# Supplementary material for: DINOSTRAT: a global database of the stratigraphic and paleolatitudinal distribution of Mesozoic–Cenozoic organic-walled dinoflagellate cysts
Source: Copernicus journal article supplement (doi:10.5194/essd-14-579-2022), 2022-02-09
Supplement: Supplementary file 3 [file Family_Cladopyxiaceae, all.pdf › Supplement/Supplement 2/Family 27 plots/Family_Cladopyxiaceae, all.pdf]

# Family Cladopyxiaceae, all

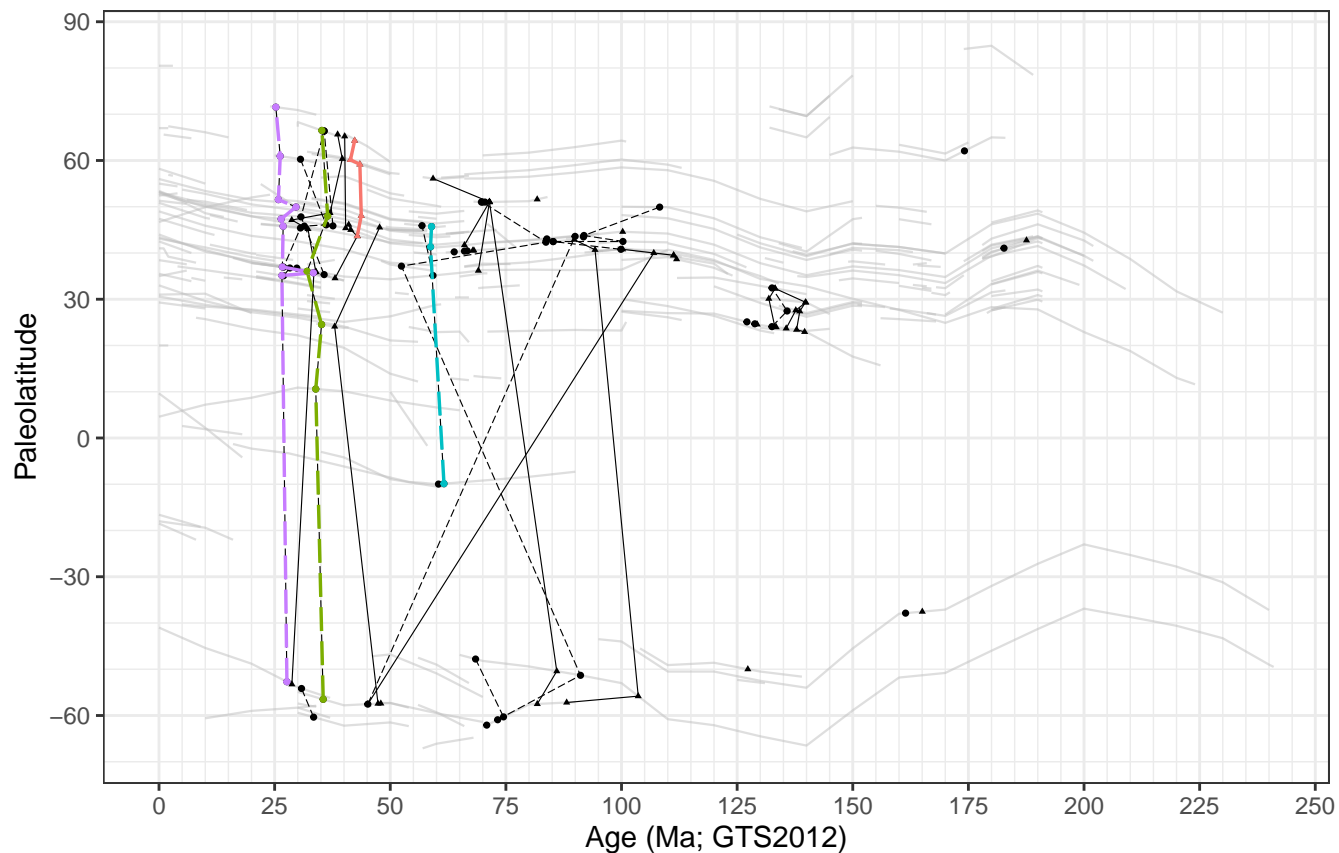

taxa — *Enneadocysta arcuata* — *Enneadocysta multicornuta* — *Fibradinium annetorpense* — *Licracysta semicirculata*
