# Supplementary material for: DINOSTRAT: a global database of the stratigraphic and paleolatitudinal distribution of Mesozoic–Cenozoic organic-walled dinoflagellate cysts
Source: Copernicus journal article supplement (doi:10.5194/essd-14-579-2022), 2022-02-09
Supplement: Supplementary file 4 [file Family_Comparodiniaceae, all.pdf › Supplement/Supplement 2/Family 27 plots/Family_Comparodiniaceae, all.pdf]

# Family Comparodiniaceae, all

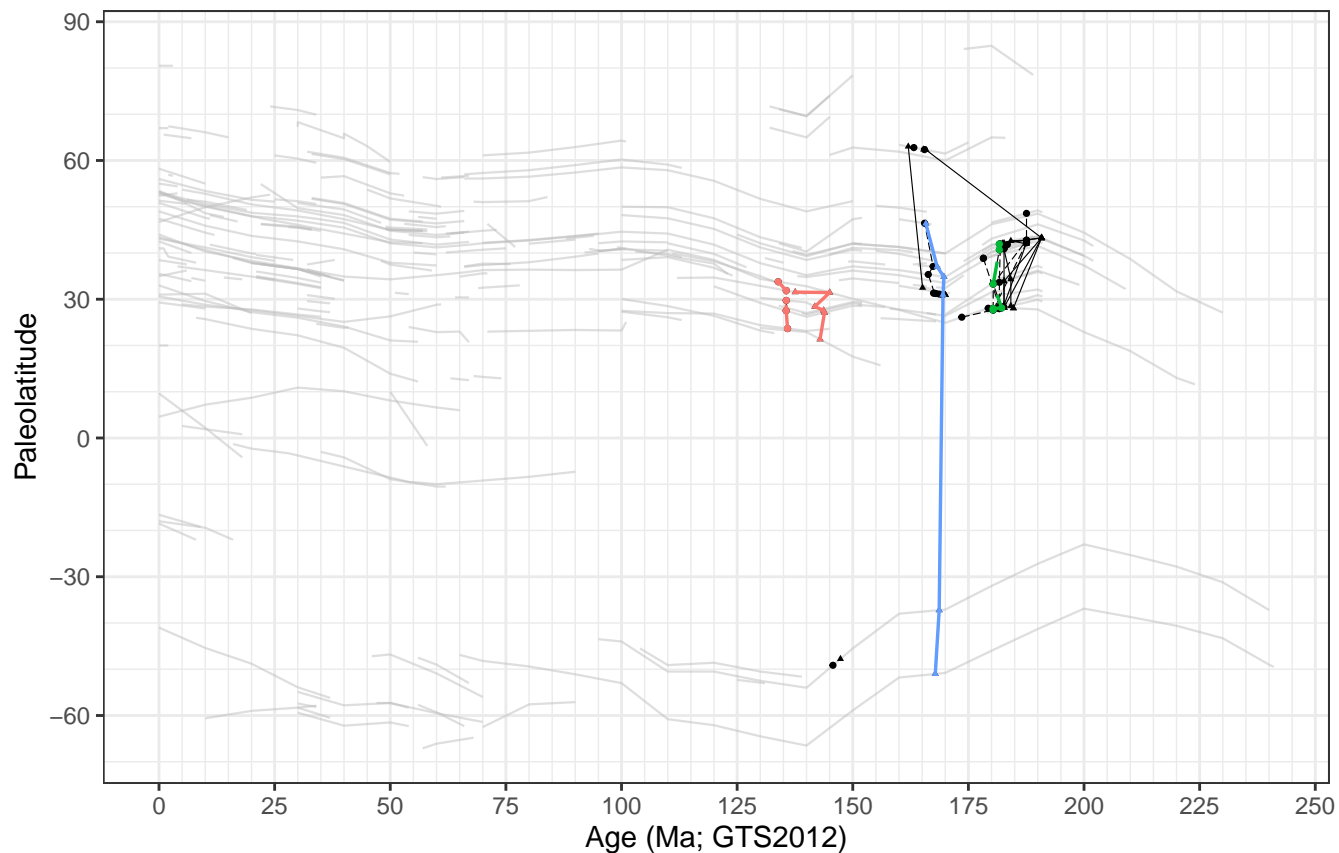

taxa —●— *Biorbifera johnwingii* —●— *Valvaeodinium koessenium* —●— *Valvaeodinium spinosum*
