# Supplementary material for: DINOSTRAT: a global database of the stratigraphic and paleolatitudinal distribution of Mesozoic–Cenozoic organic-walled dinoflagellate cysts
Source: Copernicus journal article supplement (doi:10.5194/essd-14-579-2022), 2022-02-09
Supplement: Supplementary file 7 [file Family_Gonyaulacaceae, Cribroperidinioideae.pdf › Supplement/Supplement 2/Family 27 plots/Family_Gonyaulacaceae, Cribroperidinioideae.pdf]

# Family Gonyaulacaceae, Cribroperidinioideae

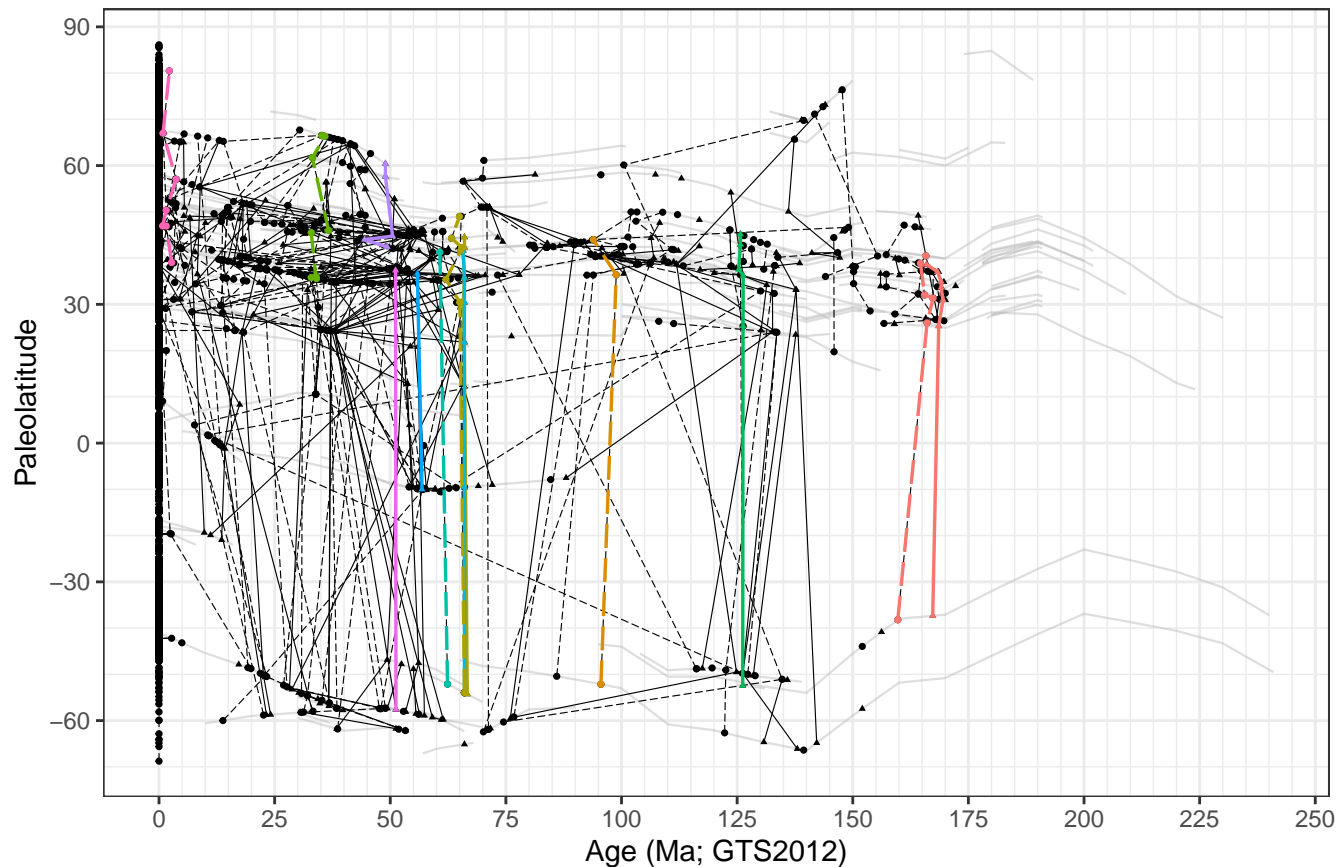

taxa

|                               |                                     |                           |                                  |
|-------------------------------|-------------------------------------|---------------------------|----------------------------------|
| <i>Aldorfia aldorfensis</i>   | <i>Cordosphaeridium funiculatum</i> | <i>Danaea californica</i> | <i>Hystrichokolpoma spinosum</i> |
| <i>Apteodinium granulatum</i> | <i>Cribroperidinium tenuiceras</i>  | <i>Danaea impages</i>     | <i>Operculodinium crassum</i>    |
| <i>Carpatella cornuta</i>     | <i>Cribroperidinium wetzeli</i>     | <i>Diphyes ficusoides</i> |                                  |
