# Supplementary material for: DINOSTRAT: a global database of the stratigraphic and paleolatitudinal distribution of Mesozoic–Cenozoic organic-walled dinoflagellate cysts
Source: Copernicus journal article supplement (doi:10.5194/essd-14-579-2022), 2022-02-09
Supplement: Supplementary file 8 [file Family_Gonyaulacaceae, Gonyaulacoideae.pdf › Supplement/Supplement 2/Family 27 plots/Family_Gonyaulacaceae, Gonyaulacoideae.pdf]

# Family Gonyaulacaceae, Gonyaulacoideae

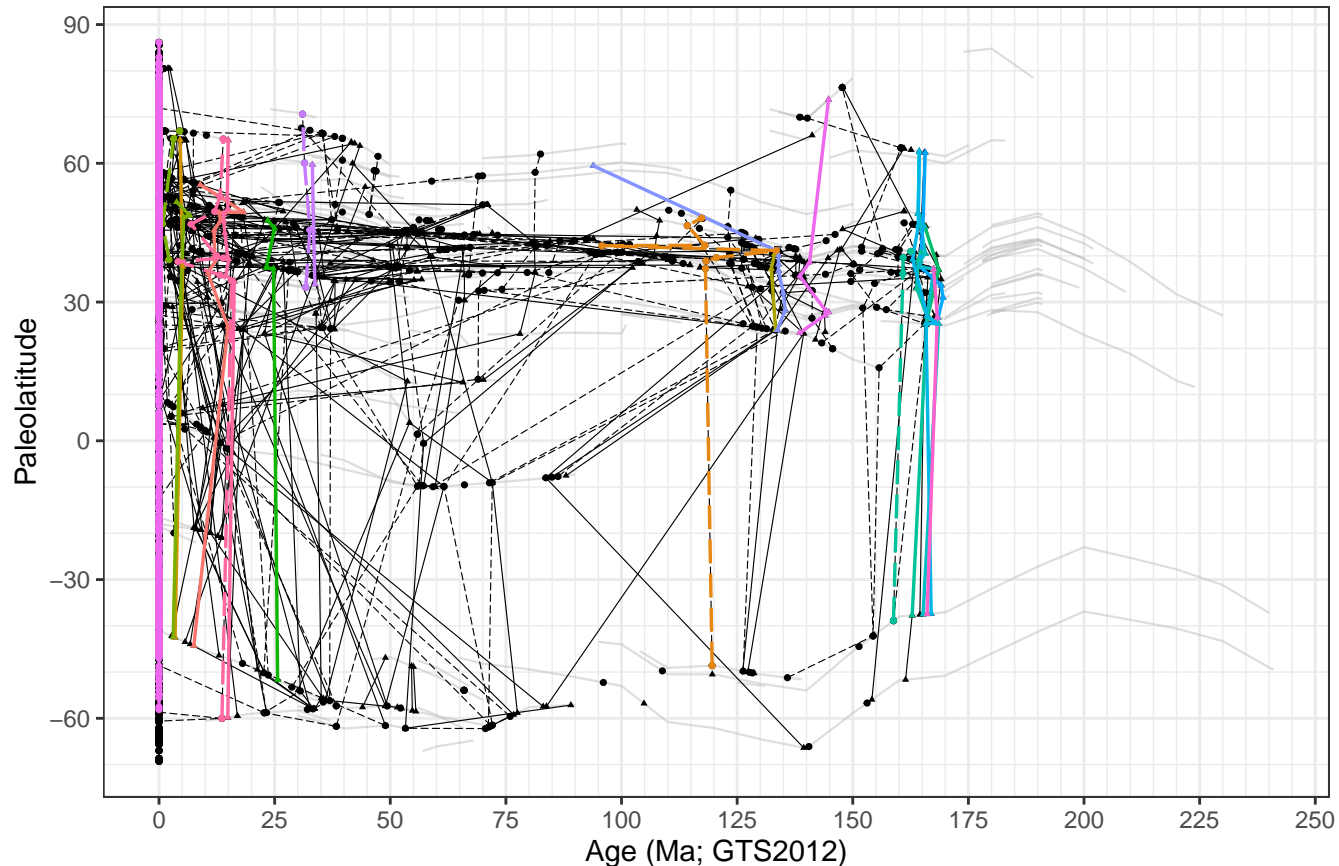

taxa

- |                                      |                                      |                                  |                                   |
|--------------------------------------|--------------------------------------|----------------------------------|-----------------------------------|
| <i>Achomosphaera andalousiensis</i>  | <i>Corrudinium harlandii</i>         | <i>Gonyaulacysta eisenackii</i>  | <i>Spiniferites manumii</i>       |
| <i>Achomosphaera neptuni</i>         | <i>Ectosphaeropsis burdigalensis</i> | <i>Gonyaulacysta jurassica</i>   | <i>Spiniferites ramosus</i>       |
| <i>Ataxiodinium confusum</i>         | <i>Escharisphaeridia pocockii</i>    | <i>Gonyaulacysta pectinigera</i> | <i>Tubotuberella dangeardii</i>   |
| <i>Callaiosphaeridium trycherium</i> | <i>Gonyaulacysta centriconnata</i>   | <i>Hystrichodinium furcatum</i>  | <i>Unipontidinium aquaeductum</i> |
