# Supplementary material for: DINOSTRAT: a global database of the stratigraphic and paleolatitudinal distribution of Mesozoic–Cenozoic organic-walled dinoflagellate cysts
Source: Copernicus journal article supplement (doi:10.5194/essd-14-579-2022), 2022-02-09
Supplement: Supplementary file 9 [file Family_Gonyaulacaceae, Leptodinioideae.pdf › Supplement/Supplement 2/Family 27 plots/Family_Gonyaulacaceae, Leptodinioideae.pdf]

# Family Gonyaulacaceae, Leptodinioideae

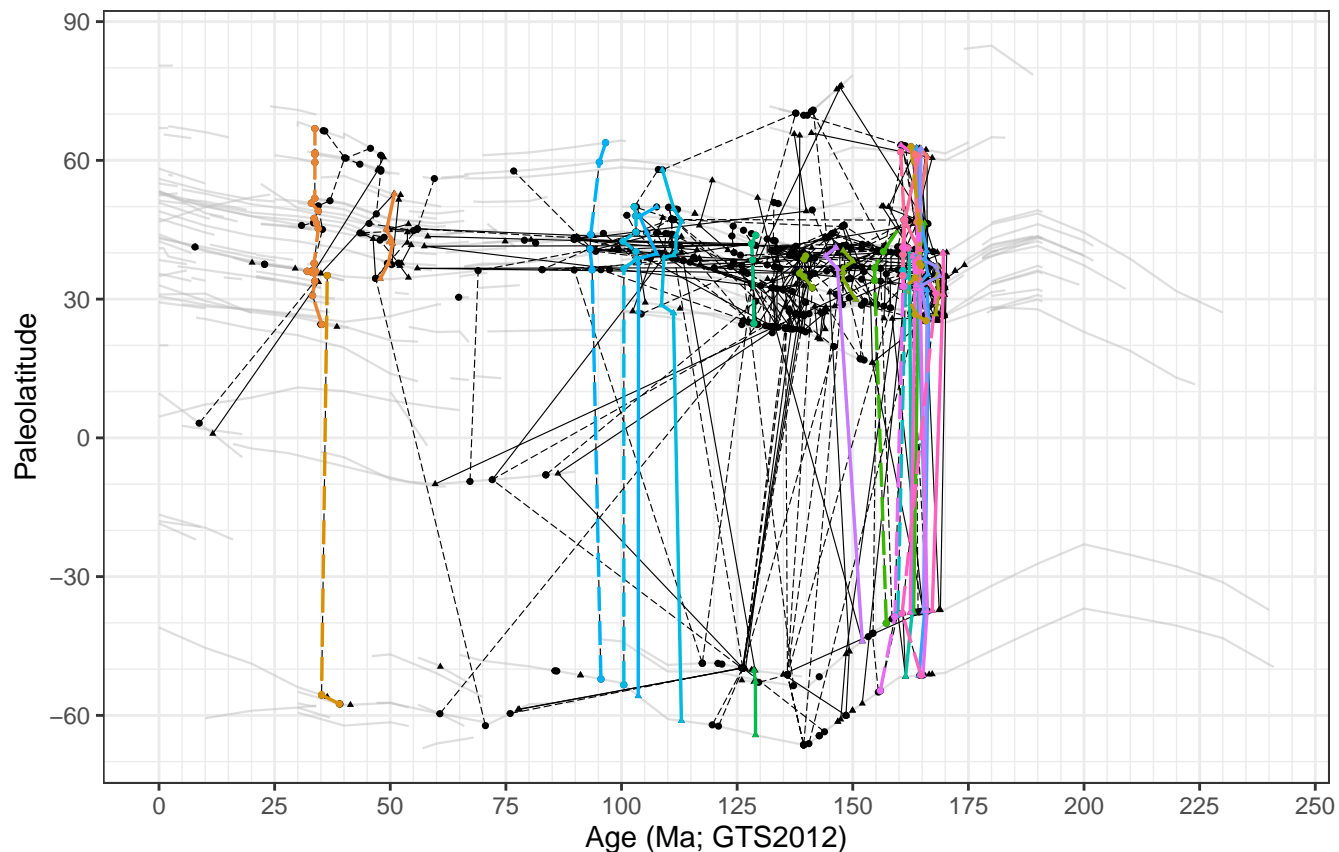

- |                                     |                                 |                                        |                                      |                                        |
|-------------------------------------|---------------------------------|----------------------------------------|--------------------------------------|----------------------------------------|
| <i>Ambonosphaera calloviana</i>     | <i>Ctenodinium cornigera</i>    | <i>Kleithriasphaeridium corrugatum</i> | <i>Litosphaeridium siphoniphorum</i> | <i>Stiphrosphaeridium dictyophorum</i> |
| <i>Areosphaeridium diktyoplokum</i> | <i>Dichadogonyaulax culmula</i> | <i>Leptodinium ambiguum</i>            | <i>Rigaudella aemula</i>             | <i>Sirmiodiniopsis orbis</i>           |
| <i>Cooksonidium capricornum</i>     | <i>Endoscrinium galeritum</i>   | <i>Limbodinium absidatum</i>           | <i>Sirmiodiniopsis orbis</i>         | <i>Stiphrosphaeridium dictyophorum</i> |
| <i>Ctenodinium continuum</i>        | <i>Herendeenia postprojecta</i> | <i>Litosphaeridium arundum</i>         |                                      |                                        |
