# Supplementary material for: DINOSTRAT: a global database of the stratigraphic and paleolatitudinal distribution of Mesozoic–Cenozoic organic-walled dinoflagellate cysts
Source: Copernicus journal article supplement (doi:10.5194/essd-14-579-2022), 2022-02-09
Supplement: Supplementary file 10 [file Family_Gonyaulacaceae, other.pdf › Supplement/Supplement 2/Family 27 plots/Family_Gonyaulacaceae, other.pdf]

# Family Gonyaulacaceae, other

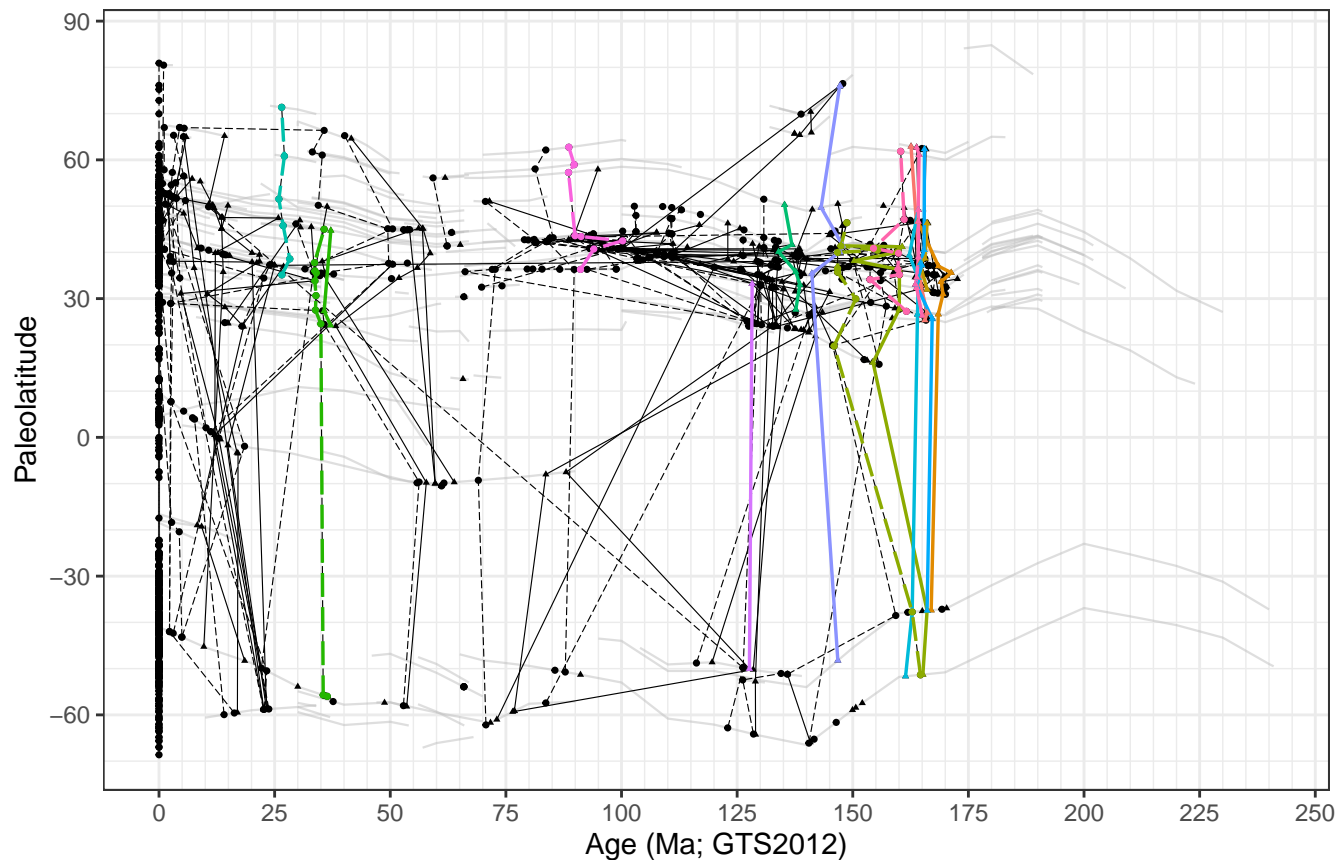

- |                                       |                                    |                                   |                               |                     |
|---------------------------------------|------------------------------------|-----------------------------------|-------------------------------|---------------------|
| <i>Barbatocysta pilosa</i>            | <i>Glossosodium dimorphum</i>      | <i>Saturnodinium pansum</i>       | <i>Scriniodinium pharo</i>    | <i>Trichodinium</i> |
| <i>Chytroeisphaeridia chytrooides</i> | <i>Hemiplacophora semilunifera</i> | <i>Scriniodinium crystallinum</i> | <i>Sepispinula ancorifera</i> |                     |
| <i>Chytroeisphaeridia hyalina</i>     | <i>Nelchinopsis kostromiensis</i>  | <i>Scriniodinium dictyotum</i>    | <i>Stephodinium coronatum</i> |                     |
