# Supplementary material for: DINOSTRAT: a global database of the stratigraphic and paleolatitudinal distribution of Mesozoic–Cenozoic organic-walled dinoflagellate cysts
Source: Copernicus journal article supplement (doi:10.5194/essd-14-579-2022), 2022-02-09
Supplement: Supplementary file 14 [file Family_Order Gonyaulacales Family uncertain, uncertain.pdf › Supplement/Supplement 2/Family 27 plots/Family_Order Gonyaulacales Family uncertain, uncertain.pdf]

# Family Order Gonyaulacales Family uncertain, uncertain

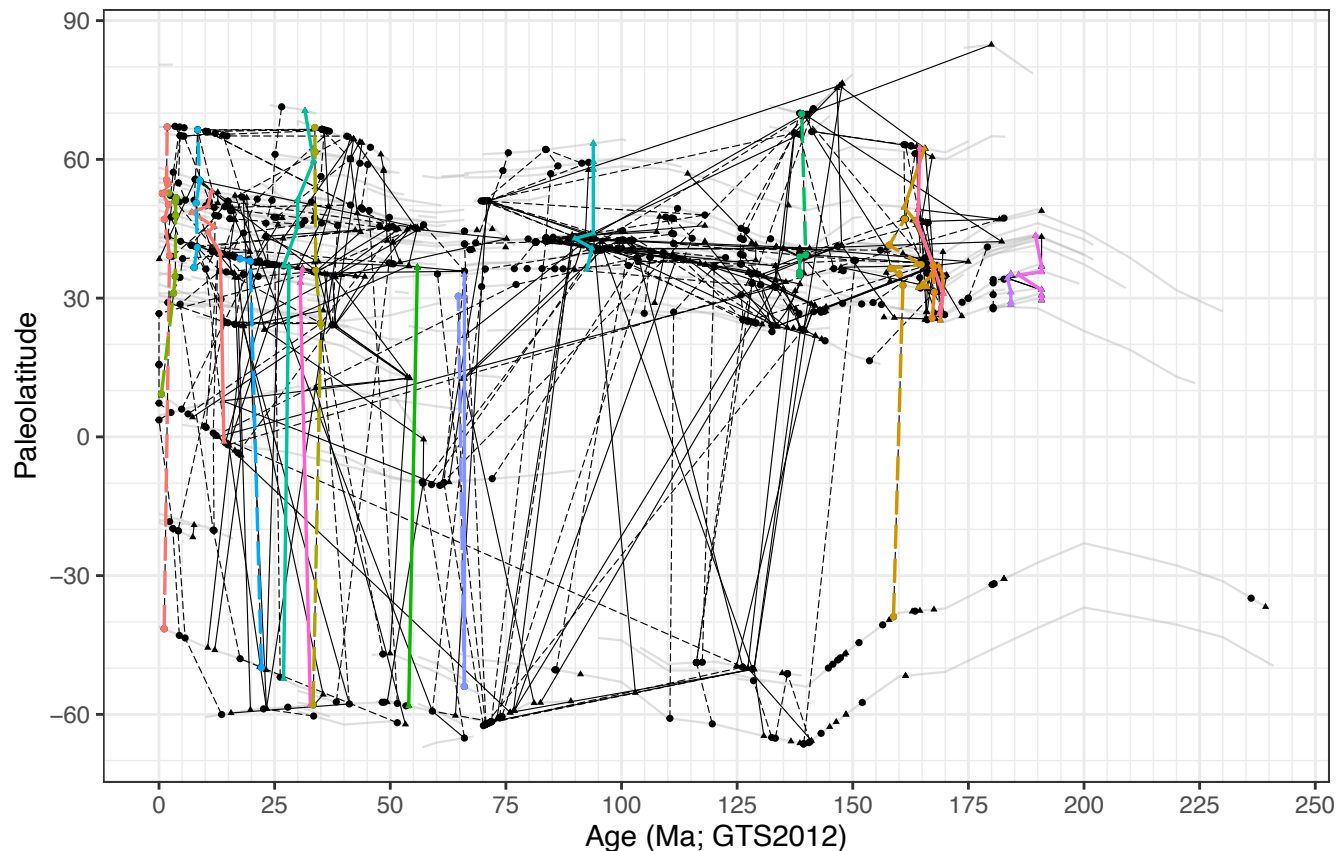

taxa

- |                                                                       |                                                                               |                                                                          |                                                                           |
|-----------------------------------------------------------------------|-------------------------------------------------------------------------------|--------------------------------------------------------------------------|---------------------------------------------------------------------------|
| <span style="color: red;">—●—</span> <i>Amiculosphaera umbracula</i>  | <span style="color: green;">—●—</span> <i>Batiacasphaera minuta</i>           | <span style="color: cyan;">—●—</span> <i>Heterosphaeridium difficile</i> | <span style="color: magenta;">—●—</span> <i>Mendicodinium brunneum</i>    |
| <span style="color: orange;">—●—</span> <i>Atopodinium polygonale</i> | <span style="color: green;">—●—</span> <i>Cleistosphaeridium polypetellum</i> | <span style="color: cyan;">—●—</span> <i>Labyrinthodinium truncatum</i>  | <span style="color: magenta;">—●—</span> <i>Mendicodinium microscabum</i> |
| <span style="color: yellow;">—●—</span> <i>Atopodinium prostratum</i> | <span style="color: green;">—●—</span> <i>Dingodinium spinosum</i>            | <span style="color: blue;">—●—</span> <i>Membranilarnacia picena</i>     | <span style="color: pink;">—●—</span> <i>Oligokolpoma galeottii</i>       |
| <span style="color: olive;">—●—</span> <i>Batiacasphaera compta</i>   | <span style="color: cyan;">—●—</span> <i>Distatodinium biffii</i>             | <span style="color: blue;">—●—</span> <i>Membranilarnacia tenella</i>    | <span style="color: red;">—●—</span> <i>Valensiella ovulum</i>            |
