# Supplementary material for: DINOSTRAT: a global database of the stratigraphic and paleolatitudinal distribution of Mesozoic–Cenozoic organic-walled dinoflagellate cysts
Source: Copernicus journal article supplement (doi:10.5194/essd-14-579-2022), 2022-02-09
Supplement: Supplementary file 16 [file Family_Peridiniaceae, Deflandreoideae.pdf › Supplement/Supplement 2/Family 27 plots/Family_Peridiniaceae, Deflandreoideae.pdf]

# Family Peridiniaceae, Deflandreoideae

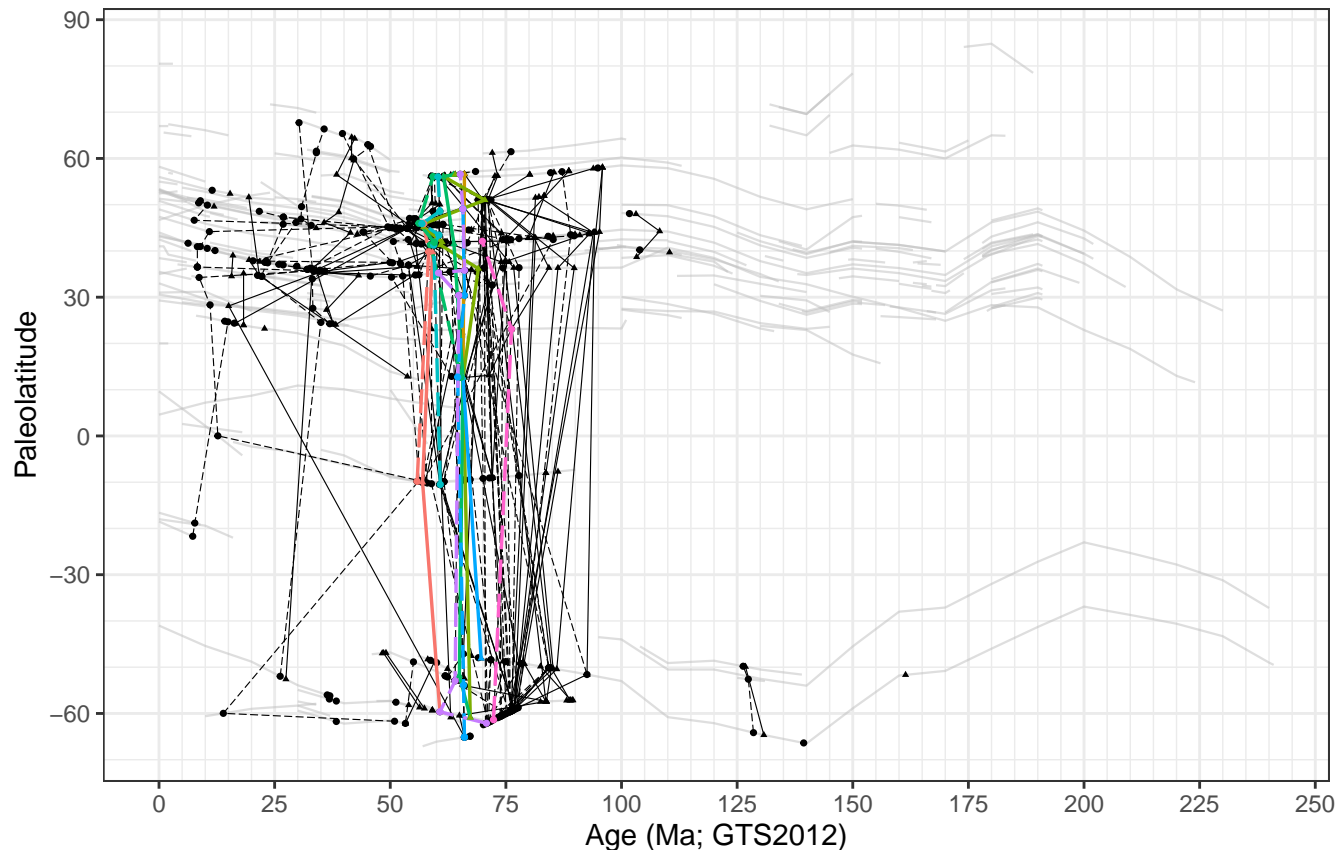

taxa

- |                                                                     |                                                                    |                                                                       |                                                                          |
|---------------------------------------------------------------------|--------------------------------------------------------------------|-----------------------------------------------------------------------|--------------------------------------------------------------------------|
| <span style="color: red;">—●—</span> <i>Cerodinium medcalfii</i>    | <span style="color: olive;">—●—</span> <i>Cerodinium speciosum</i> | <span style="color: teal;">—●—</span> <i>Isabelidinium viborgense</i> | <span style="color: purple;">—●—</span> <i>Trithyrodinium evittii</i>    |
| <span style="color: orange;">—●—</span> <i>Cerodinium pannuceum</i> | <span style="color: green;">—●—</span> <i>Cerodinium striatum</i>  | <span style="color: blue;">—●—</span> <i>Manumiella druggii</i>       | <span style="color: magenta;">—●—</span> <i>Trithyrodinium suspectum</i> |
