# Supplementary material for: DINOSTRAT: a global database of the stratigraphic and paleolatitudinal distribution of Mesozoic–Cenozoic organic-walled dinoflagellate cysts
Source: Copernicus journal article supplement (doi:10.5194/essd-14-579-2022), 2022-02-09
Supplement: Supplementary file 17 [file Family_Peridiniaceae, Palaeoperidinioideae.pdf › Supplement/Supplement 2/Family 27 plots/Family_Peridiniaceae, Palaeoperidinioideae.pdf]

# Family Peridiniaceae, Palaeoperidinioideae

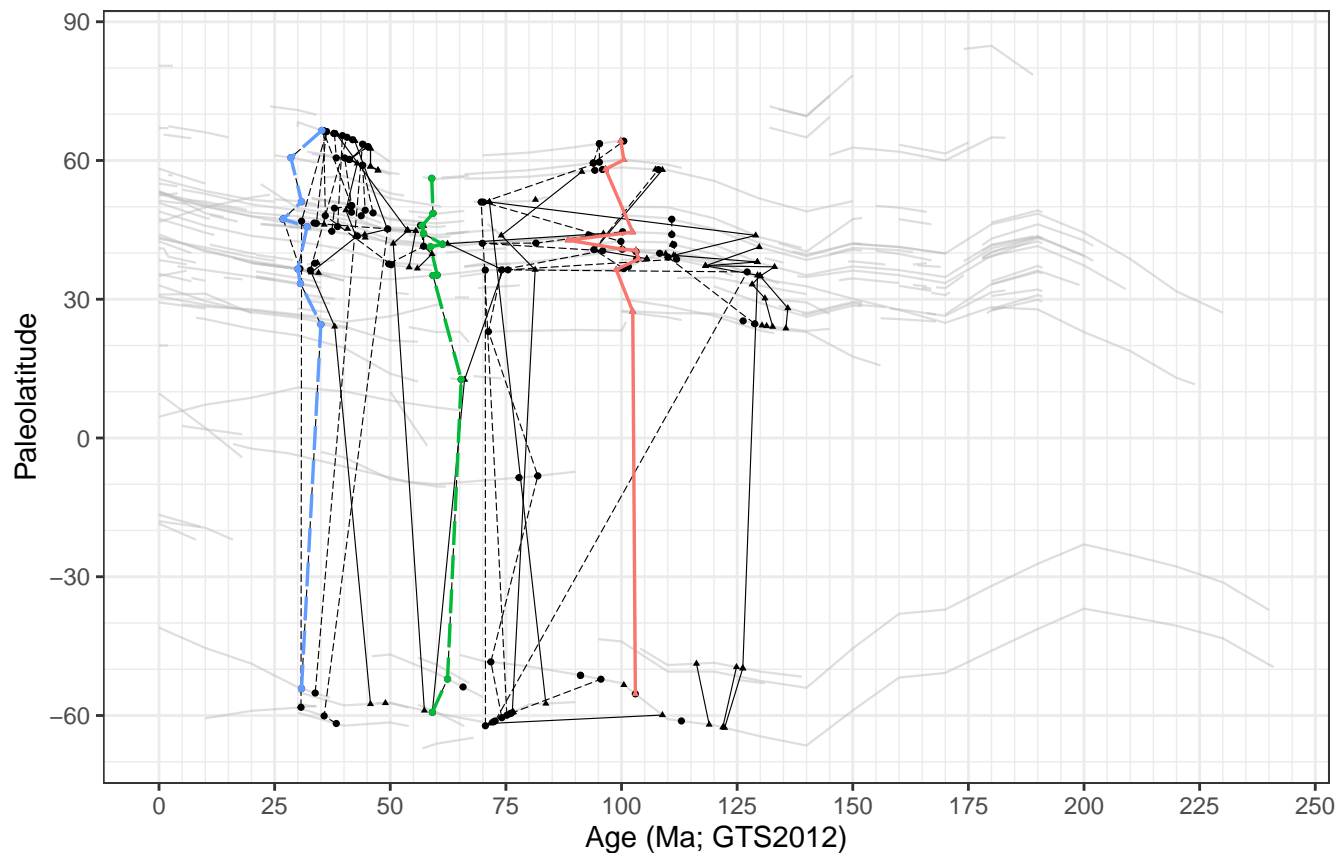

taxa — *Palaeohystrichophora infusorioides* — *Palaeoperidinium pyrophorum* — *Phthanoperidinium comatum*
