# Supplementary material for: DINOSTRAT: a global database of the stratigraphic and paleolatitudinal distribution of Mesozoic–Cenozoic organic-walled dinoflagellate cysts
Source: Copernicus journal article supplement (doi:10.5194/essd-14-579-2022), 2022-02-09
Supplement: Supplementary file 18 [file Family_Peridiniaceae, Wetzelielloideae.pdf › Supplement/Supplement 2/Family 27 plots/Family_Peridiniaceae, Wetzelielloideae.pdf]

# Family Peridiniaceae, Wetzelielloideae

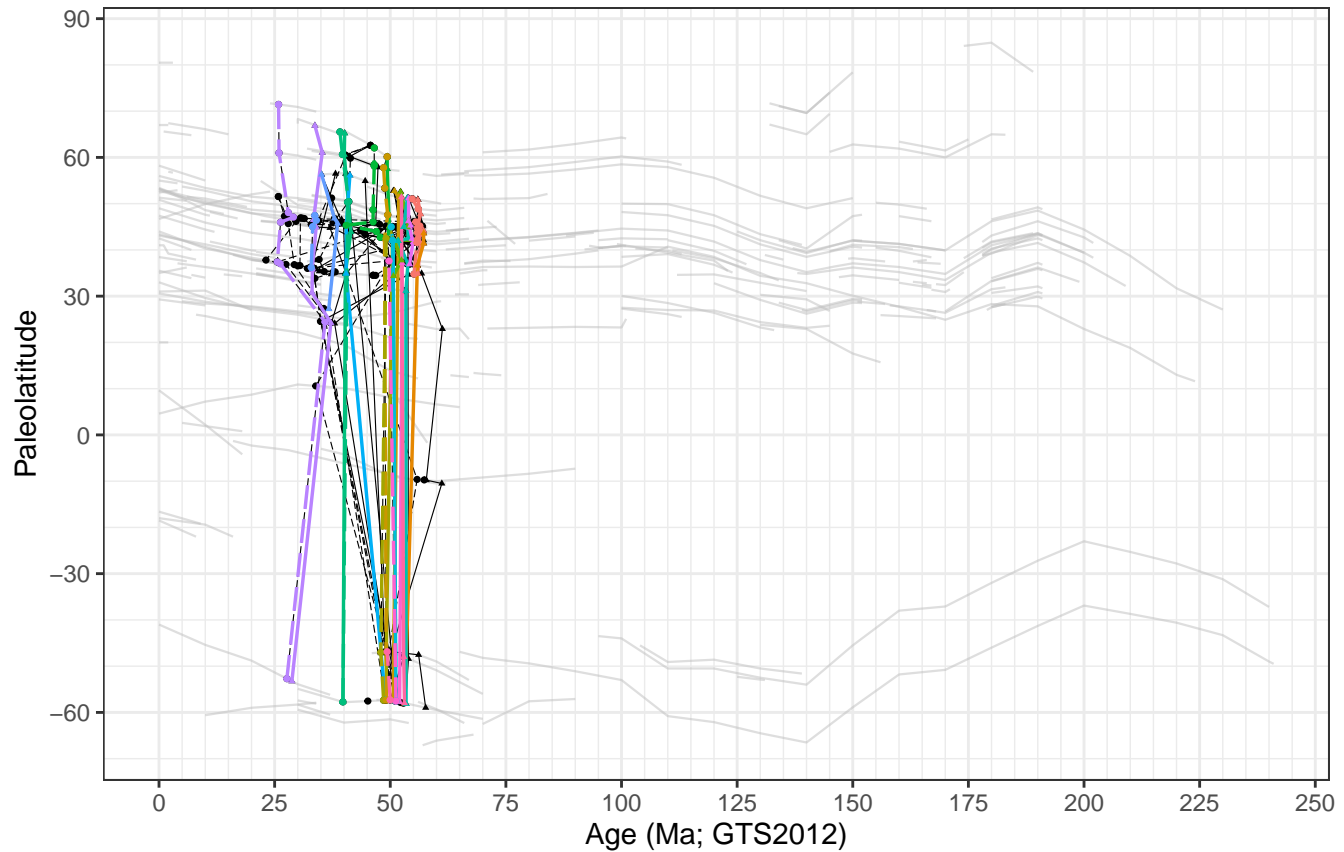

- |                                                                           |                                                                                 |                                                                          |                                                                      |                                                        |
|---------------------------------------------------------------------------|---------------------------------------------------------------------------------|--------------------------------------------------------------------------|----------------------------------------------------------------------|--------------------------------------------------------|
| <span style="color: red;">—●—</span> <i>Apectodinium augustum</i>         | <span style="color: olivegreen-400;">—●—</span> <i>Charlesdowniea edwardsii</i> | <span style="color: teal;">—●—</span> <i>Dracodinium rhomboideum</i>     | <span style="color: lightblue;">—●—</span> <i>Rhombodinium draco</i> | <span style="color: magenta;">—●—</span> <i>Wetzel</i> |
| <span style="color: orange;">—●—</span> <i>Apectodinium hyperacanthum</i> | <span style="color: limegreen;">—●—</span> <i>Dracodinium condylos</i>          | <span style="color: cyan;">—●—</span> <i>Dracodinium varielongitudum</i> | <span style="color: blue;">—●—</span> <i>Rhombodinium perforatum</i> | <span style="color: pink;">—●—</span> <i>Wetzel</i>    |
| <span style="color: gold;">—●—</span> <i>Charlesdowniea columna</i>       | <span style="color: green;">—●—</span> <i>Dracodinium pachydermum</i>           | <span style="color: lightcyan;">—●—</span> <i>Kisselevia insolens</i>    | <span style="color: purple;">—●—</span> <i>Wetzeliella gochtii</i>   | <span style="color: hotpink;">—●—</span> <i>Wilson</i> |
