# Supplementary material for: DINOSTRAT: a global database of the stratigraphic and paleolatitudinal distribution of Mesozoic–Cenozoic organic-walled dinoflagellate cysts
Source: Copernicus journal article supplement (doi:10.5194/essd-14-579-2022), 2022-02-09
Supplement: Supplementary file 21 [file Family_Protoperidiniaceae, all.pdf › Supplement/Supplement 2/Family 27 plots/Family_Protoperidiniaceae, all.pdf]

# Family Protoperidiniaceae, all

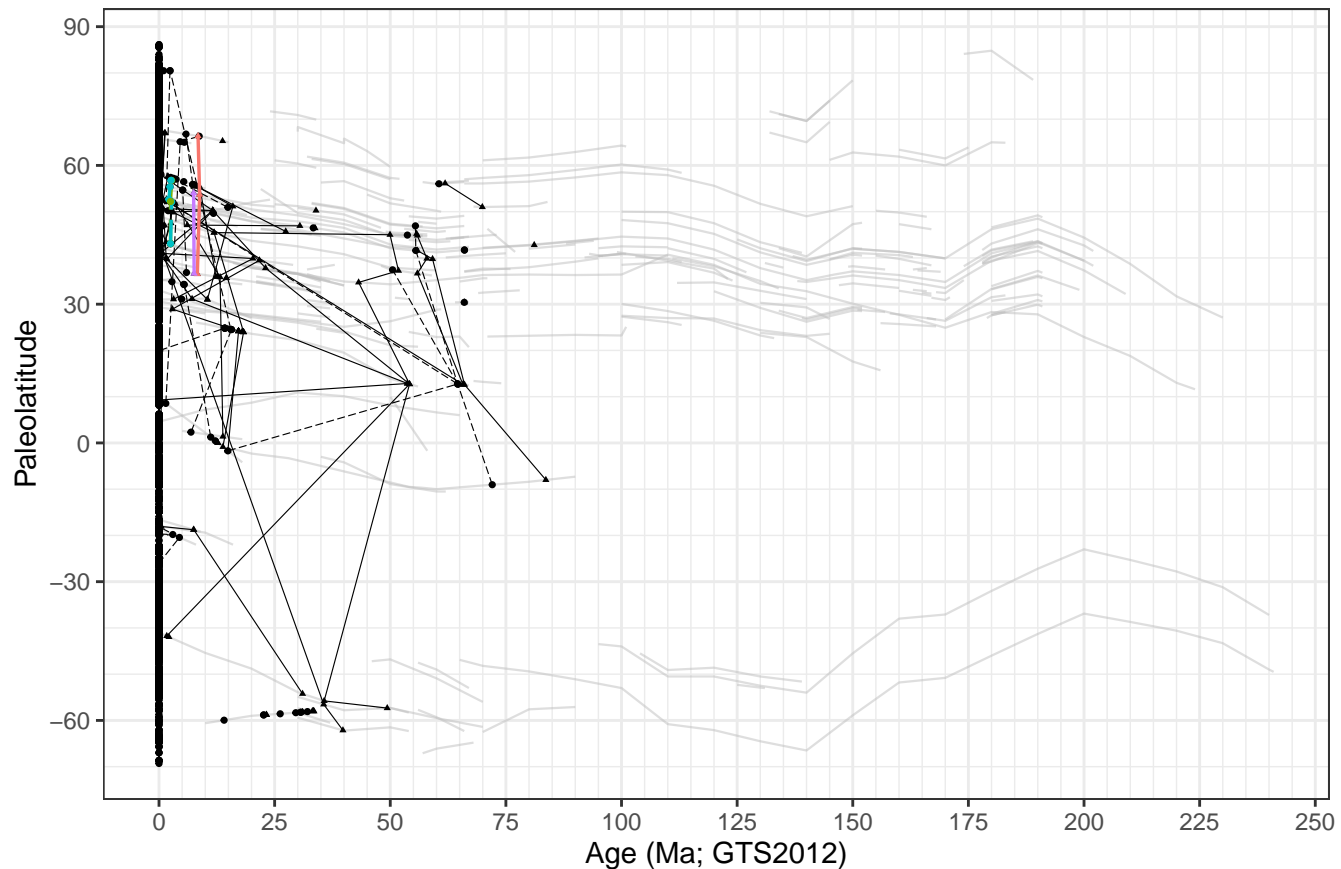

taxa —●— *Barssidinium evangelinae* —●— *Barssidinium graminosum* —●— *Barssidinium pliogenicum* —●— *Selenopemphix armageddonensis*
