# Supplementary material for: DINOSTRAT: a global database of the stratigraphic and paleolatitudinal distribution of Mesozoic–Cenozoic organic-walled dinoflagellate cysts
Source: Copernicus journal article supplement (doi:10.5194/essd-14-579-2022), 2022-02-09
Supplement: Supplementary file 27 [file Family_misc, misc.pdf › Supplement/Supplement 2/Family 27 plots/Family_misc, misc.pdf]

# Family misc, misc

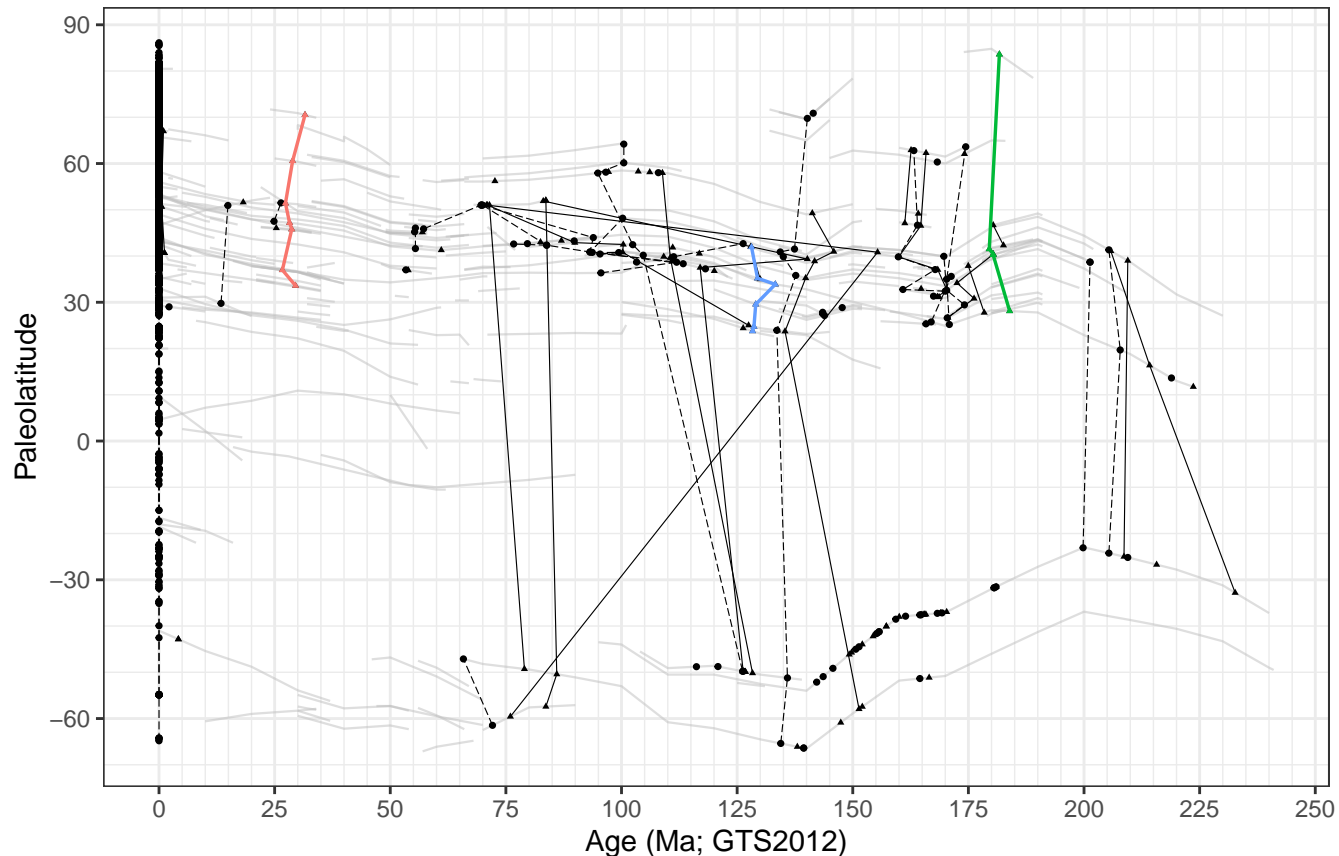

taxa    — *Artemisiocysta cladodichotoma*    — *Phallocysta eumekes*    — *Prolixosphaeridium parvispinum*
