# Supplementary material for: DINOSTRAT: a global database of the stratigraphic and paleolatitudinal distribution of Mesozoic–Cenozoic organic-walled dinoflagellate cysts
Source: Copernicus journal article supplement (doi:10.5194/essd-14-579-2022), 2022-02-09
Supplement: Supplementary file 582 [file Site_1121.pdf › Supplement/Supplement 2/Sites 188 plots/Site_1121.pdf]

Site  
1121

61.0

61.5

62.0

62.5

63.0

Age (Ma)

FO\_LO

△ FO

*Isabelidium cingulatum*

*Thalassiphora delicata*

Species

△

△
