# Supplementary material for: DINOSTRAT: a global database of the stratigraphic and paleolatitudinal distribution of Mesozoic–Cenozoic organic-walled dinoflagellate cysts
Source: Copernicus journal article supplement (doi:10.5194/essd-14-579-2022), 2022-02-09
Supplement: Supplementary file 584 [file Site_1170.pdf › Supplement/Supplement 2/Sites 188 plots/Site_1170.pdf]

Site

1170

35.675

35.700

35.725

35.750

Age (Ma)

FO\_LO

△

LO

*Phthanoperidinium stockmansii*

Species
