# Supplementary material for: DINOSTRAT: a global database of the stratigraphic and paleolatitudinal distribution of Mesozoic–Cenozoic organic-walled dinoflagellate cysts
Source: Copernicus journal article supplement (doi:10.5194/essd-14-579-2022), 2022-02-09

Site

1405

Age (Ma)

22.2

22.4

22.6

FO\_LO

△ LO

*Hystriocholpoma pusillum*

*Filispheera filifera*

*Deflandrea phosphoritica*

*Svalbardella* spp.

Species

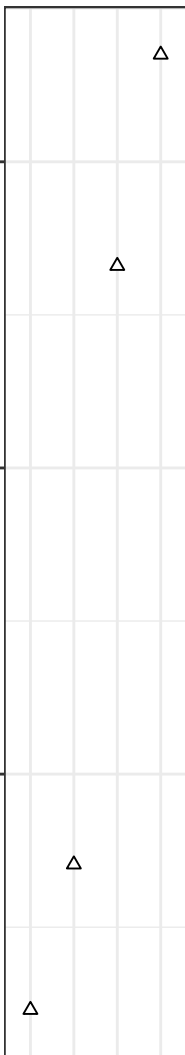

Supplement: Supplementary file 587 [file Site_1405.pdf › Supplement/Supplement 2/Sites 188 plots/Site_1405.pdf]
