# Supplementary material for: DINOSTRAT: a global database of the stratigraphic and paleolatitudinal distribution of Mesozoic–Cenozoic organic-walled dinoflagellate cysts
Source: Copernicus journal article supplement (doi:10.5194/essd-14-579-2022), 2022-02-09
Supplement: Supplementary file 591 [file Site_263.pdf › Supplement/Supplement 2/Sites 188 plots/Site_263.pdf]

Site

263

Age (Ma)

FO\_LO

△ FO

▽ LO

126

127

128

129

*Kleithriasphaeridium fasciatum*

*Phoberocysta tabulata*

*Herendeenia postprojecta*

*Sepispinula ambigua*

*Ovoidinium cinctum*

*Carpodinium granulatum*

*Gardodinium lowii*

*Pyxidiella tumida*

*Cribrerodinium tenuiceras*

*Kaiwaradinium scrutillinum*

*Phoberocysta neocomica*

*Pseudoceratium retusum*

*Tehamadinium sousense*

Species
