# Supplementary material for: DINOSTRAT: a global database of the stratigraphic and paleolatitudinal distribution of Mesozoic–Cenozoic organic-walled dinoflagellate cysts
Source: Copernicus journal article supplement (doi:10.5194/essd-14-579-2022), 2022-02-09
Supplement: Supplementary file 598 [file Site_511.pdf › Supplement/Supplement 2/Sites 188 plots/Site_511.pdf]

Site

511

33.450

33.475

33.500

33.525

Age (Ma)

FO\_LO

Δ FO

*Malvinia escutiana*

Species

Δ
