# Supplementary material for: DINOSTRAT: a global database of the stratigraphic and paleolatitudinal distribution of Mesozoic–Cenozoic organic-walled dinoflagellate cysts
Source: Copernicus journal article supplement (doi:10.5194/essd-14-579-2022), 2022-02-09

Site

605

Age (Ma)

FO\_LO

△ FO

▽ LO

66

67

68

69

70

*Alisogymnium euclaense*

*Pierceites pentagona*

*Palynodinium grallator*

*Membranilarnacia tenella*

Species

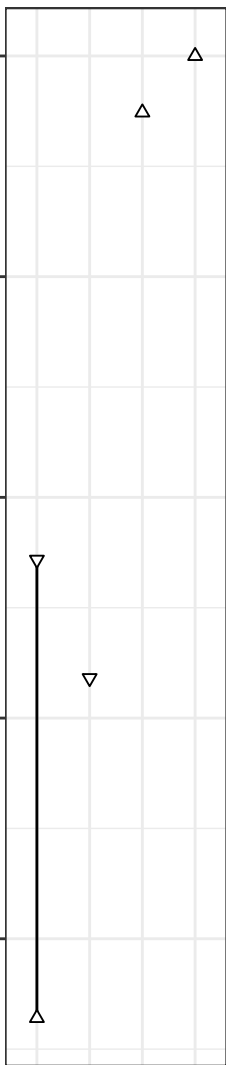

Supplement: Supplementary file 606 [file Site_605.pdf › Supplement/Supplement 2/Sites 188 plots/Site_605.pdf]
