# Supplementary material for: DINOSTRAT: a global database of the stratigraphic and paleolatitudinal distribution of Mesozoic–Cenozoic organic-walled dinoflagellate cysts
Source: Copernicus journal article supplement (doi:10.5194/essd-14-579-2022), 2022-02-09

Site

908

Age (Ma)

FO\_LO

△ FO

▽ LO

26

28

30

*Artemisiocysta cladodichotoma*

*Distatodinium bifidii*

*Spiriferites manumii*

*Saturnodinium pansum*

*Wetzelella gochtii*

*Licracysta semicirculata*

Species

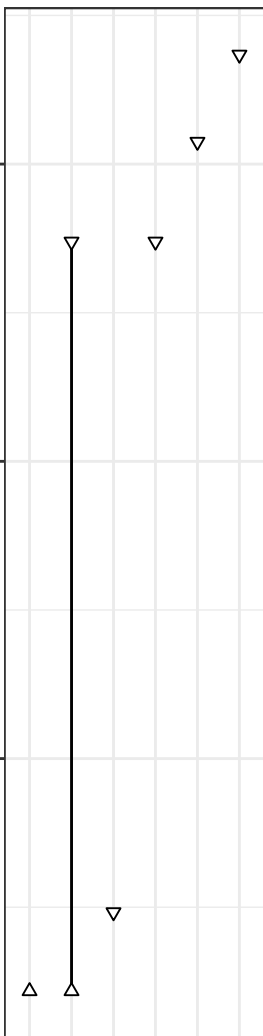

Supplement: Supplementary file 624 [file Site_908.pdf › Supplement/Supplement 2/Sites 188 plots/Site_908.pdf]
