# Supplementary material for: DINOSTRAT: a global database of the stratigraphic and paleolatitudinal distribution of Mesozoic–Cenozoic organic-walled dinoflagellate cysts
Source: Copernicus journal article supplement (doi:10.5194/essd-14-579-2022), 2022-02-09

# Site

Adana

Age (Ma)

16.0

16.4

16.8

FO\_LO

△ FO

▽ LO

*Labyrinthodinium truncatum*

*Cerebrocysta poulsenii*

*Unipontidinium aquaeductum*

*Palaeocystodinium ventricosum*

Species

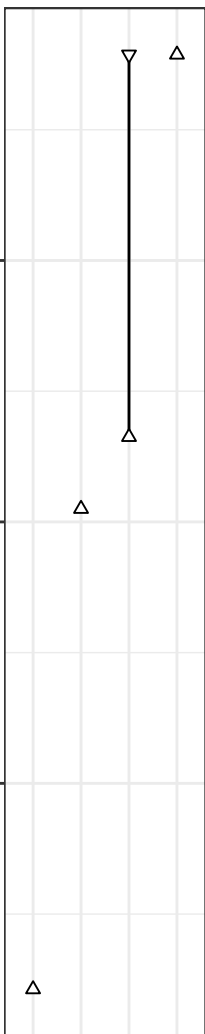

Supplement: Supplementary file 630 [file Site_Adana.pdf › Supplement/Supplement 2/Sites 188 plots/Site_Adana.pdf]
