# Supplementary material for: DINOSTRAT: a global database of the stratigraphic and paleolatitudinal distribution of Mesozoic–Cenozoic organic-walled dinoflagellate cysts
Source: Copernicus journal article supplement (doi:10.5194/essd-14-579-2022), 2022-02-09

Site

Albstadt

Age (Ma)

FO\_LO

△ FO  
▽ LO

165.3

165.6

165.9

*Atopodinium prostaticum*

*Rhynchodiniopsis regalis*

*Ctenidodinium combazii*

*Stephanelytron callovianum*

*Pareodinia cerebraloides*

*Valvaedinium groenlandicum*

Species

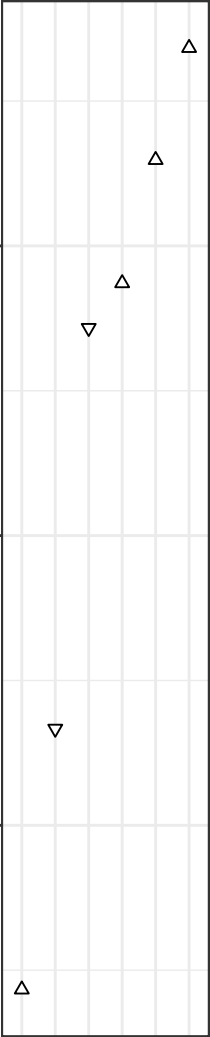

Supplement: Supplementary file 631 [file Site_Albstadt.pdf › Supplement/Supplement 2/Sites 188 plots/Site_Albstadt.pdf]
