# Supplementary material for: DINOSTRAT: a global database of the stratigraphic and paleolatitudinal distribution of Mesozoic–Cenozoic organic-walled dinoflagellate cysts
Source: Copernicus journal article supplement (doi:10.5194/essd-14-579-2022), 2022-02-09
Supplement: Supplementary file 635 [file Site_Bad tolz.pdf › Supplement/Supplement 2/Sites 188 plots/Site_Bad tolz.pdf]

Site

Bad tolz

82.125

82.150

82.175

82.200

Age (Ma)

FO\_LO

△ FO

*Palynodinium helveticum*

Species
