# Supplementary material for: DINOSTRAT: a global database of the stratigraphic and paleolatitudinal distribution of Mesozoic–Cenozoic organic-walled dinoflagellate cysts
Source: Copernicus journal article supplement (doi:10.5194/essd-14-579-2022), 2022-02-09
Supplement: Supplementary file 665 [file Site_Duneau.pdf › Supplement/Supplement 2/Sites 188 plots/Site_Duneau.pdf]

Site

Duneau

Age (Ma)

FO\_LO

△ FO

▽ LO

96

98

100

*Sepispinula ambigua*

*Aptecodinium deflandrei*

*Calliosphaeridium asymmetricum*

*Circulodinium colliveri*

*Exochosphaeridium phragmites*

*Florentinia deanei*

*Hystriodinium pulchrum*

*Impletosphaeridium clavulum*

*Leberidocysta deflocata*

*Oligosphaeridium prolispirosum*

*Pterodinium cingulatum cingulatum*

*Scrinodinium campanula*

*Spiniferites twistingensis*

*Cauveridinium membraniphorum*

*Cyclonephelium clathromarginatum*

*Cyclonephelium compactum*

*Ellipsodinium rugulosum*

*Florentinia mantellii*

Species
