# Supplementary material for: DINOSTRAT: a global database of the stratigraphic and paleolatitudinal distribution of Mesozoic–Cenozoic organic-walled dinoflagellate cysts
Source: Copernicus journal article supplement (doi:10.5194/essd-14-579-2022), 2022-02-09
Supplement: Supplementary file 670 [file Site_Figueira Da Foz.pdf › Supplement/Supplement 2/Sites 188 plots/Site_Figueira Da Foz.pdf]

Site

Figueira Da Foz

Age (Ma)

FO\_LO

△ FO

▽ LO

165.7

165.8

165.9

166.0

*Achnatosphaeridium caulleryi*

*Barbatocysta pilosa*

*Ctenodinium continuum*

*Dicladogonyaulax sellwoodi*

*Gonyaulacysta centricornata*

*Gonyaulacysta eisenackii*

*Gonyaulacysta jurassica*

*Impletosphaeridium ehrenbergii*

*Sentusidinium riouli*

*Paroodinia ceratophora*

*Ctenodinium combazi*

*Kalyptea stegasta*

*Meiourgonyaulax valensi*

*Valensiella dictydia*

*Compositosphaeridium pobonicum*

*Gonyaulacysta jurassica adecta longicornis*

*Korystocysta kettonensis*

*Meiourgonyaulax spongiosa*

*Endoscrinium luridum*

Species
