# Supplementary material for: DINOSTRAT: a global database of the stratigraphic and paleolatitudinal distribution of Mesozoic–Cenozoic organic-walled dinoflagellate cysts
Source: Copernicus journal article supplement (doi:10.5194/essd-14-579-2022), 2022-02-09
Supplement: Supplementary file 701 [file Site_Mossy Grove.pdf › Supplement/Supplement 2/Sites 188 plots/Site_Mossy Grove.pdf]

# Site

Mossy Grove

34.39

34.41

34.43

34.45

34.47

Age (Ma)

FO\_LO

△

LO

*Cordosphaeridium inodes*

Species
