# Supplementary material for: DINOSTRAT: a global database of the stratigraphic and paleolatitudinal distribution of Mesozoic–Cenozoic organic-walled dinoflagellate cysts
Source: Copernicus journal article supplement (doi:10.5194/essd-14-579-2022), 2022-02-09

# Site

Piobbico

104

106

108

110

Age (Ma)

FO\_LO

△ LO

*Haprocysta perdictya*

*Danea chibanis*

*Codonella psygma*

*Tetamadinium sousense*

Species

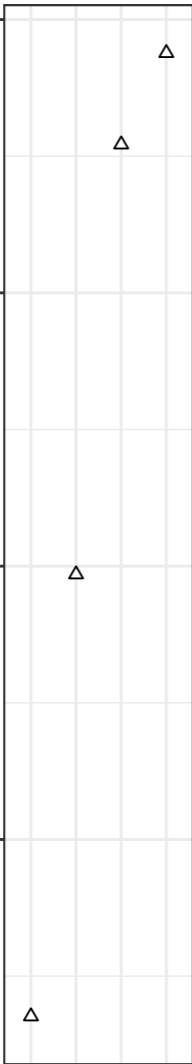

Supplement: Supplementary file 713 [file Site_Piobbico.pdf › Supplement/Supplement 2/Sites 188 plots/Site_Piobbico.pdf]
