# Supplementary material for: DINOSTRAT: a global database of the stratigraphic and paleolatitudinal distribution of Mesozoic–Cenozoic organic-walled dinoflagellate cysts
Source: Copernicus journal article supplement (doi:10.5194/essd-14-579-2022), 2022-02-09

Site

Schandelah

Age (Ma)

FO\_LO

△ FO

▽ LO

185

190

195

200

*Rhaetogonyaulax rhaetica*

*Dapcodinium priscum*

*Liasidium variabile*

*Luehndea spinosa*

Species

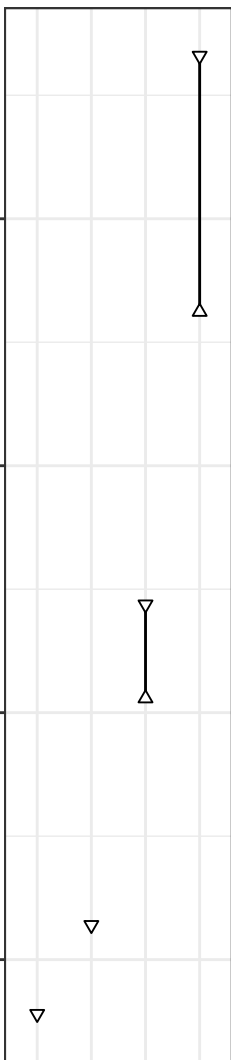

Supplement: Supplementary file 727 [file Site_Schandelah.pdf › Supplement/Supplement 2/Sites 188 plots/Site_Schandelah.pdf]
