# Supplementary material for: DINOSTRAT: a global database of the stratigraphic and paleolatitudinal distribution of Mesozoic–Cenozoic organic-walled dinoflagellate cysts
Source: Copernicus journal article supplement (doi:10.5194/essd-14-579-2022), 2022-02-09

Site

T20-87

2.5

3.0

3.5

4.0

4.5

5.0

Age (Ma)

FO\_LO

△ FO

▽ LO

*Impagidinium plicatum*

*Invertocysta lacrymosa*

*Ataxiodinium confusum*

Species

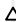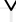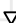

Supplement: Supplementary file 738 [file Site_T20-87.pdf › Supplement/Supplement 2/Sites 188 plots/Site_T20-87.pdf]
