# Supplementary material for: DINOSTRAT: a global database of the stratigraphic and paleolatitudinal distribution of Mesozoic–Cenozoic organic-walled dinoflagellate cysts
Source: Copernicus journal article supplement (doi:10.5194/essd-14-579-2022), 2022-02-09

# Site

Tusa

Age (Ma)

FO\_LO

△ FO

▽ LO

33

34

35

36

37

*Achomospaera alaicomu*

*Glaphyrocysta semitecta*

*Hemiplacophora semilunifera*

*Areosphaeridium diktyoplokum*

*Wetzelia gochitii*

Species

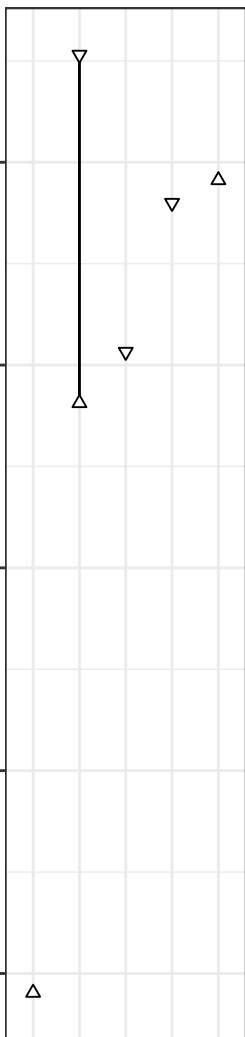

Supplement: Supplementary file 741 [file Site_Tusa.pdf › Supplement/Supplement 2/Sites 188 plots/Site_Tusa.pdf]
