# Supplementary material for: DINOSTRAT: a global database of the stratigraphic and paleolatitudinal distribution of Mesozoic–Cenozoic organic-walled dinoflagellate cysts
Source: Copernicus journal article supplement (doi:10.5194/essd-14-579-2022), 2022-02-09
Supplement: Supplementary file [file essd-14-579-2022-supplement-title-page.pdf › essd-14-579-2022-supplement-title-page.pdf]

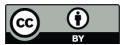

## *Supplement of*

# **DINOSTRAT: a global database of the stratigraphic and paleolatitudinal distribution of Mesozoic–Cenozoic organic-walled dinoflagellate cysts**

**Peter K. Bijl**

*Correspondence to:* Peter K. Bijl (p.k.bijl@uu.nl)

- essd-14-579-2022-supplement-title-page.pdf
- Supplement
  - Supplement 1 Conversions to GTS2012.csv
  - Supplement 2
    - \* .DS\_Store
    - \* Family 27 plots
    - \* Genus 459 plots
    - \* Modern 92 plots
    - \* Sites 188 plots
    - \* Species 1914 plots
- \_\_MACOSX
  - .\_Supplement
  - Supplement
    - \* .\_Supplement 1 Conversions to GTS2012.csv
    - \* .\_Supplement 2
    - \* Supplement 2

The copyright of individual parts of the supplement might differ from the article licence.
