# Supplementary figures and images for: DINOSTRAT: a global database of the stratigraphic and paleolatitudinal distribution of Mesozoic–Cenozoic organic-walled dinoflagellate cysts (part 1 of 27)
Source: Copernicus journal article supplement (doi:10.5194/essd-14-579-2022), 2022-02-09

# Family Areoligeraceae, all

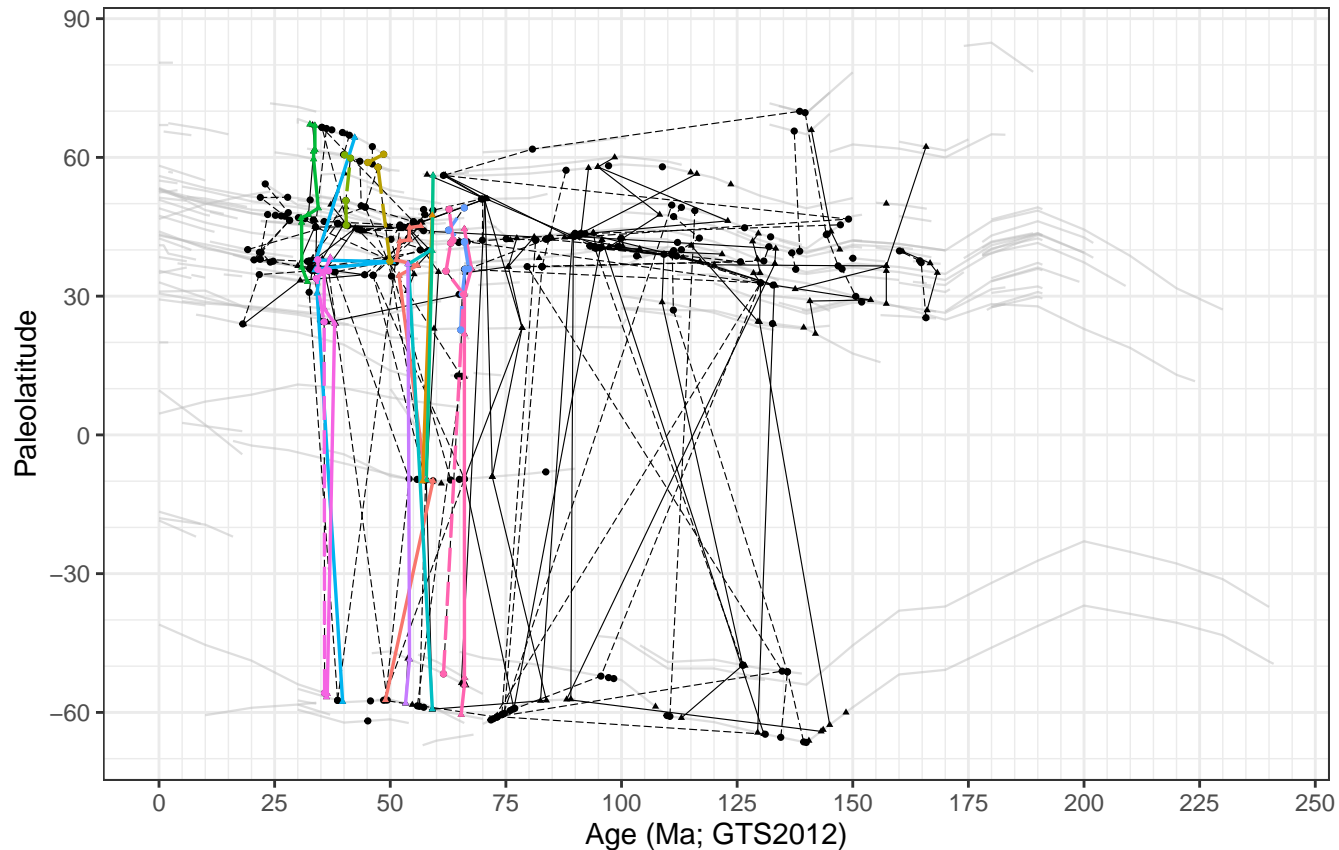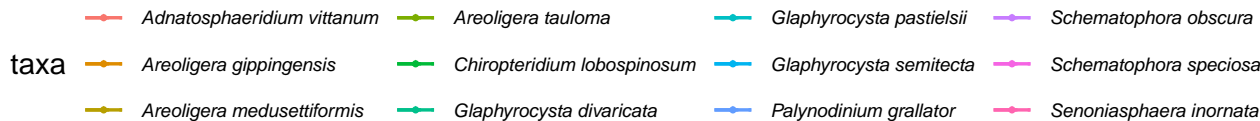

Supplement: Supplementary file 1 [file Family_Areoligeraceae, all.pdf › Supplement/Supplement 2/Family 27 plots/Family_Areoligeraceae, all.pdf]

# Family Ceratiaceae, all

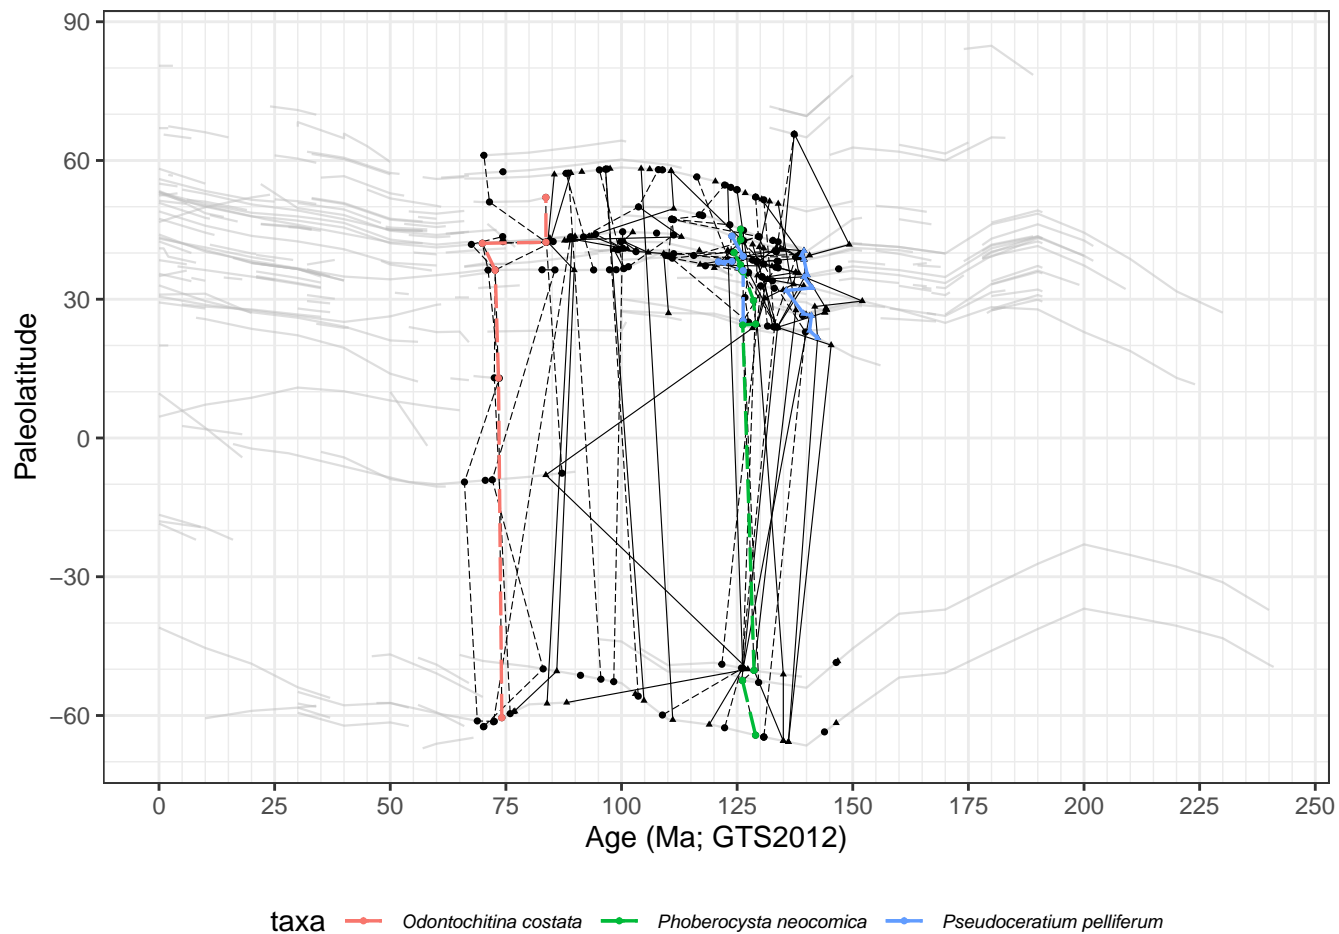

Supplement: Supplementary file 2 [file Family_Ceratiaceae, all.pdf › Supplement/Supplement 2/Family 27 plots/Family_Ceratiaceae, all.pdf]

# Family Dollidiniaceae, all

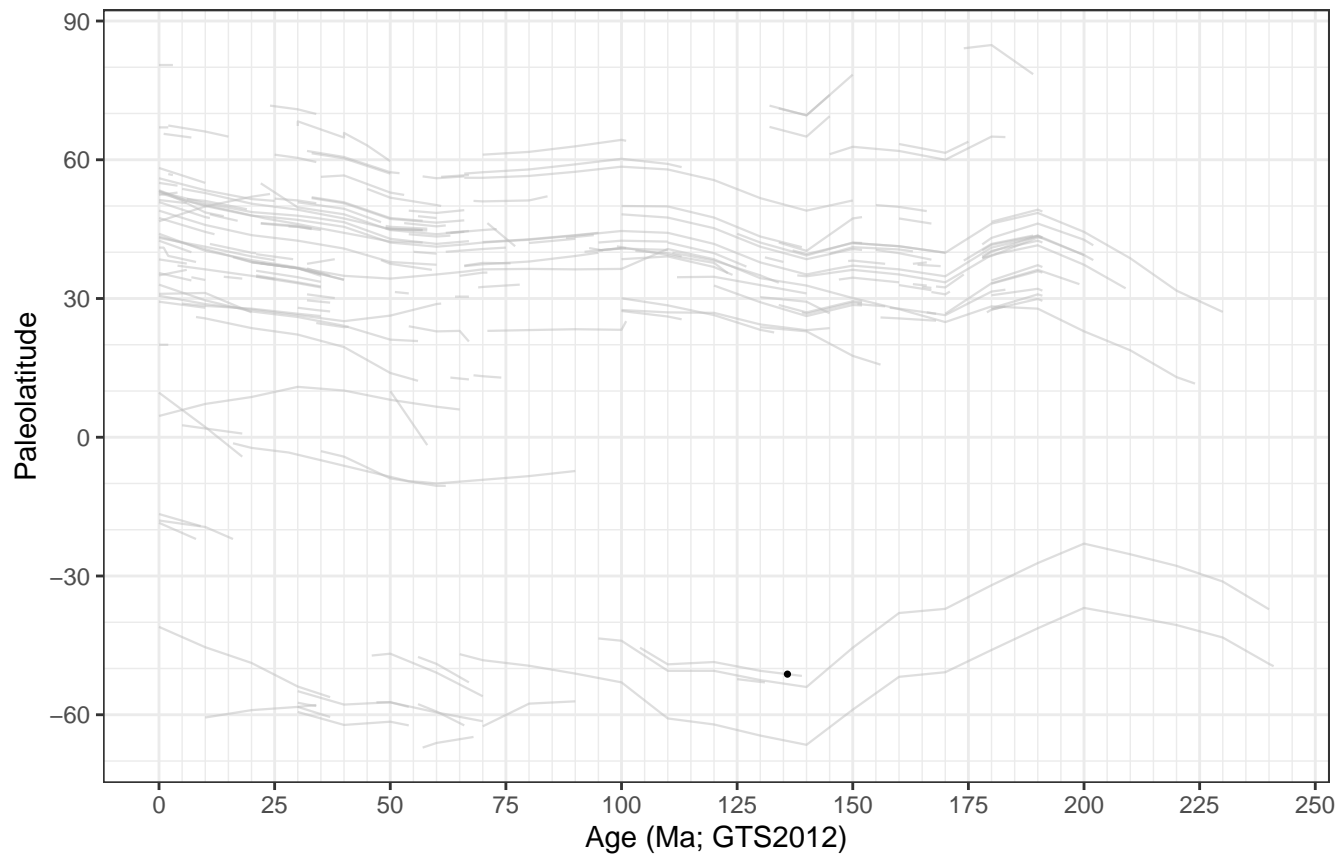

Supplement: Supplementary file 5 [file Family_Dollidiniaceae, all.pdf › Supplement/Supplement 2/Family 27 plots/Family_Dollidiniaceae, all.pdf]

# Family Heterocapsaceae, all

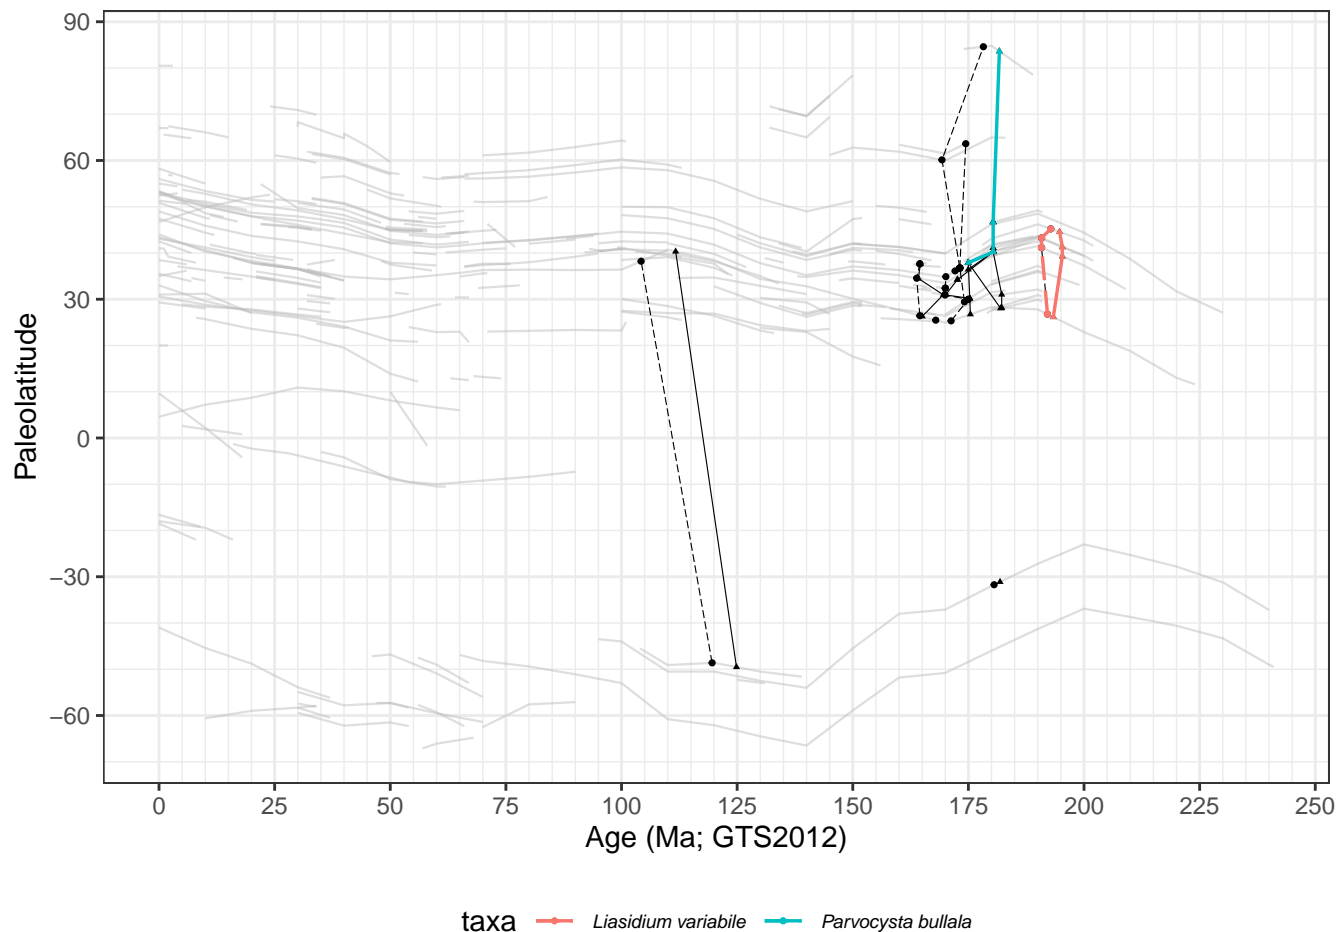

Supplement: Supplementary file 11 [file Family_Heterocapsaceae, all.pdf › Supplement/Supplement 2/Family 27 plots/Family_Heterocapsaceae, all.pdf]

# Family Mancodiniaceae, all

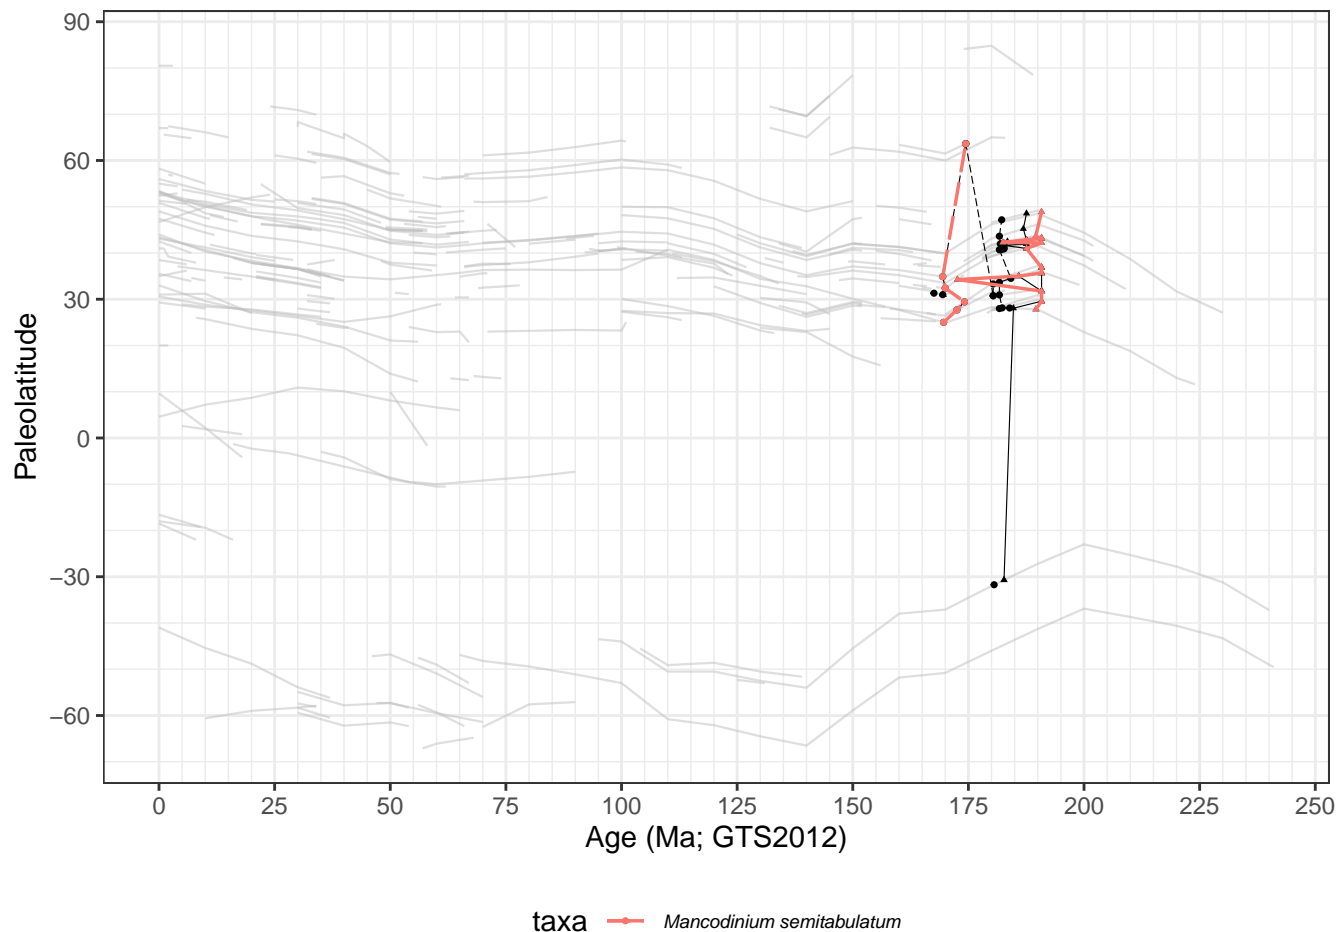

Supplement: Supplementary file 12 [file Family_Mancodiniaceae, all.pdf › Supplement/Supplement 2/Family 27 plots/Family_Mancodiniaceae, all.pdf]

# Family Nannoceratopsiaceae, all

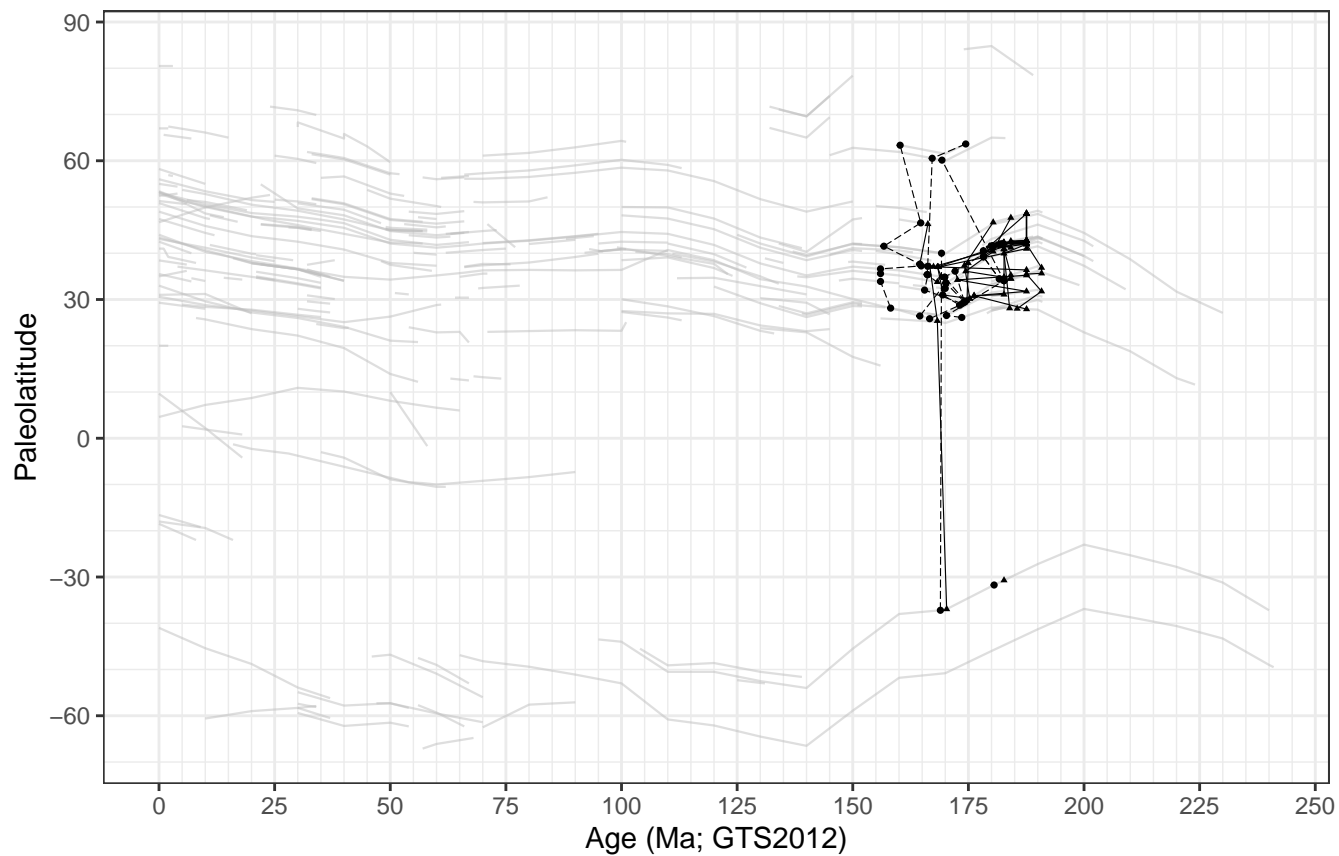

Supplement: Supplementary file 13 [file Family_Nannoceratopsiaceae, all.pdf › Supplement/Supplement 2/Family 27 plots/Family_Nannoceratopsiaceae, all.pdf]

# Family Peridiniaceae, other

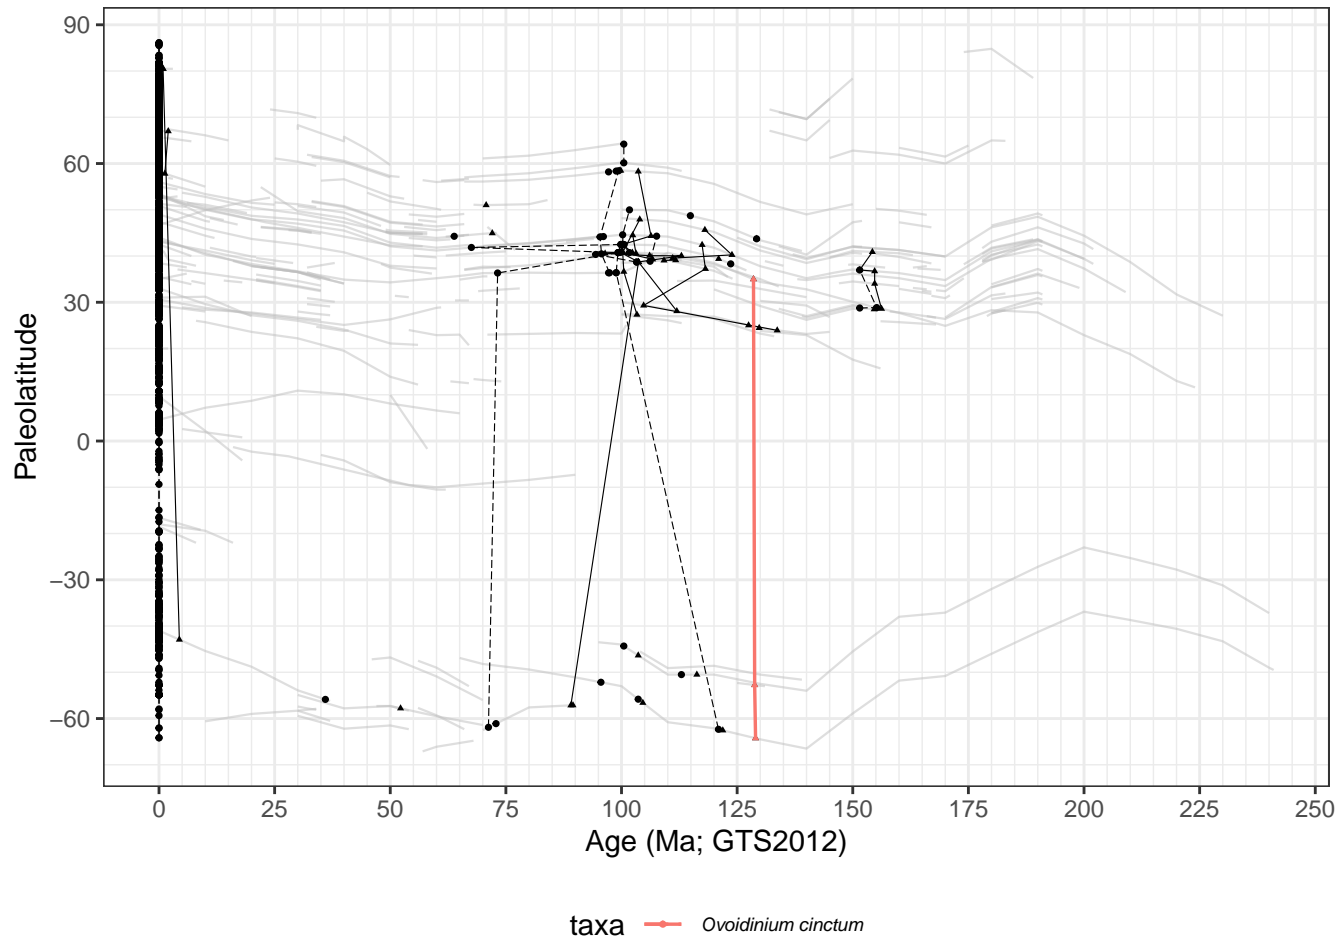

Supplement: Supplementary file 19 [file Family_Peridiniaceae, other.pdf › Supplement/Supplement 2/Family 27 plots/Family_Peridiniaceae, other.pdf]

# Family Polykrikaceae, all

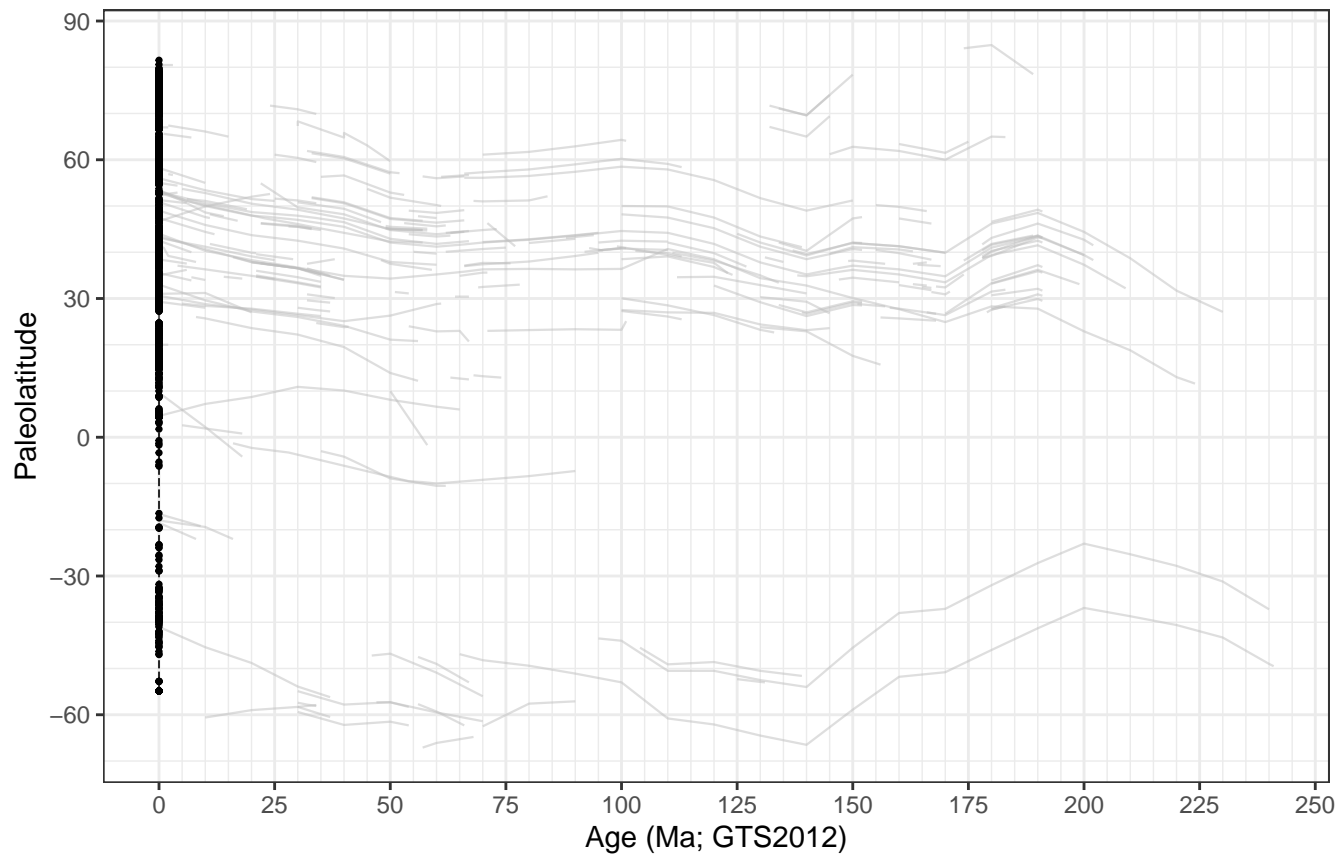

Supplement: Supplementary file 20 [file Family_Polykrikaceae, all.pdf › Supplement/Supplement 2/Family 27 plots/Family_Polykrikaceae, all.pdf]

# Family Ptychodiscaceae, Dinogymnioideae

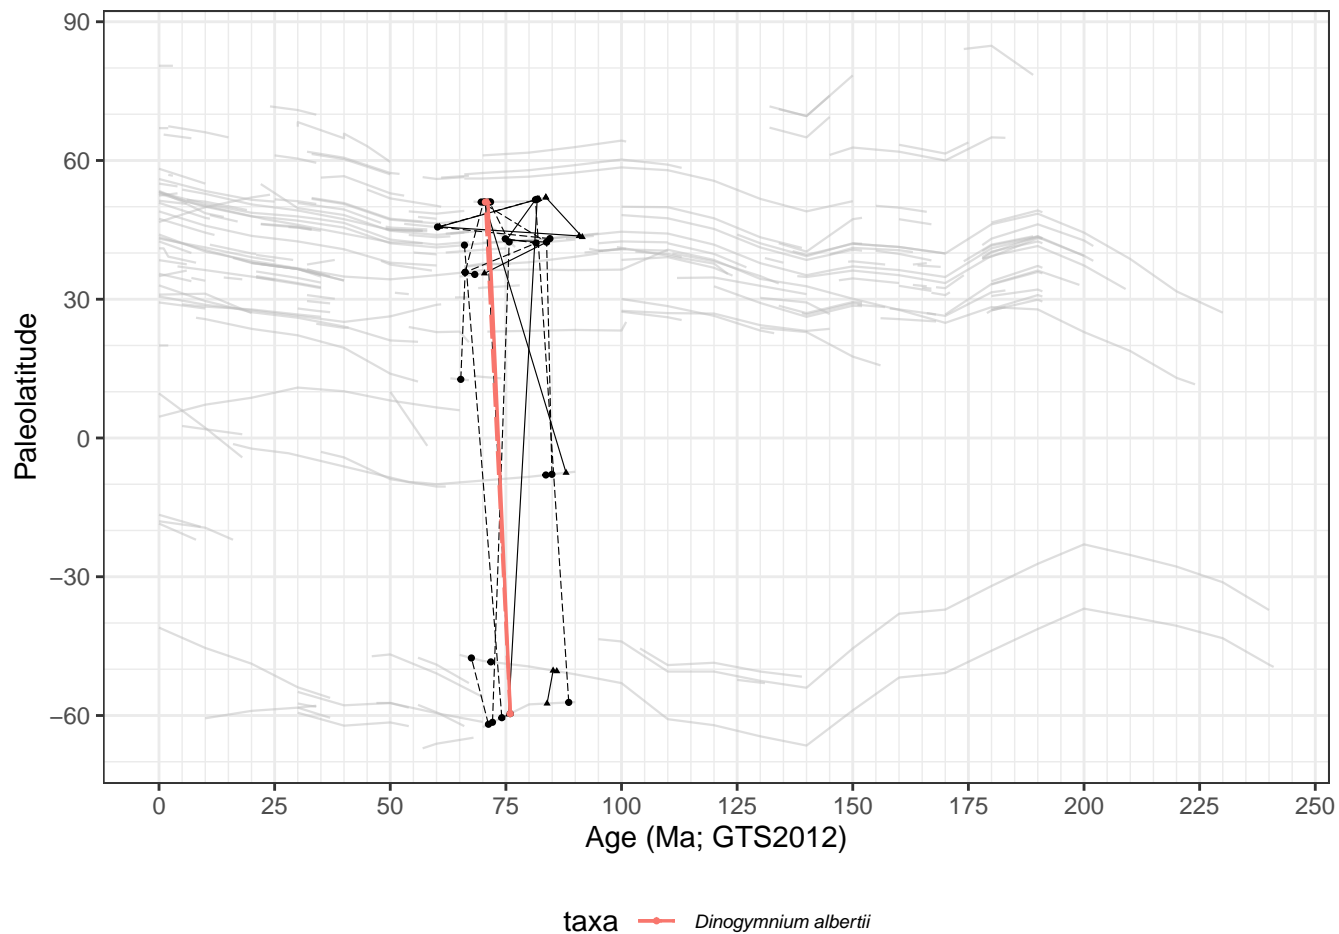

Supplement: Supplementary file 22 [file Family_Ptychodiscaceae, Dinogymnioideae.pdf › Supplement/Supplement 2/Family 27 plots/Family_Ptychodiscaceae, Dinogymnioideae.pdf]

# Family Scriniocassiaceae, all

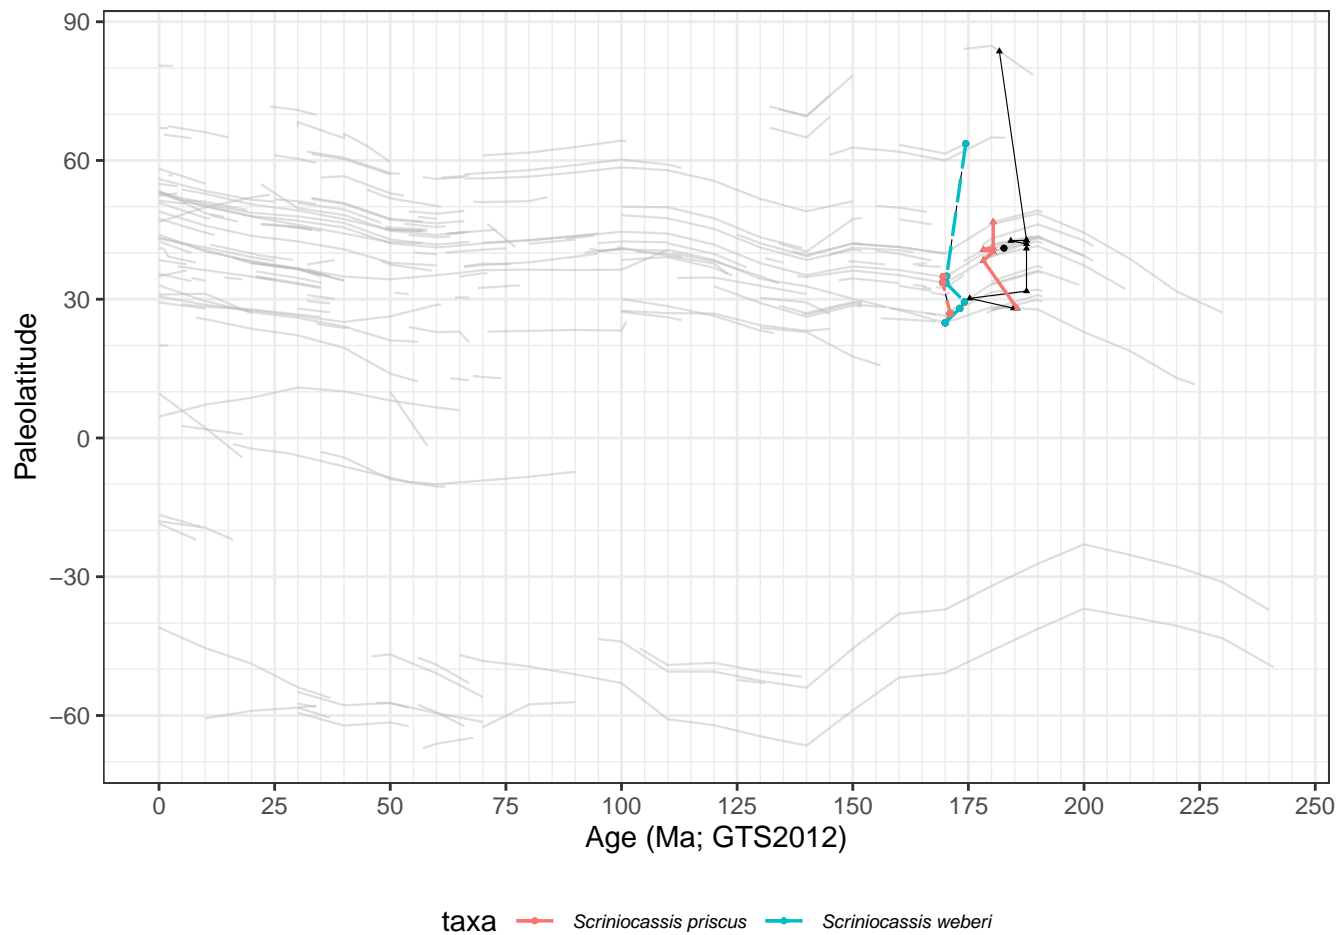

Supplement: Supplementary file 23 [file Family_Scriniocassiaceae, all.pdf › Supplement/Supplement 2/Family 27 plots/Family_Scriniocassiaceae, all.pdf]

# Family Shublikodiniaceae, all

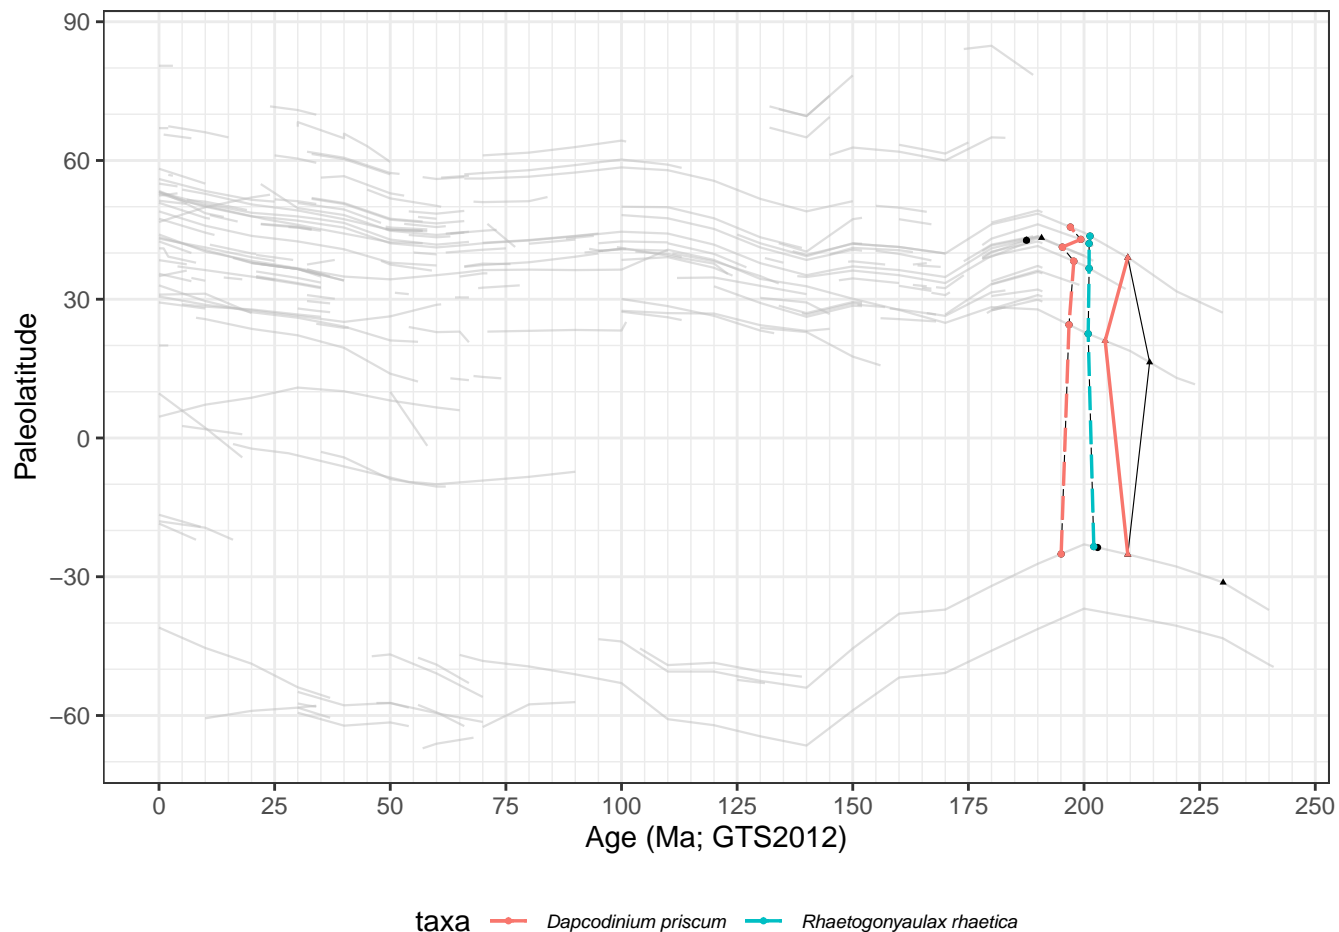

Supplement: Supplementary file 24 [file Family_Shublikodiniaceae, all.pdf › Supplement/Supplement 2/Family 27 plots/Family_Shublikodiniaceae, all.pdf]

# Family Stephanelytraceae, all

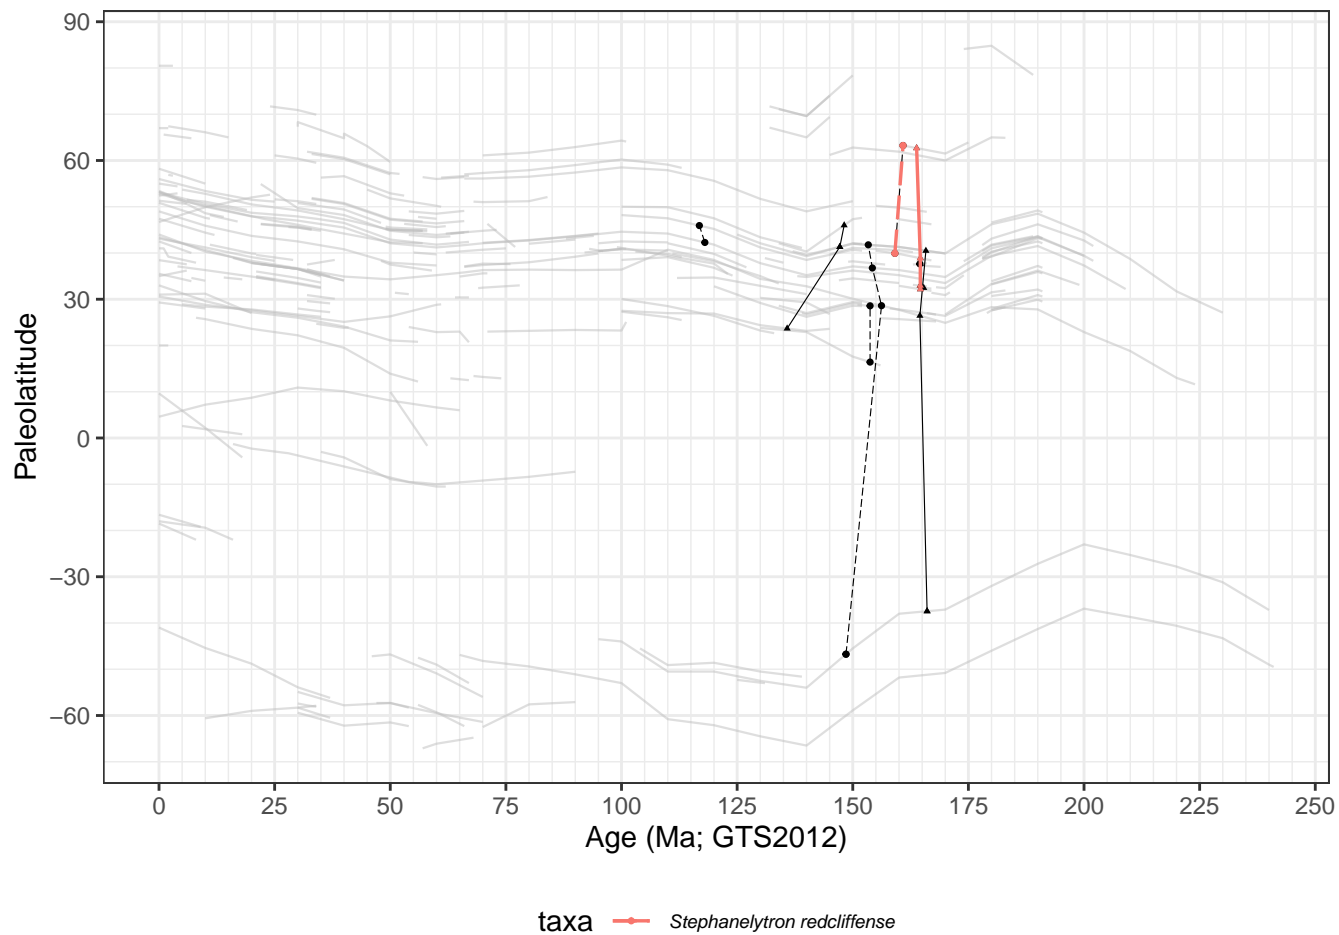

Supplement: Supplementary file 25 [file Family_Stephanelytraceae, all.pdf › Supplement/Supplement 2/Family 27 plots/Family_Stephanelytraceae, all.pdf]

# Family Suessiaceae, all

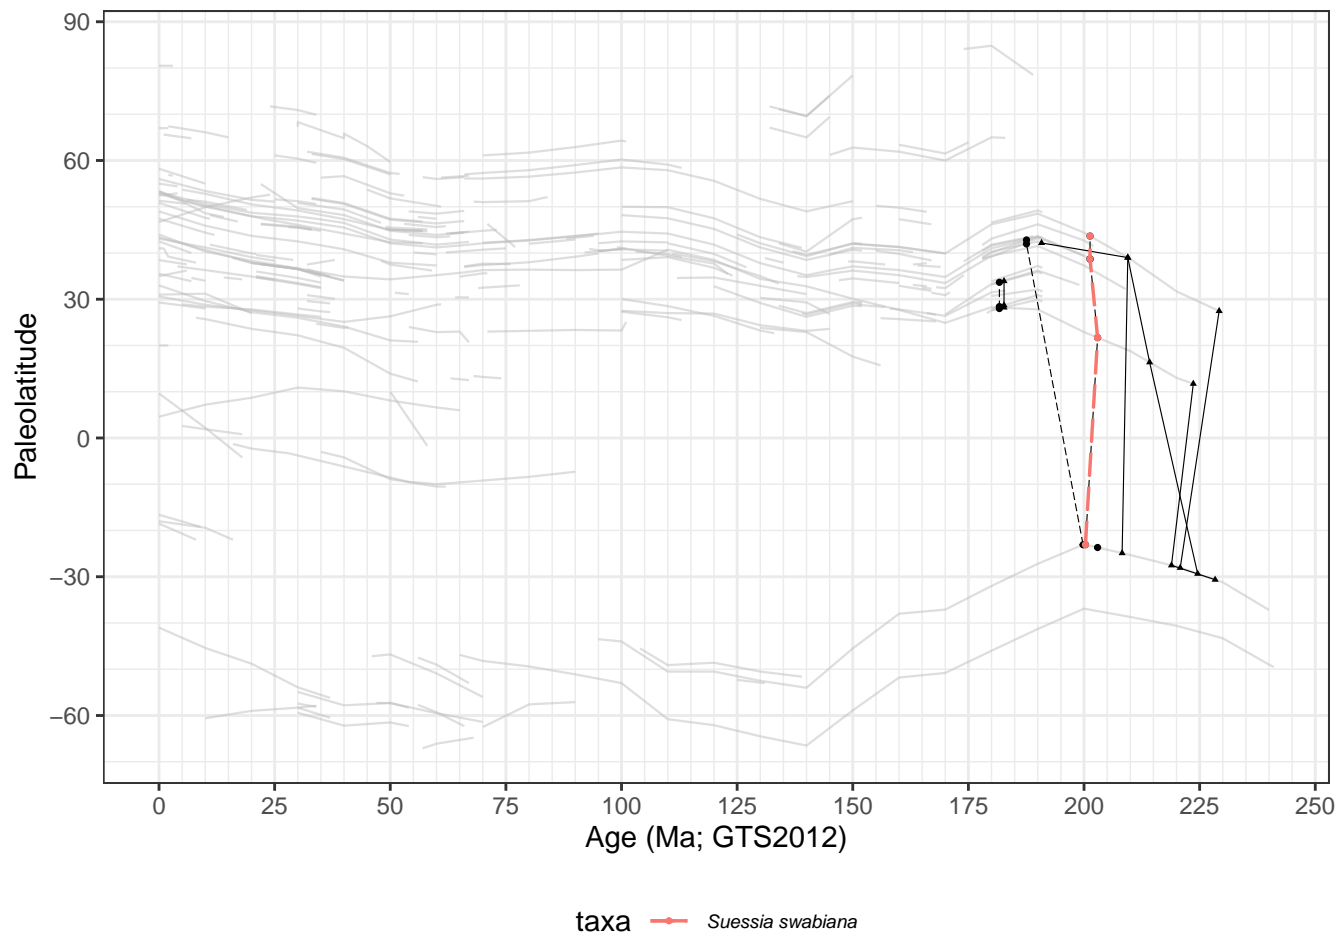

Supplement: Supplementary file 26 [file Family_Suessiaceae, all.pdf › Supplement/Supplement 2/Family 27 plots/Family_Suessiaceae, all.pdf]

# Genus Abratopdinium

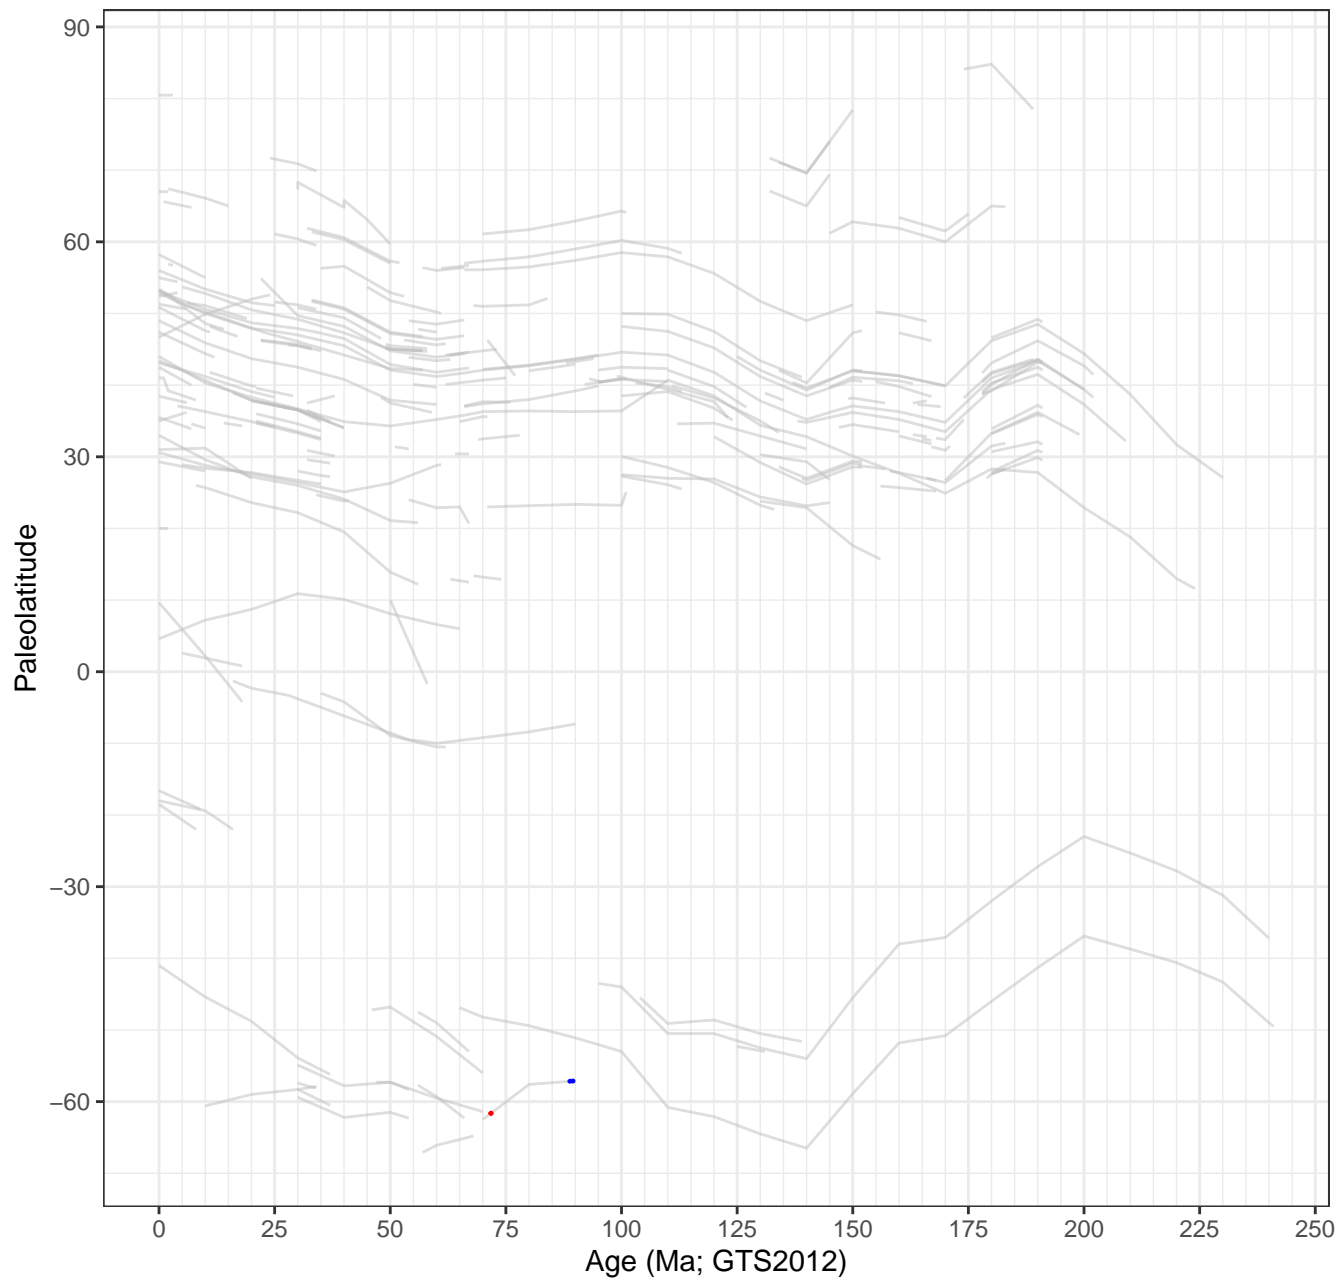

Supplement: Supplementary file 28 [file Genus Abratopdinium.pdf › Supplement/Supplement 2/Genus 459 plots/Genus Abratopdinium.pdf]

# Genus *Acanthaulax*

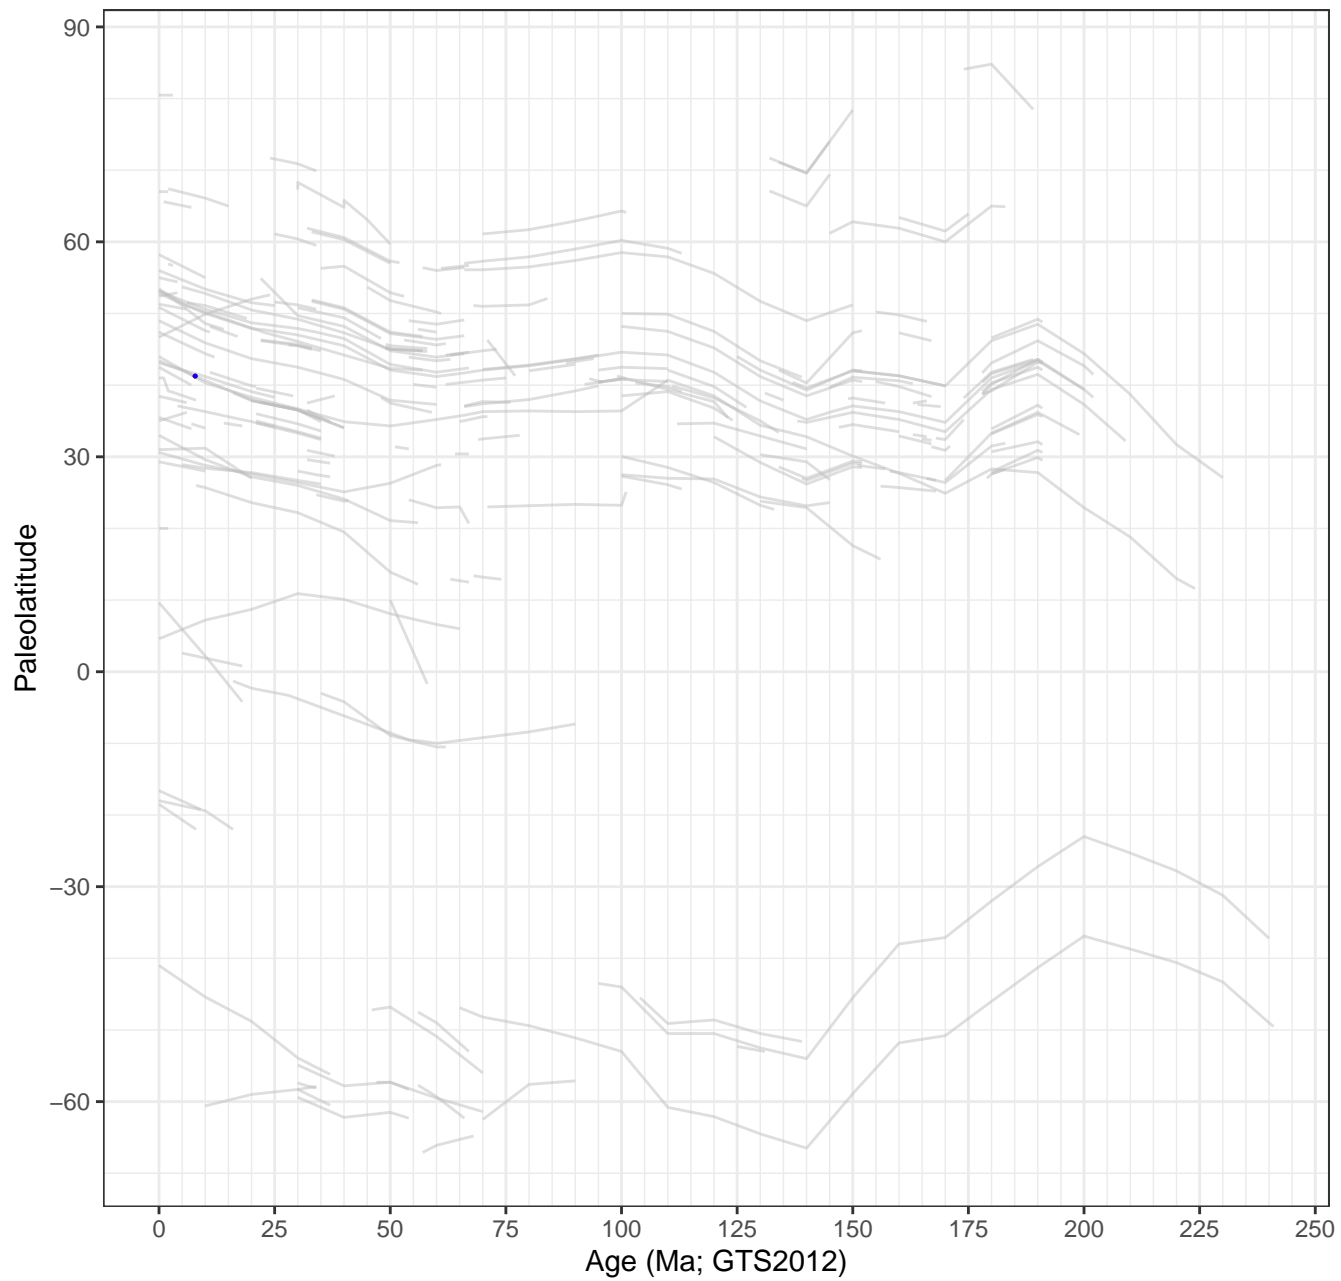

Supplement: Supplementary file 29 [file Genus Acanthaulax.pdf › Supplement/Supplement 2/Genus 459 plots/Genus Acanthaulax.pdf]

# Genus Achilleodinium

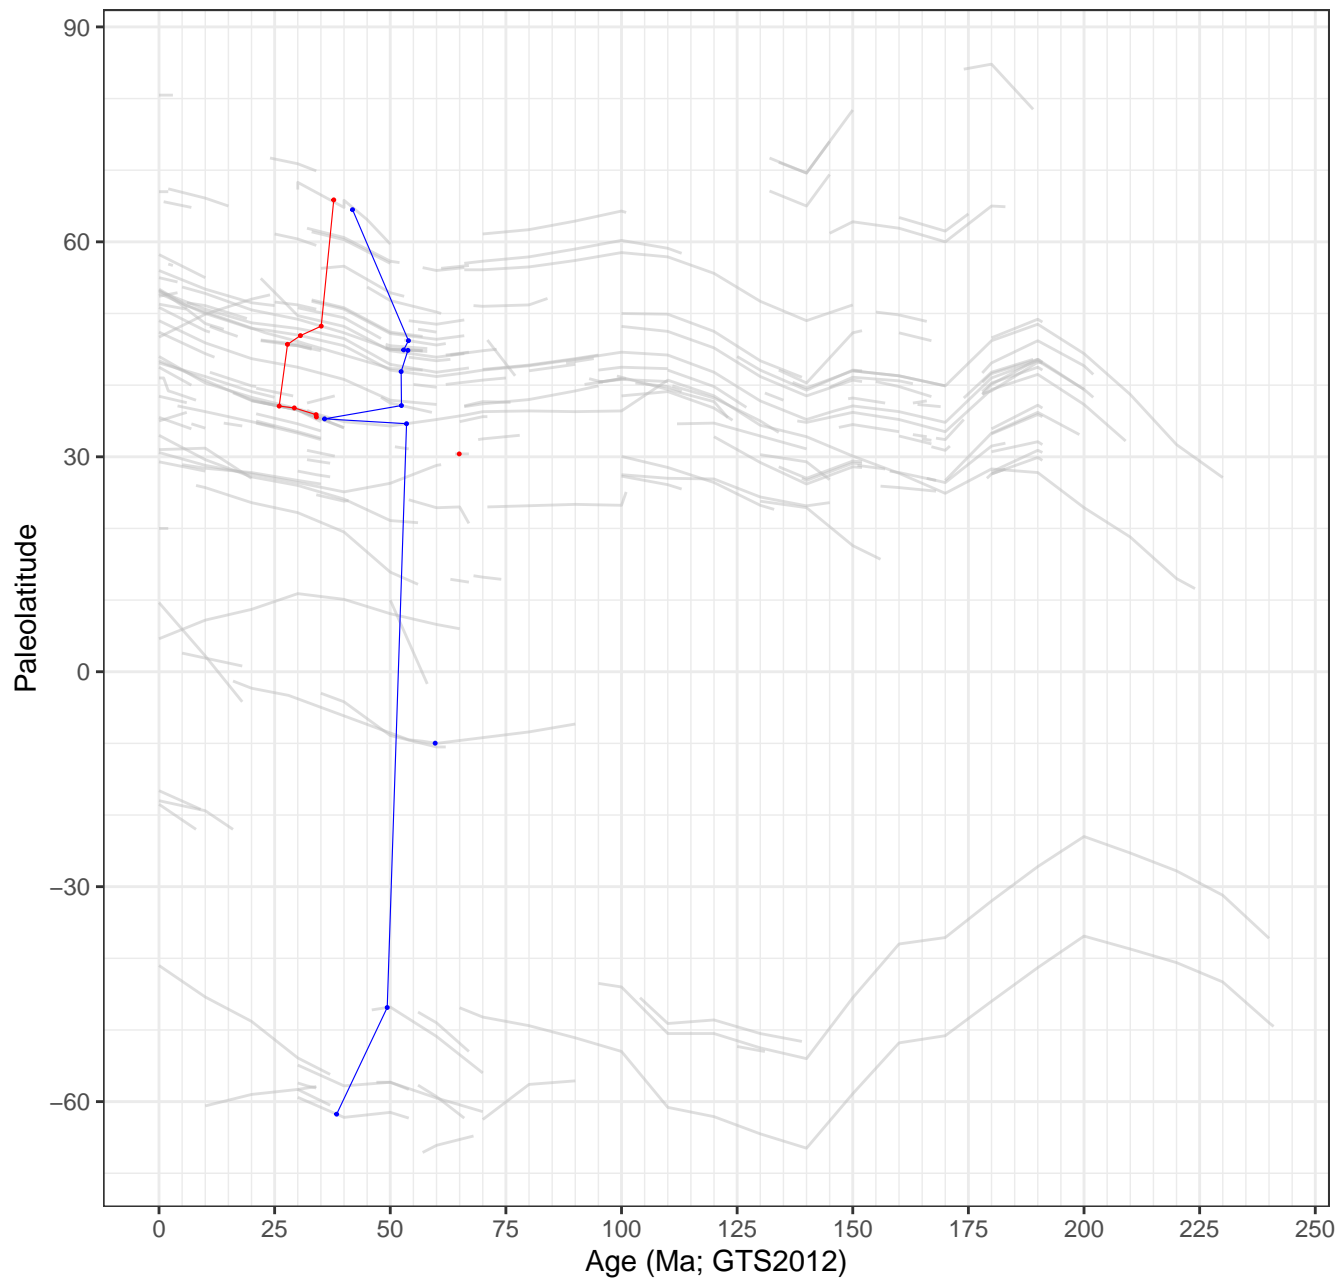

Supplement: Supplementary file 30 [file Genus Achilleodinium.pdf › Supplement/Supplement 2/Genus 459 plots/Genus Achilleodinium.pdf]

# Genus *Achomosphaera*

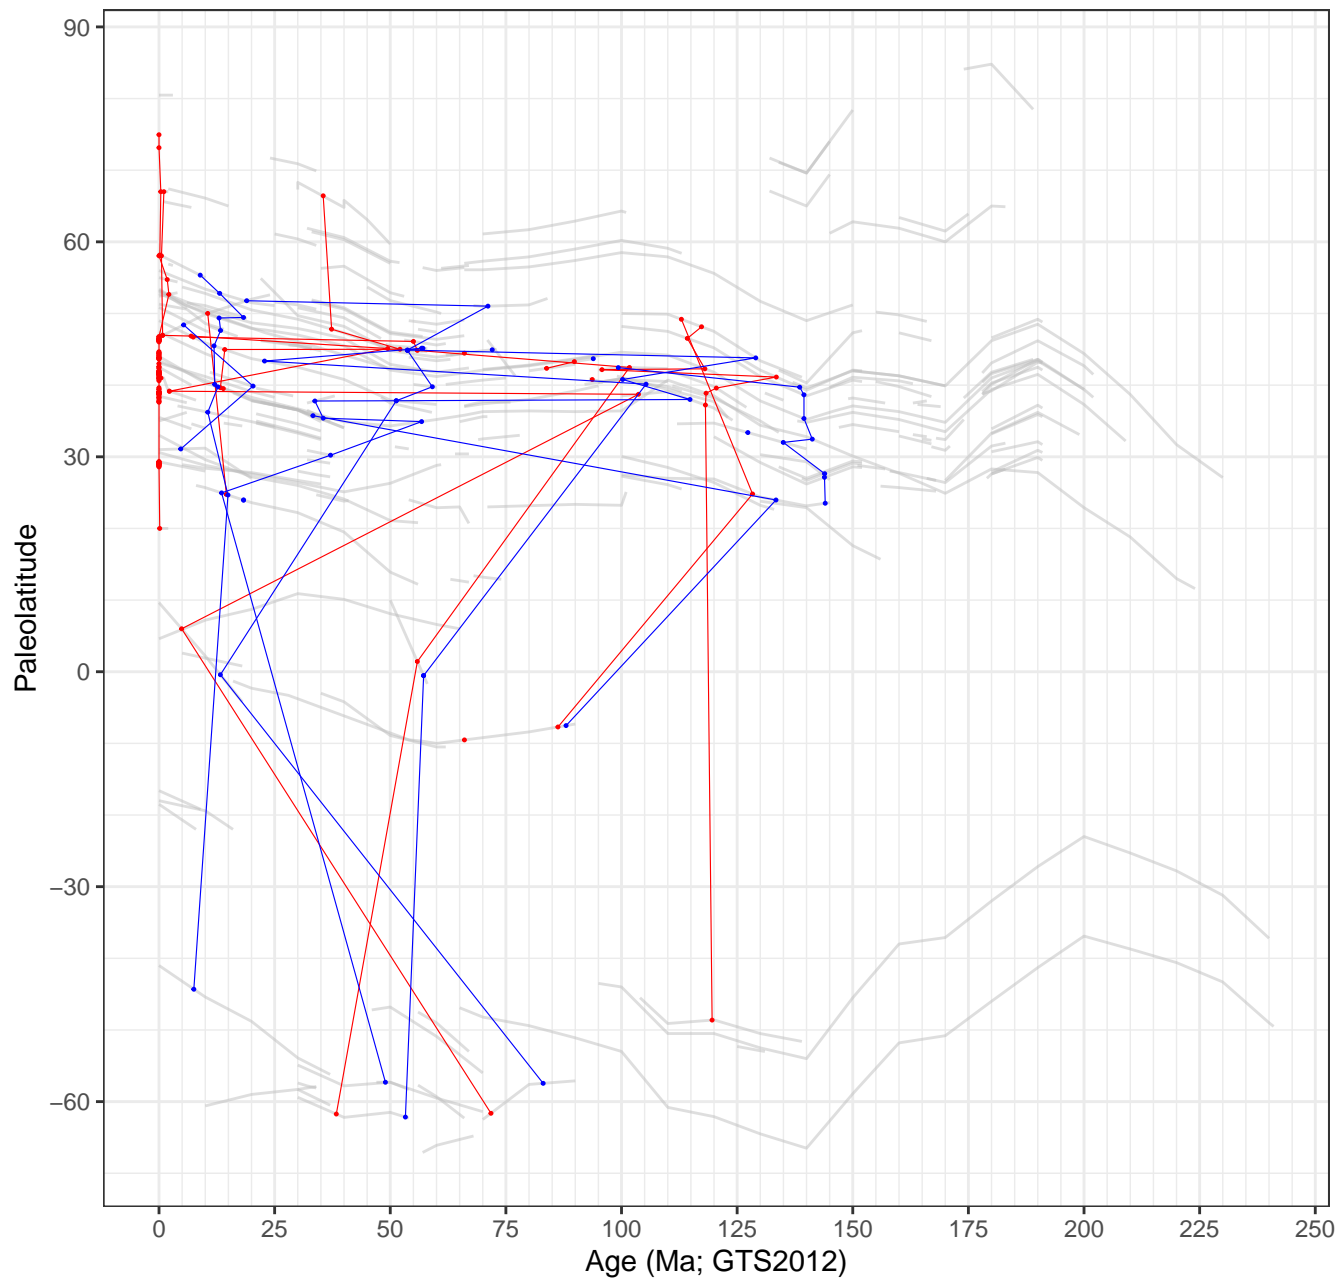

Supplement: Supplementary file 31 [file Genus Achomosphaera.pdf › Supplement/Supplement 2/Genus 459 plots/Genus Achomosphaera.pdf]

# Genus Actinotherca

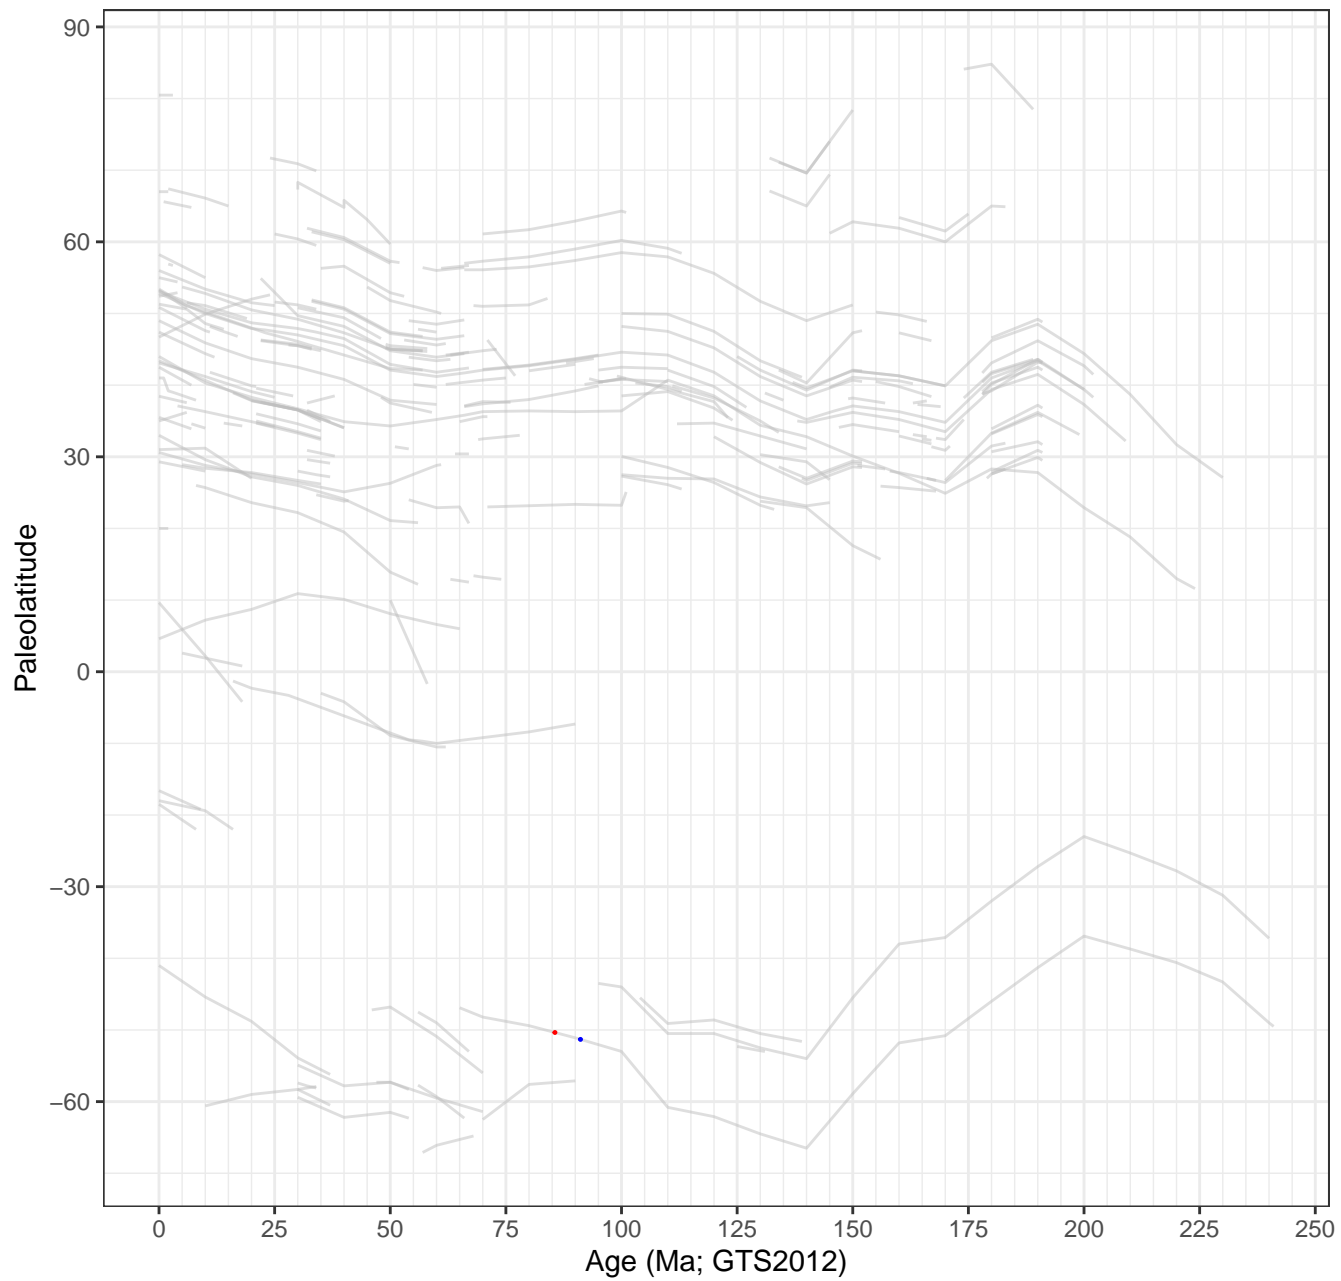

Supplement: Supplementary file 32 [file Genus Actinotheca.pdf › Supplement/Supplement 2/Genus 459 plots/Genus Actinotheca.pdf]

# Genus Adeliessphaera

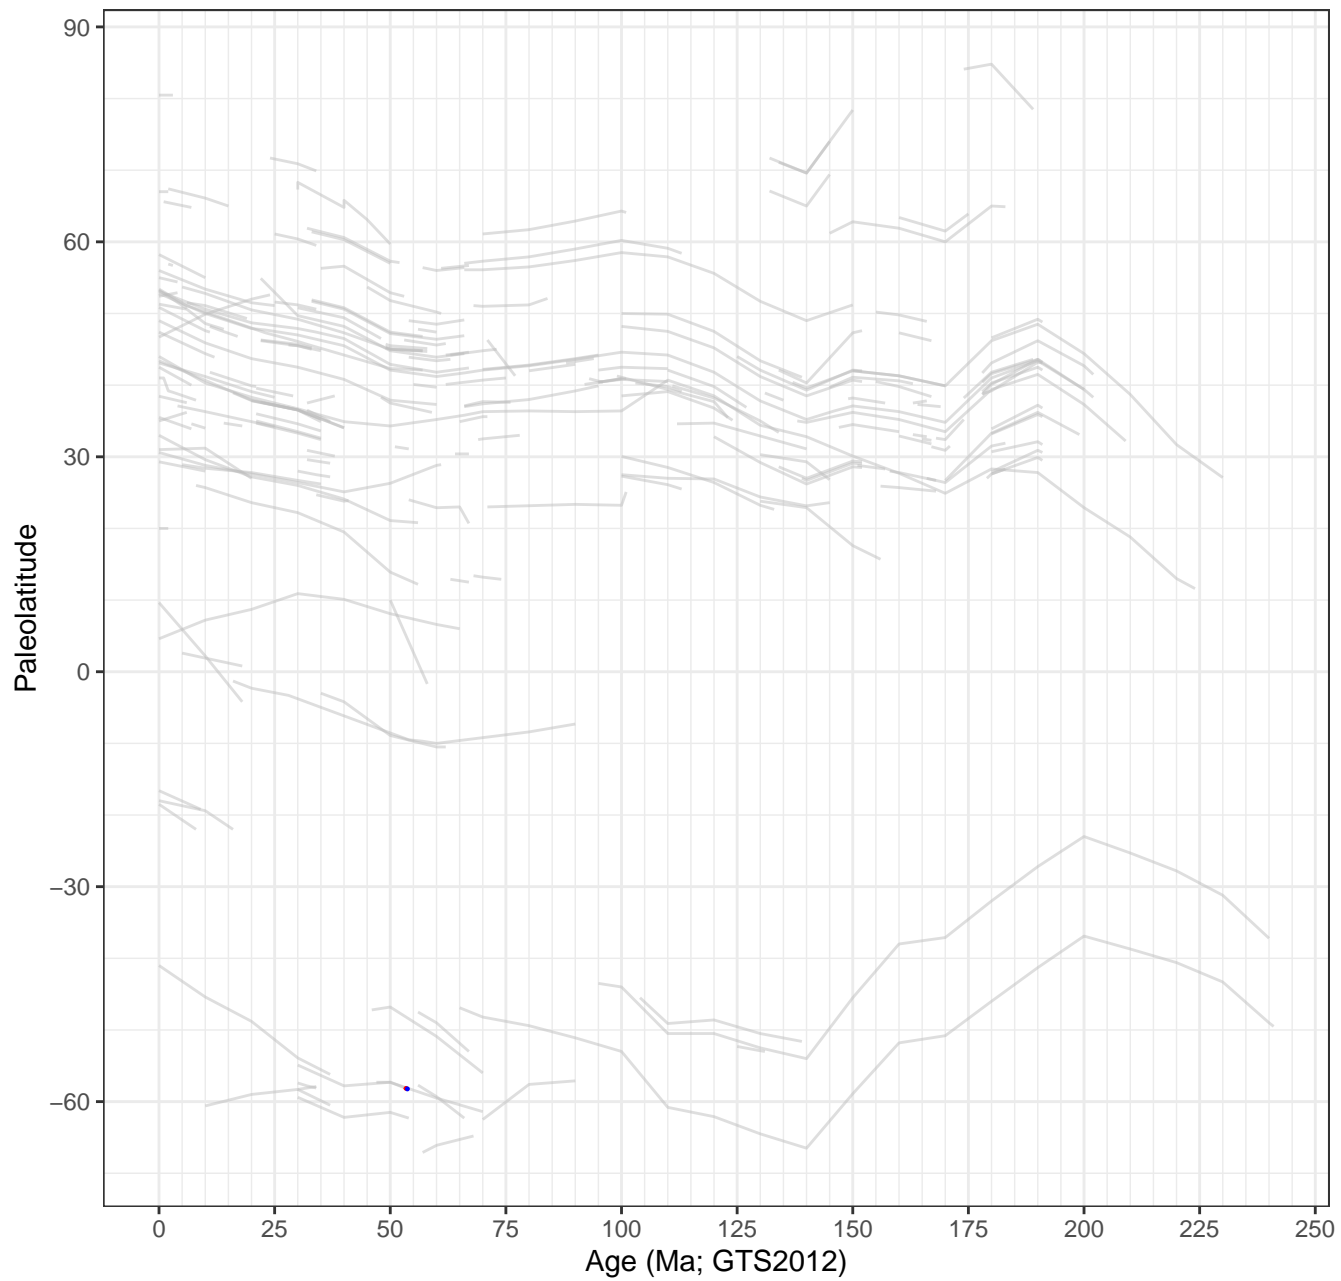

Supplement: Supplementary file 33 [file Genus Adeliesphaera.pdf › Supplement/Supplement 2/Genus 459 plots/Genus Adeliesphaera.pdf]

# Genus Adnatosphaeridium

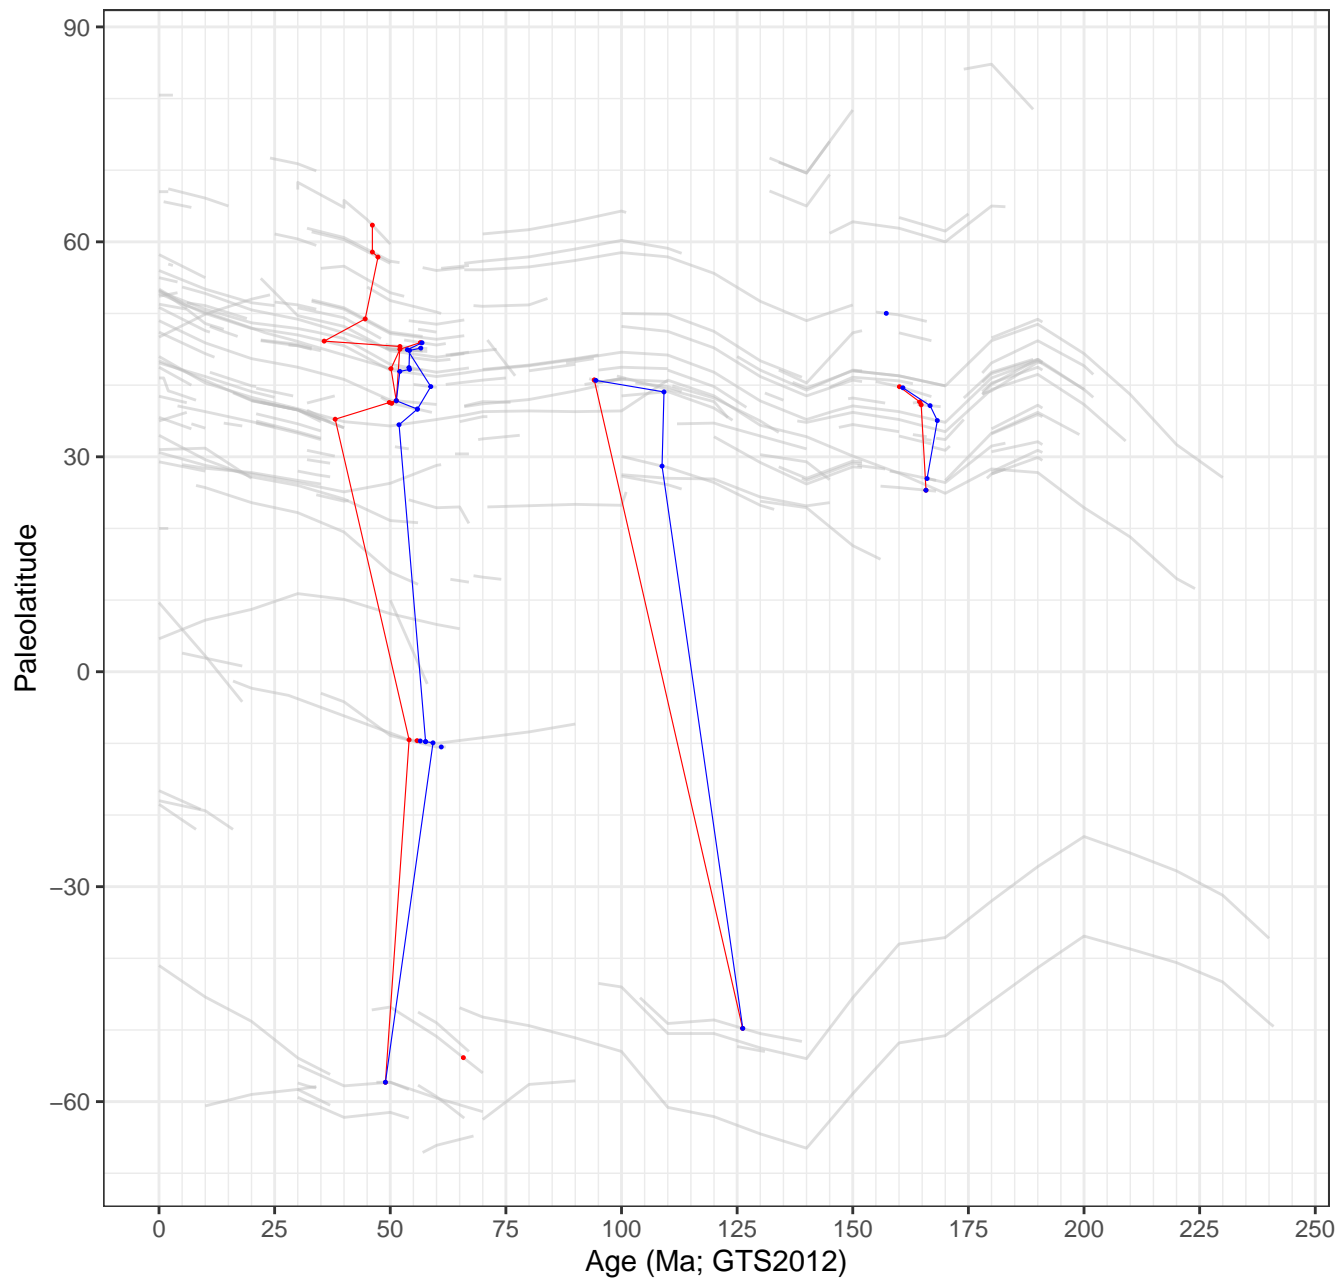

Supplement: Supplementary file 34 [file Genus Adnatosphaeridium.pdf › Supplement/Supplement 2/Genus 459 plots/Genus Adnatosphaeridium.pdf]

# Genus Aidelocysta

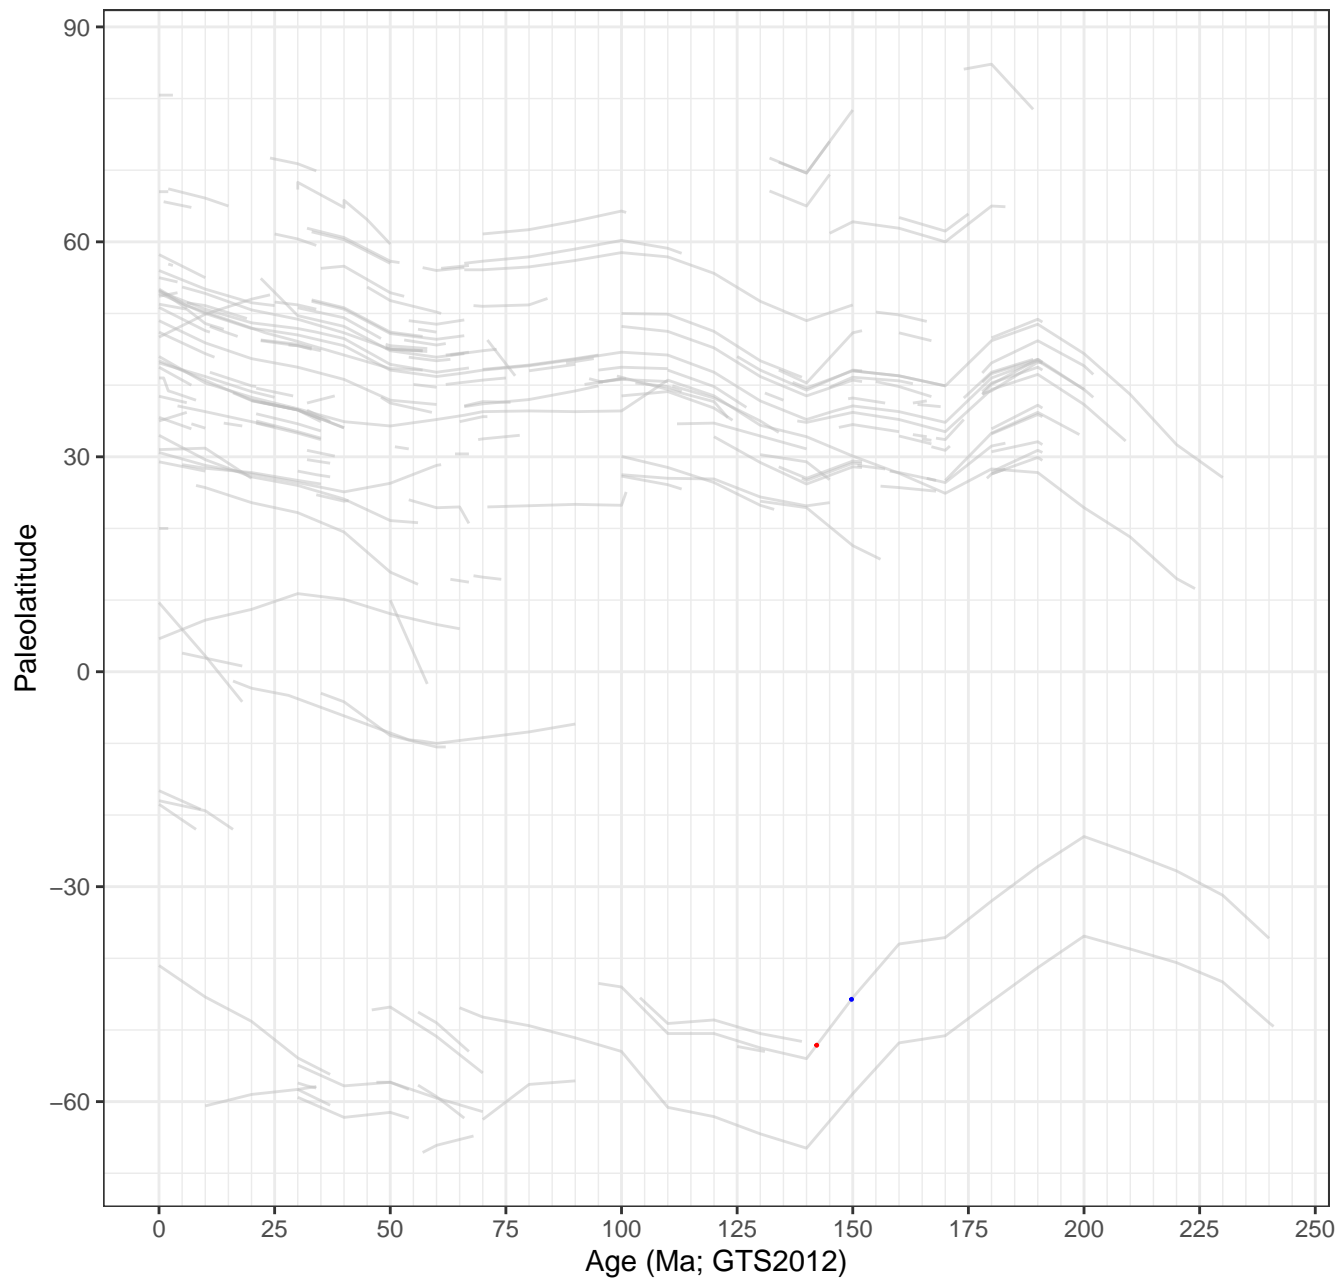

Supplement: Supplementary file 35 [file Genus Aidelocysta.pdf › Supplement/Supplement 2/Genus 459 plots/Genus Aidelocysta.pdf]

# Genus Aireiana

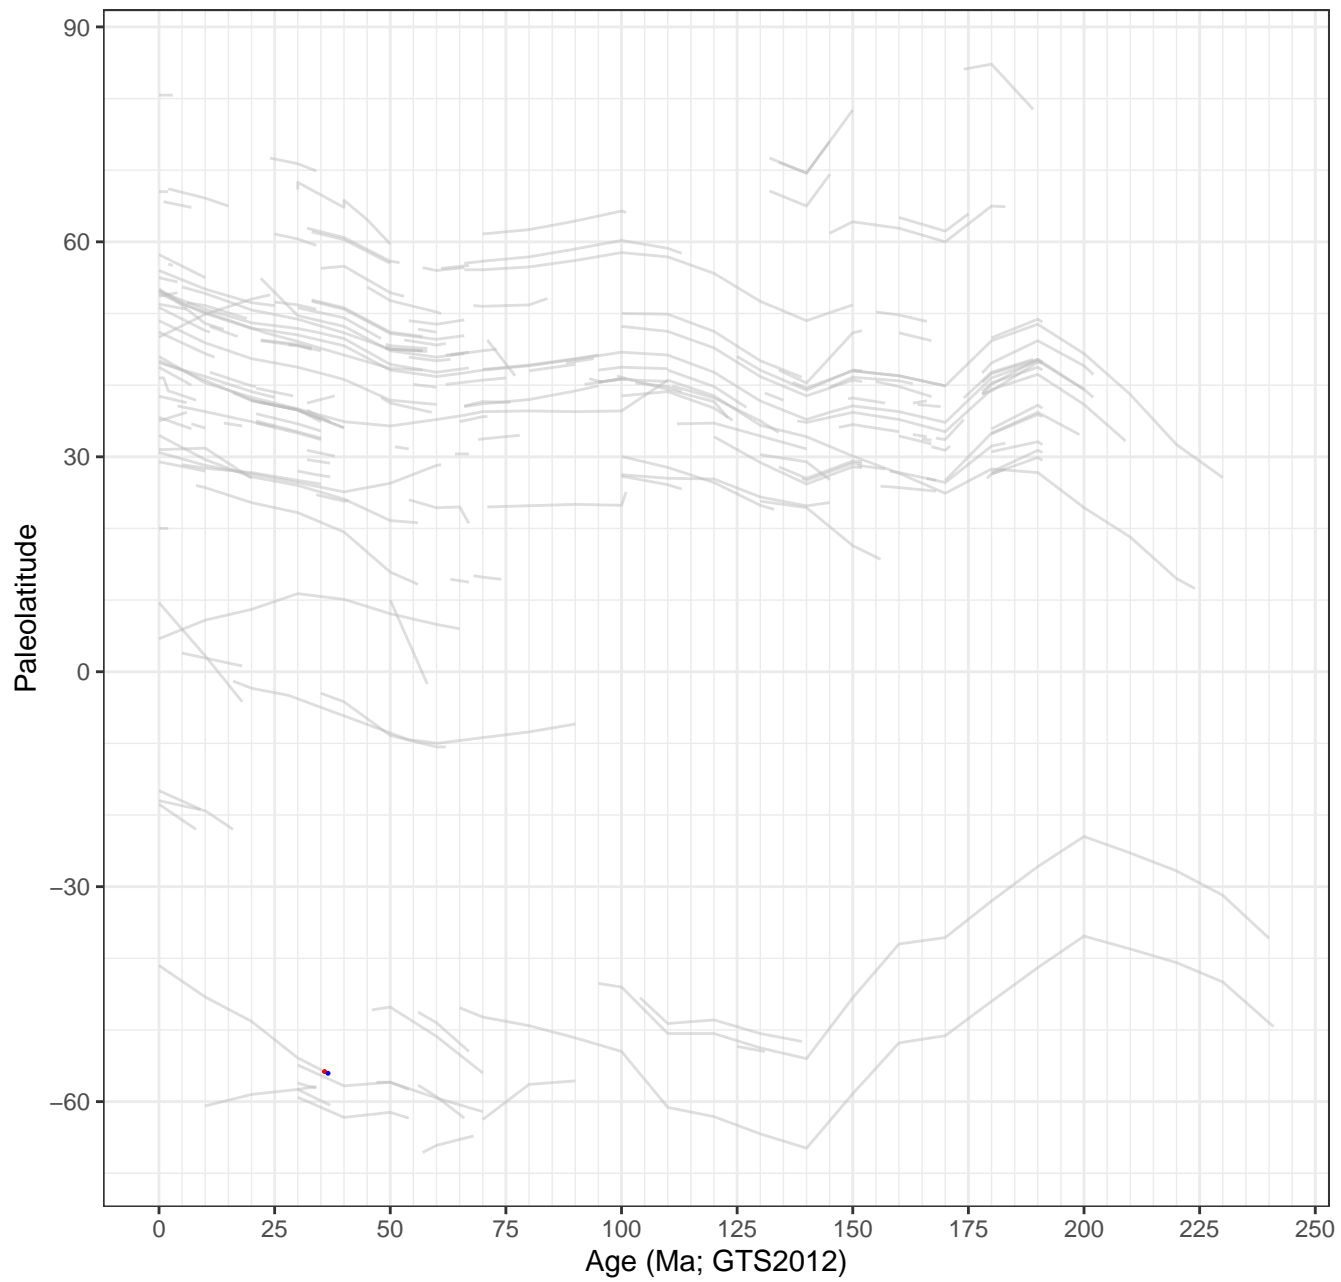

Supplement: Supplementary file 36 [file Genus Aireiana.pdf › Supplement/Supplement 2/Genus 459 plots/Genus Aireiana.pdf]

# Genus Aldorfia

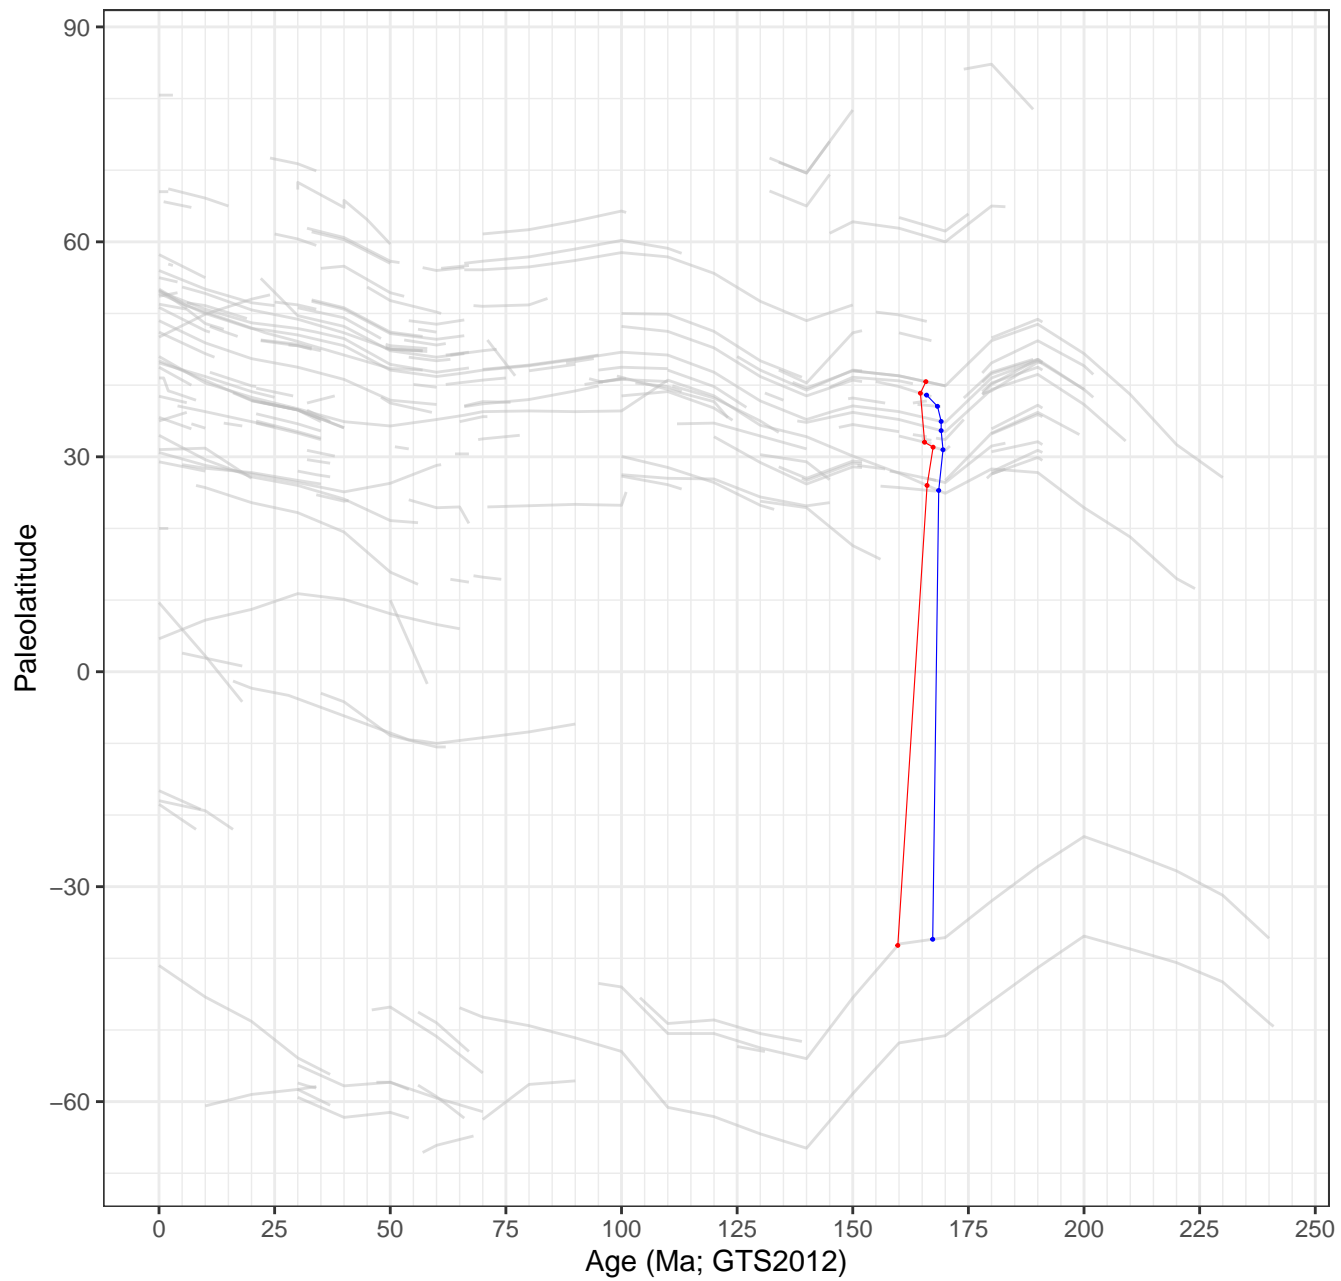

Supplement: Supplementary file 37 [file Genus Aldorfia.pdf › Supplement/Supplement 2/Genus 459 plots/Genus Aldorfia.pdf]

# Genus *Algasphaeridium*

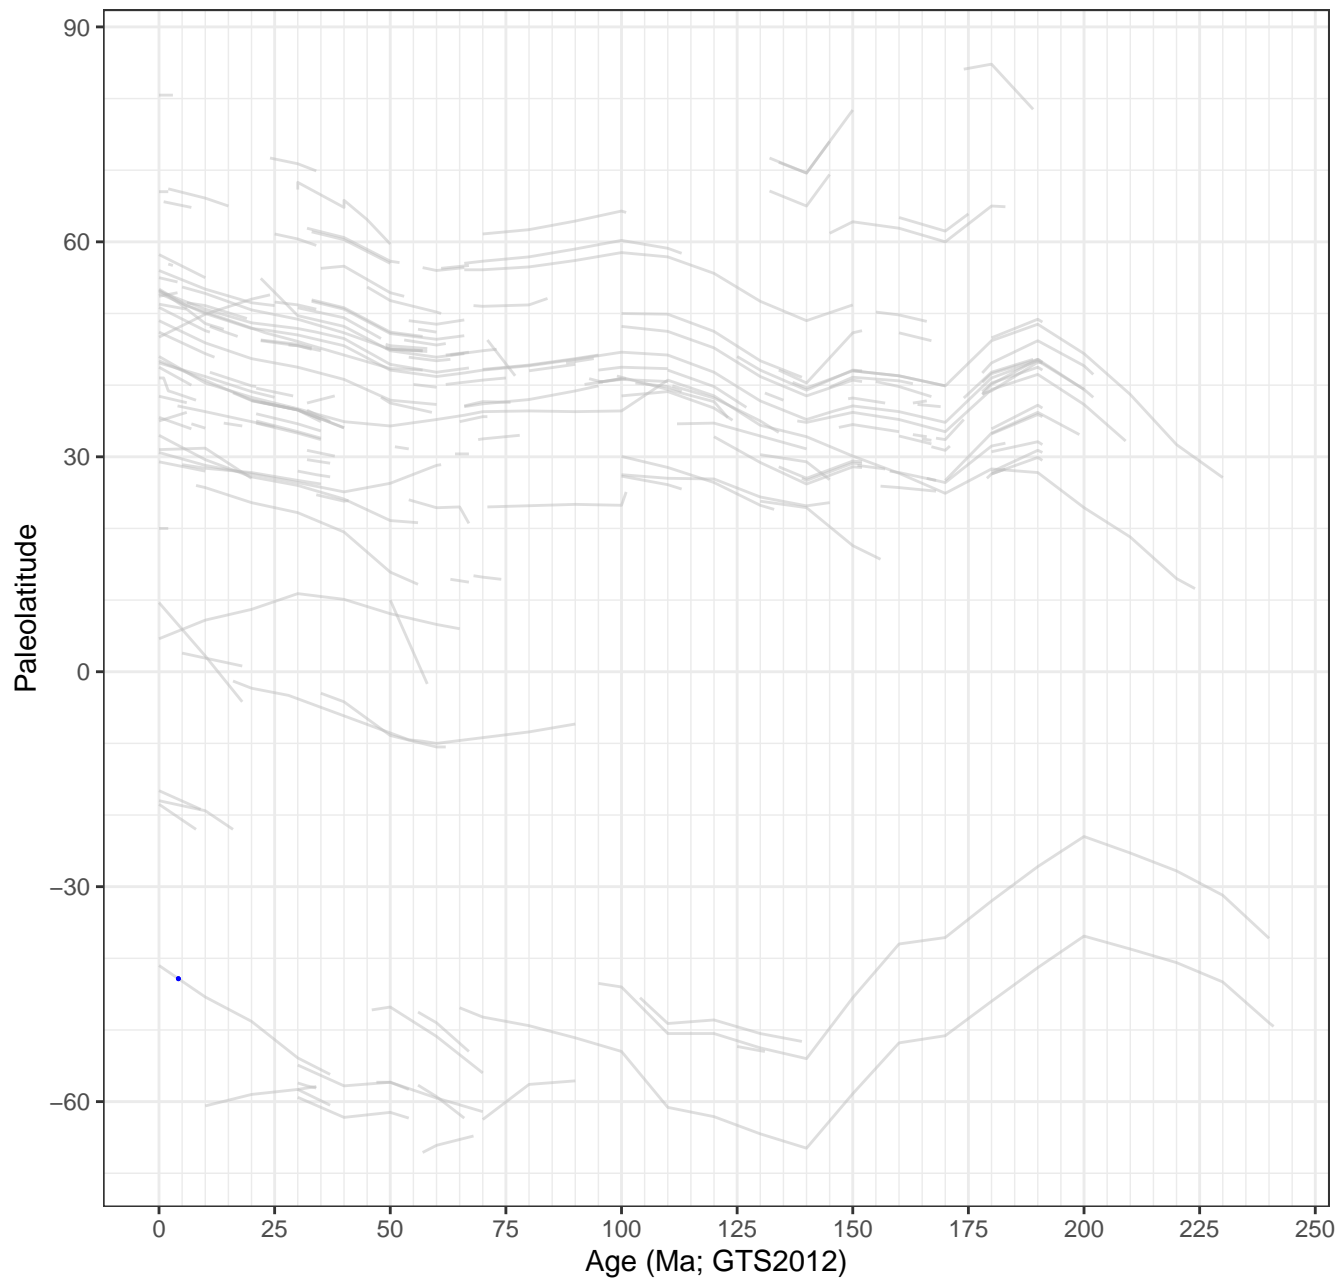

Supplement: Supplementary file 38 [file Genus Algidasphaeridium.pdf › Supplement/Supplement 2/Genus 459 plots/Genus Algidasphaeridium.pdf]

# Genus *Alisocysta*

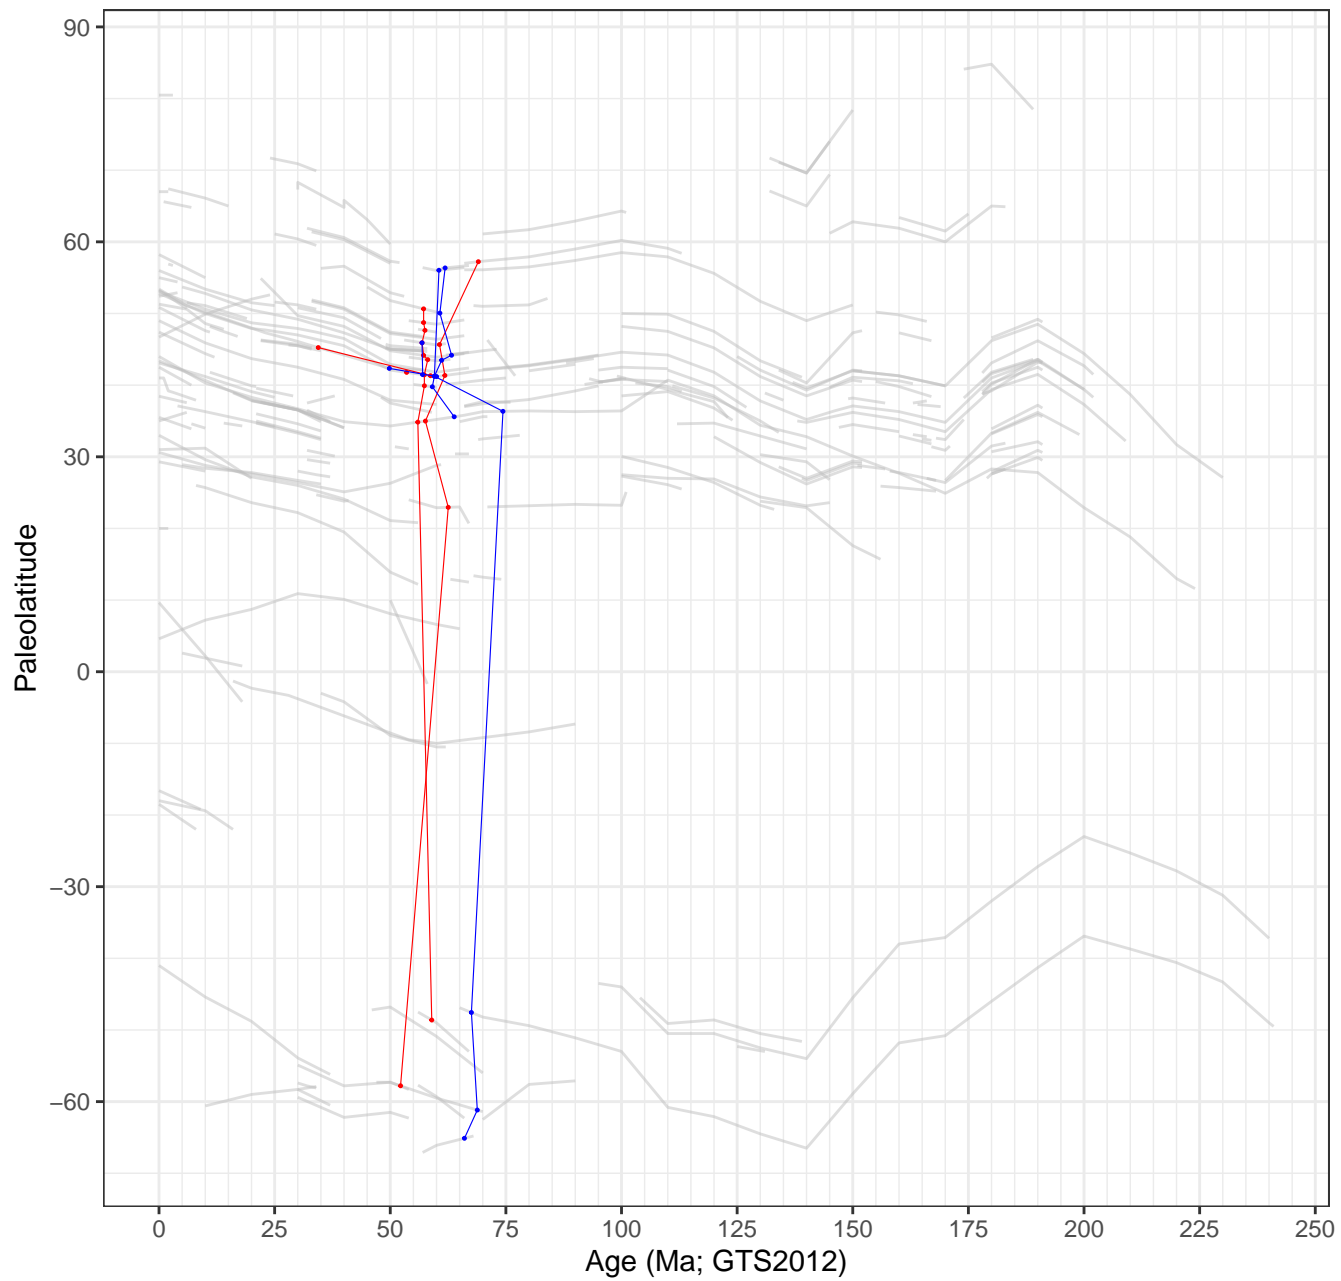

Supplement: Supplementary file 39 [file Genus Alisocysta.pdf › Supplement/Supplement 2/Genus 459 plots/Genus Alisocysta.pdf]

# Genus *Alisogymnium*

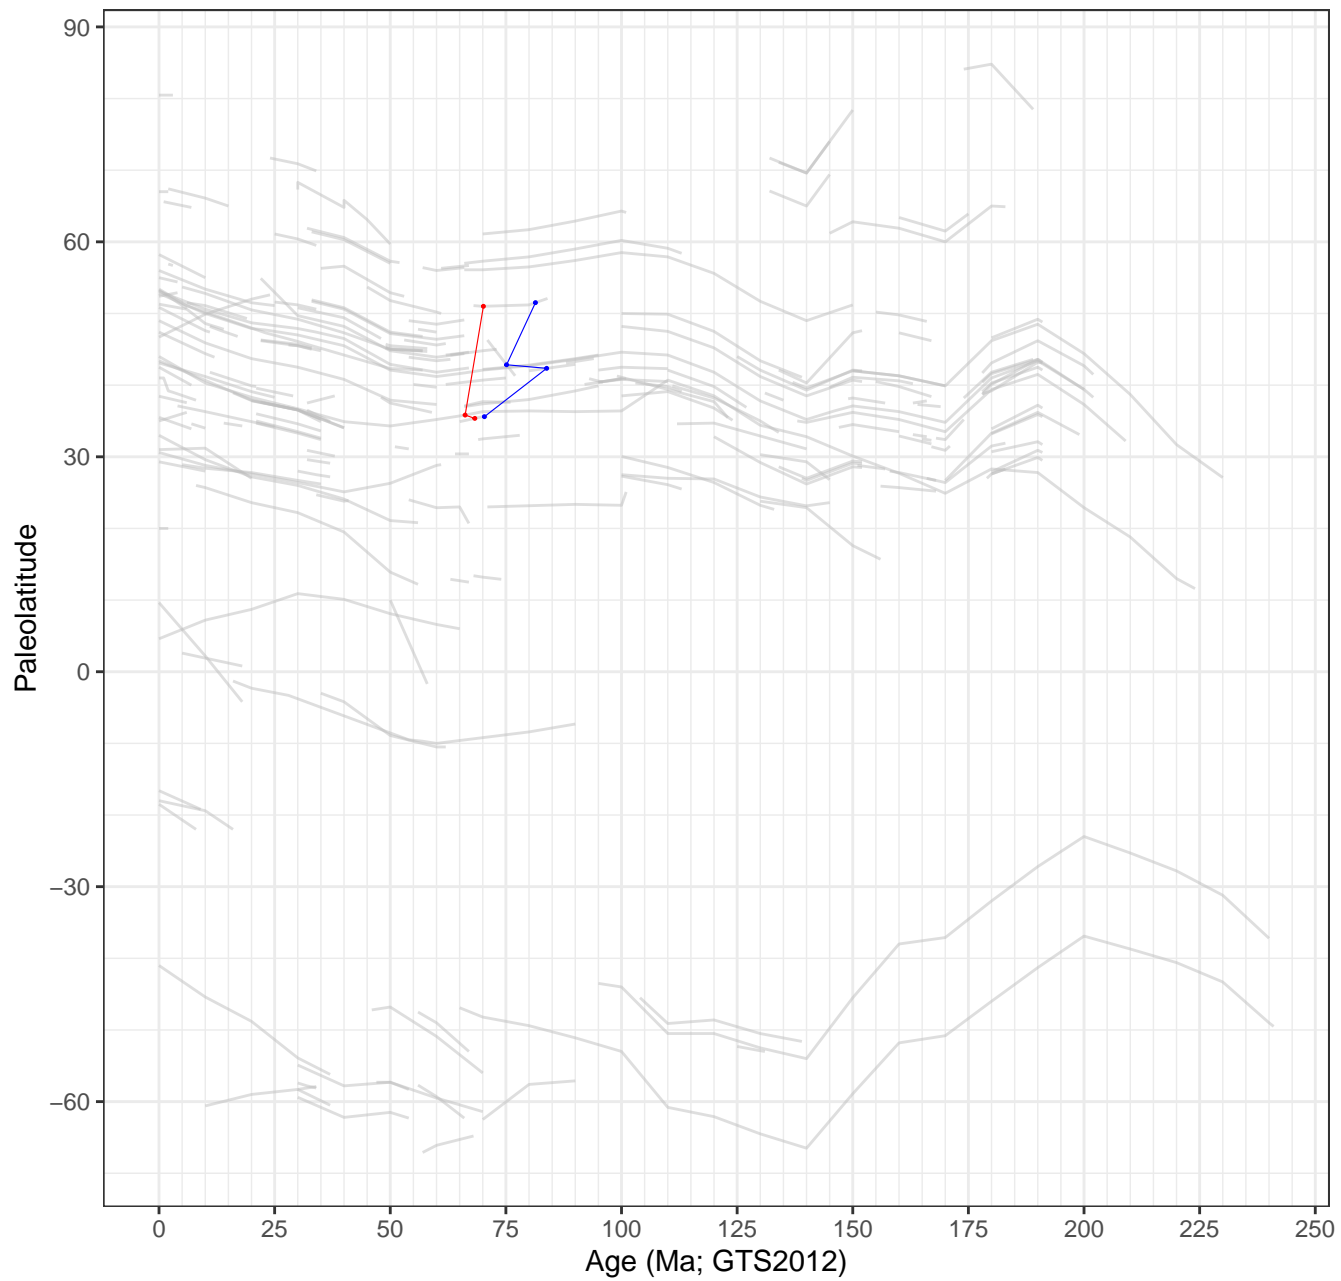

Supplement: Supplementary file 40 [file Genus Alisogymnium.pdf › Supplement/Supplement 2/Genus 459 plots/Genus Alisogymnium.pdf]

# Genus *Alterbidinium*

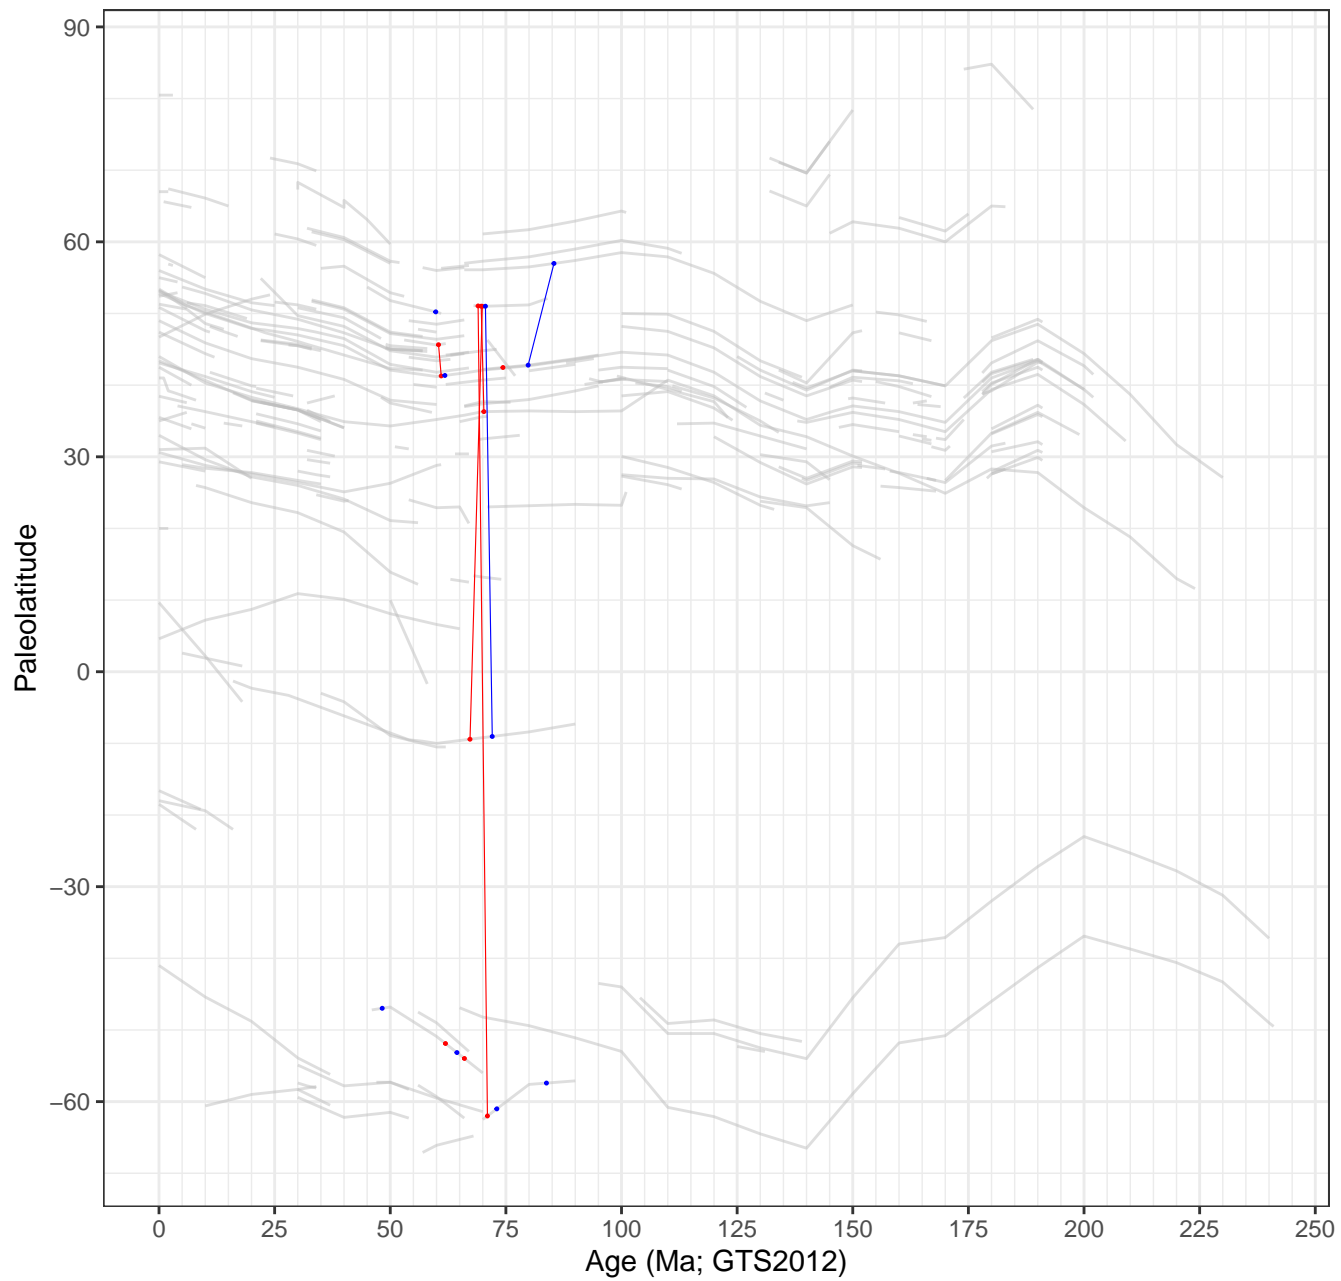

Supplement: Supplementary file 41 [file Genus Alterbidinium.pdf › Supplement/Supplement 2/Genus 459 plots/Genus Alterbidinium.pdf]

# Genus Ambonosphaera

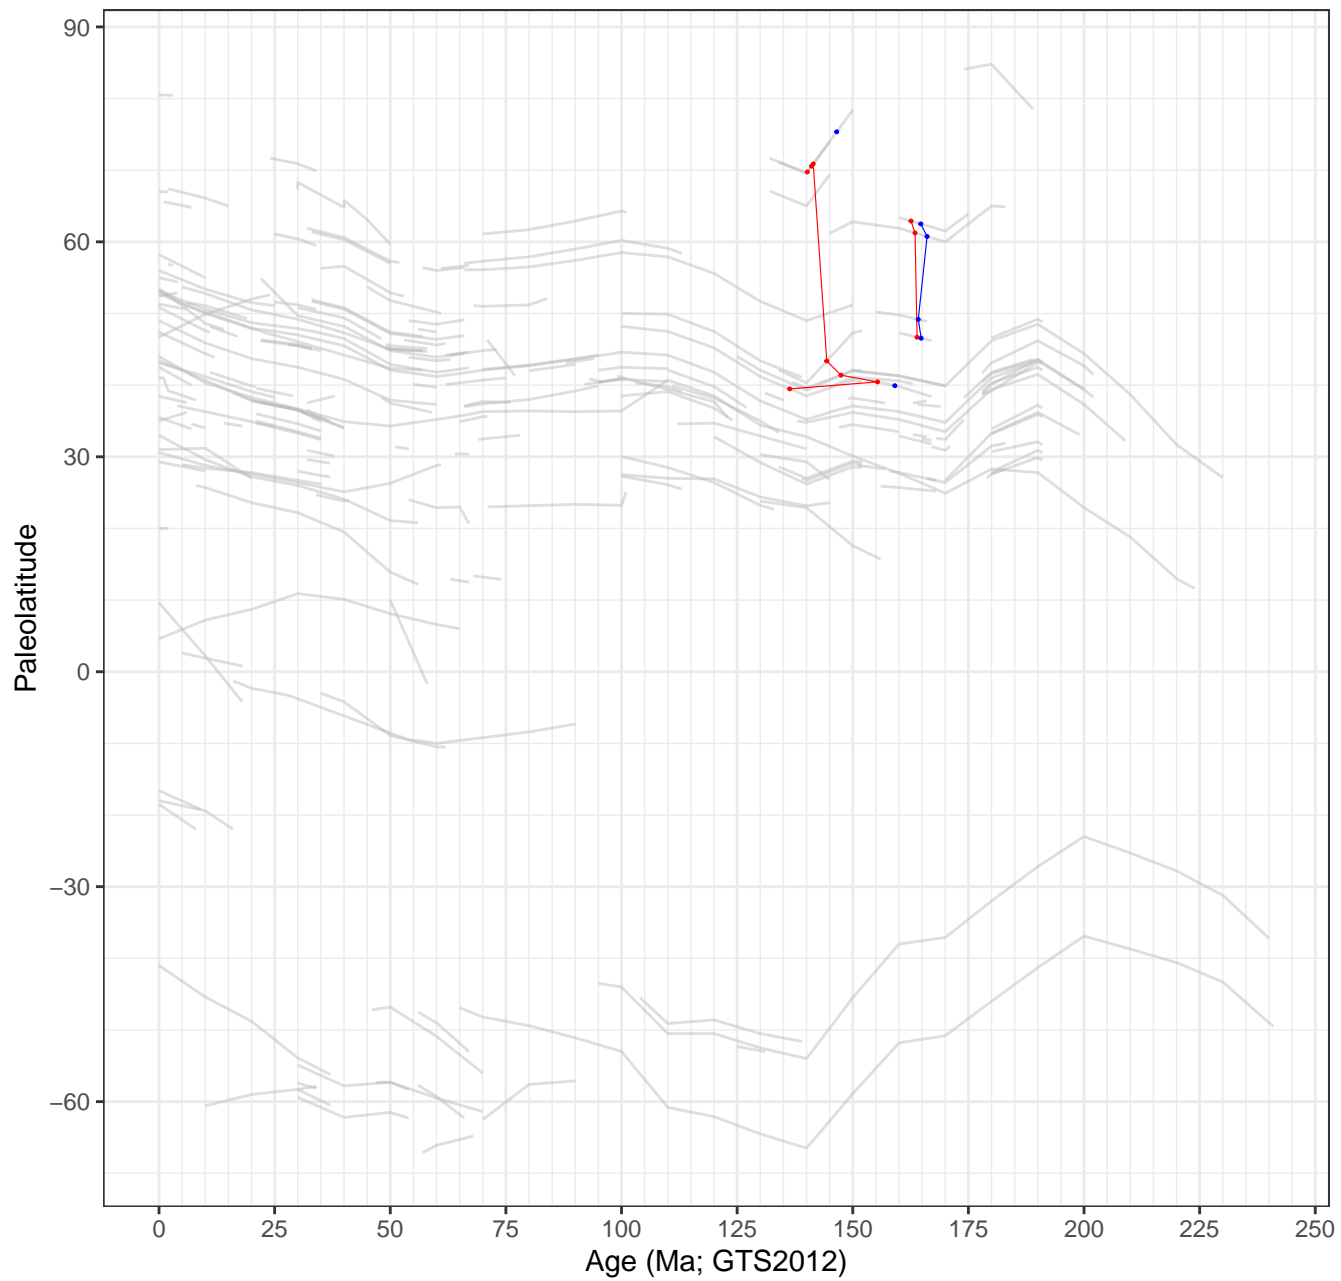

Supplement: Supplementary file 42 [file Genus Ambonosphaera.pdf › Supplement/Supplement 2/Genus 459 plots/Genus Ambonosphaera.pdf]

# Genus Amiculospaera

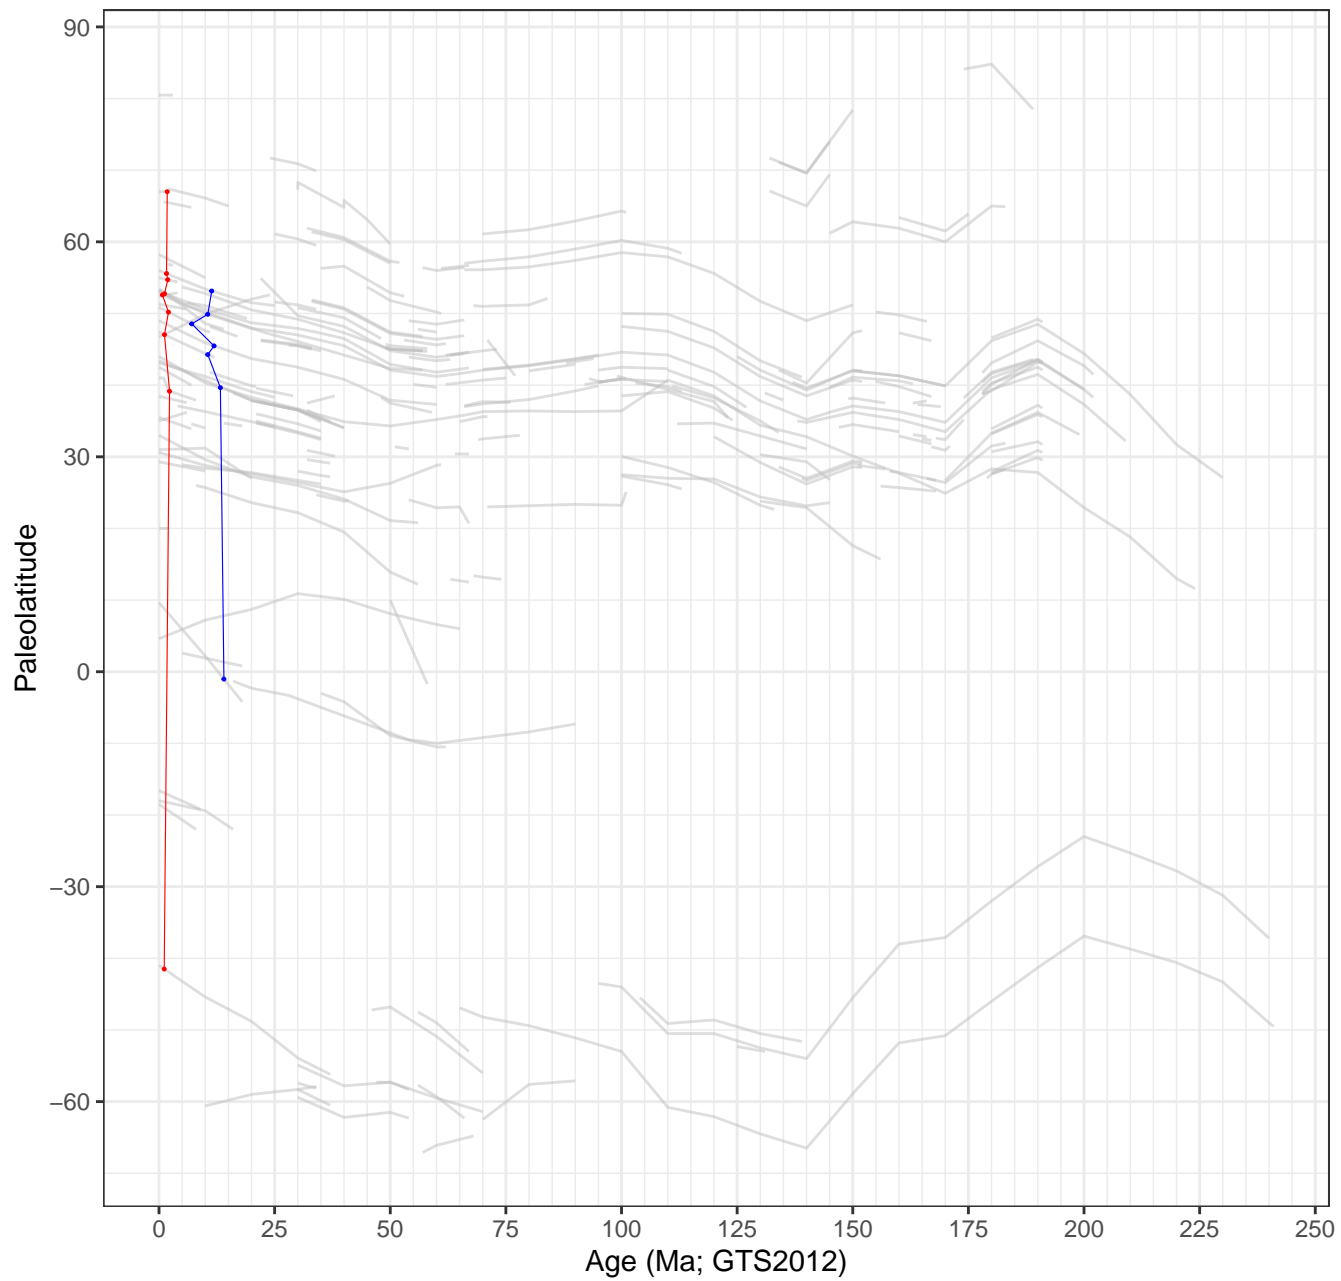

Supplement: Supplementary file 43 [file Genus Amiculosphaera.pdf › Supplement/Supplement 2/Genus 459 plots/Genus Amiculosphaera.pdf]

# Genus Amphidiadema

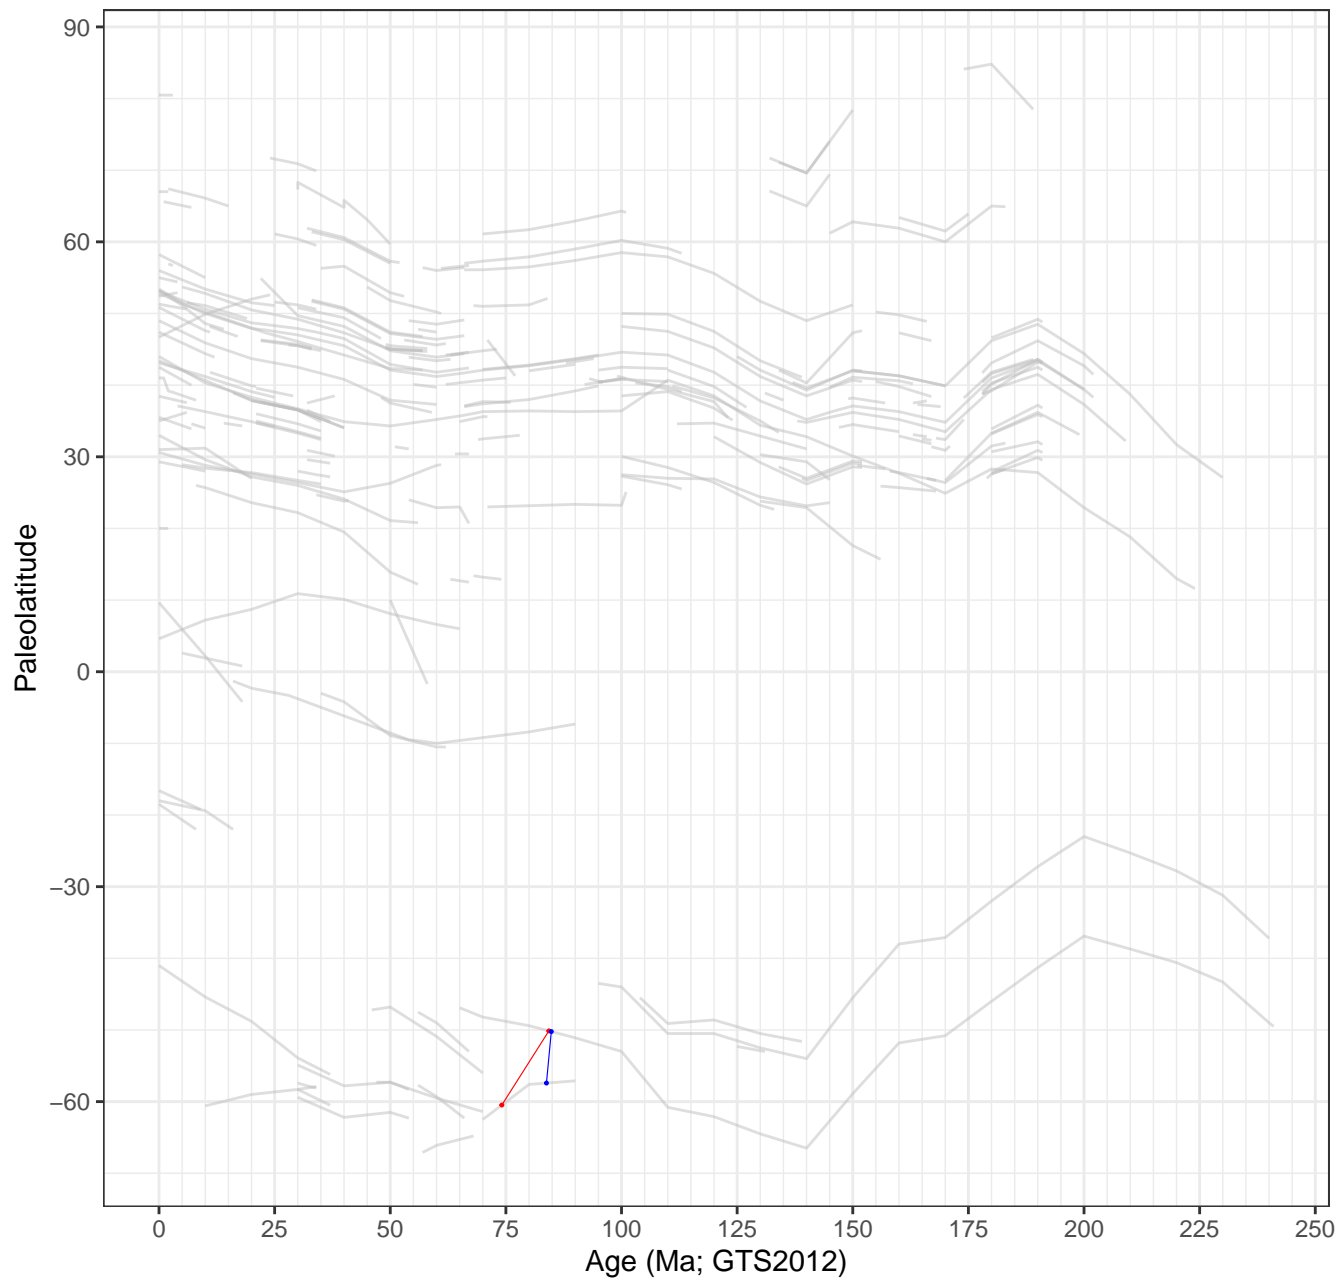

Supplement: Supplementary file 44 [file Genus Amphidiadema.pdf › Supplement/Supplement 2/Genus 459 plots/Genus Amphidiadema.pdf]

# Genus Amphigymnium

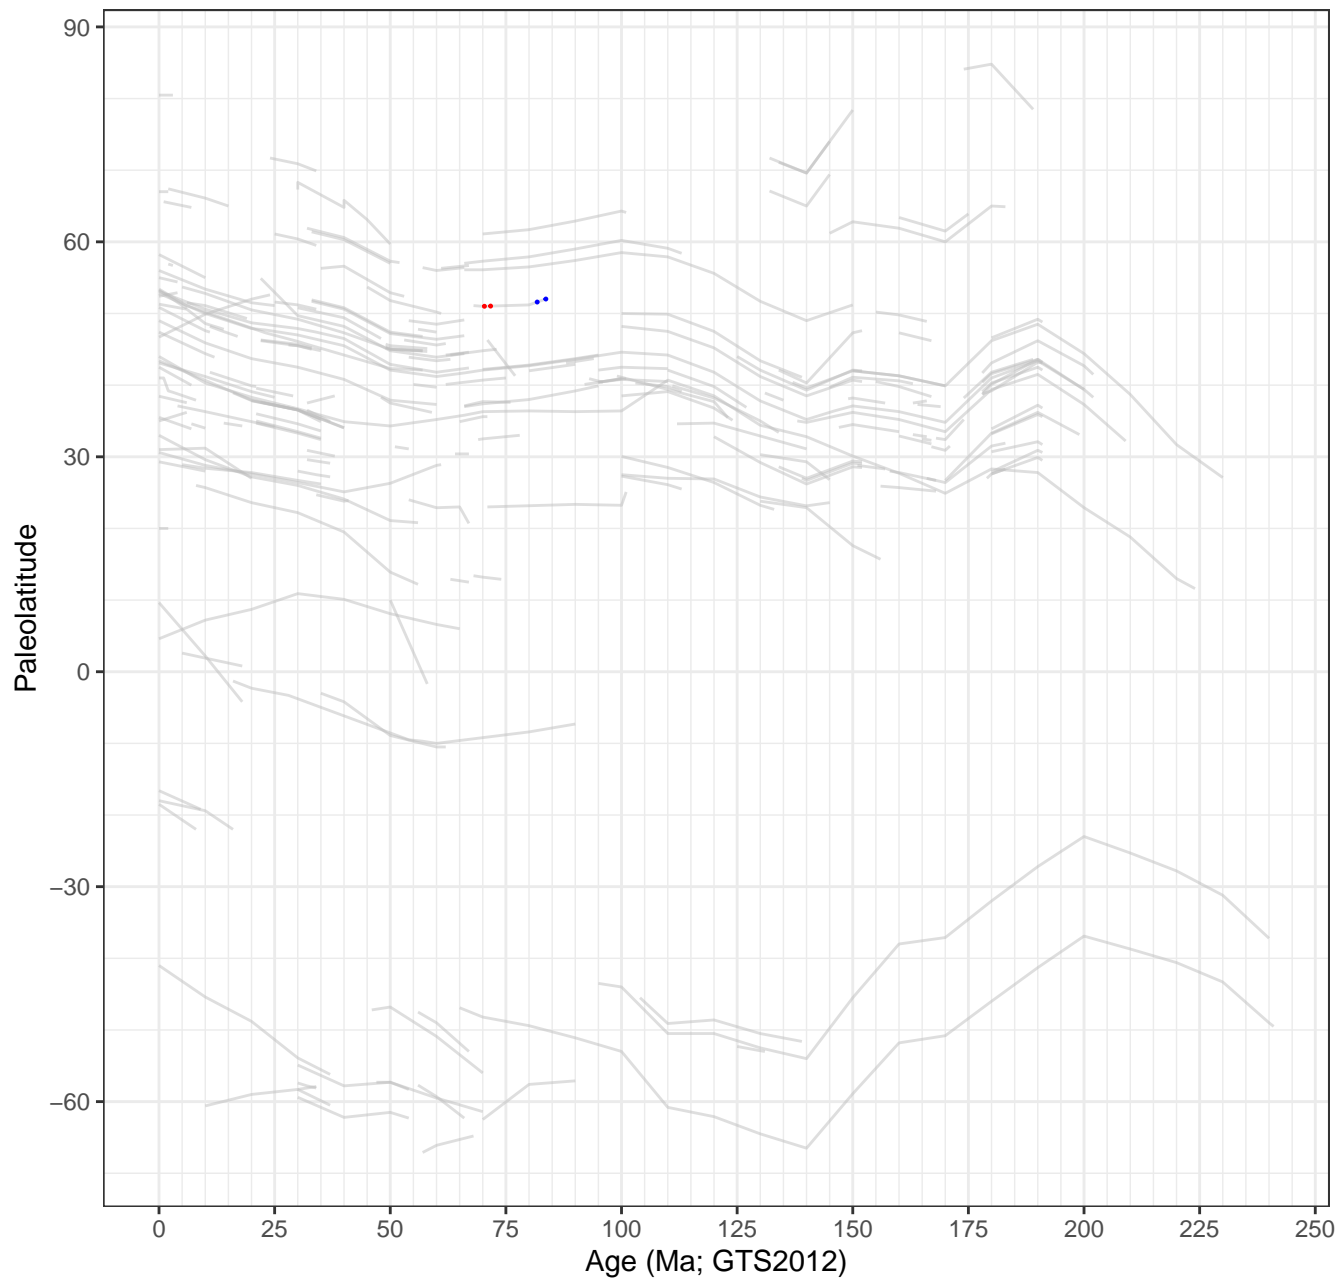

Supplement: Supplementary file 45 [file Genus Amphigymnium.pdf › Supplement/Supplement 2/Genus 459 plots/Genus Amphigymnium.pdf]

# Genus Amphorosphaeridium

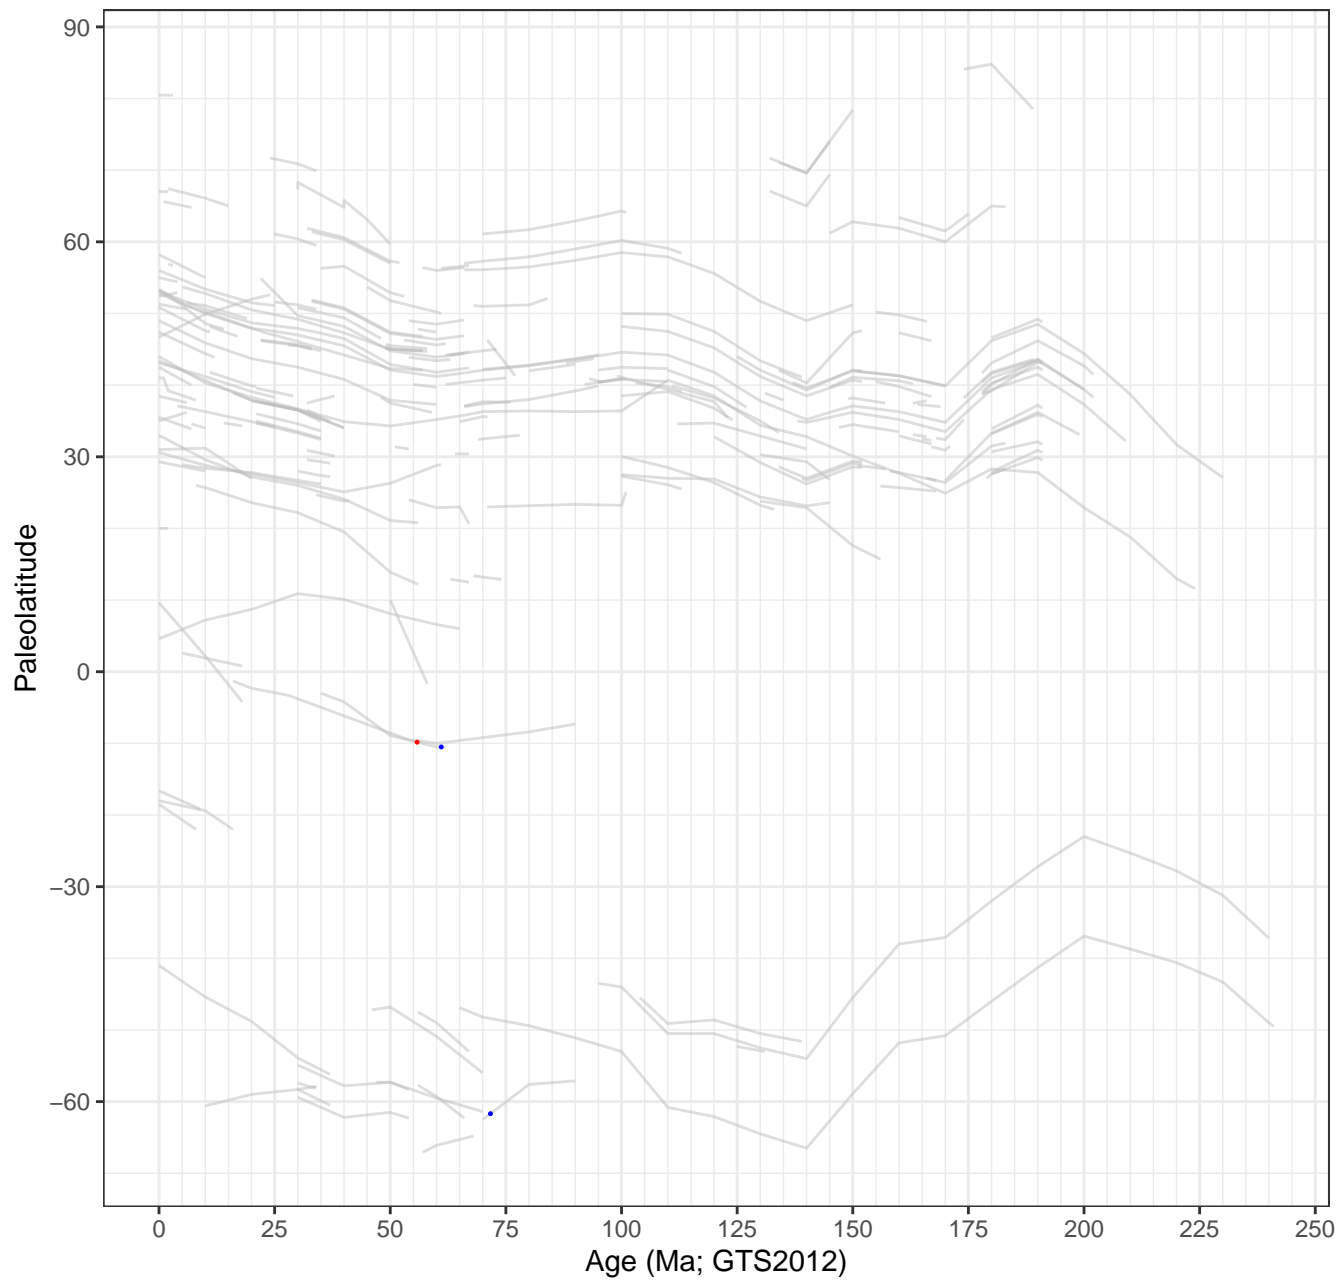

Supplement: Supplementary file 46 [file Genus Amphorosphaeridium.pdf › Supplement/Supplement 2/Genus 459 plots/Genus Amphorosphaeridium.pdf]

# Genus Amphorulacysta

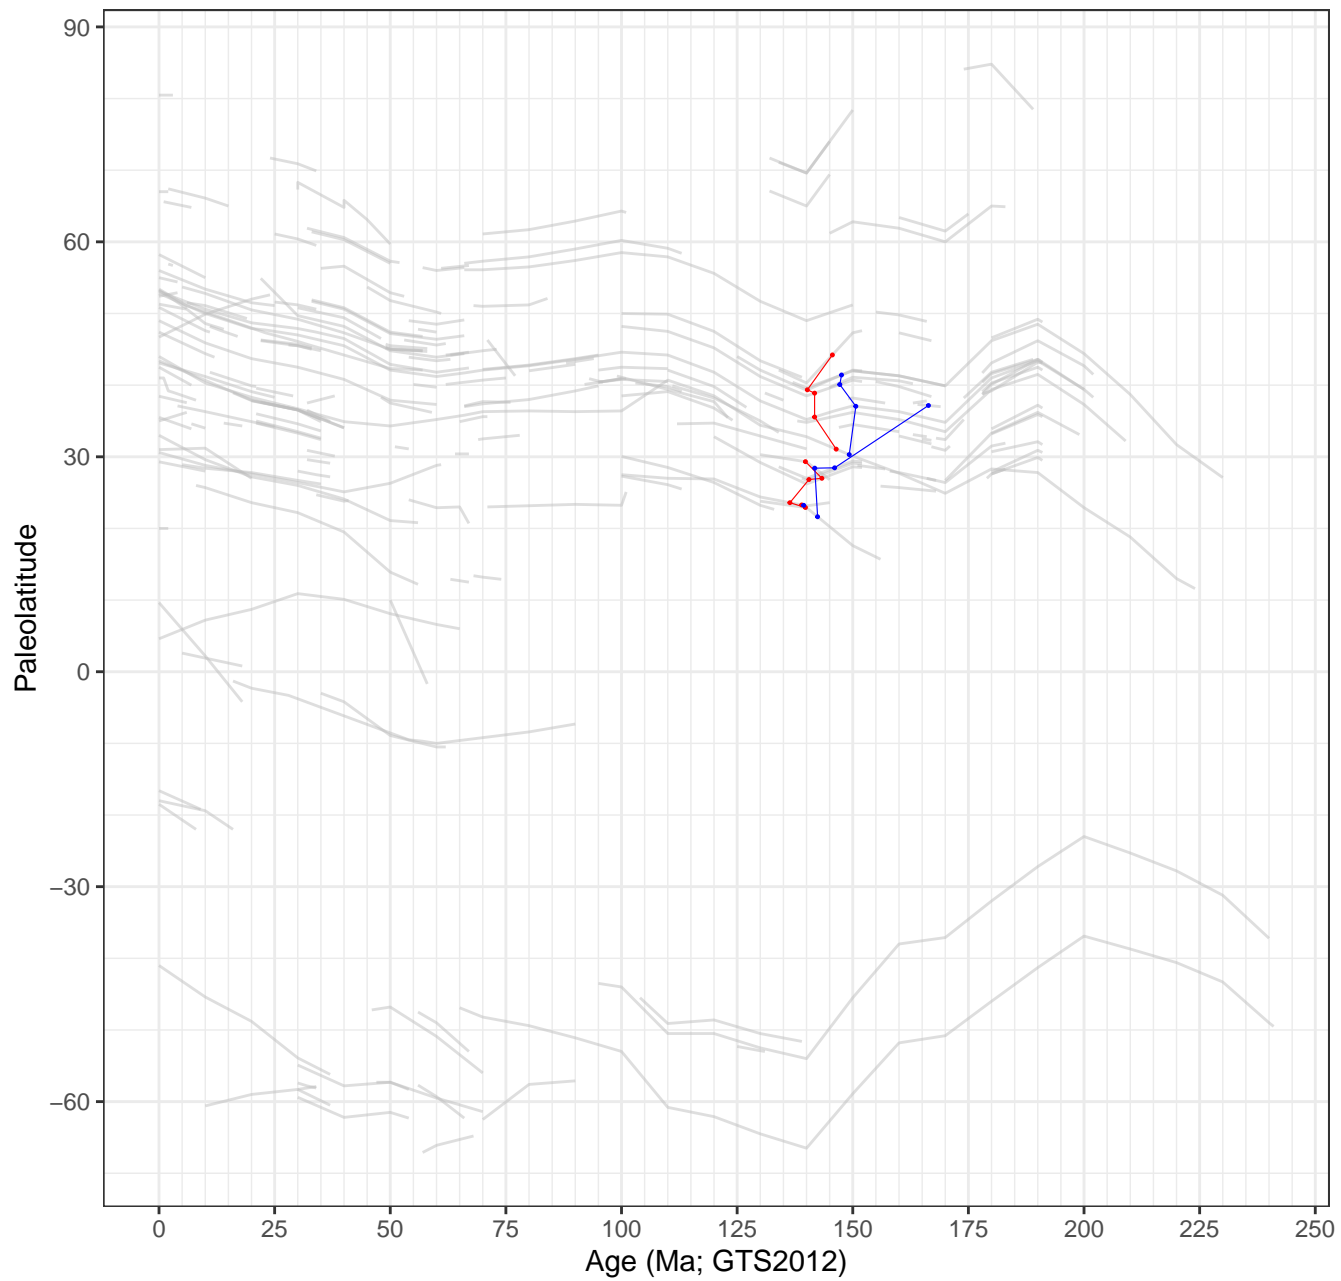

Supplement: Supplementary file 47 [file Genus Amphorulacysta.pdf › Supplement/Supplement 2/Genus 459 plots/Genus Amphorulacysta.pdf]

# Genus Ampulladinium

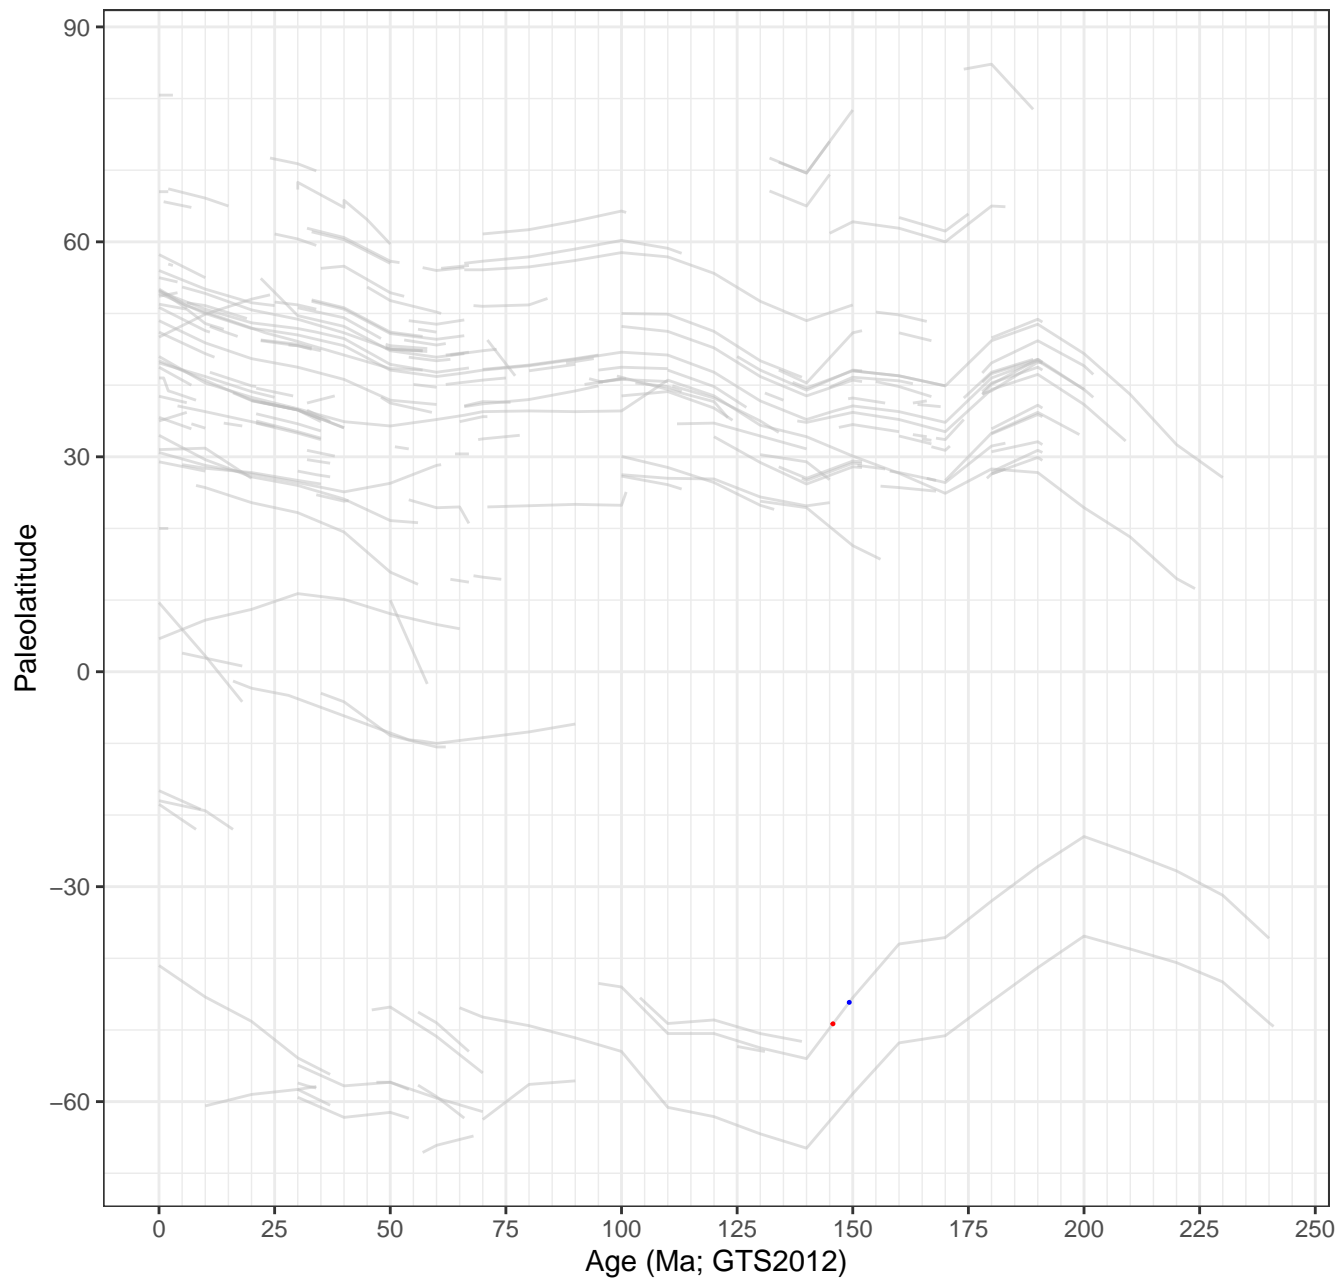

Supplement: Supplementary file 48 [file Genus Ampulladinium.pdf › Supplement/Supplement 2/Genus 459 plots/Genus Ampulladinium.pdf]

# Genus Andalusiella

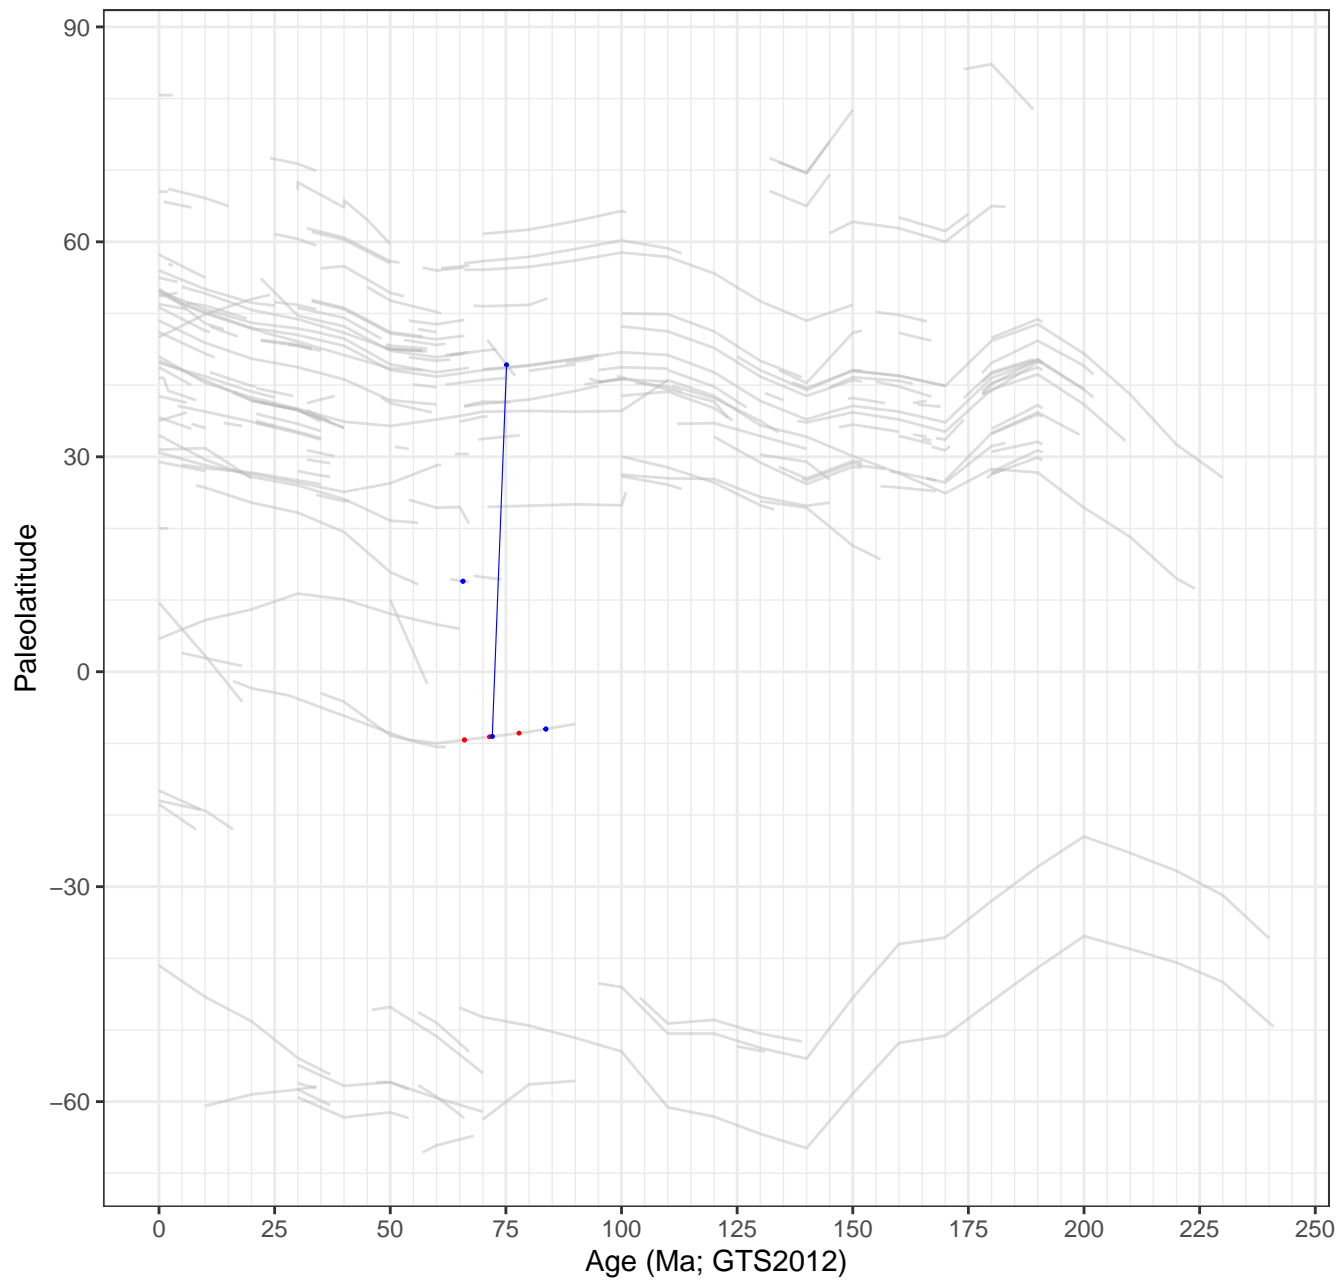

Supplement: Supplementary file 49 [file Genus Andalusiella.pdf › Supplement/Supplement 2/Genus 459 plots/Genus Andalusiella.pdf]

# Genus Angustidinium

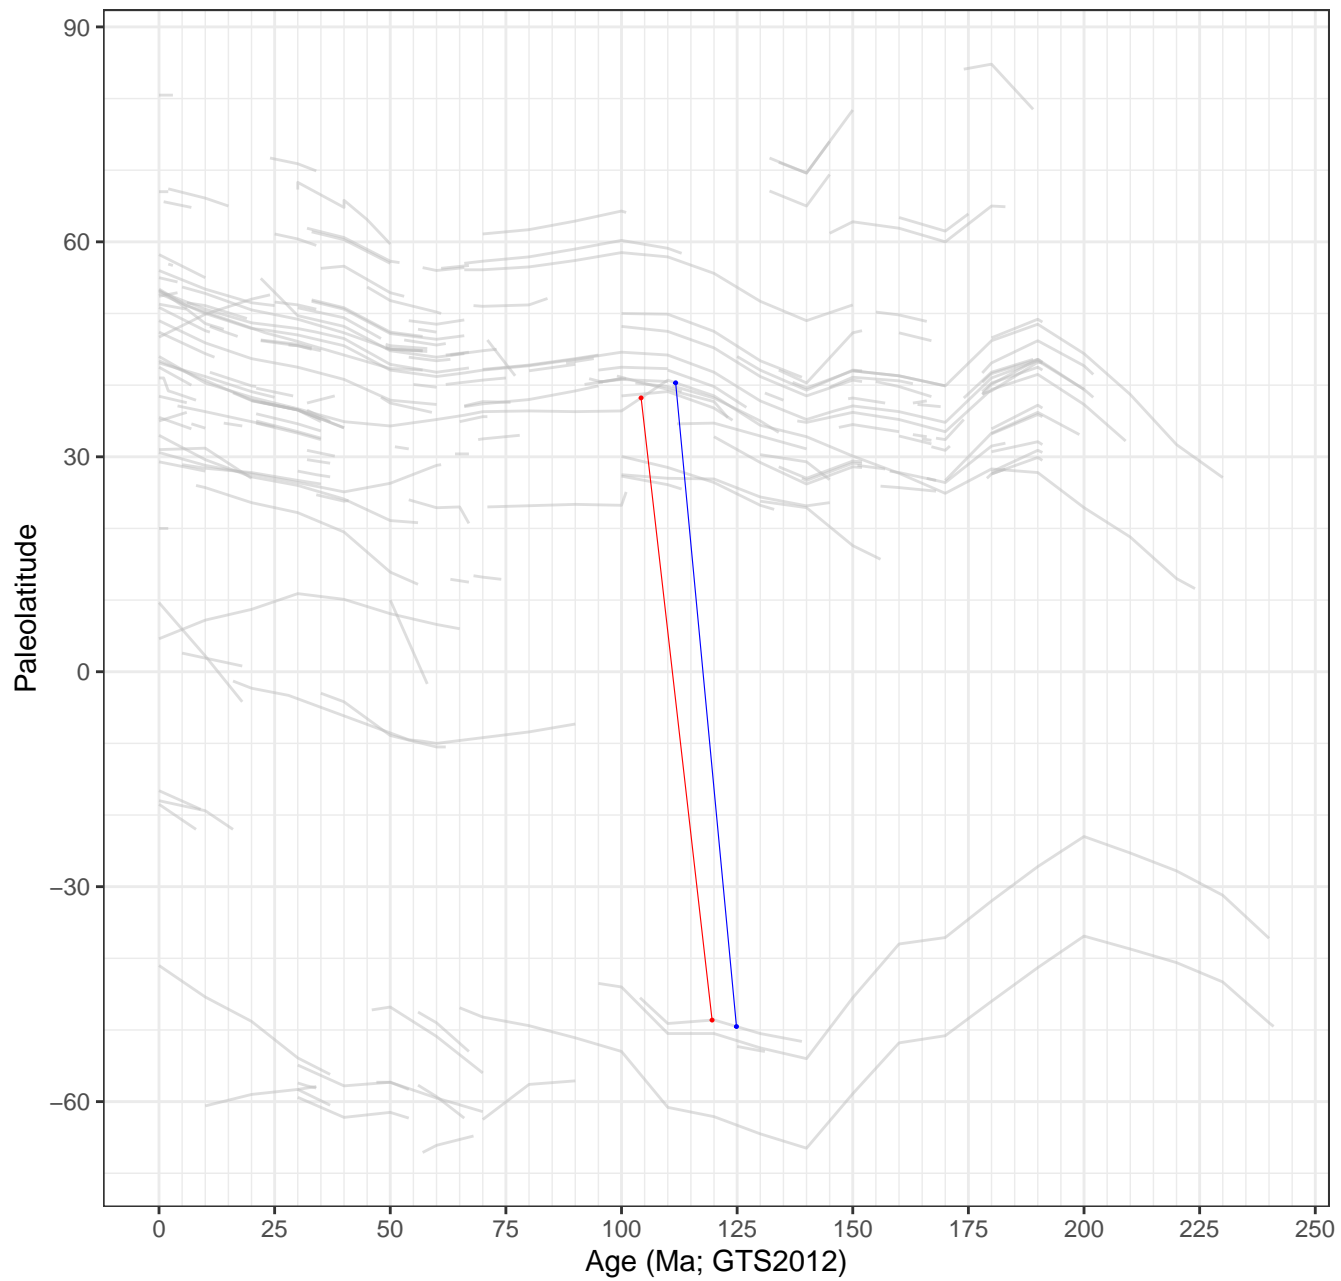

Supplement: Supplementary file 50 [file Genus Angustidinium.pdf › Supplement/Supplement 2/Genus 459 plots/Genus Angustidinium.pdf]

# Genus Apectodinium

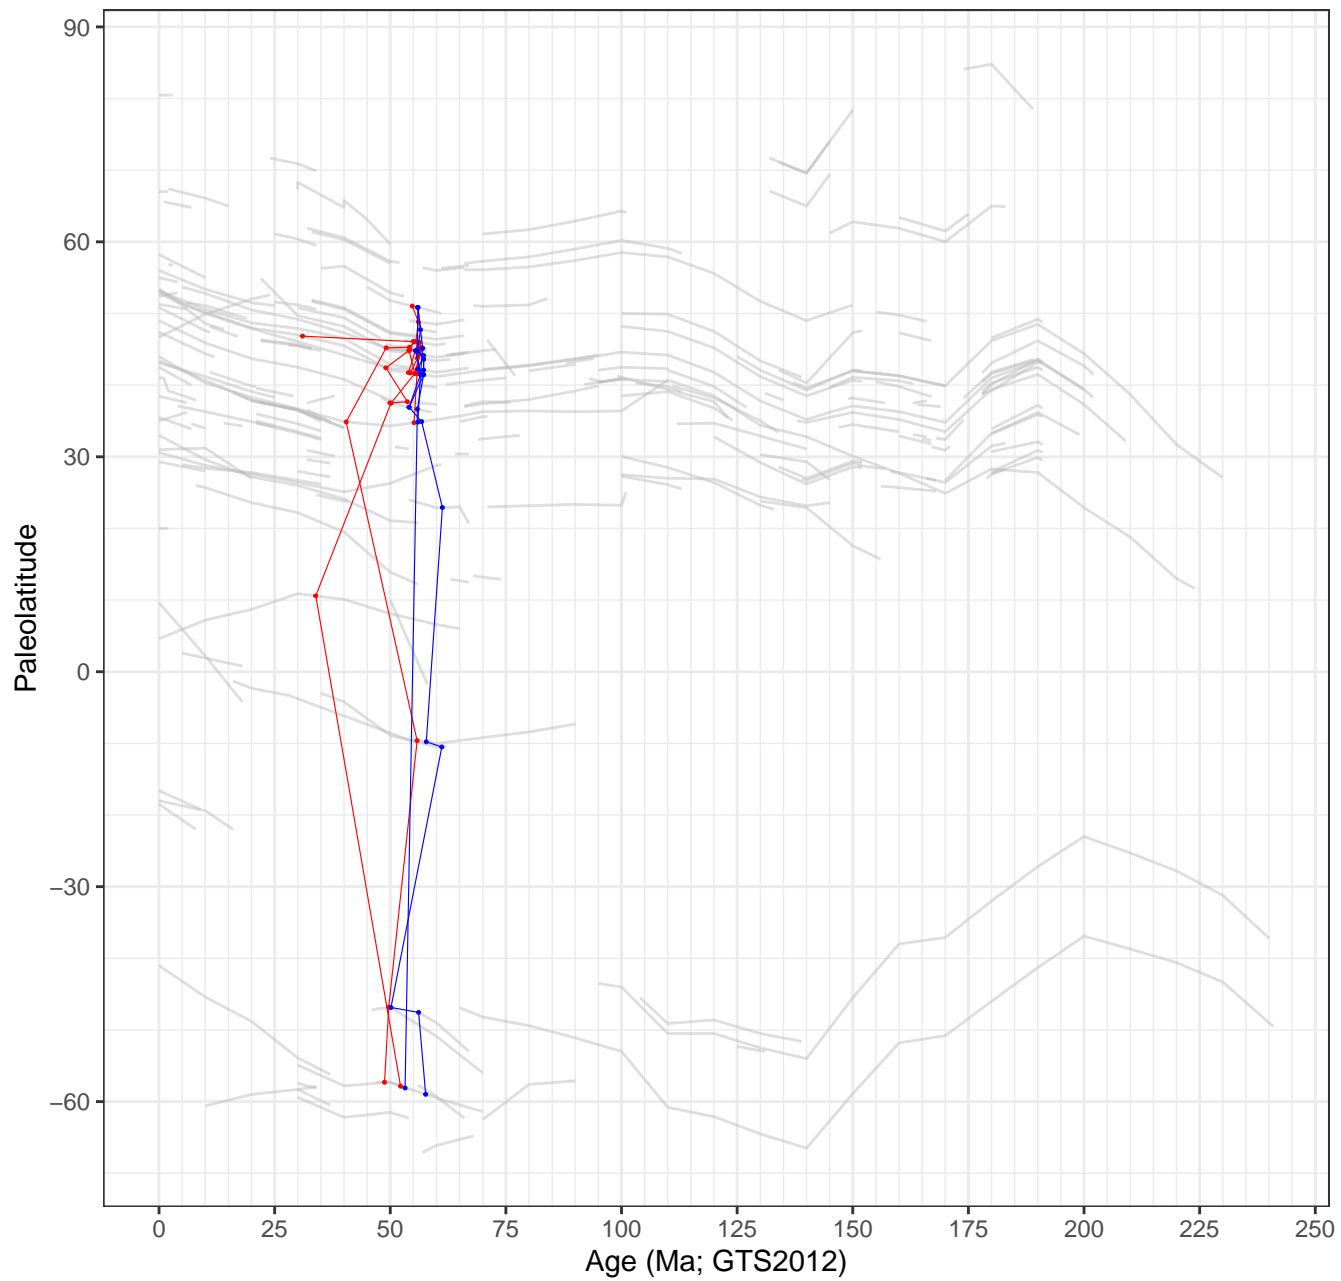

Supplement: Supplementary file 51 [file Genus Apectodinium.pdf › Supplement/Supplement 2/Genus 459 plots/Genus Apectodinium.pdf]

# Genus Aprobolocysta

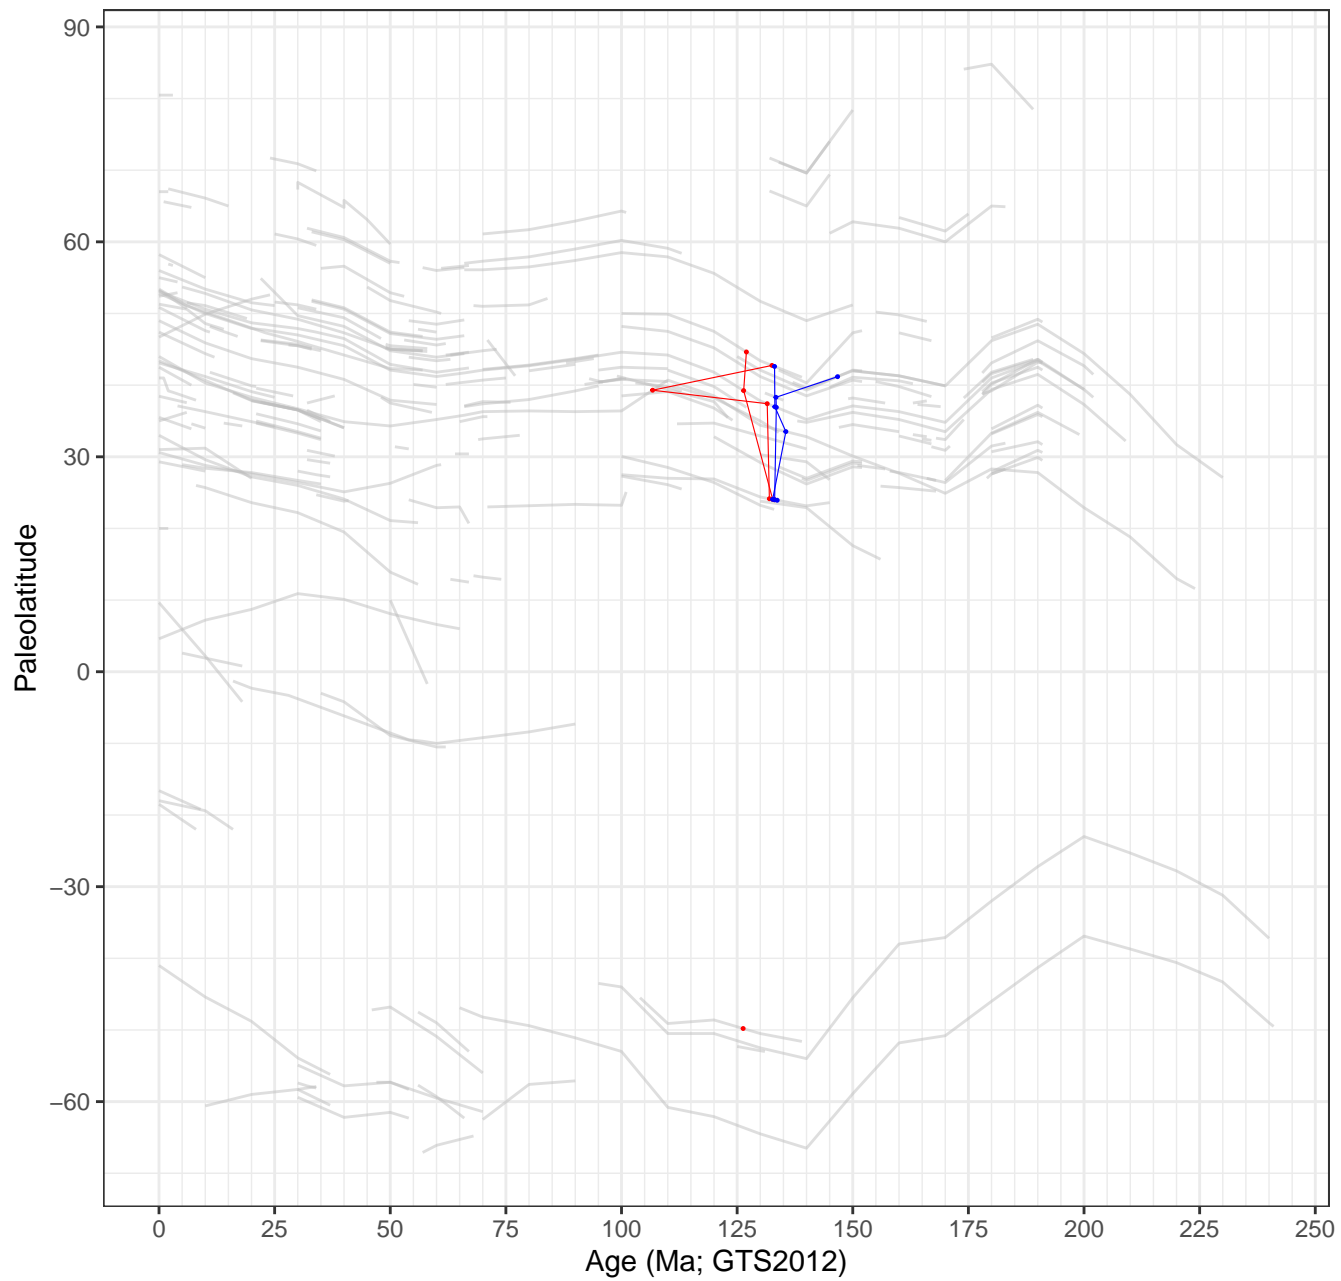

Supplement: Supplementary file 52 [file Genus Aprobolocysta.pdf › Supplement/Supplement 2/Genus 459 plots/Genus Aprobolocysta.pdf]

# Genus Aptea

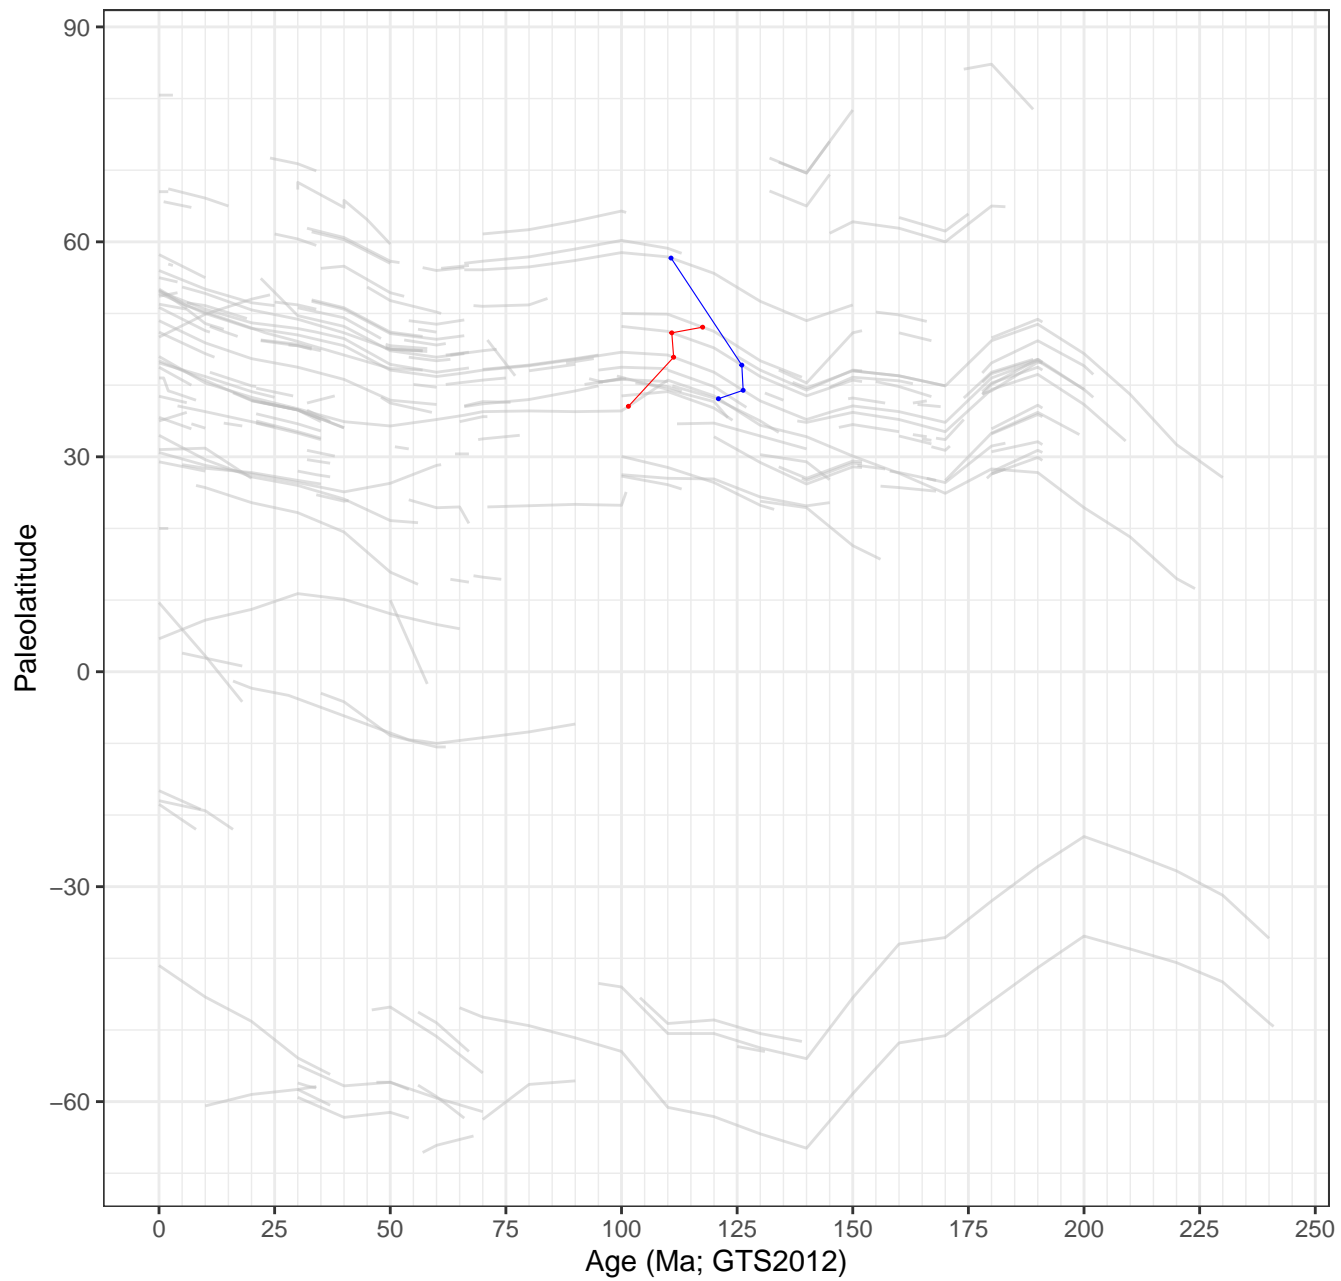

Supplement: Supplementary file 53 [file Genus Aptea.pdf › Supplement/Supplement 2/Genus 459 plots/Genus Aptea.pdf]

# Genus Apteodinium

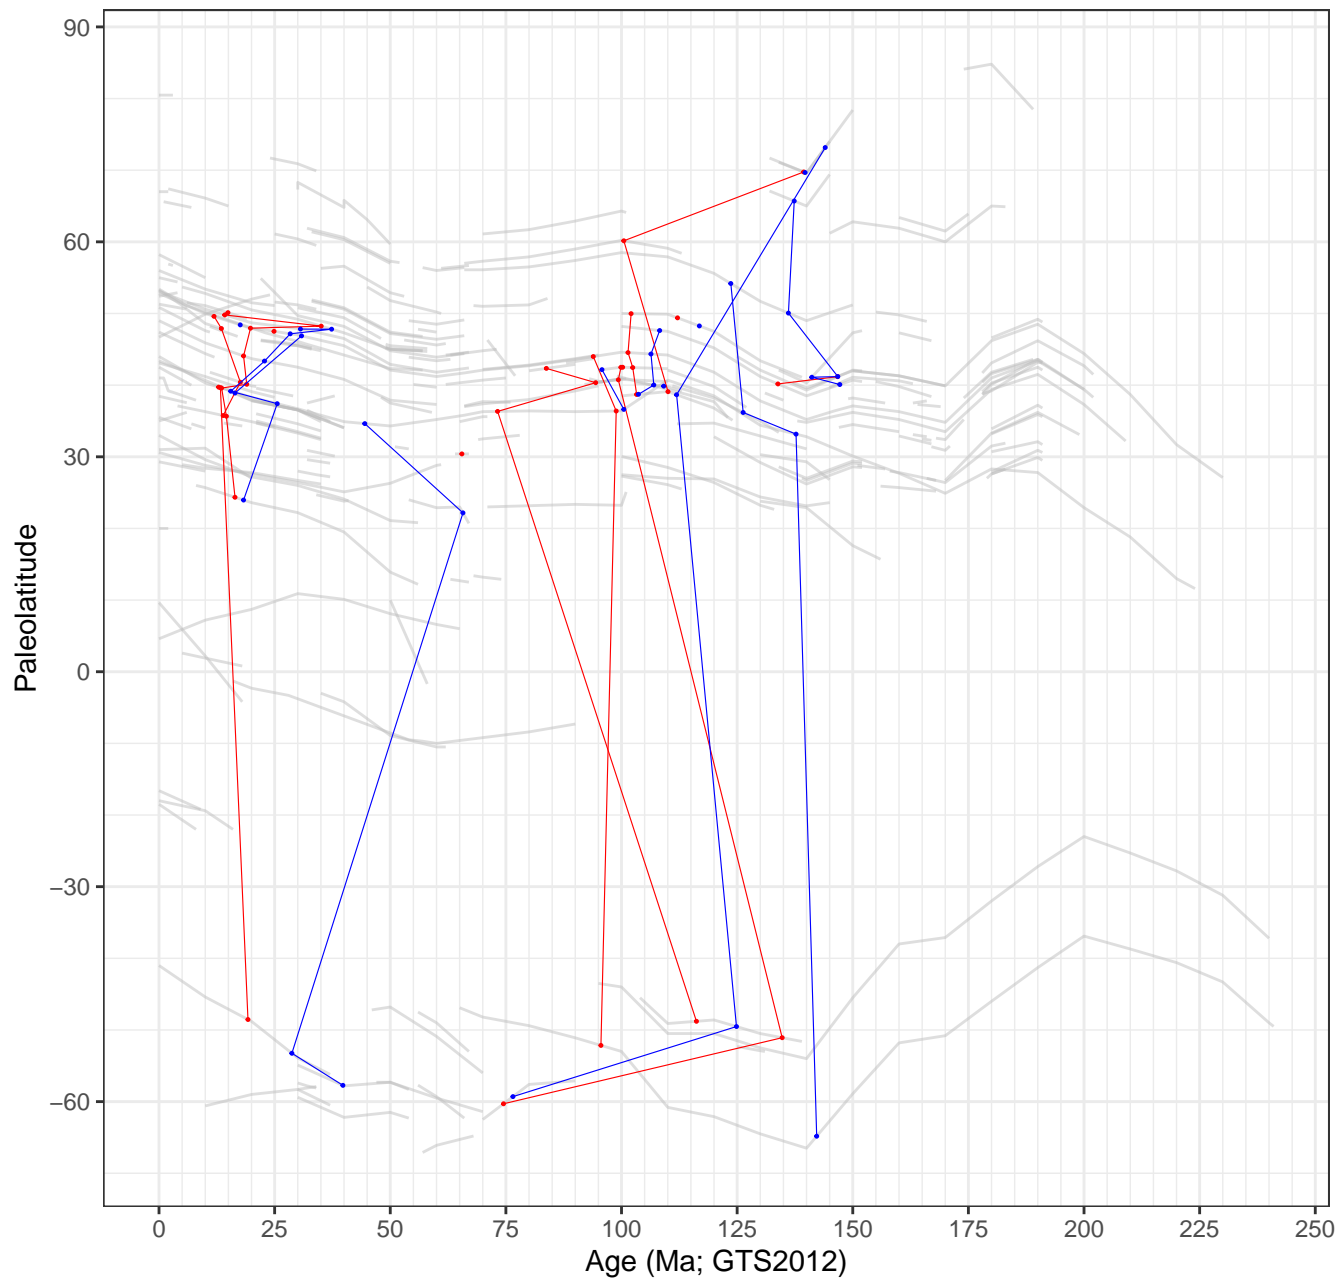

Supplement: Supplementary file 54 [file Genus Apteodinium.pdf › Supplement/Supplement 2/Genus 459 plots/Genus Apteodinium.pdf]

# Genus Arachnodinium

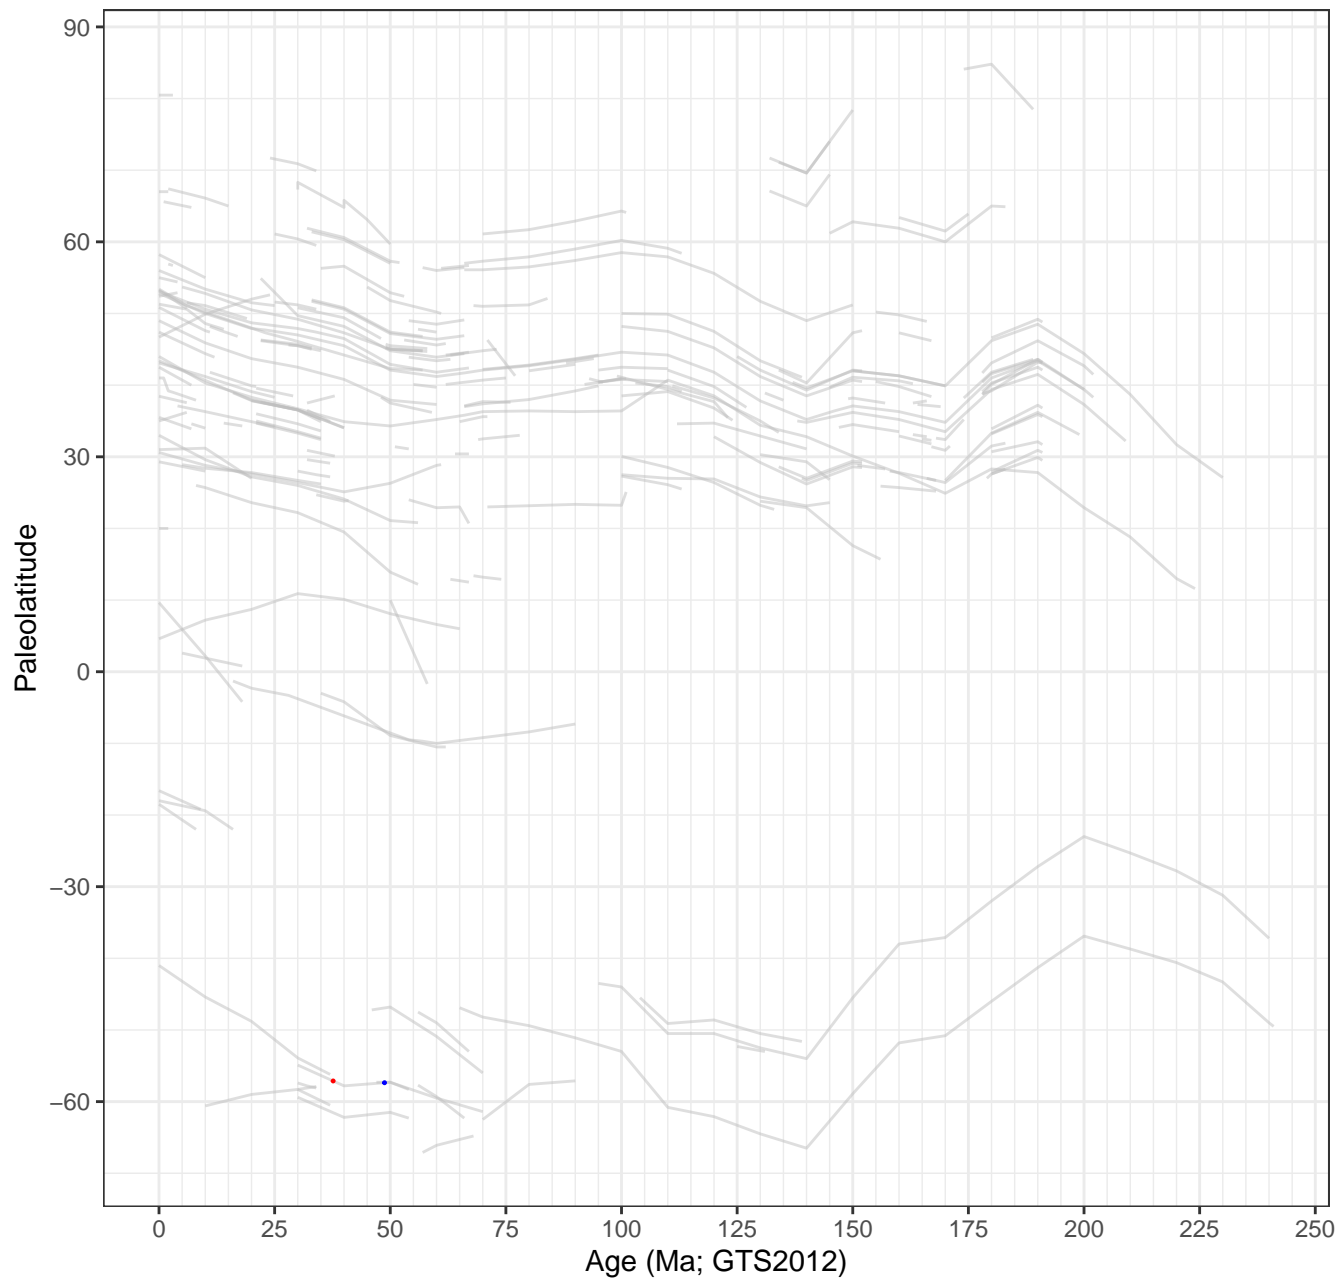

Supplement: Supplementary file 55 [file Genus Arachnodinium.pdf › Supplement/Supplement 2/Genus 459 plots/Genus Arachnodinium.pdf]

# Genus *Araneosphaera*

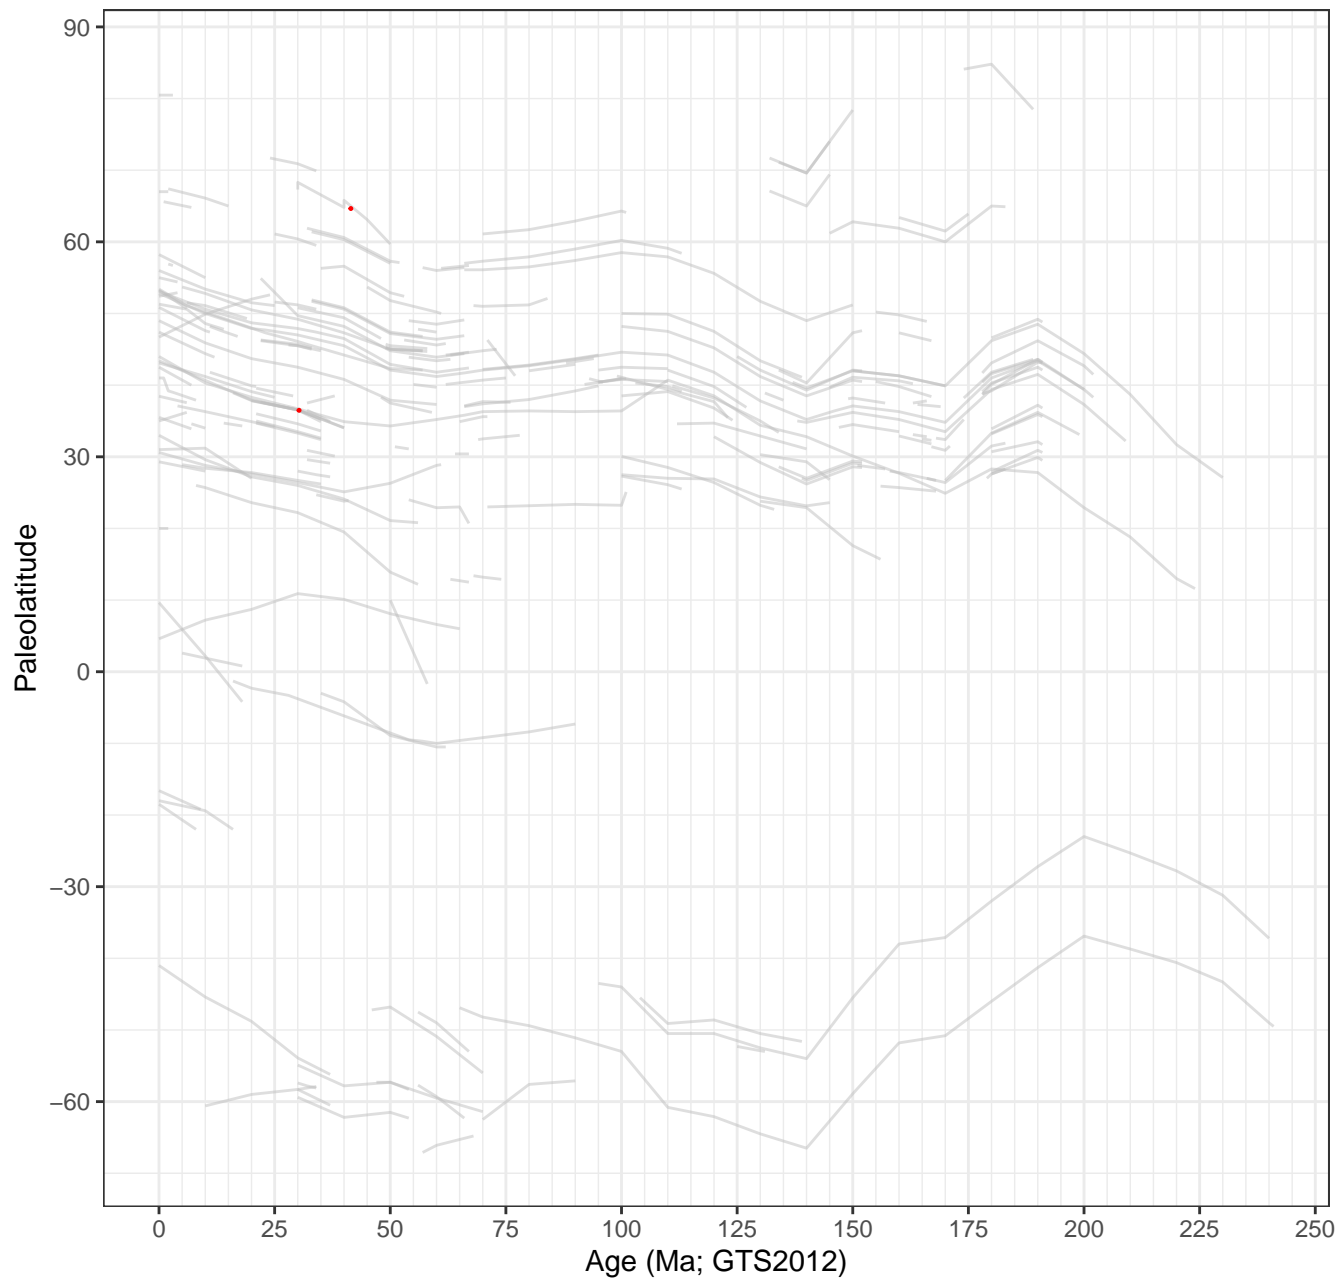

Supplement: Supplementary file 56 [file Genus Araneosphaera.pdf › Supplement/Supplement 2/Genus 459 plots/Genus Araneosphaera.pdf]

# Genus *Areoligera*

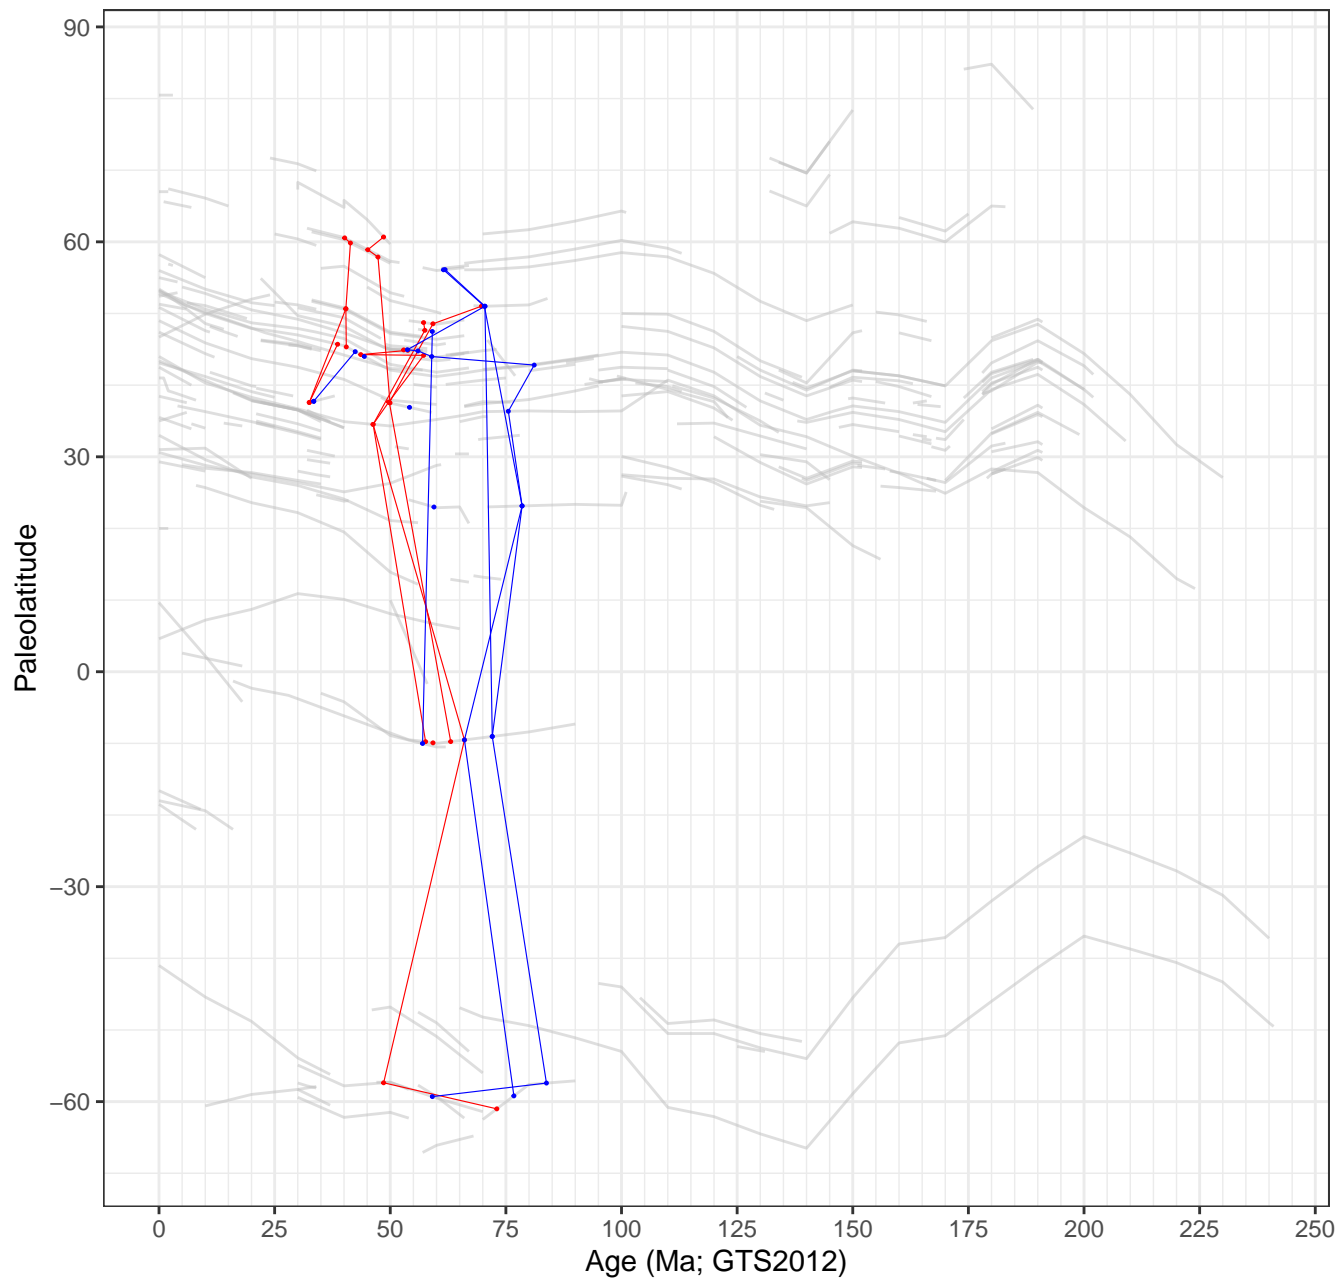

Supplement: Supplementary file 57 [file Genus Areoligera.pdf › Supplement/Supplement 2/Genus 459 plots/Genus Areoligera.pdf]

# Genus Areosphaeridium

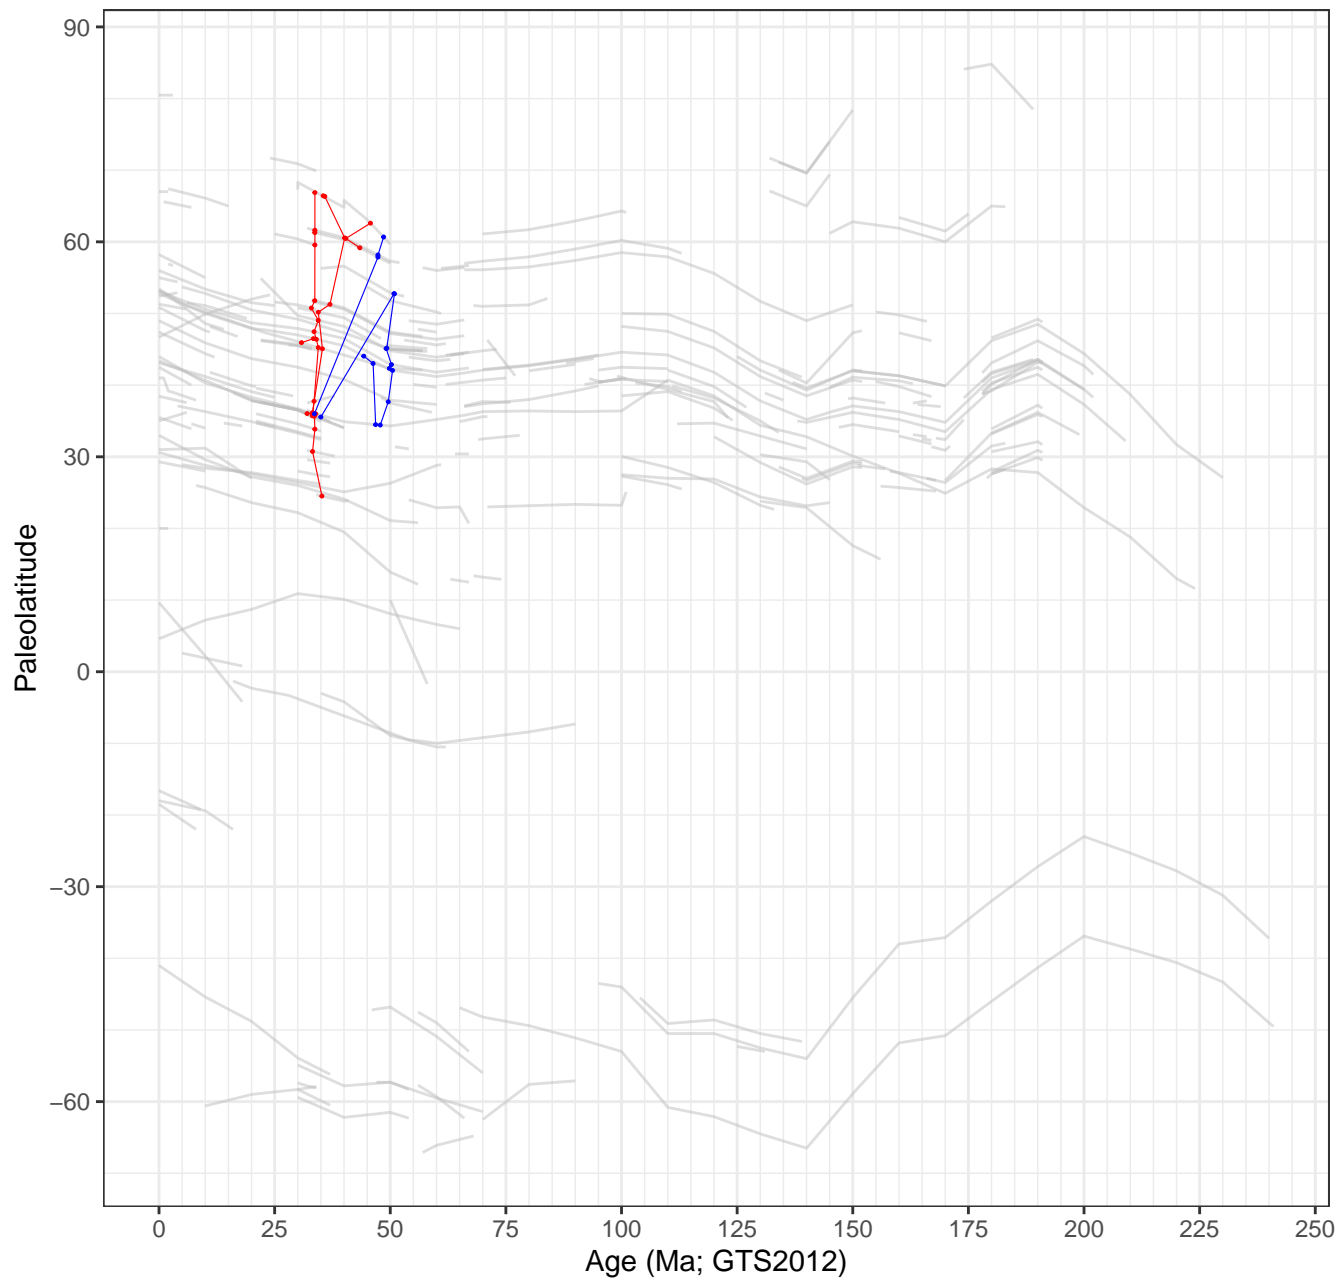

Supplement: Supplementary file 58 [file Genus Areosphaeridium.pdf › Supplement/Supplement 2/Genus 459 plots/Genus Areosphaeridium.pdf]

# Genus Arkellea

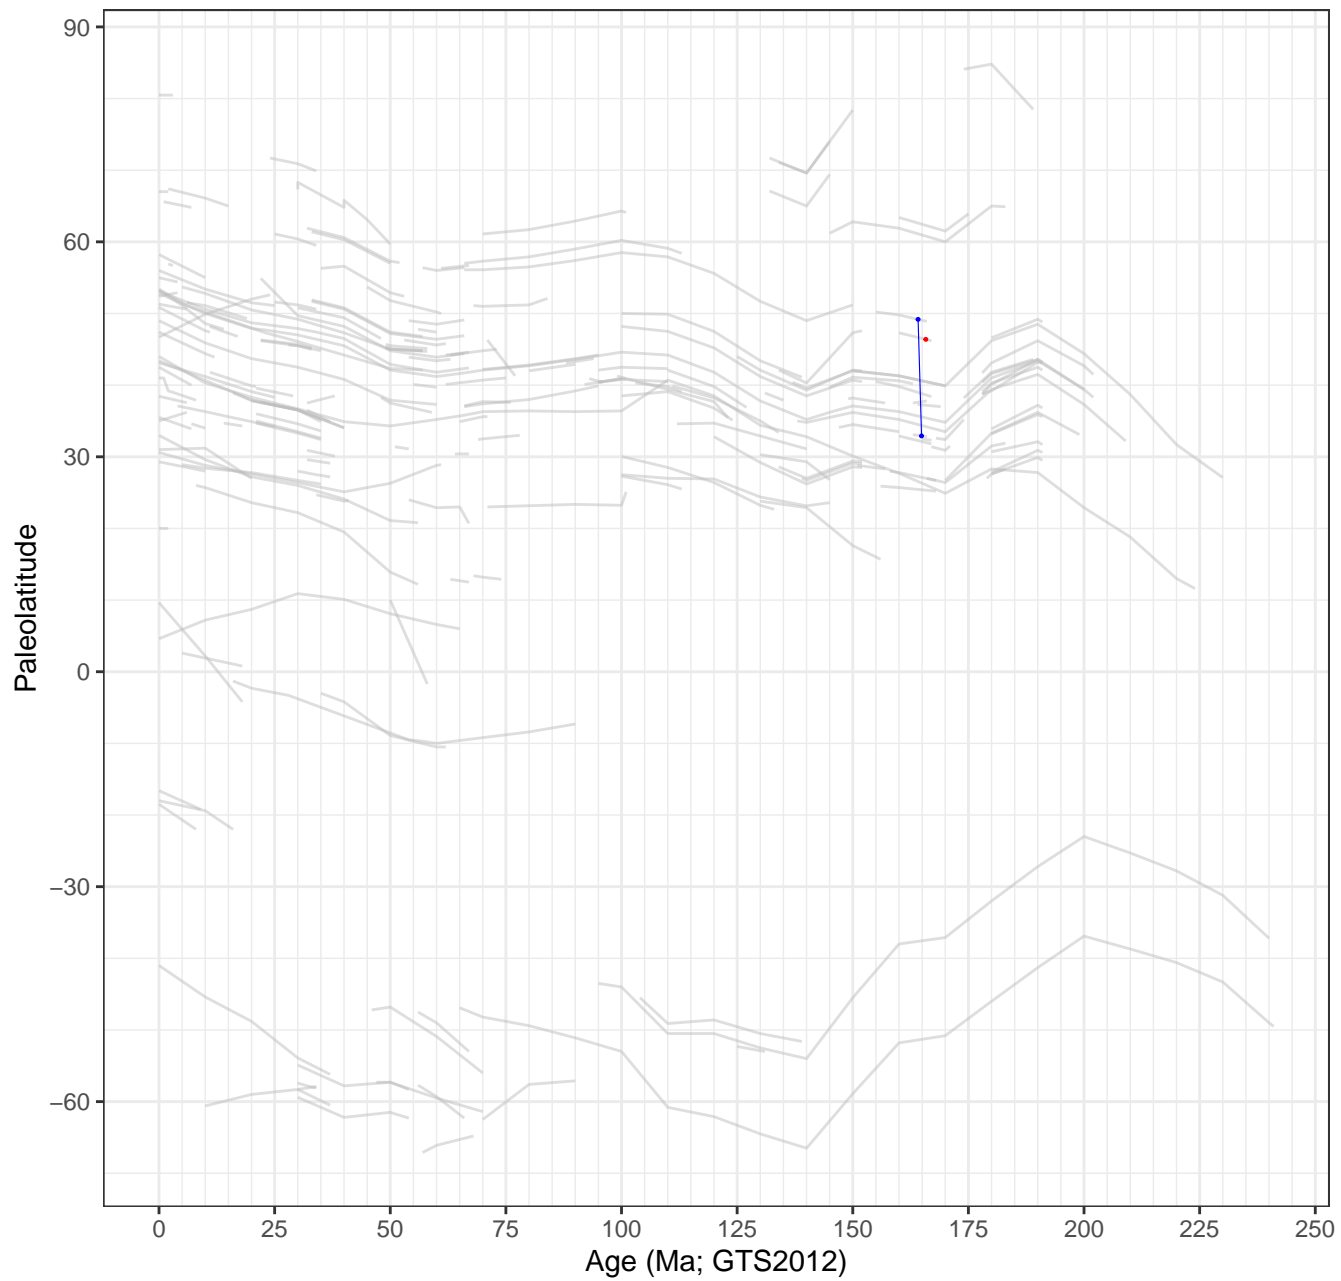

Supplement: Supplementary file 59 [file Genus Arkellea.pdf › Supplement/Supplement 2/Genus 459 plots/Genus Arkellea.pdf]

# Genus *Artemisiocysta*

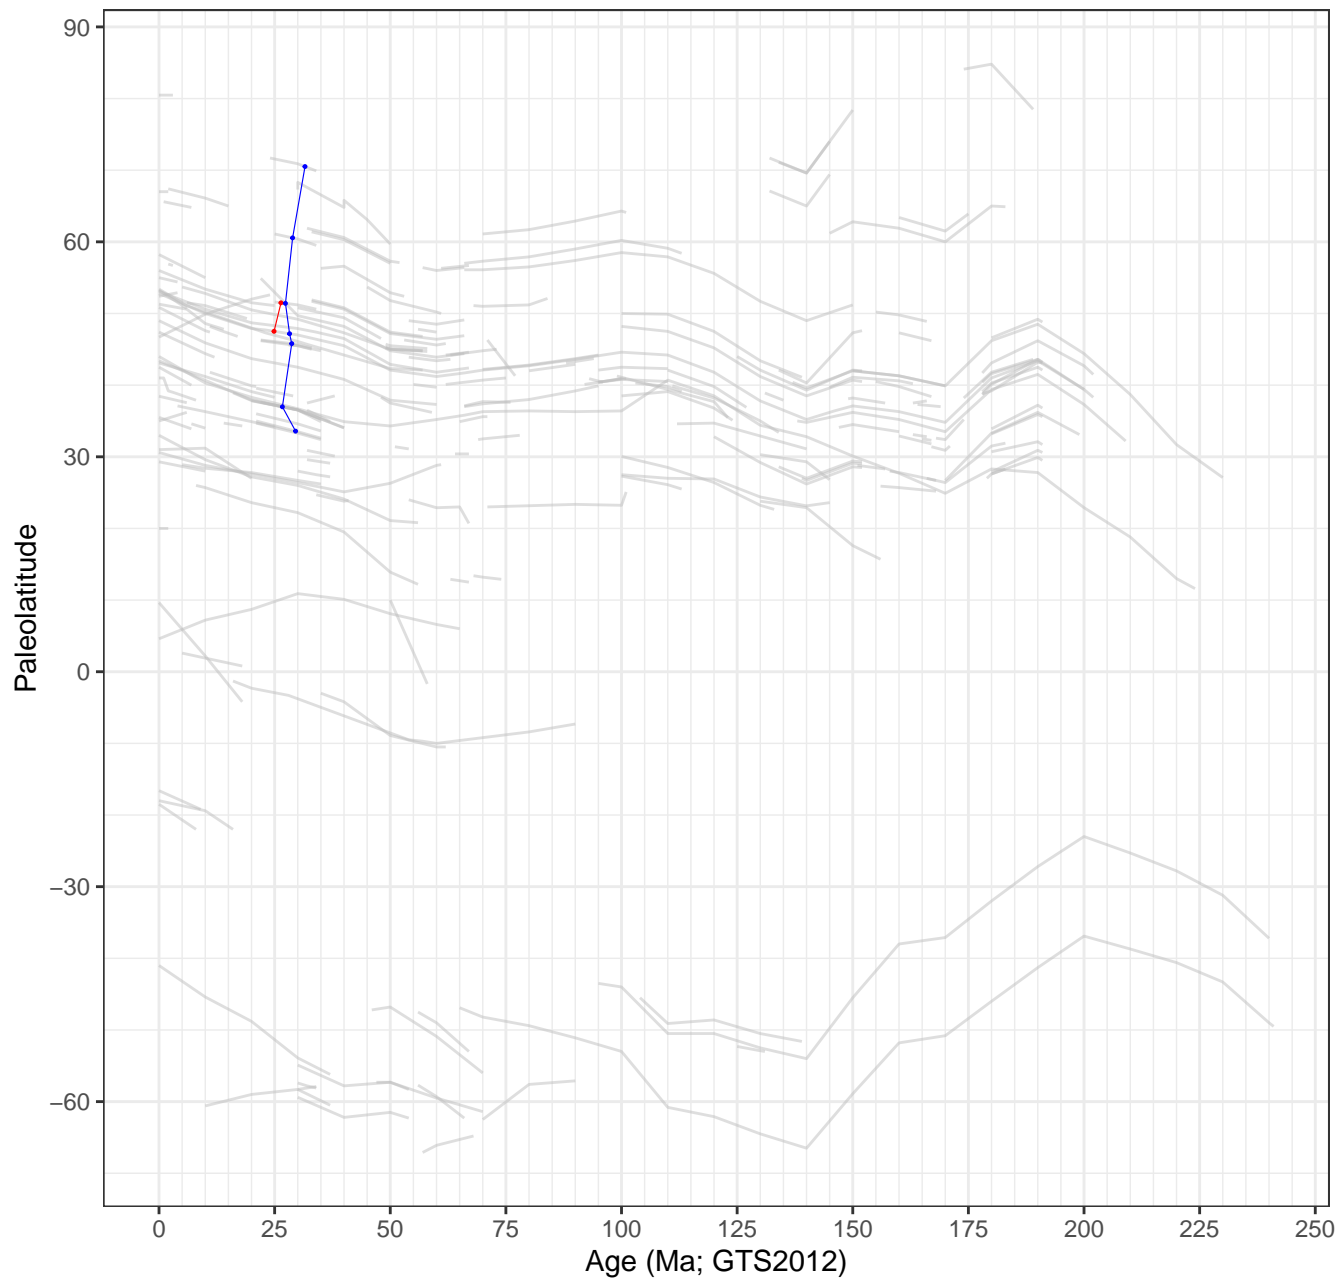

Supplement: Supplementary file 60 [file Genus Artemisiocysta.pdf › Supplement/Supplement 2/Genus 459 plots/Genus Artemisiocysta.pdf]

# Genus Ascodinium

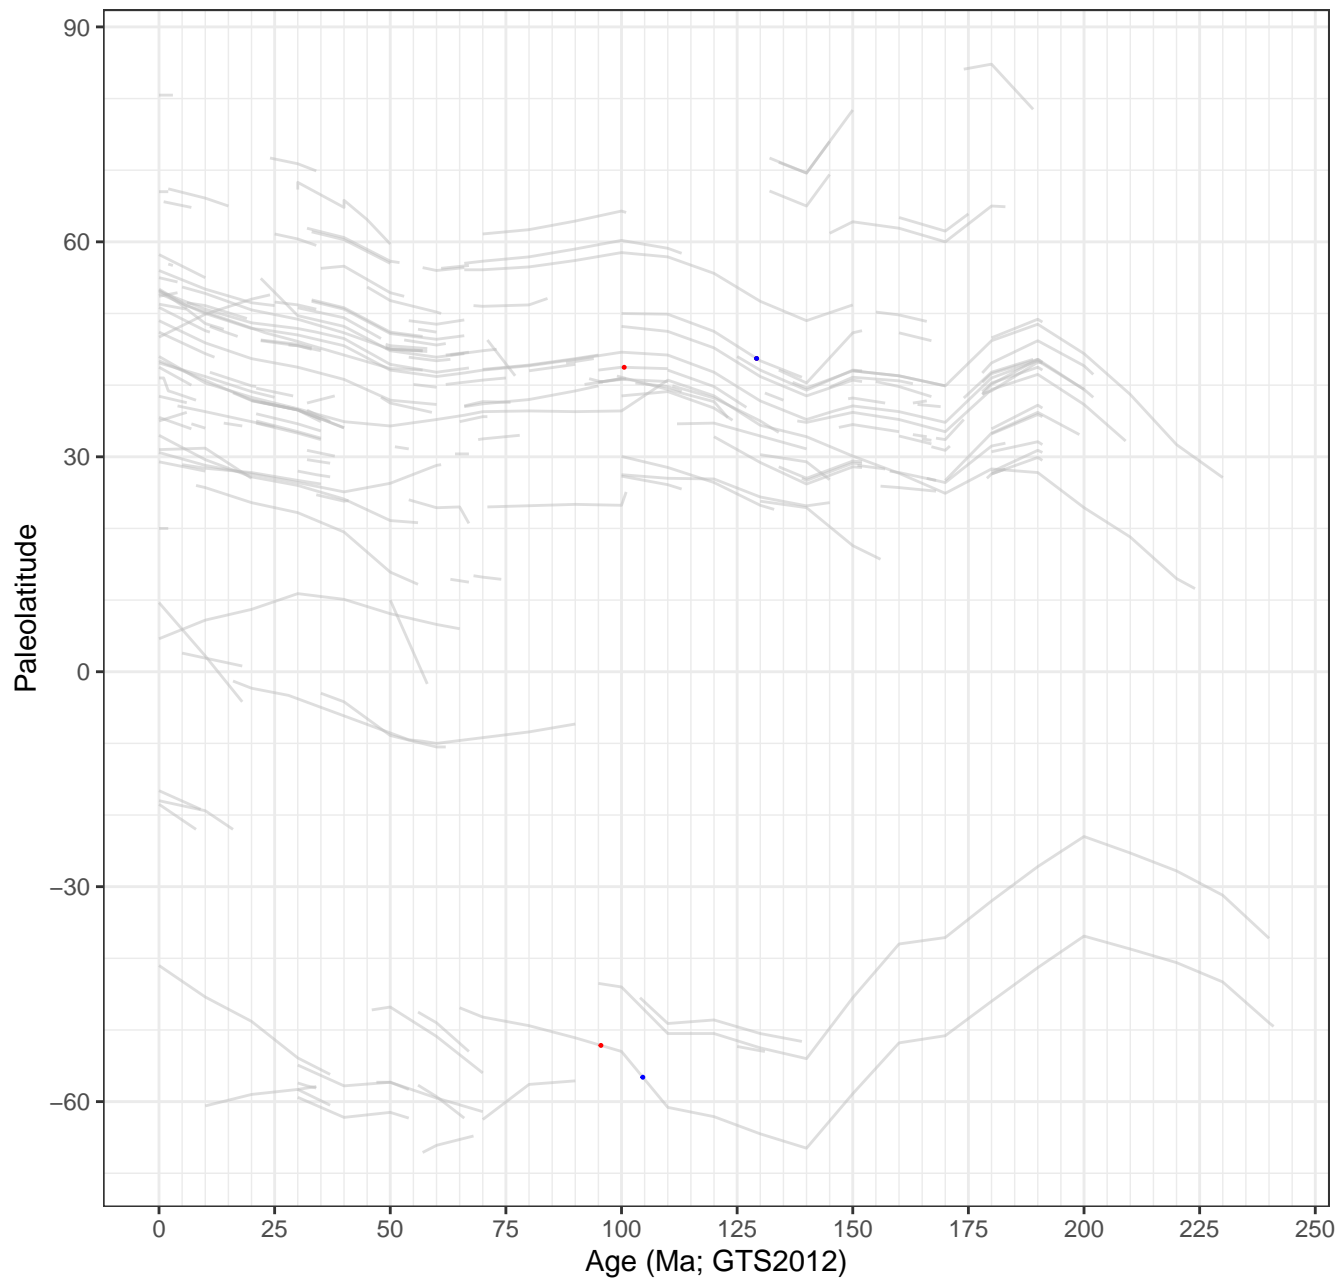

Supplement: Supplementary file 61 [file Genus Ascodinium.pdf › Supplement/Supplement 2/Genus 459 plots/Genus Ascodinium.pdf]

# Genus *Ascostomocystis*

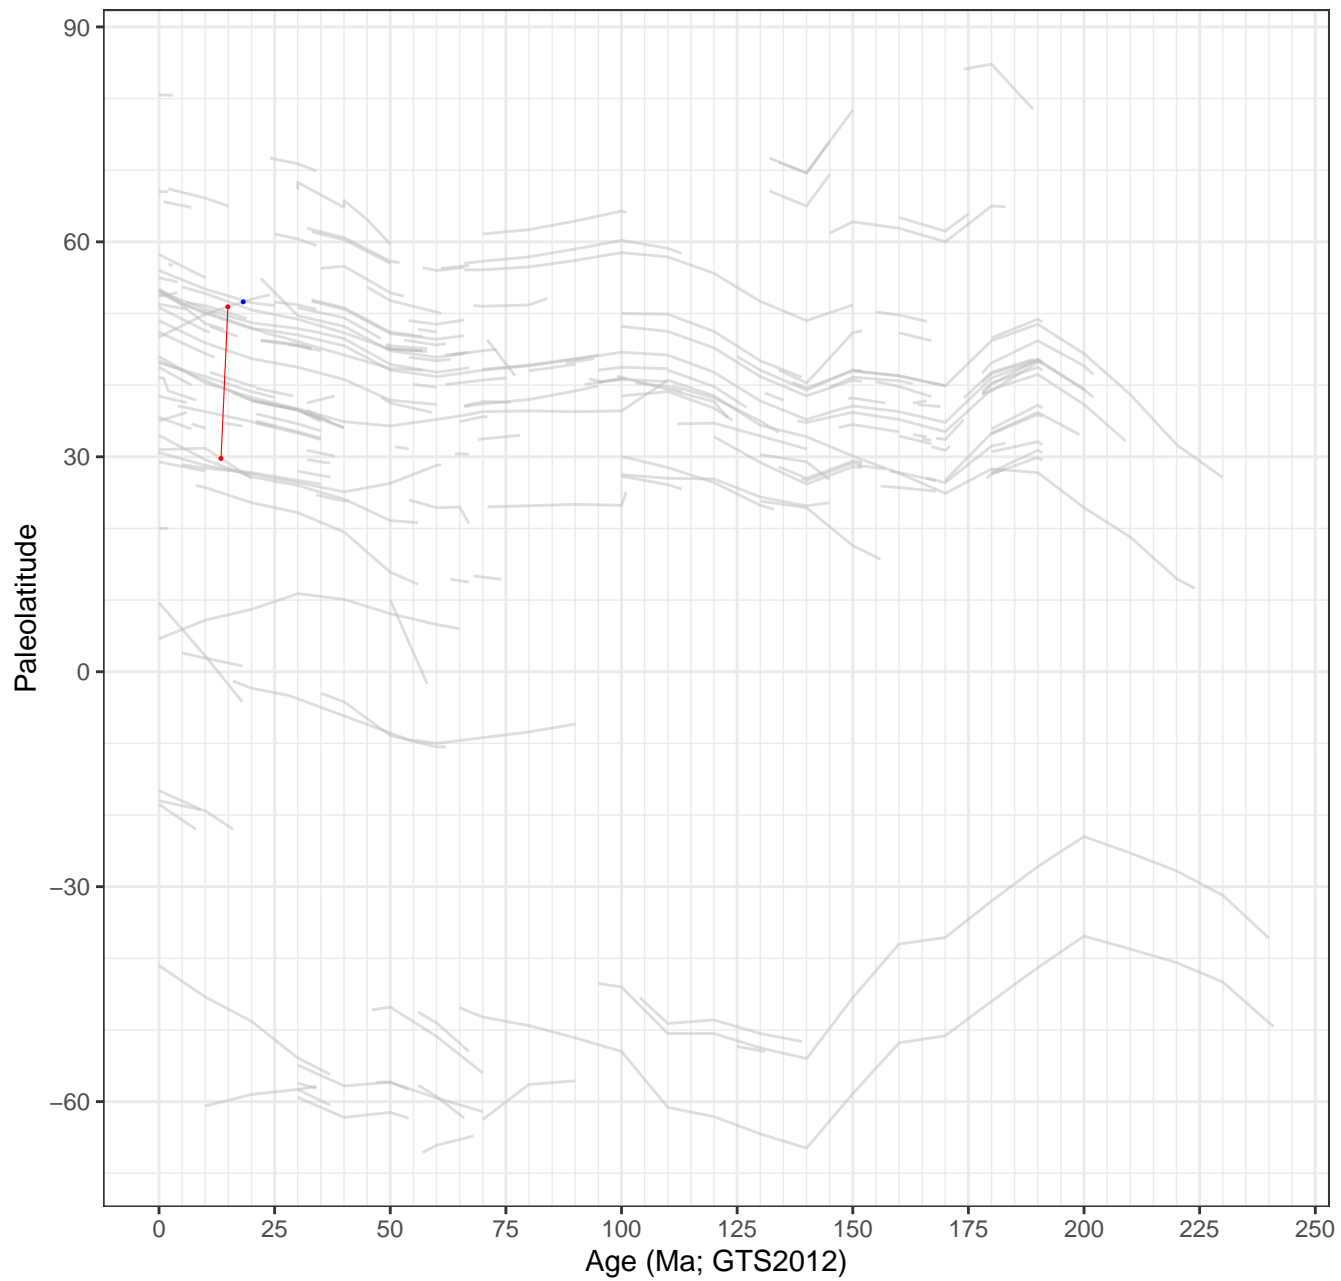

Supplement: Supplementary file 62 [file Genus Ascostomocystis.pdf › Supplement/Supplement 2/Genus 459 plots/Genus Ascostomocystis.pdf]

# Genus Ataxiodinium

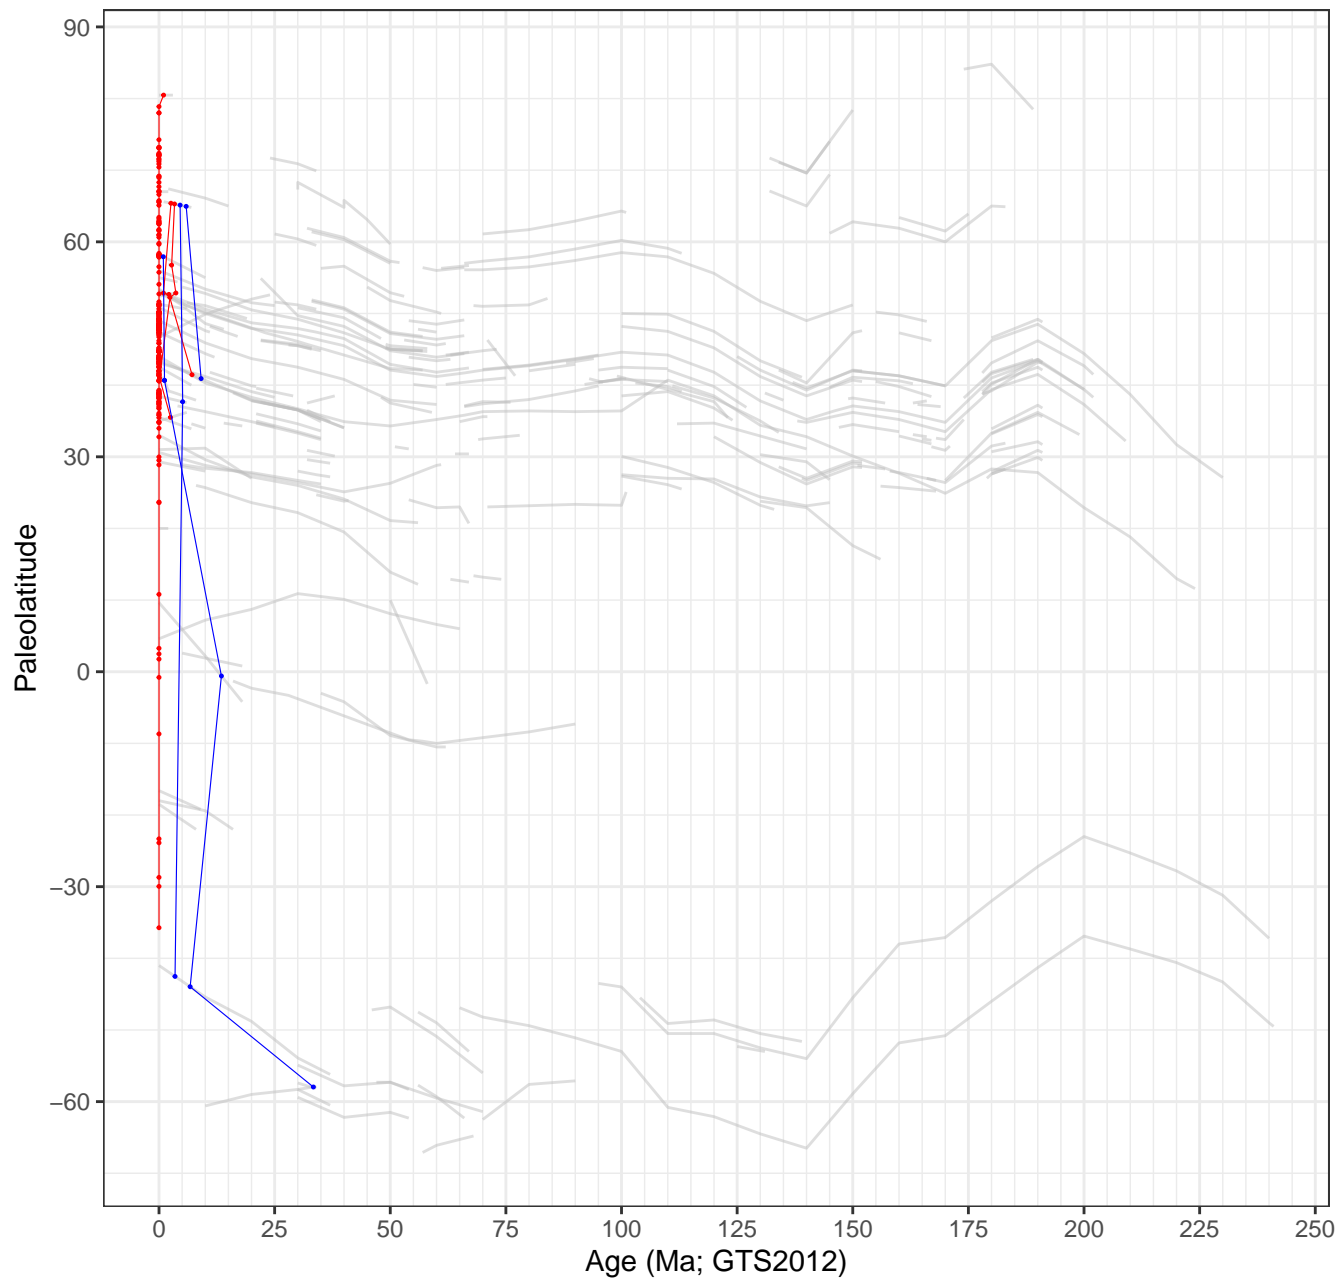

Supplement: Supplementary file 63 [file Genus Ataxiodinium.pdf › Supplement/Supplement 2/Genus 459 plots/Genus Ataxiodinium.pdf]

# Genus *Athigmatocysta*

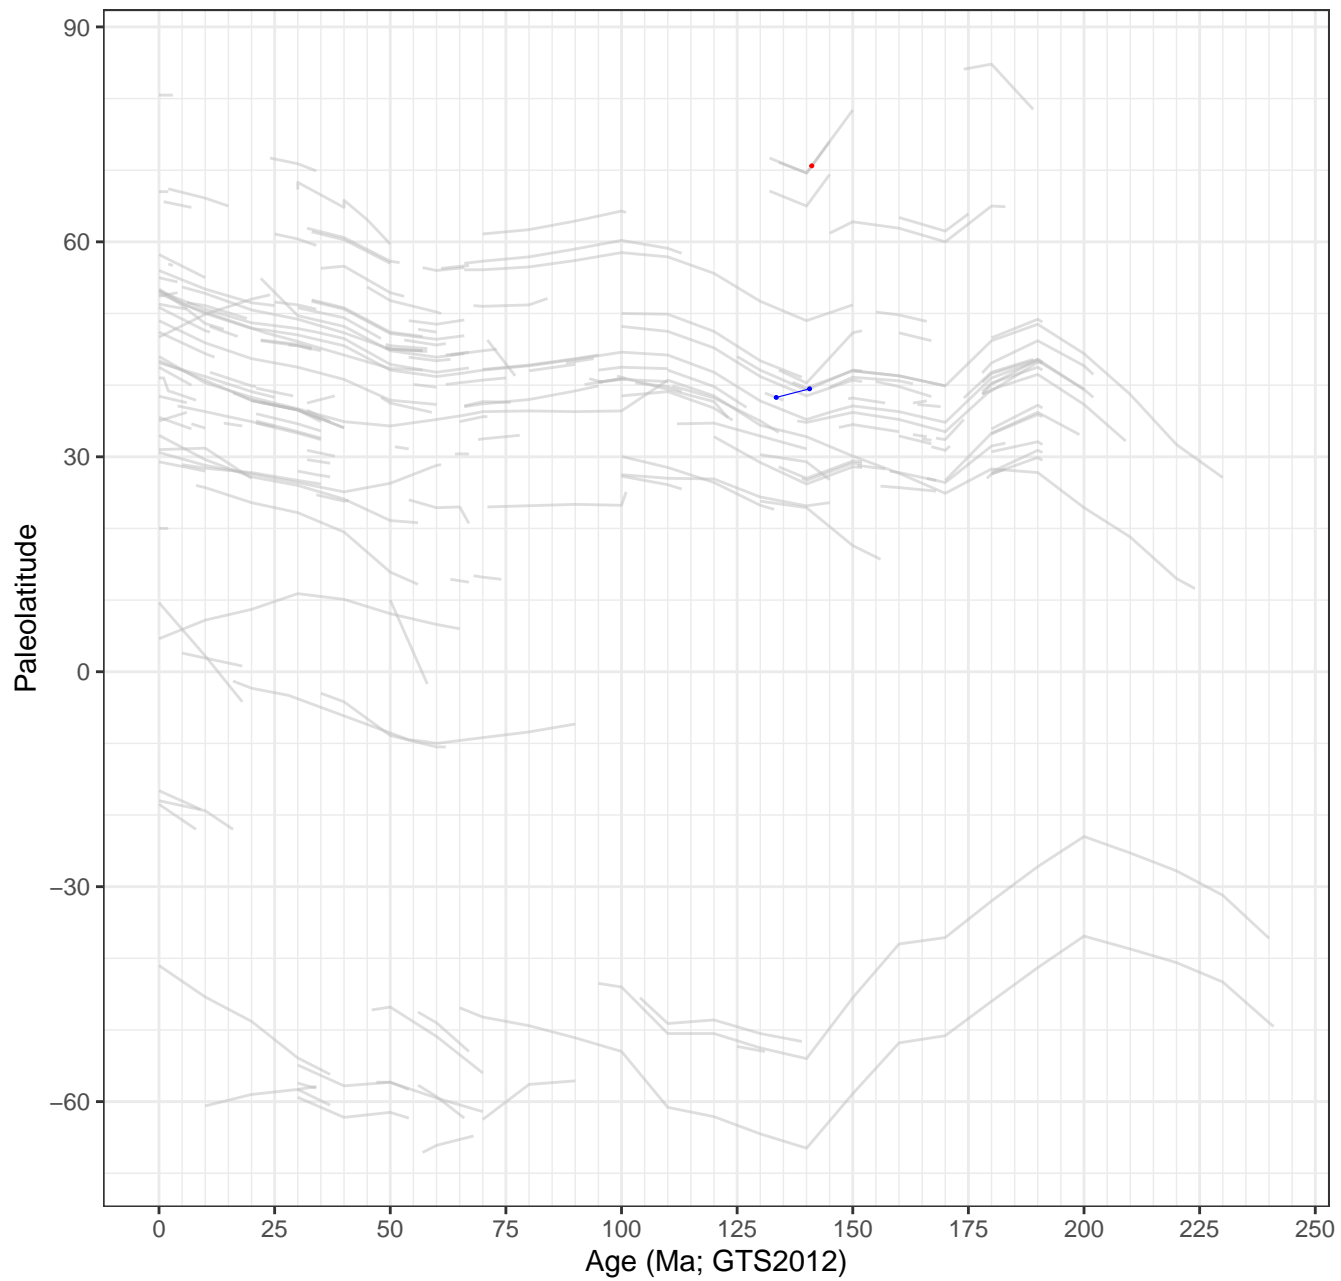

Supplement: Supplementary file 64 [file Genus Athigmatocysta.pdf › Supplement/Supplement 2/Genus 459 plots/Genus Athigmatocysta.pdf]

# Genus Atopodinium

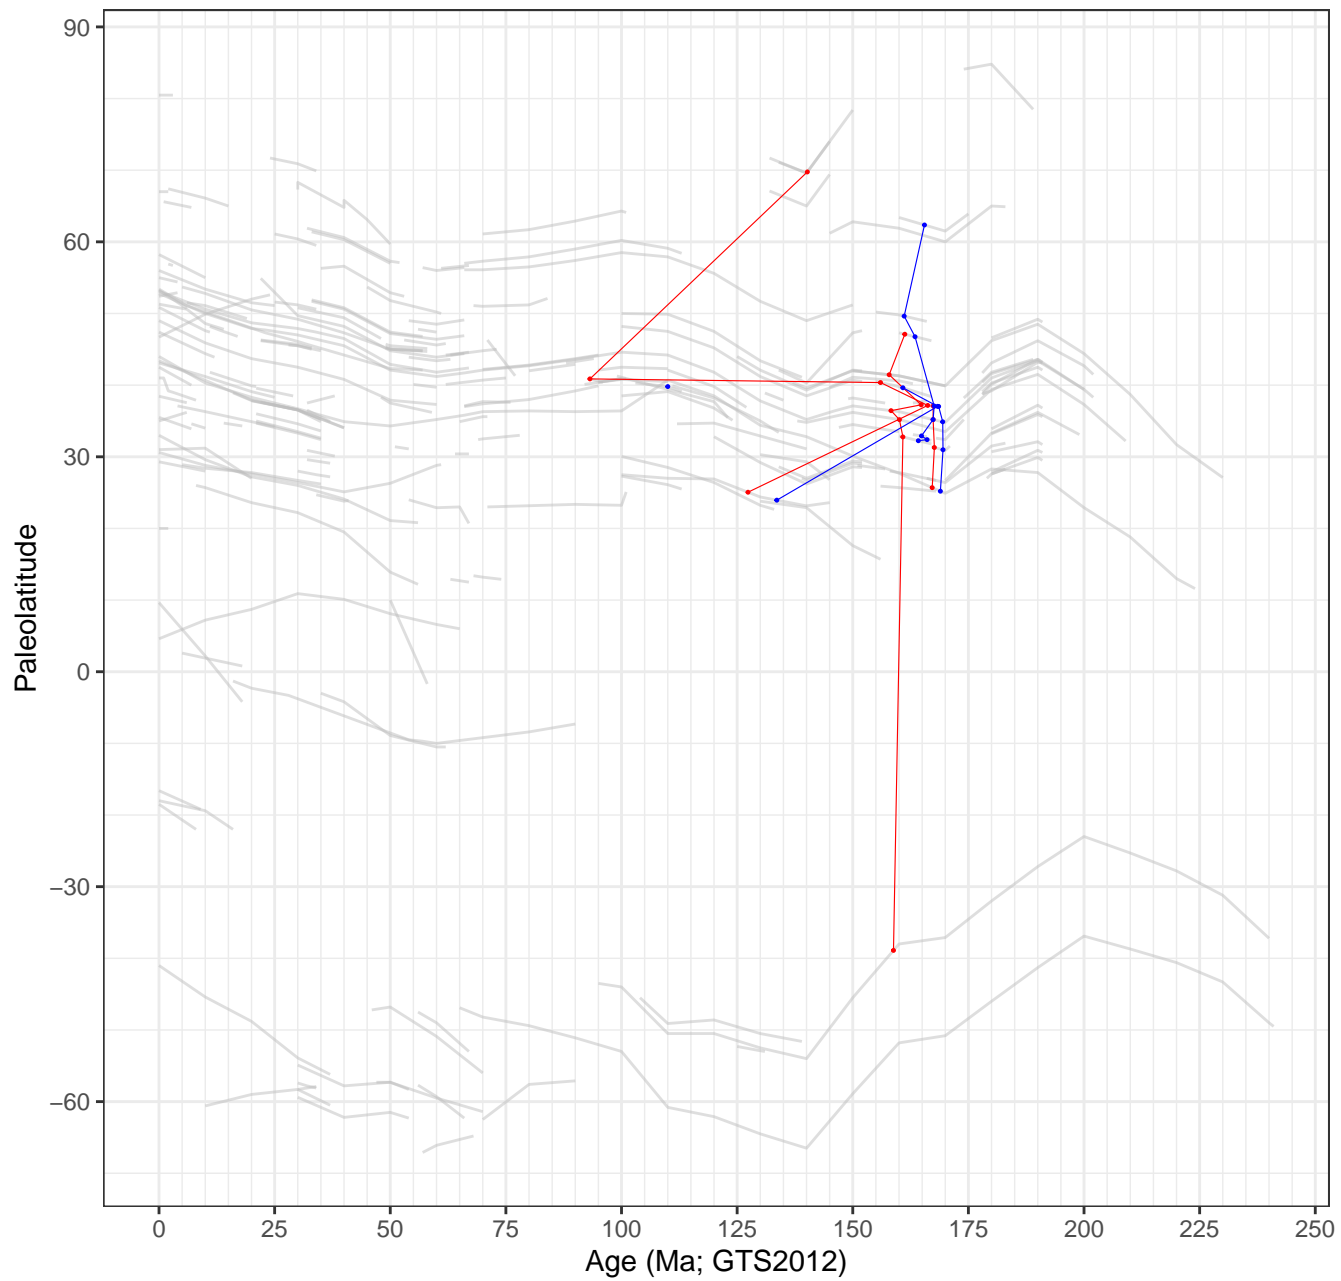

Supplement: Supplementary file 65 [file Genus Atopodinium.pdf › Supplement/Supplement 2/Genus 459 plots/Genus Atopodinium.pdf]

# Genus Avellodinium

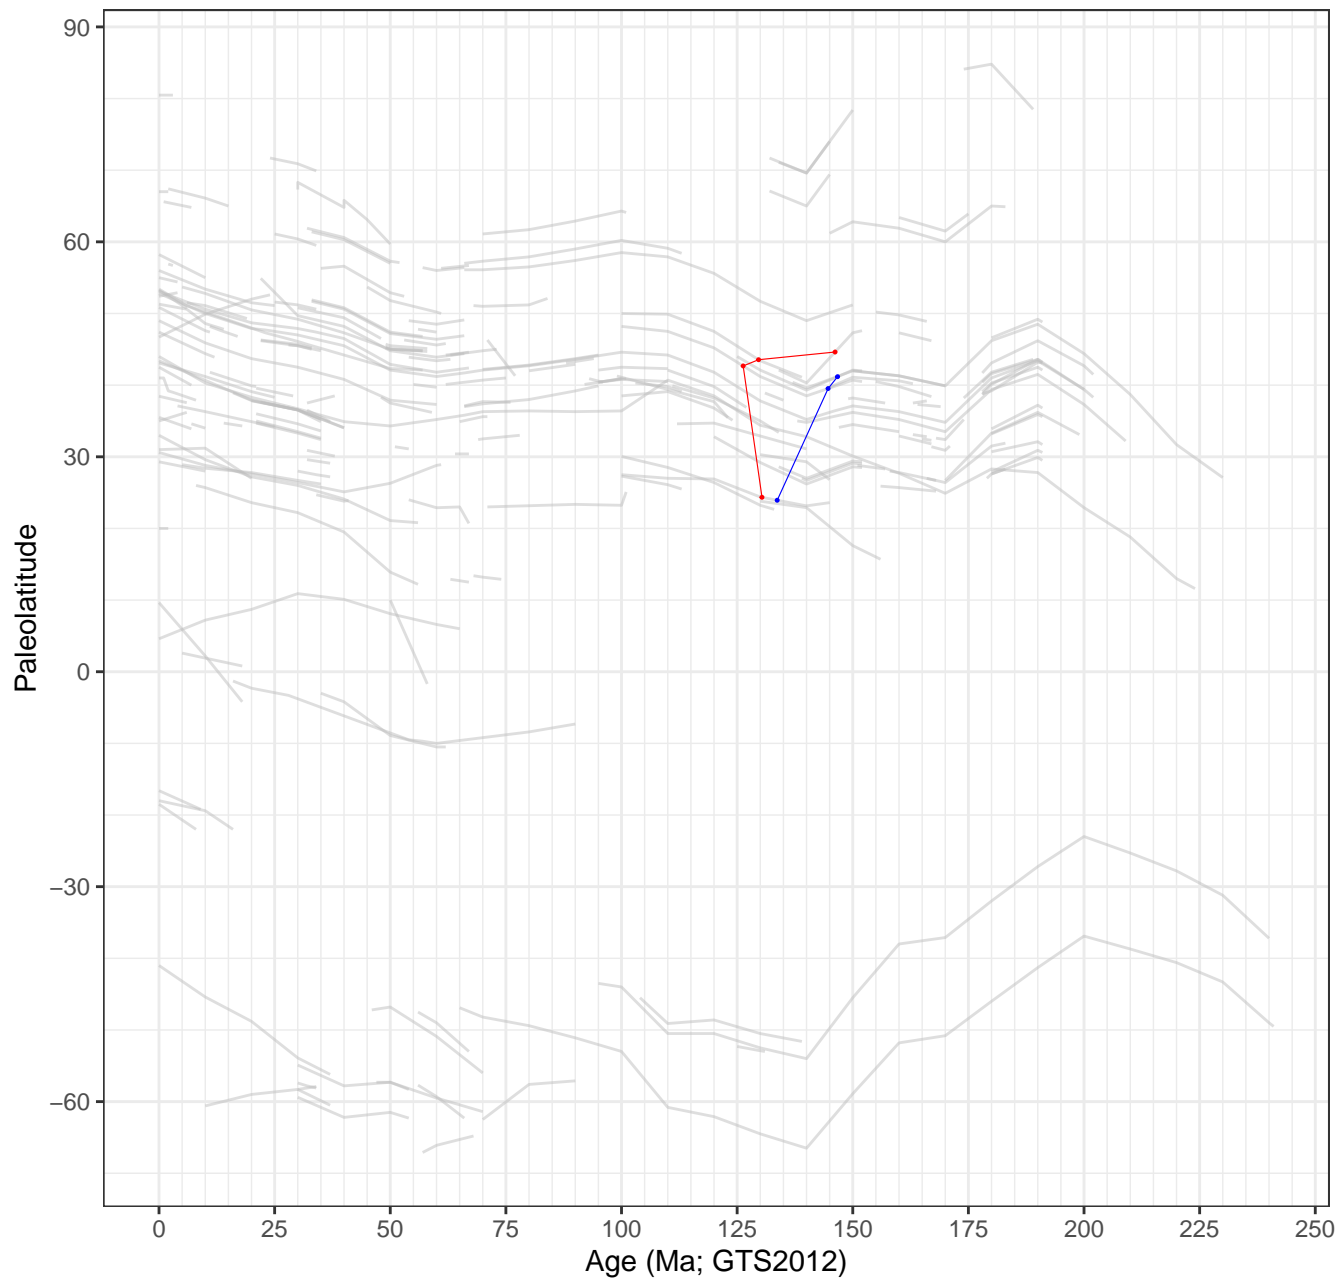

Supplement: Supplementary file 66 [file Genus Avellodinium.pdf › Supplement/Supplement 2/Genus 459 plots/Genus Avellodinium.pdf]

# Genus Axiodinium

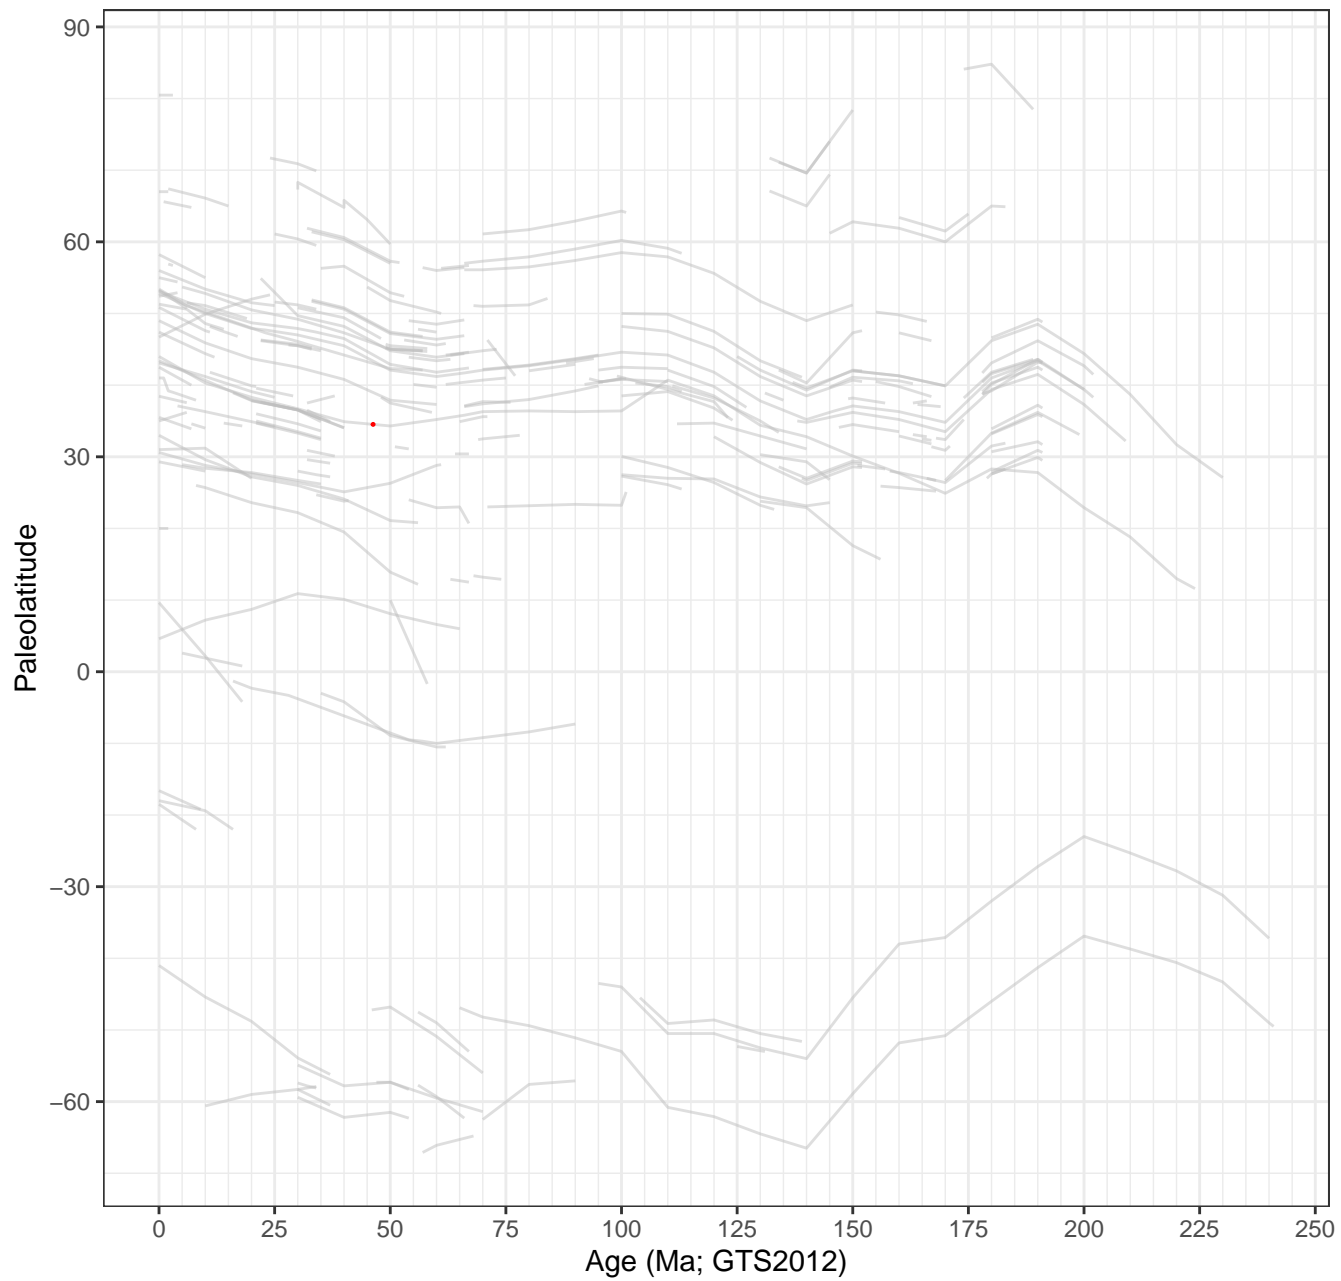

Supplement: Supplementary file 67 [file Genus Axiodinium.pdf › Supplement/Supplement 2/Genus 459 plots/Genus Axiodinium.pdf]

# Genus Balcattia

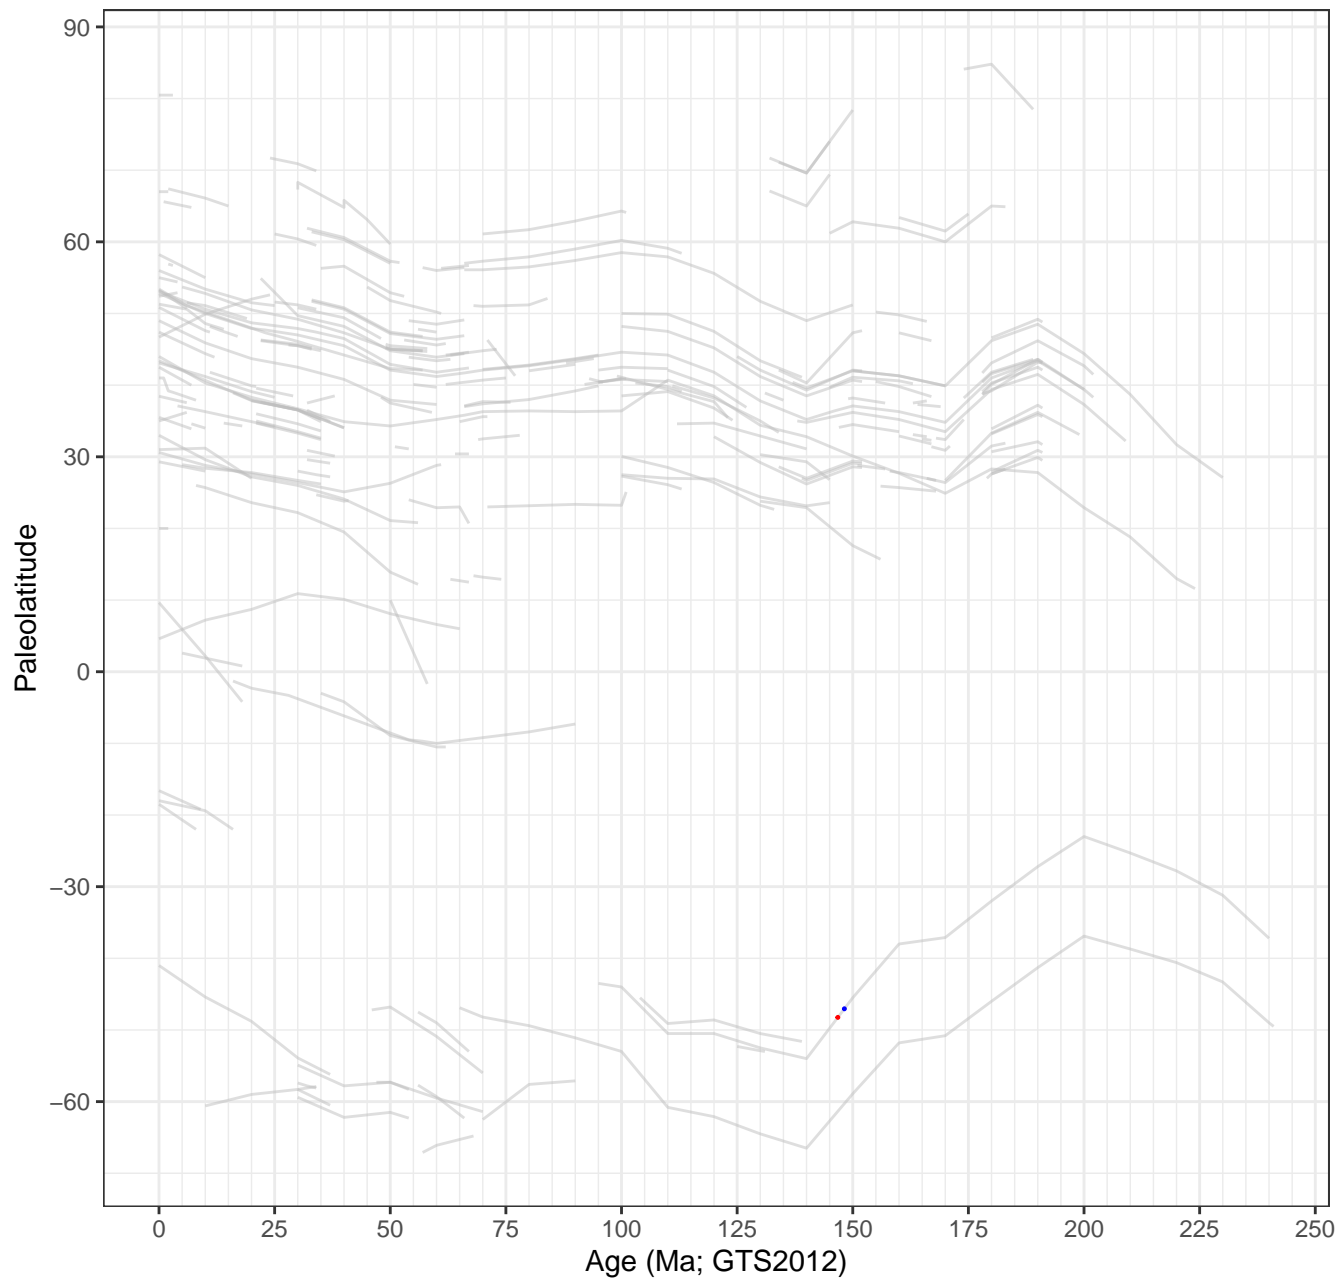

Supplement: Supplementary file 68 [file Genus Balcattia.pdf › Supplement/Supplement 2/Genus 459 plots/Genus Balcattia.pdf]

# Genus *Balteocysta*



Supplement: Supplementary file 69 [file Genus Balteocysta.pdf › Supplement/Supplement 2/Genus 459 plots/Genus Balteocysta.pdf]

# Genus *Baltisphaeridium*

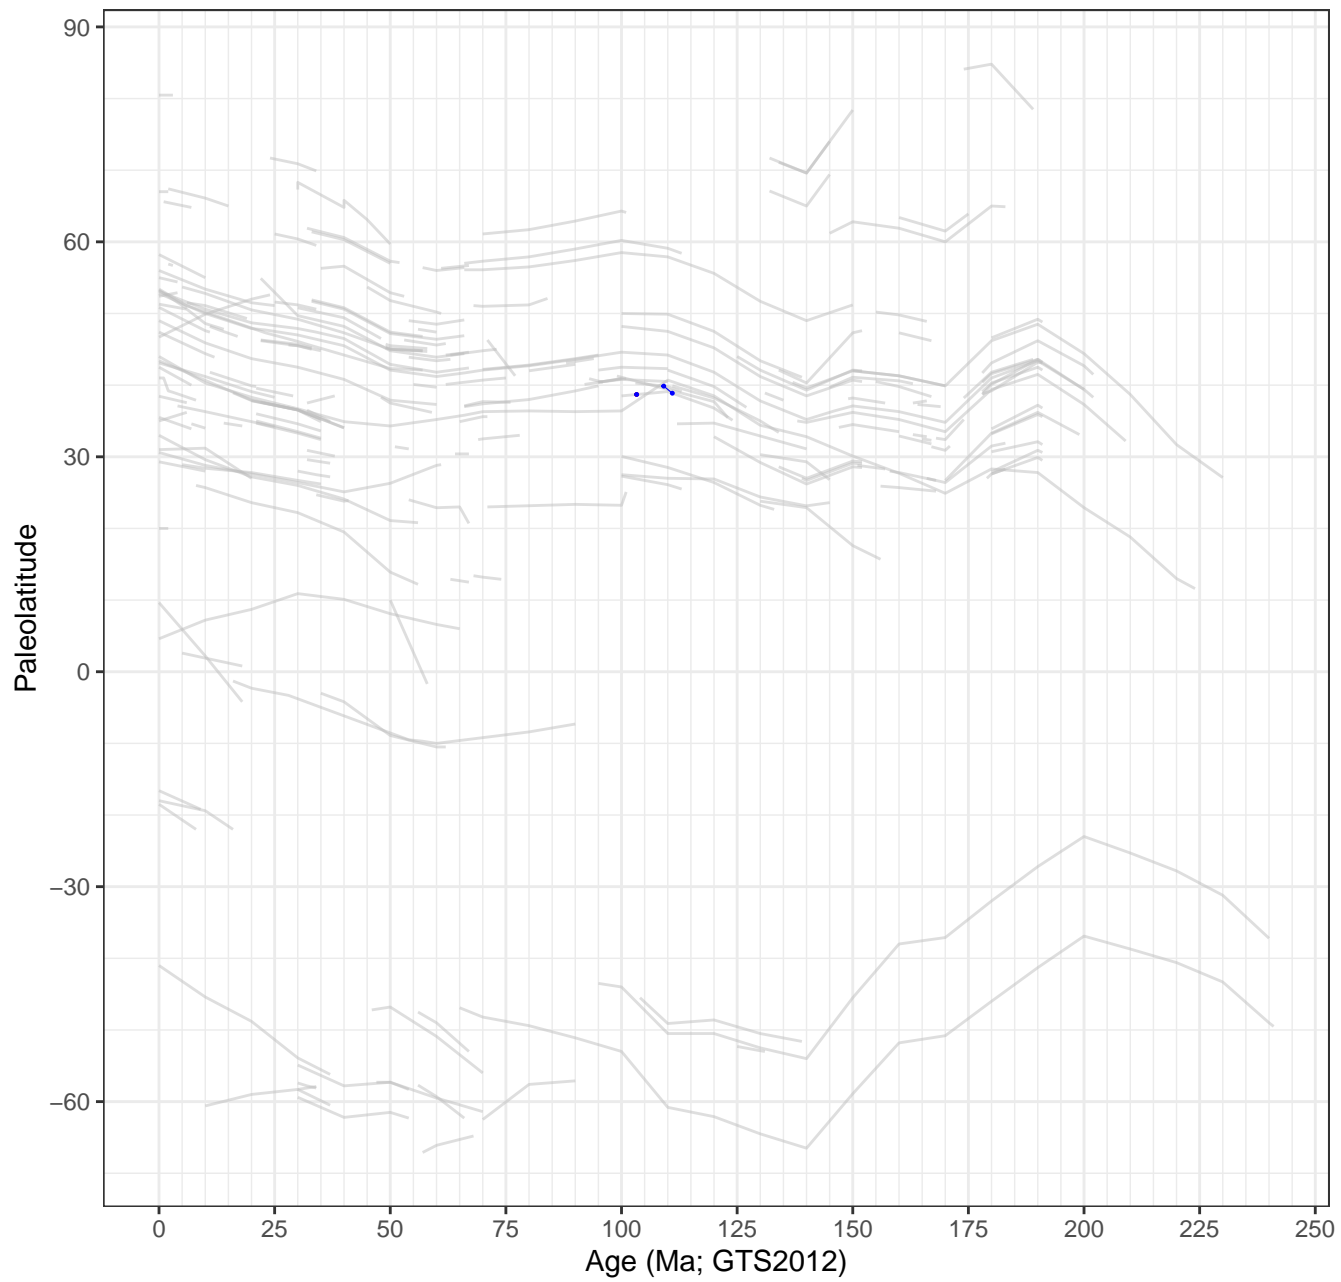

Supplement: Supplementary file 70 [file Genus Baltisphaeridium.pdf › Supplement/Supplement 2/Genus 459 plots/Genus Baltisphaeridium.pdf]

# Genus *Barbatacysta*

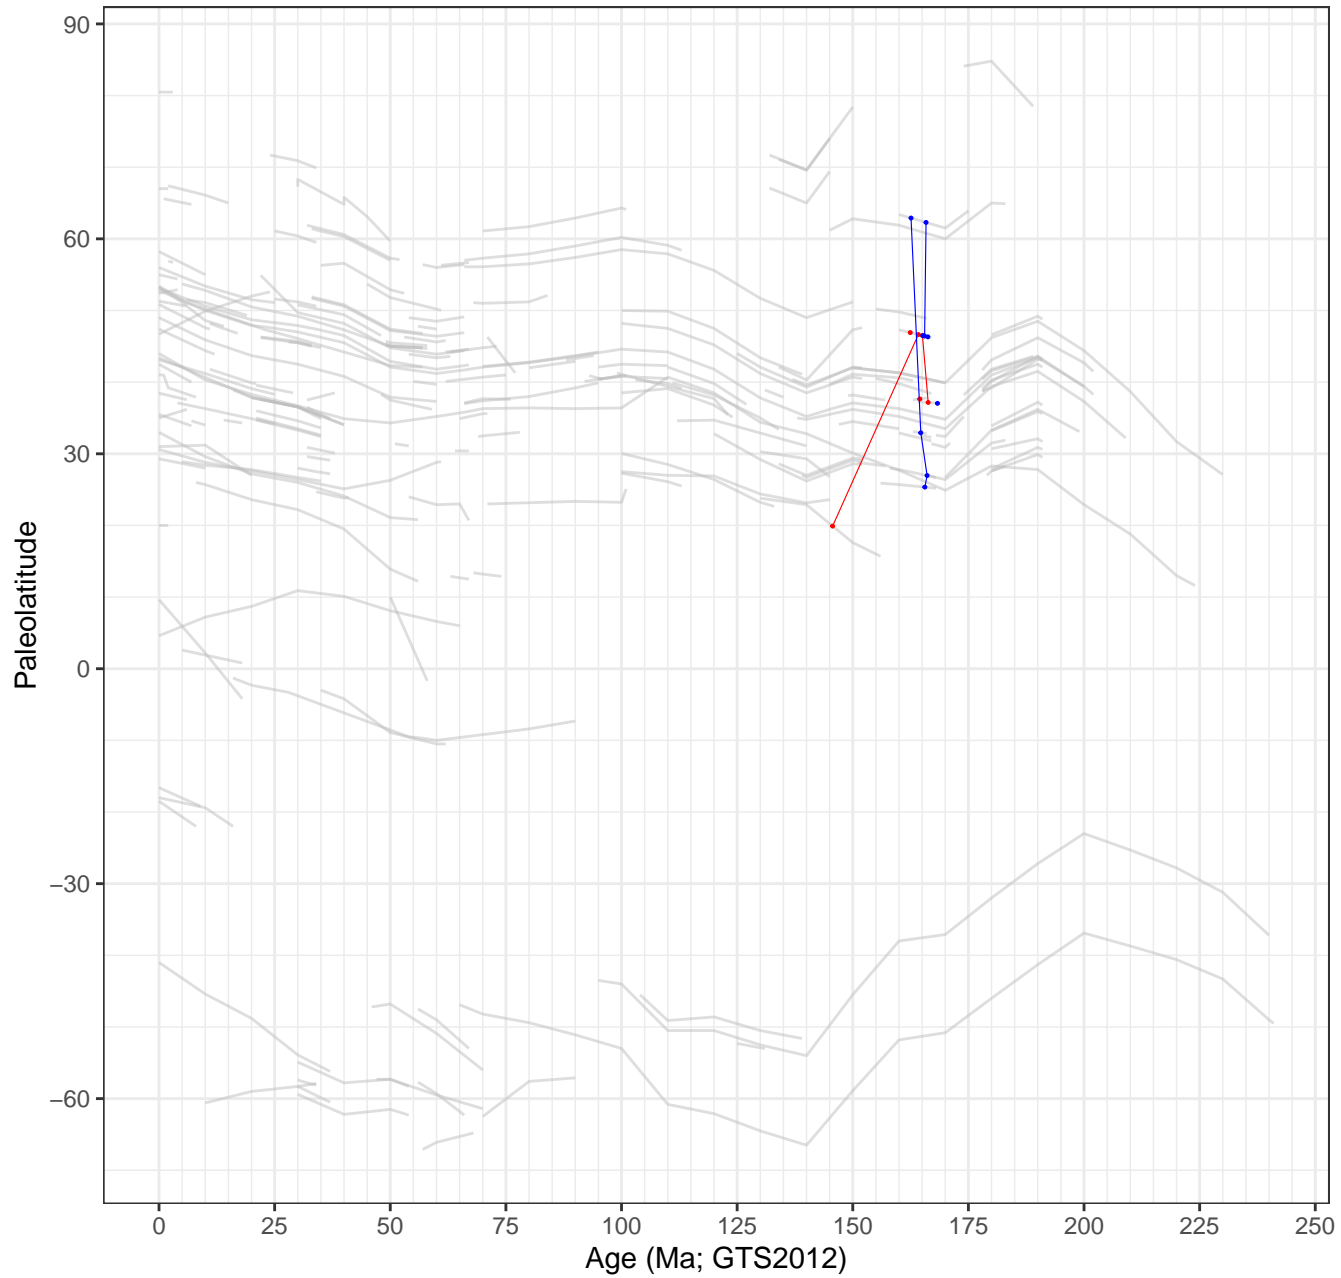

Supplement: Supplementary file 71 [file Genus Barbatacysta.pdf › Supplement/Supplement 2/Genus 459 plots/Genus Barbatacysta.pdf]

# Genus Barssidinium

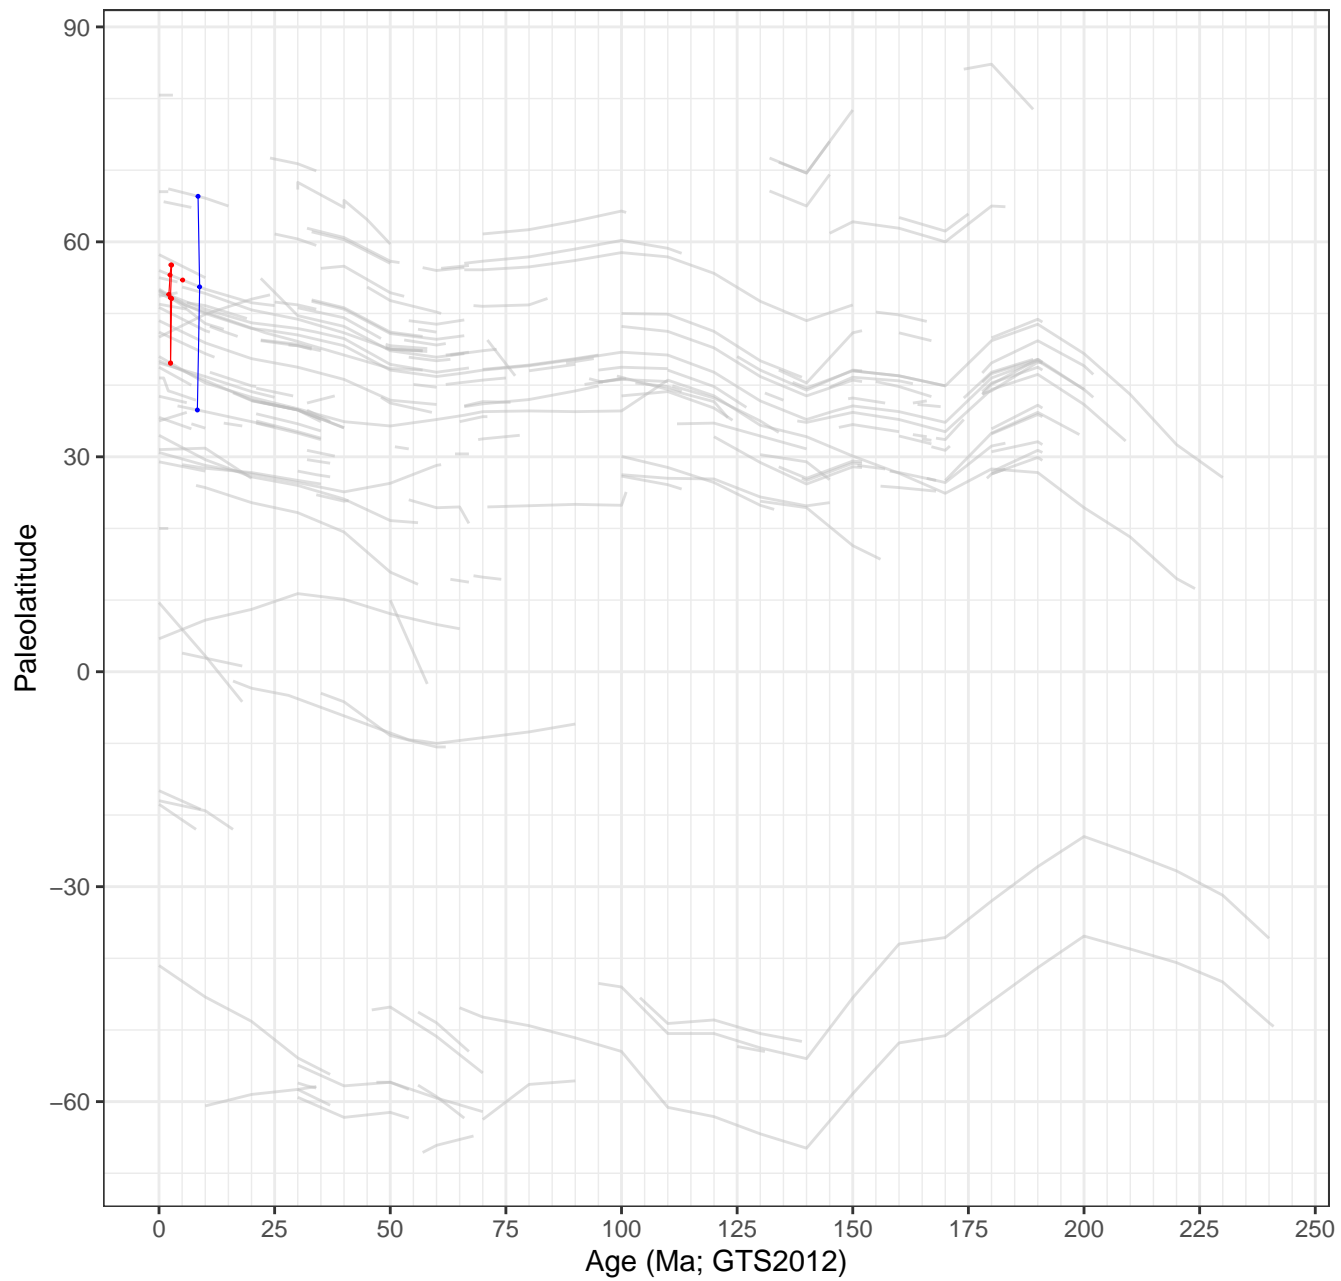

Supplement: Supplementary file 72 [file Genus Barssidinium.pdf › Supplement/Supplement 2/Genus 459 plots/Genus Barssidinium.pdf]

# Genus Batiacasphaera

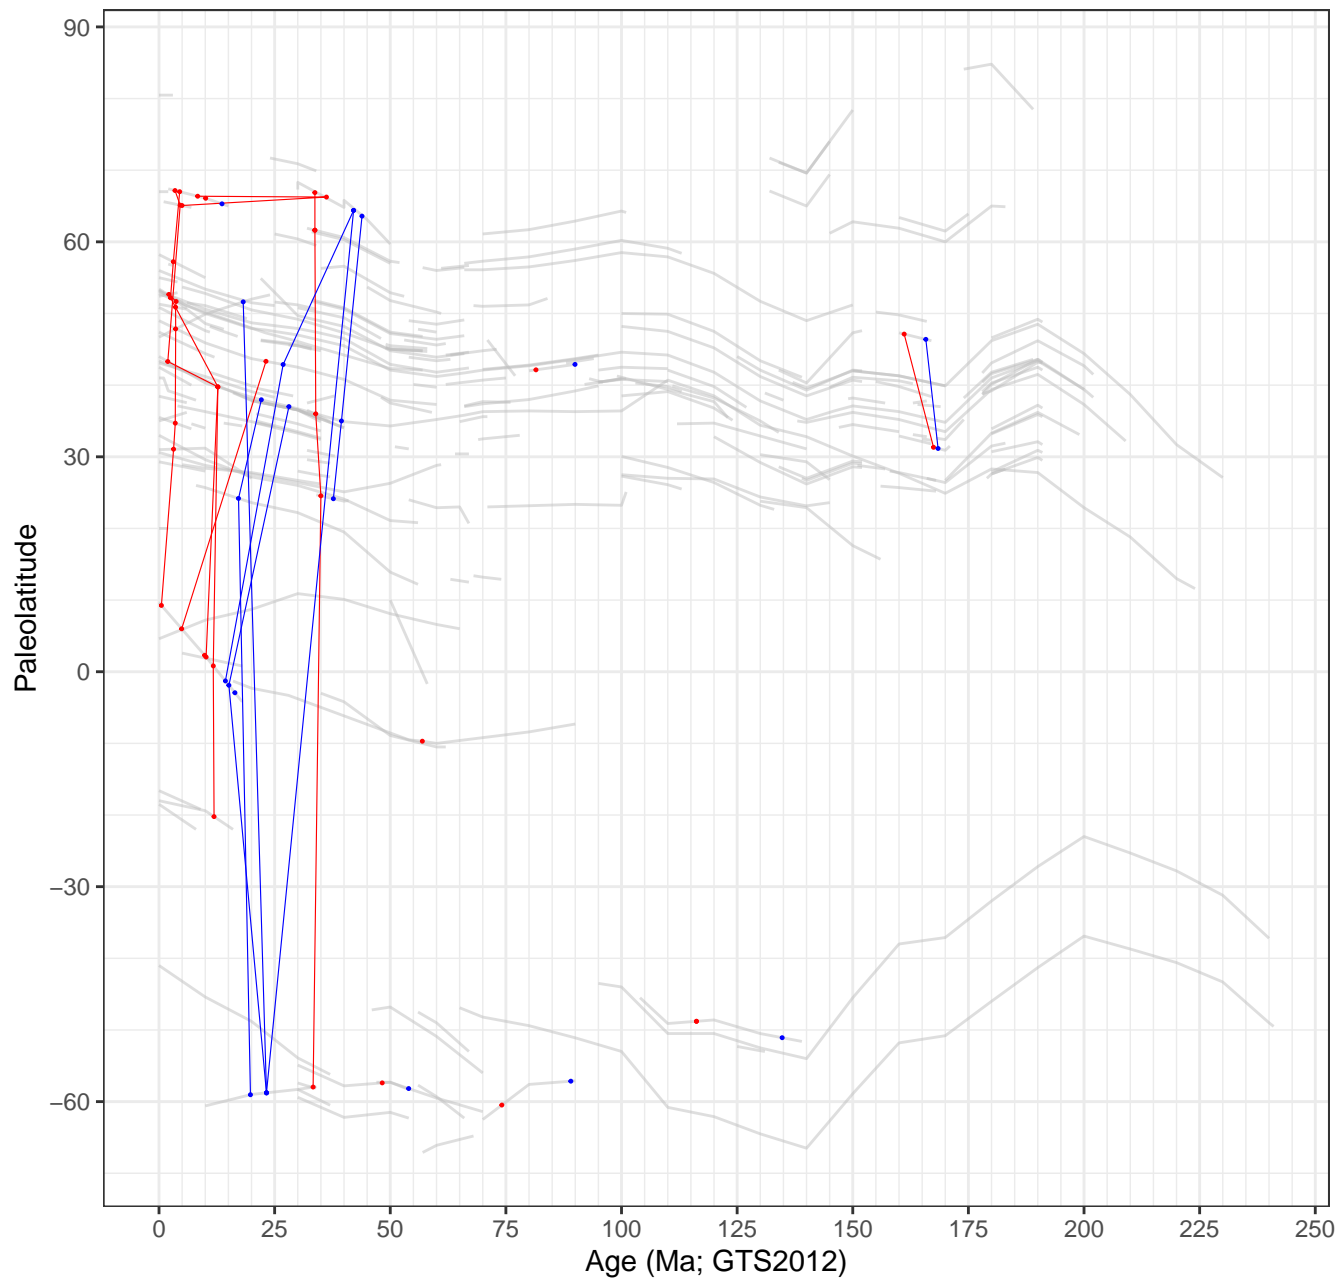

Supplement: Supplementary file 73 [file Genus Batiacasphaera.pdf › Supplement/Supplement 2/Genus 459 plots/Genus Batiacasphaera.pdf]

# Genus Batioladinium

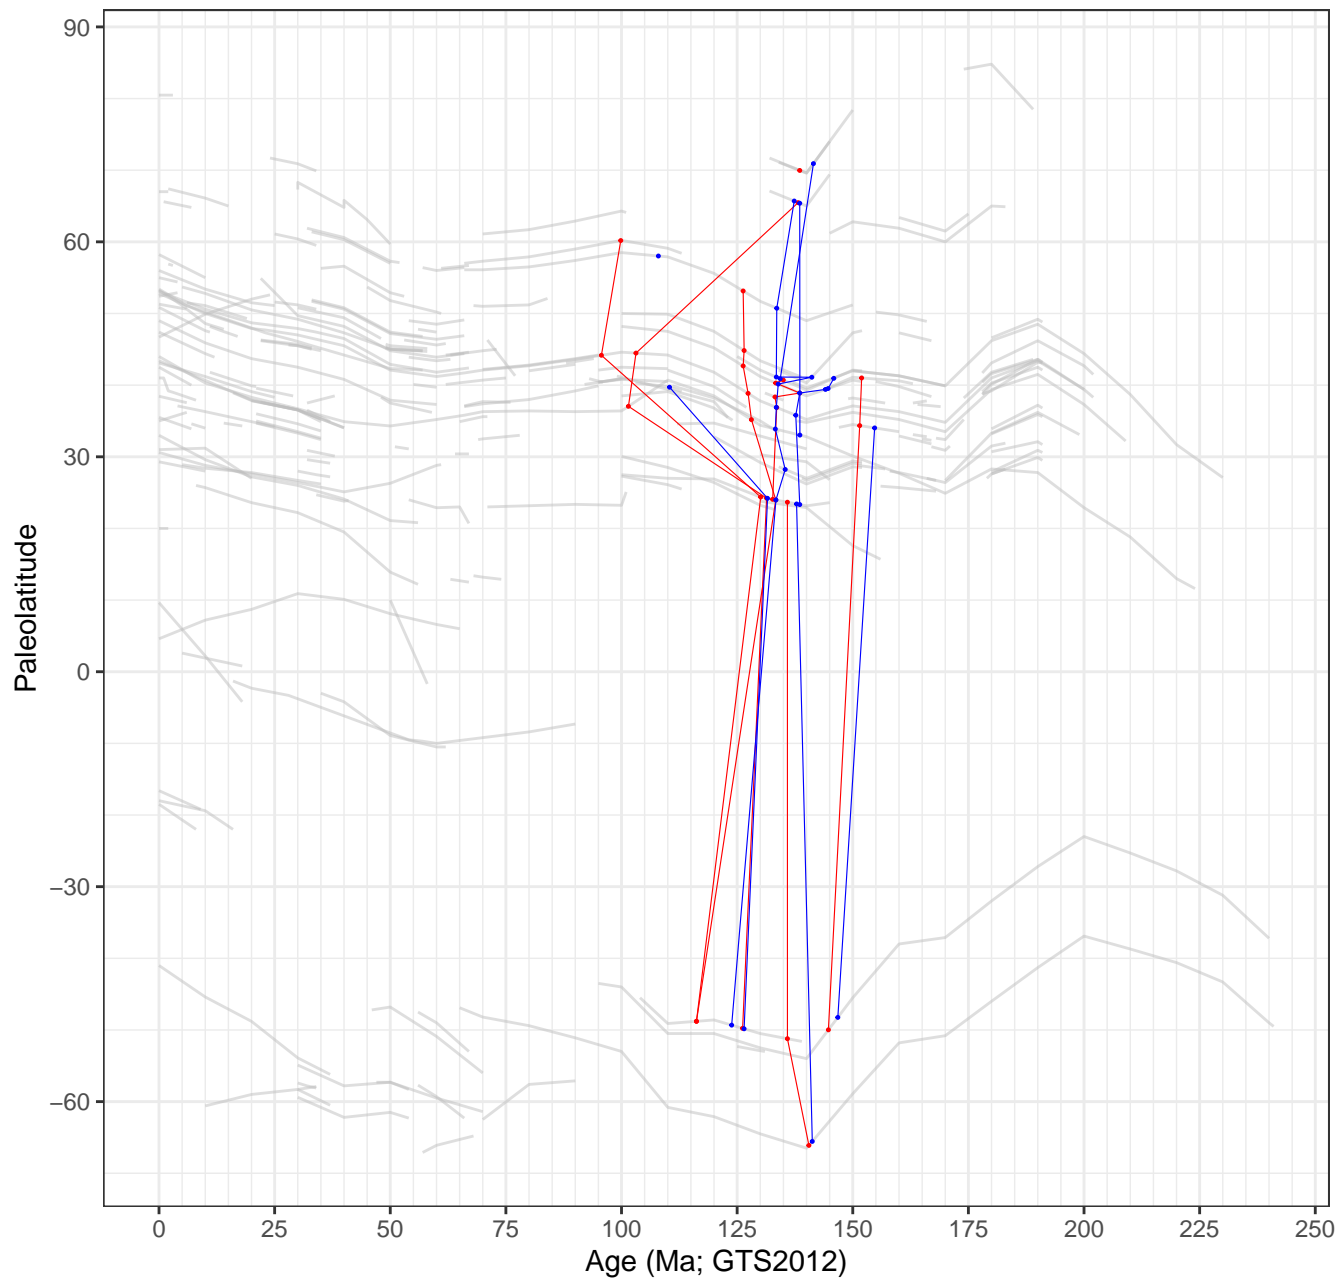

Supplement: Supplementary file 74 [file Genus Batioladinium.pdf › Supplement/Supplement 2/Genus 459 plots/Genus Batioladinium.pdf]

# Genus Beaumontella

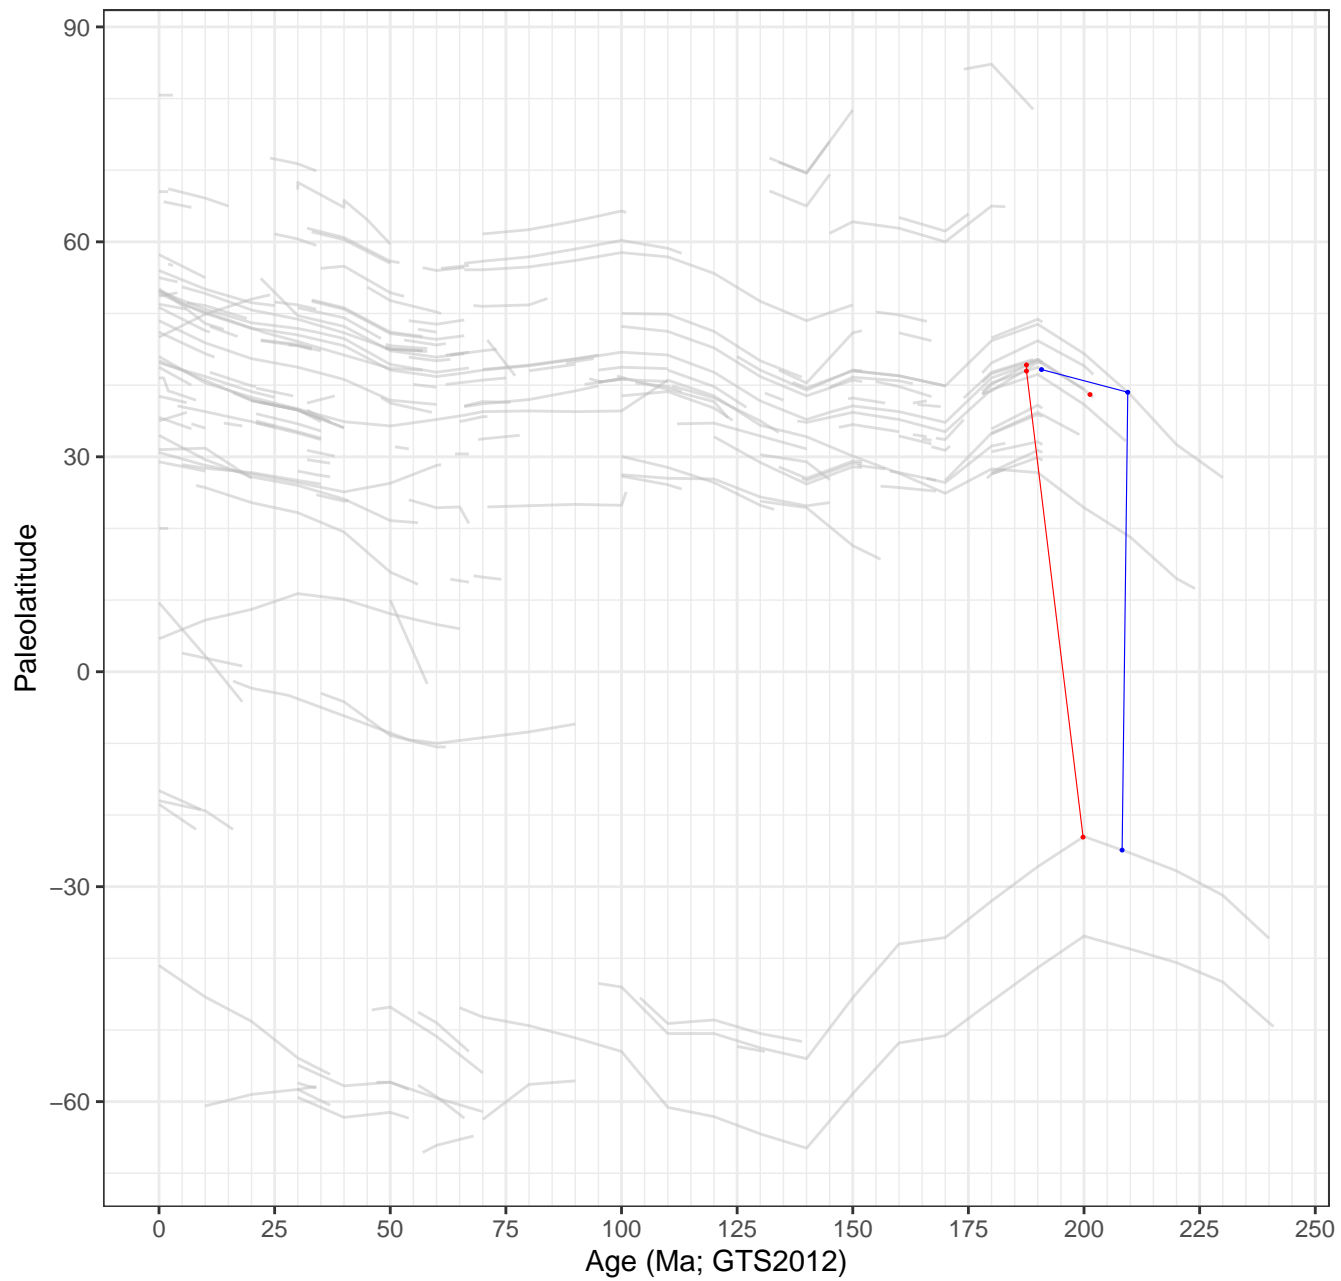

Supplement: Supplementary file 75 [file Genus Beaumontella.pdf › Supplement/Supplement 2/Genus 459 plots/Genus Beaumontella.pdf]

# Genus Belodinium

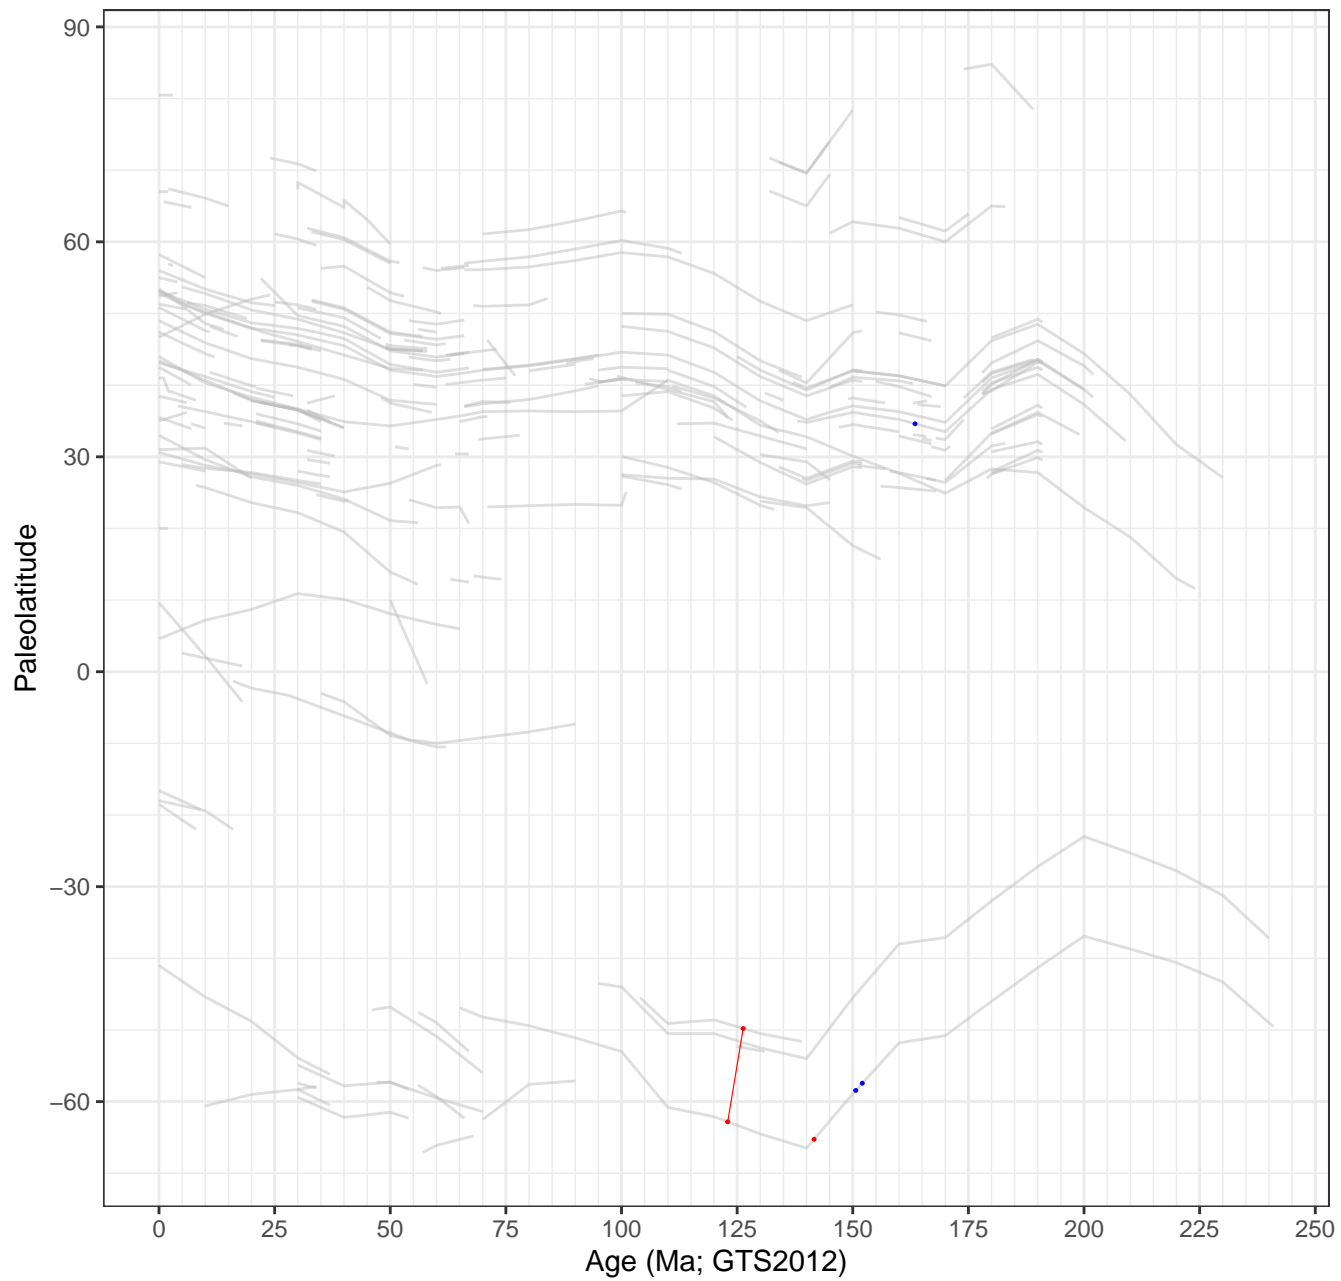

Supplement: Supplementary file 76 [file Genus Belodinium.pdf › Supplement/Supplement 2/Genus 459 plots/Genus Belodinium.pdf]

# Genus Belowicysta

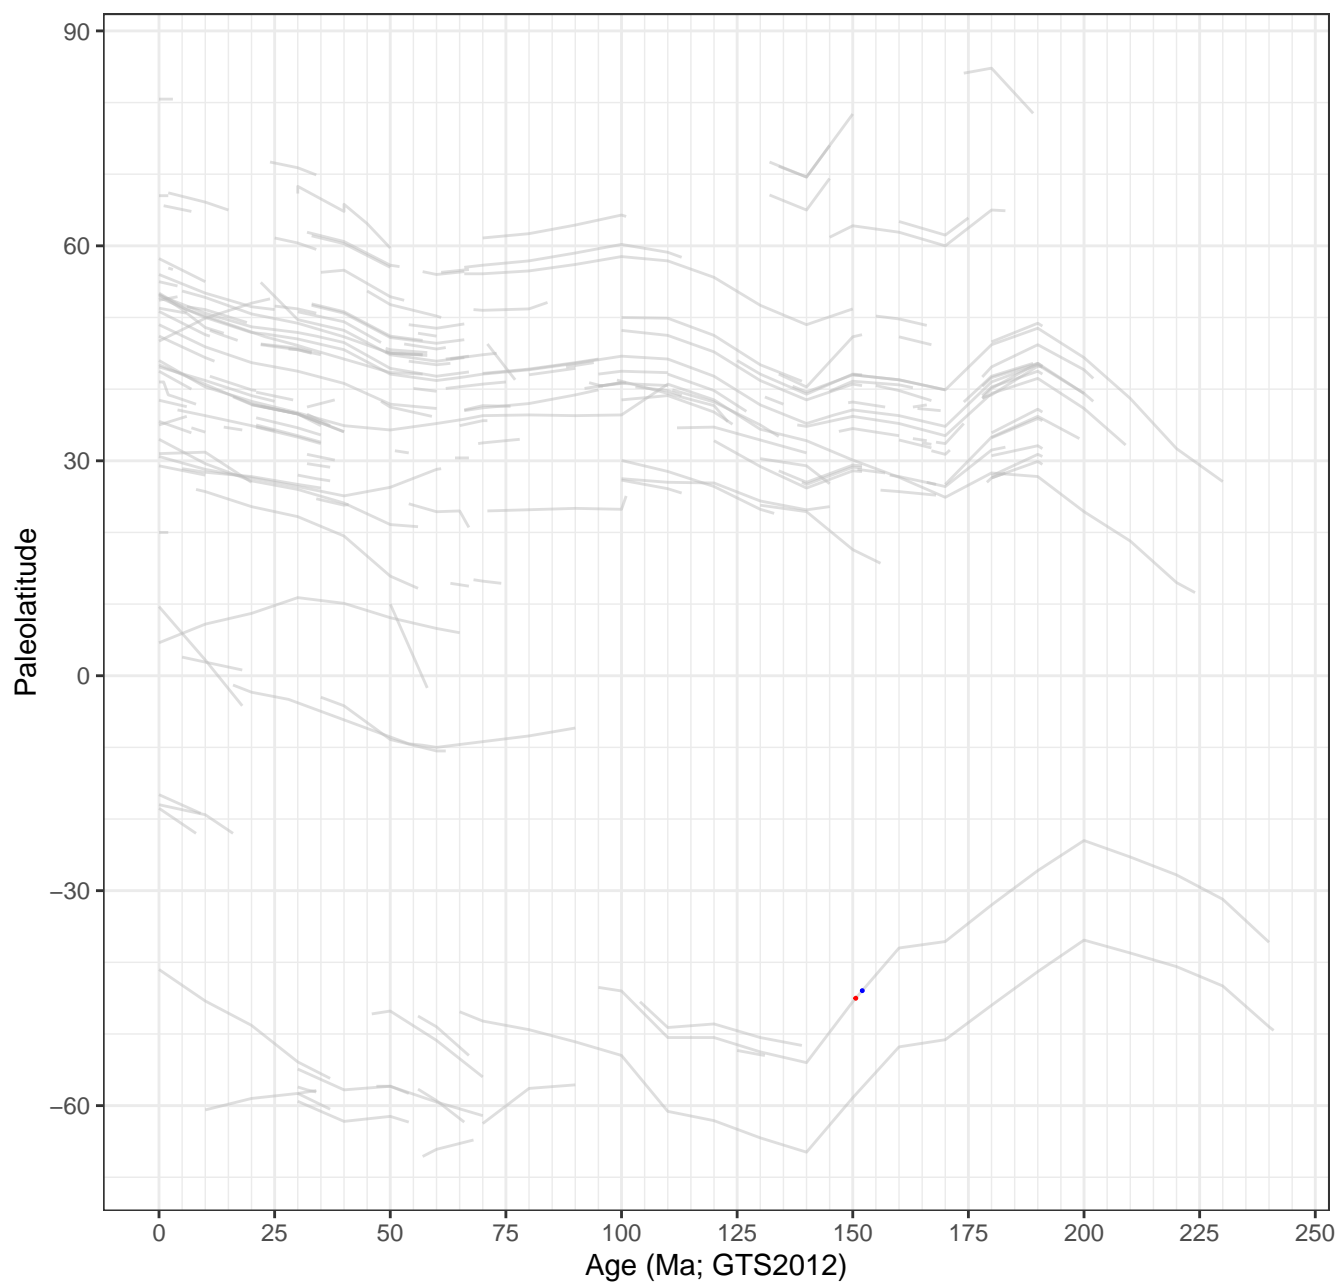

Supplement: Supplementary file 77 [file Genus Belowicysta.pdf › Supplement/Supplement 2/Genus 459 plots/Genus Belowicysta.pdf]

# Genus Biconidinium

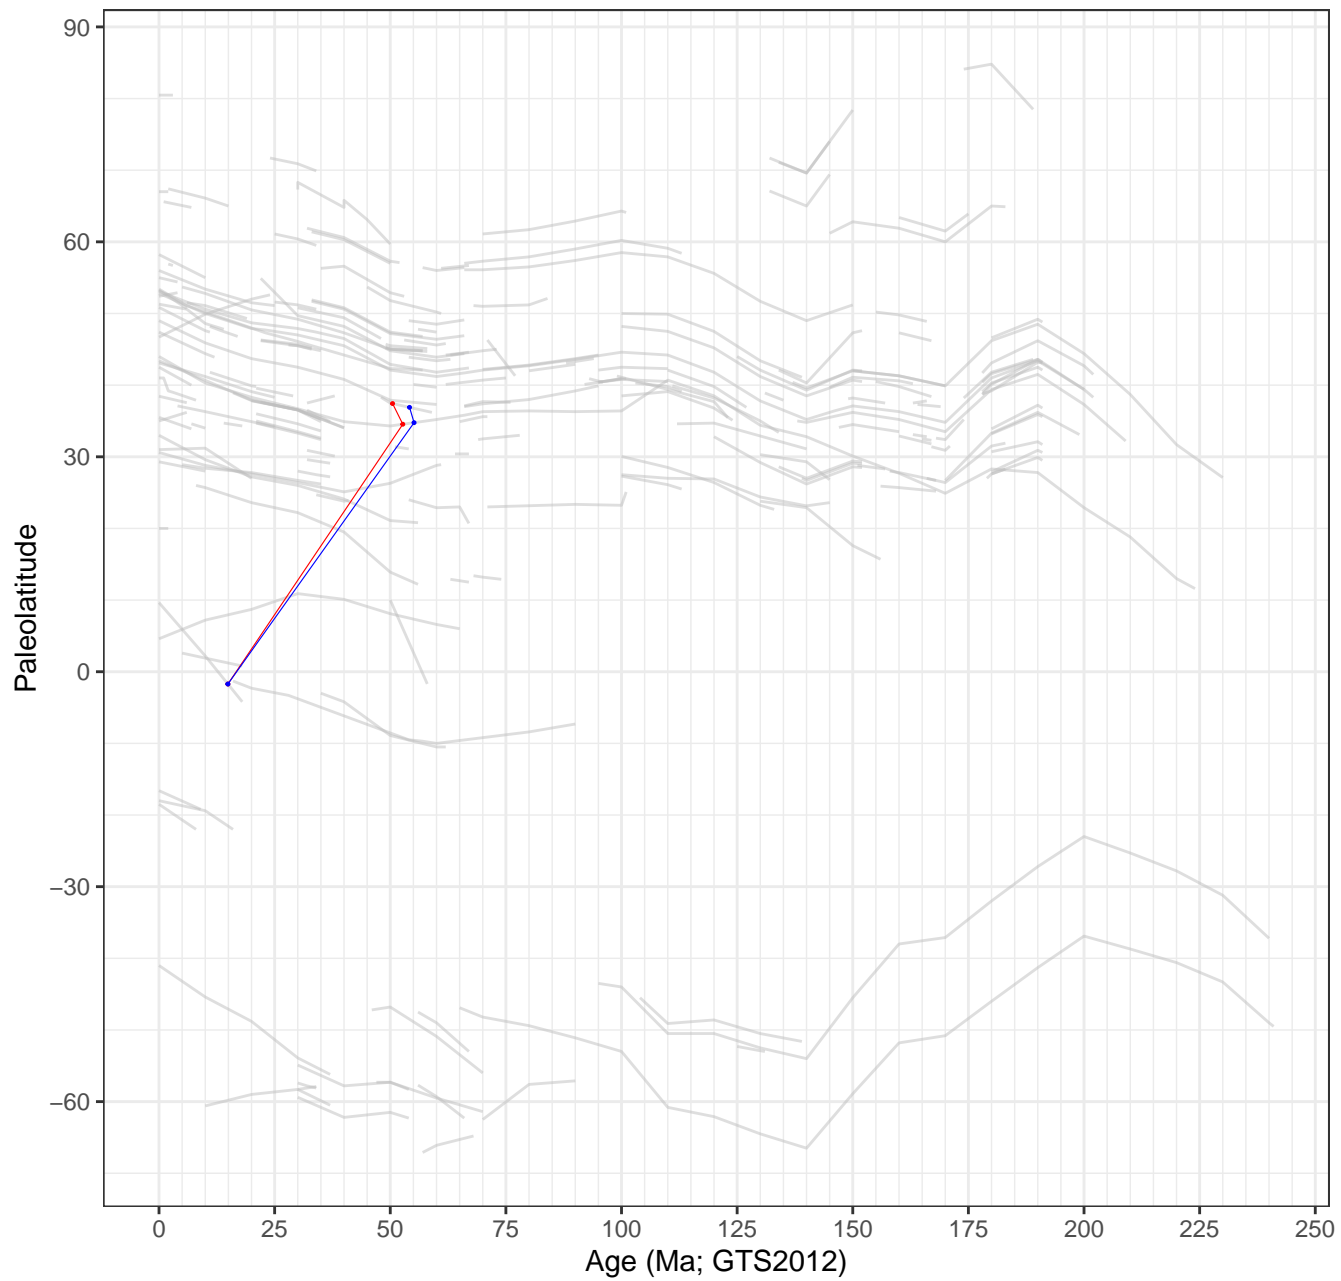

Supplement: Supplementary file 78 [file Genus Biconidinium.pdf › Supplement/Supplement 2/Genus 459 plots/Genus Biconidinium.pdf]

# Genus Biecheleria

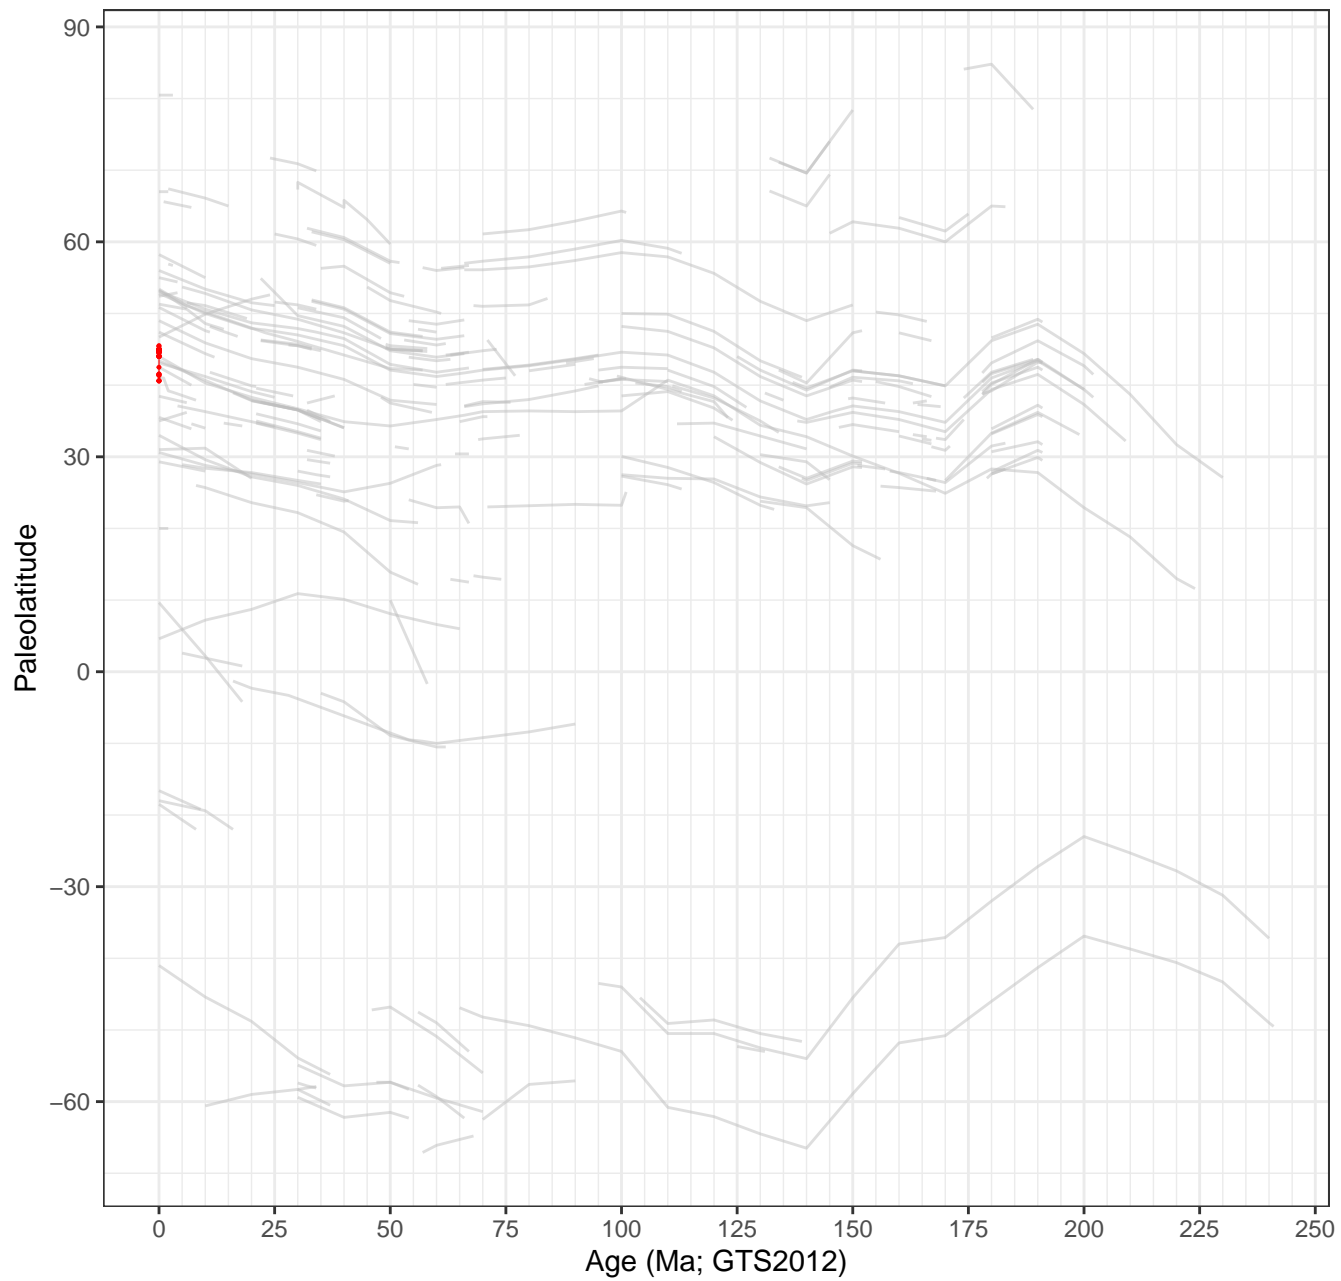

Supplement: Supplementary file 79 [file Genus Biecheleria.pdf › Supplement/Supplement 2/Genus 459 plots/Genus Biecheleria.pdf]

# Genus Biorbifera

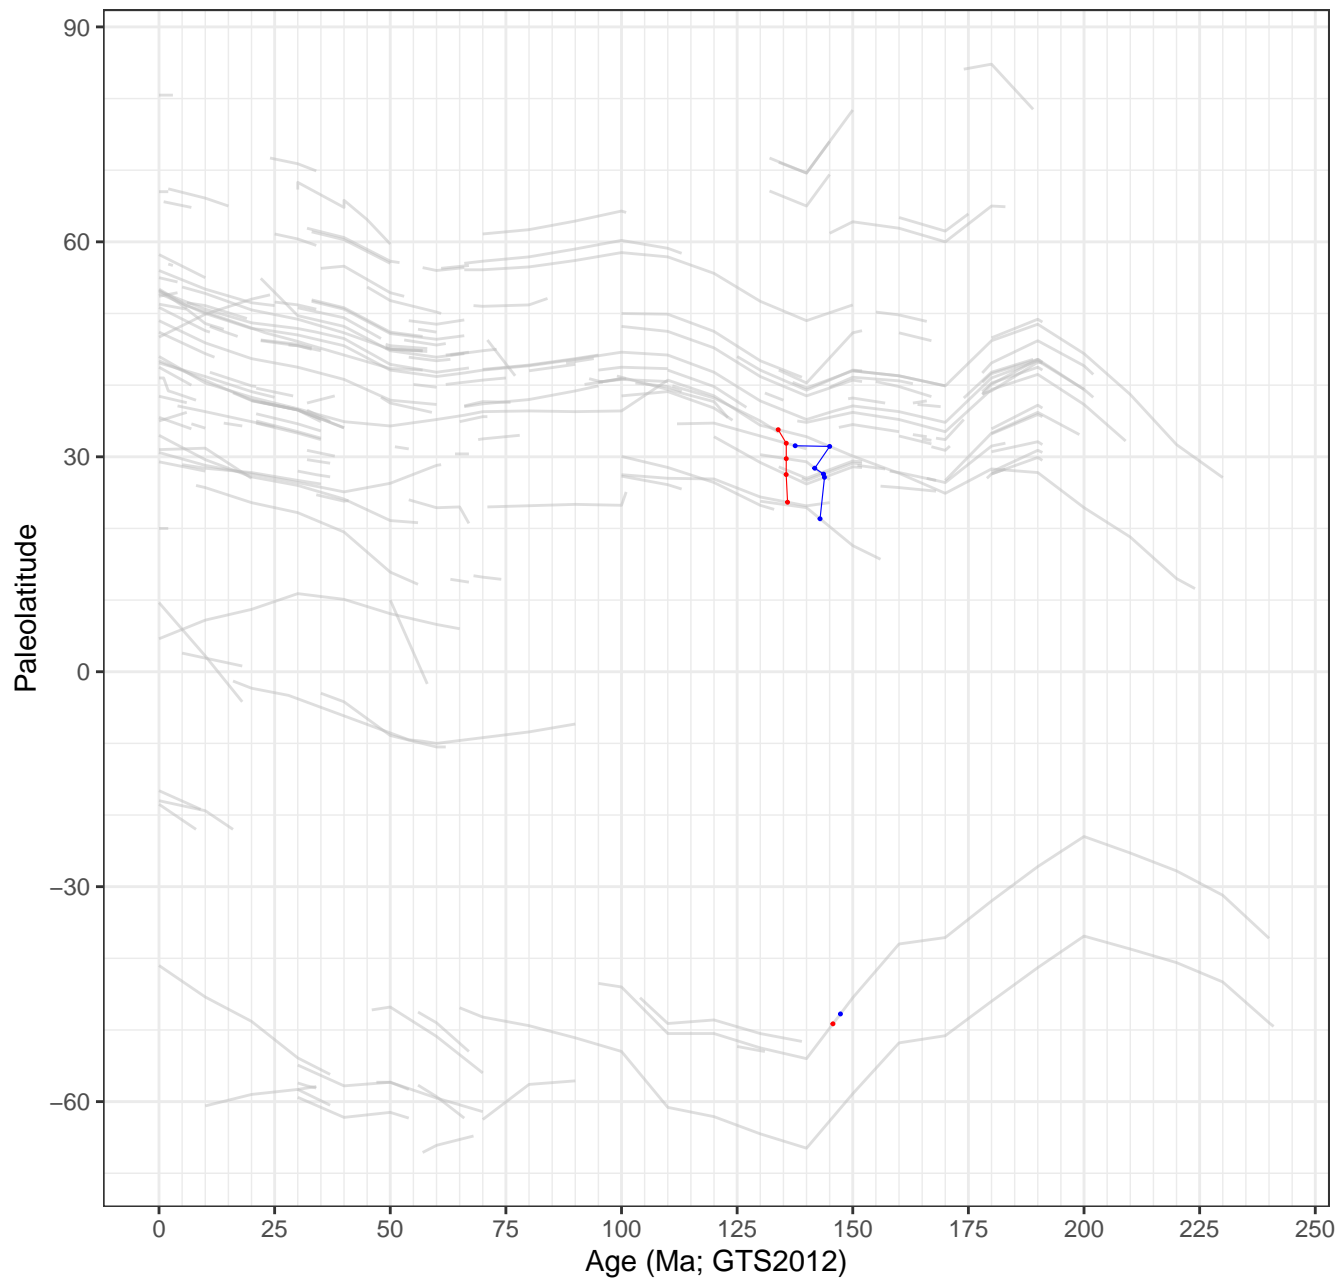

Supplement: Supplementary file 80 [file Genus Biorbifera.pdf › Supplement/Supplement 2/Genus 459 plots/Genus Biorbifera.pdf]

# Genus Bitectatodinium

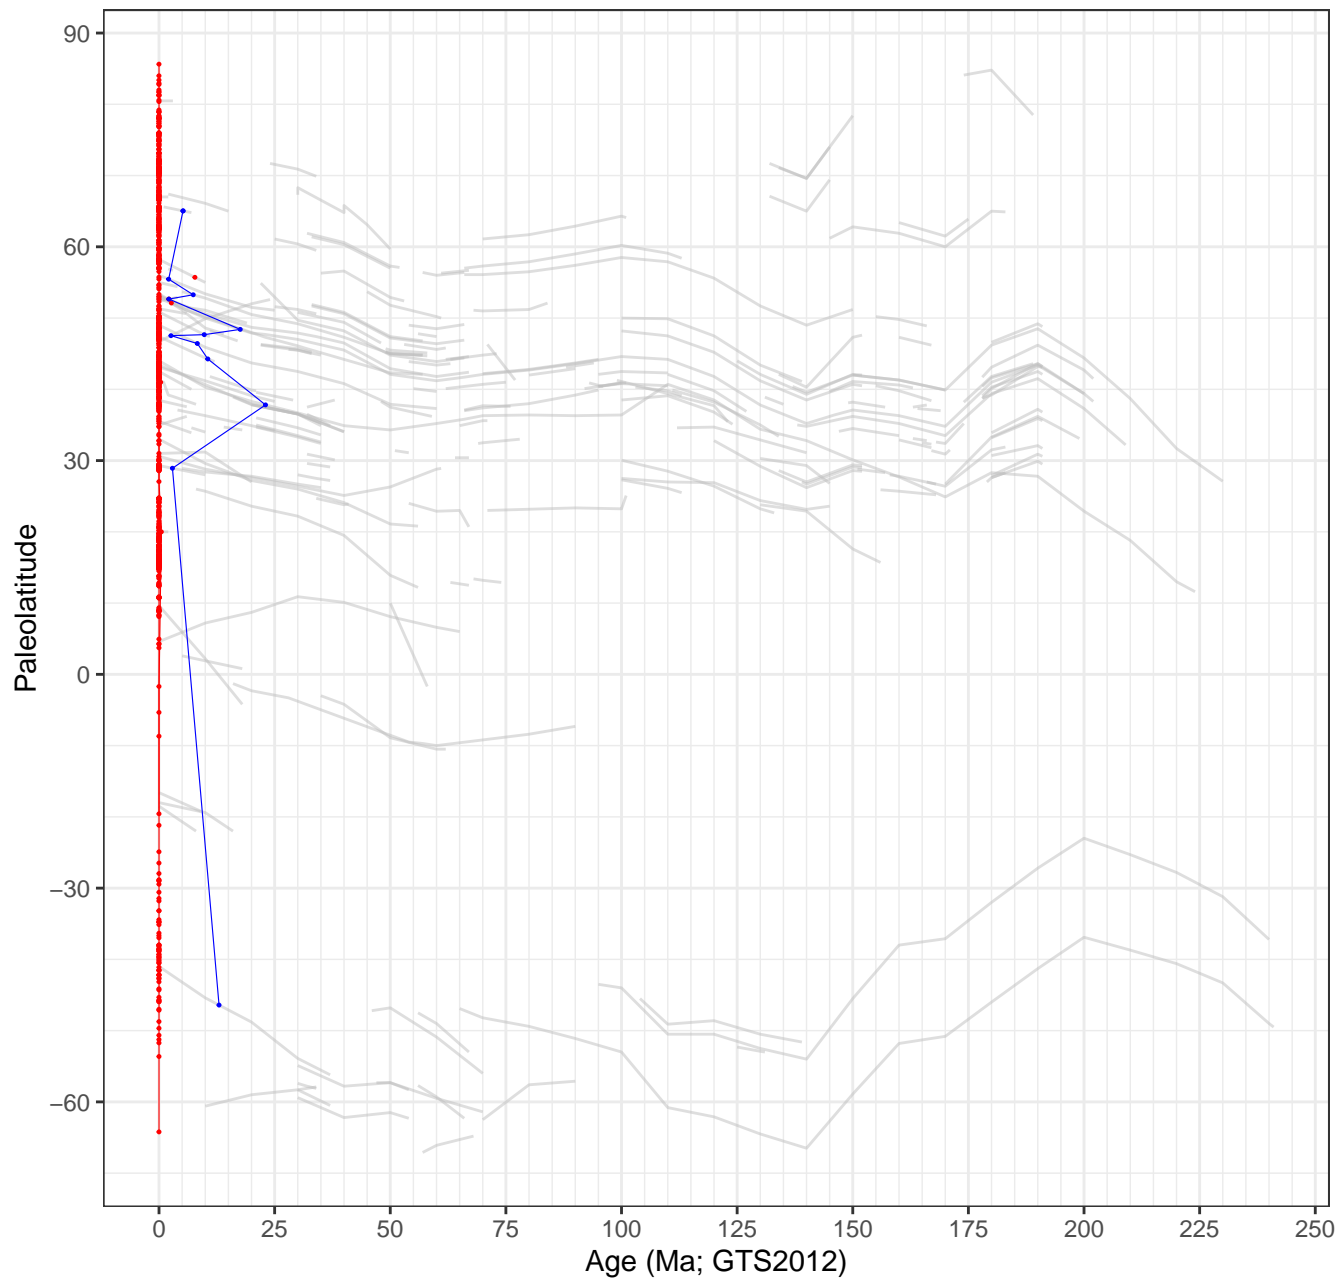

Supplement: Supplementary file 81 [file Genus Bitectatodinium.pdf › Supplement/Supplement 2/Genus 459 plots/Genus Bitectatodinium.pdf]

# Genus Blysmatodinium

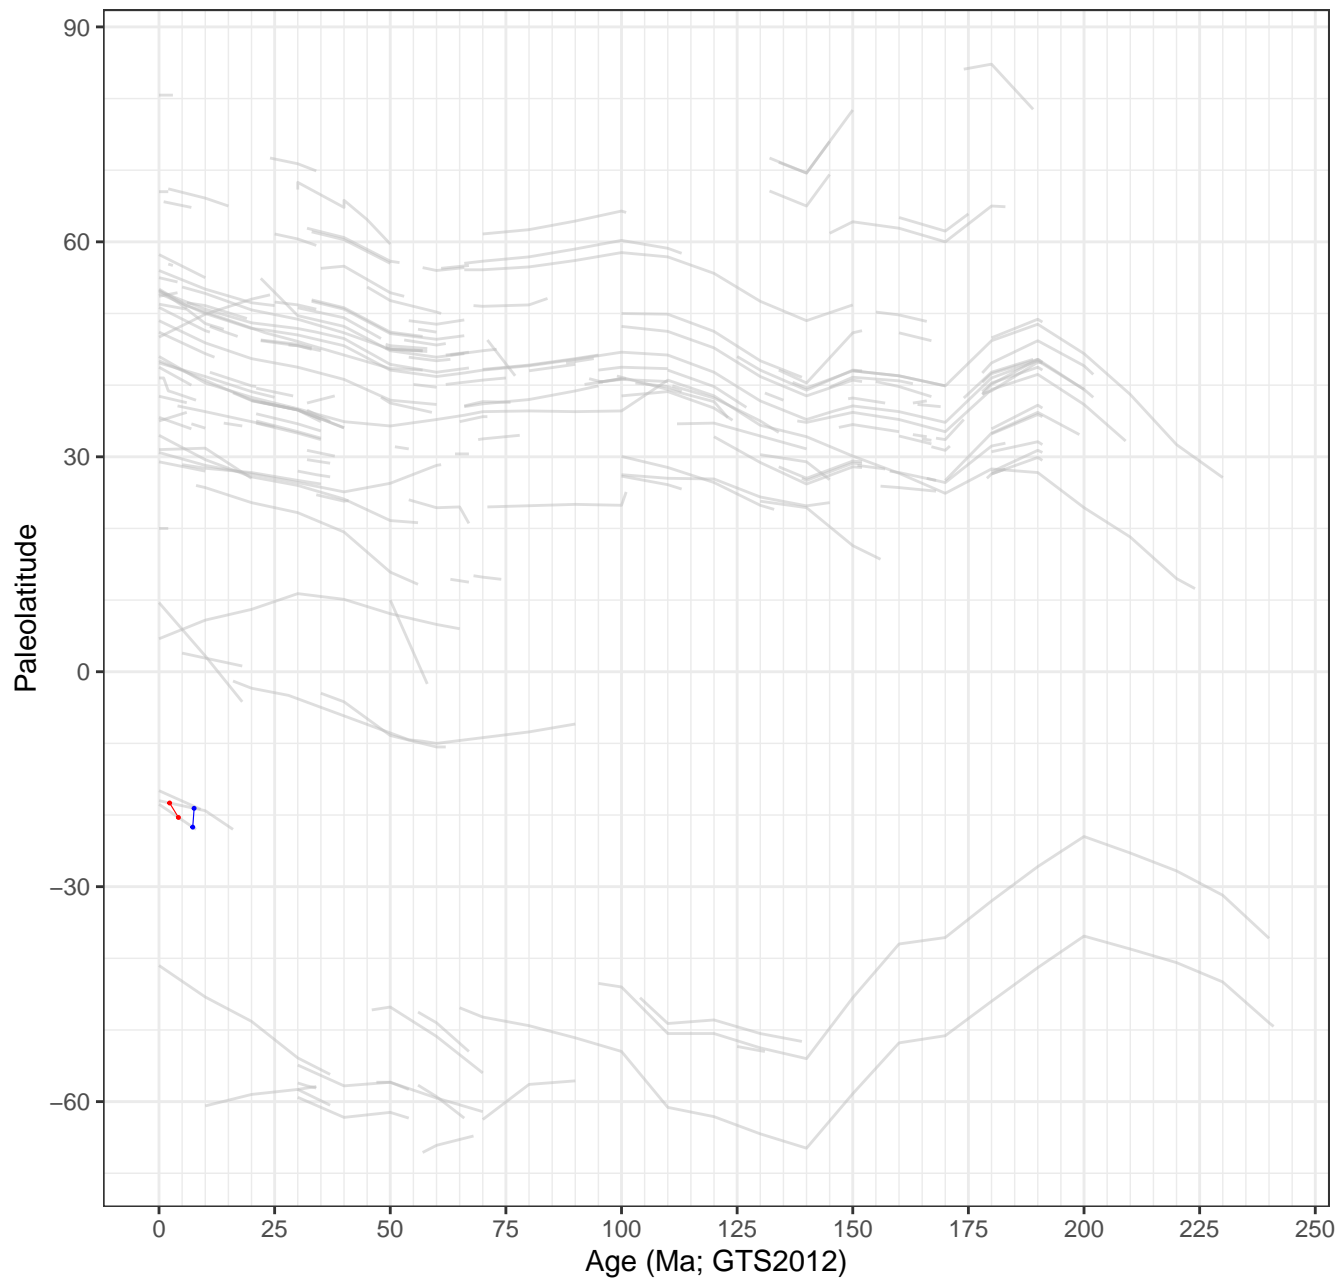

Supplement: Supplementary file 82 [file Genus Blysmatodinium.pdf › Supplement/Supplement 2/Genus 459 plots/Genus Blysmatodinium.pdf]

# Genus Boreocysta

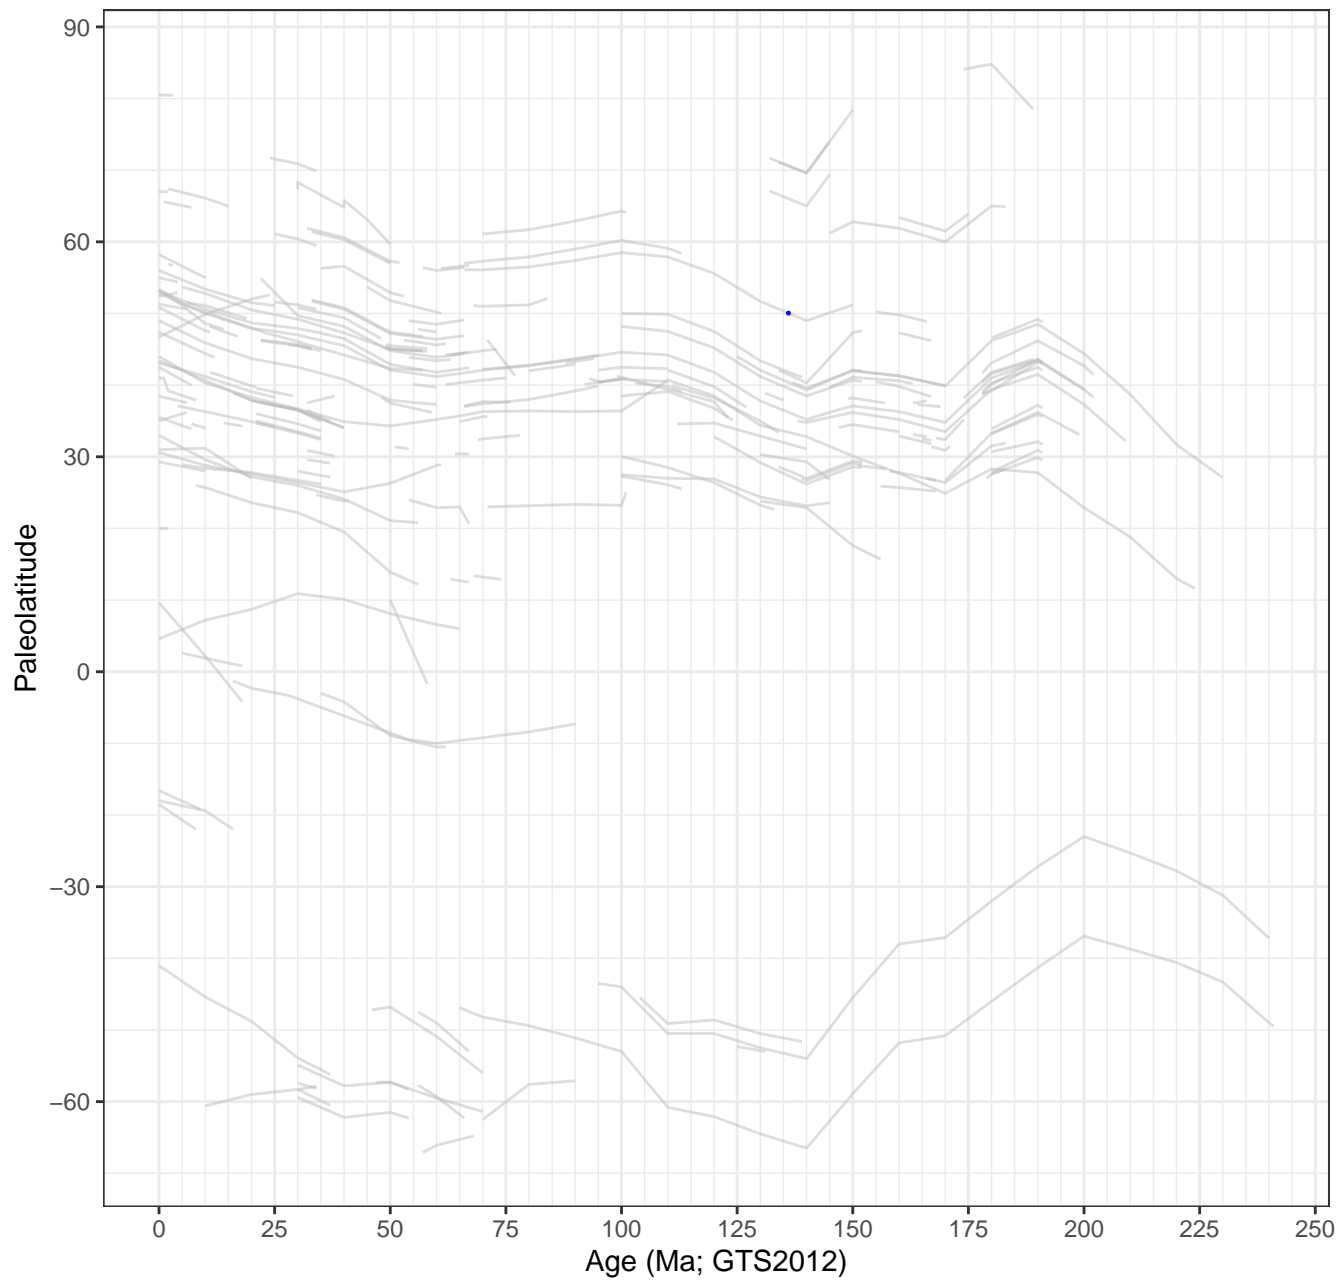

Supplement: Supplementary file 83 [file Genus Boreocysta.pdf › Supplement/Supplement 2/Genus 459 plots/Genus Boreocysta.pdf]

# Genus Bourkidinium

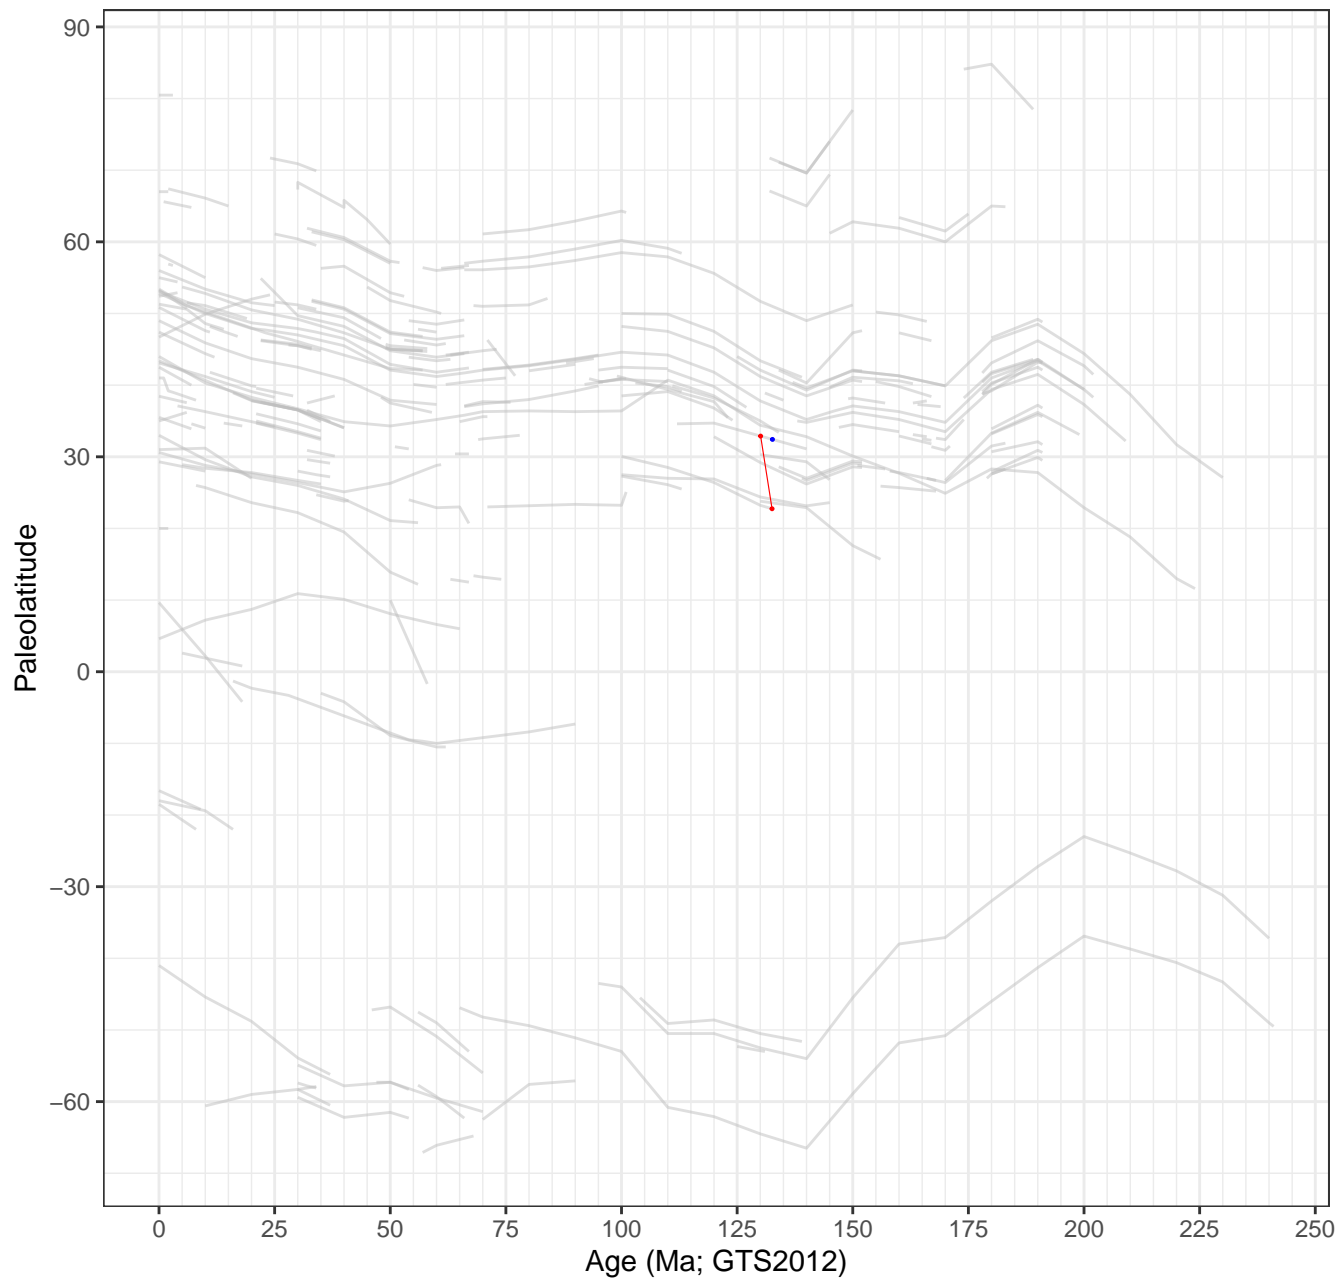

Supplement: Supplementary file 84 [file Genus Bourkidinium.pdf › Supplement/Supplement 2/Genus 459 plots/Genus Bourkidinium.pdf]

# Genus *Bradleyella*

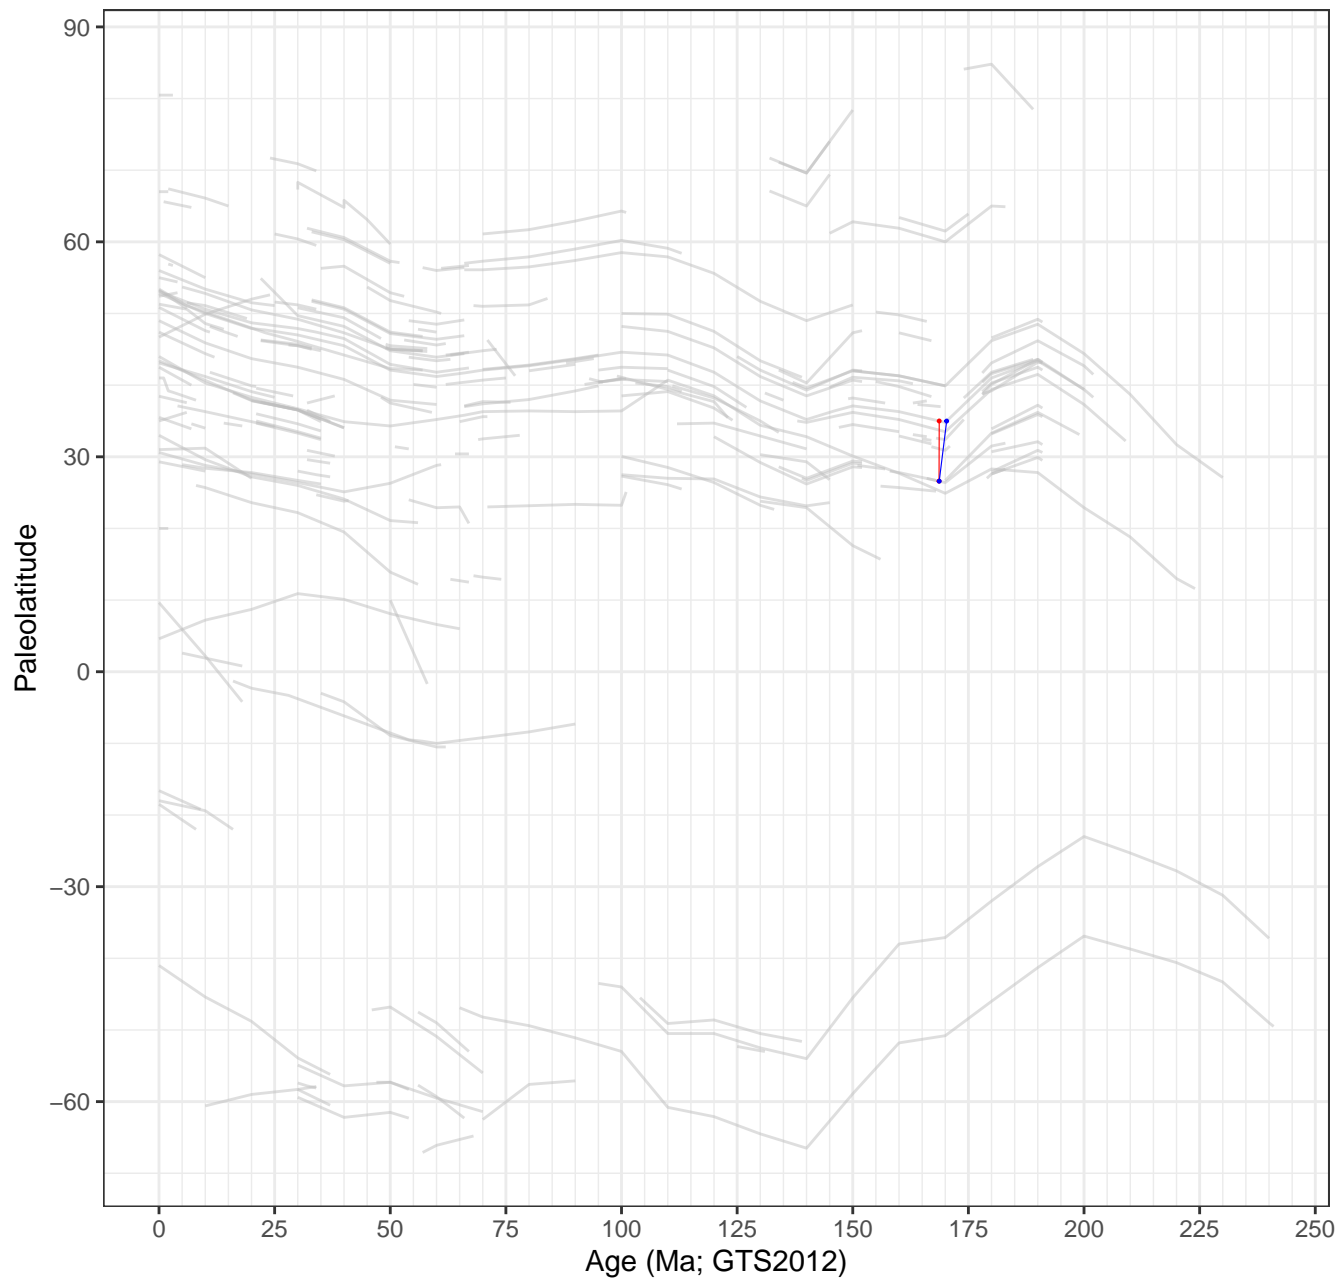

Supplement: Supplementary file 85 [file Genus Bradleyella.pdf › Supplement/Supplement 2/Genus 459 plots/Genus Bradleyella.pdf]

# Genus Brigantedinium

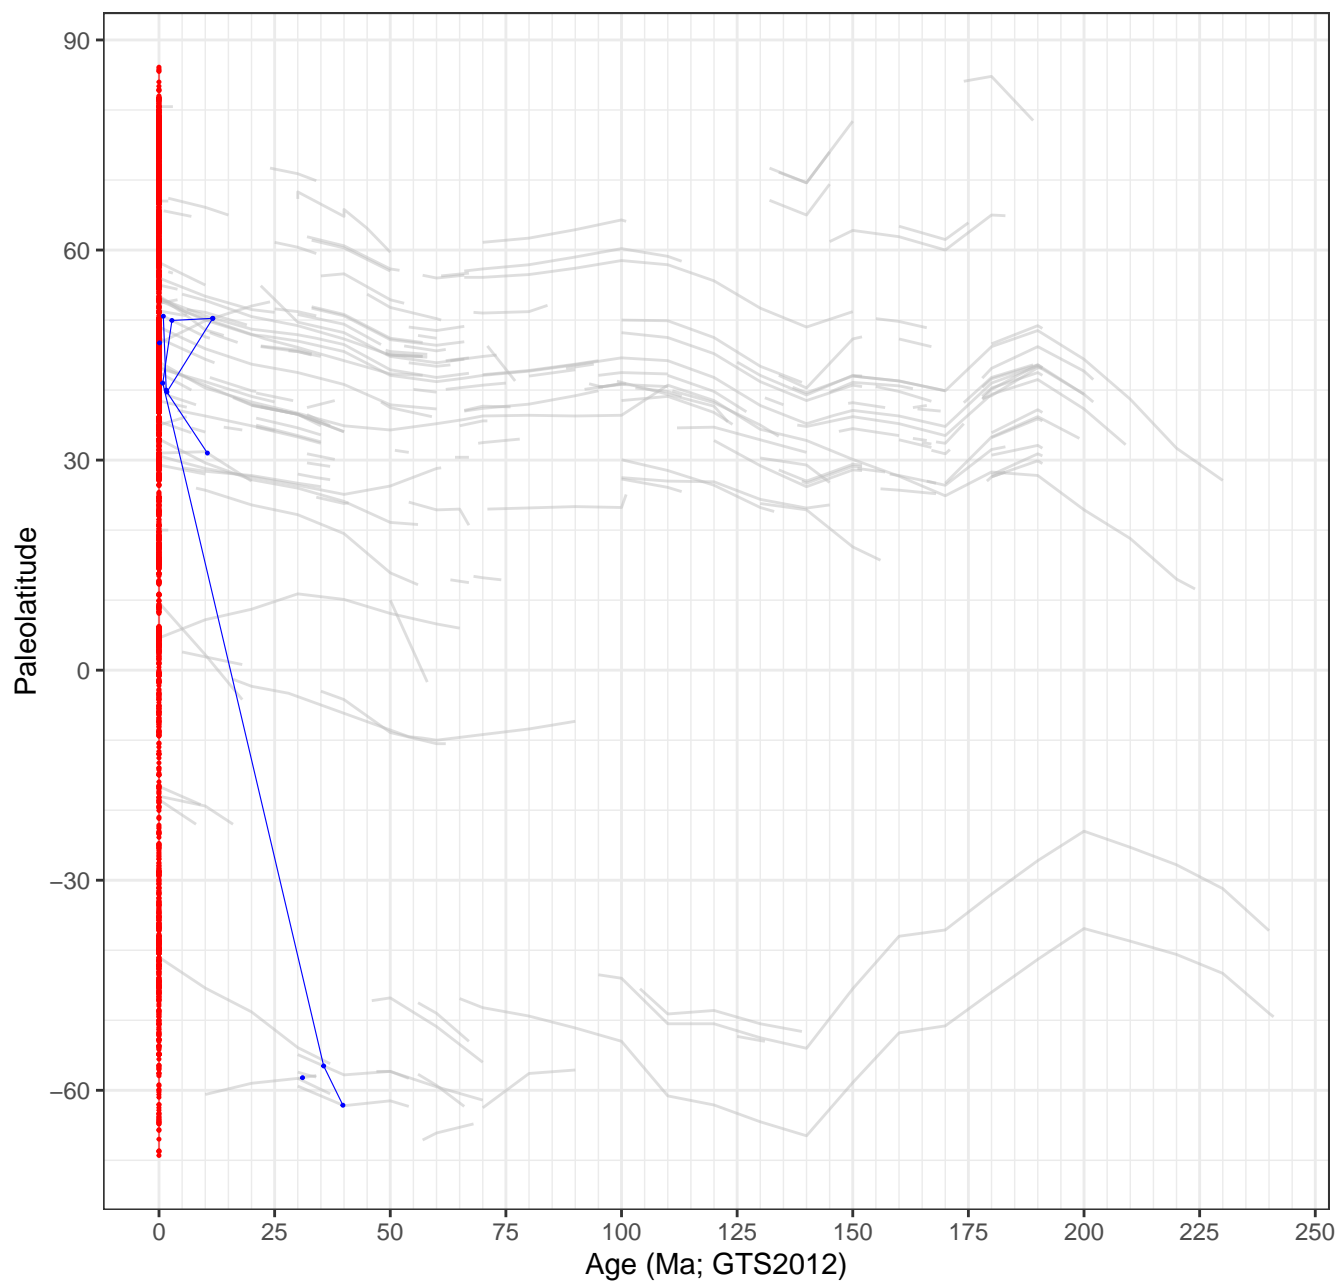

Supplement: Supplementary file 86 [file Genus Brigantedinium.pdf › Supplement/Supplement 2/Genus 459 plots/Genus Brigantedinium.pdf]

# Genus Broomea

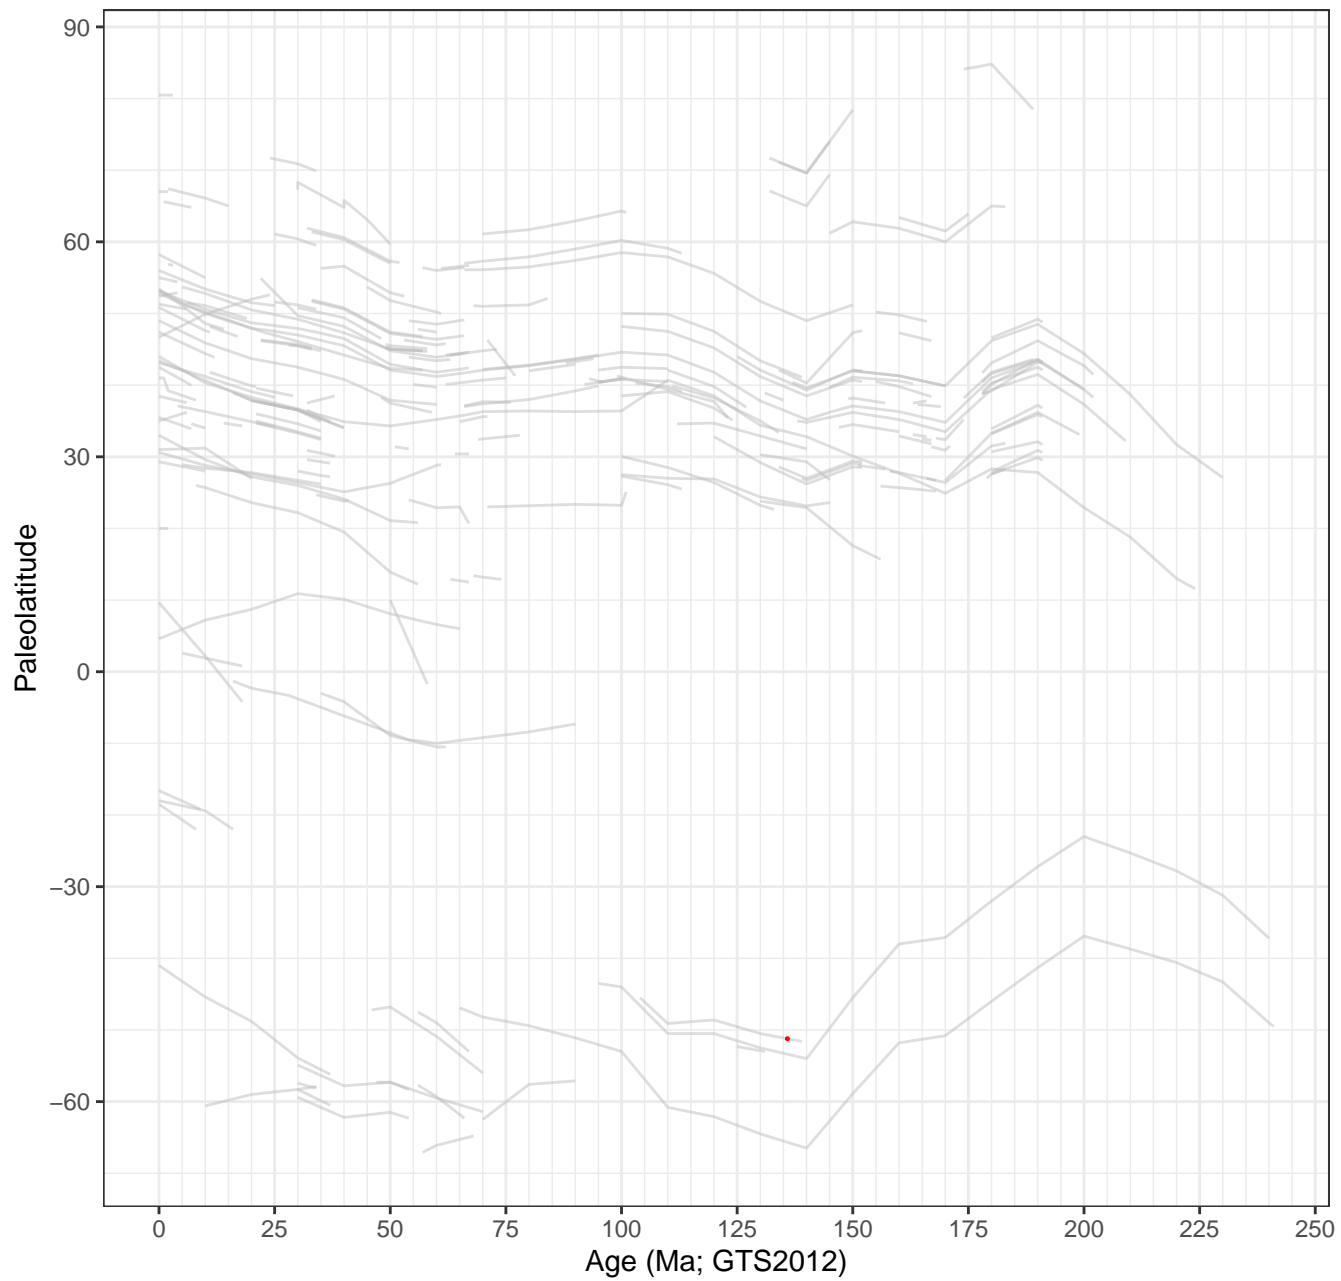

Supplement: Supplementary file 87 [file Genus Broomea.pdf › Supplement/Supplement 2/Genus 459 plots/Genus Broomea.pdf]

# Genus *Bulbodinium*

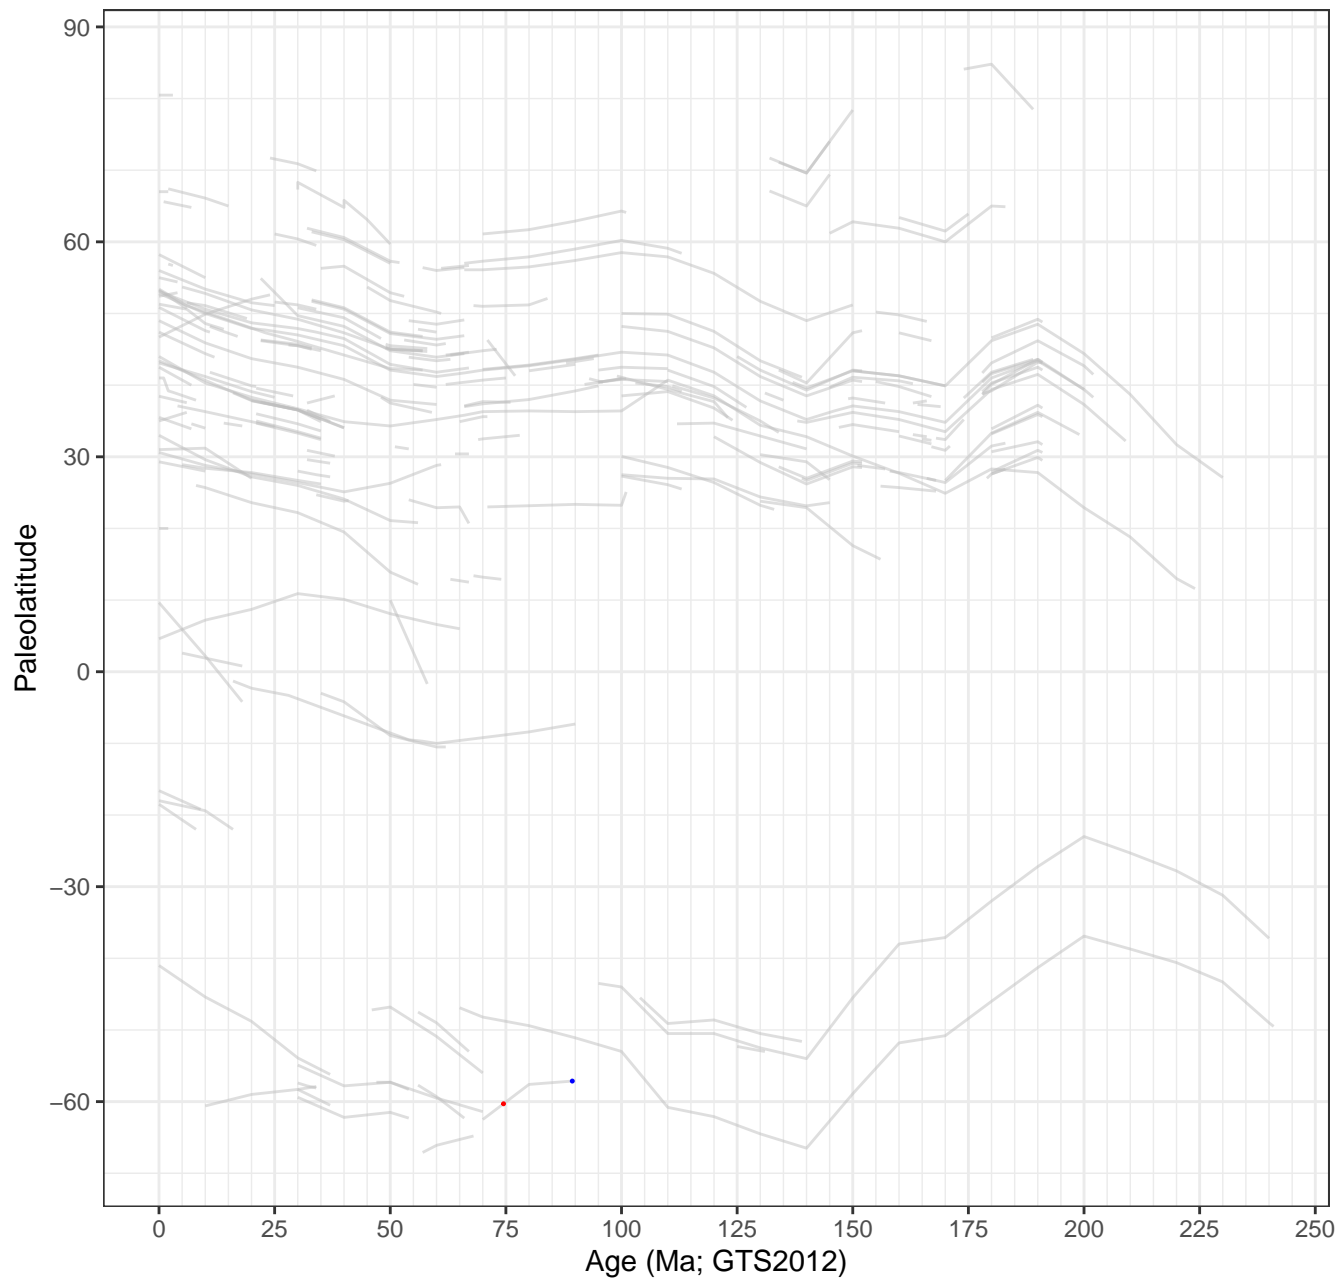

Supplement: Supplementary file 88 [file Genus Bulbodinium.pdf › Supplement/Supplement 2/Genus 459 plots/Genus Bulbodinium.pdf]

# Genus Caligodinium

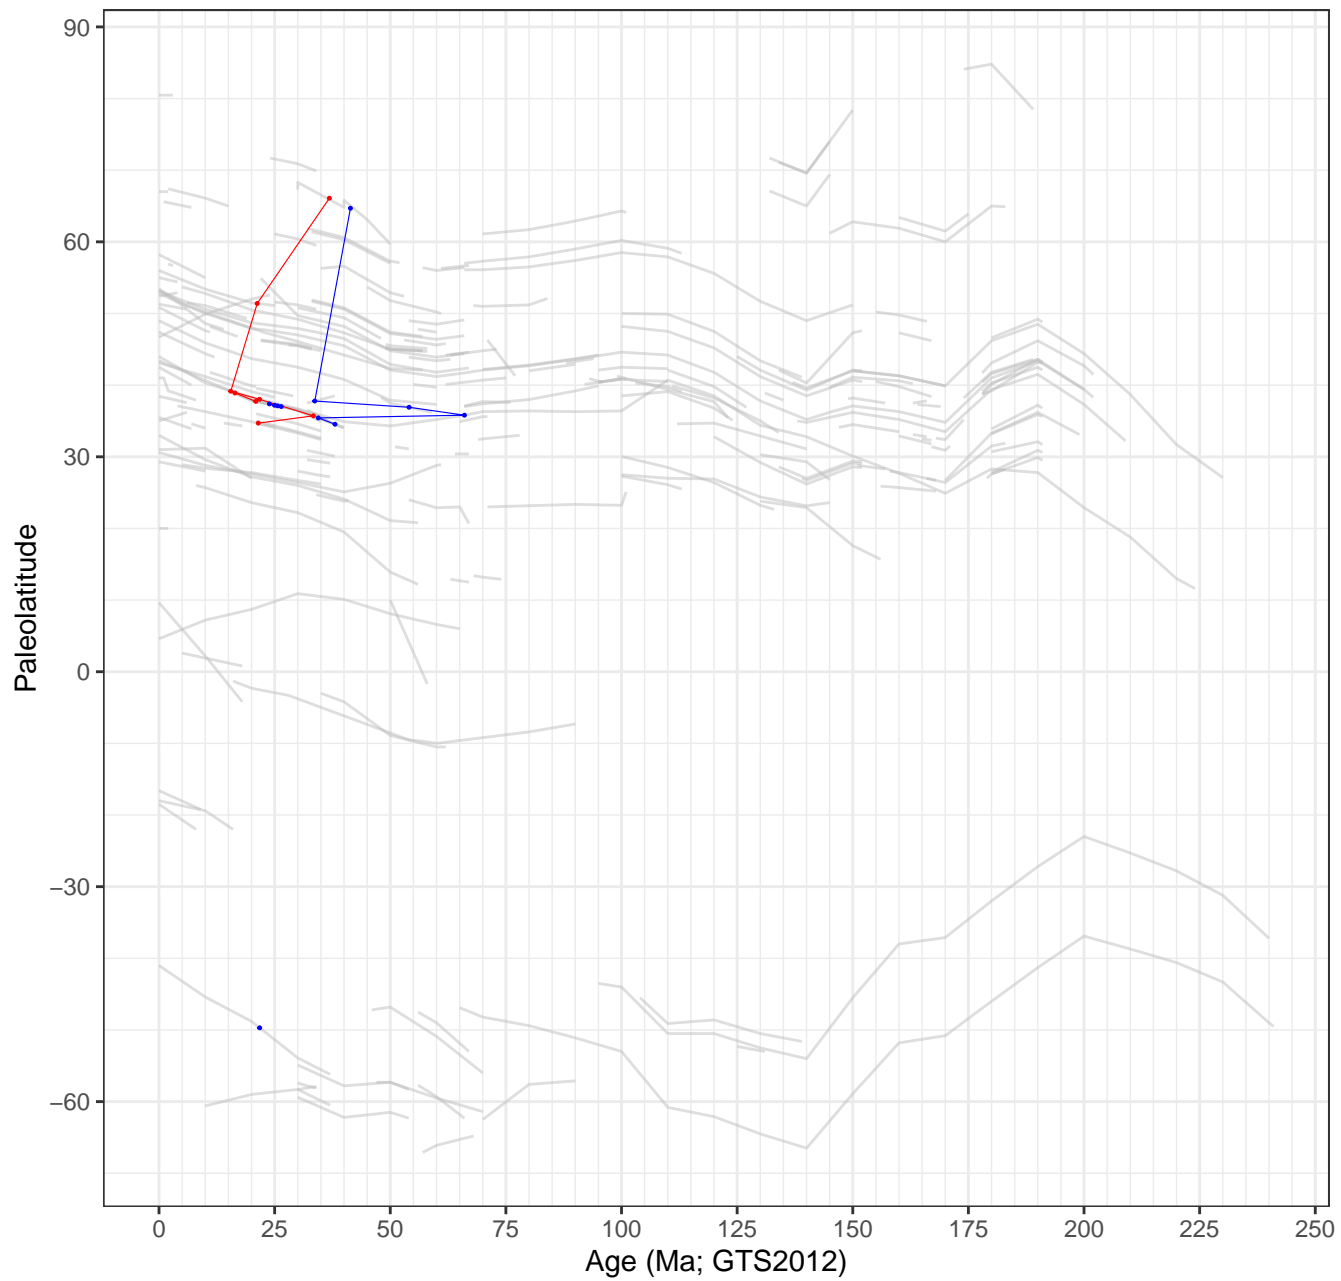

Supplement: Supplementary file 89 [file Genus Caligodinium.pdf › Supplement/Supplement 2/Genus 459 plots/Genus Caligodinium.pdf]

# Genus Callaiosphaeridium

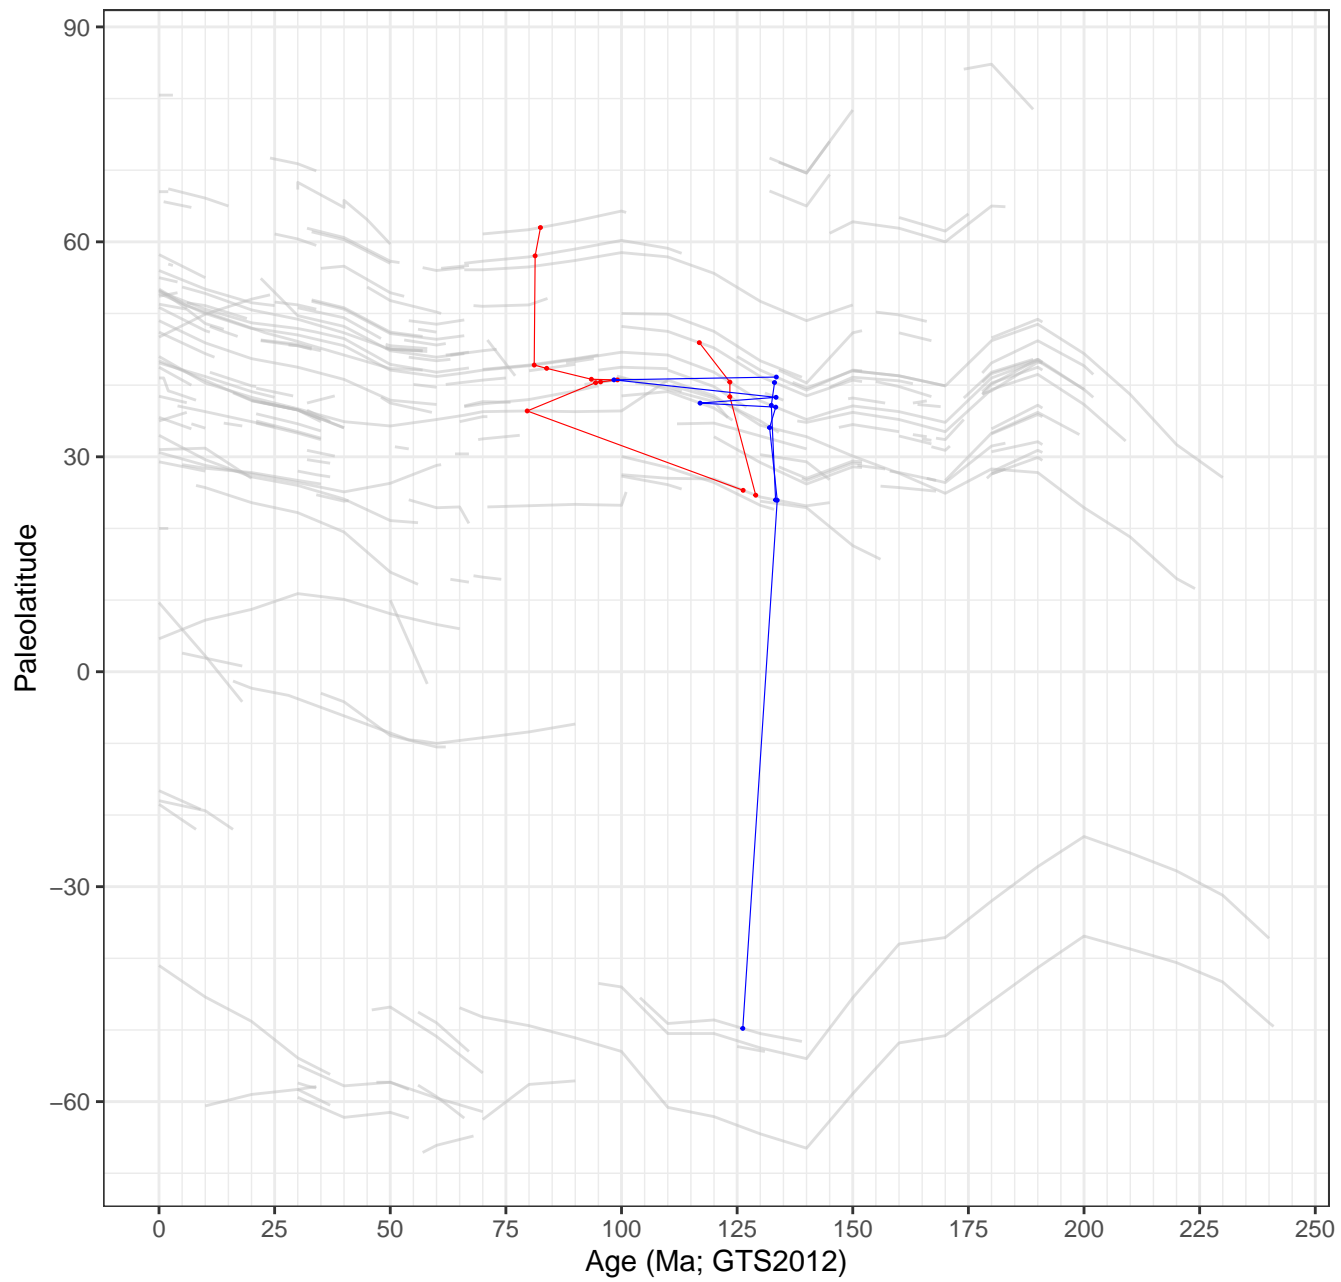

Supplement: Supplementary file 90 [file Genus Callaiosphaeridium.pdf › Supplement/Supplement 2/Genus 459 plots/Genus Callaiosphaeridium.pdf]

# Genus Canningia

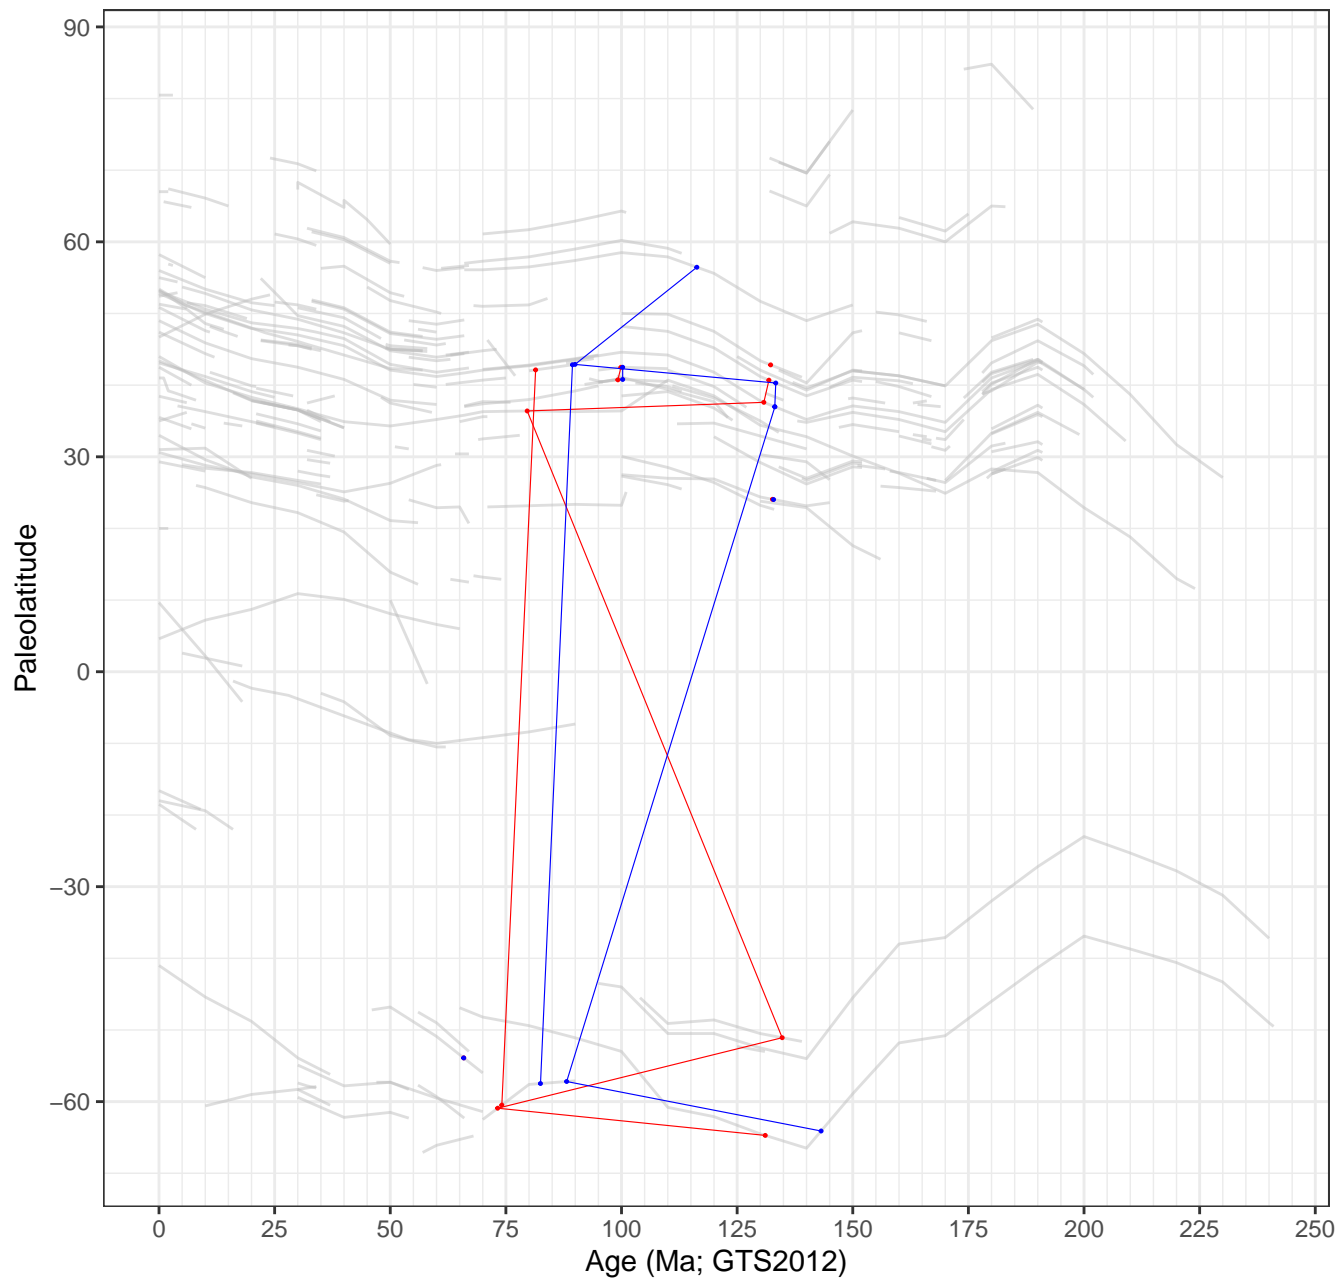

Supplement: Supplementary file 91 [file Genus Canningia.pdf › Supplement/Supplement 2/Genus 459 plots/Genus Canningia.pdf]

# Genus Canningiopsis

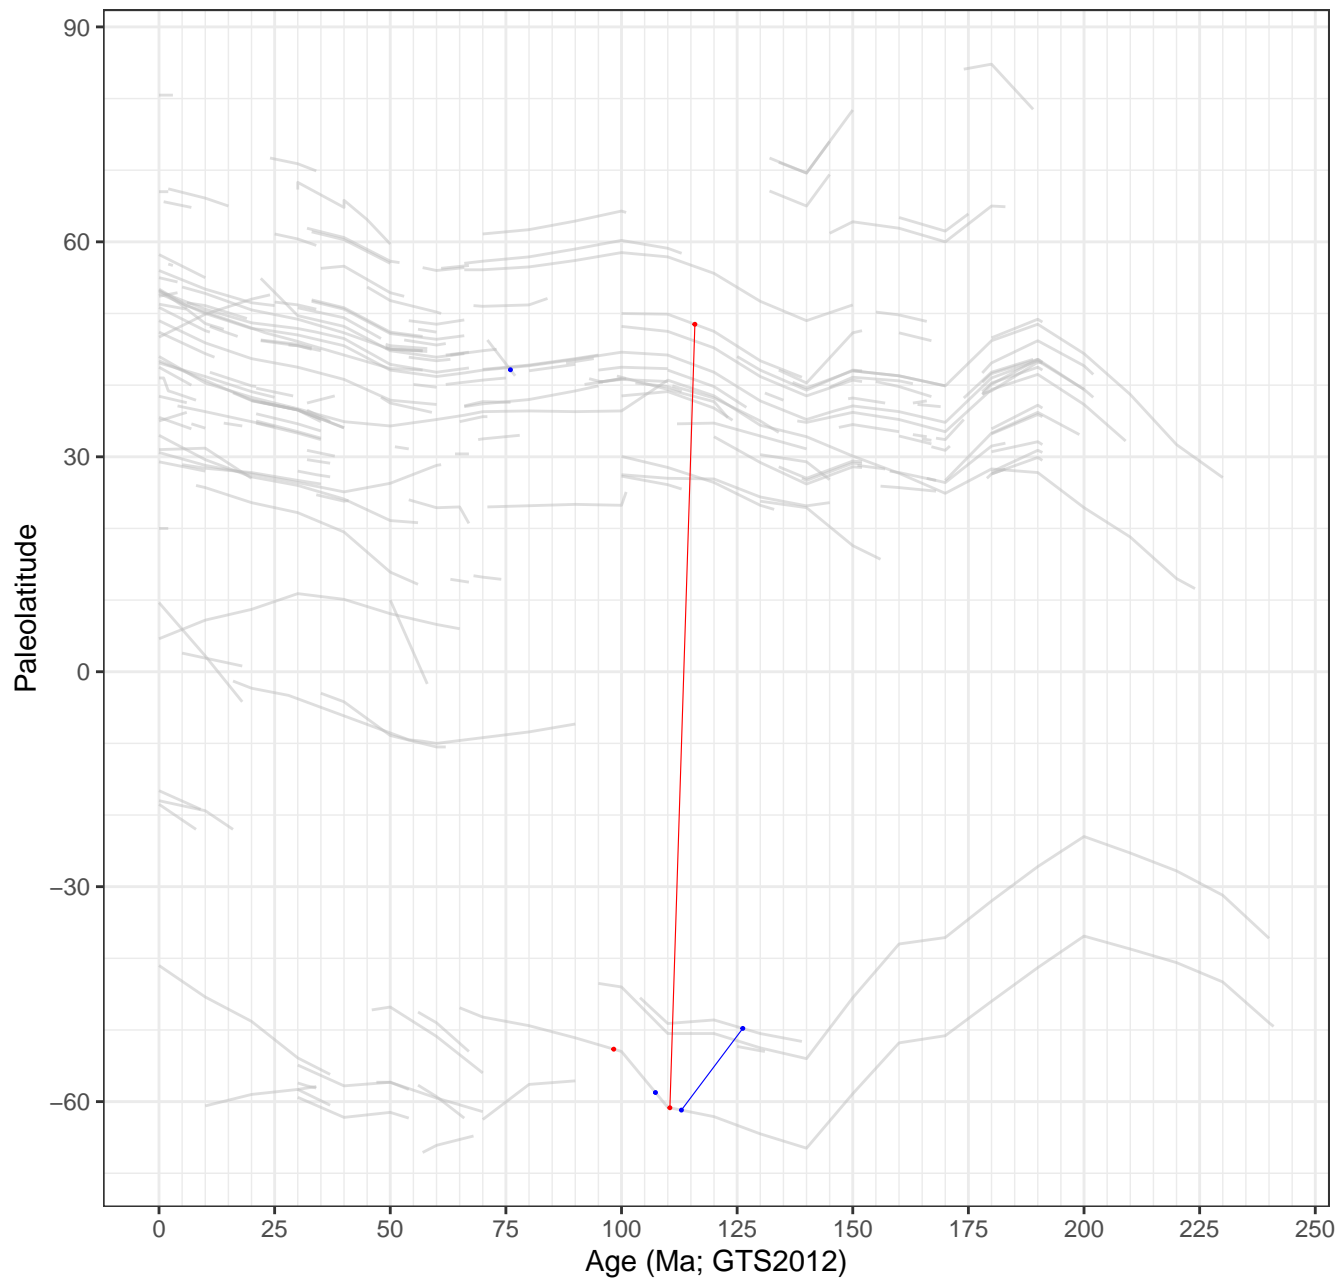

Supplement: Supplementary file 92 [file Genus Canninginopsis.pdf › Supplement/Supplement 2/Genus 459 plots/Genus Canninginopsis.pdf]

# Genus *Cannosphaeropsis*

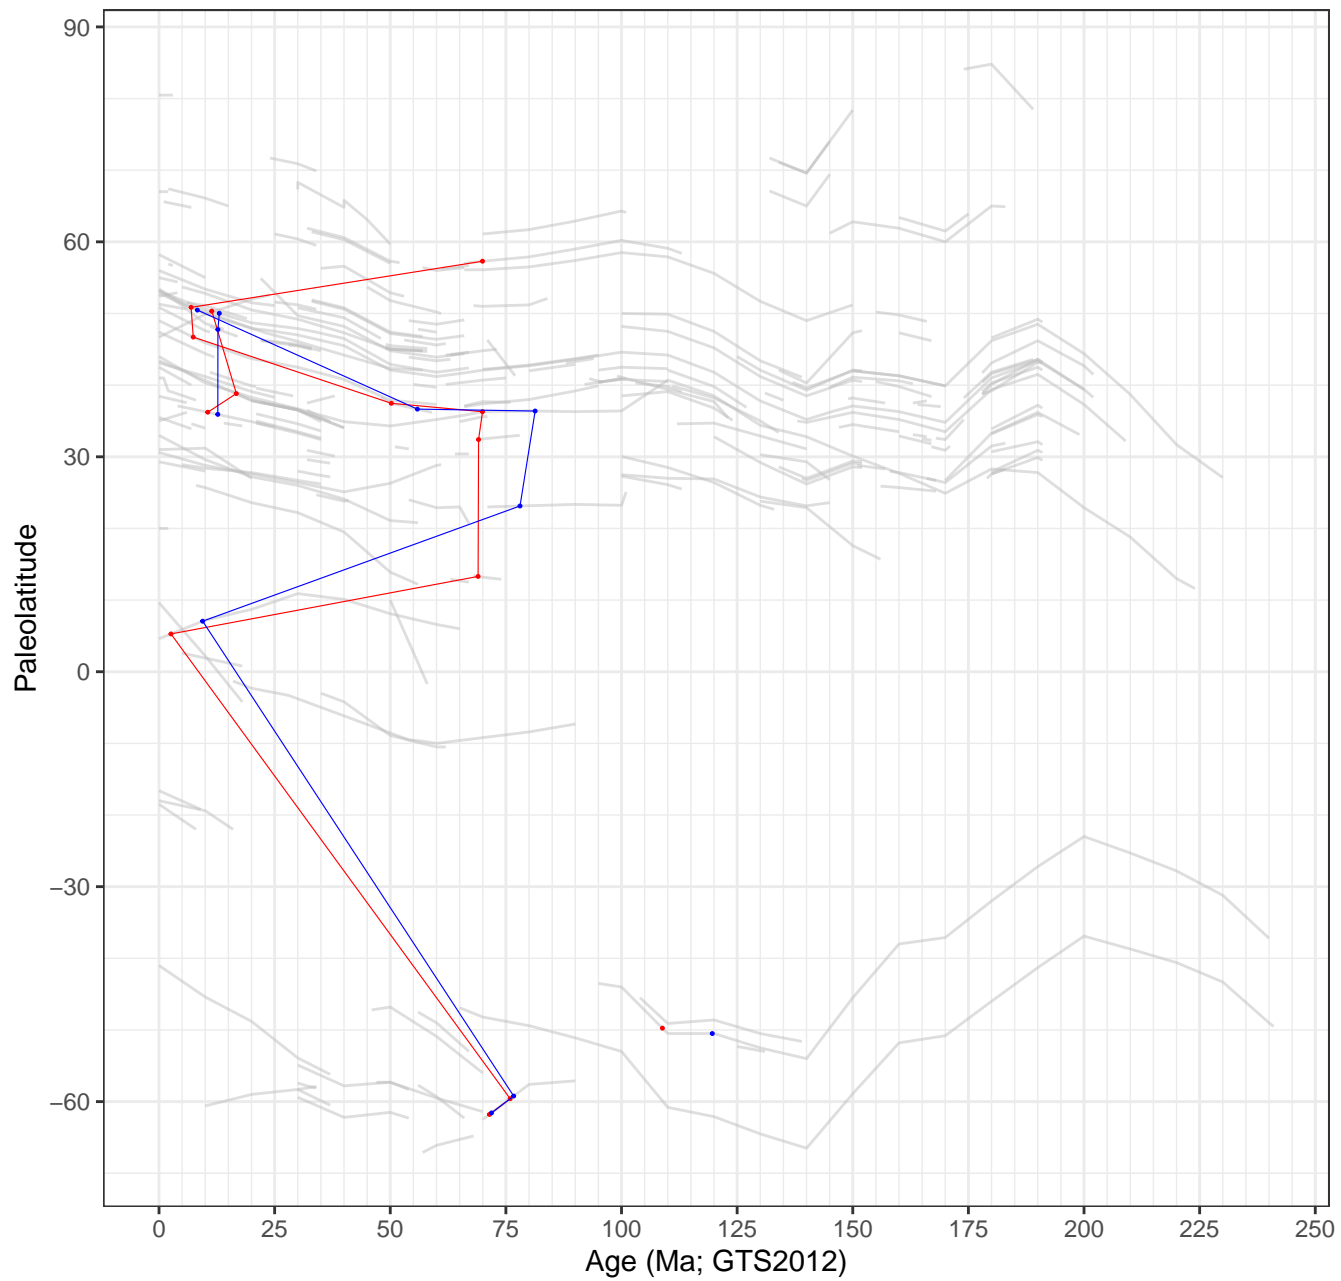

Supplement: Supplementary file 93 [file Genus Cannosphaeropsis.pdf › Supplement/Supplement 2/Genus 459 plots/Genus Cannosphaeropsis.pdf]

# Genus Cantulodinium

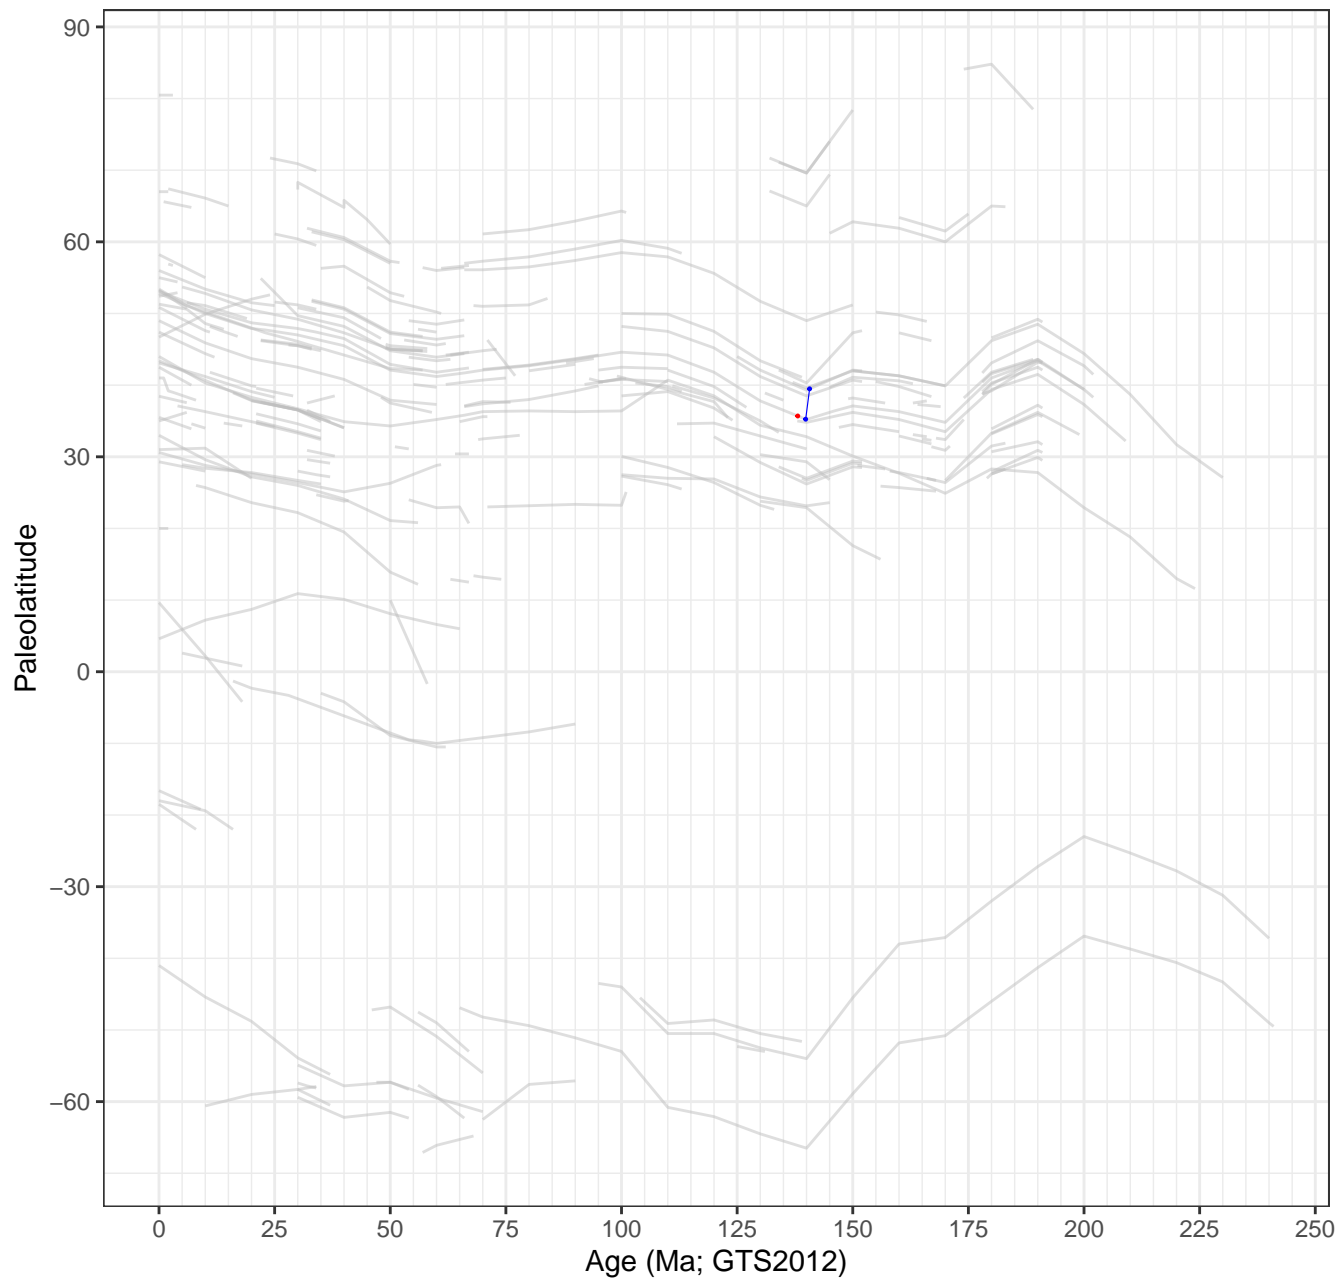

Supplement: Supplementary file 94 [file Genus Cantulodinium.pdf › Supplement/Supplement 2/Genus 459 plots/Genus Cantulodinium.pdf]

# Genus Capillicysta

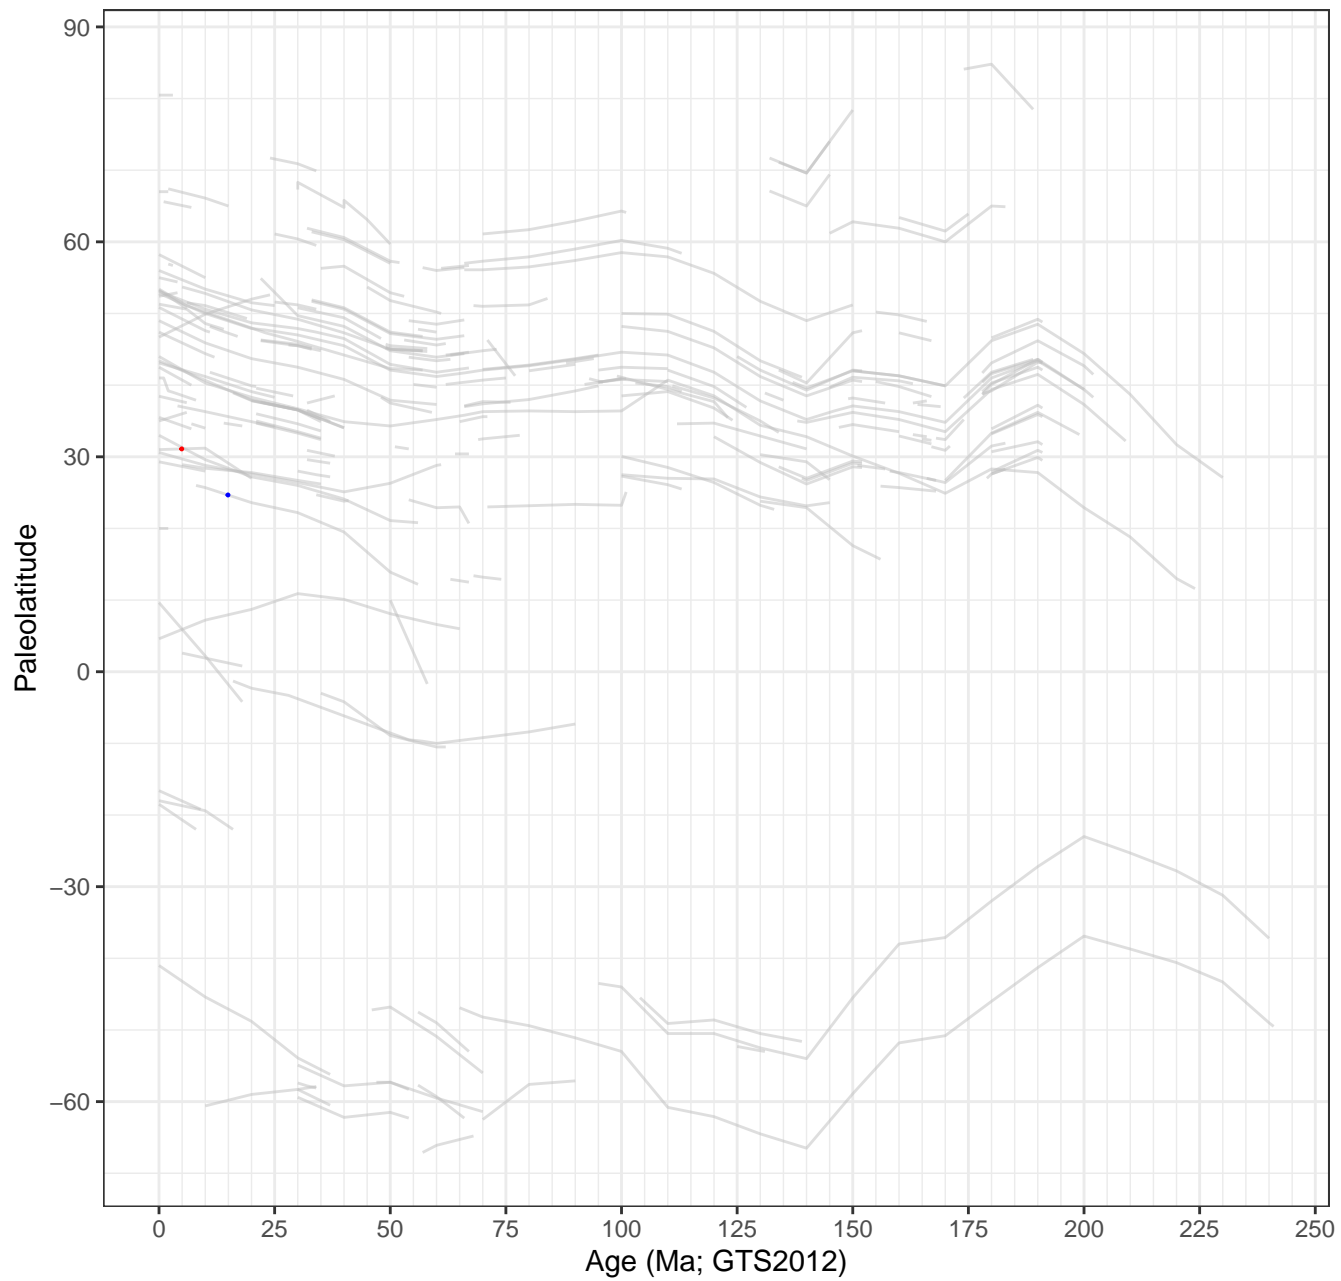

Supplement: Supplementary file 95 [file Genus Capillicysta.pdf › Supplement/Supplement 2/Genus 459 plots/Genus Capillicysta.pdf]

# Genus *Carpatella*

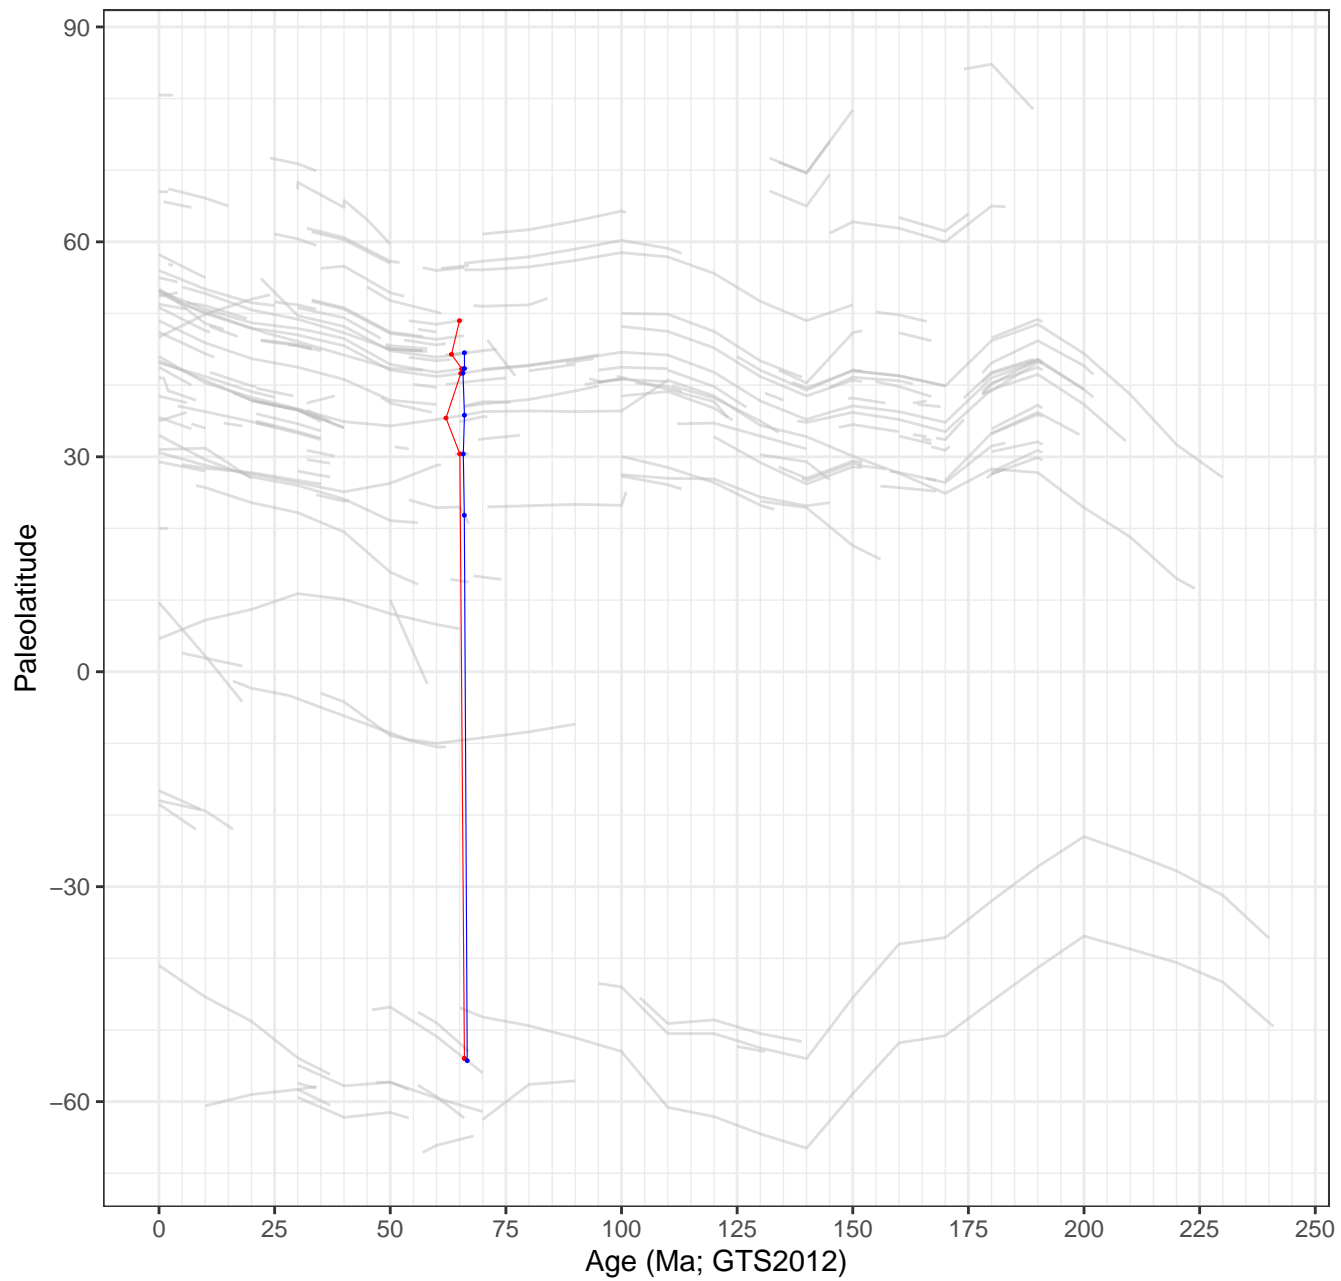

Supplement: Supplementary file 96 [file Genus Carpatella.pdf › Supplement/Supplement 2/Genus 459 plots/Genus Carpatella.pdf]

# Genus *Carpathodinium*

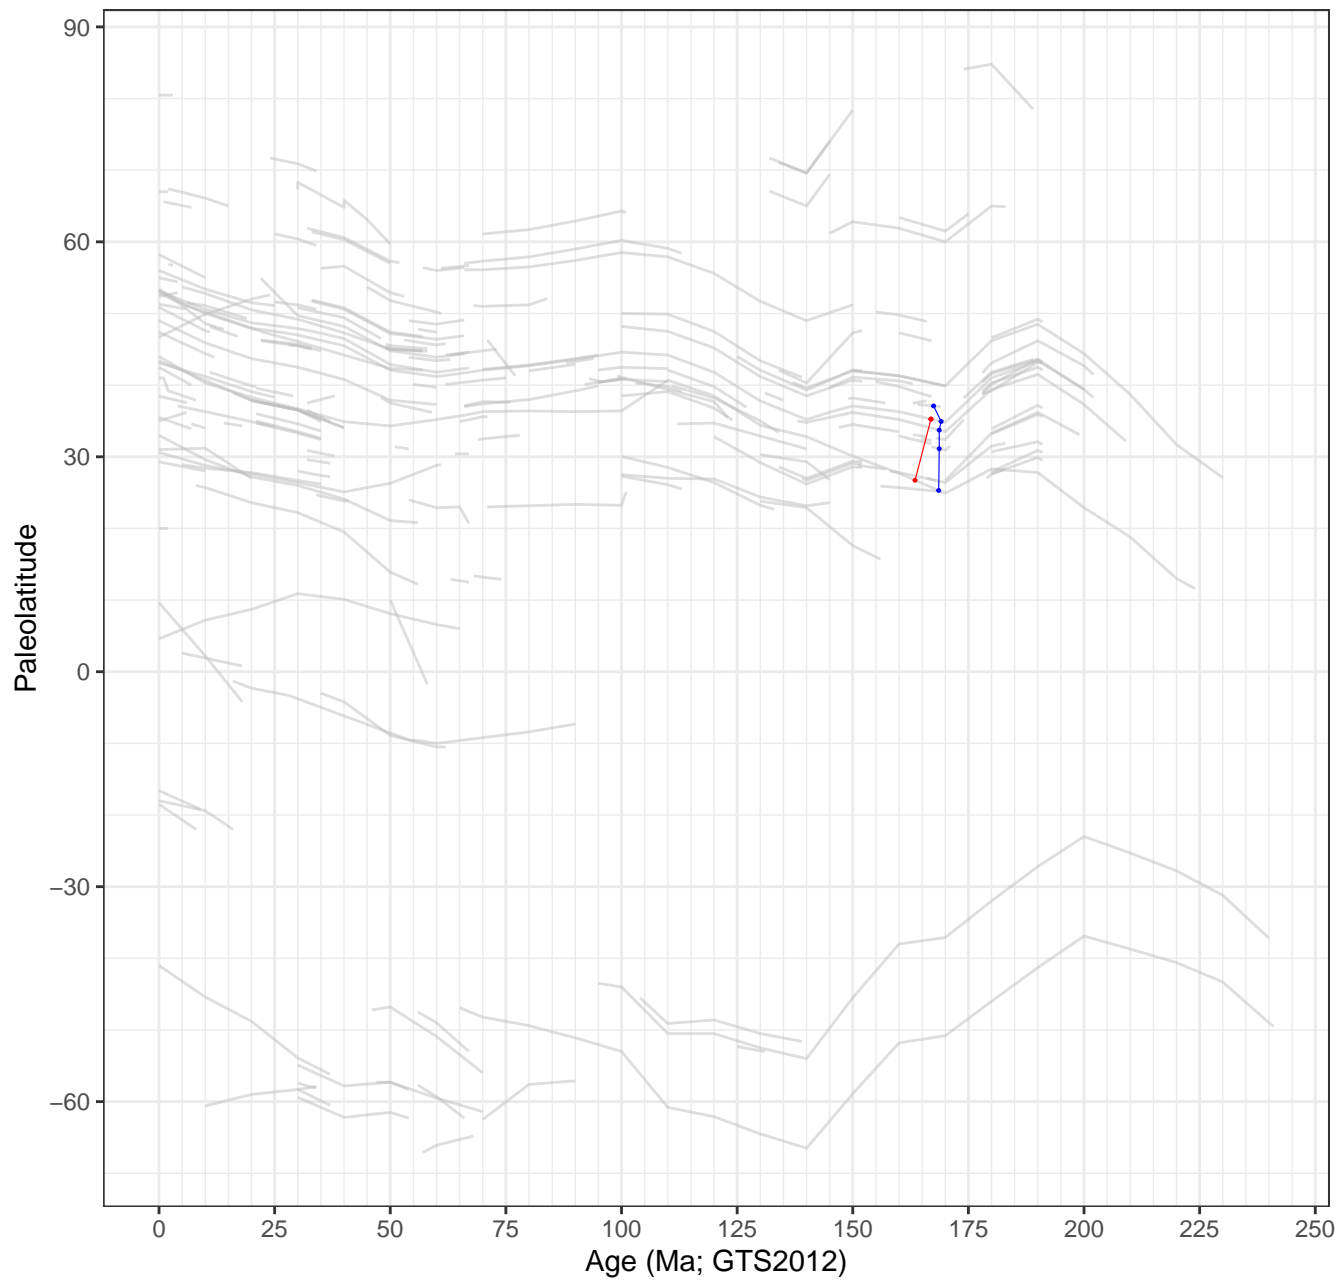

Supplement: Supplementary file 97 [file Genus Carpathodinium.pdf › Supplement/Supplement 2/Genus 459 plots/Genus Carpathodinium.pdf]

# Genus *Carpodinium*

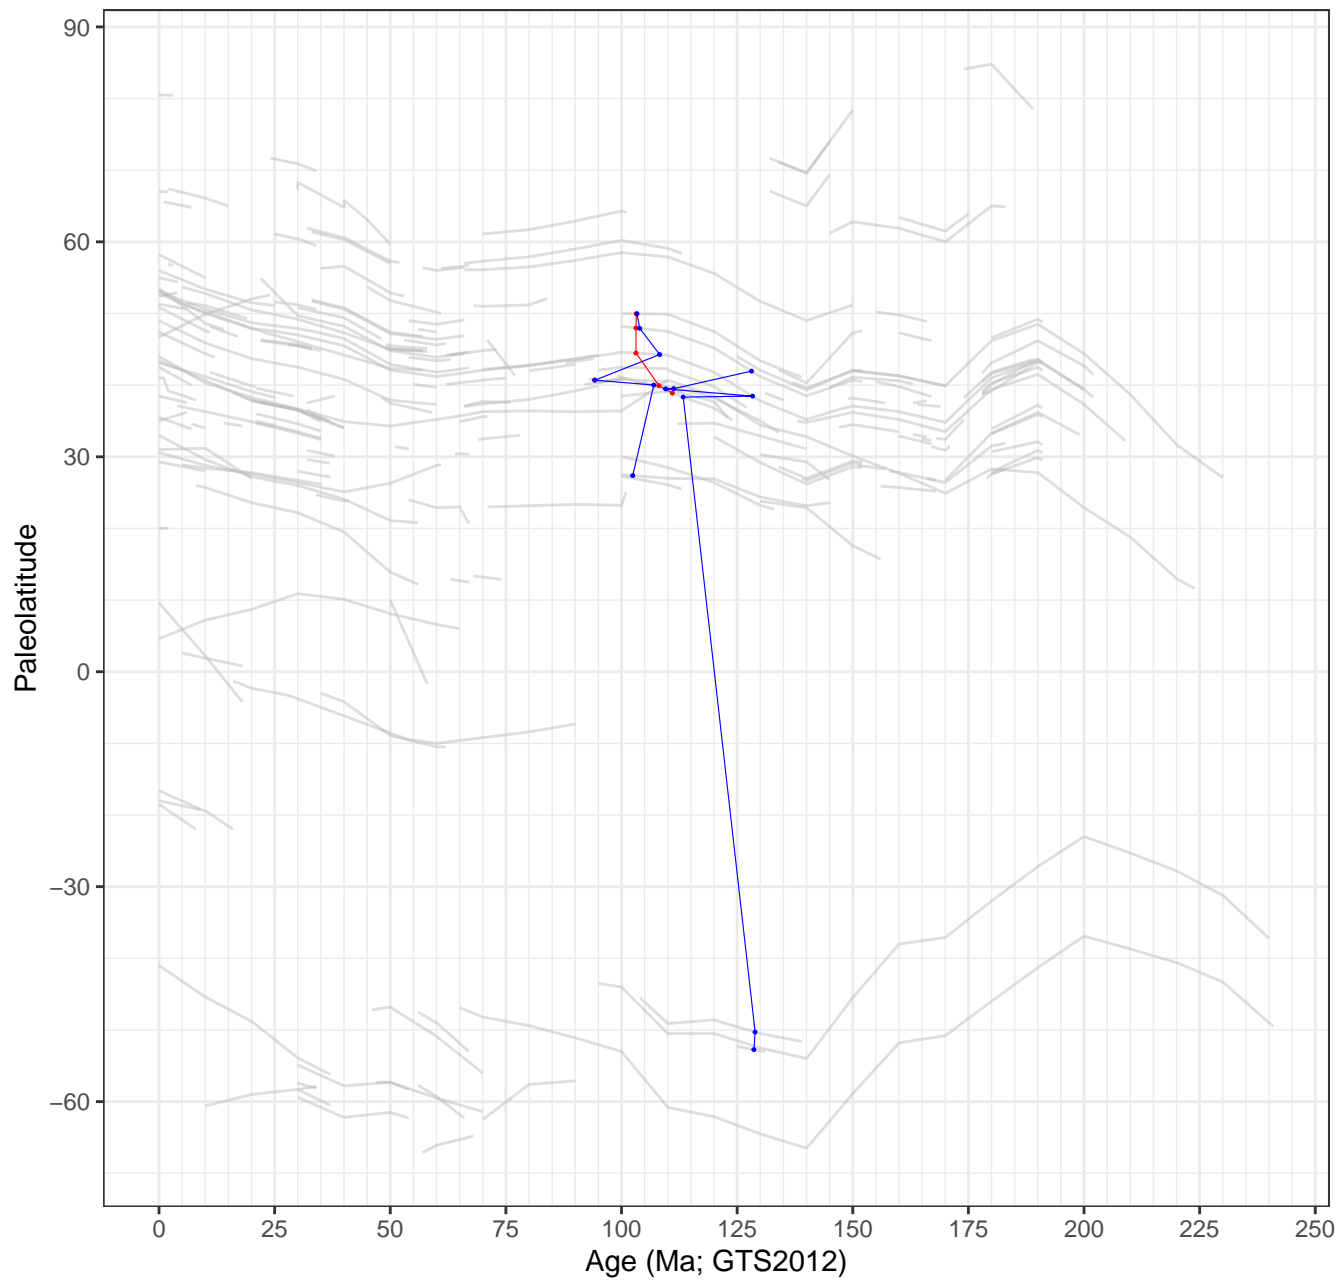

Supplement: Supplementary file 98 [file Genus Carpodinium.pdf › Supplement/Supplement 2/Genus 459 plots/Genus Carpodinium.pdf]

# Genus Caspidinium

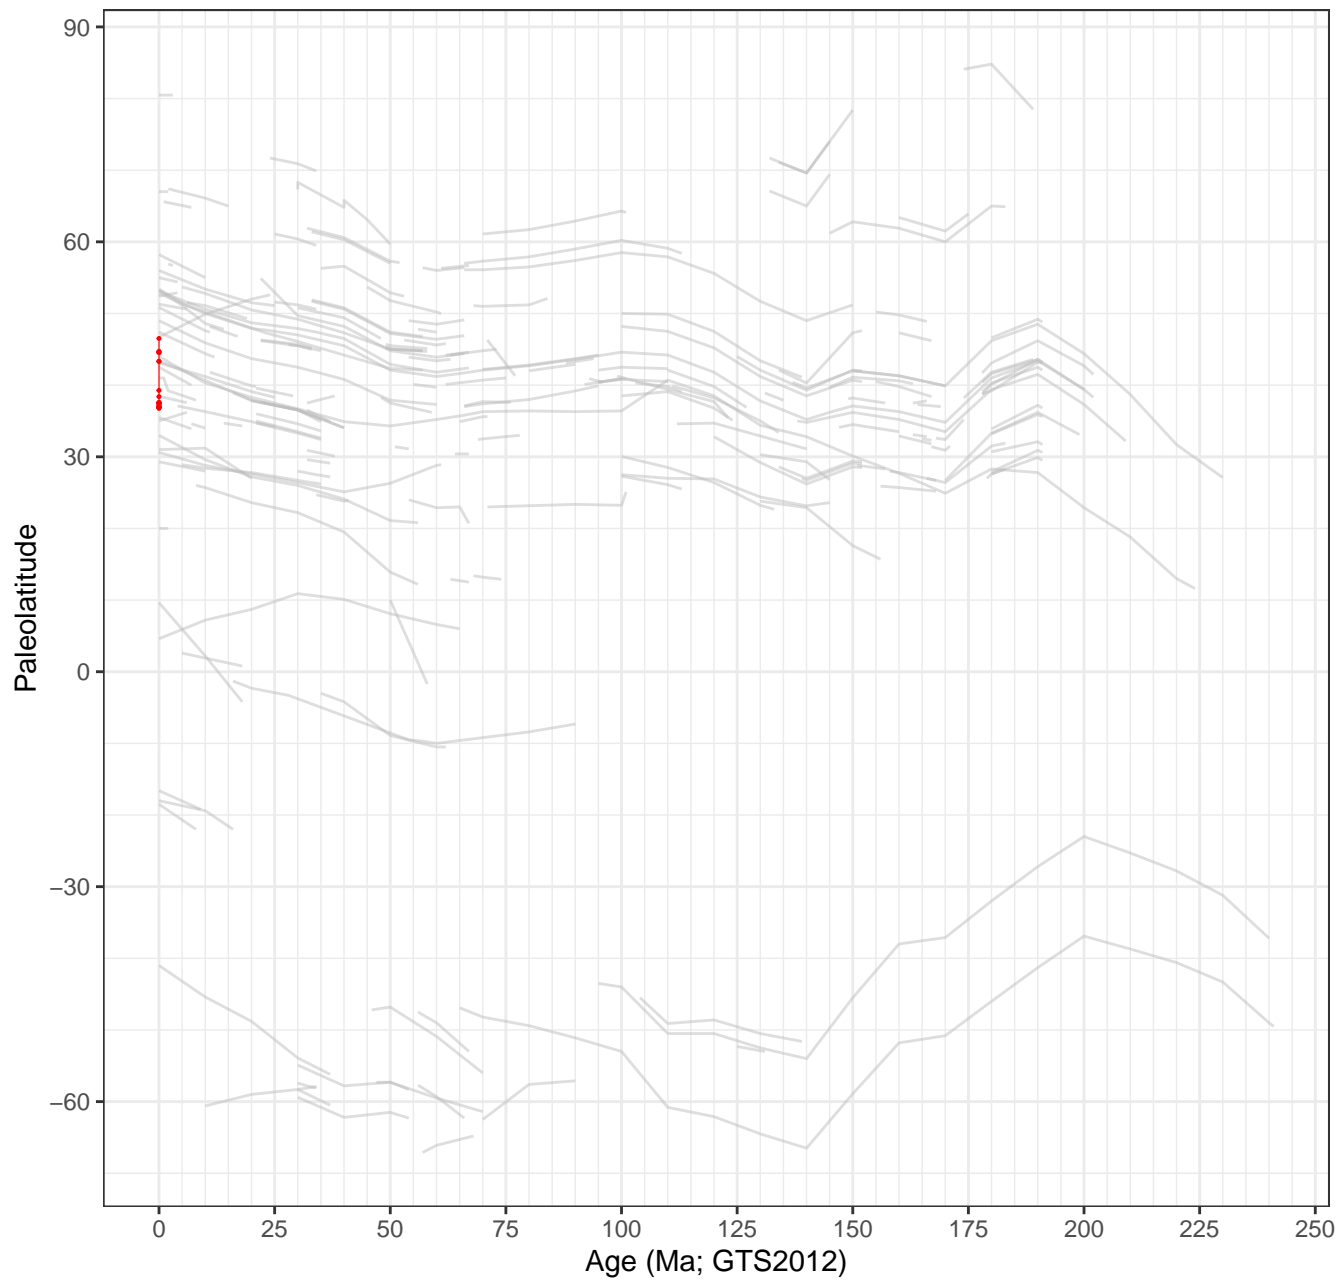

Supplement: Supplementary file 99 [file Genus Caspidinium.pdf › Supplement/Supplement 2/Genus 459 plots/Genus Caspidinium.pdf]

# Genus *Cassiculosphaeridia*

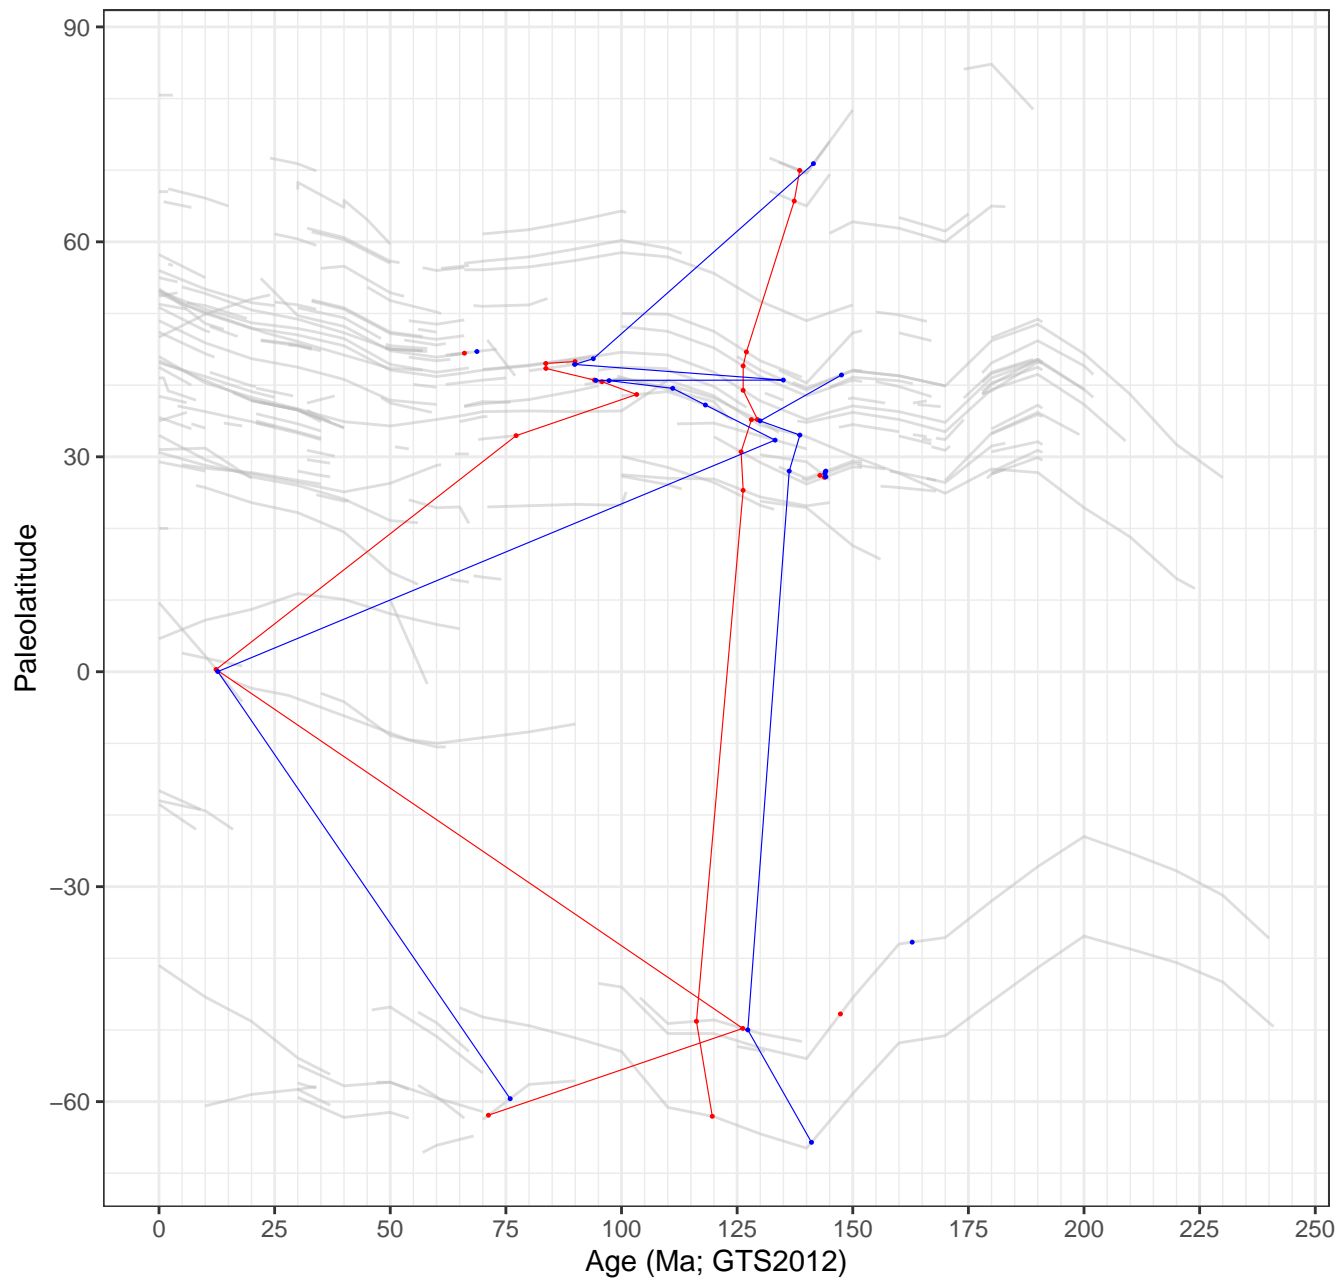

Supplement: Supplementary file 100 [file Genus Cassiculosphaeridia.pdf › Supplement/Supplement 2/Genus 459 plots/Genus Cassiculosphaeridia.pdf]

# Genus *Cassidium*

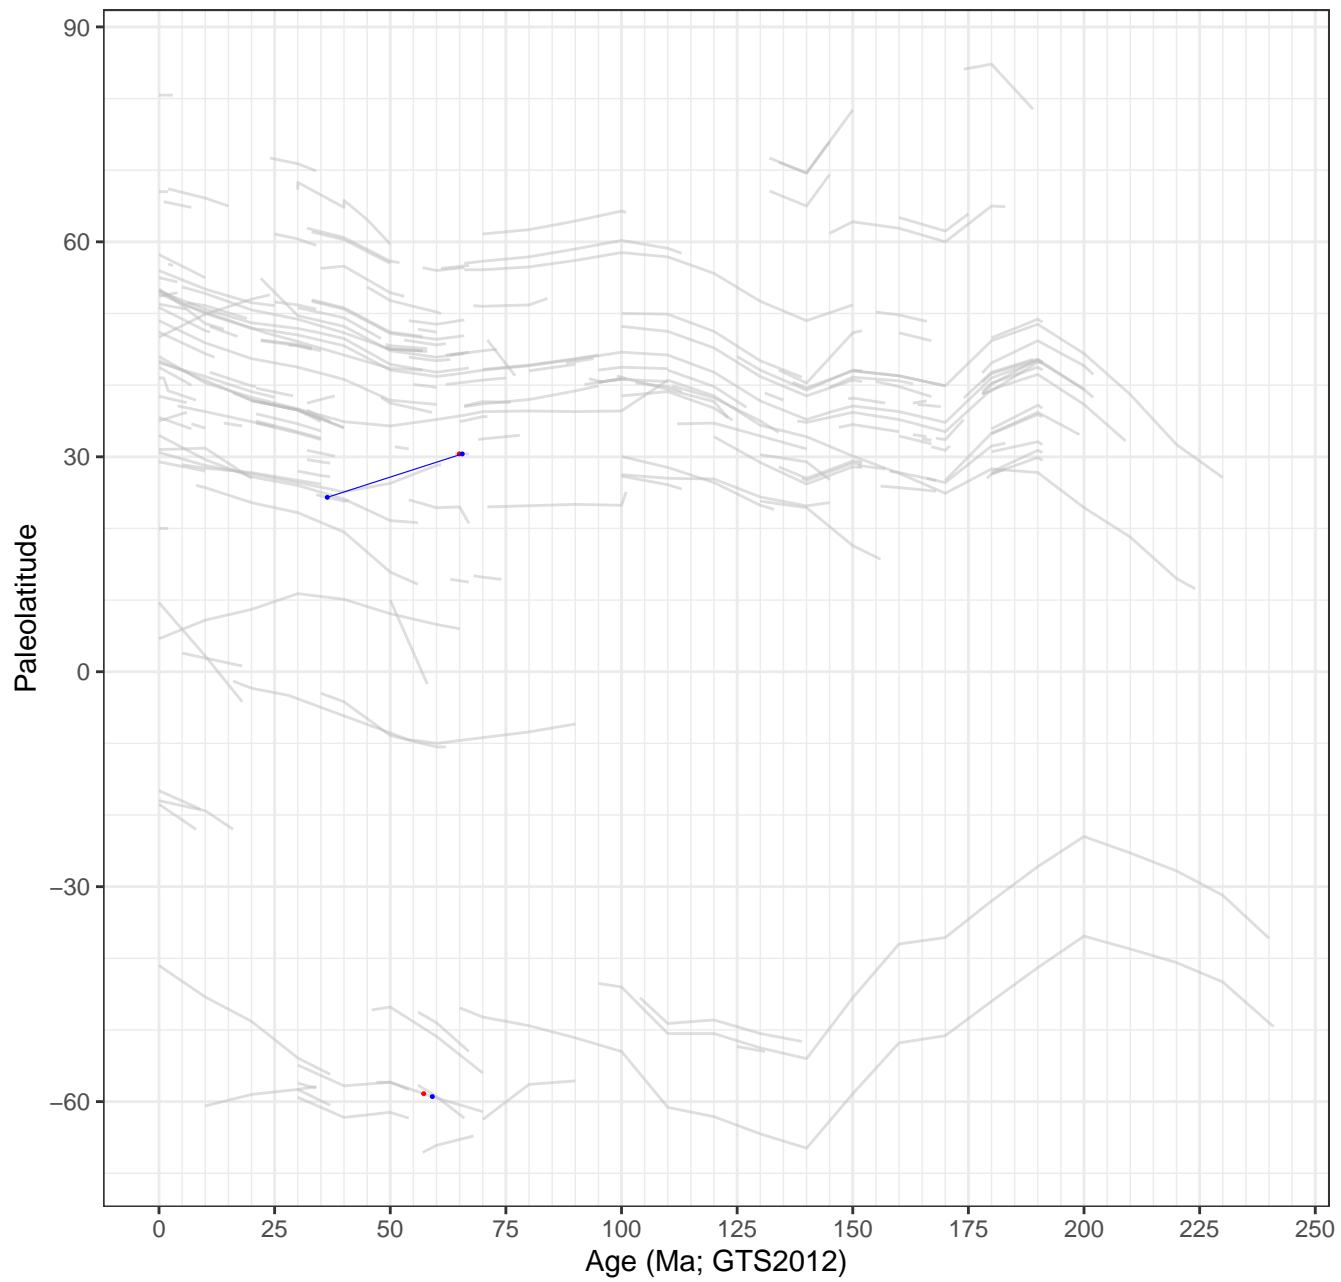

Supplement: Supplementary file 101 [file Genus Cassidium.pdf › Supplement/Supplement 2/Genus 459 plots/Genus Cassidium.pdf]

# Genus Cauca

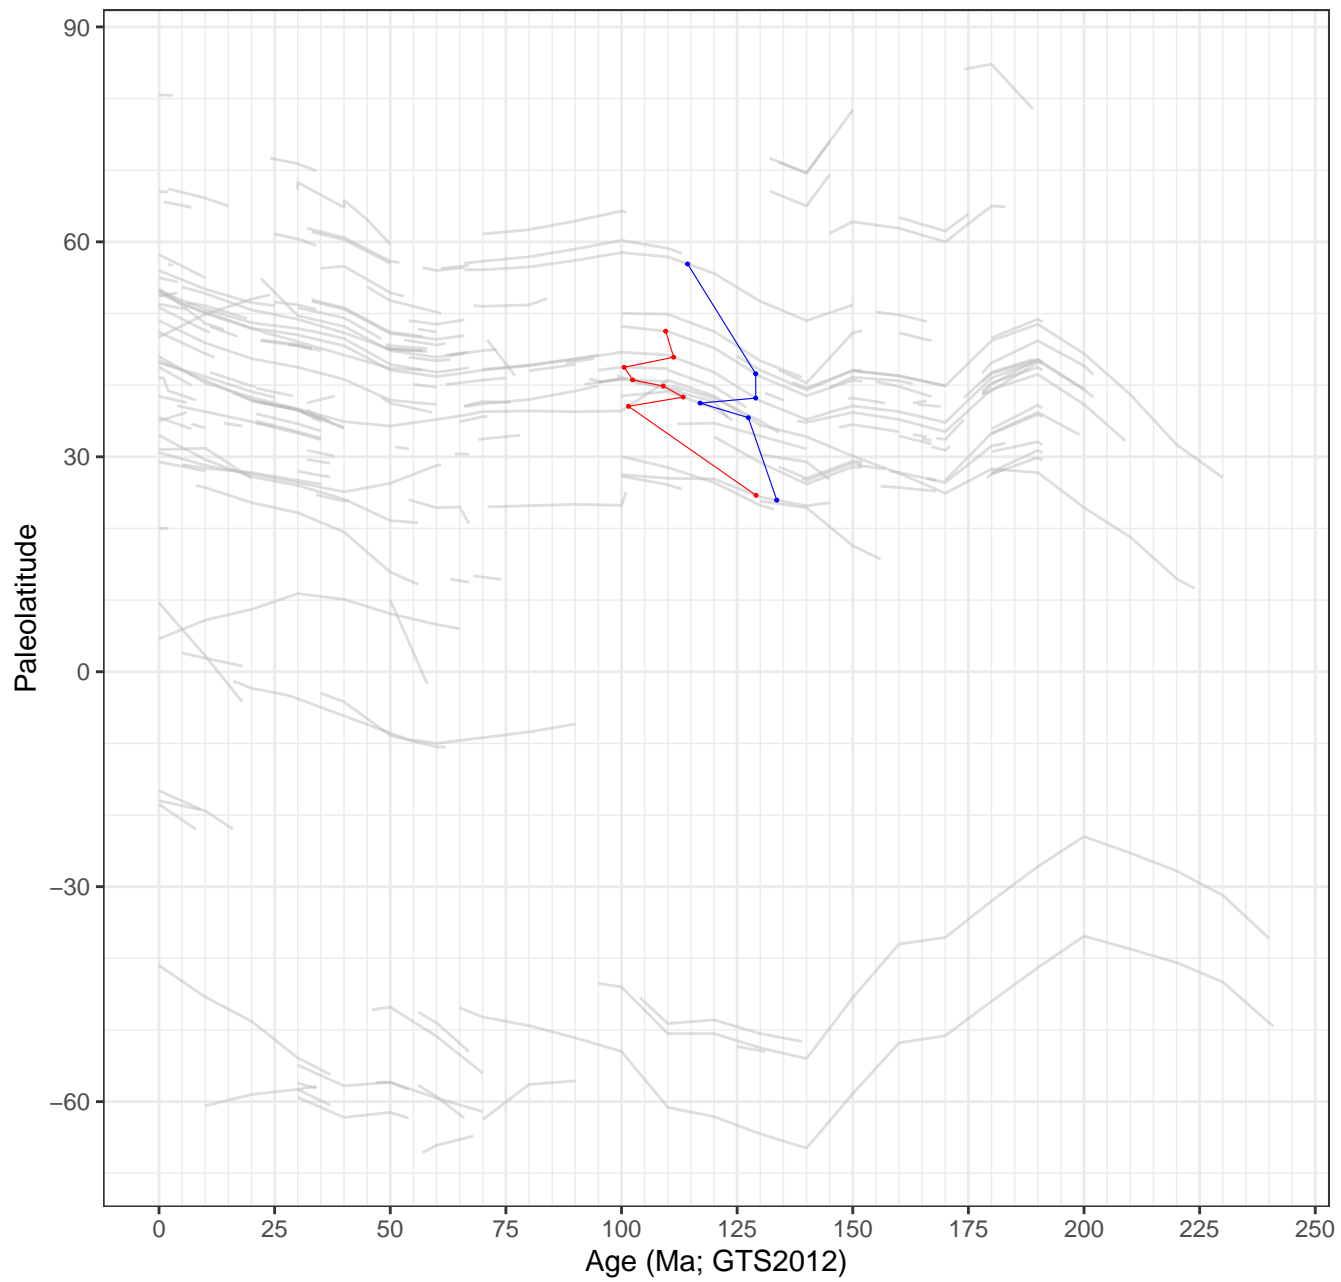

Supplement: Supplementary file 102 [file Genus Cauca.pdf › Supplement/Supplement 2/Genus 459 plots/Genus Cauca.pdf]

# Genus *Cauveridinium*

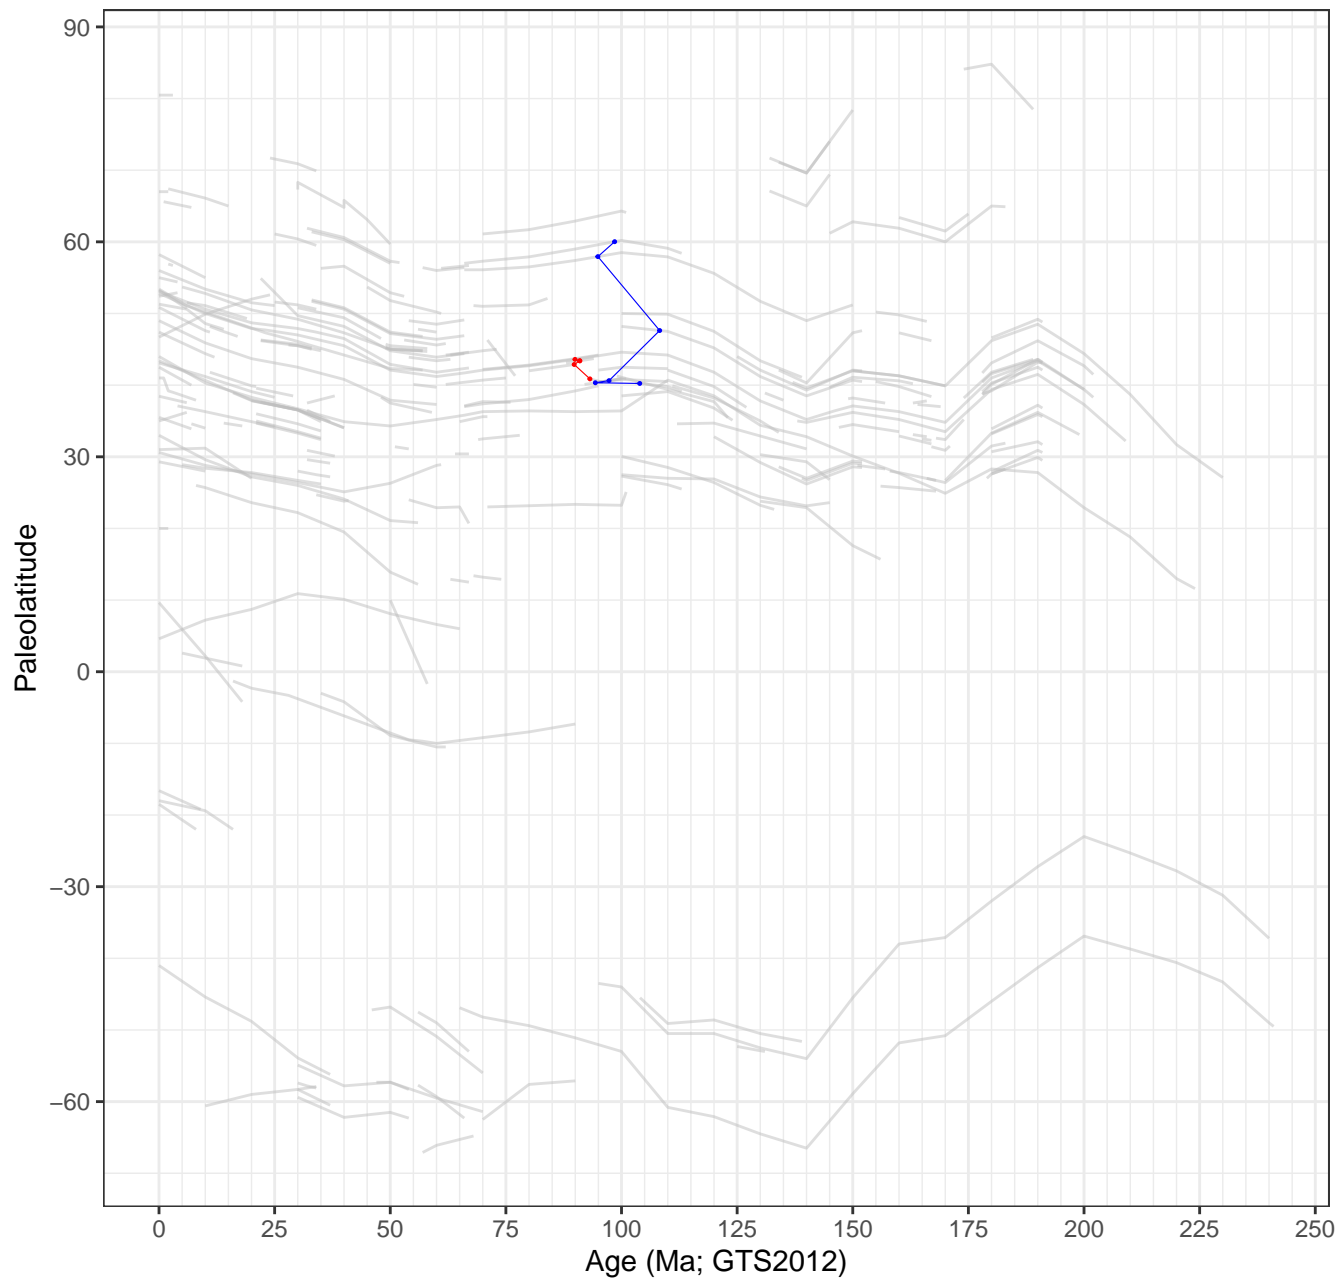

Supplement: Supplementary file 103 [file Genus Cauveridinium.pdf › Supplement/Supplement 2/Genus 459 plots/Genus Cauveridinium.pdf]

# Genus Cepadinium

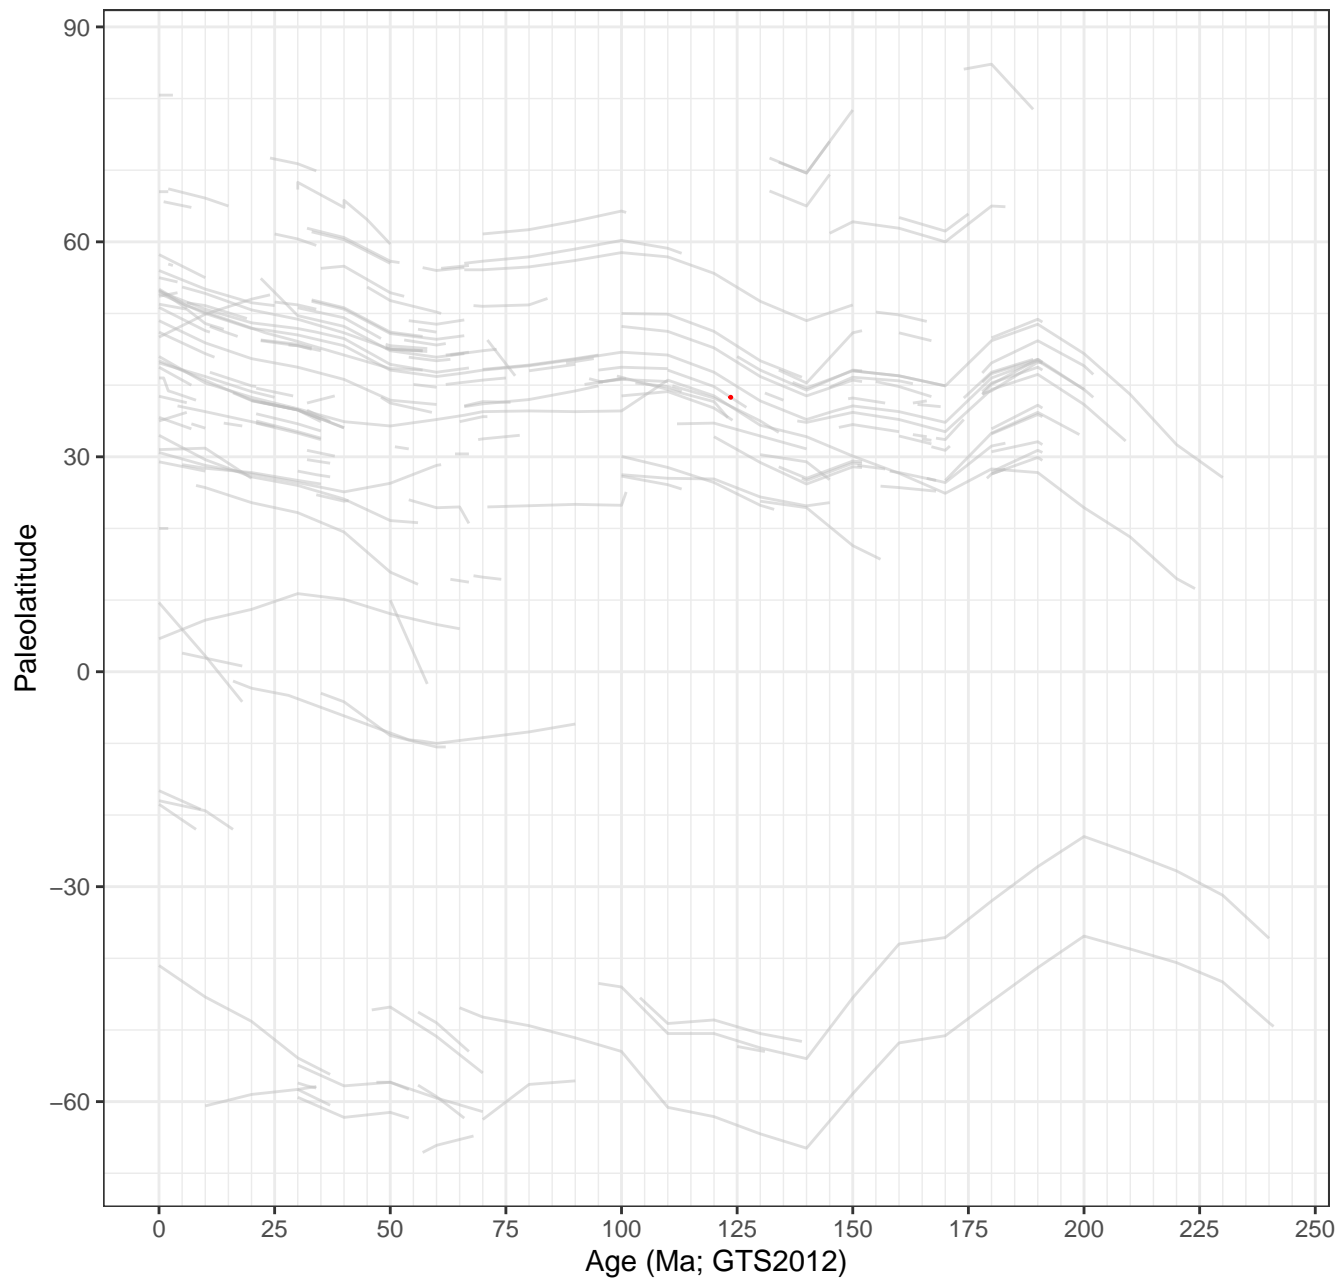

Supplement: Supplementary file 104 [file Genus Cepadinium.pdf › Supplement/Supplement 2/Genus 459 plots/Genus Cepadinium.pdf]

# Genus Cerbia

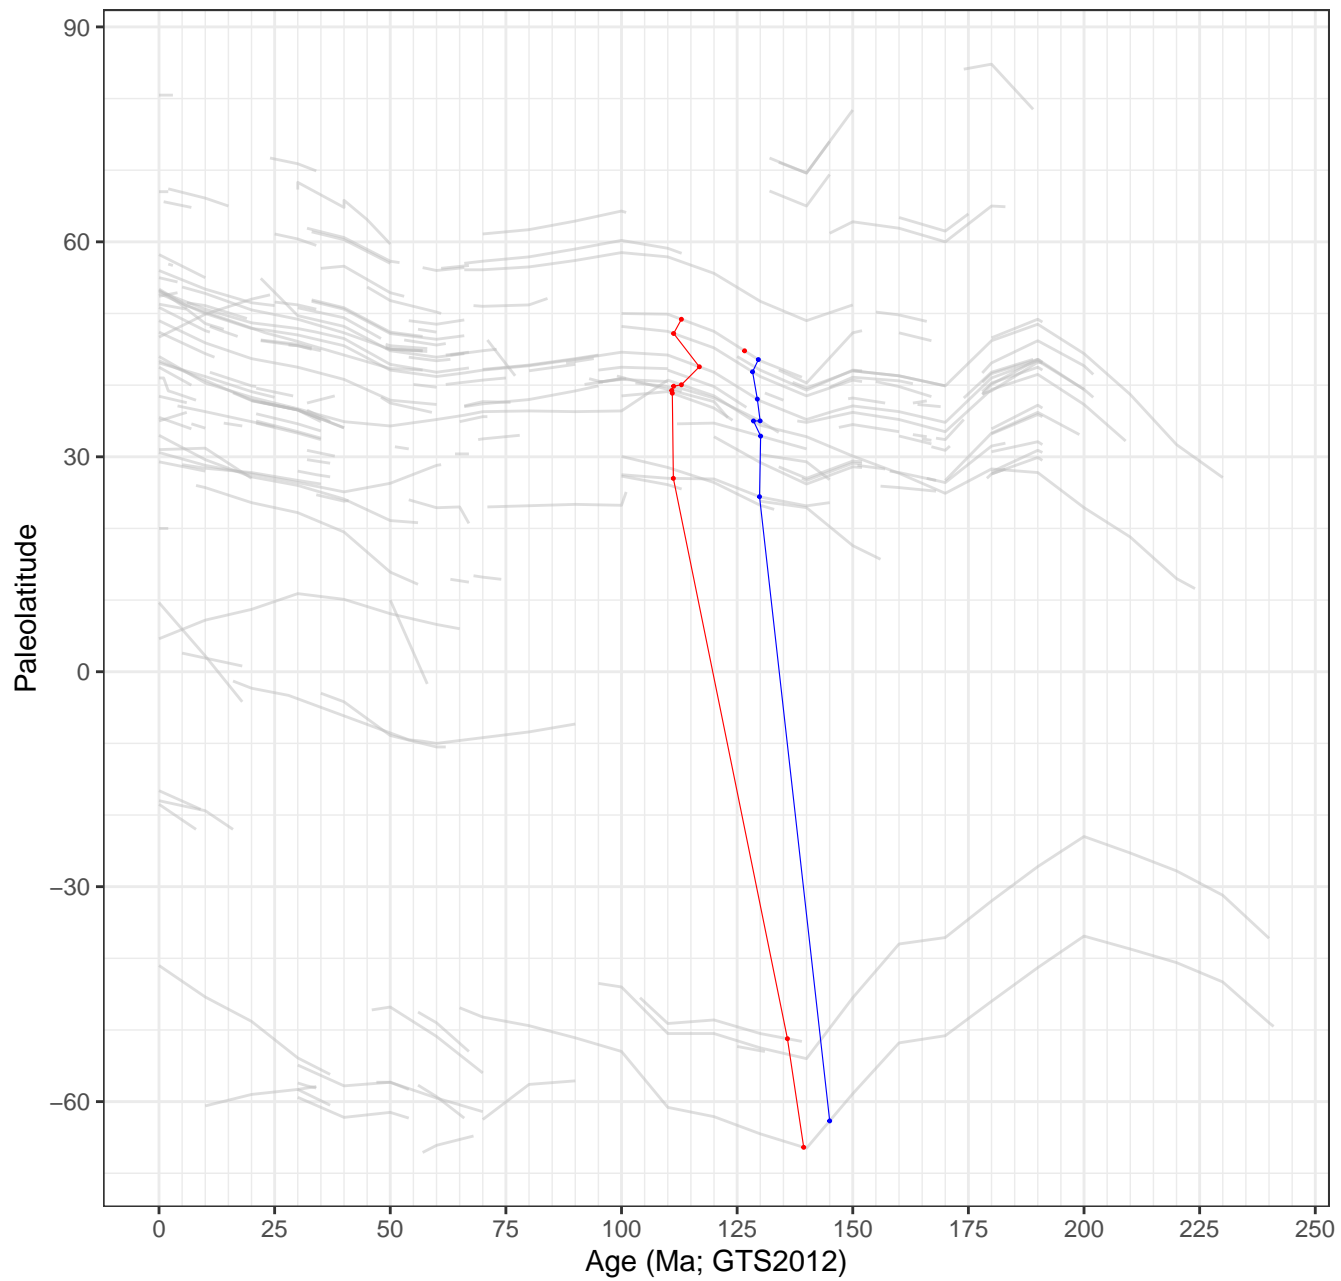

Supplement: Supplementary file 105 [file Genus Cerbia.pdf › Supplement/Supplement 2/Genus 459 plots/Genus Cerbia.pdf]

# Genus *Cerebrocysta*

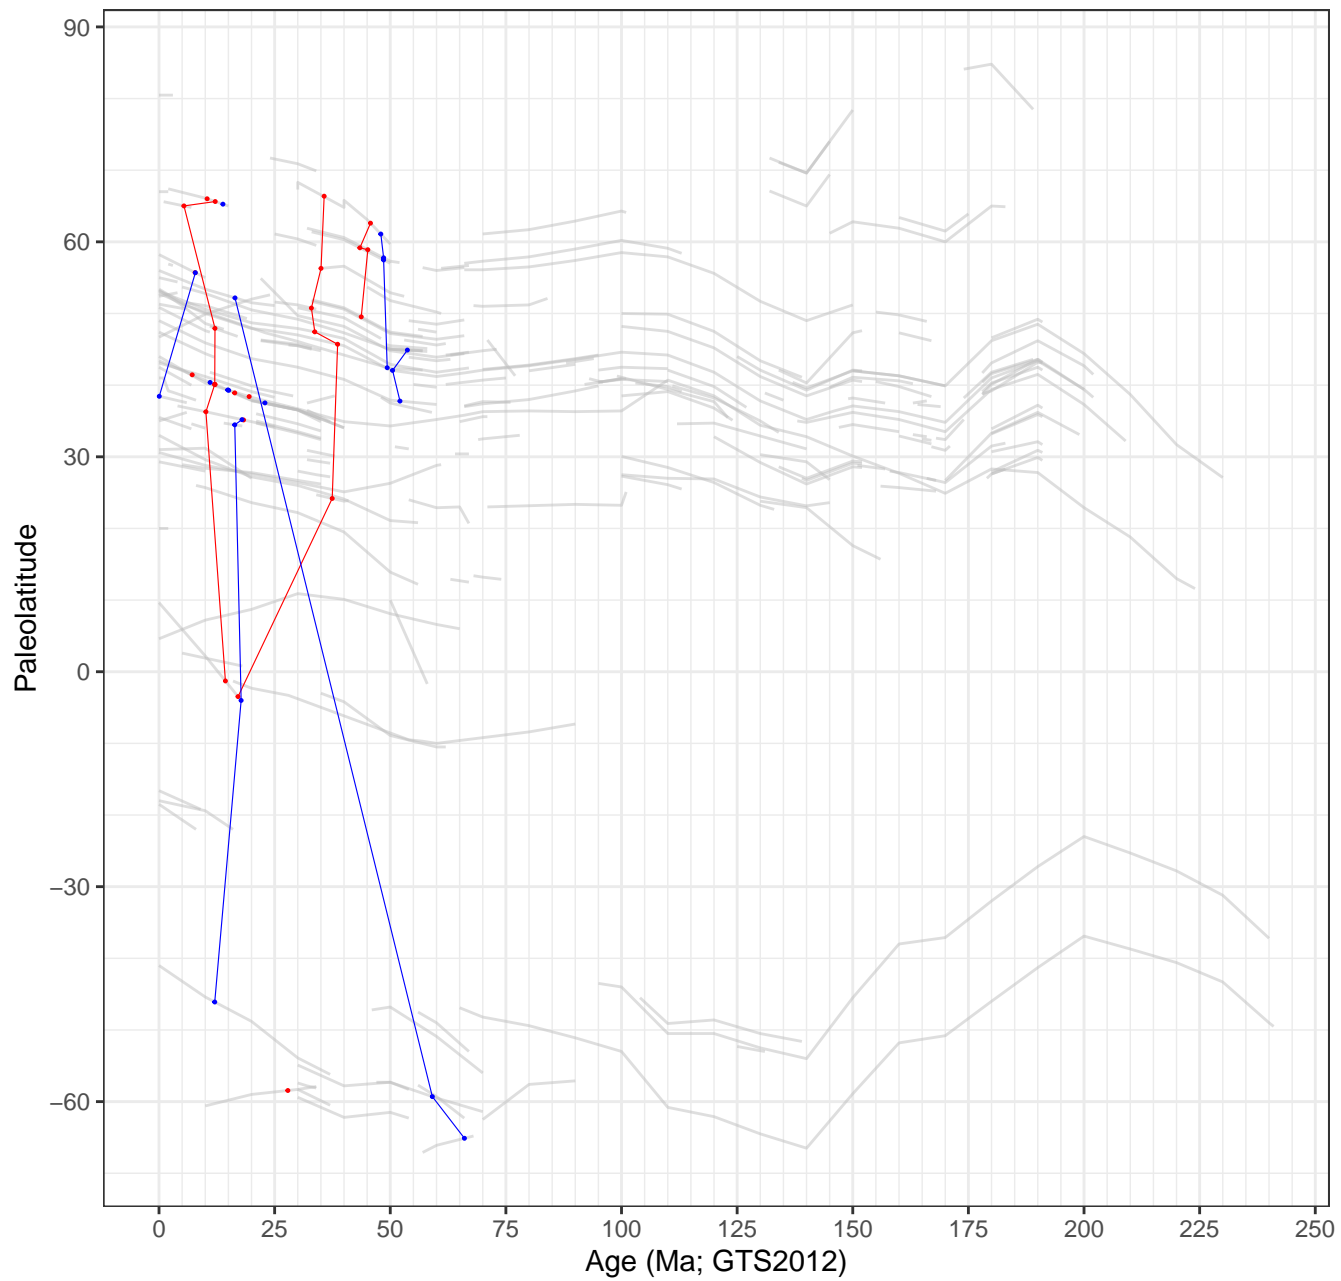

Supplement: Supplementary file 106 [file Genus Cerebrocysta.pdf › Supplement/Supplement 2/Genus 459 plots/Genus Cerebrocysta.pdf]

# Genus *Cernicysta*

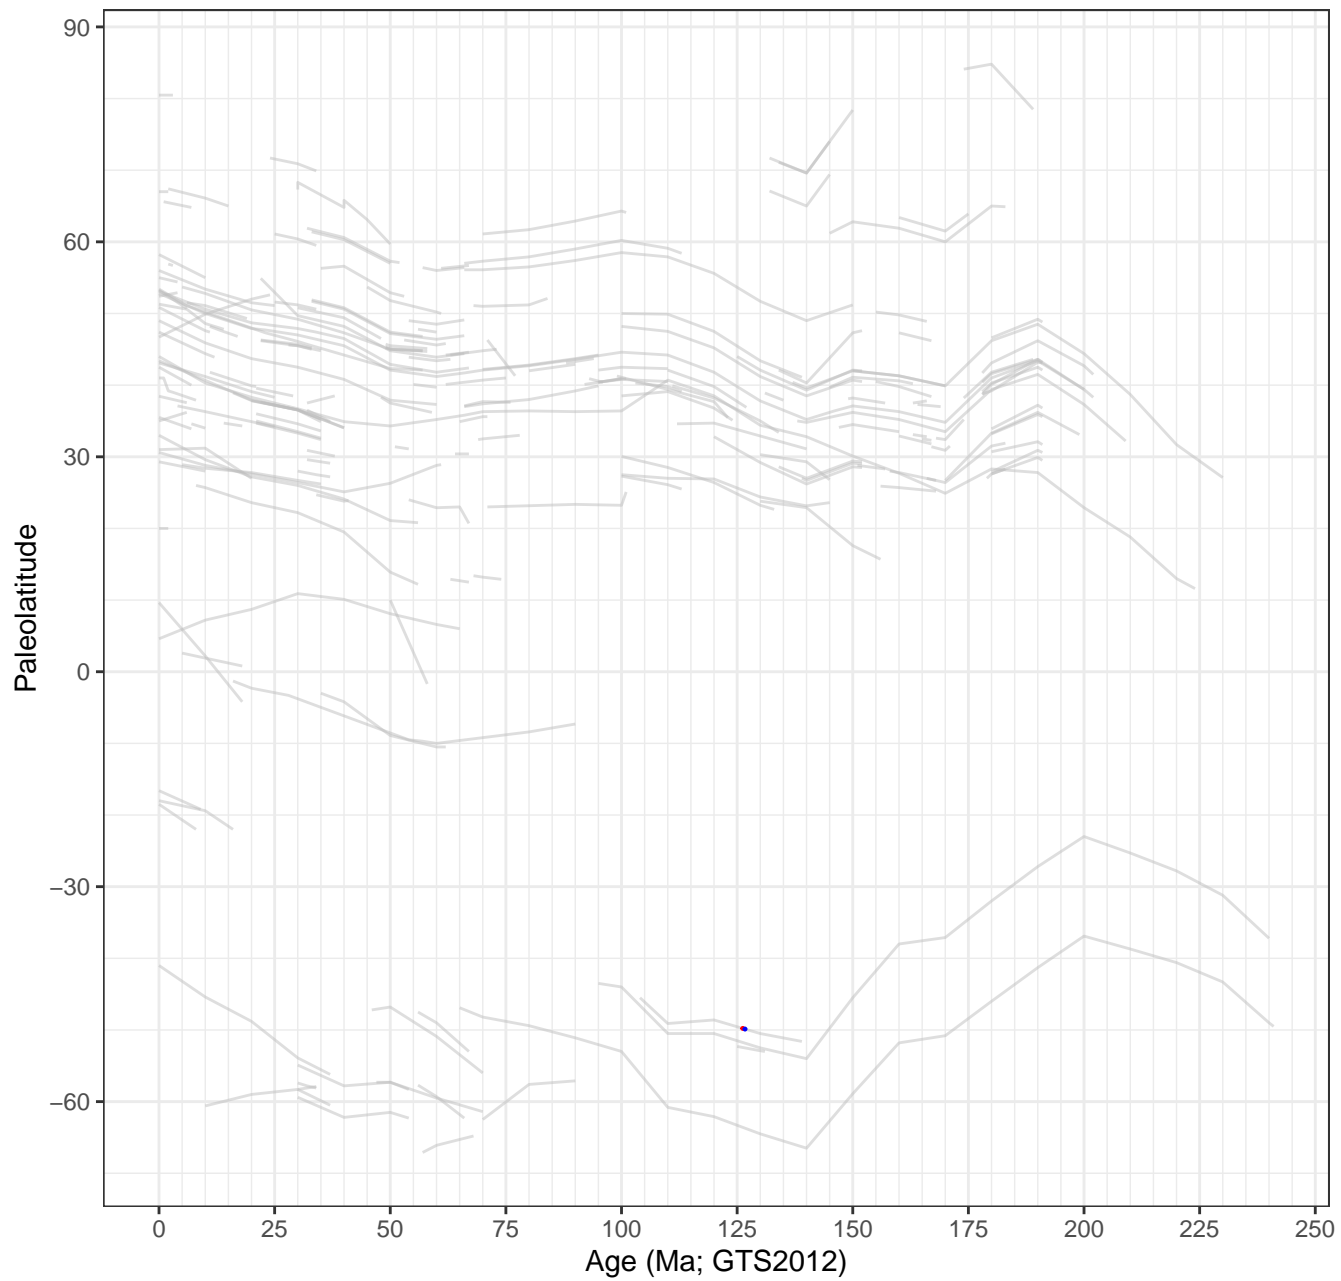

Supplement: Supplementary file 107 [file Genus Cernicysta.pdf › Supplement/Supplement 2/Genus 459 plots/Genus Cernicysta.pdf]

# Genus Cerodinium

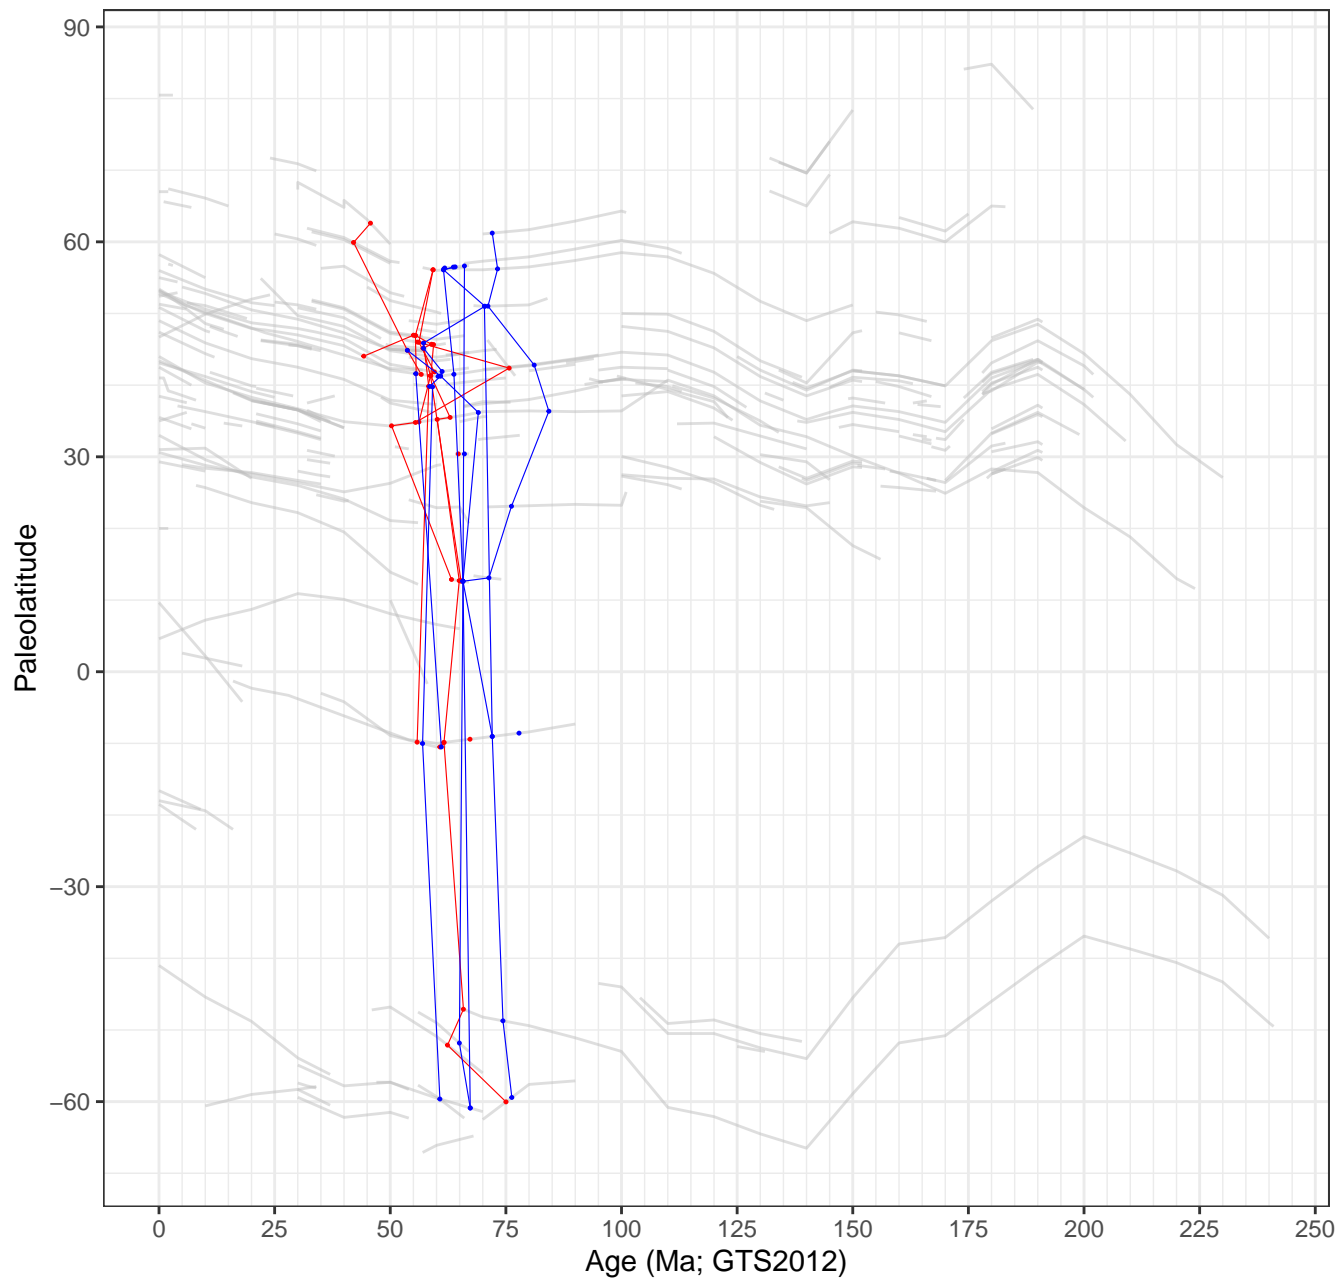

Supplement: Supplementary file 108 [file Genus Cerodinium.pdf › Supplement/Supplement 2/Genus 459 plots/Genus Cerodinium.pdf]

# Genus Charlesdowniea

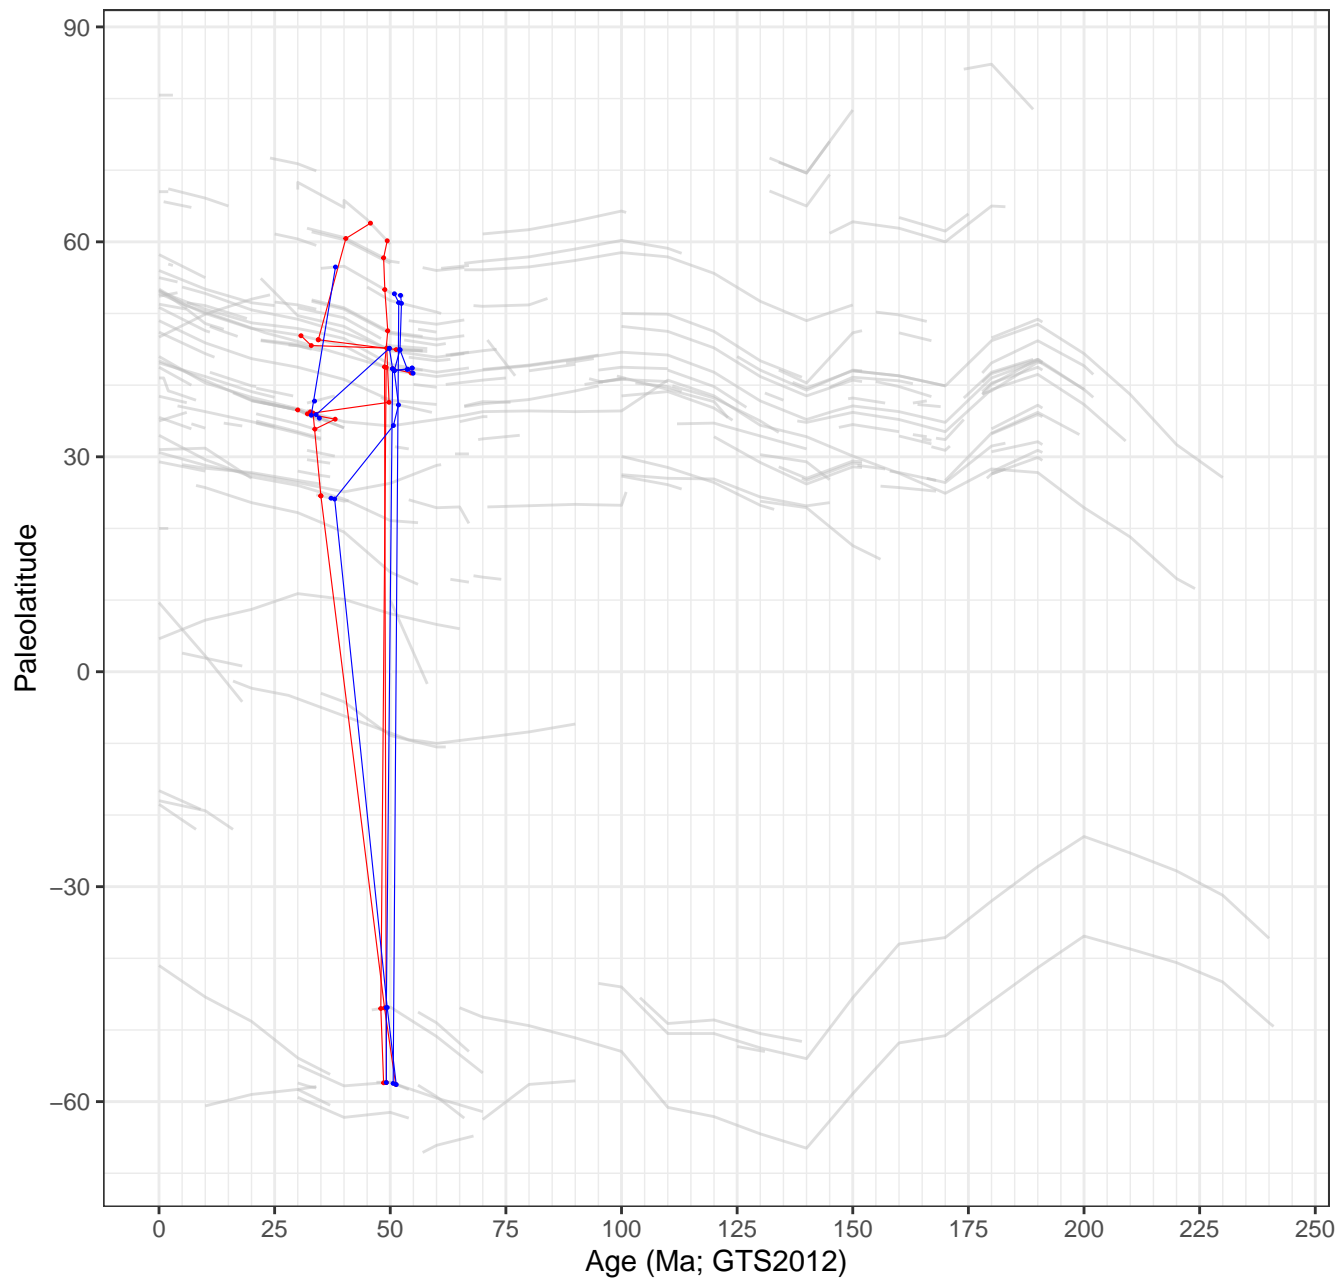

Supplement: Supplementary file 109 [file Genus Charlesdowniea.pdf › Supplement/Supplement 2/Genus 459 plots/Genus Charlesdowniea.pdf]

# Genus Chatangiella

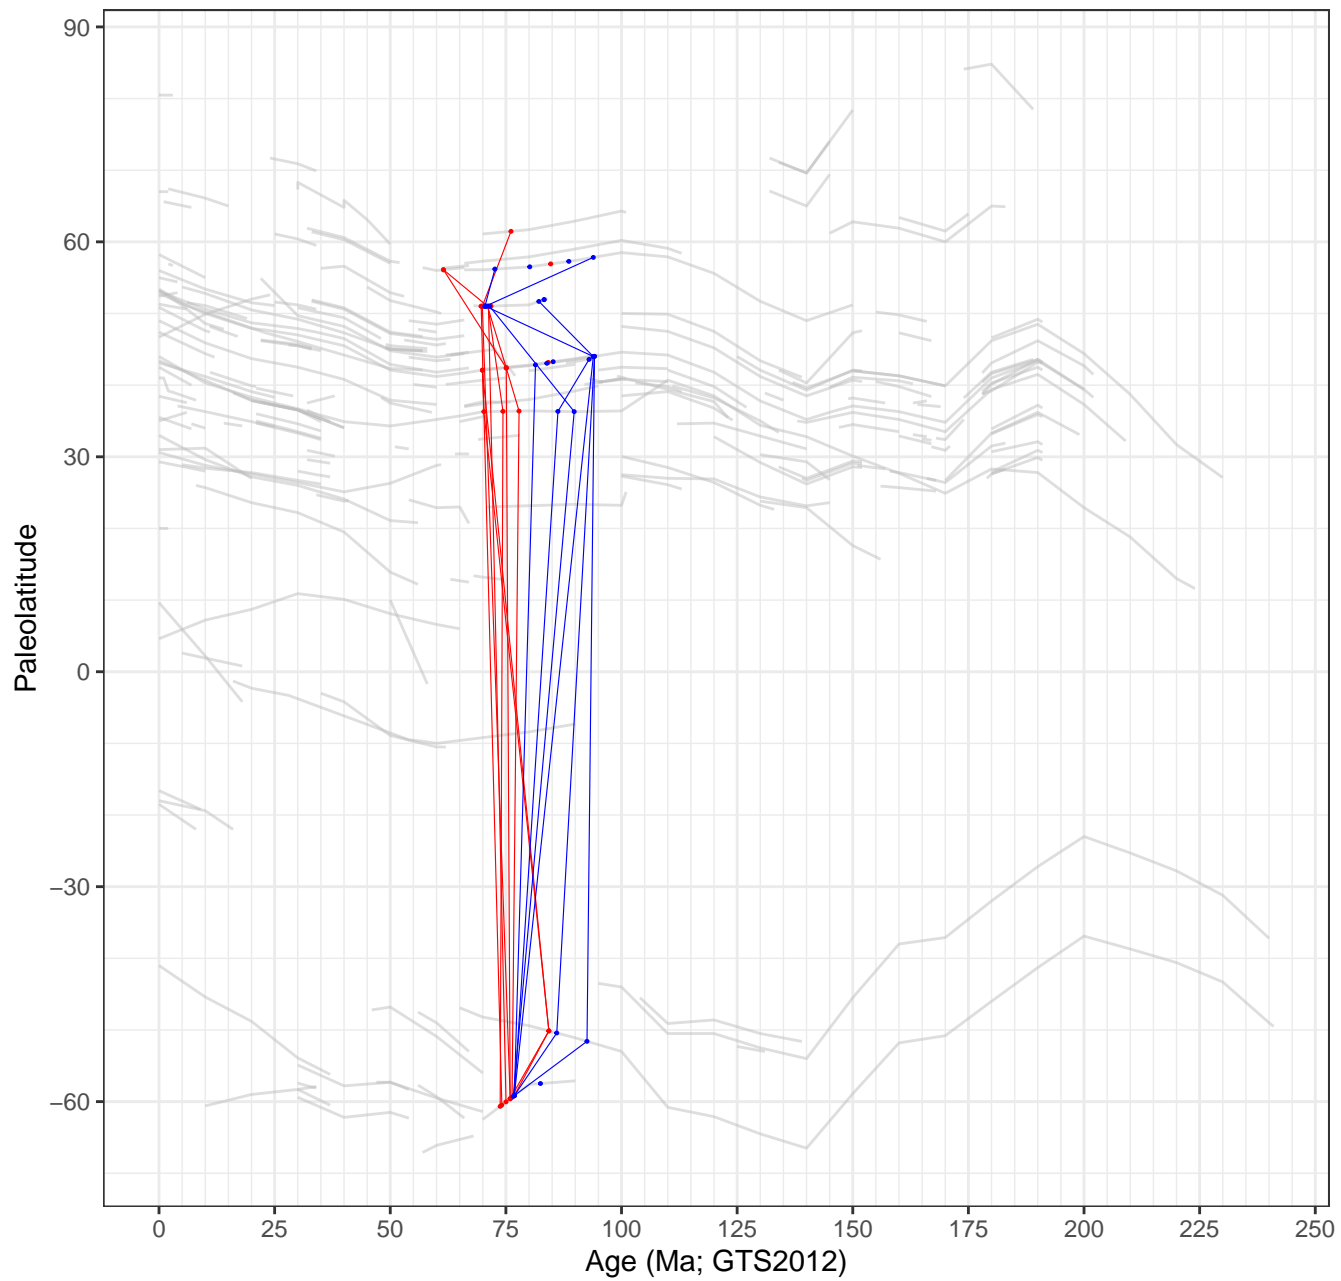

Supplement: Supplementary file 110 [file Genus Chatangiella.pdf › Supplement/Supplement 2/Genus 459 plots/Genus Chatangiella.pdf]

# Genus Chichaouadinium

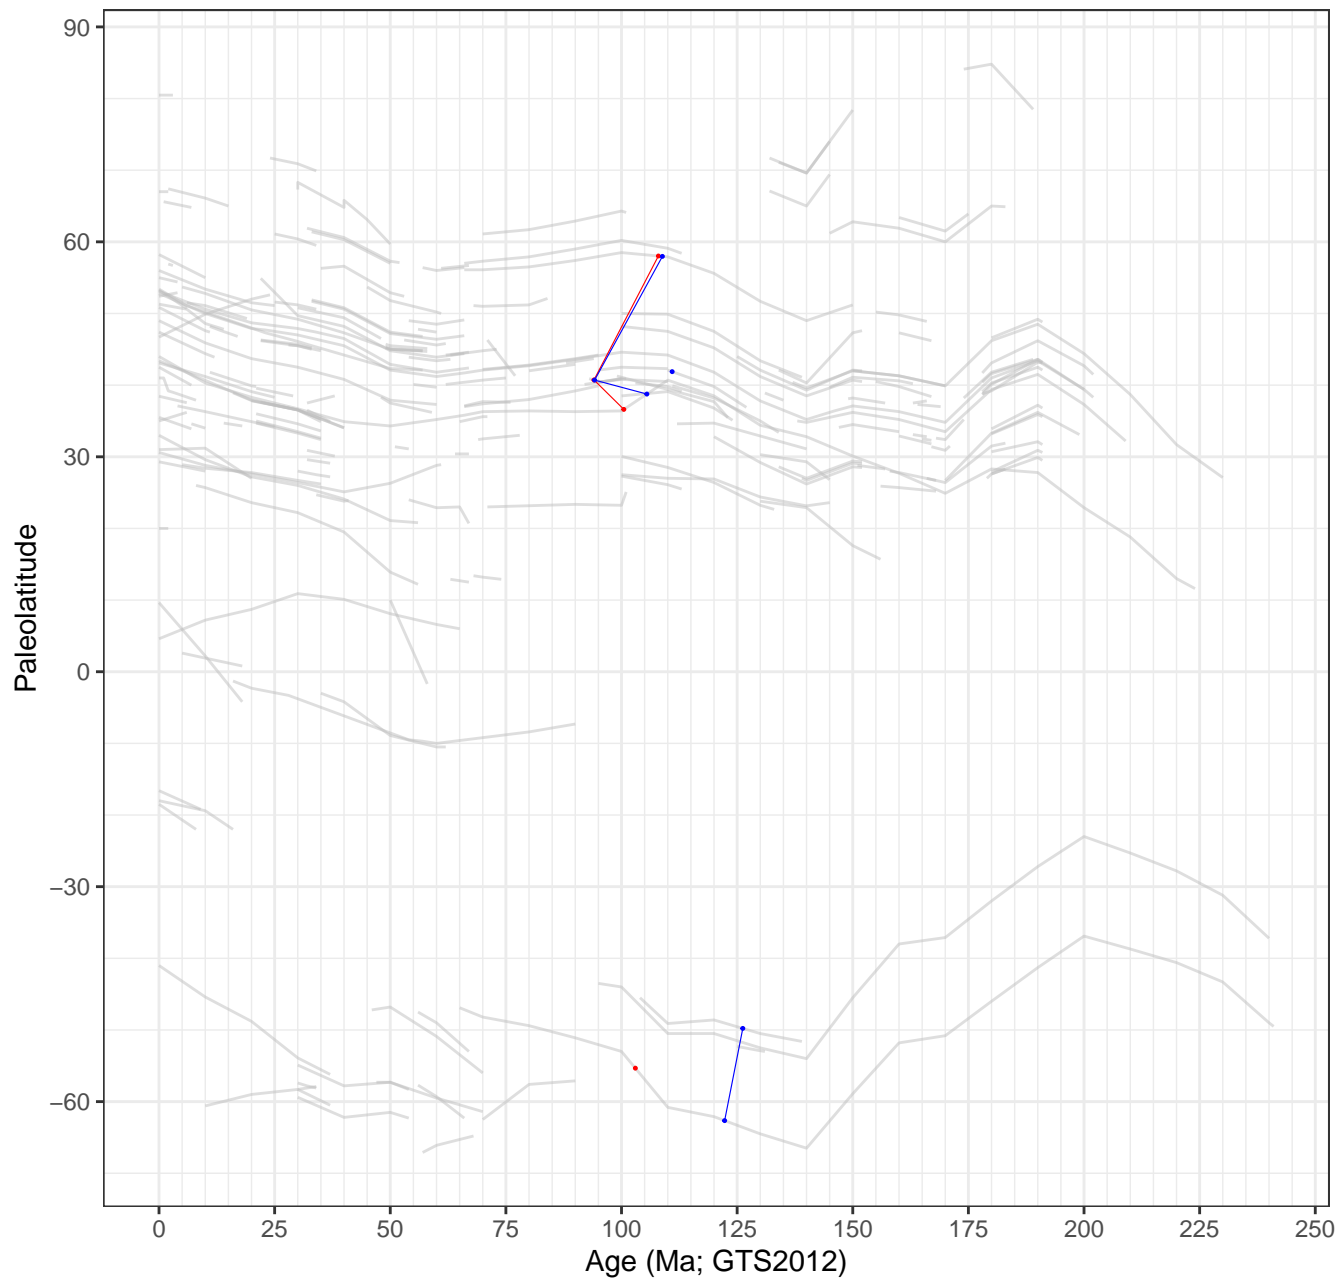

Supplement: Supplementary file 111 [file Genus Chichaouadinium.pdf › Supplement/Supplement 2/Genus 459 plots/Genus Chichaouadinium.pdf]

# Genus Chiropteridium

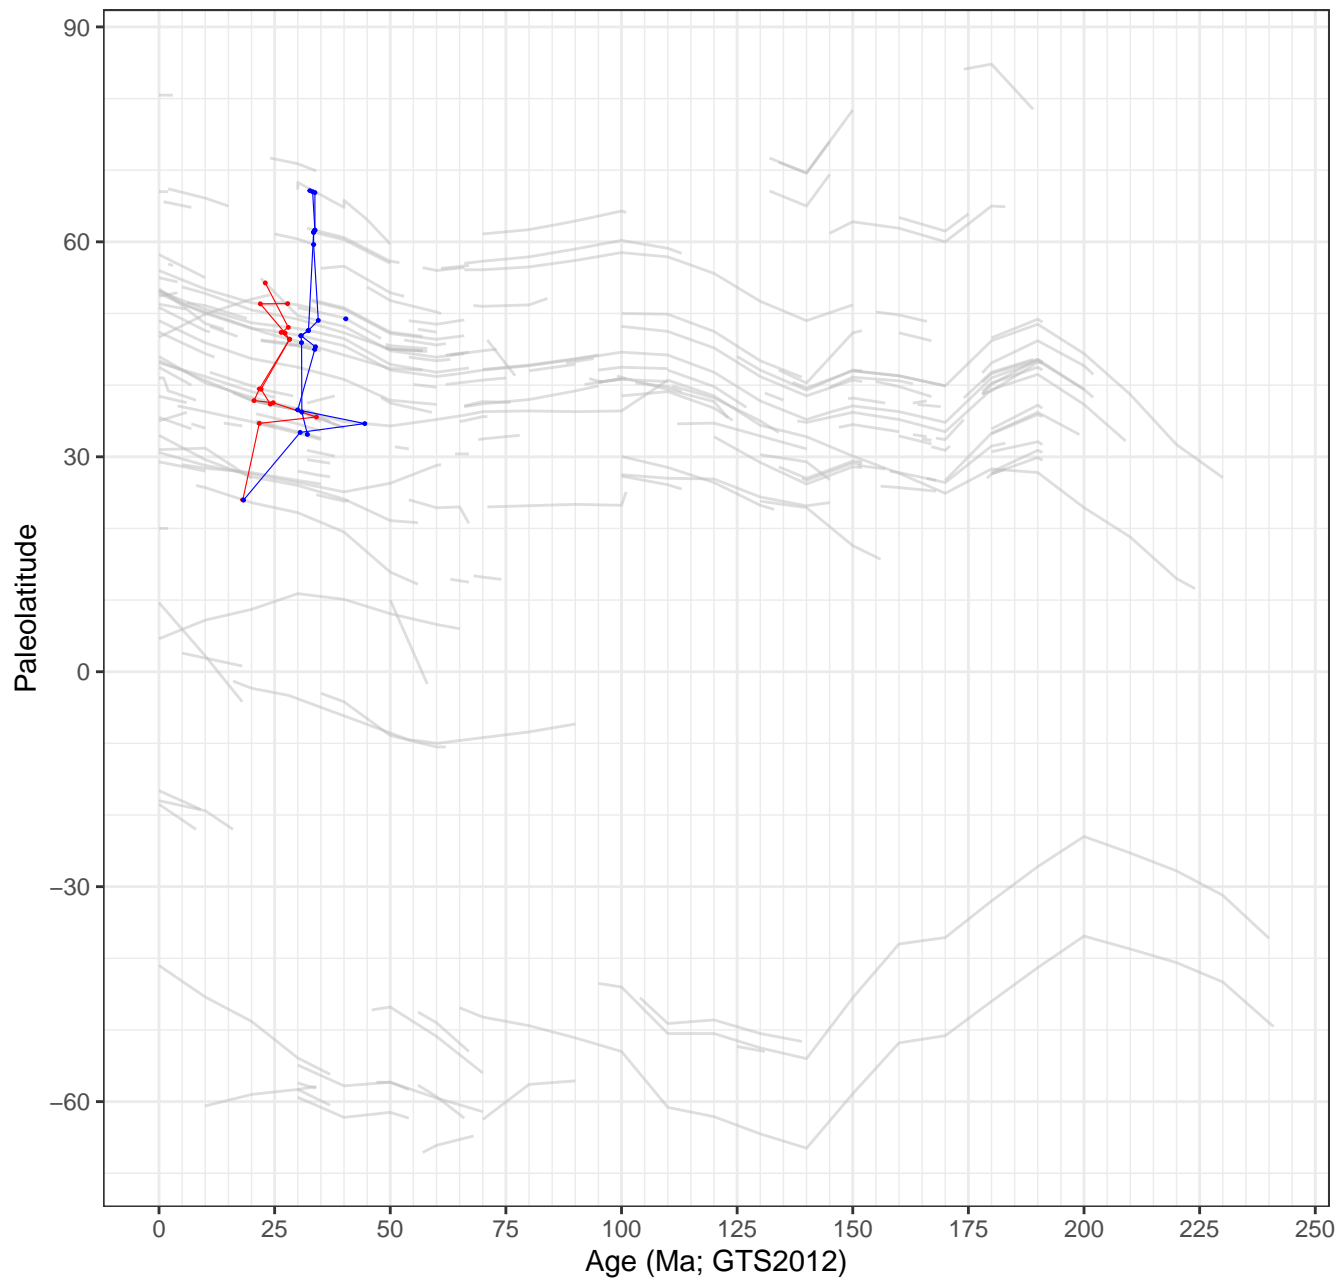

Supplement: Supplementary file 112 [file Genus Chiropteridium.pdf › Supplement/Supplement 2/Genus 459 plots/Genus Chiropteridium.pdf]

# Genus Chlamydoophorella

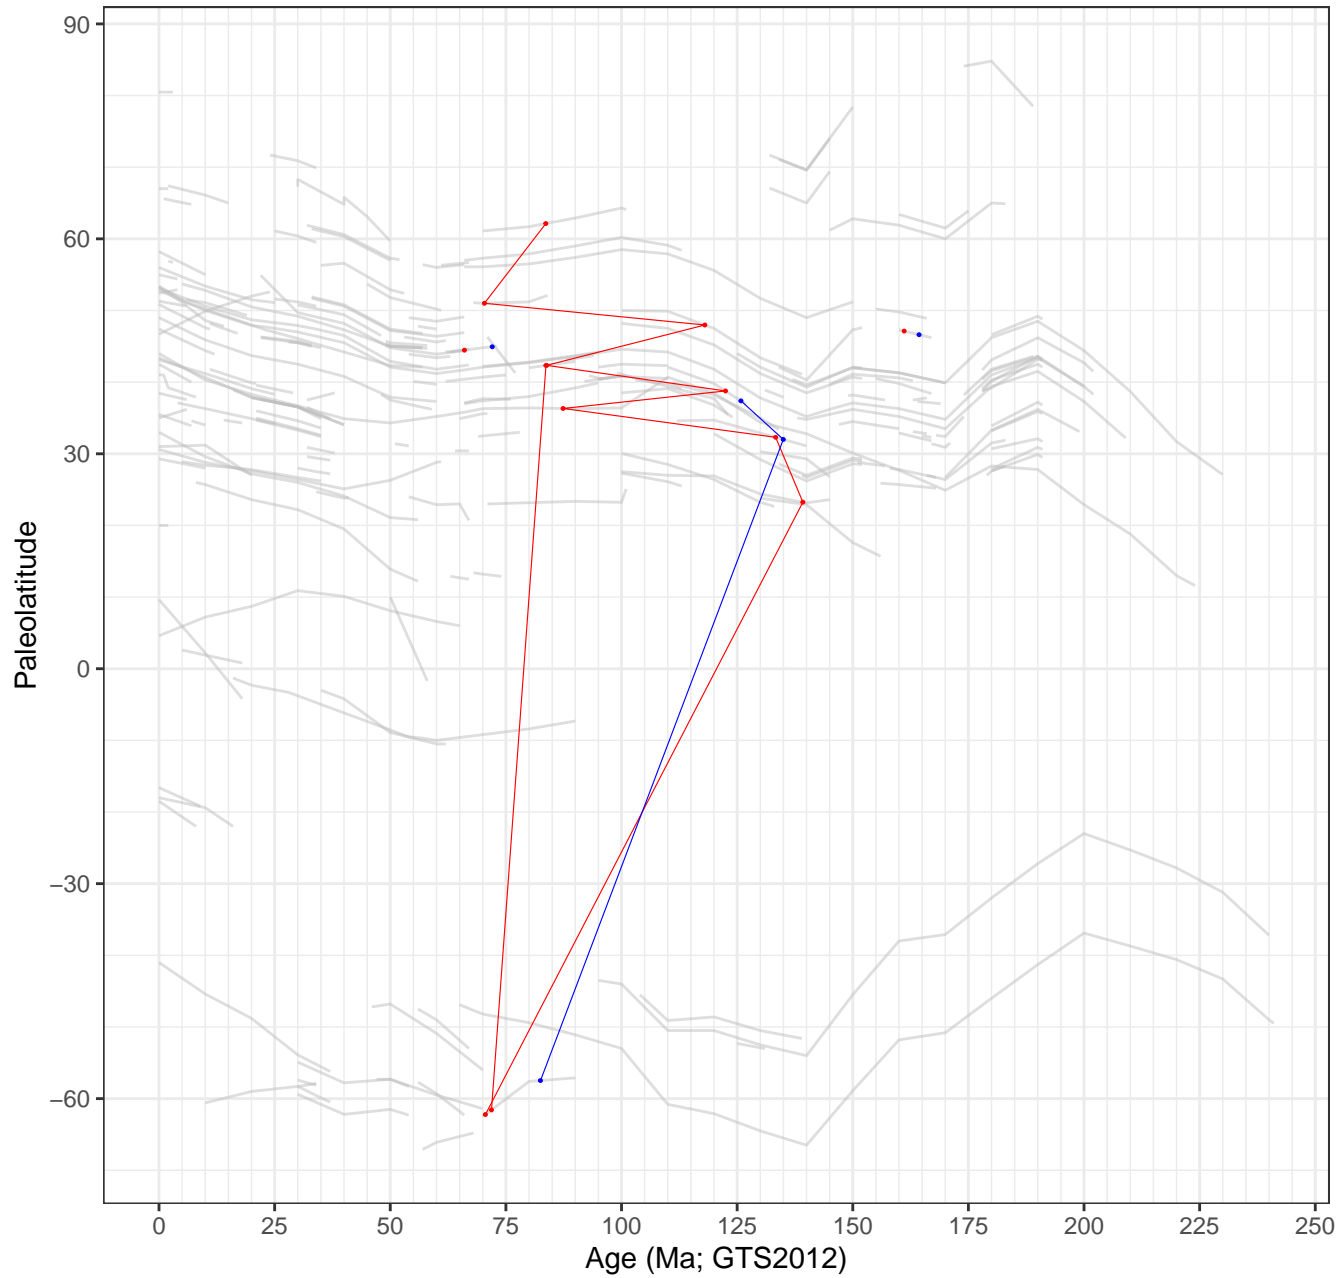

Supplement: Supplementary file 113 [file Genus Chlamydophorella.pdf › Supplement/Supplement 2/Genus 459 plots/Genus Chlamydophorella.pdf]

# Genus Chytroeisphaeridia

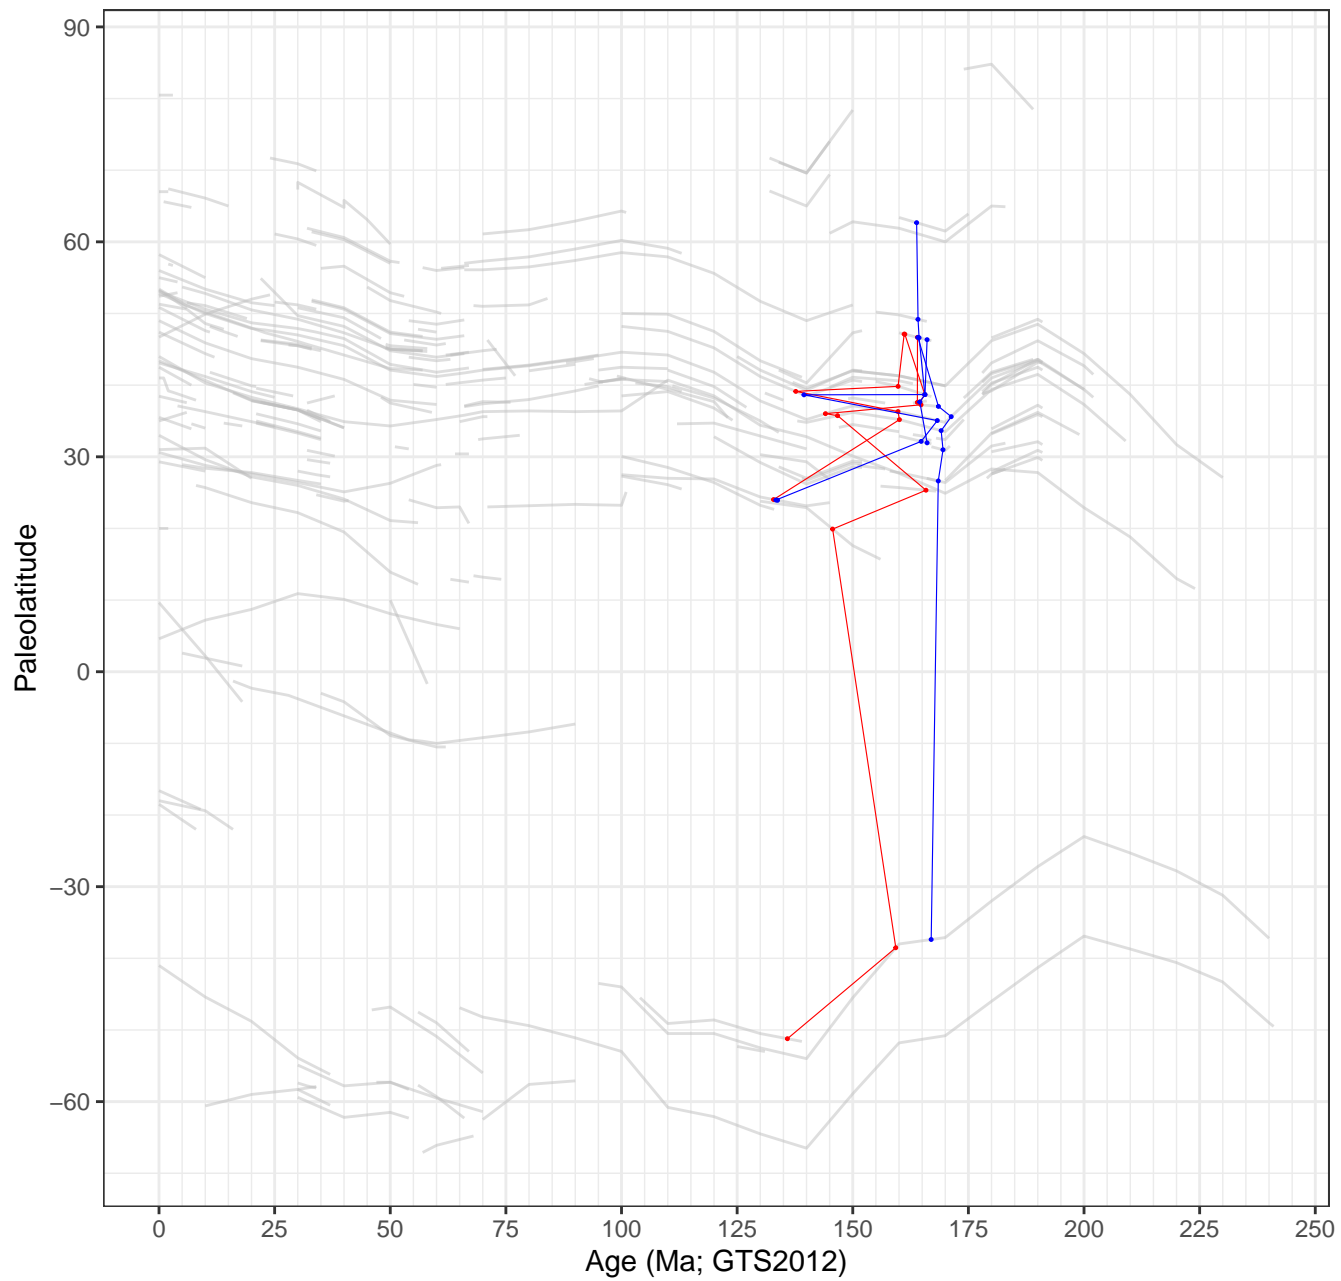

Supplement: Supplementary file 114 [file Genus Chytroeisphaeridia.pdf › Supplement/Supplement 2/Genus 459 plots/Genus Chytroeisphaeridia.pdf]
