# Supplementary figures and images for: DINOSTRAT: a global database of the stratigraphic and paleolatitudinal distribution of Mesozoic–Cenozoic organic-walled dinoflagellate cysts (part 2 of 27)
Source: Copernicus journal article supplement (doi:10.5194/essd-14-579-2022), 2022-02-09

# Genus Circulodinium

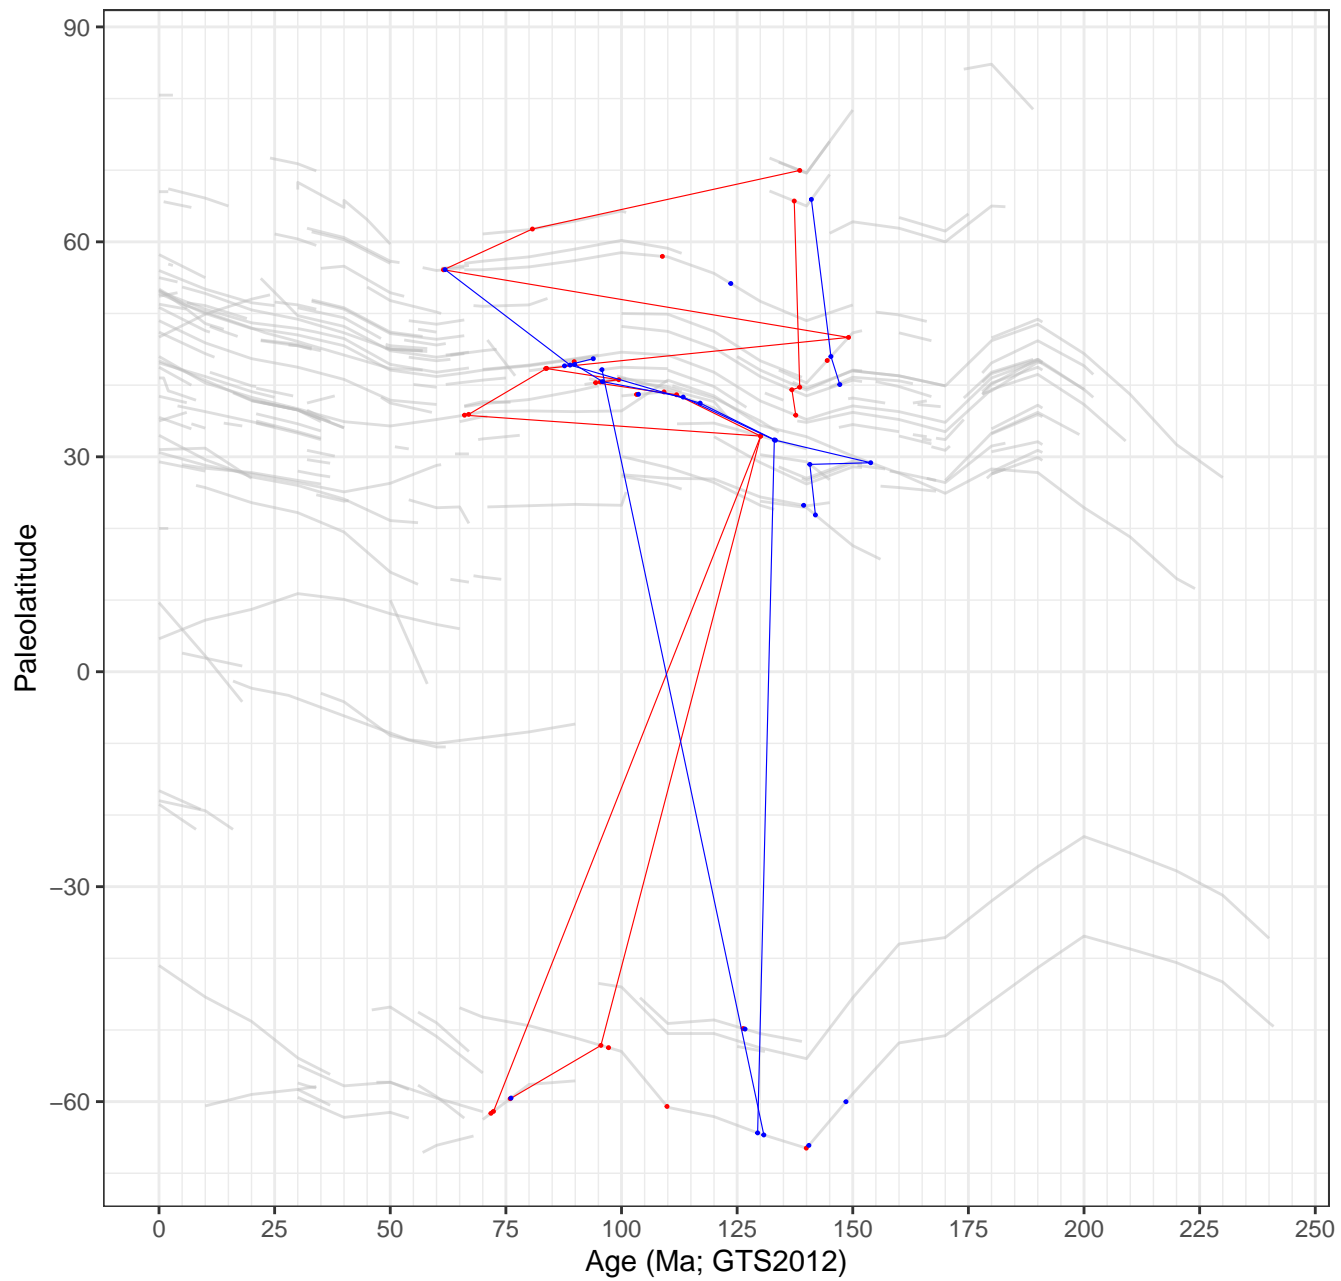

Supplement: Supplementary file 115 [file Genus Circulodinium.pdf › Supplement/Supplement 2/Genus 459 plots/Genus Circulodinium.pdf]

# Genus Cirrusphaera

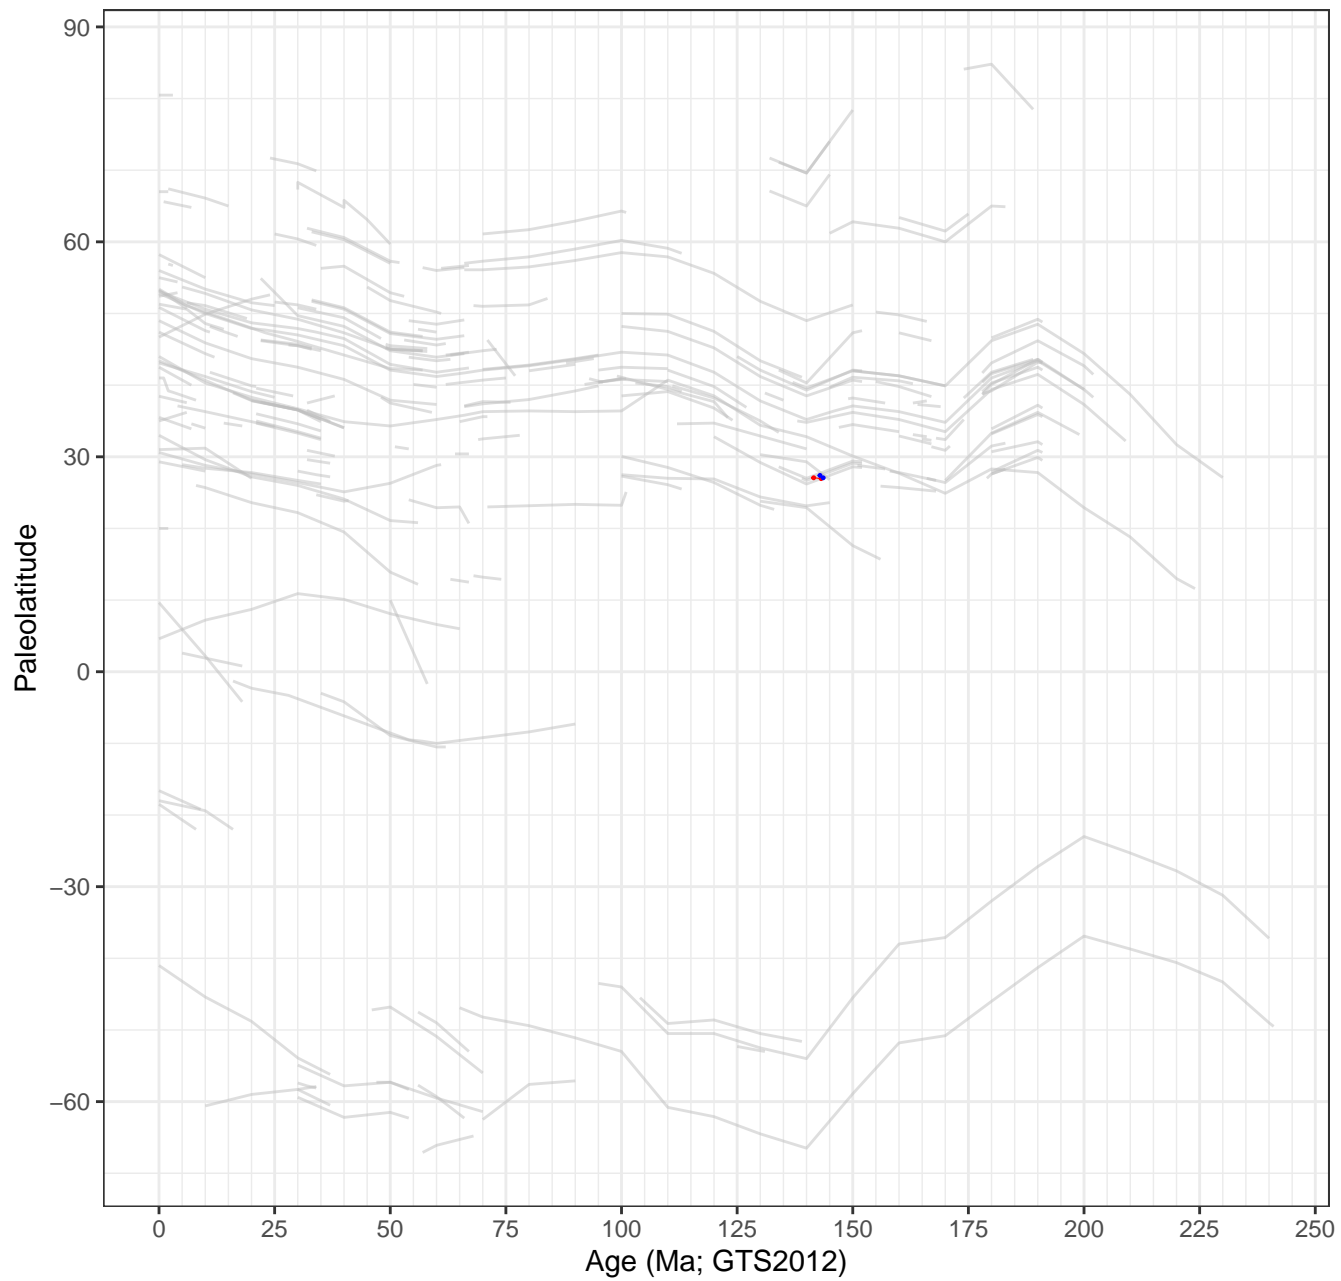

Supplement: Supplementary file 116 [file Genus Cirrusphaera.pdf › Supplement/Supplement 2/Genus 459 plots/Genus Cirrusphaera.pdf]

# Genus Cladopyxidium

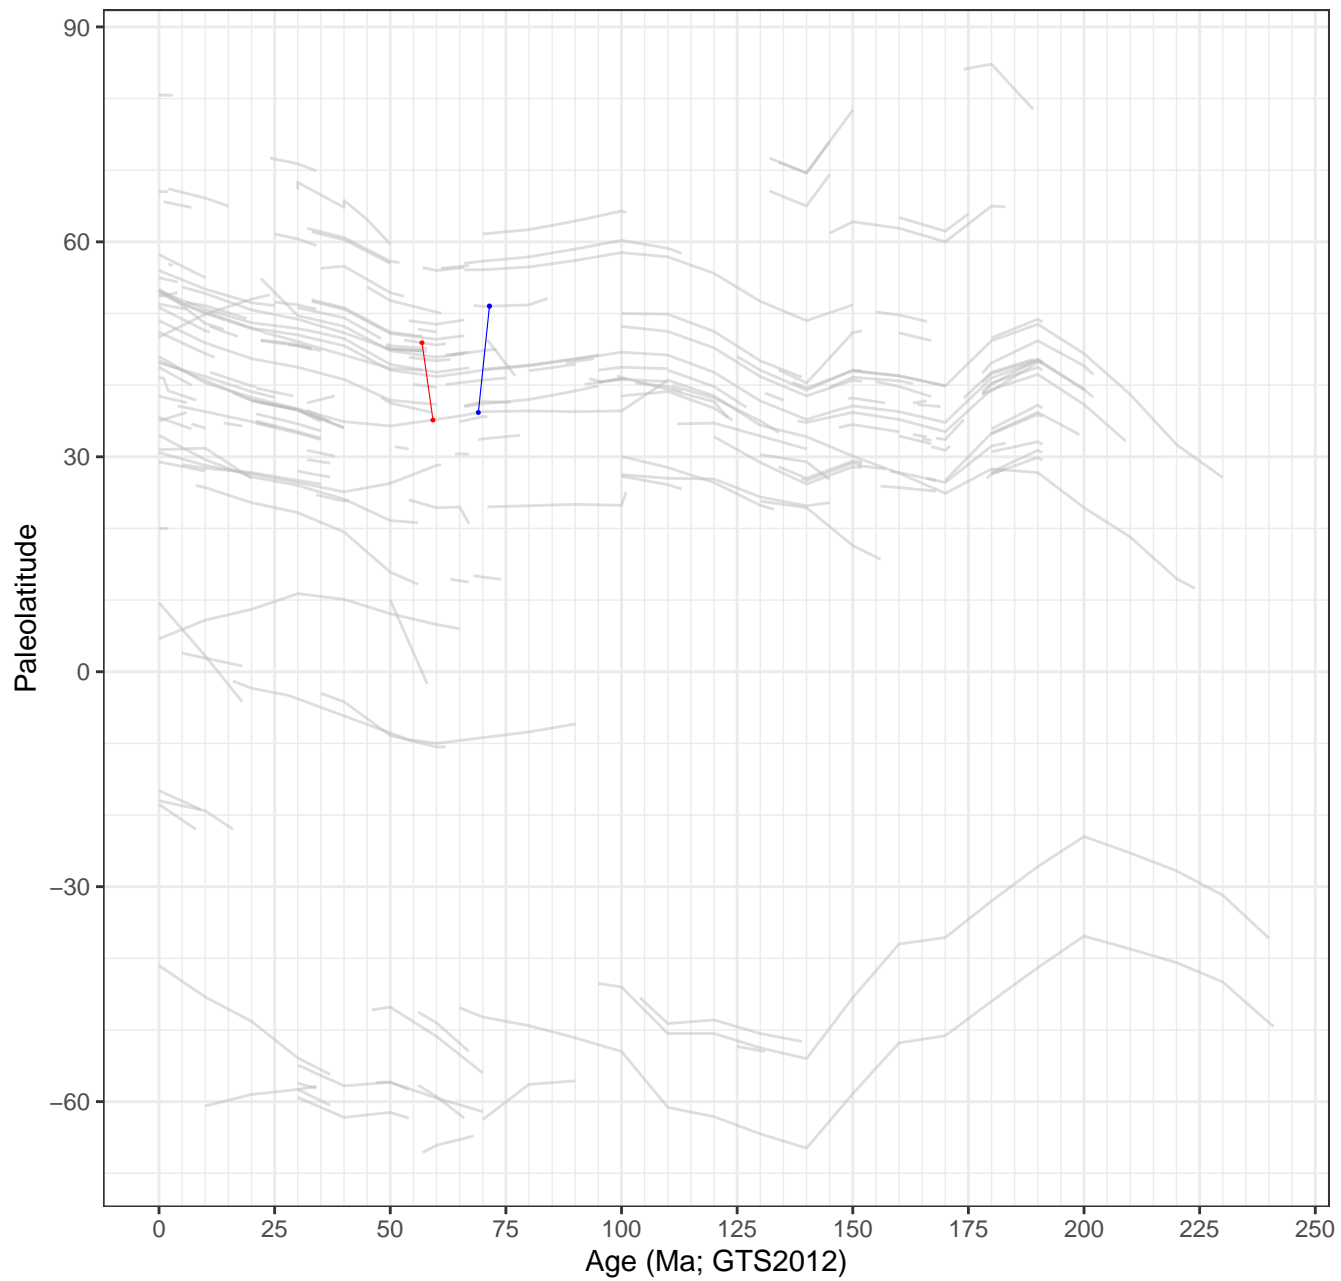

Supplement: Supplementary file 117 [file Genus Cladopyxidium.pdf › Supplement/Supplement 2/Genus 459 plots/Genus Cladopyxidium.pdf]

# Genus *Clathroctenocystis*

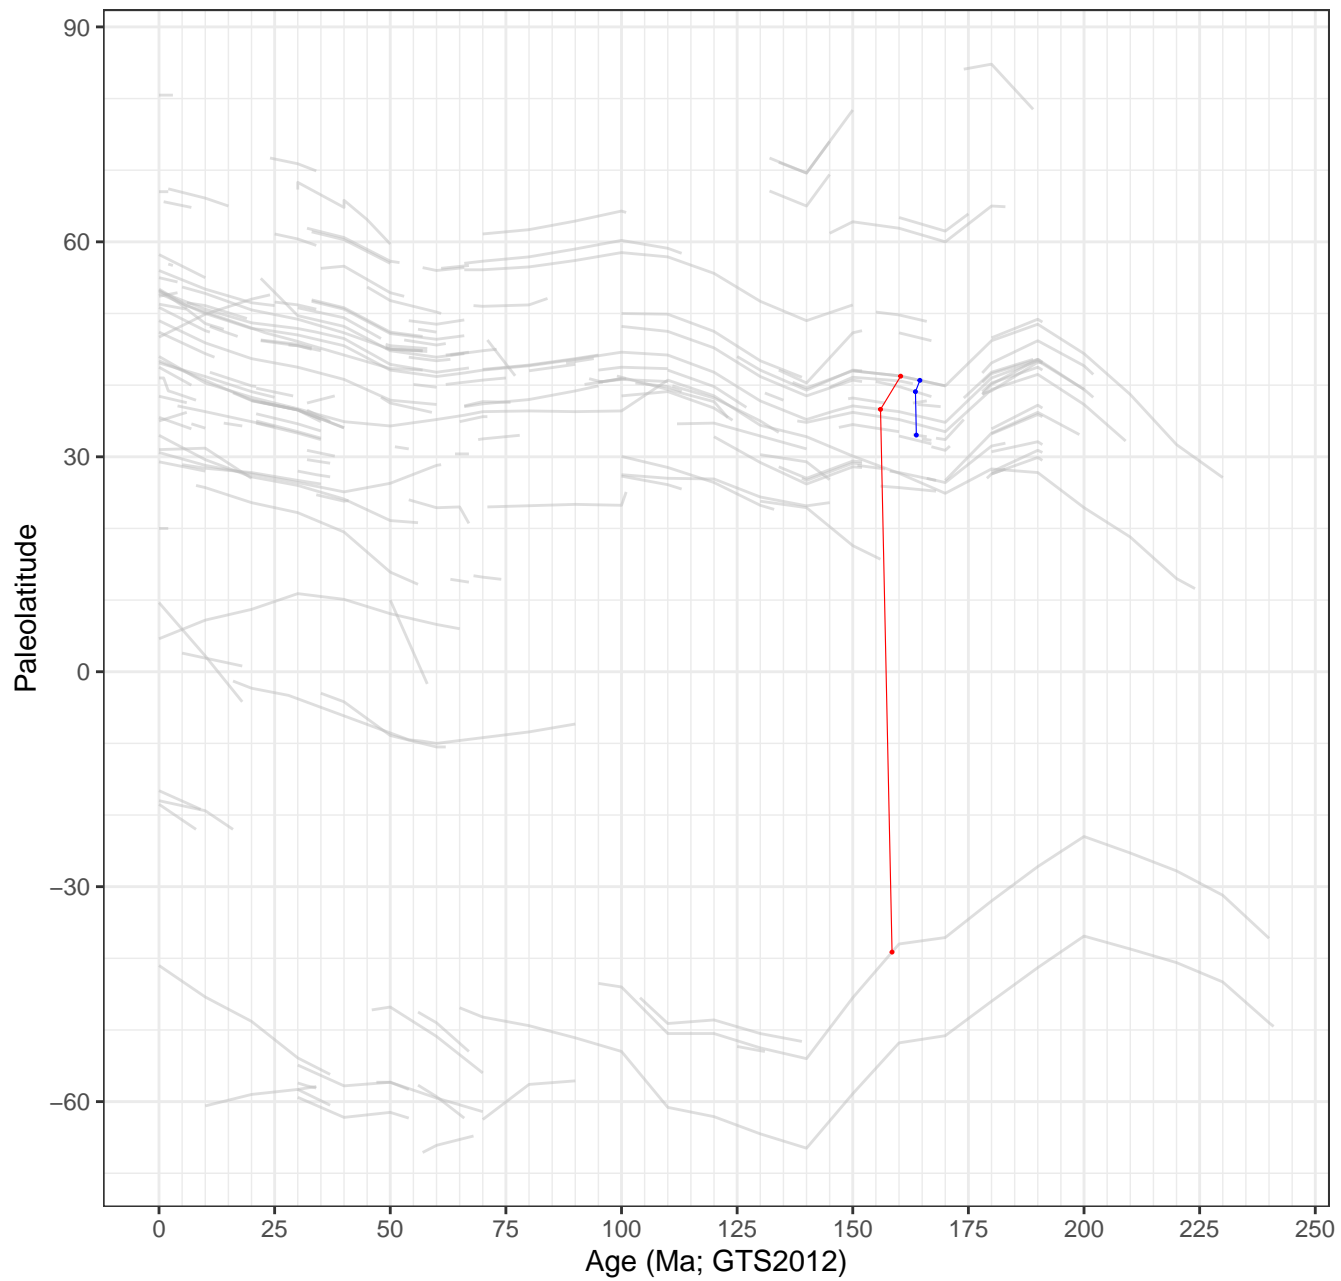

Supplement: Supplementary file 118 [file Genus Clathroctenocystis.pdf › Supplement/Supplement 2/Genus 459 plots/Genus Clathroctenocystis.pdf]

# Genus *Cleistosphaeridium*

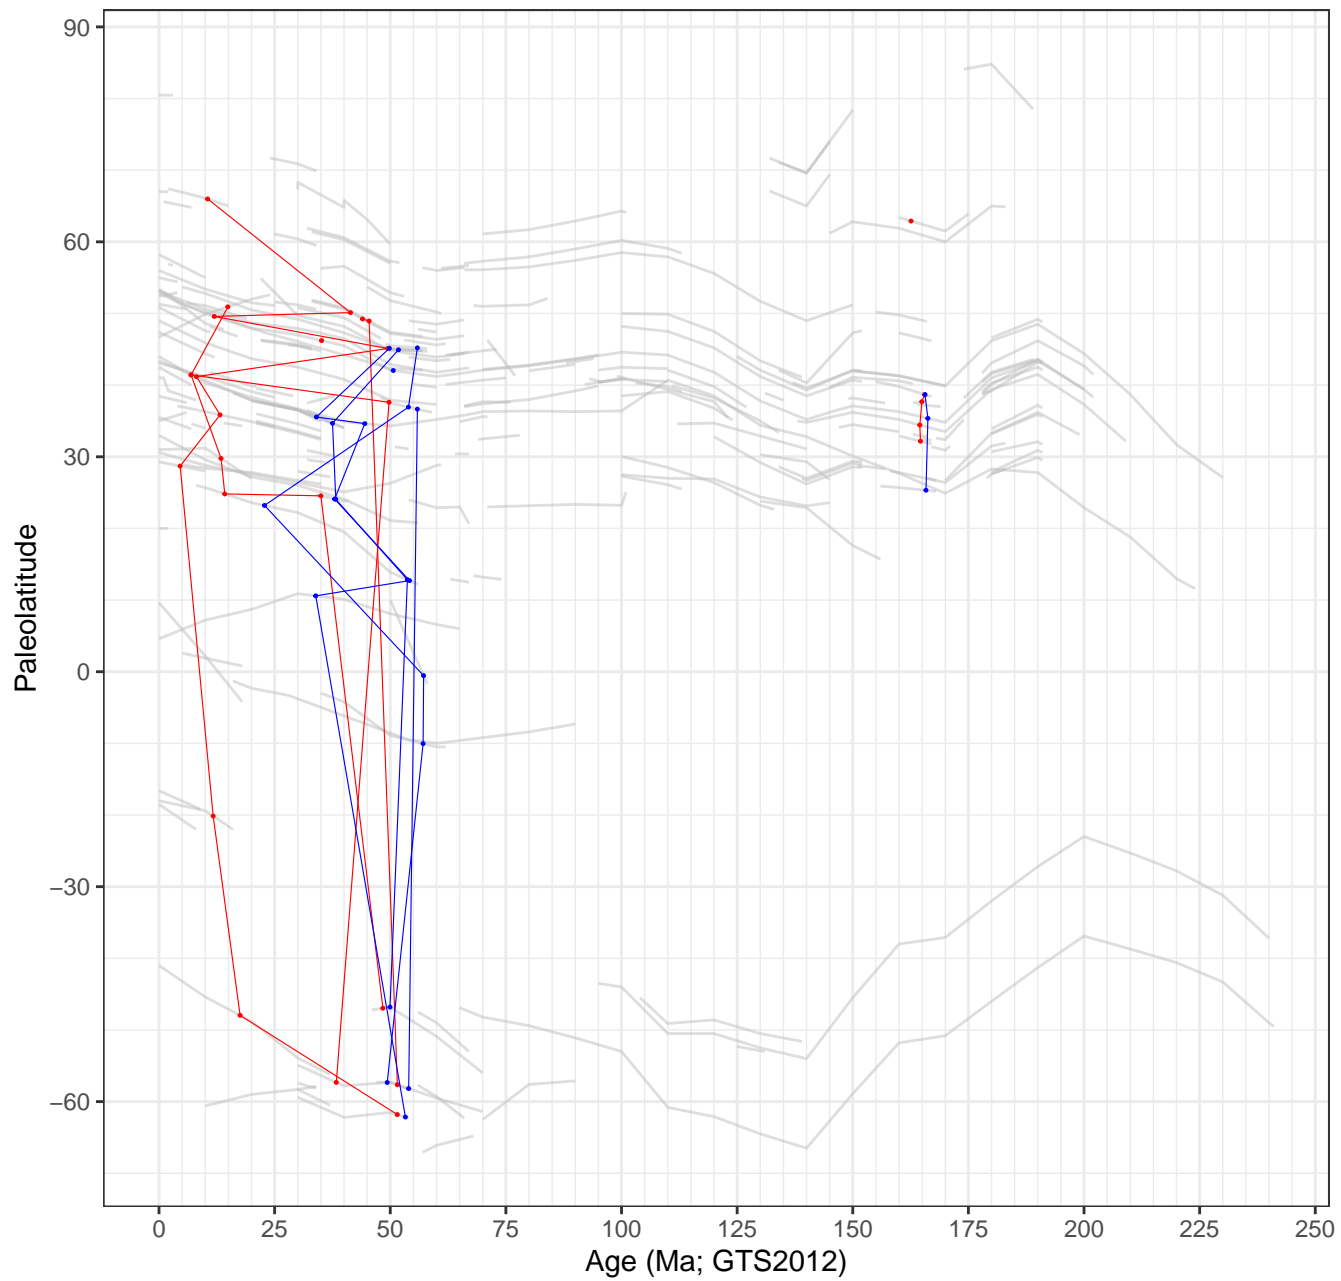

Supplement: Supplementary file 119 [file Genus Cleistosphaeridium.pdf › Supplement/Supplement 2/Genus 459 plots/Genus Cleistosphaeridium.pdf]

# Genus *Codoniella*

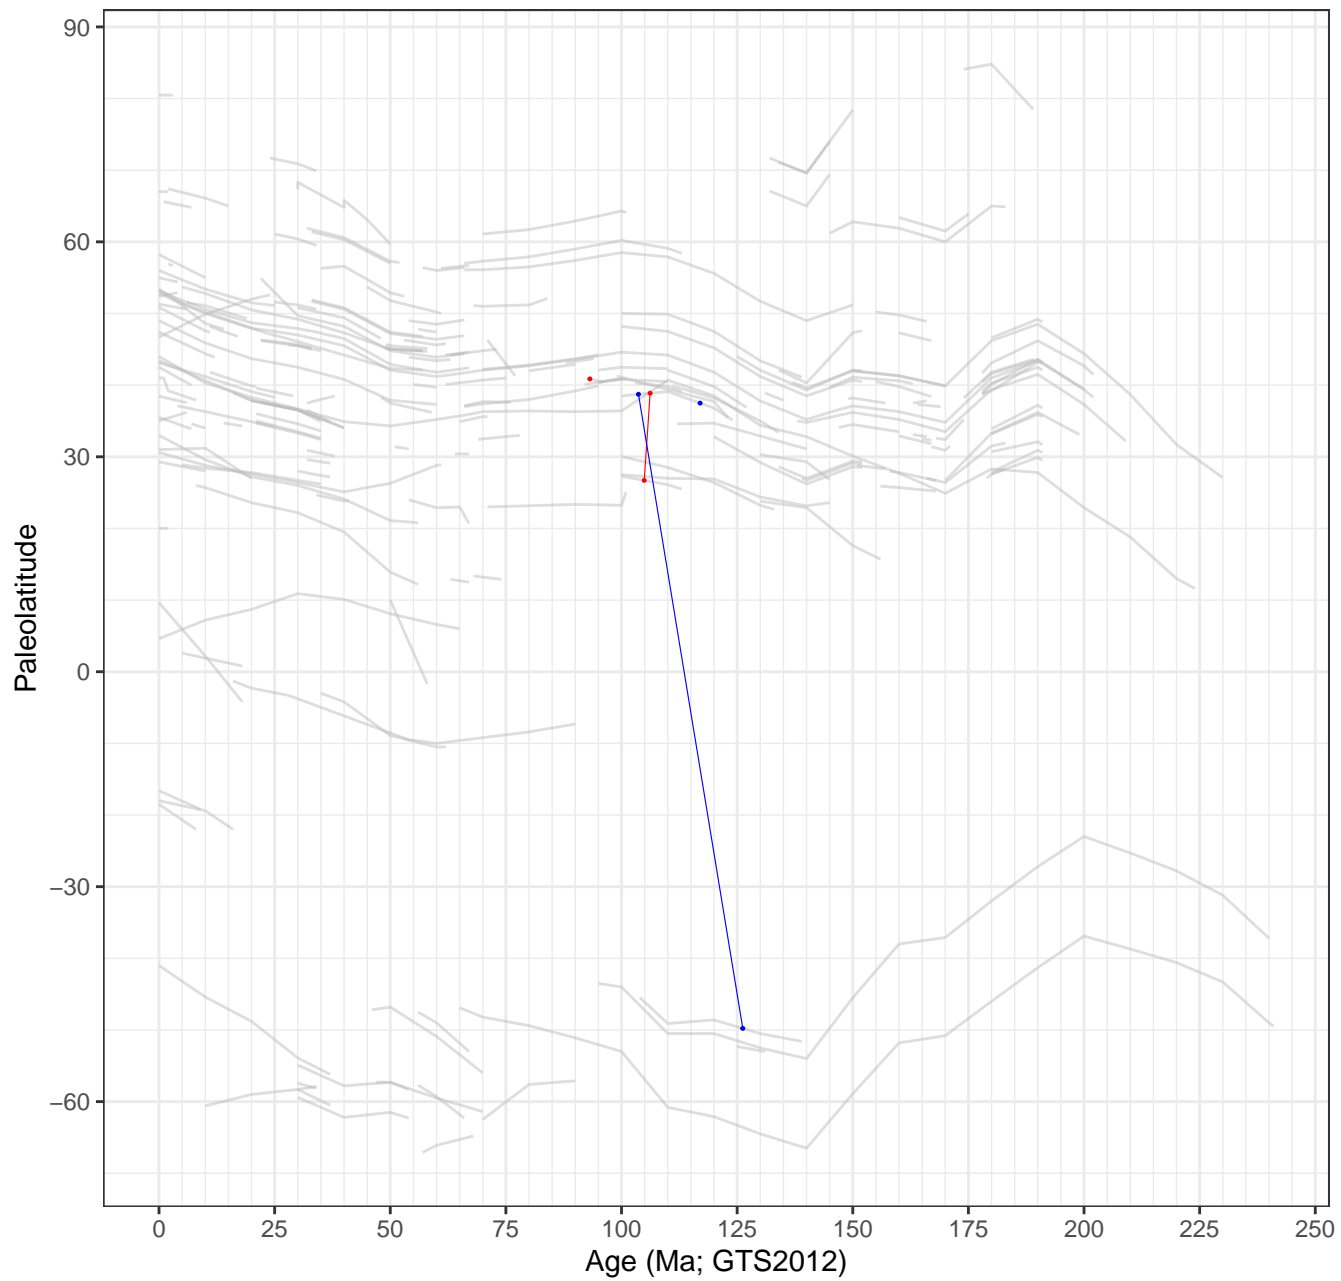

Supplement: Supplementary file 120 [file Genus Codoniella.pdf › Supplement/Supplement 2/Genus 459 plots/Genus Codoniella.pdf]

# Genus Comasphaeridium

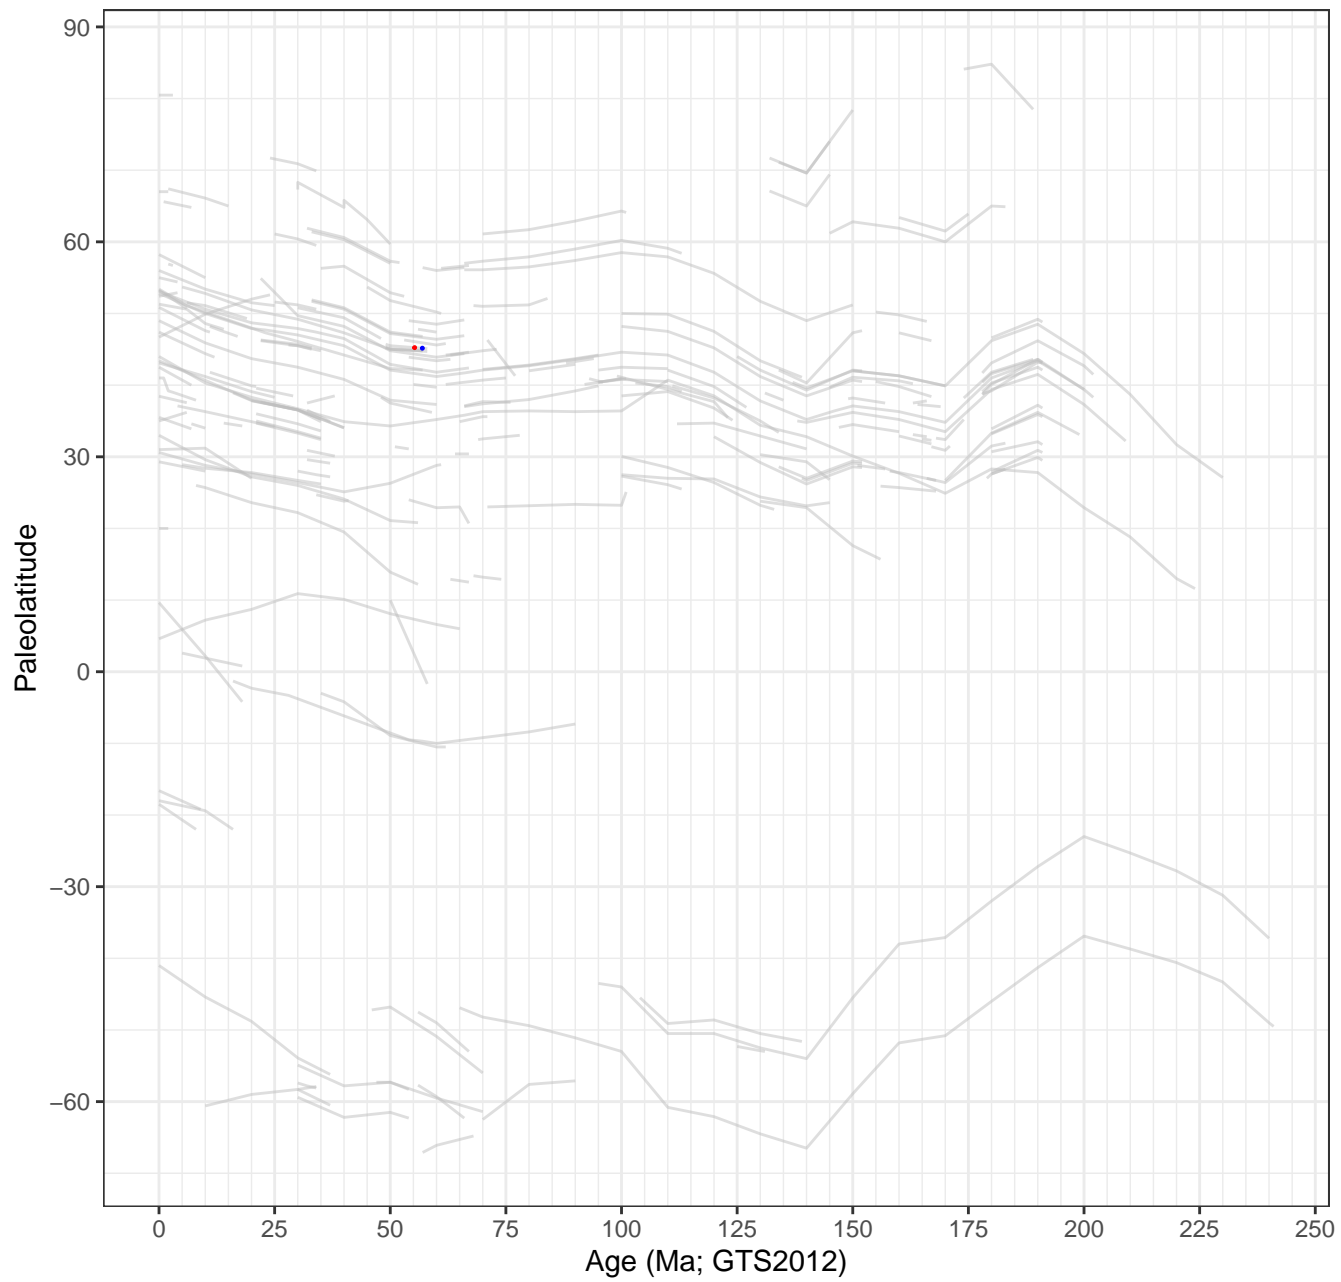

Supplement: Supplementary file 121 [file Genus Comasphaeridium.pdf › Supplement/Supplement 2/Genus 459 plots/Genus Comasphaeridium.pdf]

# Genus Cometodinium

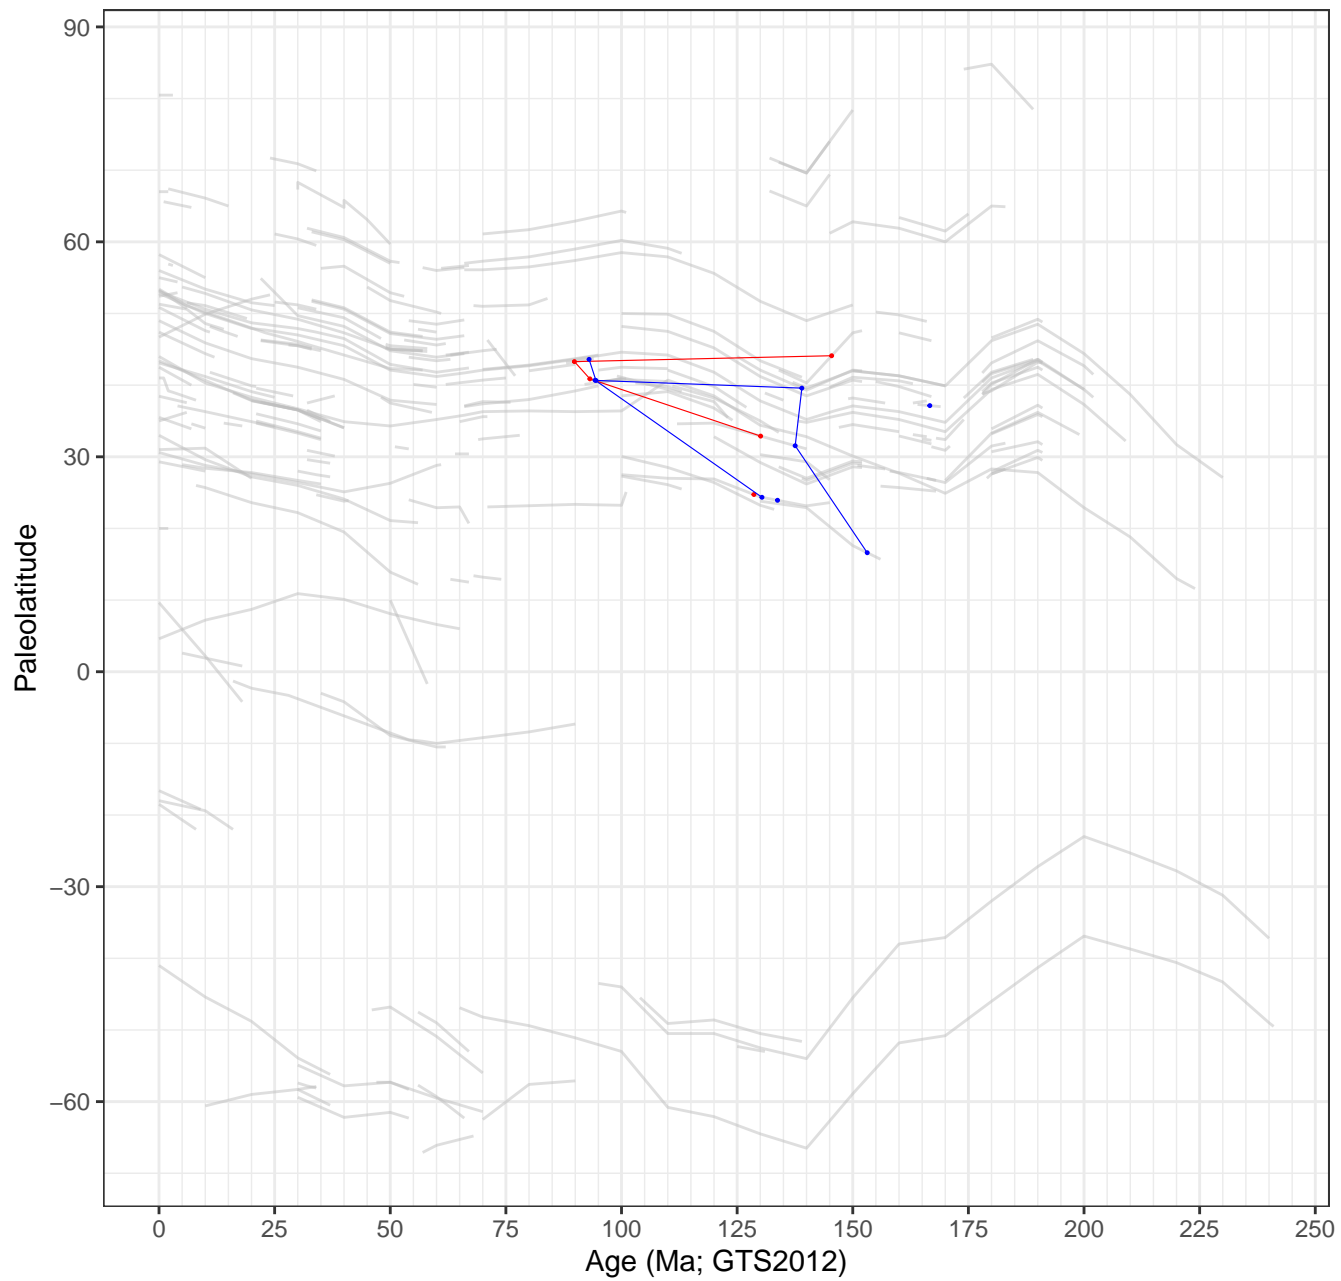

Supplement: Supplementary file 122 [file Genus Cometodinium.pdf › Supplement/Supplement 2/Genus 459 plots/Genus Cometodinium.pdf]

# Genus Compositosphaeridium

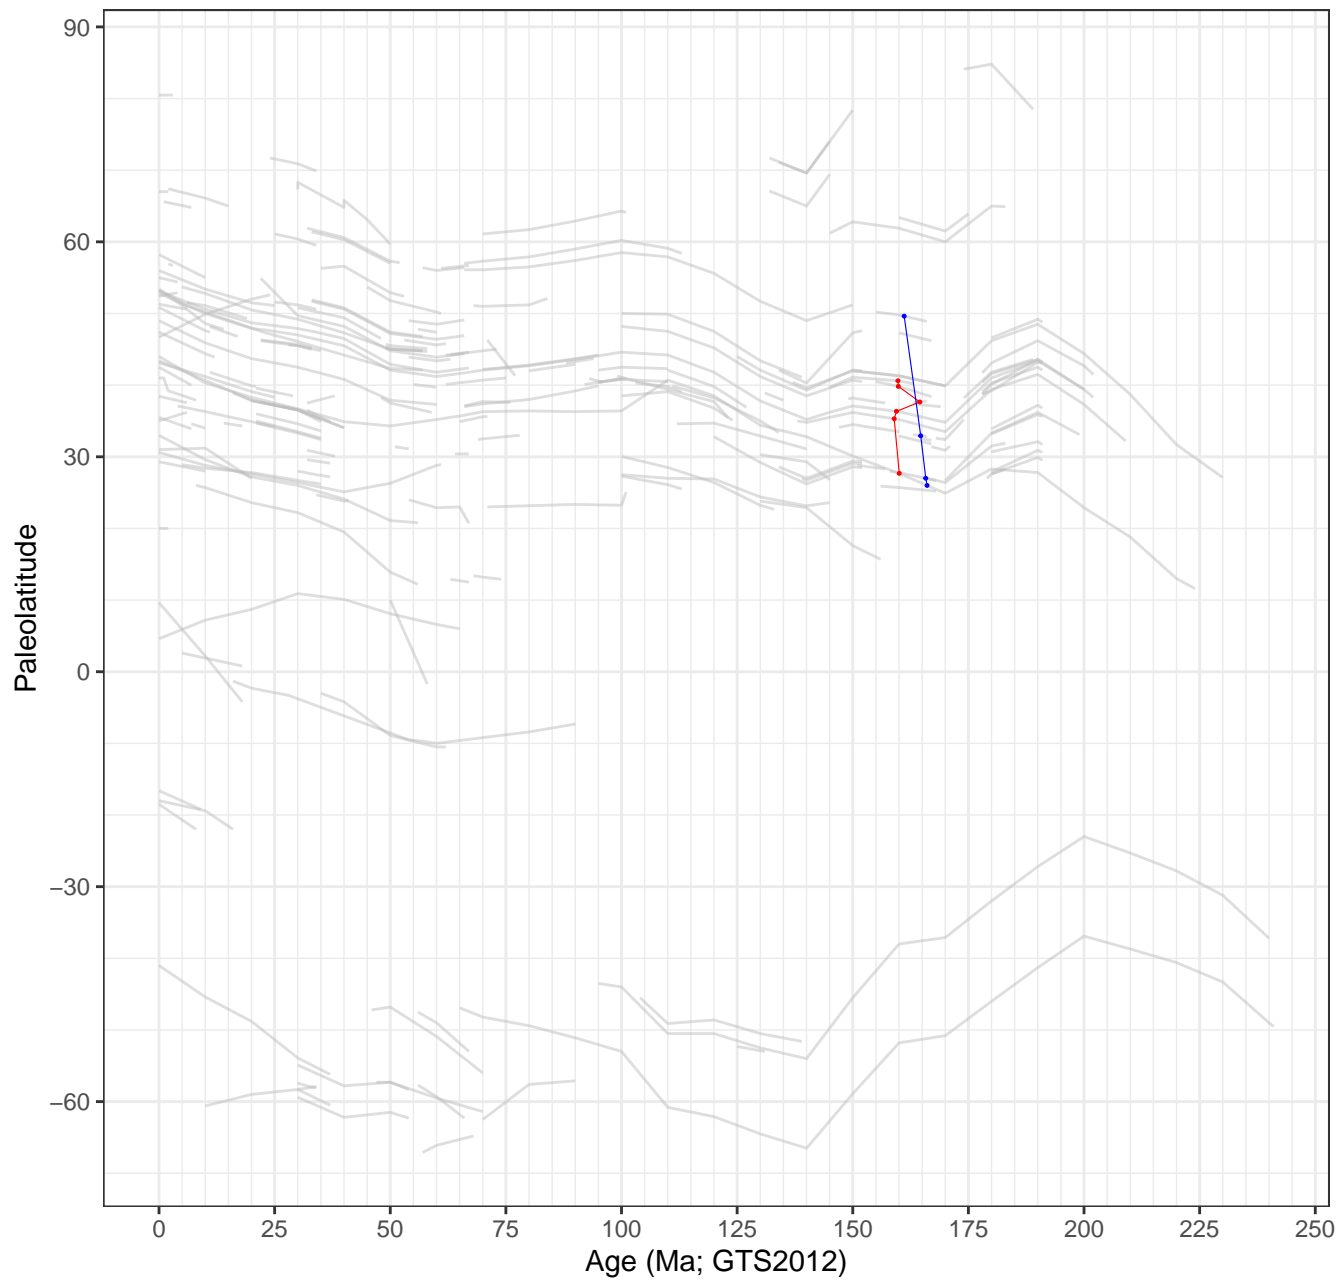

Supplement: Supplementary file 123 [file Genus Compositosphaeridium.pdf › Supplement/Supplement 2/Genus 459 plots/Genus Compositosphaeridium.pdf]

# Genus *Conneximura*

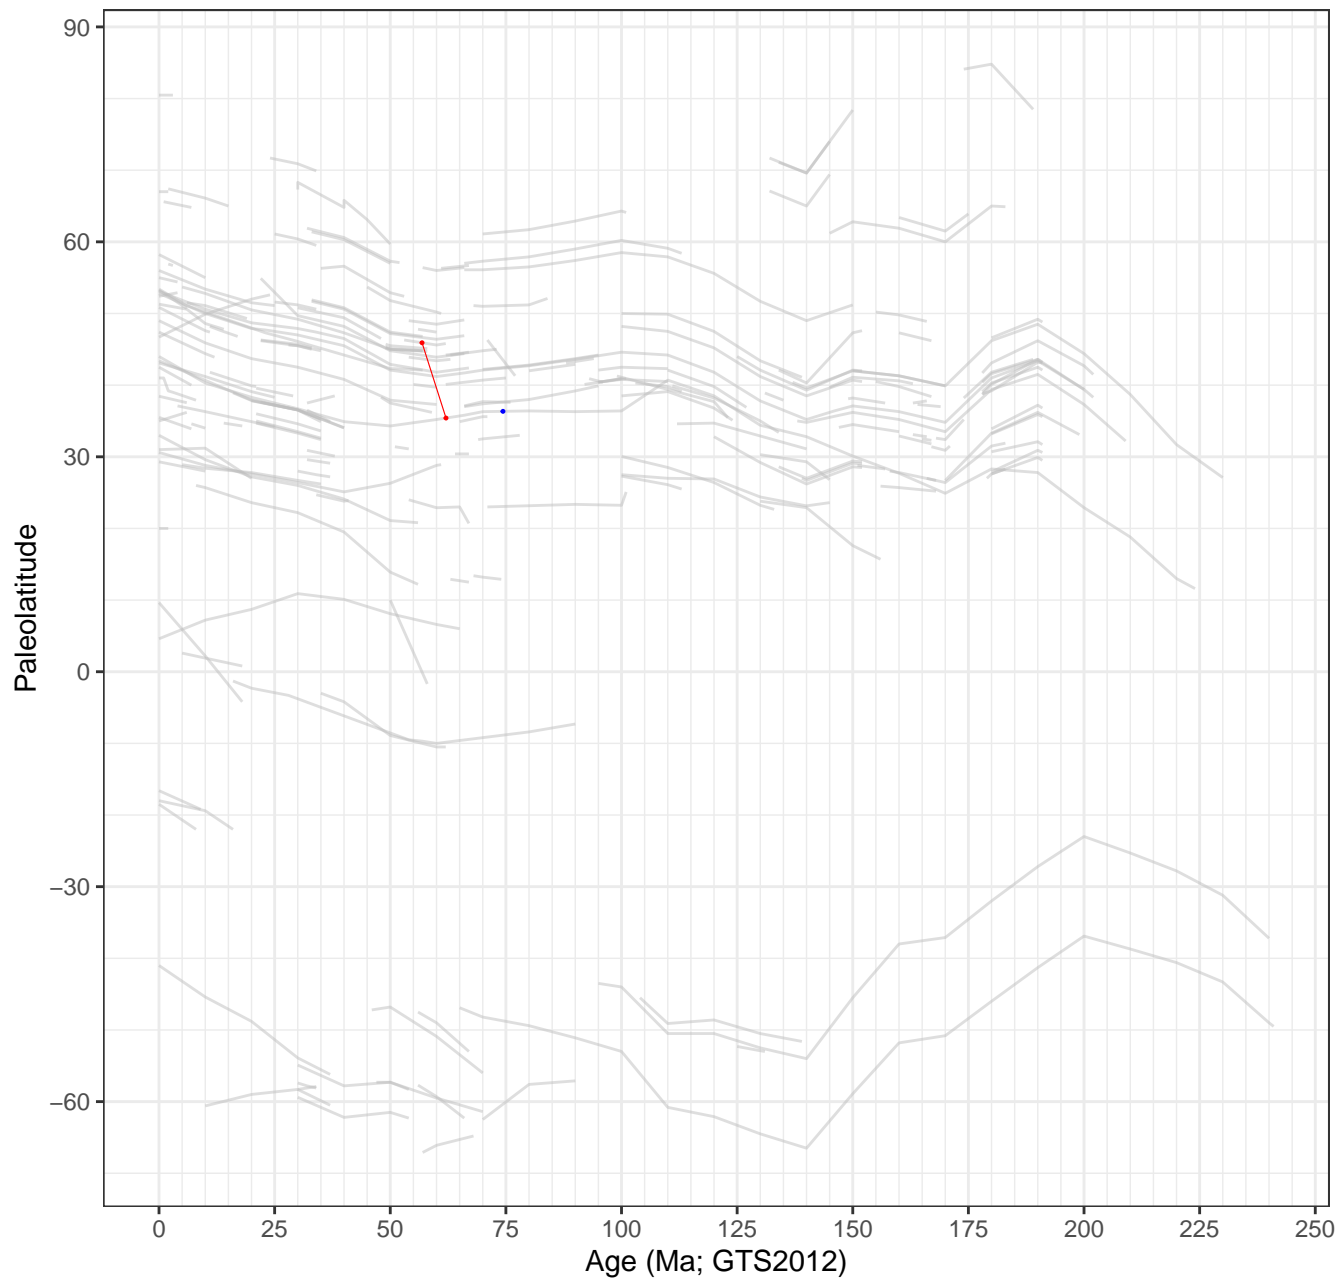

Supplement: Supplementary file 124 [file Genus Conneximura.pdf › Supplement/Supplement 2/Genus 459 plots/Genus Conneximura.pdf]

# Genus Conosphaeridium

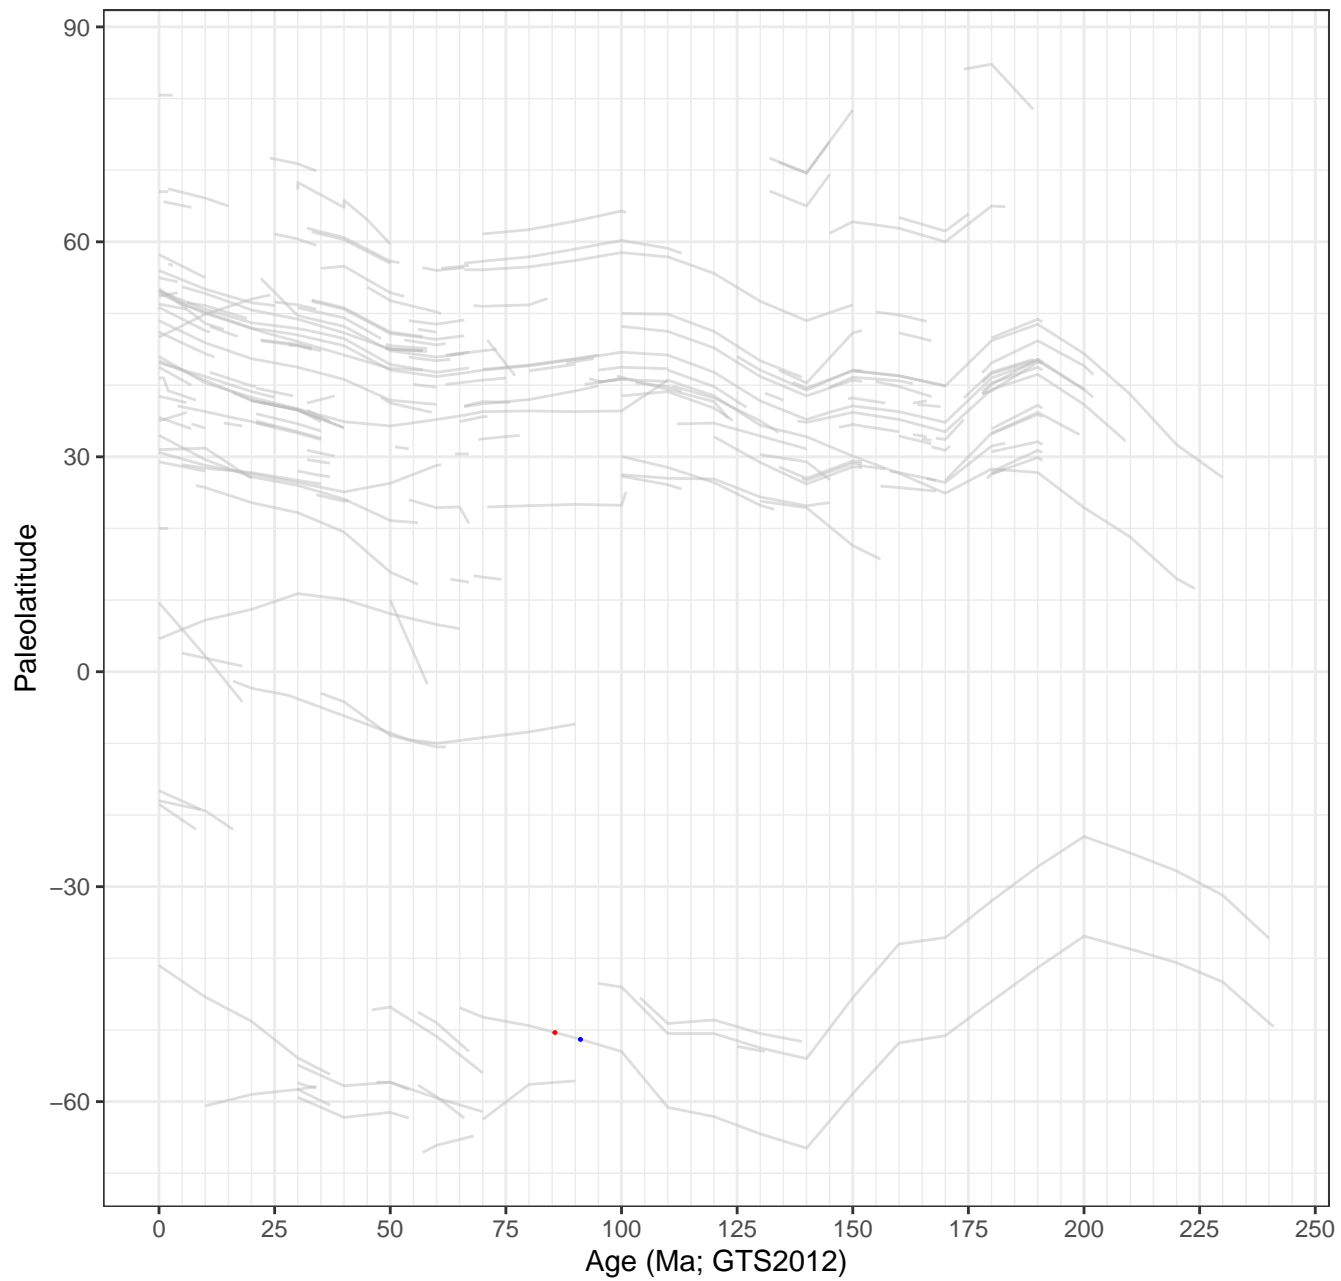

Supplement: Supplementary file 125 [file Genus Conosphaeridium.pdf › Supplement/Supplement 2/Genus 459 plots/Genus Conosphaeridium.pdf]

# Genus Cooksonidium

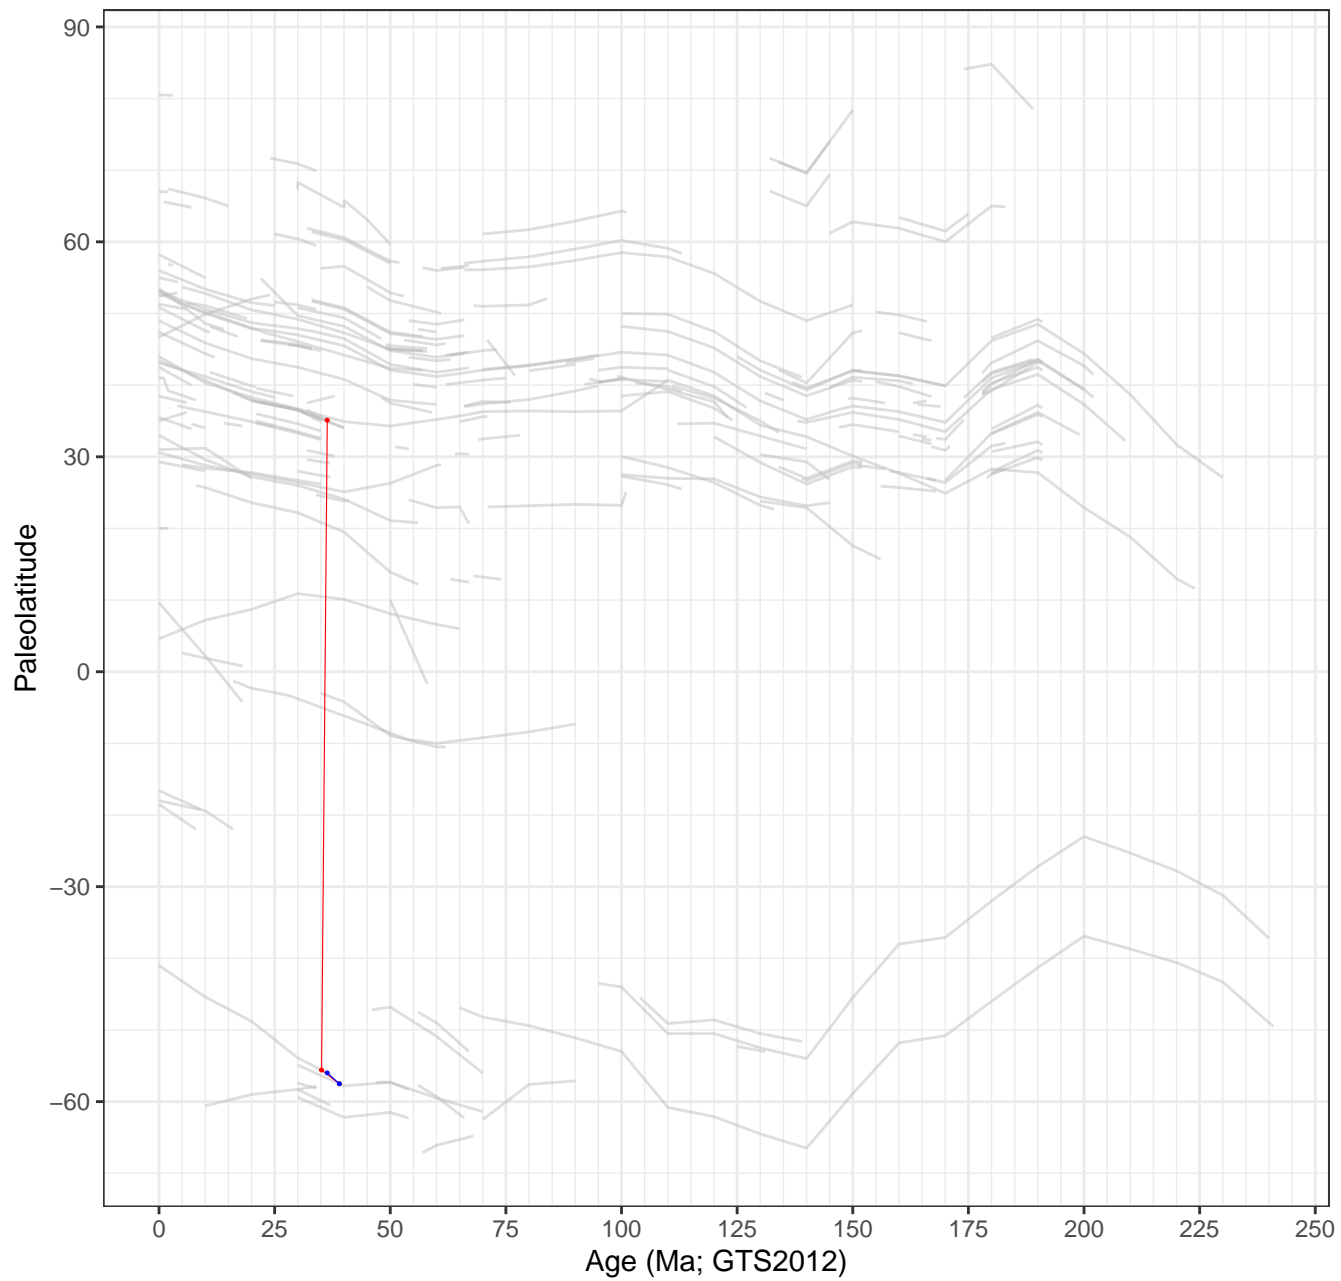

Supplement: Supplementary file 126 [file Genus Cooksonidium.pdf › Supplement/Supplement 2/Genus 459 plots/Genus Cooksonidium.pdf]

# Genus Corculodinium

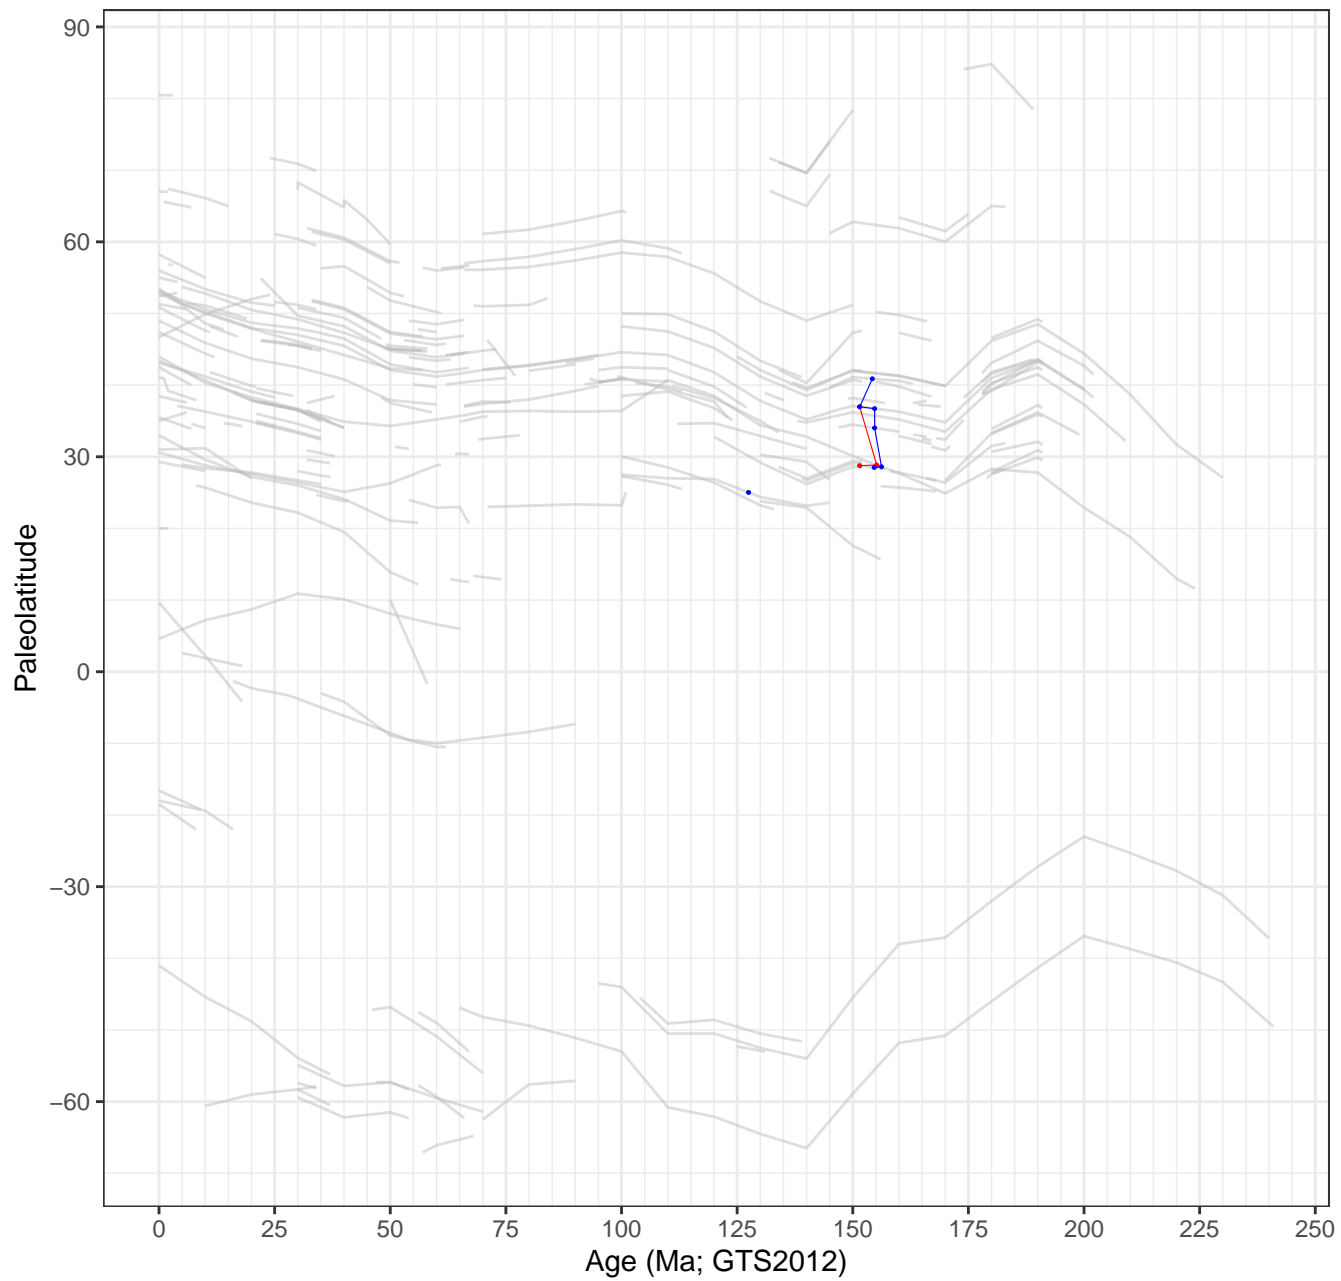

Supplement: Supplementary file 127 [file Genus Corculodinium.pdf › Supplement/Supplement 2/Genus 459 plots/Genus Corculodinium.pdf]

# Genus Cordosphaeridium

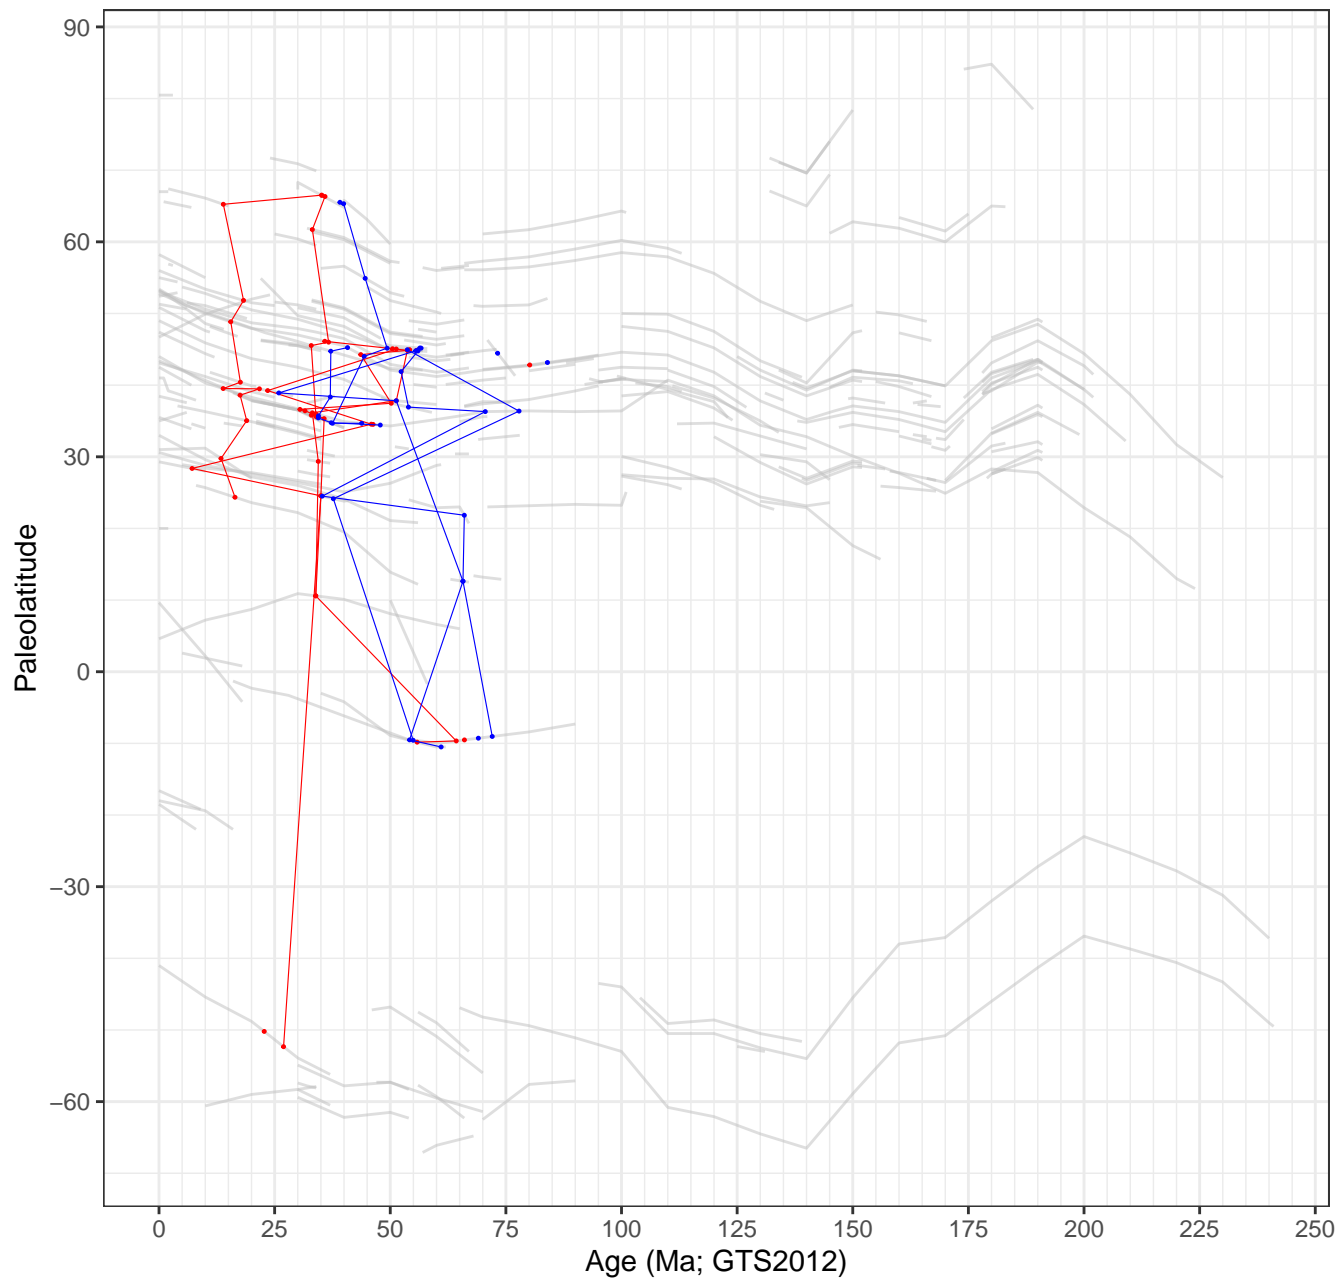

Supplement: Supplementary file 128 [file Genus Cordosphaeridium.pdf › Supplement/Supplement 2/Genus 459 plots/Genus Cordosphaeridium.pdf]

# Genus Coronifera

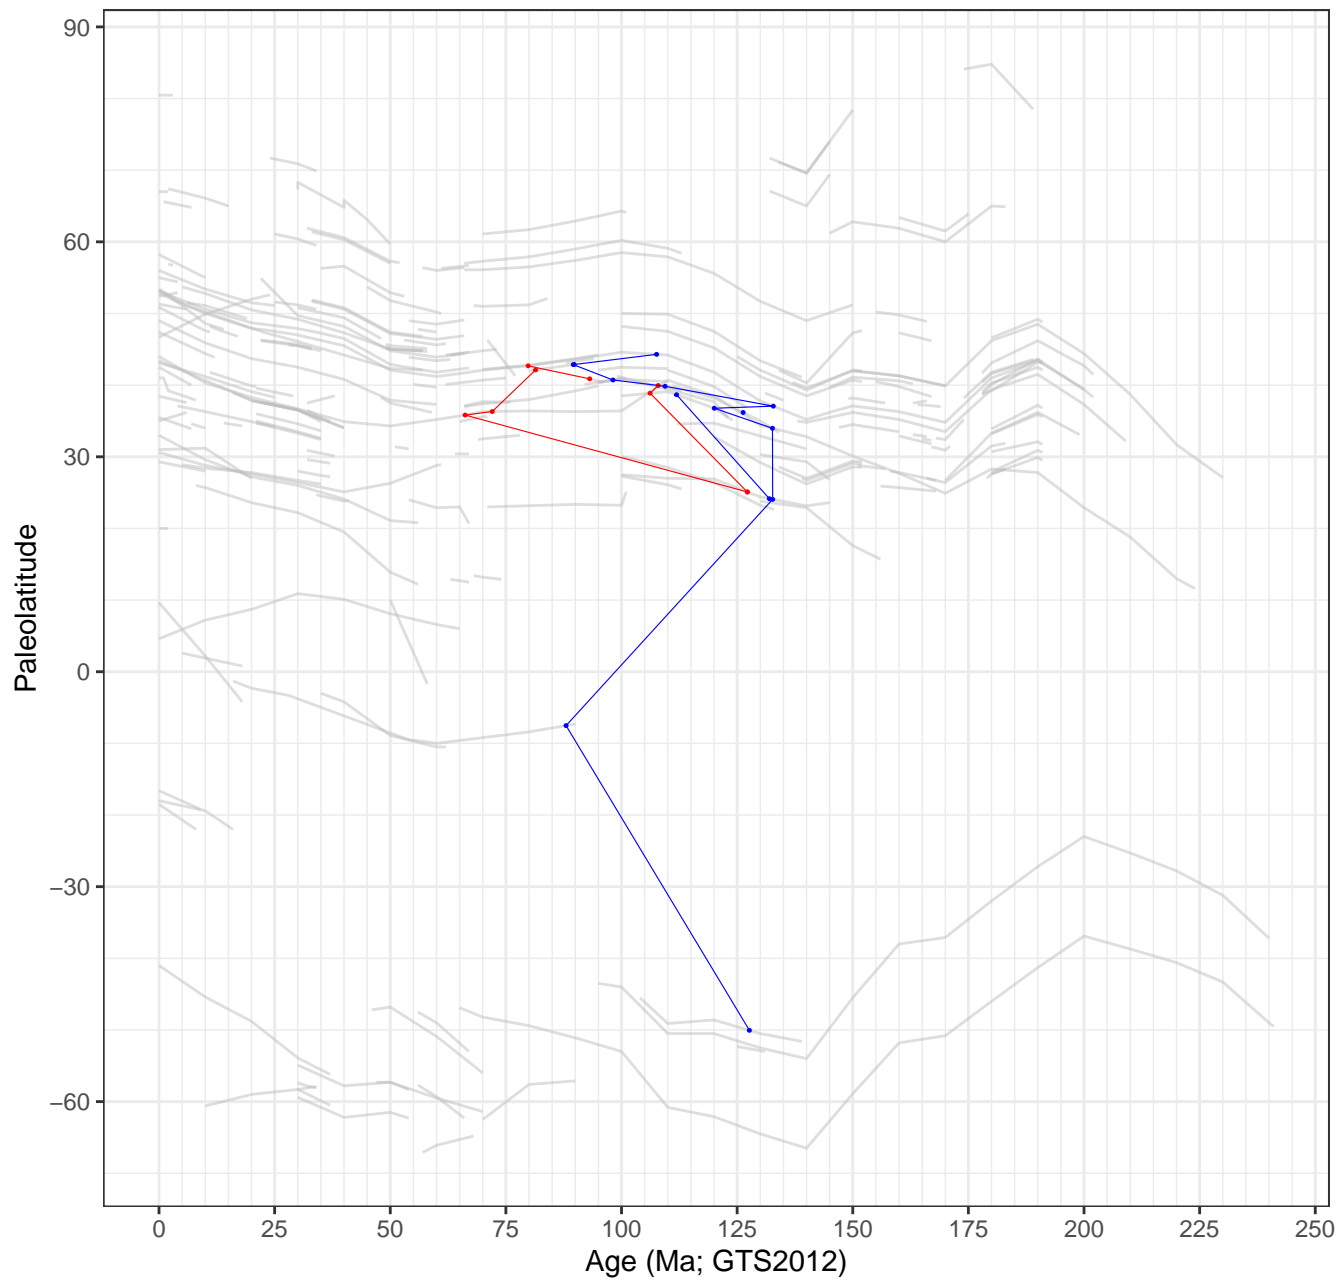

Supplement: Supplementary file 129 [file Genus Coronifera.pdf › Supplement/Supplement 2/Genus 459 plots/Genus Coronifera.pdf]

# Genus *Corrudinium*

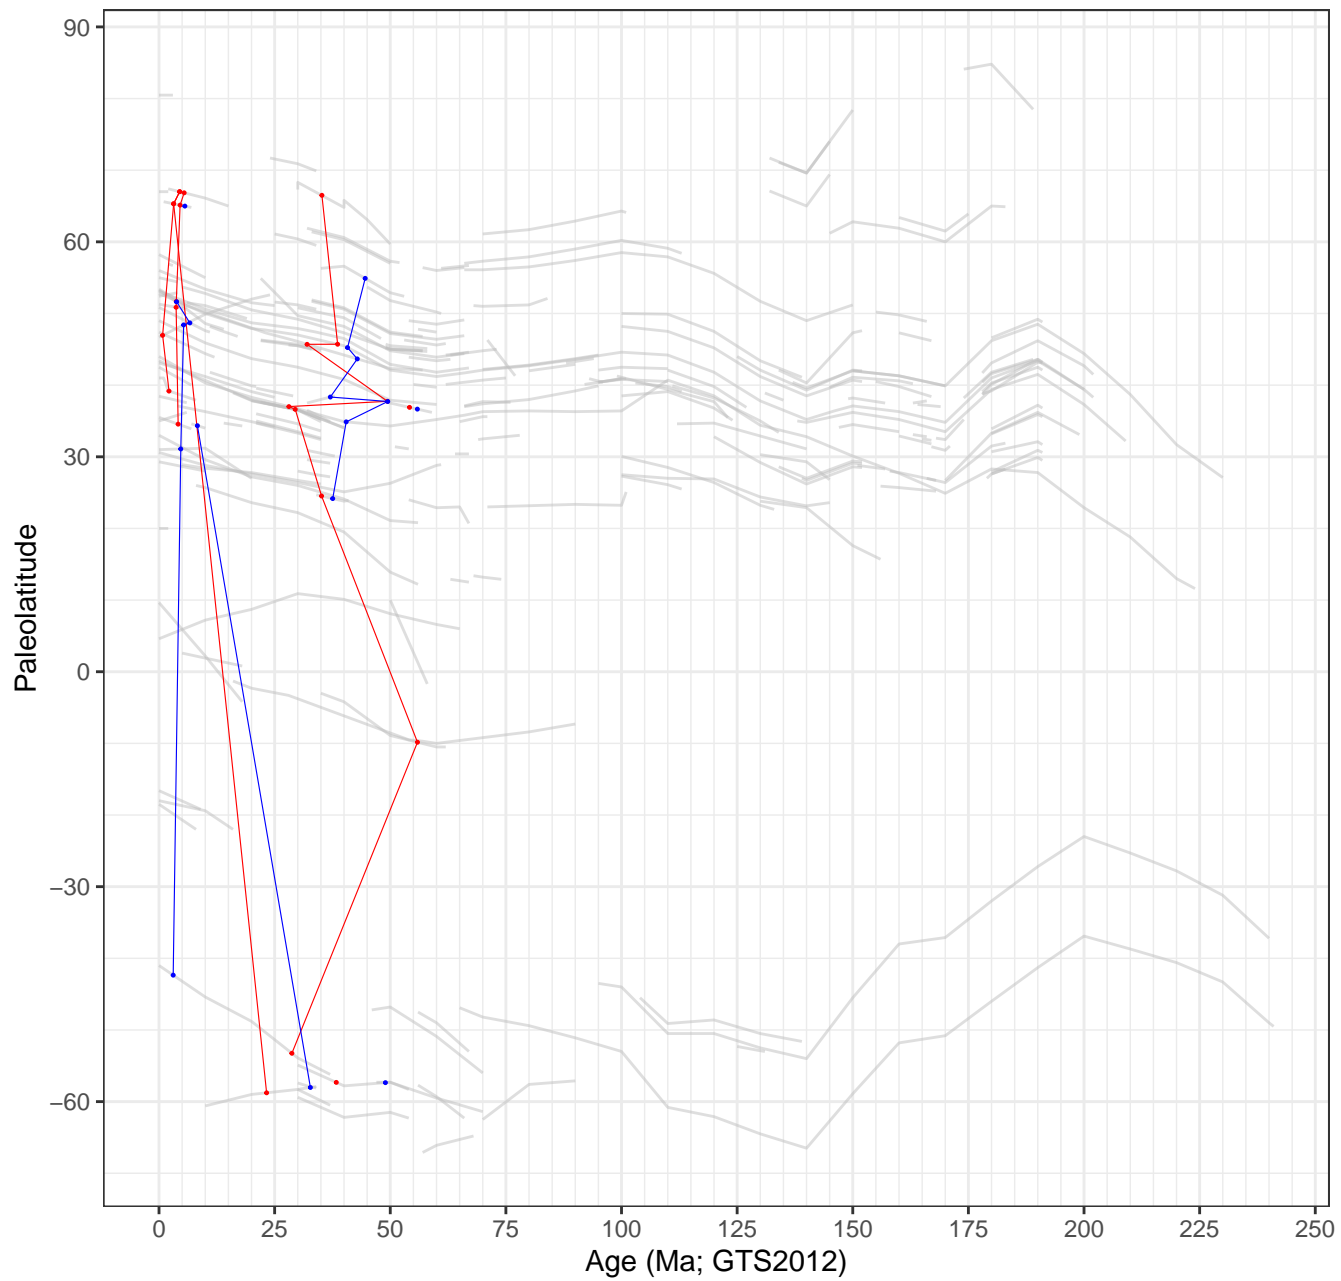

Supplement: Supplementary file 130 [file Genus Corrudinium.pdf › Supplement/Supplement 2/Genus 459 plots/Genus Corrudinium.pdf]

# Genus Costacysta

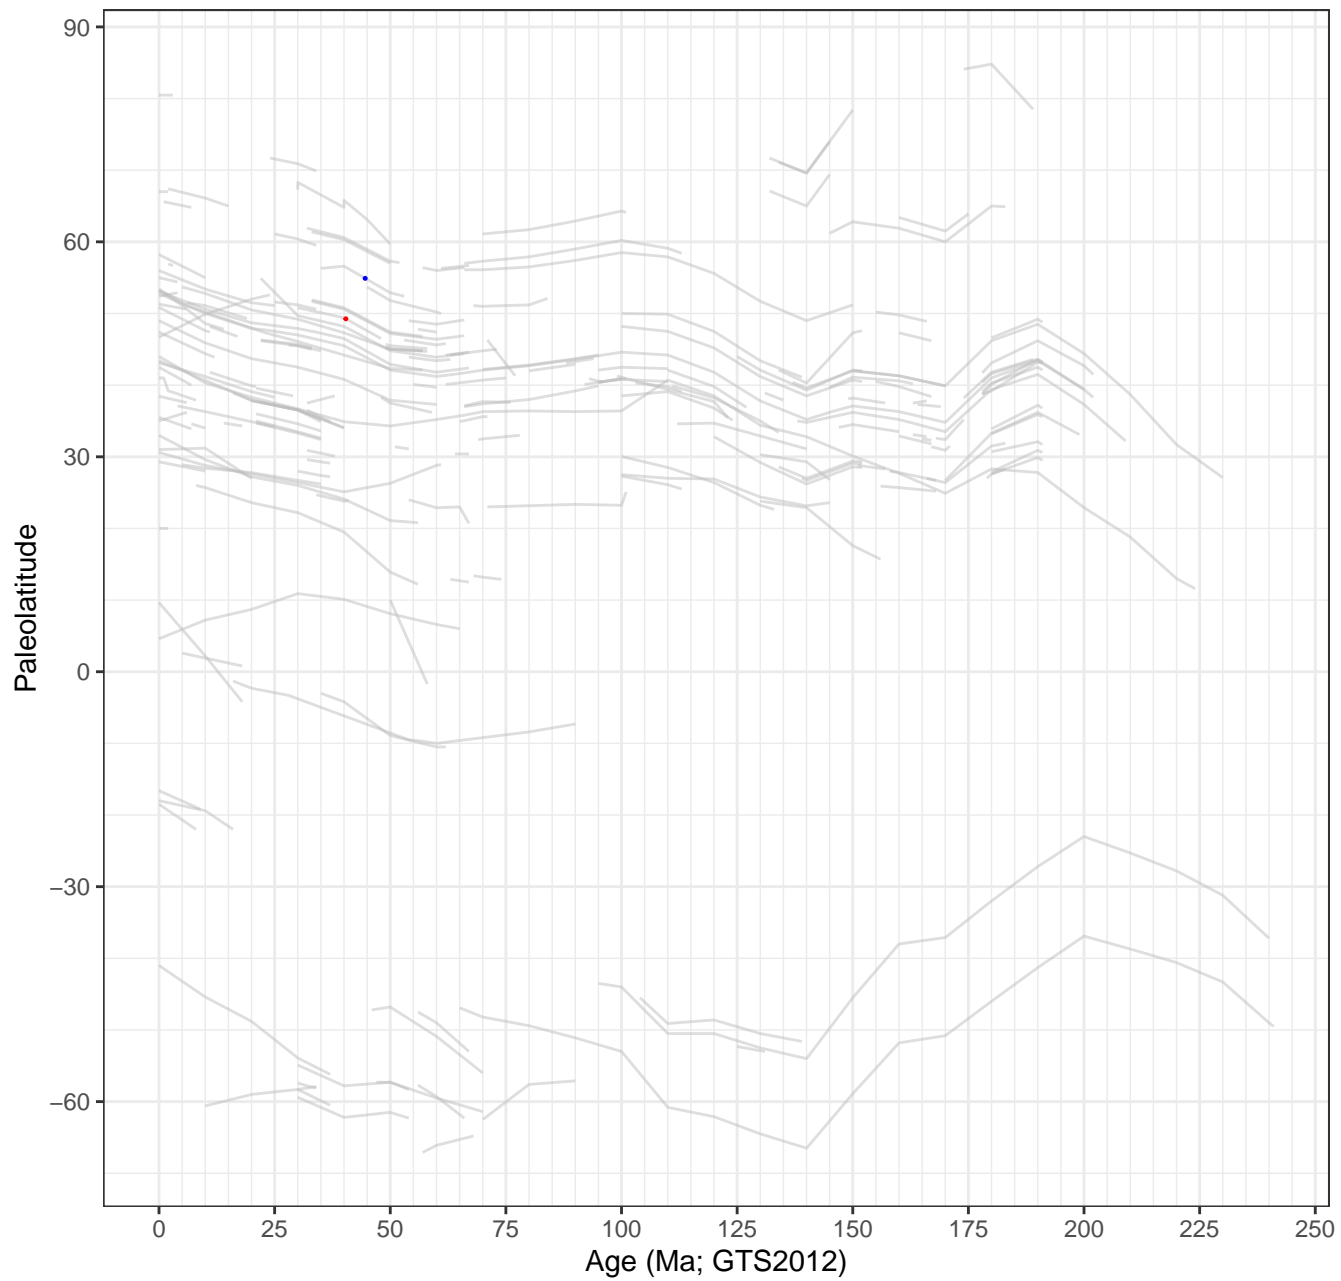

Supplement: Supplementary file 131 [file Genus Costacysta.pdf › Supplement/Supplement 2/Genus 459 plots/Genus Costacysta.pdf]

# Genus Cousteaudinium

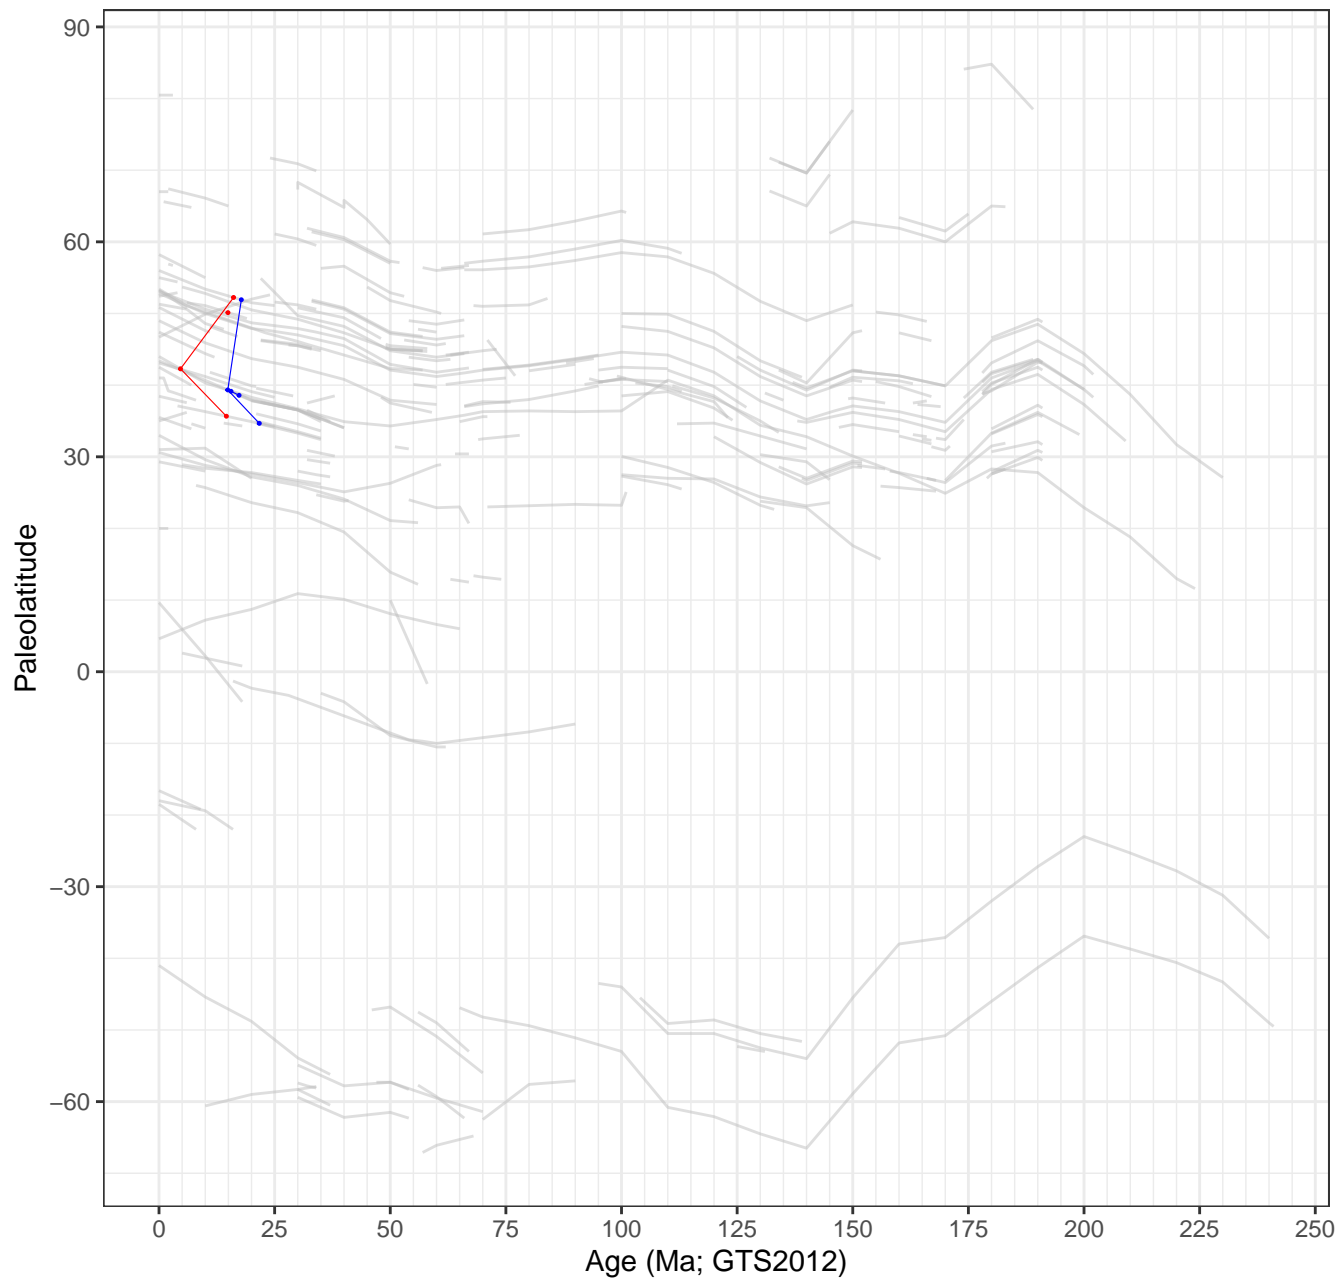

Supplement: Supplementary file 132 [file Genus Cousteaudinium.pdf › Supplement/Supplement 2/Genus 459 plots/Genus Cousteaudinium.pdf]

# Genus Craspedodinium

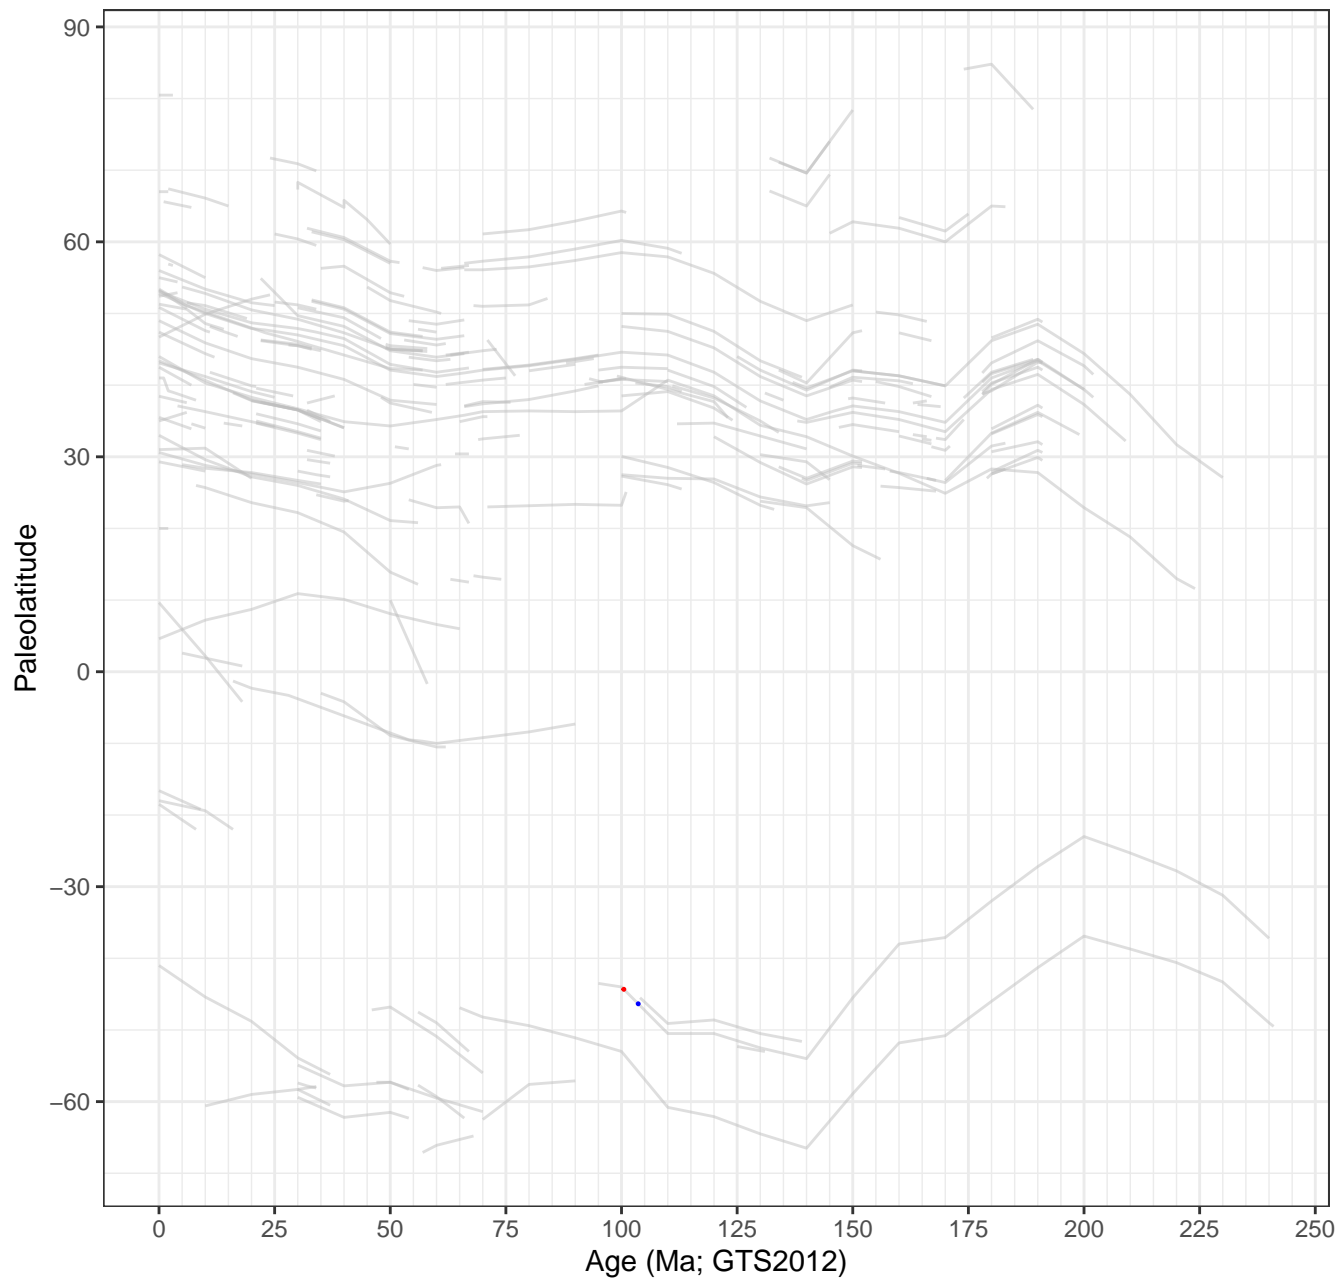

Supplement: Supplementary file 133 [file Genus Craspedodinium.pdf › Supplement/Supplement 2/Genus 459 plots/Genus Craspedodinium.pdf]

# Genus *Cribroperidinium*

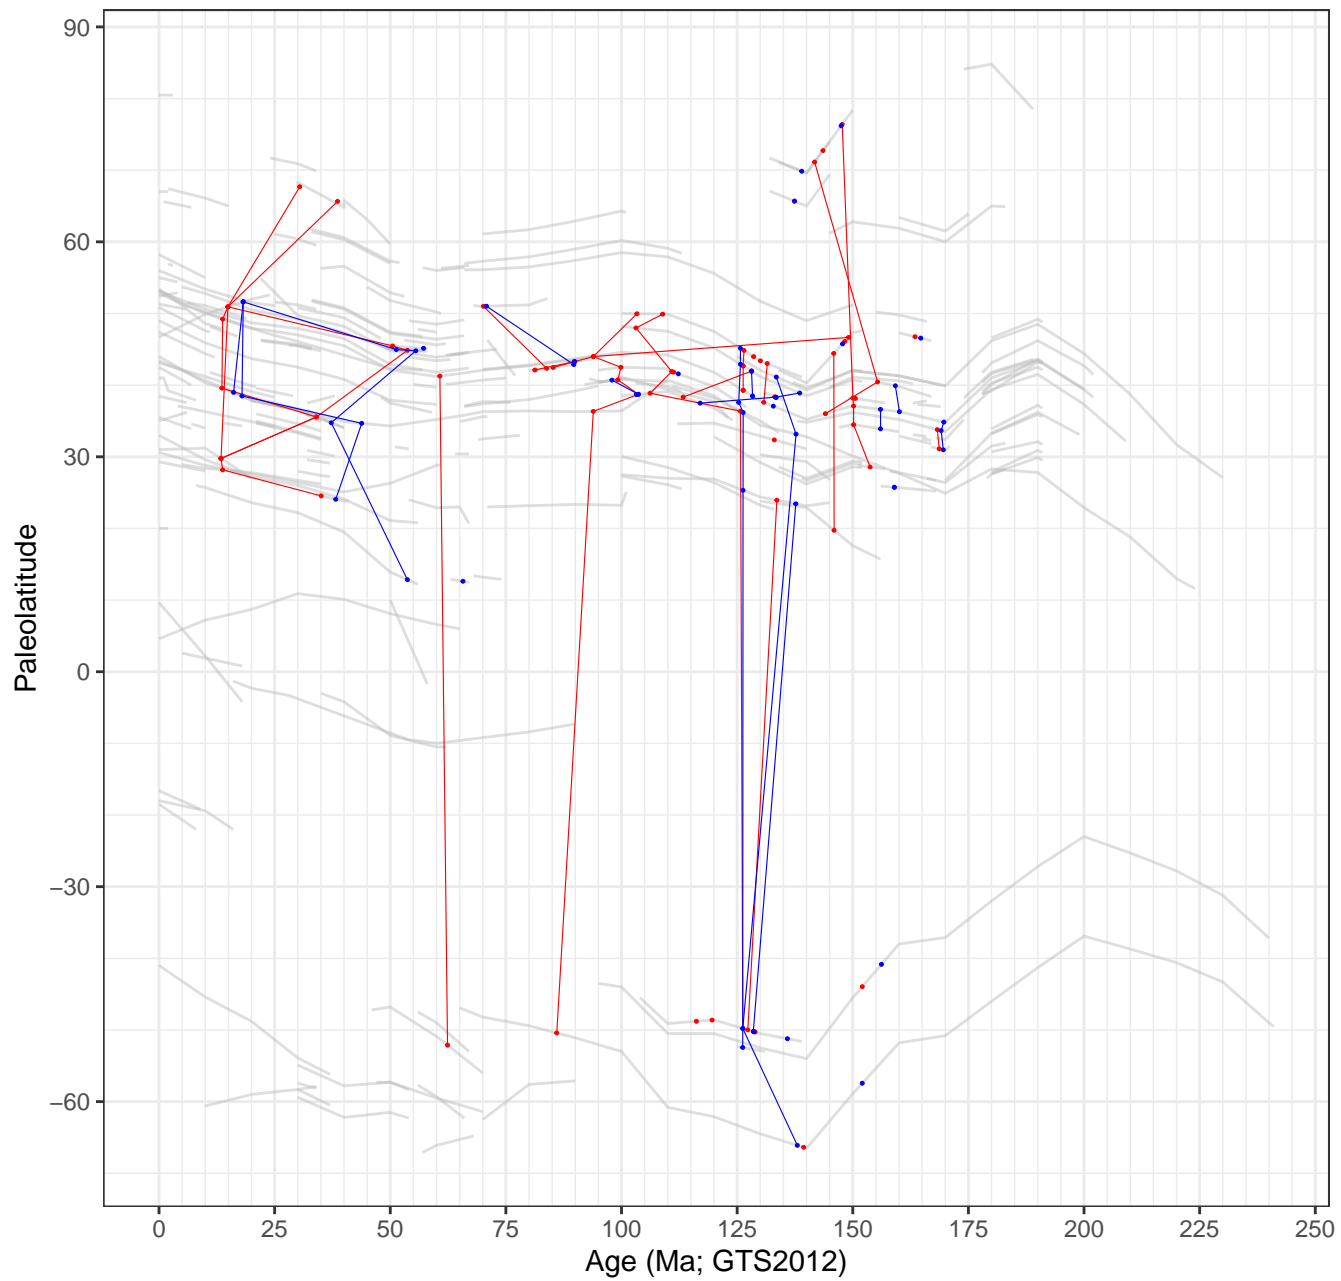

Supplement: Supplementary file 134 [file Genus Cribroperidinium.pdf › Supplement/Supplement 2/Genus 459 plots/Genus Cribroperidinium.pdf]

# Genus Cristadinium

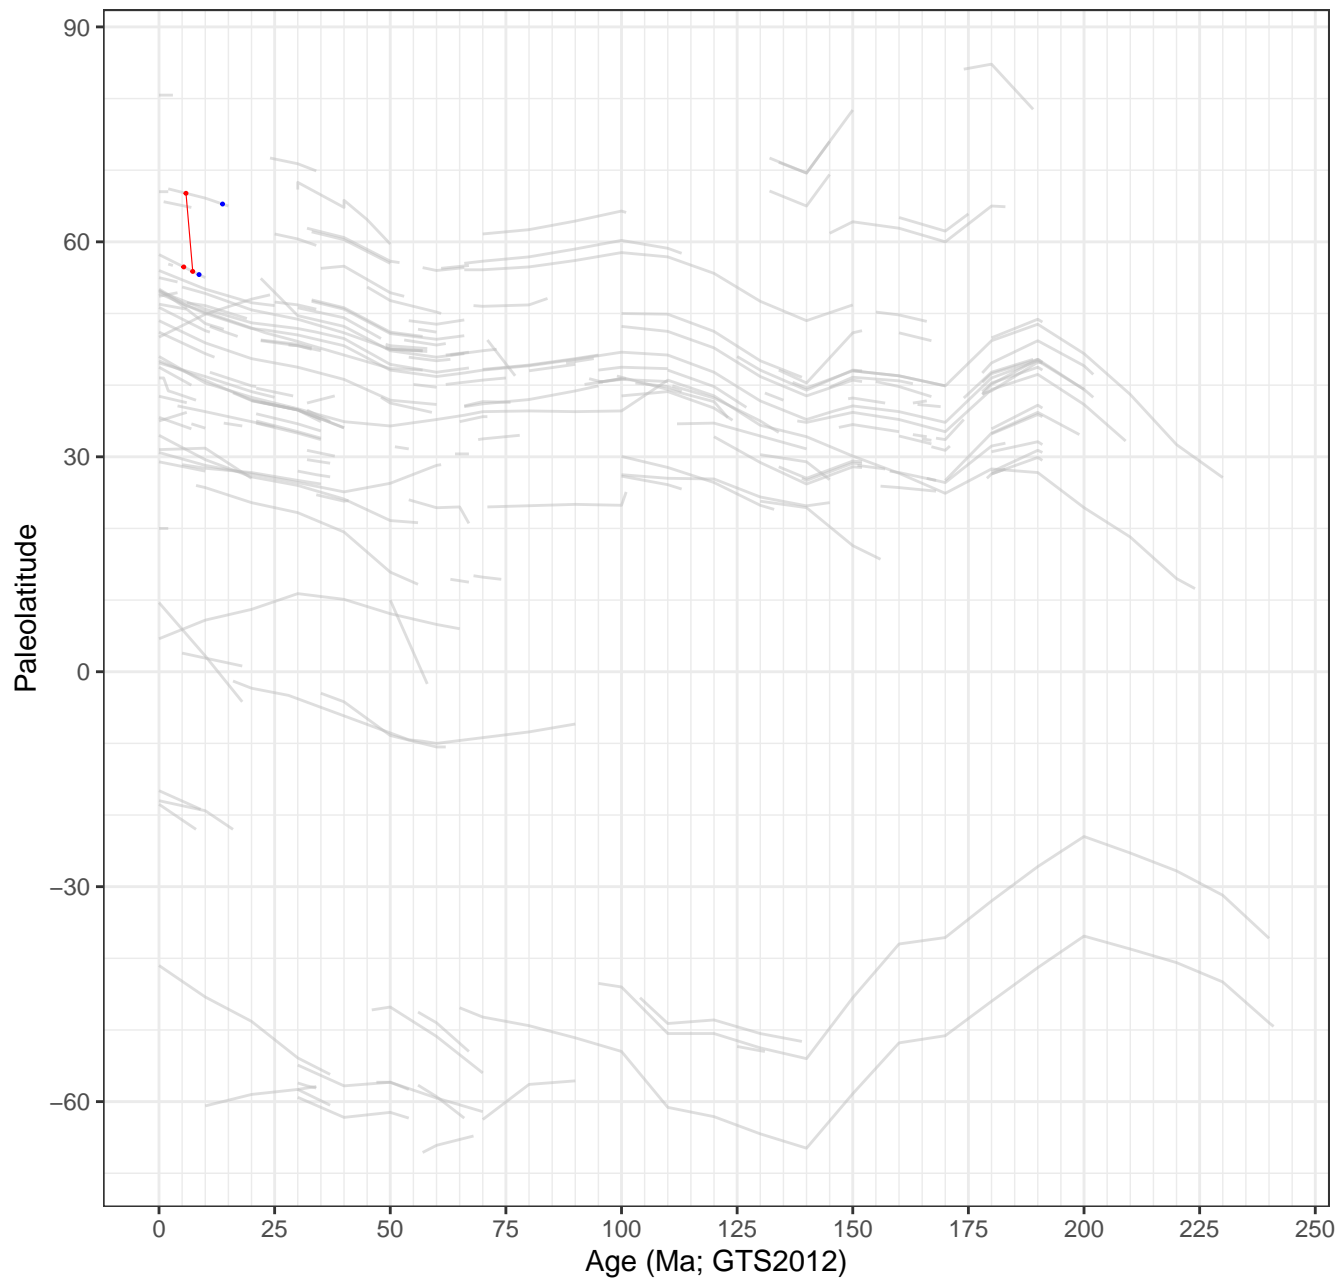

Supplement: Supplementary file 135 [file Genus Cristadinium.pdf › Supplement/Supplement 2/Genus 459 plots/Genus Cristadinium.pdf]

# Genus Cryodinium

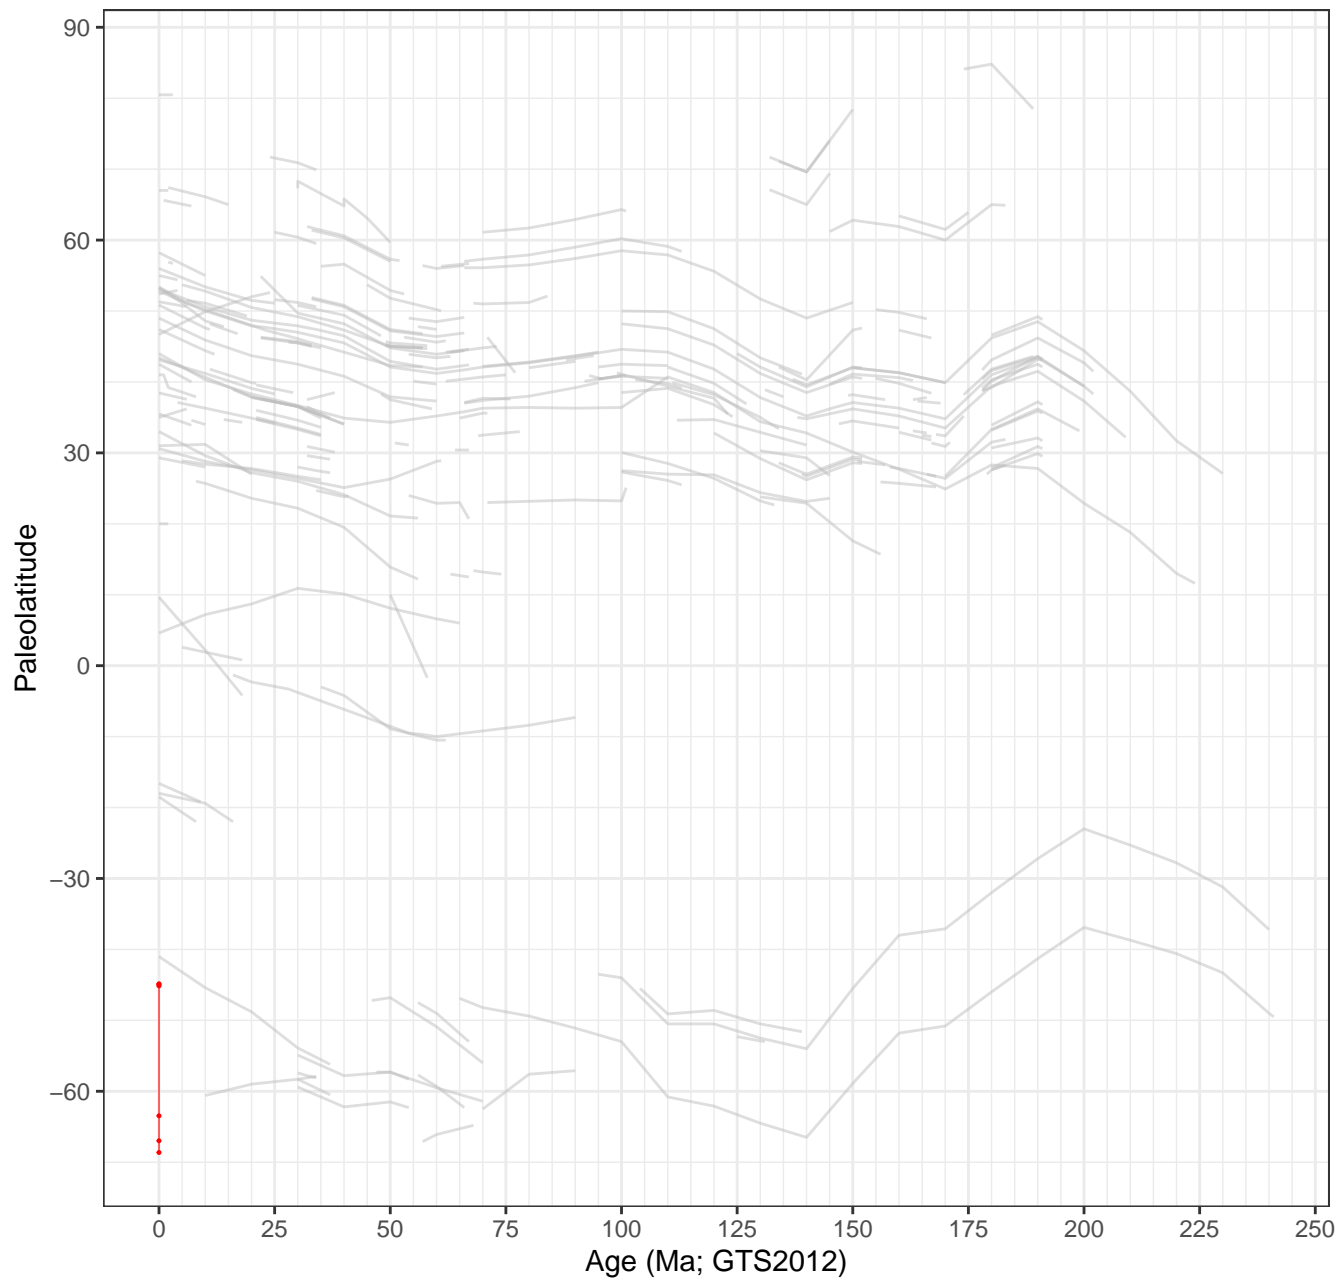

Supplement: Supplementary file 136 [file Genus Cryodinium.pdf › Supplement/Supplement 2/Genus 459 plots/Genus Cryodinium.pdf]

# Genus Ctenidodinium

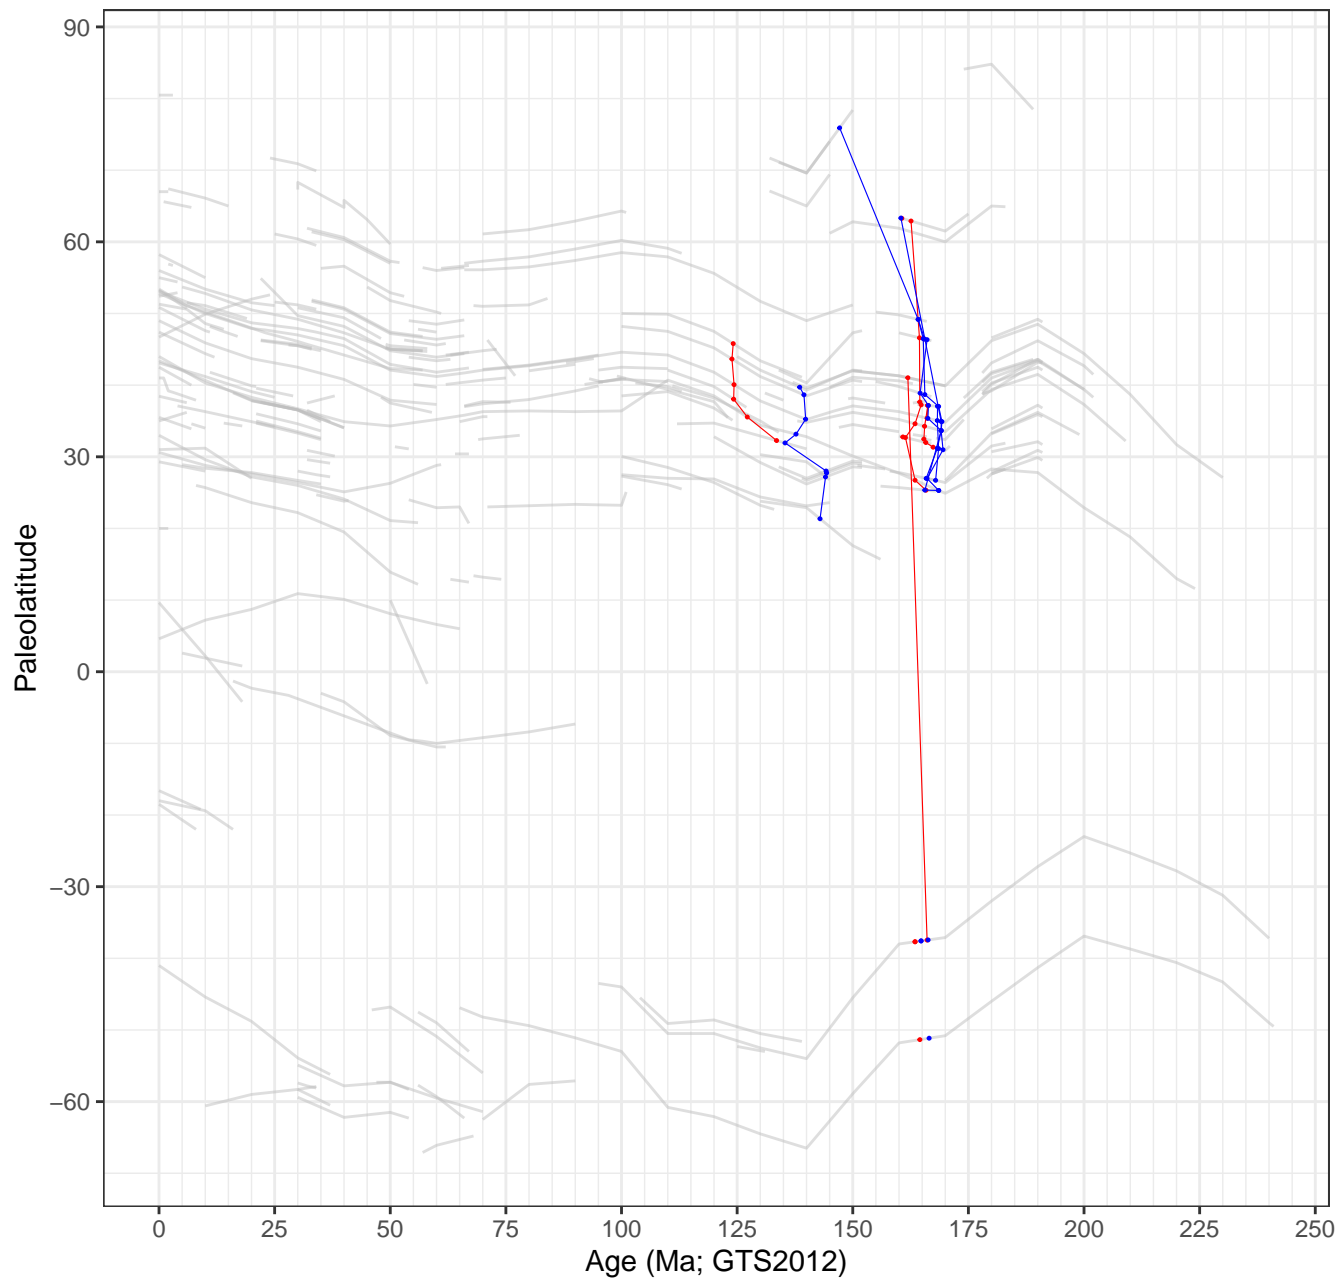

Supplement: Supplementary file 137 [file Genus Ctenidodinium.pdf › Supplement/Supplement 2/Genus 459 plots/Genus Ctenidodinium.pdf]

# Genus Culversphaera

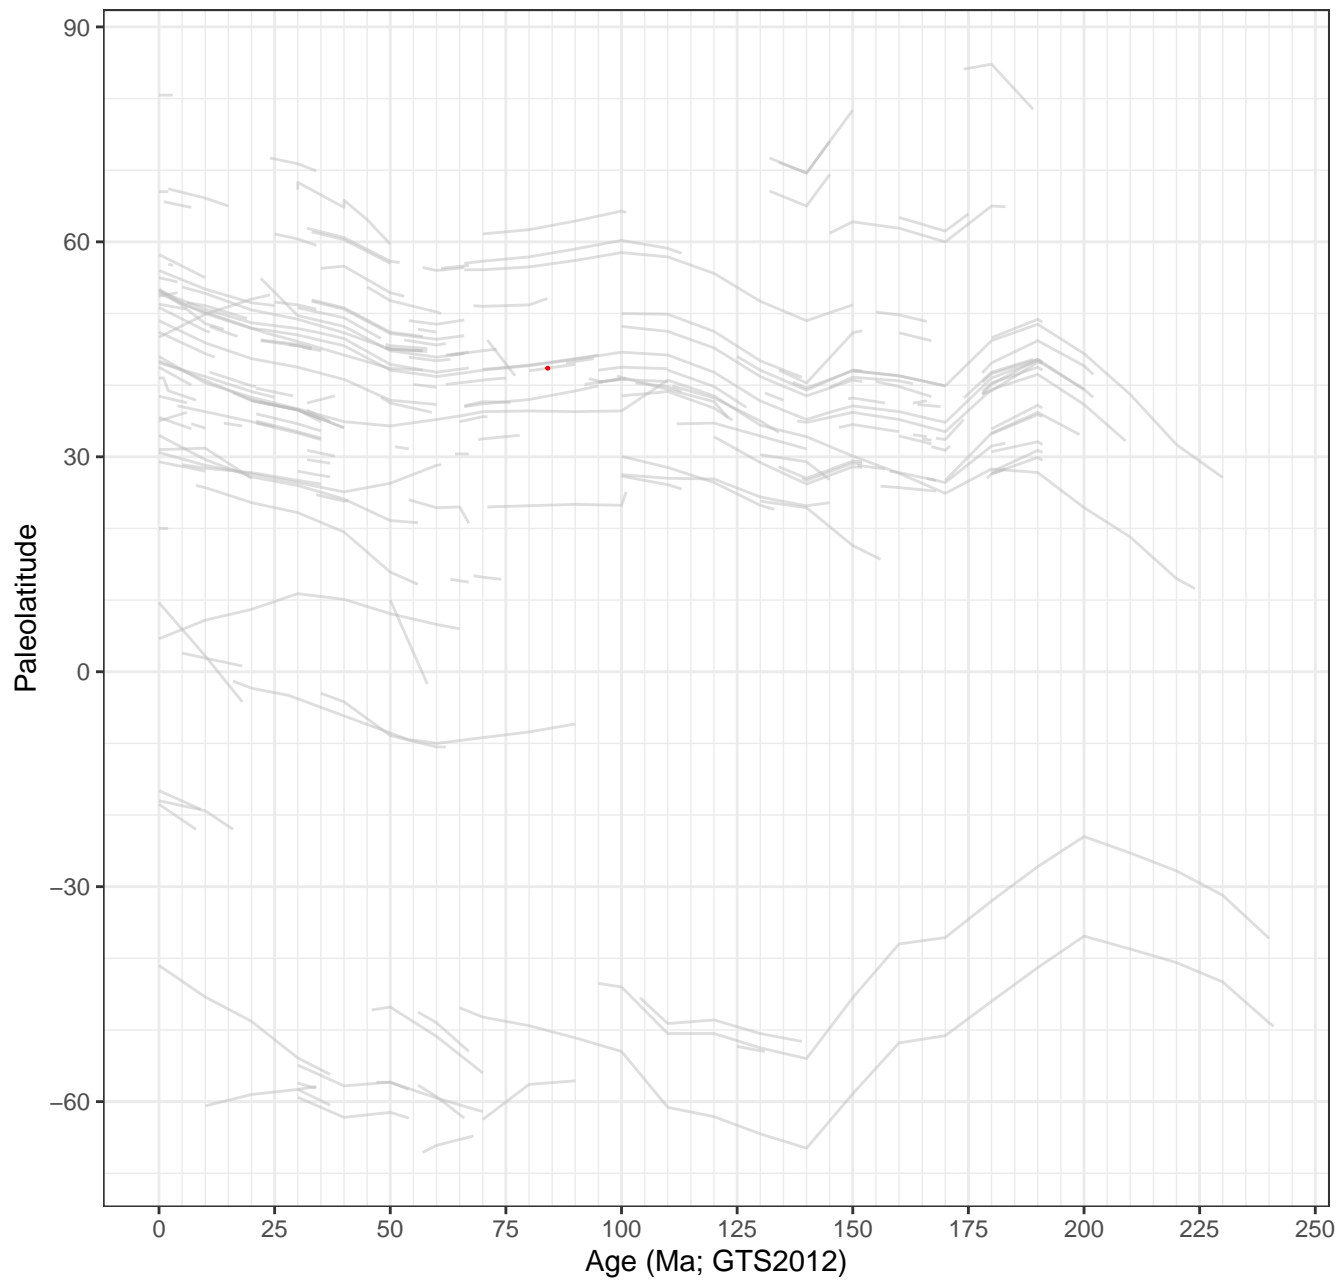

Supplement: Supplementary file 138 [file Genus Culversphaera.pdf › Supplement/Supplement 2/Genus 459 plots/Genus Culversphaera.pdf]

# Genus Cyclonephelium

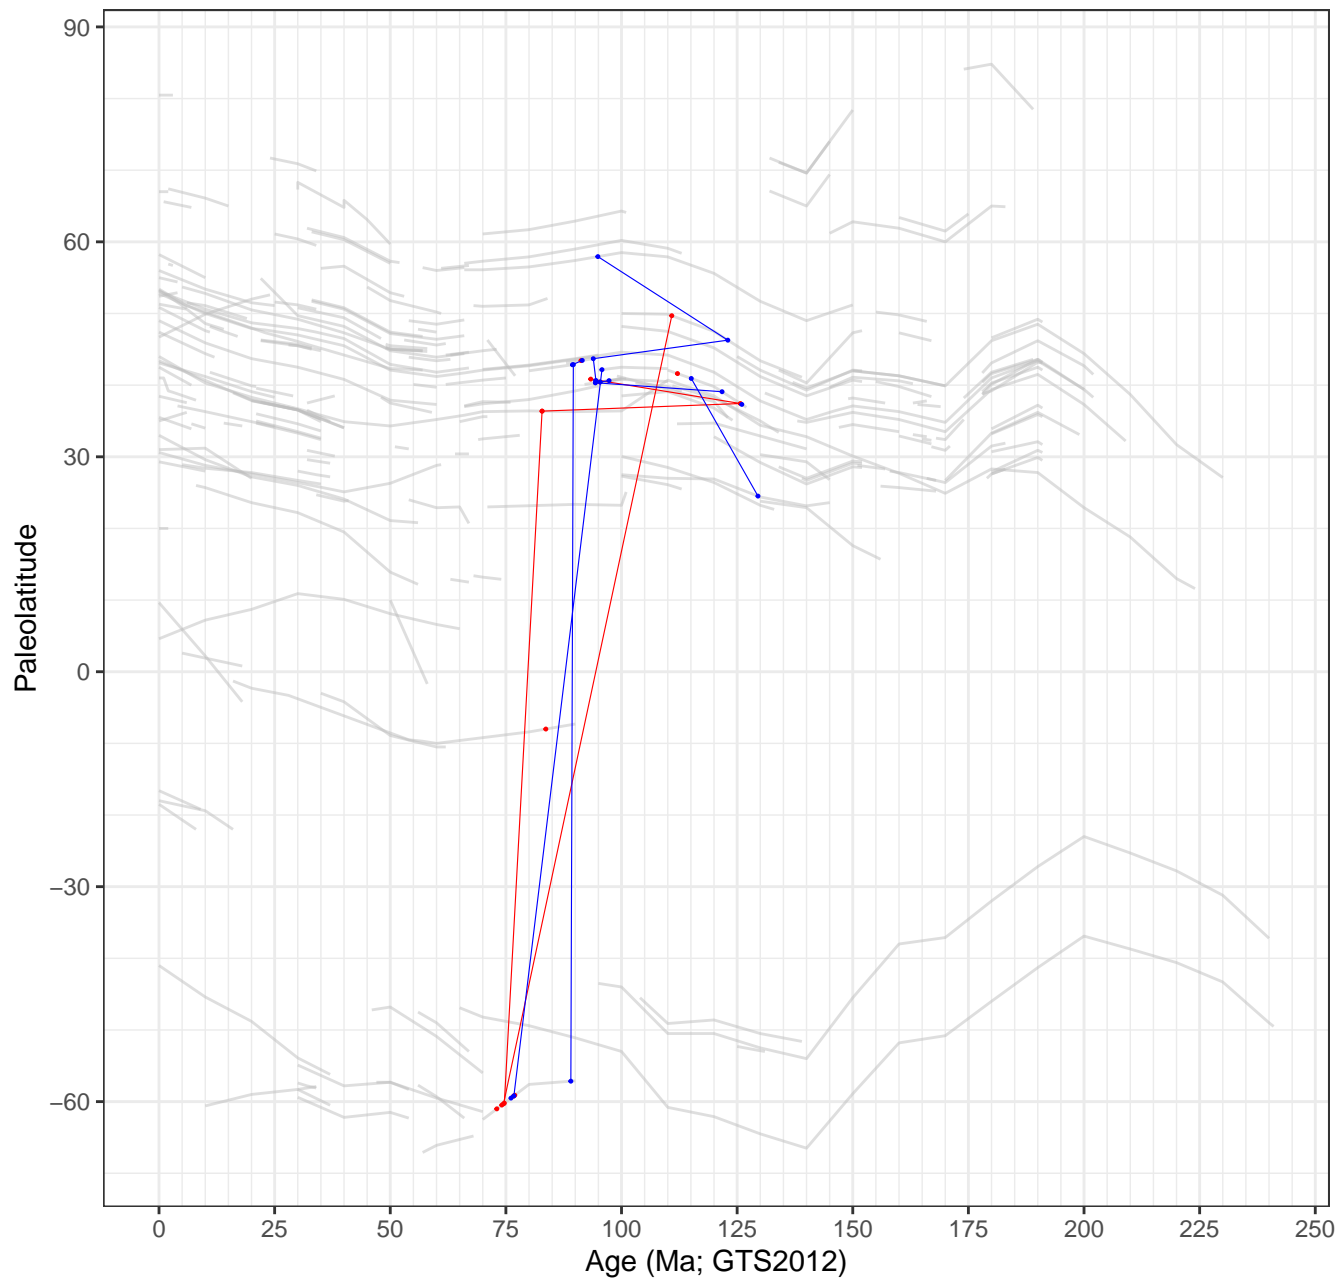

Supplement: Supplementary file 139 [file Genus Cyclonephelium.pdf › Supplement/Supplement 2/Genus 459 plots/Genus Cyclonephelium.pdf]

# Genus Cyclopsiella

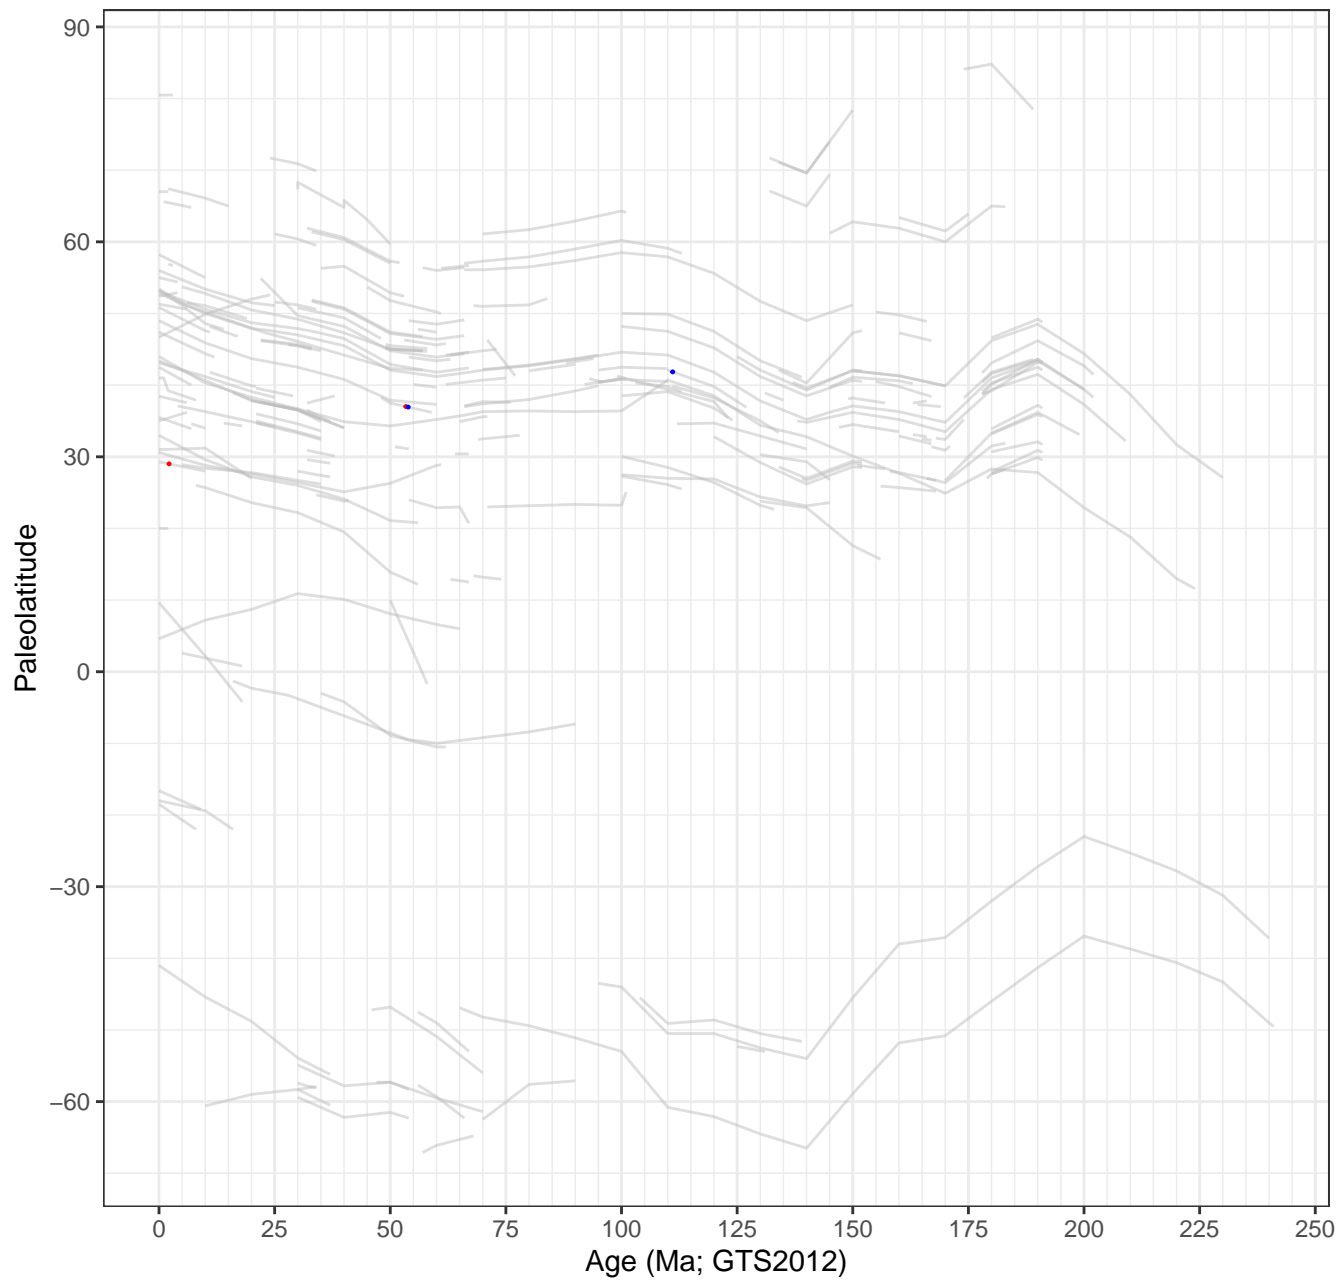

Supplement: Supplementary file 140 [file Genus Cyclopsiella.pdf › Supplement/Supplement 2/Genus 459 plots/Genus Cyclopsiella.pdf]

# Genus Cymososphaeridium

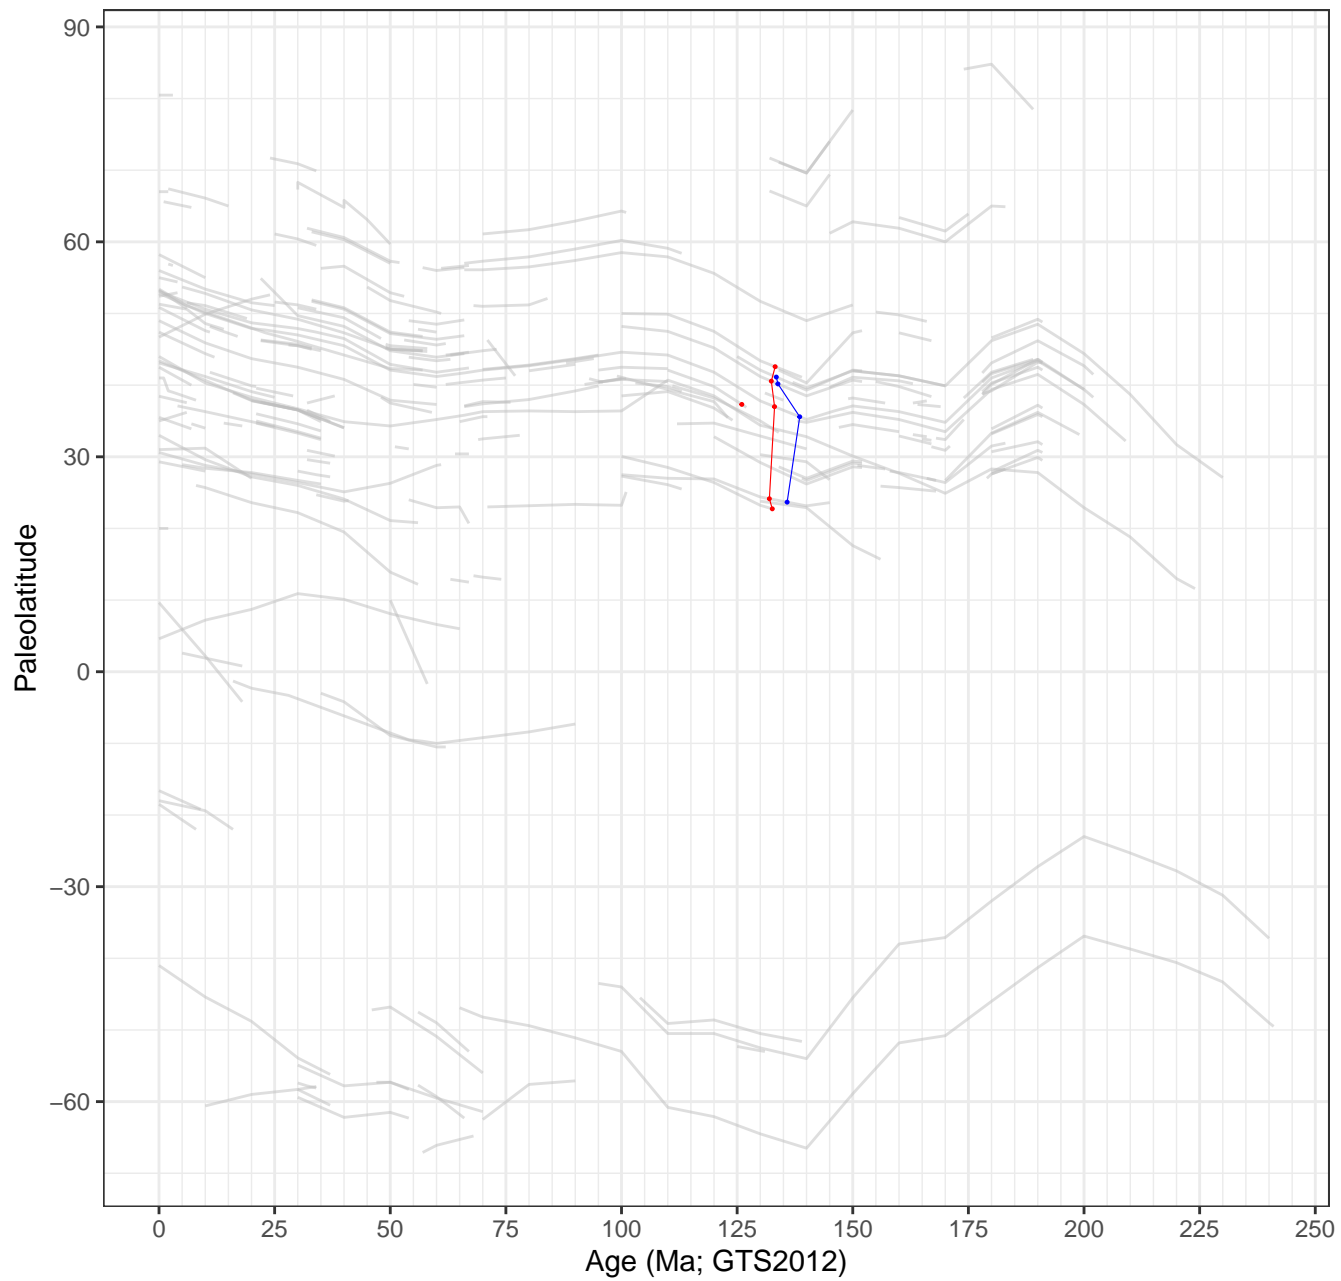

Supplement: Supplementary file 141 [file Genus Cymososphaeridium.pdf › Supplement/Supplement 2/Genus 459 plots/Genus Cymososphaeridium.pdf]

# Genus Dalella

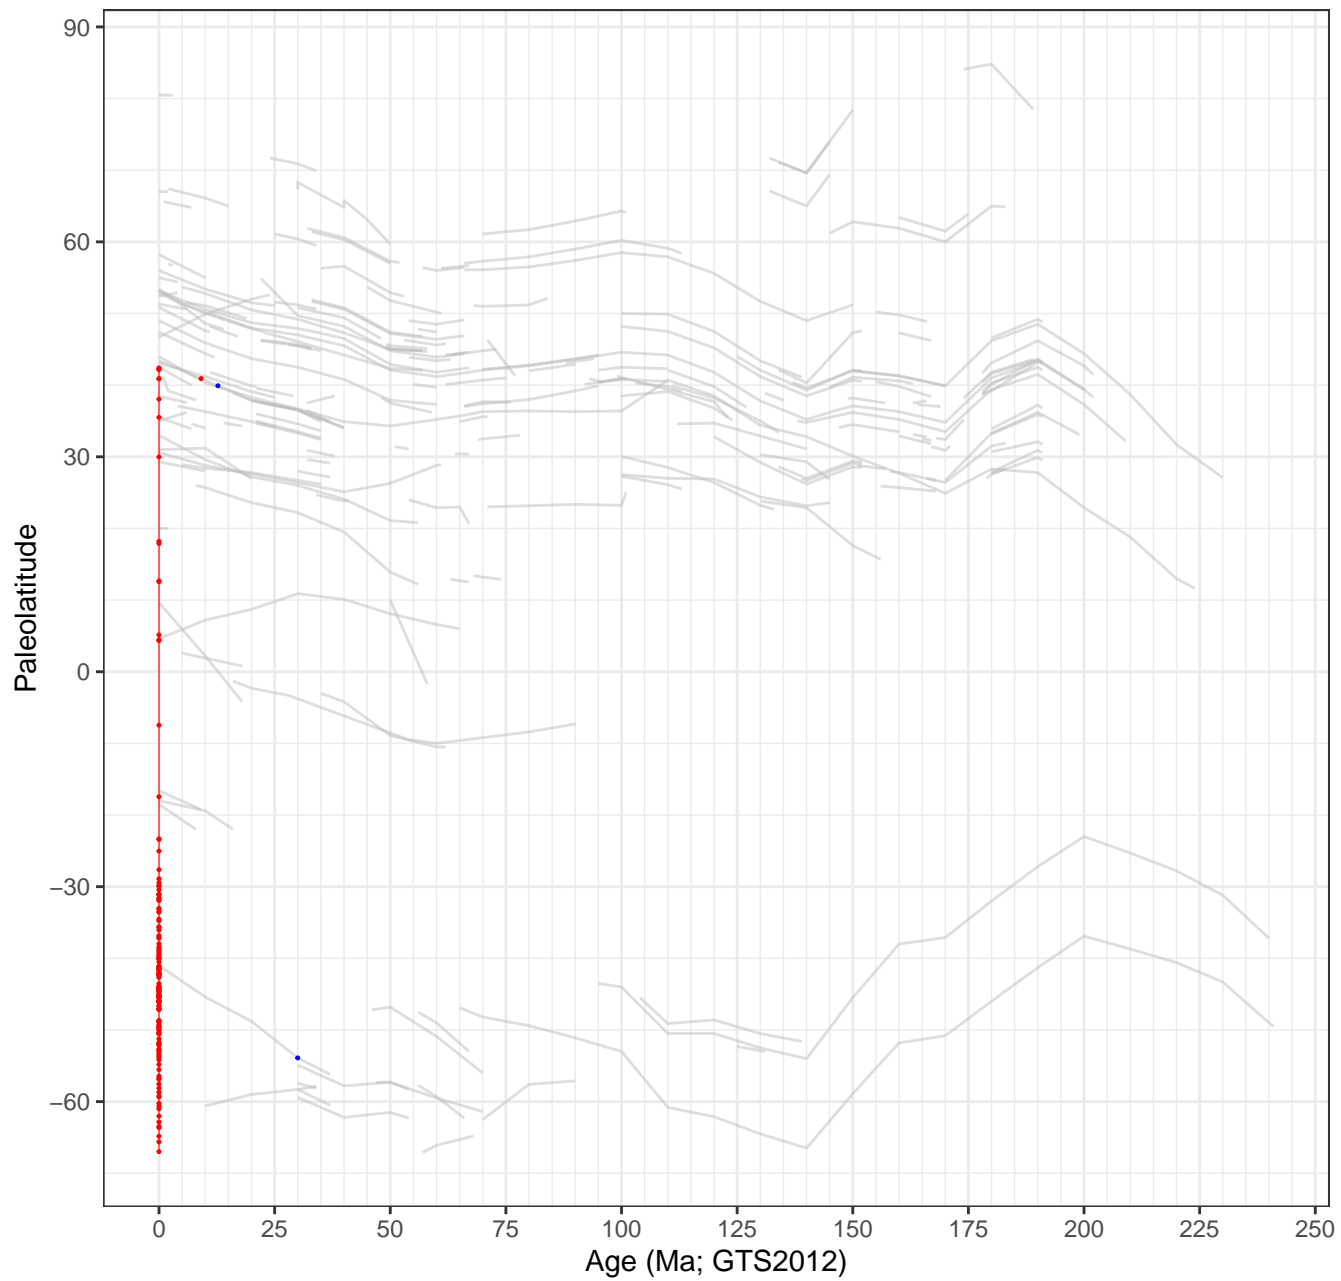

Supplement: Supplementary file 142 [file Genus Dalella.pdf › Supplement/Supplement 2/Genus 459 plots/Genus Dalella.pdf]

# Genus *Danea*

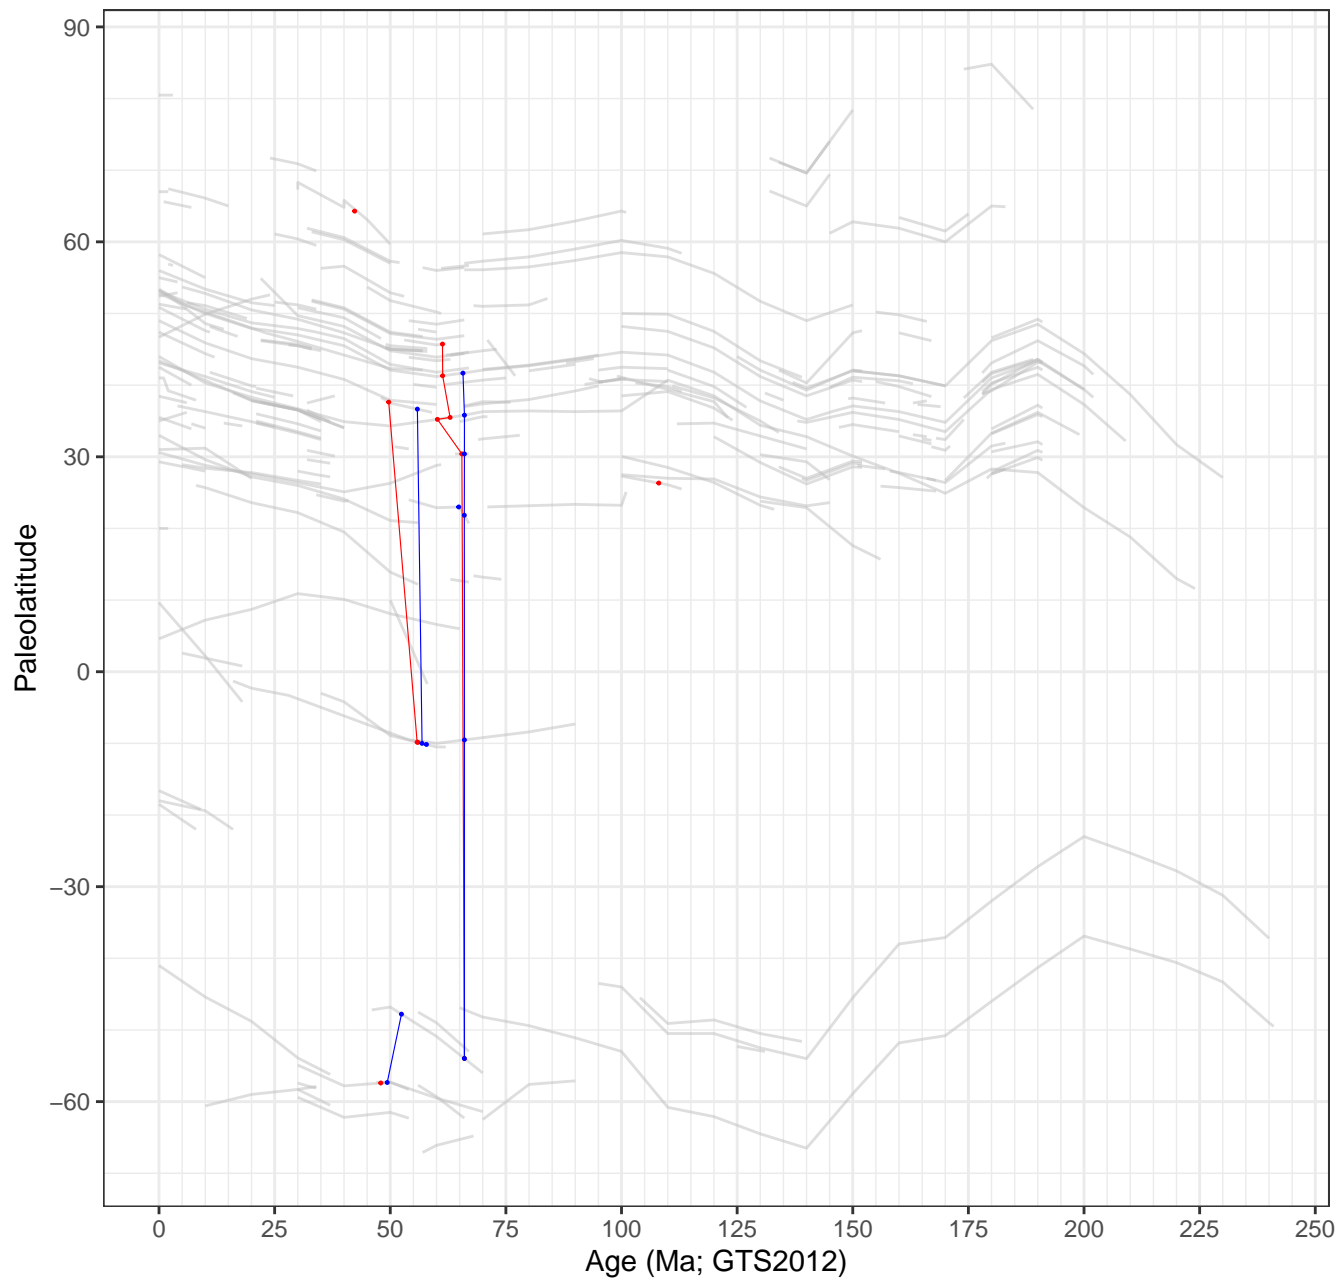

Supplement: Supplementary file 143 [file Genus Danea.pdf › Supplement/Supplement 2/Genus 459 plots/Genus Danea.pdf]

# Genus Dapcodinium

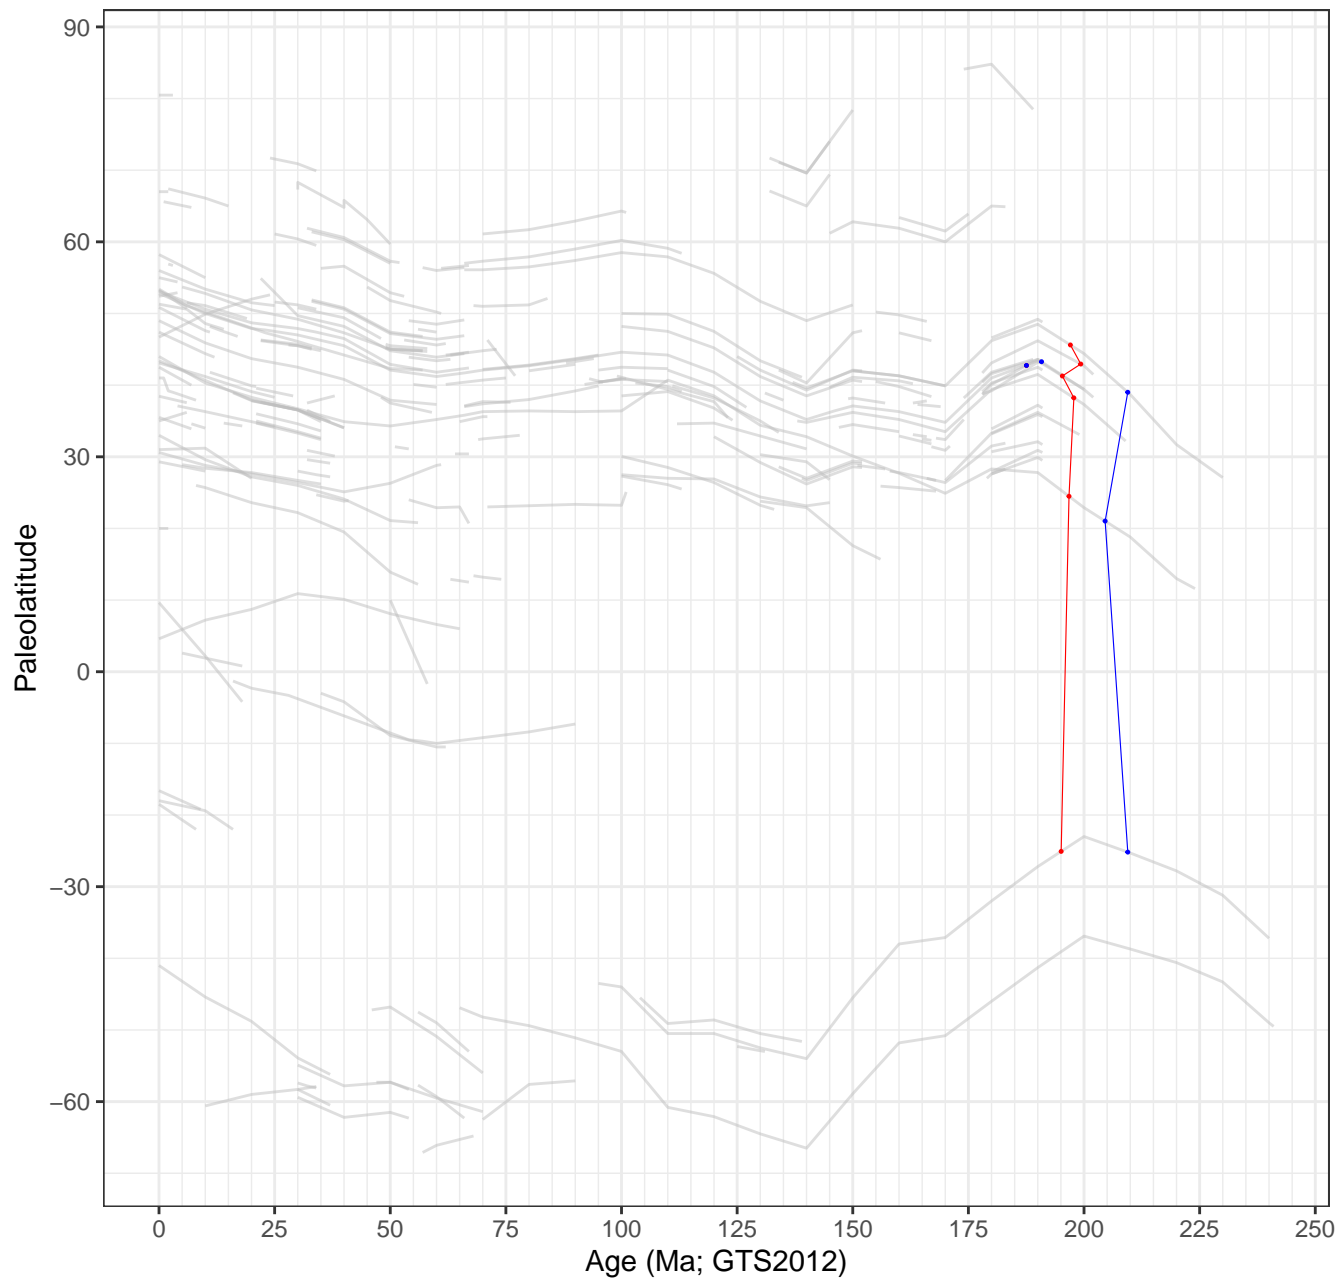

Supplement: Supplementary file 144 [file Genus Dapcodinium.pdf › Supplement/Supplement 2/Genus 459 plots/Genus Dapcodinium.pdf]

# Genus *Dapsilidinium*

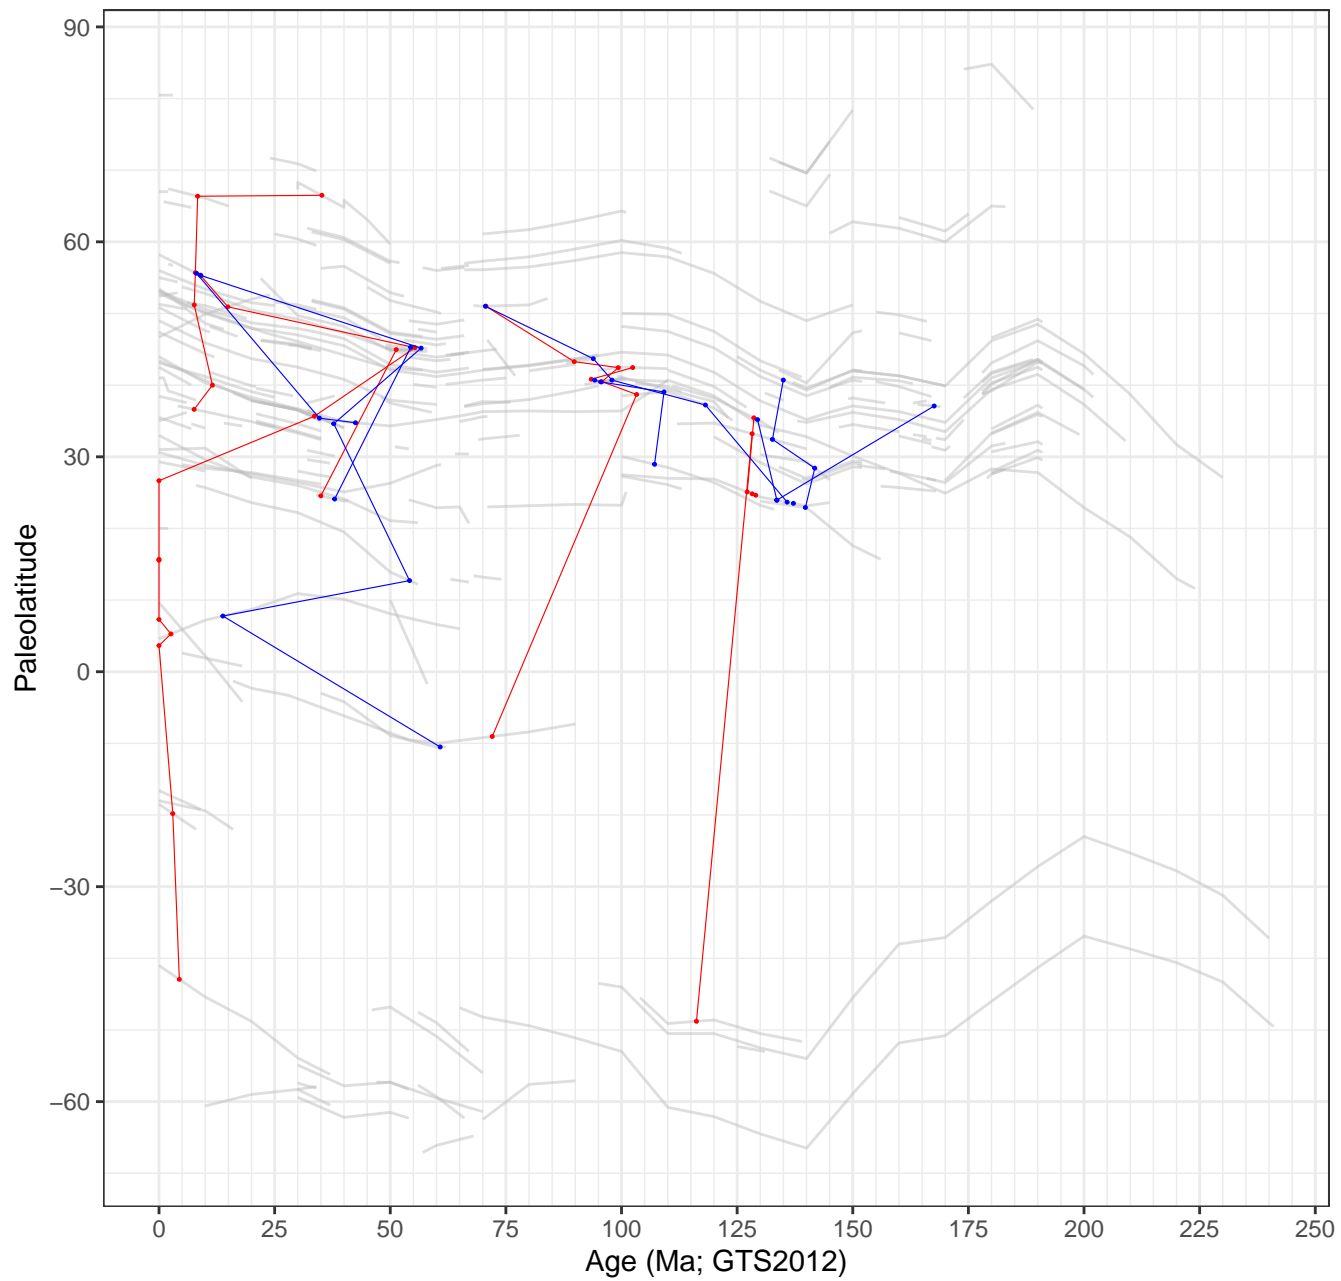

Supplement: Supplementary file 145 [file Genus Dapsilidinium.pdf › Supplement/Supplement 2/Genus 459 plots/Genus Dapsilidinium.pdf]

# Genus Deflandrea

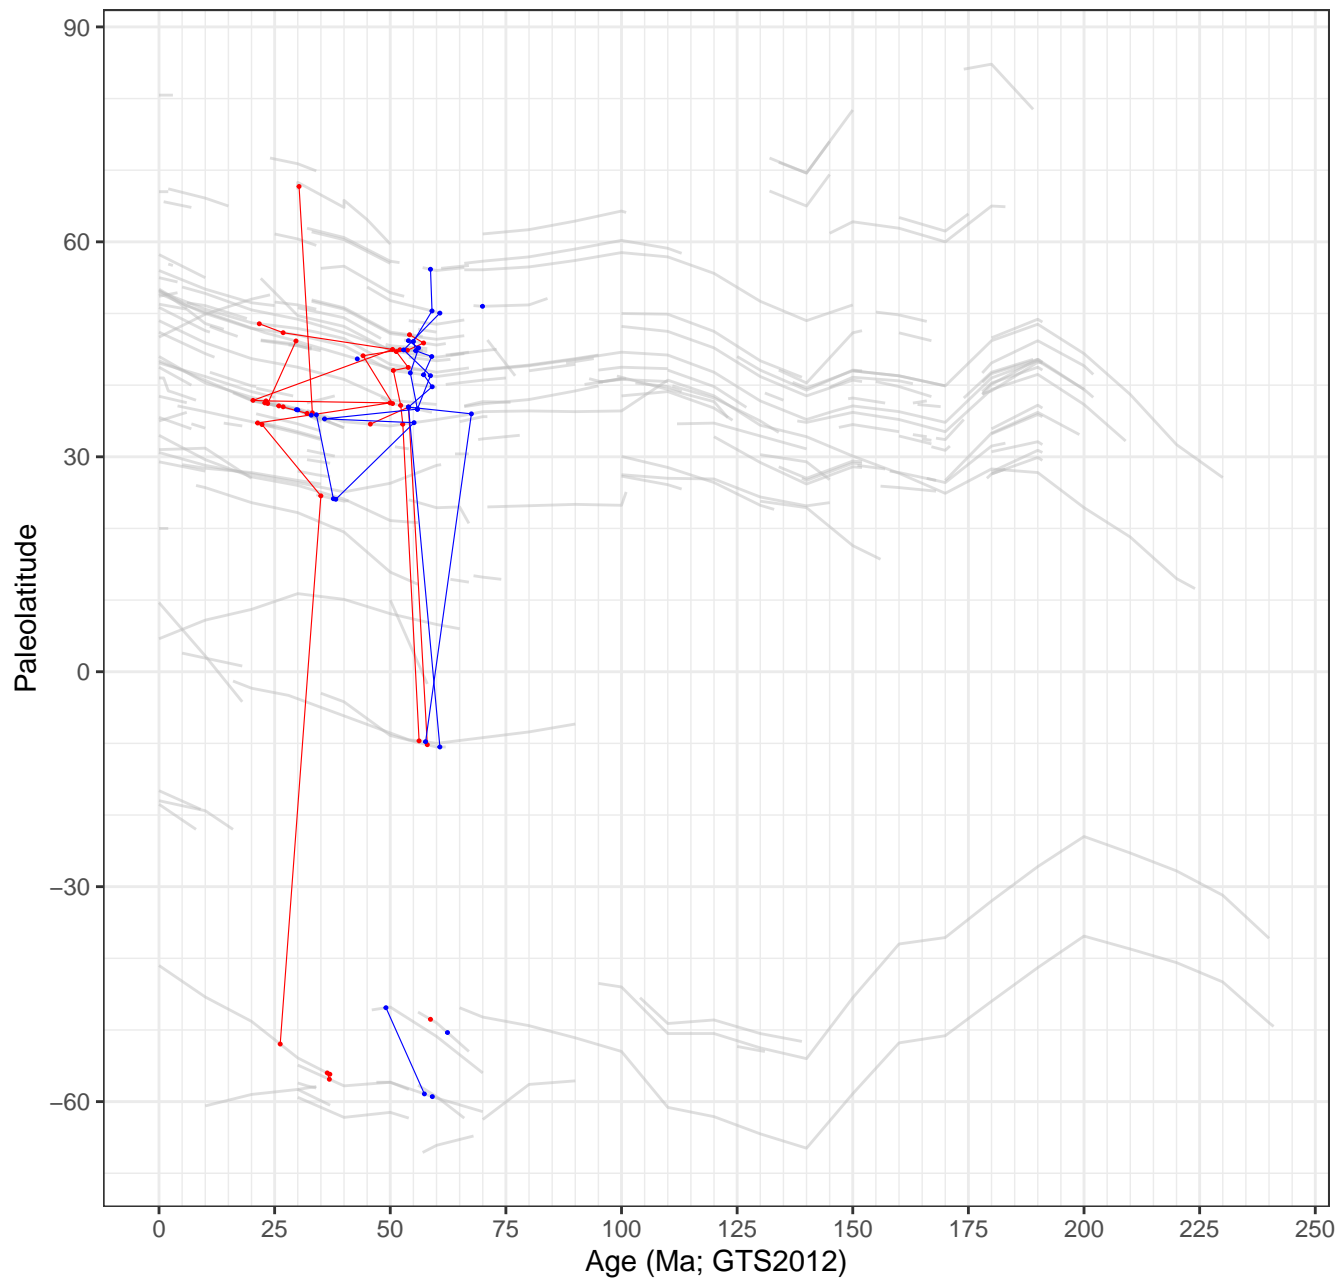

Supplement: Supplementary file 146 [file Genus Deflandrea.pdf › Supplement/Supplement 2/Genus 459 plots/Genus Deflandrea.pdf]

# Genus *Desmocysta*

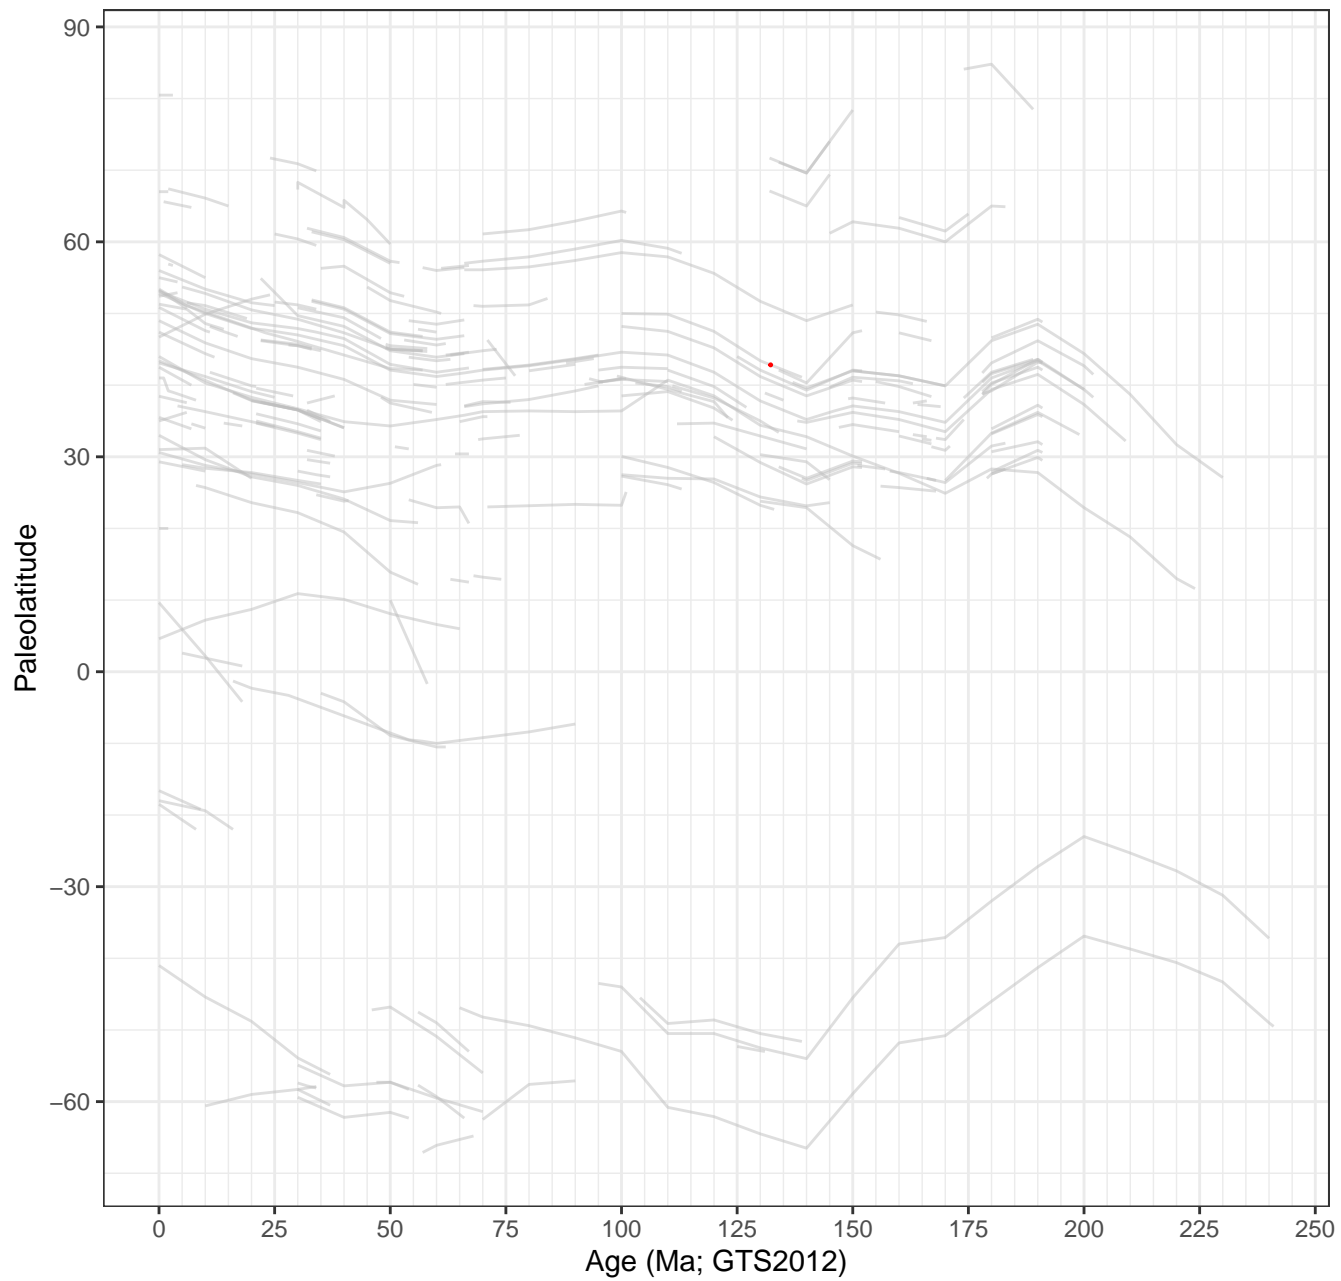

Supplement: Supplementary file 147 [file Genus Desmocysta.pdf › Supplement/Supplement 2/Genus 459 plots/Genus Desmocysta.pdf]

# Genus Diacanthum

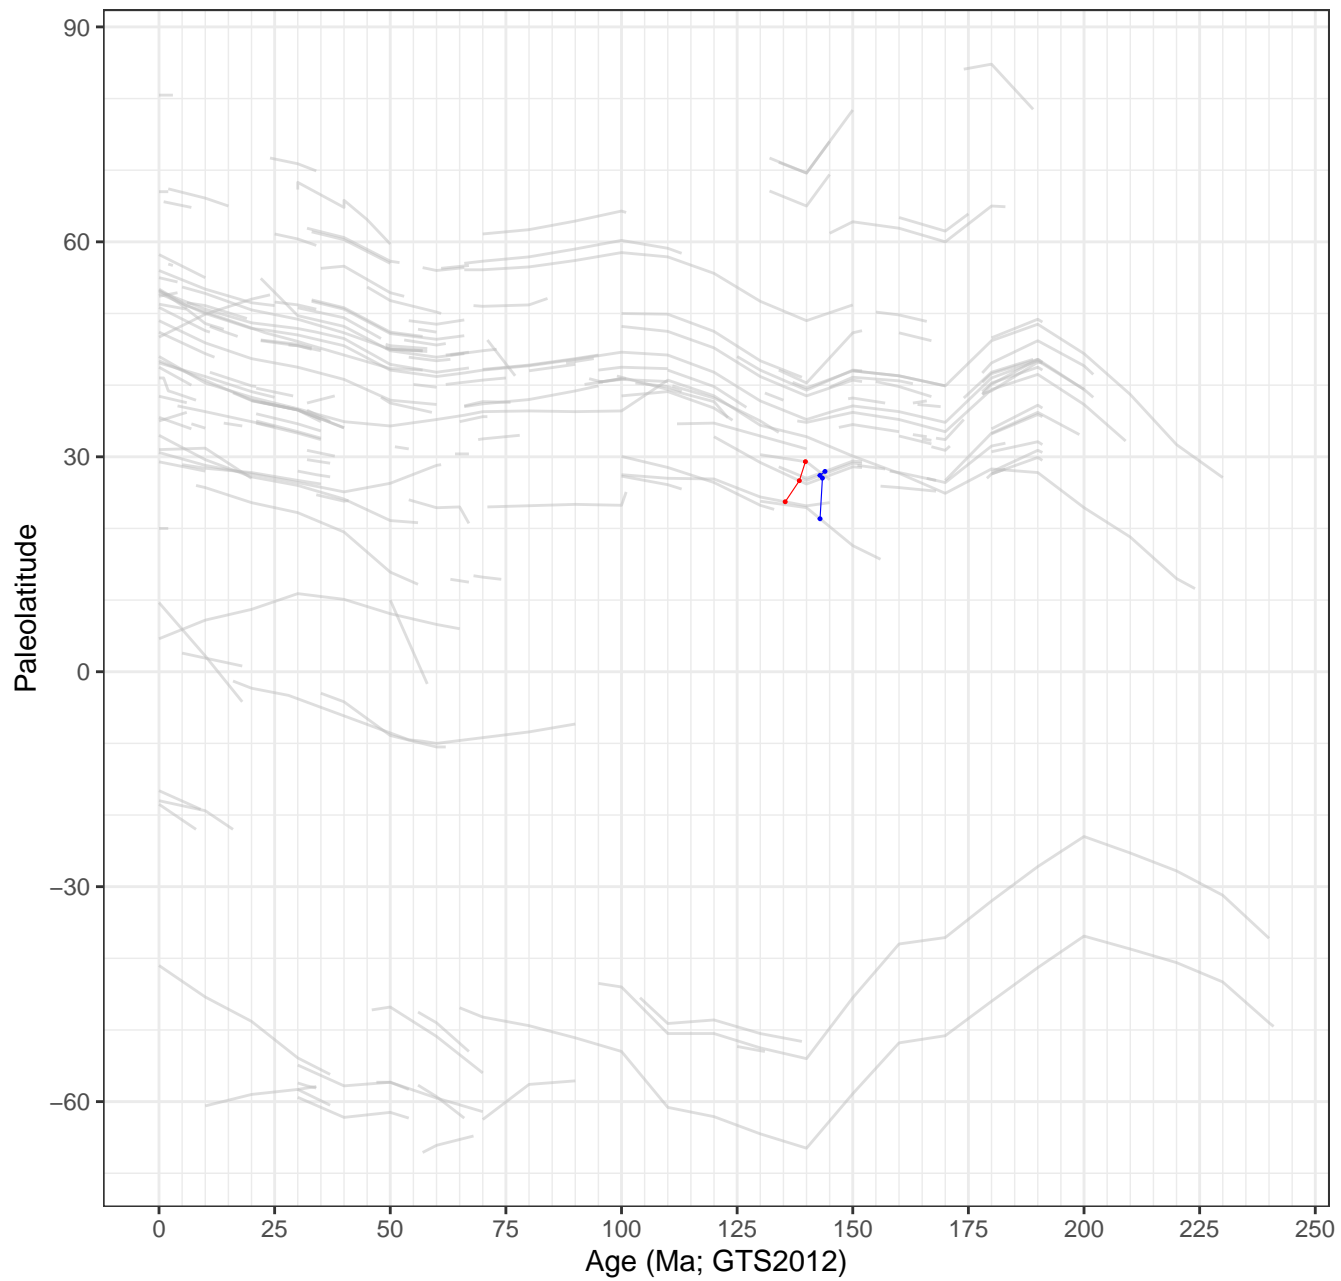

Supplement: Supplementary file 148 [file Genus Diacanthum.pdf › Supplement/Supplement 2/Genus 459 plots/Genus Diacanthum.pdf]

# Genus *Dichadogonyaulax*

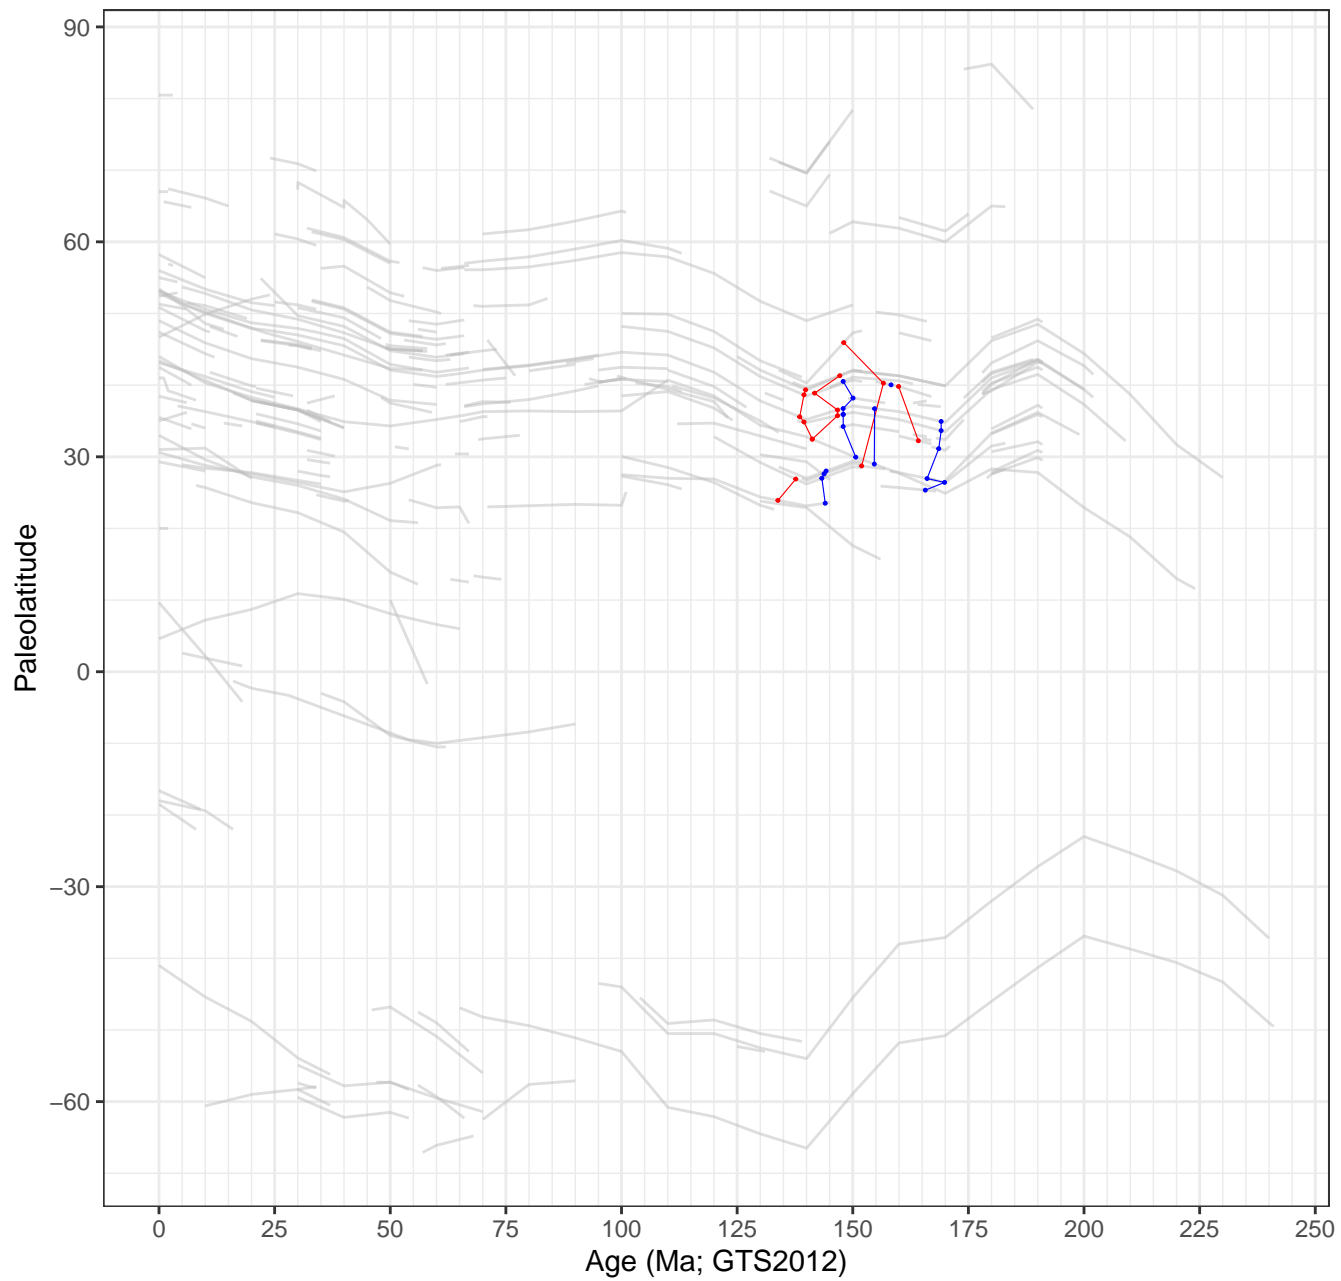

Supplement: Supplementary file 149 [file Genus Dichadogonyaulax.pdf › Supplement/Supplement 2/Genus 459 plots/Genus Dichadogonyaulax.pdf]

# Genus Diconodinium

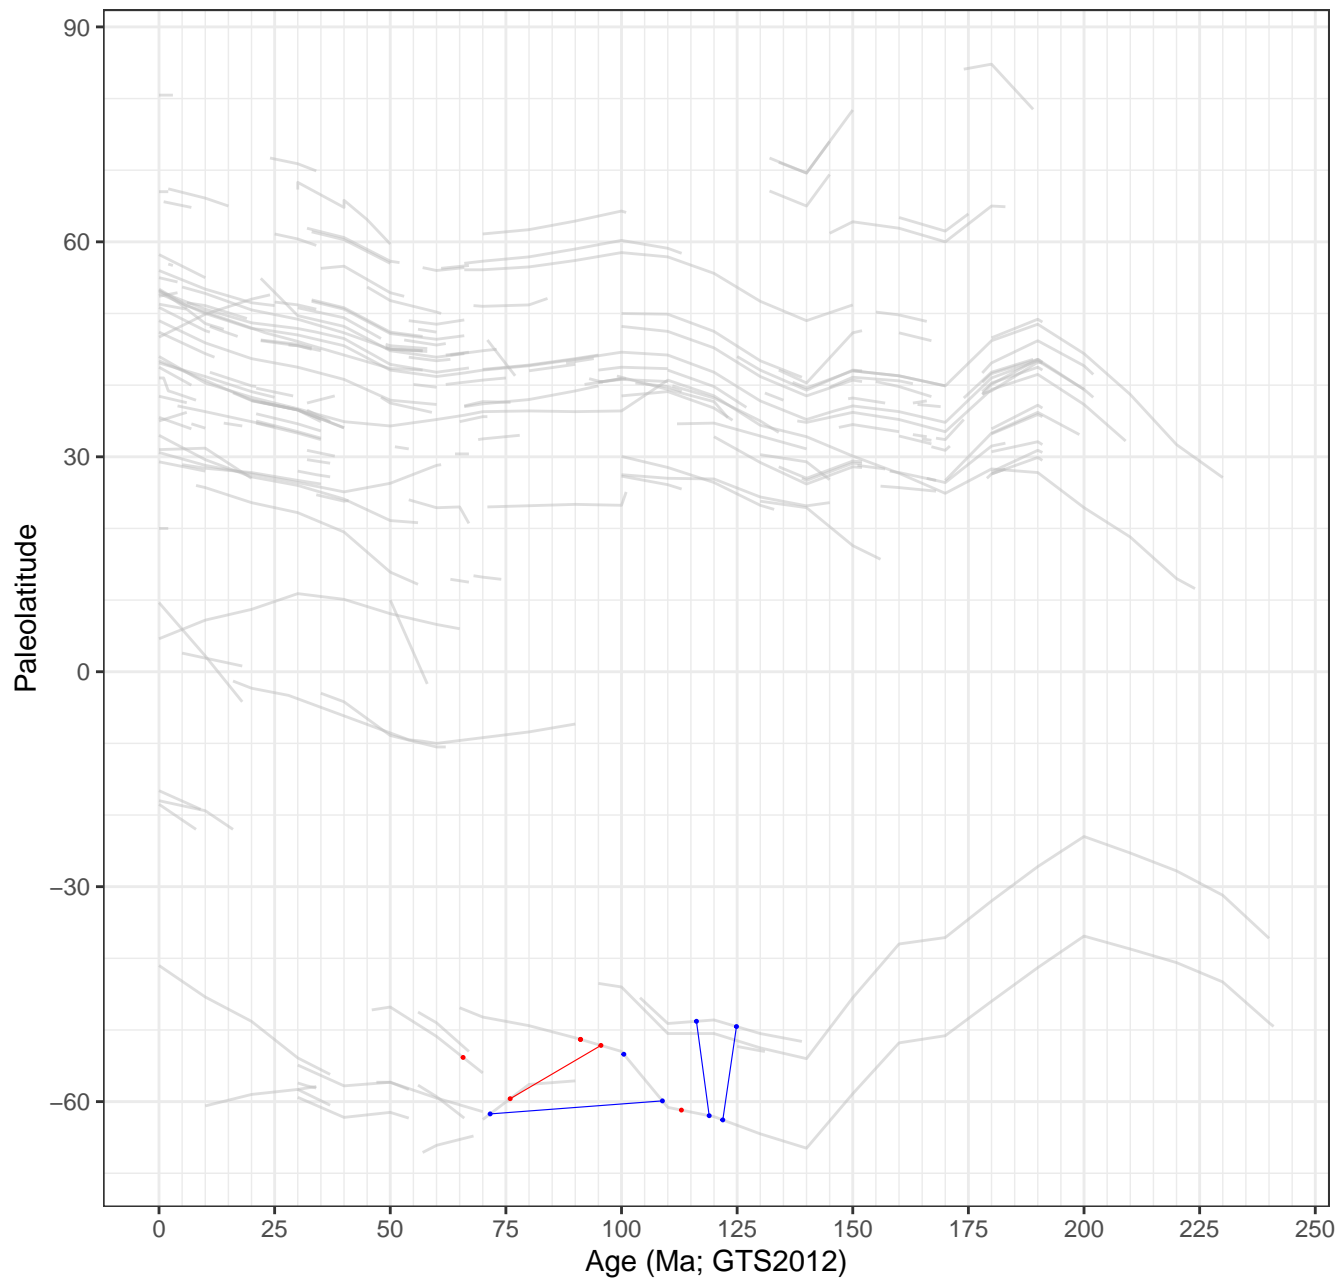

Supplement: Supplementary file 150 [file Genus Diconodinium.pdf › Supplement/Supplement 2/Genus 459 plots/Genus Diconodinium.pdf]

# Genus Dimidium

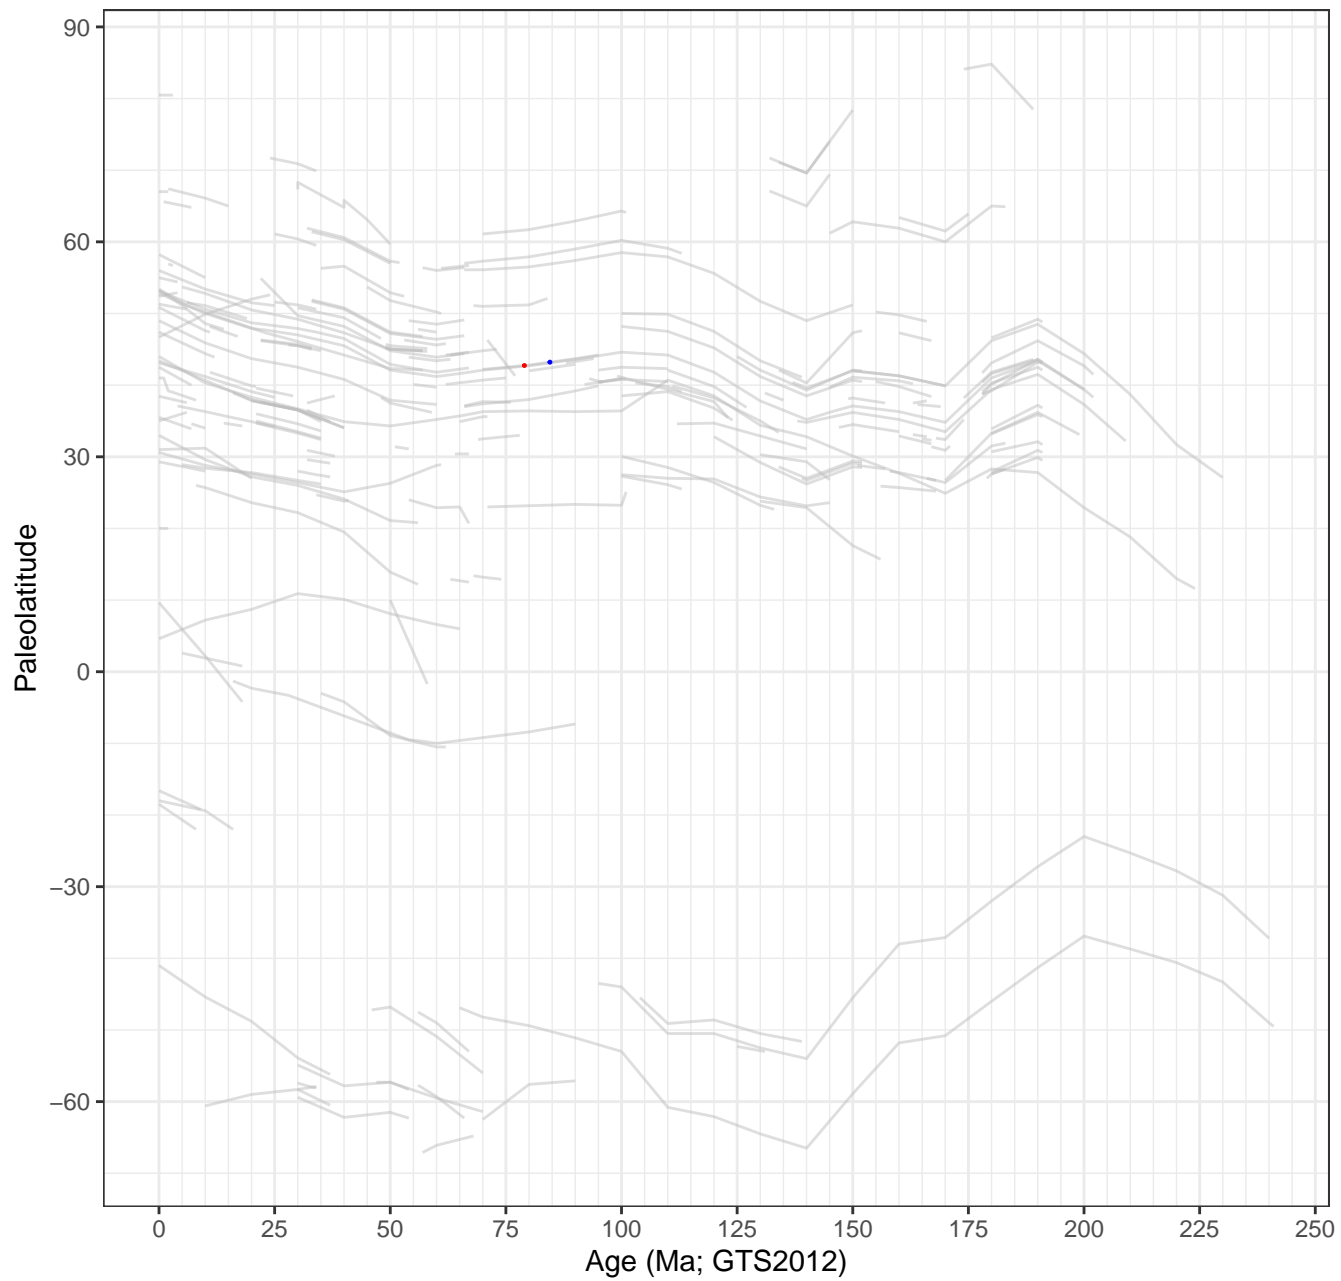

Supplement: Supplementary file 151 [file Genus Dimidium.pdf › Supplement/Supplement 2/Genus 459 plots/Genus Dimidium.pdf]

# Genus Dinaurella

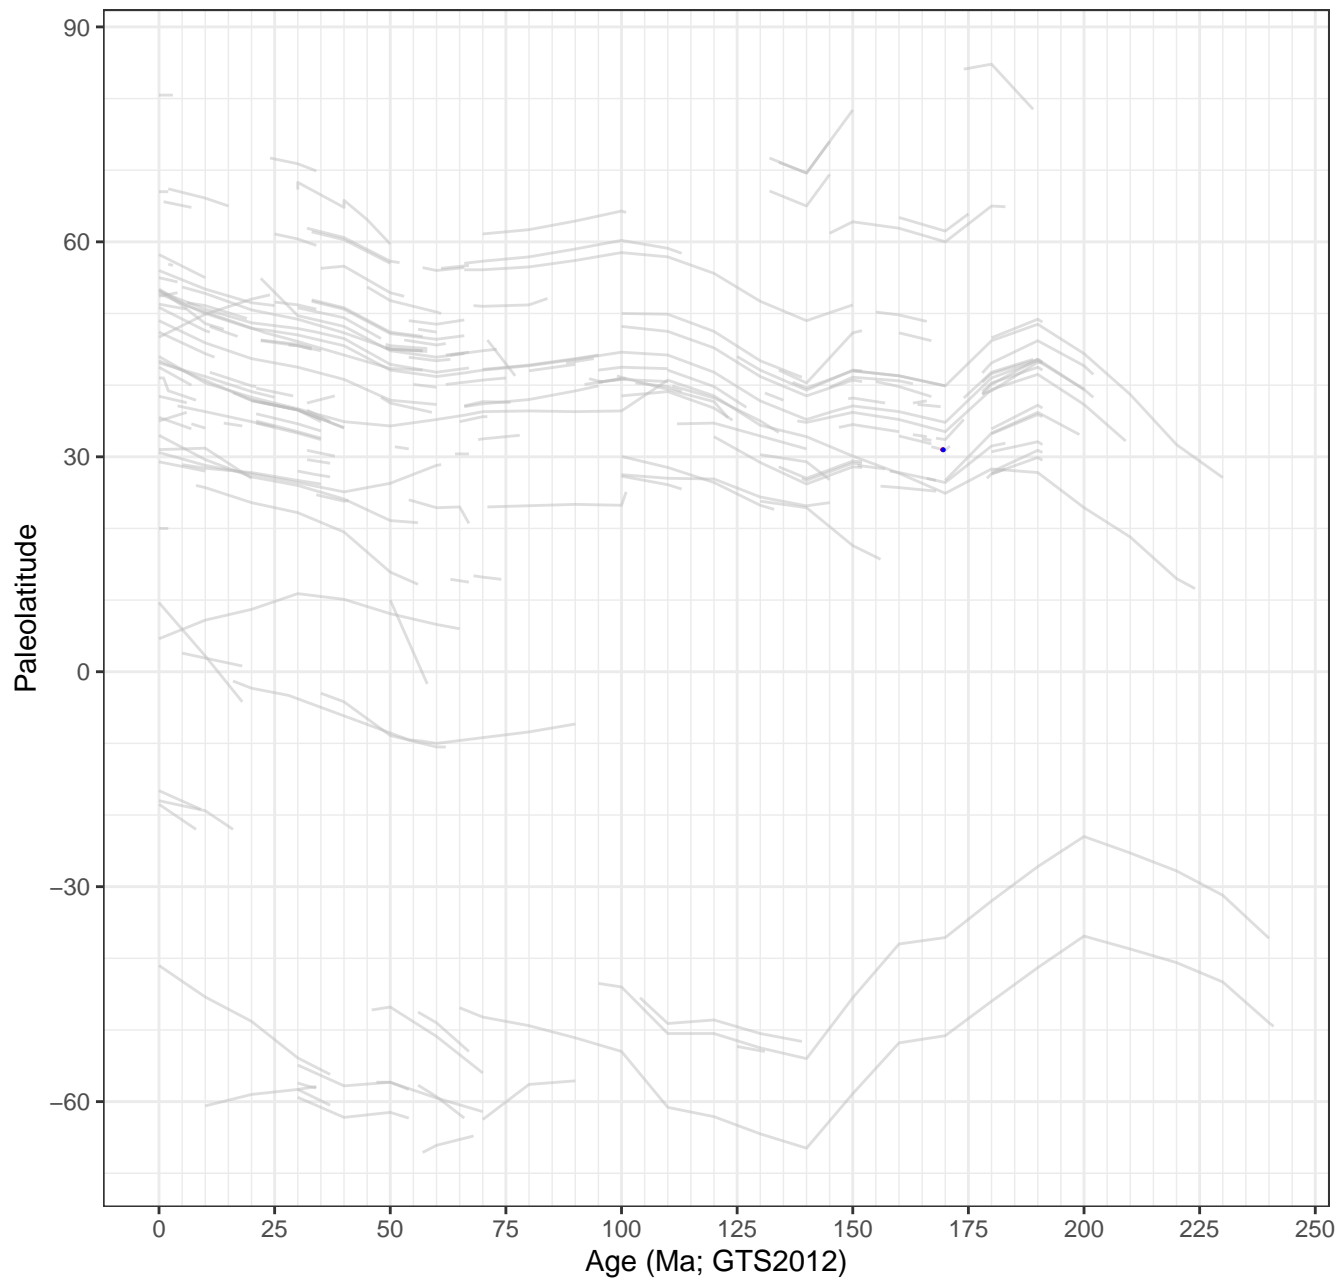

Supplement: Supplementary file 152 [file Genus Dinaurella.pdf › Supplement/Supplement 2/Genus 459 plots/Genus Dinaurella.pdf]

# Genus Dingodinium

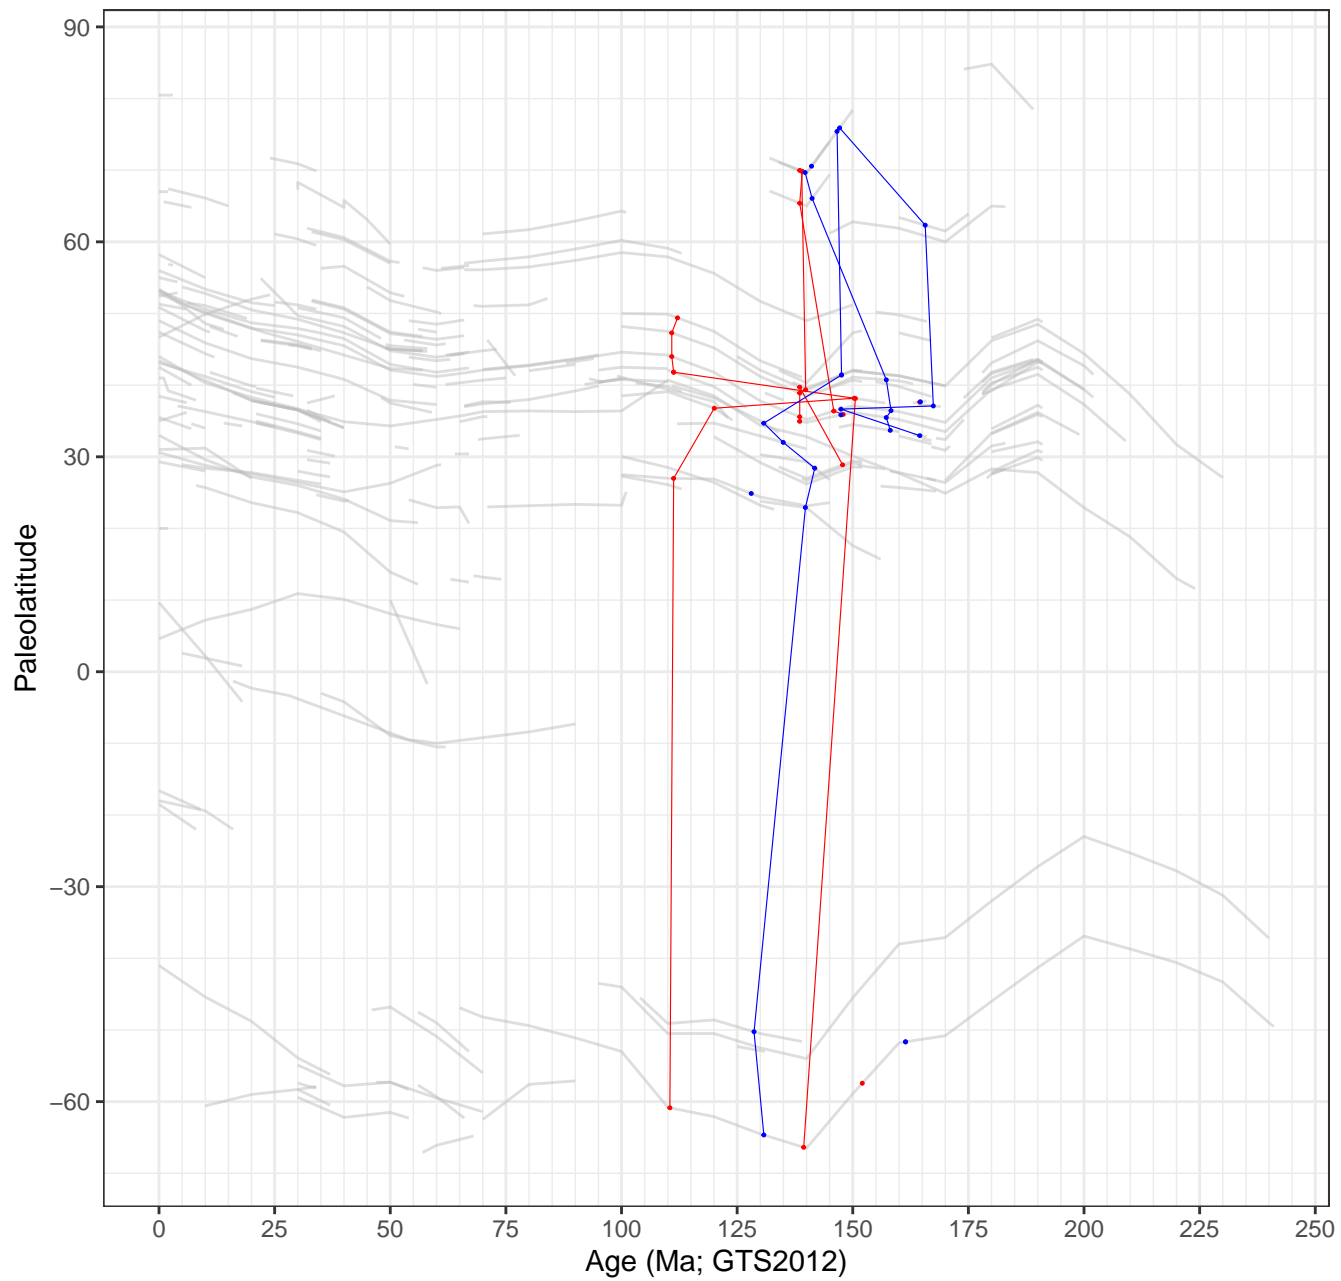

Supplement: Supplementary file 153 [file Genus Dingodinium.pdf › Supplement/Supplement 2/Genus 459 plots/Genus Dingodinium.pdf]

# Genus Dinogymnium

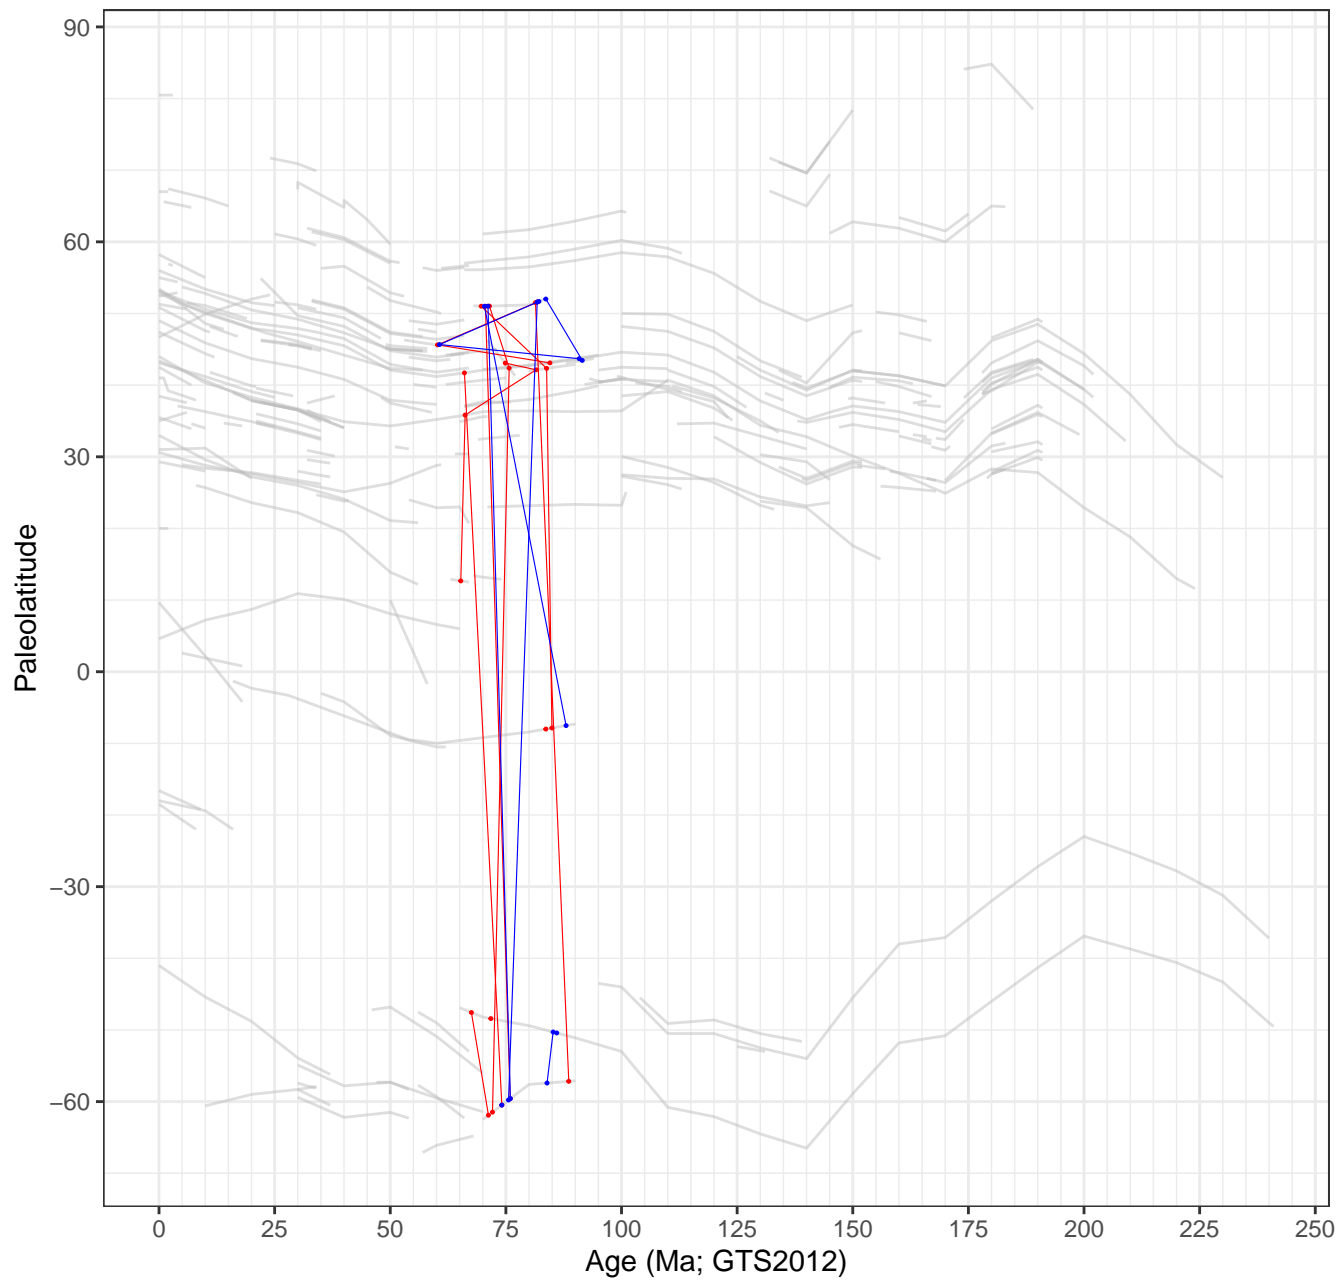

Supplement: Supplementary file 154 [file Genus Dinogymnium.pdf › Supplement/Supplement 2/Genus 459 plots/Genus Dinogymnium.pdf]

# Genus Dinopterygium

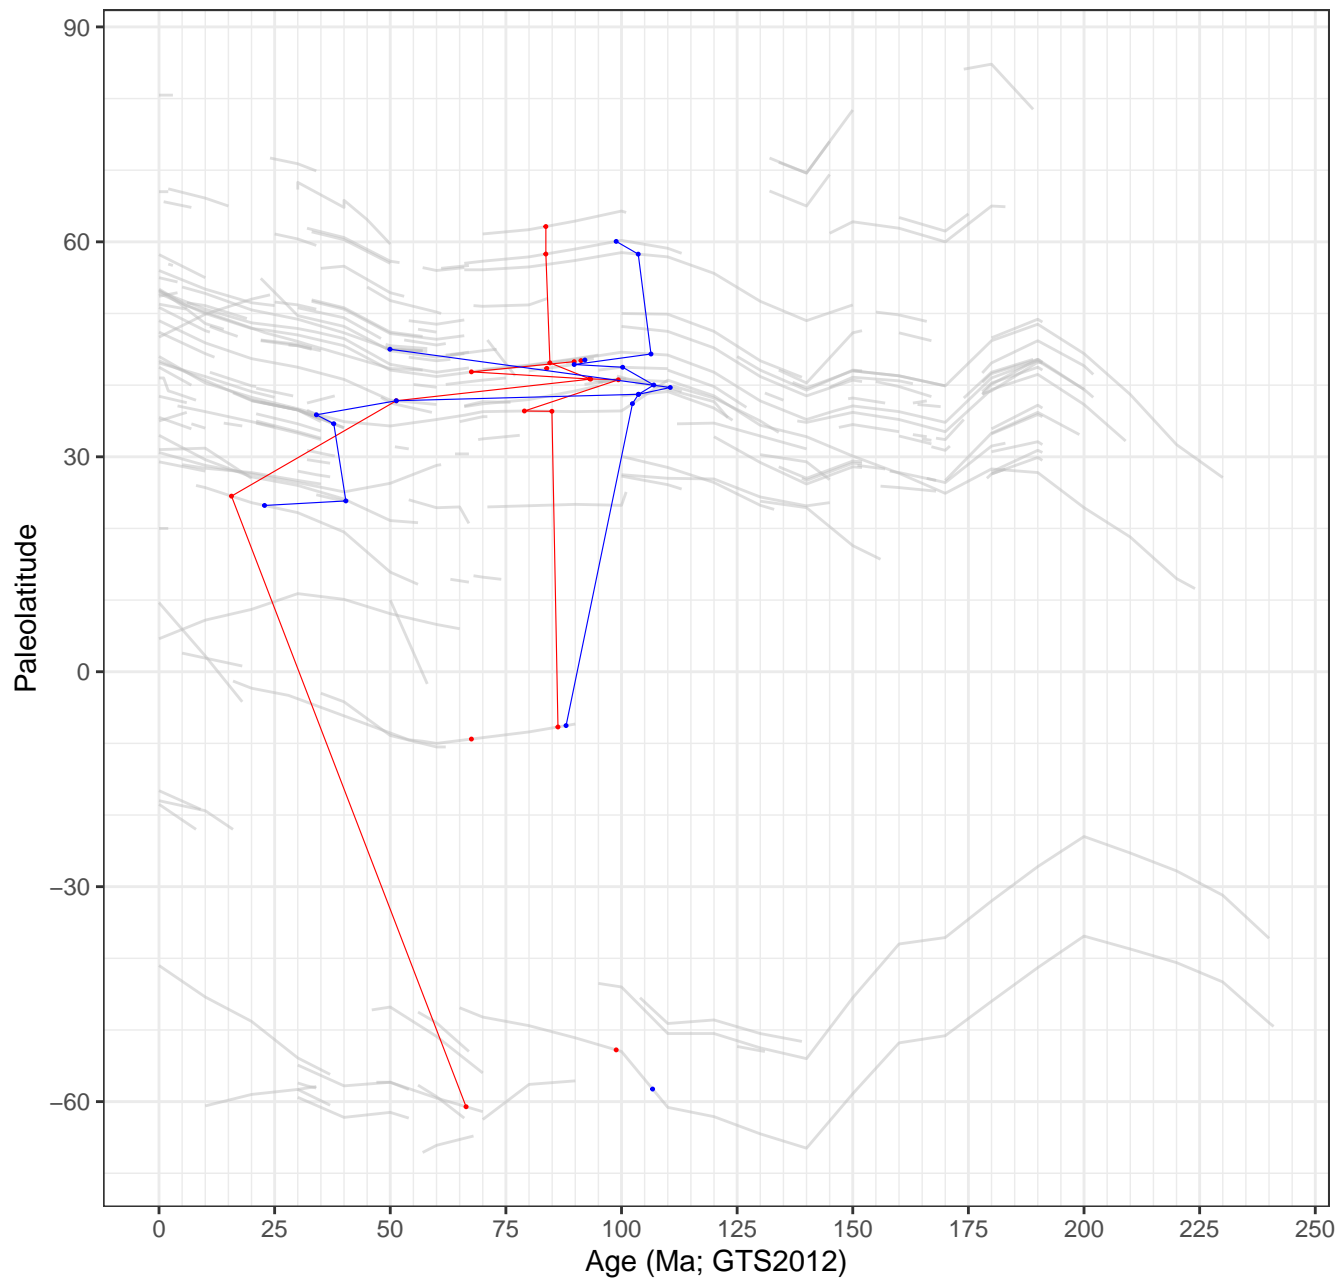

Supplement: Supplementary file 155 [file Genus Dinopterygium.pdf › Supplement/Supplement 2/Genus 459 plots/Genus Dinopterygium.pdf]

# Genus Diphyes

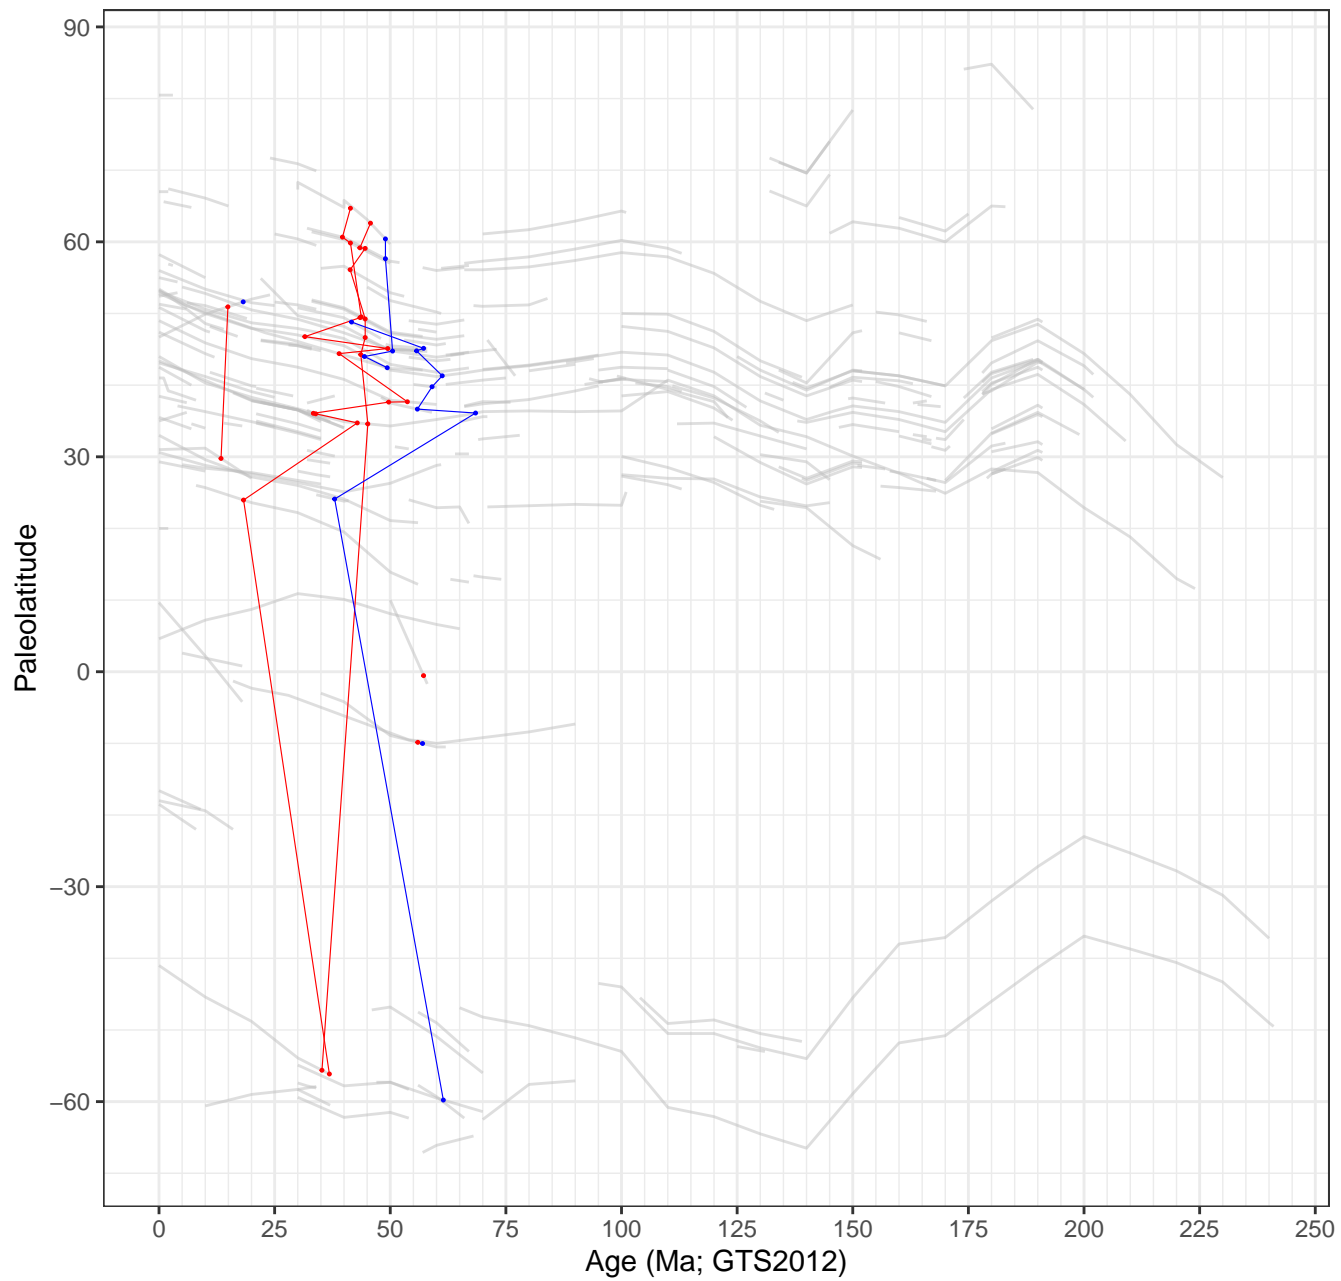

Supplement: Supplementary file 156 [file Genus Diphyes.pdf › Supplement/Supplement 2/Genus 459 plots/Genus Diphyes.pdf]

# Genus Discorsia

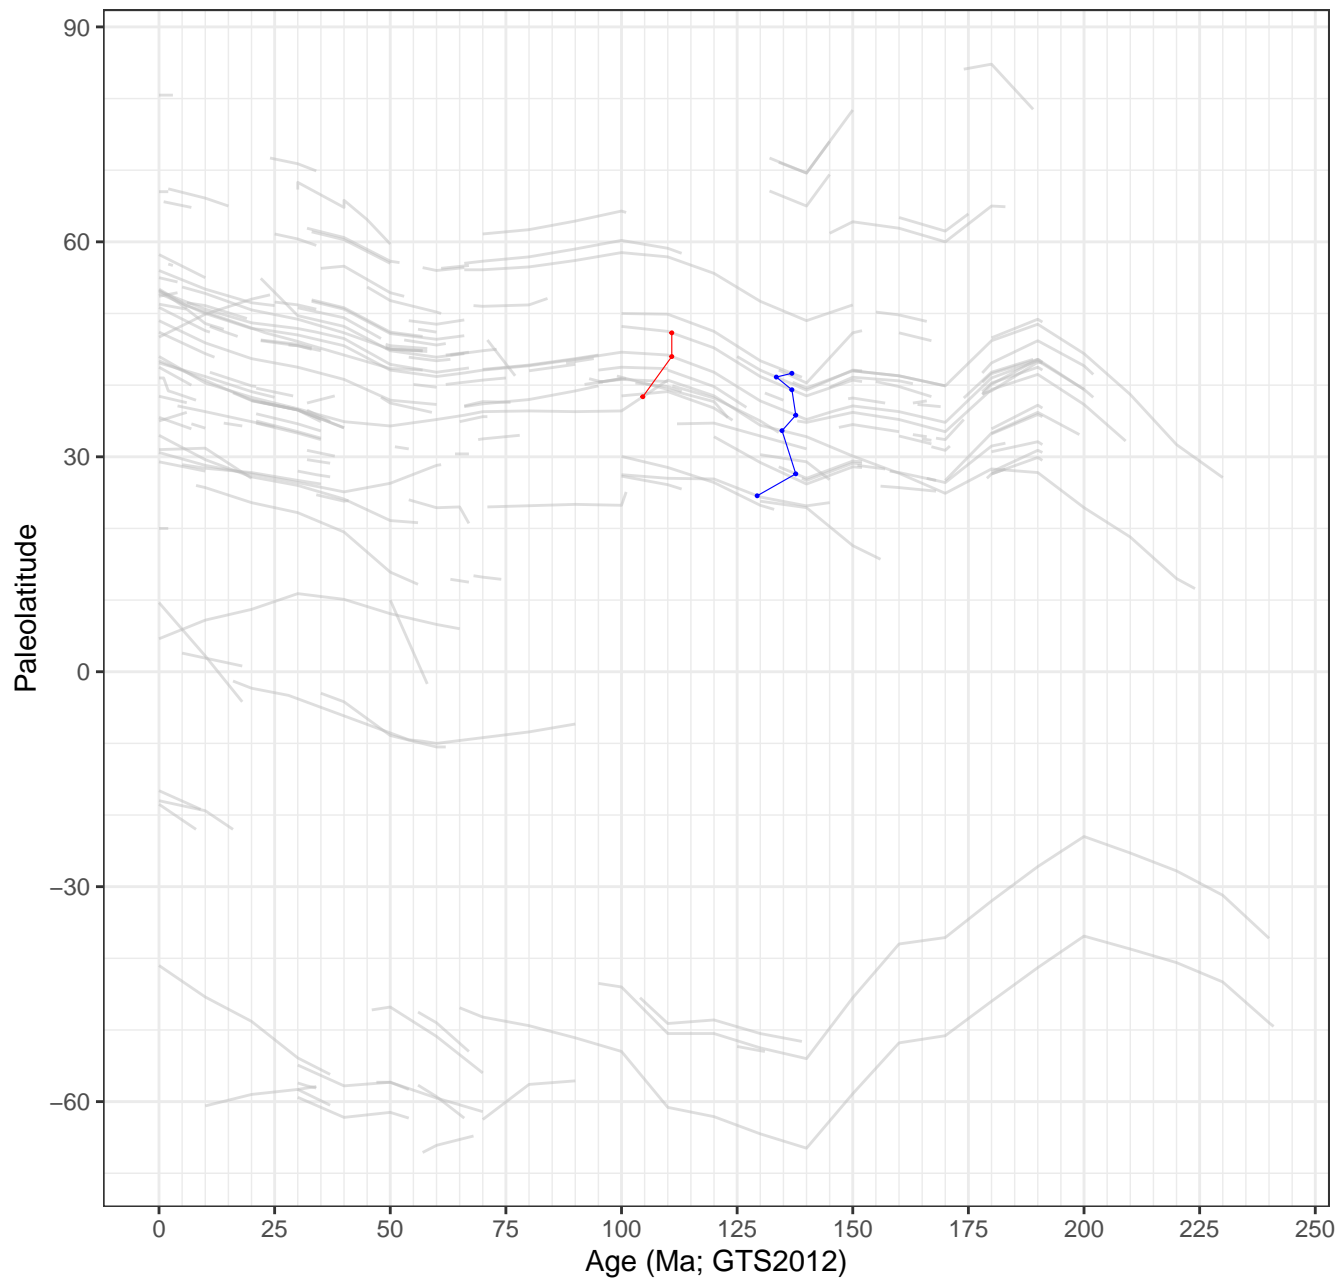

Supplement: Supplementary file 157 [file Genus Discorsia.pdf › Supplement/Supplement 2/Genus 459 plots/Genus Discorsia.pdf]

# Genus Disphaeria

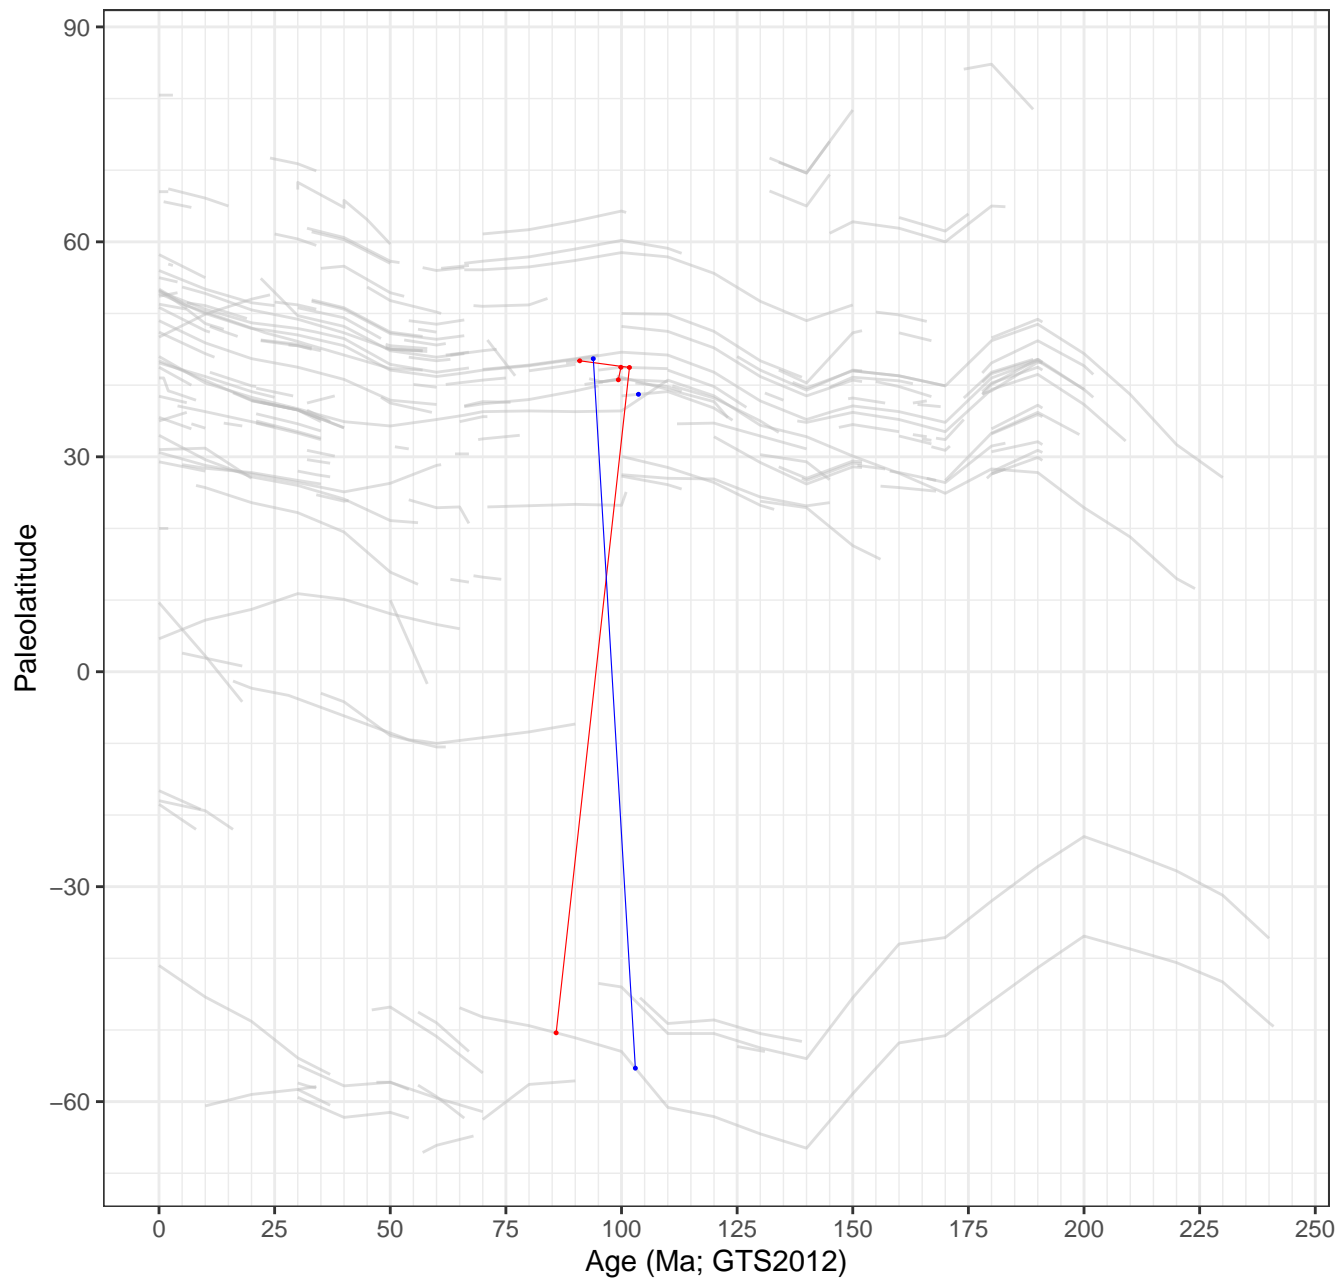

Supplement: Supplementary file 158 [file Genus Disphaeria.pdf › Supplement/Supplement 2/Genus 459 plots/Genus Disphaeria.pdf]

# Genus Disphaerogena

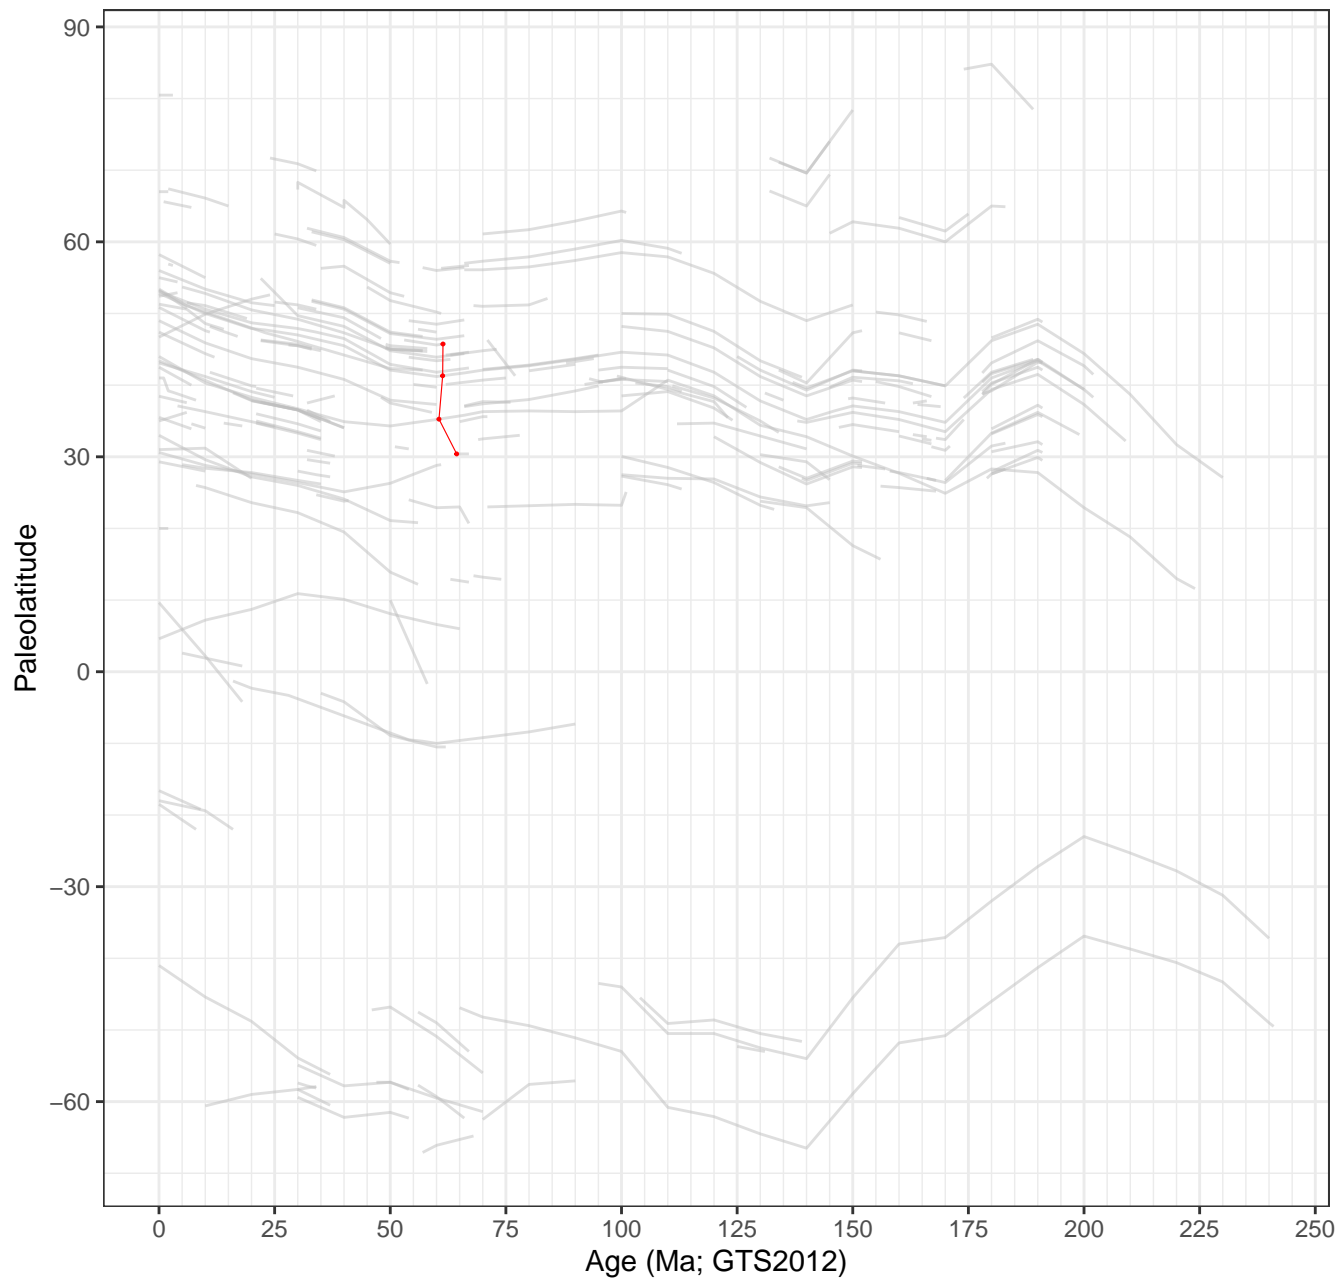

Supplement: Supplementary file 159 [file Genus Disphaerogena.pdf › Supplement/Supplement 2/Genus 459 plots/Genus Disphaerogena.pdf]

# Genus Dissiliodinium

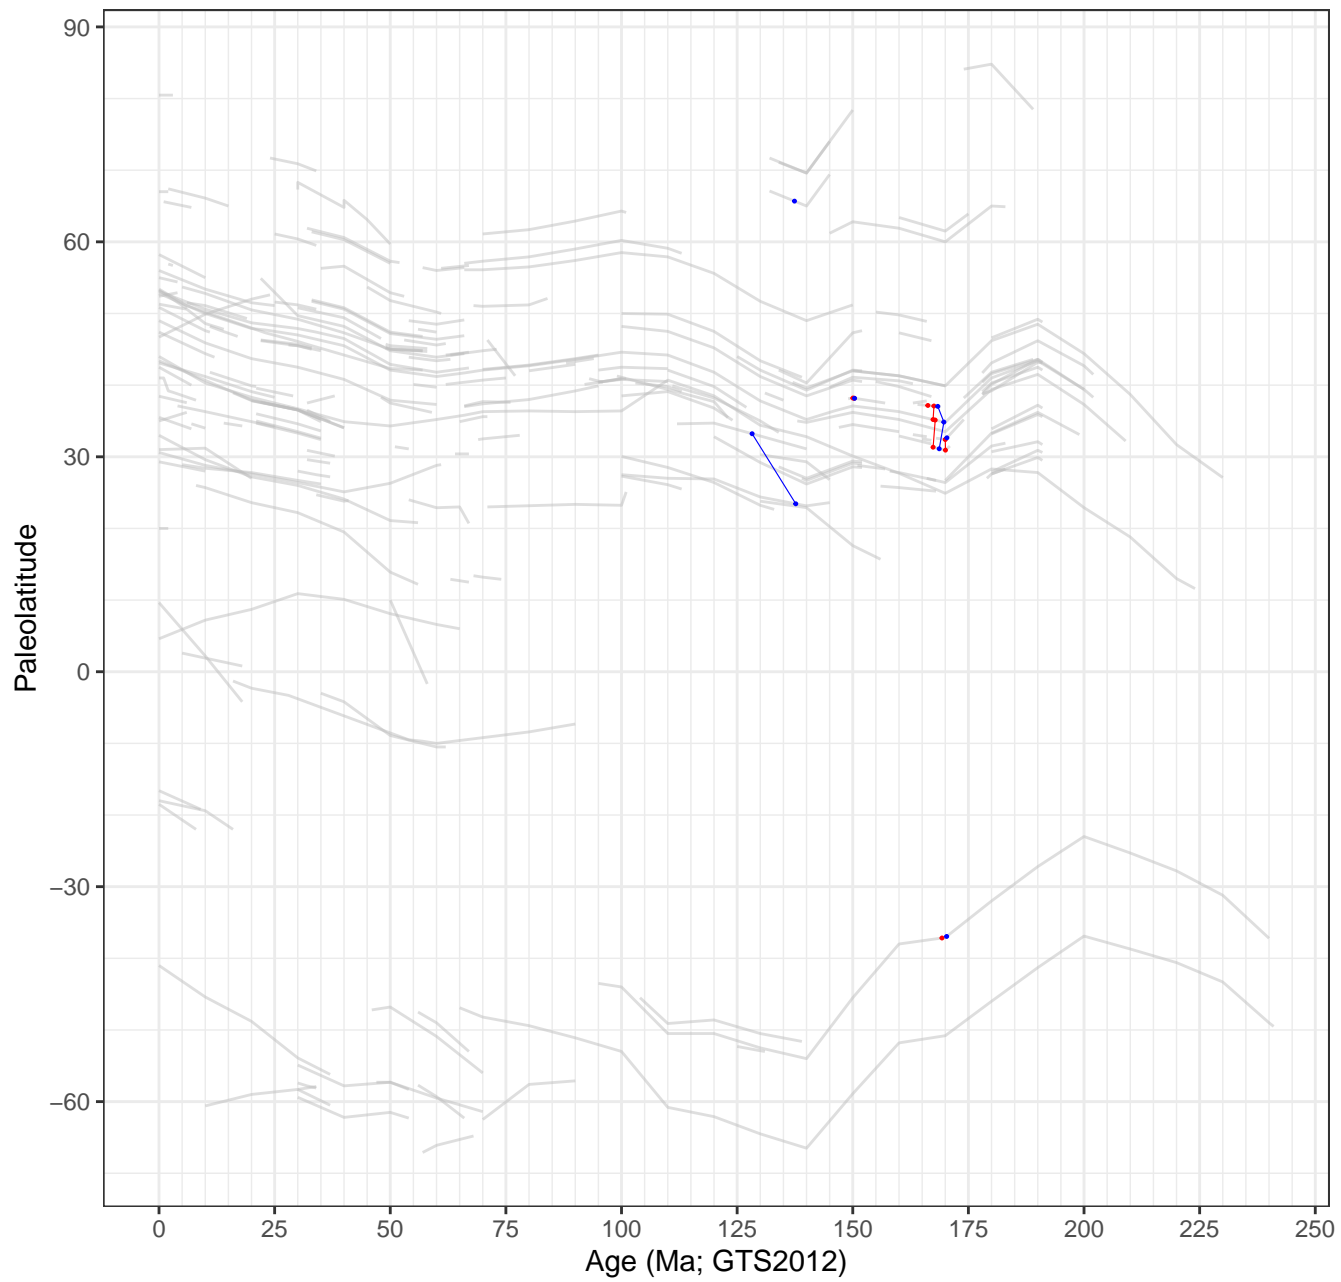

Supplement: Supplementary file 160 [file Genus Dissiliodinium.pdf › Supplement/Supplement 2/Genus 459 plots/Genus Dissiliodinium.pdf]

# Genus Dissimulidinium

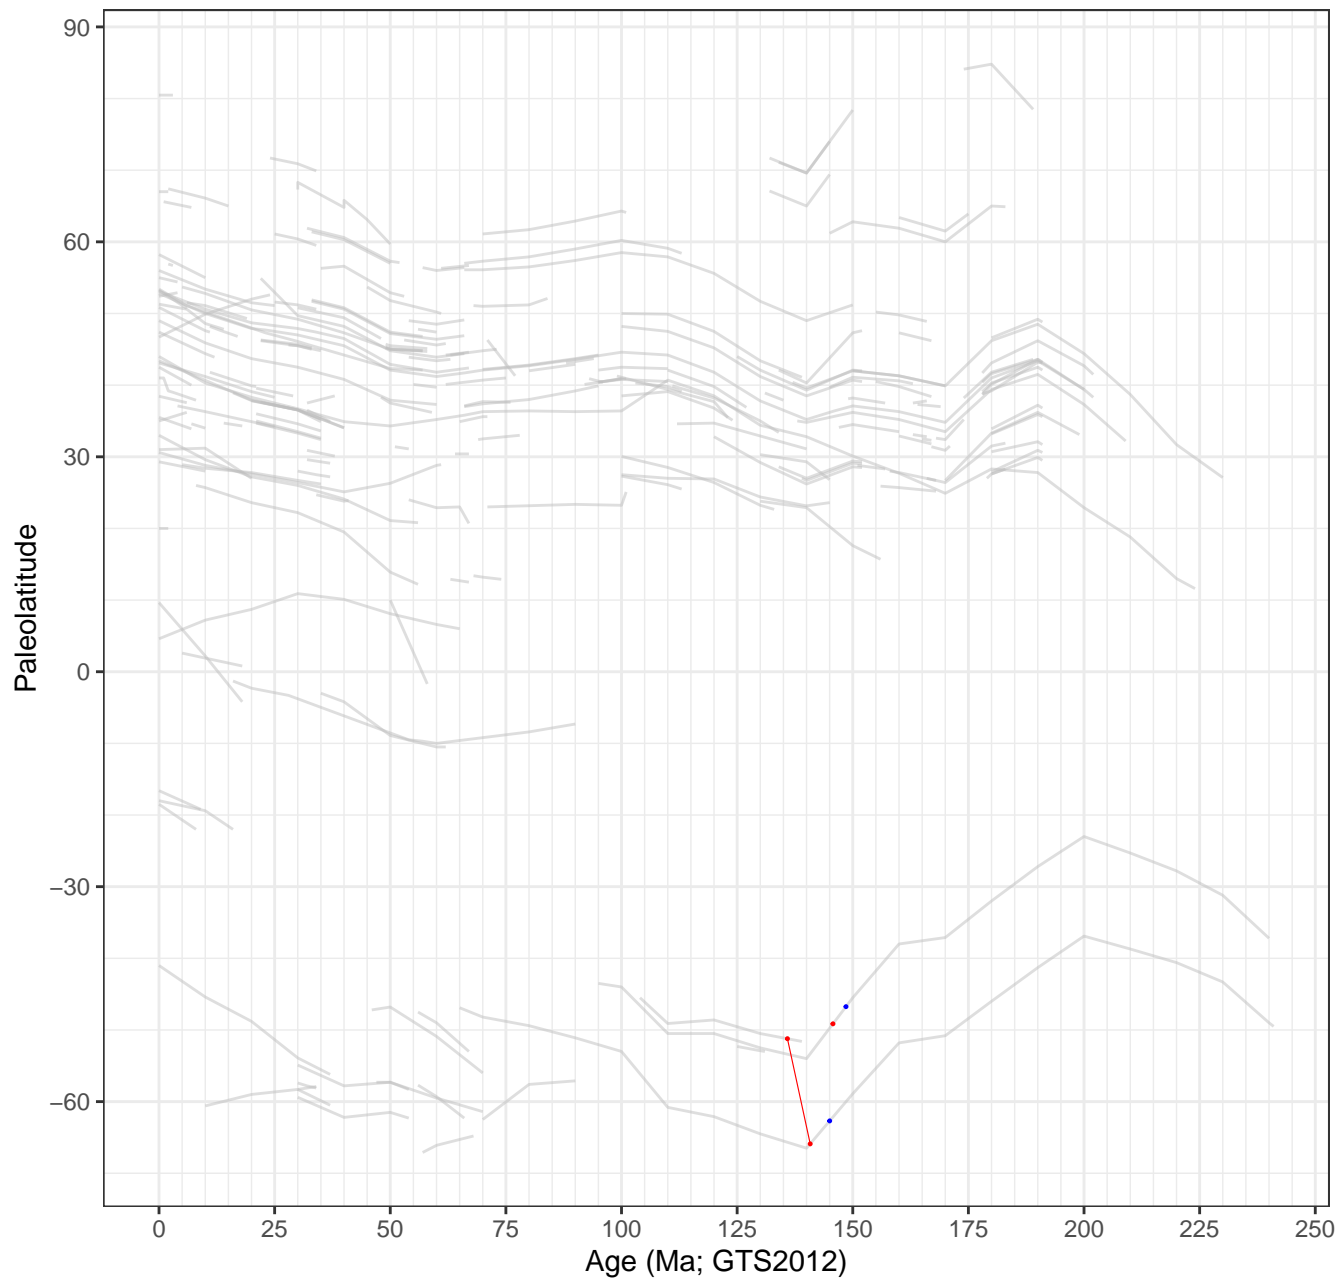

Supplement: Supplementary file 161 [file Genus Dissimulidinium.pdf › Supplement/Supplement 2/Genus 459 plots/Genus Dissimulidinium.pdf]

# Genus Distatodinium

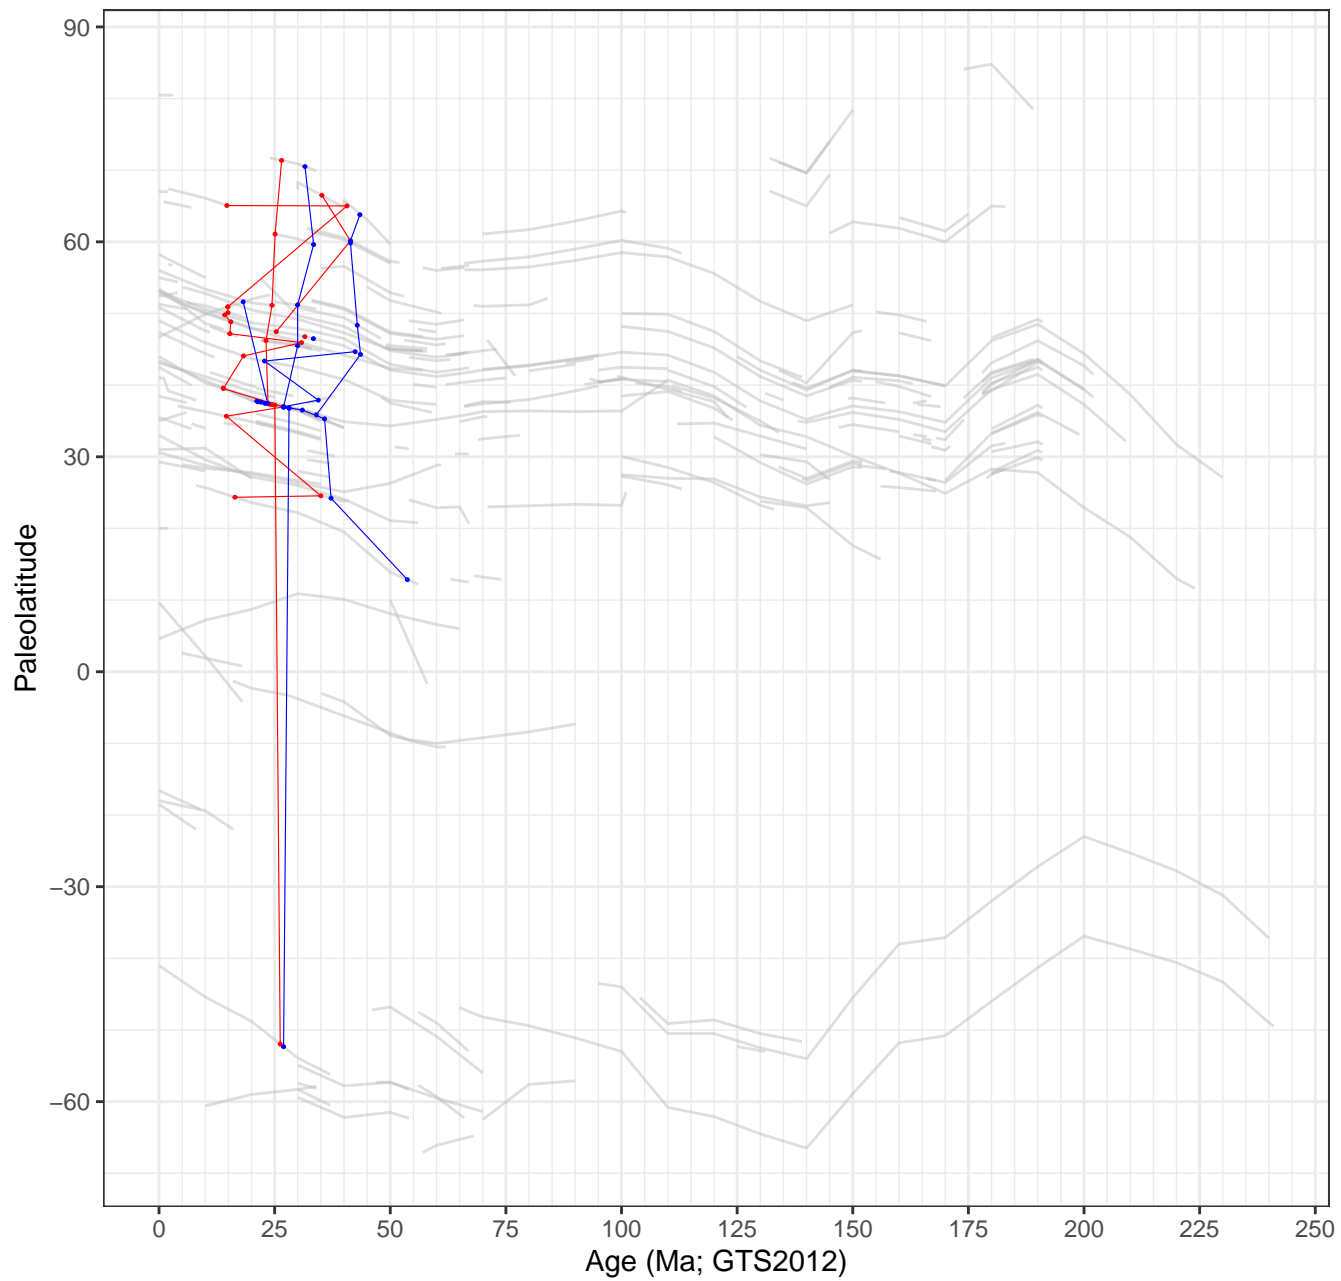

Supplement: Supplementary file 162 [file Genus Distatodinium.pdf › Supplement/Supplement 2/Genus 459 plots/Genus Distatodinium.pdf]

# Genus Dodekovia

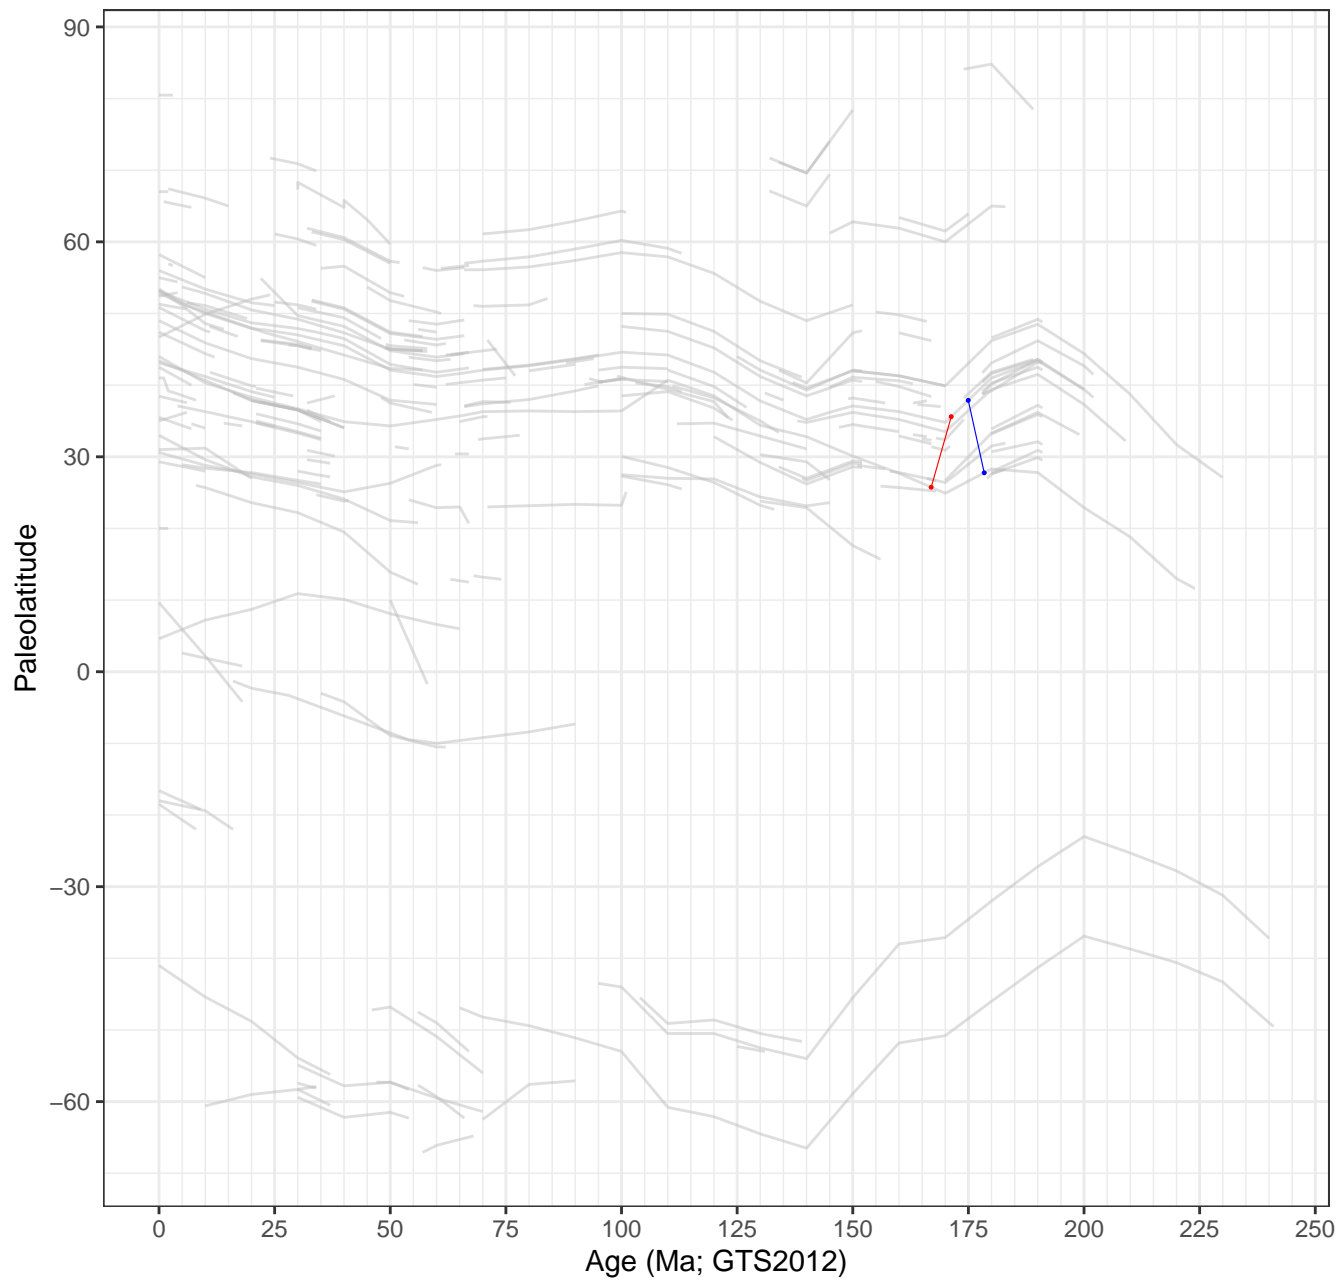

Supplement: Supplementary file 163 [file Genus Dodekovia.pdf › Supplement/Supplement 2/Genus 459 plots/Genus Dodekovia.pdf]

# Genus Dolichodinium

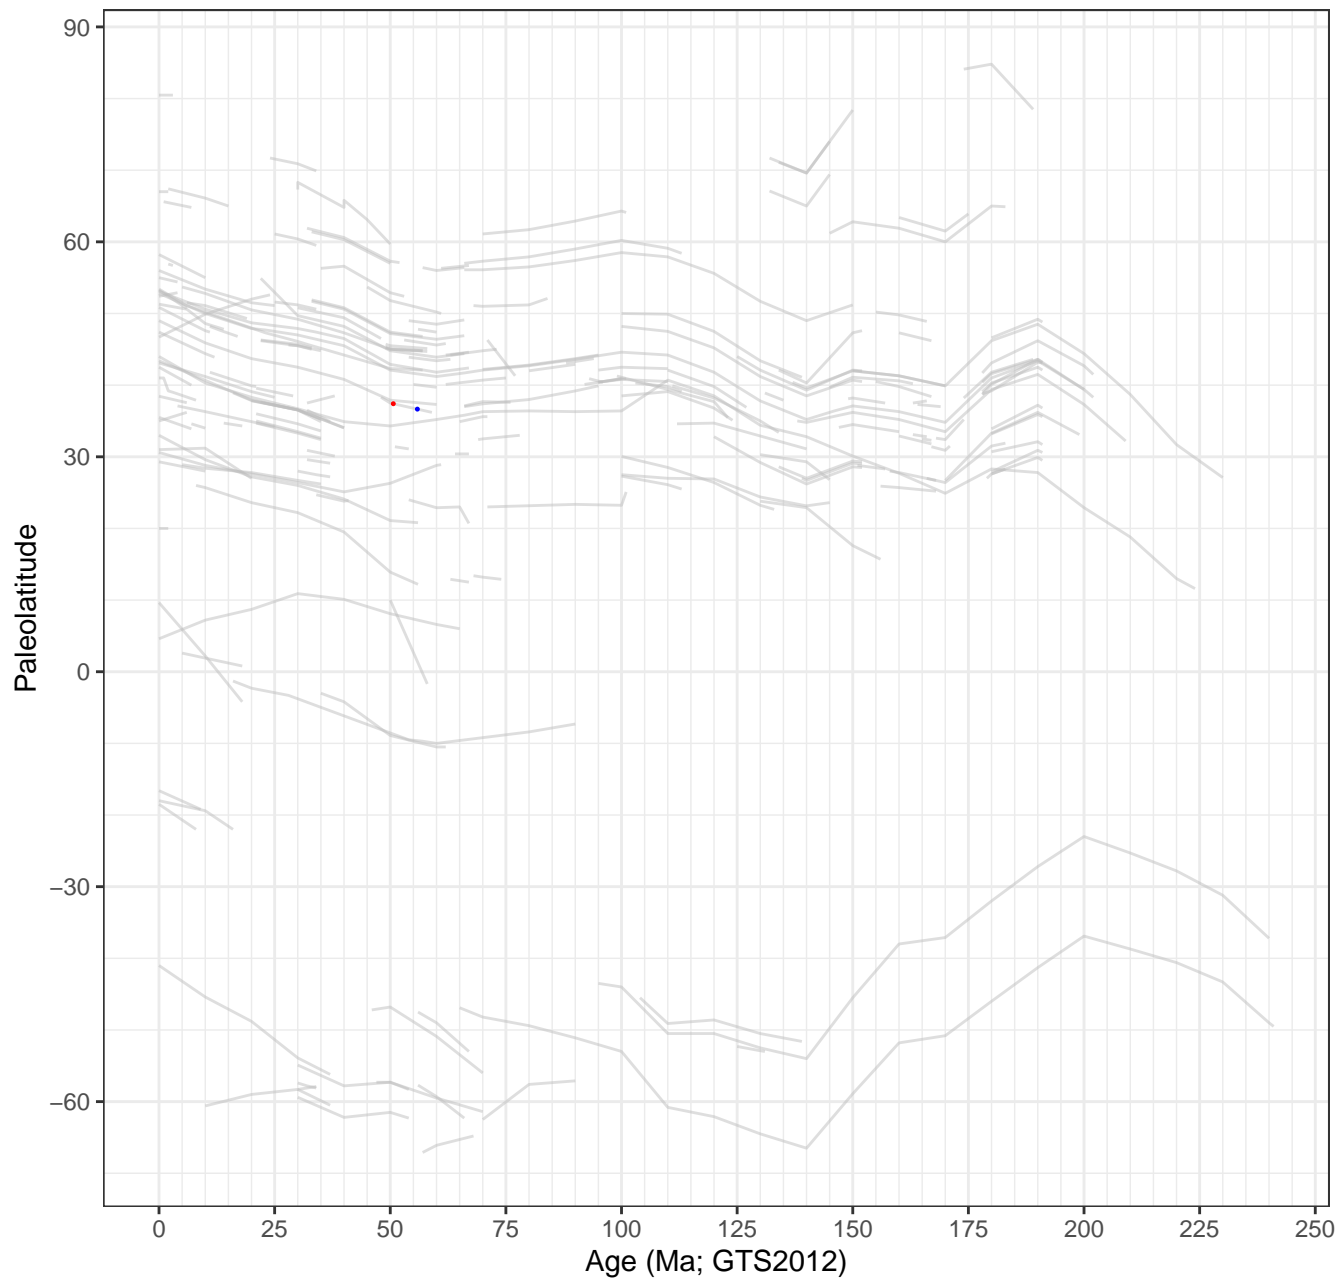

Supplement: Supplementary file 164 [file Genus Dolichodinium.pdf › Supplement/Supplement 2/Genus 459 plots/Genus Dolichodinium.pdf]

# Genus Dollidinium

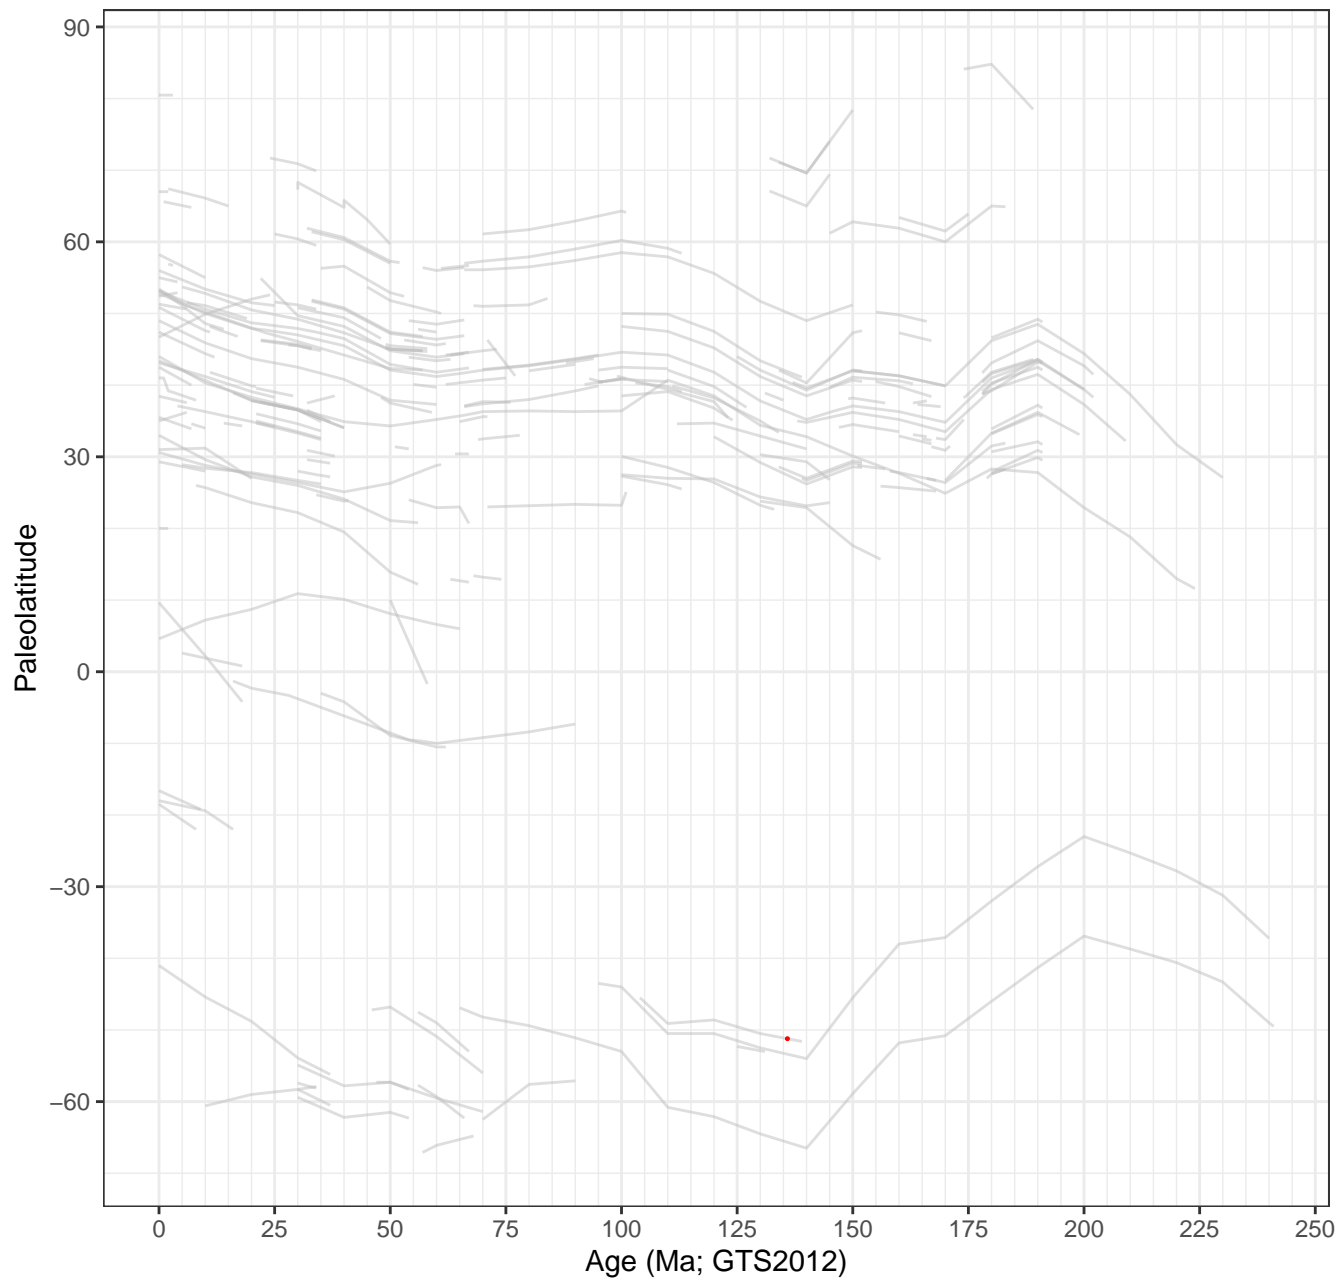

Supplement: Supplementary file 165 [file Genus Dollidinium.pdf › Supplement/Supplement 2/Genus 459 plots/Genus Dollidinium.pdf]

# Genus Dorocysta

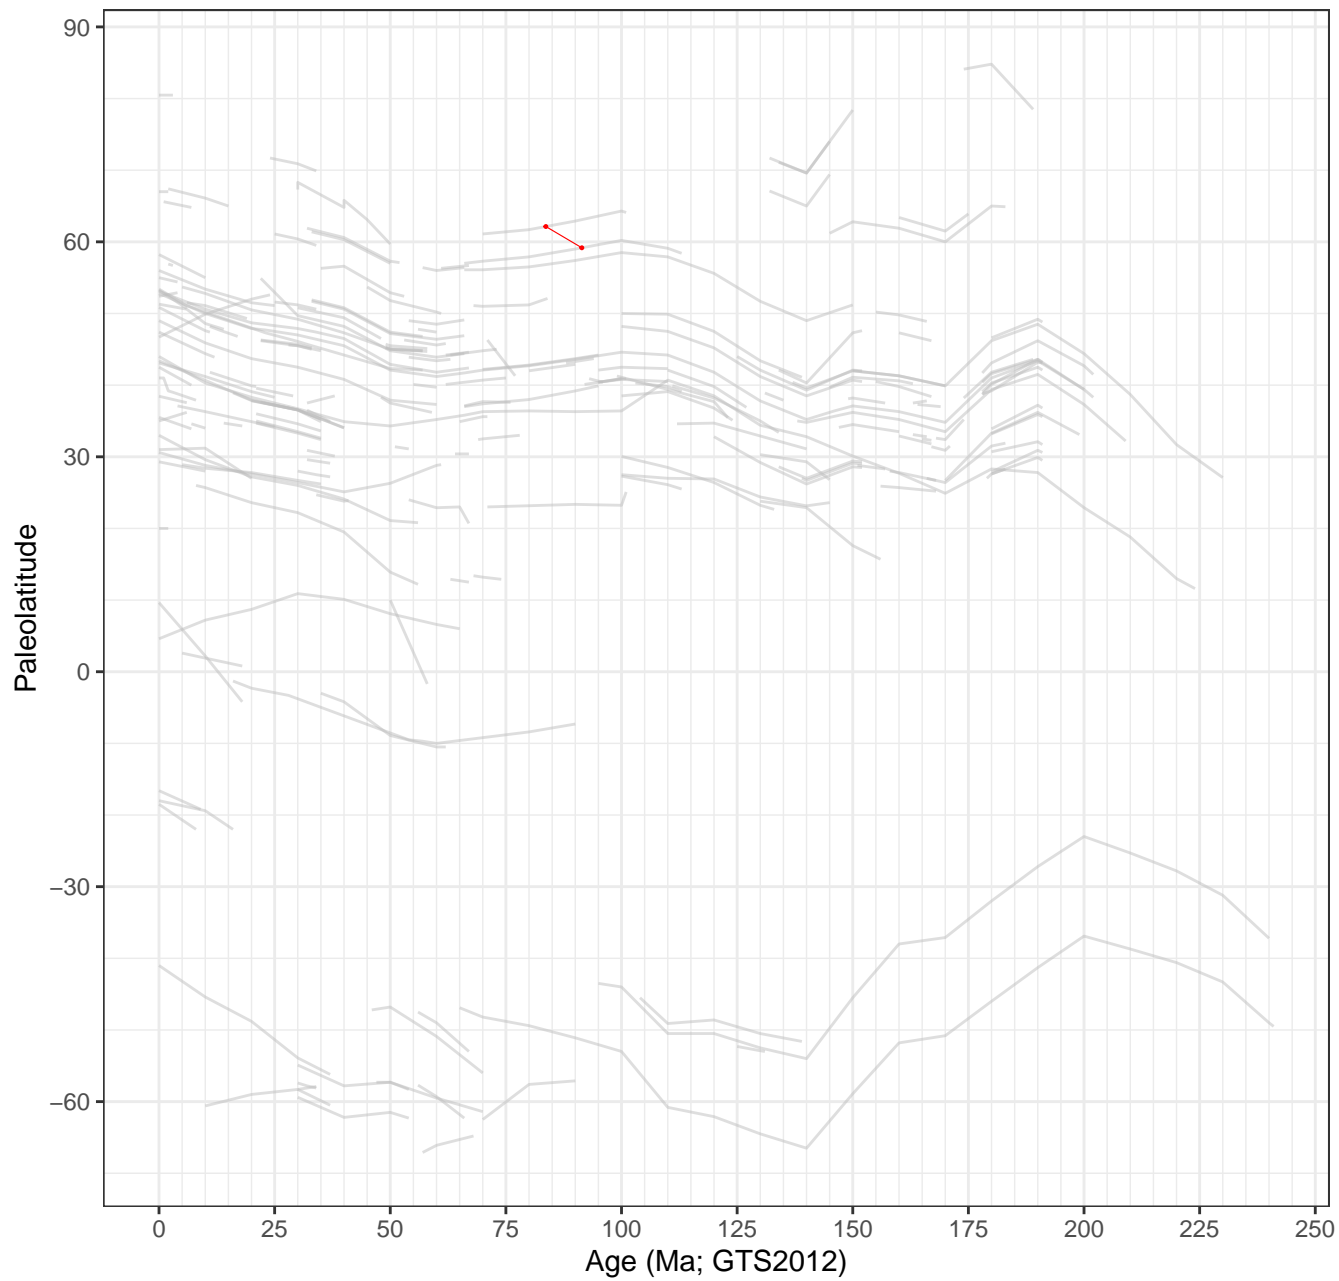

Supplement: Supplementary file 166 [file Genus Dorocysta.pdf › Supplement/Supplement 2/Genus 459 plots/Genus Dorocysta.pdf]

# Genus Downiesphaeridium

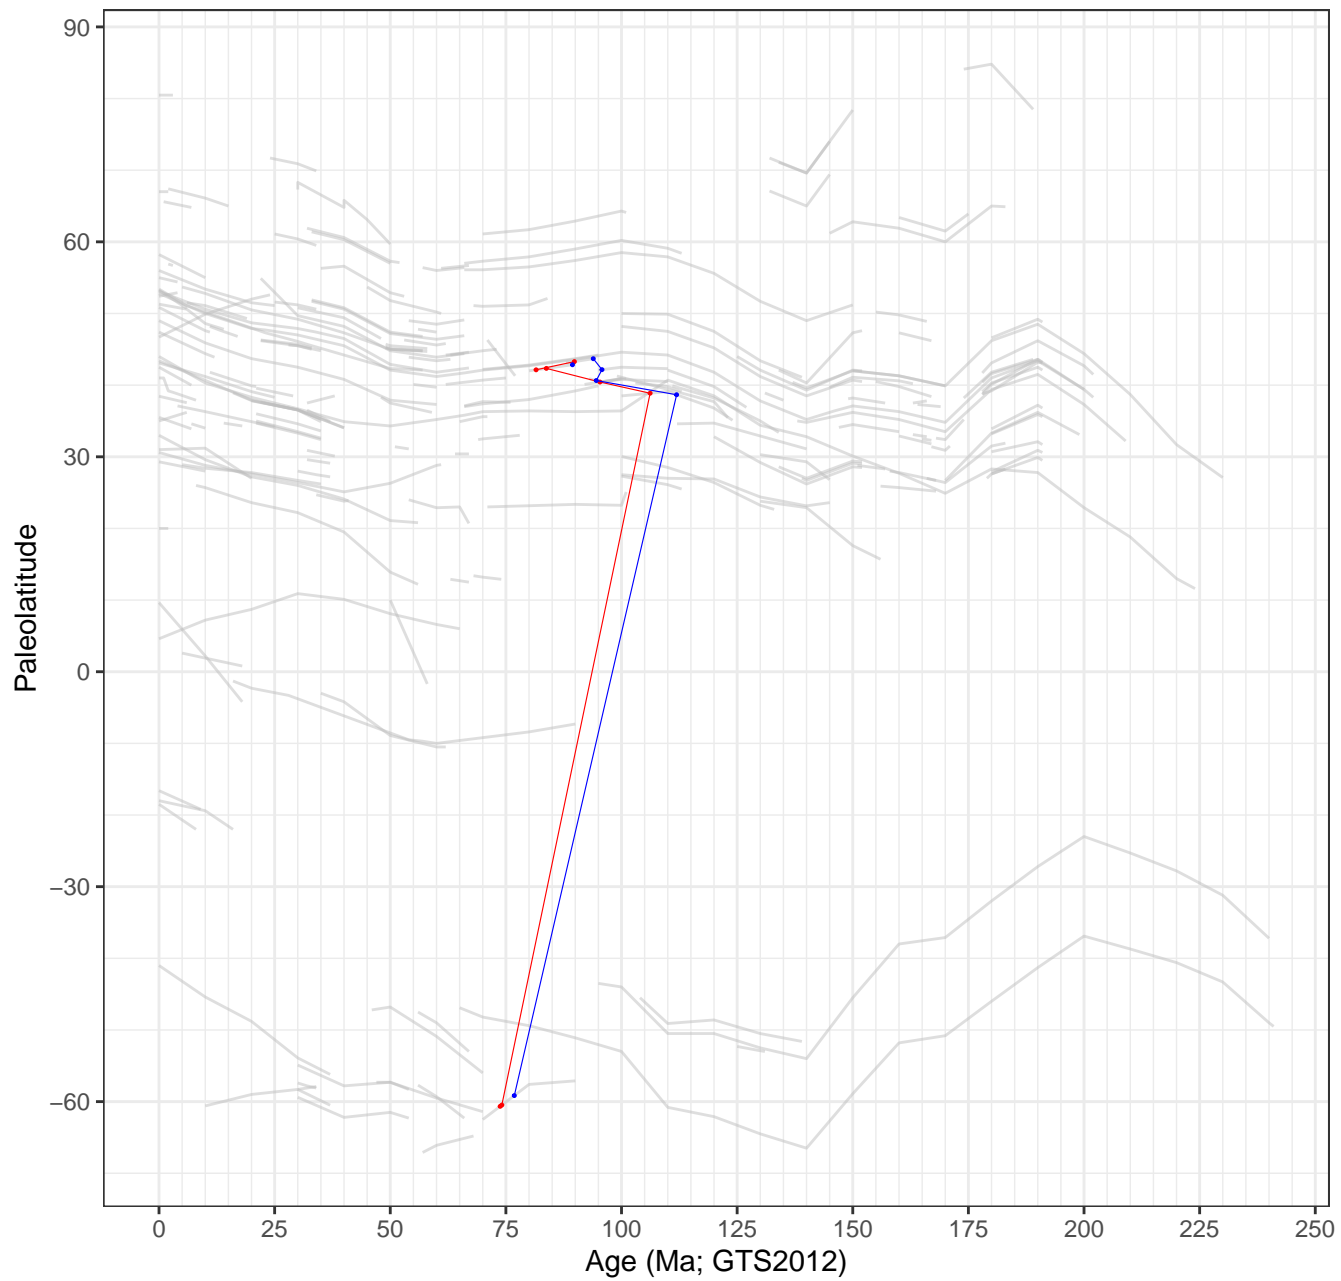

Supplement: Supplementary file 167 [file Genus Downiesphaeridium.pdf › Supplement/Supplement 2/Genus 459 plots/Genus Downiesphaeridium.pdf]

# Genus *Dracodinium*

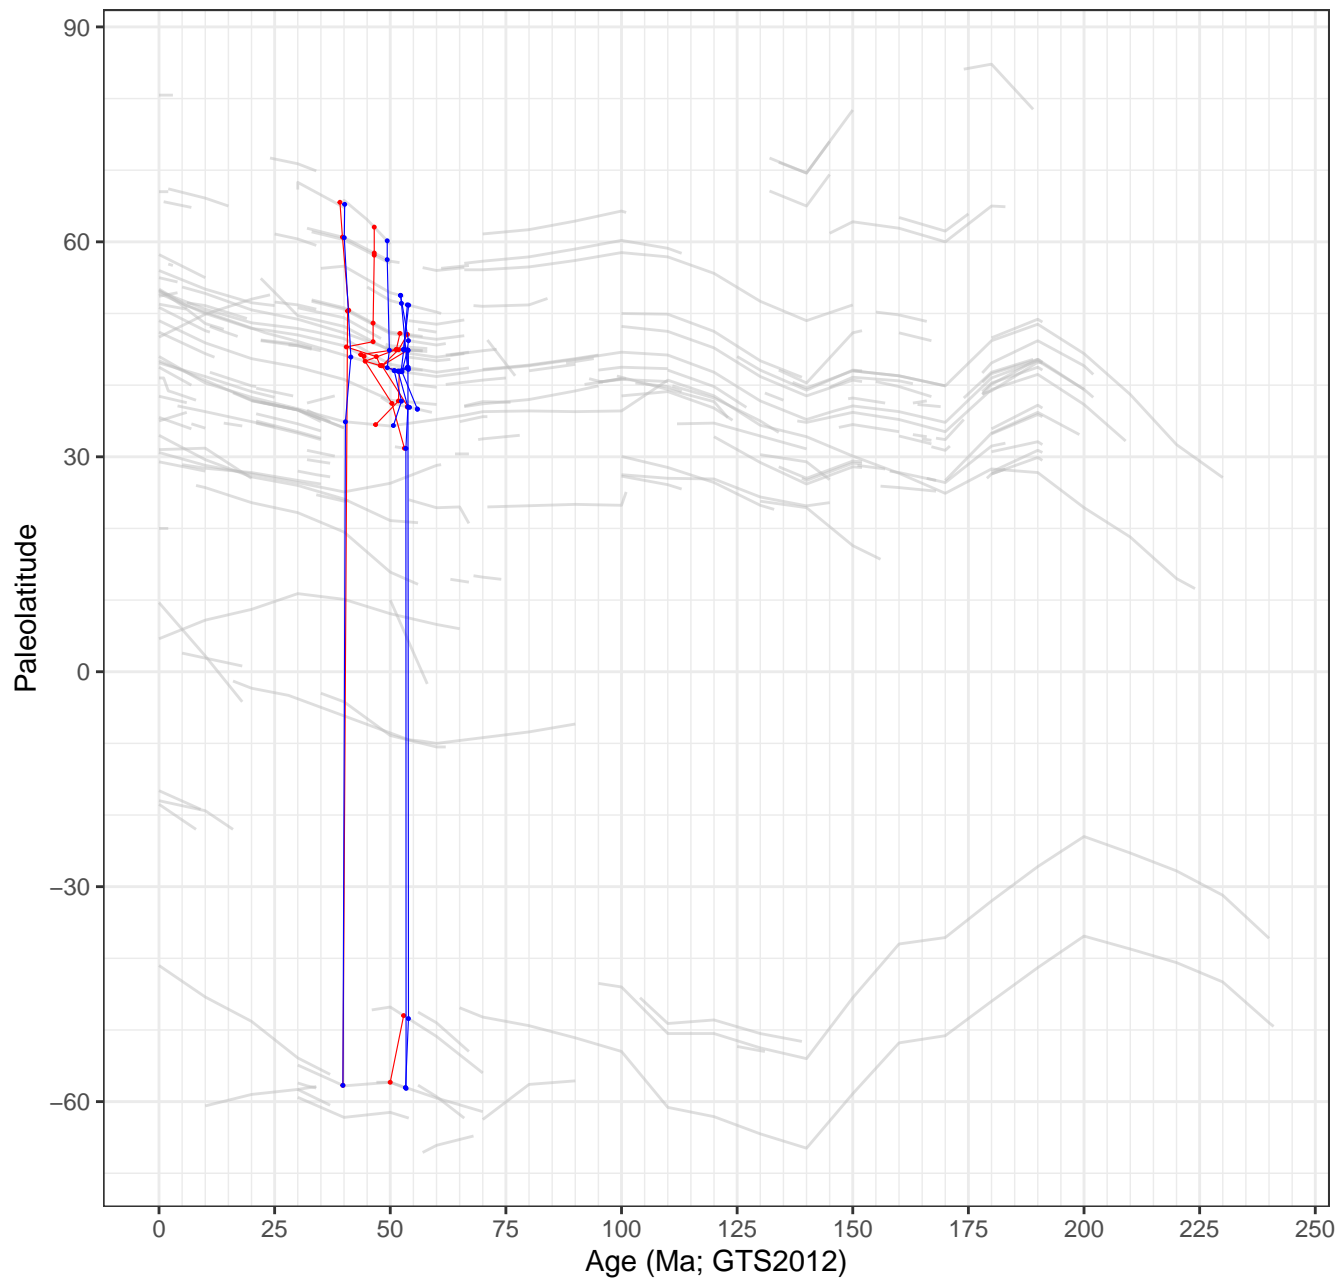

Supplement: Supplementary file 168 [file Genus Dracodinium.pdf › Supplement/Supplement 2/Genus 459 plots/Genus Dracodinium.pdf]

# Genus Druggidium

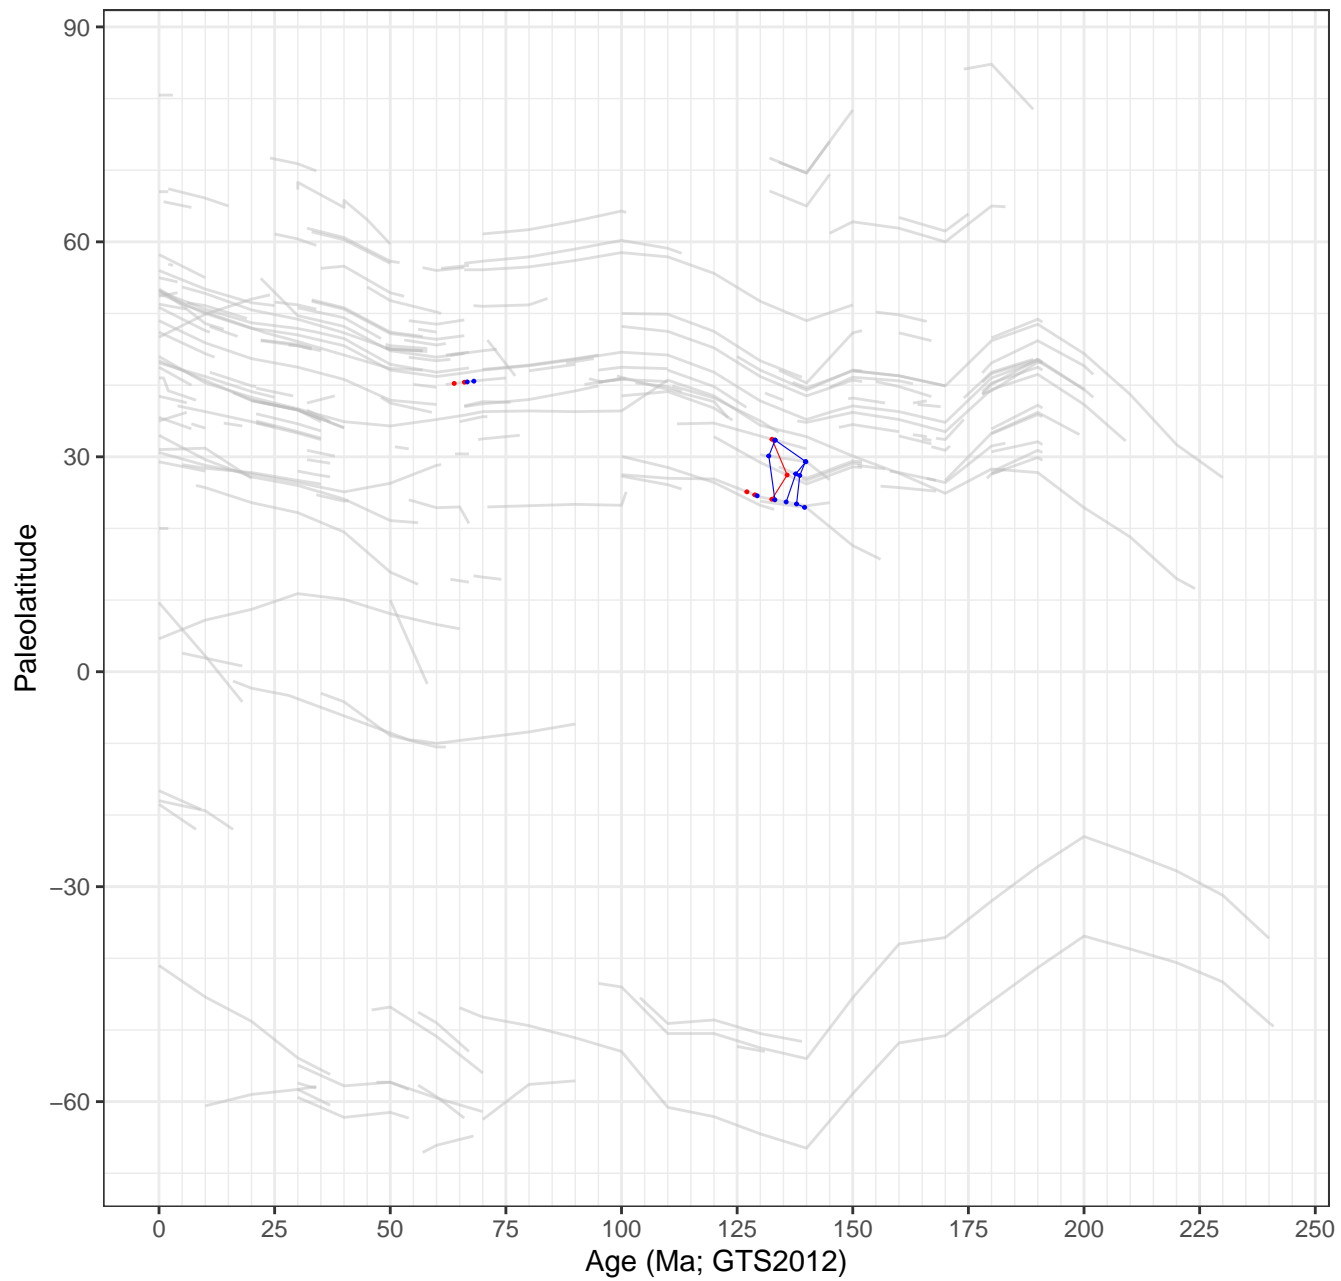

Supplement: Supplementary file 169 [file Genus Druggidium.pdf › Supplement/Supplement 2/Genus 459 plots/Genus Druggidium.pdf]

# Genus Dubridinium

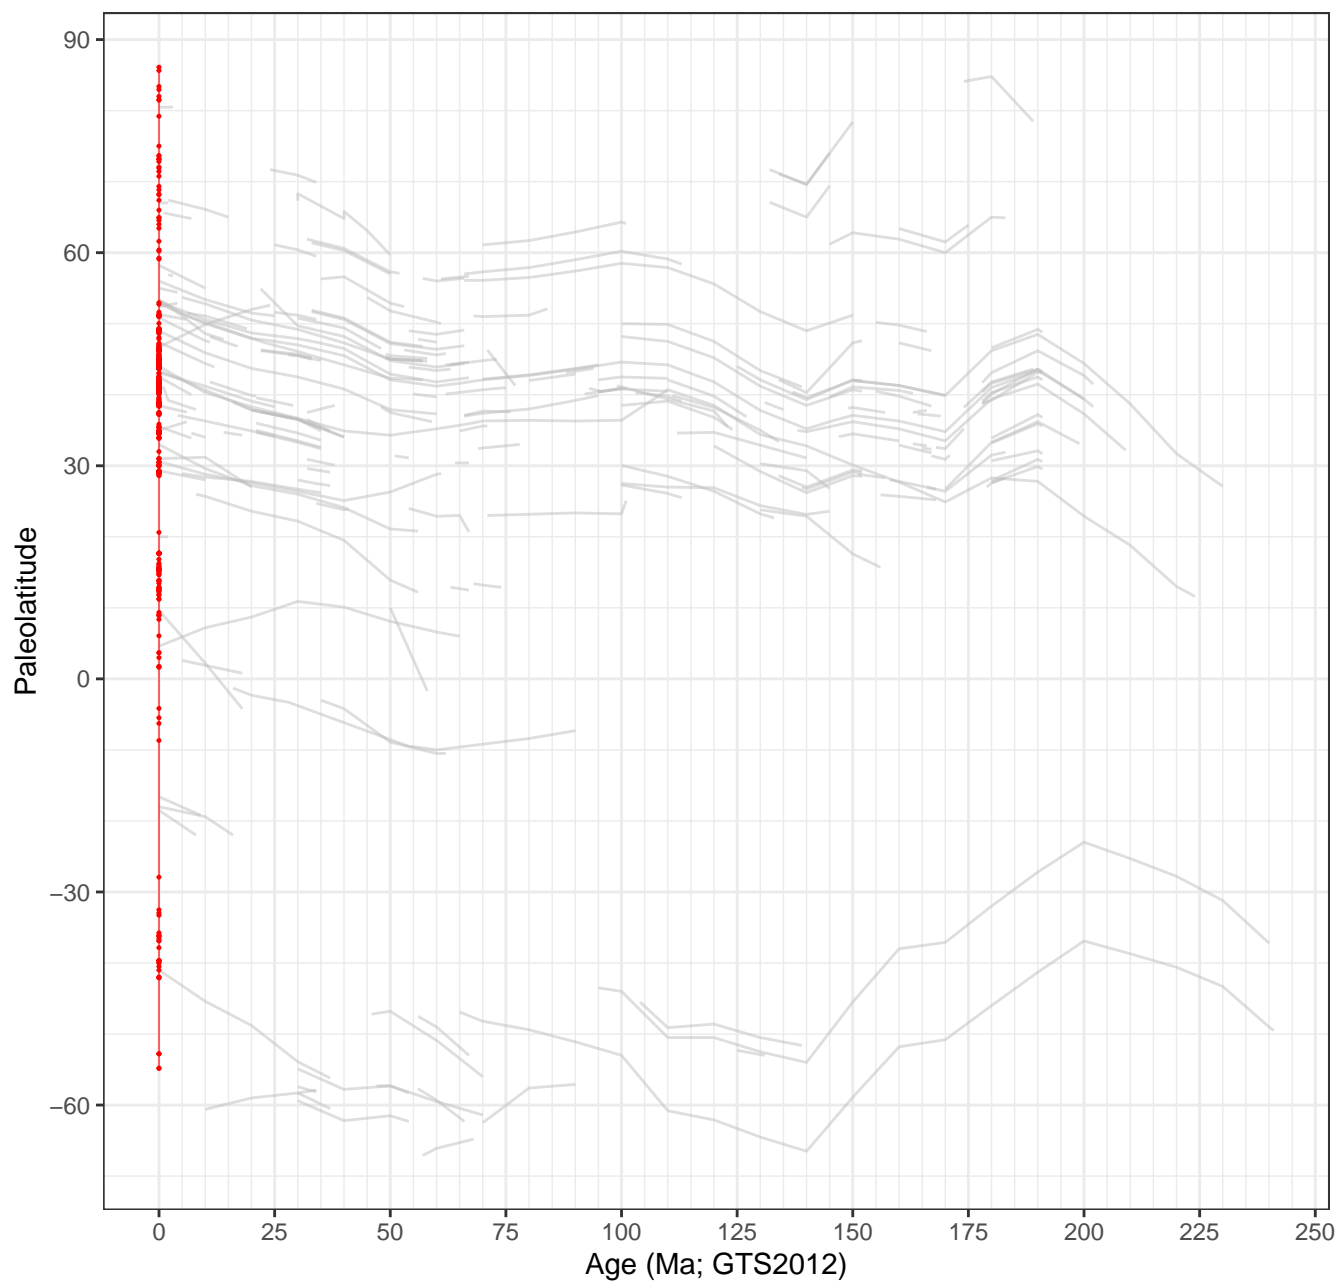

Supplement: Supplementary file 170 [file Genus Dubridinium.pdf › Supplement/Supplement 2/Genus 459 plots/Genus Dubridinium.pdf]

# Genus Duosphaeridium

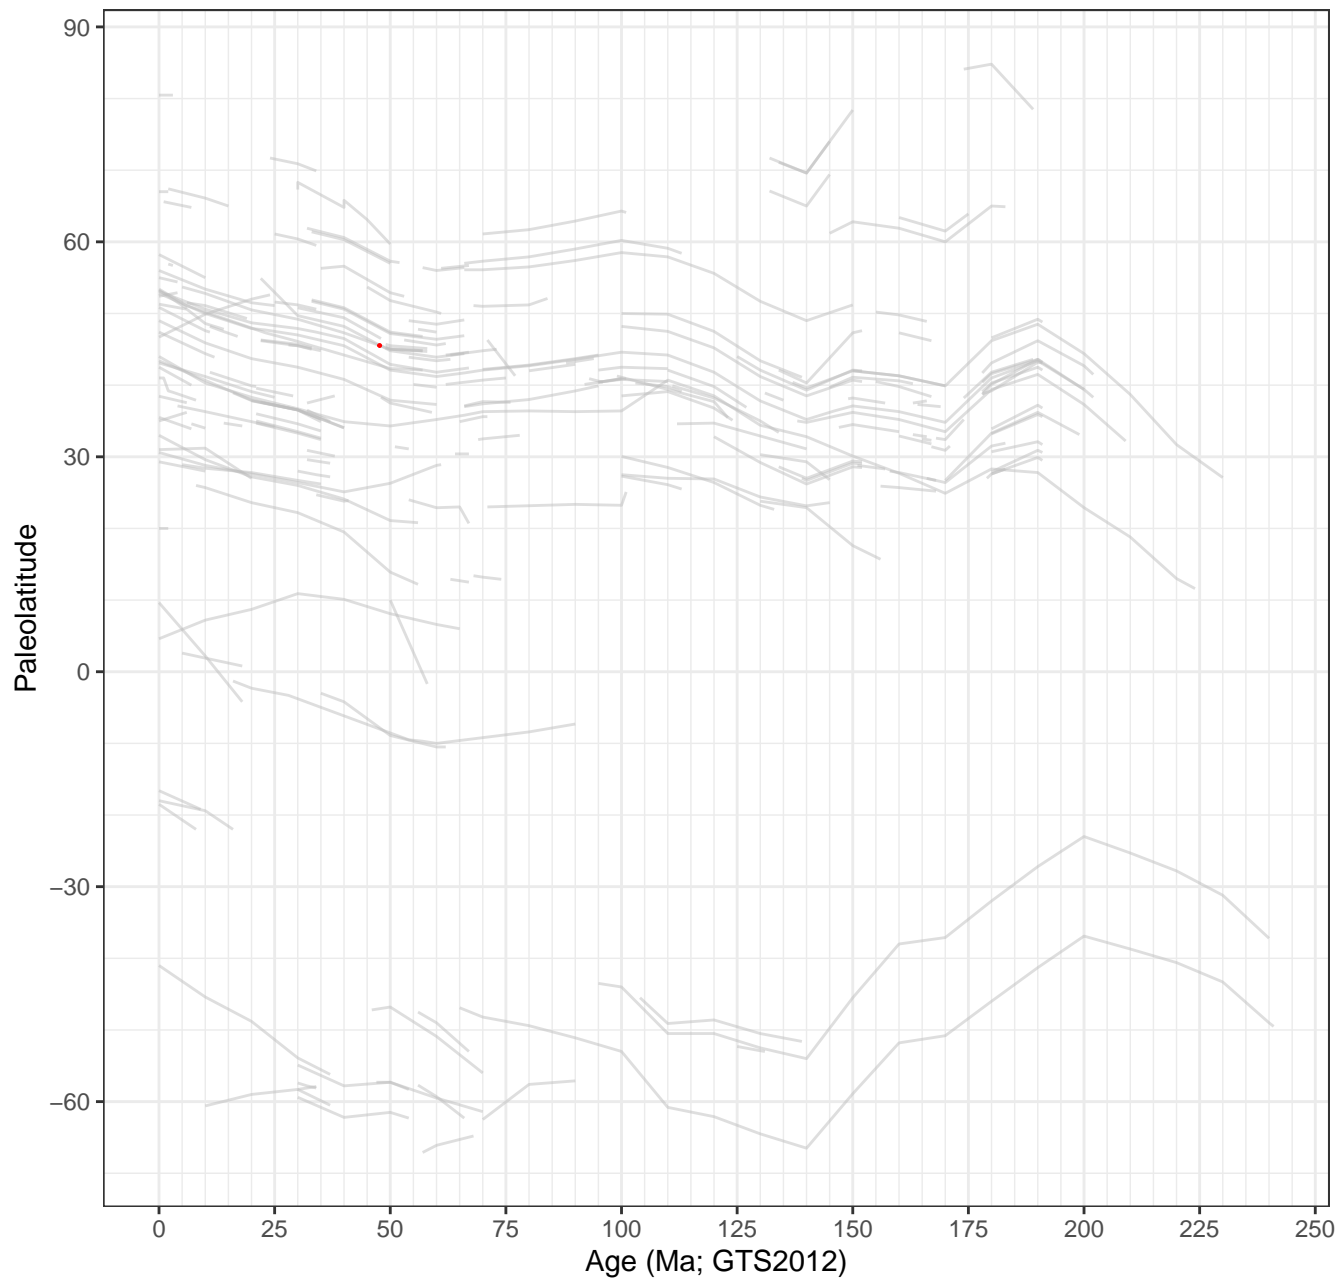

Supplement: Supplementary file 171 [file Genus Duosphaeridium.pdf › Supplement/Supplement 2/Genus 459 plots/Genus Duosphaeridium.pdf]

# Genus Durotrigia

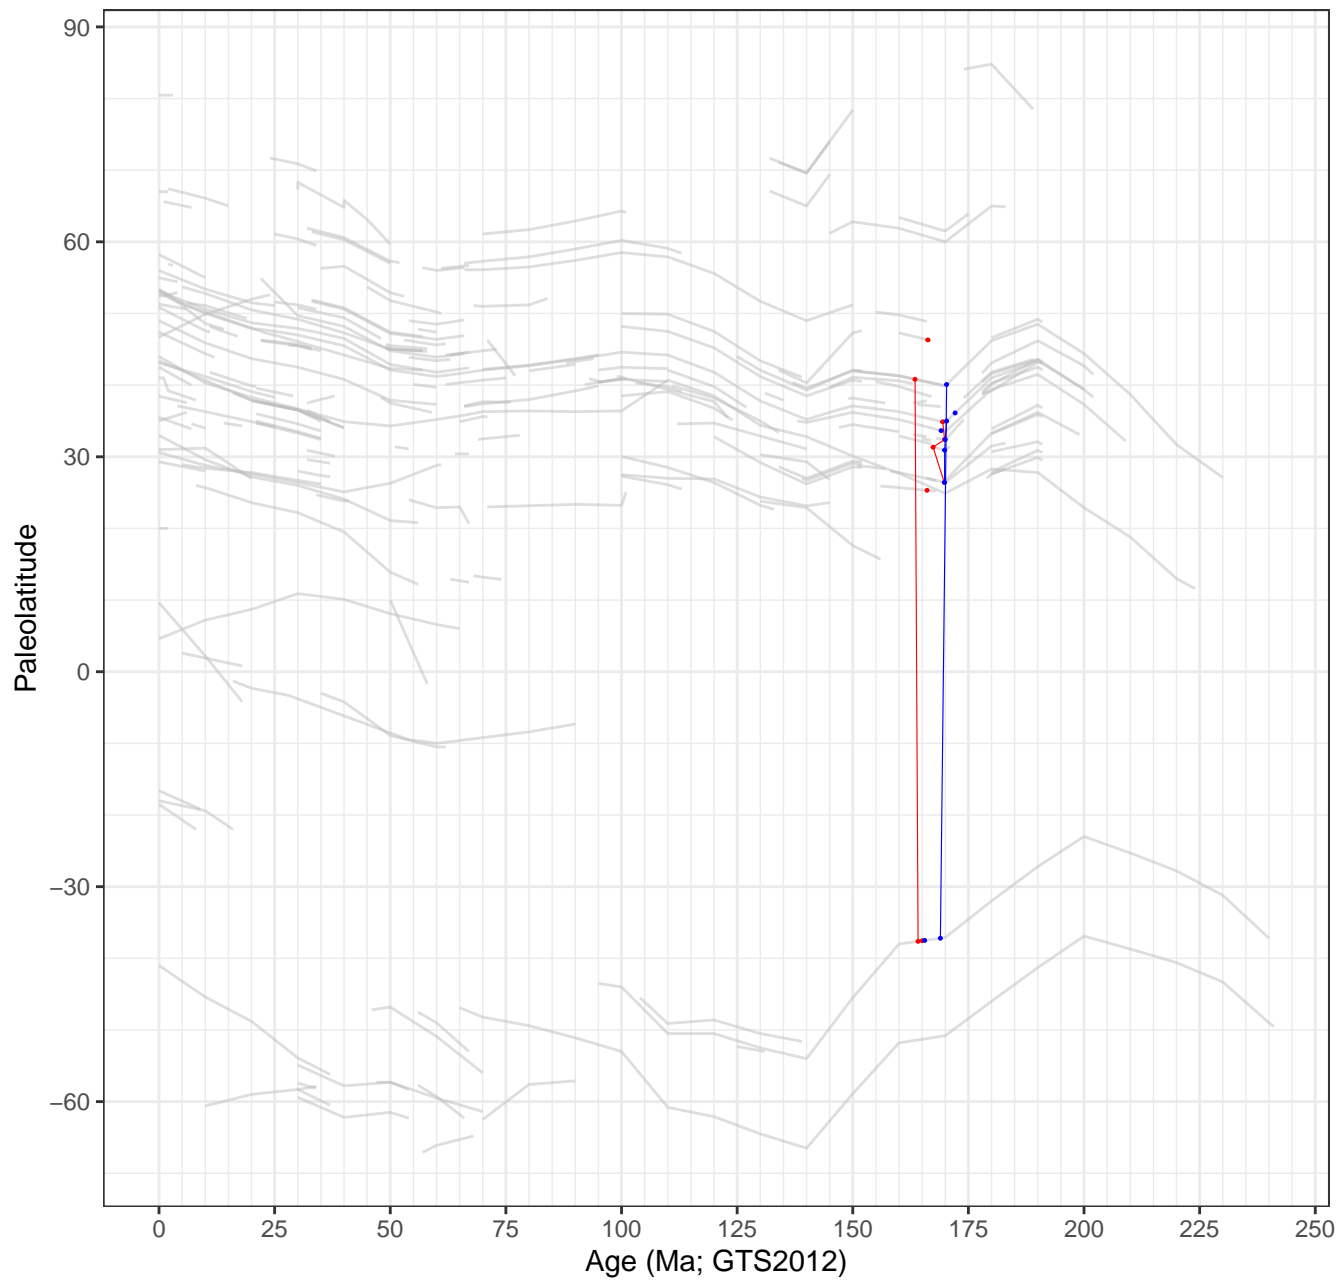

Supplement: Supplementary file 172 [file Genus Durotrigia.pdf › Supplement/Supplement 2/Genus 459 plots/Genus Durotrigia.pdf]

# Genus Eatonicysta

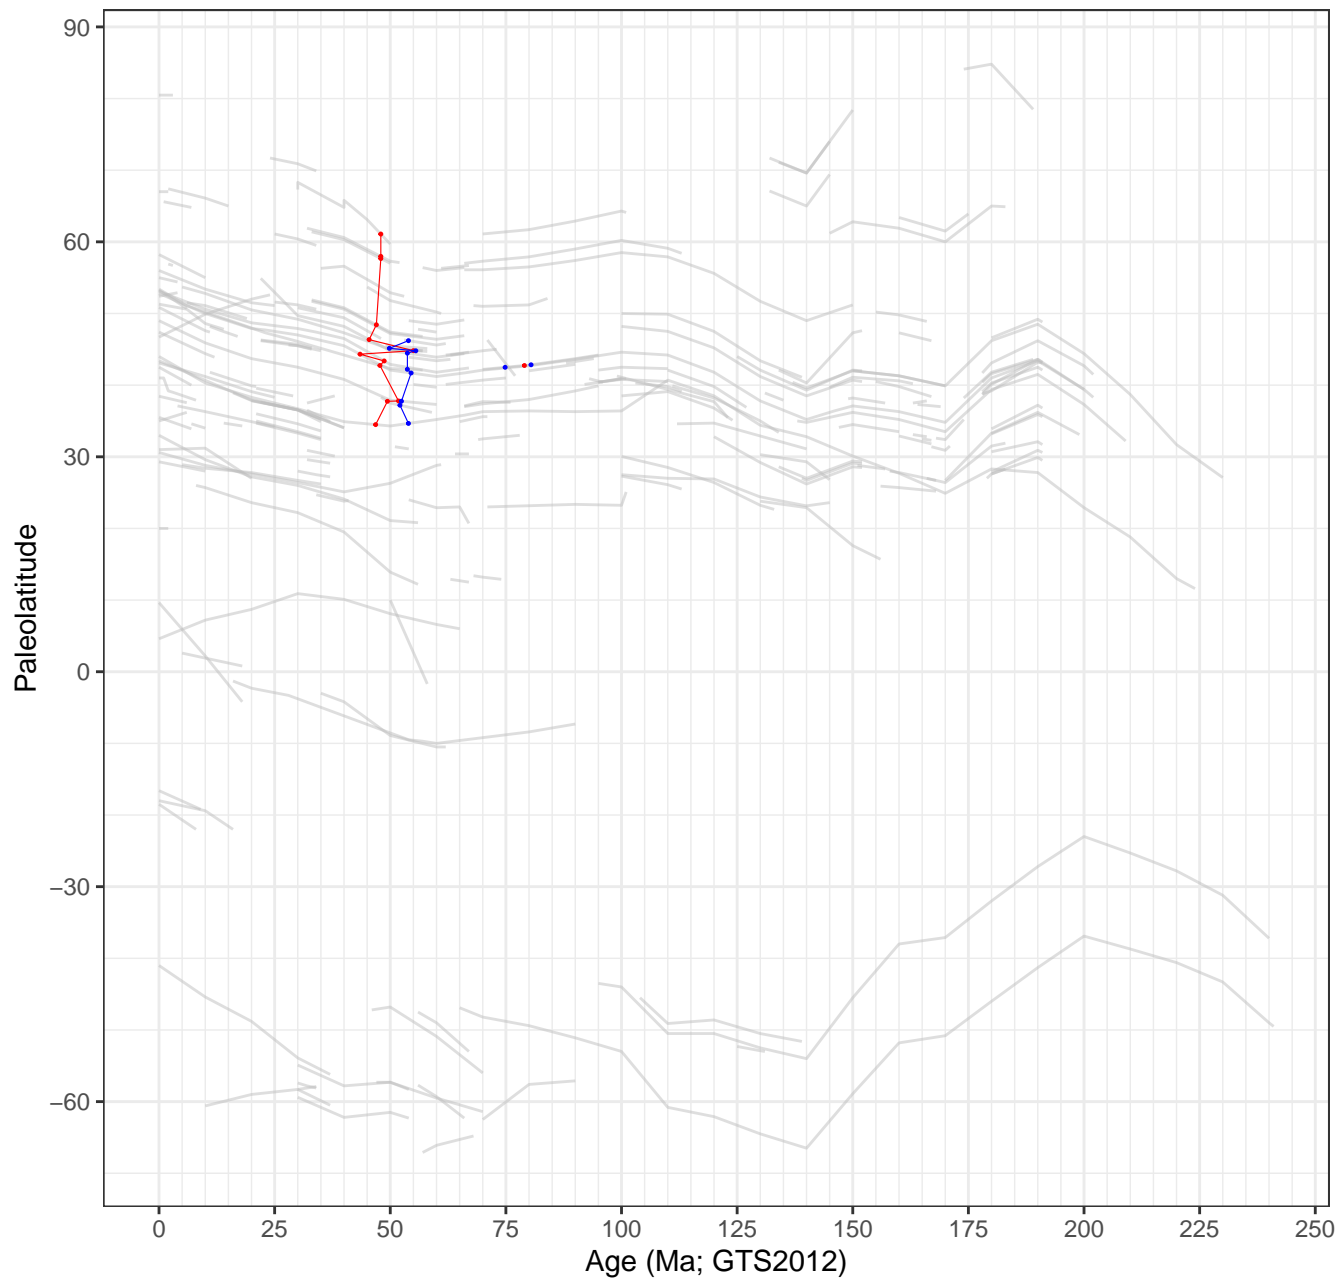

Supplement: Supplementary file 173 [file Genus Eatonicysta.pdf › Supplement/Supplement 2/Genus 459 plots/Genus Eatonicysta.pdf]

# Genus Echinidinium

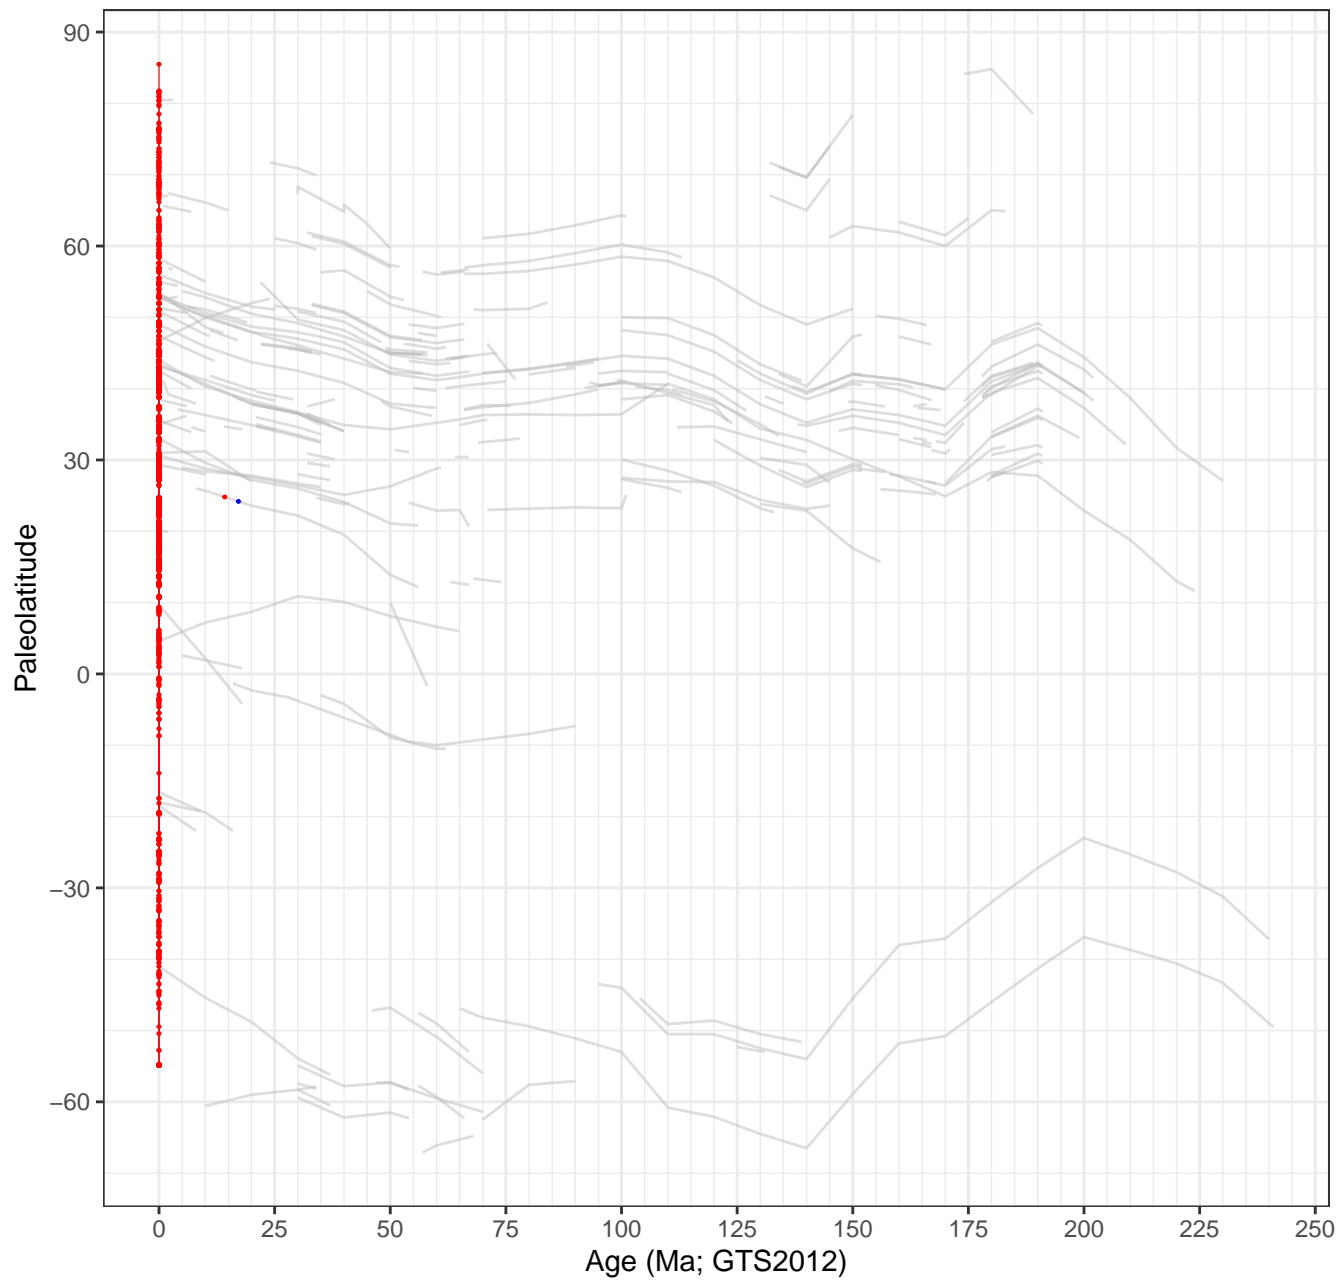

Supplement: Supplementary file 174 [file Genus Echinidinium.pdf › Supplement/Supplement 2/Genus 459 plots/Genus Echinidinium.pdf]

# Genus Ectosphaeropsis

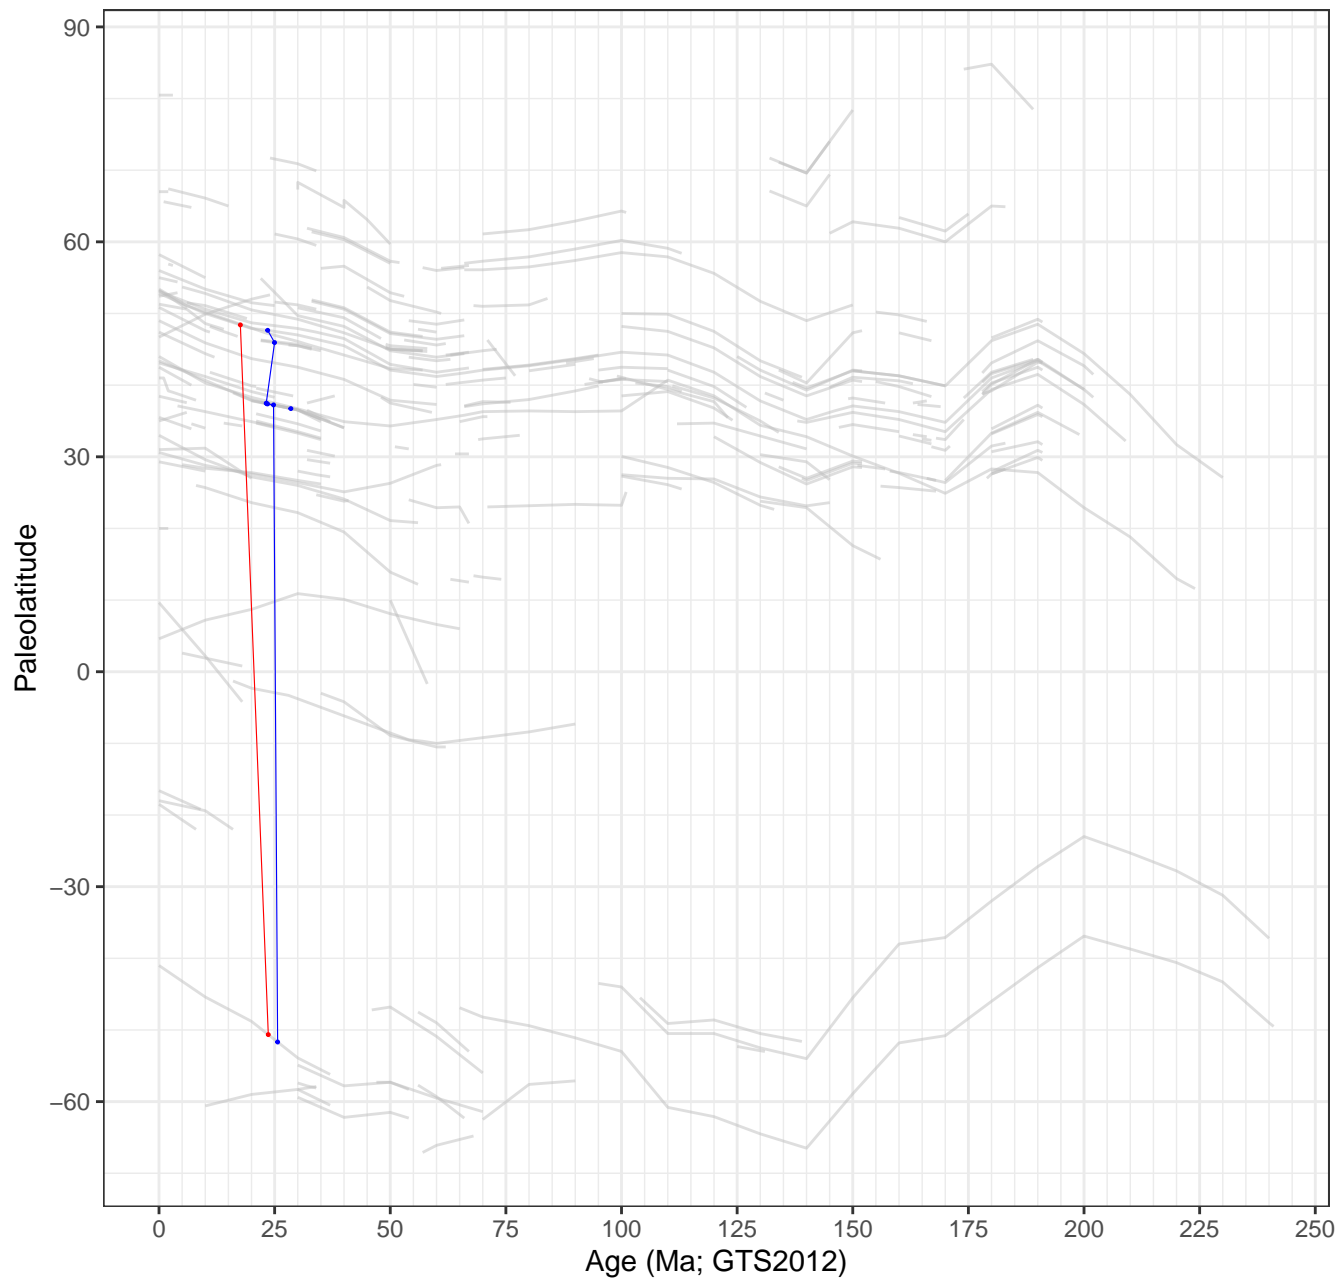

Supplement: Supplementary file 175 [file Genus Ectosphaeropsis.pdf › Supplement/Supplement 2/Genus 459 plots/Genus Ectosphaeropsis.pdf]

# Genus *Edwardsiella*

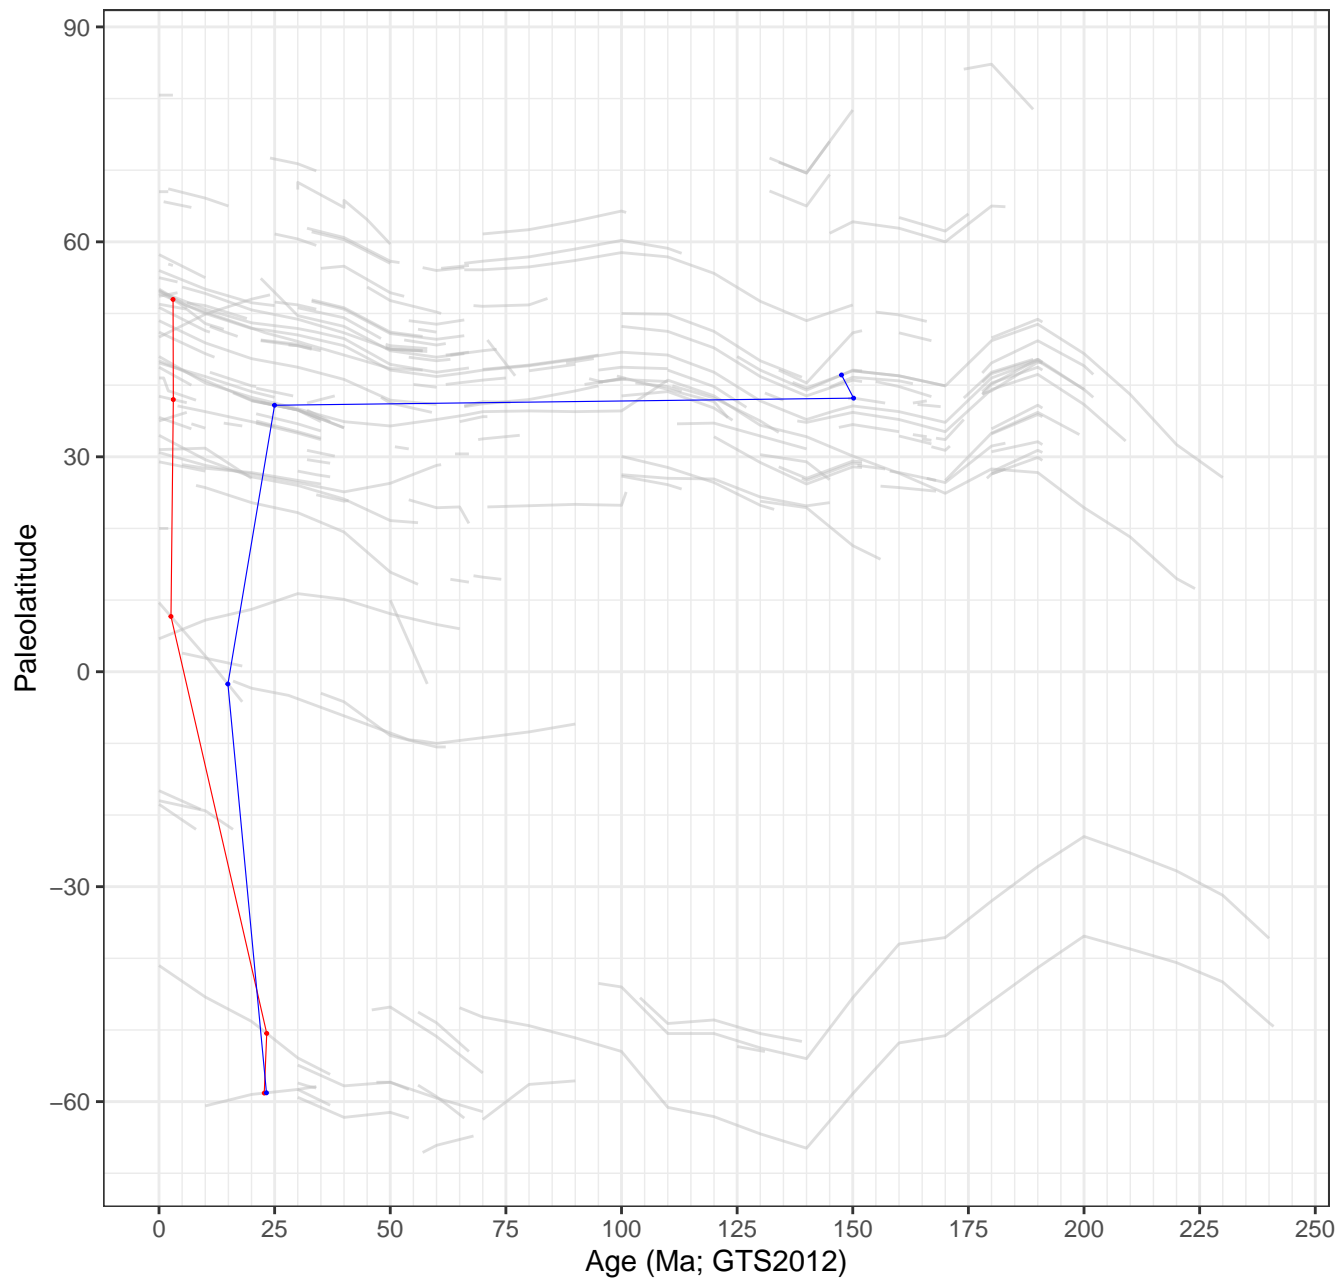

Supplement: Supplementary file 176 [file Genus Edwardsiella.pdf › Supplement/Supplement 2/Genus 459 plots/Genus Edwardsiella.pdf]

# Genus Egmontodinium

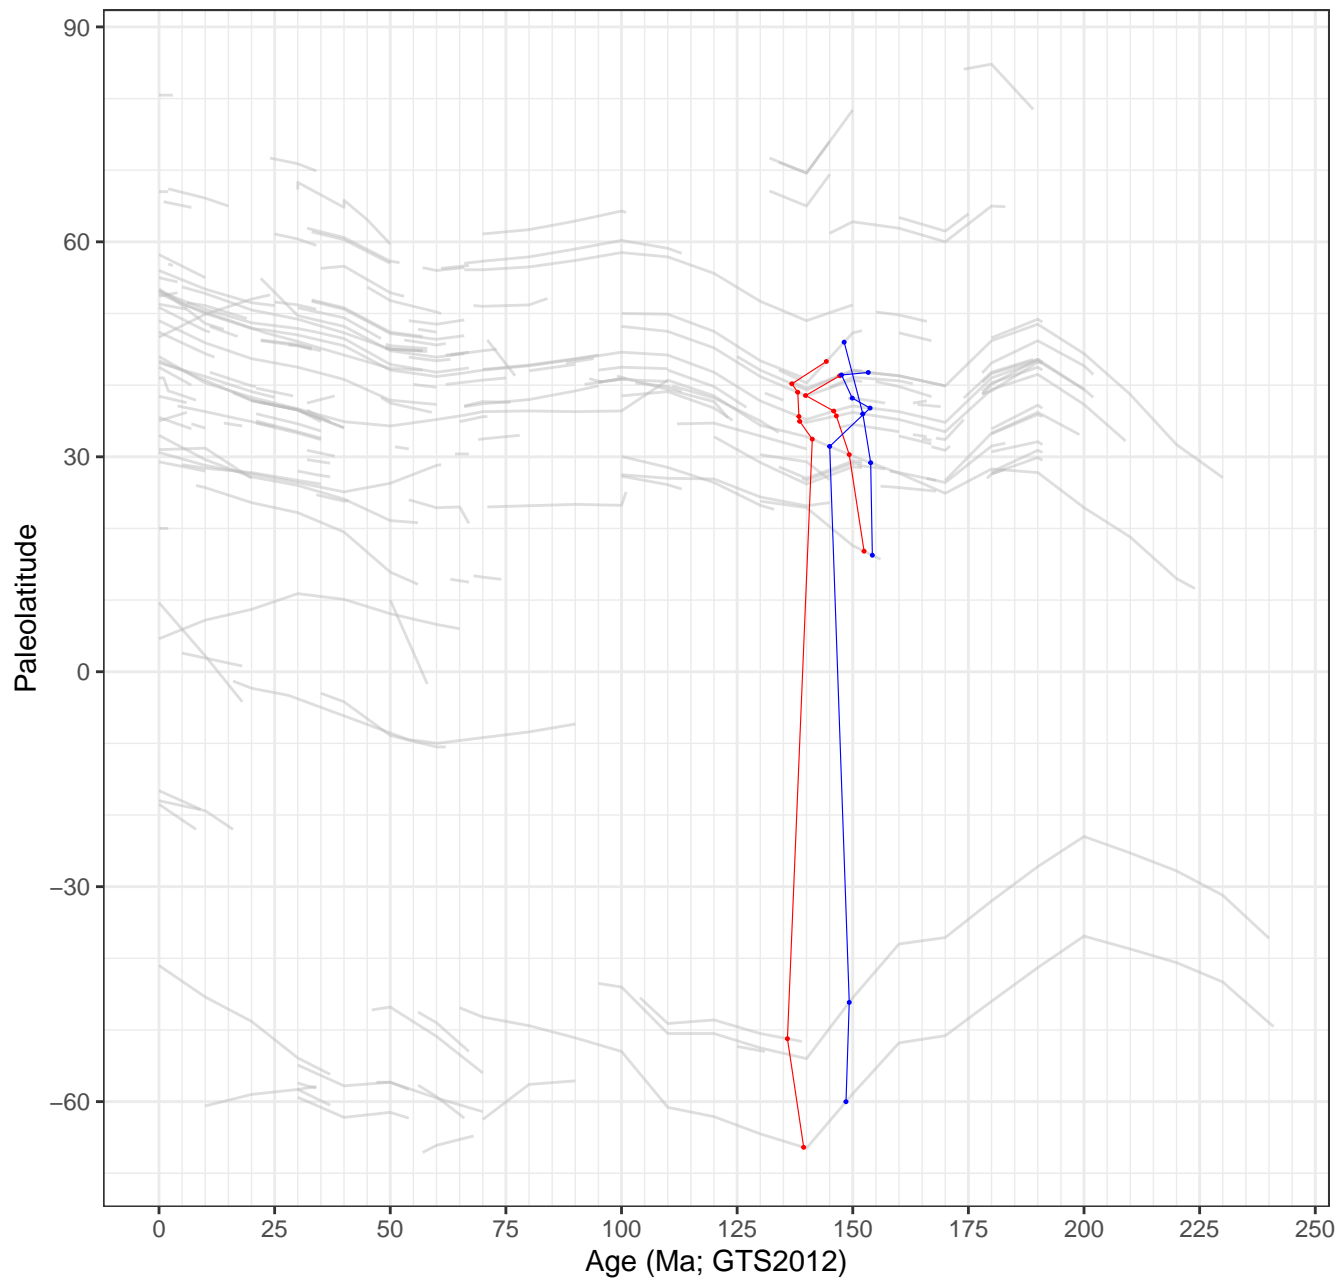

Supplement: Supplementary file 177 [file Genus Egmontodinium.pdf › Supplement/Supplement 2/Genus 459 plots/Genus Egmontodinium.pdf]

# Genus Eisenackia

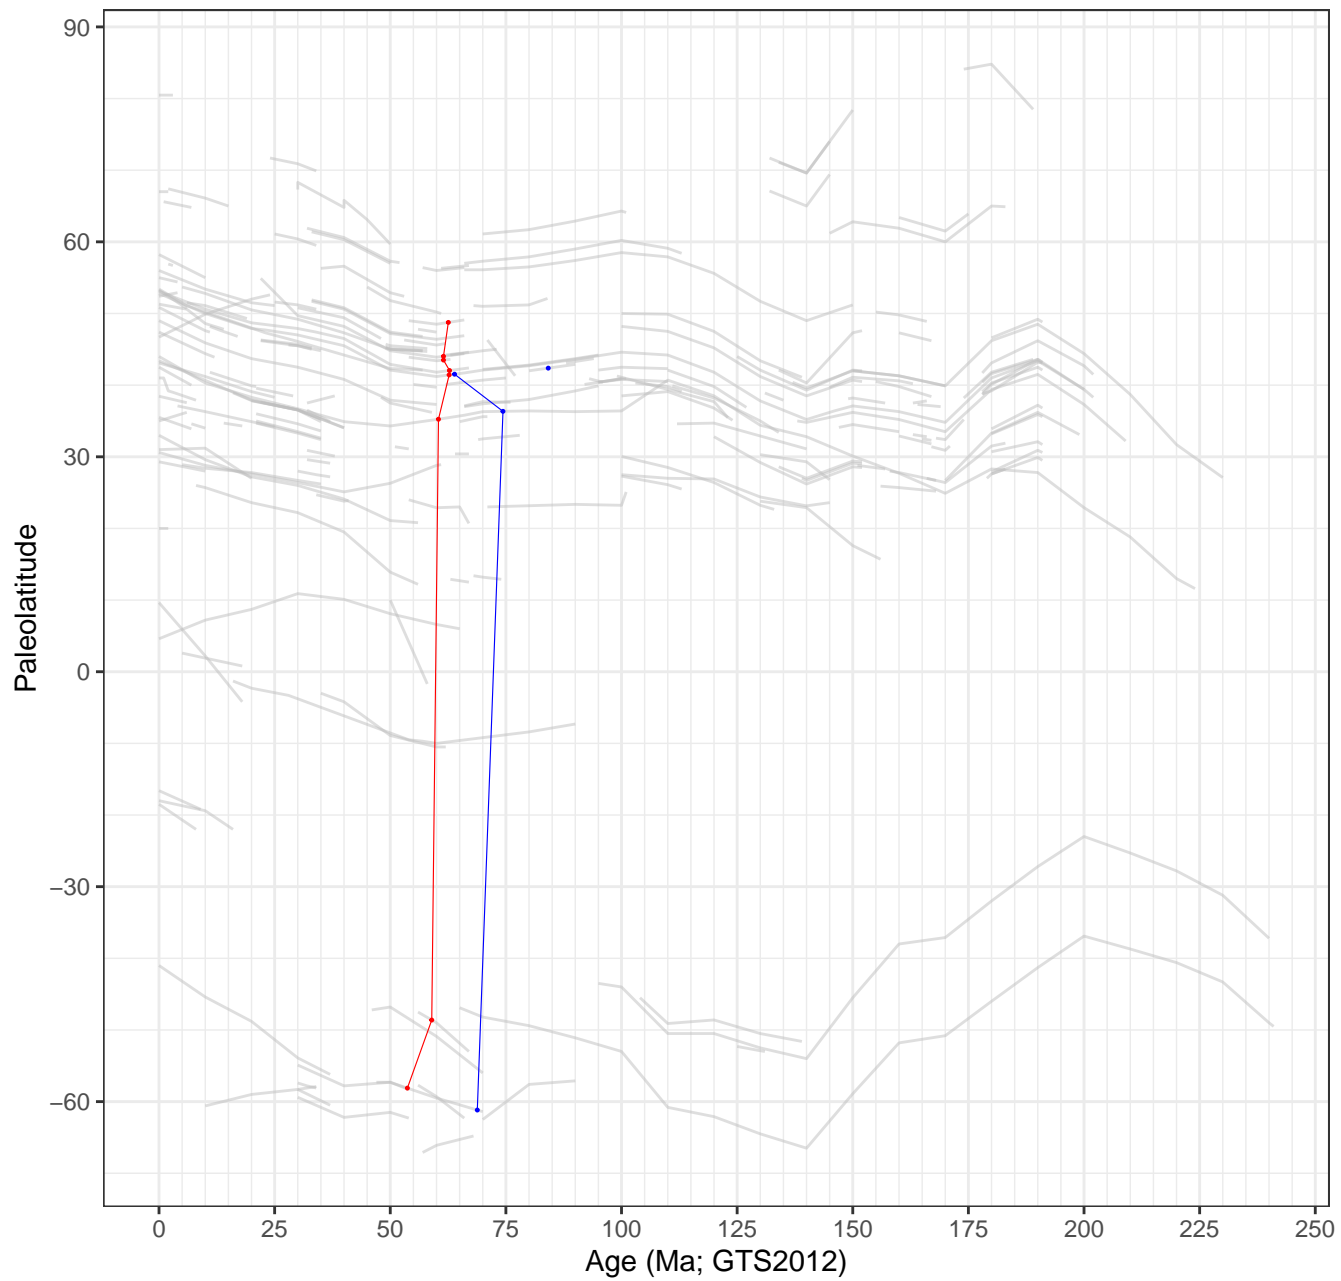

Supplement: Supplementary file 178 [file Genus Eisenackia.pdf › Supplement/Supplement 2/Genus 459 plots/Genus Eisenackia.pdf]

# Genus Ellipsodinium

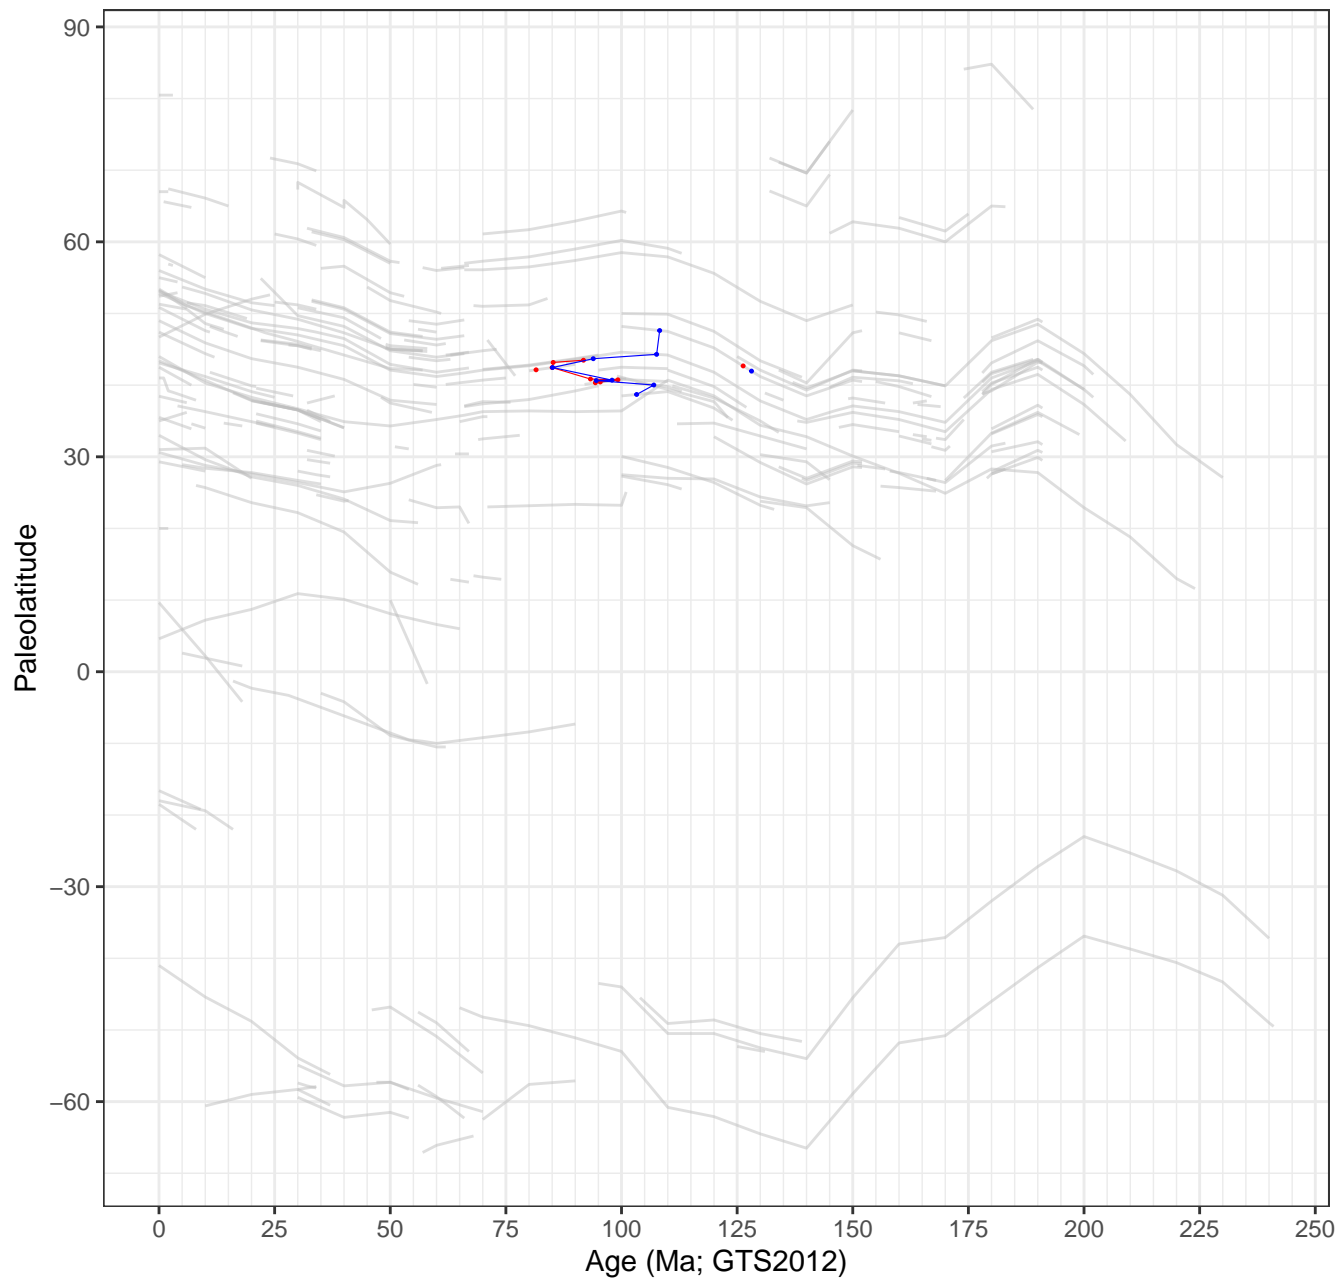

Supplement: Supplementary file 179 [file Genus Ellipsodinium.pdf › Supplement/Supplement 2/Genus 459 plots/Genus Ellipsodinium.pdf]

# Genus *Ellipsoidictyum*

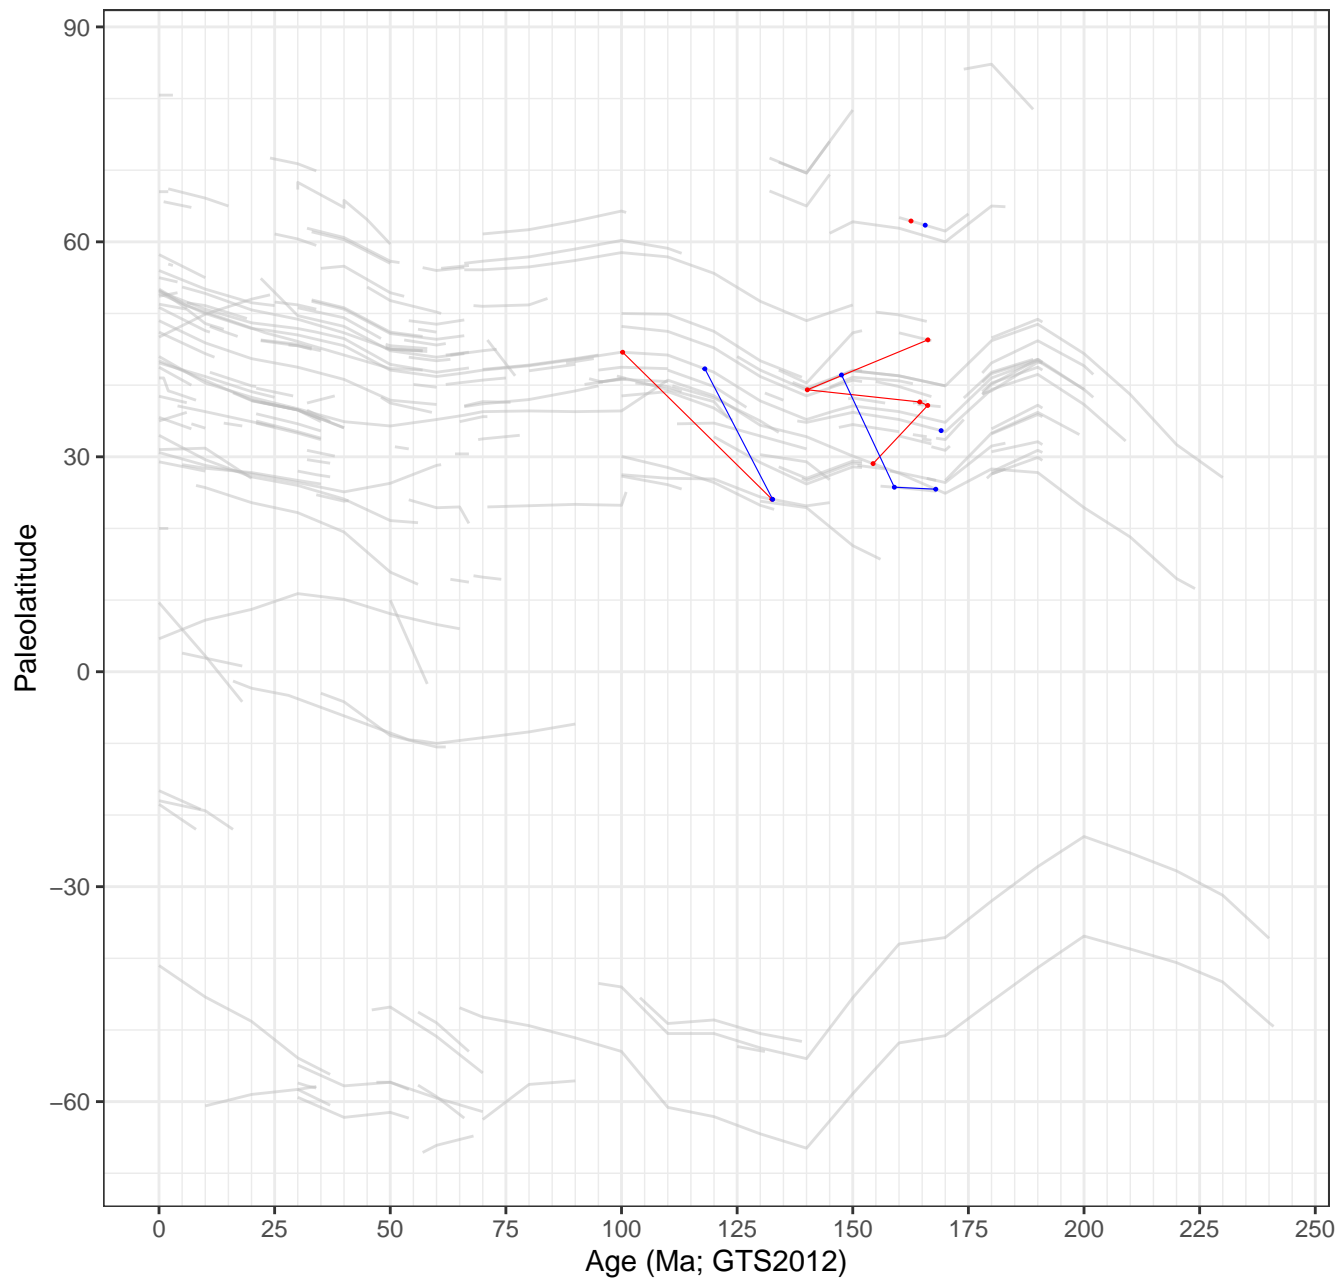

Supplement: Supplementary file 180 [file Genus Ellipsoidictyum.pdf › Supplement/Supplement 2/Genus 459 plots/Genus Ellipsoidictyum.pdf]

# Genus Elytrocyta

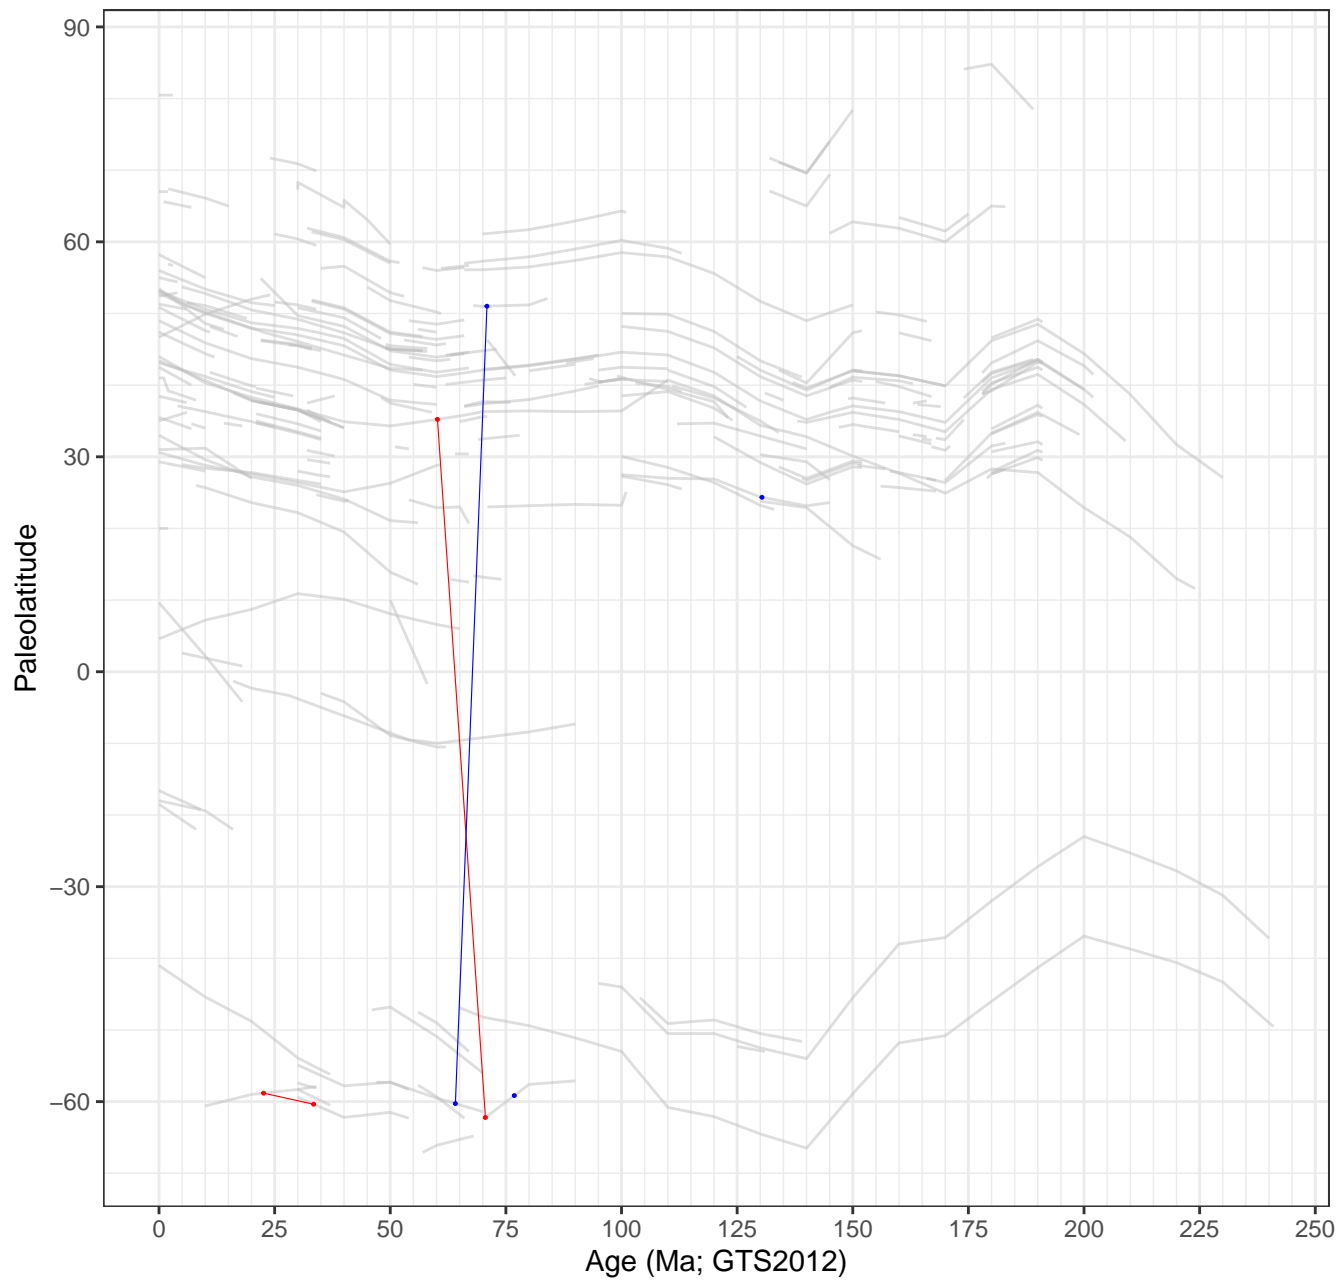

Supplement: Supplementary file 181 [file Genus Elytrocysta.pdf › Supplement/Supplement 2/Genus 459 plots/Genus Elytrocysta.pdf]

# Genus Endoceratium

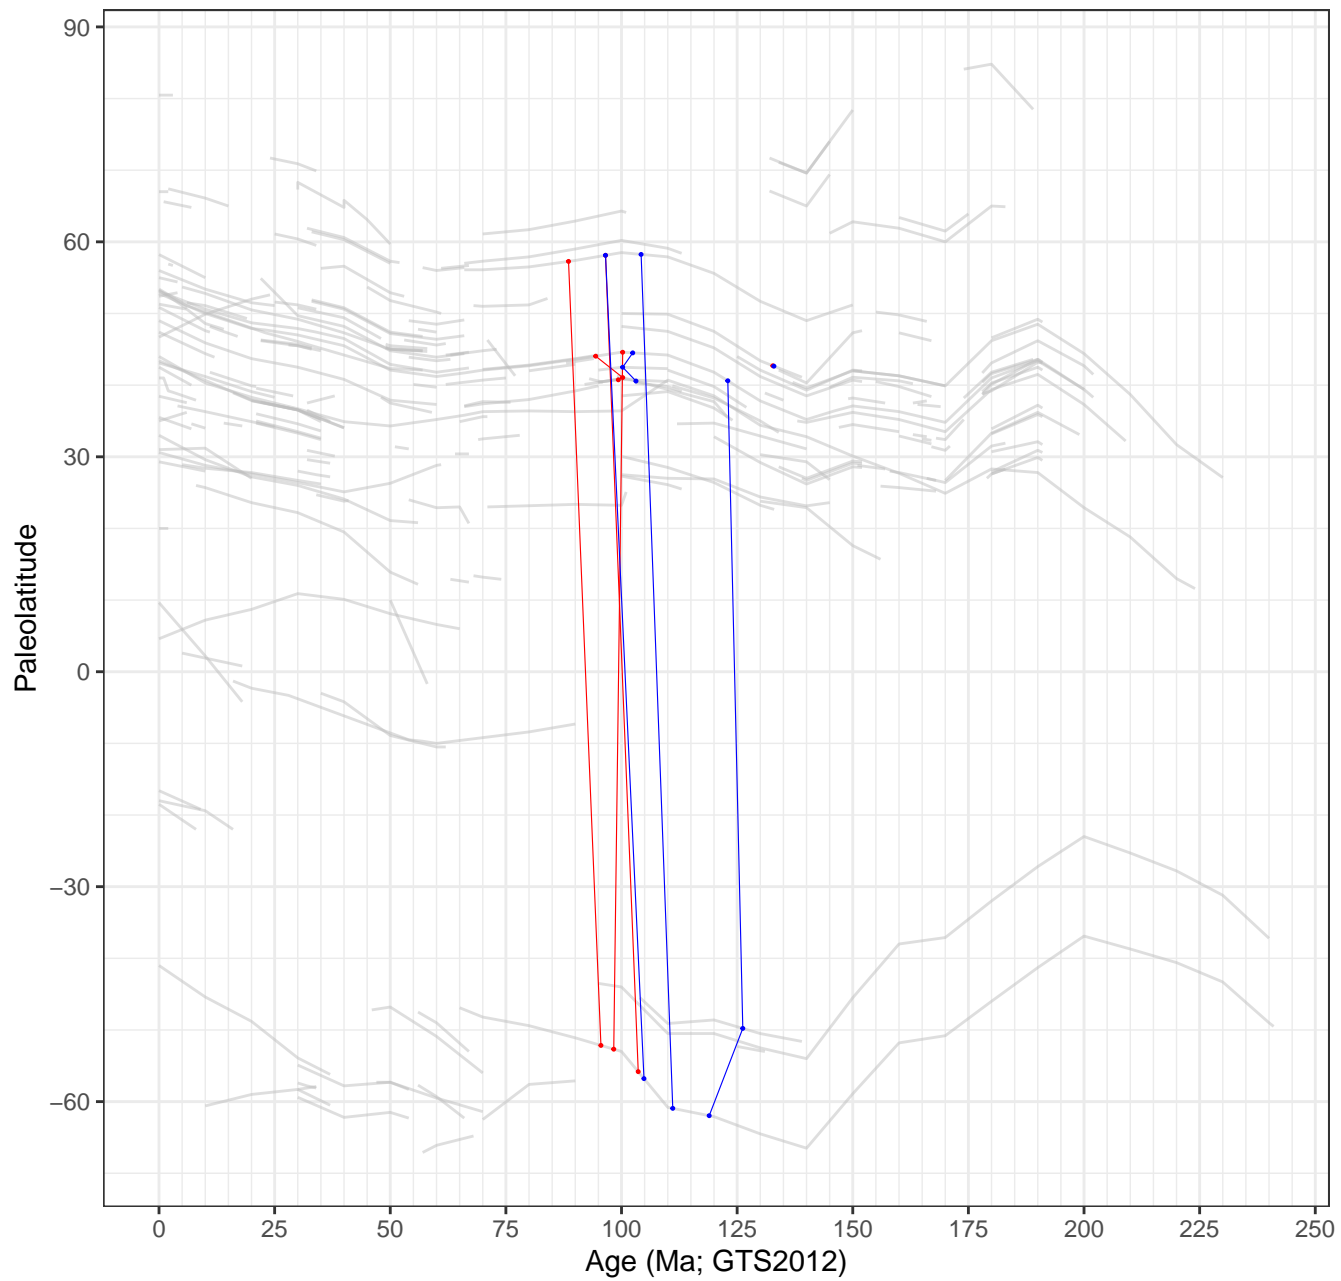

Supplement: Supplementary file 182 [file Genus Endoceratium.pdf › Supplement/Supplement 2/Genus 459 plots/Genus Endoceratium.pdf]

# Genus Endoscrinium

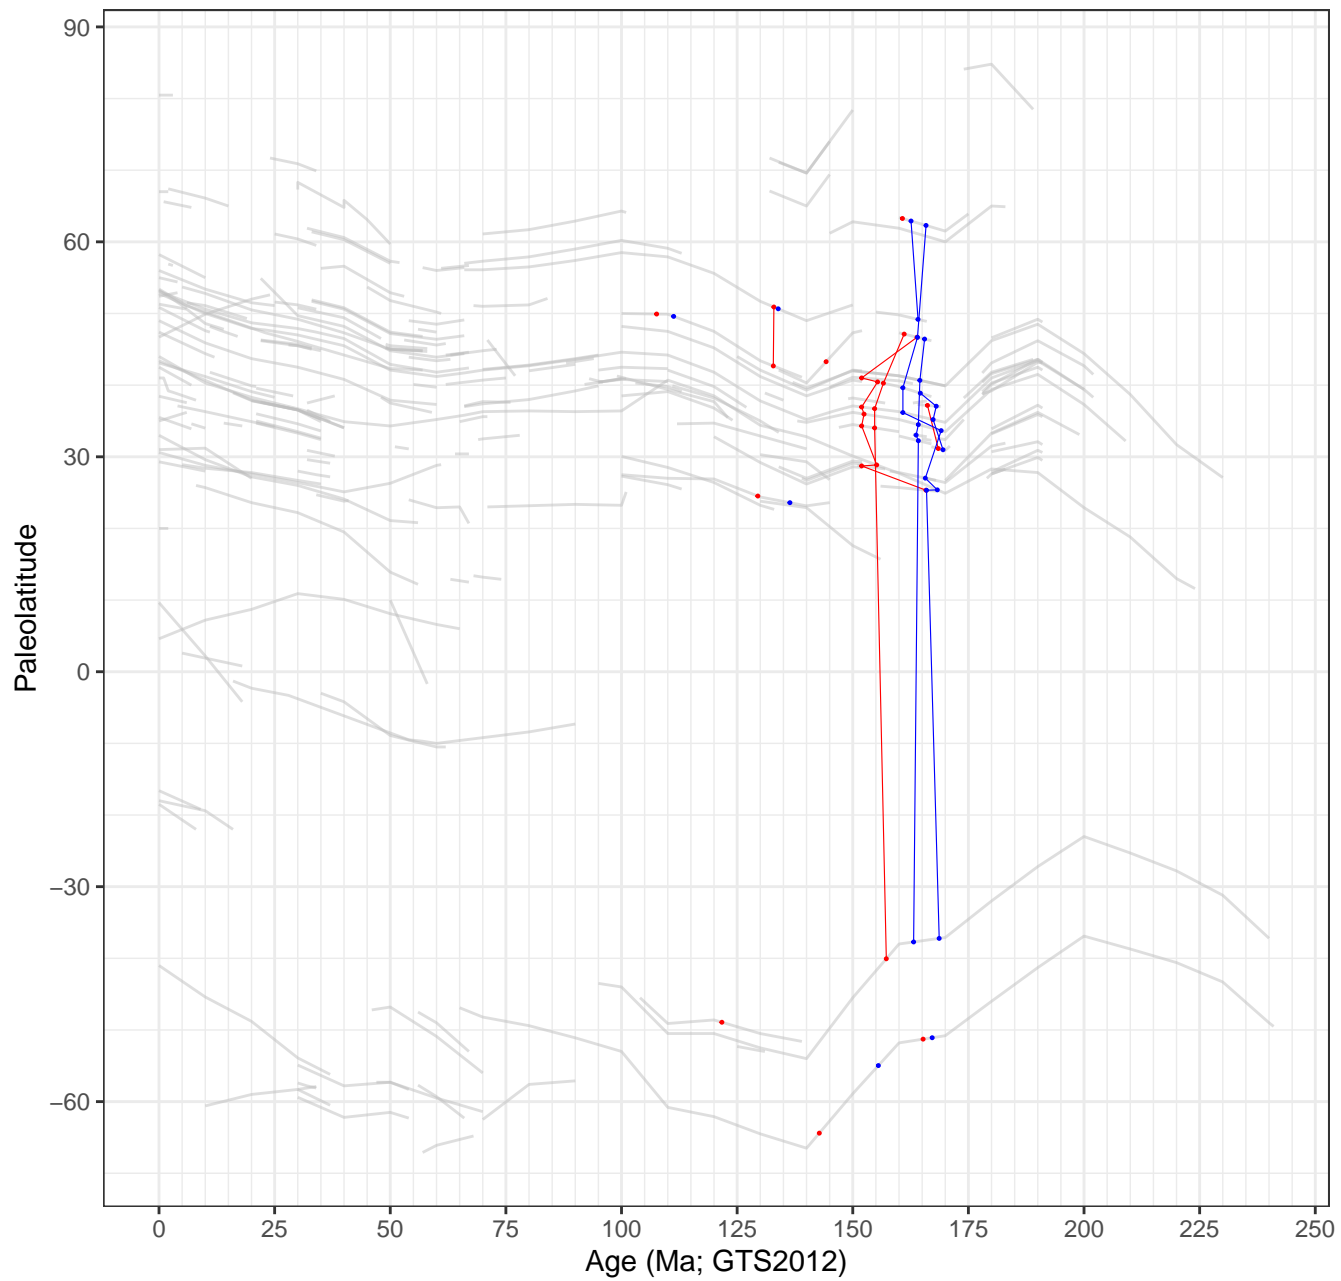

Supplement: Supplementary file 183 [file Genus Endoscrinium.pdf › Supplement/Supplement 2/Genus 459 plots/Genus Endoscrinium.pdf]

# Genus Enneadocysta

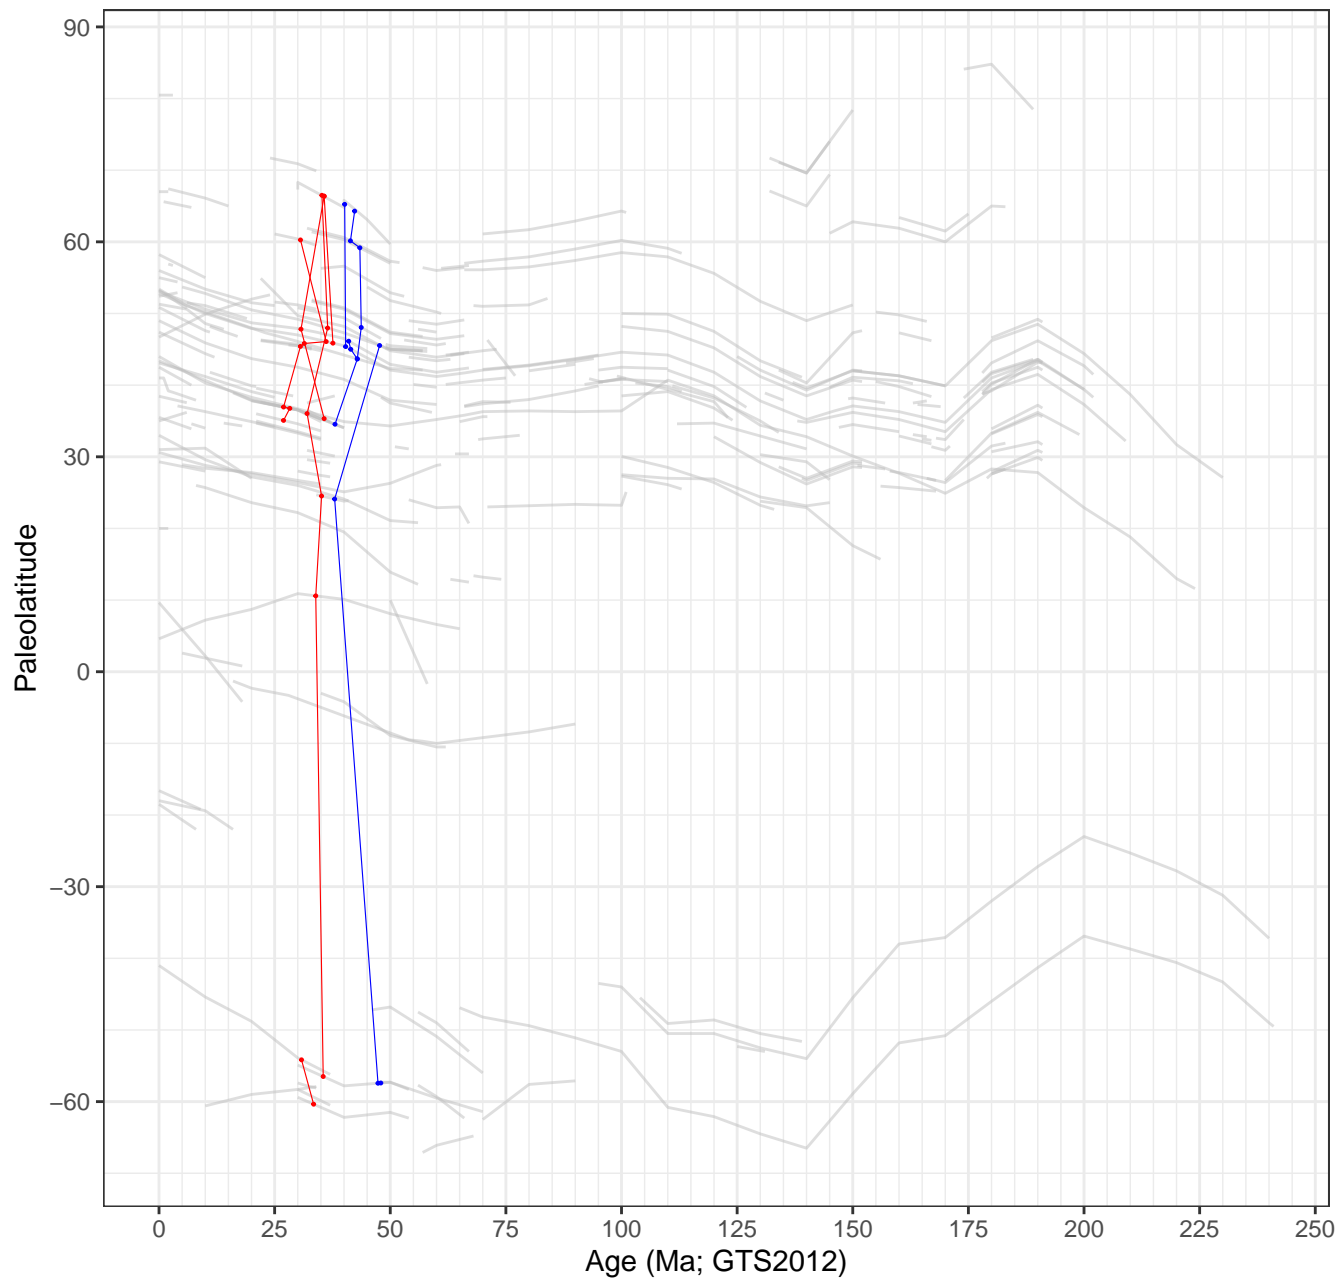

Supplement: Supplementary file 184 [file Genus Enneadocysta.pdf › Supplement/Supplement 2/Genus 459 plots/Genus Enneadocysta.pdf]

# Genus Eocladopyxis

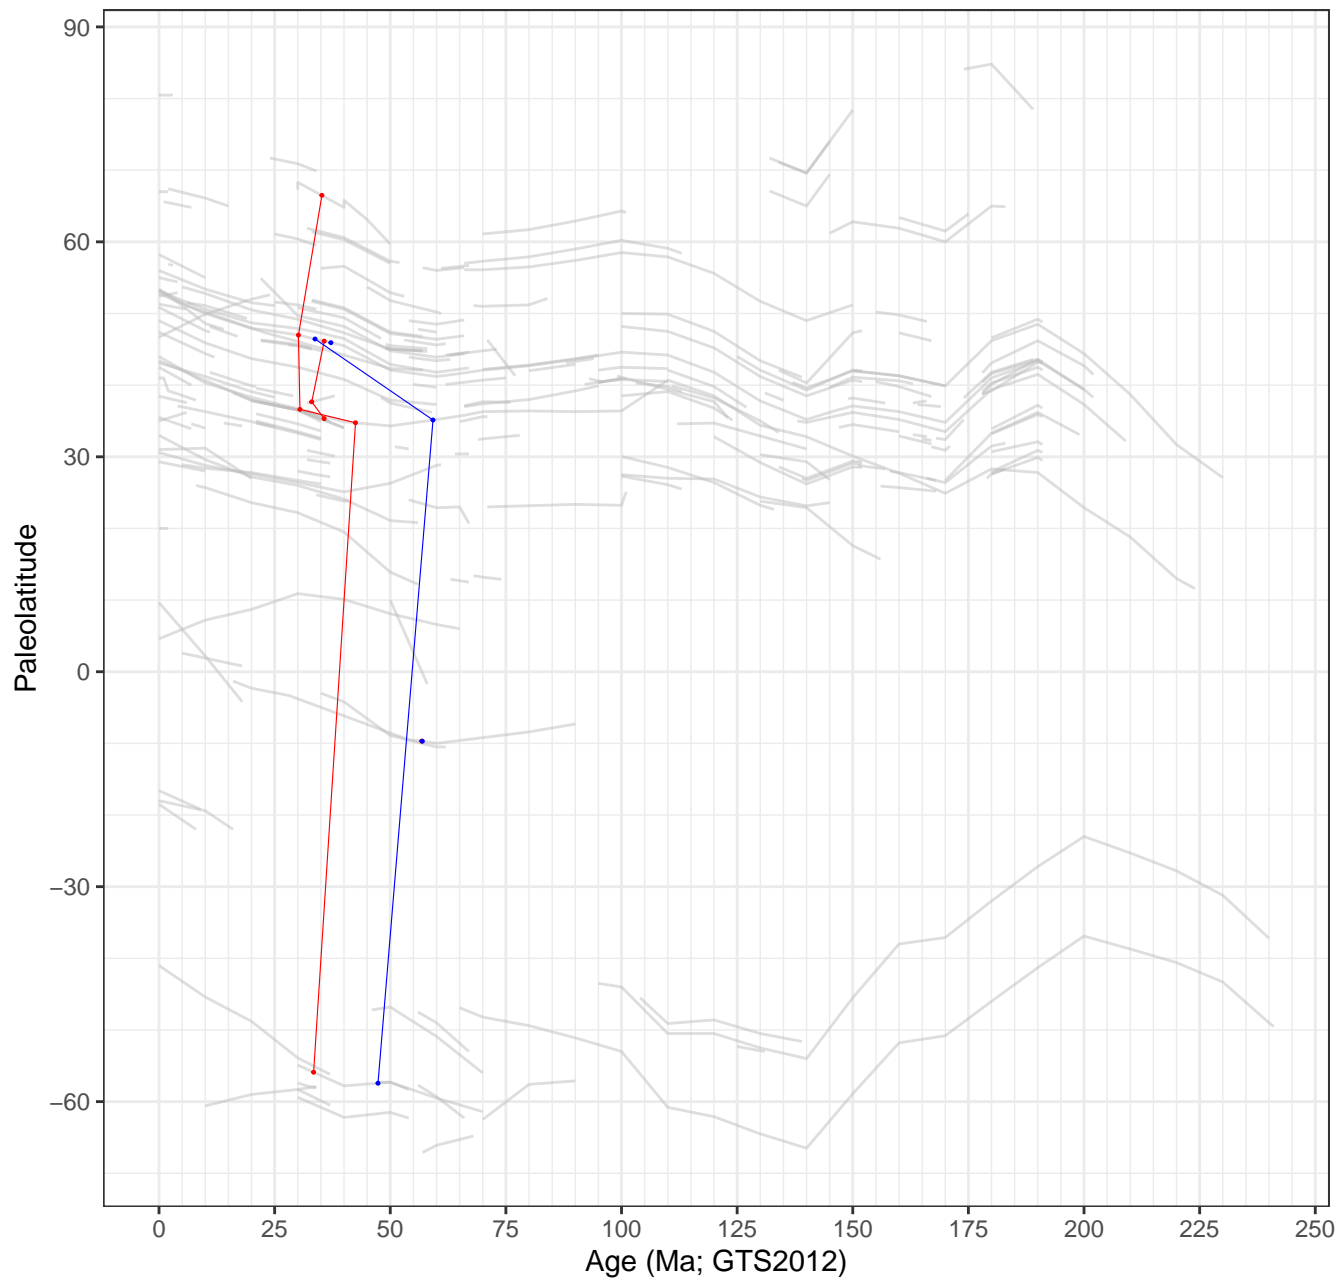

Supplement: Supplementary file 185 [file Genus Eocladopyxis.pdf › Supplement/Supplement 2/Genus 459 plots/Genus Eocladopyxis.pdf]

# Genus Eodinia

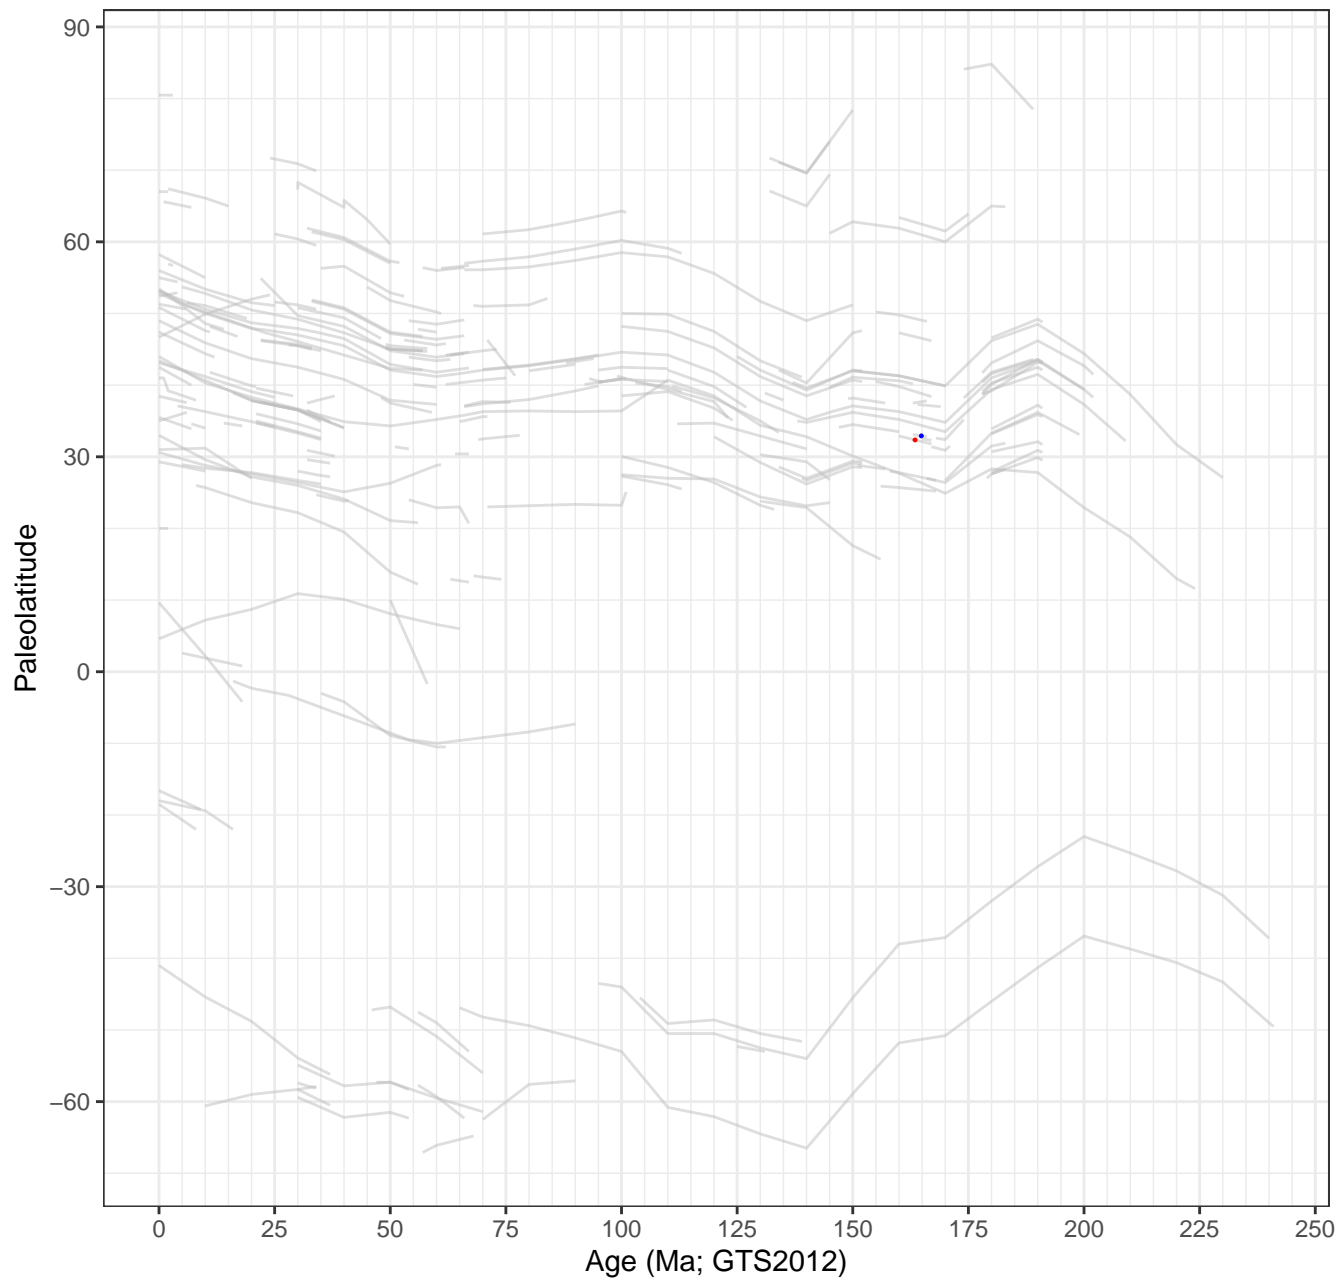

Supplement: Supplementary file 186 [file Genus Eodinia.pdf › Supplement/Supplement 2/Genus 459 plots/Genus Eodinia.pdf]

# Genus Epelidinium

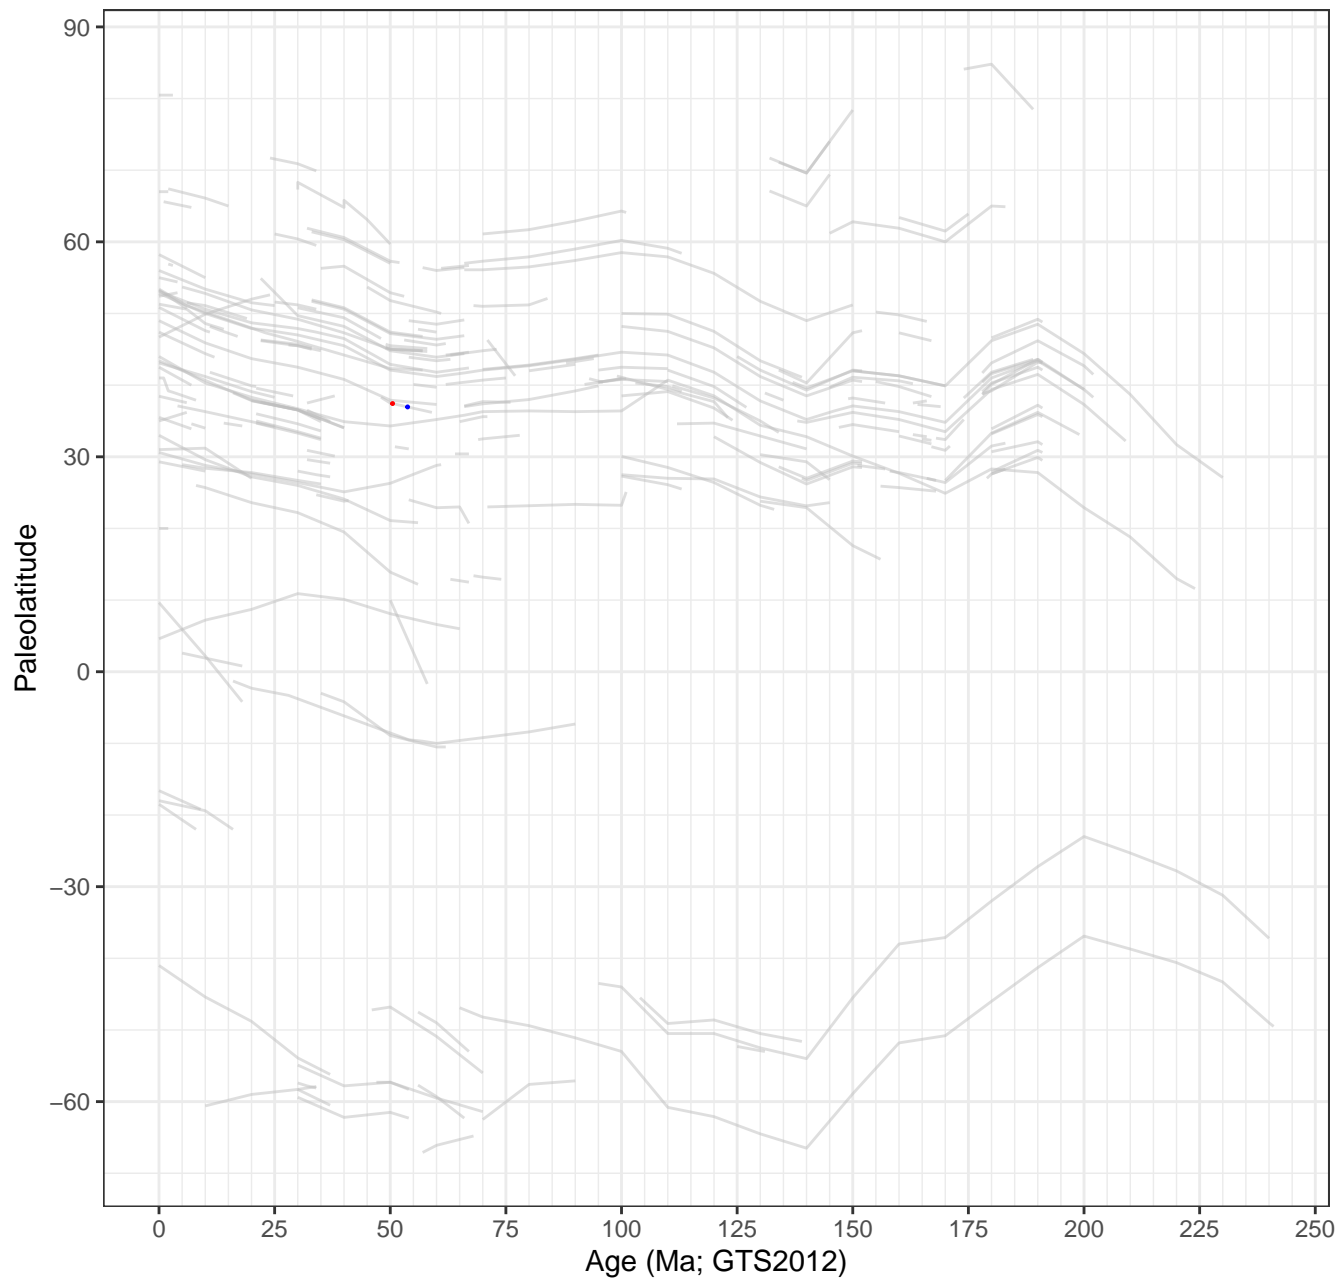

Supplement: Supplementary file 187 [file Genus Epelidinium.pdf › Supplement/Supplement 2/Genus 459 plots/Genus Epelidinium.pdf]

# Genus *Epelidodyctium*

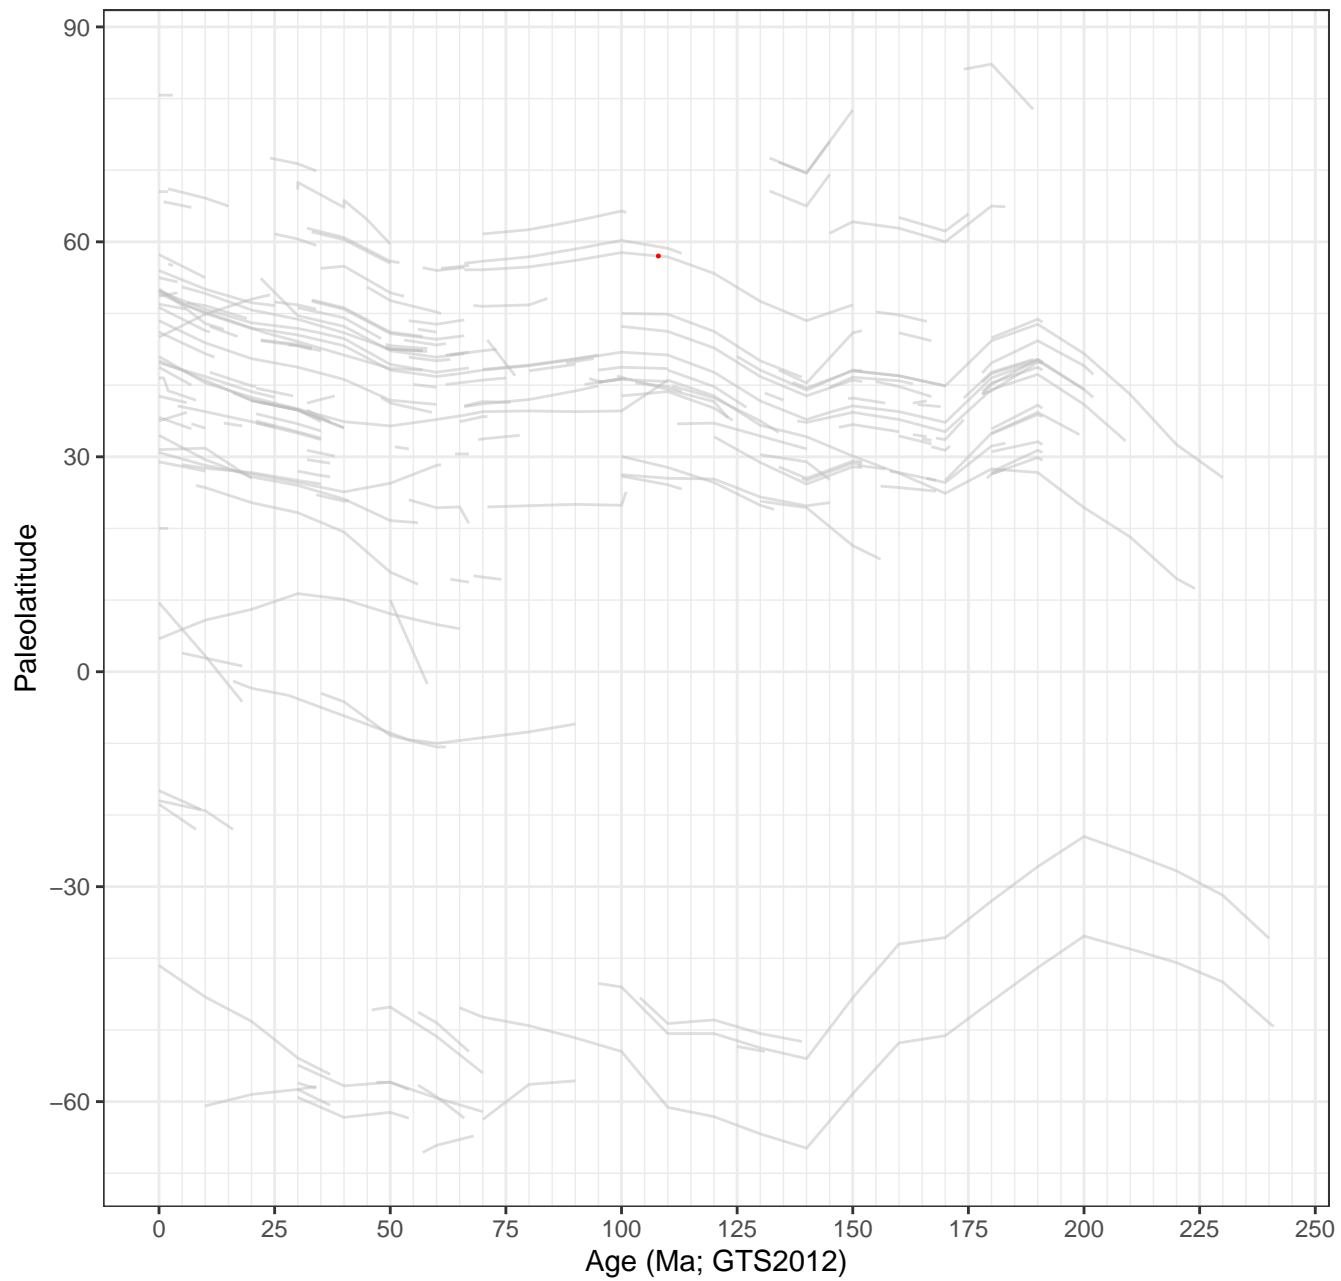

Supplement: Supplementary file 188 [file Genus Epelidodyctium.pdf › Supplement/Supplement 2/Genus 459 plots/Genus Epelidodyctium.pdf]

# Genus Epelidosphaeridia

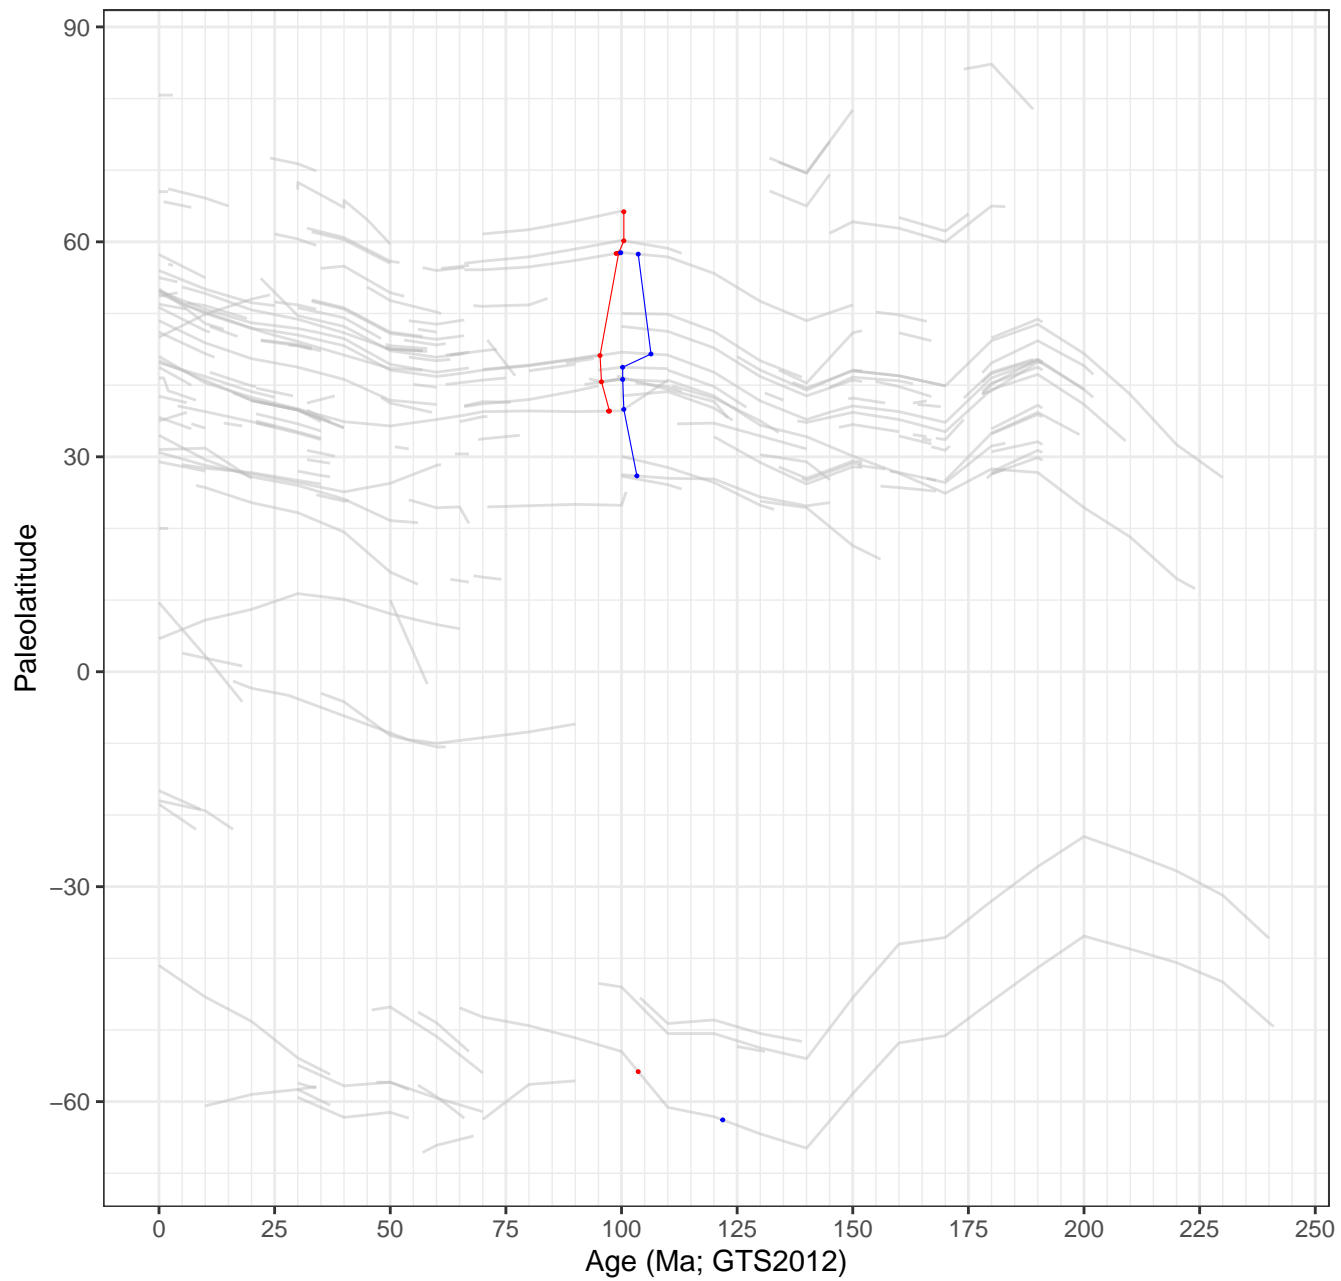

Supplement: Supplementary file 189 [file Genus Epelidosphaeridia.pdf › Supplement/Supplement 2/Genus 459 plots/Genus Epelidosphaeridia.pdf]

# Genus *Epiplosphaera*

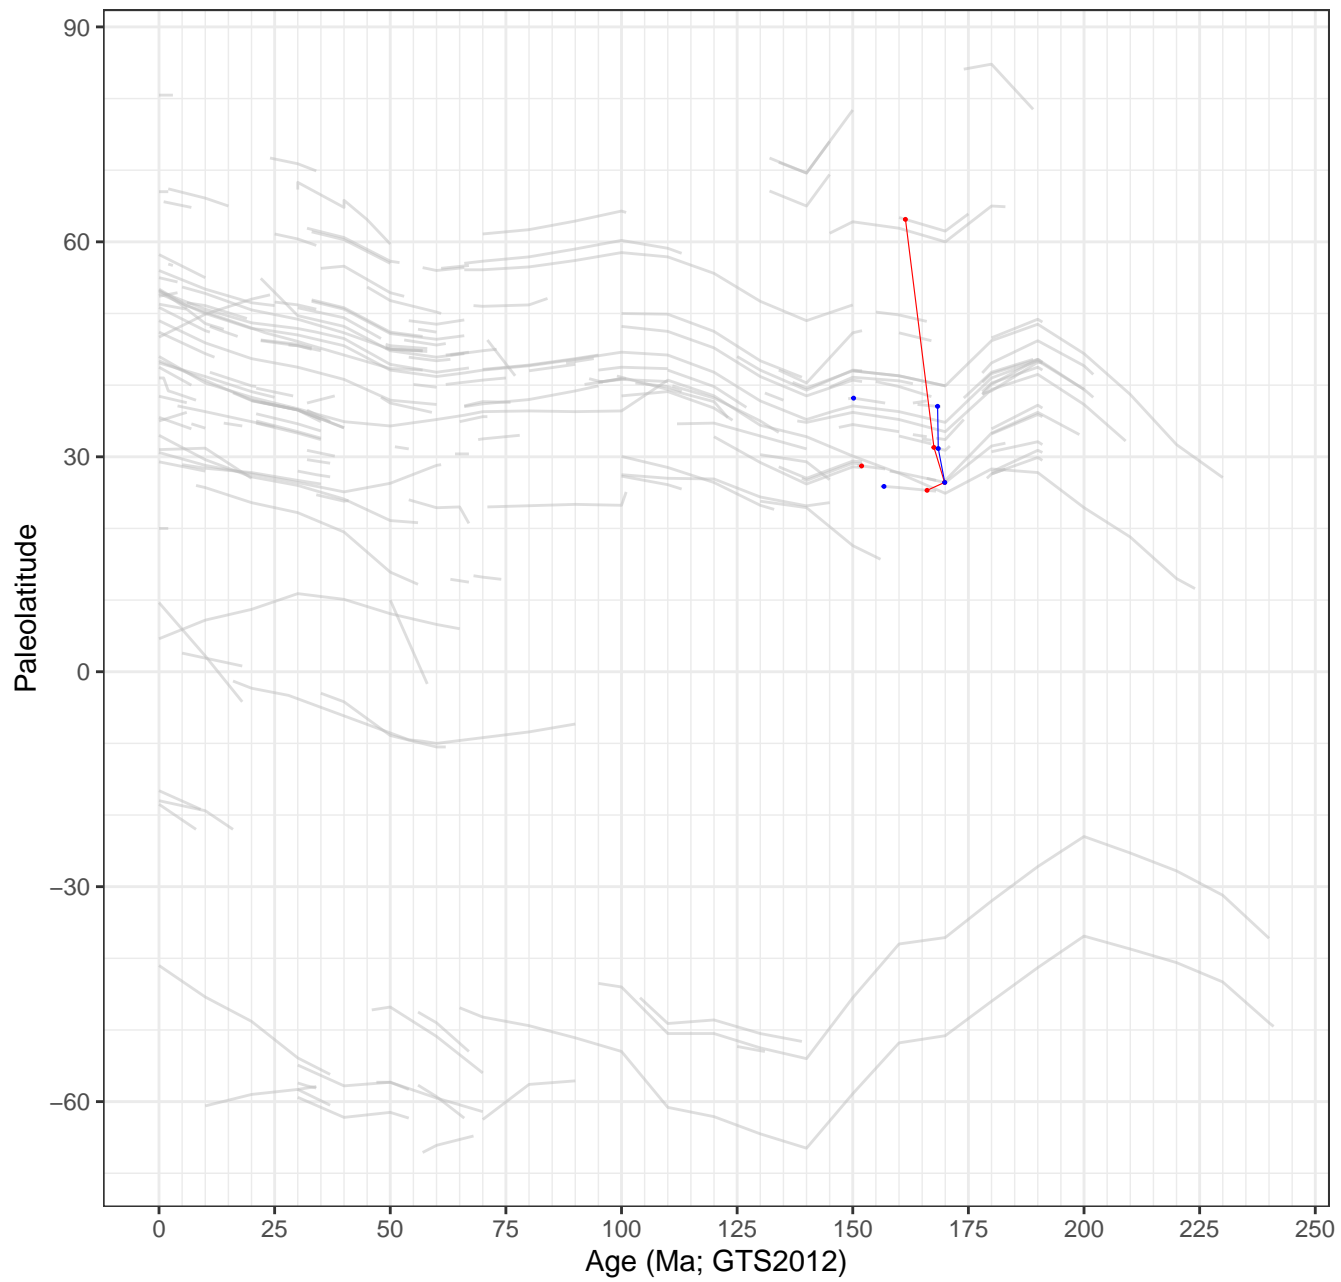

Supplement: Supplementary file 190 [file Genus Epiplosphaera.pdf › Supplement/Supplement 2/Genus 459 plots/Genus Epiplosphaera.pdf]

# Genus Eptitricysta

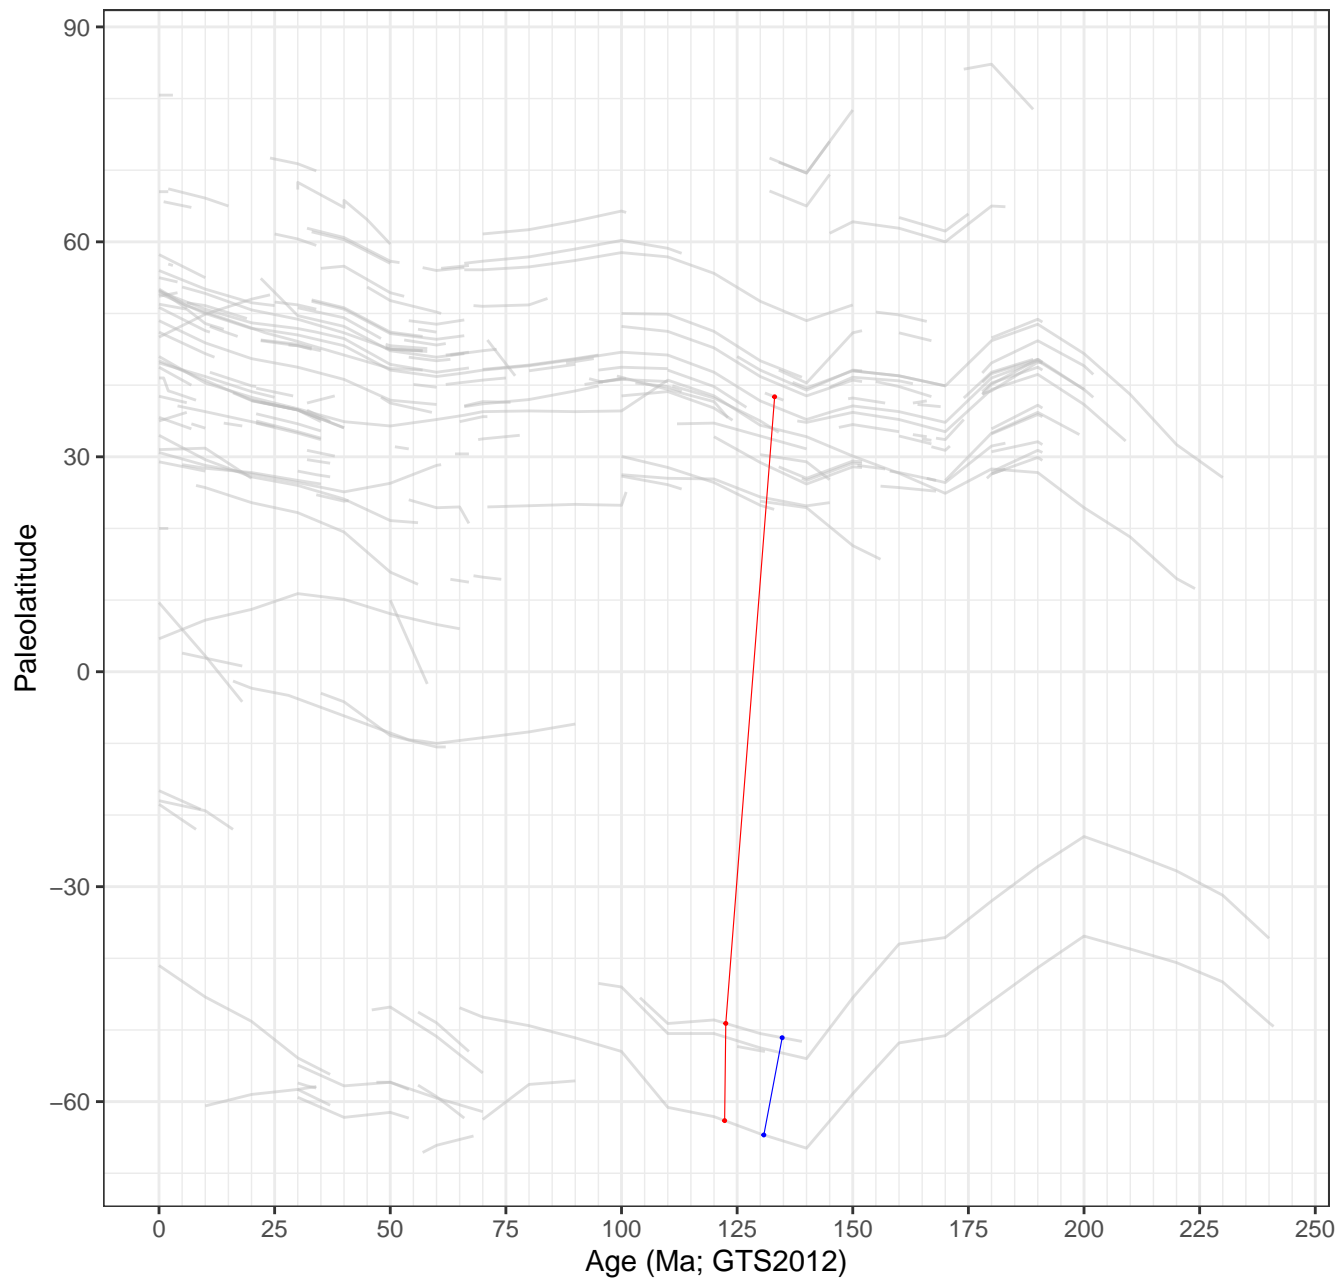

Supplement: Supplementary file 191 [file Genus Epitricysta.pdf › Supplement/Supplement 2/Genus 459 plots/Genus Epitricysta.pdf]

# Genus Erymnodinium

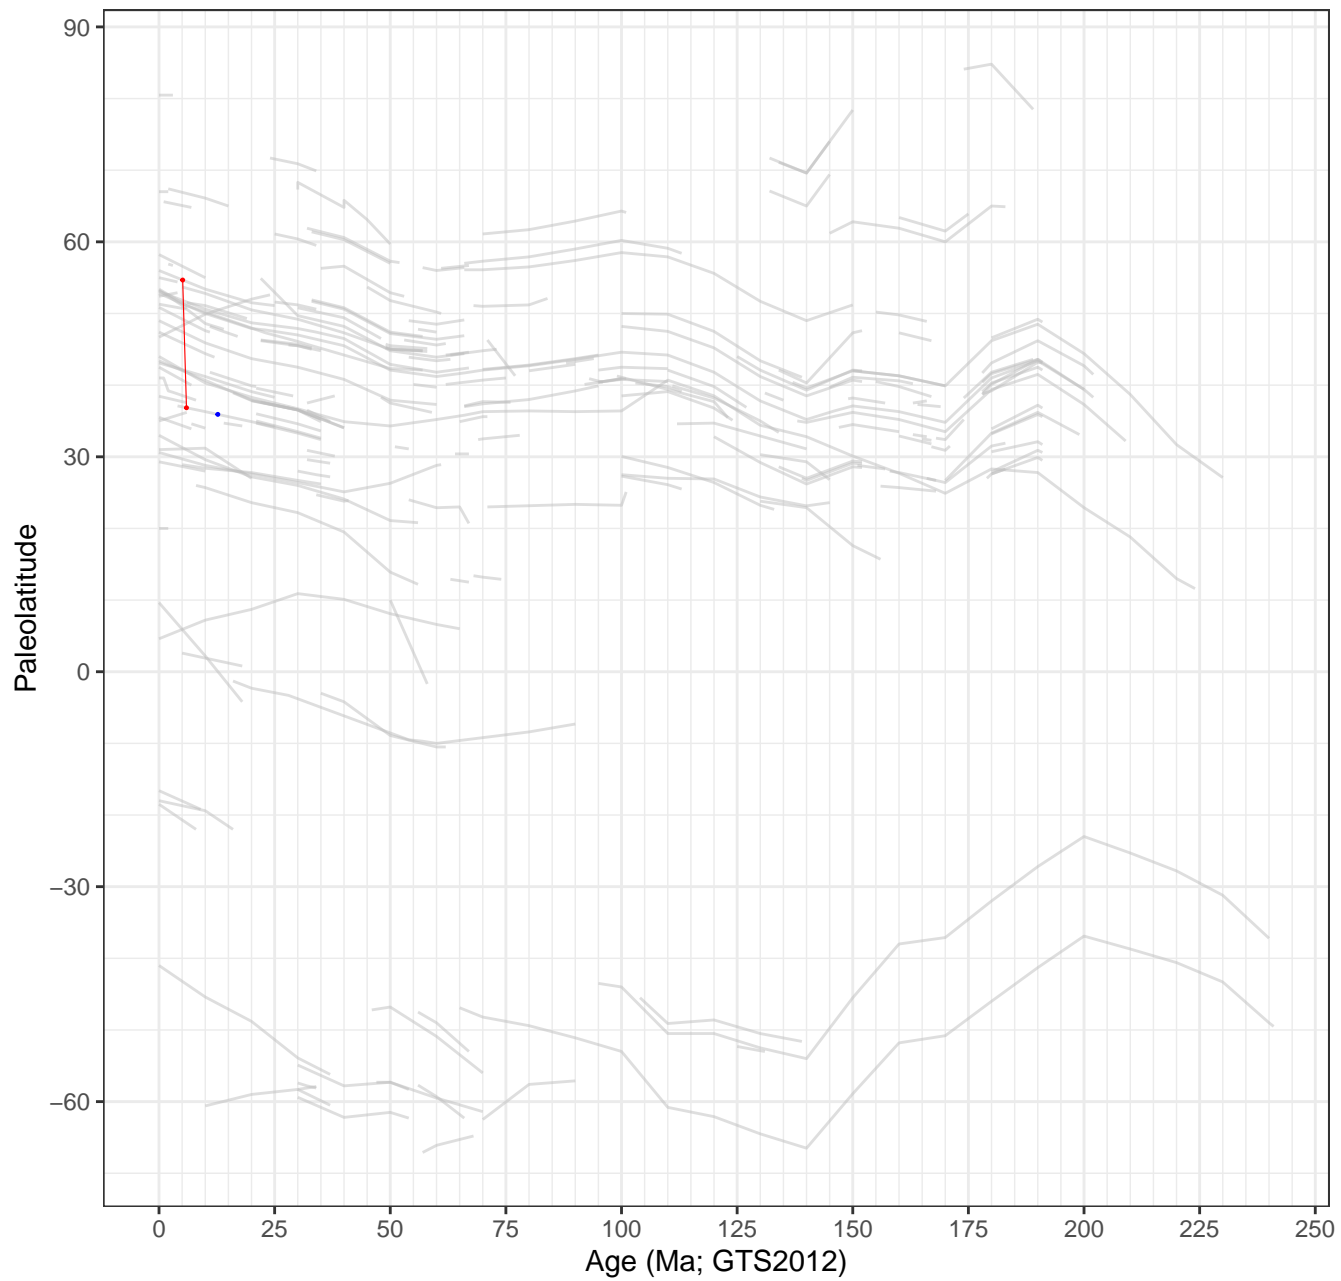

Supplement: Supplementary file 192 [file Genus Erymnodinium.pdf › Supplement/Supplement 2/Genus 459 plots/Genus Erymnodinium.pdf]

# Genus *Escharisphaeridia*

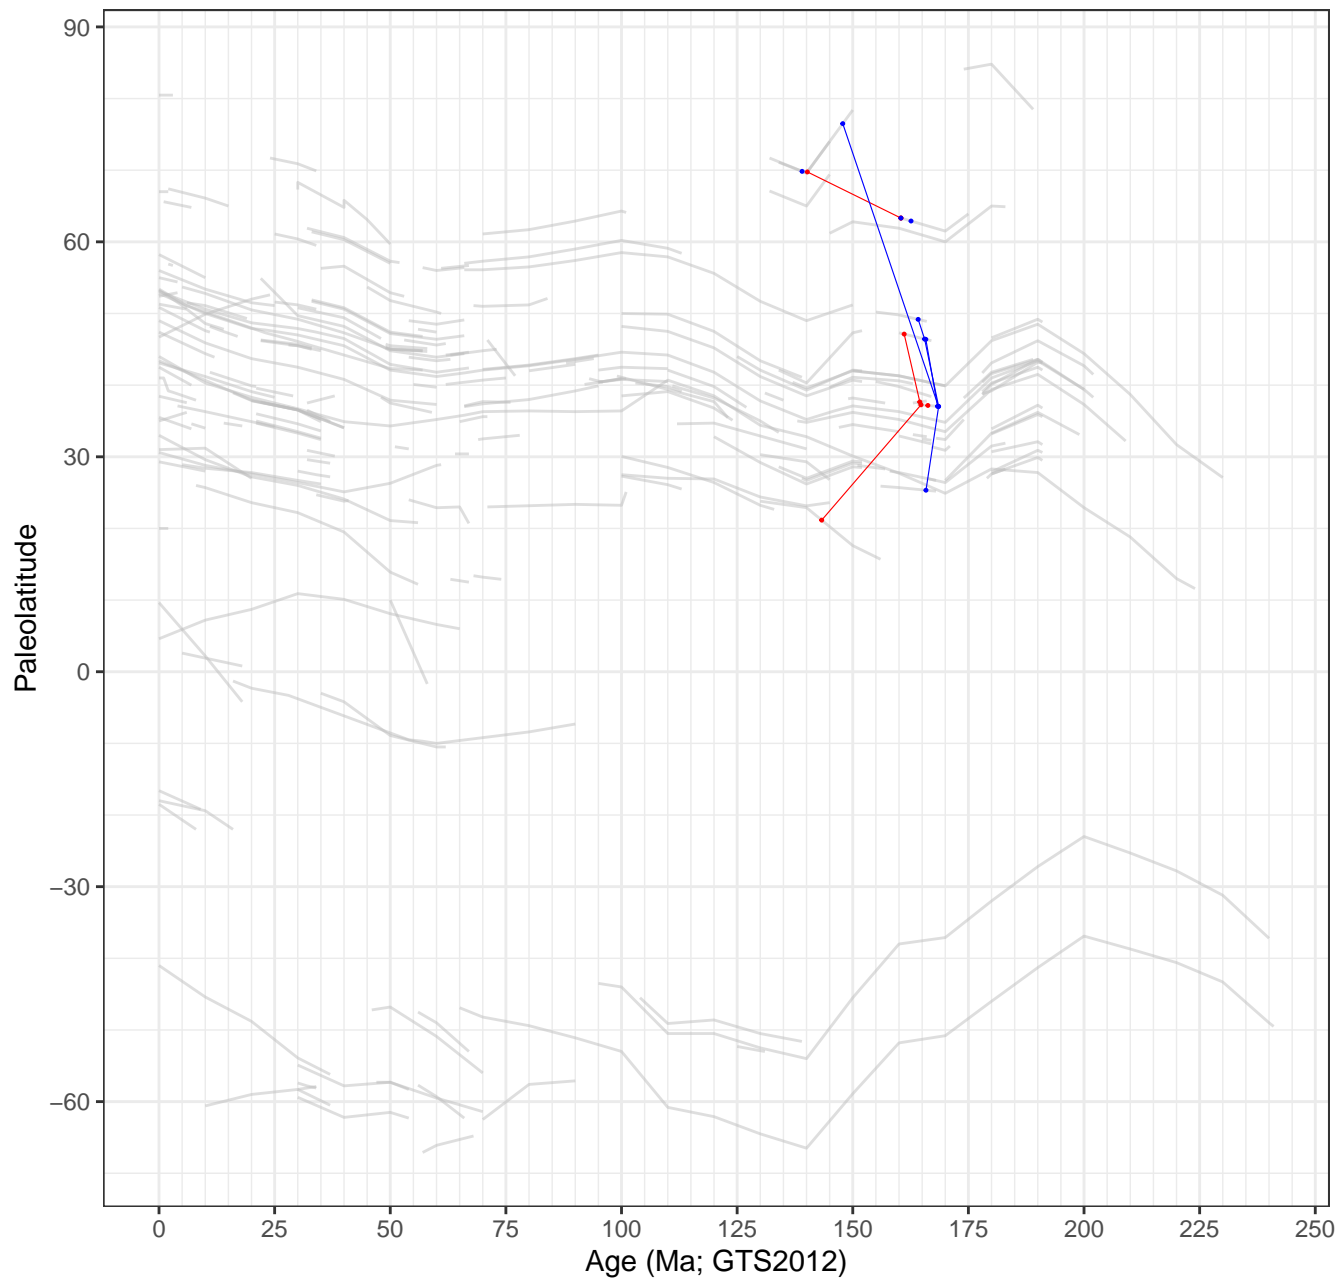

Supplement: Supplementary file 193 [file Genus Escharisphaeridia.pdf › Supplement/Supplement 2/Genus 459 plots/Genus Escharisphaeridia.pdf]

# Genus Eucladinium

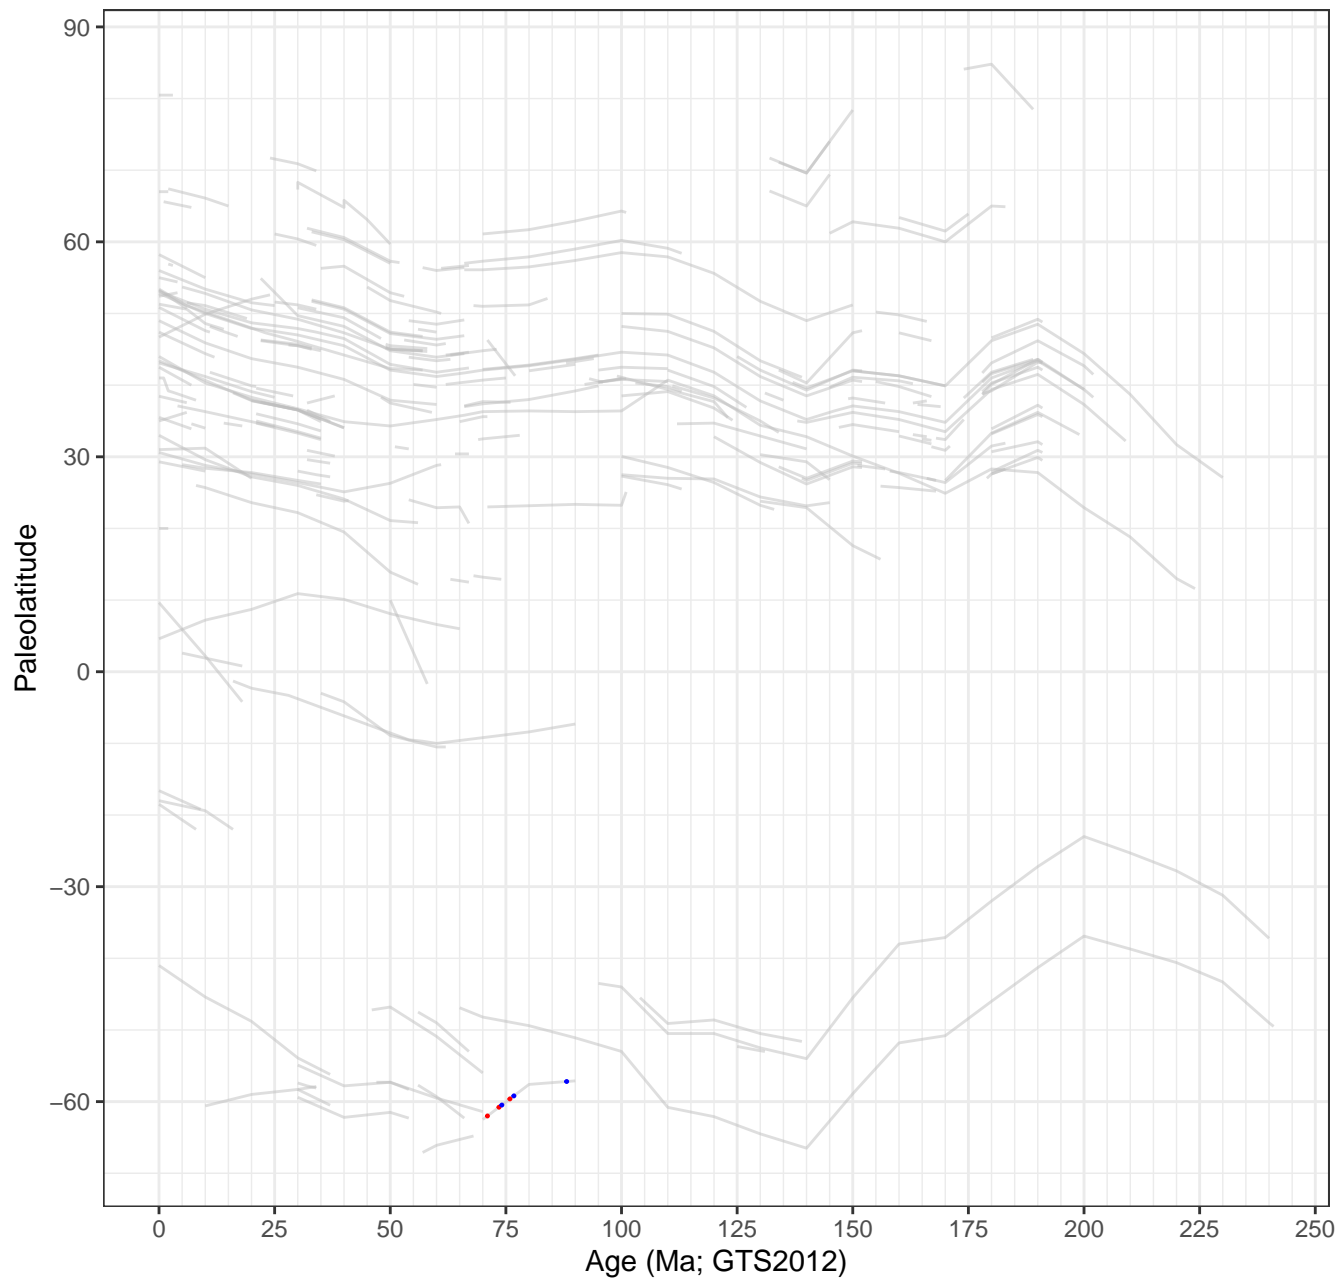

Supplement: Supplementary file 194 [file Genus Eucladinium.pdf › Supplement/Supplement 2/Genus 459 plots/Genus Eucladinium.pdf]

# Genus Eurydinium

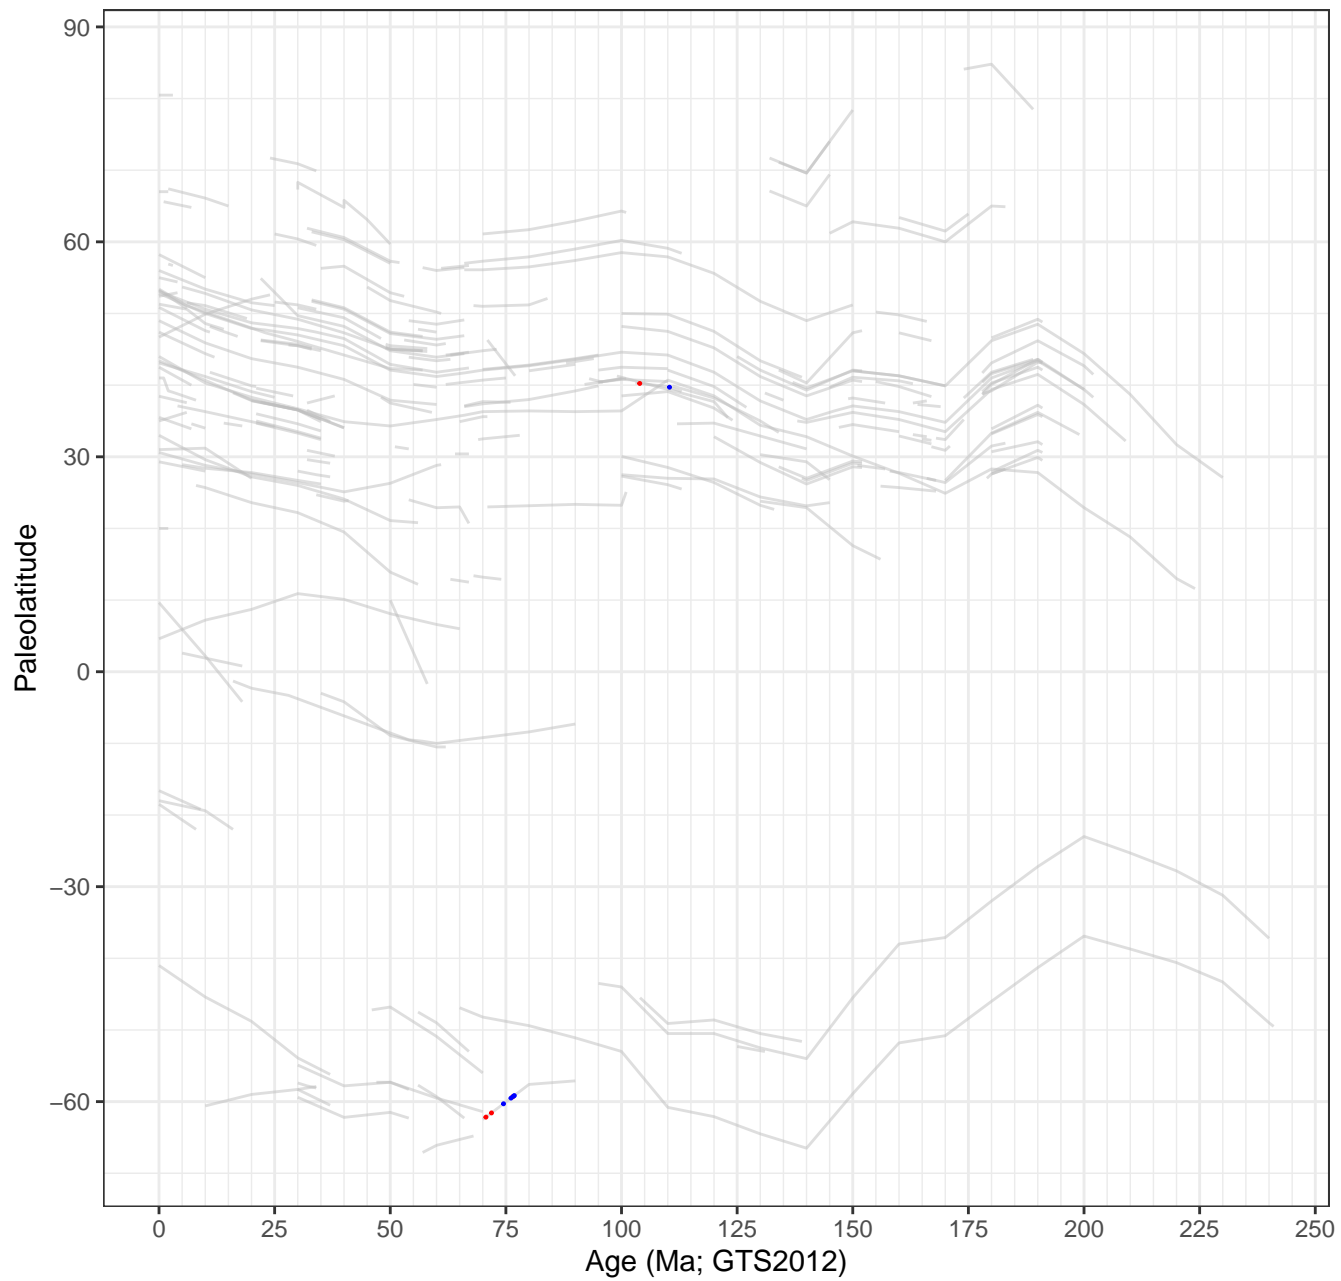

Supplement: Supplementary file 195 [file Genus Eurydinium.pdf › Supplement/Supplement 2/Genus 459 plots/Genus Eurydinium.pdf]

# Genus Evansia

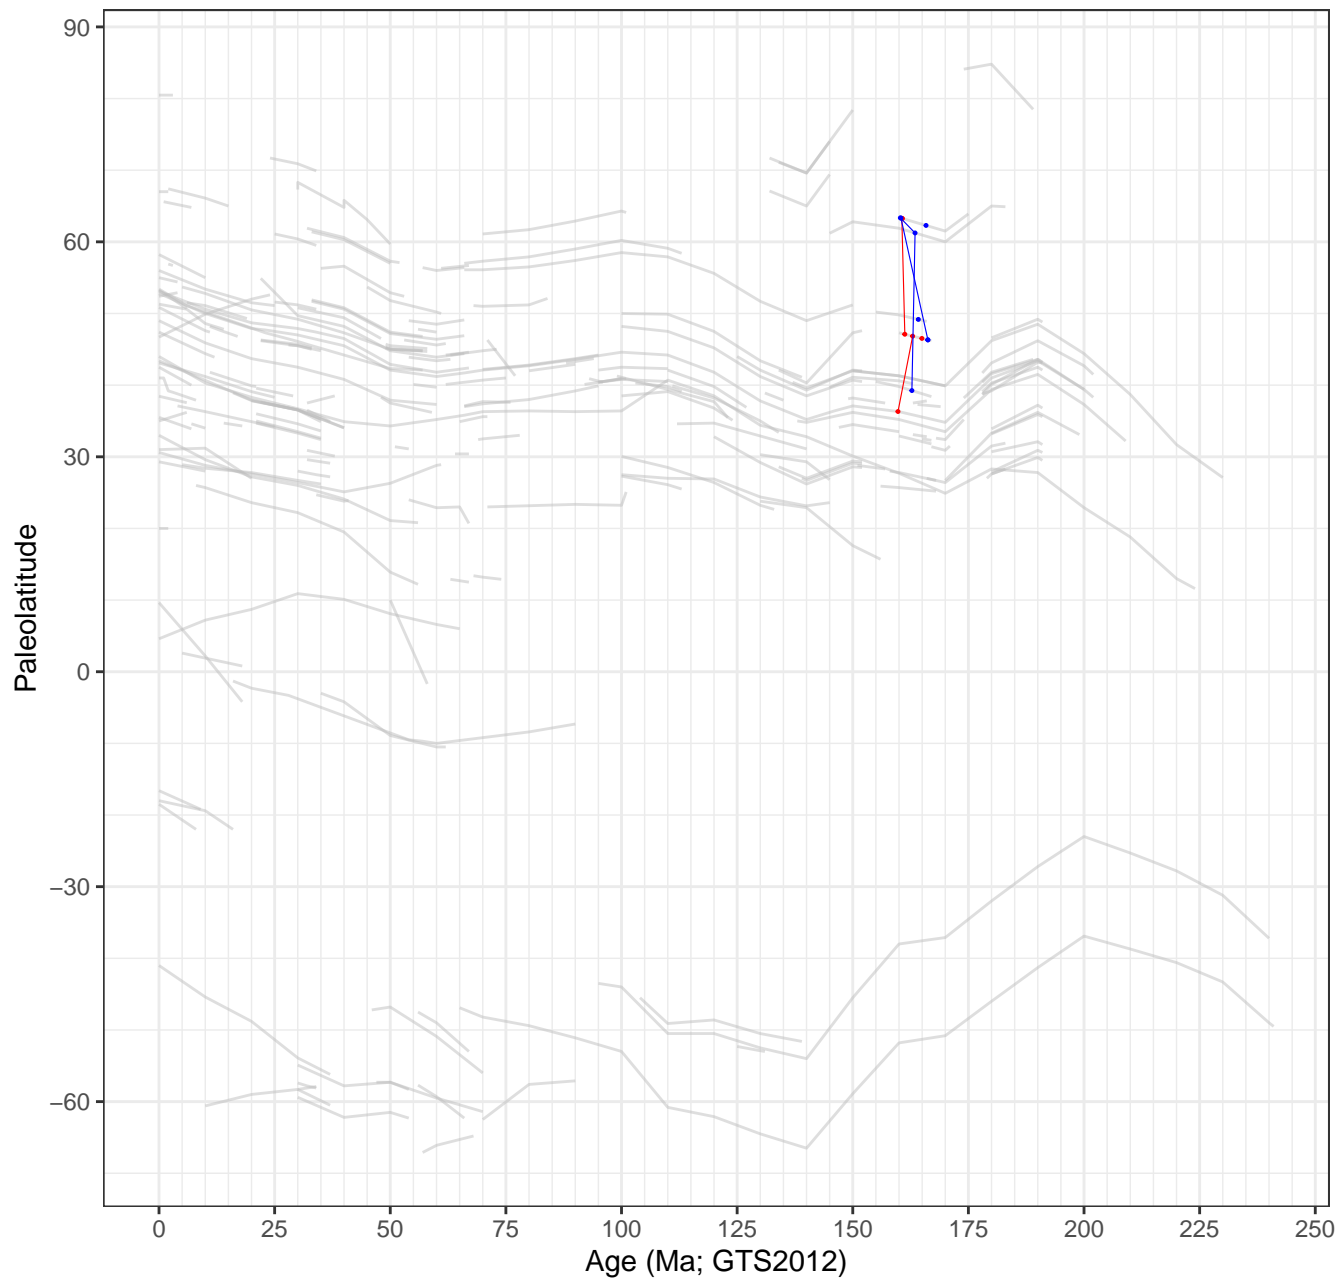

Supplement: Supplementary file 196 [file Genus Evansia.pdf › Supplement/Supplement 2/Genus 459 plots/Genus Evansia.pdf]

# Genus *Evittosphaerula*

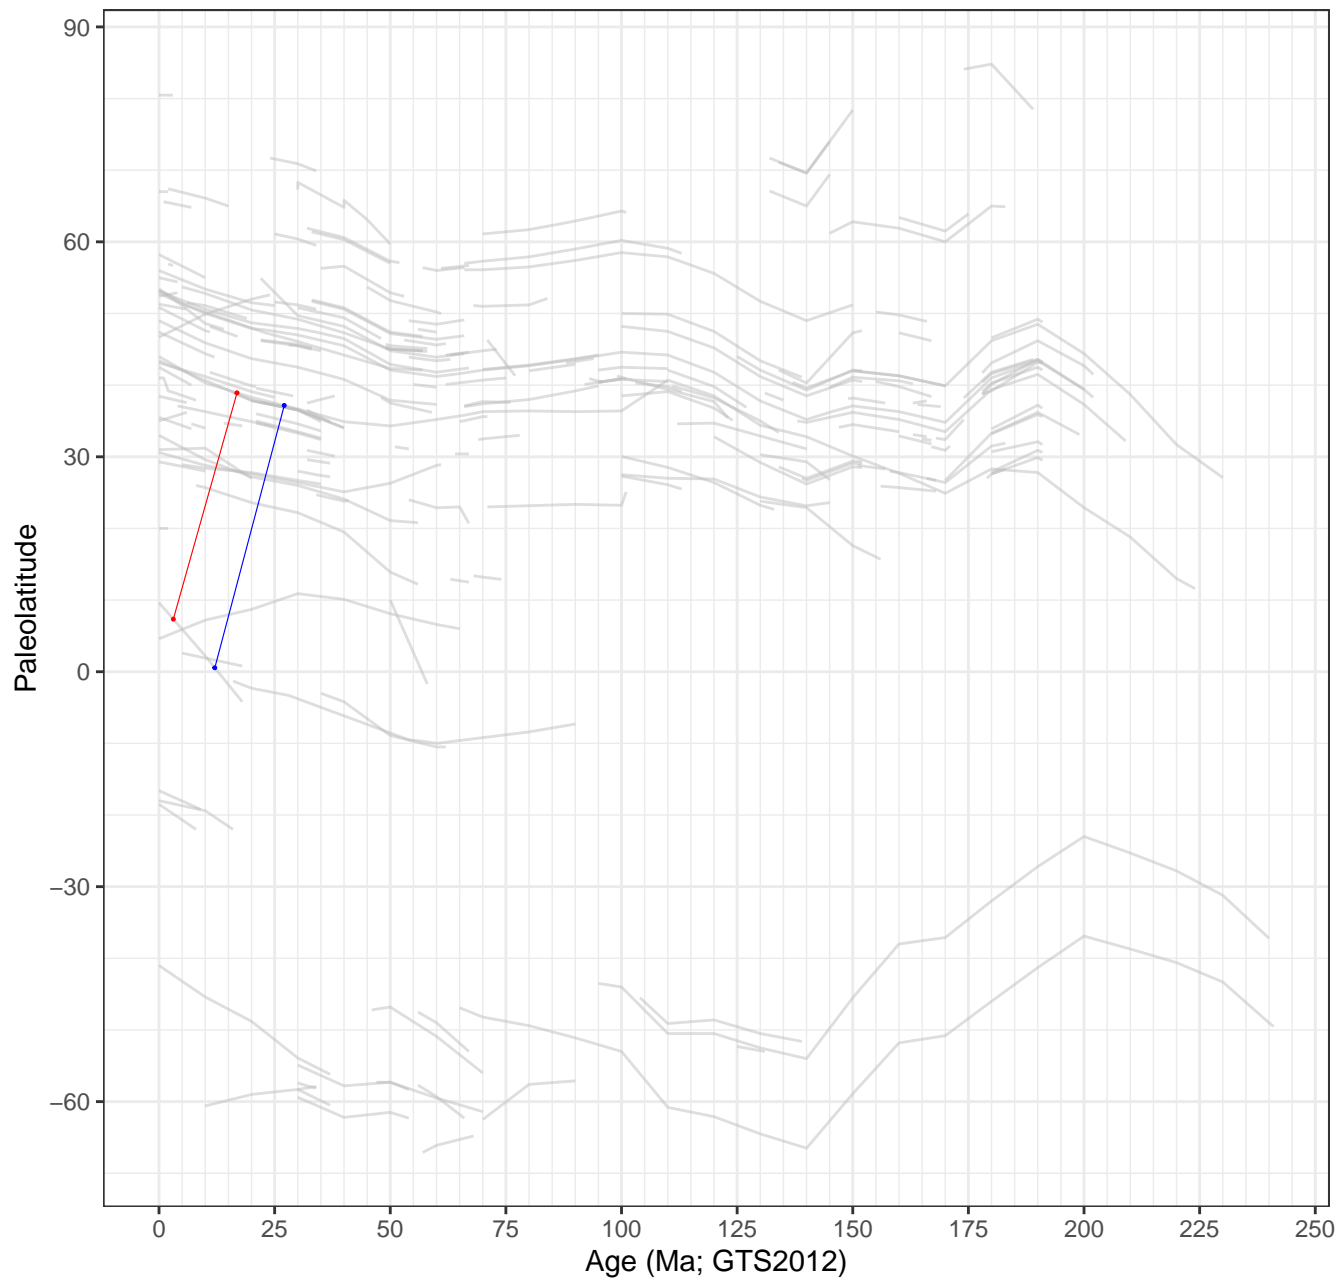

Supplement: Supplementary file 197 [file Genus Evittosphaerula.pdf › Supplement/Supplement 2/Genus 459 plots/Genus Evittosphaerula.pdf]

# Genus Exiguisphaera

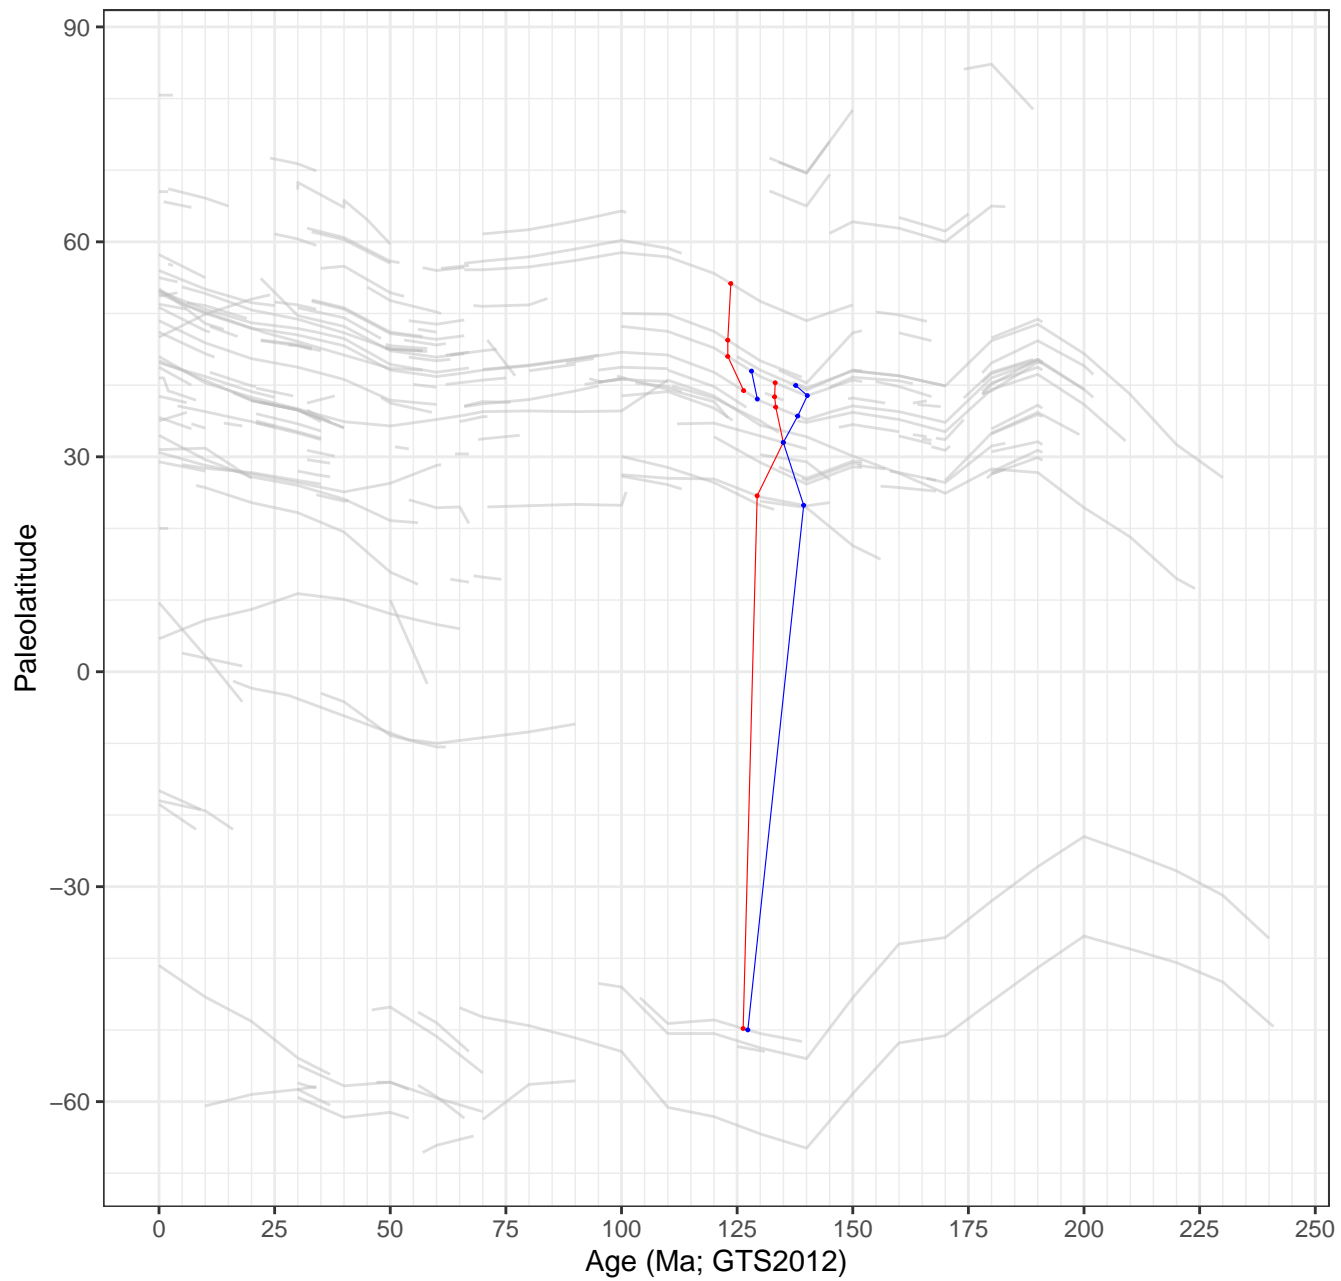

Supplement: Supplementary file 198 [file Genus Exiguisphaera.pdf › Supplement/Supplement 2/Genus 459 plots/Genus Exiguisphaera.pdf]

# Genus *Exochosphaeridium*

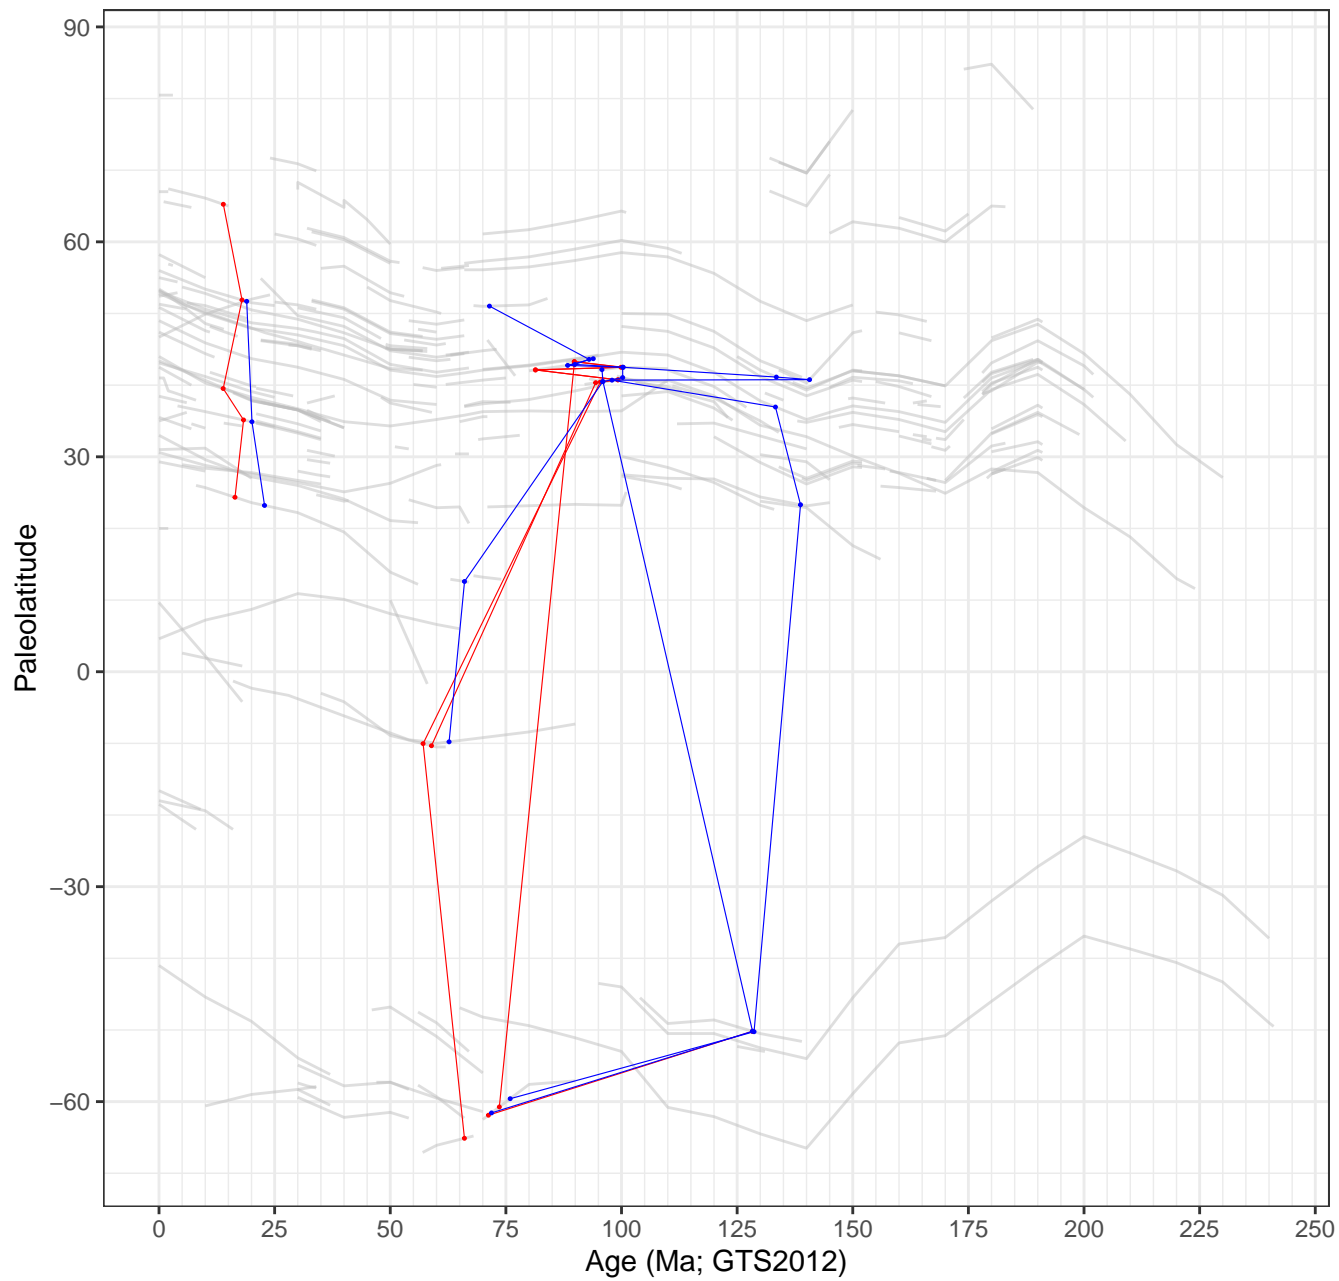

Supplement: Supplementary file 199 [file Genus Exochosphaeridium.pdf › Supplement/Supplement 2/Genus 459 plots/Genus Exochosphaeridium.pdf]

# Genus Eyrea

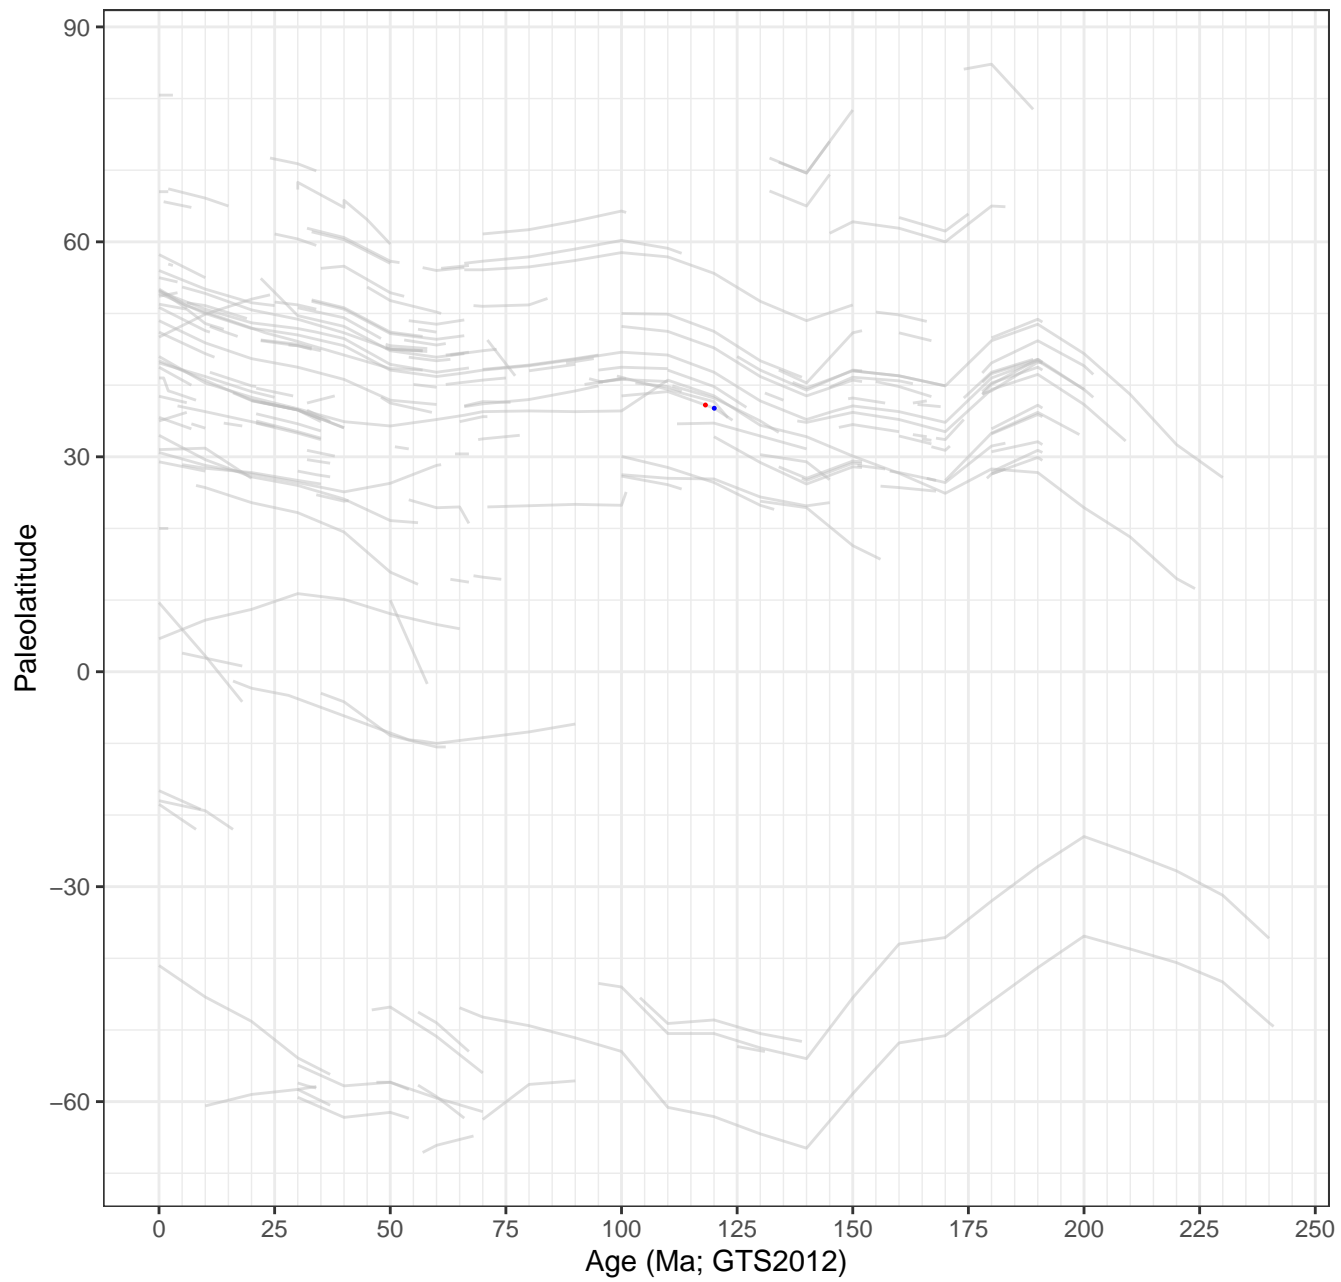

Supplement: Supplementary file 200 [file Genus Eyrea.pdf › Supplement/Supplement 2/Genus 459 plots/Genus Eyrea.pdf]

# Genus Fibradinium

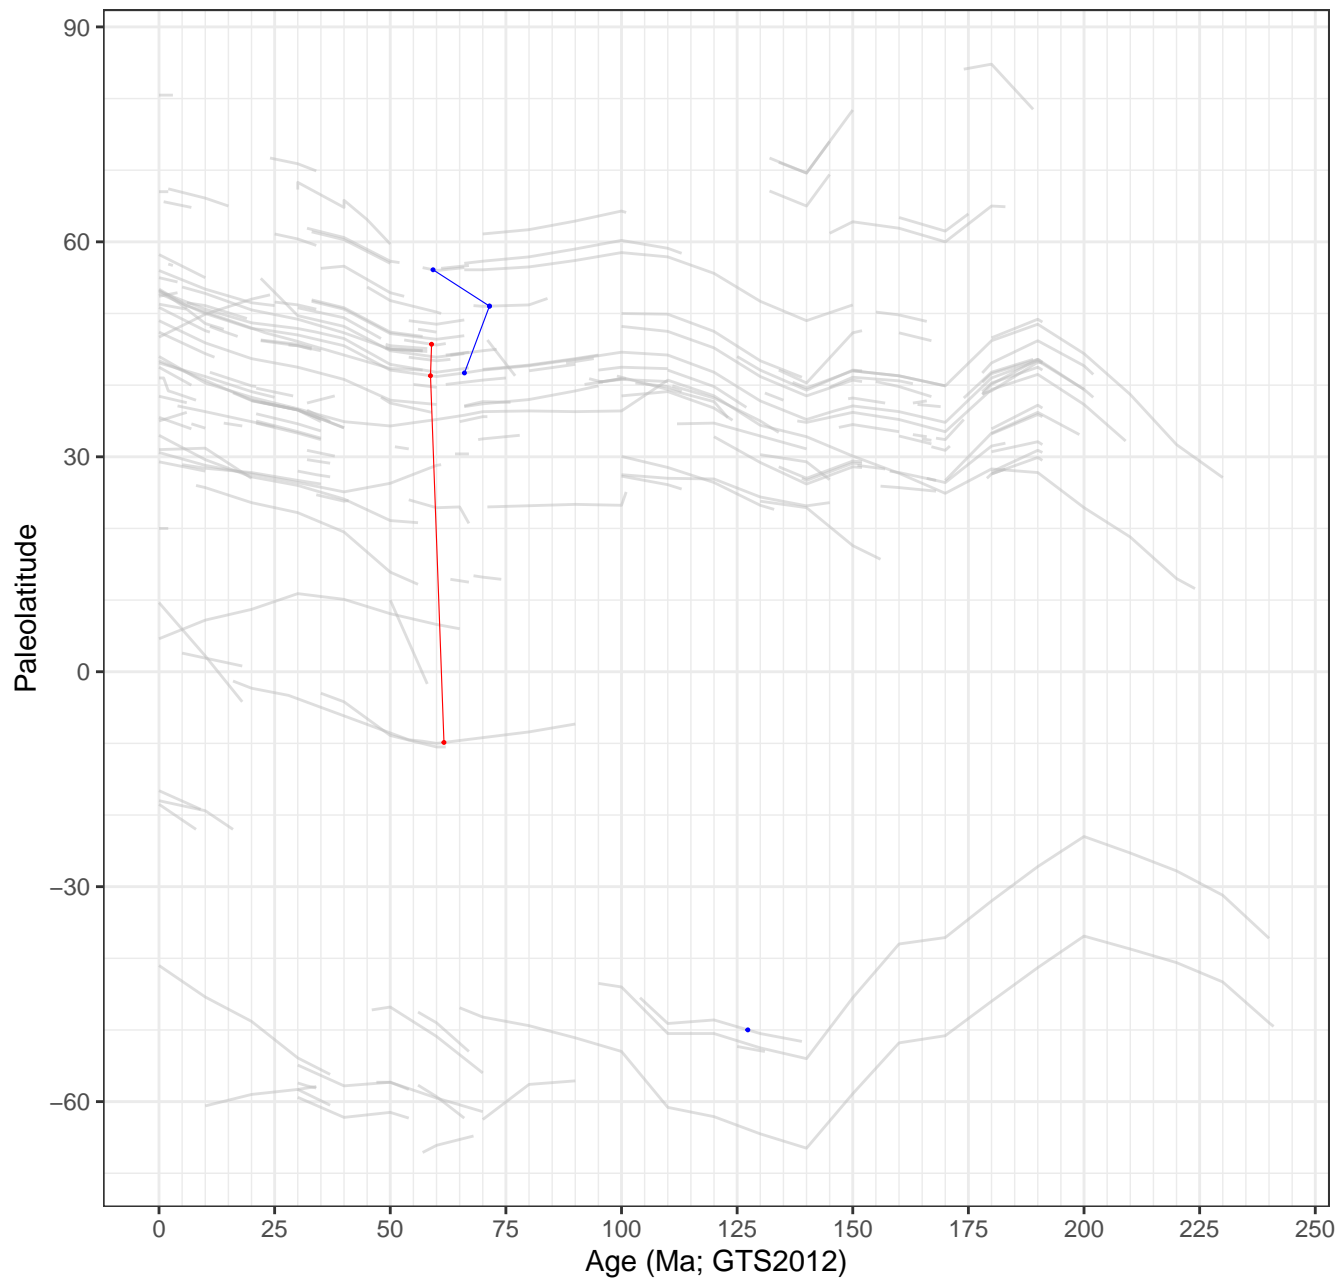

Supplement: Supplementary file 201 [file Genus Fibradinium.pdf › Supplement/Supplement 2/Genus 459 plots/Genus Fibradinium.pdf]

# Genus Fibrocysta

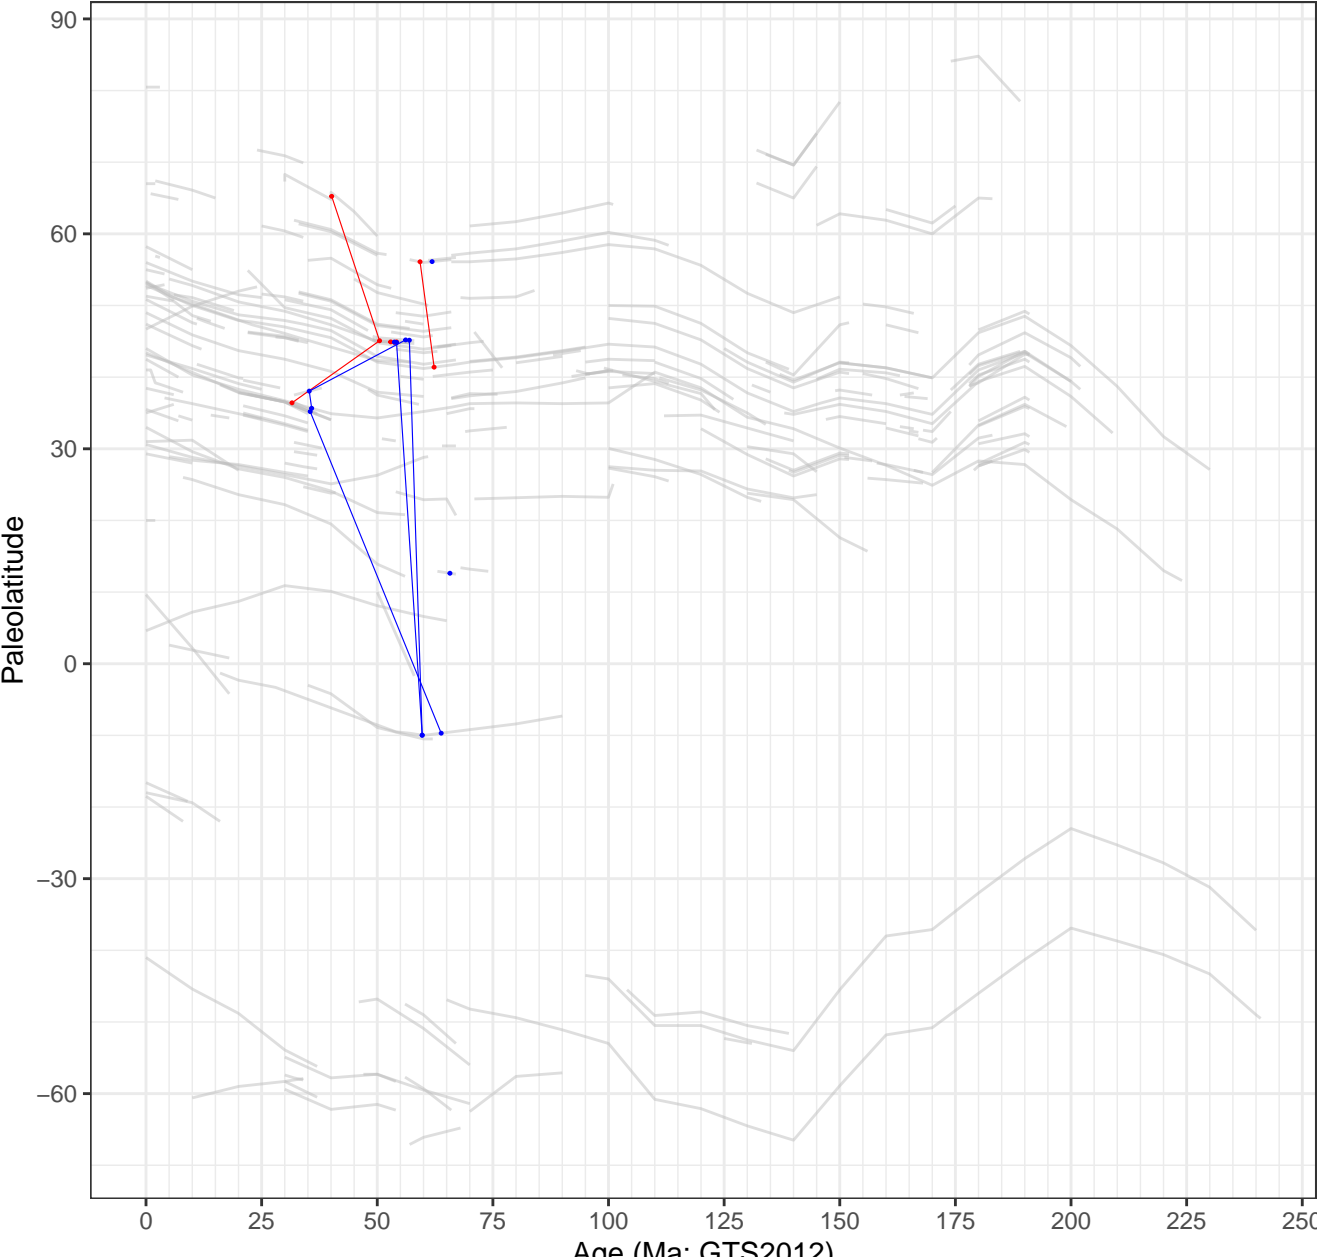

Supplement: Supplementary file 202 [file Genus Fibrocysta.pdf › Supplement/Supplement 2/Genus 459 plots/Genus Fibrocysta.pdf]

# Genus Filisphaera

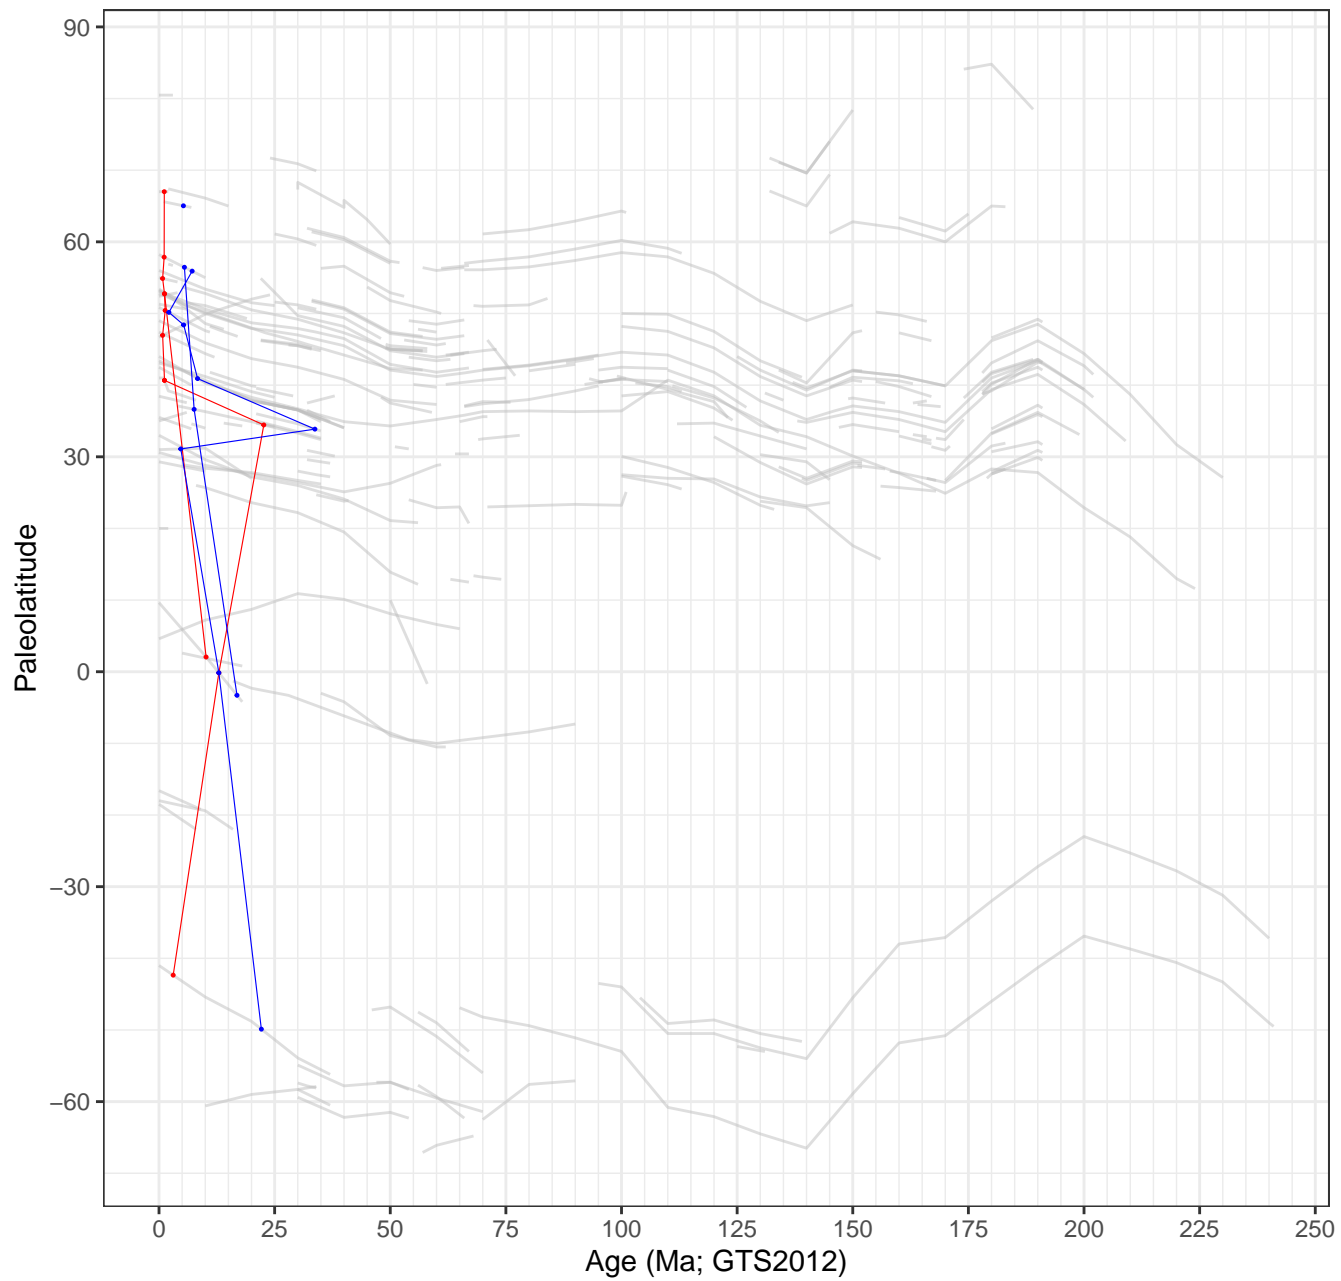

Supplement: Supplementary file 203 [file Genus Filisphaera.pdf › Supplement/Supplement 2/Genus 459 plots/Genus Filisphaera.pdf]

# Genus *Flamingoia*

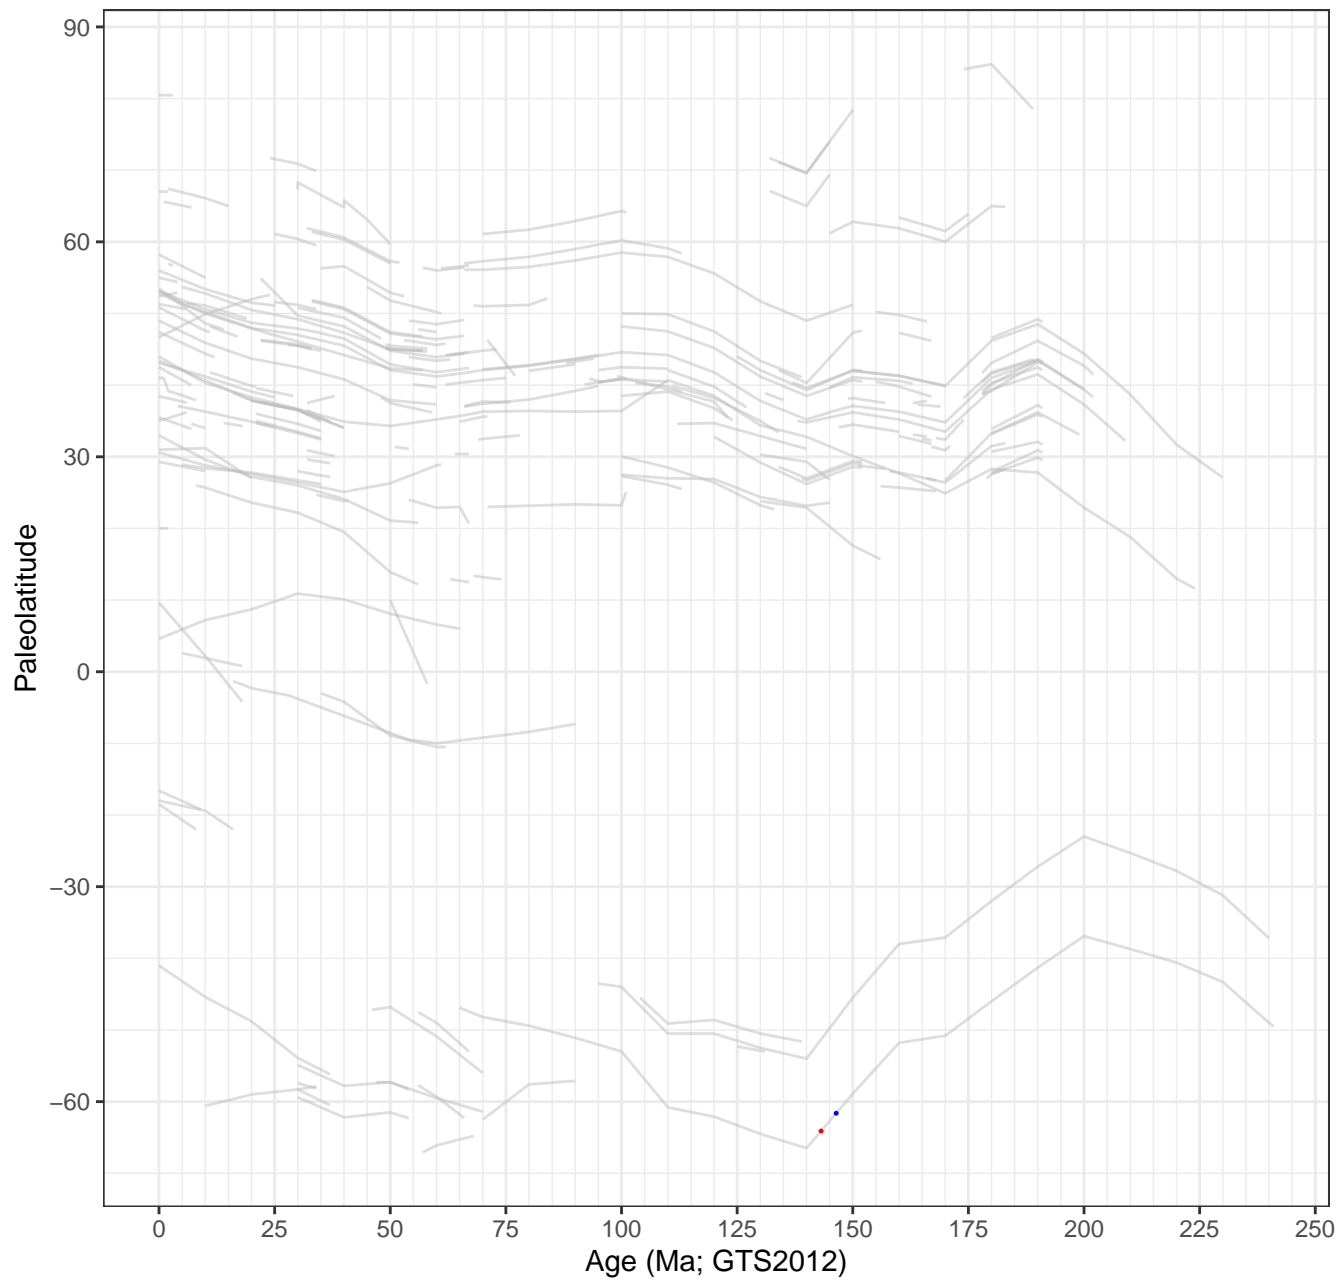

Supplement: Supplementary file 204 [file Genus Flamingoia.pdf › Supplement/Supplement 2/Genus 459 plots/Genus Flamingoia.pdf]

# Genus Flandrecysta

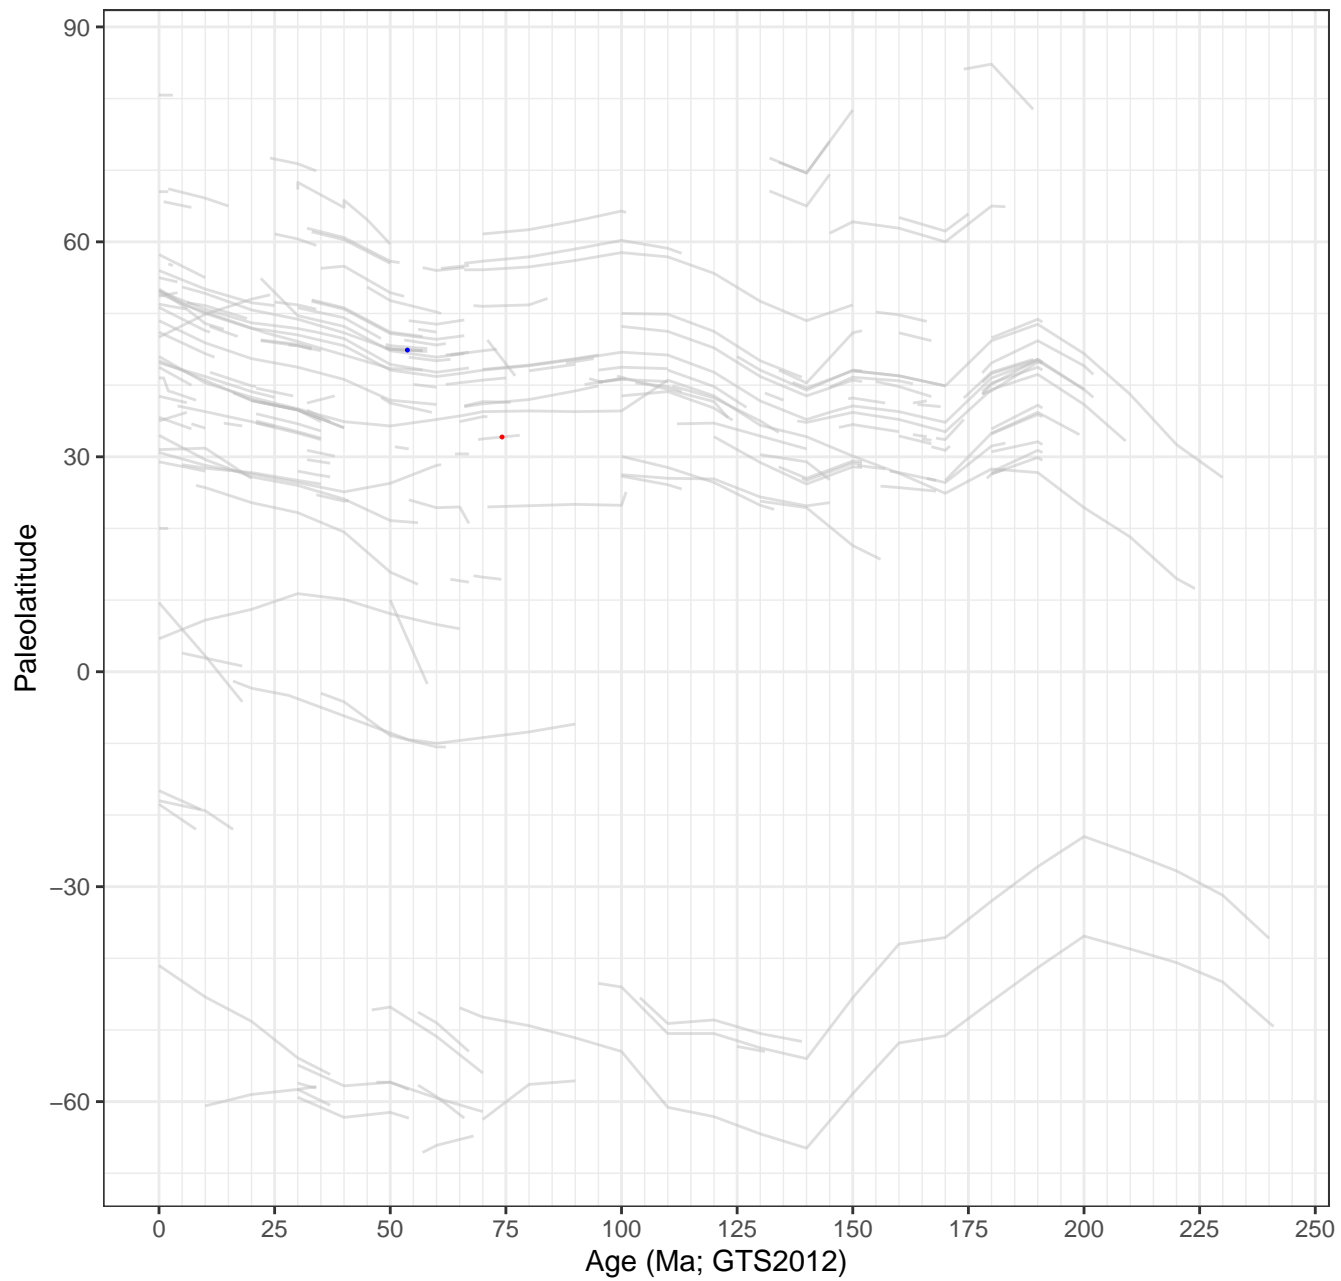

Supplement: Supplementary file 205 [file Genus Flandrecysta.pdf › Supplement/Supplement 2/Genus 459 plots/Genus Flandrecysta.pdf]

# Genus Florentinia

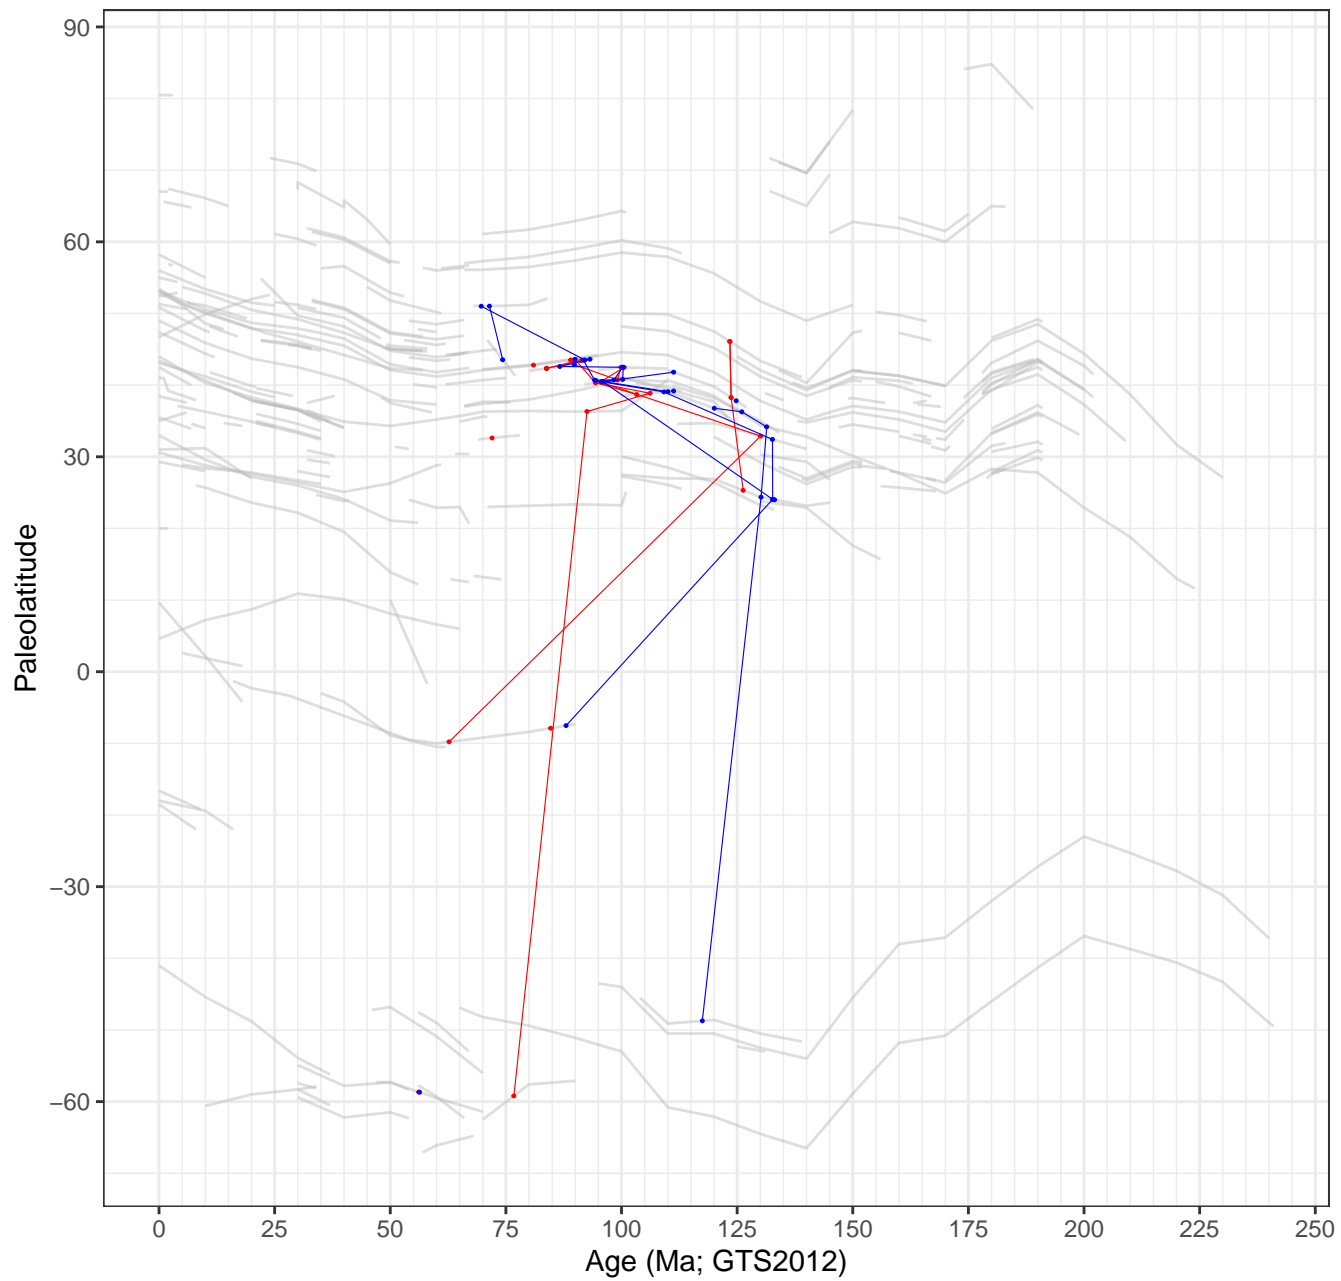

Supplement: Supplementary file 206 [file Genus Florentinia.pdf › Supplement/Supplement 2/Genus 459 plots/Genus Florentinia.pdf]

# Genus *Fostericysta*

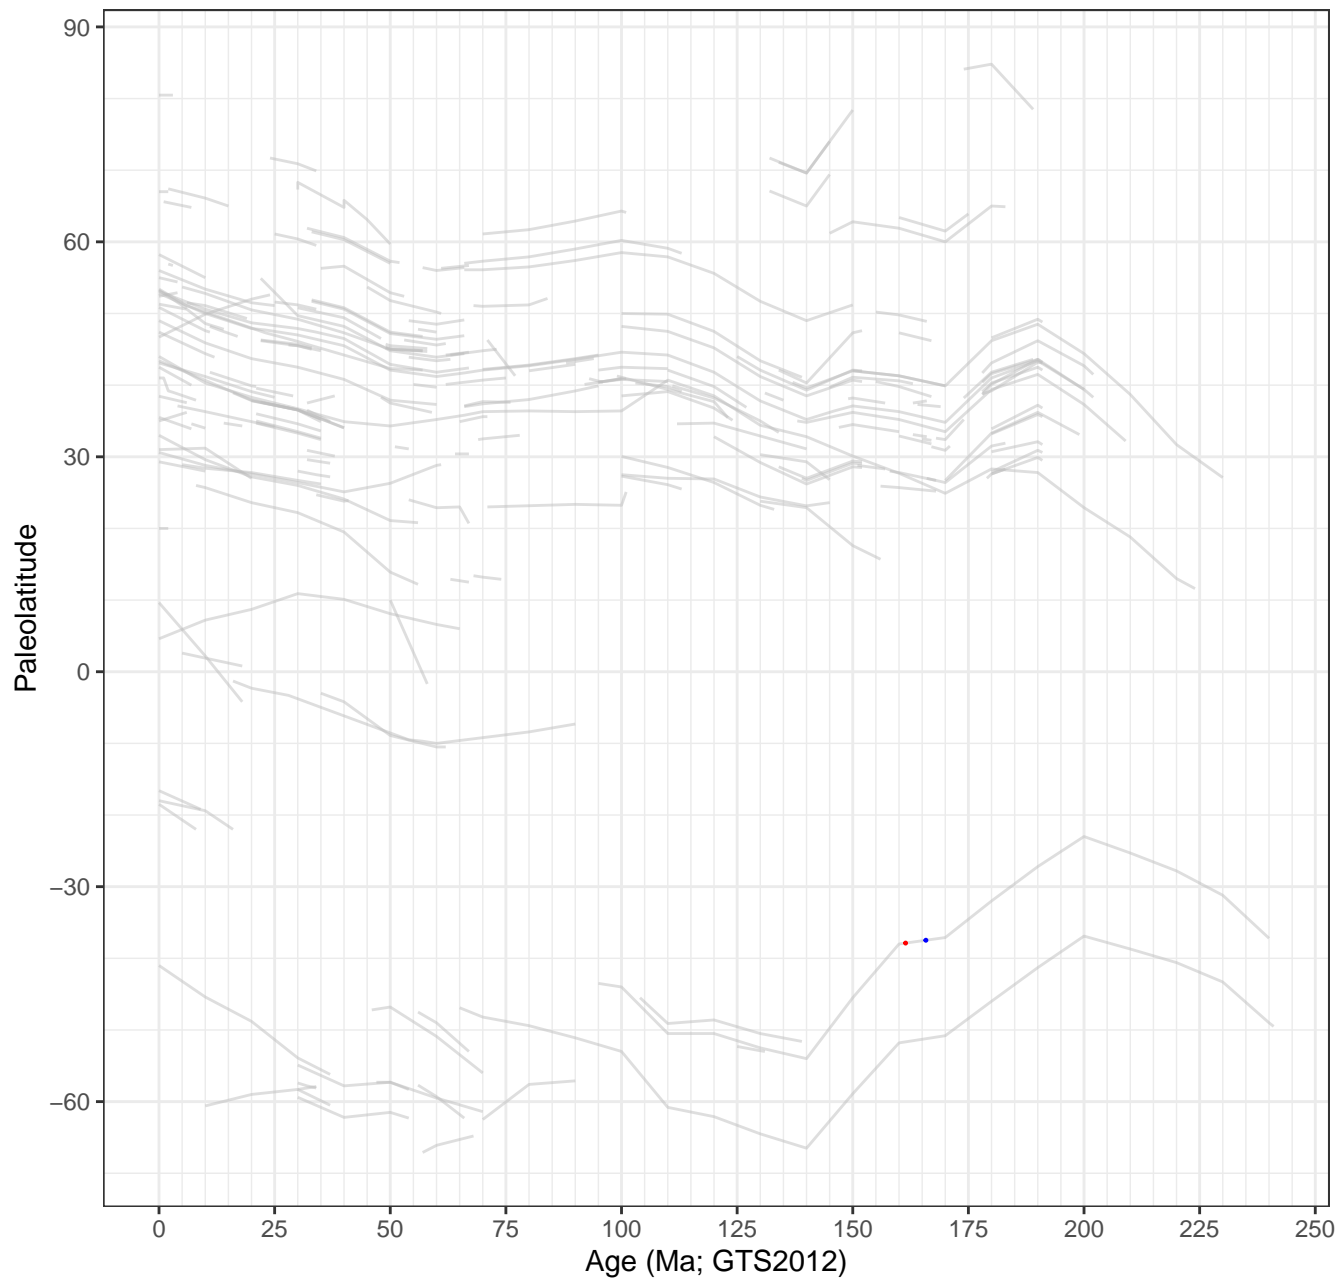

Supplement: Supplementary file 207 [file Genus Fostericysta.pdf › Supplement/Supplement 2/Genus 459 plots/Genus Fostericysta.pdf]

# Genus Foucheria

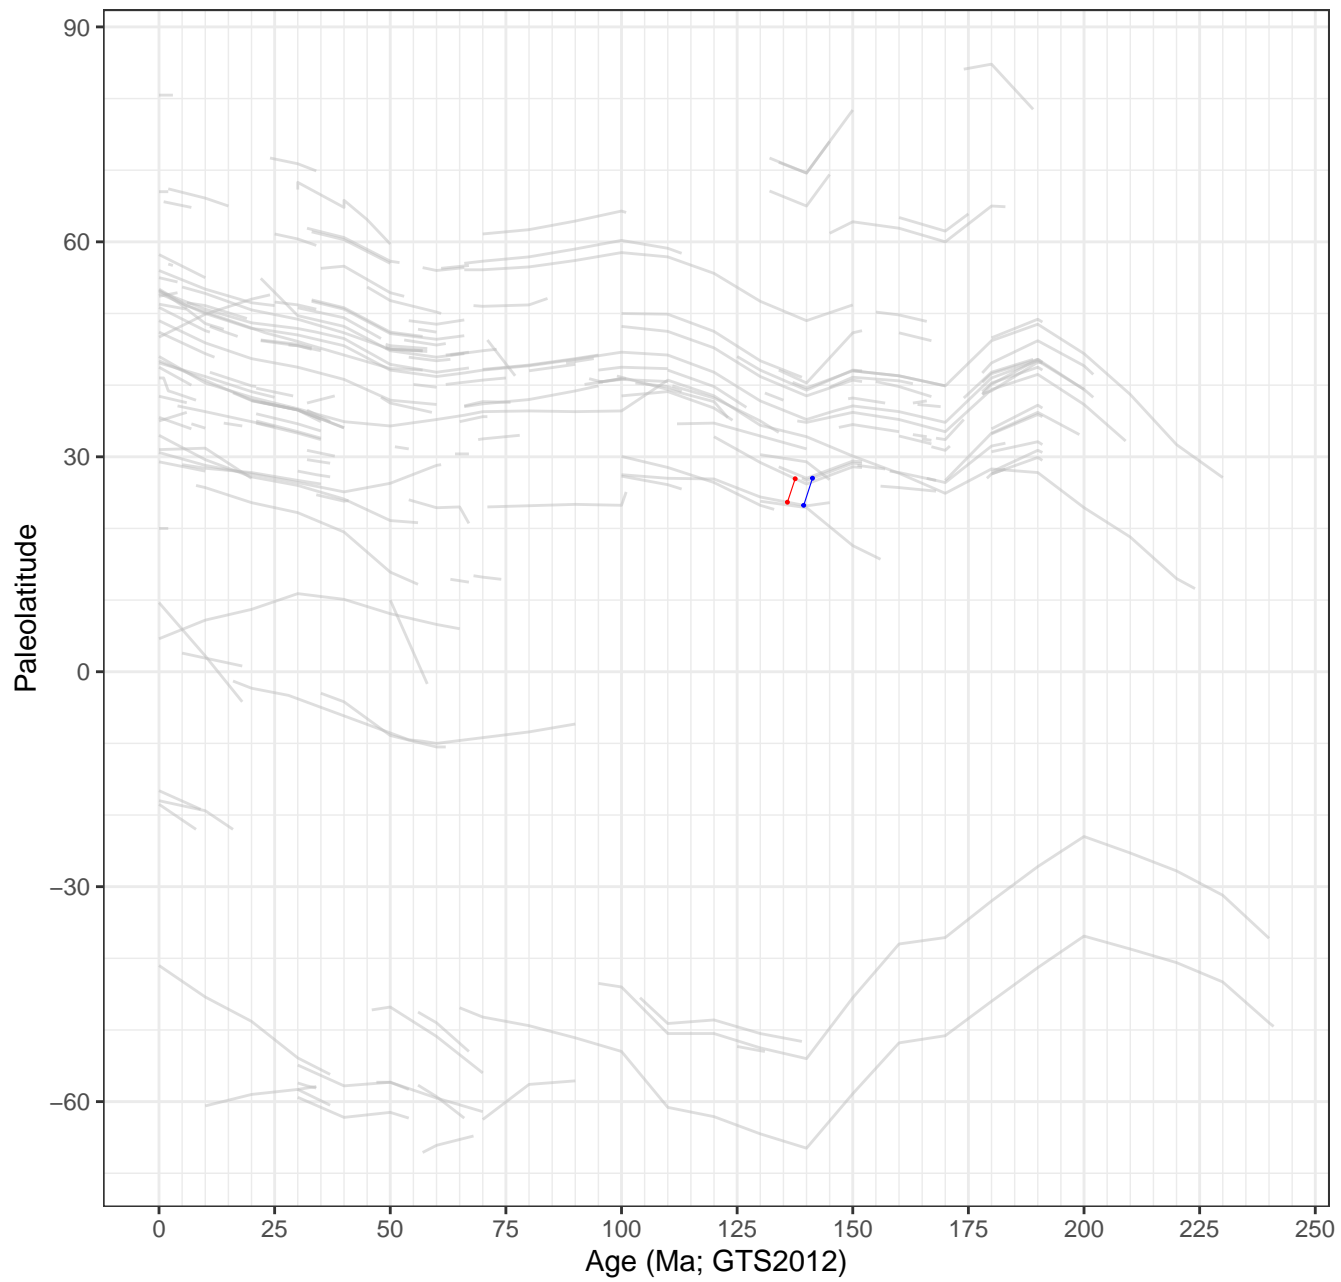

Supplement: Supplementary file 208 [file Genus Foucheria.pdf › Supplement/Supplement 2/Genus 459 plots/Genus Foucheria.pdf]

# Genus *Freboldinium*

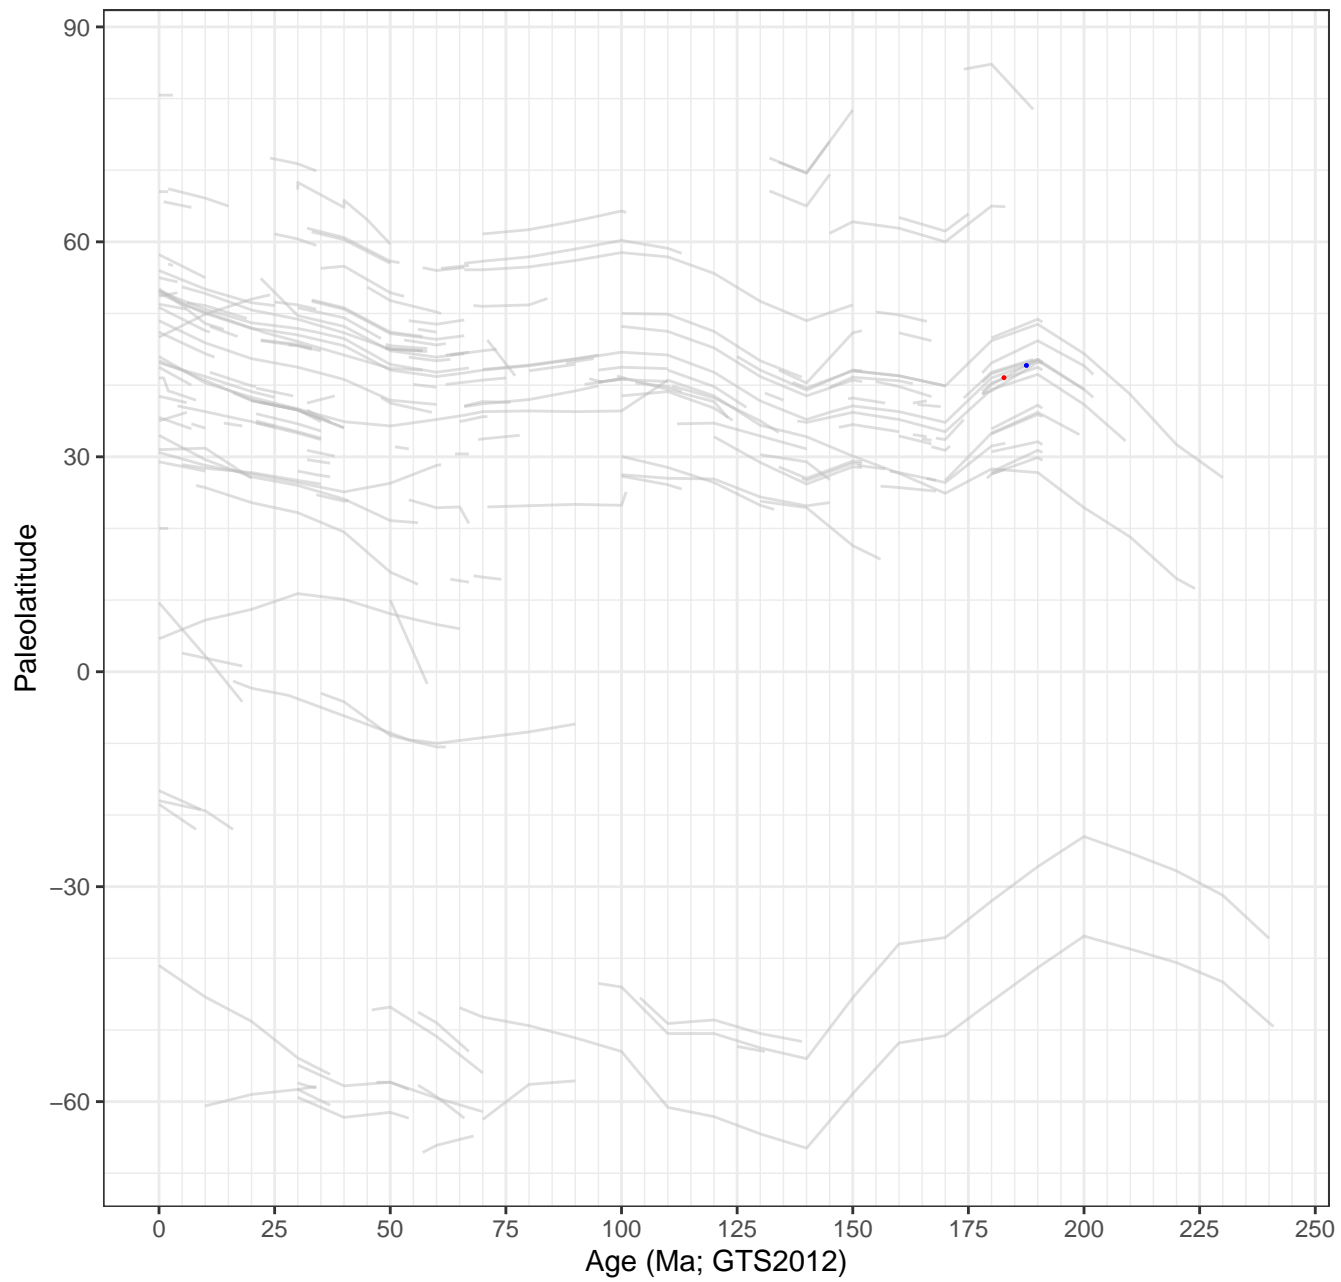

Supplement: Supplementary file 209 [file Genus Freboldinium.pdf › Supplement/Supplement 2/Genus 459 plots/Genus Freboldinium.pdf]

# Genus Fromea

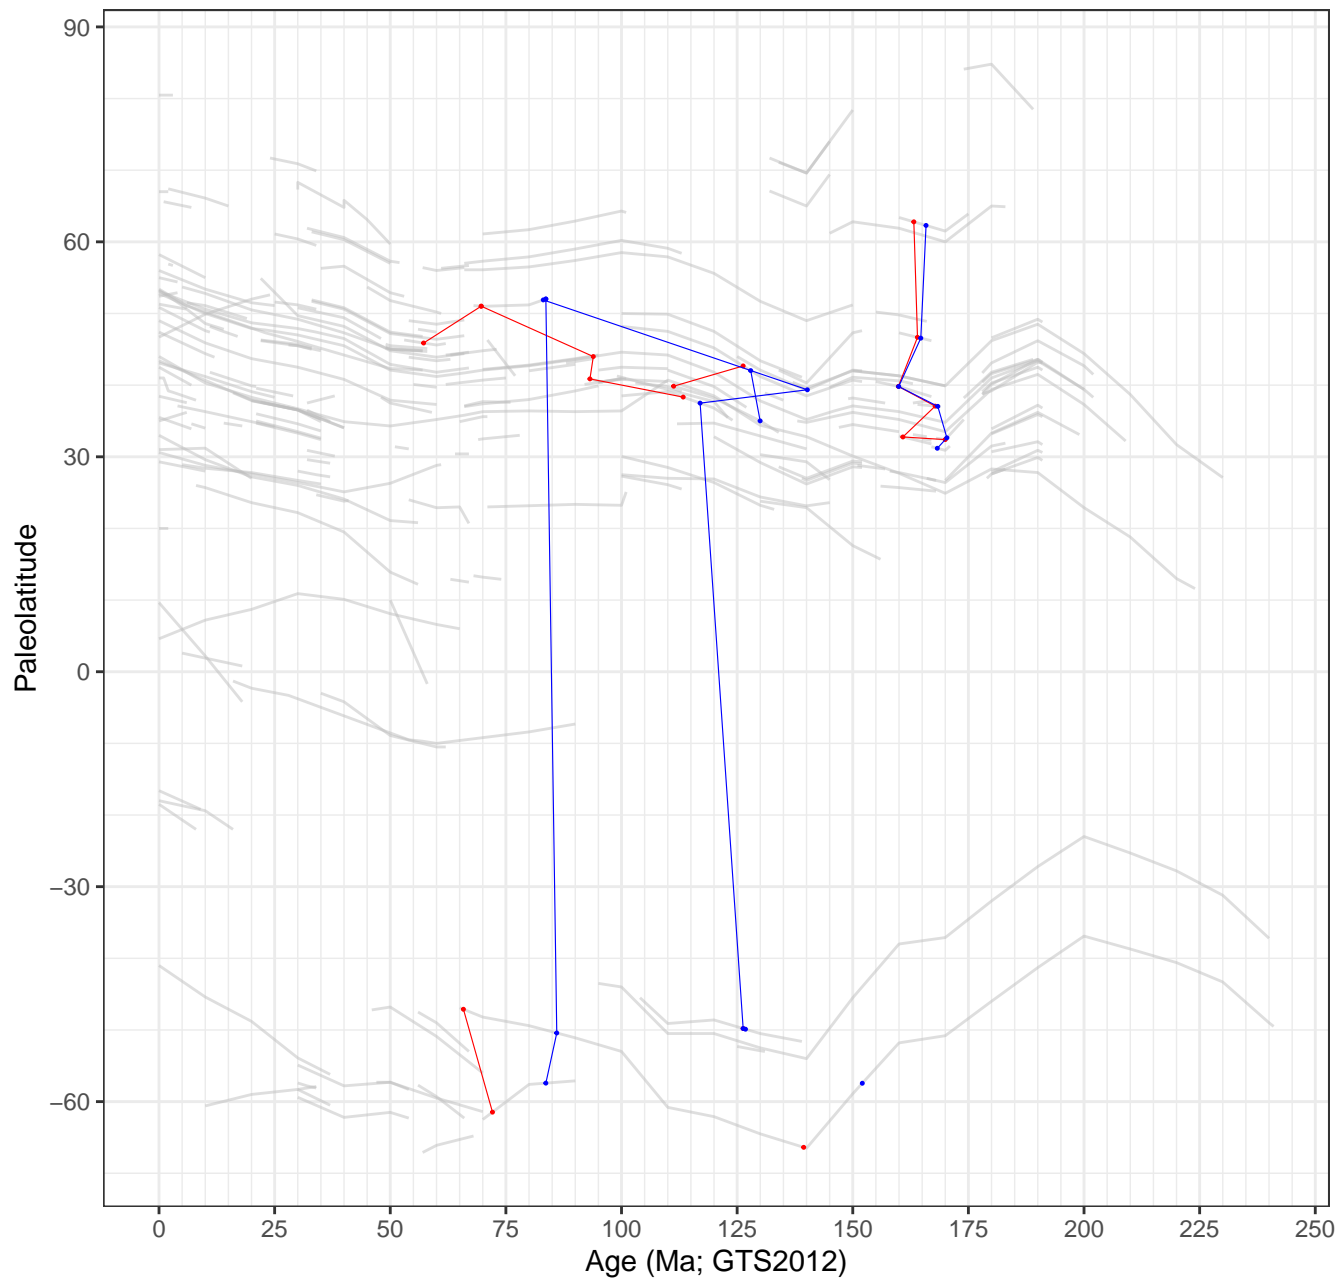

Supplement: Supplementary file 210 [file Genus Fromea.pdf › Supplement/Supplement 2/Genus 459 plots/Genus Fromea.pdf]

# Genus Fusiformacysta

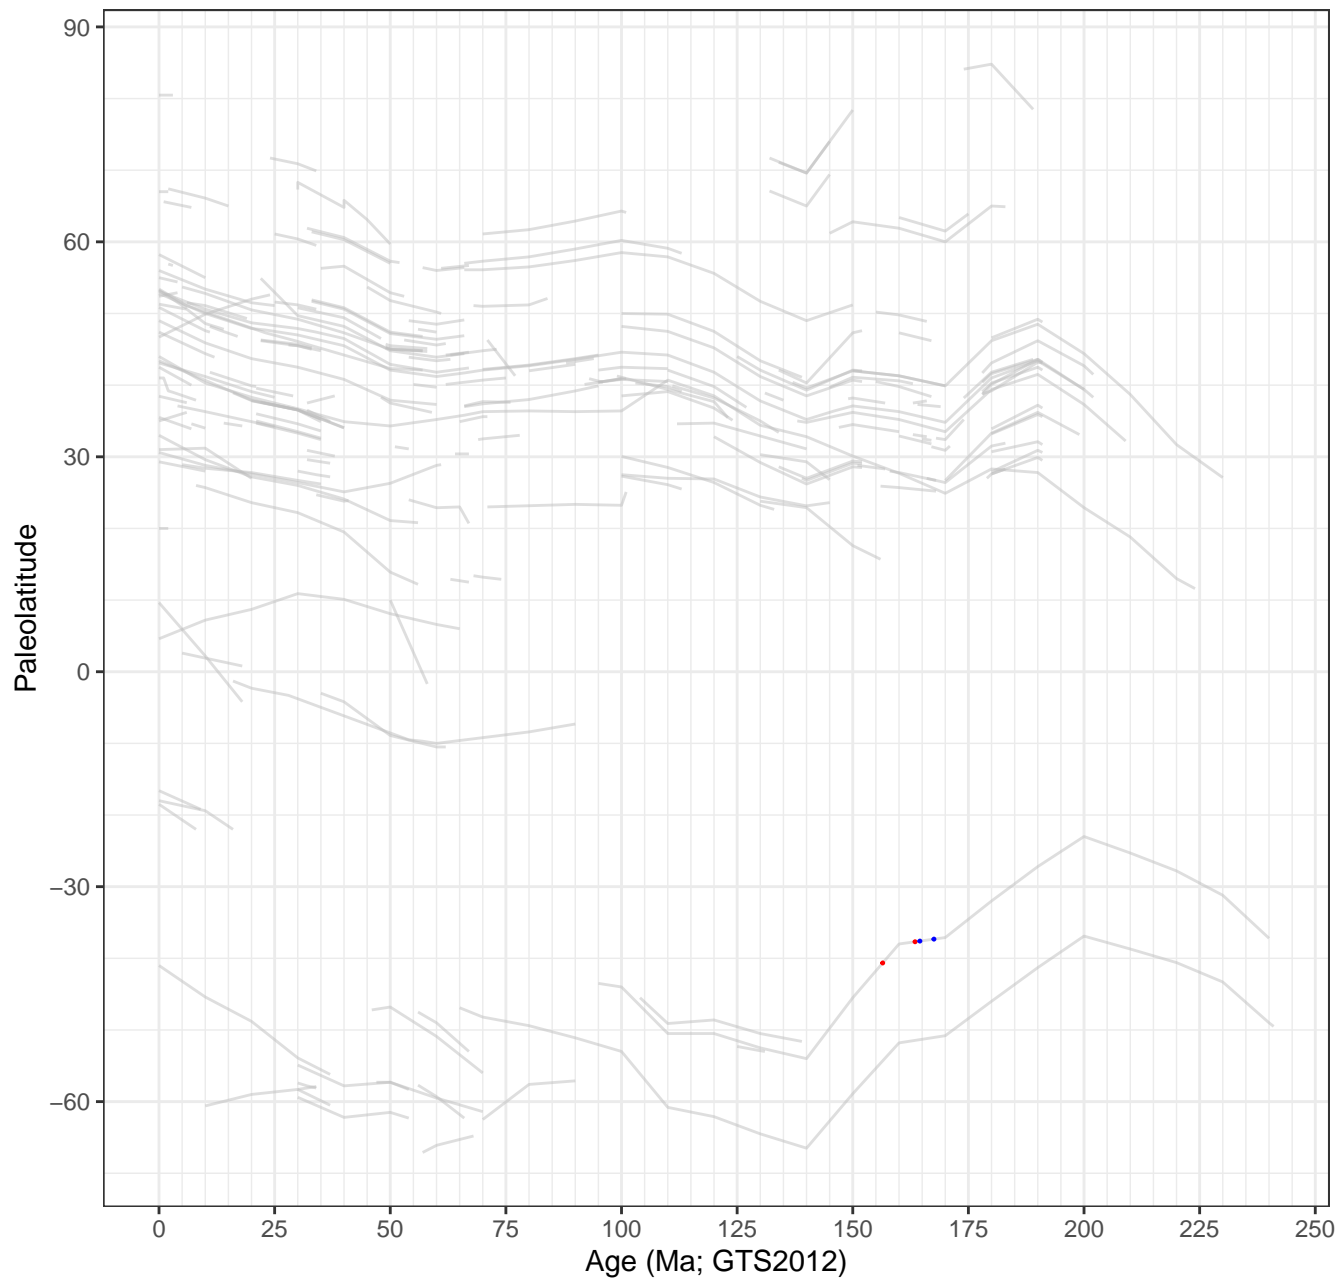

Supplement: Supplementary file 211 [file Genus Fusiformacysta.pdf › Supplement/Supplement 2/Genus 459 plots/Genus Fusiformacysta.pdf]

# Genus Galeacysta

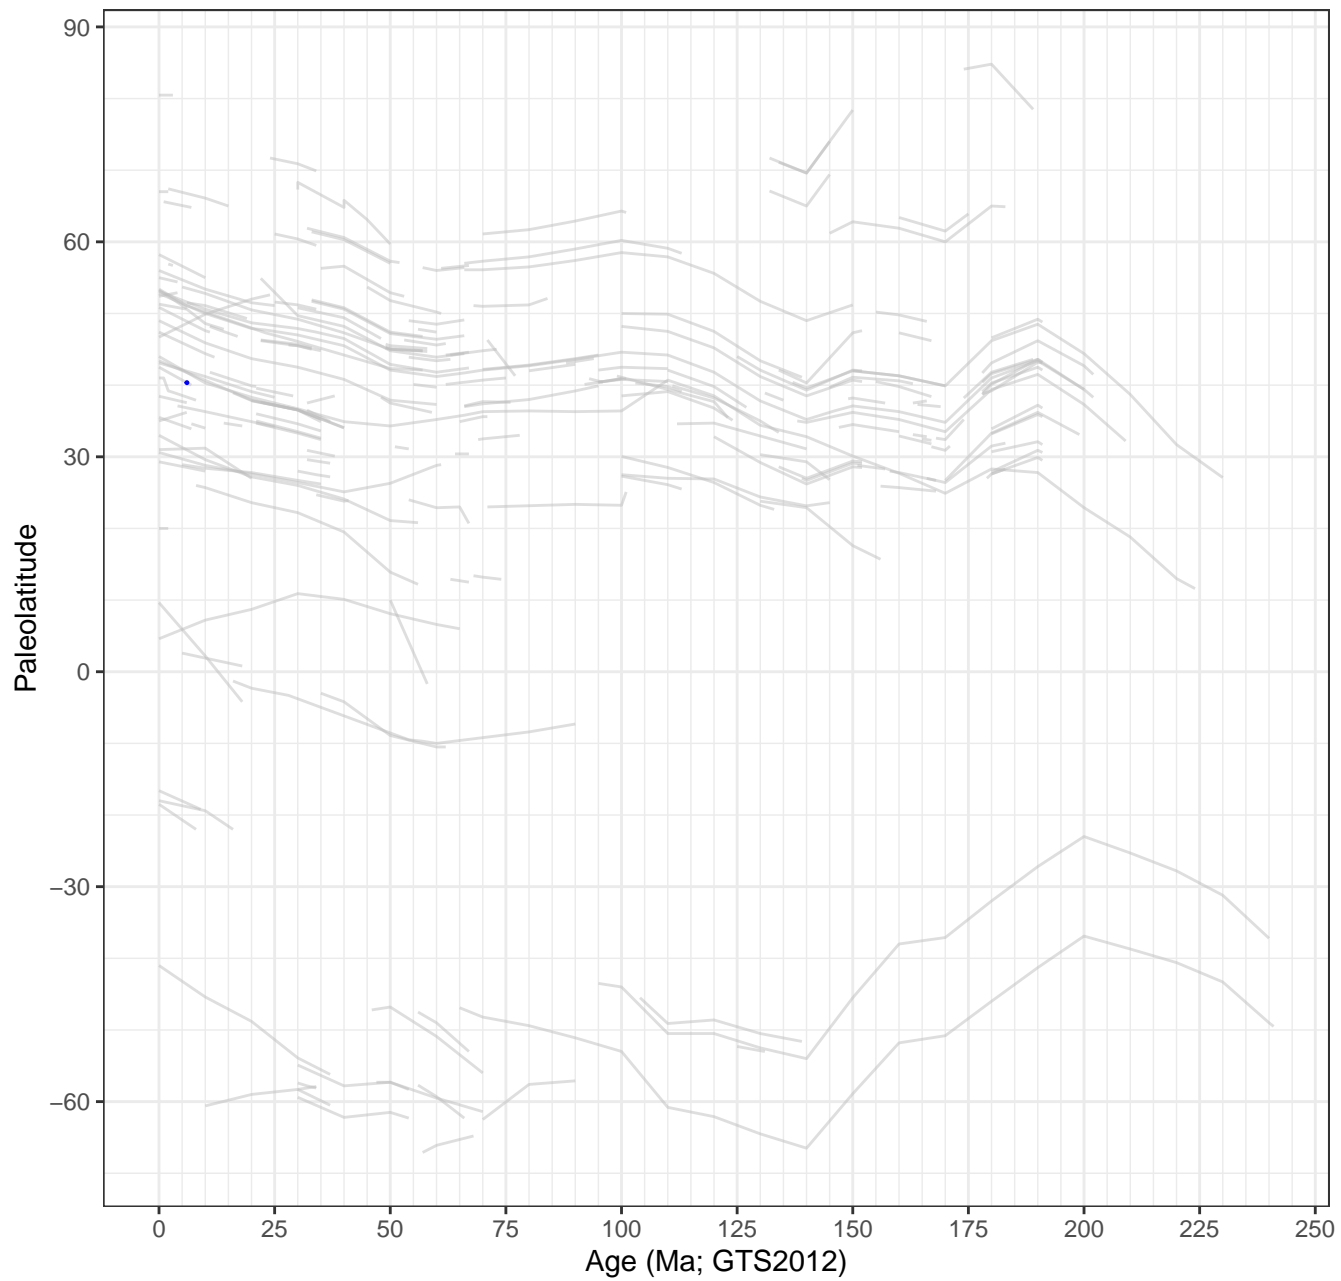

Supplement: Supplementary file 212 [file Genus Galeacysta.pdf › Supplement/Supplement 2/Genus 459 plots/Genus Galeacysta.pdf]

# Genus Gardodinium

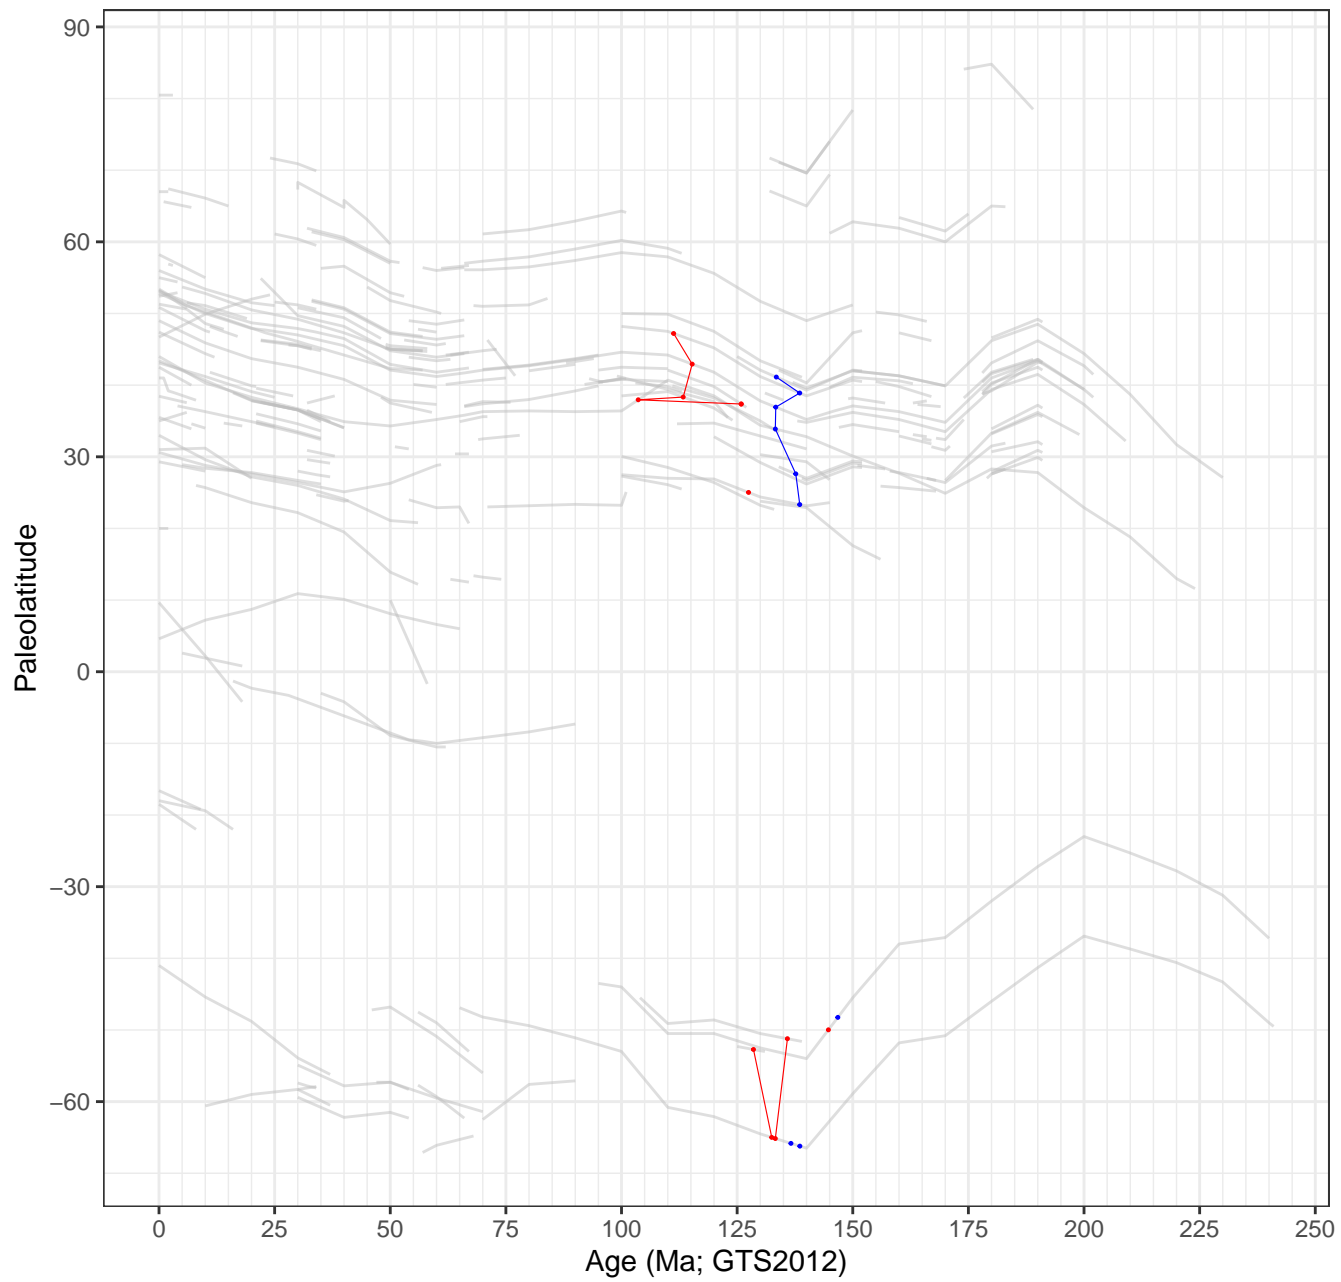

Supplement: Supplementary file 213 [file Genus Gardodinium.pdf › Supplement/Supplement 2/Genus 459 plots/Genus Gardodinium.pdf]

# Genus Geiselodinium

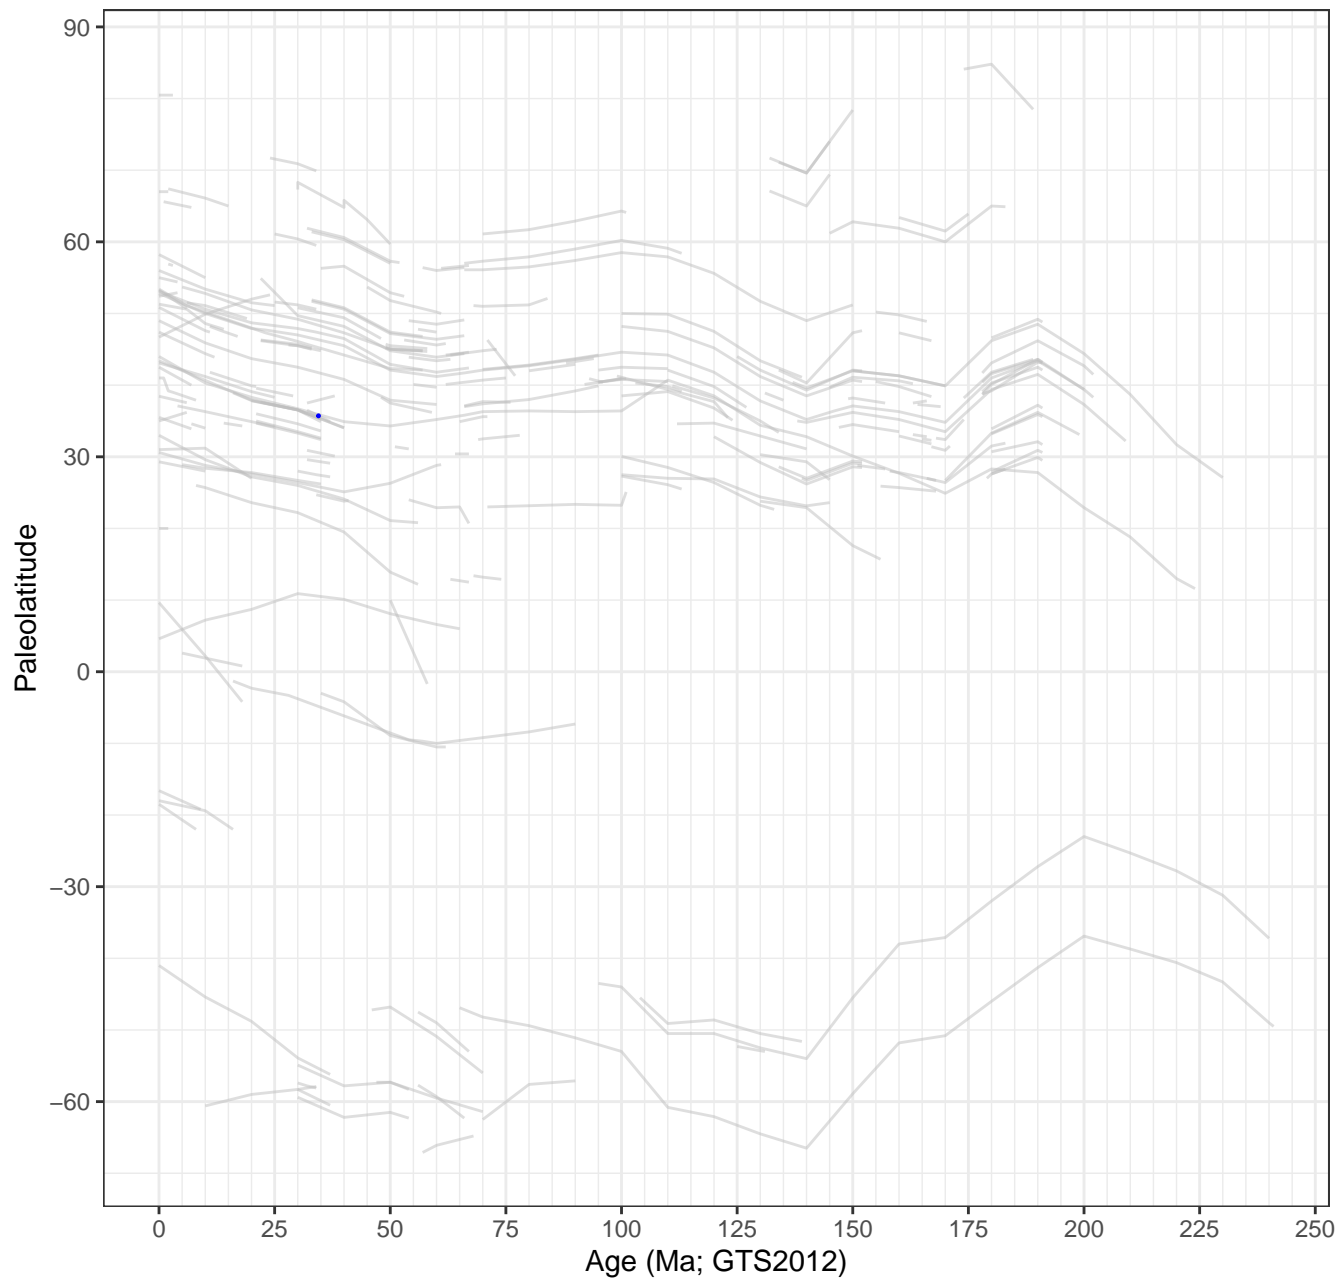

Supplement: Supplementary file 214 [file Genus Geiselodinium.pdf › Supplement/Supplement 2/Genus 459 plots/Genus Geiselodinium.pdf]
