# Supplementary figures and images for: DINOSTRAT: a global database of the stratigraphic and paleolatitudinal distribution of Mesozoic–Cenozoic organic-walled dinoflagellate cysts (part 3 of 27)
Source: Copernicus journal article supplement (doi:10.5194/essd-14-579-2022), 2022-02-09

# Genus Gelatia

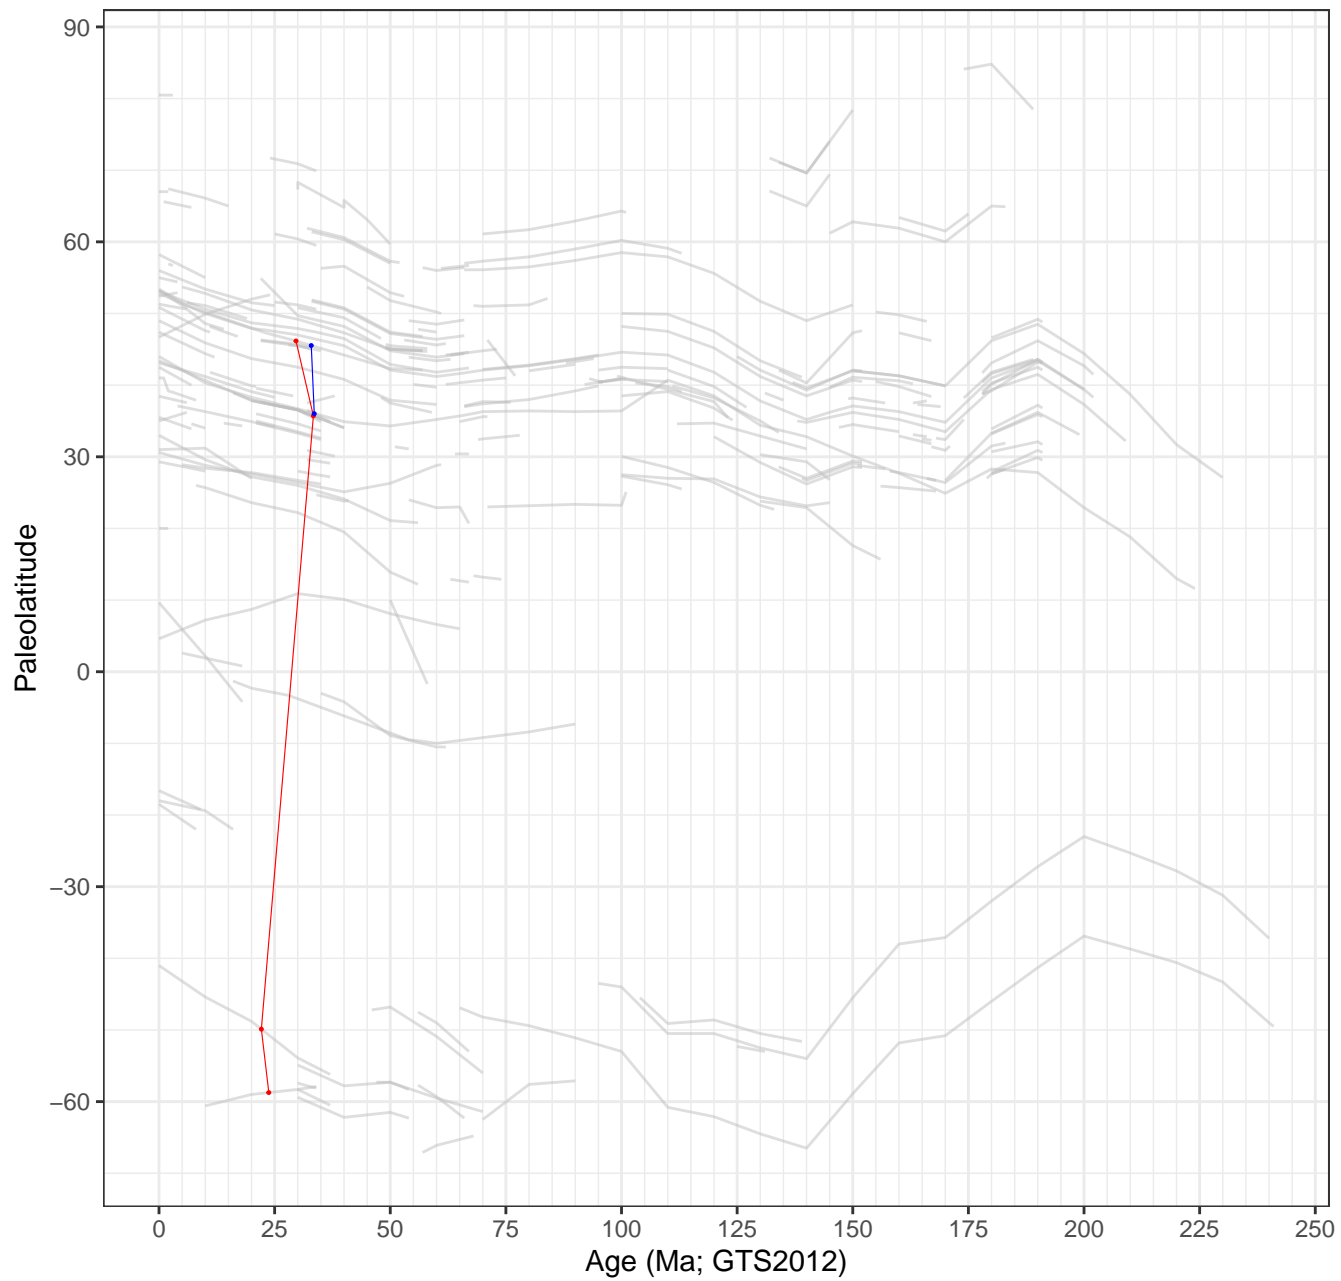

Supplement: Supplementary file 215 [file Genus Gelatia.pdf › Supplement/Supplement 2/Genus 459 plots/Genus Gelatia.pdf]

# Genus *Gerdiocysta*

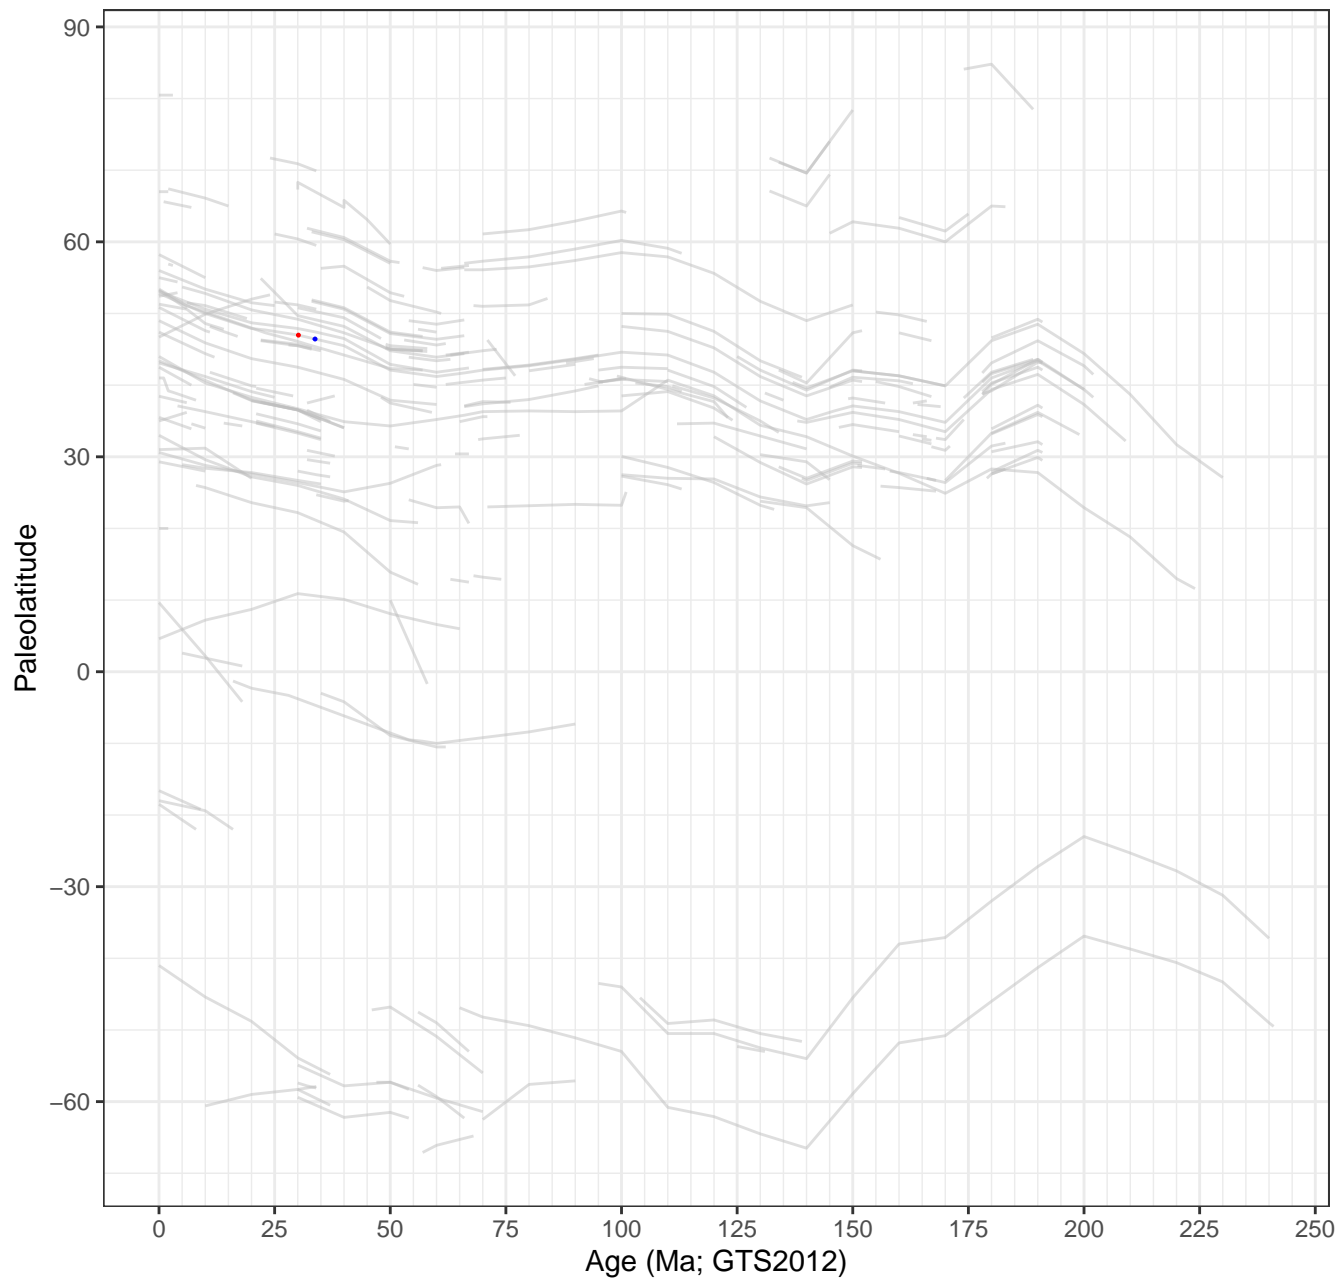

Supplement: Supplementary file 216 [file Genus Gerdiocysta.pdf › Supplement/Supplement 2/Genus 459 plots/Genus Gerdiocysta.pdf]

# Genus Gerlachidium

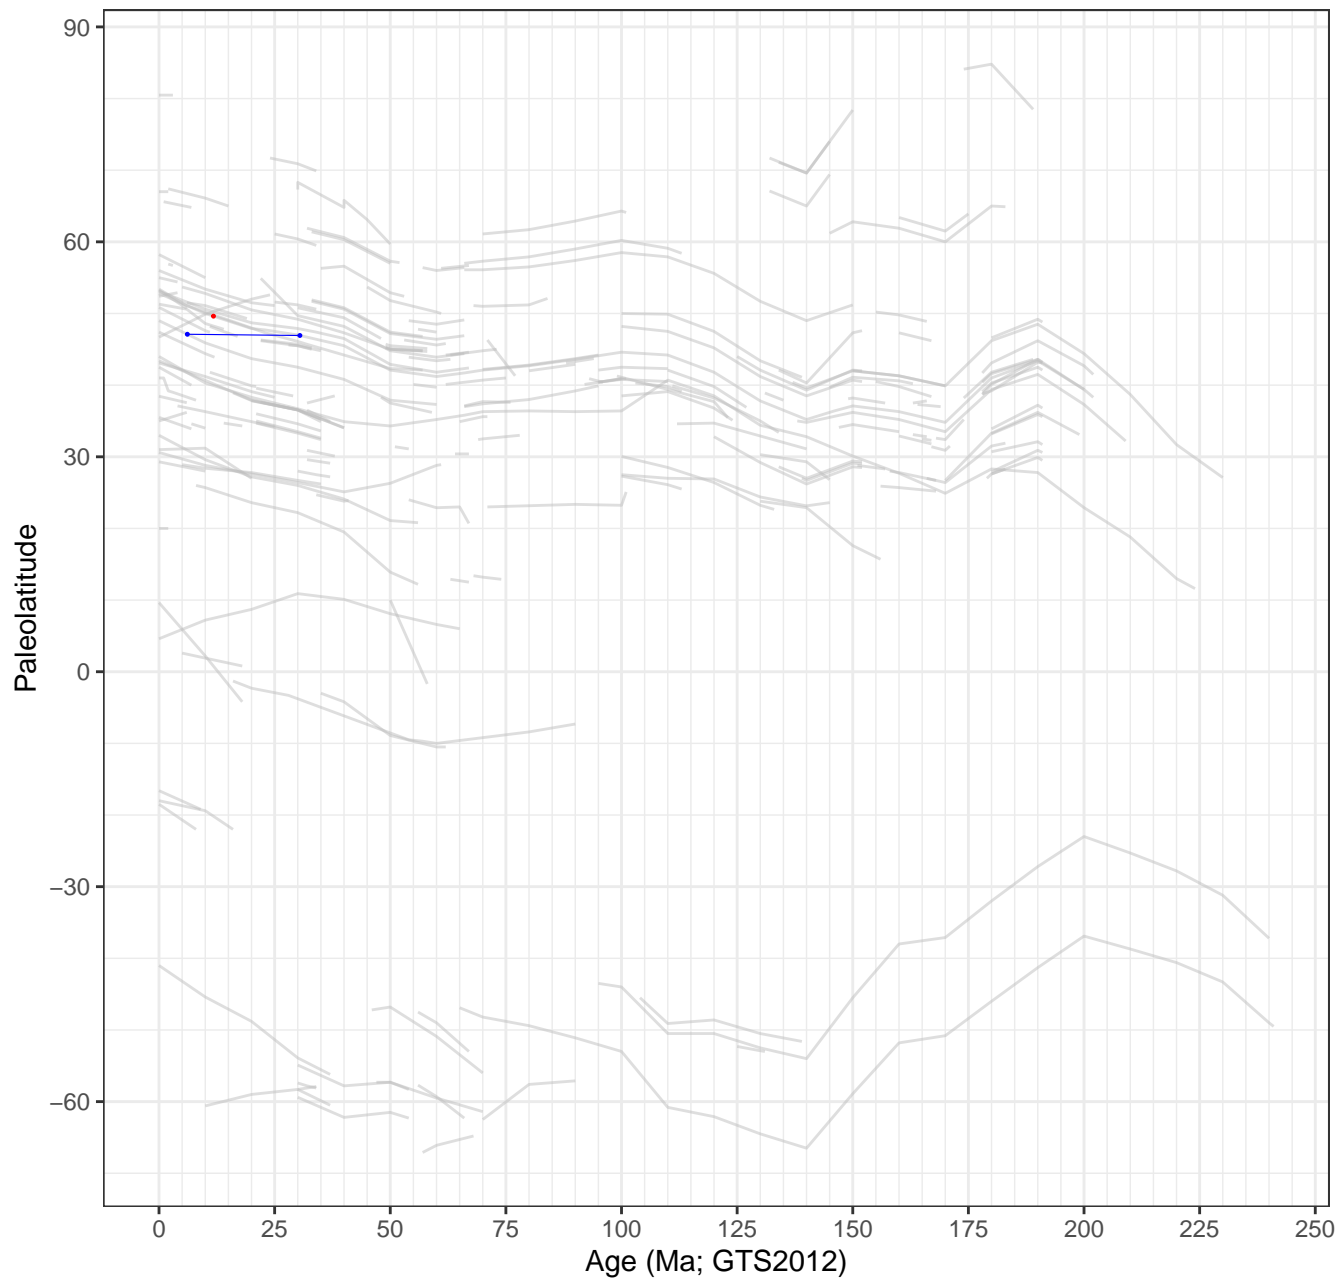

Supplement: Supplementary file 217 [file Genus Gerlachidium.pdf › Supplement/Supplement 2/Genus 459 plots/Genus Gerlachidium.pdf]

# Genus Gillinia

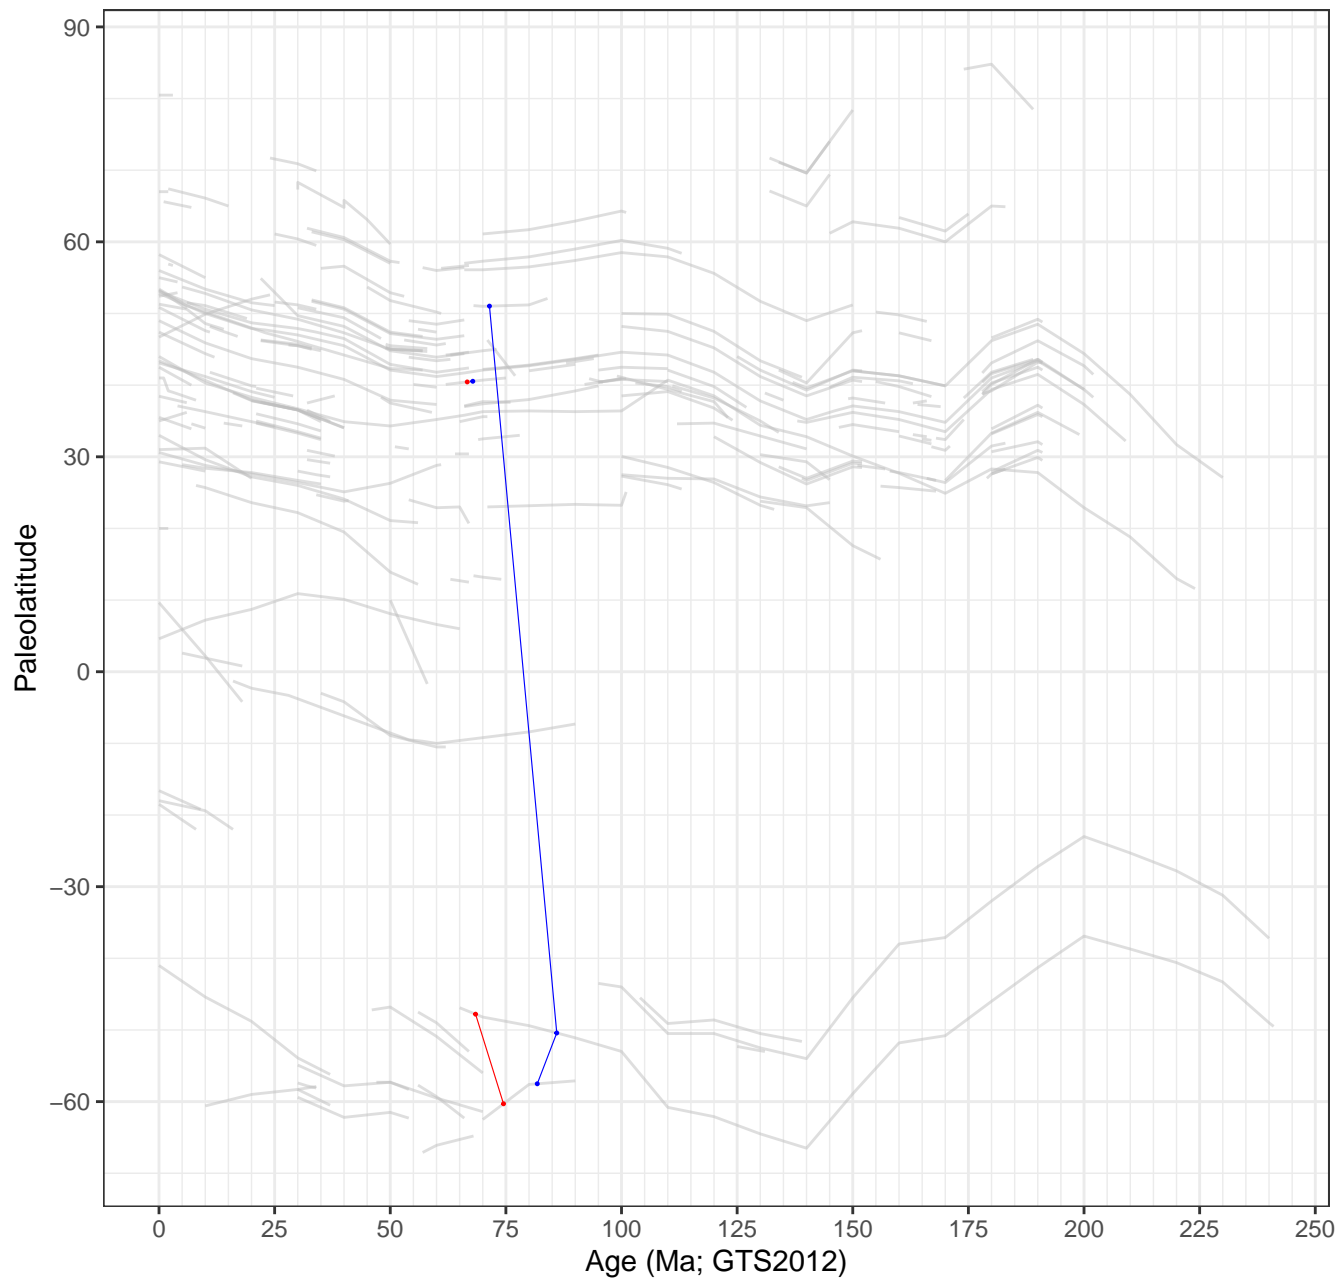

Supplement: Supplementary file 218 [file Genus Gillinia.pdf › Supplement/Supplement 2/Genus 459 plots/Genus Gillinia.pdf]

# Genus *Gingiodinium*

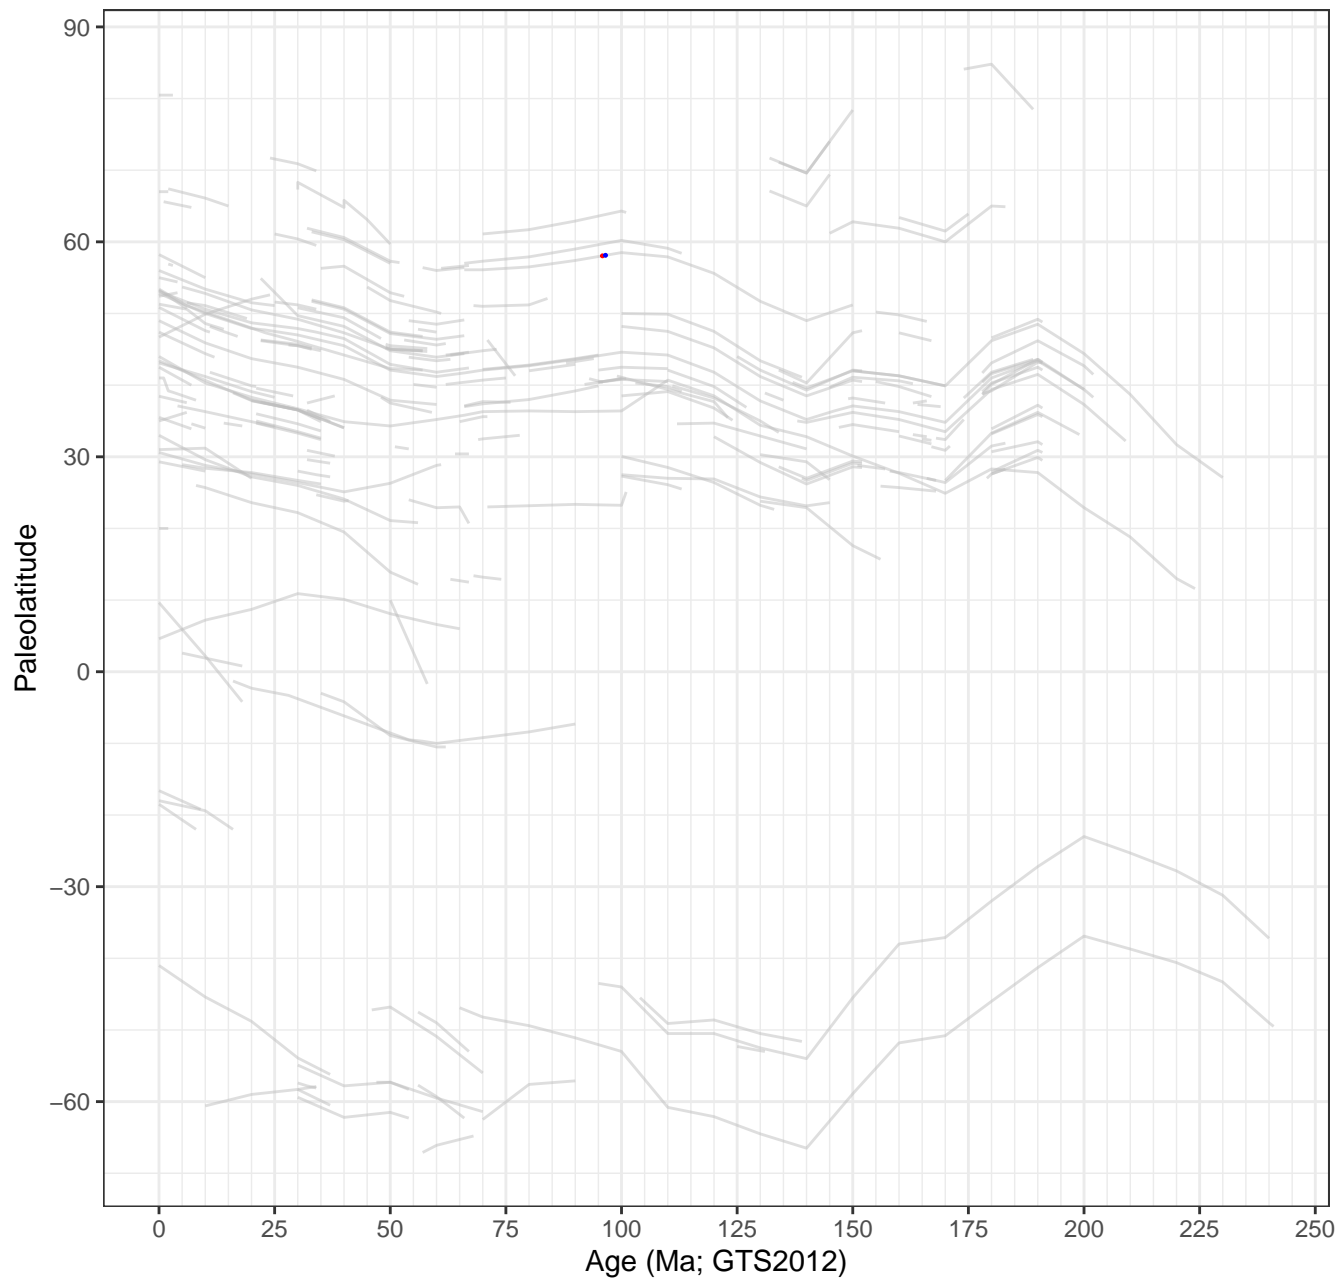

Supplement: Supplementary file 219 [file Genus Ginginodinium.pdf › Supplement/Supplement 2/Genus 459 plots/Genus Ginginodinium.pdf]

# Genus Glaphyrocysta

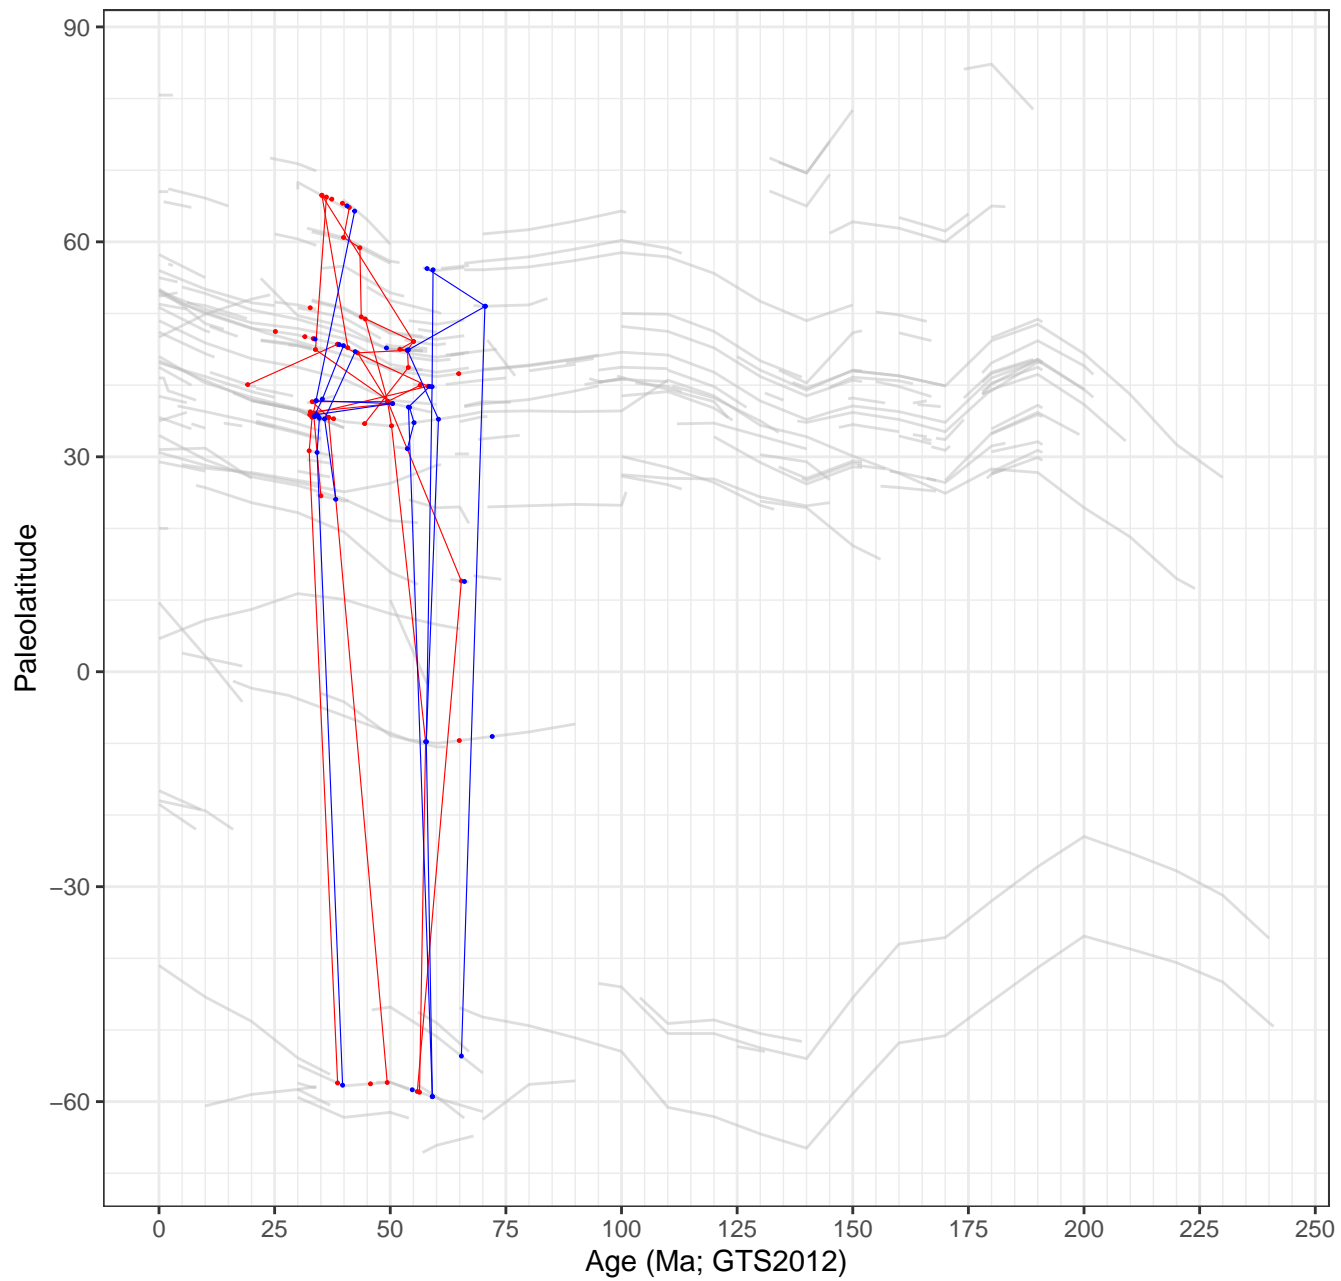

Supplement: Supplementary file 220 [file Genus Glaphyrocysta.pdf › Supplement/Supplement 2/Genus 459 plots/Genus Glaphyrocysta.pdf]

# Genus *Glossodinium*

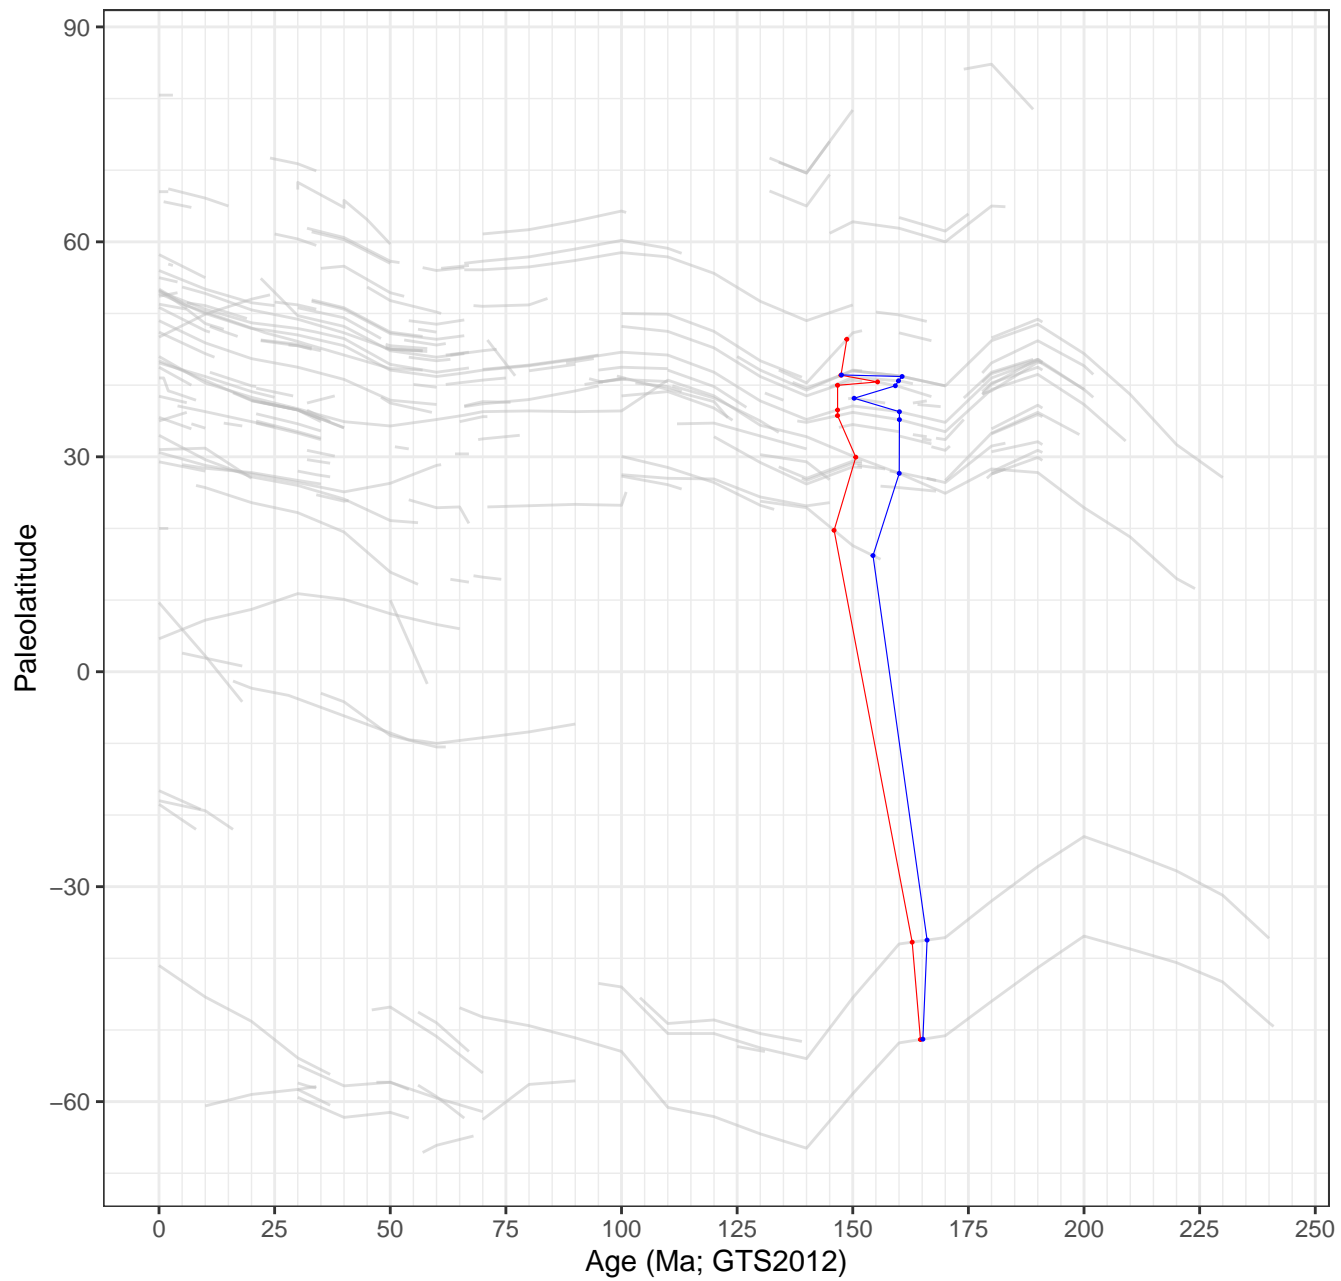

Supplement: Supplementary file 221 [file Genus Glossodinium.pdf › Supplement/Supplement 2/Genus 459 plots/Genus Glossodinium.pdf]

# Genus Gochteodinia

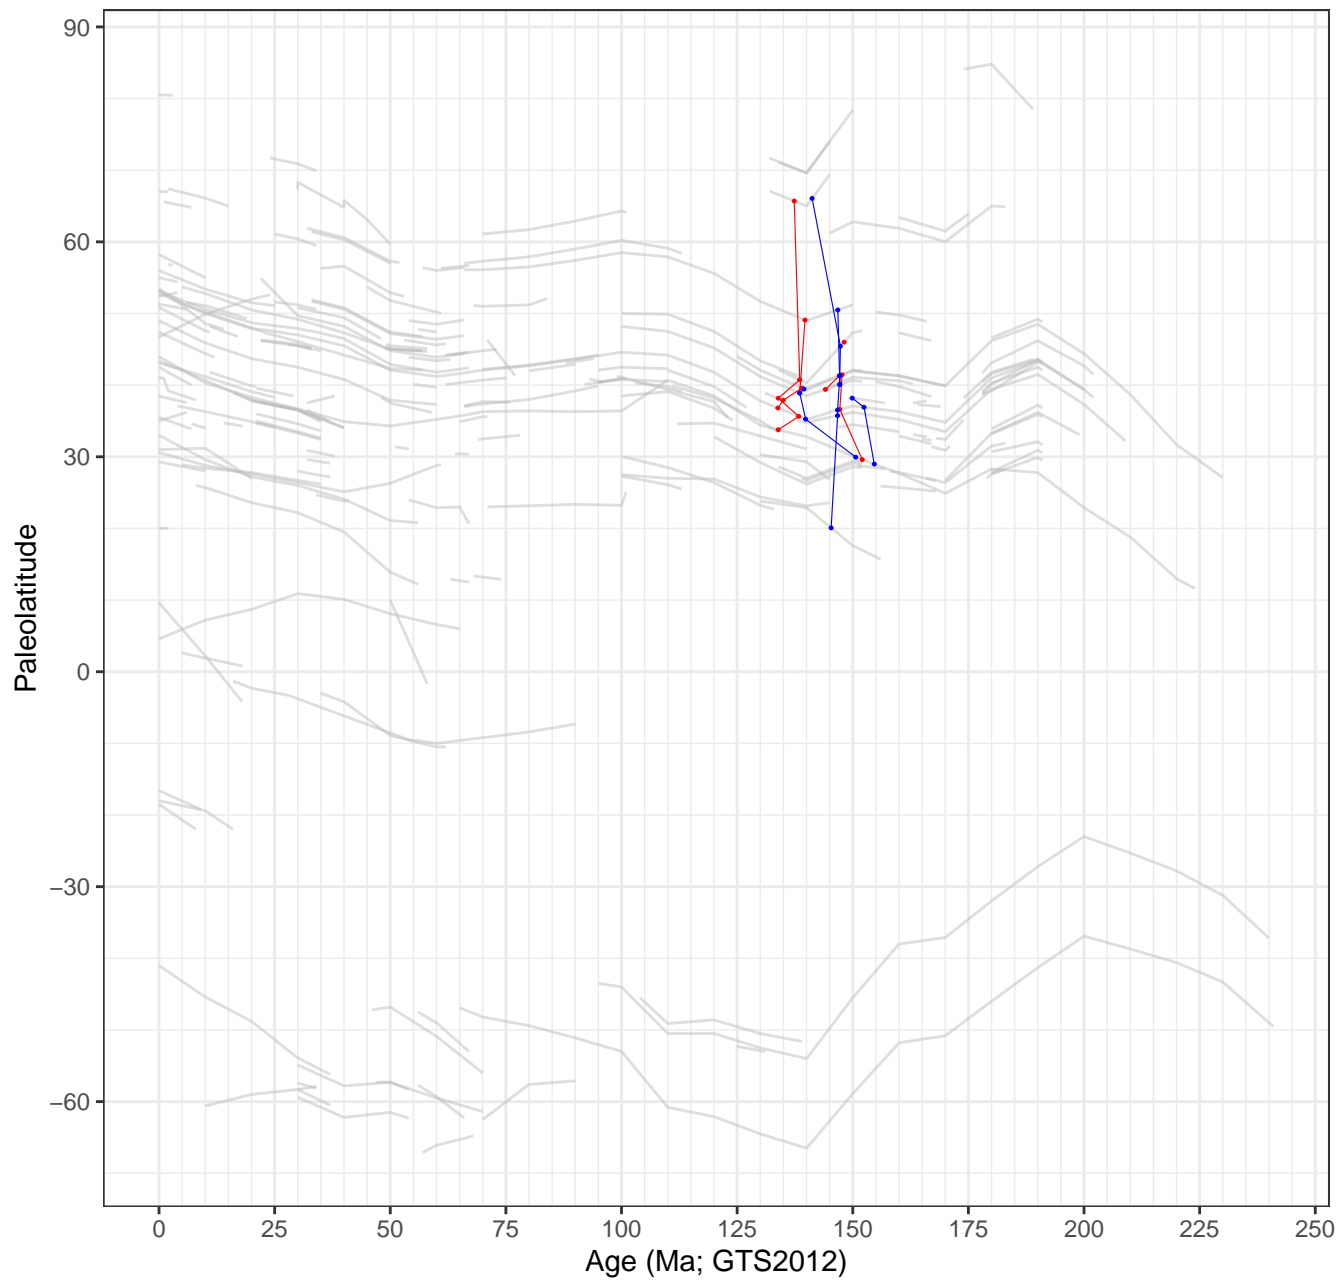

Supplement: Supplementary file 222 [file Genus Gochteodinia.pdf › Supplement/Supplement 2/Genus 459 plots/Genus Gochteodinia.pdf]

# Genus *Gongylodinium*

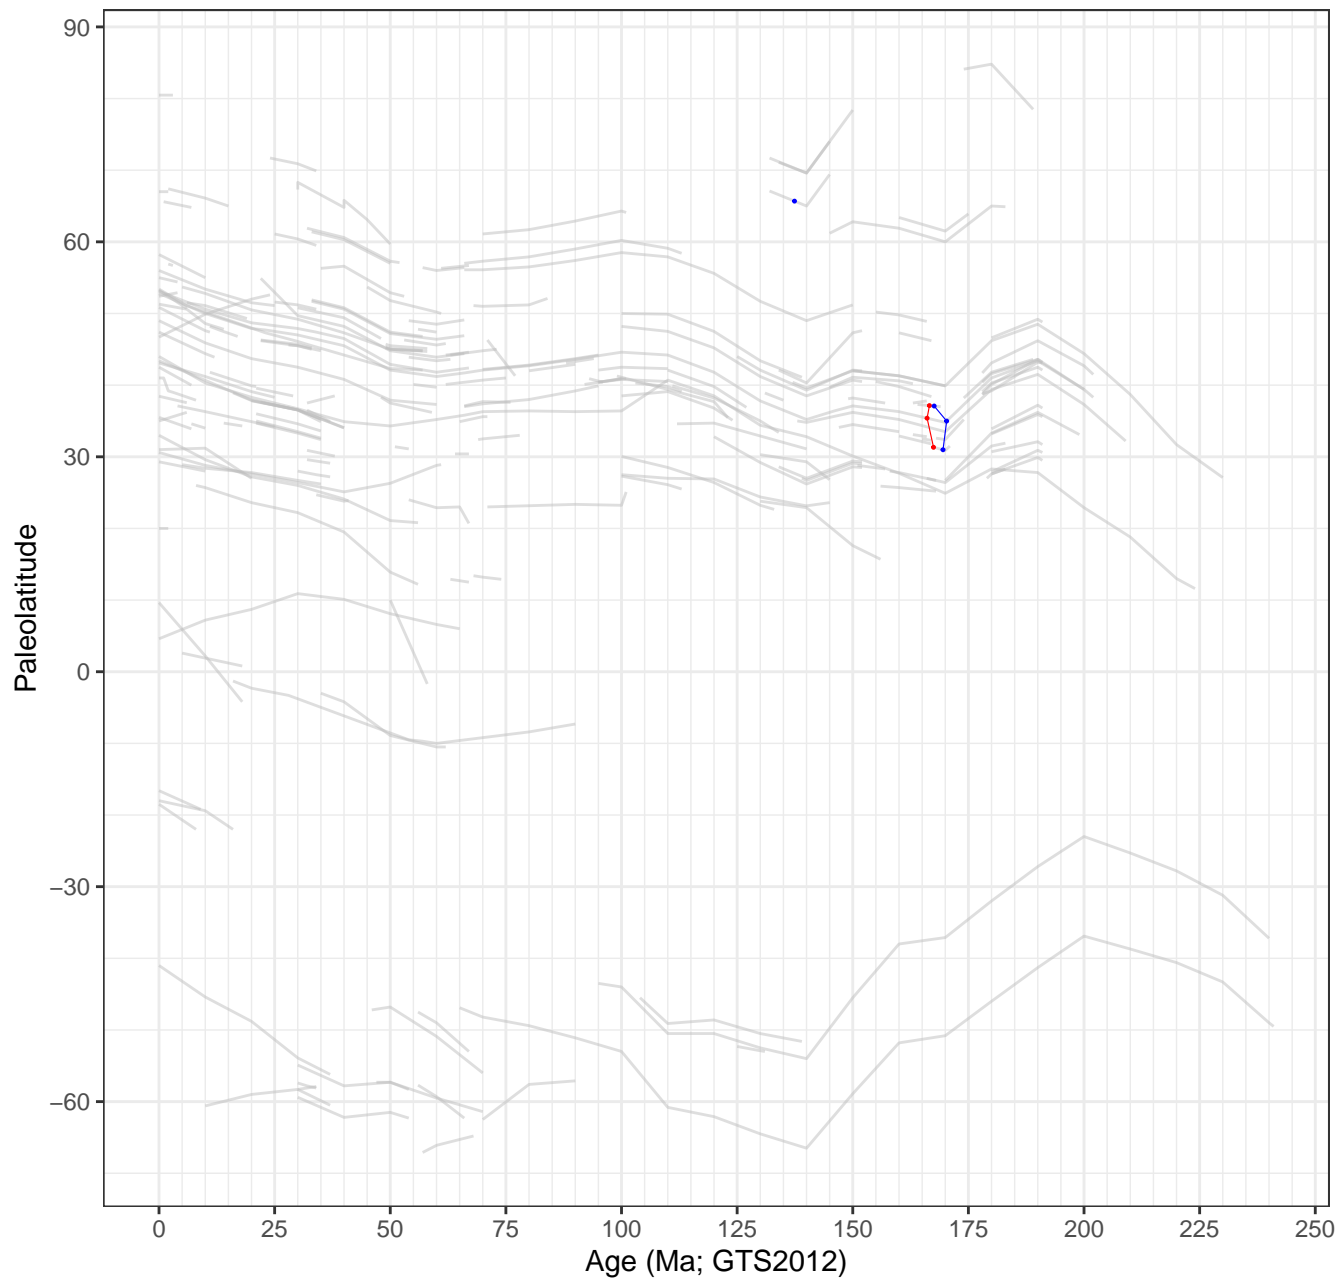

Supplement: Supplementary file 223 [file Genus Gongylodinium.pdf › Supplement/Supplement 2/Genus 459 plots/Genus Gongylodinium.pdf]

# Genus *Gonyaulacysta*

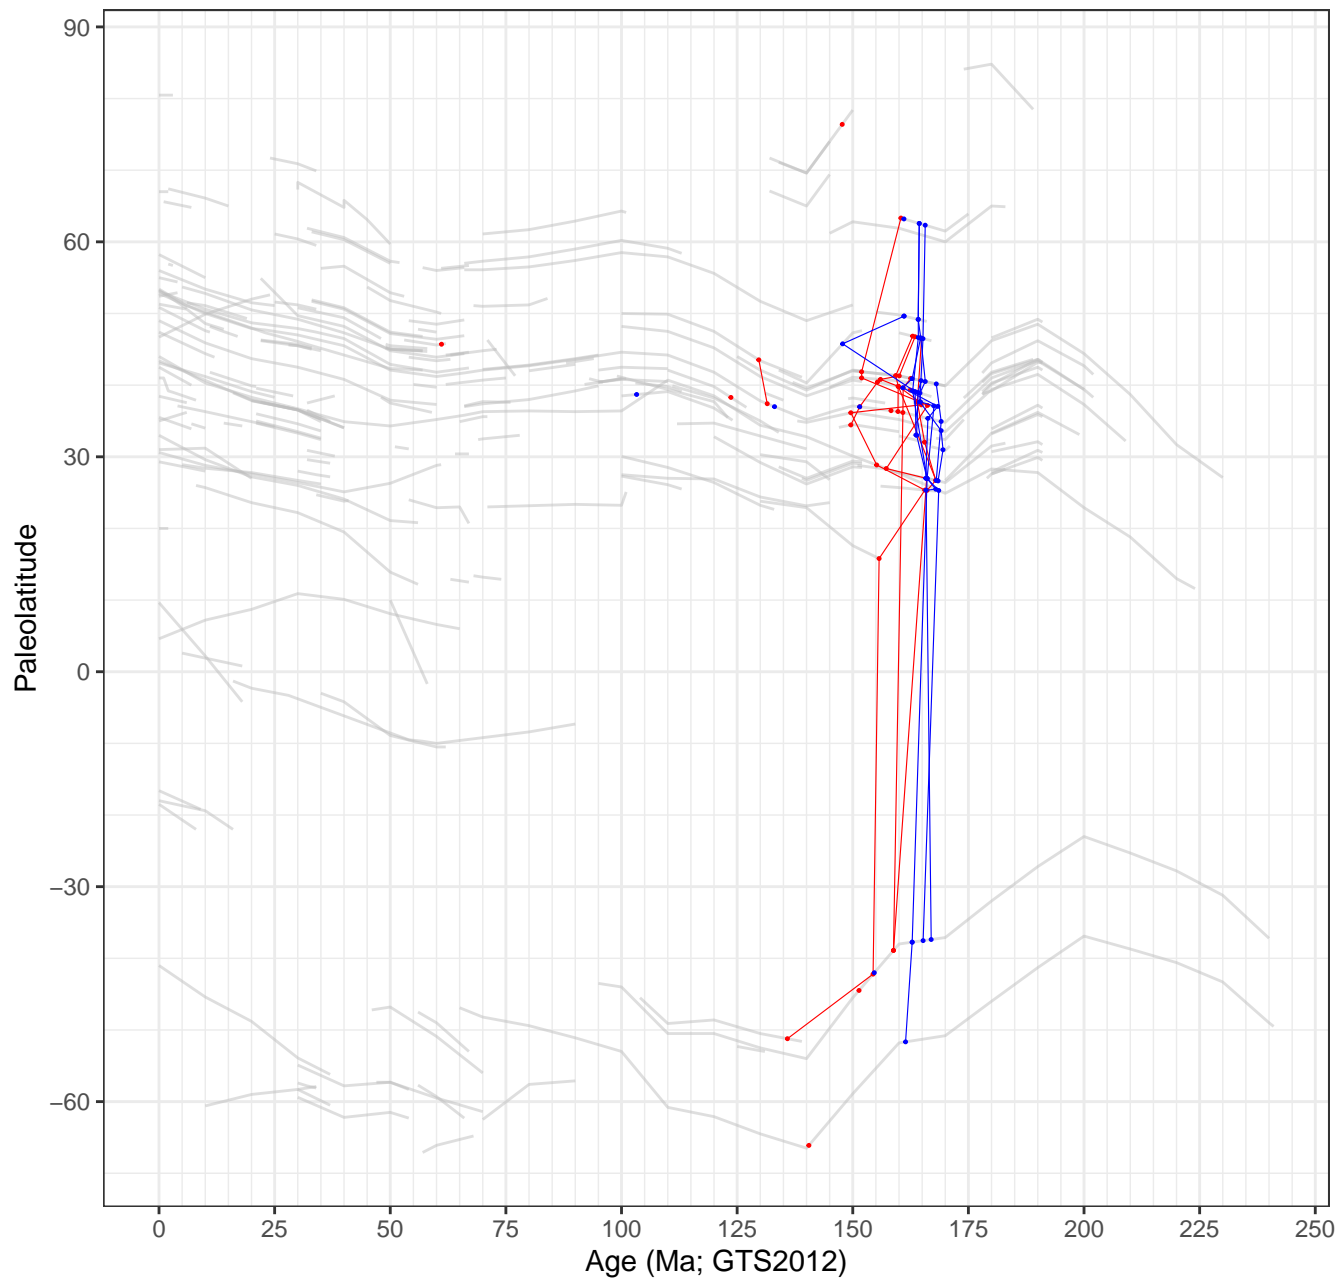

Supplement: Supplementary file 224 [file Genus Gonyaulacysta.pdf › Supplement/Supplement 2/Genus 459 plots/Genus Gonyaulacysta.pdf]

# Genus Gramocysta

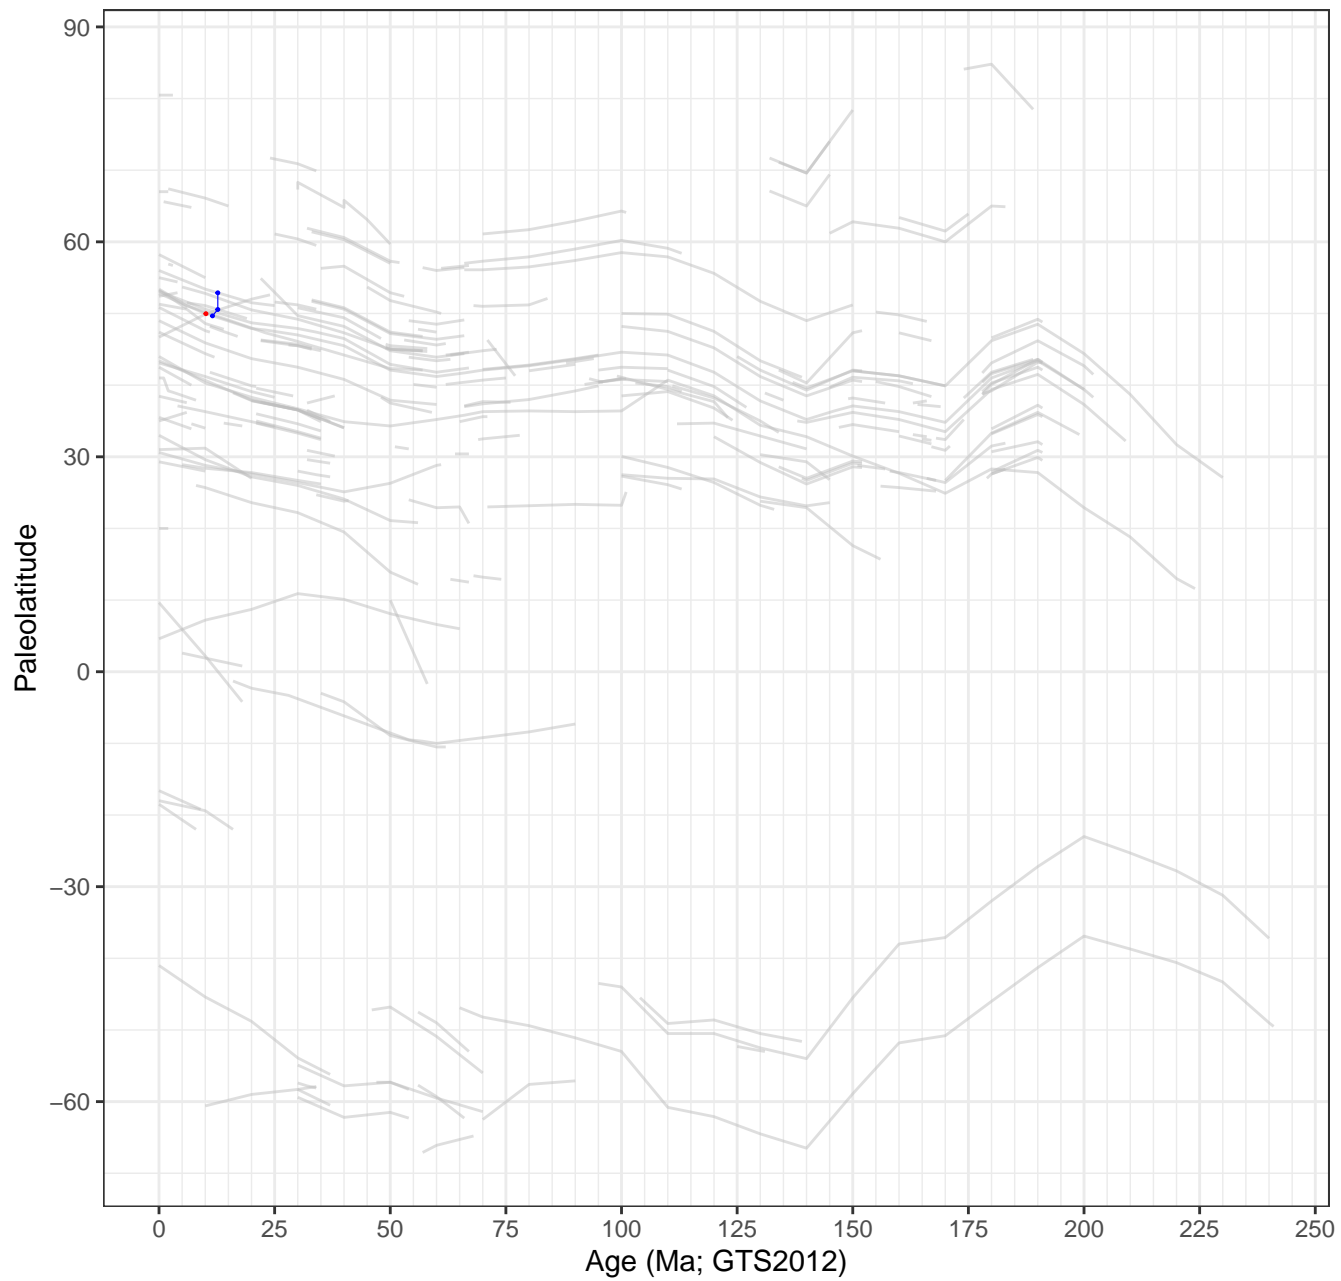

Supplement: Supplementary file 225 [file Genus Gramocysta.pdf › Supplement/Supplement 2/Genus 459 plots/Genus Gramocysta.pdf]

# Genus *Gymnodinium*

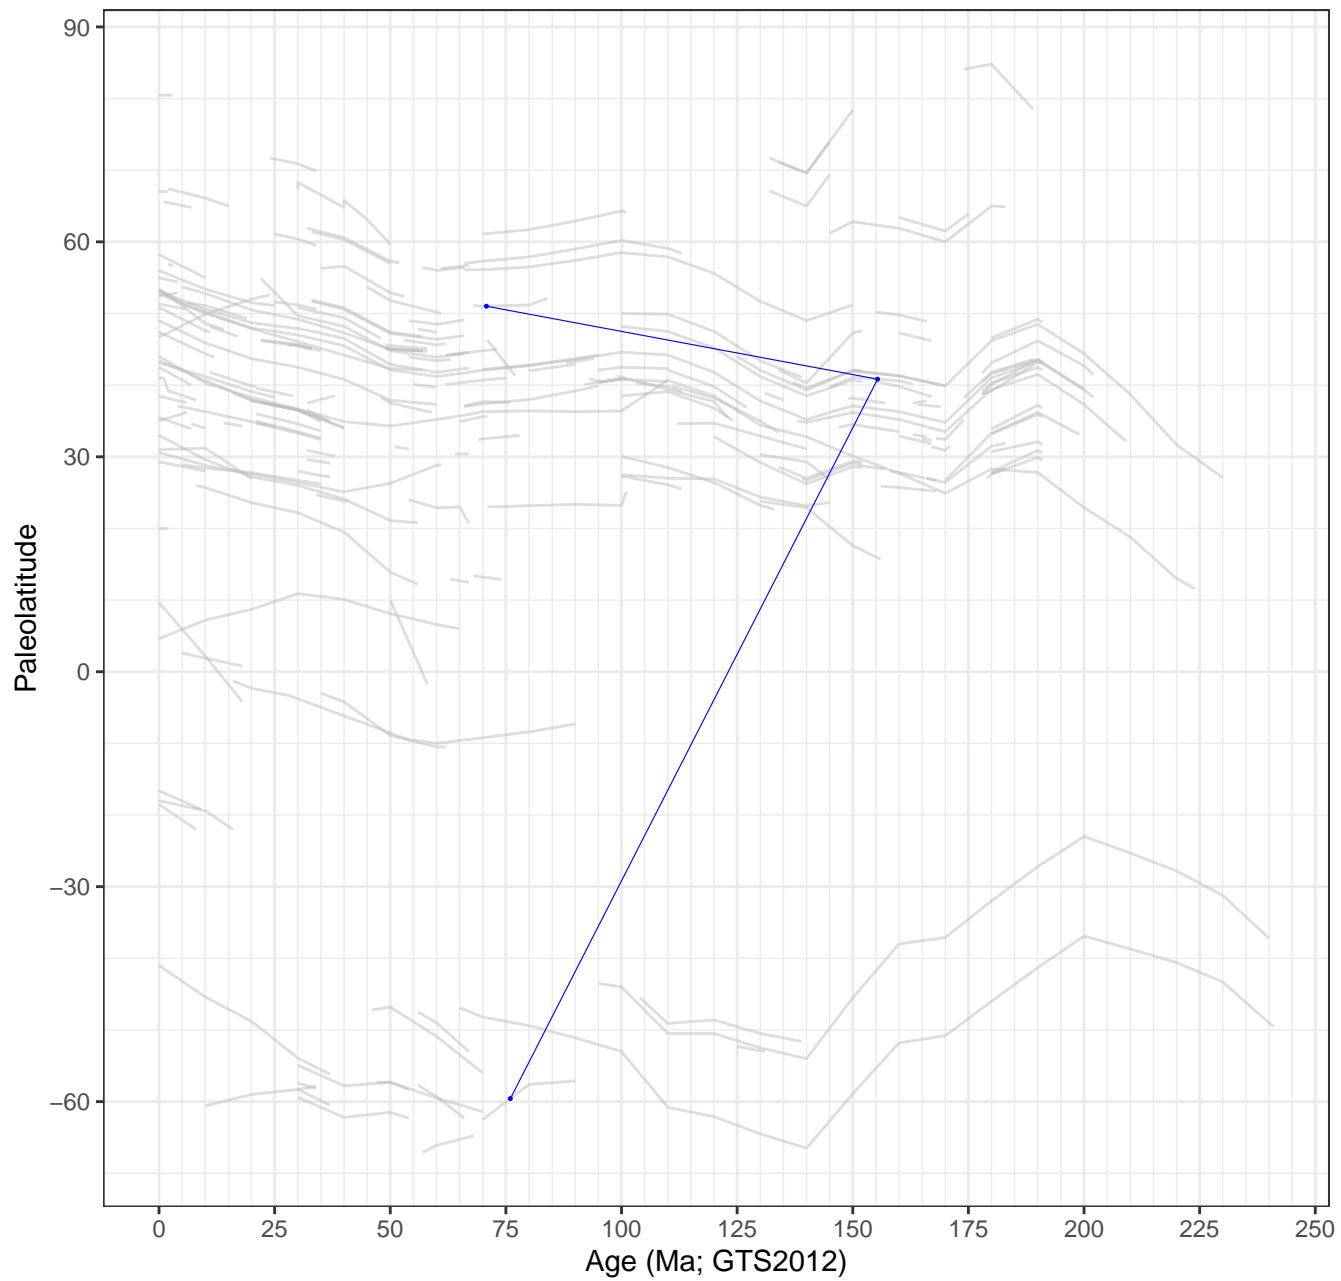

Supplement: Supplementary file 226 [file Genus Gymnodinium.pdf › Supplement/Supplement 2/Genus 459 plots/Genus Gymnodinium.pdf]

# Genus Habibacysta

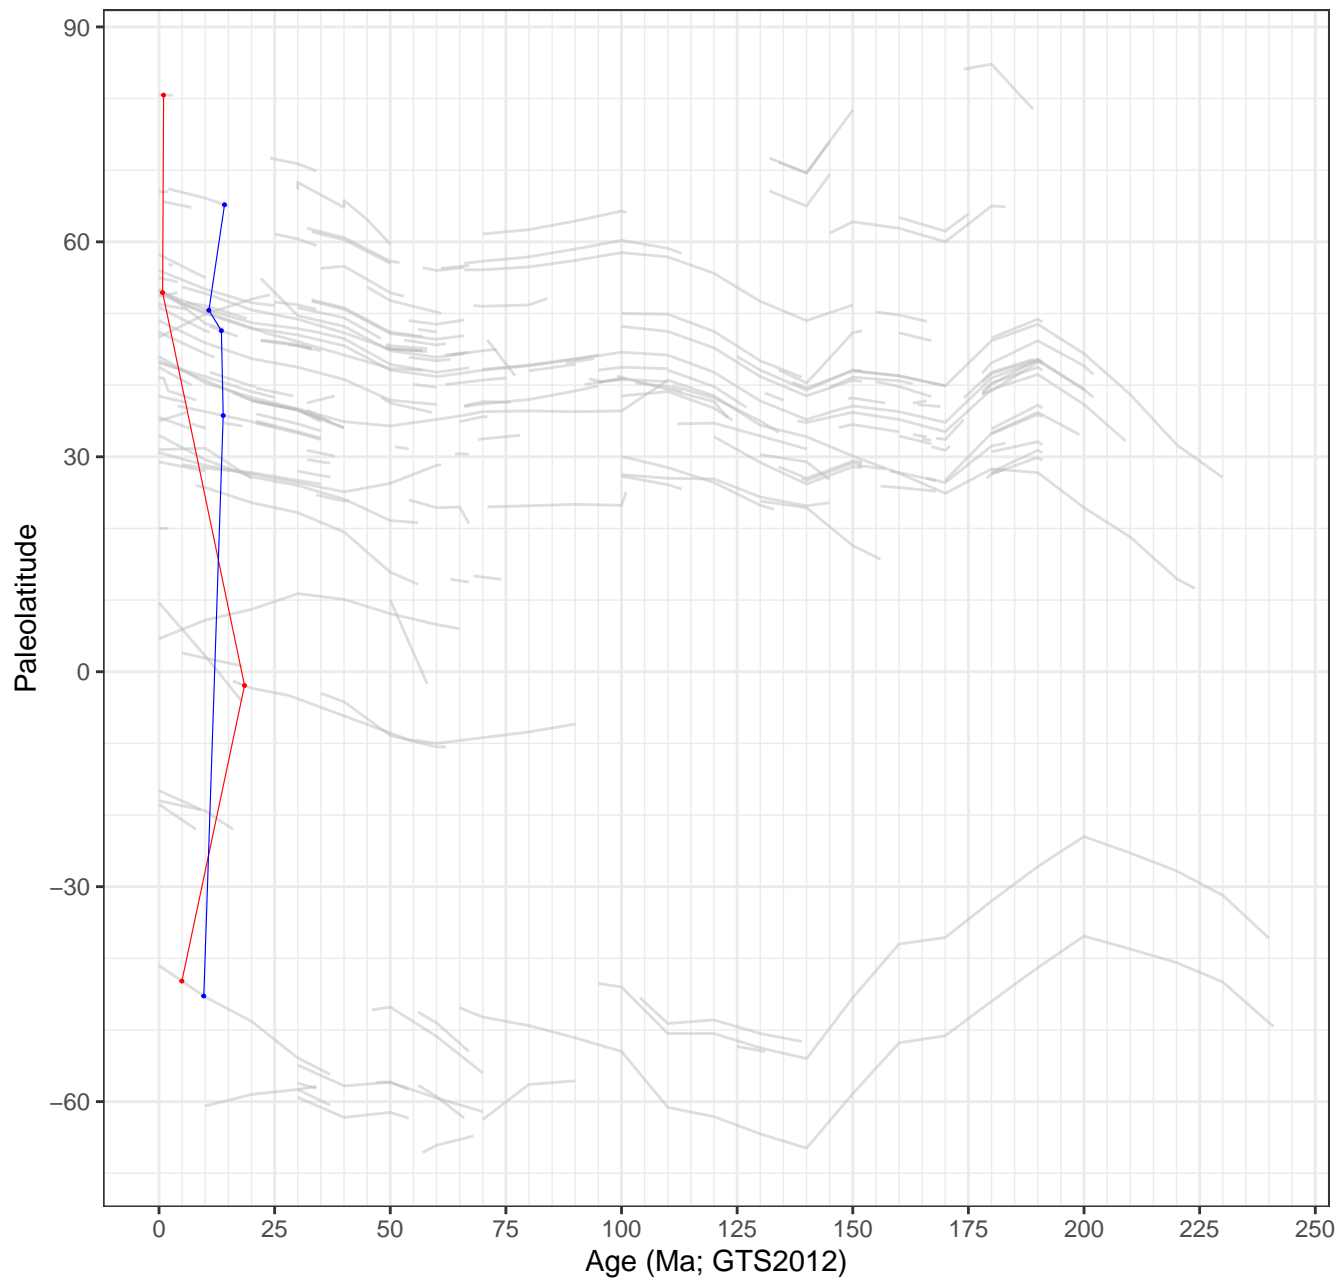

Supplement: Supplementary file 227 [file Genus Habibacysta.pdf › Supplement/Supplement 2/Genus 459 plots/Genus Habibacysta.pdf]

# Genus Hadriana

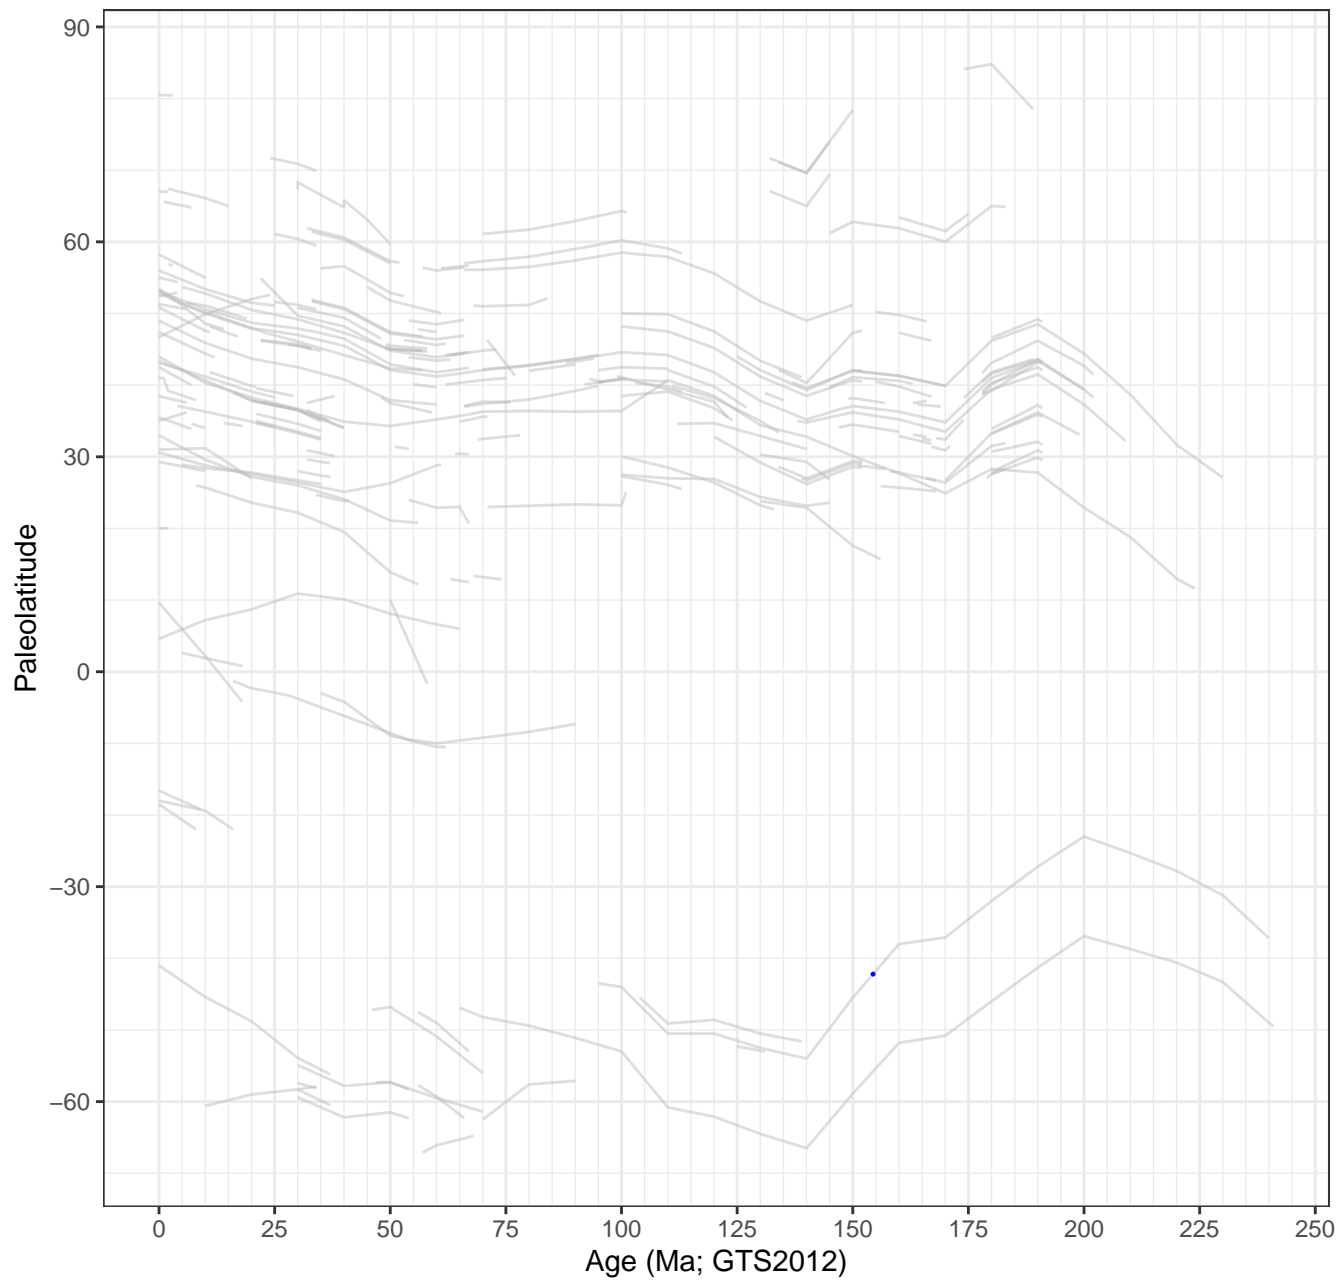

Supplement: Supplementary file 228 [file Genus Hadriana.pdf › Supplement/Supplement 2/Genus 459 plots/Genus Hadriana.pdf]

# Genus *Hafniasphaera*

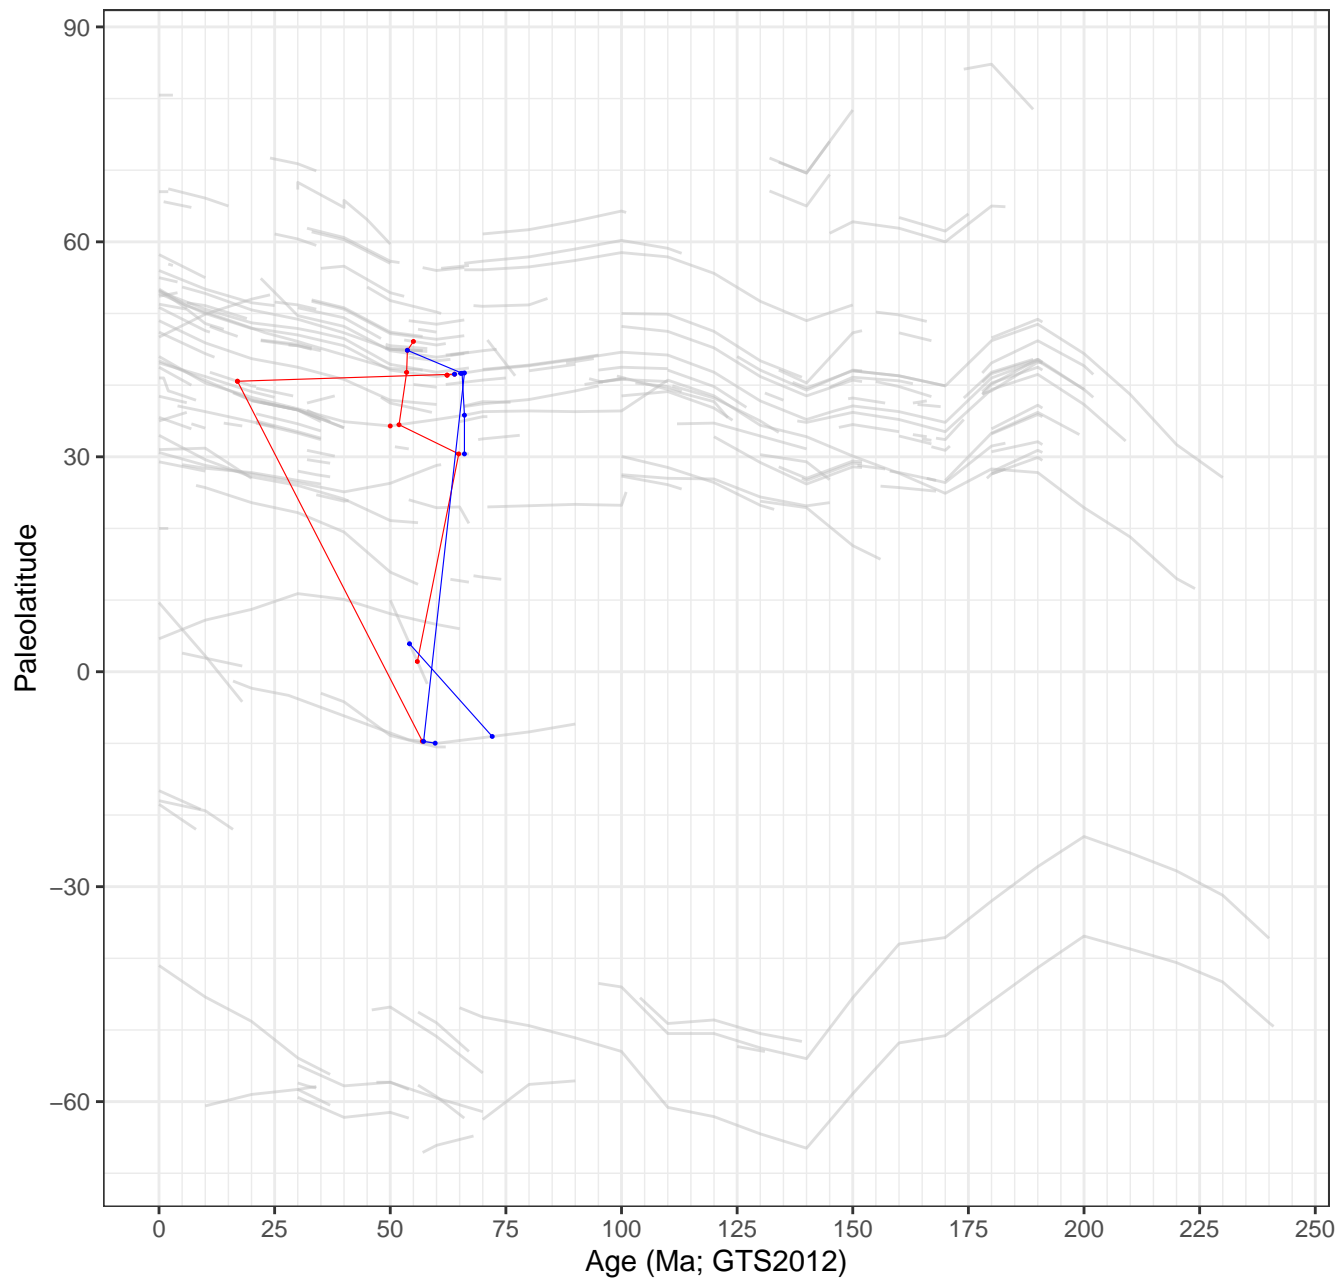

Supplement: Supplementary file 229 [file Genus Hafniasphaera.pdf › Supplement/Supplement 2/Genus 459 plots/Genus Hafniasphaera.pdf]

# Genus Hapsidaulax

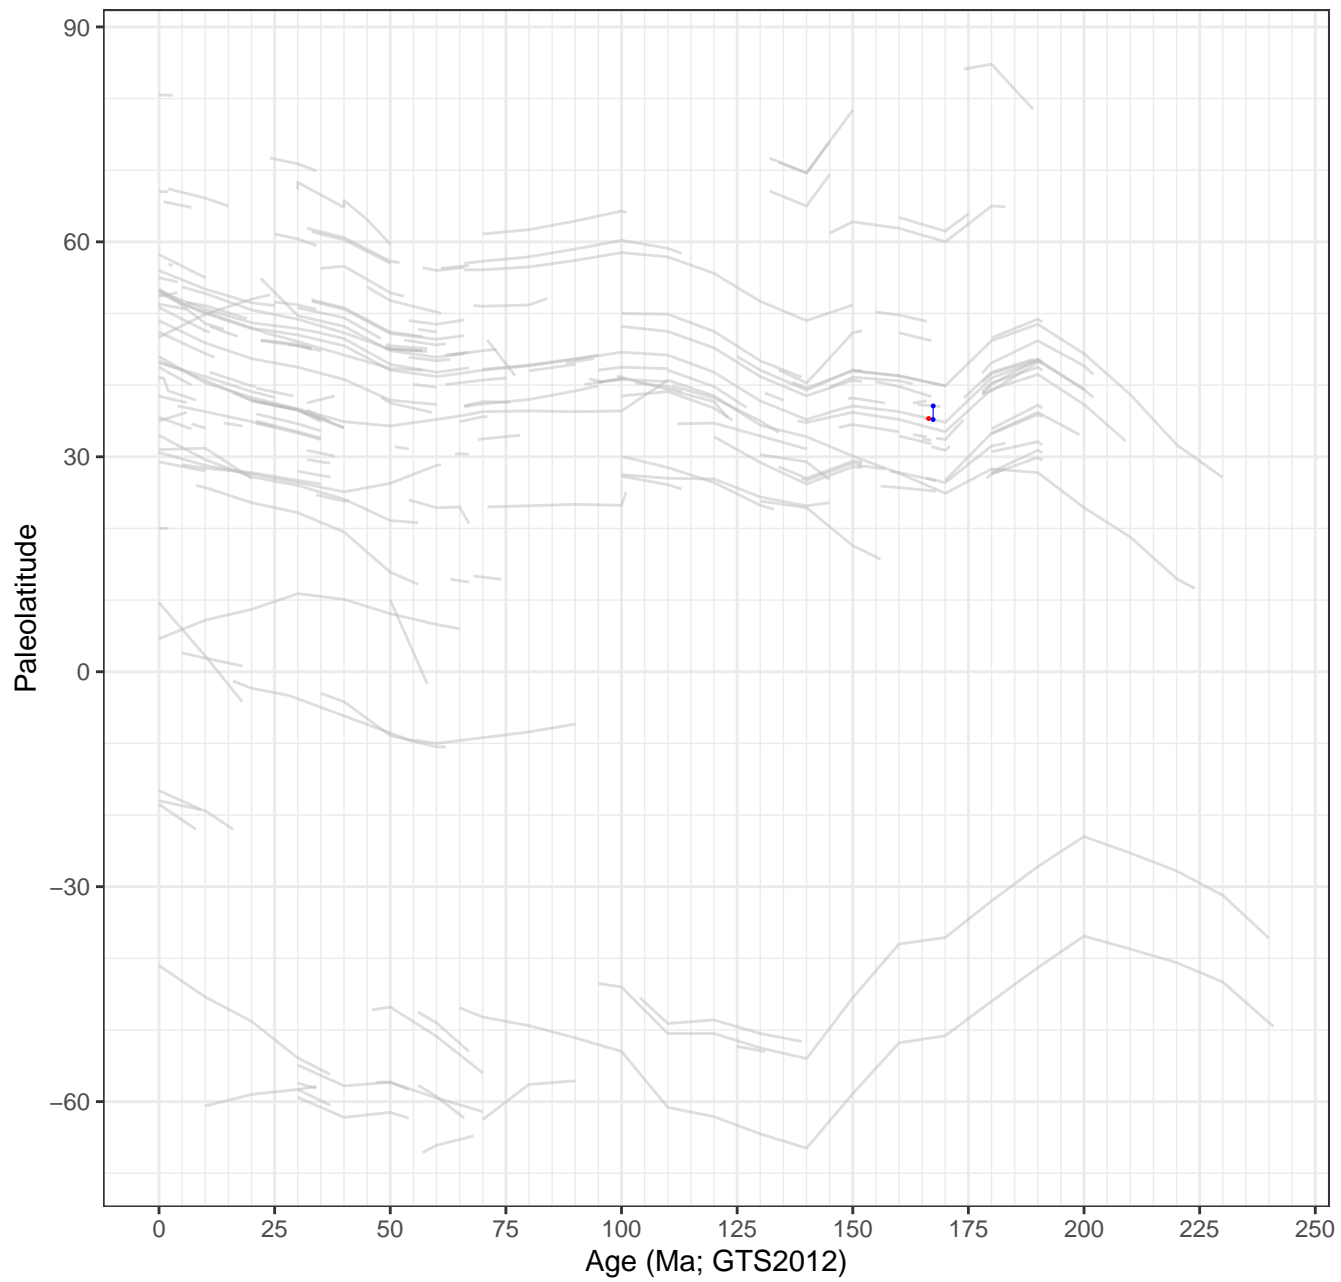

Supplement: Supplementary file 230 [file Genus Hapsidaulax.pdf › Supplement/Supplement 2/Genus 459 plots/Genus Hapsidaulax.pdf]

# Genus Hapsocysta

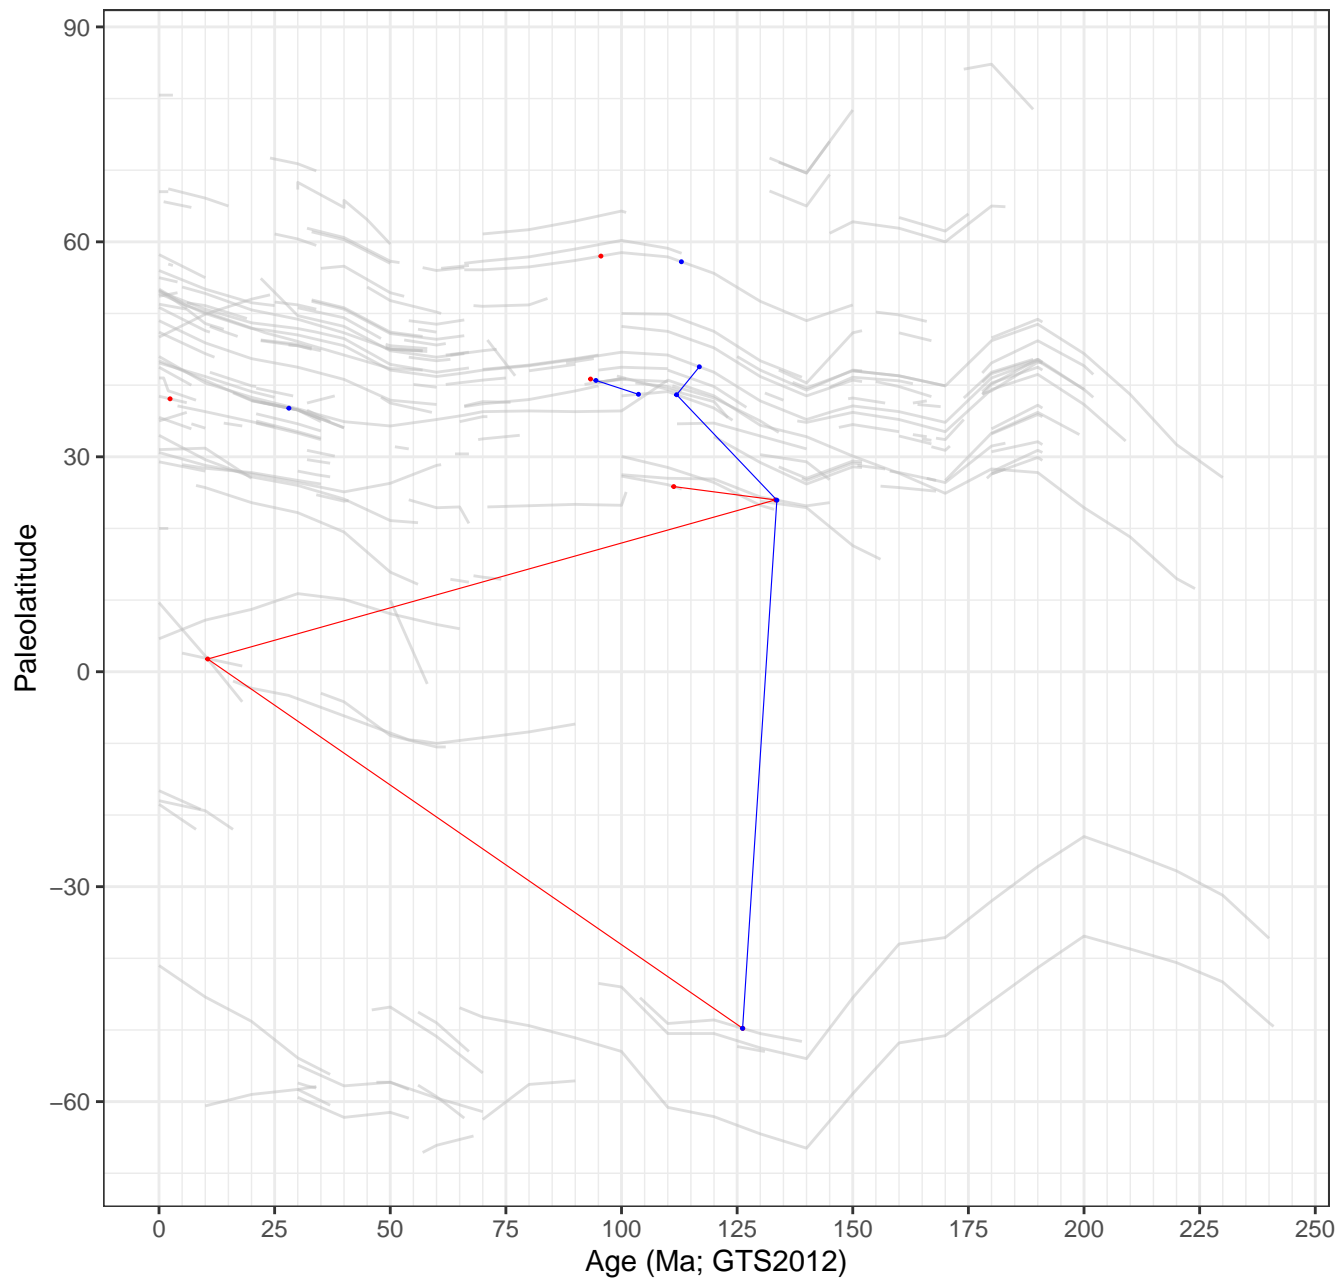

Supplement: Supplementary file 231 [file Genus Hapsocysta.pdf › Supplement/Supplement 2/Genus 459 plots/Genus Hapsocysta.pdf]

# Genus Hebecysta

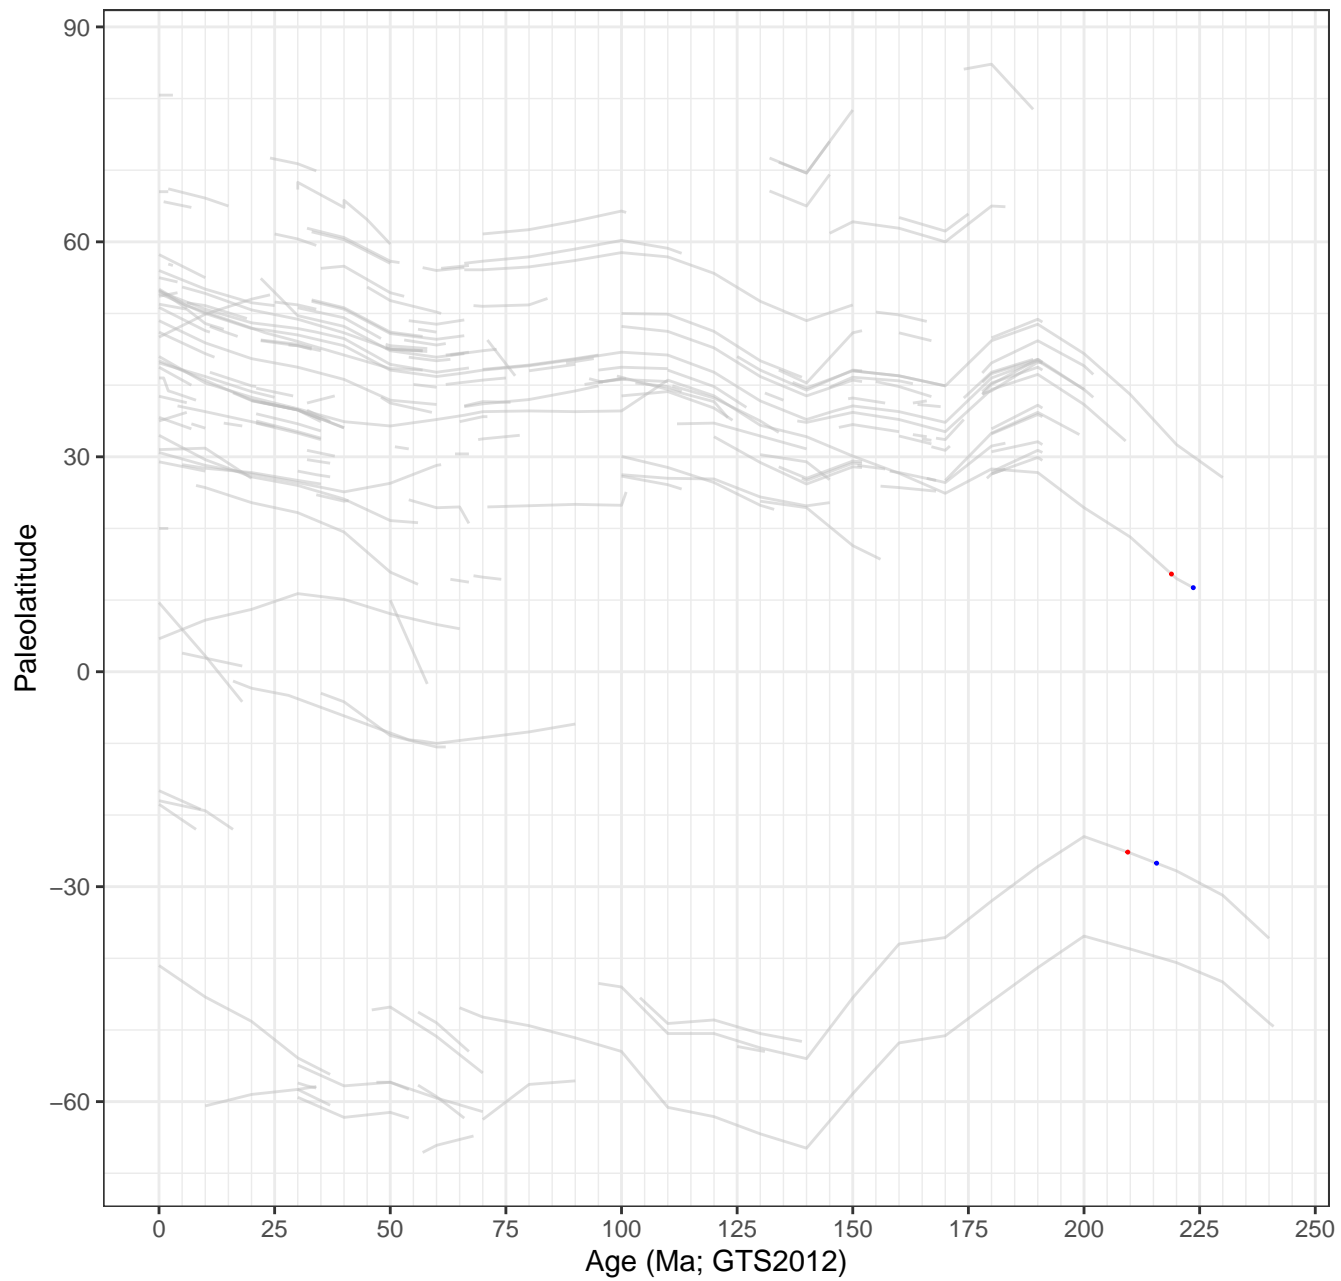

Supplement: Supplementary file 232 [file Genus Hebecysta.pdf › Supplement/Supplement 2/Genus 459 plots/Genus Hebecysta.pdf]

# Genus Heibergerella

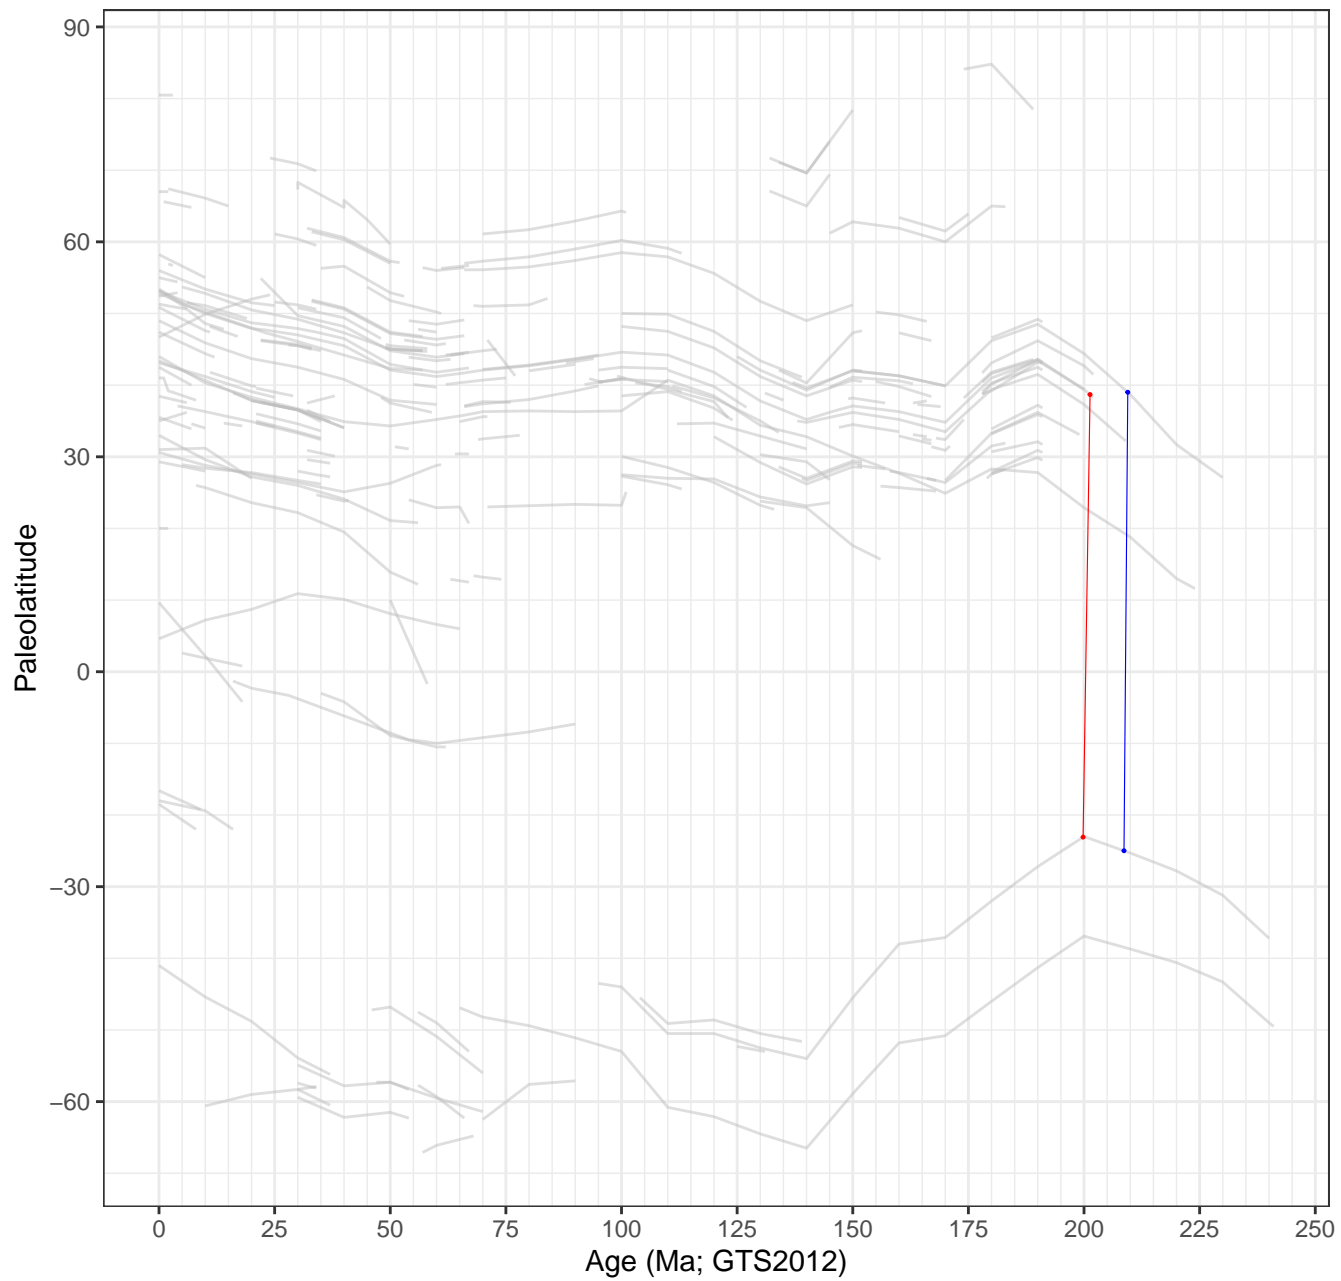

Supplement: Supplementary file 233 [file Genus Heibergella.pdf › Supplement/Supplement 2/Genus 459 plots/Genus Heibergella.pdf]

# Genus Hemiplacophora

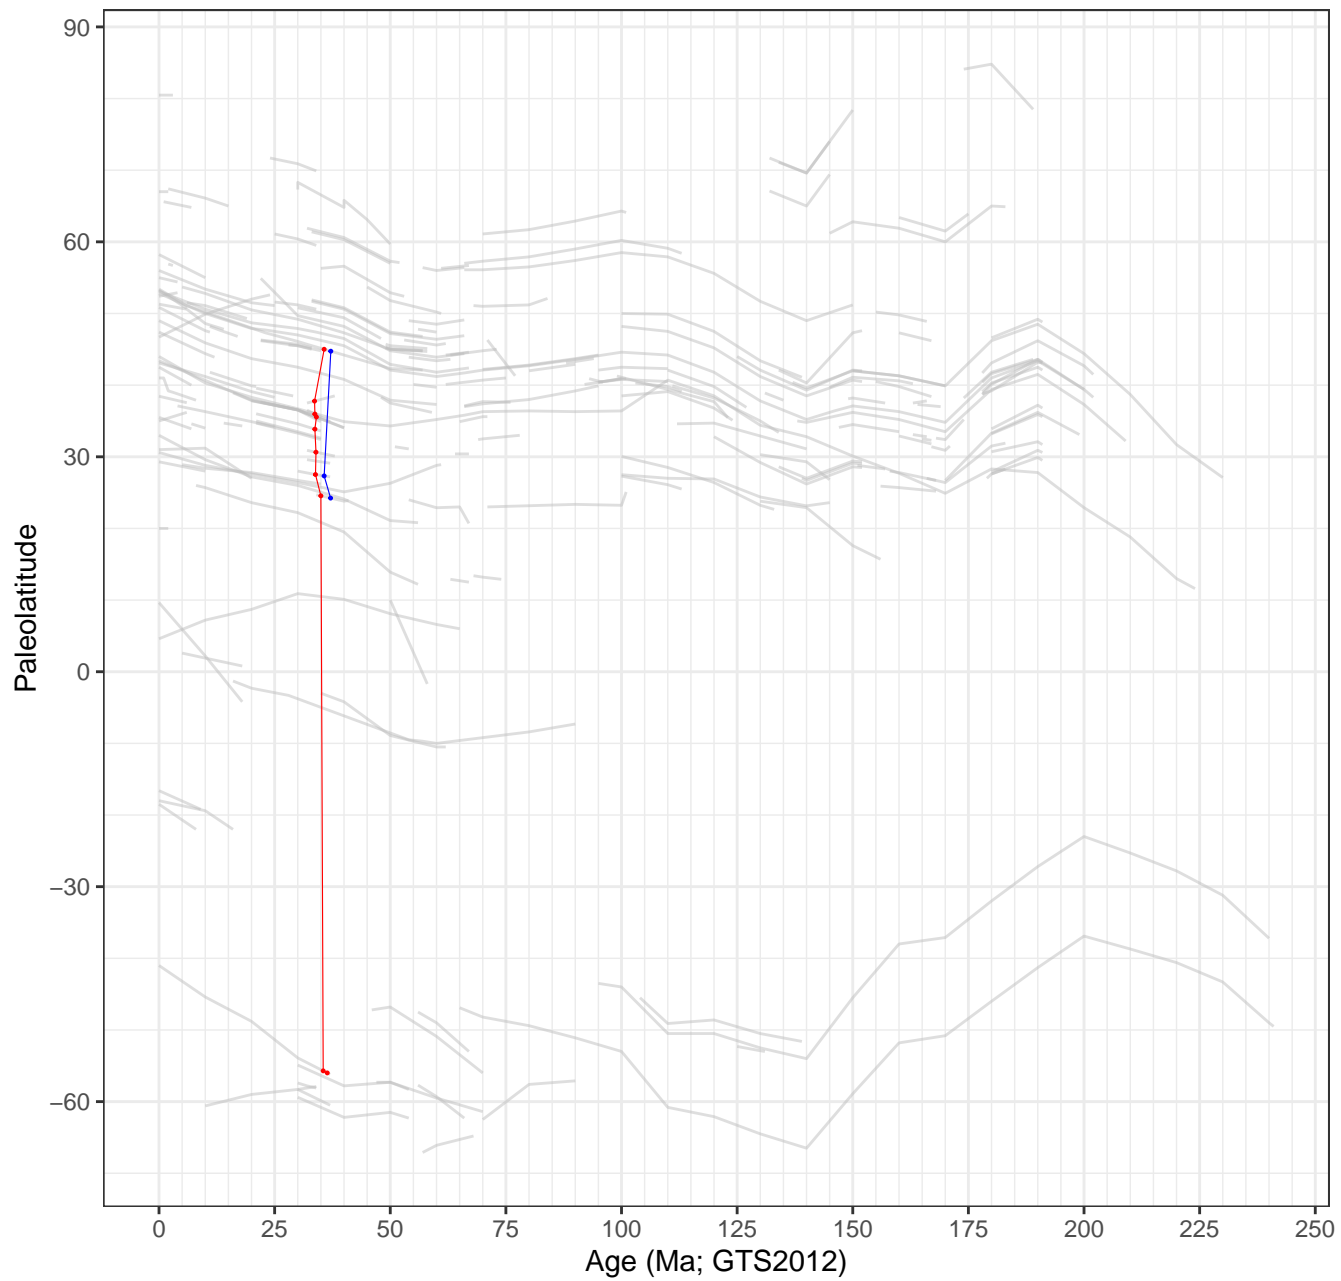

Supplement: Supplementary file 234 [file Genus Hemiplacophora.pdf › Supplement/Supplement 2/Genus 459 plots/Genus Hemiplacophora.pdf]

# Genus Herendeenia

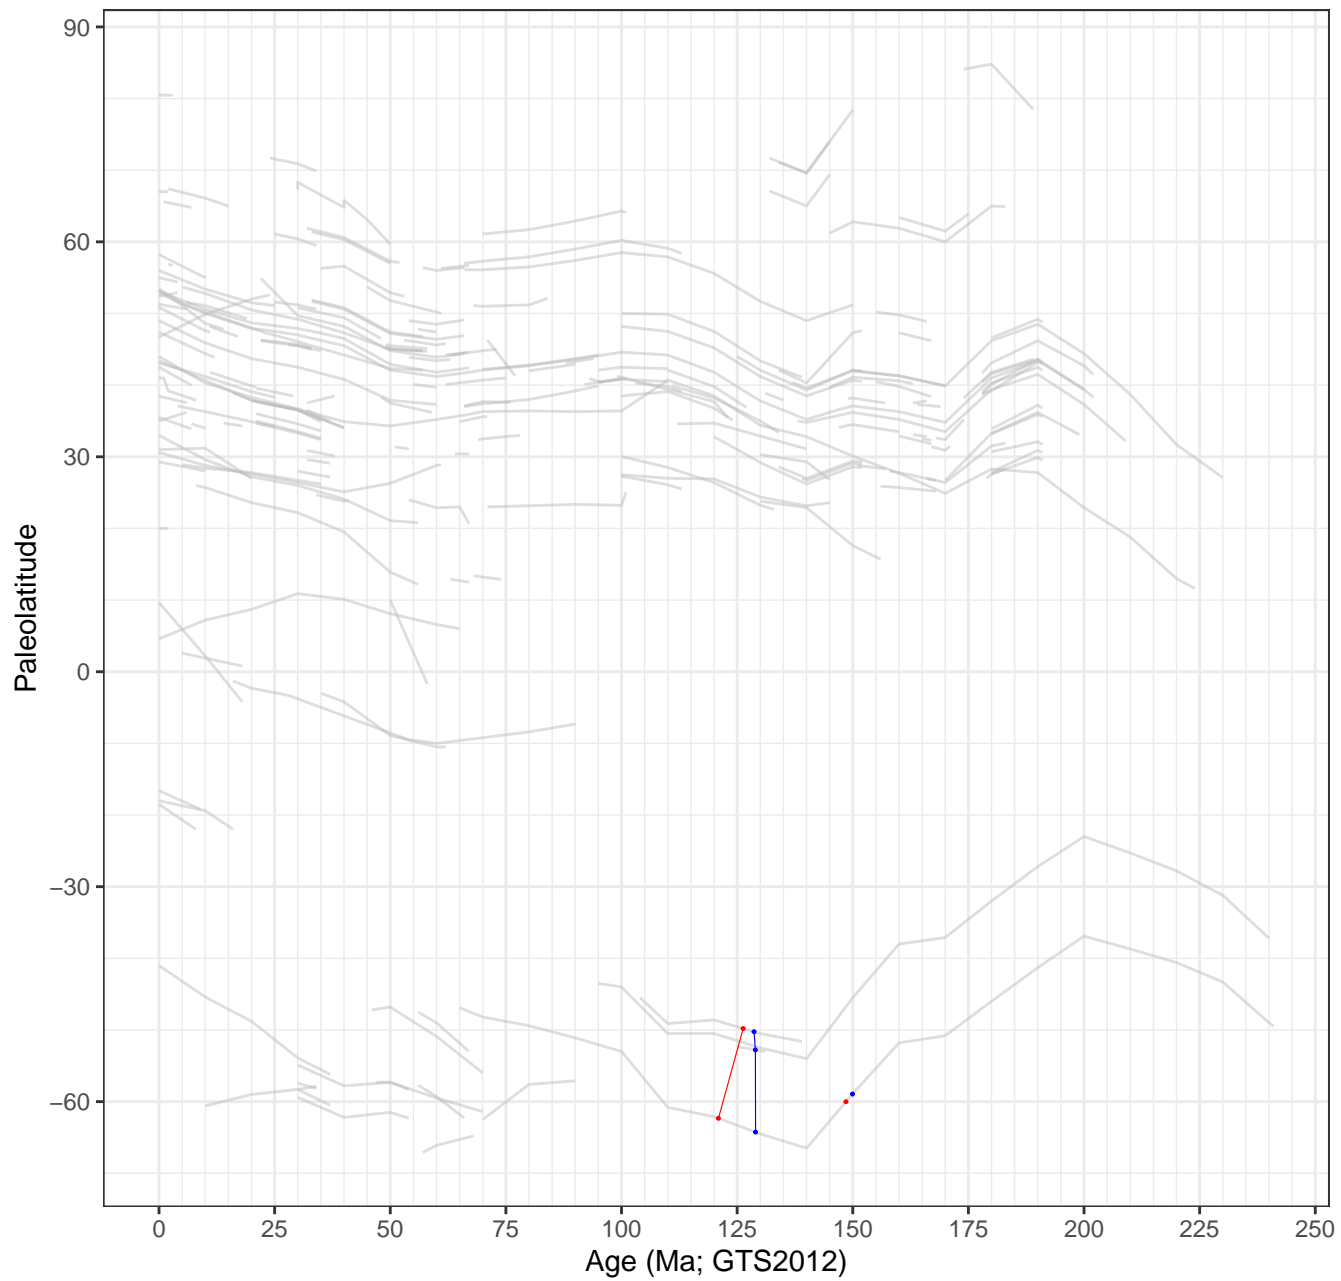

Supplement: Supplementary file 235 [file Genus Herendeenia.pdf › Supplement/Supplement 2/Genus 459 plots/Genus Herendeenia.pdf]

# Genus Heslertonia

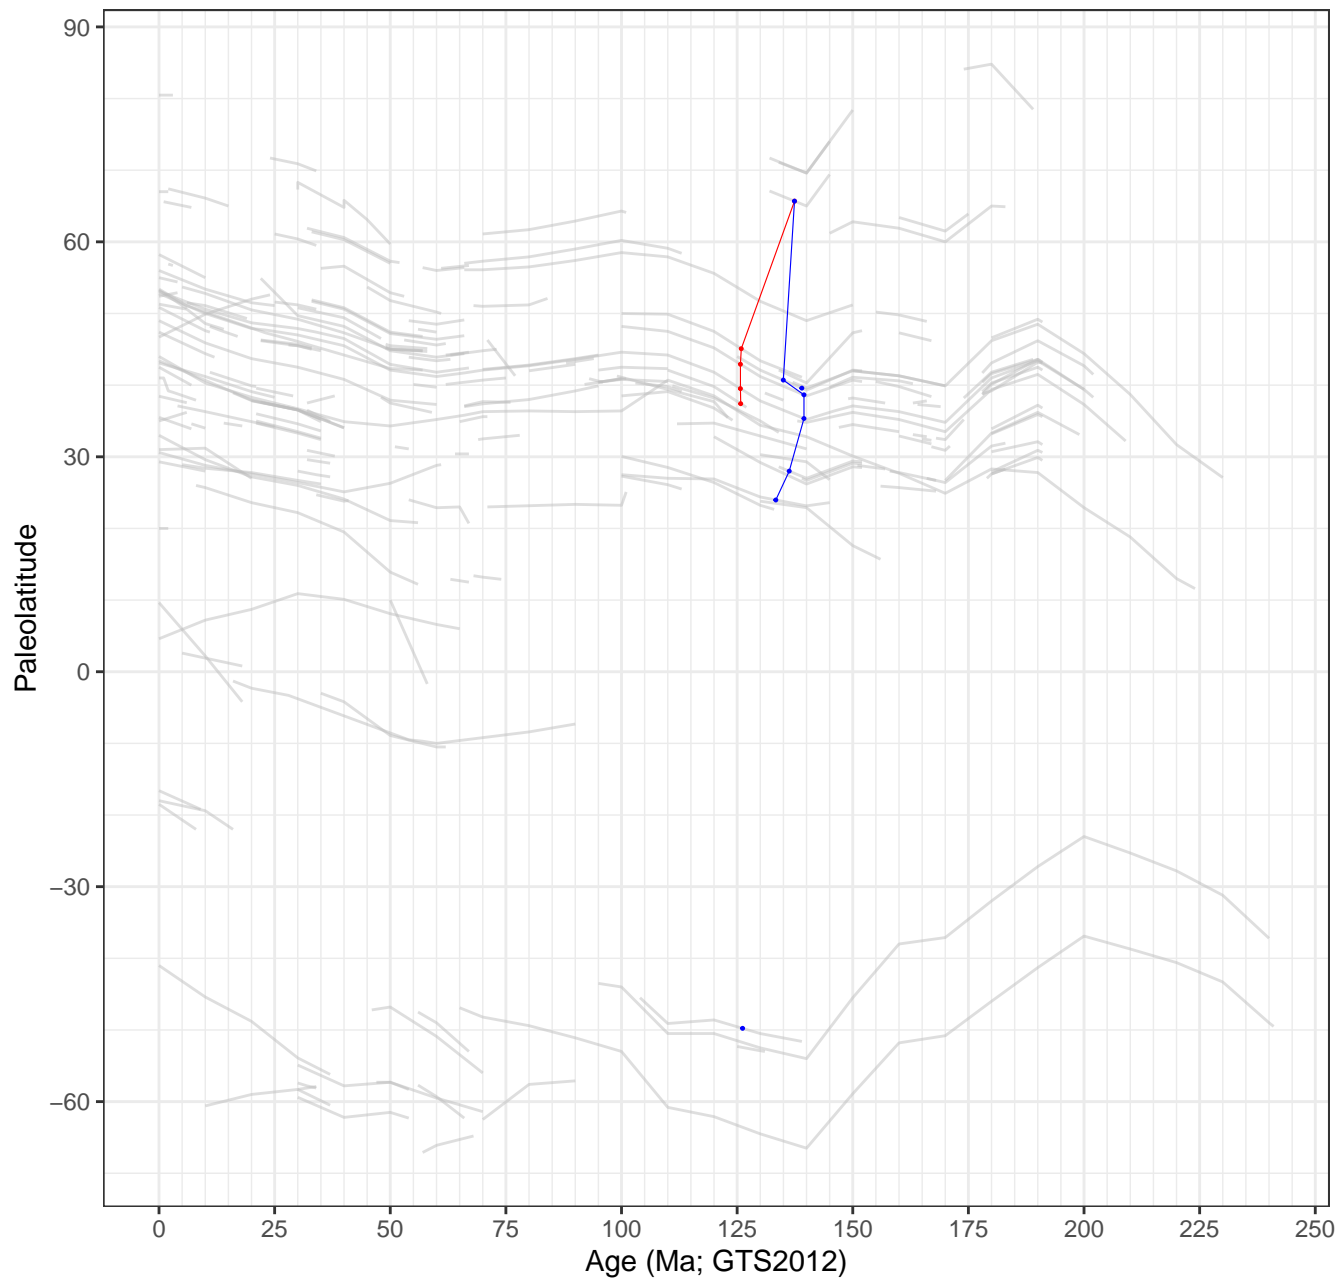

Supplement: Supplementary file 236 [file Genus Heslertonia.pdf › Supplement/Supplement 2/Genus 459 plots/Genus Heslertonia.pdf]

# Genus *Heteraulacacysta*

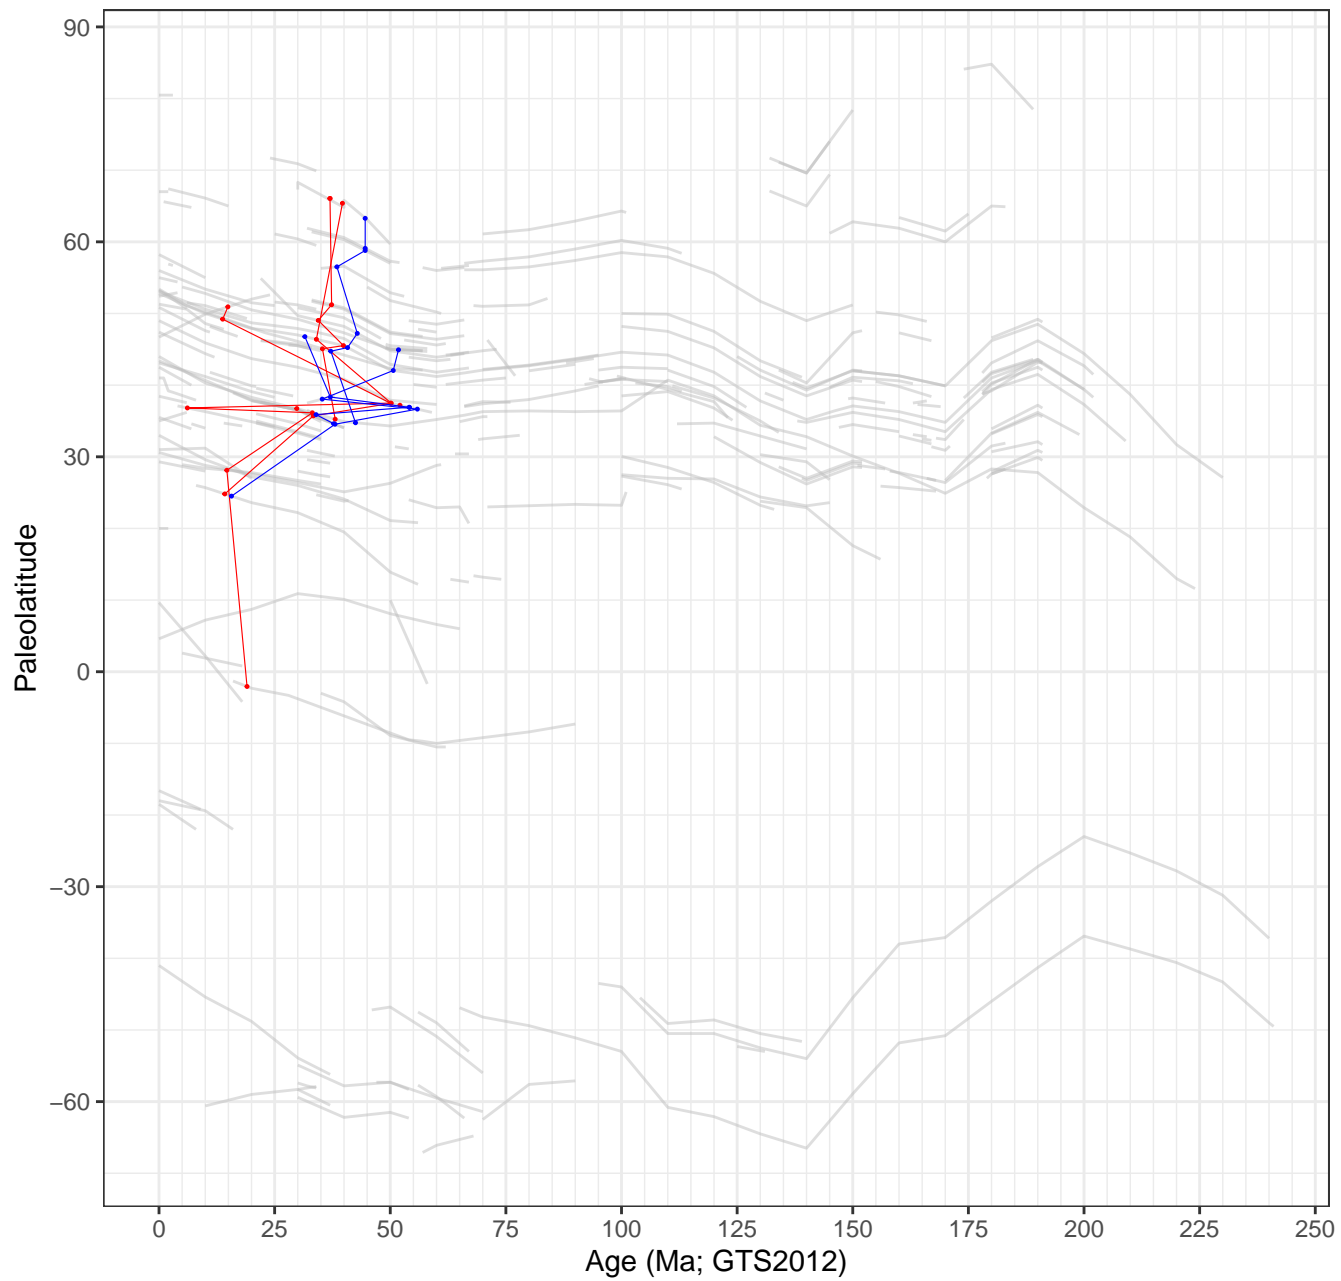

Supplement: Supplementary file 237 [file Genus Heteraulacacysta.pdf › Supplement/Supplement 2/Genus 459 plots/Genus Heteraulacacysta.pdf]

# Genus *Heterosphaeridium*

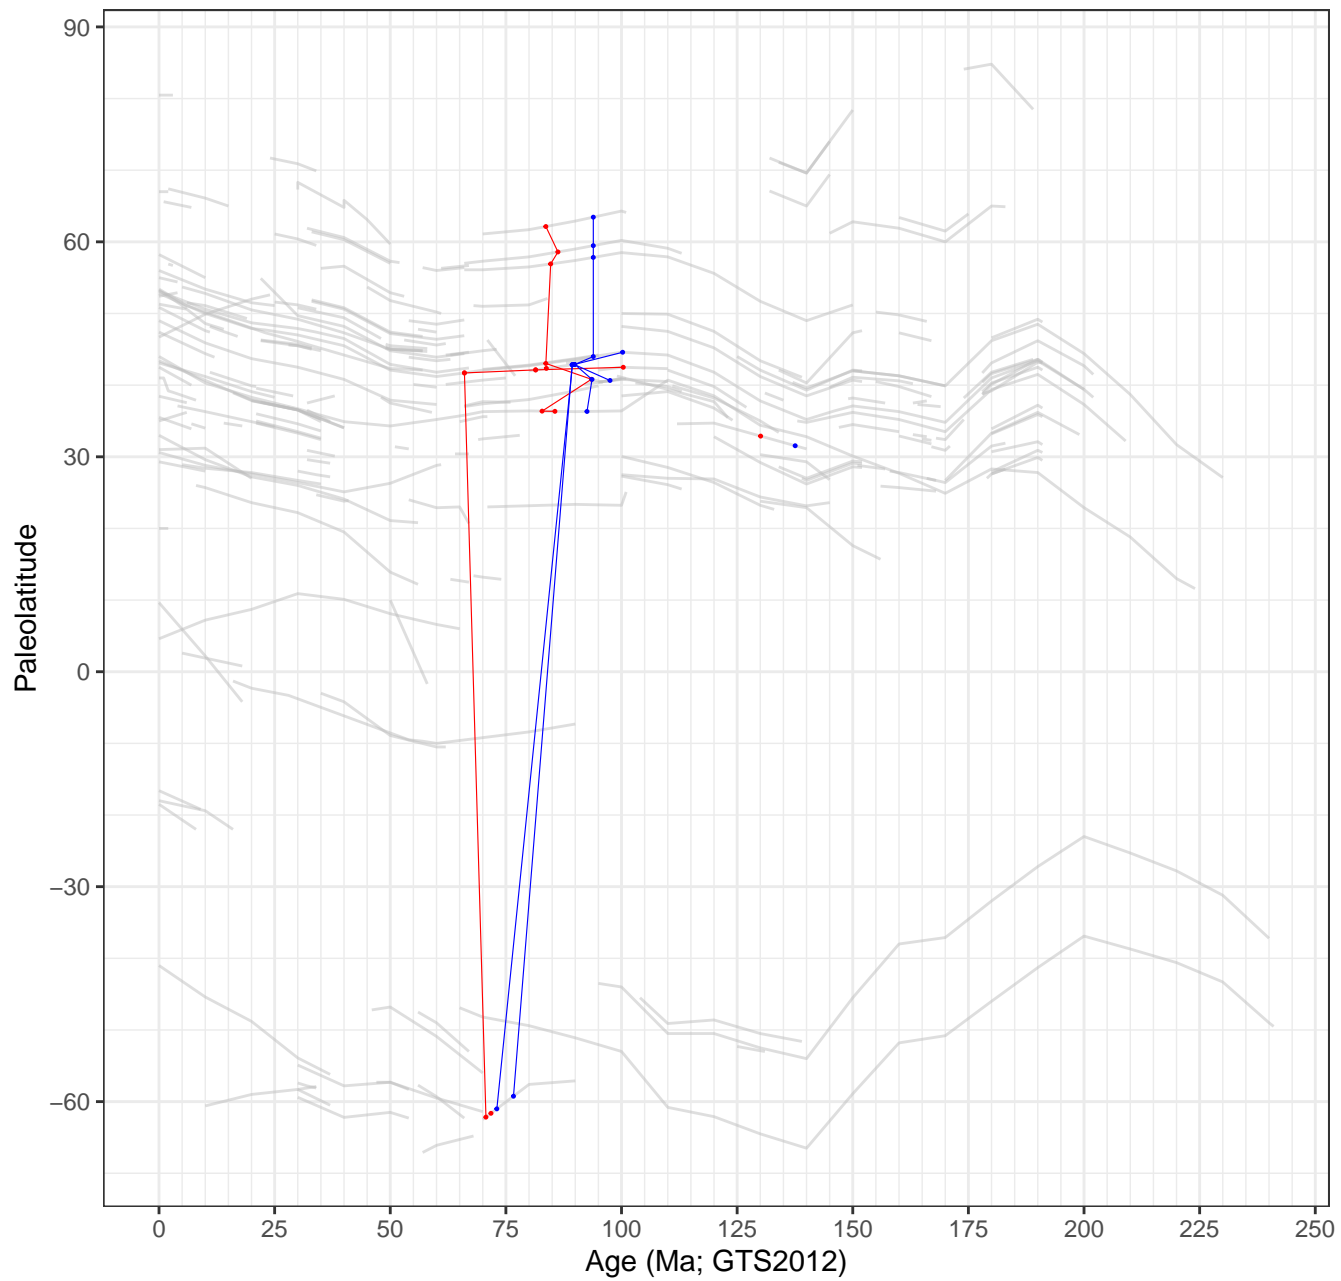

Supplement: Supplementary file 238 [file Genus Heterosphaeridium.pdf › Supplement/Supplement 2/Genus 459 plots/Genus Heterosphaeridium.pdf]

# Genus Histiocysta

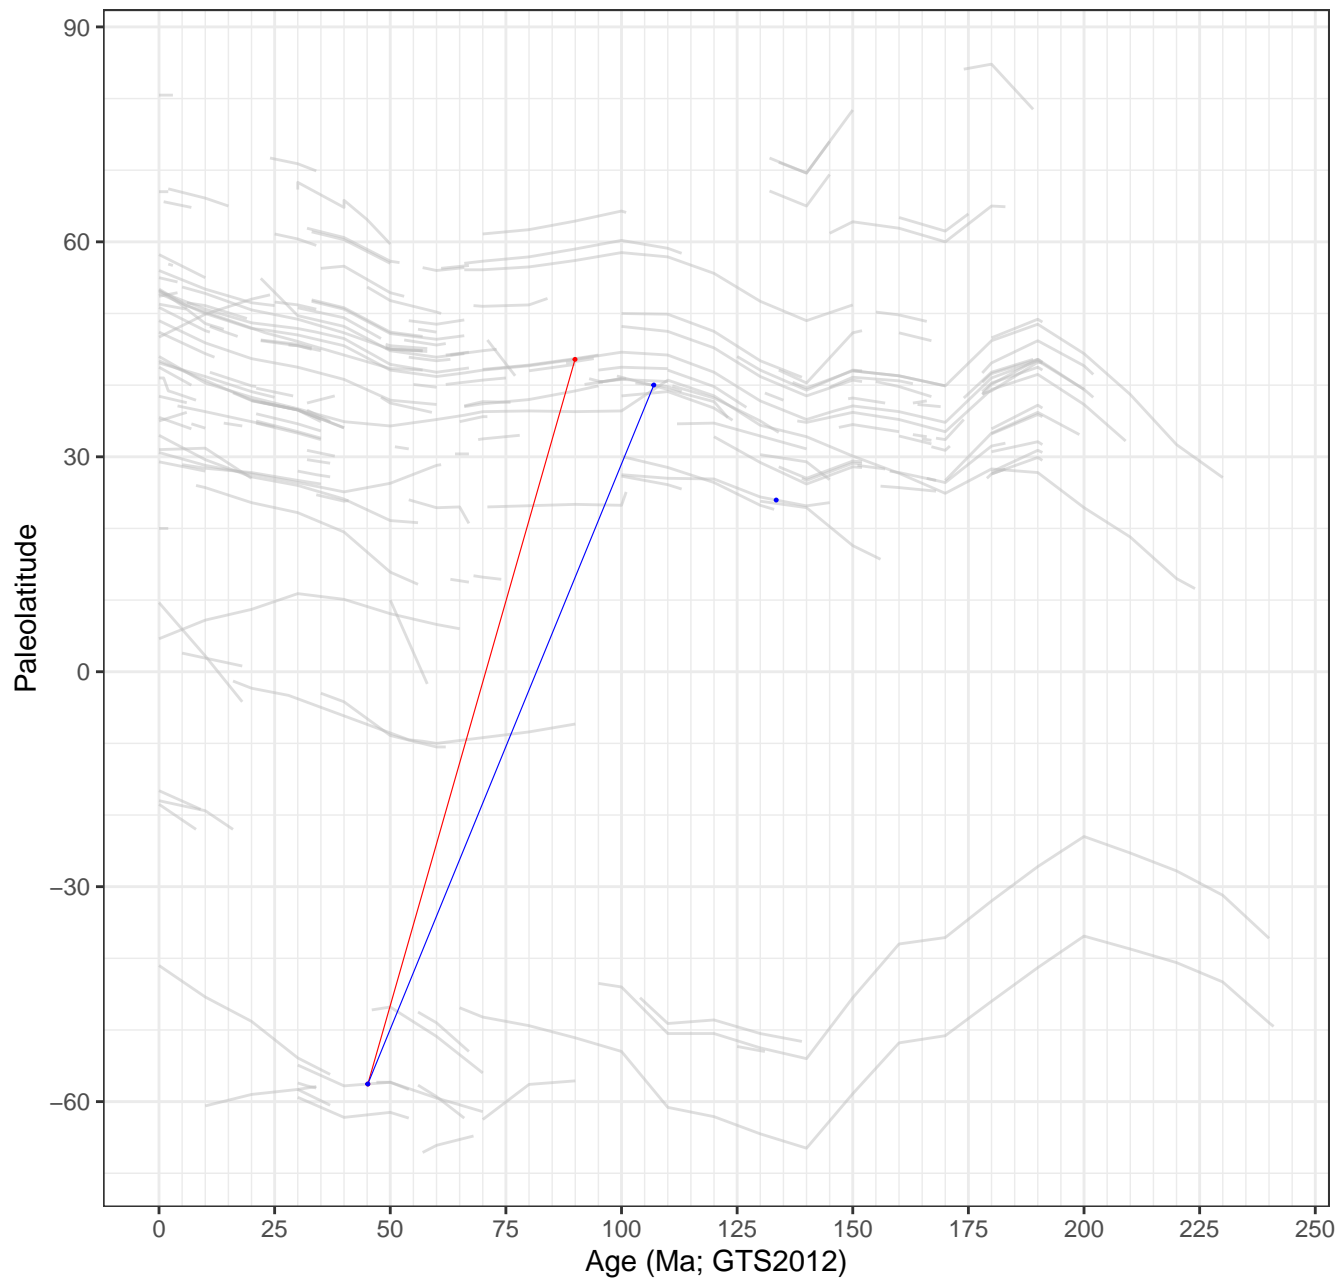

Supplement: Supplementary file 239 [file Genus Histiocysta.pdf › Supplement/Supplement 2/Genus 459 plots/Genus Histiocysta.pdf]

# Genus Histiophora

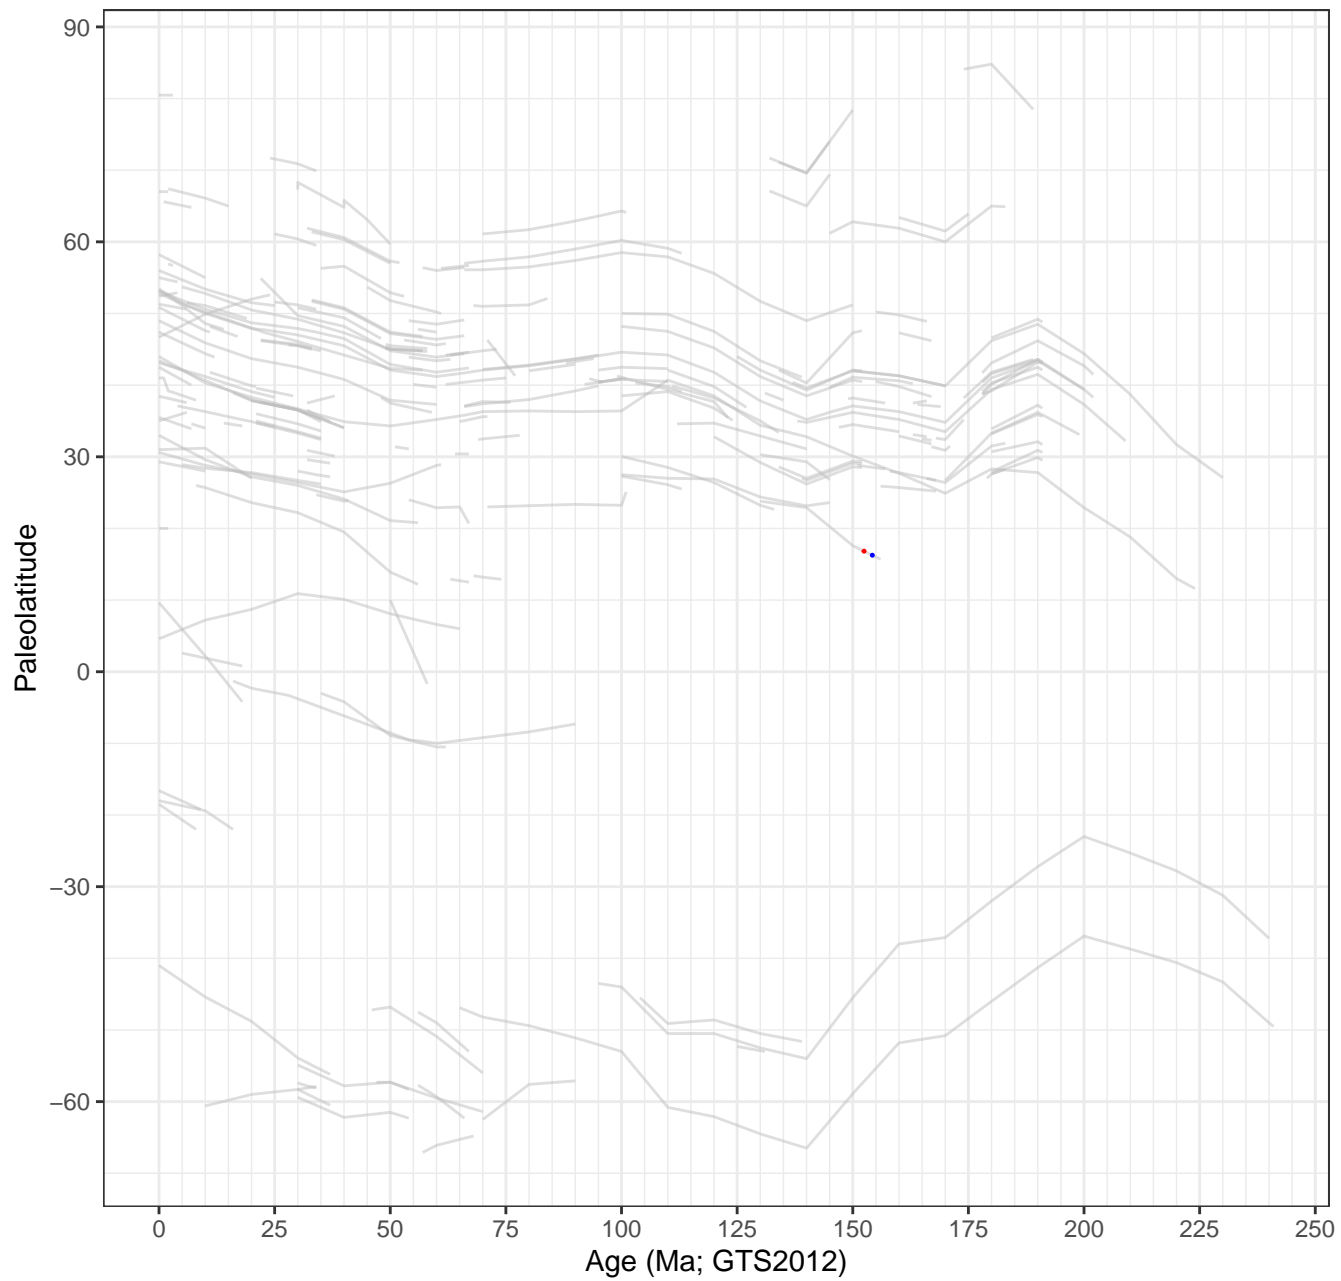

Supplement: Supplementary file 240 [file Genus Histiophora.pdf › Supplement/Supplement 2/Genus 459 plots/Genus Histiophora.pdf]

# Genus Homotryblium

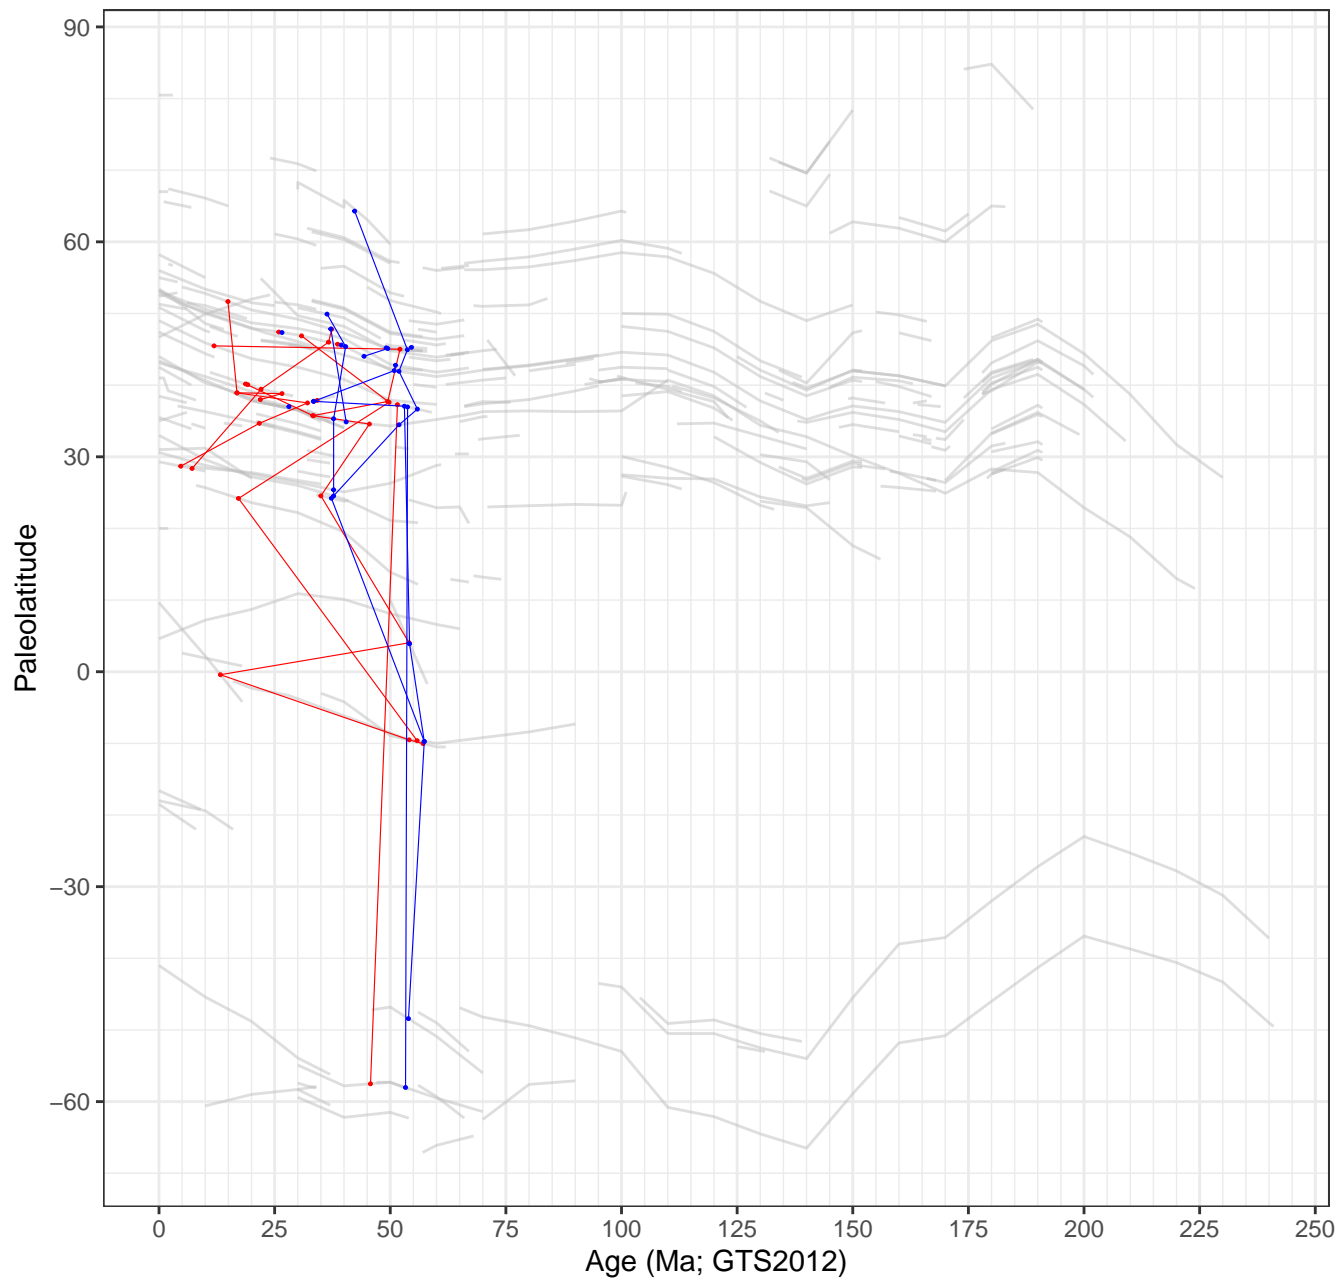

Supplement: Supplementary file 241 [file Genus Homotryblium.pdf › Supplement/Supplement 2/Genus 459 plots/Genus Homotryblium.pdf]

# Genus Hystrichodinium

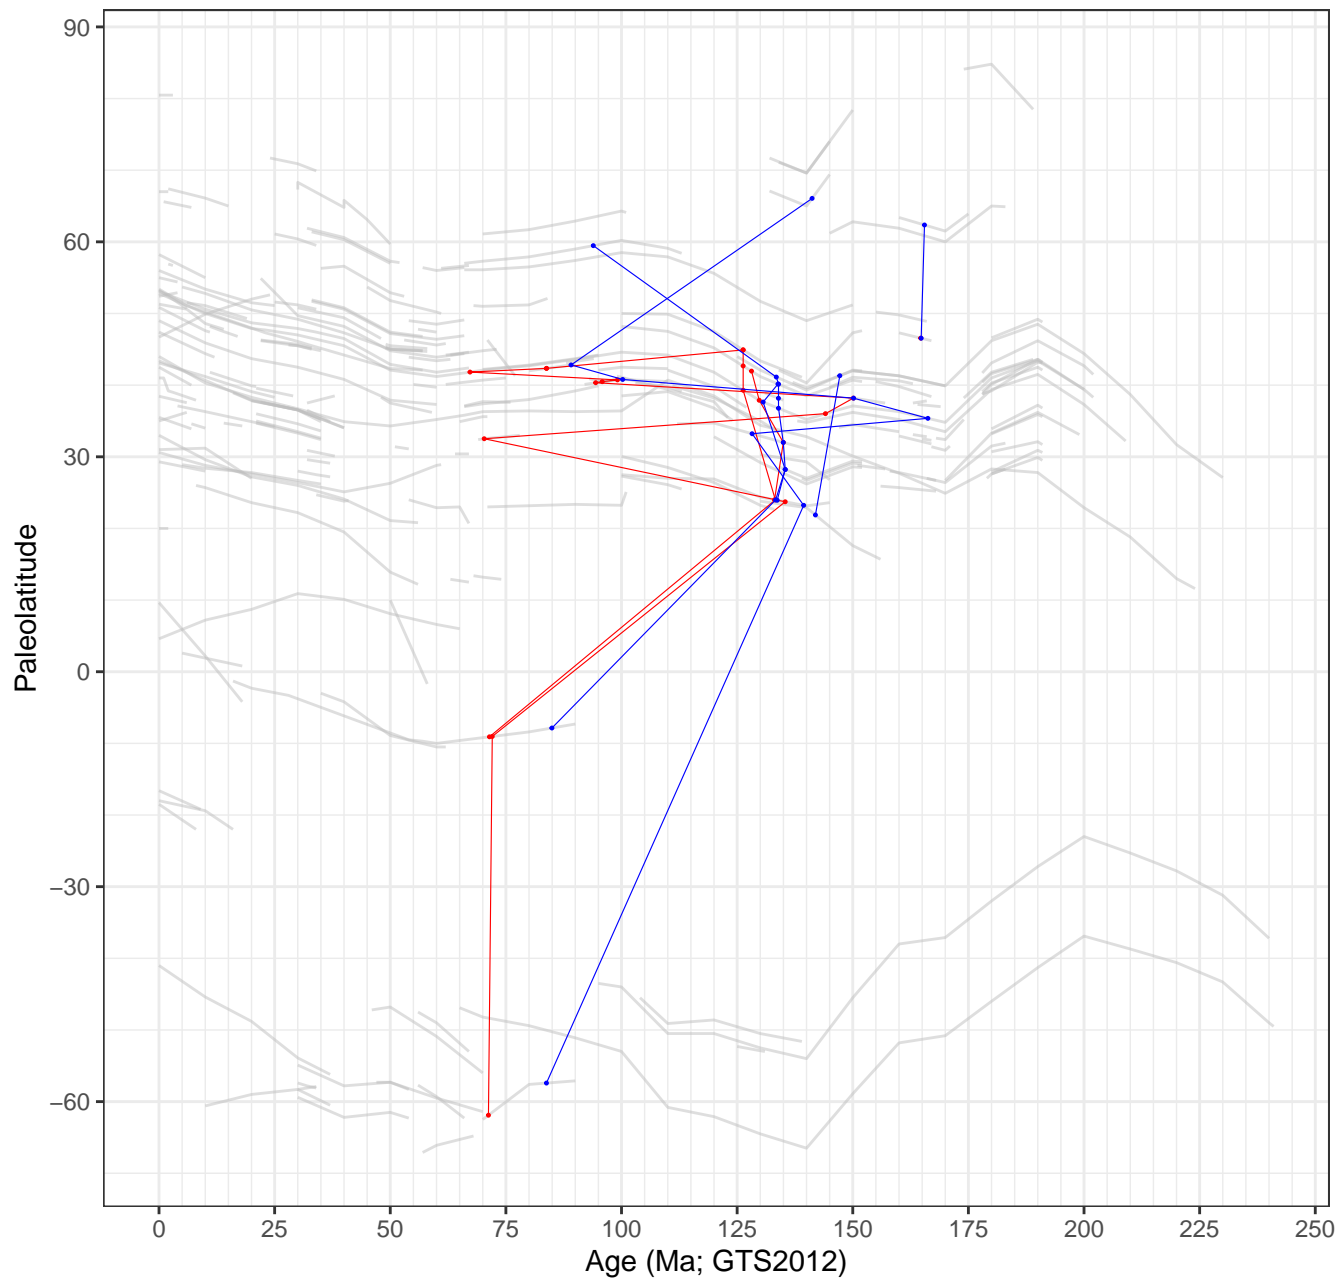

Supplement: Supplementary file 242 [file Genus Hystrichodinium.pdf › Supplement/Supplement 2/Genus 459 plots/Genus Hystrichodinium.pdf]

# Genus *Hystrichokolpoma*

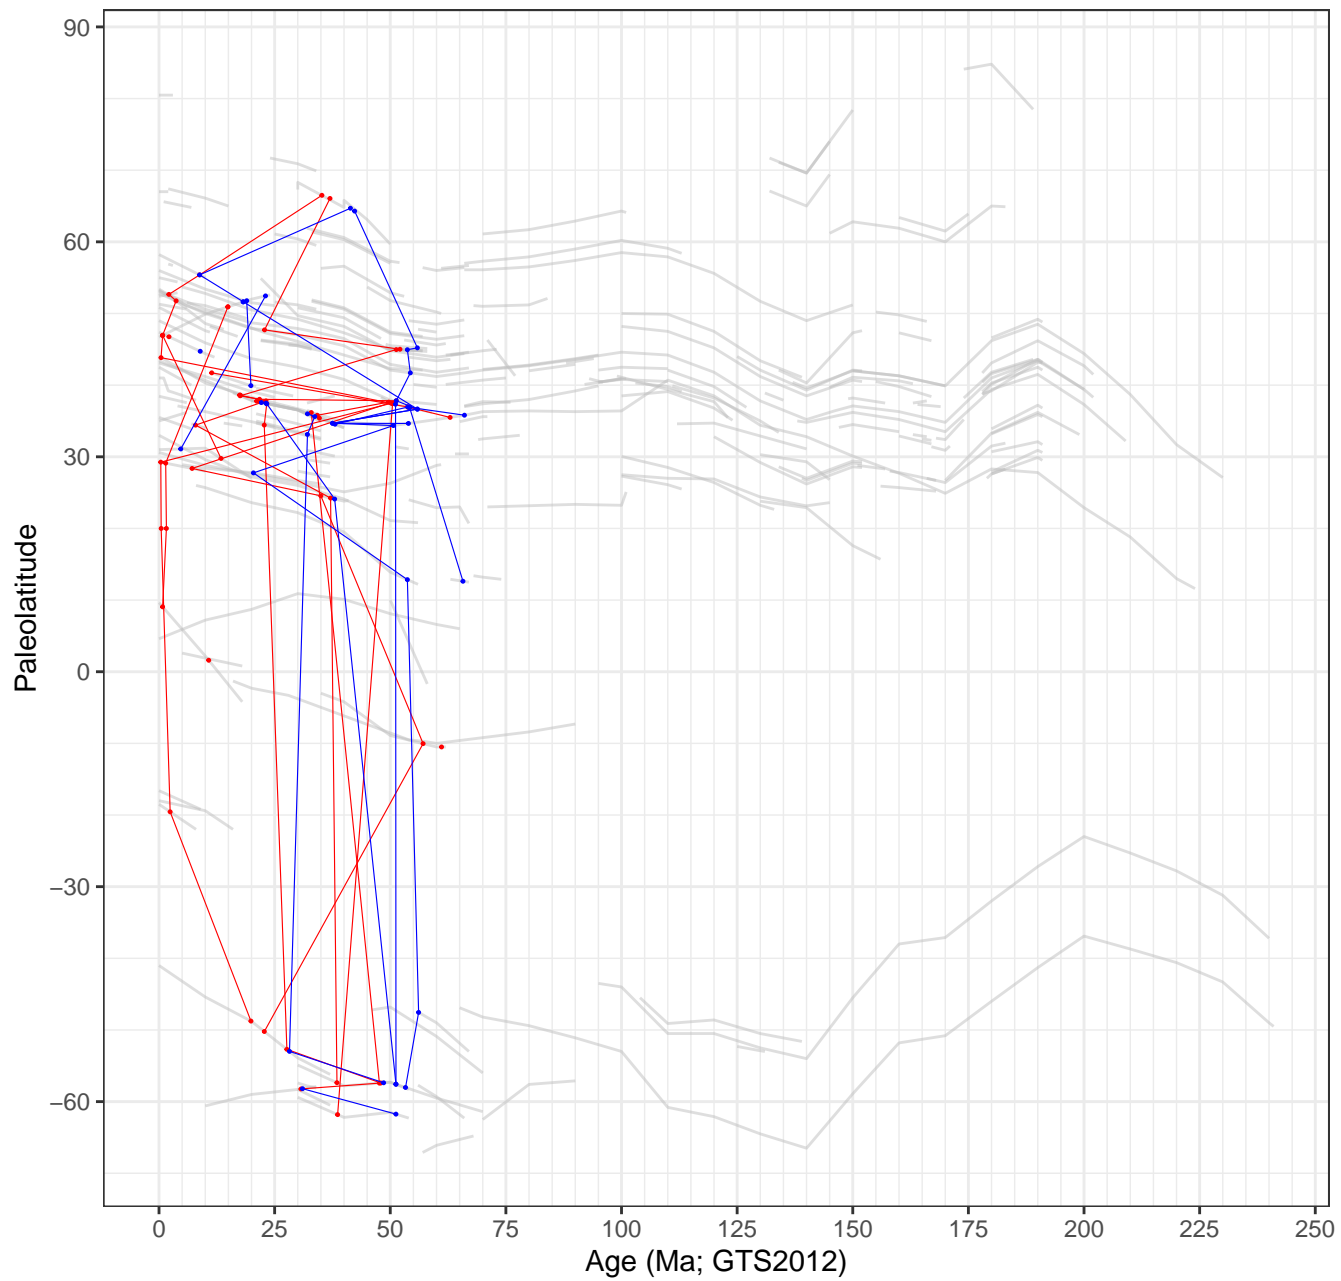

Supplement: Supplementary file 243 [file Genus Hystrichokolpoma.pdf › Supplement/Supplement 2/Genus 459 plots/Genus Hystrichokolpoma.pdf]

# Genus Hystrichosphaeridium

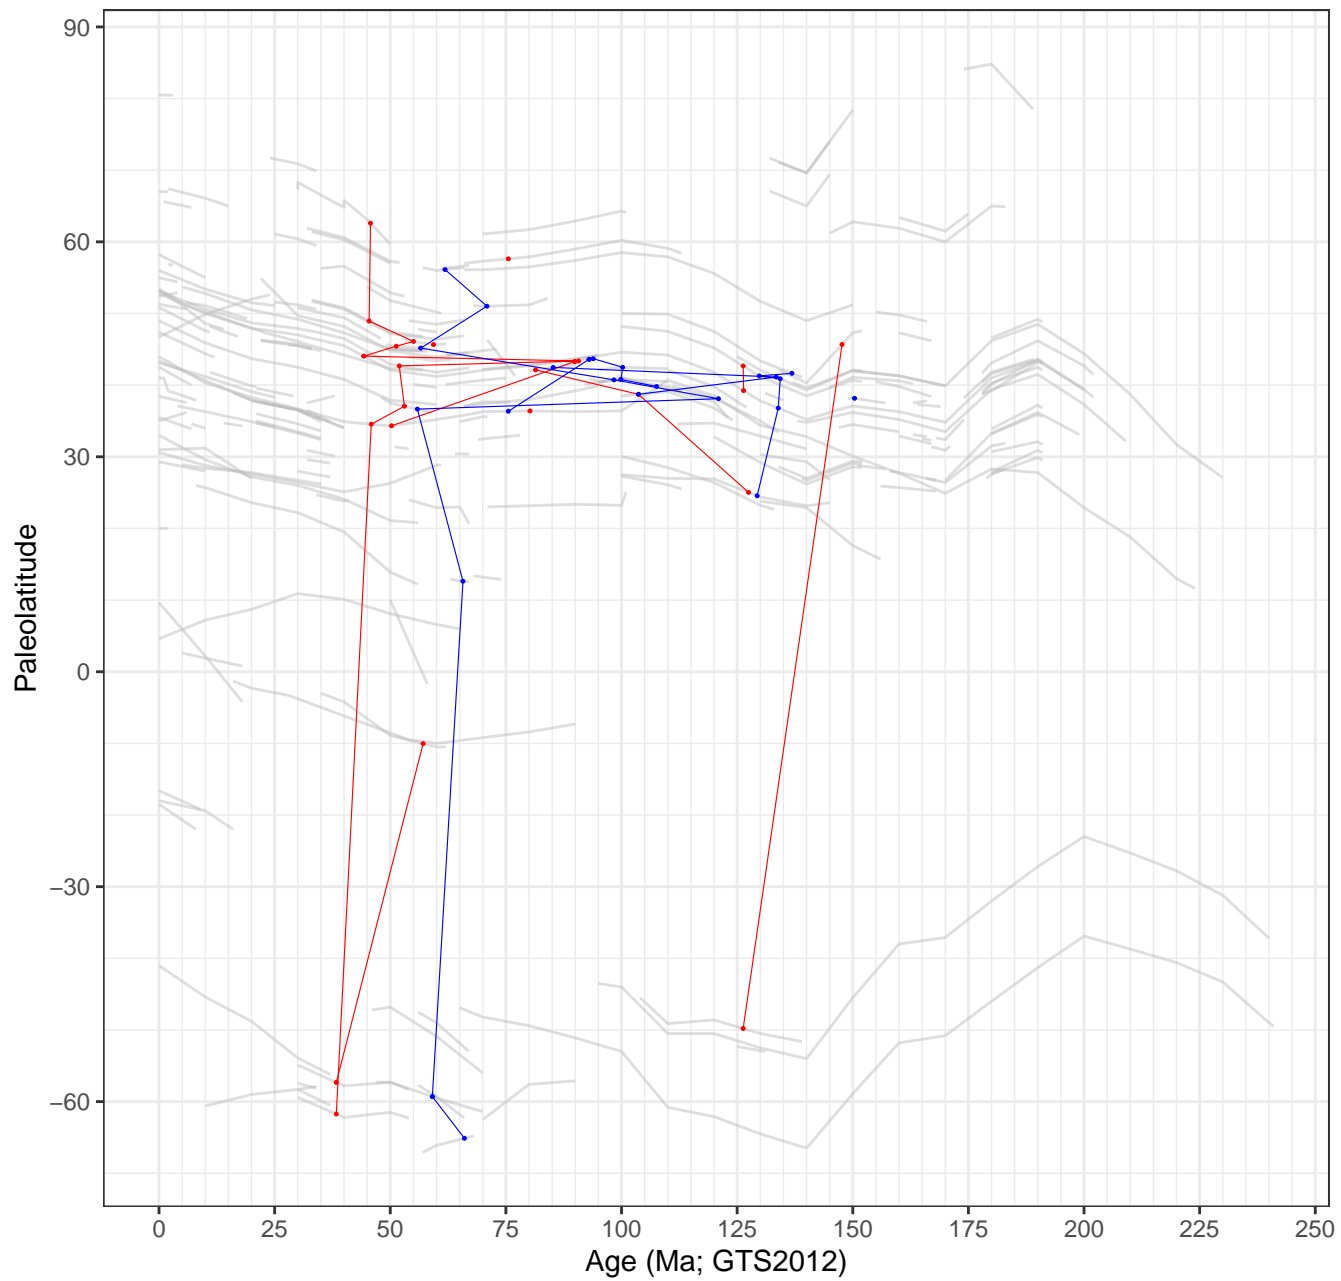

Supplement: Supplementary file 244 [file Genus Hystrichosphaeridium.pdf › Supplement/Supplement 2/Genus 459 plots/Genus Hystrichosphaeridium.pdf]

# Genus Hystrichosphaerina

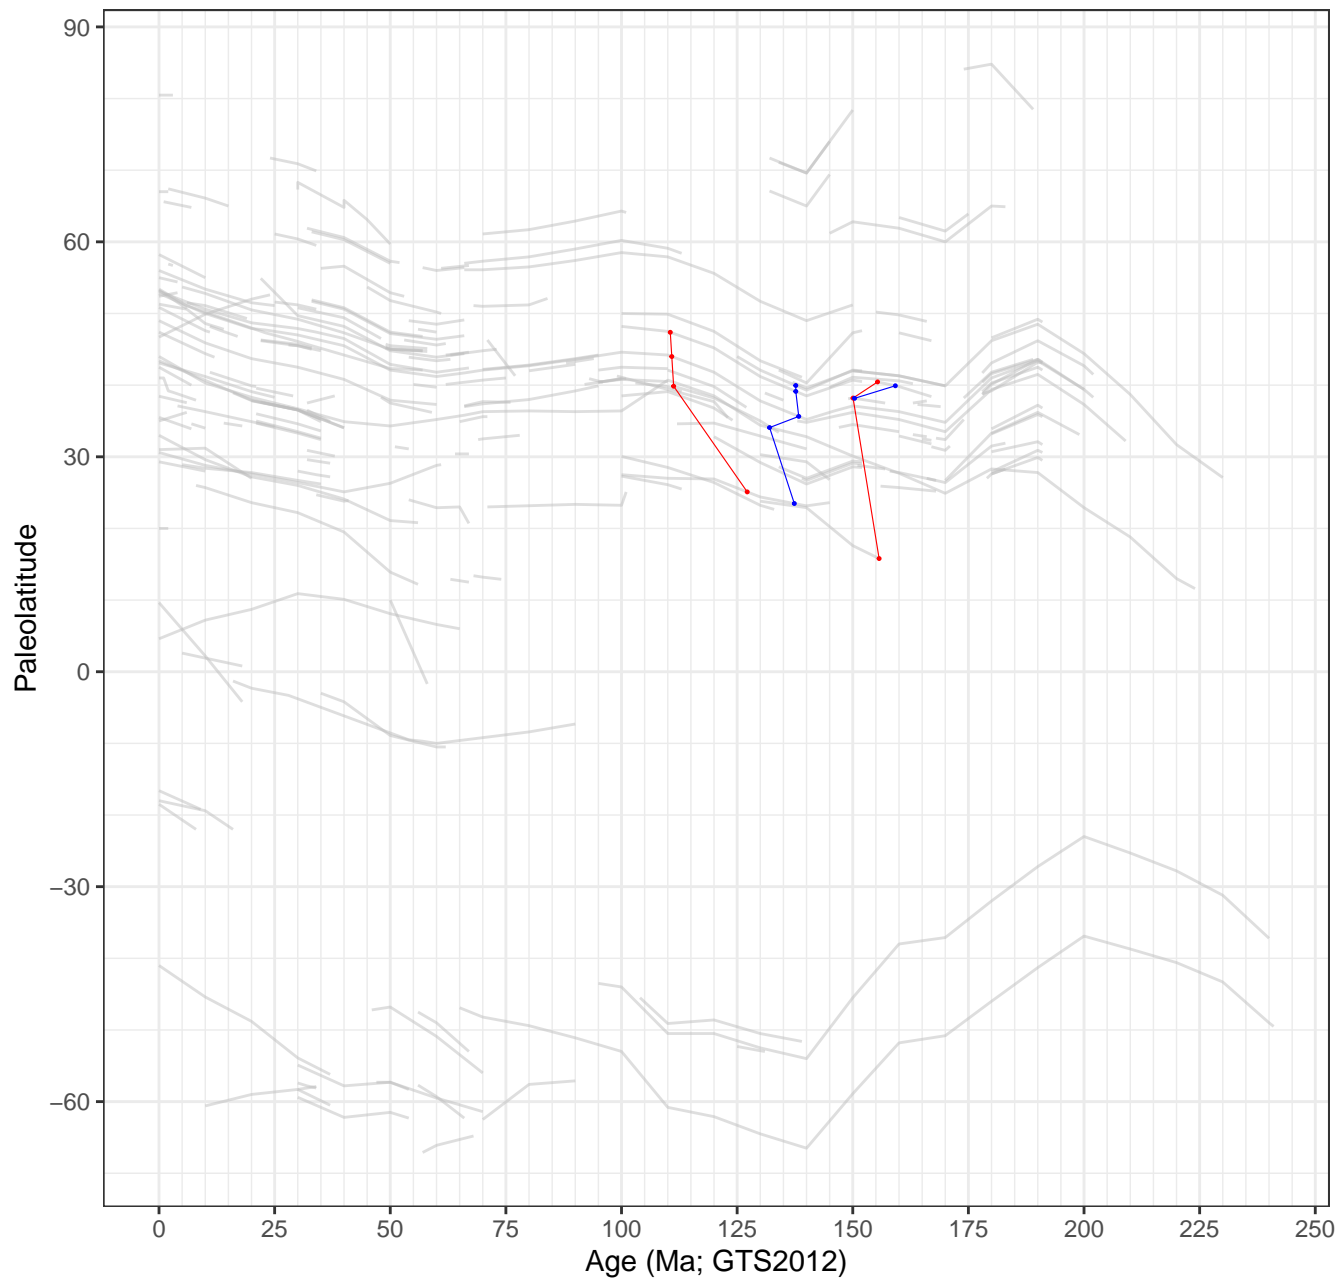

Supplement: Supplementary file 245 [file Genus Hystrichosphaerina.pdf › Supplement/Supplement 2/Genus 459 plots/Genus Hystrichosphaerina.pdf]

# Genus *Hystrichosphaeropsis*

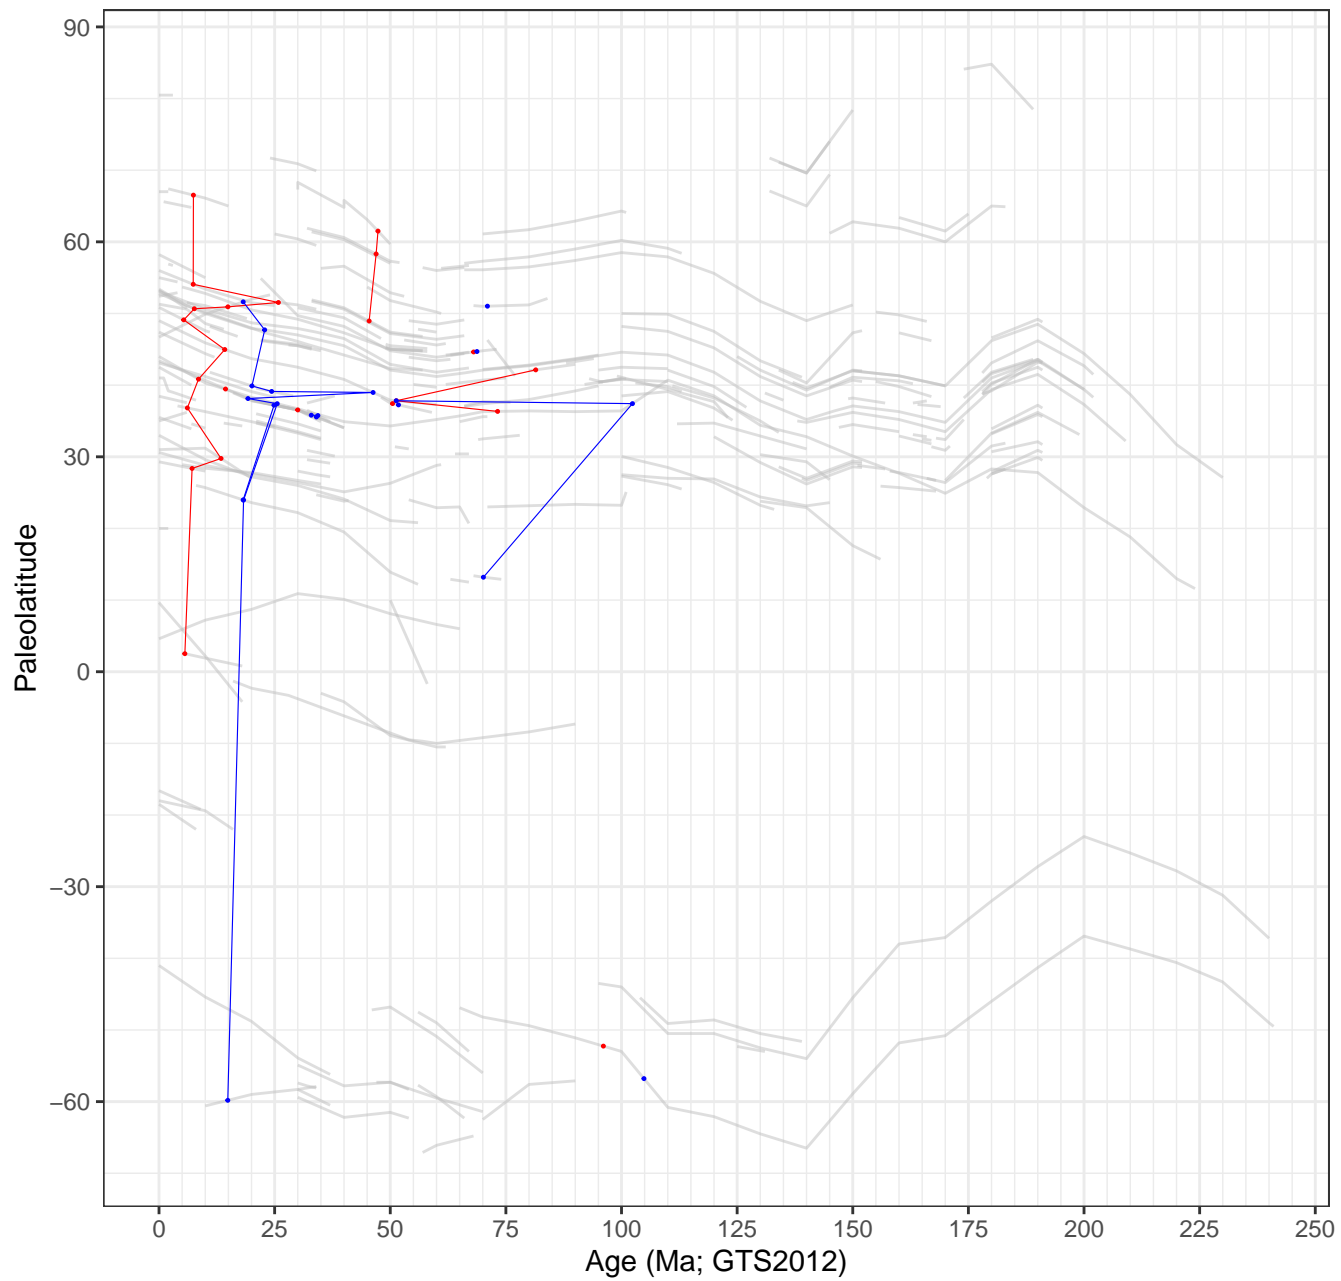

Supplement: Supplementary file 246 [file Genus Hystrichosphaeropsis.pdf › Supplement/Supplement 2/Genus 459 plots/Genus Hystrichosphaeropsis.pdf]

# Genus Hystrichostrogylon

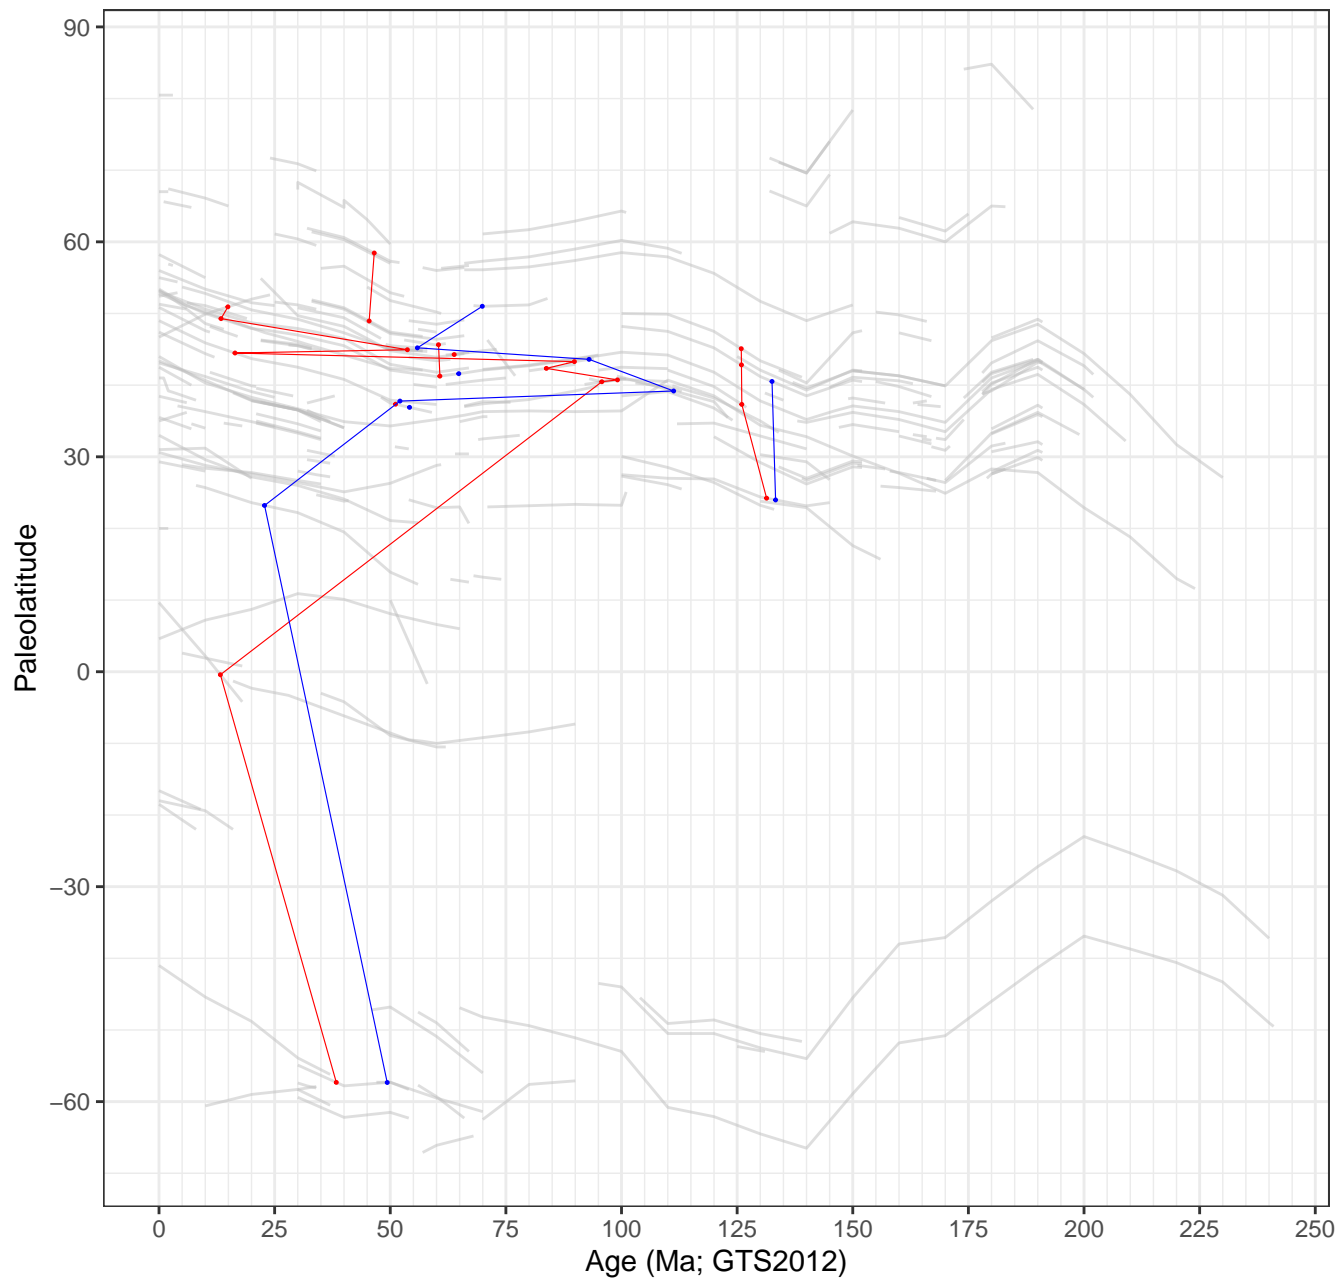

Supplement: Supplementary file 247 [file Genus Hystrichostrogylon.pdf › Supplement/Supplement 2/Genus 459 plots/Genus Hystrichostrogylon.pdf]

# Genus *Ifecysta*

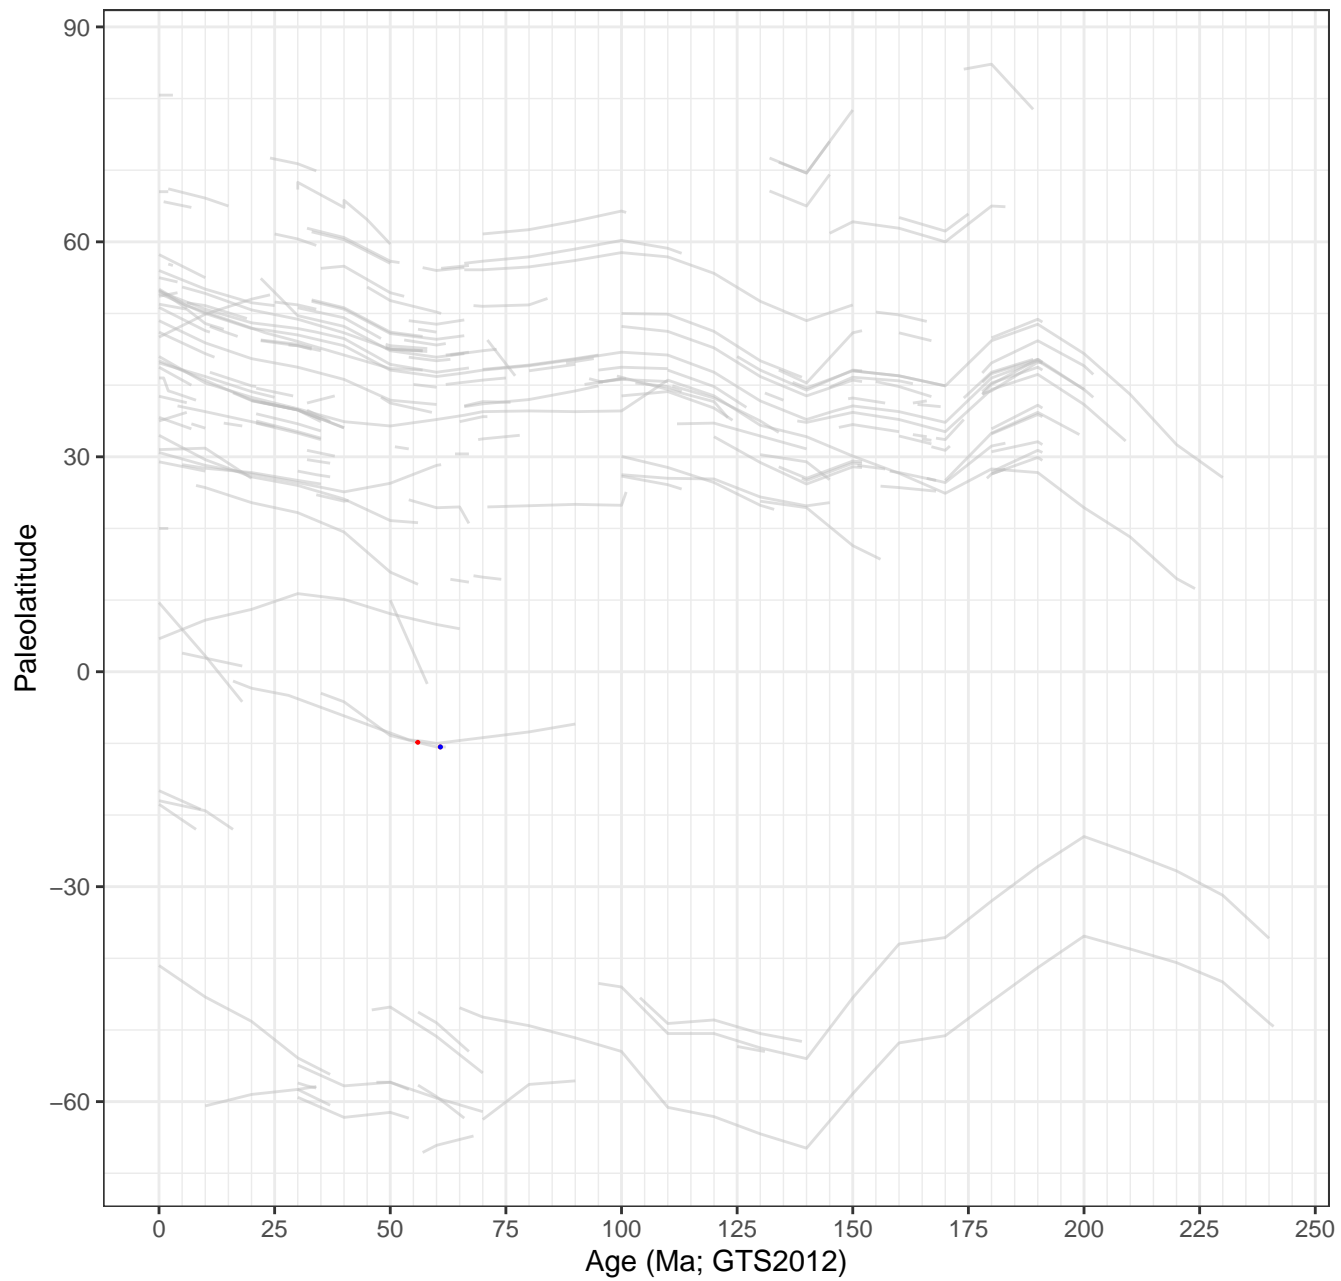

Supplement: Supplementary file 248 [file Genus Ifecysta.pdf › Supplement/Supplement 2/Genus 459 plots/Genus Ifecysta.pdf]

# Genus Imbatodinium

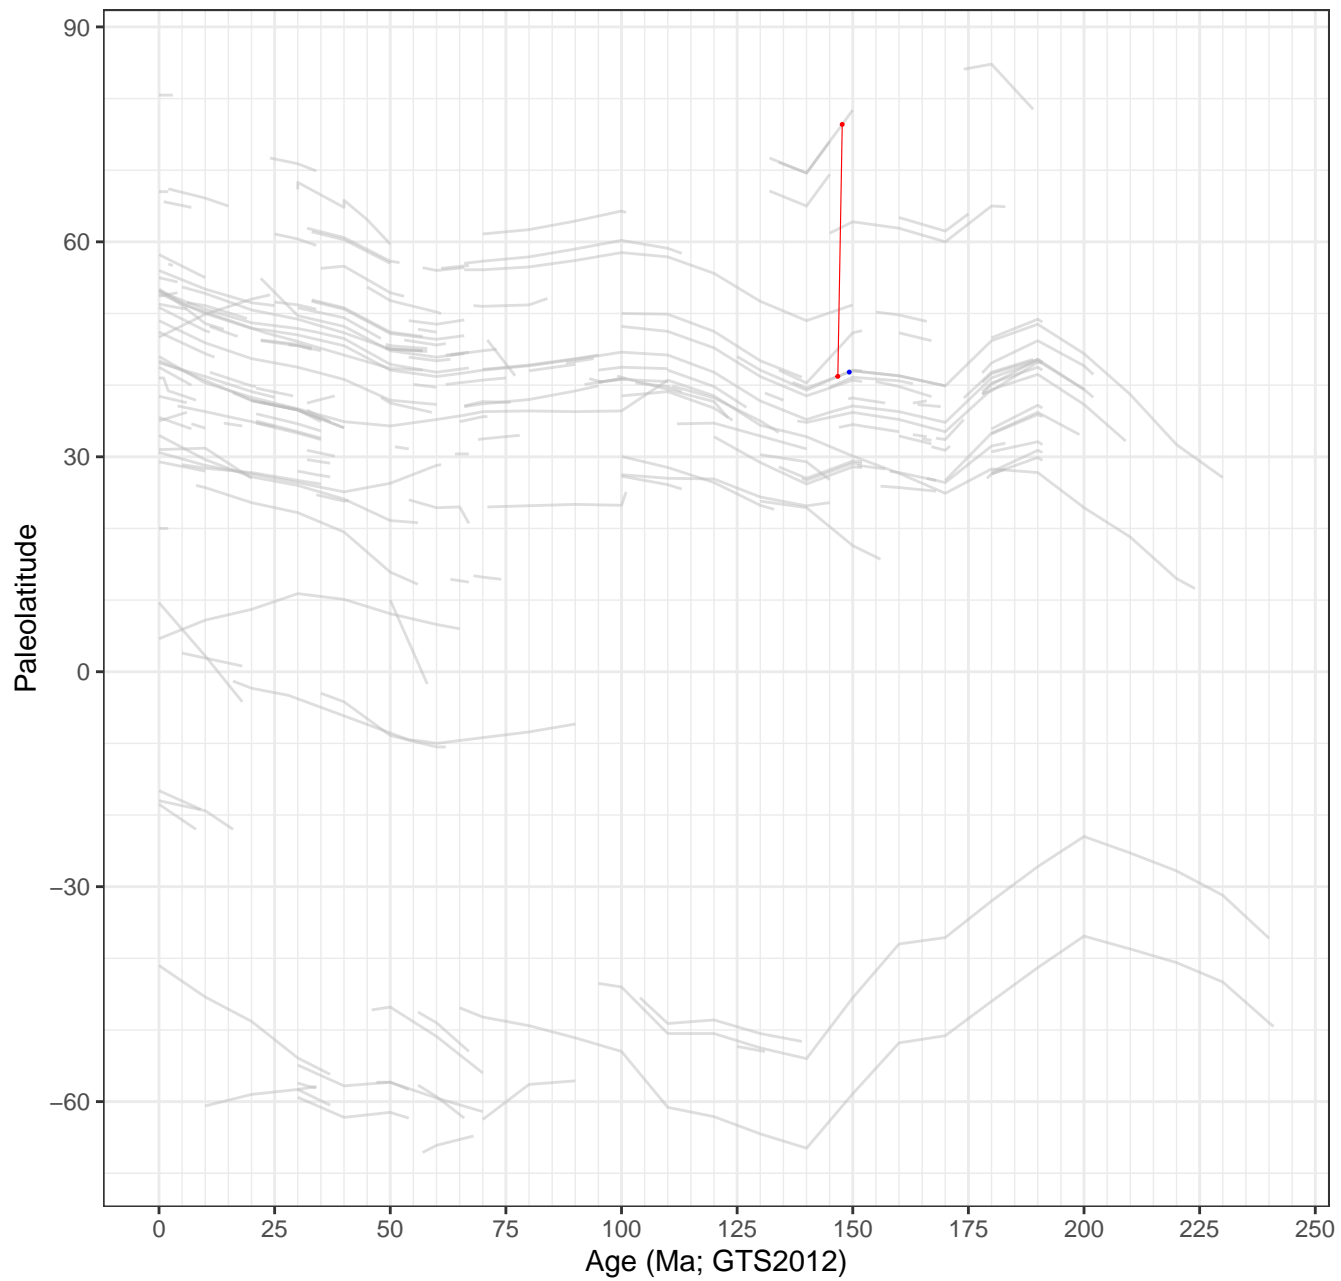

Supplement: Supplementary file 249 [file Genus Imbatodinium.pdf › Supplement/Supplement 2/Genus 459 plots/Genus Imbatodinium.pdf]

# Genus Impagidinium

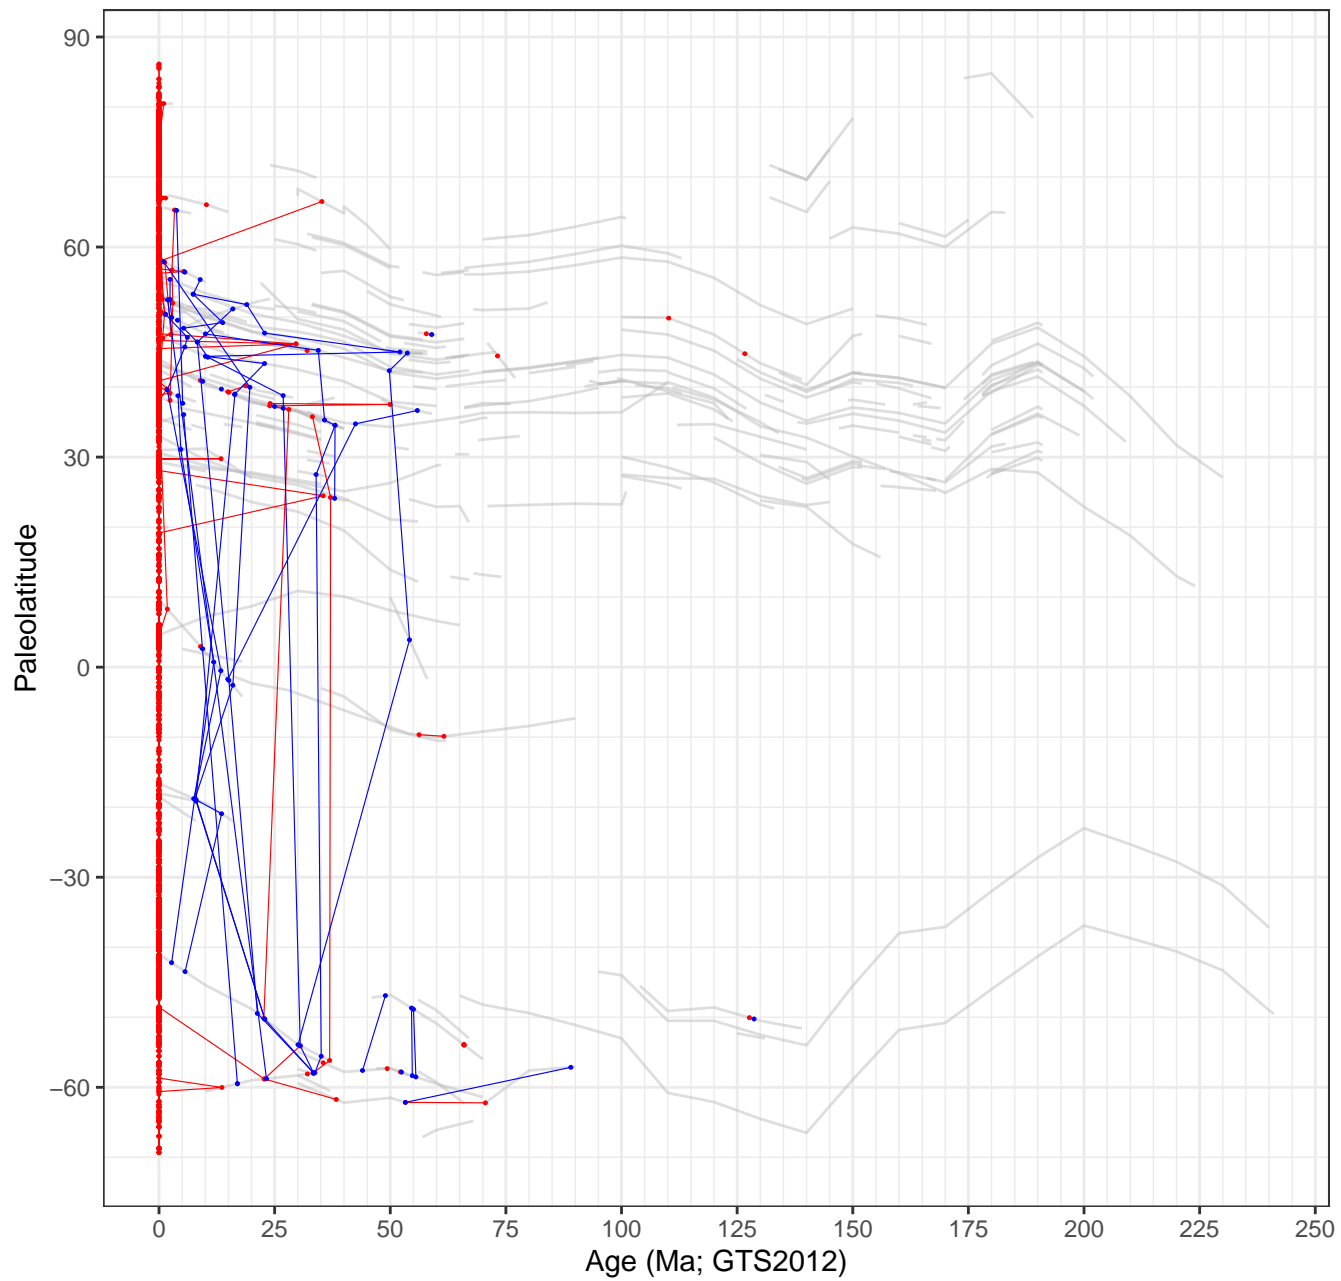

Supplement: Supplementary file 250 [file Genus Impagidinium.pdf › Supplement/Supplement 2/Genus 459 plots/Genus Impagidinium.pdf]

# Genus Imperfectodinium

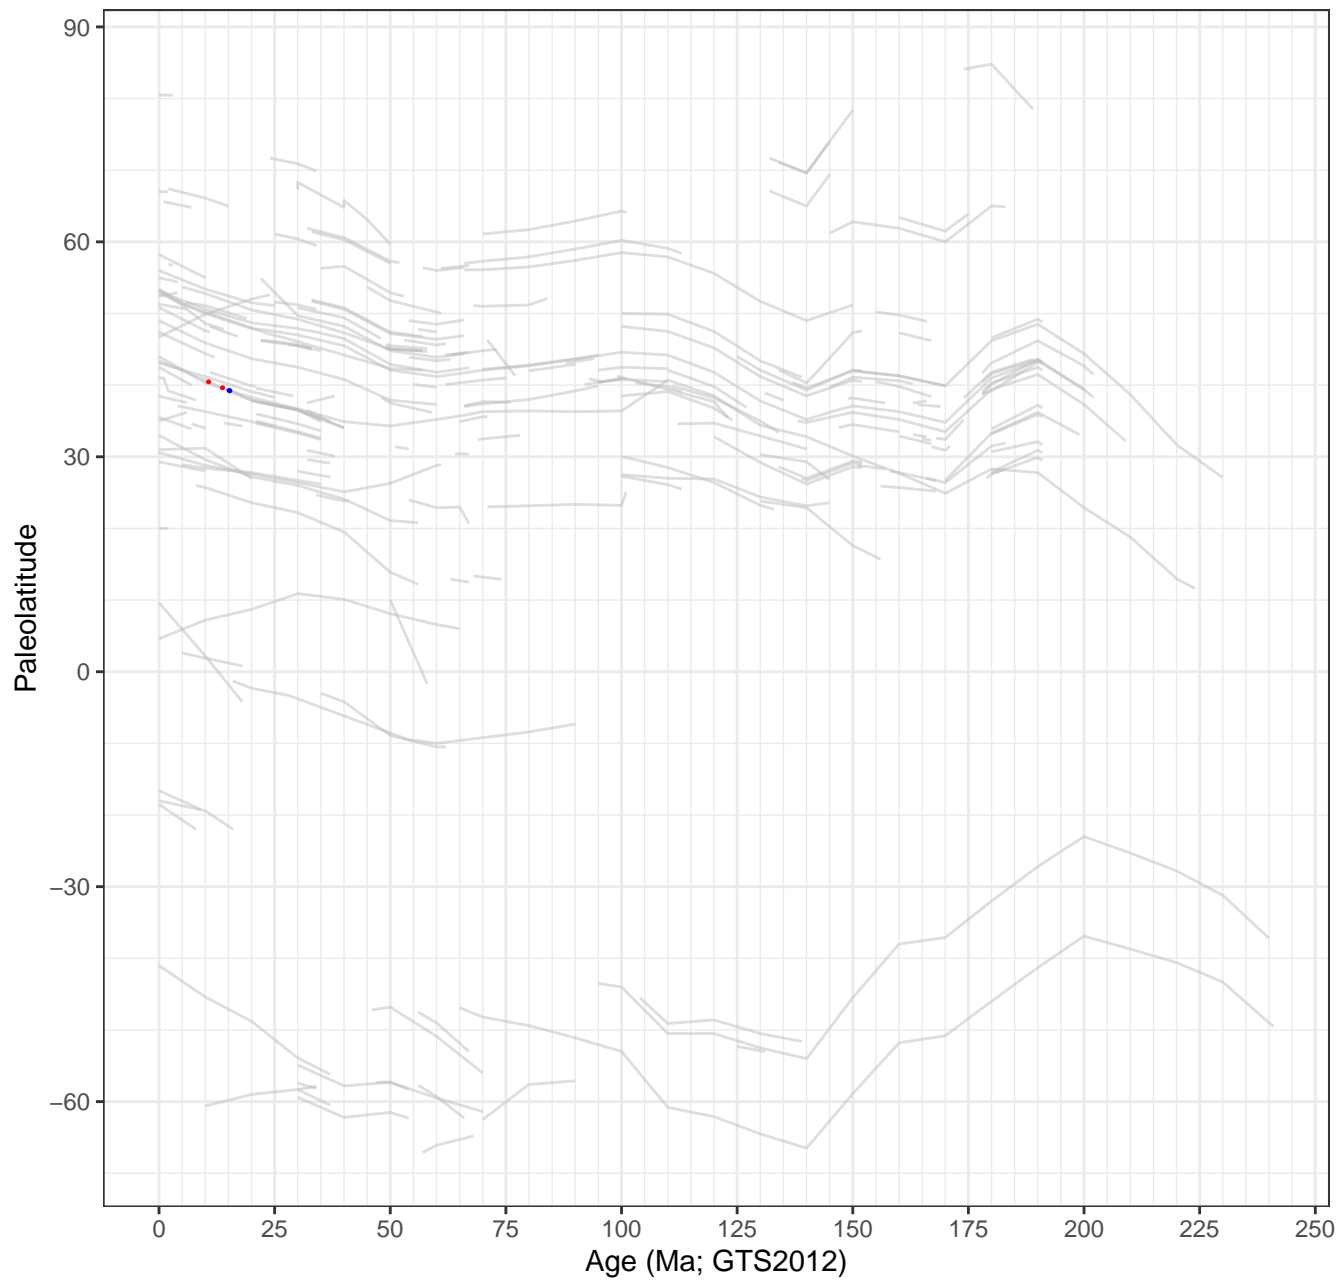

Supplement: Supplementary file 251 [file Genus Imperfectodinium.pdf › Supplement/Supplement 2/Genus 459 plots/Genus Imperfectodinium.pdf]

# Genus Impletosphaeridium

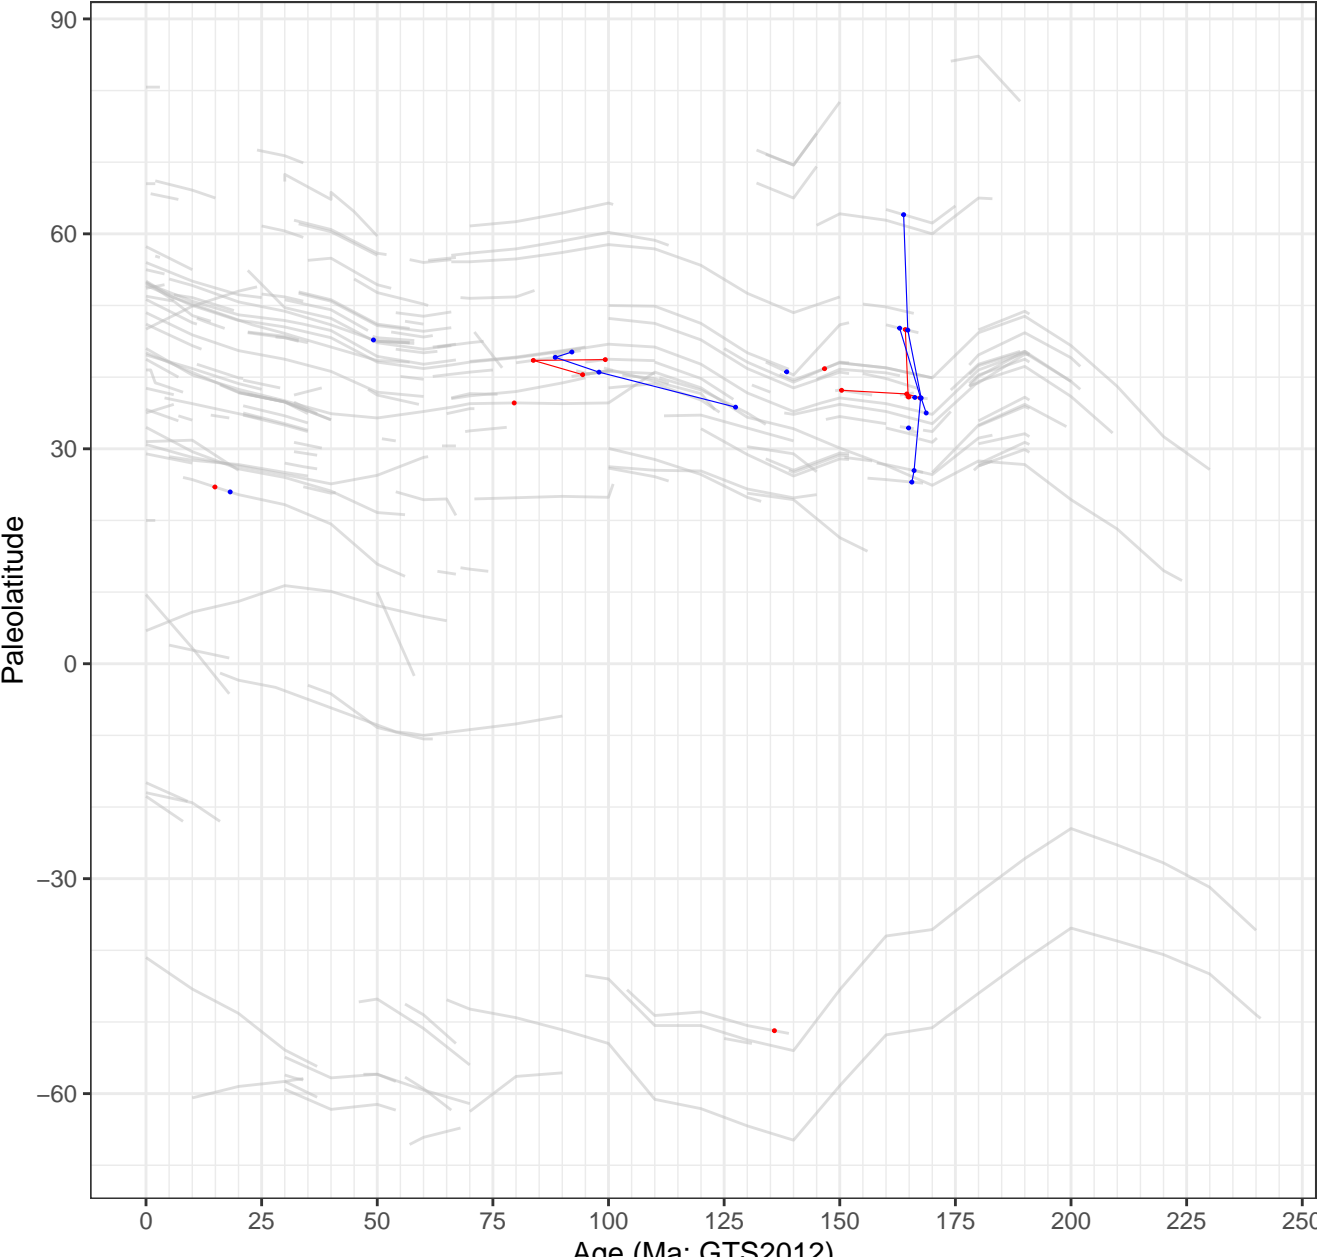

Supplement: Supplementary file 252 [file Genus Impletosphaeridium.pdf › Supplement/Supplement 2/Genus 459 plots/Genus Impletosphaeridium.pdf]

# Genus Indodinium

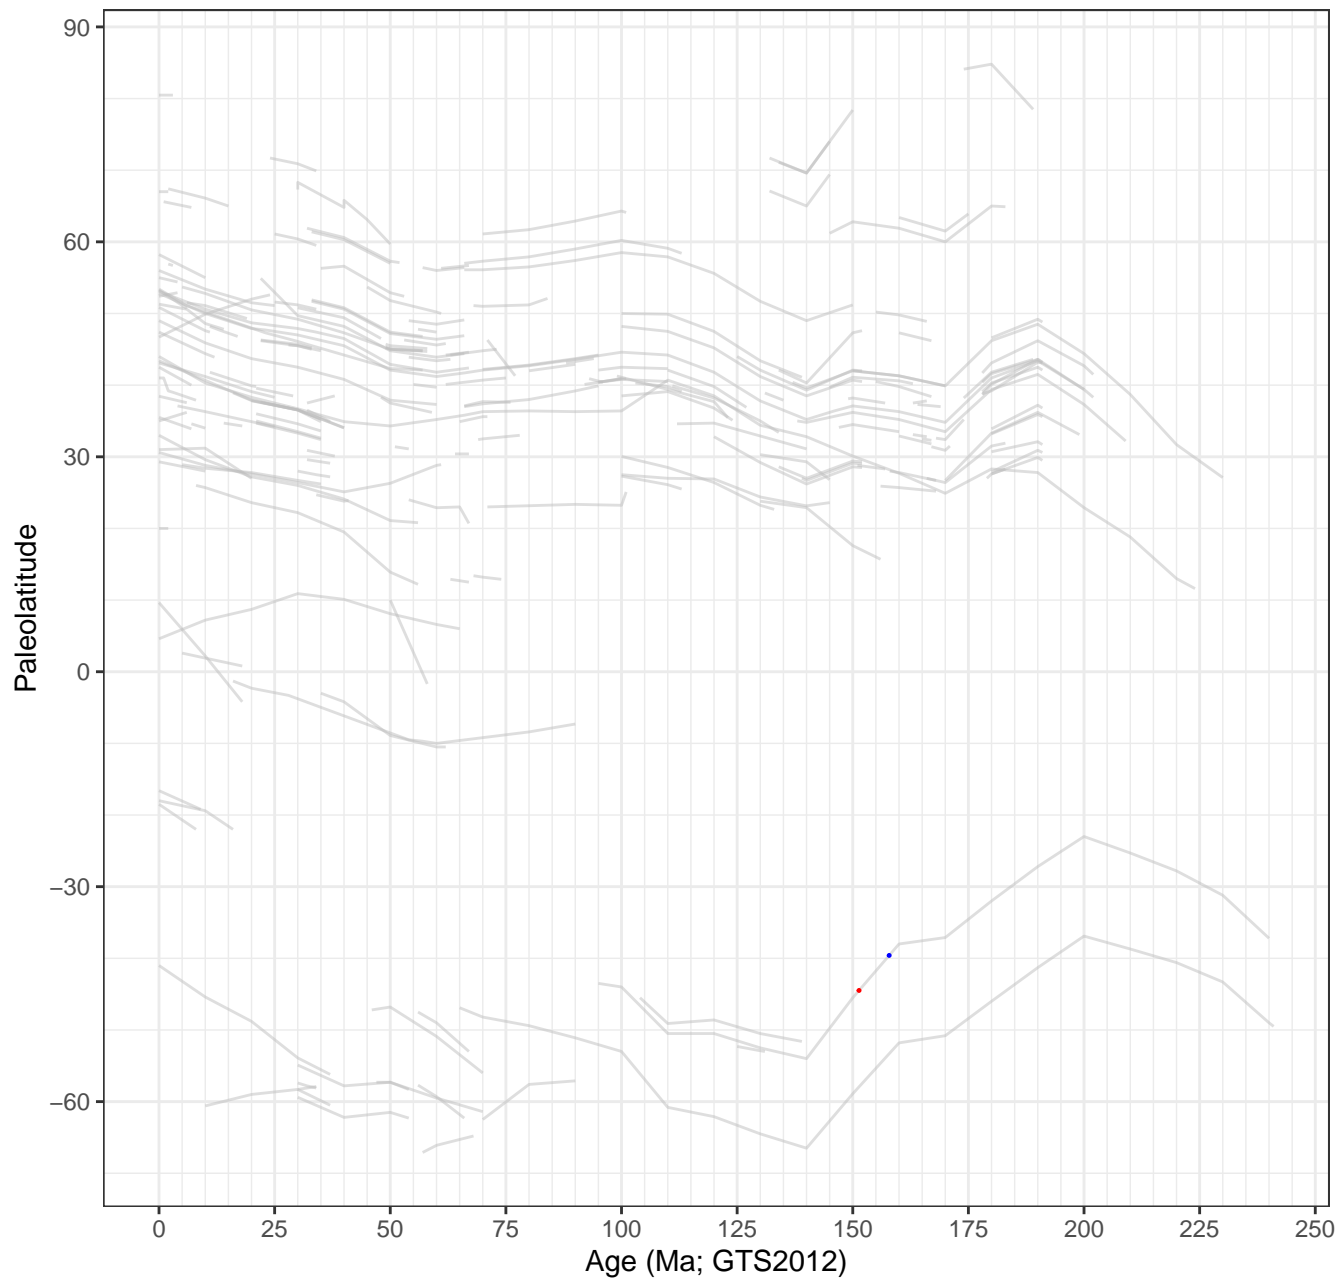

Supplement: Supplementary file 253 [file Genus Indodinium.pdf › Supplement/Supplement 2/Genus 459 plots/Genus Indodinium.pdf]

# Genus Invertocysta

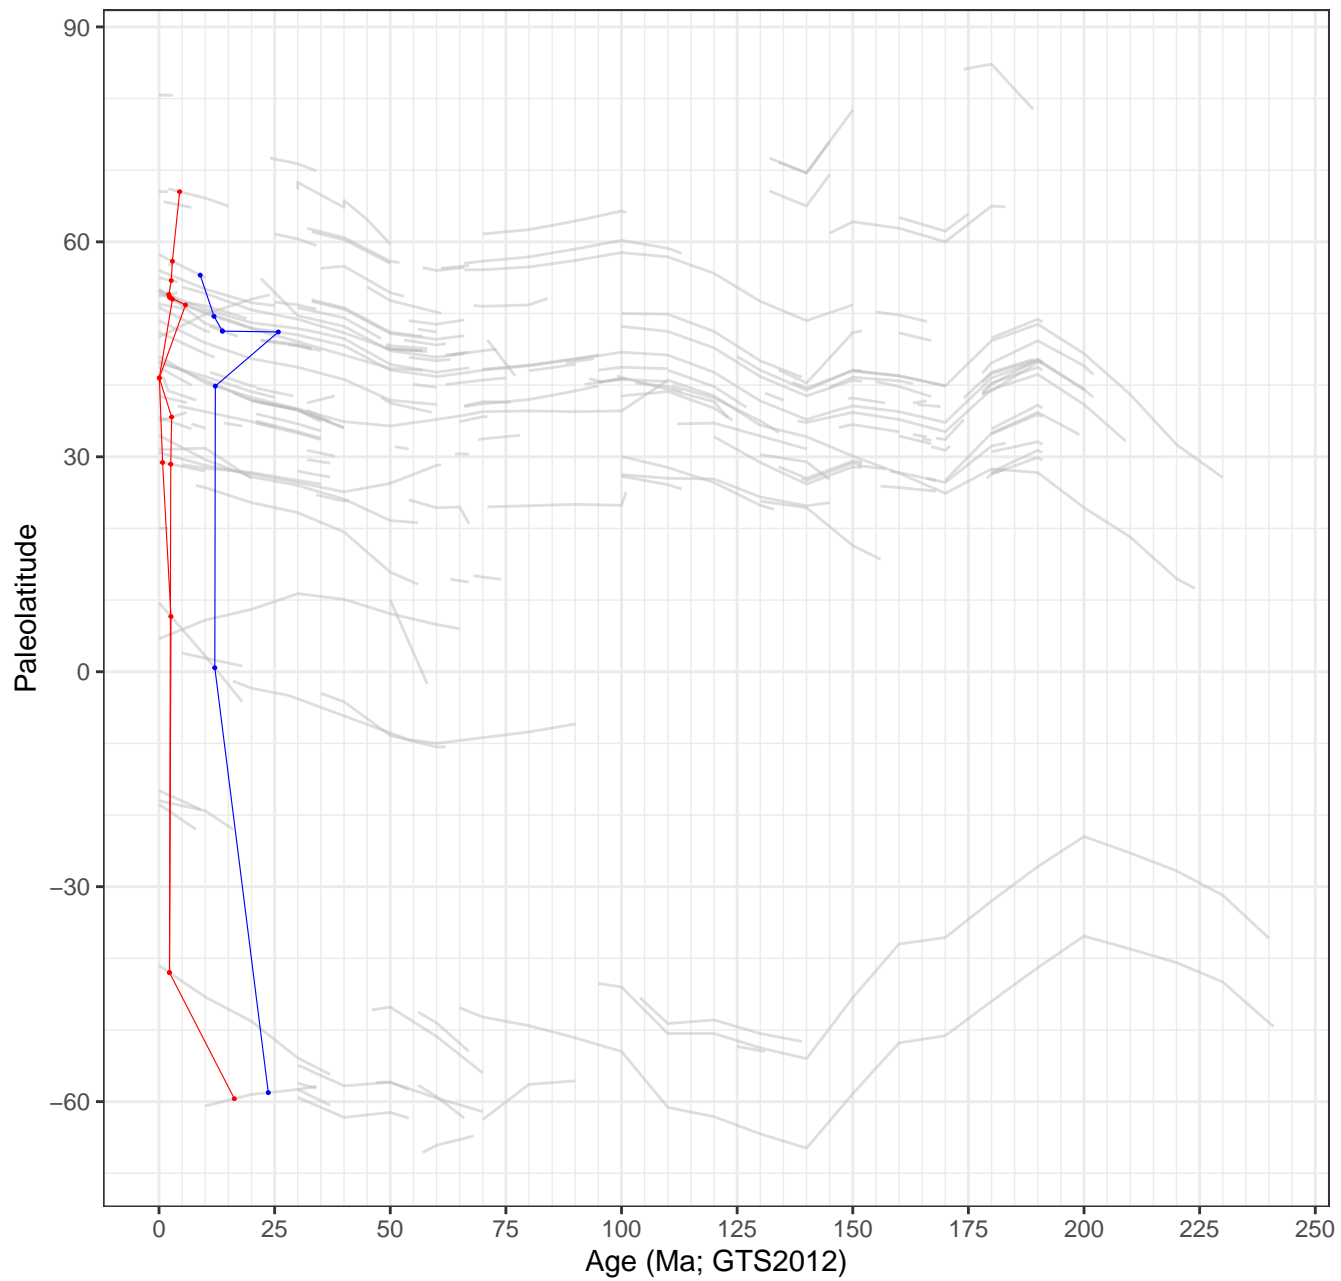

Supplement: Supplementary file 254 [file Genus Invertocysta.pdf › Supplement/Supplement 2/Genus 459 plots/Genus Invertocysta.pdf]

# Genus Isabelidium

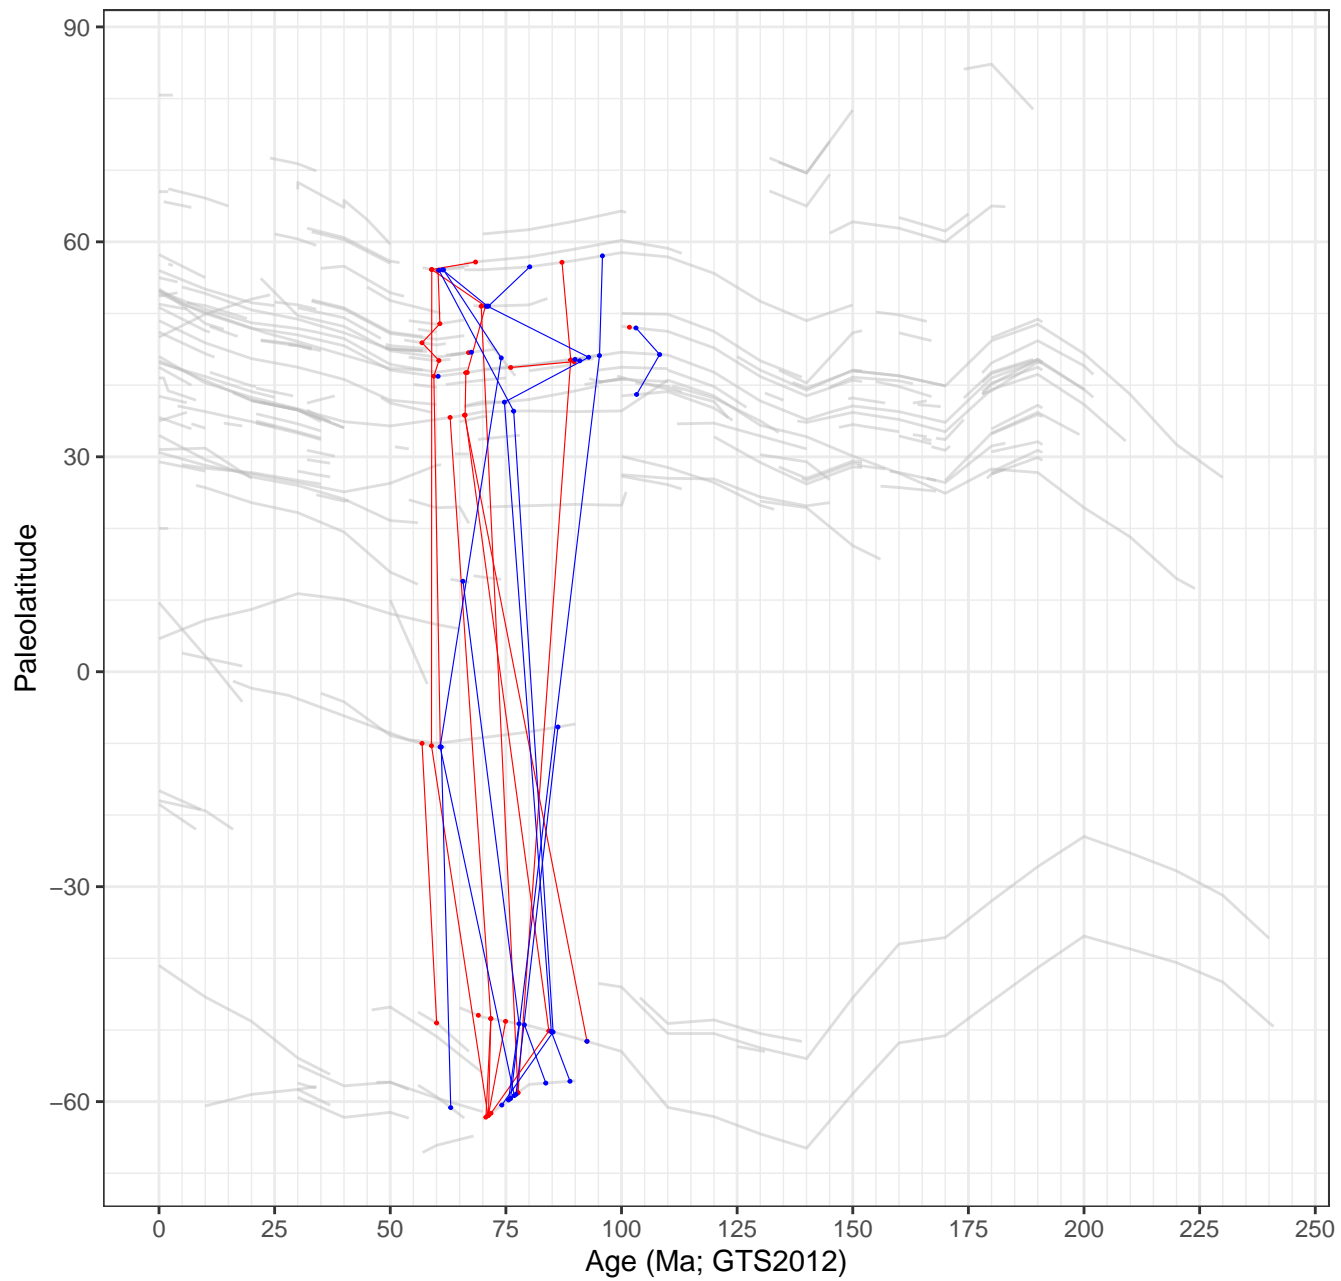

Supplement: Supplementary file 255 [file Genus Isabelidinium.pdf › Supplement/Supplement 2/Genus 459 plots/Genus Isabelidinium.pdf]

# Genus Islandinium

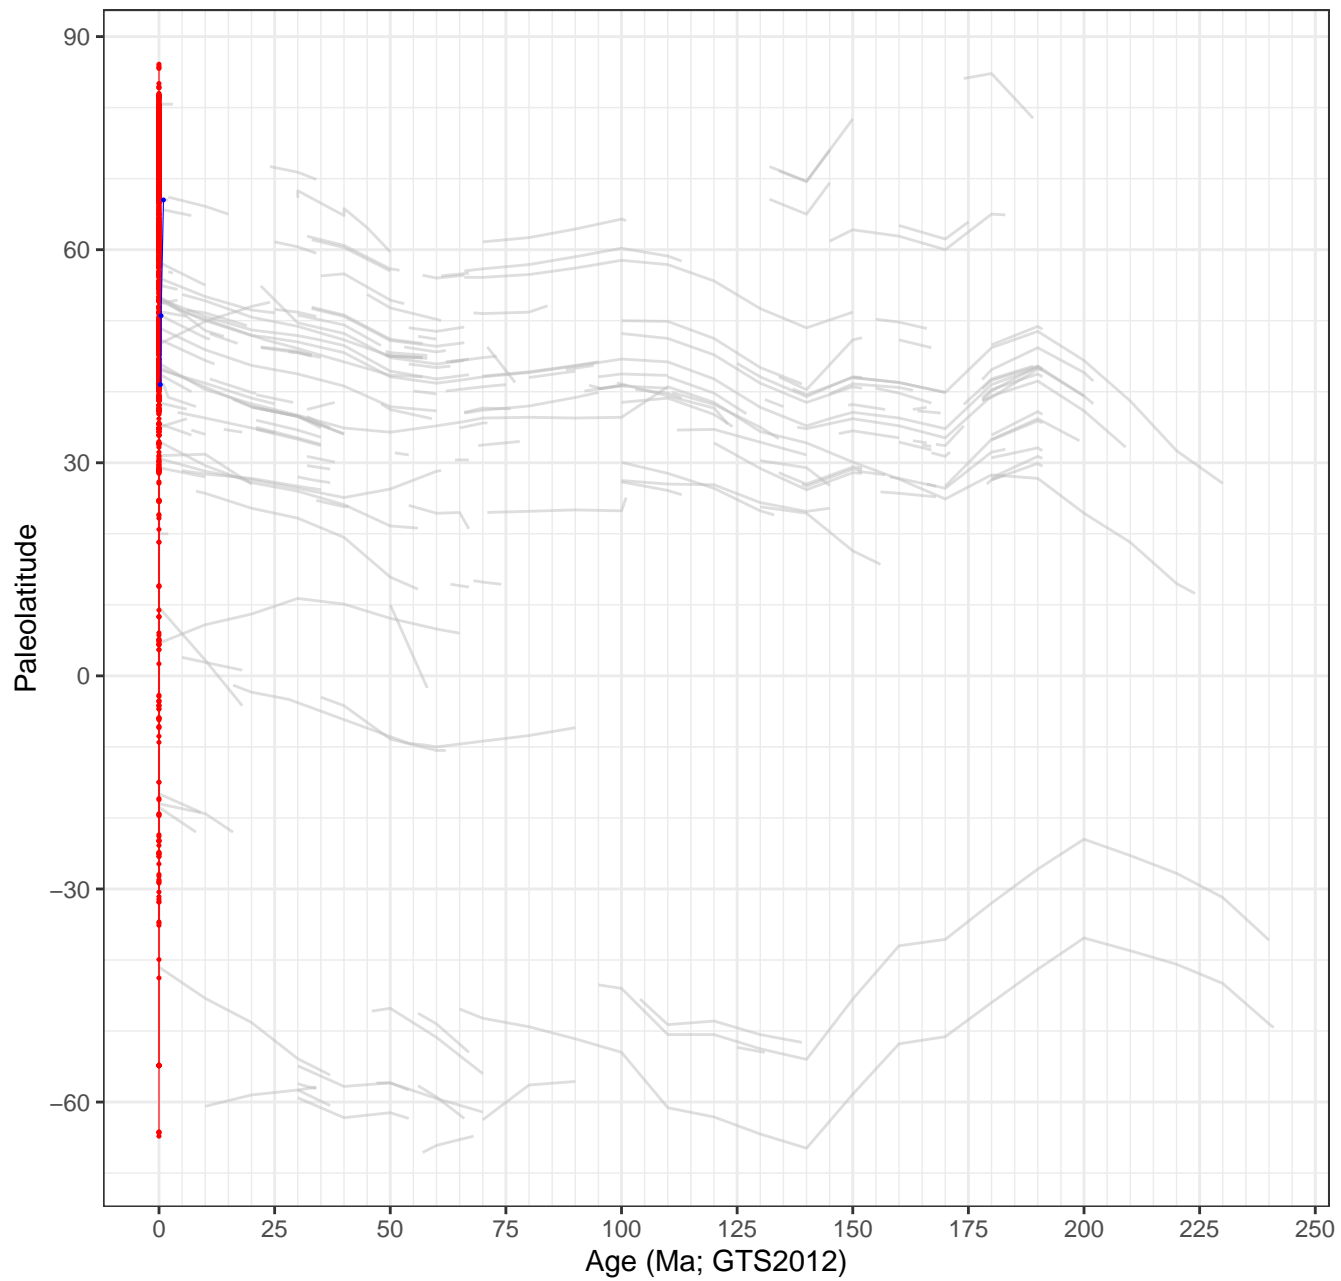

Supplement: Supplementary file 256 [file Genus Islandinium.pdf › Supplement/Supplement 2/Genus 459 plots/Genus Islandinium.pdf]

# Genus Isthmocystis

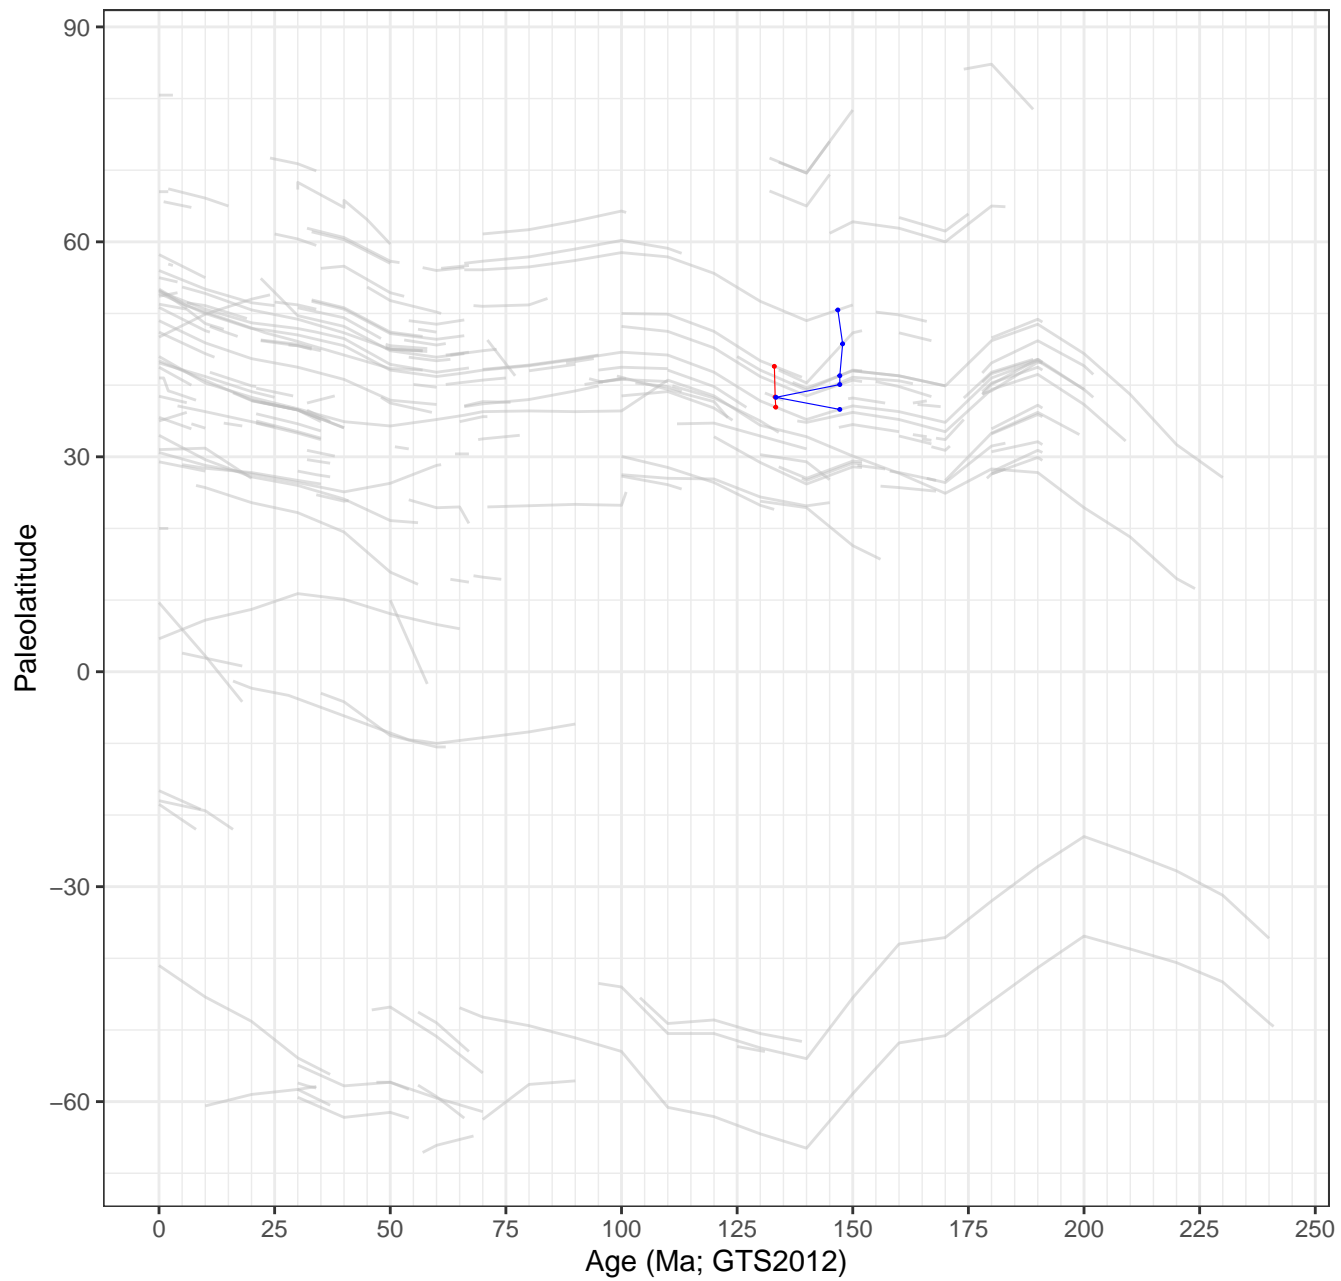

Supplement: Supplementary file 257 [file Genus Isthmocystis.pdf › Supplement/Supplement 2/Genus 459 plots/Genus Isthmocystis.pdf]

# Genus Jansonia

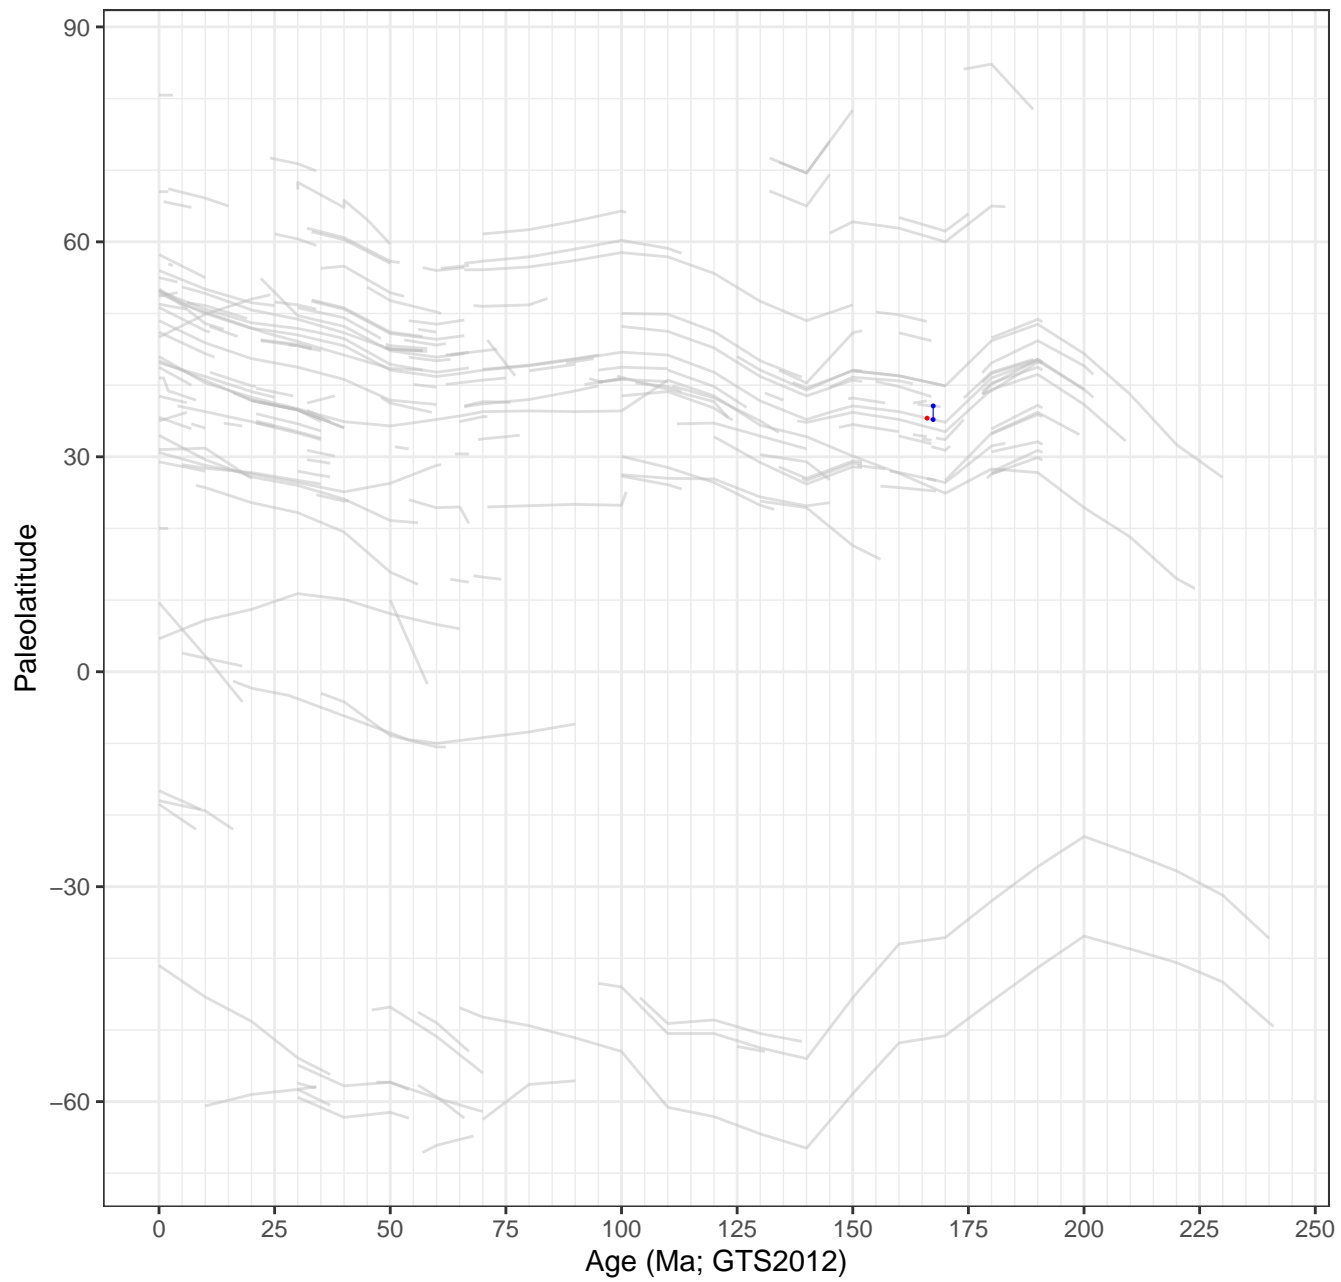

Supplement: Supplementary file 258 [file Genus Jansonia.pdf › Supplement/Supplement 2/Genus 459 plots/Genus Jansonia.pdf]

# Genus Kaiwaradinium

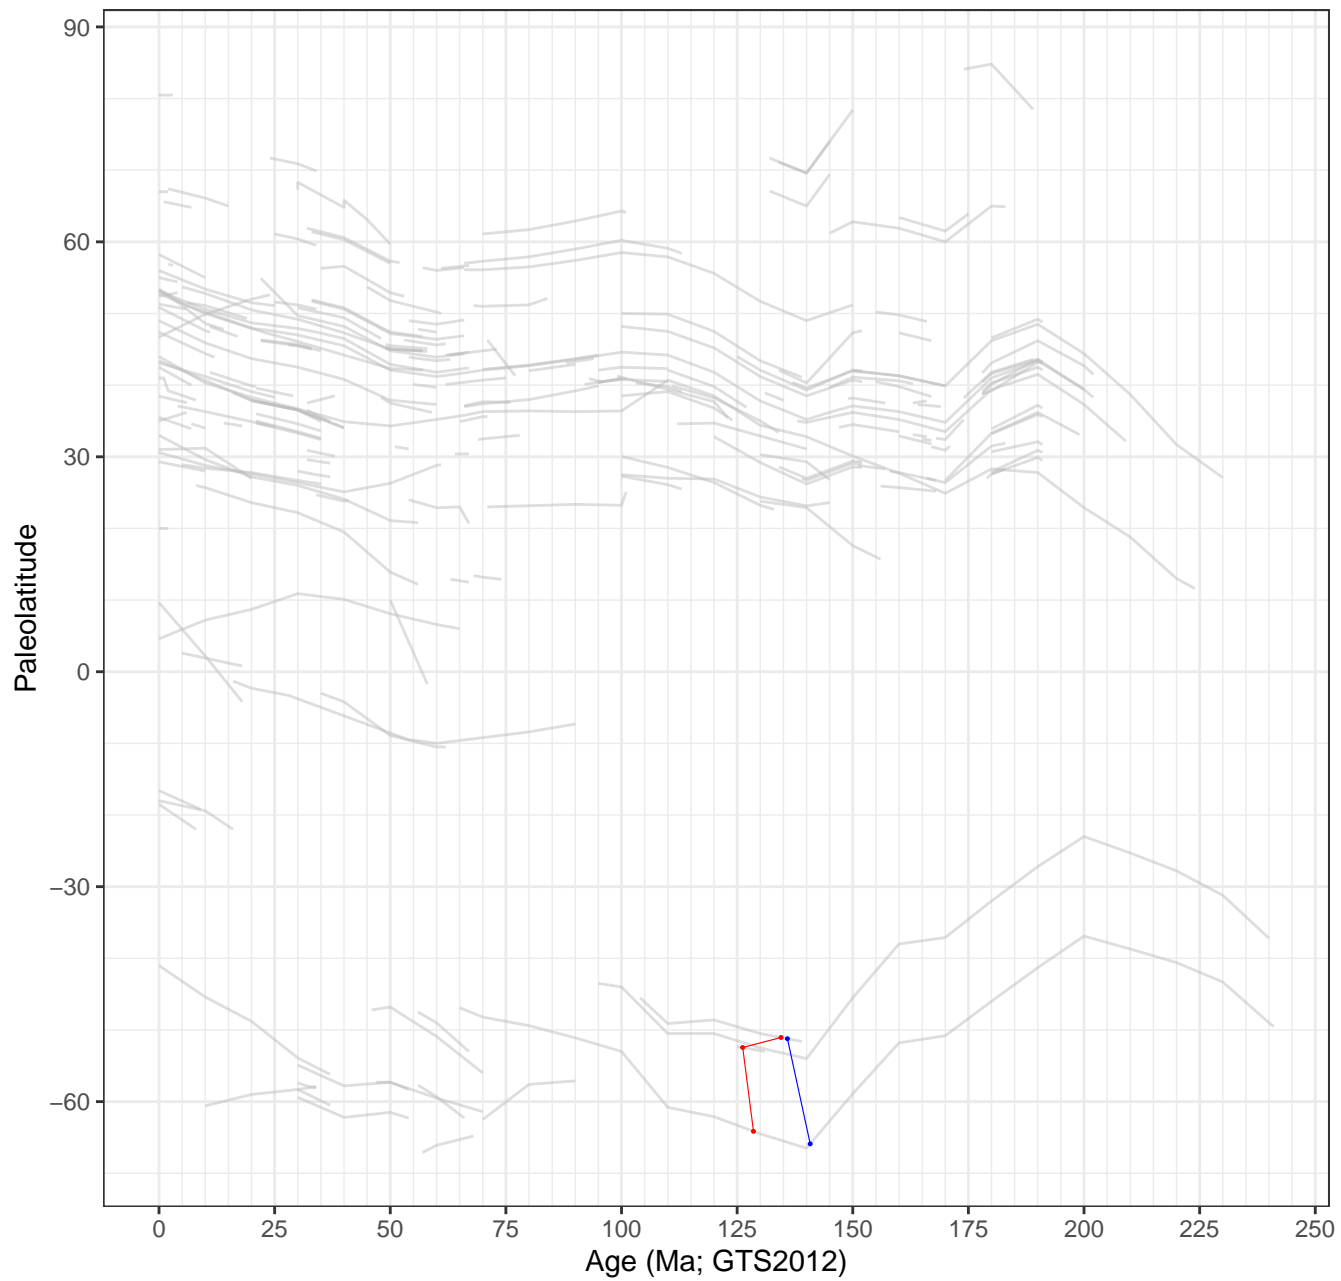

Supplement: Supplementary file 259 [file Genus Kaiwaradinium.pdf › Supplement/Supplement 2/Genus 459 plots/Genus Kaiwaradinium.pdf]

# Genus *Kallosphaeridium*

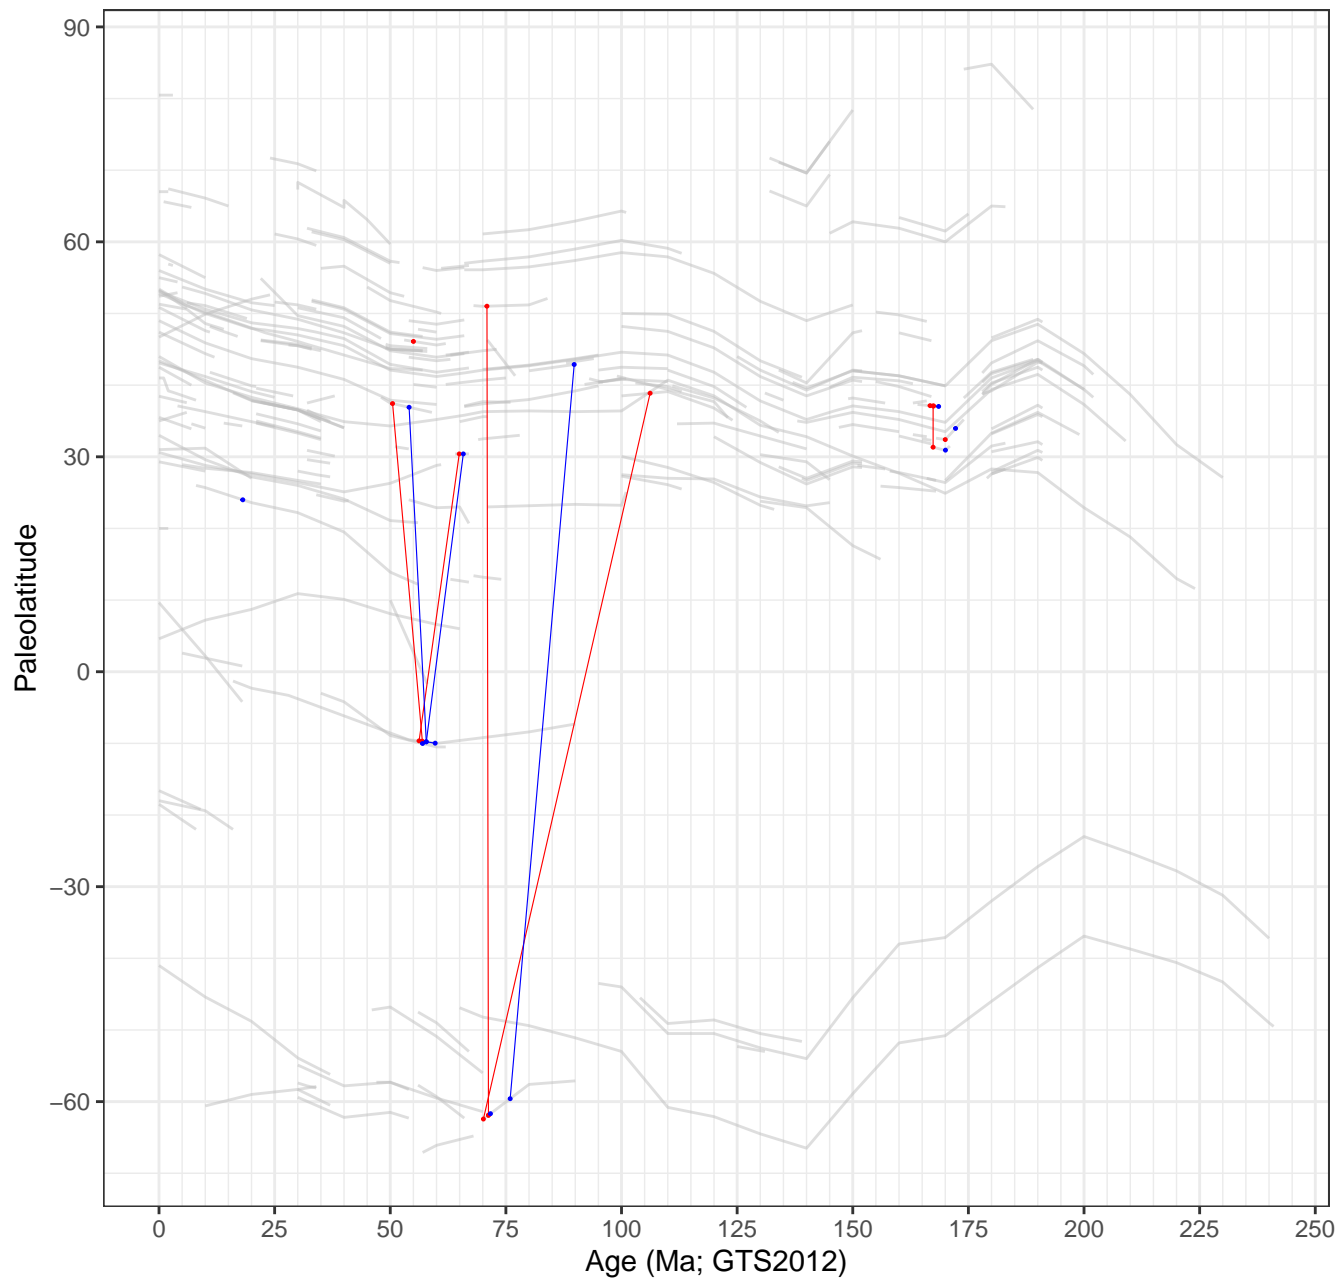

Supplement: Supplementary file 260 [file Genus Kallosphaeridium.pdf › Supplement/Supplement 2/Genus 459 plots/Genus Kallosphaeridium.pdf]

# Genus Kalyptea

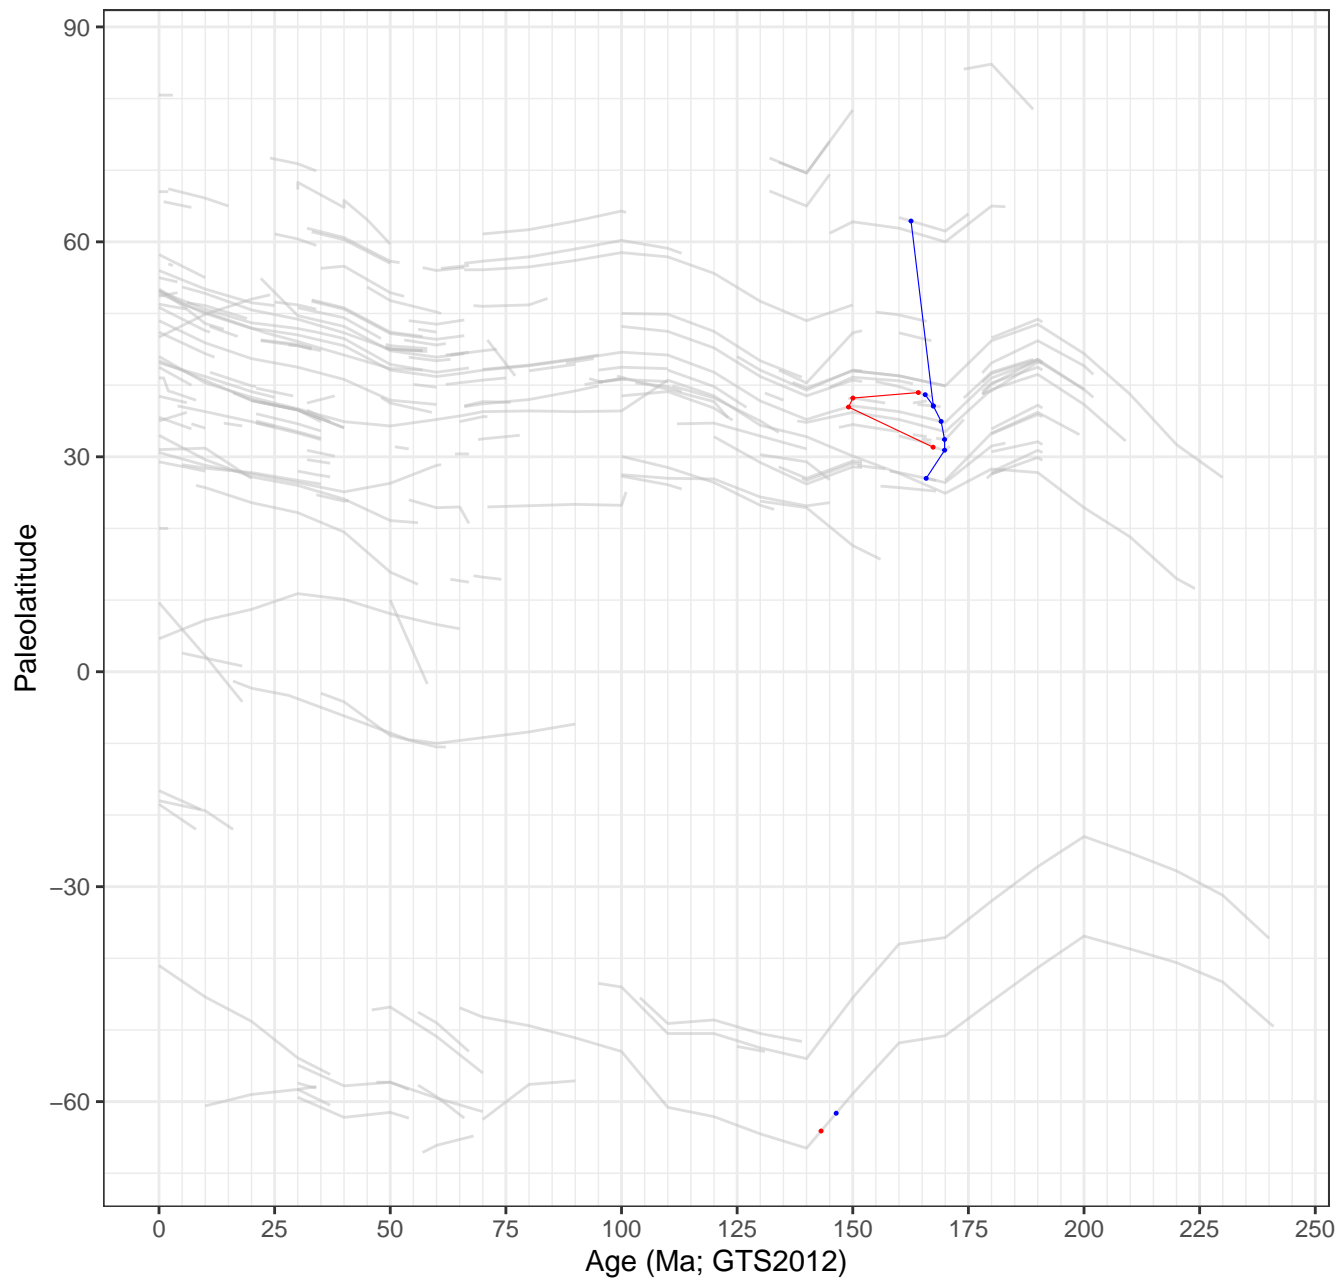

Supplement: Supplementary file 261 [file Genus Kalyptea.pdf › Supplement/Supplement 2/Genus 459 plots/Genus Kalyptea.pdf]

# Genus Kenleyia

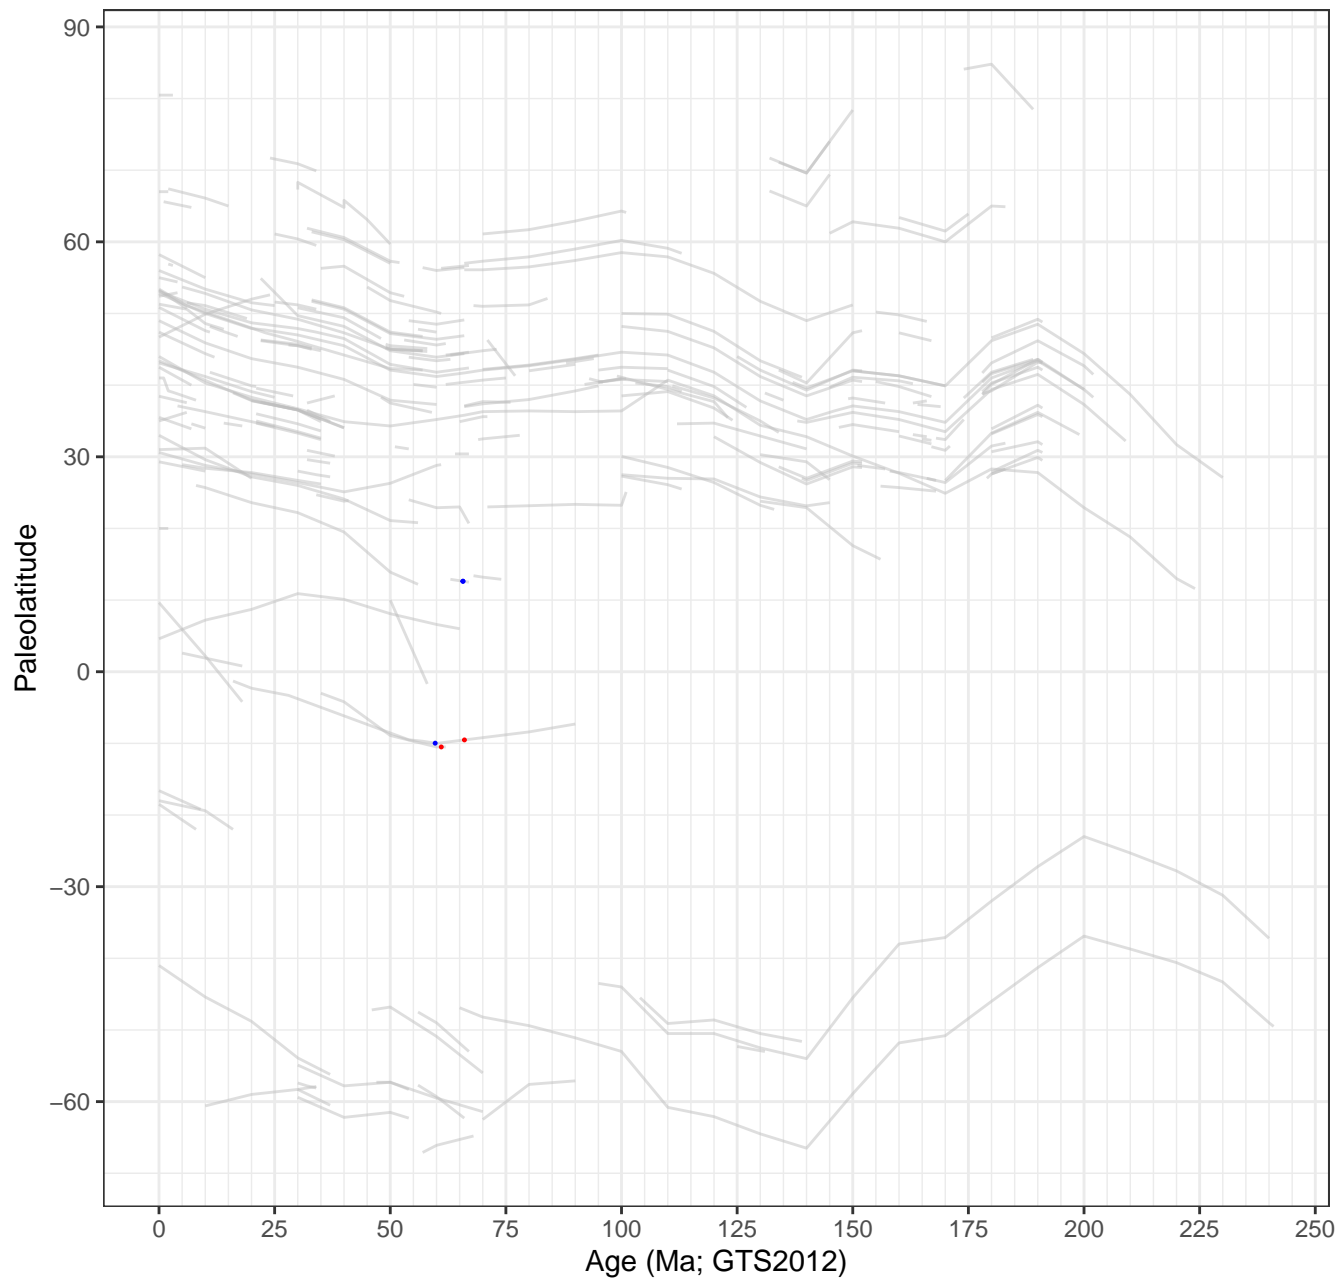

Supplement: Supplementary file 262 [file Genus Kenleyia.pdf › Supplement/Supplement 2/Genus 459 plots/Genus Kenleyia.pdf]

# Genus Kiokansium

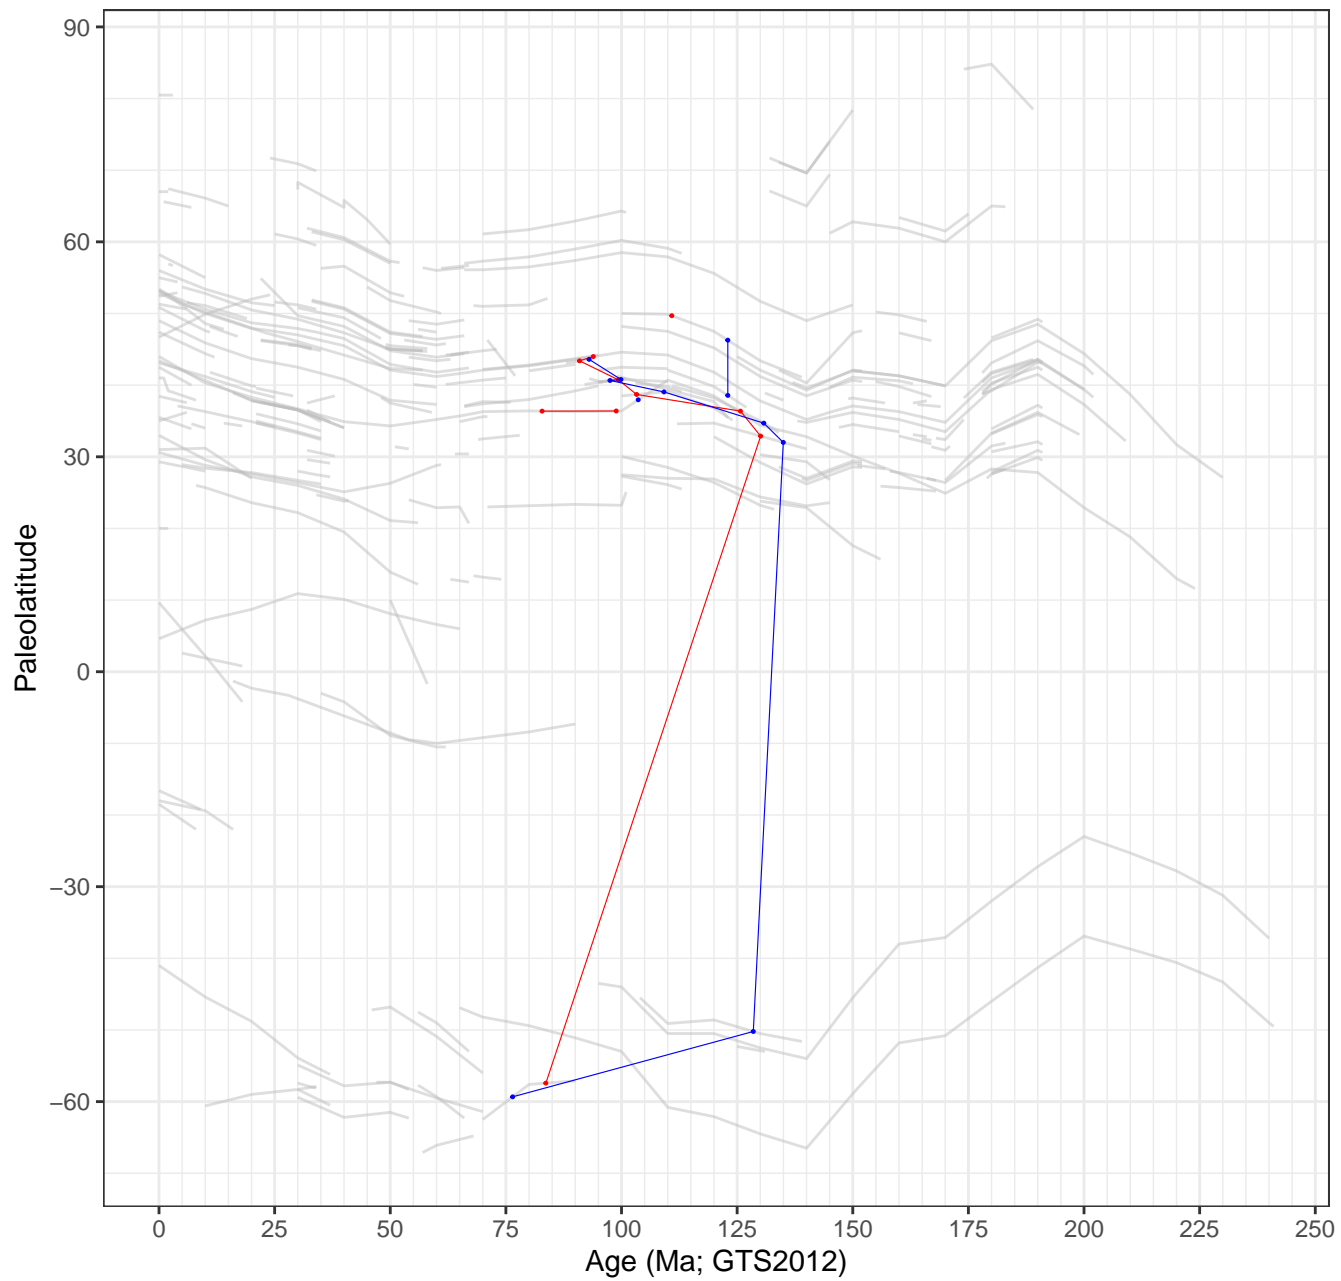

Supplement: Supplementary file 263 [file Genus Kiokansium.pdf › Supplement/Supplement 2/Genus 459 plots/Genus Kiokansium.pdf]

# Genus Kisselevia

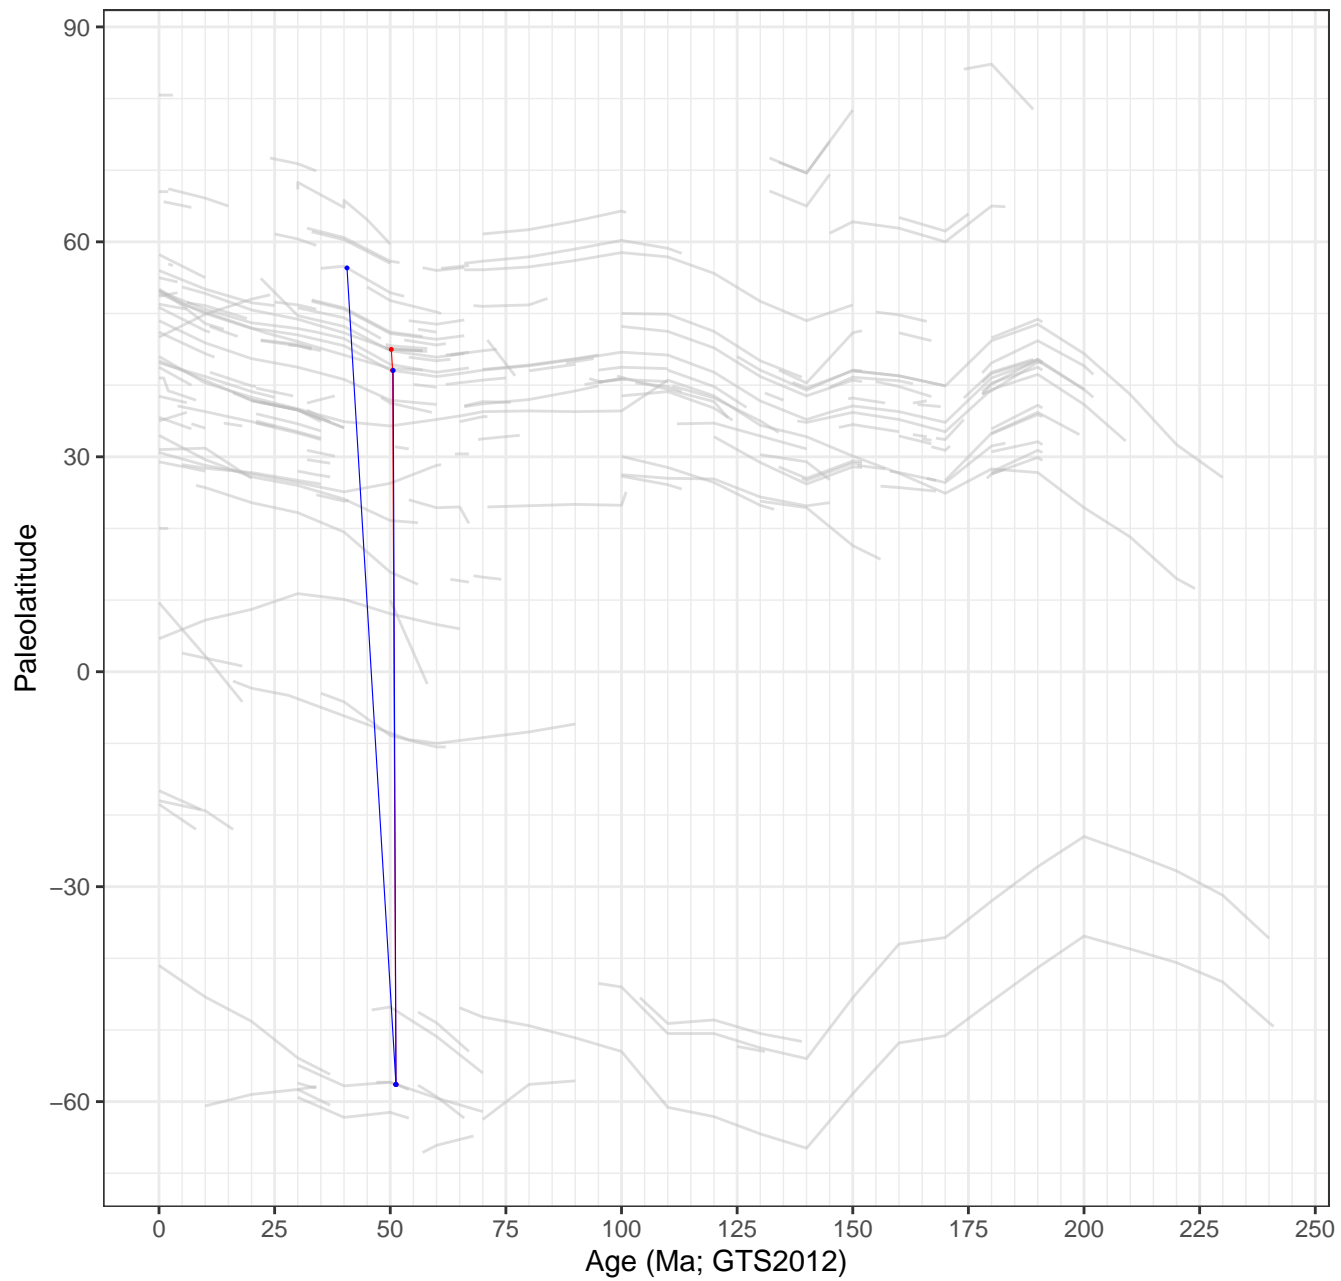

Supplement: Supplementary file 264 [file Genus Kisselevia.pdf › Supplement/Supplement 2/Genus 459 plots/Genus Kisselevia.pdf]

# Genus *Kleithriasphaeridium*

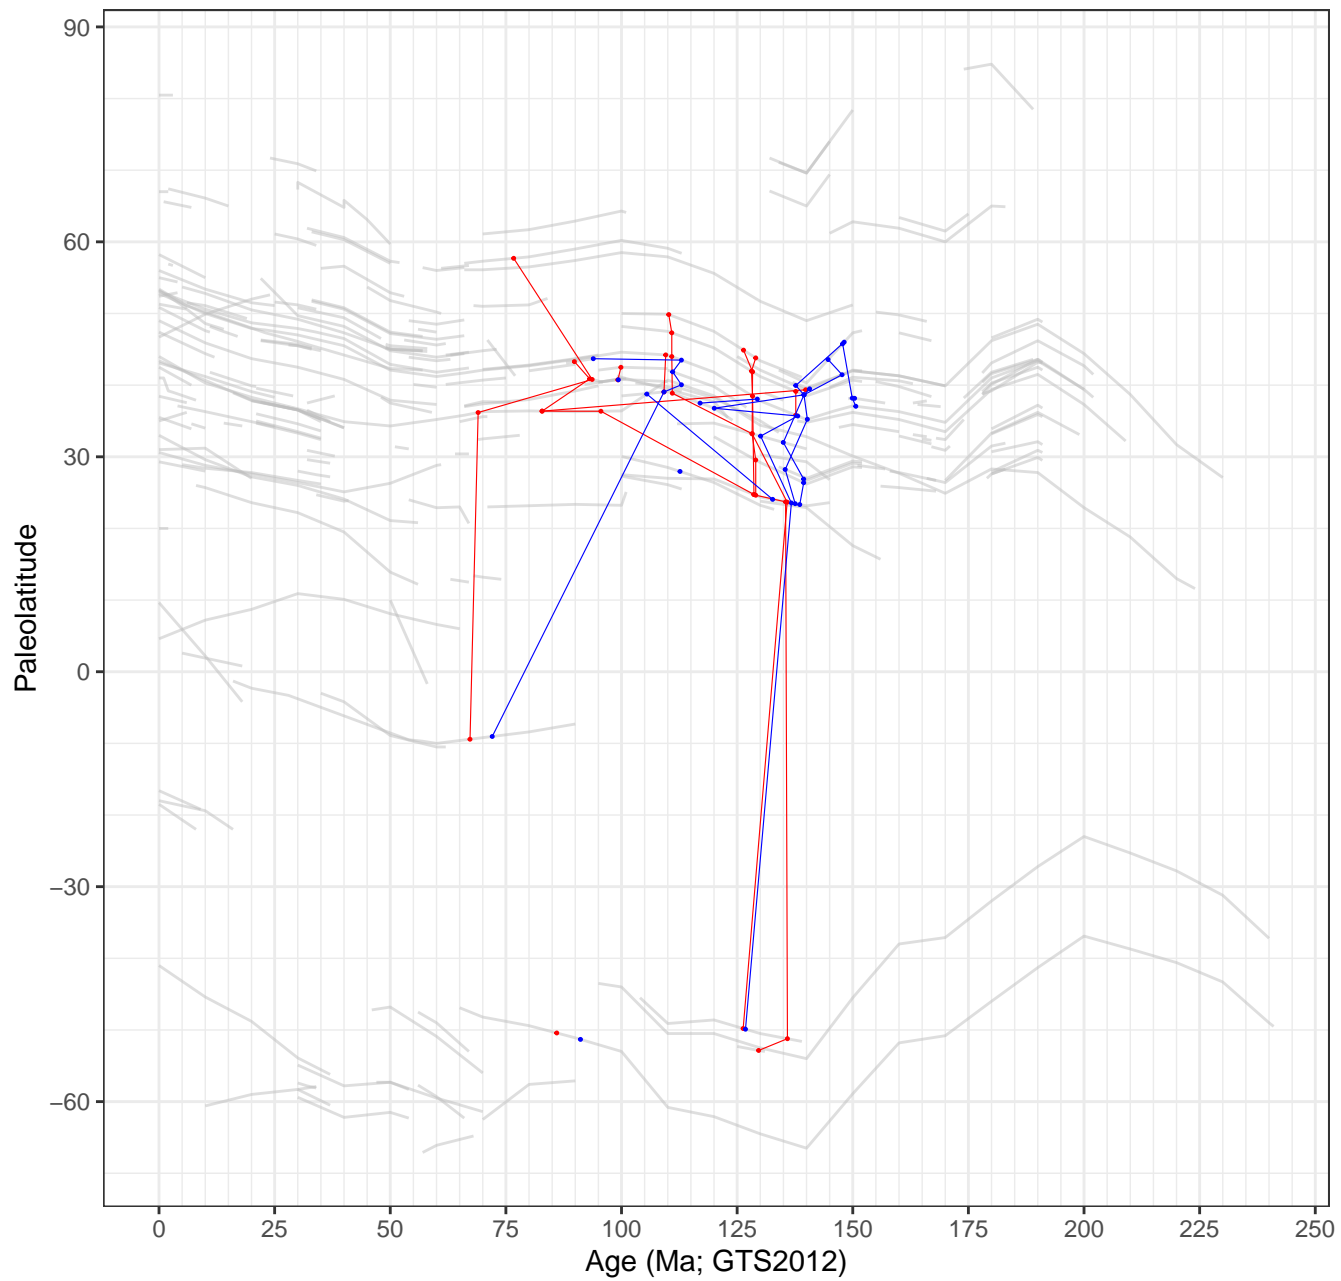

Supplement: Supplementary file 265 [file Genus Kleithriasphaeridium.pdf › Supplement/Supplement 2/Genus 459 plots/Genus Kleithriasphaeridium.pdf]

# Genus Komewuia

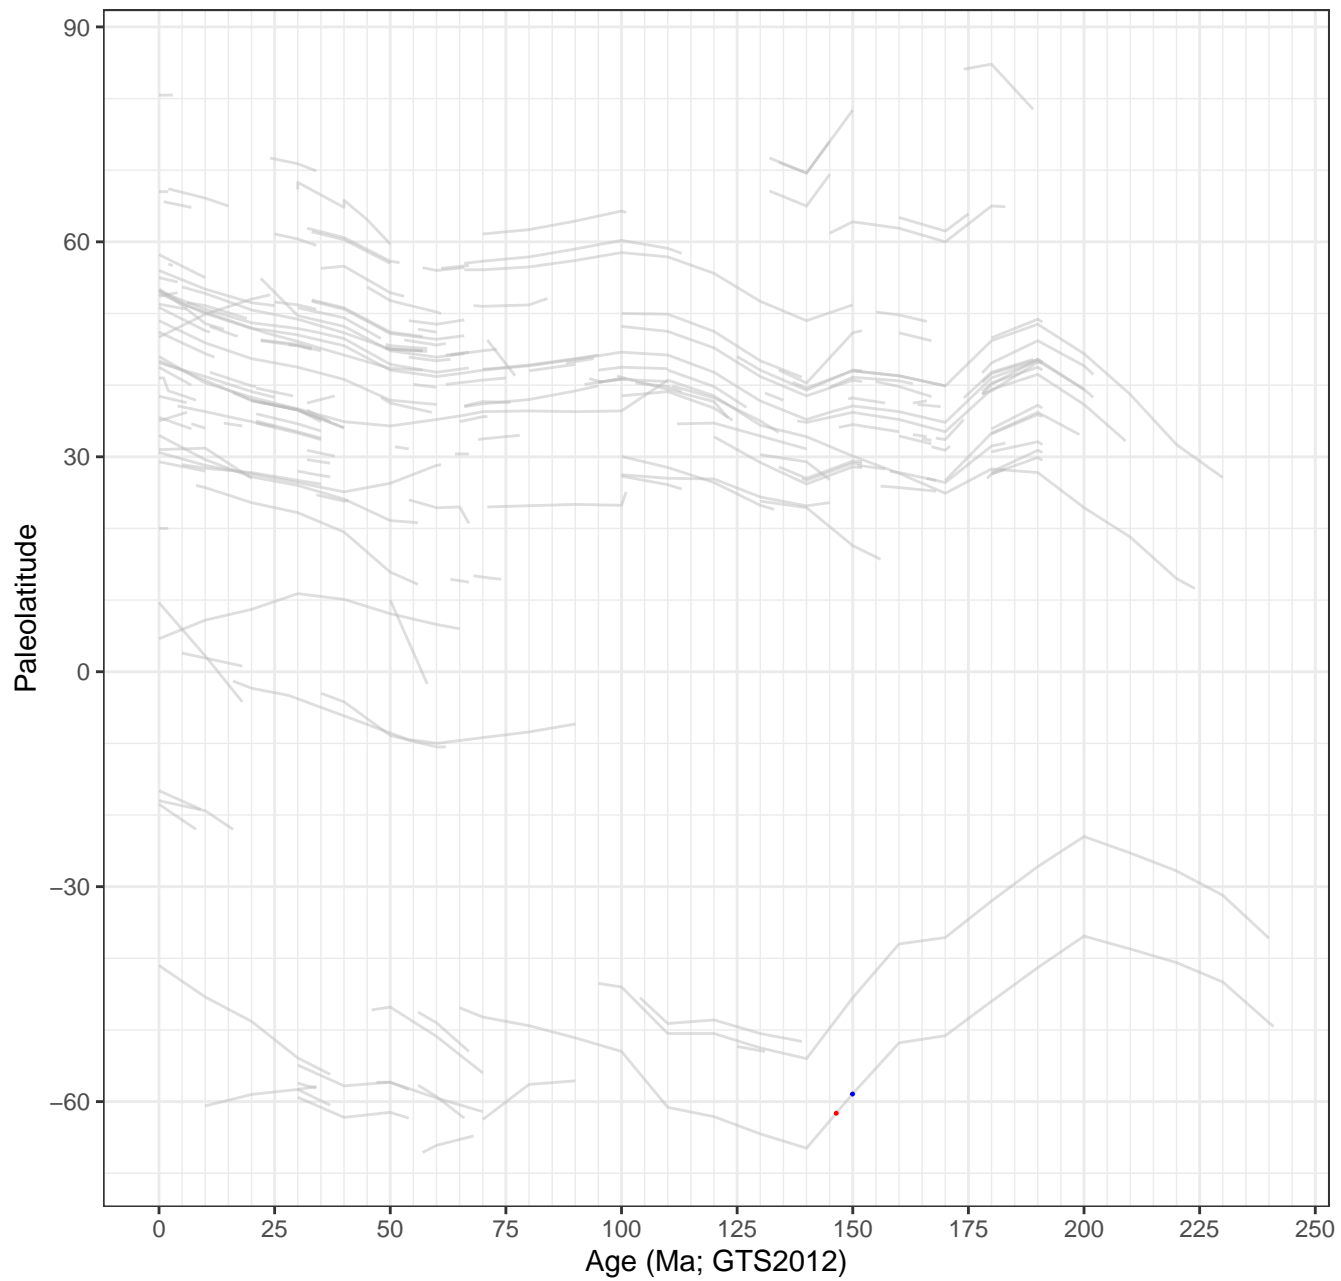

Supplement: Supplementary file 266 [file Genus Komewuia.pdf › Supplement/Supplement 2/Genus 459 plots/Genus Komewuia.pdf]

# Genus *Korystocysta*

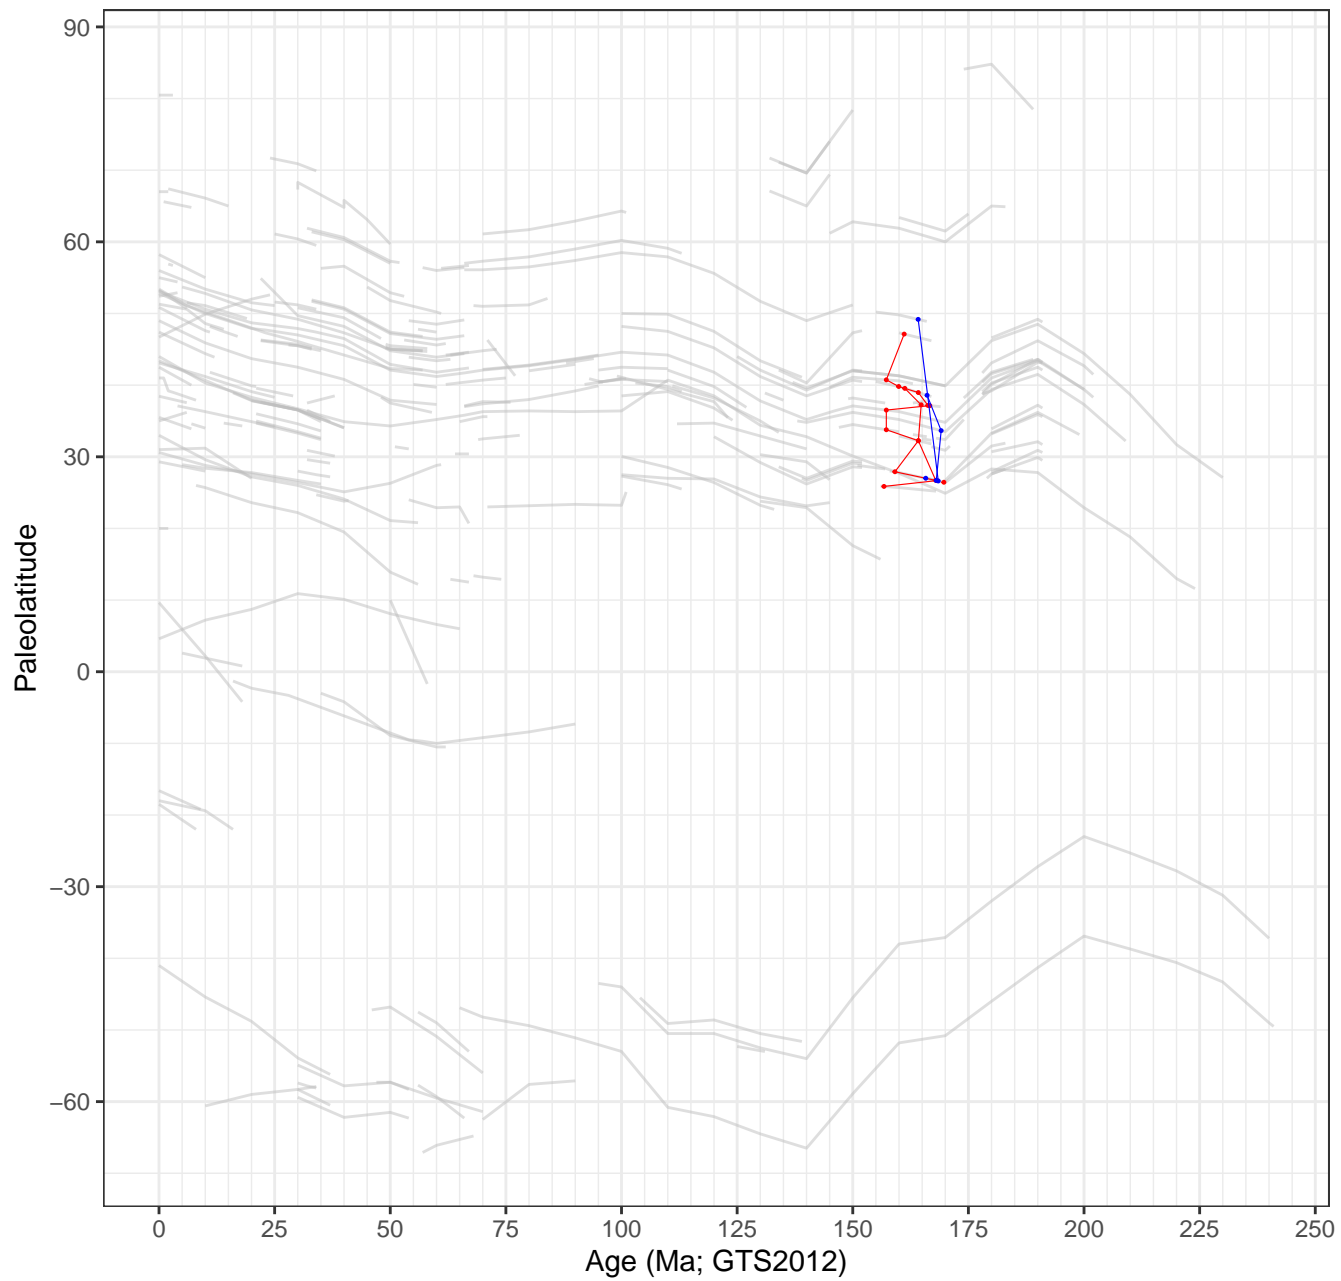

Supplement: Supplementary file 267 [file Genus Korystocysta.pdf › Supplement/Supplement 2/Genus 459 plots/Genus Korystocysta.pdf]

# Genus Labyrinthodinium

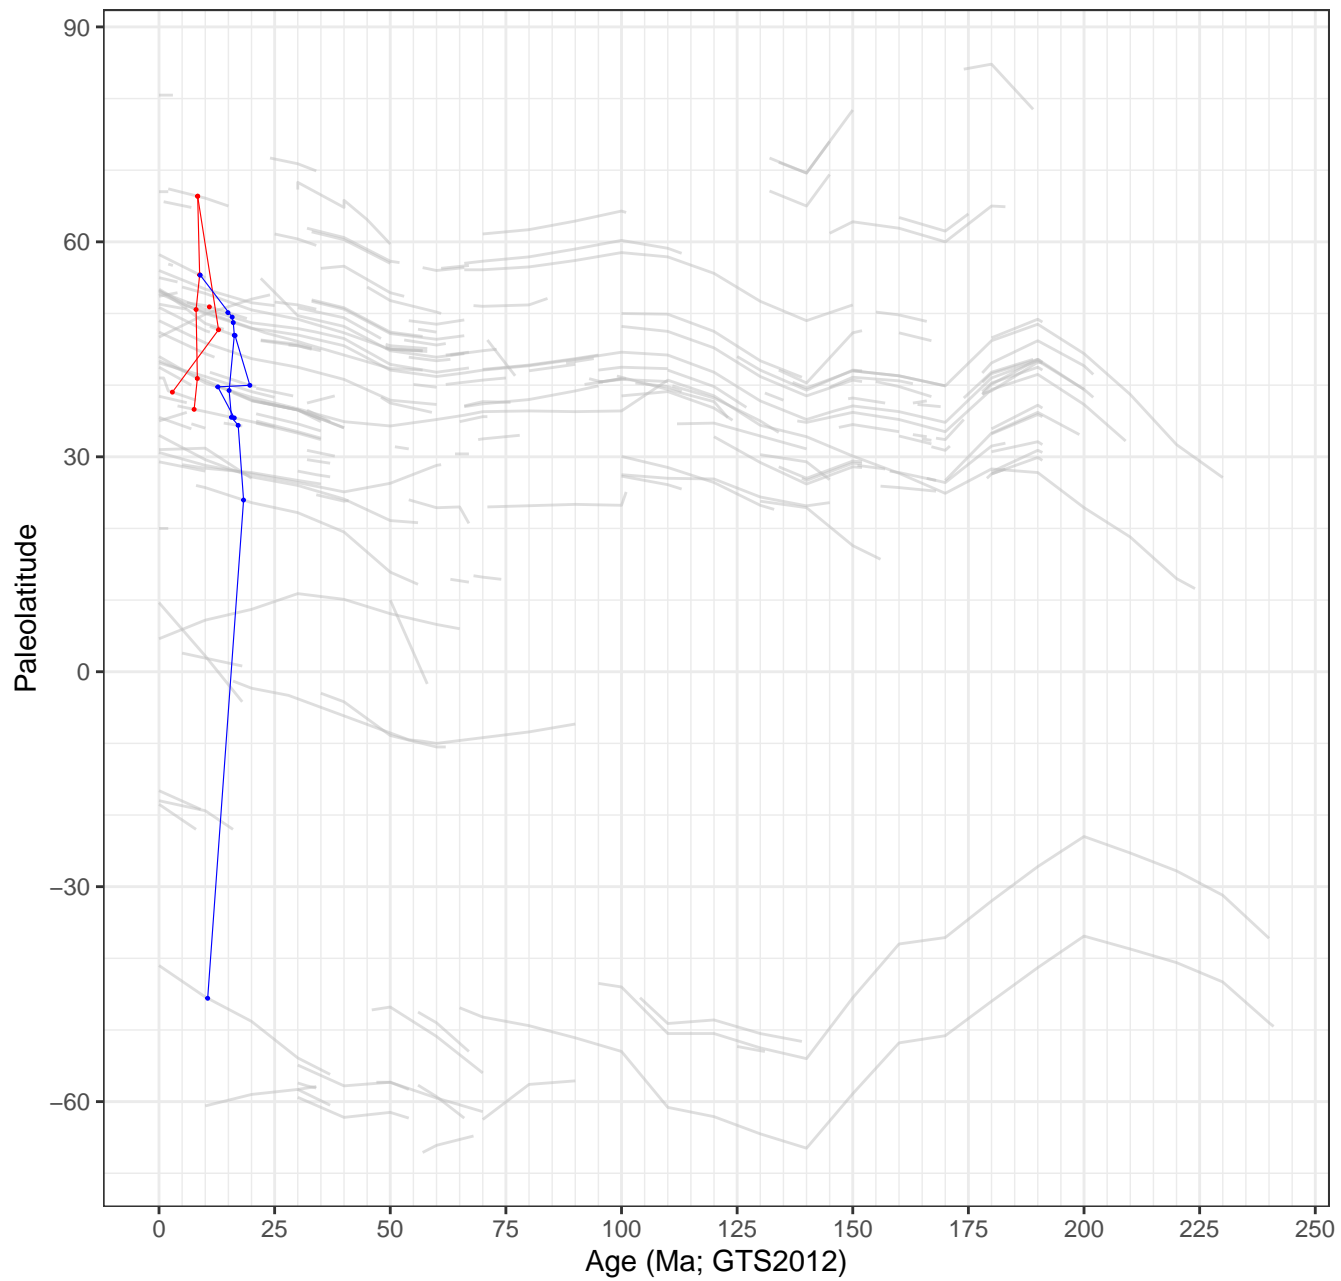

Supplement: Supplementary file 268 [file Genus Labyrinthodinium.pdf › Supplement/Supplement 2/Genus 459 plots/Genus Labyrinthodinium.pdf]

# Genus Laciniadinium

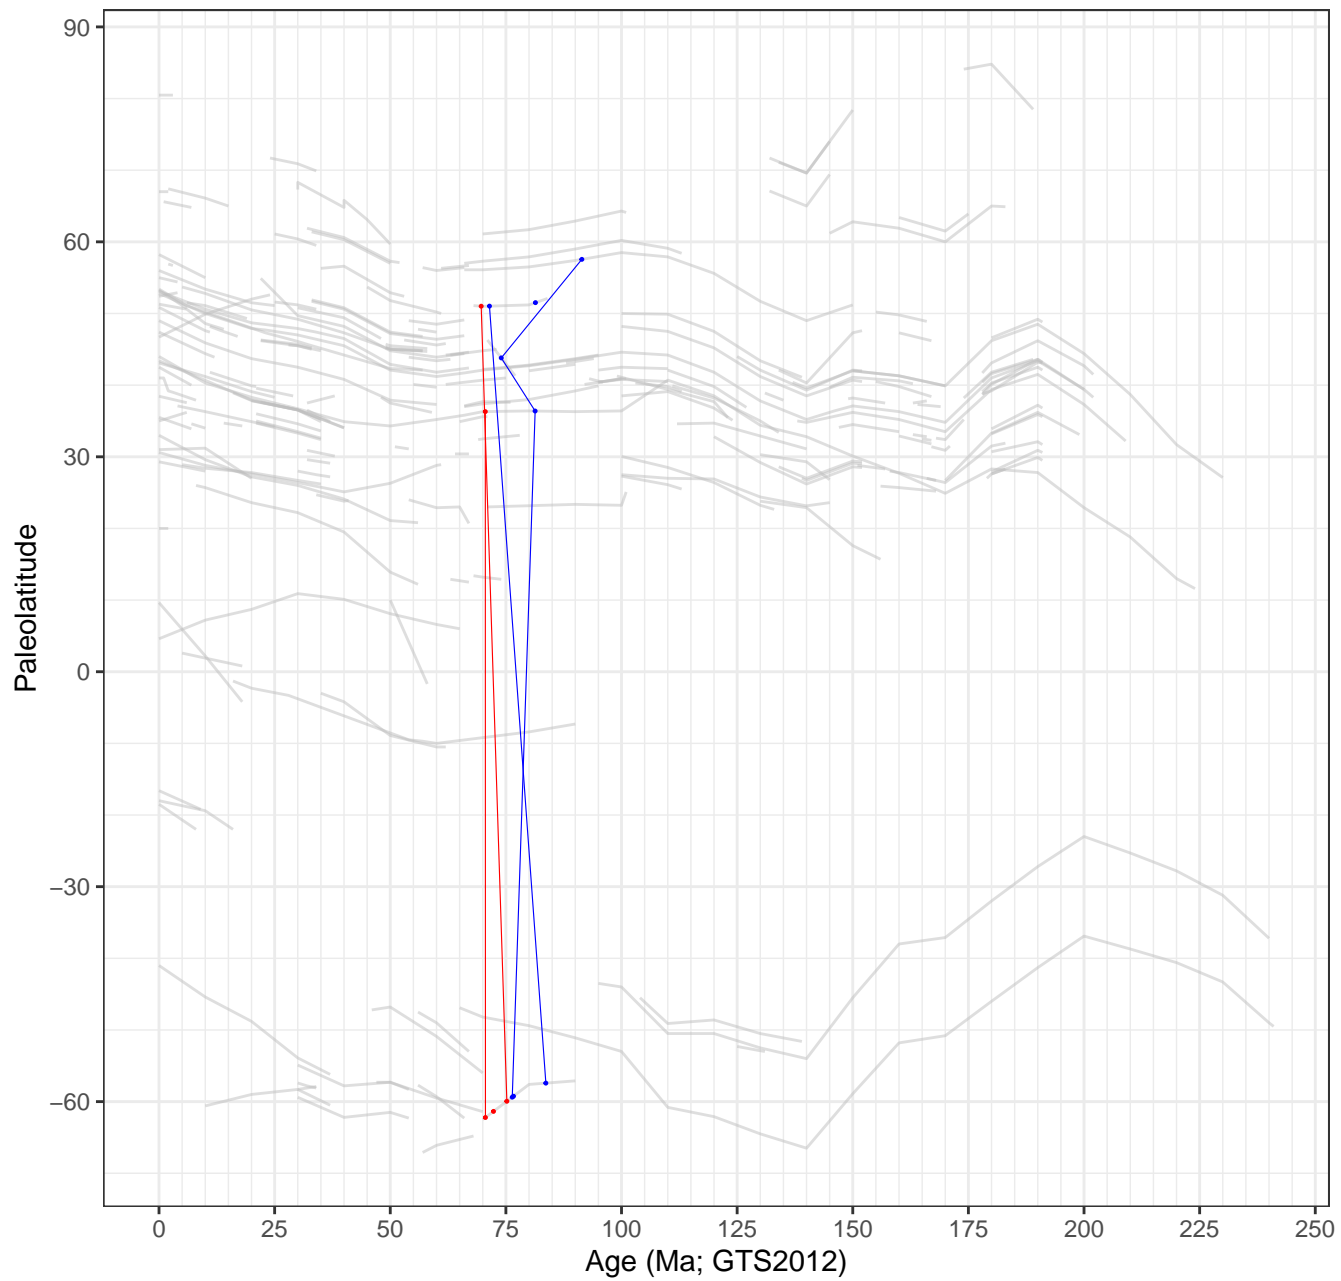

Supplement: Supplementary file 269 [file Genus Laciniadinium.pdf › Supplement/Supplement 2/Genus 459 plots/Genus Laciniadinium.pdf]

# Genus Lacrymodinium

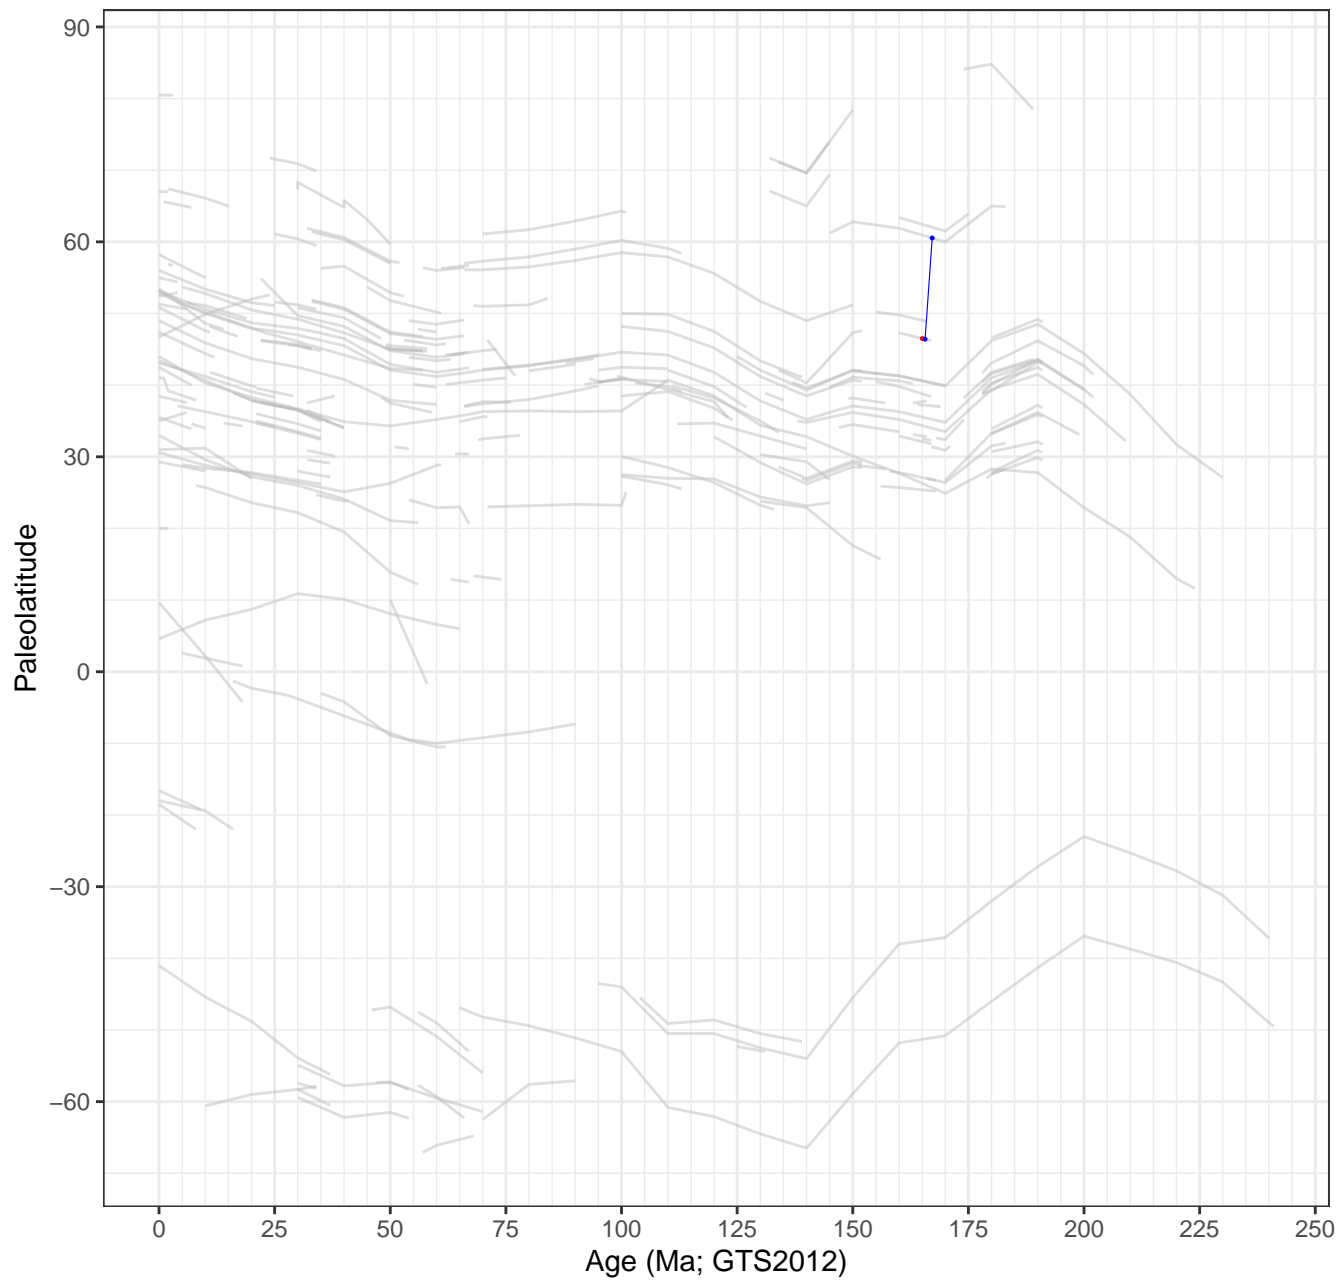

Supplement: Supplementary file 270 [file Genus Lacrymodinium.pdf › Supplement/Supplement 2/Genus 459 plots/Genus Lacrymodinium.pdf]

# Genus *Lagenorhynchus*

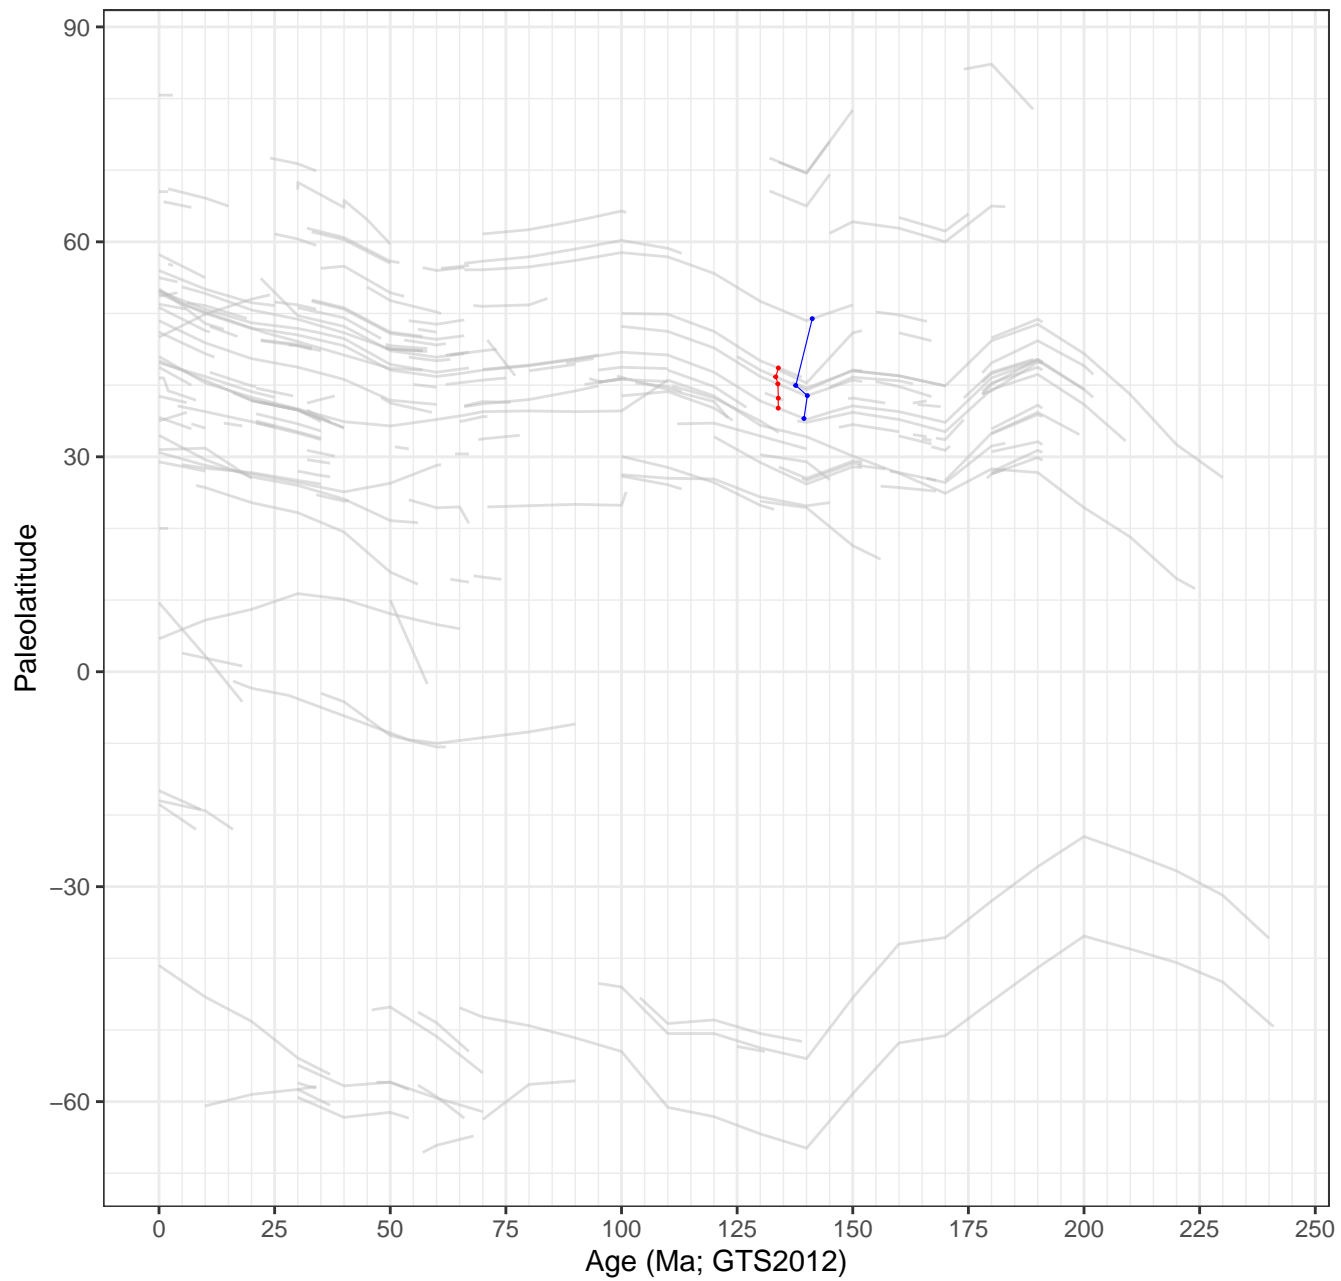

Supplement: Supplementary file 271 [file Genus Lagenorhytis.pdf › Supplement/Supplement 2/Genus 459 plots/Genus Lagenorhytis.pdf]

# Genus *Lanterna*

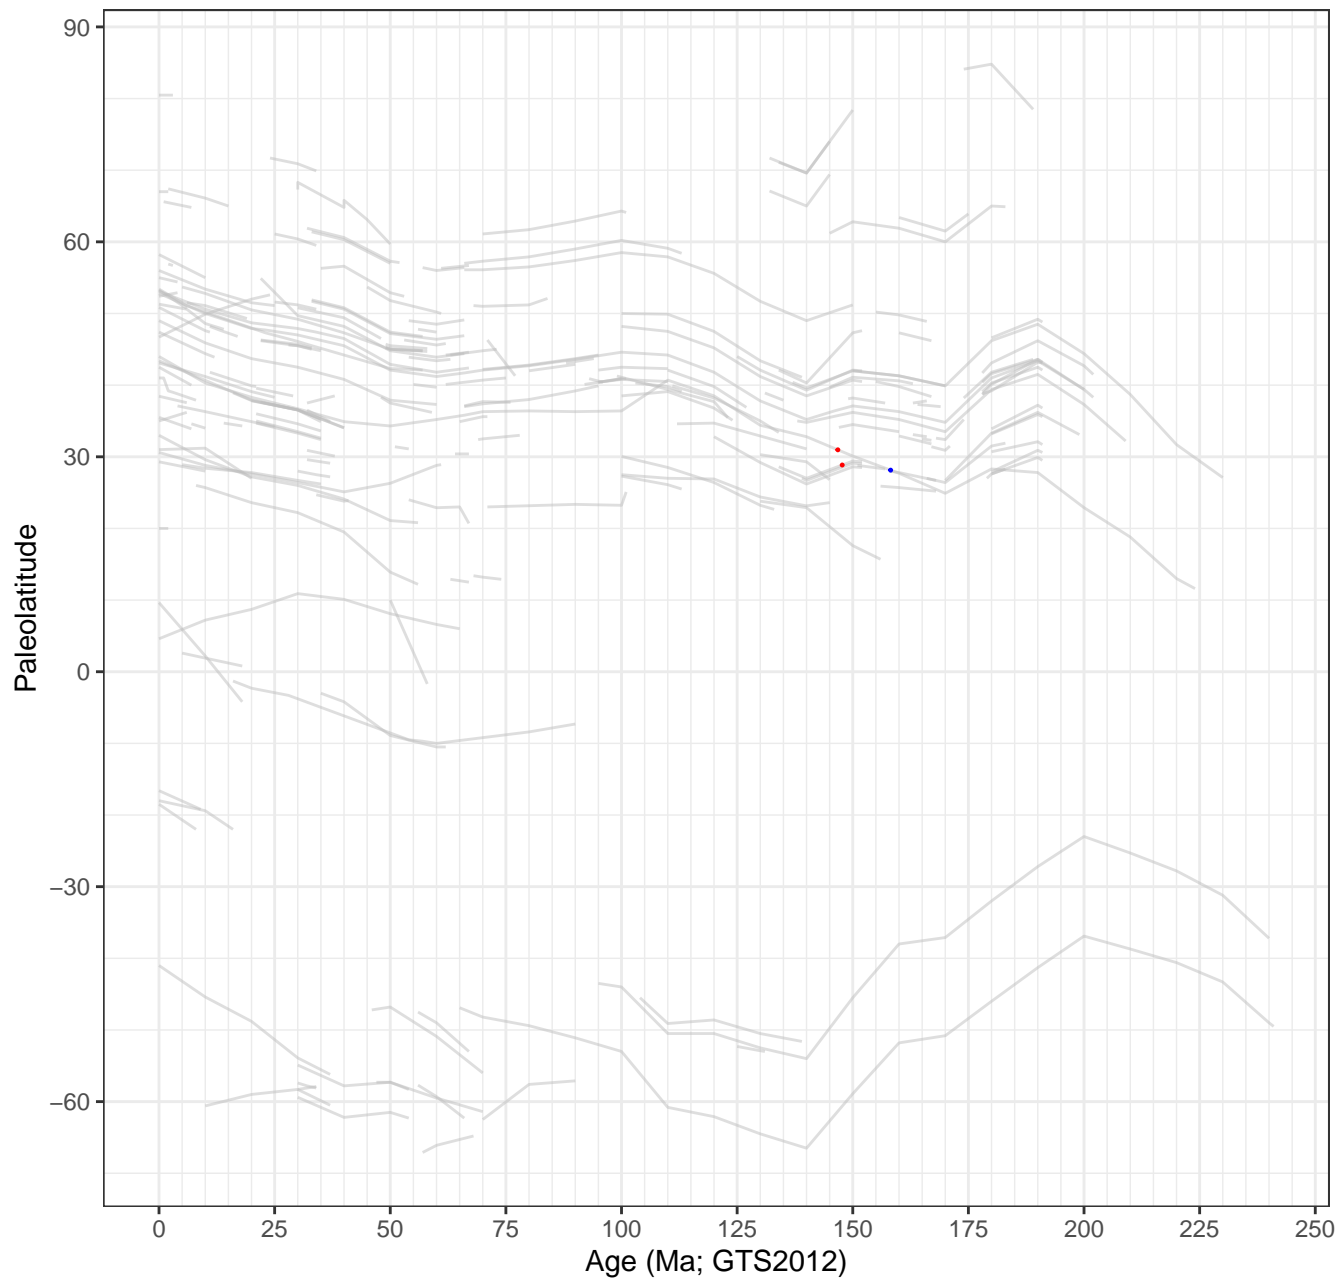

Supplement: Supplementary file 272 [file Genus Lanterna.pdf › Supplement/Supplement 2/Genus 459 plots/Genus Lanterna.pdf]

# Genus *Lanternosphaeridium*

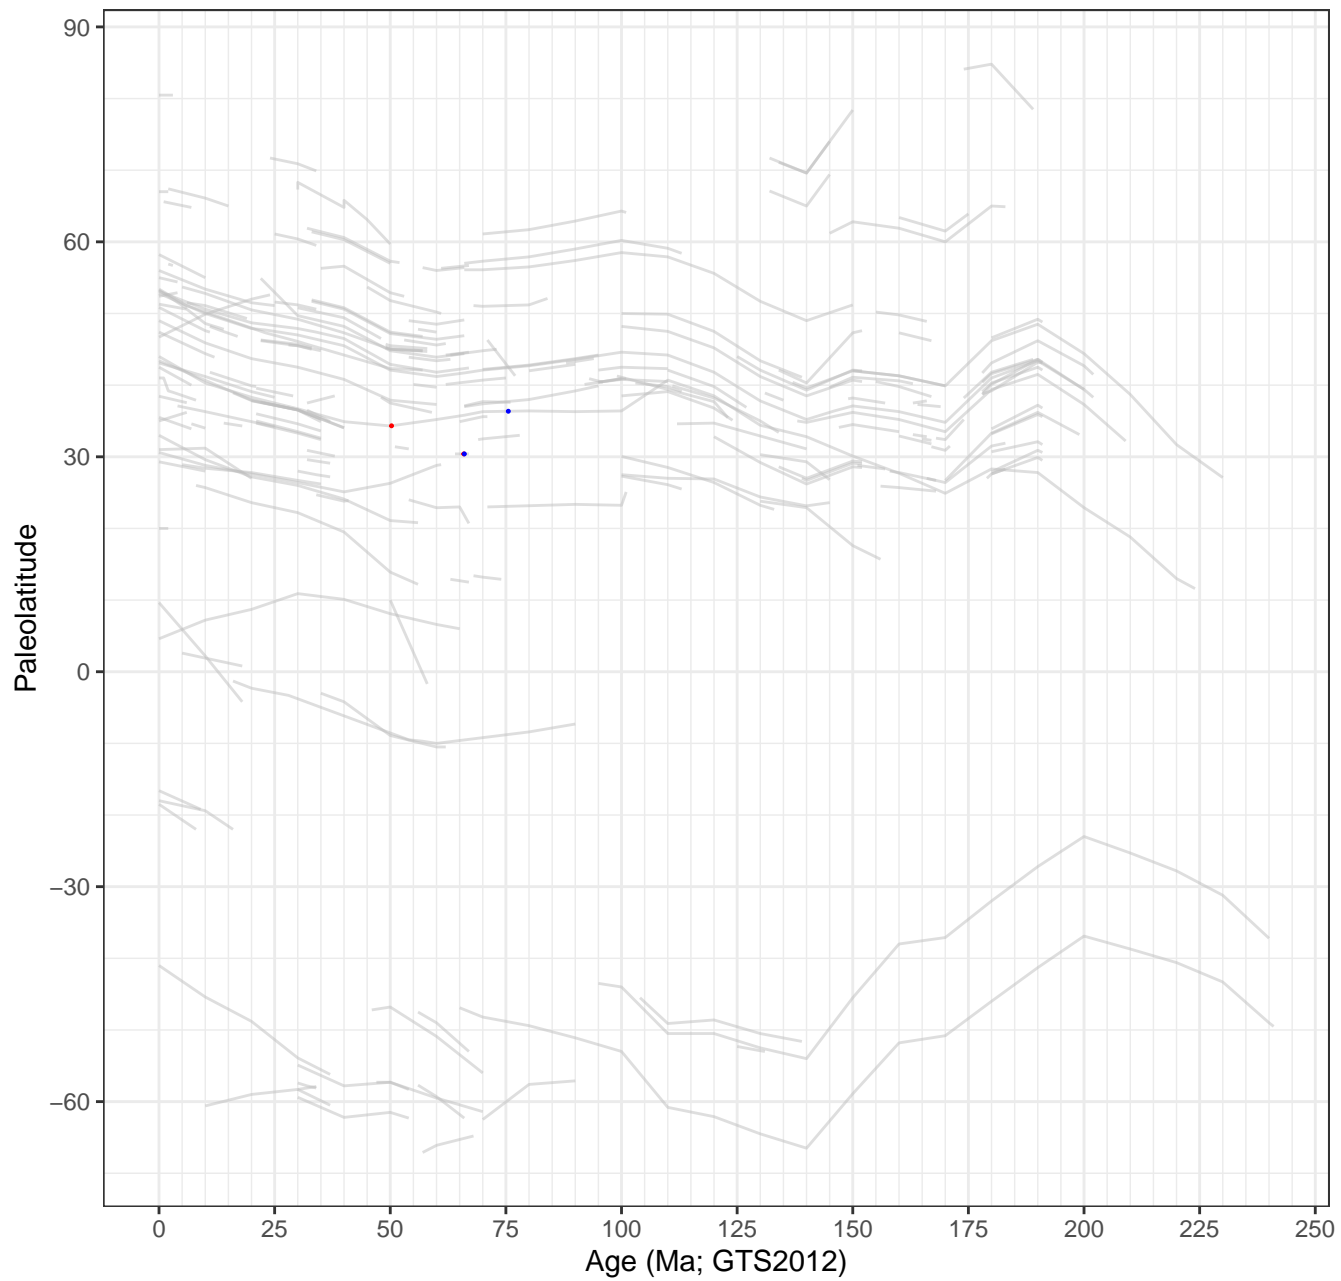

Supplement: Supplementary file 273 [file Genus Lanternosphaeridium.pdf › Supplement/Supplement 2/Genus 459 plots/Genus Lanternosphaeridium.pdf]

# Genus Leberidocysta

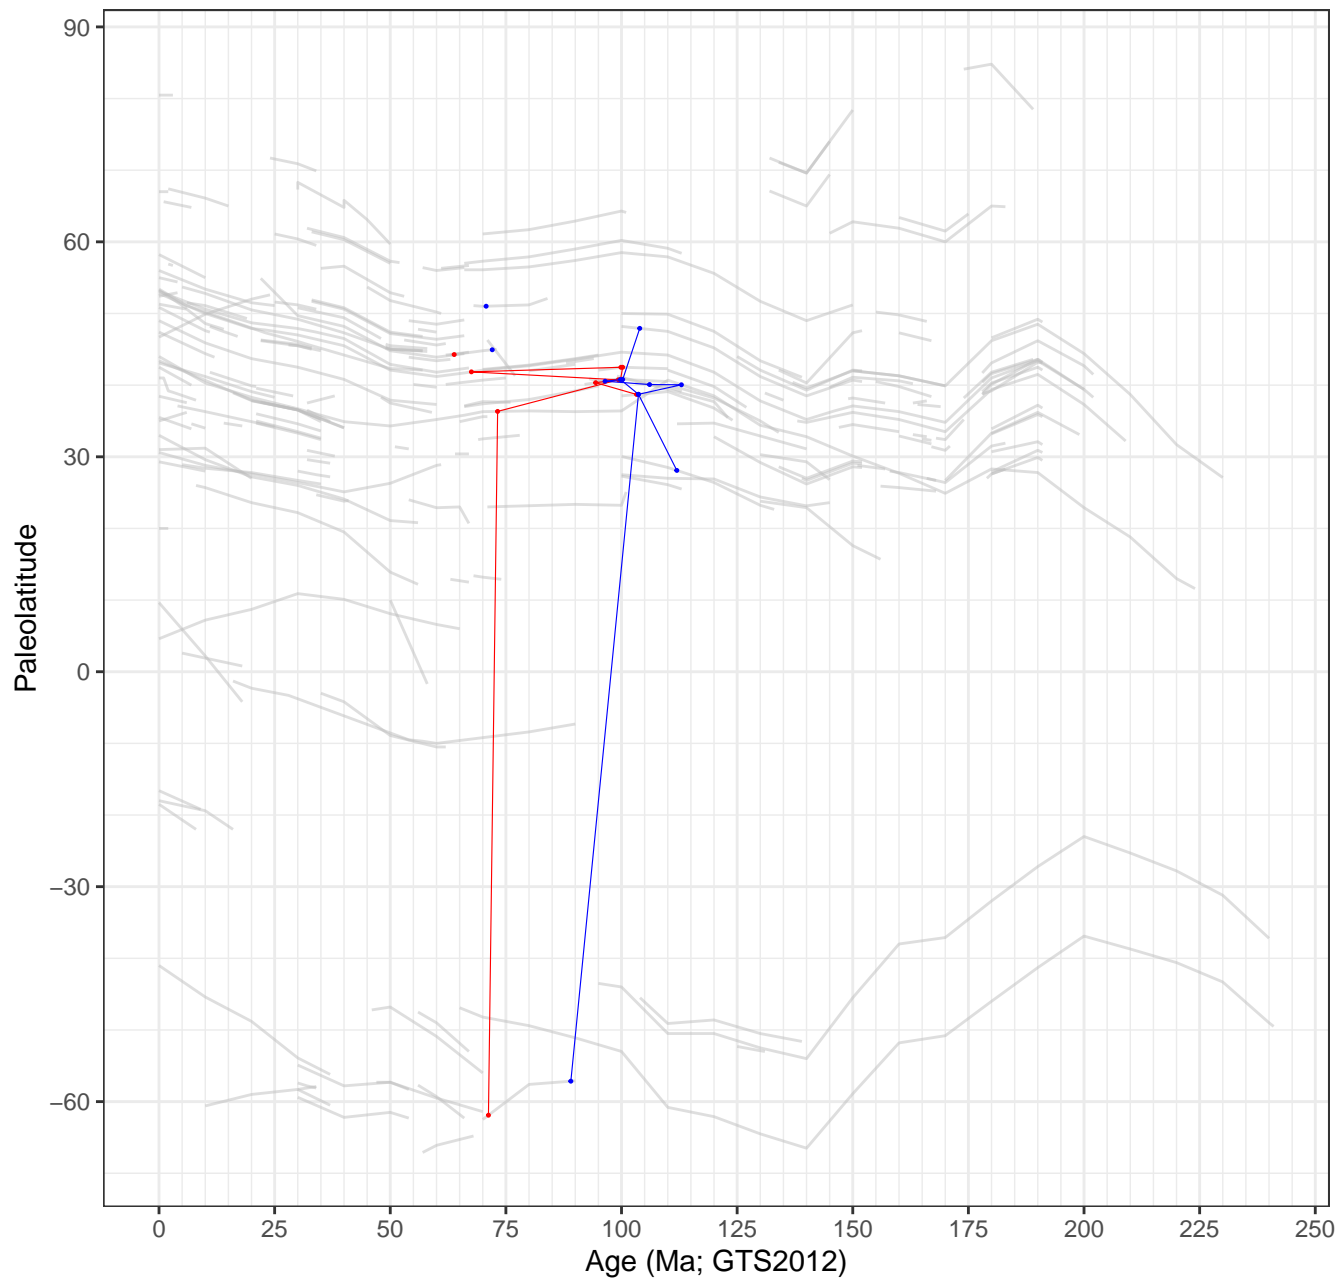

Supplement: Supplementary file 274 [file Genus Leberidocysta.pdf › Supplement/Supplement 2/Genus 459 plots/Genus Leberidocysta.pdf]

# Genus *Lejeunecestya*

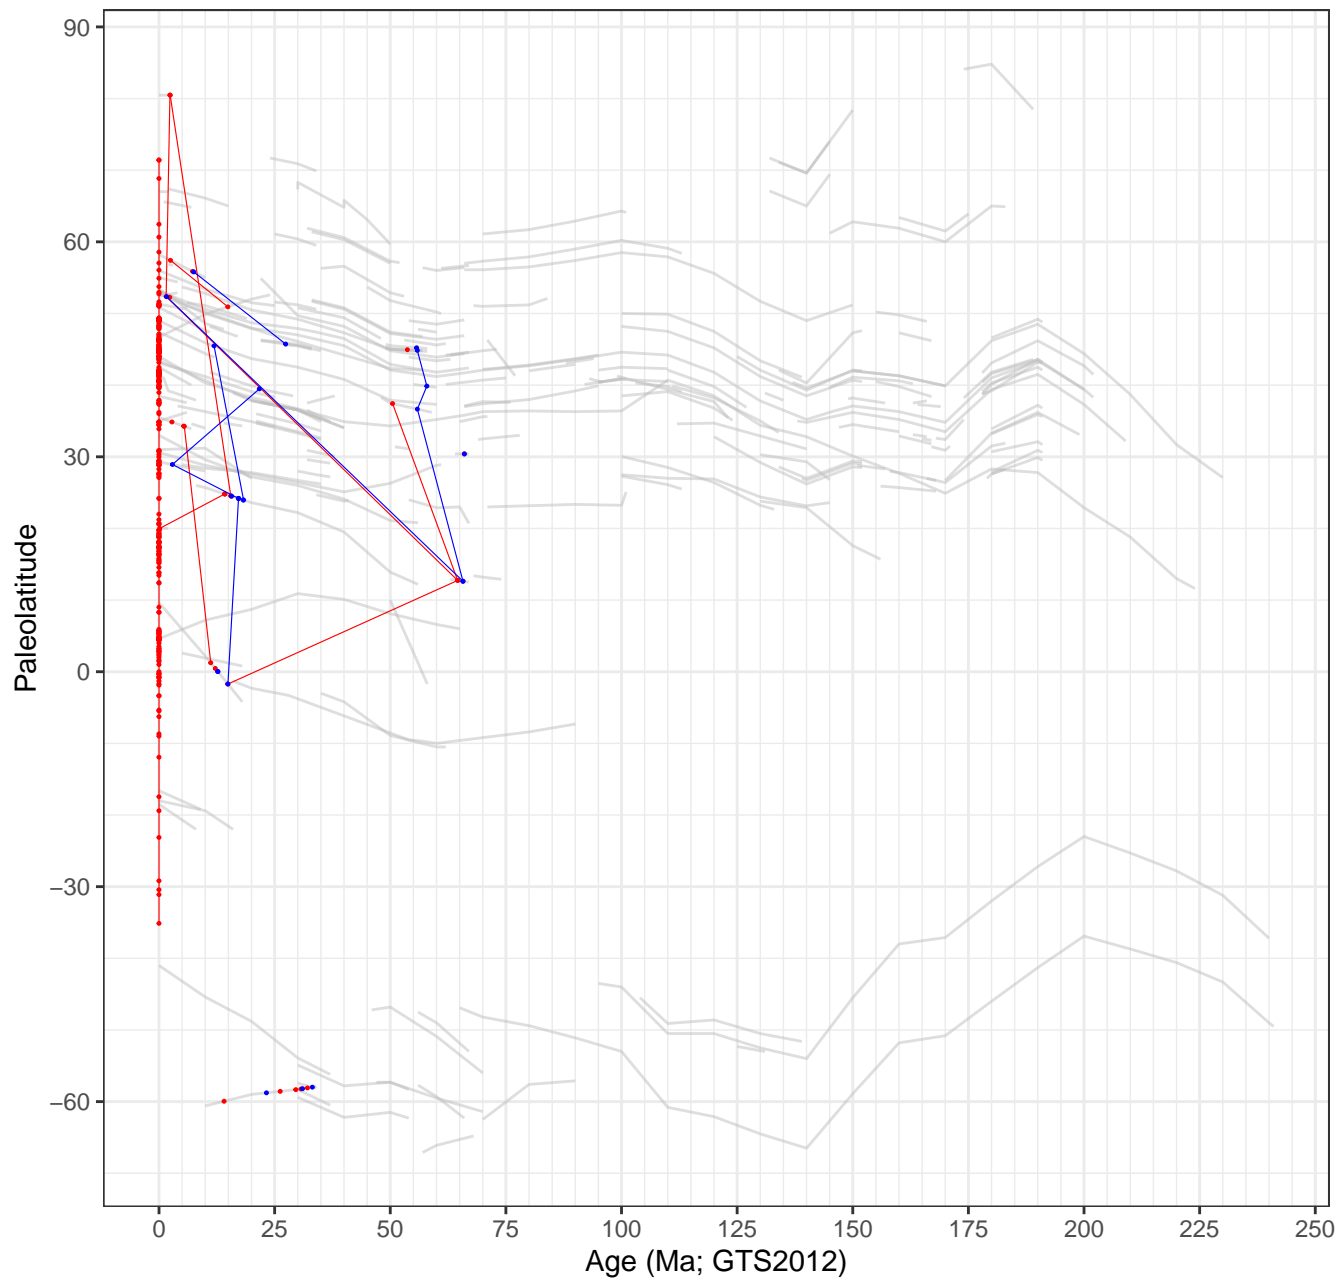

Supplement: Supplementary file 275 [file Genus Lejeunecysta.pdf › Supplement/Supplement 2/Genus 459 plots/Genus Lejeunecysta.pdf]

# Genus *Lentinia*

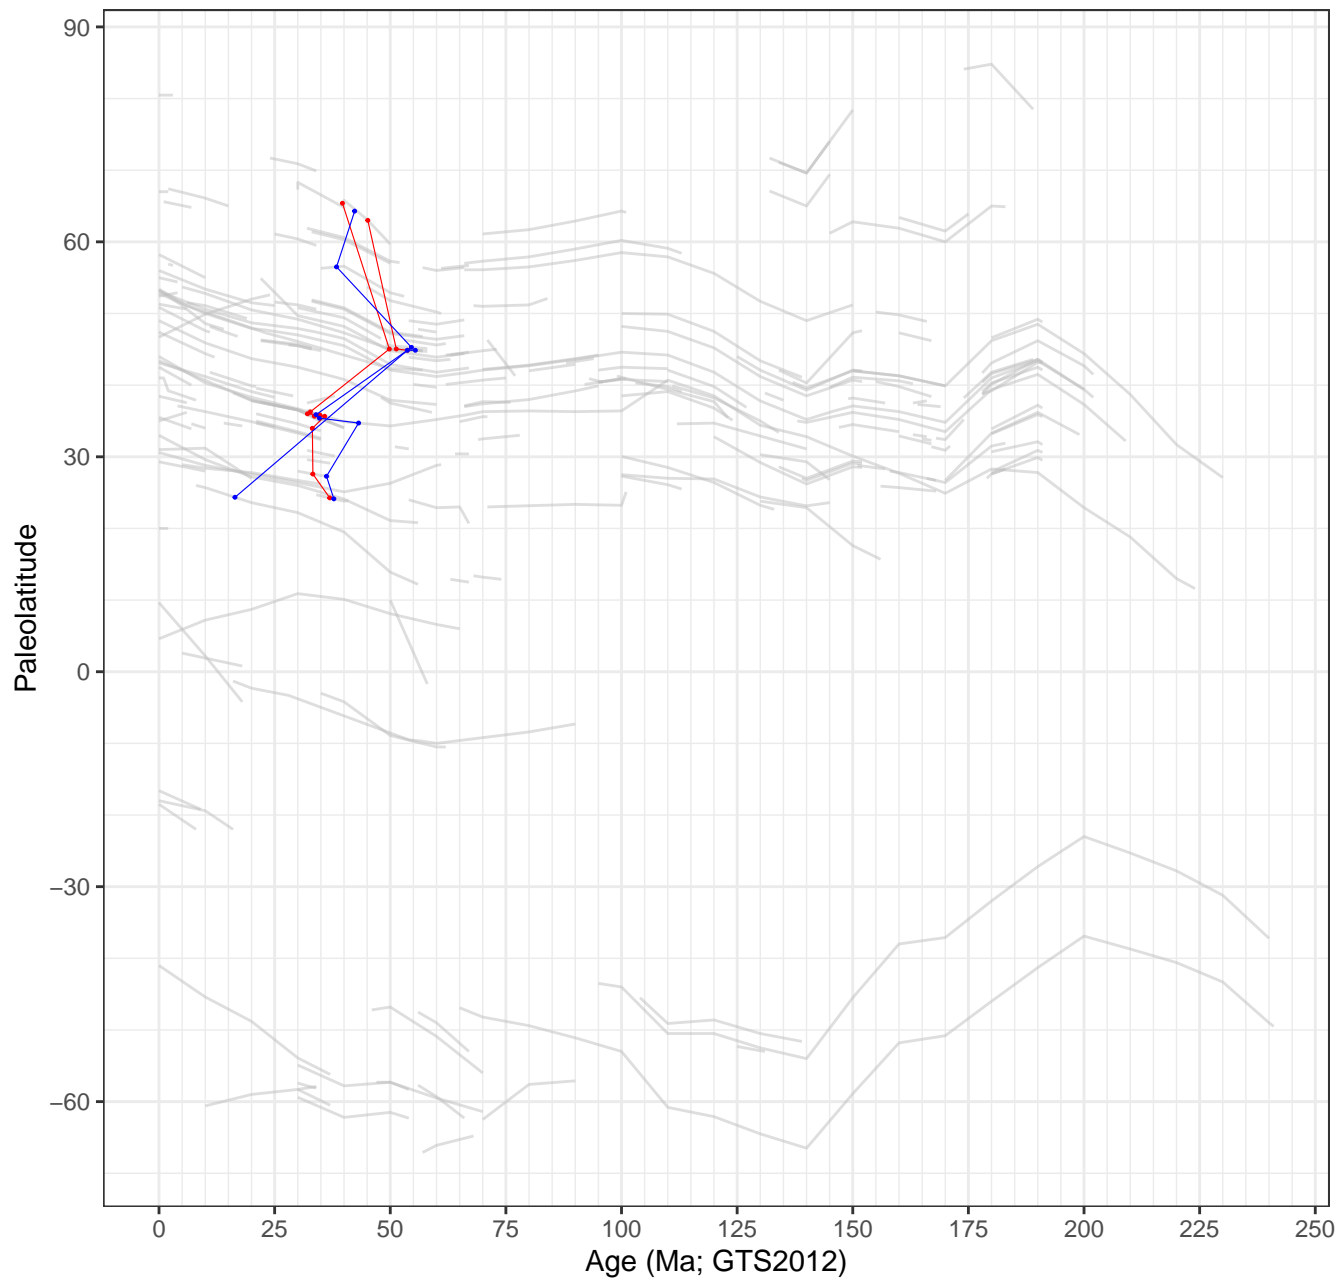

Supplement: Supplementary file 276 [file Genus Lentinia.pdf › Supplement/Supplement 2/Genus 459 plots/Genus Lentinia.pdf]

# Genus Leptodinium

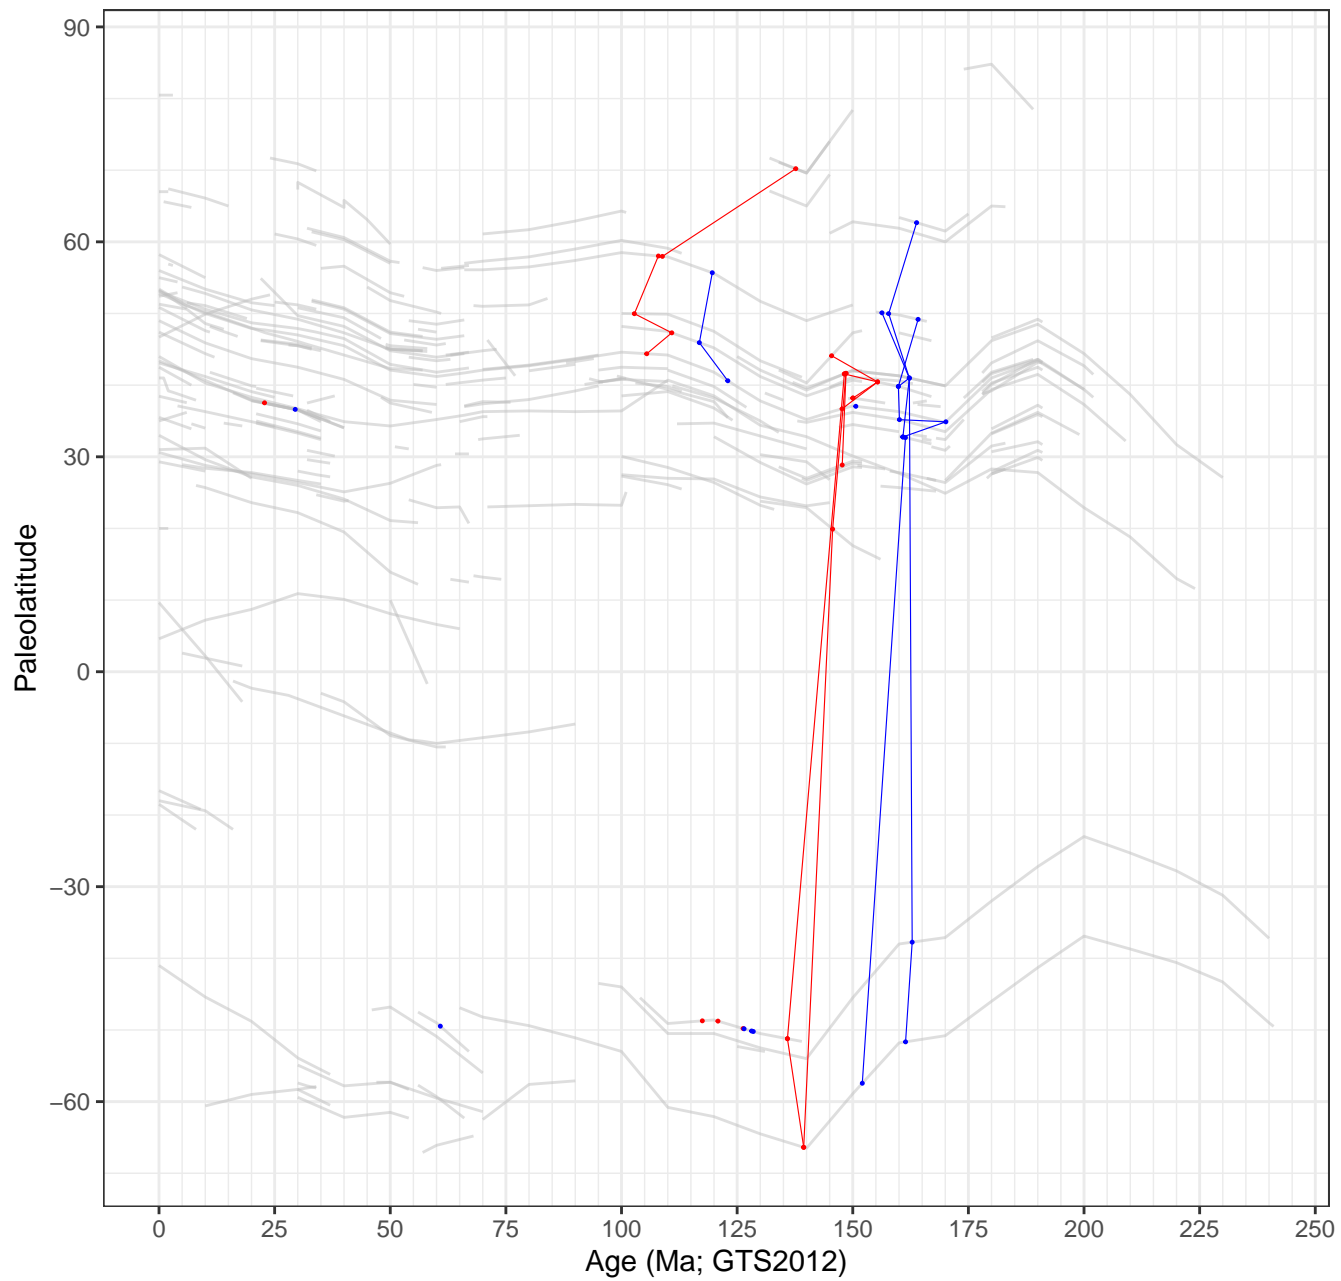

Supplement: Supplementary file 277 [file Genus Leptodinium.pdf › Supplement/Supplement 2/Genus 459 plots/Genus Leptodinium.pdf]

# Genus Liasidium

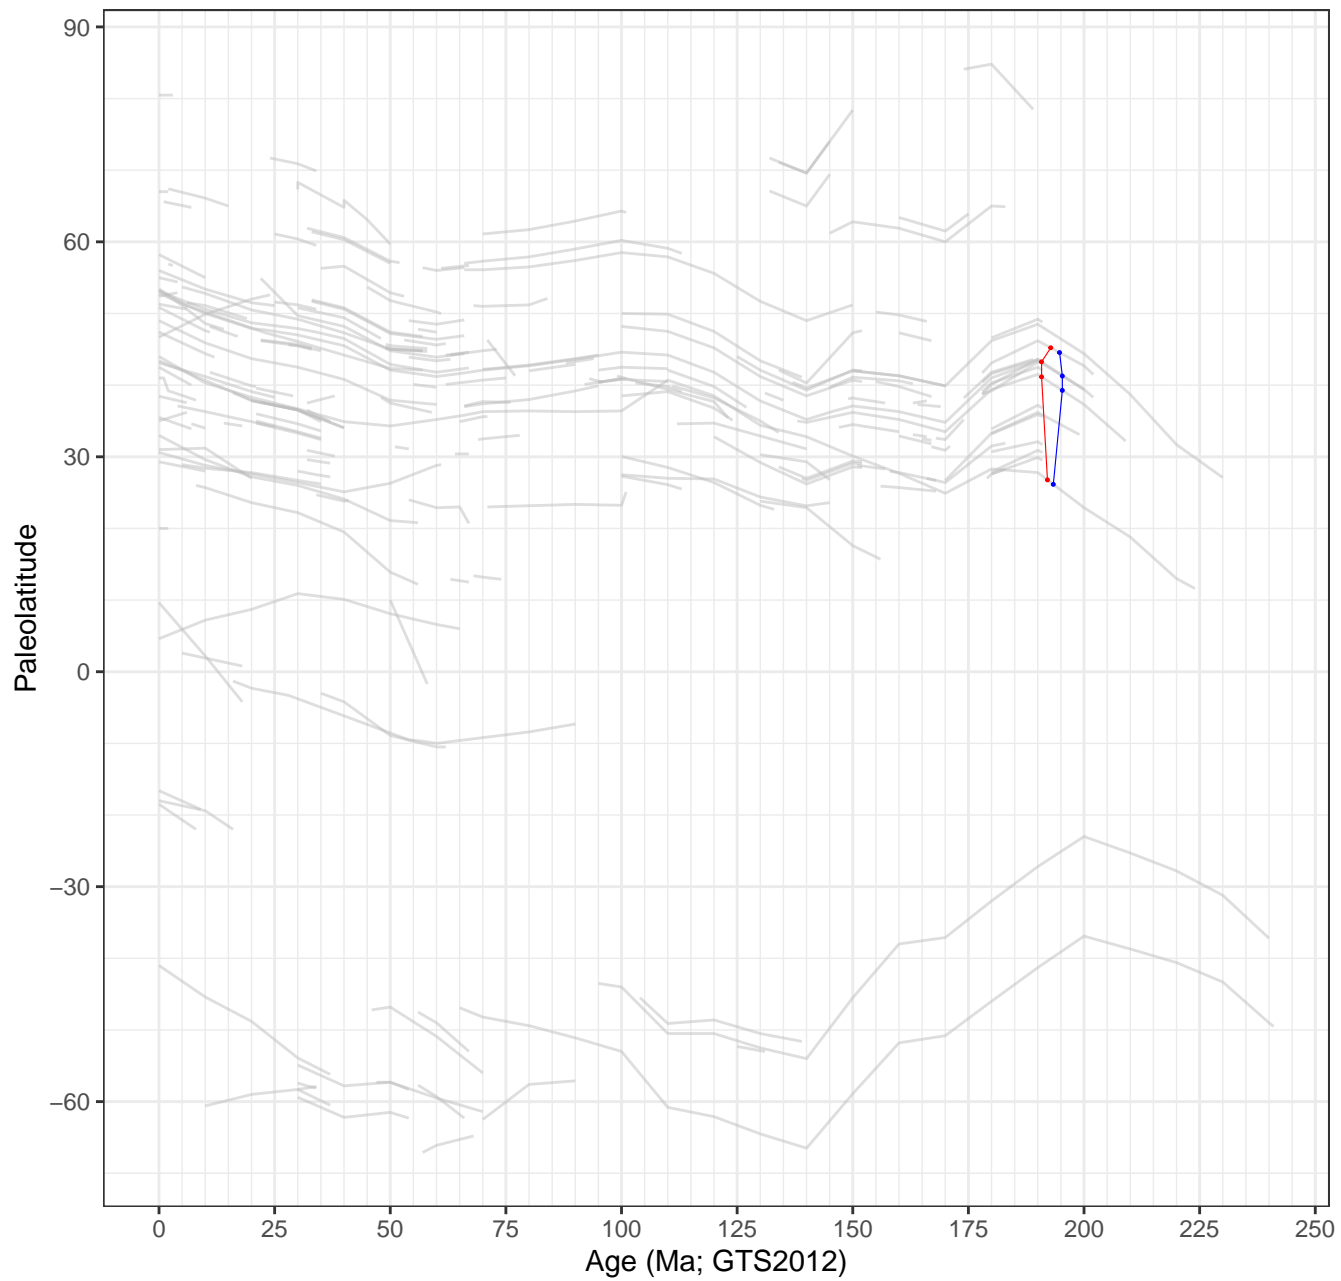

Supplement: Supplementary file 278 [file Genus Liasidium.pdf › Supplement/Supplement 2/Genus 459 plots/Genus Liasidium.pdf]

# Genus Licracysta

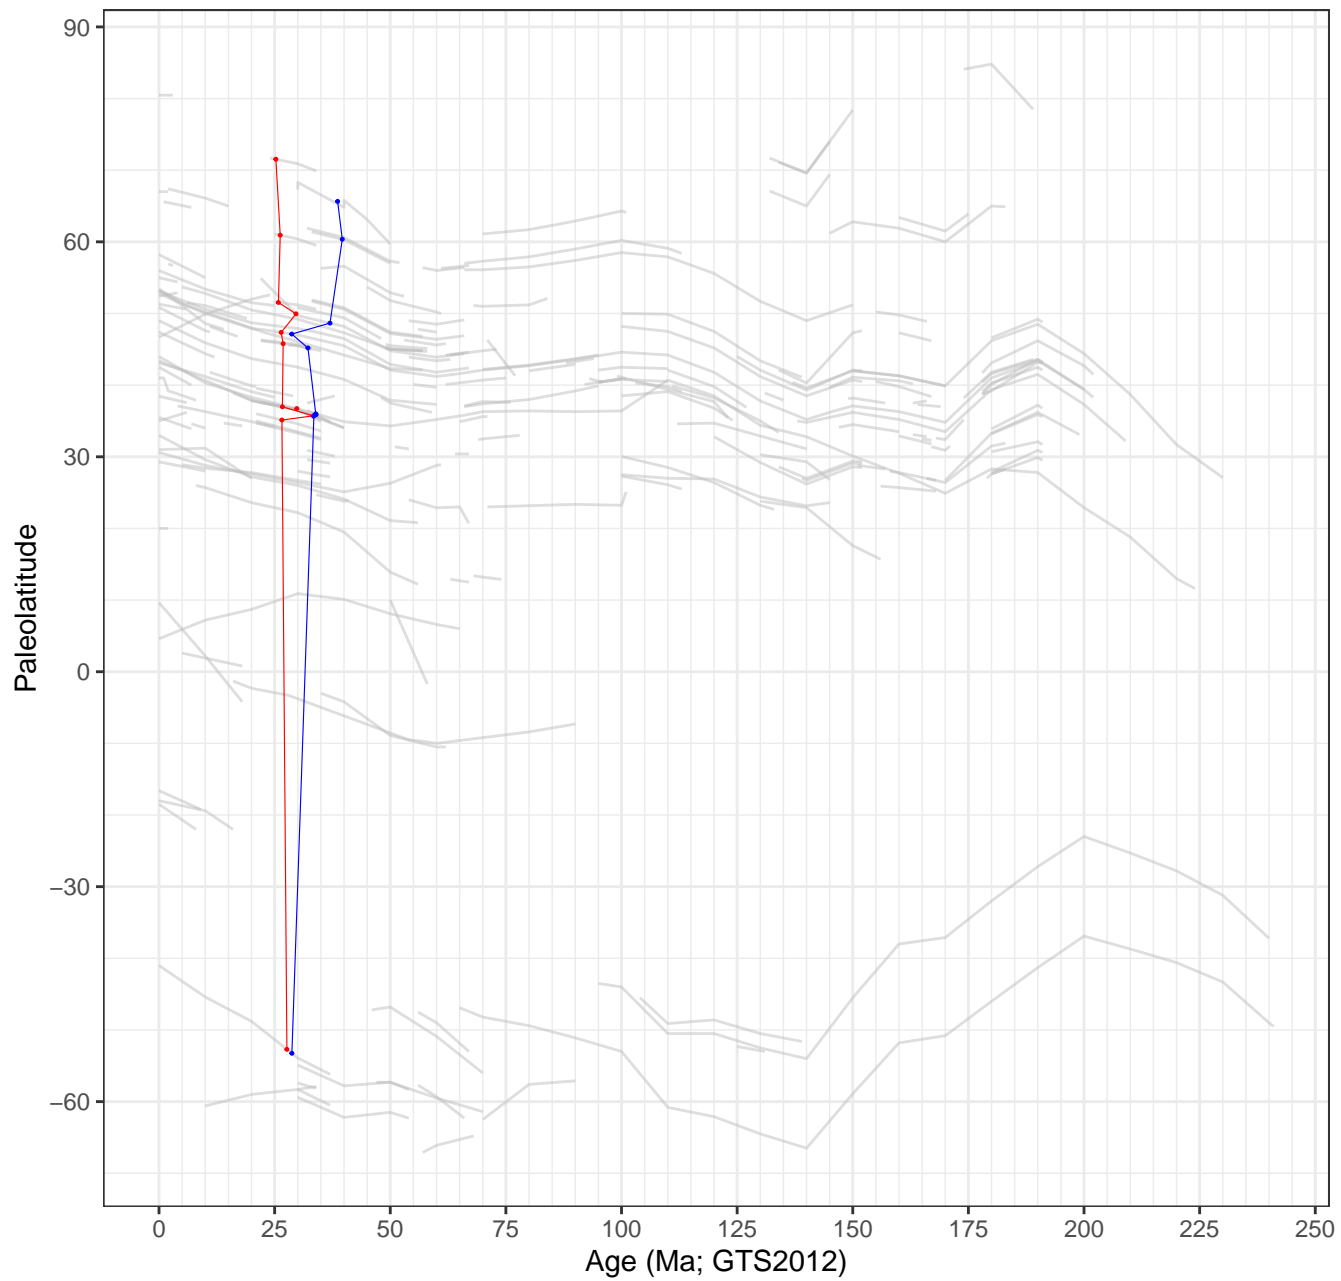

Supplement: Supplementary file 279 [file Genus Licracysta.pdf › Supplement/Supplement 2/Genus 459 plots/Genus Licracysta.pdf]

# Genus *Liesbergia*

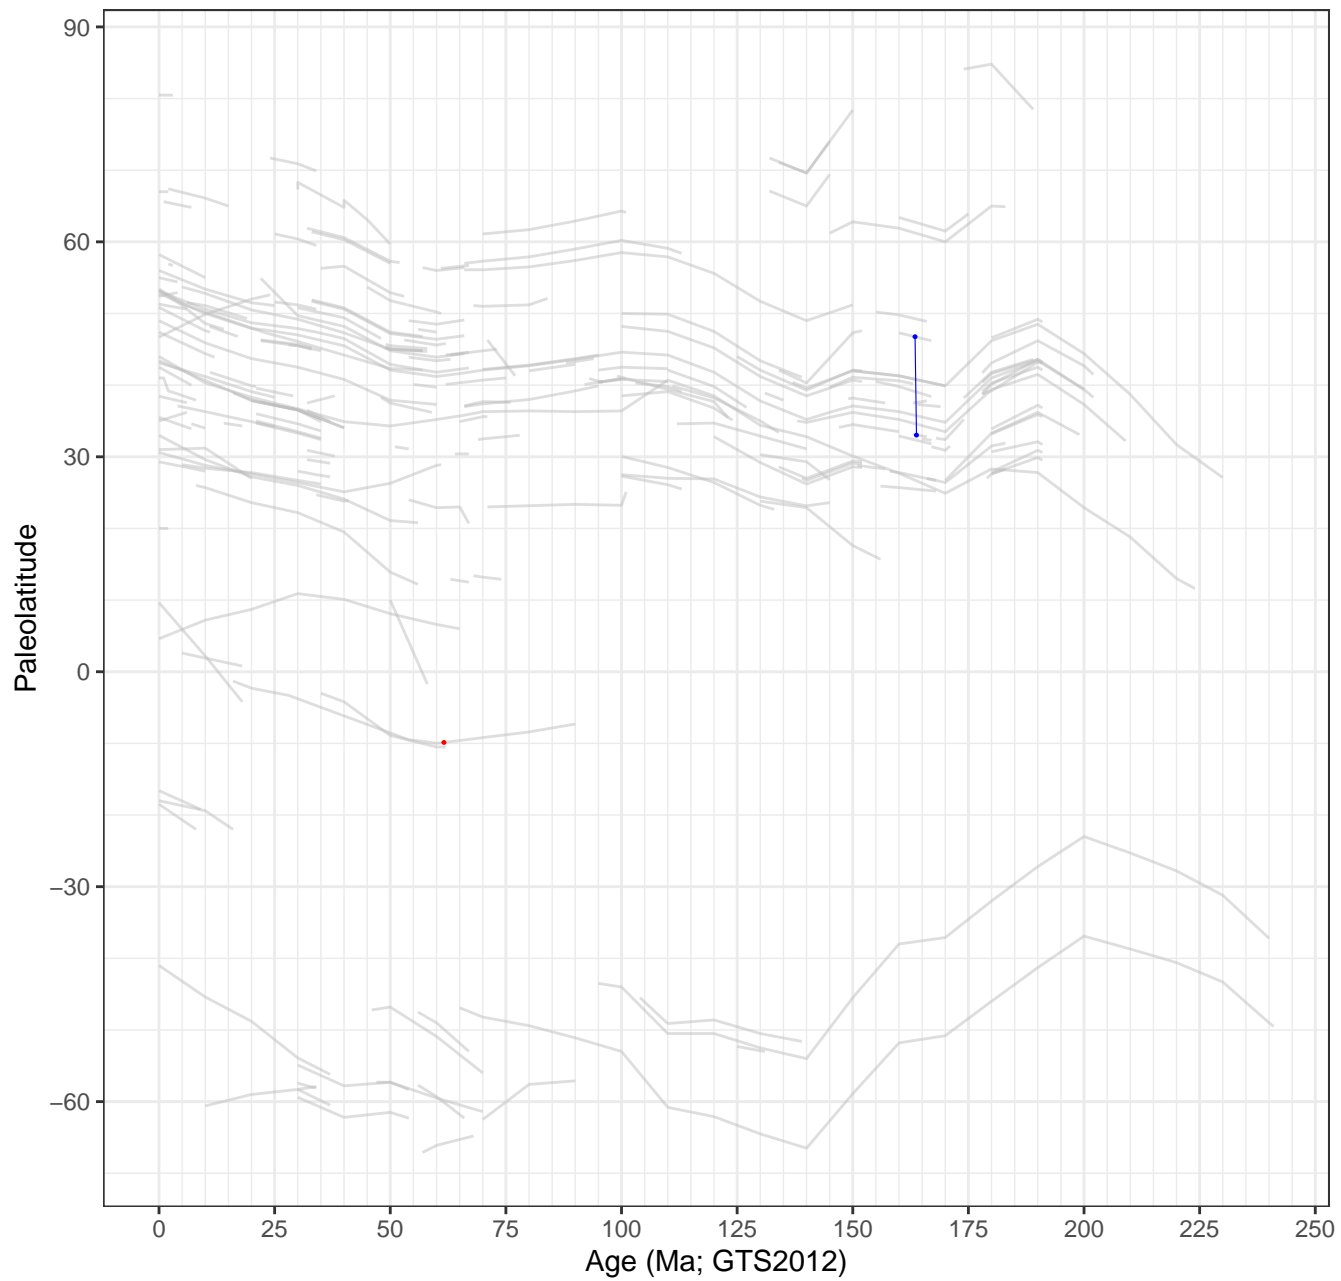

Supplement: Supplementary file 280 [file Genus Liesbergia.pdf › Supplement/Supplement 2/Genus 459 plots/Genus Liesbergia.pdf]

# Genus Limbicysta

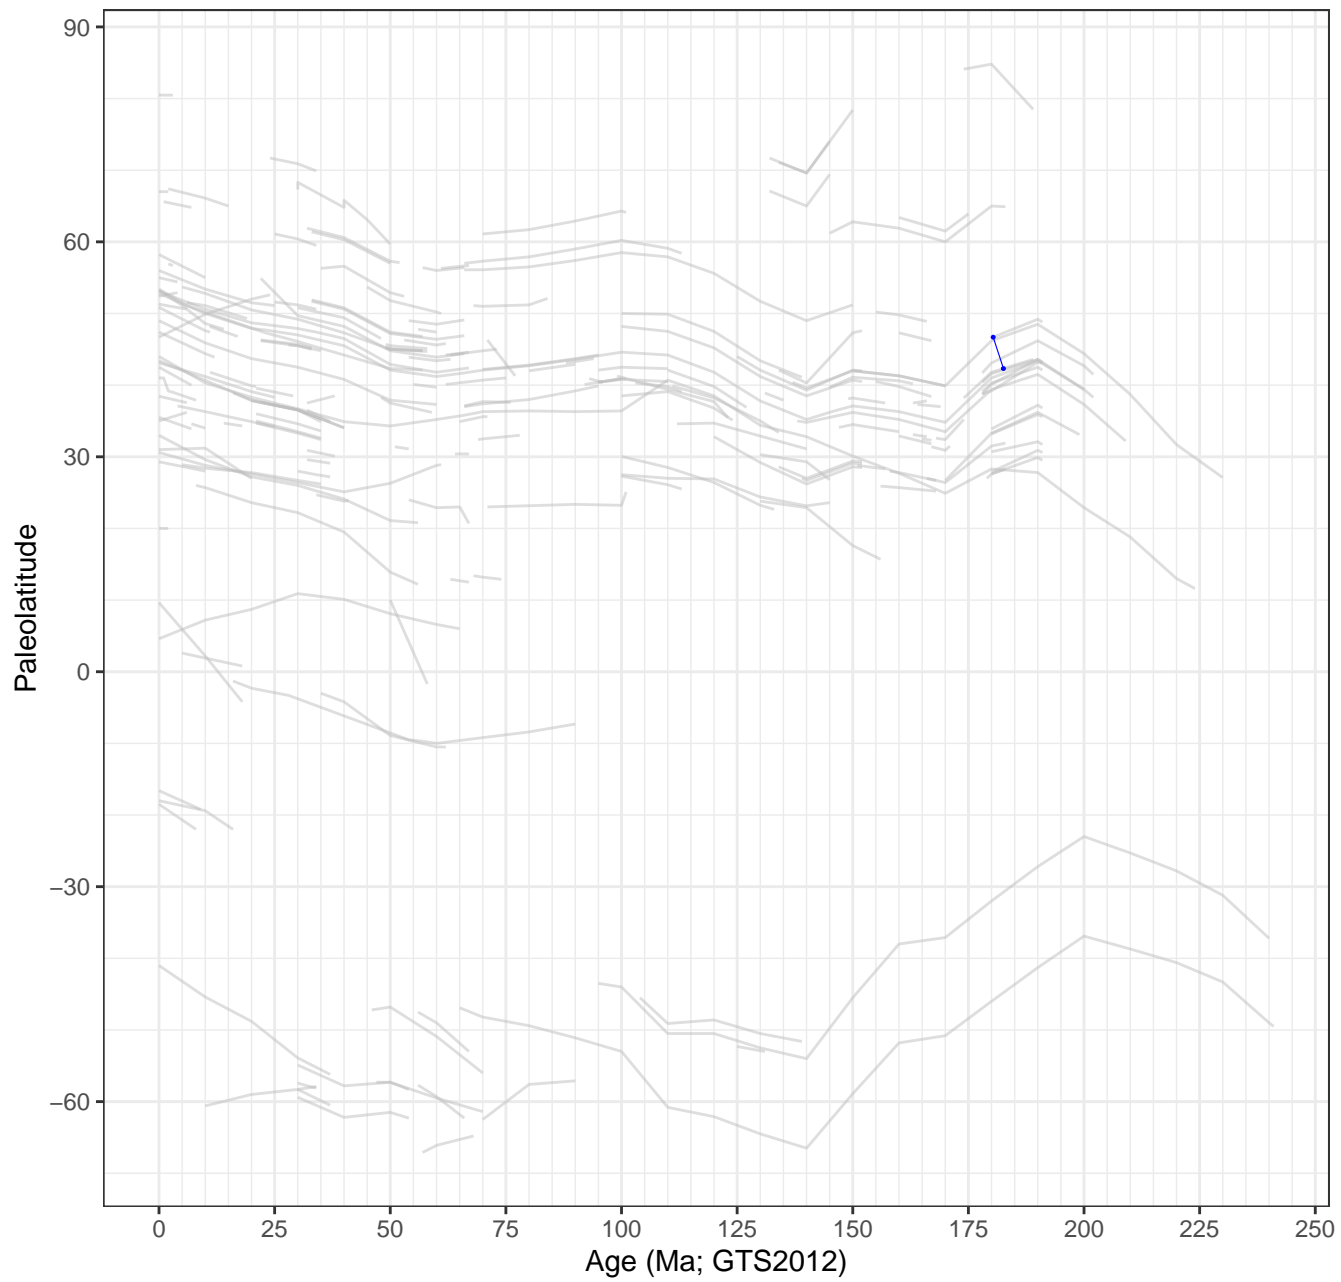

Supplement: Supplementary file 281 [file Genus Limbicysta.pdf › Supplement/Supplement 2/Genus 459 plots/Genus Limbicysta.pdf]

# Genus Limbodinium

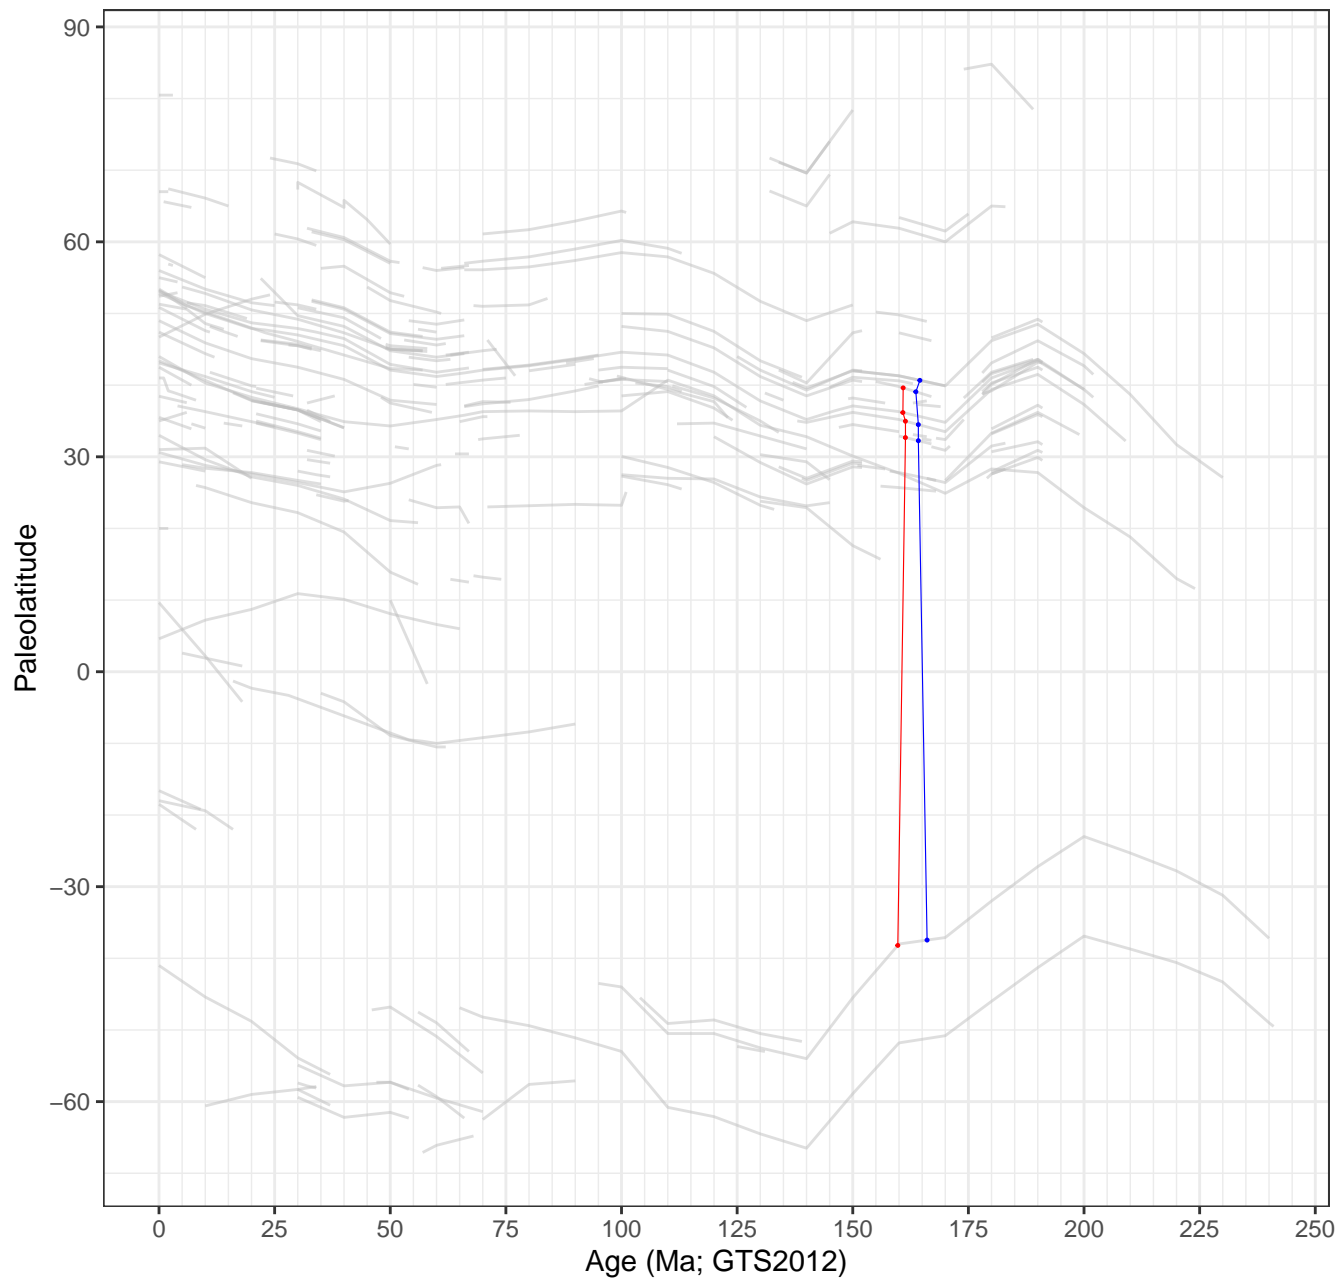

Supplement: Supplementary file 282 [file Genus Limbodinium.pdf › Supplement/Supplement 2/Genus 459 plots/Genus Limbodinium.pdf]

# Genus *Lingulodinium*

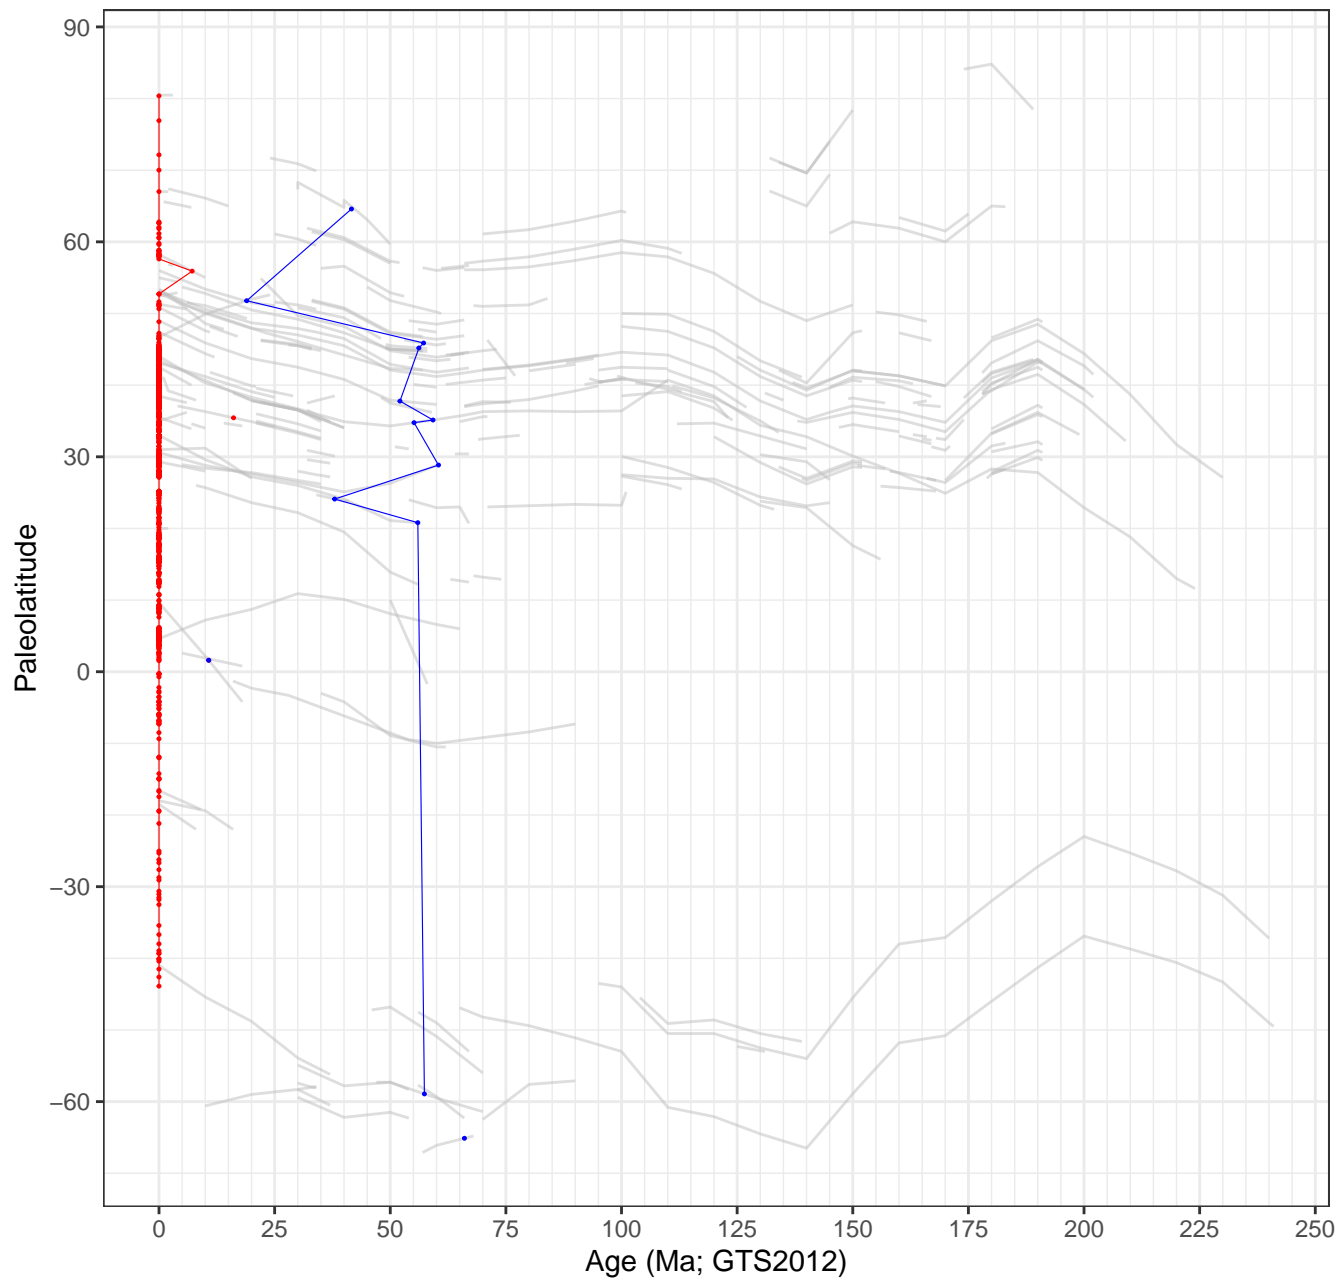

Supplement: Supplementary file 283 [file Genus Lingulodinium.pdf › Supplement/Supplement 2/Genus 459 plots/Genus Lingulodinium.pdf]

# Genus Lithodinia

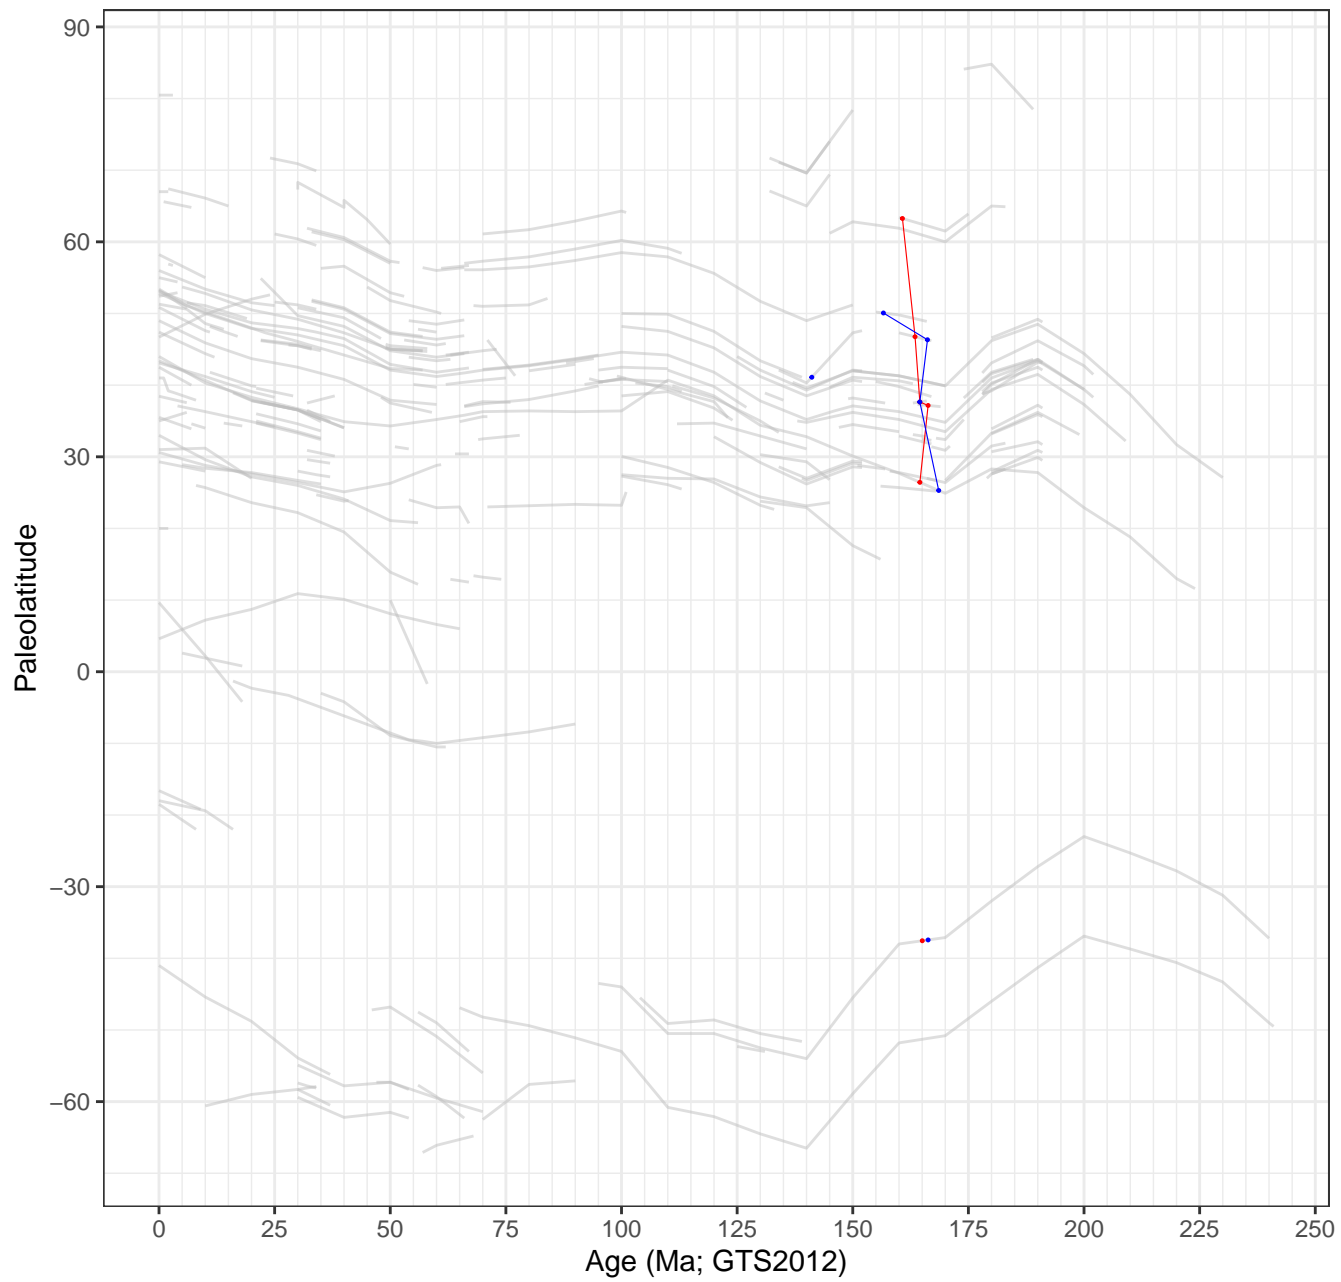

Supplement: Supplementary file 284 [file Genus Lithodinia.pdf › Supplement/Supplement 2/Genus 459 plots/Genus Lithodinia.pdf]

# Genus *Litosphaeridium*

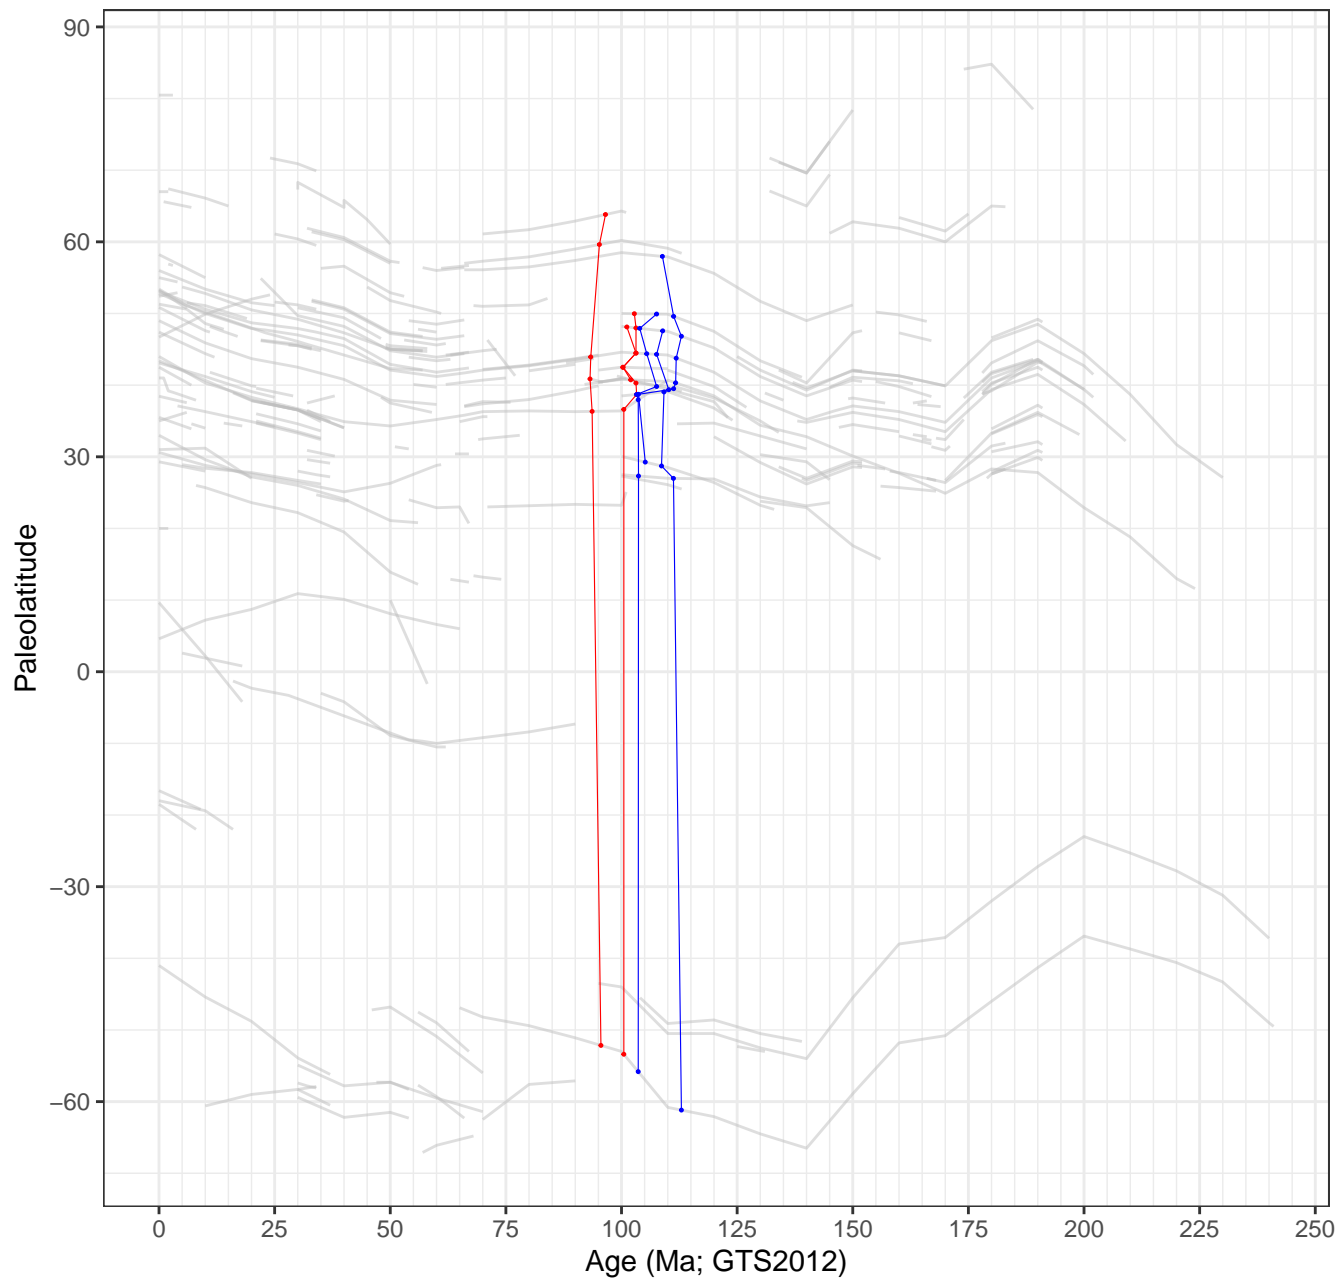

Supplement: Supplementary file 285 [file Genus Litosphaeridium.pdf › Supplement/Supplement 2/Genus 459 plots/Genus Litosphaeridium.pdf]

# Genus Lophocysta

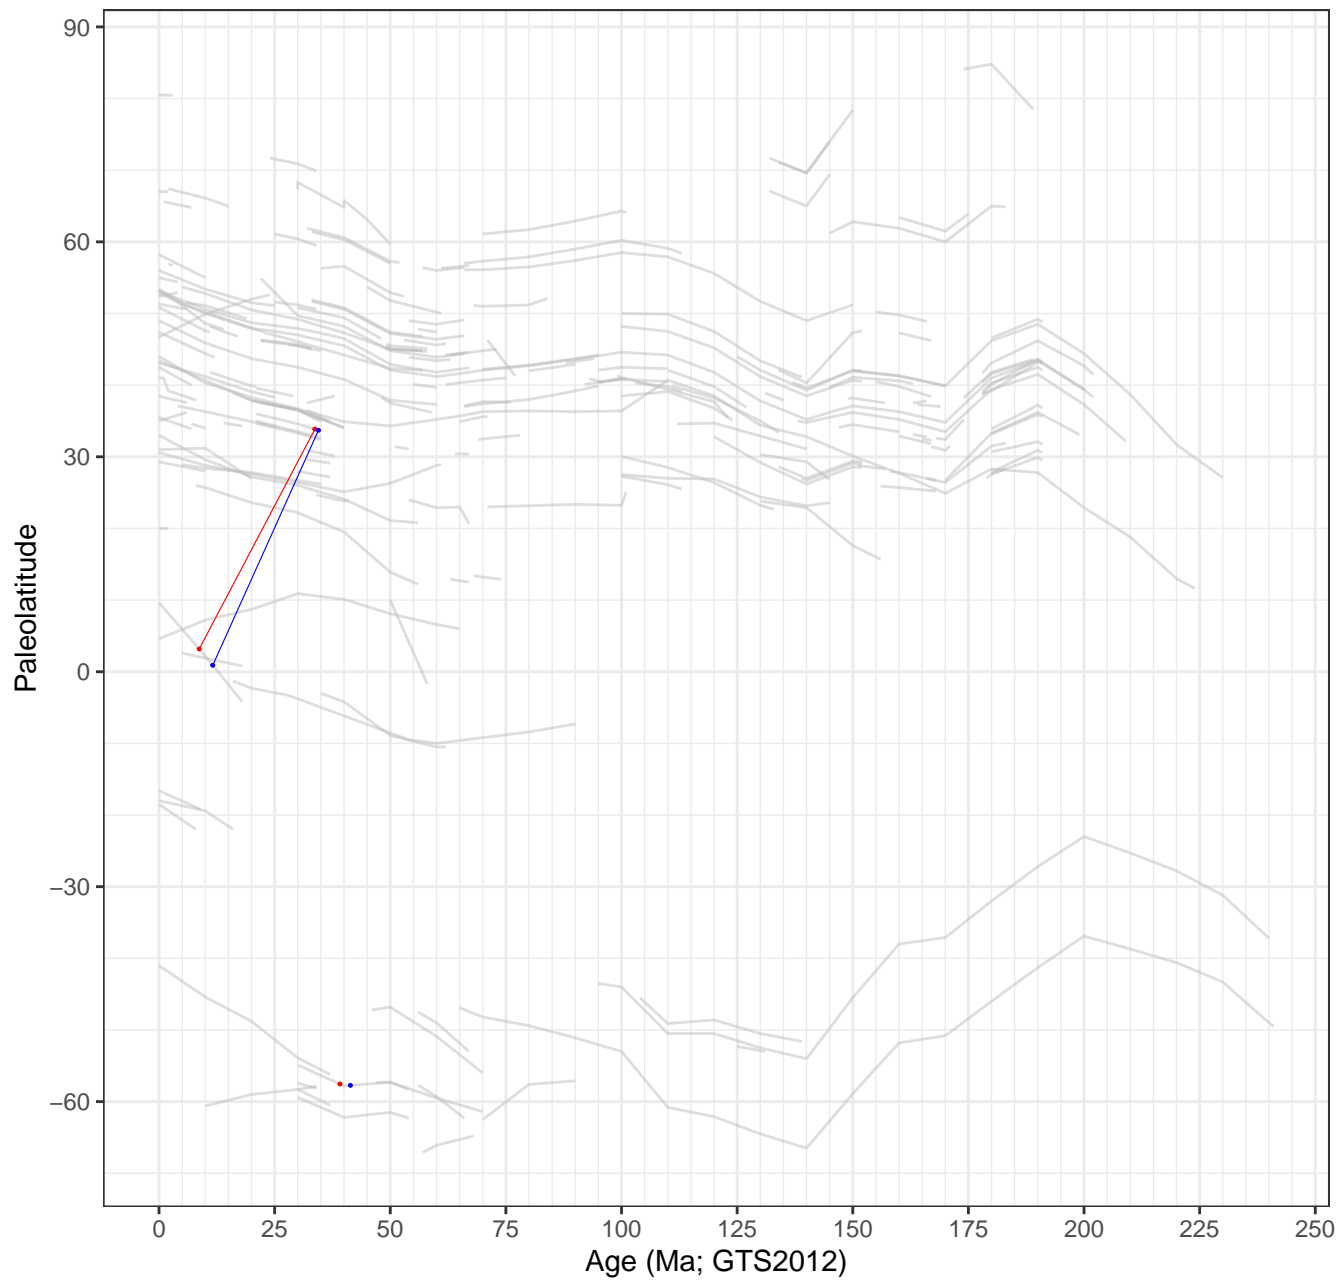

Supplement: Supplementary file 286 [file Genus Lophocysta.pdf › Supplement/Supplement 2/Genus 459 plots/Genus Lophocysta.pdf]

# Genus Luehndea

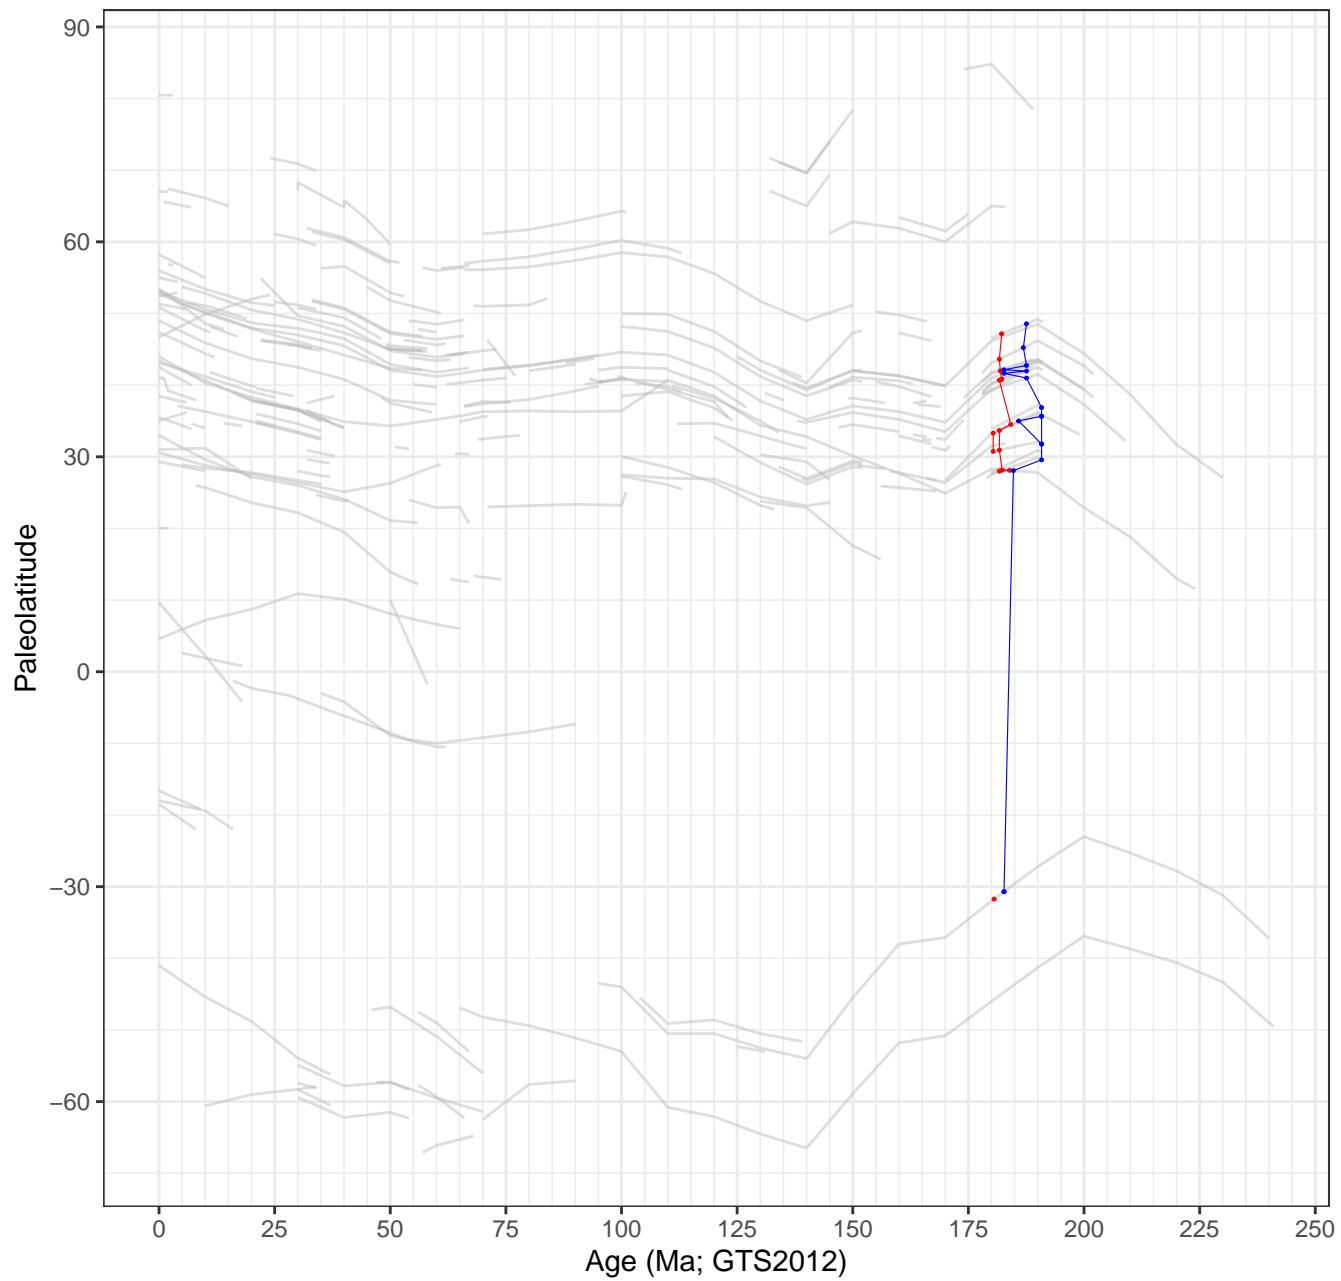

Supplement: Supplementary file 287 [file Genus Luehndea.pdf › Supplement/Supplement 2/Genus 459 plots/Genus Luehndea.pdf]

# Genus Luxadinium

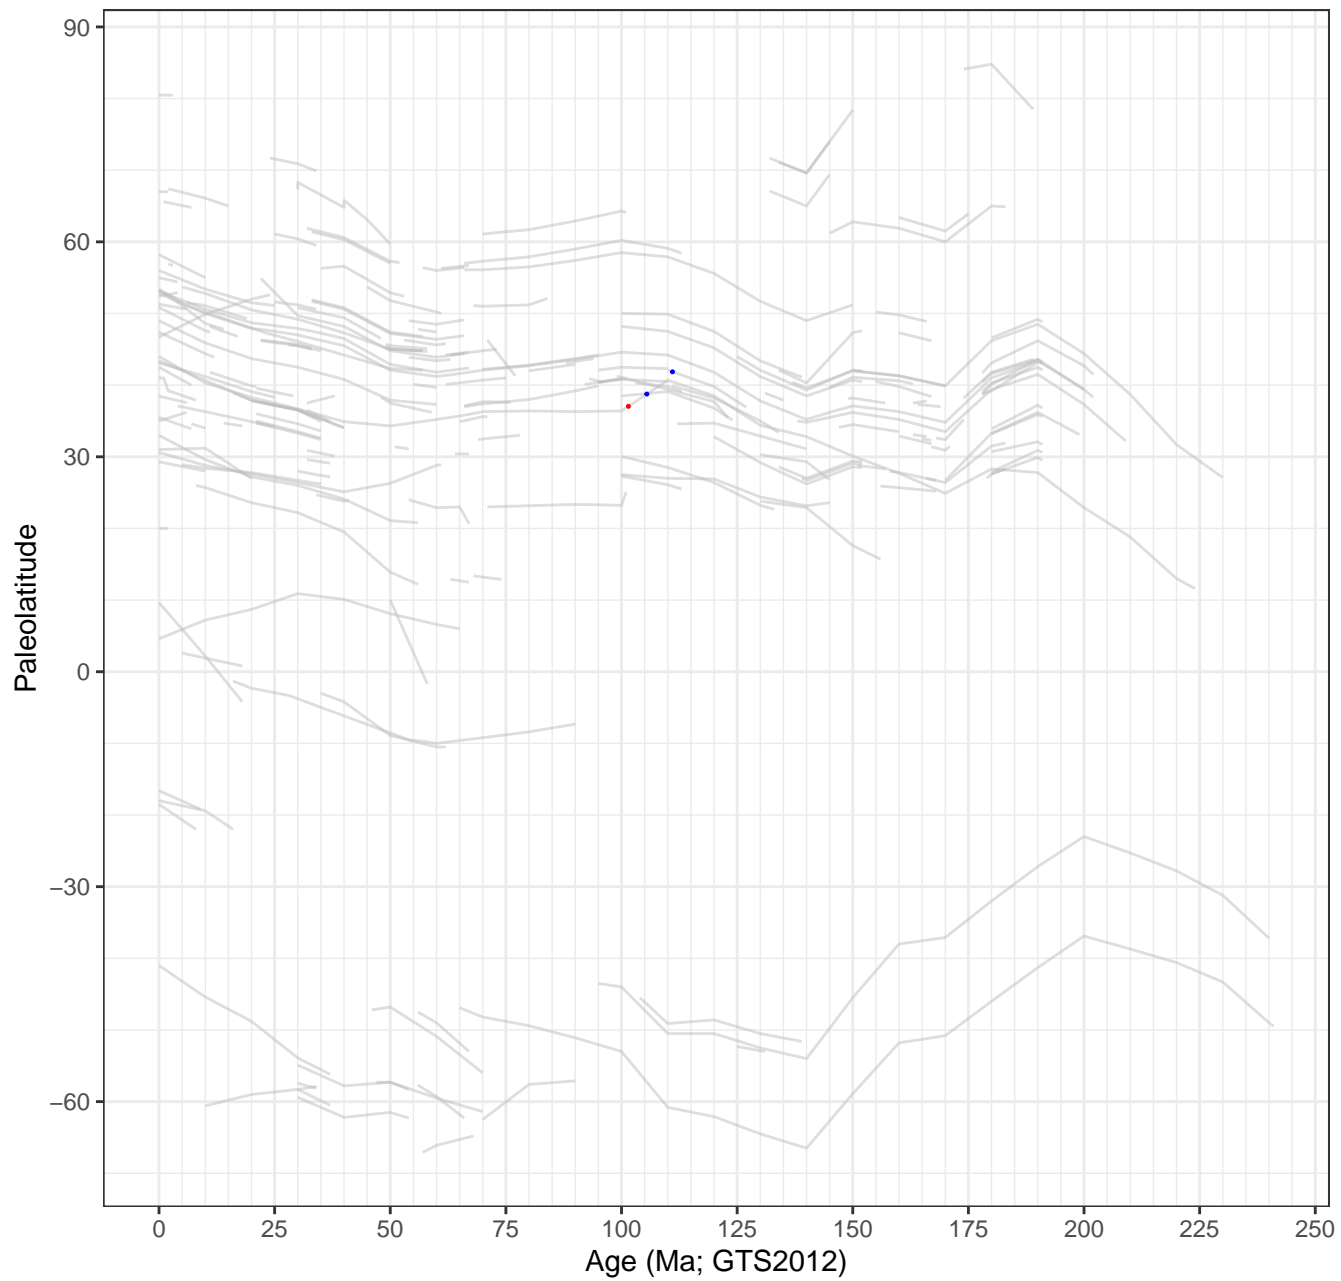

Supplement: Supplementary file 288 [file Genus Luxadinium.pdf › Supplement/Supplement 2/Genus 459 plots/Genus Luxadinium.pdf]

# Genus *Maduradinium*

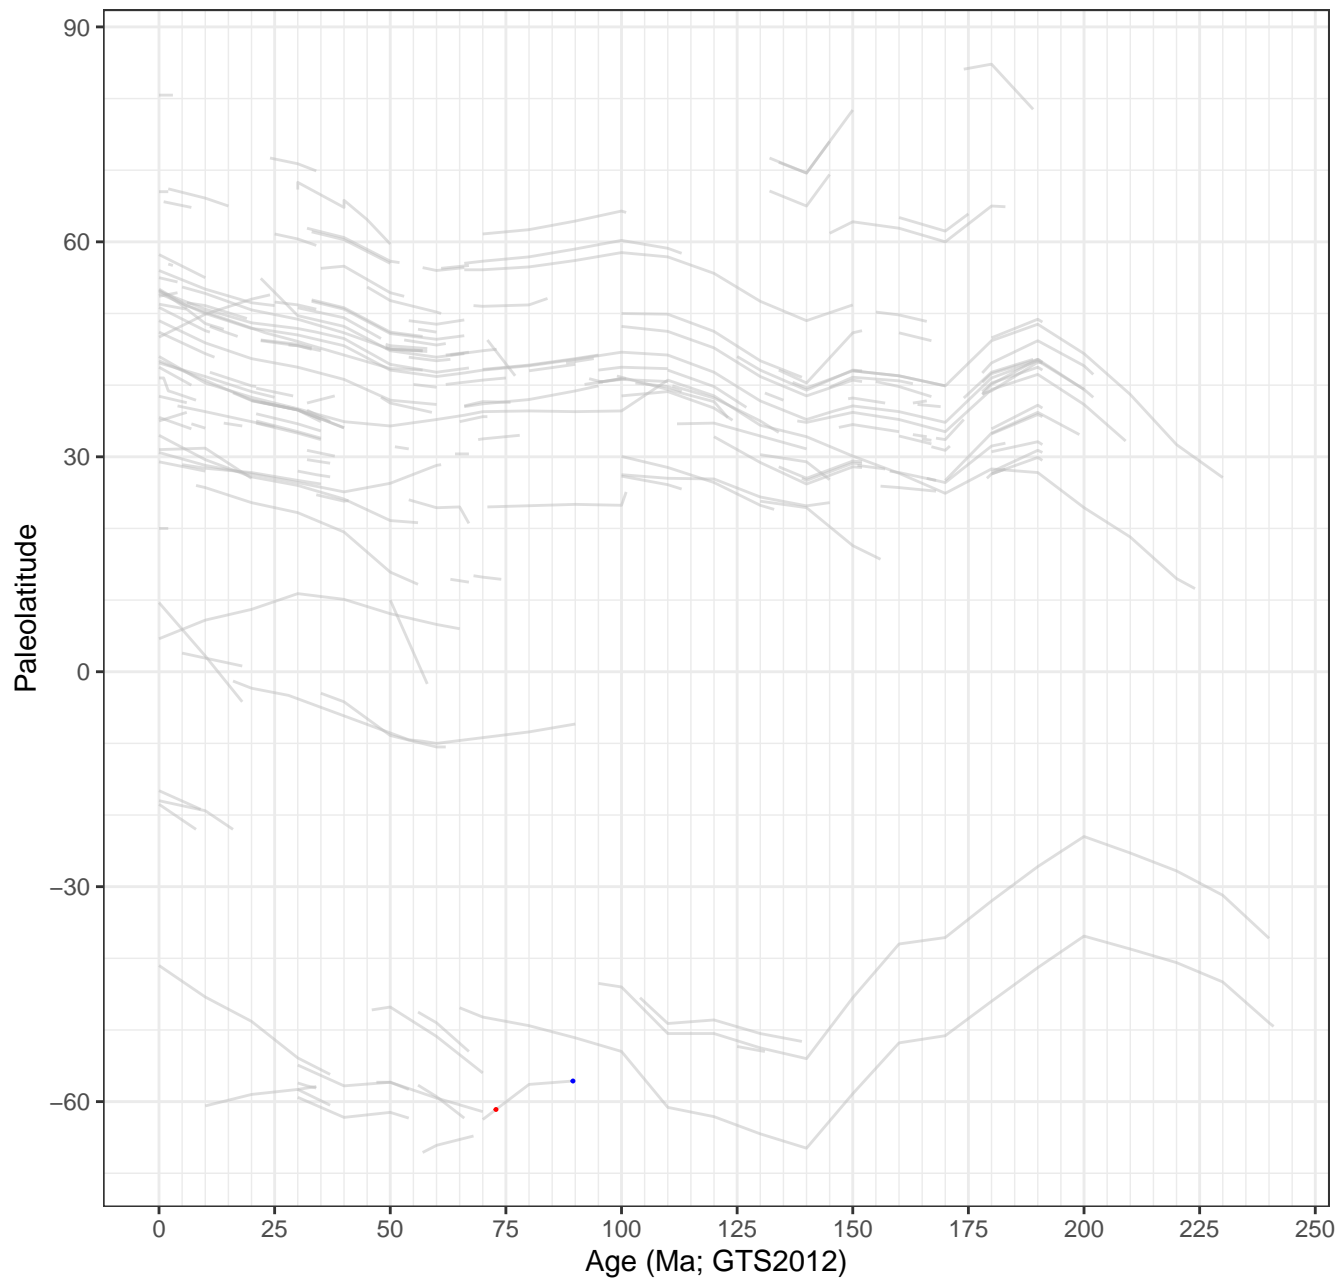

Supplement: Supplementary file 289 [file Genus Maduradinium.pdf › Supplement/Supplement 2/Genus 459 plots/Genus Maduradinium.pdf]

# Genus Malvinia

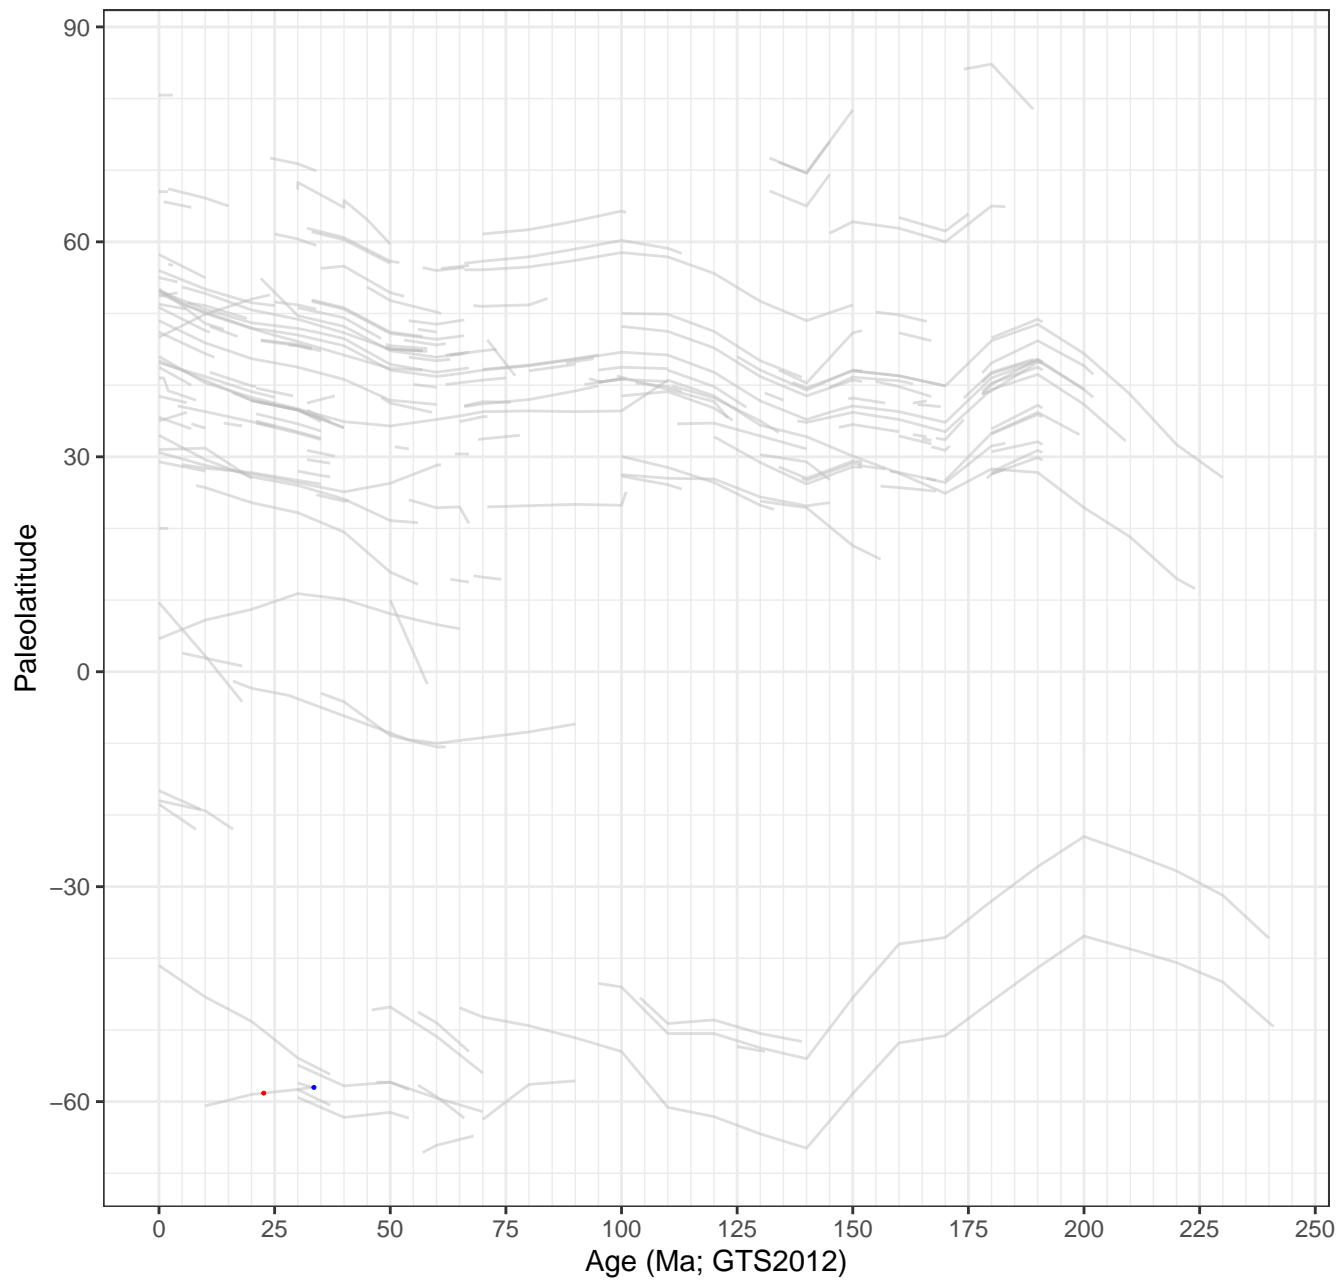

Supplement: Supplementary file 290 [file Genus Malvinia.pdf › Supplement/Supplement 2/Genus 459 plots/Genus Malvinia.pdf]

# Genus Mancodinium

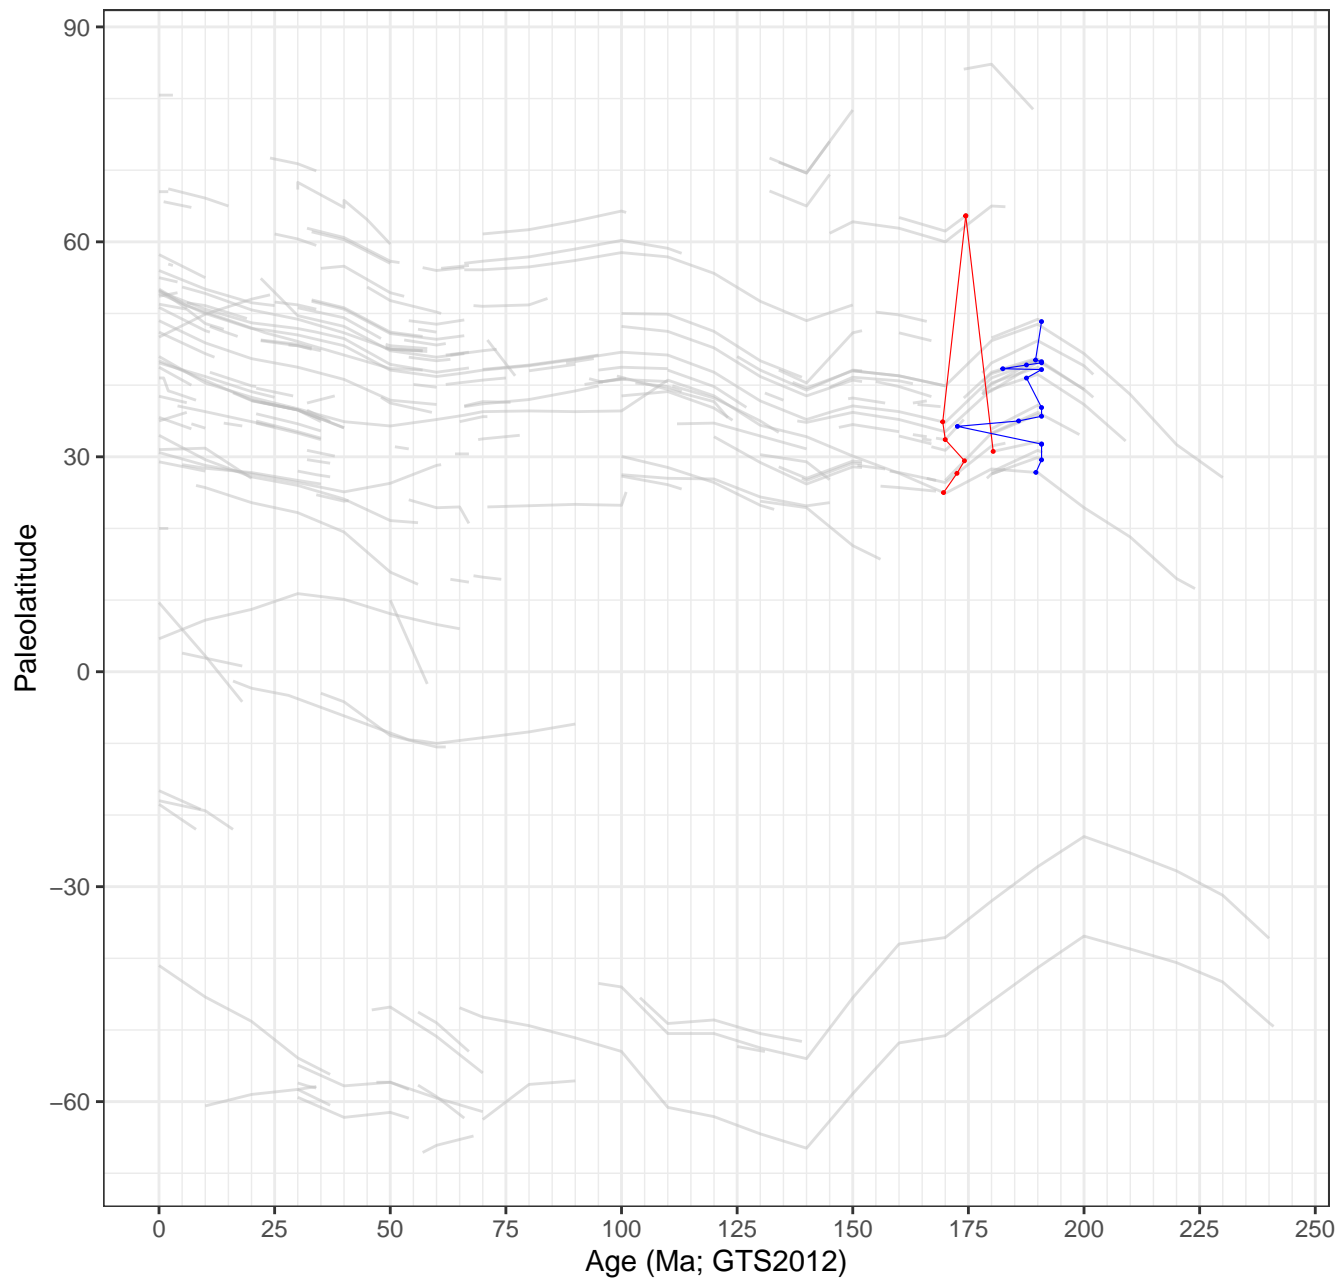

Supplement: Supplementary file 291 [file Genus Mancodinium.pdf › Supplement/Supplement 2/Genus 459 plots/Genus Mancodinium.pdf]

# Genus Manumiella

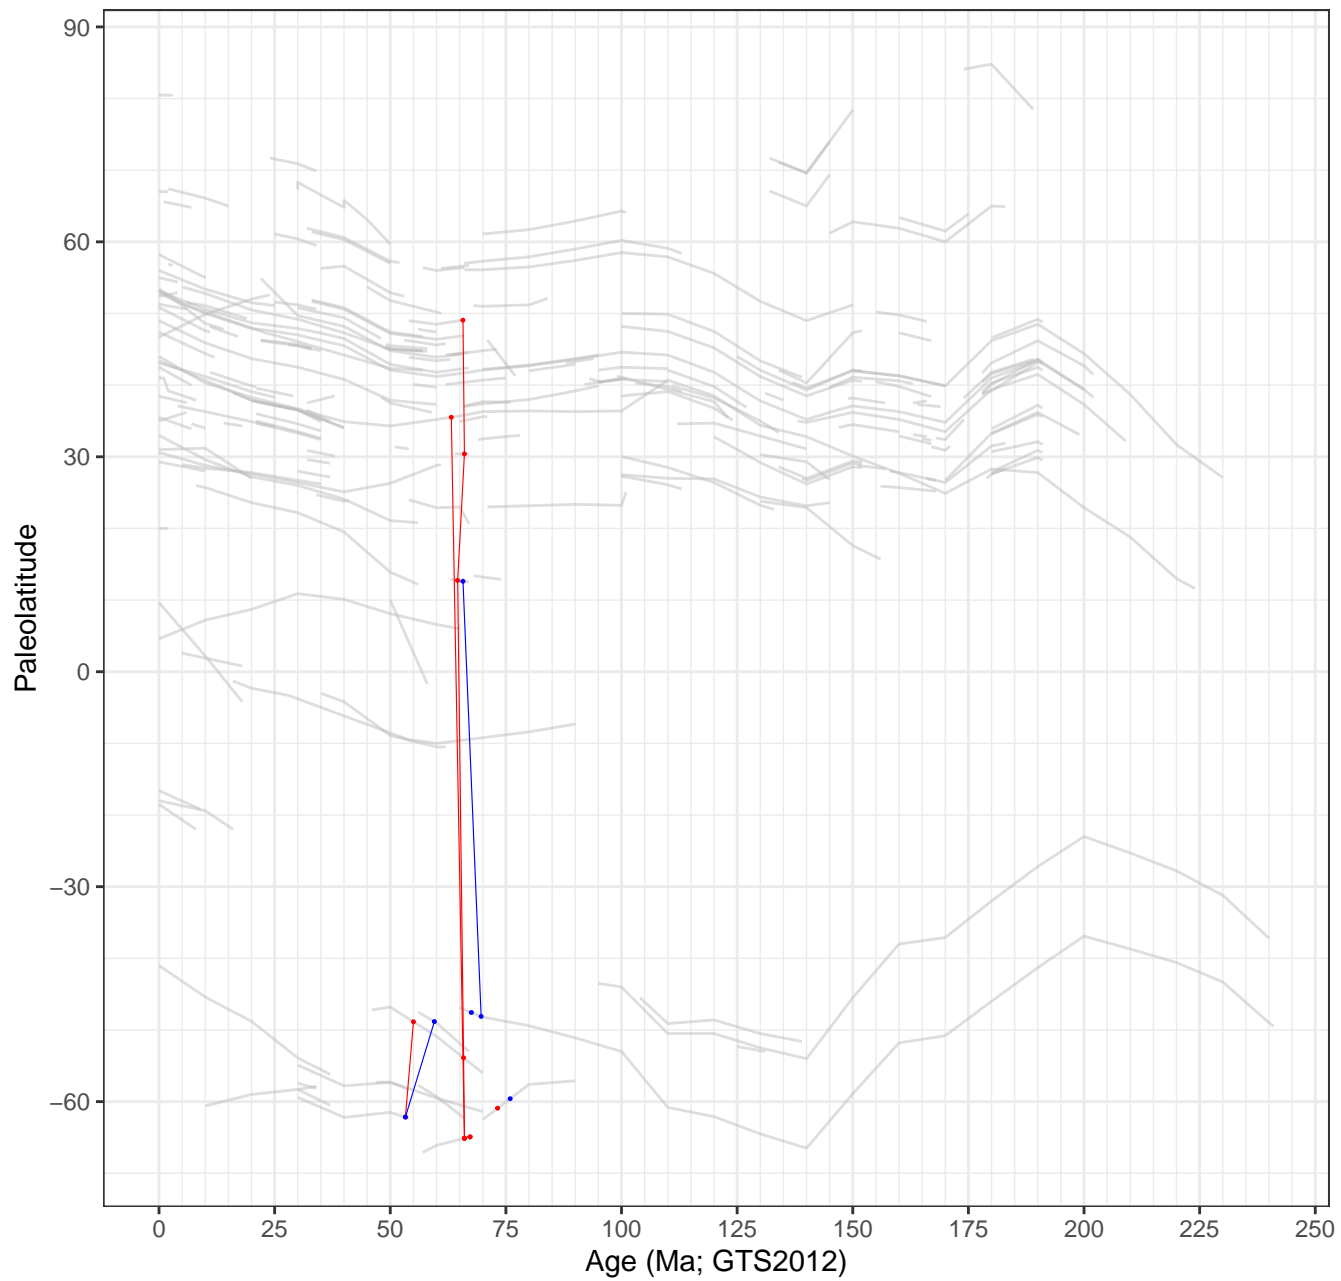

Supplement: Supplementary file 292 [file Genus Manumiella.pdf › Supplement/Supplement 2/Genus 459 plots/Genus Manumiella.pdf]

# Genus Maturodinium

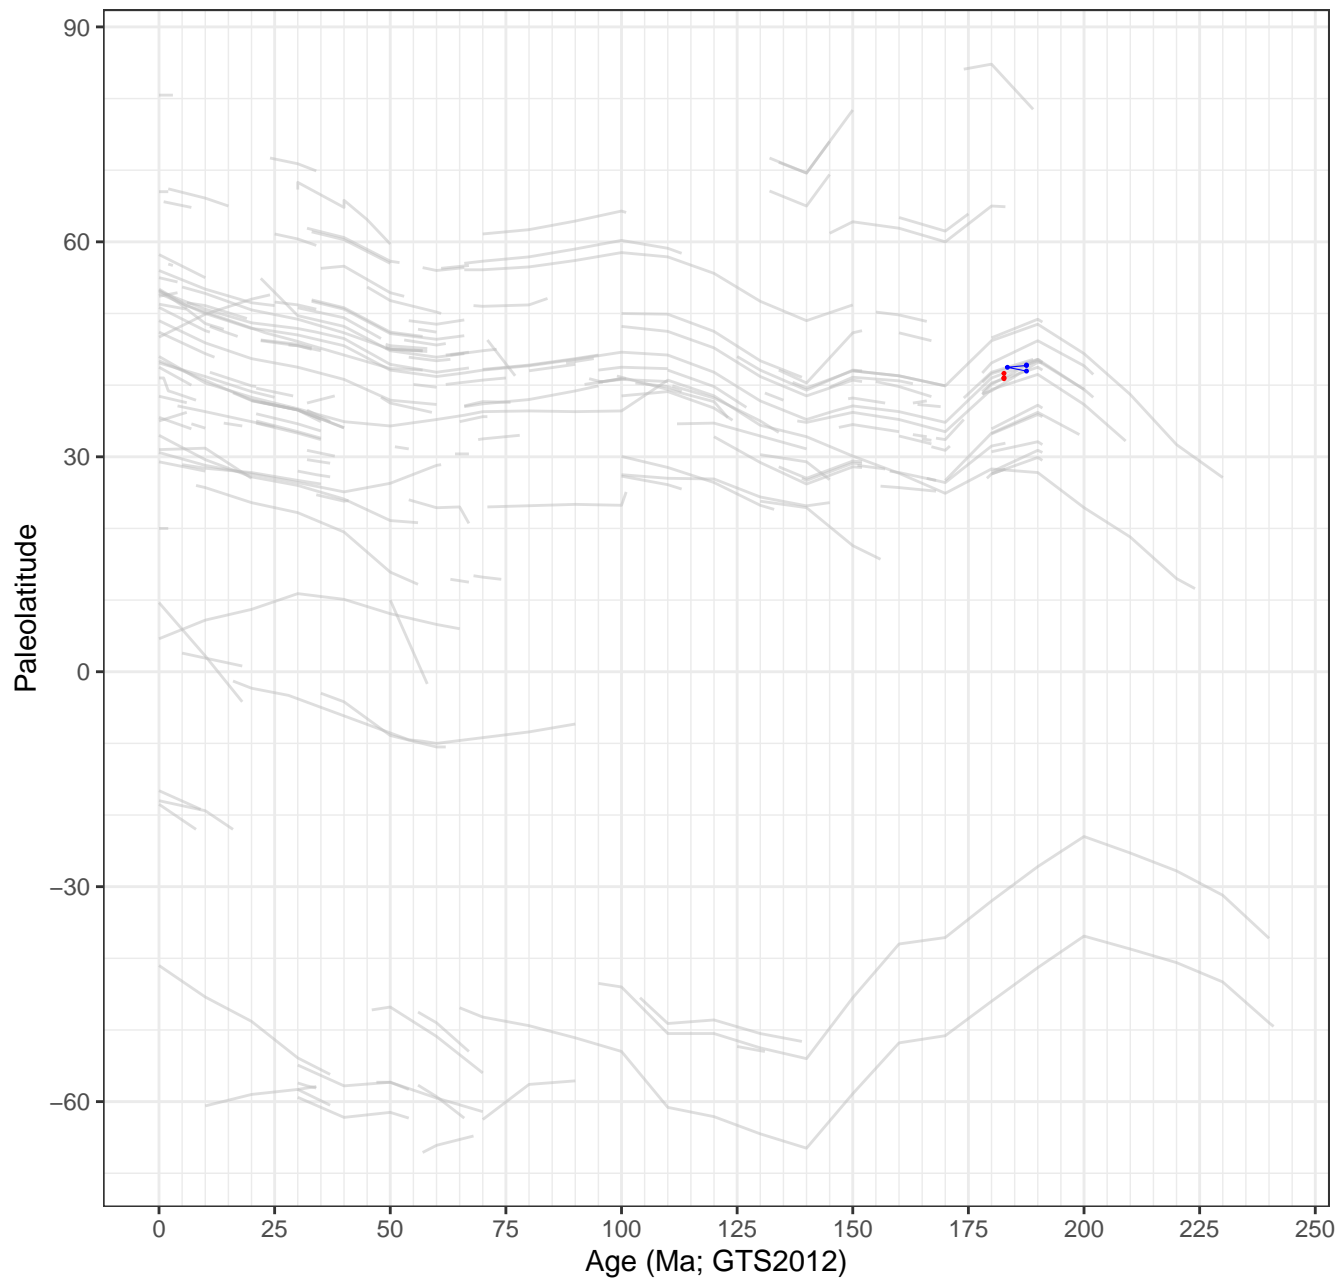

Supplement: Supplementary file 293 [file Genus Maturodinium.pdf › Supplement/Supplement 2/Genus 459 plots/Genus Maturodinium.pdf]

# Genus Meiourodinium

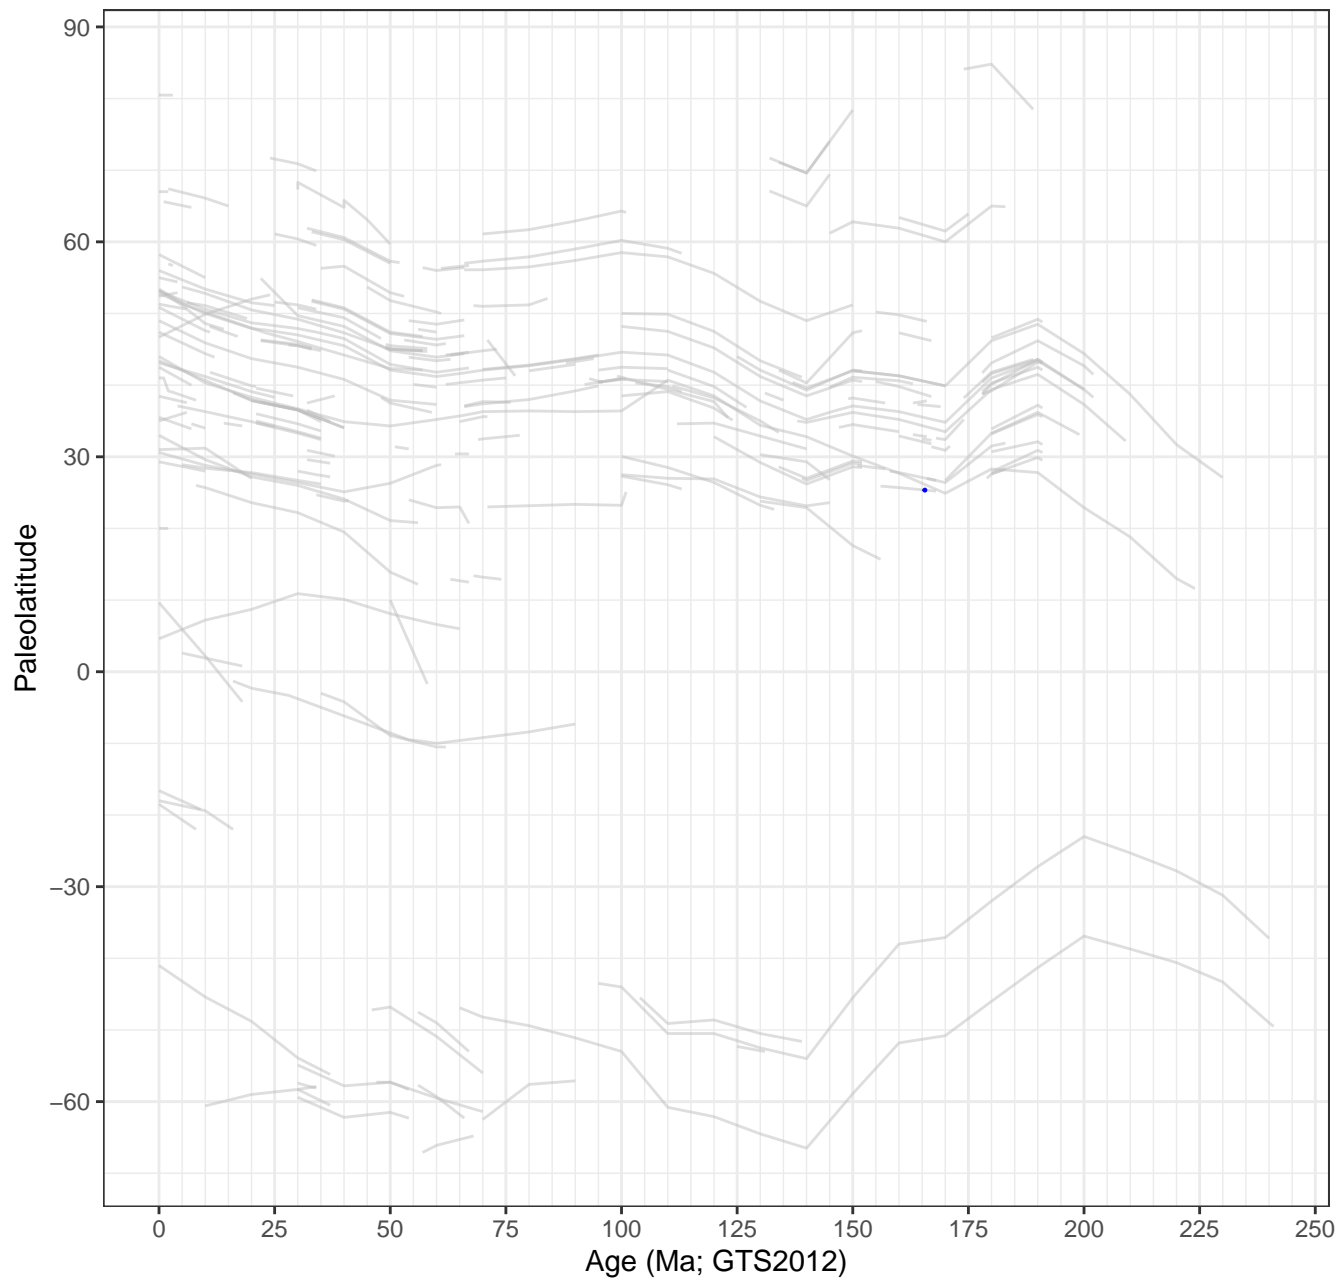

Supplement: Supplementary file 294 [file Genus Meiourodinium.pdf › Supplement/Supplement 2/Genus 459 plots/Genus Meiourodinium.pdf]

# Genus *Meiourogonyaulax*

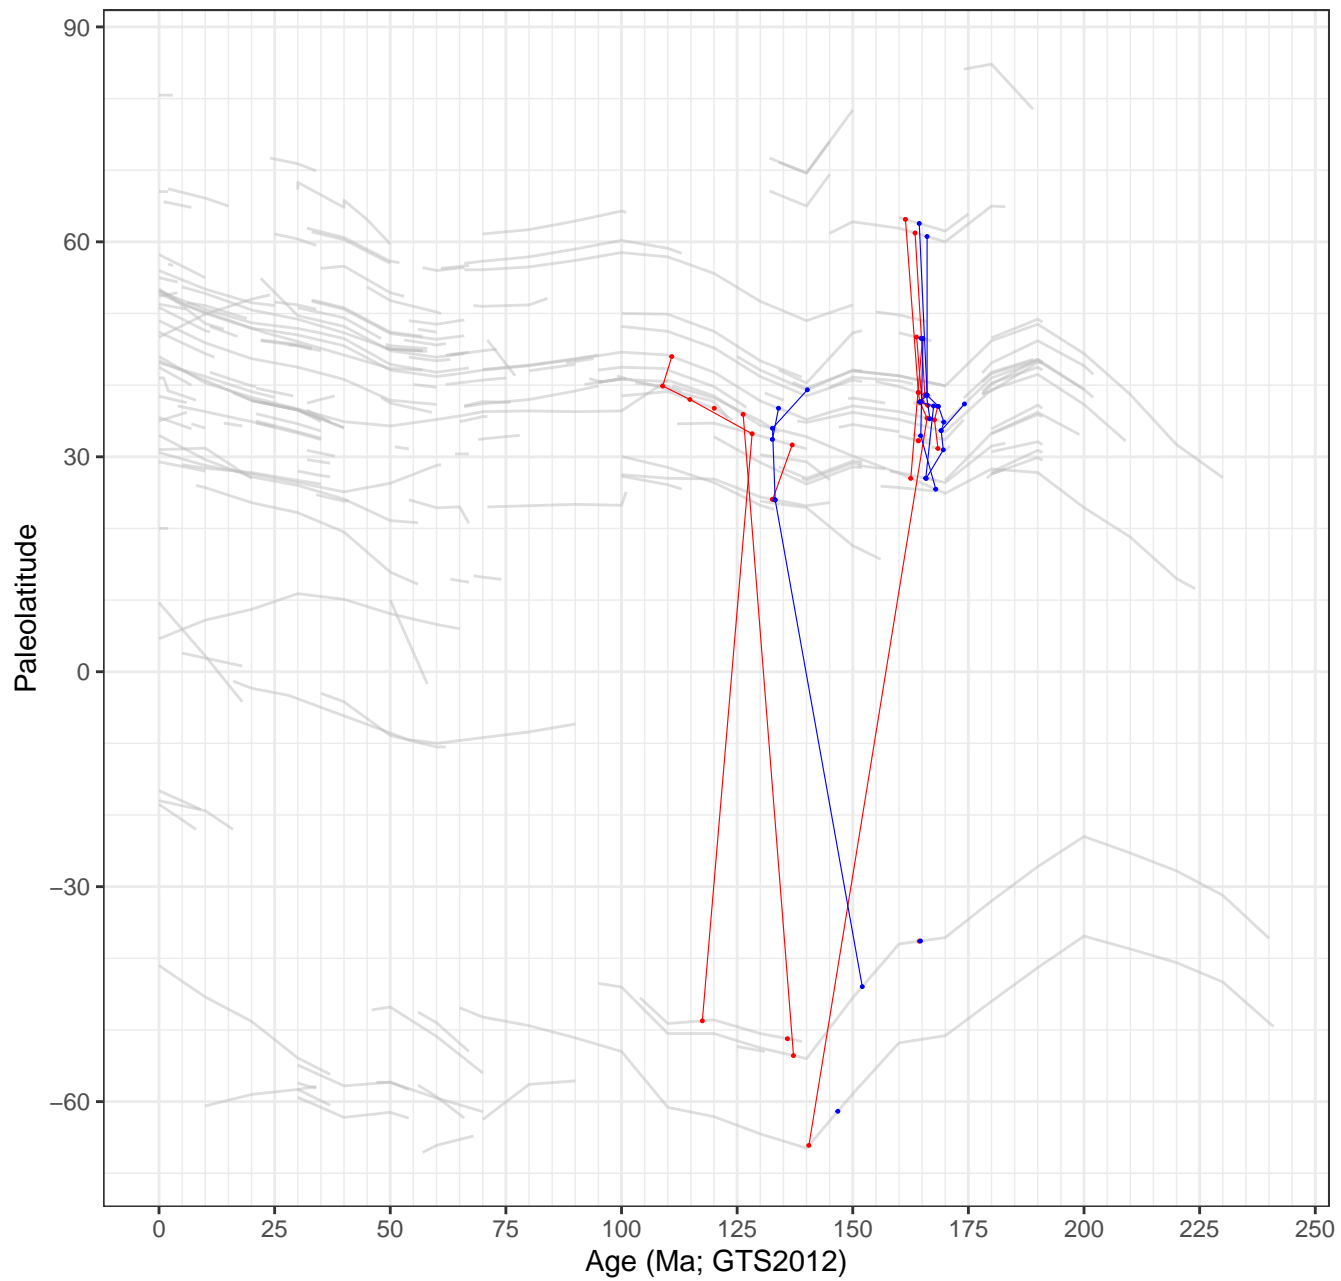

Supplement: Supplementary file 295 [file Genus Meiourogonyaulax.pdf › Supplement/Supplement 2/Genus 459 plots/Genus Meiourogonyaulax.pdf]

# Genus Melitasphaeridium

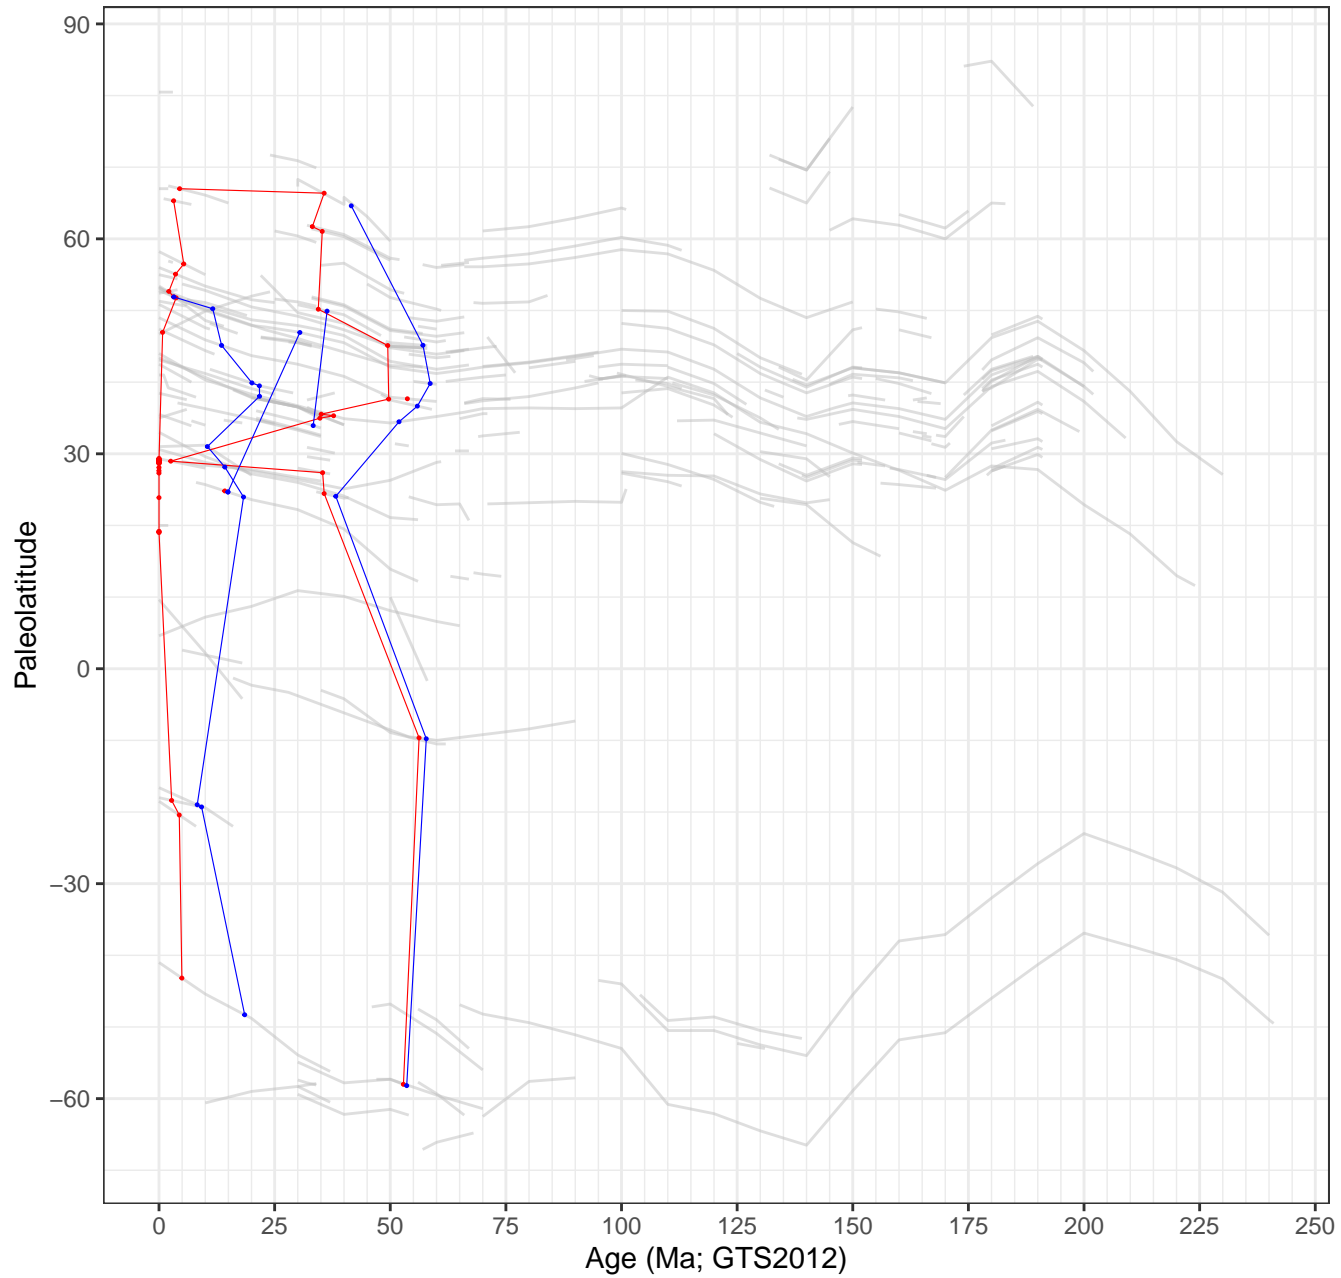

Supplement: Supplementary file 296 [file Genus Melitasphaeridium.pdf › Supplement/Supplement 2/Genus 459 plots/Genus Melitasphaeridium.pdf]

# Genus Membranilarnacia

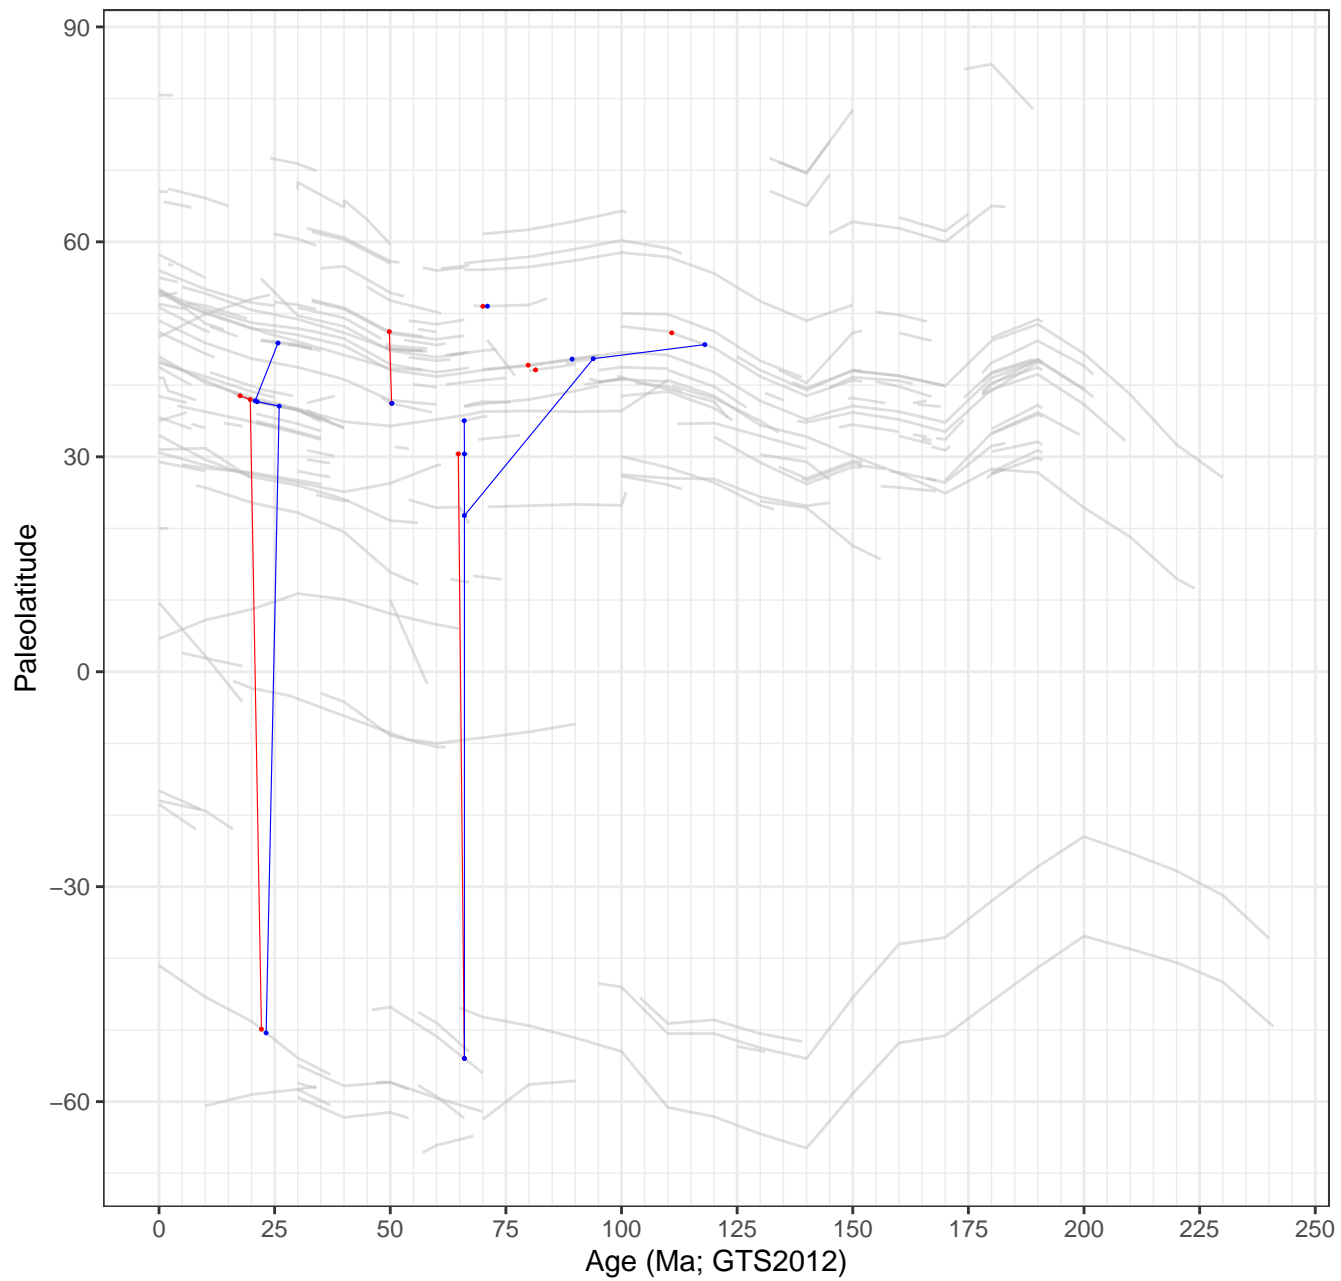

Supplement: Supplementary file 297 [file Genus Membranilarnacia.pdf › Supplement/Supplement 2/Genus 459 plots/Genus Membranilarnacia.pdf]

# Genus Membranilarnax

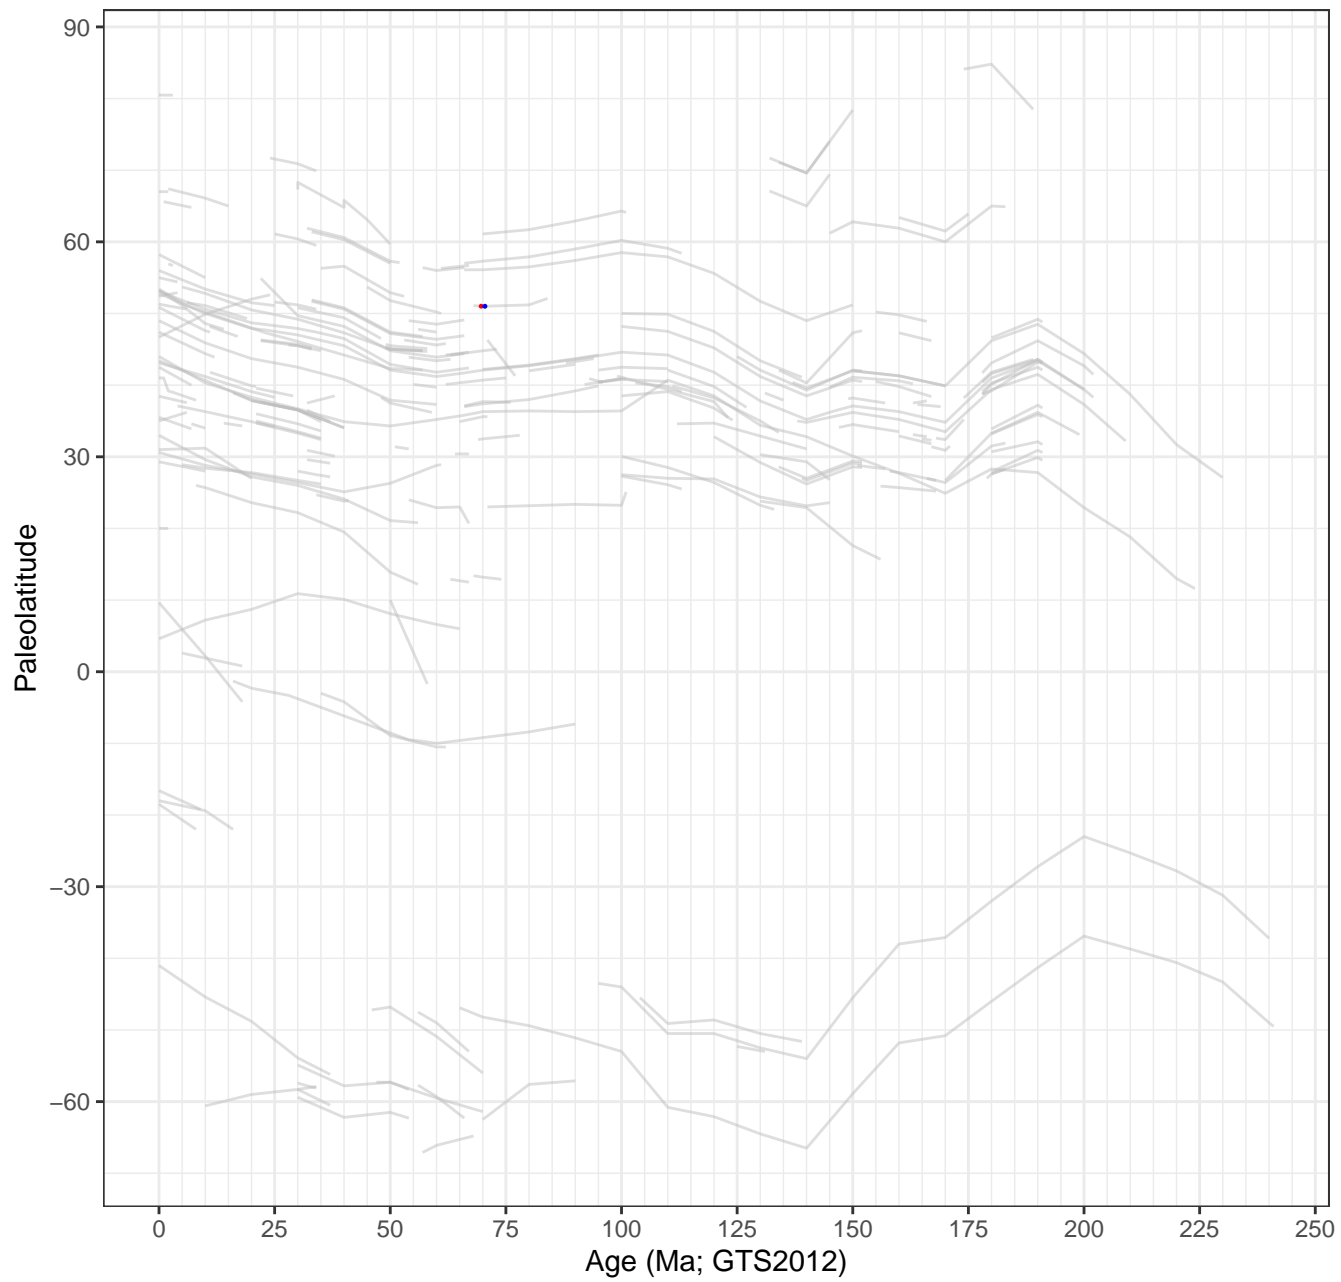

Supplement: Supplementary file 298 [file Genus Membranilarnax.pdf › Supplement/Supplement 2/Genus 459 plots/Genus Membranilarnax.pdf]

# Genus Membranophoridium

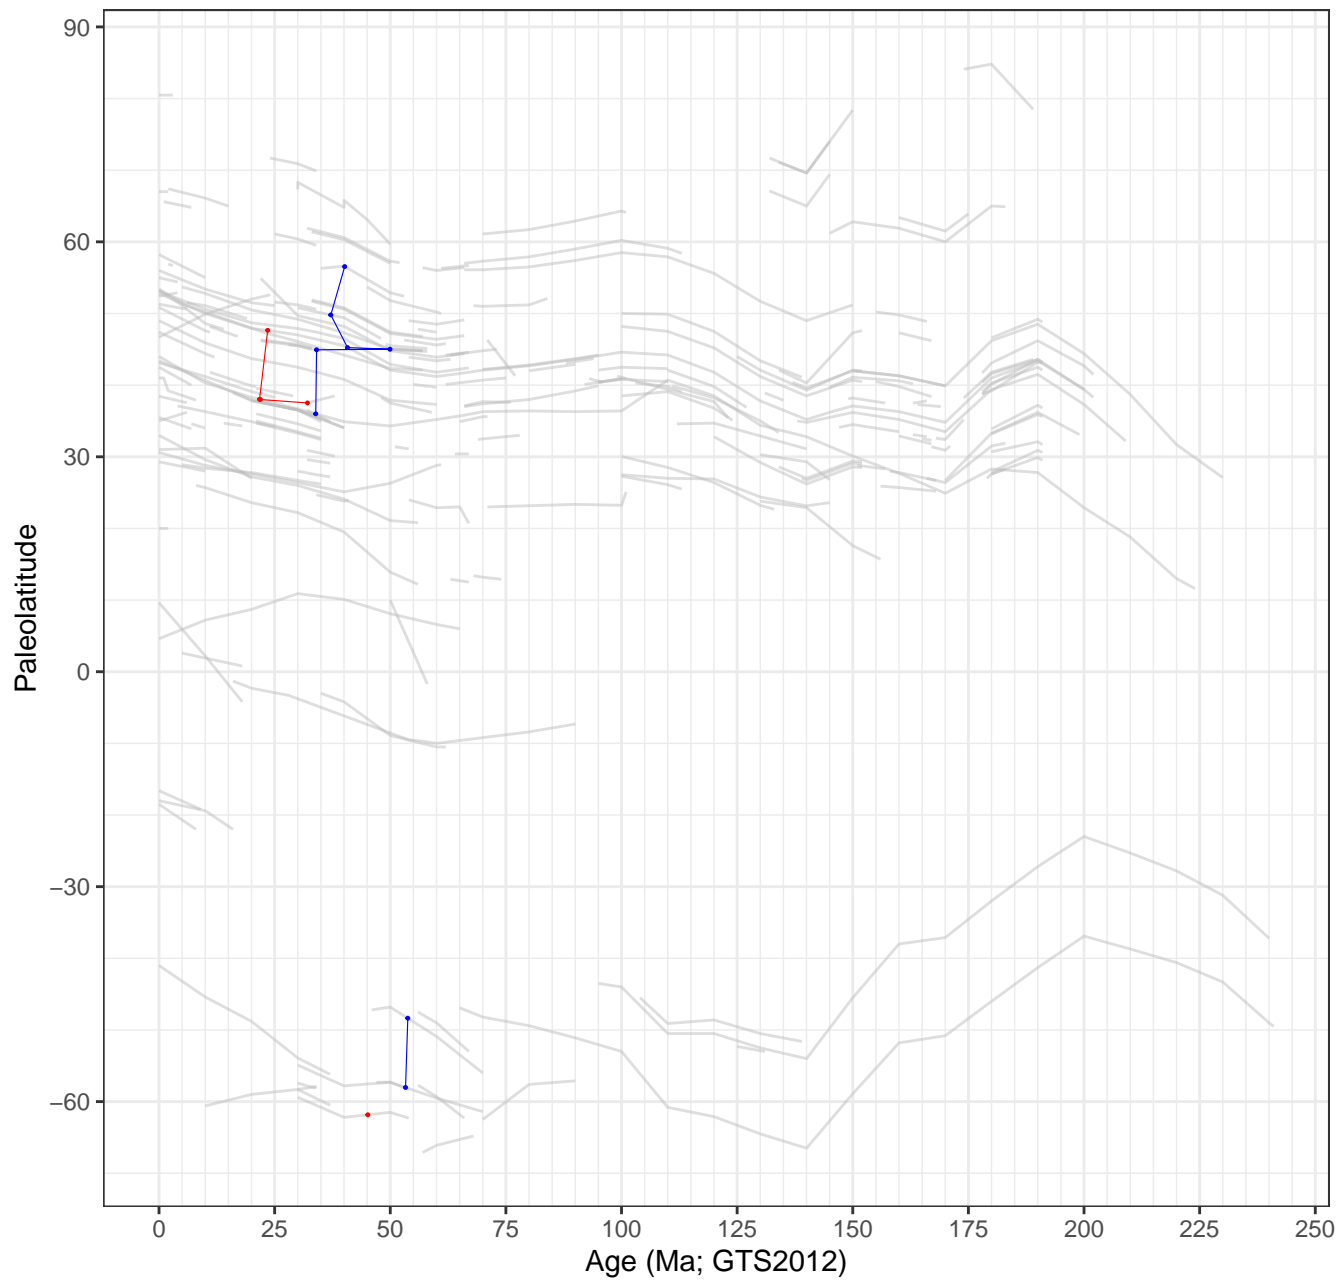

Supplement: Supplementary file 299 [file Genus Membranophoridium.pdf › Supplement/Supplement 2/Genus 459 plots/Genus Membranophoridium.pdf]

# Genus Membranosphaera

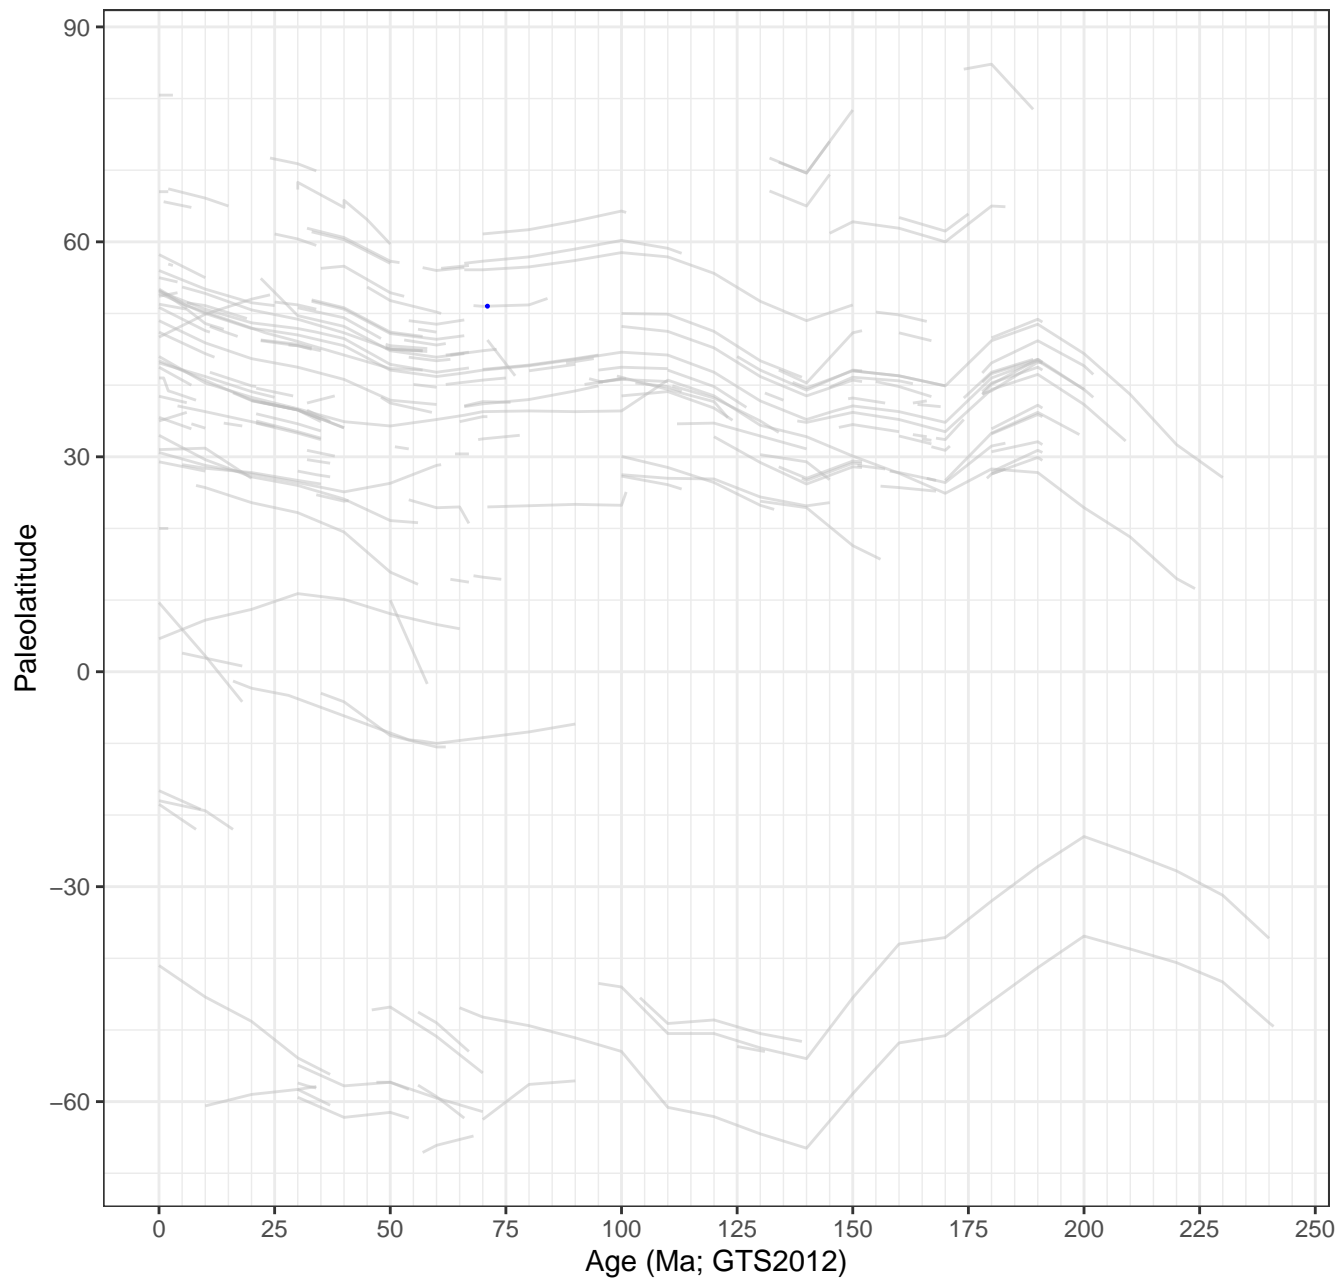

Supplement: Supplementary file 300 [file Genus Membranosphaera.pdf › Supplement/Supplement 2/Genus 459 plots/Genus Membranosphaera.pdf]

# Genus Mendicodinium

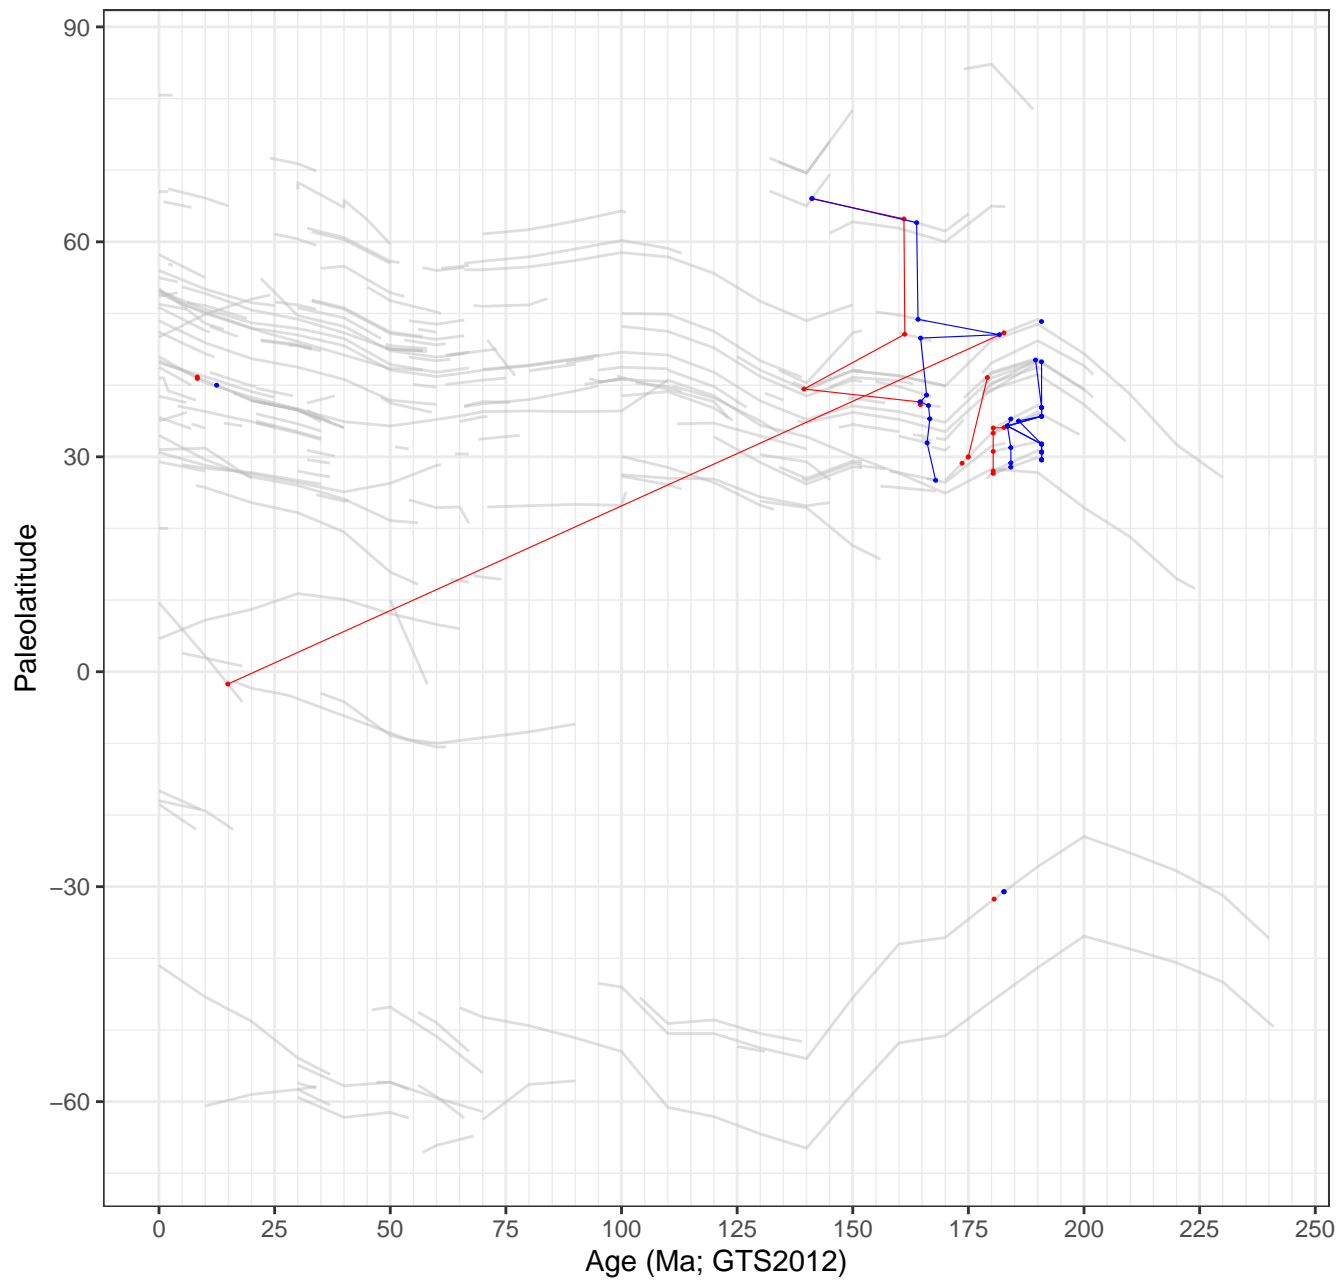

Supplement: Supplementary file 301 [file Genus Mendicodinium.pdf › Supplement/Supplement 2/Genus 459 plots/Genus Mendicodinium.pdf]

# Genus Microdinium

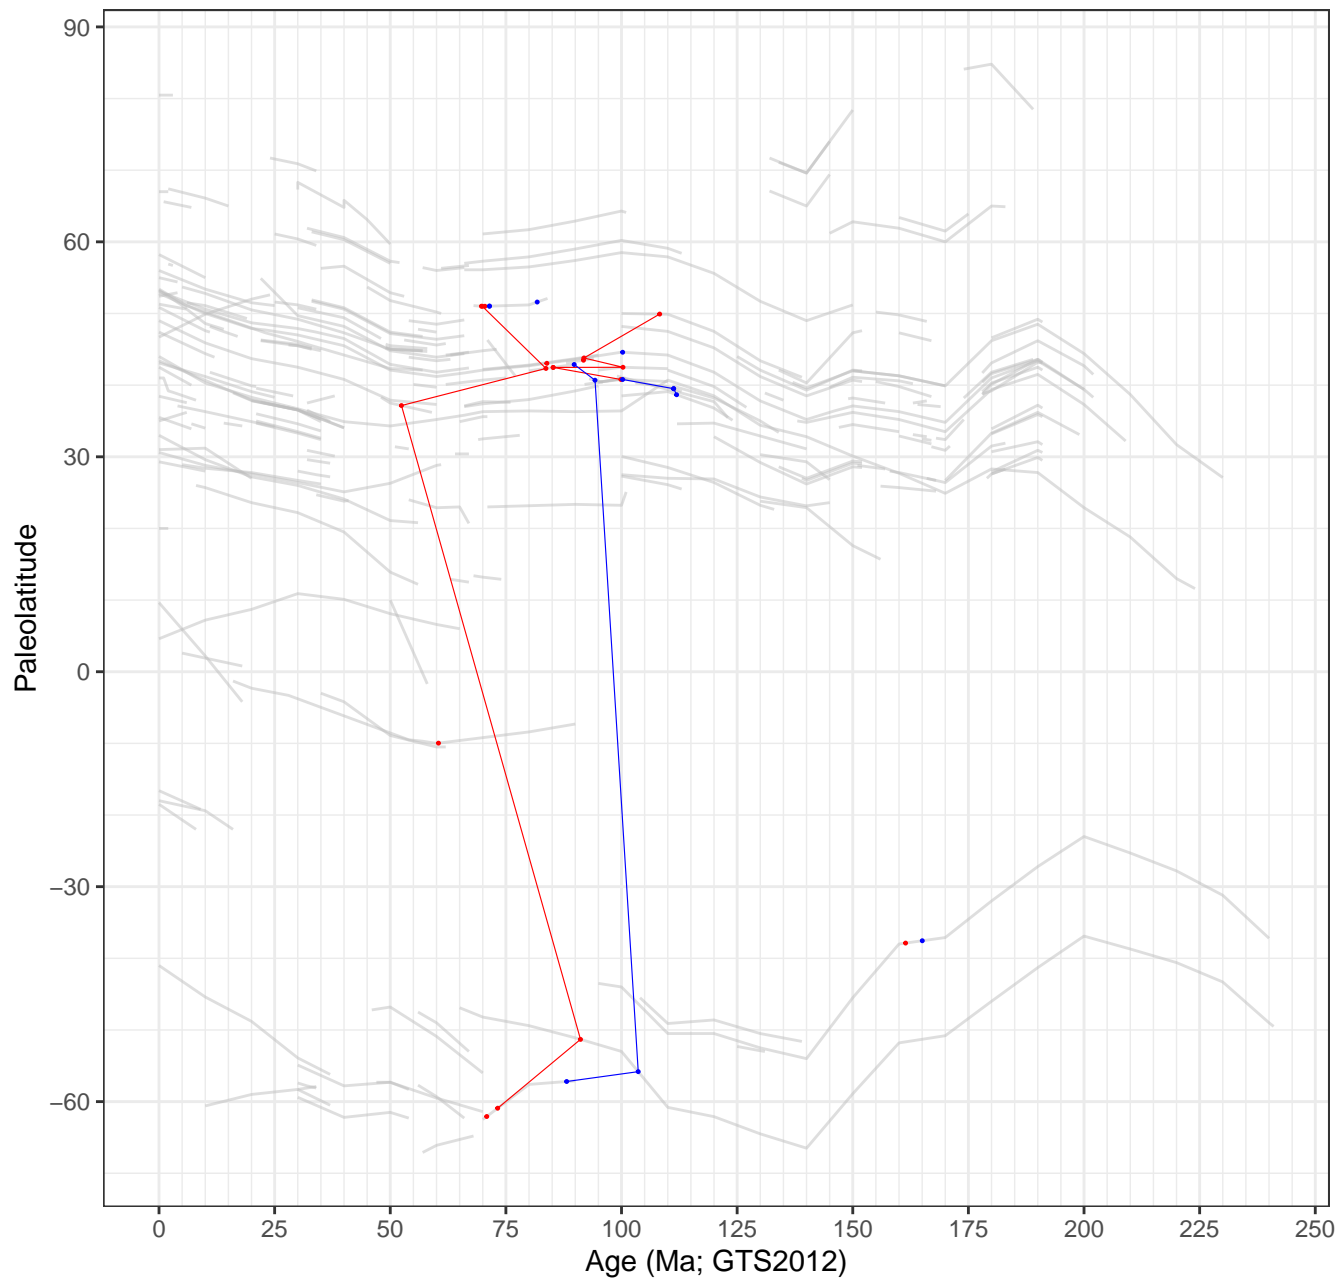

Supplement: Supplementary file 302 [file Genus Microdinium.pdf › Supplement/Supplement 2/Genus 459 plots/Genus Microdinium.pdf]

# Genus *Microsphaeridium*

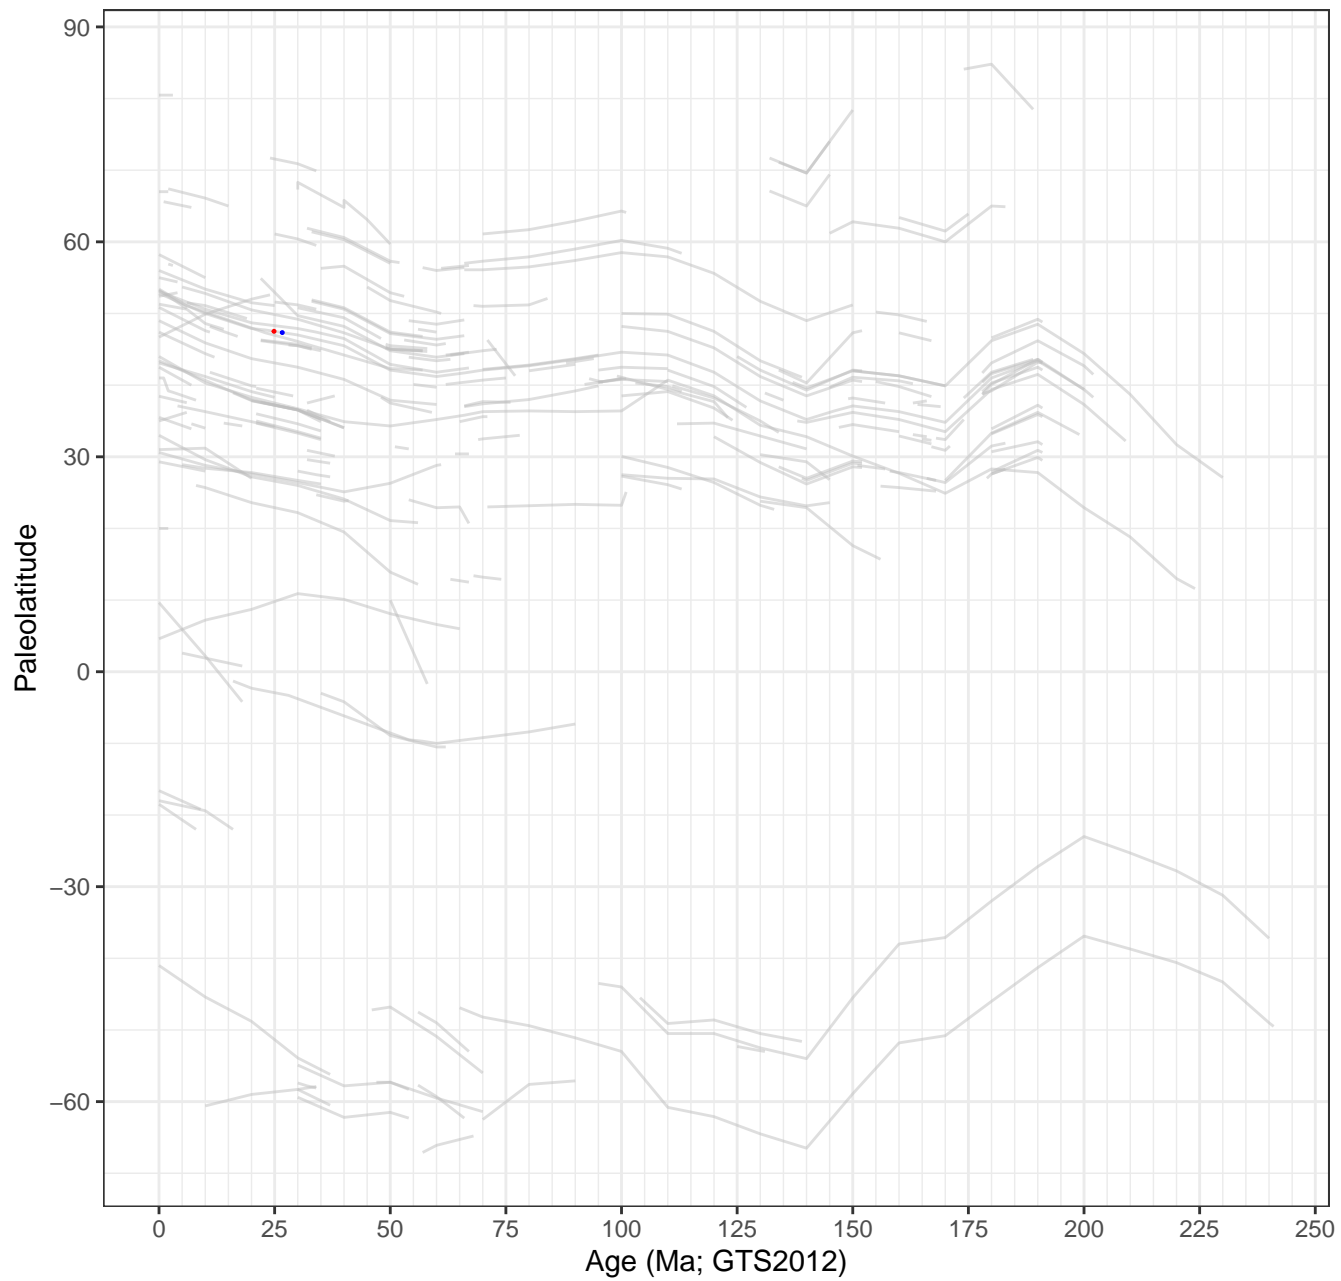

Supplement: Supplementary file 303 [file Genus Microsphaeridium.pdf › Supplement/Supplement 2/Genus 459 plots/Genus Microsphaeridium.pdf]

# Genus *Mikrocysta*

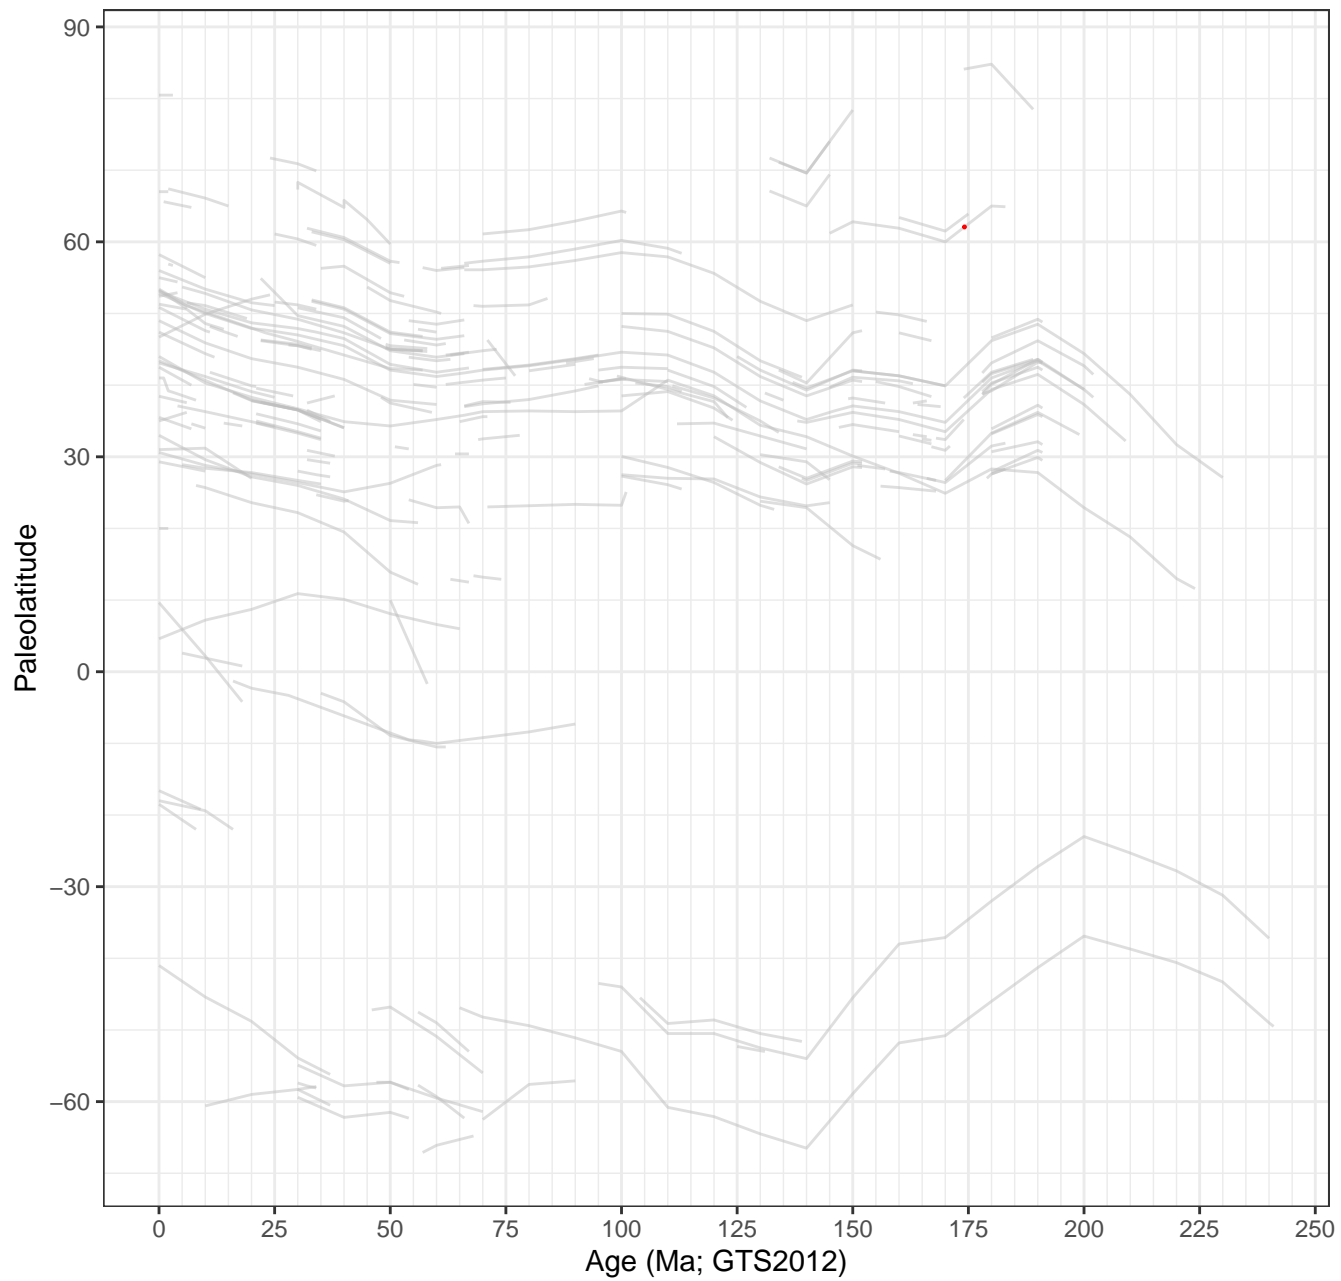

Supplement: Supplementary file 304 [file Genus Mikrocysta.pdf › Supplement/Supplement 2/Genus 459 plots/Genus Mikrocysta.pdf]

# Genus Minisphaeridium

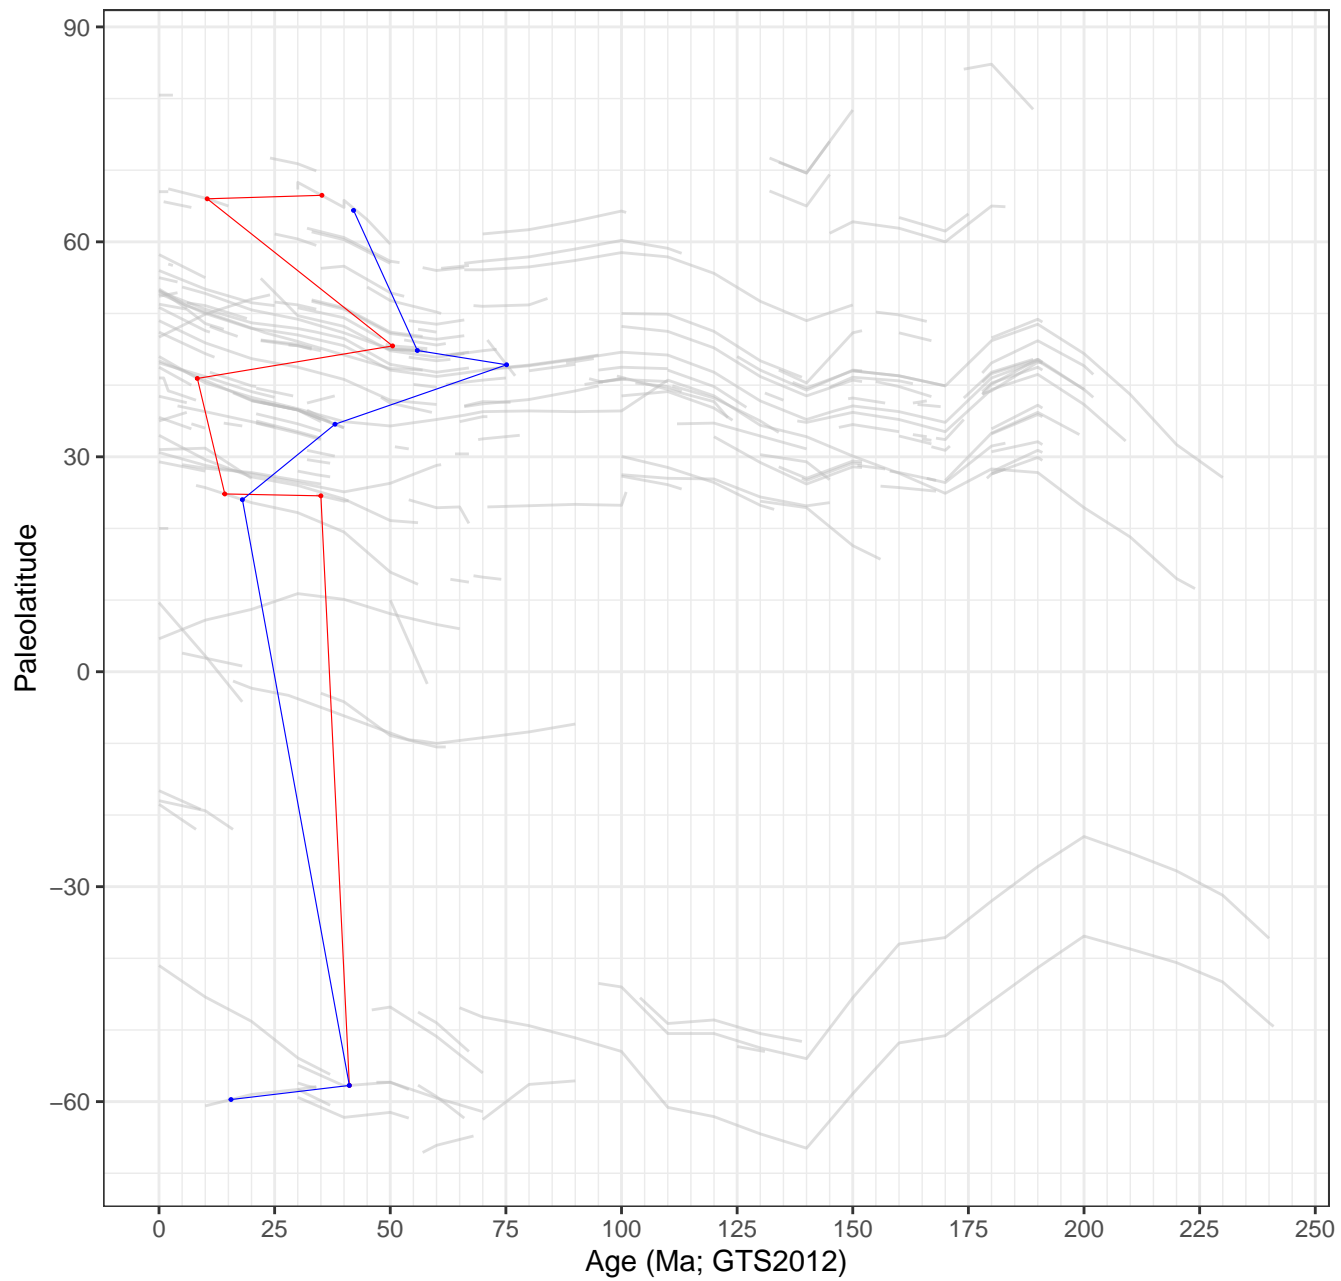

Supplement: Supplementary file 305 [file Genus Minisphaeridium.pdf › Supplement/Supplement 2/Genus 459 plots/Genus Minisphaeridium.pdf]

# Genus Moesiodinium

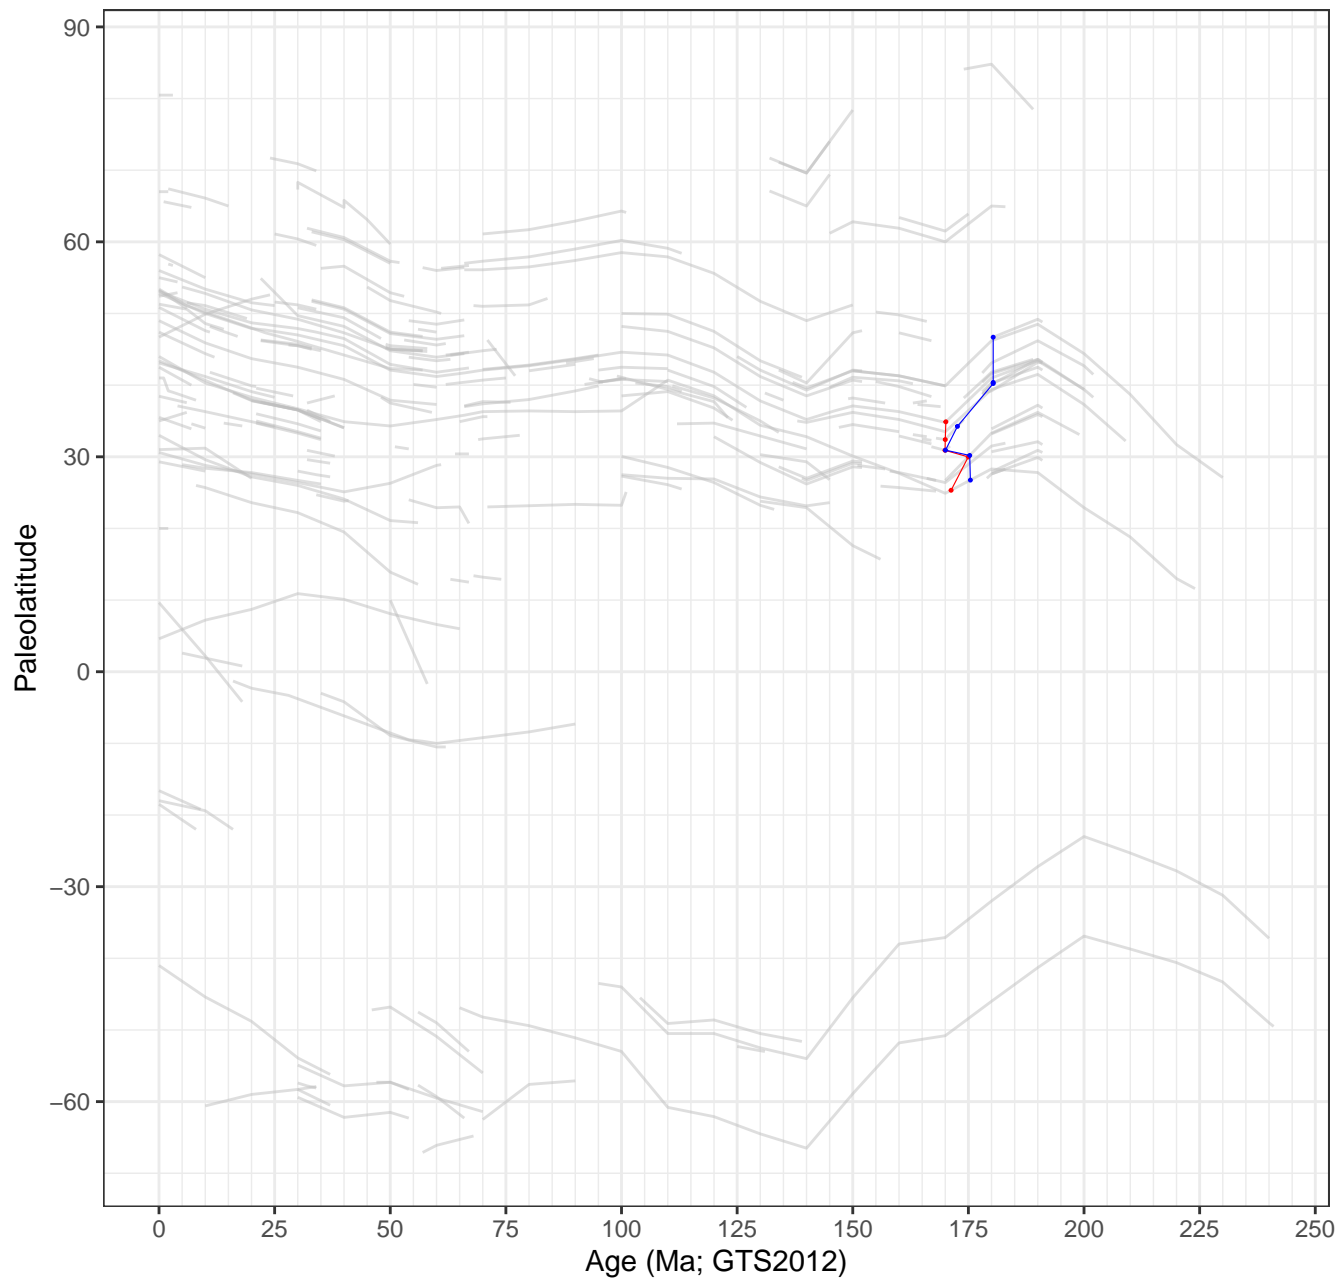

Supplement: Supplementary file 306 [file Genus Moesiodinium.pdf › Supplement/Supplement 2/Genus 459 plots/Genus Moesiodinium.pdf]

# Genus Mombasadinium

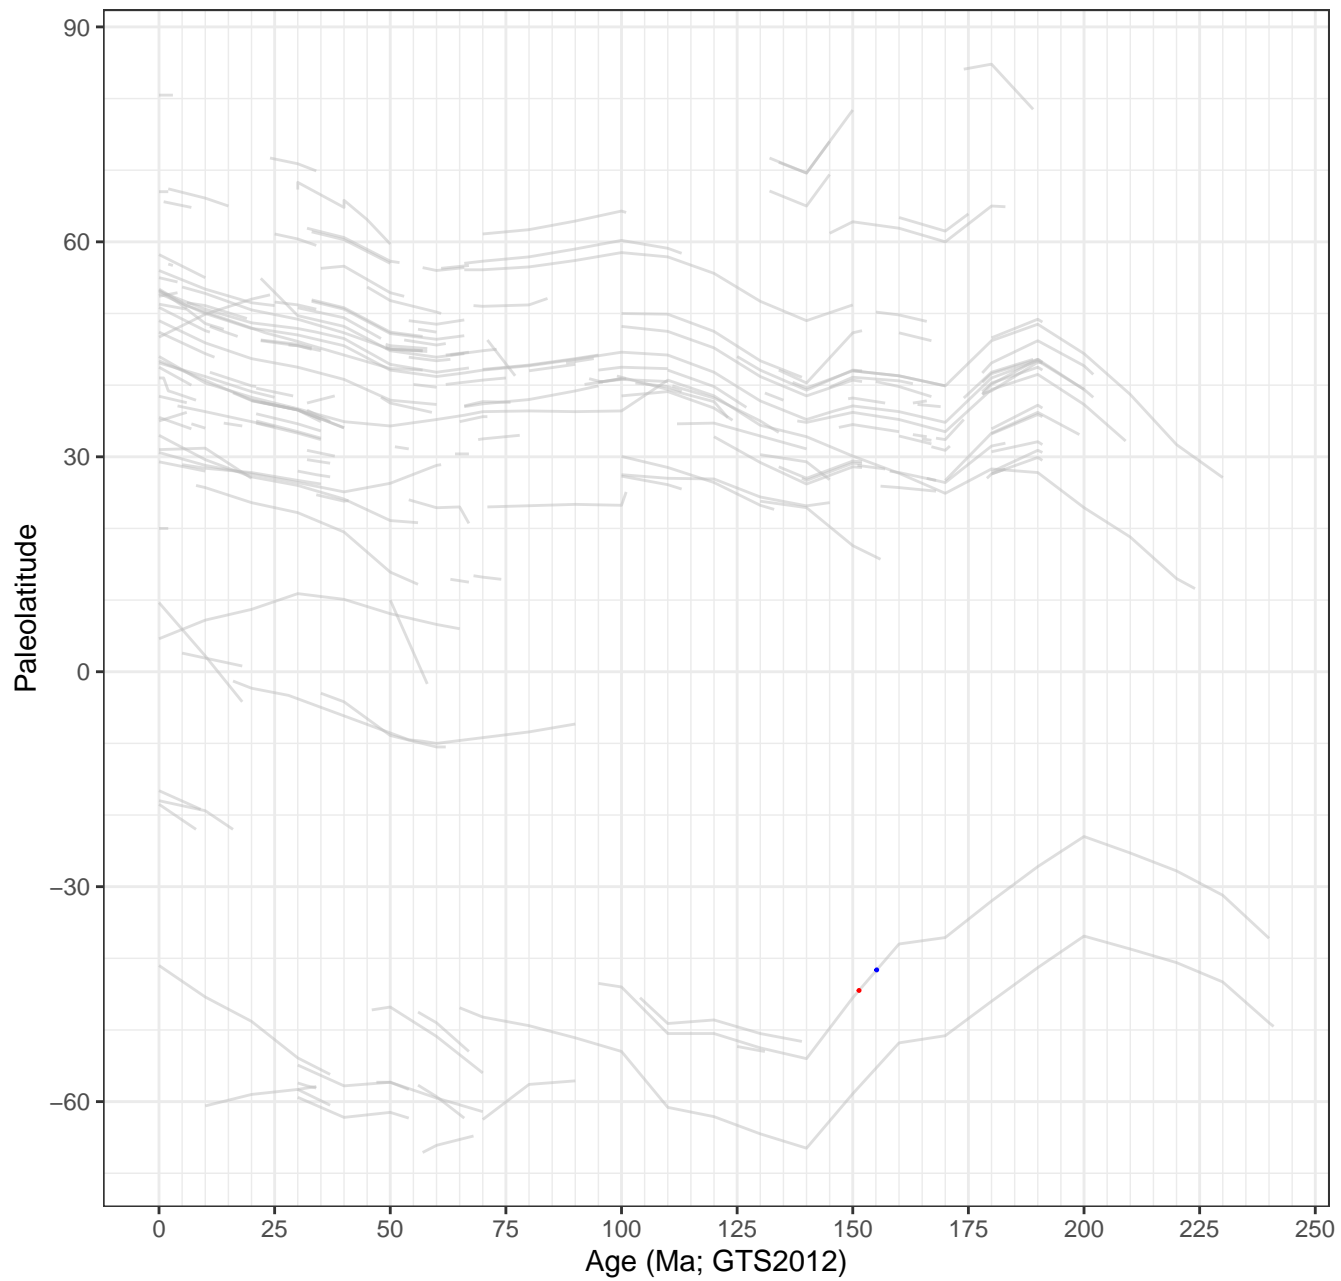

Supplement: Supplementary file 307 [file Genus Mombasadinium.pdf › Supplement/Supplement 2/Genus 459 plots/Genus Mombasadinium.pdf]

# Genus Moorodinium

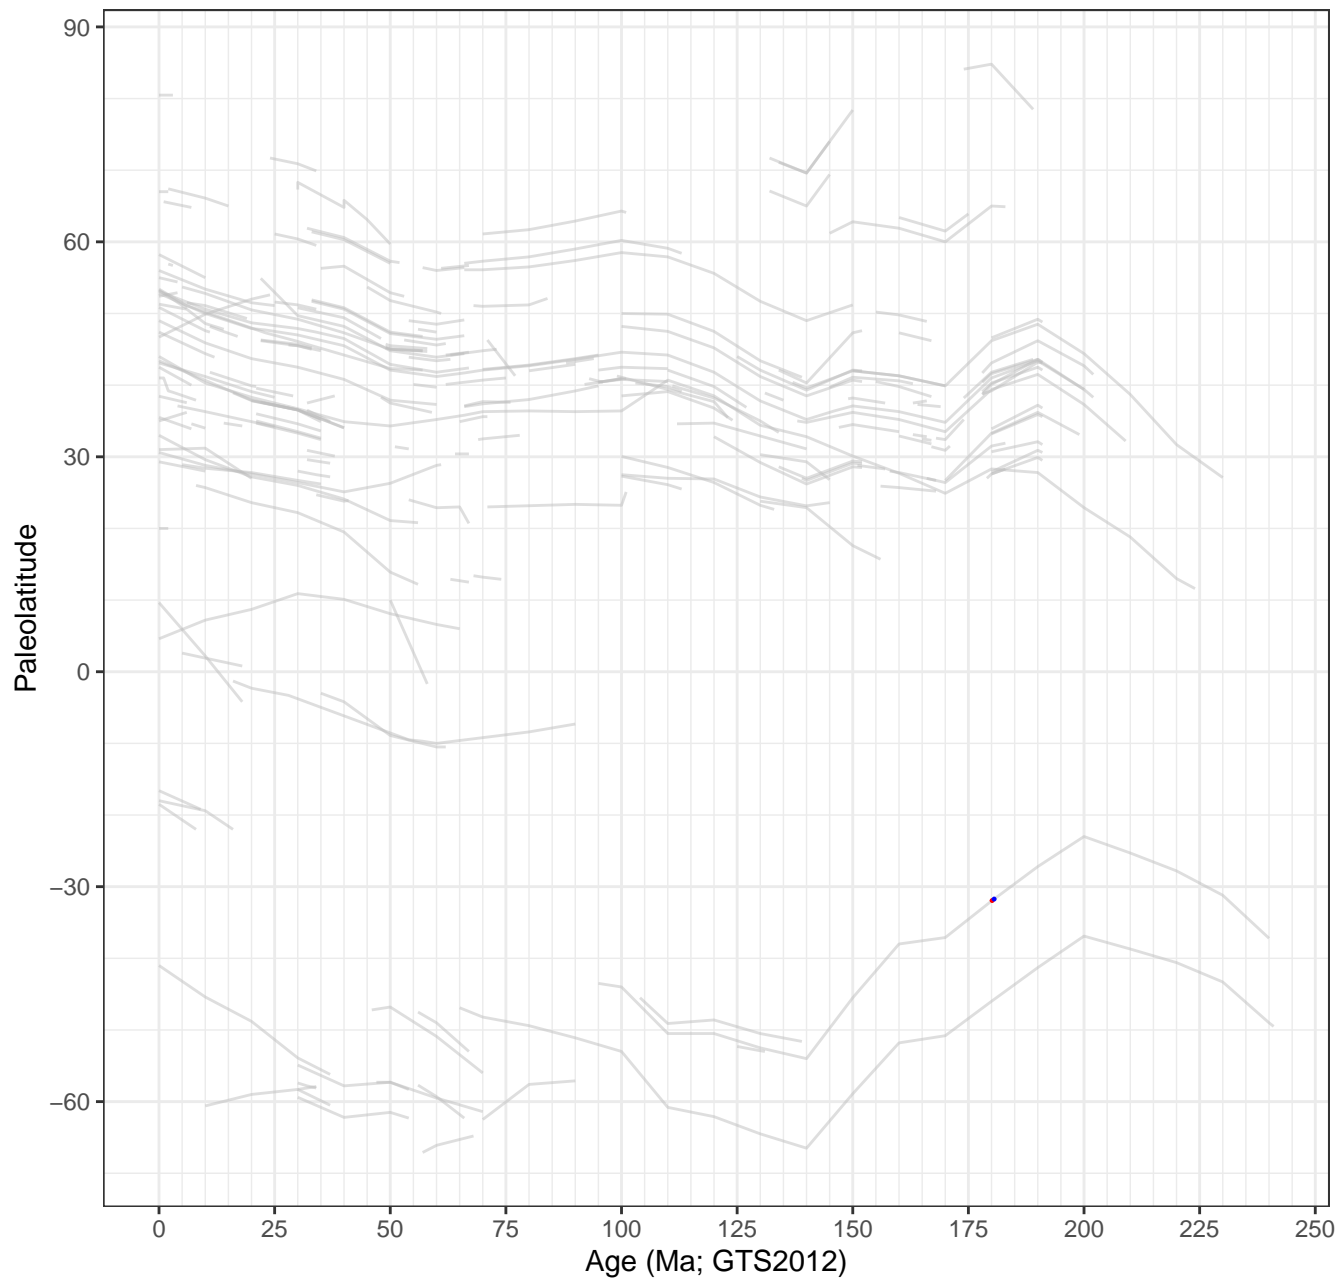

Supplement: Supplementary file 308 [file Genus Moorodinium.pdf › Supplement/Supplement 2/Genus 459 plots/Genus Moorodinium.pdf]

# Genus Mosaicodinium

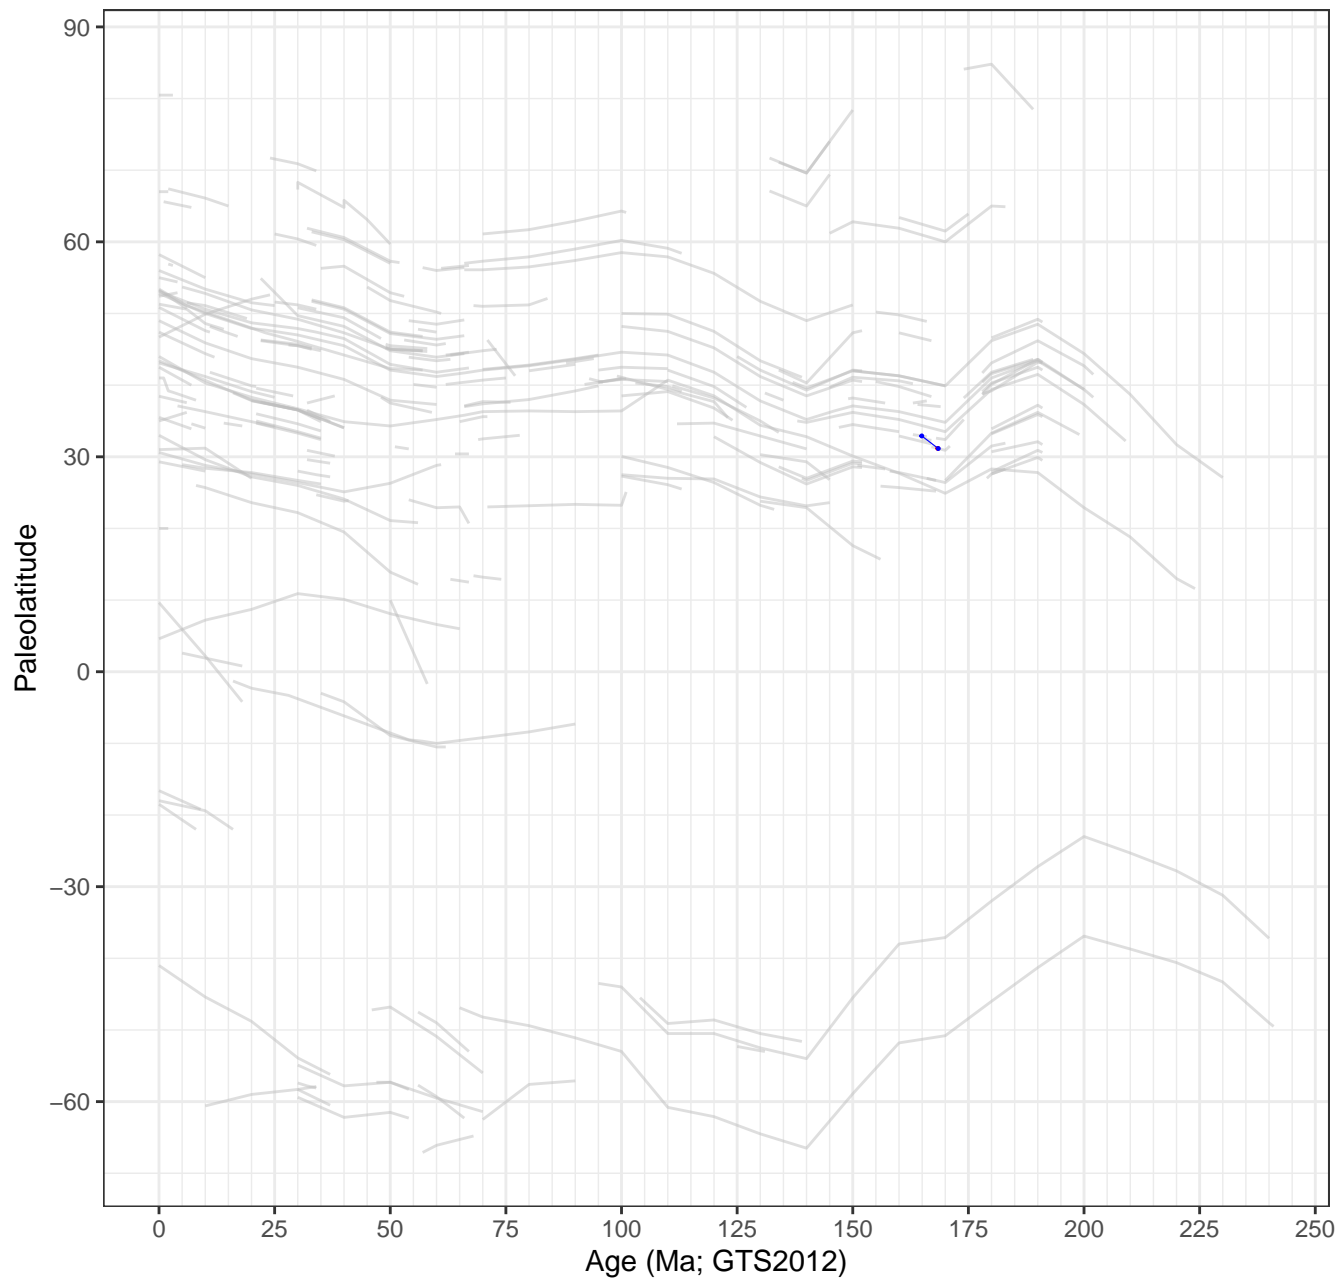

Supplement: Supplementary file 309 [file Genus Mosaicodinium.pdf › Supplement/Supplement 2/Genus 459 plots/Genus Mosaicodinium.pdf]

# Genus Muderongia

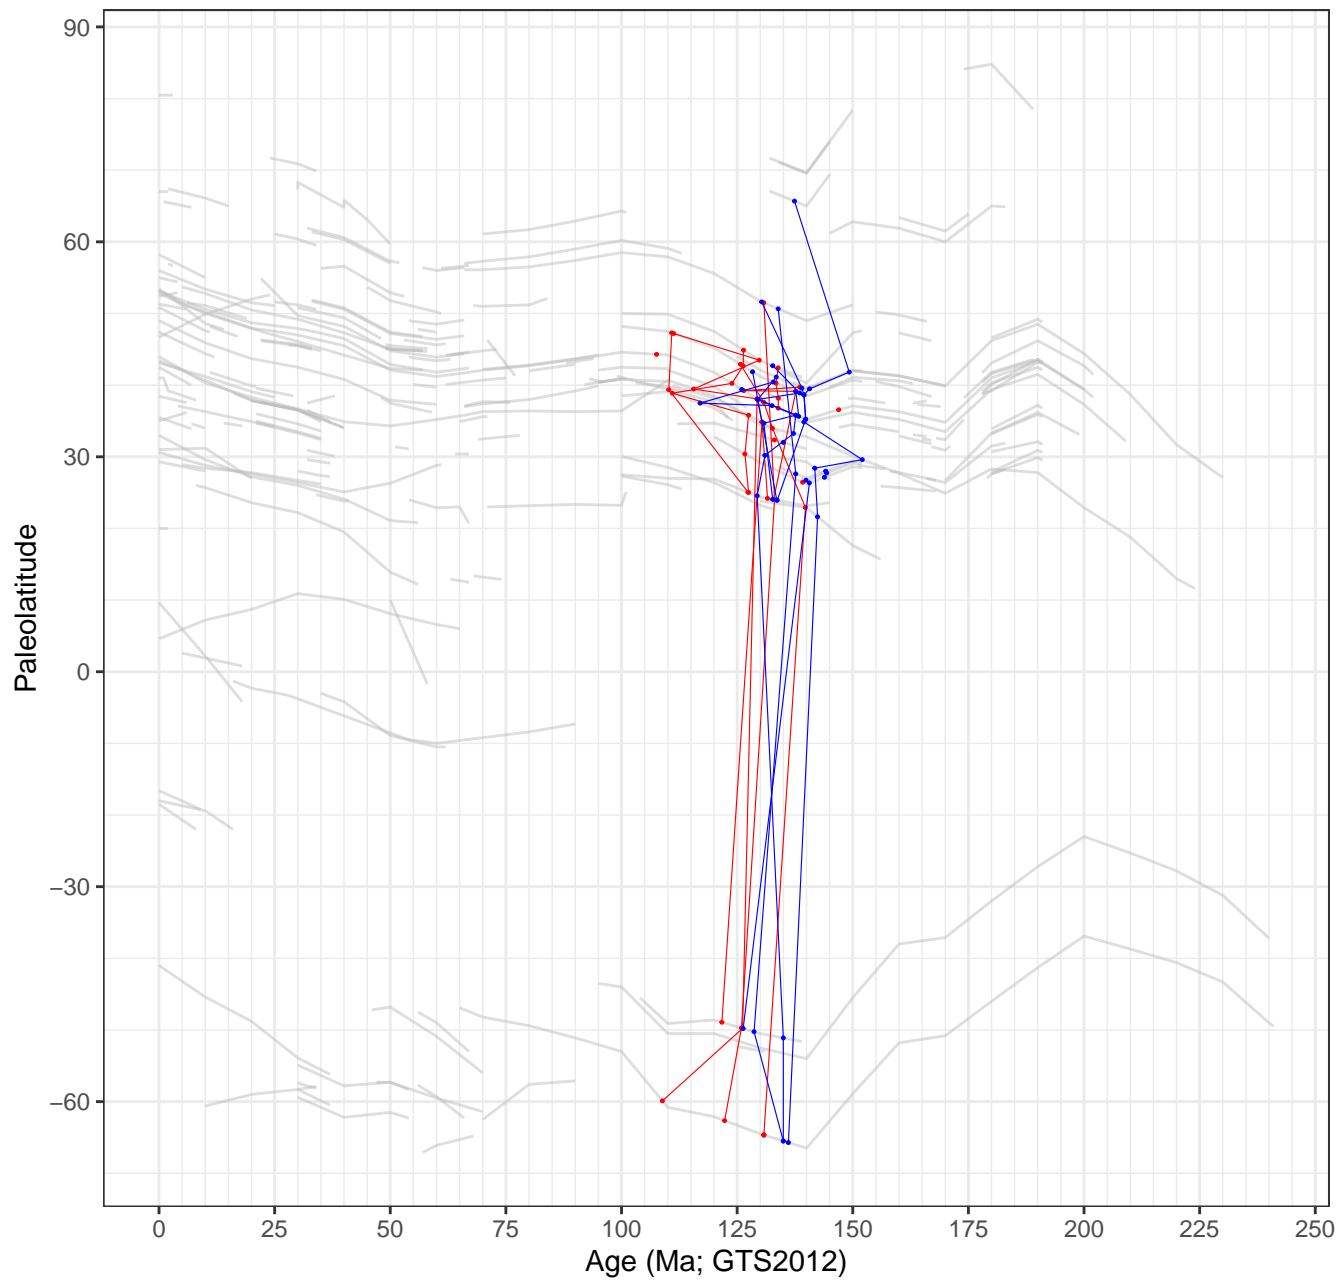

Supplement: Supplementary file 310 [file Genus Muderongia.pdf › Supplement/Supplement 2/Genus 459 plots/Genus Muderongia.pdf]

# Genus Muratodinium

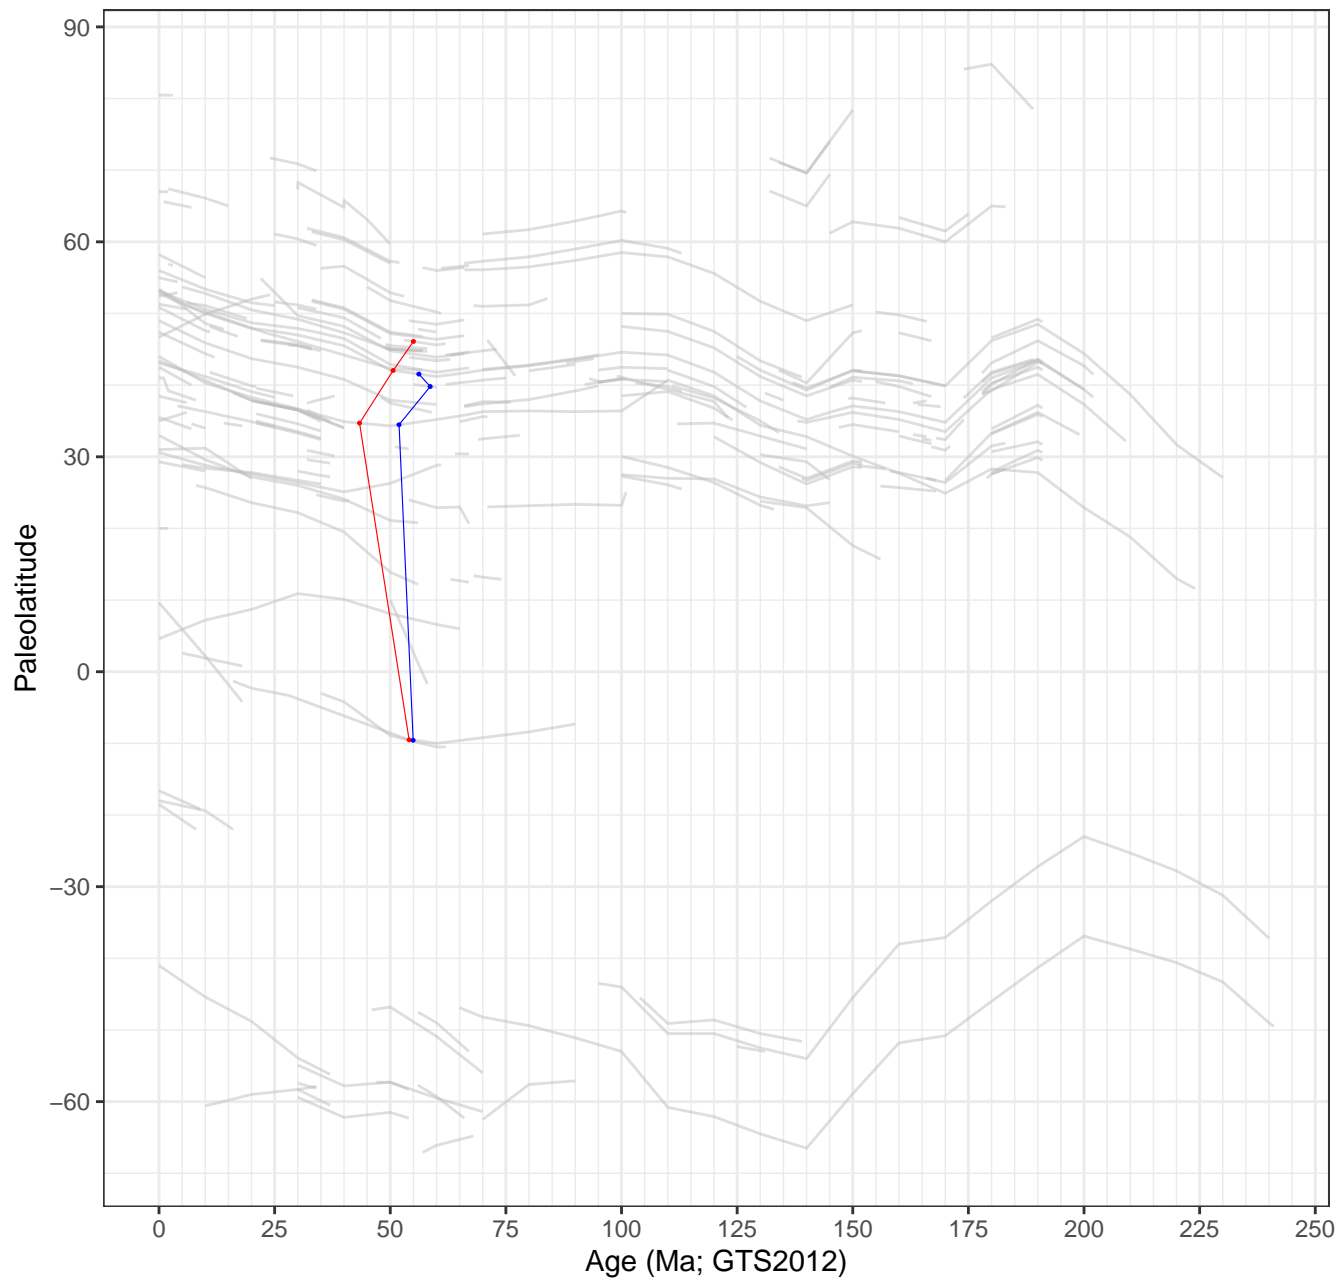

Supplement: Supplementary file 311 [file Genus Muratodinium.pdf › Supplement/Supplement 2/Genus 459 plots/Genus Muratodinium.pdf]

# Genus *Nannoceratopsis*

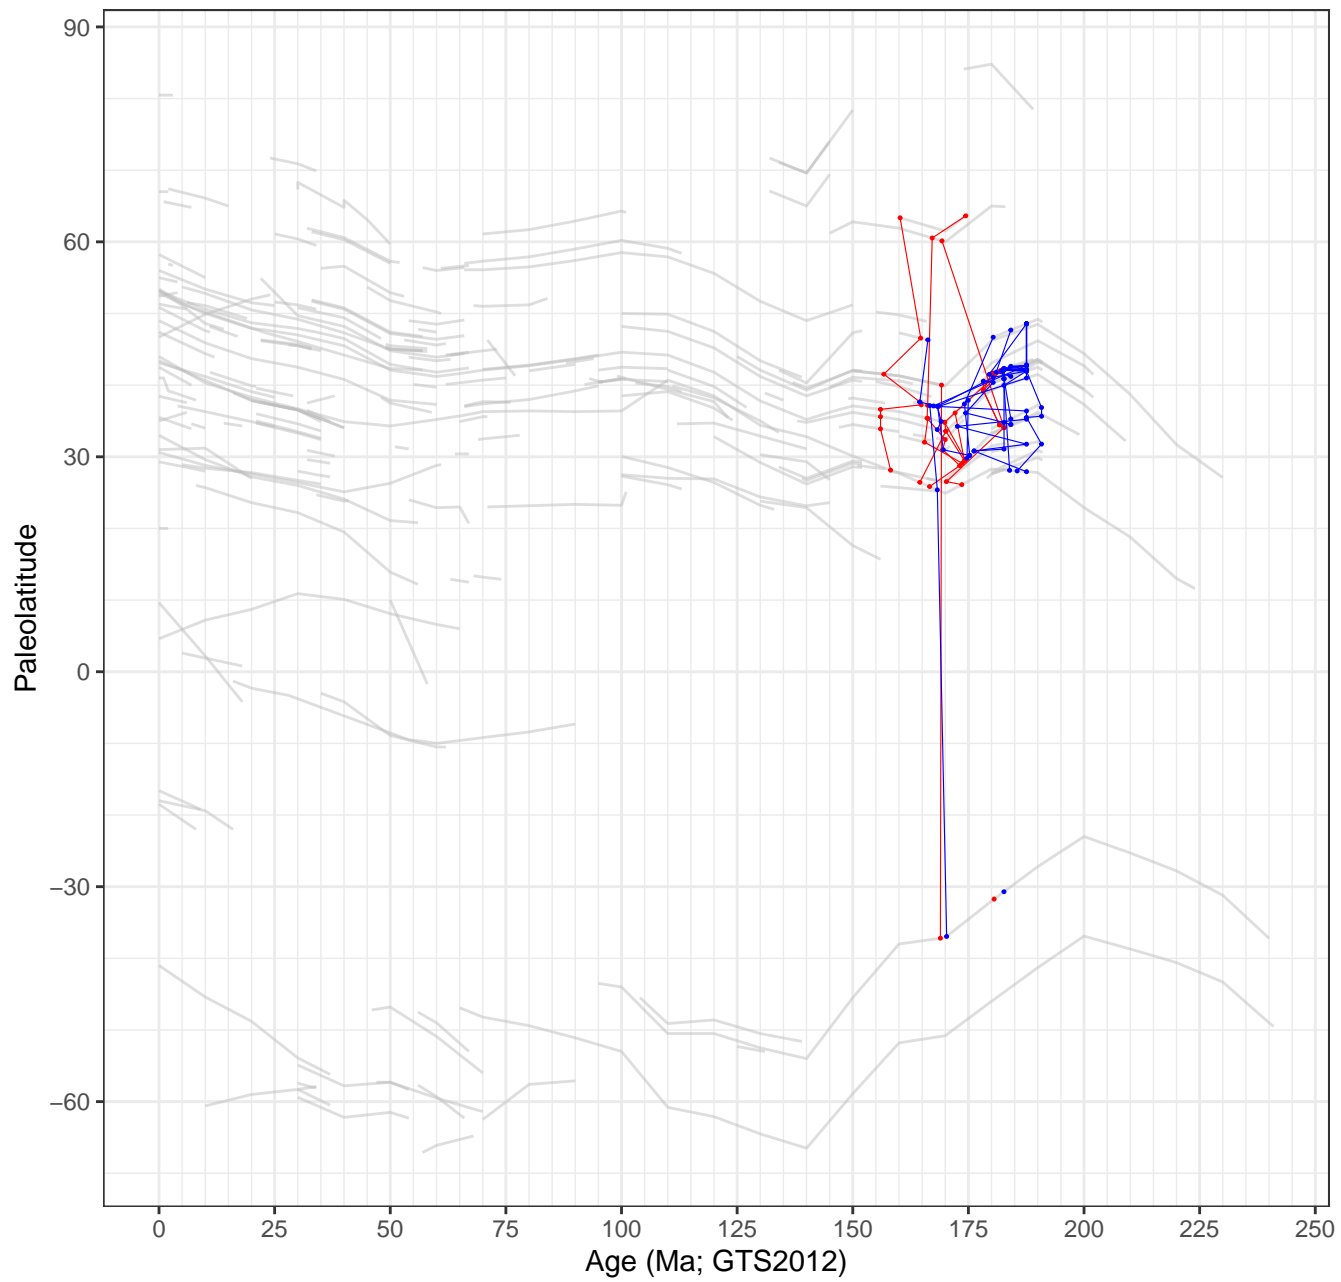

Supplement: Supplementary file 312 [file Genus Nannoceratopsis.pdf › Supplement/Supplement 2/Genus 459 plots/Genus Nannoceratopsis.pdf]

# Genus Nelchinopsis

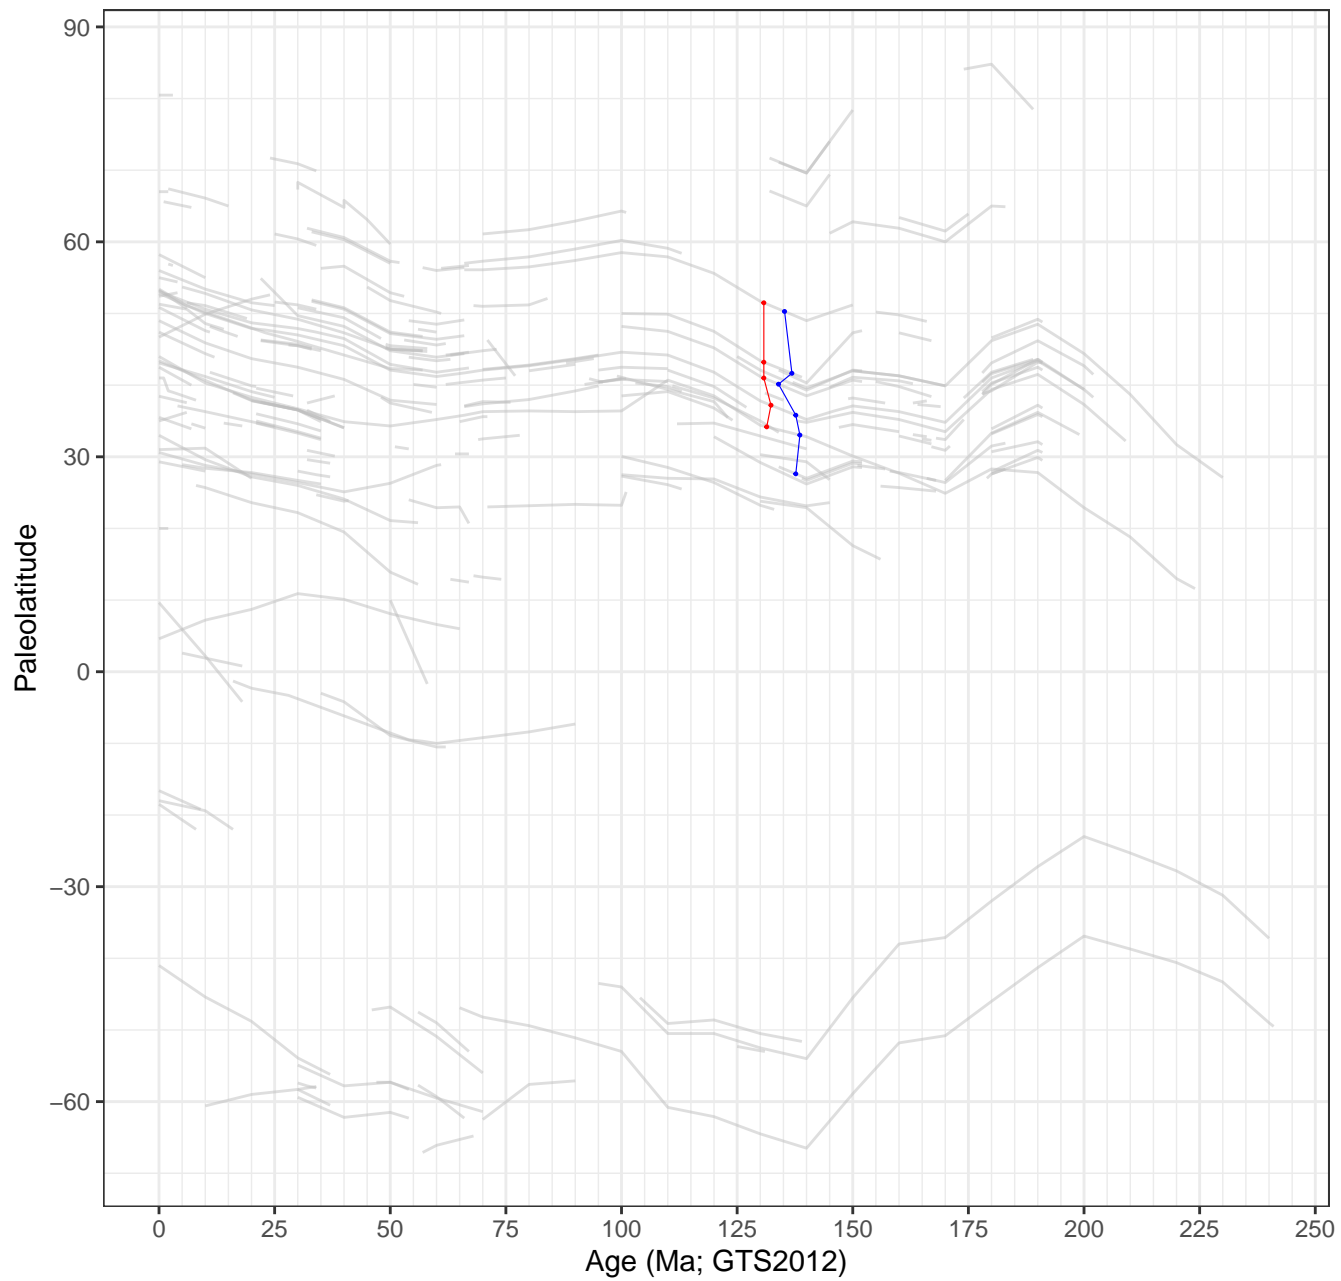

Supplement: Supplementary file 313 [file Genus Nelchinopsis.pdf › Supplement/Supplement 2/Genus 459 plots/Genus Nelchinopsis.pdf]

# Genus *Nelsoniella*

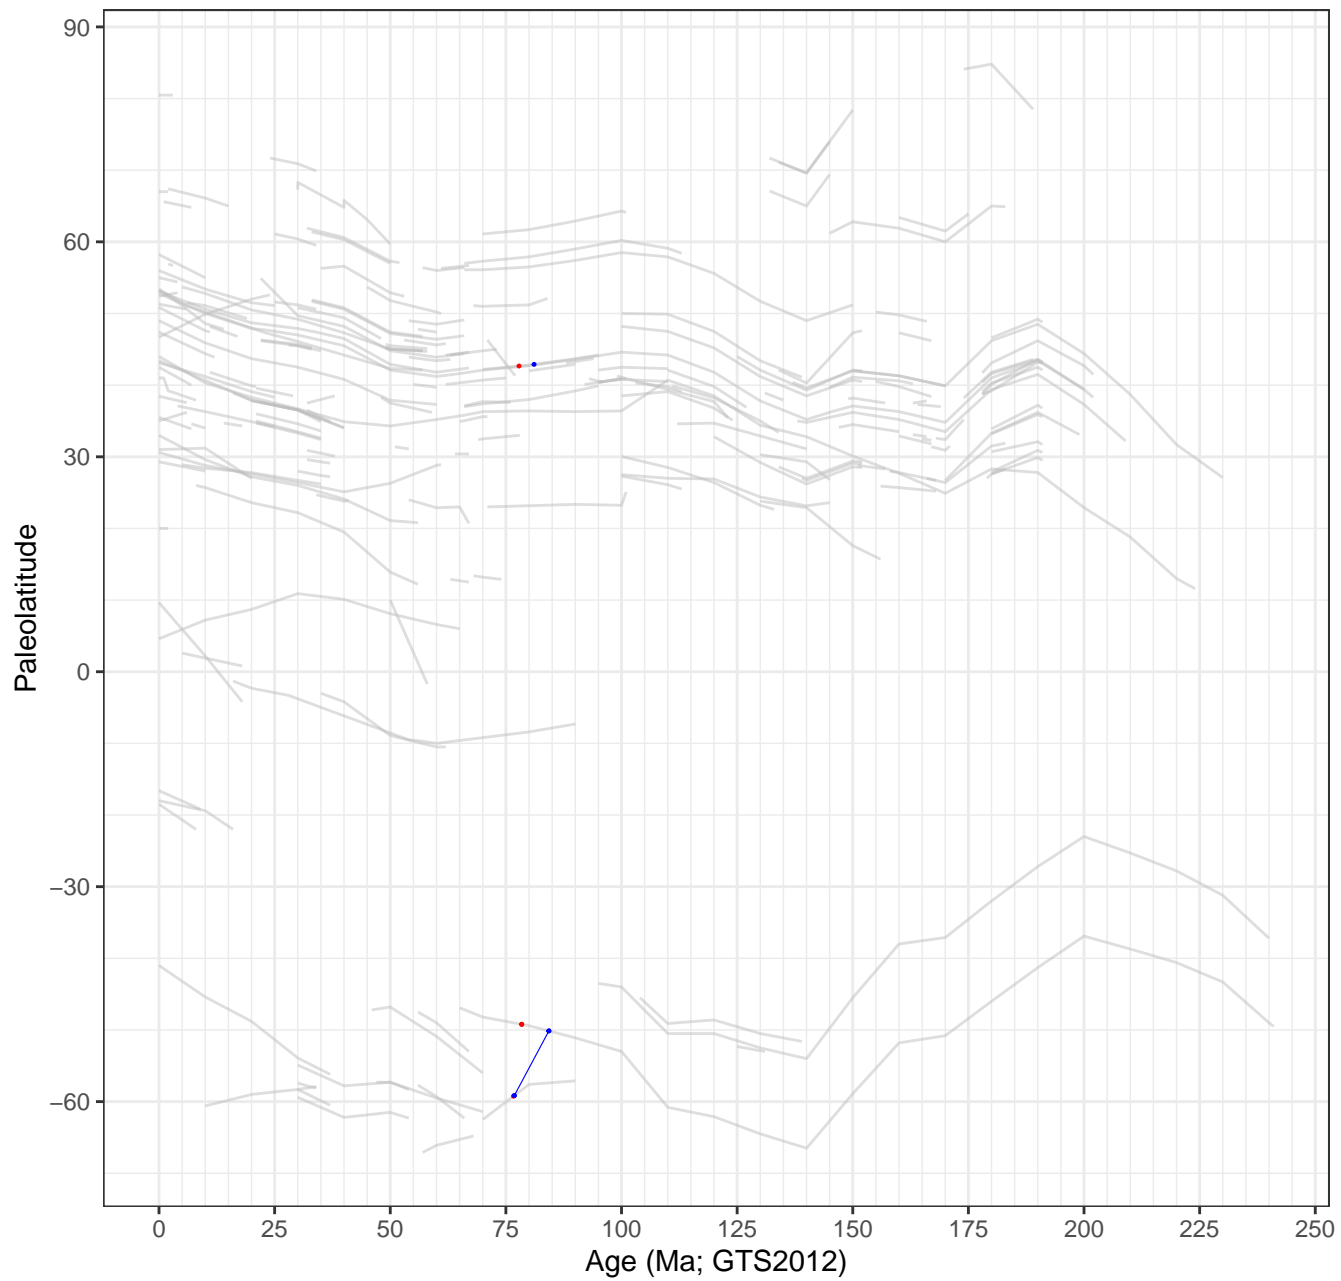

Supplement: Supplementary file 314 [file Genus Nelsoniella.pdf › Supplement/Supplement 2/Genus 459 plots/Genus Nelsoniella.pdf]
