# Supplementary figures and images for: DINOSTRAT: a global database of the stratigraphic and paleolatitudinal distribution of Mesozoic–Cenozoic organic-walled dinoflagellate cysts (part 4 of 27)
Source: Copernicus journal article supplement (doi:10.5194/essd-14-579-2022), 2022-02-09

# Genus *Nematosphaeropsis*

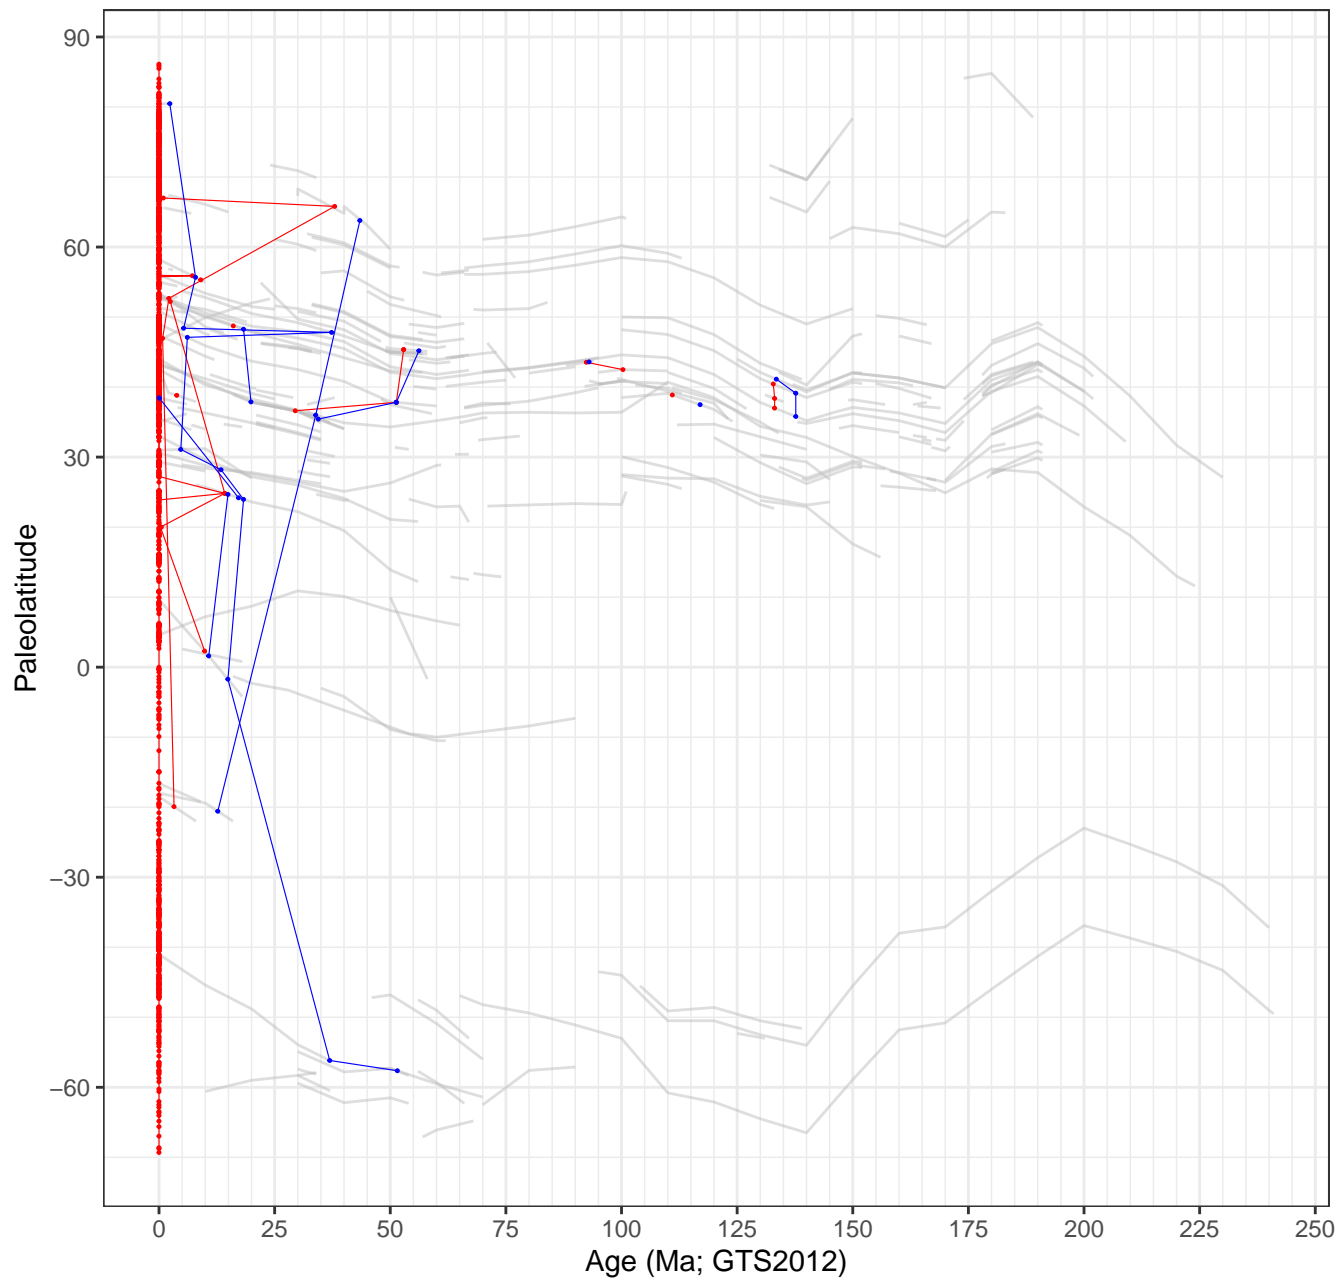

Supplement: Supplementary file 315 [file Genus Nematosphaeropsis.pdf › Supplement/Supplement 2/Genus 459 plots/Genus Nematosphaeropsis.pdf]

# Genus Nexosispinum

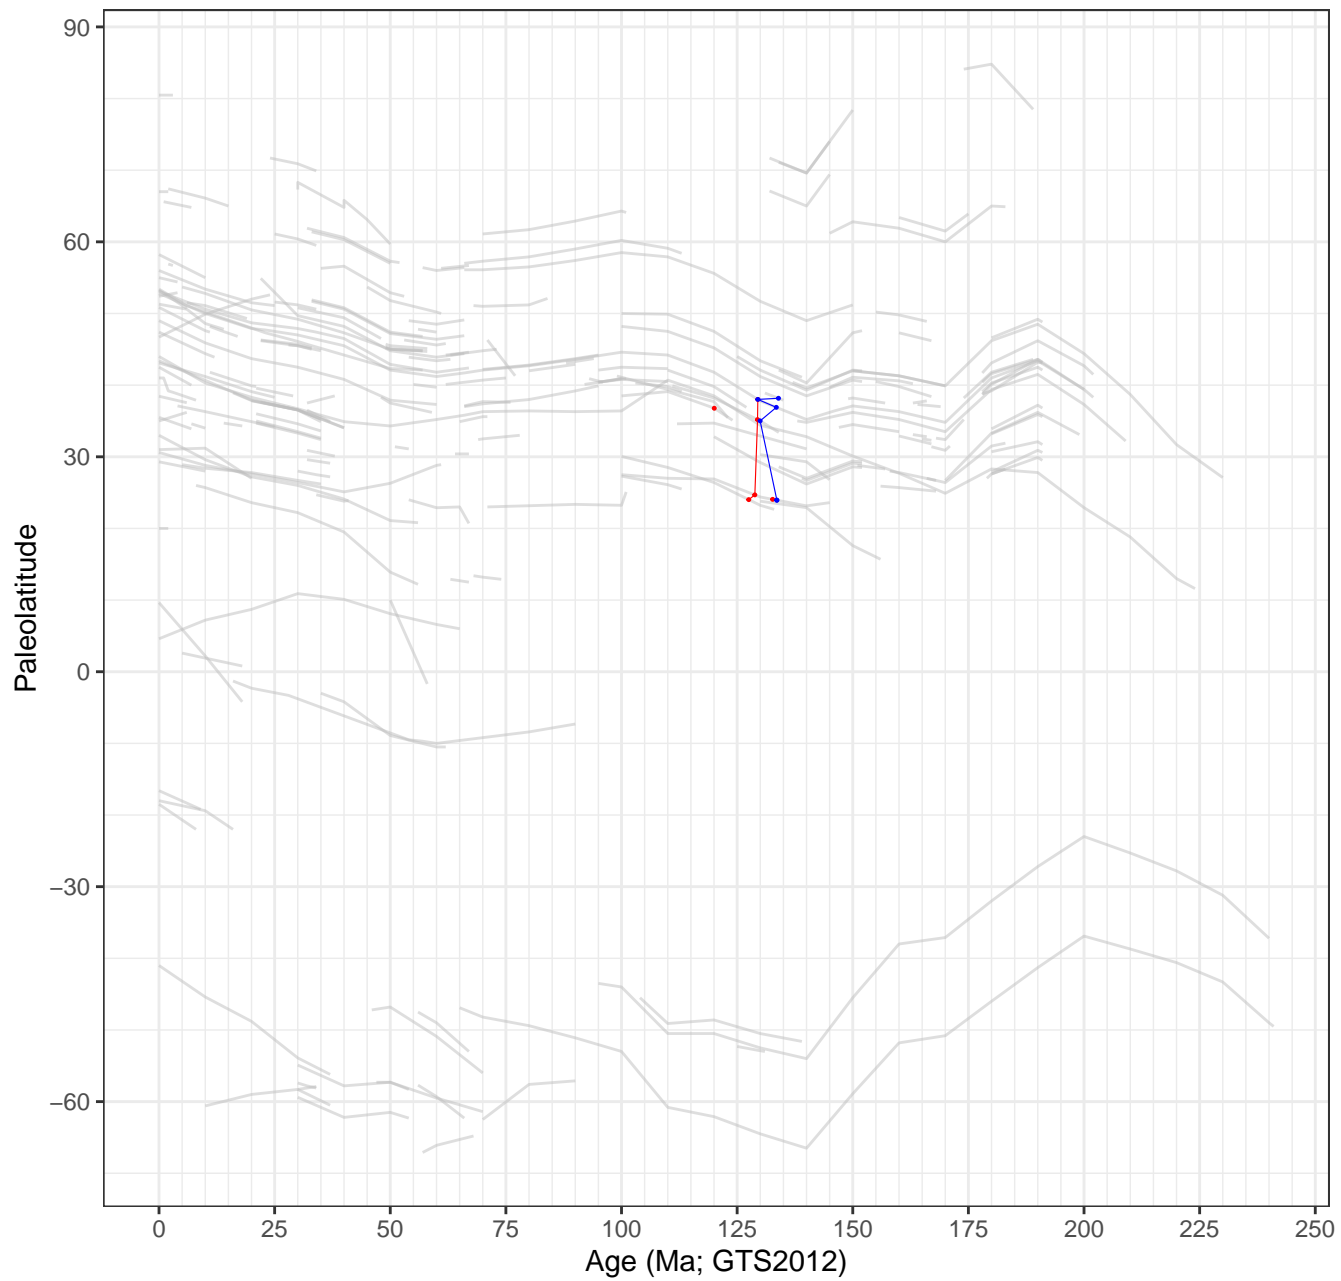

Supplement: Supplementary file 316 [file Genus Nexosispinum.pdf › Supplement/Supplement 2/Genus 459 plots/Genus Nexosispinum.pdf]

# Genus Noricysta

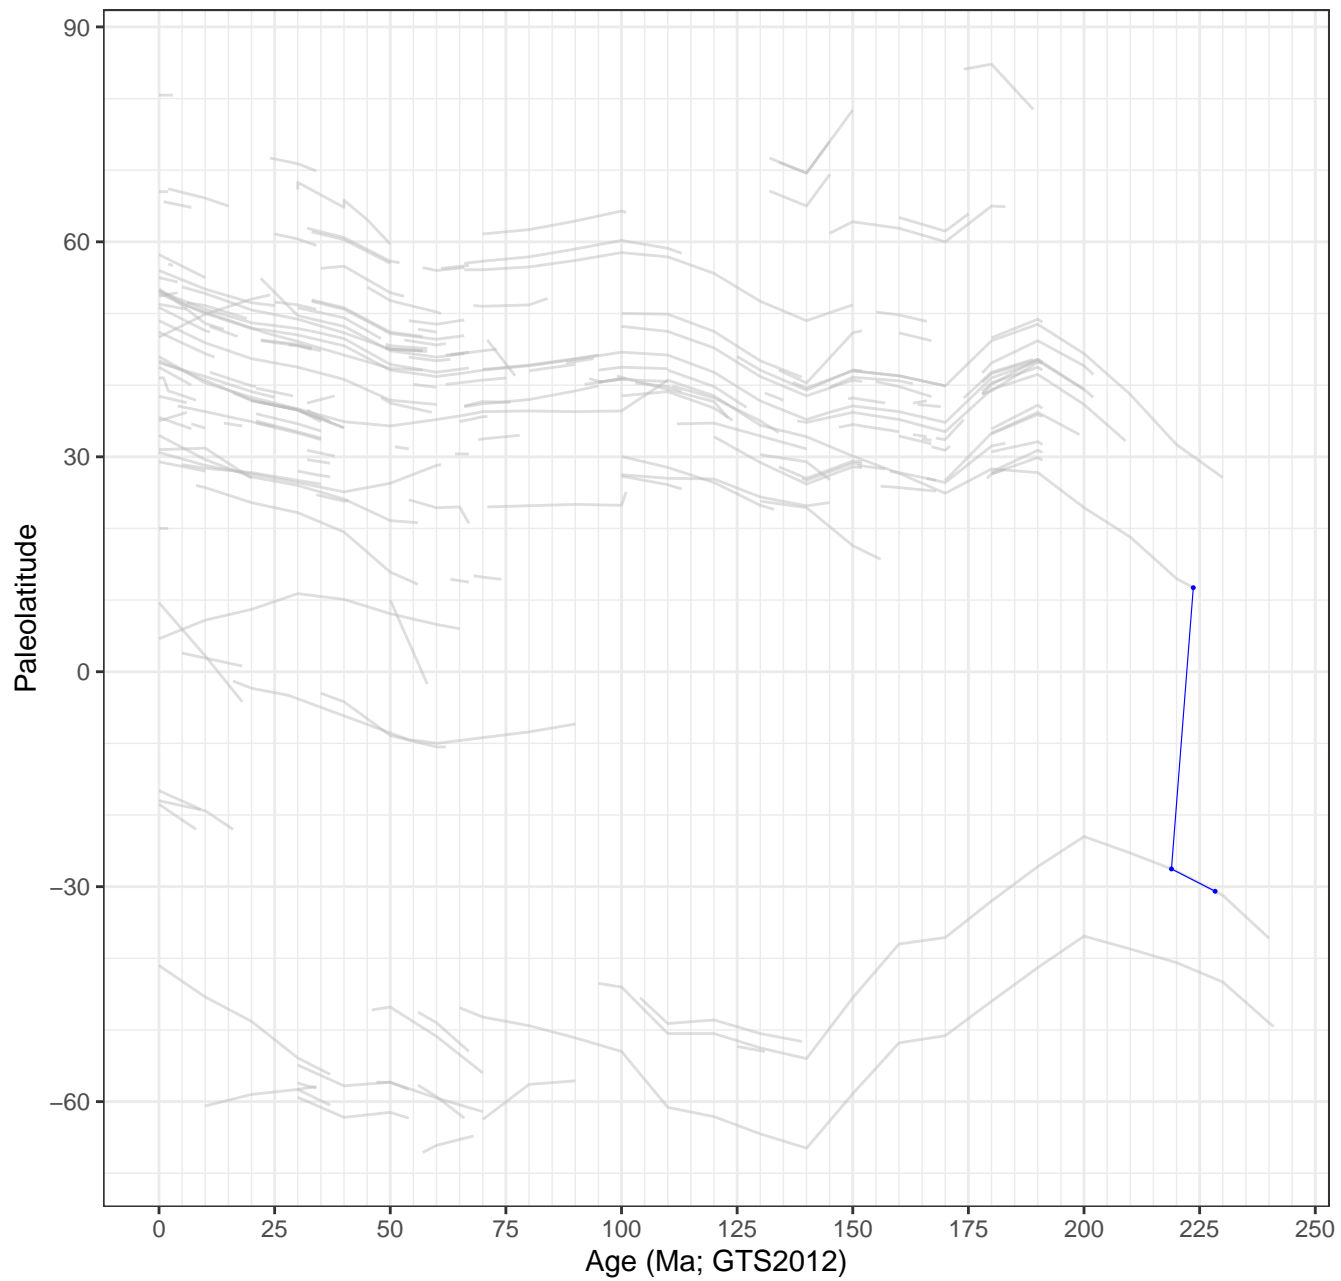

Supplement: Supplementary file 317 [file Genus Noricysta.pdf › Supplement/Supplement 2/Genus 459 plots/Genus Noricysta.pdf]

# Genus Nummus

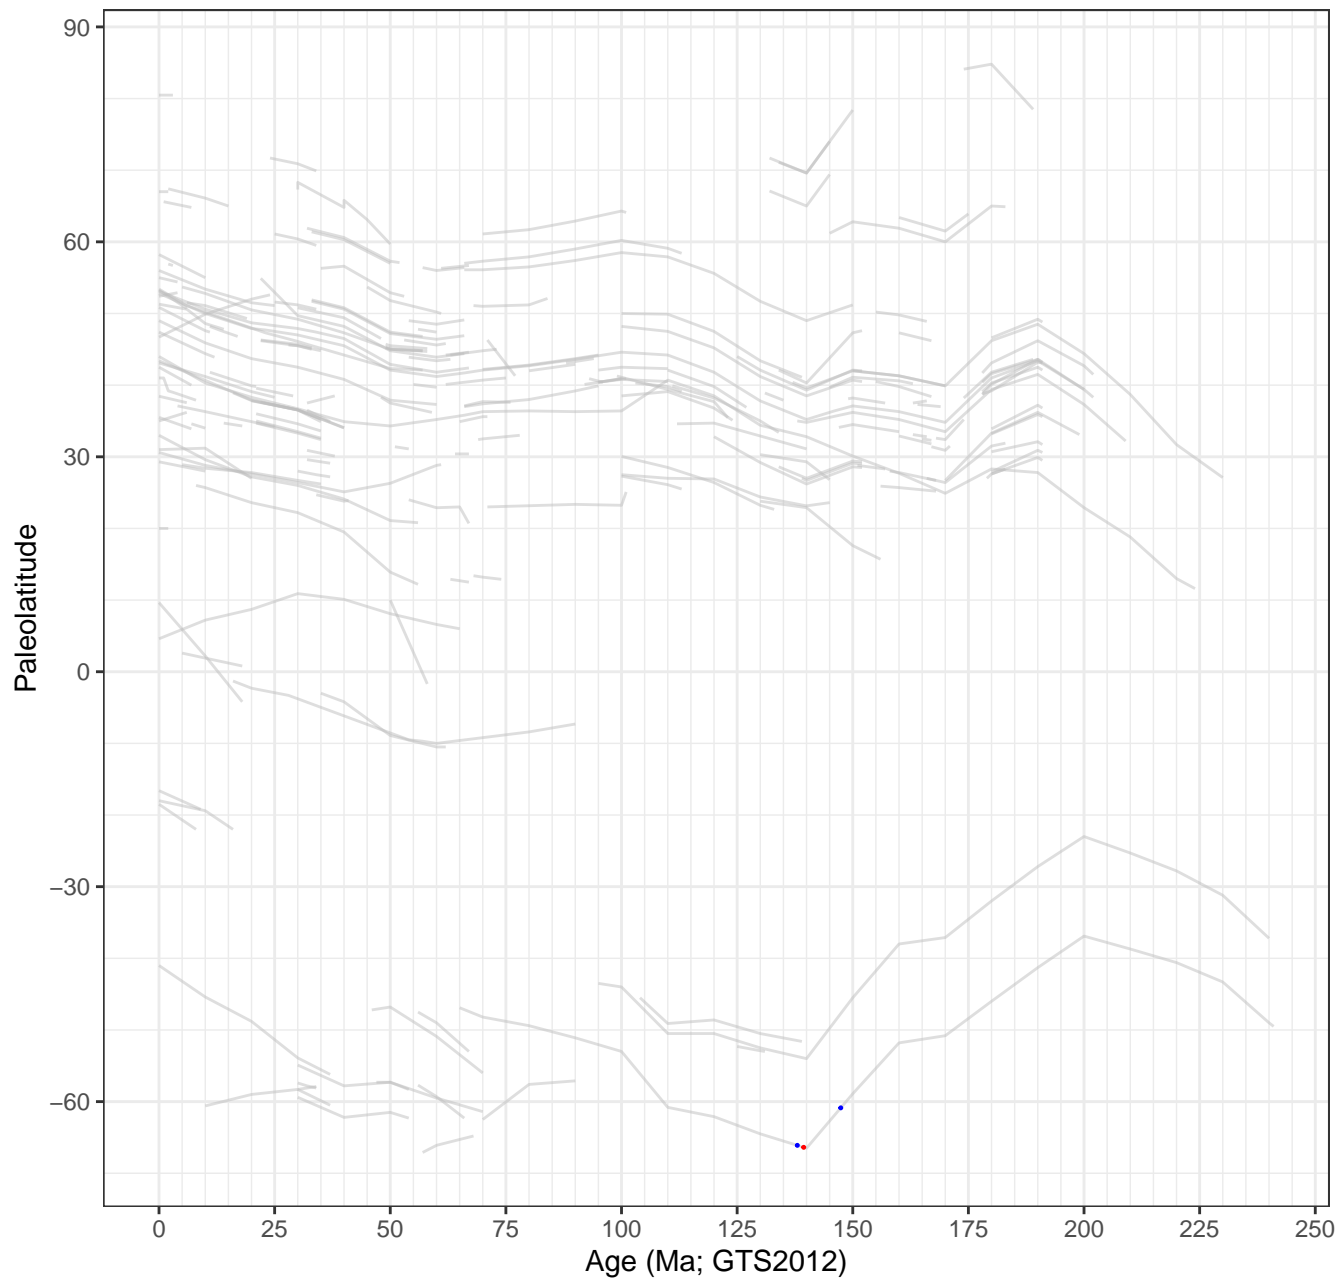

Supplement: Supplementary file 318 [file Genus Nummus.pdf › Supplement/Supplement 2/Genus 459 plots/Genus Nummus.pdf]

# Genus Nyktericysta

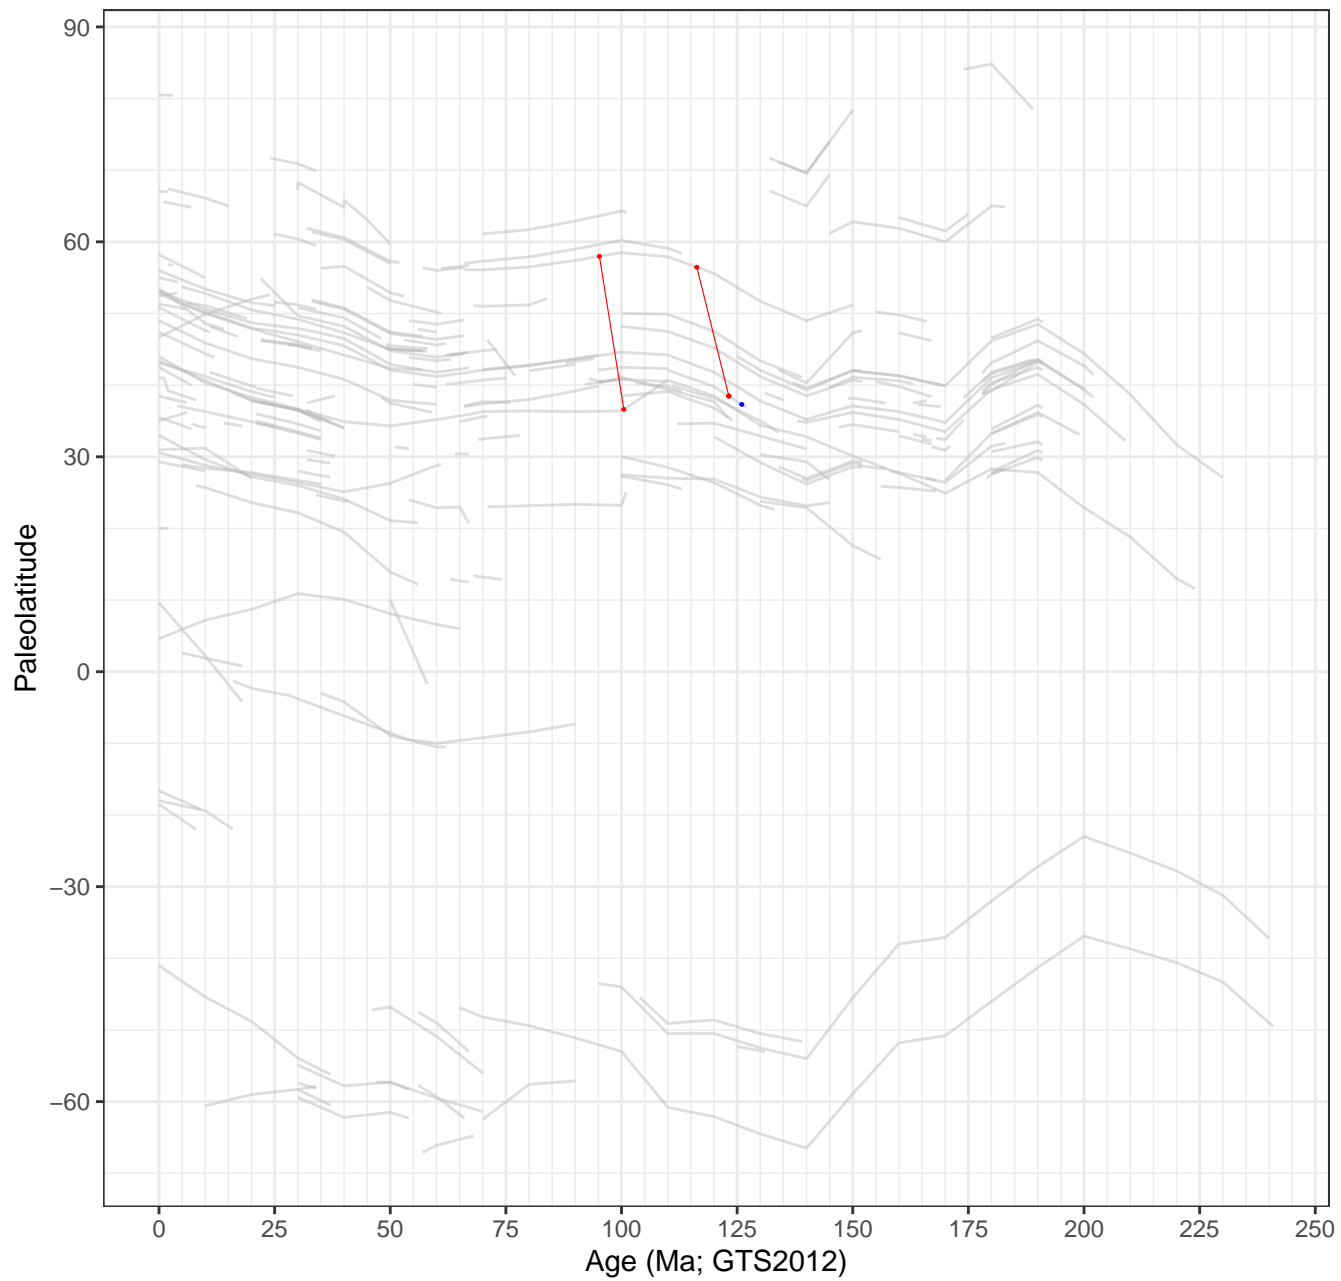

Supplement: Supplementary file 319 [file Genus Nyktericysta.pdf › Supplement/Supplement 2/Genus 459 plots/Genus Nyktericysta.pdf]

# Genus Occisucysta

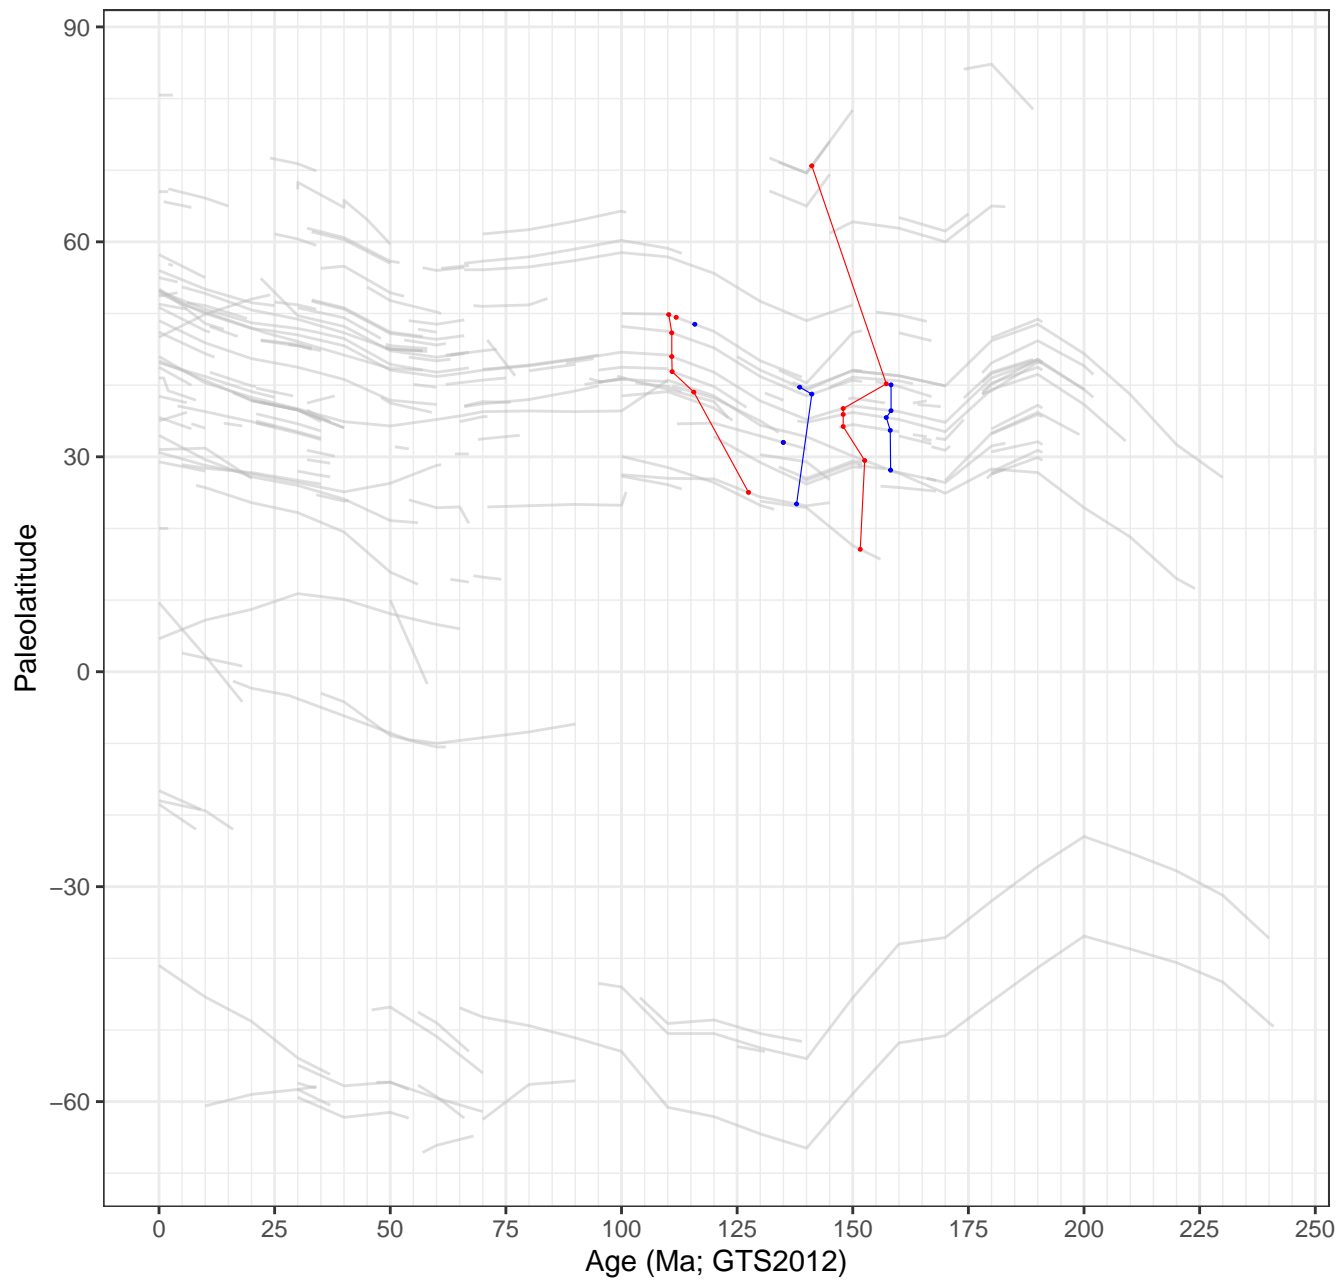

Supplement: Supplementary file 320 [file Genus Occisucysta.pdf › Supplement/Supplement 2/Genus 459 plots/Genus Occisucysta.pdf]

# Genus Ochetodinium

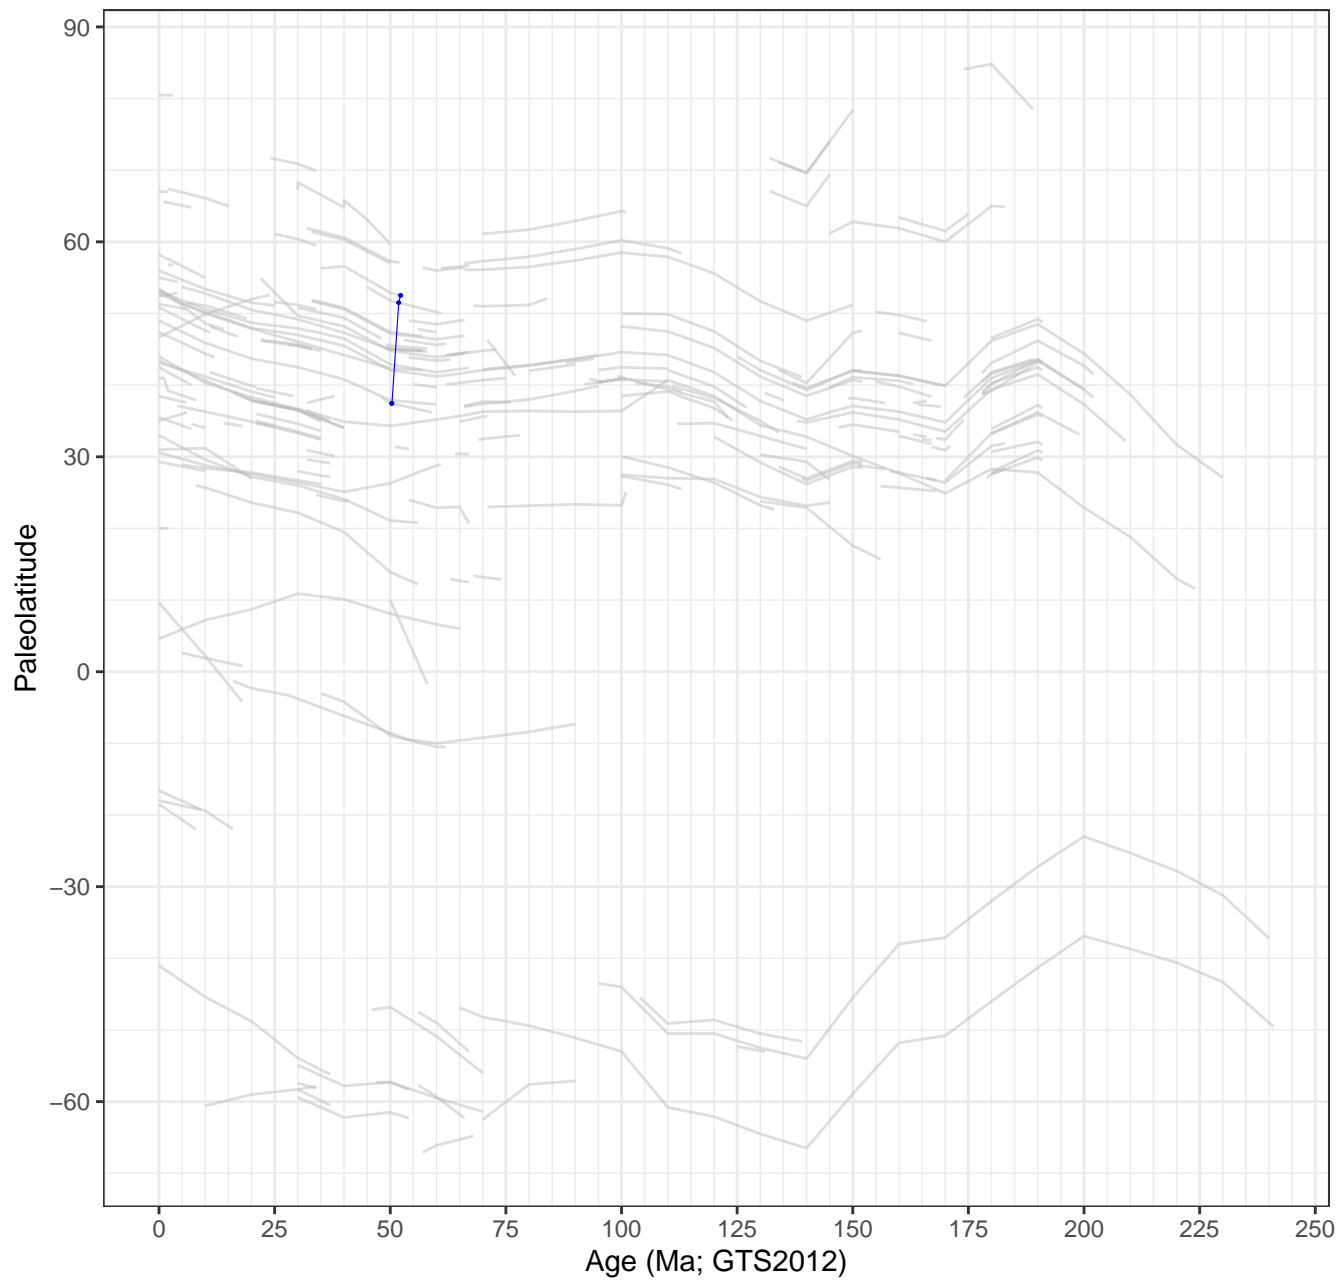

Supplement: Supplementary file 321 [file Genus Ochetodinium.pdf › Supplement/Supplement 2/Genus 459 plots/Genus Ochetodinium.pdf]

# Genus Octodinium

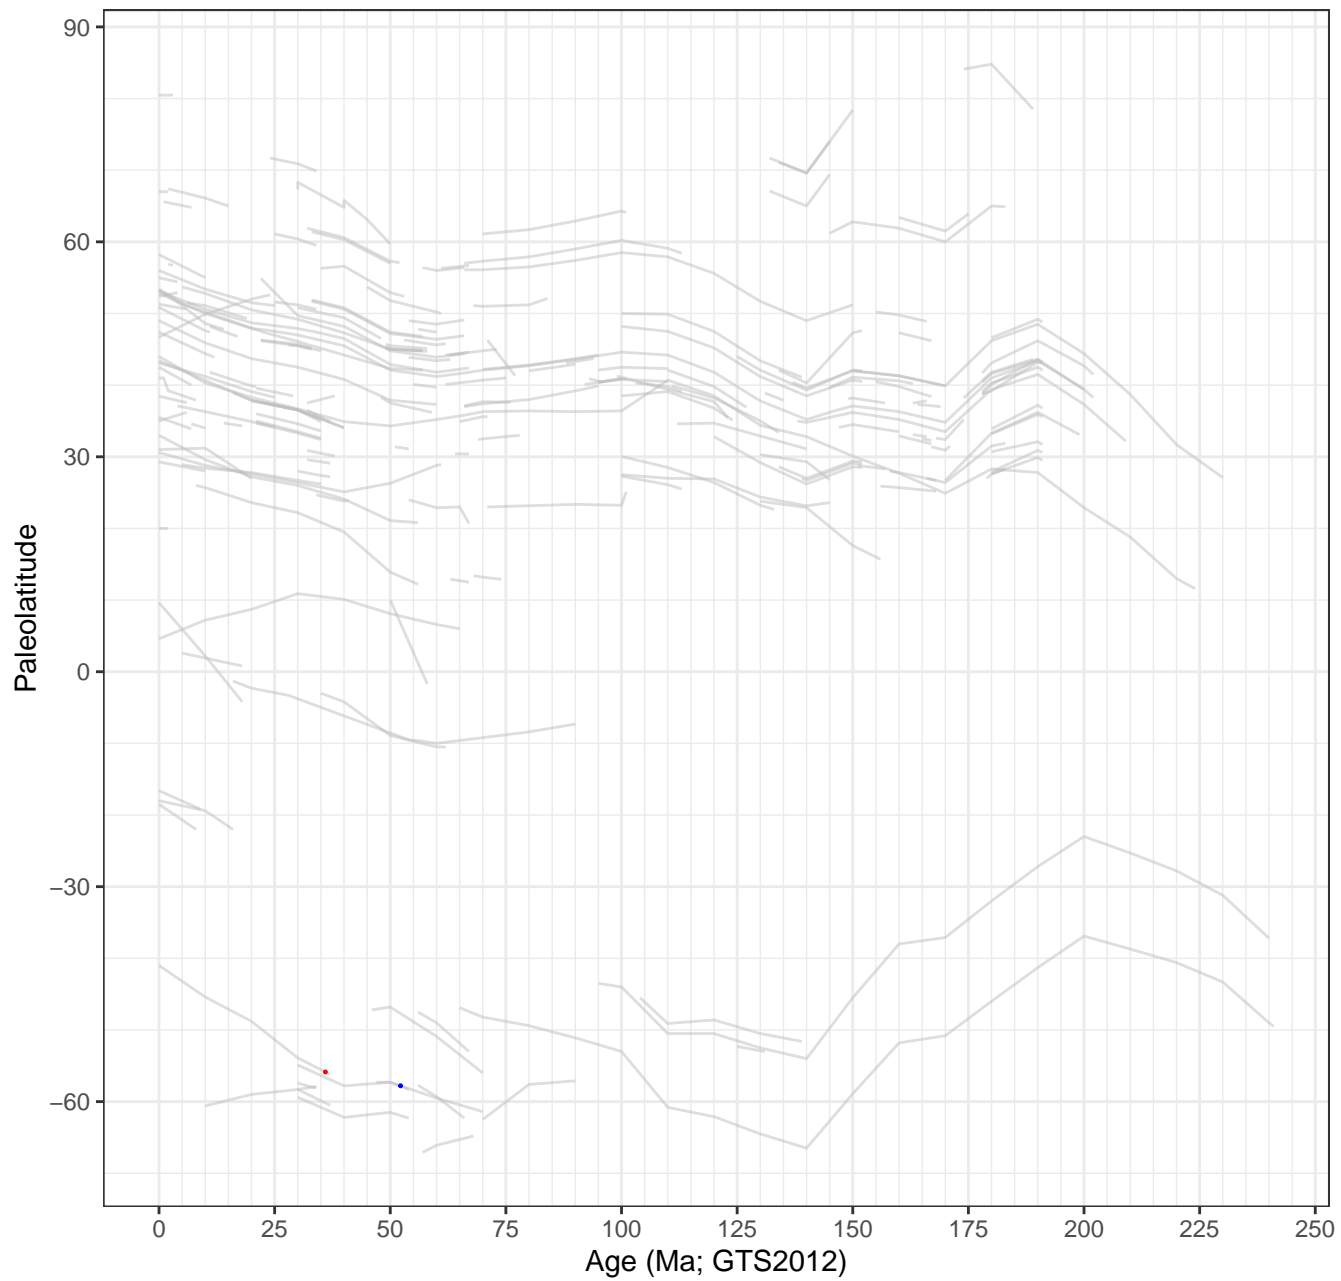

Supplement: Supplementary file 322 [file Genus Octodinium.pdf › Supplement/Supplement 2/Genus 459 plots/Genus Octodinium.pdf]

# Genus *Odontochitina*

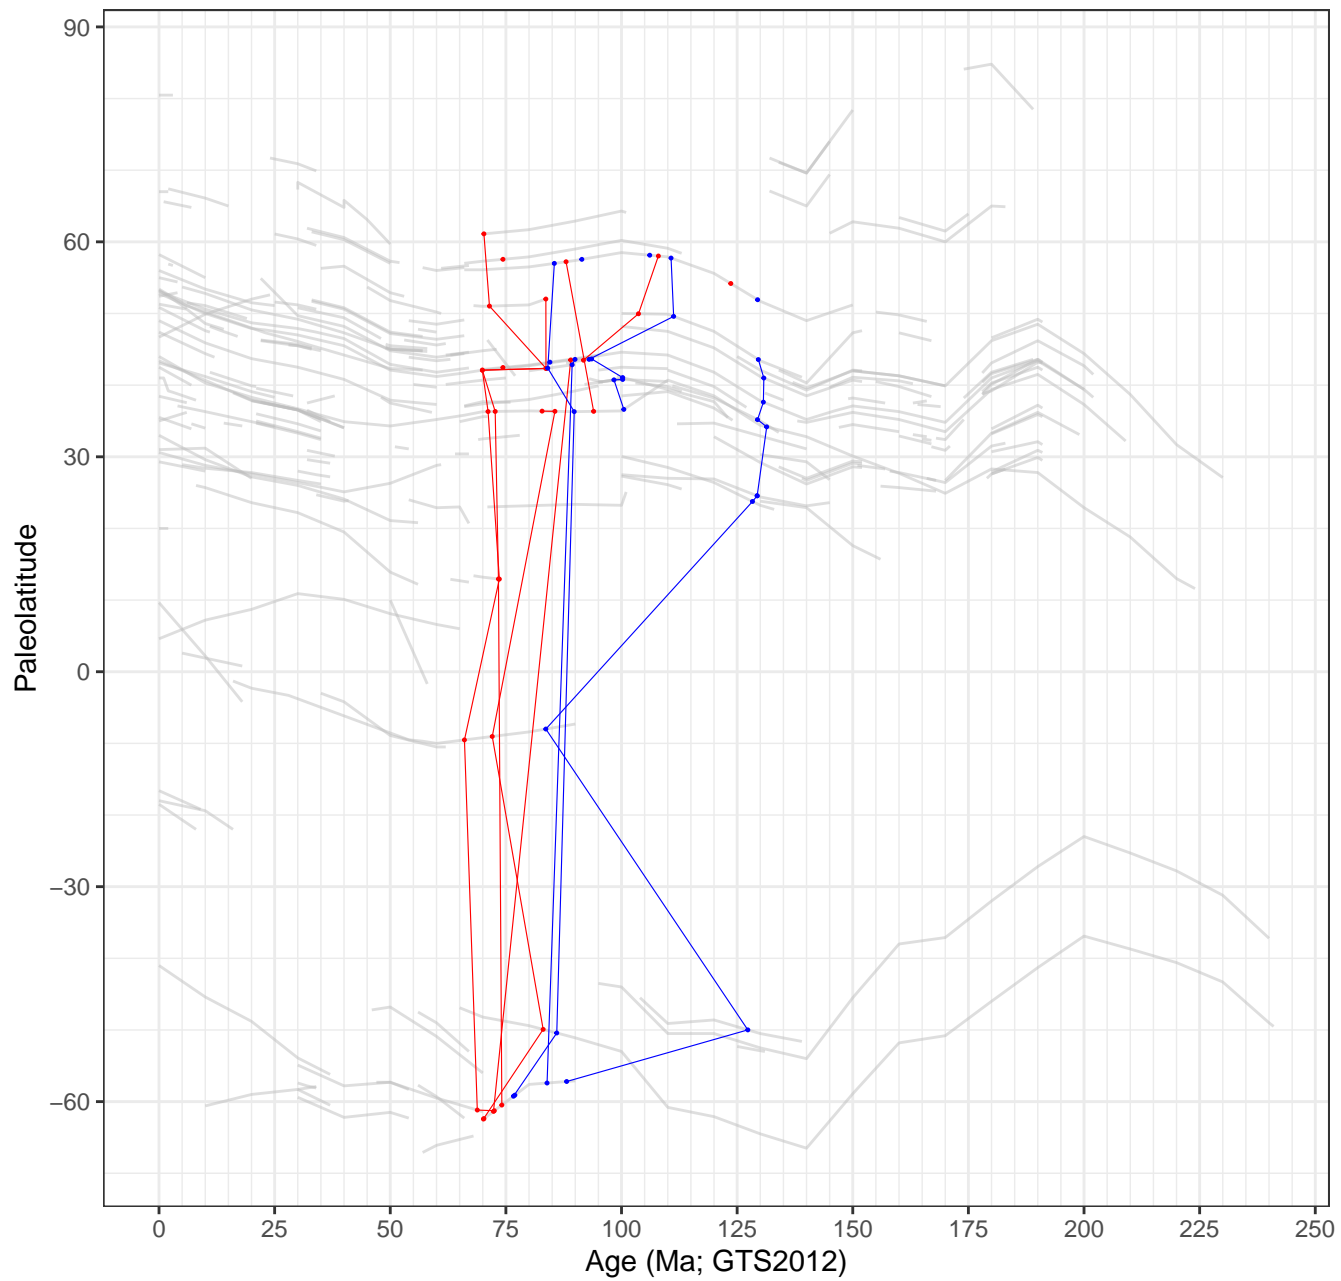

Supplement: Supplementary file 323 [file Genus Odontochitina.pdf › Supplement/Supplement 2/Genus 459 plots/Genus Odontochitina.pdf]

# Genus Oligokolpoma

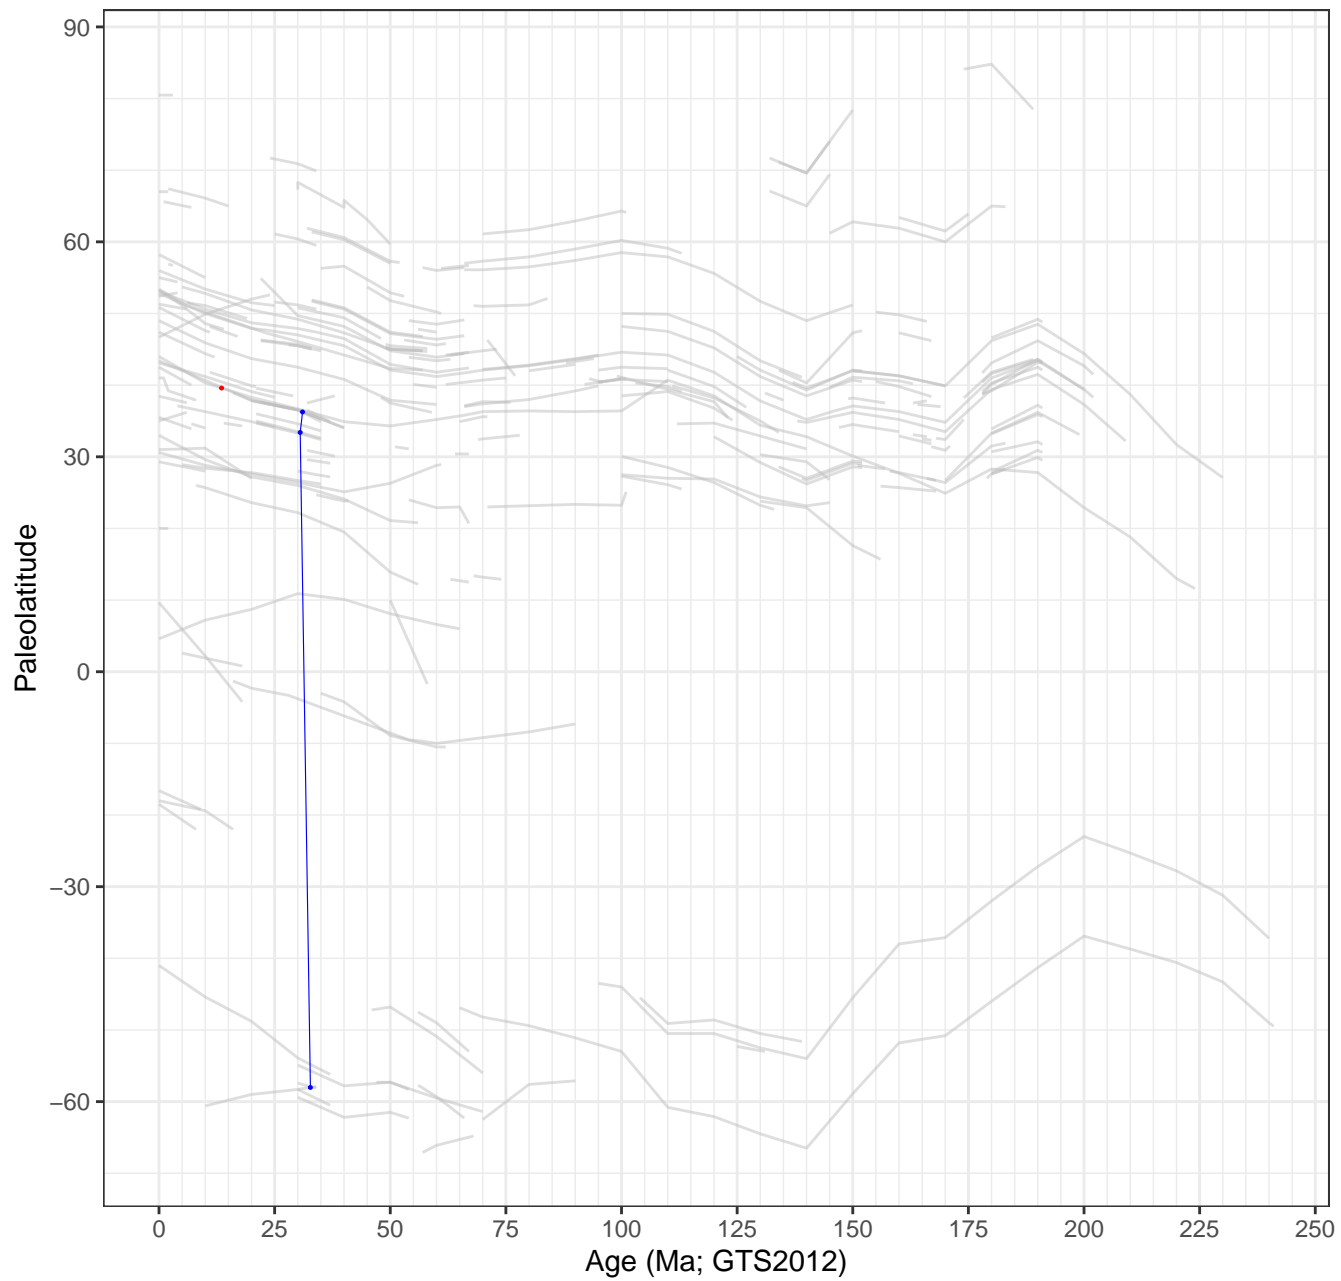

Supplement: Supplementary file 324 [file Genus Oligokolpoma.pdf › Supplement/Supplement 2/Genus 459 plots/Genus Oligokolpoma.pdf]

# Genus *Oligosphaeridium*

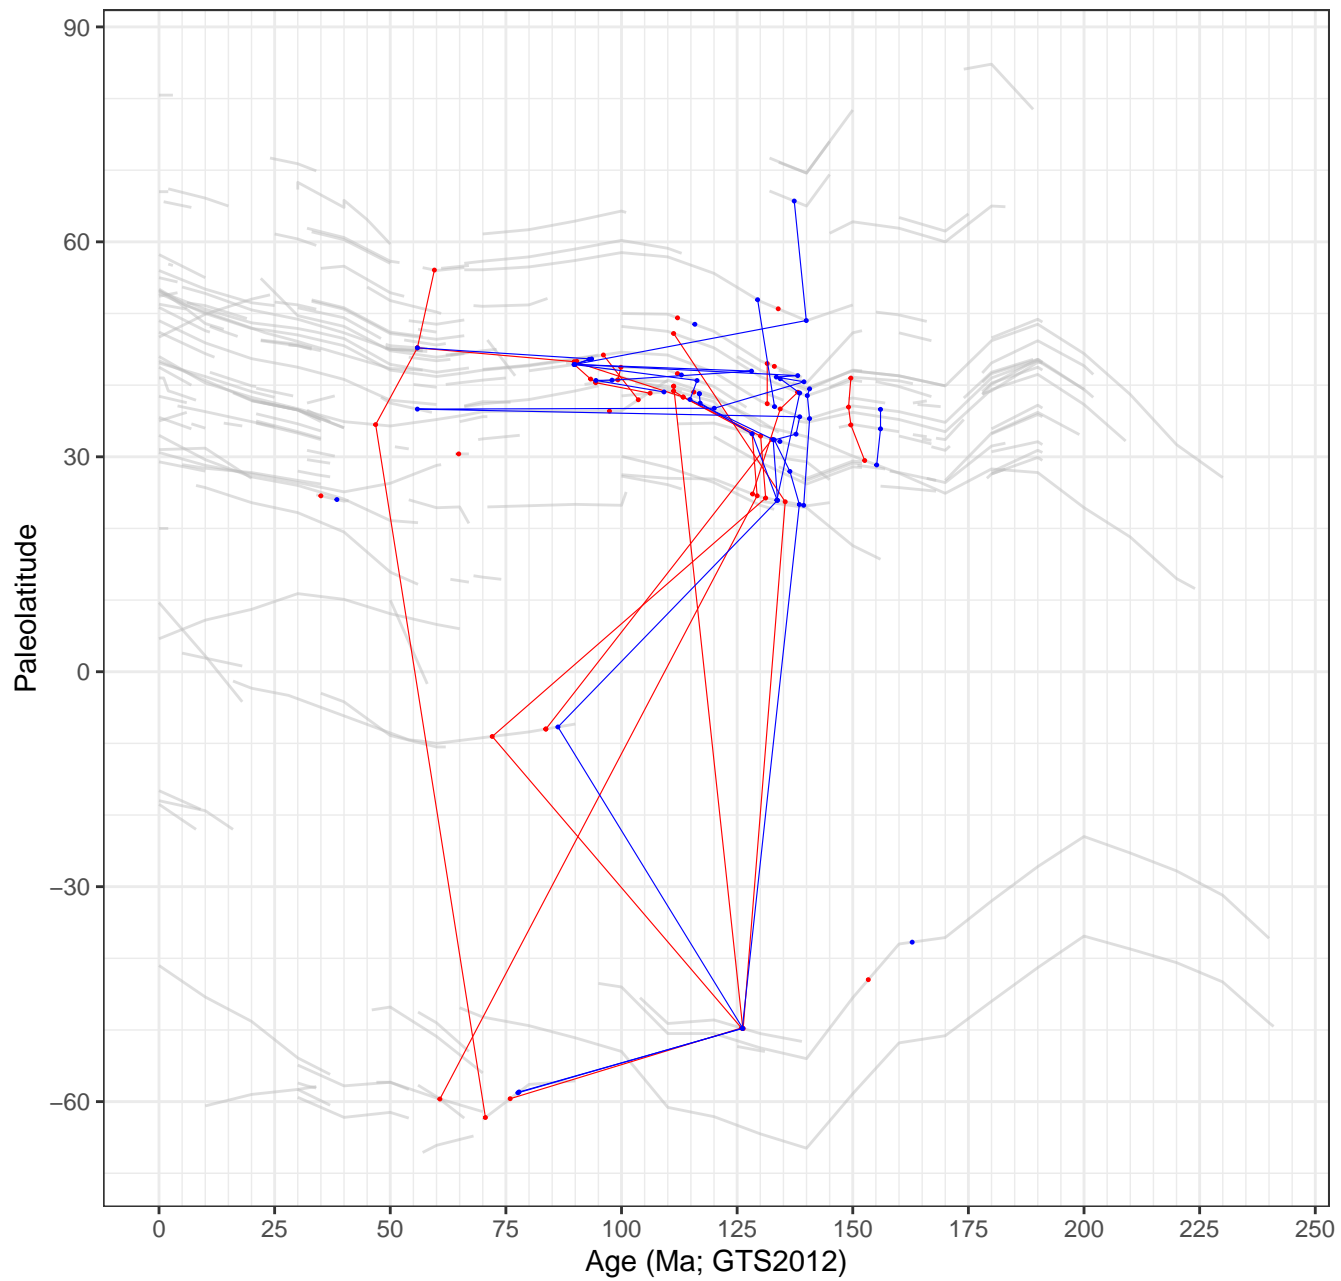

Supplement: Supplementary file 325 [file Genus Oligosphaeridium.pdf › Supplement/Supplement 2/Genus 459 plots/Genus Oligosphaeridium.pdf]

# Genus Omatia

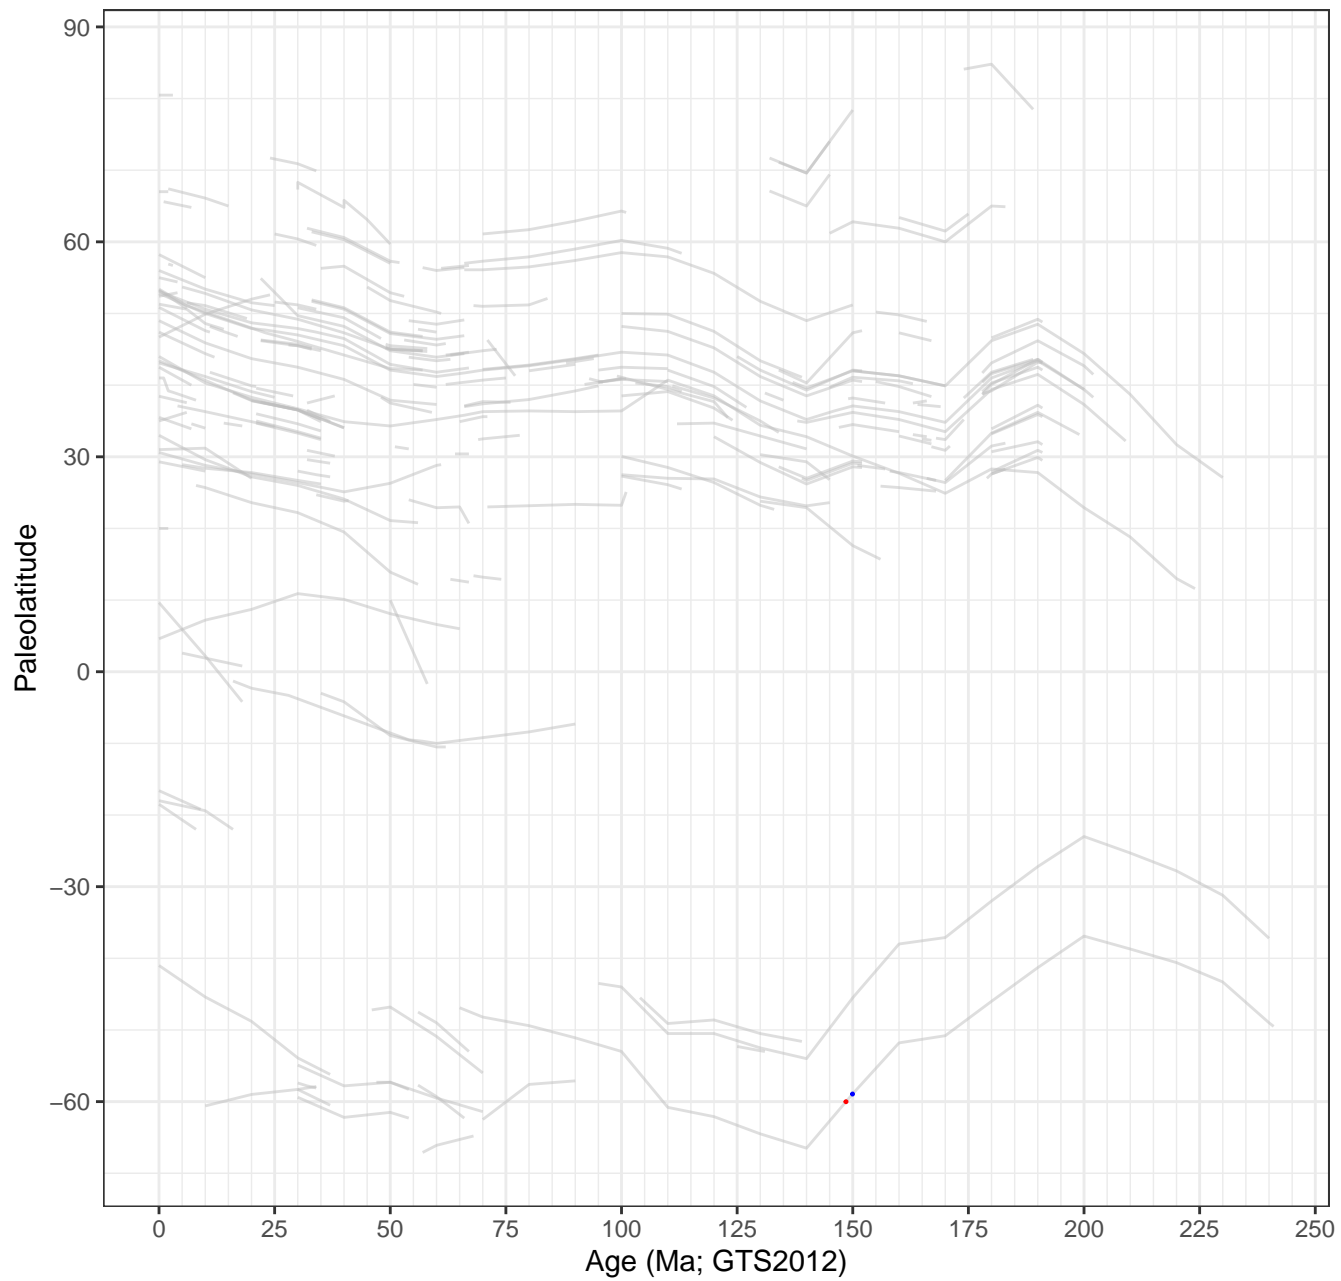

Supplement: Supplementary file 326 [file Genus Omatia.pdf › Supplement/Supplement 2/Genus 459 plots/Genus Omatia.pdf]

# Genus Operculodinium

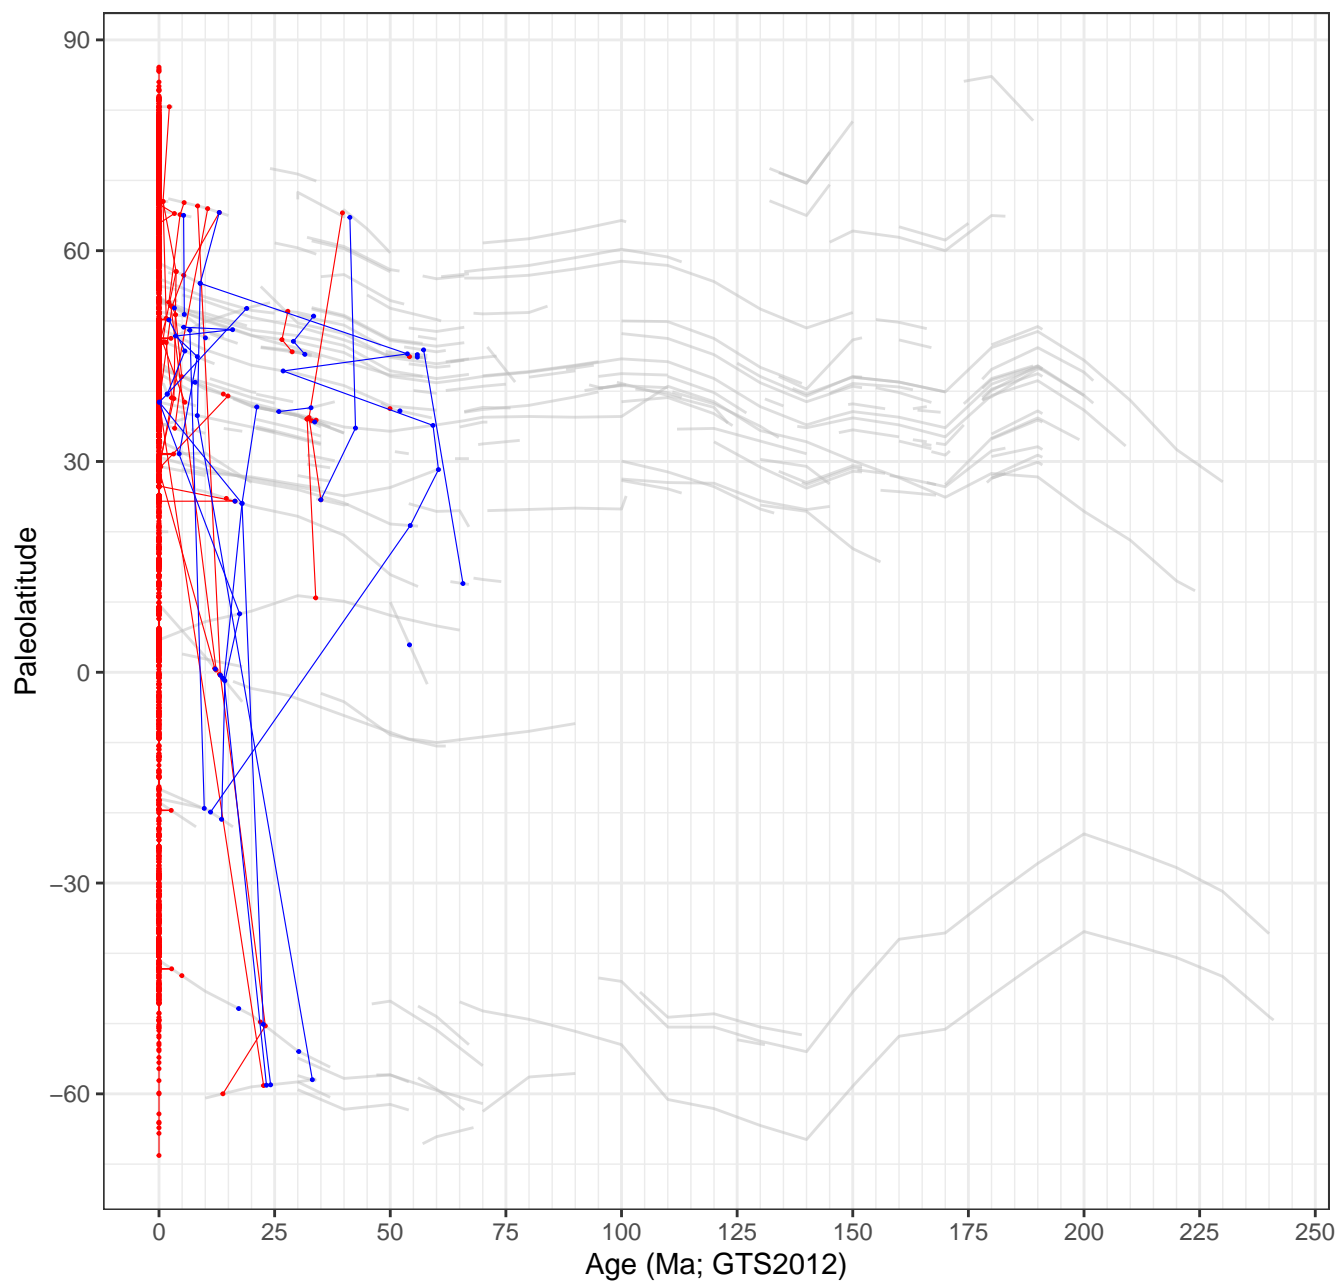

Supplement: Supplementary file 327 [file Genus Operculodinium.pdf › Supplement/Supplement 2/Genus 459 plots/Genus Operculodinium.pdf]

# Genus Orobodinium

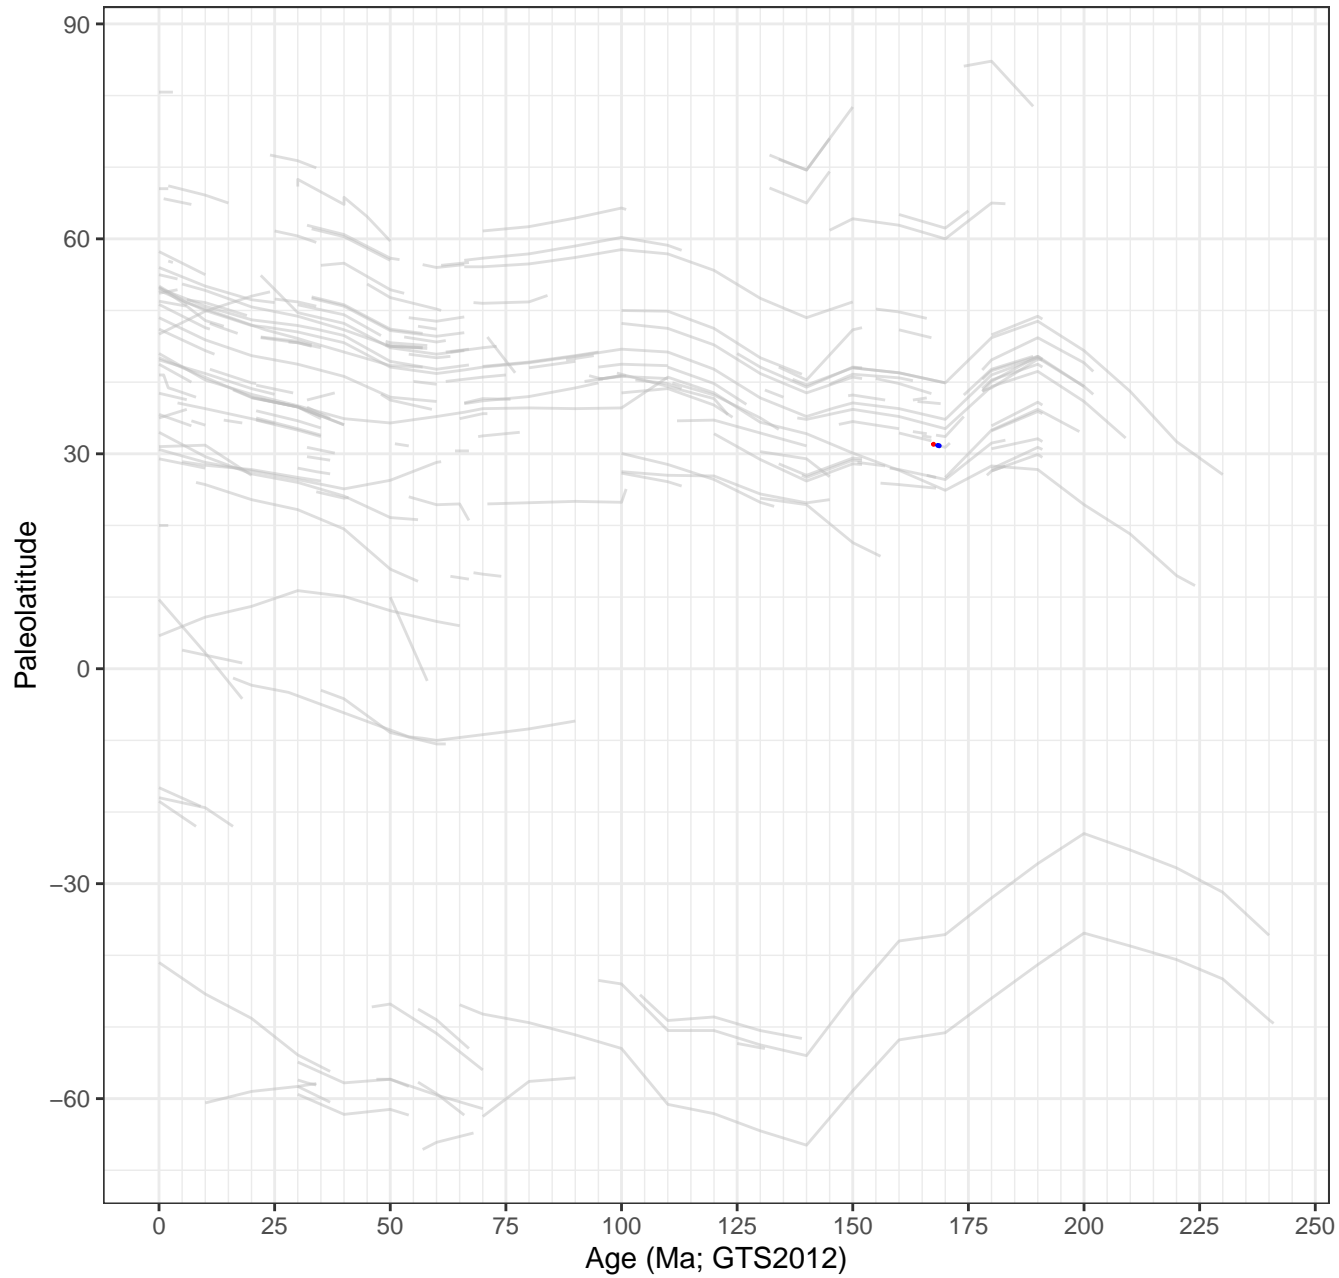

Supplement: Supplementary file 328 [file Genus Orobodinium.pdf › Supplement/Supplement 2/Genus 459 plots/Genus Orobodinium.pdf]

# Genus *Ovalicysta*

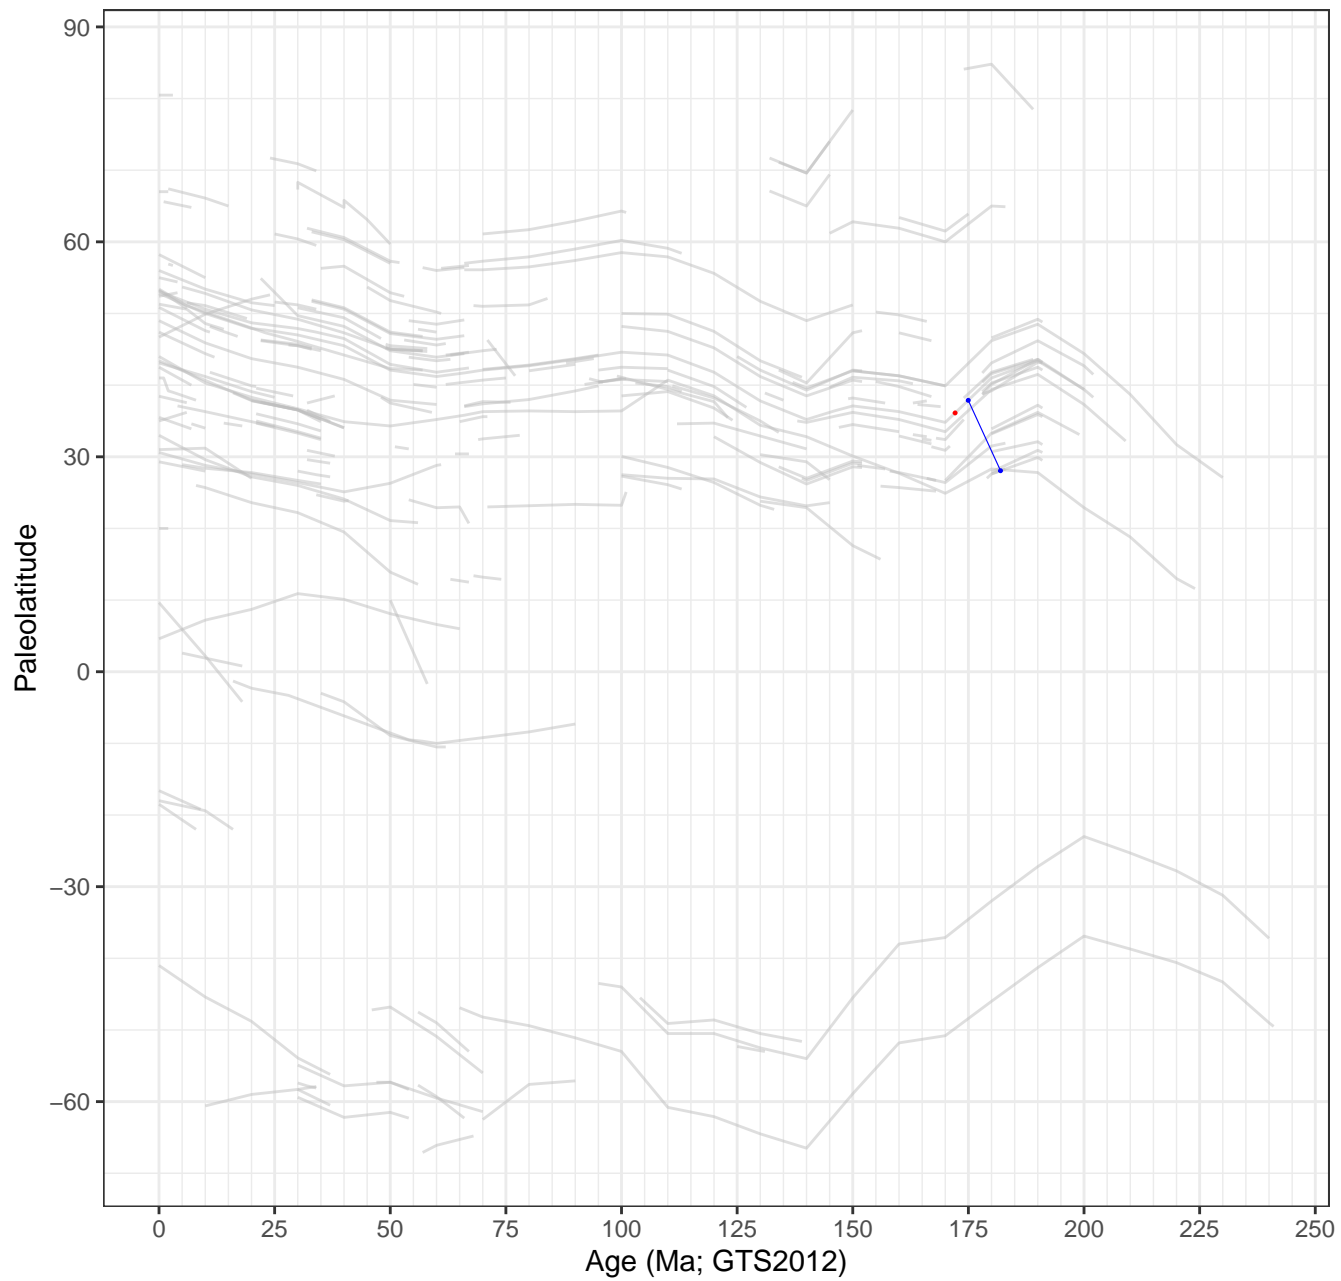

Supplement: Supplementary file 329 [file Genus Ovalicysta.pdf › Supplement/Supplement 2/Genus 459 plots/Genus Ovalicysta.pdf]

# Genus Ovoidinium

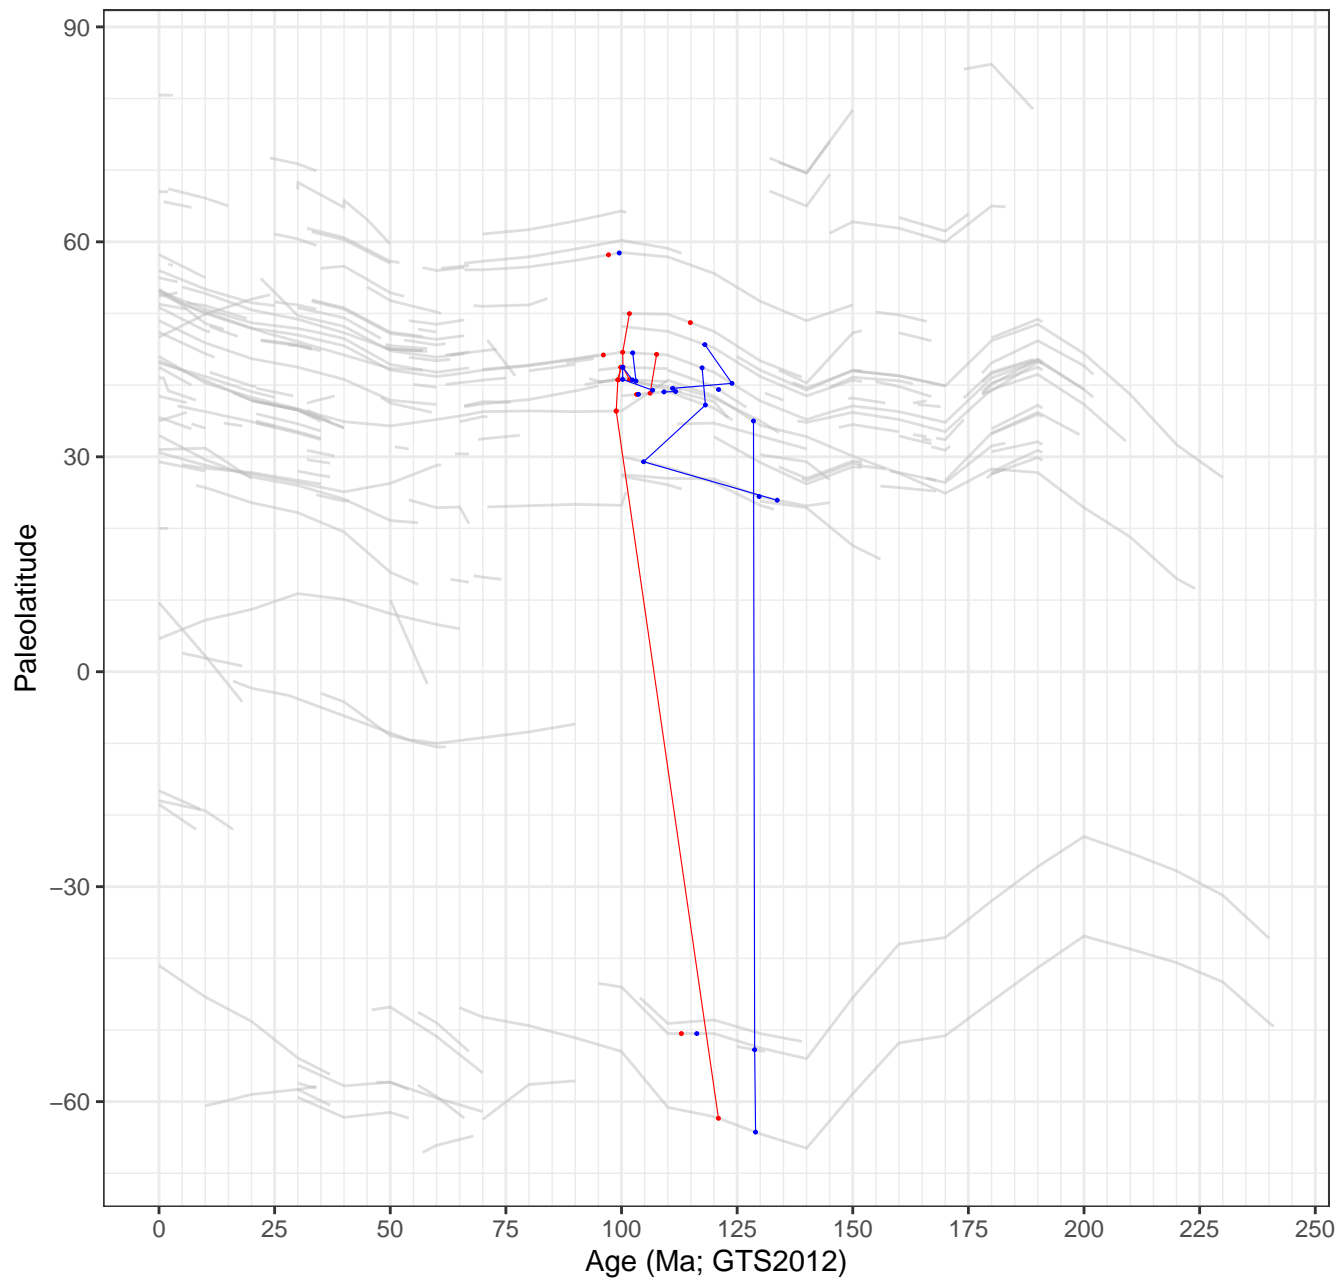

Supplement: Supplementary file 330 [file Genus Ovoidinium.pdf › Supplement/Supplement 2/Genus 459 plots/Genus Ovoidinium.pdf]

# Genus Palaecysta

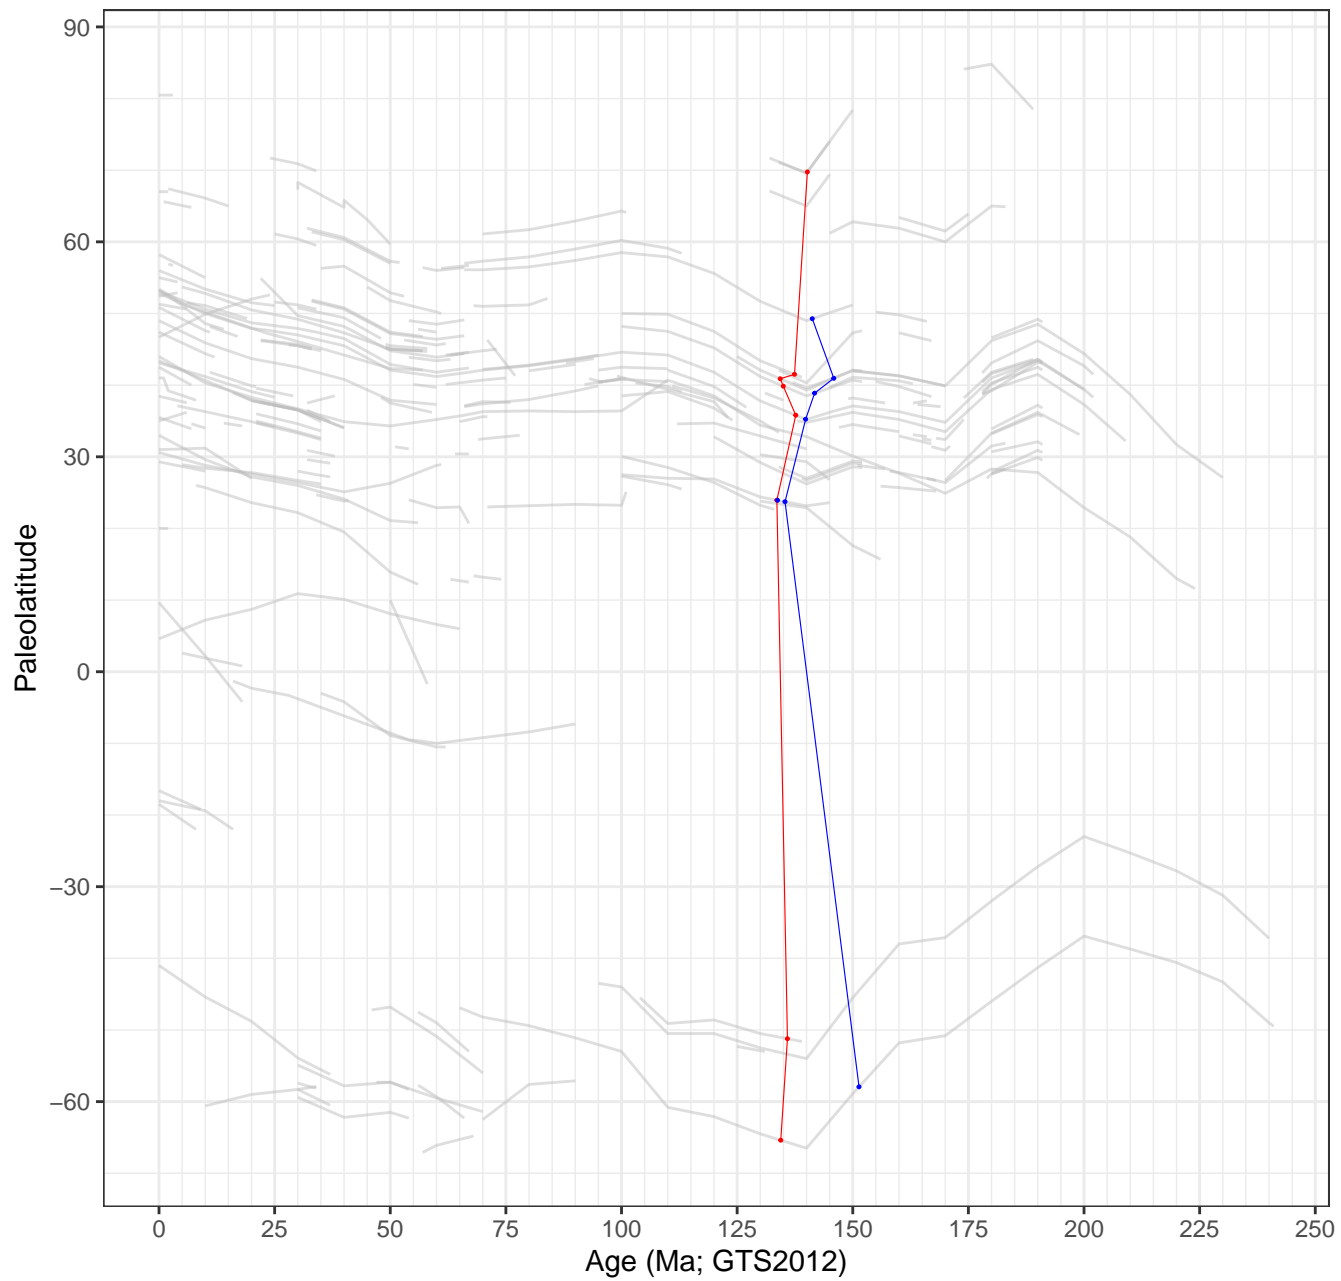

Supplement: Supplementary file 331 [file Genus Palaecysta.pdf › Supplement/Supplement 2/Genus 459 plots/Genus Palaecysta.pdf]

# Genus *Palaeocystodinium*

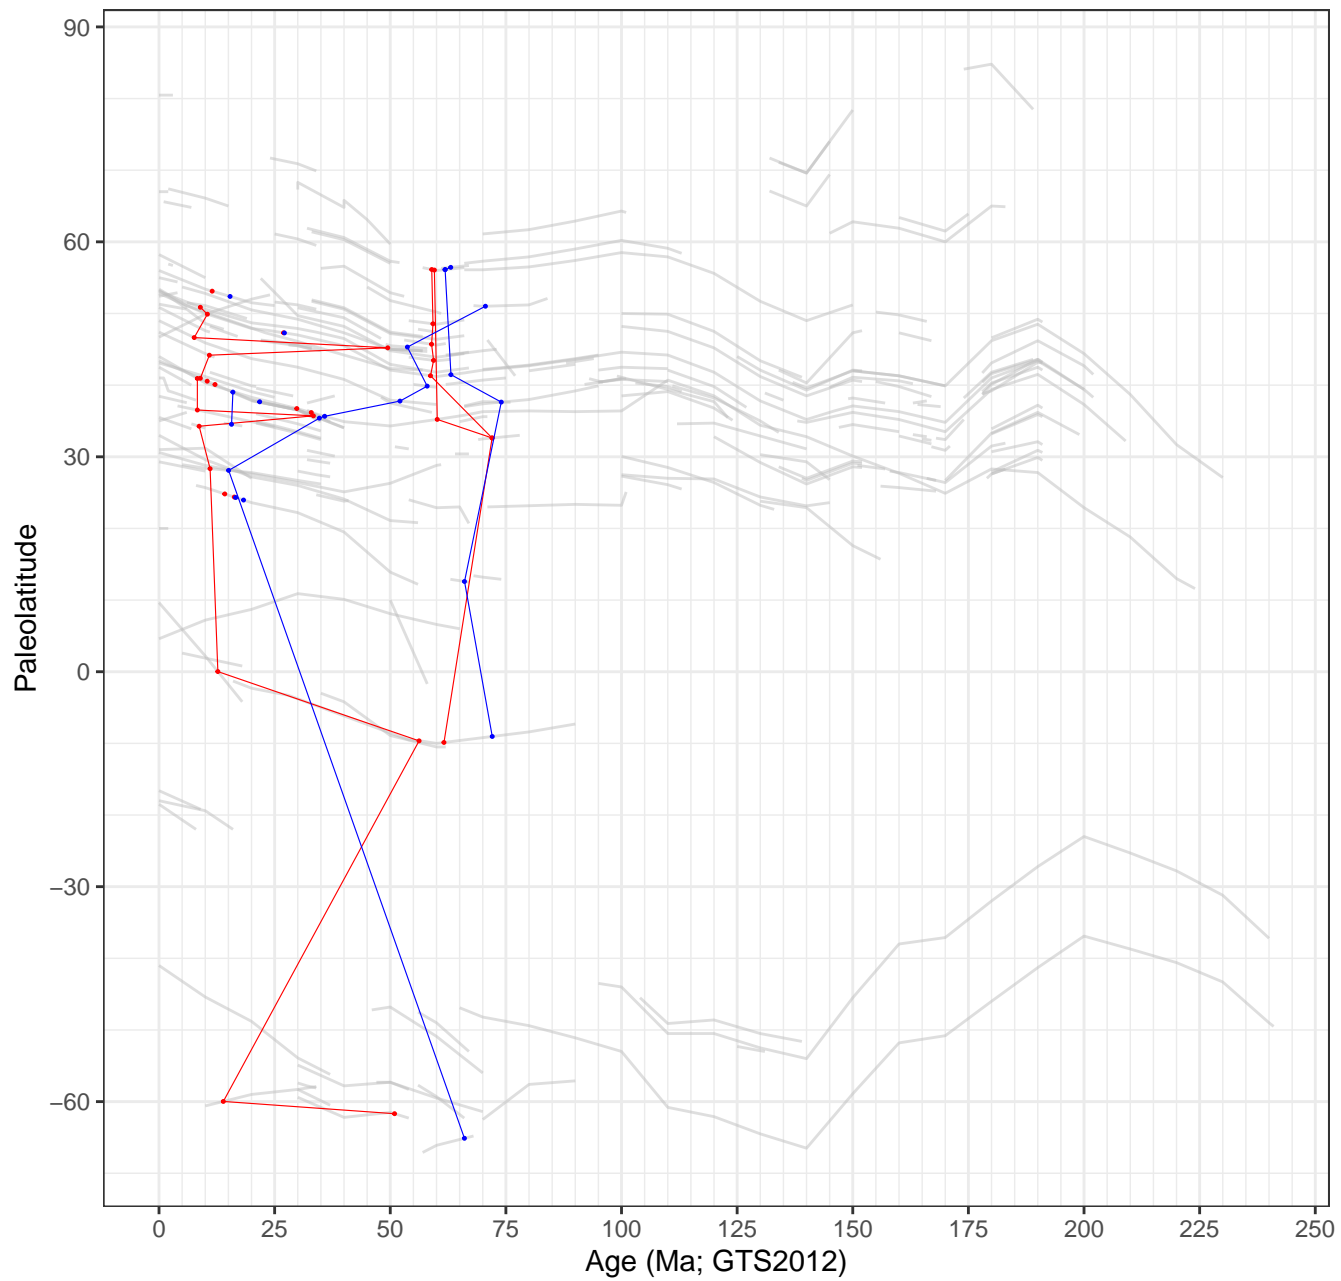

Supplement: Supplementary file 332 [file Genus Palaeocystodinium.pdf › Supplement/Supplement 2/Genus 459 plots/Genus Palaeocystodinium.pdf]

# Genus *Palaeoglenodinium*

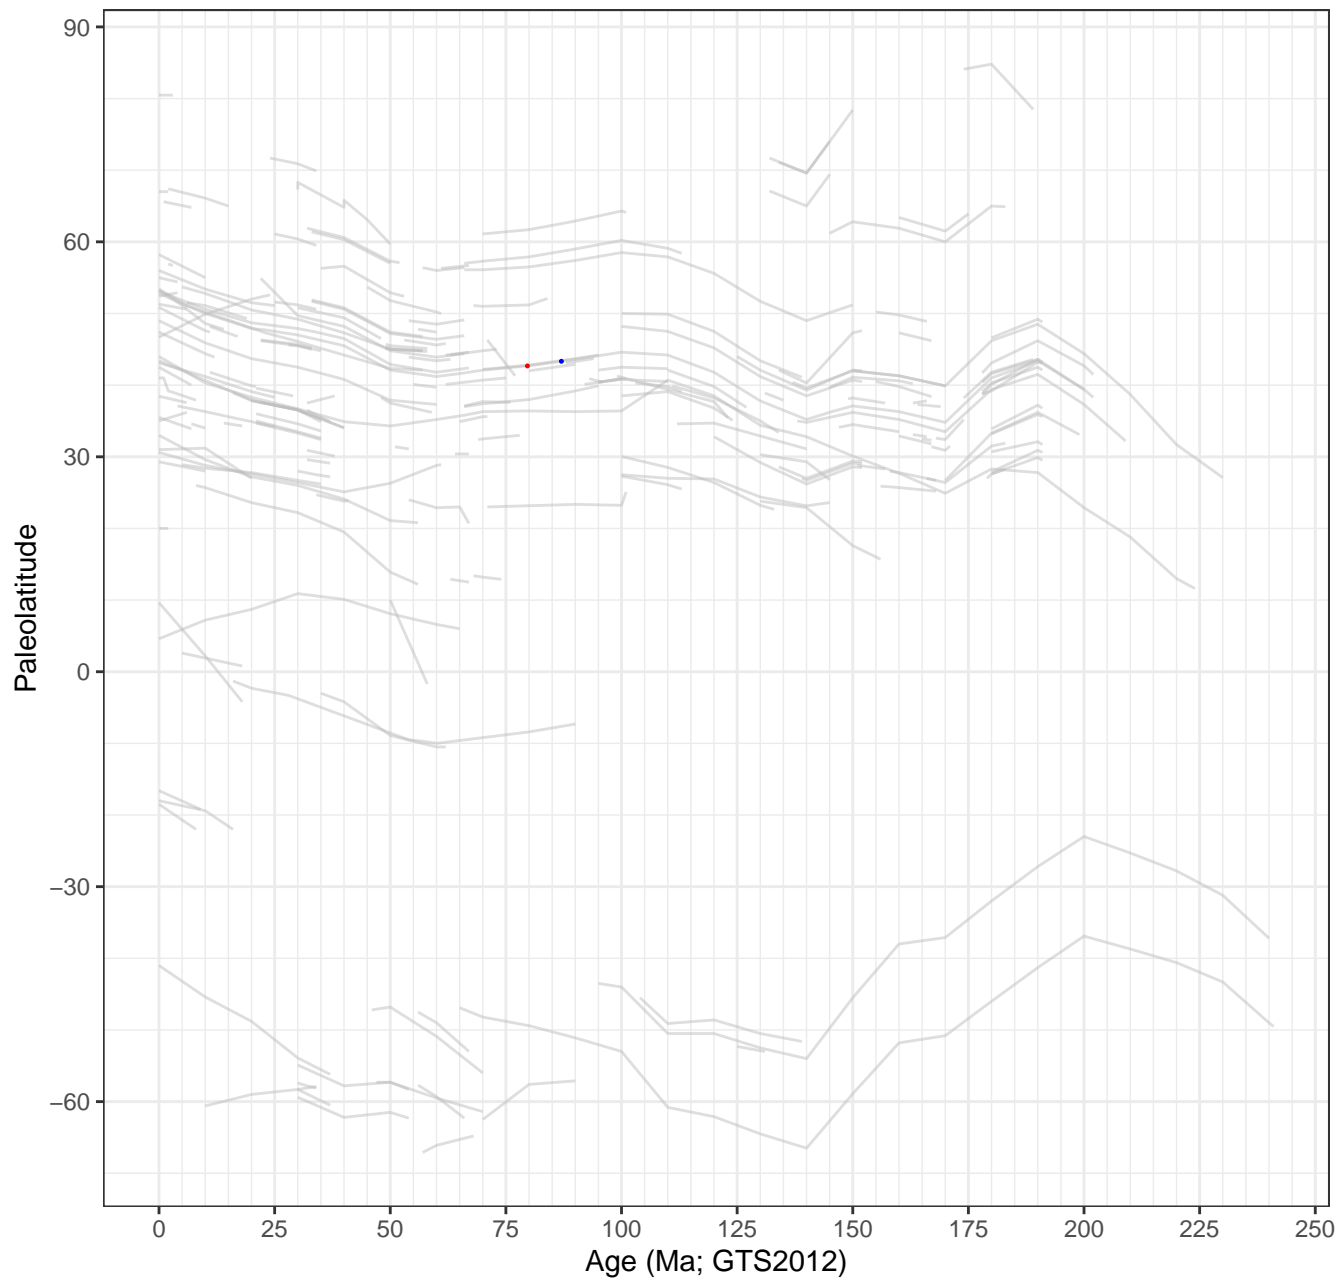

Supplement: Supplementary file 333 [file Genus Palaeoglenodinium.pdf › Supplement/Supplement 2/Genus 459 plots/Genus Palaeoglenodinium.pdf]

# Genus Palaeohystrichophora

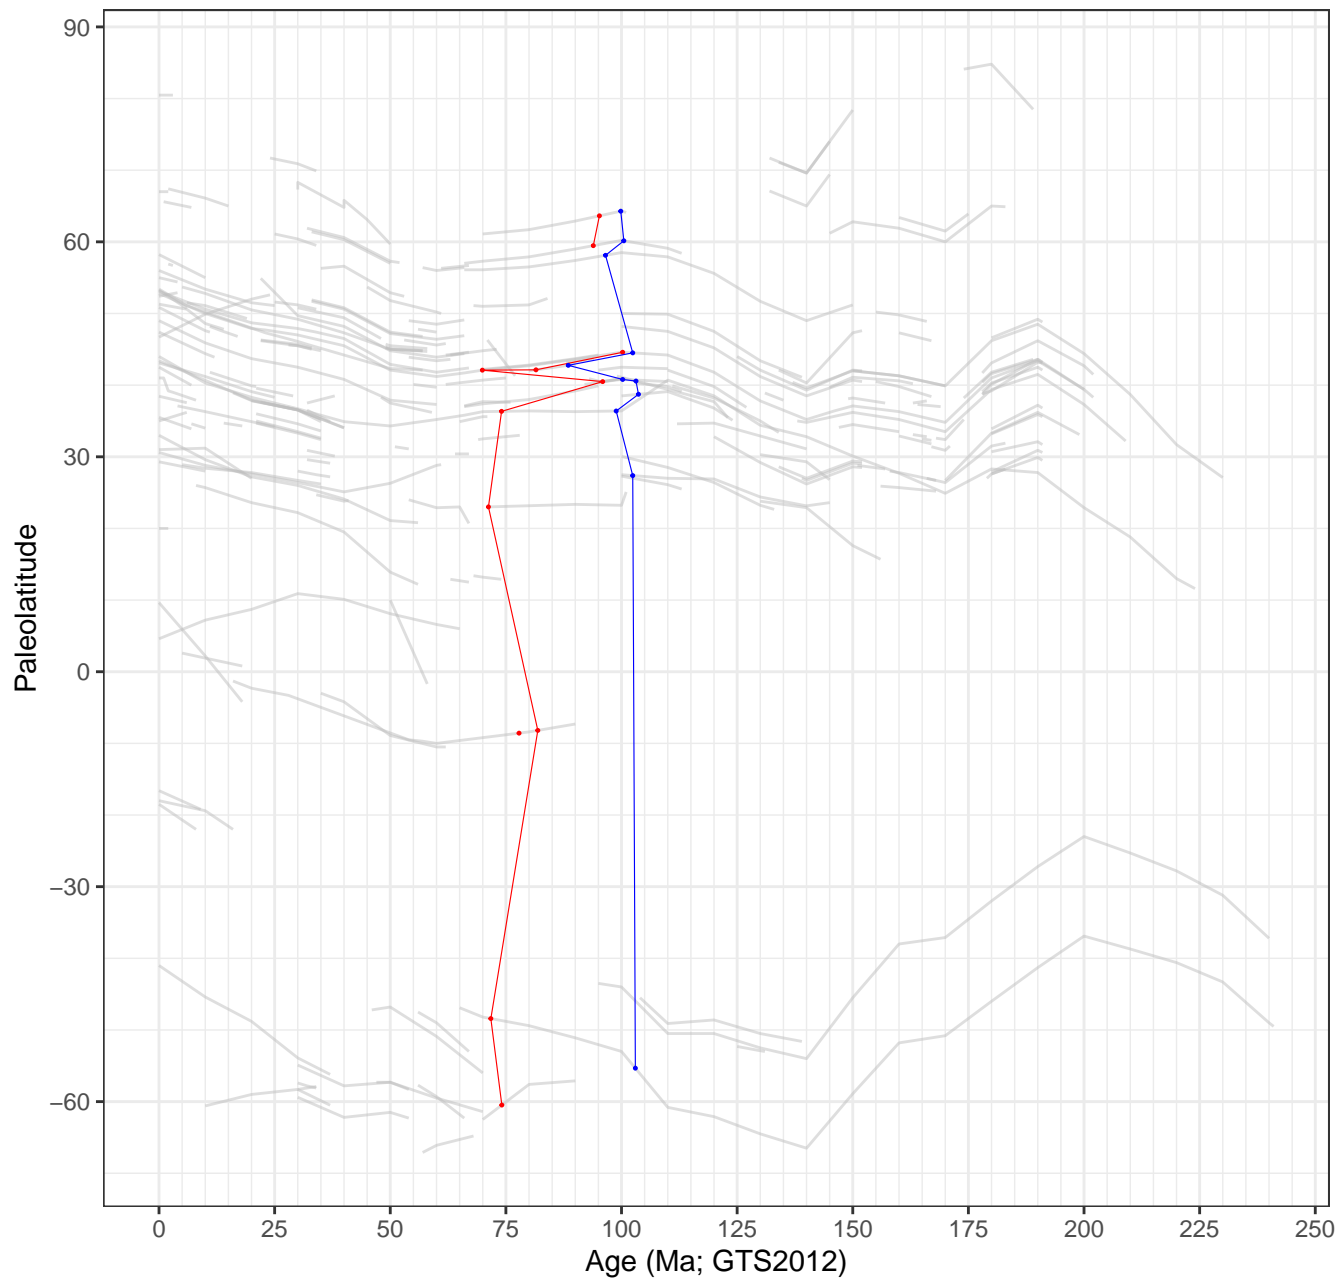

Supplement: Supplementary file 334 [file Genus Palaeohystrichophora.pdf › Supplement/Supplement 2/Genus 459 plots/Genus Palaeohystrichophora.pdf]

# Genus Palaeoperidinium

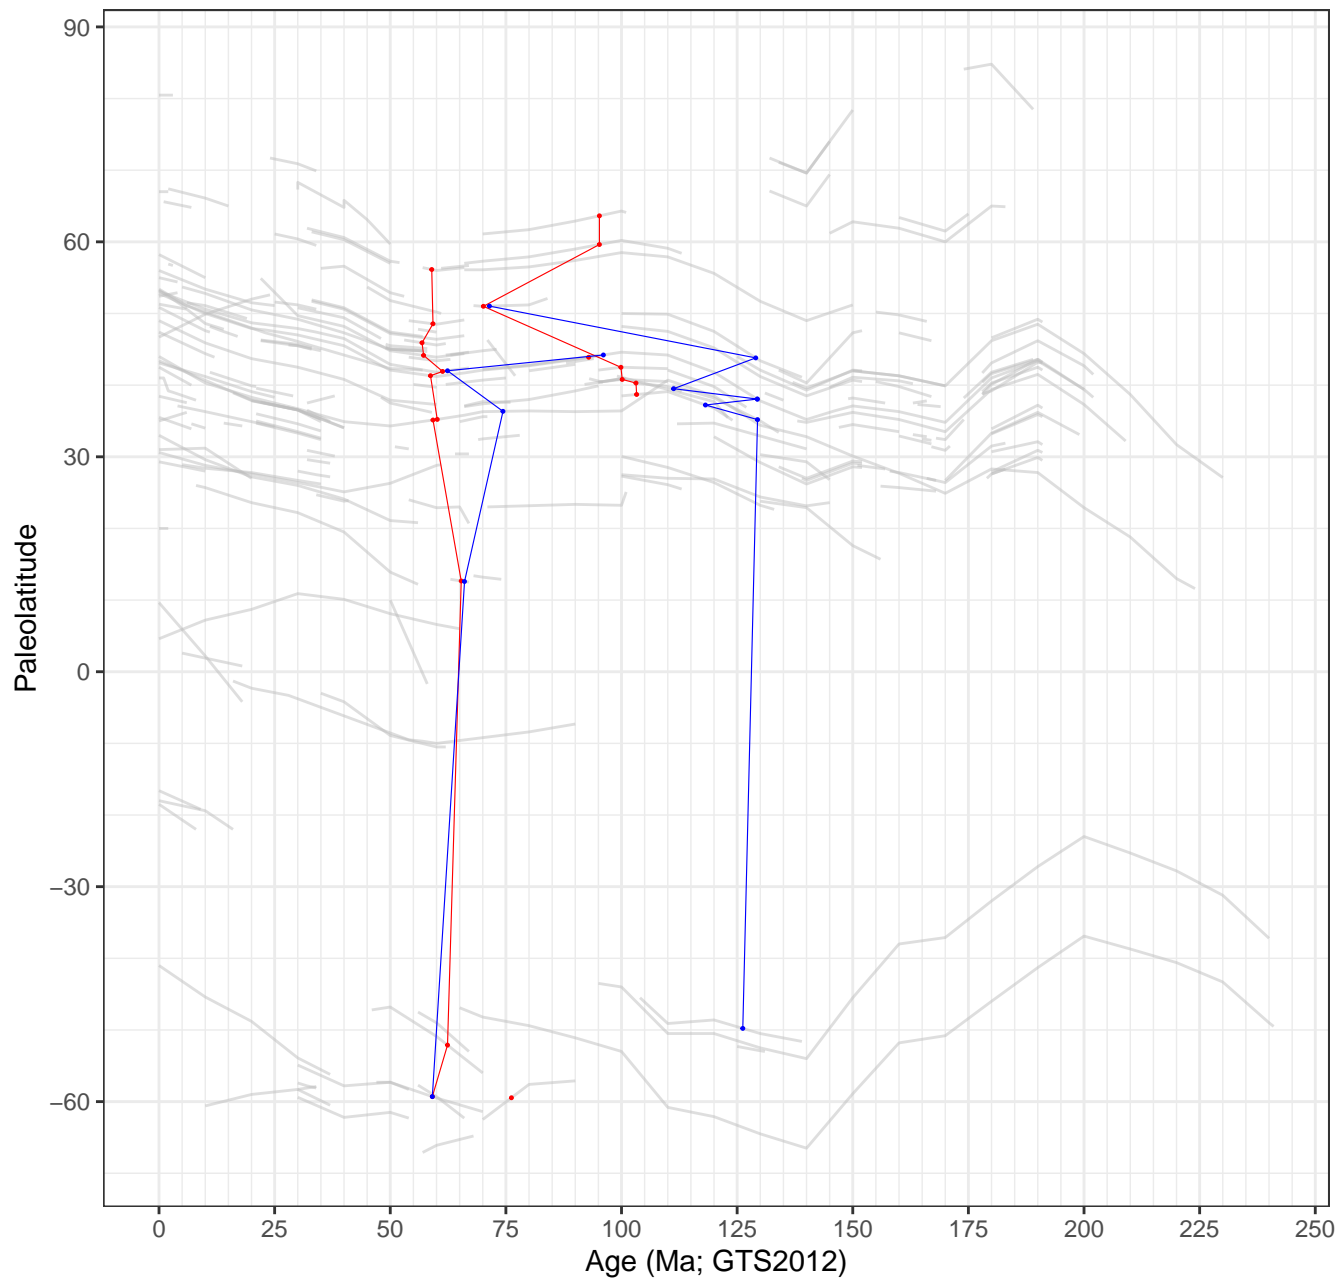

Supplement: Supplementary file 335 [file Genus Palaeoperidinium.pdf › Supplement/Supplement 2/Genus 459 plots/Genus Palaeoperidinium.pdf]

# Genus *Palaeostomocystis*

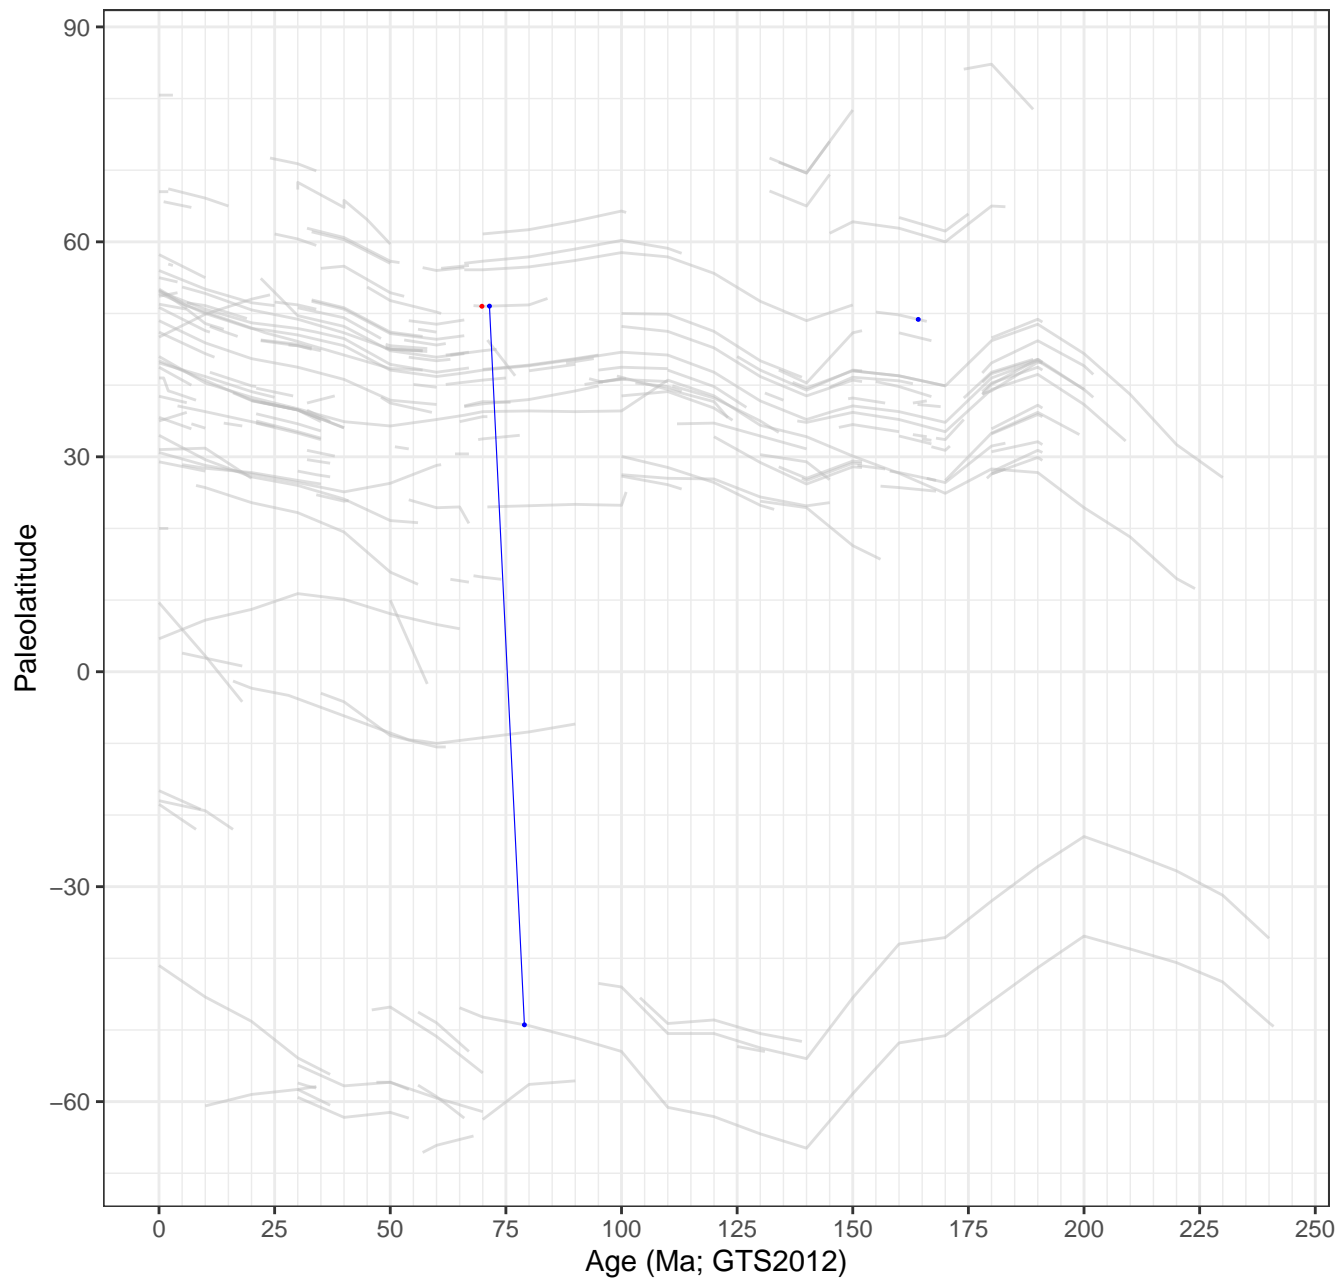

Supplement: Supplementary file 336 [file Genus Palaeostomocystis.pdf › Supplement/Supplement 2/Genus 459 plots/Genus Palaeostomocystis.pdf]

# Genus Palaeotetradinium

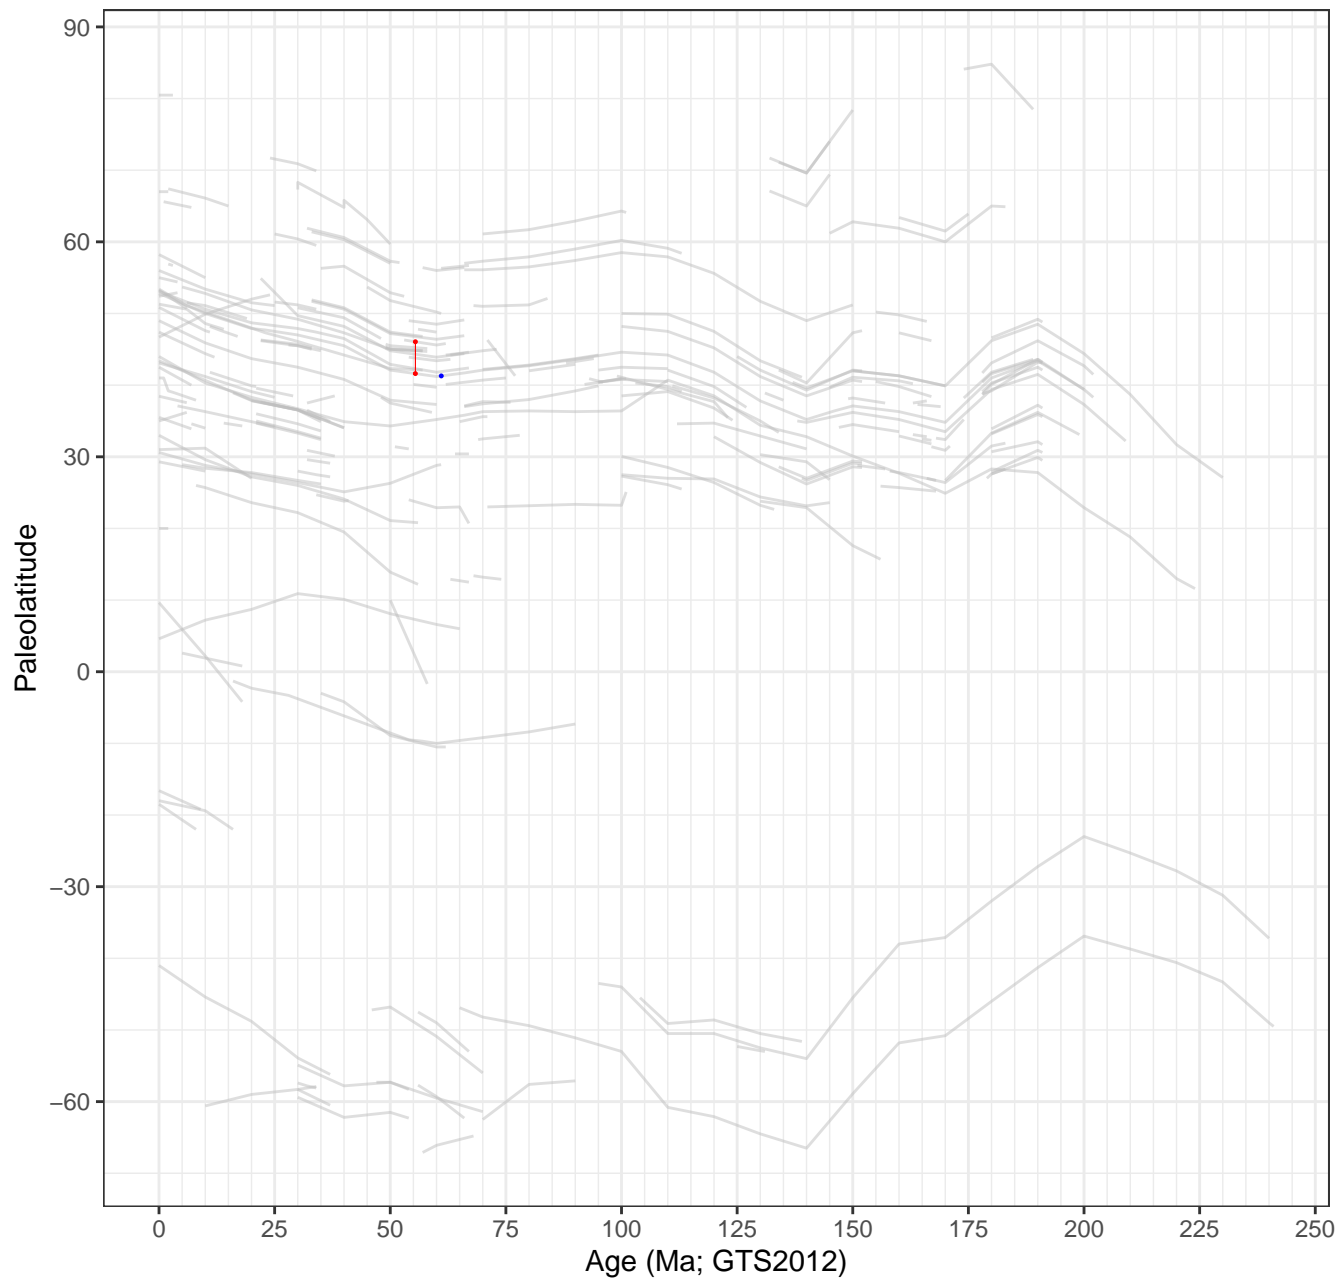

Supplement: Supplementary file 337 [file Genus Palaeotetradinium.pdf › Supplement/Supplement 2/Genus 459 plots/Genus Palaeotetradinium.pdf]

# Genus *Palynodinium*

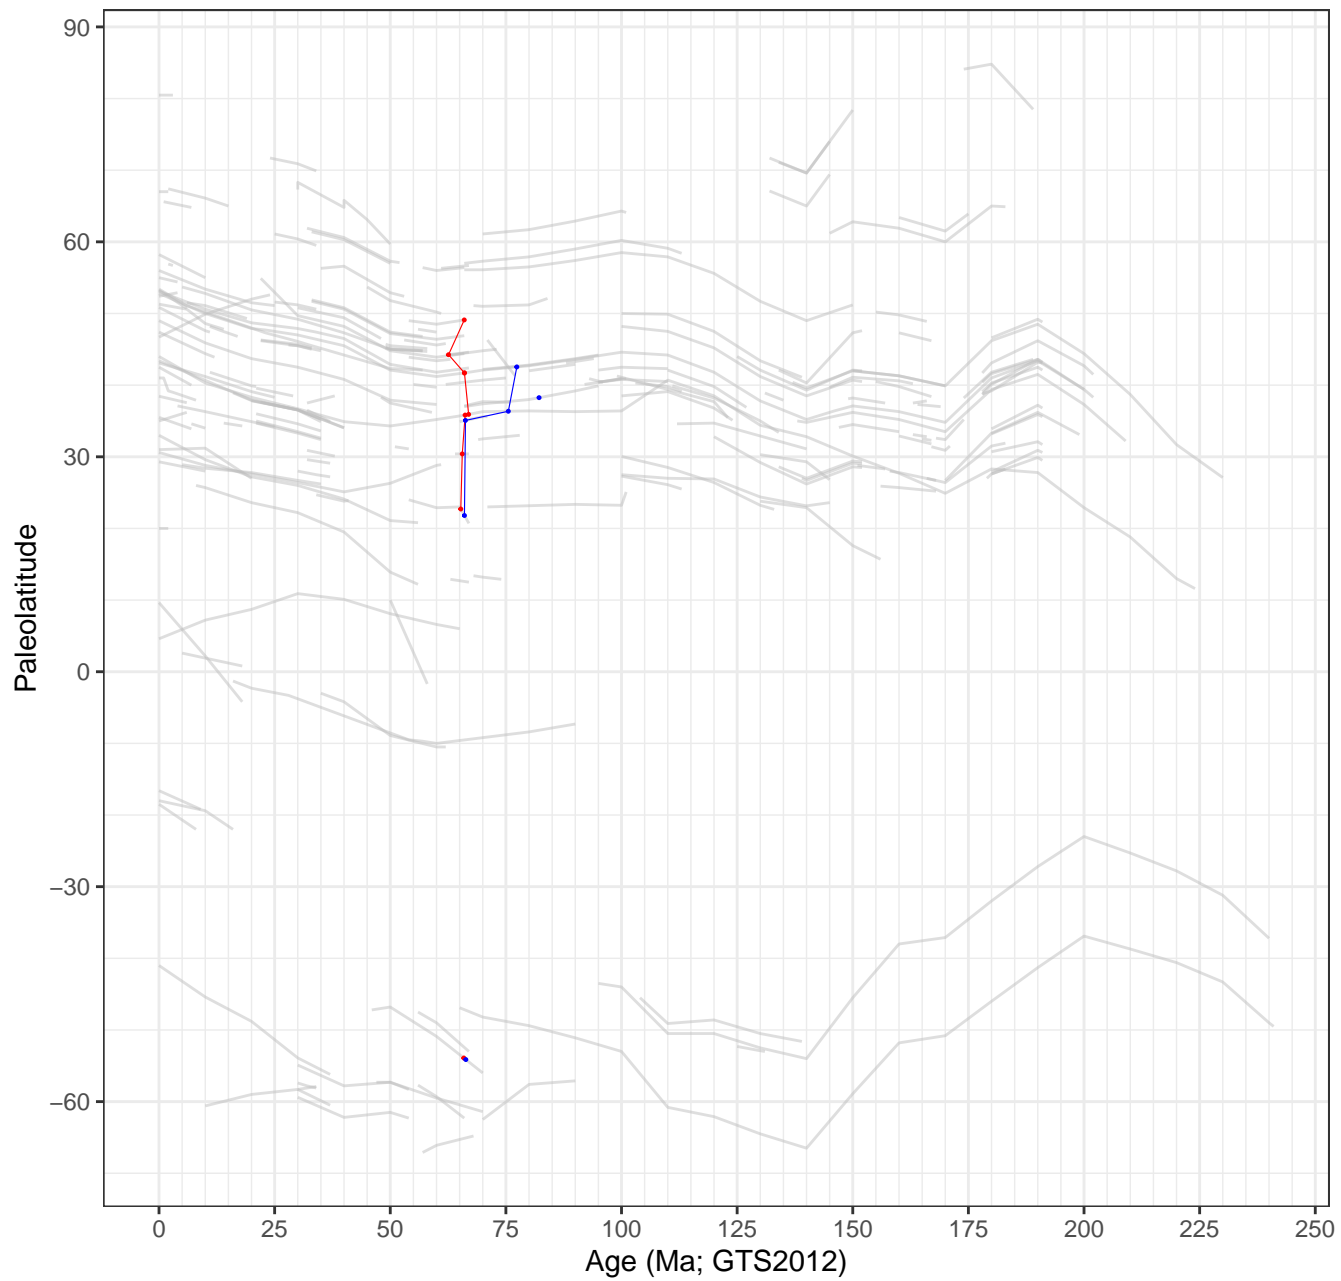

Supplement: Supplementary file 338 [file Genus Palynodinium.pdf › Supplement/Supplement 2/Genus 459 plots/Genus Palynodinium.pdf]

# Genus Papuadinium

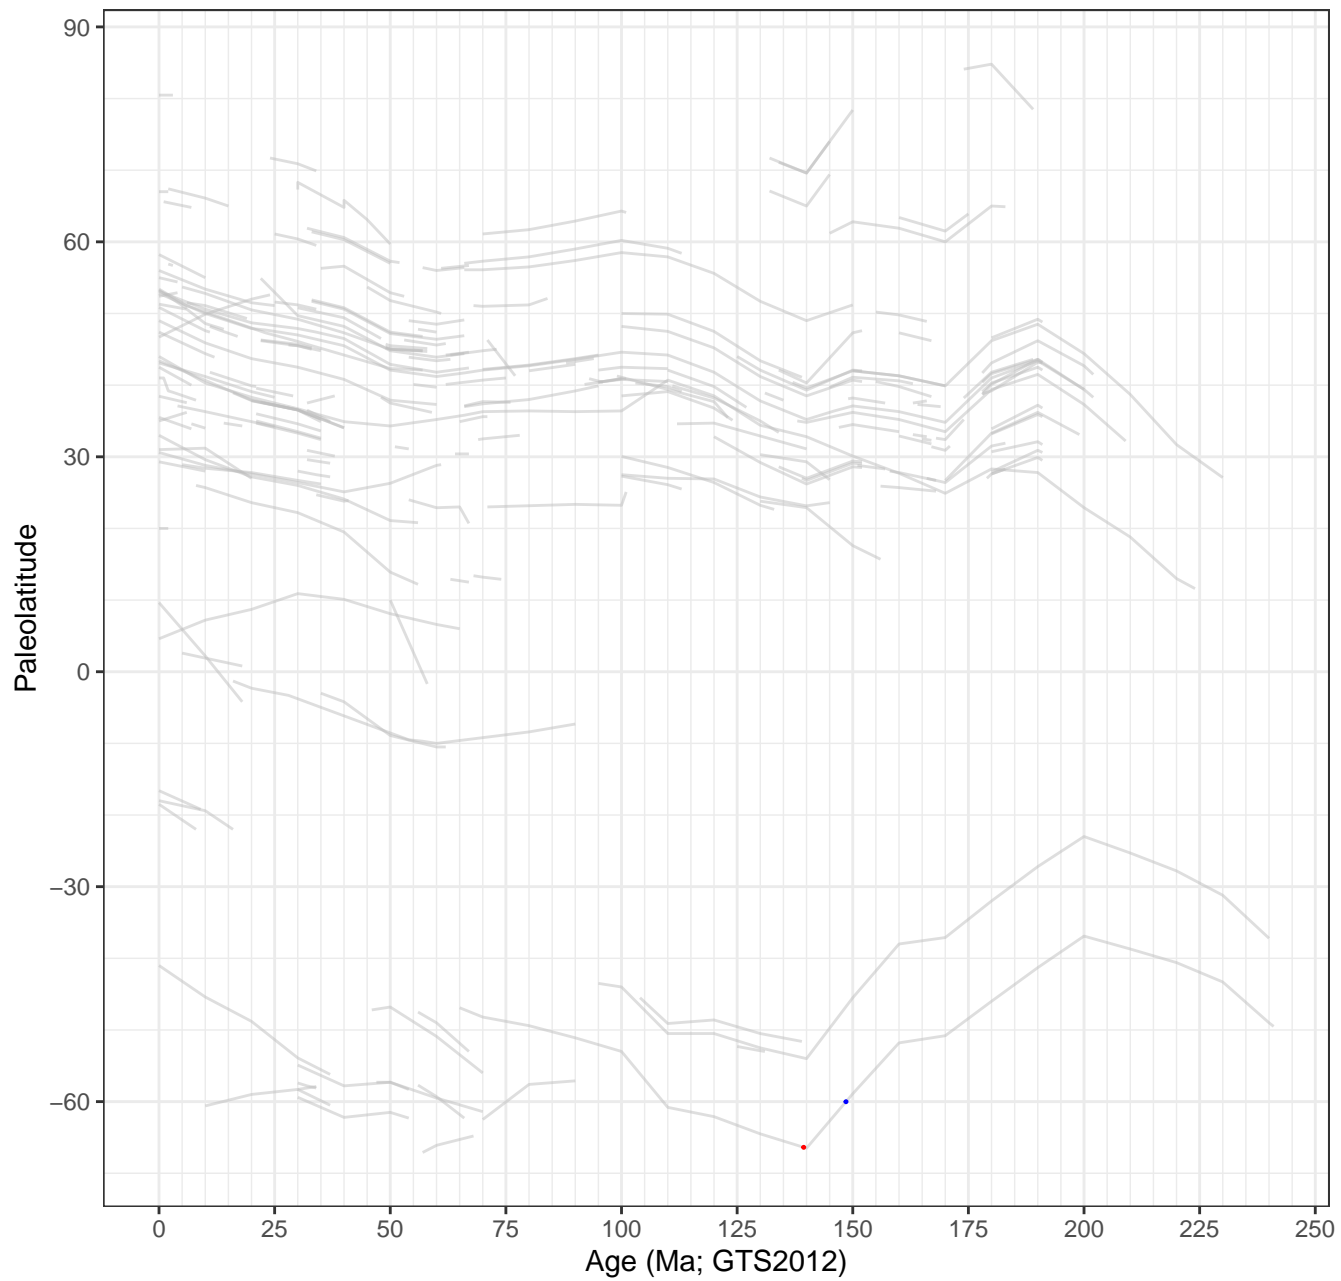

Supplement: Supplementary file 339 [file Genus Papuadinium.pdf › Supplement/Supplement 2/Genus 459 plots/Genus Papuadinium.pdf]

# Genus *Paraevansia*

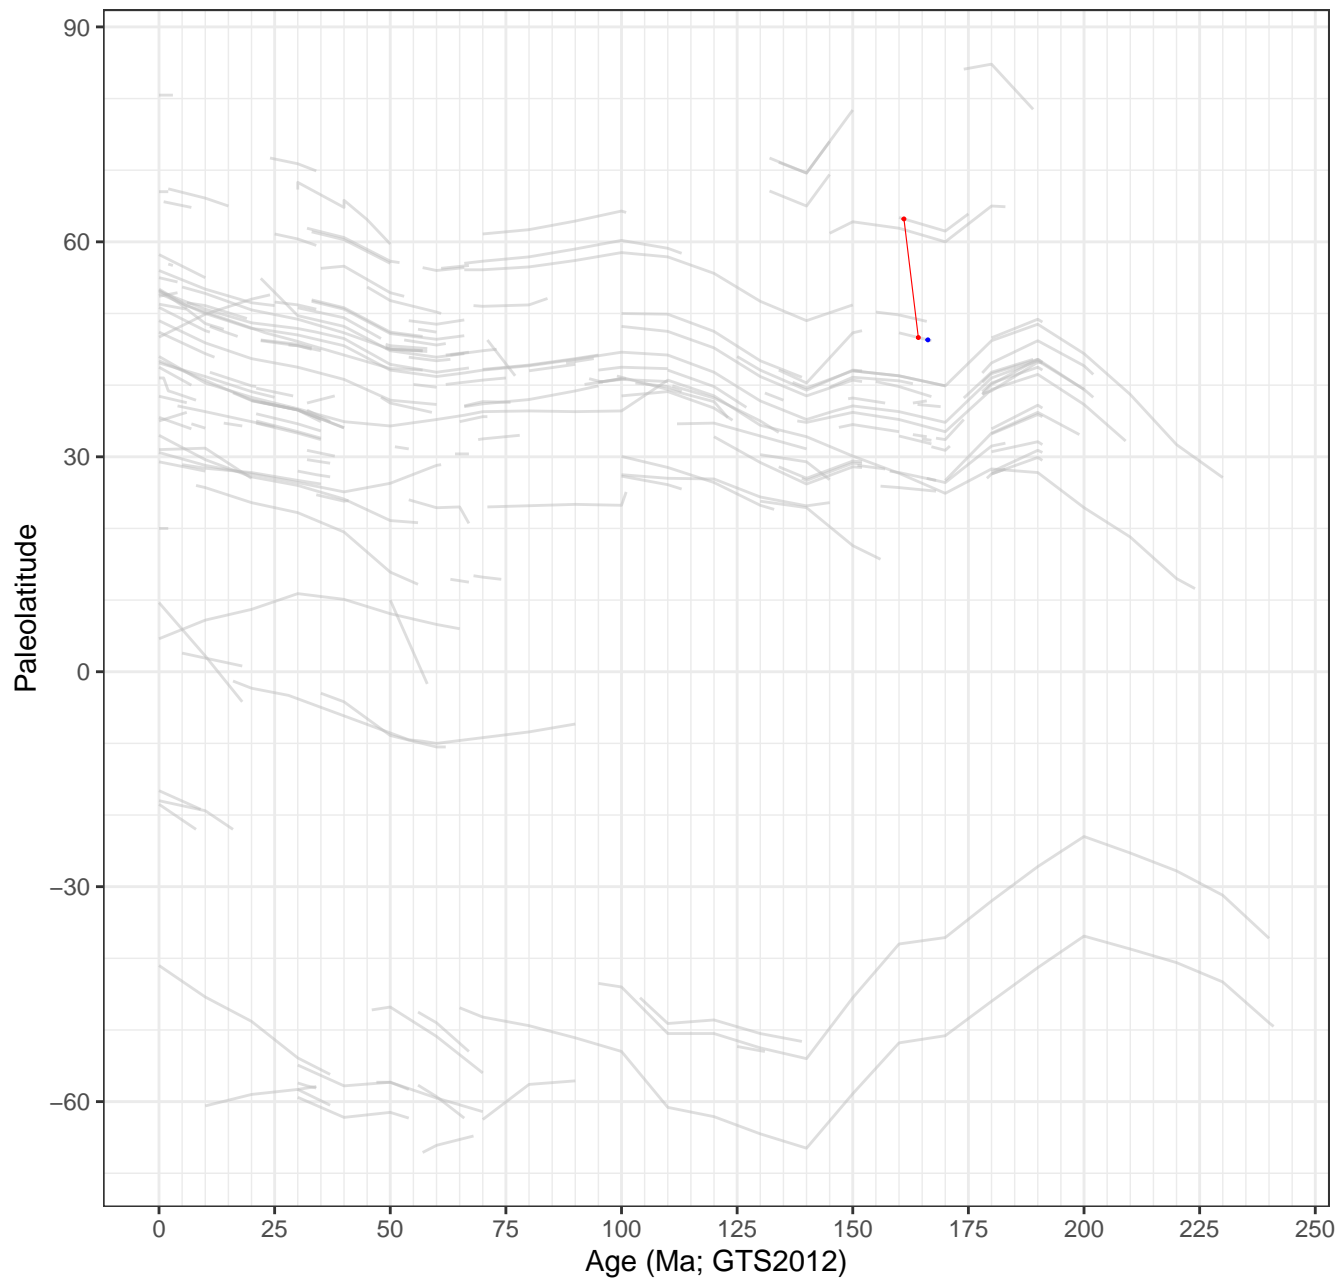

Supplement: Supplementary file 340 [file Genus Paraevansia.pdf › Supplement/Supplement 2/Genus 459 plots/Genus Paraevansia.pdf]

# Genus *Paragonyaulacysta*

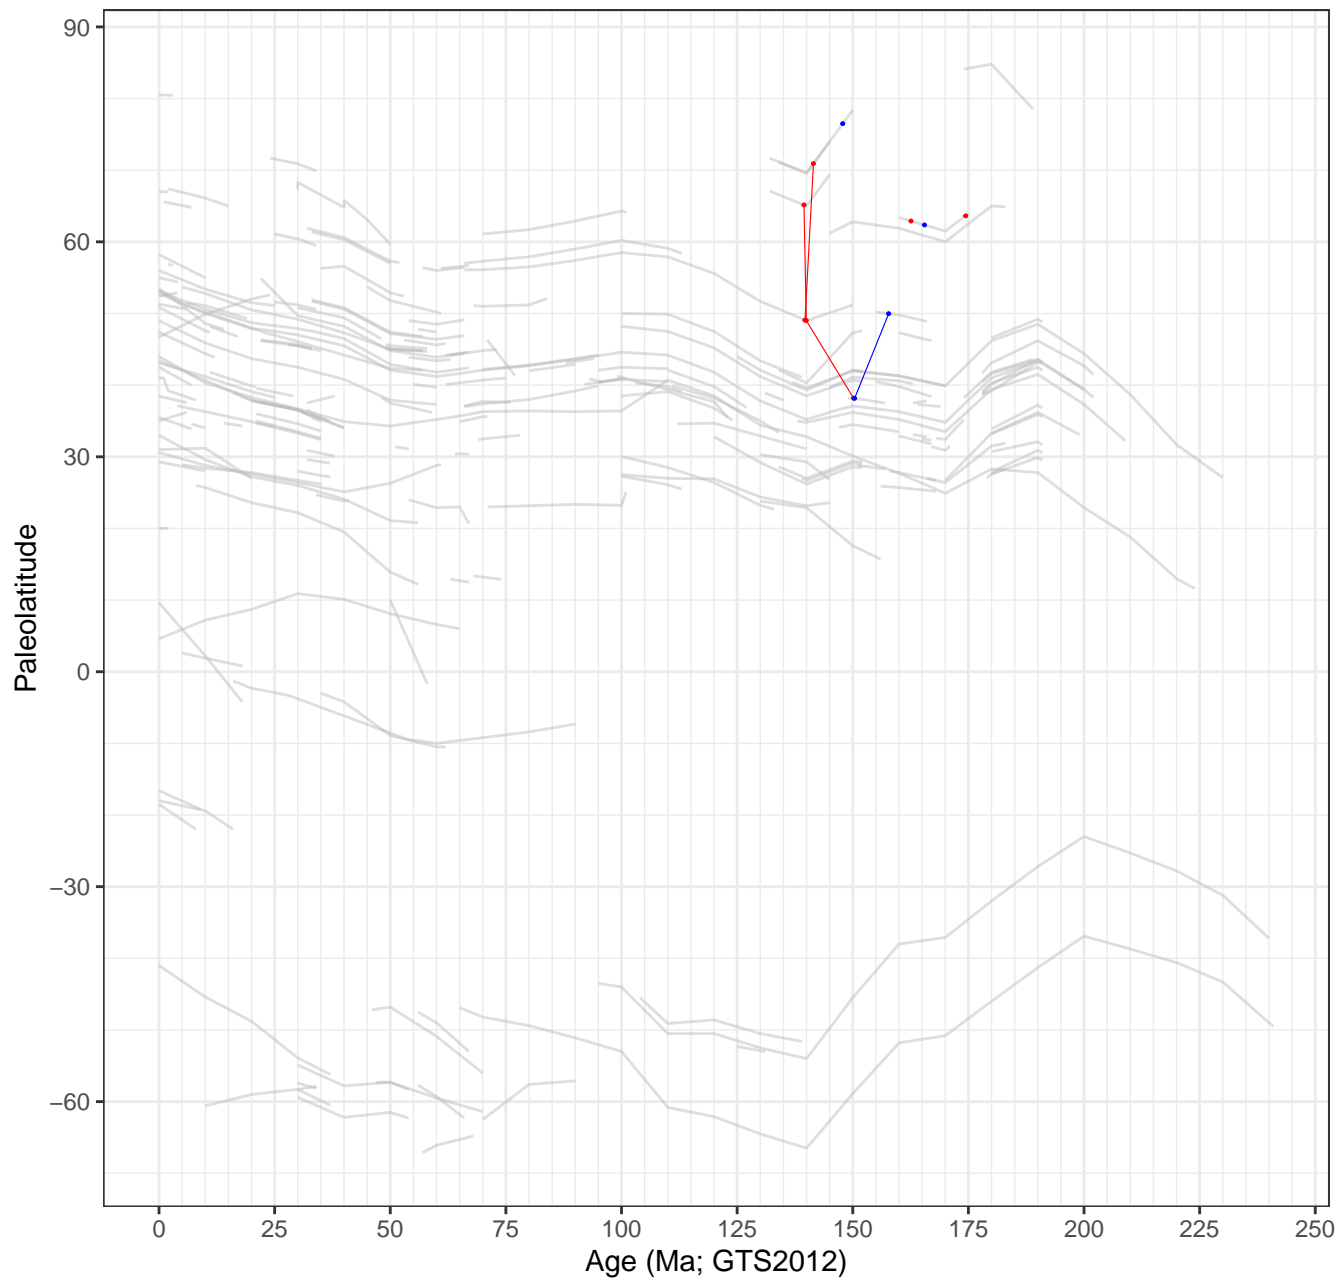

Supplement: Supplementary file 341 [file Genus Paragonyaulacysta.pdf › Supplement/Supplement 2/Genus 459 plots/Genus Paragonyaulacysta.pdf]

# Genus *Parascrinioicassis*

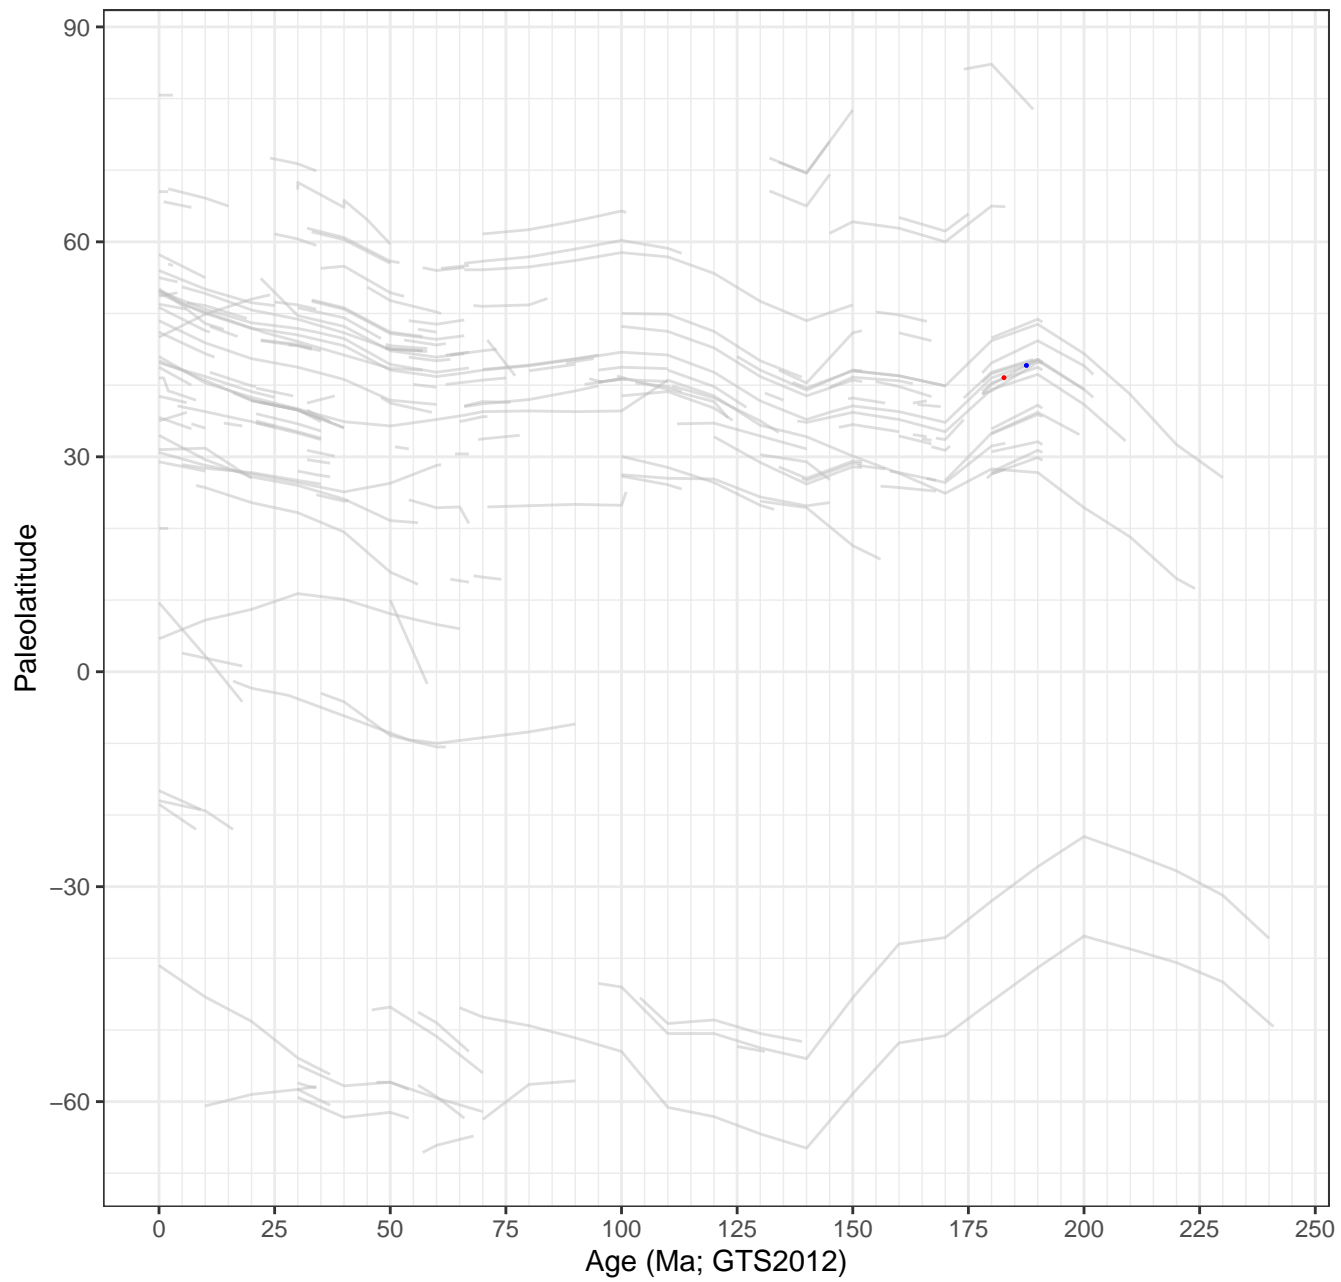

Supplement: Supplementary file 342 [file Genus Parascriniocassis.pdf › Supplement/Supplement 2/Genus 459 plots/Genus Parascriniocassis.pdf]

# Genus Pareodinia

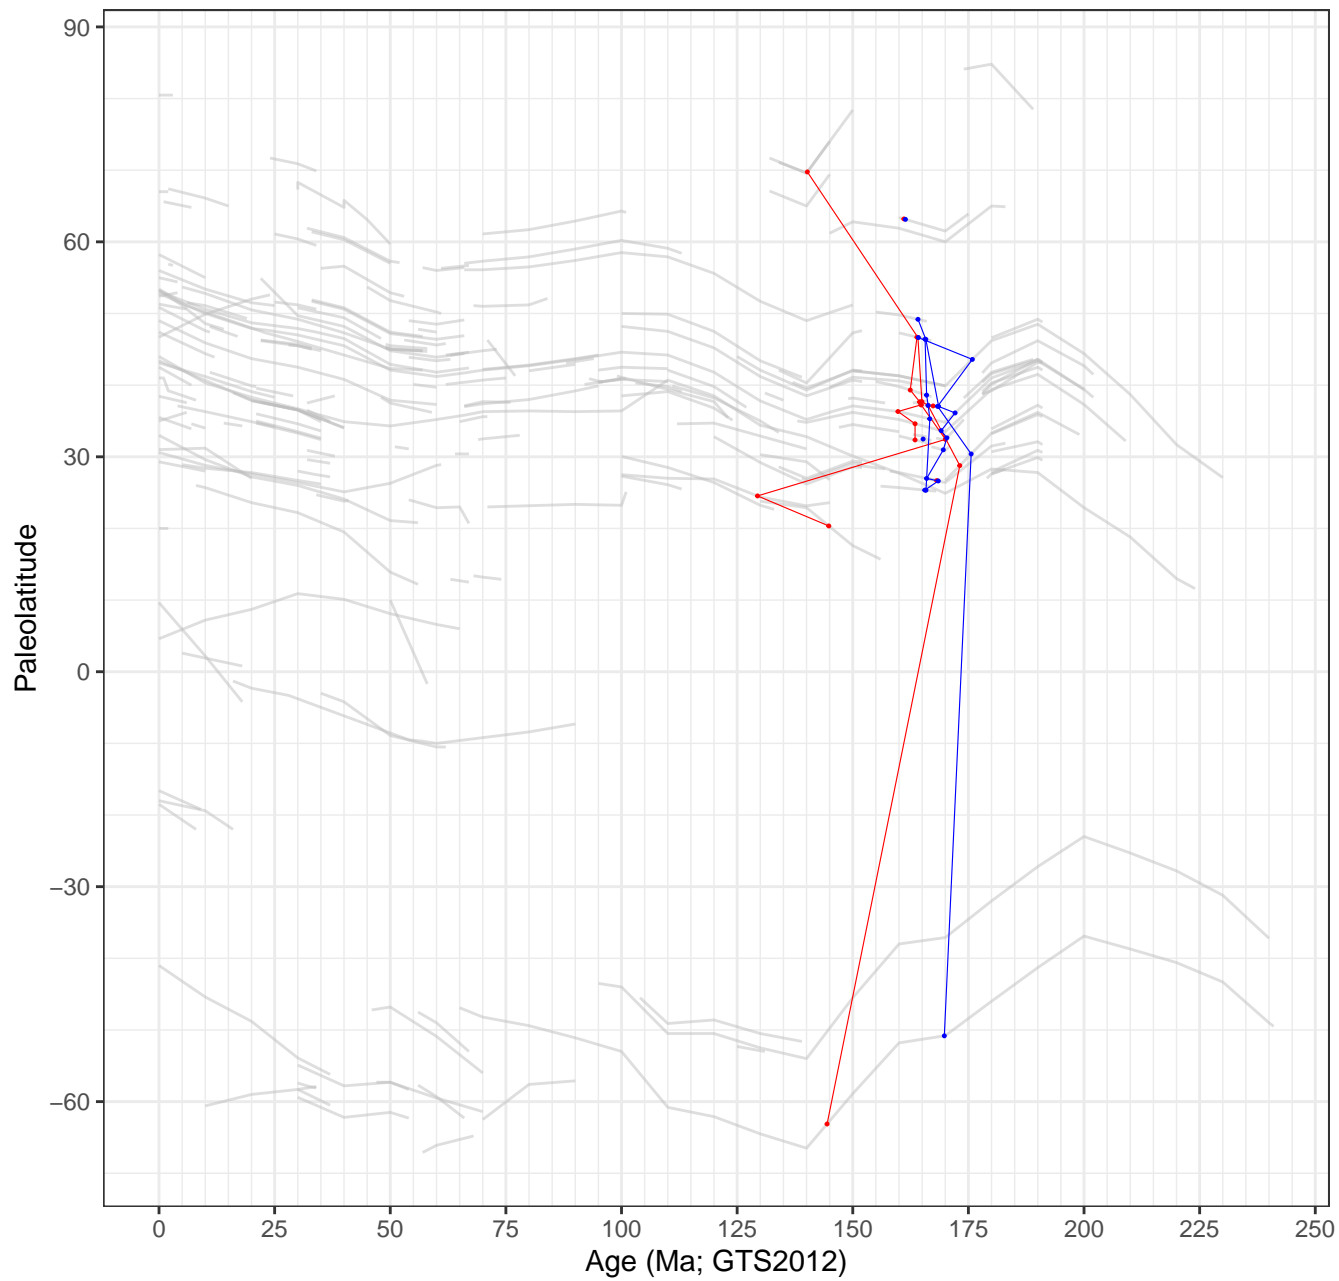

Supplement: Supplementary file 343 [file Genus Pareodinia.pdf › Supplement/Supplement 2/Genus 459 plots/Genus Pareodinia.pdf]

# Genus Parvocysta

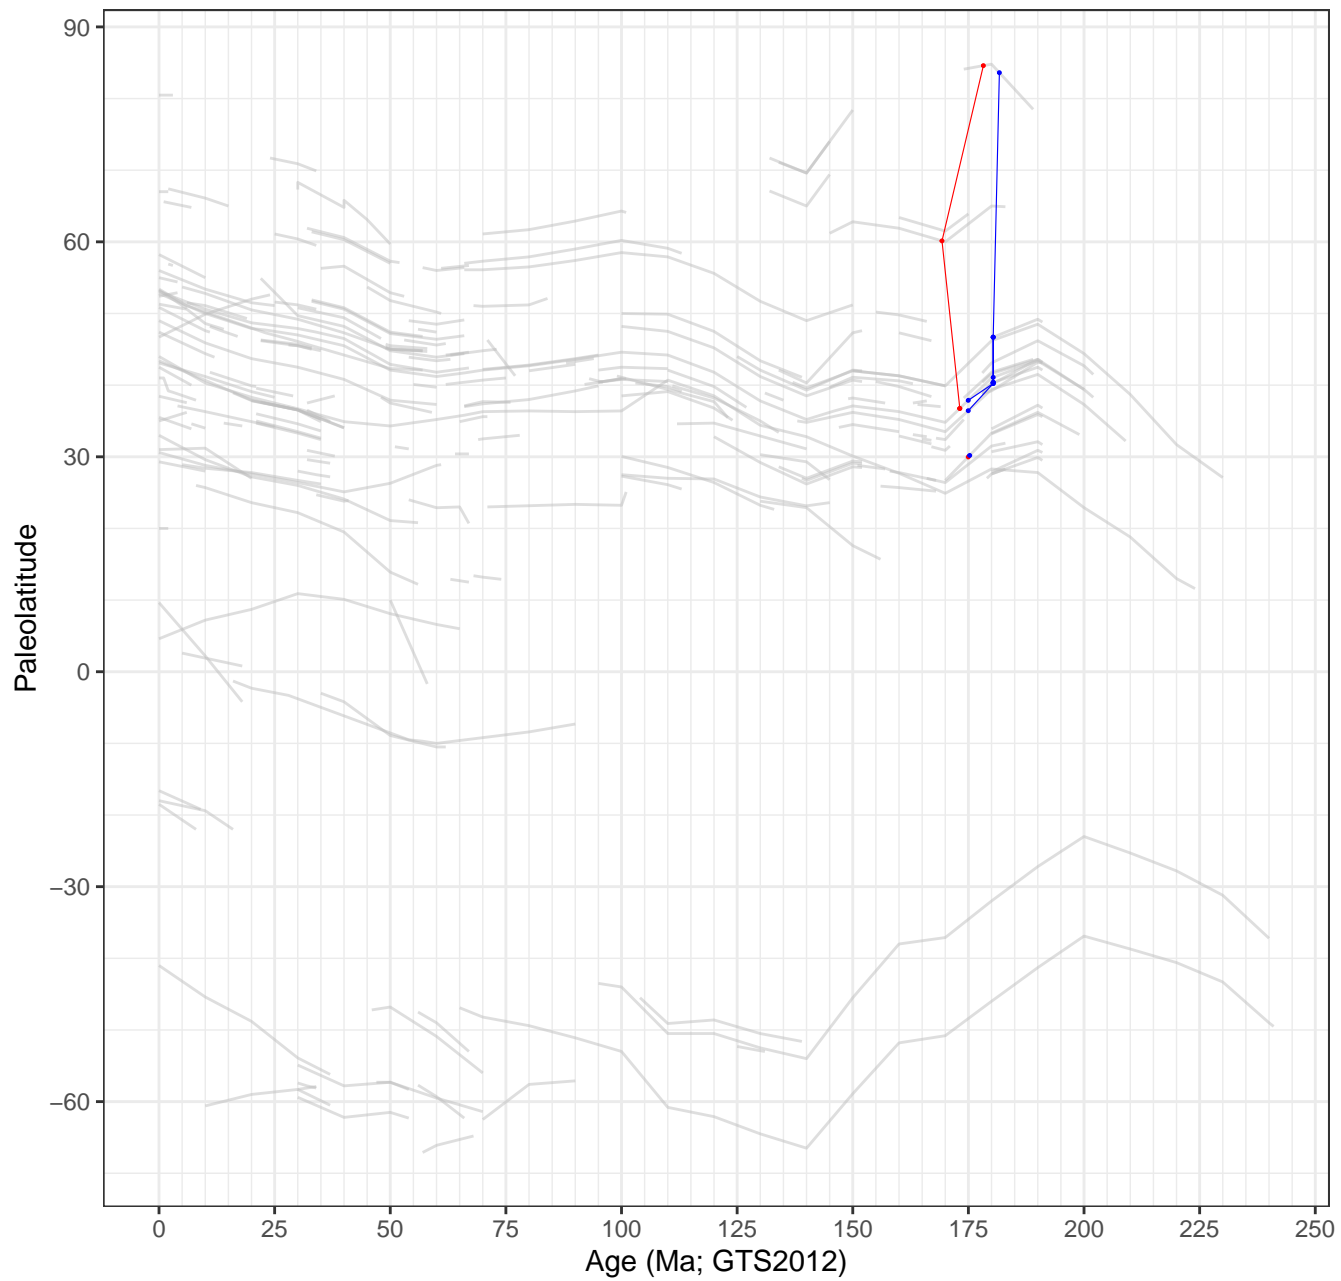

Supplement: Supplementary file 344 [file Genus Parvocysta.pdf › Supplement/Supplement 2/Genus 459 plots/Genus Parvocysta.pdf]

# Genus Paucisphaeridium

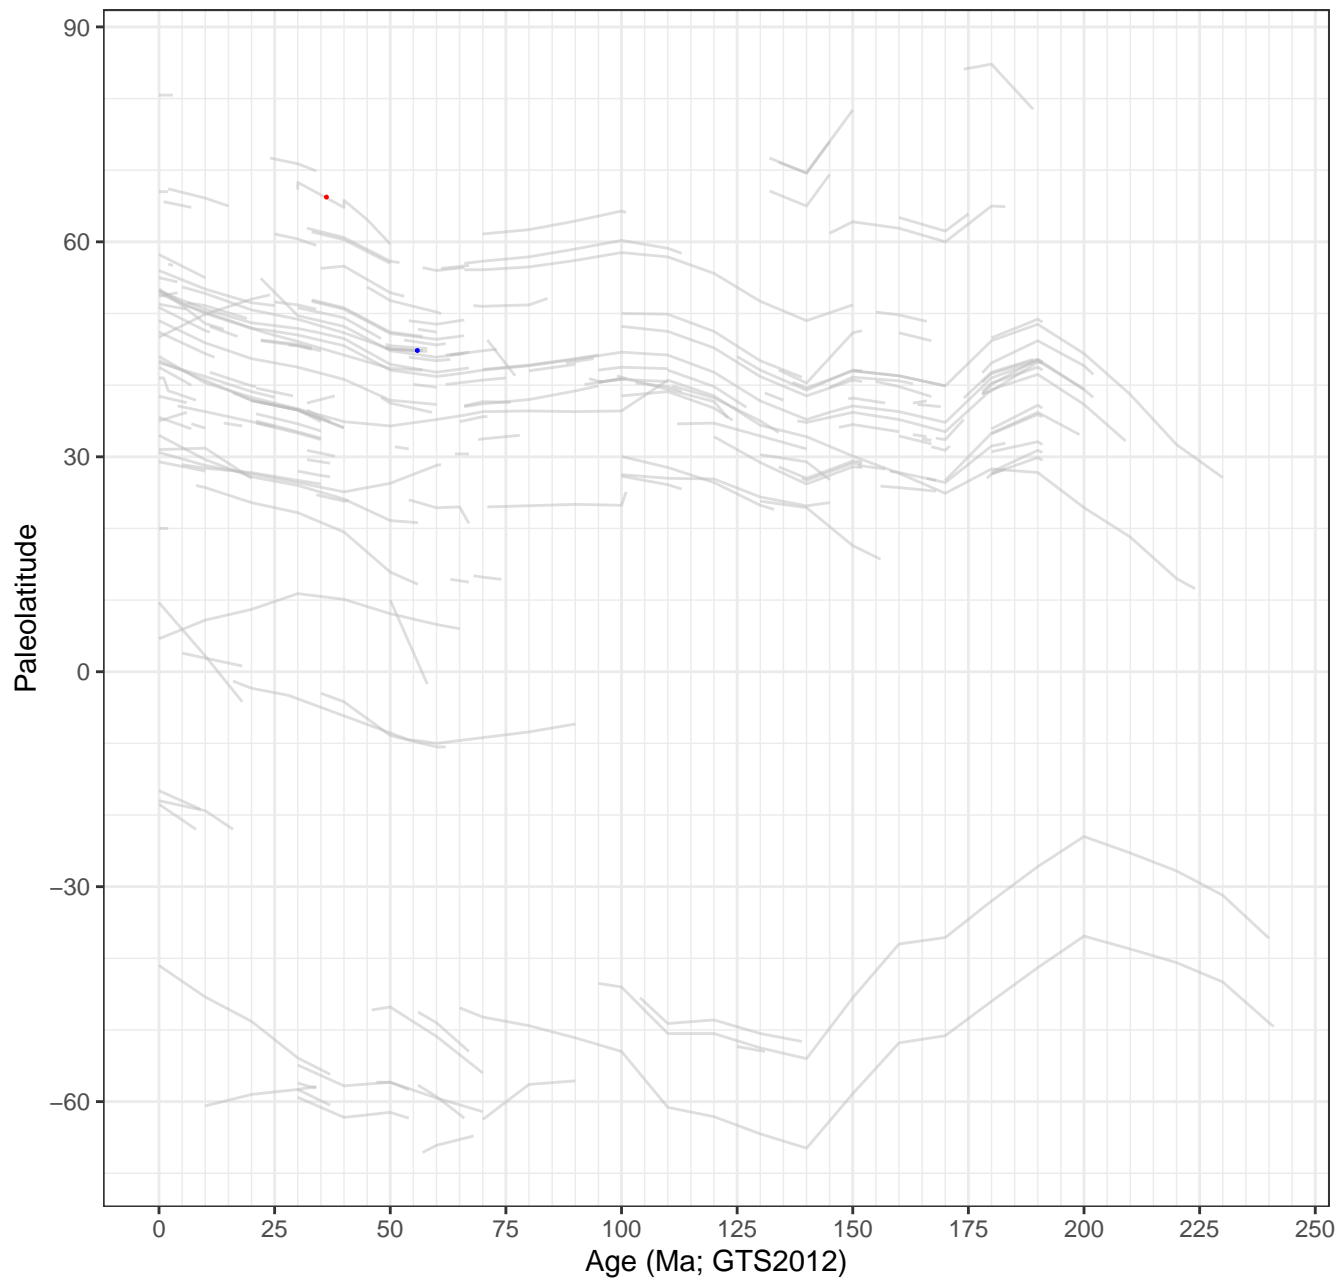

Supplement: Supplementary file 345 [file Genus Paucisphaeridium.pdf › Supplement/Supplement 2/Genus 459 plots/Genus Paucisphaeridium.pdf]

# Genus Pentadinium

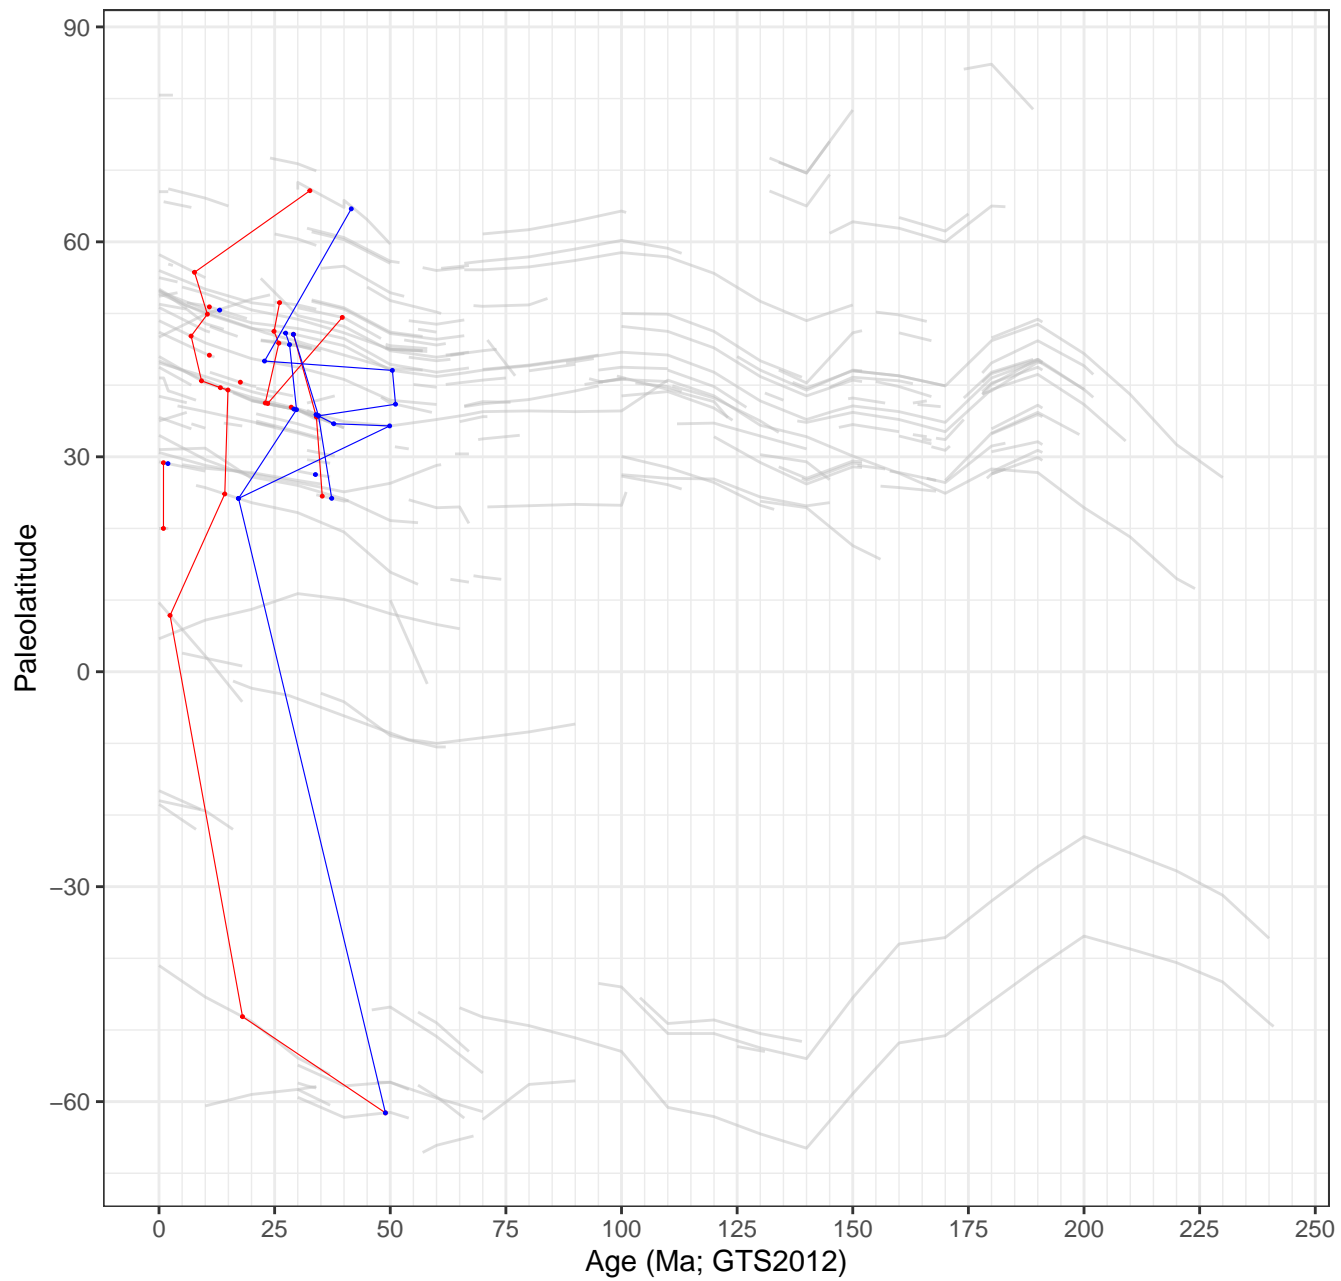

Supplement: Supplementary file 346 [file Genus Pentadinium.pdf › Supplement/Supplement 2/Genus 459 plots/Genus Pentadinium.pdf]

# Genus Pentaparsodinium

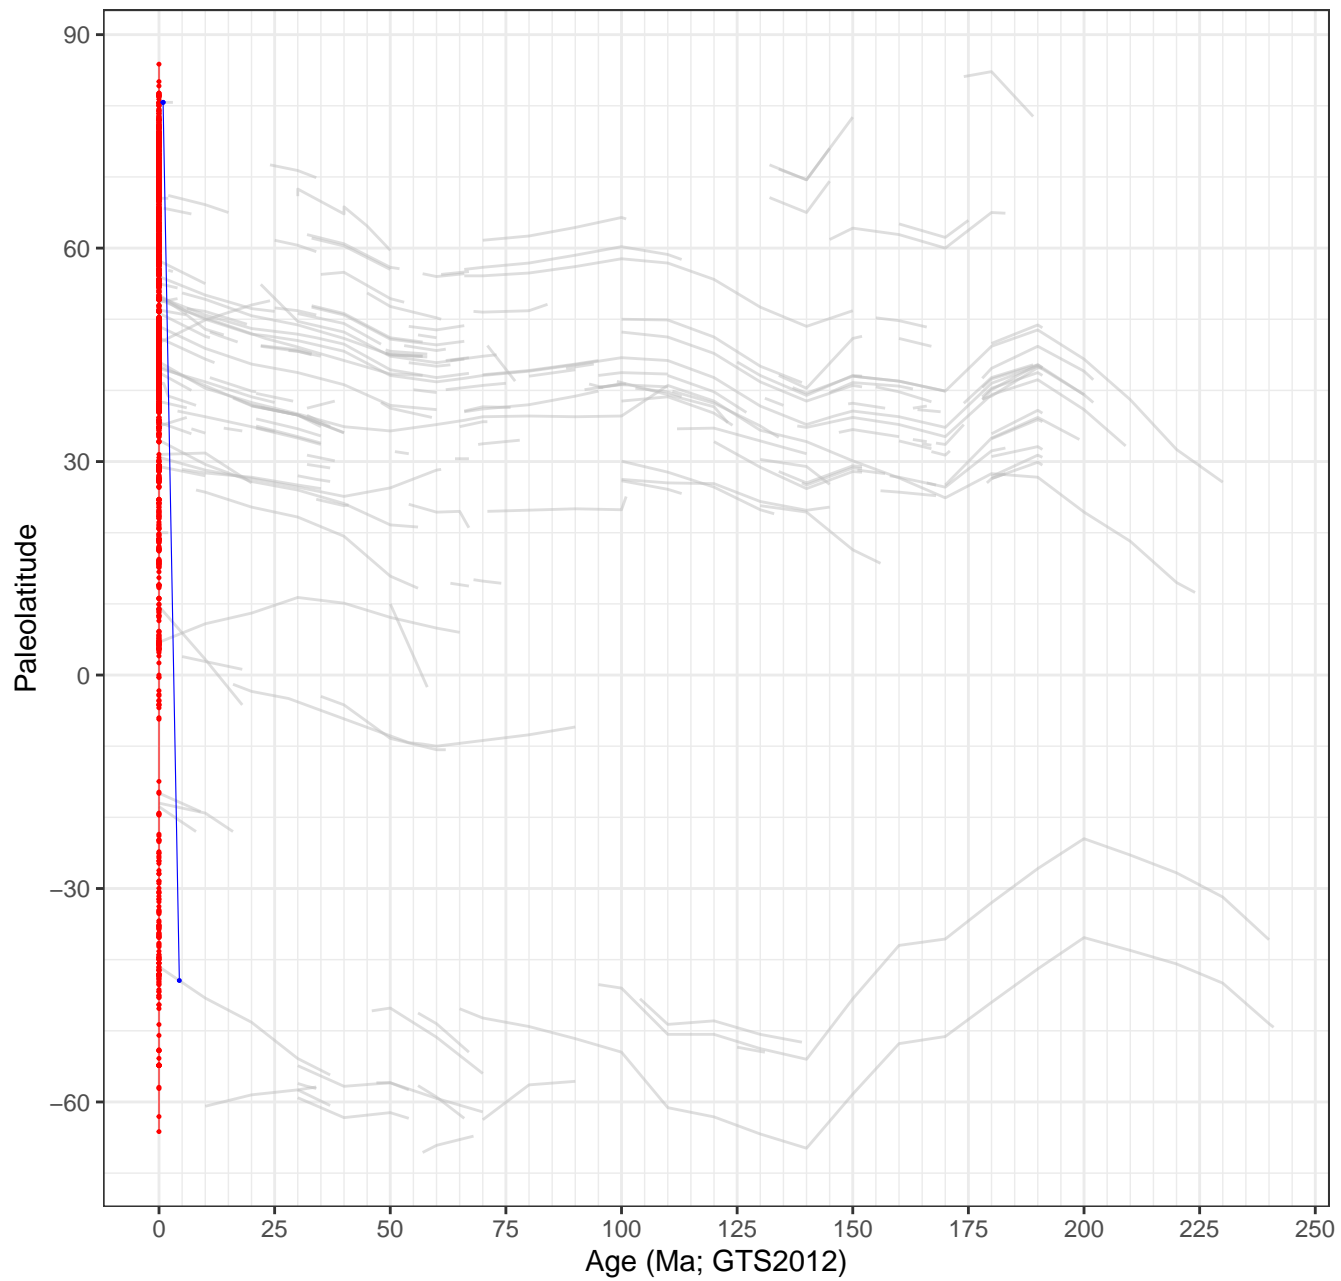

Supplement: Supplementary file 347 [file Genus Pentapharsodinium.pdf › Supplement/Supplement 2/Genus 459 plots/Genus Pentapharsodinium.pdf]

# Genus Peridictyocysta

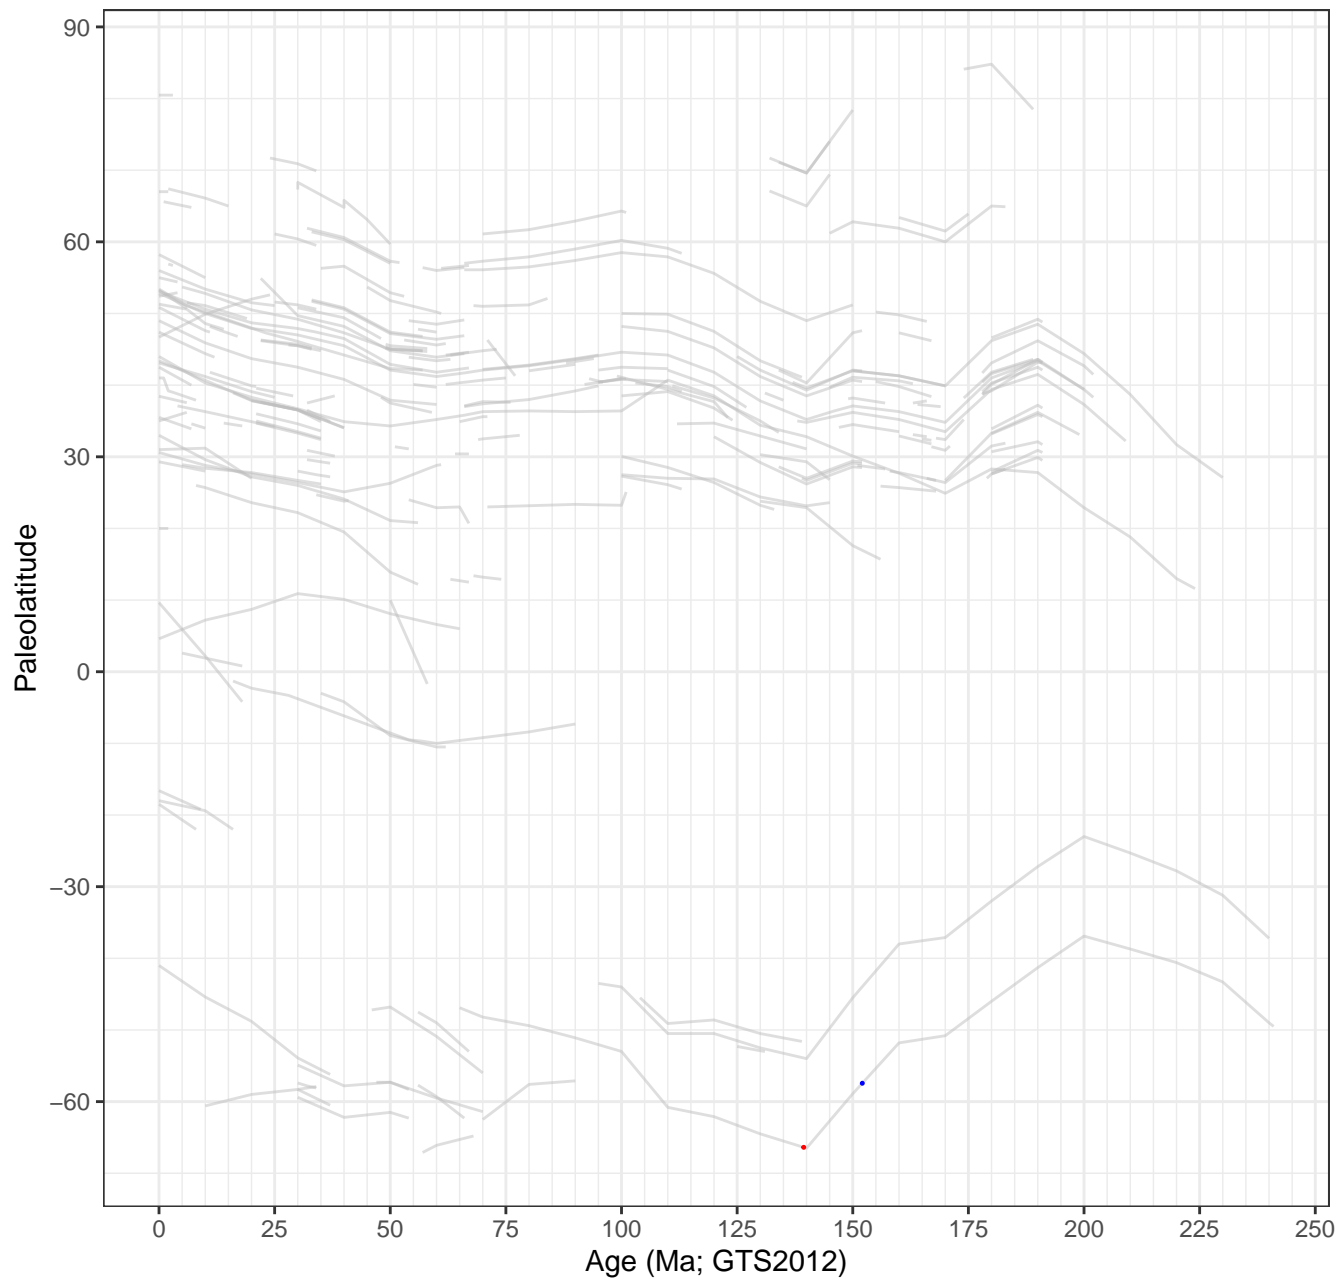

Supplement: Supplementary file 348 [file Genus Peridictyocysta.pdf › Supplement/Supplement 2/Genus 459 plots/Genus Peridictyocysta.pdf]

# Genus Peridinium

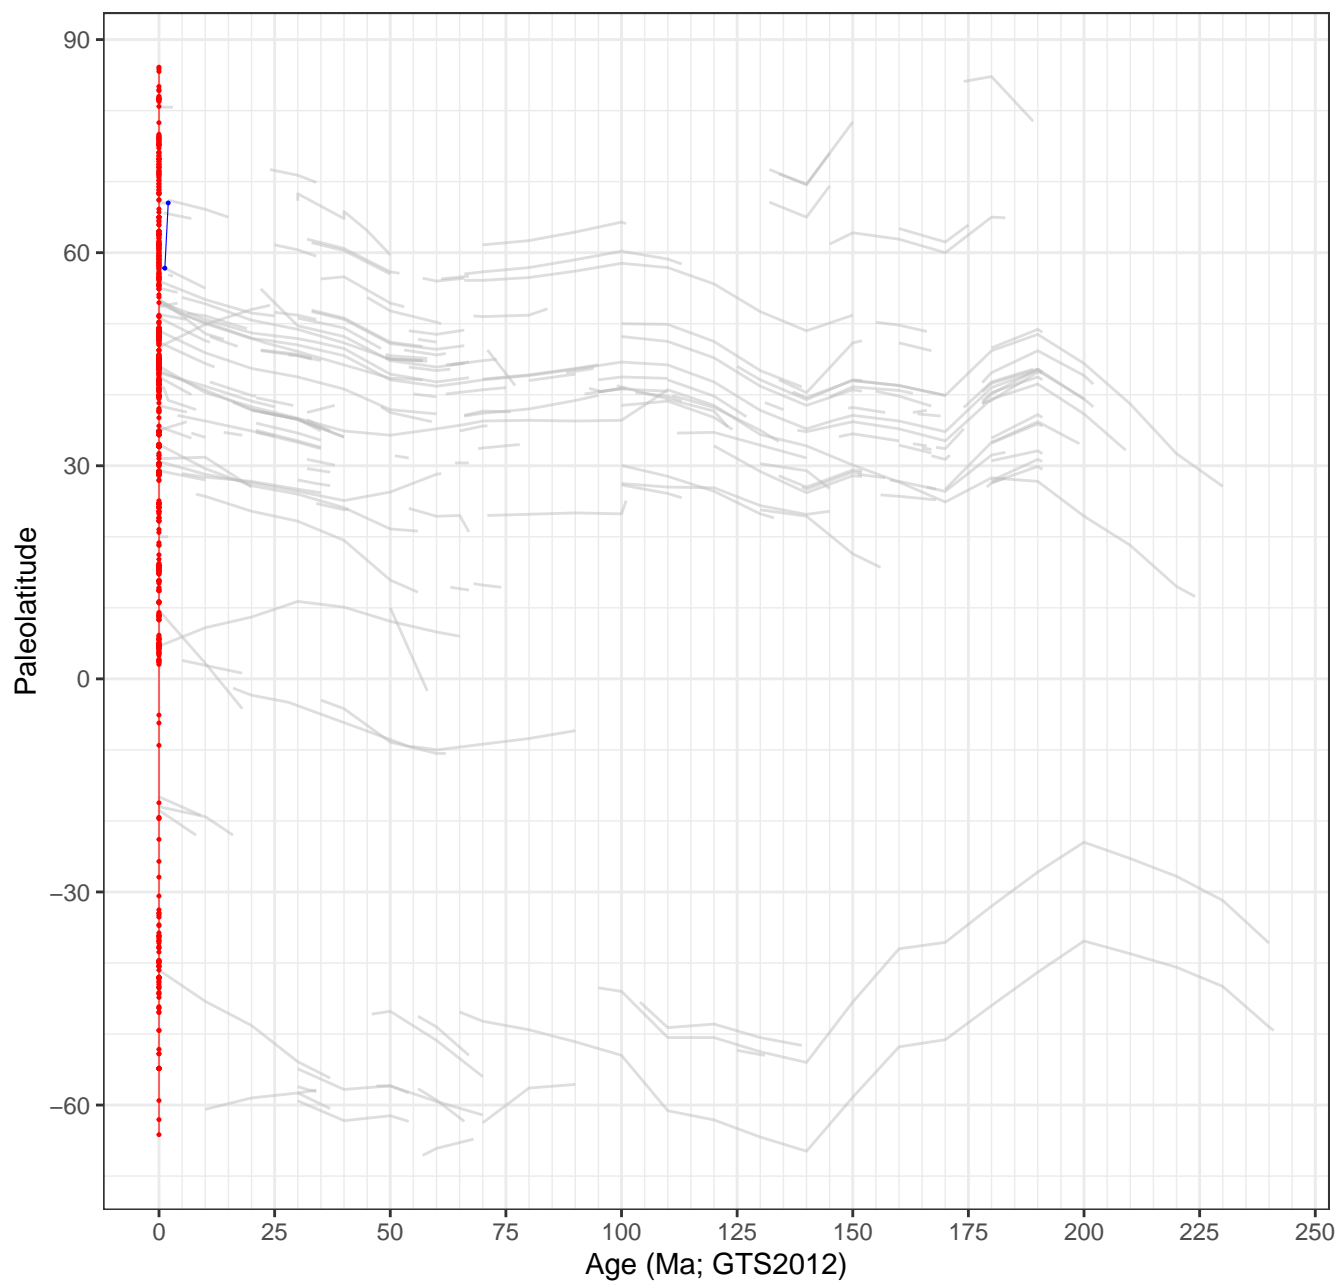

Supplement: Supplementary file 349 [file Genus Peridinium.pdf › Supplement/Supplement 2/Genus 459 plots/Genus Peridinium.pdf]

# Genus *Perisseiasphaeridium*

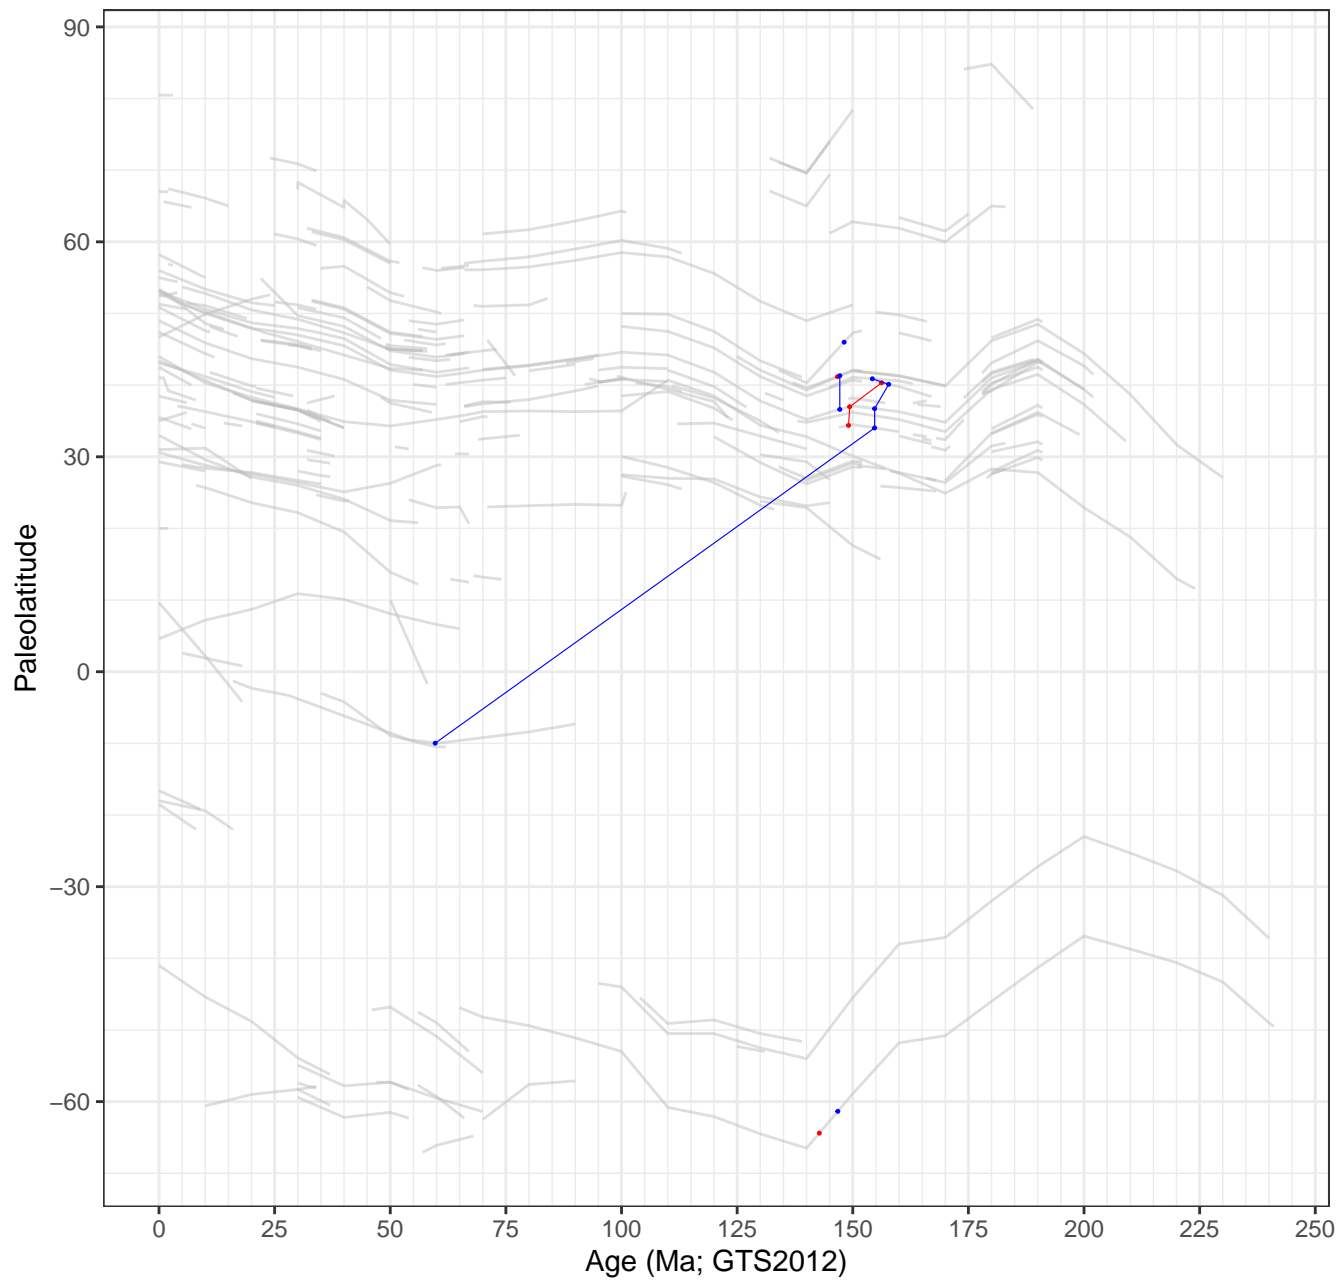

Supplement: Supplementary file 350 [file Genus Perisseiasphaeridium.pdf › Supplement/Supplement 2/Genus 459 plots/Genus Perisseiasphaeridium.pdf]

# Genus Pervosphaeridium

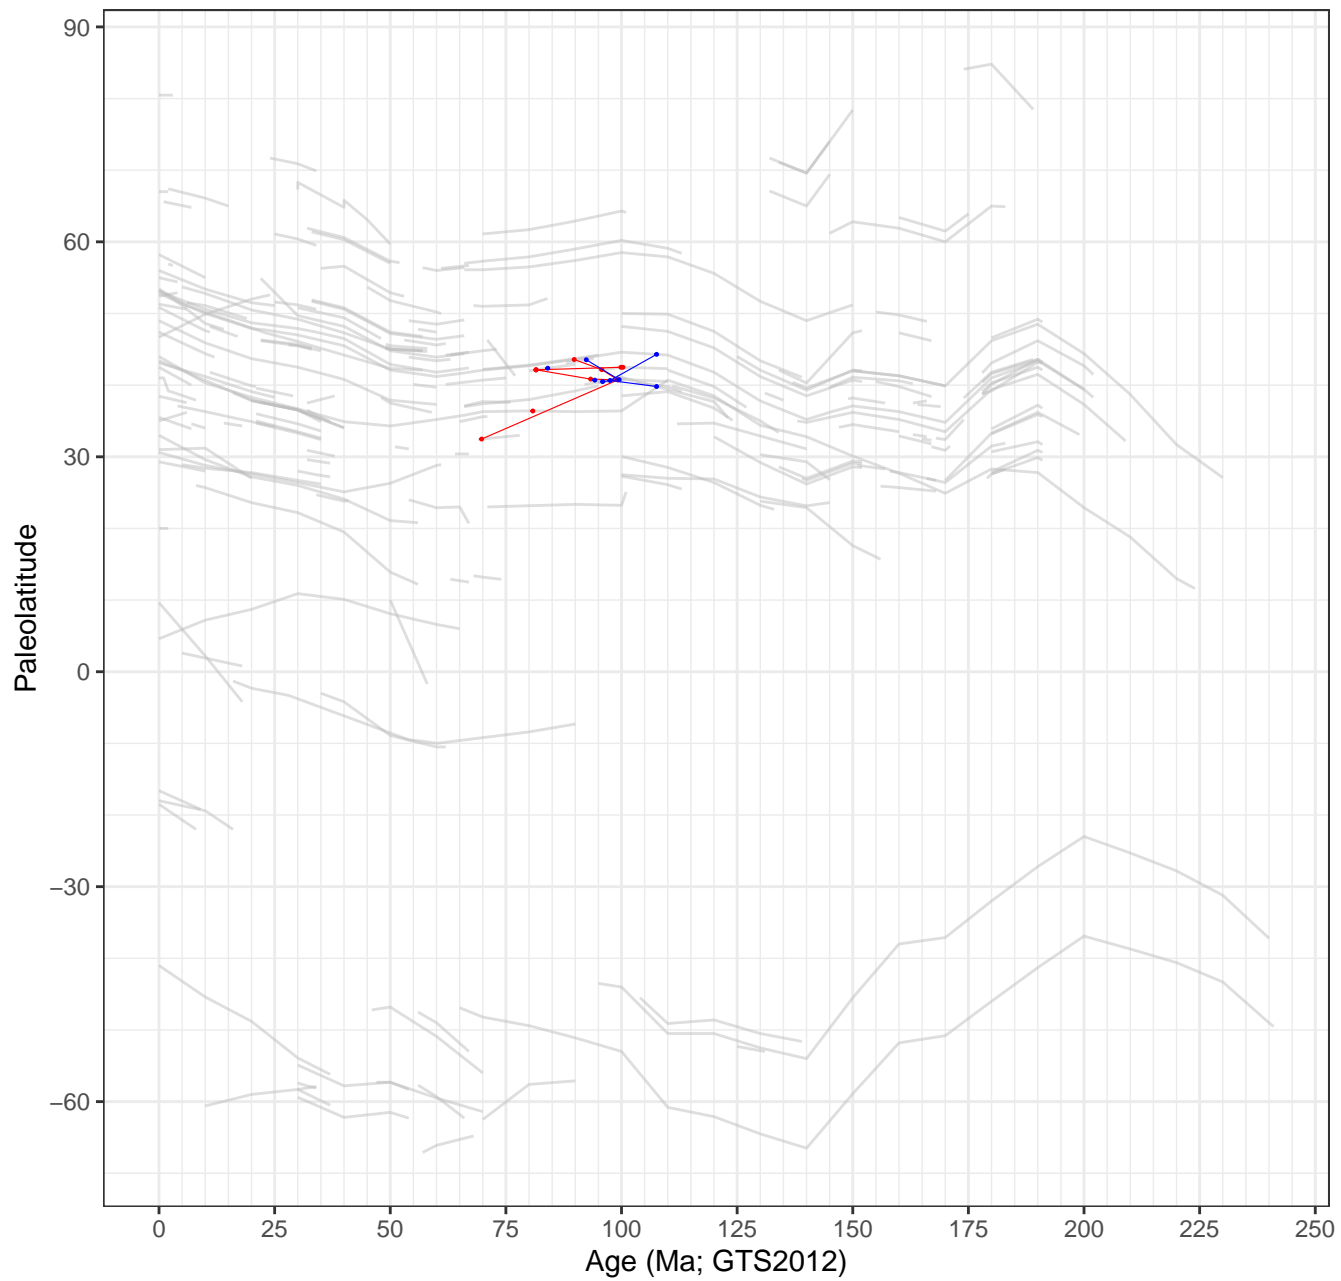

Supplement: Supplementary file 351 [file Genus Pervosphaeridium.pdf › Supplement/Supplement 2/Genus 459 plots/Genus Pervosphaeridium.pdf]

# Genus *Petalodinium*

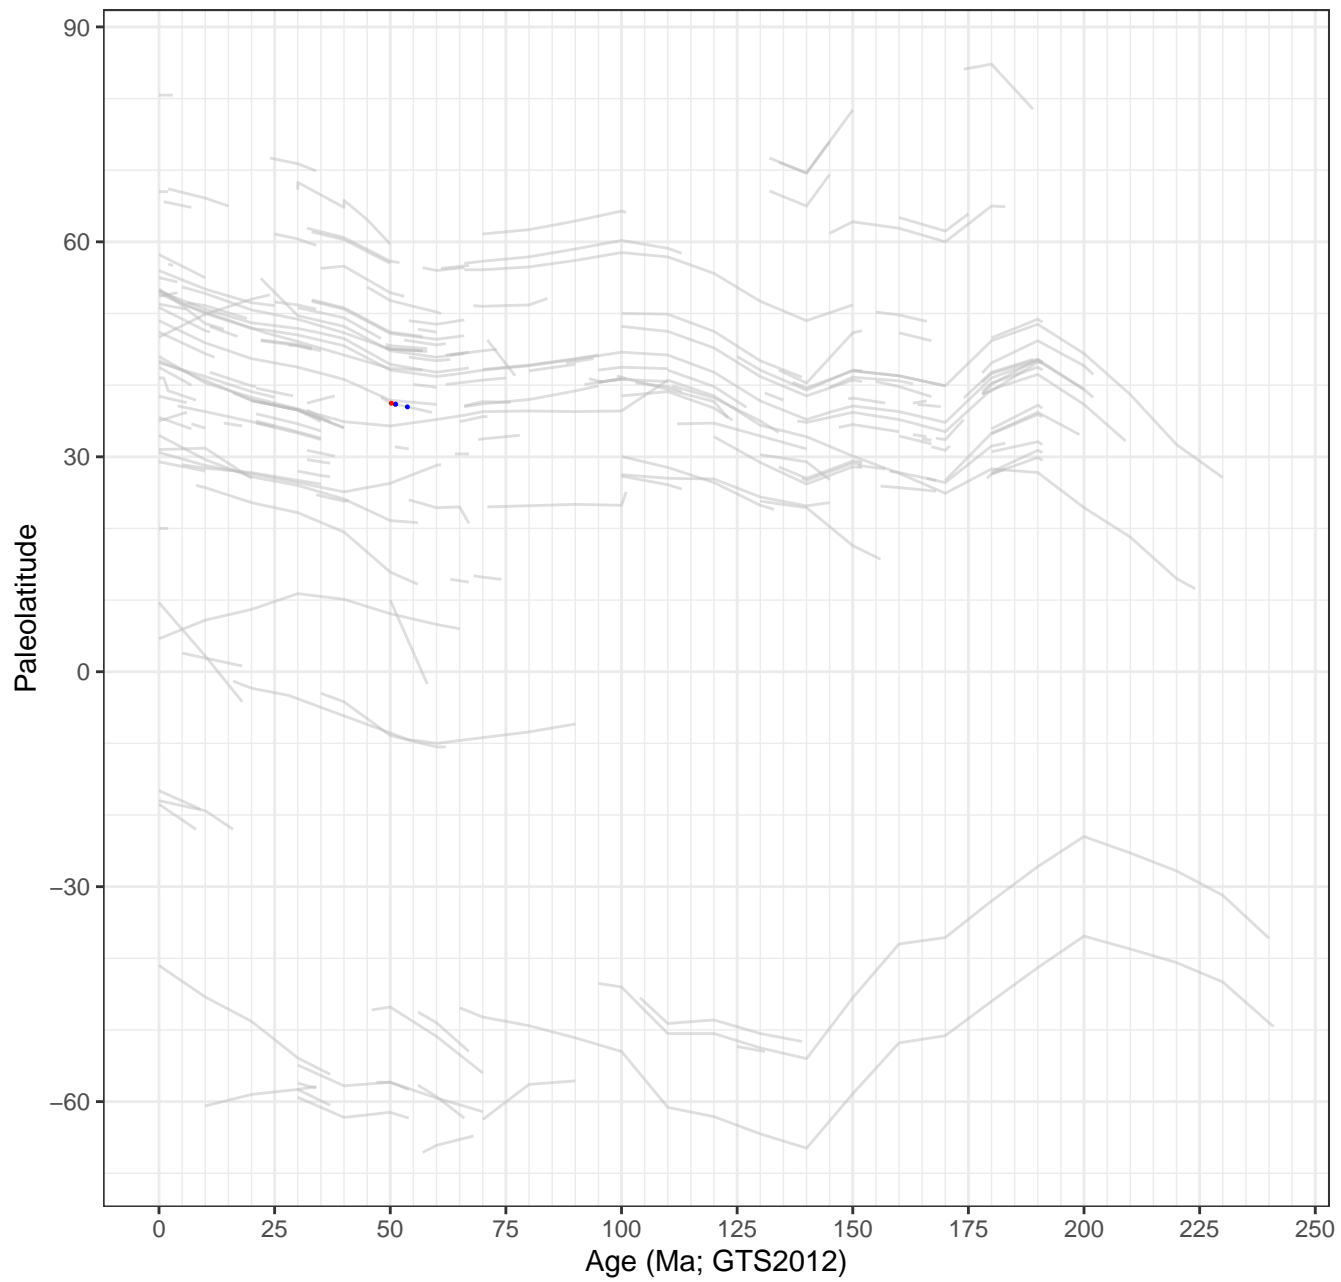

Supplement: Supplementary file 352 [file Genus Petalodinium.pdf › Supplement/Supplement 2/Genus 459 plots/Genus Petalodinium.pdf]

# Genus Phallocysta

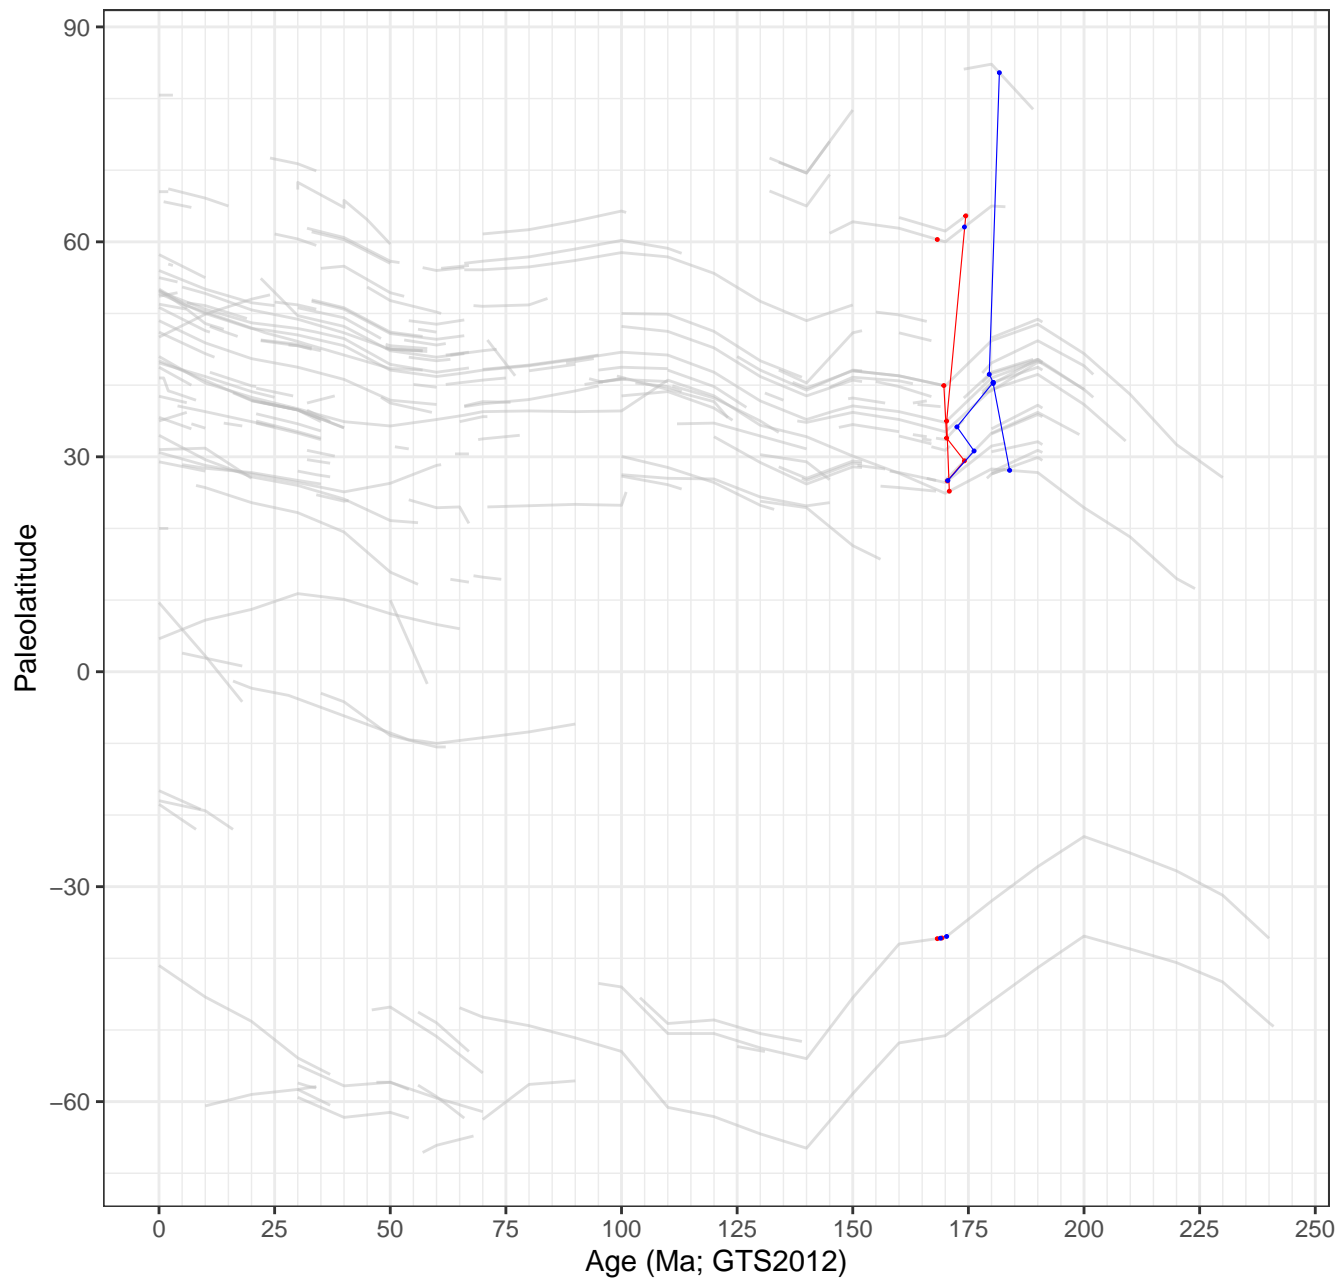

Supplement: Supplementary file 353 [file Genus Phallocysta.pdf › Supplement/Supplement 2/Genus 459 plots/Genus Phallocysta.pdf]

# Genus *Phanerodinium*

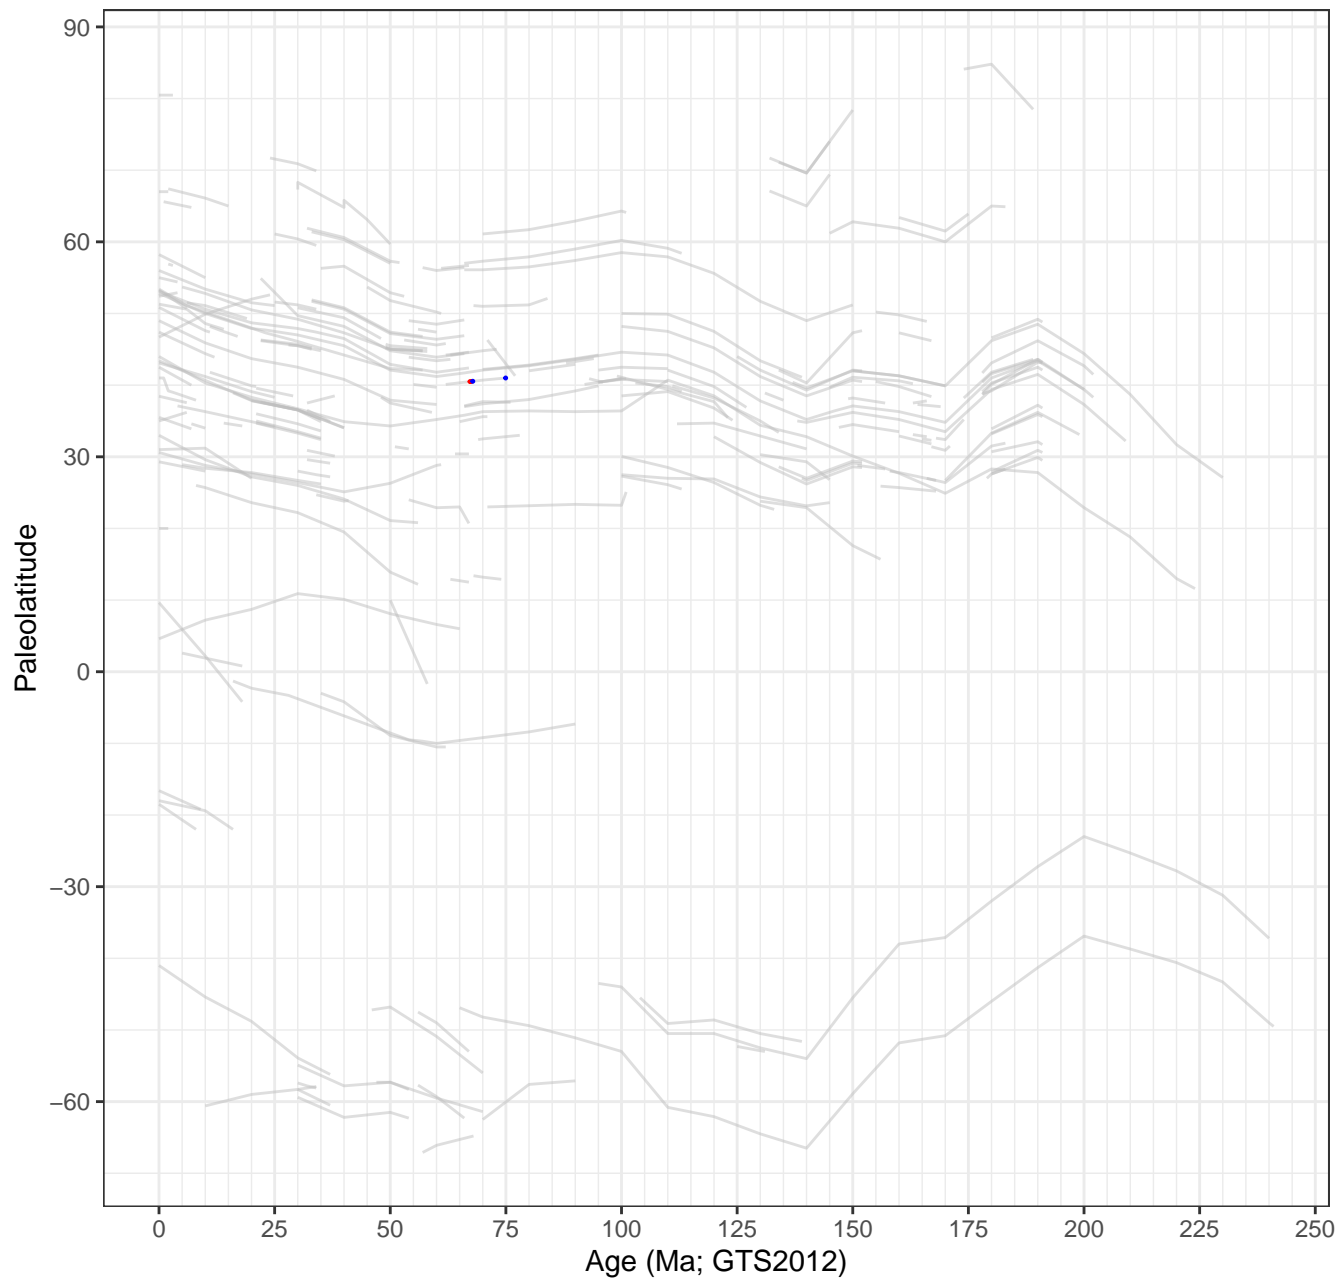

Supplement: Supplementary file 354 [file Genus Phanerodinium.pdf › Supplement/Supplement 2/Genus 459 plots/Genus Phanerodinium.pdf]

# Genus Phelodinium

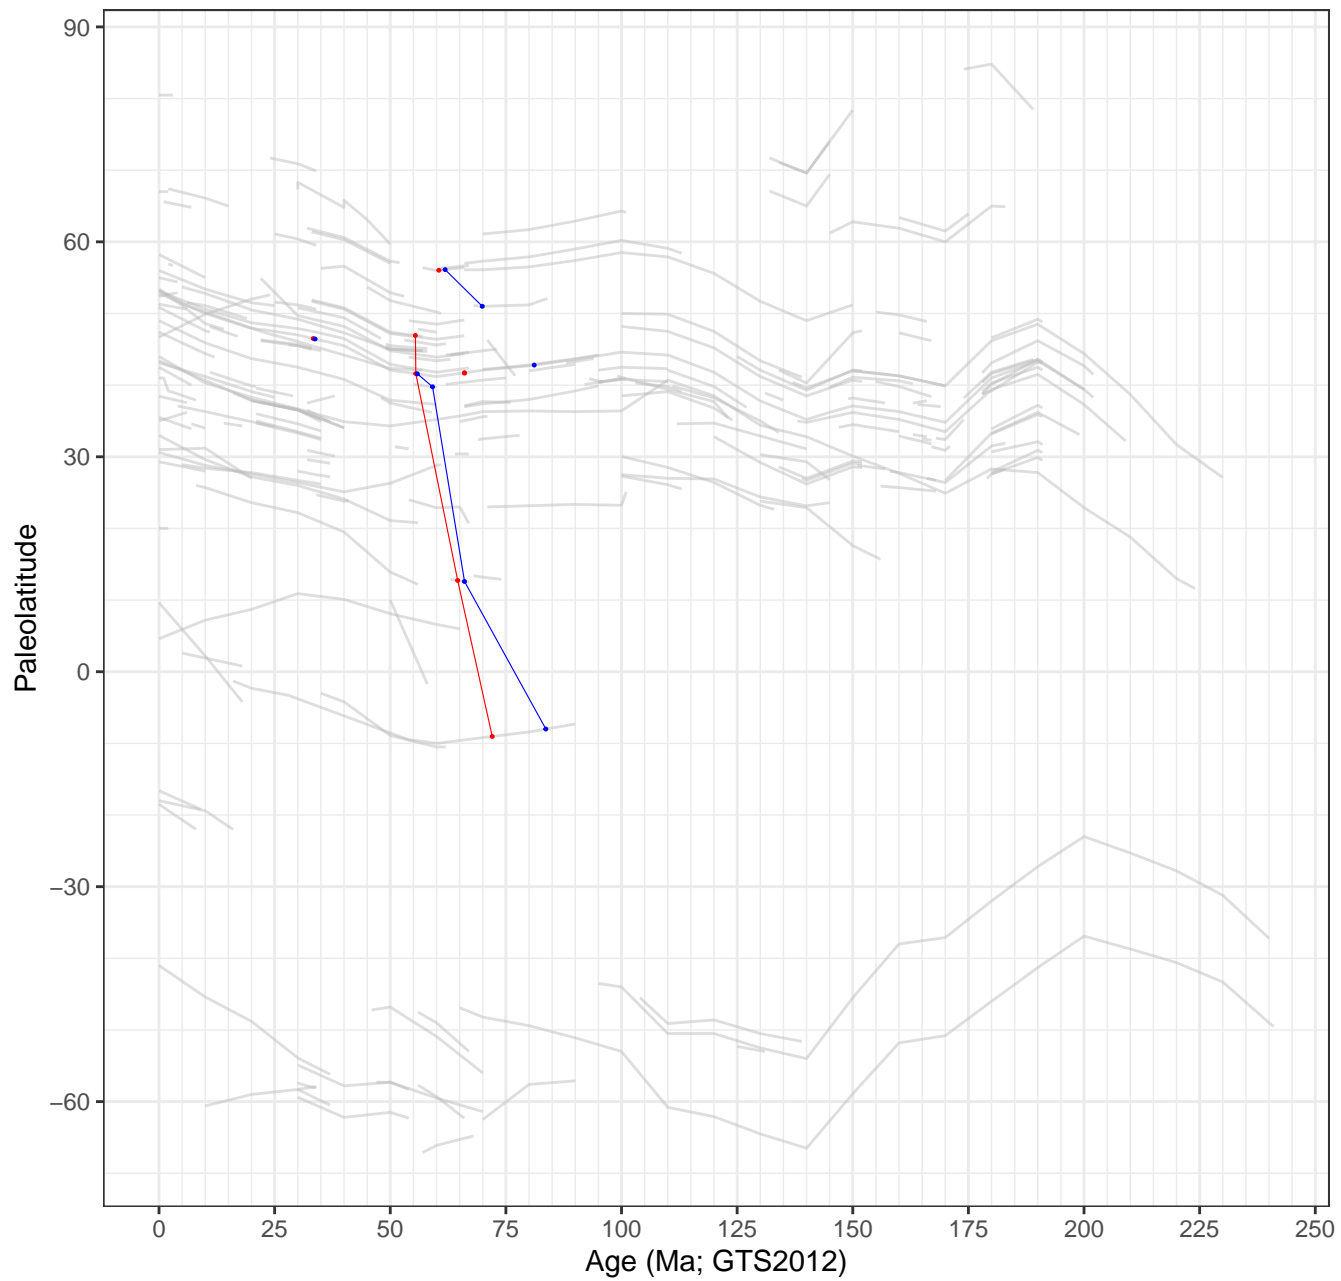

Supplement: Supplementary file 355 [file Genus Phelodinium.pdf › Supplement/Supplement 2/Genus 459 plots/Genus Phelodinium.pdf]

# Genus *Phoberocysta*

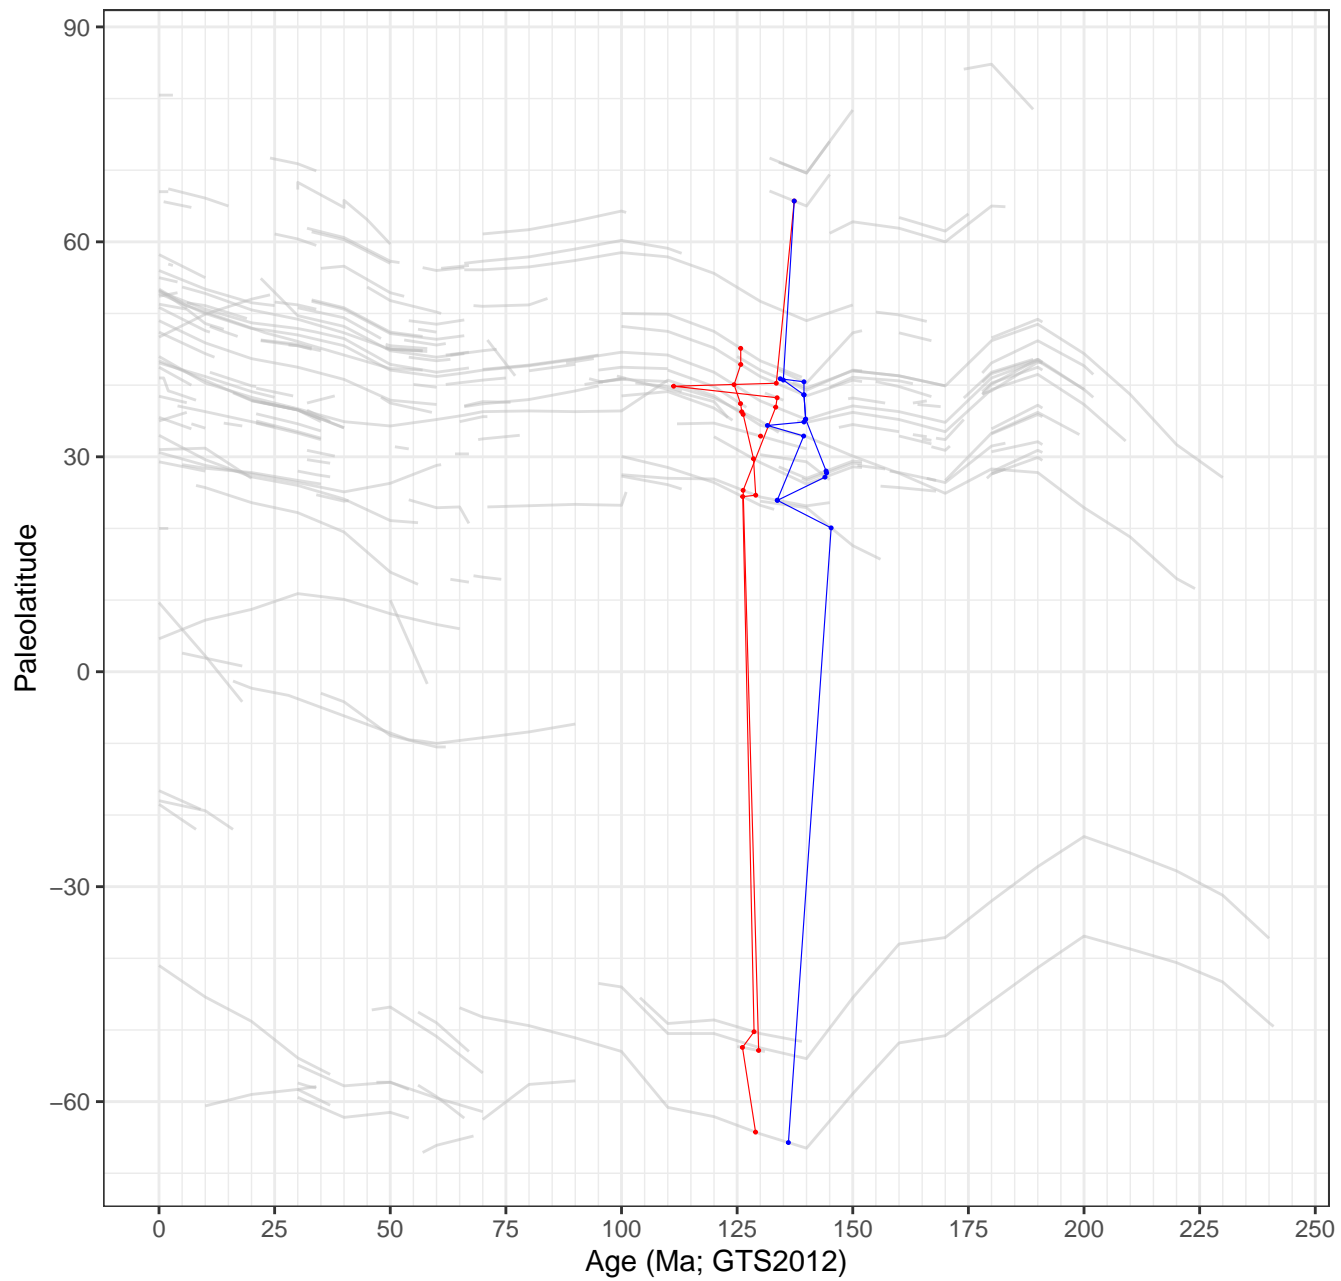

Supplement: Supplementary file 356 [file Genus Phoberocysta.pdf › Supplement/Supplement 2/Genus 459 plots/Genus Phoberocysta.pdf]

# Genus Phthanoperidinium

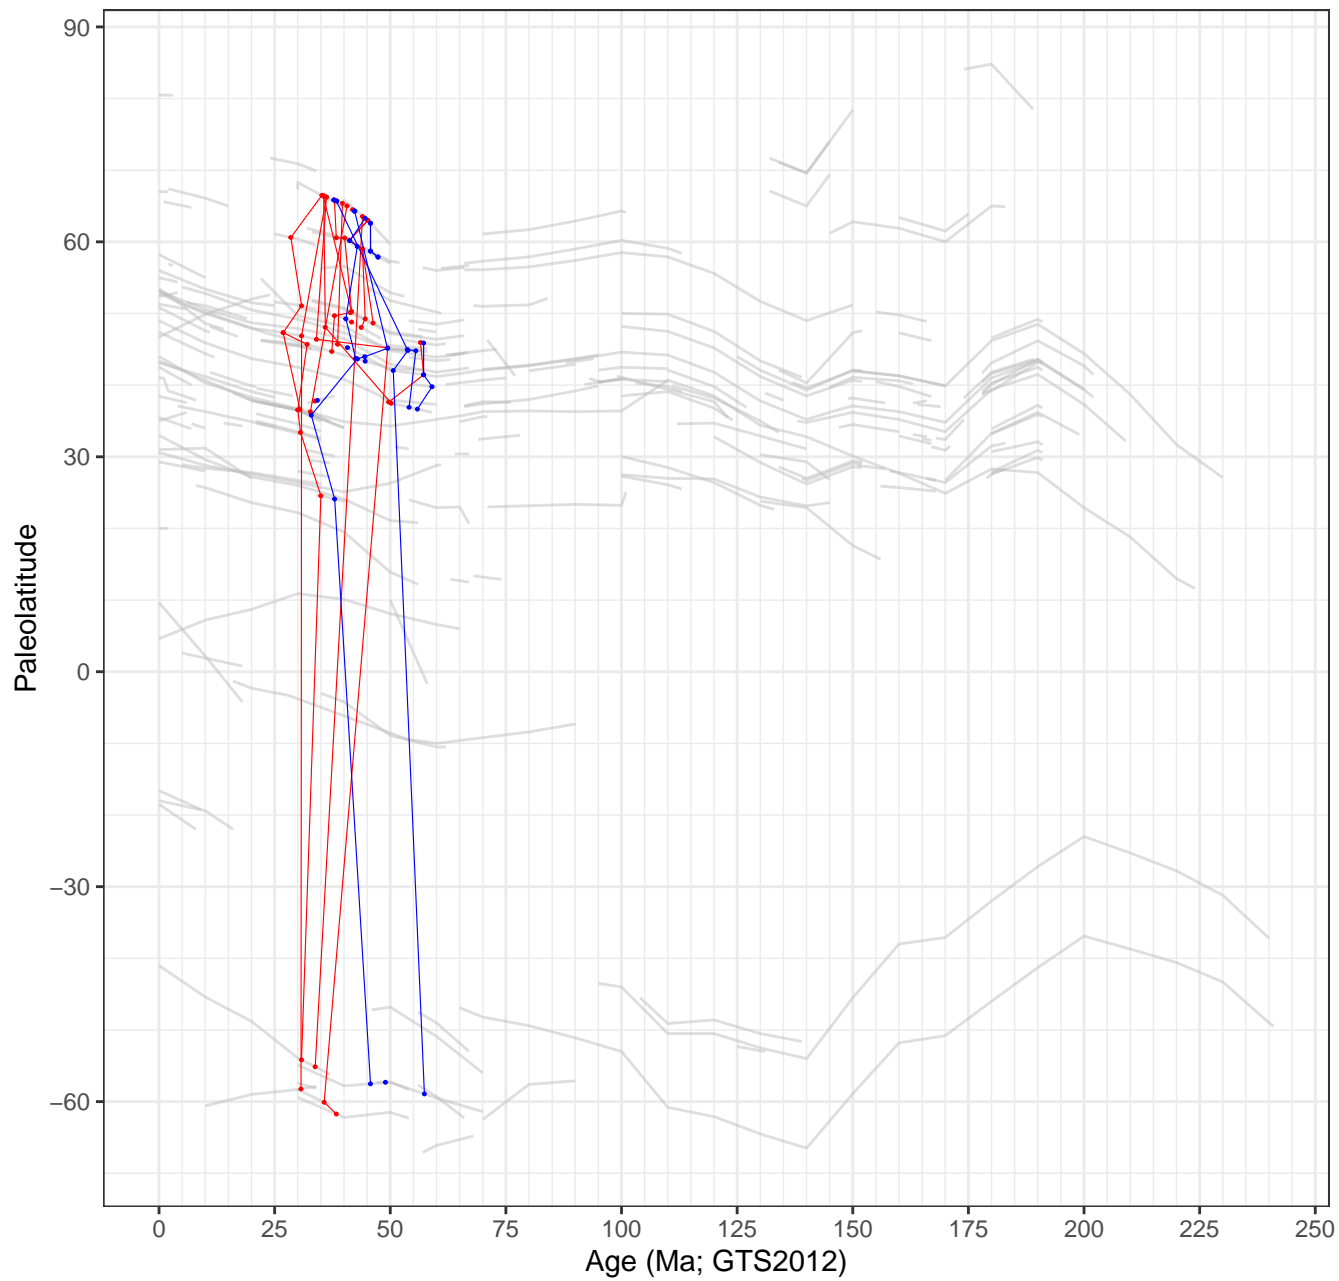

Supplement: Supplementary file 357 [file Genus Phthanoperidinium.pdf › Supplement/Supplement 2/Genus 459 plots/Genus Phthanoperidinium.pdf]

# Genus *Pierceites*

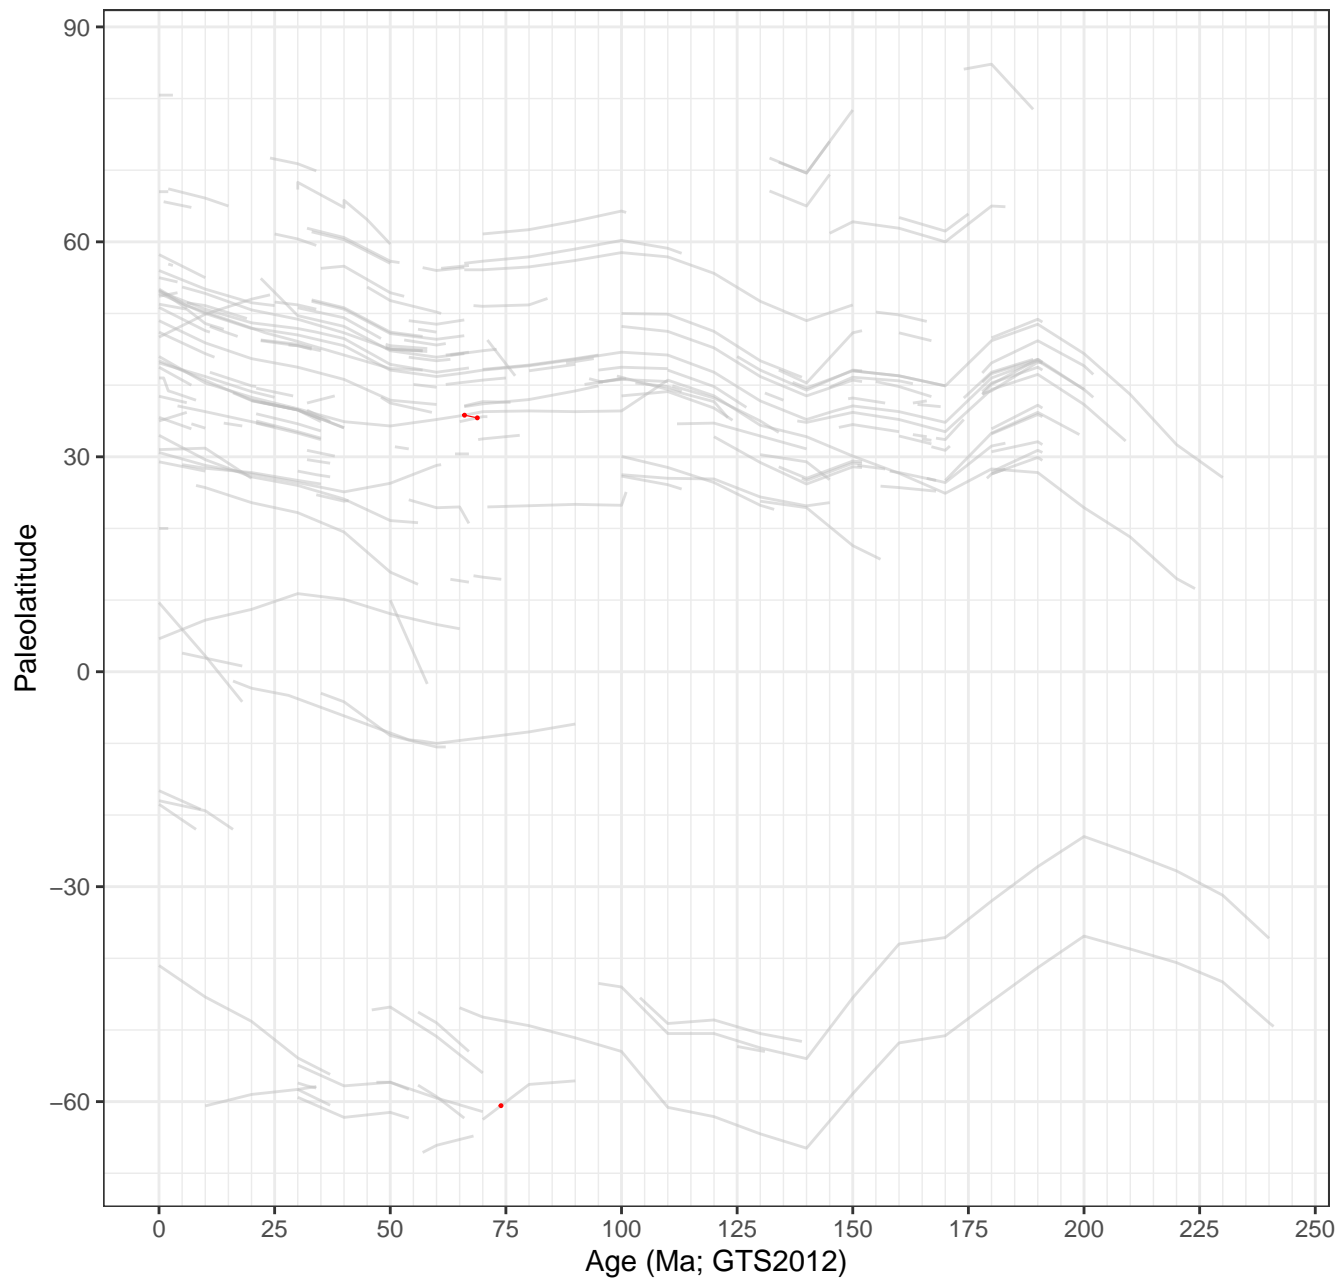

Supplement: Supplementary file 358 [file Genus Pierceites.pdf › Supplement/Supplement 2/Genus 459 plots/Genus Pierceites.pdf]

# Genus *Pilosidinium*

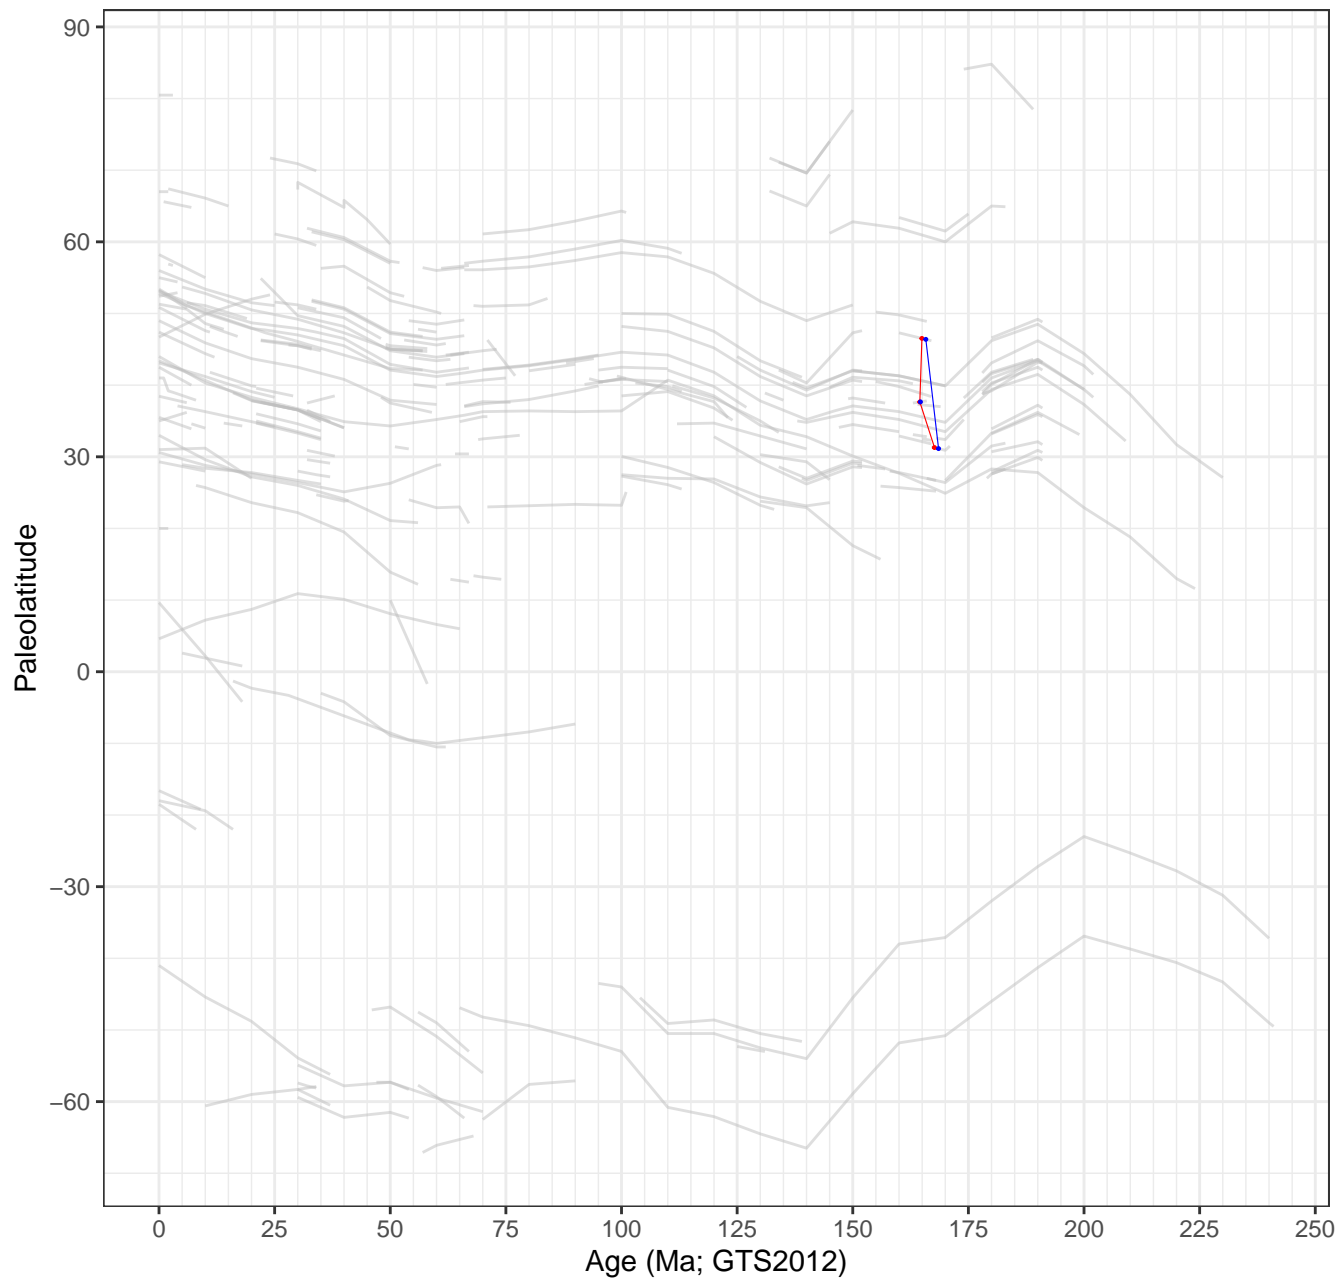

Supplement: Supplementary file 359 [file Genus Pilosidinium.pdf › Supplement/Supplement 2/Genus 459 plots/Genus Pilosidinium.pdf]

# Genus Pinocchiodinium

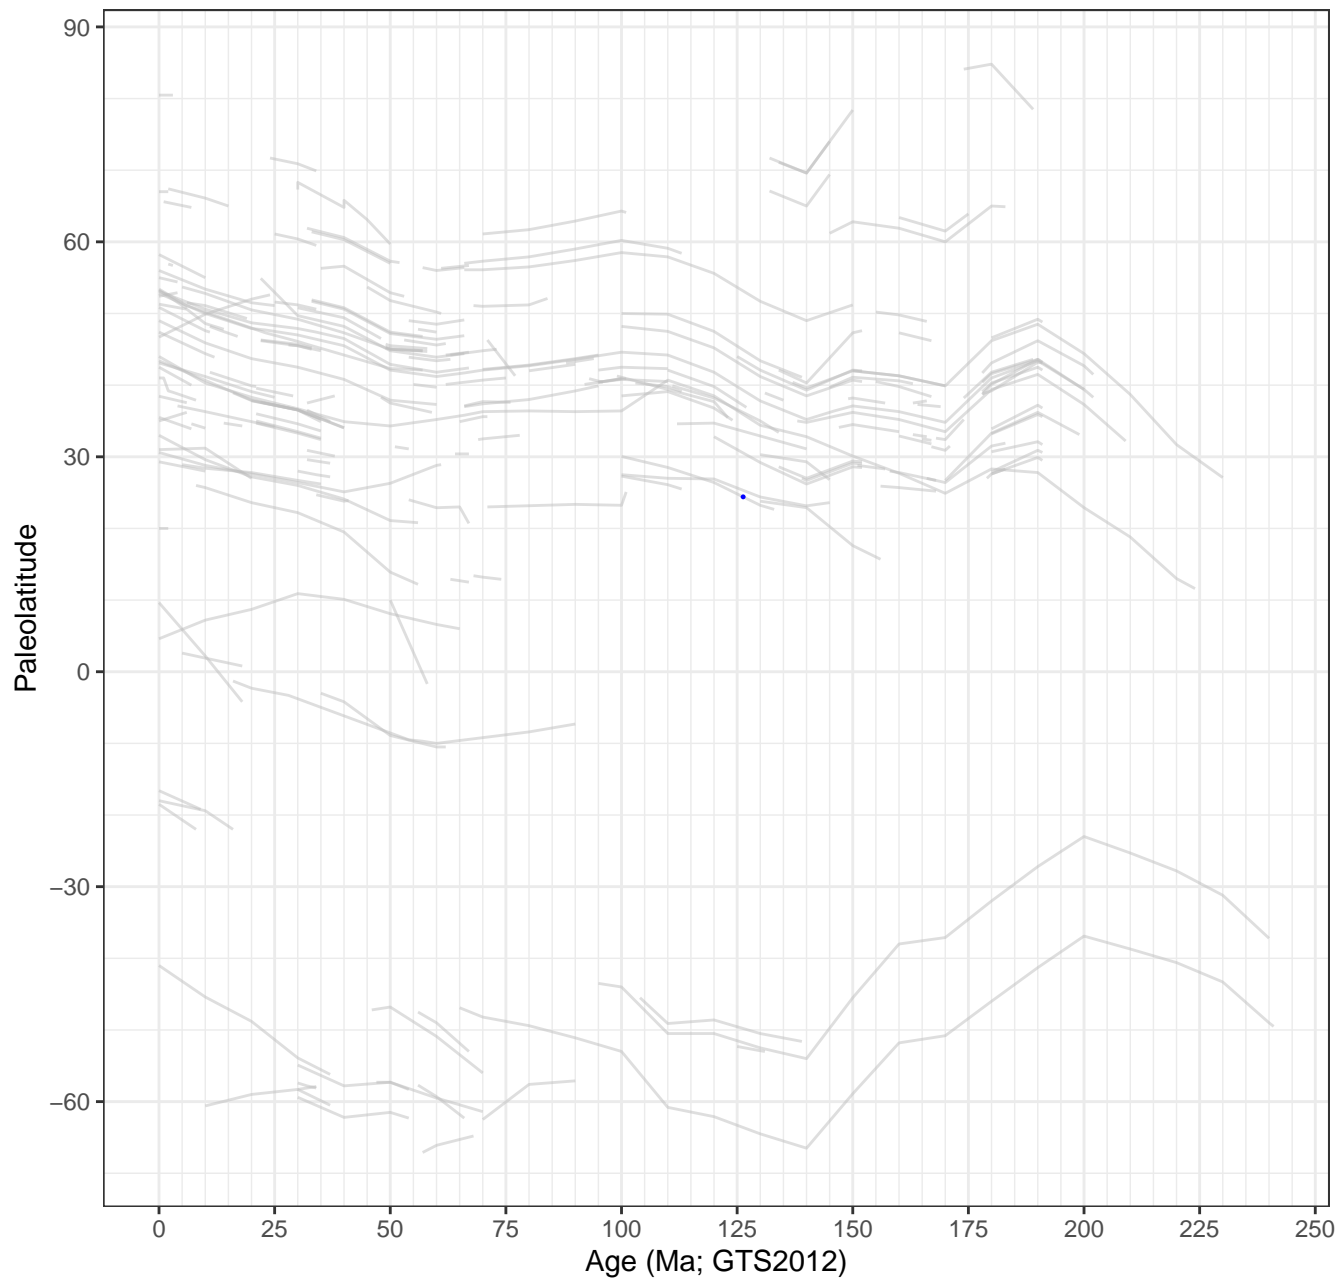

Supplement: Supplementary file 360 [file Genus Pinocchiodinium.pdf › Supplement/Supplement 2/Genus 459 plots/Genus Pinocchiodinium.pdf]

# Genus *Piperodinium*

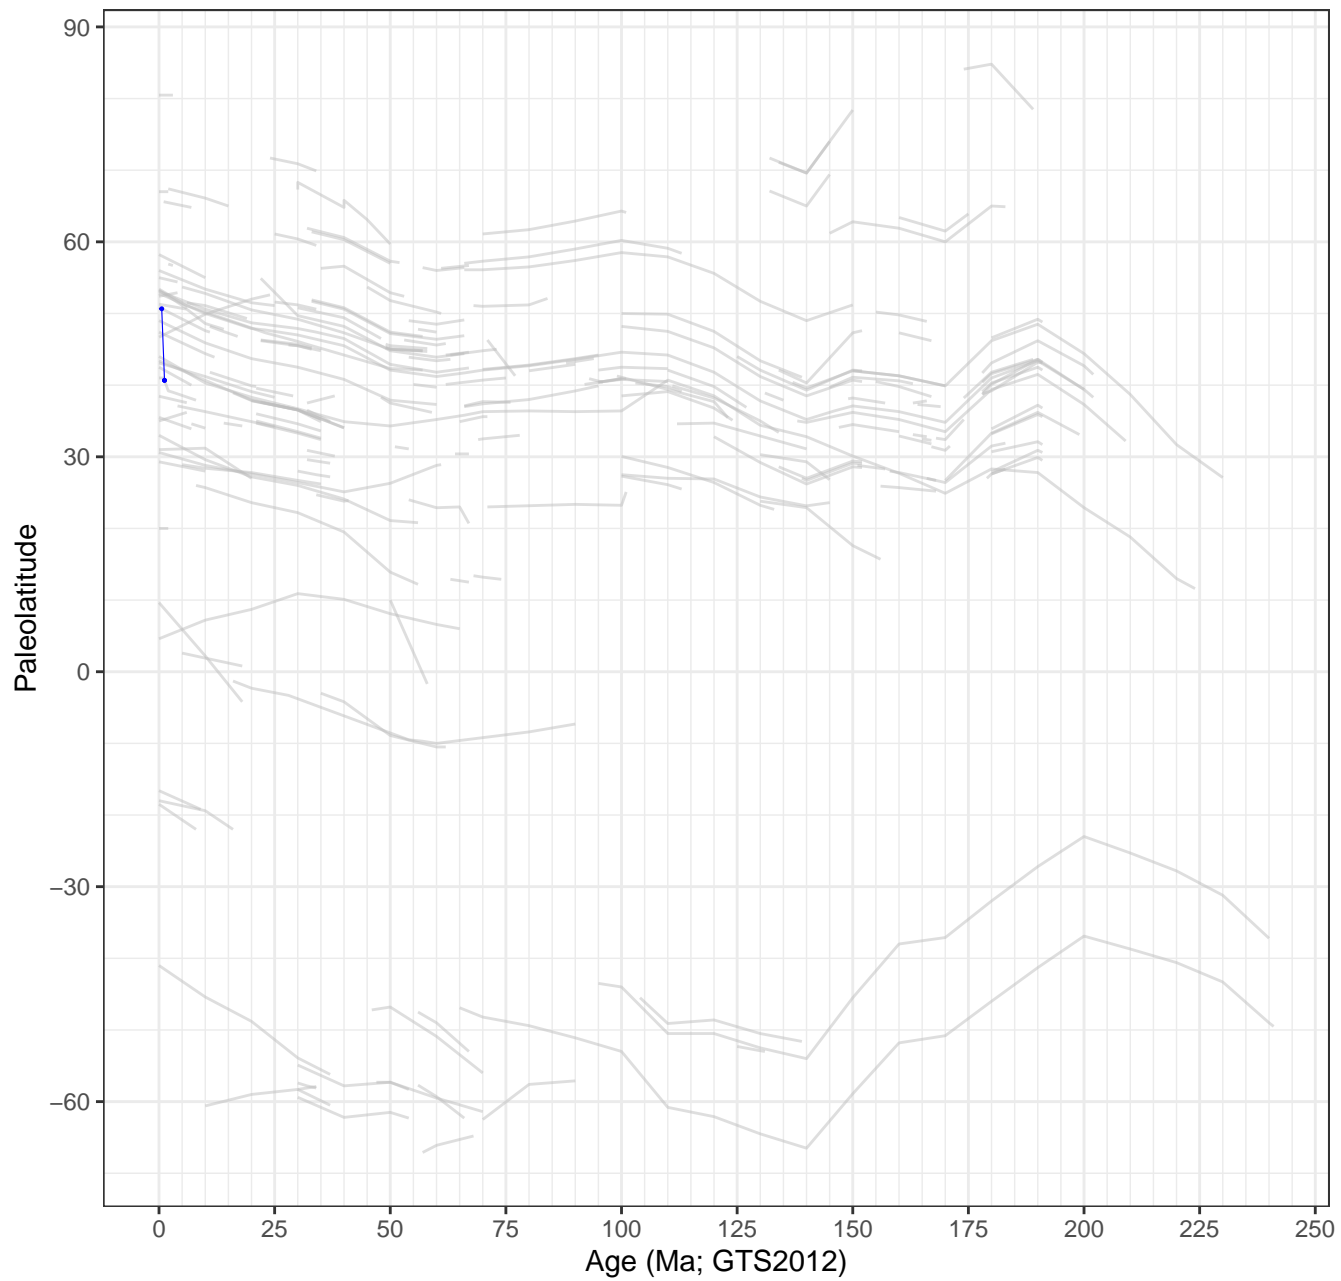

Supplement: Supplementary file 361 [file Genus Piperodinium.pdf › Supplement/Supplement 2/Genus 459 plots/Genus Piperodinium.pdf]

# Genus Platycystidia

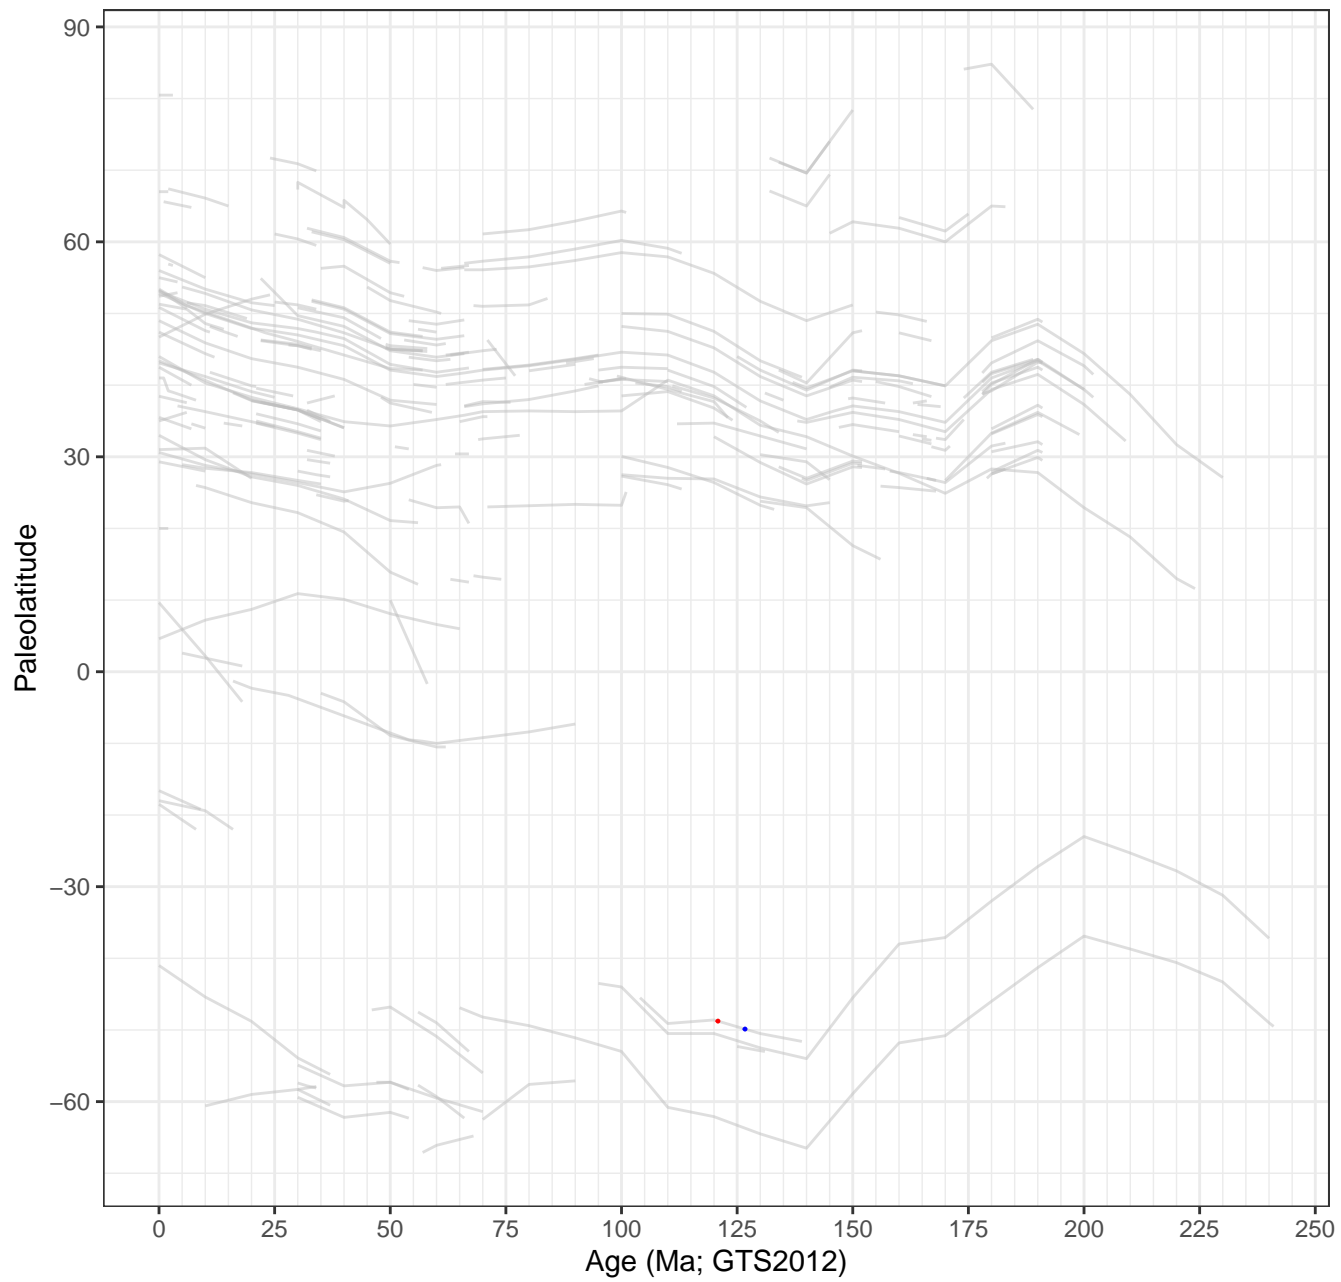

Supplement: Supplementary file 362 [file Genus Platycystidia.pdf › Supplement/Supplement 2/Genus 459 plots/Genus Platycystidia.pdf]

# Genus Pluriarvalium

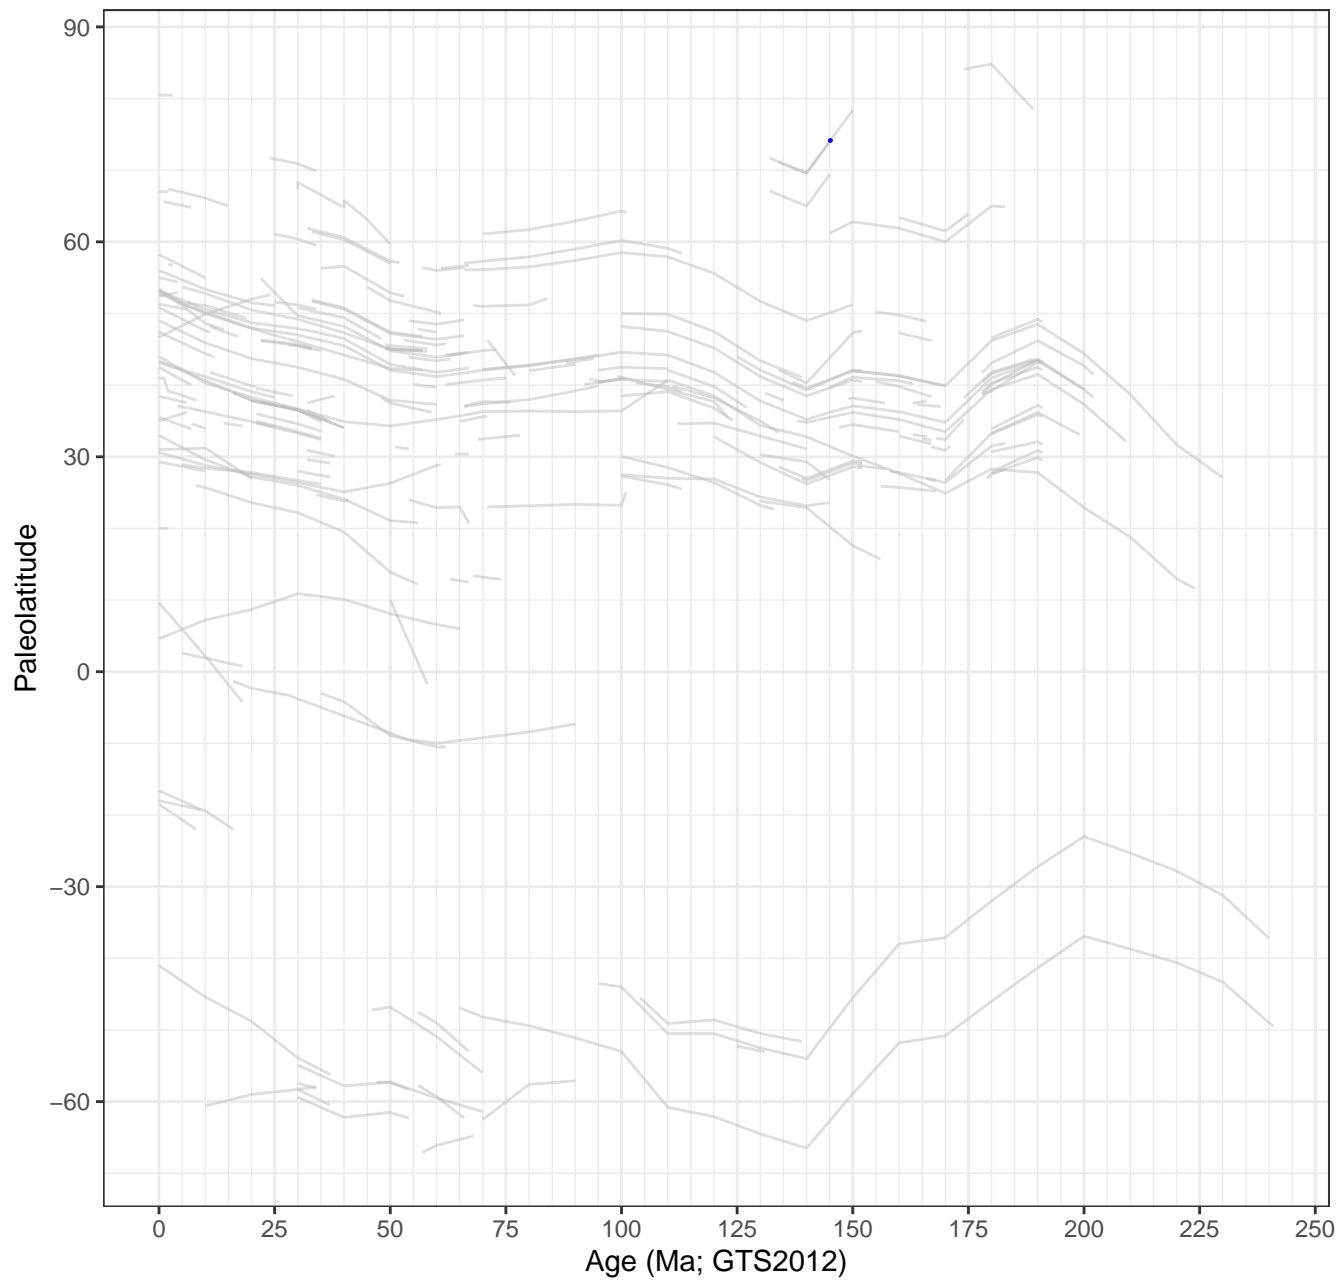

Supplement: Supplementary file 363 [file Genus Pluriarvalium.pdf › Supplement/Supplement 2/Genus 459 plots/Genus Pluriarvalium.pdf]

# Genus Polygonifera

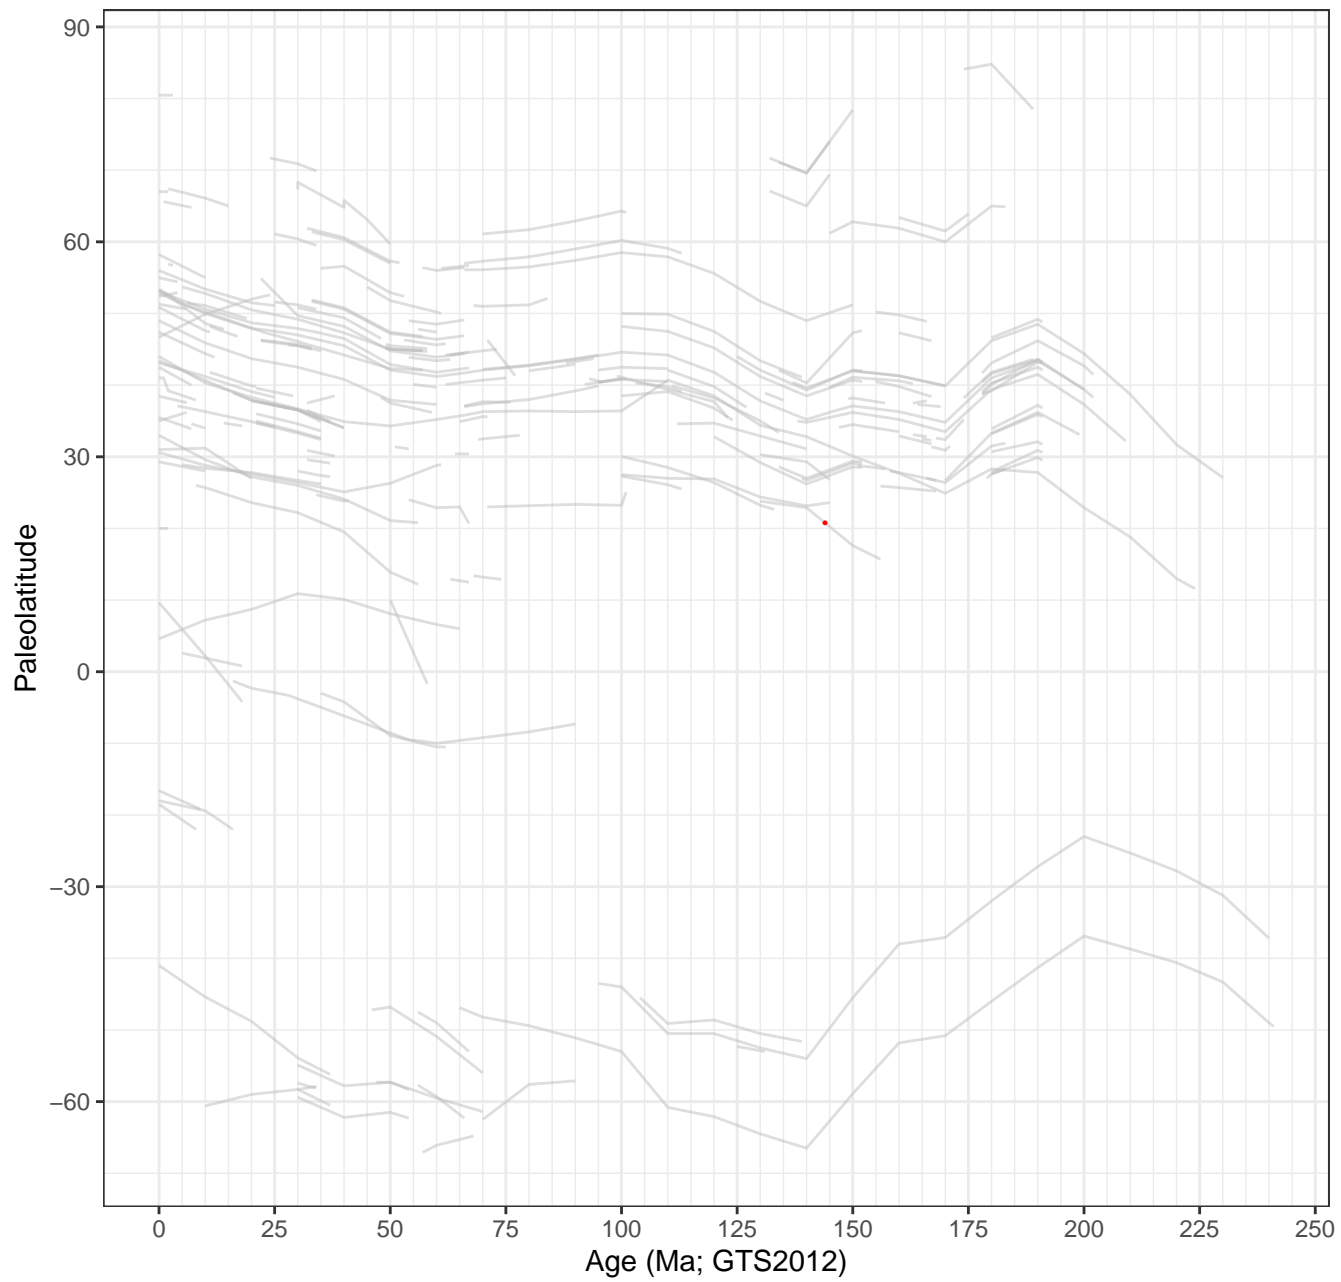

Supplement: Supplementary file 364 [file Genus Polygonifera.pdf › Supplement/Supplement 2/Genus 459 plots/Genus Polygonifera.pdf]

# Genus Polykrikos

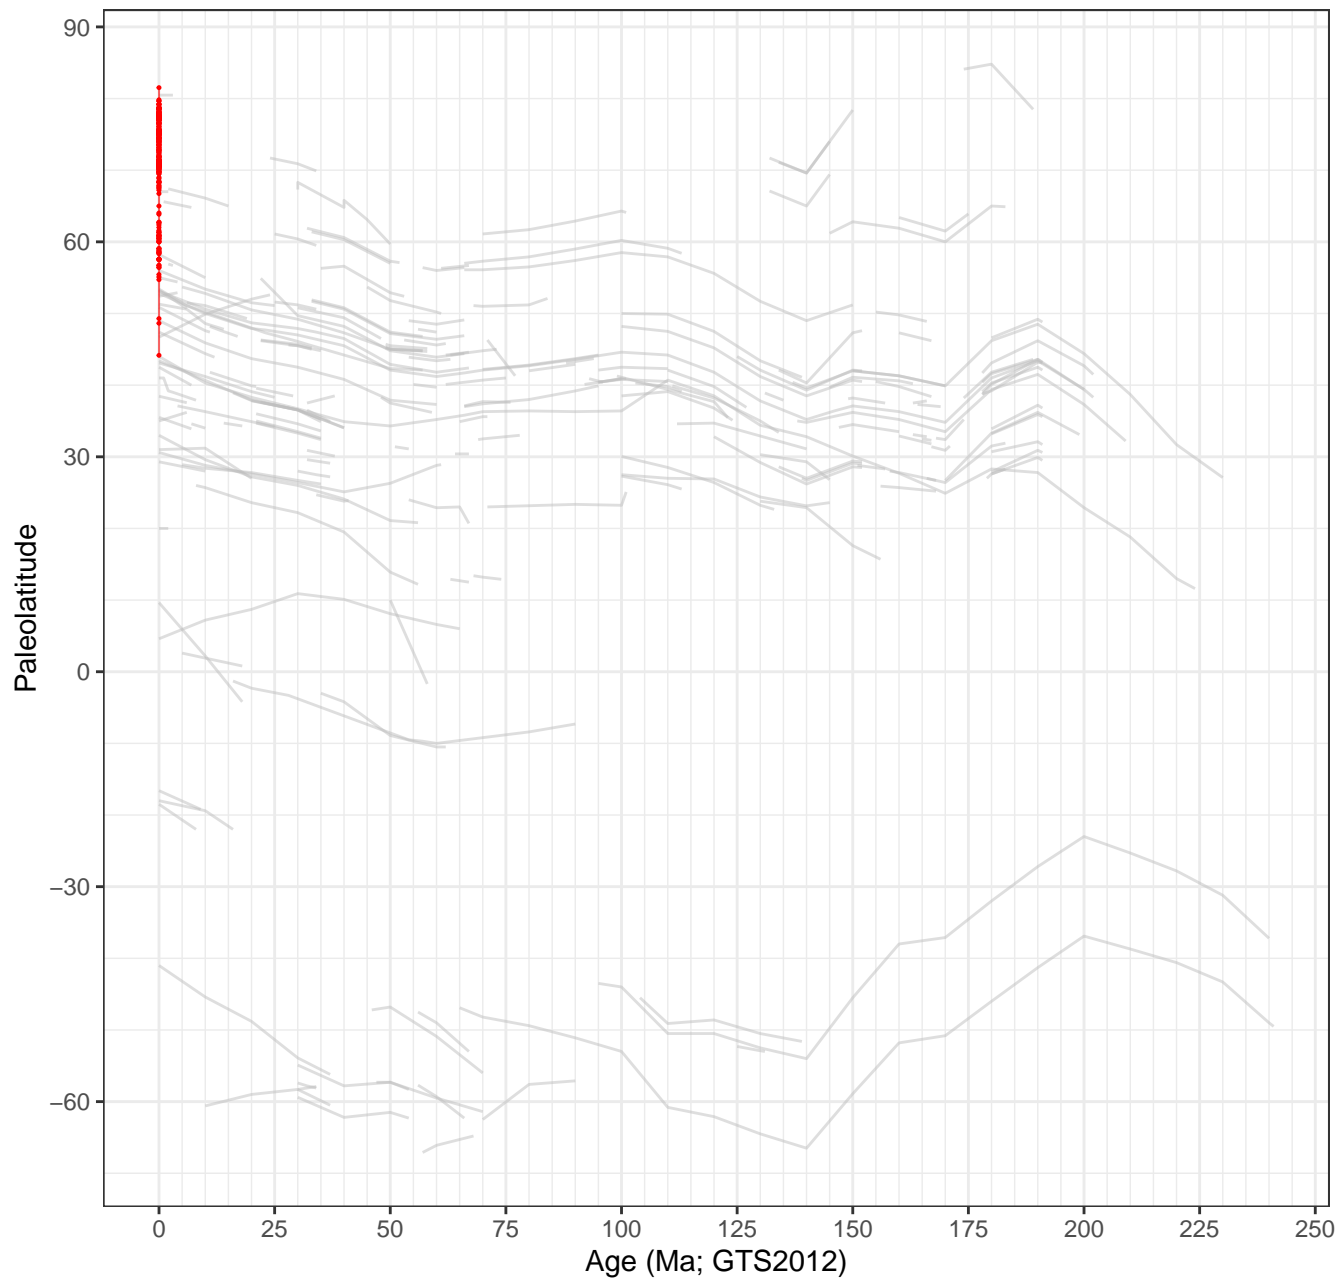

Supplement: Supplementary file 365 [file Genus Polykrikos.pdf › Supplement/Supplement 2/Genus 459 plots/Genus Polykrikos.pdf]

# Genus Polysphaeridium

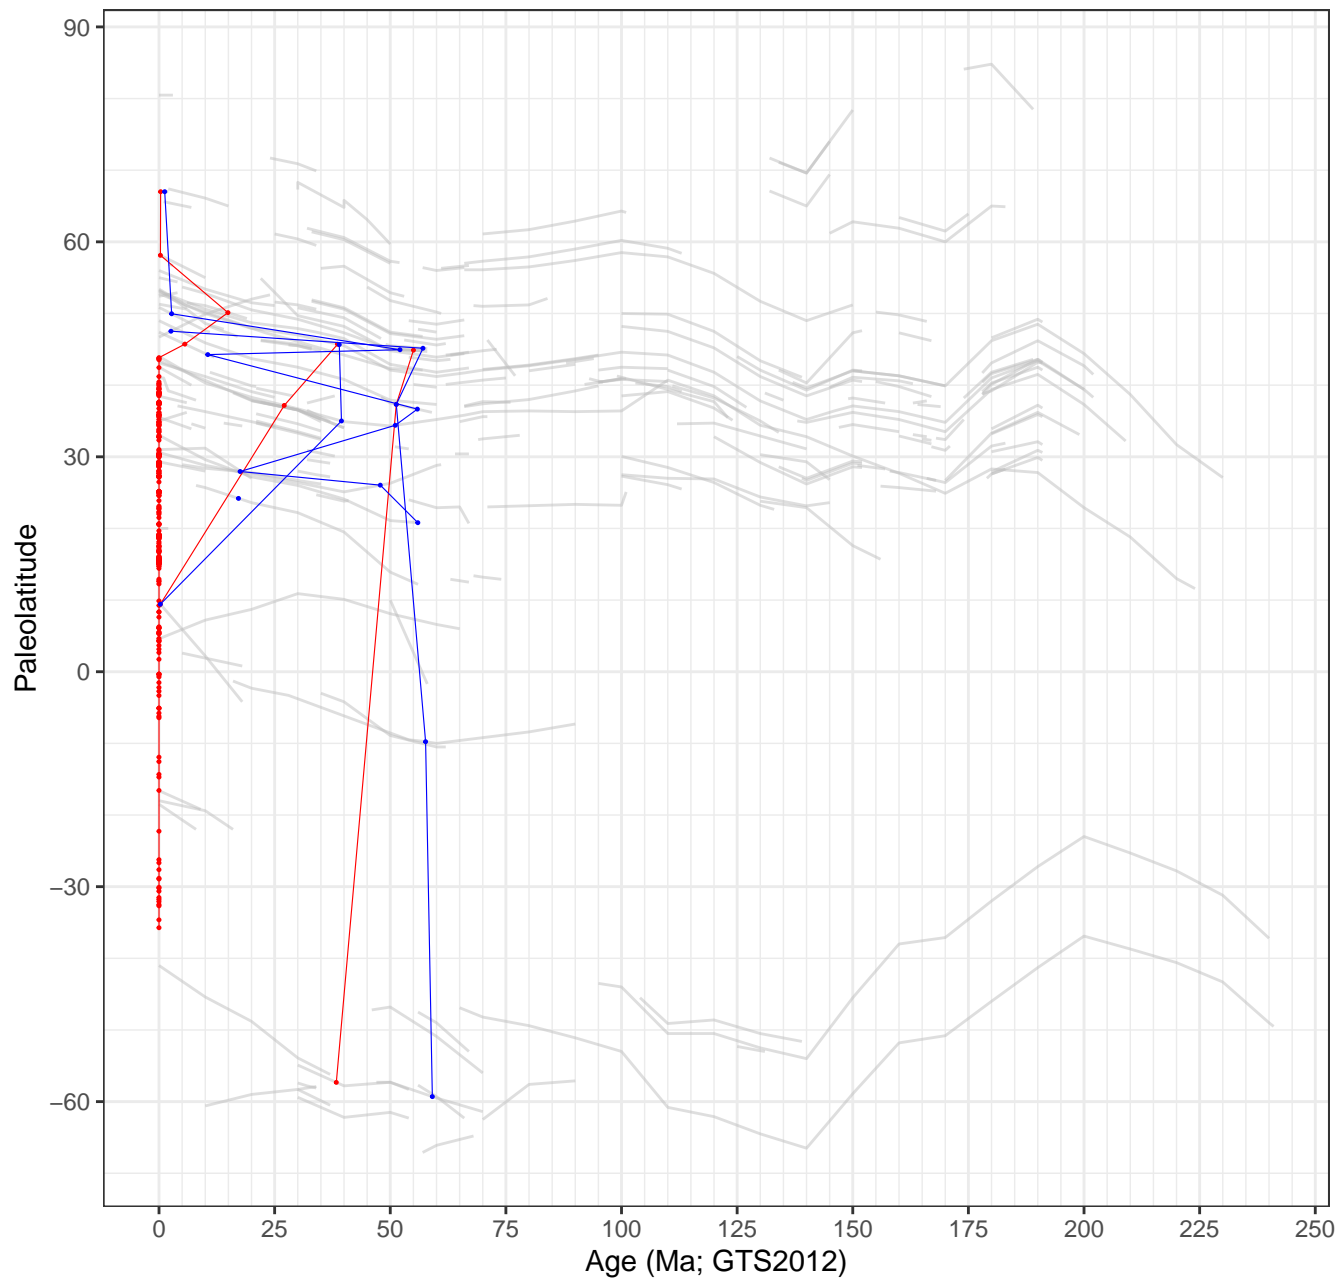

Supplement: Supplementary file 366 [file Genus Polysphaeridium.pdf › Supplement/Supplement 2/Genus 459 plots/Genus Polysphaeridium.pdf]

# Genus *Polystephanephorus*

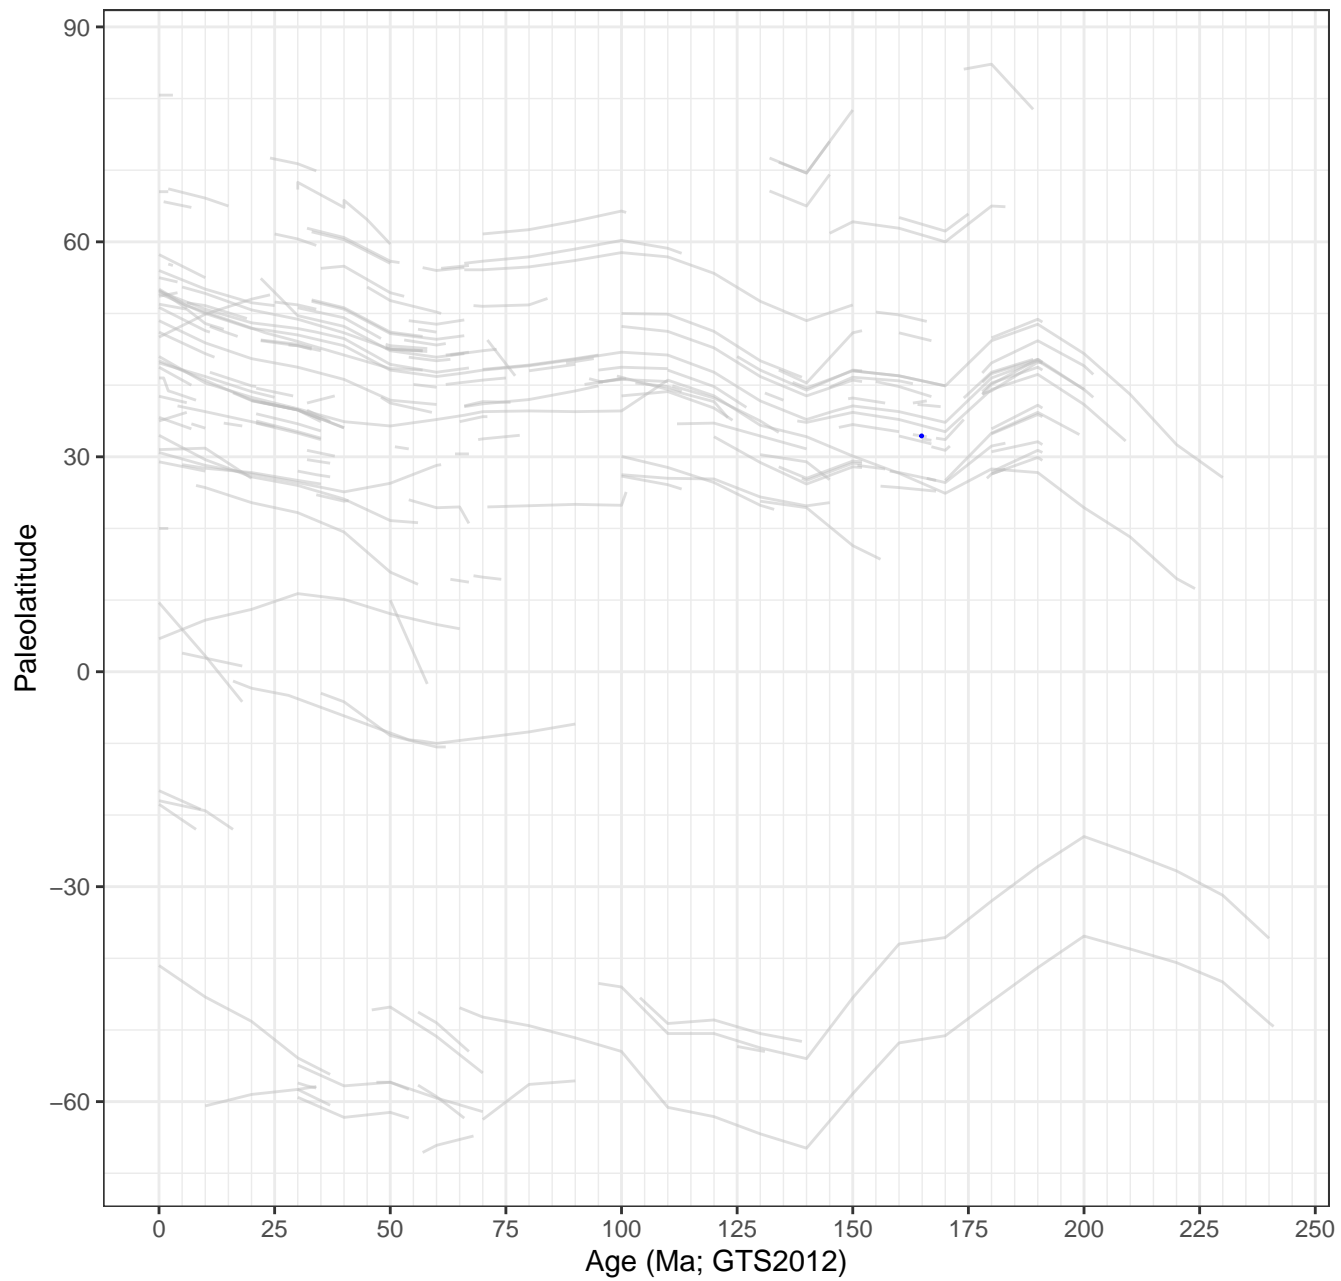

Supplement: Supplementary file 367 [file Genus Polystephanephorus.pdf › Supplement/Supplement 2/Genus 459 plots/Genus Polystephanephorus.pdf]

# Genus *Prolixosphaeridiopsis*

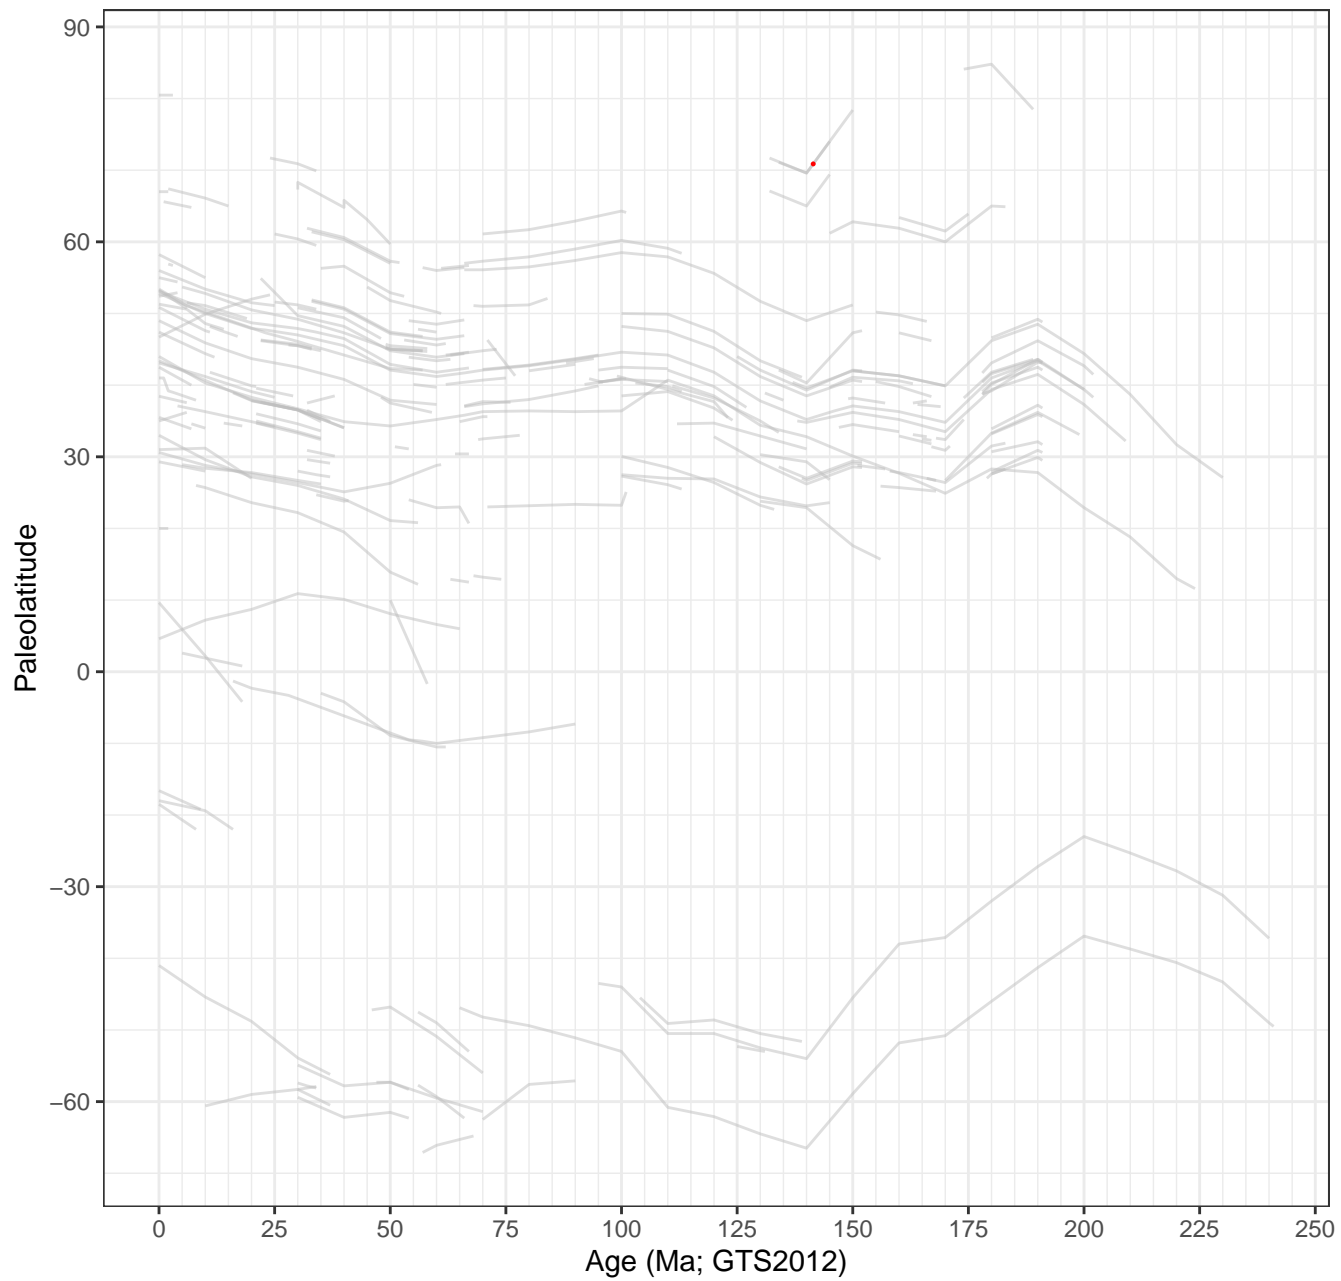

Supplement: Supplementary file 368 [file Genus Prolixosphaeridiopsis.pdf › Supplement/Supplement 2/Genus 459 plots/Genus Prolixosphaeridiopsis.pdf]

# Genus *Prolixosphaeridium*

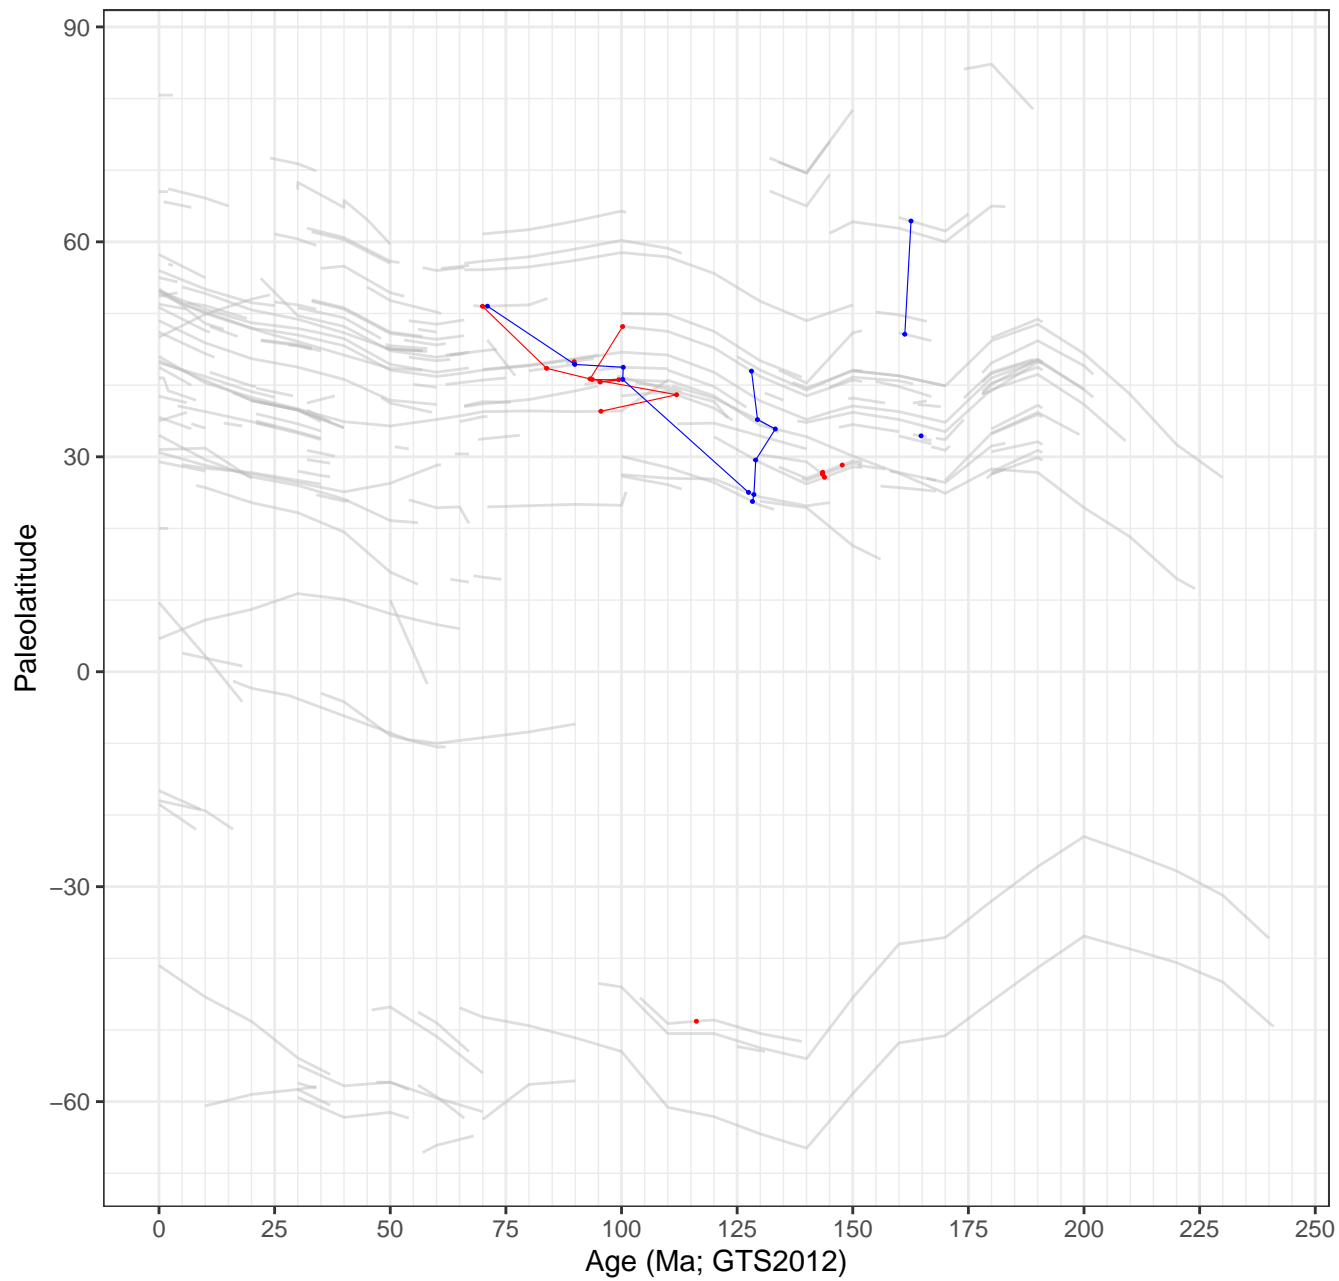

Supplement: Supplementary file 369 [file Genus Prolixosphaeridium.pdf › Supplement/Supplement 2/Genus 459 plots/Genus Prolixosphaeridium.pdf]

# Genus Protobatioladinium

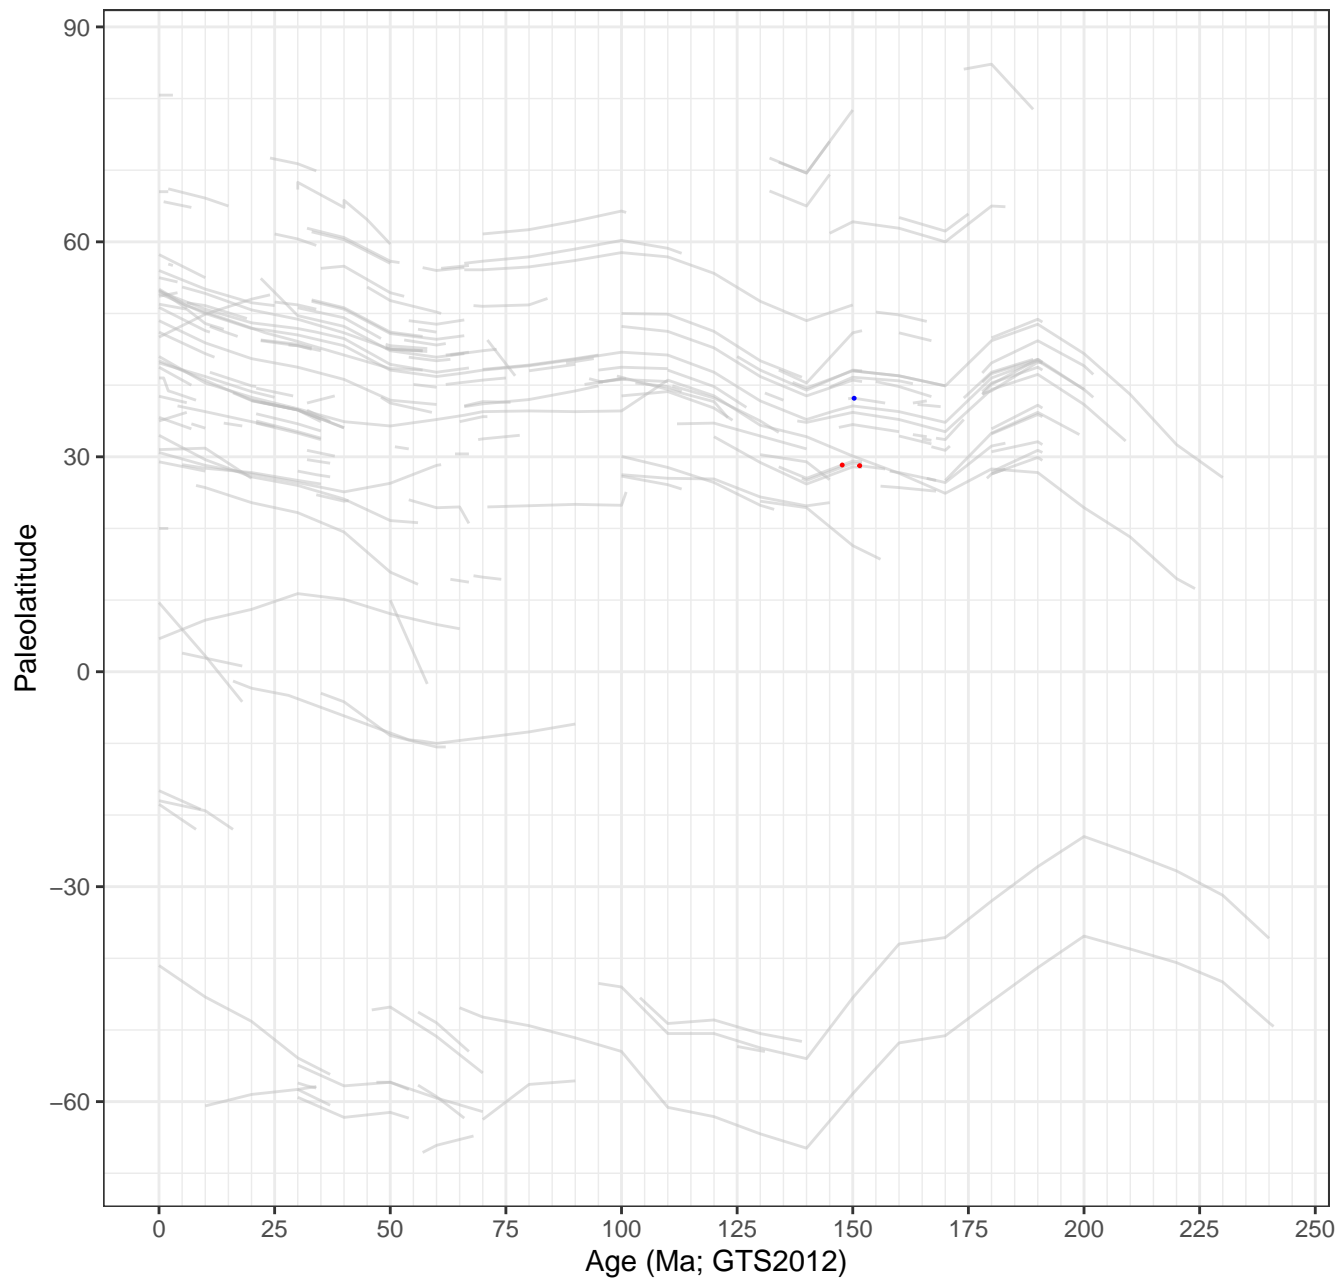

Supplement: Supplementary file 370 [file Genus Protobatioladinium.pdf › Supplement/Supplement 2/Genus 459 plots/Genus Protobatioladinium.pdf]

# Genus Protoellipsodinium

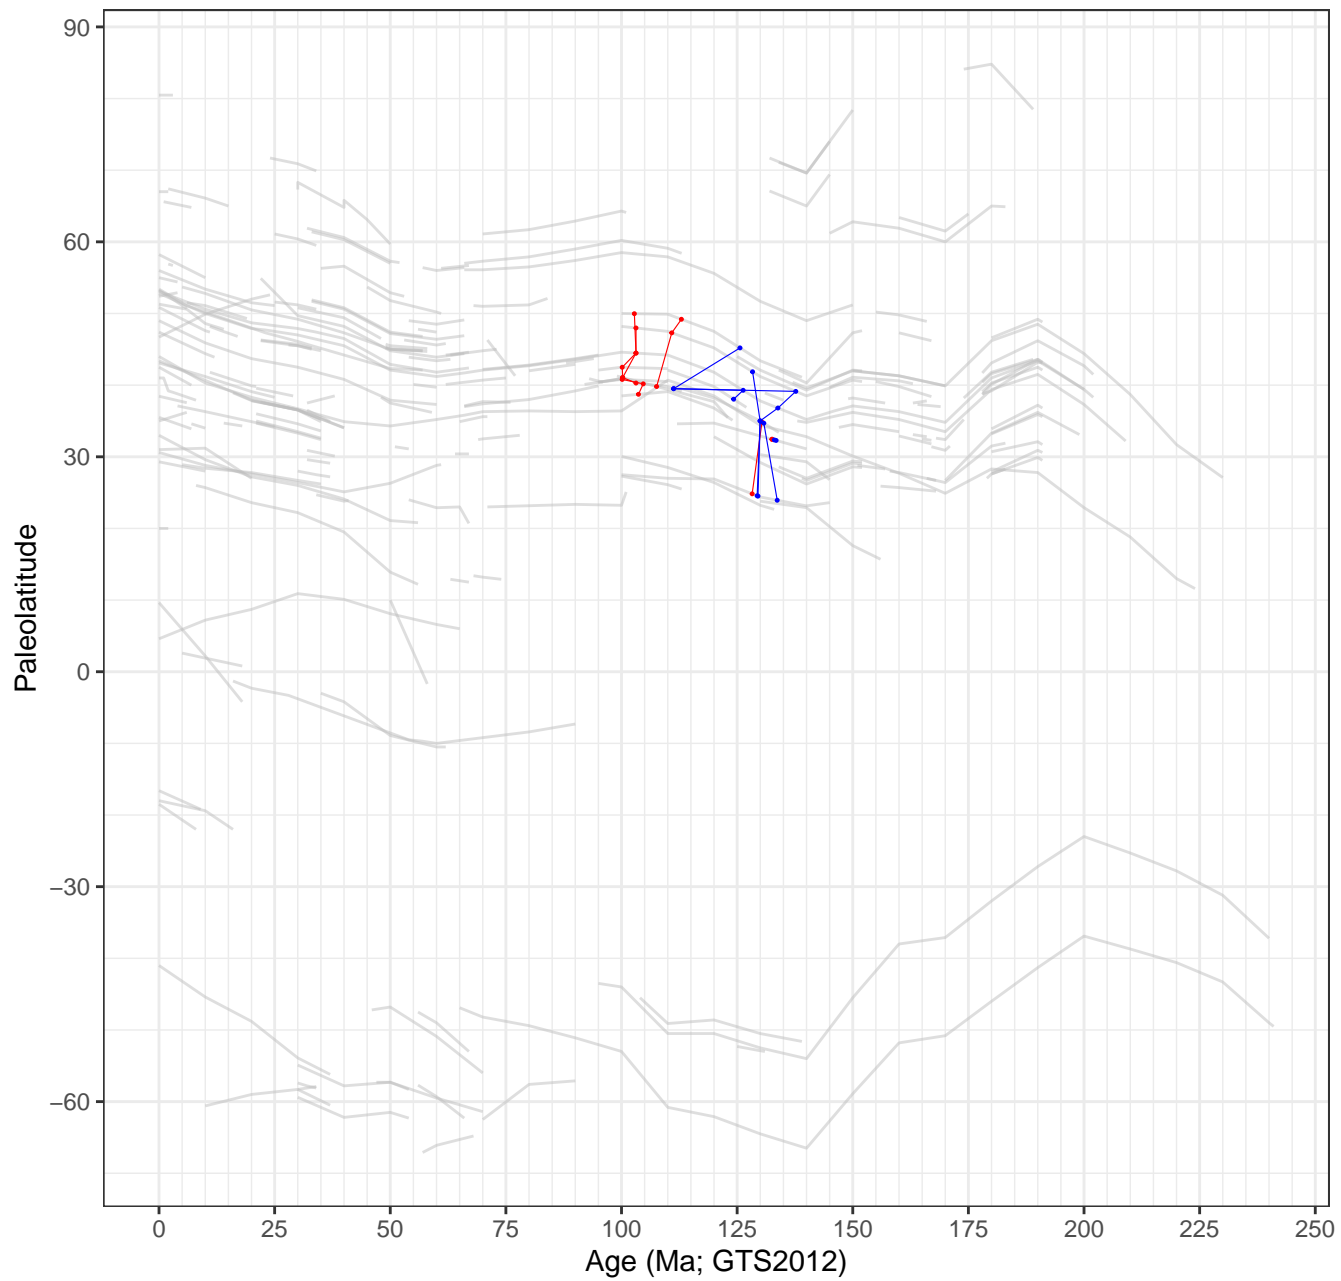

Supplement: Supplementary file 371 [file Genus Protoellipsodinium.pdf › Supplement/Supplement 2/Genus 459 plots/Genus Protoellipsodinium.pdf]

# Genus *Psalignonyaulax*

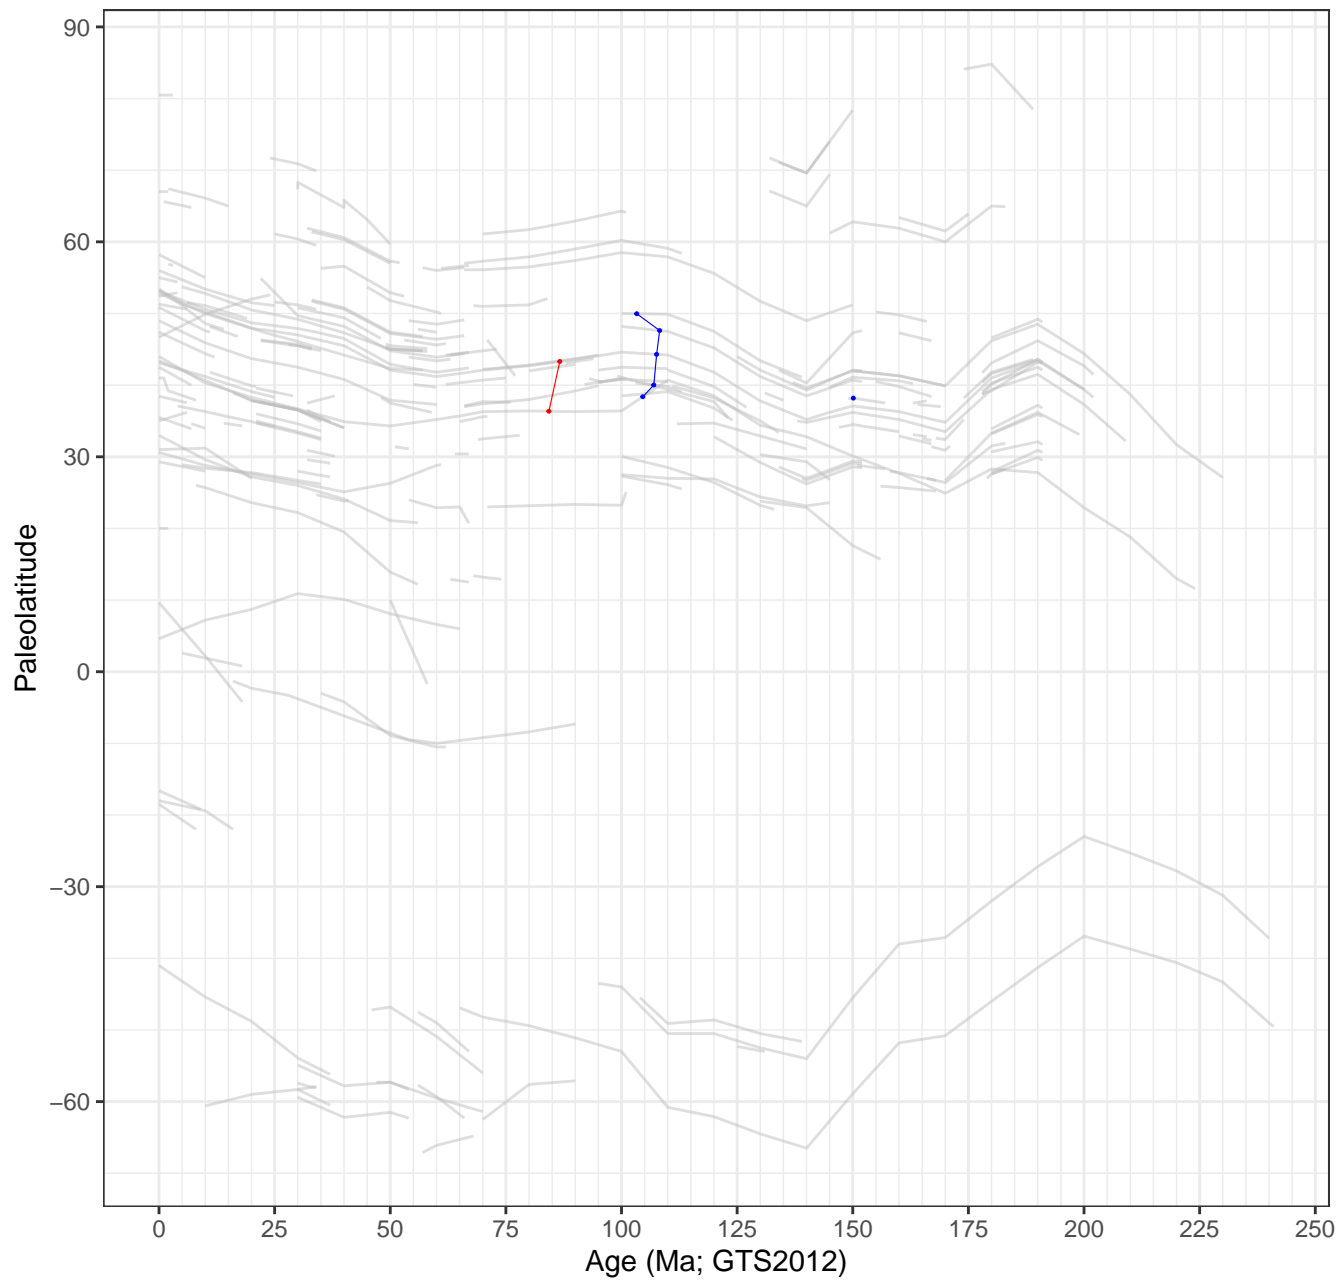

Supplement: Supplementary file 372 [file Genus Psaligonyaulax.pdf › Supplement/Supplement 2/Genus 459 plots/Genus Psaligonyaulax.pdf]

# Genus *Pseudoceratium*

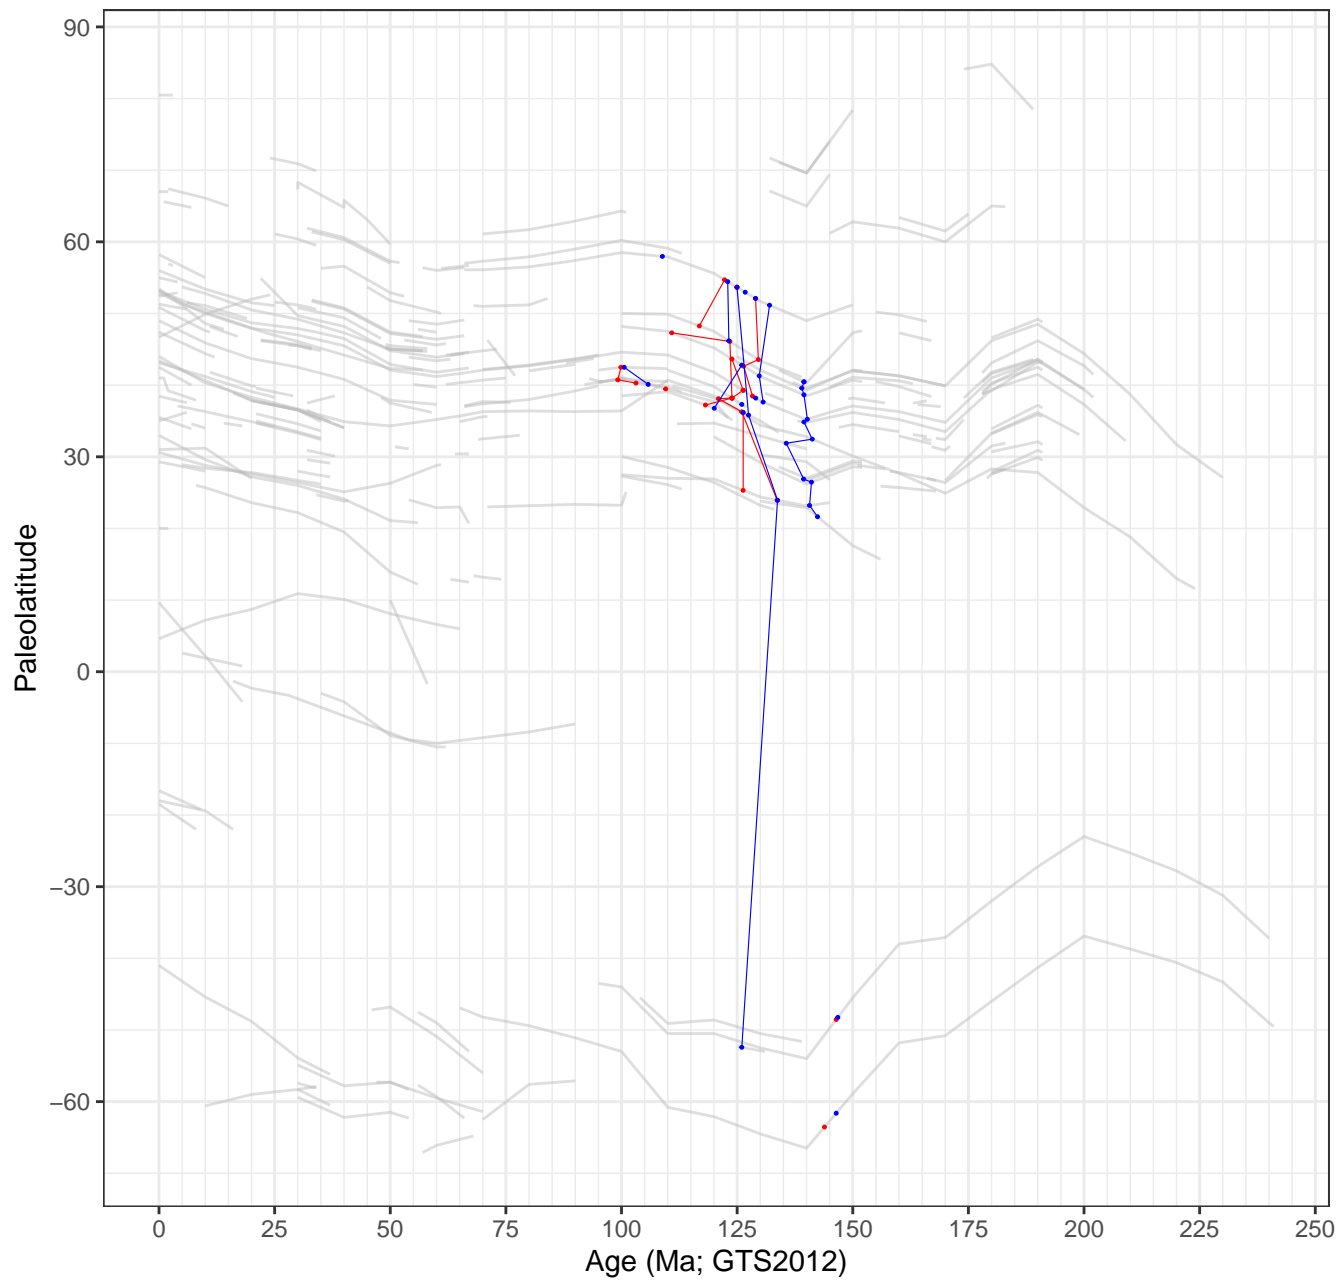

Supplement: Supplementary file 373 [file Genus Pseudoceratium.pdf › Supplement/Supplement 2/Genus 459 plots/Genus Pseudoceratium.pdf]

# Genus Pterodinium

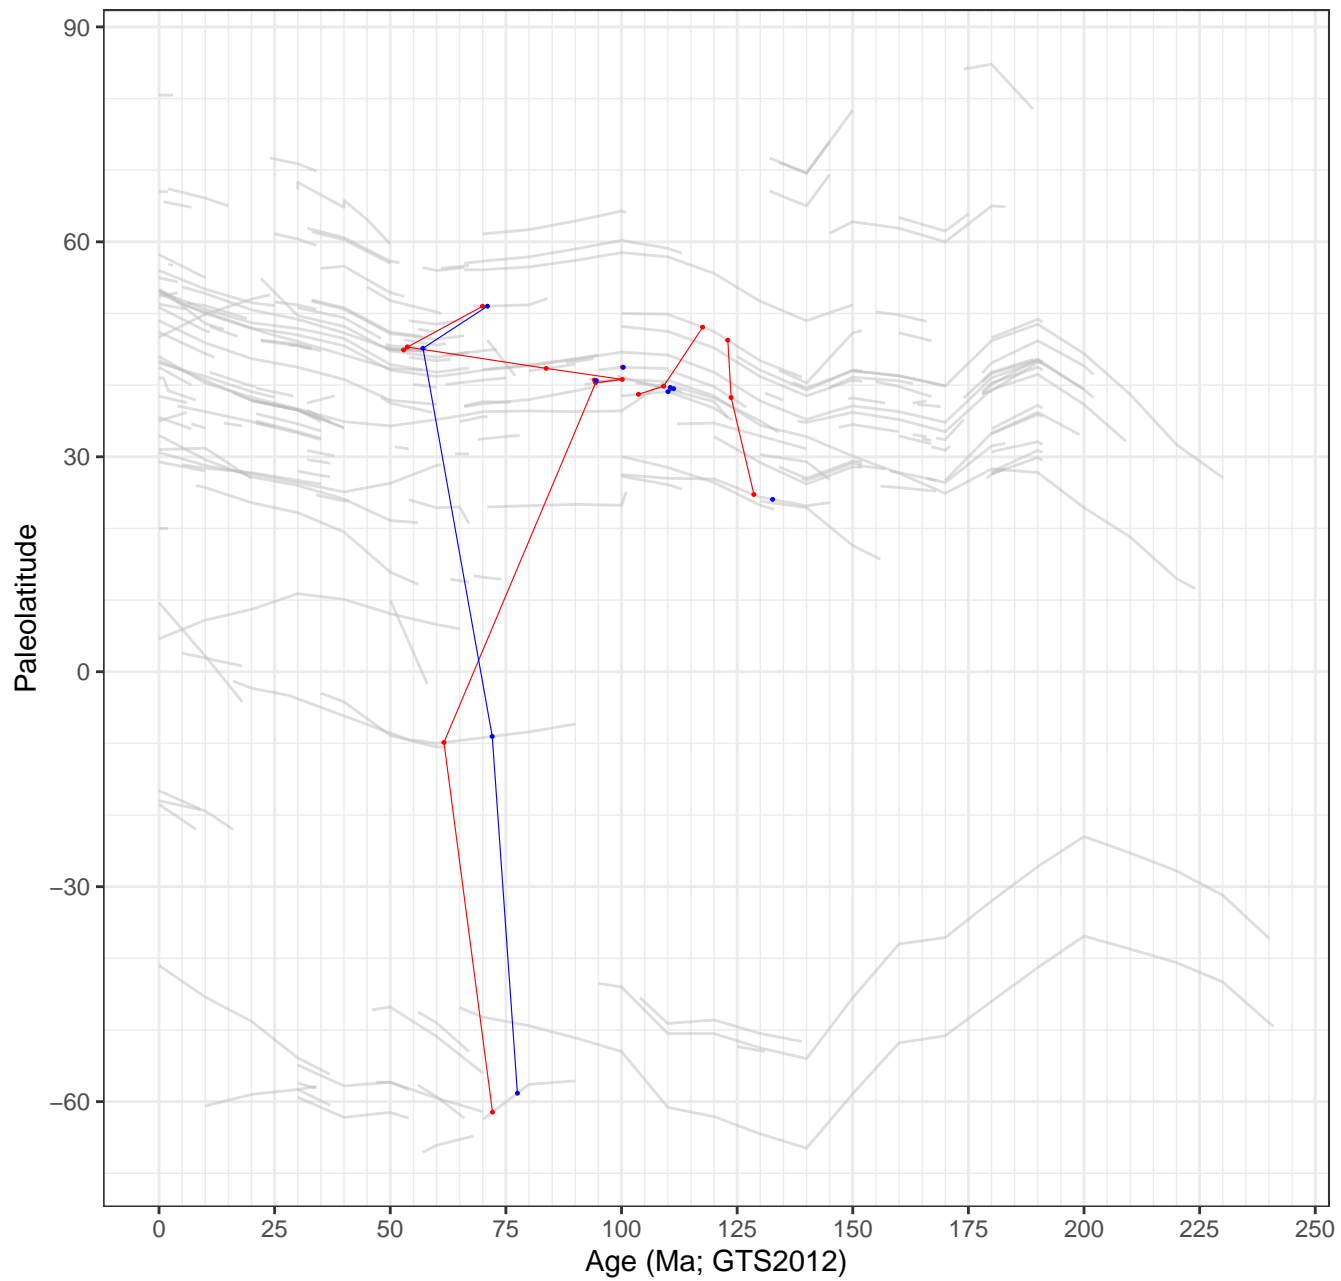

Supplement: Supplementary file 374 [file Genus Pterodinium.pdf › Supplement/Supplement 2/Genus 459 plots/Genus Pterodinium.pdf]

# Genus Pulchrasphaera

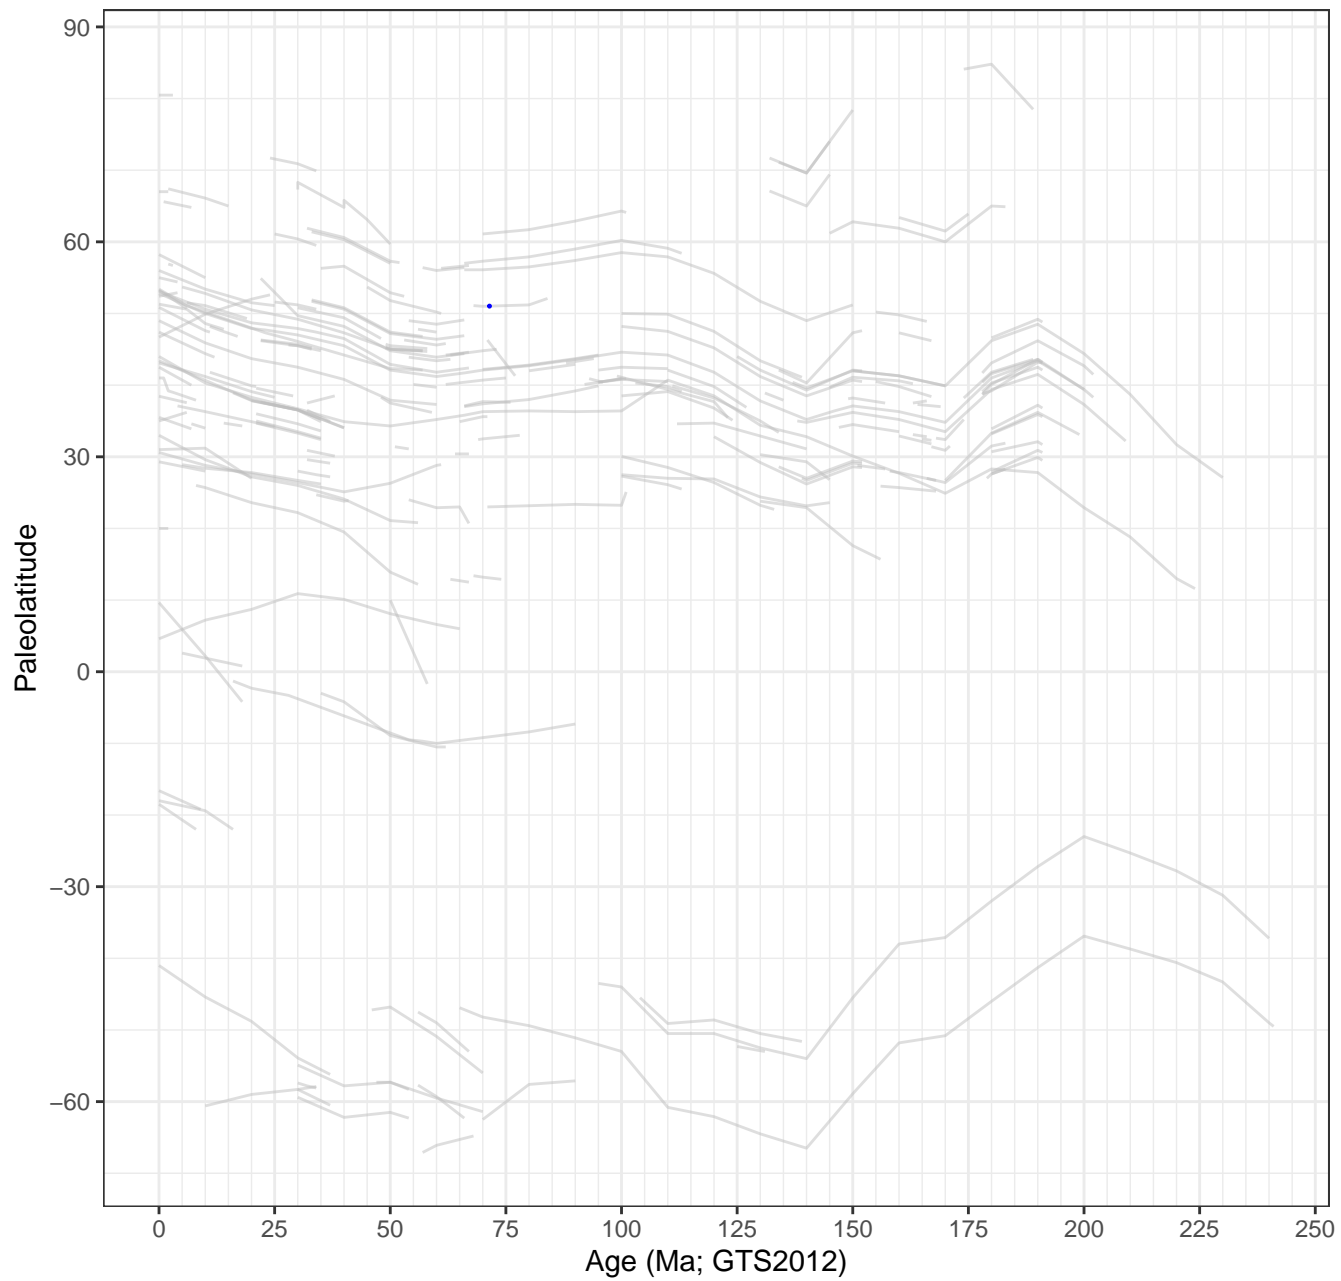

Supplement: Supplementary file 375 [file Genus Pulchrasphaera.pdf › Supplement/Supplement 2/Genus 459 plots/Genus Pulchrasphaera.pdf]

# Genus Pyxidiella

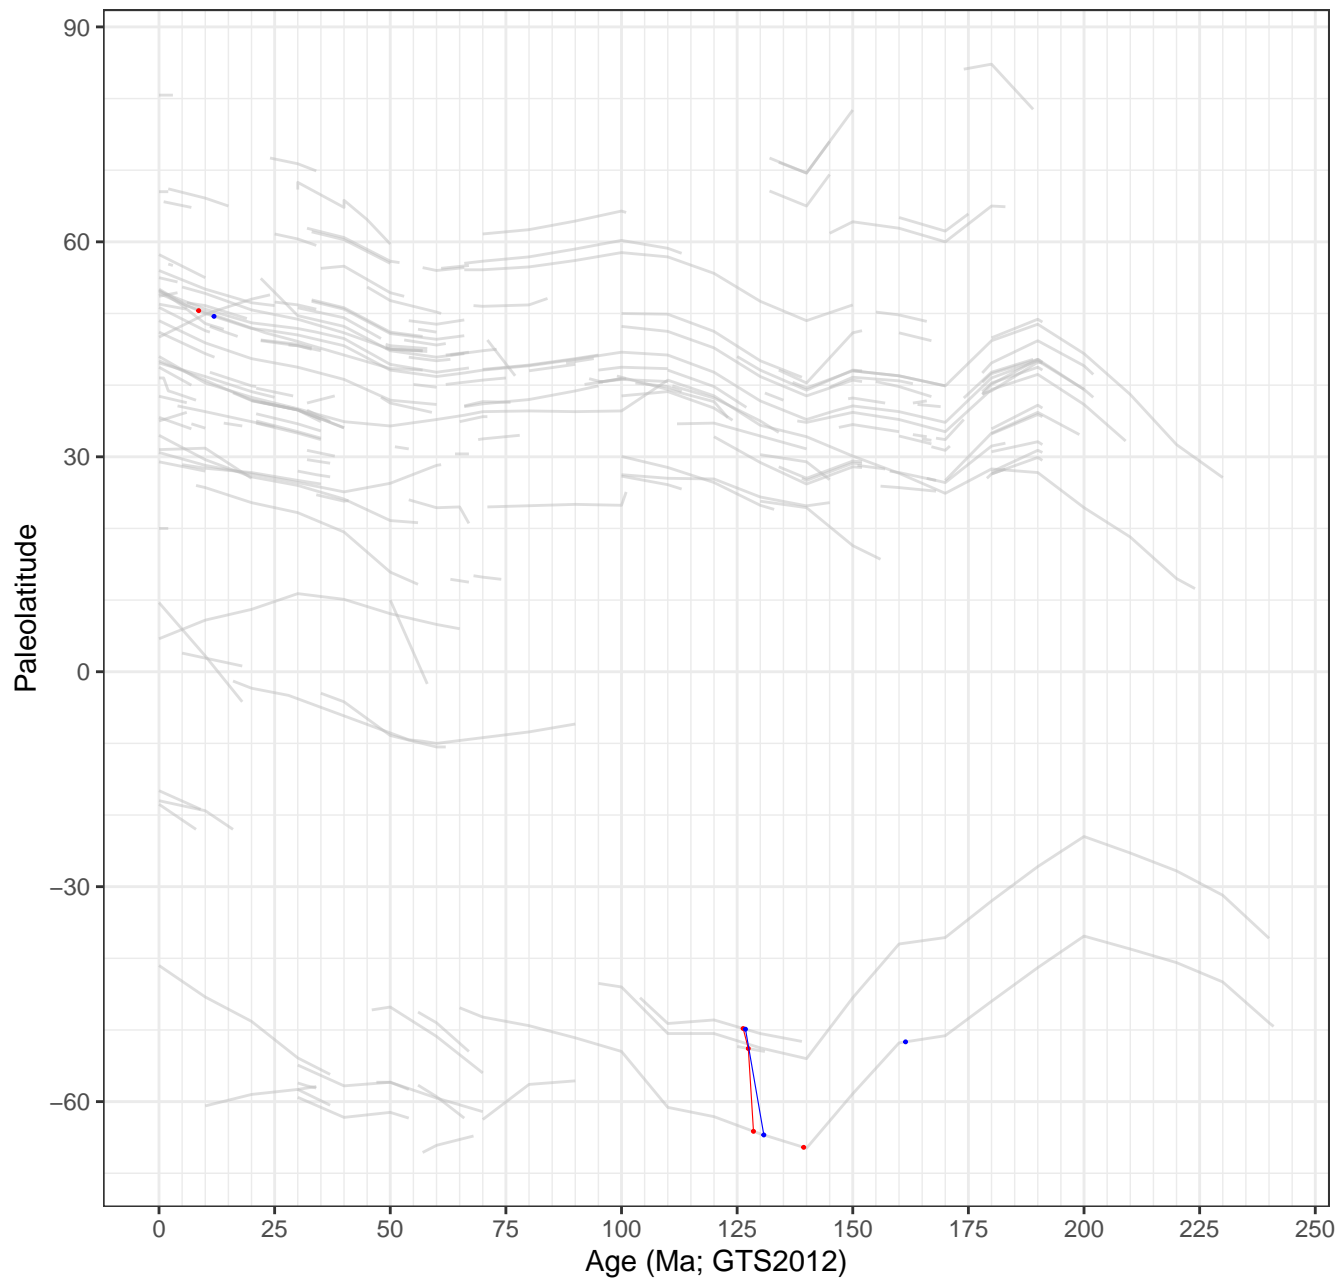

Supplement: Supplementary file 376 [file Genus Pyxidiella.pdf › Supplement/Supplement 2/Genus 459 plots/Genus Pyxidiella.pdf]

# Genus Pyxidinoopsis

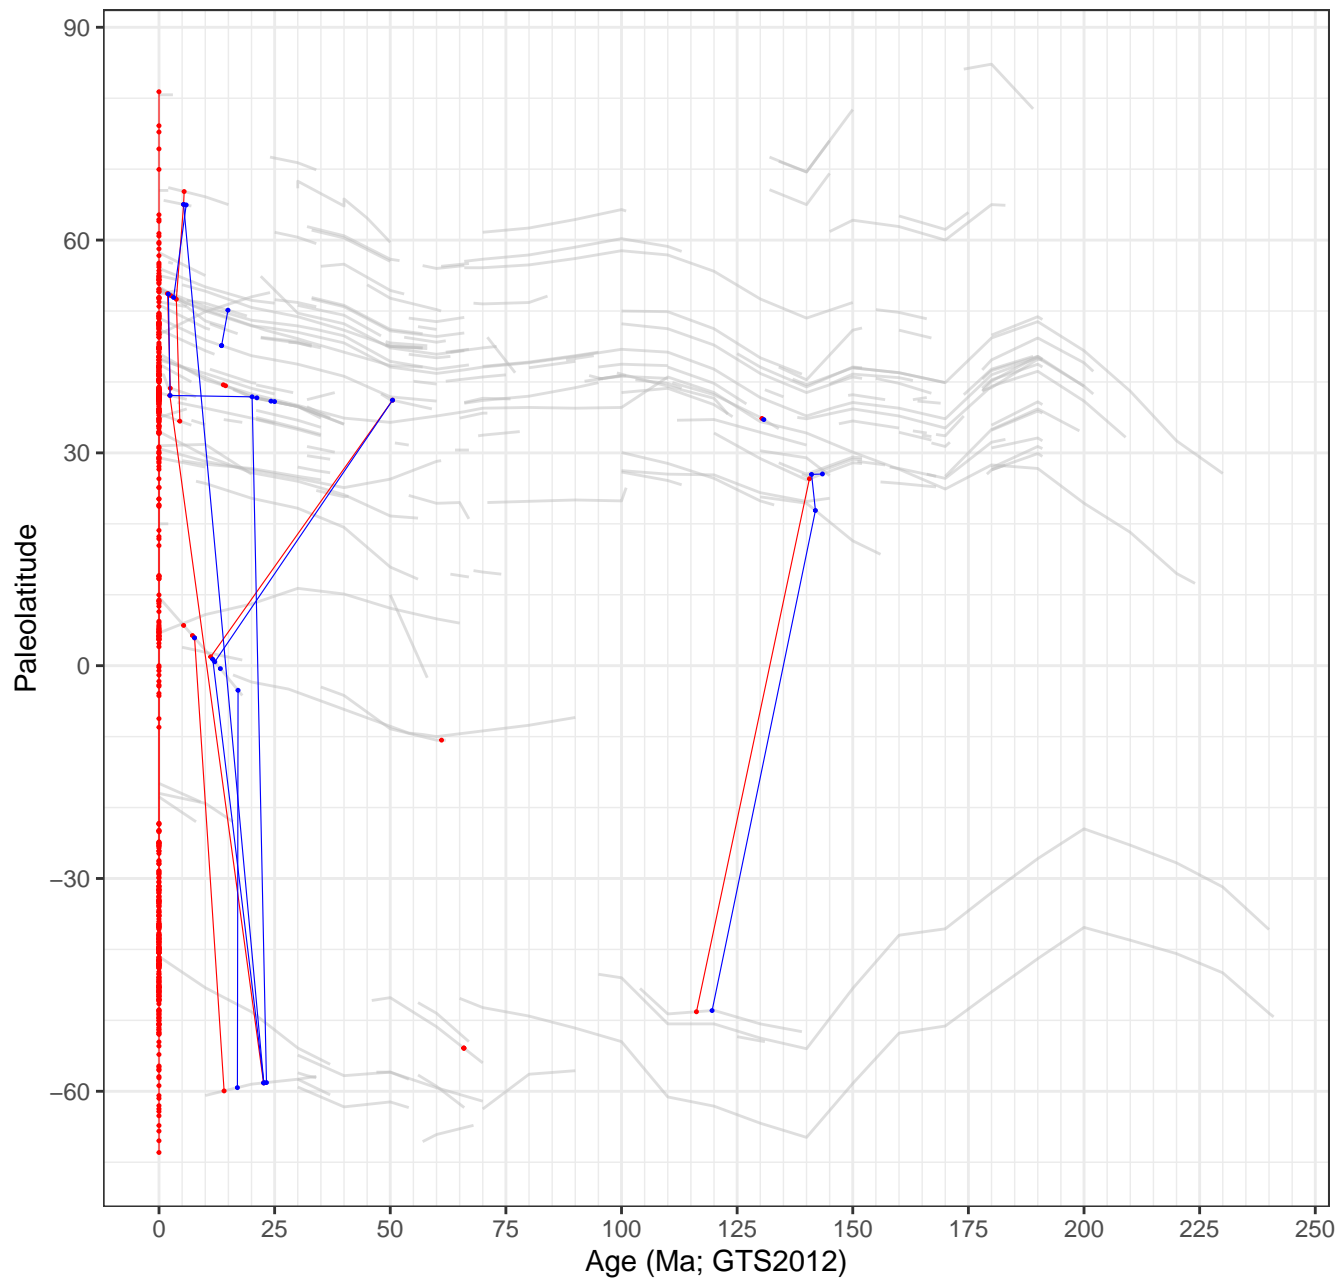

Supplement: Supplementary file 377 [file Genus Pyxidinopsis.pdf › Supplement/Supplement 2/Genus 459 plots/Genus Pyxidinopsis.pdf]

# Genus *Quinquecupis*

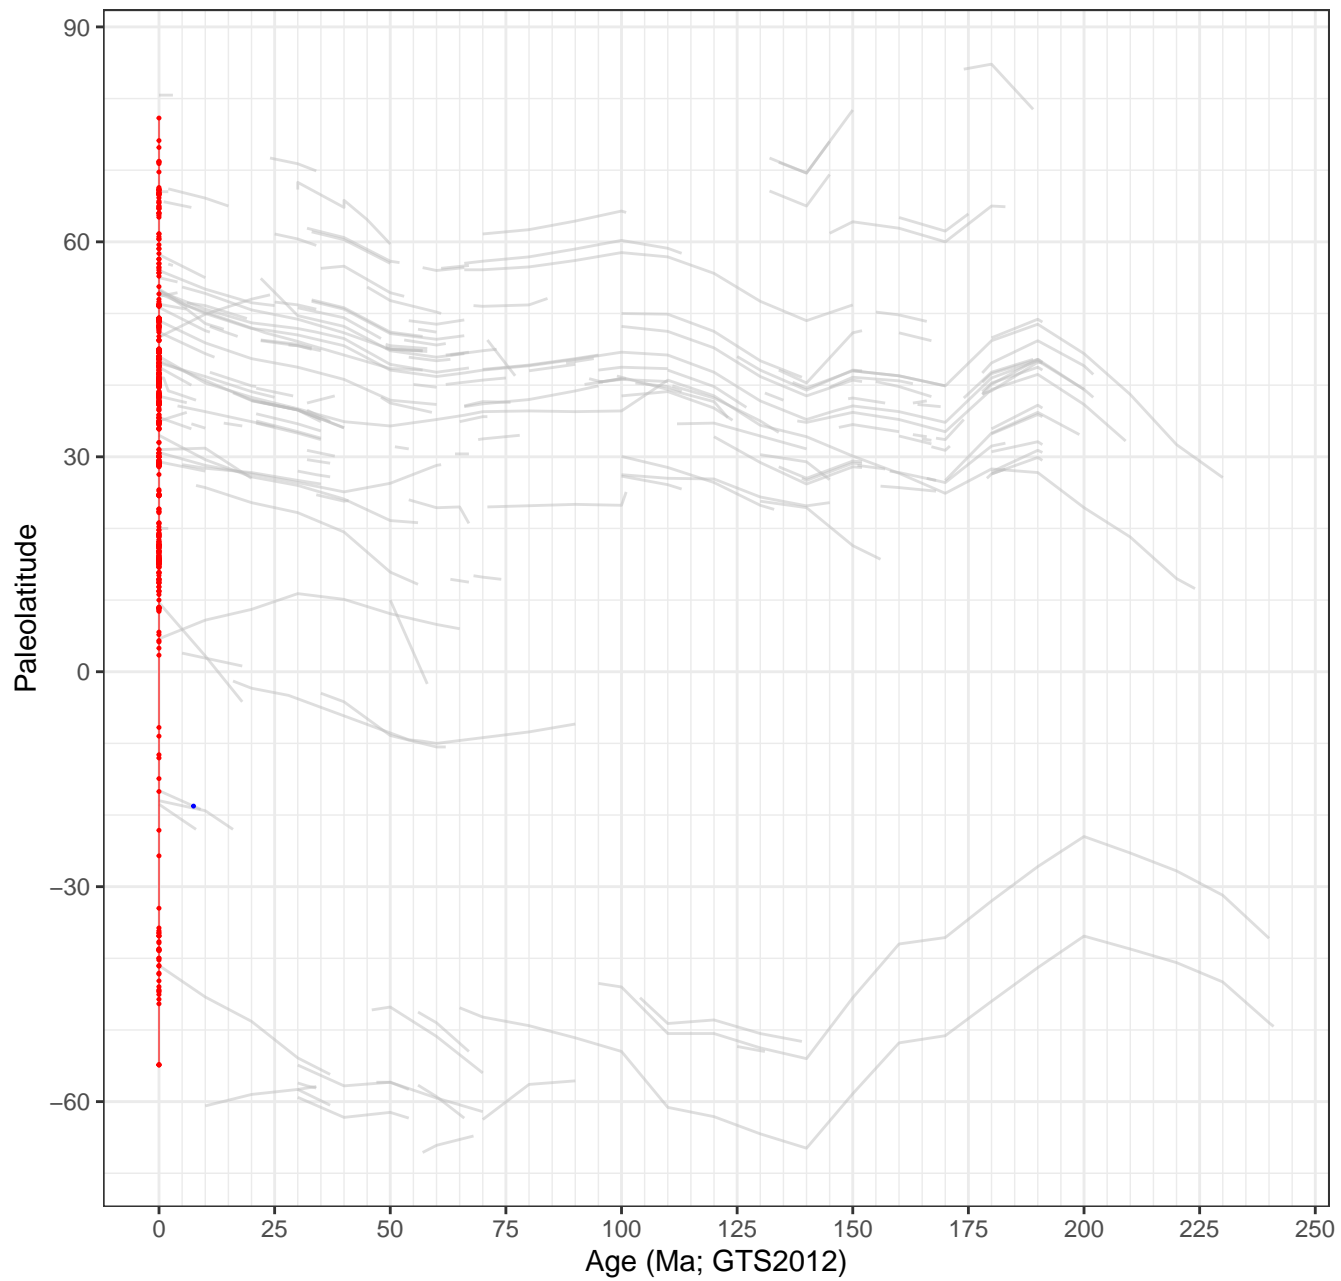

Supplement: Supplementary file 378 [file Genus Quinquecuspis.pdf › Supplement/Supplement 2/Genus 459 plots/Genus Quinquecuspis.pdf]

# Genus *Raetiaedinium*

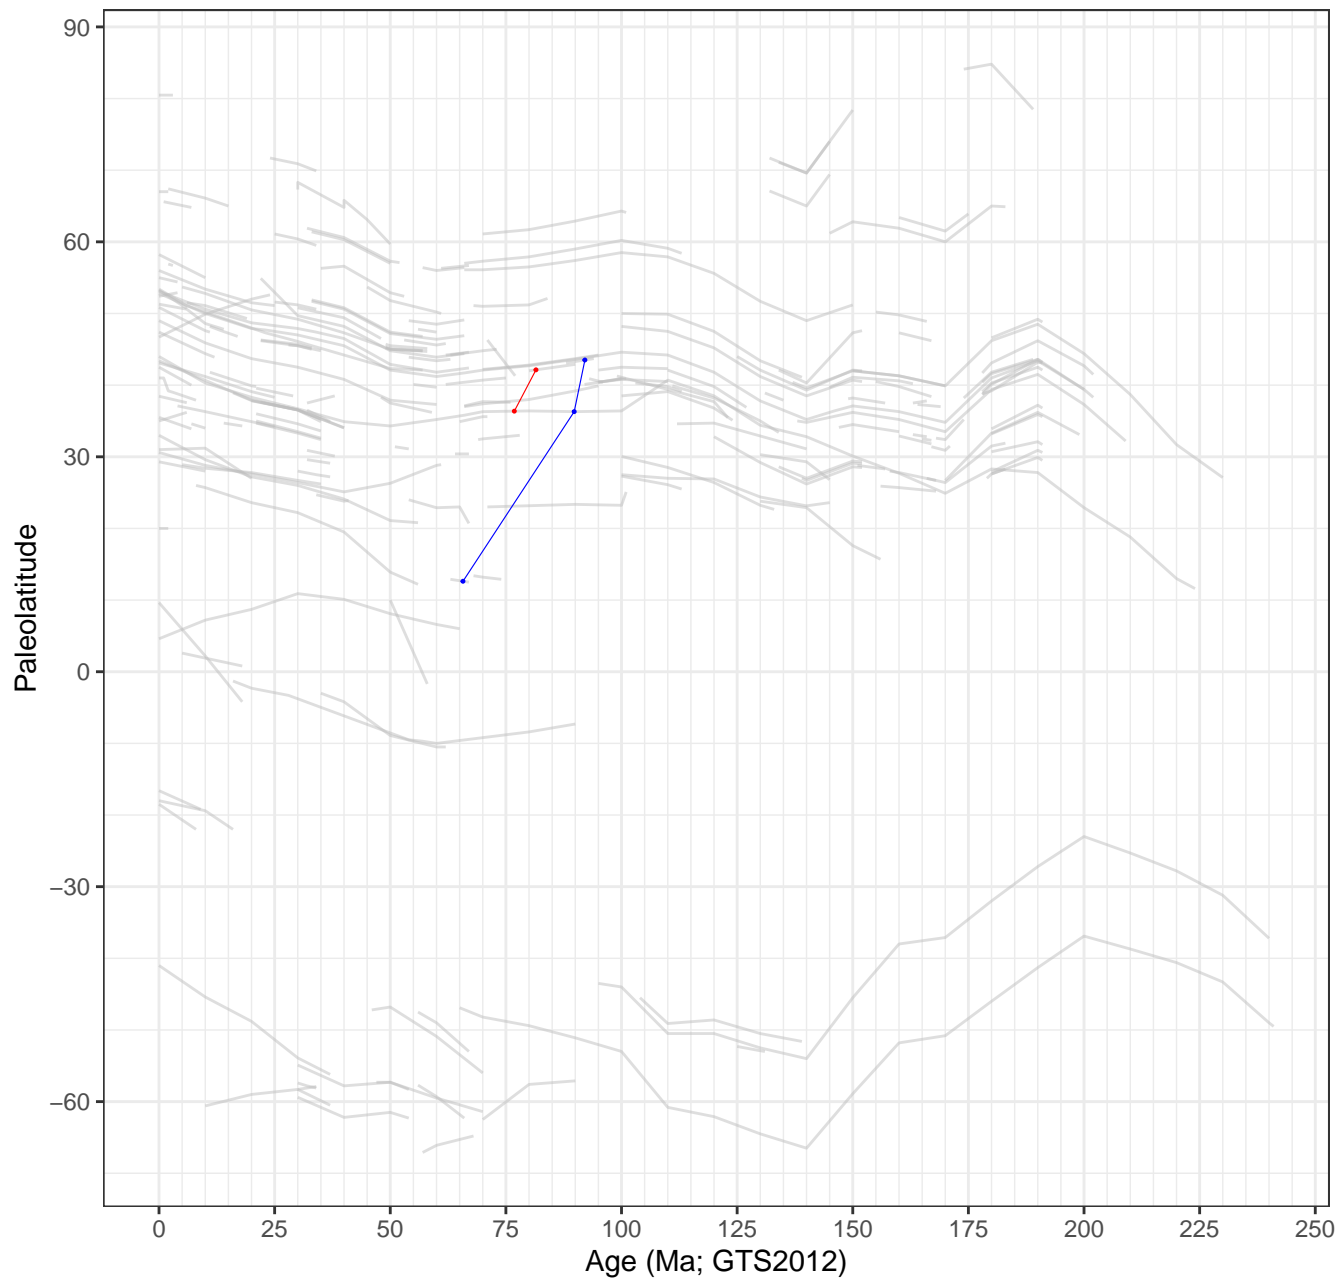

Supplement: Supplementary file 379 [file Genus Raetiaedinium.pdf › Supplement/Supplement 2/Genus 459 plots/Genus Raetiaedinium.pdf]

# Genus *Raphidodinium*

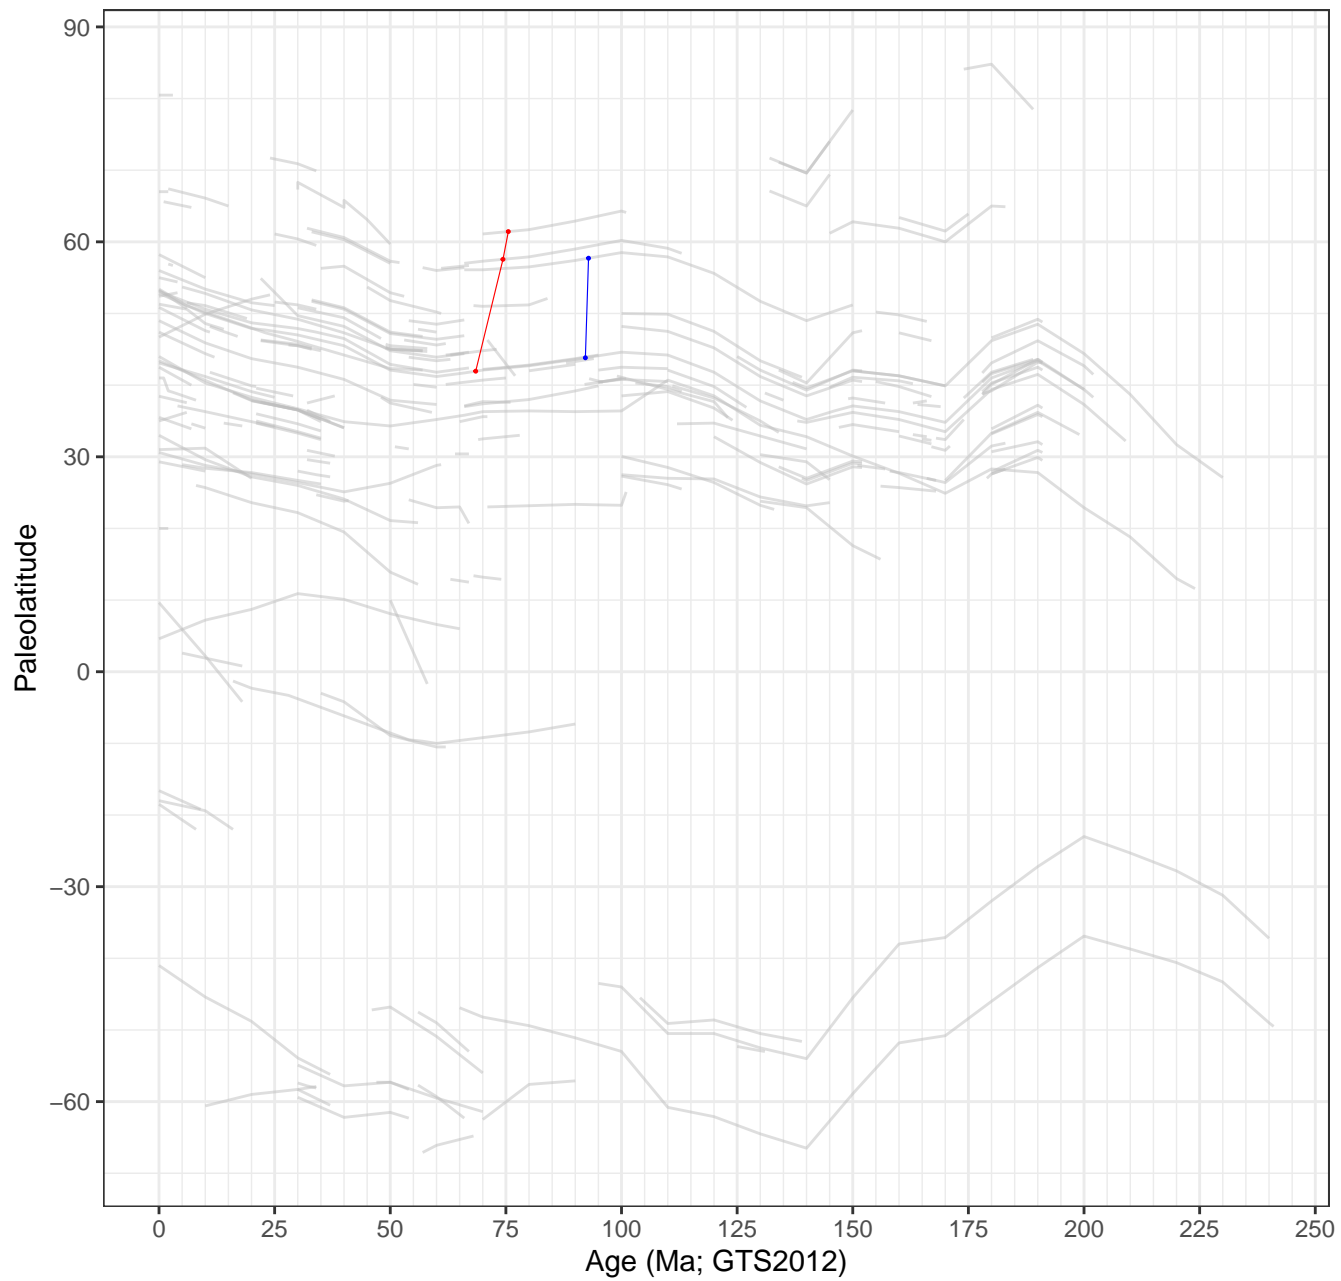

Supplement: Supplementary file 380 [file Genus Raphidodinium.pdf › Supplement/Supplement 2/Genus 459 plots/Genus Raphidodinium.pdf]

# Genus Renidinium

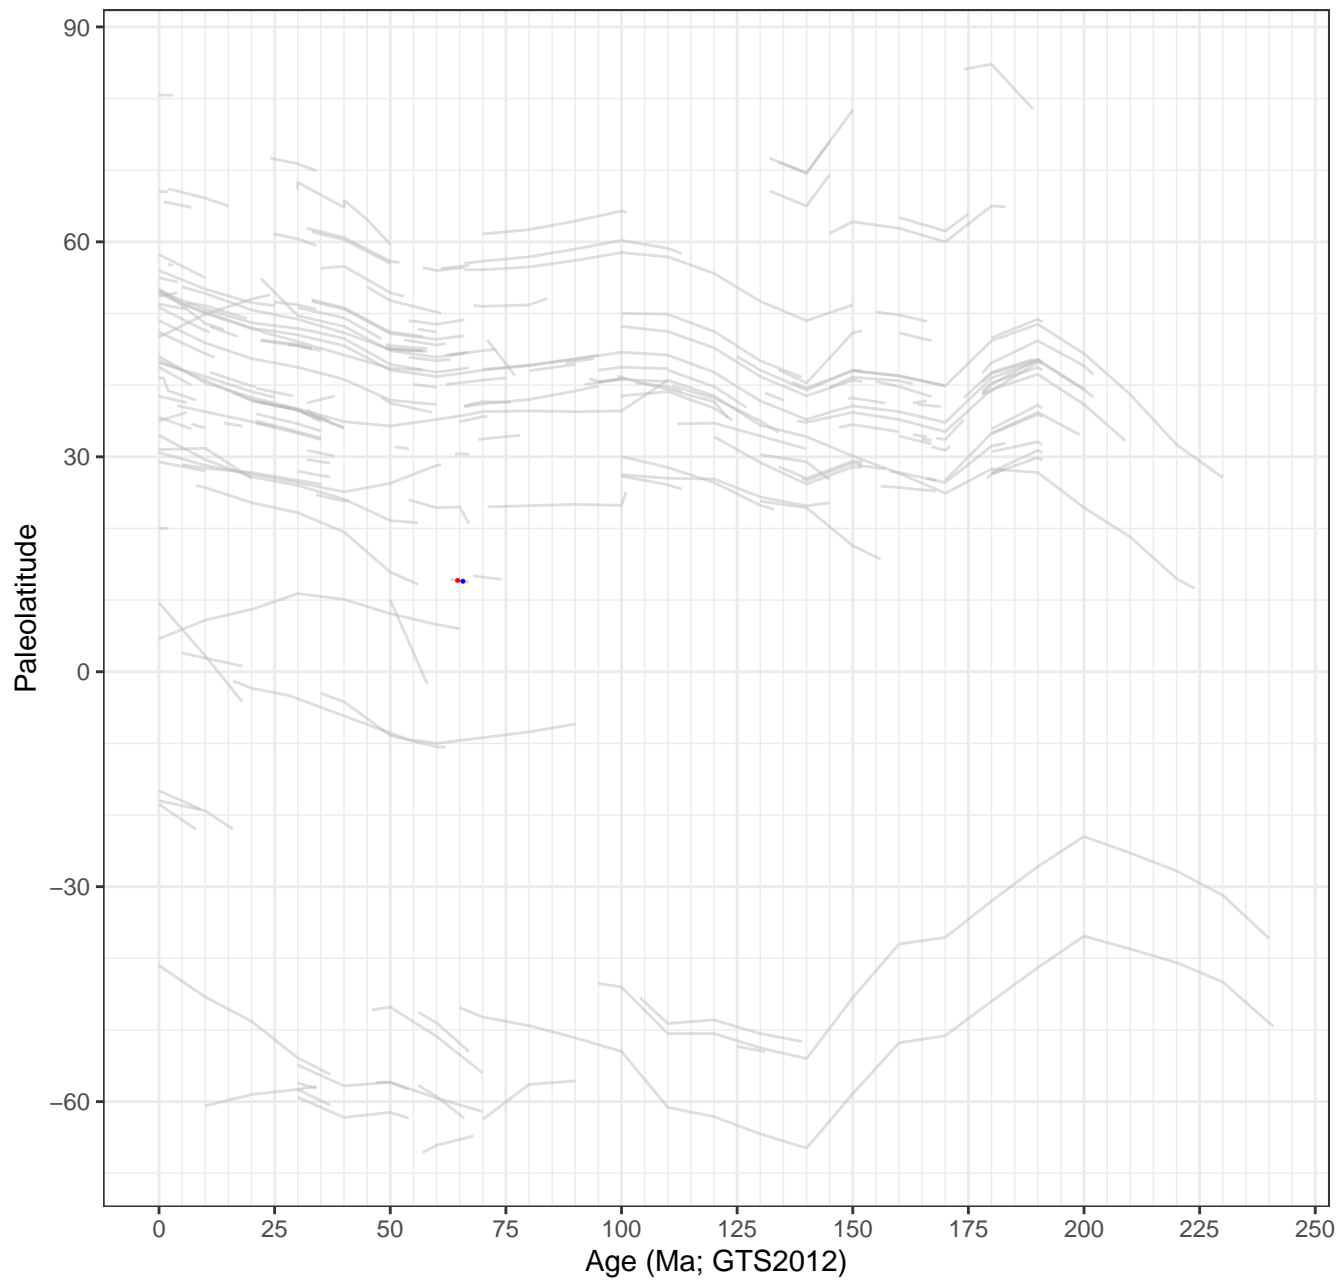

Supplement: Supplementary file 381 [file Genus Renidinium.pdf › Supplement/Supplement 2/Genus 459 plots/Genus Renidinium.pdf]

# Genus Reticulatosphaera

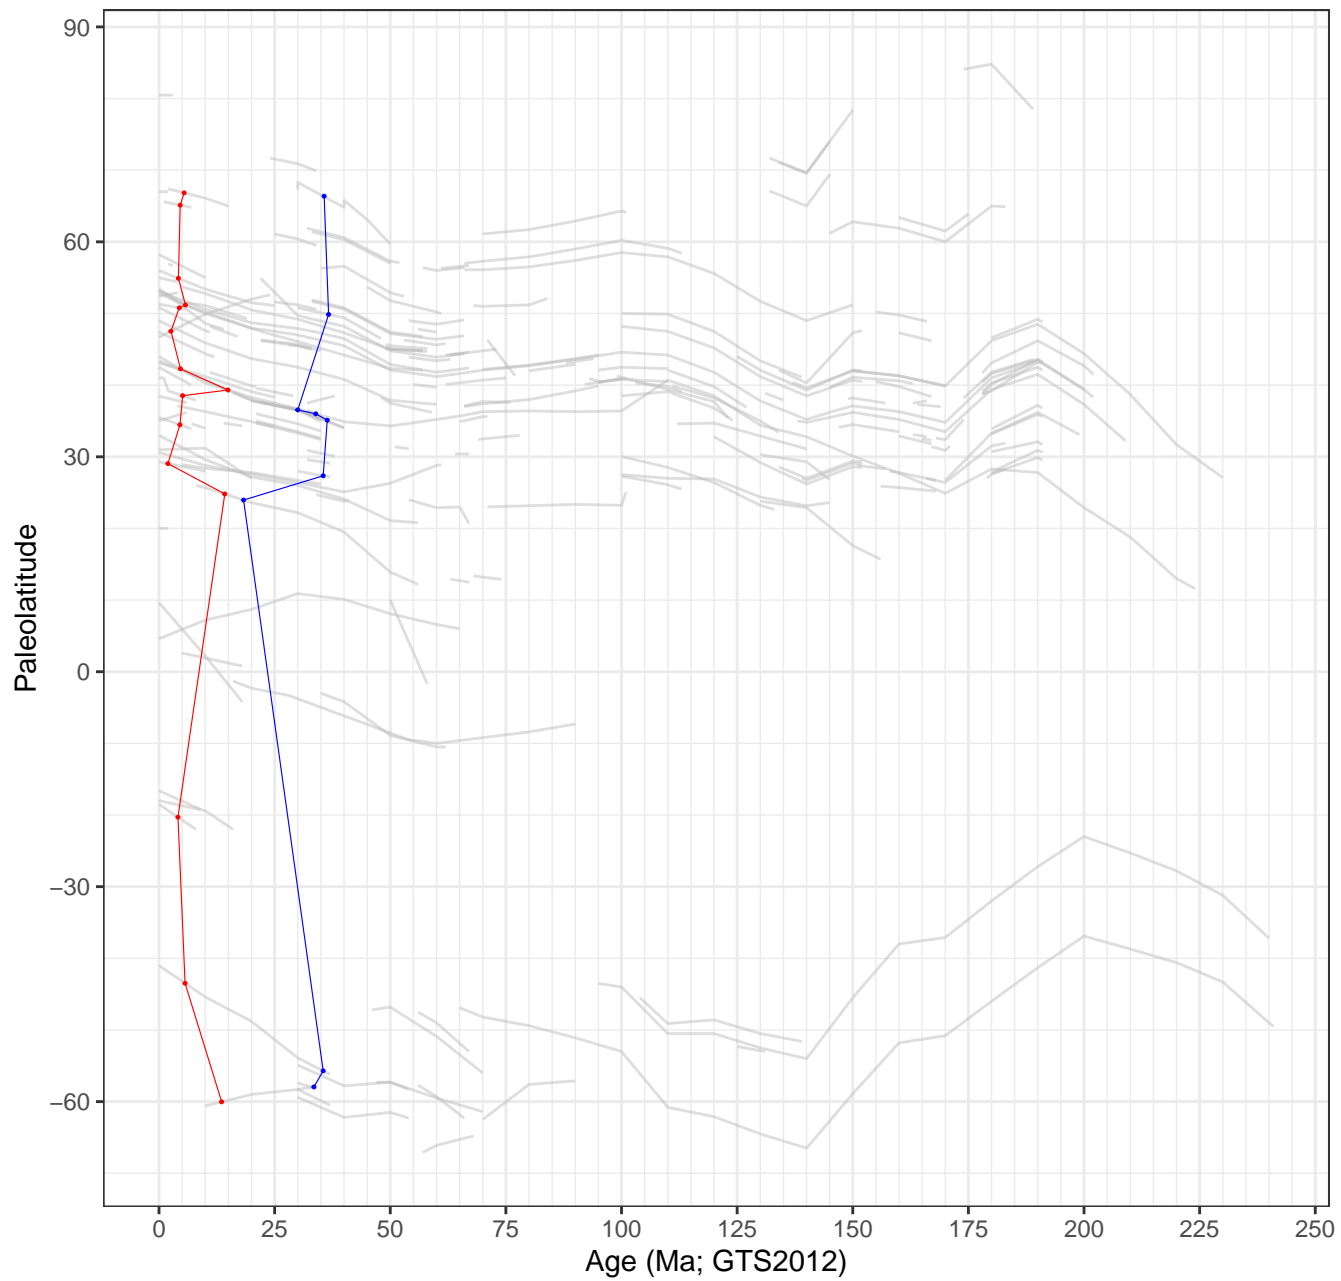

Supplement: Supplementary file 382 [file Genus Reticulatosphaera.pdf › Supplement/Supplement 2/Genus 459 plots/Genus Reticulatosphaera.pdf]

# Genus Reutlingia

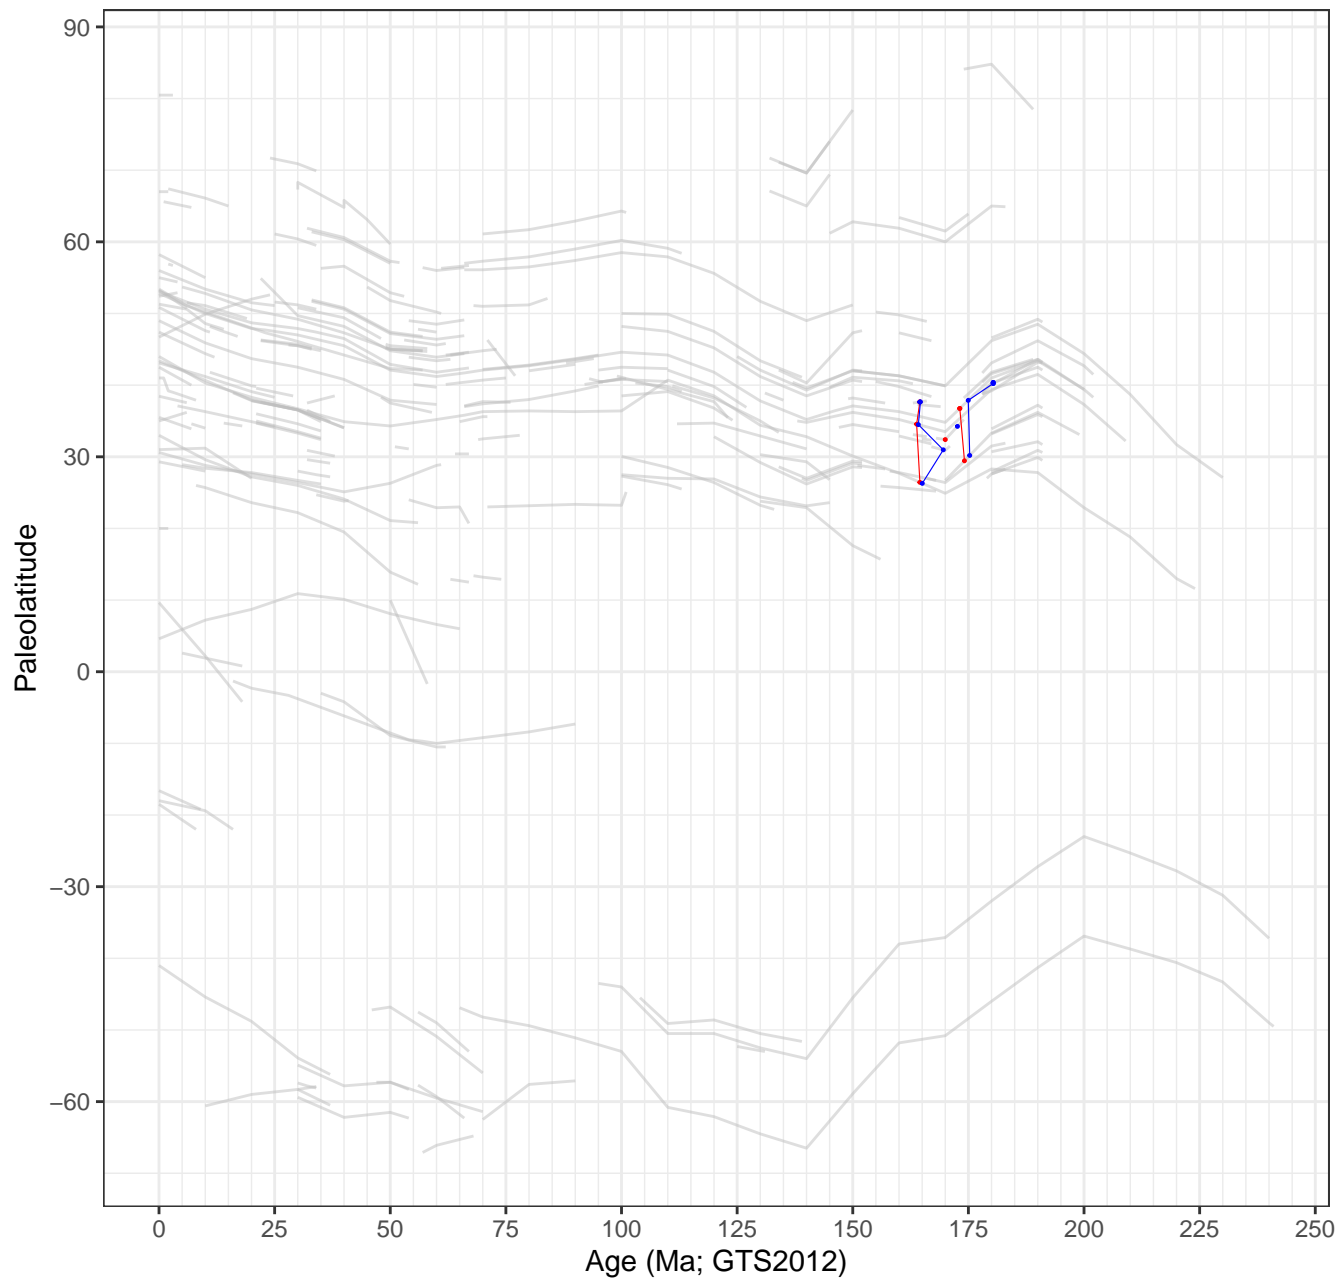

Supplement: Supplementary file 383 [file Genus Reutlingia.pdf › Supplement/Supplement 2/Genus 459 plots/Genus Reutlingia.pdf]

# Genus Rhadinodinium

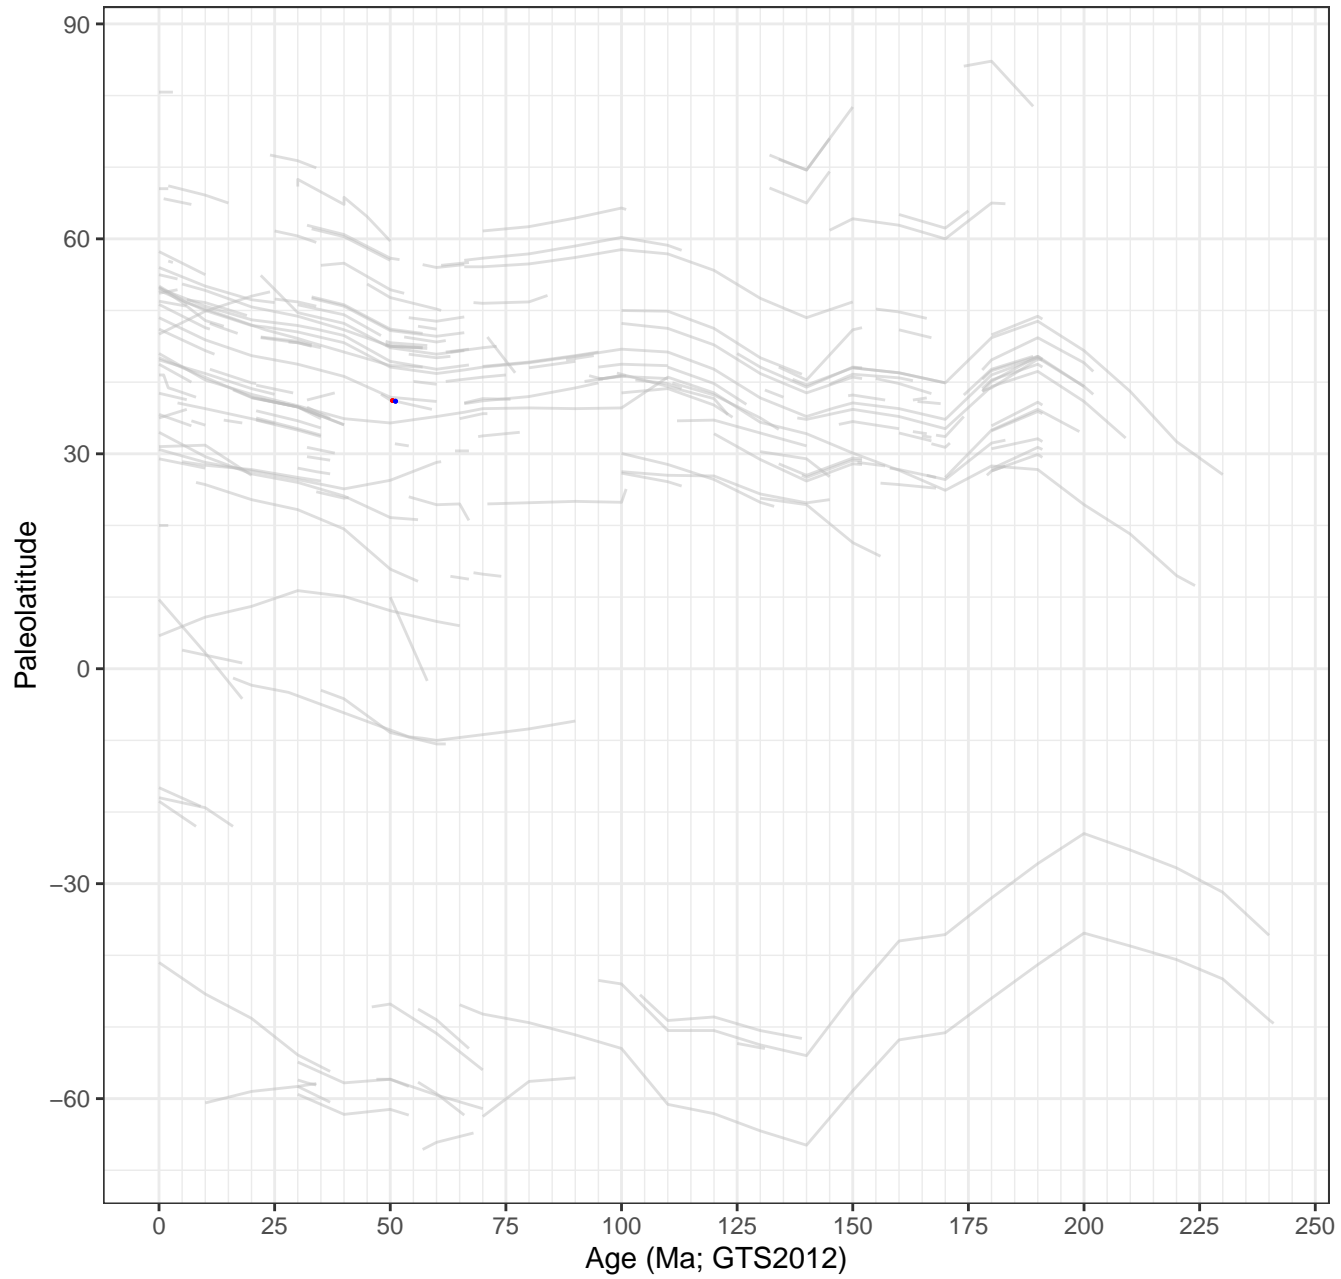

Supplement: Supplementary file 384 [file Genus Rhadinodinium.pdf › Supplement/Supplement 2/Genus 459 plots/Genus Rhadinodinium.pdf]

# Genus Rhaetogonyaulax

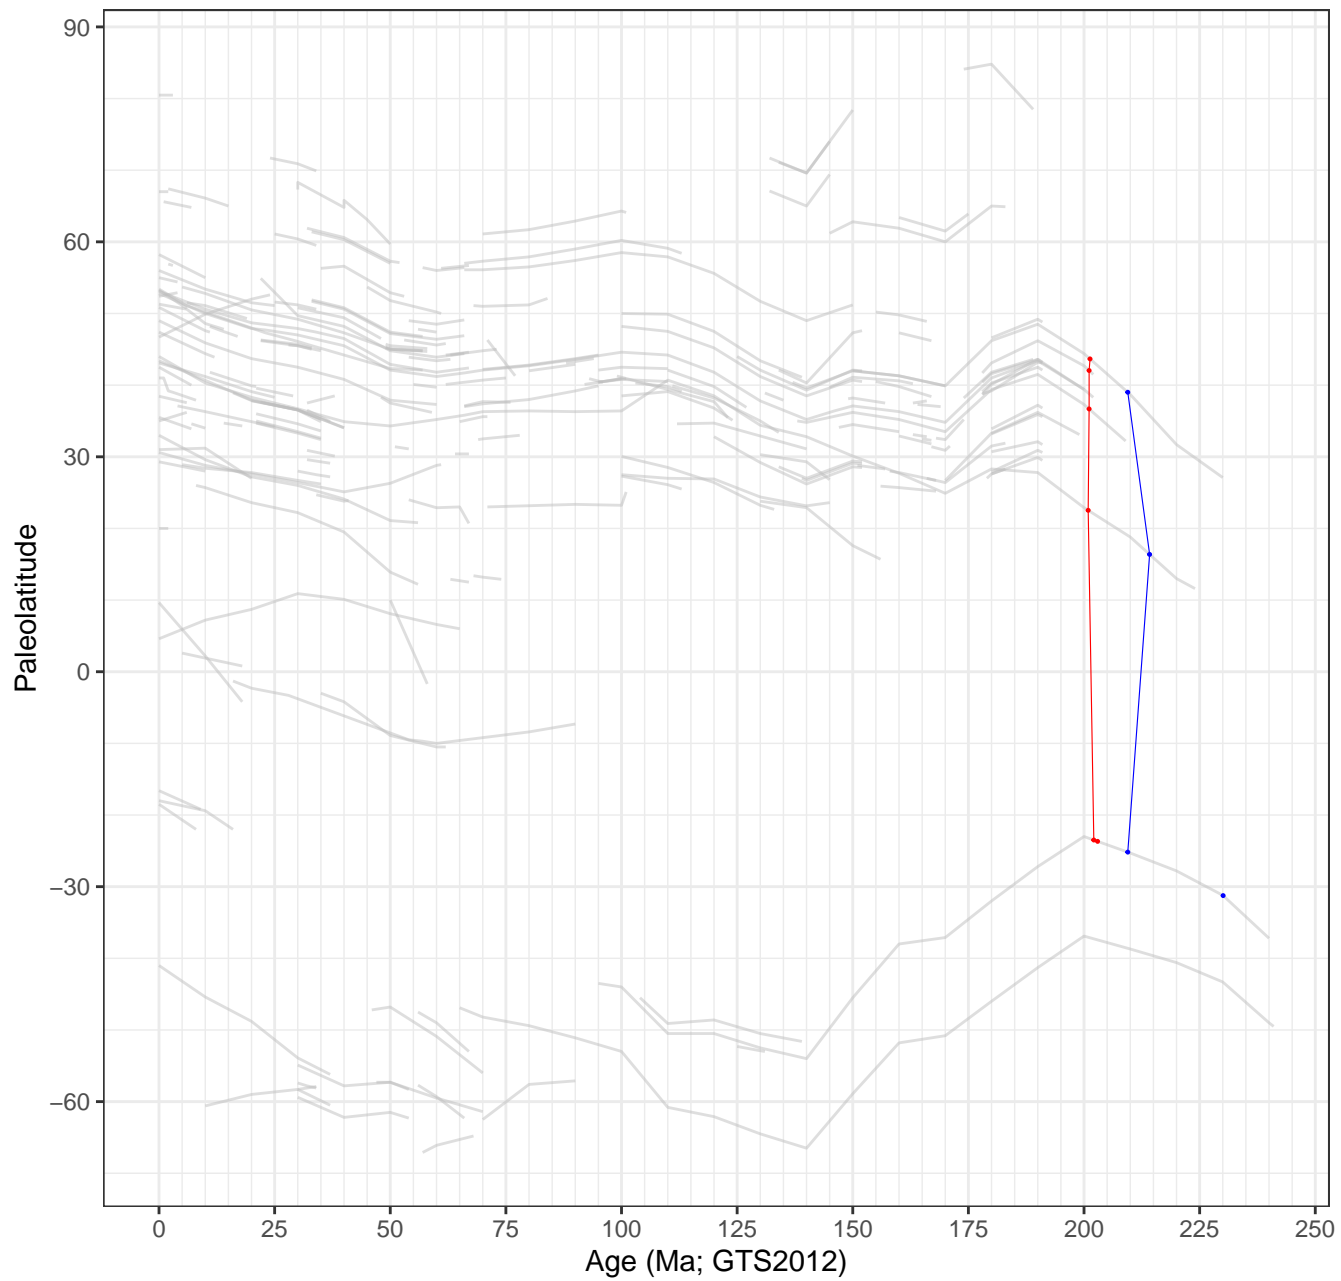

Supplement: Supplementary file 385 [file Genus Rhaetogonyaulax.pdf › Supplement/Supplement 2/Genus 459 plots/Genus Rhaetogonyaulax.pdf]

# Genus Rhiptocorys

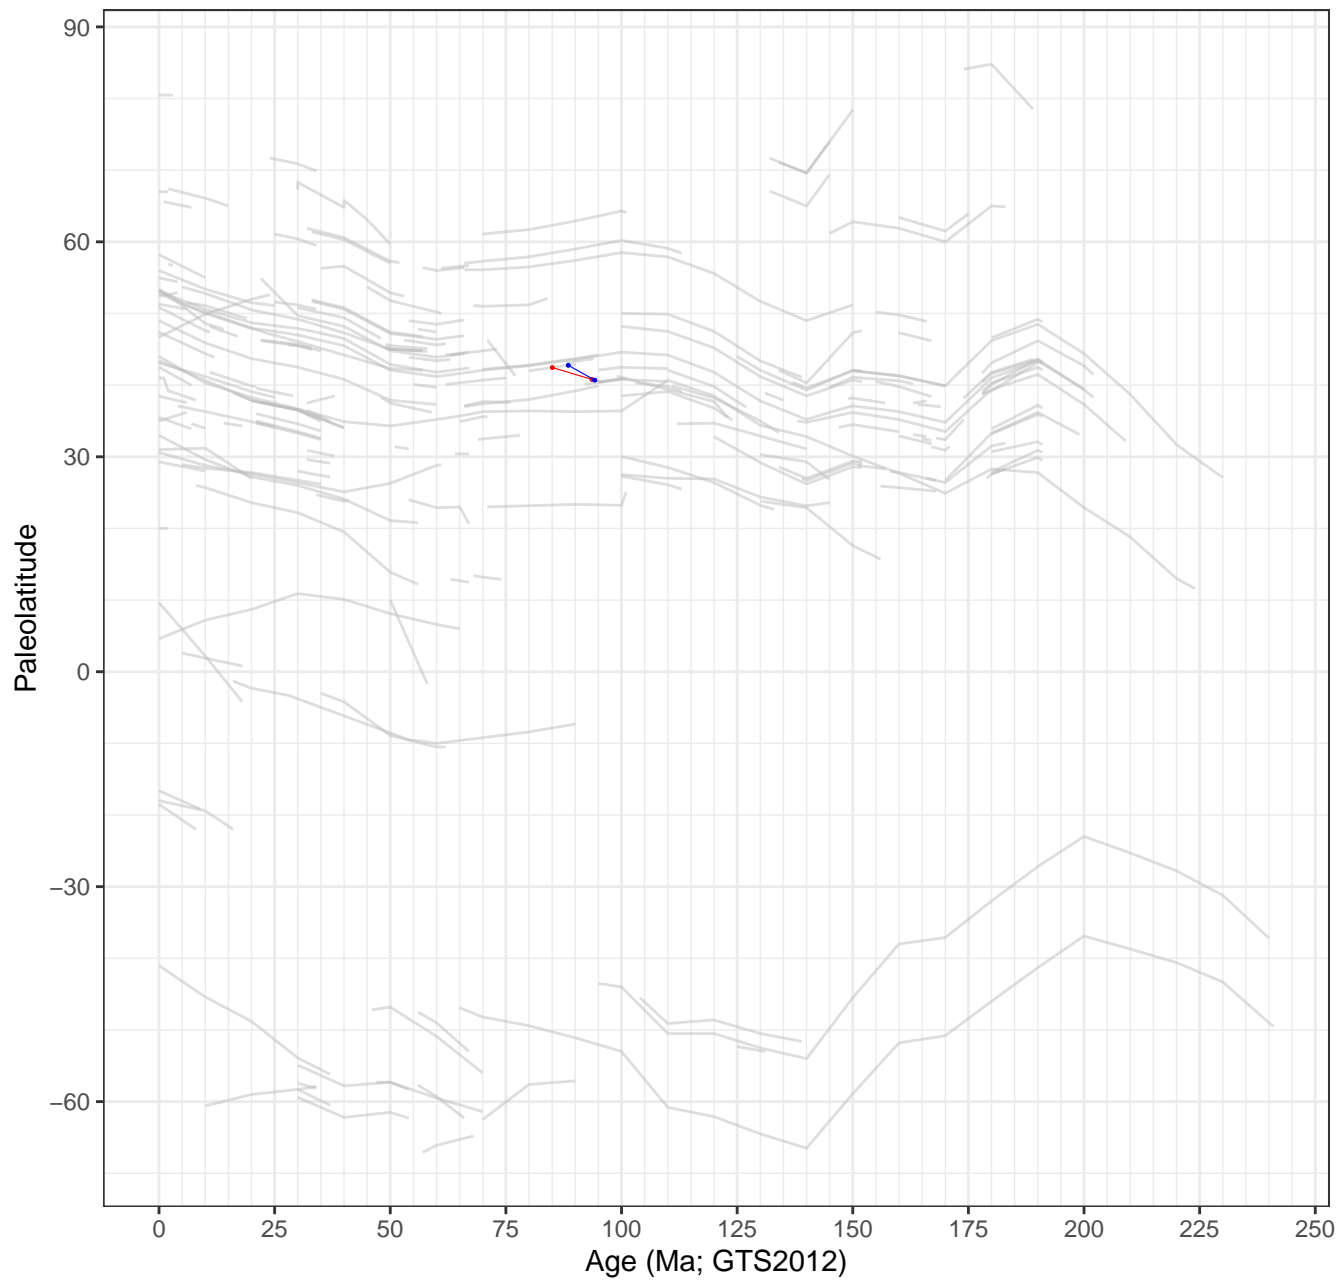

Supplement: Supplementary file 386 [file Genus Rhiptocorys.pdf › Supplement/Supplement 2/Genus 459 plots/Genus Rhiptocorys.pdf]

# Genus Rhombodella

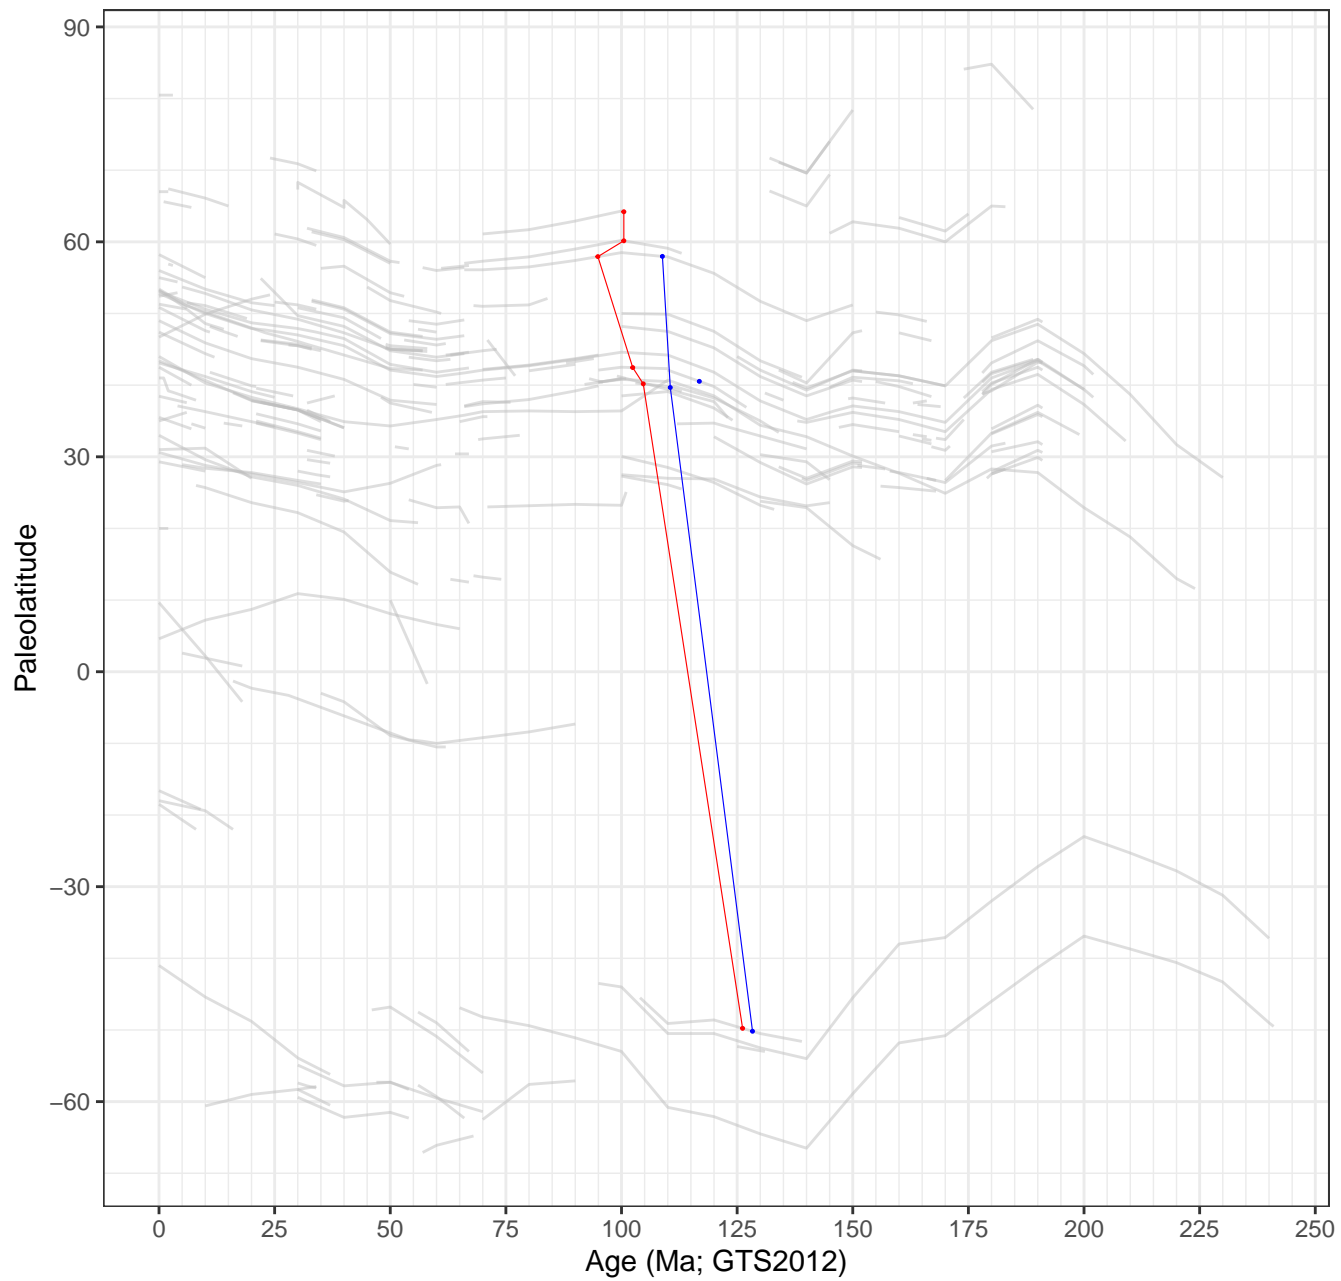

Supplement: Supplementary file 387 [file Genus Rhombodella.pdf › Supplement/Supplement 2/Genus 459 plots/Genus Rhombodella.pdf]

# Genus Rhombodinium

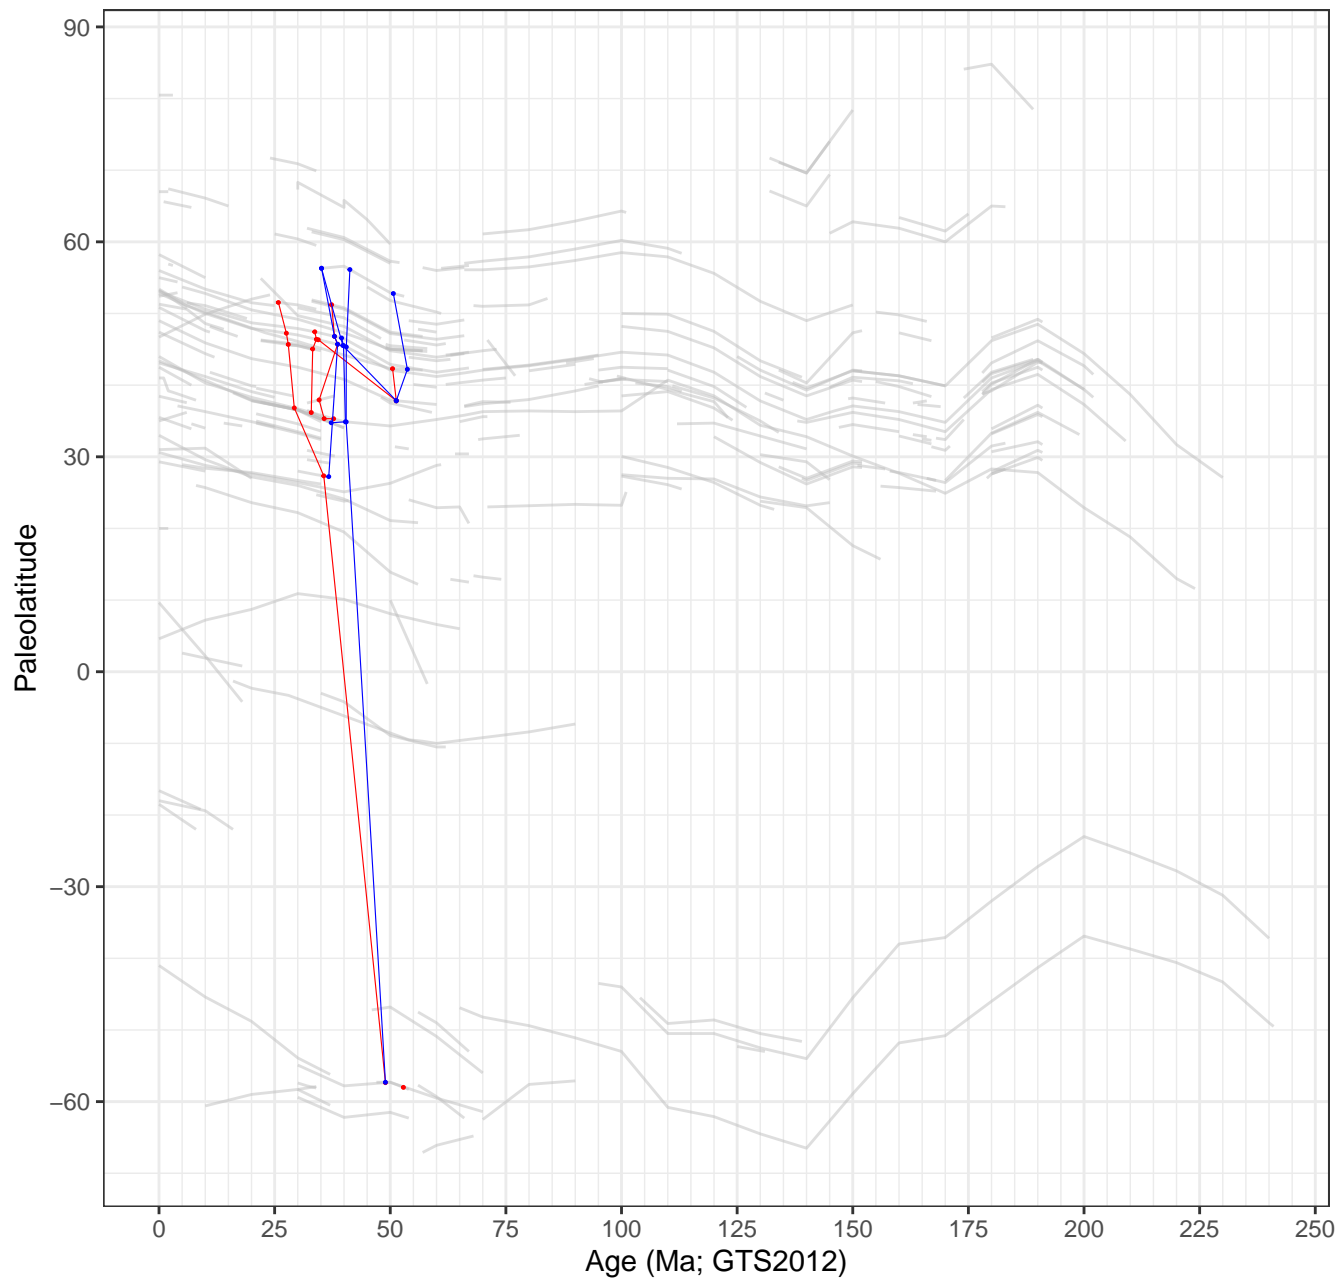

Supplement: Supplementary file 388 [file Genus Rhombodinium.pdf › Supplement/Supplement 2/Genus 459 plots/Genus Rhombodinium.pdf]

# Genus *Rhynchodiniopsis*

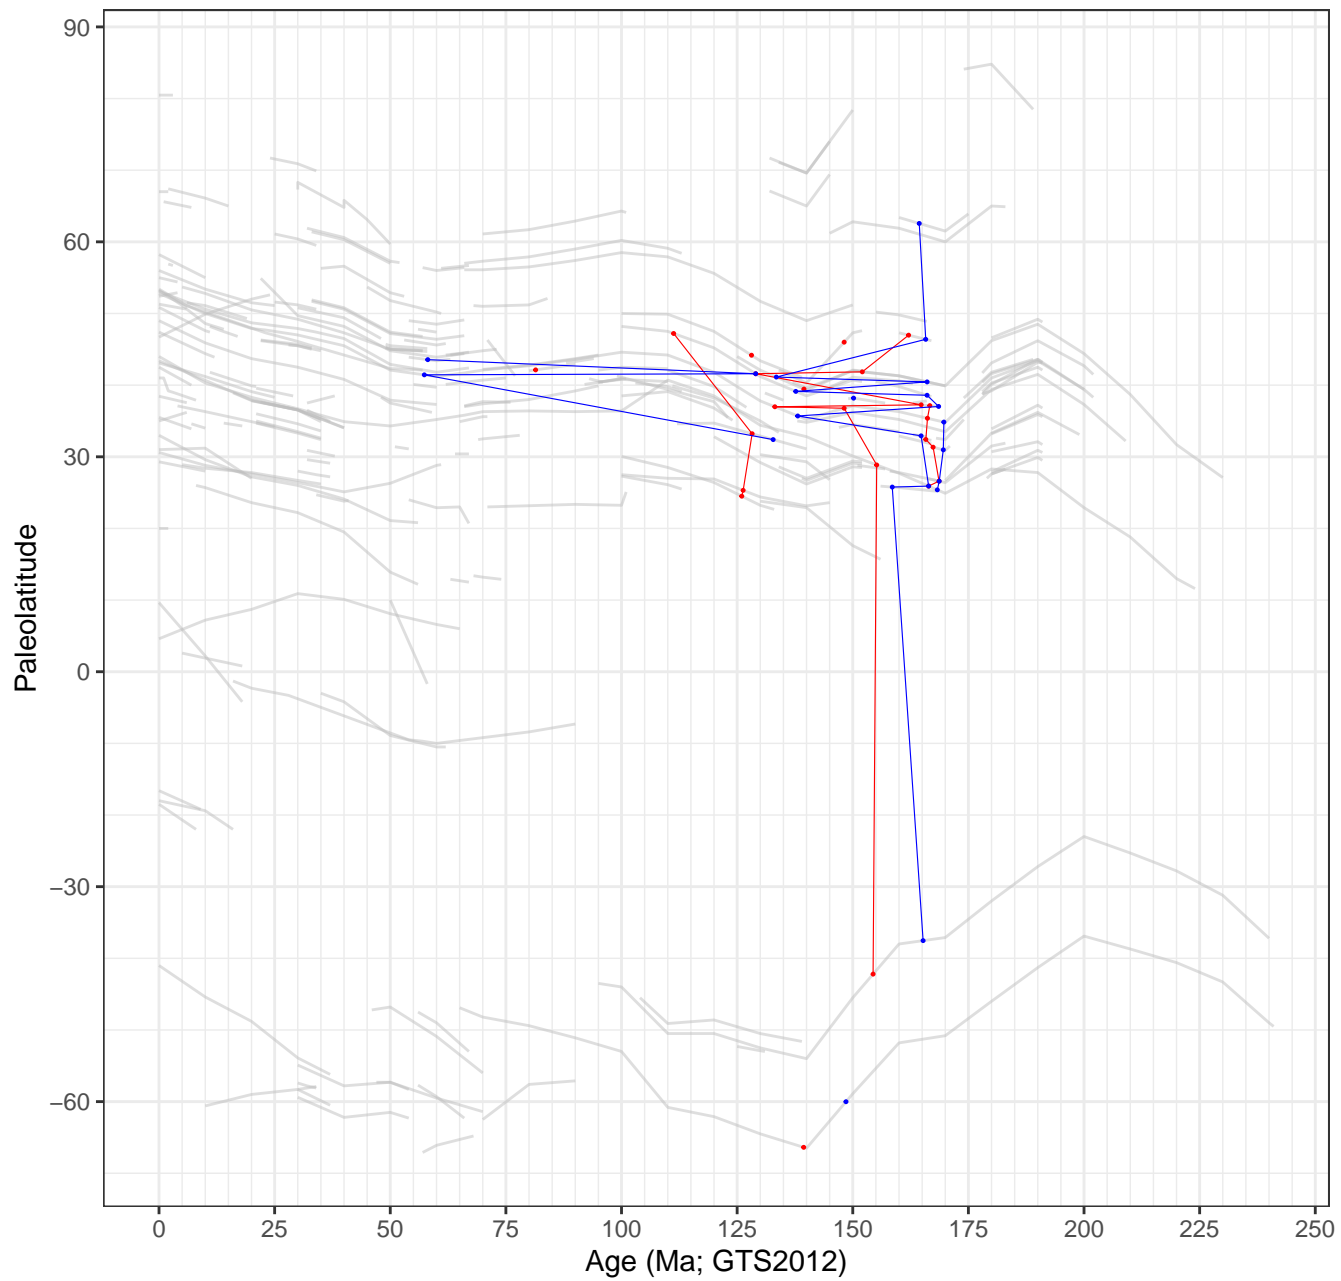

Supplement: Supplementary file 389 [file Genus Rhynchodiniopsis.pdf › Supplement/Supplement 2/Genus 459 plots/Genus Rhynchodiniopsis.pdf]

# Genus Rigaudella

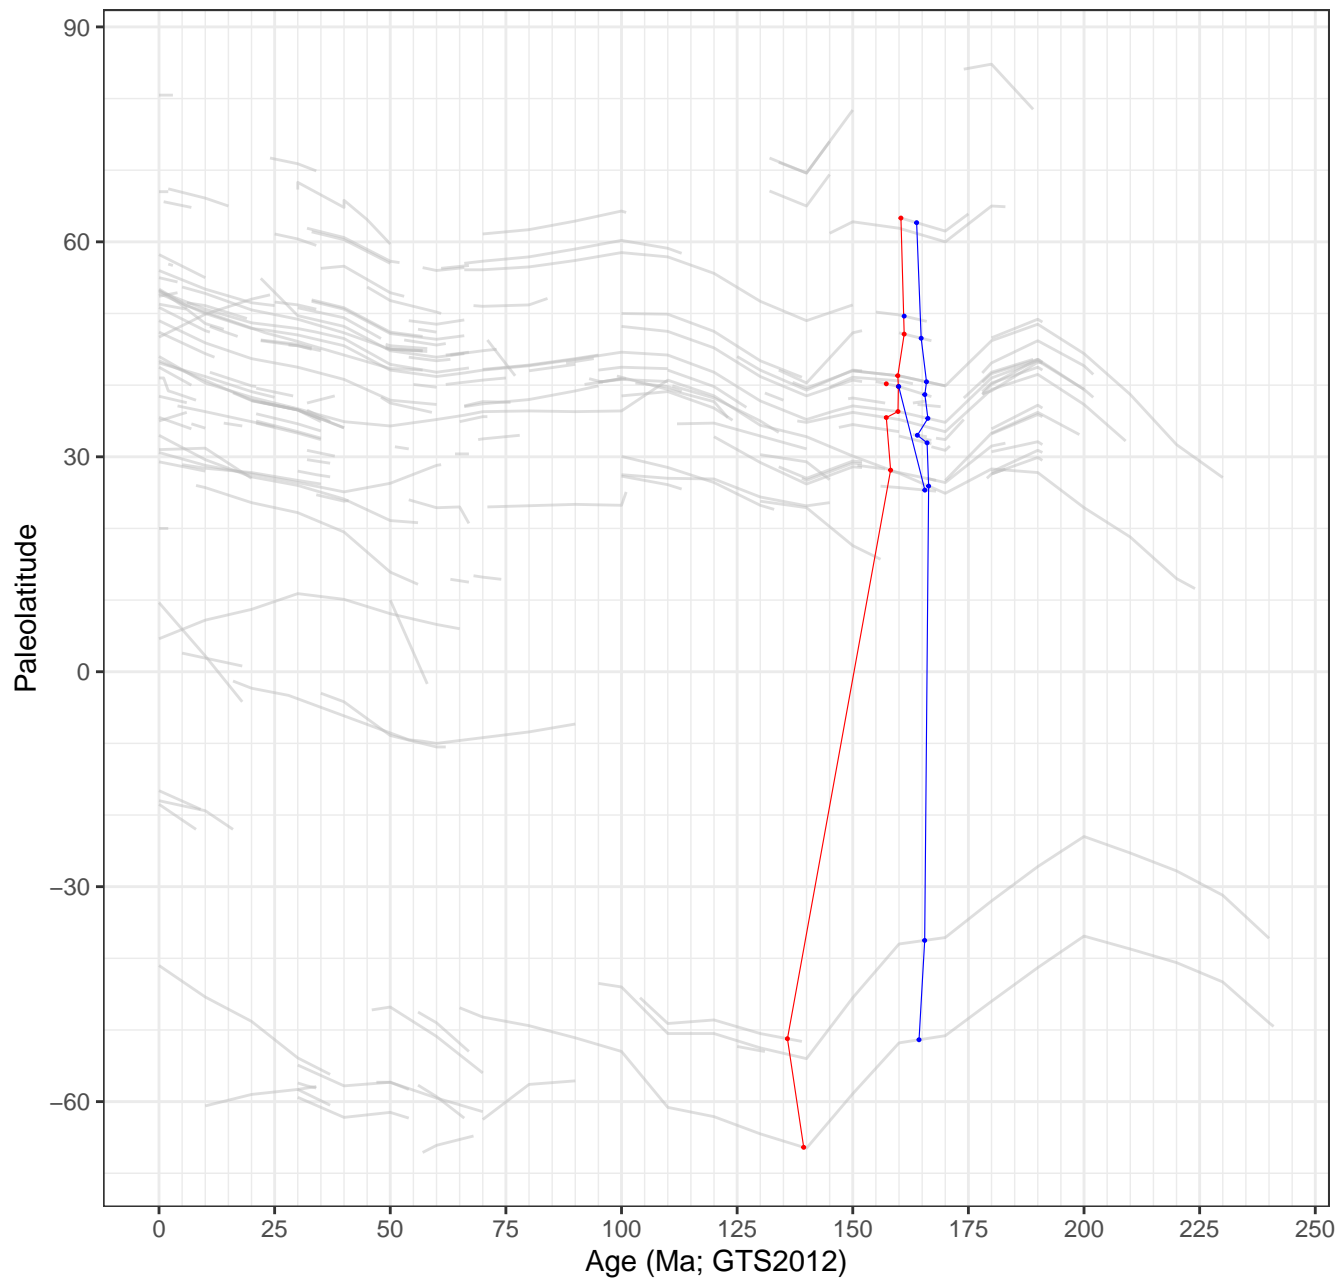

Supplement: Supplementary file 390 [file Genus Rigaudella.pdf › Supplement/Supplement 2/Genus 459 plots/Genus Rigaudella.pdf]

# Genus Rosswangia

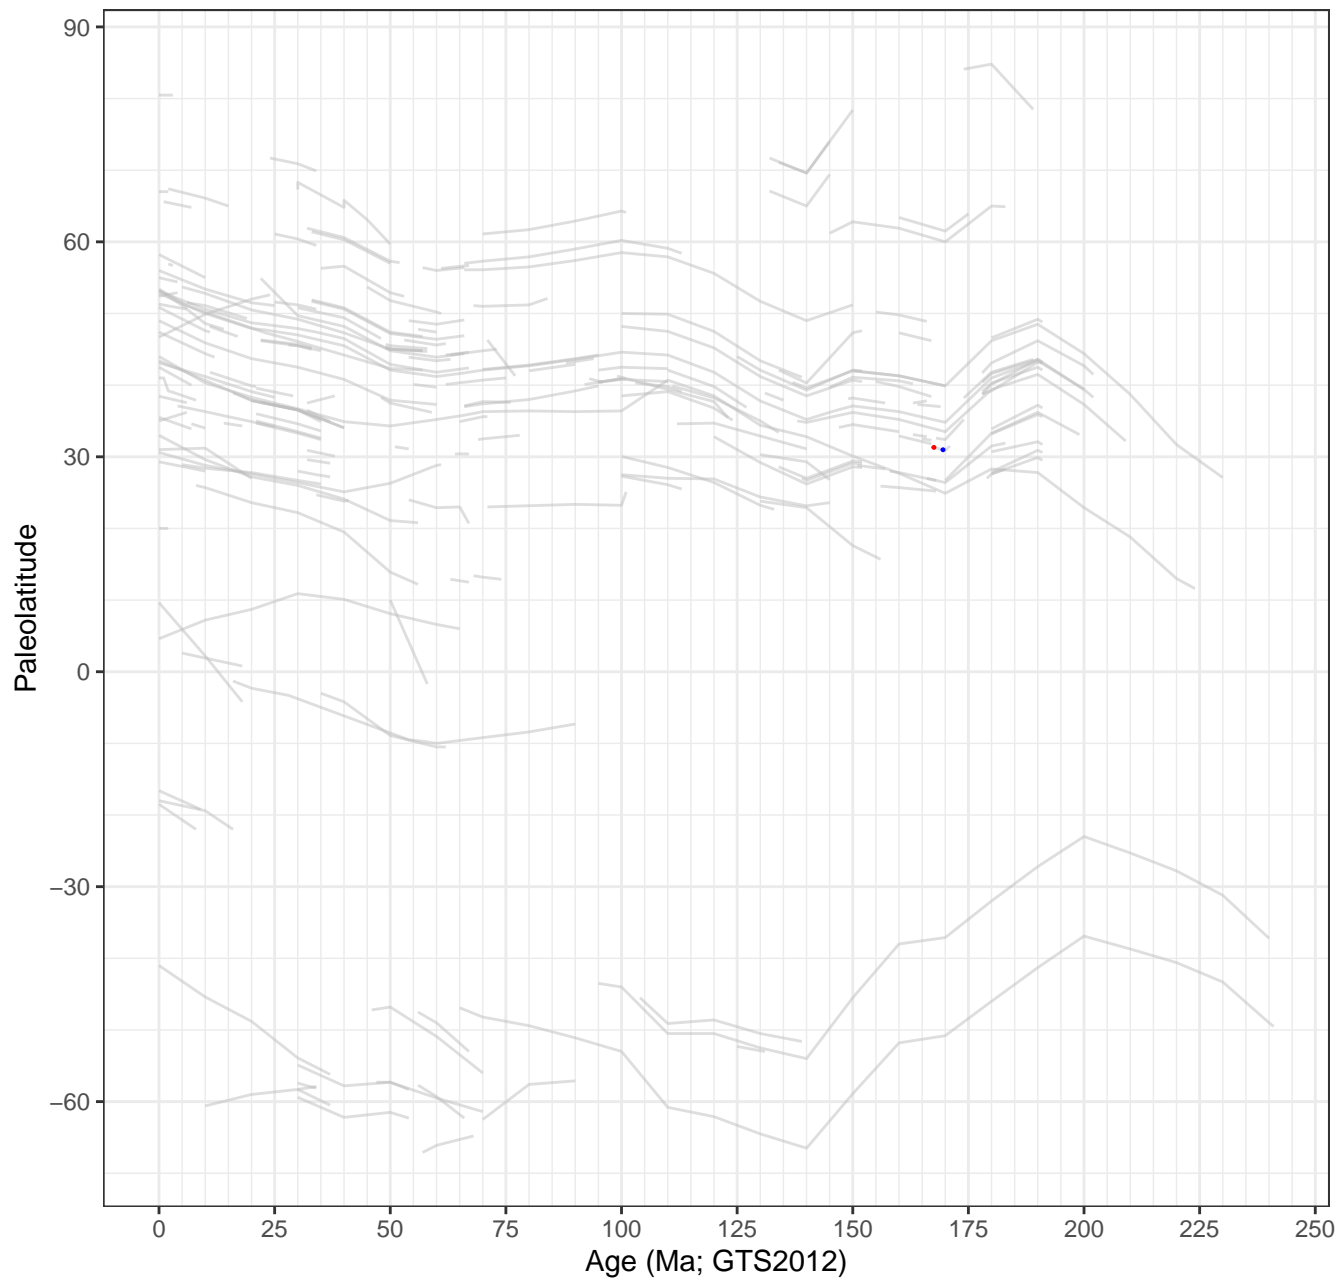

Supplement: Supplementary file 391 [file Genus Rosswangia.pdf › Supplement/Supplement 2/Genus 459 plots/Genus Rosswangia.pdf]

# Genus Rotosphaeropsis

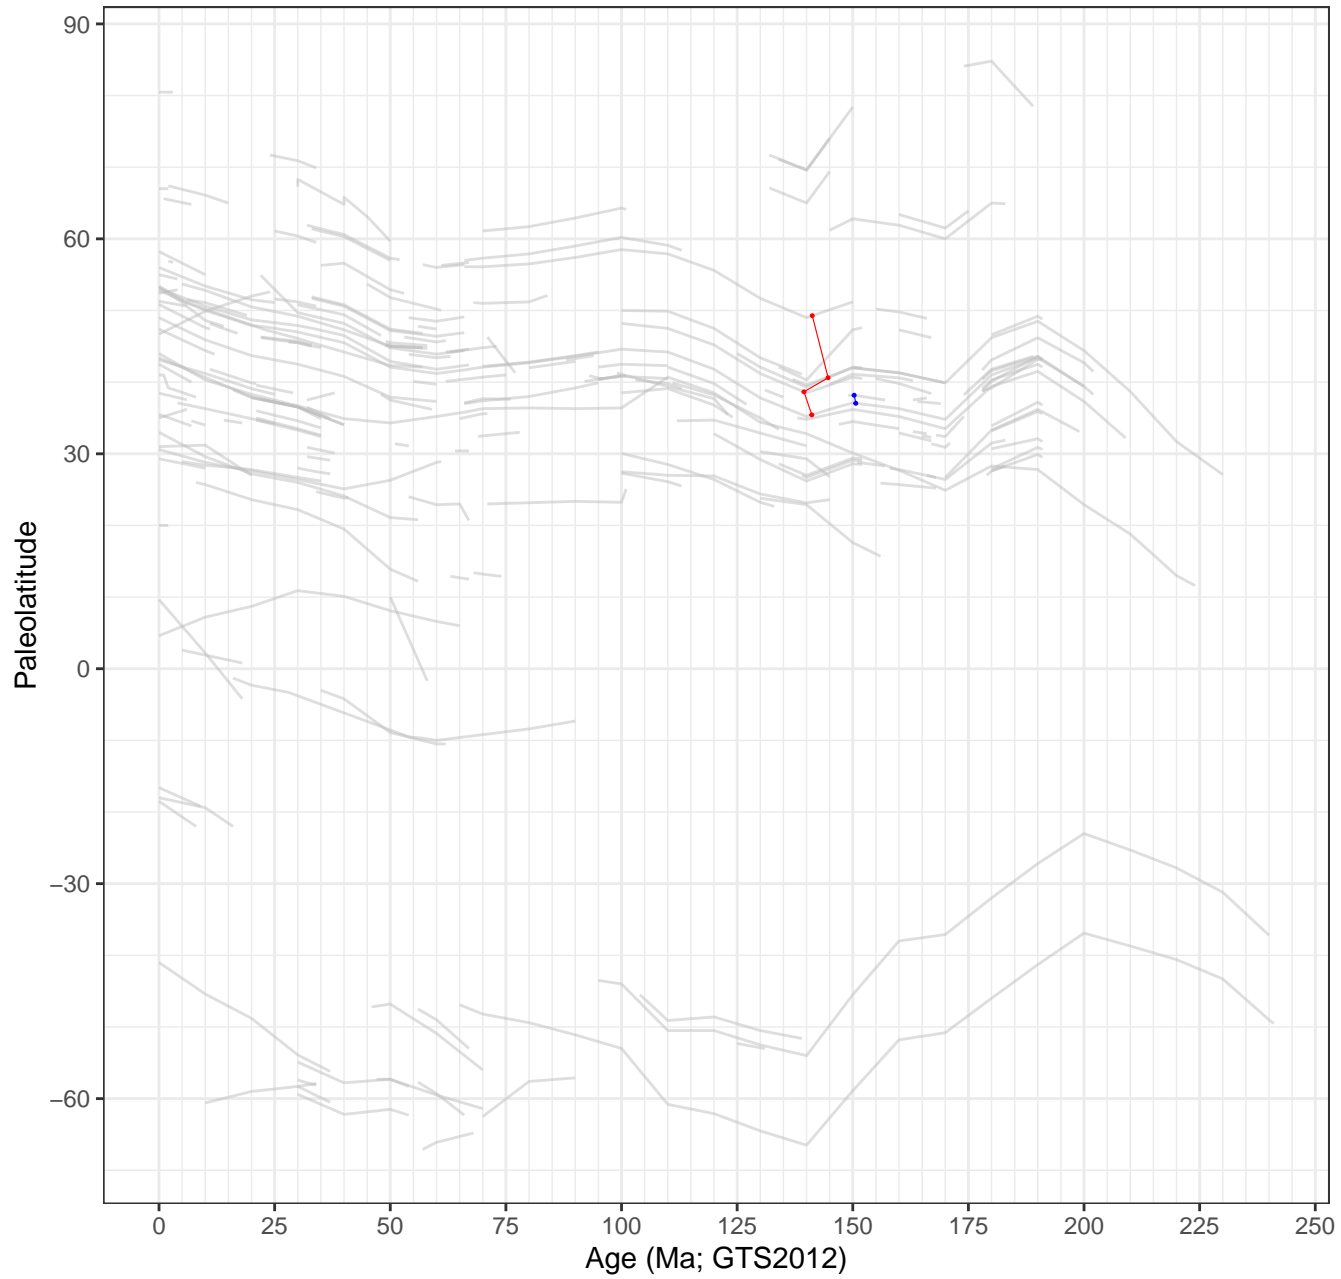

Supplement: Supplementary file 392 [file Genus Rotosphaeropsis.pdf › Supplement/Supplement 2/Genus 459 plots/Genus Rotosphaeropsis.pdf]

# Genus Rottnestia

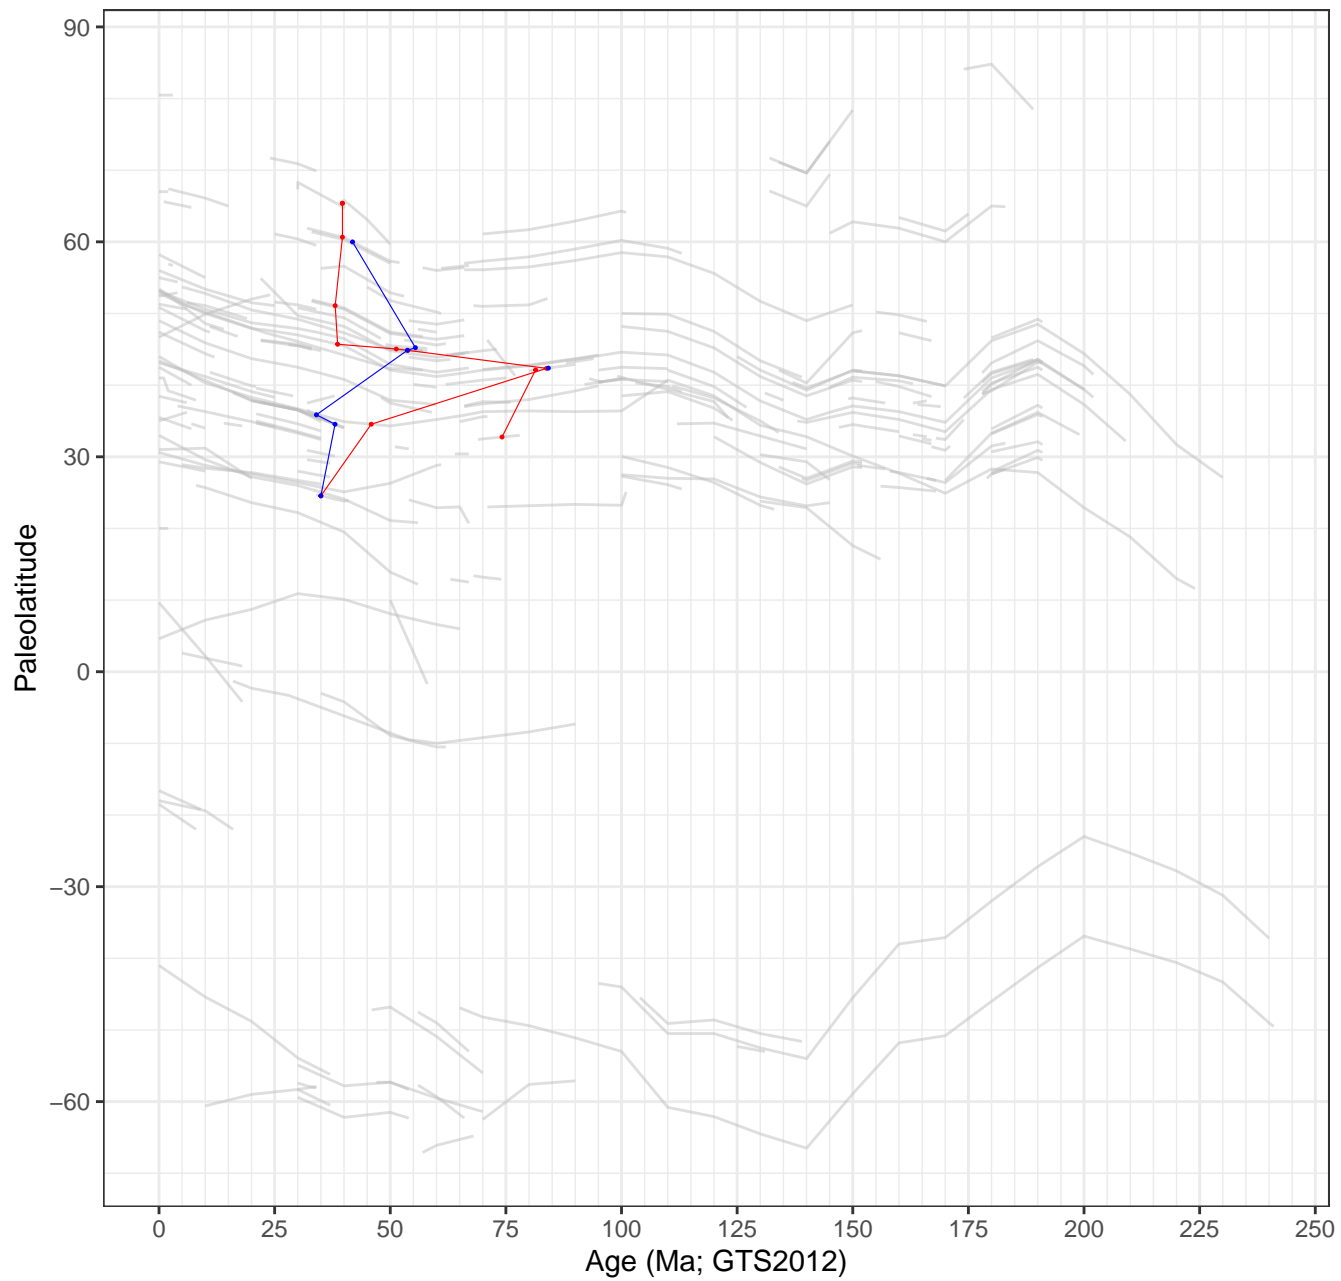

Supplement: Supplementary file 393 [file Genus Rottnestia.pdf › Supplement/Supplement 2/Genus 459 plots/Genus Rottnestia.pdf]

# Genus Sahulidiniun

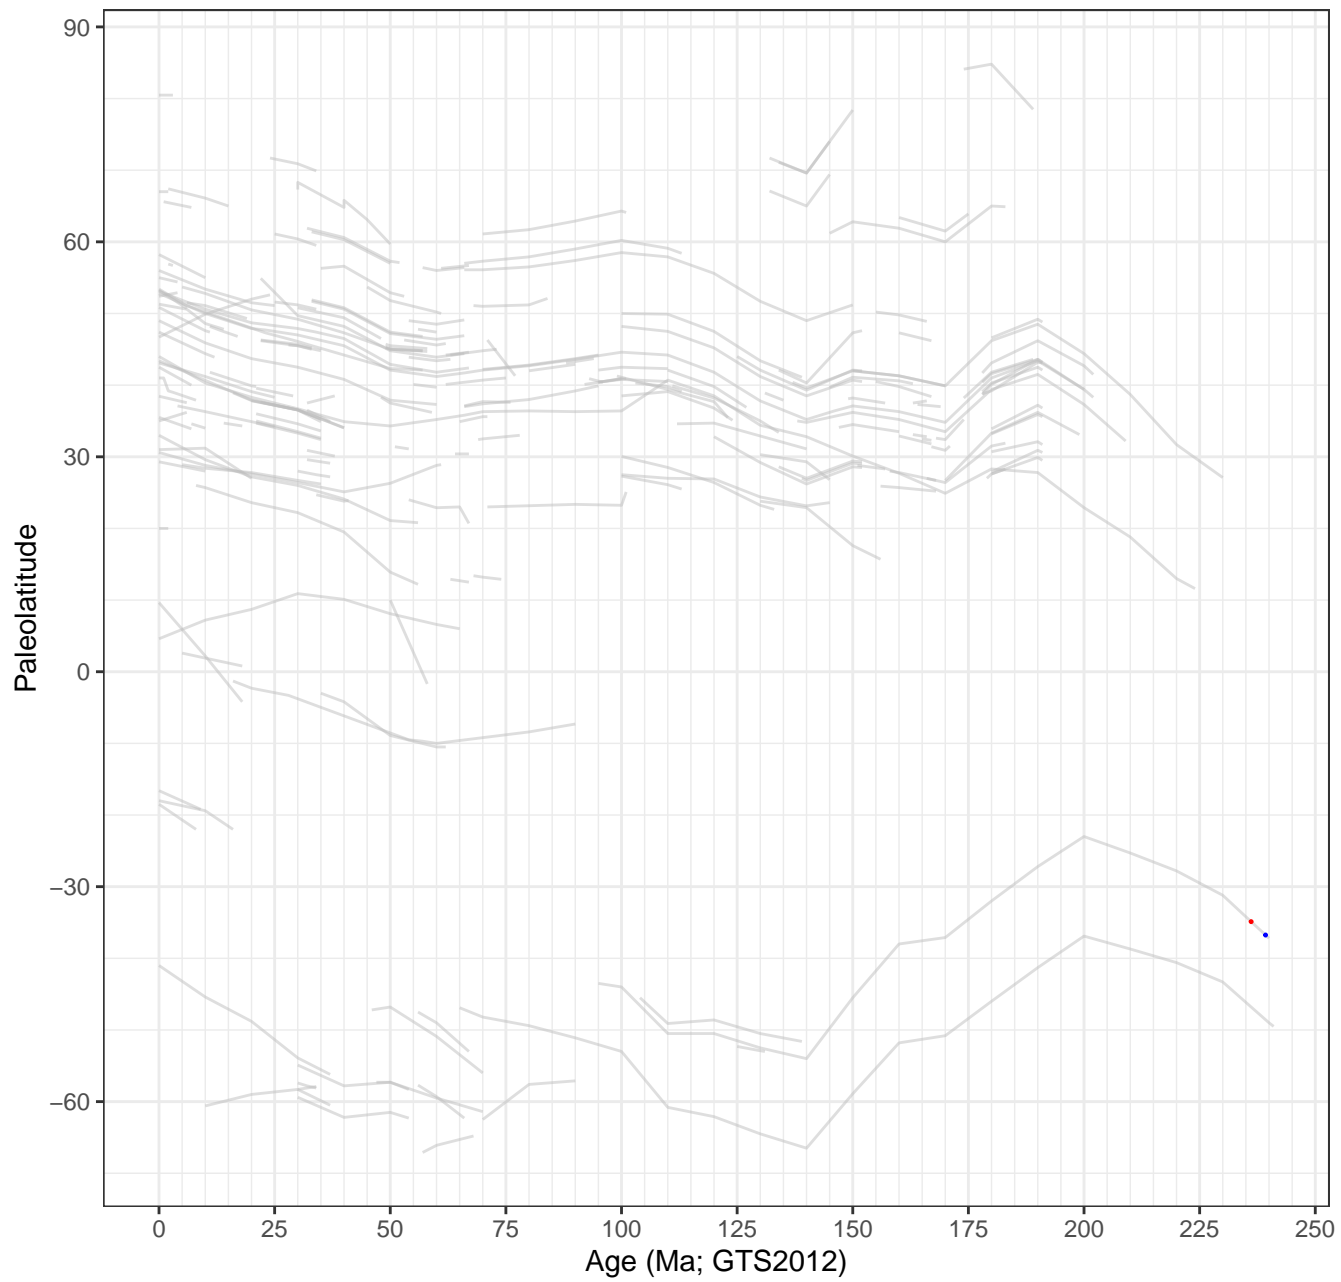

Supplement: Supplementary file 394 [file Genus Sahulidiniun.pdf › Supplement/Supplement 2/Genus 459 plots/Genus Sahulidiniun.pdf]

# Genus Samlandia

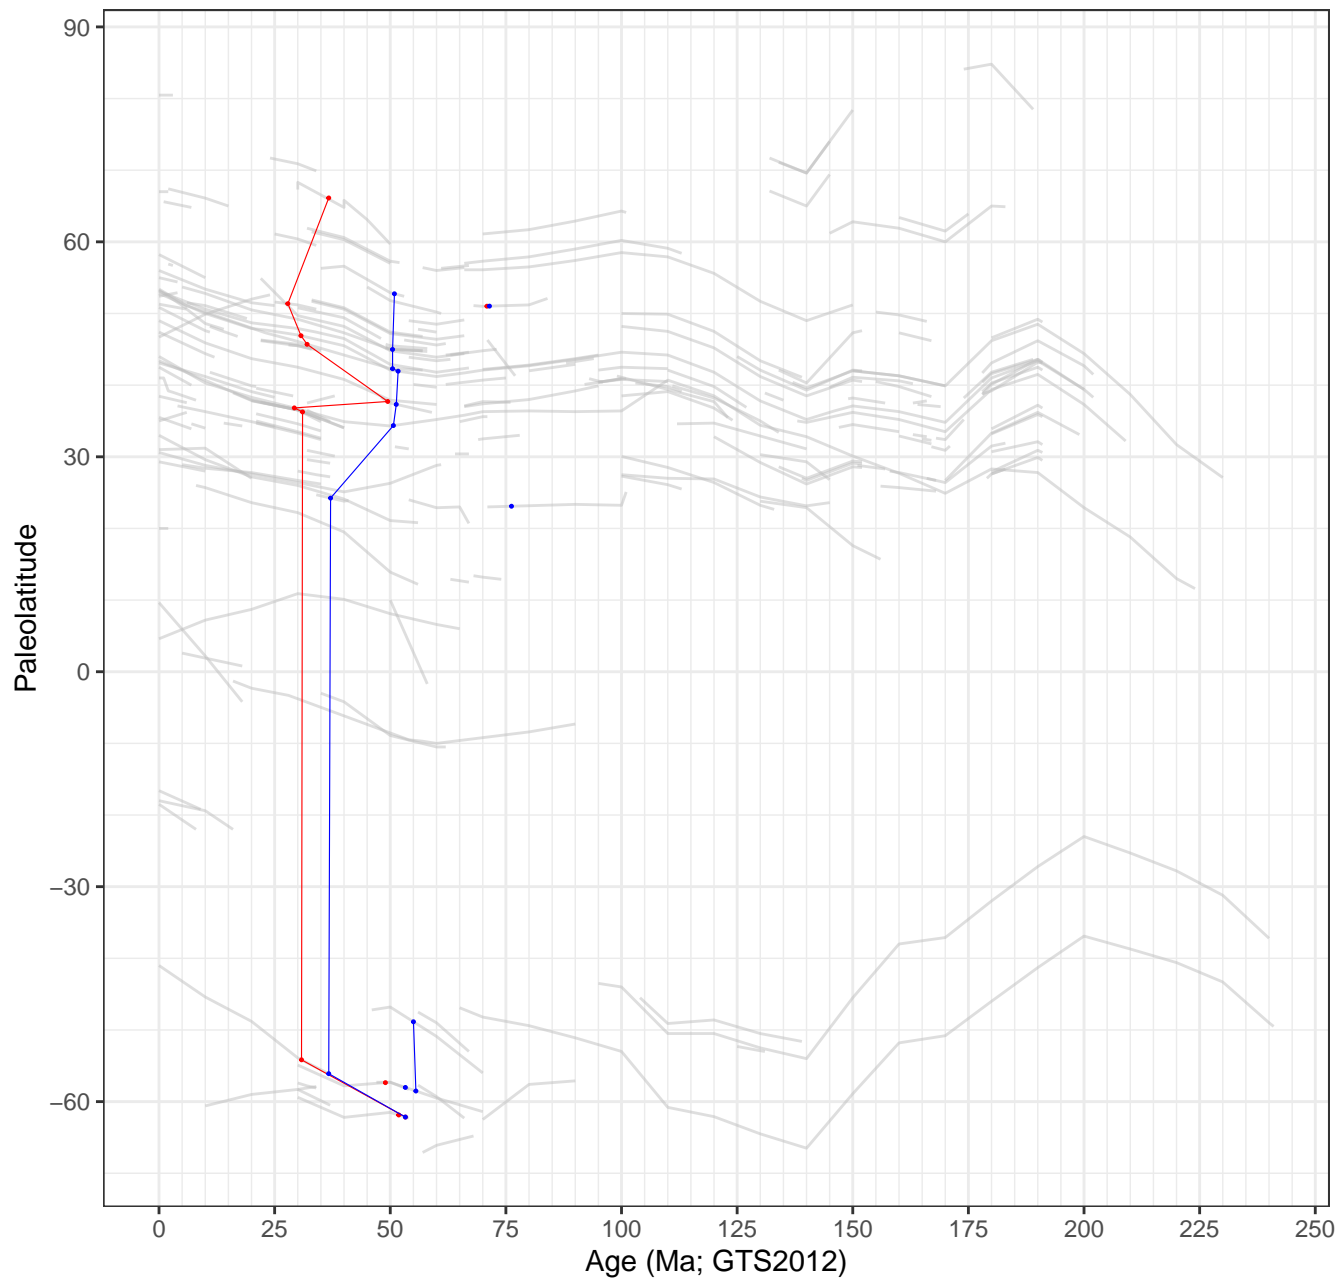

Supplement: Supplementary file 395 [file Genus Samlandia.pdf › Supplement/Supplement 2/Genus 459 plots/Genus Samlandia.pdf]

# Genus *Saturnodinium*

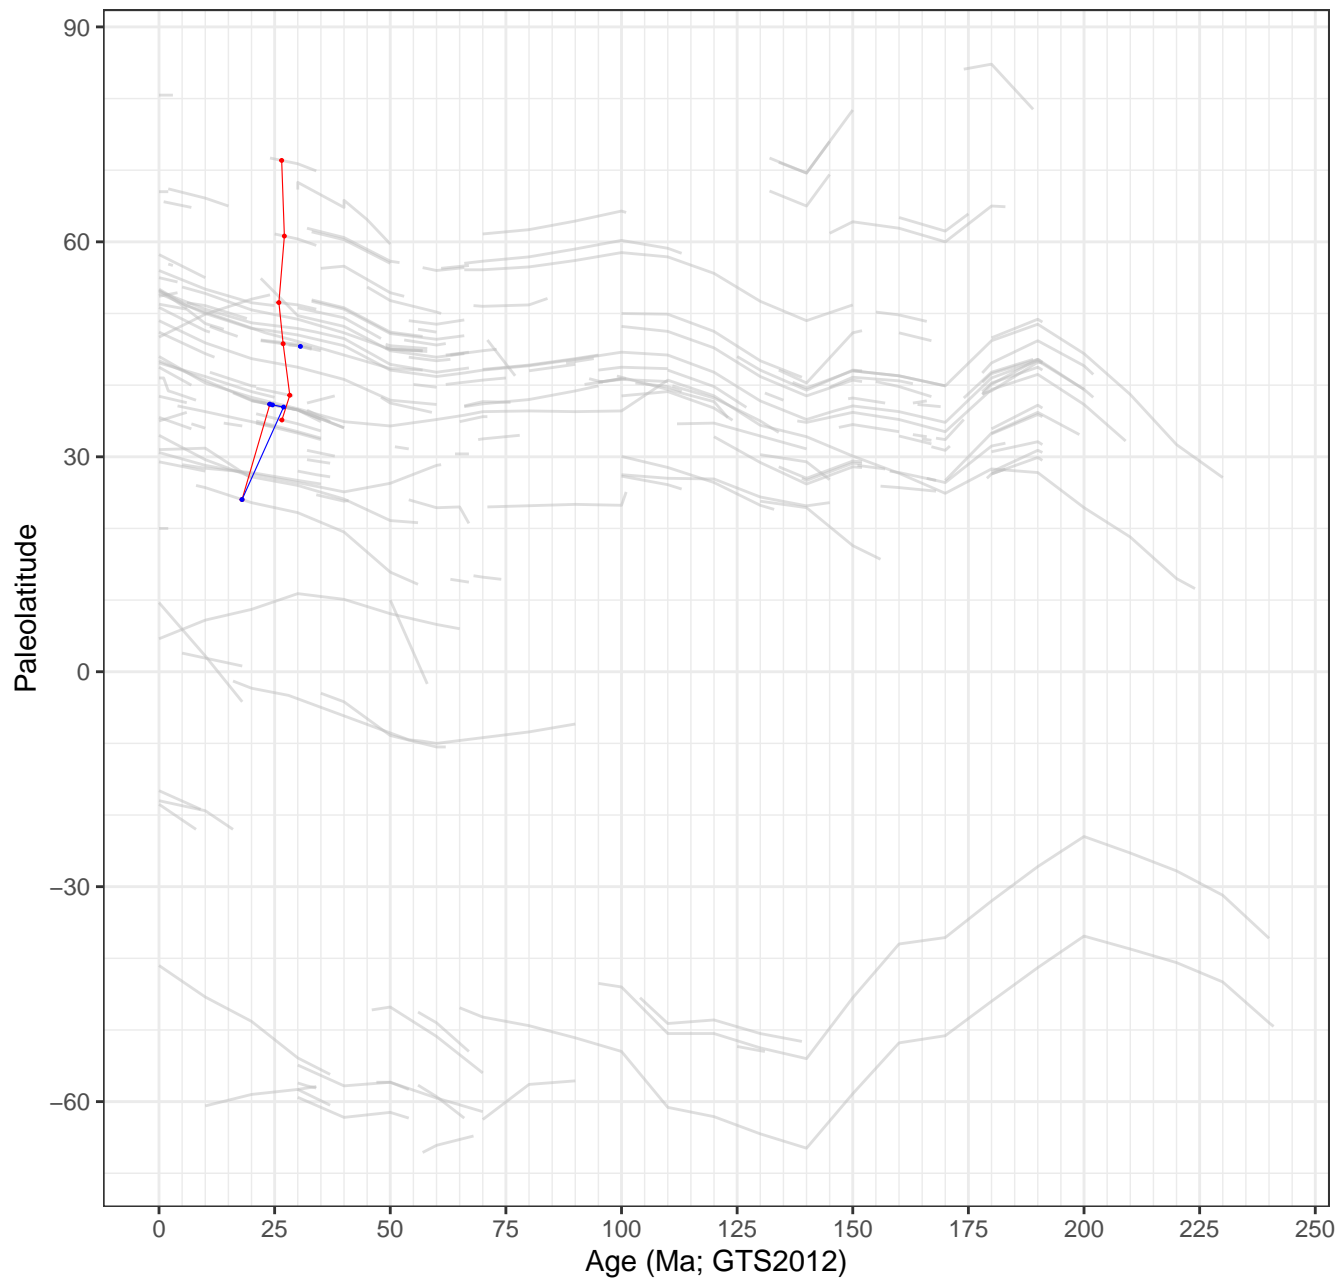

Supplement: Supplementary file 396 [file Genus Saturnodinium.pdf › Supplement/Supplement 2/Genus 459 plots/Genus Saturnodinium.pdf]

# Genus Satyrodinium

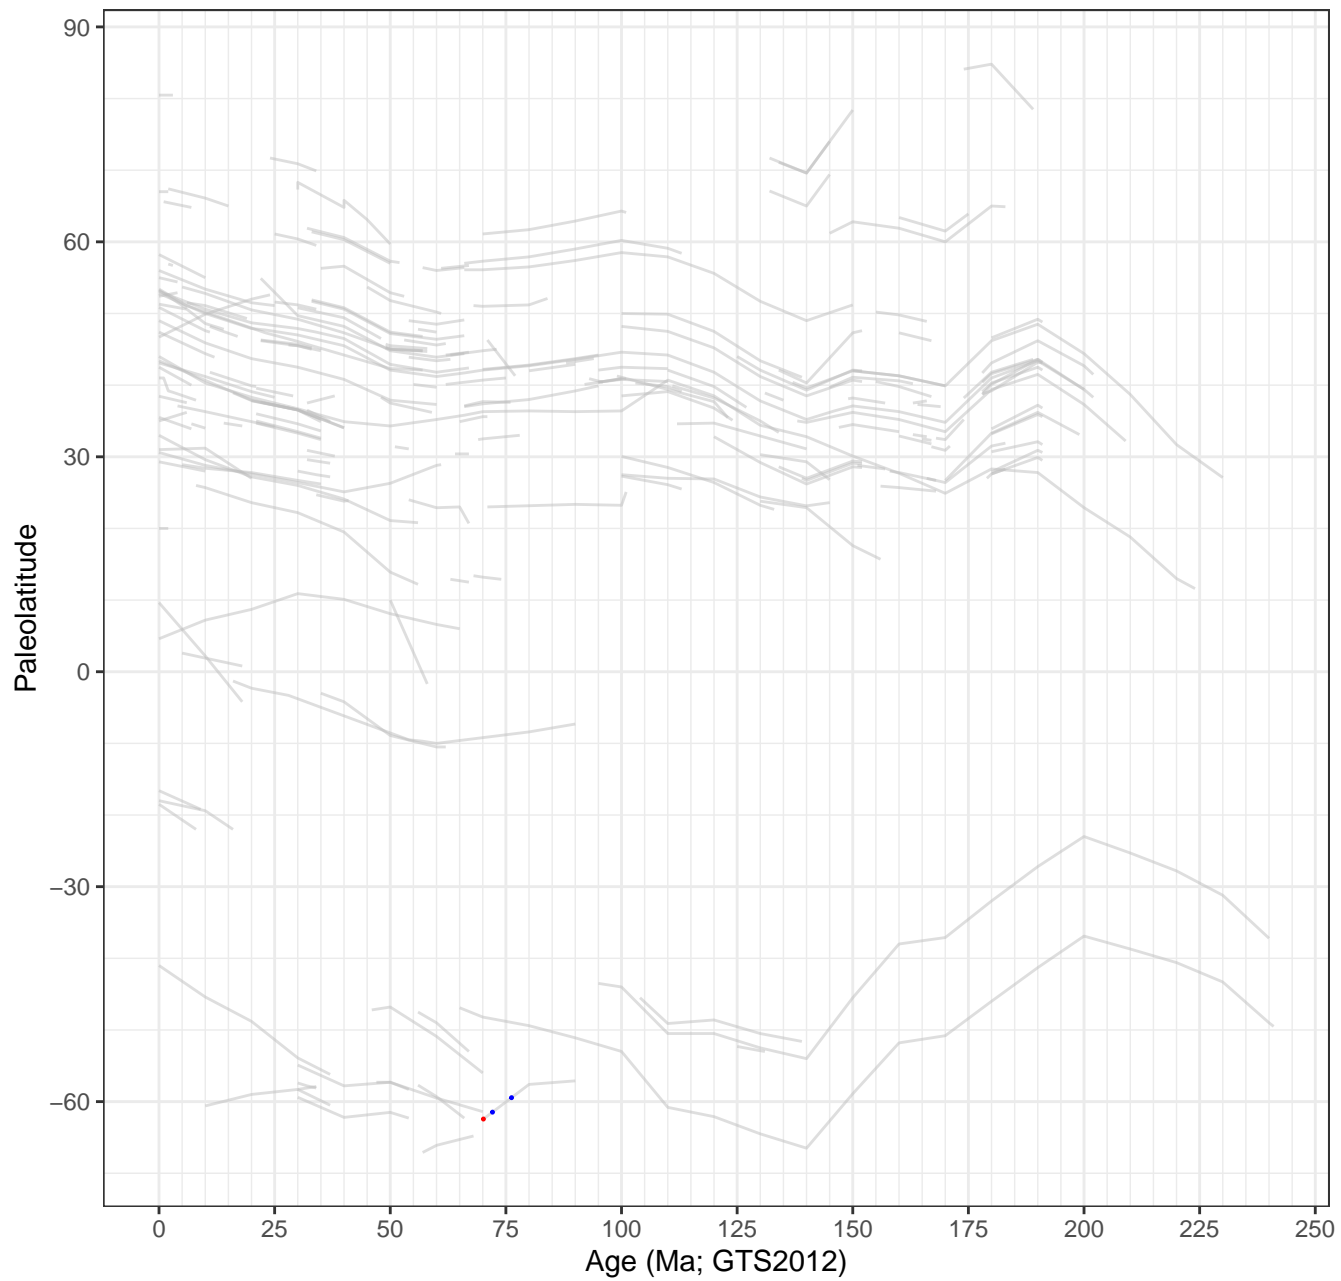

Supplement: Supplementary file 397 [file Genus Satyrodinium.pdf › Supplement/Supplement 2/Genus 459 plots/Genus Satyrodinium.pdf]

# Genus Schematophora

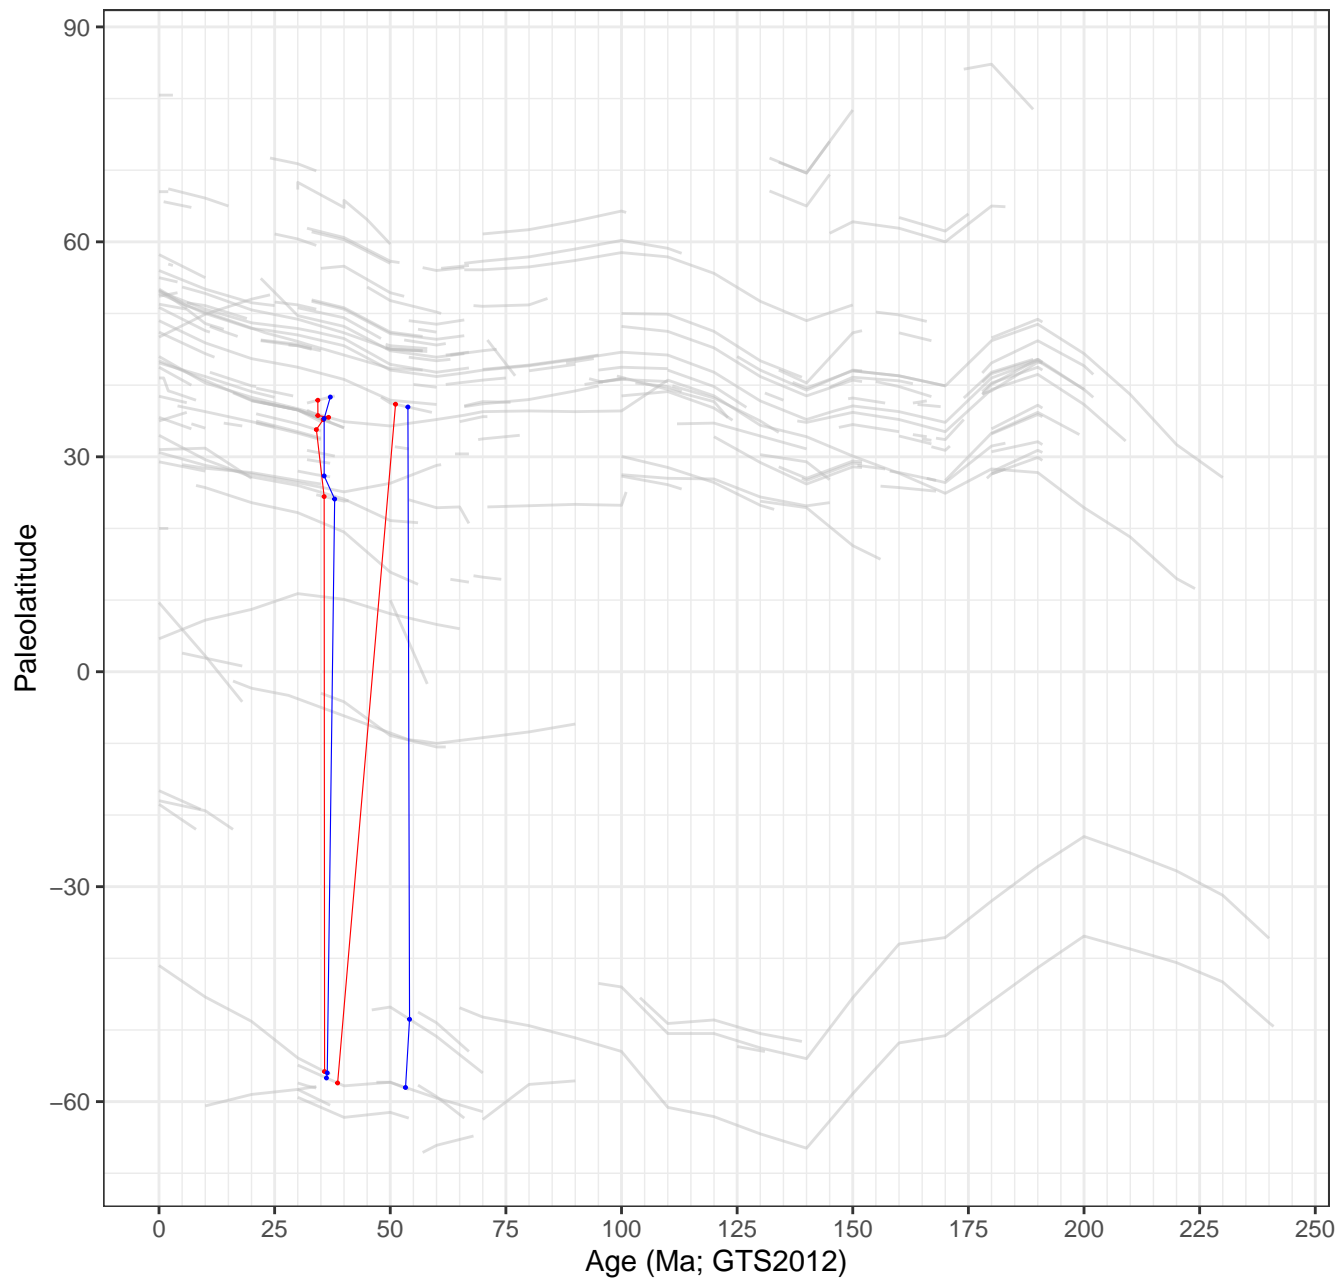

Supplement: Supplementary file 398 [file Genus Schematophora.pdf › Supplement/Supplement 2/Genus 459 plots/Genus Schematophora.pdf]

# Genus Schizocystia

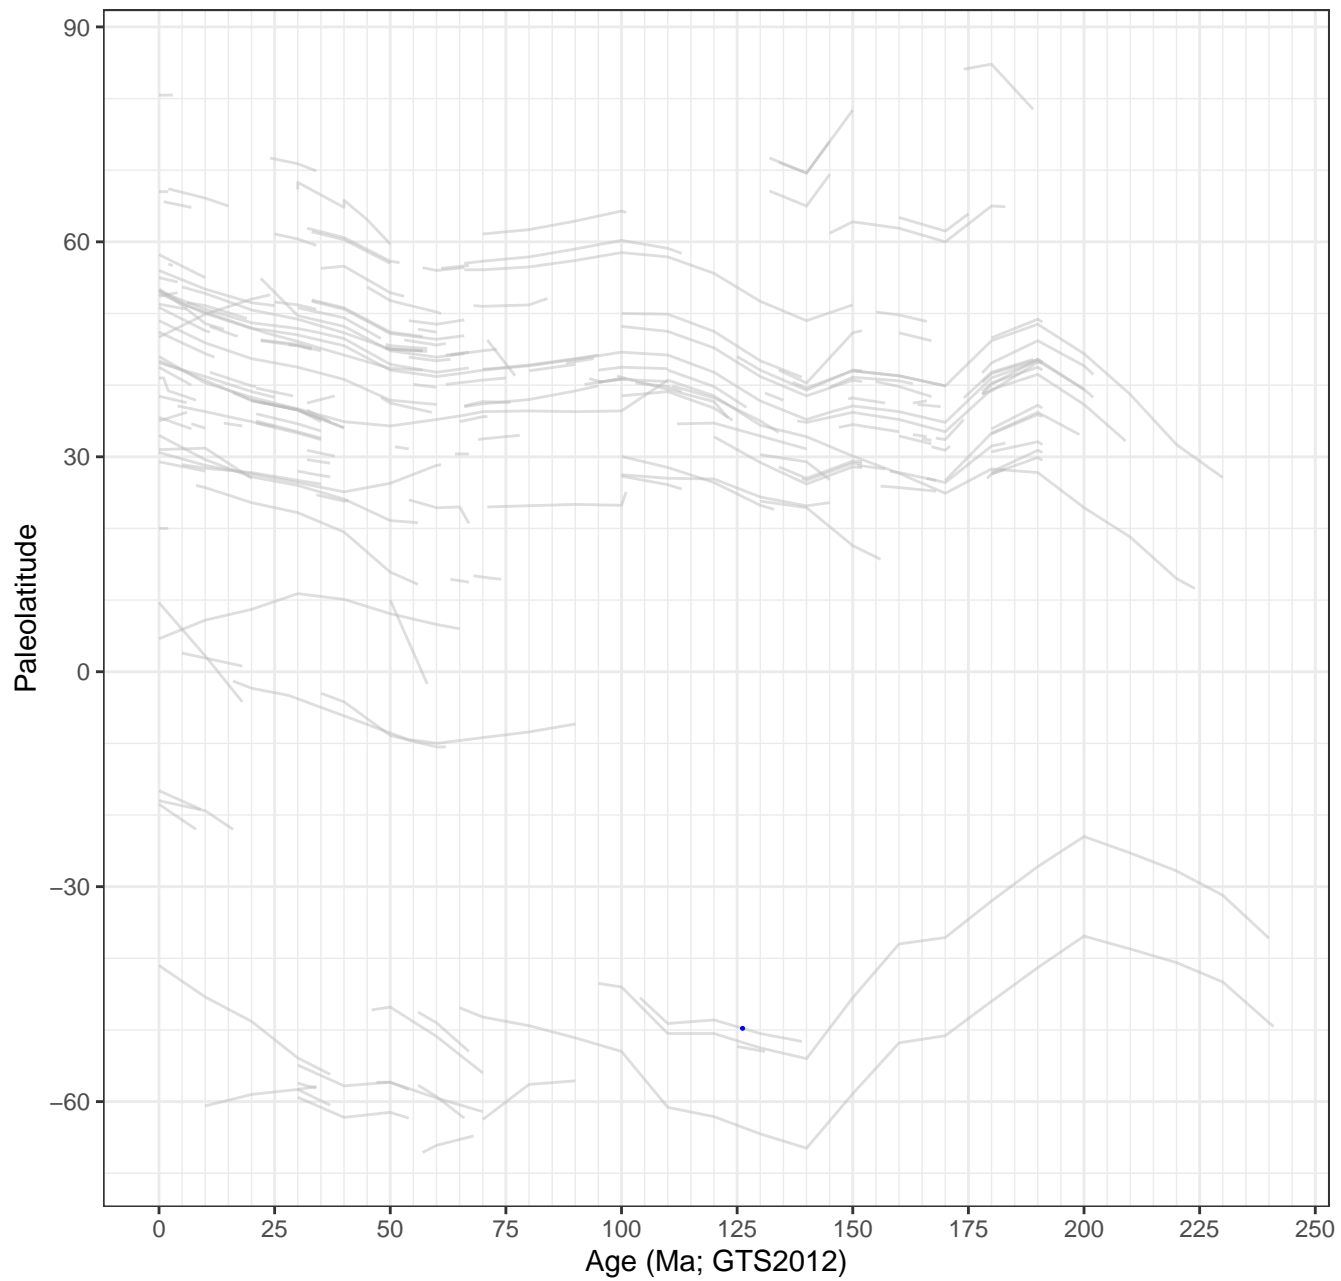

Supplement: Supplementary file 399 [file Genus Schizocystia.pdf › Supplement/Supplement 2/Genus 459 plots/Genus Schizocystia.pdf]

# Genus *Scriniocassis*

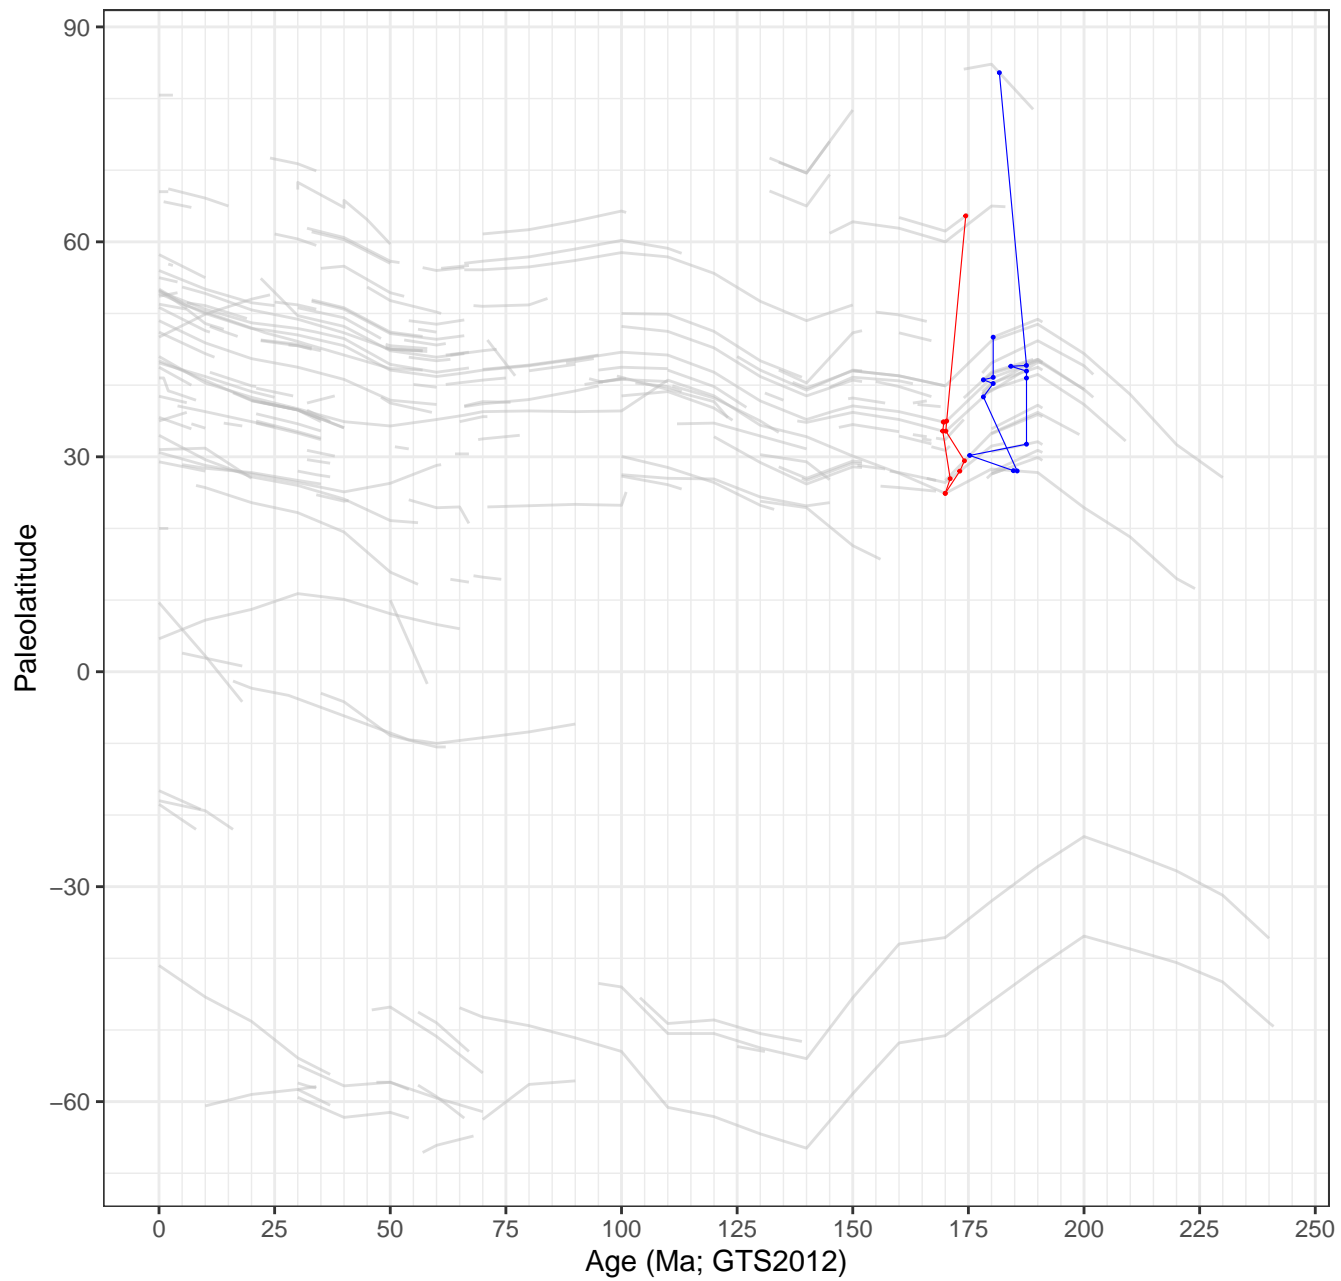

Supplement: Supplementary file 400 [file Genus Scriniocassis.pdf › Supplement/Supplement 2/Genus 459 plots/Genus Scriniocassis.pdf]

# Genus *Scriniodinium*

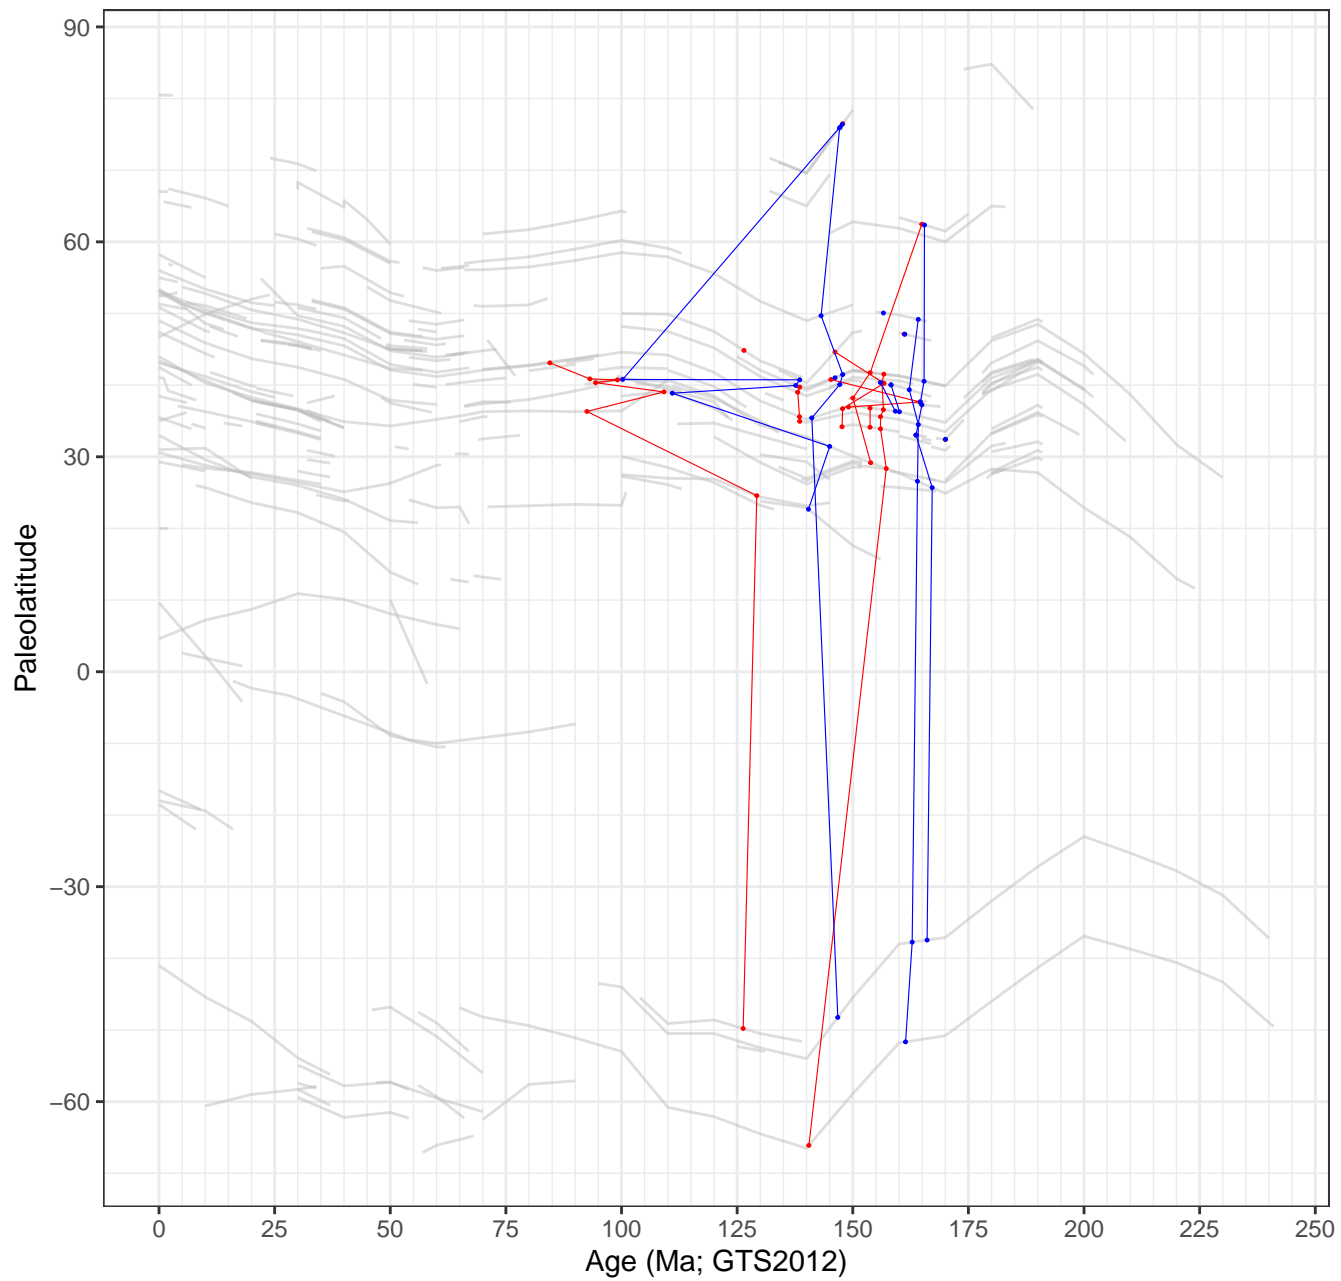

Supplement: Supplementary file 401 [file Genus Scriniodinium.pdf › Supplement/Supplement 2/Genus 459 plots/Genus Scriniodinium.pdf]

# Genus *Selenopemphix*

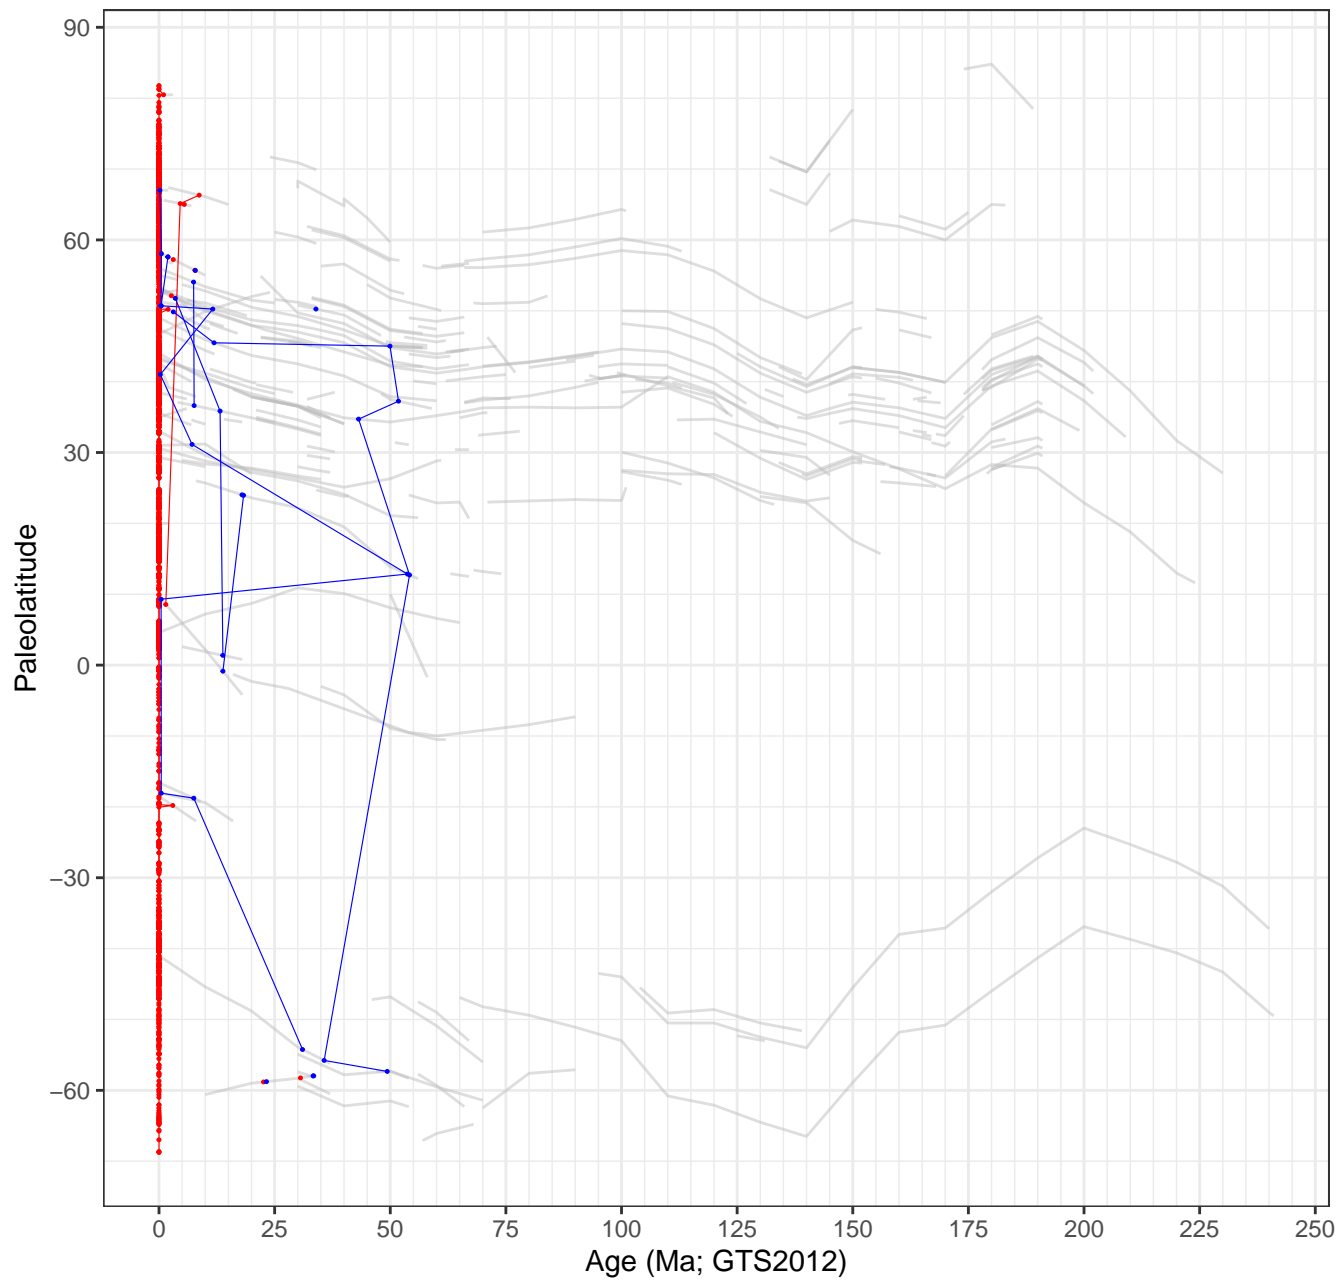

Supplement: Supplementary file 402 [file Genus Selenopemphix.pdf › Supplement/Supplement 2/Genus 459 plots/Genus Selenopemphix.pdf]

# Genus Semicavidinium

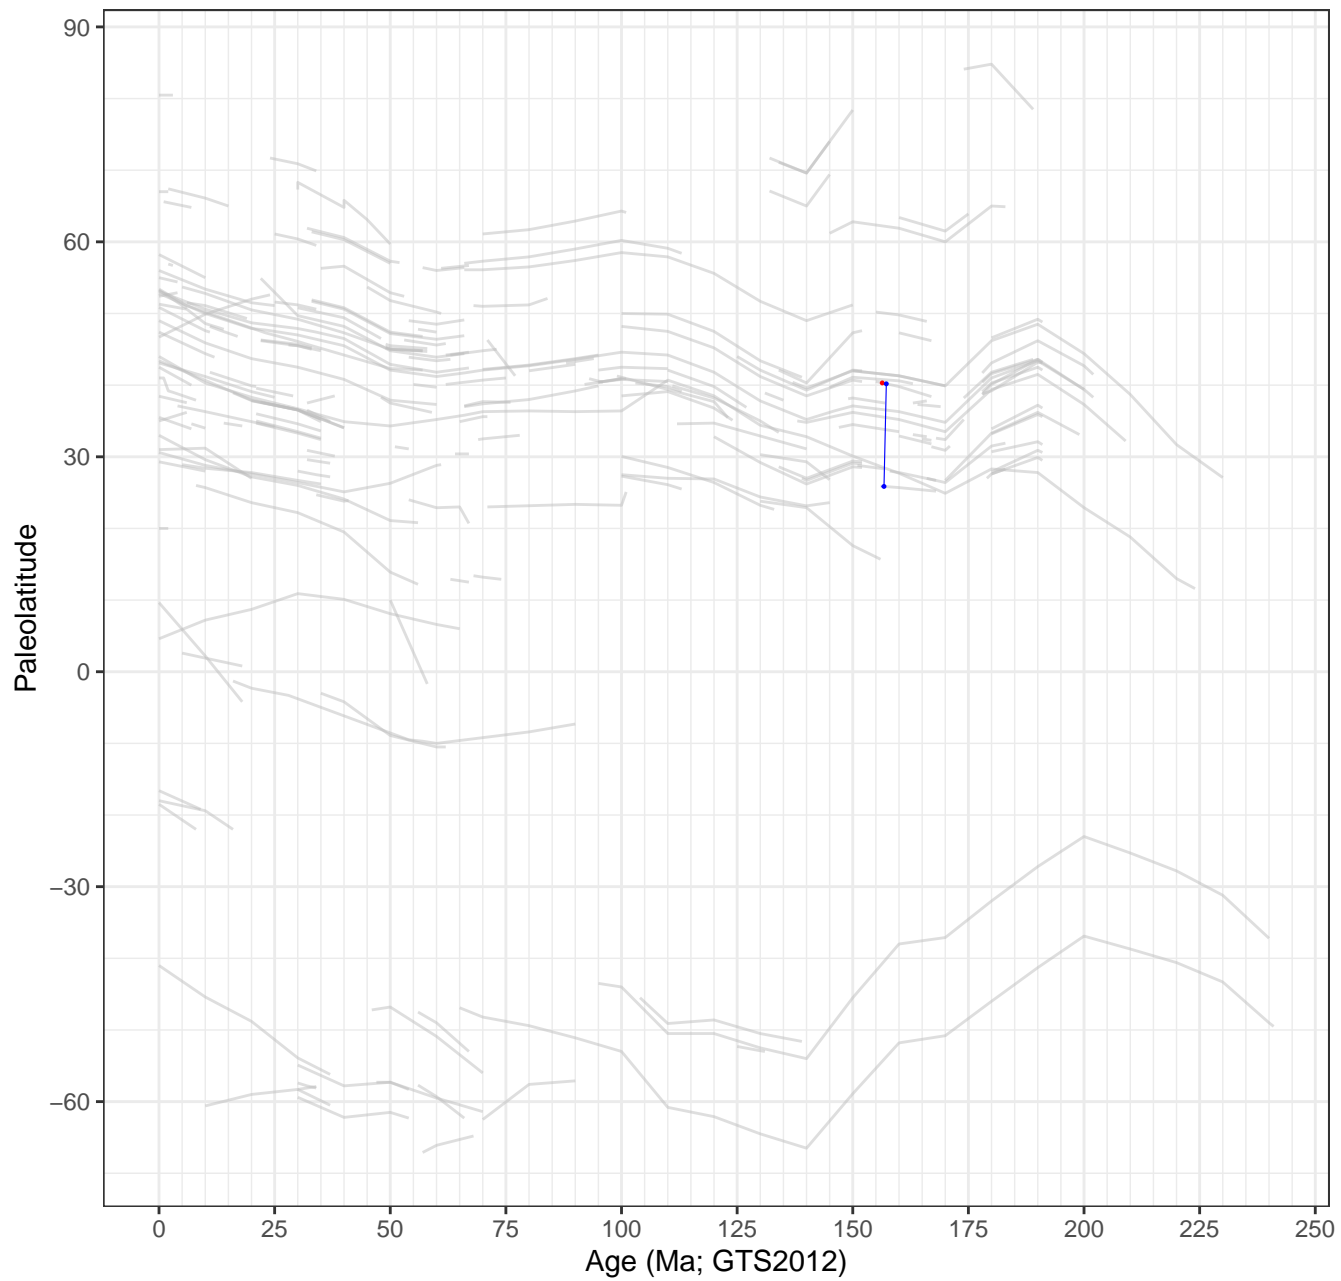

Supplement: Supplementary file 403 [file Genus Semicavidinium.pdf › Supplement/Supplement 2/Genus 459 plots/Genus Semicavidinium.pdf]

# Genus Senegalinium

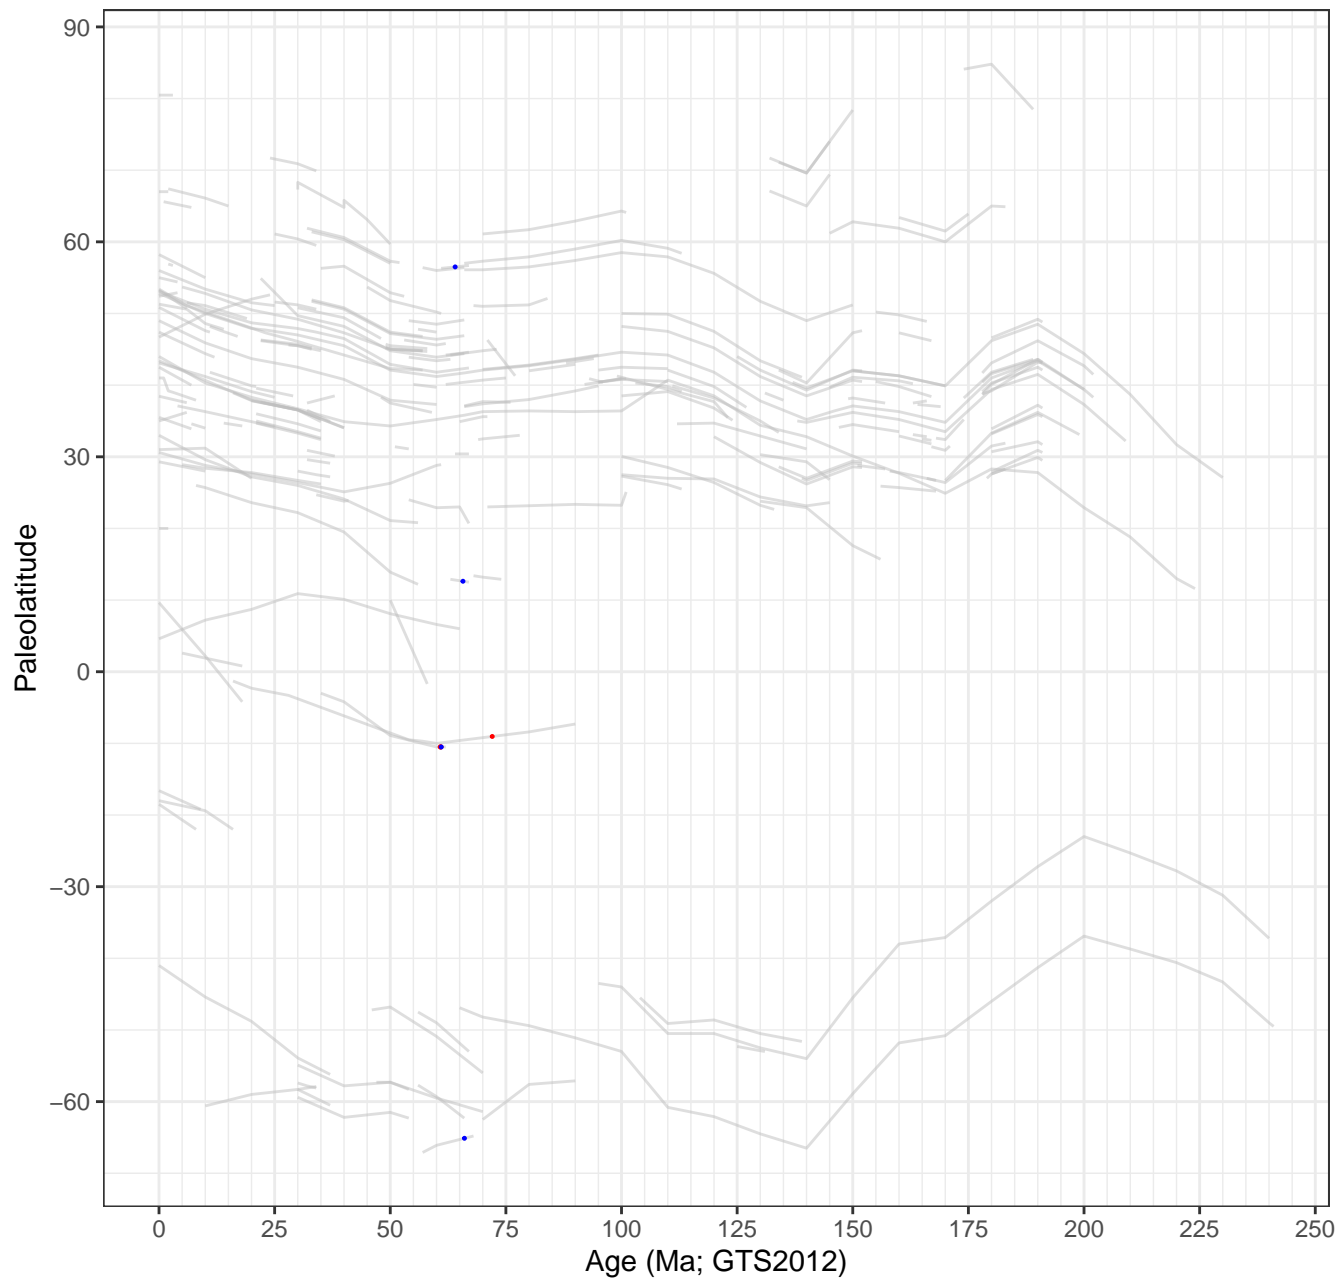

Supplement: Supplementary file 404 [file Genus Senegalinium.pdf › Supplement/Supplement 2/Genus 459 plots/Genus Senegalinium.pdf]

# Genus *Senoniasphaera*

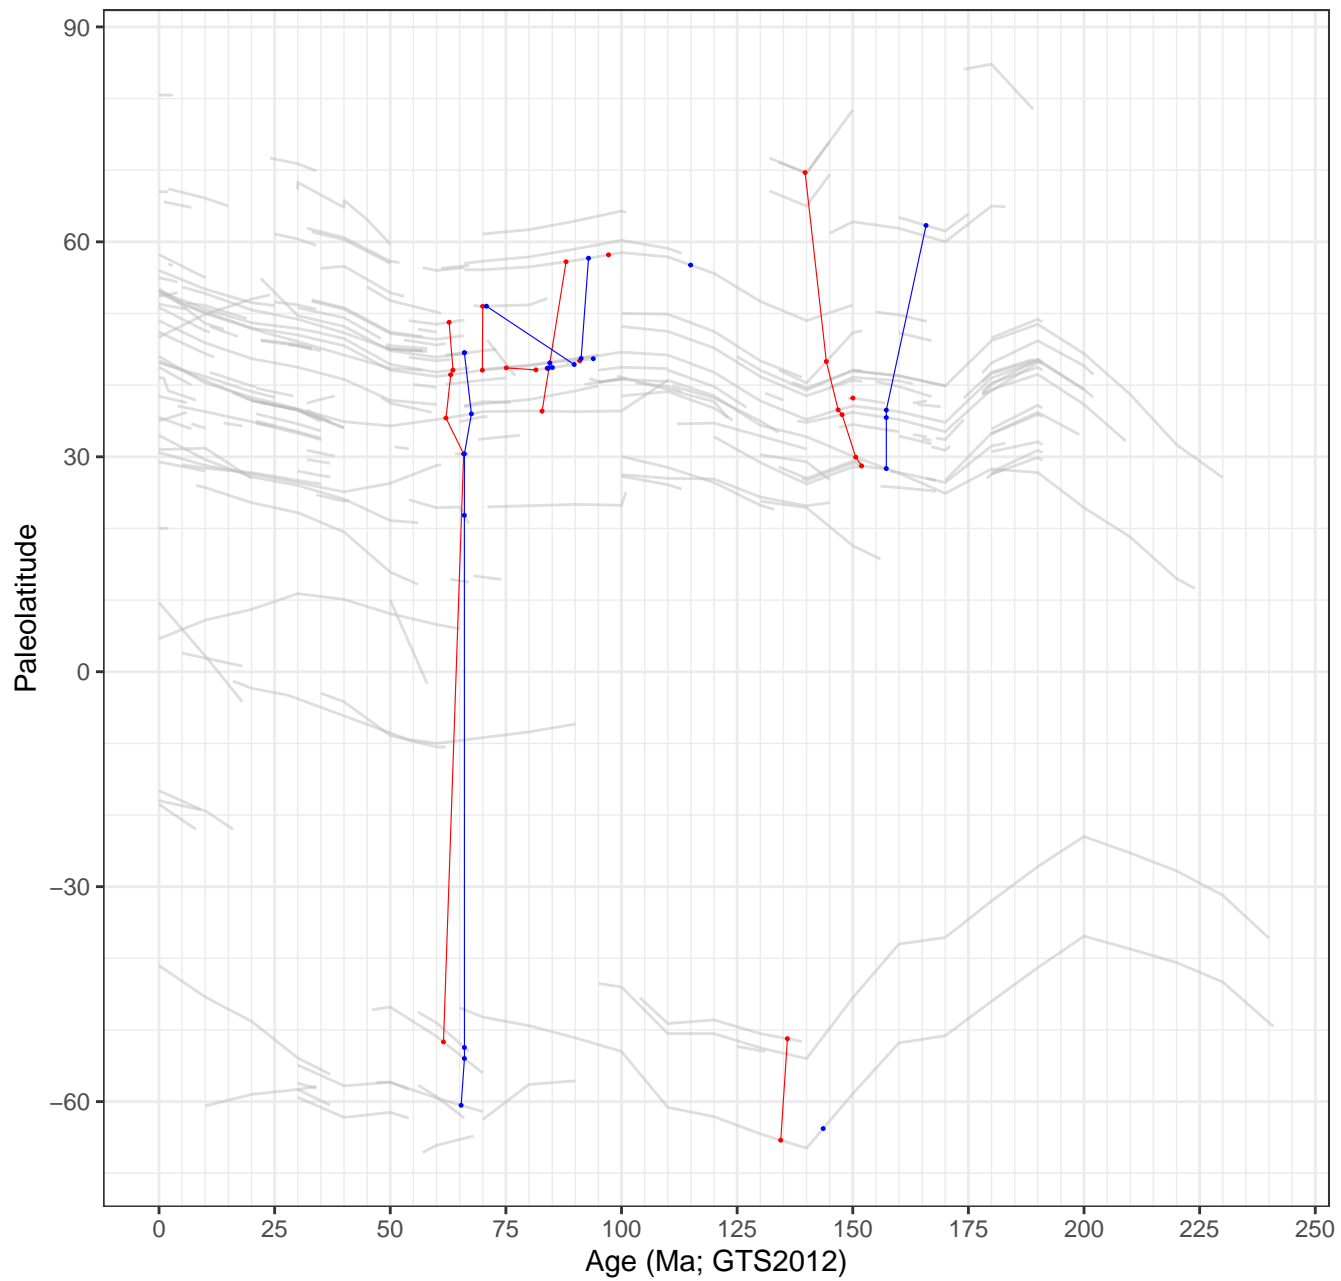

Supplement: Supplementary file 405 [file Genus Senoniasphaera.pdf › Supplement/Supplement 2/Genus 459 plots/Genus Senoniasphaera.pdf]

# Genus Sentusidinium

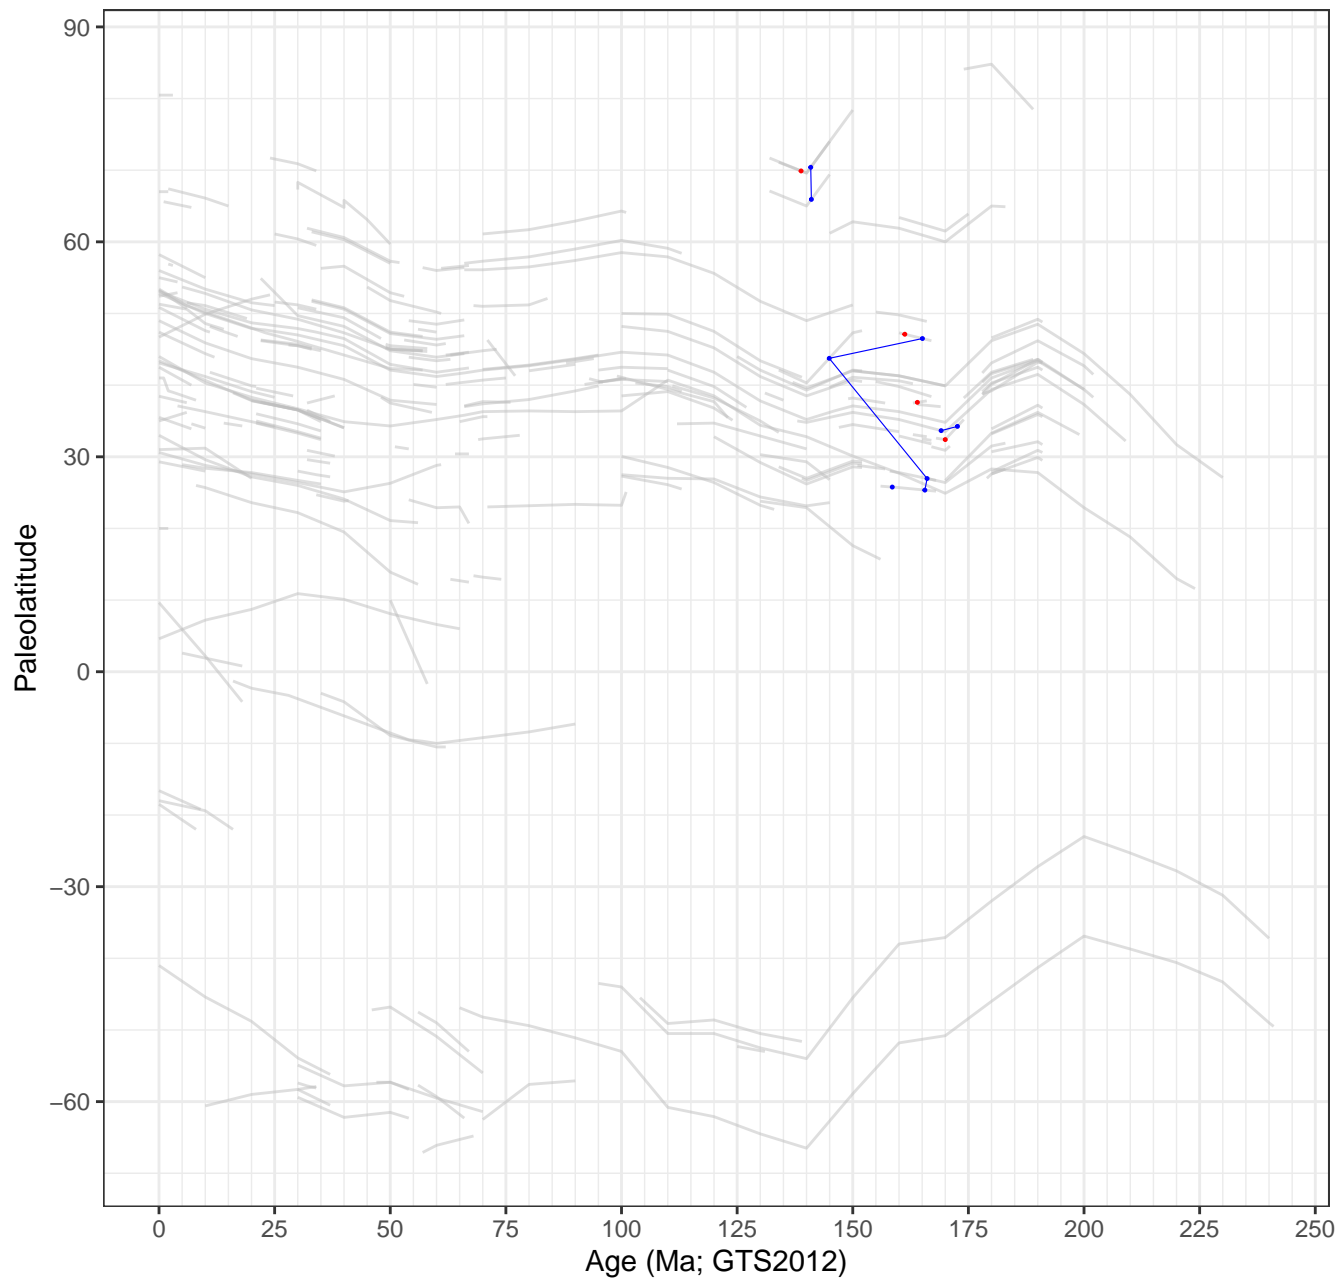

Supplement: Supplementary file 406 [file Genus Sentusidinium.pdf › Supplement/Supplement 2/Genus 459 plots/Genus Sentusidinium.pdf]

# Genus Sepispinula

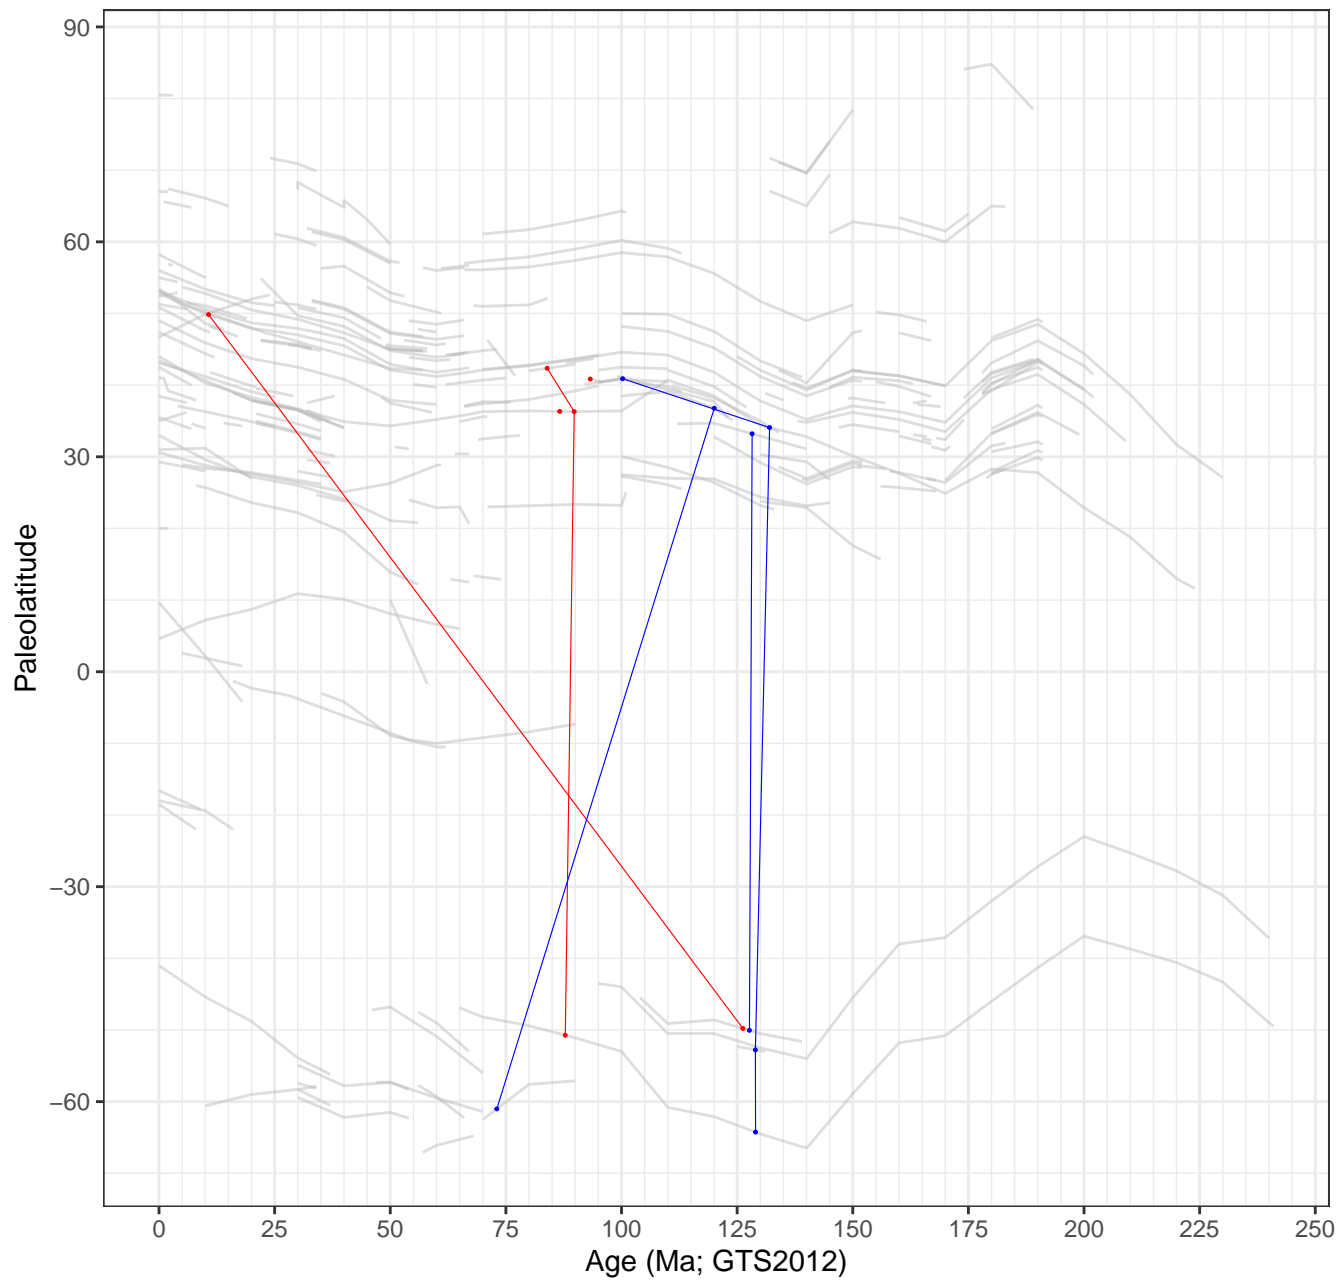

Supplement: Supplementary file 407 [file Genus Sepispinula.pdf › Supplement/Supplement 2/Genus 459 plots/Genus Sepispinula.pdf]

# Genus Sindridinium

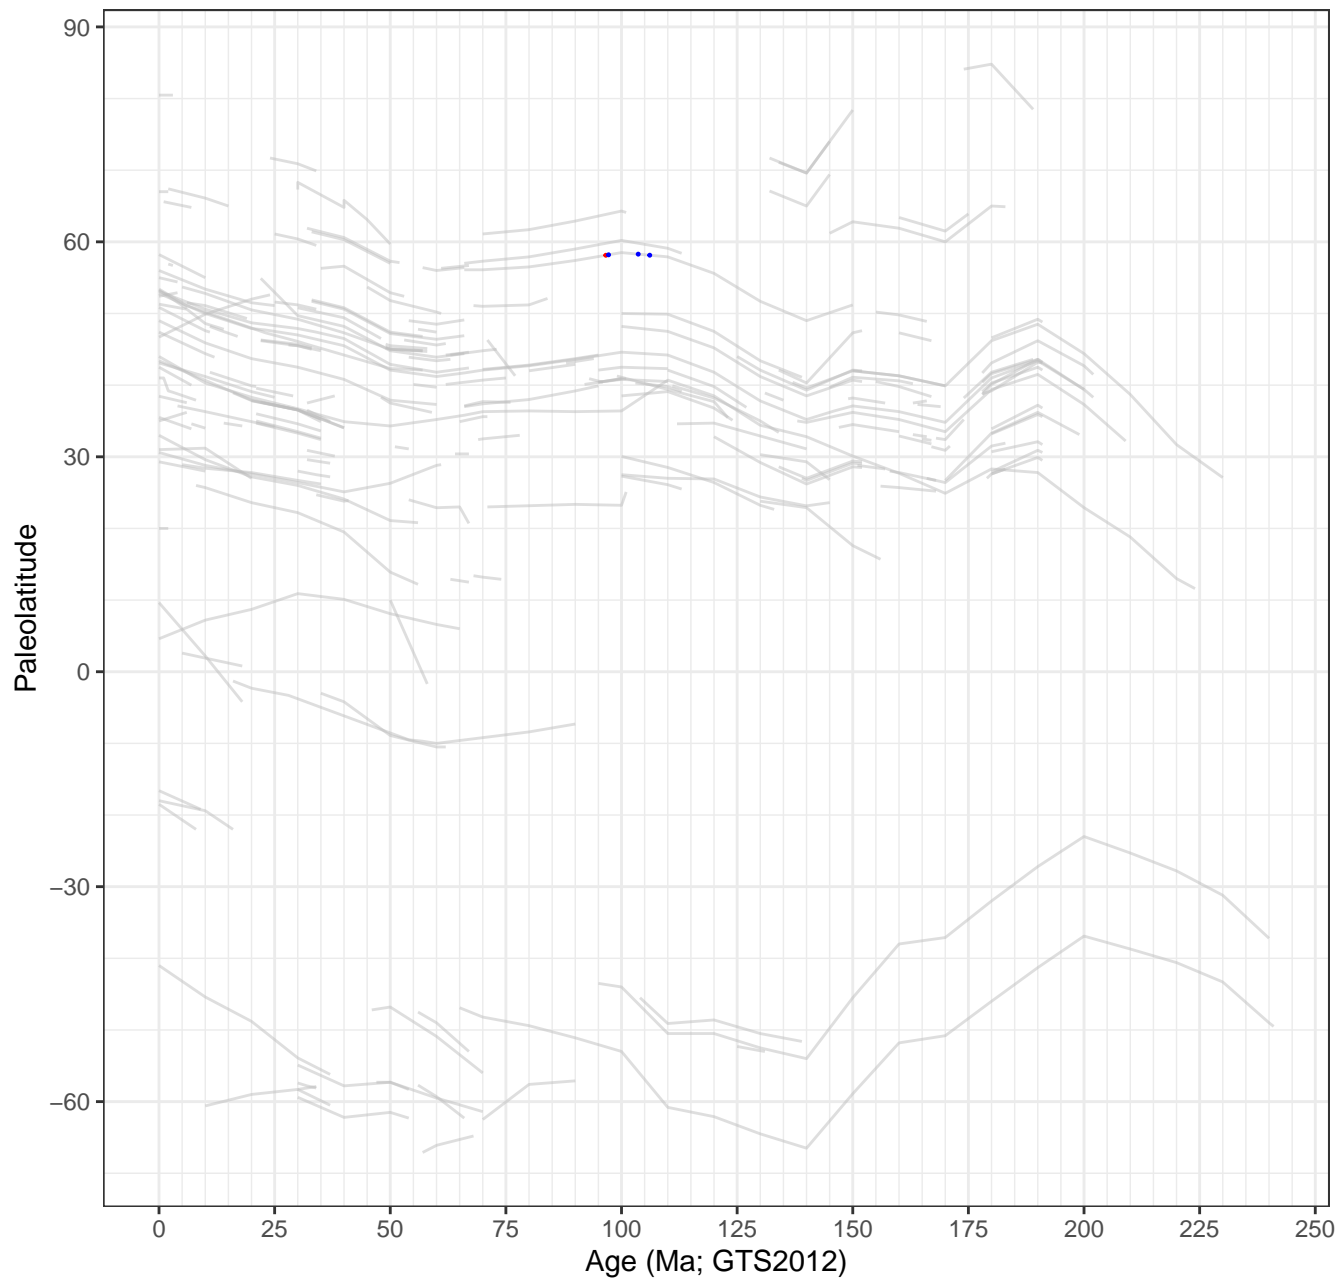

Supplement: Supplementary file 408 [file Genus Sindridinium.pdf › Supplement/Supplement 2/Genus 459 plots/Genus Sindridinium.pdf]

# Genus Sirmiodiniopsis

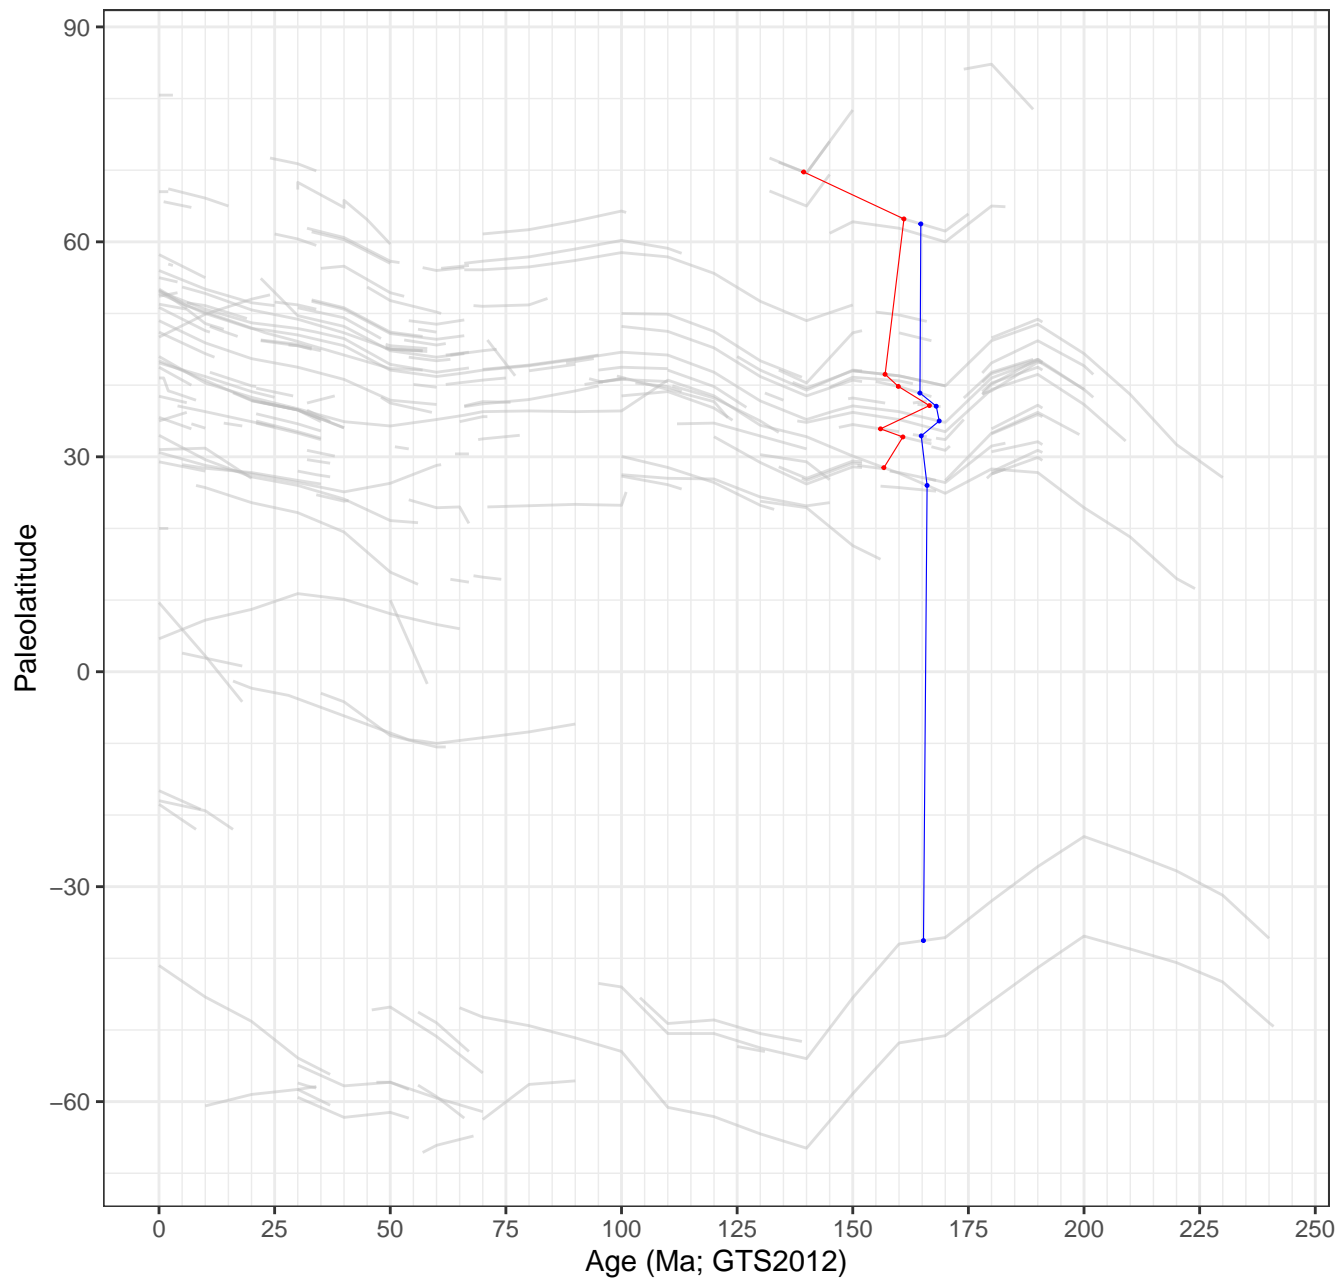

Supplement: Supplementary file 409 [file Genus Sirmiodiniopsis.pdf › Supplement/Supplement 2/Genus 459 plots/Genus Sirmiodiniopsis.pdf]

# Genus Sirmiodinium

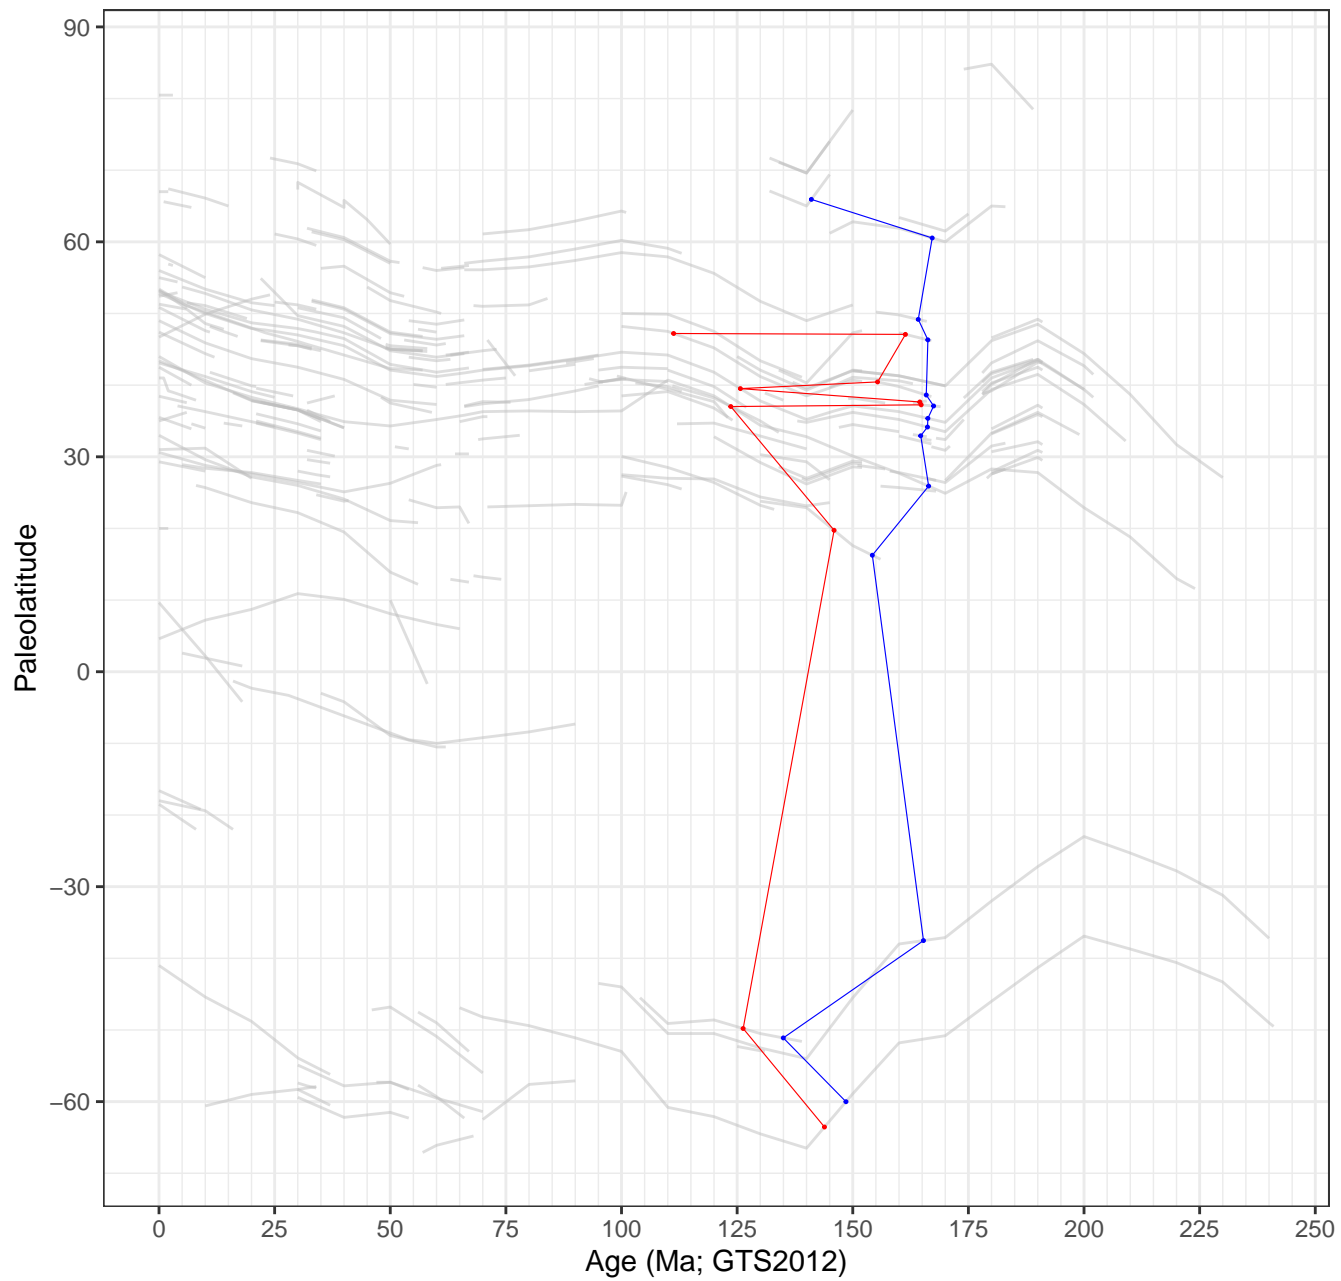

Supplement: Supplementary file 410 [file Genus Sirmiodinium.pdf › Supplement/Supplement 2/Genus 459 plots/Genus Sirmiodinium.pdf]

# Genus Skuadinium

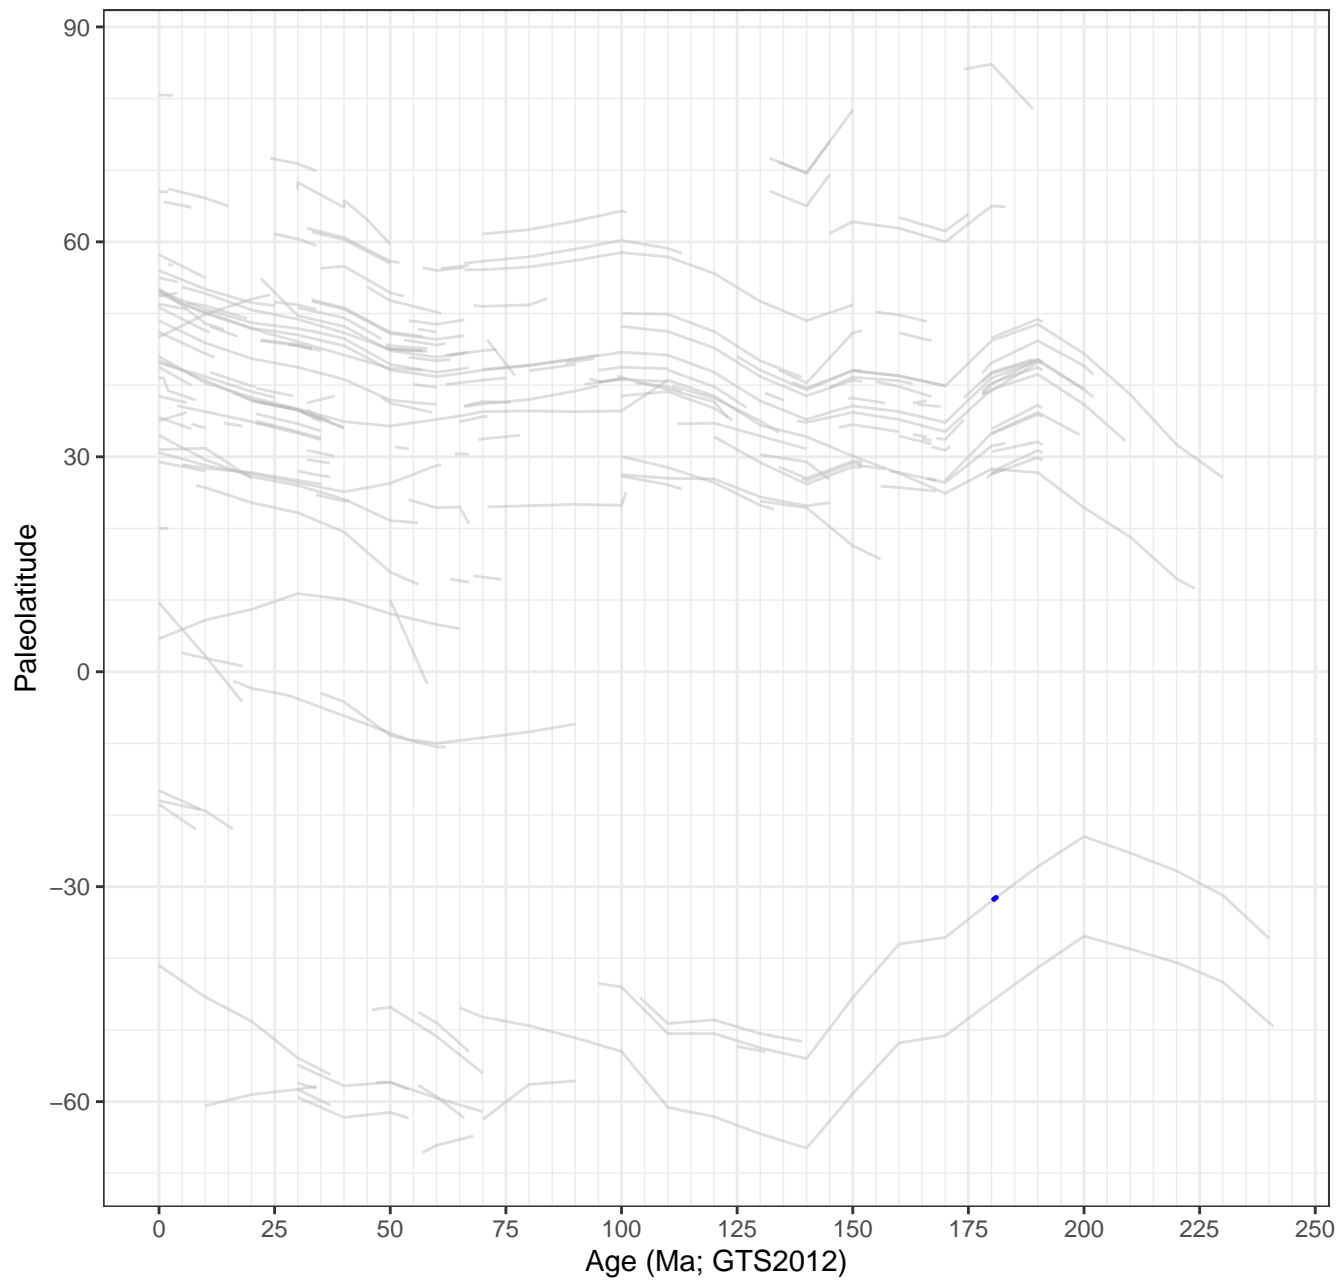

Supplement: Supplementary file 411 [file Genus Skuadinium.pdf › Supplement/Supplement 2/Genus 459 plots/Genus Skuadinium.pdf]

# Genus Solisphaeridium

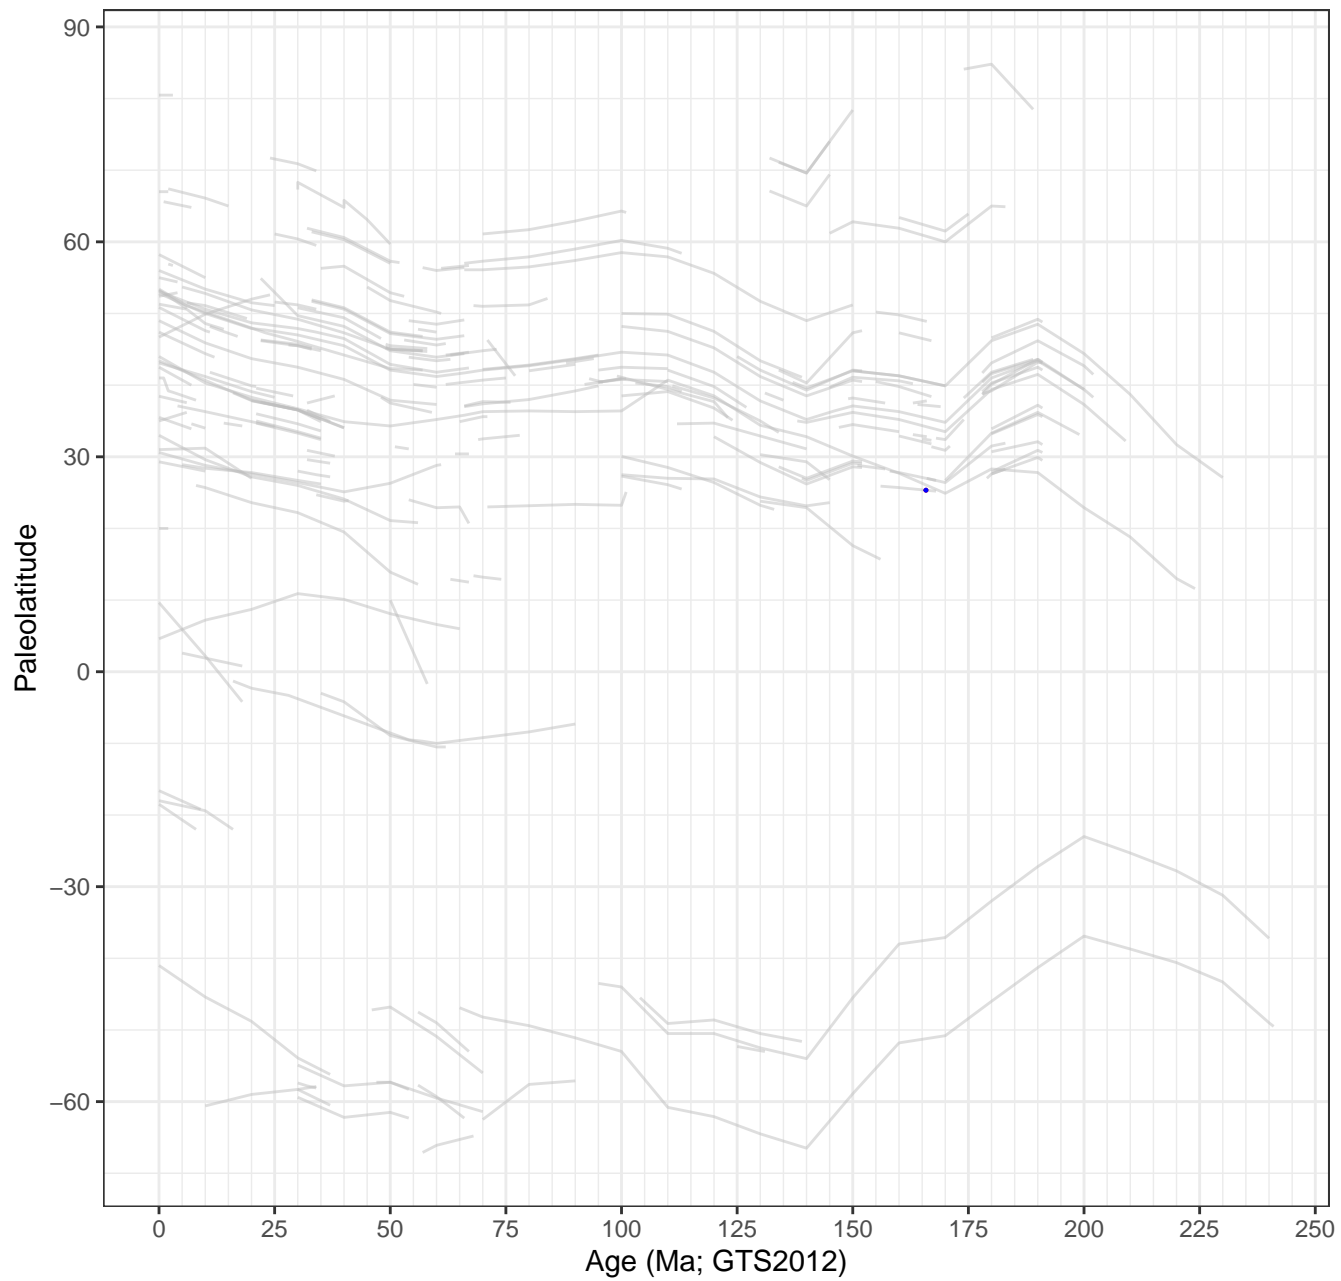

Supplement: Supplementary file 412 [file Genus Solisphaeridium.pdf › Supplement/Supplement 2/Genus 459 plots/Genus Solisphaeridium.pdf]

# Genus Sophismatia

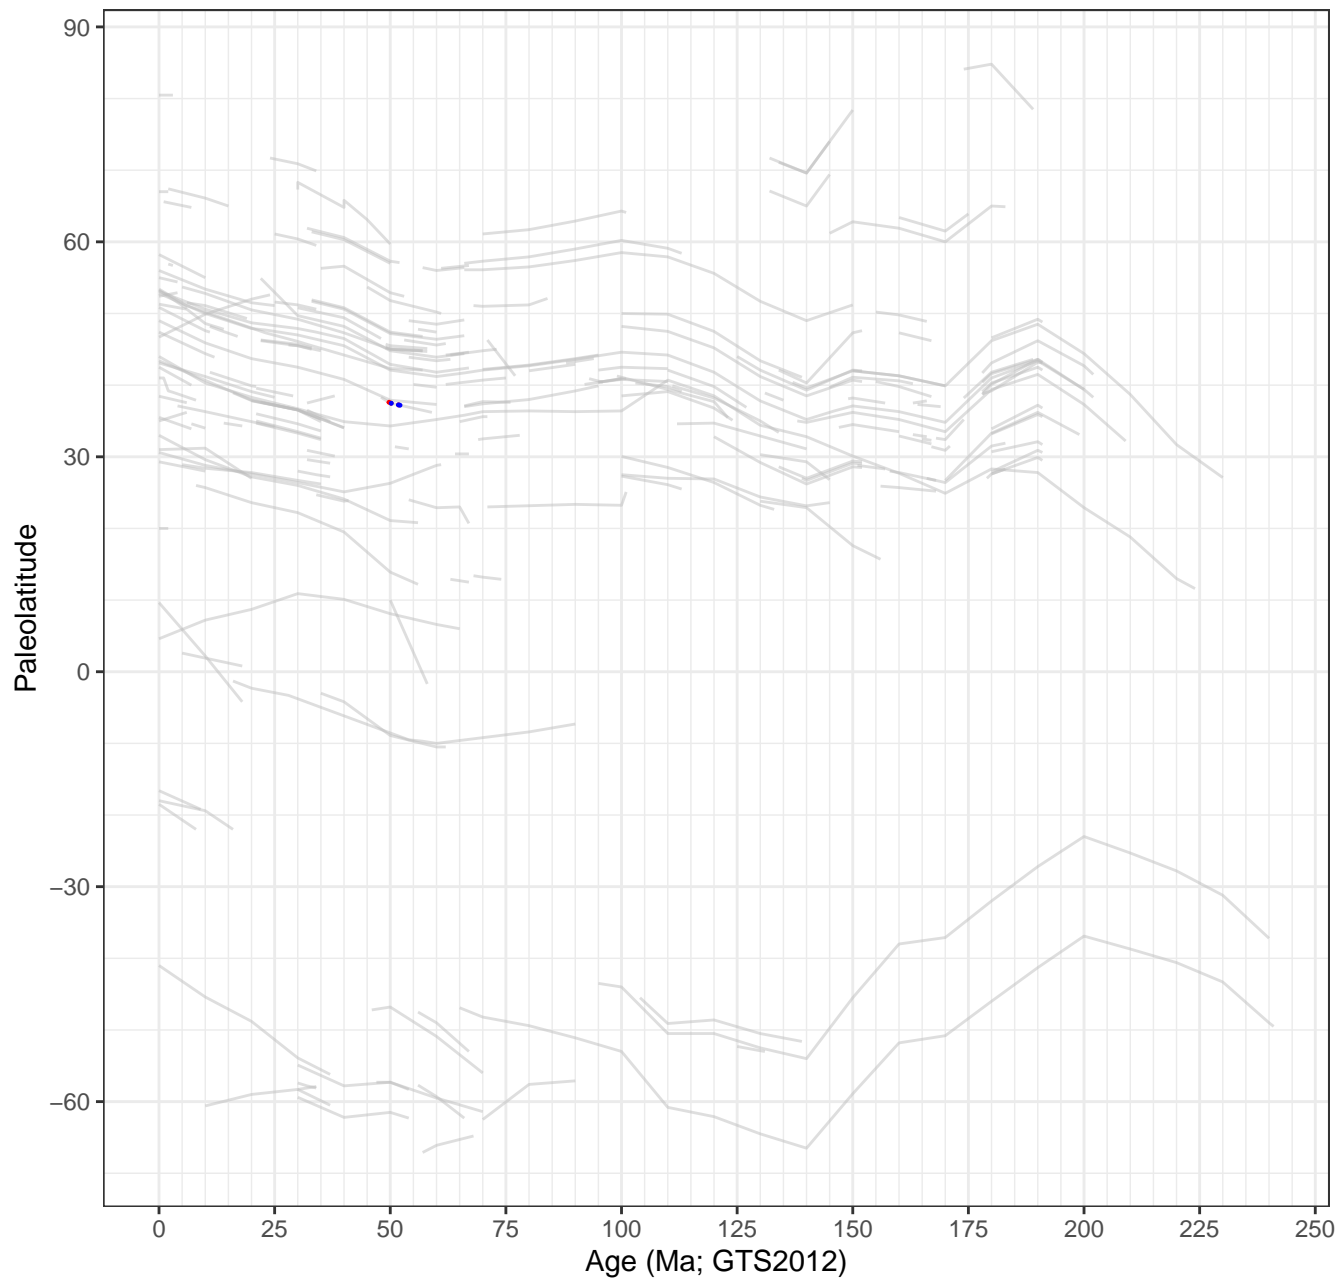

Supplement: Supplementary file 413 [file Genus Sophismatia.pdf › Supplement/Supplement 2/Genus 459 plots/Genus Sophismatia.pdf]

# Genus Spinidinium

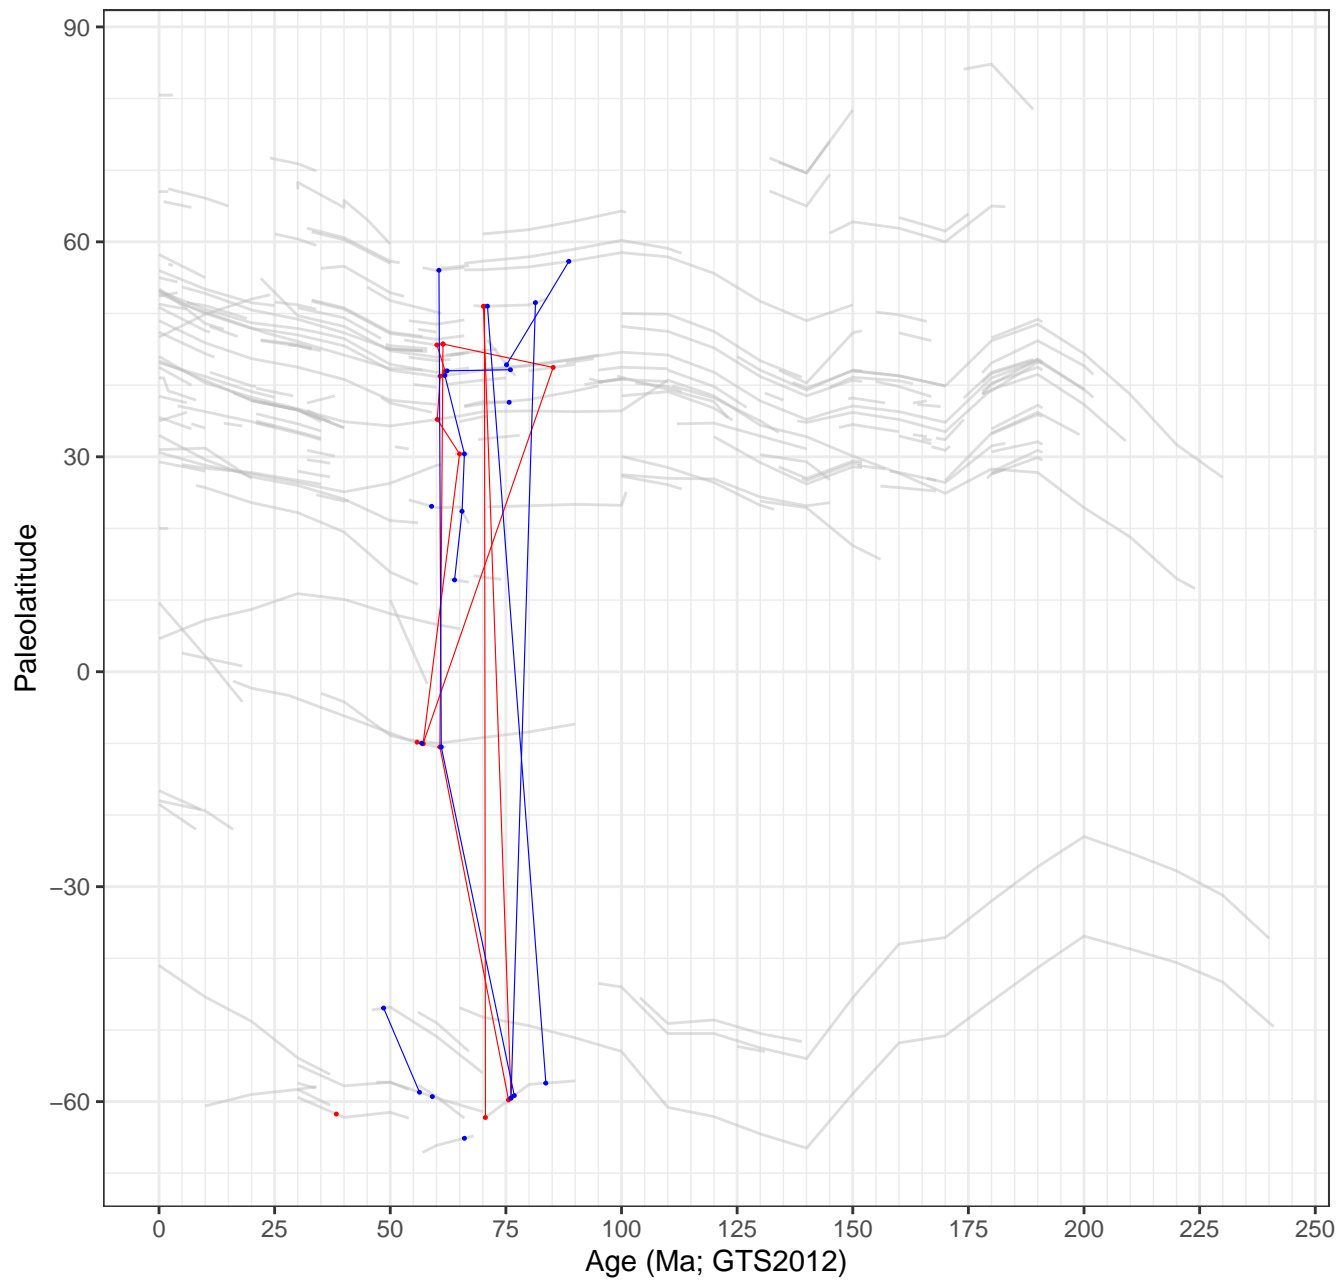

Supplement: Supplementary file 414 [file Genus Spinidinium.pdf › Supplement/Supplement 2/Genus 459 plots/Genus Spinidinium.pdf]
