# Supplementary figures and images for: DINOSTRAT: a global database of the stratigraphic and paleolatitudinal distribution of Mesozoic–Cenozoic organic-walled dinoflagellate cysts (part 5 of 27)
Source: Copernicus journal article supplement (doi:10.5194/essd-14-579-2022), 2022-02-09

# Genus Spiniferella

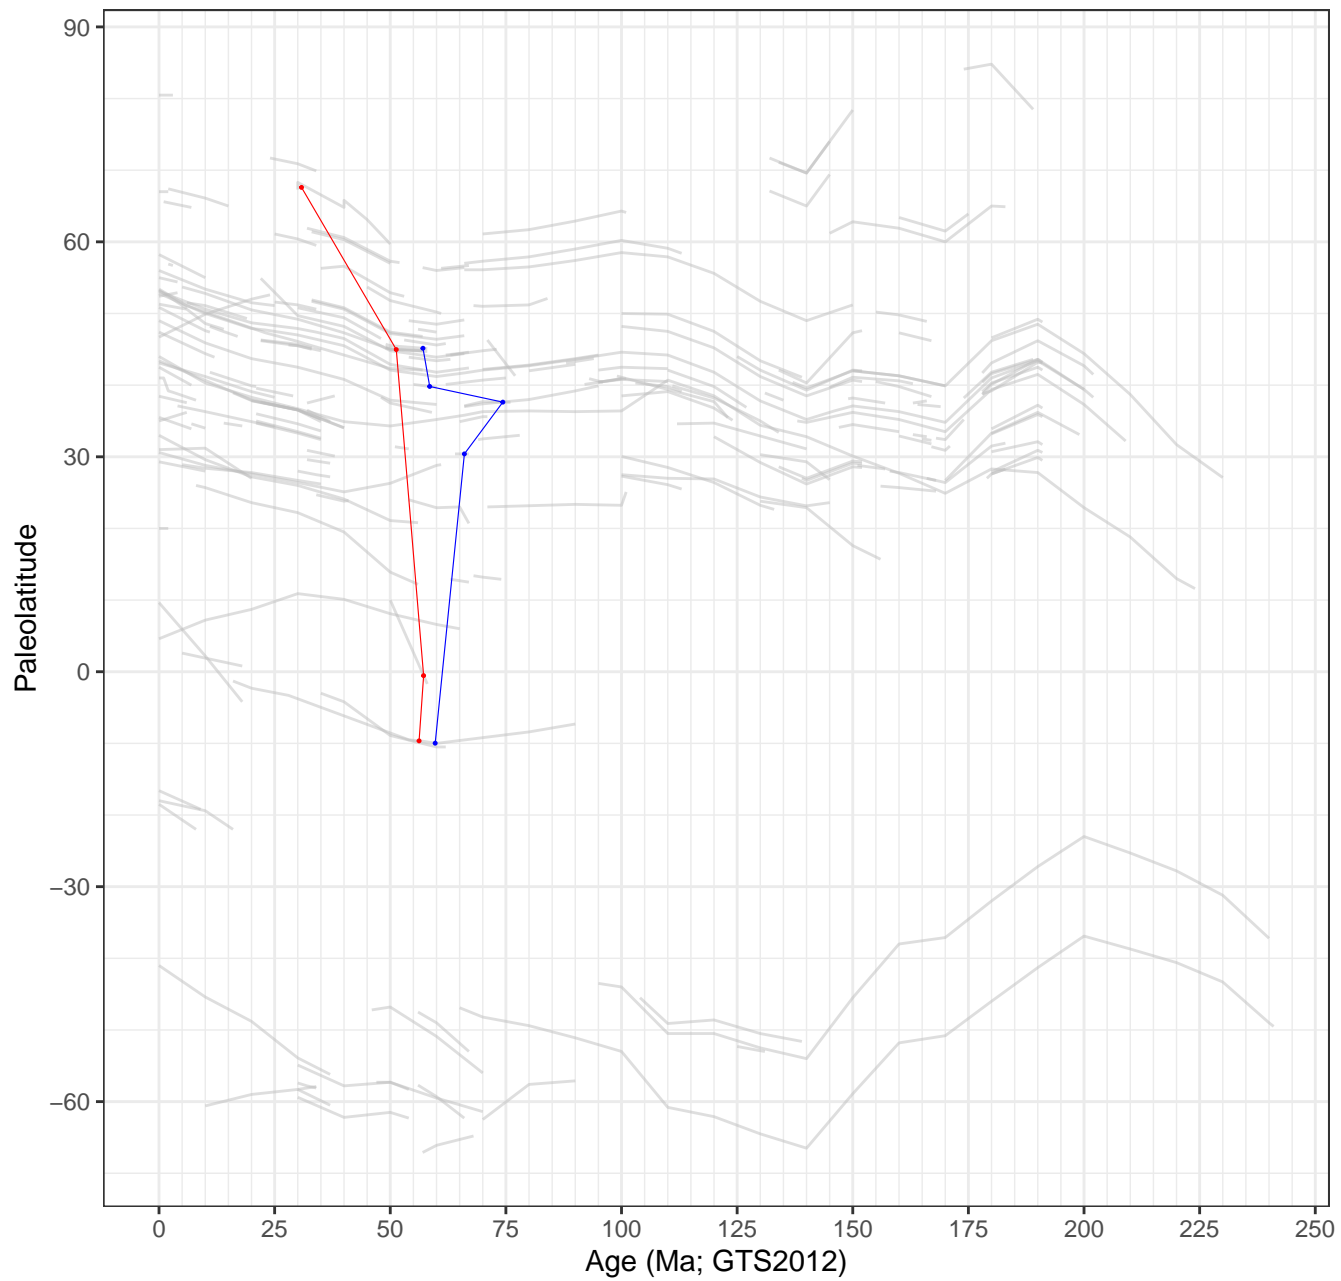

Supplement: Supplementary file 415 [file Genus Spiniferella.pdf › Supplement/Supplement 2/Genus 459 plots/Genus Spiniferella.pdf]

# Genus Spiniferites

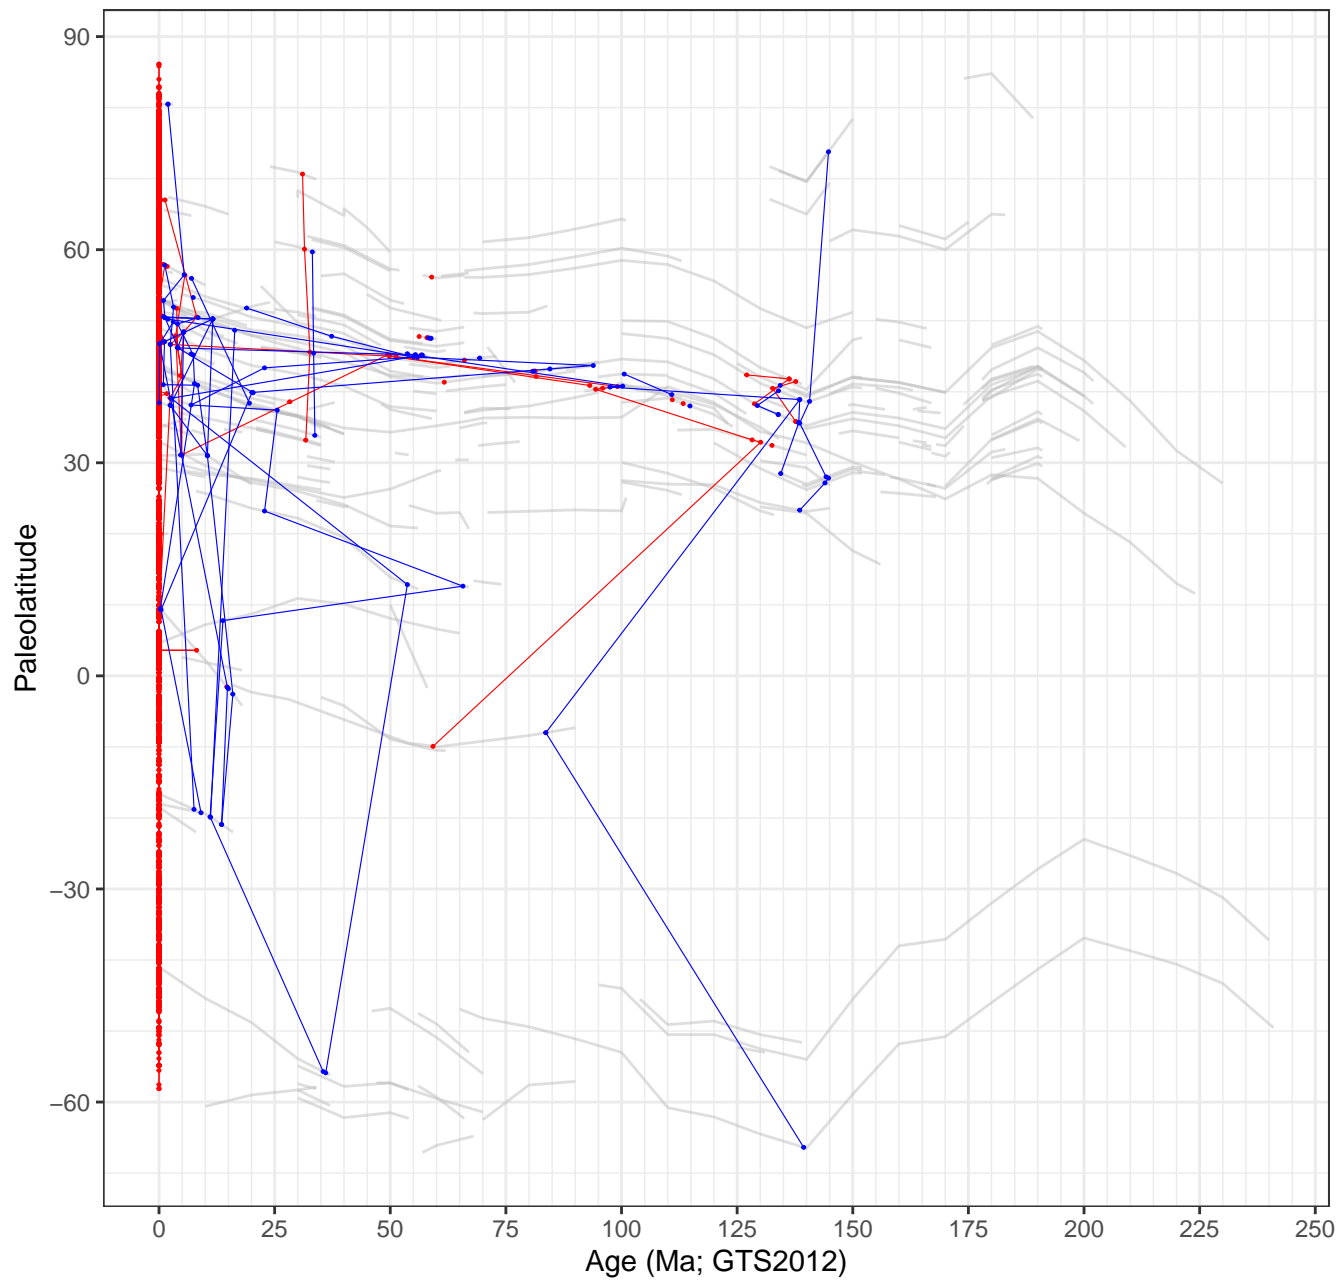

Supplement: Supplementary file 416 [file Genus Spiniferites.pdf › Supplement/Supplement 2/Genus 459 plots/Genus Spiniferites.pdf]

# Genus Spongodinium

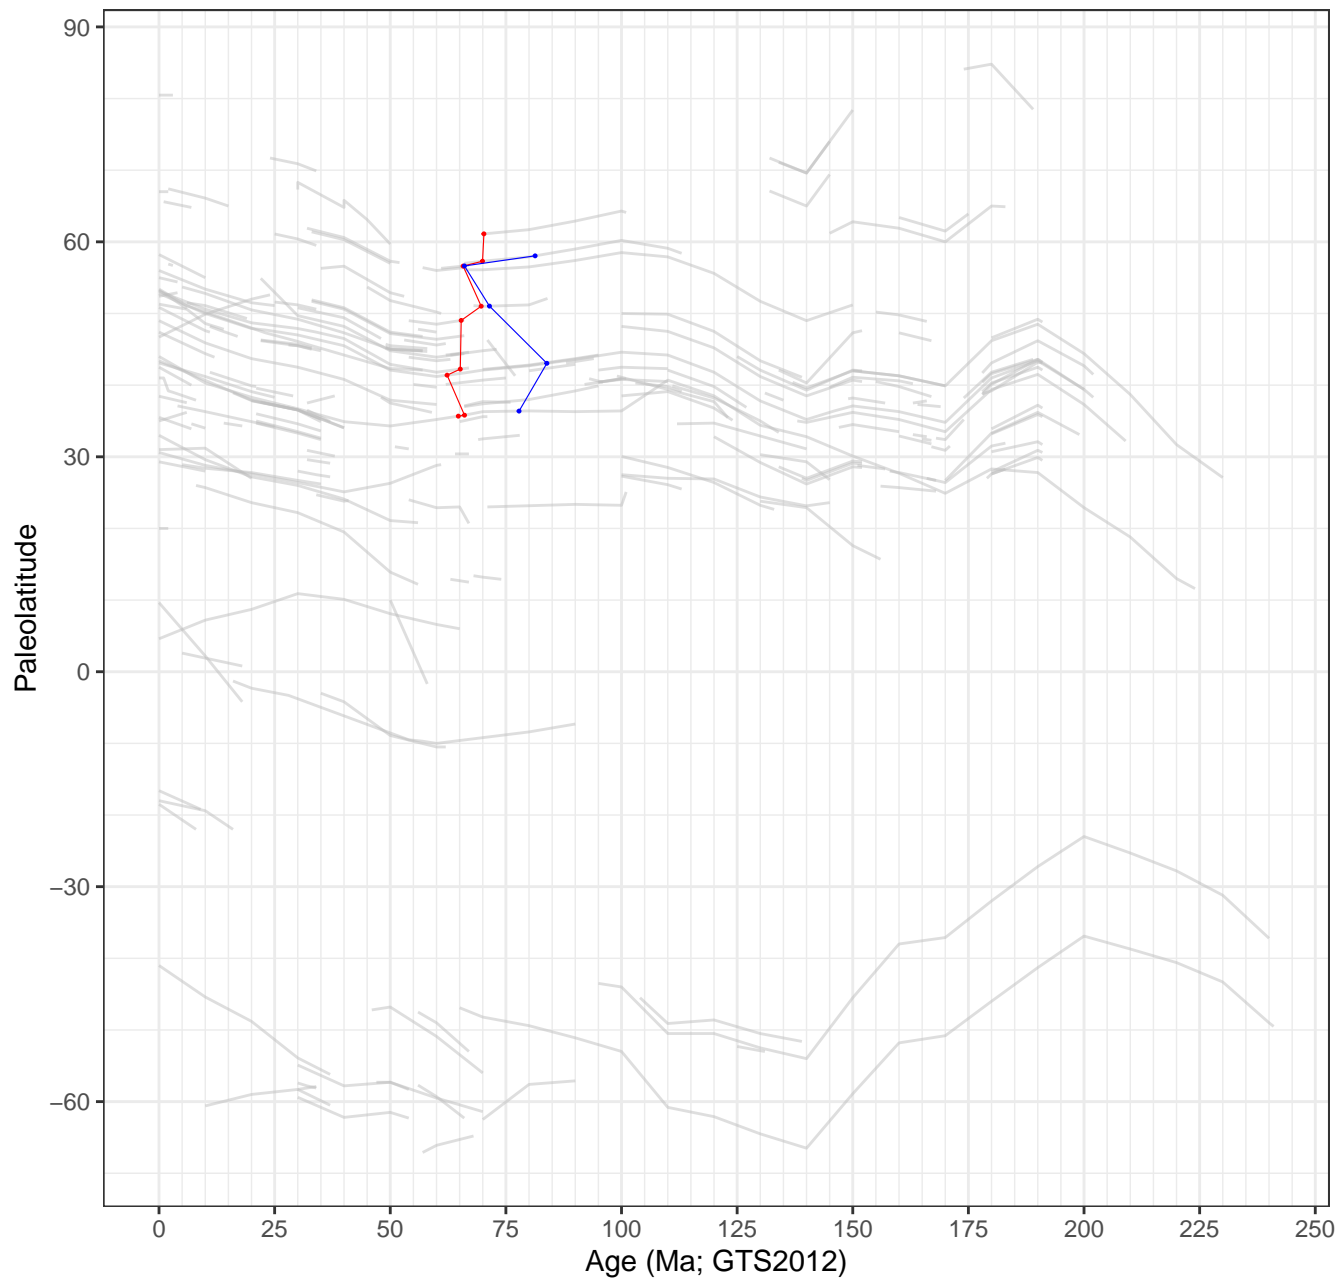

Supplement: Supplementary file 417 [file Genus Spongodinium.pdf › Supplement/Supplement 2/Genus 459 plots/Genus Spongodinium.pdf]

# Genus *Stanfordella*

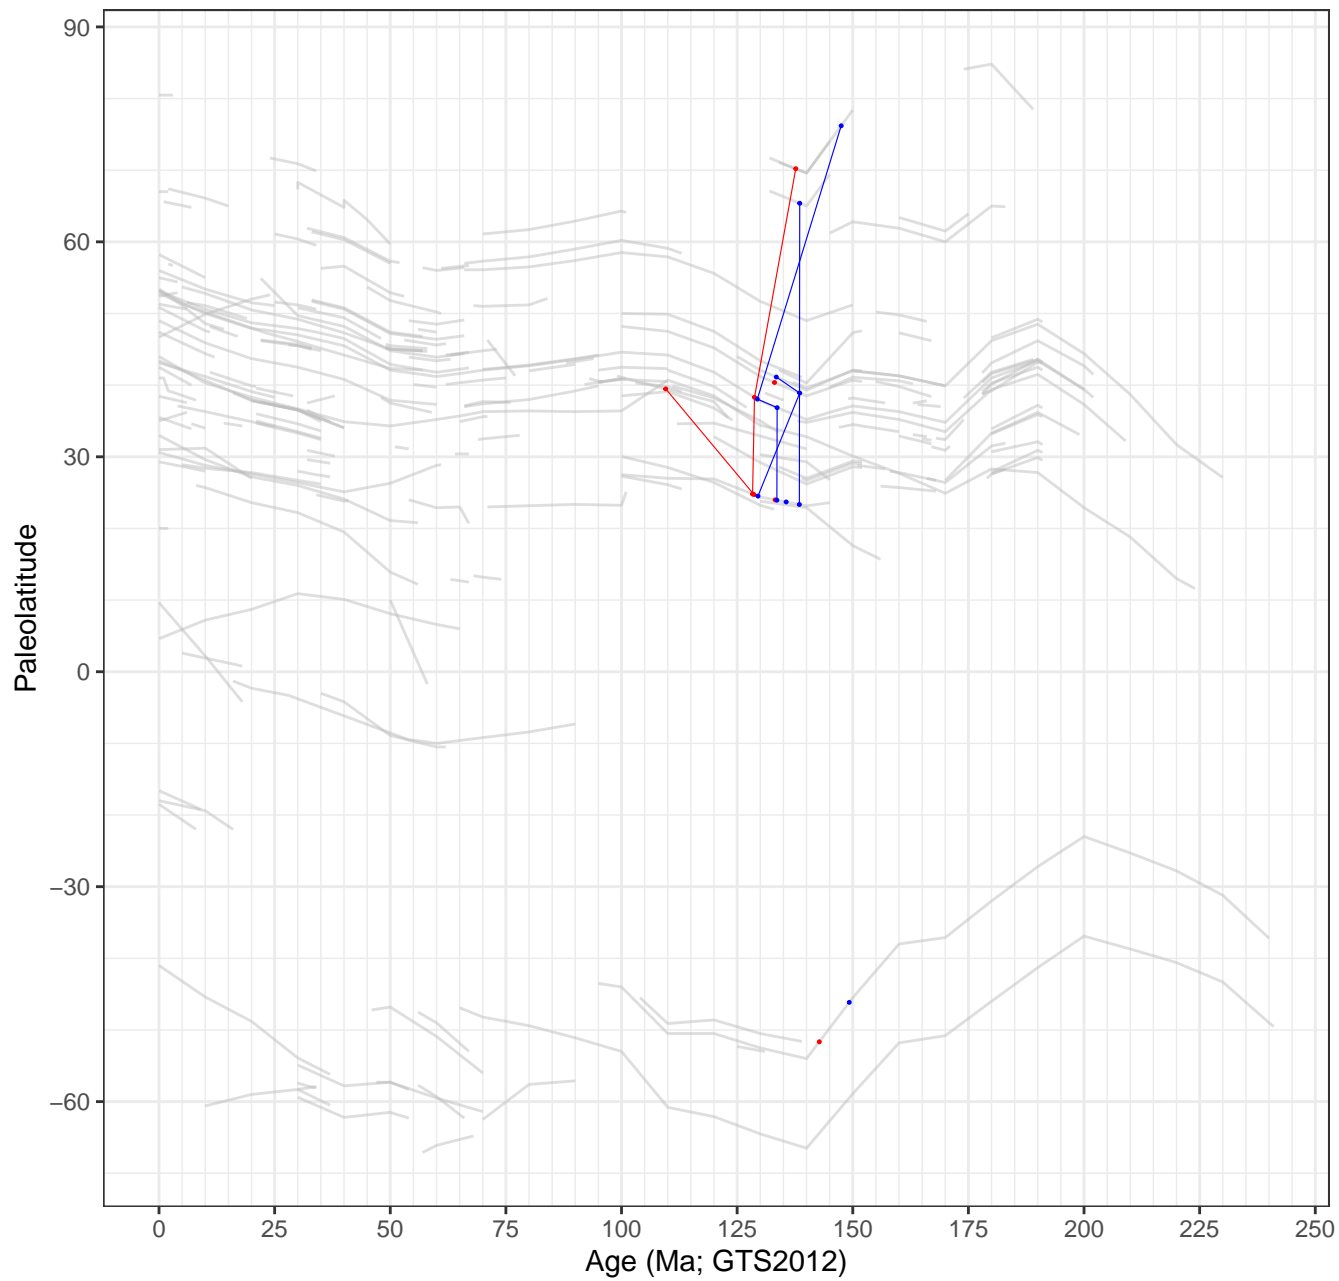

Supplement: Supplementary file 418 [file Genus Stanfordella.pdf › Supplement/Supplement 2/Genus 459 plots/Genus Stanfordella.pdf]

# Genus *Stelladinium*

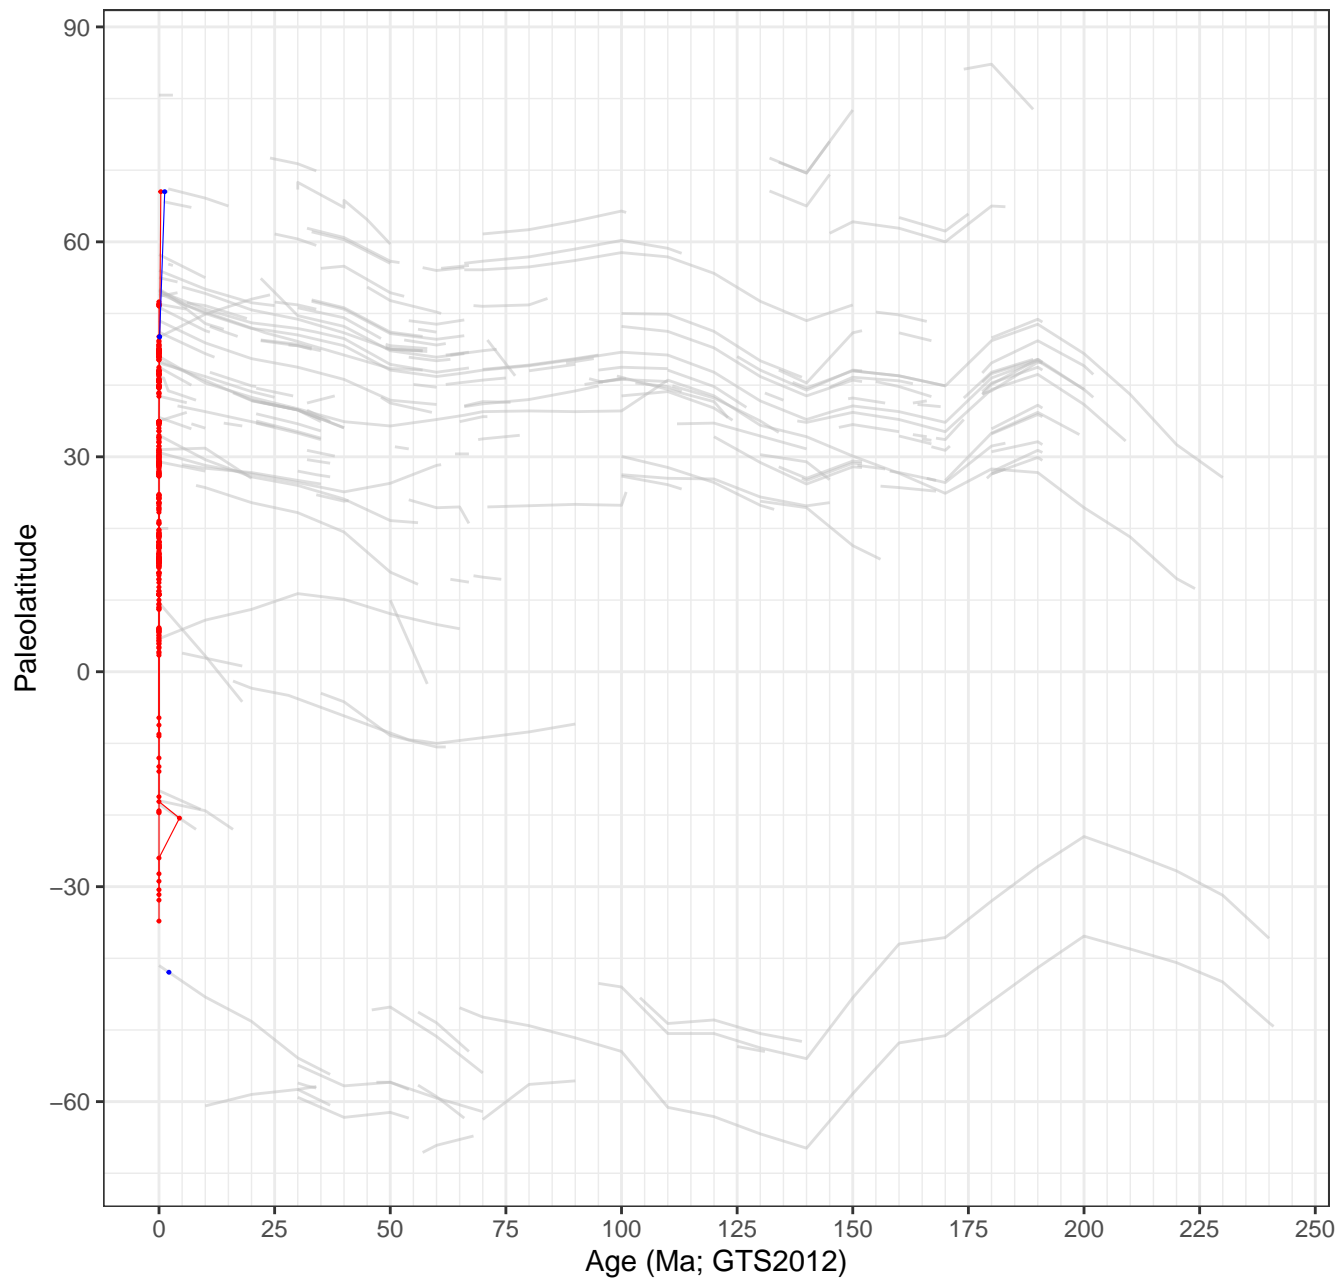

Supplement: Supplementary file 419 [file Genus Stelladinium.pdf › Supplement/Supplement 2/Genus 459 plots/Genus Stelladinium.pdf]

# Genus Stephanelytron

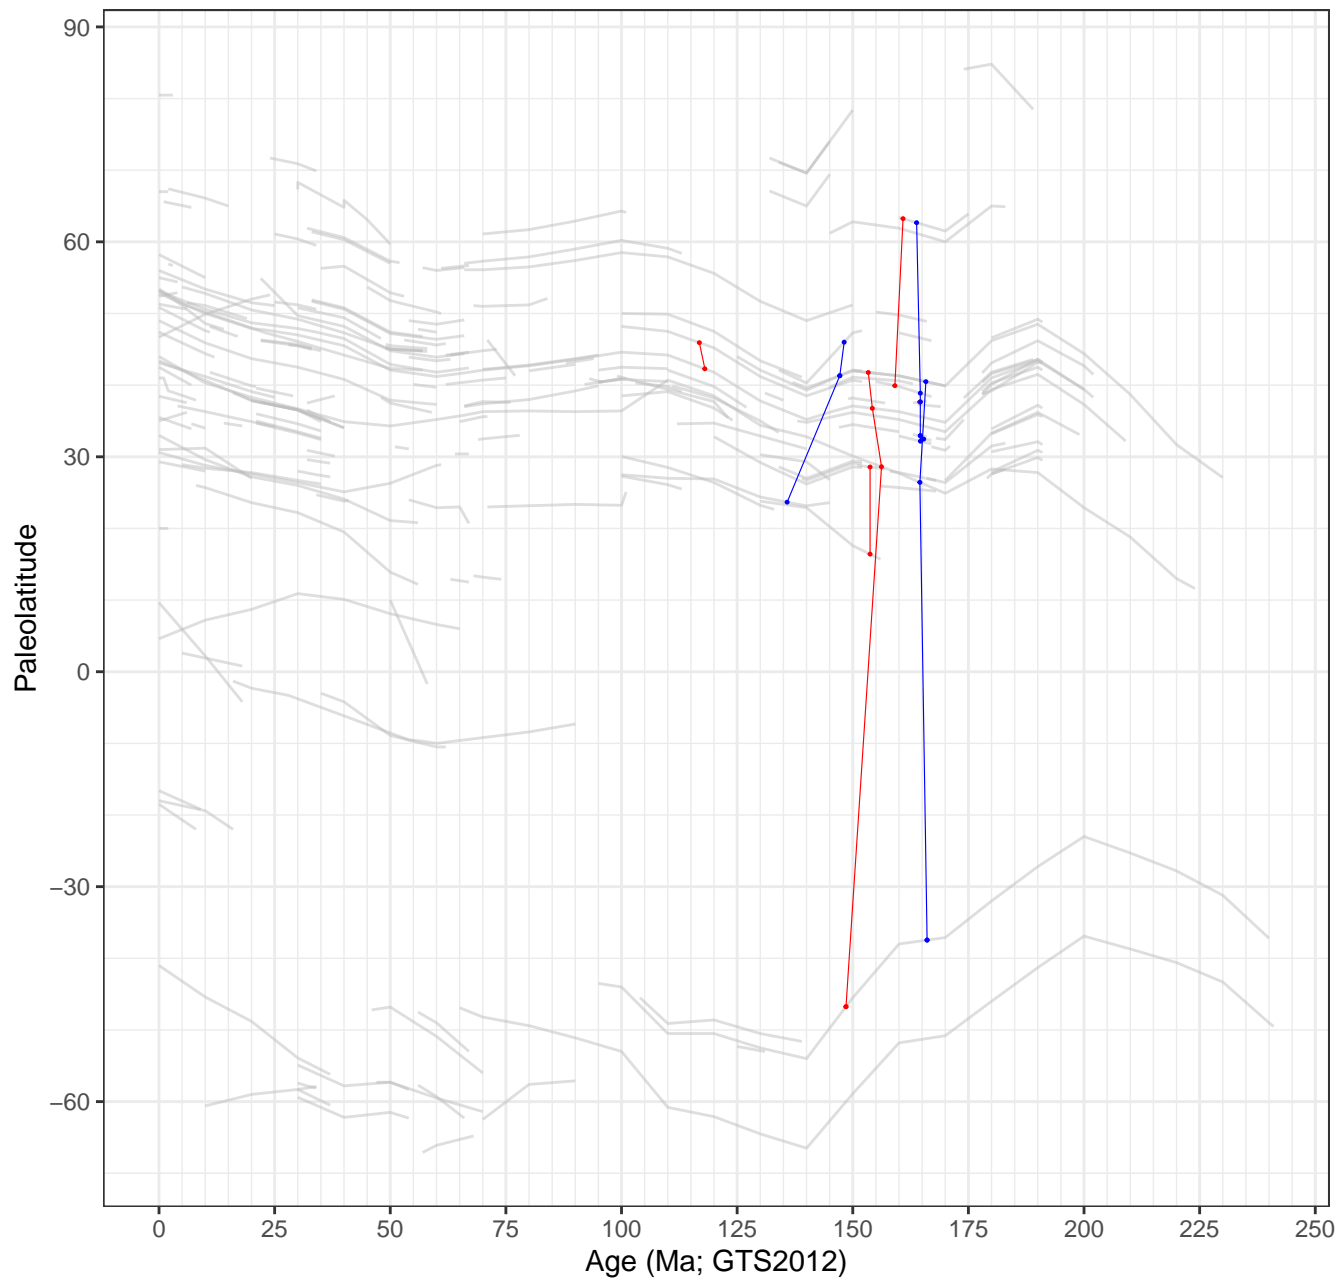

Supplement: Supplementary file 420 [file Genus Stephanelytron.pdf › Supplement/Supplement 2/Genus 459 plots/Genus Stephanelytron.pdf]

# Genus *Stephodinium*

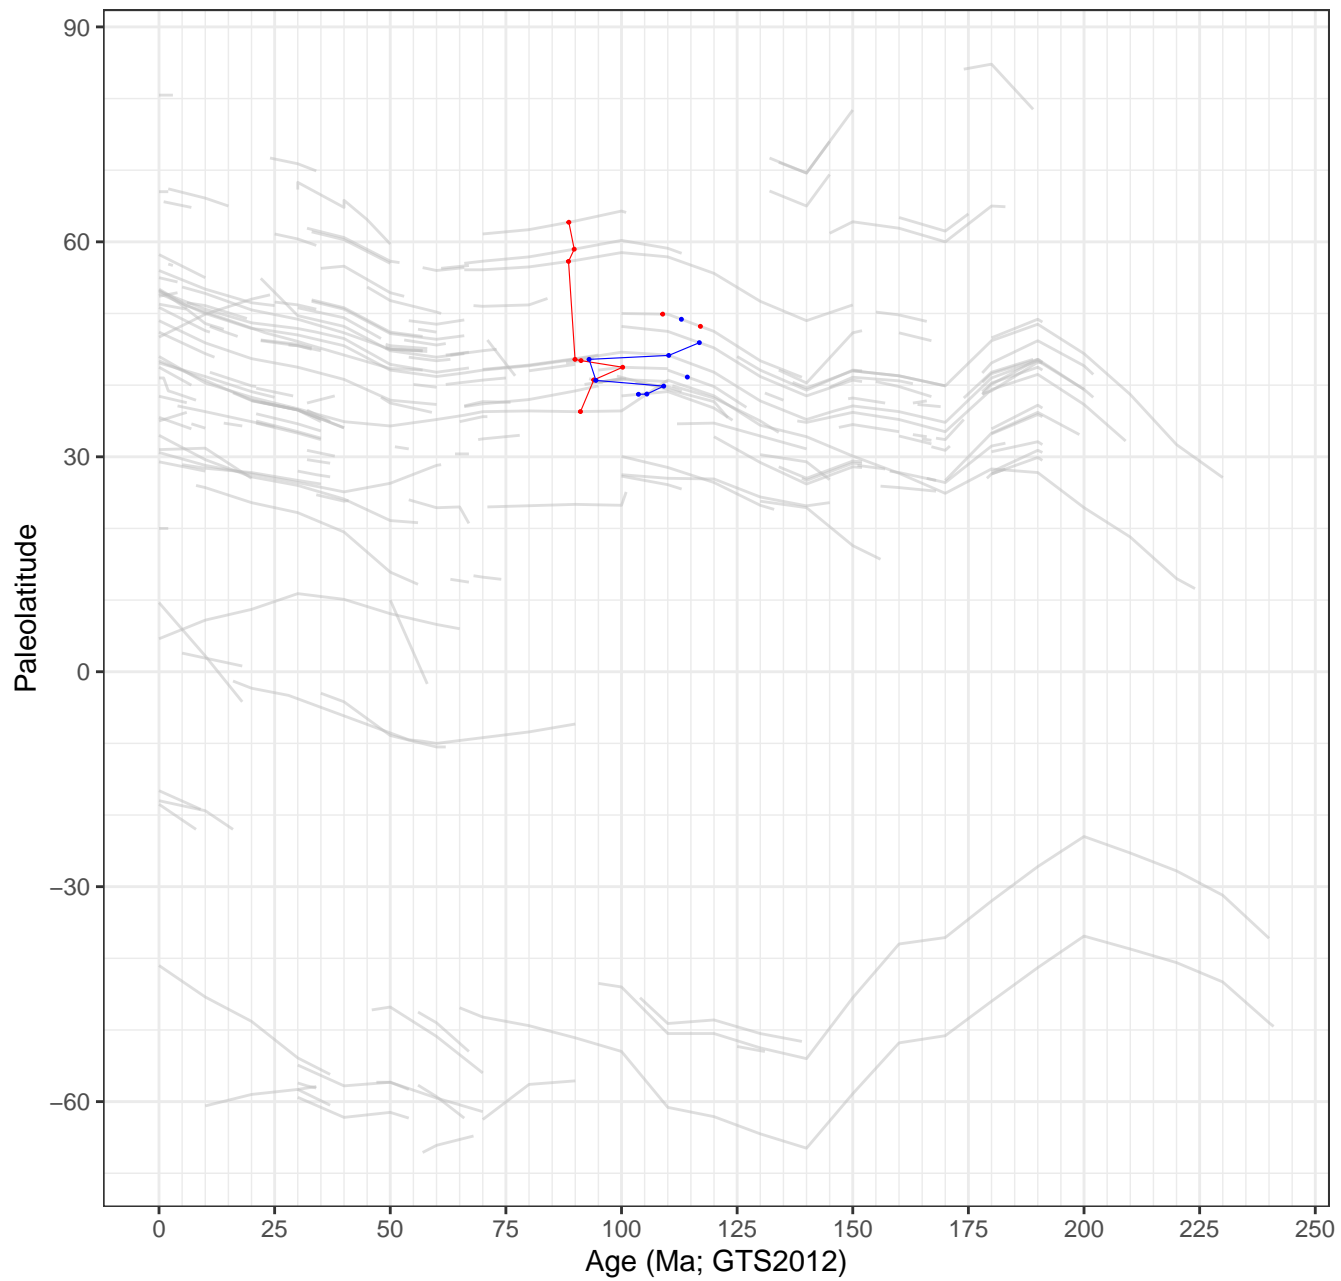

Supplement: Supplementary file 421 [file Genus Stephodinium.pdf › Supplement/Supplement 2/Genus 459 plots/Genus Stephodinium.pdf]

# Genus Stiphrosphaeridium

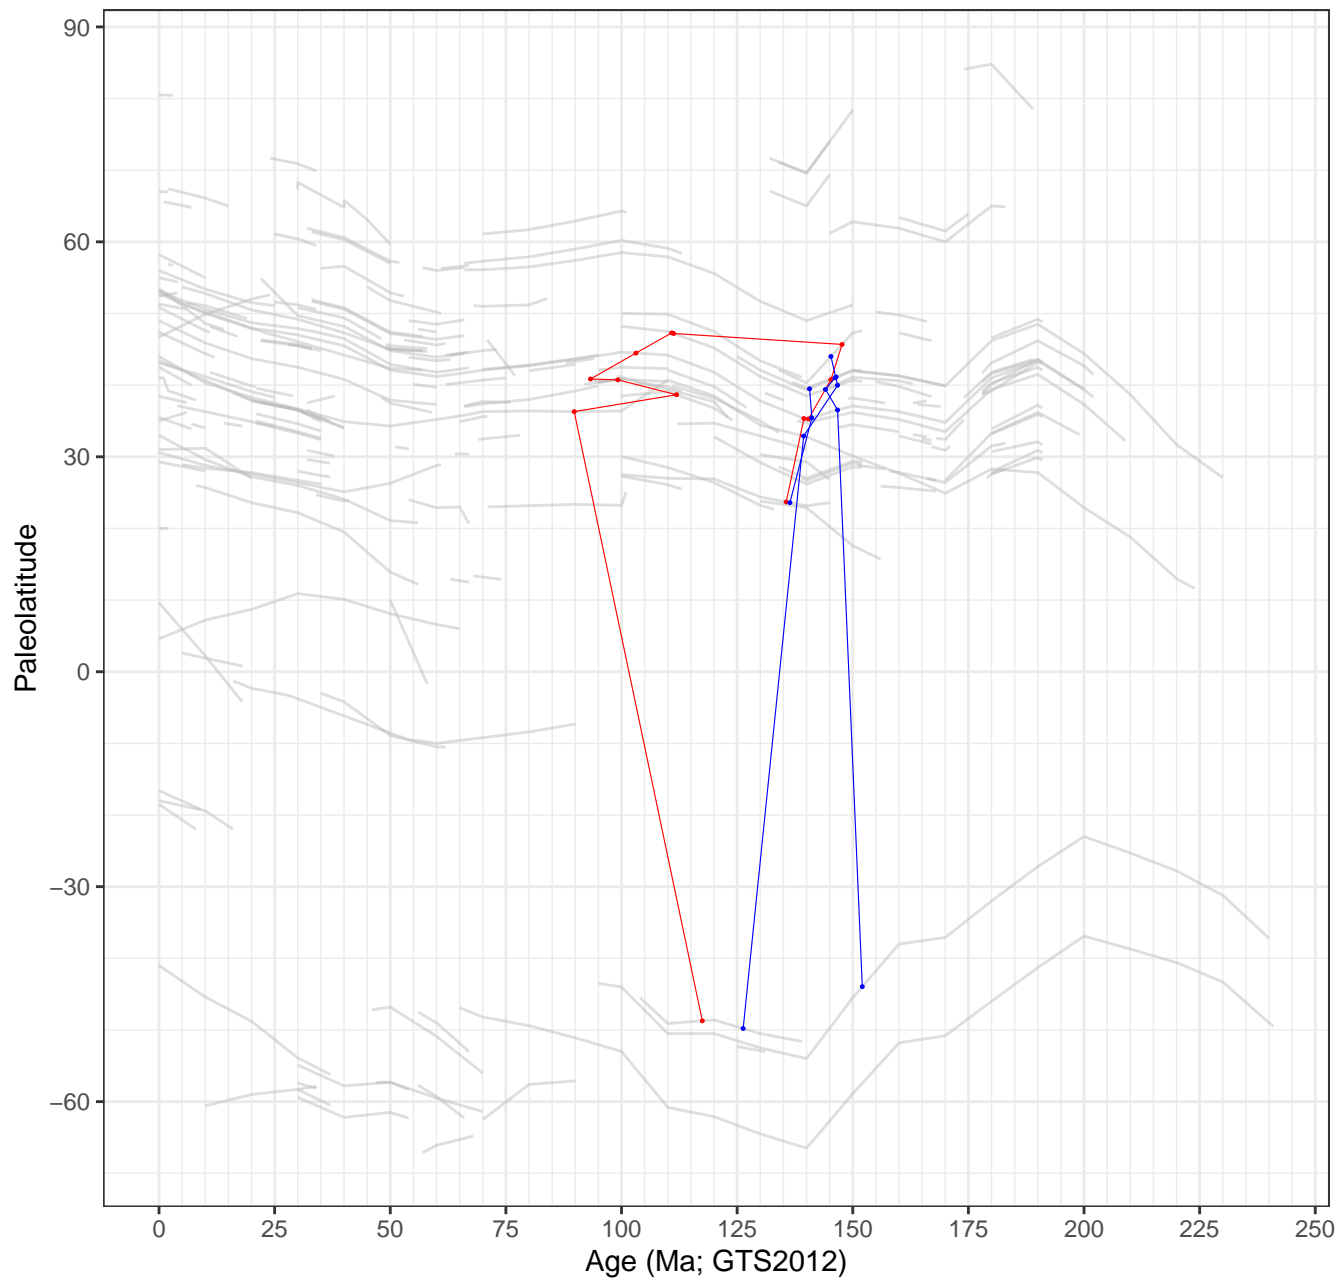

Supplement: Supplementary file 422 [file Genus Stiphrosphaeridium.pdf › Supplement/Supplement 2/Genus 459 plots/Genus Stiphrosphaeridium.pdf]

# Genus Stoveracysta

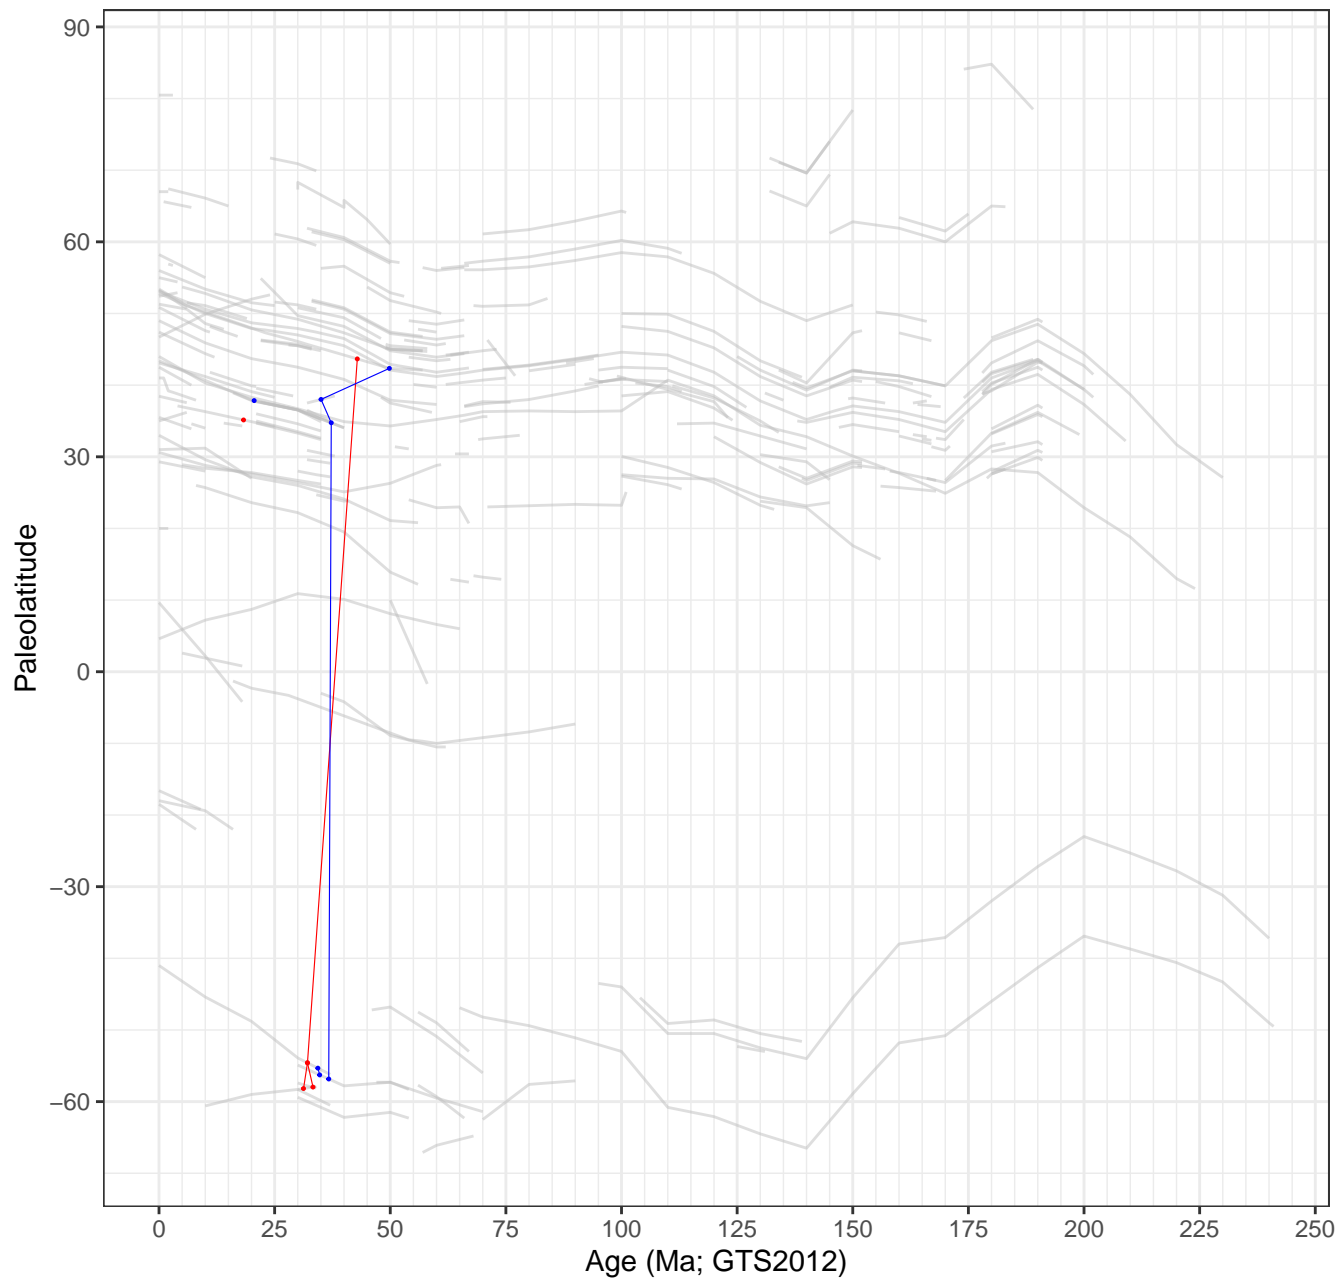

Supplement: Supplementary file 423 [file Genus Stoveracysta.pdf › Supplement/Supplement 2/Genus 459 plots/Genus Stoveracysta.pdf]

# Genus *Striatodinium*

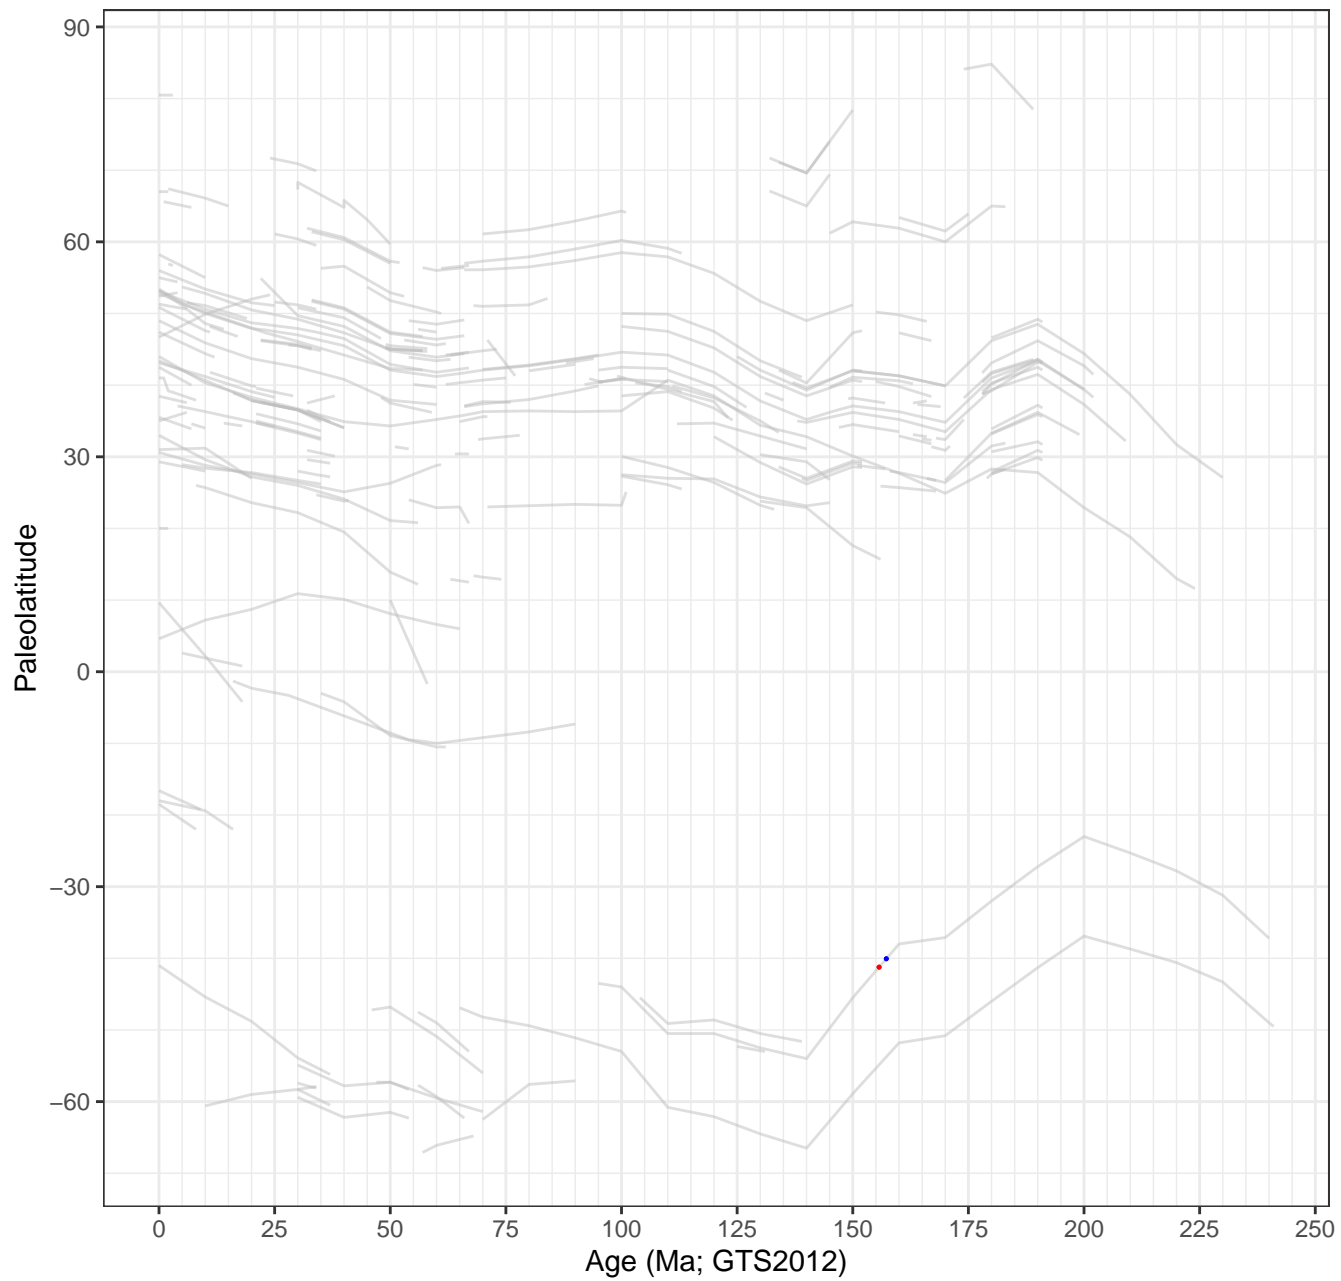

Supplement: Supplementary file 424 [file Genus Striatodinium.pdf › Supplement/Supplement 2/Genus 459 plots/Genus Striatodinium.pdf]

# Genus *Subtilisphaera*

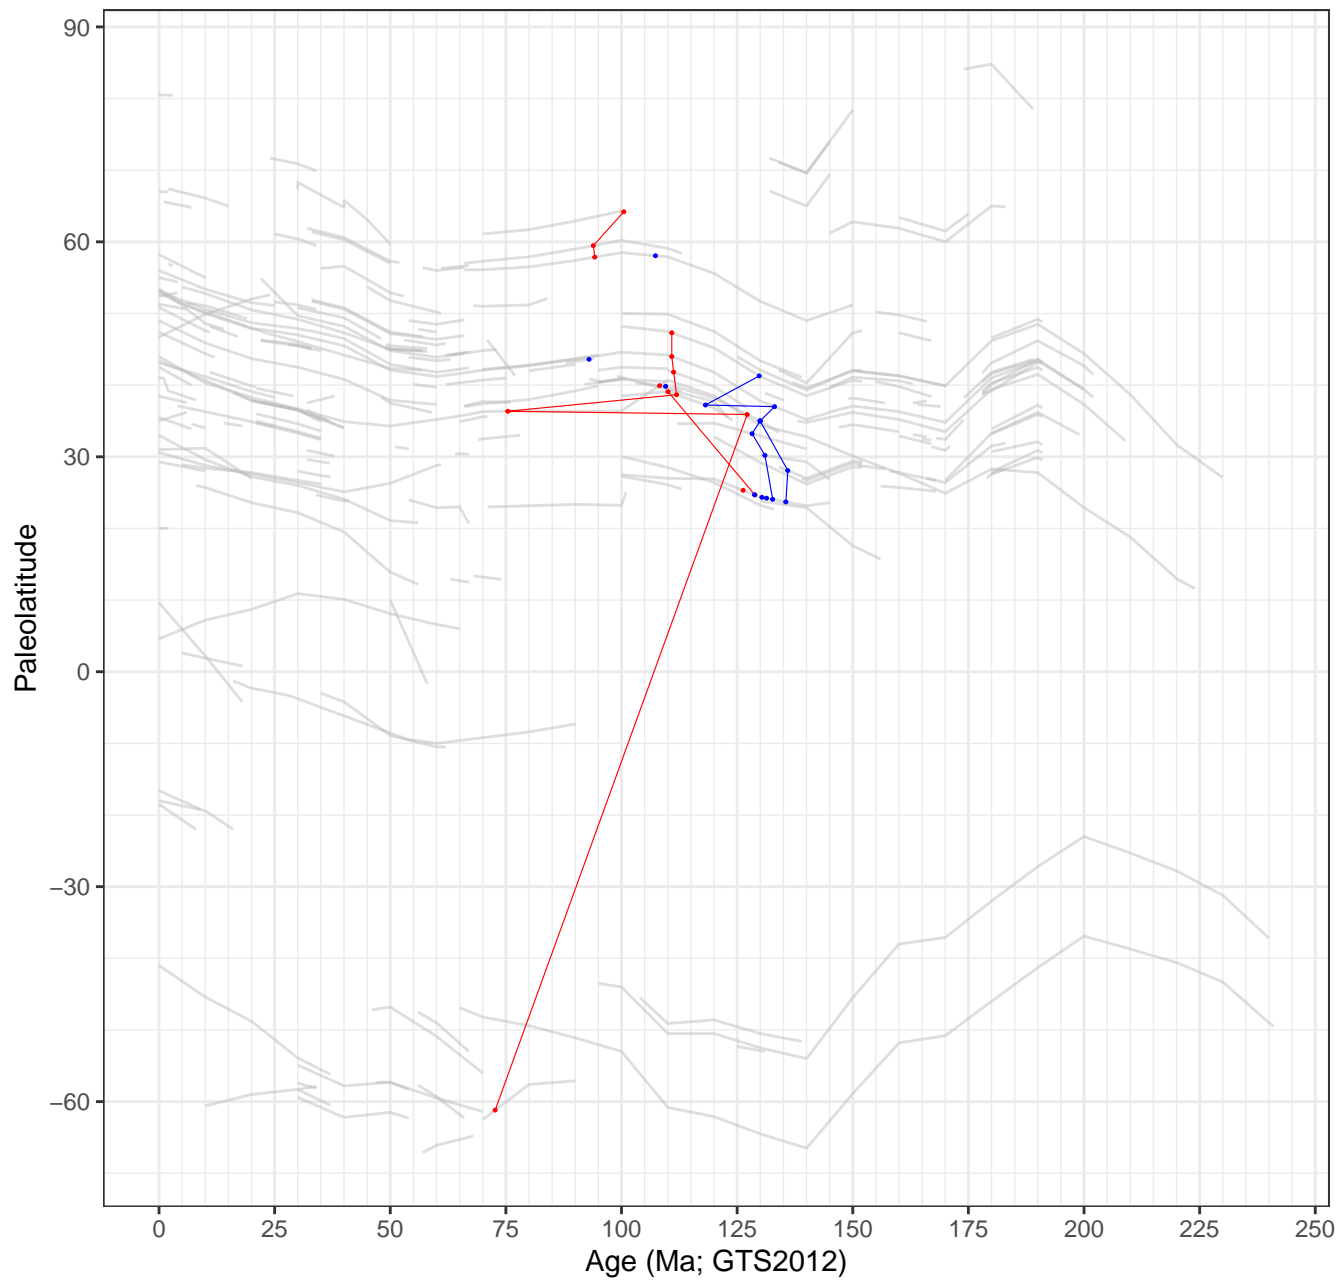

Supplement: Supplementary file 425 [file Genus Subtilisphaera.pdf › Supplement/Supplement 2/Genus 459 plots/Genus Subtilisphaera.pdf]

# Genus Suessia

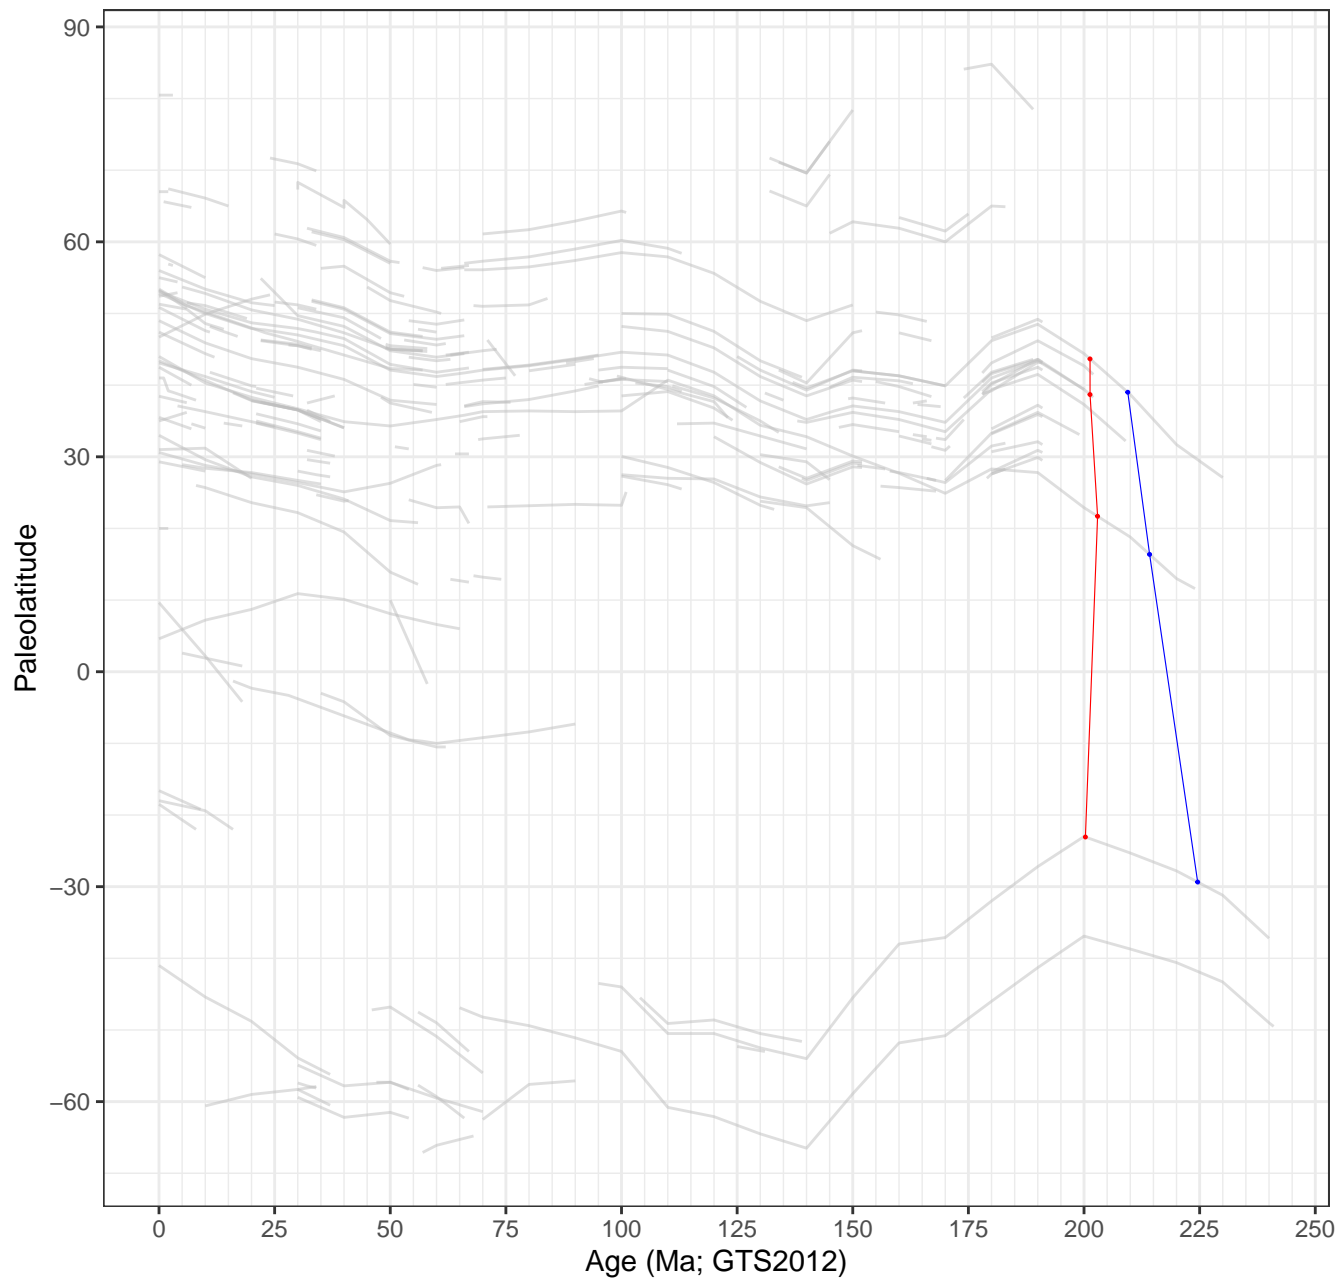

Supplement: Supplementary file 426 [file Genus Suessia.pdf › Supplement/Supplement 2/Genus 459 plots/Genus Suessia.pdf]

# Genus Sumatradinium

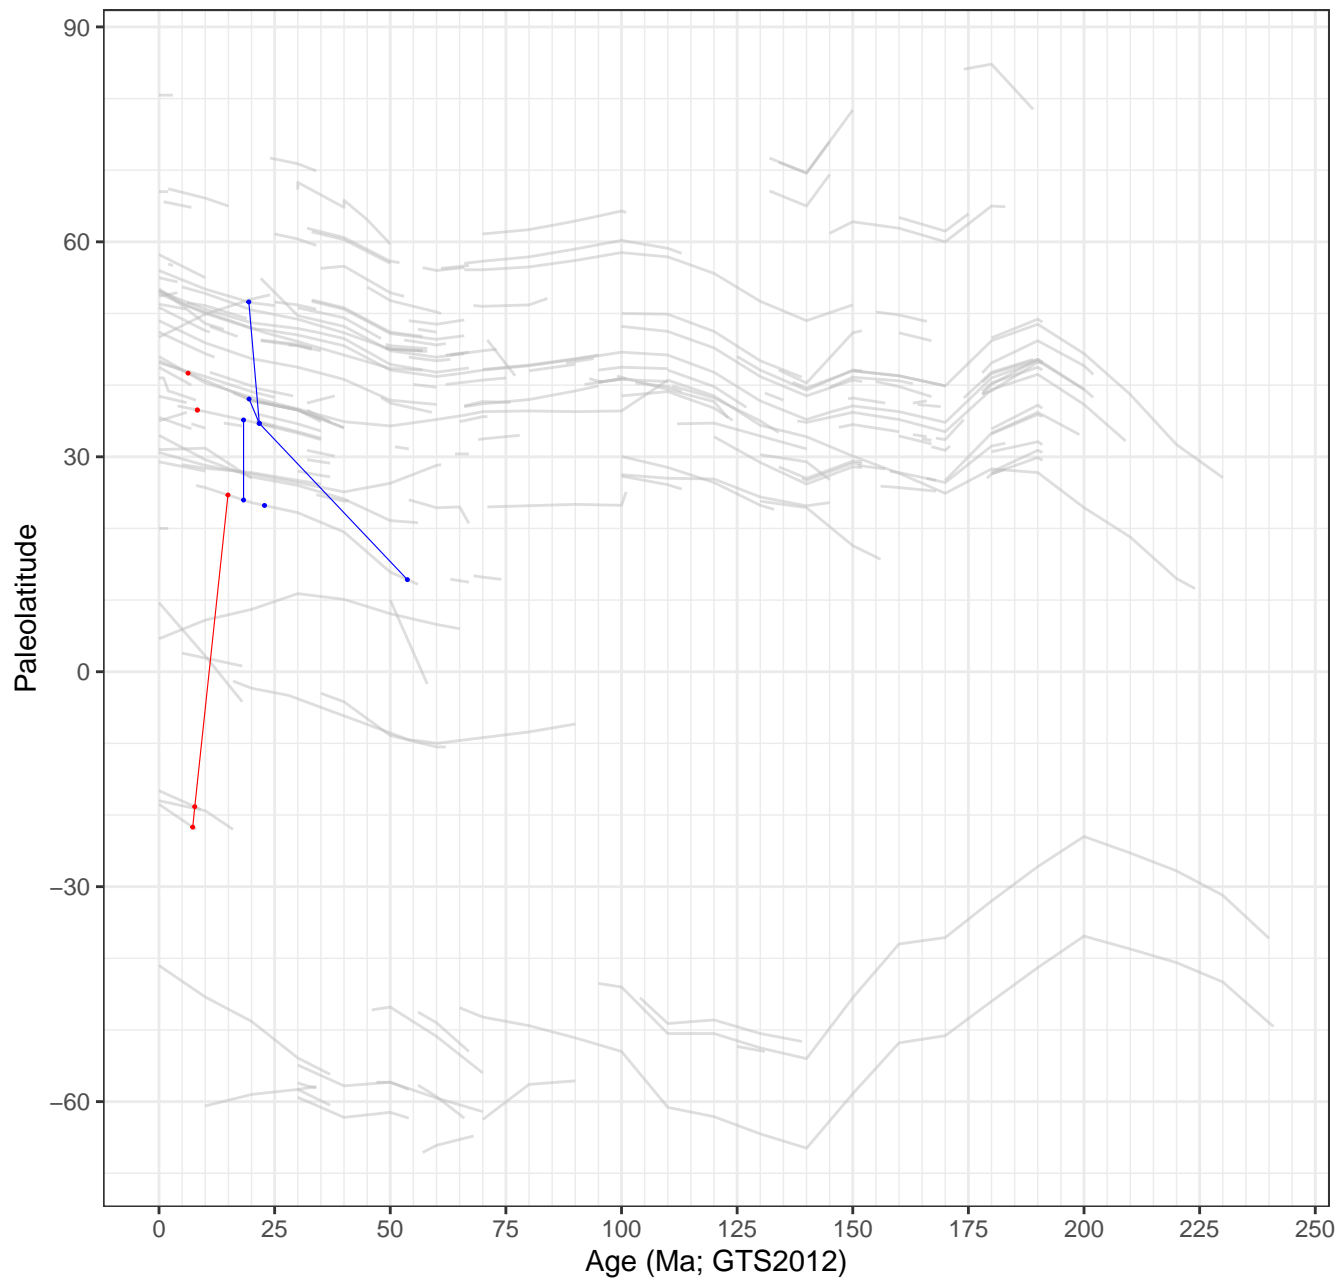

Supplement: Supplementary file 427 [file Genus Sumatradinium.pdf › Supplement/Supplement 2/Genus 459 plots/Genus Sumatradinium.pdf]

# Genus *Surculosphaeridium*

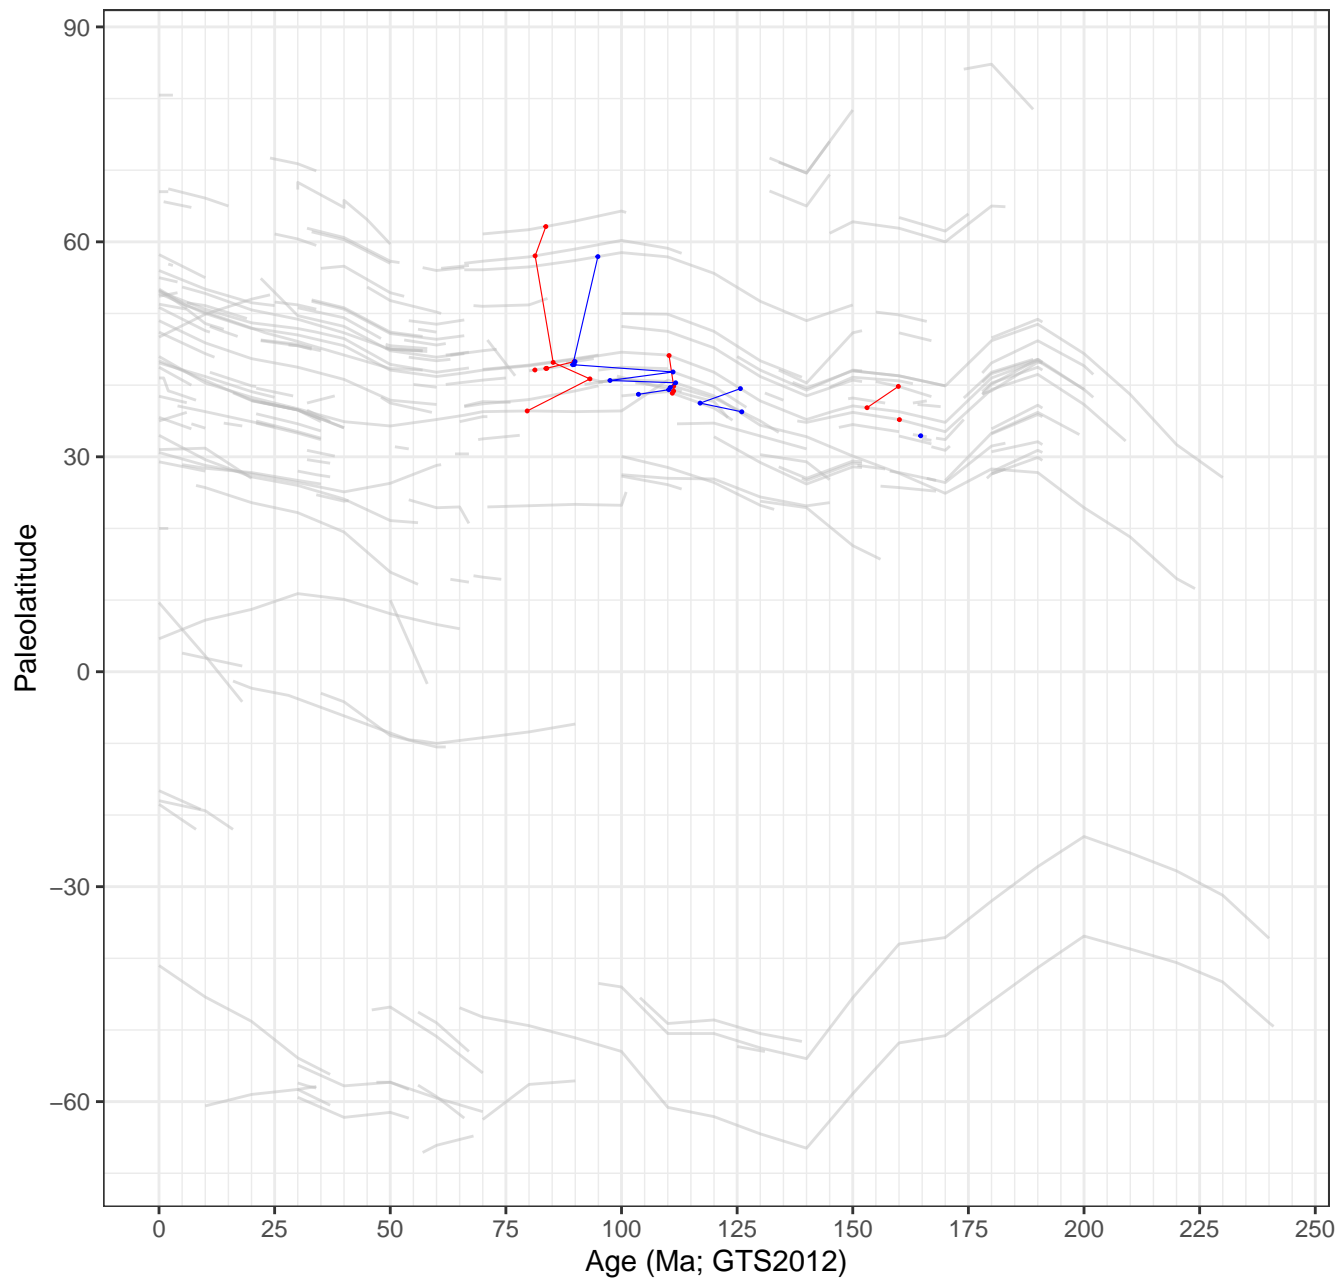

Supplement: Supplementary file 428 [file Genus Surculosphaeridium.pdf › Supplement/Supplement 2/Genus 459 plots/Genus Surculosphaeridium.pdf]

# Genus *Susadinium*

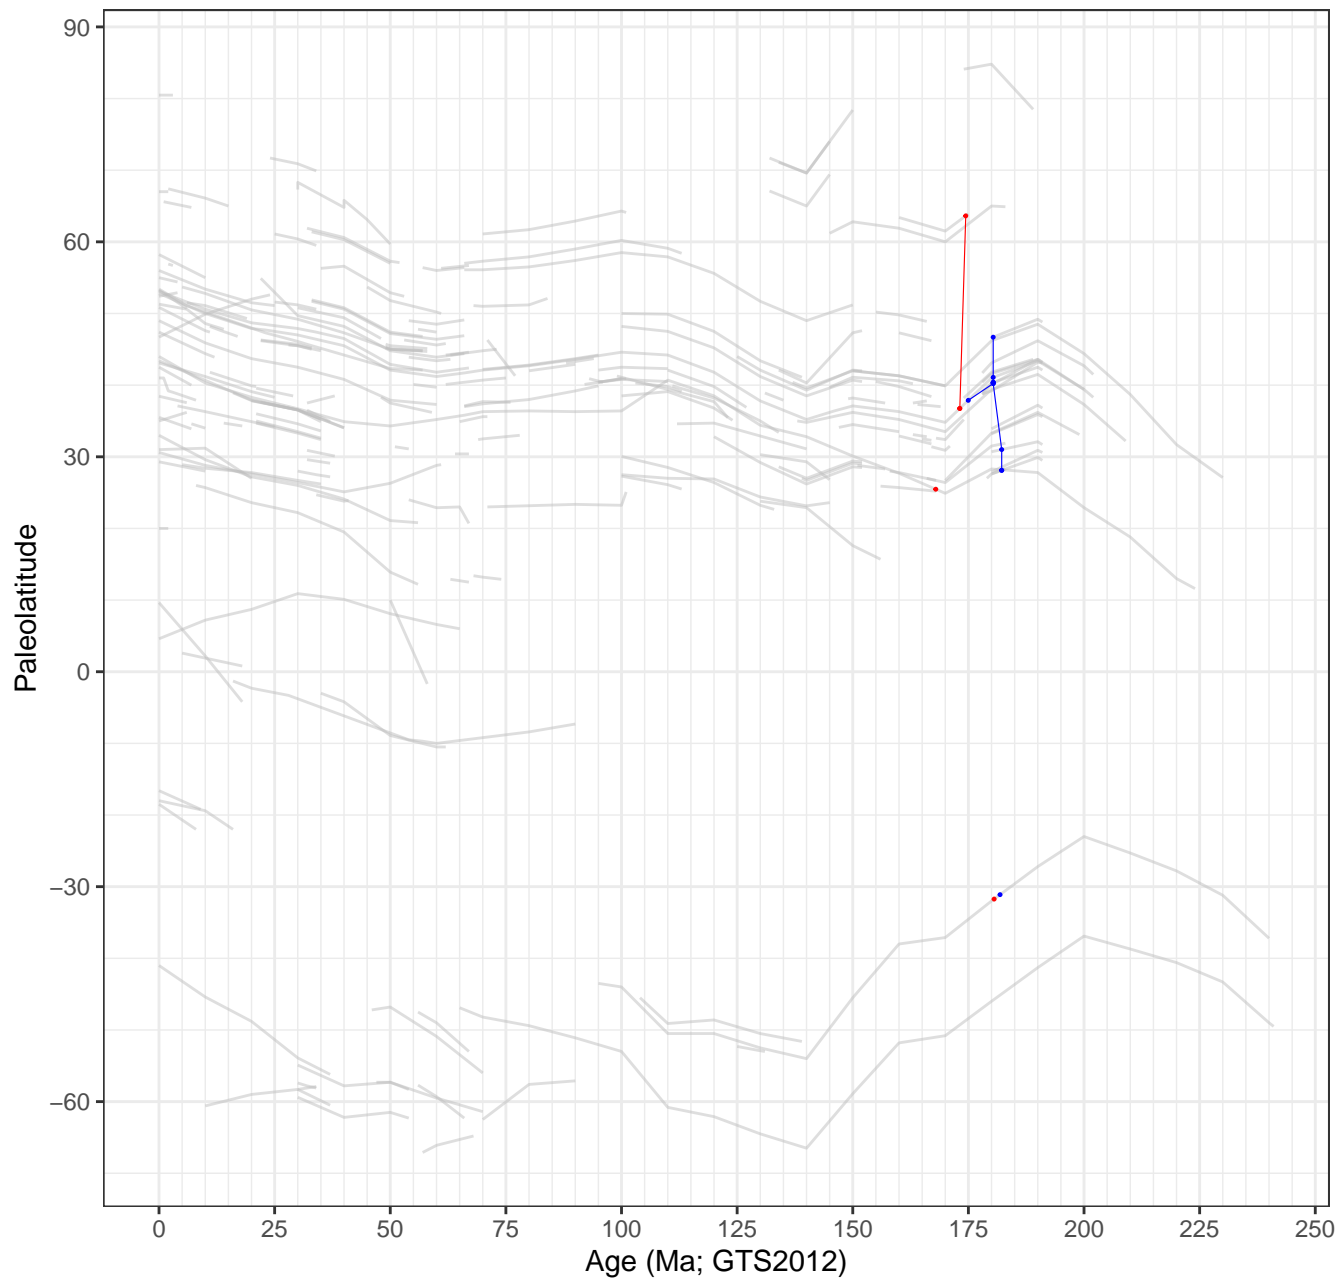

Supplement: Supplementary file 429 [file Genus Susadinium.pdf › Supplement/Supplement 2/Genus 459 plots/Genus Susadinium.pdf]

# Genus Svalbardella

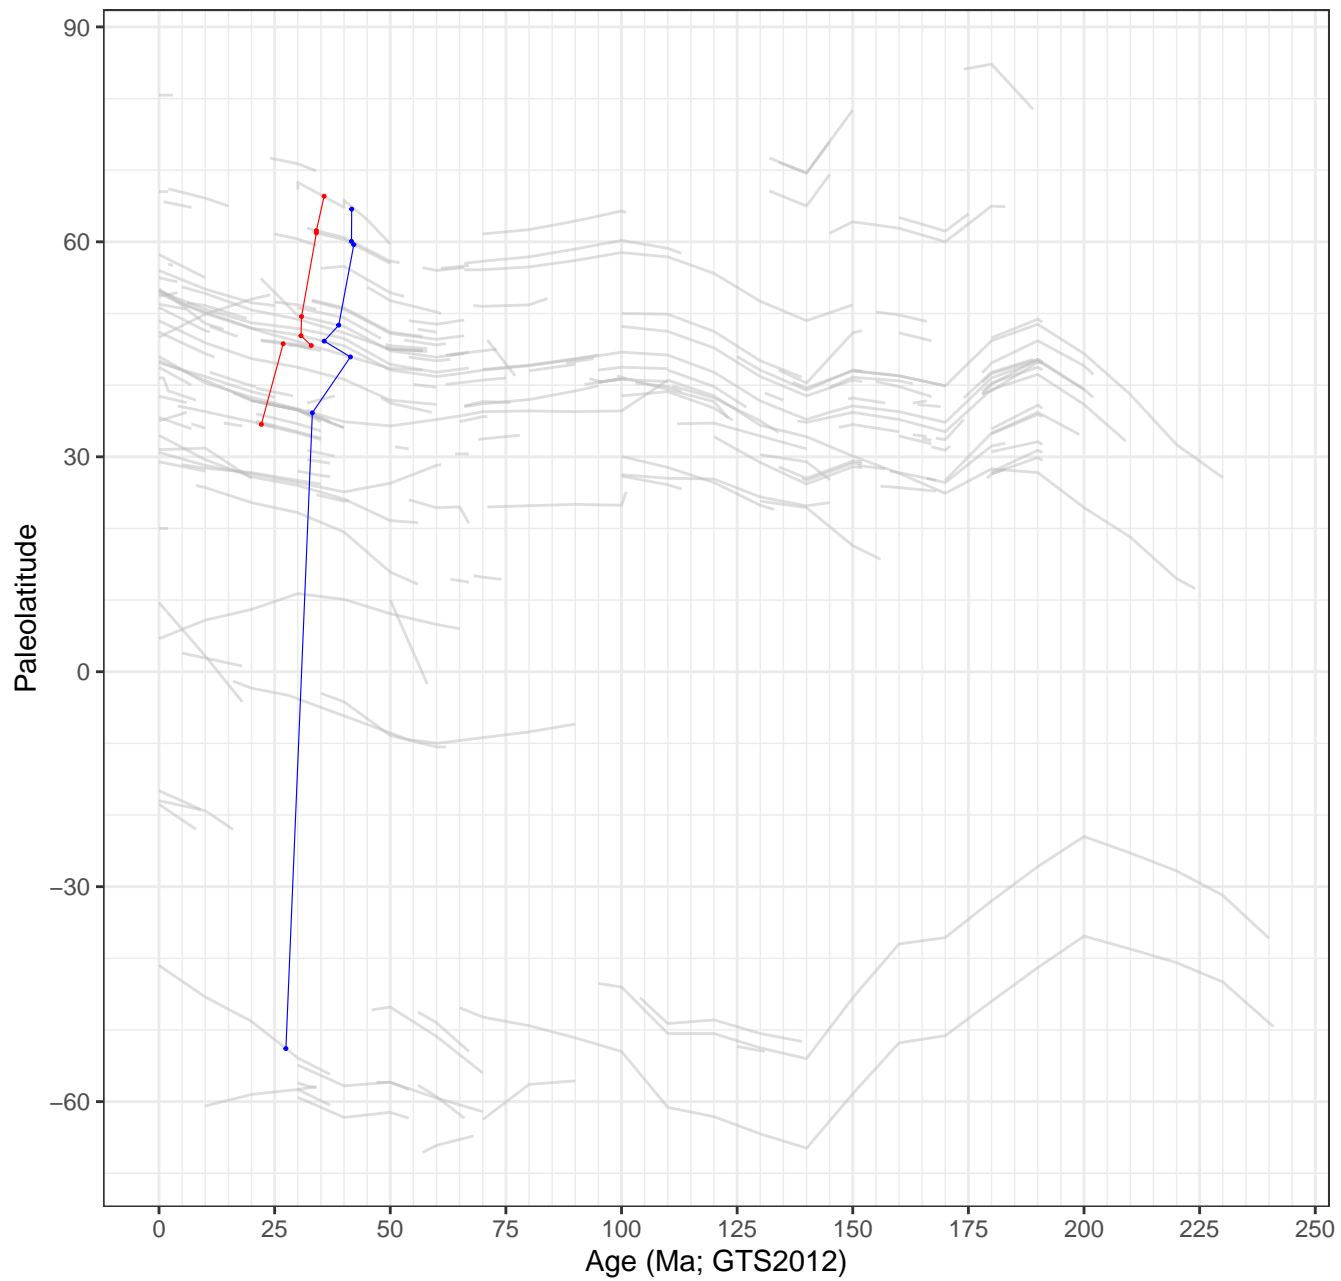

Supplement: Supplementary file 430 [file Genus Svalbardella.pdf › Supplement/Supplement 2/Genus 459 plots/Genus Svalbardella.pdf]

# Genus Sverdrupiella

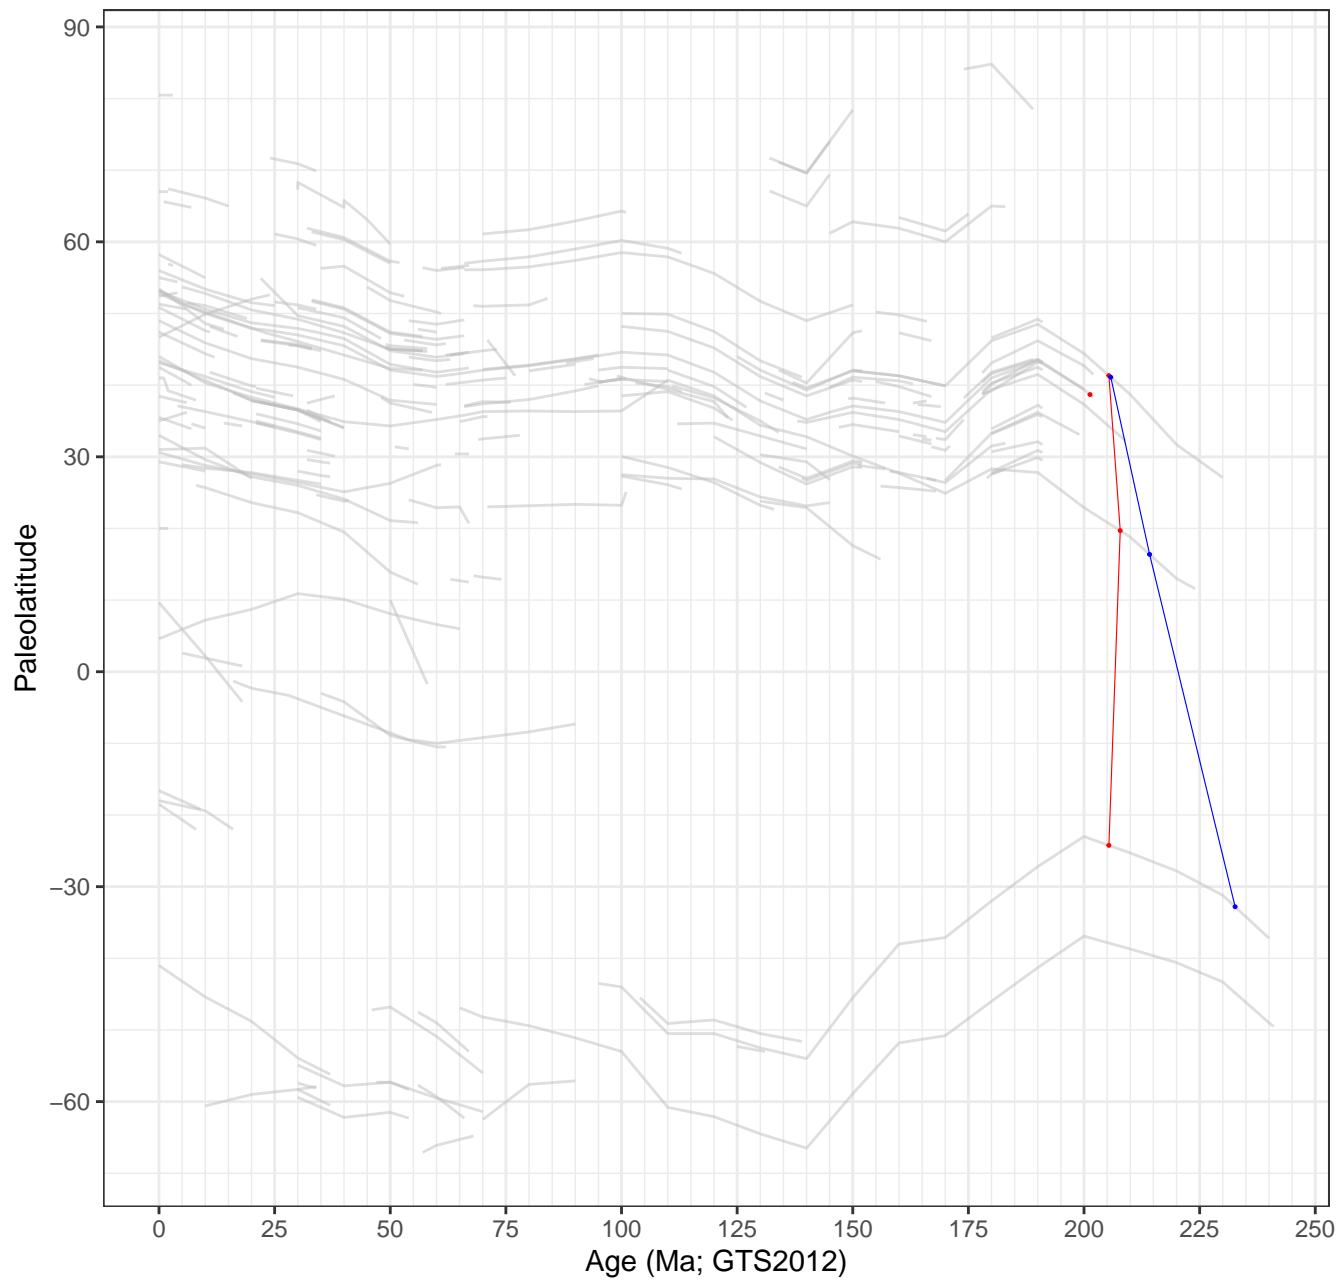

Supplement: Supplementary file 431 [file Genus Sverdrupiella.pdf › Supplement/Supplement 2/Genus 459 plots/Genus Sverdrupiella.pdf]

# Genus Systematophora

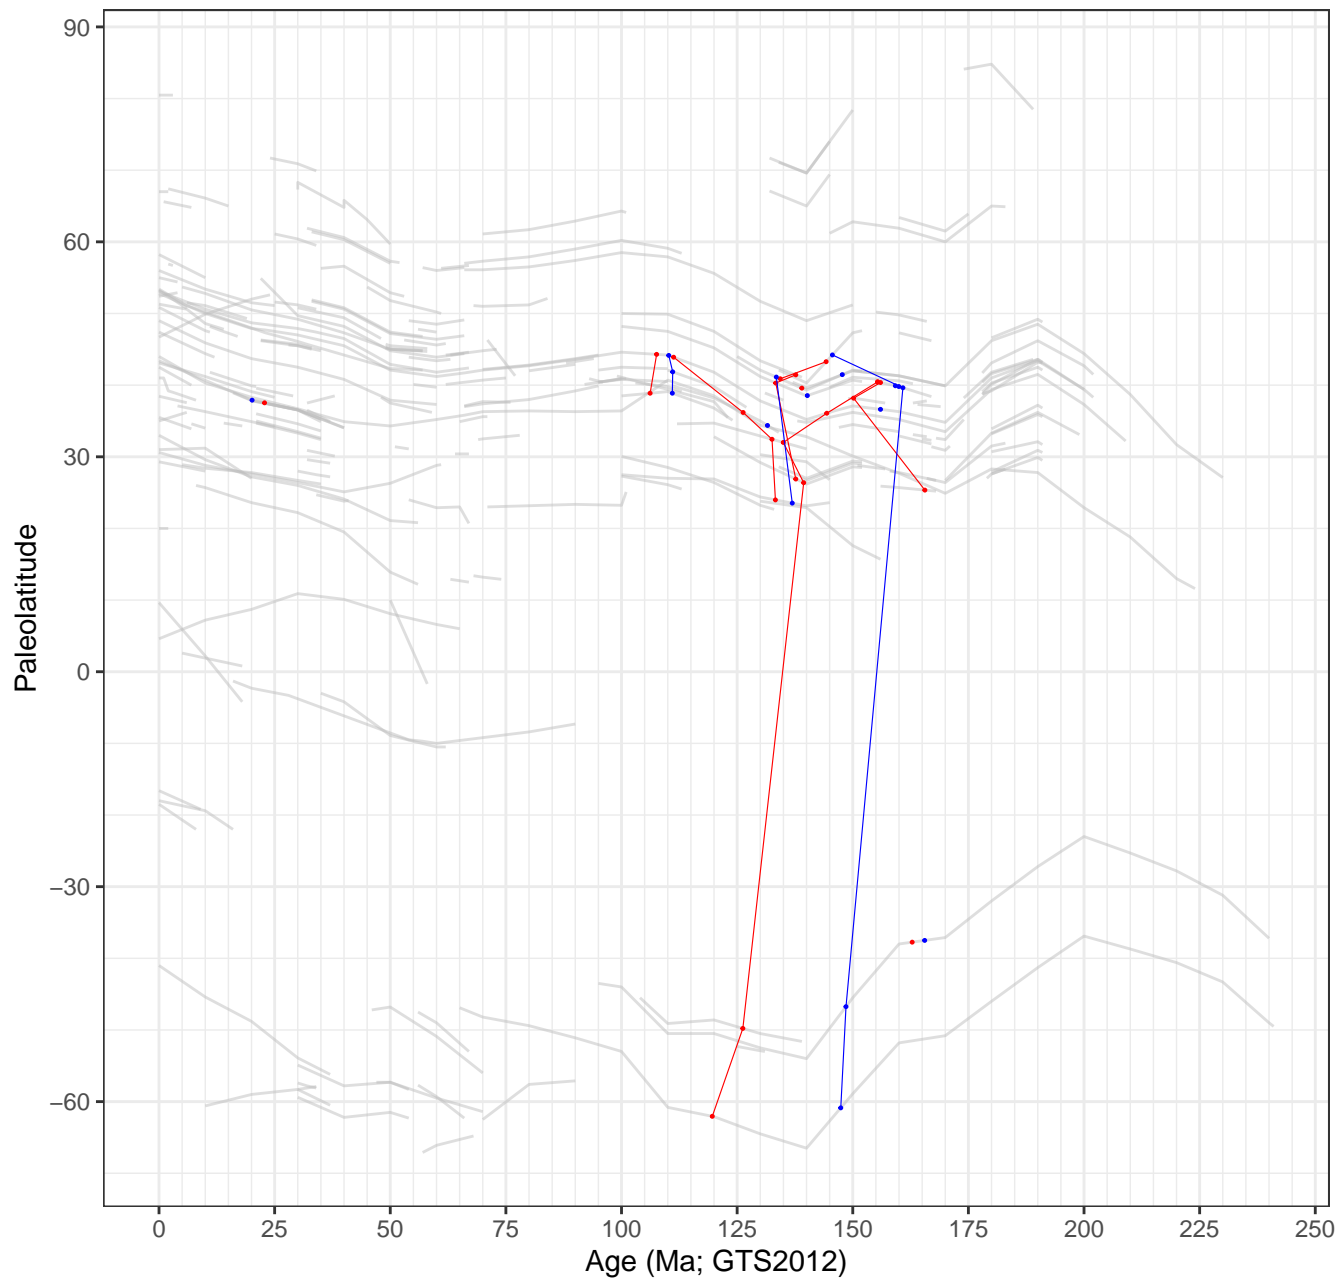

Supplement: Supplementary file 432 [file Genus Systematophora.pdf › Supplement/Supplement 2/Genus 459 plots/Genus Systematophora.pdf]

# Genus Tabulodinium

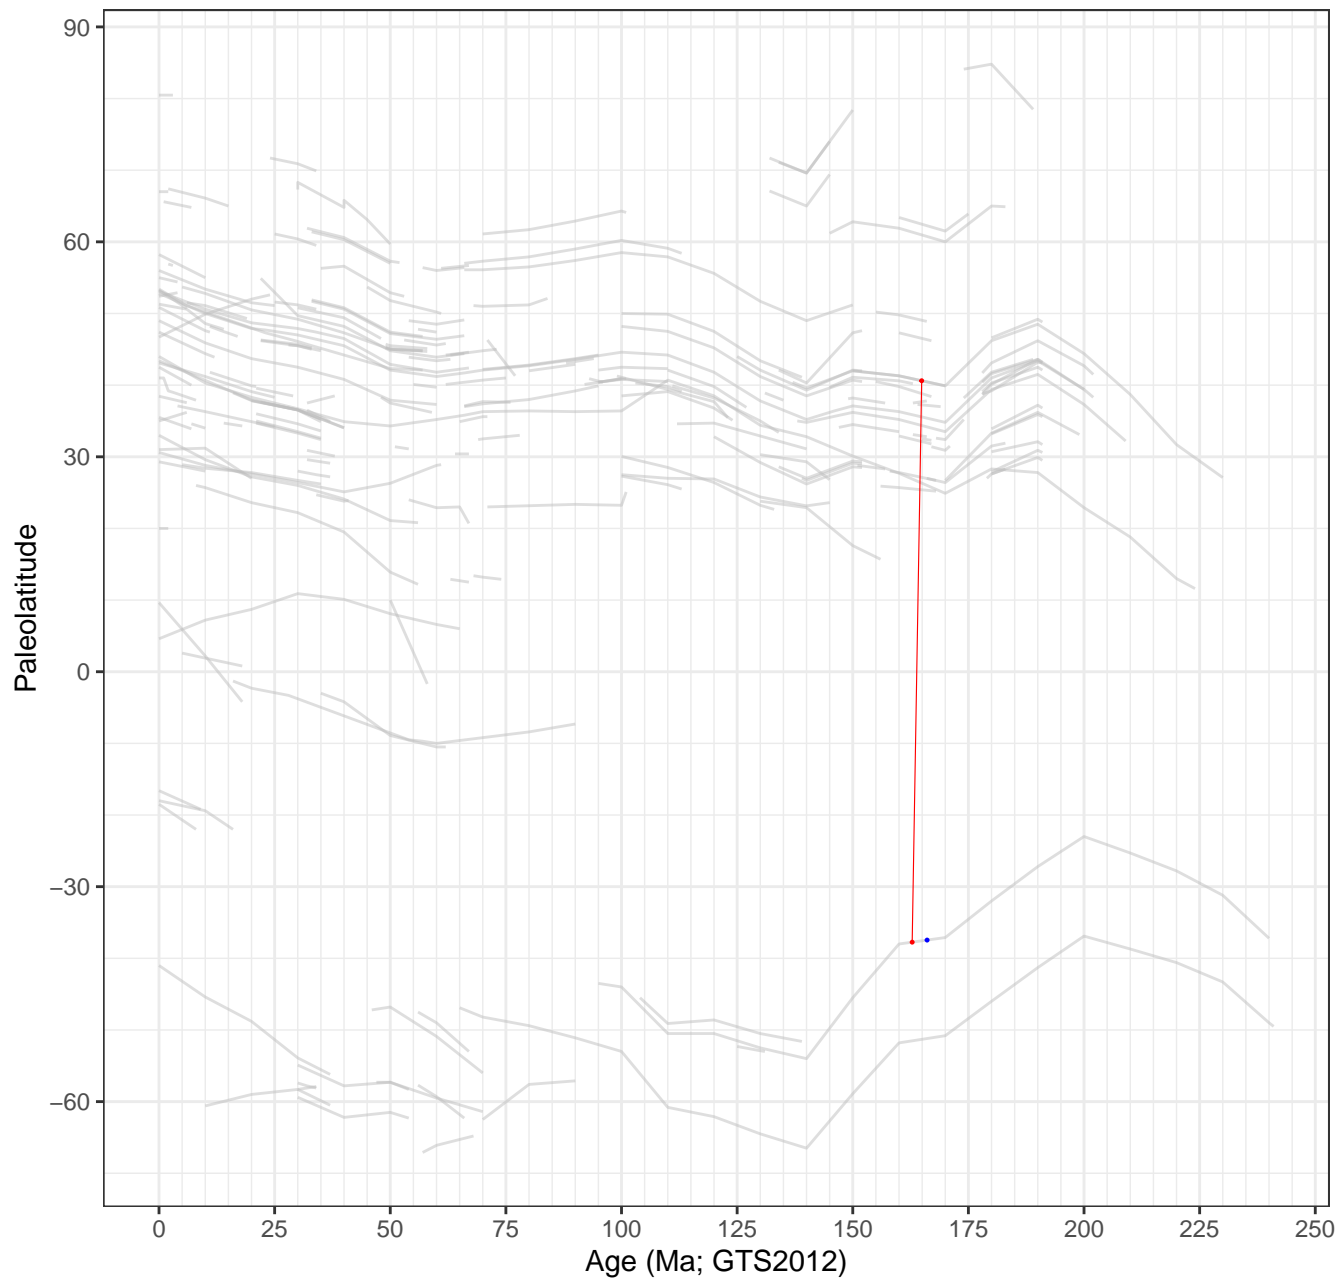

Supplement: Supplementary file 433 [file Genus Tabulodinium.pdf › Supplement/Supplement 2/Genus 459 plots/Genus Tabulodinium.pdf]

# Genus Taleisphaera

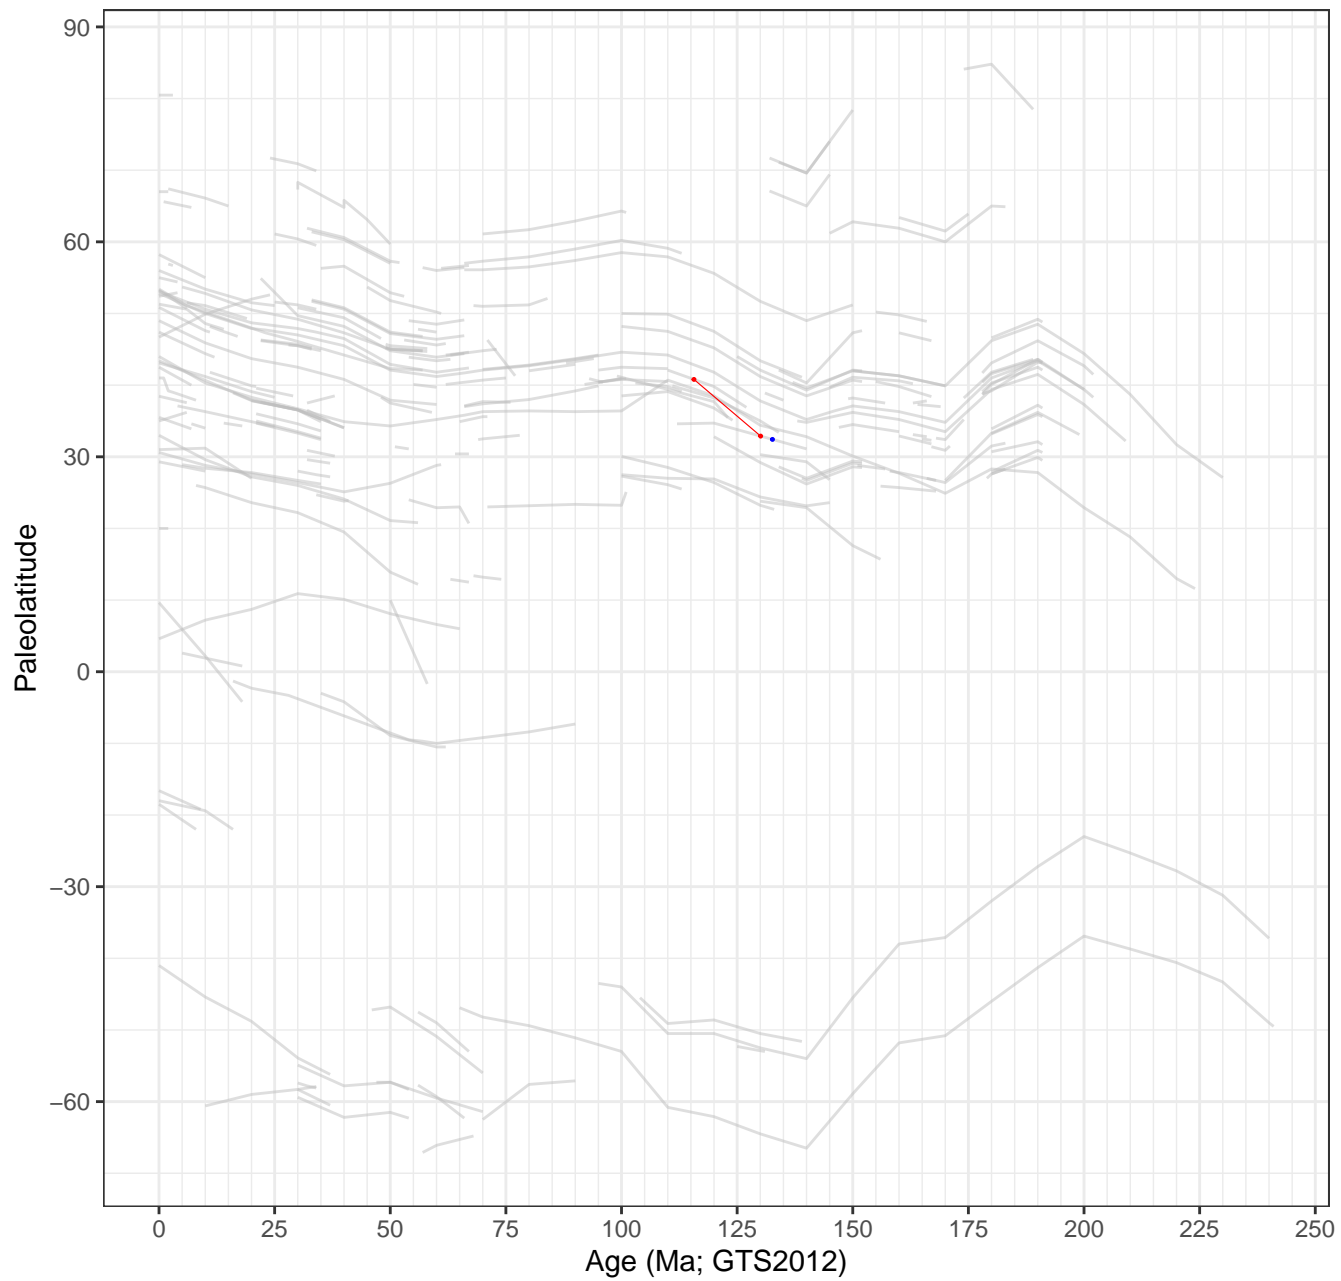

Supplement: Supplementary file 434 [file Genus Taleisphaera.pdf › Supplement/Supplement 2/Genus 459 plots/Genus Taleisphaera.pdf]

# Genus *Tanyosphaeridium*

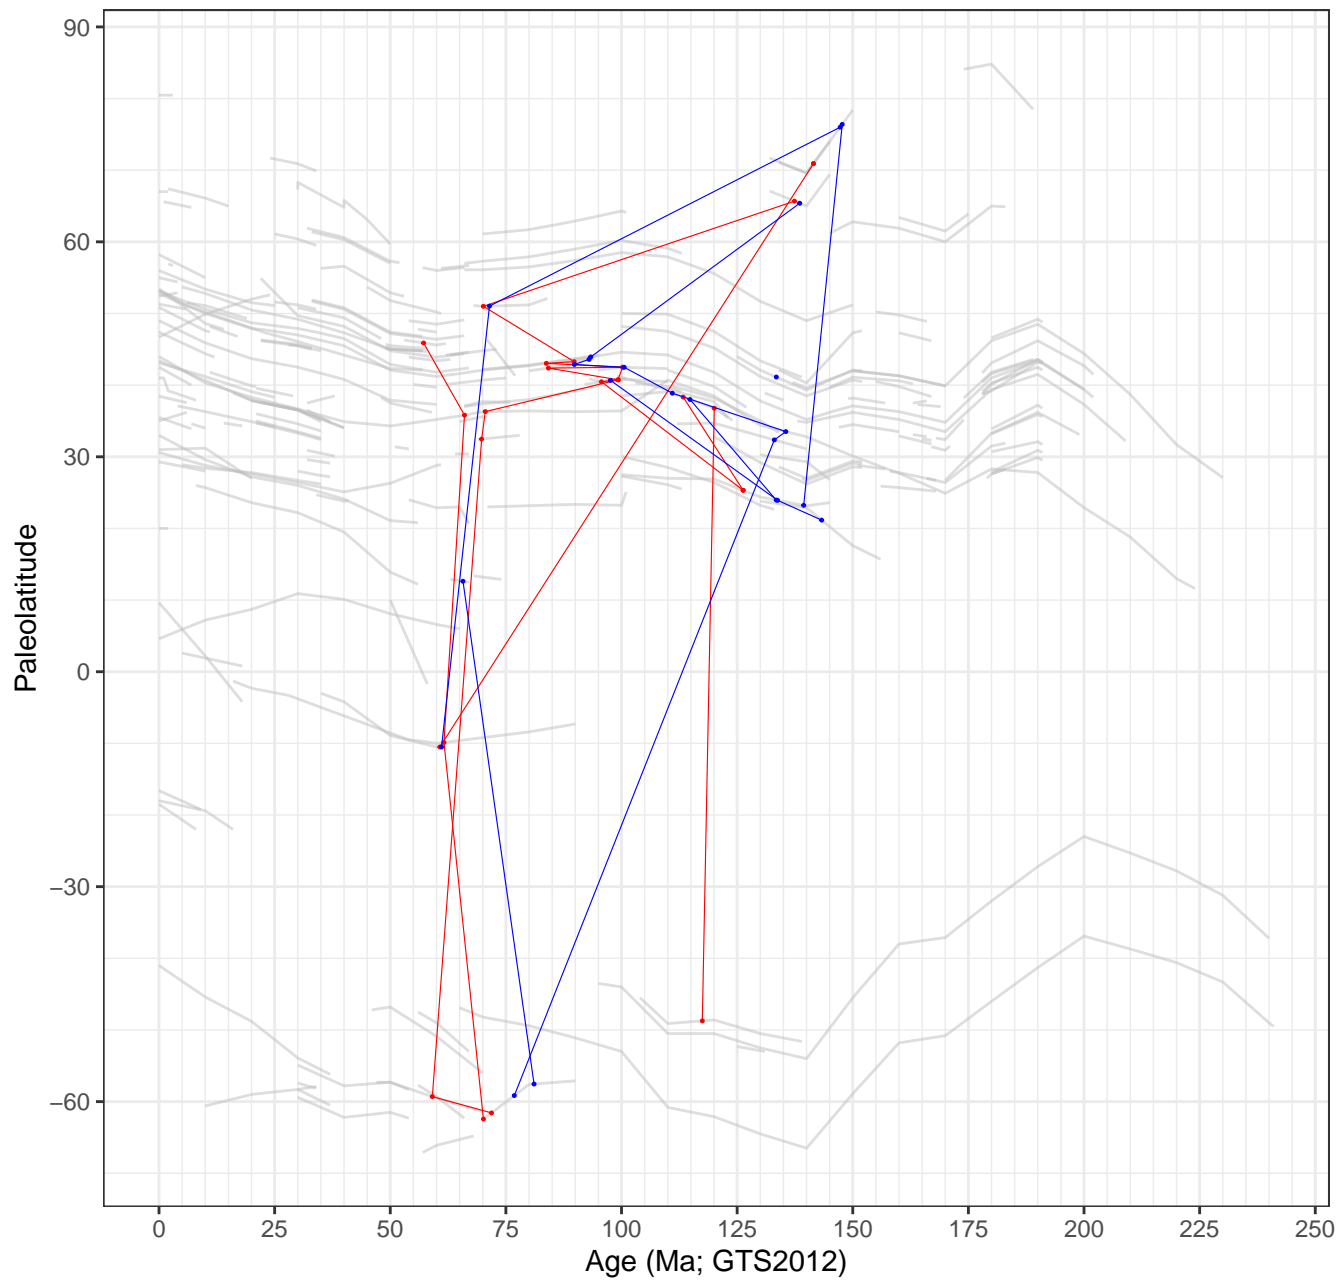

Supplement: Supplementary file 435 [file Genus Tanyosphaeridium.pdf › Supplement/Supplement 2/Genus 459 plots/Genus Tanyosphaeridium.pdf]

# Genus Tectatodinium

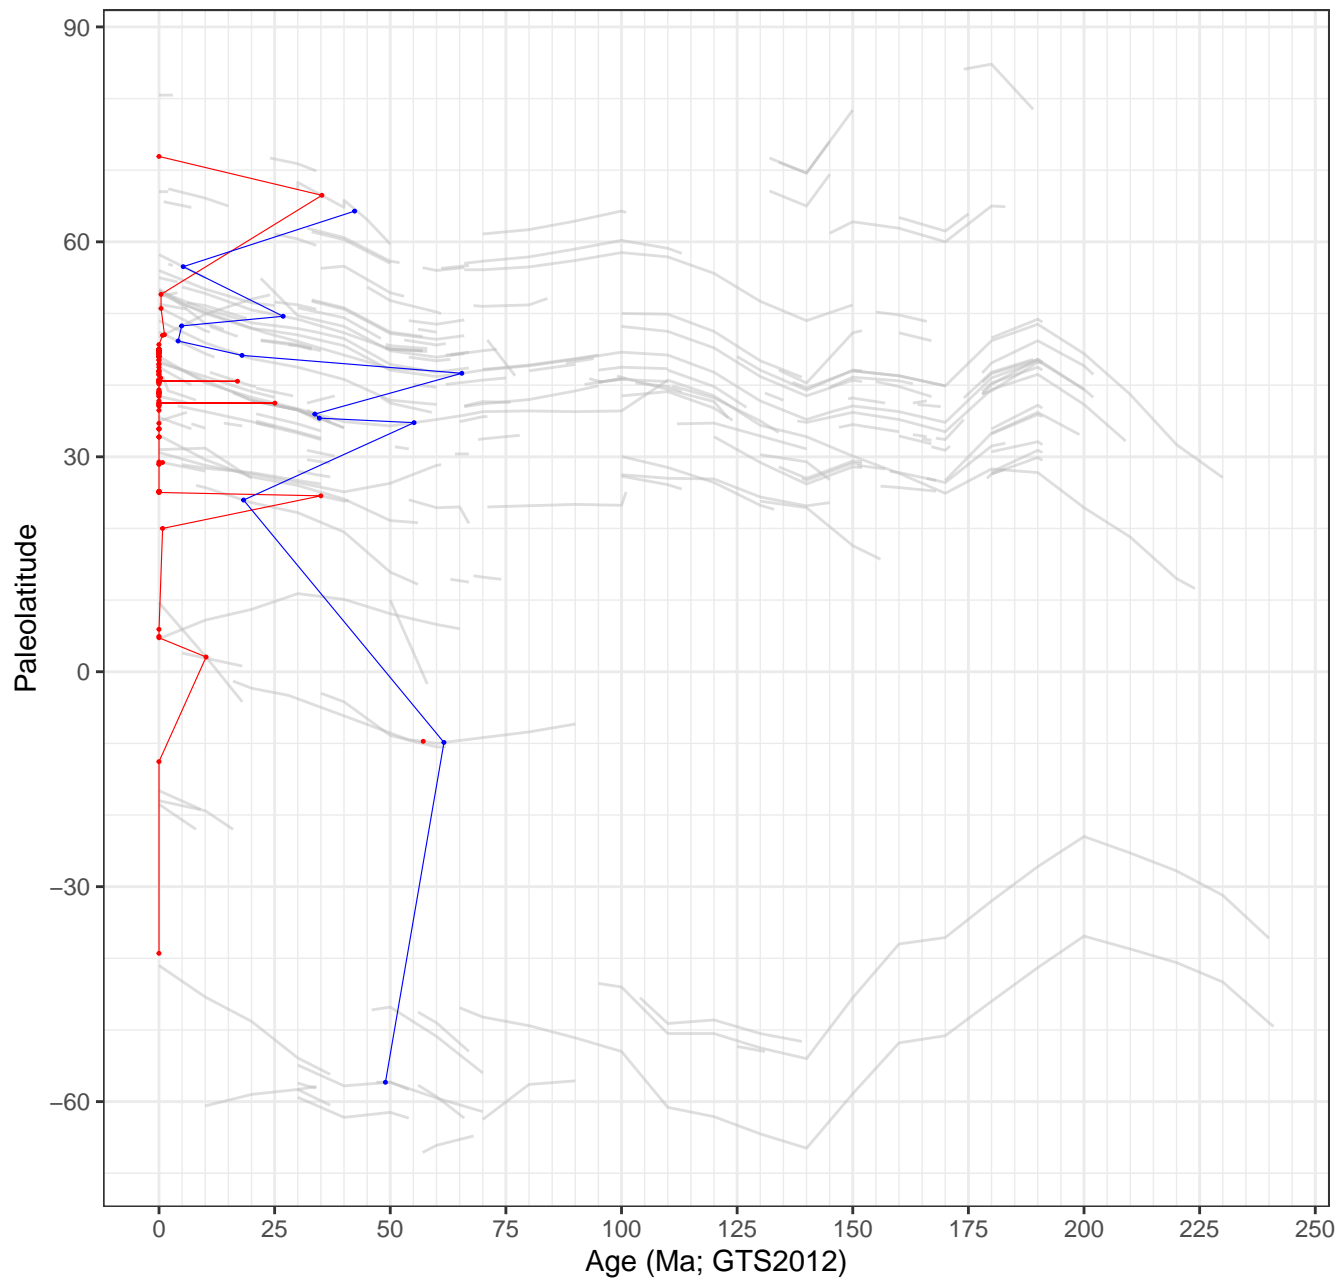

Supplement: Supplementary file 436 [file Genus Tectatodinium.pdf › Supplement/Supplement 2/Genus 459 plots/Genus Tectatodinium.pdf]

# Genus *Tehamadinium*

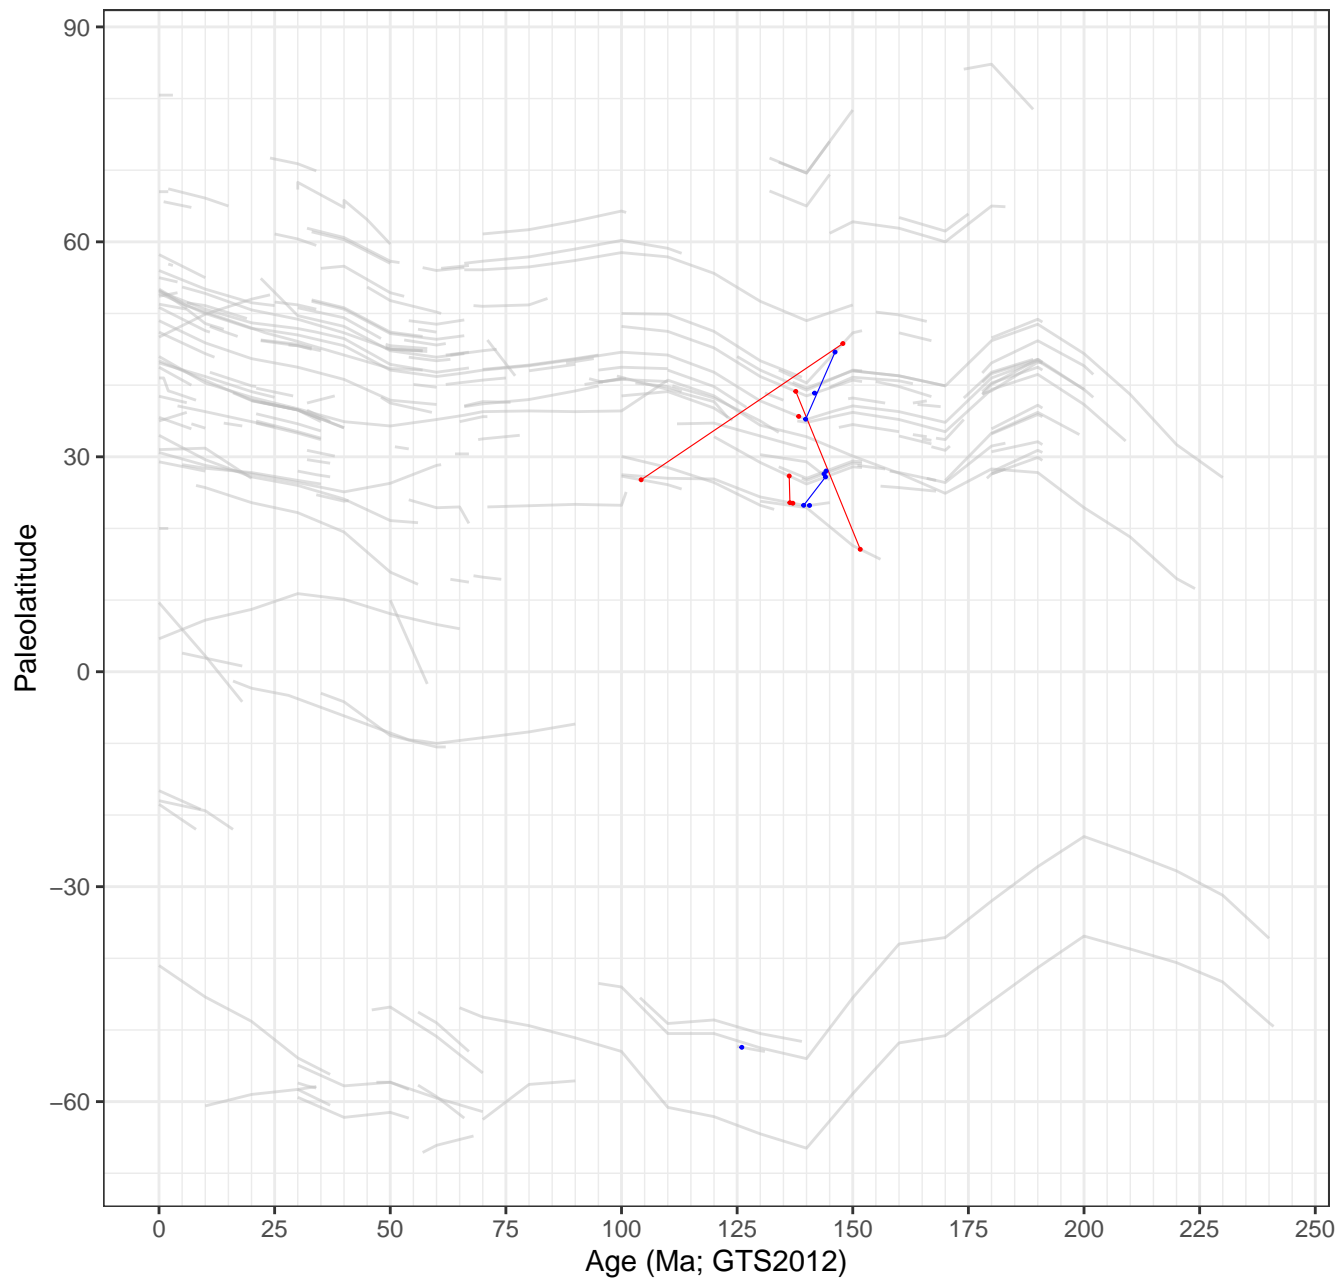

Supplement: Supplementary file 437 [file Genus Tehamadinium.pdf › Supplement/Supplement 2/Genus 459 plots/Genus Tehamadinium.pdf]

# Genus Tenua

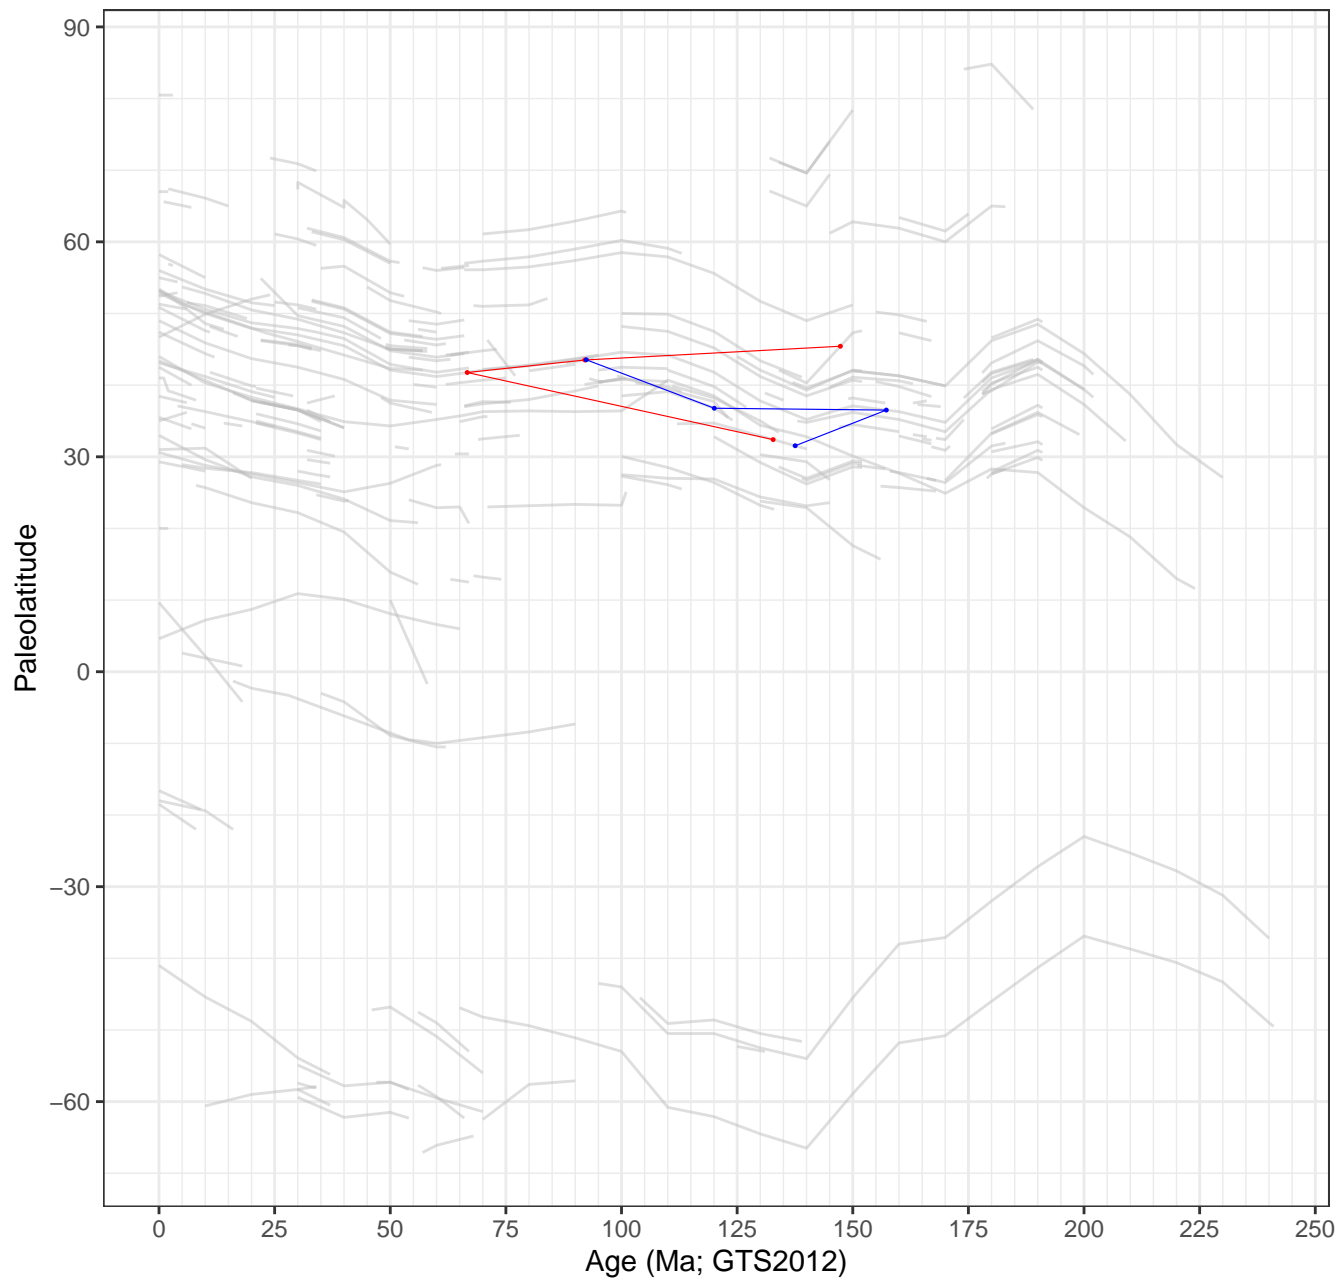

Supplement: Supplementary file 438 [file Genus Tenua.pdf › Supplement/Supplement 2/Genus 459 plots/Genus Tenua.pdf]

# Genus *Ternia*

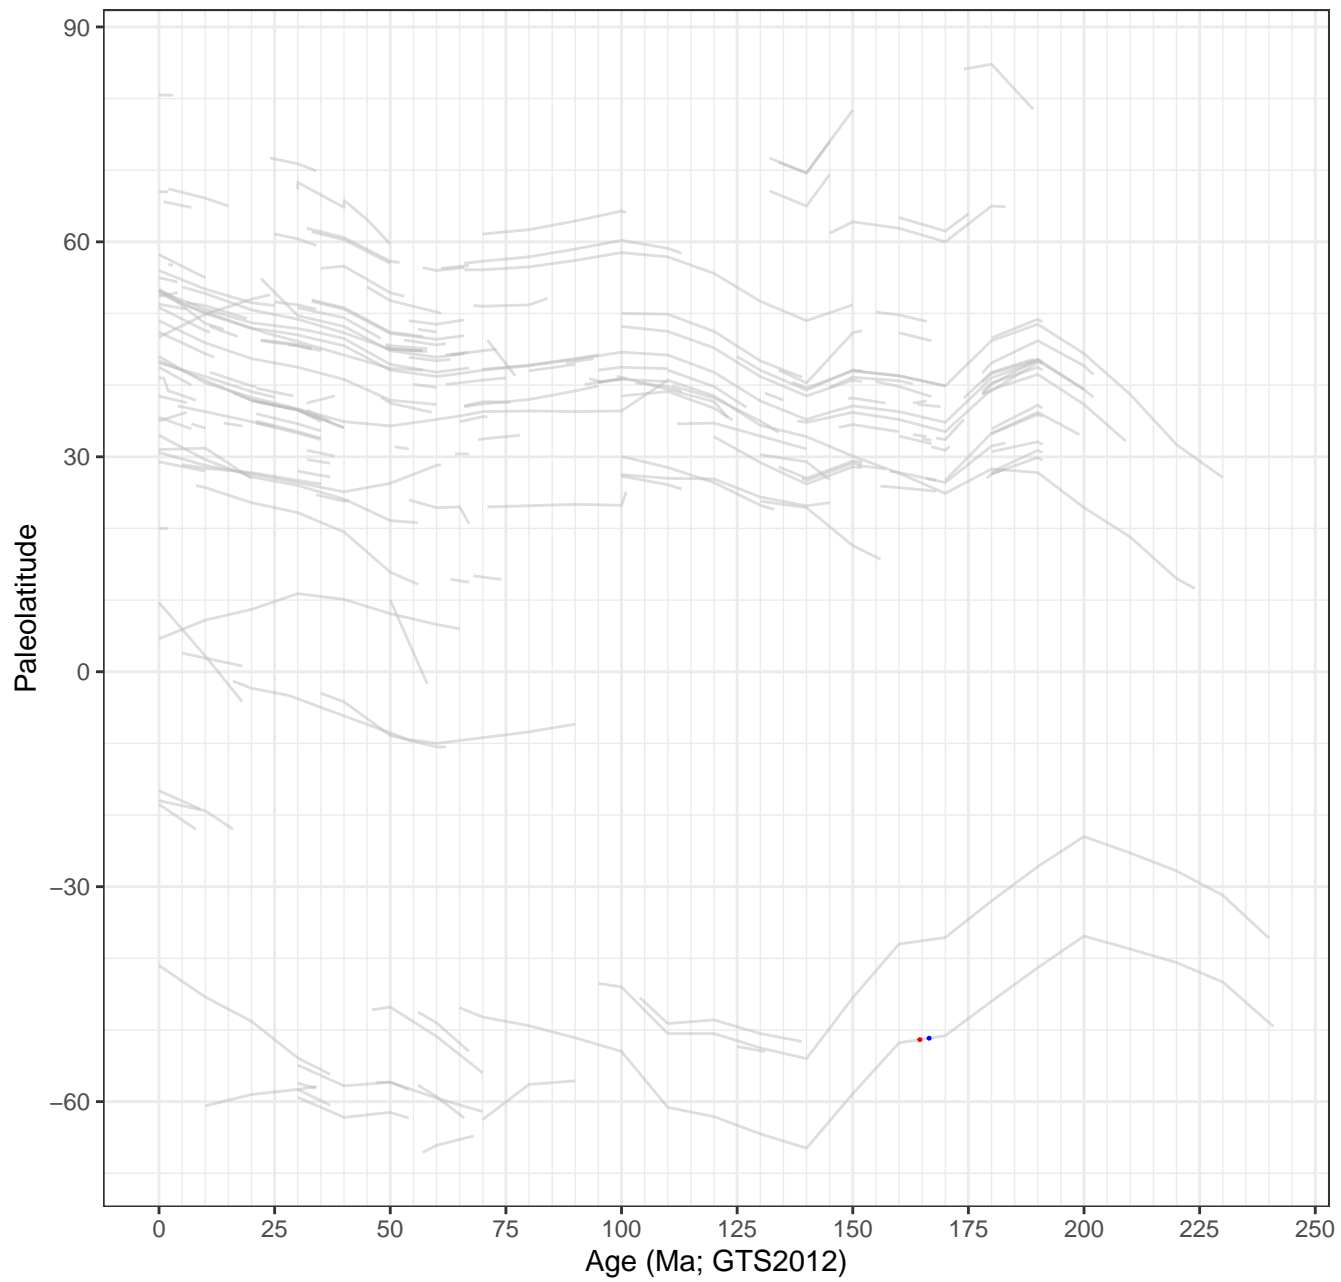

Supplement: Supplementary file 439 [file Genus Ternia.pdf › Supplement/Supplement 2/Genus 459 plots/Genus Ternia.pdf]

# Genus *Thalassiphora*

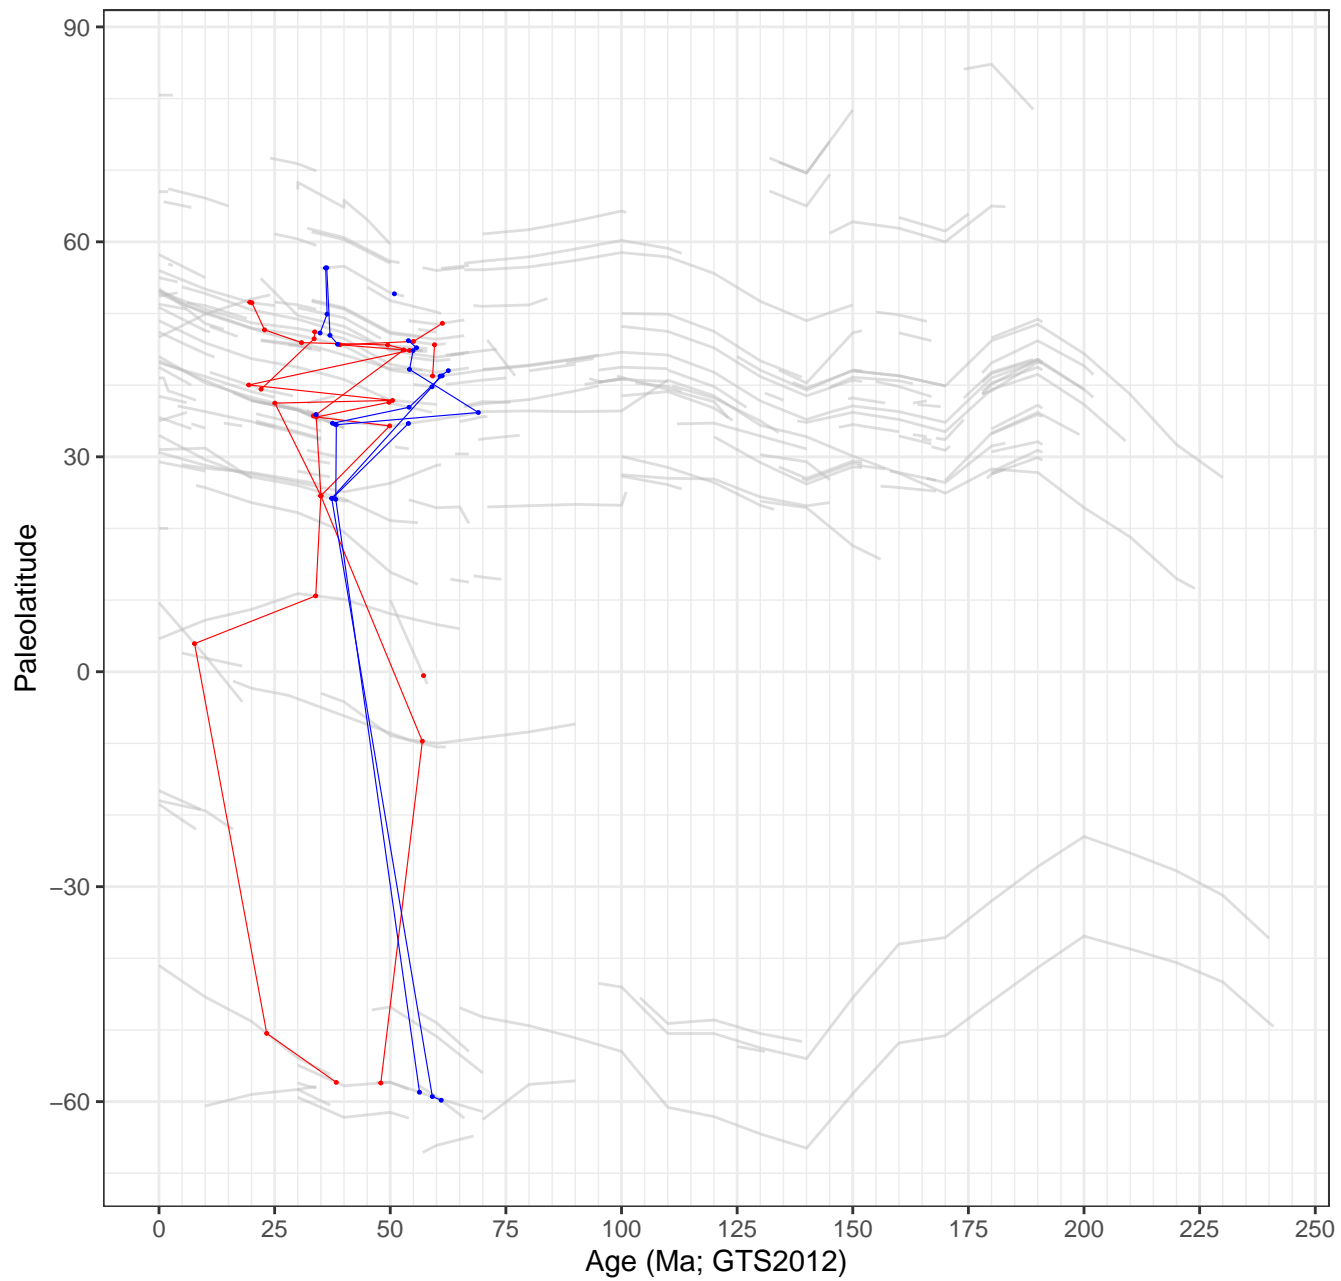

Supplement: Supplementary file 440 [file Genus Thalassiphora.pdf › Supplement/Supplement 2/Genus 459 plots/Genus Thalassiphora.pdf]

# Genus *Trabeculidinium*

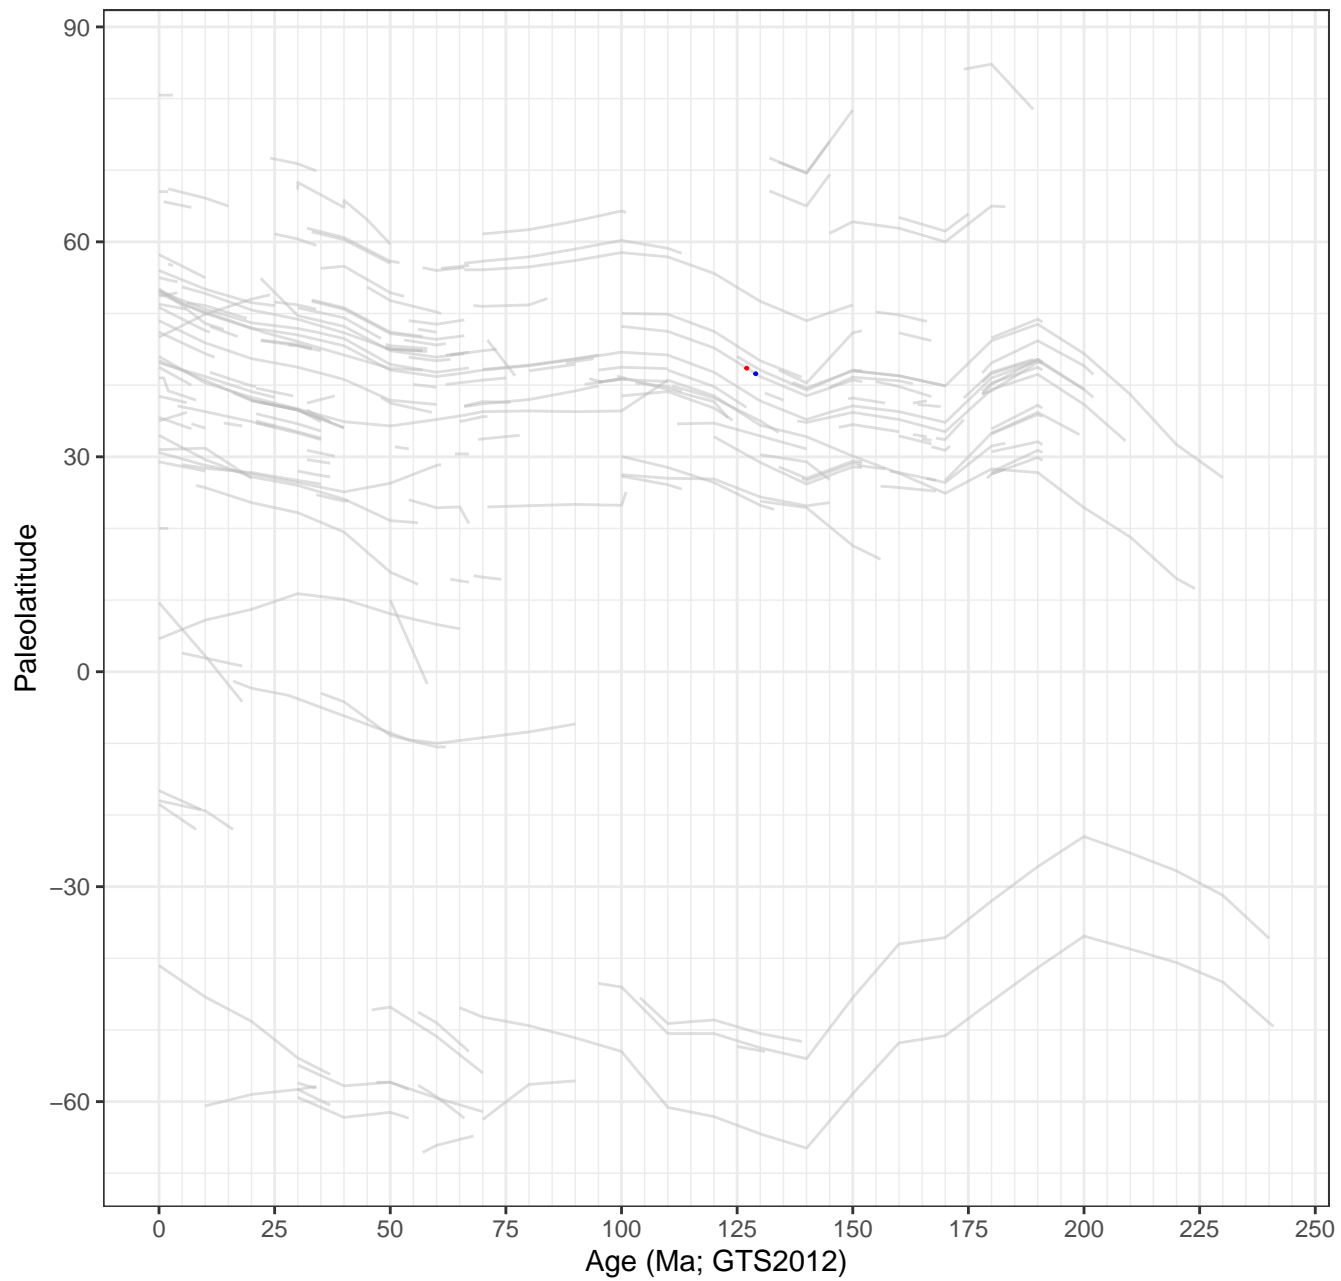

Supplement: Supplementary file 441 [file Genus Trabeculidinium.pdf › Supplement/Supplement 2/Genus 459 plots/Genus Trabeculidinium.pdf]

# Genus Triblastula

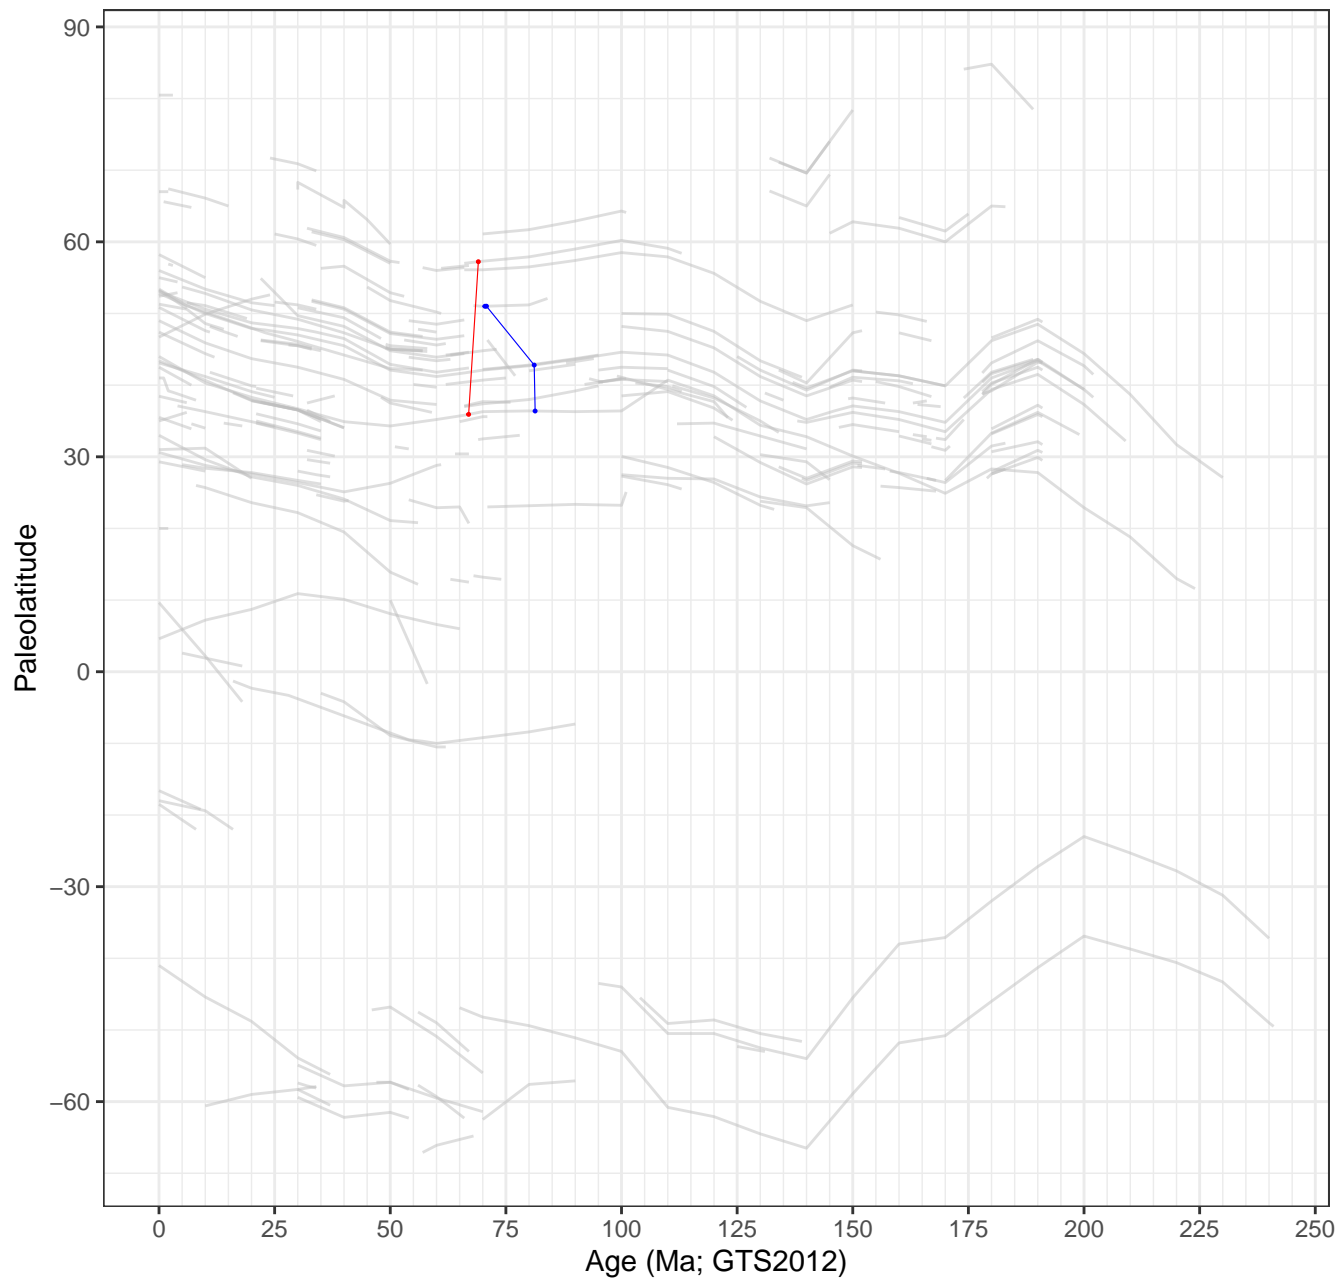

Supplement: Supplementary file 442 [file Genus Triblastula.pdf › Supplement/Supplement 2/Genus 459 plots/Genus Triblastula.pdf]

# Genus Trichodinium

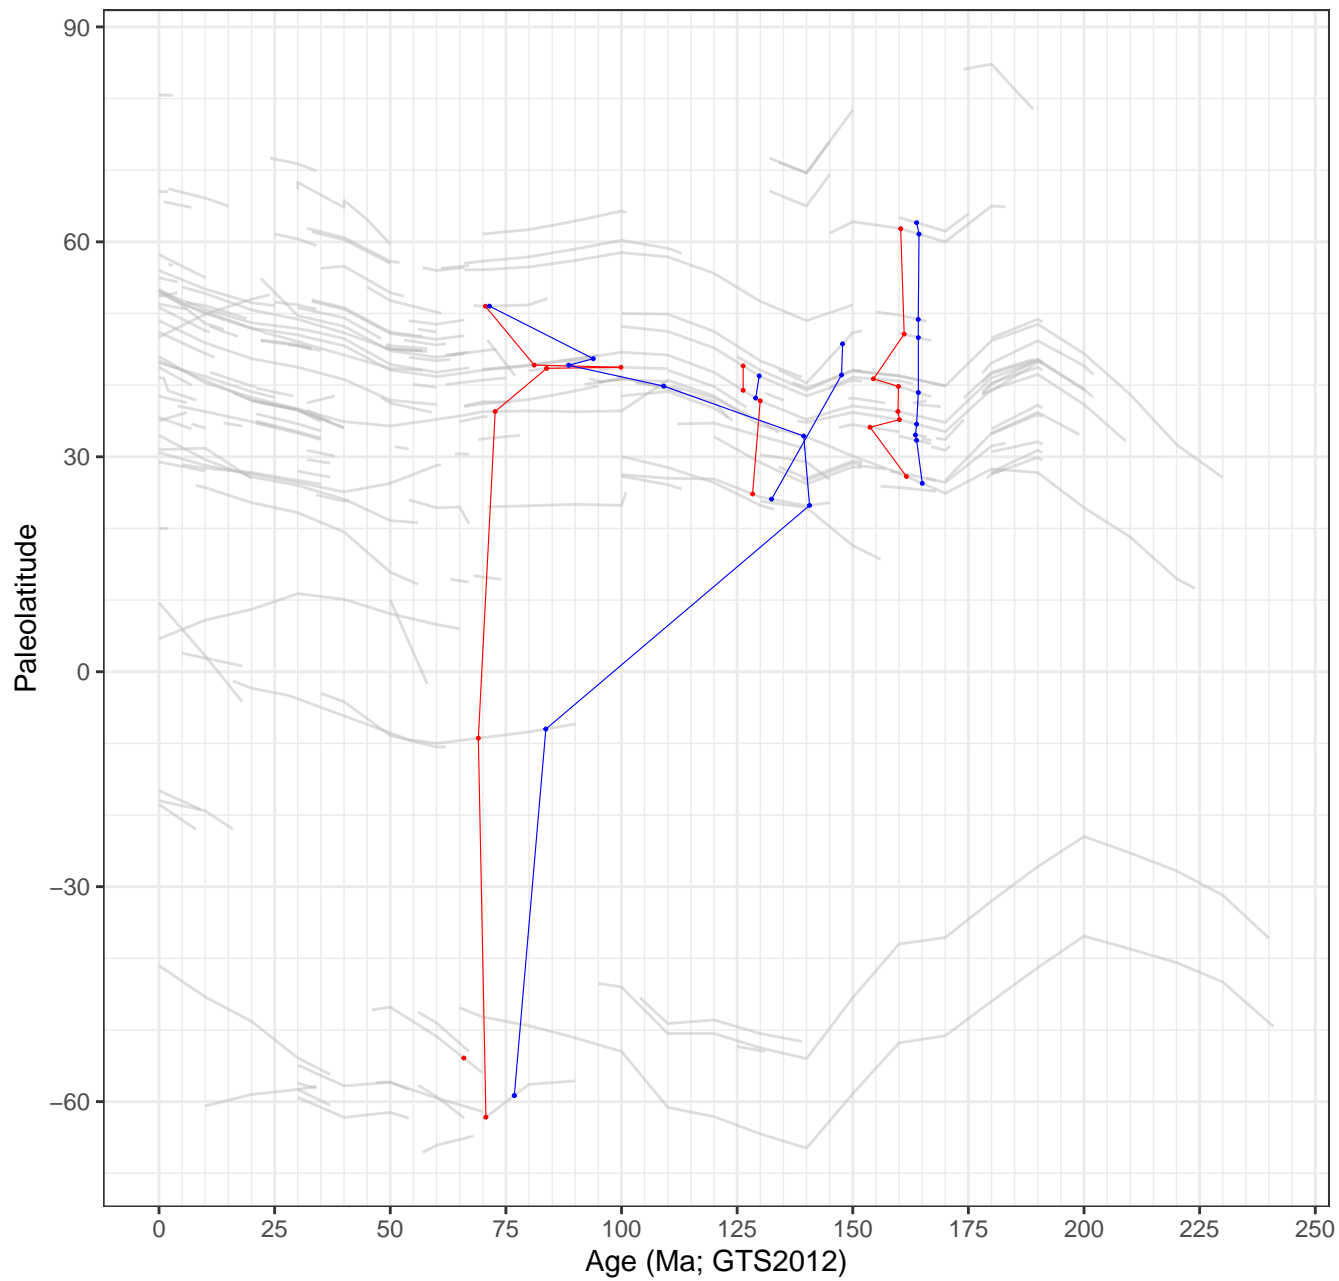

Supplement: Supplementary file 443 [file Genus Trichodinium.pdf › Supplement/Supplement 2/Genus 459 plots/Genus Trichodinium.pdf]

# Genus Tringadinium

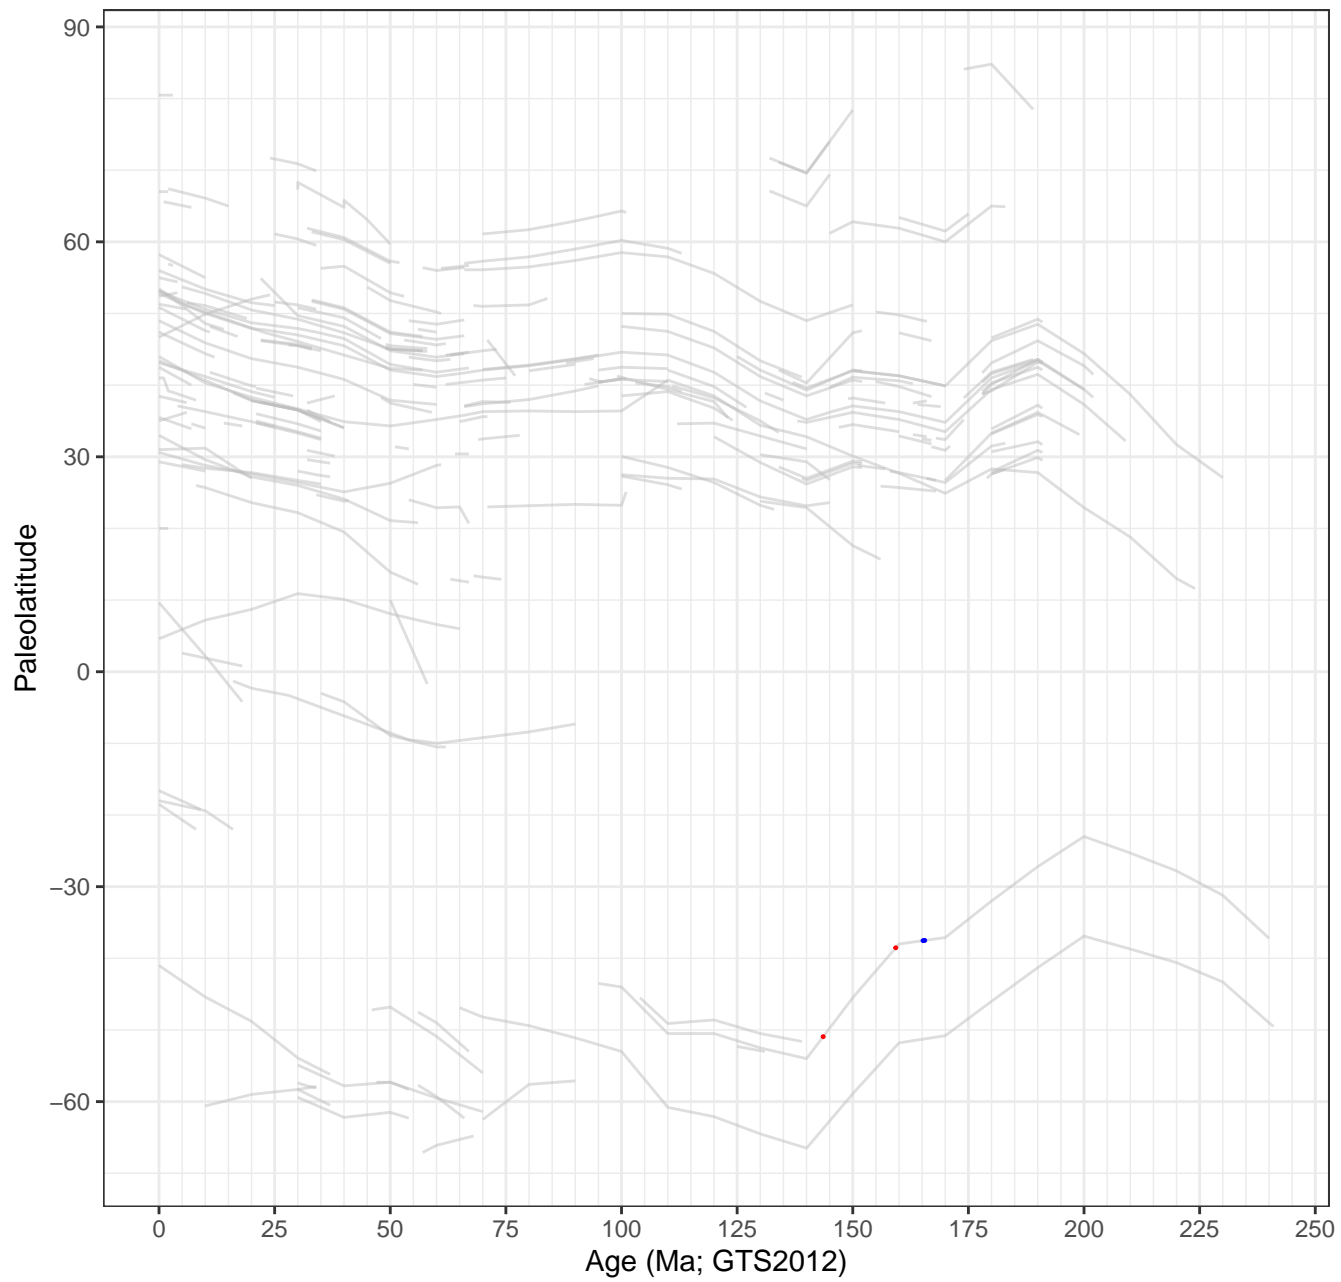

Supplement: Supplementary file 444 [file Genus Tringadinium.pdf › Supplement/Supplement 2/Genus 459 plots/Genus Tringadinium.pdf]

# Genus Trinovantedinium

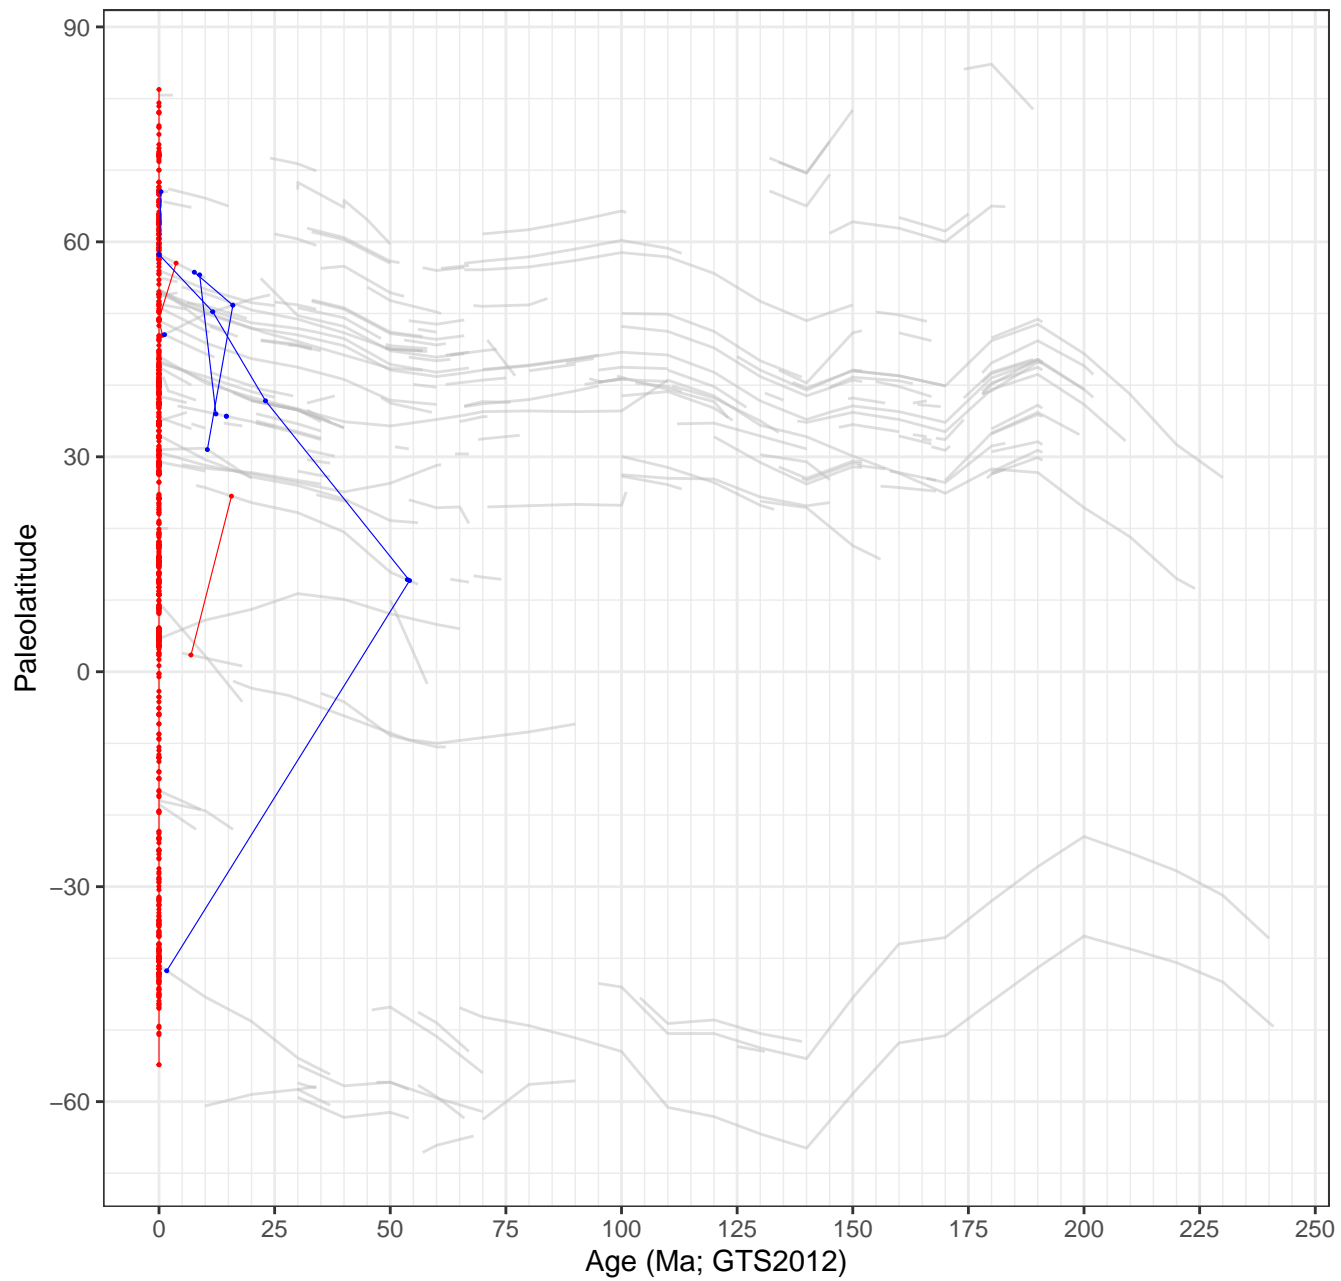

Supplement: Supplementary file 445 [file Genus Trinovantedinium.pdf › Supplement/Supplement 2/Genus 459 plots/Genus Trinovantedinium.pdf]

# Genus *Triphragmadinium*

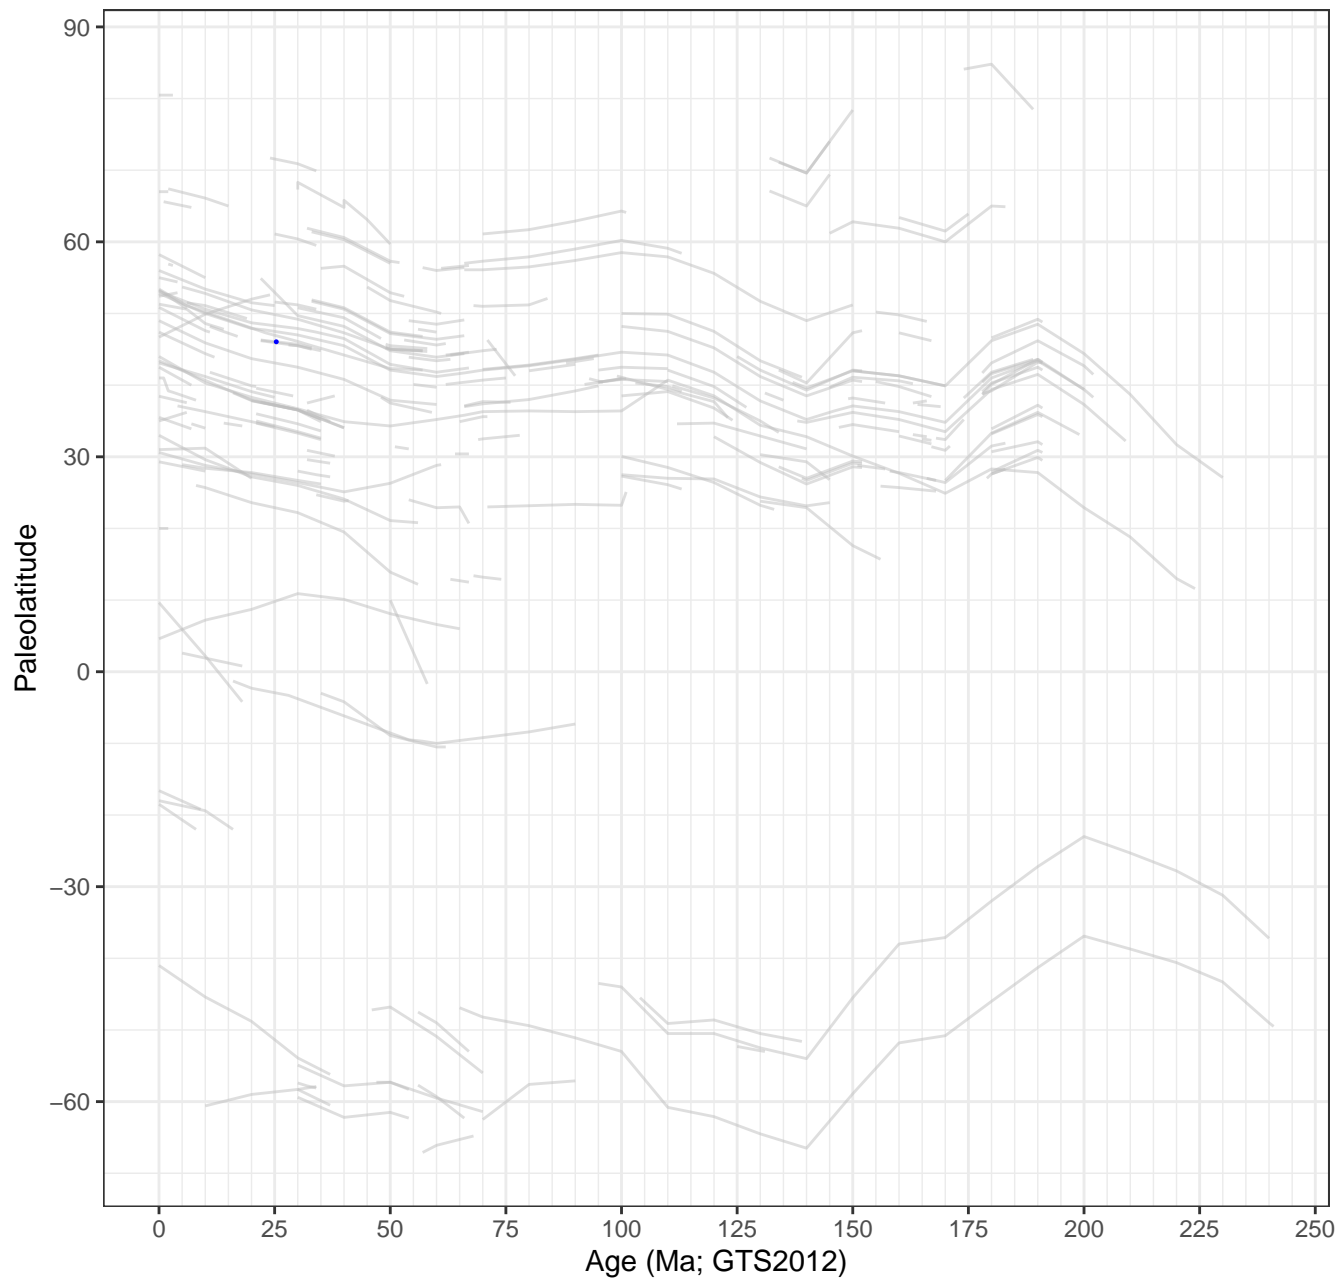

Supplement: Supplementary file 446 [file Genus Triphragmadinium.pdf › Supplement/Supplement 2/Genus 459 plots/Genus Triphragmadinium.pdf]

# Genus *Trithyrodinium*

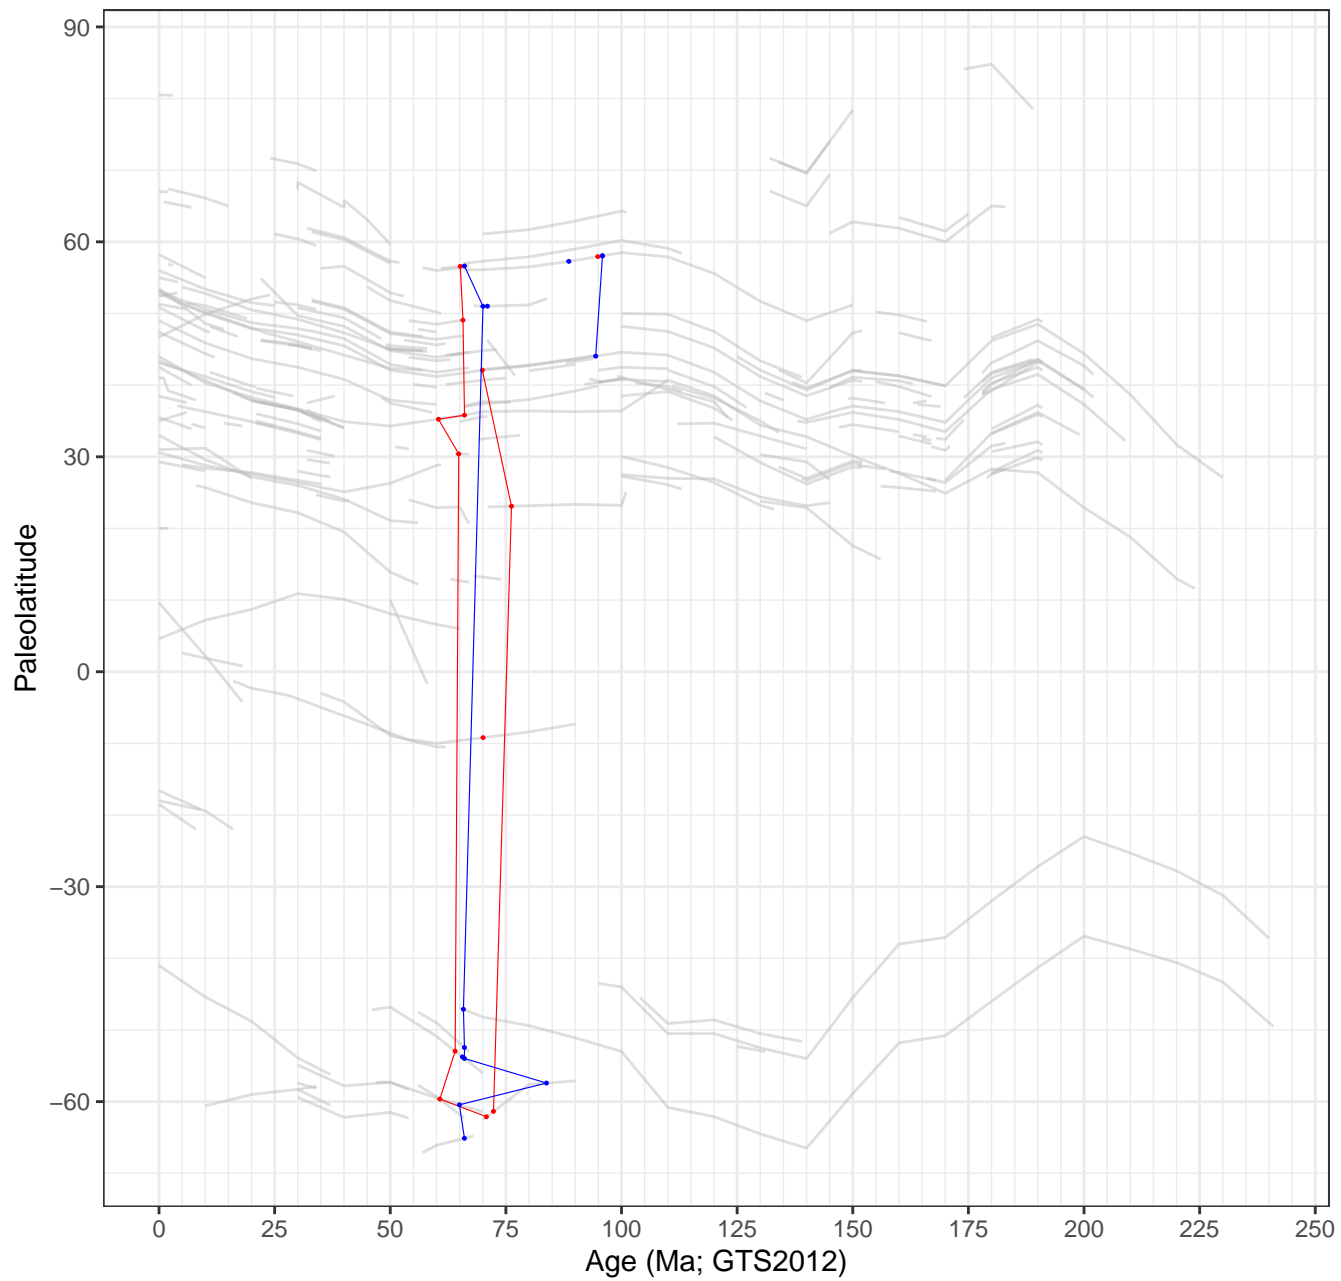

Supplement: Supplementary file 447 [file Genus Trithyrodinium.pdf › Supplement/Supplement 2/Genus 459 plots/Genus Trithyrodinium.pdf]

# Genus Tuberculodinium

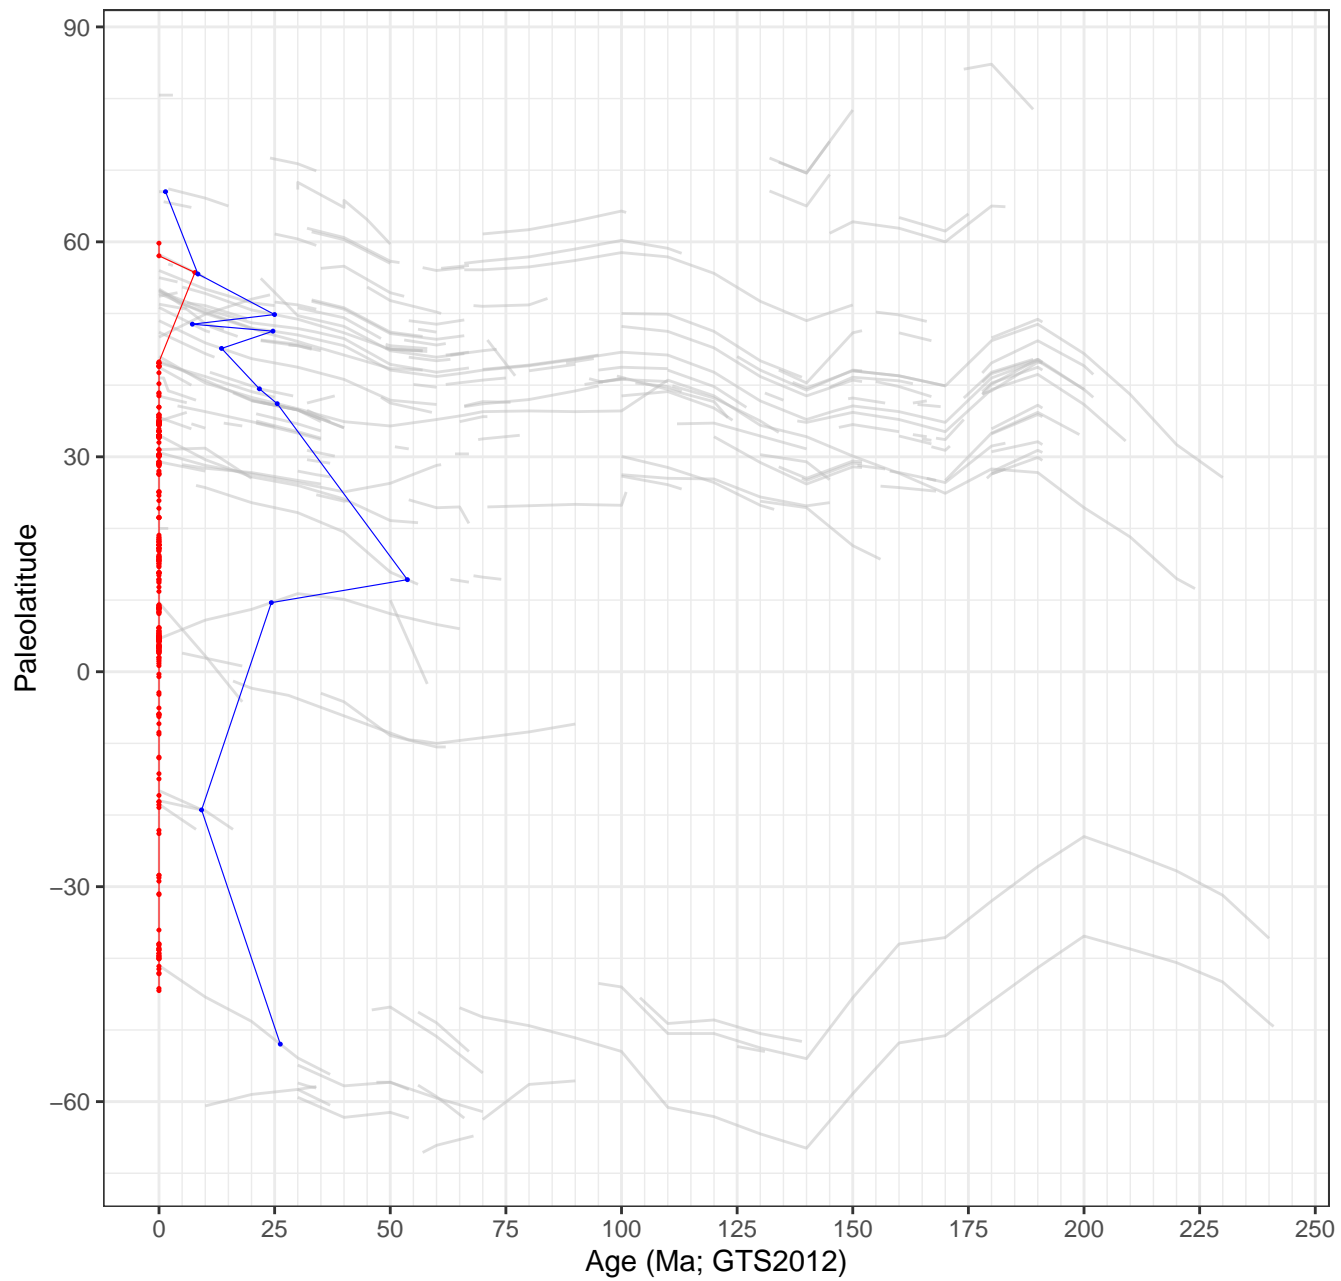

Supplement: Supplementary file 448 [file Genus Tuberculodinium.pdf › Supplement/Supplement 2/Genus 459 plots/Genus Tuberculodinium.pdf]

# Genus Tubidermodinium

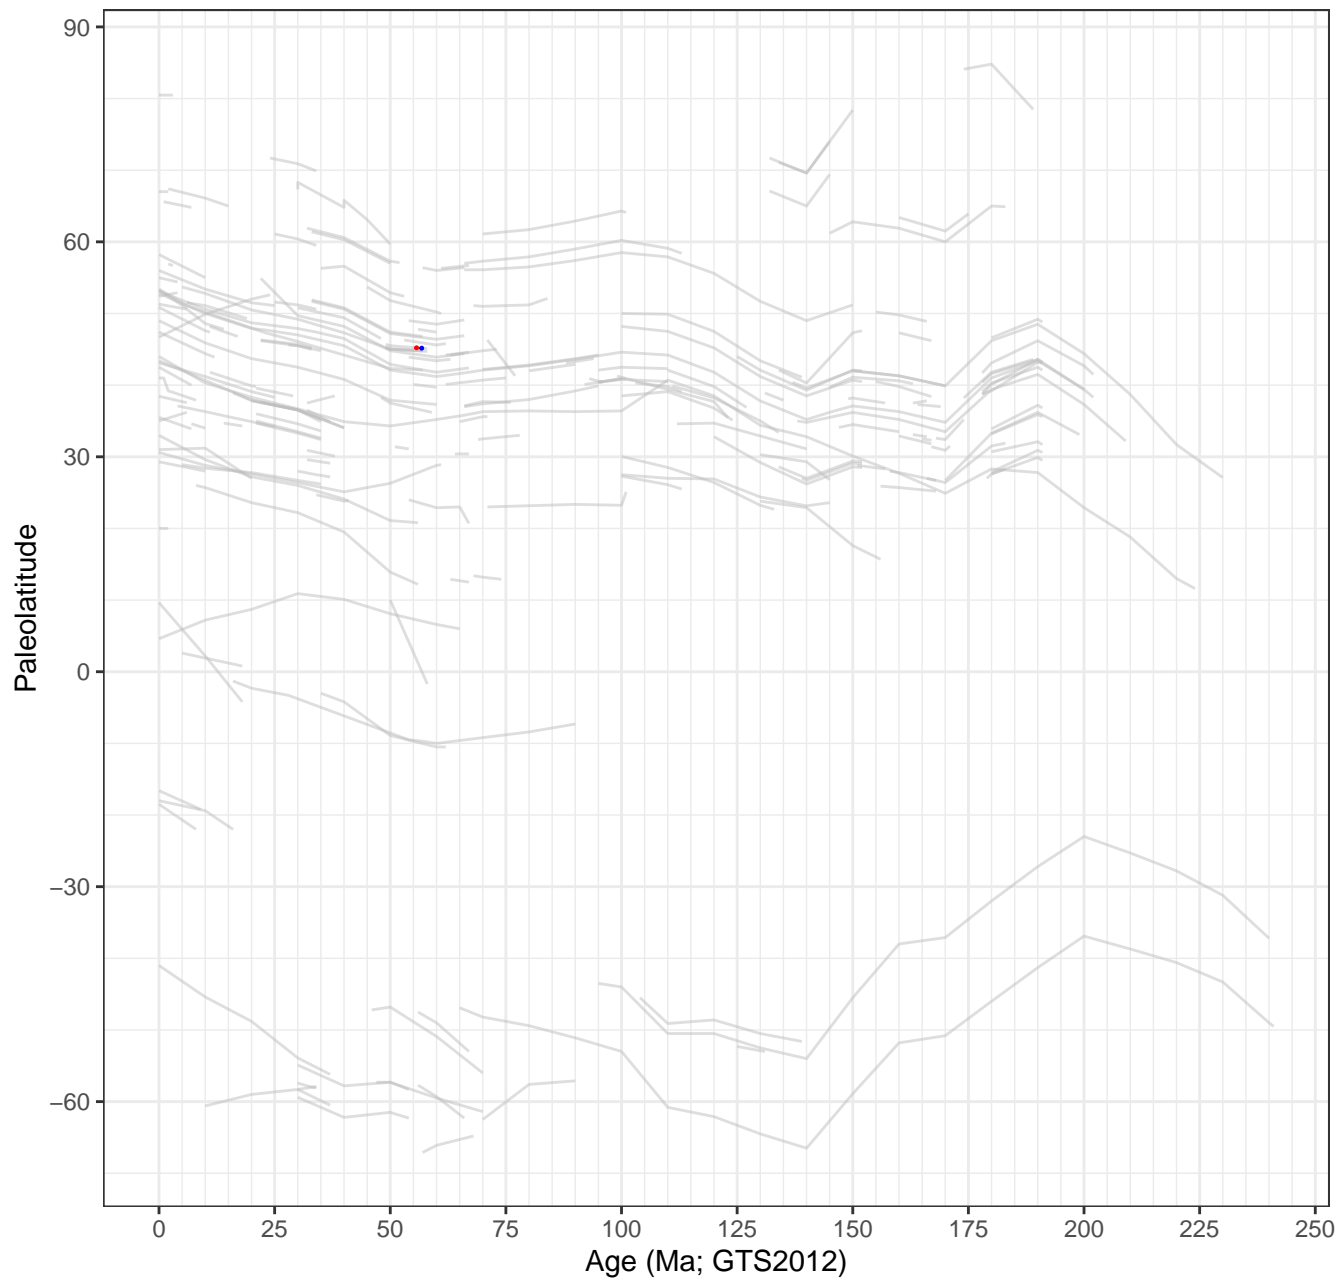

Supplement: Supplementary file 449 [file Genus Tubidermodinium.pdf › Supplement/Supplement 2/Genus 459 plots/Genus Tubidermodinium.pdf]

# Genus Tubotuberella

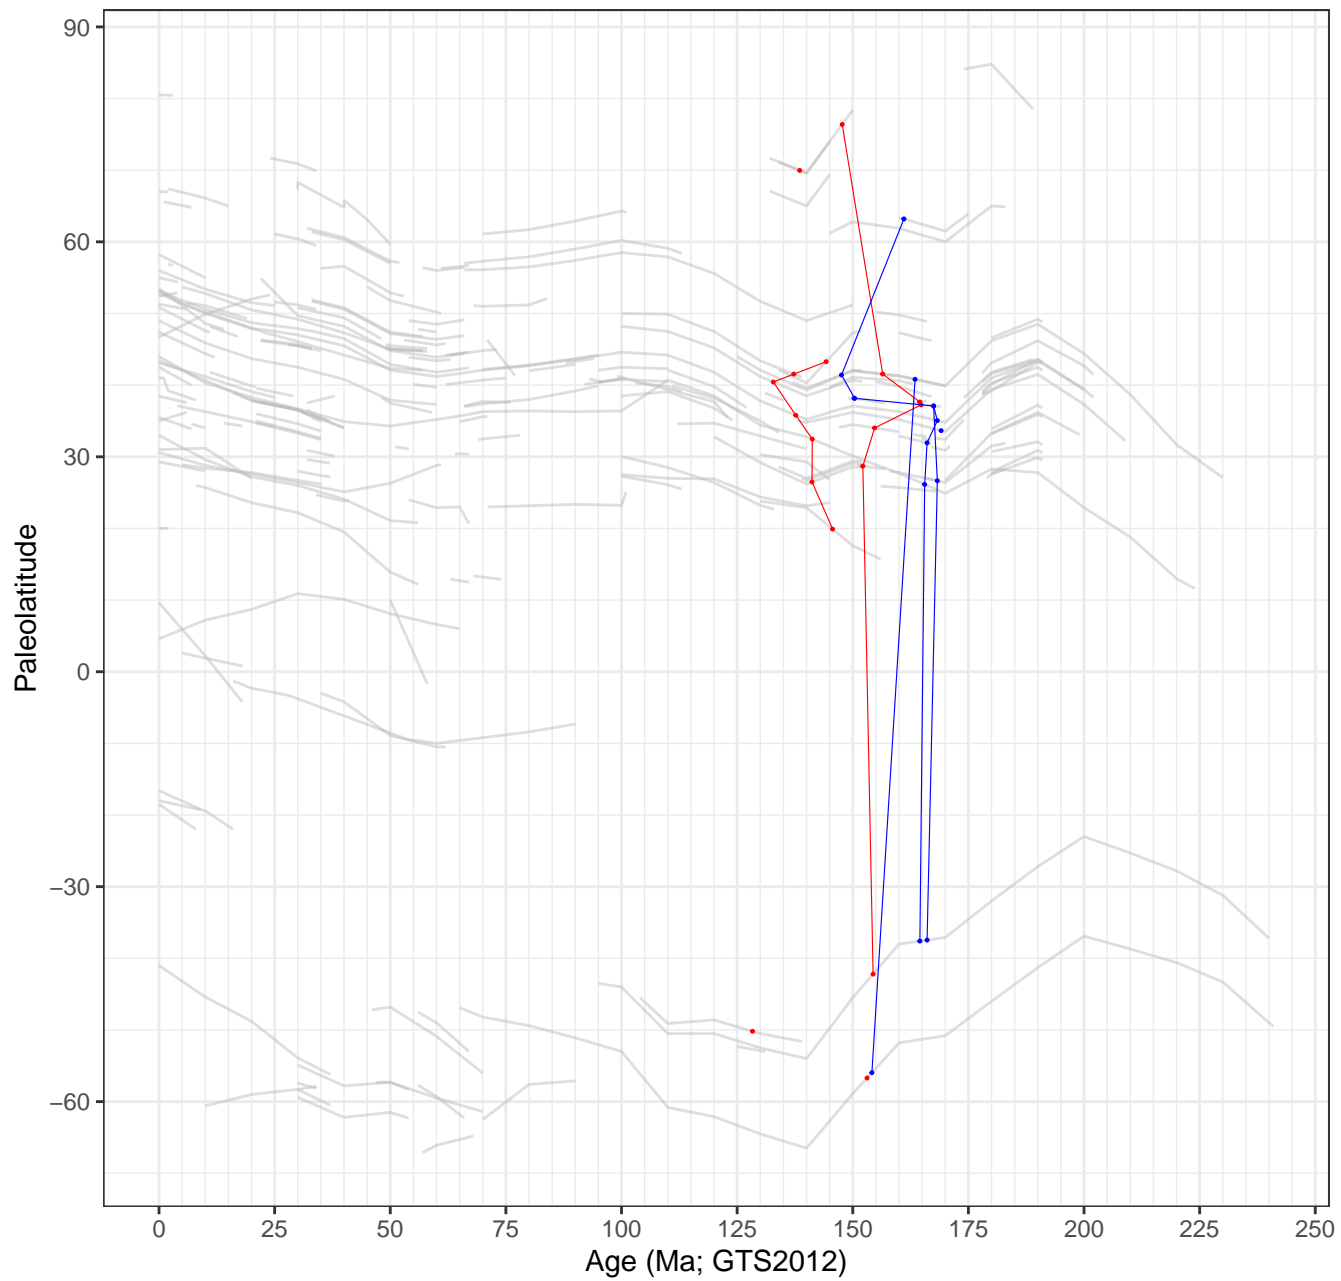

Supplement: Supplementary file 450 [file Genus Tubotuberella.pdf › Supplement/Supplement 2/Genus 459 plots/Genus Tubotuberella.pdf]

# Genus Turbiosphaera

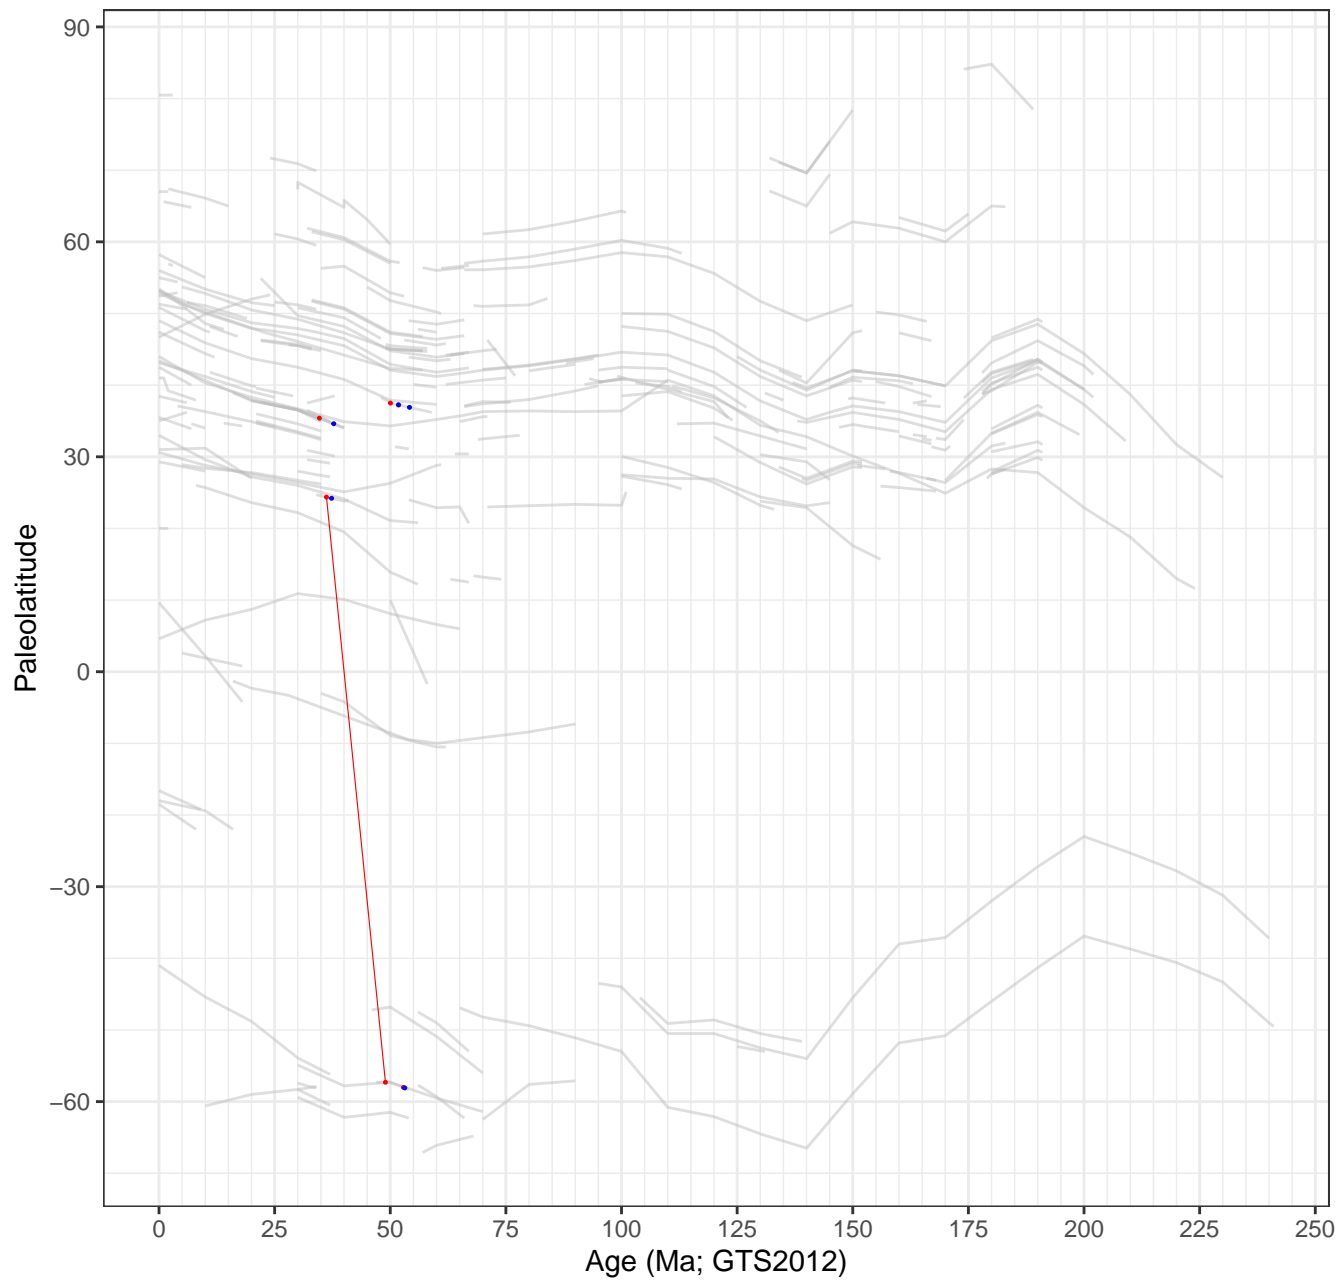

Supplement: Supplementary file 451 [file Genus Turbiosphaera.pdf › Supplement/Supplement 2/Genus 459 plots/Genus Turbiosphaera.pdf]

# Genus Umbradiadium

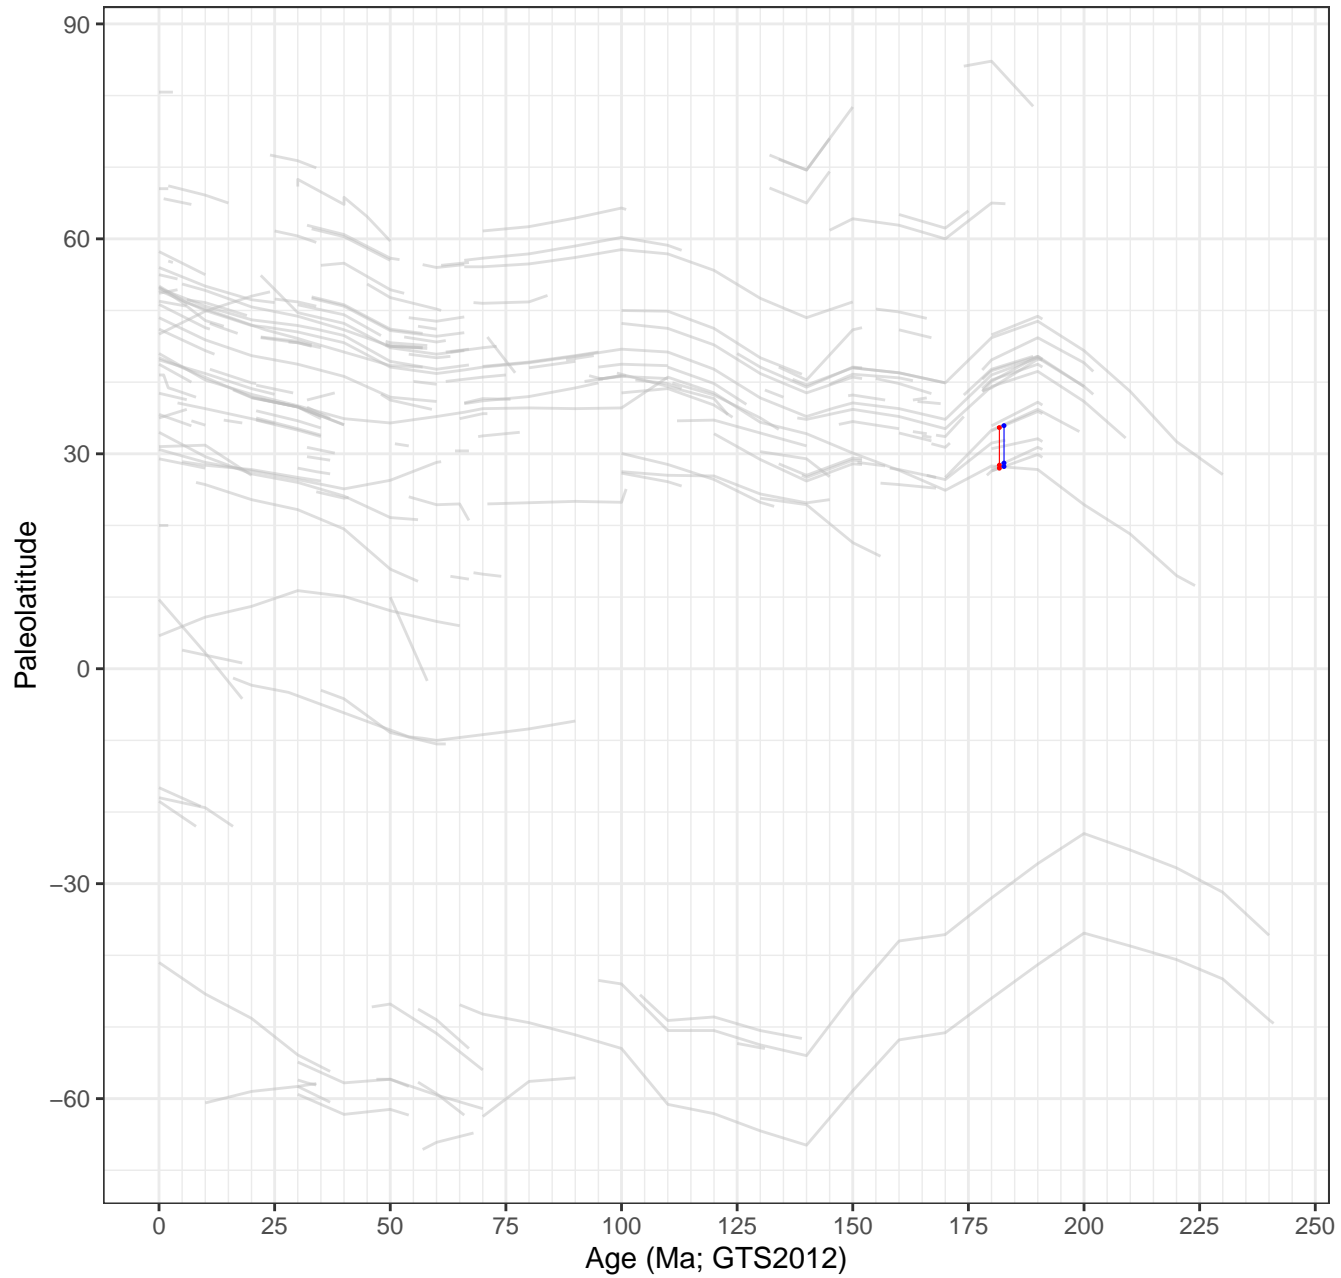

Supplement: Supplementary file 452 [file Genus Umbriadinium.pdf › Supplement/Supplement 2/Genus 459 plots/Genus Umbriadinium.pdf]

# Genus Unipontidinium

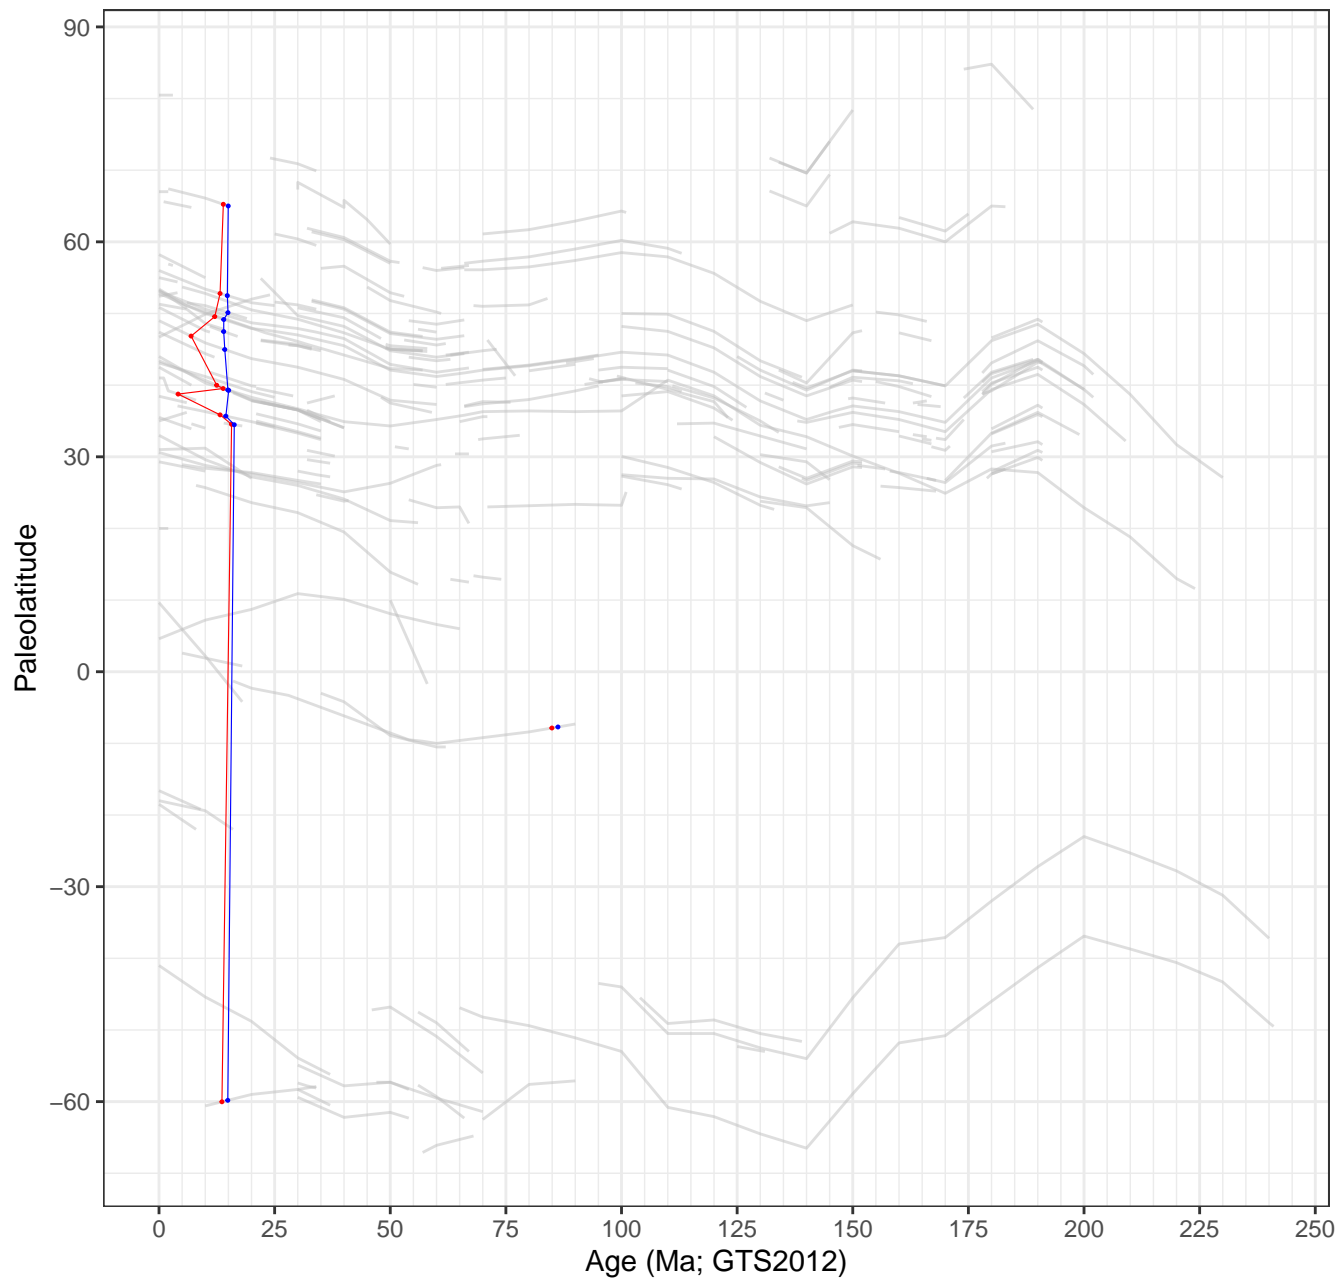

Supplement: Supplementary file 453 [file Genus Unipontidinium.pdf › Supplement/Supplement 2/Genus 459 plots/Genus Unipontidinium.pdf]

# Genus Valaveodinium

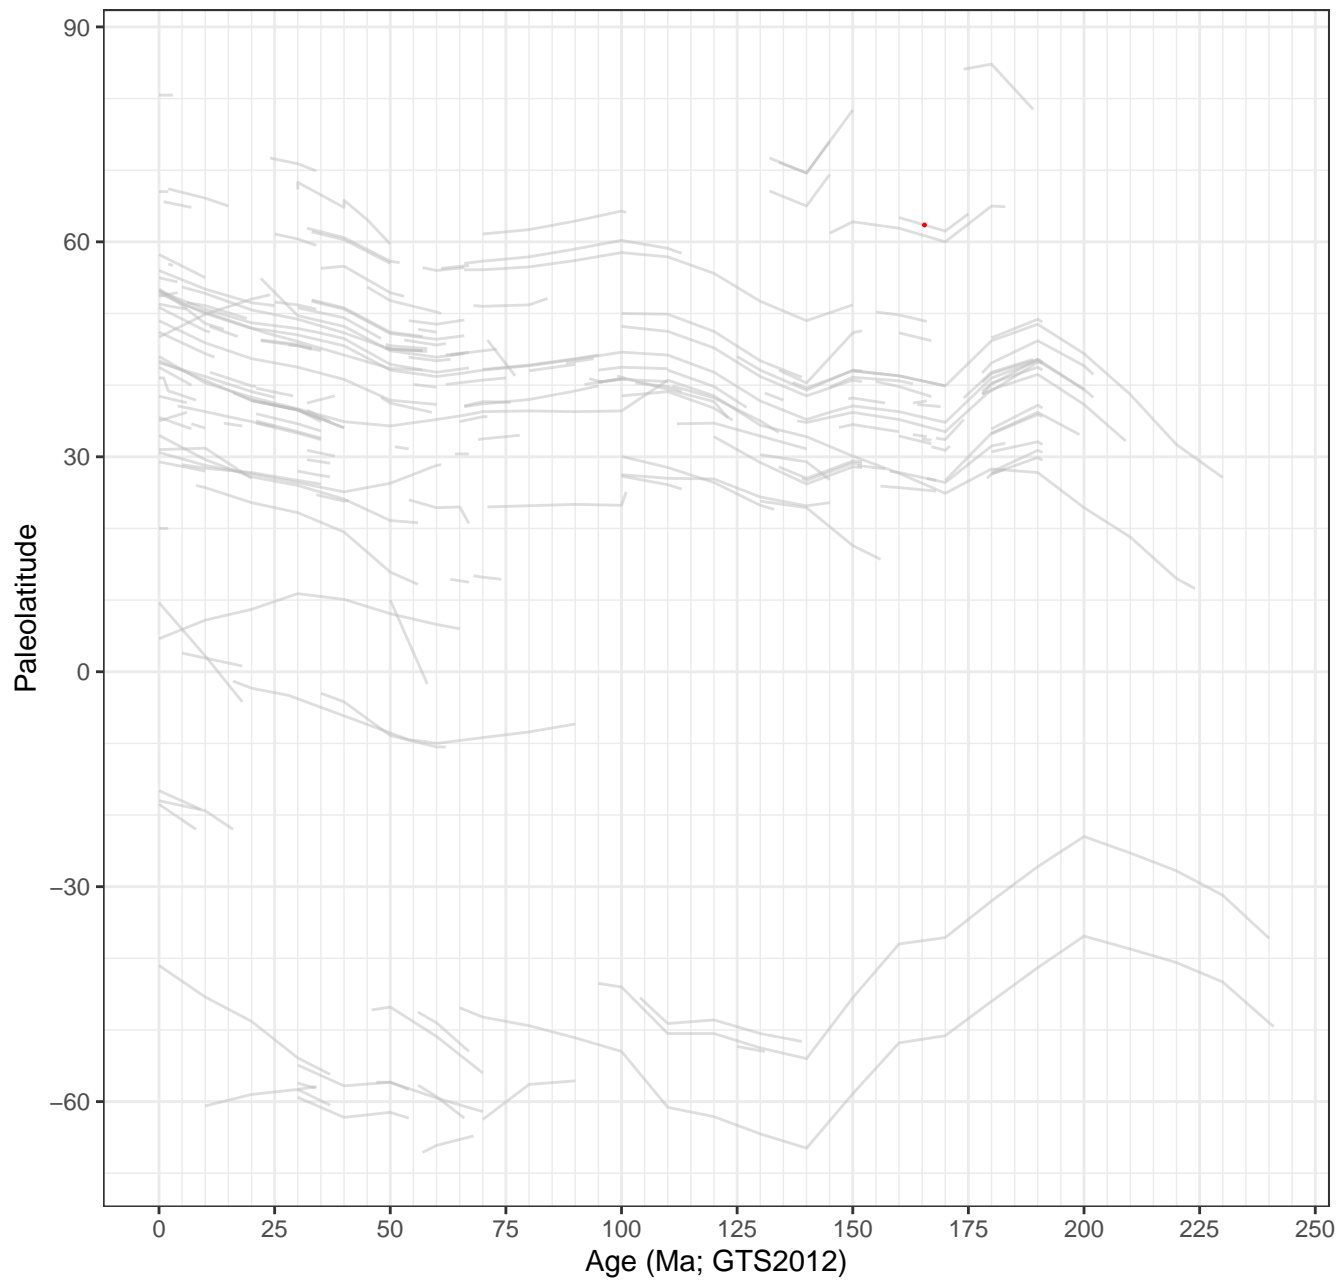

Supplement: Supplementary file 454 [file Genus Valaveodinium.pdf › Supplement/Supplement 2/Genus 459 plots/Genus Valaveodinium.pdf]

# Genus Valensiella

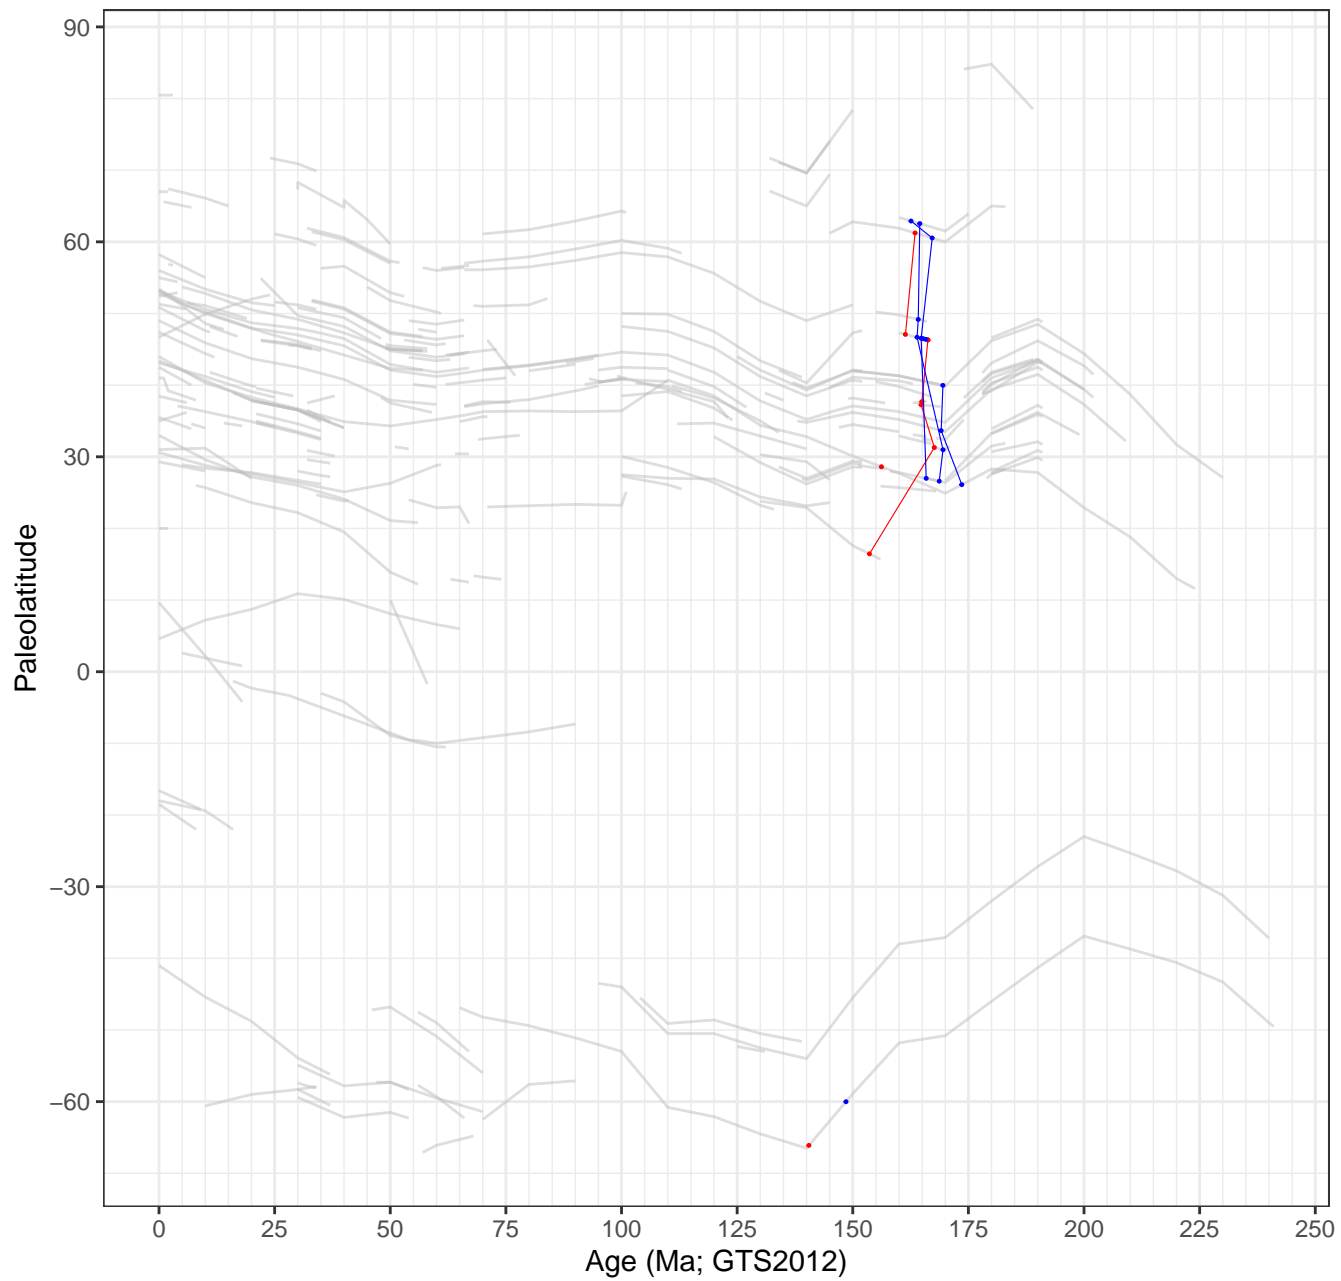

Supplement: Supplementary file 455 [file Genus Valensiella.pdf › Supplement/Supplement 2/Genus 459 plots/Genus Valensiella.pdf]

# Genus Vallodinium

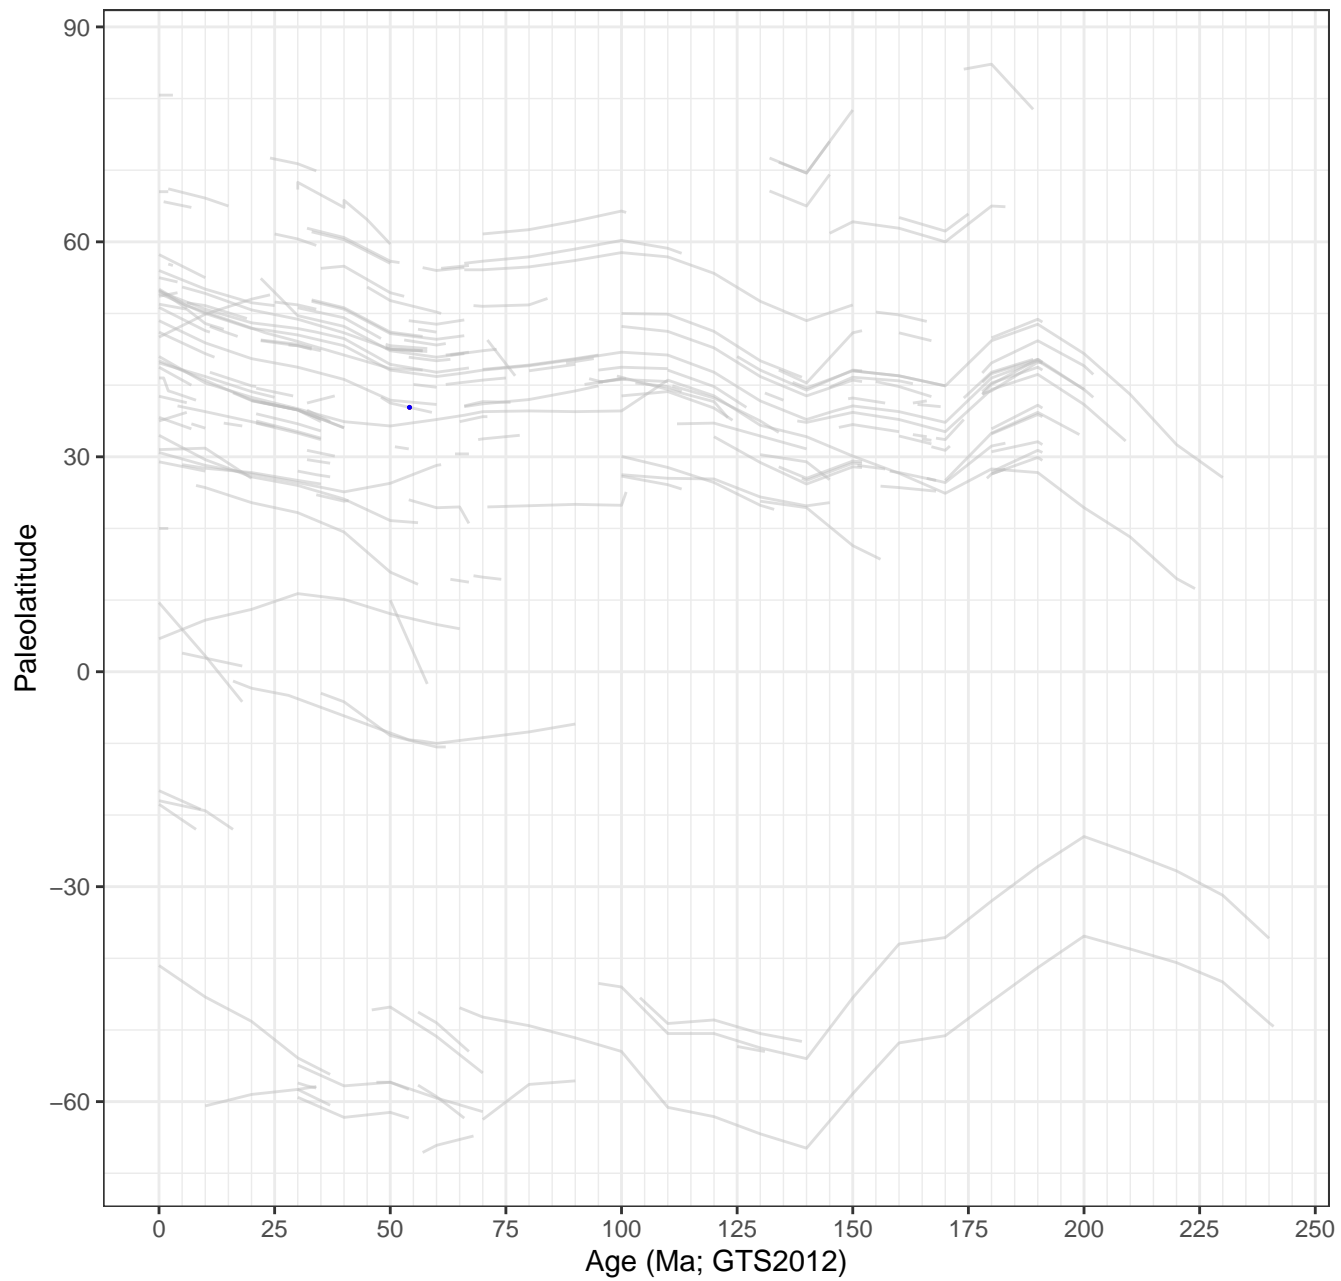

Supplement: Supplementary file 456 [file Genus Vallodinium.pdf › Supplement/Supplement 2/Genus 459 plots/Genus Vallodinium.pdf]

# Genus Valvaeodinium

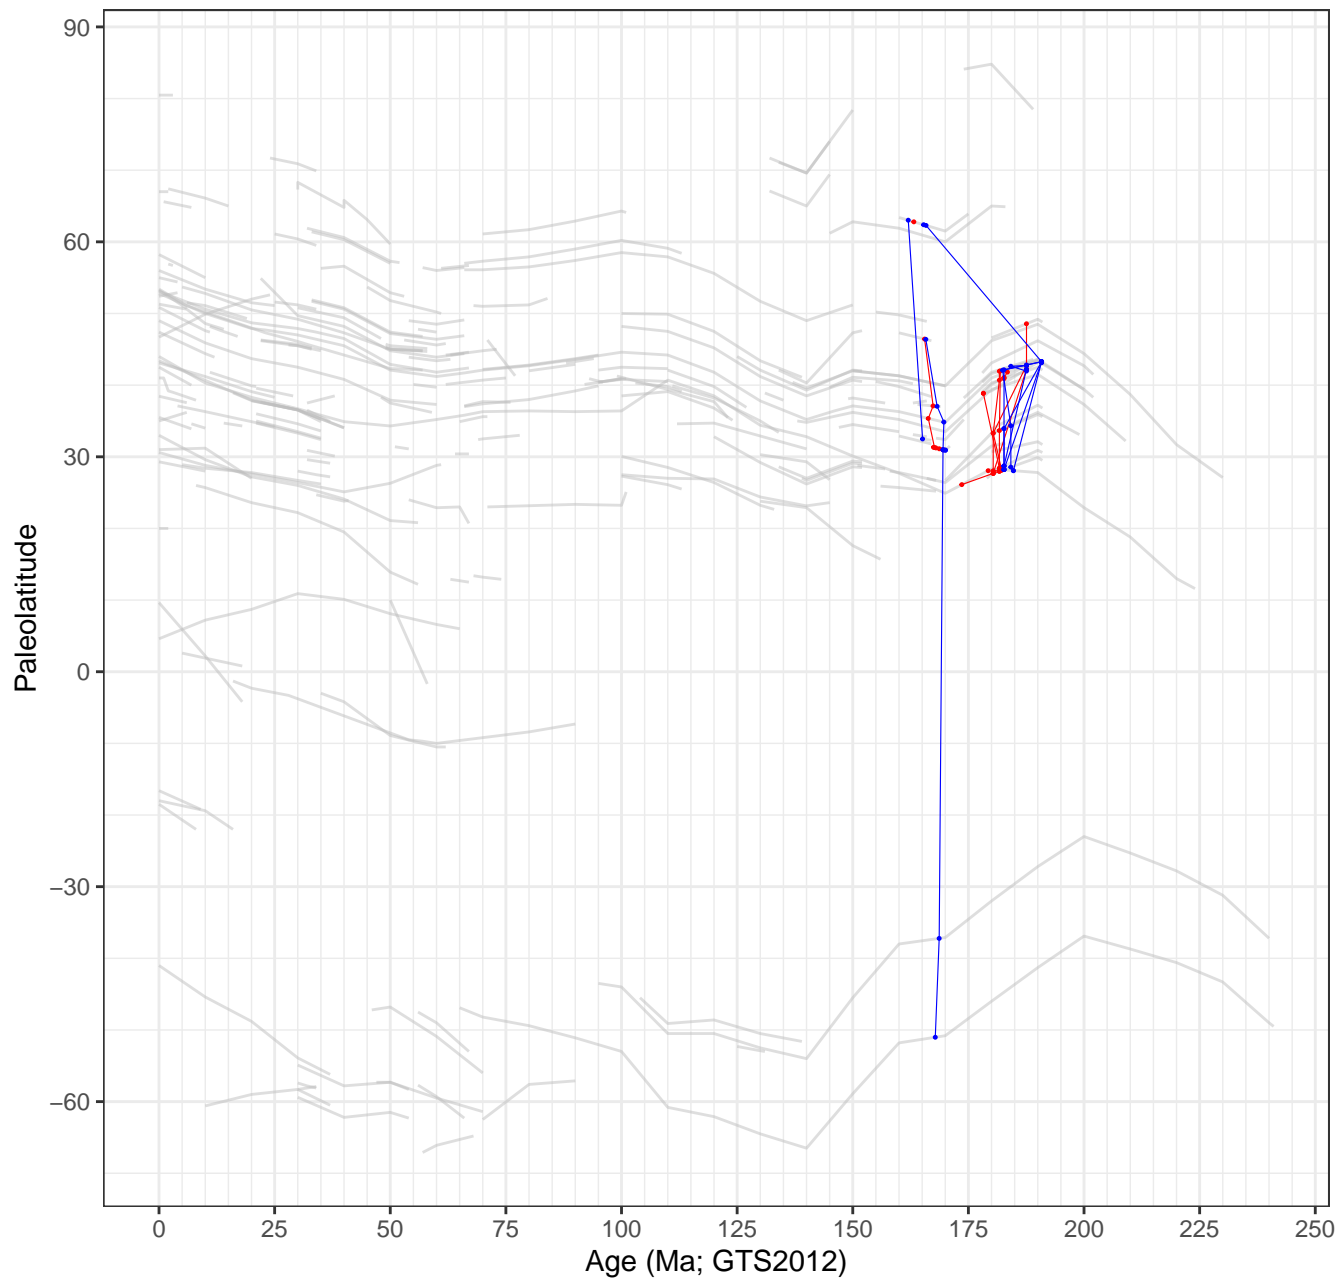

Supplement: Supplementary file 457 [file Genus Valvaeodinium.pdf › Supplement/Supplement 2/Genus 459 plots/Genus Valvaeodinium.pdf]

# Genus Vectidinium

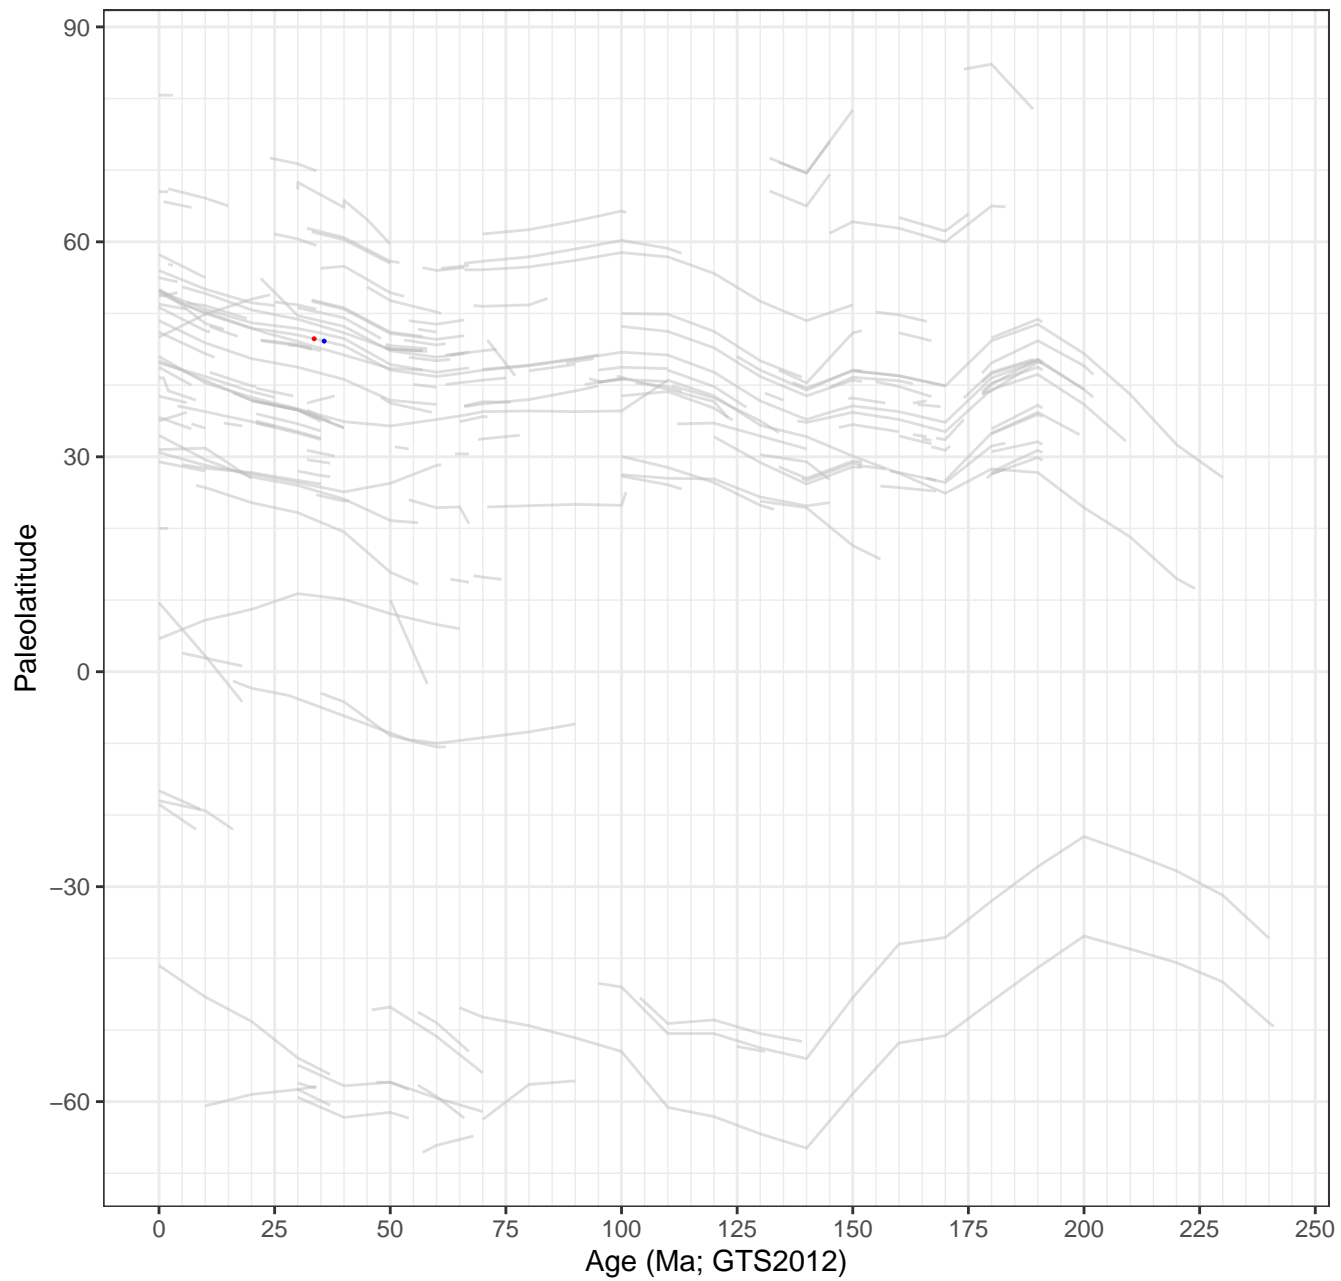

Supplement: Supplementary file 458 [file Genus Vectidinium.pdf › Supplement/Supplement 2/Genus 459 plots/Genus Vectidinium.pdf]

# Genus Vesperopsis

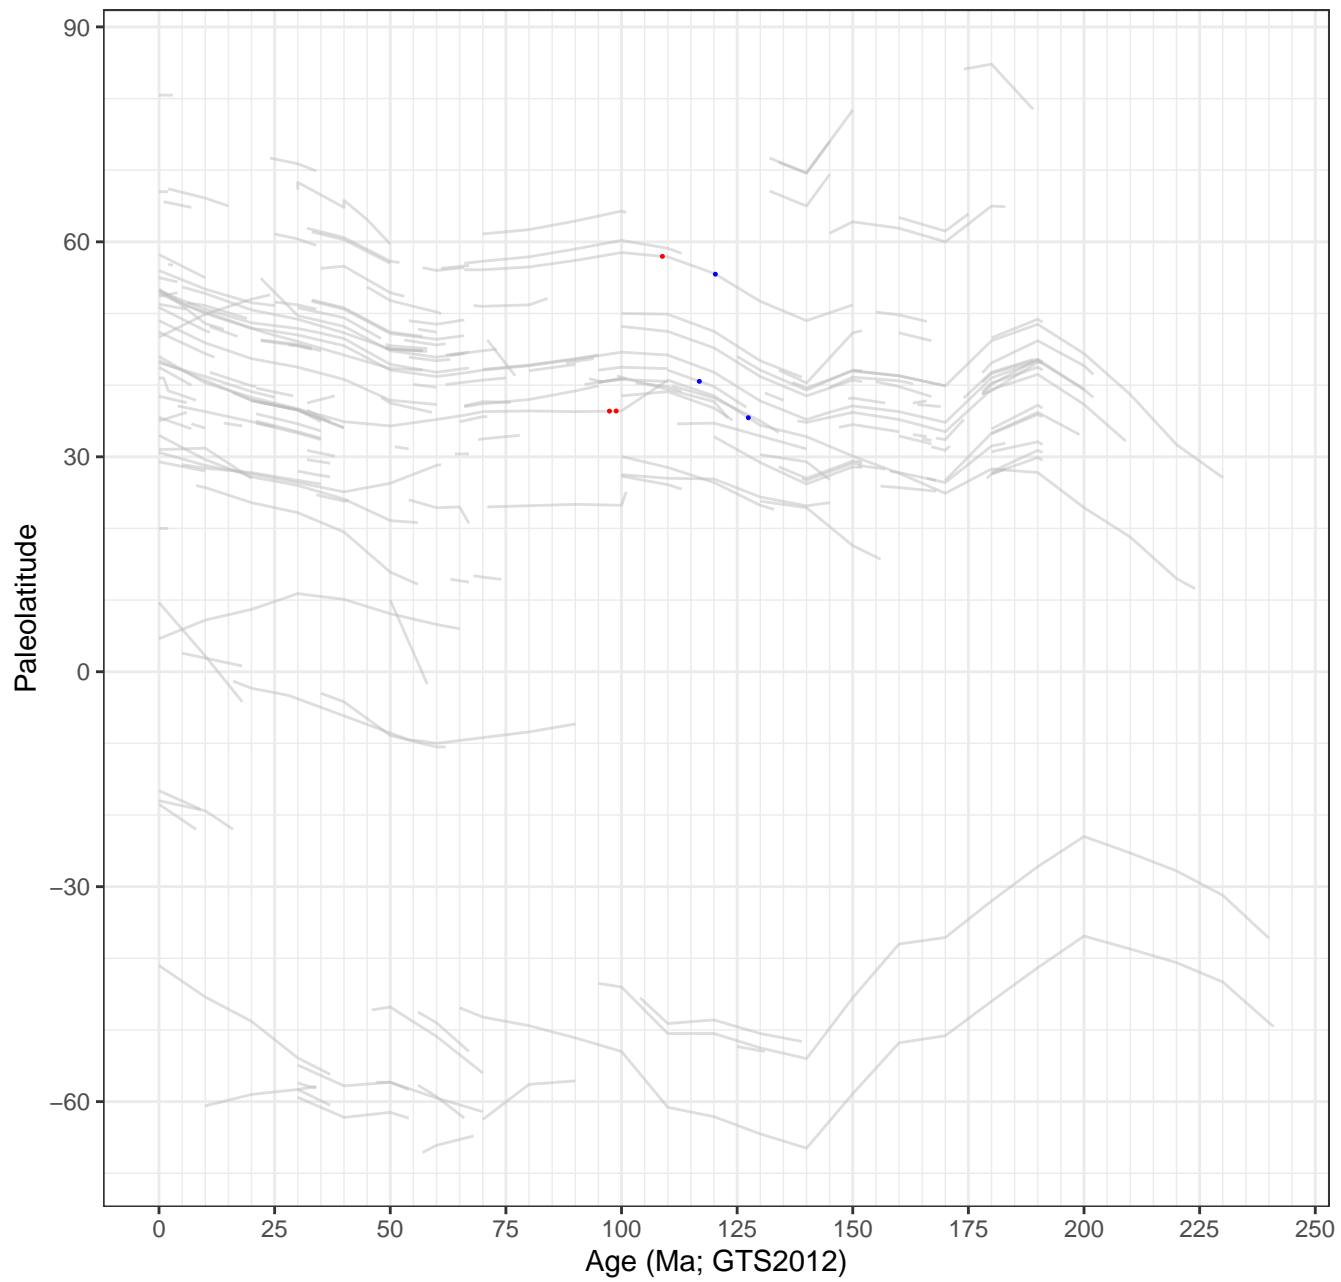

Supplement: Supplementary file 459 [file Genus Vesperopsis.pdf › Supplement/Supplement 2/Genus 459 plots/Genus Vesperopsis.pdf]

# Genus Voodooia

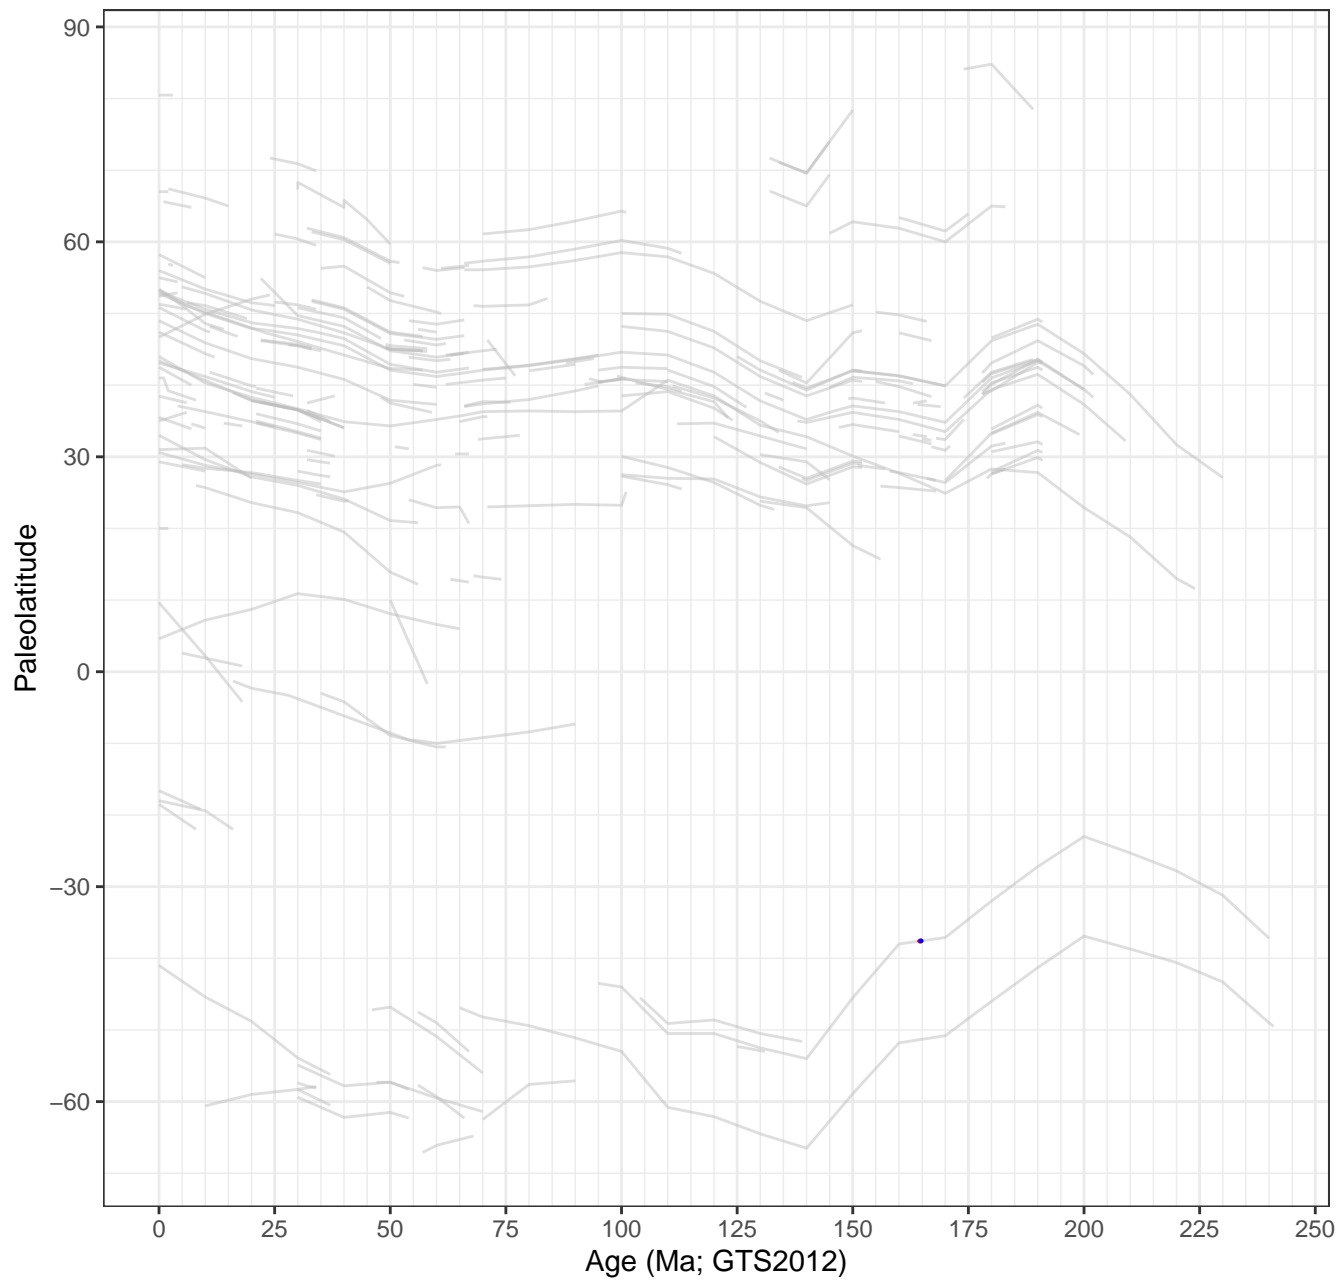

Supplement: Supplementary file 460 [file Genus Voodooia.pdf › Supplement/Supplement 2/Genus 459 plots/Genus Voodooia.pdf]

# Genus Votadinium

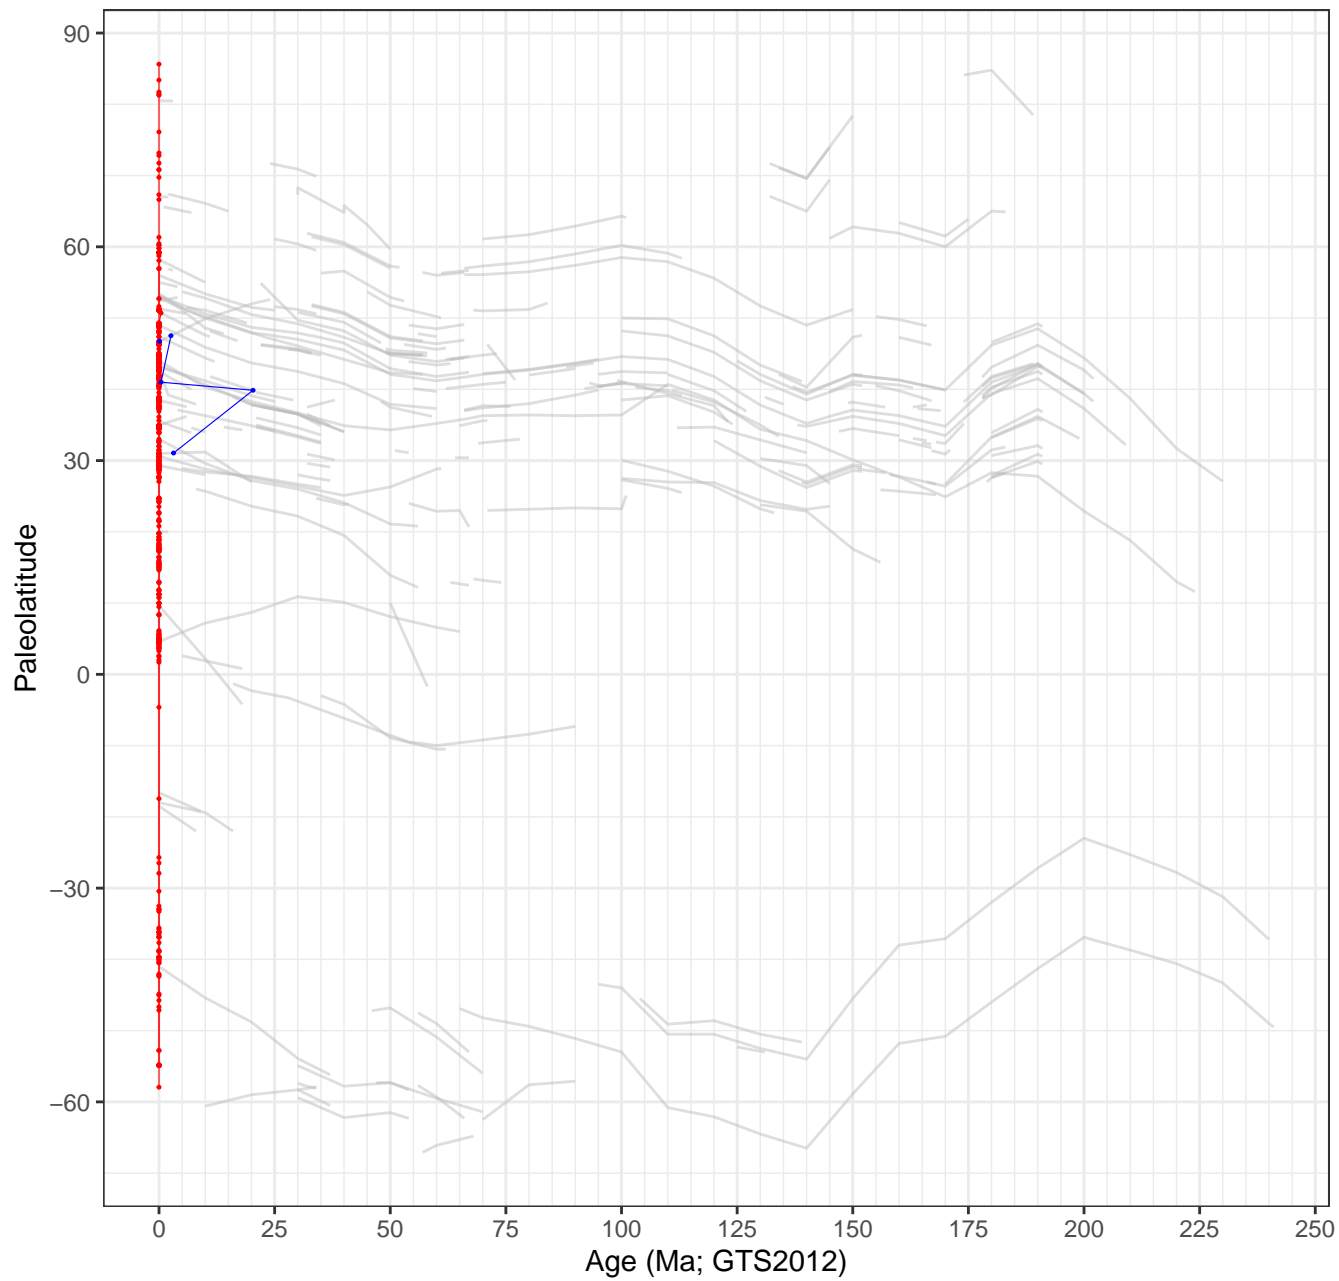

Supplement: Supplementary file 461 [file Genus Votadinium.pdf › Supplement/Supplement 2/Genus 459 plots/Genus Votadinium.pdf]

# Genus Vozzhennikovia

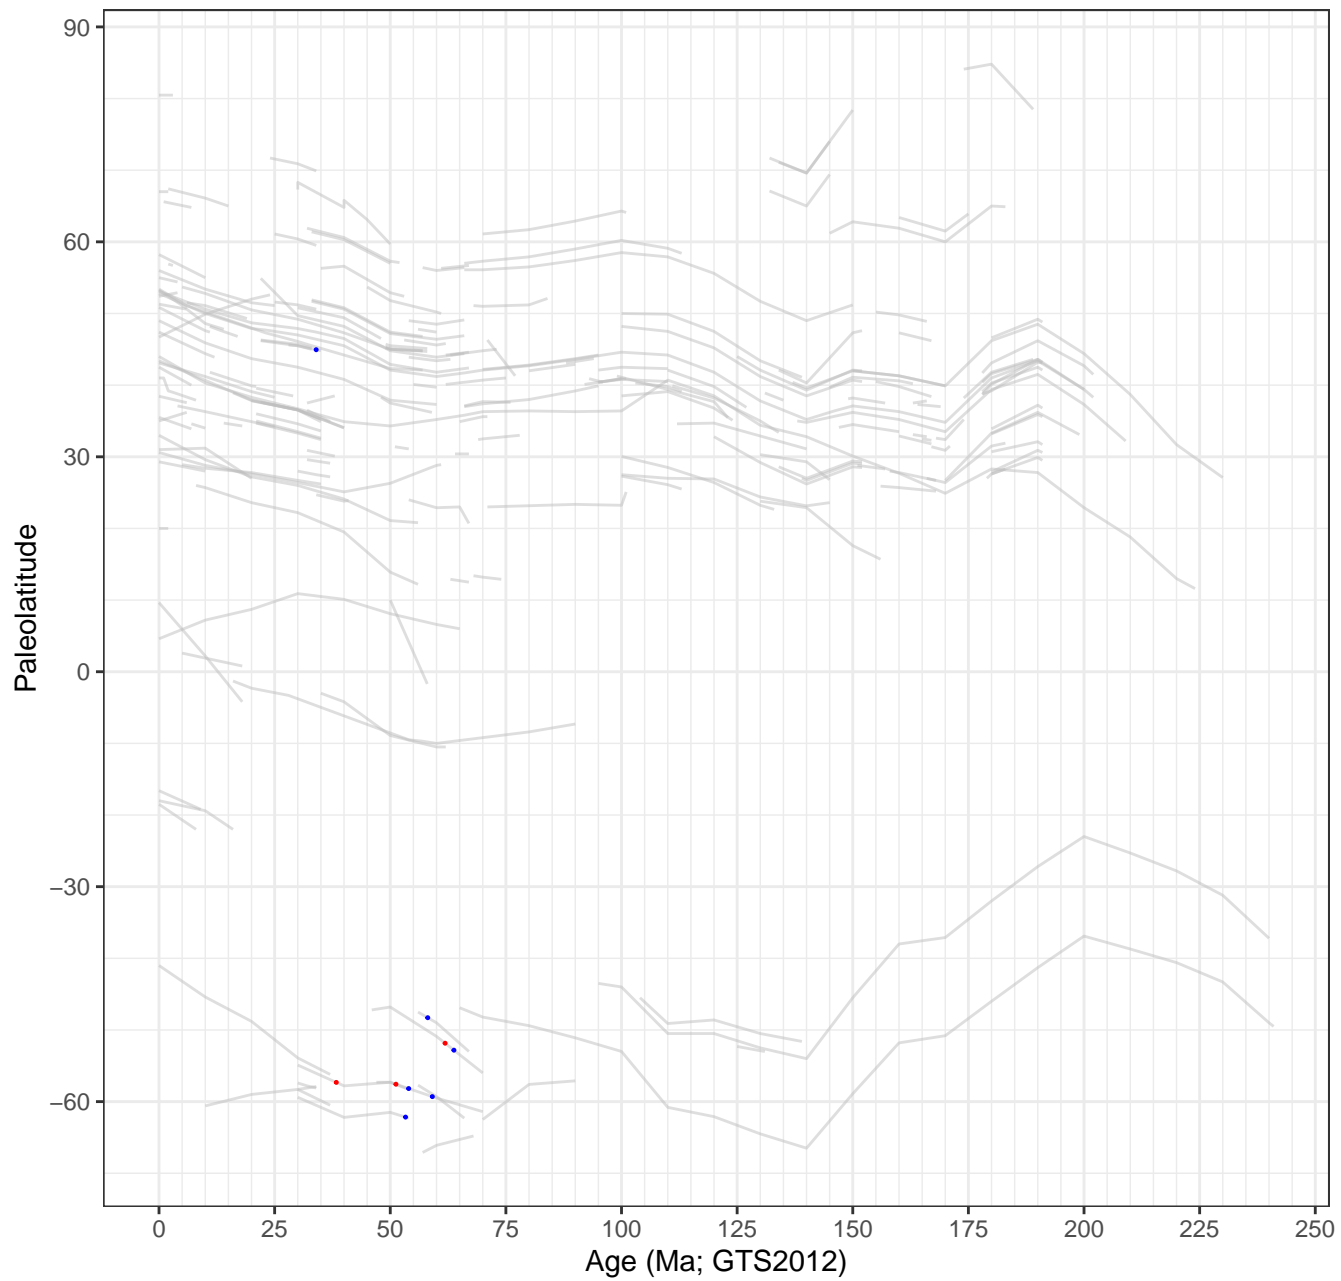

Supplement: Supplementary file 462 [file Genus Vozzhennikovia.pdf › Supplement/Supplement 2/Genus 459 plots/Genus Vozzhennikovia.pdf]

# Genus Wallodinium

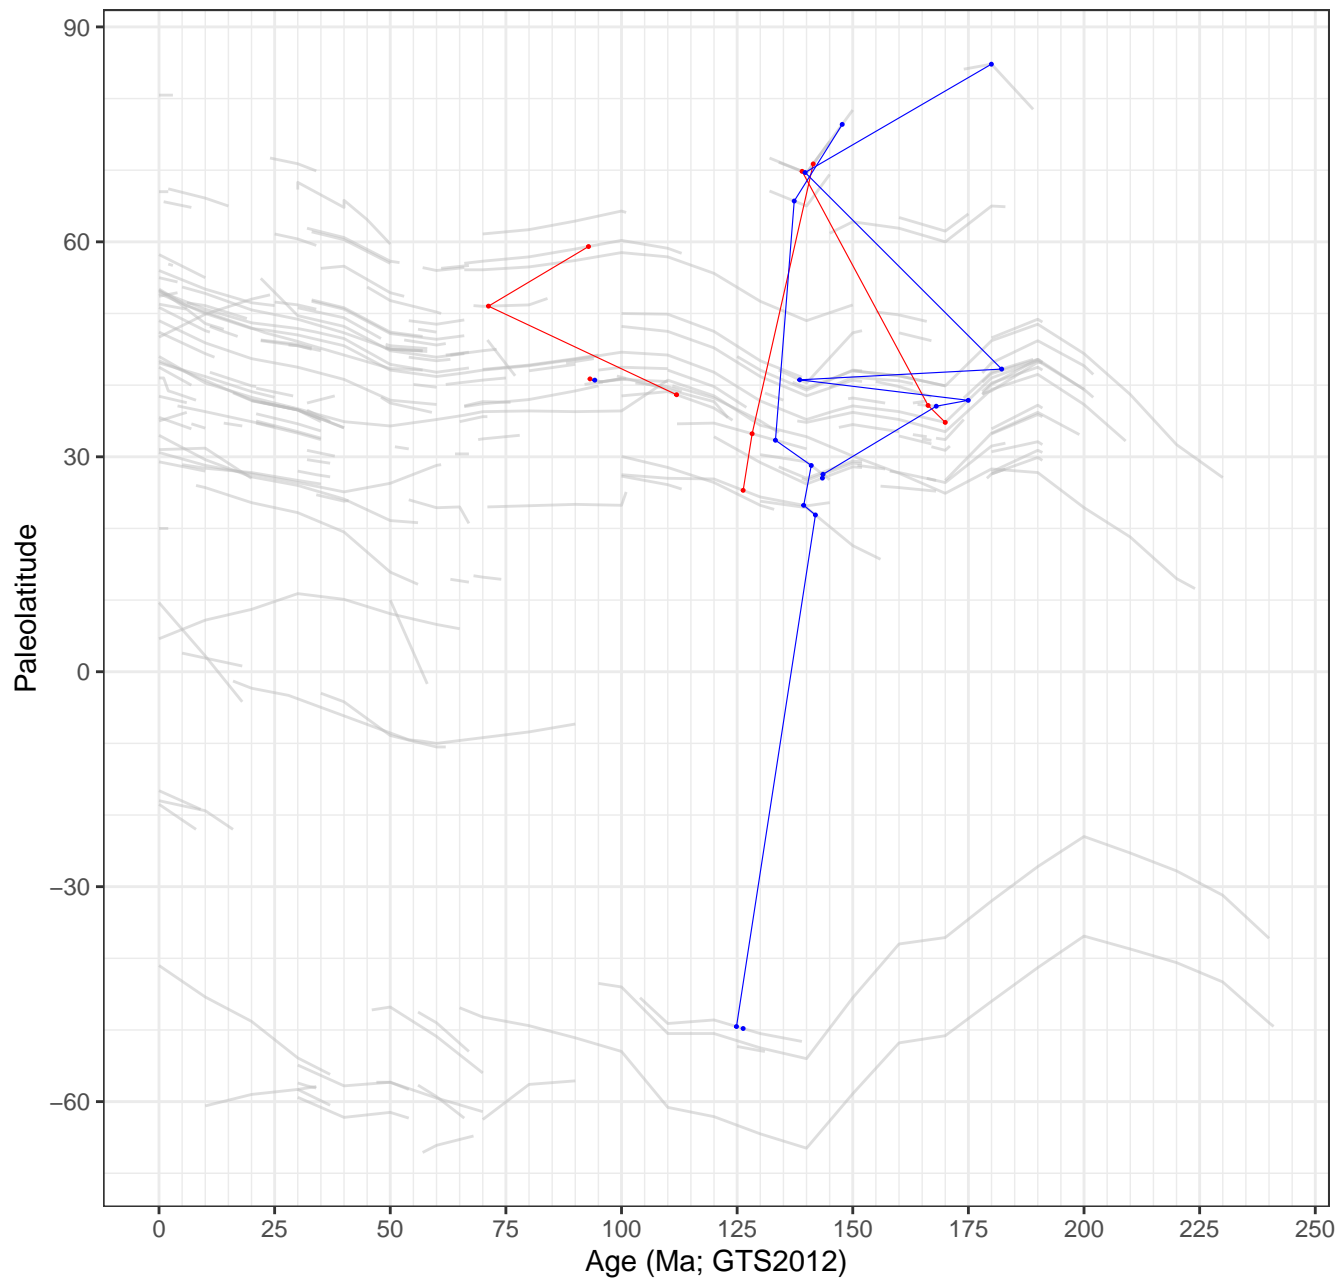

Supplement: Supplementary file 463 [file Genus Wallodinium.pdf › Supplement/Supplement 2/Genus 459 plots/Genus Wallodinium.pdf]

# Genus Wanaea

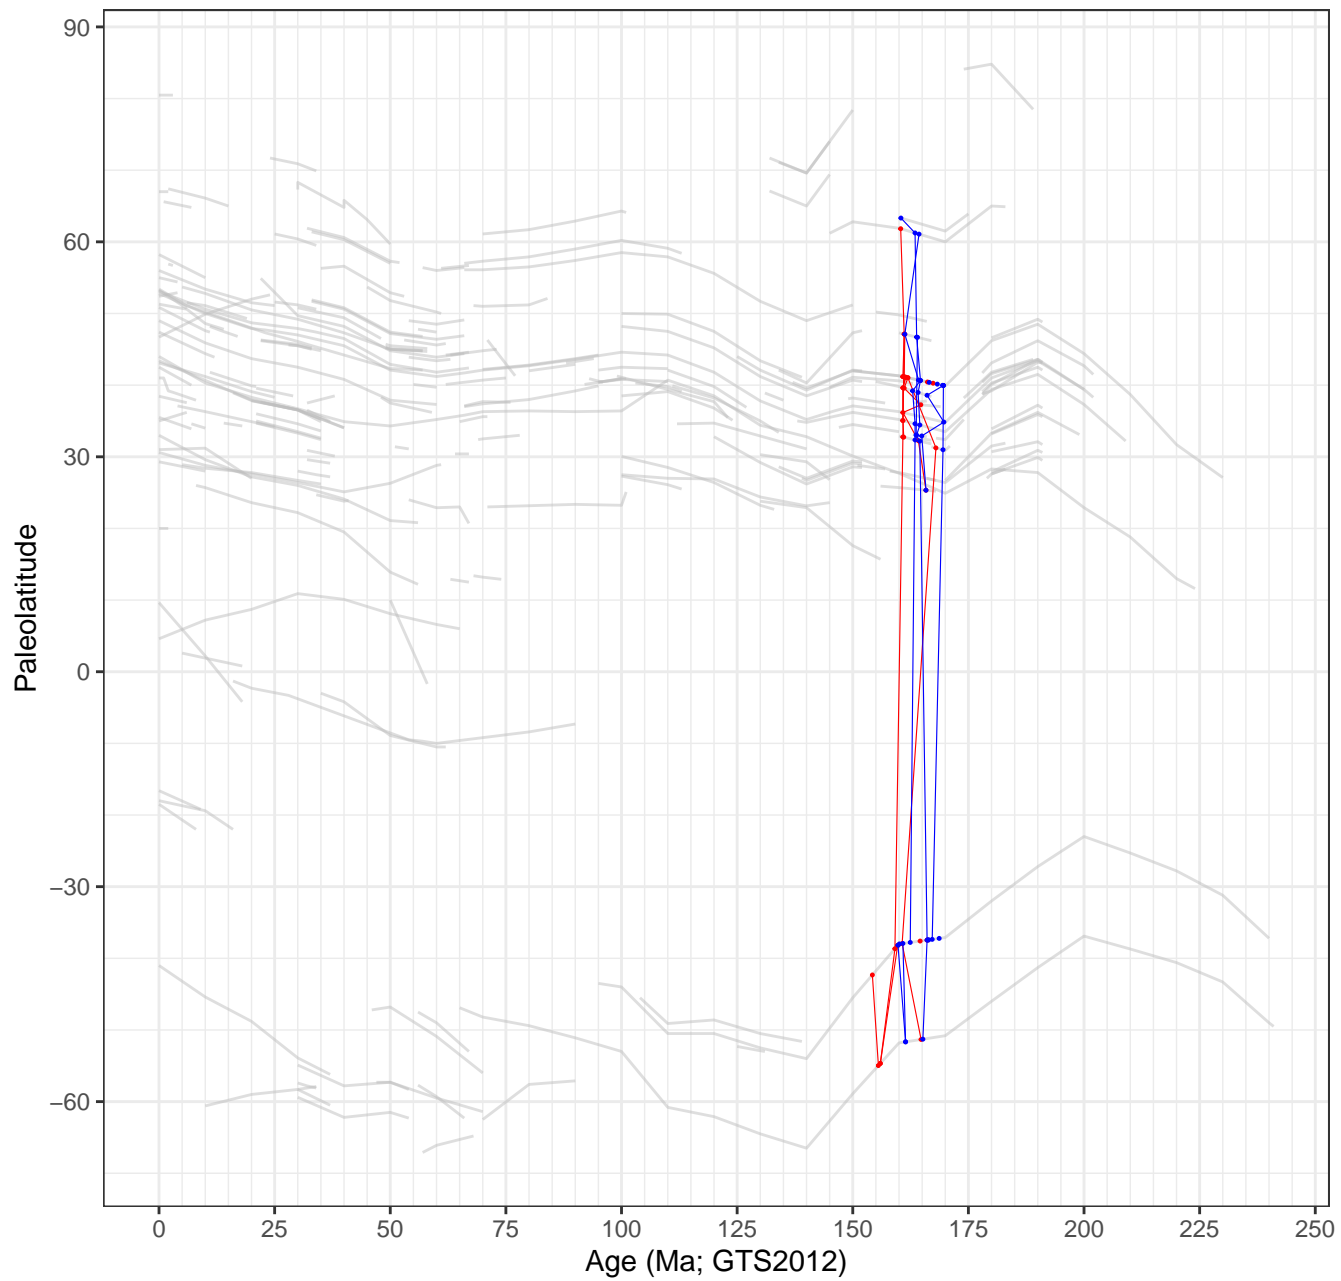

Supplement: Supplementary file 464 [file Genus Wanaea.pdf › Supplement/Supplement 2/Genus 459 plots/Genus Wanaea.pdf]

# Genus Wanneria

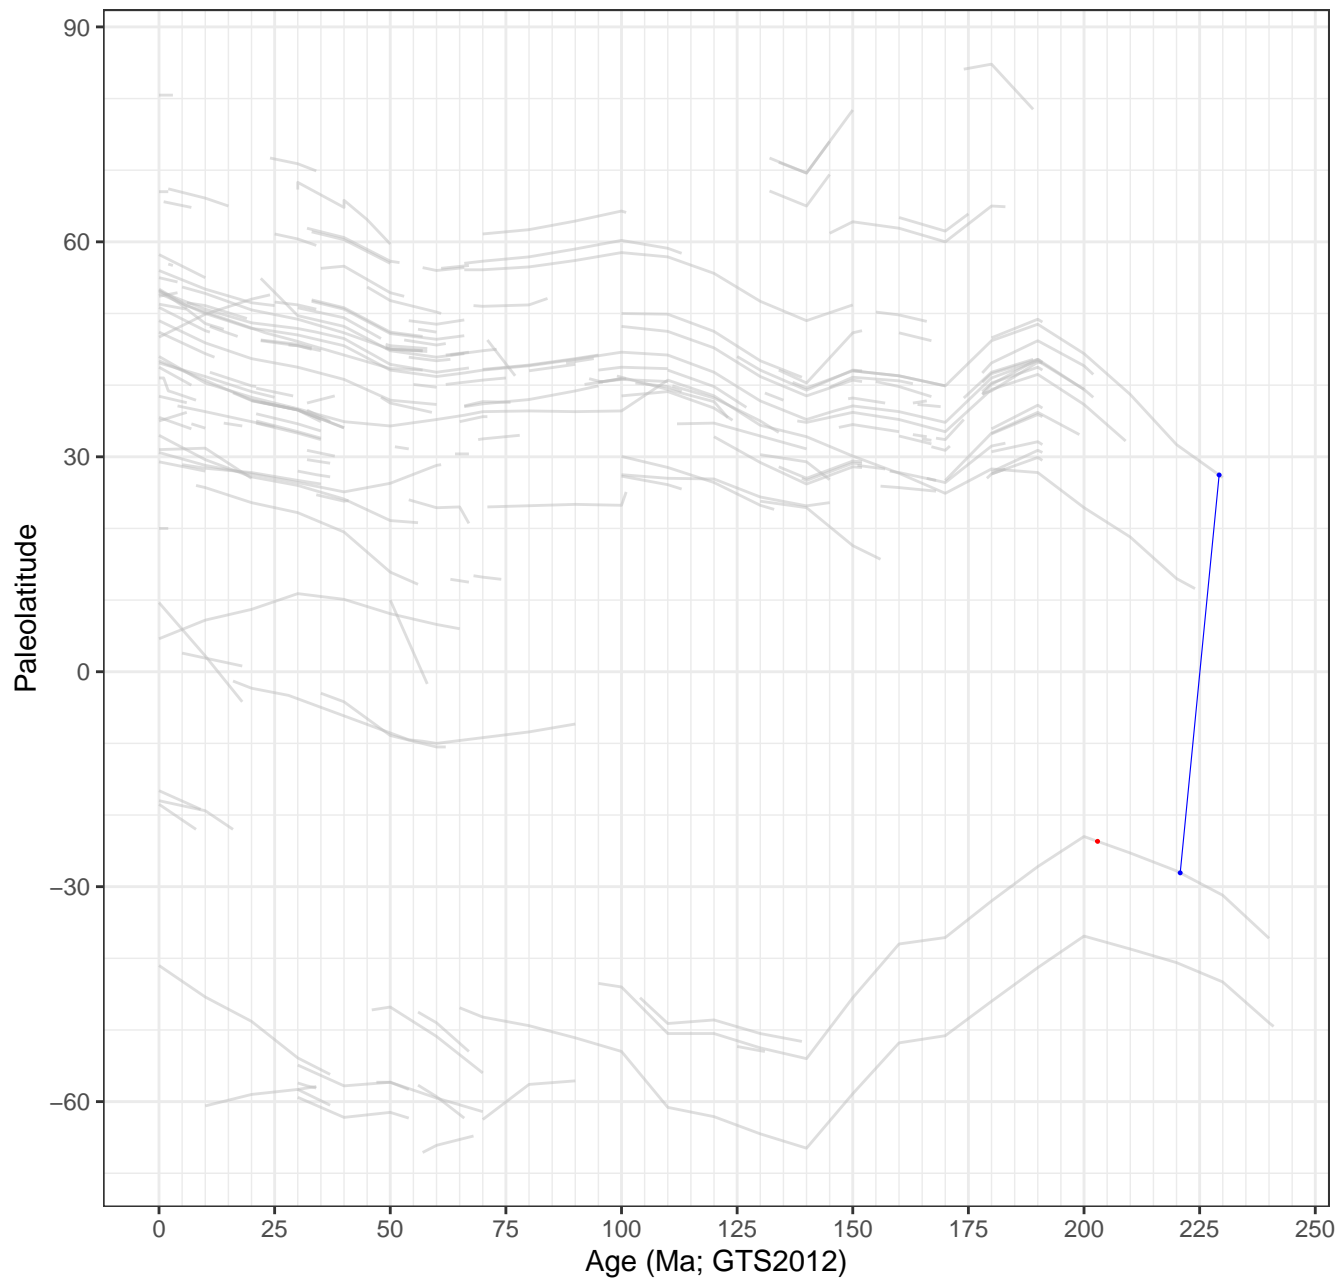

Supplement: Supplementary file 465 [file Genus Wanneria.pdf › Supplement/Supplement 2/Genus 459 plots/Genus Wanneria.pdf]

# Genus *Warrenia*

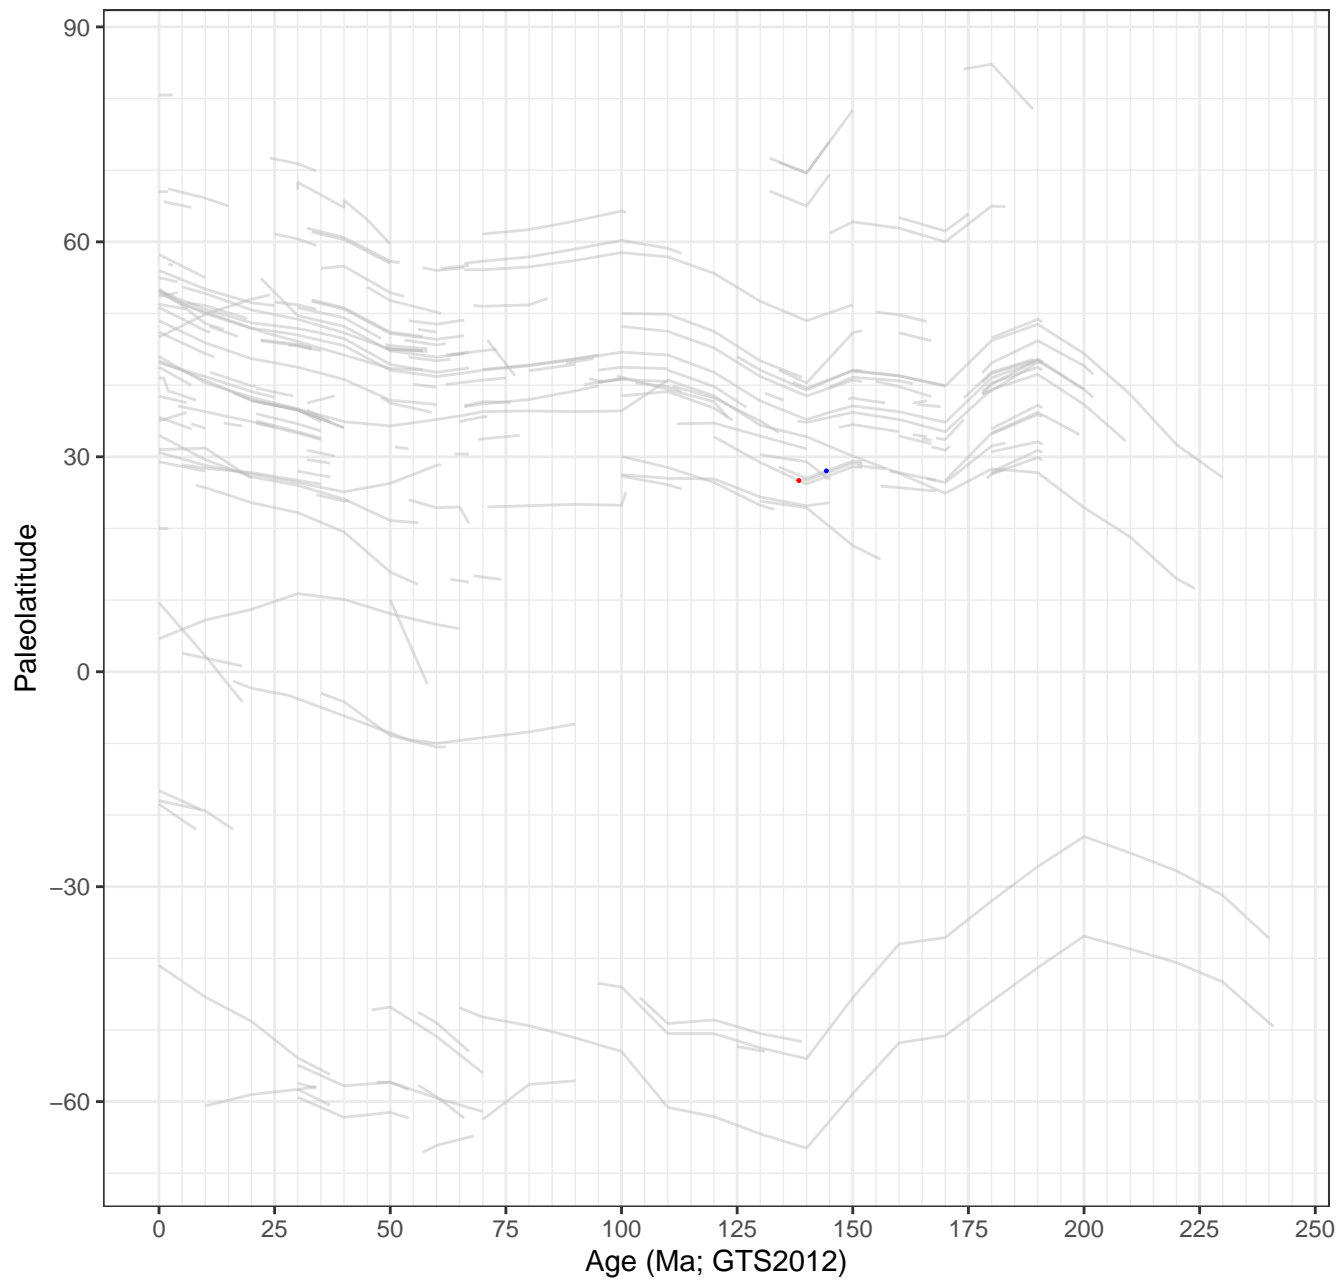

Supplement: Supplementary file 466 [file Genus Warrenia.pdf › Supplement/Supplement 2/Genus 459 plots/Genus Warrenia.pdf]

# Genus Wetzeliella

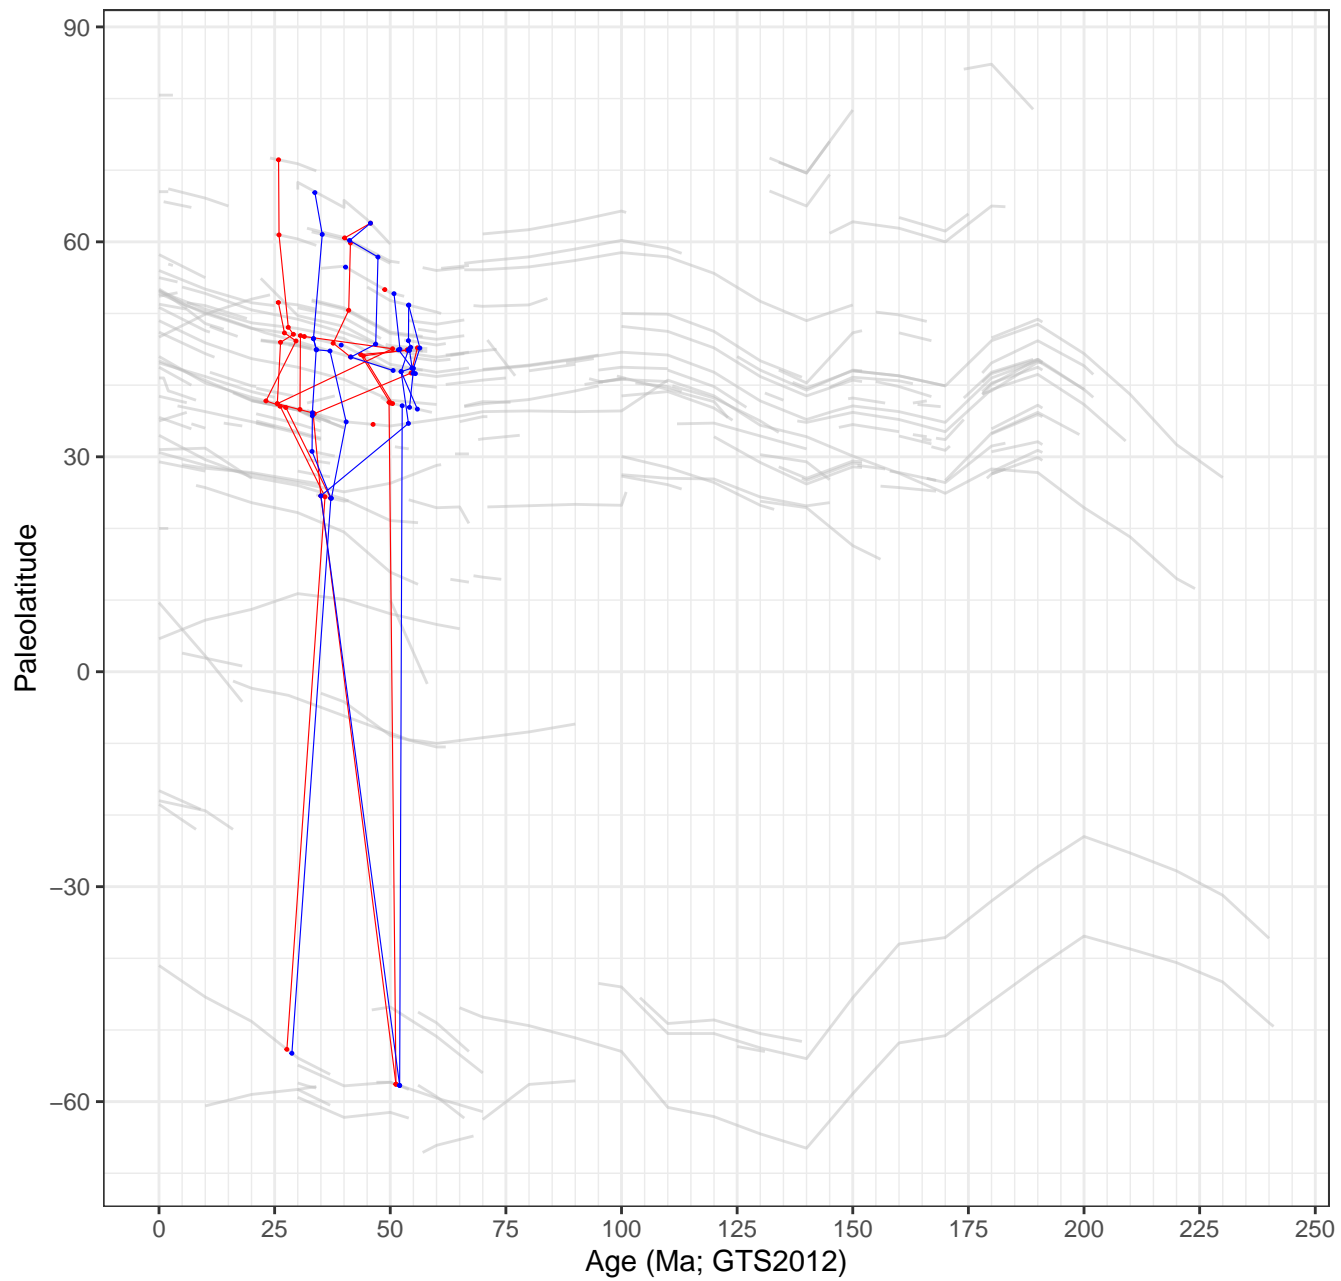

Supplement: Supplementary file 467 [file Genus Wetzeliella.pdf › Supplement/Supplement 2/Genus 459 plots/Genus Wetzeliella.pdf]

# Genus Whitecliffia

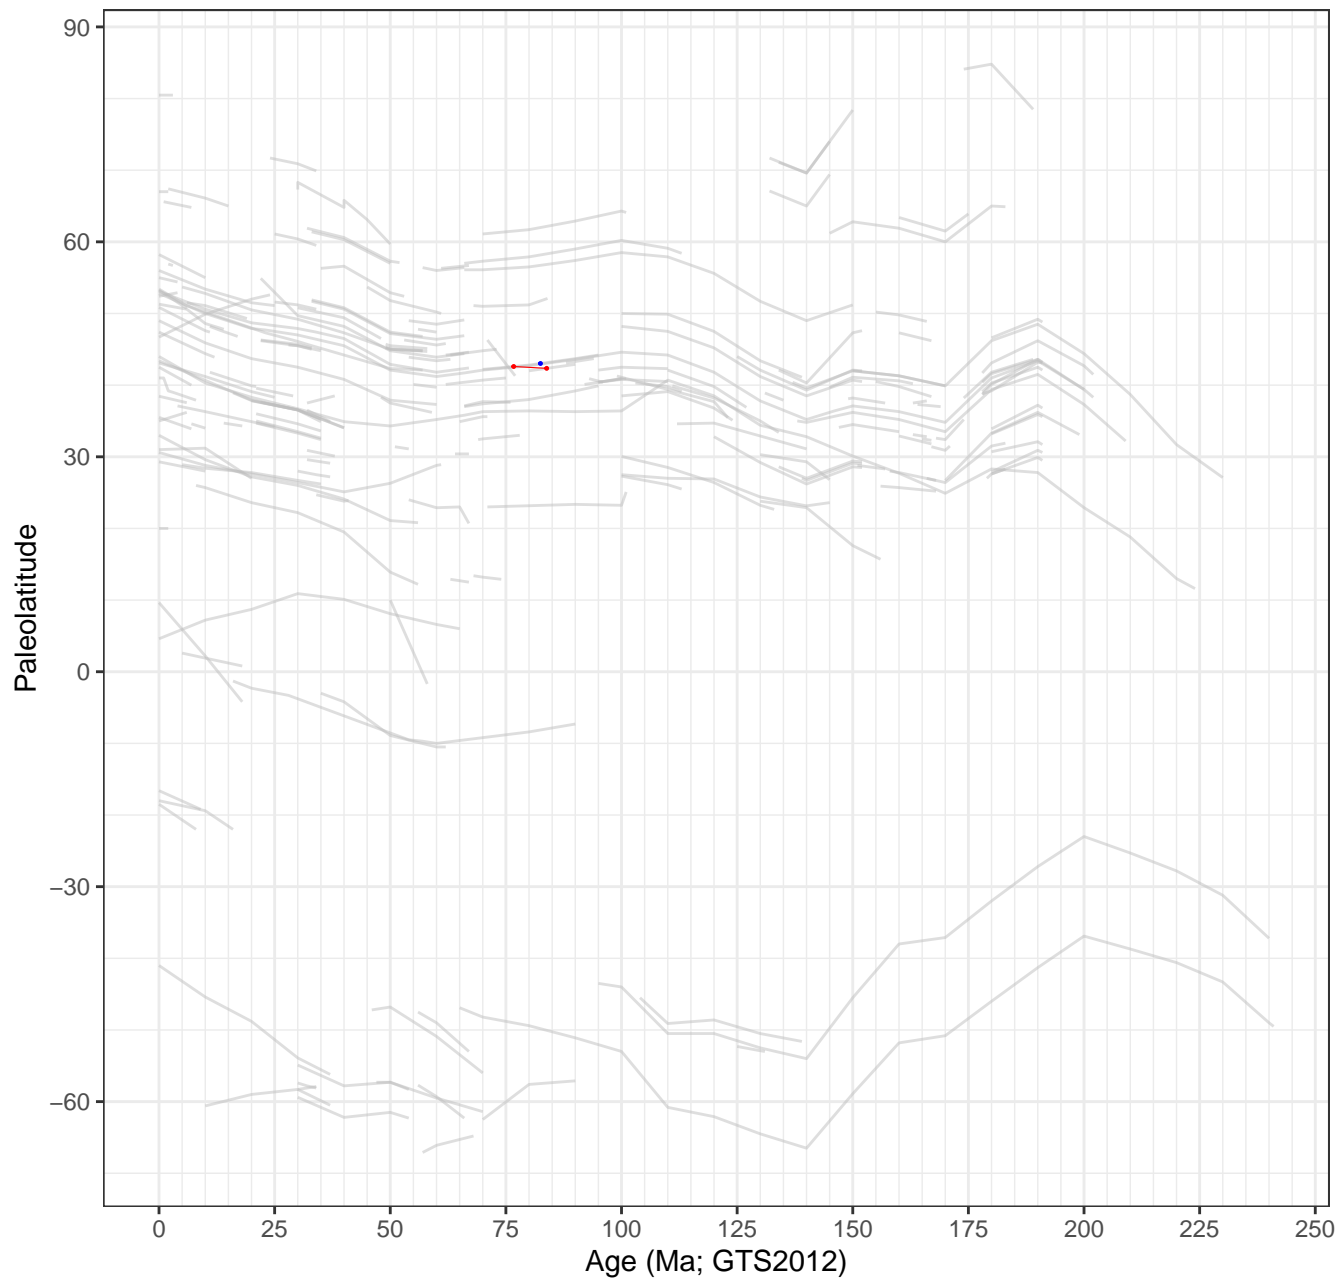

Supplement: Supplementary file 468 [file Genus Whitecliffia.pdf › Supplement/Supplement 2/Genus 459 plots/Genus Whitecliffia.pdf]

# Genus Wigginsella

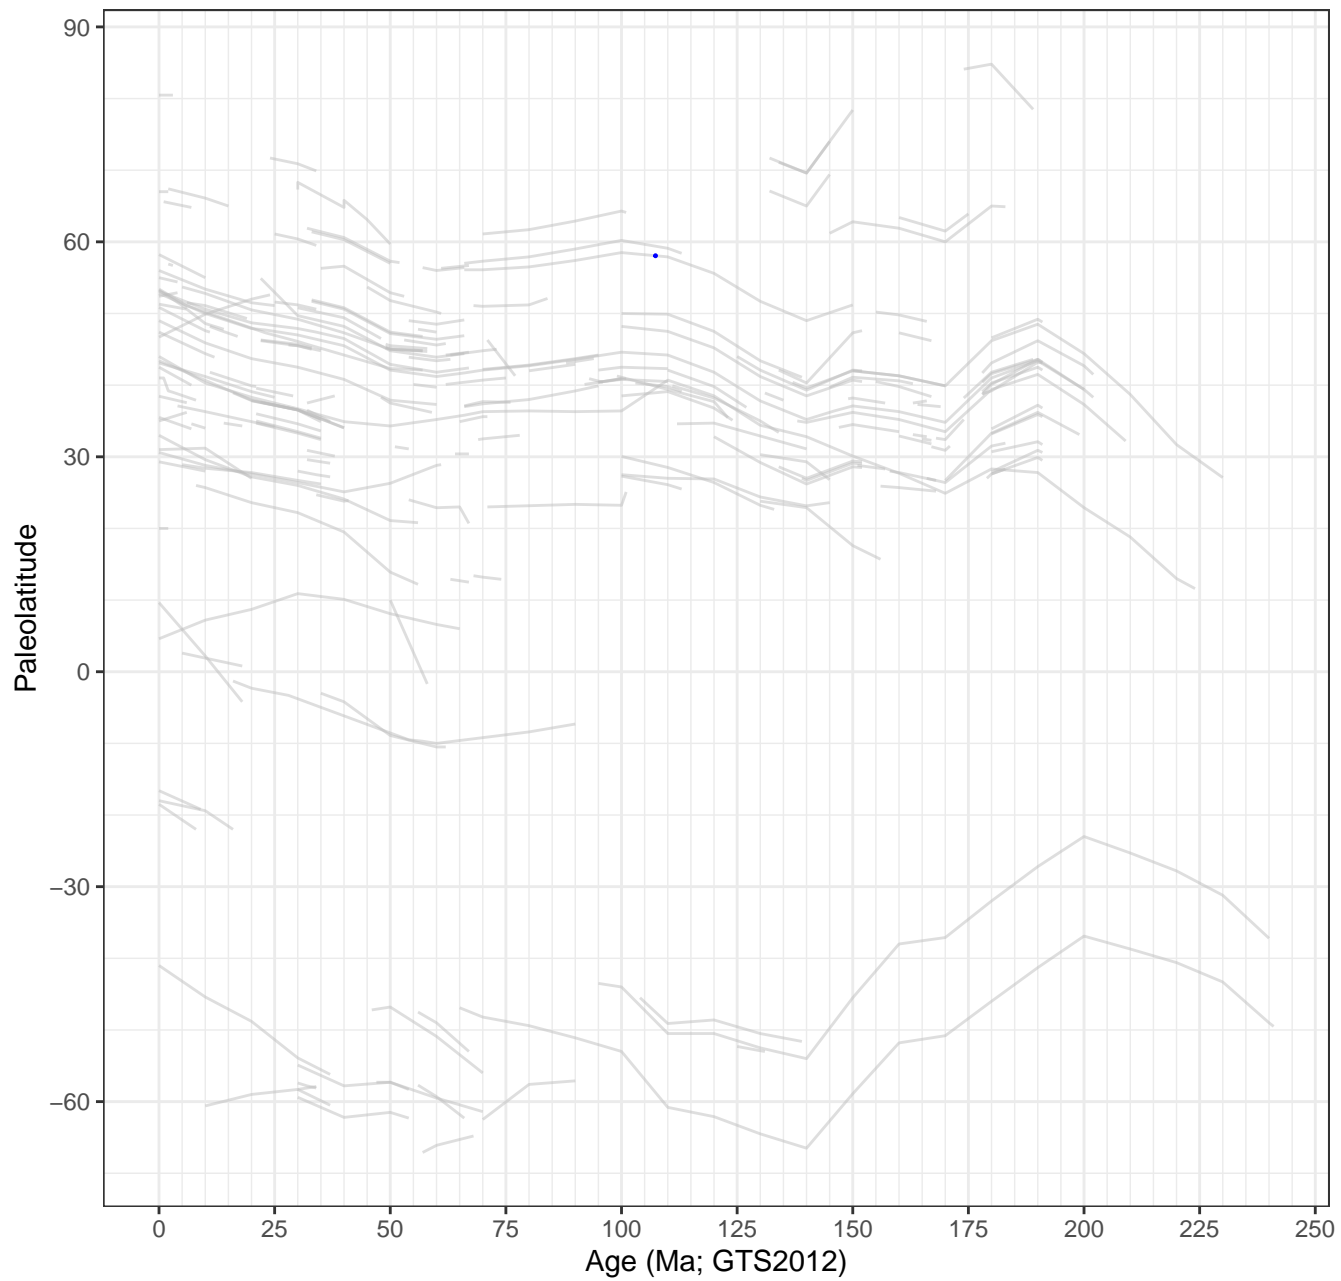

Supplement: Supplementary file 469 [file Genus Wigginsiella.pdf › Supplement/Supplement 2/Genus 459 plots/Genus Wigginsiella.pdf]

# Genus Willeidinium

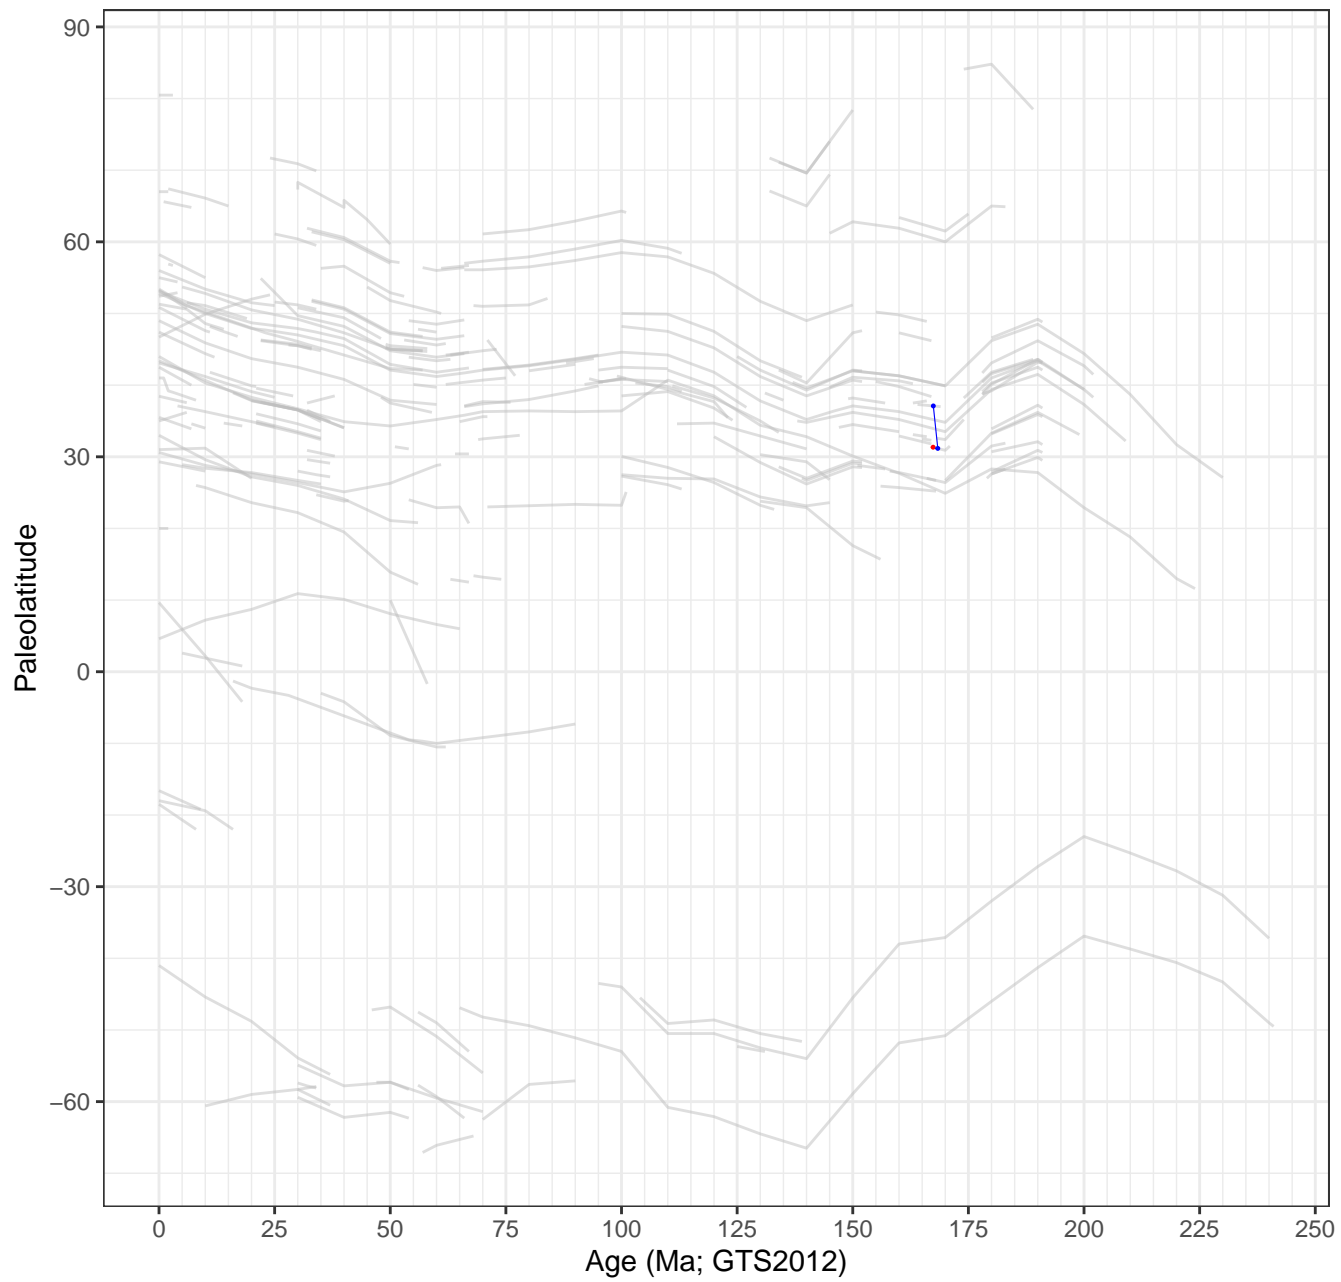

Supplement: Supplementary file 470 [file Genus Willeidinium.pdf › Supplement/Supplement 2/Genus 459 plots/Genus Willeidinium.pdf]

# Genus *Wilsonidinium*

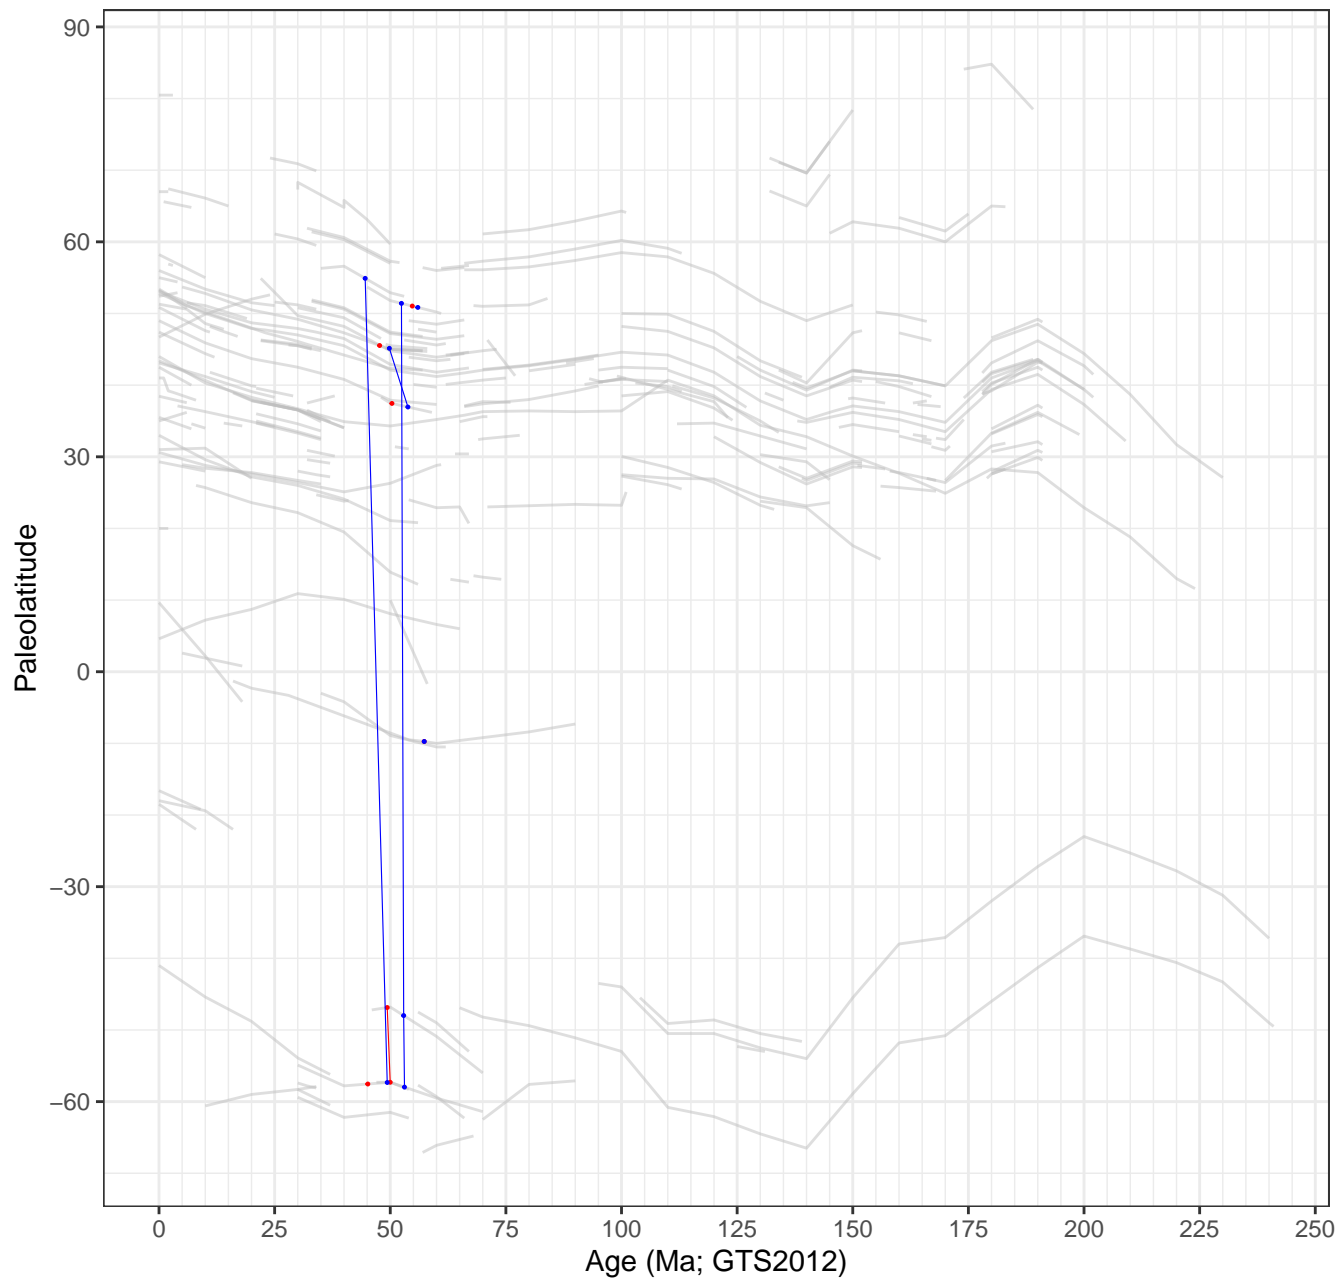

Supplement: Supplementary file 471 [file Genus Wilsonidinium.pdf › Supplement/Supplement 2/Genus 459 plots/Genus Wilsonidinium.pdf]

# Genus Wodehousia

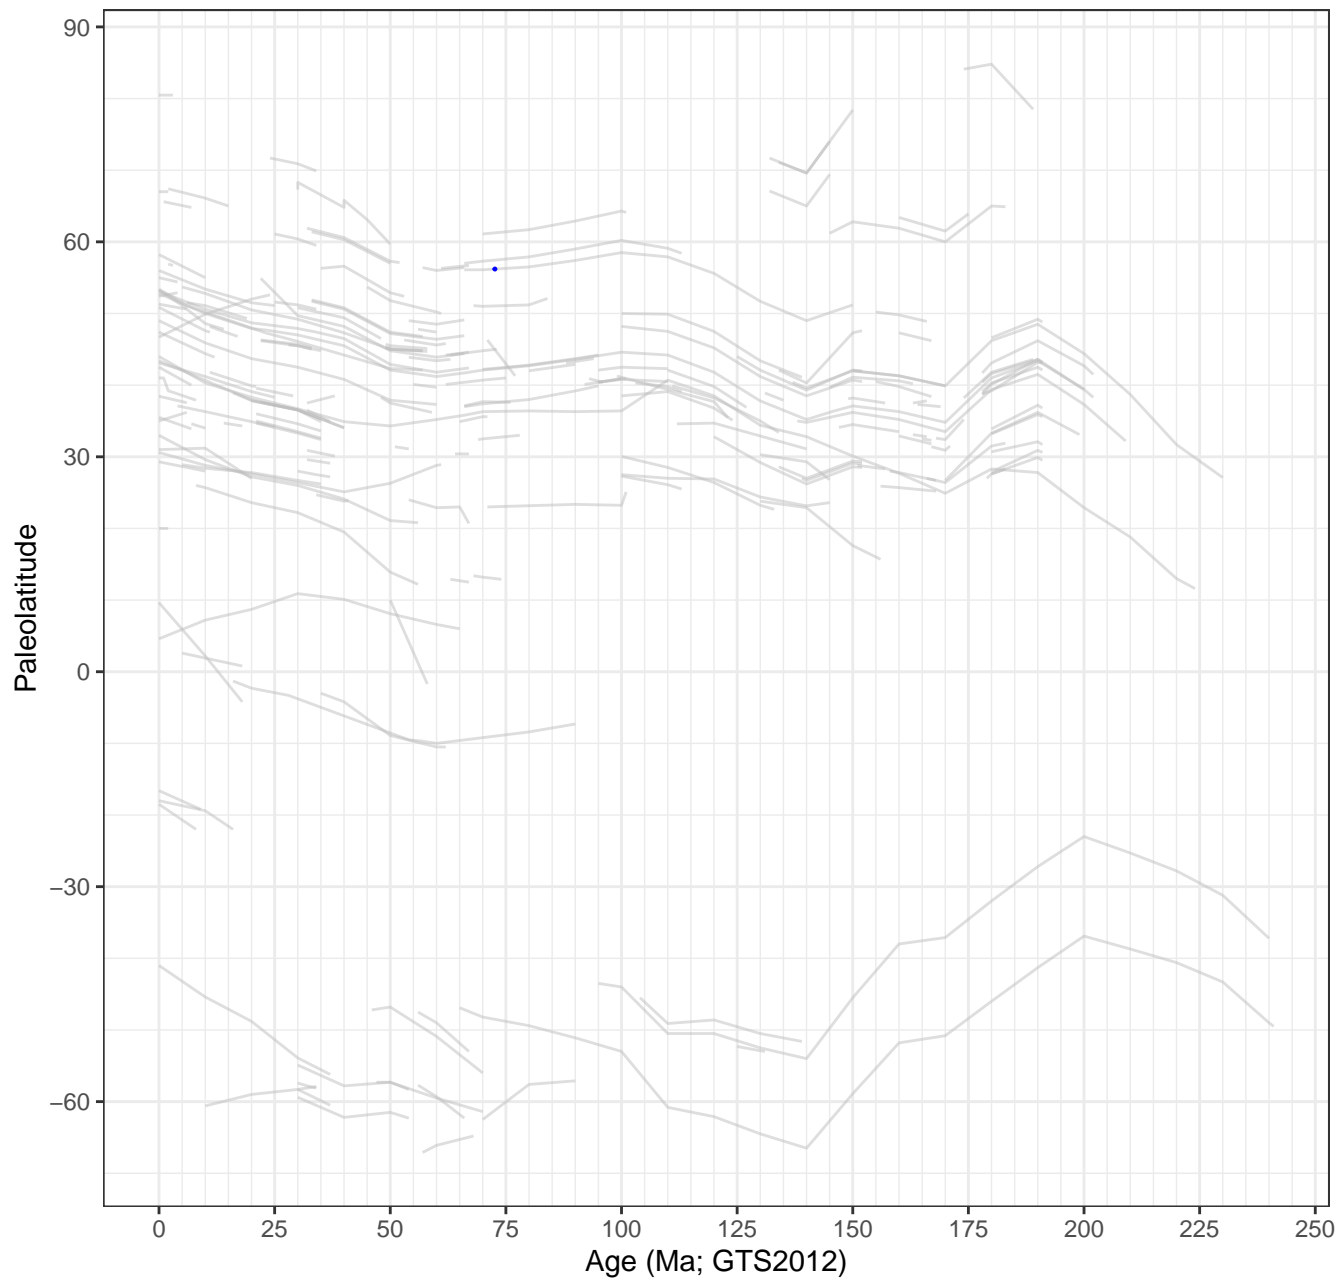

Supplement: Supplementary file 472 [file Genus Wodehousia.pdf › Supplement/Supplement 2/Genus 459 plots/Genus Wodehousia.pdf]

# Genus Woodinia

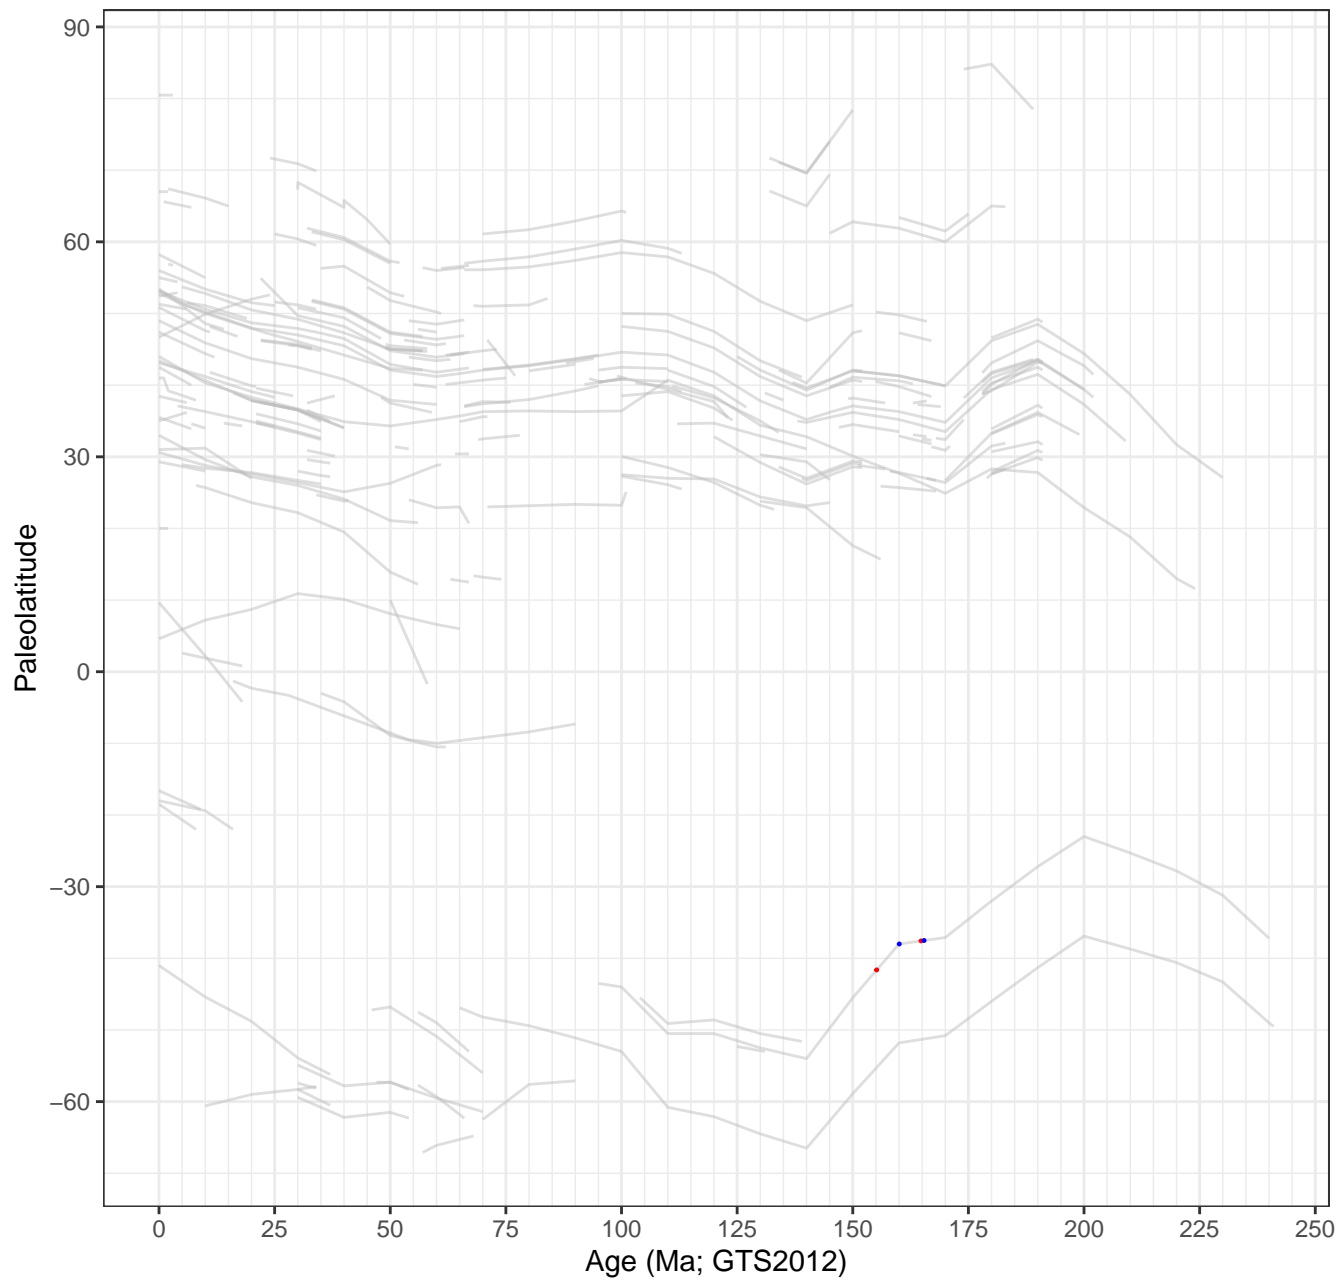

Supplement: Supplementary file 473 [file Genus Woodinia.pdf › Supplement/Supplement 2/Genus 459 plots/Genus Woodinia.pdf]

# Genus Wrevittia

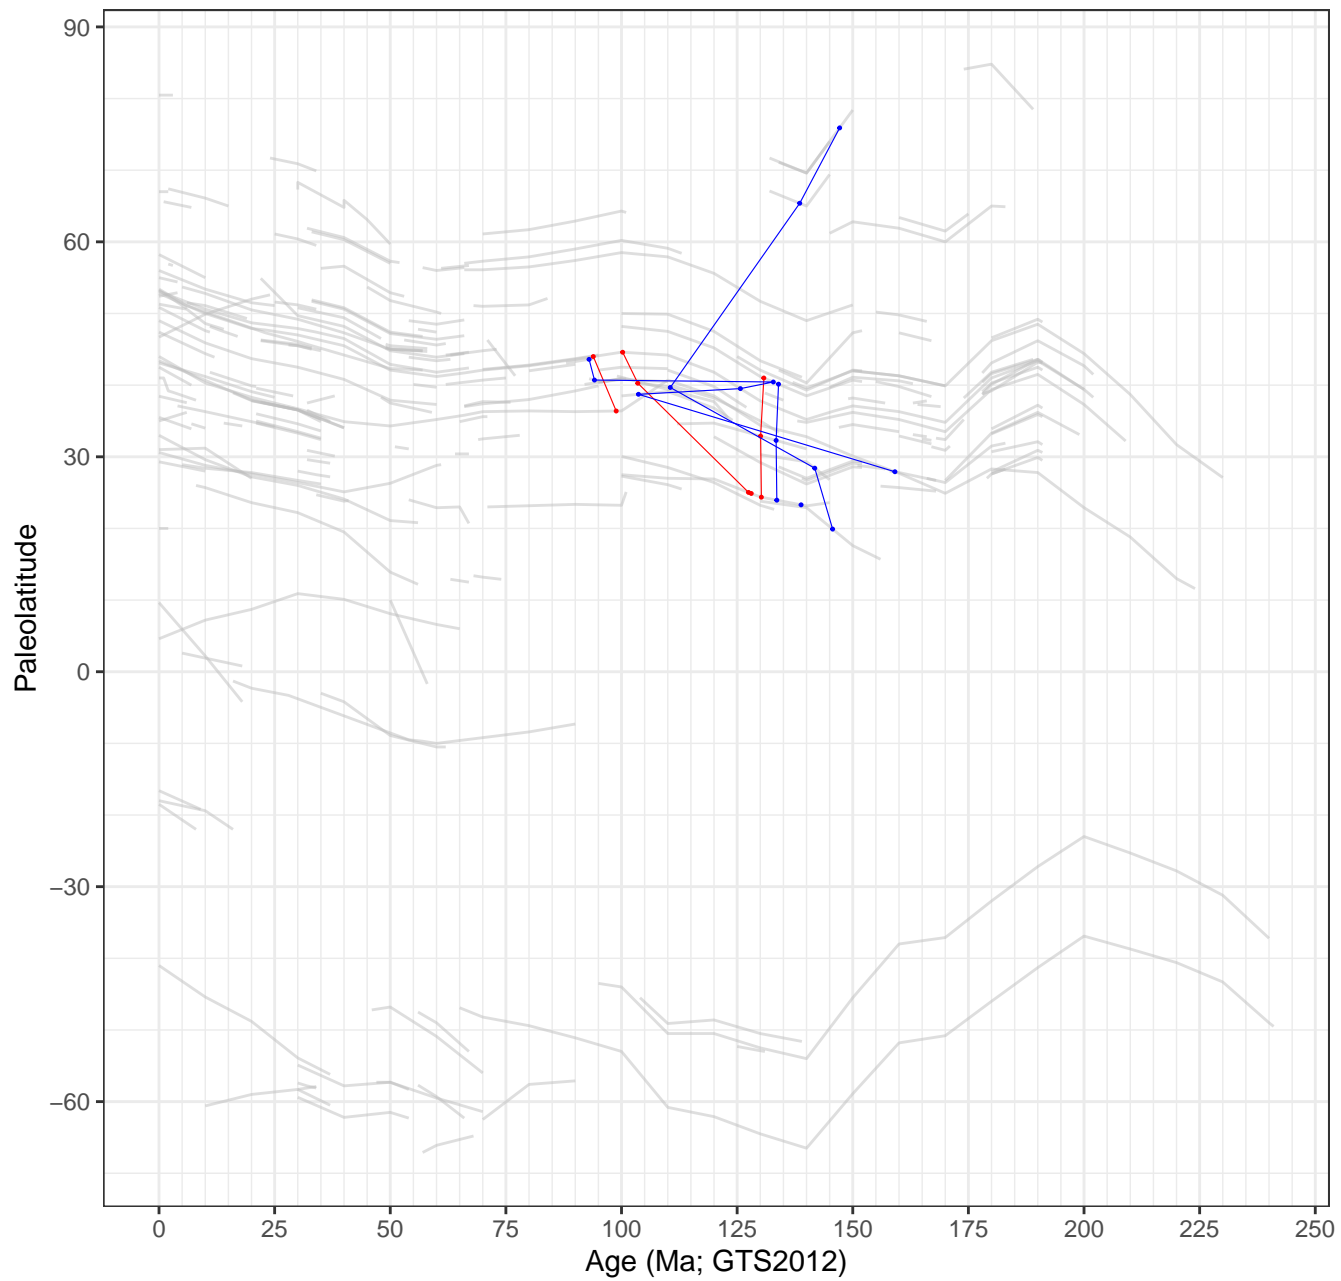

Supplement: Supplementary file 474 [file Genus Wrevittia.pdf › Supplement/Supplement 2/Genus 459 plots/Genus Wrevittia.pdf]

# Genus Xandarodinium

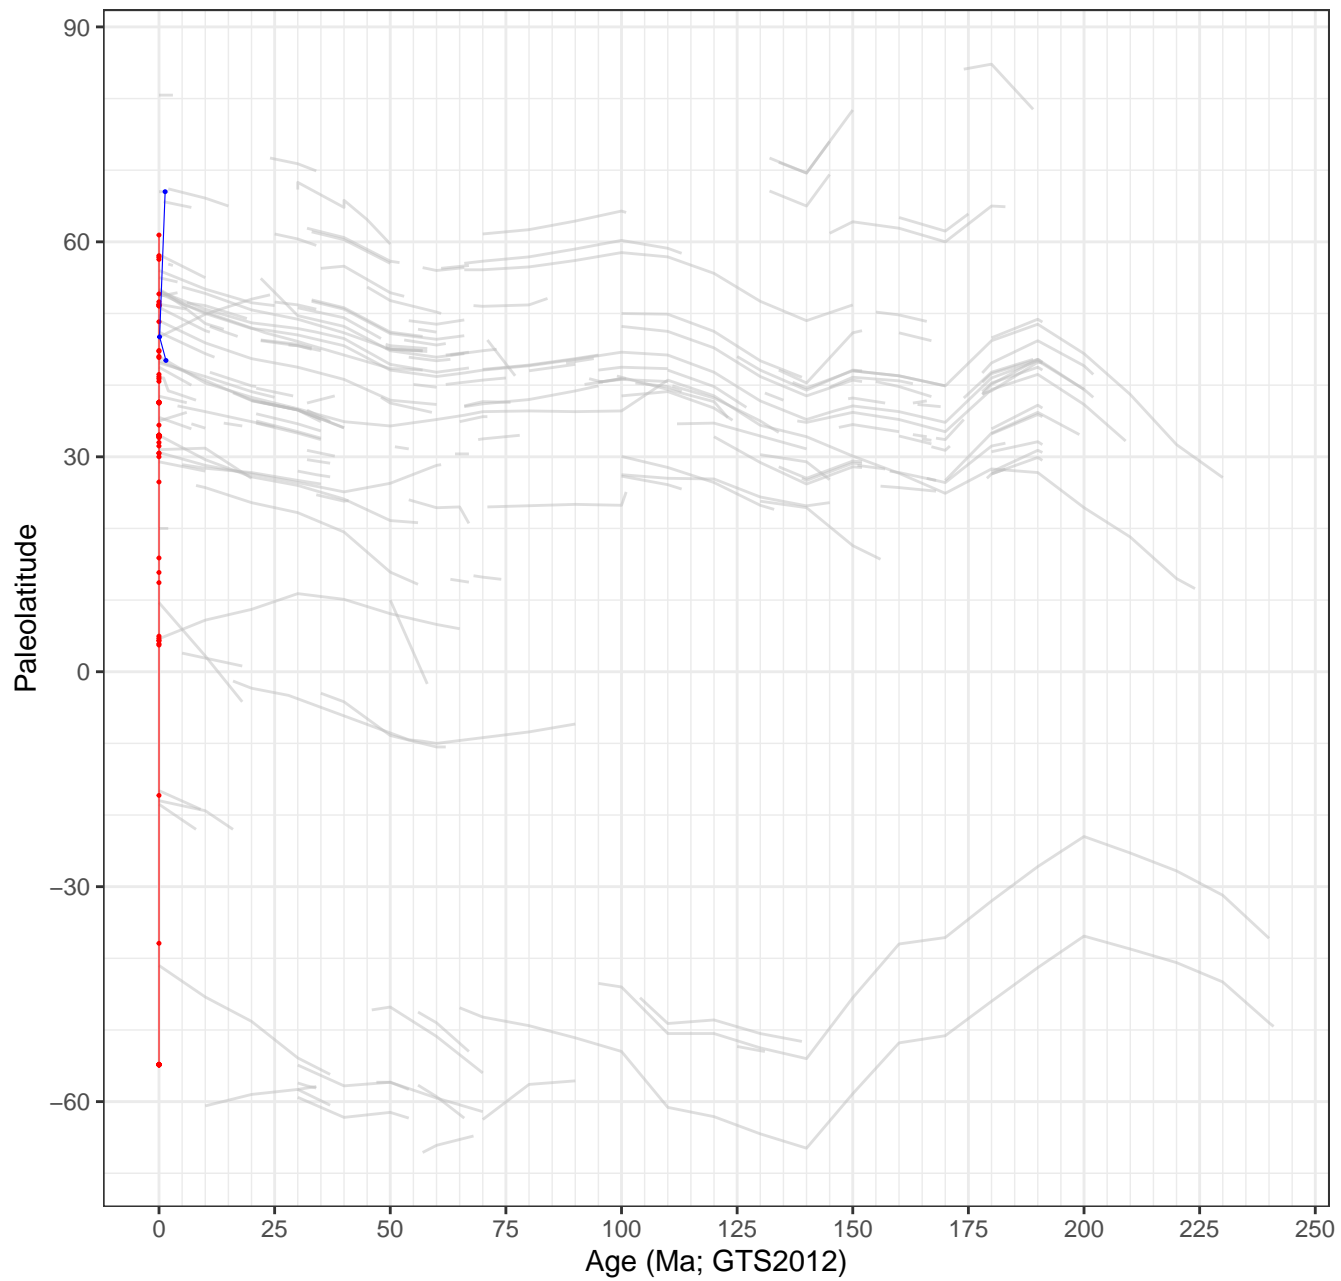

Supplement: Supplementary file 475 [file Genus Xandarodinium.pdf › Supplement/Supplement 2/Genus 459 plots/Genus Xandarodinium.pdf]

# Genus *Xenascus*

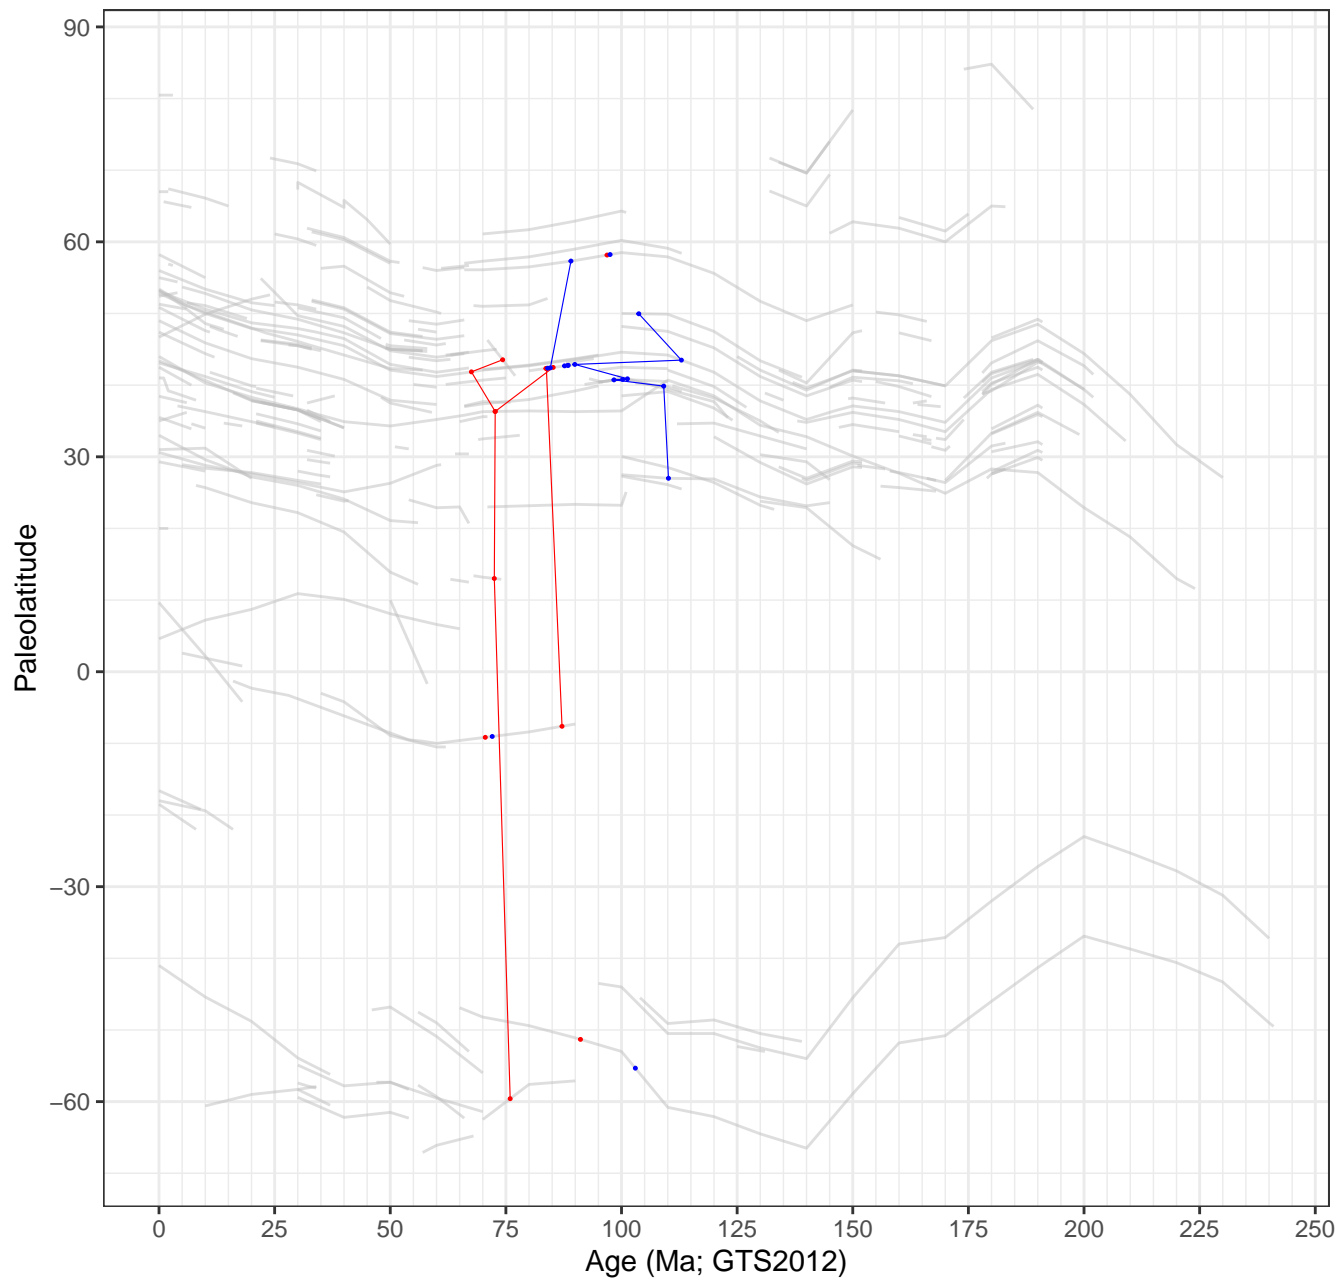

Supplement: Supplementary file 476 [file Genus Xenascus.pdf › Supplement/Supplement 2/Genus 459 plots/Genus Xenascus.pdf]

# Genus Xenicodinium

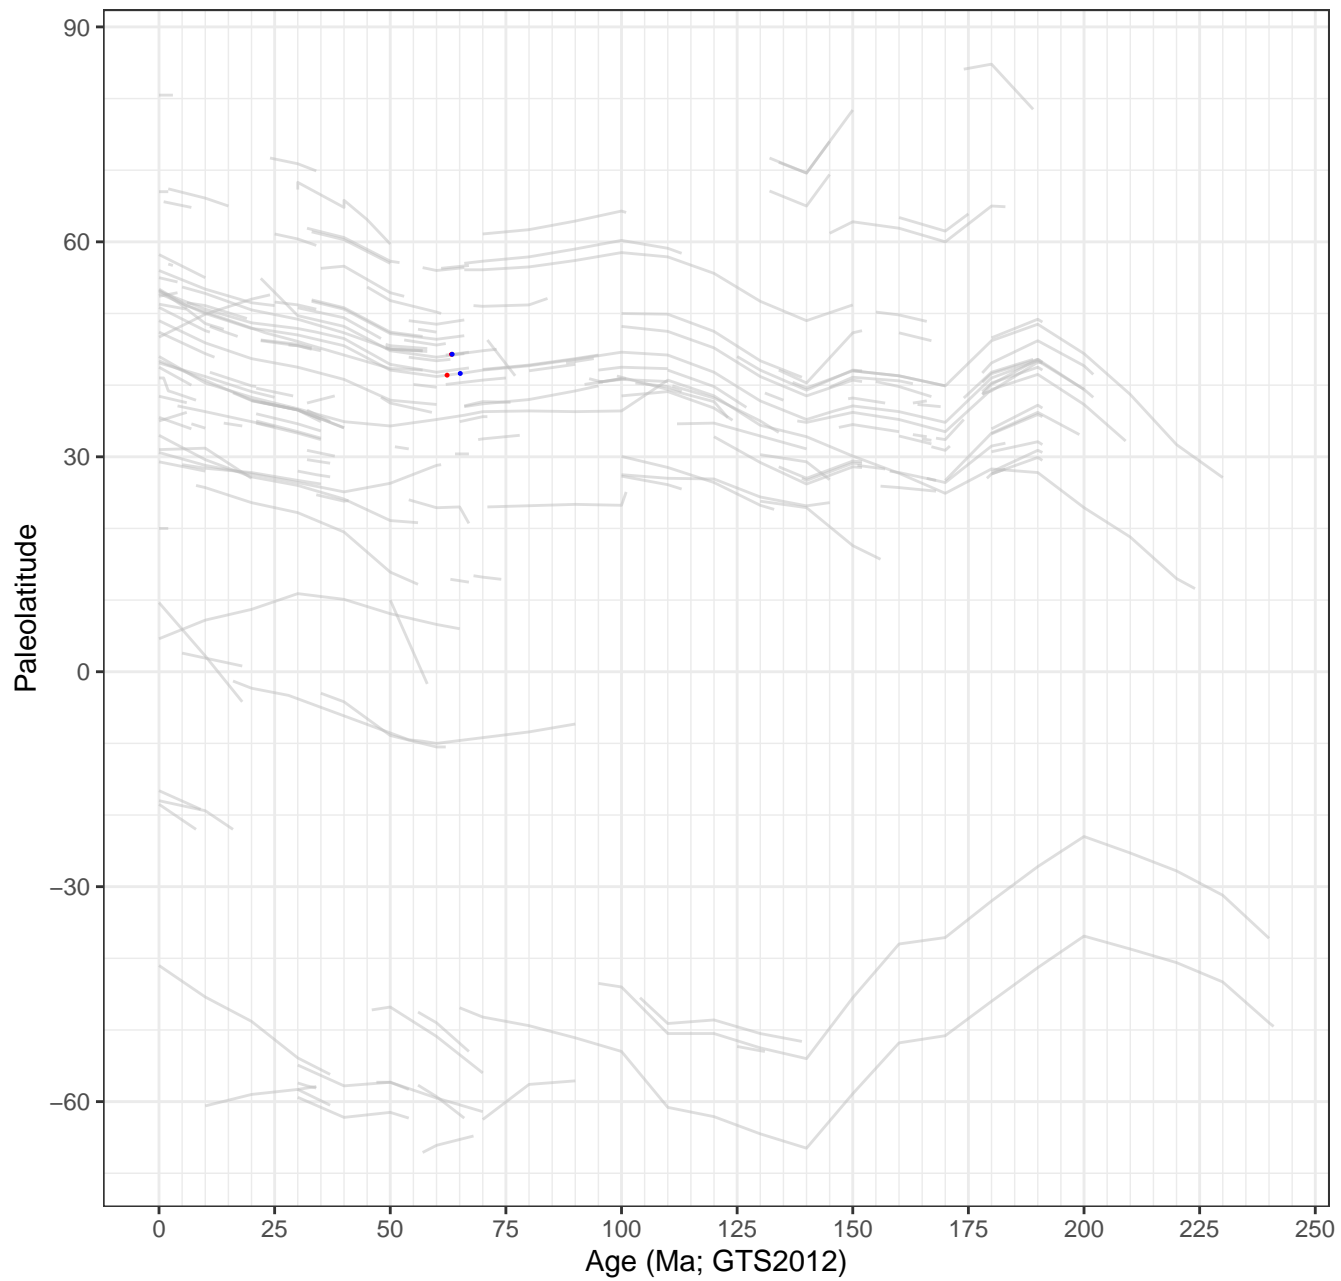

Supplement: Supplementary file 477 [file Genus Xenicodinium.pdf › Supplement/Supplement 2/Genus 459 plots/Genus Xenicodinium.pdf]

# Genus Xenikoon

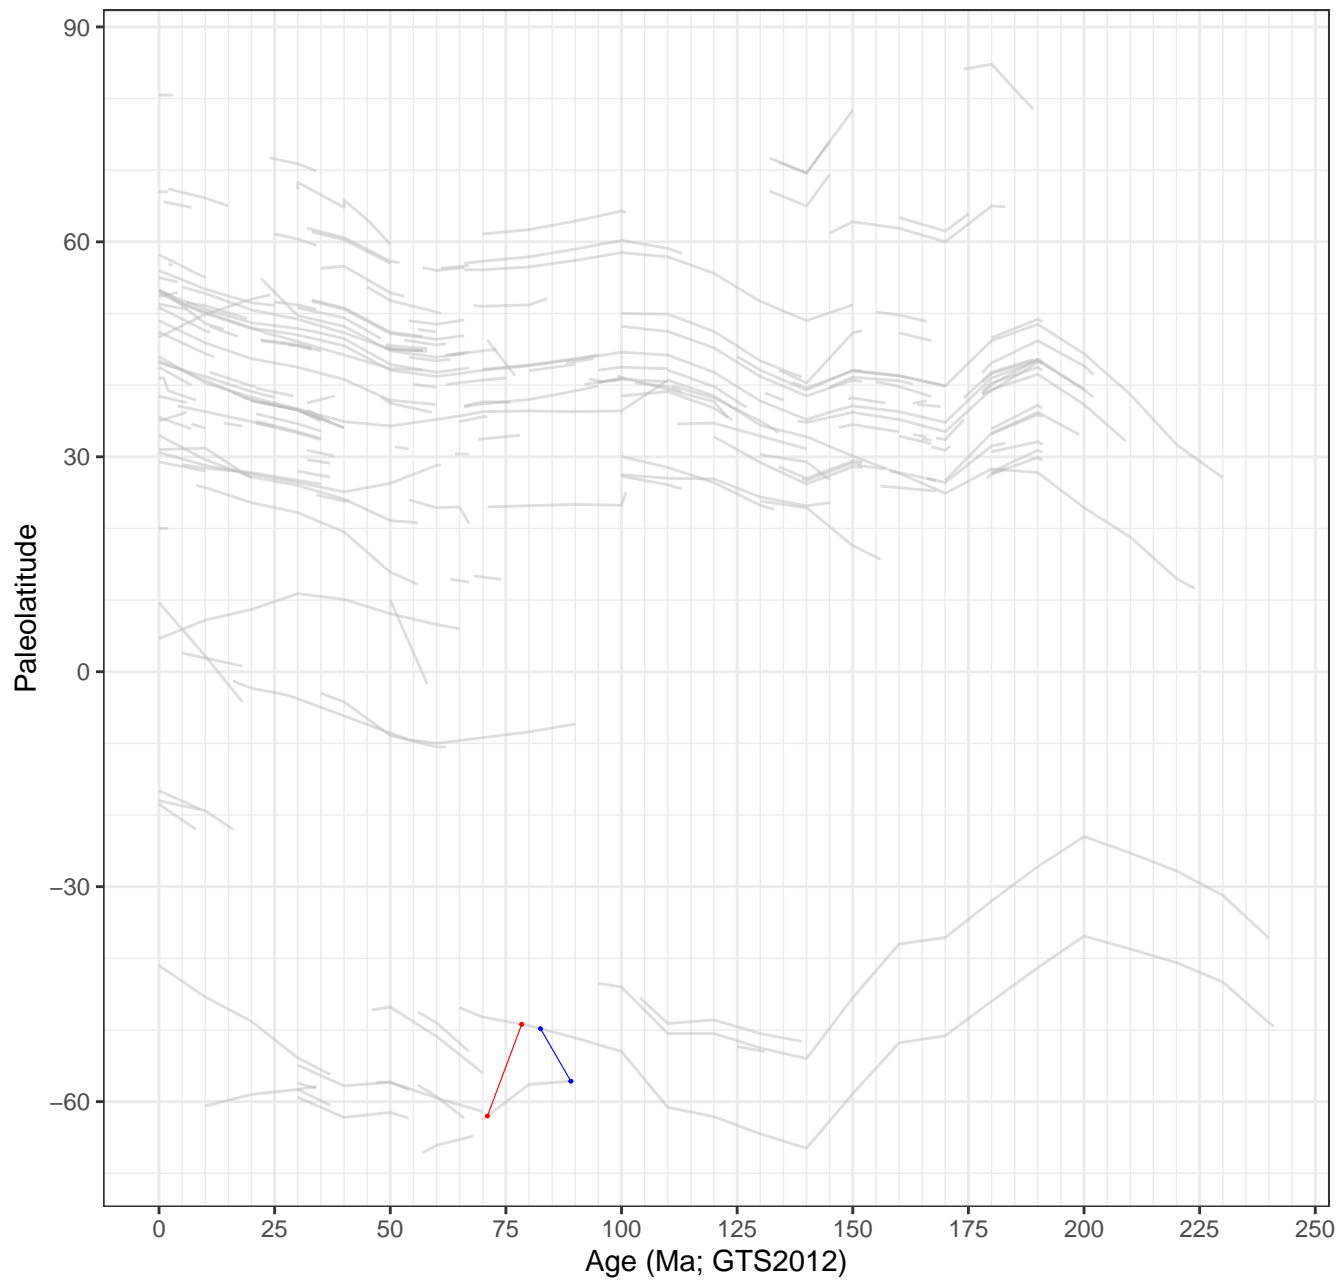

Supplement: Supplementary file 478 [file Genus Xenikoon.pdf › Supplement/Supplement 2/Genus 459 plots/Genus Xenikoon.pdf]

# Genus Yalkalpodinium

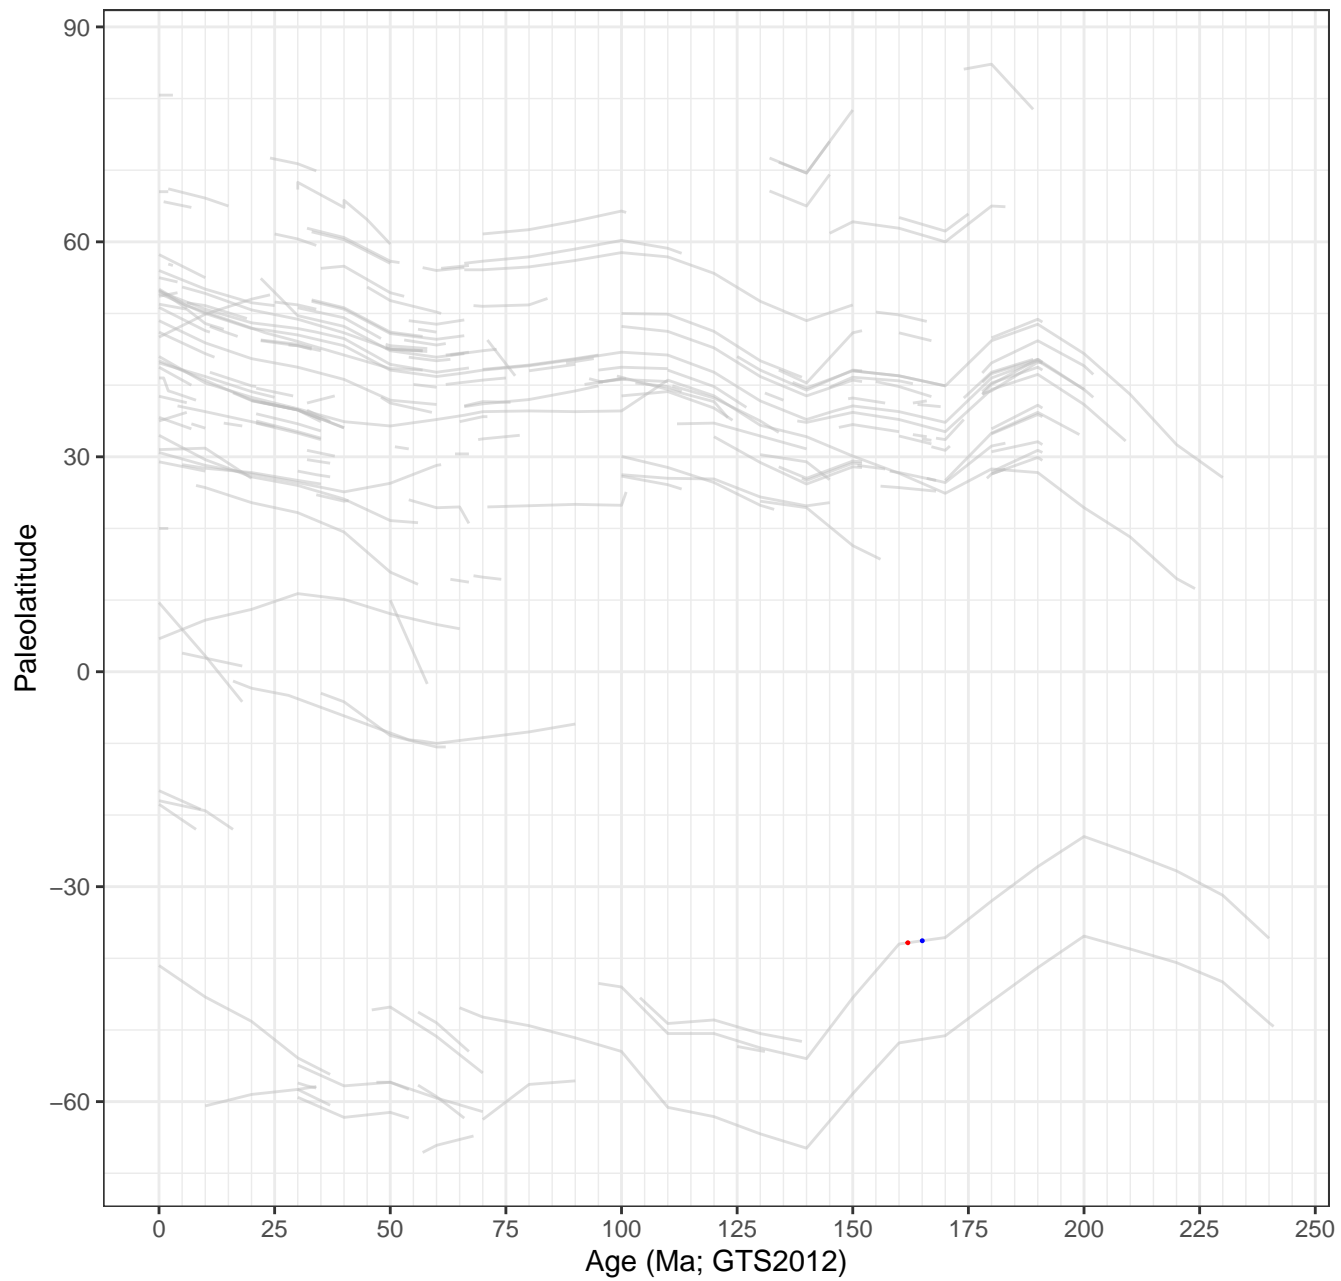

Supplement: Supplementary file 479 [file Genus Yalkalpodinium.pdf › Supplement/Supplement 2/Genus 459 plots/Genus Yalkalpodinium.pdf]

# Genus Ynezidinium

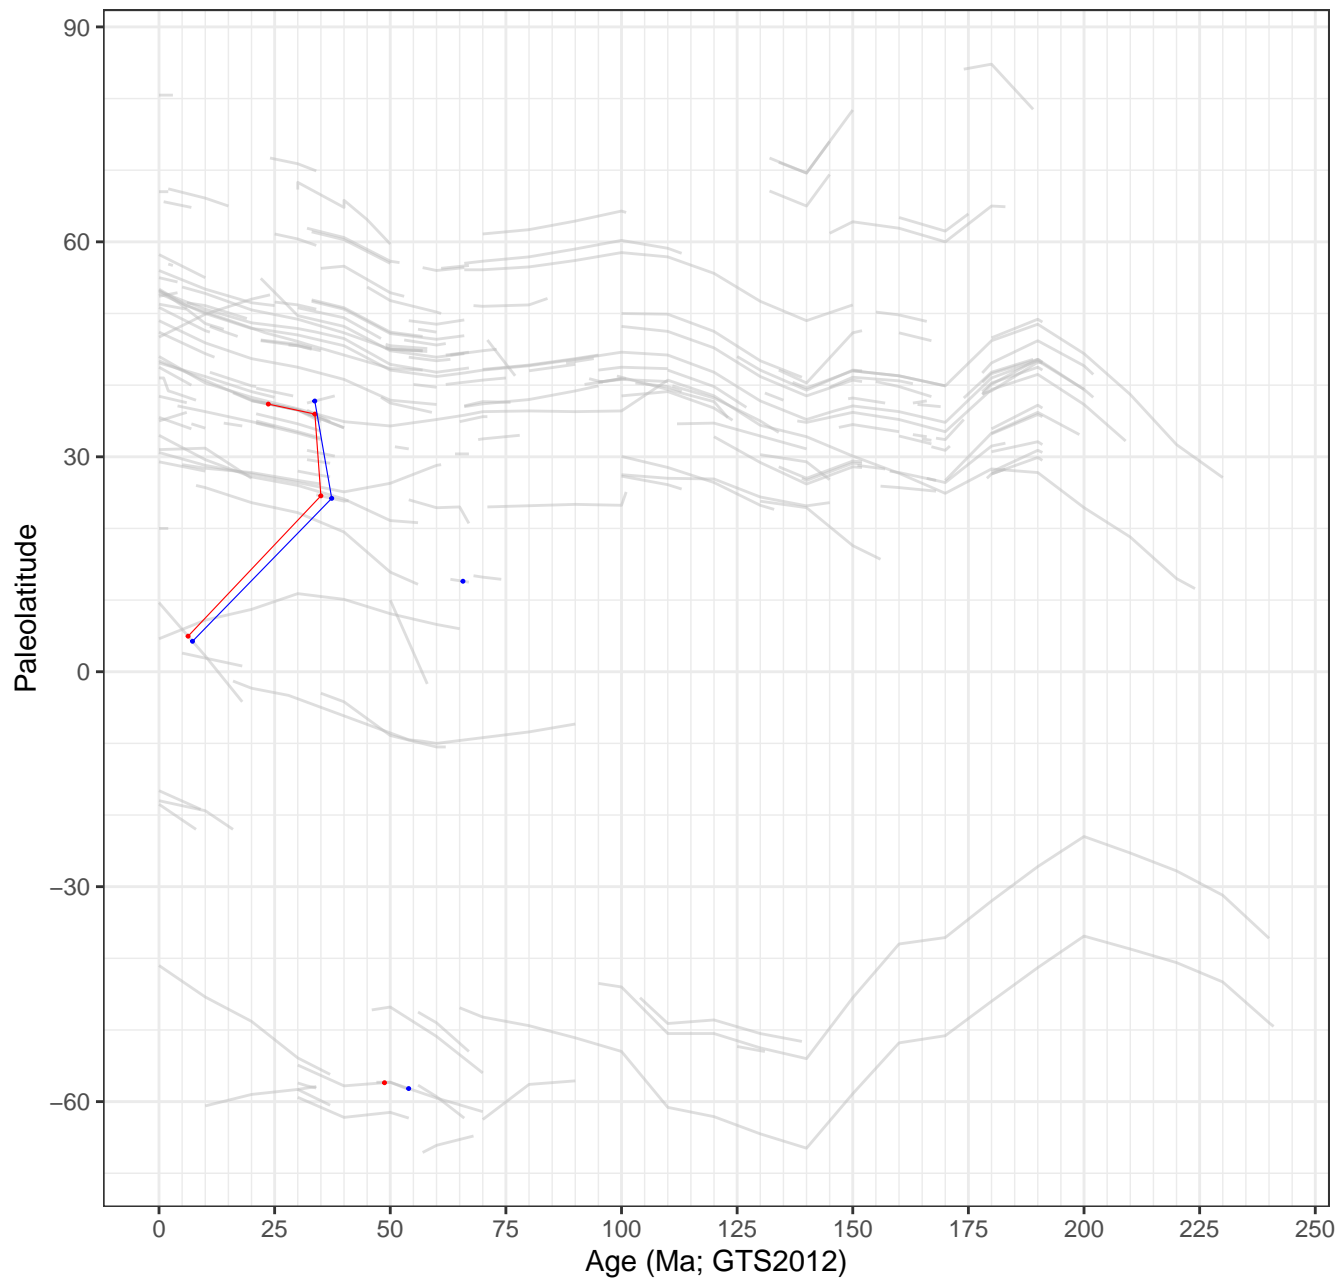

Supplement: Supplementary file 480 [file Genus Ynezidinium.pdf › Supplement/Supplement 2/Genus 459 plots/Genus Ynezidinium.pdf]

# Genus cyst of *Gymnodinium*

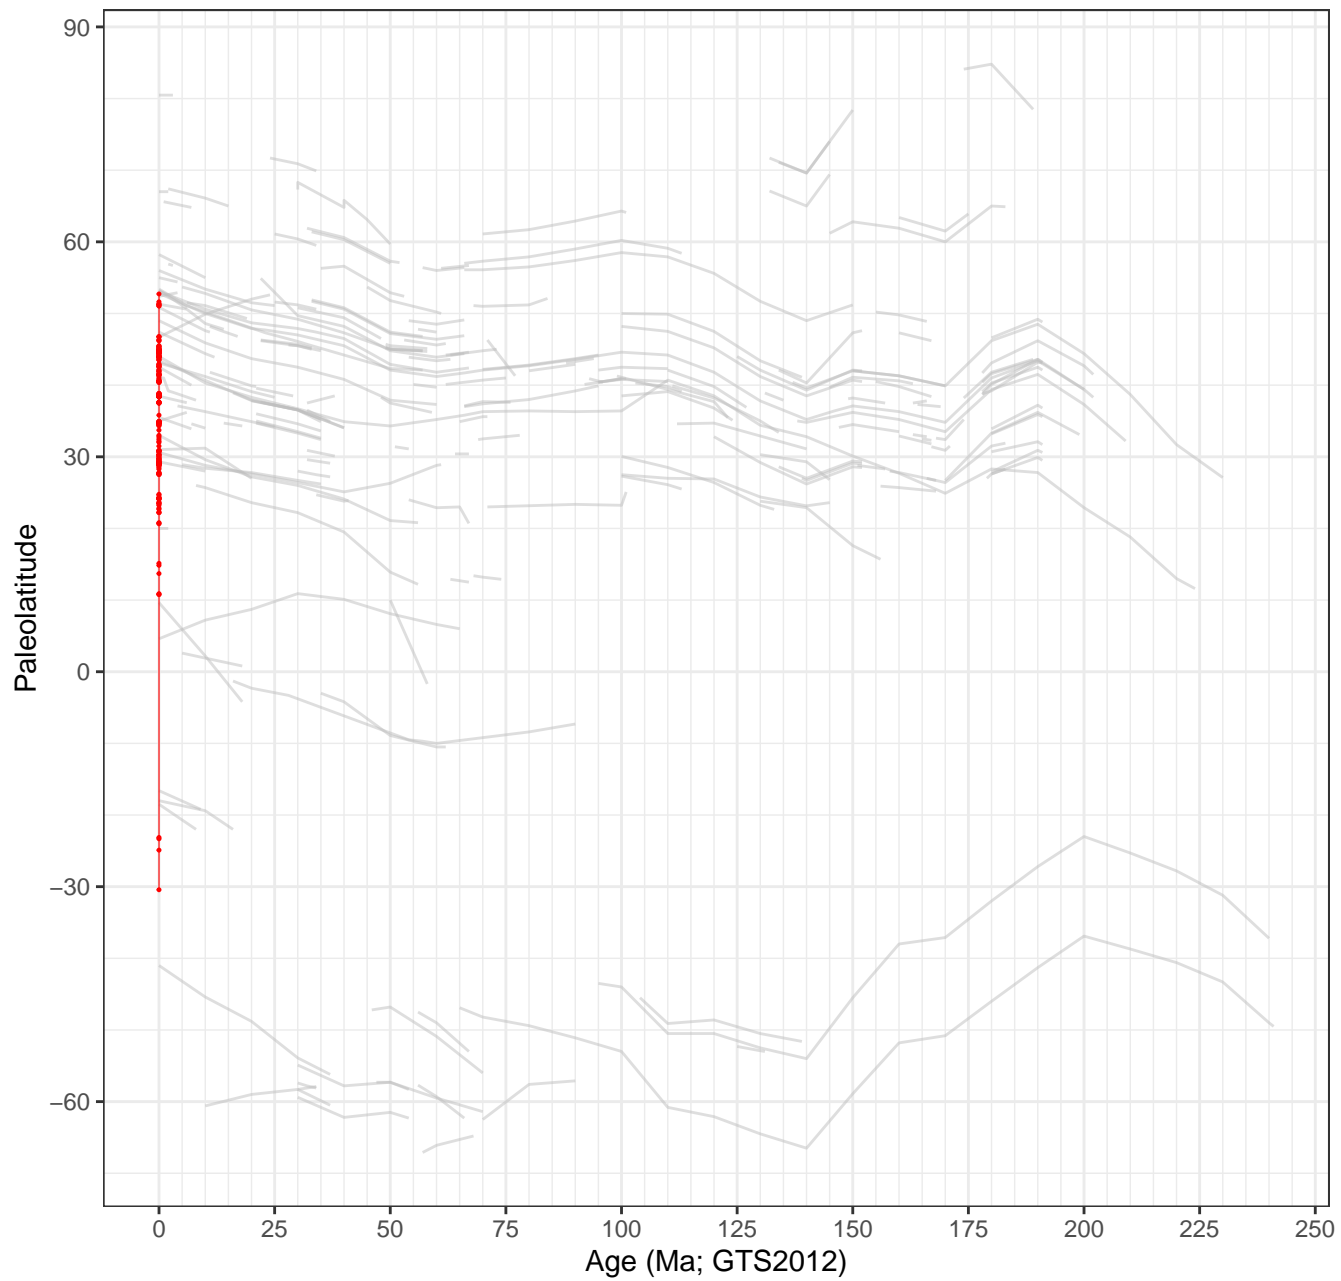

Supplement: Supplementary file 481 [file Genus cyst of Gymnodinium.pdf › Supplement/Supplement 2/Genus 459 plots/Genus cyst of Gymnodinium.pdf]

# Genus cyst of *Oblea*

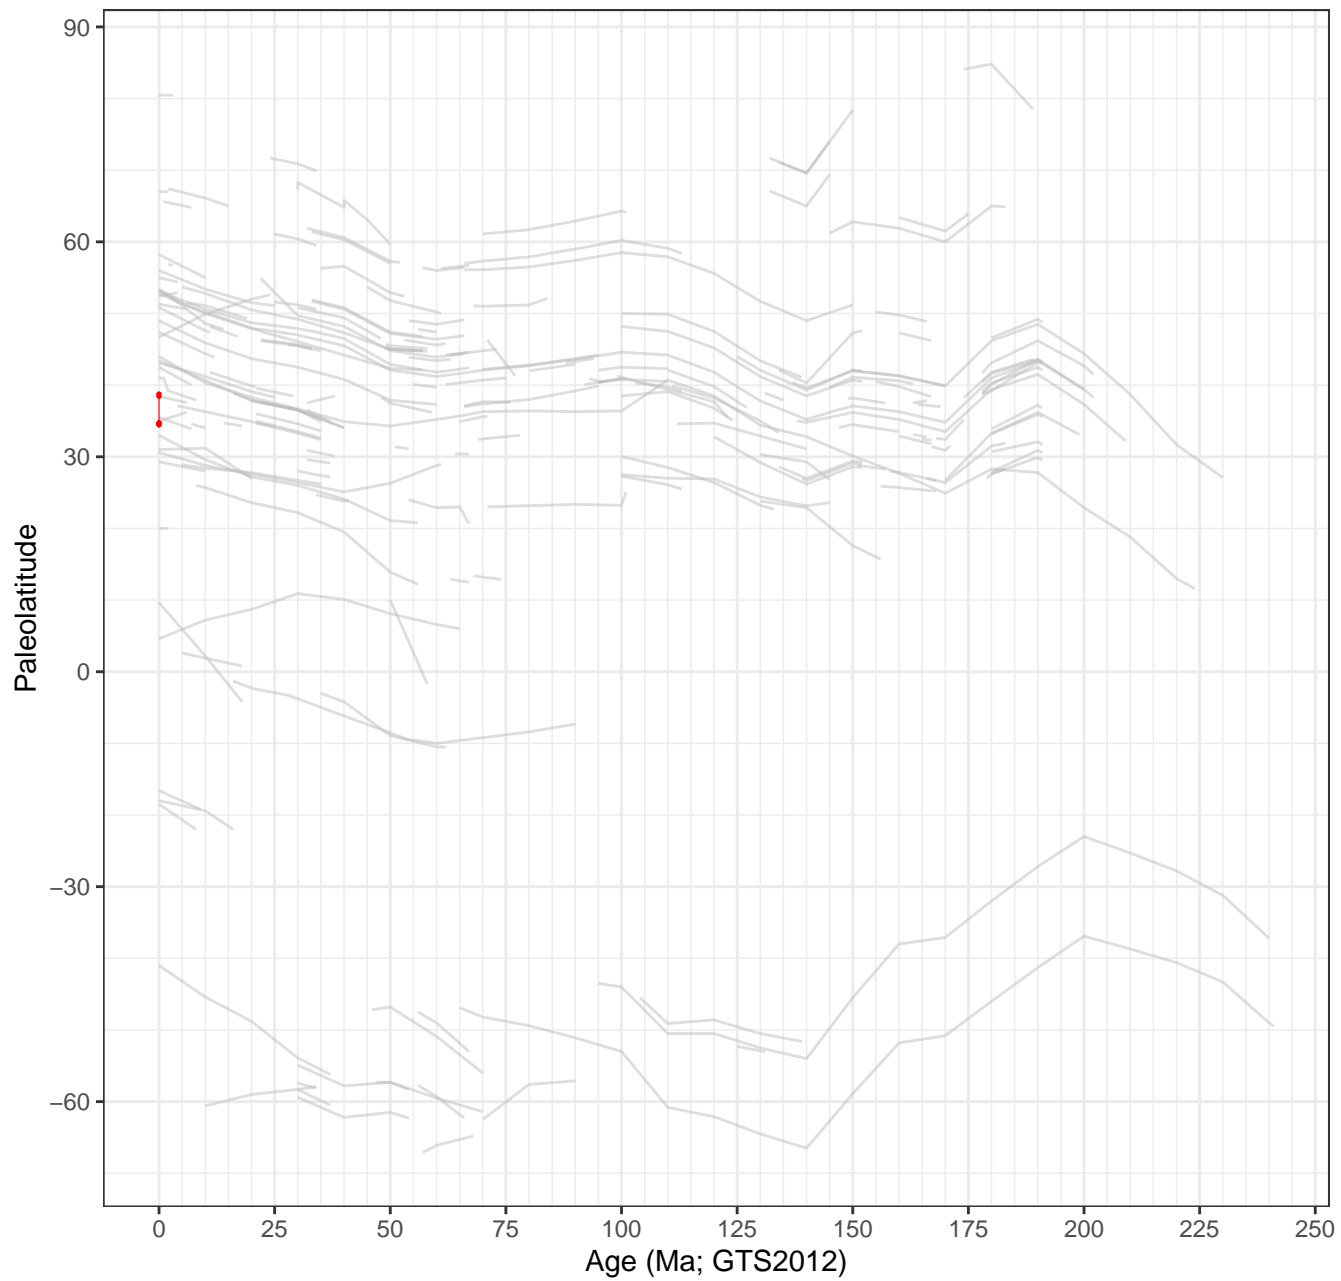

Supplement: Supplementary file 482 [file Genus cyst of Oblea.pdf › Supplement/Supplement 2/Genus 459 plots/Genus cyst of Oblea.pdf]

# Genus cyst of *Polarella*

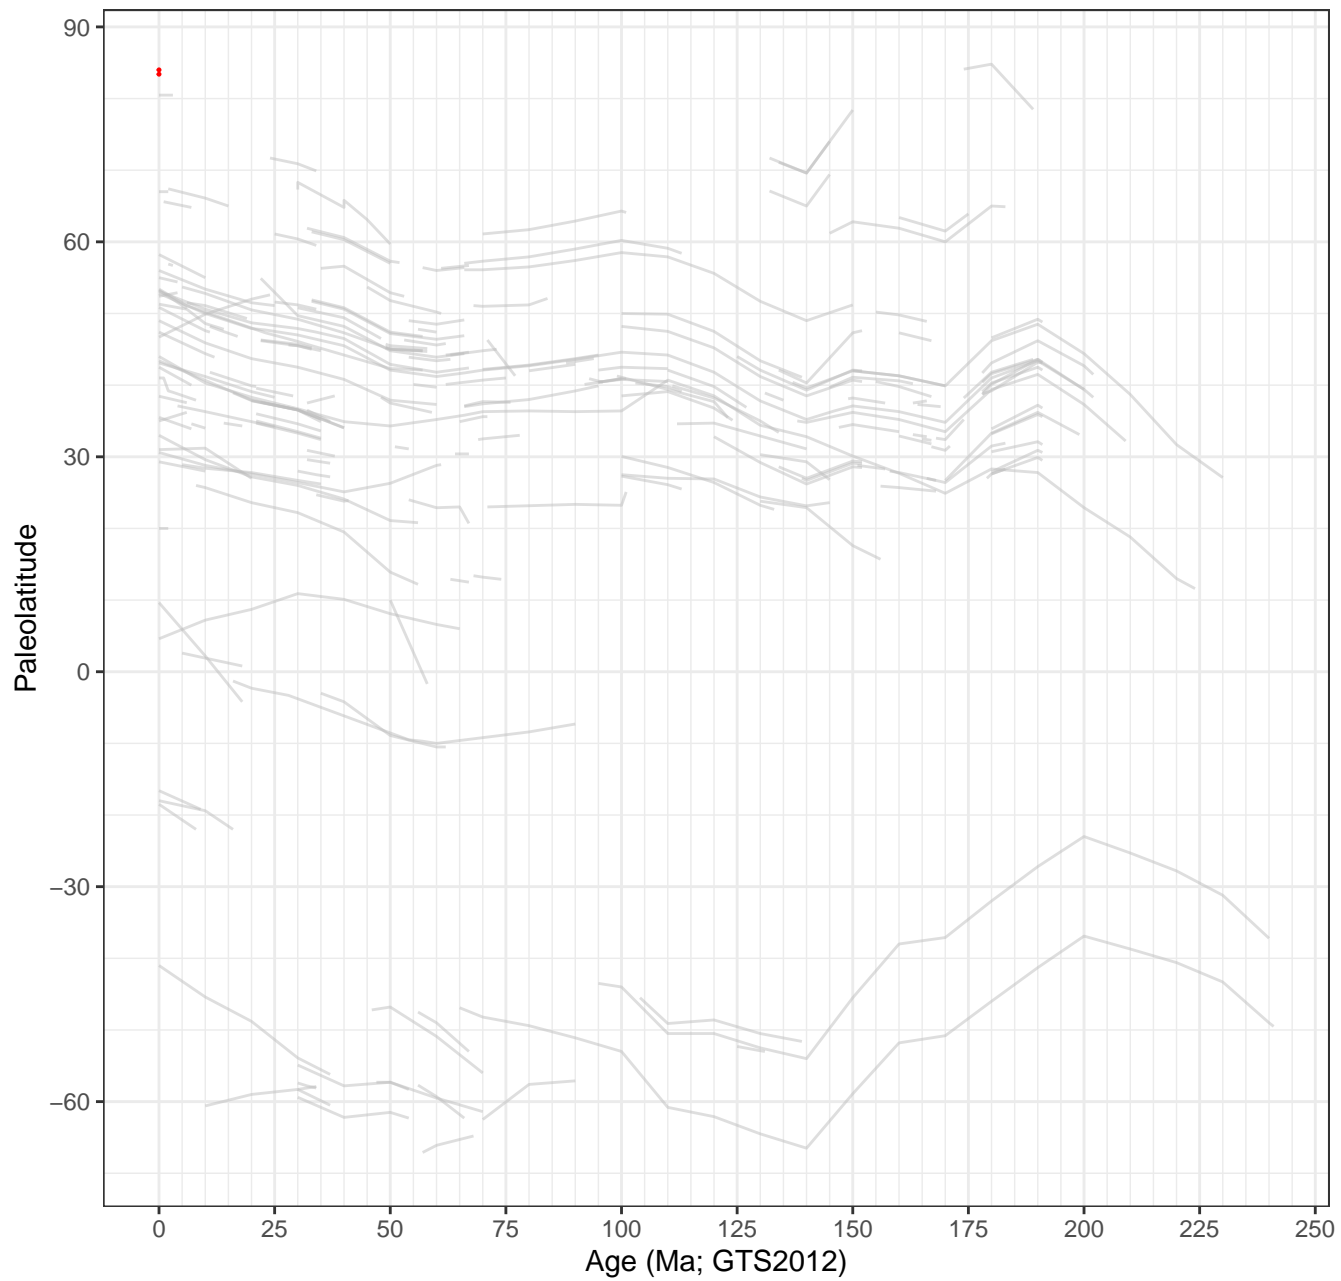

Supplement: Supplementary file 483 [file Genus cyst of Polarella.pdf › Supplement/Supplement 2/Genus 459 plots/Genus cyst of Polarella.pdf]

# Genus cyst of Polykrikos

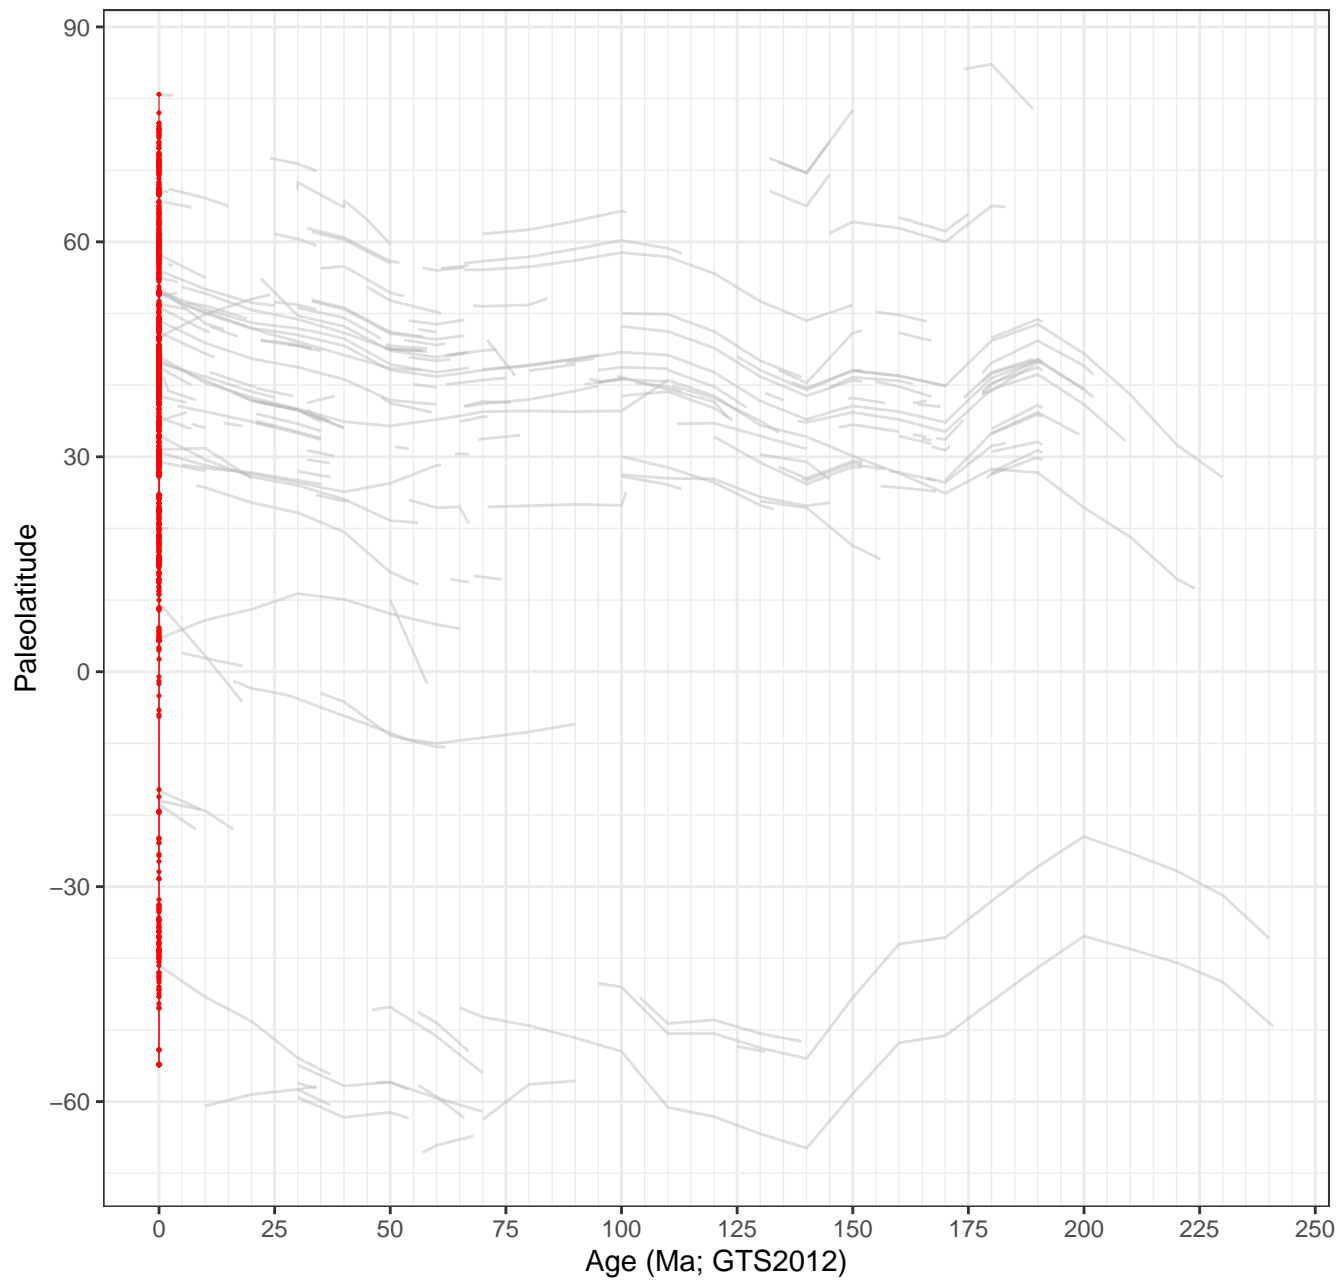

Supplement: Supplementary file 484 [file Genus cyst of Polykrikos.pdf › Supplement/Supplement 2/Genus 459 plots/Genus cyst of Polykrikos.pdf]

# Genus cyst of *Protoperidinium*

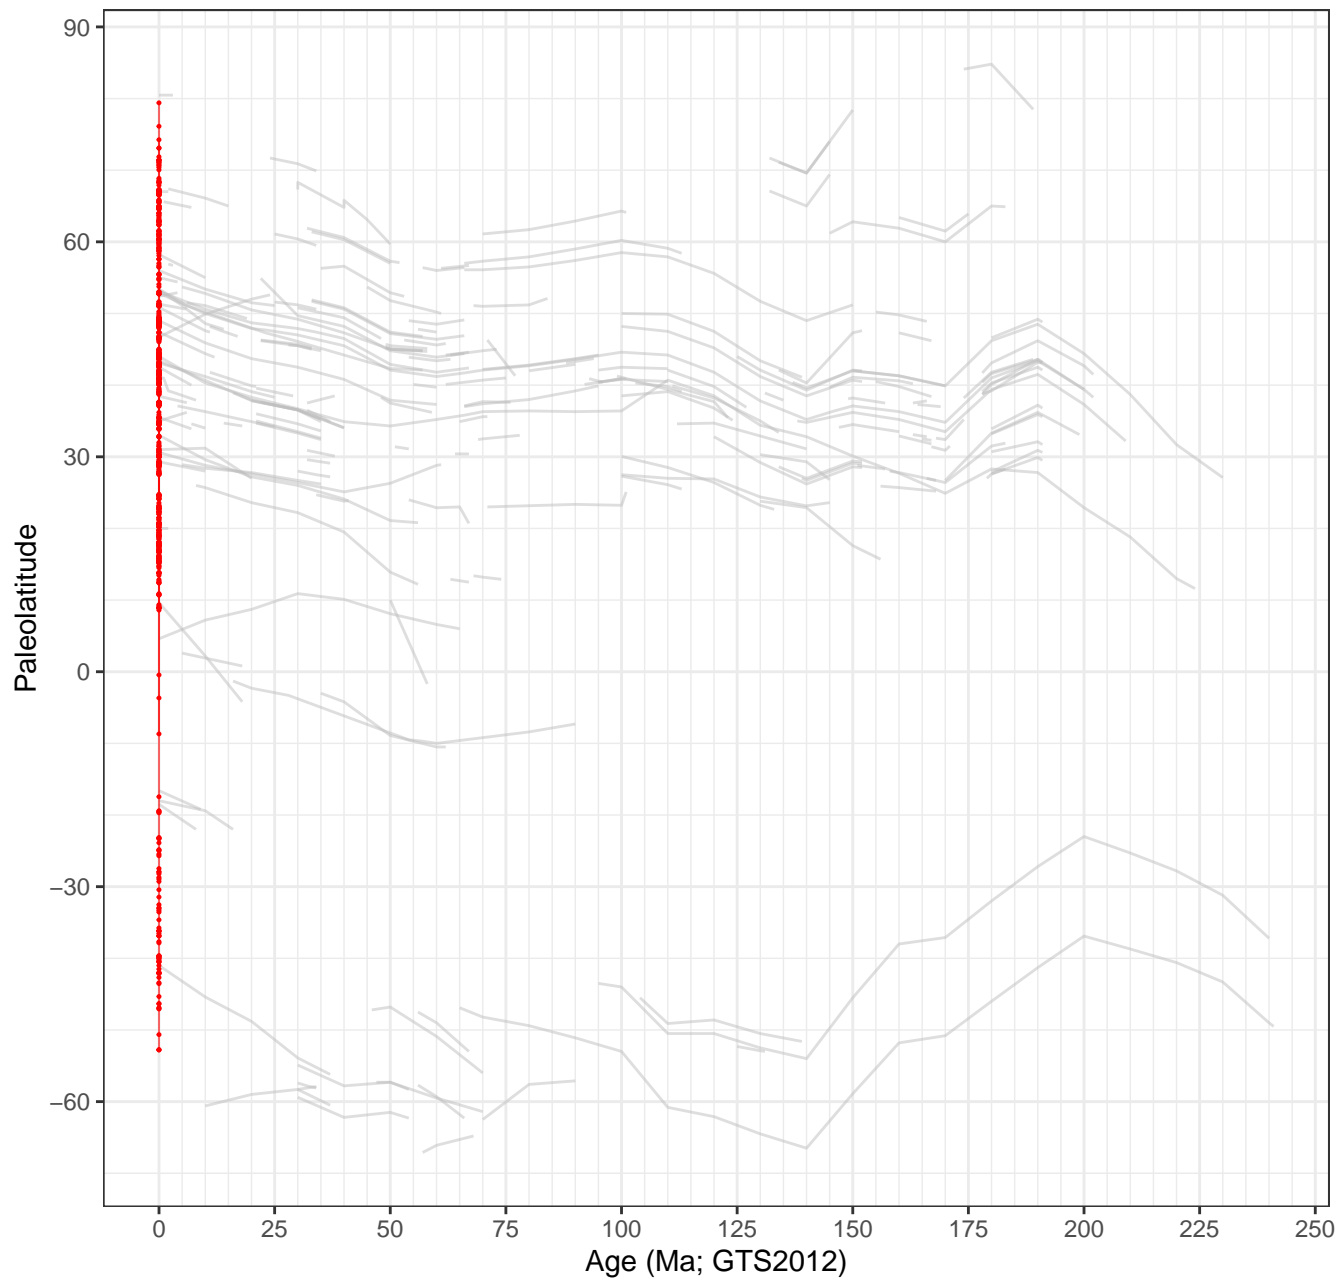

Supplement: Supplementary file 485 [file Genus cyst of Protoperidinium.pdf › Supplement/Supplement 2/Genus 459 plots/Genus cyst of Protoperidinium.pdf]

# Genus cyst of *Scrippsiella*

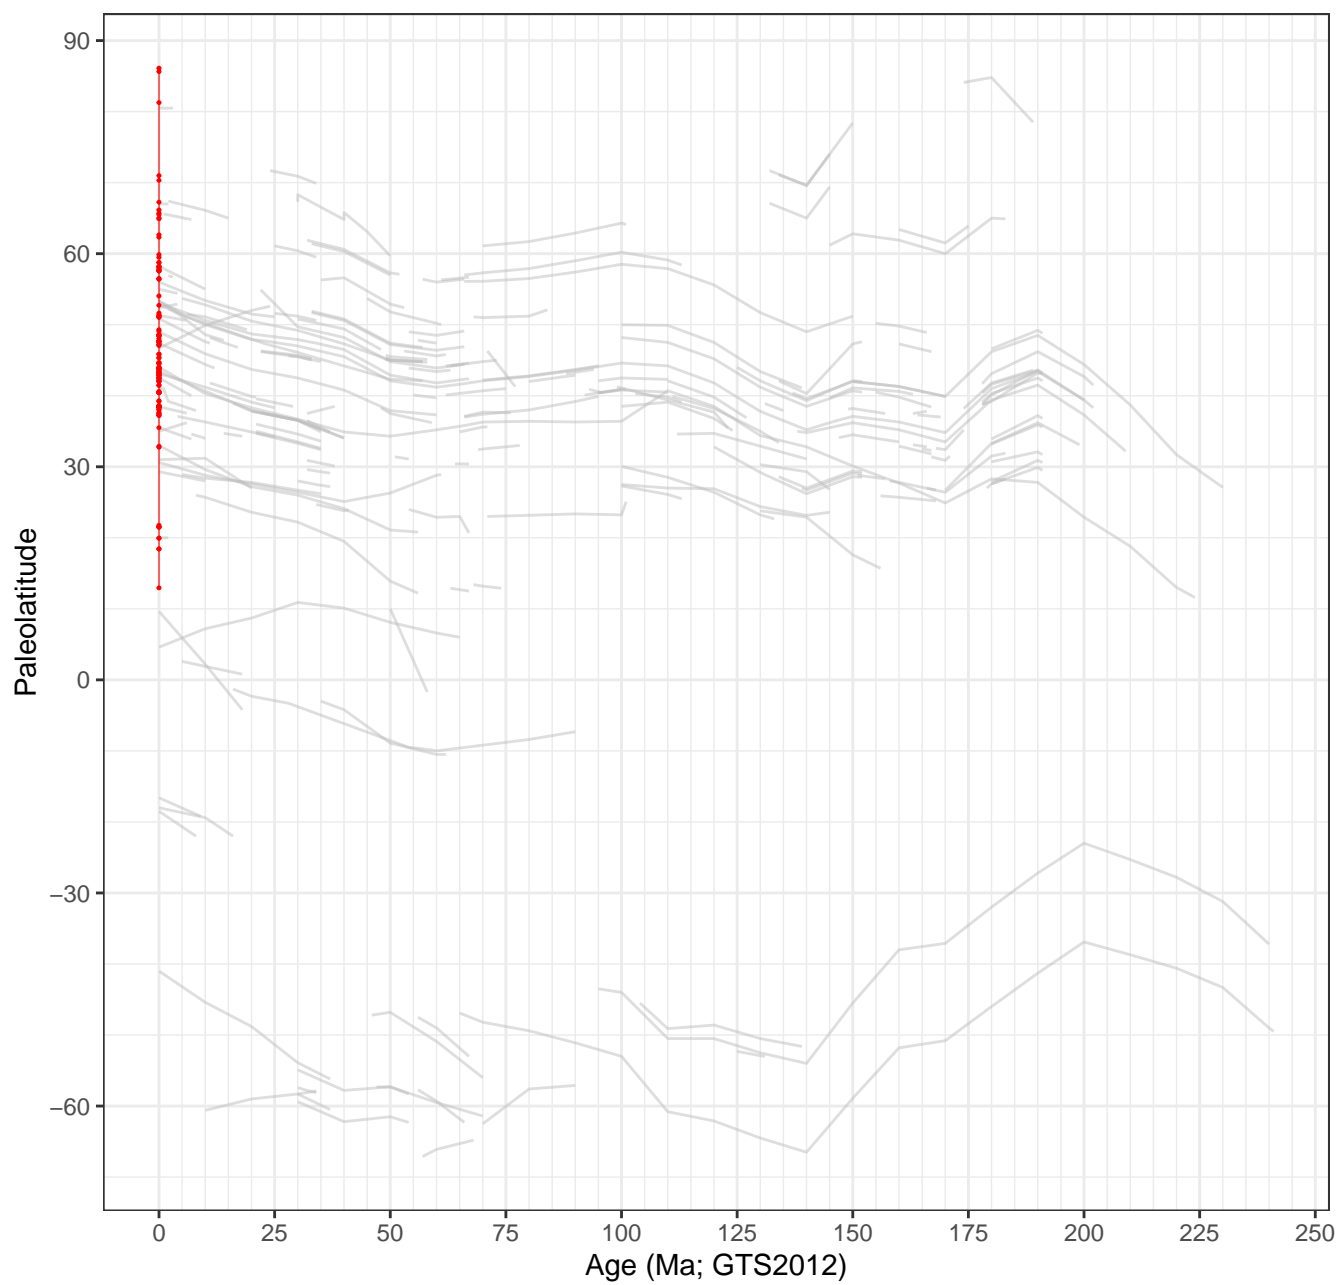

Supplement: Supplementary file 486 [file Genus cyst of Scrippsiella.pdf › Supplement/Supplement 2/Genus 459 plots/Genus cyst of Scrippsiella.pdf]

# Species *Achomospaera andalousiensis*

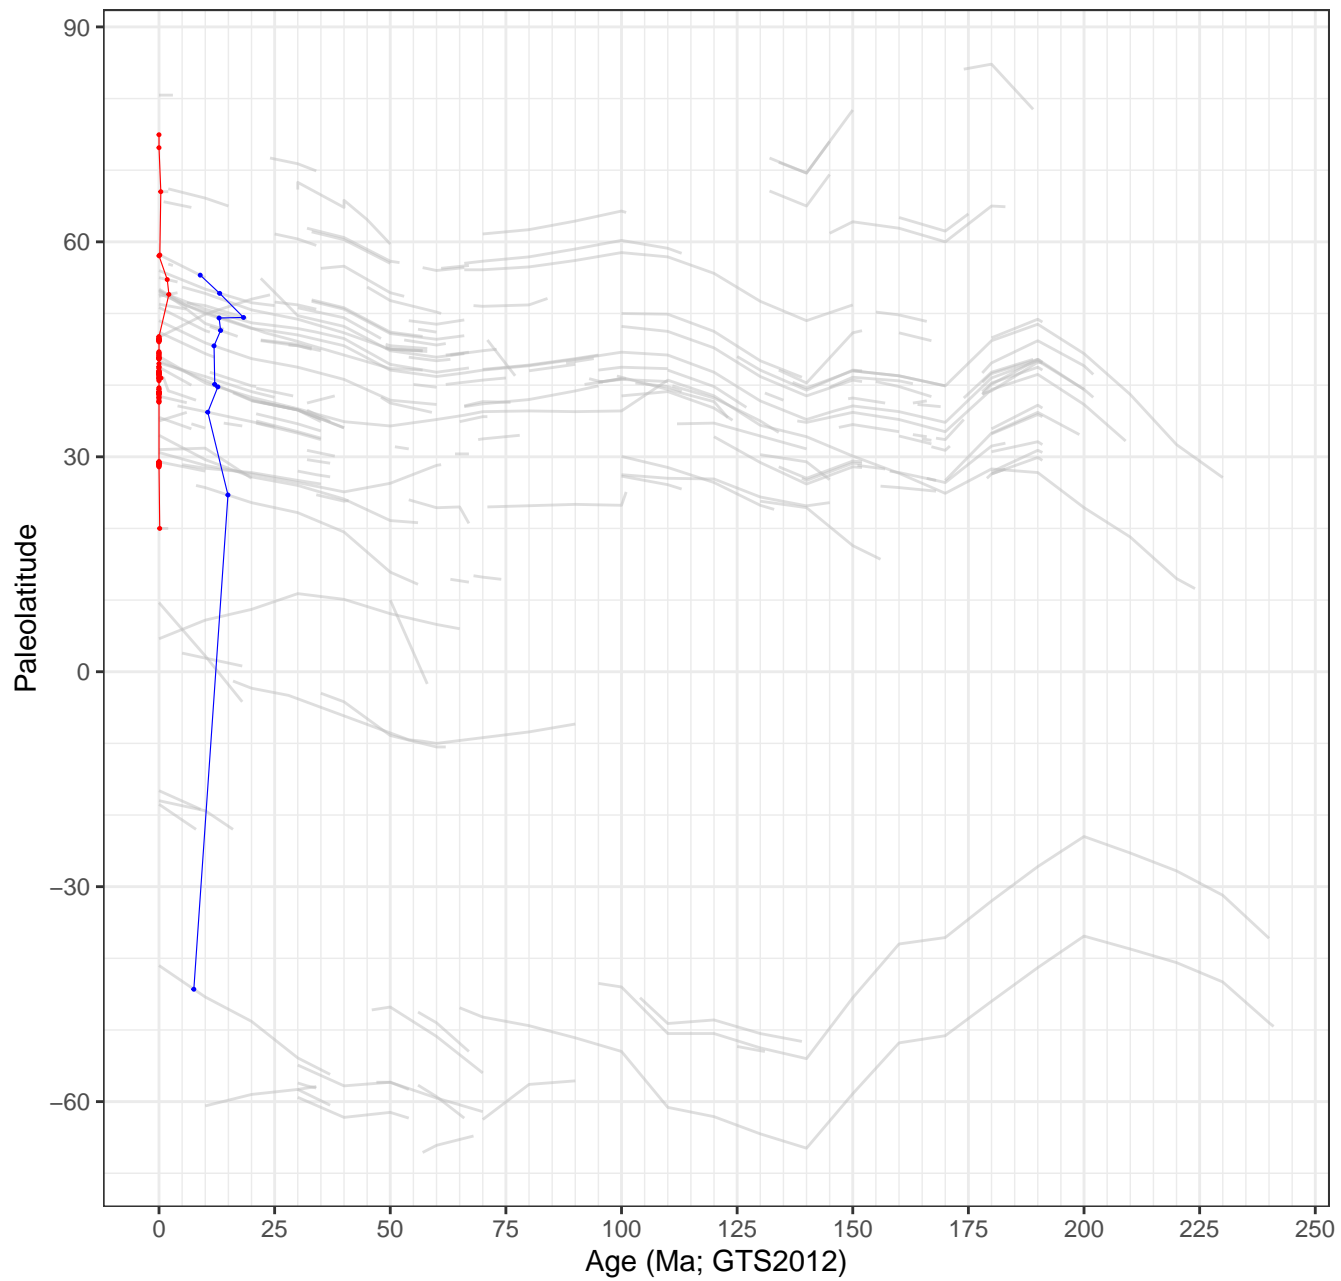

Supplement: Supplementary file 487 [file modern_Achomosphaera andalousiensis.pdf › Supplement/Supplement 2/Modern 92 plots/modern_Achomosphaera andalousiensis.pdf]

# Species *Ataxiodinium choane*

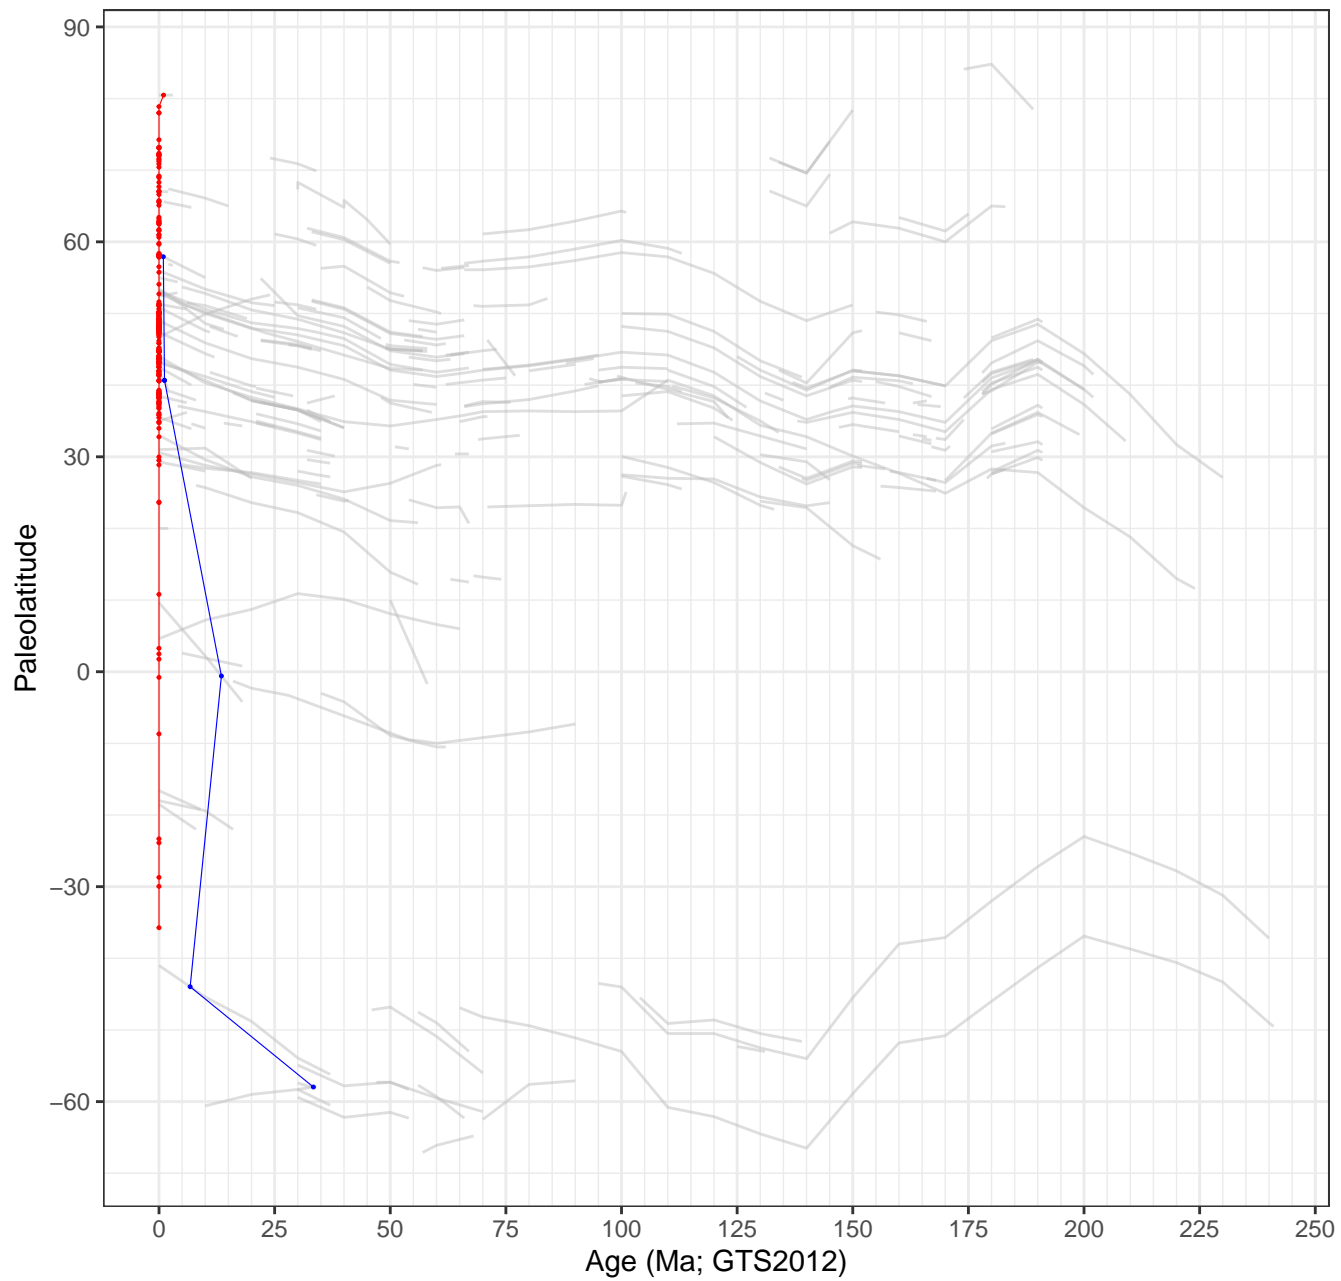

Supplement: Supplementary file 488 [file modern_Ataxiodinium choane.pdf › Supplement/Supplement 2/Modern 92 plots/modern_Ataxiodinium choane.pdf]

# Species *Biecheleria baltica*

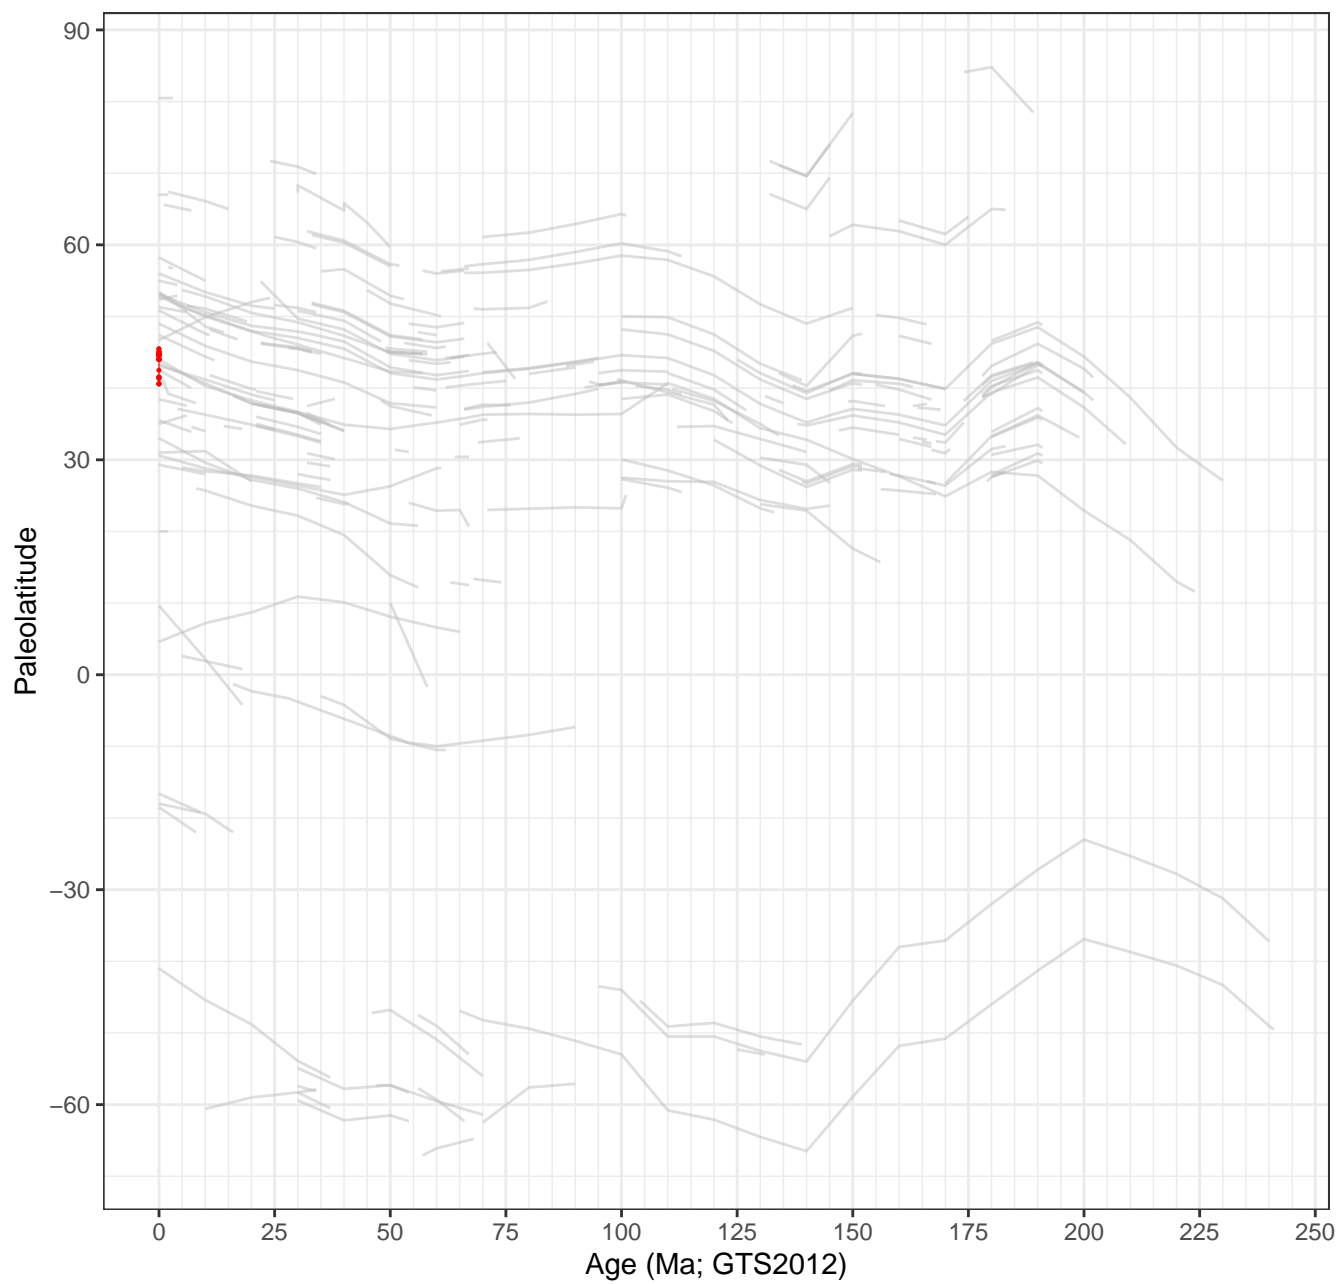

Supplement: Supplementary file 489 [file modern_Biecheleria baltica.pdf › Supplement/Supplement 2/Modern 92 plots/modern_Biecheleria baltica.pdf]

# Species *Bitectatodinium spongium*

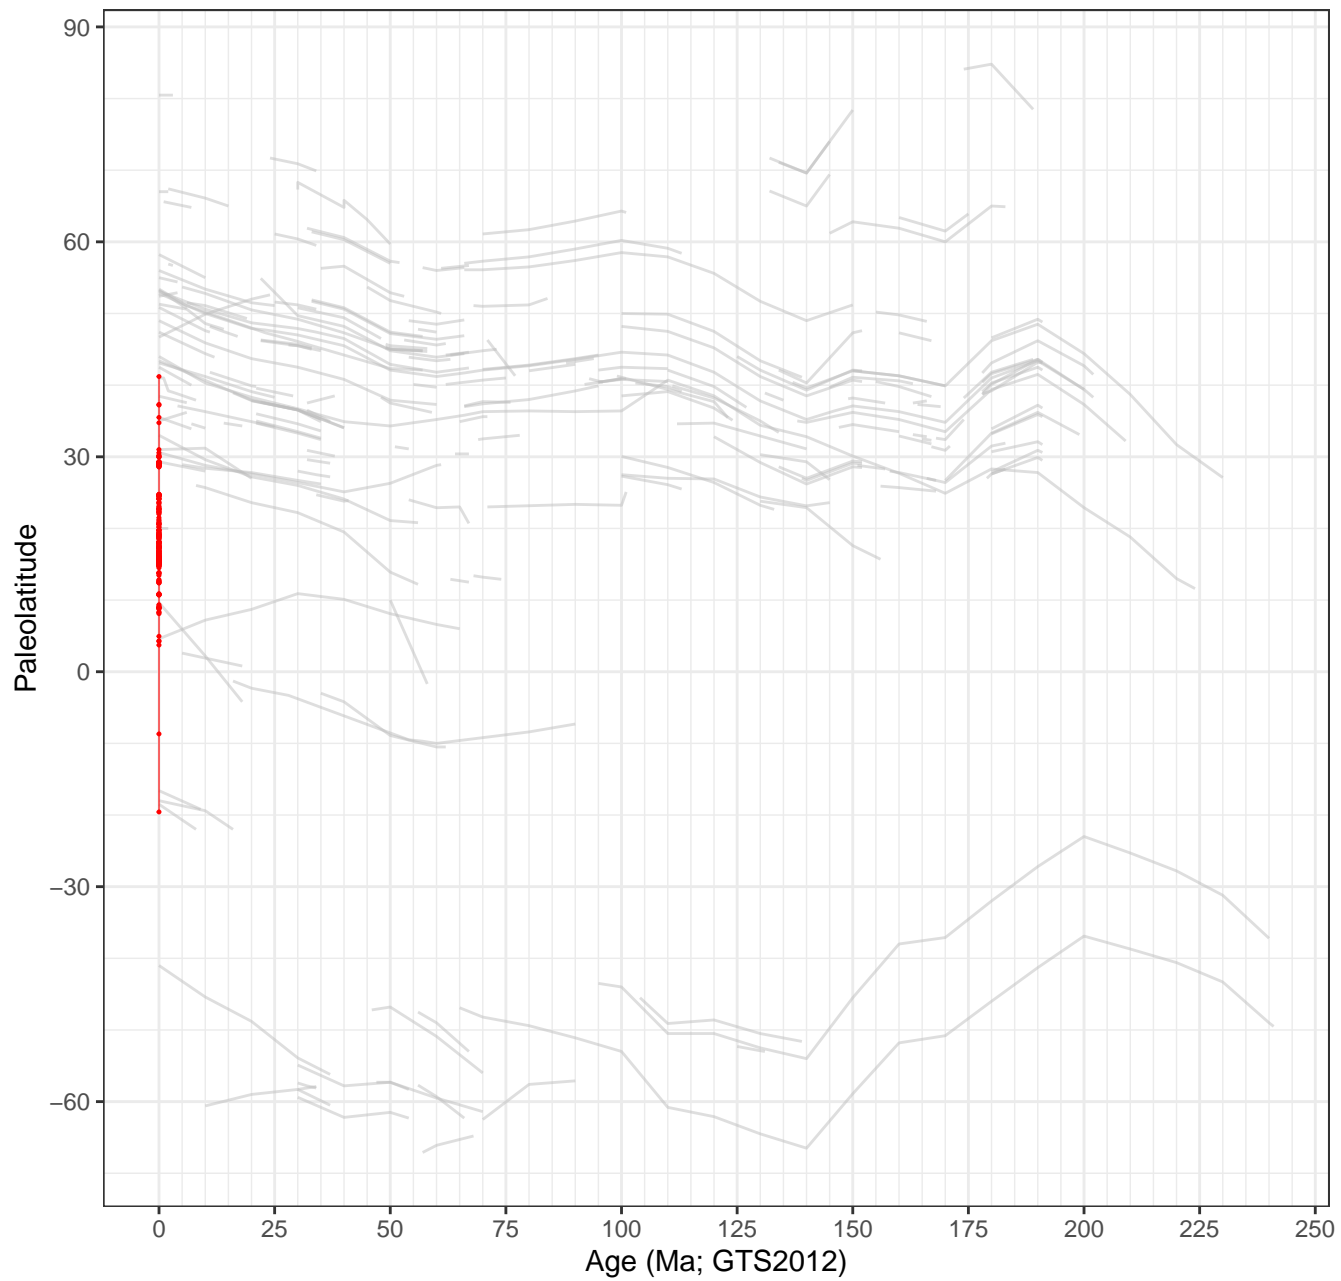

Supplement: Supplementary file 490 [file modern_Bitectatodinium spongium.pdf › Supplement/Supplement 2/Modern 92 plots/modern_Bitectatodinium spongium.pdf]

# Species *Bitectatodinium tepikiense*

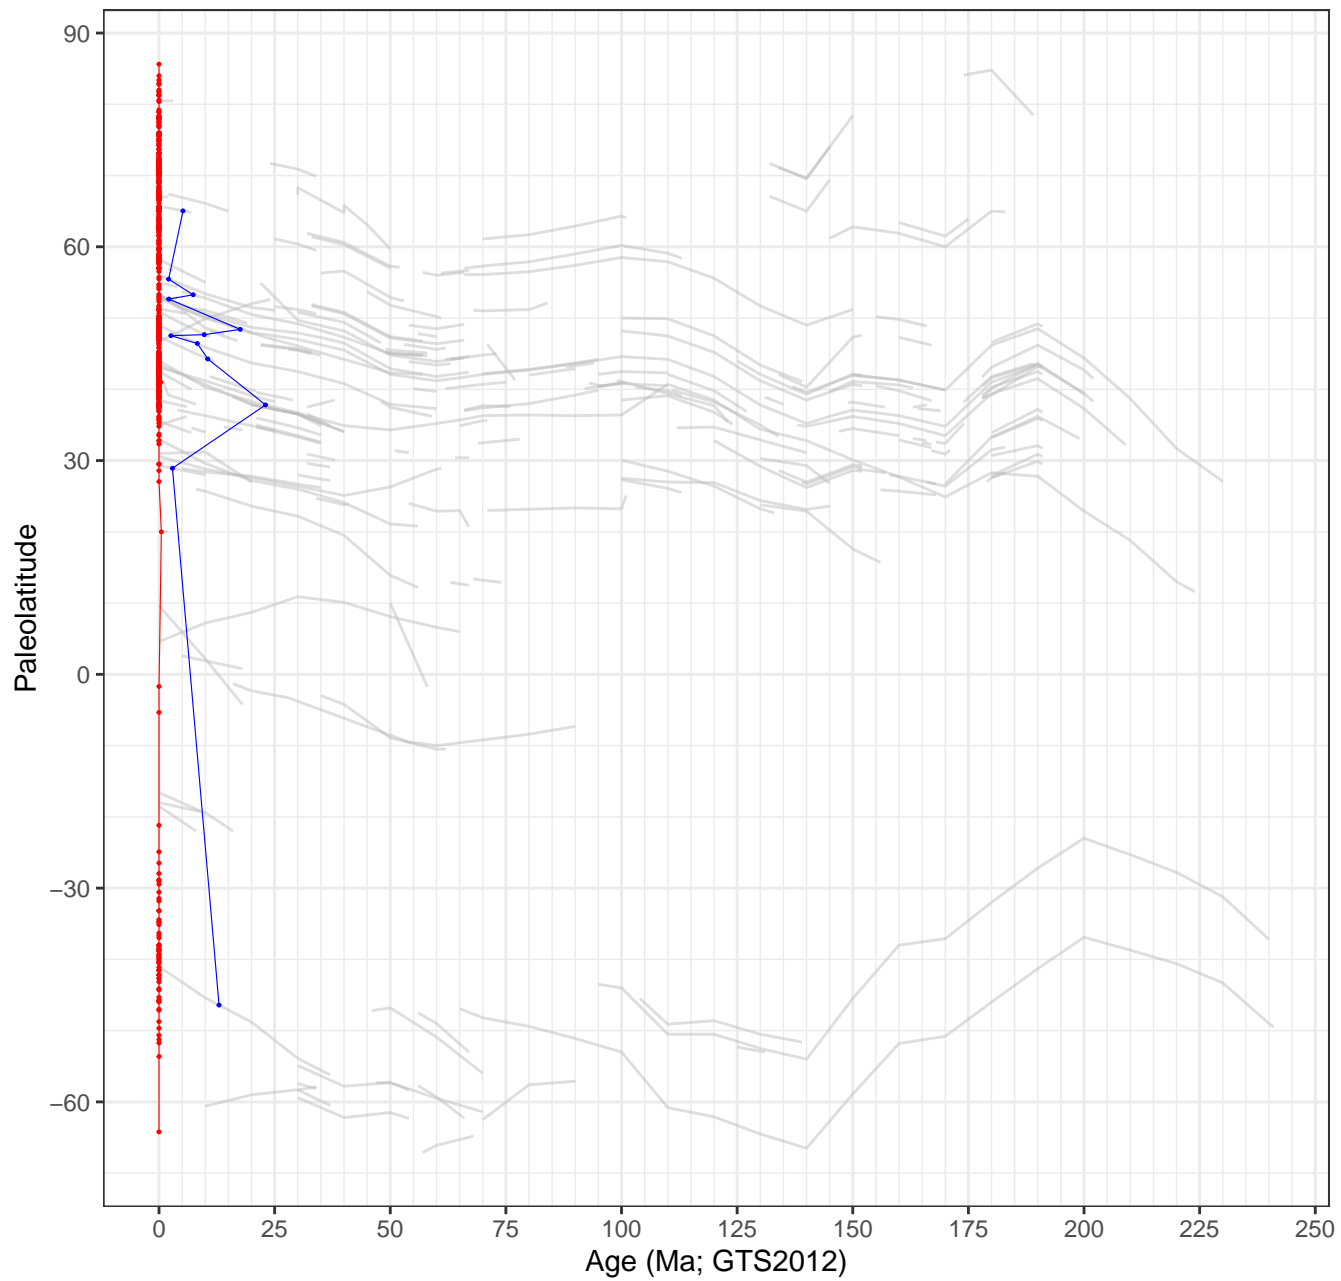

Supplement: Supplementary file 491 [file modern_Bitectatodinium tepikiense.pdf › Supplement/Supplement 2/Modern 92 plots/modern_Bitectatodinium tepikiense.pdf]

# Species *Brigantedinium simplex*

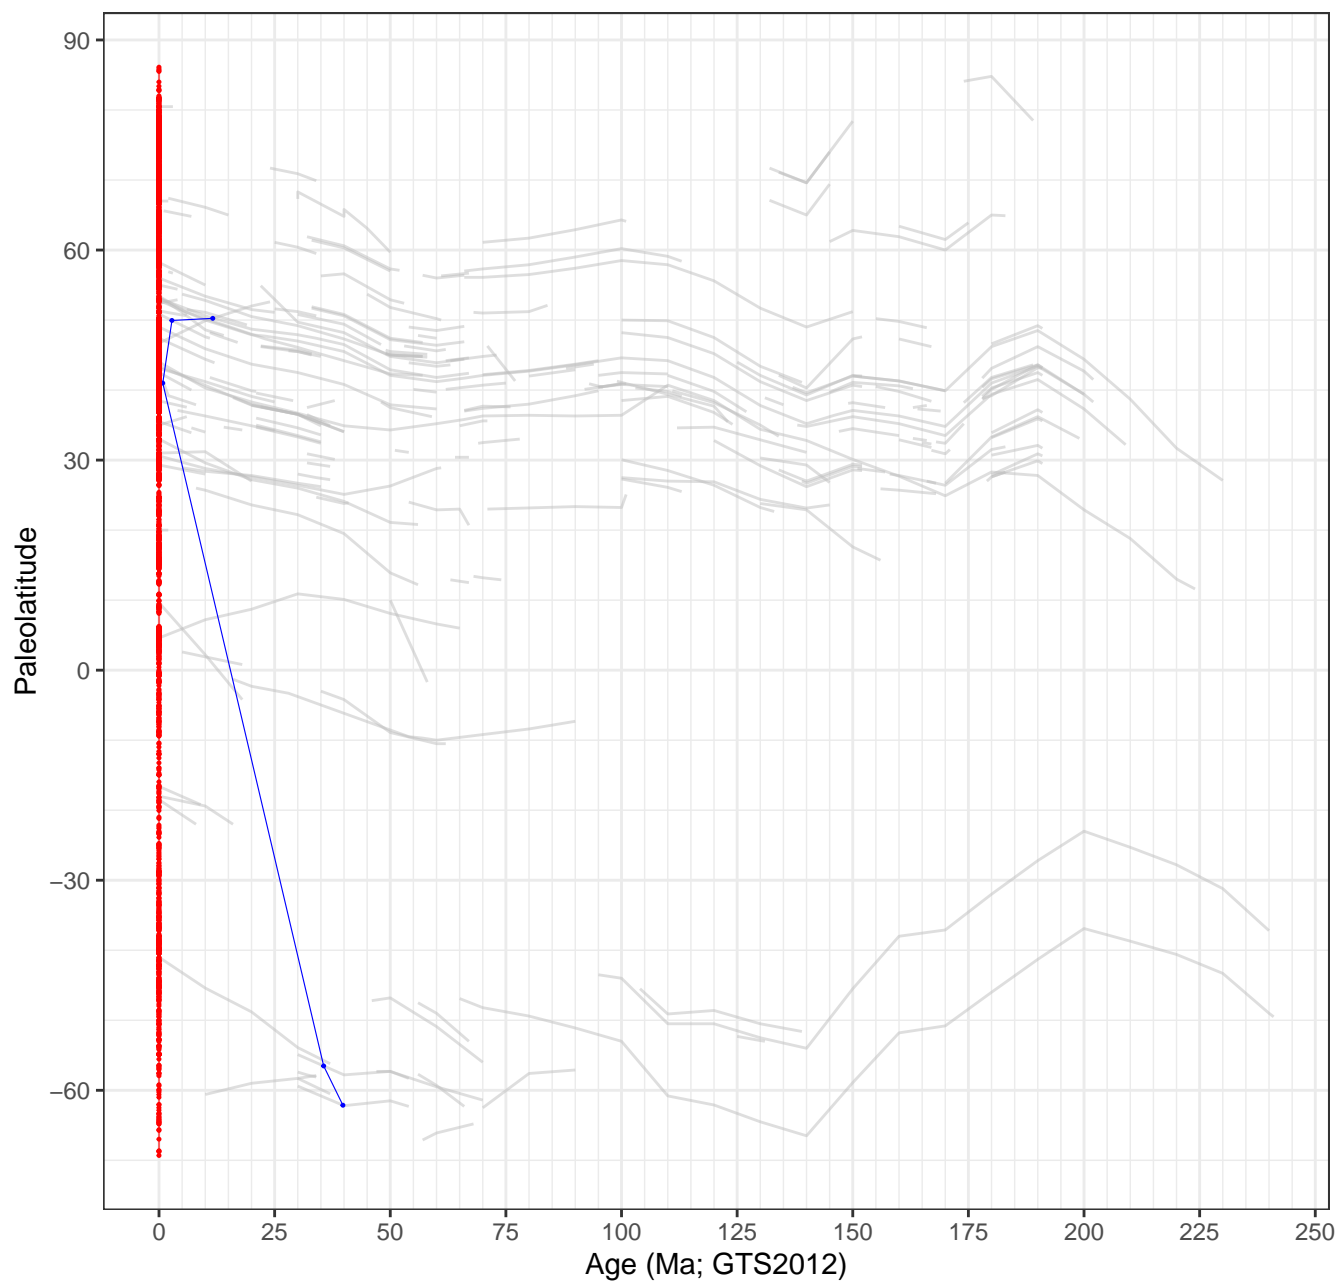

Supplement: Supplementary file 492 [file modern_Brigantedinium simplex.pdf › Supplement/Supplement 2/Modern 92 plots/modern_Brigantedinium simplex.pdf]

# Species *Caspidinium rugosum*

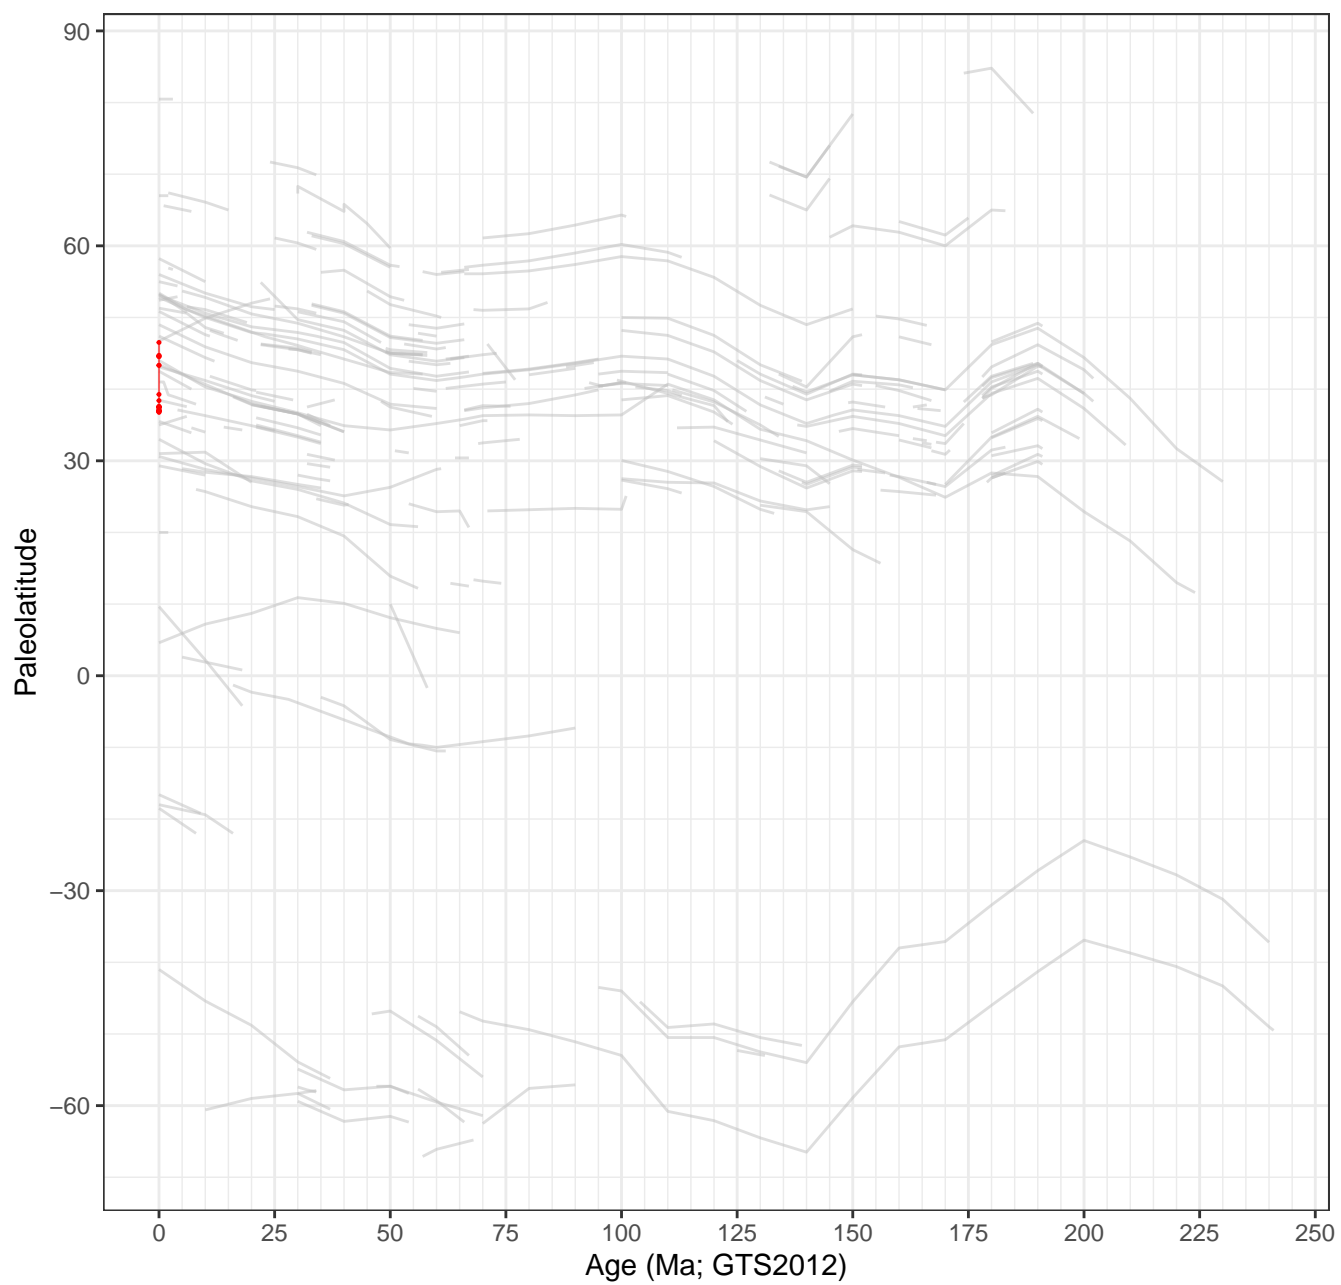

Supplement: Supplementary file 493 [file modern_Caspidinium rugosum.pdf › Supplement/Supplement 2/Modern 92 plots/modern_Caspidinium rugosum.pdf]

# Species *Cryodinium meridianum*

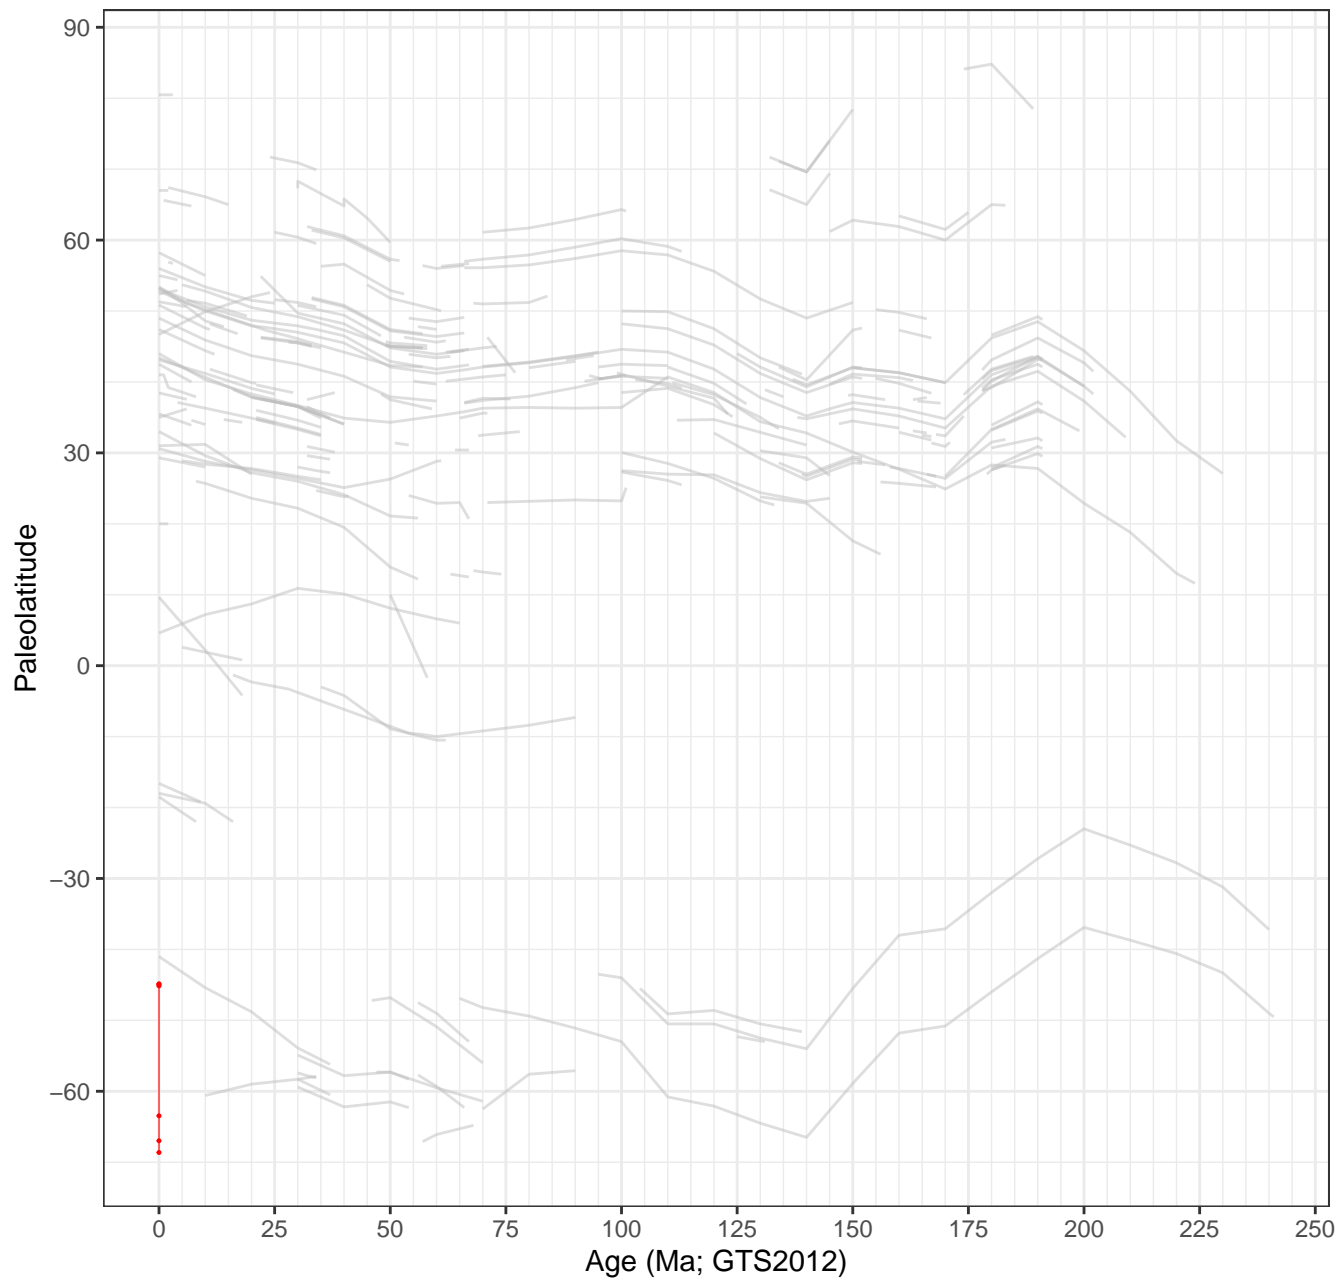

Supplement: Supplementary file 494 [file modern_Cryodinium meridianum.pdf › Supplement/Supplement 2/Modern 92 plots/modern_Cryodinium meridianum.pdf]

# Species *Dalella chathamense*

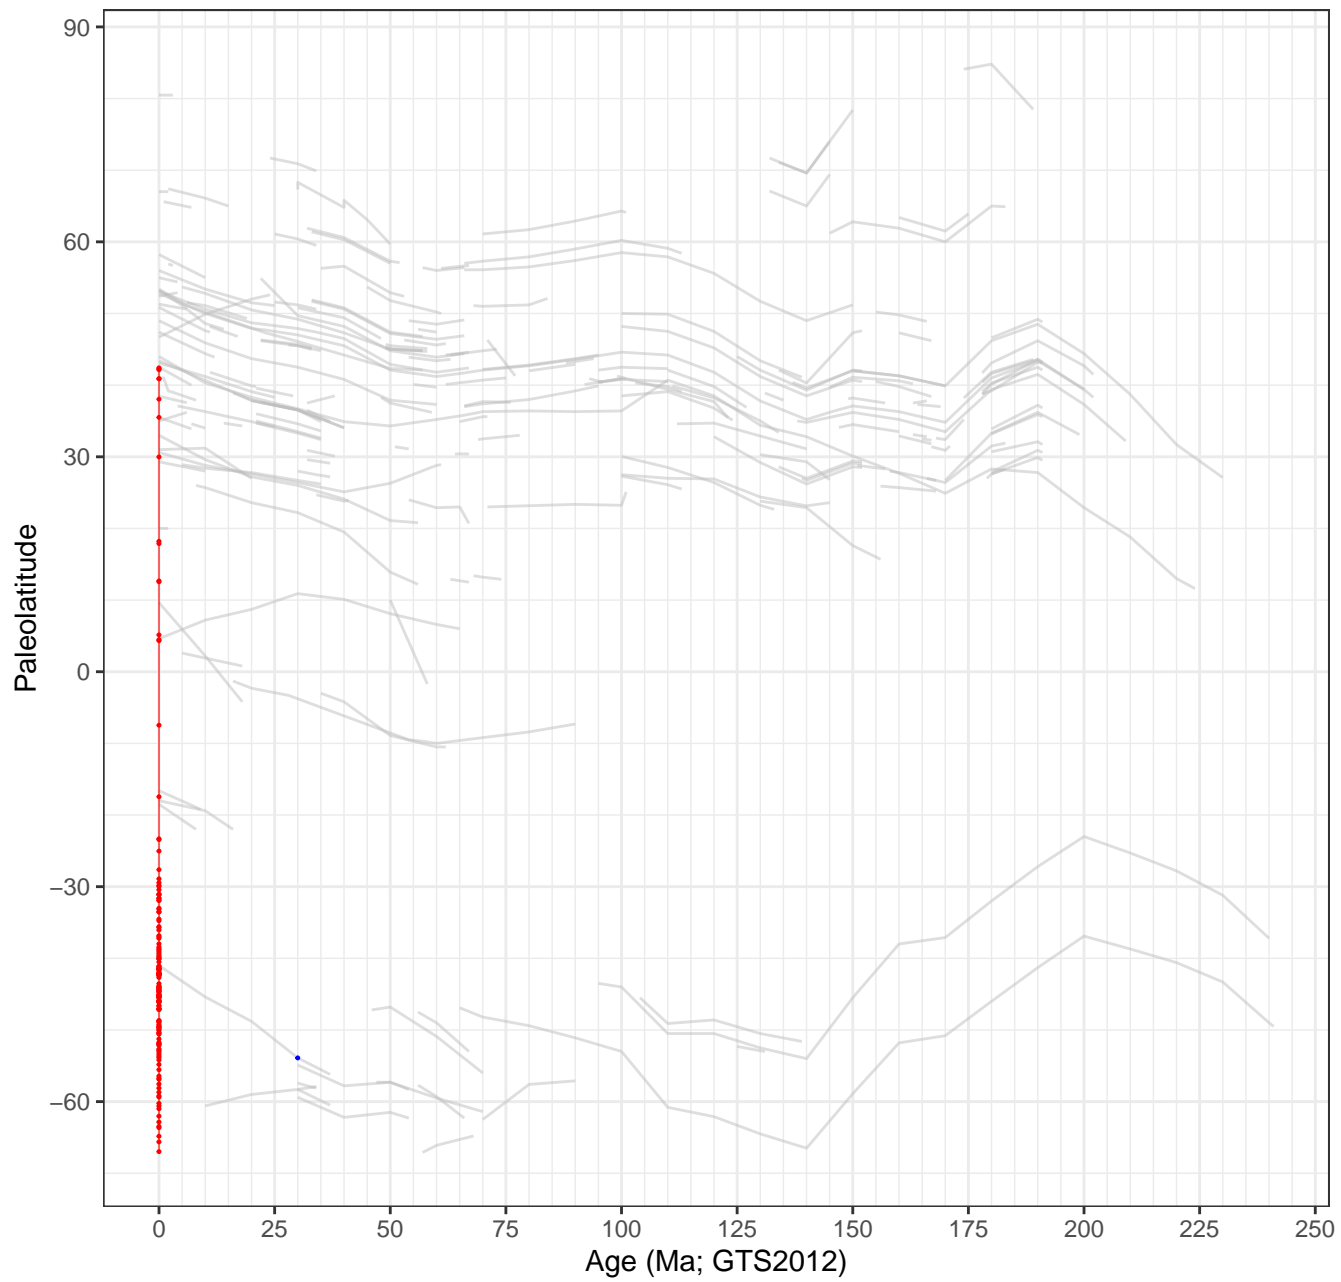

Supplement: Supplementary file 495 [file modern_Dalella chathamense.pdf › Supplement/Supplement 2/Modern 92 plots/modern_Dalella chathamense.pdf]

# Species *Dapsilidinium pastielsii*

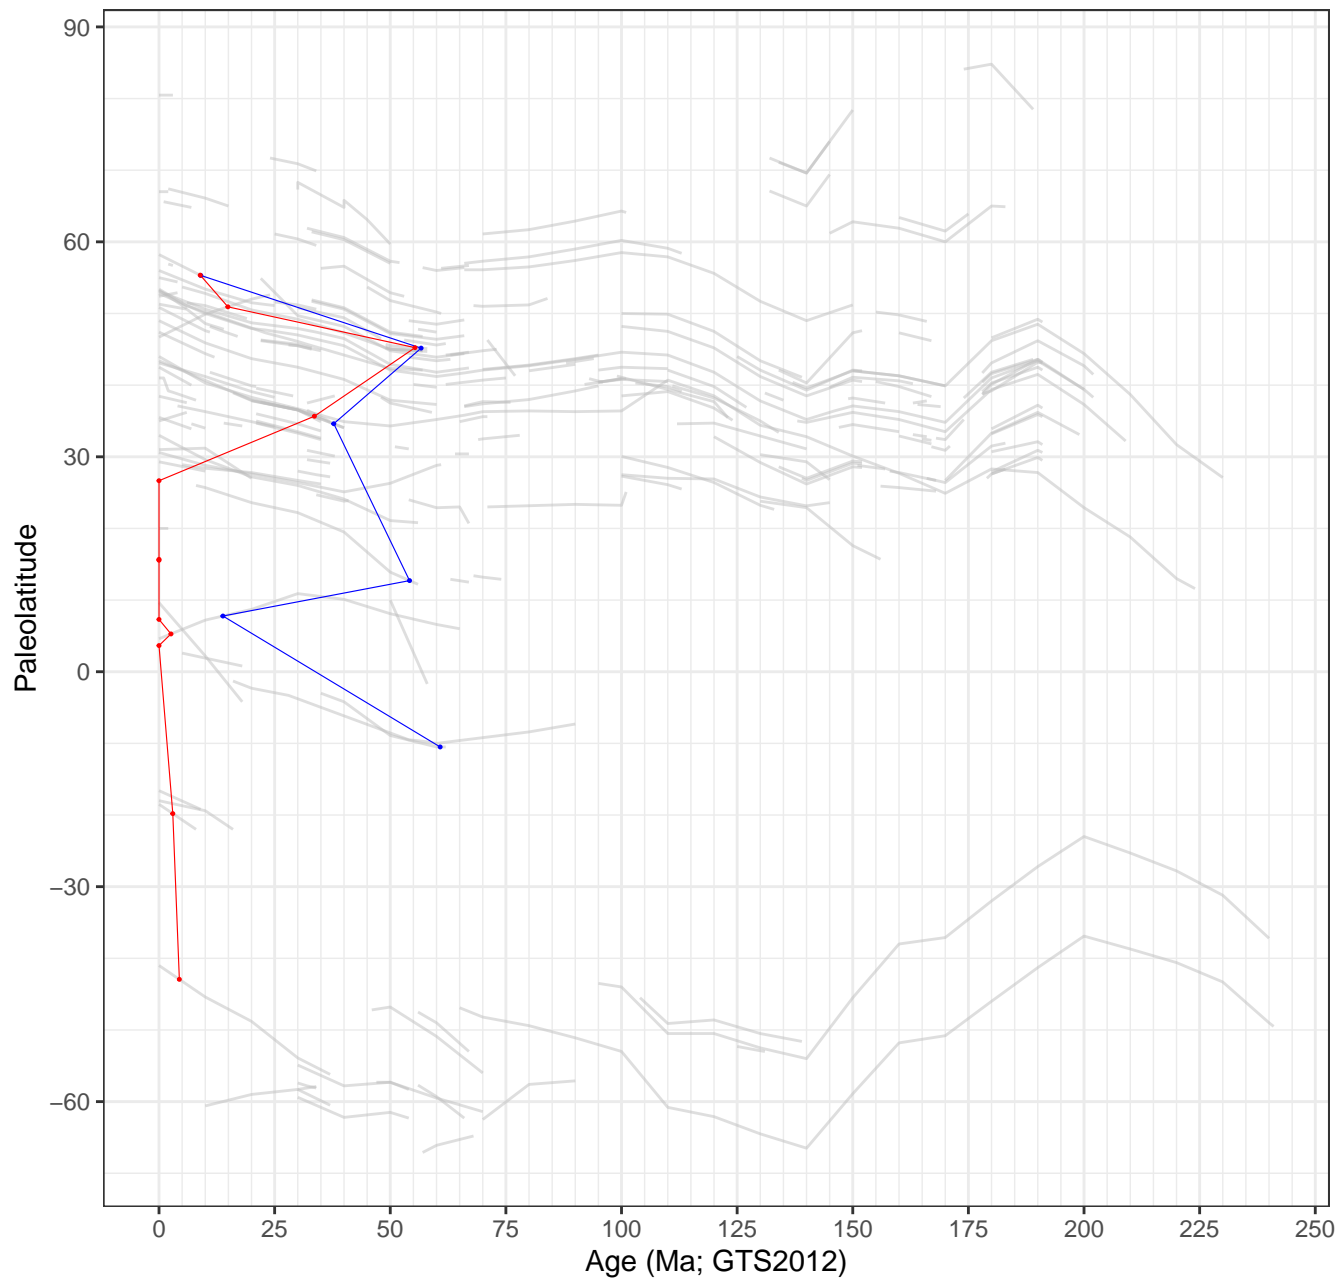

Supplement: Supplementary file 496 [file modern_Dapsilidinium pastielsii.pdf › Supplement/Supplement 2/Modern 92 plots/modern_Dapsilidinium pastielsii.pdf]

# Species Dubridinium spp.

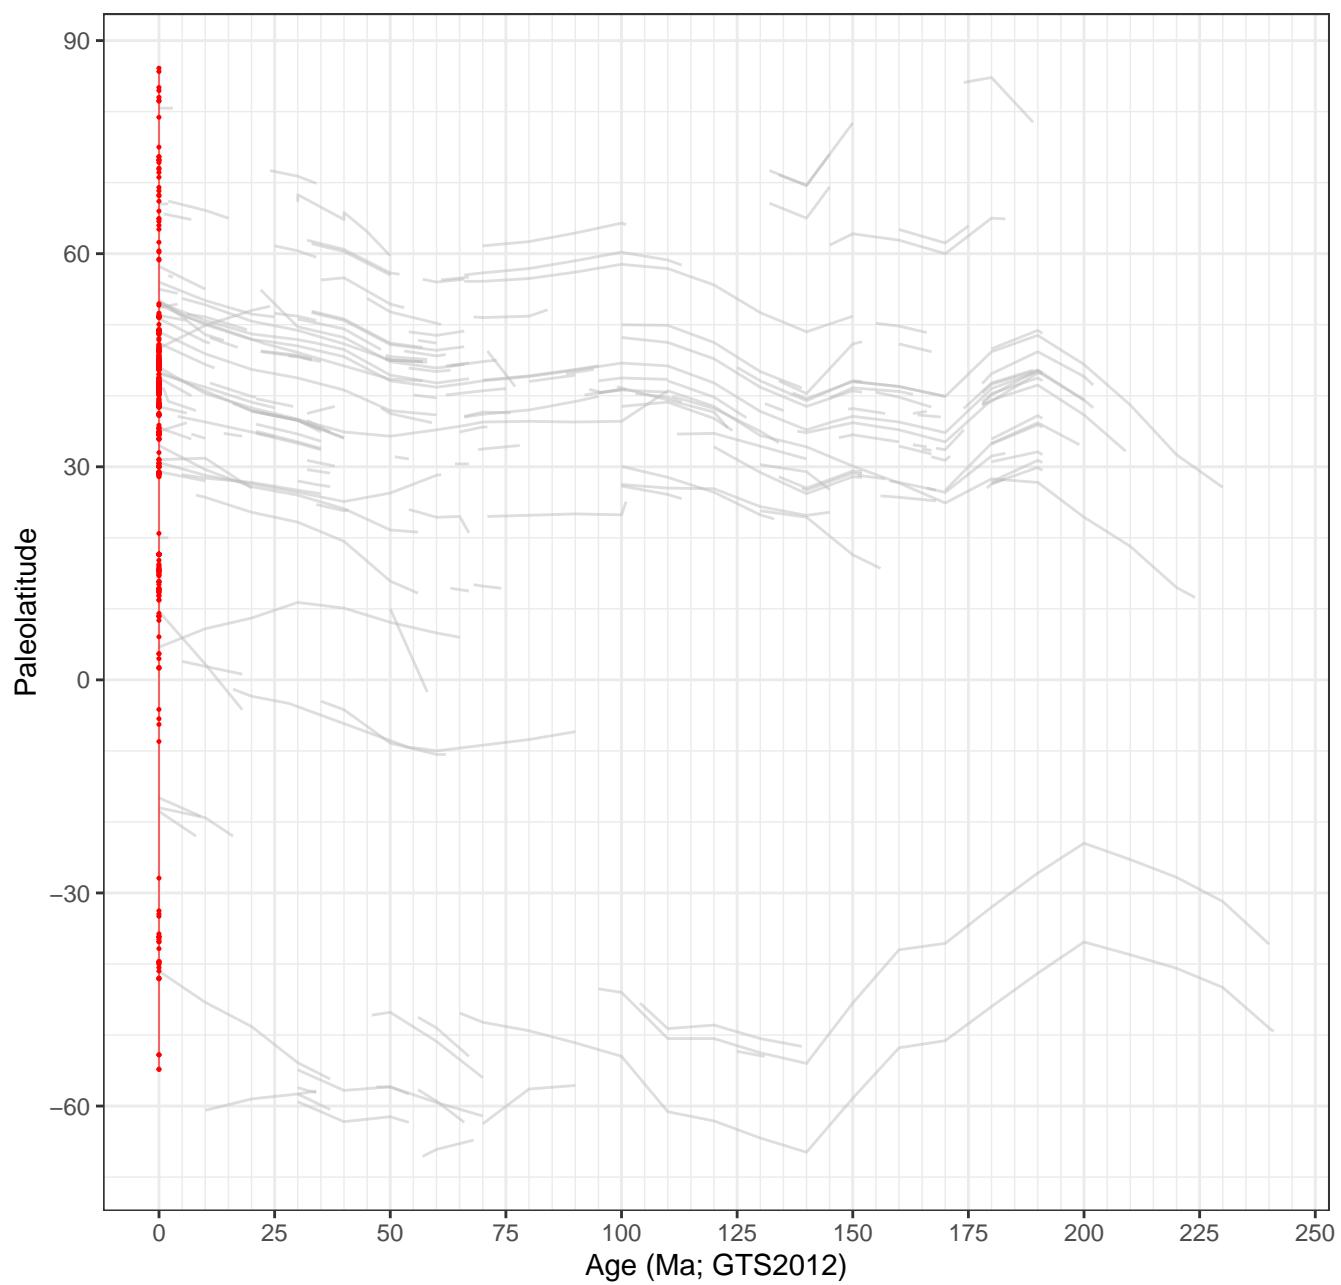

Supplement: Supplementary file 497 [file modern_Dubridinium spp..pdf › Supplement/Supplement 2/Modern 92 plots/modern_Dubridinium spp..pdf]

# Species *Echinidinium aculeatum*

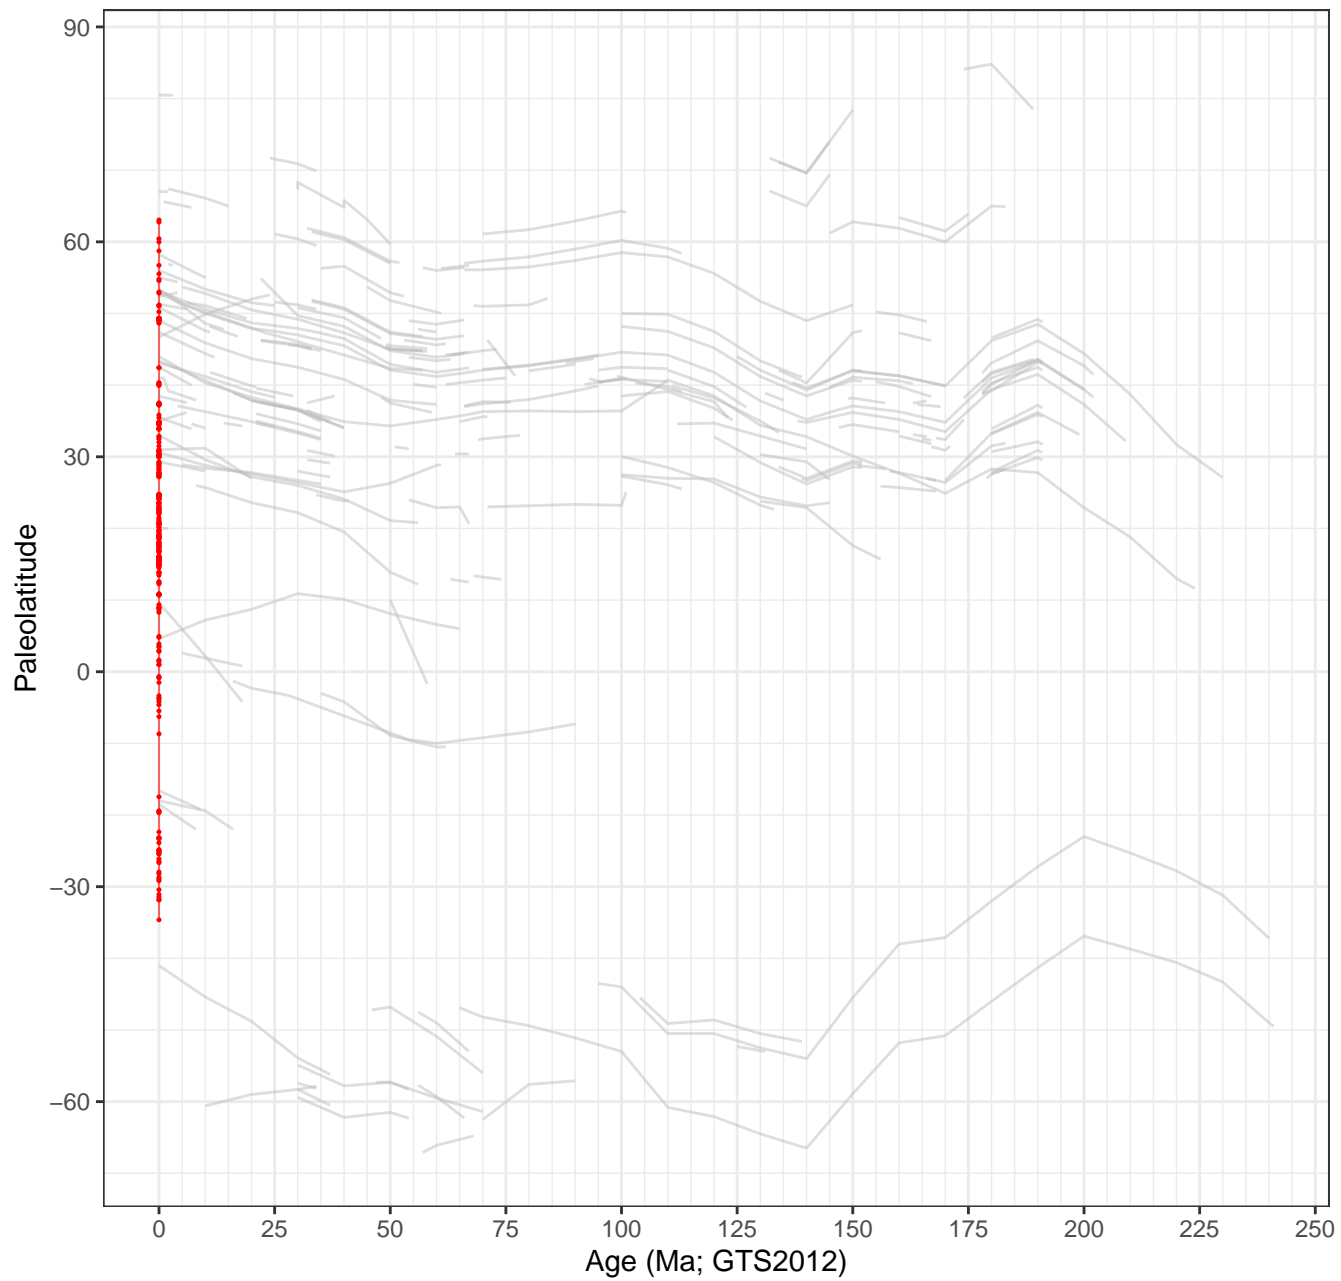

Supplement: Supplementary file 498 [file modern_Echinidinium aculeatum.pdf › Supplement/Supplement 2/Modern 92 plots/modern_Echinidinium aculeatum.pdf]

# Species *Echinidinium bispiniformum*

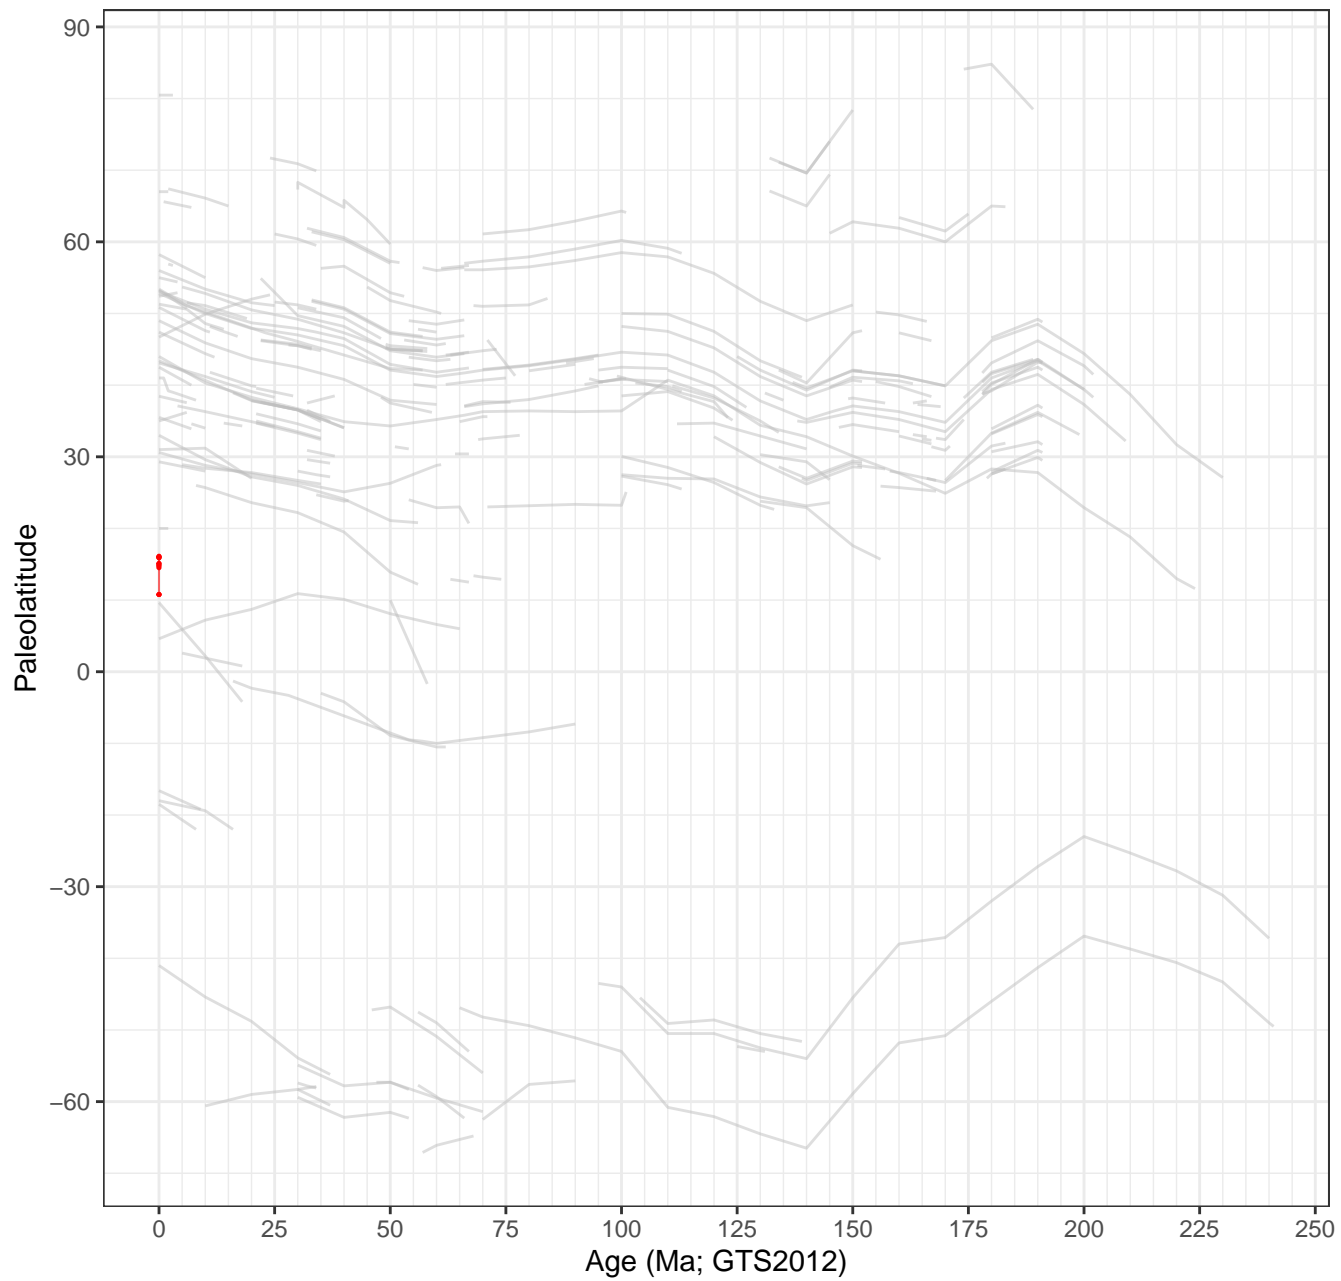

Supplement: Supplementary file 499 [file modern_Echinidinium bispiniformum.pdf › Supplement/Supplement 2/Modern 92 plots/modern_Echinidinium bispiniformum.pdf]

# Species *Echinidinium delicatum*

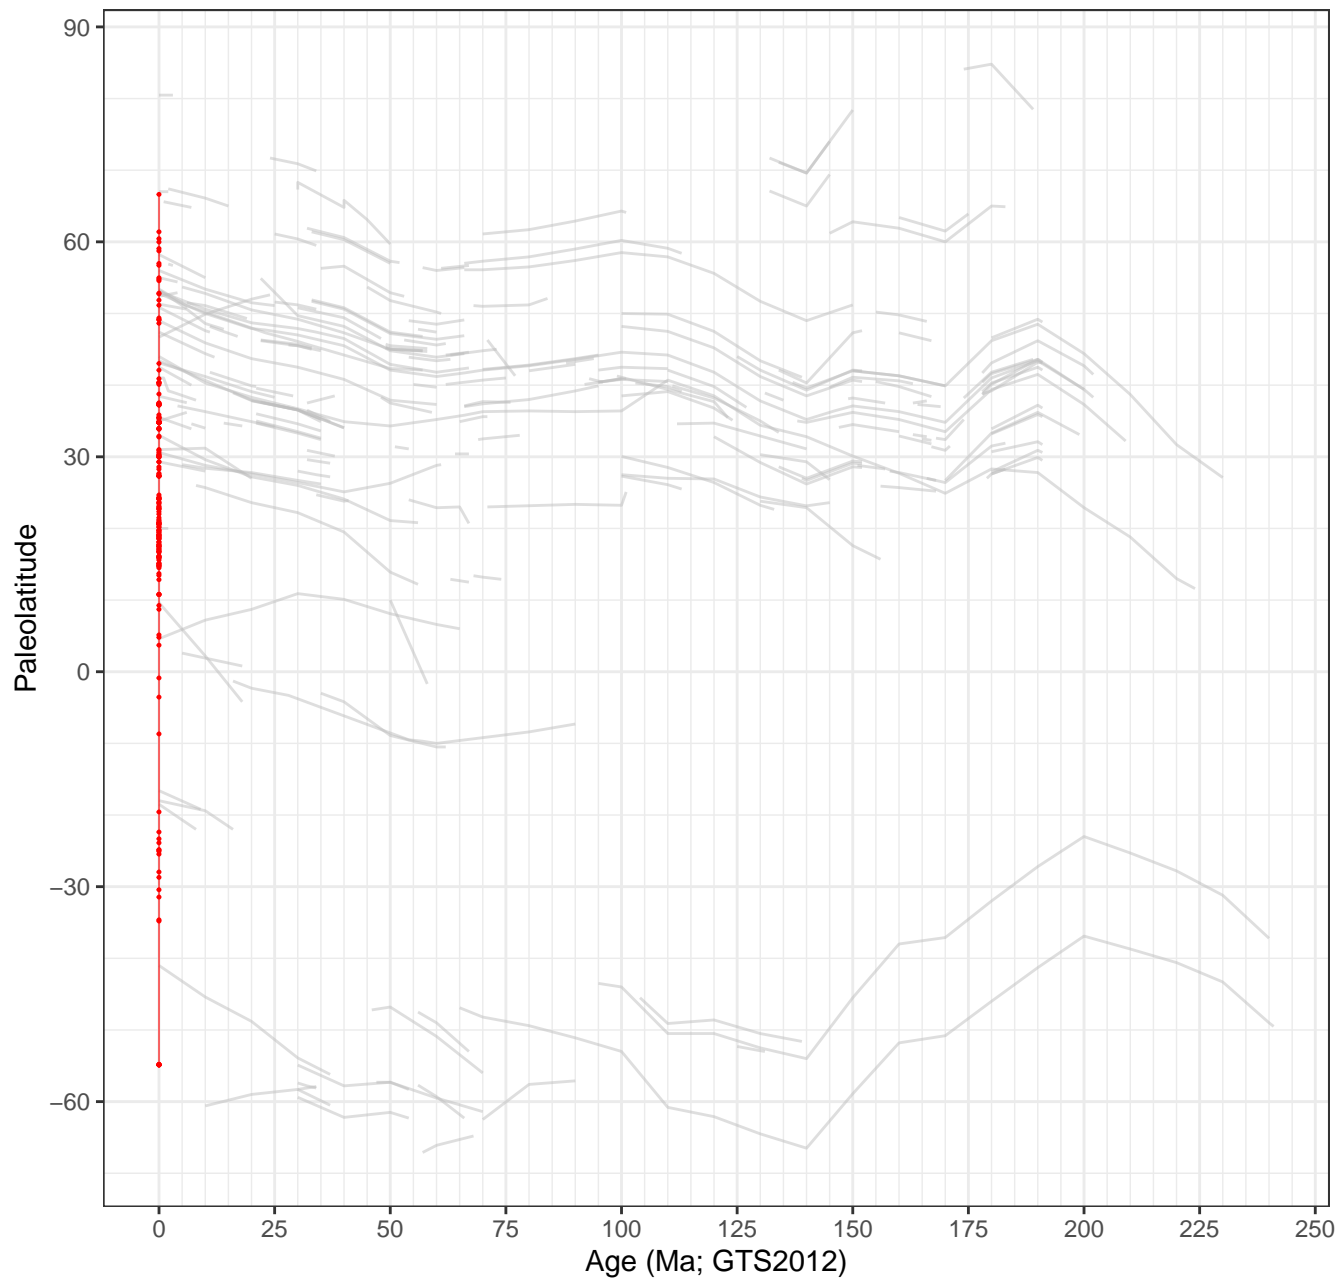

Supplement: Supplementary file 500 [file modern_Echinidinium delicatum.pdf › Supplement/Supplement 2/Modern 92 plots/modern_Echinidinium delicatum.pdf]

# Species *Echinidinium granulatum*

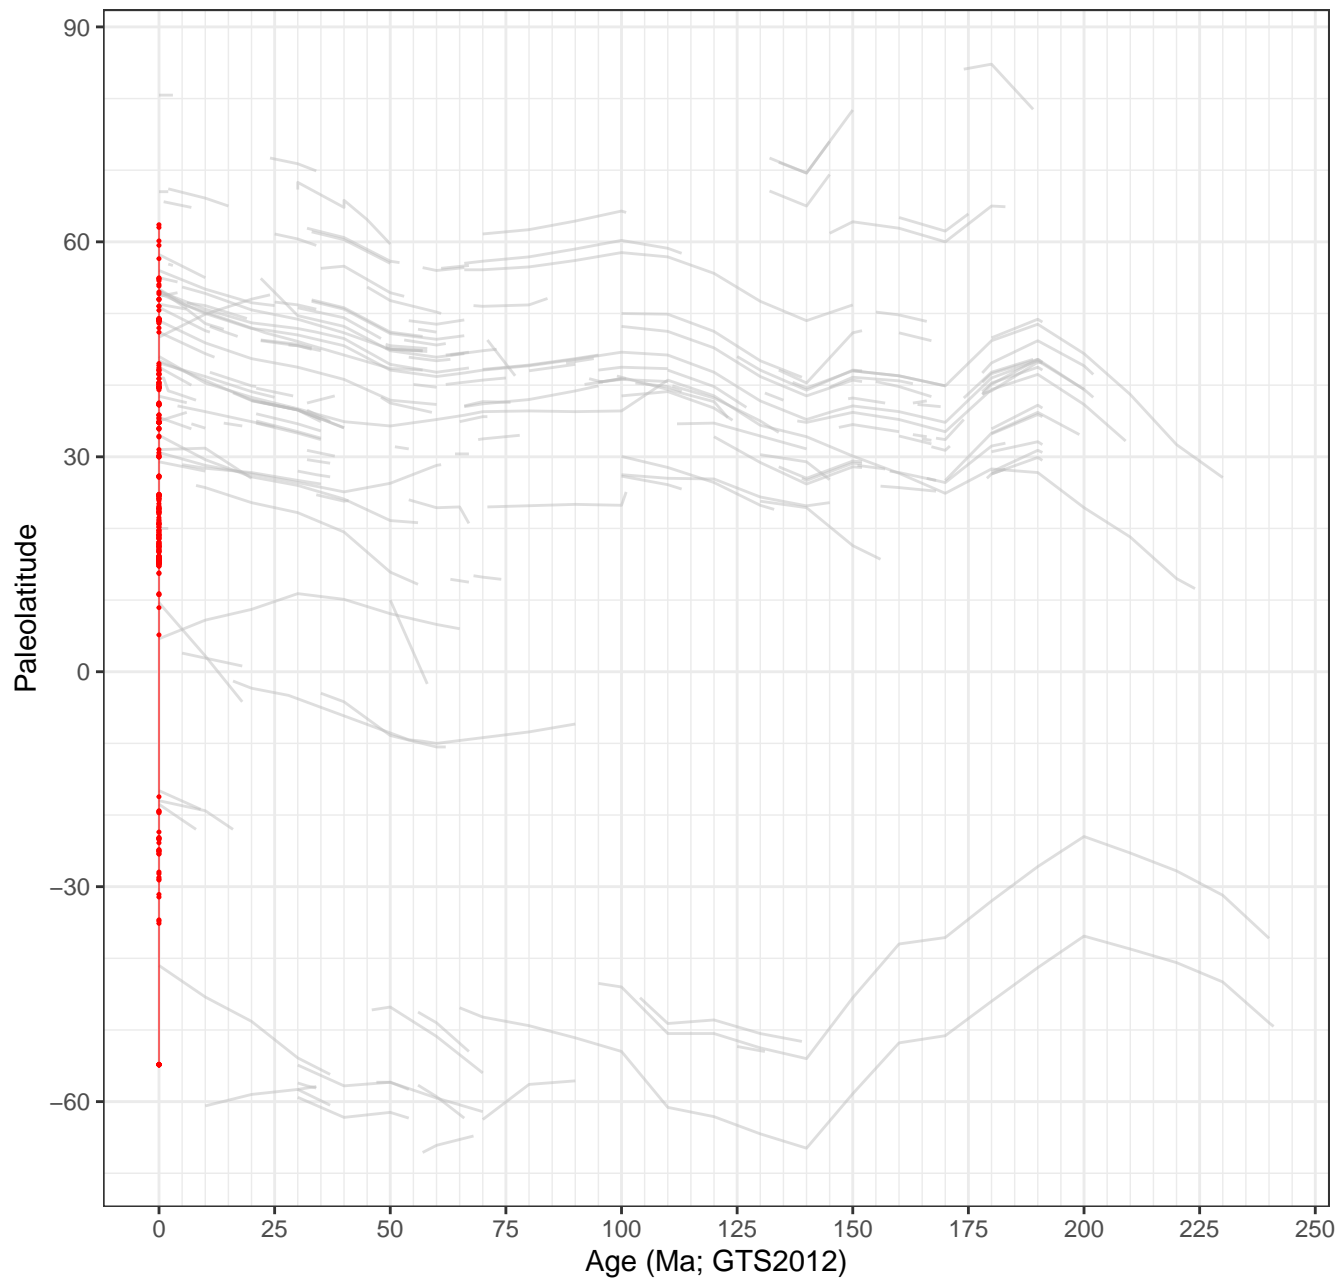

Supplement: Supplementary file 501 [file modern_Echinidinium granulatum.pdf › Supplement/Supplement 2/Modern 92 plots/modern_Echinidinium granulatum.pdf]

# Species *Echinidinium karens*

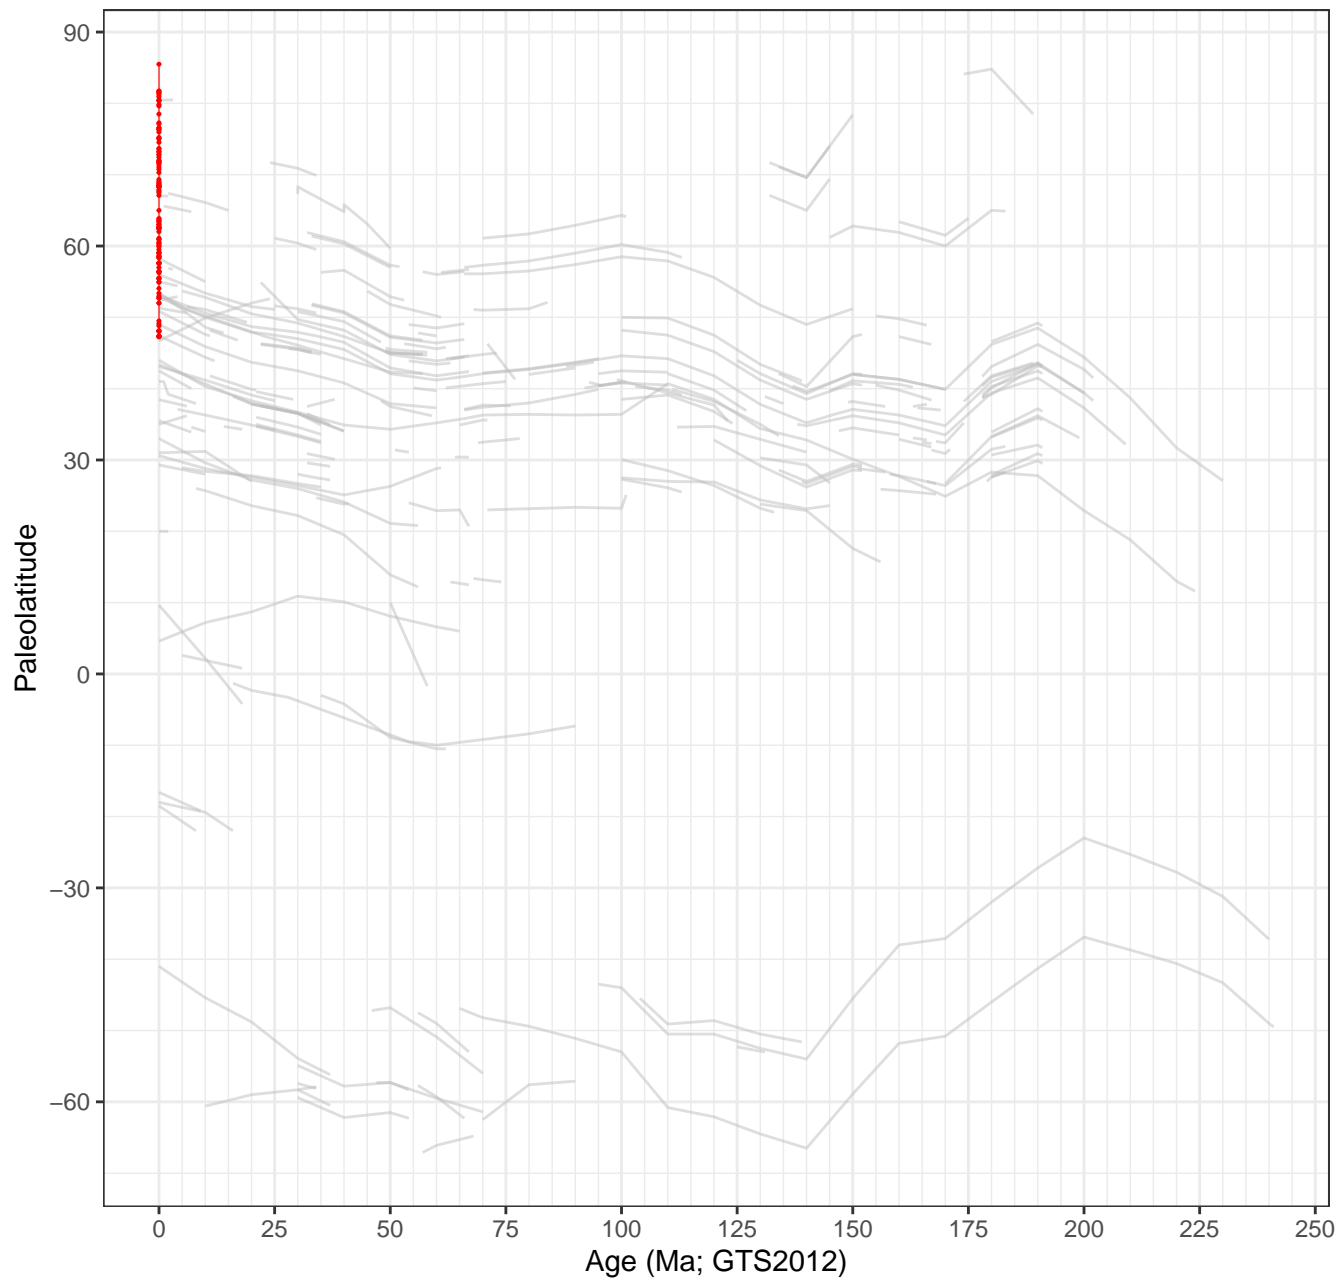

Supplement: Supplementary file 502 [file modern_Echinidinium karense.pdf › Supplement/Supplement 2/Modern 92 plots/modern_Echinidinium karense.pdf]

# Species Echinidinium spp.

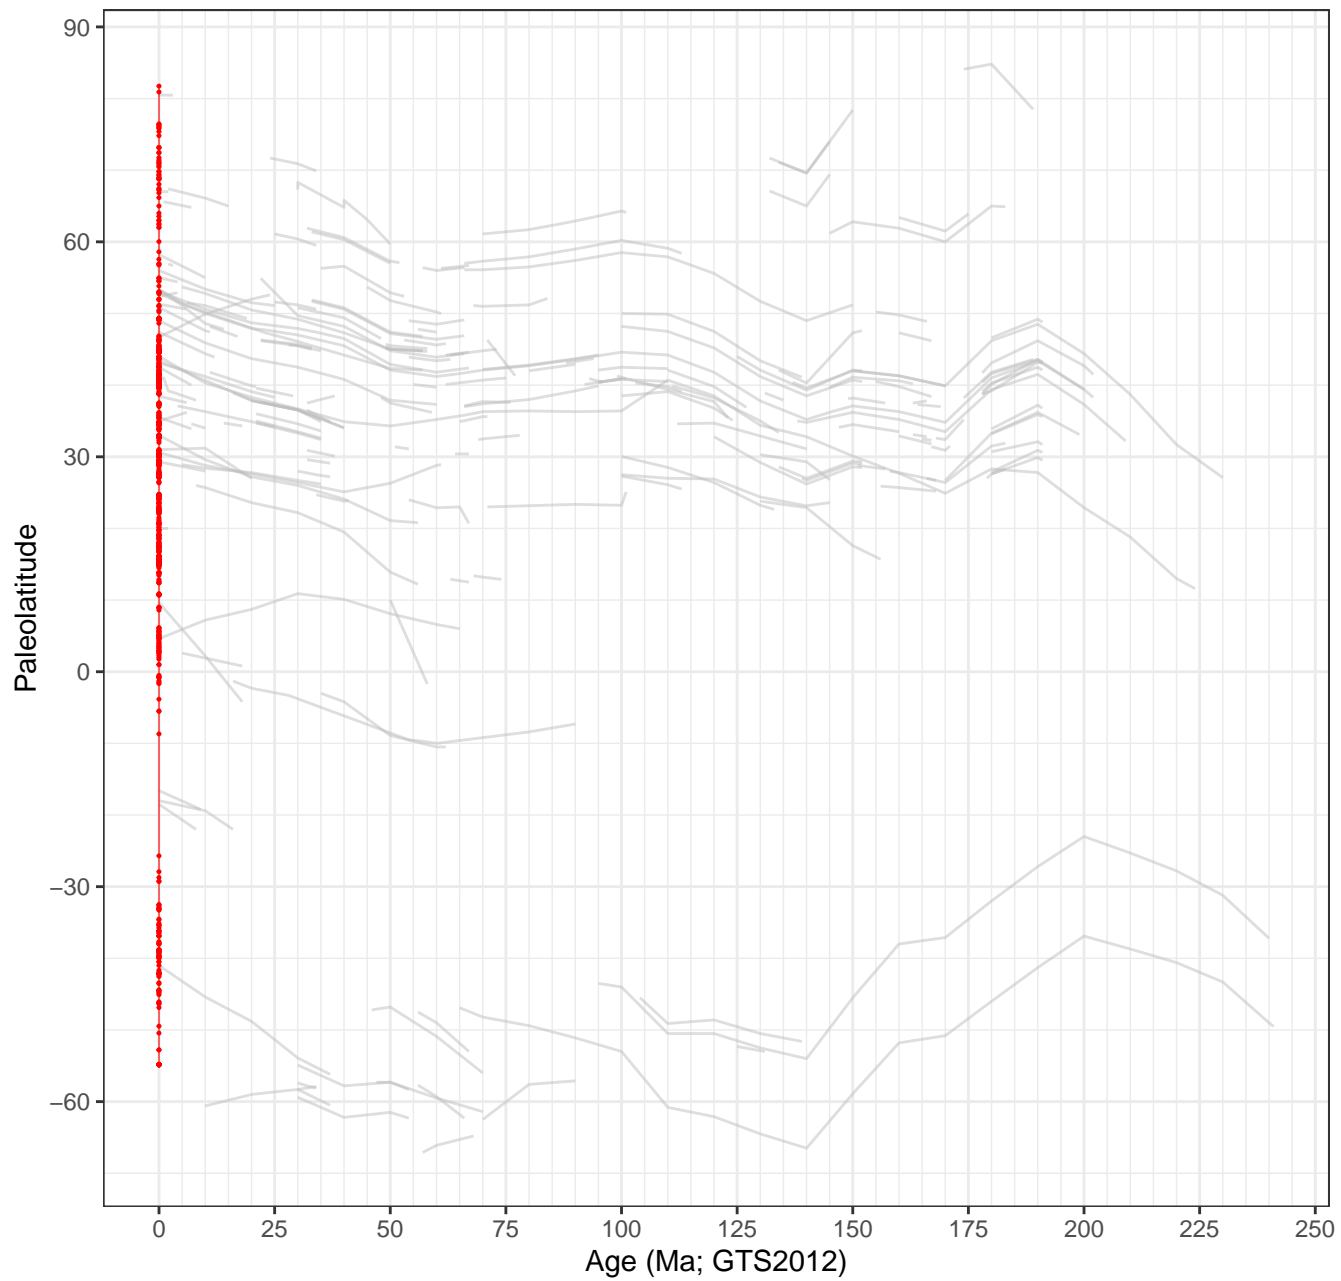

Supplement: Supplementary file 503 [file modern_Echinidinium spp..pdf › Supplement/Supplement 2/Modern 92 plots/modern_Echinidinium spp..pdf]

# Species *Echinidinium transparantum*

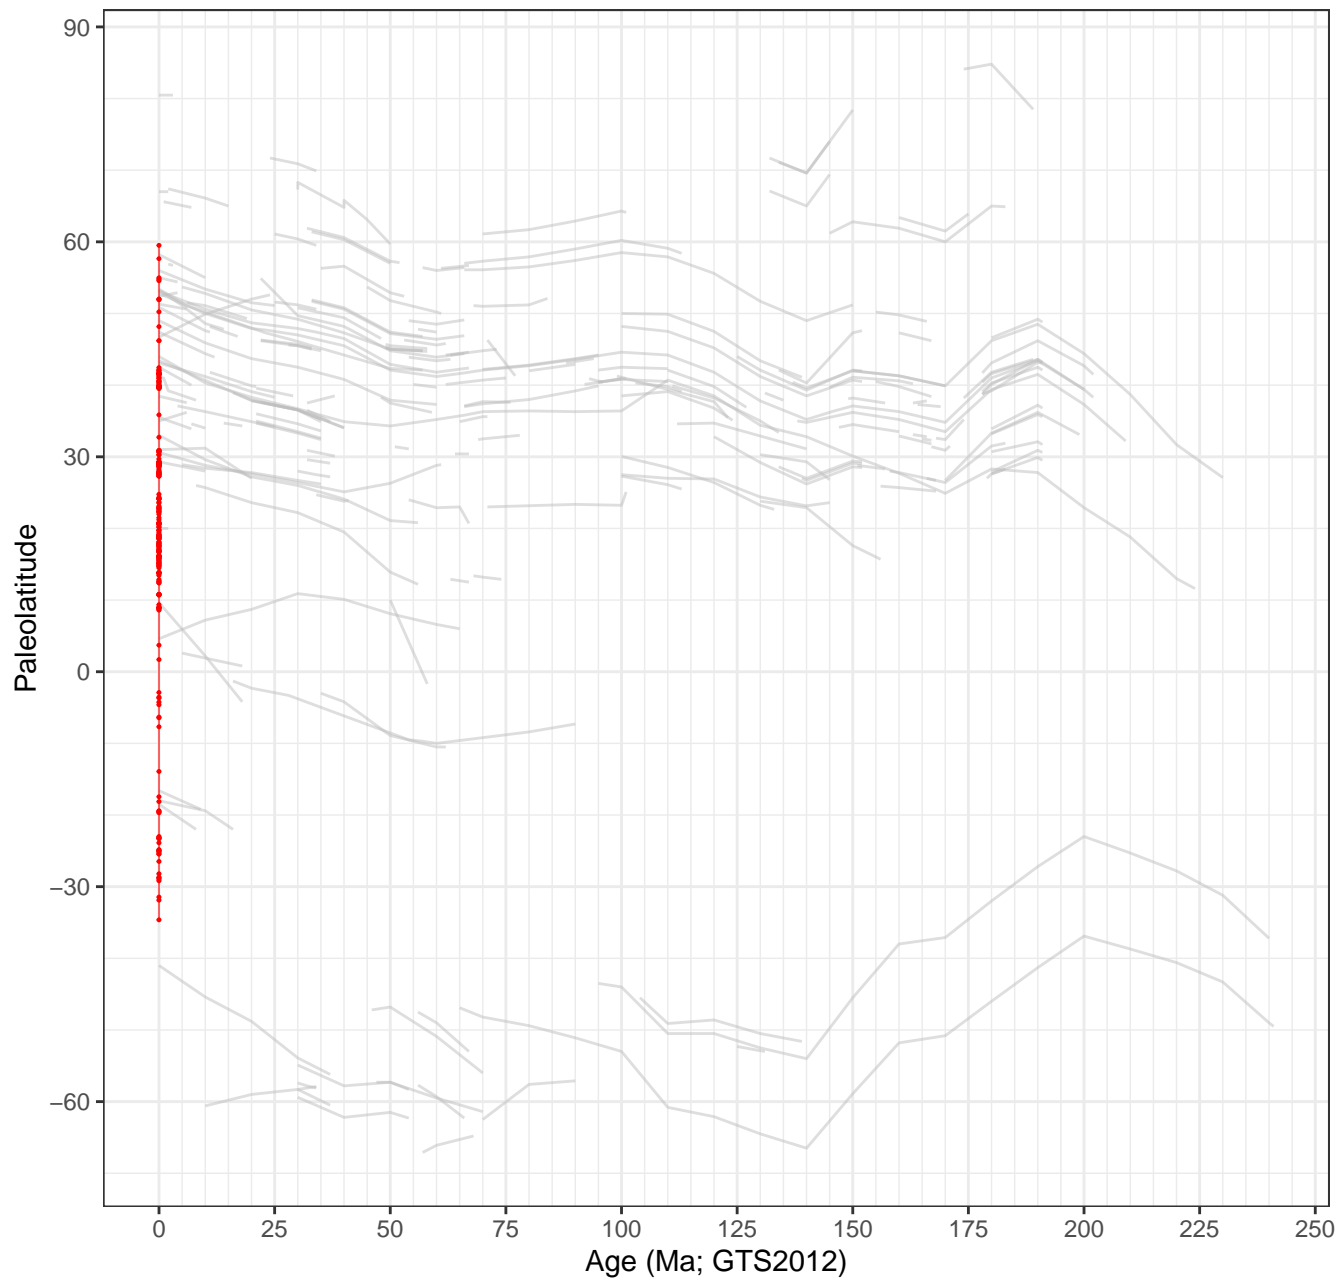

Supplement: Supplementary file 504 [file modern_Echinidinium transparantum.pdf › Supplement/Supplement 2/Modern 92 plots/modern_Echinidinium transparantum.pdf]

# Species *Echinidinium zonneveldii*

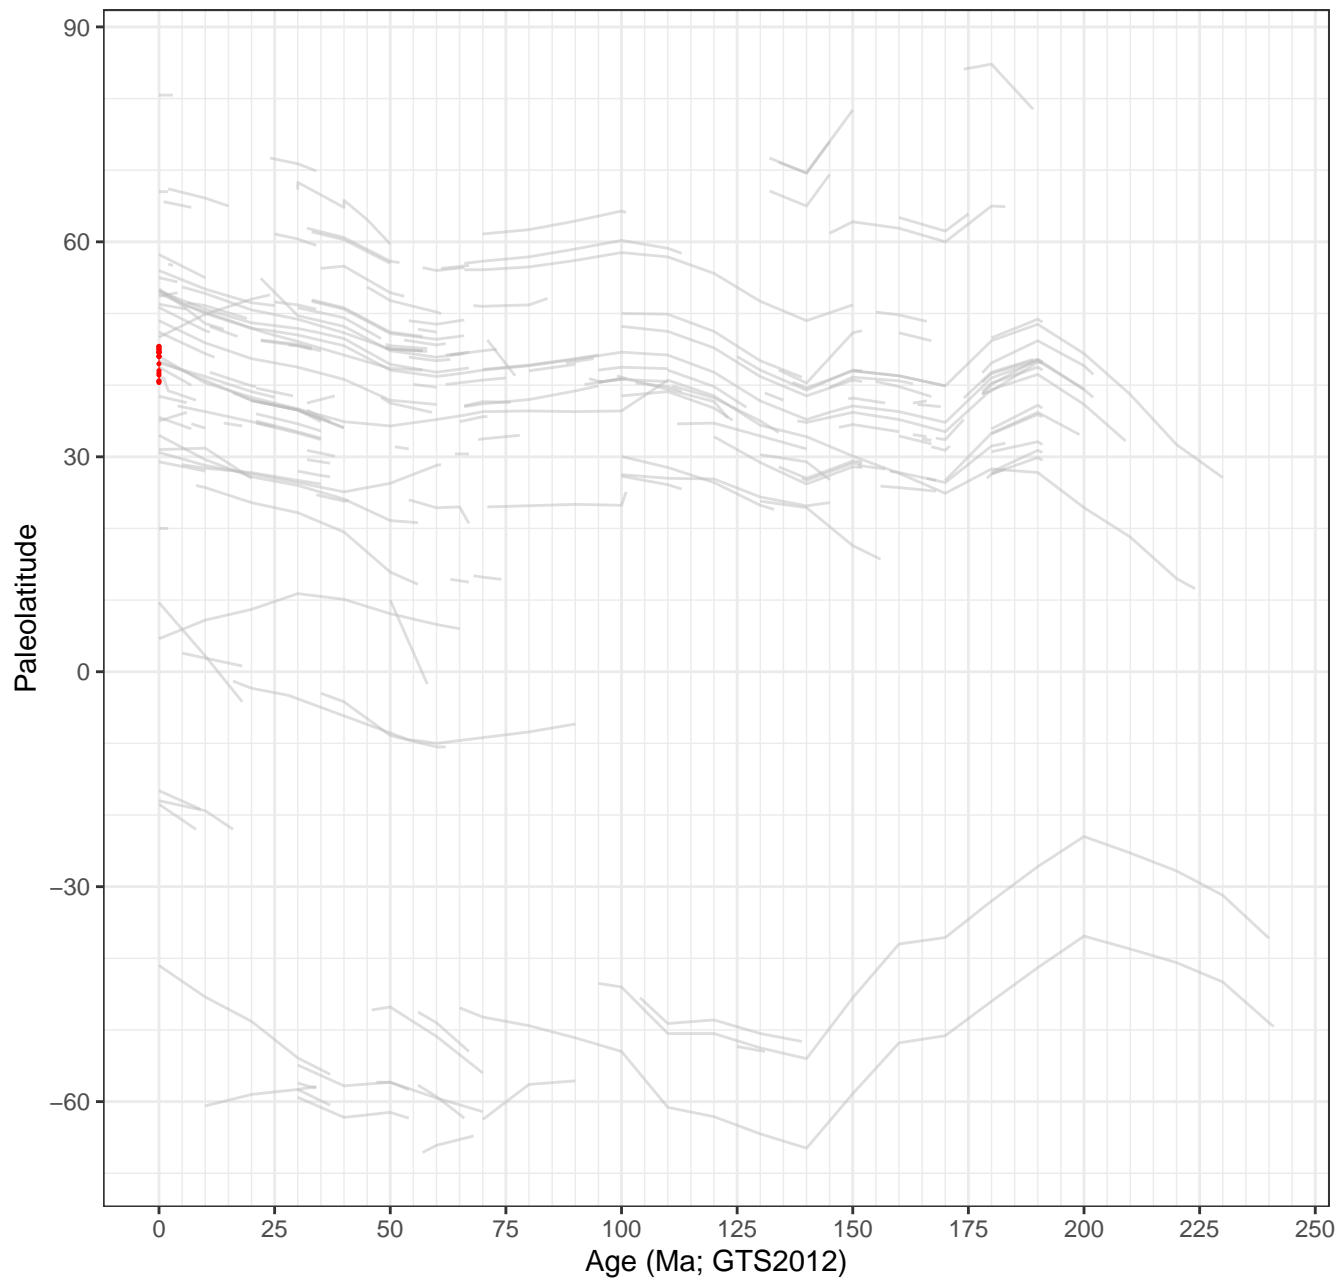

Supplement: Supplementary file 505 [file modern_Echinidinium zonneveldii.pdf › Supplement/Supplement 2/Modern 92 plots/modern_Echinidinium zonneveldii.pdf]

# Species *Impagidinium aculeatum*

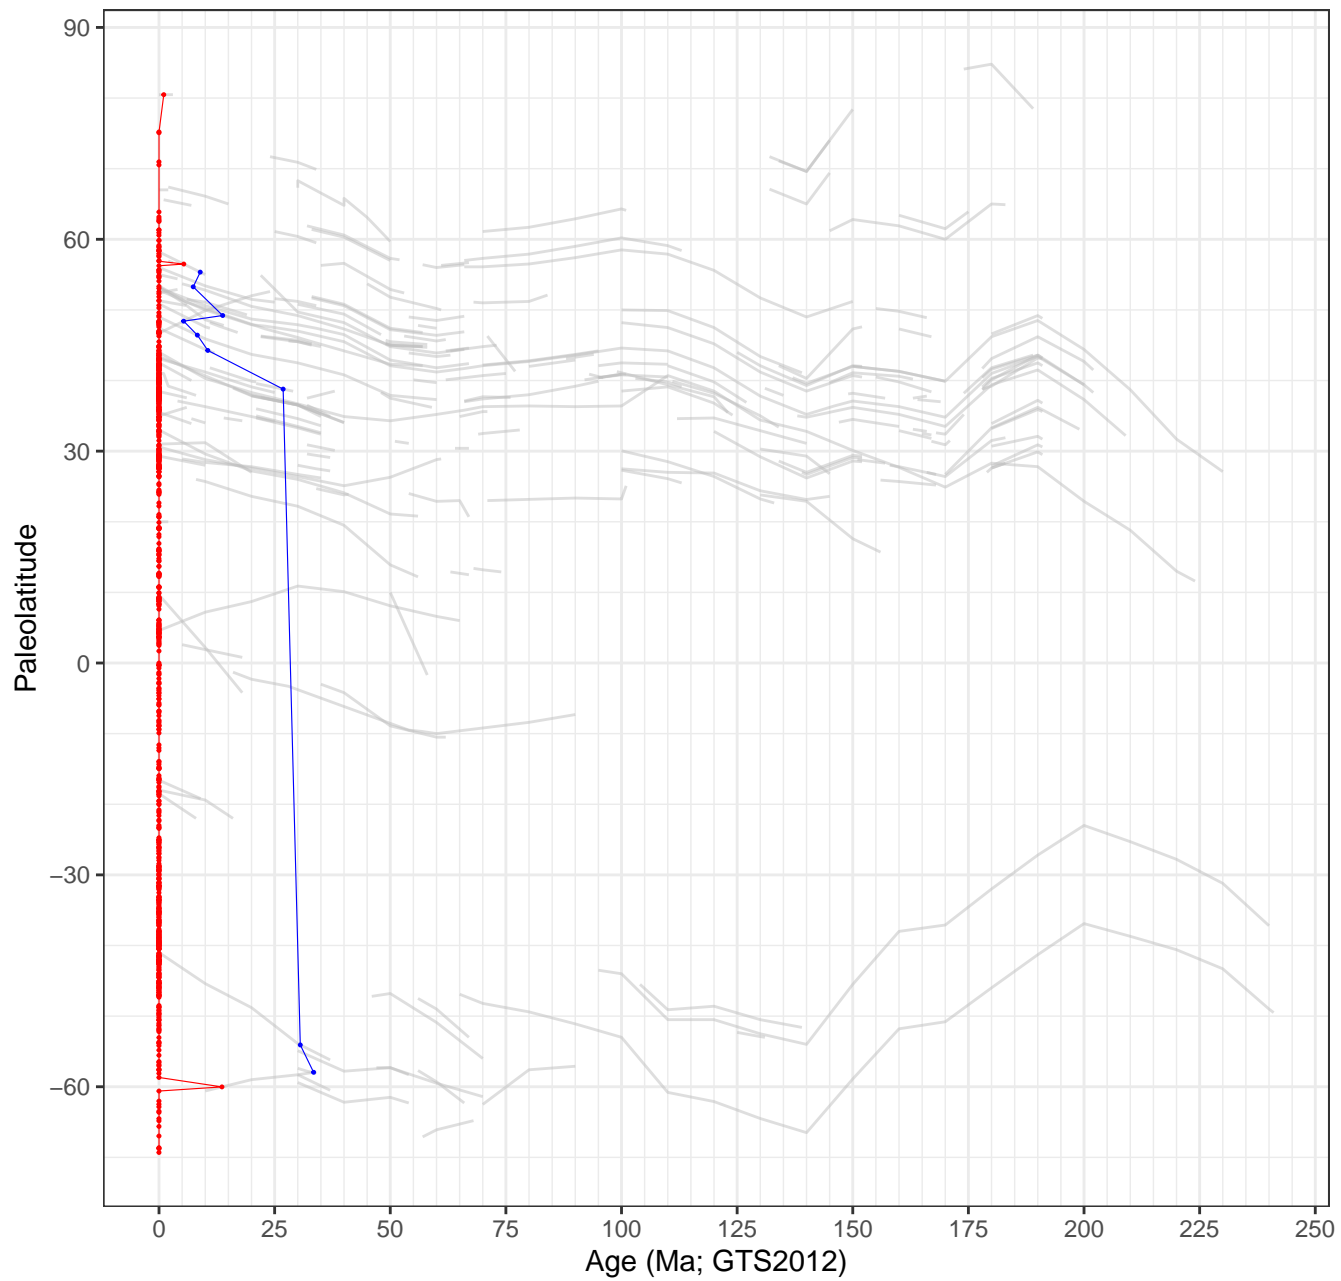

Supplement: Supplementary file 506 [file modern_Impagidinium aculeatum.pdf › Supplement/Supplement 2/Modern 92 plots/modern_Impagidinium aculeatum.pdf]

# Species *Impagidinium caspiense*

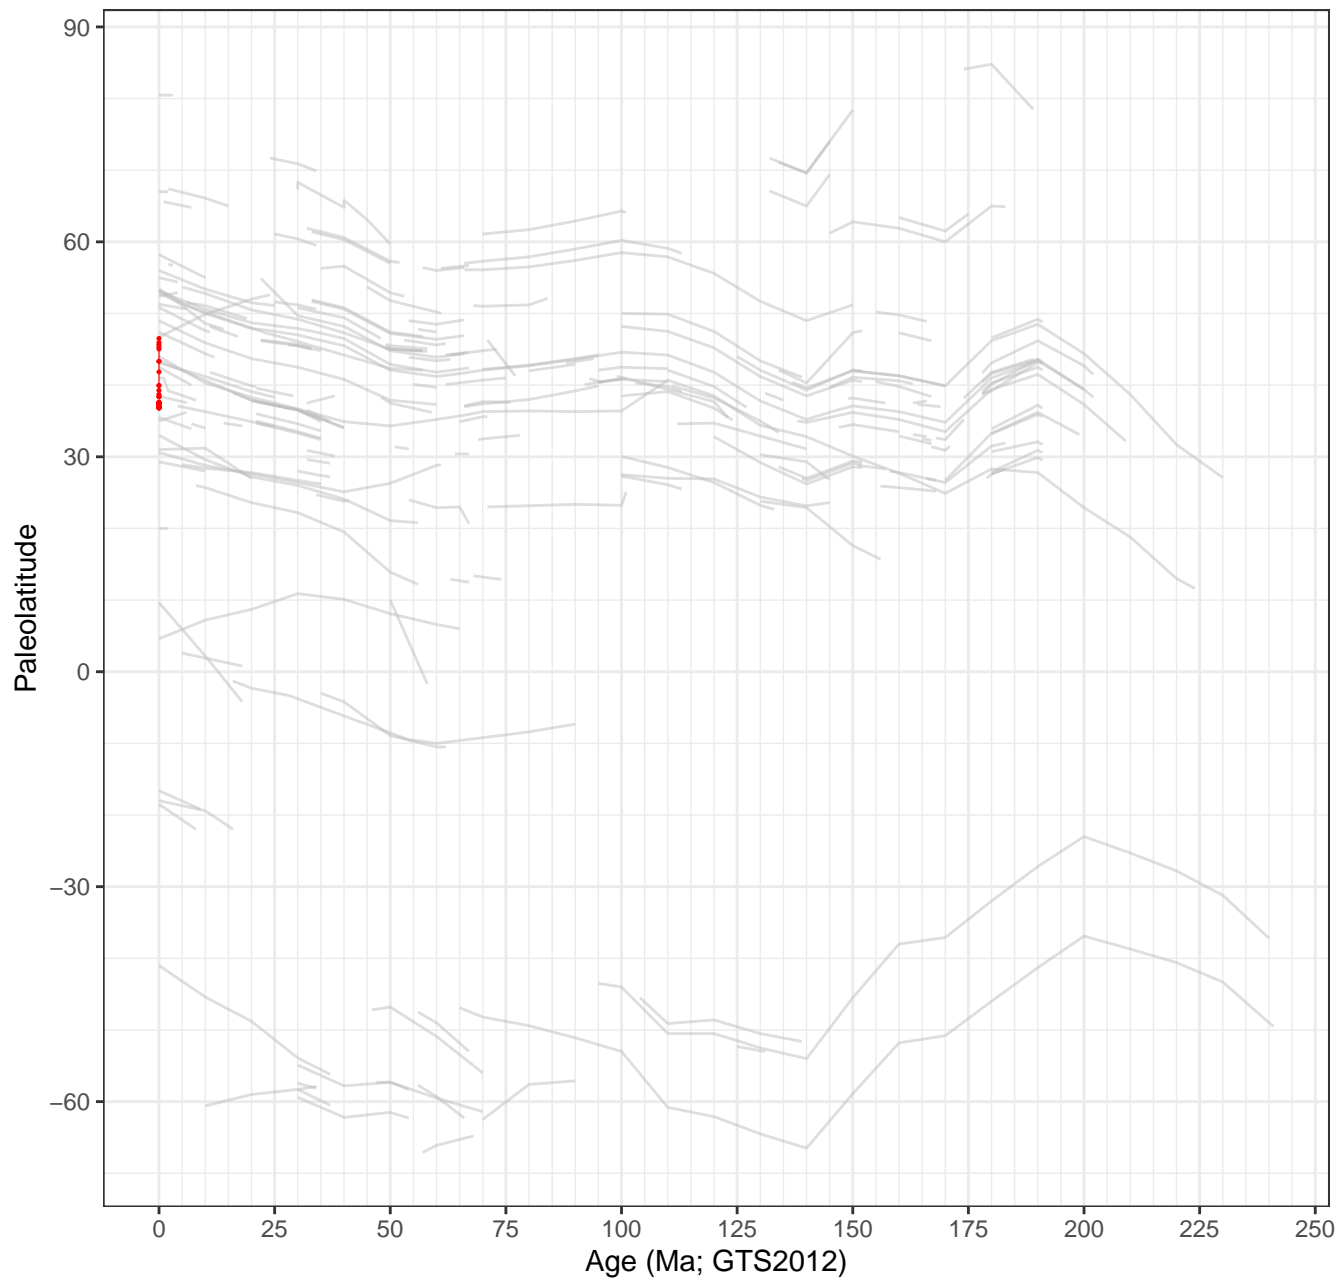

Supplement: Supplementary file 507 [file modern_Impagidinium caspienense.pdf › Supplement/Supplement 2/Modern 92 plots/modern_Impagidinium caspienense.pdf]

# Species *Impagidinium japonicum*

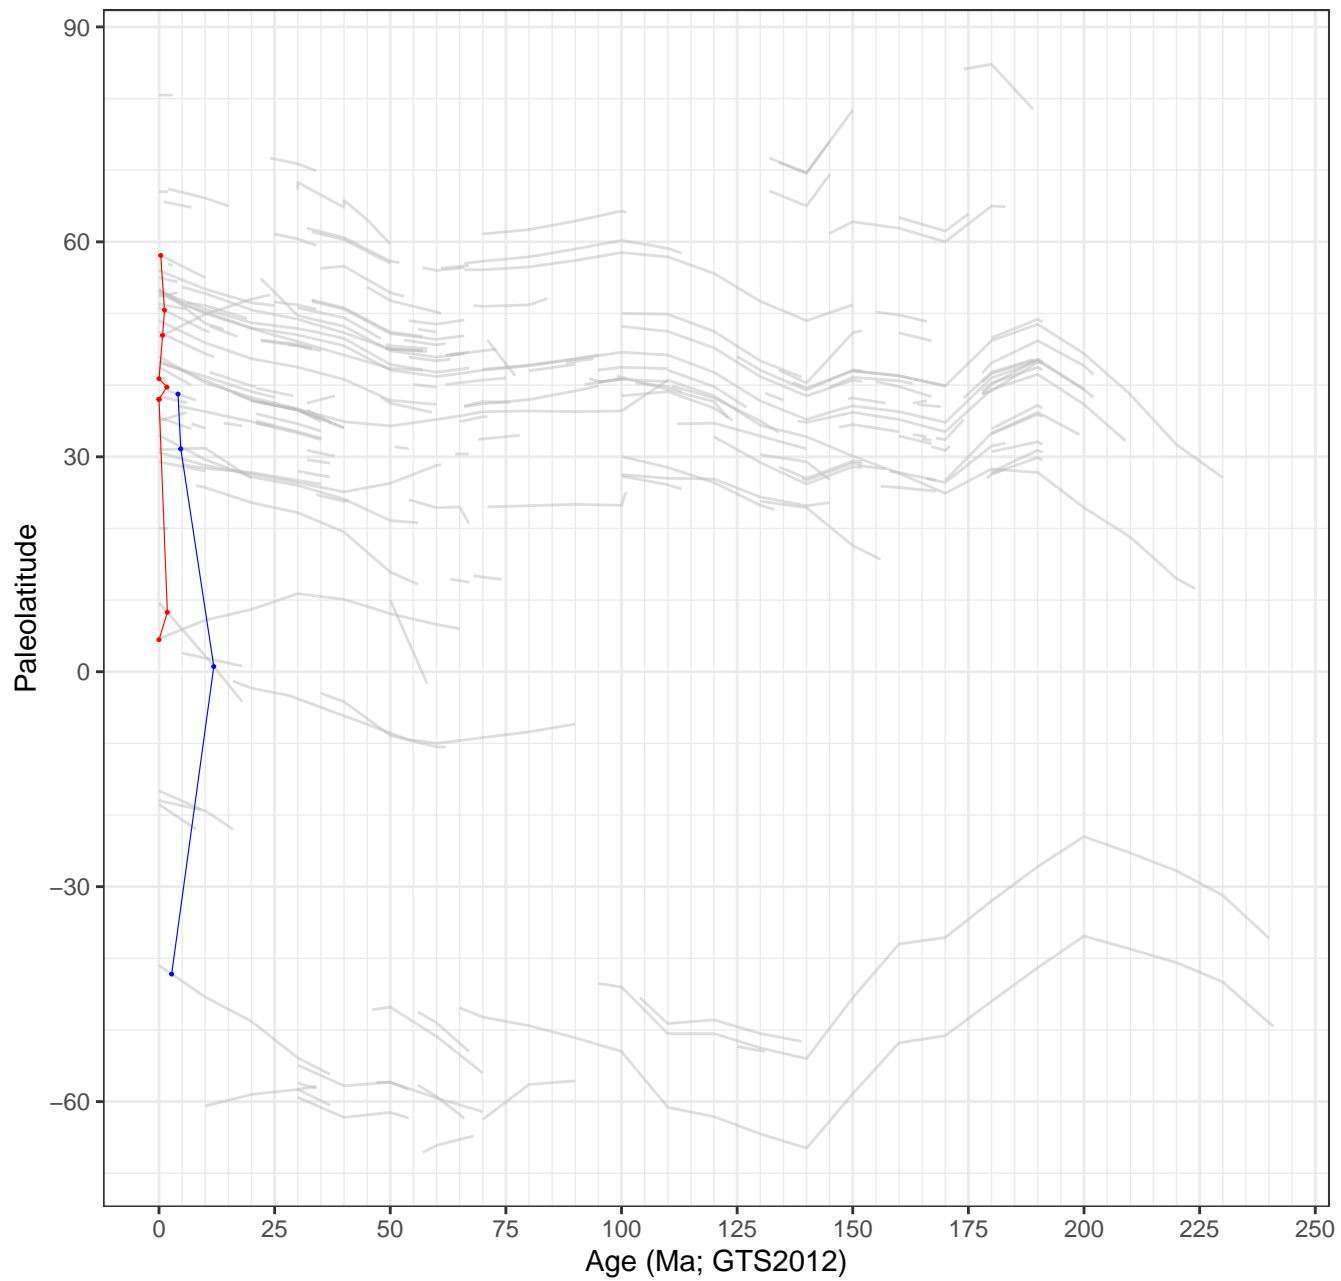

Supplement: Supplementary file 508 [file modern_Impagidinium japonicum.pdf › Supplement/Supplement 2/Modern 92 plots/modern_Impagidinium japonicum.pdf]

# Species *Impagidinium pallidum*

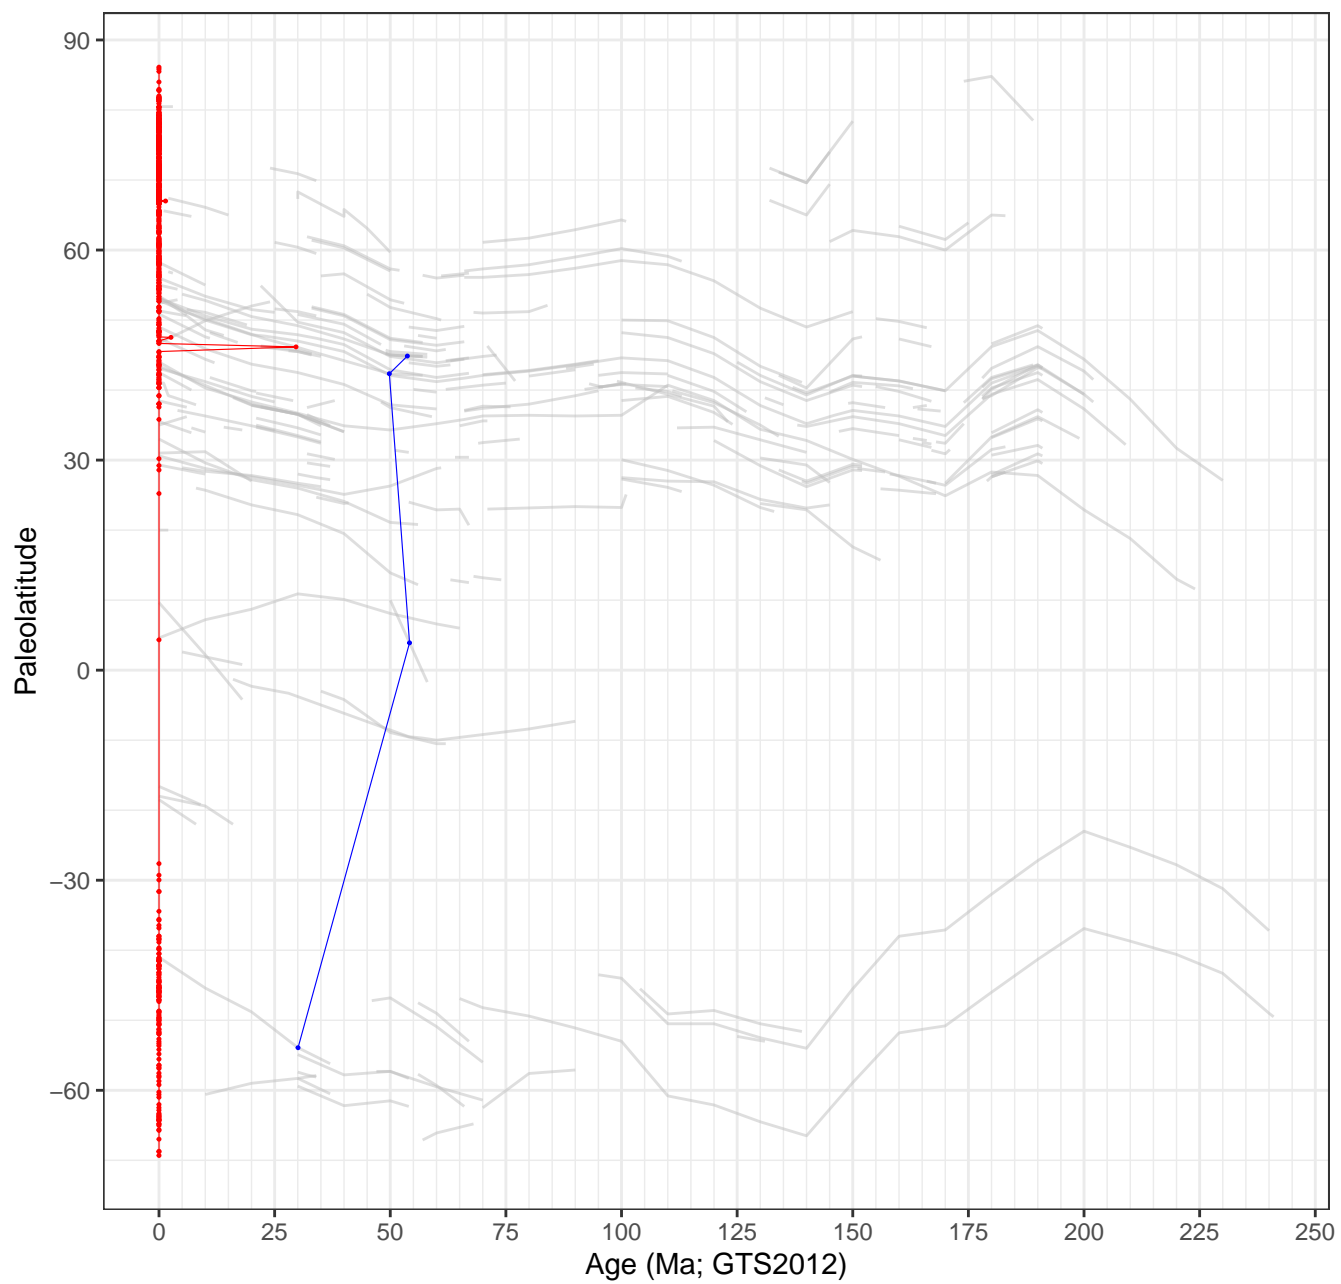

Supplement: Supplementary file 509 [file modern_Impagidinium pallidum.pdf › Supplement/Supplement 2/Modern 92 plots/modern_Impagidinium pallidum.pdf]

# Species *Impagidinium paradoxum*

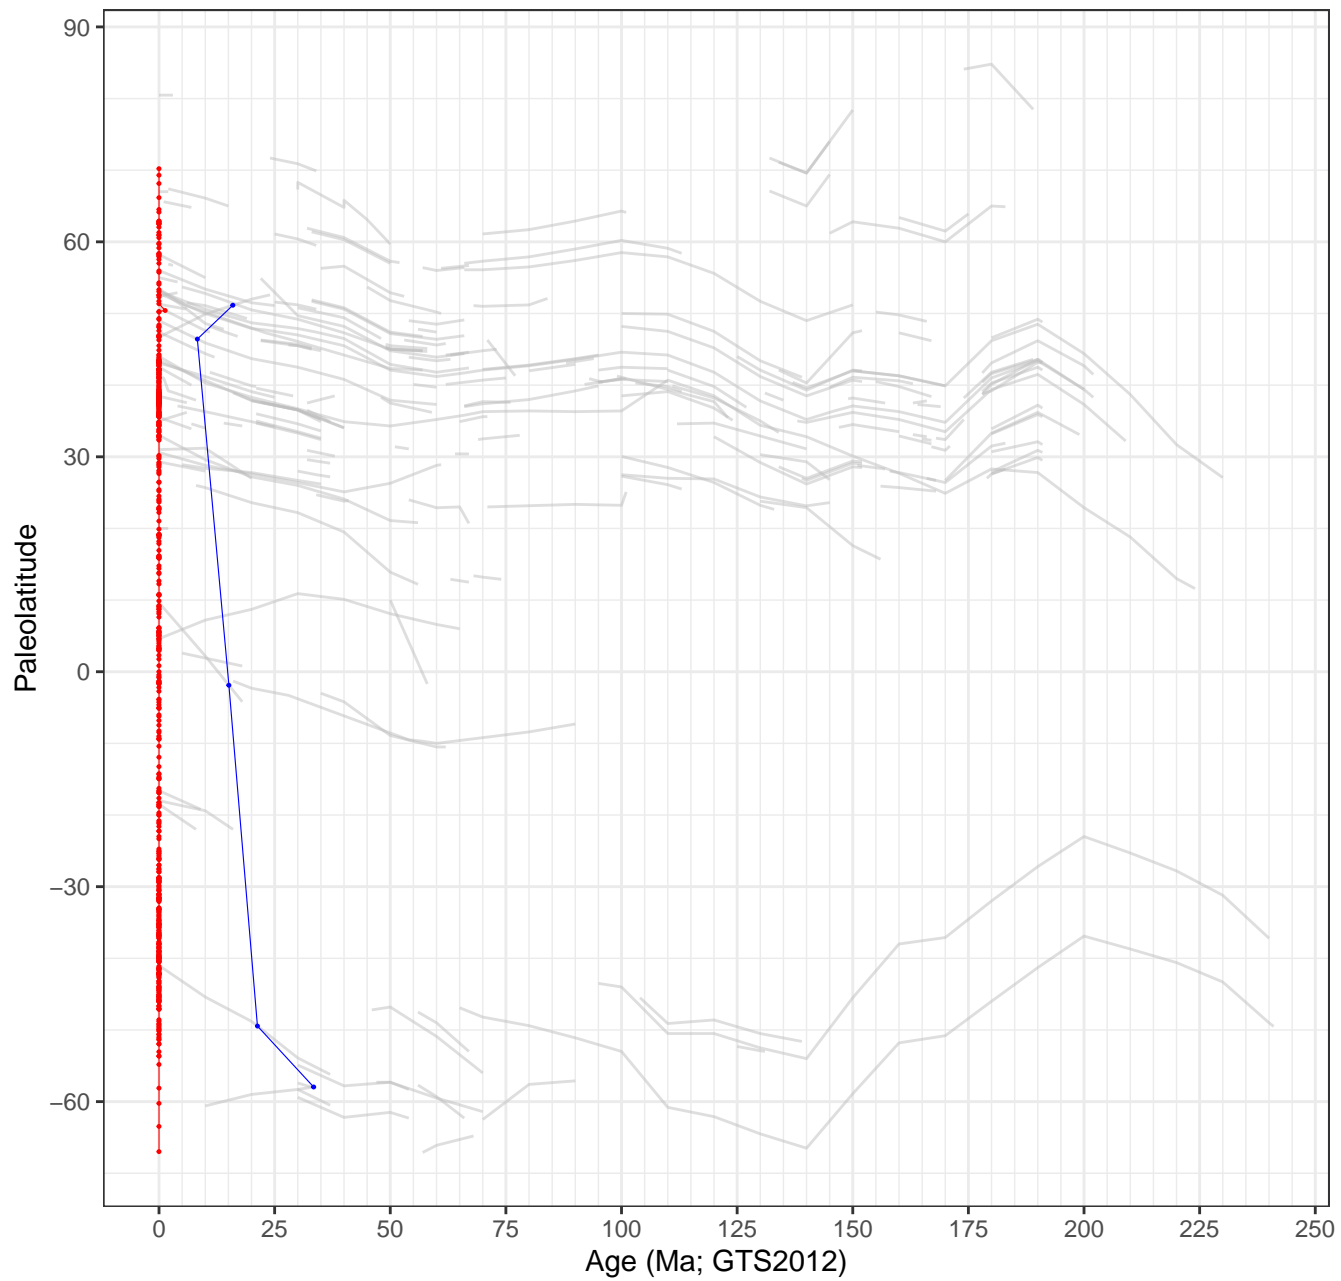

Supplement: Supplementary file 510 [file modern_Impagidinium paradoxum.pdf › Supplement/Supplement 2/Modern 92 plots/modern_Impagidinium paradoxum.pdf]

# Species *Impagidinium patulum*

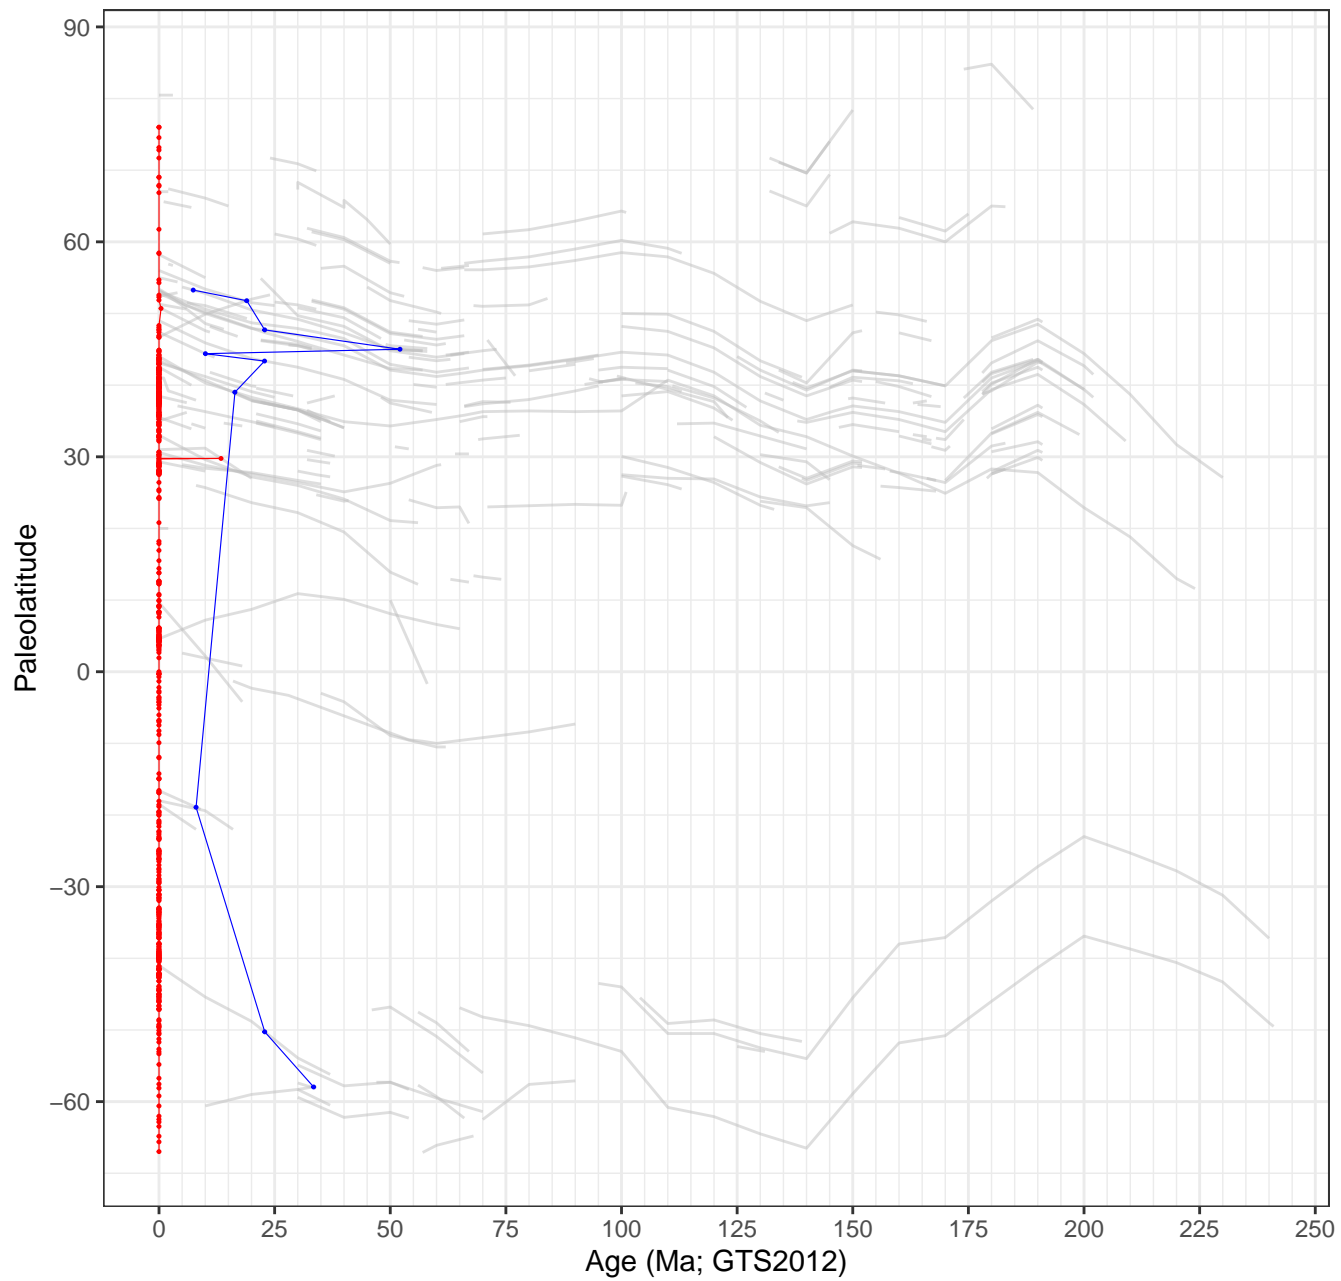

Supplement: Supplementary file 511 [file modern_Impagidinium patulum.pdf › Supplement/Supplement 2/Modern 92 plots/modern_Impagidinium patulum.pdf]

# Species *Impagidinium plicatum*

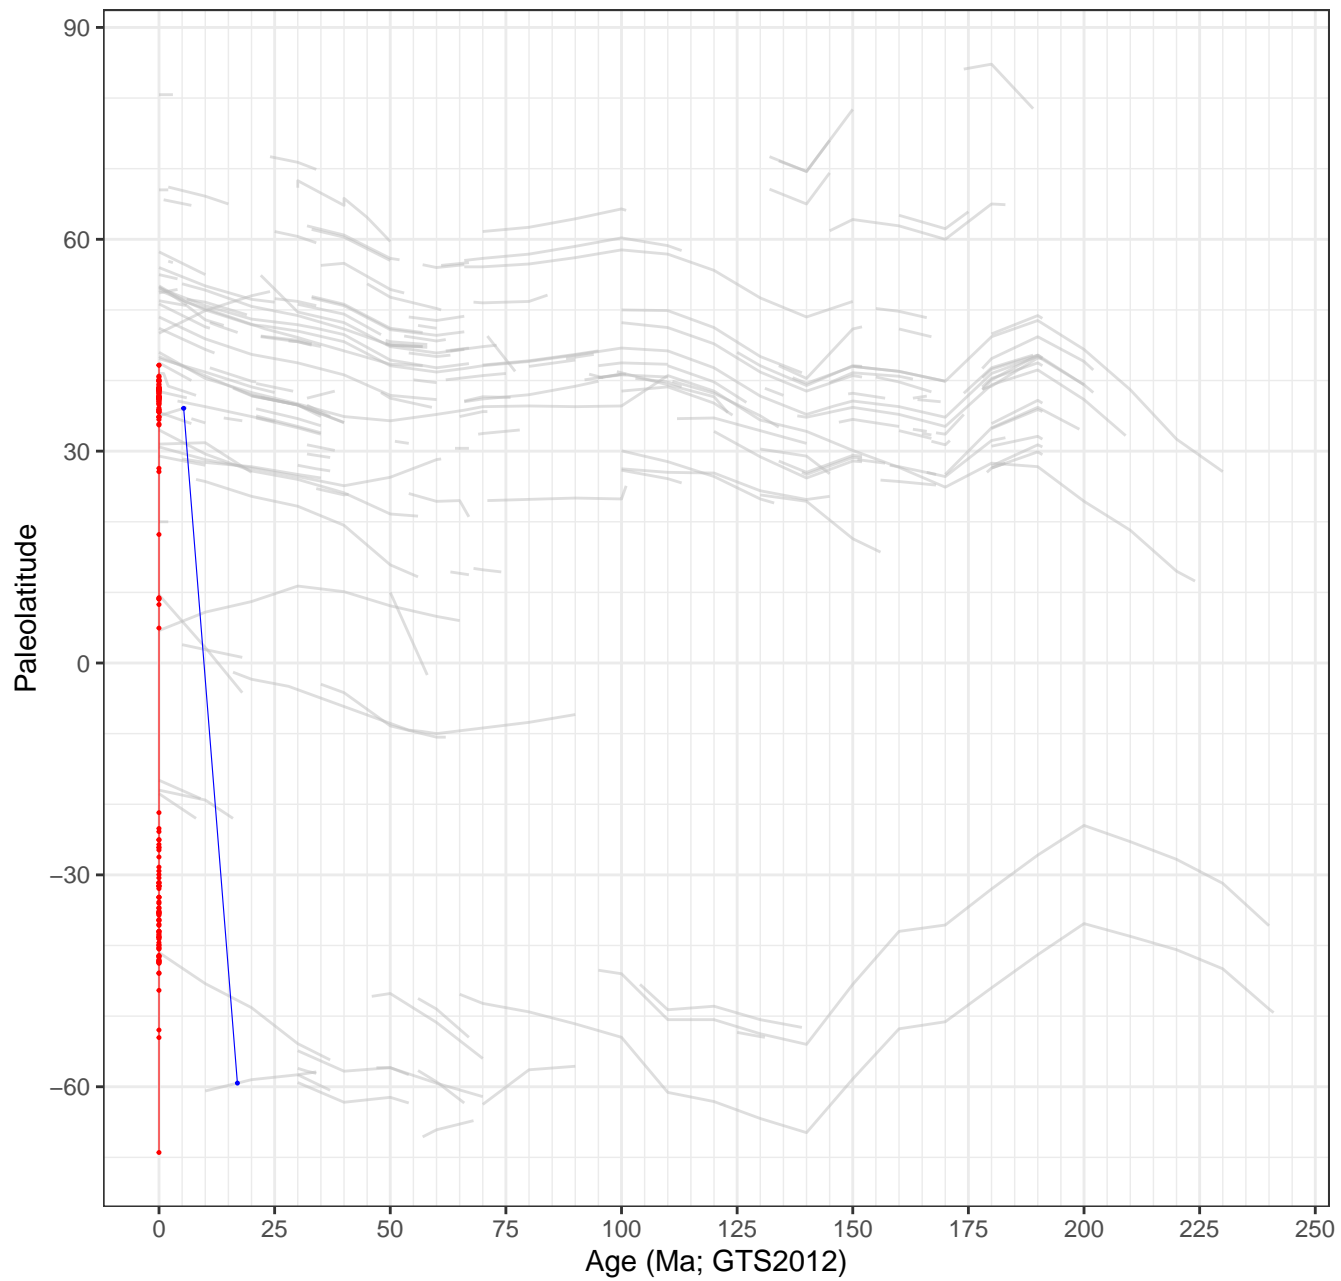

Supplement: Supplementary file 512 [file modern_Impagidinium plicatum.pdf › Supplement/Supplement 2/Modern 92 plots/modern_Impagidinium plicatum.pdf]

# Species *Impagidinium sphaericum*

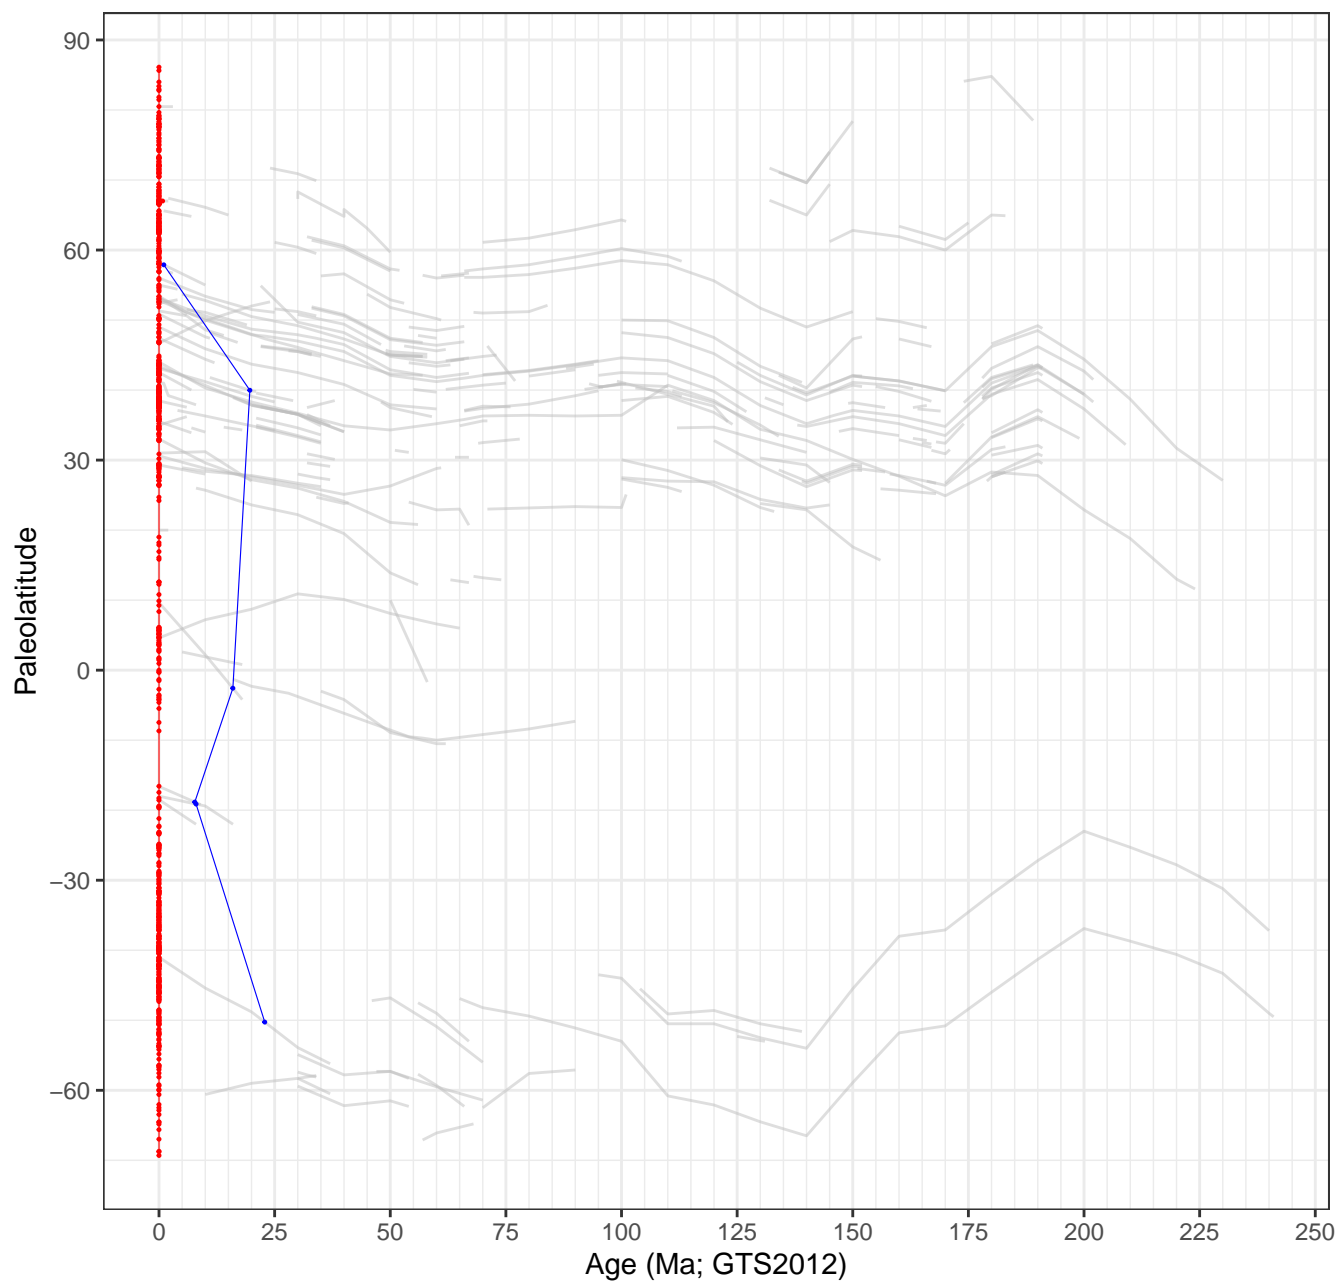

Supplement: Supplementary file 513 [file modern_Impagidinium sphaericum.pdf › Supplement/Supplement 2/Modern 92 plots/modern_Impagidinium sphaericum.pdf]

# Species *Impagidinium striatum*

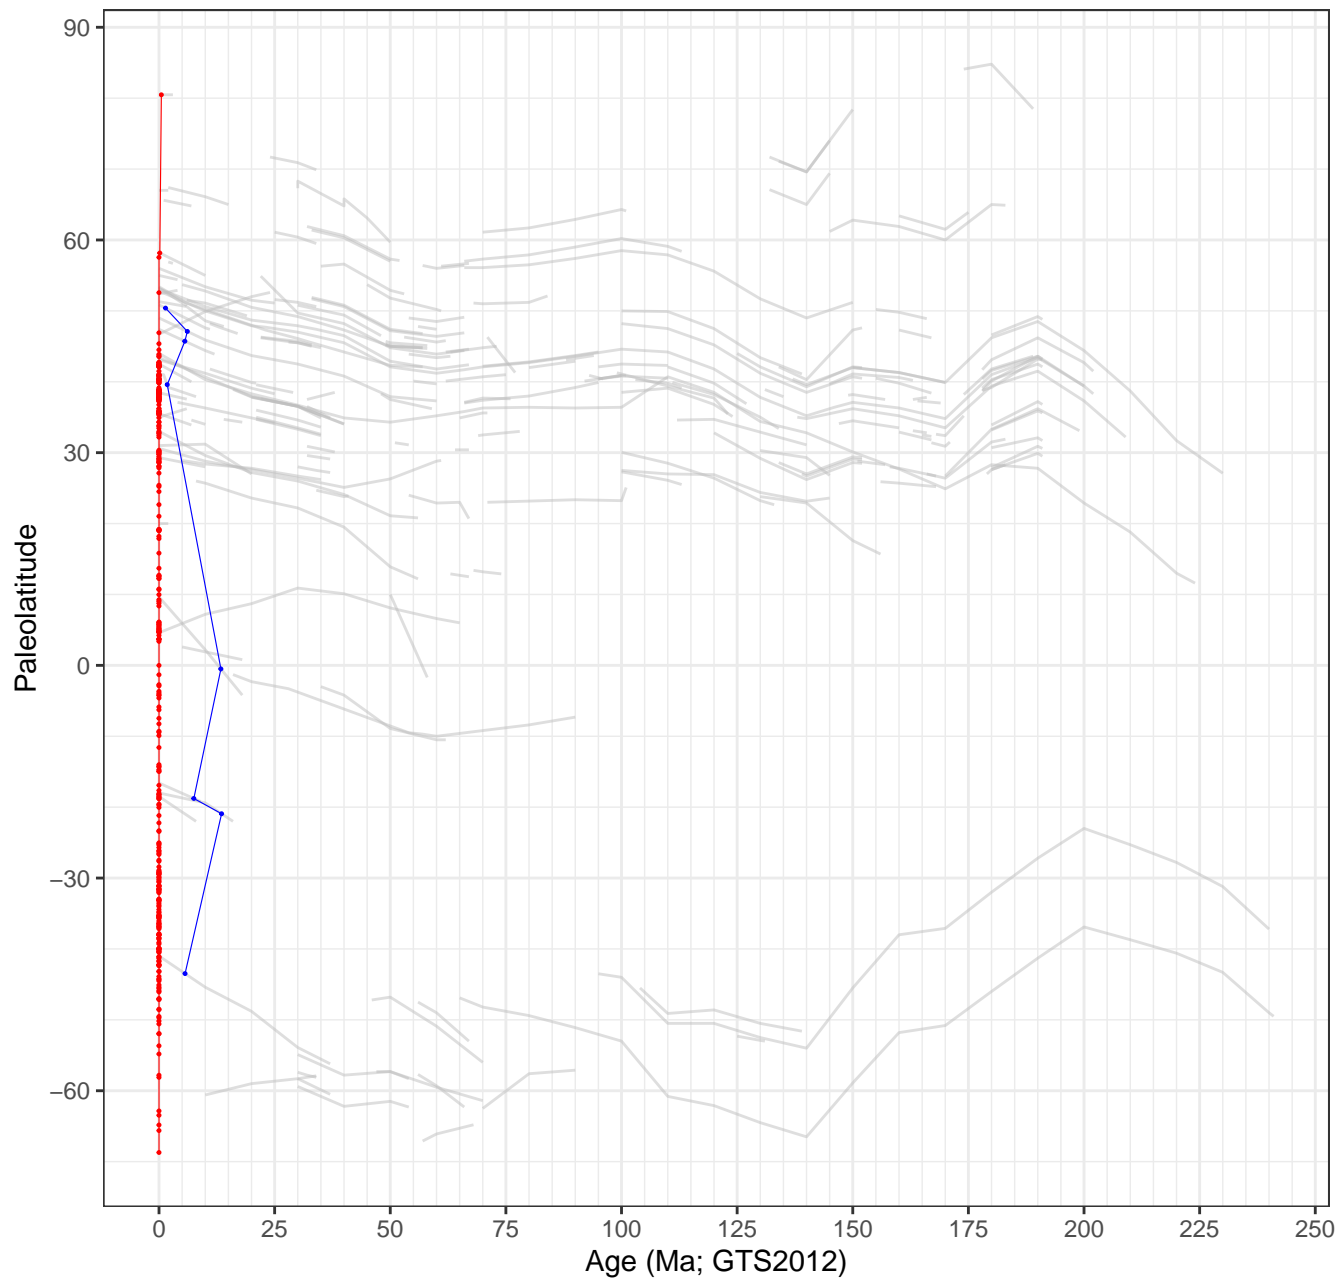

Supplement: Supplementary file 514 [file modern_Impagidinium strialatum.pdf › Supplement/Supplement 2/Modern 92 plots/modern_Impagidinium strialatum.pdf]
