# Supplementary figures and images for: DINOSTRAT: a global database of the stratigraphic and paleolatitudinal distribution of Mesozoic–Cenozoic organic-walled dinoflagellate cysts (part 6 of 27)
Source: Copernicus journal article supplement (doi:10.5194/essd-14-579-2022), 2022-02-09

# Species *Impagidinium variaseptum*

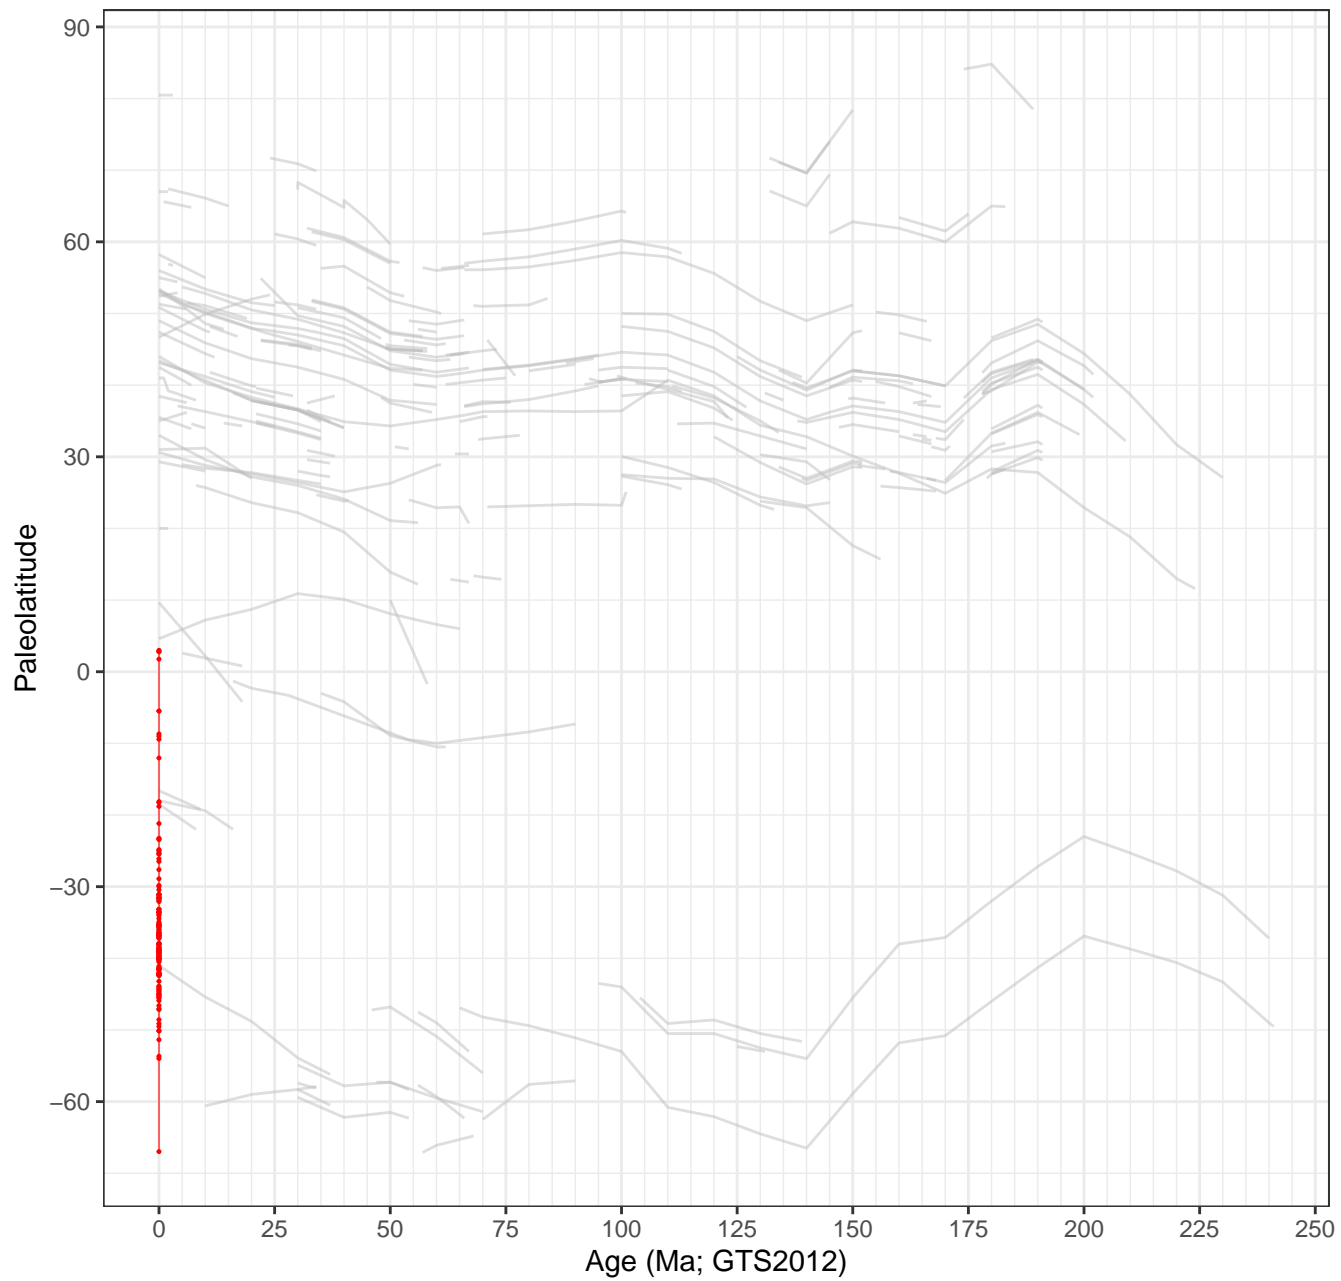

Supplement: Supplementary file 515 [file modern_Impagidinium variaseptum.pdf › Supplement/Supplement 2/Modern 92 plots/modern_Impagidinium variaseptum.pdf]

# Species *Impagidinium velorum*

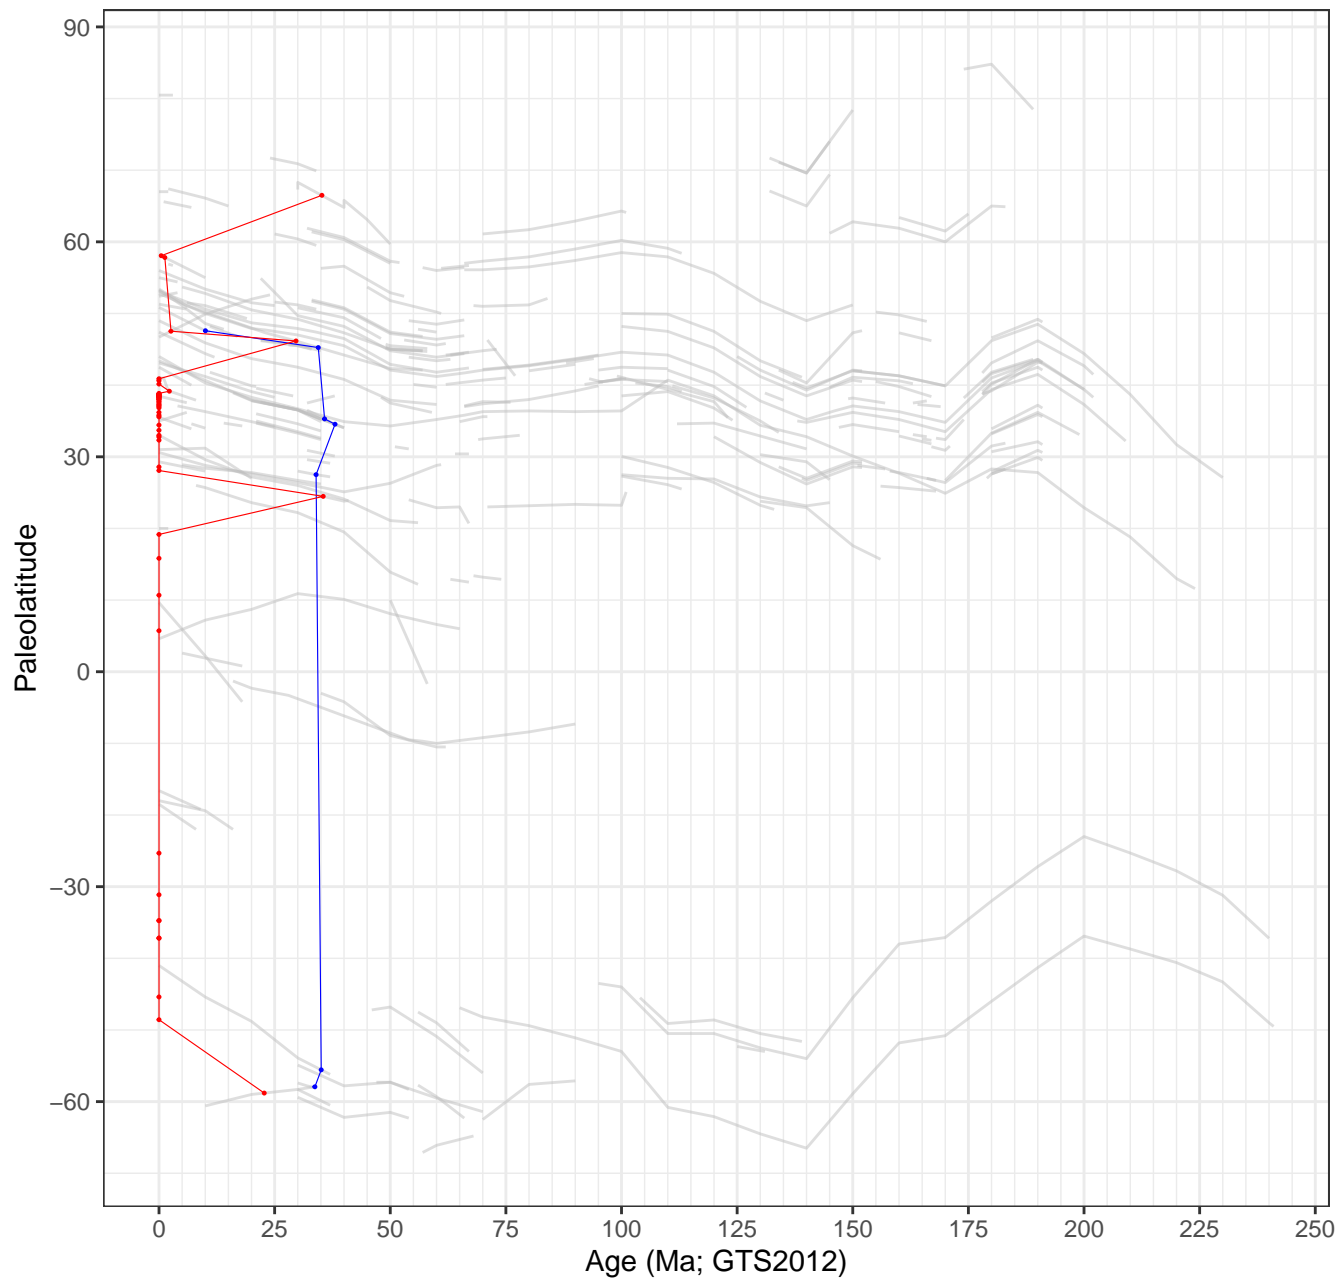

Supplement: Supplementary file 516 [file modern_Impagidinium velorum.pdf › Supplement/Supplement 2/Modern 92 plots/modern_Impagidinium velorum.pdf]

# Species *Islandinium brevispinosum*

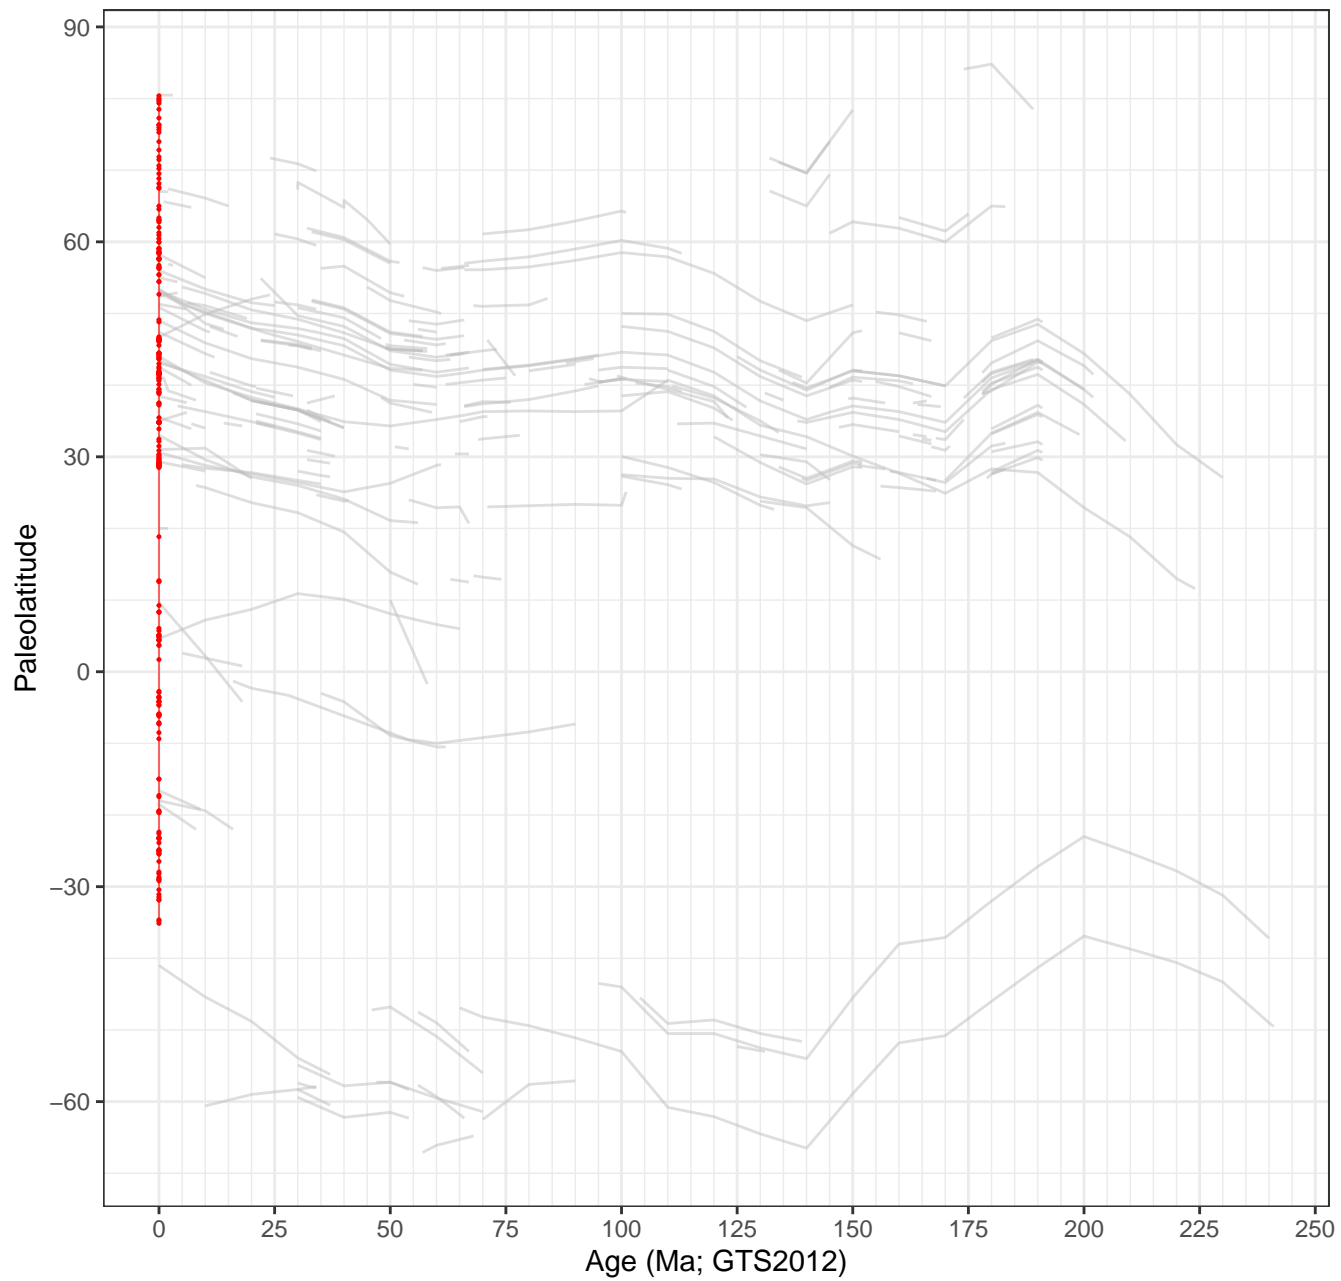

Supplement: Supplementary file 517 [file modern_Islandinium brevispinosum.pdf › Supplement/Supplement 2/Modern 92 plots/modern_Islandinium brevispinosum.pdf]

# Species *Islandinium cesare*

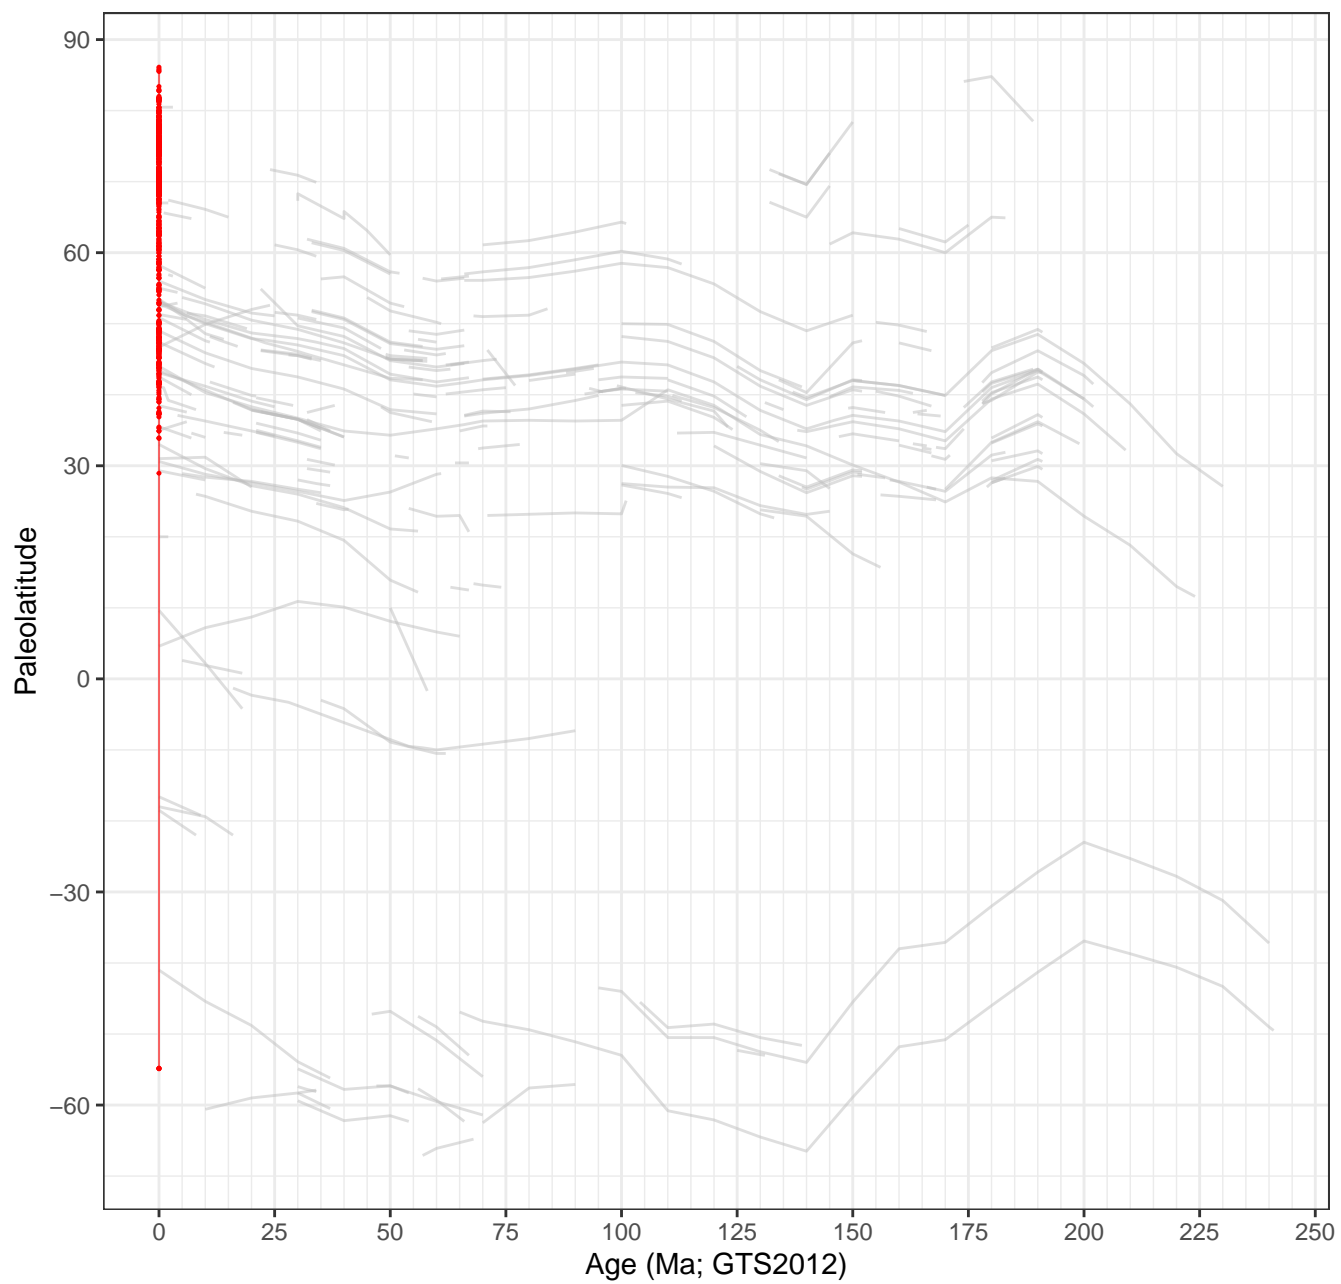

Supplement: Supplementary file 518 [file modern_Islandinium cesare.pdf › Supplement/Supplement 2/Modern 92 plots/modern_Islandinium cesare.pdf]

# Species *Islandinium minutum*

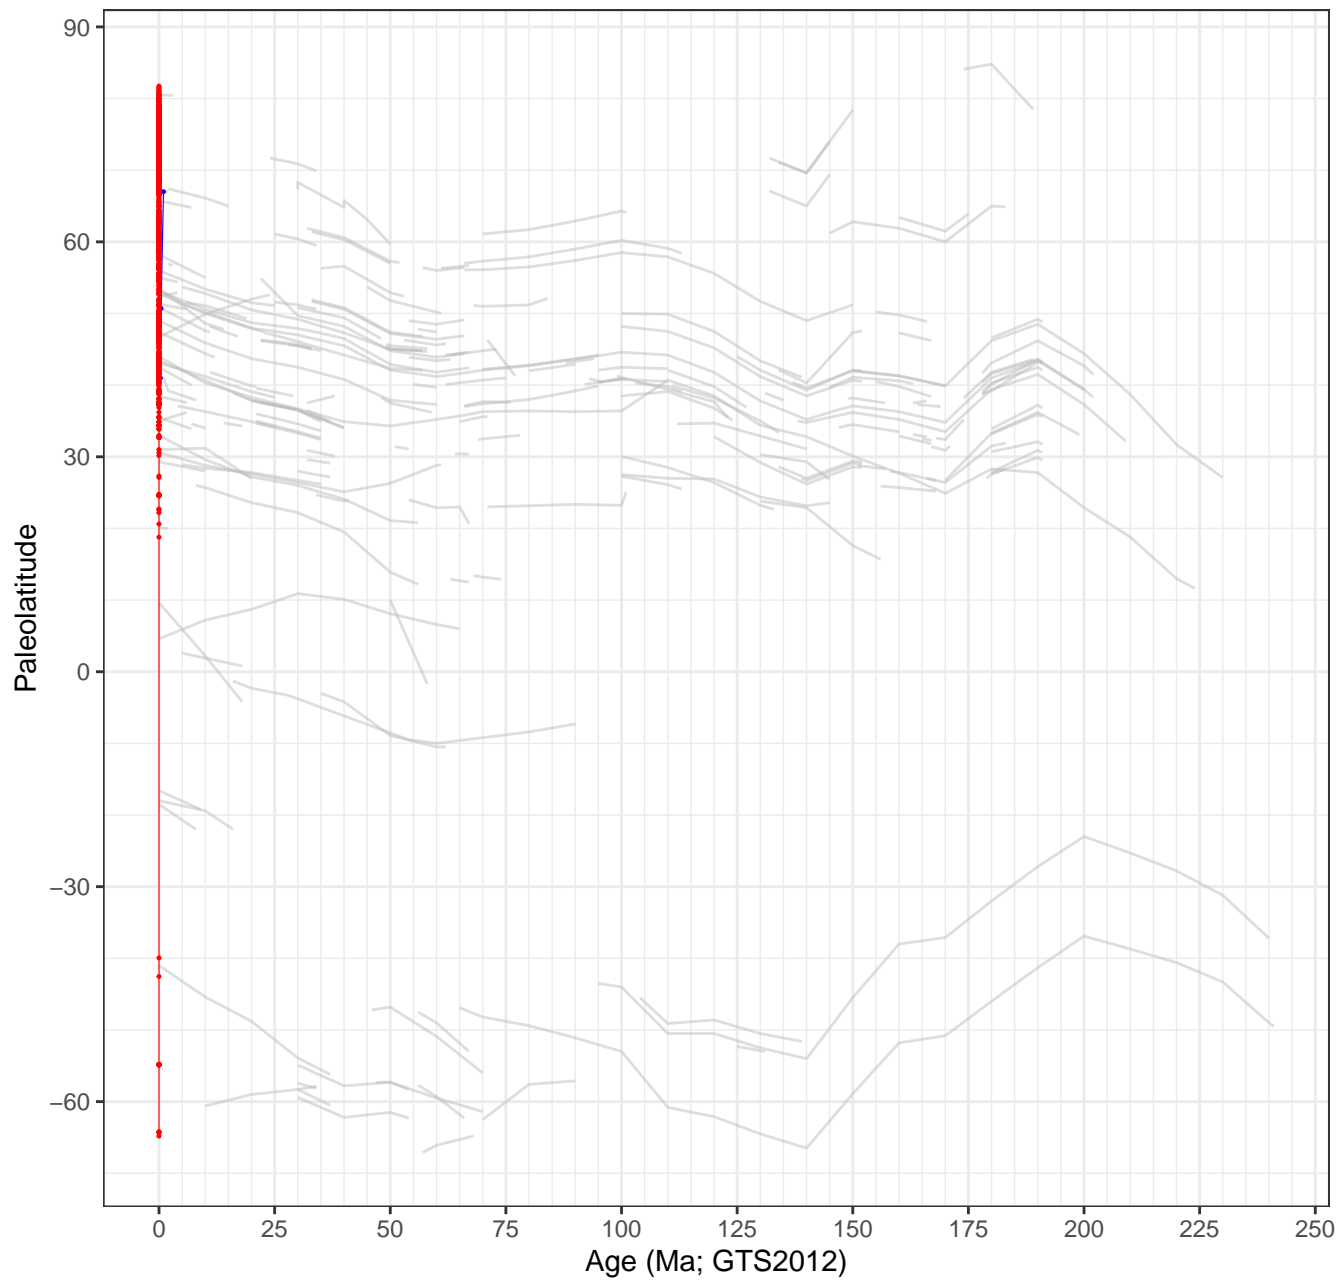

Supplement: Supplementary file 519 [file modern_Islandinium minutum.pdf › Supplement/Supplement 2/Modern 92 plots/modern_Islandinium minutum.pdf]

# Species *Lejeunecysta* spp.

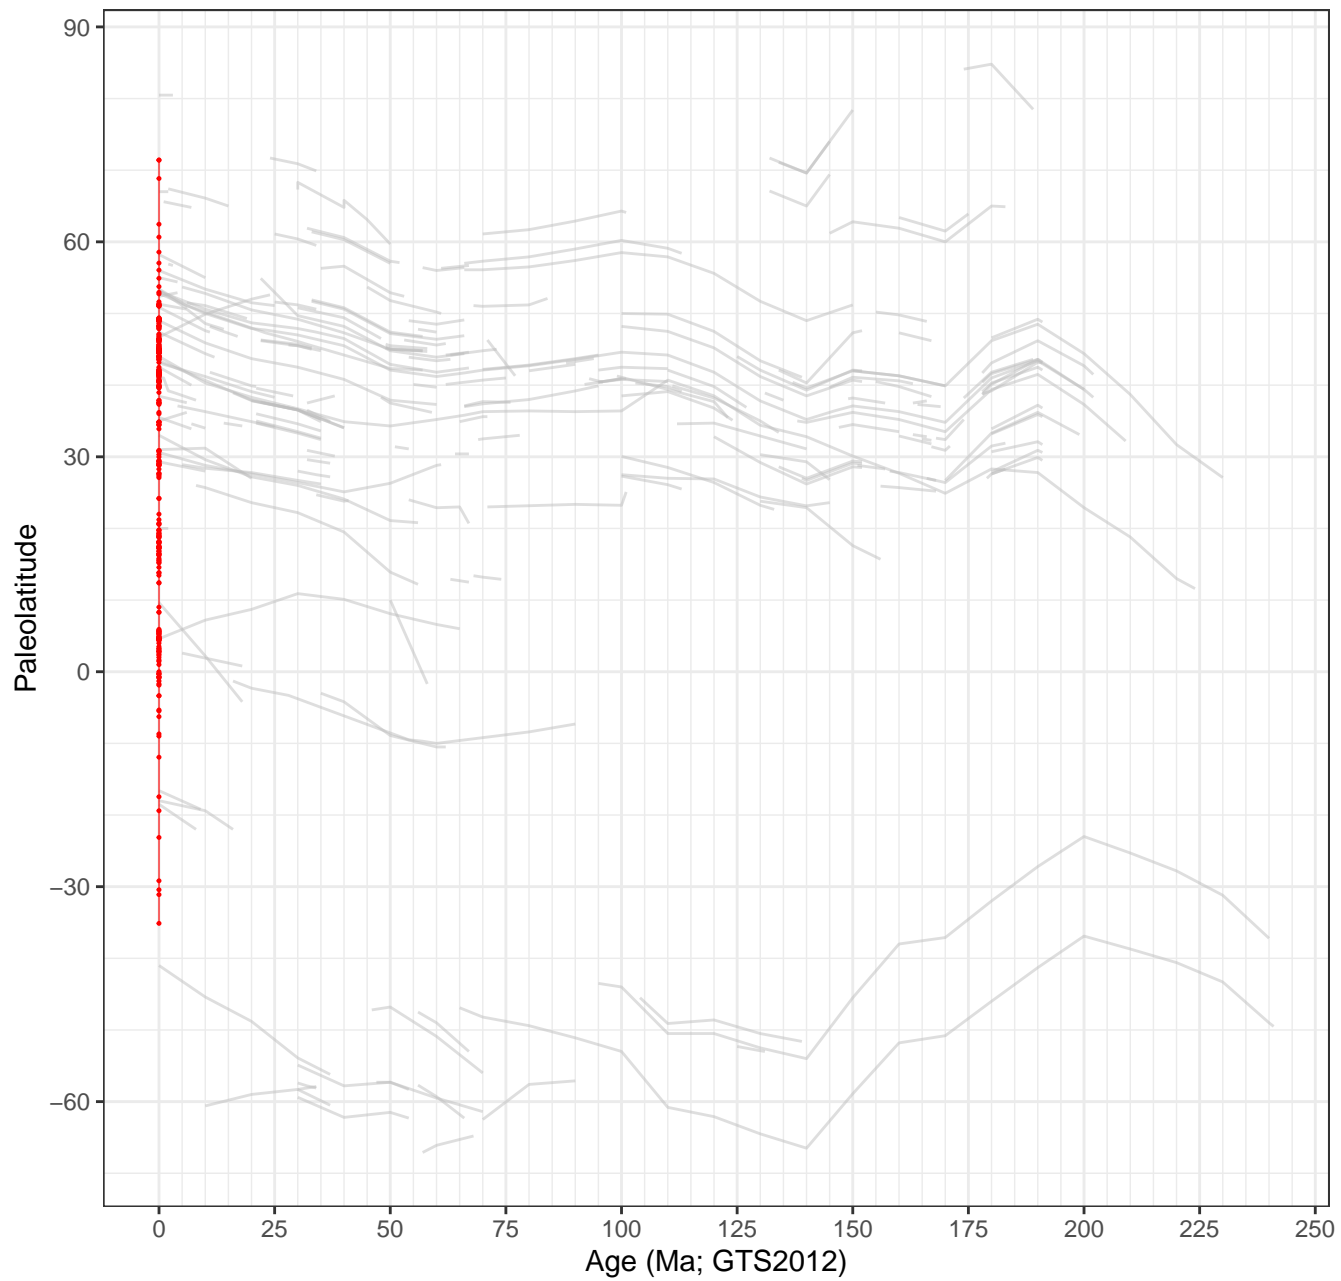

Supplement: Supplementary file 520 [file modern_Lejeunecysta spp..pdf › Supplement/Supplement 2/Modern 92 plots/modern_Lejeunecysta spp..pdf]

# Species *Lingulodinium machaerophorum*

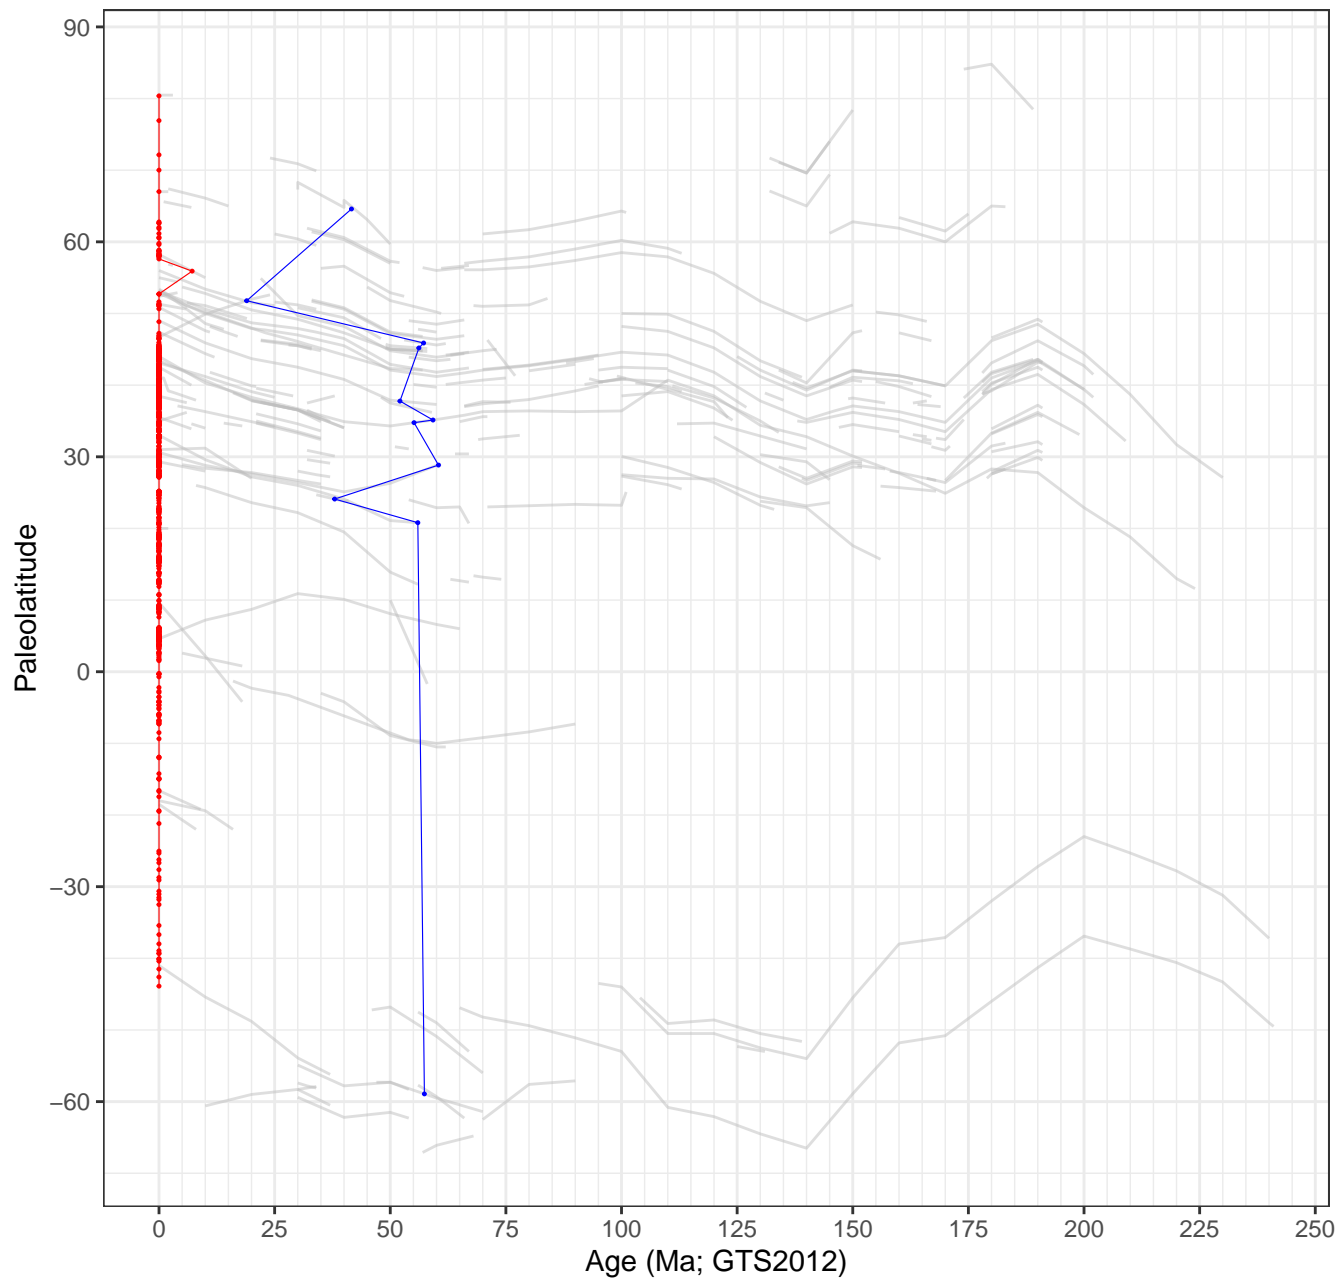

Supplement: Supplementary file 521 [file modern_Lingulodinium machaerophorum.pdf › Supplement/Supplement 2/Modern 92 plots/modern_Lingulodinium machaerophorum.pdf]

# Species *Melittasphaeridium choanophorum*

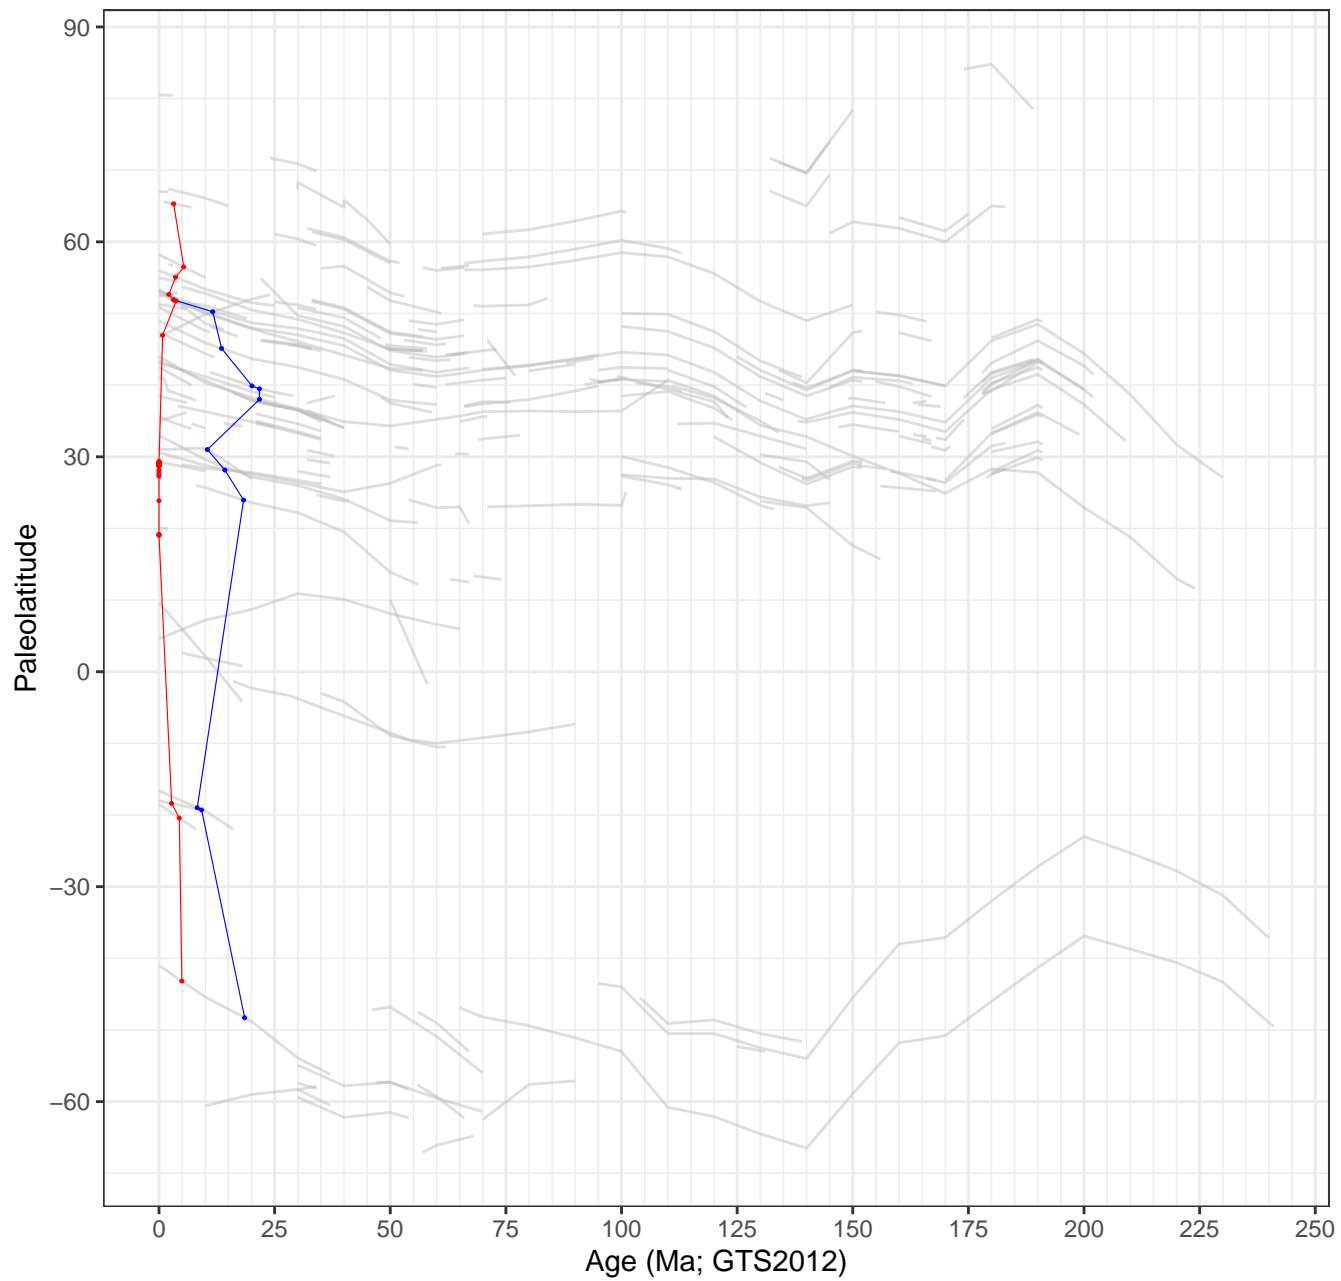

Supplement: Supplementary file 522 [file modern_Melitasphaeridium choanophorum.pdf › Supplement/Supplement 2/Modern 92 plots/modern_Melitasphaeridium choanophorum.pdf]

# Species *Nematosphaeropsis labyrinthus*

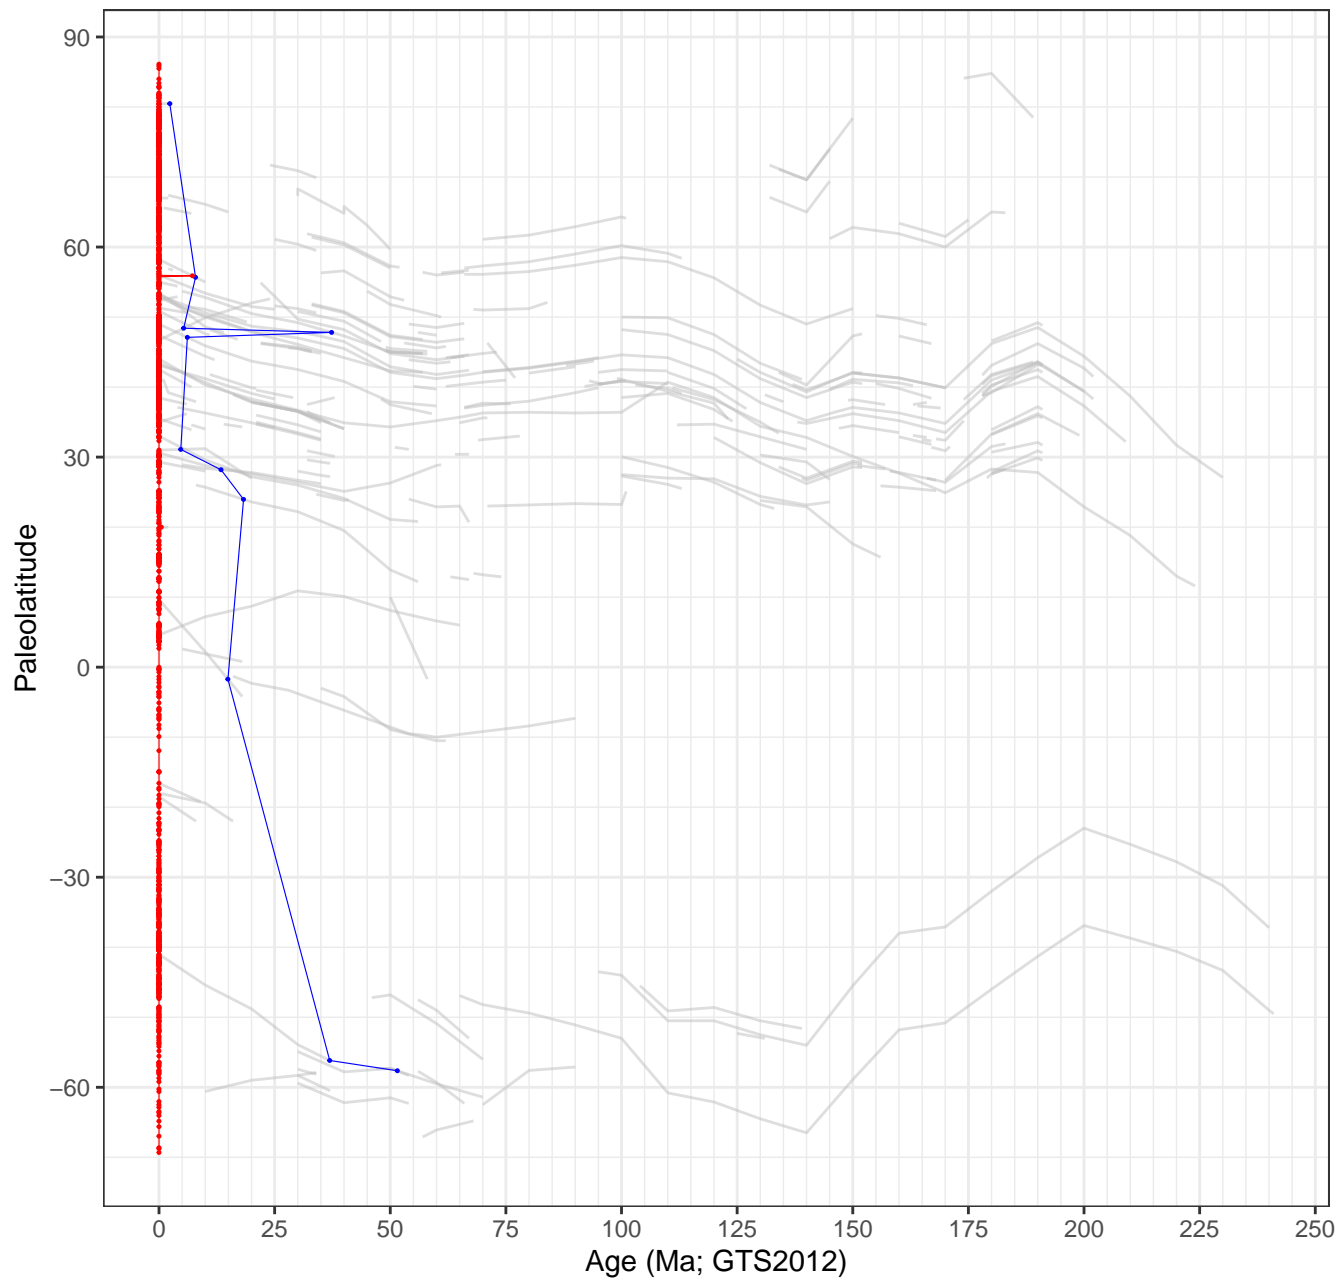

Supplement: Supplementary file 523 [file modern_Nematosphaeropsis labyrinthus.pdf › Supplement/Supplement 2/Modern 92 plots/modern_Nematosphaeropsis labyrinthus.pdf]

# Species *Nematosphaeropsis rigida*

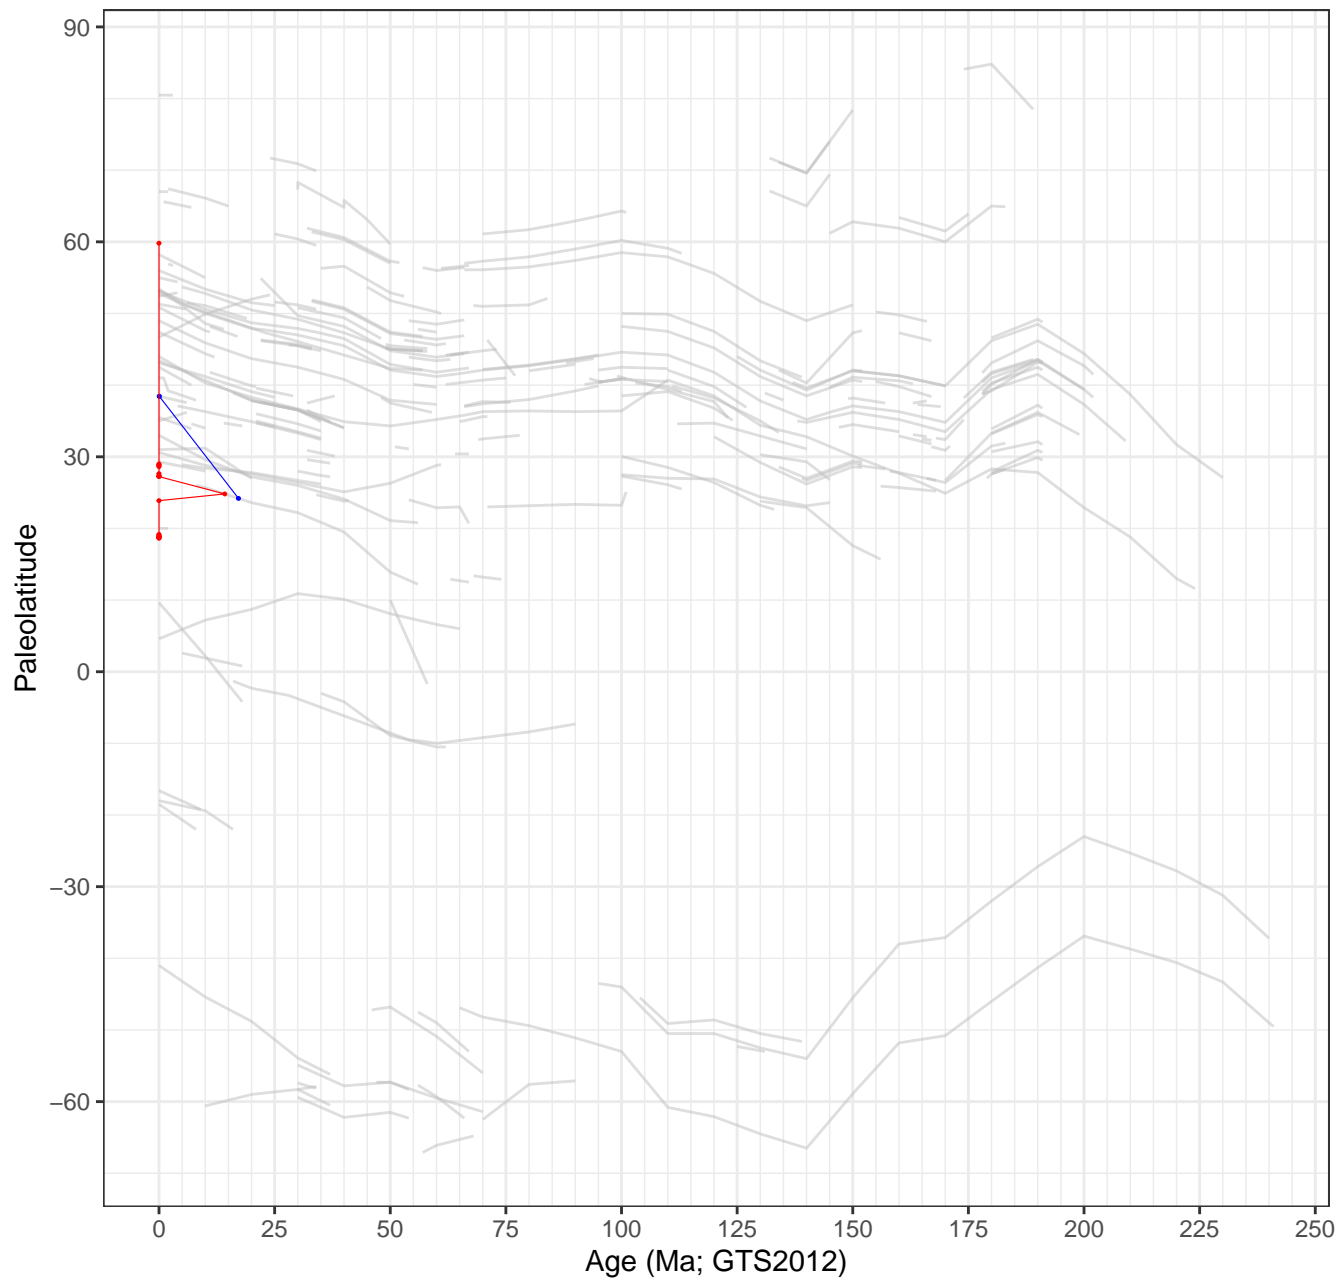

Supplement: Supplementary file 524 [file modern_Nematosphaeropsis rigida.pdf › Supplement/Supplement 2/Modern 92 plots/modern_Nematosphaeropsis rigida.pdf]

# Species *Operculodinium aguinawense*

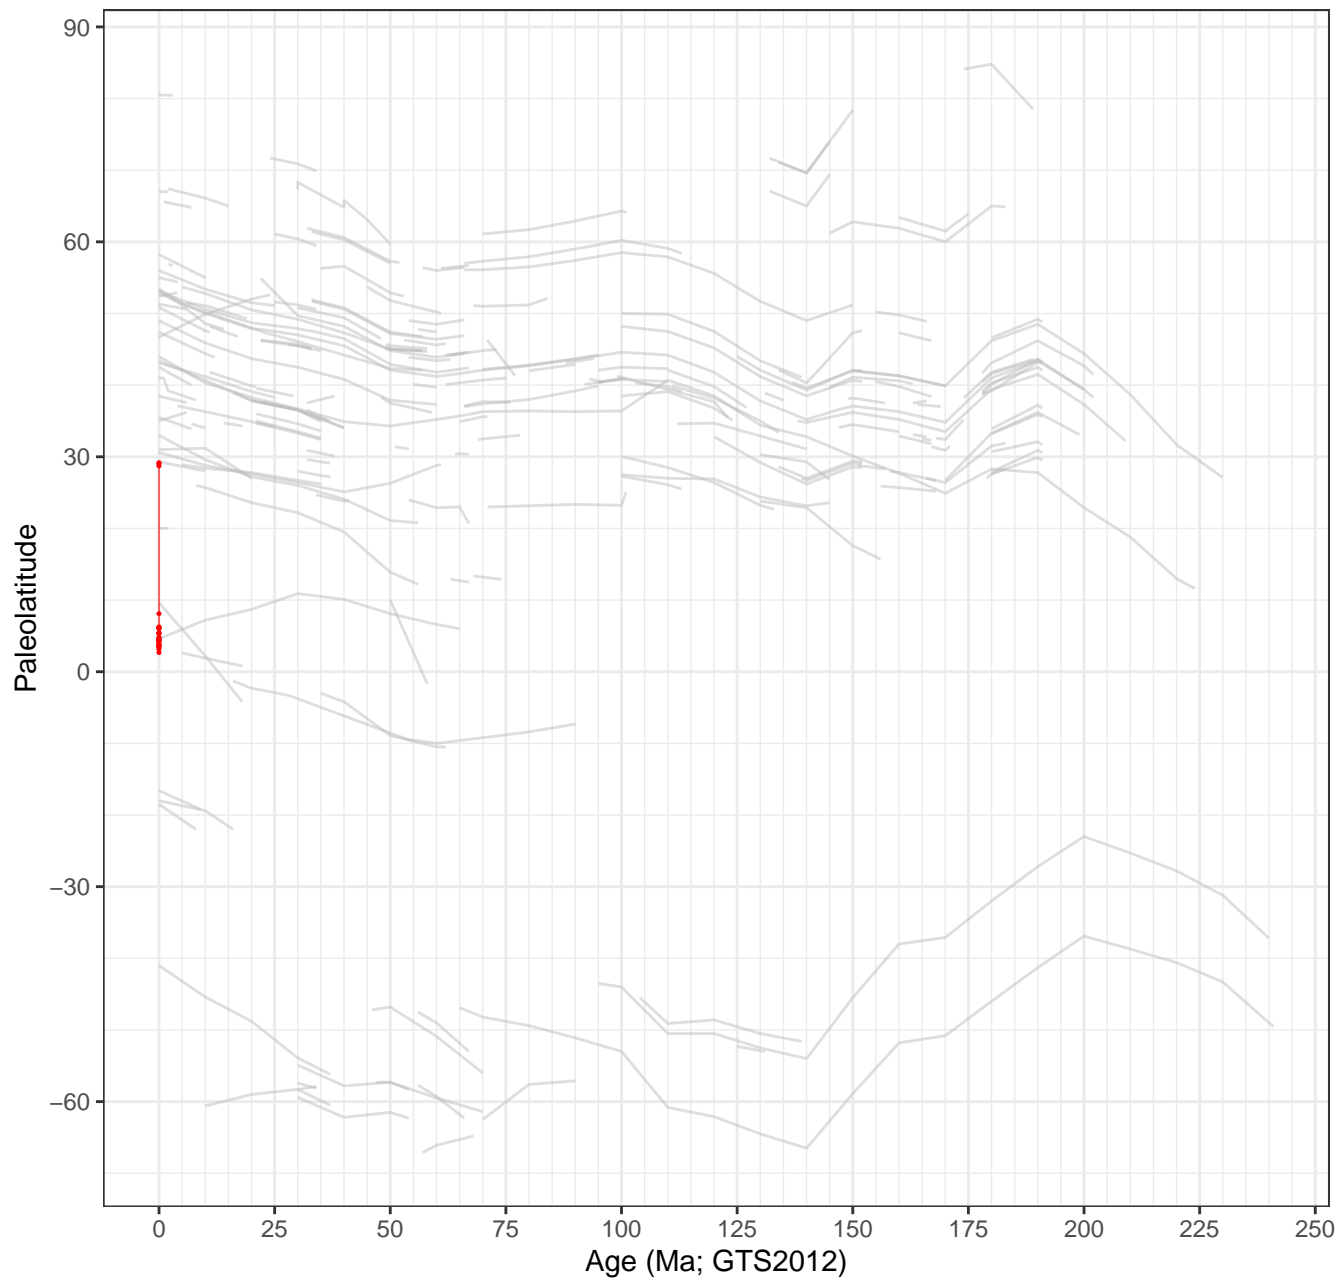

Supplement: Supplementary file 525 [file modern_Operculodinium aguinawense.pdf › Supplement/Supplement 2/Modern 92 plots/modern_Operculodinium aguinawense.pdf]

# Species *Operculodinium centrocarpum*

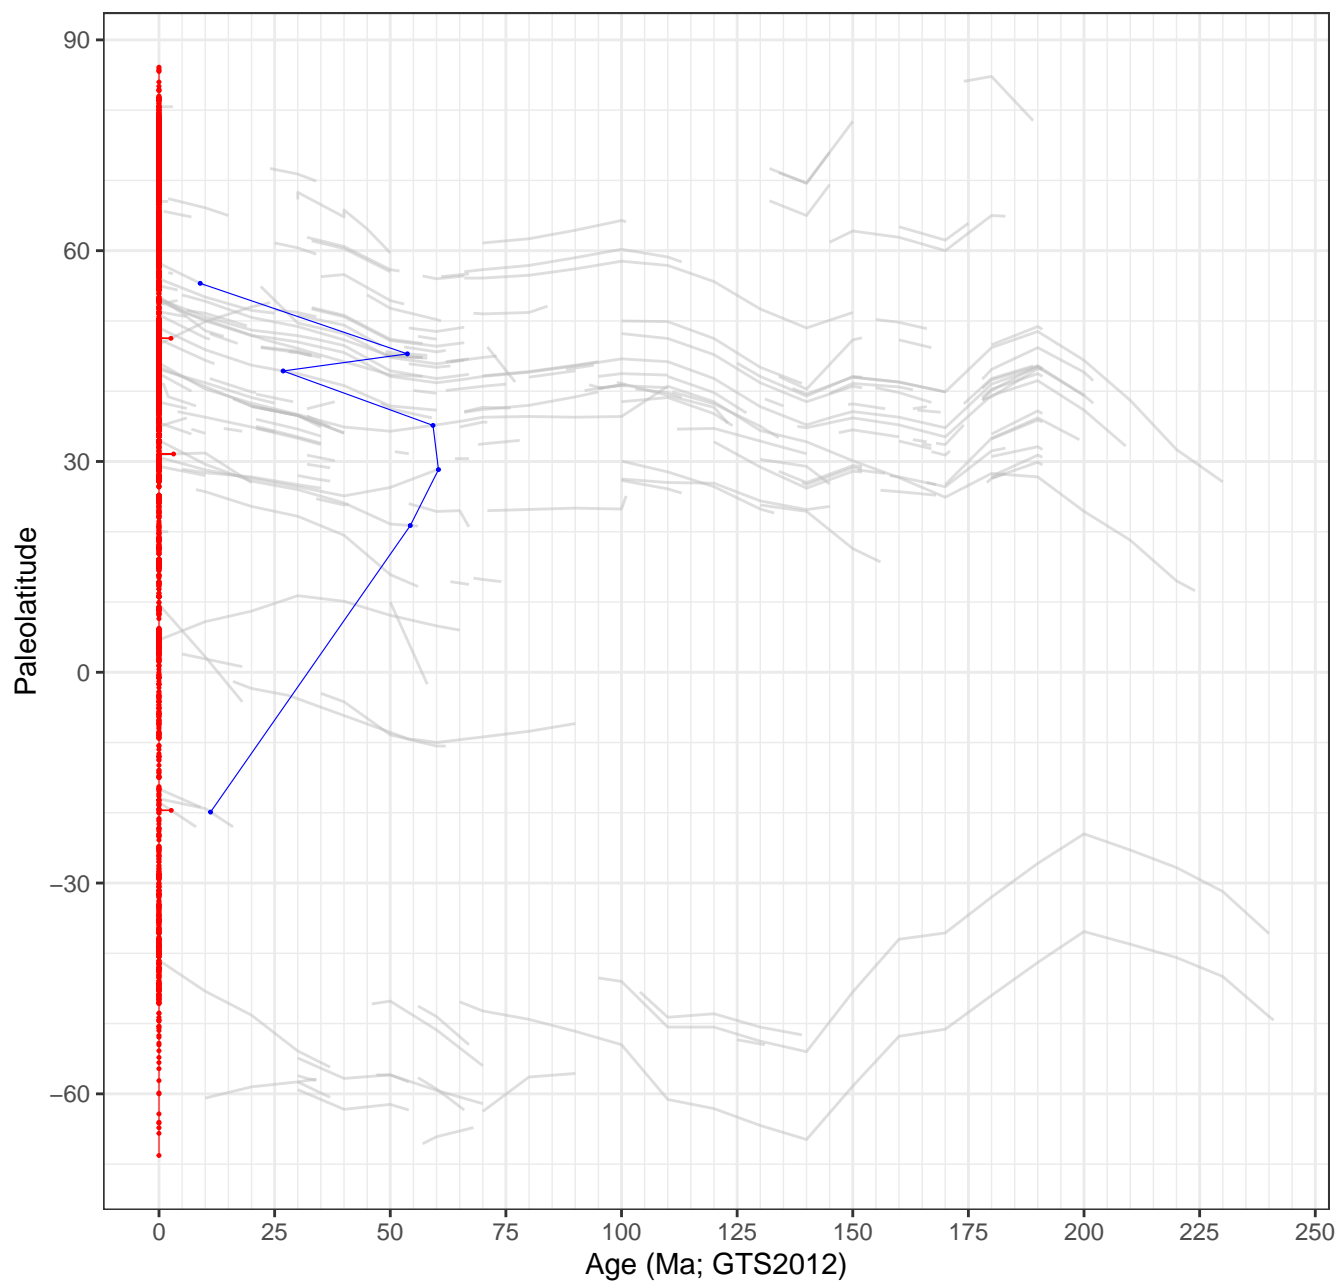

Supplement: Supplementary file 526 [file modern_Operculodinium centrocarpum.pdf › Supplement/Supplement 2/Modern 92 plots/modern_Operculodinium centrocarpum.pdf]

# Species *Operculodinium giganteum*

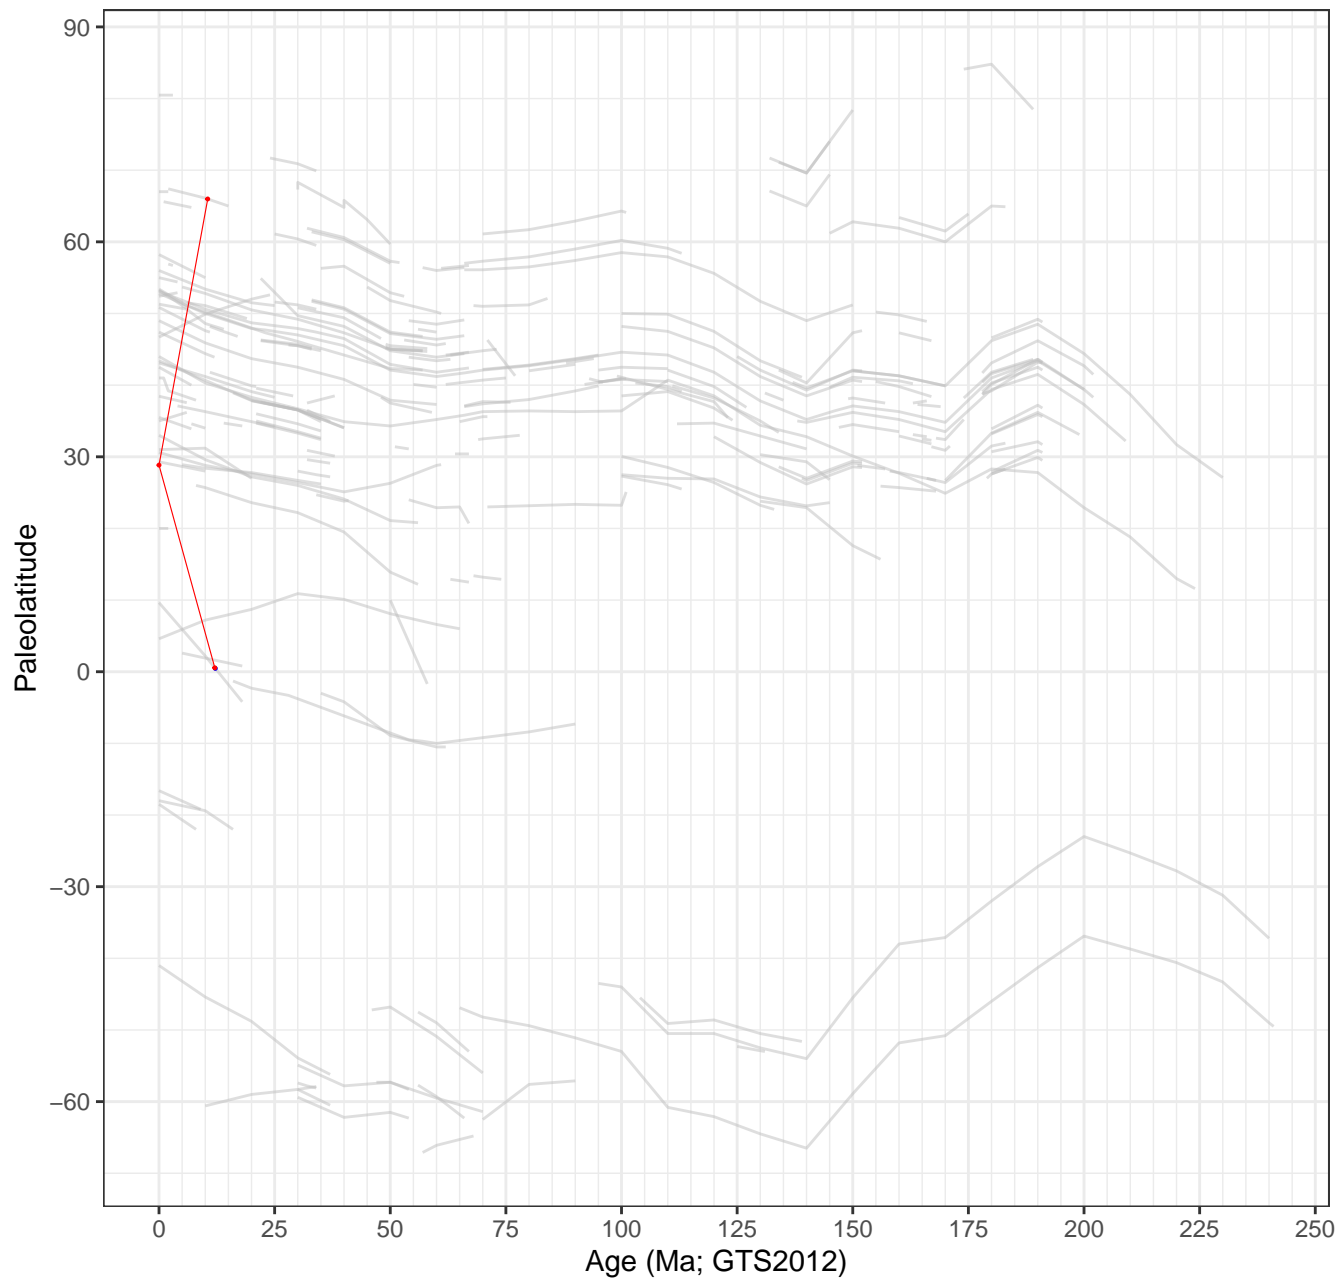

Supplement: Supplementary file 527 [file modern_Operculodinium giganteum.pdf › Supplement/Supplement 2/Modern 92 plots/modern_Operculodinium giganteum.pdf]

# Species *Operculodinium israelianum*

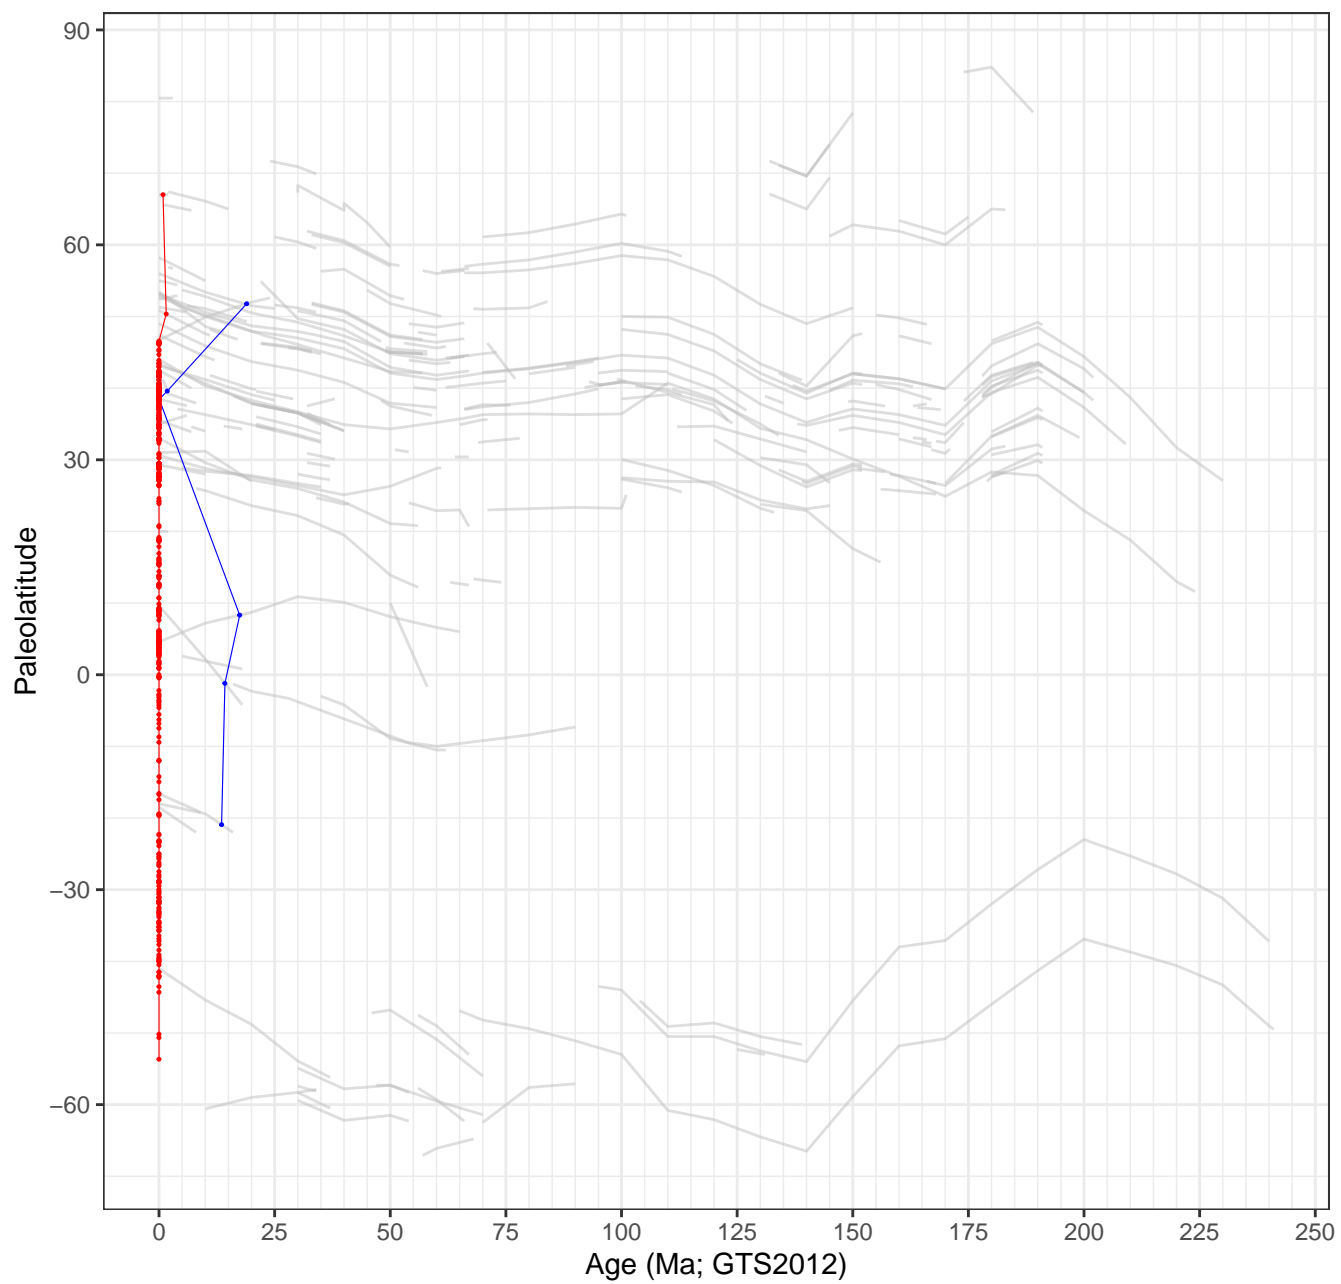

Supplement: Supplementary file 528 [file modern_Operculodinium israelianum.pdf › Supplement/Supplement 2/Modern 92 plots/modern_Operculodinium israelianum.pdf]

# Species *Operculodinium janduchenei*

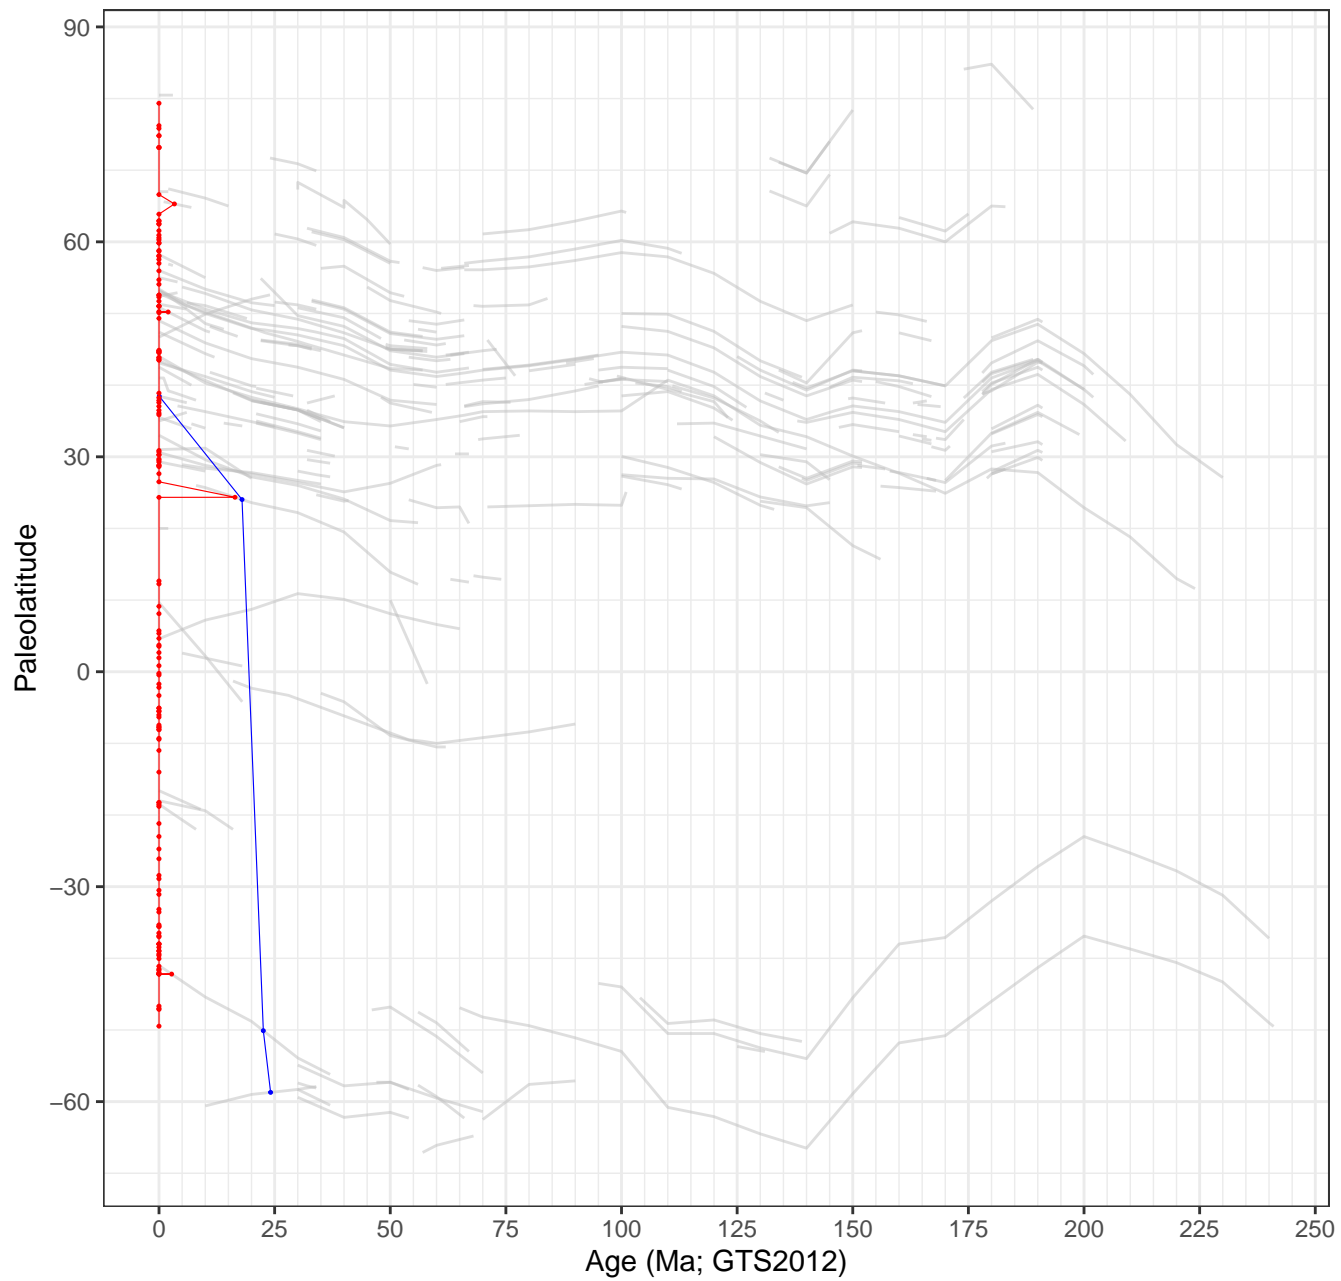

Supplement: Supplementary file 529 [file modern_Operculodinium janduchenei.pdf › Supplement/Supplement 2/Modern 92 plots/modern_Operculodinium janduchenei.pdf]

# Species *Operculodinium longispinigerum*

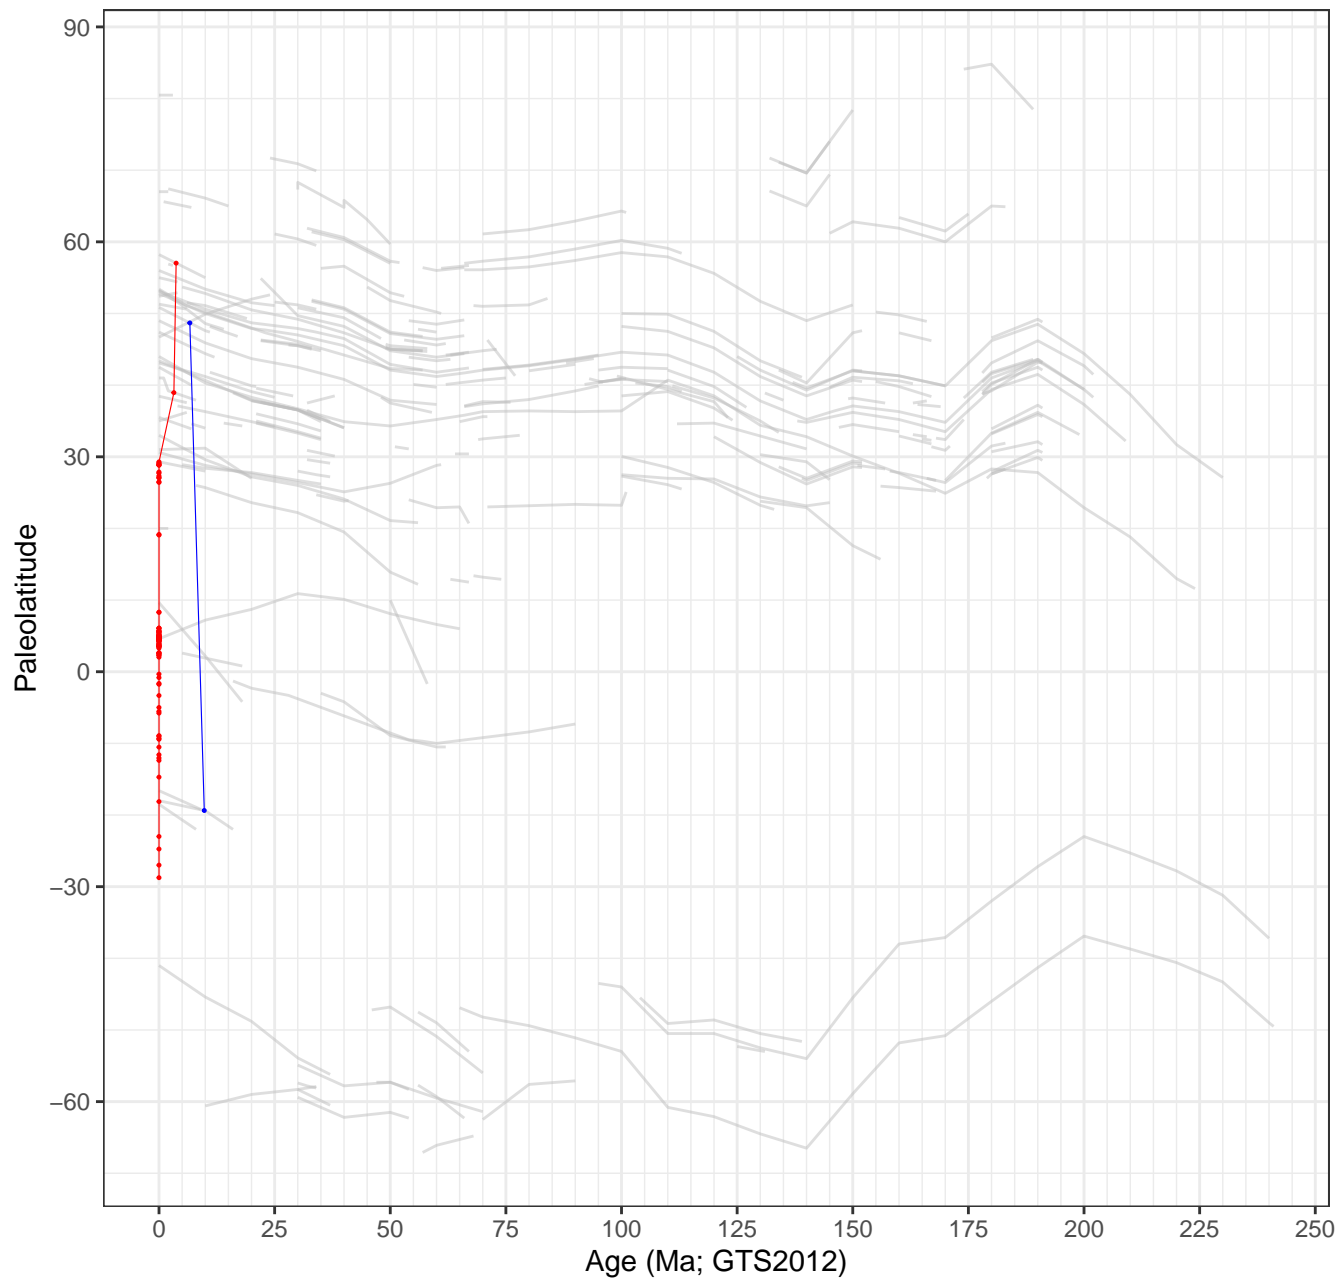

Supplement: Supplementary file 530 [file modern_Operculodinium longispinigerum.pdf › Supplement/Supplement 2/Modern 92 plots/modern_Operculodinium longispinigerum.pdf]

# Species *Pentapharsodinium dalei*

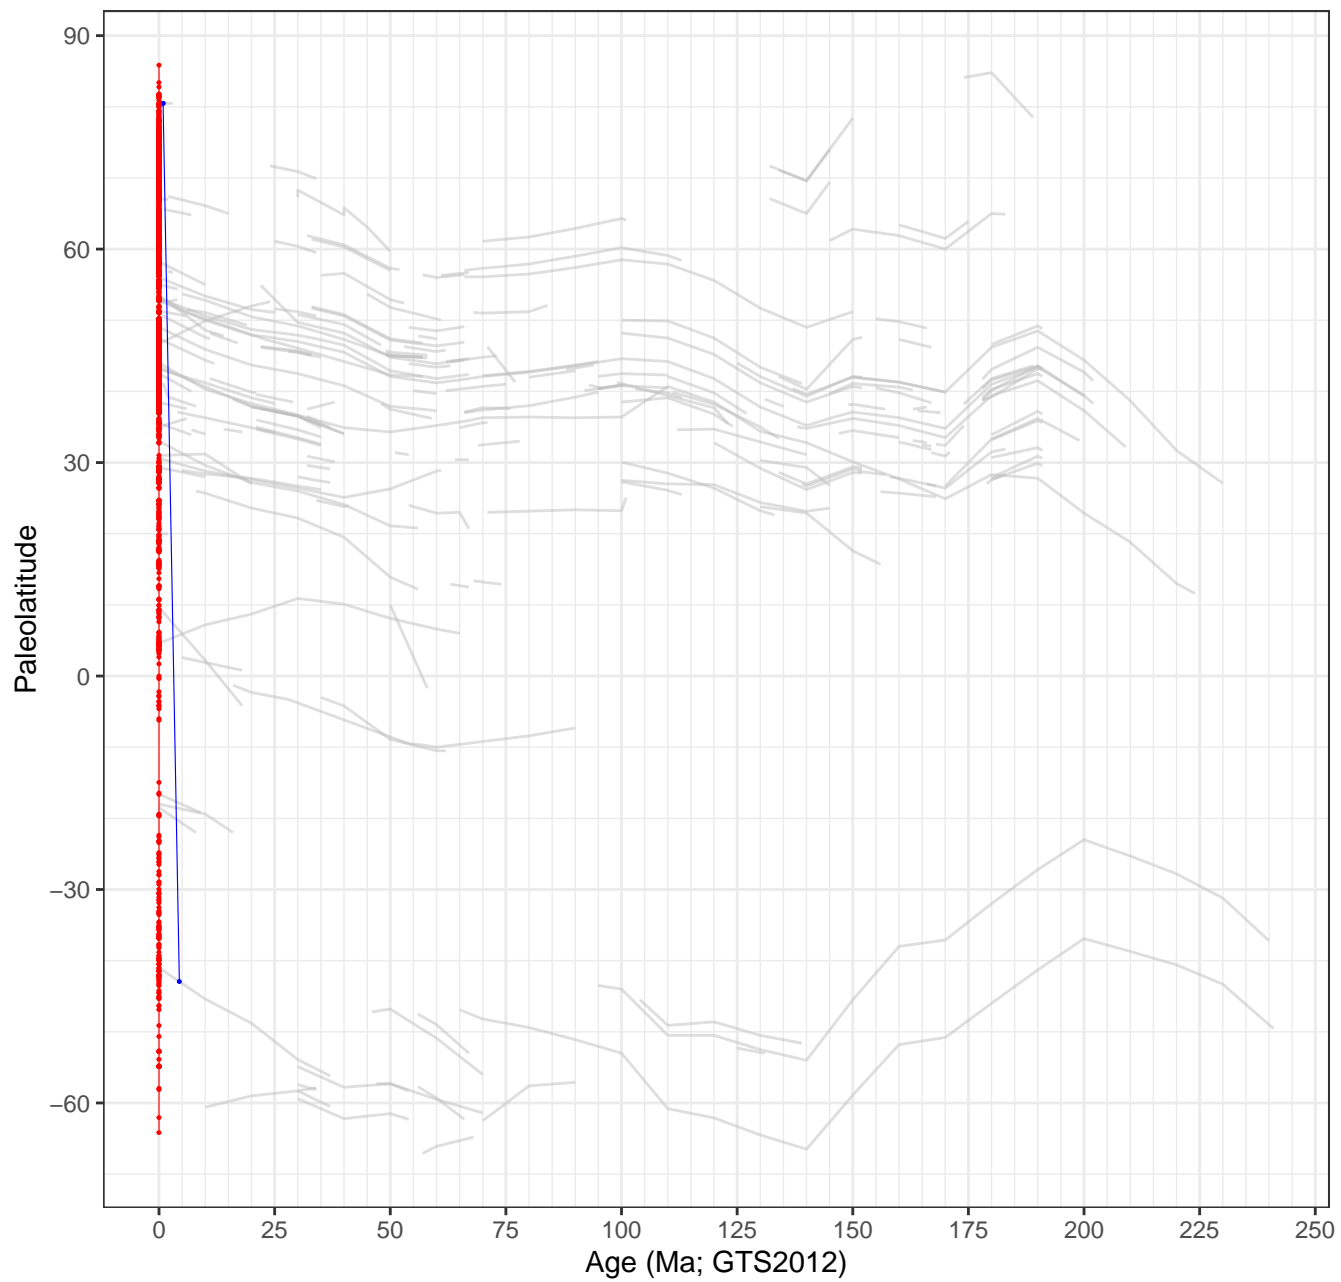

Supplement: Supplementary file 531 [file modern_Pentapharsodinium dalei.pdf › Supplement/Supplement 2/Modern 92 plots/modern_Pentapharsodinium dalei.pdf]

# Species *Peridinium ponticum*

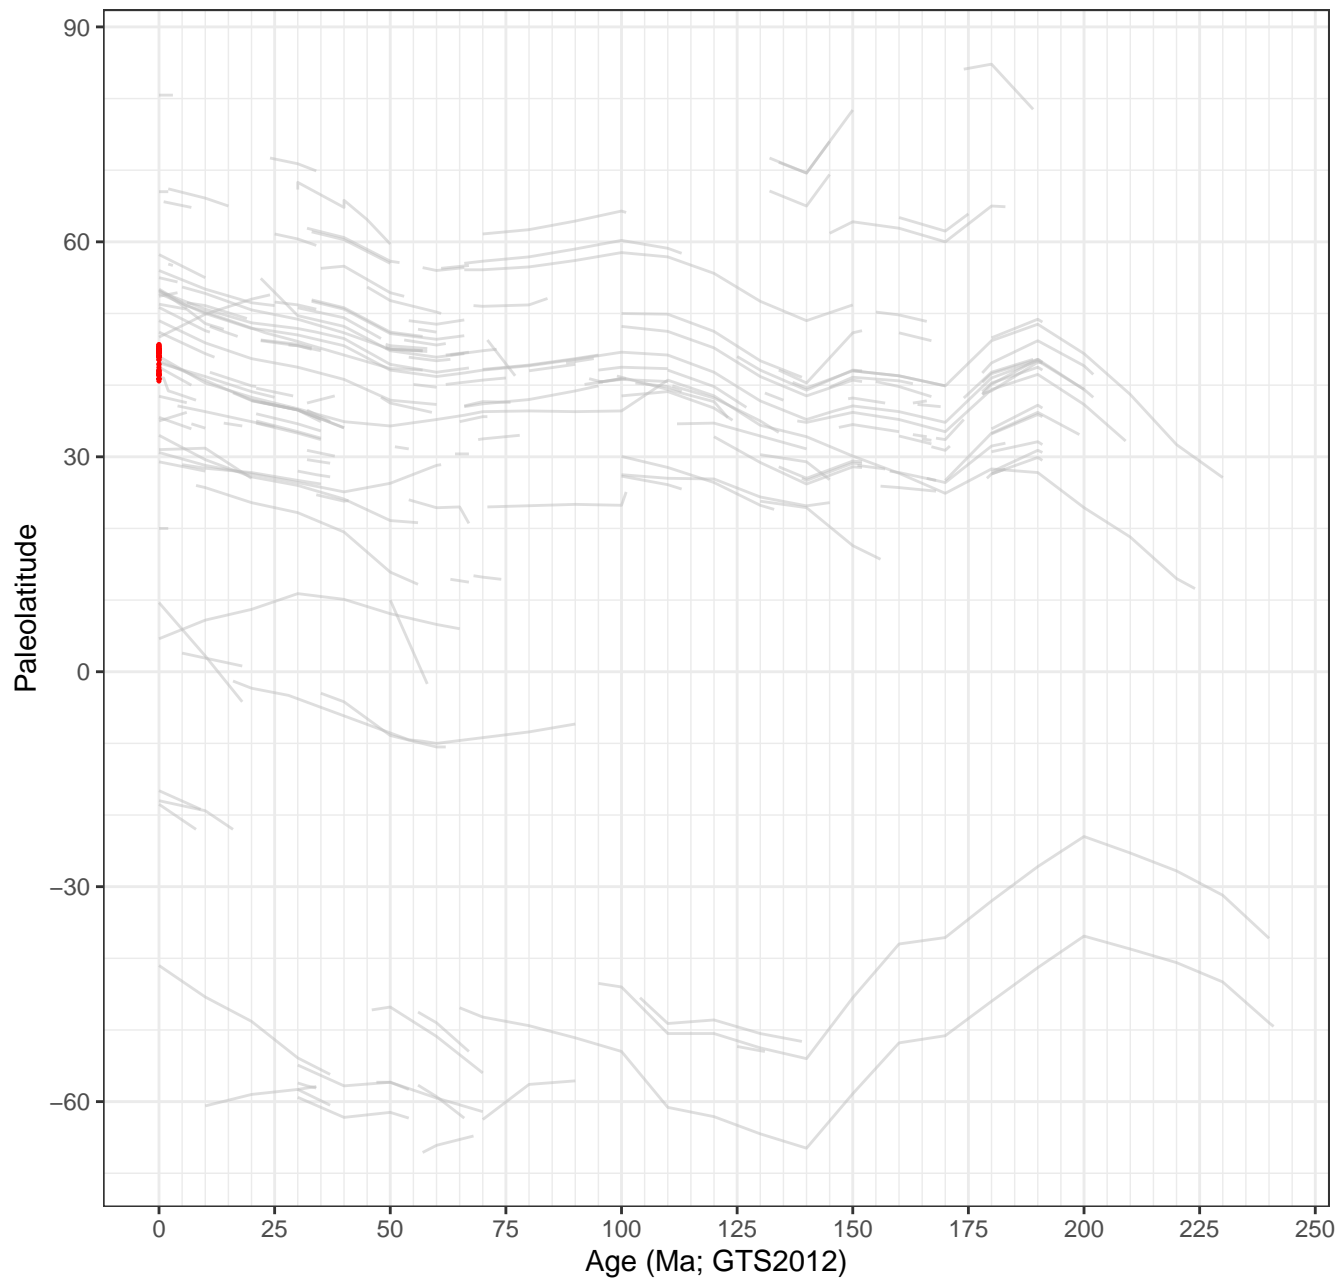

Supplement: Supplementary file 532 [file modern_Peridinium ponticum.pdf › Supplement/Supplement 2/Modern 92 plots/modern_Peridinium ponticum.pdf]

# Species Peridinium spp.

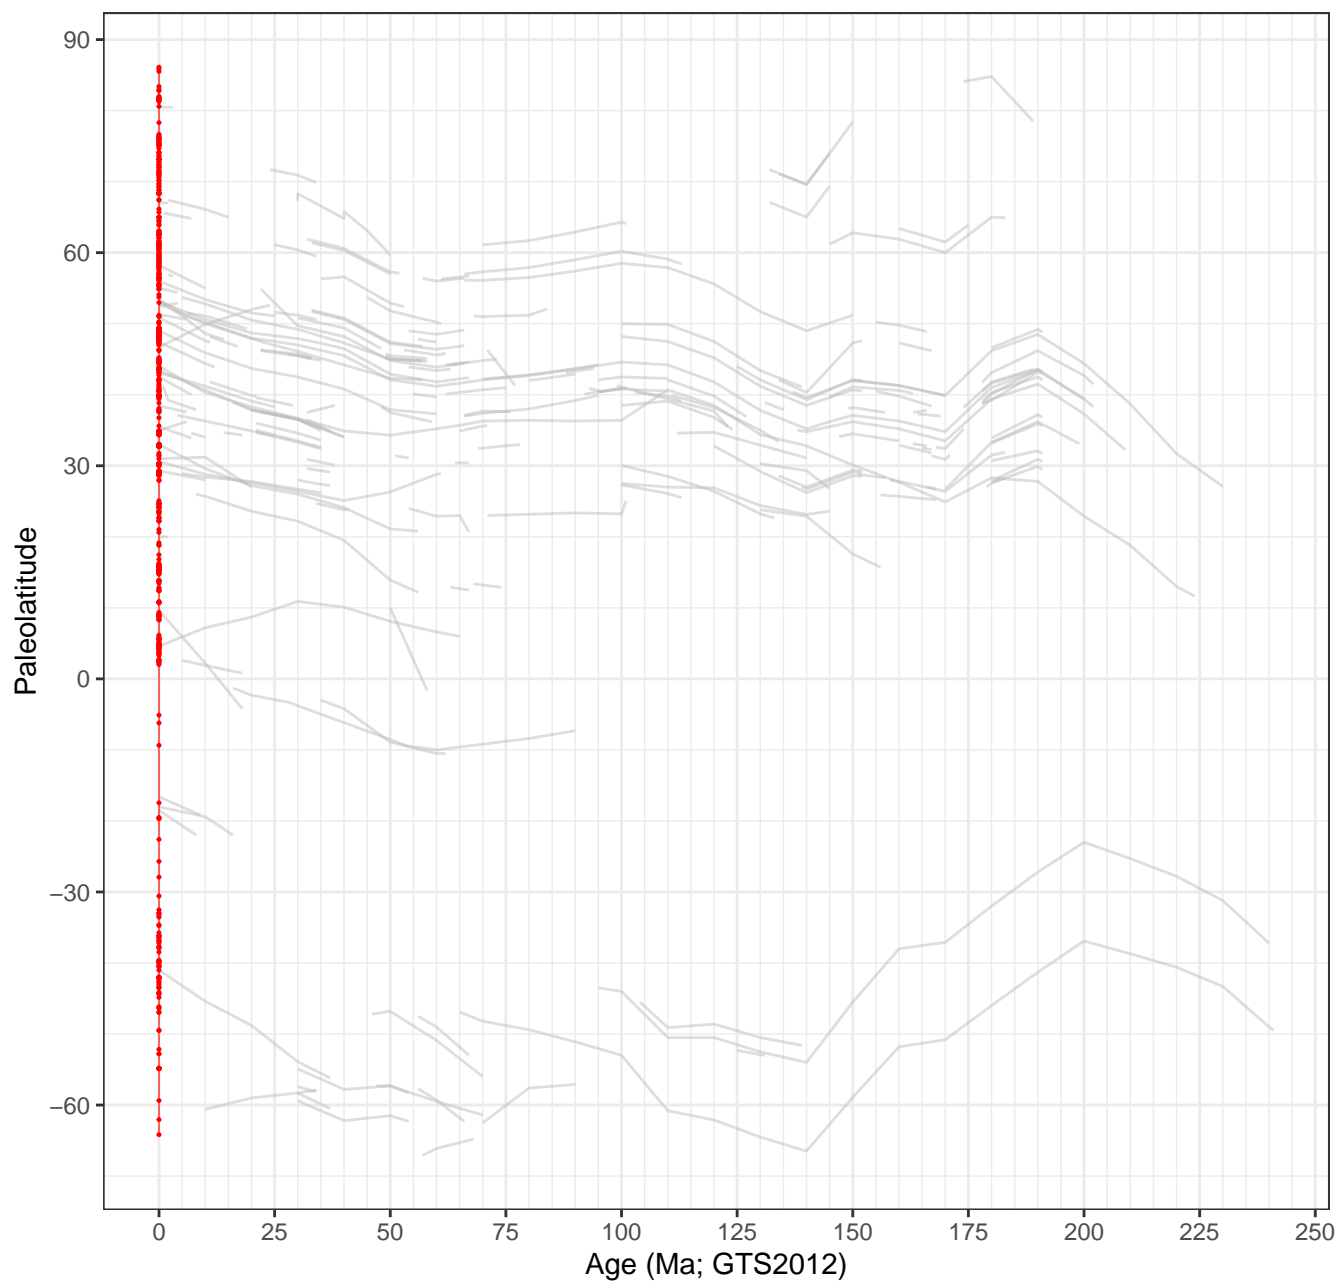

Supplement: Supplementary file 533 [file modern_Peridinium spp..pdf › Supplement/Supplement 2/Modern 92 plots/modern_Peridinium spp..pdf]

# Species *Polykrikos quadratus*

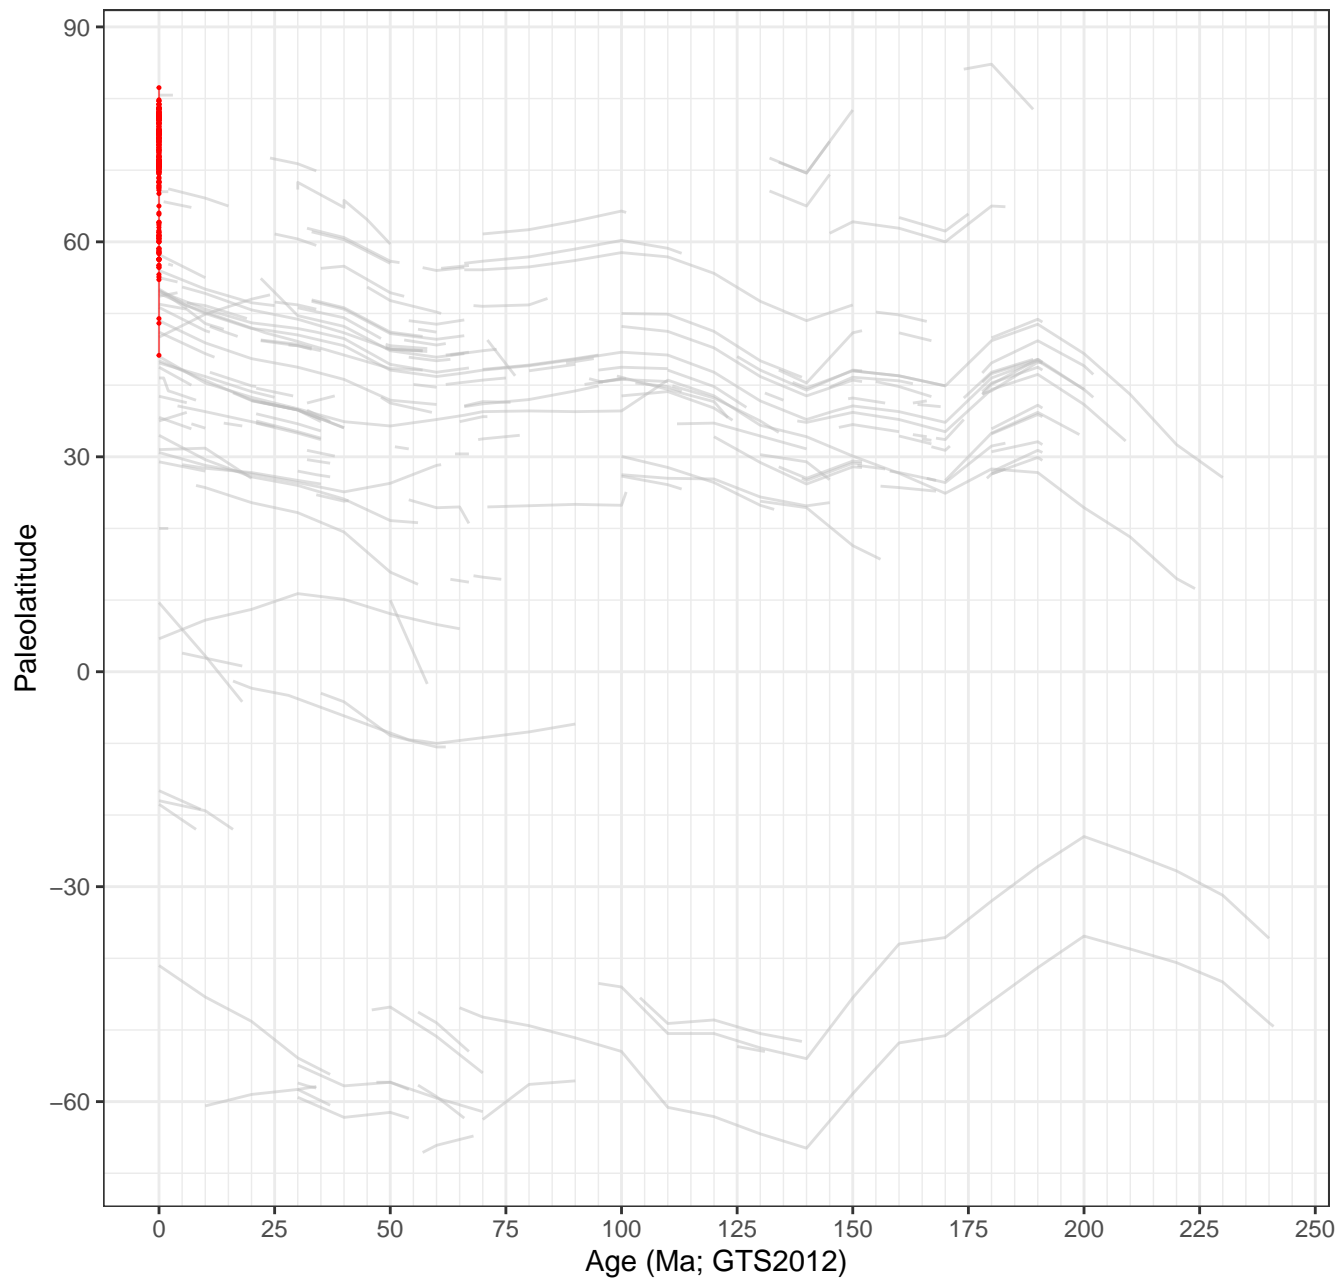

Supplement: Supplementary file 534 [file modern_Polykrikos quadratus.pdf › Supplement/Supplement 2/Modern 92 plots/modern_Polykrikos quadratus.pdf]

# Species *Polysphaeridium zoharyi*

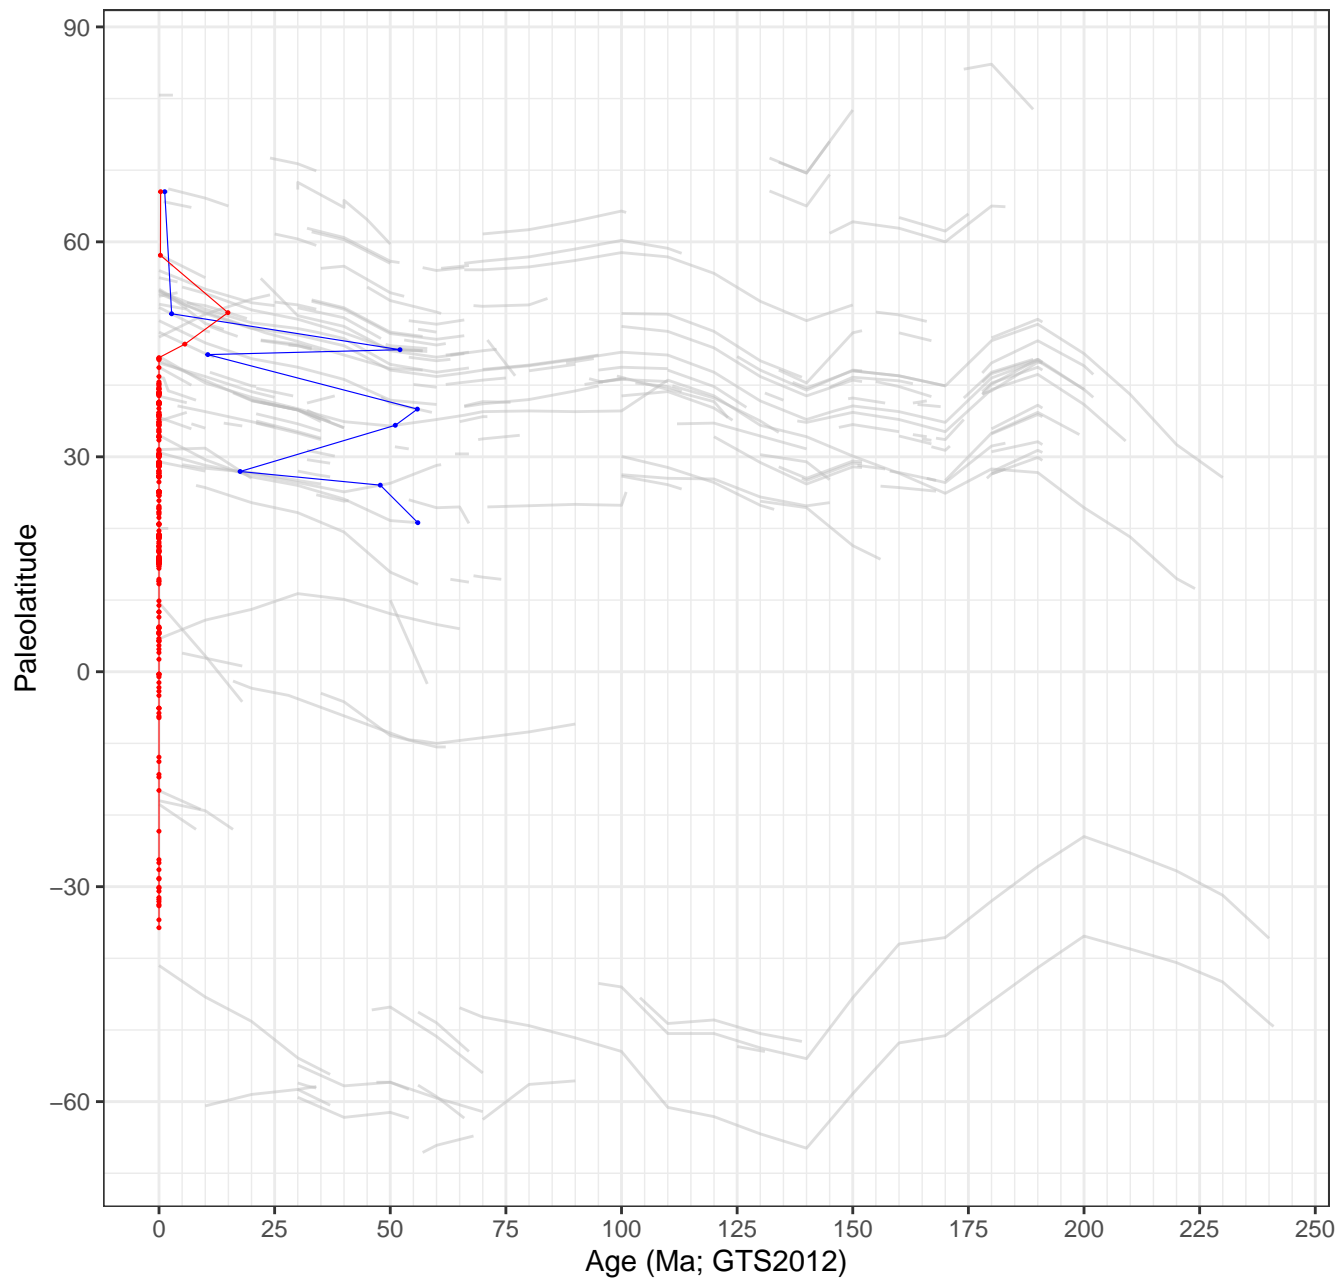

Supplement: Supplementary file 535 [file modern_Polysphaeridium zoharyi.pdf › Supplement/Supplement 2/Modern 92 plots/modern_Polysphaeridium zoharyi.pdf]

# Species *Pyxidinopsis psilata*

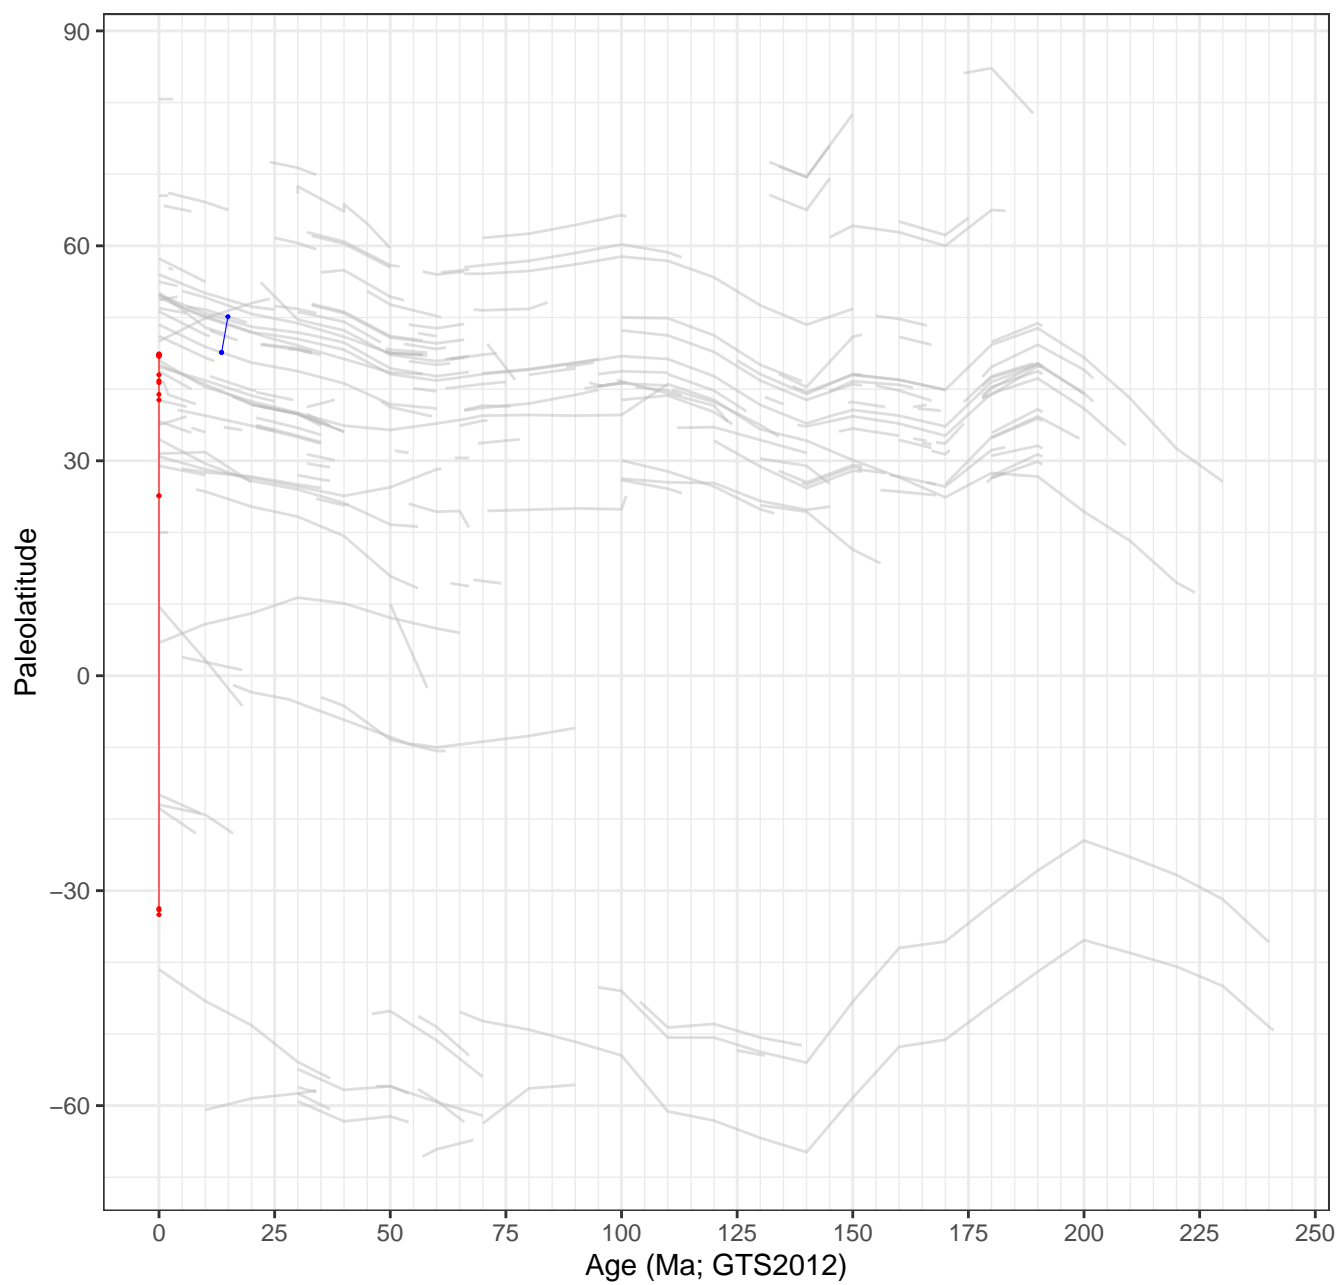

Supplement: Supplementary file 536 [file modern_Pyxidinopsis psilata.pdf › Supplement/Supplement 2/Modern 92 plots/modern_Pyxidinopsis psilata.pdf]

# Species *Pyxidopsis reticulata*

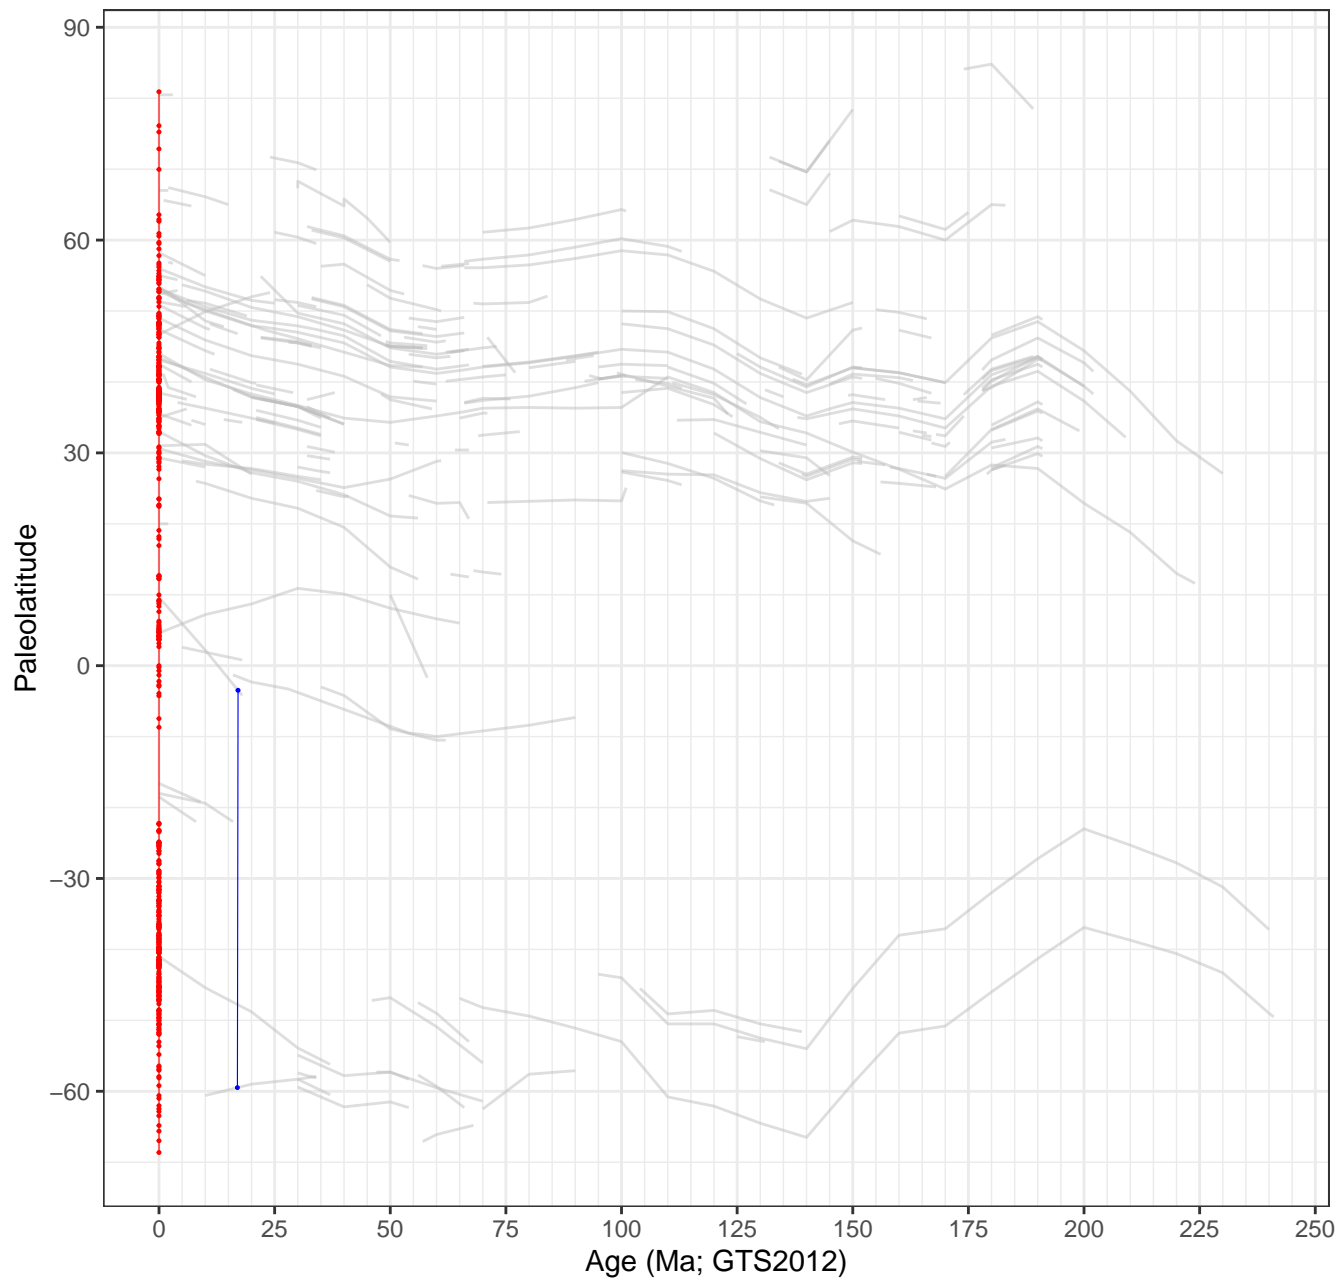

Supplement: Supplementary file 537 [file modern_Pyxidinopsis reticulata.pdf › Supplement/Supplement 2/Modern 92 plots/modern_Pyxidinopsis reticulata.pdf]

# Species *Quinquecuspis concreta*

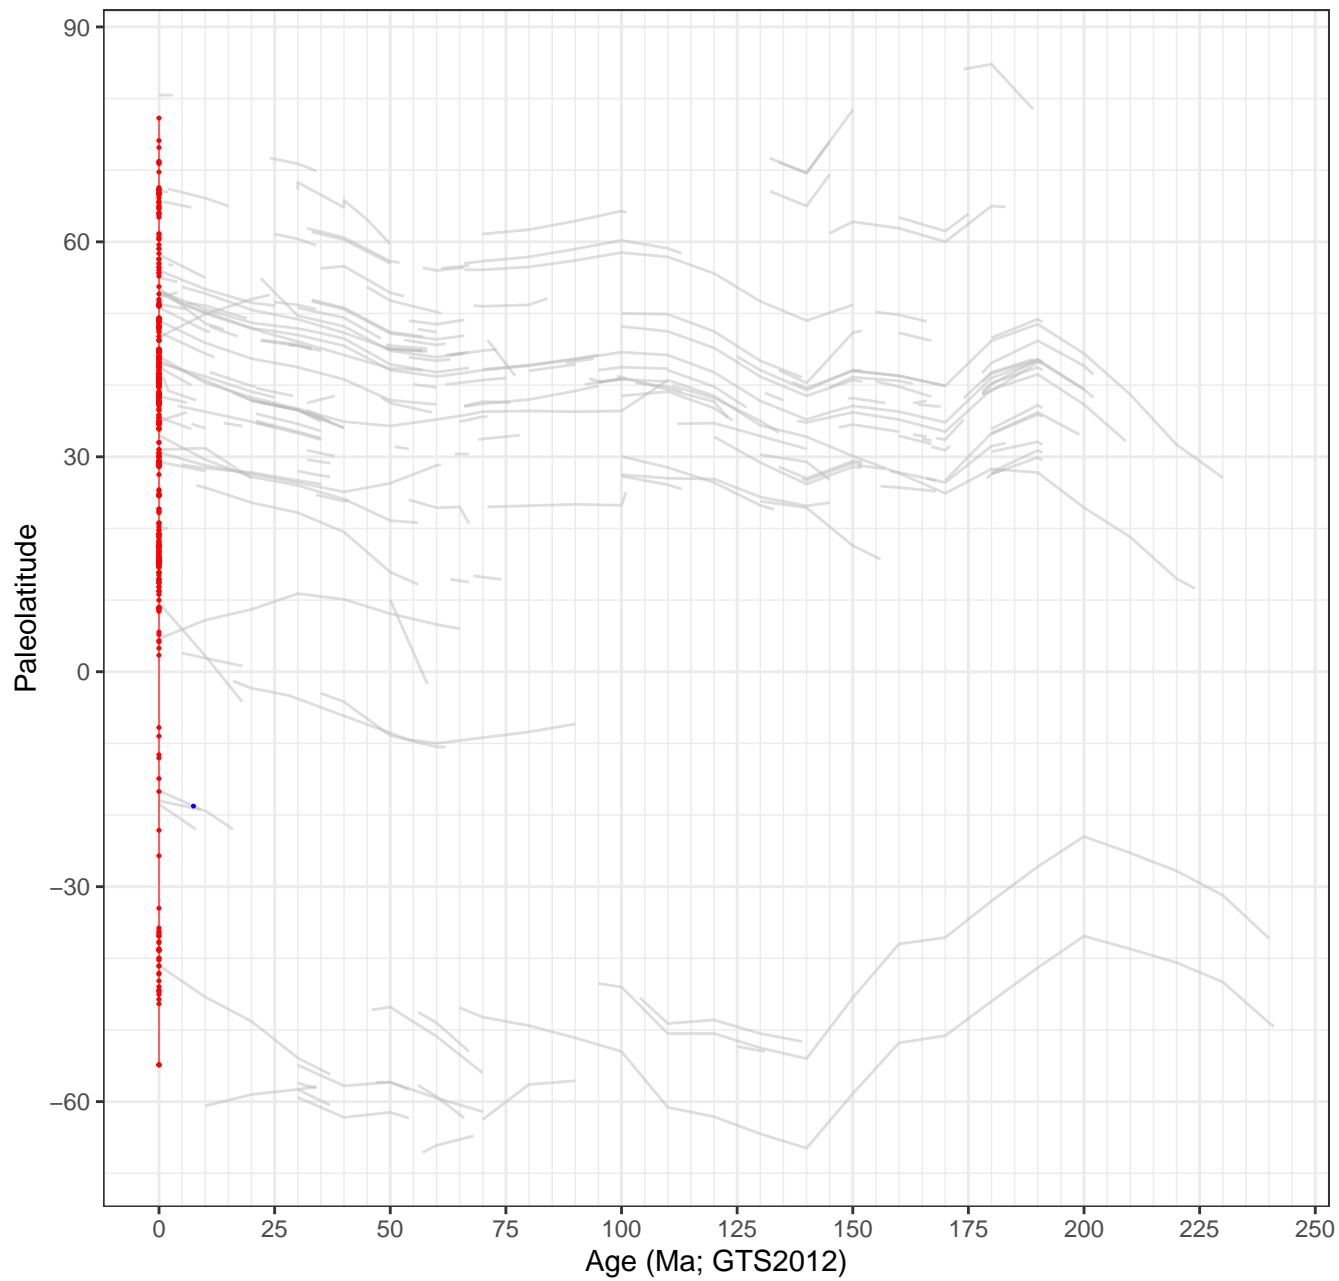

Supplement: Supplementary file 538 [file modern_Quinquecuspis concreta.pdf › Supplement/Supplement 2/Modern 92 plots/modern_Quinquecuspis concreta.pdf]

# Species *Selenopemphix antarctica*

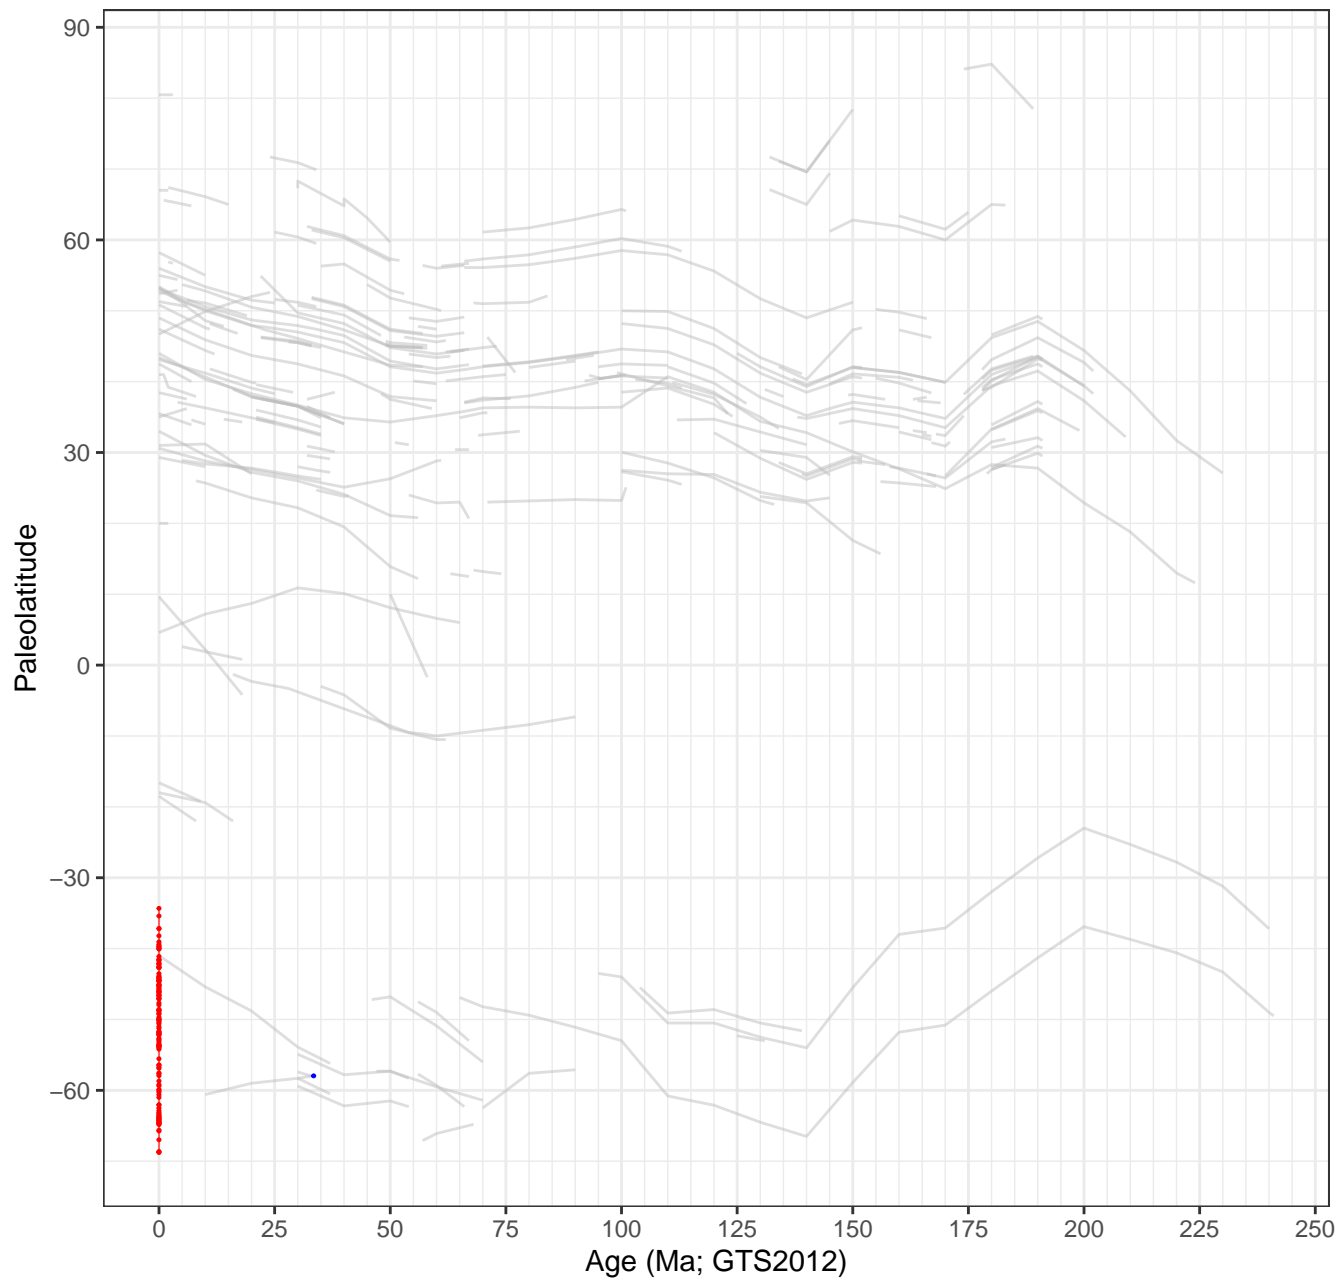

Supplement: Supplementary file 539 [file modern_Selenopemphix antarctica.pdf › Supplement/Supplement 2/Modern 92 plots/modern_Selenopemphix antarctica.pdf]

# Species *Selenopemphix nephroides*

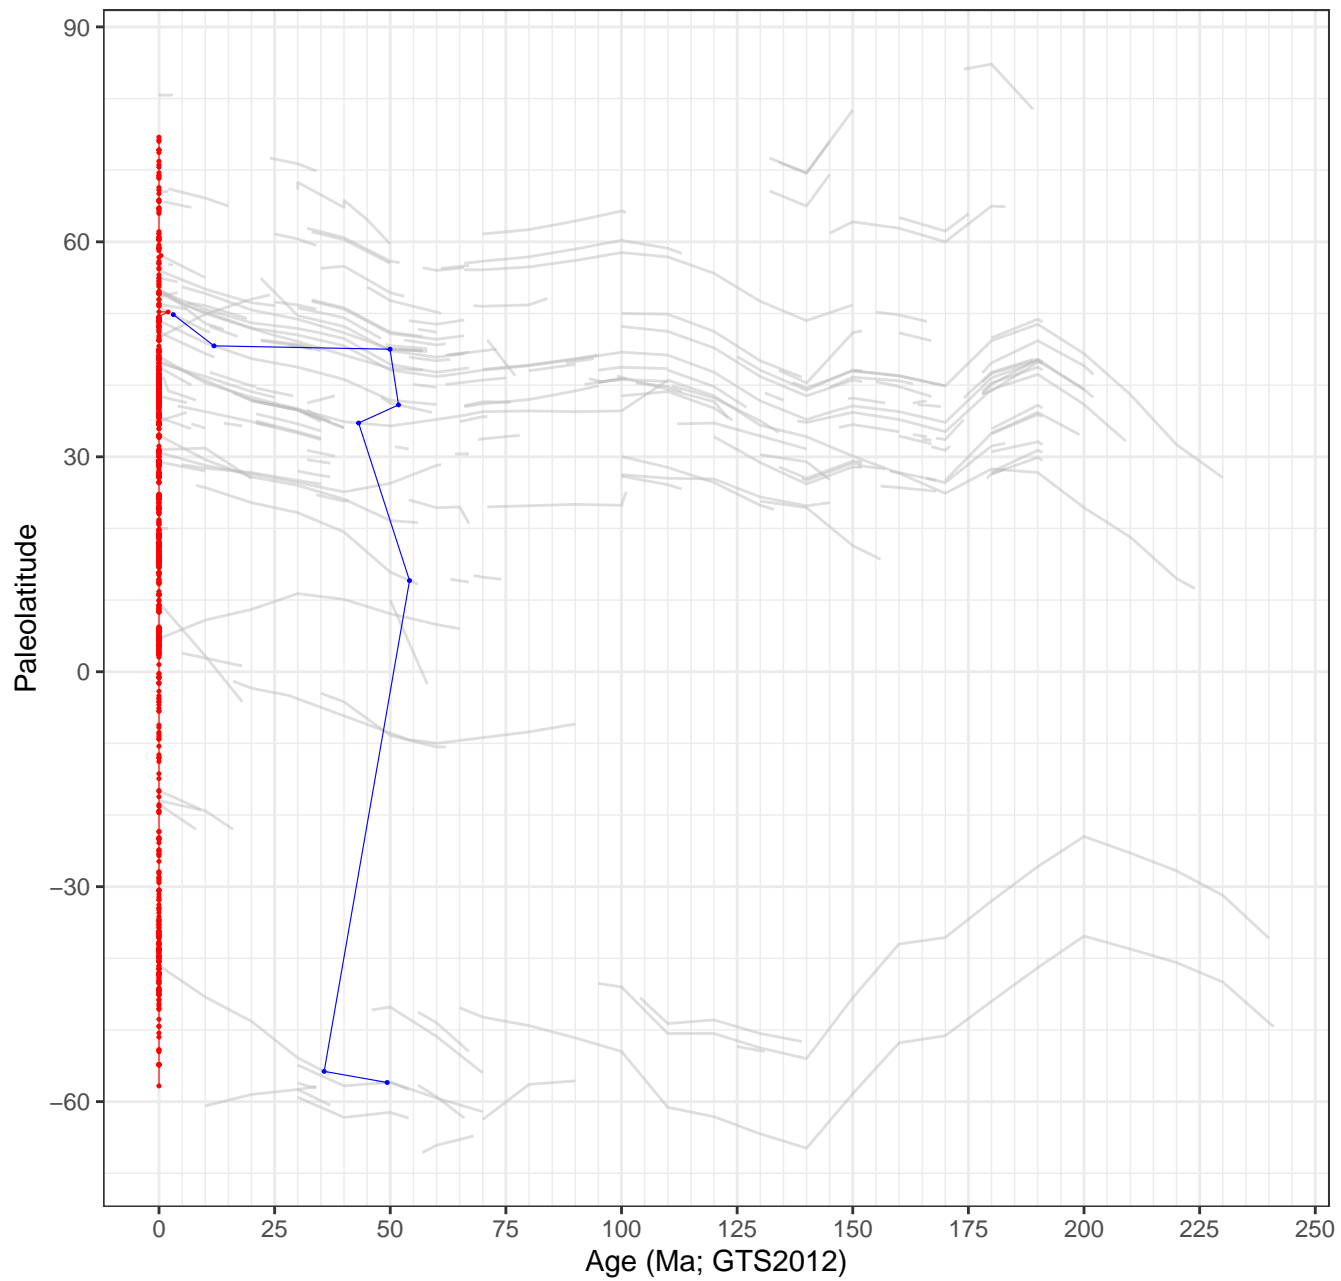

Supplement: Supplementary file 540 [file modern_Selenopemphix nephroides.pdf › Supplement/Supplement 2/Modern 92 plots/modern_Selenopemphix nephroides.pdf]

# Species *Selenopemphix quanta*

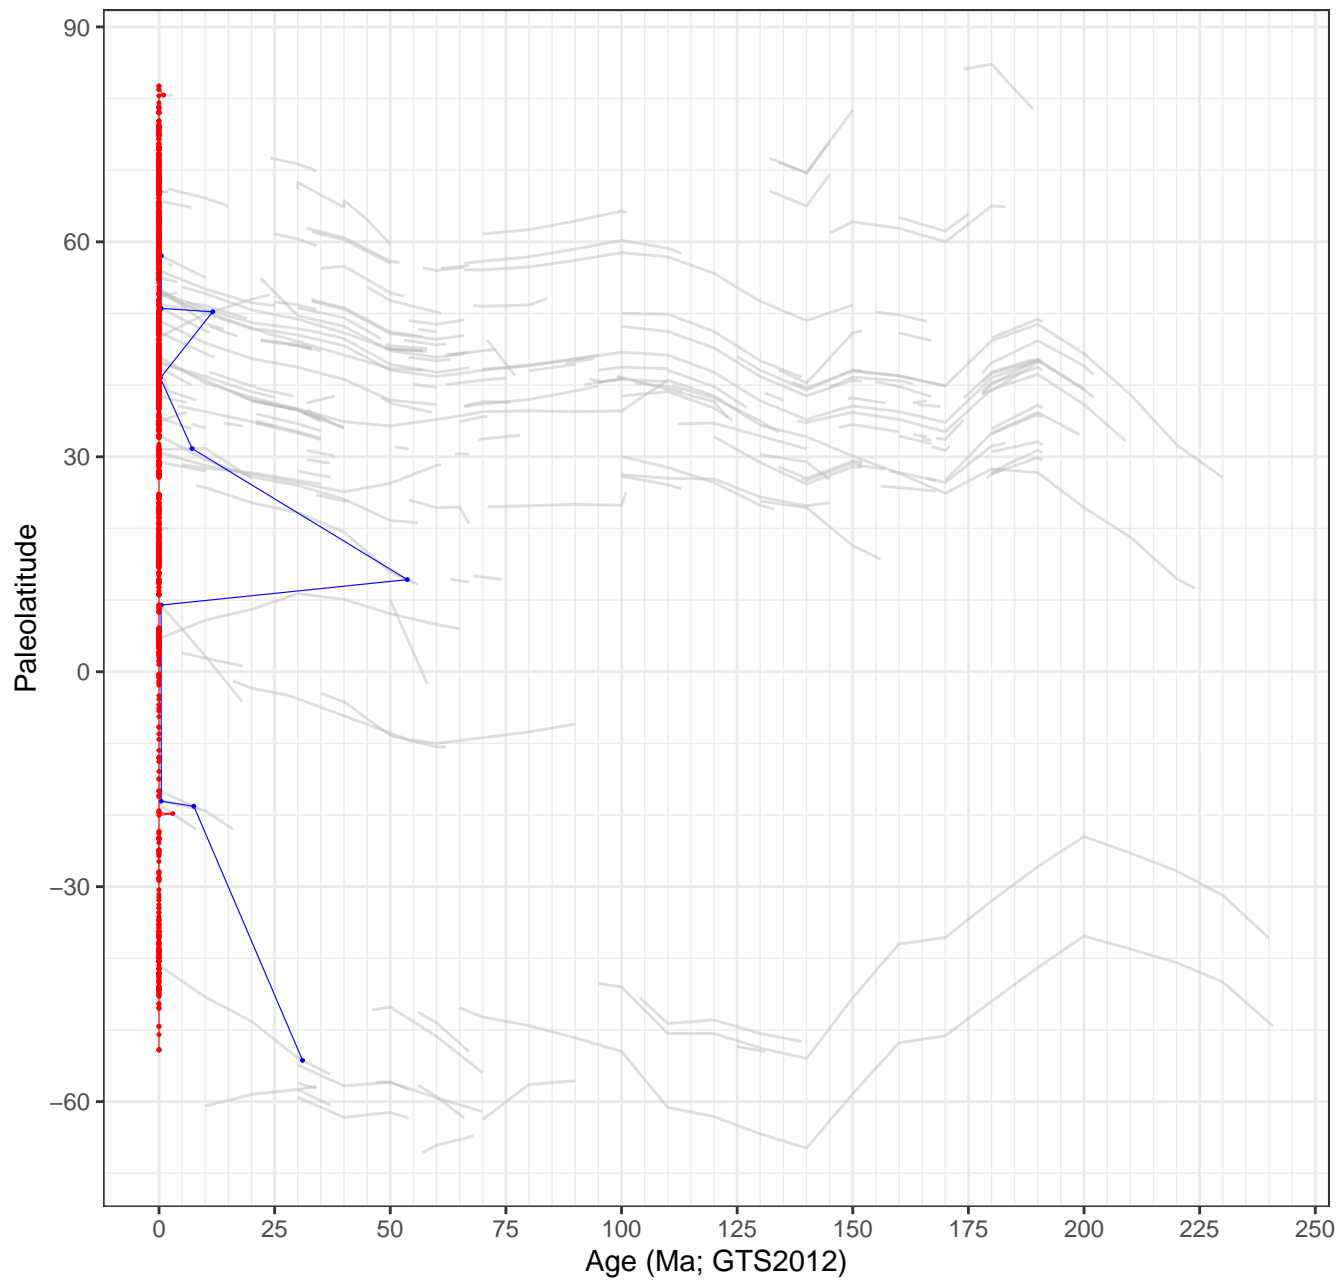

Supplement: Supplementary file 541 [file modern_Selenopemphix quanta.pdf › Supplement/Supplement 2/Modern 92 plots/modern_Selenopemphix quanta.pdf]

# Species *Spiniferites belerius*

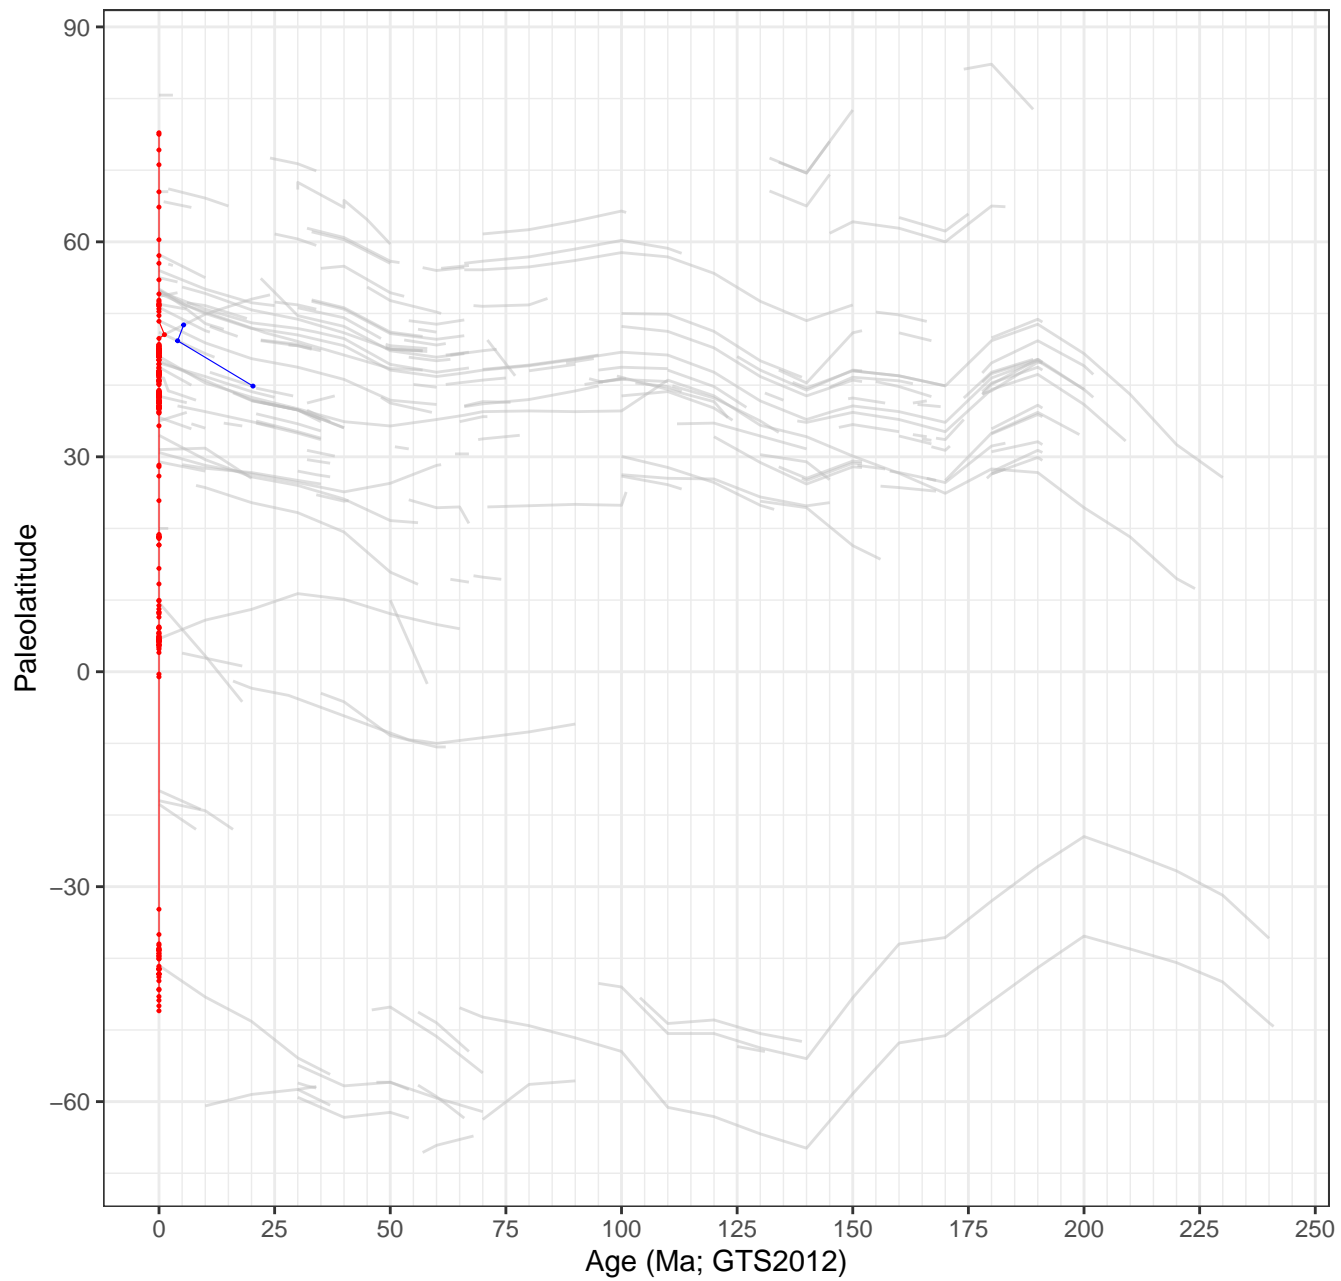

Supplement: Supplementary file 542 [file modern_Spiniferites belerius.pdf › Supplement/Supplement 2/Modern 92 plots/modern_Spiniferites belerius.pdf]

# Species *Spiniferites bentorii*

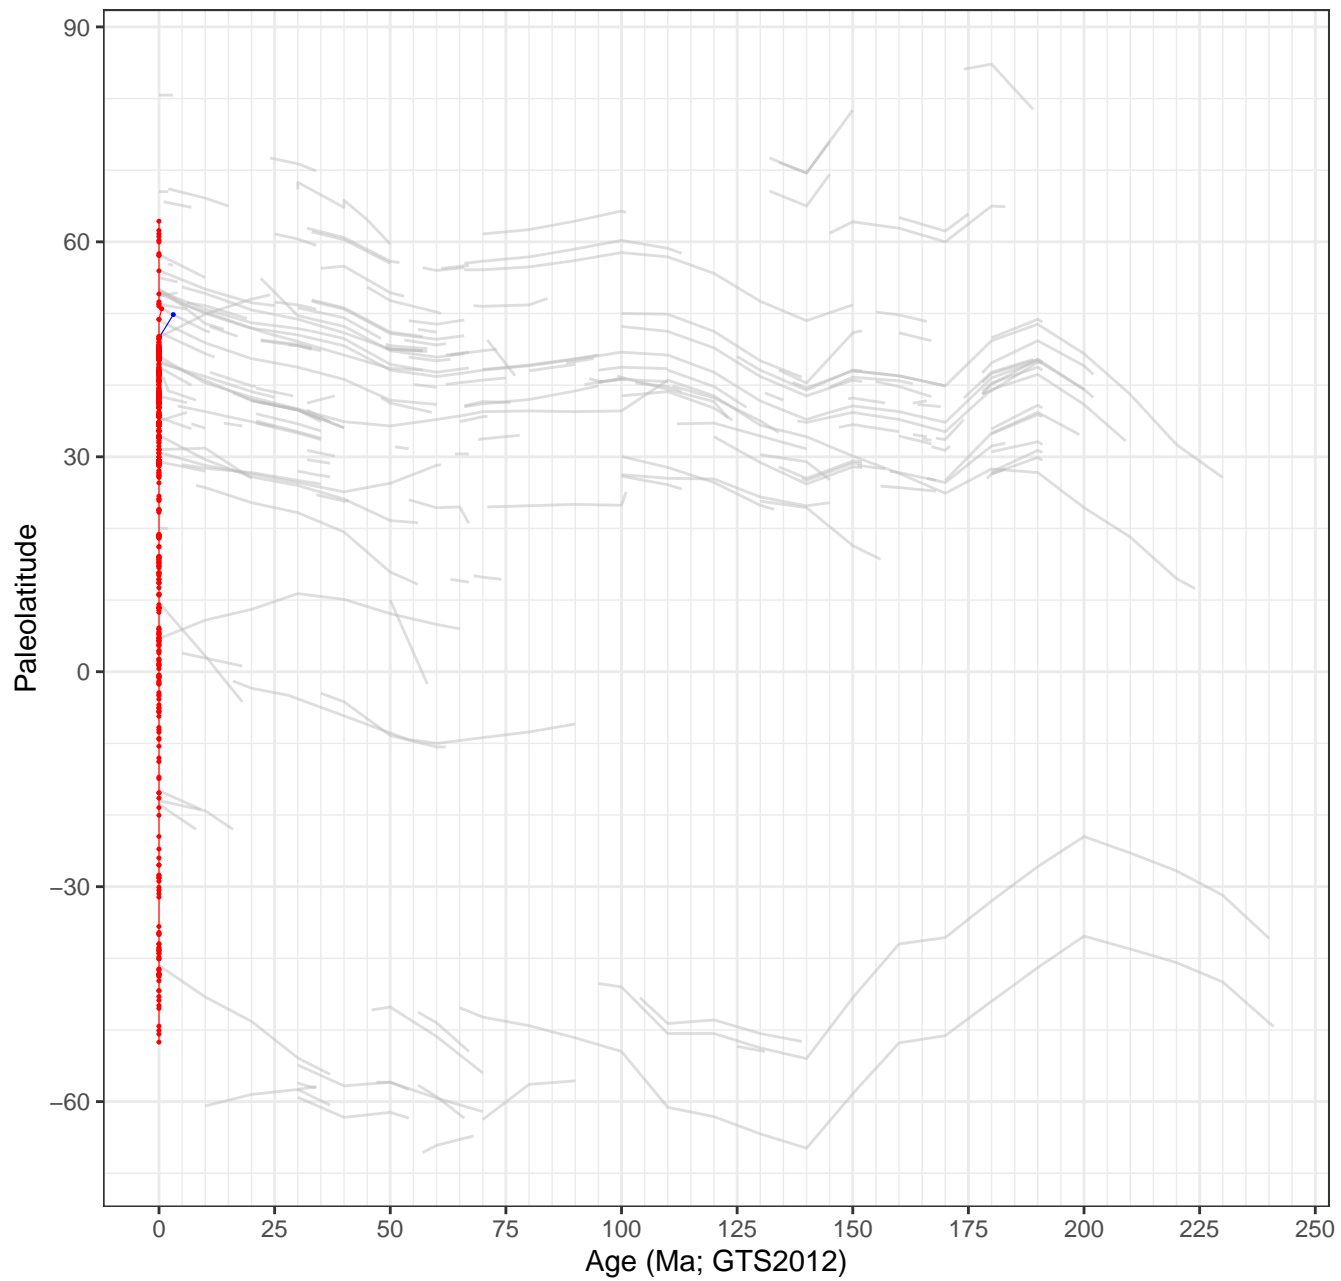

Supplement: Supplementary file 543 [file modern_Spiniferites bentorii.pdf › Supplement/Supplement 2/Modern 92 plots/modern_Spiniferites bentorii.pdf]

# Species *Spiniferites bulloideus*

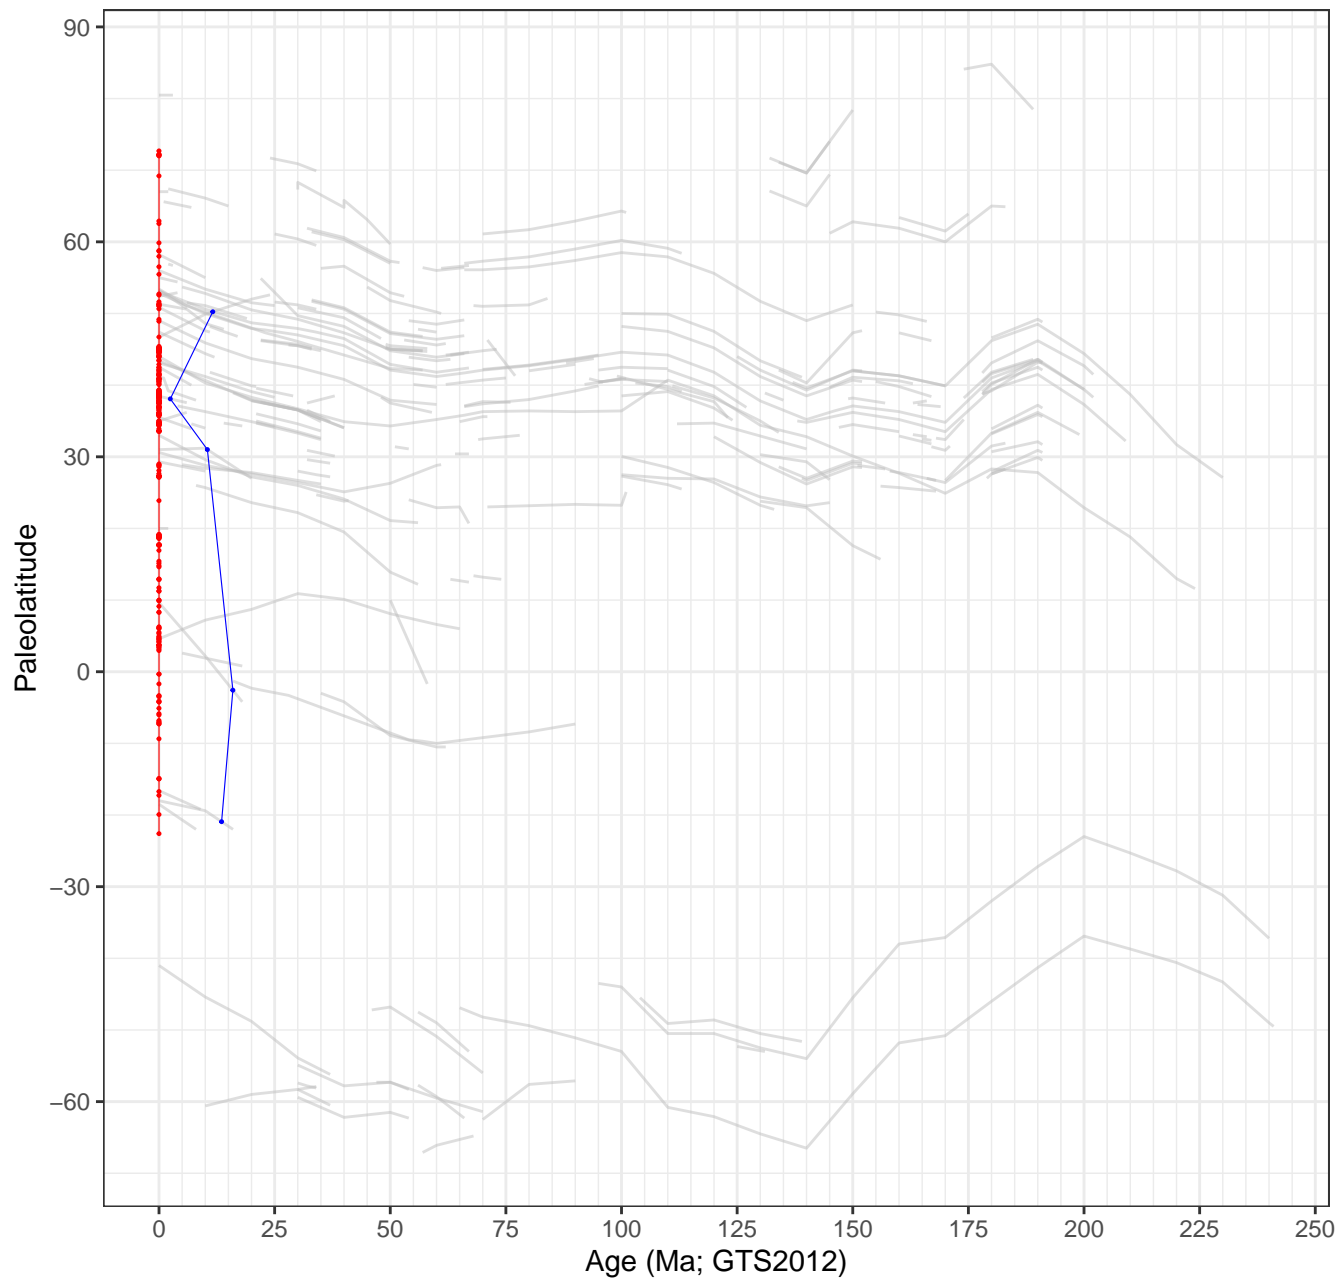

Supplement: Supplementary file 544 [file modern_Spiniferites bulloideus.pdf › Supplement/Supplement 2/Modern 92 plots/modern_Spiniferites bulloideus.pdf]

# Species *Spiniferites cruciformis*

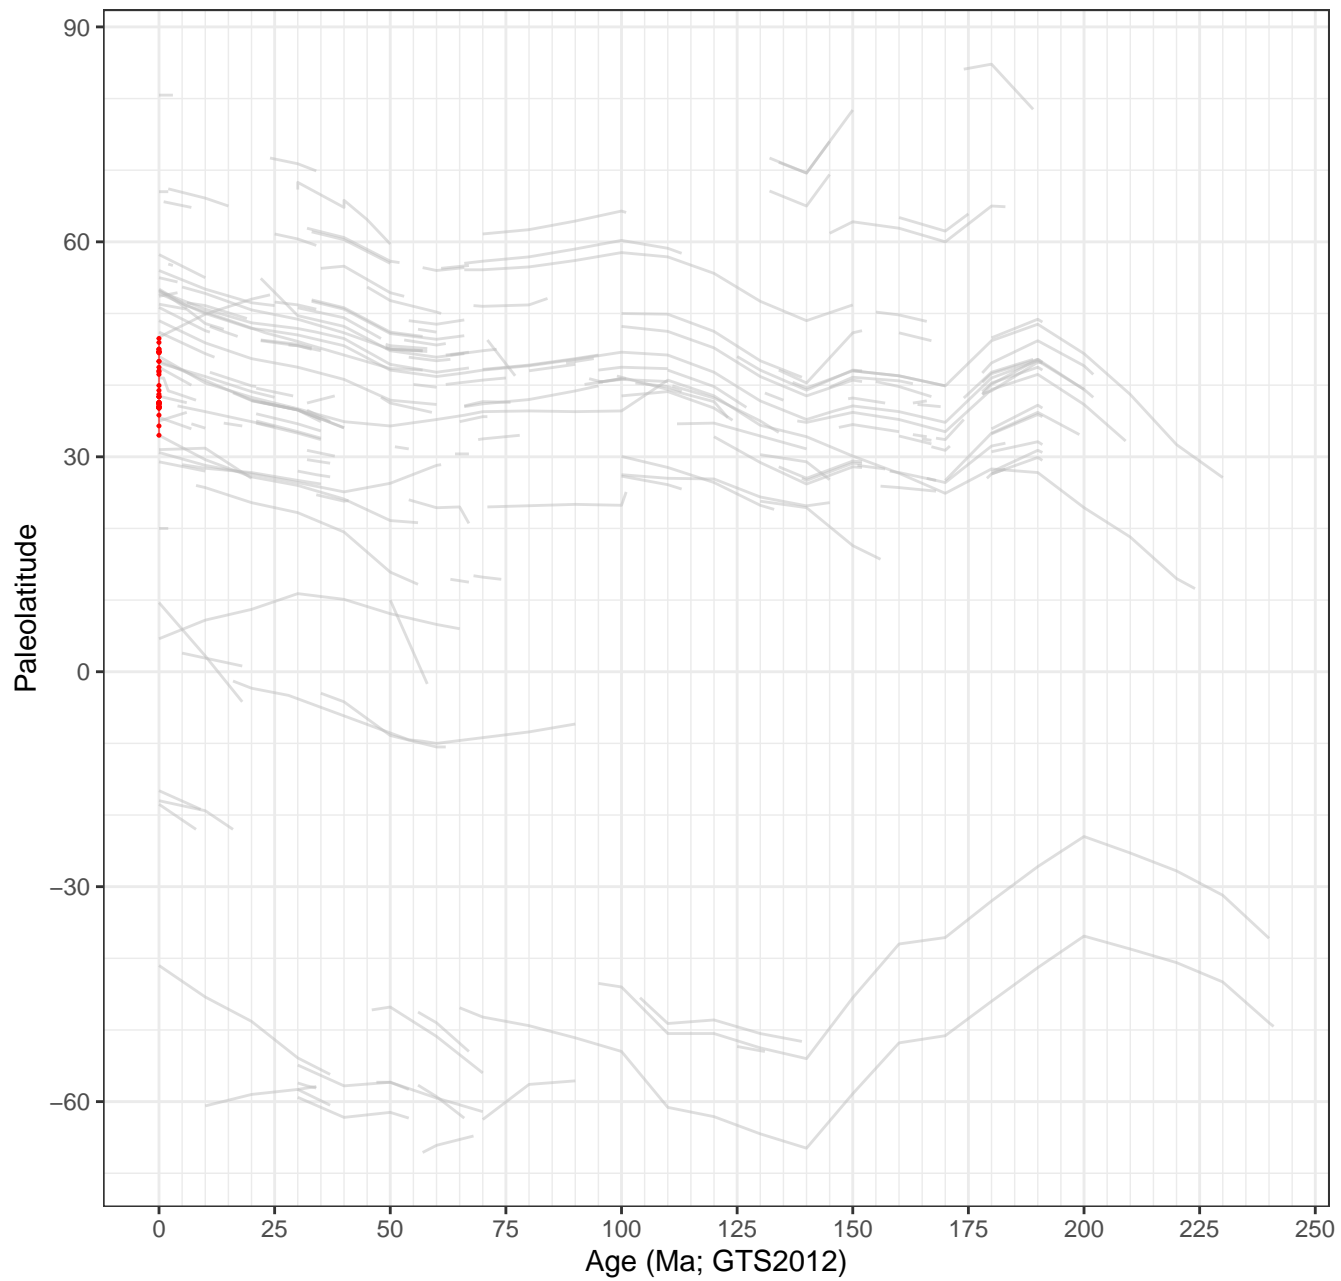

Supplement: Supplementary file 545 [file modern_Spiniferites cruciformis.pdf › Supplement/Supplement 2/Modern 92 plots/modern_Spiniferites cruciformis.pdf]

# Species *Spiniferites delicatus*

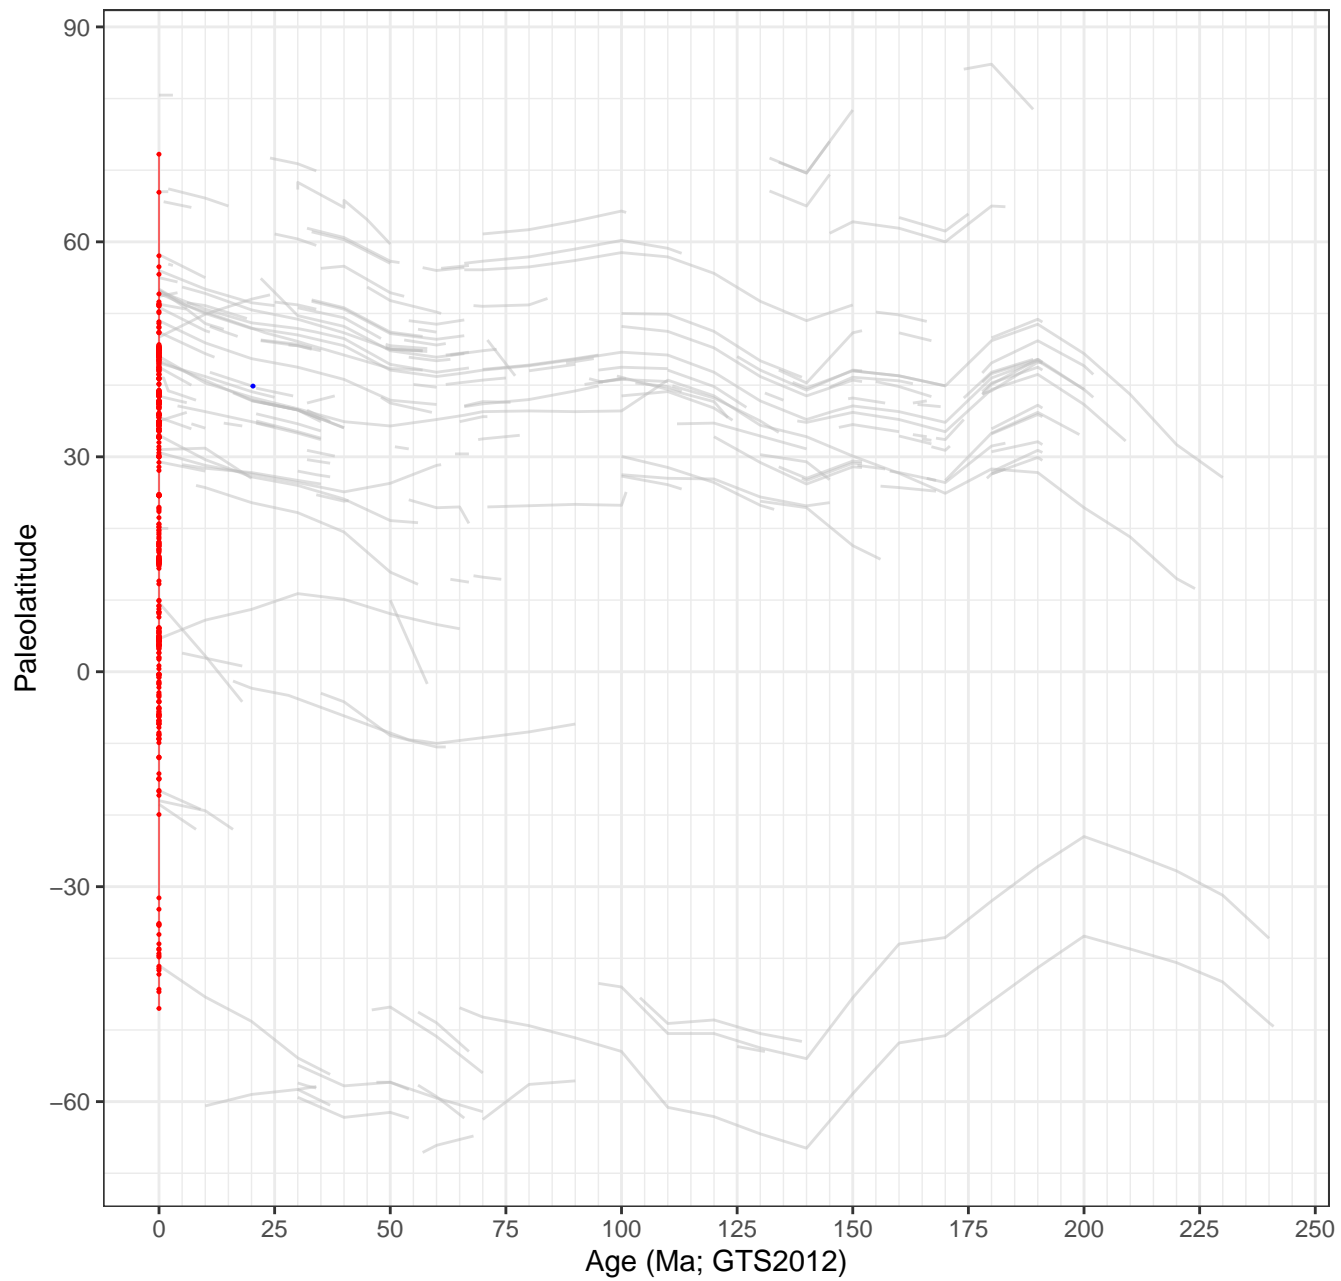

Supplement: Supplementary file 546 [file modern_Spiniferites delicatus.pdf › Supplement/Supplement 2/Modern 92 plots/modern_Spiniferites delicatus.pdf]

# Species *Spiniferites elongatus*

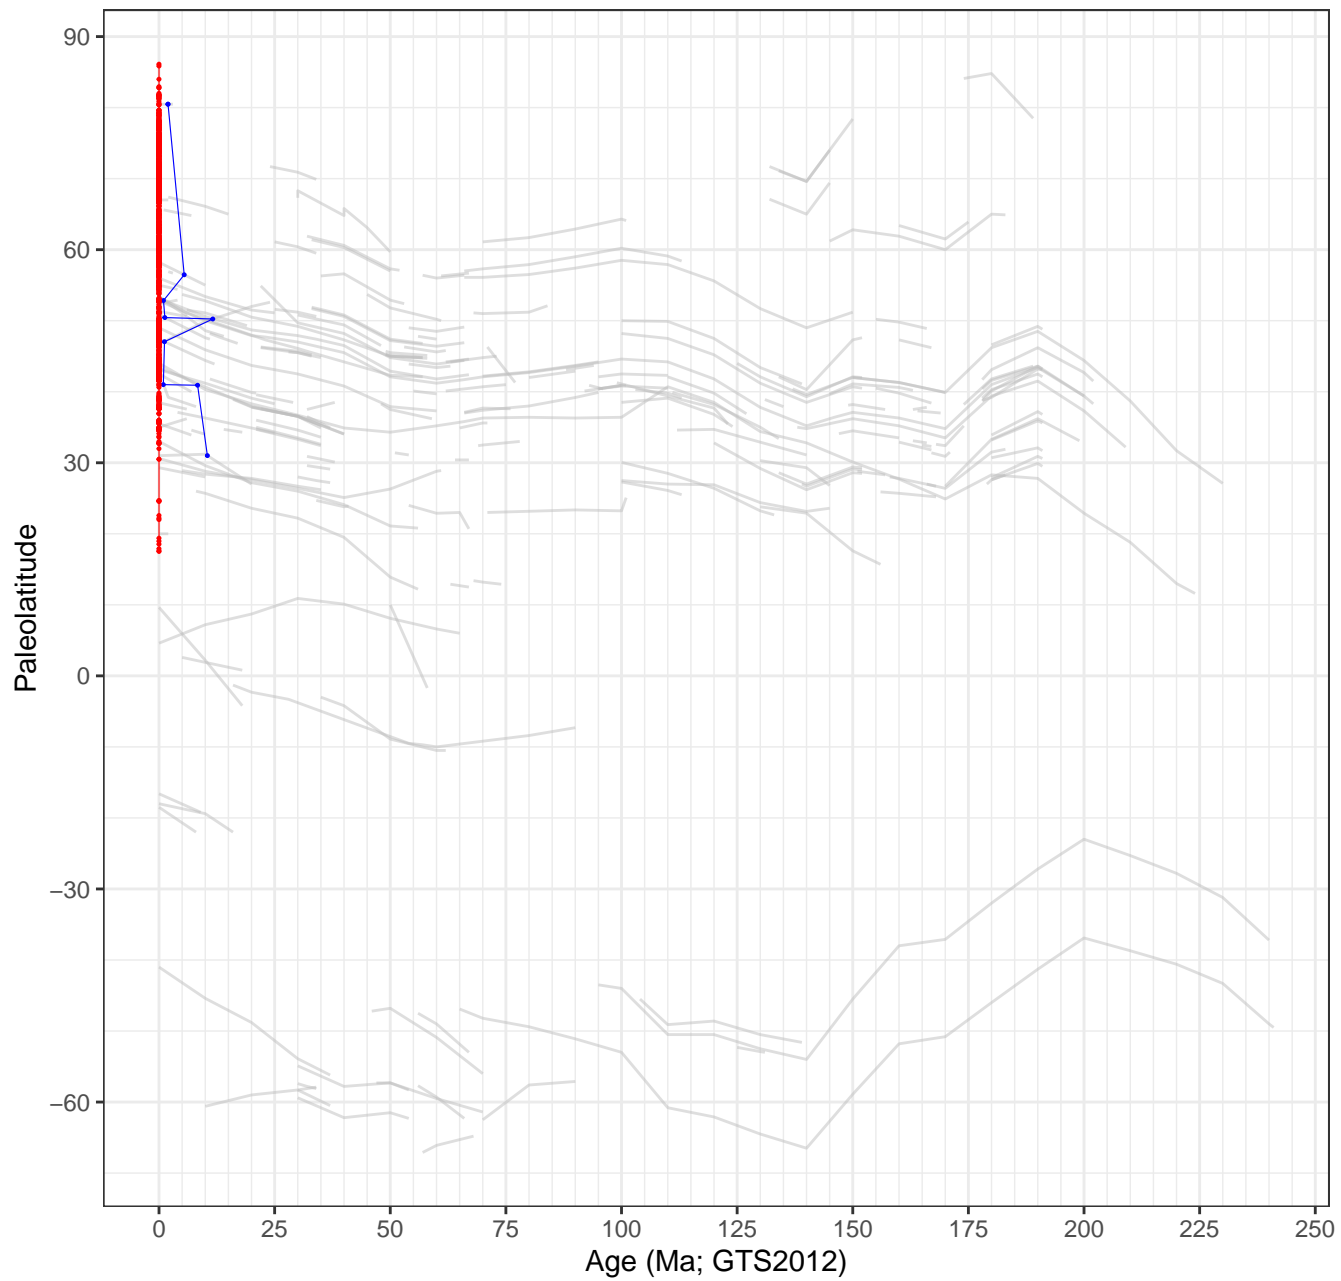

Supplement: Supplementary file 547 [file modern_Spiniferites elongatus.pdf › Supplement/Supplement 2/Modern 92 plots/modern_Spiniferites elongatus.pdf]

# Species *Spiniferites lazus*

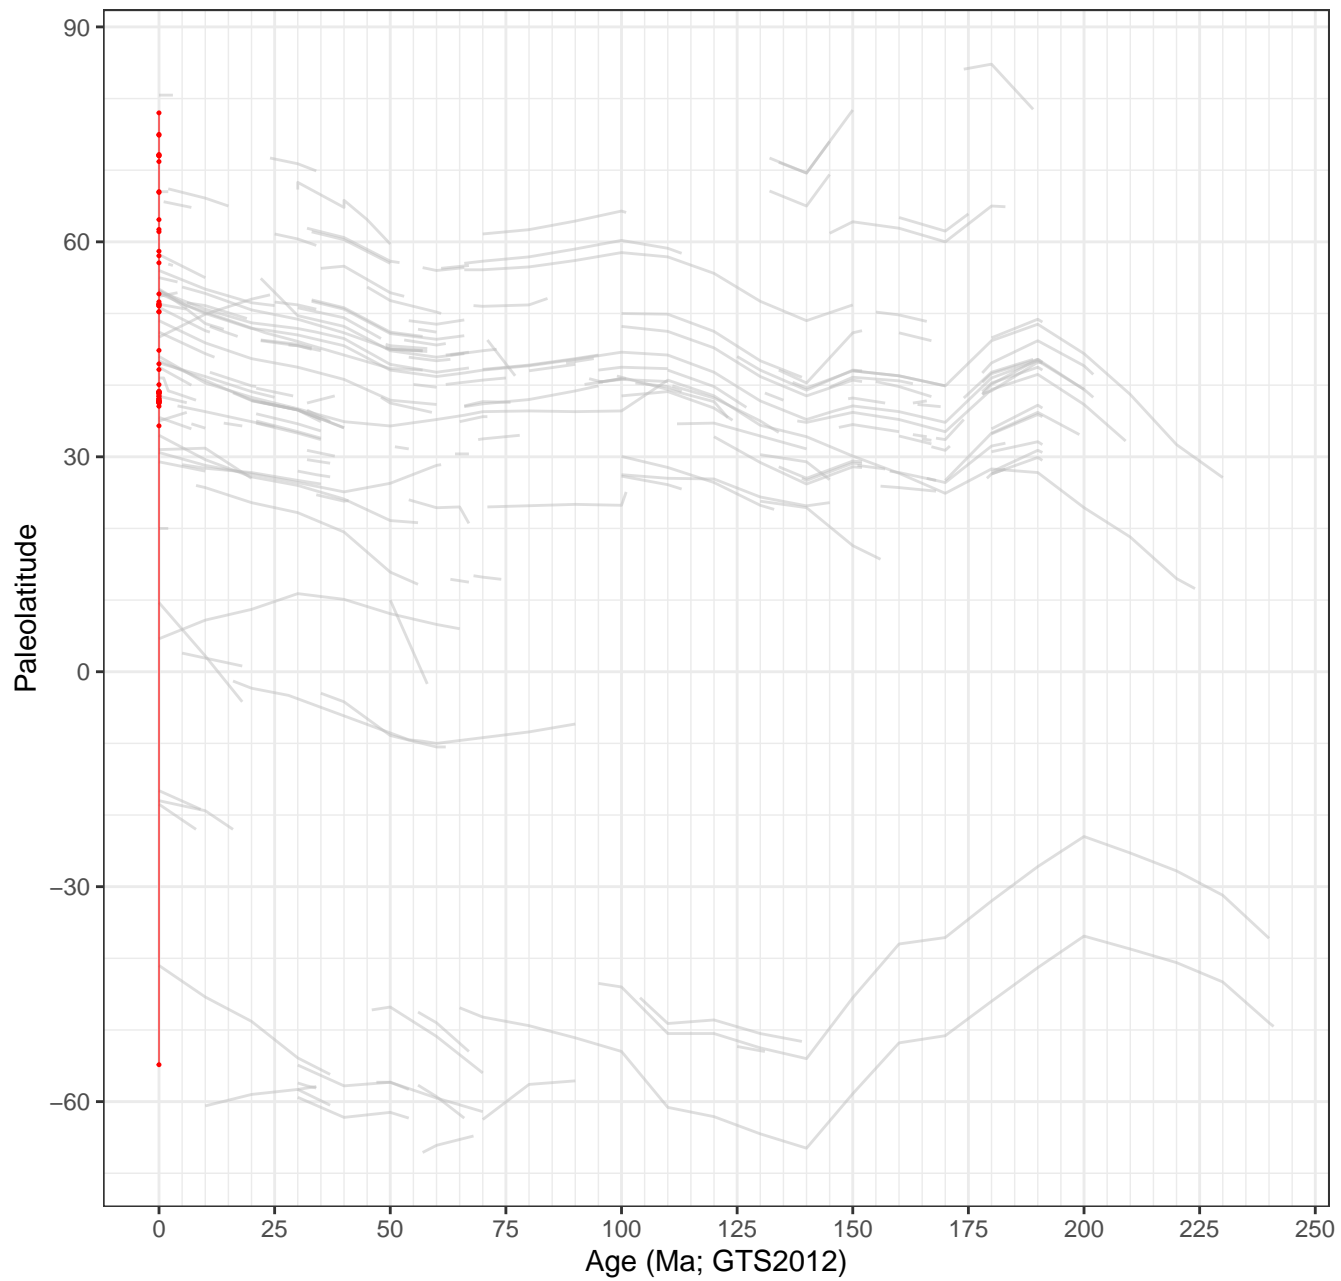

Supplement: Supplementary file 548 [file modern_Spiniferites lazus.pdf › Supplement/Supplement 2/Modern 92 plots/modern_Spiniferites lazus.pdf]

# Species *Spiniferites membranaceus*

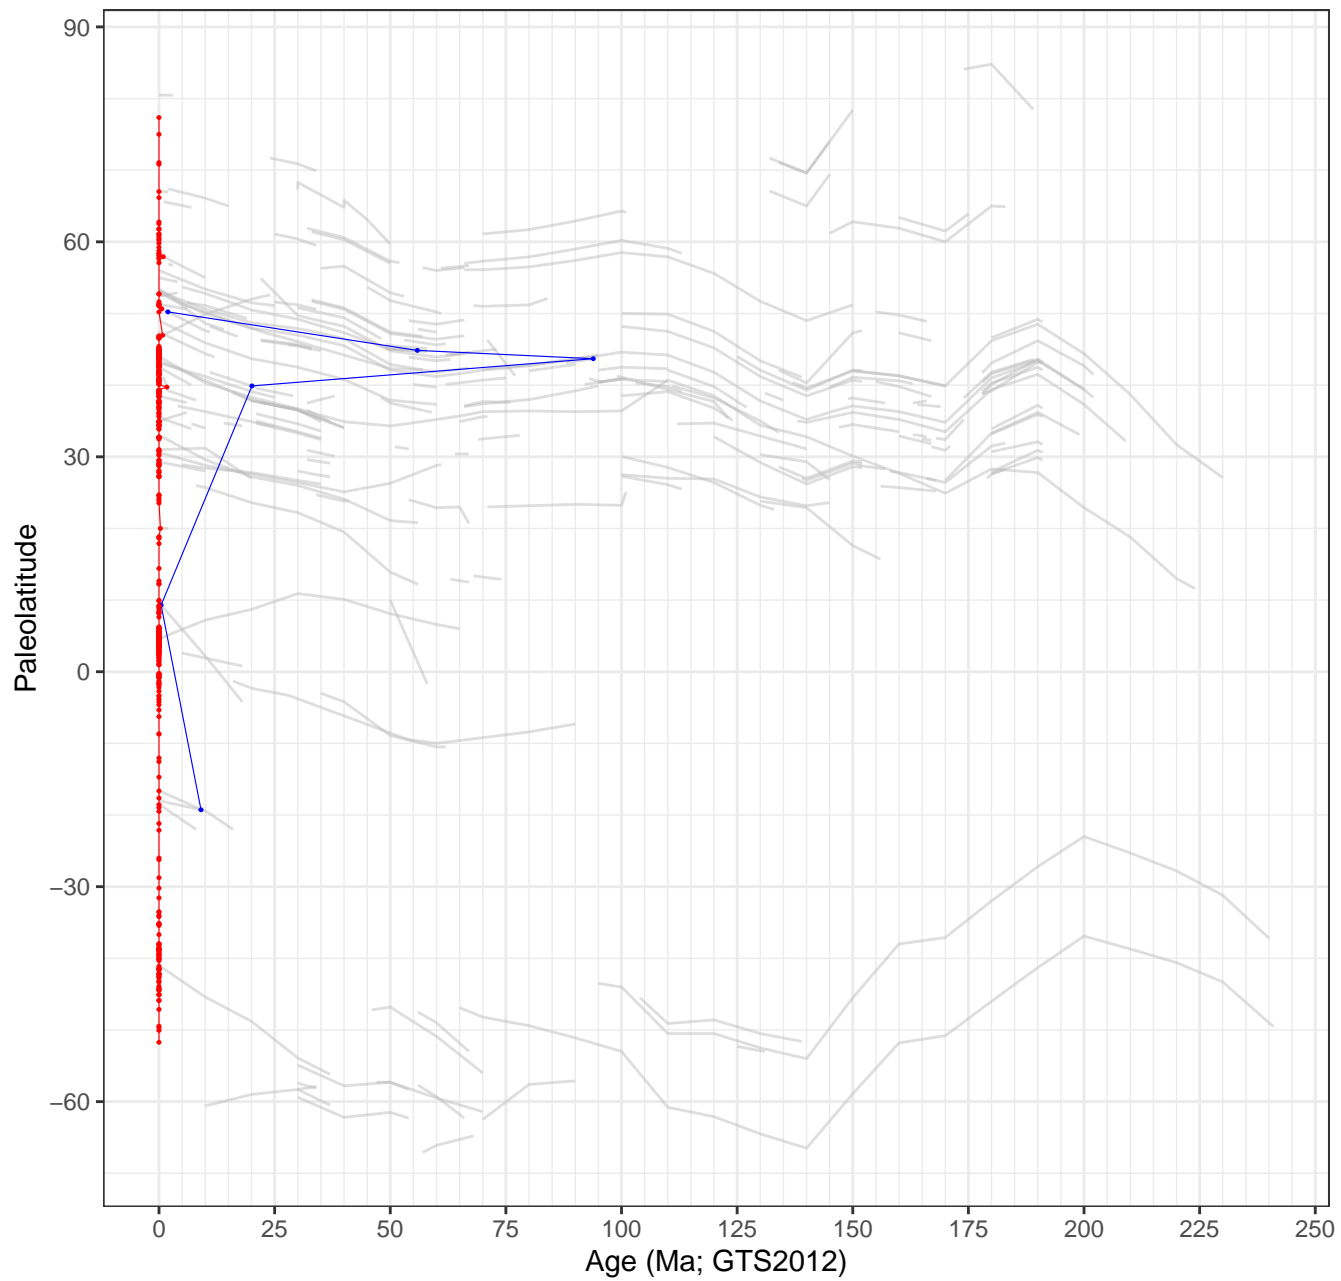

Supplement: Supplementary file 549 [file modern_Spiniferites membranaceus.pdf › Supplement/Supplement 2/Modern 92 plots/modern_Spiniferites membranaceus.pdf]

# Species *Spiniferites mirabilis*

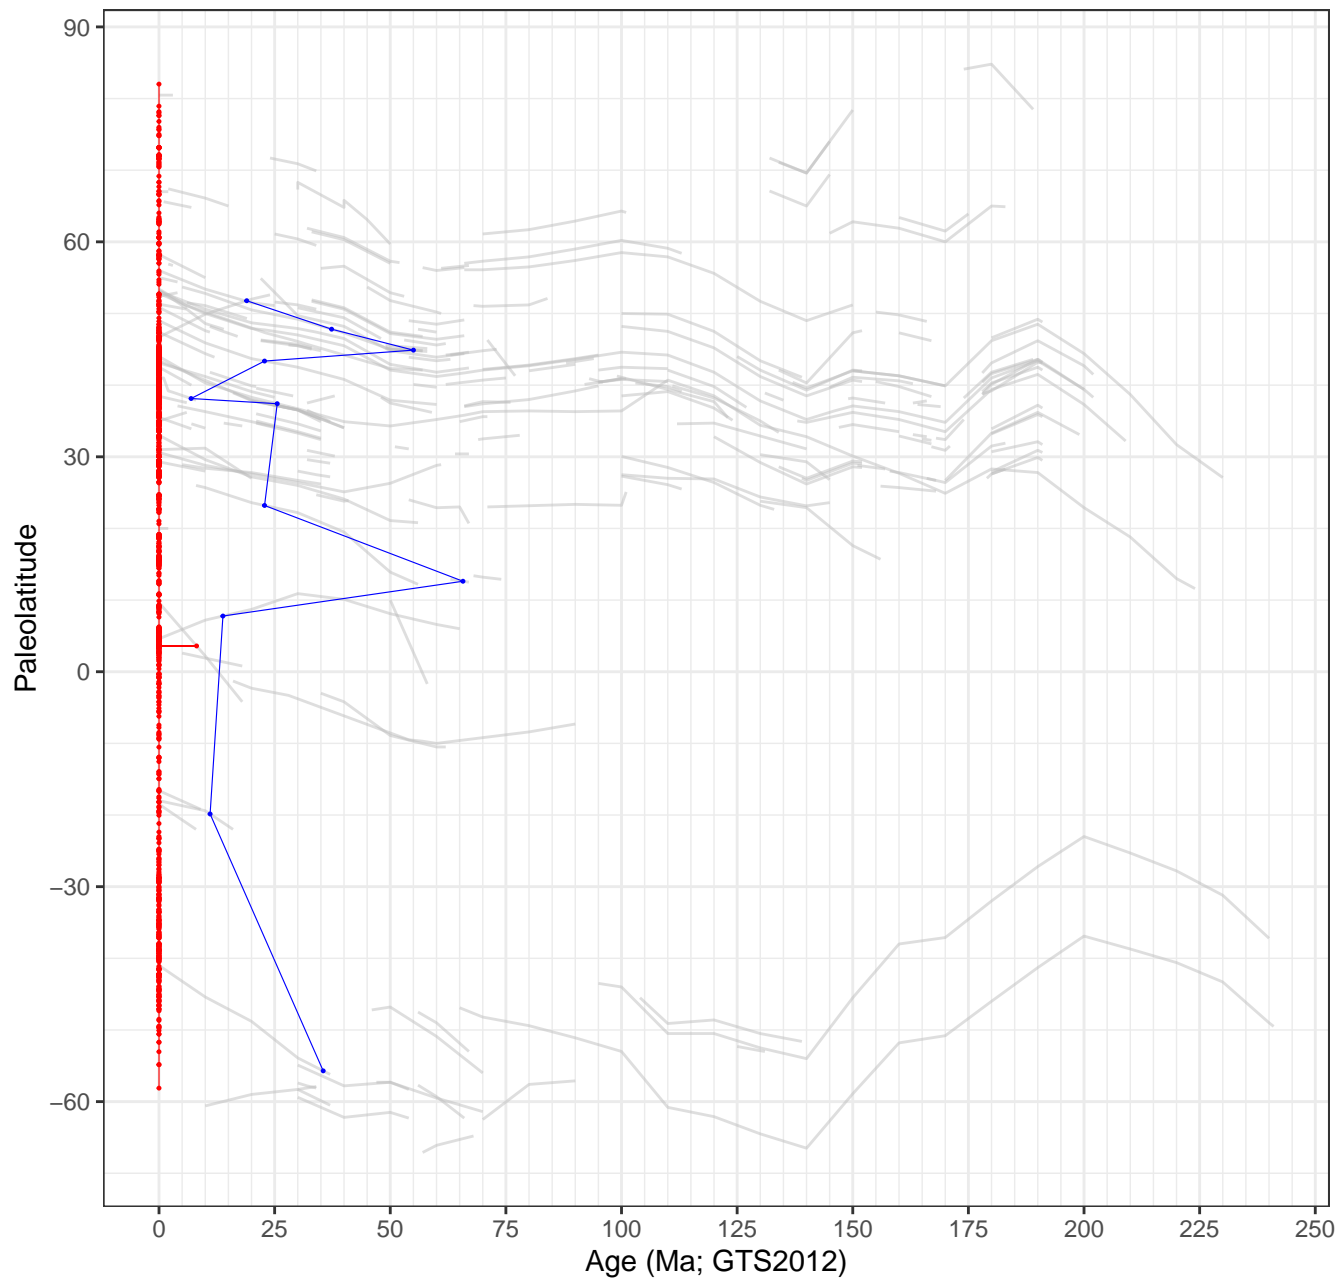

Supplement: Supplementary file 550 [file modern_Spiniferites mirabilis.pdf › Supplement/Supplement 2/Modern 92 plots/modern_Spiniferites mirabilis.pdf]

# Species *Spiniferites pachydermus*

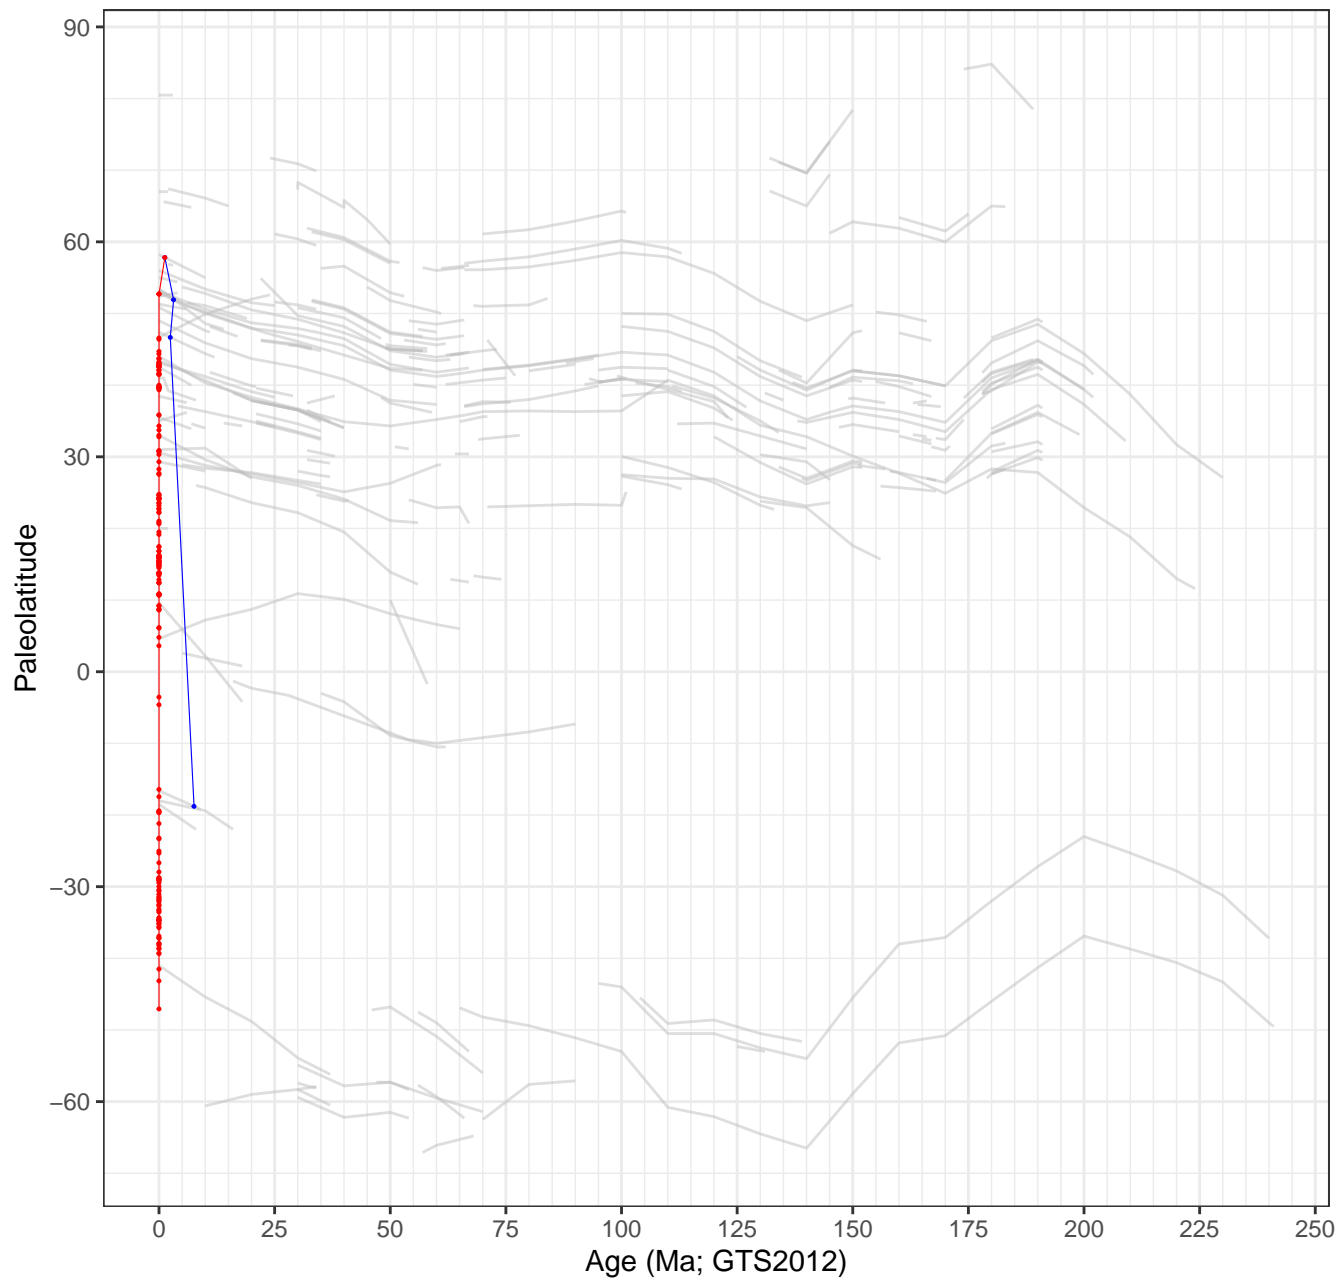

Supplement: Supplementary file 551 [file modern_Spiniferites pachydermus.pdf › Supplement/Supplement 2/Modern 92 plots/modern_Spiniferites pachydermus.pdf]

# Species *Spiniferites ramosus*

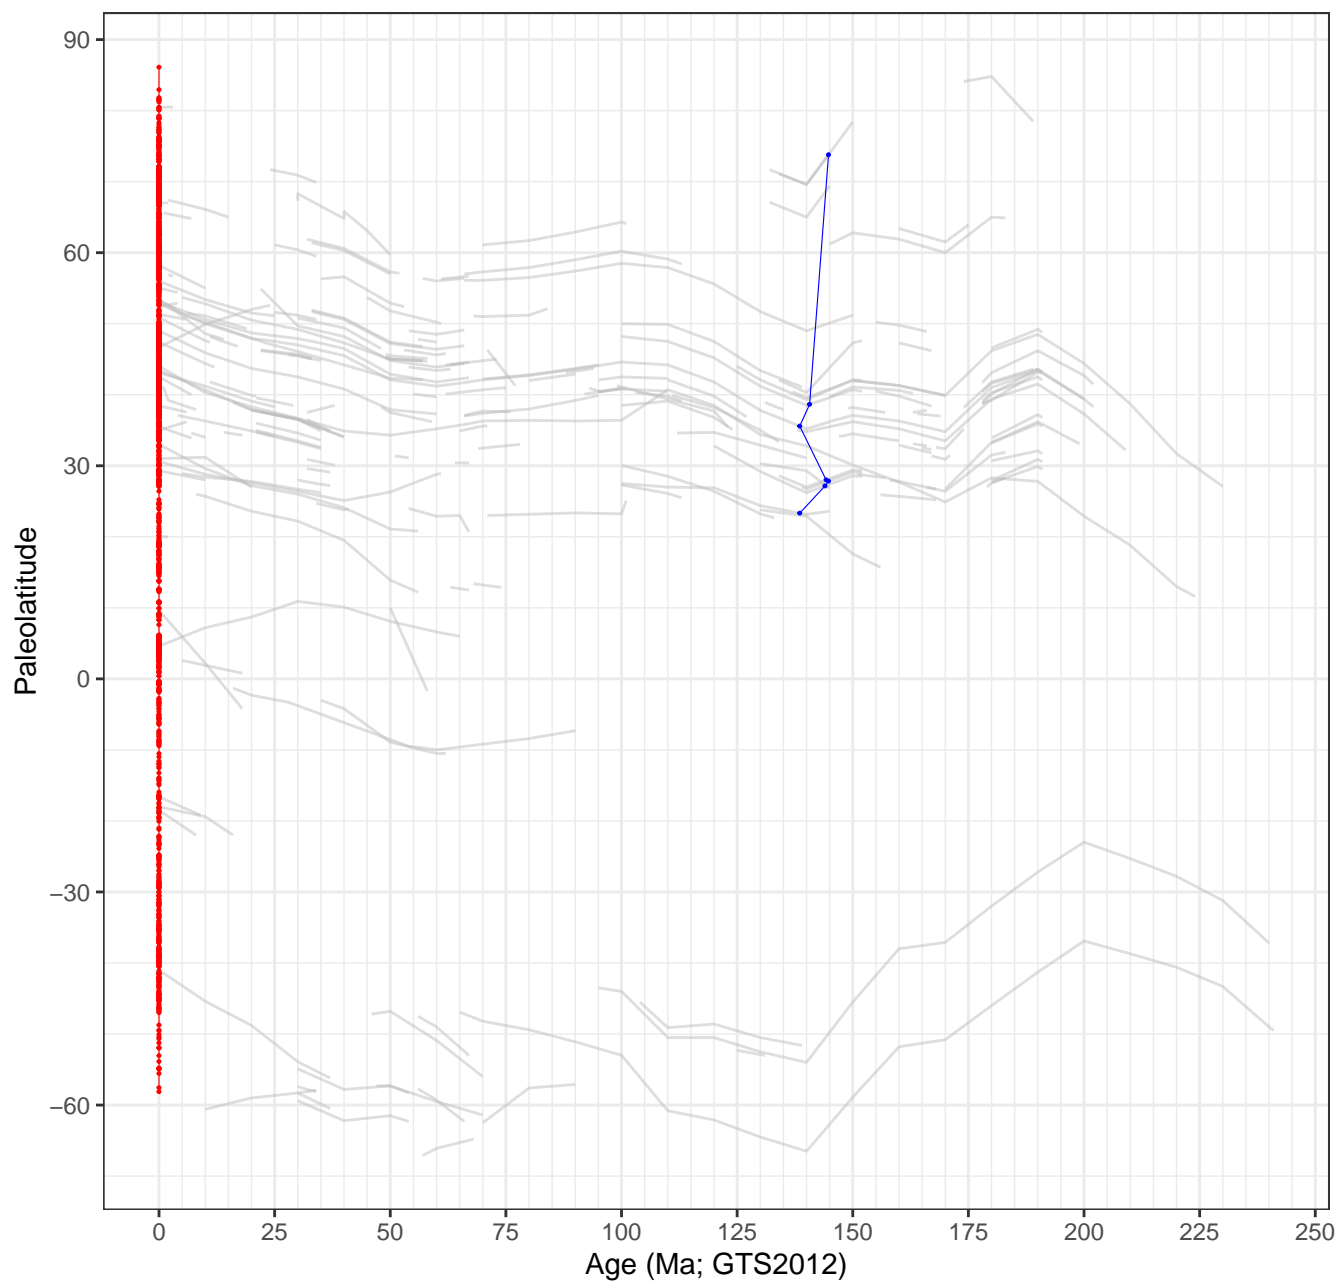

Supplement: Supplementary file 552 [file modern_Spiniferites ramosus.pdf › Supplement/Supplement 2/Modern 92 plots/modern_Spiniferites ramosus.pdf]

# Species *Spiniferites* sp.

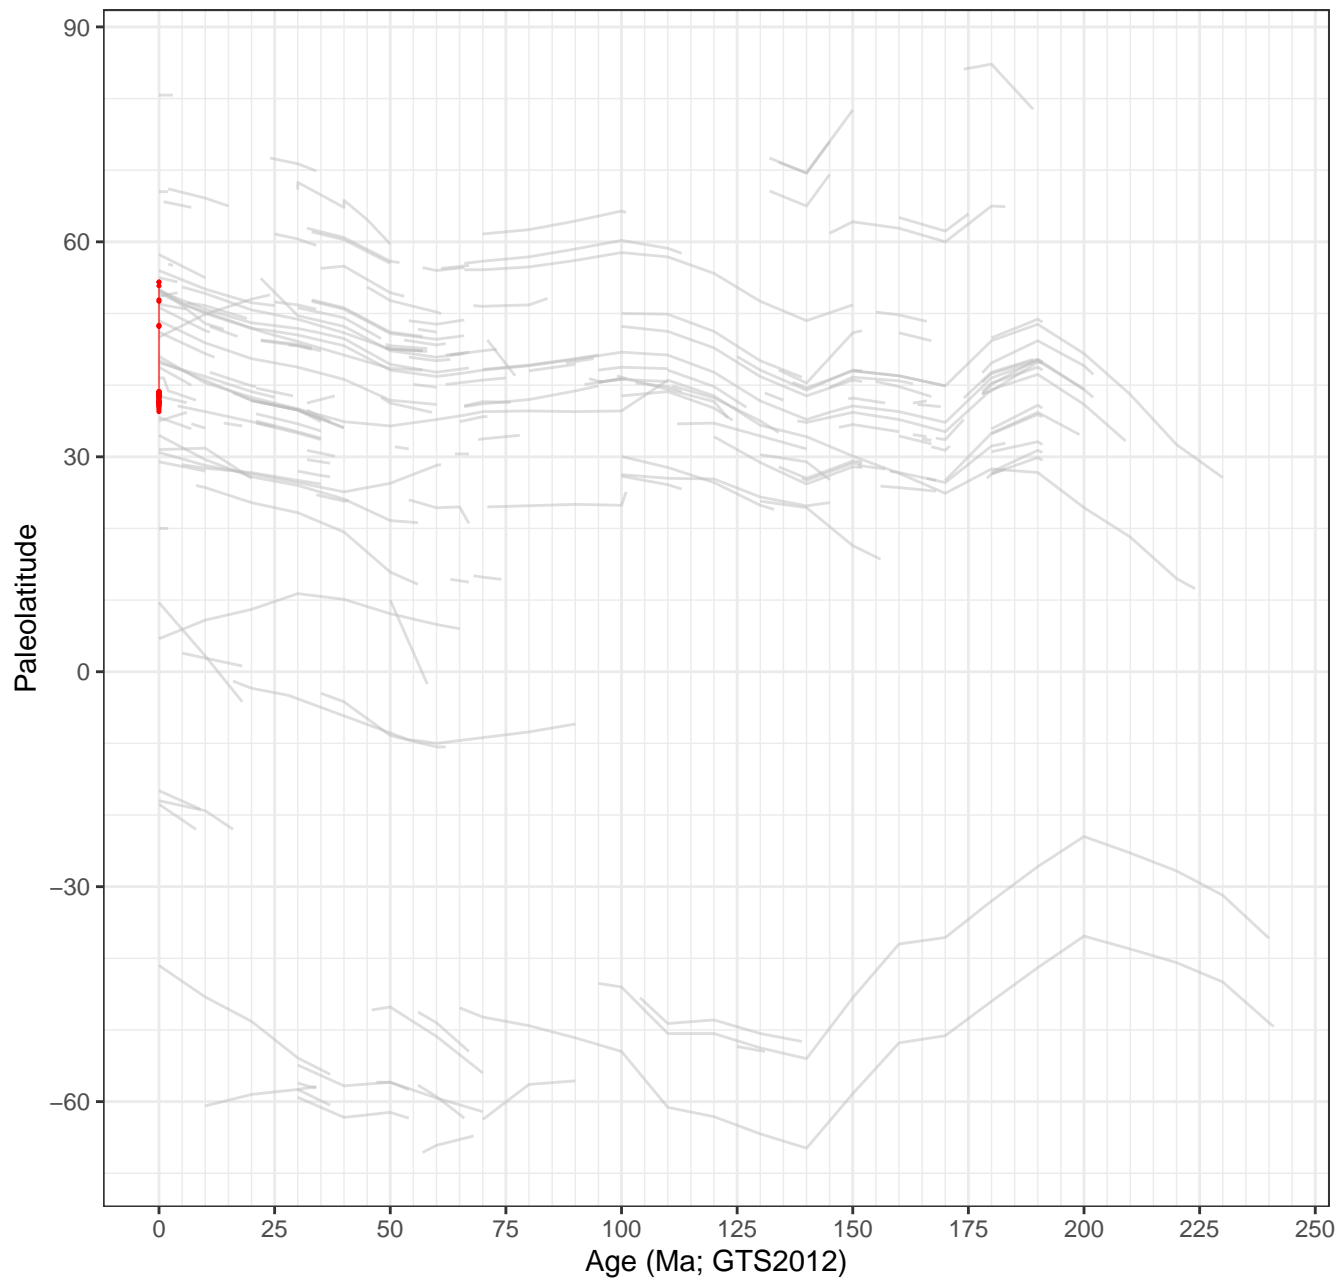

Supplement: Supplementary file 553 [file modern_Spiniferites sp..pdf › Supplement/Supplement 2/Modern 92 plots/modern_Spiniferites sp..pdf]

# Species *Spiniferites* spp.

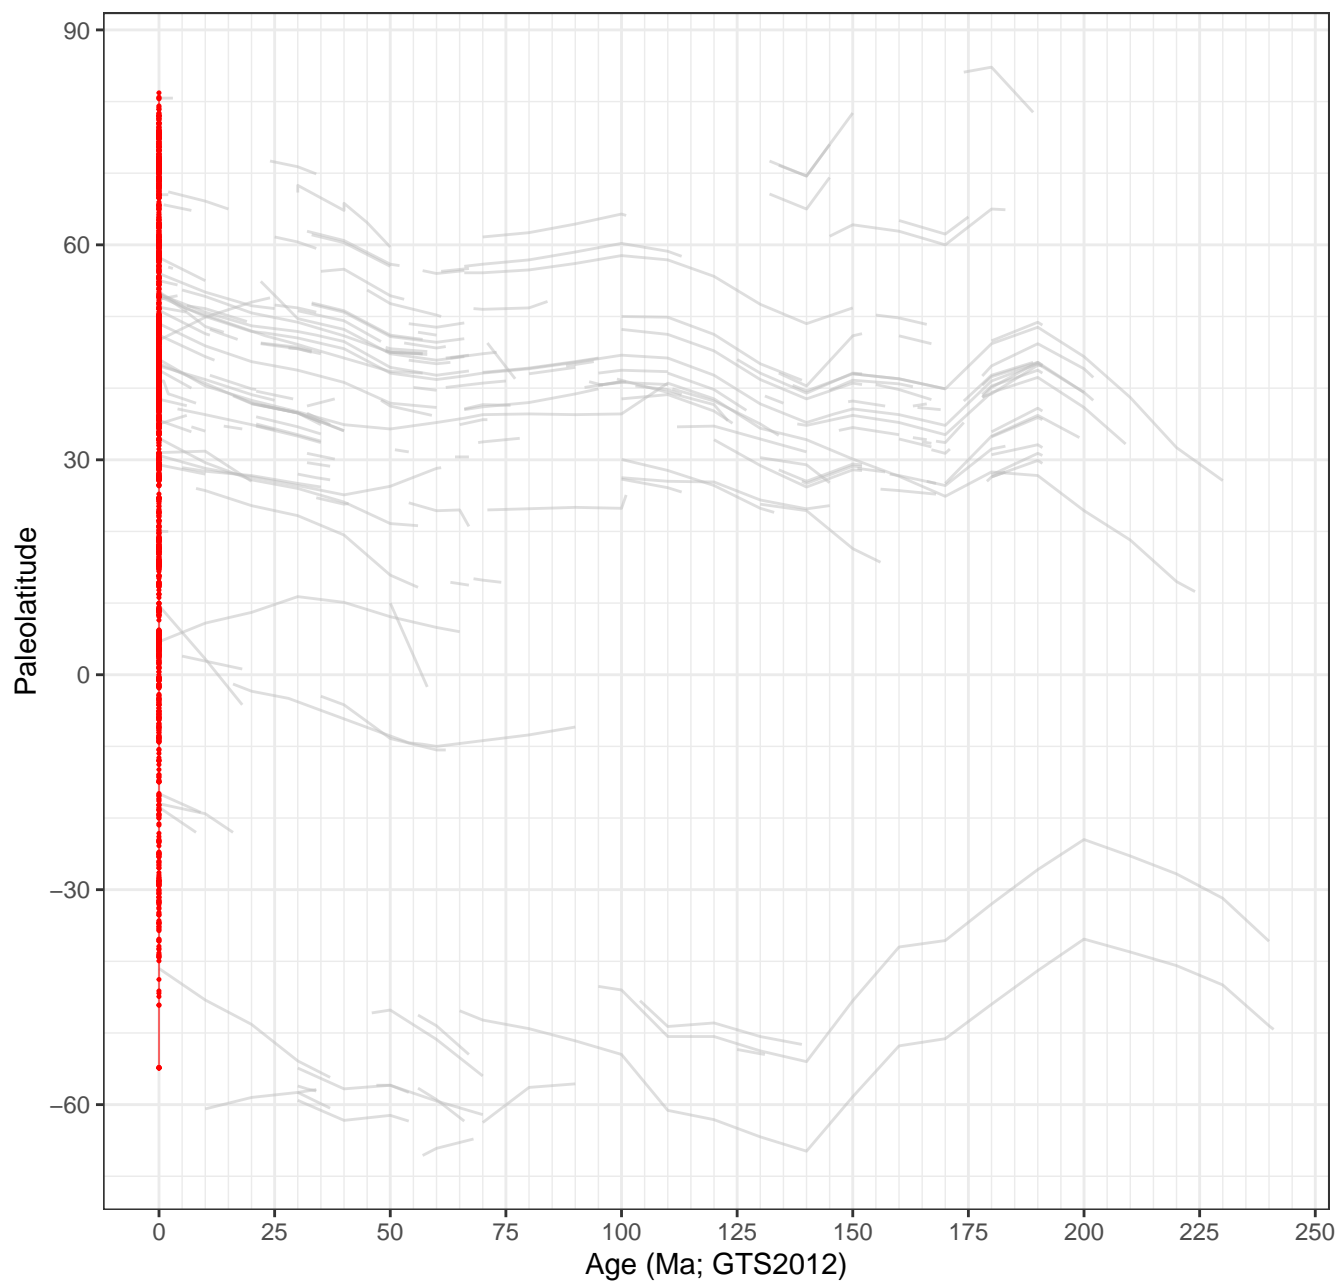

Supplement: Supplementary file 554 [file modern_Spiniferites spp..pdf › Supplement/Supplement 2/Modern 92 plots/modern_Spiniferites spp..pdf]

# Species *Stelladinium bifurcatum*

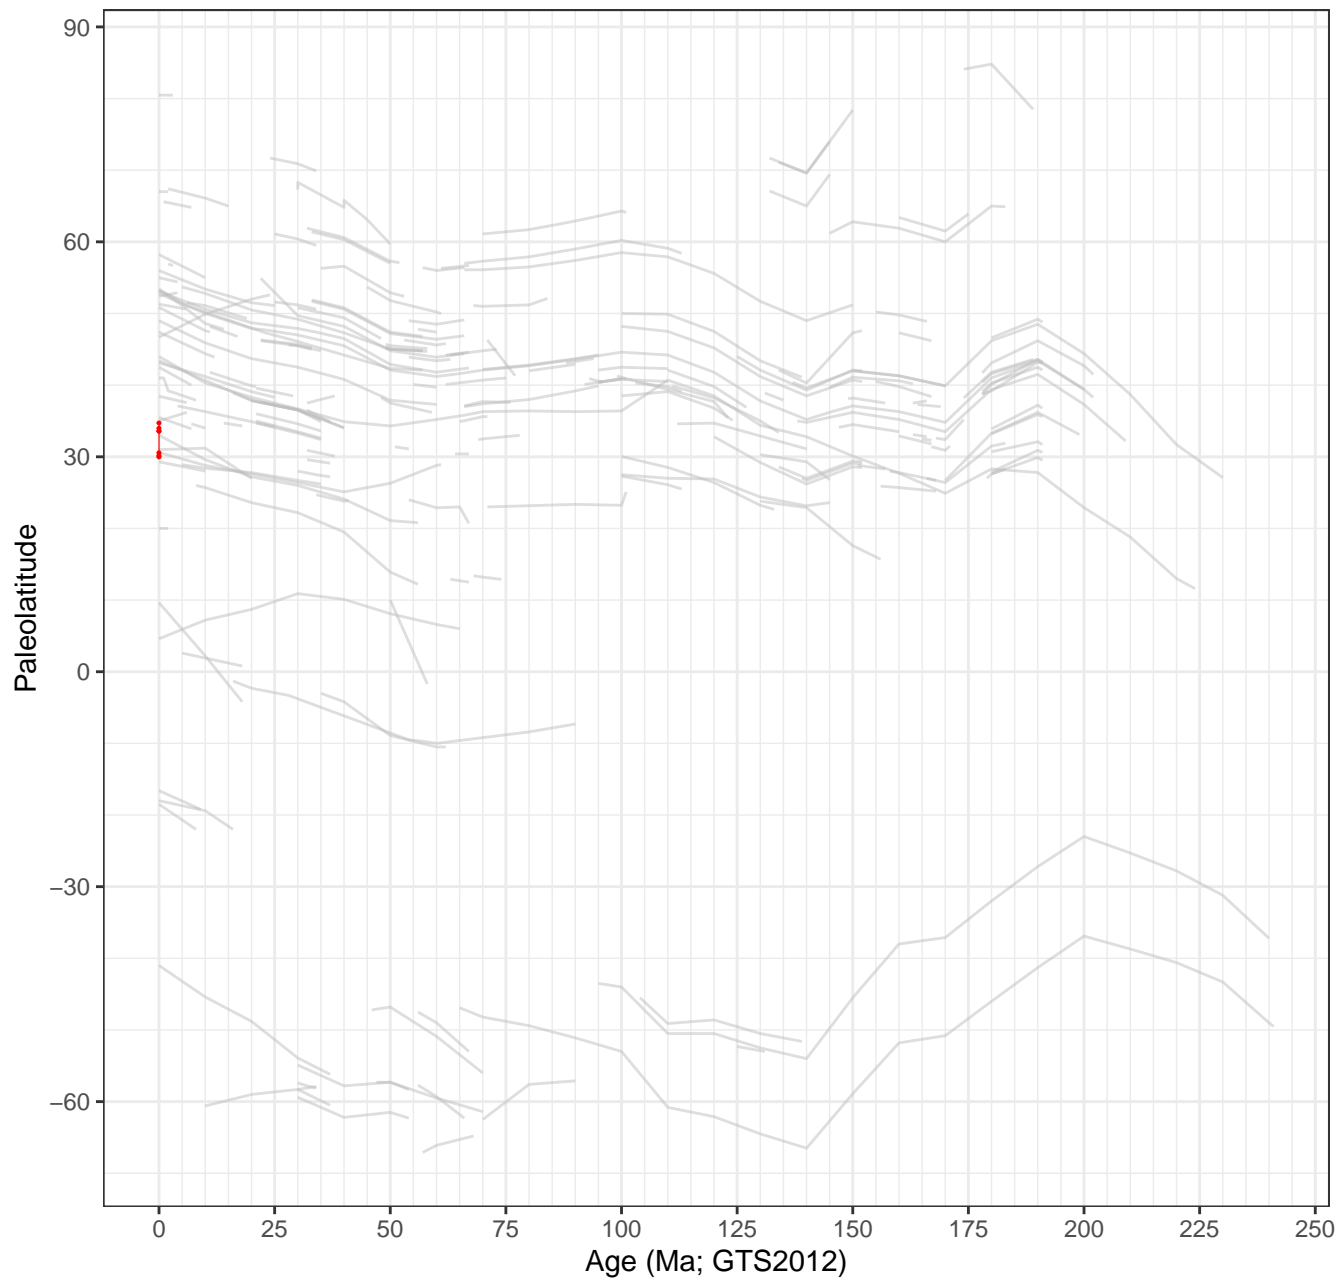

Supplement: Supplementary file 555 [file modern_Stelladinium bifurcatum.pdf › Supplement/Supplement 2/Modern 92 plots/modern_Stelladinium bifurcatum.pdf]

# Species *Stelladinium reidii*

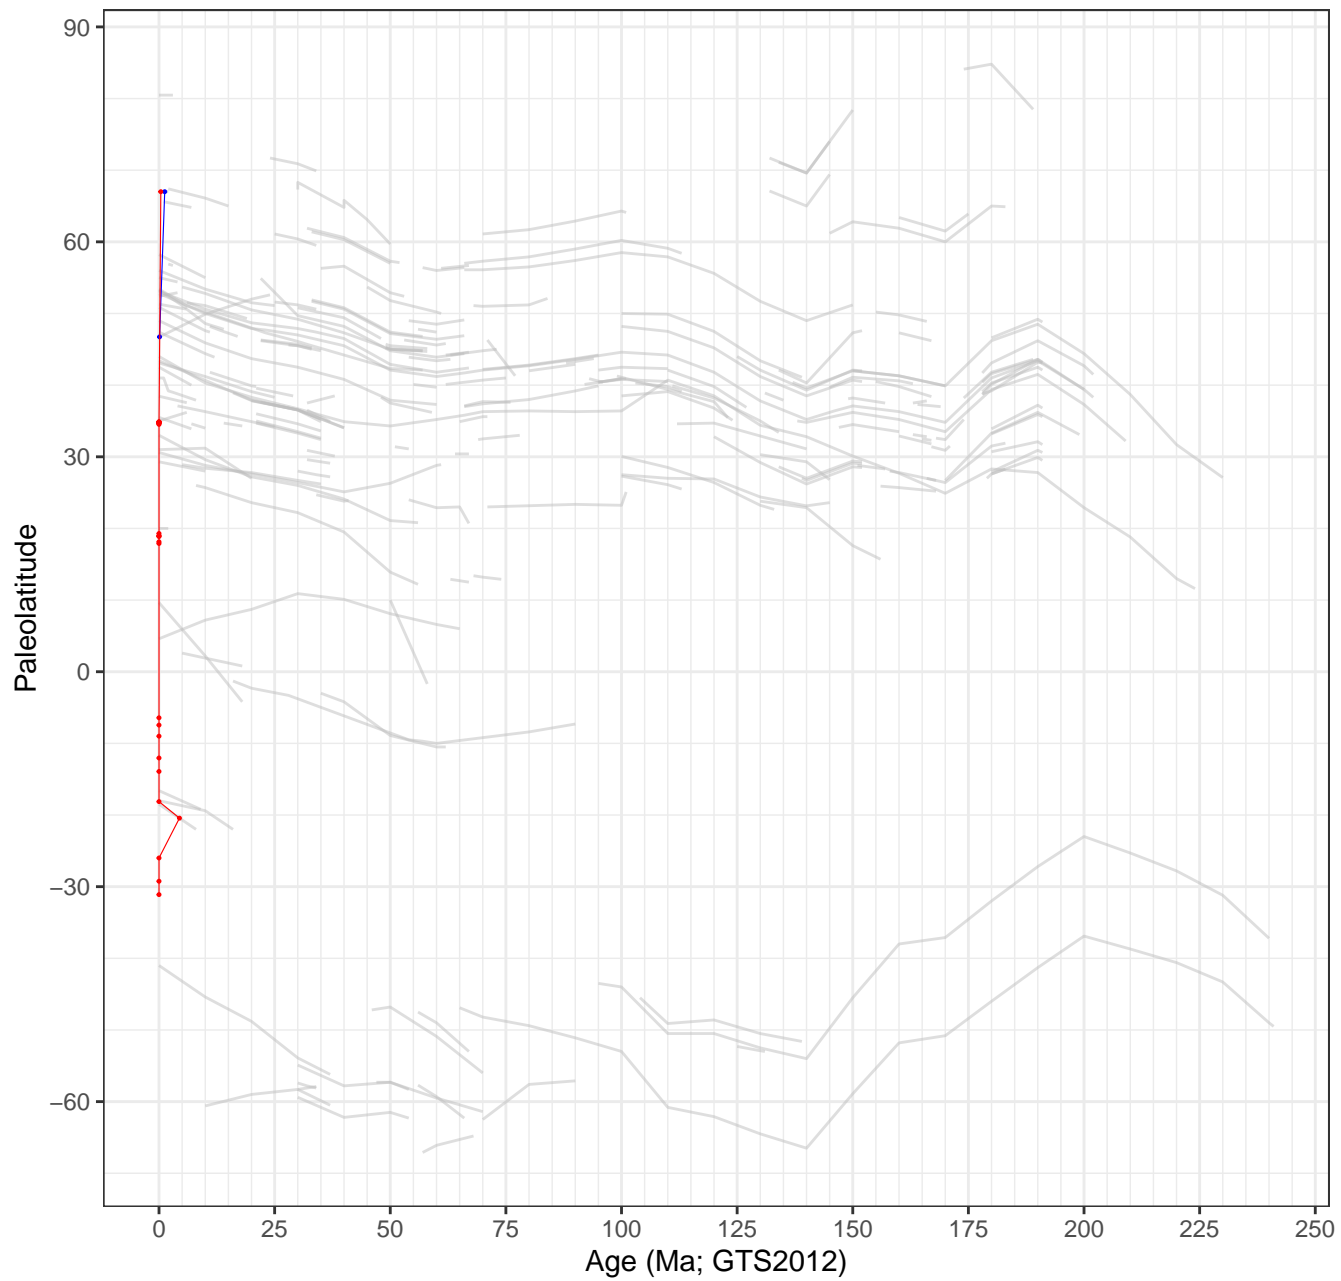

Supplement: Supplementary file 556 [file modern_Stelladinium reidii.pdf › Supplement/Supplement 2/Modern 92 plots/modern_Stelladinium reidii.pdf]

# Species *Stelladinium robustum*

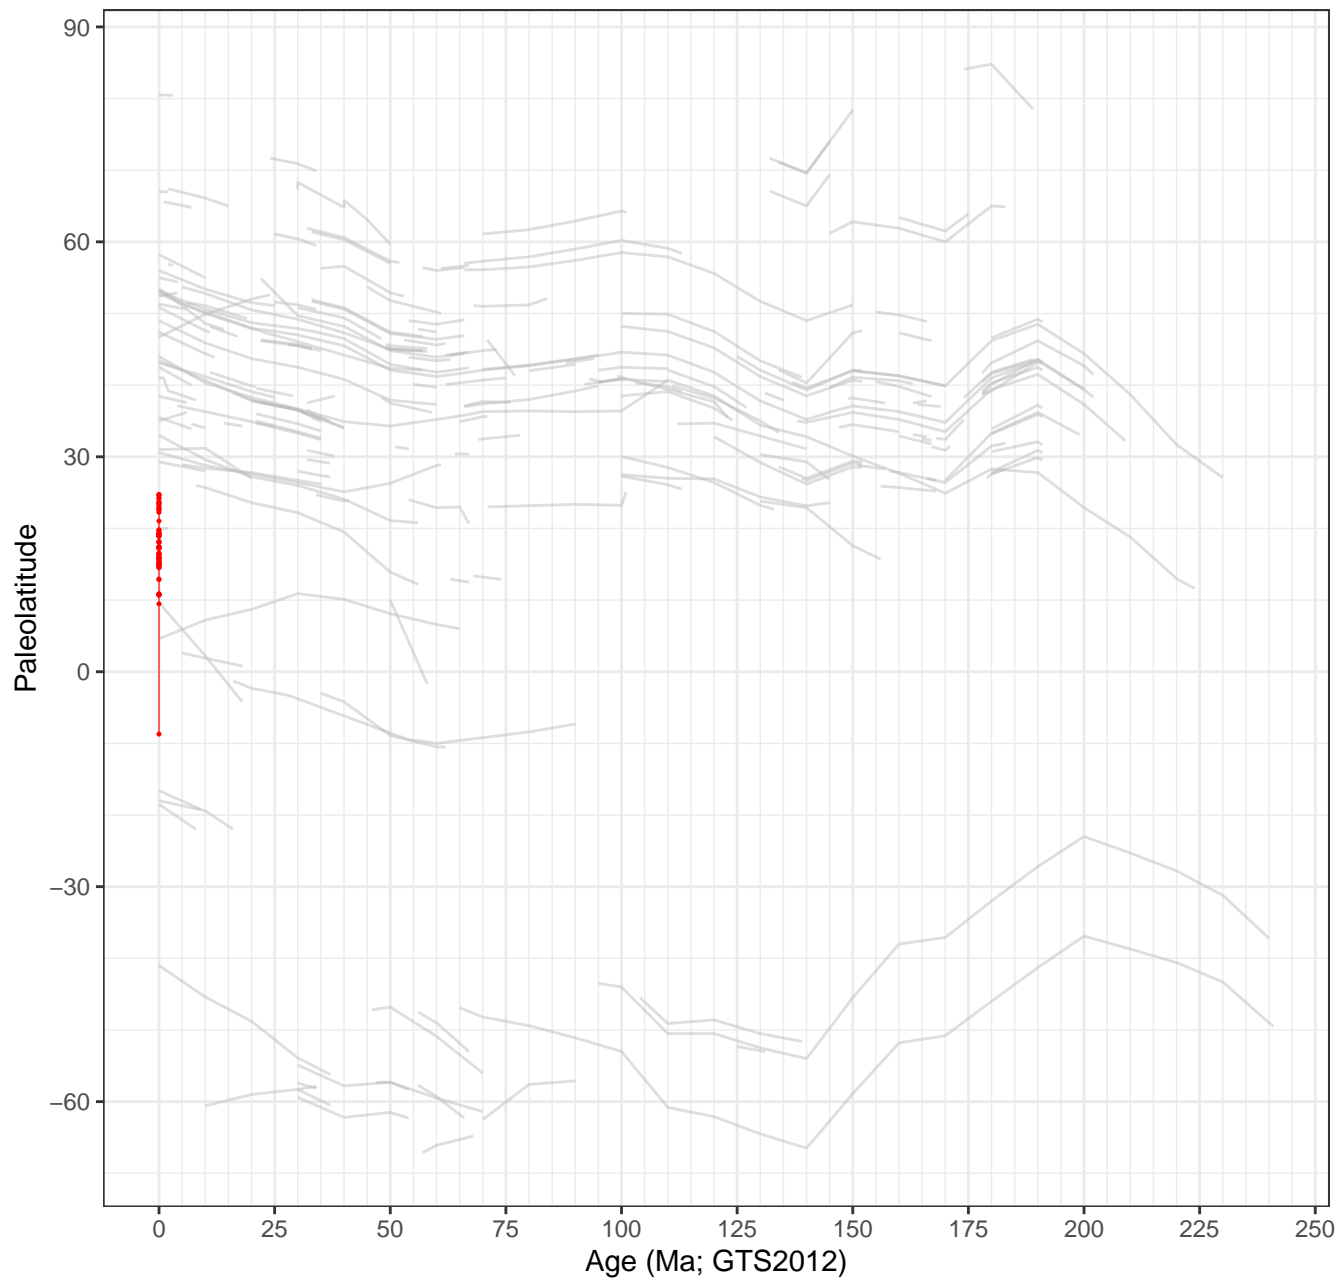

Supplement: Supplementary file 557 [file modern_Stelladinium robustum.pdf › Supplement/Supplement 2/Modern 92 plots/modern_Stelladinium robustum.pdf]

# Species *Stelladinium stellatum*

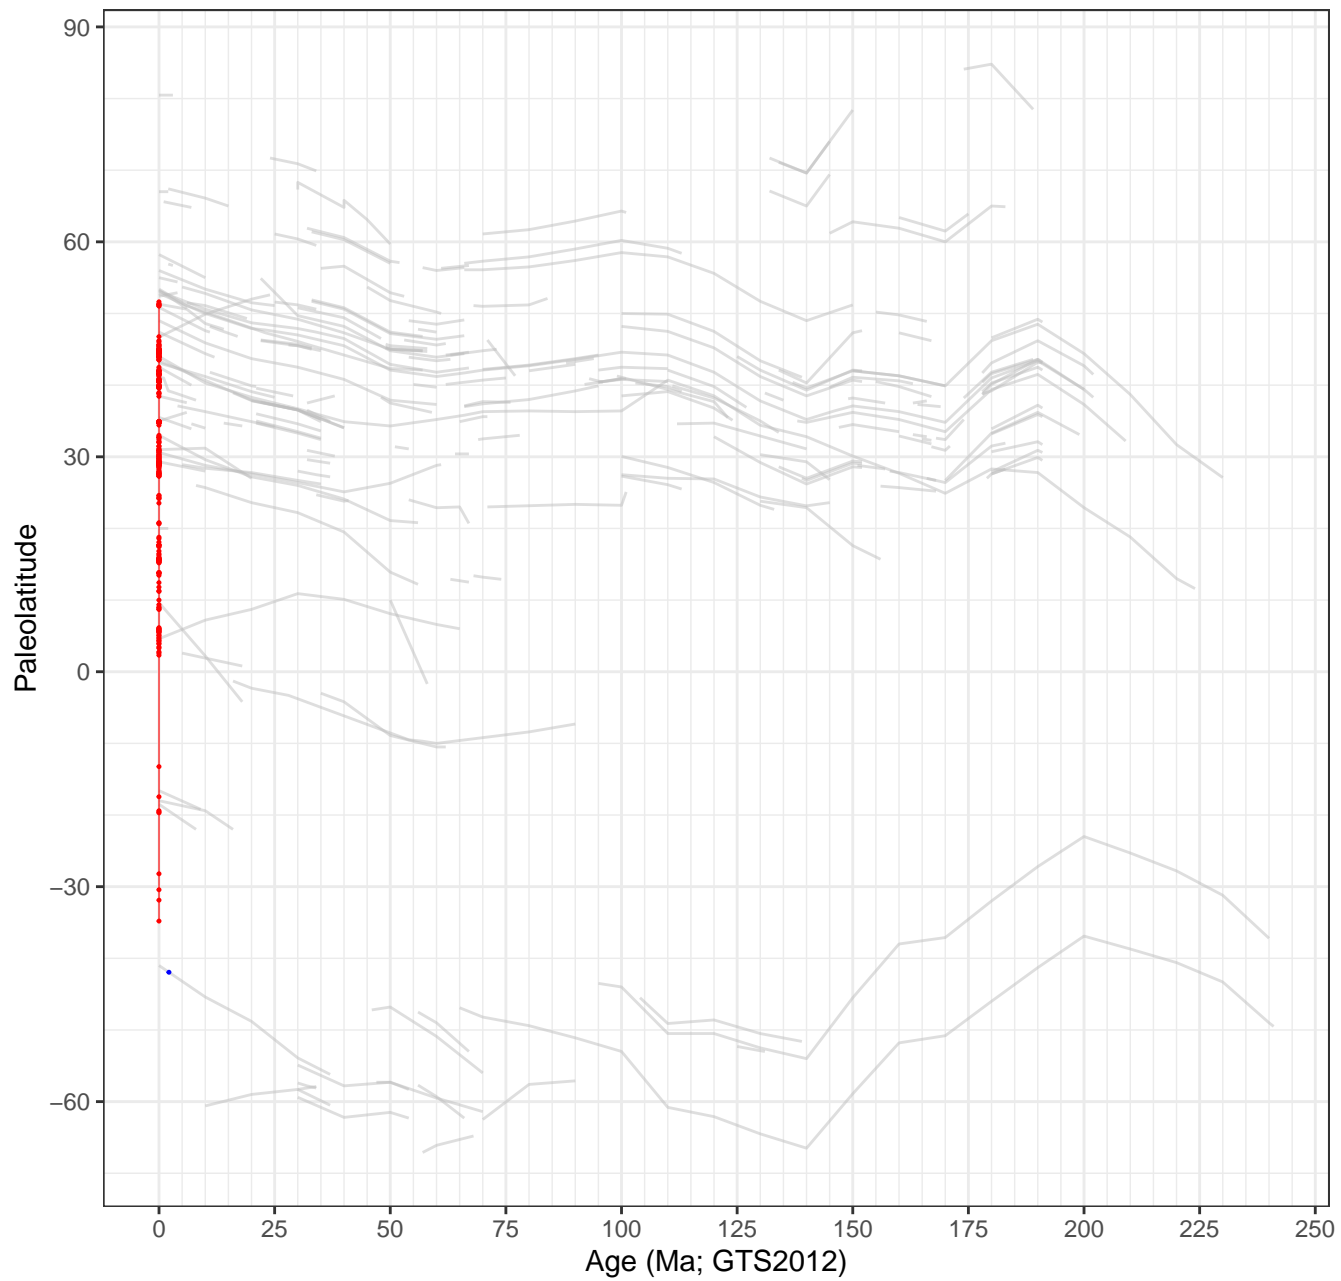

Supplement: Supplementary file 558 [file modern_Stelladinium stellatum.pdf › Supplement/Supplement 2/Modern 92 plots/modern_Stelladinium stellatum.pdf]

# Species *Tectatodinium pellitum*

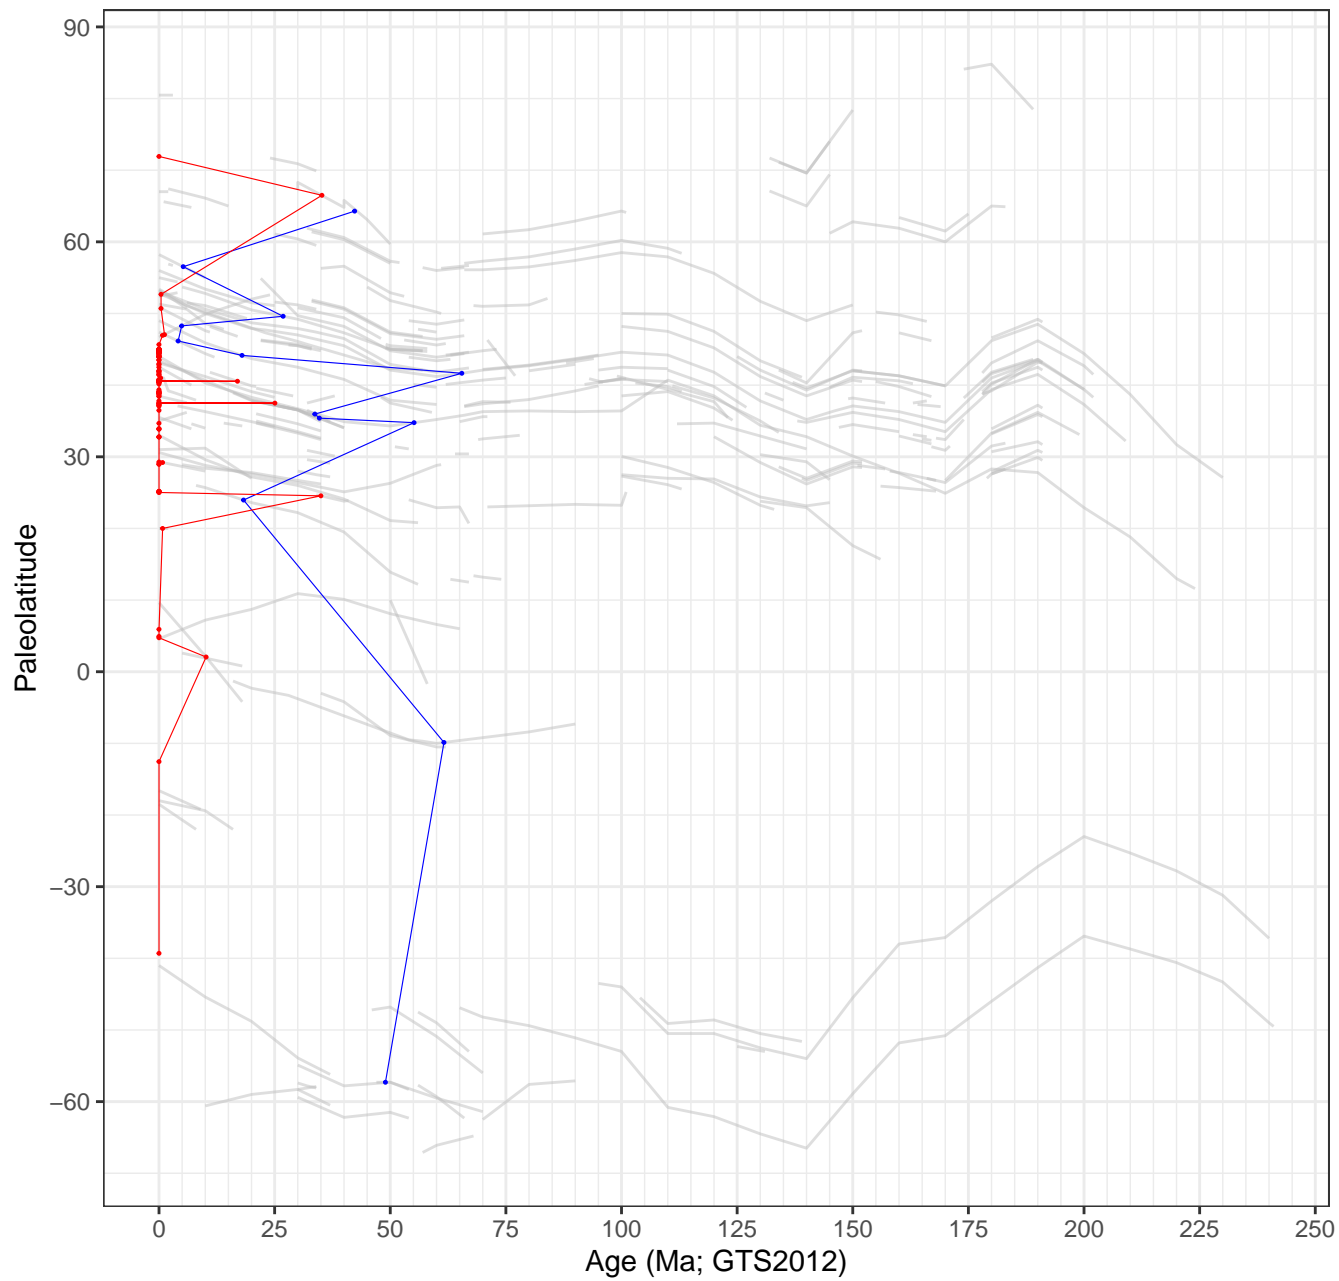

Supplement: Supplementary file 559 [file modern_Tectatodinium pellitum.pdf › Supplement/Supplement 2/Modern 92 plots/modern_Tectatodinium pellitum.pdf]

# Species *Trinovantedinium applanatum*

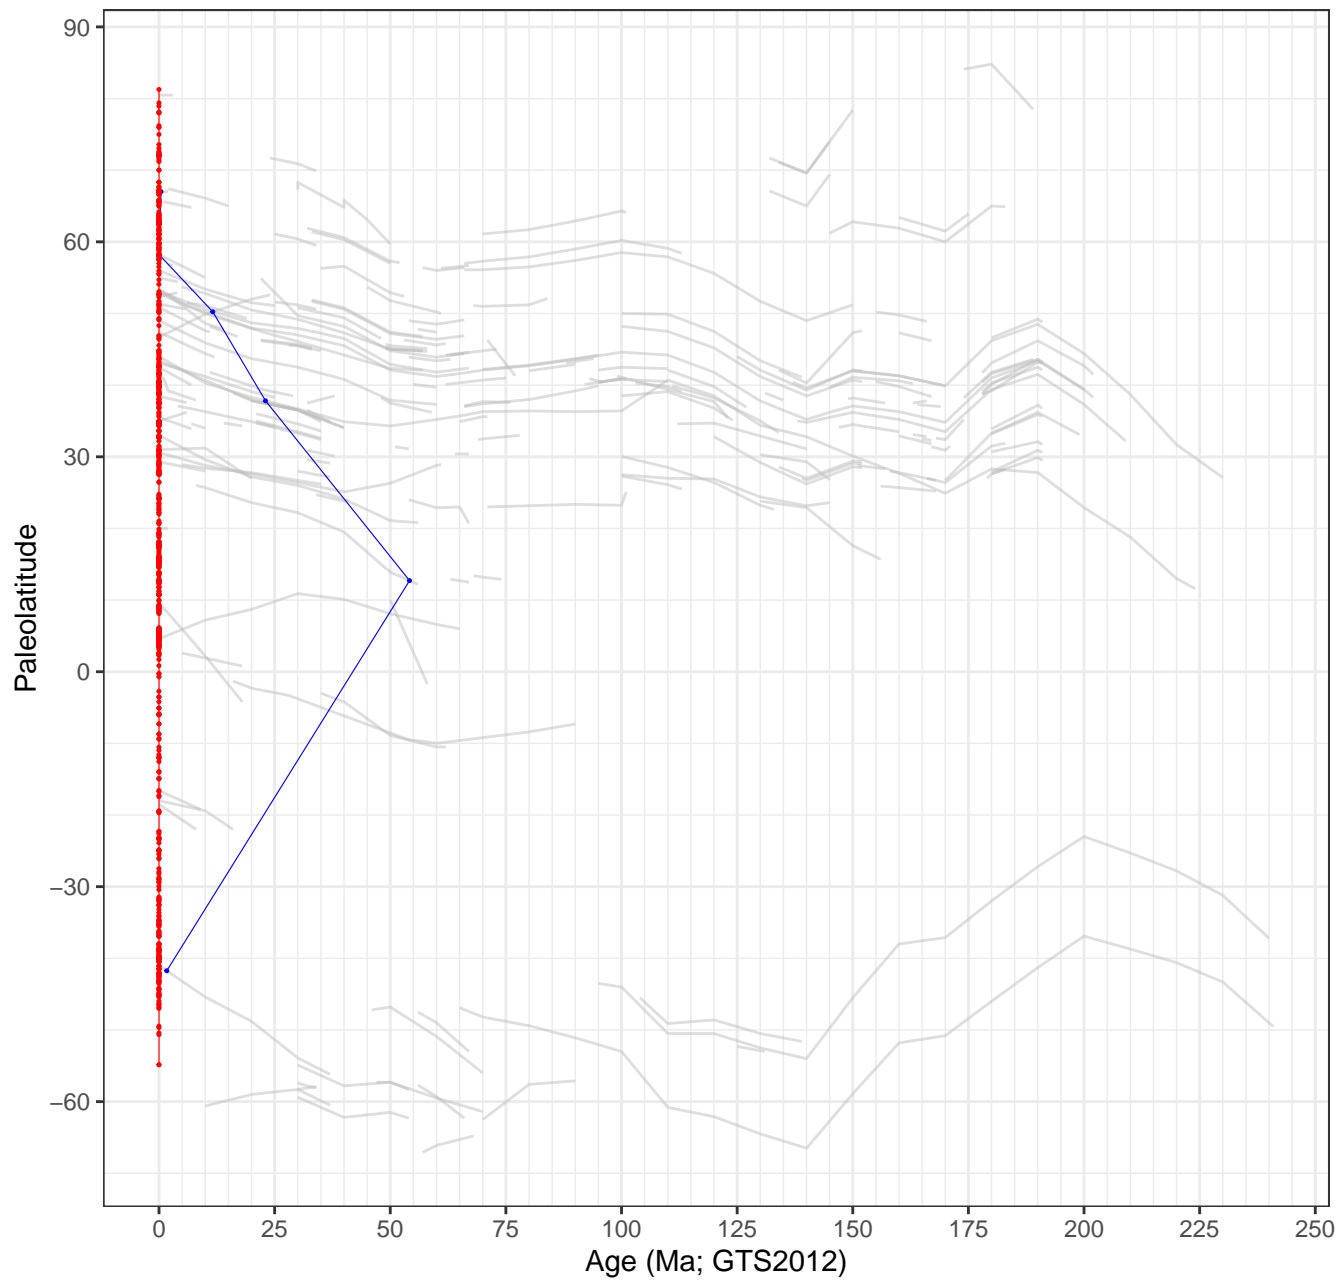

Supplement: Supplementary file 560 [file modern_Trinovantedinium applanatum.pdf › Supplement/Supplement 2/Modern 92 plots/modern_Trinovantedinium applanatum.pdf]

# Species *Trinovantedinium pallidifulum*

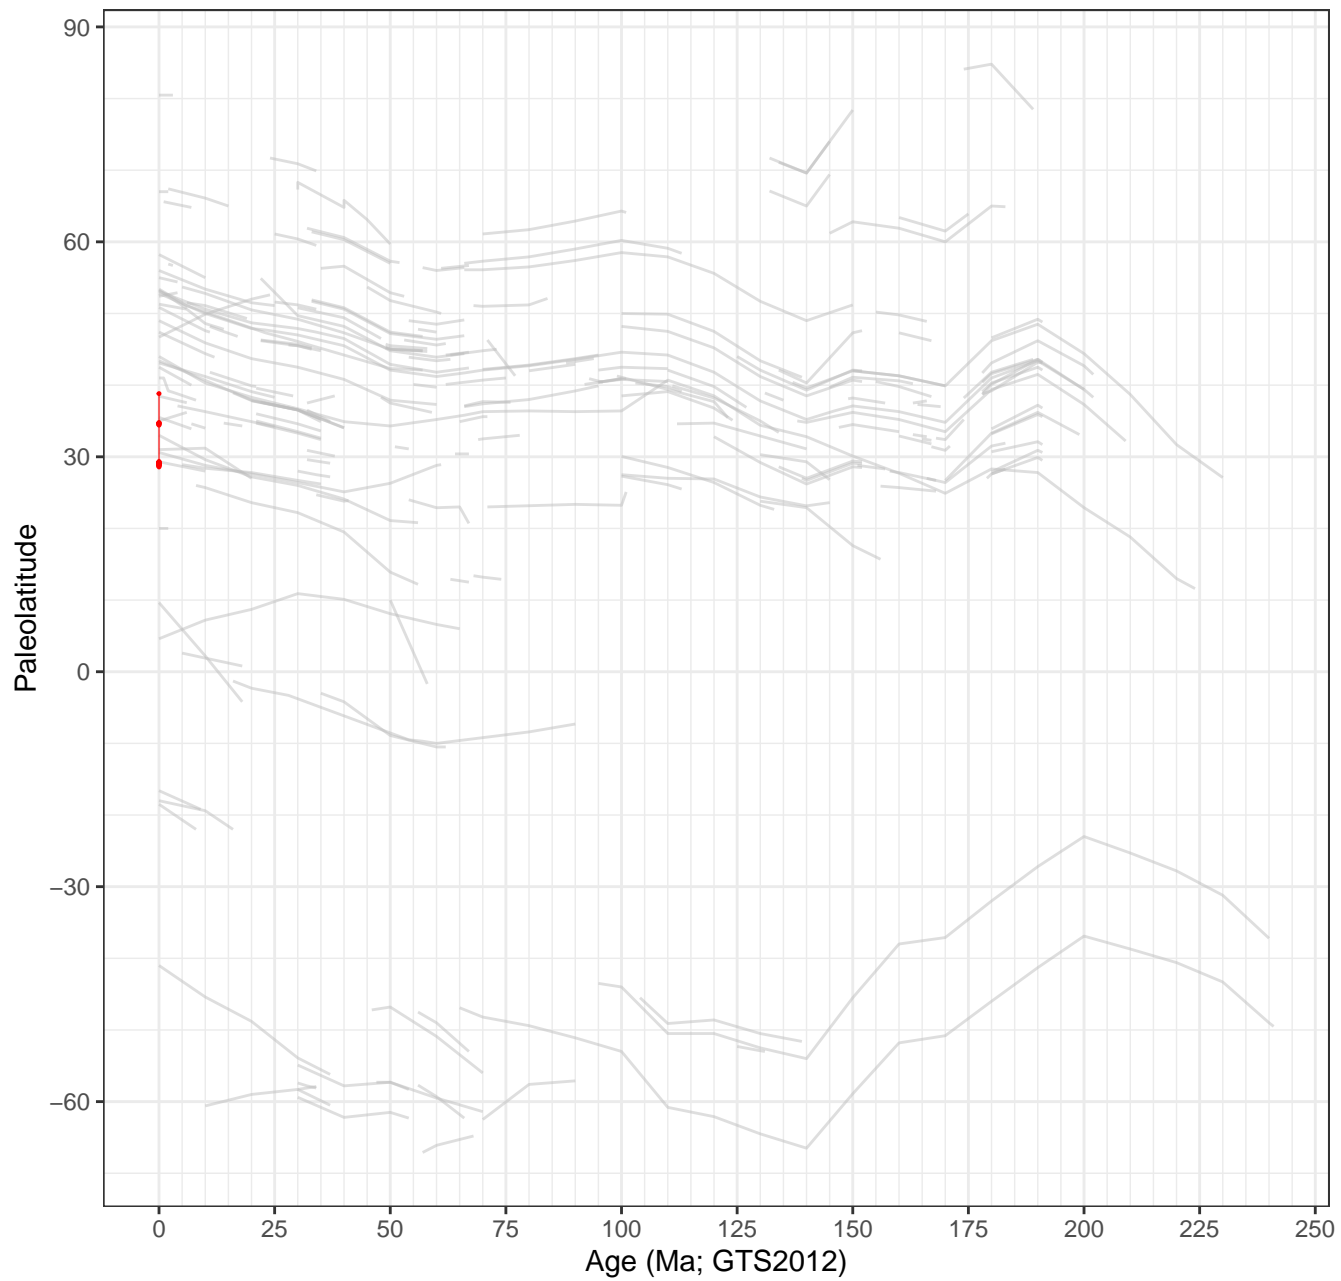

Supplement: Supplementary file 561 [file modern_Trinovantedinium pallidifulvum.pdf › Supplement/Supplement 2/Modern 92 plots/modern_Trinovantedinium pallidifulvum.pdf]

# Species *Trinovantedinium variabile*

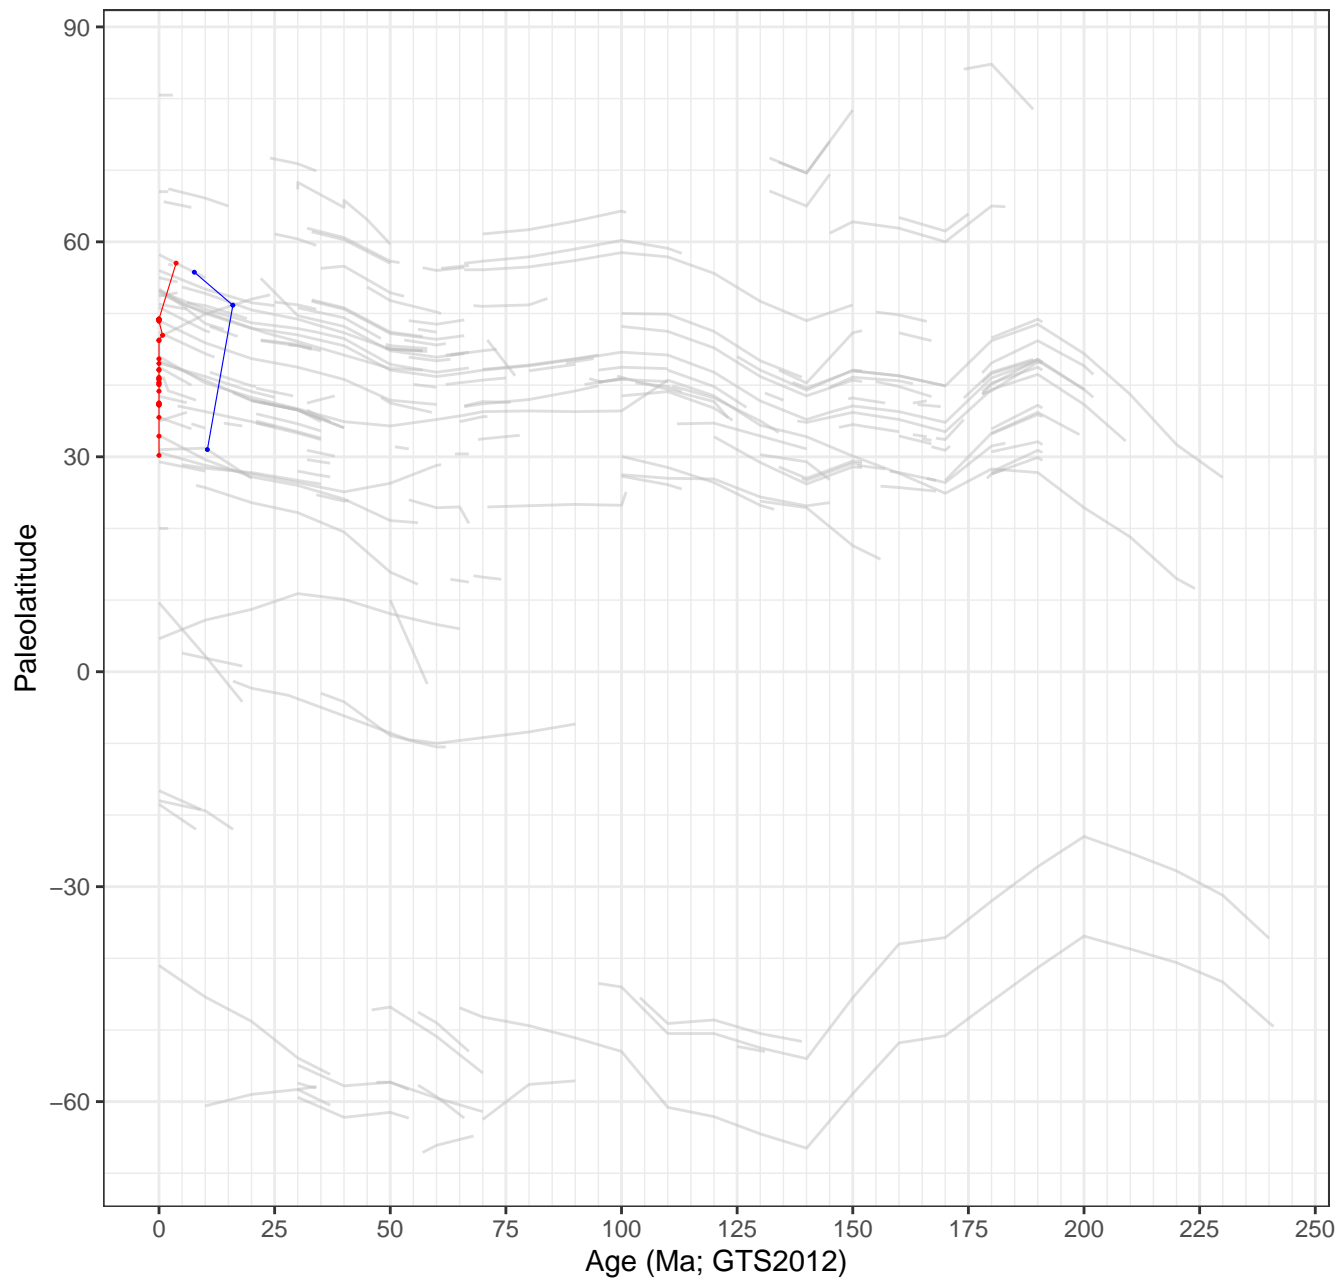

Supplement: Supplementary file 562 [file modern_Trinovantedinium variabile.pdf › Supplement/Supplement 2/Modern 92 plots/modern_Trinovantedinium variabile.pdf]

# Species *Tuberculodinium vancampoeae*

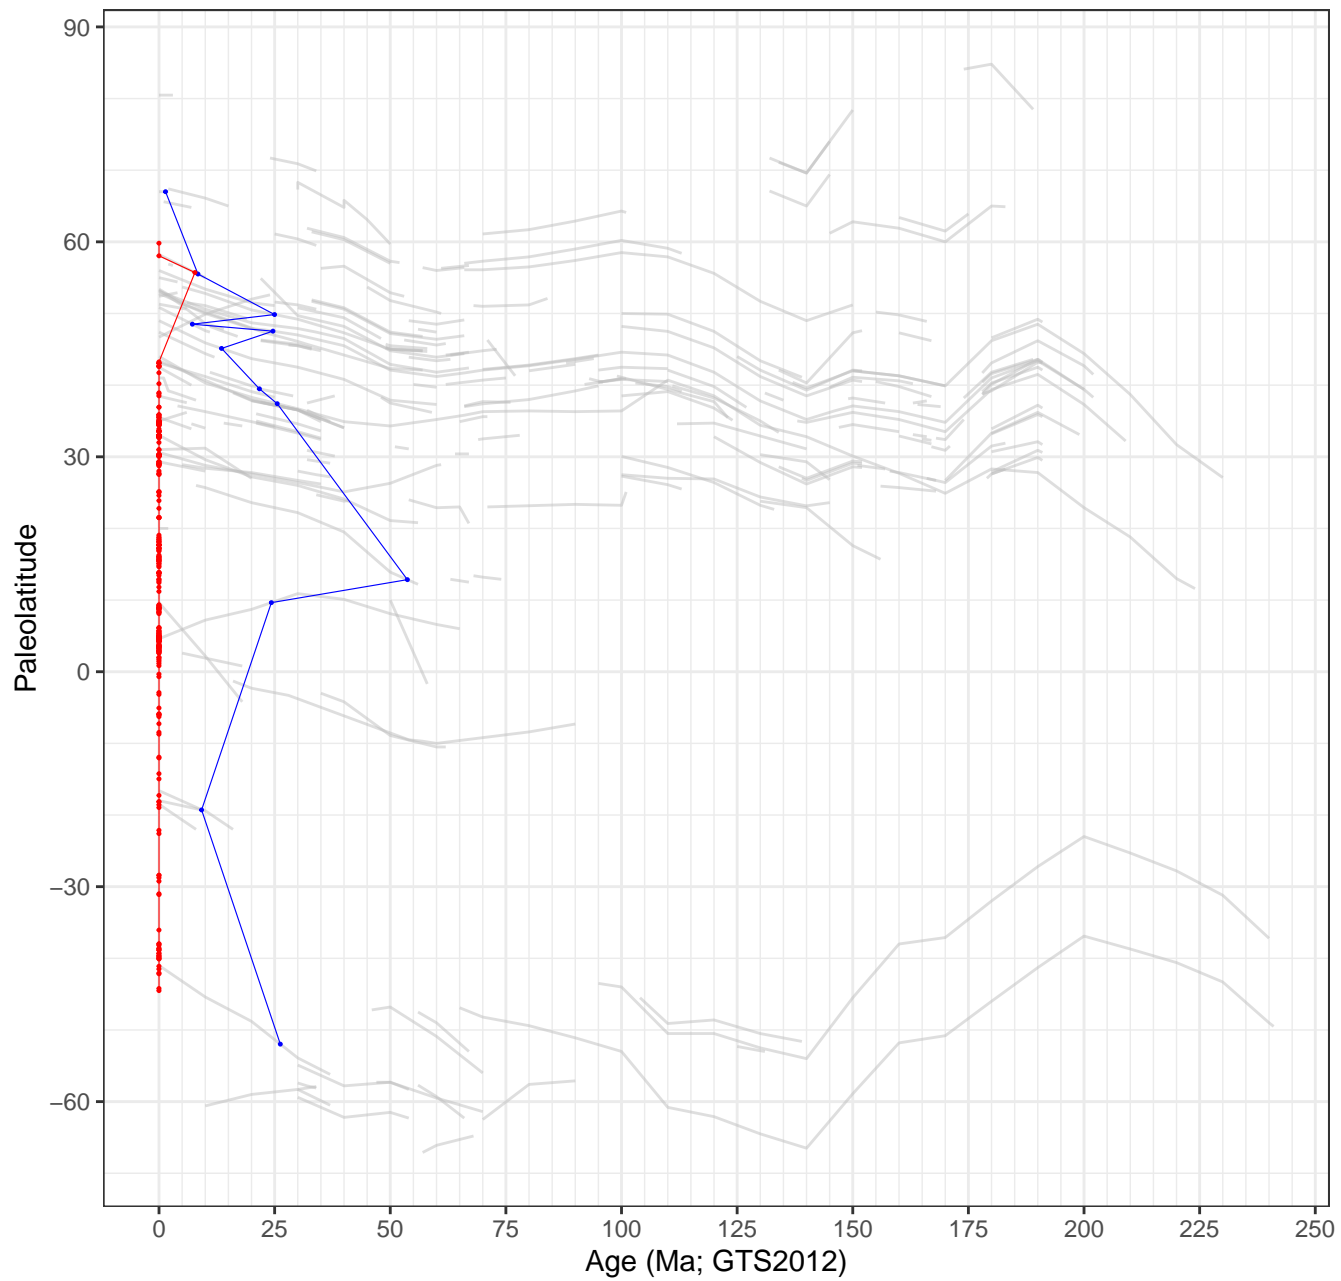

Supplement: Supplementary file 563 [file modern_Tuberculodinium vancampoae.pdf › Supplement/Supplement 2/Modern 92 plots/modern_Tuberculodinium vancampoae.pdf]

# Species Votadinium calvum

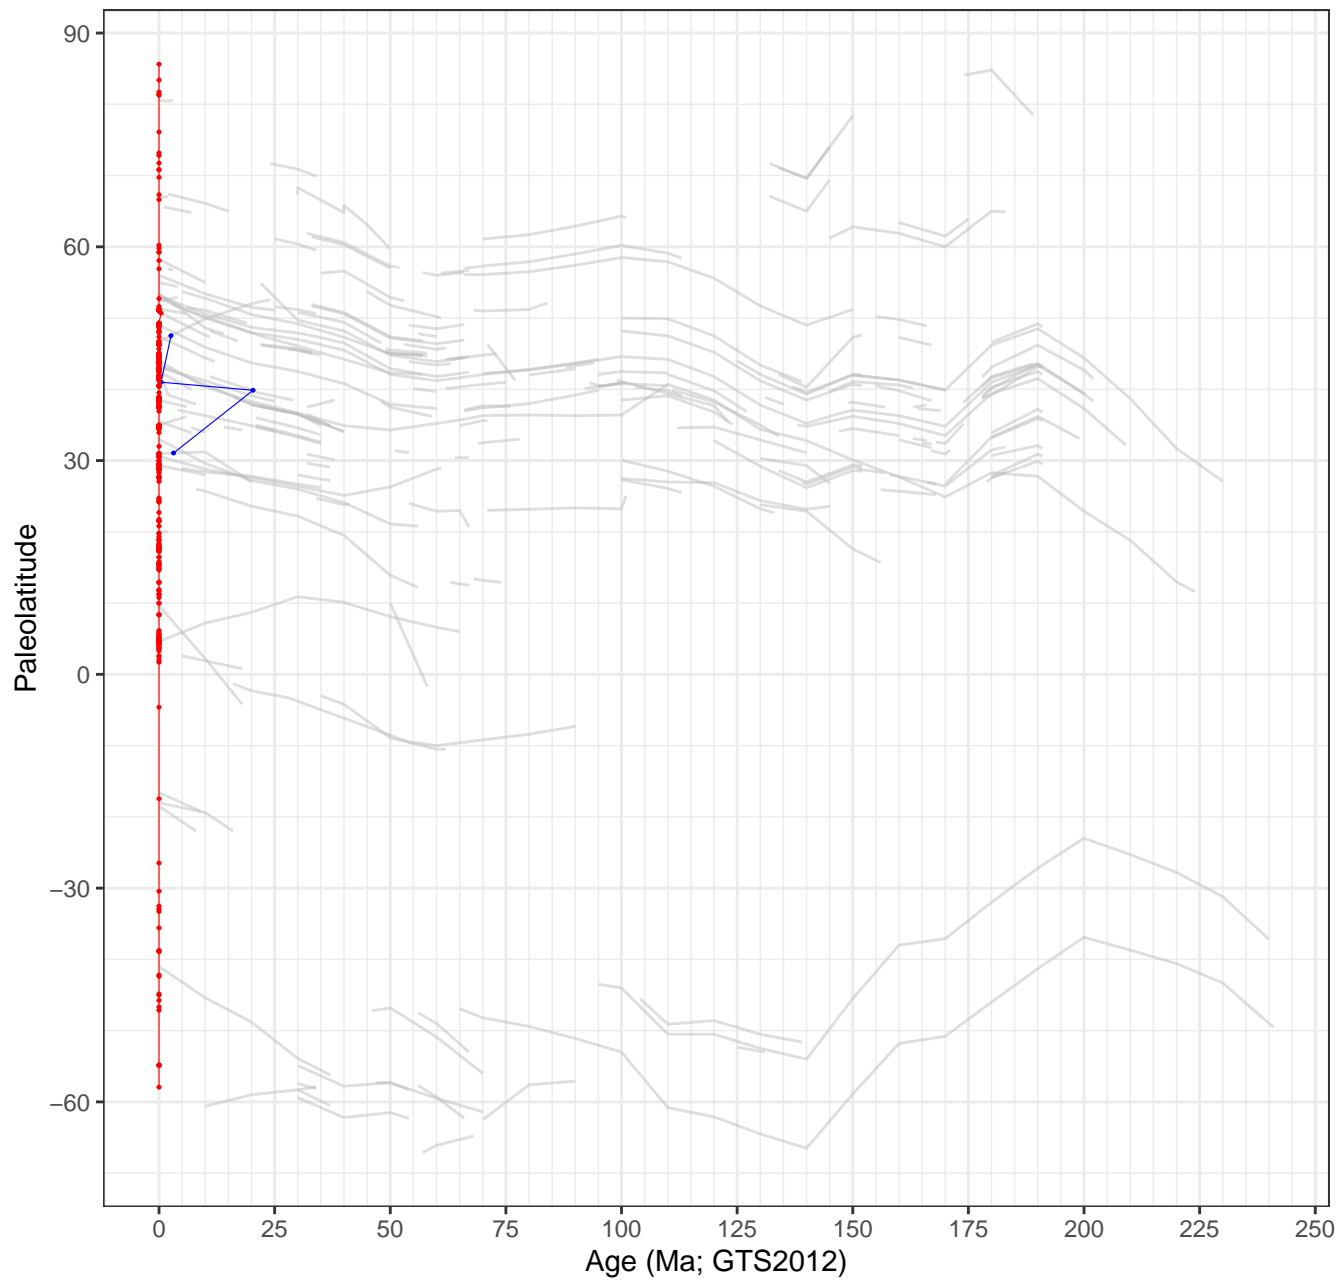

Supplement: Supplementary file 564 [file modern_Votadinium calvum.pdf › Supplement/Supplement 2/Modern 92 plots/modern_Votadinium calvum.pdf]

# Species *Votadinium spinosum*

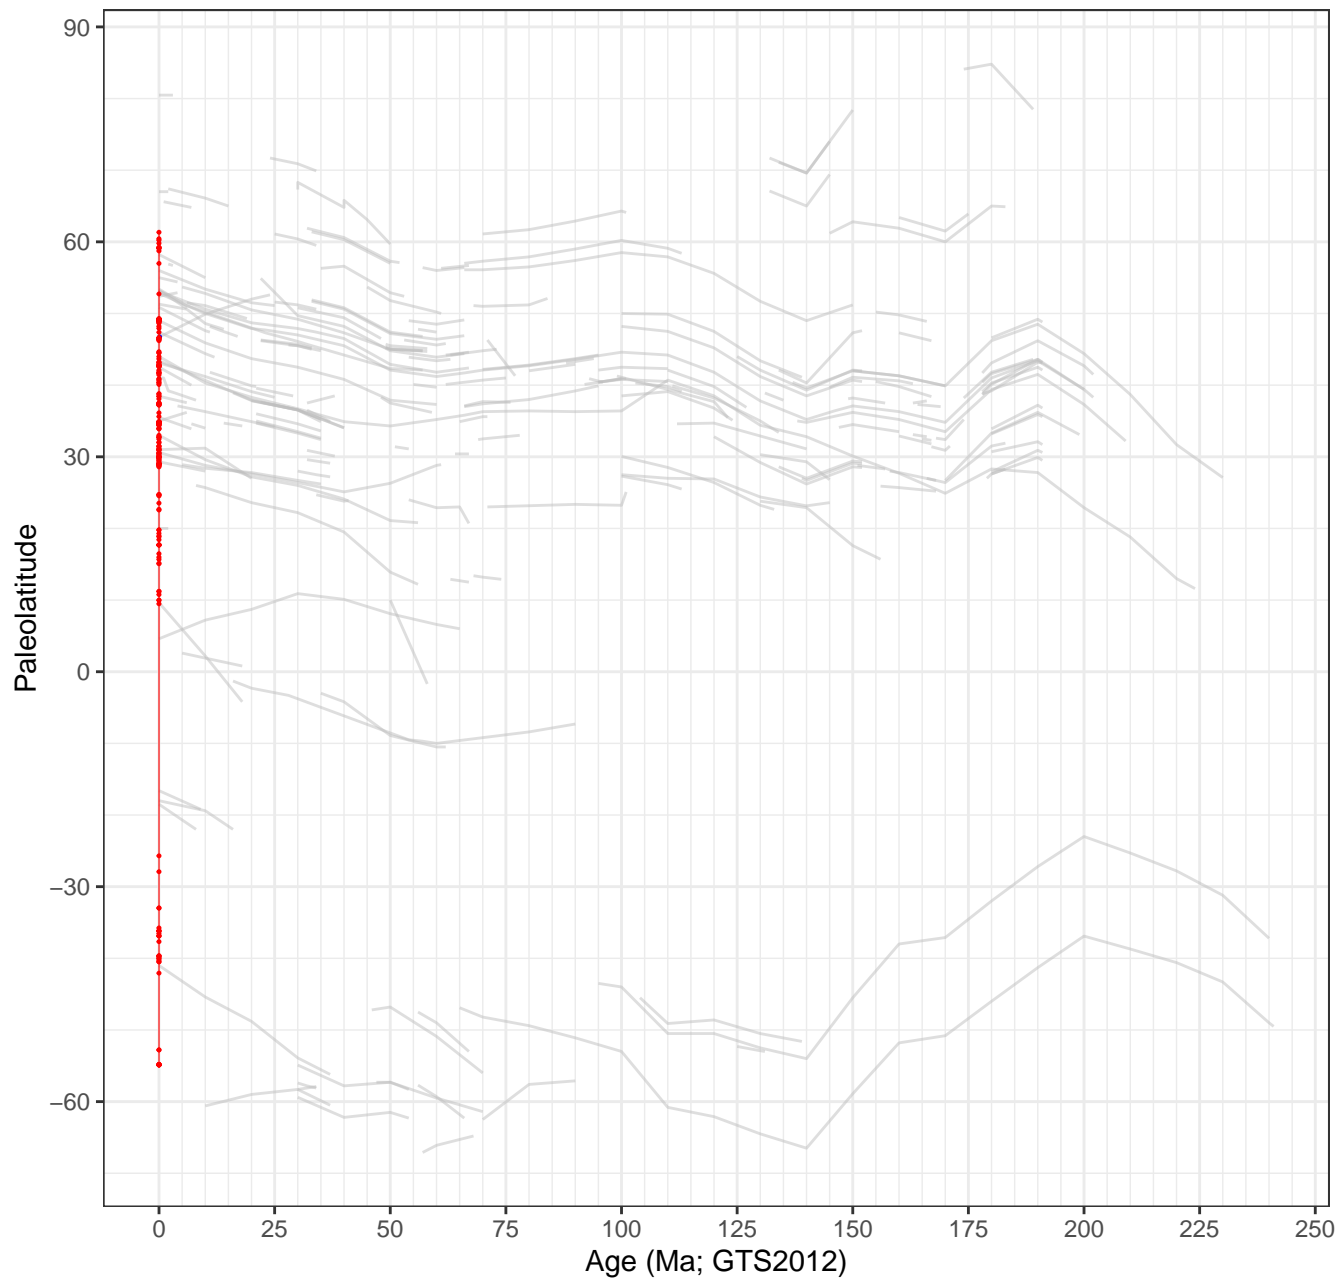

Supplement: Supplementary file 565 [file modern_Votadinium spinosum.pdf › Supplement/Supplement 2/Modern 92 plots/modern_Votadinium spinosum.pdf]

# Species *Xandarodinium xanthum*

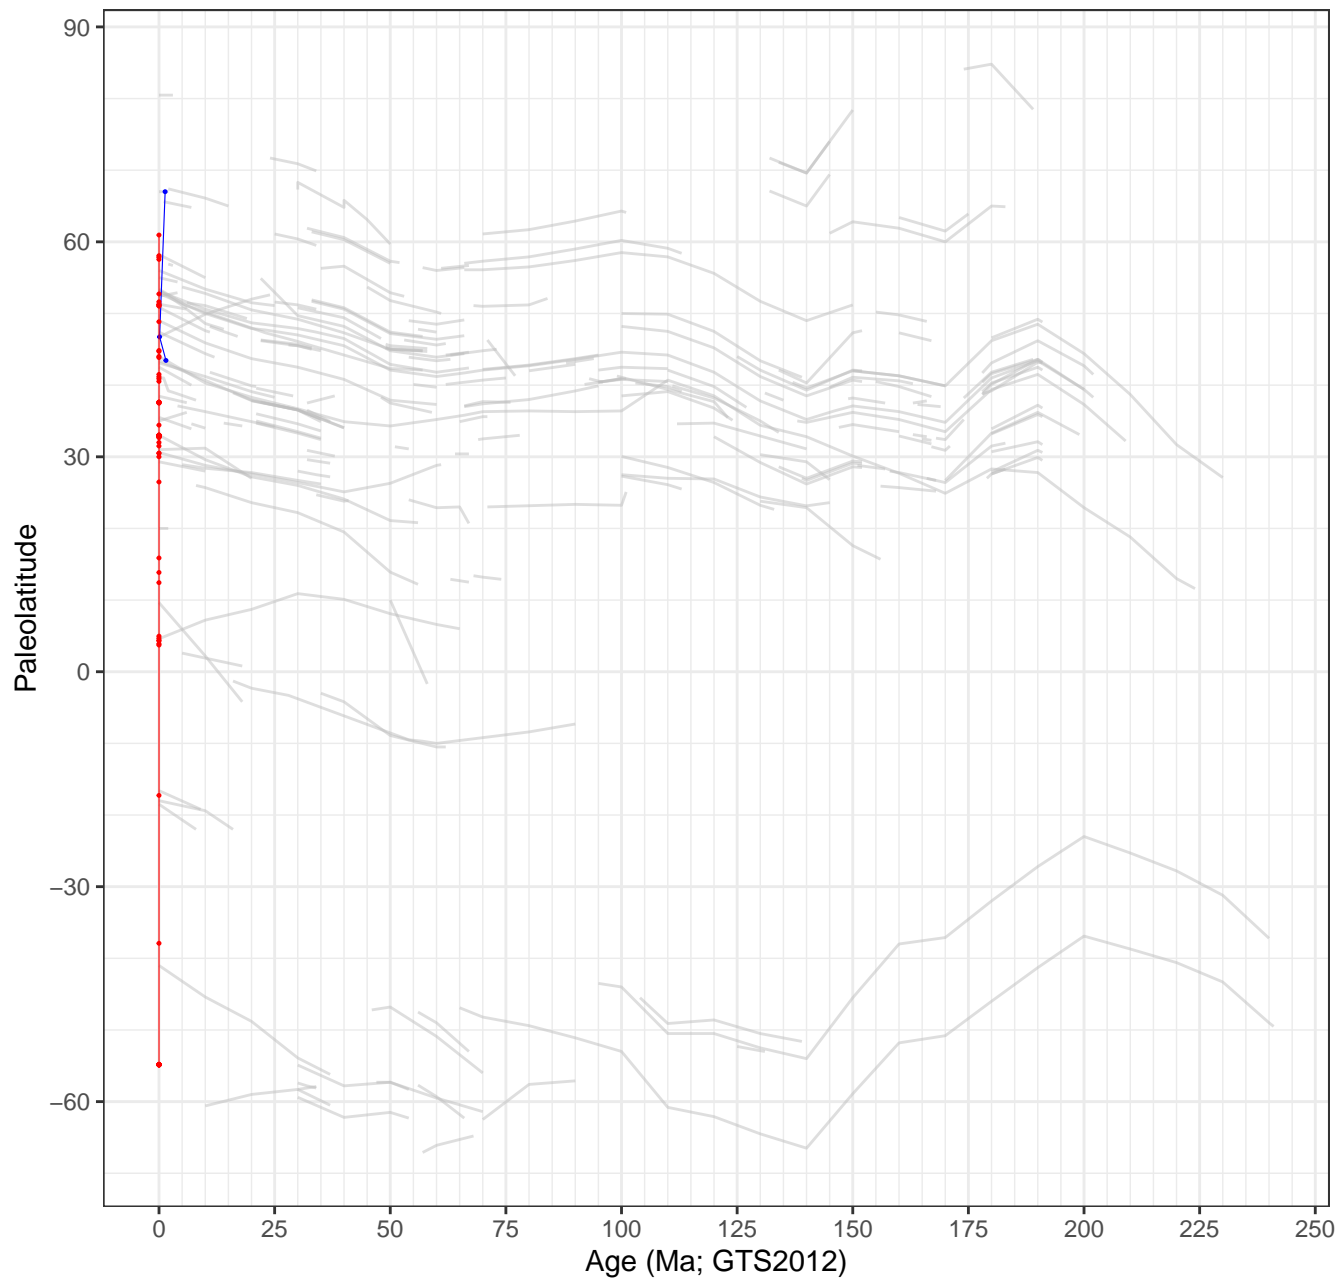

Supplement: Supplementary file 566 [file modern_Xandarodinium xanthum.pdf › Supplement/Supplement 2/Modern 92 plots/modern_Xandarodinium xanthum.pdf]

# Species cyst of *Gymnodinium* spp.

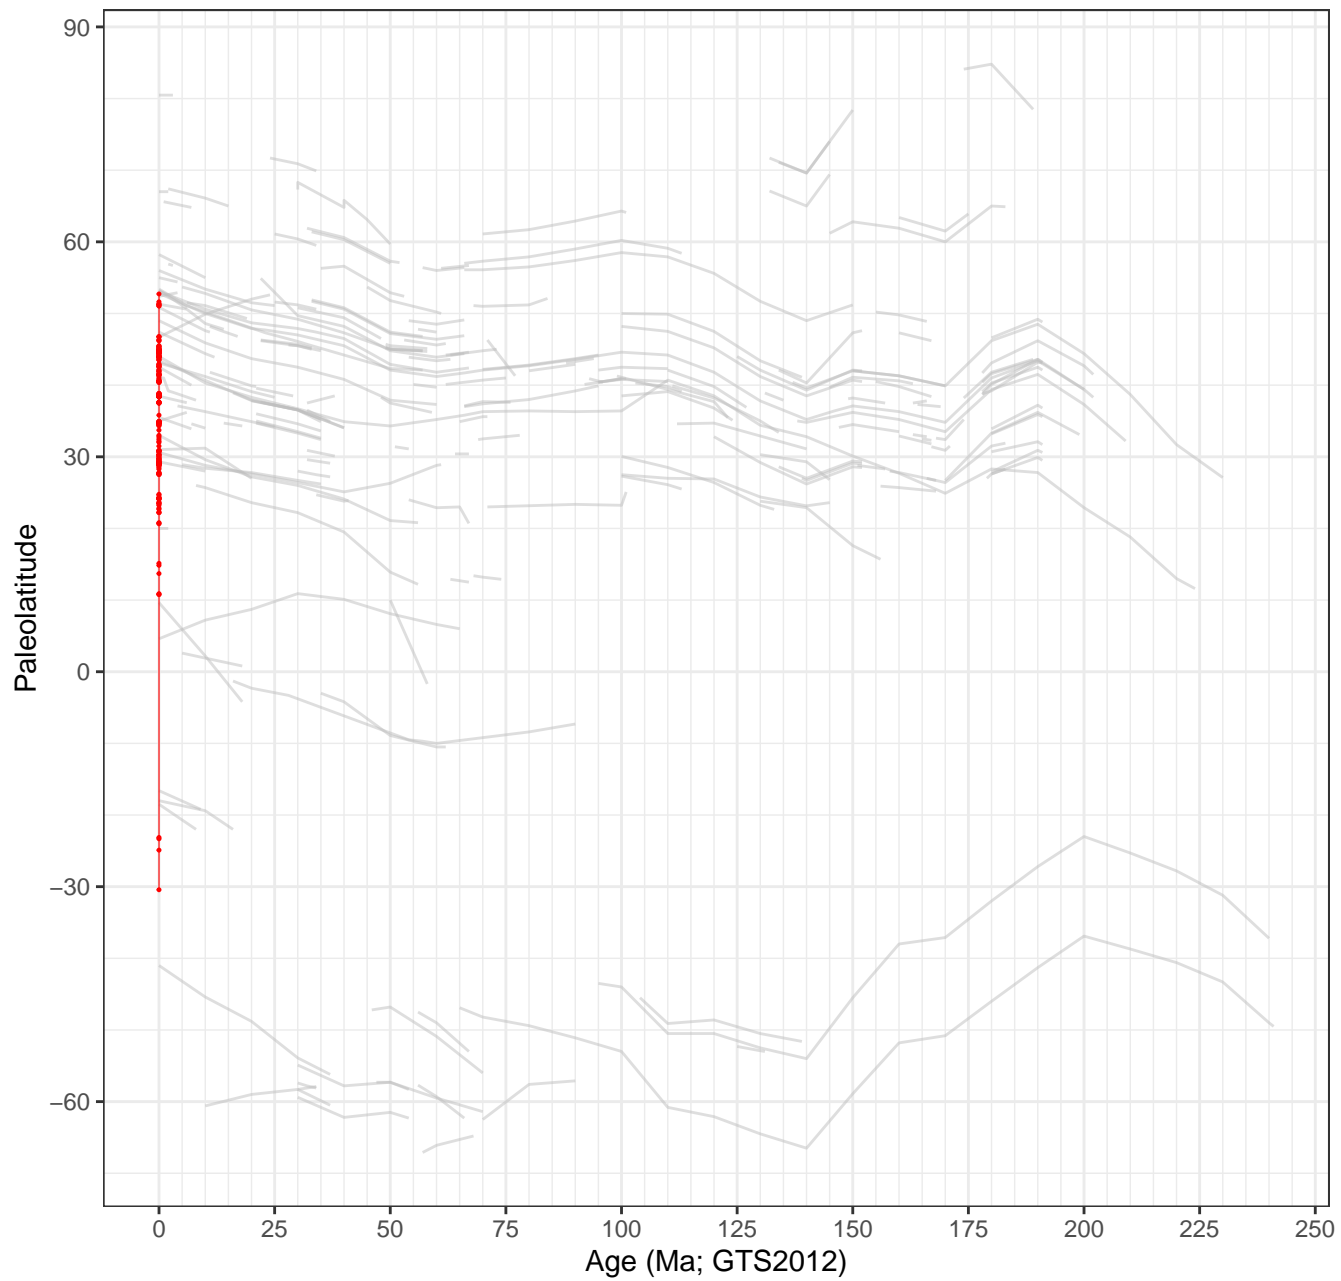

Supplement: Supplementary file 567 [file modern_cyst of Gymnodinium spp..pdf › Supplement/Supplement 2/Modern 92 plots/modern_cyst of Gymnodinium spp..pdf]

# Species cyst of *Oblea acanthocysta*

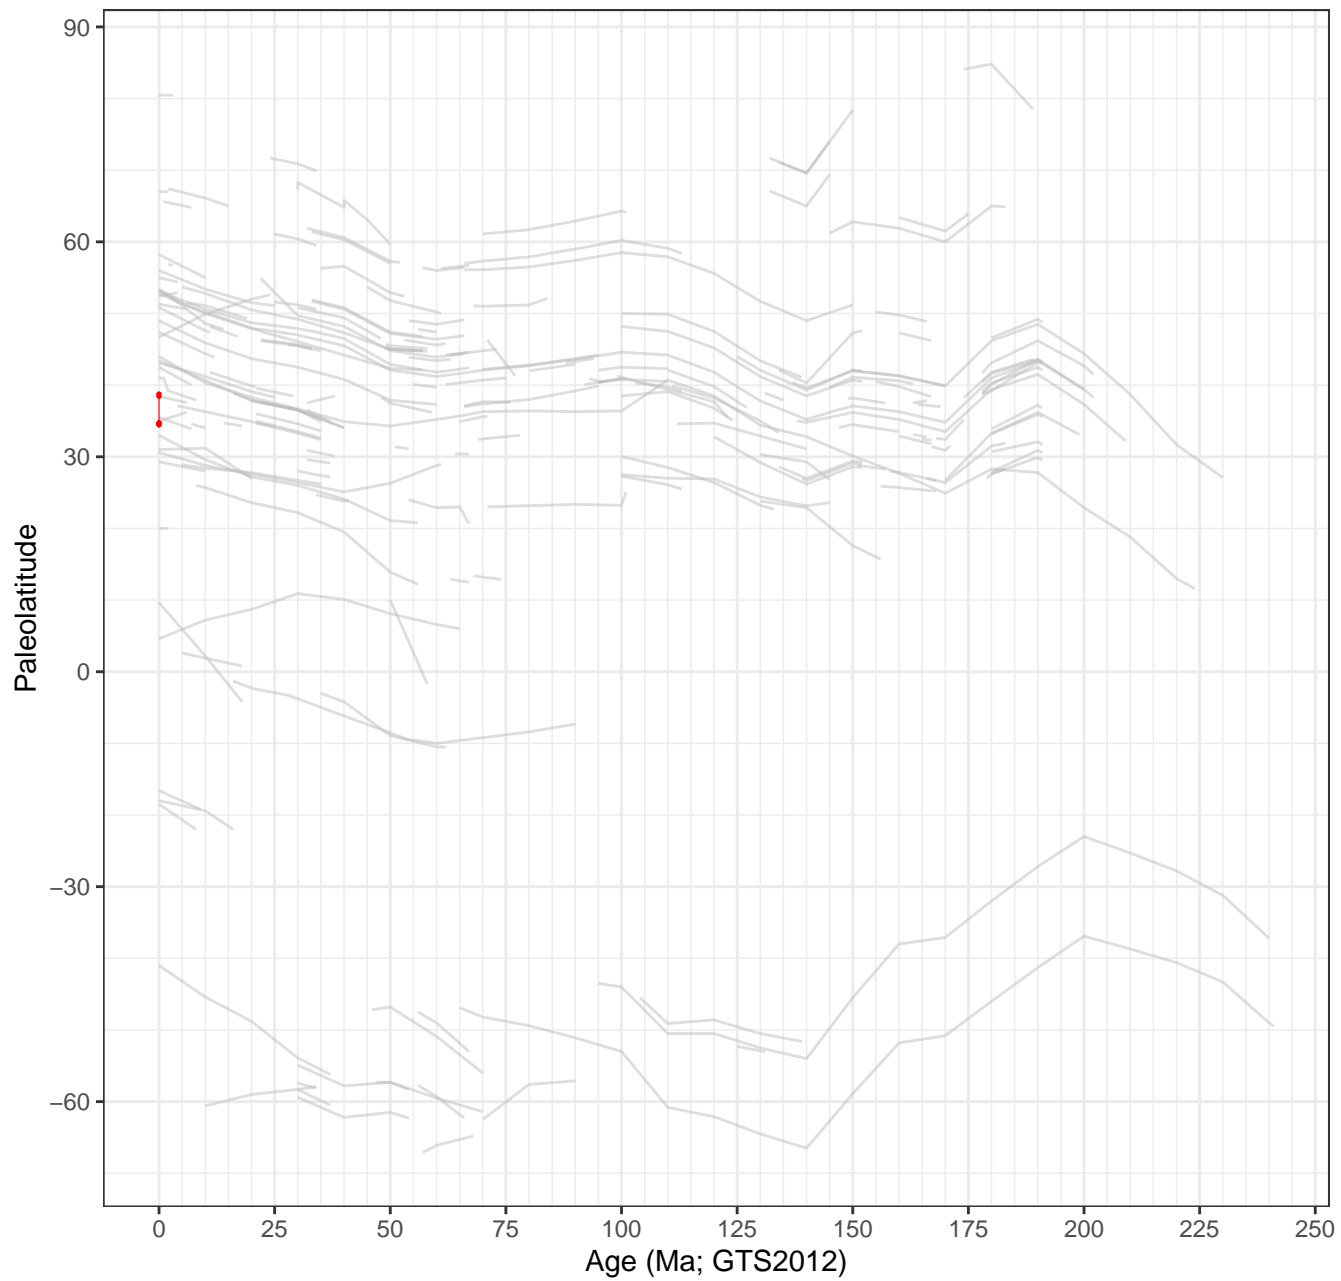

Supplement: Supplementary file 568 [file modern_cyst of Oblea acanthocysta.pdf › Supplement/Supplement 2/Modern 92 plots/modern_cyst of Oblea acanthocysta.pdf]

# Species cyst of *Polarella glacialis*

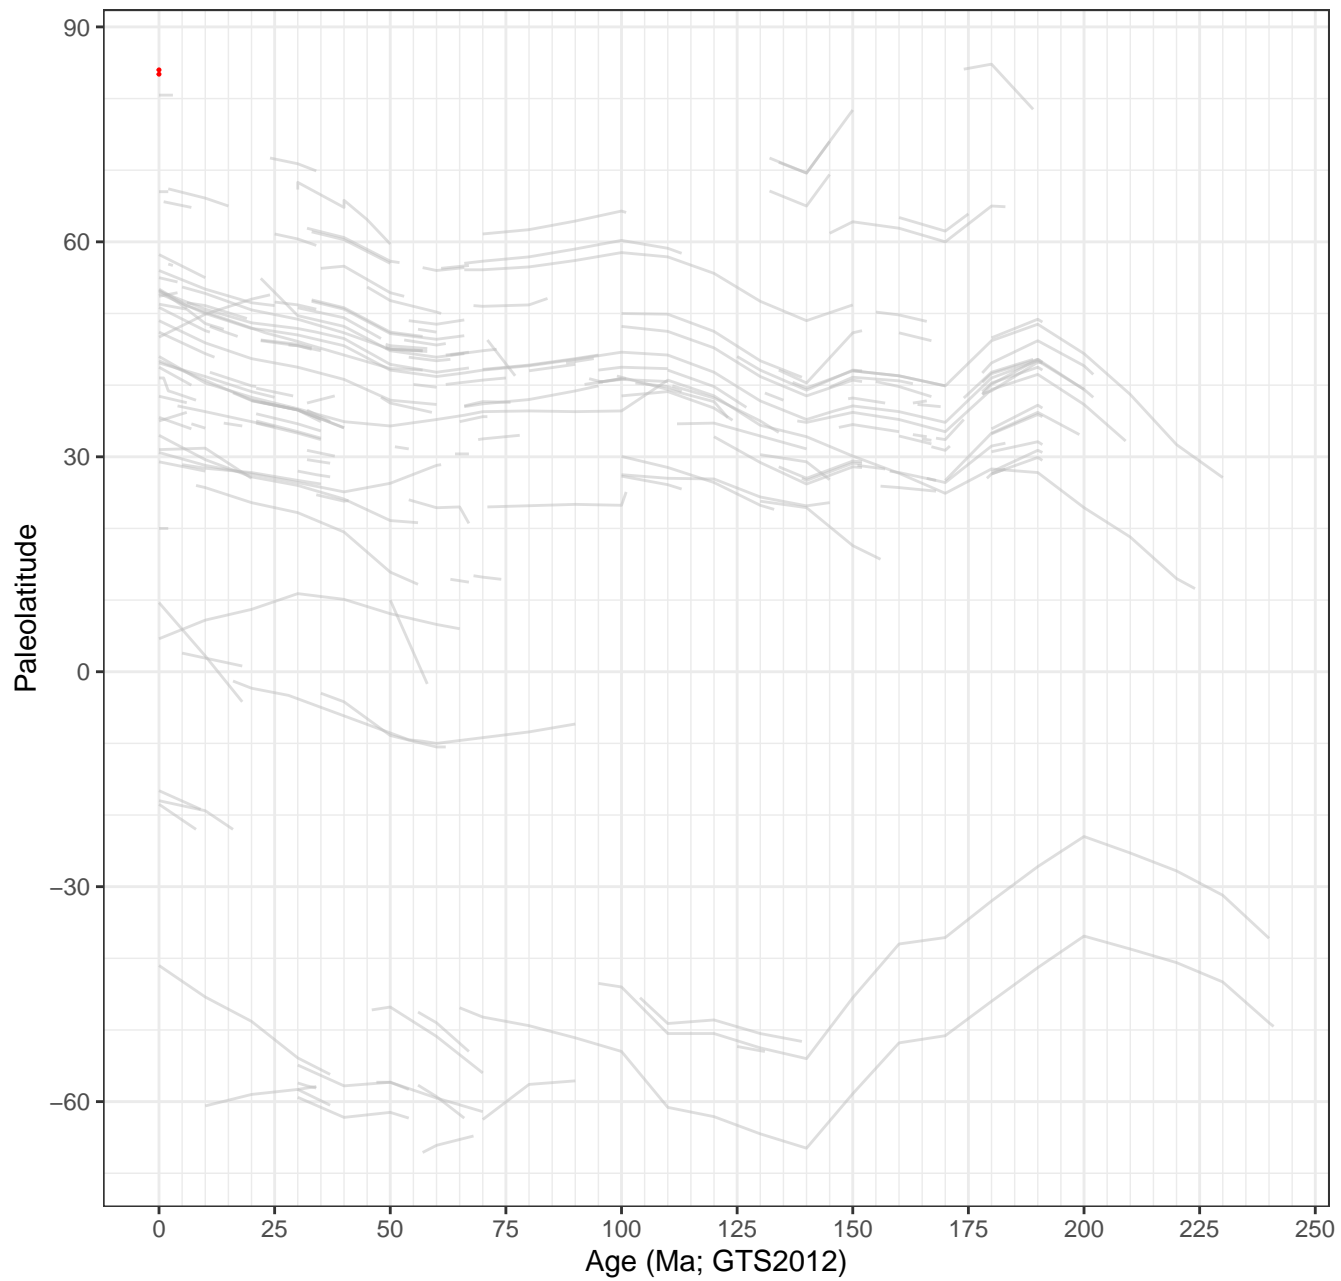

Supplement: Supplementary file 569 [file modern_cyst of Polarella glacialis.pdf › Supplement/Supplement 2/Modern 92 plots/modern_cyst of Polarella glacialis.pdf]

# Species cyst of *Polykrikos hartmannii*

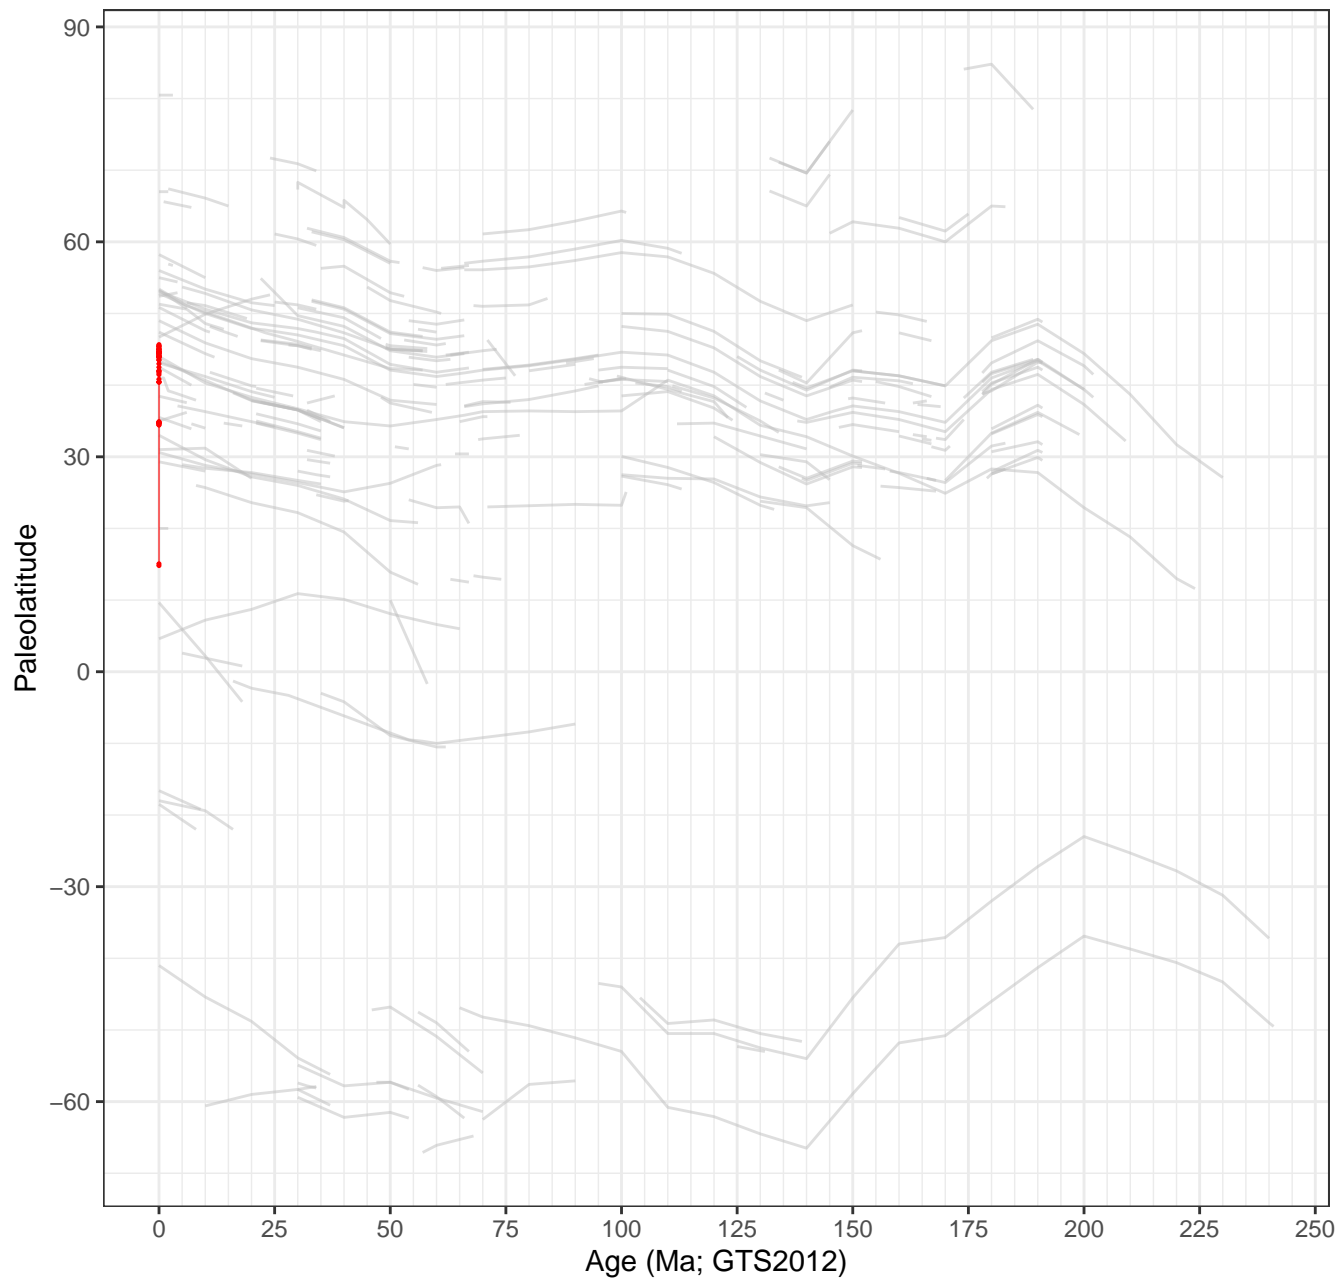

Supplement: Supplementary file 570 [file modern_cyst of Polykrikos hartmannii.pdf › Supplement/Supplement 2/Modern 92 plots/modern_cyst of Polykrikos hartmannii.pdf]

# Species cyst of *Polykrikos kofoidii*

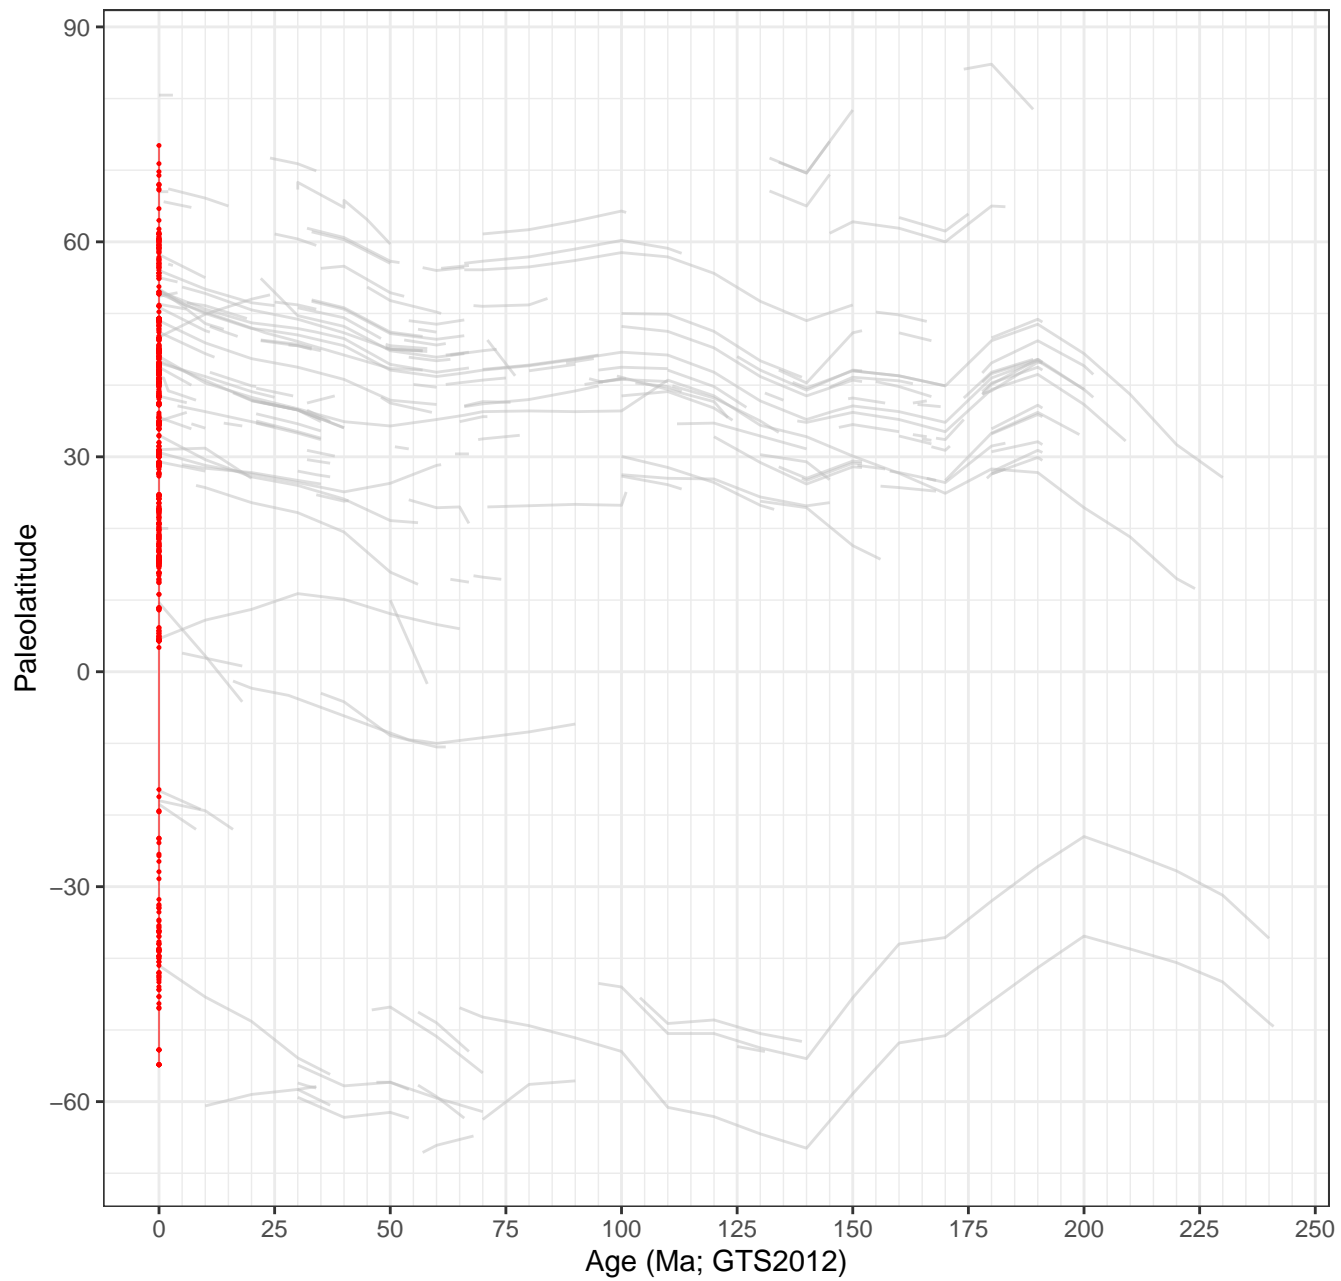

Supplement: Supplementary file 571 [file modern_cyst of Polykrikos kofoidii.pdf › Supplement/Supplement 2/Modern 92 plots/modern_cyst of Polykrikos kofoidii.pdf]

# Species cyst of *Polykrikos schwartzii*

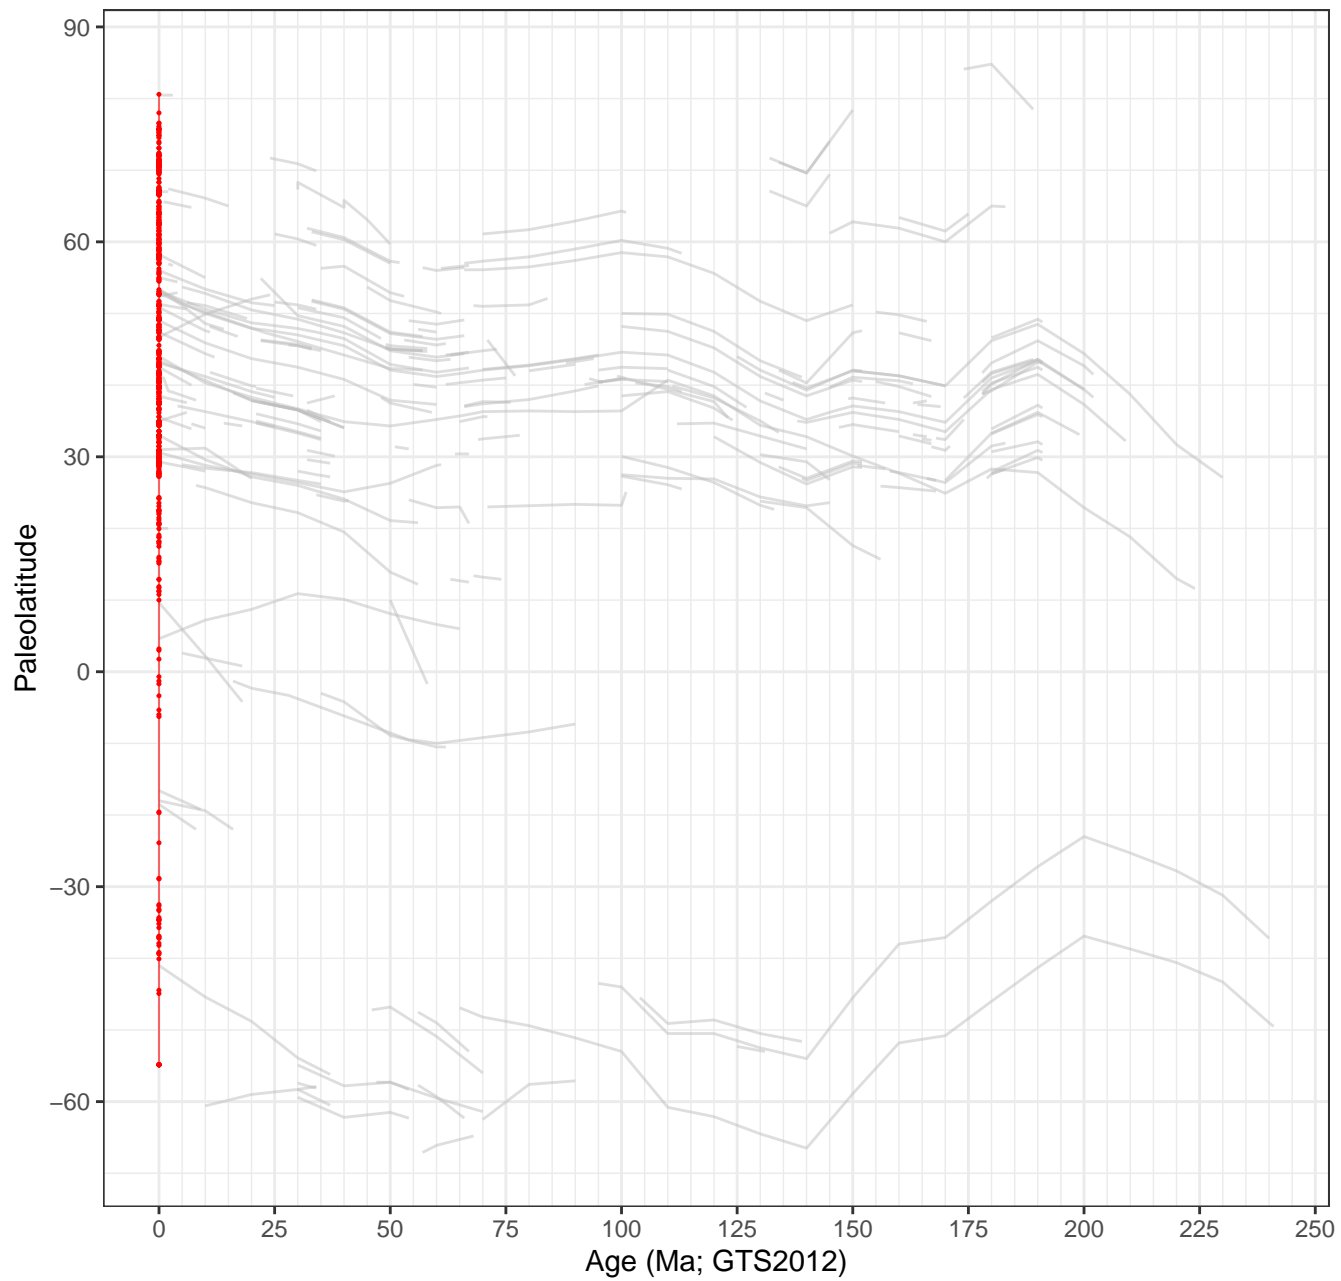

Supplement: Supplementary file 572 [file modern_cyst of Polykrikos schwartzii.pdf › Supplement/Supplement 2/Modern 92 plots/modern_cyst of Polykrikos schwartzii.pdf]

# Species cyst of *Protoperidinium americanum*

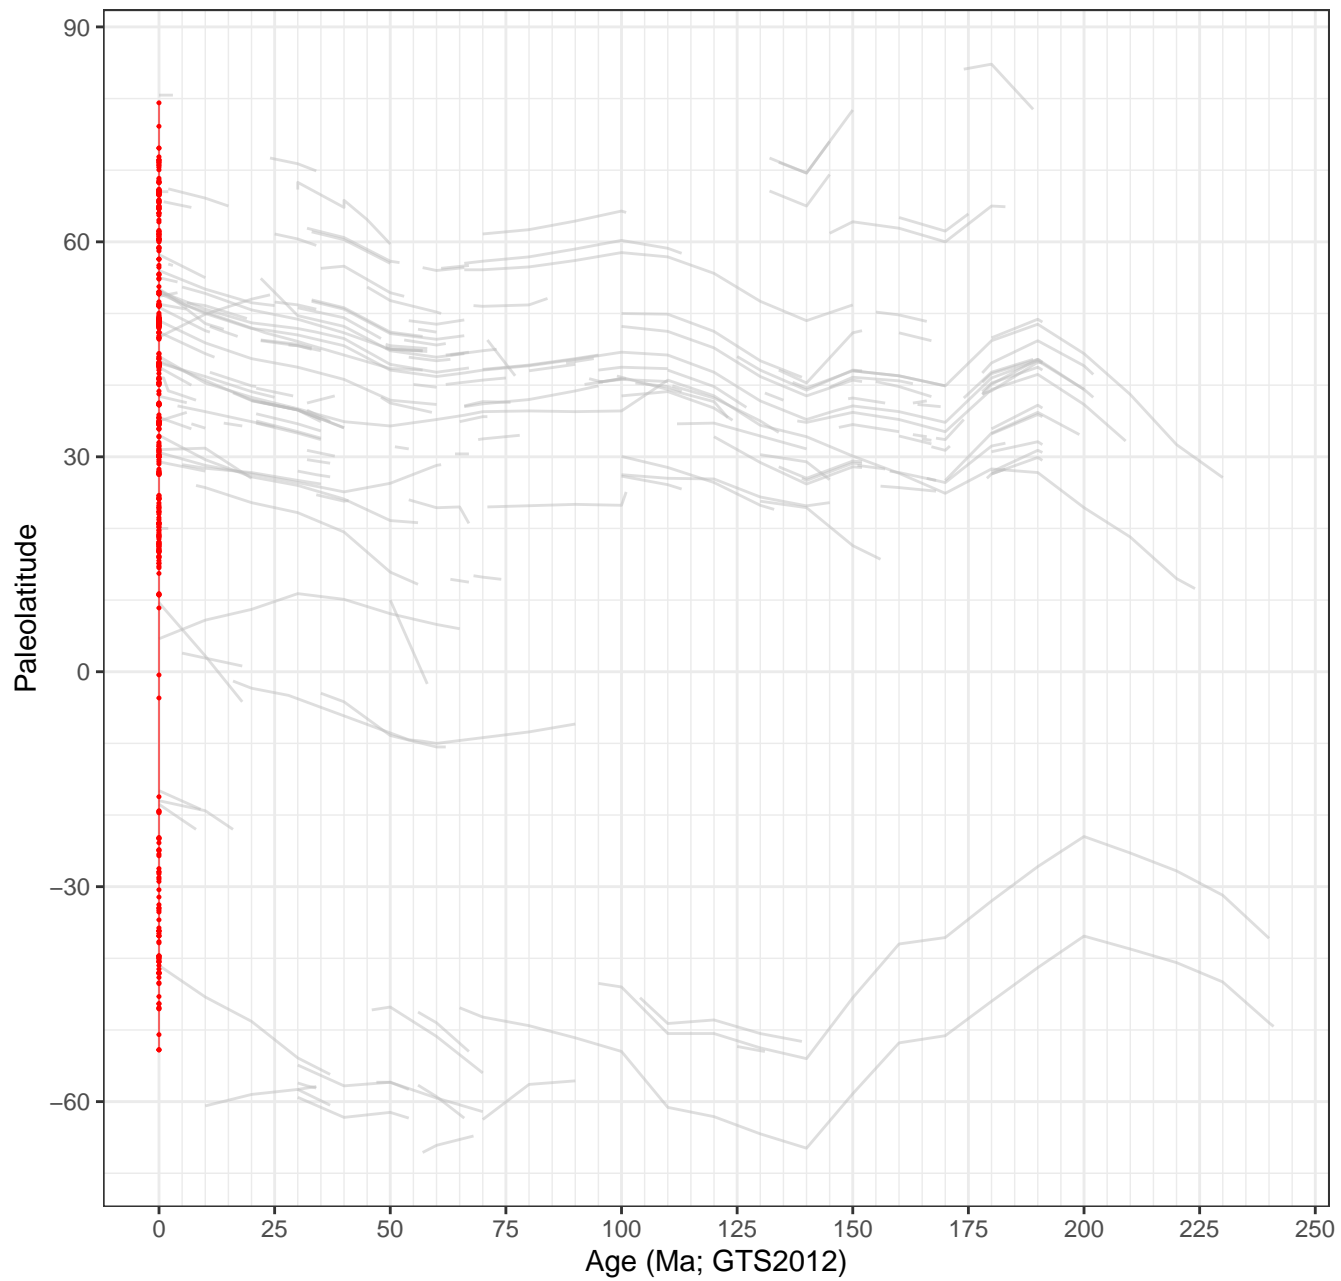

Supplement: Supplementary file 573 [file modern_cyst of Protoperidinium americanum.pdf › Supplement/Supplement 2/Modern 92 plots/modern_cyst of Protoperidinium americanum.pdf]

# Species cyst of *Protoperidinium fukuyoi*

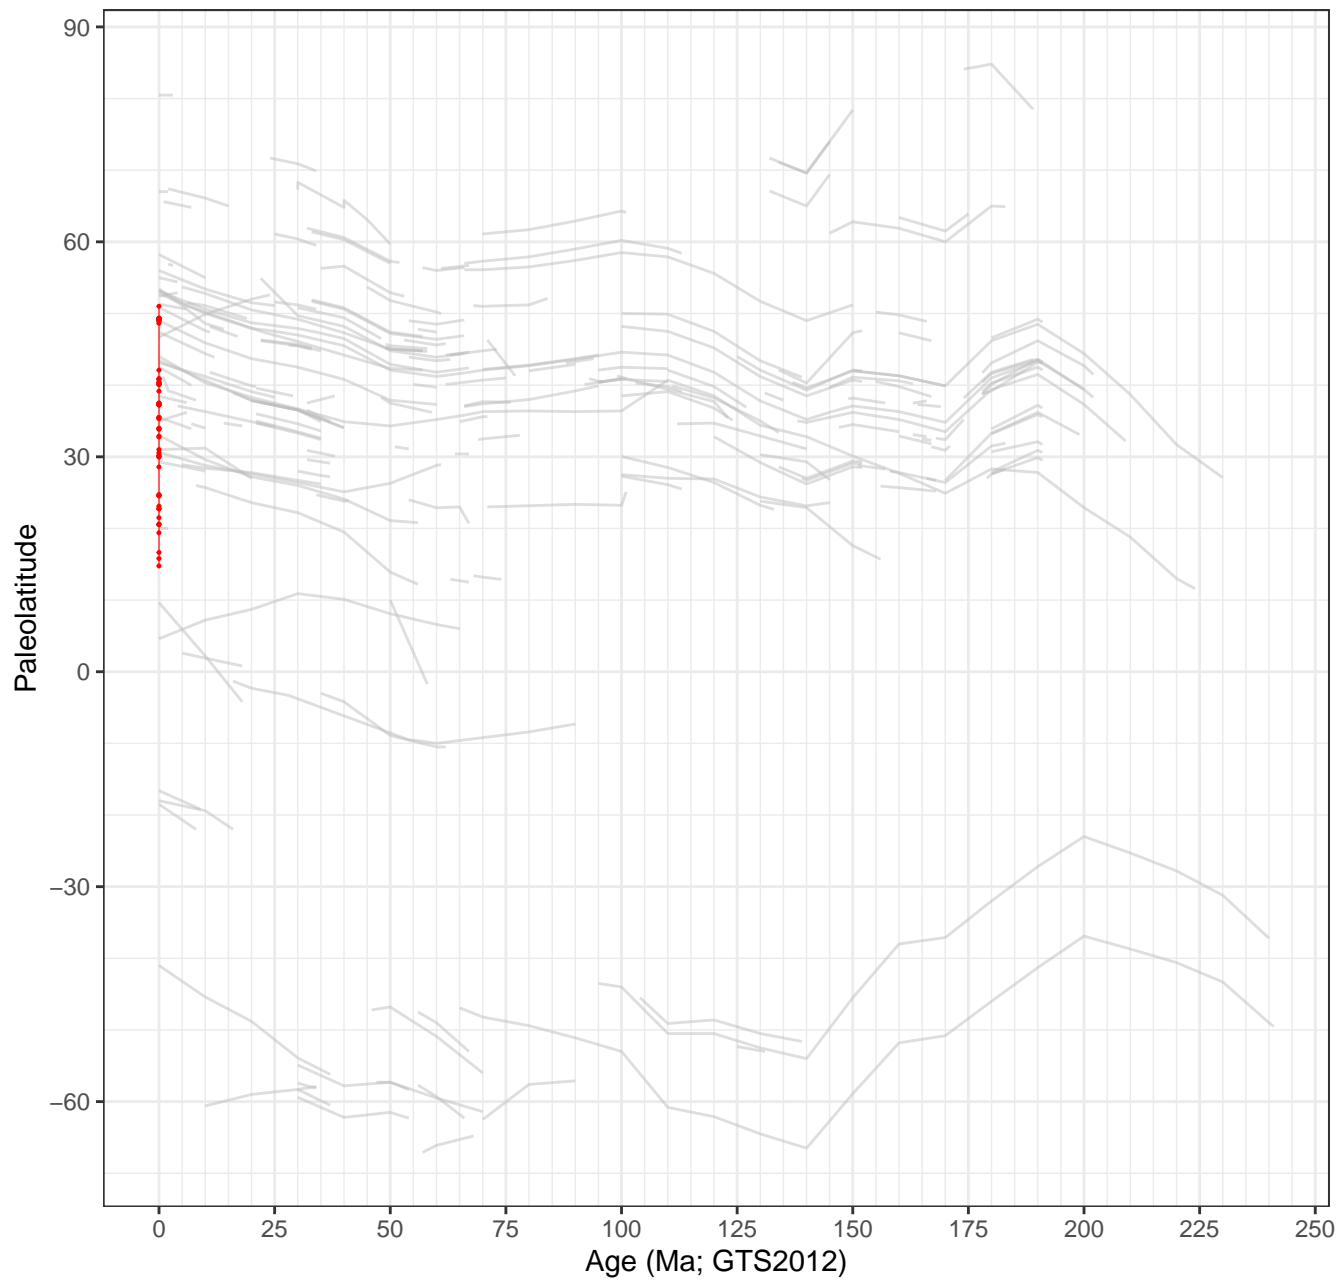

Supplement: Supplementary file 574 [file modern_cyst of Protoperidinium fukuyoi.pdf › Supplement/Supplement 2/Modern 92 plots/modern_cyst of Protoperidinium fukuyoi.pdf]

# Species cyst of *Protoperidinium minutum*

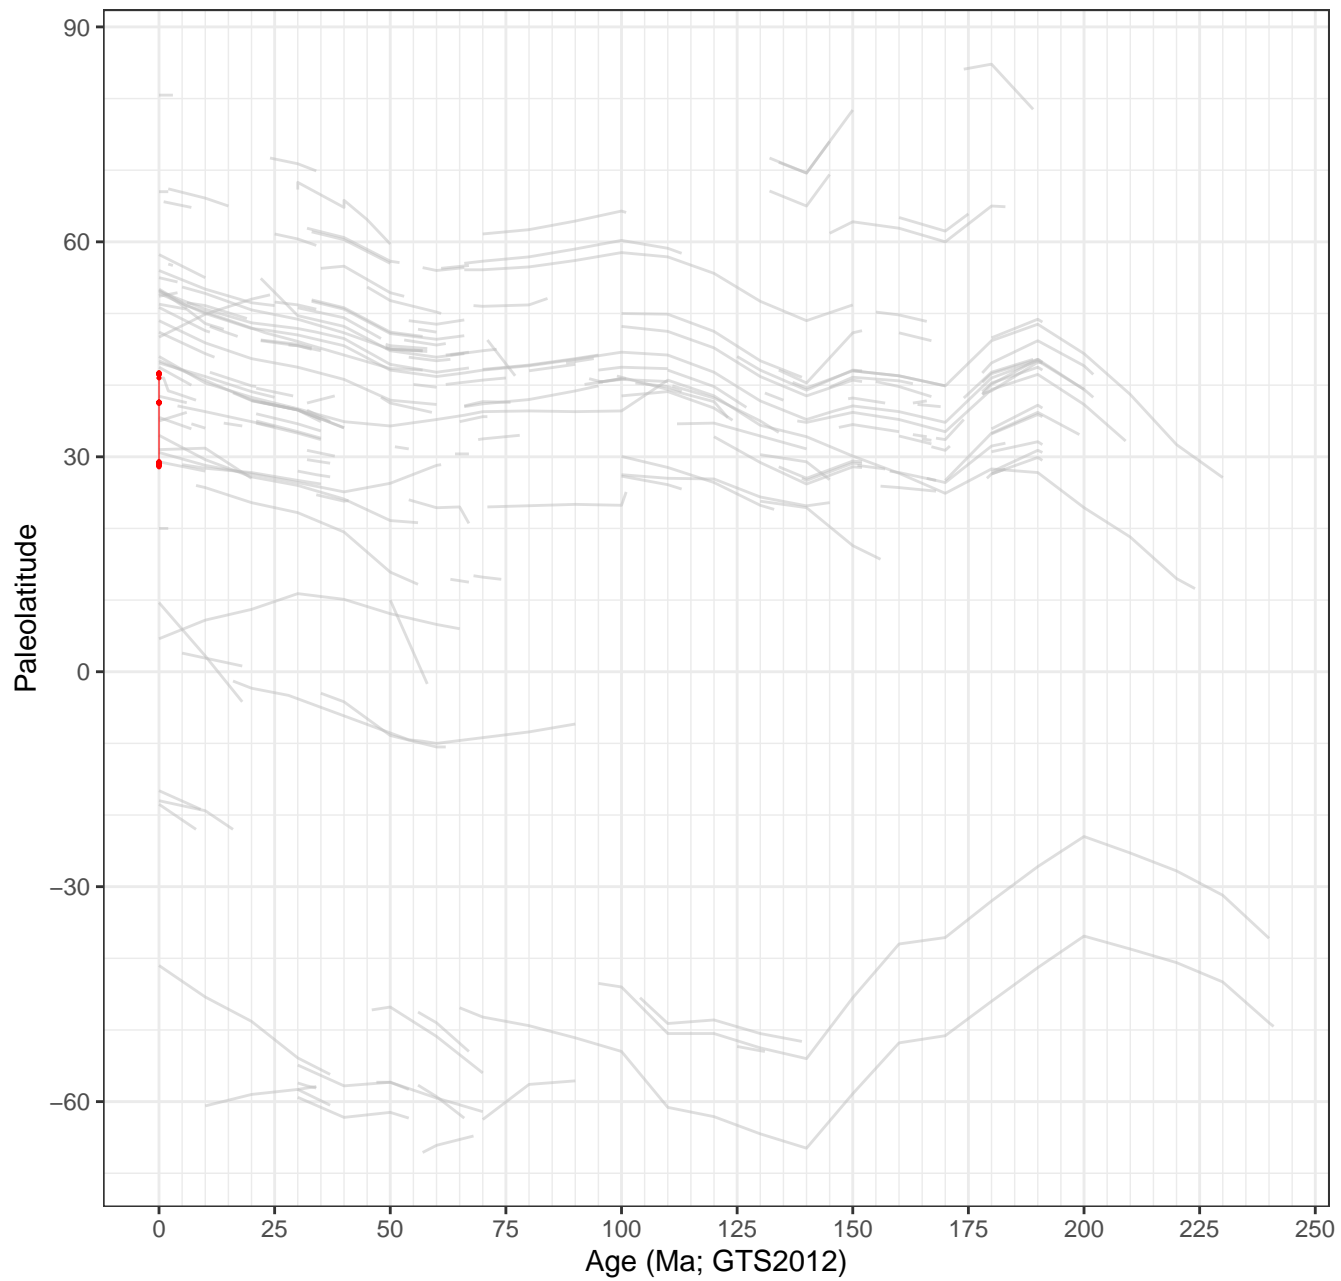

Supplement: Supplementary file 575 [file modern_cyst of Protoperidinium minutum.pdf › Supplement/Supplement 2/Modern 92 plots/modern_cyst of Protoperidinium minutum.pdf]

# Species cyst of *Protoperidinium monospinum*

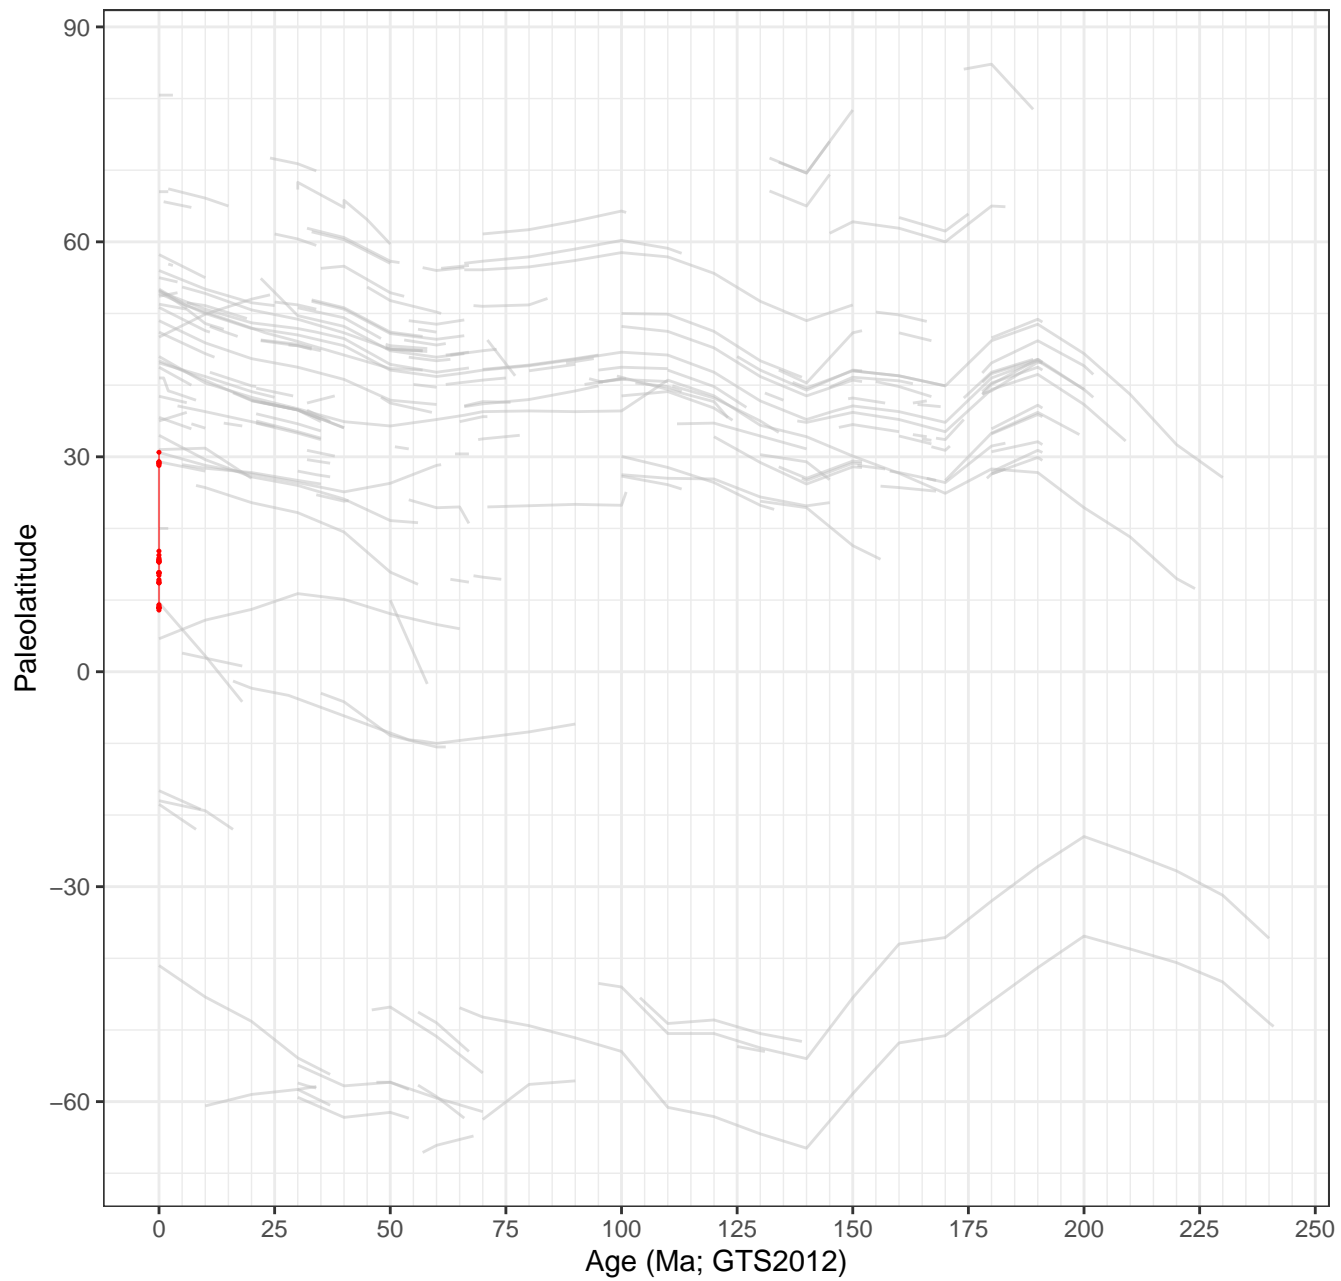

Supplement: Supplementary file 576 [file modern_cyst of Protoperidinium monospinum.pdf › Supplement/Supplement 2/Modern 92 plots/modern_cyst of Protoperidinium monospinum.pdf]

# Species cyst of *Protoperidinium nudum*

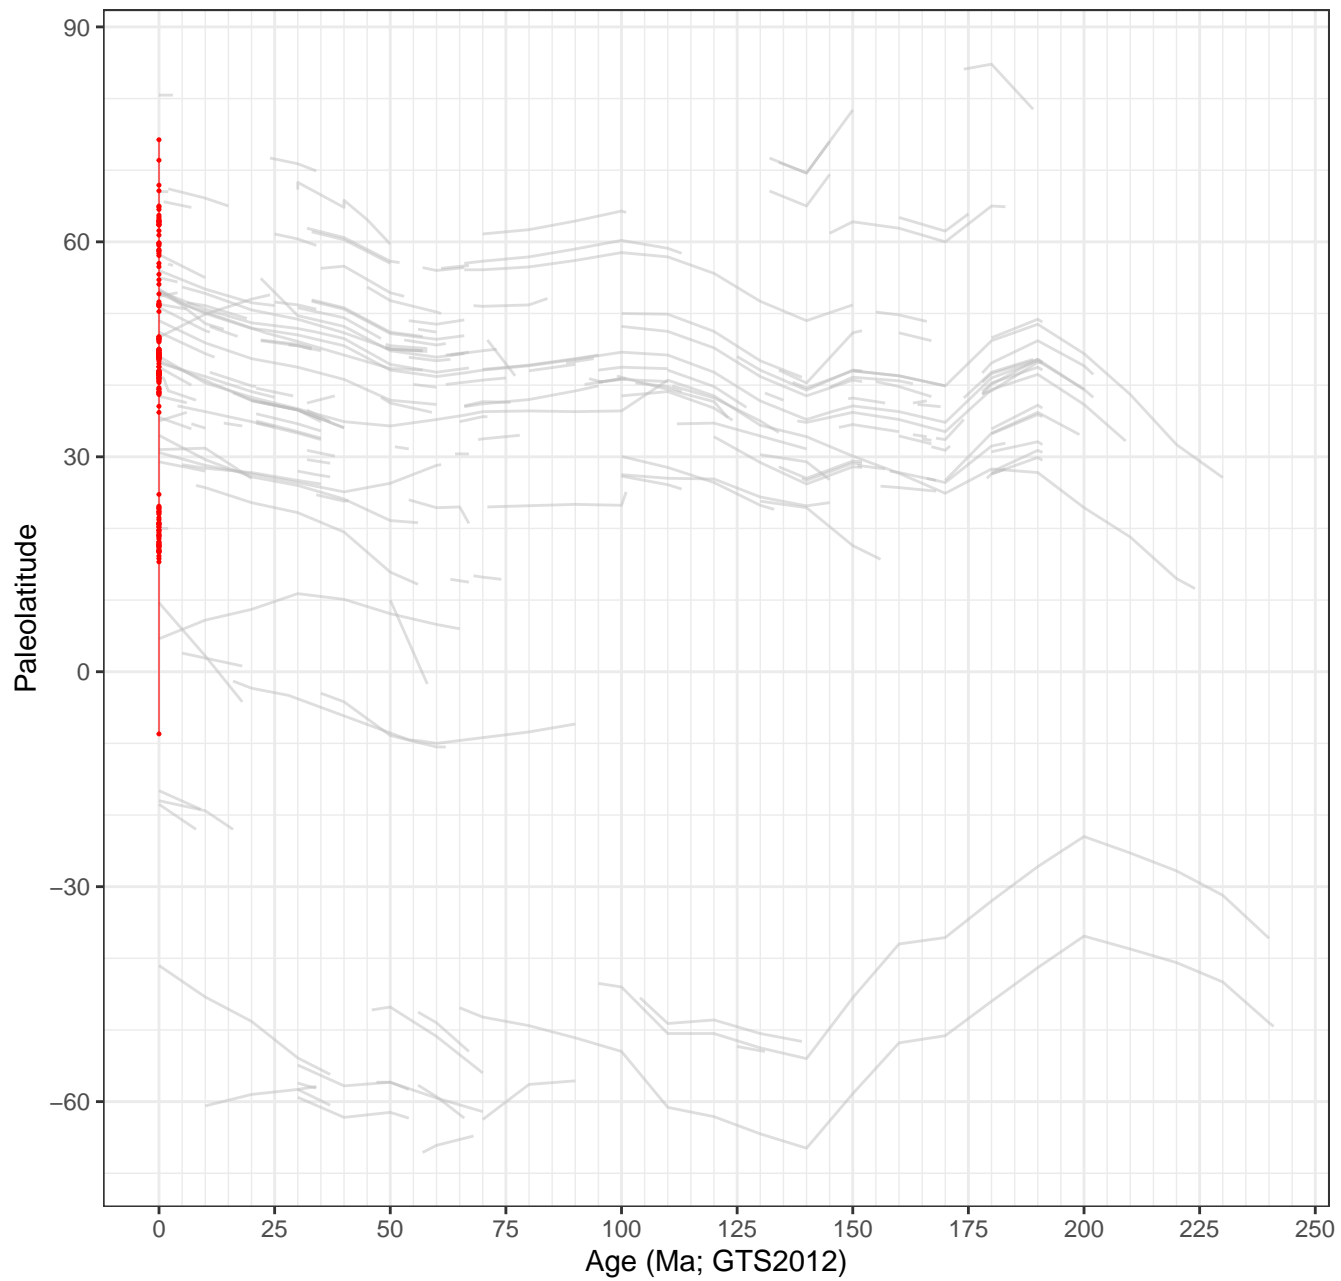

Supplement: Supplementary file 577 [file modern_cyst of Protoperidinium nudum.pdf › Supplement/Supplement 2/Modern 92 plots/modern_cyst of Protoperidinium nudum.pdf]

# Species cyst of *Scrippsiella trifida*

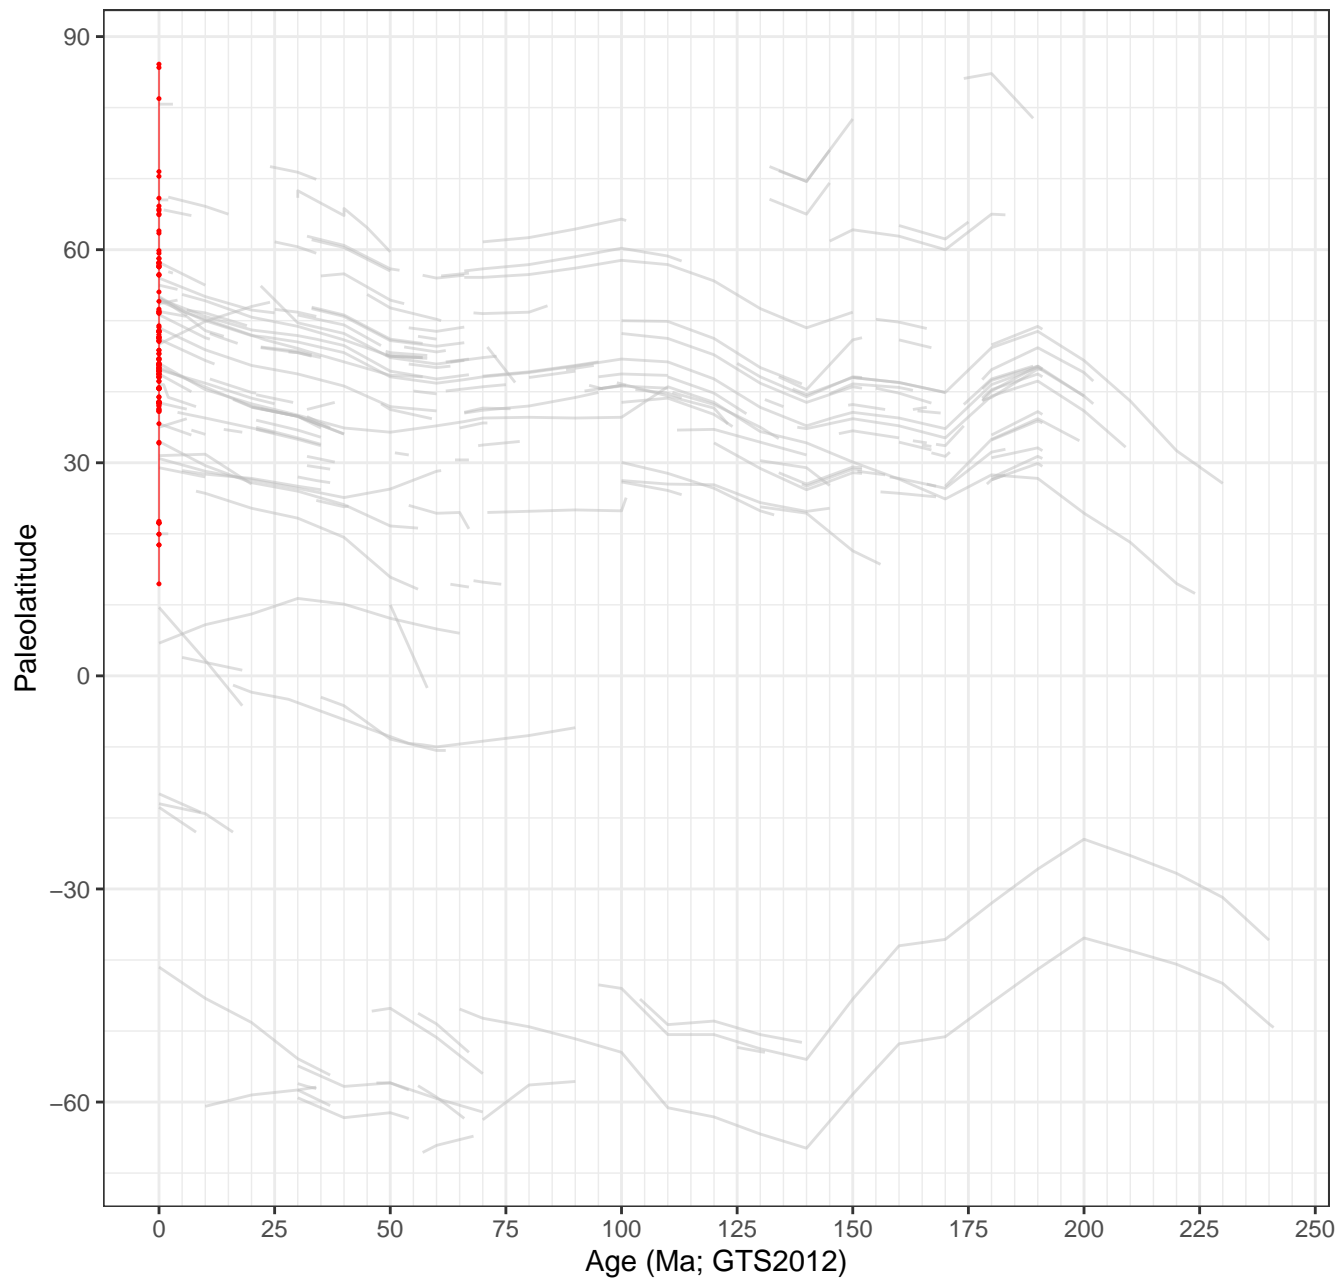

Supplement: Supplementary file 578 [file modern_cyst of Scrippsiella trifida.pdf › Supplement/Supplement 2/Modern 92 plots/modern_cyst of Scrippsiella trifida.pdf]

Site  
011-BP

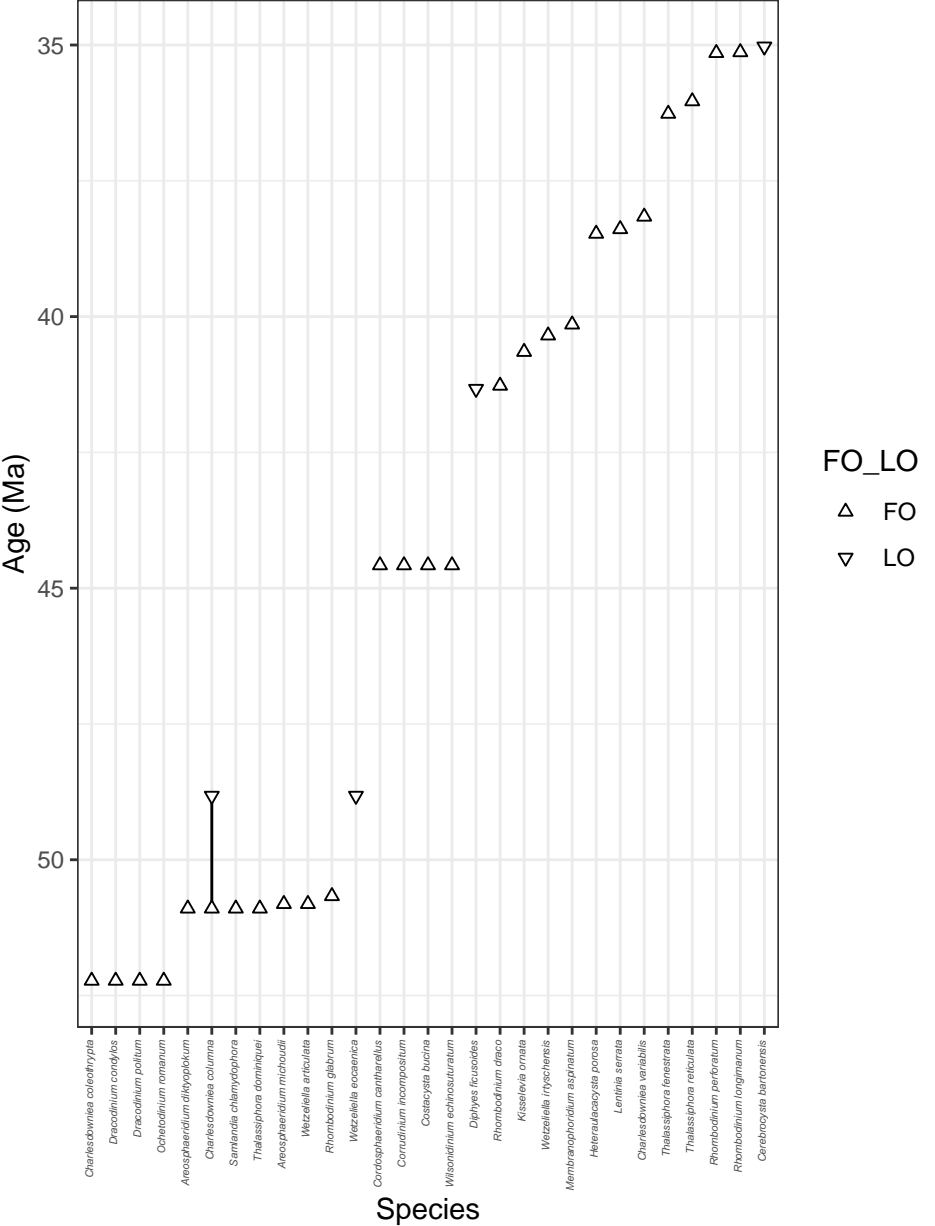

Supplement: Supplementary file 579 [file Site_011-BP.pdf › Supplement/Supplement 2/Sites 188 plots/Site_011-BP.pdf]

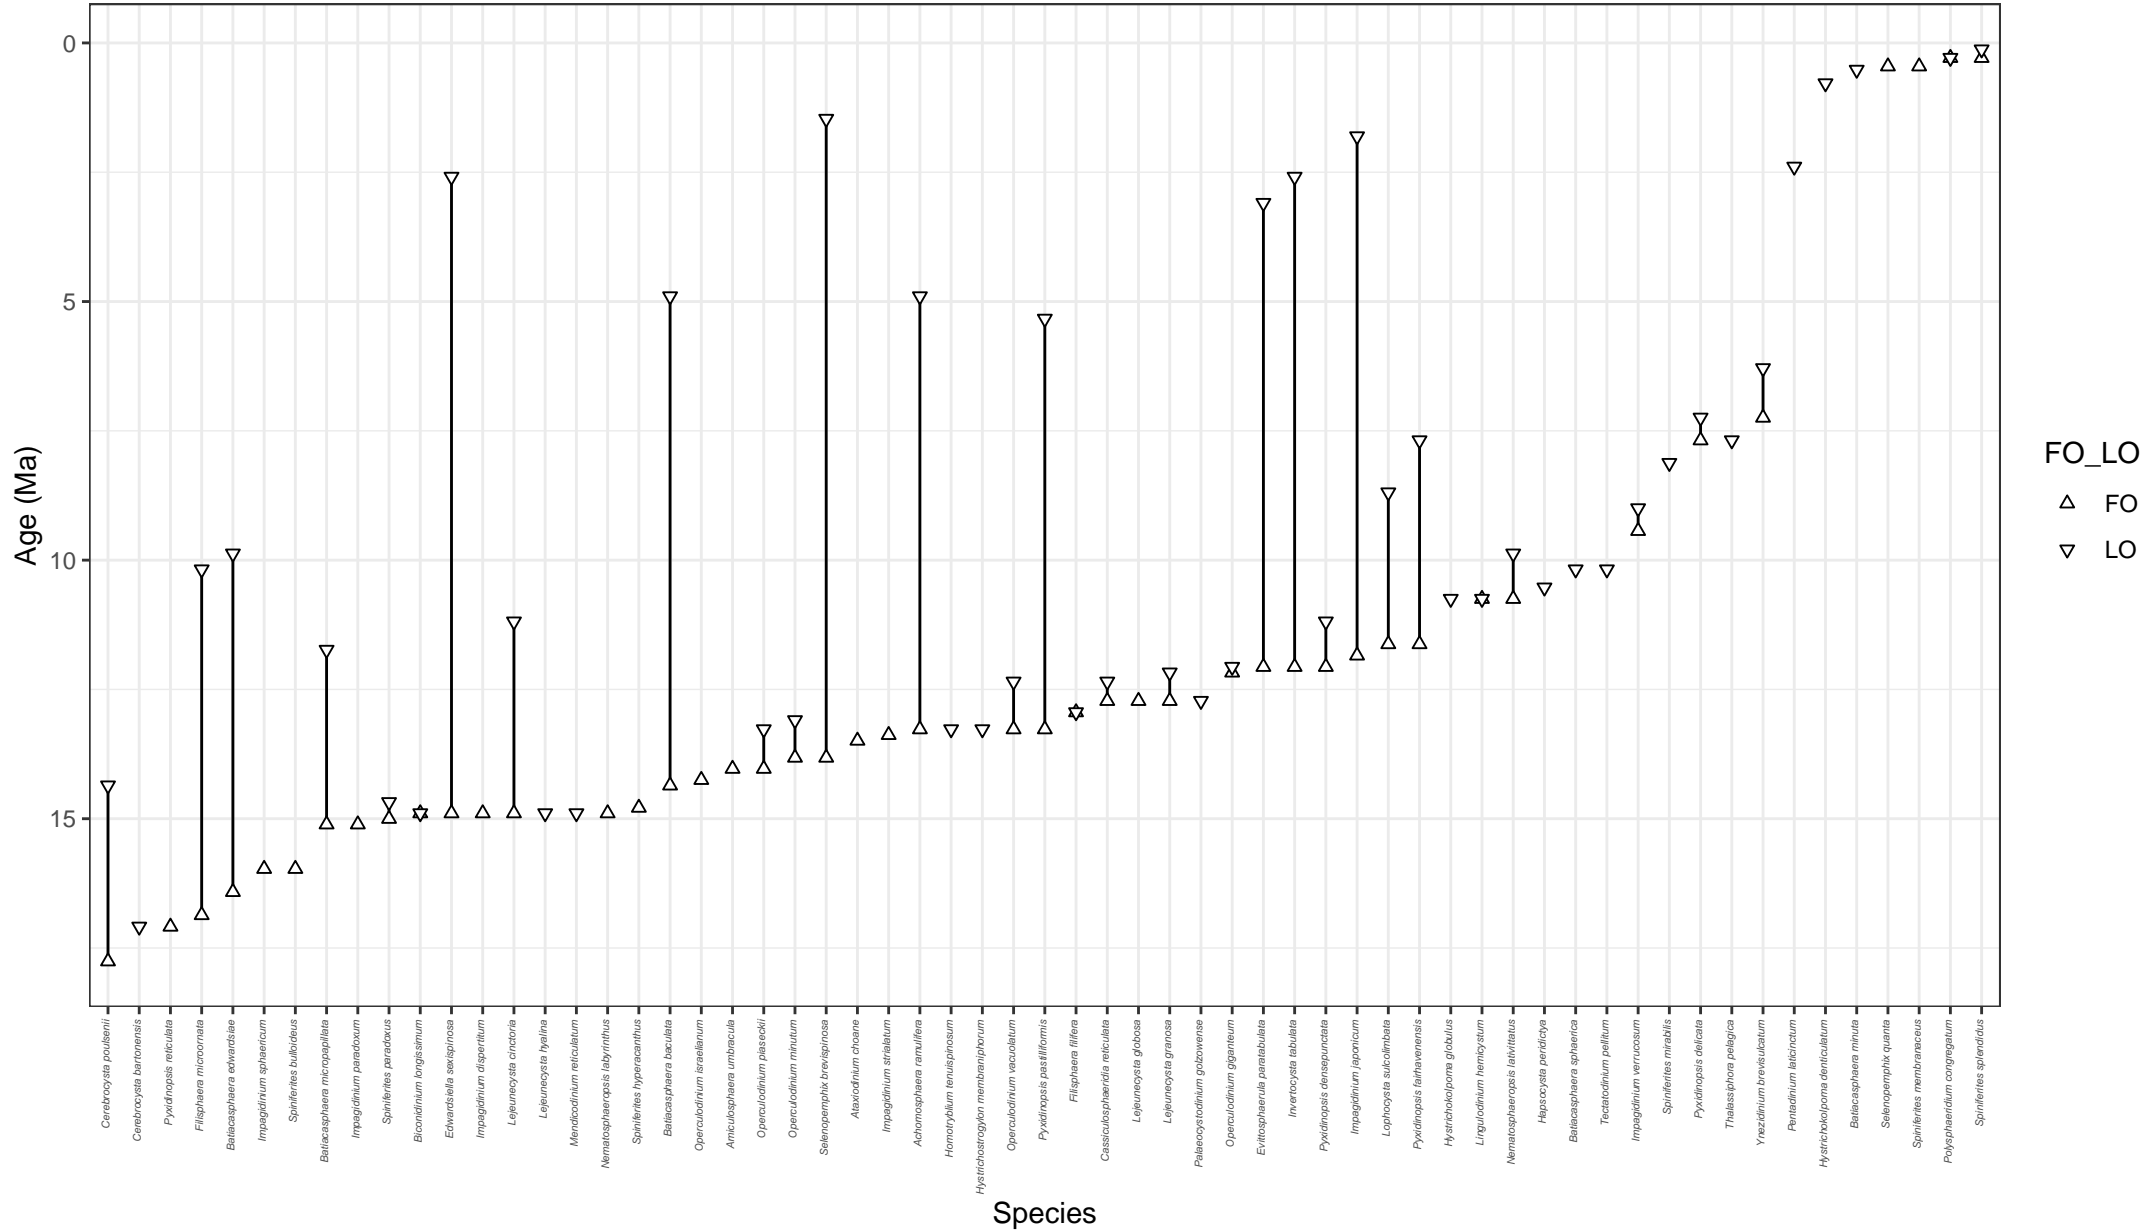

Supplement: Supplementary file 580 [file Site_1039.pdf › Supplement/Supplement 2/Sites 188 plots/Site_1039.pdf]

Site  
1053

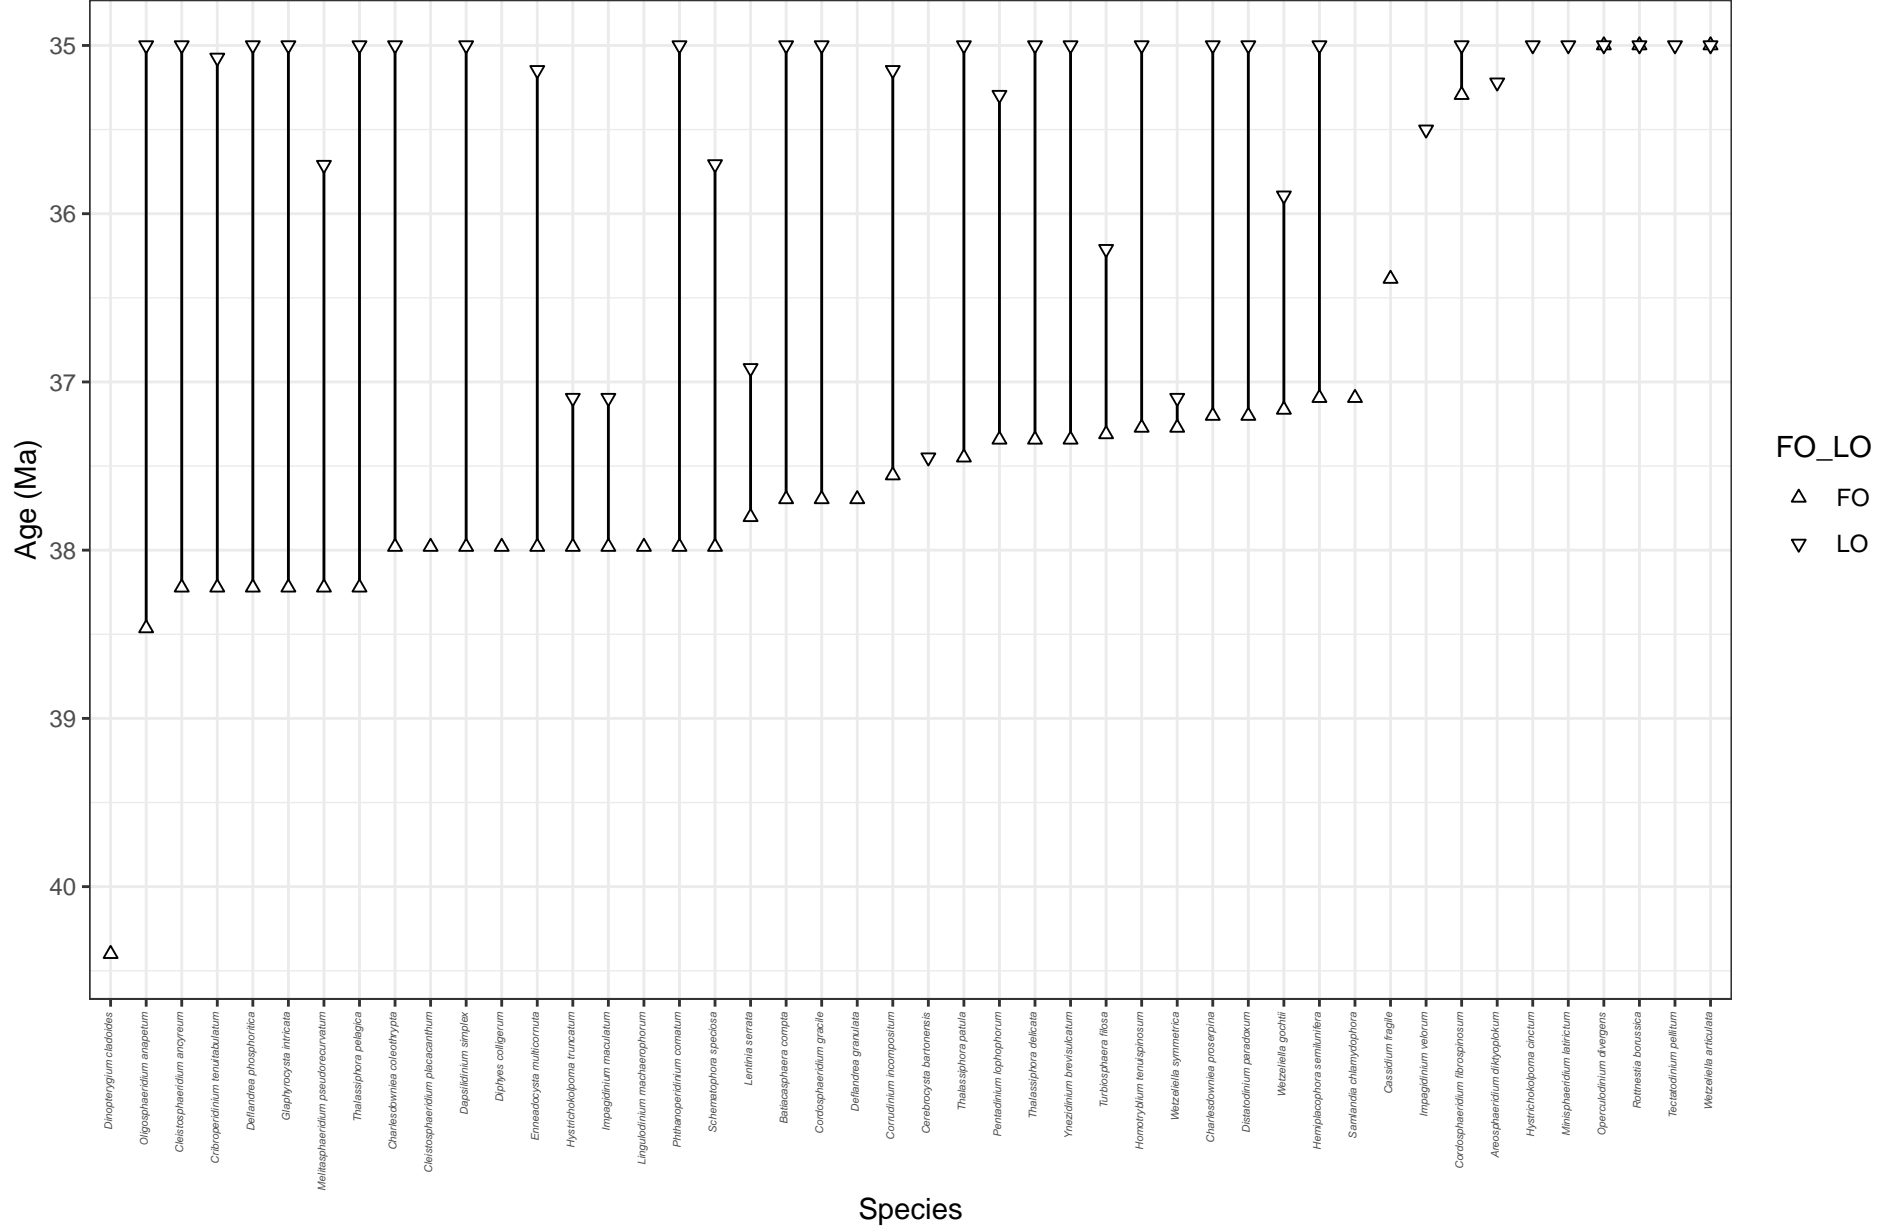

Supplement: Supplementary file 581 [file Site_1053.pdf › Supplement/Supplement 2/Sites 188 plots/Site_1053.pdf]

Site  
1168

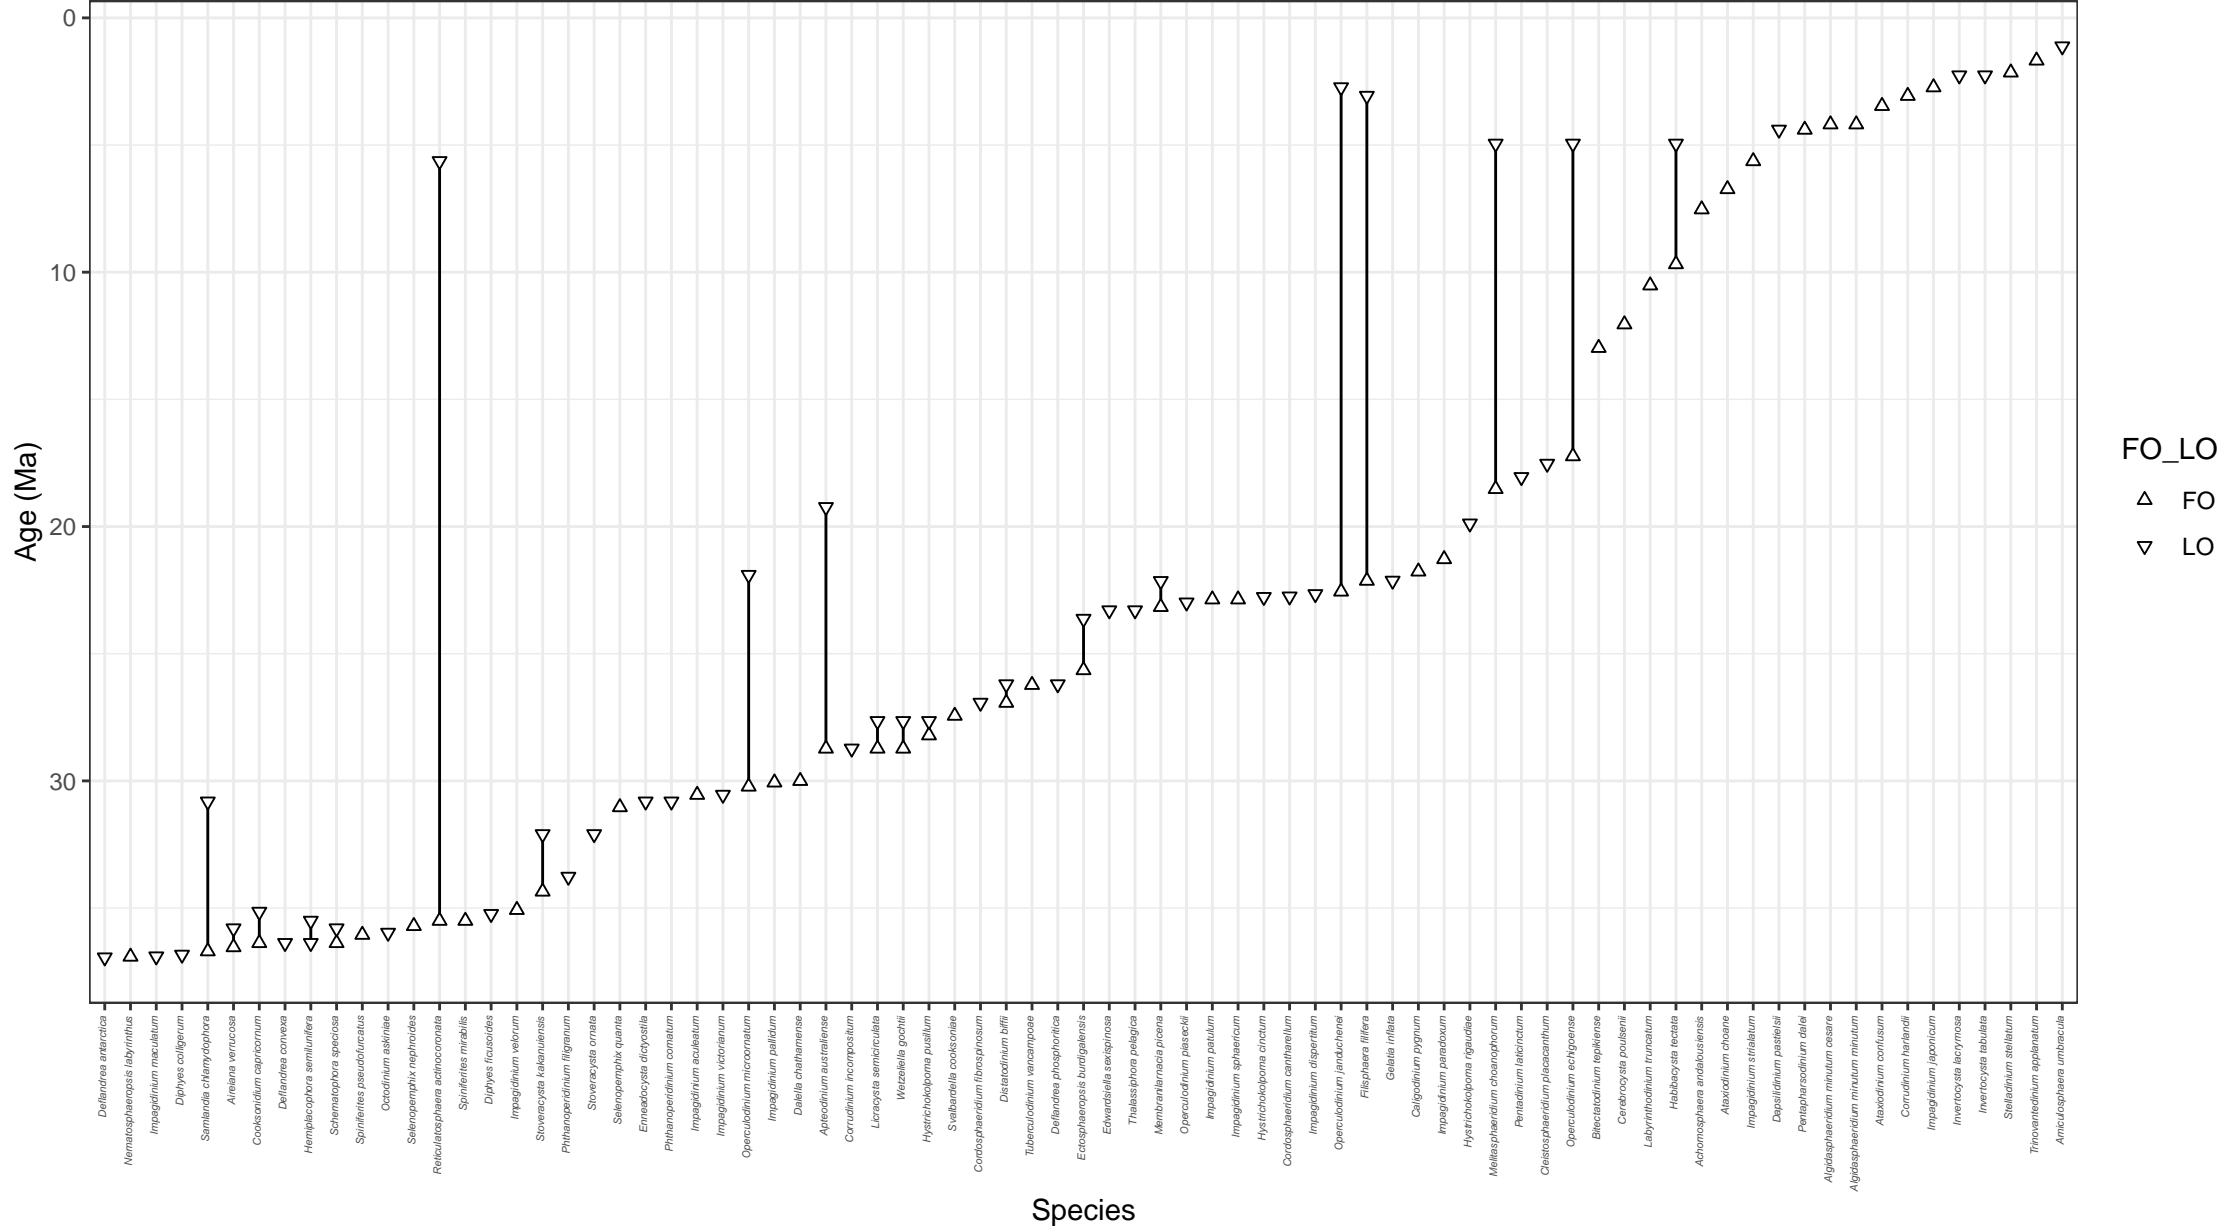

Supplement: Supplementary file 583 [file Site_1168.pdf › Supplement/Supplement 2/Sites 188 plots/Site_1168.pdf]

Site  
1171

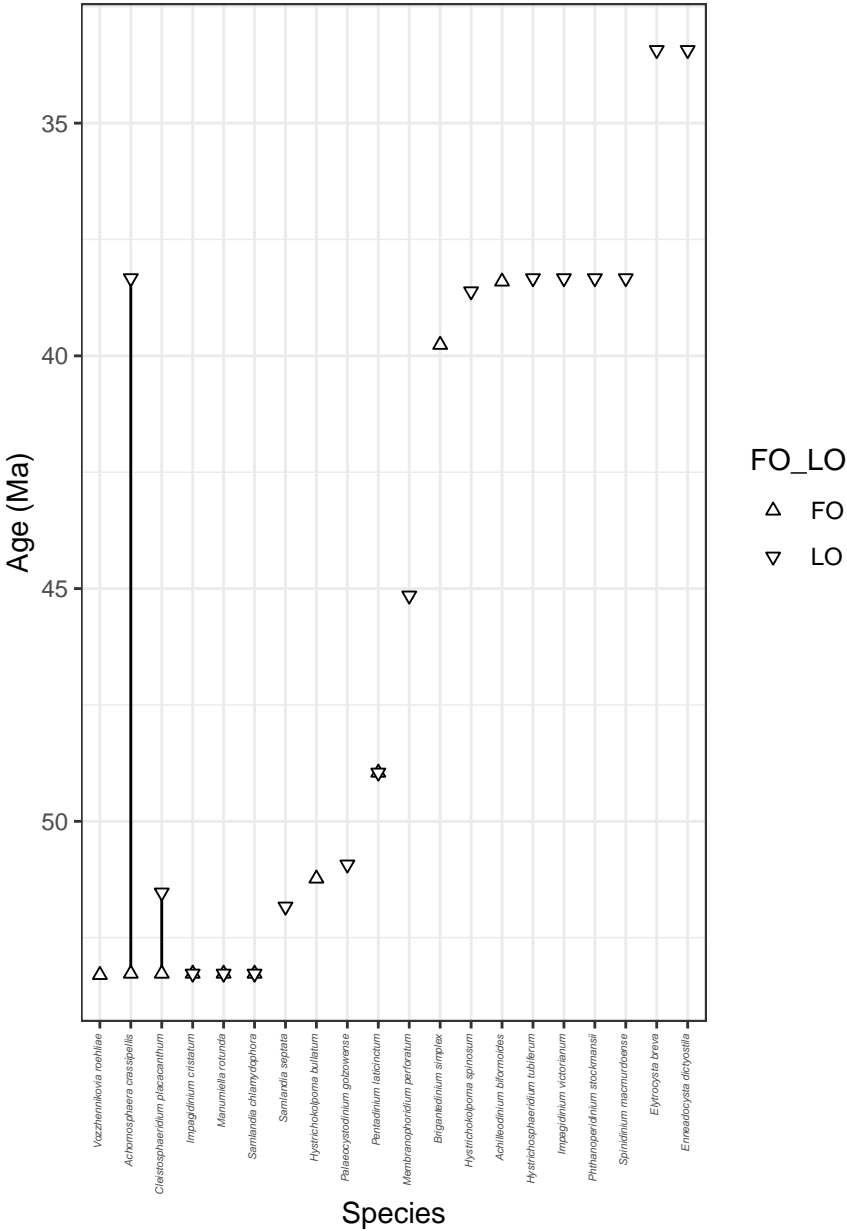

Supplement: Supplementary file 585 [file Site_1171.pdf › Supplement/Supplement 2/Sites 188 plots/Site_1171.pdf]

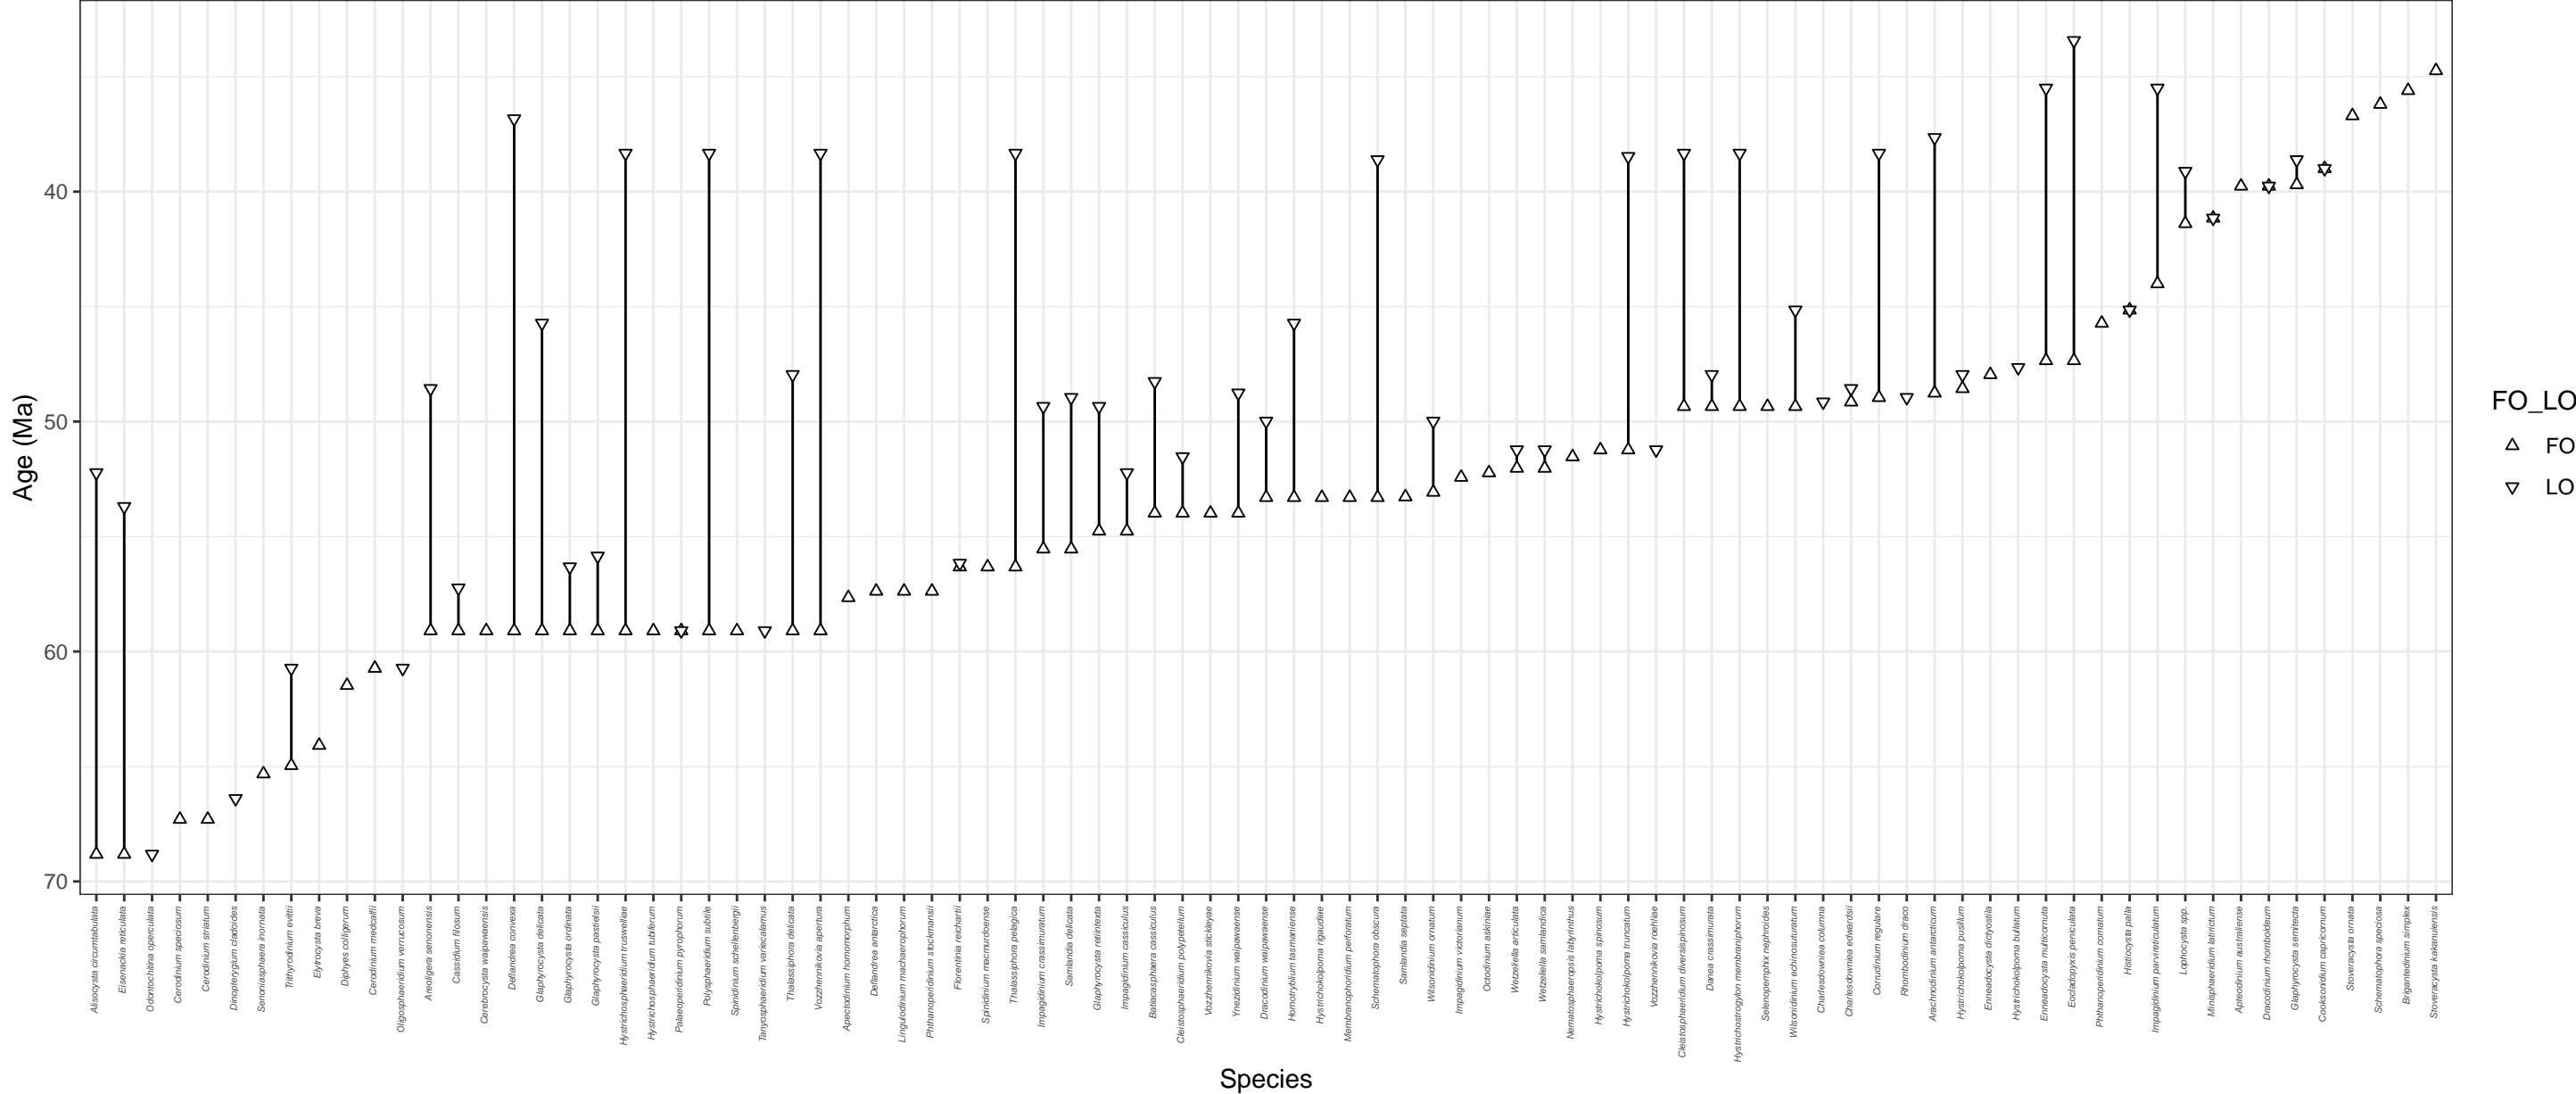

Supplement: Supplementary file 586 [file Site_1172.pdf › Supplement/Supplement 2/Sites 188 plots/Site_1172.pdf]

Site

1406

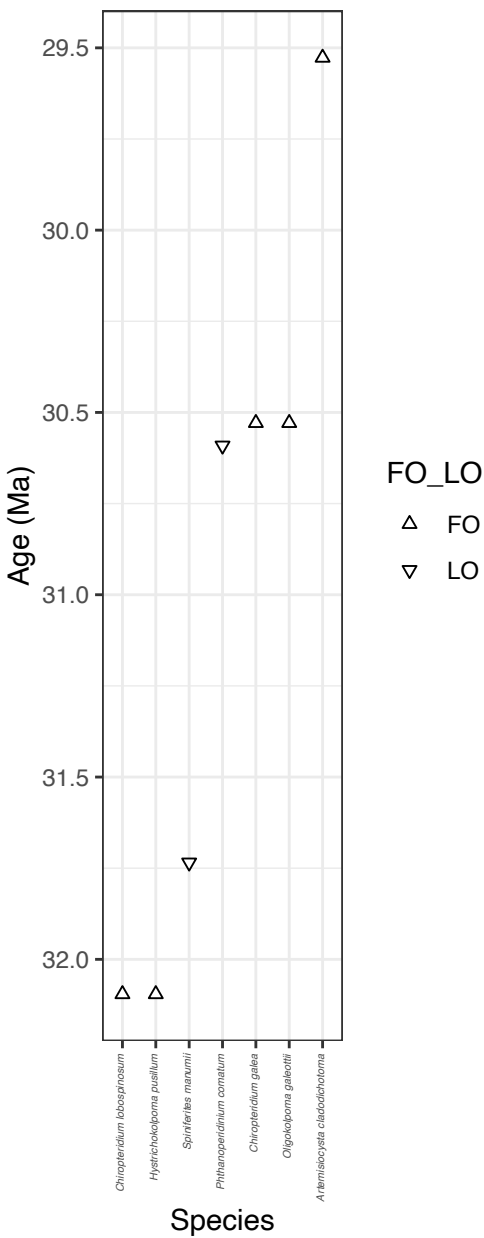

Supplement: Supplementary file 588 [file Site_1406.pdf › Supplement/Supplement 2/Sites 188 plots/Site_1406.pdf]

Site

1411

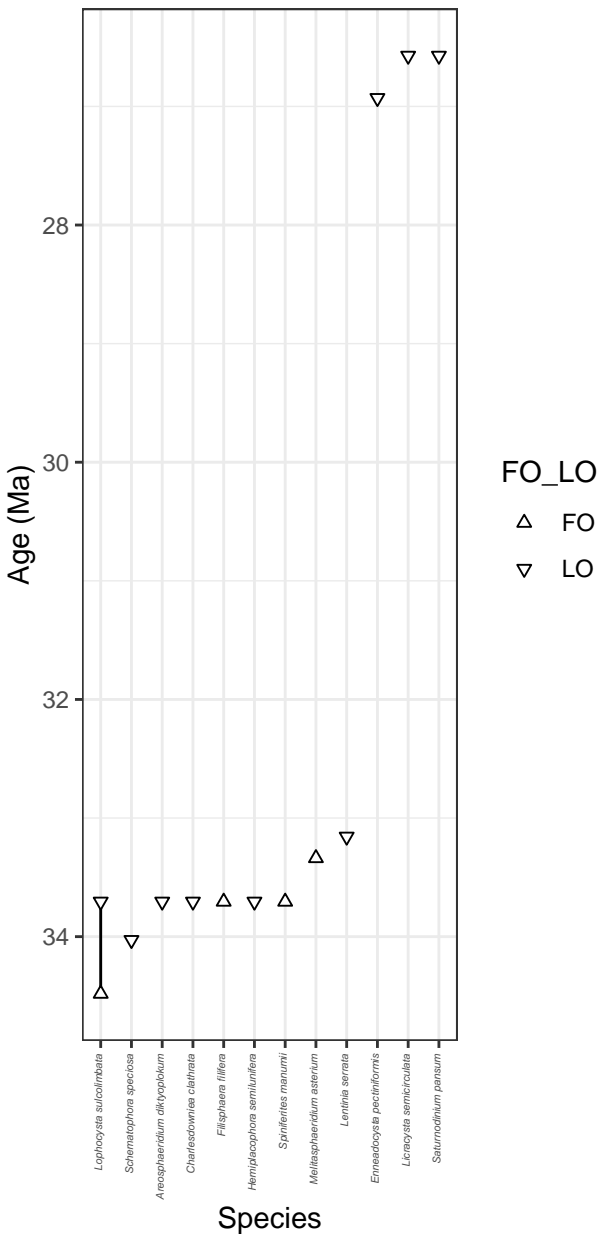

Supplement: Supplementary file 589 [file Site_1411.pdf › Supplement/Supplement 2/Sites 188 plots/Site_1411.pdf]

Site

25\_8-4

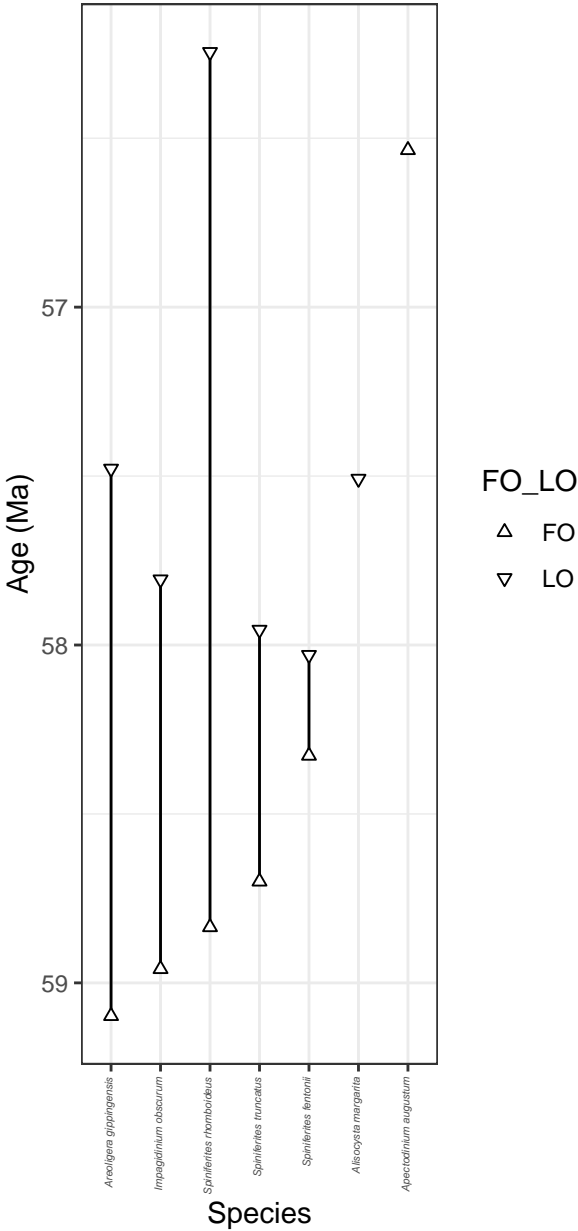

Supplement: Supplementary file 590 [file Site_25_8-4.pdf › Supplement/Supplement 2/Sites 188 plots/Site_25_8-4.pdf]

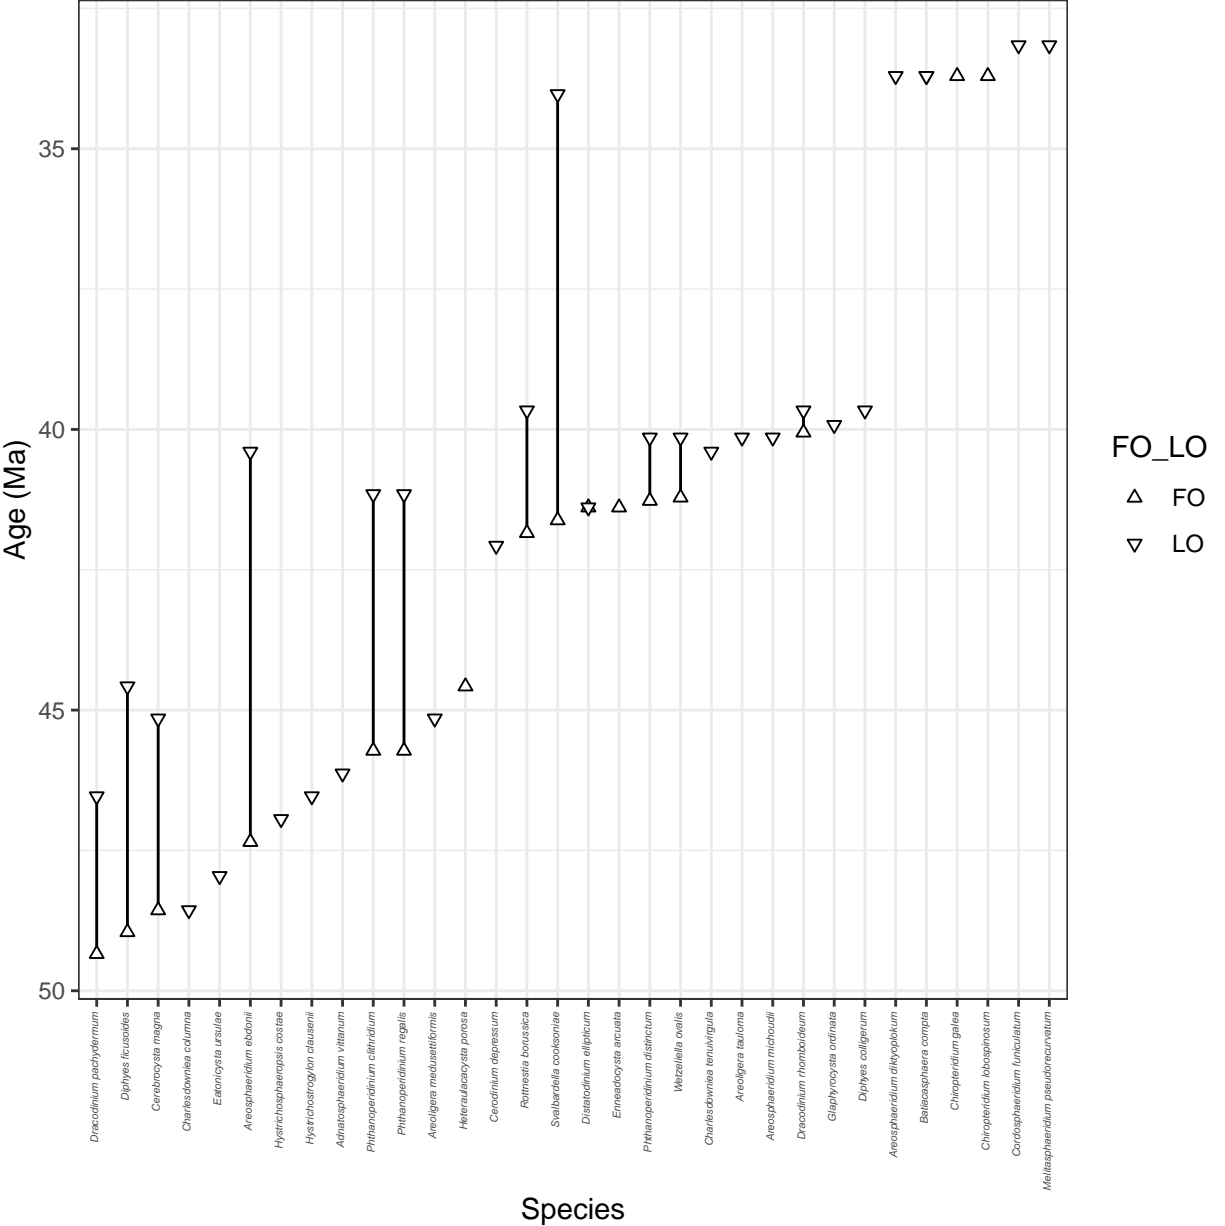

Supplement: Supplementary file 592 [file Site_338.pdf › Supplement/Supplement 2/Sites 188 plots/Site_338.pdf]

Site

370

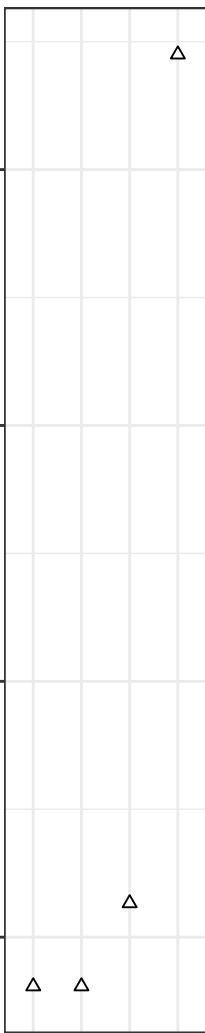

FO\_LO

Δ FO

Species

Supplement: Supplementary file 593 [file Site_370.pdf › Supplement/Supplement 2/Sites 188 plots/Site_370.pdf]

Site

380

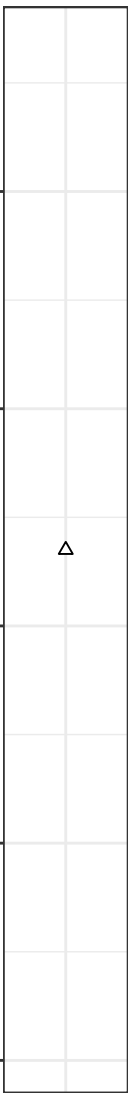

FO\_LO

△

FO

Species

Supplement: Supplementary file 594 [file Site_380.pdf › Supplement/Supplement 2/Sites 188 plots/Site_380.pdf]

Site

400

Age (Ma)

3

6

9

FO\_LO

△ FO

▽ LO

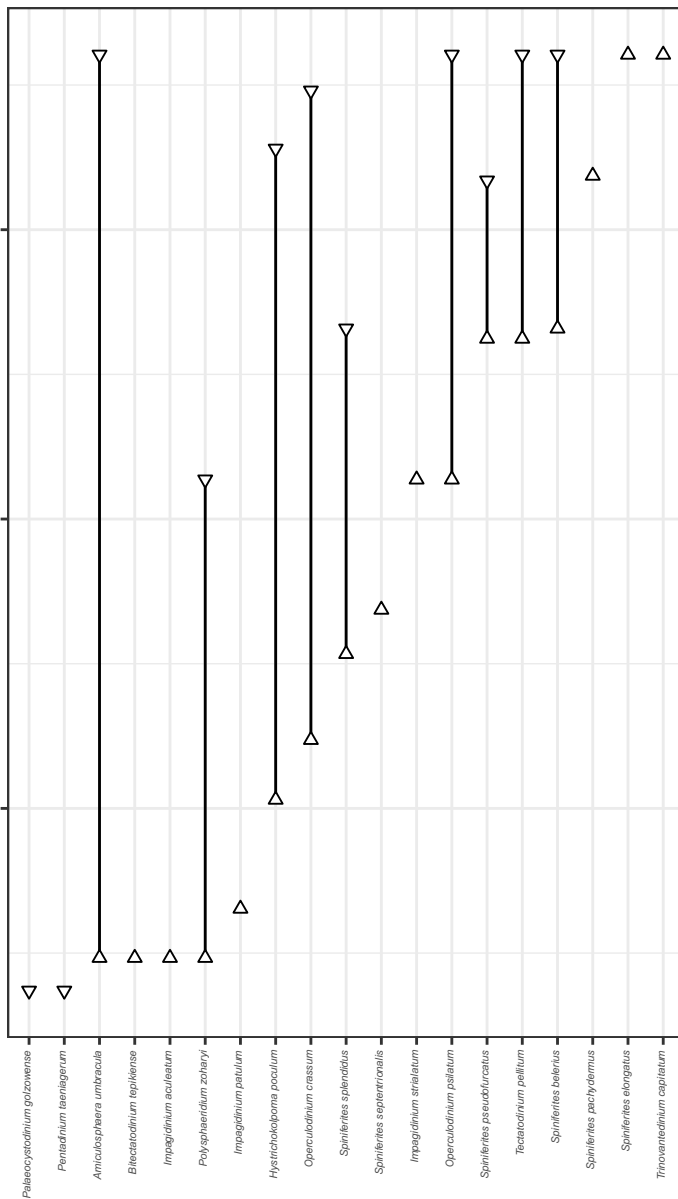

Supplement: Supplementary file 595 [file Site_400.pdf › Supplement/Supplement 2/Sites 188 plots/Site_400.pdf]

Site  
400A

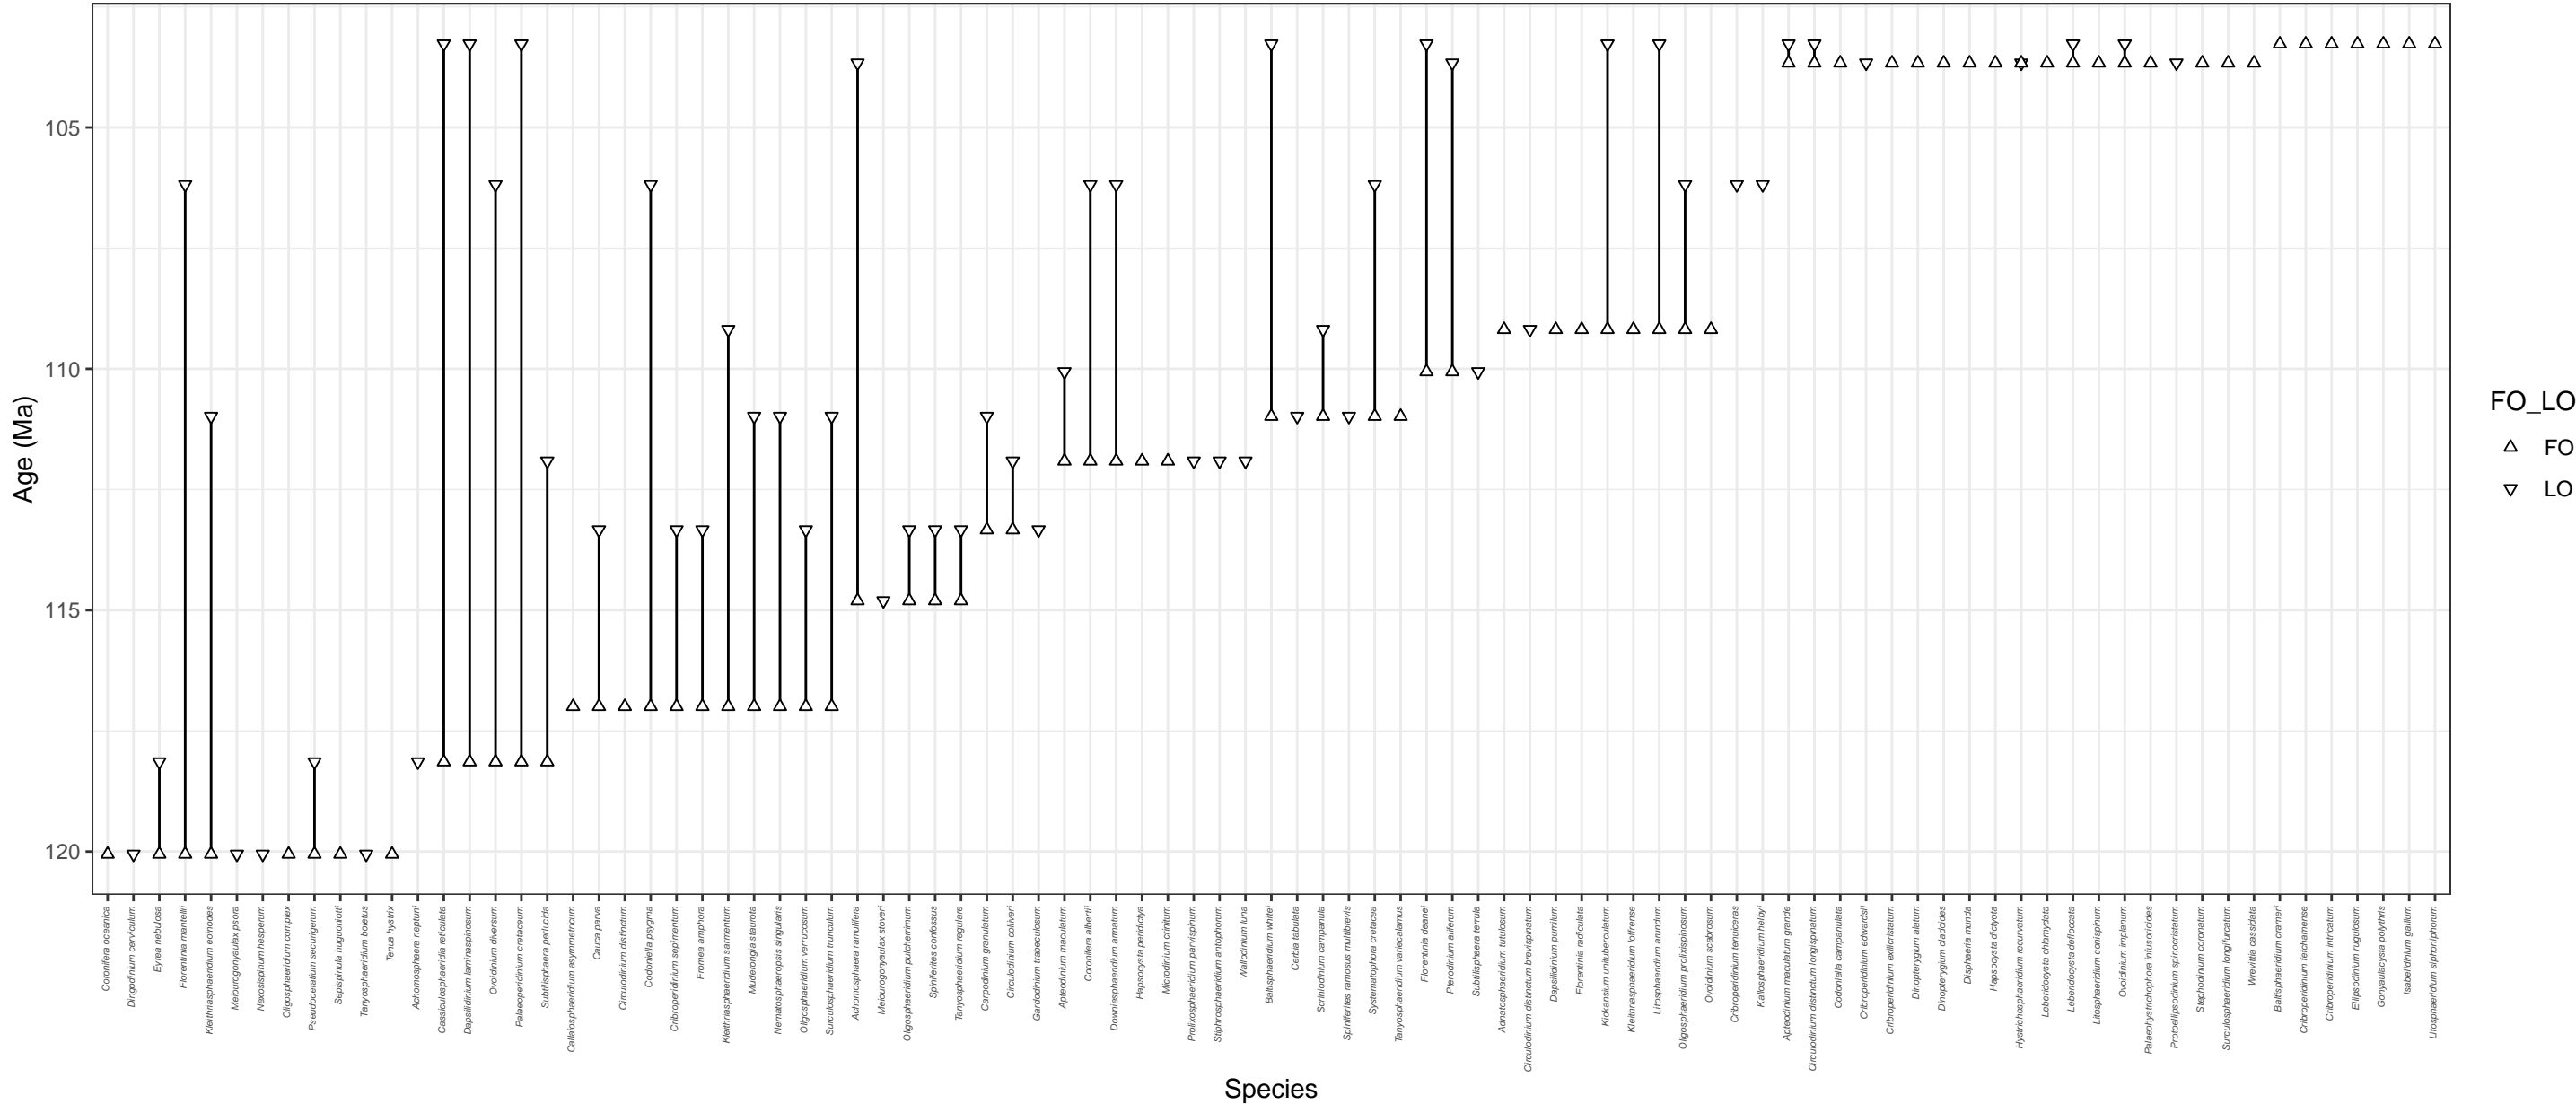

Supplement: Supplementary file 596 [file Site_400A.pdf › Supplement/Supplement 2/Sites 188 plots/Site_400A.pdf]

Site  
403–406

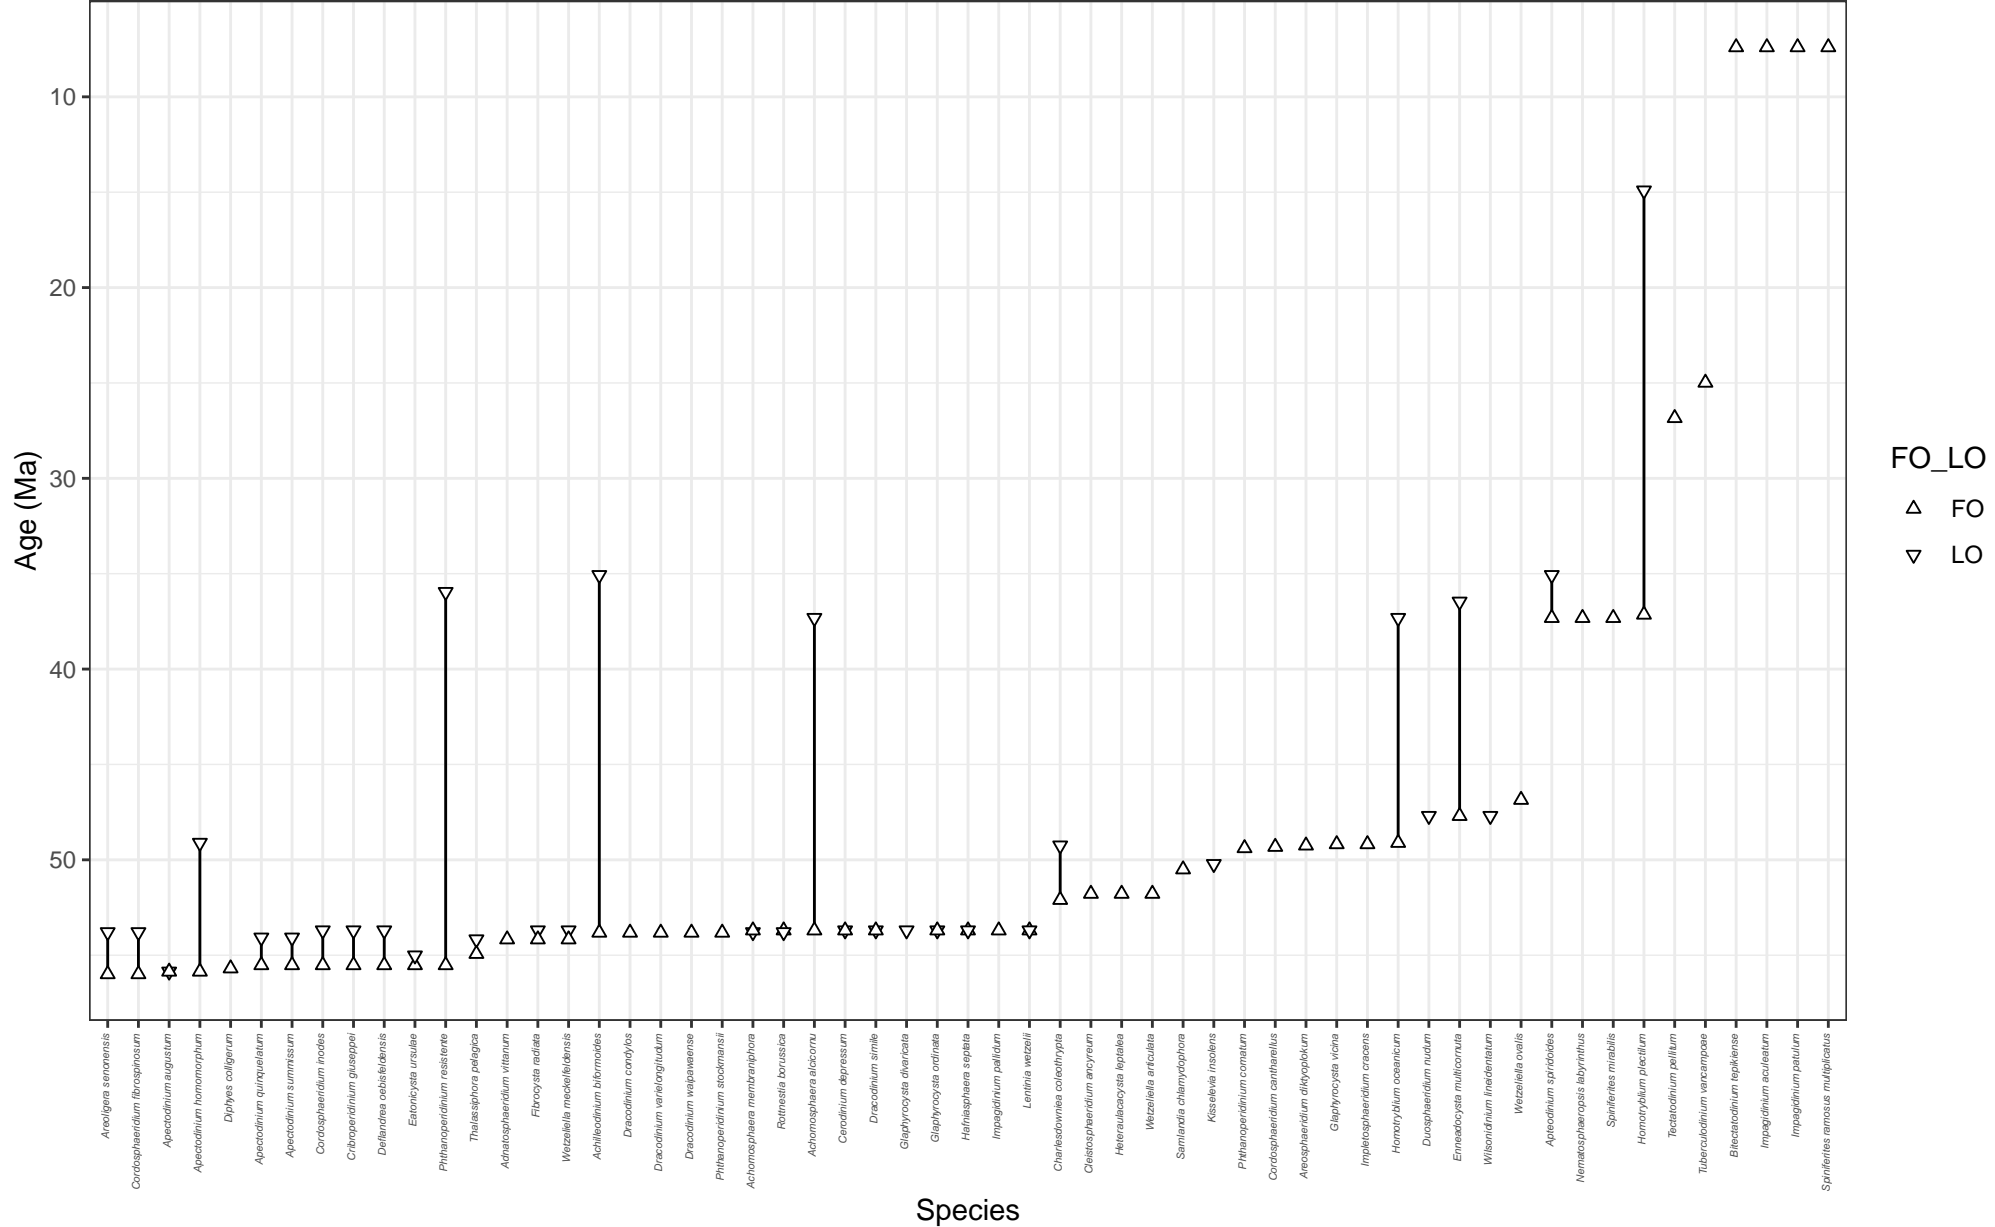

Supplement: Supplementary file 597 [file Site_403-406.pdf › Supplement/Supplement 2/Sites 188 plots/Site_403-406.pdf]

Site

534

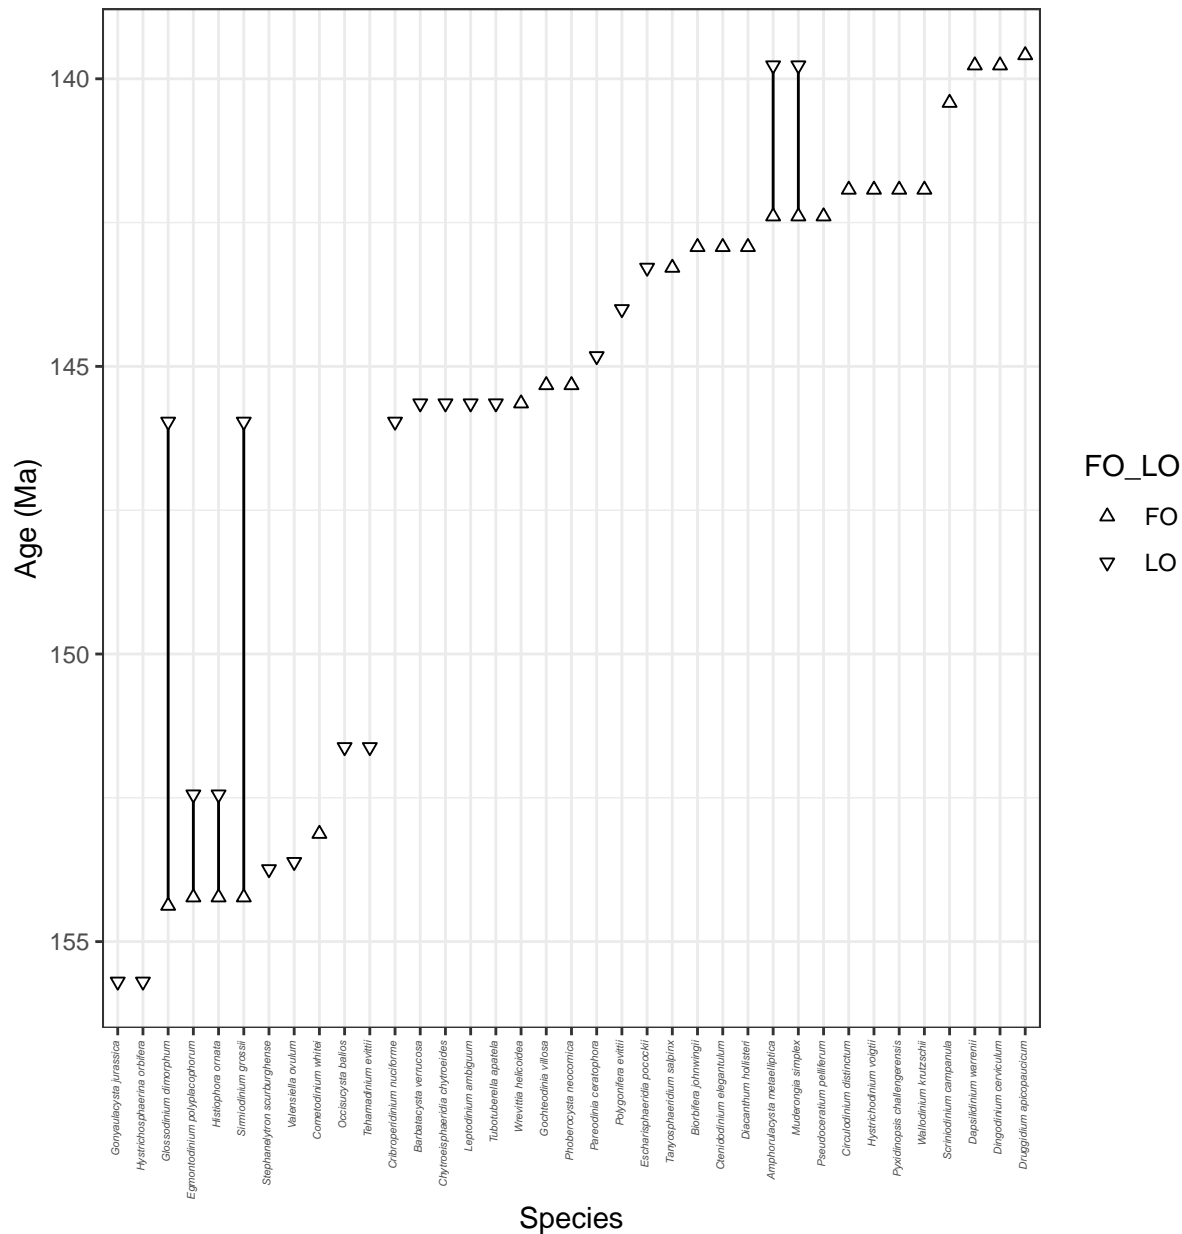

Supplement: Supplementary file 599 [file Site_534.pdf › Supplement/Supplement 2/Sites 188 plots/Site_534.pdf]

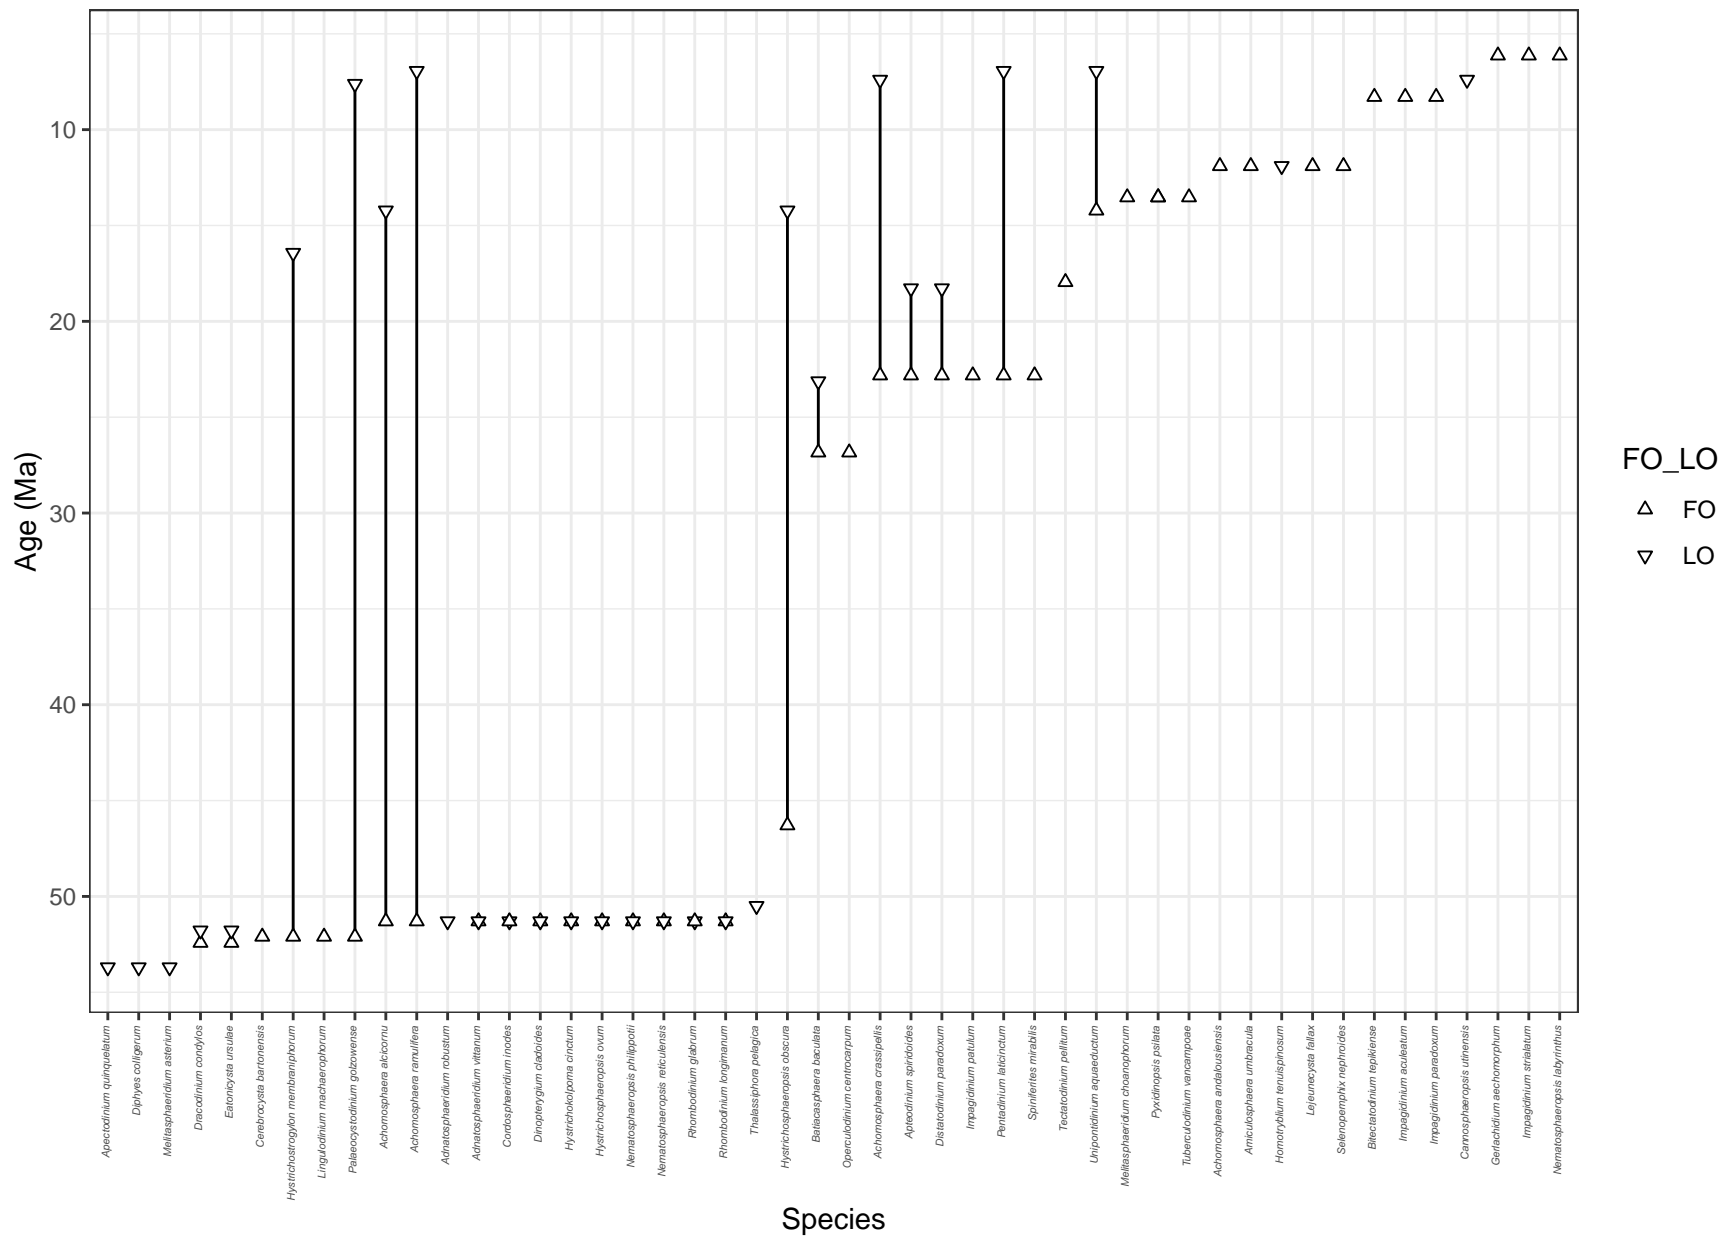

Supplement: Supplementary file 600 [file Site_548.pdf › Supplement/Supplement 2/Sites 188 plots/Site_548.pdf]

Site

552

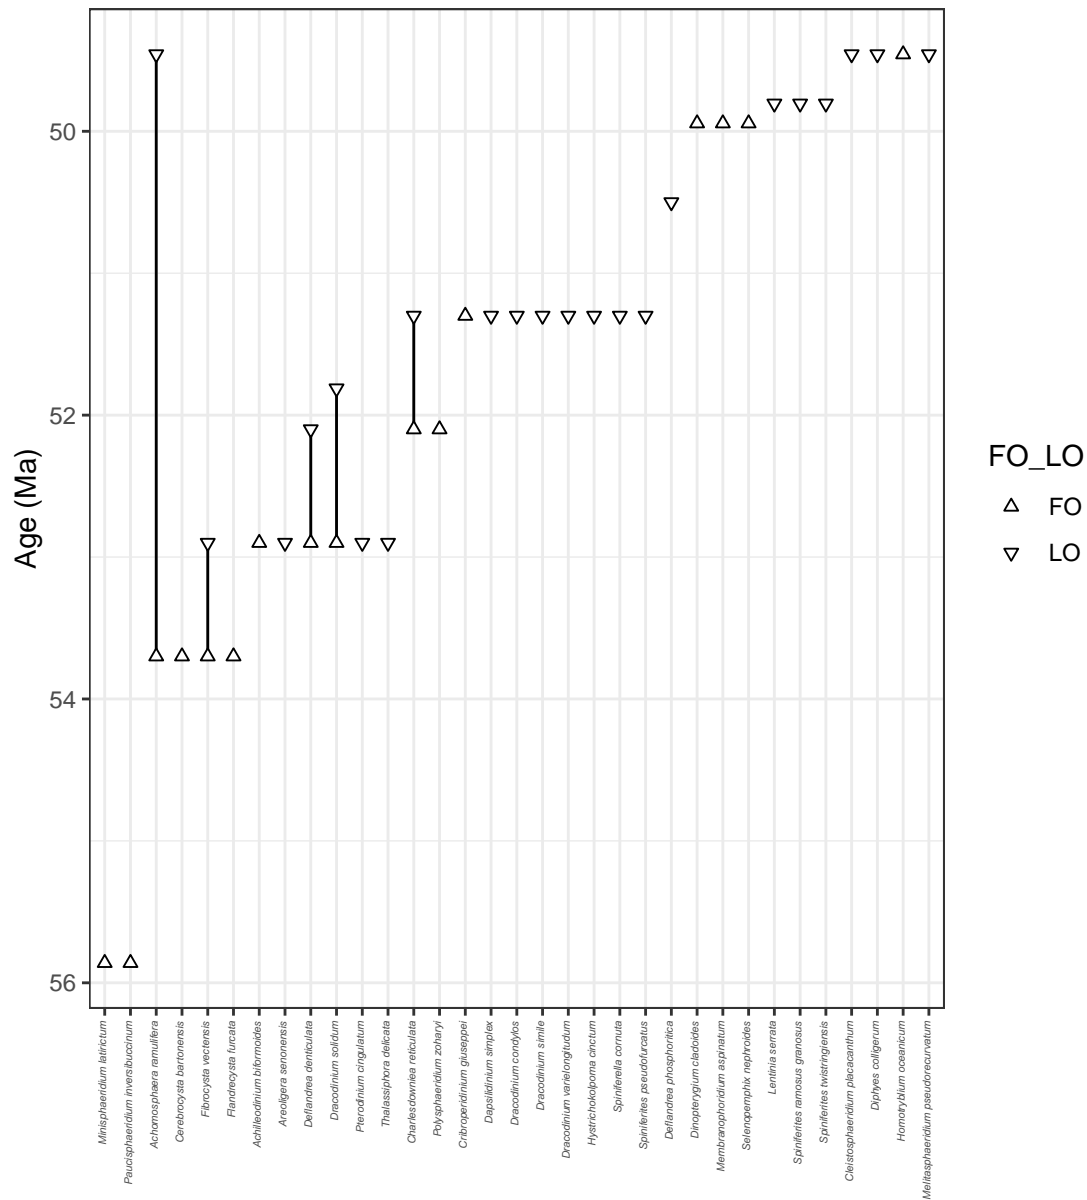

Supplement: Supplementary file 601 [file Site_552.pdf › Supplement/Supplement 2/Sites 188 plots/Site_552.pdf]

# Site 553

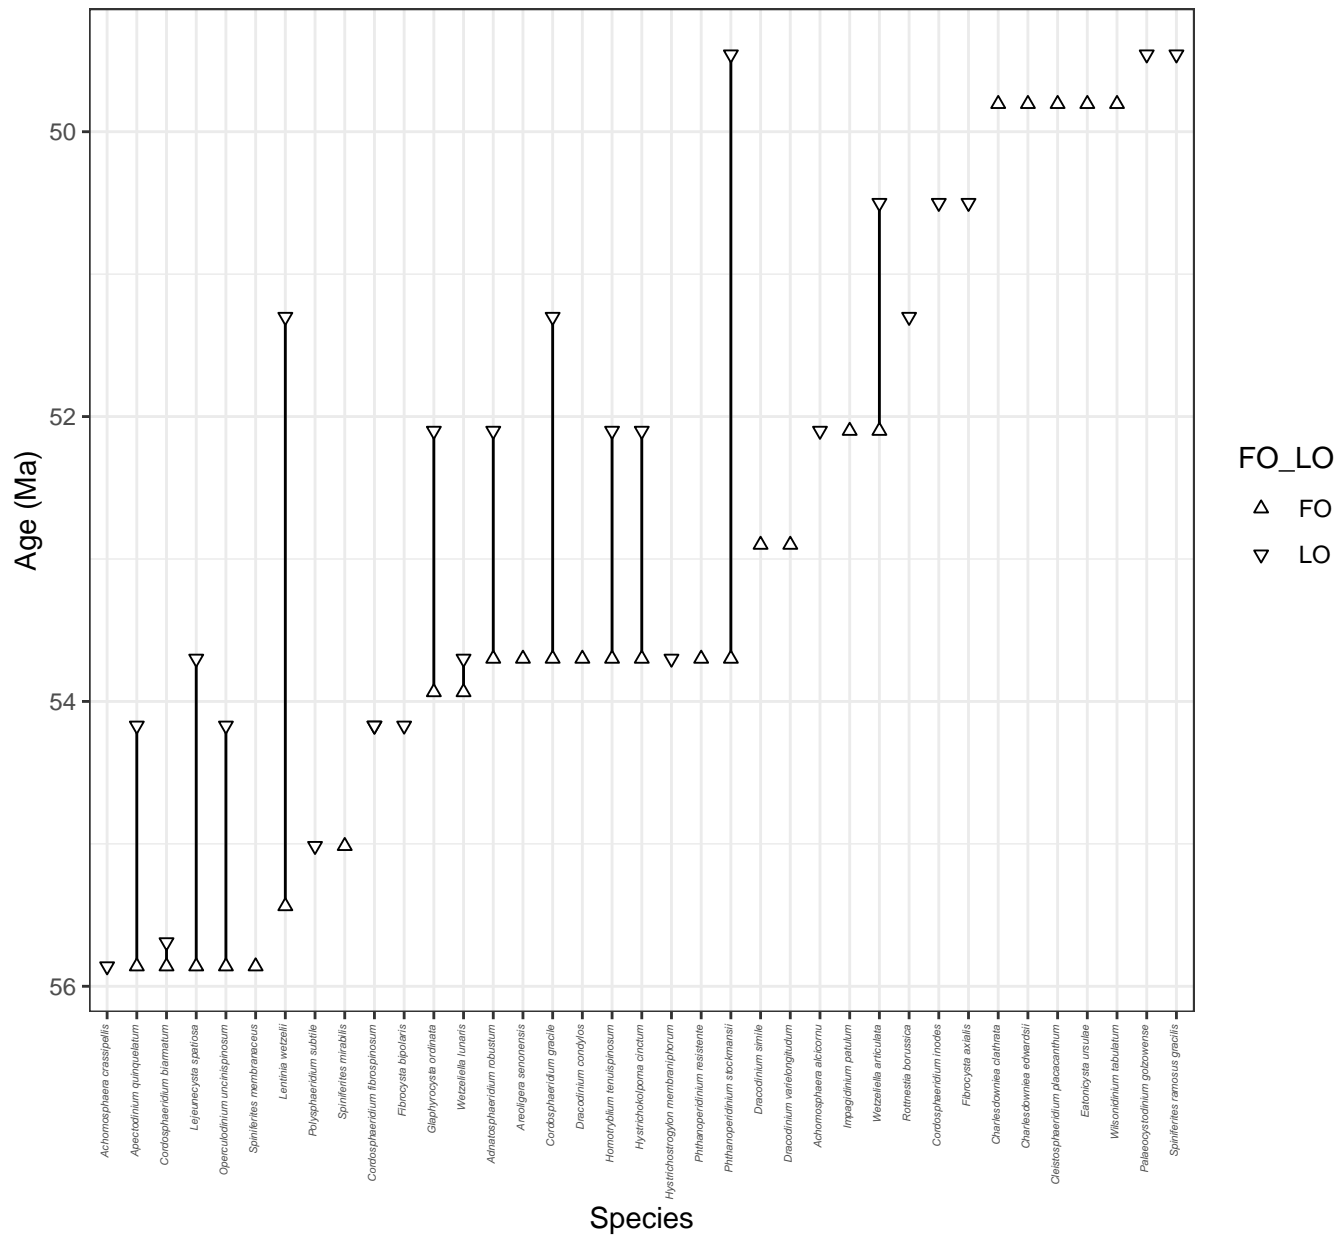

Supplement: Supplementary file 602 [file Site_553.pdf › Supplement/Supplement 2/Sites 188 plots/Site_553.pdf]

Site

555

Age (Ma)

FO\_LO

△ FO

▽ LO

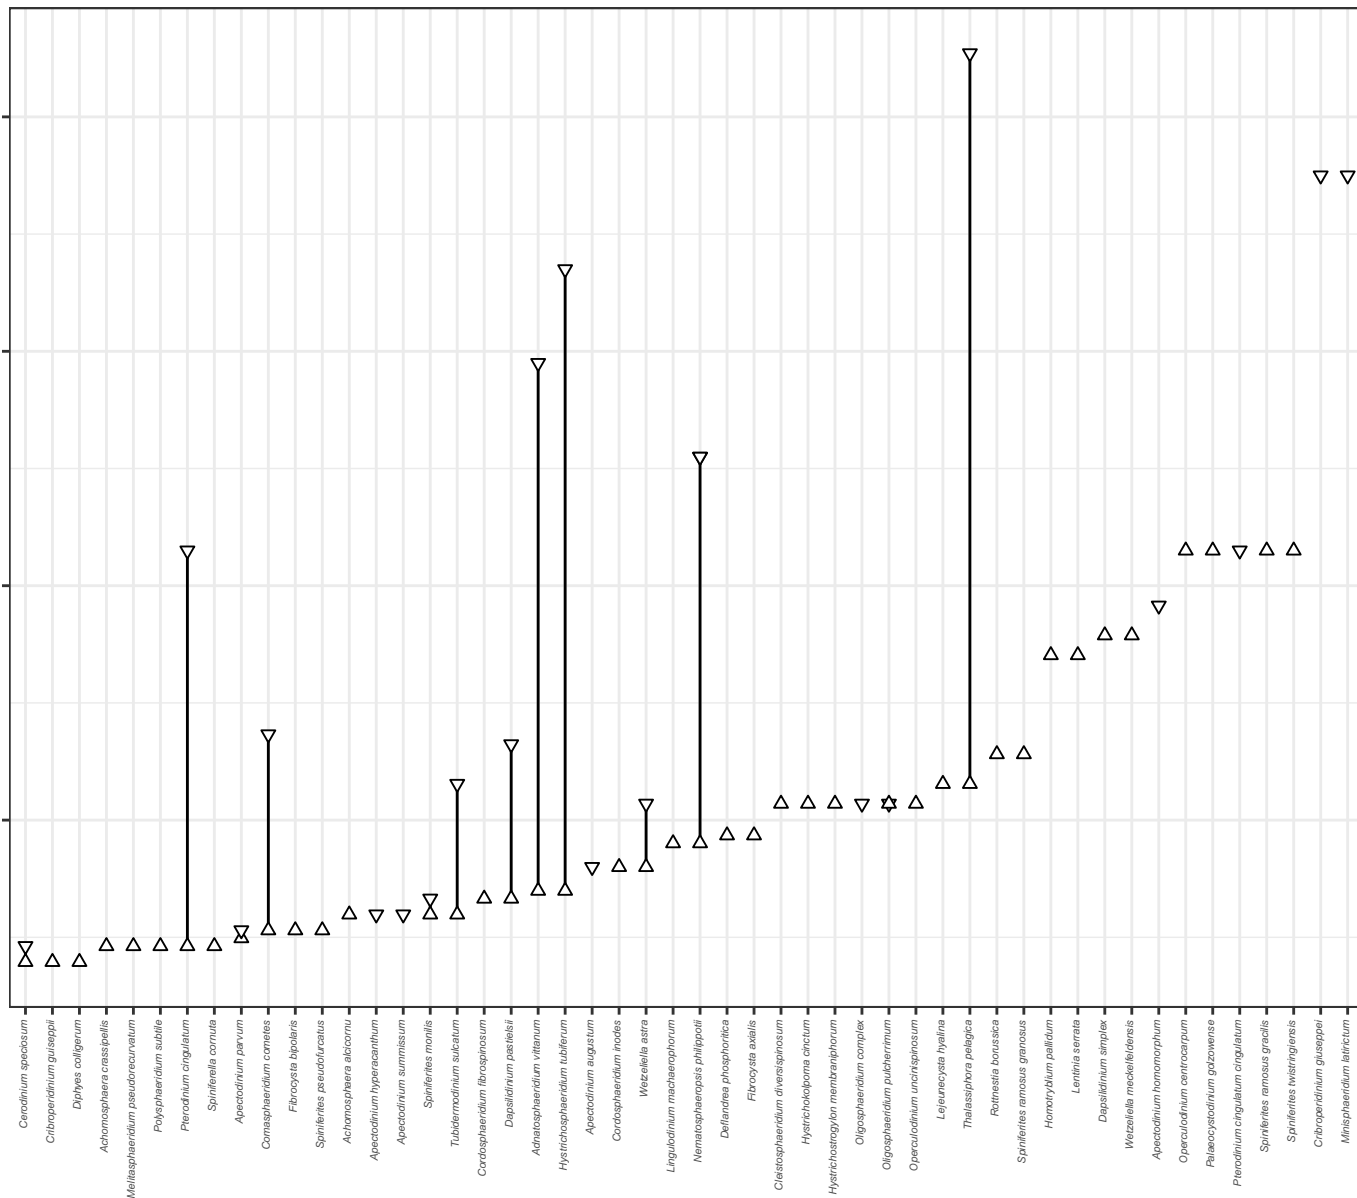

Supplement: Supplementary file 603 [file Site_555.pdf › Supplement/Supplement 2/Sites 188 plots/Site_555.pdf]

Site

603

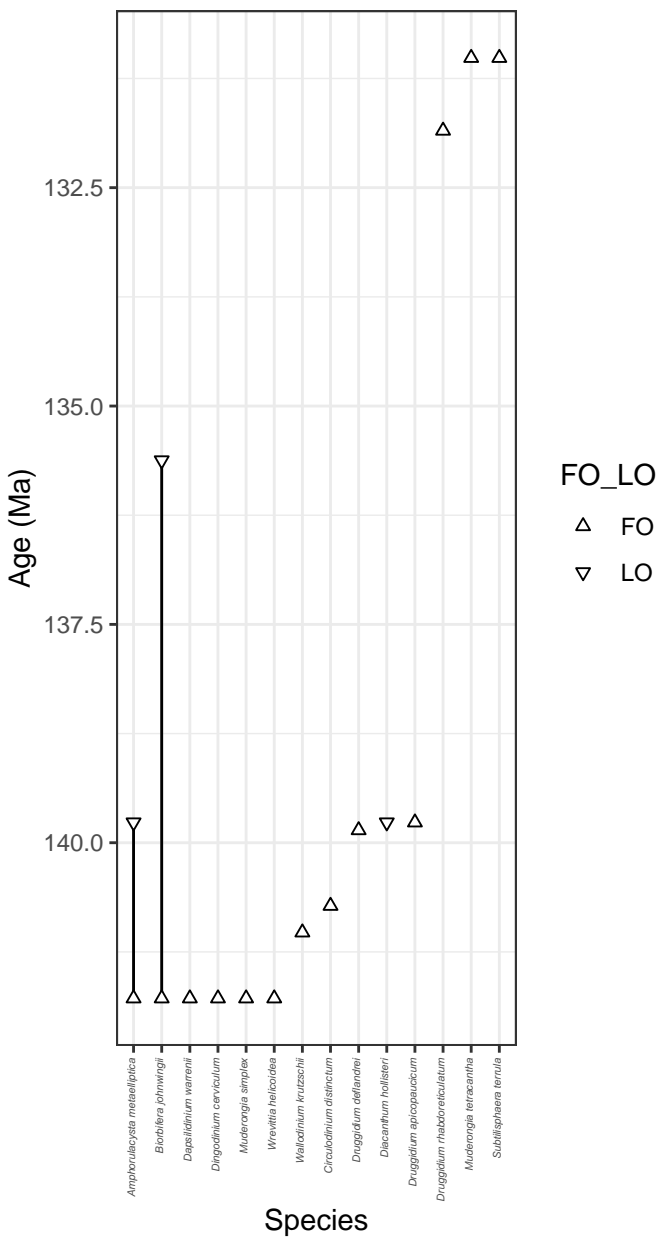

Supplement: Supplementary file 604 [file Site_603.pdf › Supplement/Supplement 2/Sites 188 plots/Site_603.pdf]

Site

603A

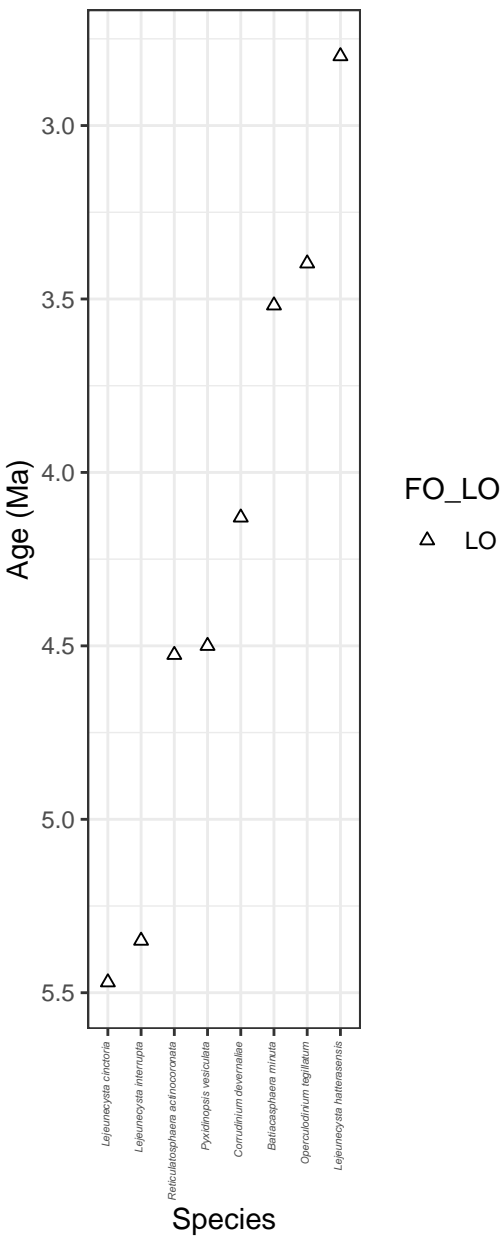

Supplement: Supplementary file 605 [file Site_603A.pdf › Supplement/Supplement 2/Sites 188 plots/Site_603A.pdf]

# Site 607

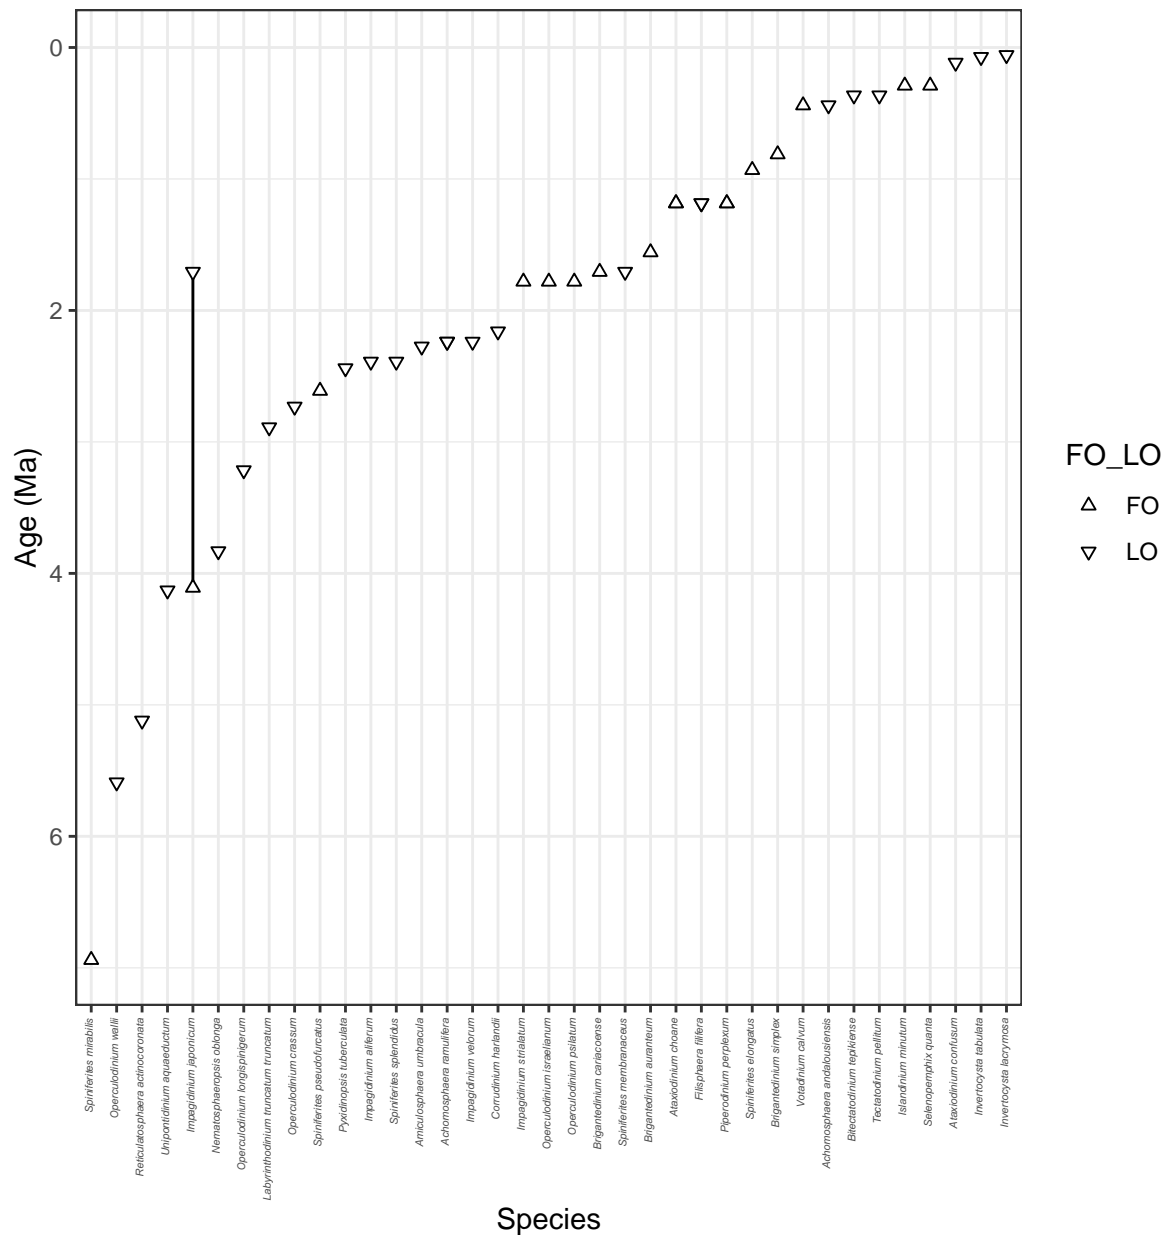

Supplement: Supplementary file 607 [file Site_607.pdf › Supplement/Supplement 2/Sites 188 plots/Site_607.pdf]

Site  
610

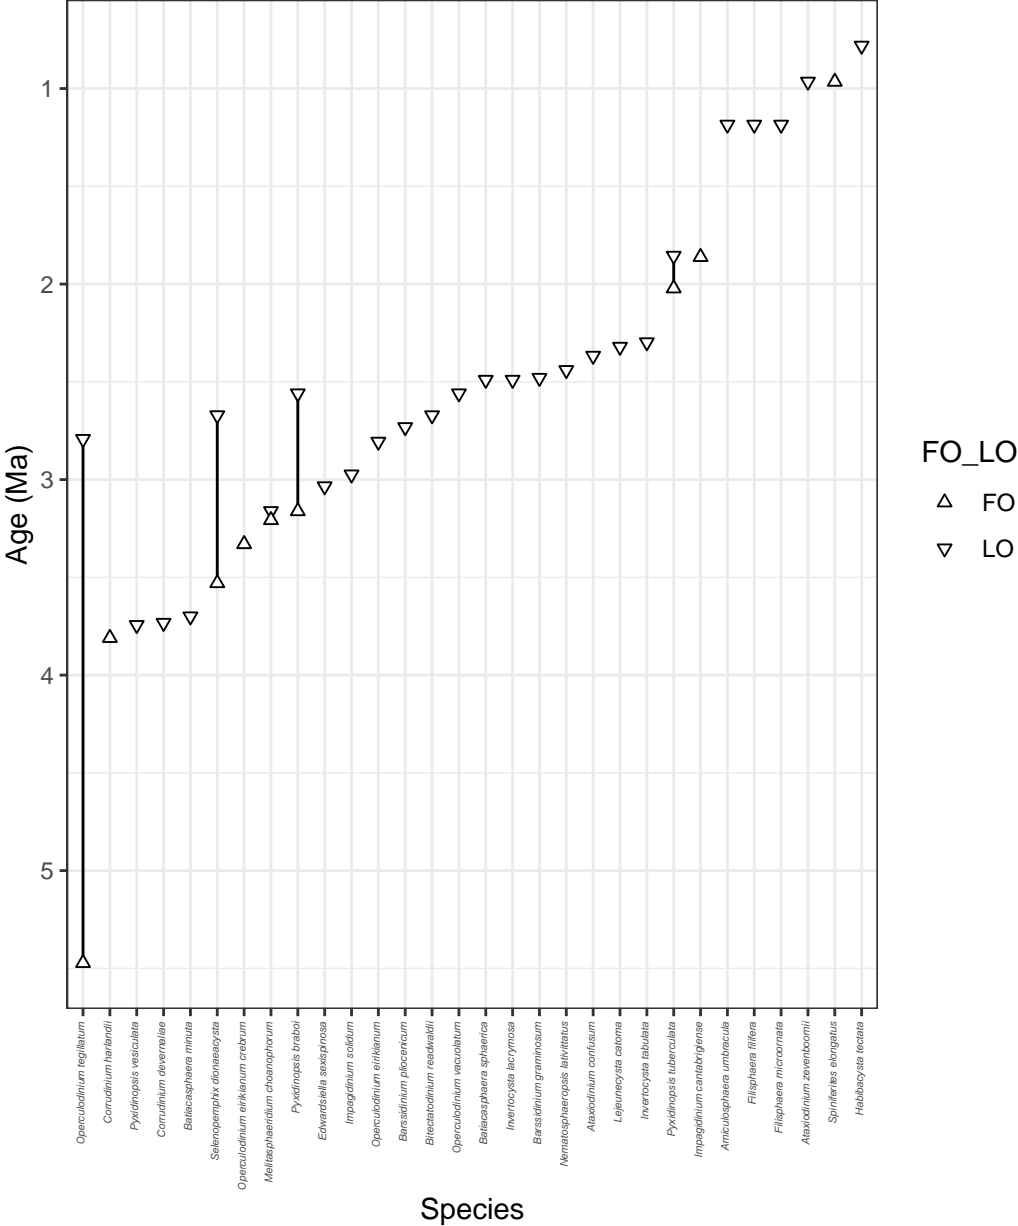

Supplement: Supplementary file 608 [file Site_610.pdf › Supplement/Supplement 2/Sites 188 plots/Site_610.pdf]

Site

611

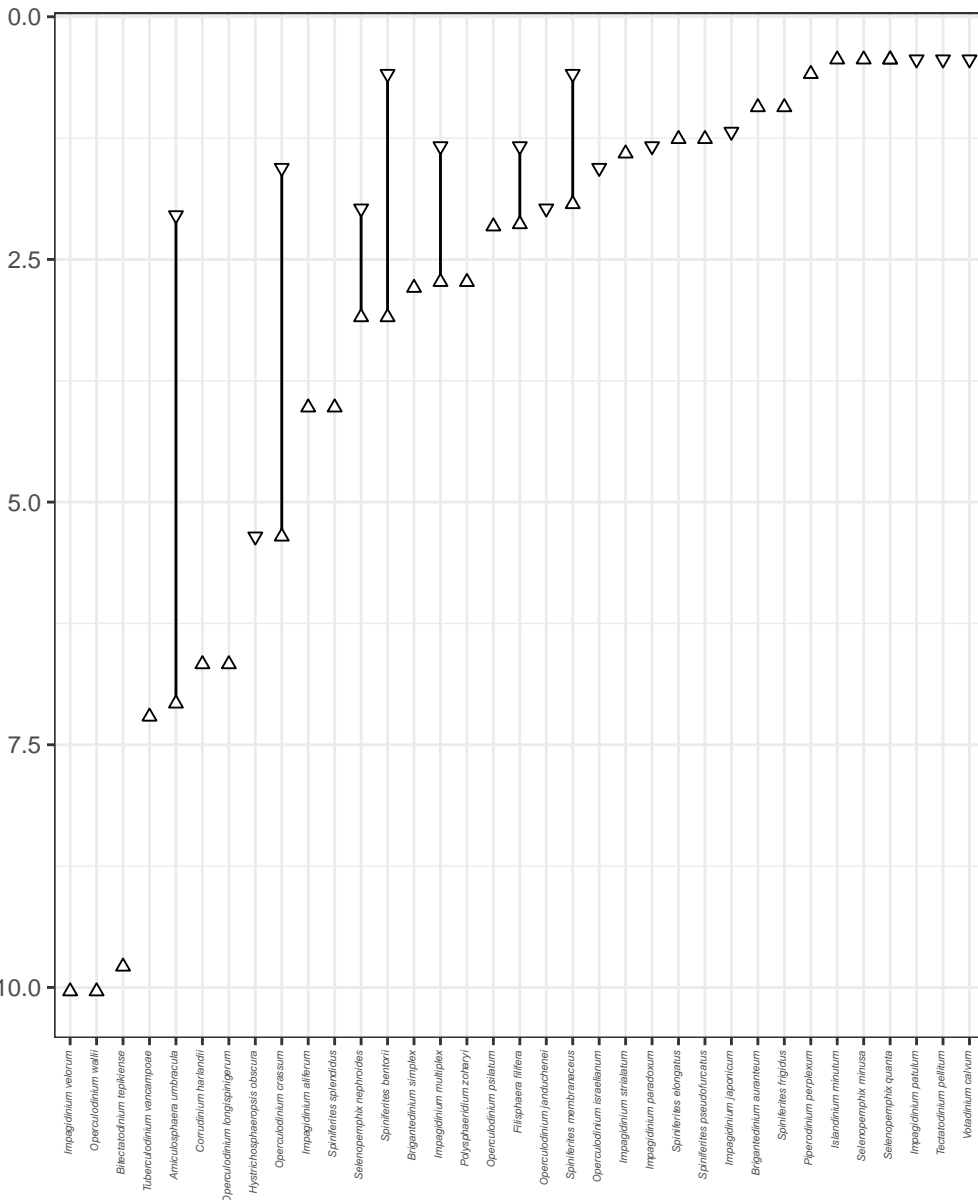

Supplement: Supplementary file 609 [file Site_611.pdf › Supplement/Supplement 2/Sites 188 plots/Site_611.pdf]

Site  
612

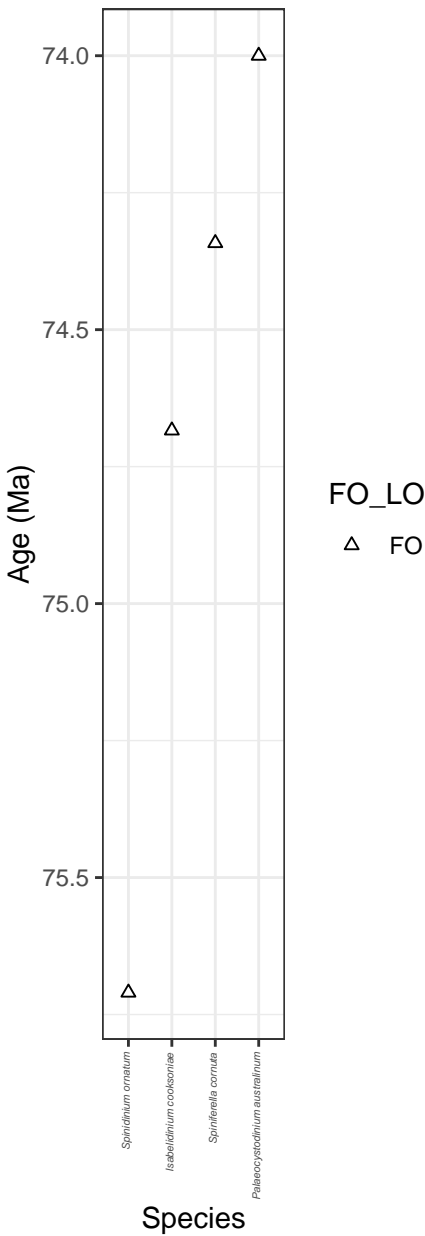

Supplement: Supplementary file 610 [file Site_612.pdf › Supplement/Supplement 2/Sites 188 plots/Site_612.pdf]

Site  
638B

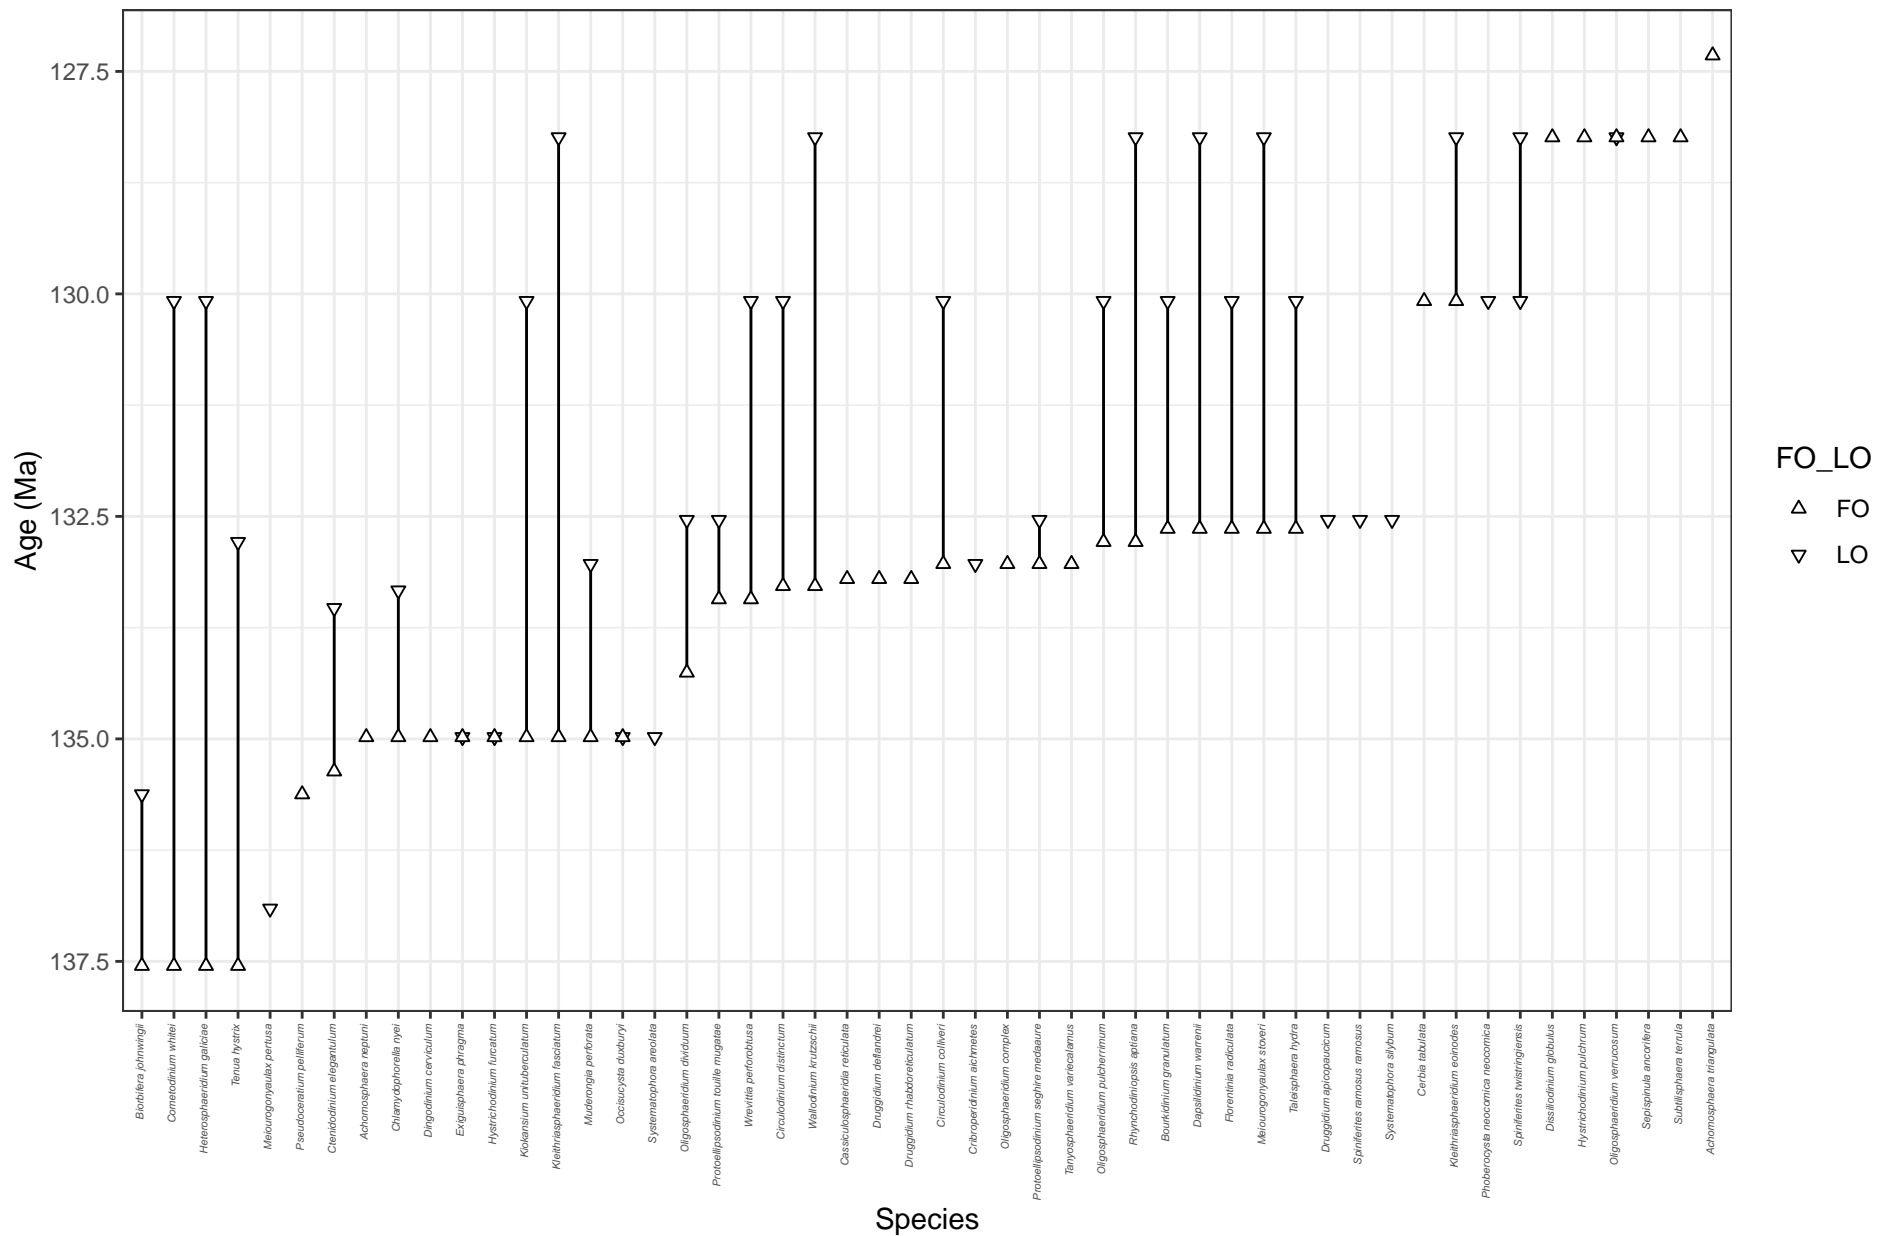

Supplement: Supplementary file 611 [file Site_638B.pdf › Supplement/Supplement 2/Sites 188 plots/Site_638B.pdf]

Site  
642B

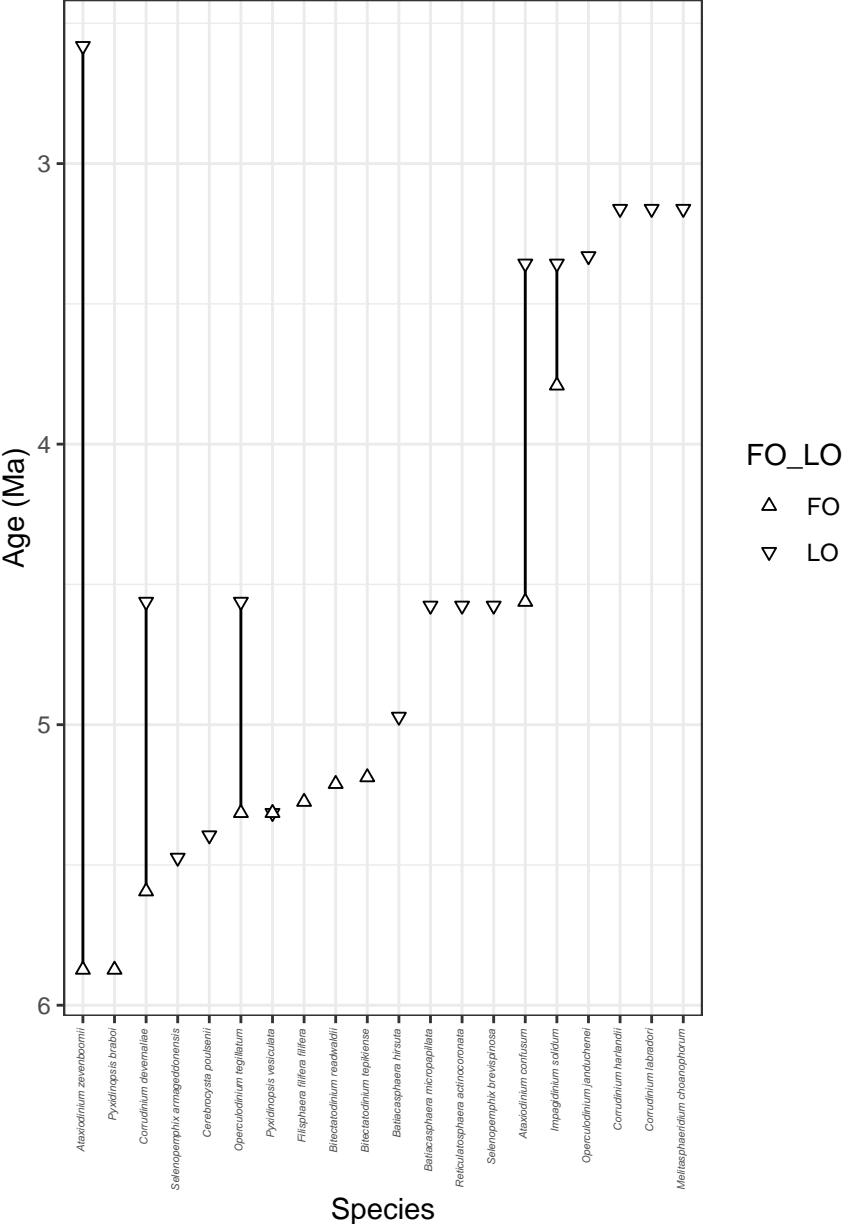

Supplement: Supplementary file 612 [file Site_642B.pdf › Supplement/Supplement 2/Sites 188 plots/Site_642B.pdf]

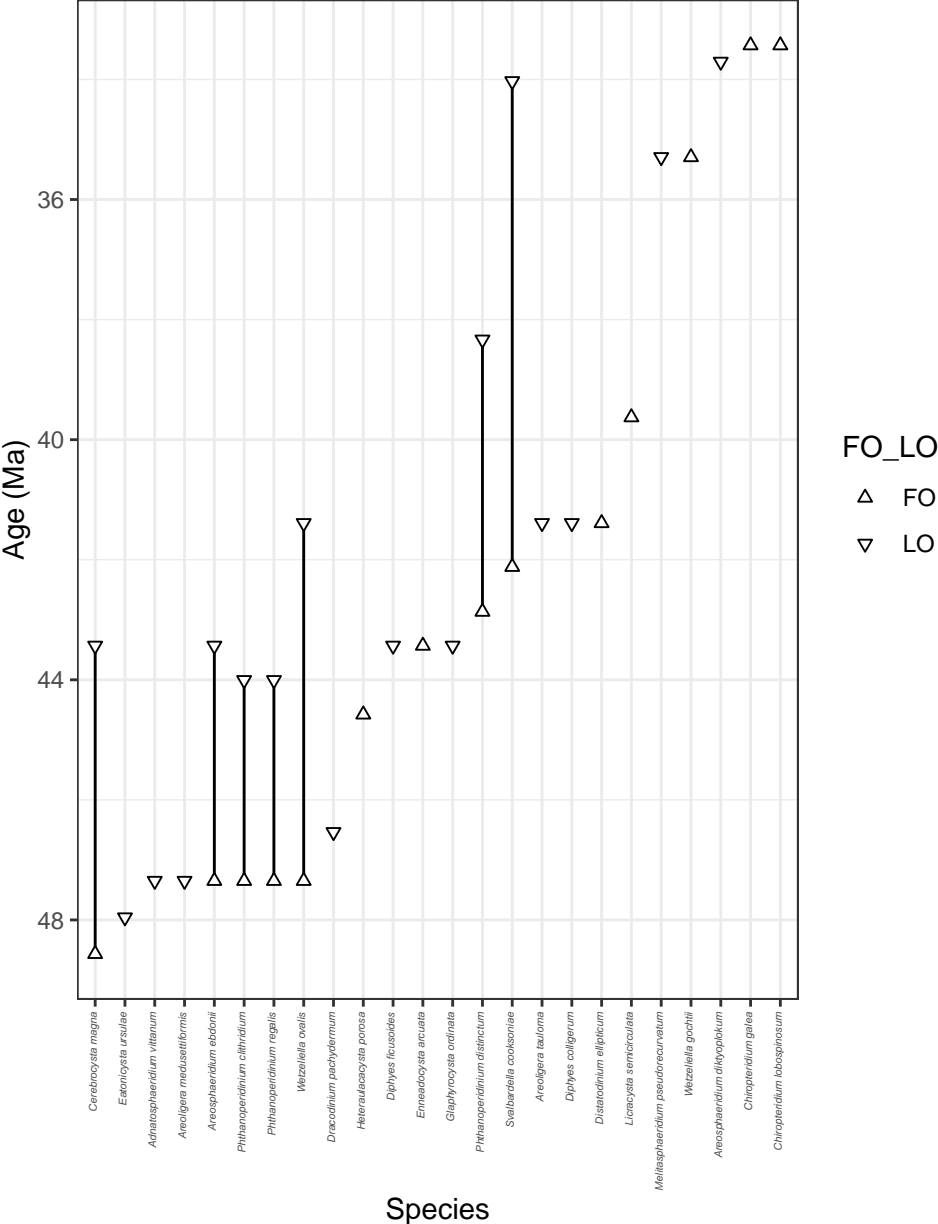

Supplement: Supplementary file 613 [file Site_643.pdf › Supplement/Supplement 2/Sites 188 plots/Site_643.pdf]

Site  
644

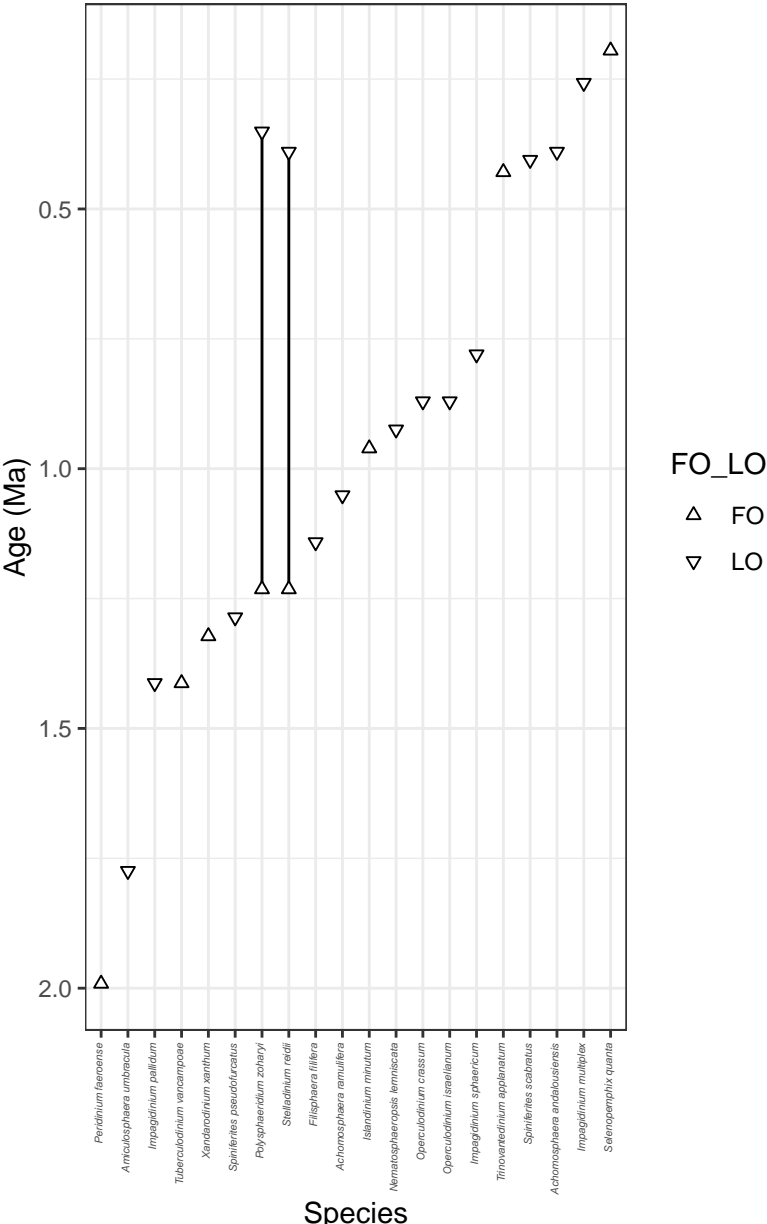

Supplement: Supplementary file 614 [file Site_644.pdf › Supplement/Supplement 2/Sites 188 plots/Site_644.pdf]

Site

646

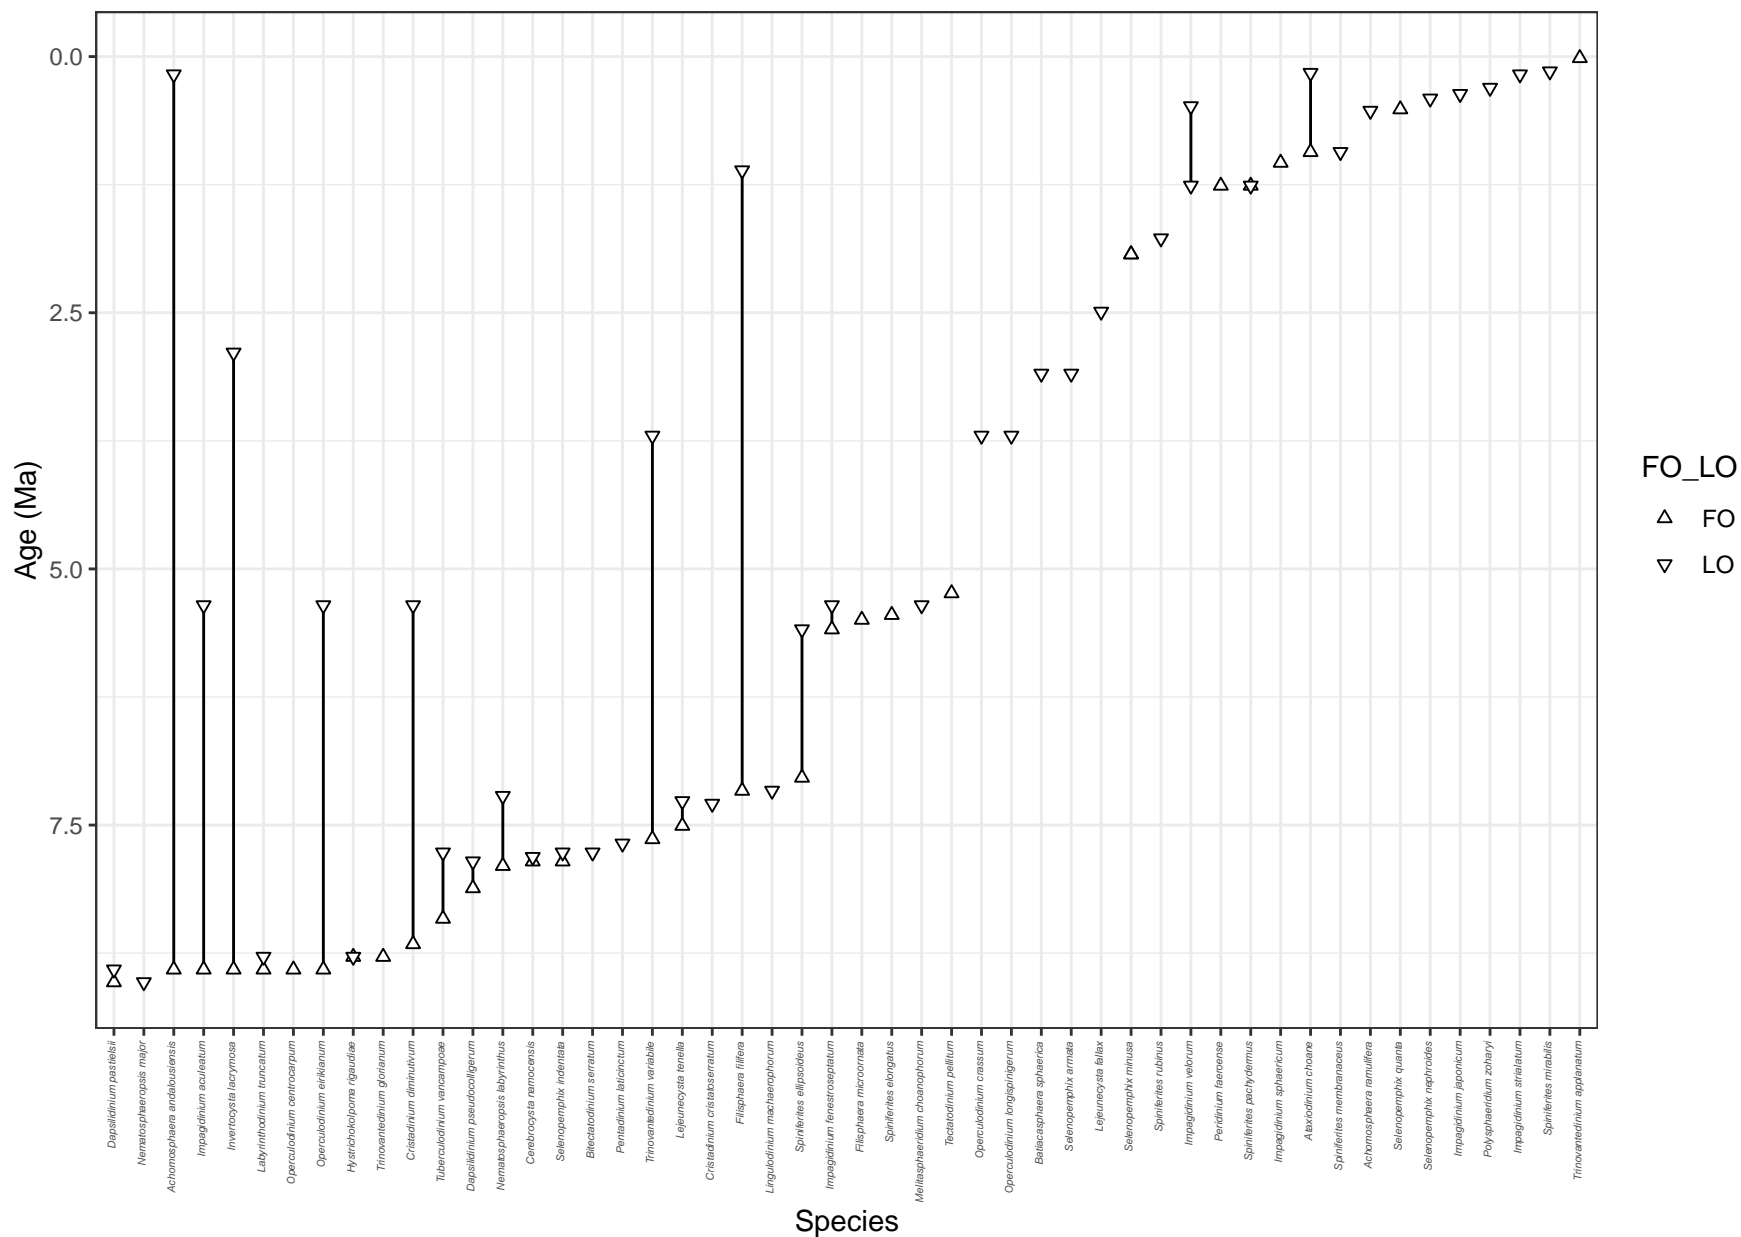

Supplement: Supplementary file 615 [file Site_646.pdf › Supplement/Supplement 2/Sites 188 plots/Site_646.pdf]

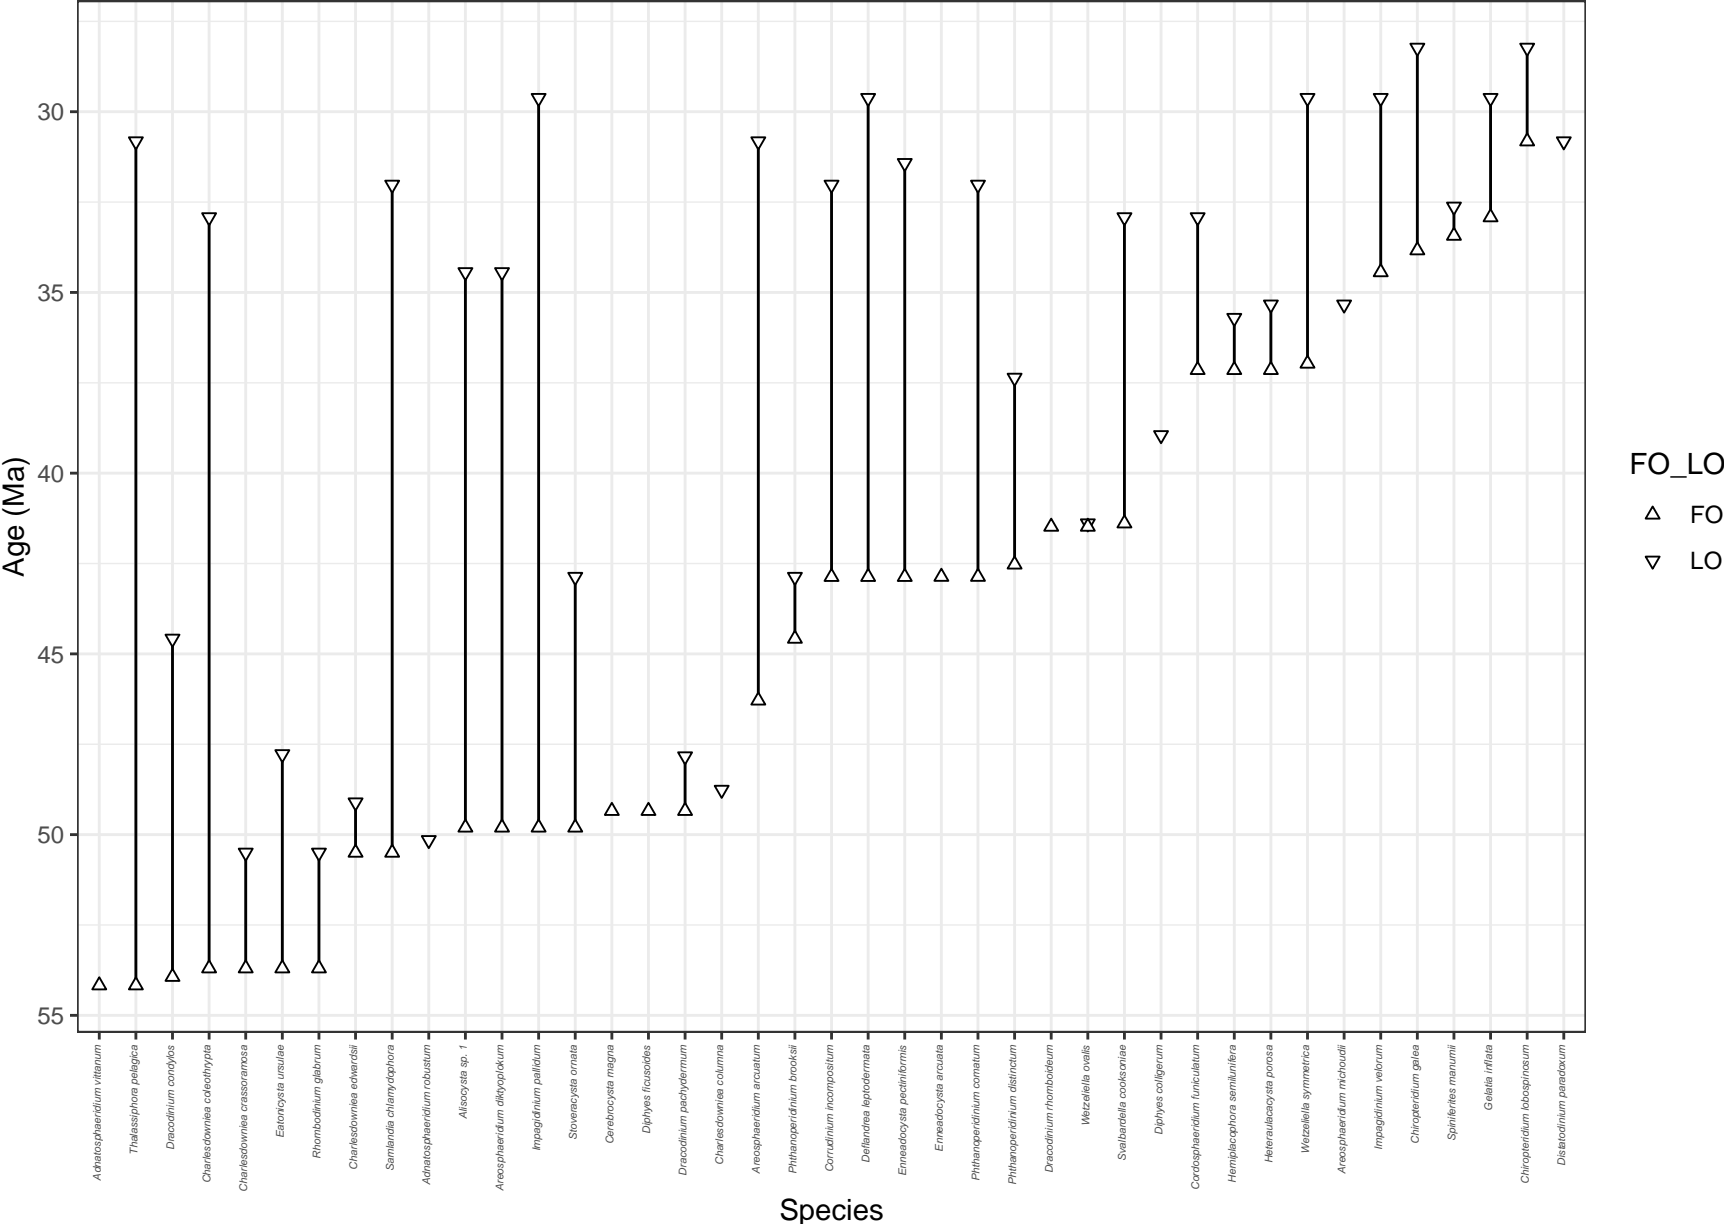

Supplement: Supplementary file 616 [file Site_647.pdf › Supplement/Supplement 2/Sites 188 plots/Site_647.pdf]

Site  
6711

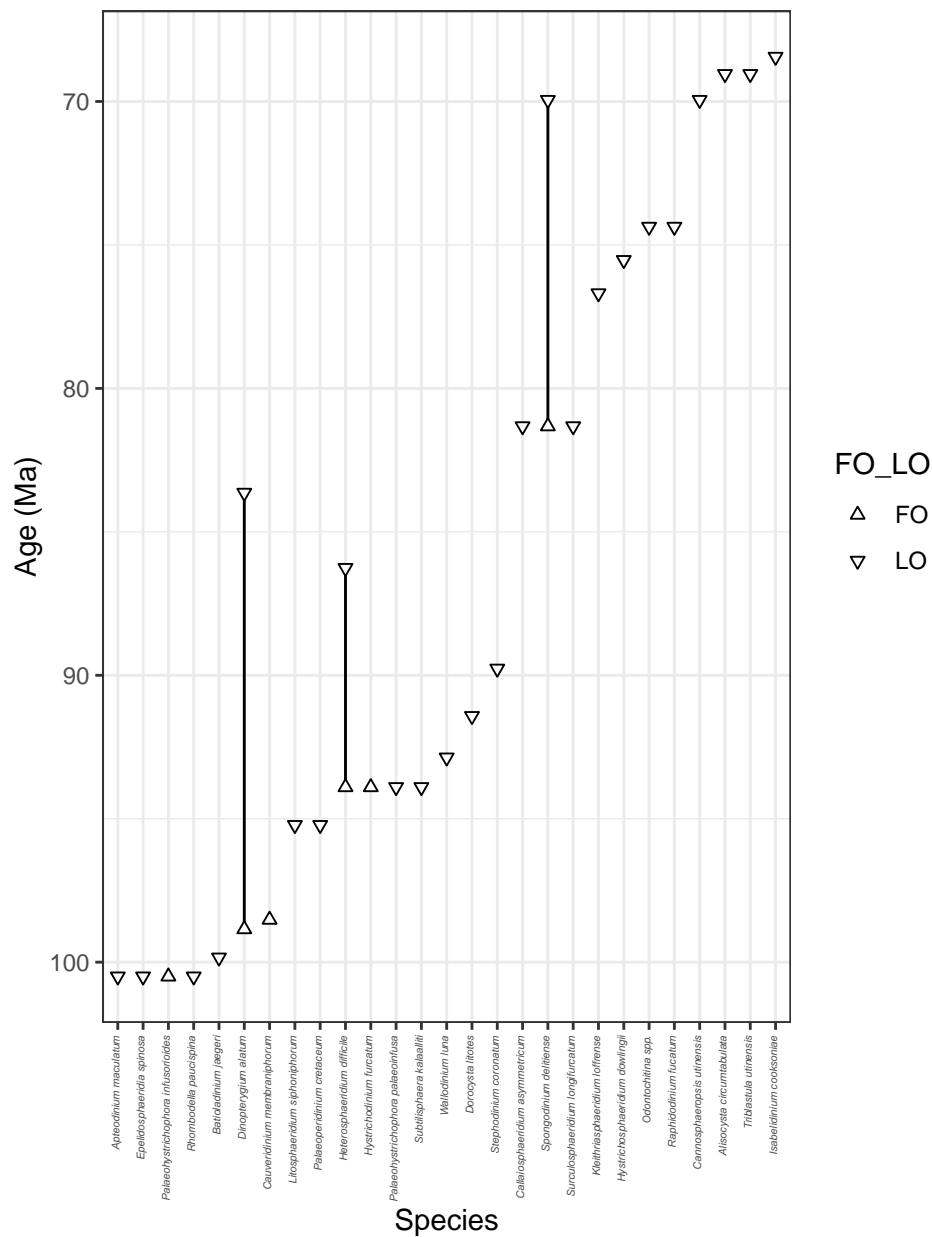

Supplement: Supplementary file 617 [file Site_6711.pdf › Supplement/Supplement 2/Sites 188 plots/Site_6711.pdf]

Site

748

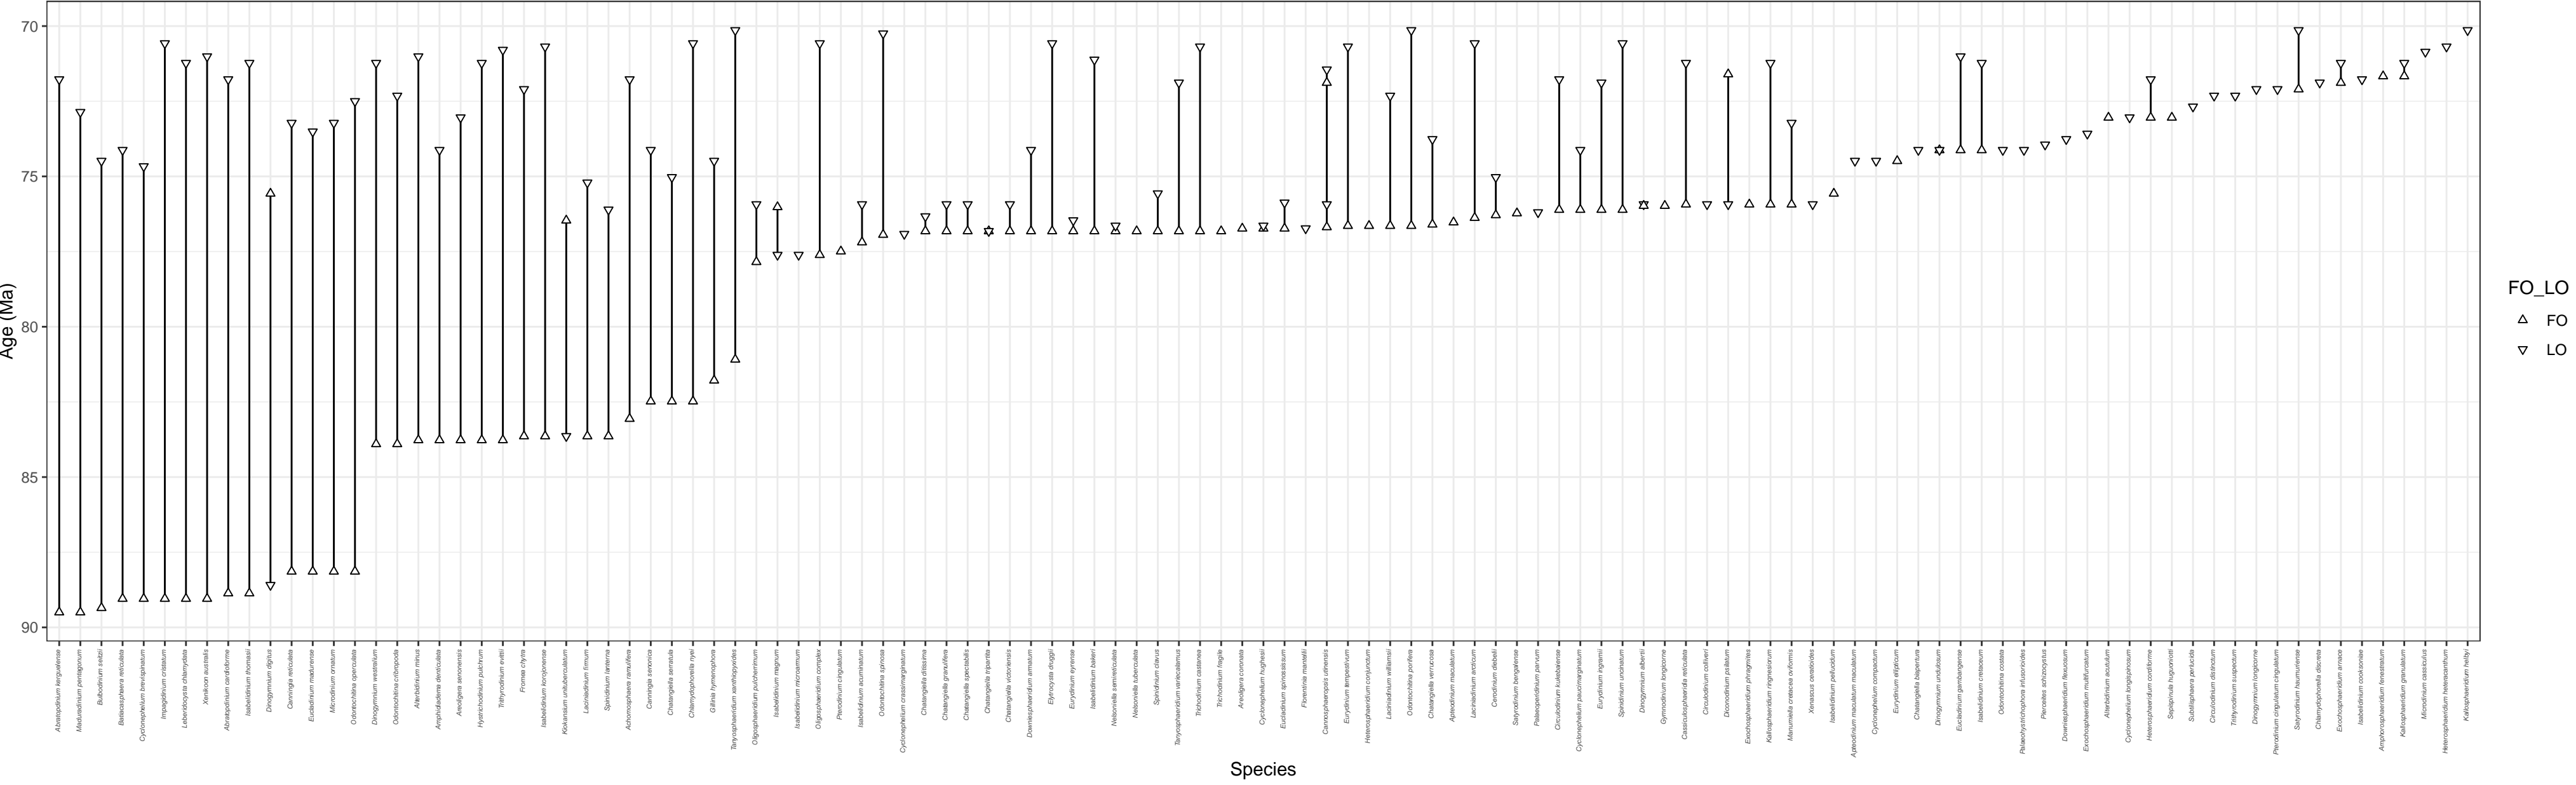

Supplement: Supplementary file 618 [file Site_748.pdf › Supplement/Supplement 2/Sites 188 plots/Site_748.pdf]

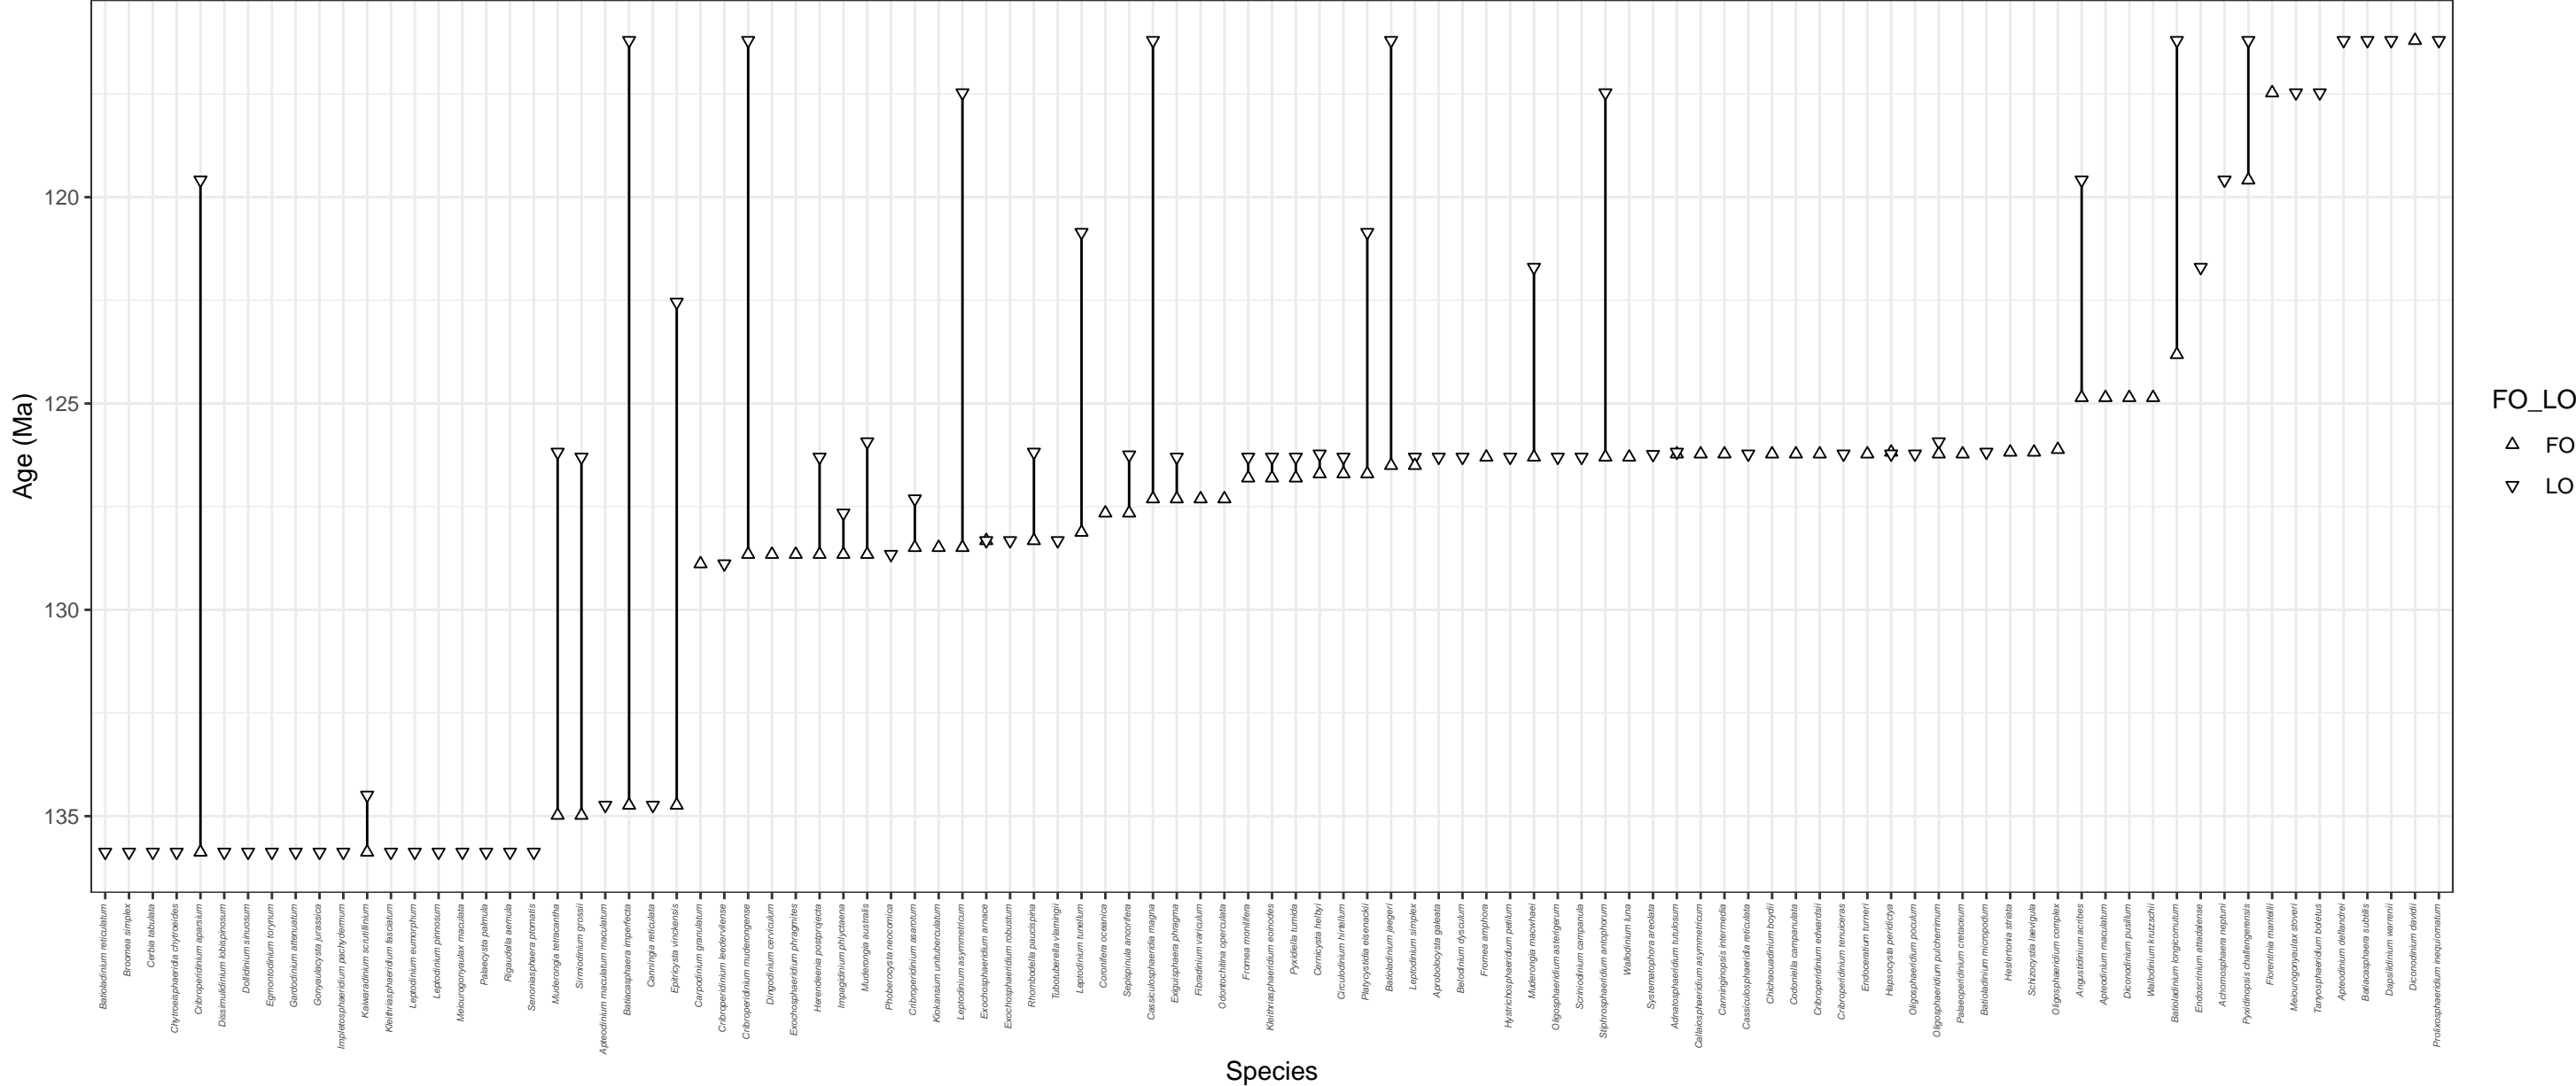

Supplement: Supplementary file 619 [file Site_765.pdf › Supplement/Supplement 2/Sites 188 plots/Site_765.pdf]

# Site 765A

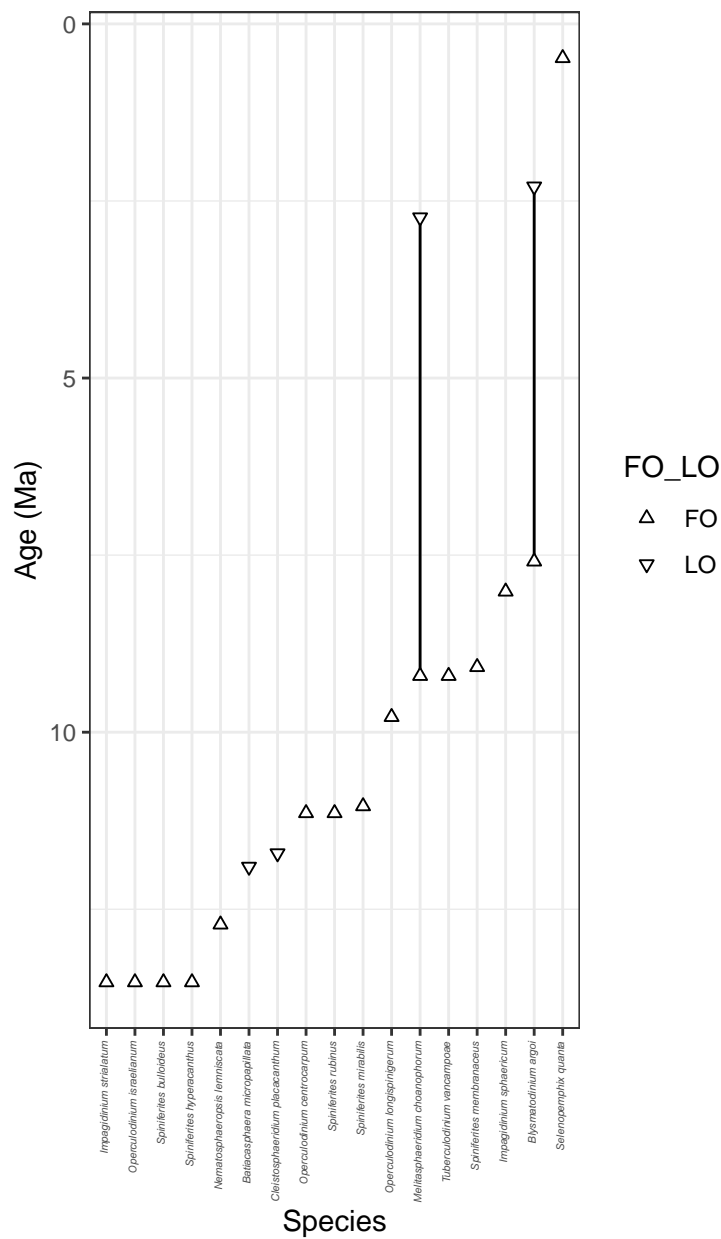

Supplement: Supplementary file 620 [file Site_765A.pdf › Supplement/Supplement 2/Sites 188 plots/Site_765A.pdf]
