# Supplementary figures and images for: DINOSTRAT: a global database of the stratigraphic and paleolatitudinal distribution of Mesozoic–Cenozoic organic-walled dinoflagellate cysts (part 7 of 27)
Source: Copernicus journal article supplement (doi:10.5194/essd-14-579-2022), 2022-02-09

Site

815

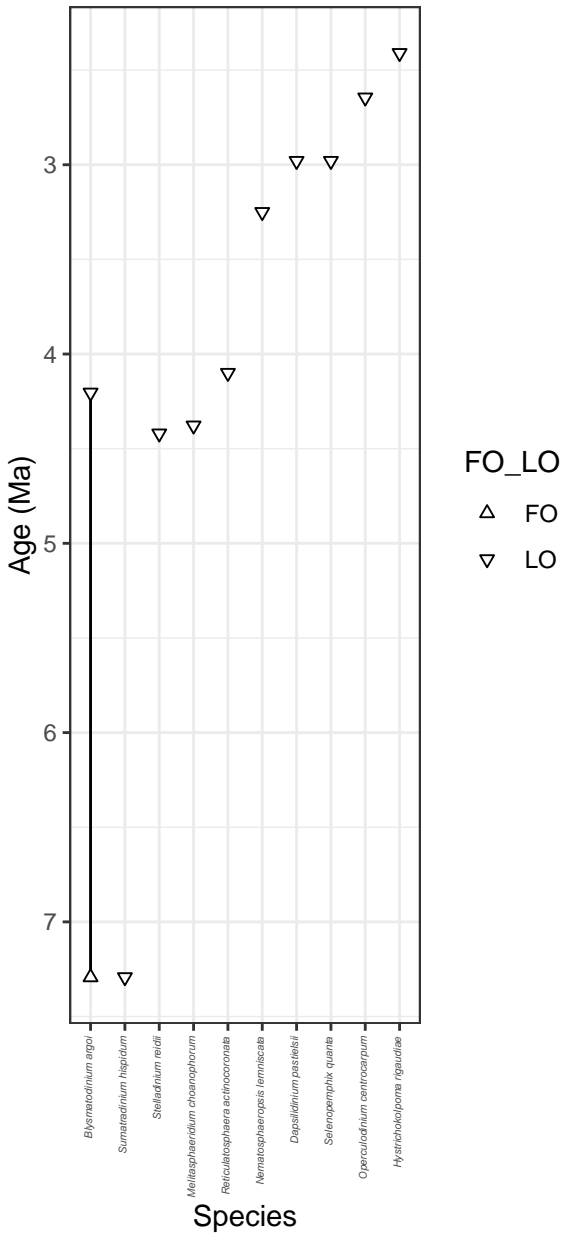

Supplement: Supplementary file 621 [file Site_815.pdf › Supplement/Supplement 2/Sites 188 plots/Site_815.pdf]

Site

823

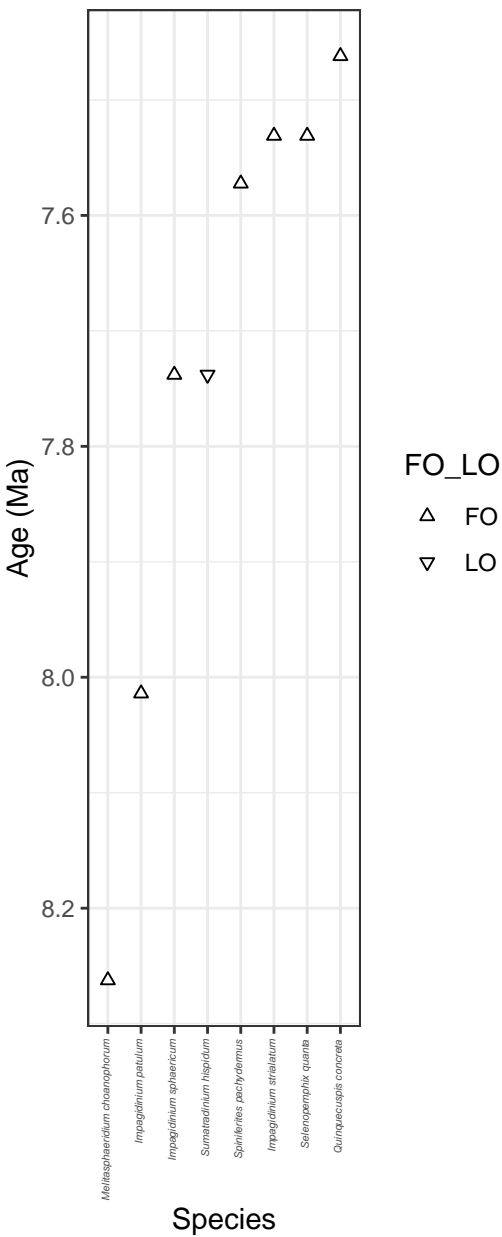

Supplement: Supplementary file 622 [file Site_823.pdf › Supplement/Supplement 2/Sites 188 plots/Site_823.pdf]

Site

907

Age (Ma)

FO\_LO

△ FO

▽ LO

Species

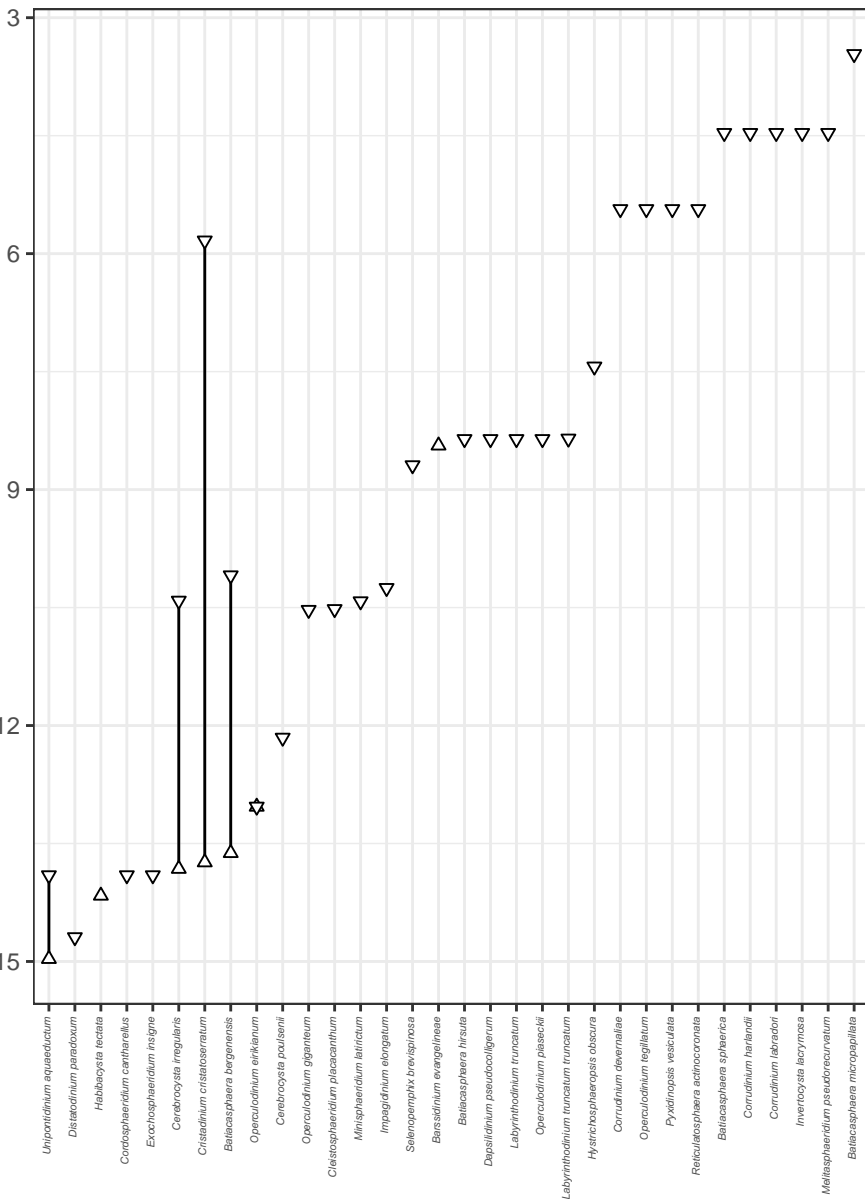

Supplement: Supplementary file 623 [file Site_907.pdf › Supplement/Supplement 2/Sites 188 plots/Site_907.pdf]

Site

911

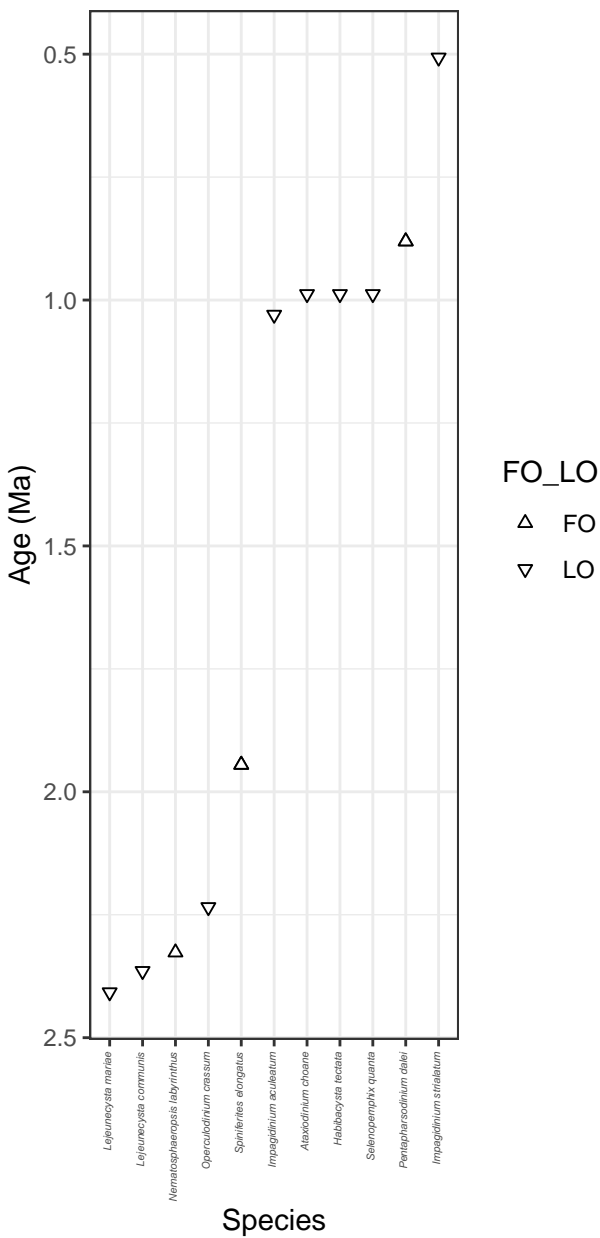

Supplement: Supplementary file 625 [file Site_911.pdf › Supplement/Supplement 2/Sites 188 plots/Site_911.pdf]

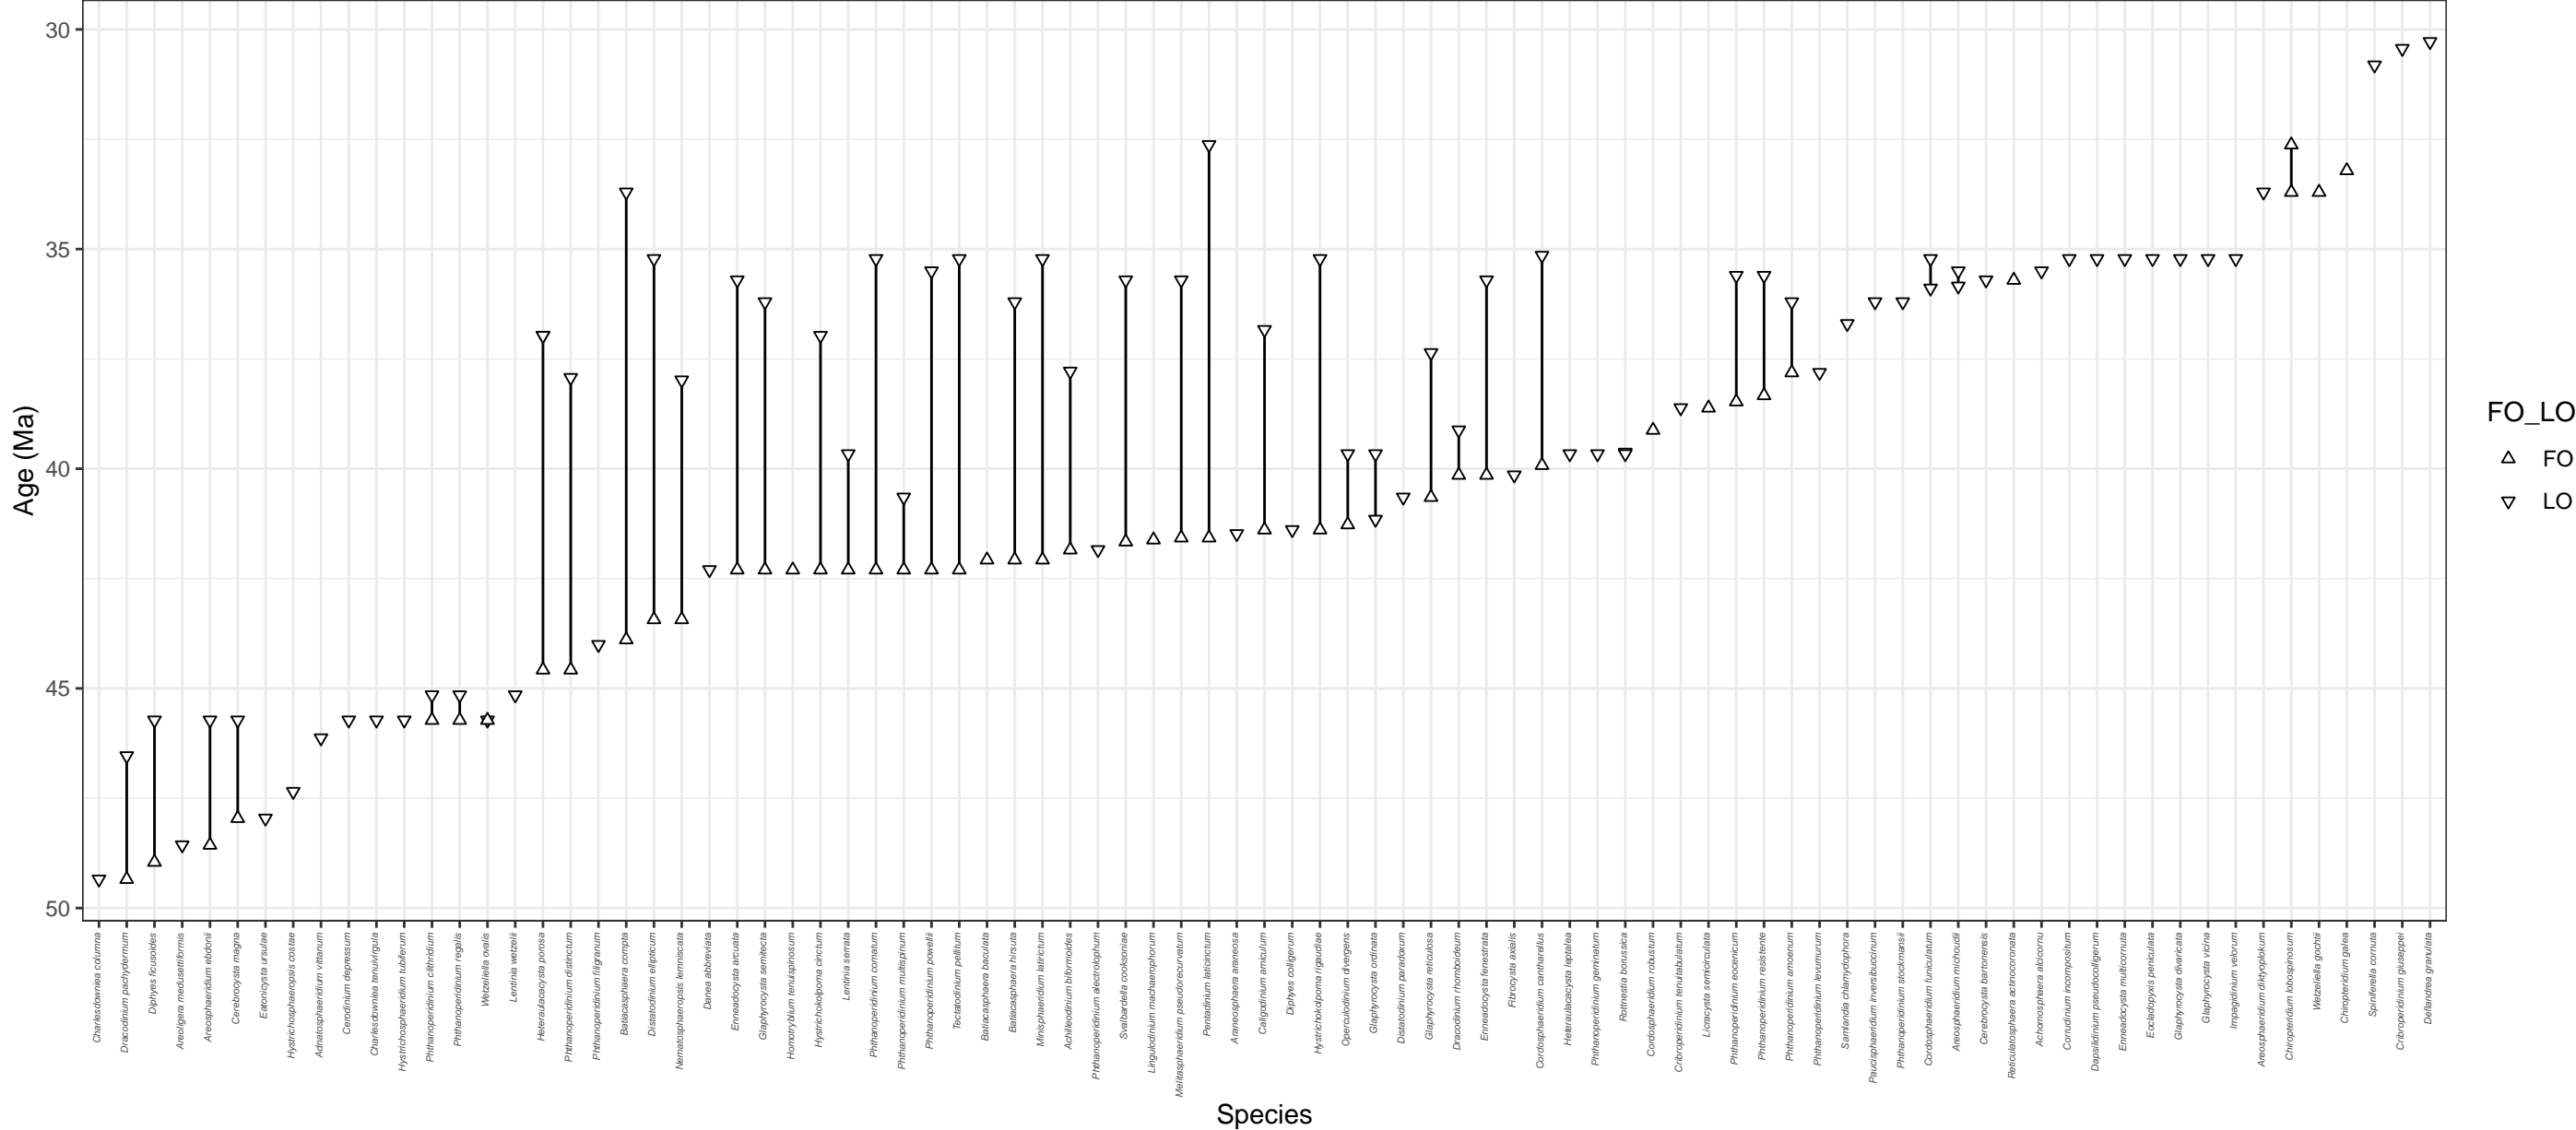

Supplement: Supplementary file 626 [file Site_913.pdf › Supplement/Supplement 2/Sites 188 plots/Site_913.pdf]

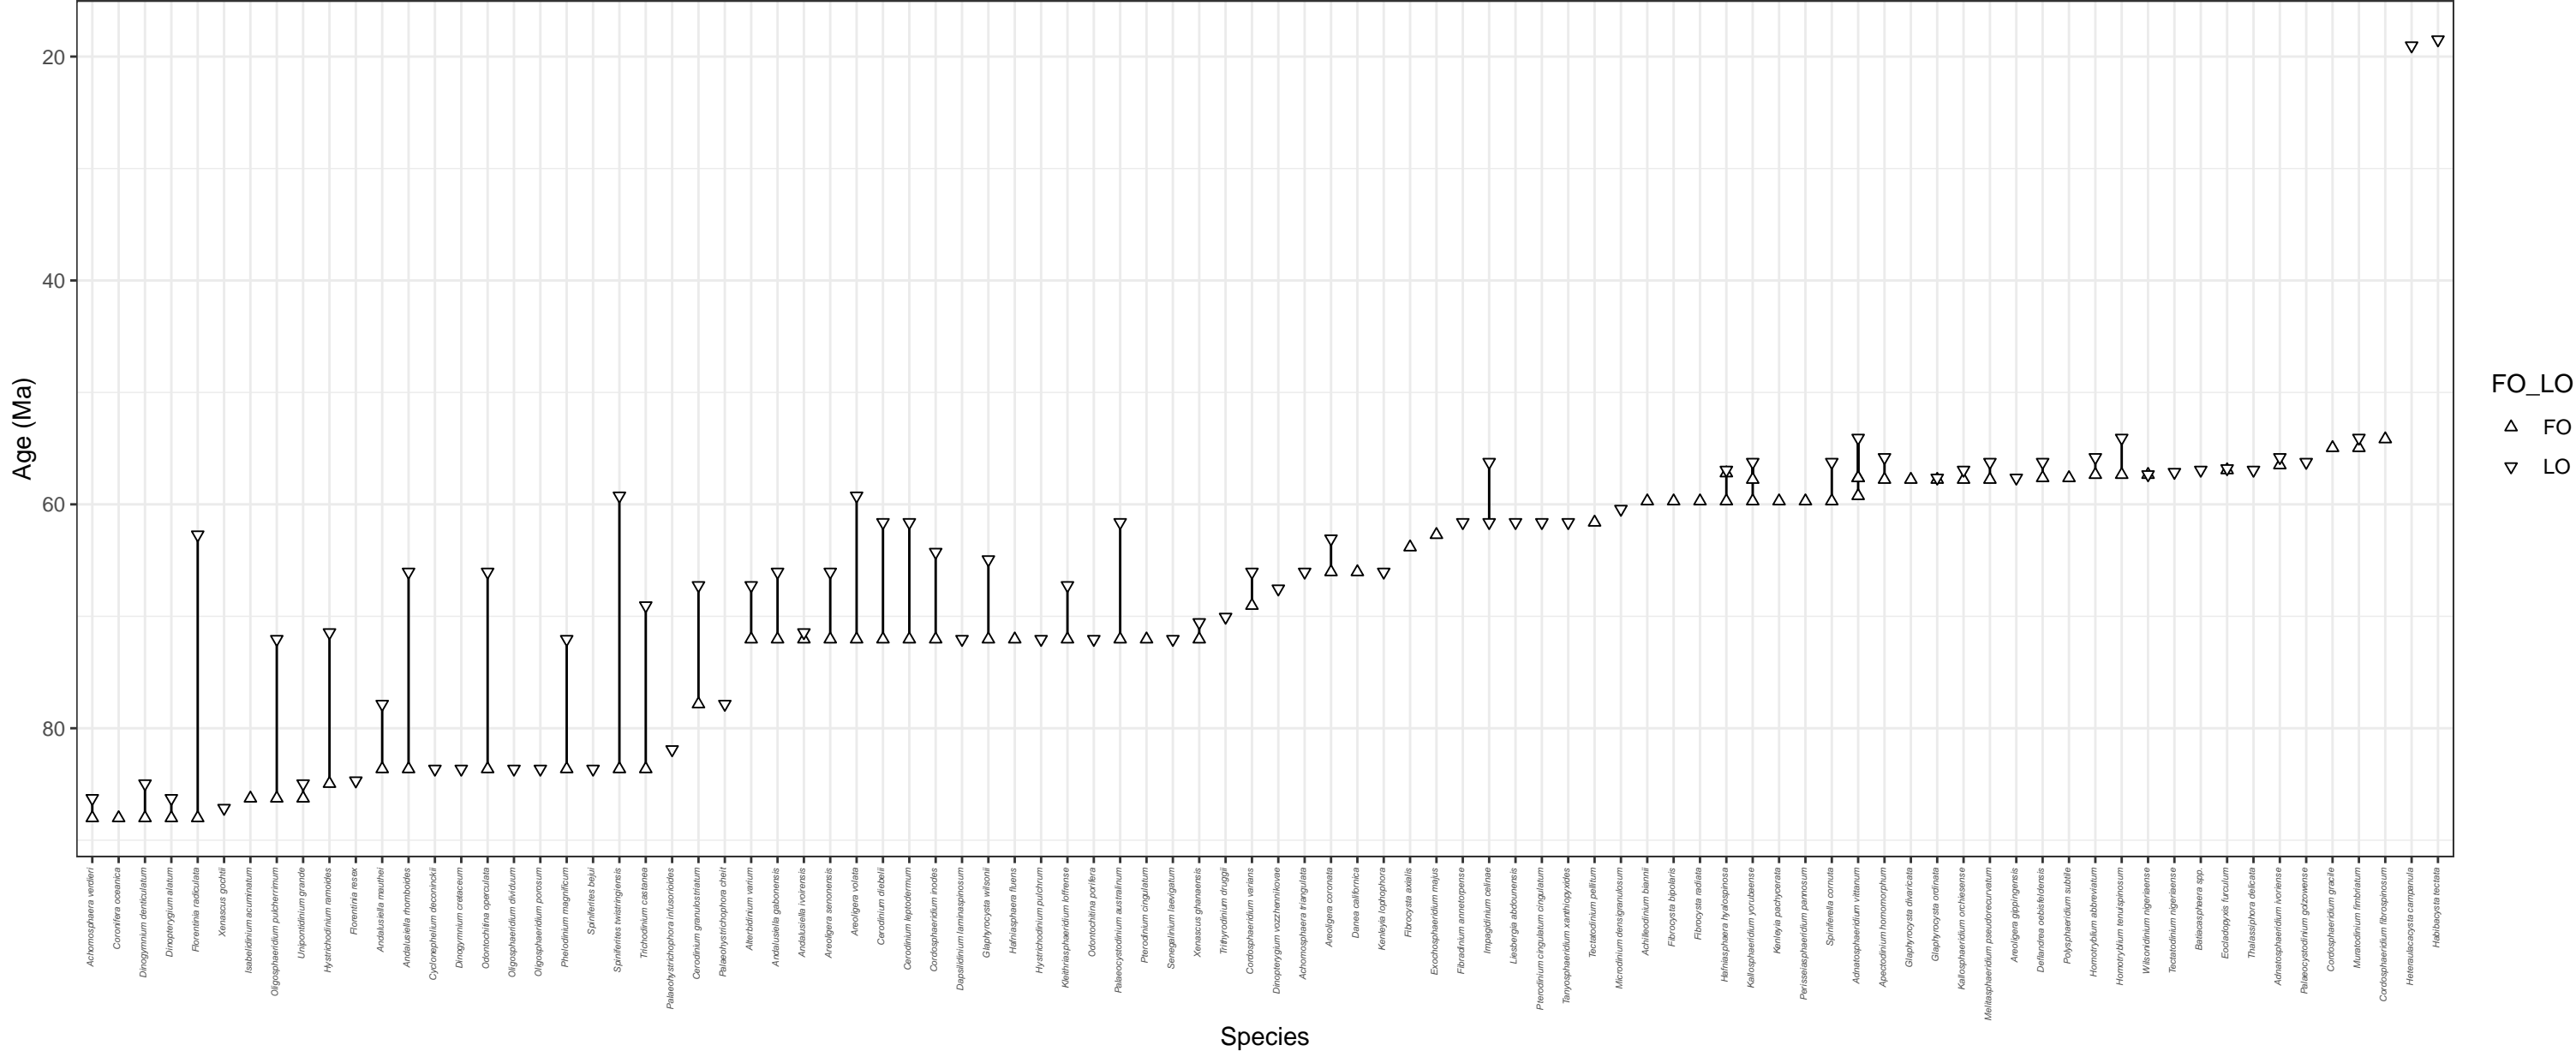

Supplement: Supplementary file 627 [file Site_959.pdf › Supplement/Supplement 2/Sites 188 plots/Site_959.pdf]

Site

985

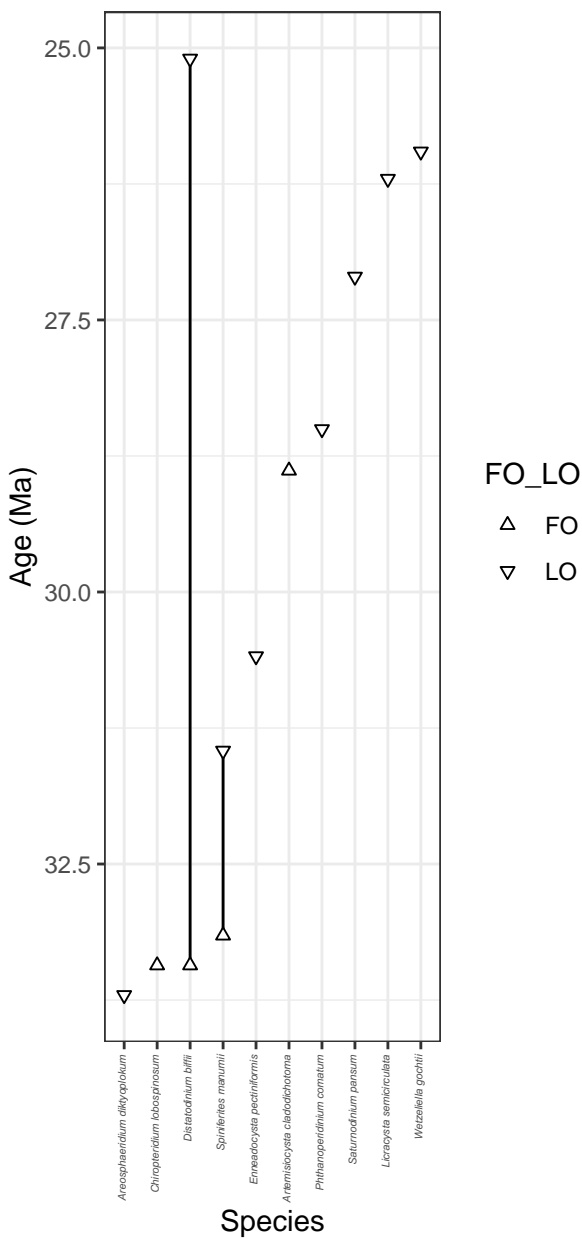

Supplement: Supplementary file 628 [file Site_985.pdf › Supplement/Supplement 2/Sites 188 plots/Site_985.pdf]

# Site

## APTICORE

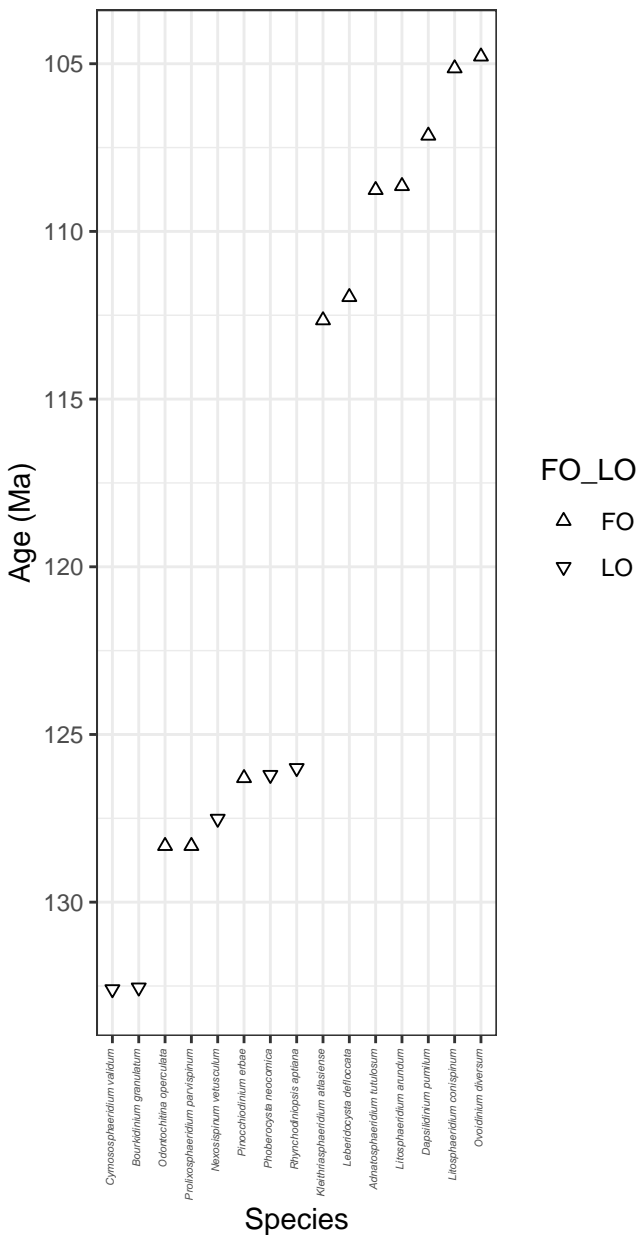

Supplement: Supplementary file 629 [file Site_APTICORE.pdf › Supplement/Supplement 2/Sites 188 plots/Site_APTICORE.pdf]

# Site Angles

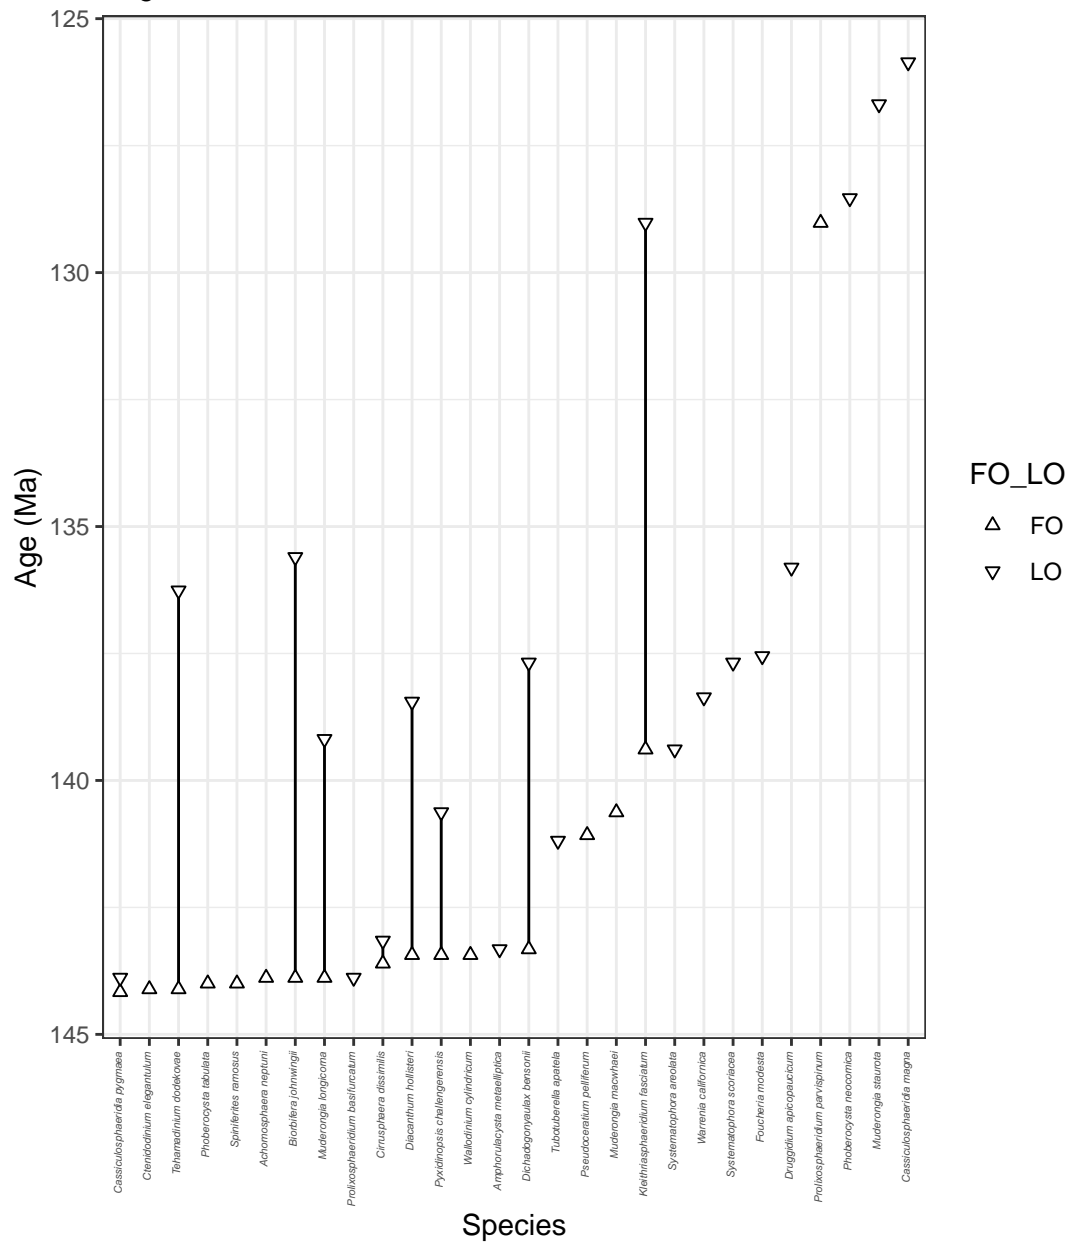

Supplement: Supplementary file 632 [file Site_Angles.pdf › Supplement/Supplement 2/Sites 188 plots/Site_Angles.pdf]

# Site

Angora Road, Tawanui

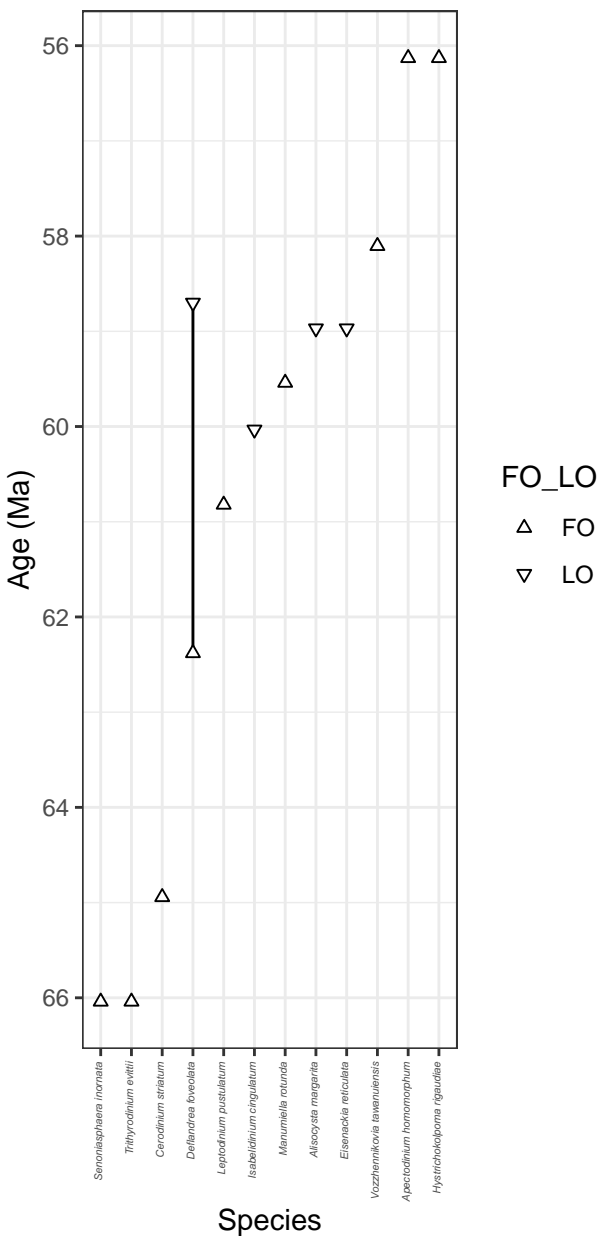

Supplement: Supplementary file 633 [file Site_Angora Road, Tawanui.pdf › Supplement/Supplement 2/Sites 188 plots/Site_Angora Road, Tawanui.pdf]

Site  
Australia Synthesis

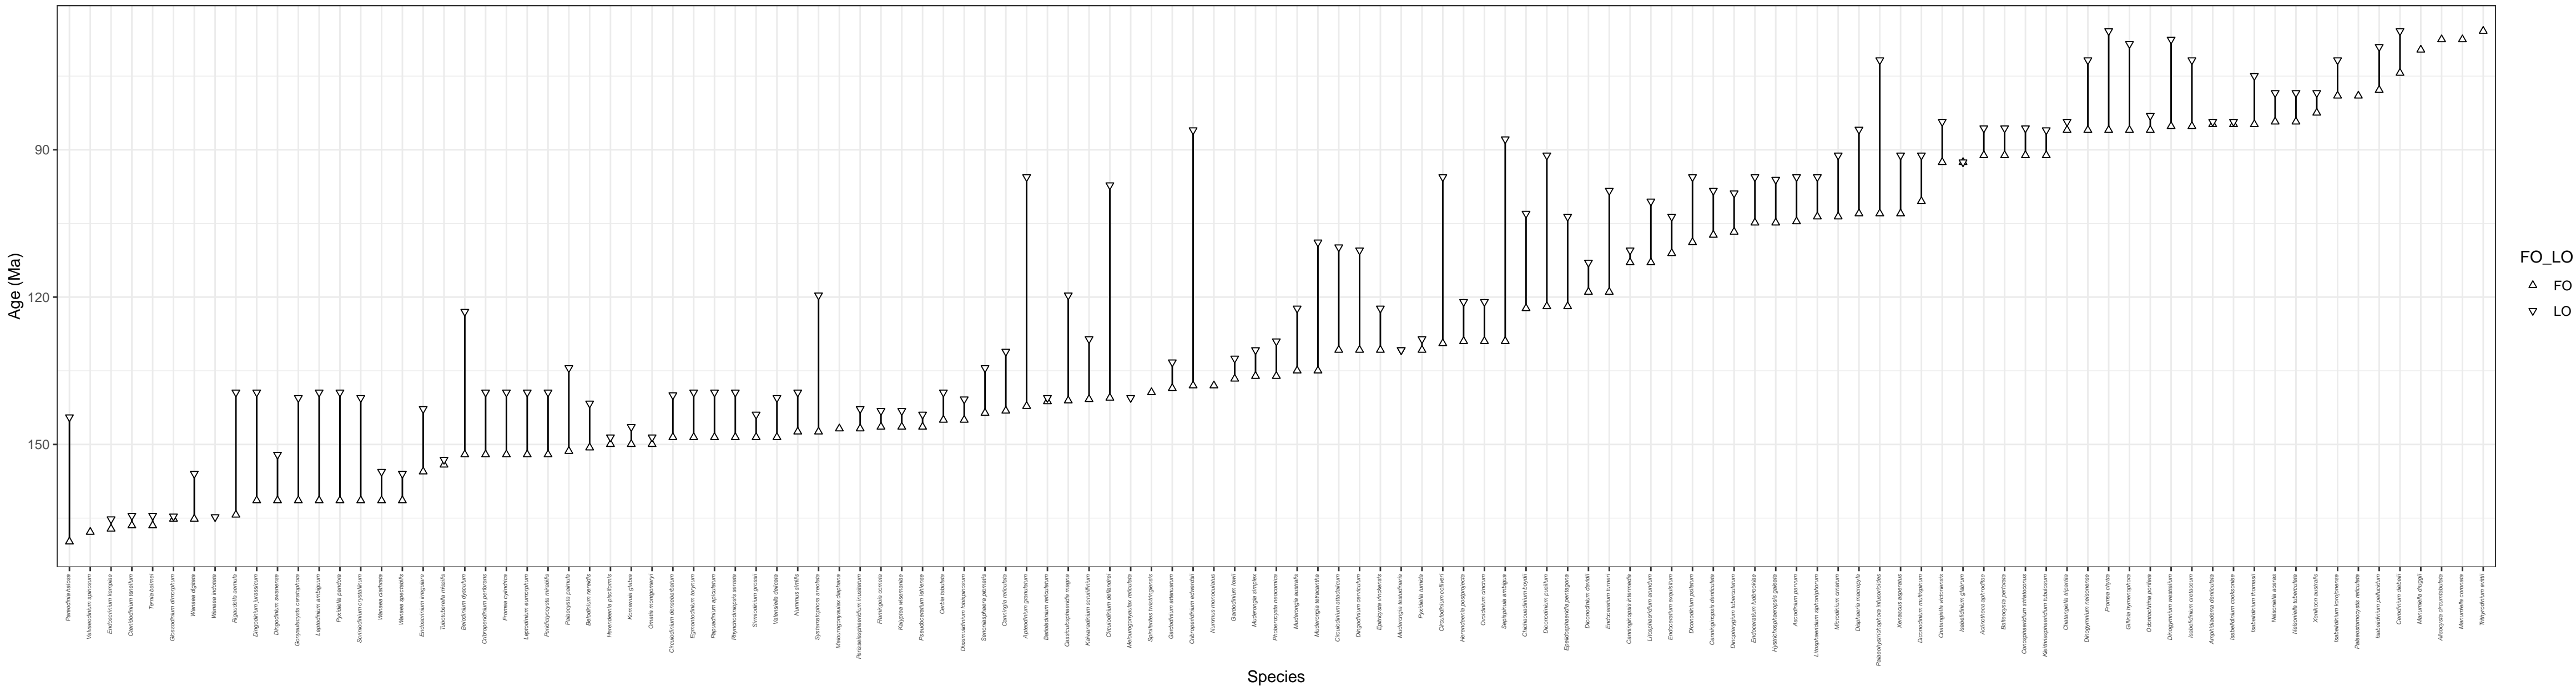

Supplement: Supplementary file 634 [file Site_Australia Synthesis.pdf › Supplement/Supplement 2/Sites 188 plots/Site_Australia Synthesis.pdf]

# Site

Barentz Sea

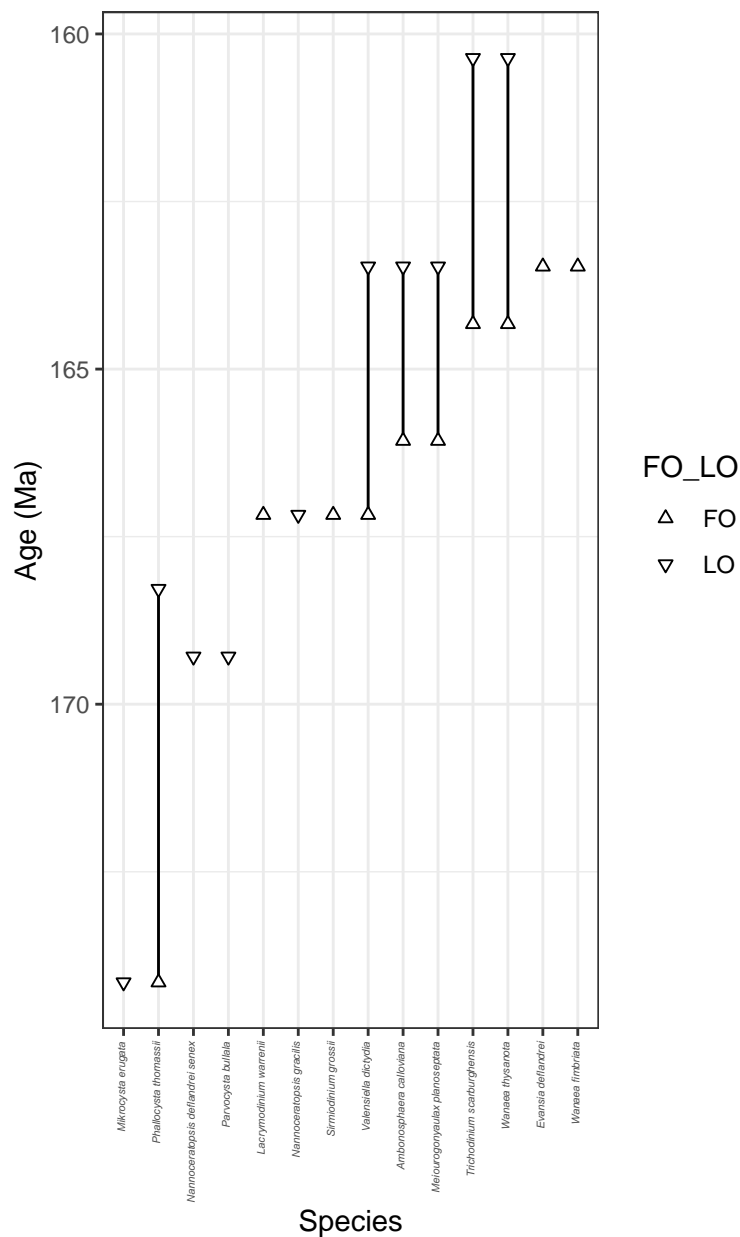

Supplement: Supplementary file 636 [file Site_Barentz Sea.pdf › Supplement/Supplement 2/Sites 188 plots/Site_Barentz Sea.pdf]

Site  
Bavaria

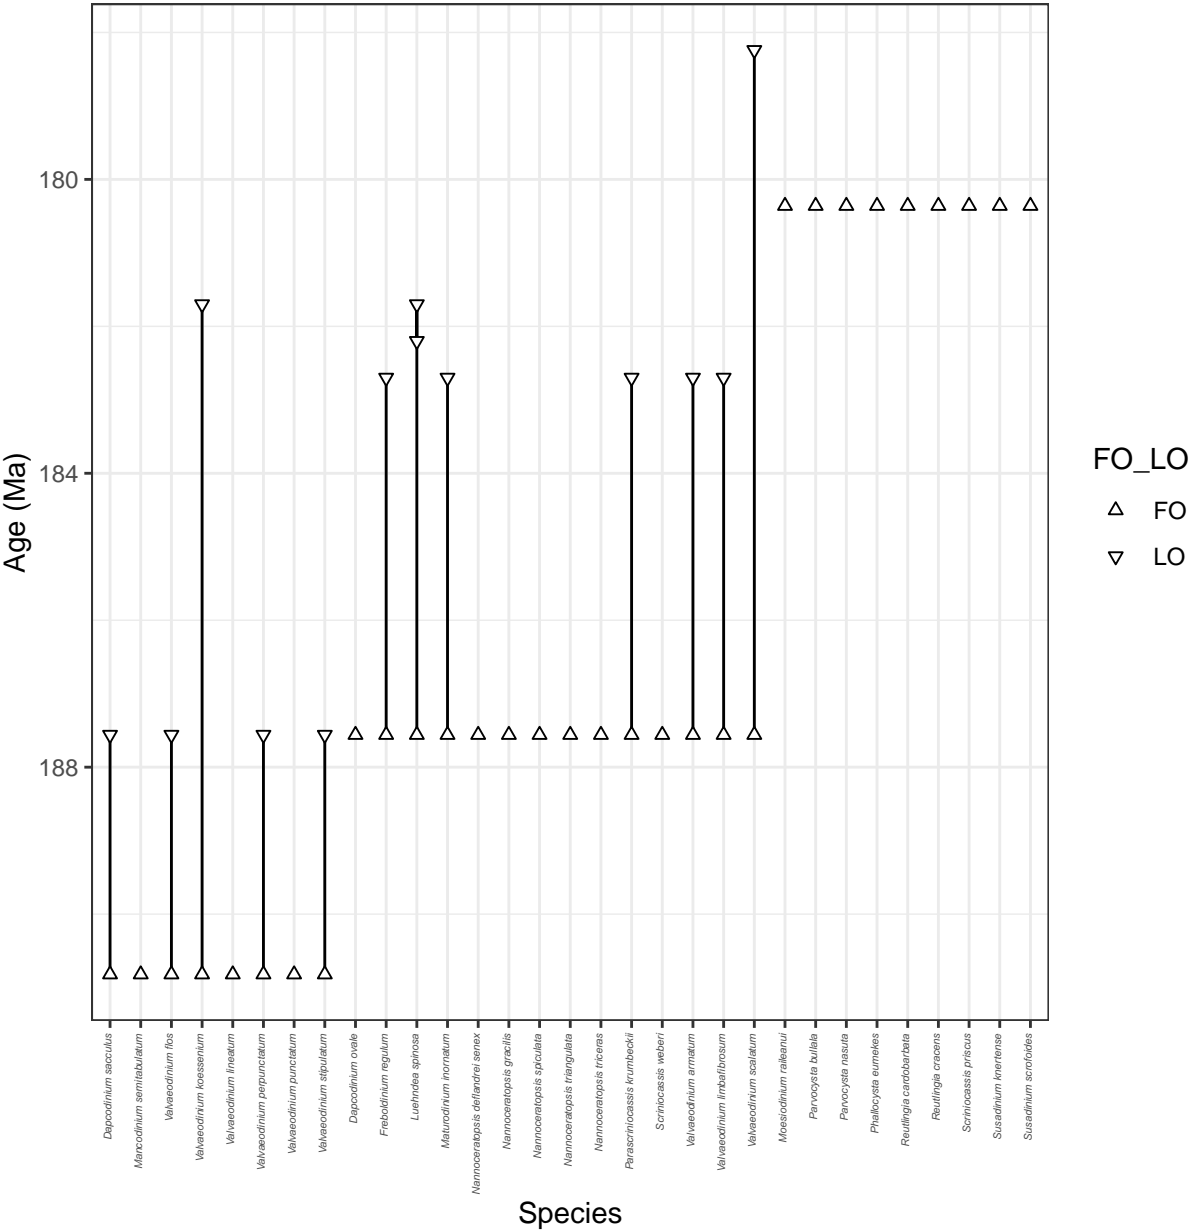

Supplement: Supplementary file 637 [file Site_Bavaria.pdf › Supplement/Supplement 2/Sites 188 plots/Site_Bavaria.pdf]

# Site

## Berrias

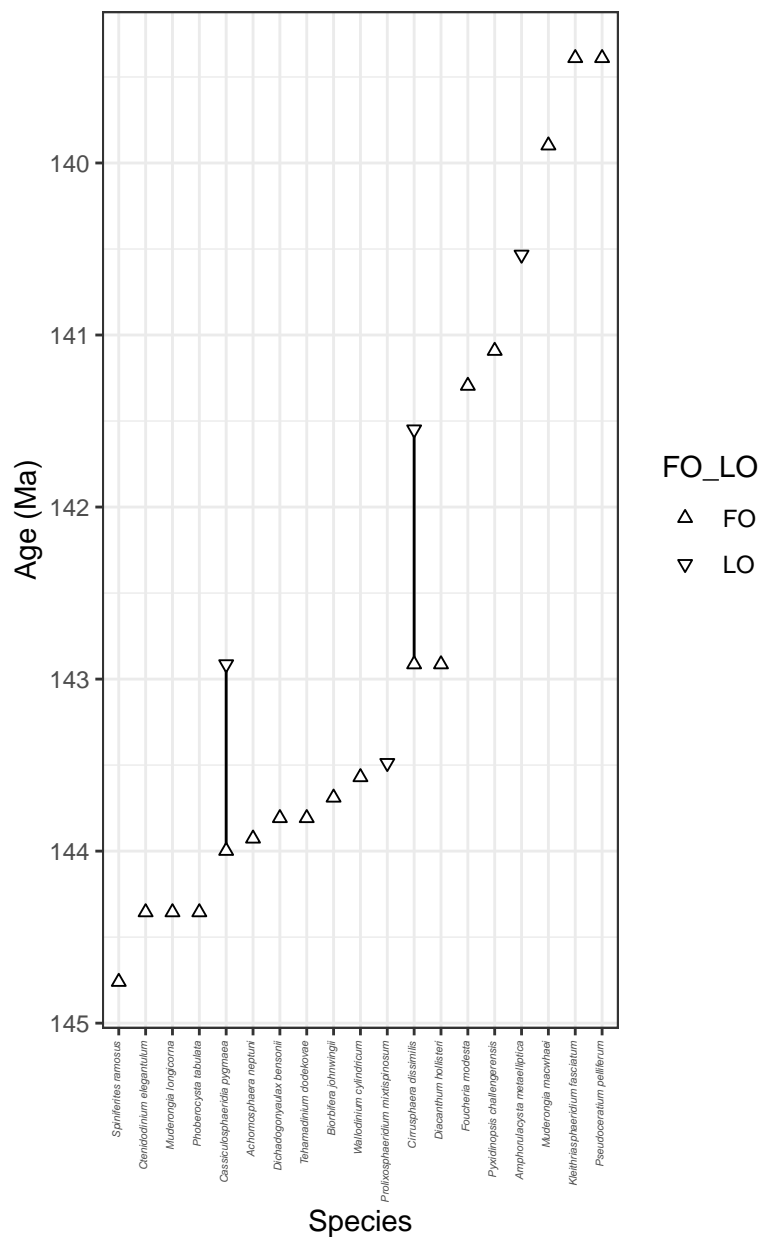

Supplement: Supplementary file 638 [file Site_Berrias.pdf › Supplement/Supplement 2/Sites 188 plots/Site_Berrias.pdf]

Site  
Bohemain Basin

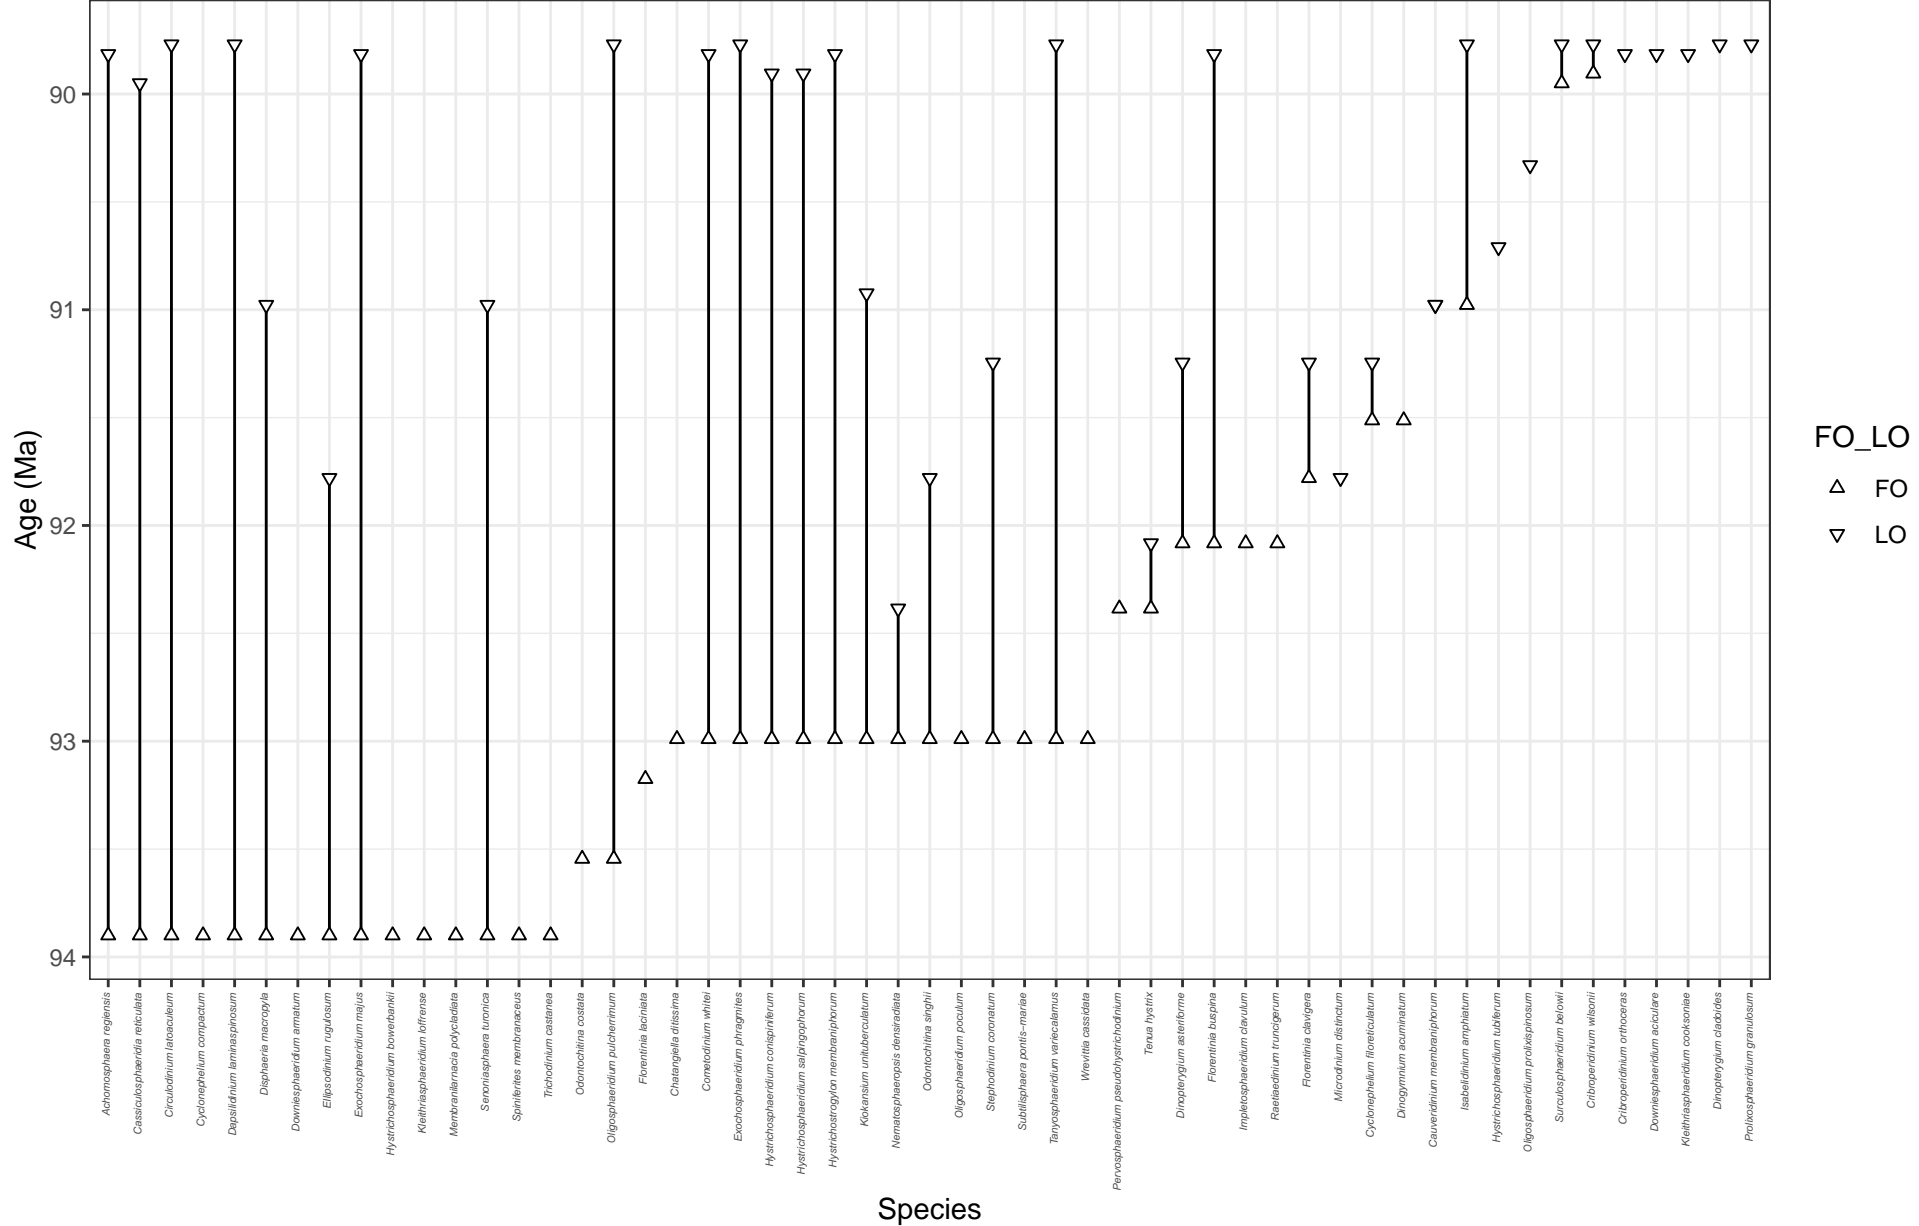

Supplement: Supplementary file 639 [file Site_Bohemain Basin.pdf › Supplement/Supplement 2/Sites 188 plots/Site_Bohemain Basin.pdf]

# Site

## Boom Doel

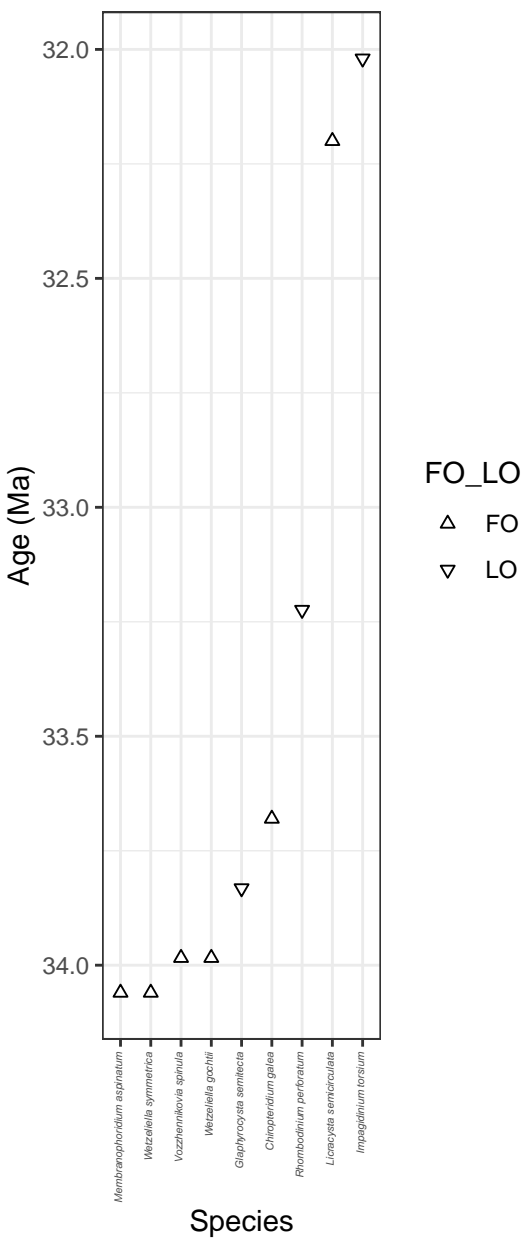

Supplement: Supplementary file 640 [file Site_Boom Doel.pdf › Supplement/Supplement 2/Sites 188 plots/Site_Boom Doel.pdf]

Site  
Bordeaux

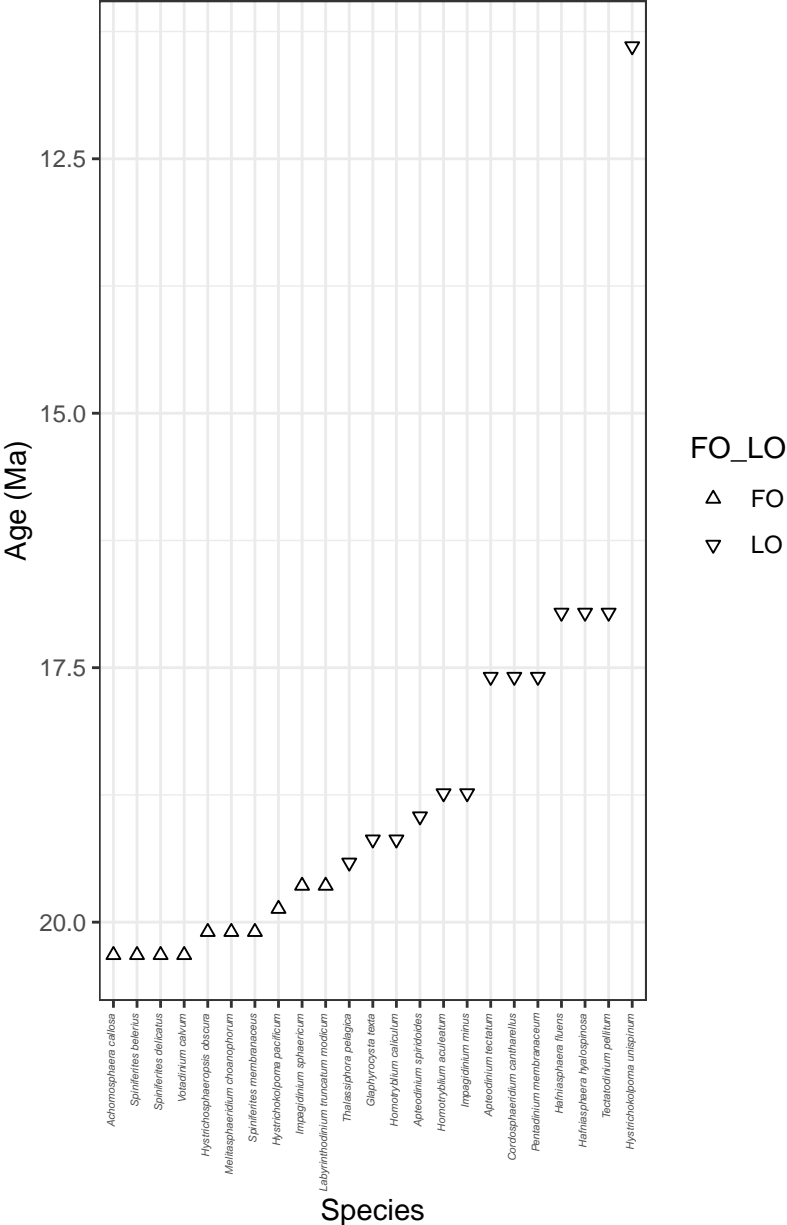

Supplement: Supplementary file 641 [file Site_Bordeaux.pdf › Supplement/Supplement 2/Sites 188 plots/Site_Bordeaux.pdf]

# Site

Borneo

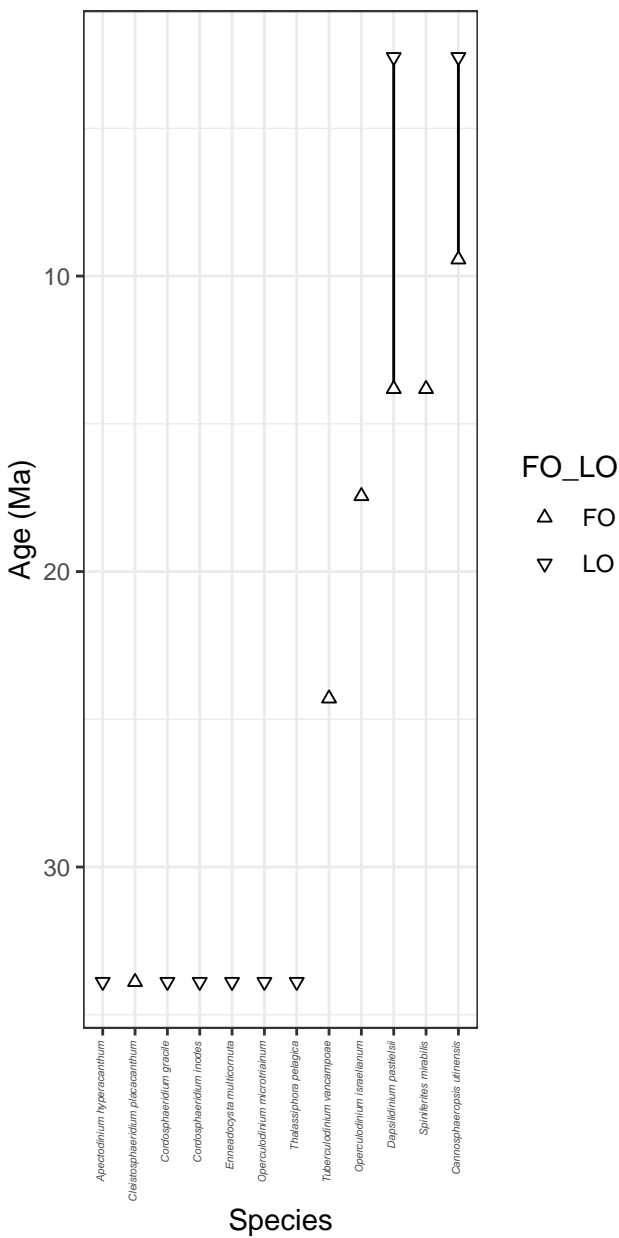

Supplement: Supplementary file 642 [file Site_Borneo.pdf › Supplement/Supplement 2/Sites 188 plots/Site_Borneo.pdf]

Site  
Boyarka

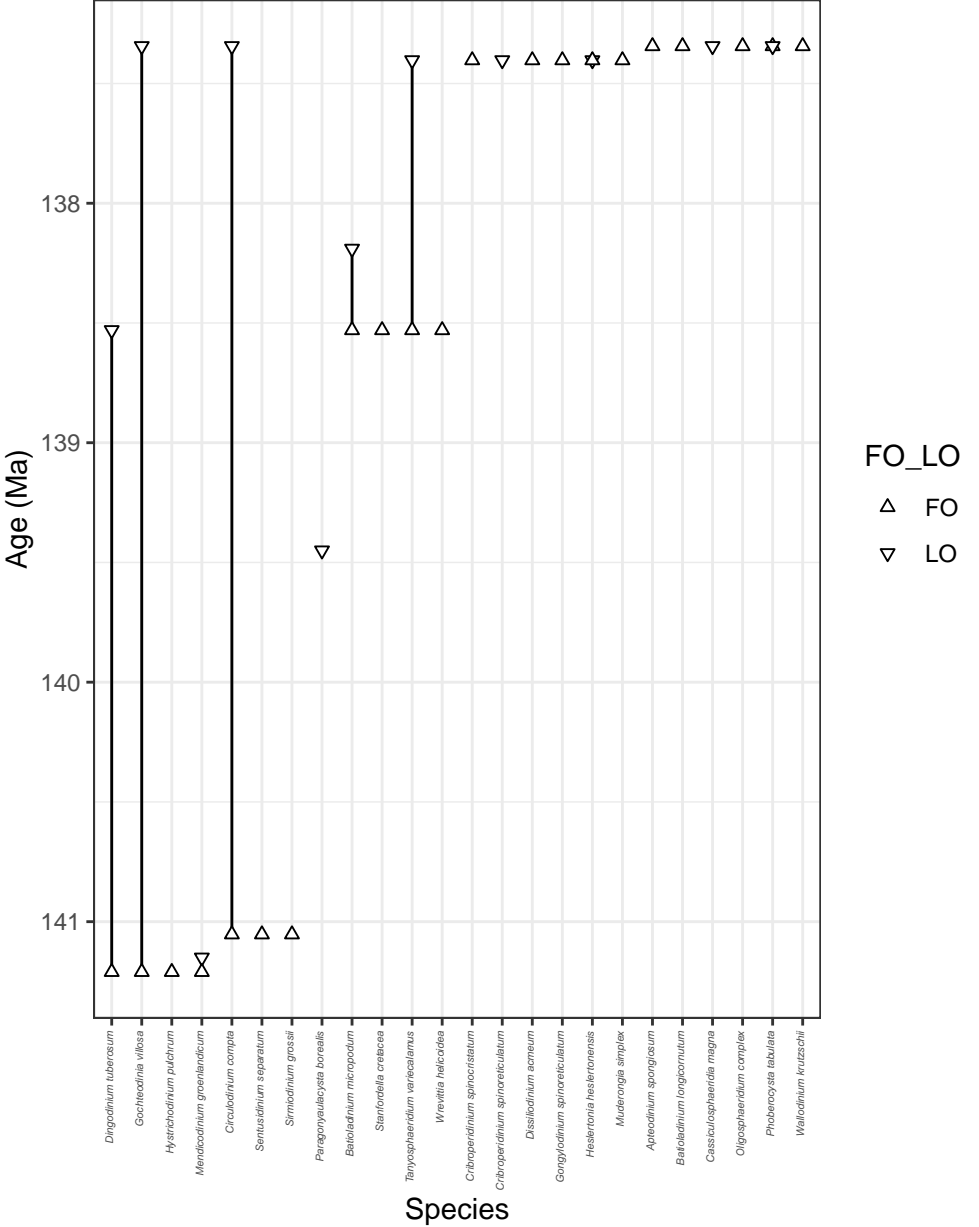

Supplement: Supplementary file 643 [file Site_Boyarka.pdf › Supplement/Supplement 2/Sites 188 plots/Site_Boyarka.pdf]

Site

Broyon

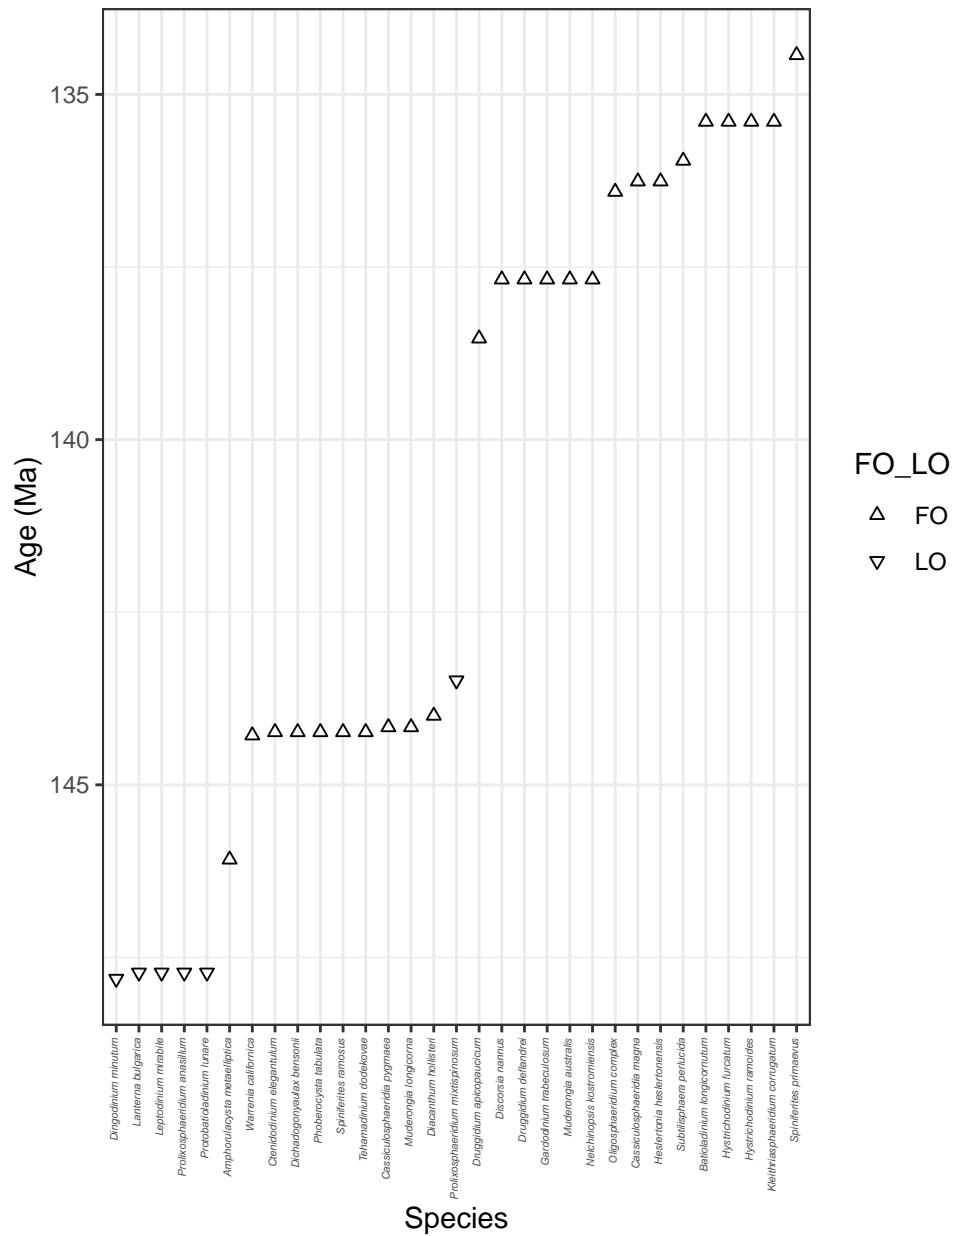

Supplement: Supplementary file 644 [file Site_Broyon.pdf › Supplement/Supplement 2/Sites 188 plots/Site_Broyon.pdf]

# Site

Buenaventura 1–ST–P

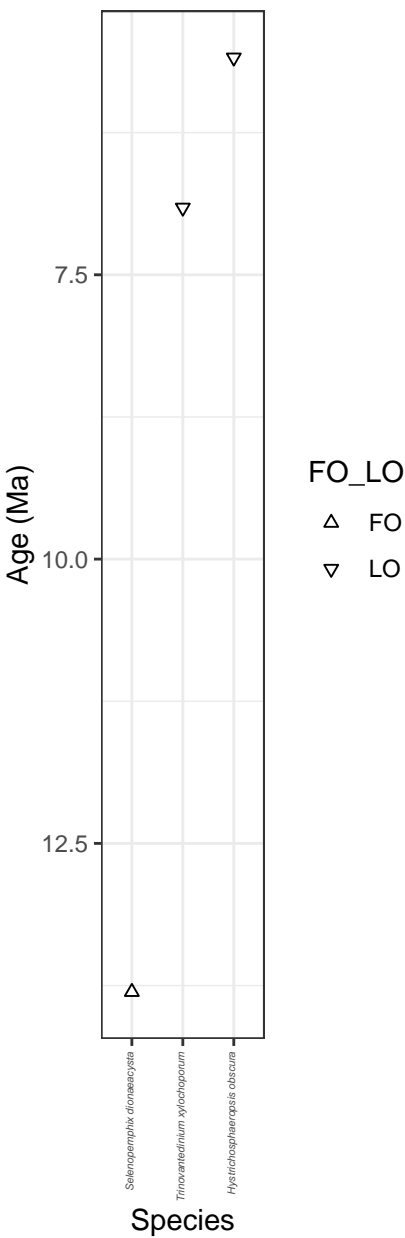

Supplement: Supplementary file 645 [file Site_Buenaventura 1-ST-P.pdf › Supplement/Supplement 2/Sites 188 plots/Site_Buenaventura 1-ST-P.pdf]

# Site

## Bulgaria

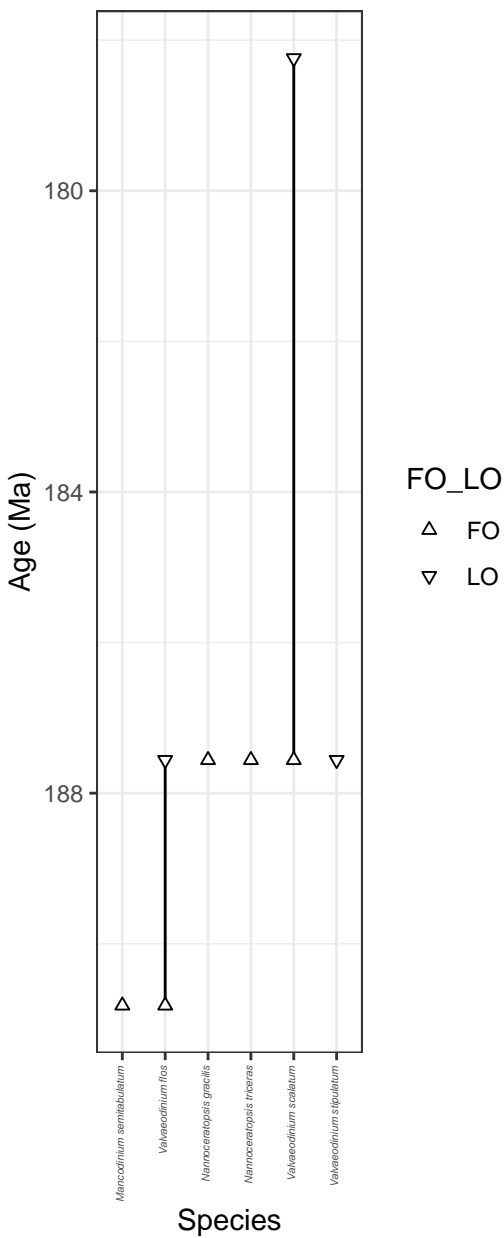

Supplement: Supplementary file 646 [file Site_Bulgaria.pdf › Supplement/Supplement 2/Sites 188 plots/Site_Bulgaria.pdf]

Site

Cabo Mondego

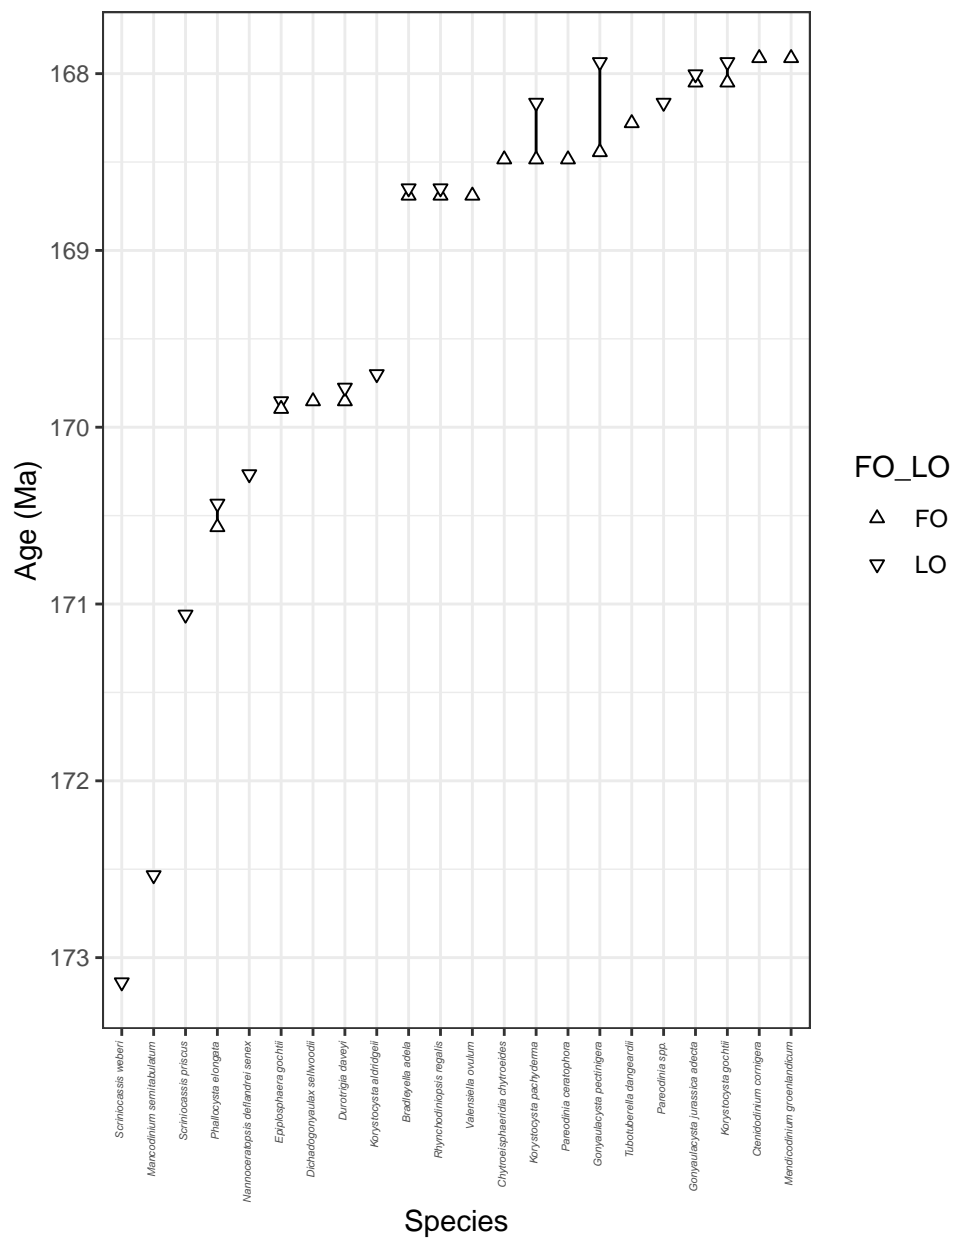

Supplement: Supplementary file 647 [file Site_Cabo Mondego.pdf › Supplement/Supplement 2/Sites 188 plots/Site_Cabo Mondego.pdf]

# Site

## Calvados

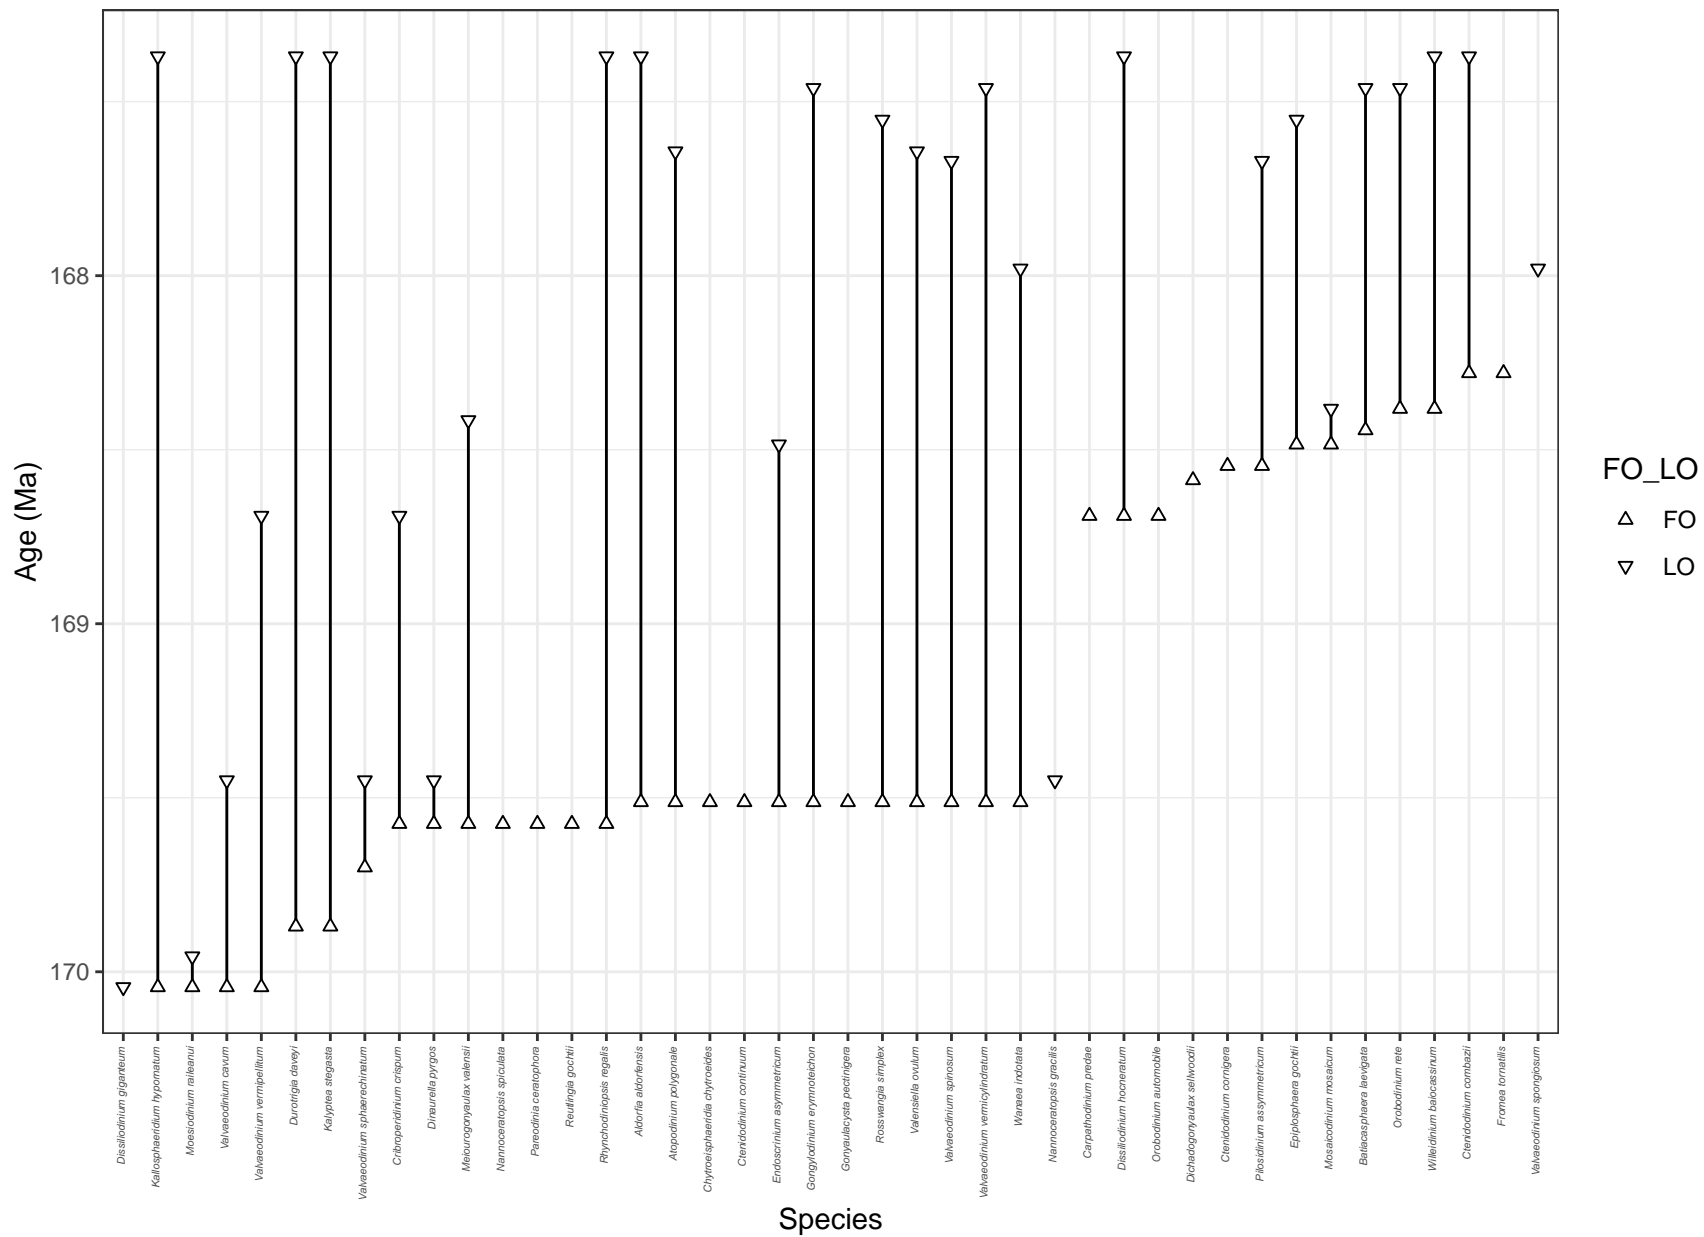

Supplement: Supplementary file 648 [file Site_Calvados.pdf › Supplement/Supplement 2/Sites 188 plots/Site_Calvados.pdf]

Site  
Central Danish Trough

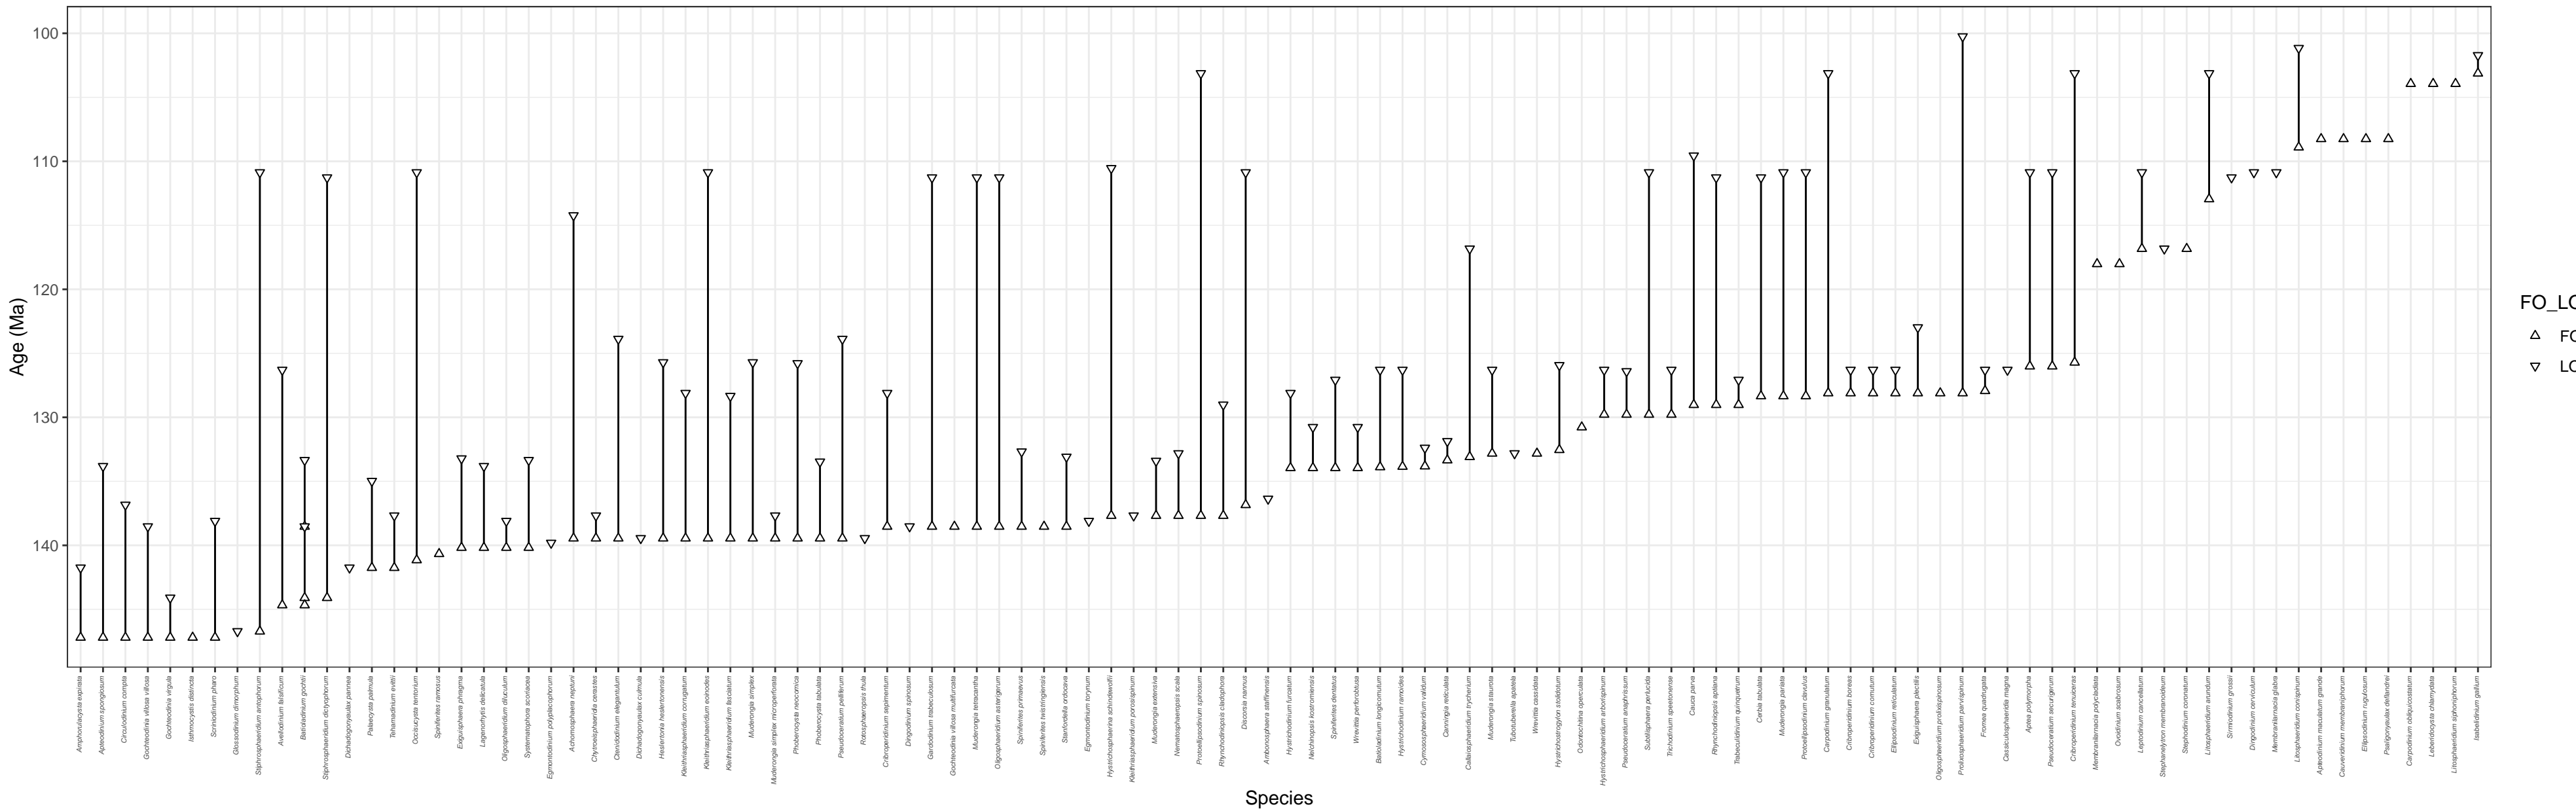

Supplement: Supplementary file 649 [file Site_Central Danish Trough.pdf › Supplement/Supplement 2/Sites 188 plots/Site_Central Danish Trough.pdf]

# Site

## Central Italy

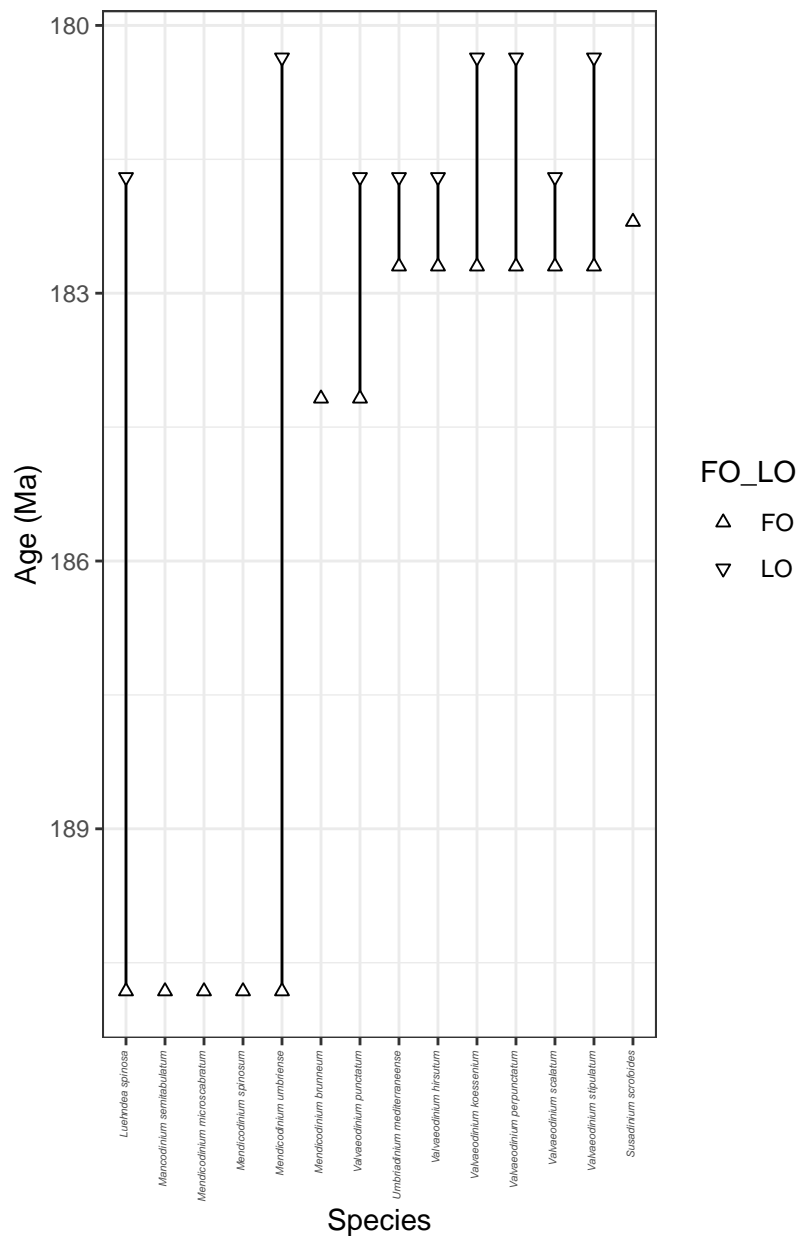

Supplement: Supplementary file 650 [file Site_Central Italy.pdf › Supplement/Supplement 2/Sites 188 plots/Site_Central Italy.pdf]

Site  
Central North Sea

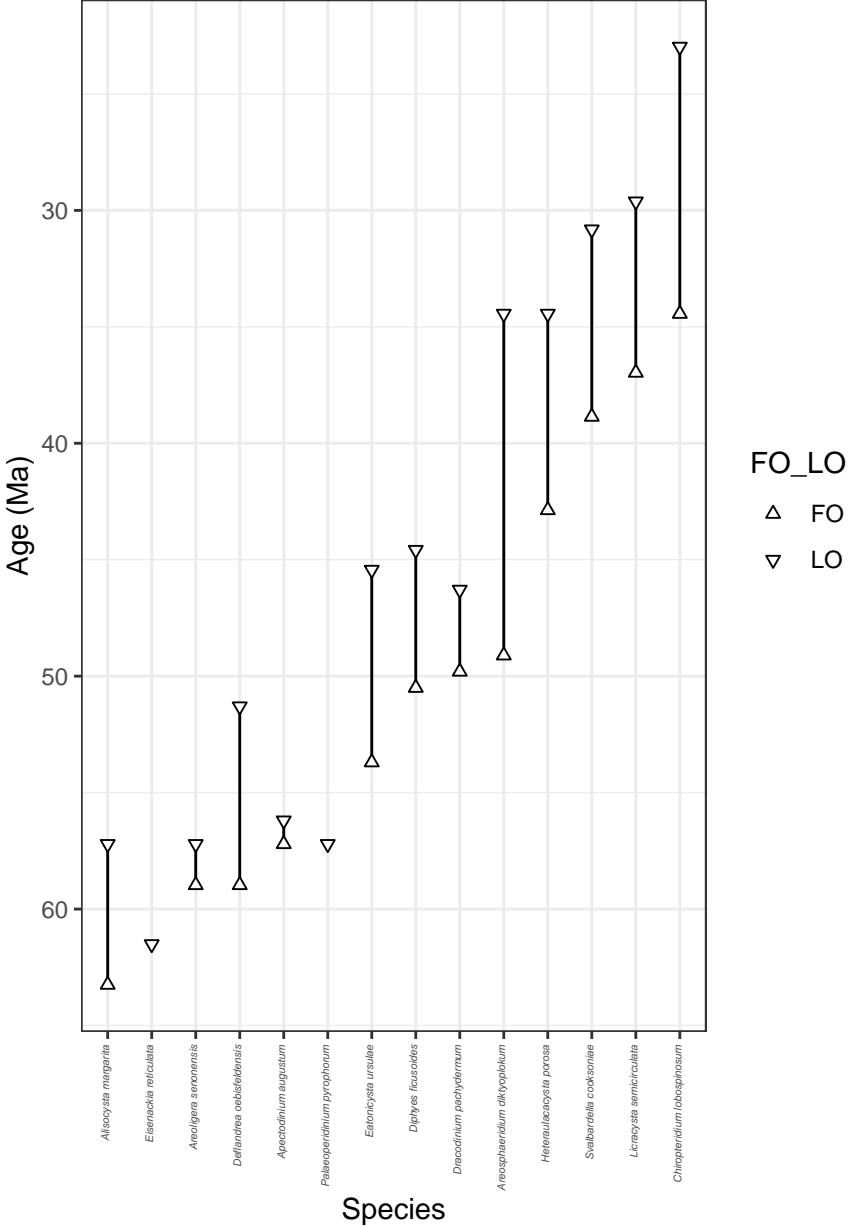

Supplement: Supplementary file 651 [file Site_Central North Sea.pdf › Supplement/Supplement 2/Sites 188 plots/Site_Central North Sea.pdf]

# Site

## Chesapeak Bay

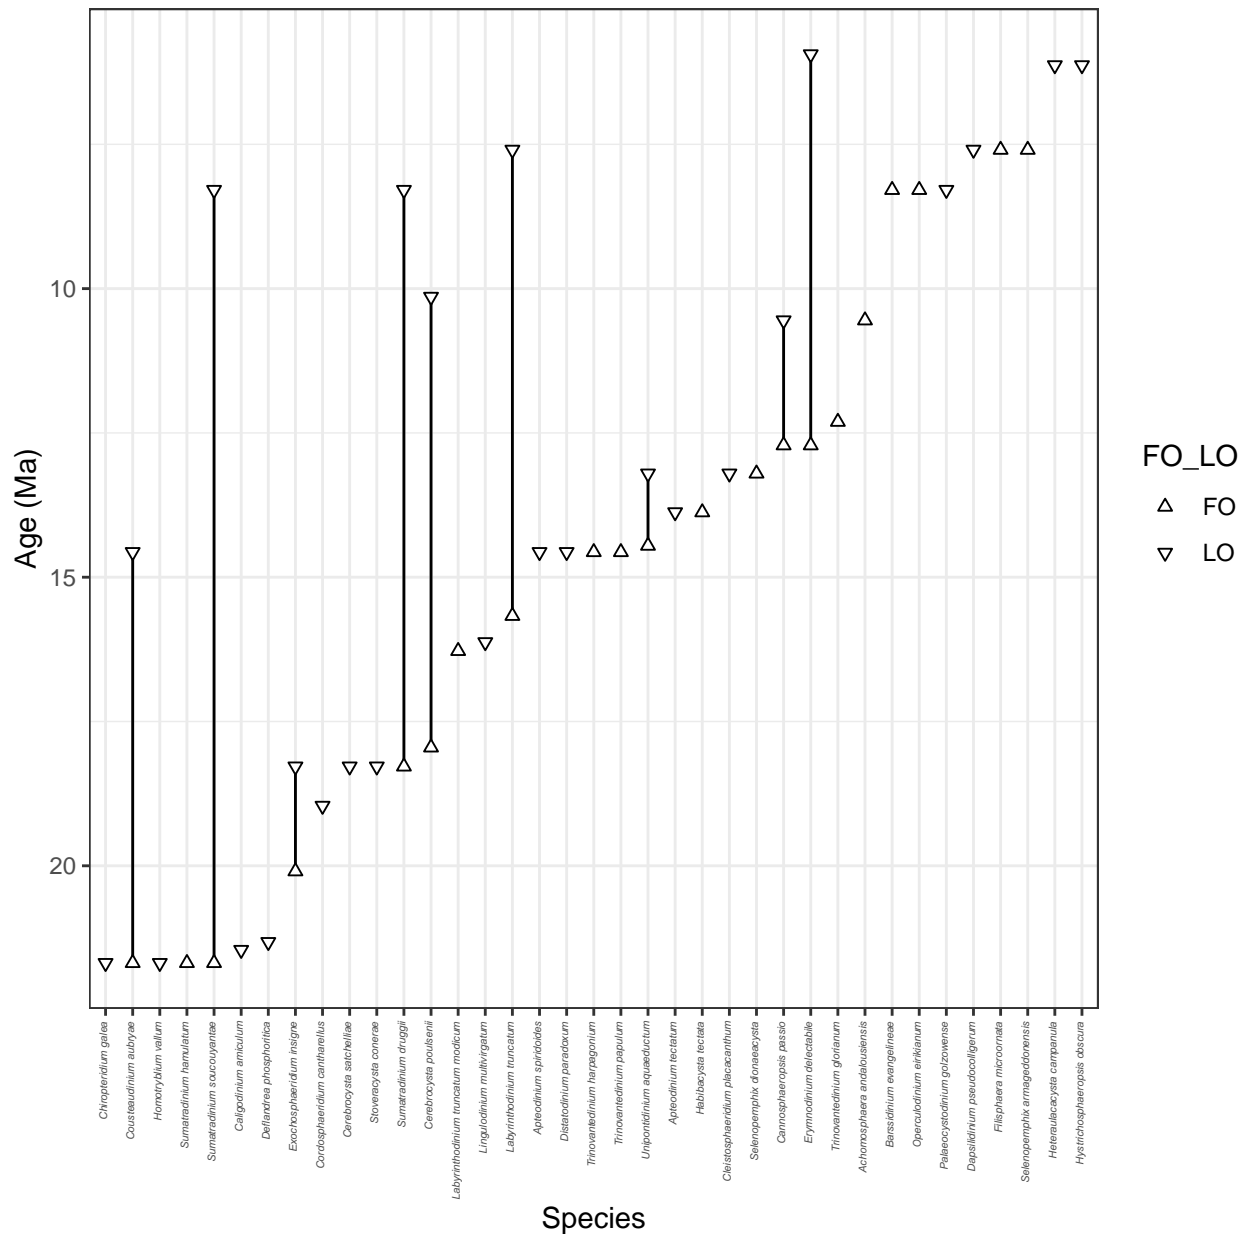

Supplement: Supplementary file 652 [file Site_Chesapeak Bay.pdf › Supplement/Supplement 2/Sites 188 plots/Site_Chesapeak Bay.pdf]

# Site

## Contessa

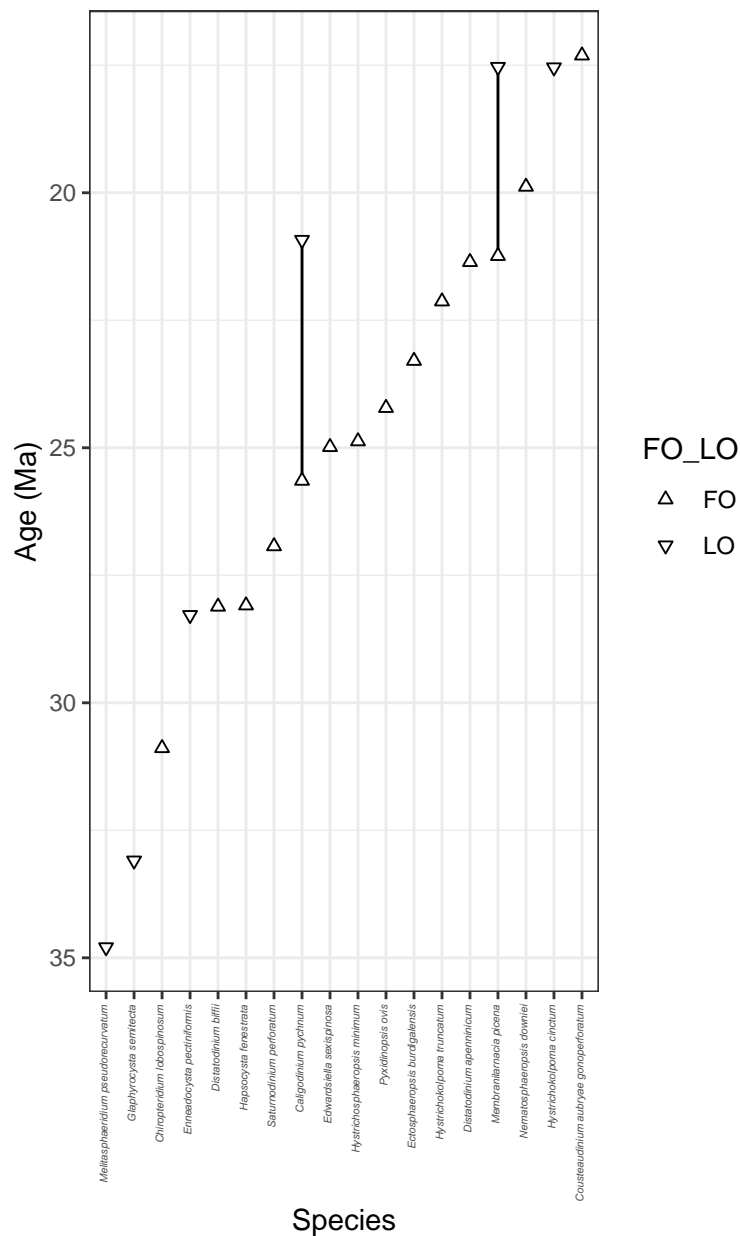

Supplement: Supplementary file 653 [file Site_Contessa.pdf › Supplement/Supplement 2/Sites 188 plots/Site_Contessa.pdf]

# Site

## Cordebugle

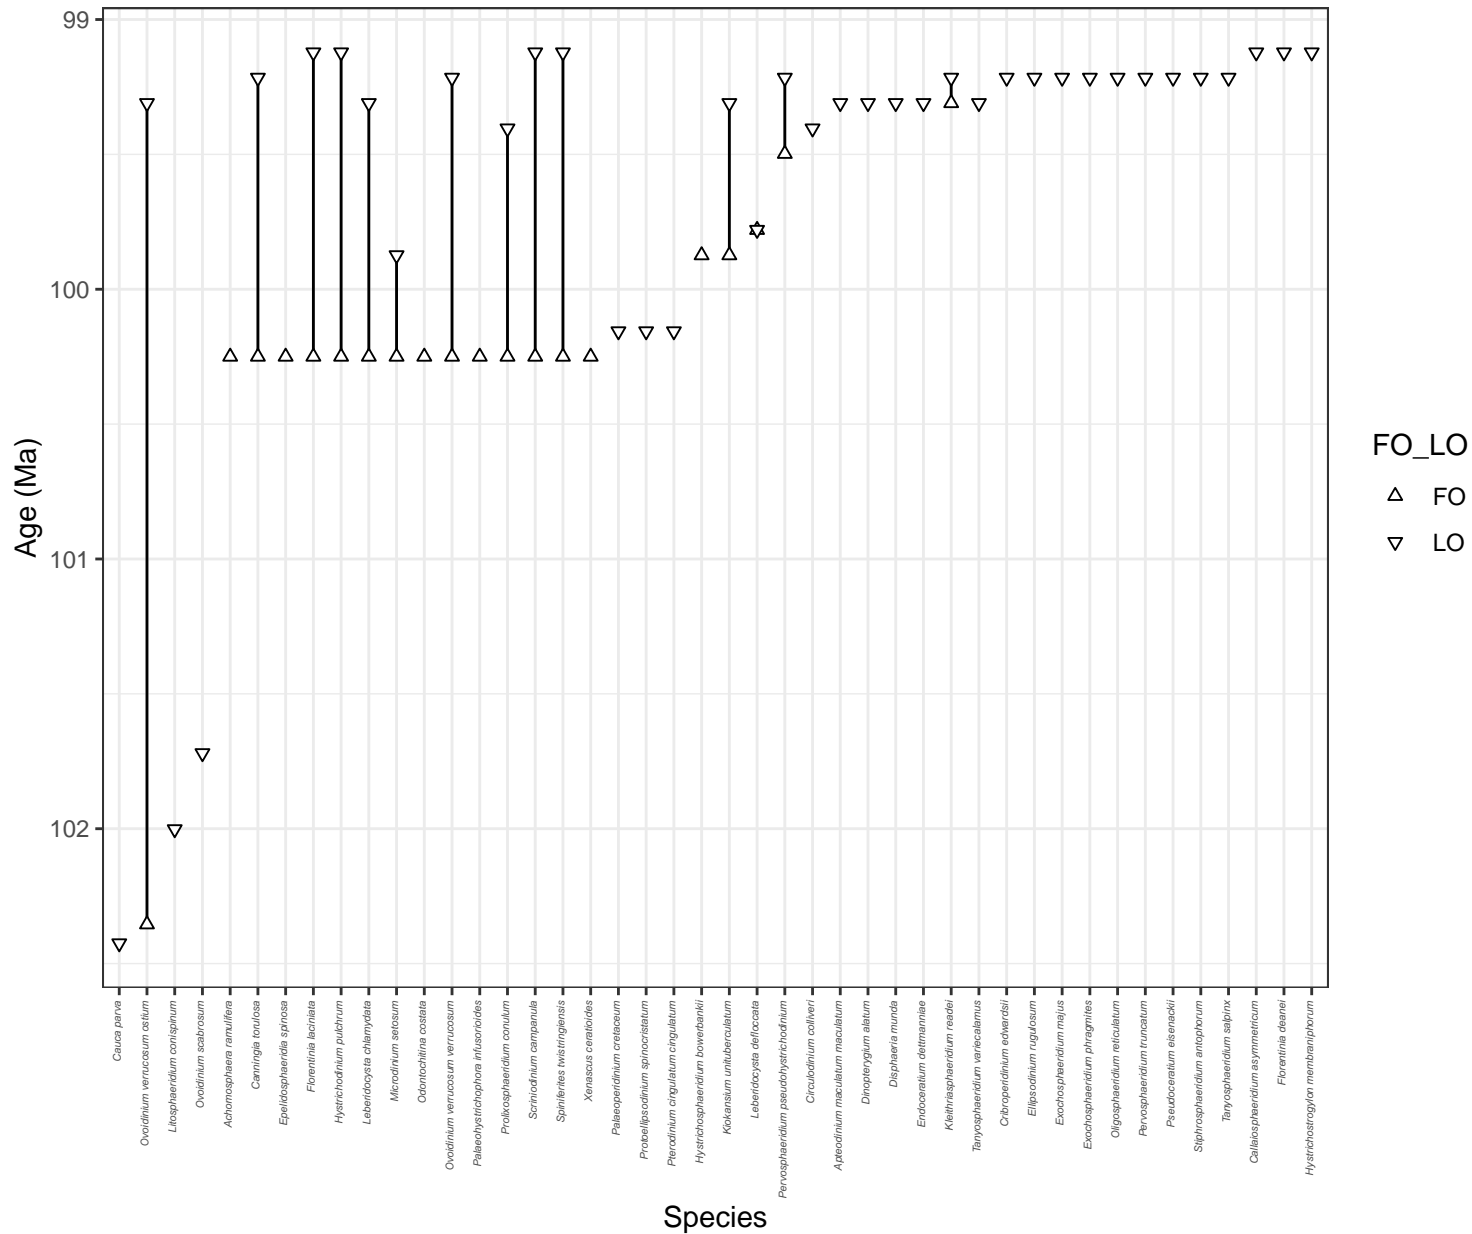

Supplement: Supplementary file 654 [file Site_Cordebugle.pdf › Supplement/Supplement 2/Sites 188 plots/Site_Cordebugle.pdf]

# Site

## Cuacacus

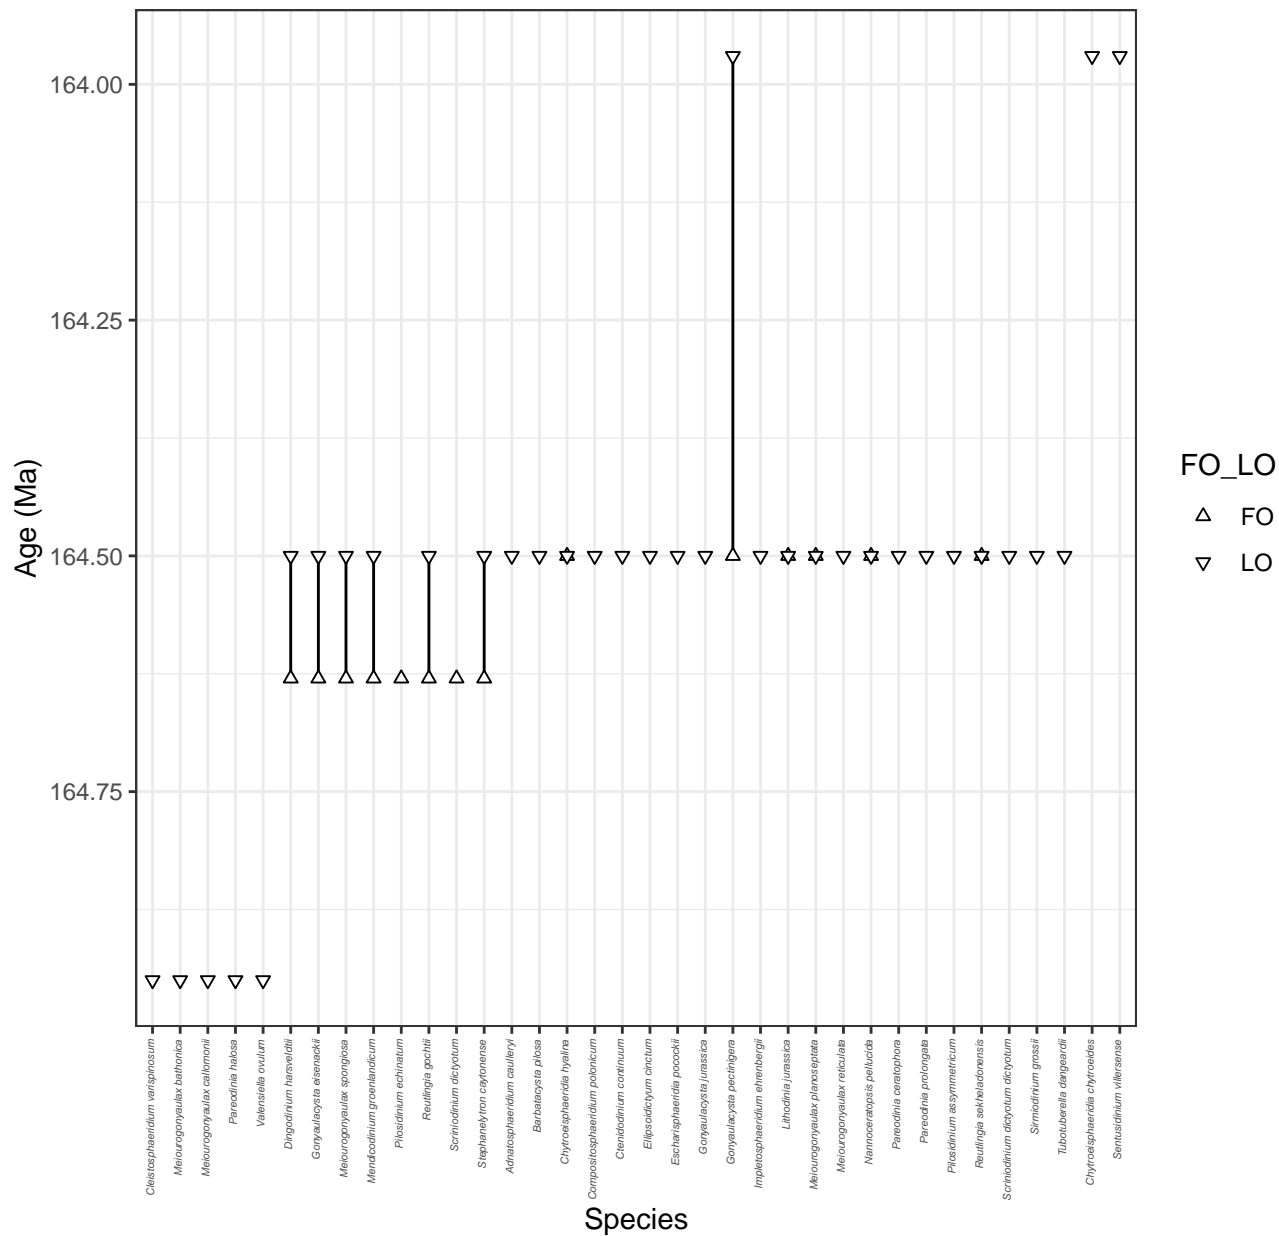

Supplement: Supplementary file 655 [file Site_Cuacasus.pdf › Supplement/Supplement 2/Sites 188 plots/Site_Cuacasus.pdf]

Site  
Czestochowa

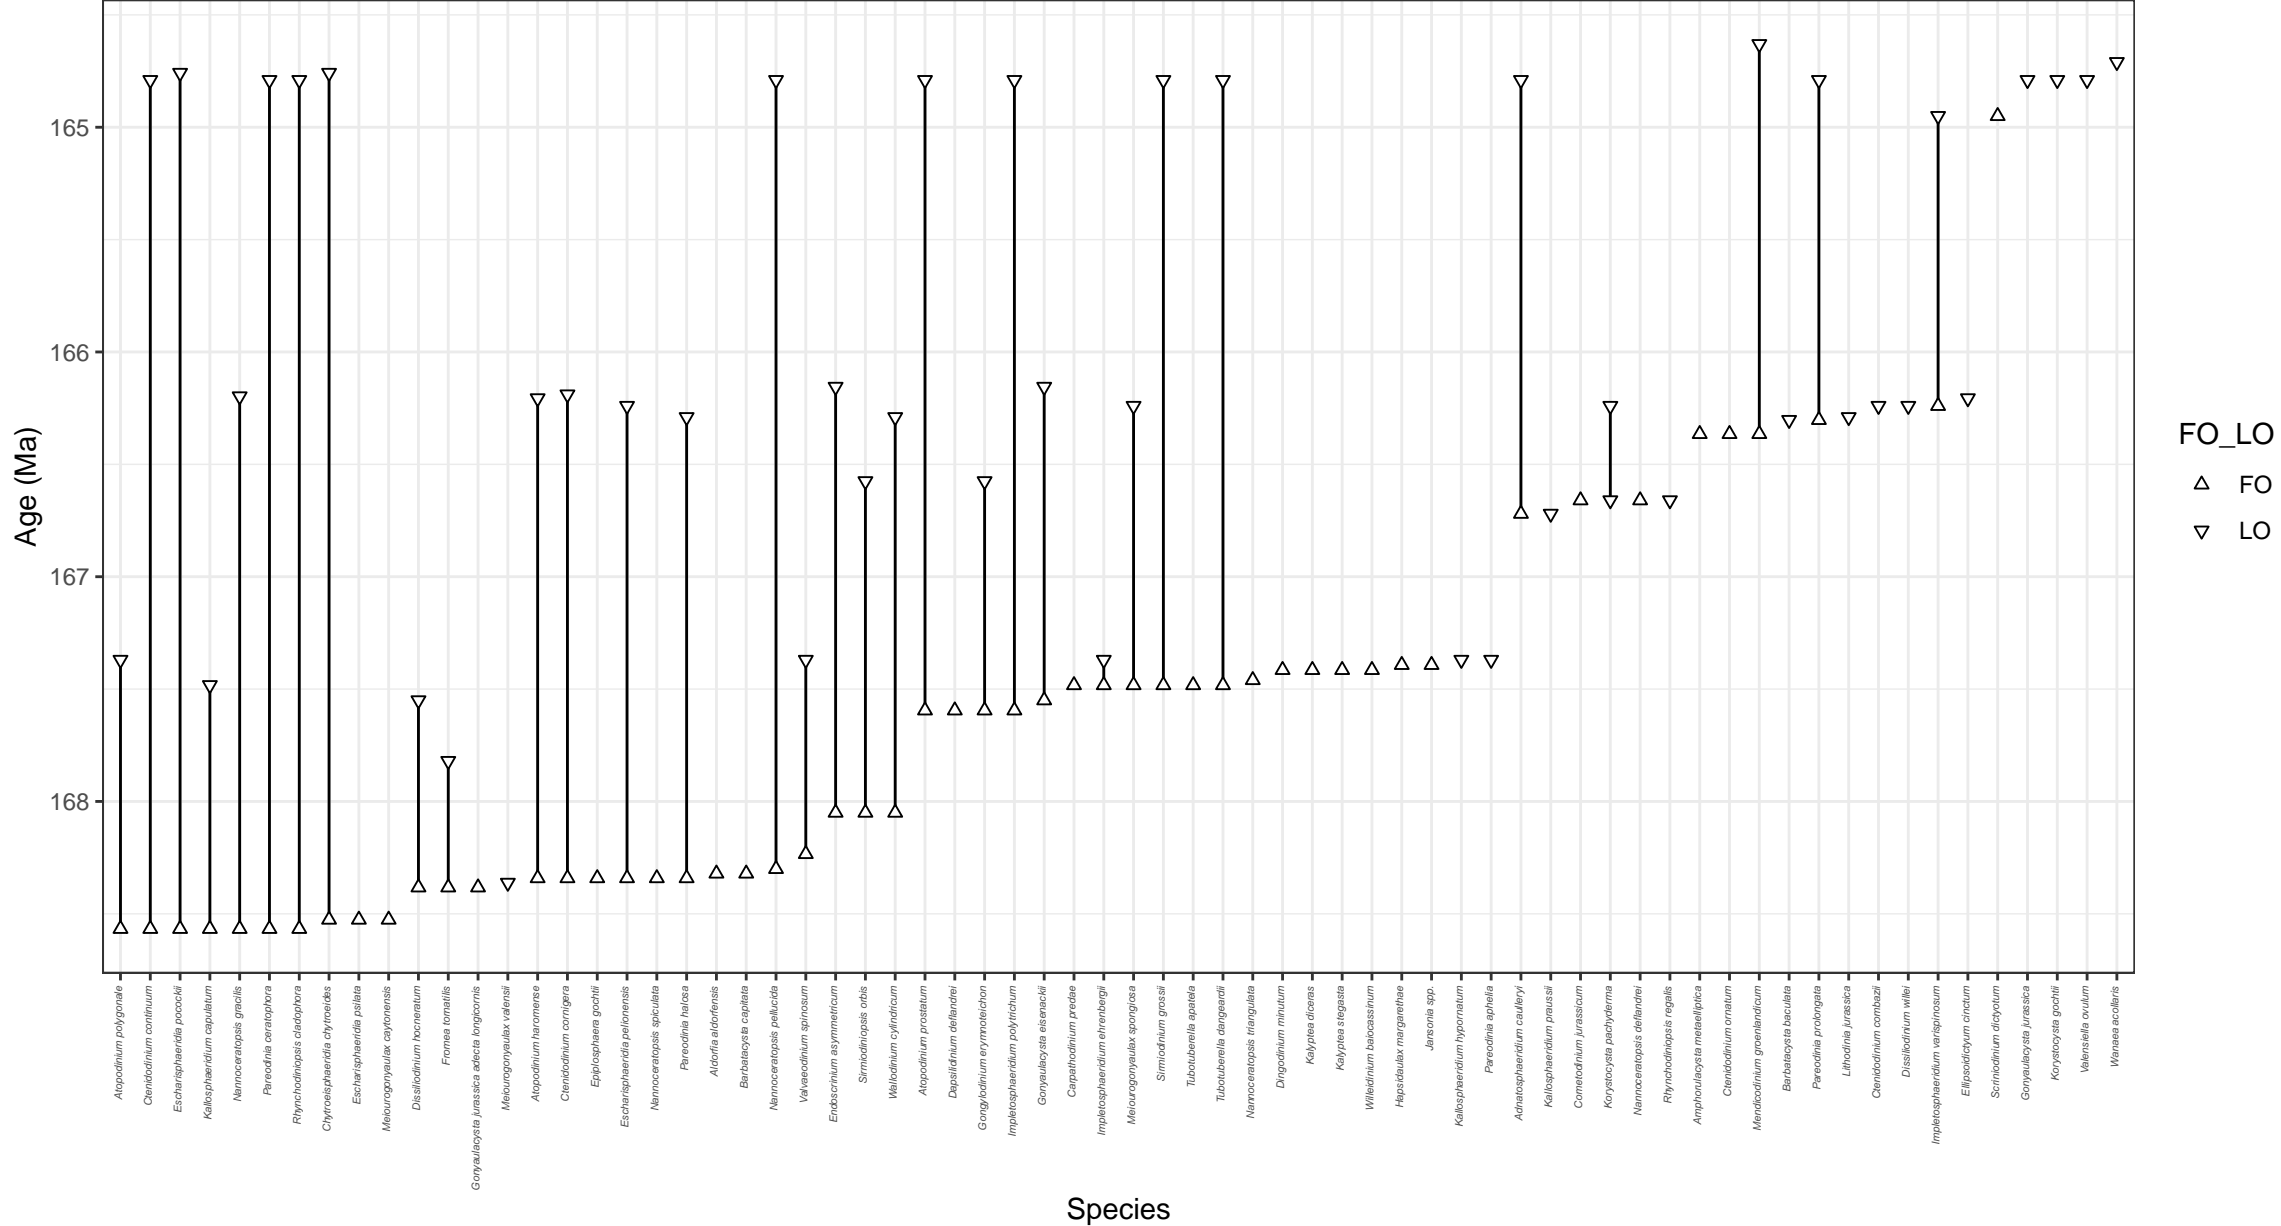

Supplement: Supplementary file 656 [file Site_Czestochowa.pdf › Supplement/Supplement 2/Sites 188 plots/Site_Czestochowa.pdf]

Site

DSDP 1–6

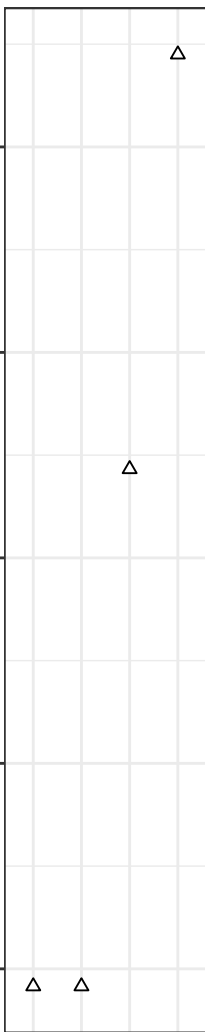

FO\_LO

Δ

FO

Species

Supplement: Supplementary file 657 [file Site_DSDP 1-6.pdf › Supplement/Supplement 2/Sites 188 plots/Site_DSDP 1-6.pdf]

# Site

Dan Field

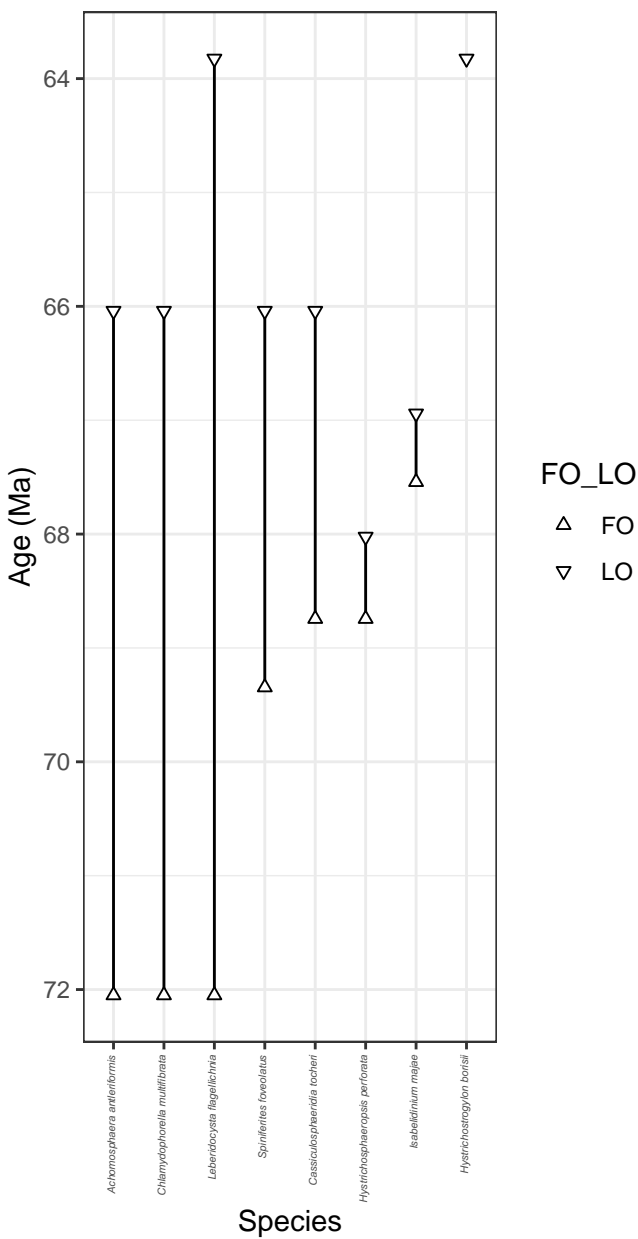

Supplement: Supplementary file 658 [file Site_Dan Field.pdf › Supplement/Supplement 2/Sites 188 plots/Site_Dan Field.pdf]

Site

Denmark1

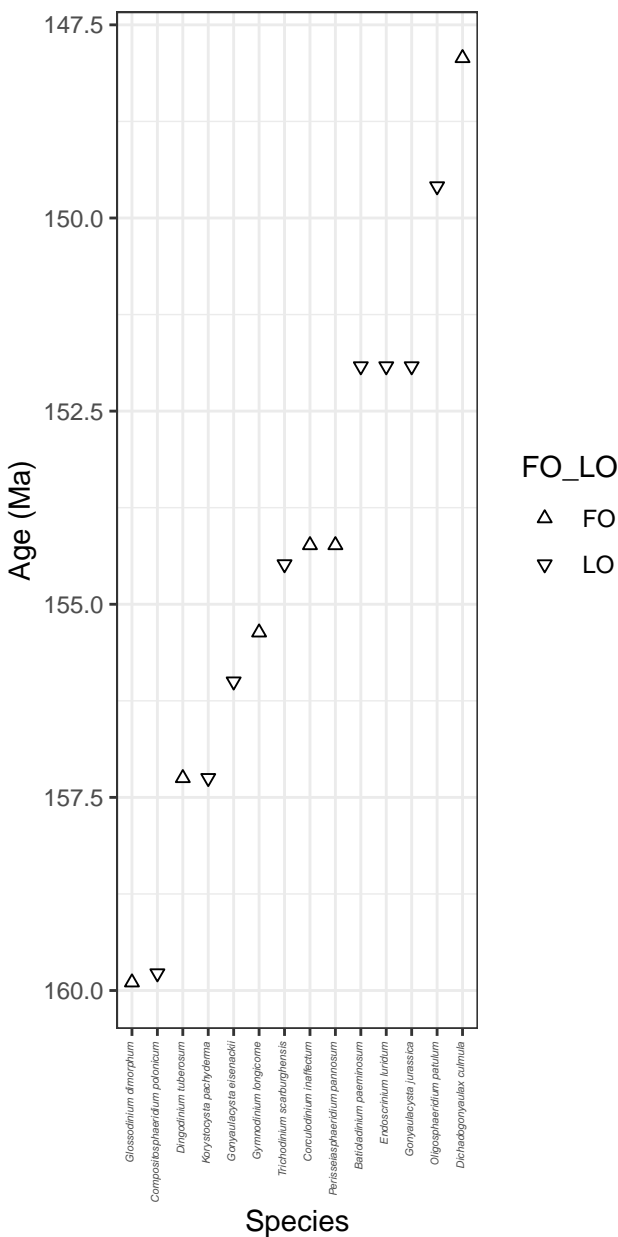

Supplement: Supplementary file 659 [file Site_Denmark1.pdf › Supplement/Supplement 2/Sites 188 plots/Site_Denmark1.pdf]

Site  
Denmark2

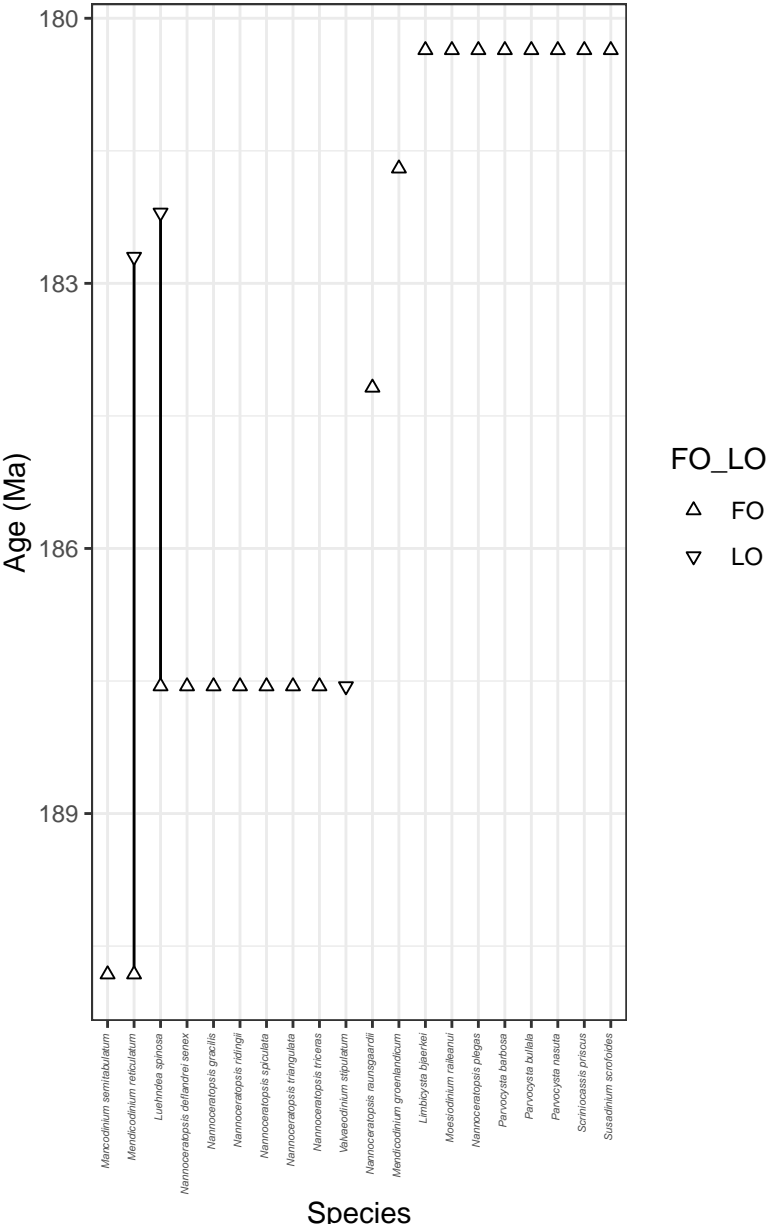

Supplement: Supplementary file 660 [file Site_Denmark2.pdf › Supplement/Supplement 2/Sites 188 plots/Site_Denmark2.pdf]

# Site

## Denmark3

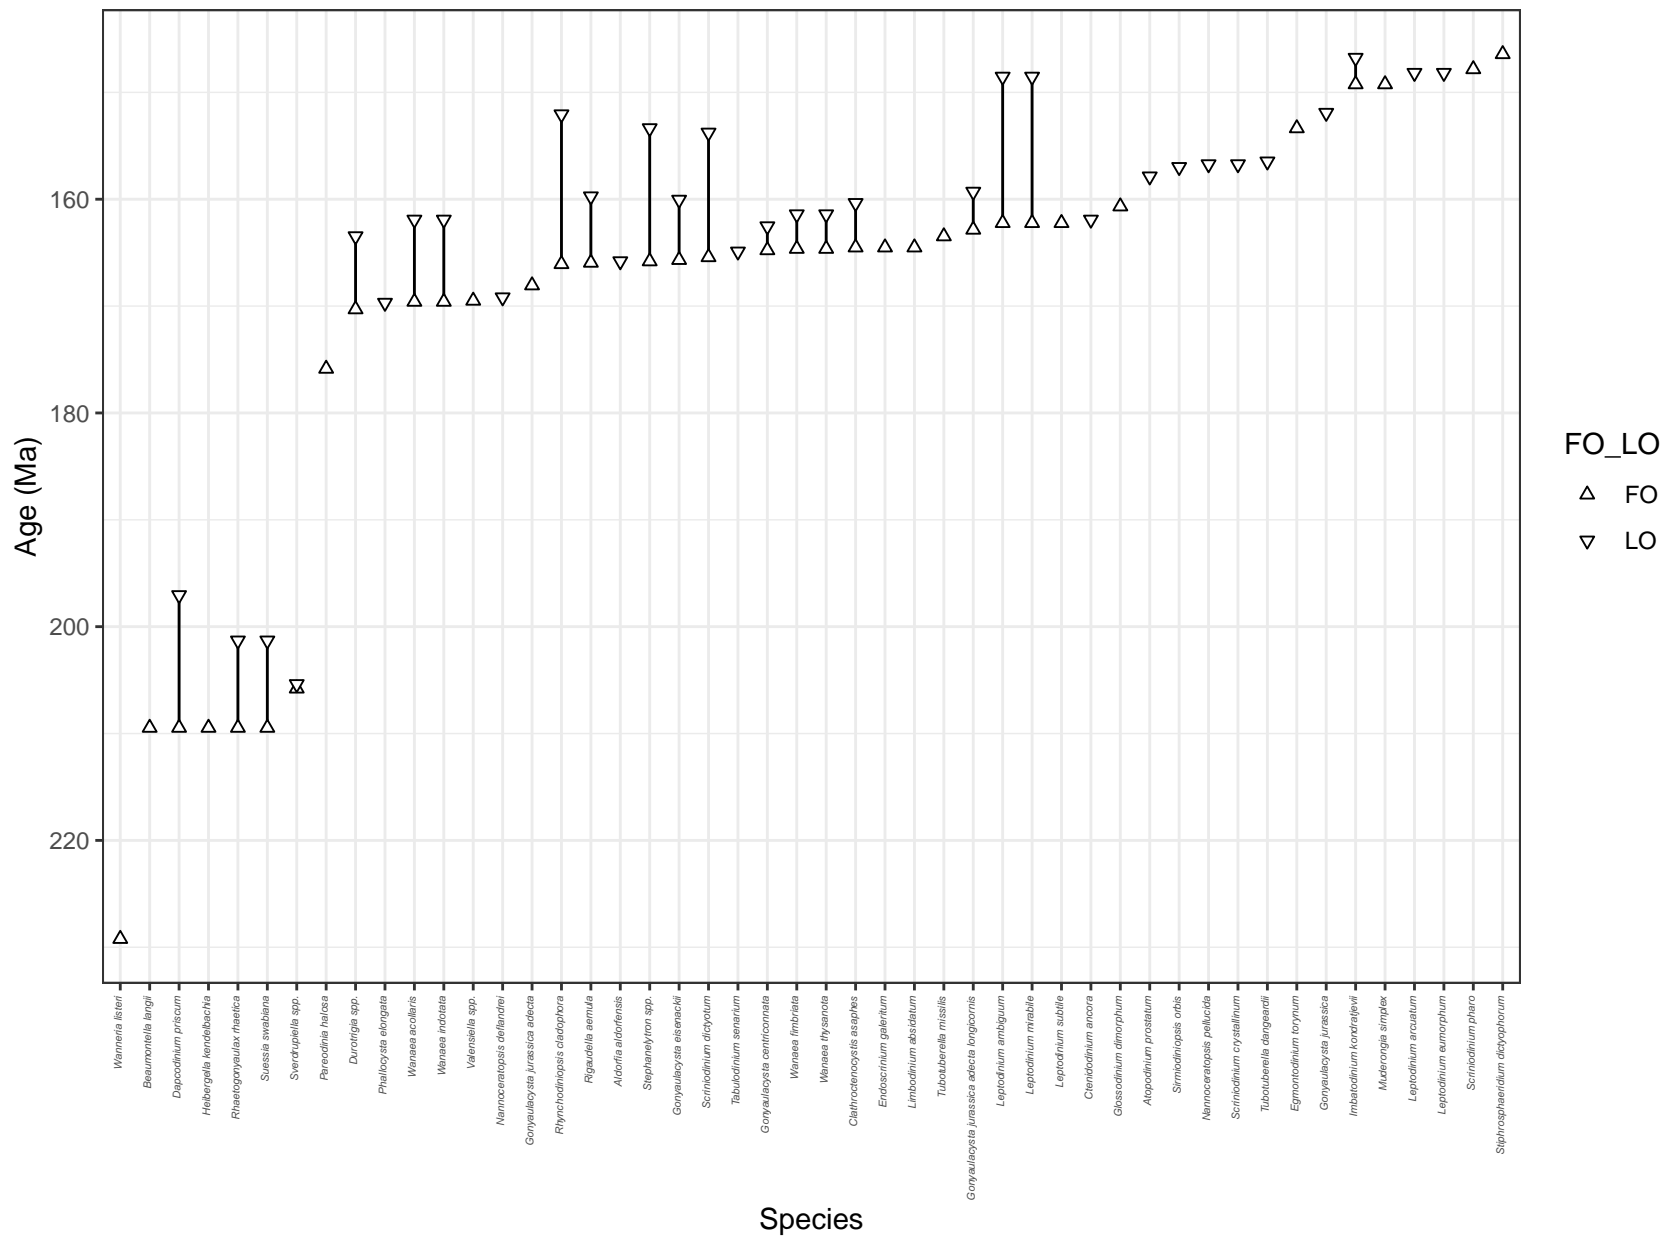

Supplement: Supplementary file 661 [file Site_Denmark3.pdf › Supplement/Supplement 2/Sites 188 plots/Site_Denmark3.pdf]

Site  
Disko

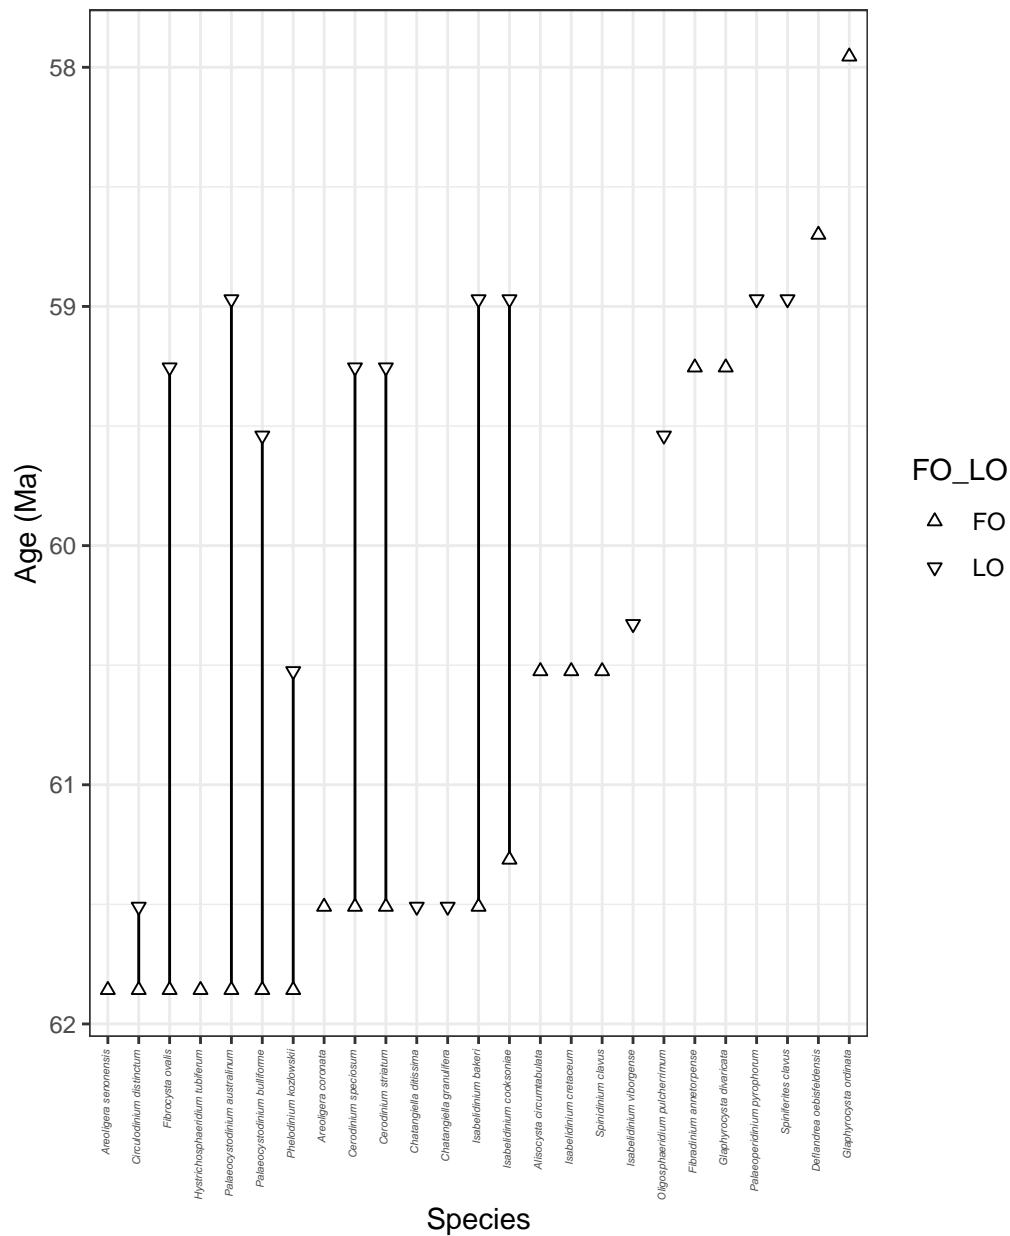

Supplement: Supplementary file 662 [file Site_Disko.pdf › Supplement/Supplement 2/Sites 188 plots/Site_Disko.pdf]

Site

Doel

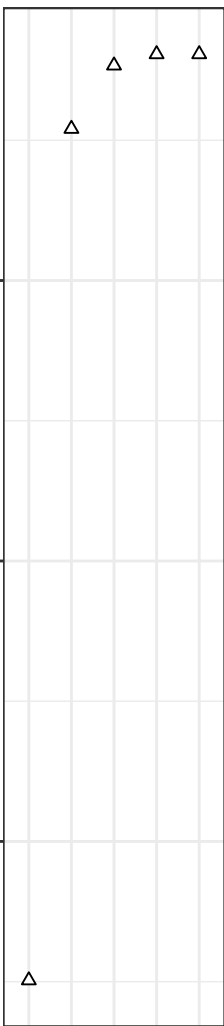

FO\_LO

△

LO

Age (Ma)

Species

Supplement: Supplementary file 663 [file Site_Doel.pdf › Supplement/Supplement 2/Sites 188 plots/Site_Doel.pdf]

Site  
Dorset–Yorkshire

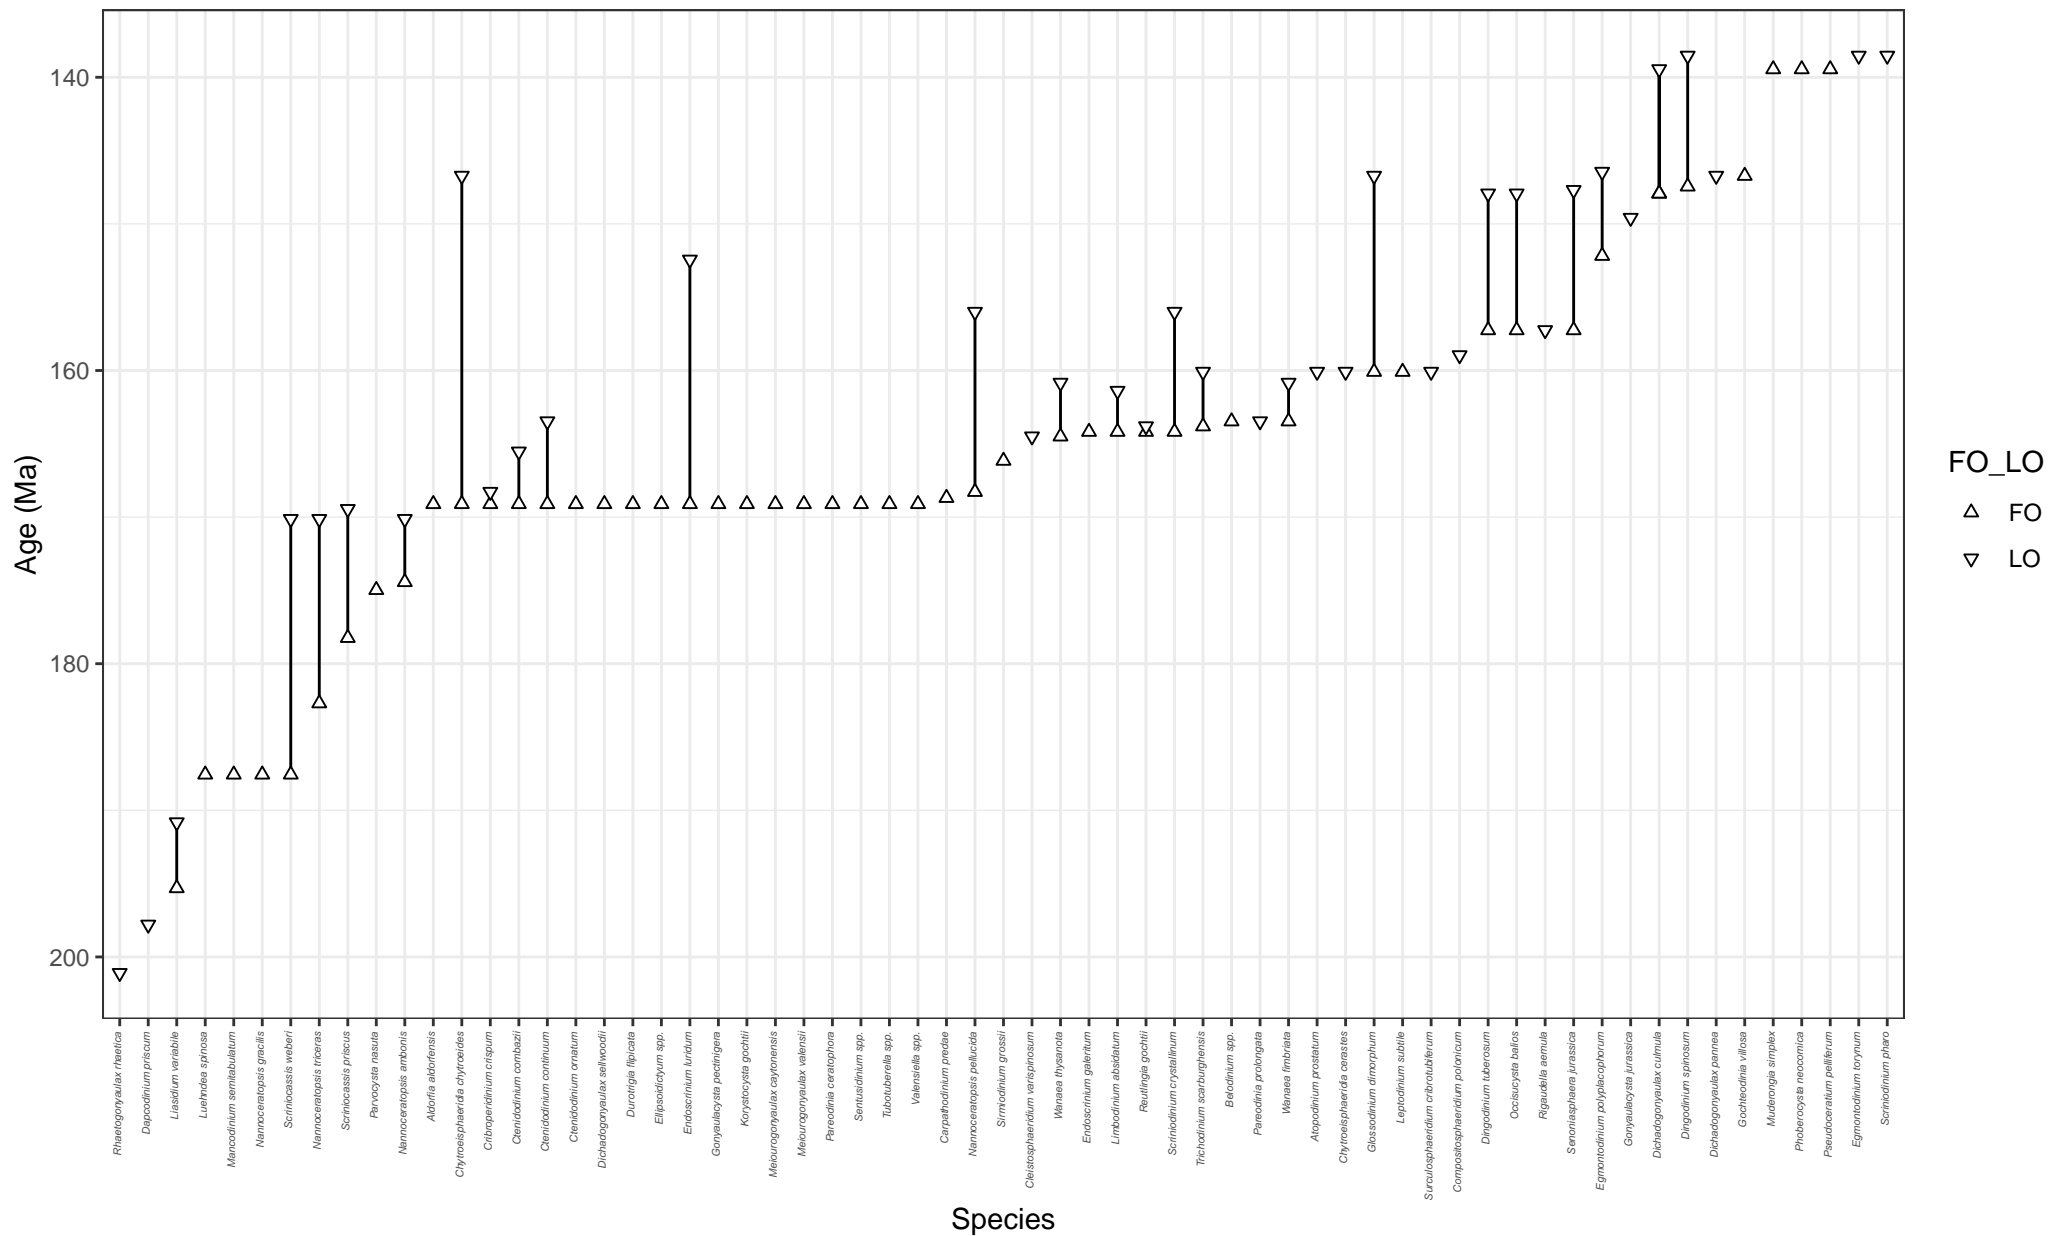

Supplement: Supplementary file 664 [file Site_Dorset-Yorkshire.pdf › Supplement/Supplement 2/Sites 188 plots/Site_Dorset-Yorkshire.pdf]

# Site

## E67-135

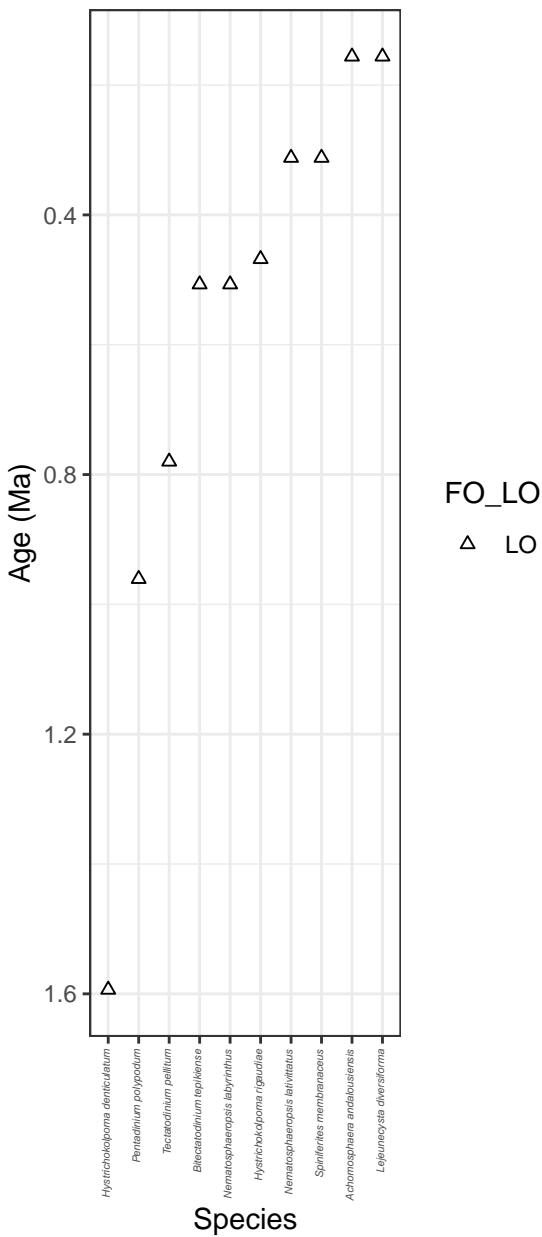

Supplement: Supplementary file 666 [file Site_E67-135.pdf › Supplement/Supplement 2/Sites 188 plots/Site_E67-135.pdf]

Site

El Kef

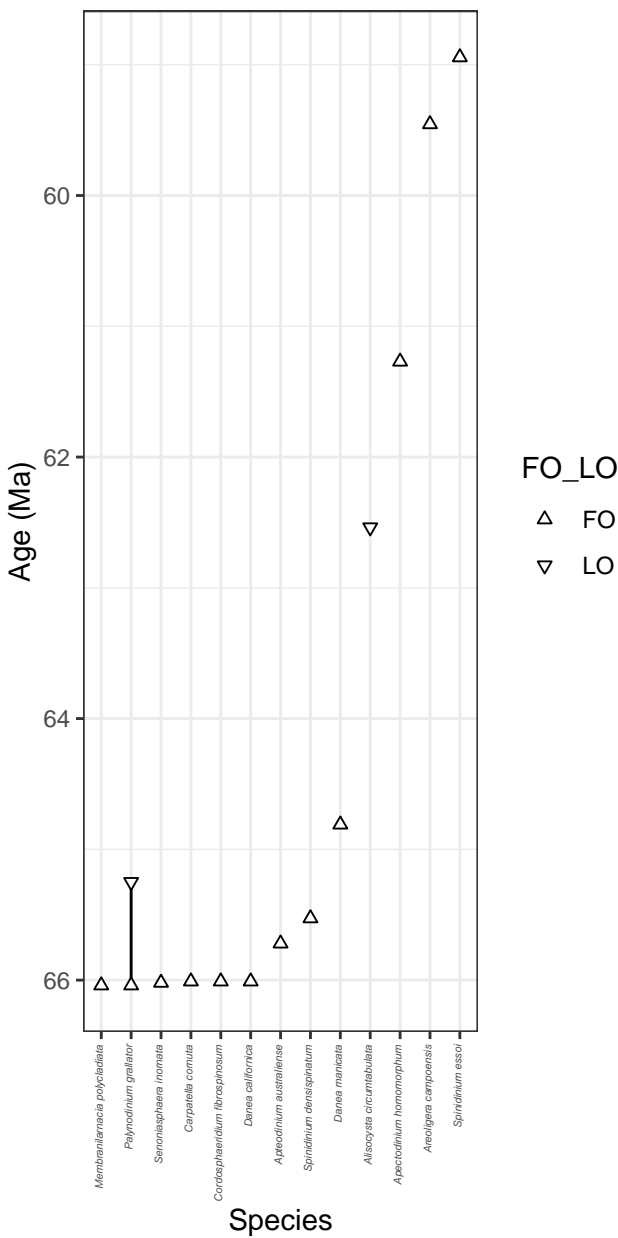

Supplement: Supplementary file 667 [file Site_El Kef.pdf › Supplement/Supplement 2/Sites 188 plots/Site_El Kef.pdf]

# Site

Europe compilation

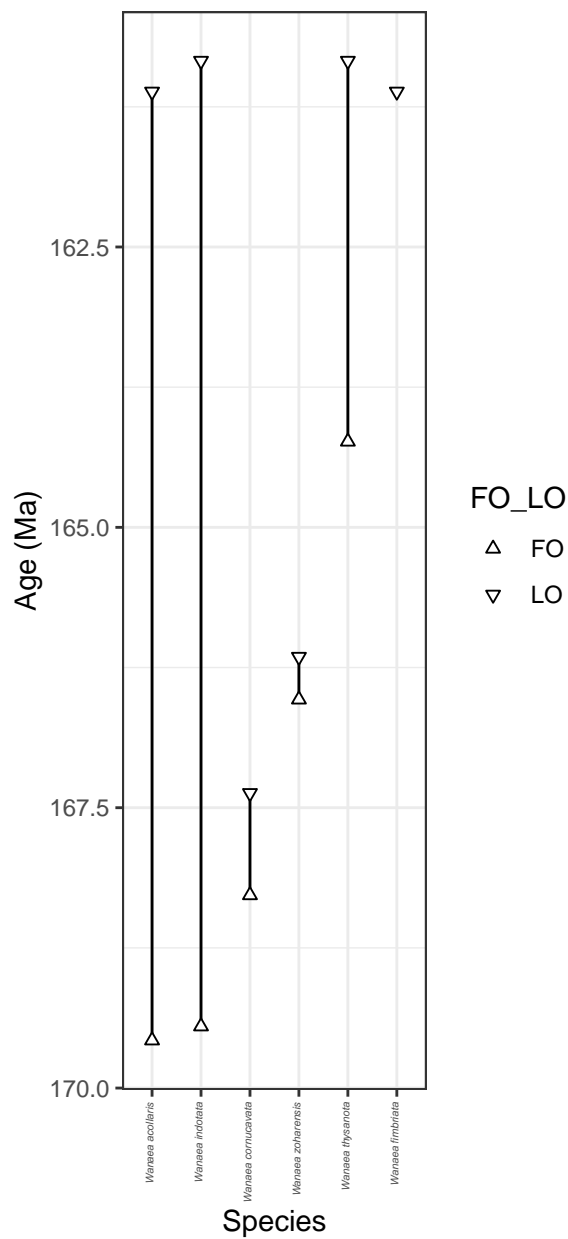

Supplement: Supplementary file 668 [file Site_Europe compilation.pdf › Supplement/Supplement 2/Sites 188 plots/Site_Europe compilation.pdf]

Site

Faroe-Shetland

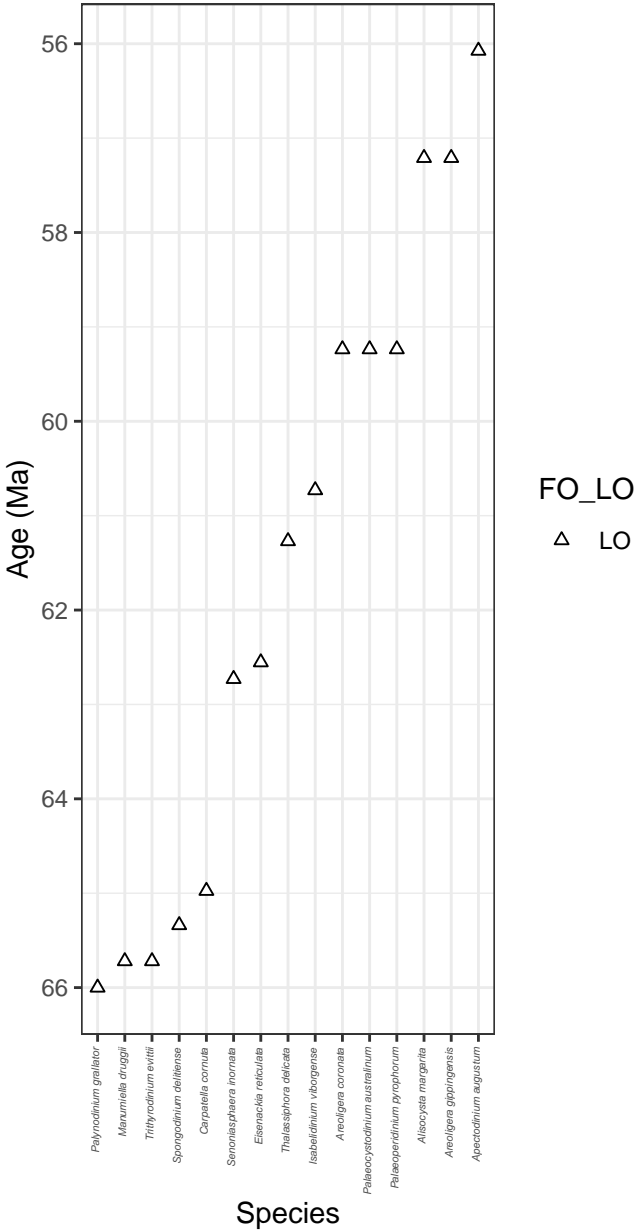

Supplement: Supplementary file 669 [file Site_Faroe-Shetland.pdf › Supplement/Supplement 2/Sites 188 plots/Site_Faroe-Shetland.pdf]

# Site

Fiumara Saraceno

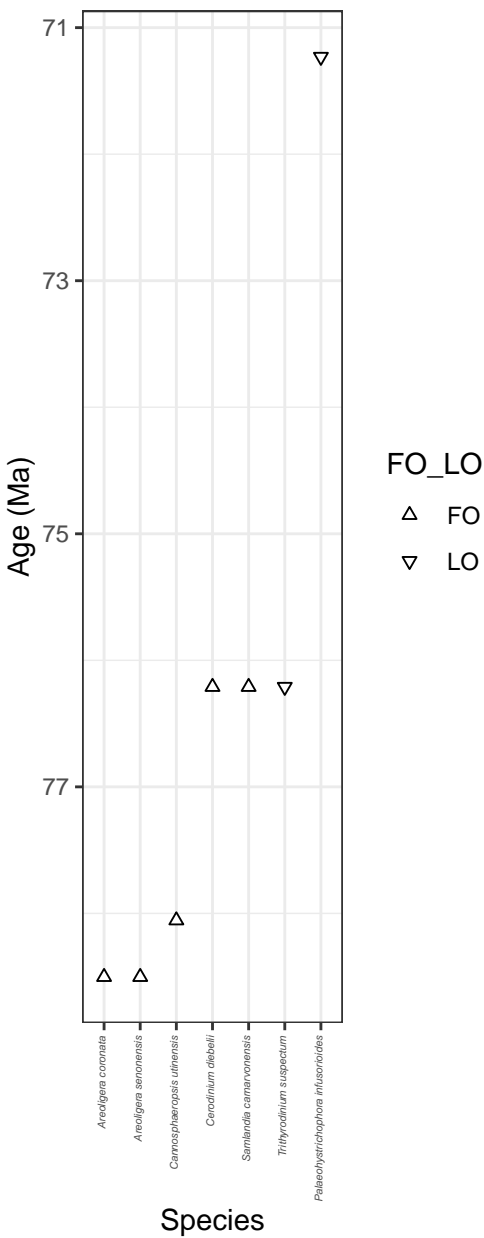

Supplement: Supplementary file 671 [file Site_Fiumara Saraceno.pdf › Supplement/Supplement 2/Sites 188 plots/Site_Fiumara Saraceno.pdf]

# Site

## Fumichon

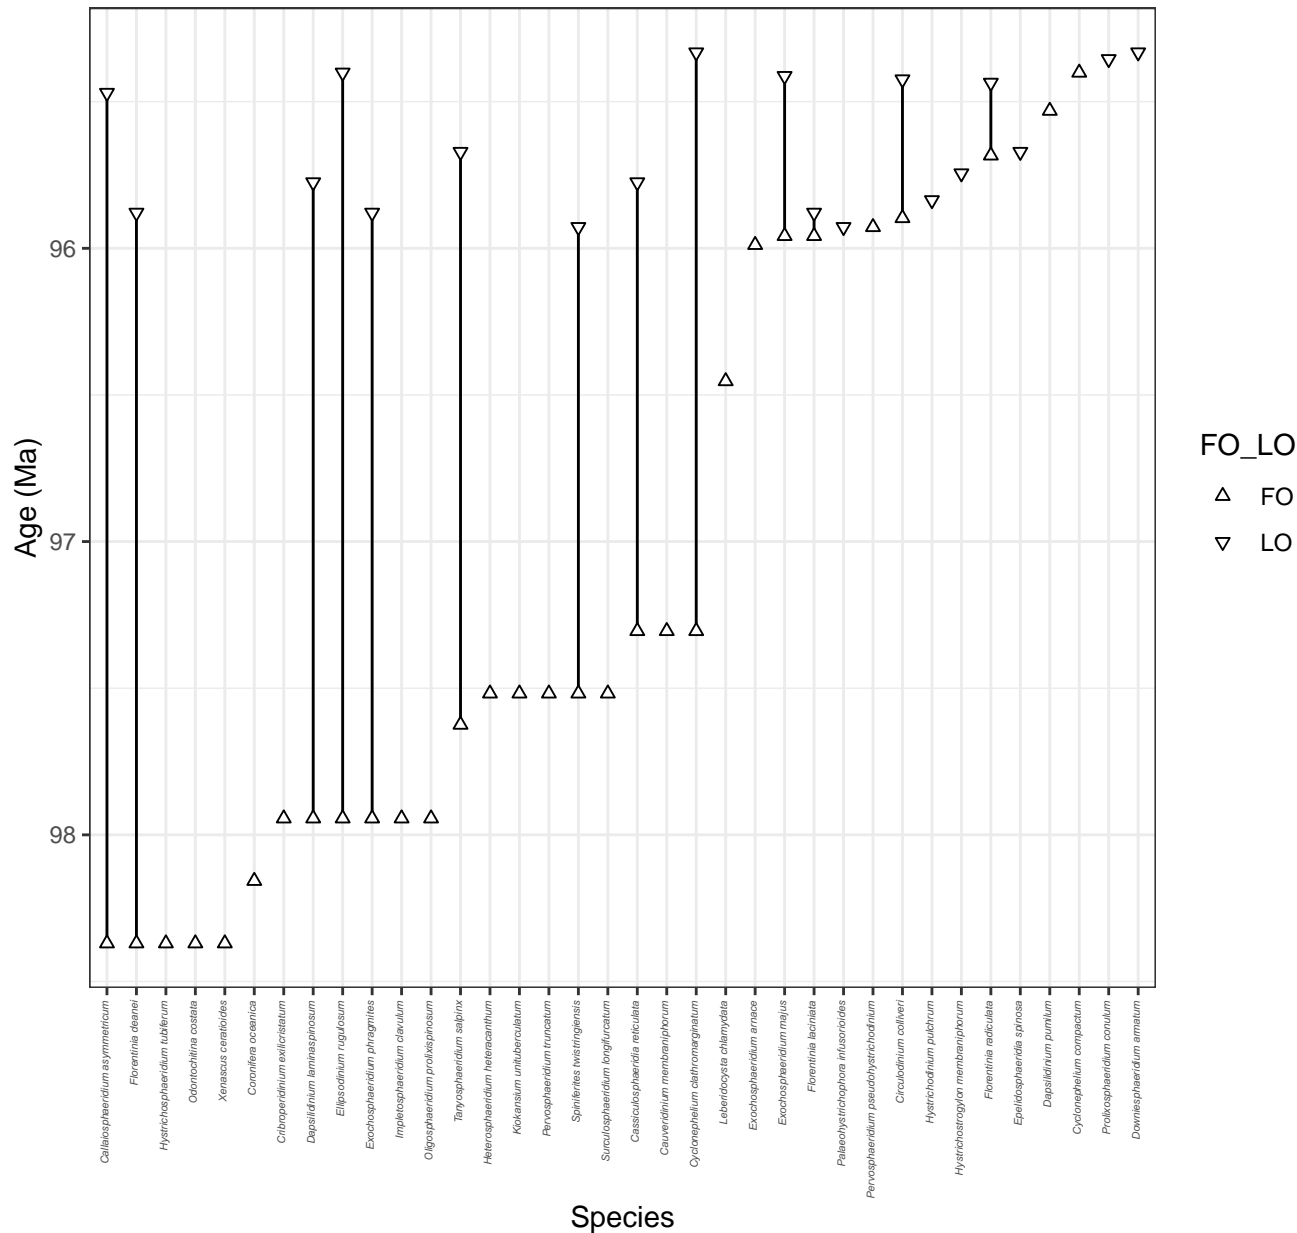

Supplement: Supplementary file 672 [file Site_Fumichon.pdf › Supplement/Supplement 2/Sites 188 plots/Site_Fumichon.pdf]

Site

Gibbliscemi

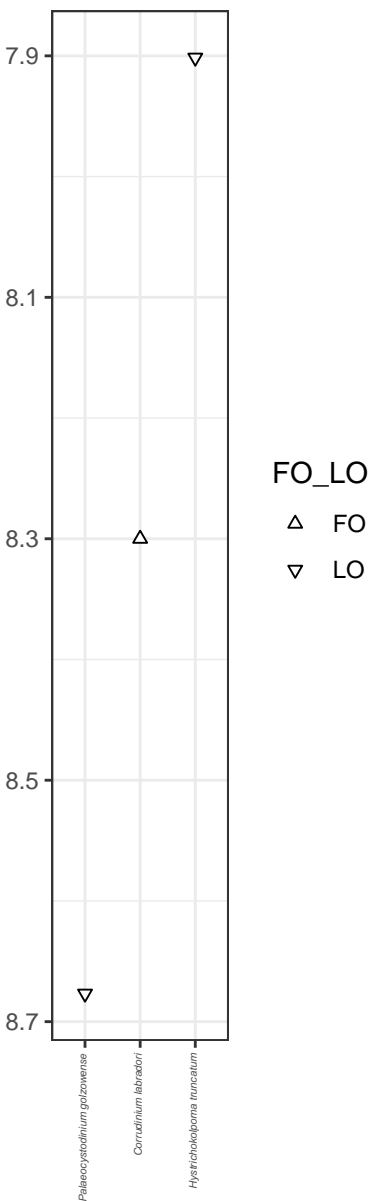

Supplement: Supplementary file 673 [file Site_Gibliscemi.pdf › Supplement/Supplement 2/Sites 188 plots/Site_Gibliscemi.pdf]

# Site Greece

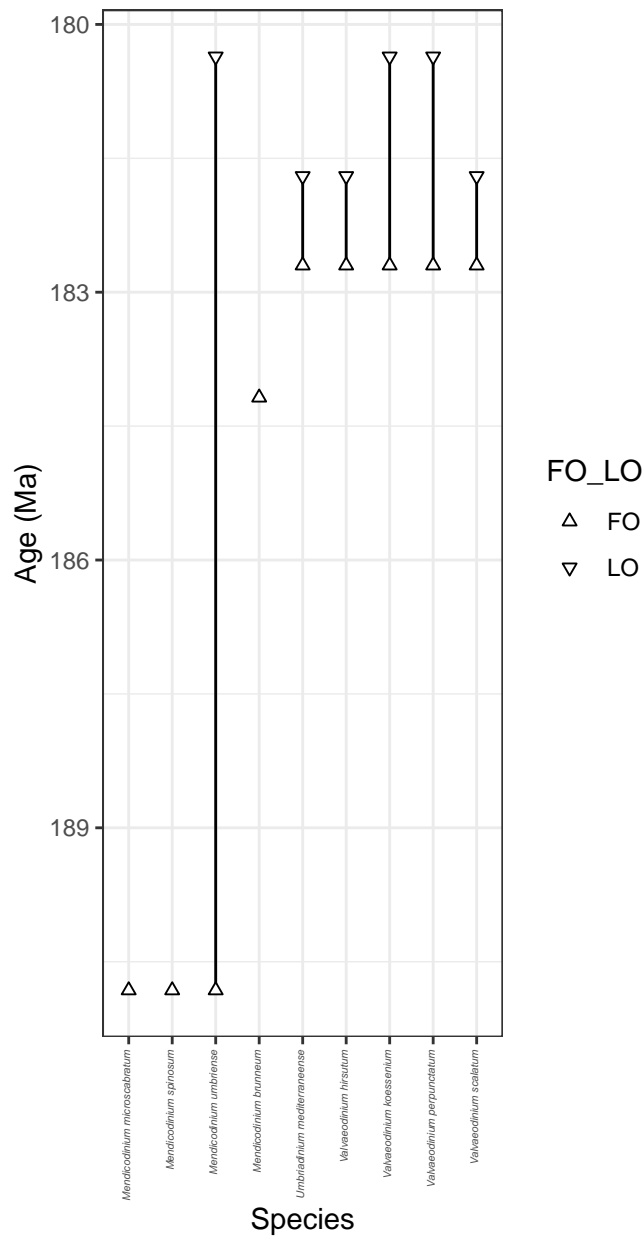

Supplement: Supplementary file 674 [file Site_Greece.pdf › Supplement/Supplement 2/Sites 188 plots/Site_Greece.pdf]

# Site

Gulf Coast1

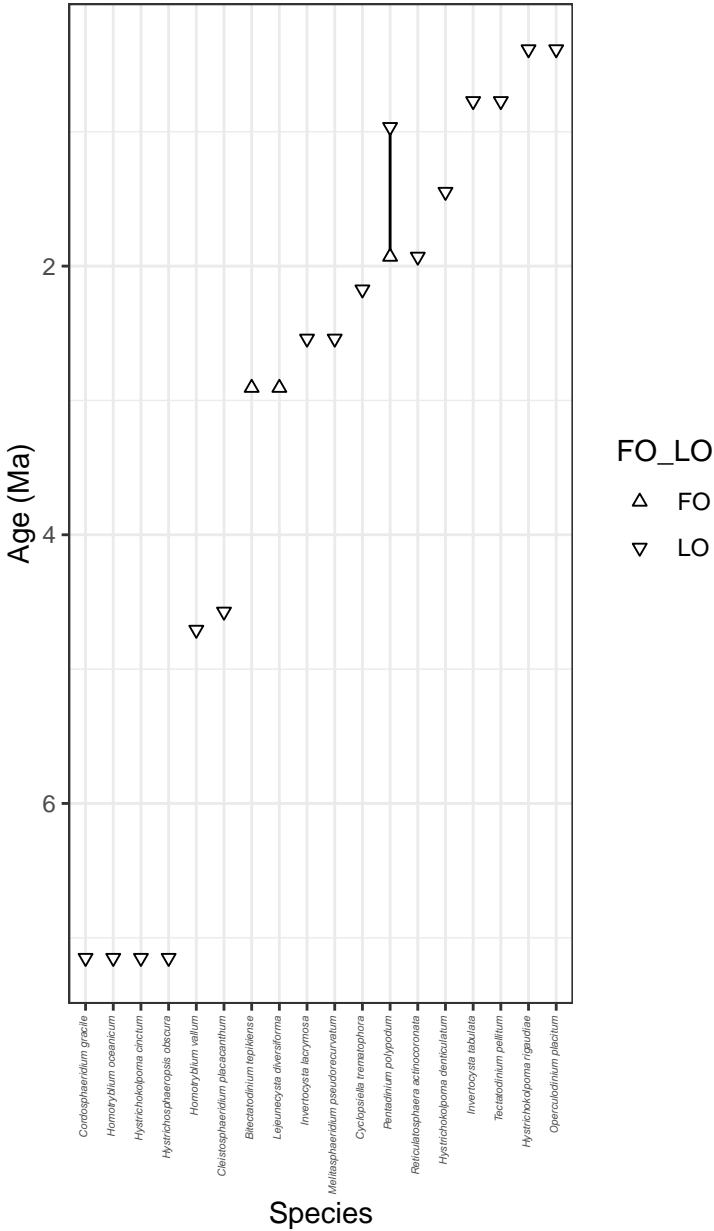

Supplement: Supplementary file 675 [file Site_Gulf Coast1.pdf › Supplement/Supplement 2/Sites 188 plots/Site_Gulf Coast1.pdf]

# Site

## Gulf Coast2

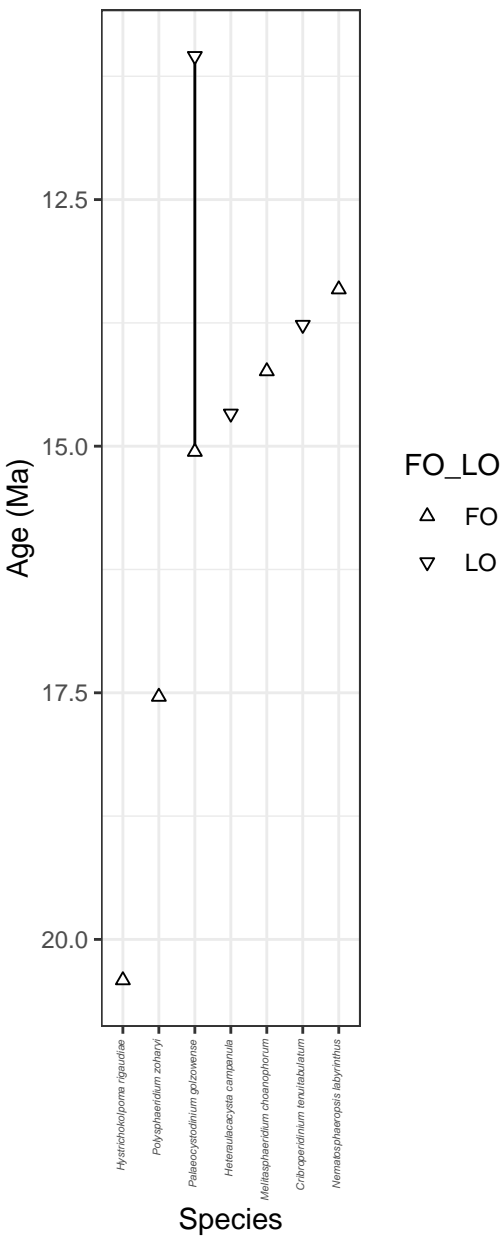

Supplement: Supplementary file 676 [file Site_Gulf Coast2.pdf › Supplement/Supplement 2/Sites 188 plots/Site_Gulf Coast2.pdf]

Site  
Haldager 1

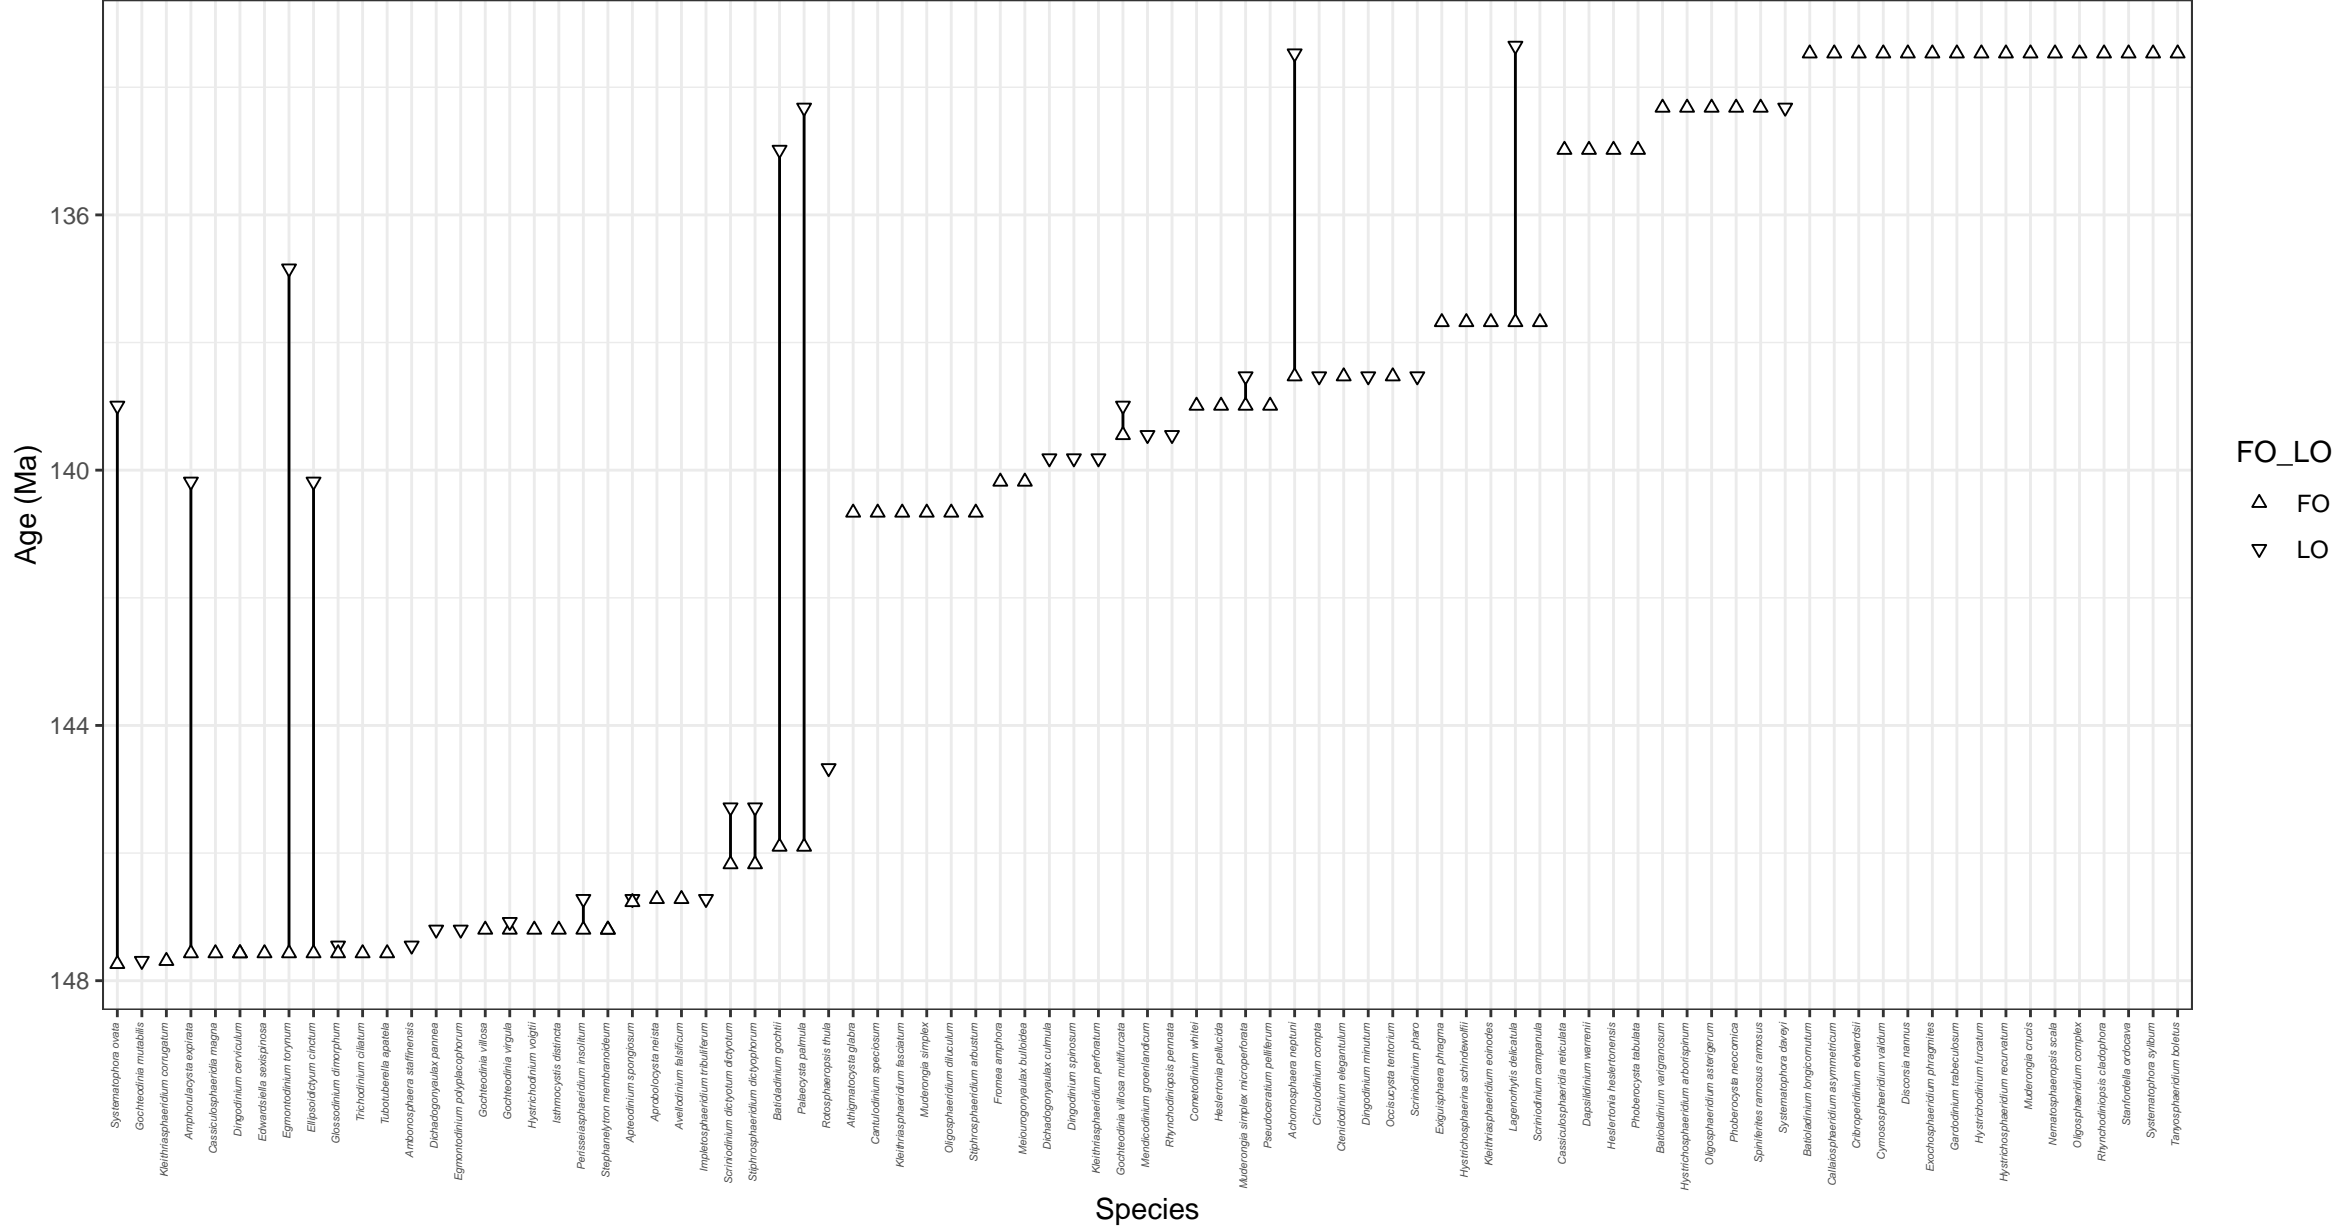

Supplement: Supplementary file 677 [file Site_Haldager 1.pdf › Supplement/Supplement 2/Sites 188 plots/Site_Haldager 1.pdf]

Site  
Hausen

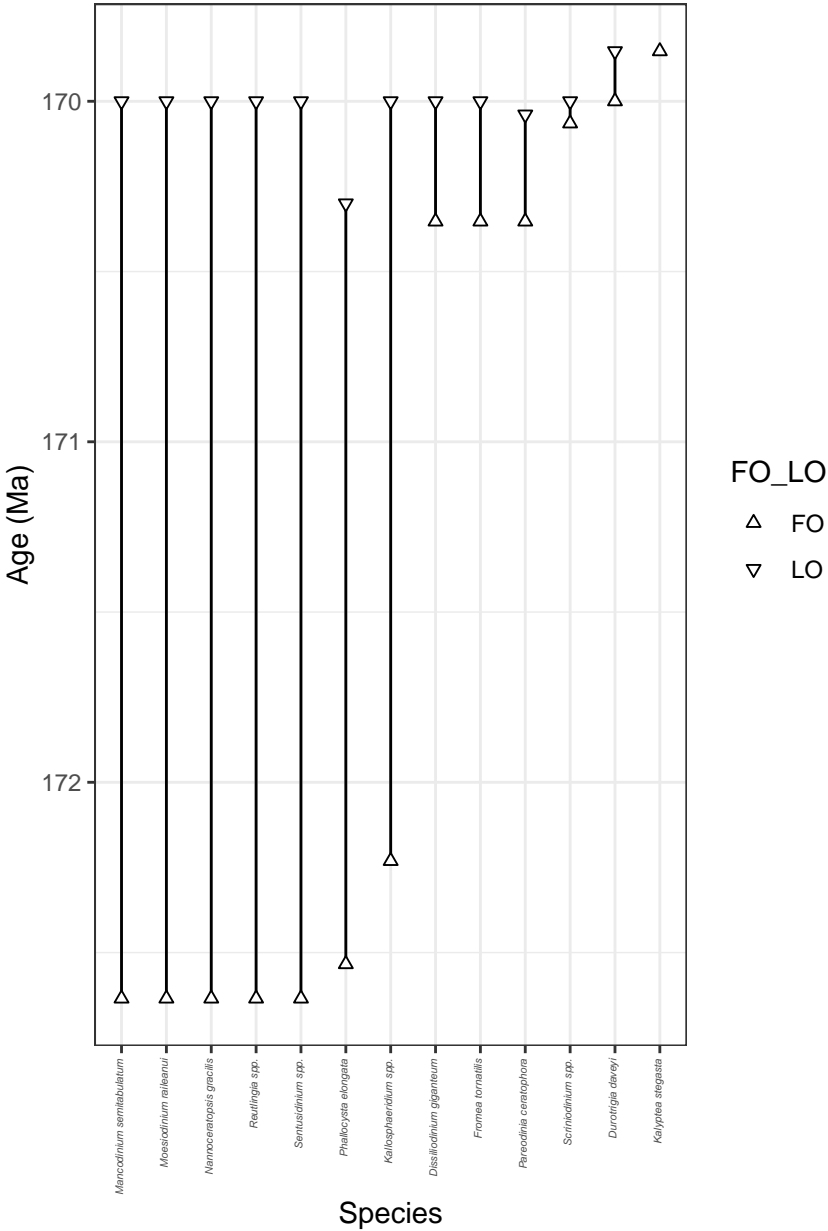

Supplement: Supplementary file 678 [file Site_Hausen.pdf › Supplement/Supplement 2/Sites 188 plots/Site_Hausen.pdf]

Site  
Hold With Hope

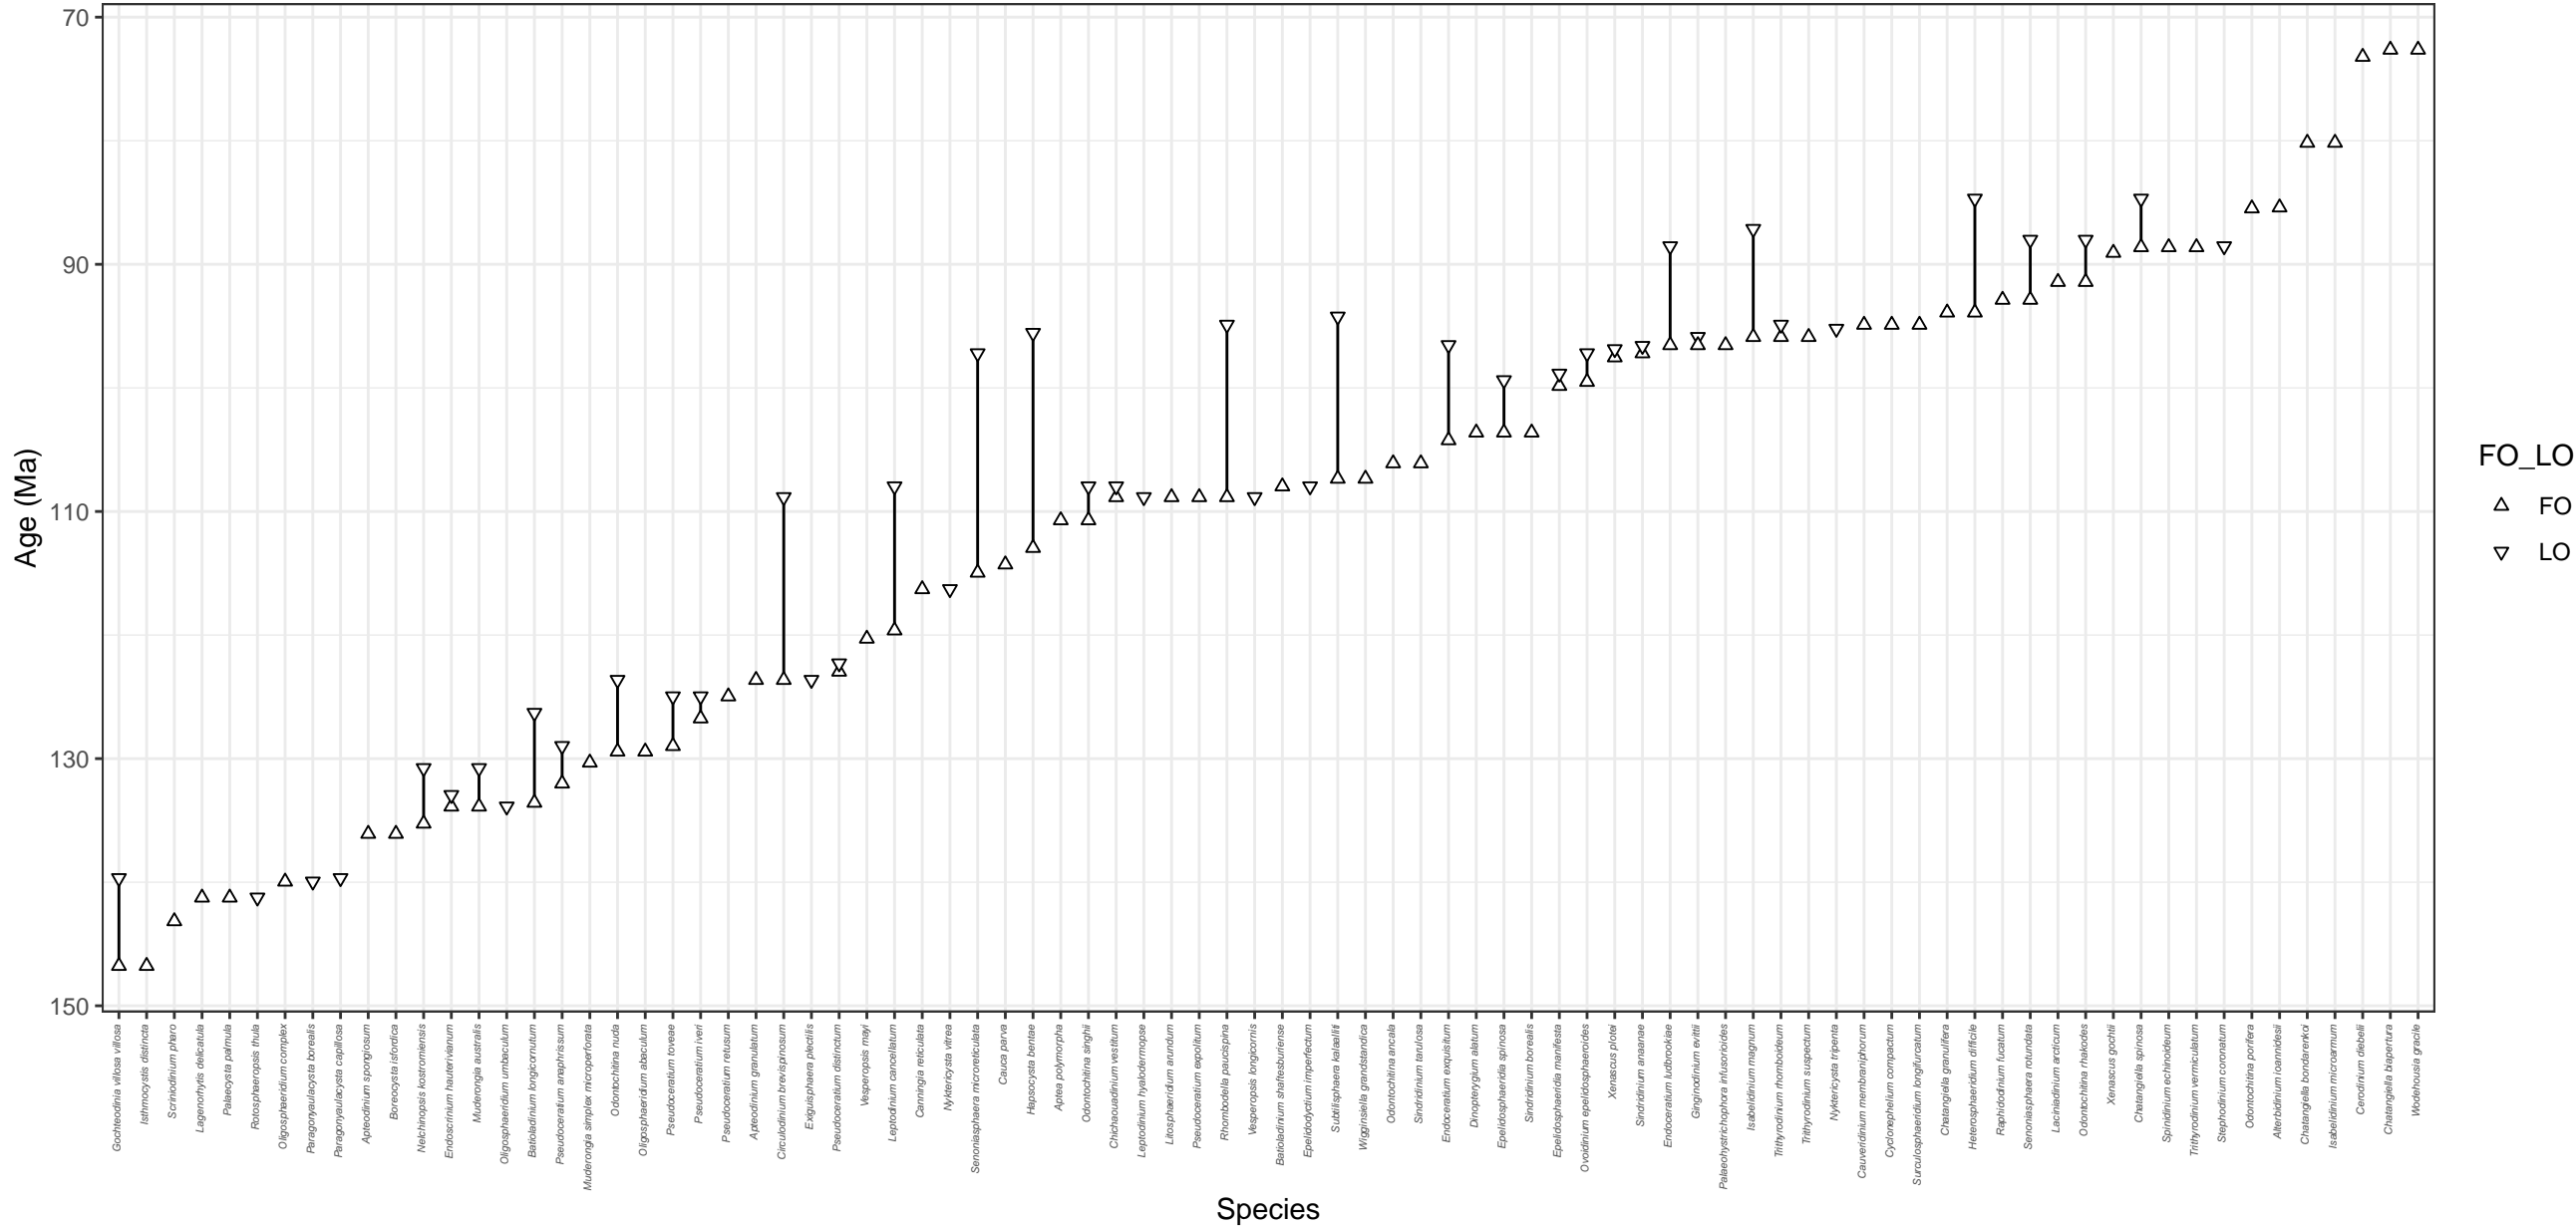

Supplement: Supplementary file 679 [file Site_Hold With Hope.pdf › Supplement/Supplement 2/Sites 188 plots/Site_Hold With Hope.pdf]

Site  
Hor Harar

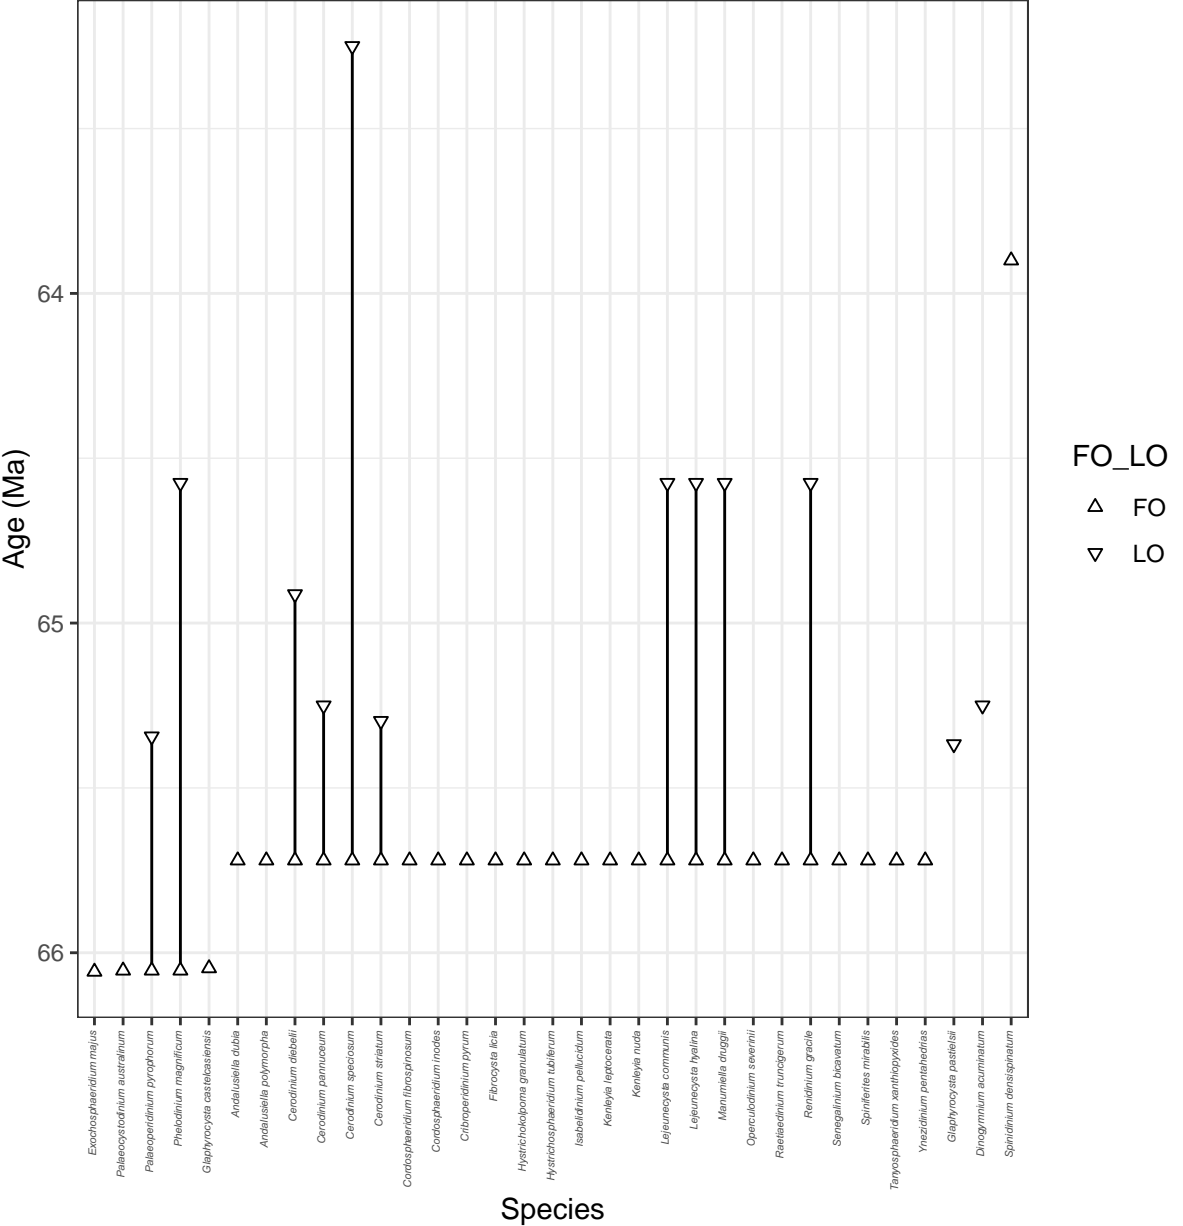

Supplement: Supplementary file 680 [file Site_Hor Harar.pdf › Supplement/Supplement 2/Sites 188 plots/Site_Hor Harar.pdf]

Site

Hornby Island

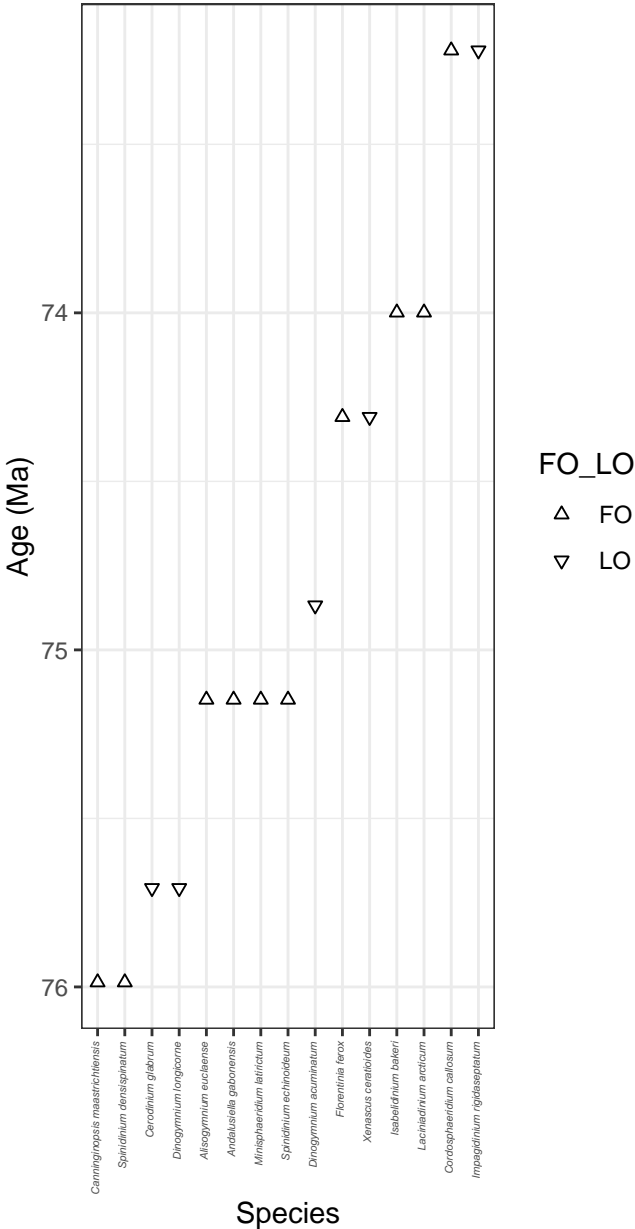

Supplement: Supplementary file 681 [file Site_Hornby Island.pdf › Supplement/Supplement 2/Sites 188 plots/Site_Hornby Island.pdf]

# Site Hungary

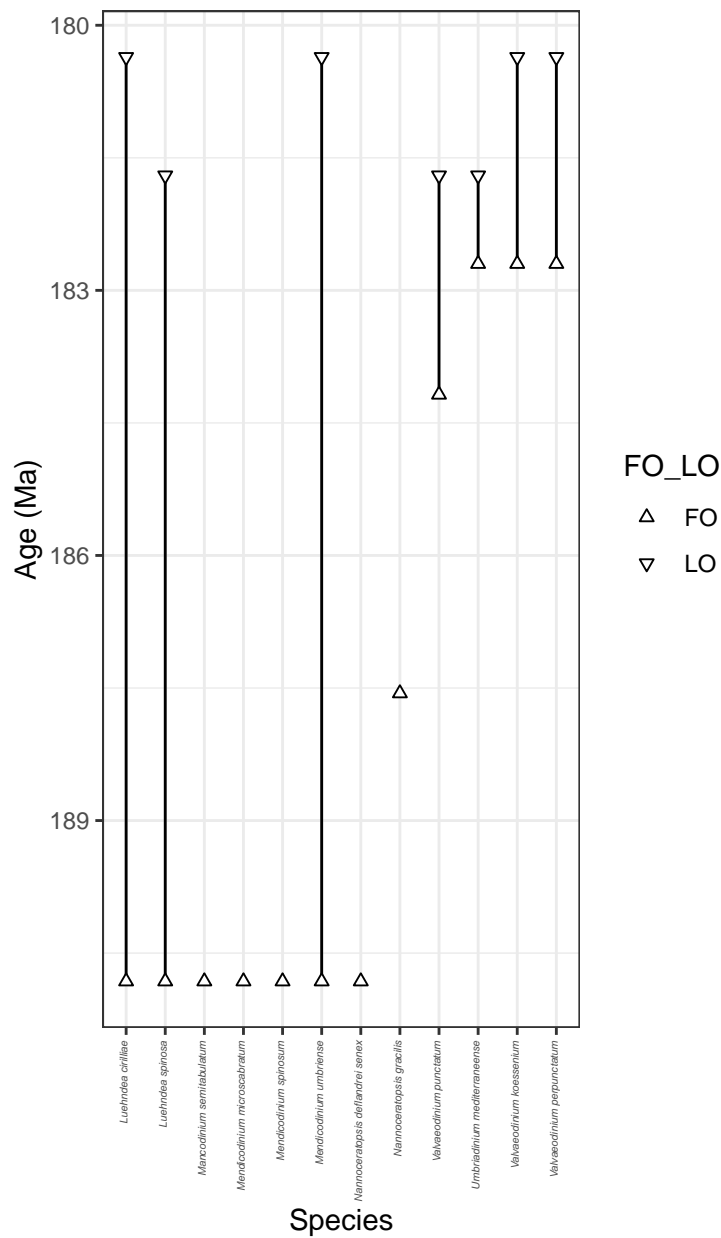

Supplement: Supplementary file 682 [file Site_Hungary.pdf › Supplement/Supplement 2/Sites 188 plots/Site_Hungary.pdf]

Site  
Isle of Skye

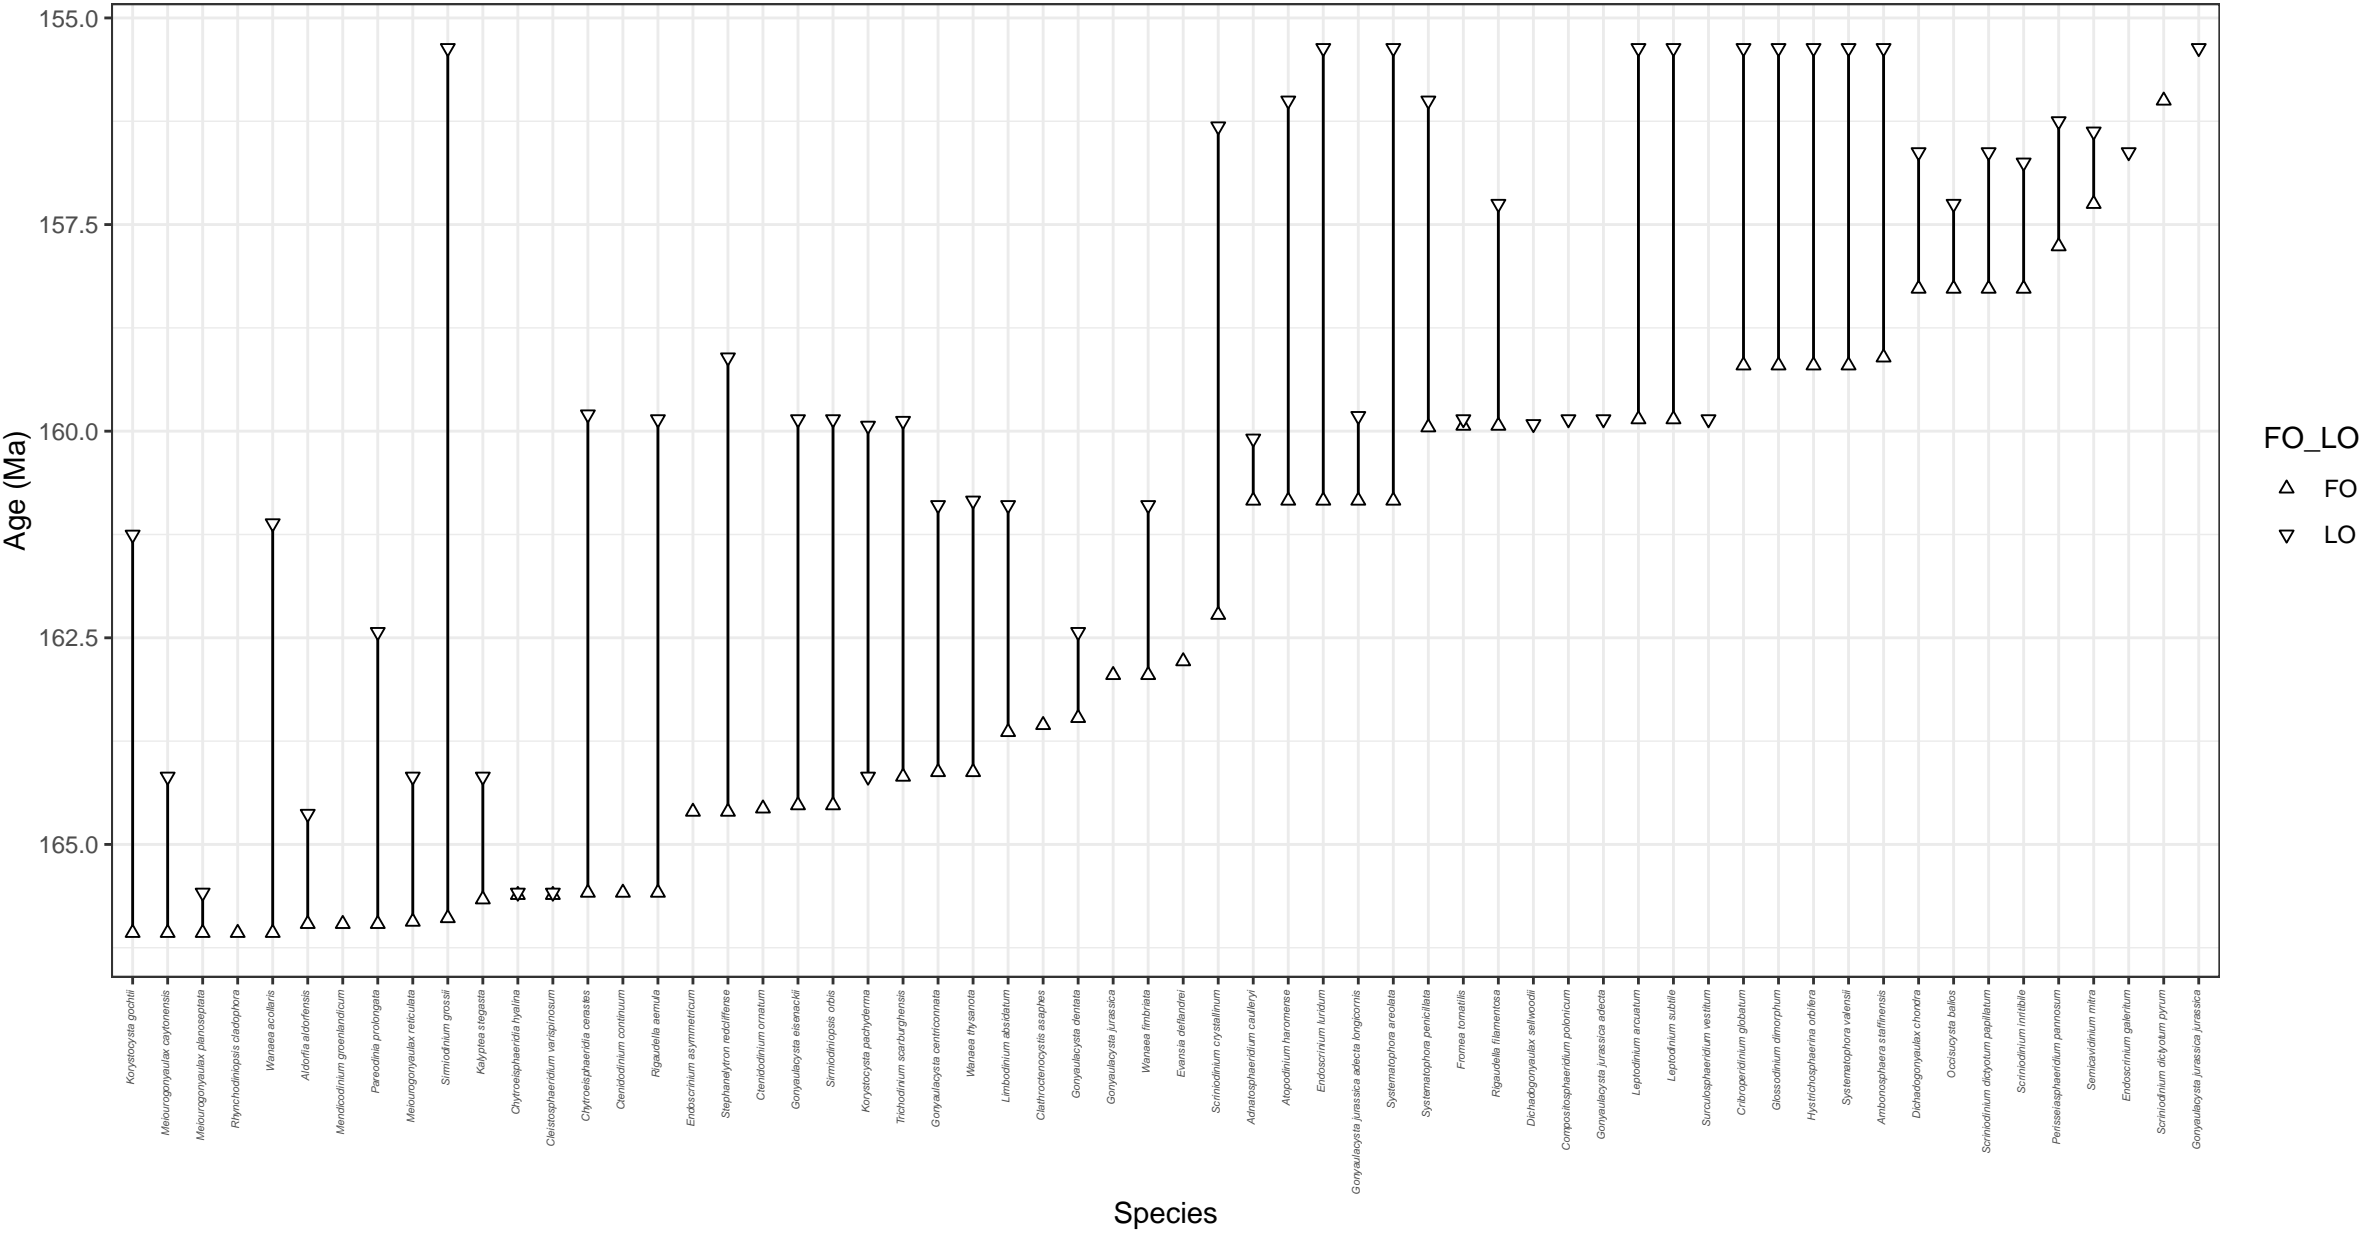

Supplement: Supplementary file 683 [file Site_Isle of Skye.pdf › Supplement/Supplement 2/Sites 188 plots/Site_Isle of Skye.pdf]

Site  
Isle of Wright

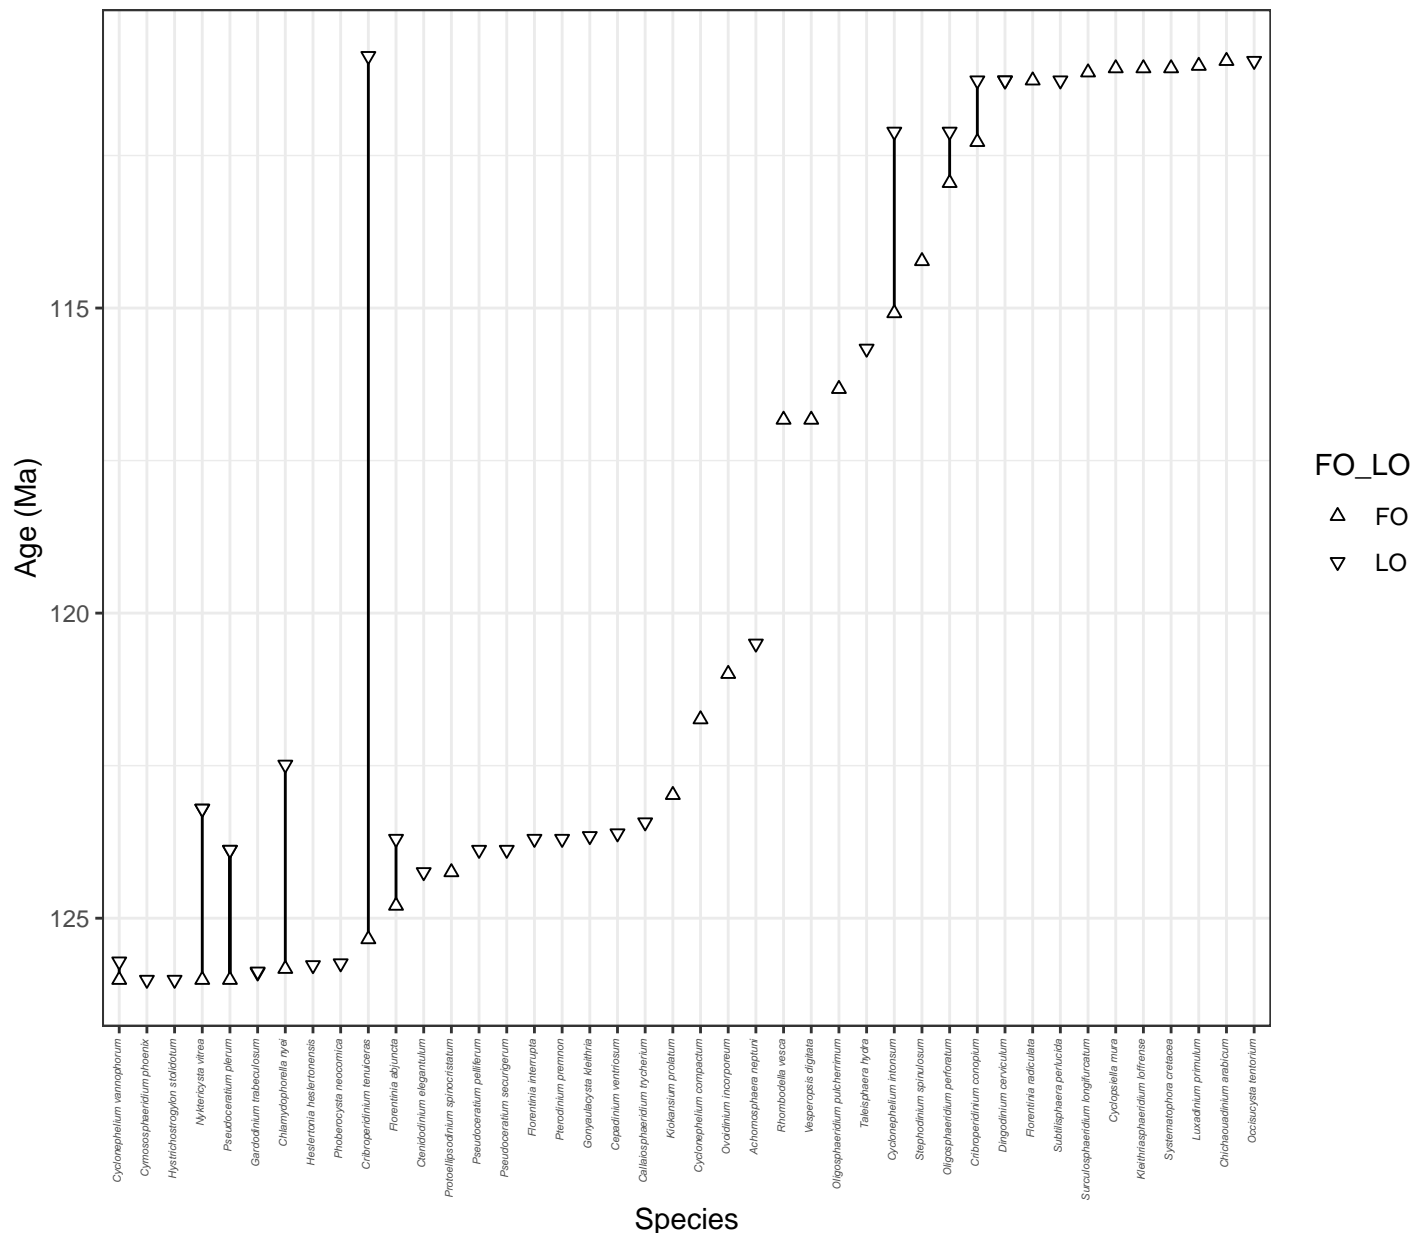

Supplement: Supplementary file 684 [file Site_Isle of Wright.pdf › Supplement/Supplement 2/Sites 188 plots/Site_Isle of Wright.pdf]

# Site

Jutland

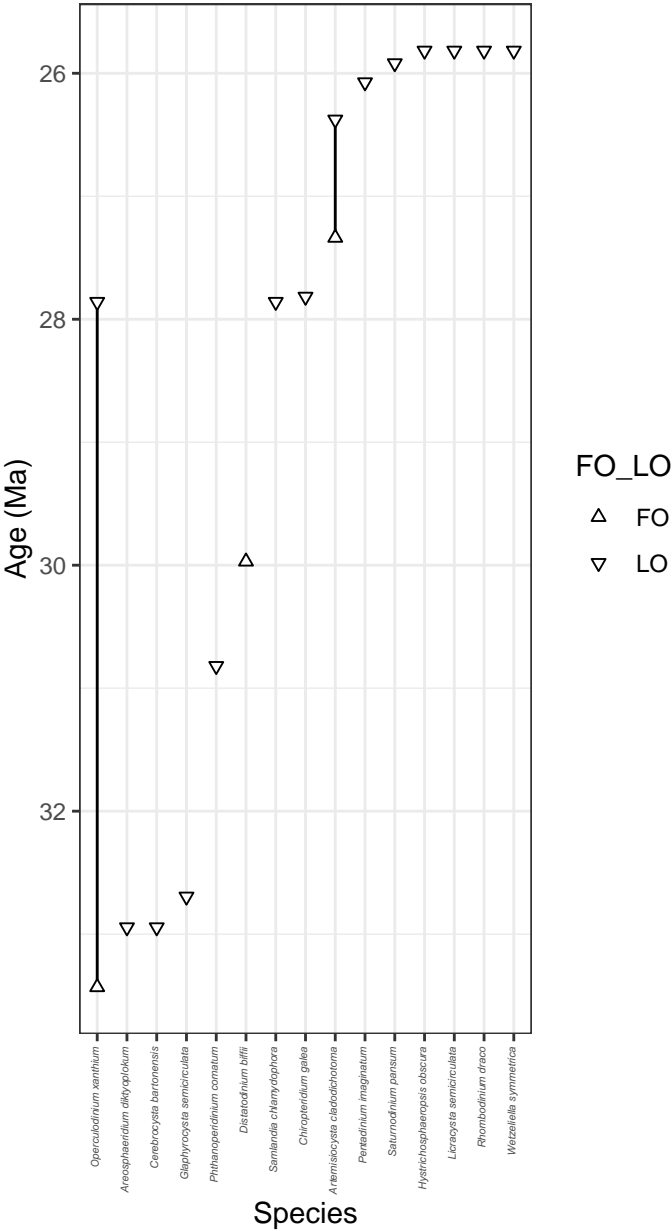

Supplement: Supplementary file 685 [file Site_Jutland.pdf › Supplement/Supplement 2/Sites 188 plots/Site_Jutland.pdf]

Site  
Jylland

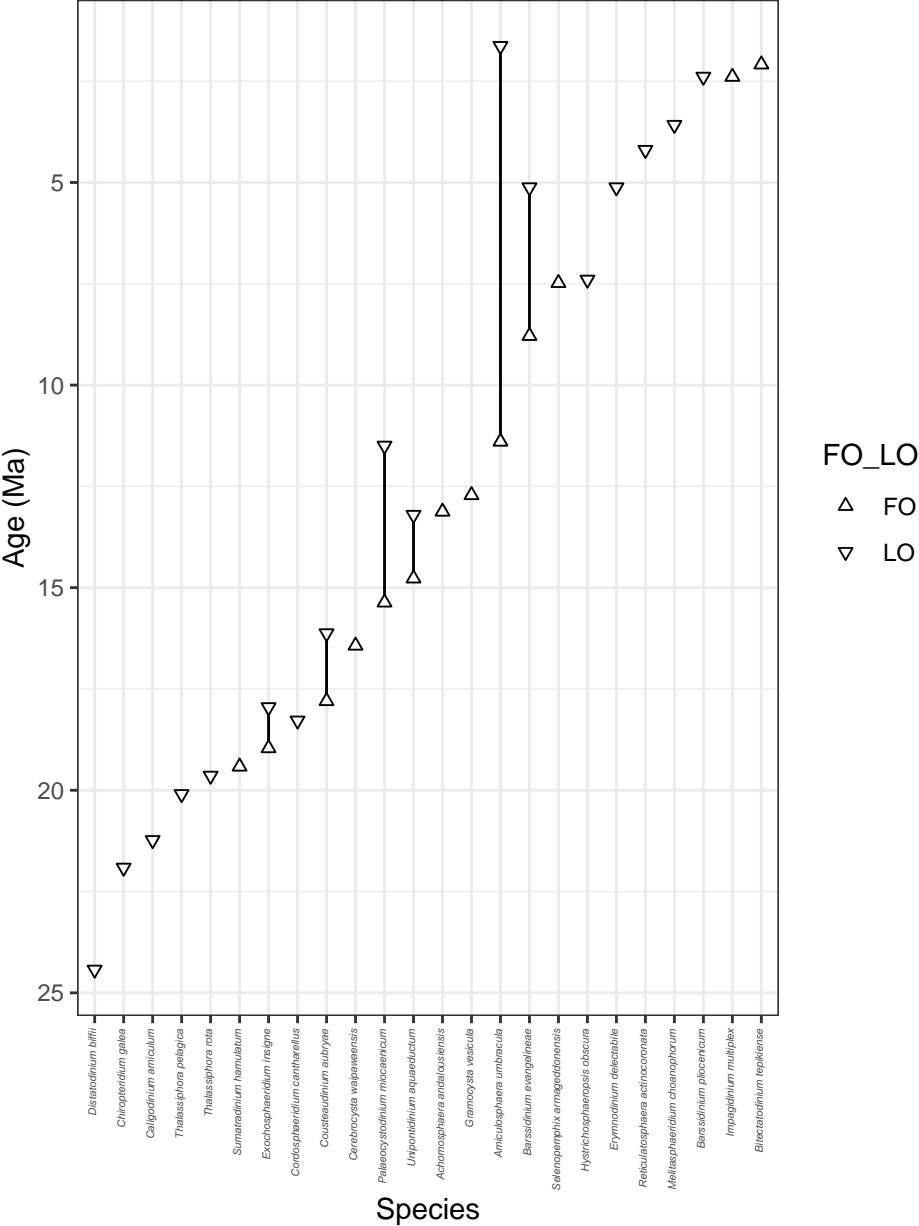

Supplement: Supplementary file 686 [file Site_Jylland.pdf › Supplement/Supplement 2/Sites 188 plots/Site_Jylland.pdf]

# Site Kandern

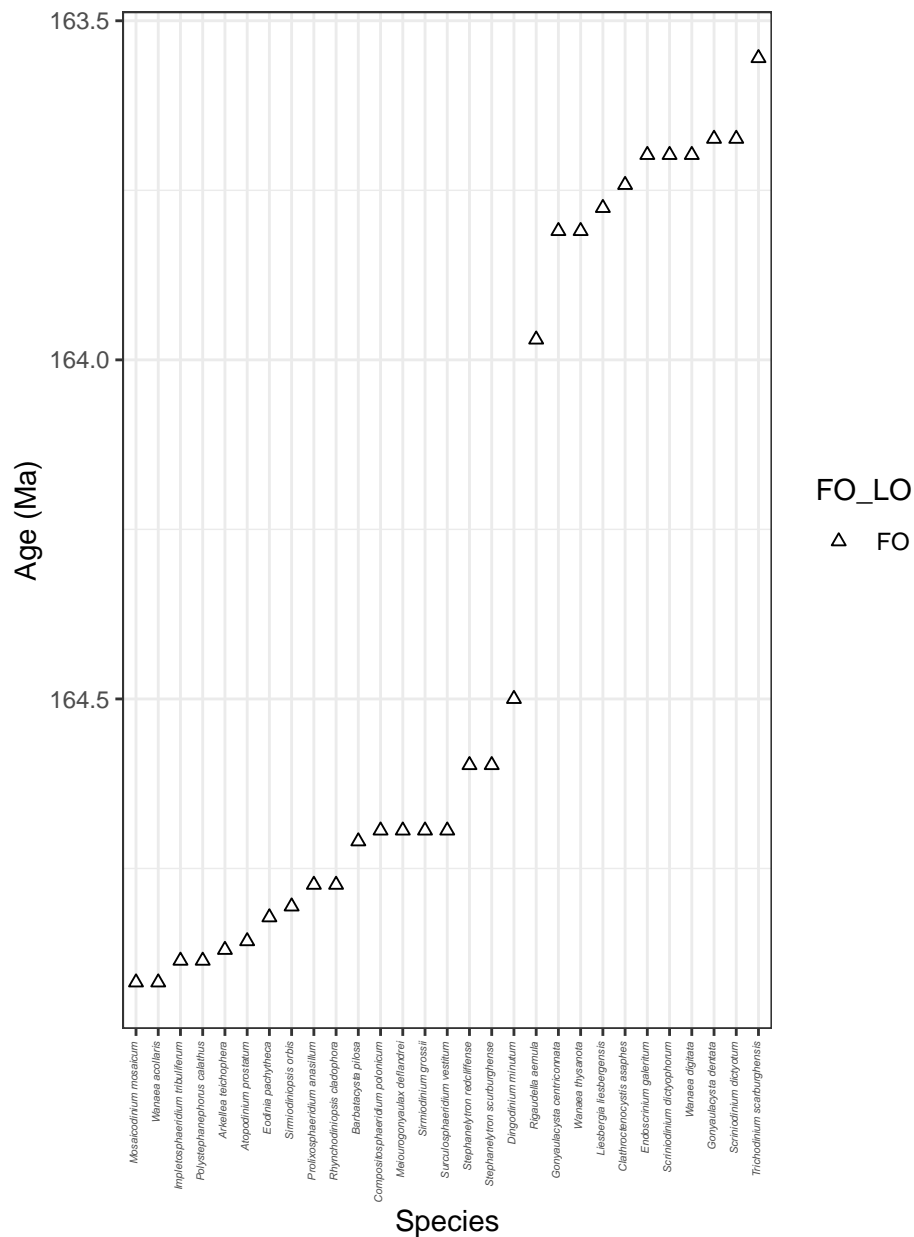

Supplement: Supplementary file 687 [file Site_Kandern.pdf › Supplement/Supplement 2/Sites 188 plots/Site_Kandern.pdf]

# Site

## Kelimityar

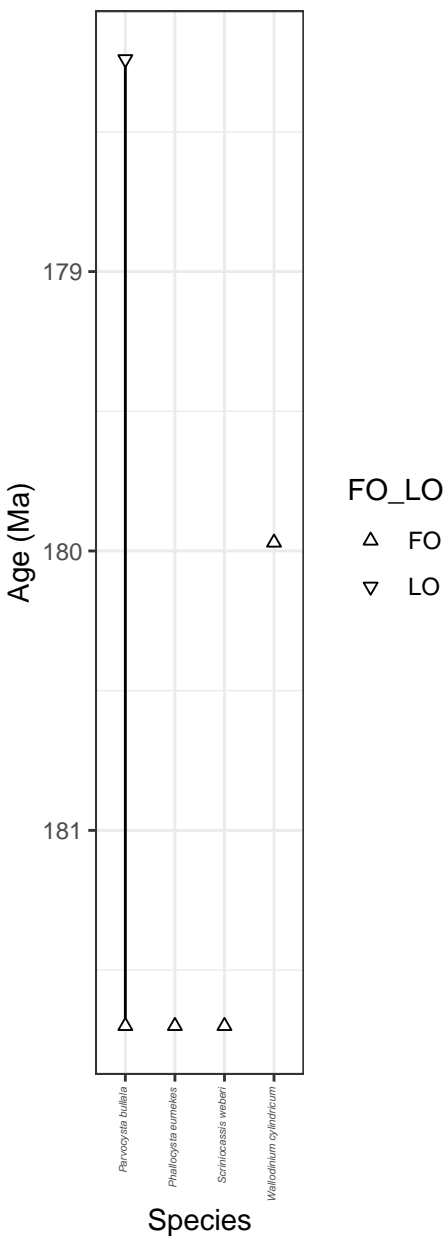

Supplement: Supplementary file 688 [file Site_Kelimyar.pdf › Supplement/Supplement 2/Sites 188 plots/Site_Kelimyar.pdf]

Site  
Kimmerer Clay N Yorkshire

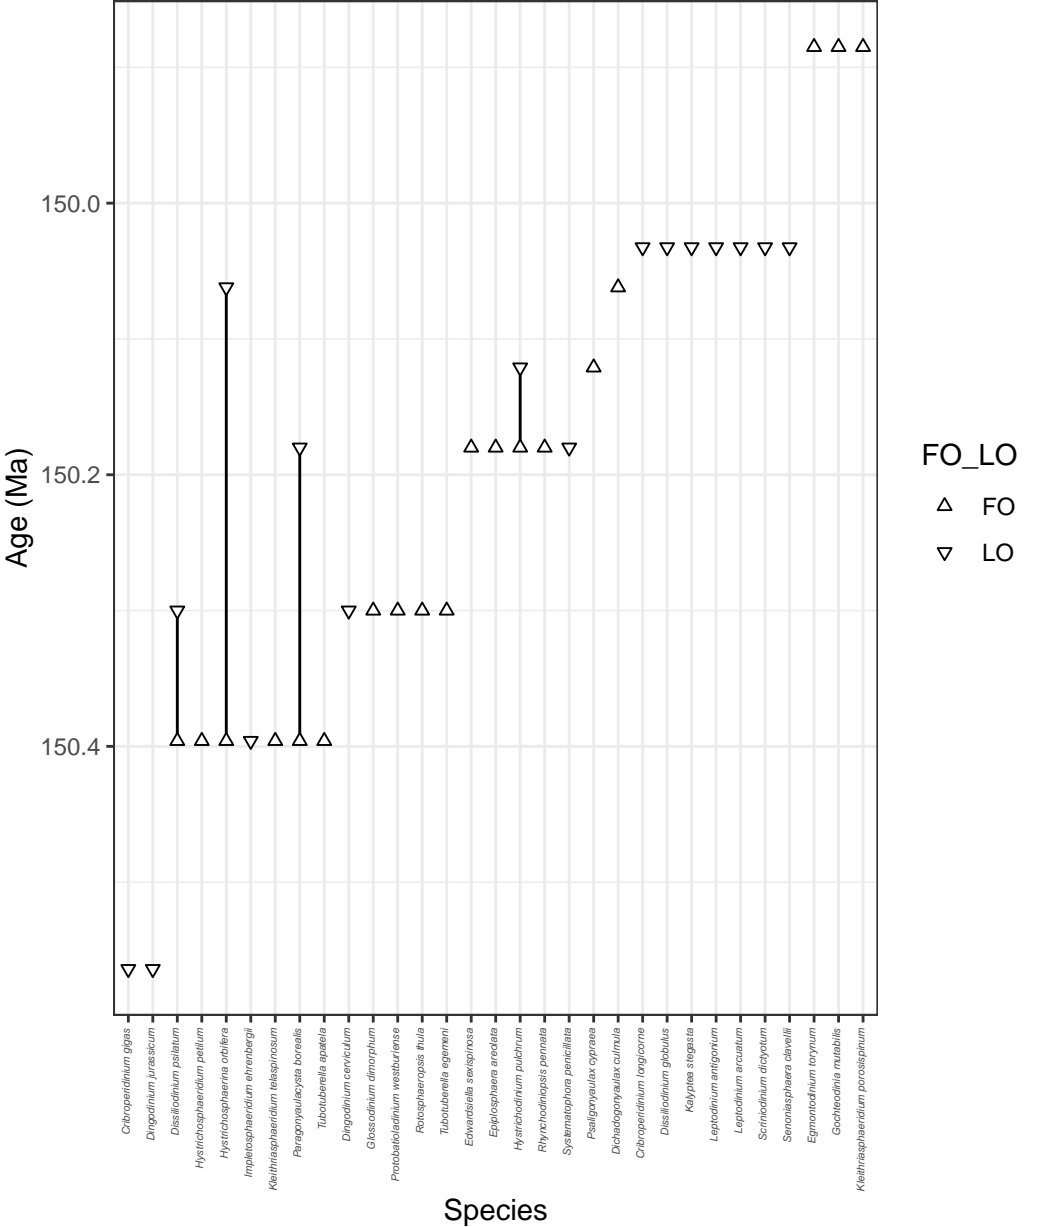

Supplement: Supplementary file 689 [file Site_Kimmeridge Clay N Yorkshire.pdf › Supplement/Supplement 2/Sites 188 plots/Site_Kimmeridge Clay N Yorkshire.pdf]

# Site

## Kimmeridge

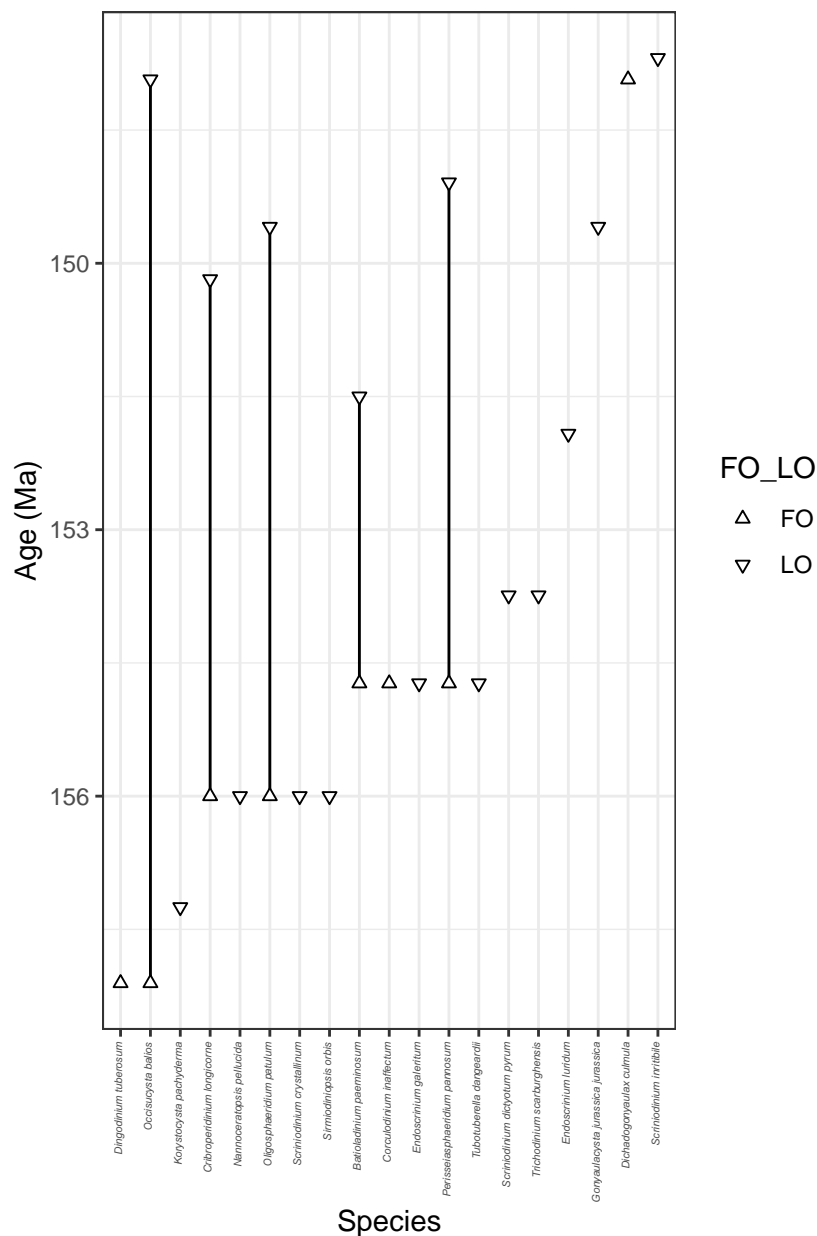

Supplement: Supplementary file 690 [file Site_Kimmeridge.pdf › Supplement/Supplement 2/Sites 188 plots/Site_Kimmeridge.pdf]

# Site

## Kong Karls Land

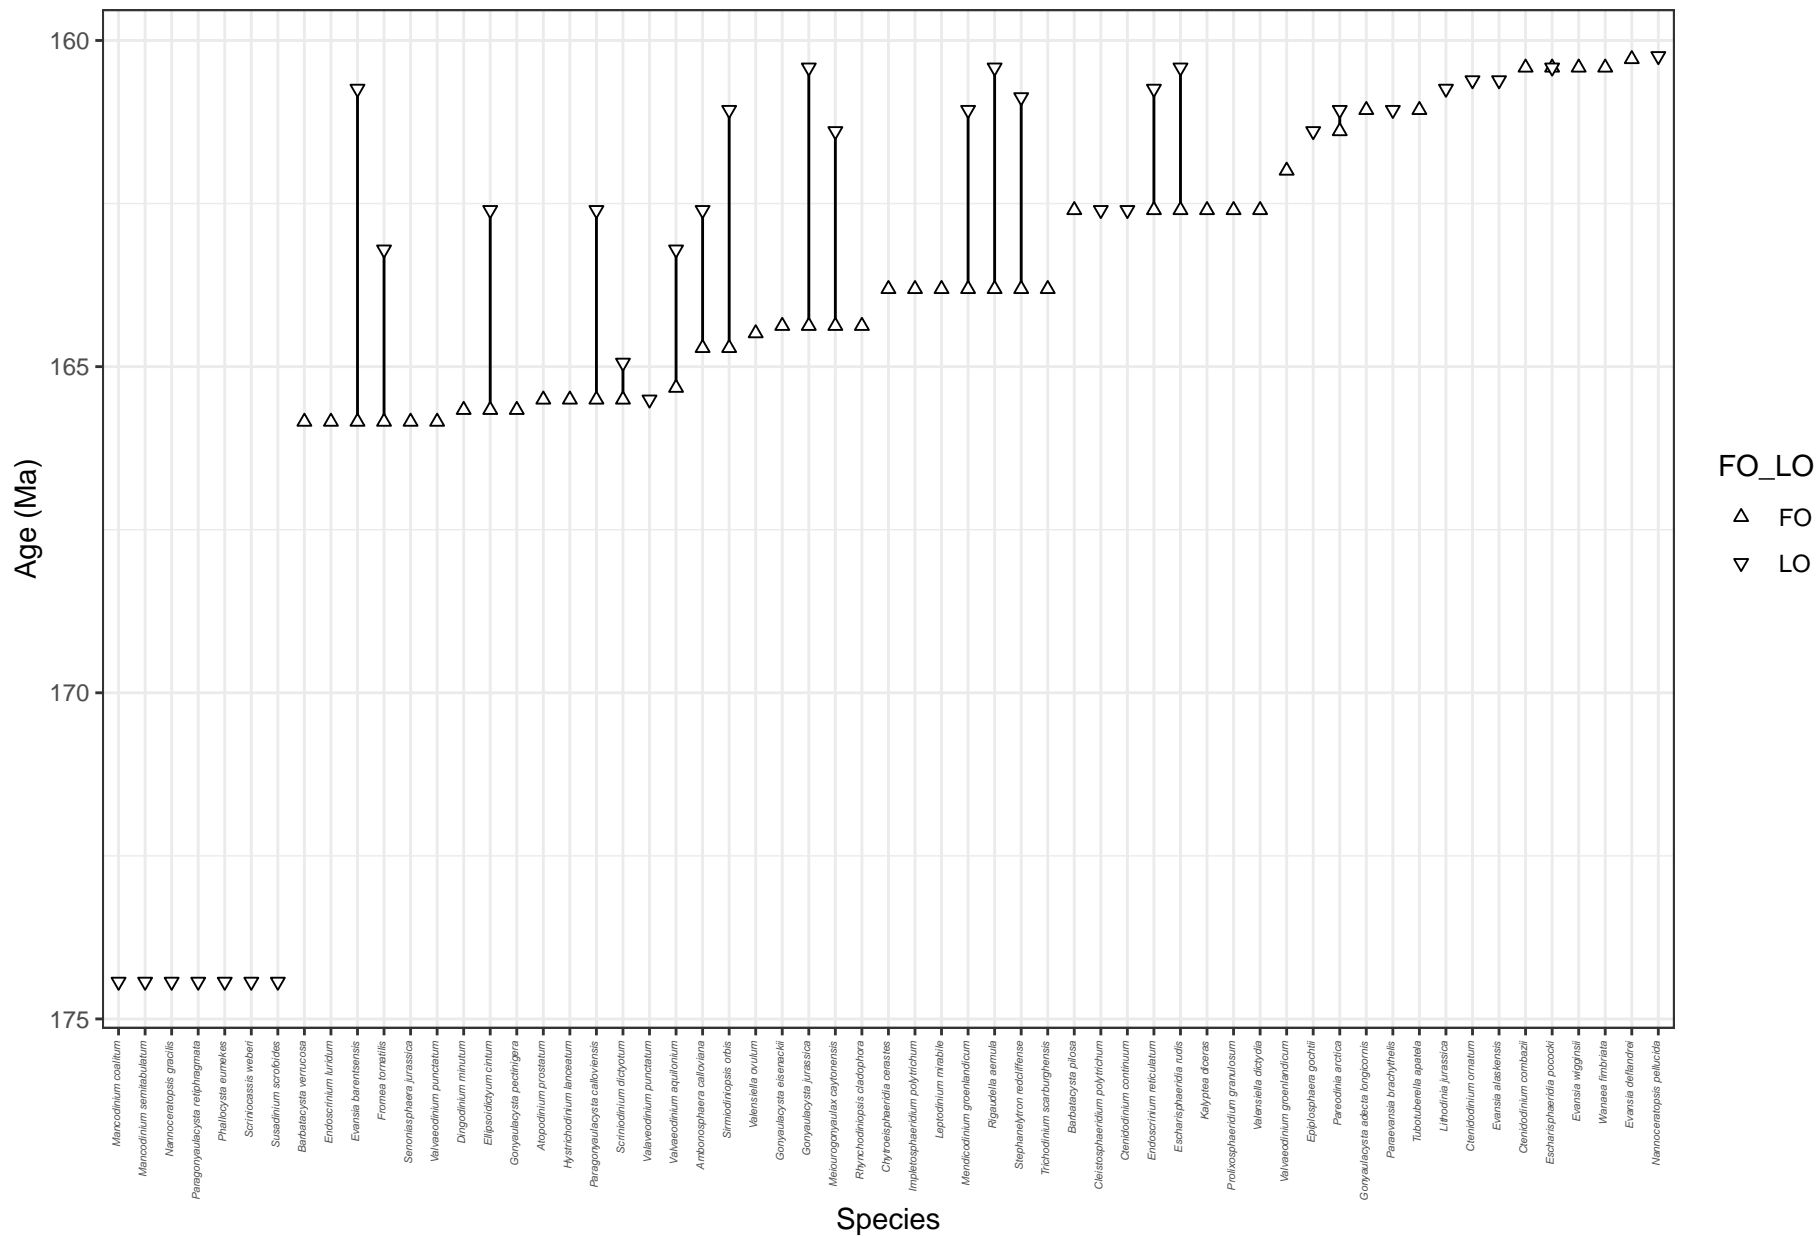

Supplement: Supplementary file 691 [file Site_Kong Karls Land.pdf › Supplement/Supplement 2/Sites 188 plots/Site_Kong Karls Land.pdf]

# Site

Kysing-4

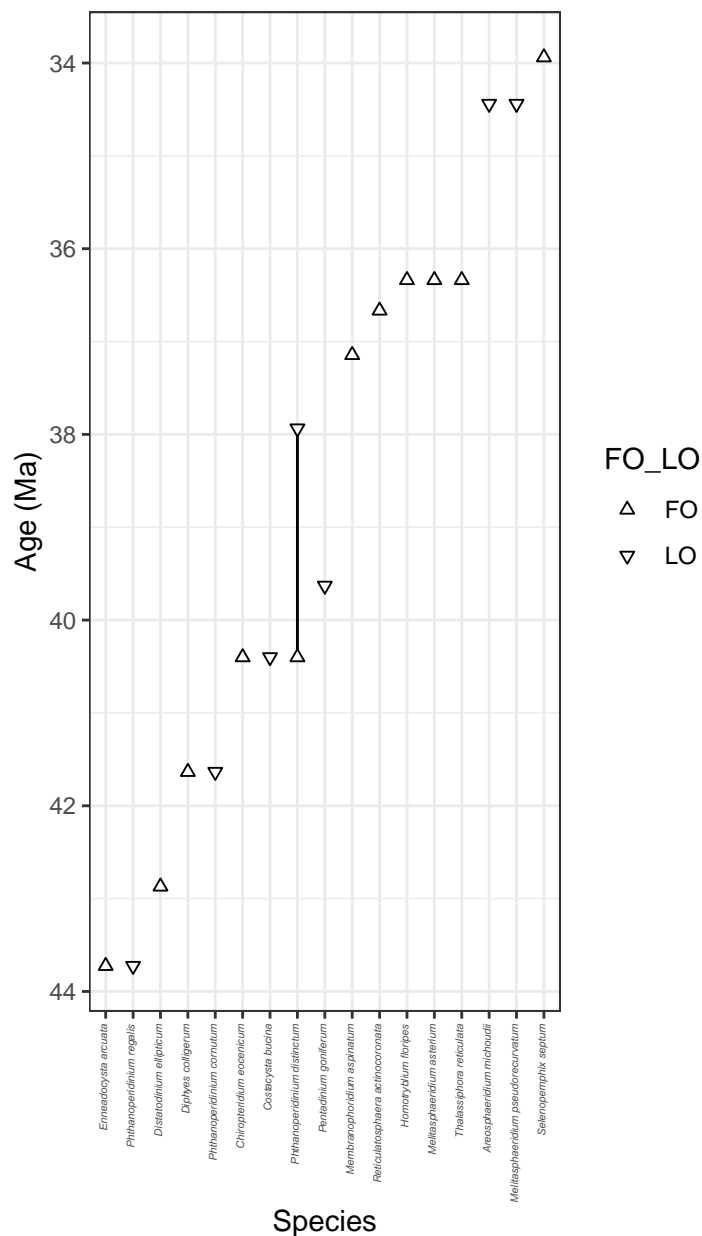

Supplement: Supplementary file 692 [file Site_Kysing-4.pdf › Supplement/Supplement 2/Sites 188 plots/Site_Kysing-4.pdf]

# Site

## Landana

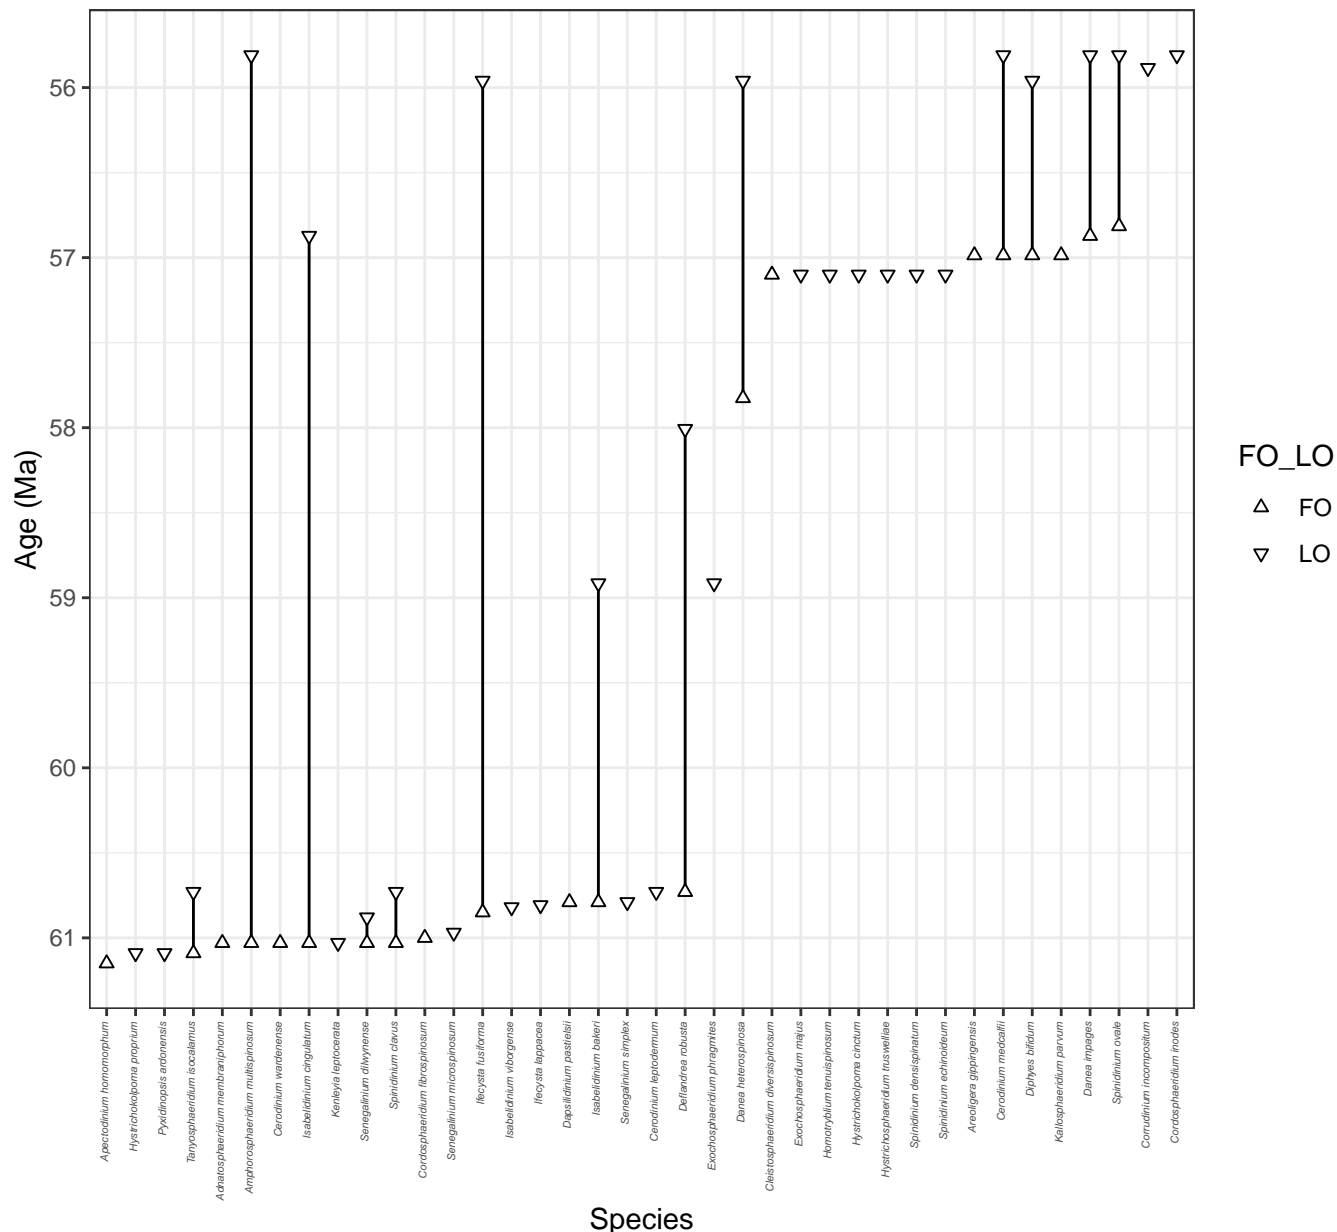

Supplement: Supplementary file 693 [file Site_Landana.pdf › Supplement/Supplement 2/Sites 188 plots/Site_Landana.pdf]

Site

Lemme

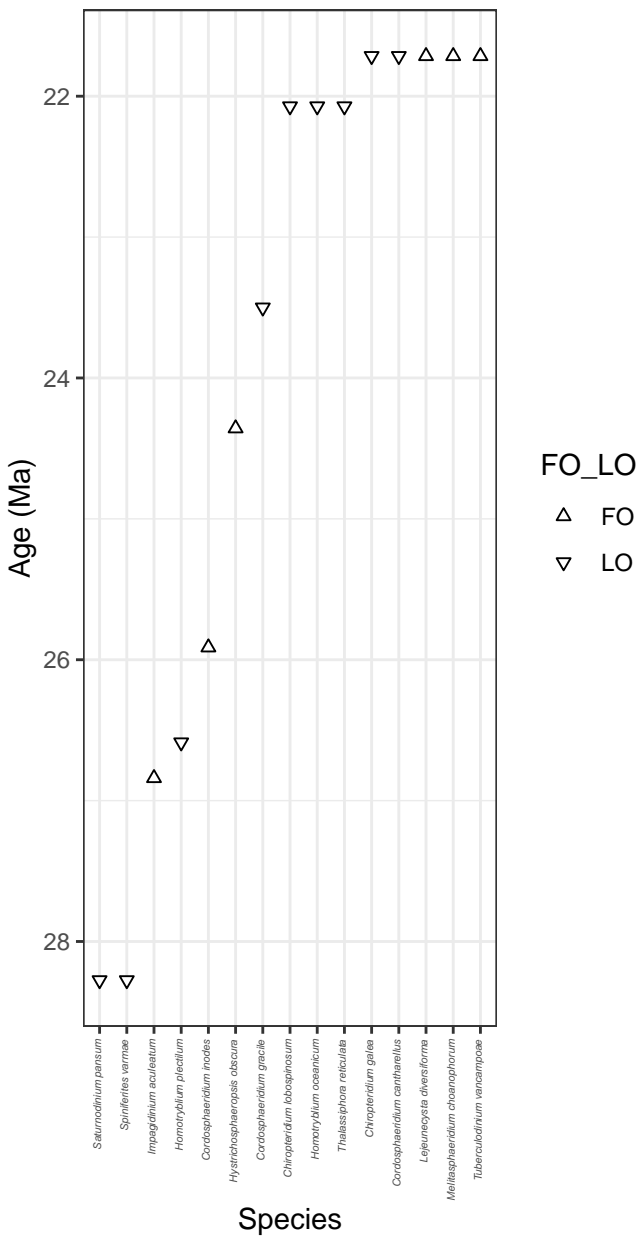

Supplement: Supplementary file 694 [file Site_Lemme.pdf › Supplement/Supplement 2/Sites 188 plots/Site_Lemme.pdf]

# Site

M8, Hartuv B

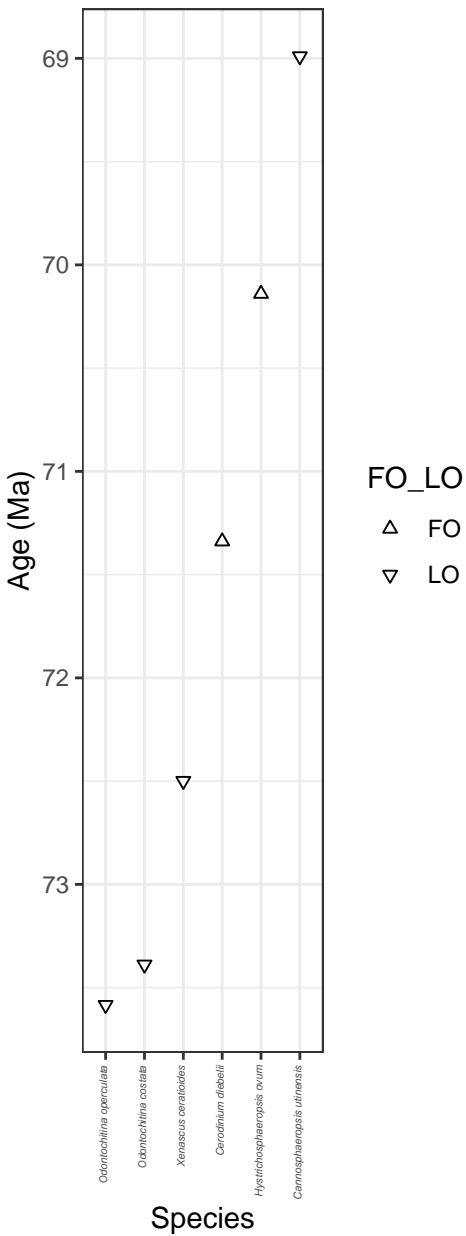

Supplement: Supplementary file 695 [file Site_M8, Hartuv B.pdf › Supplement/Supplement 2/Sites 188 plots/Site_M8, Hartuv B.pdf]

Site  
Marche

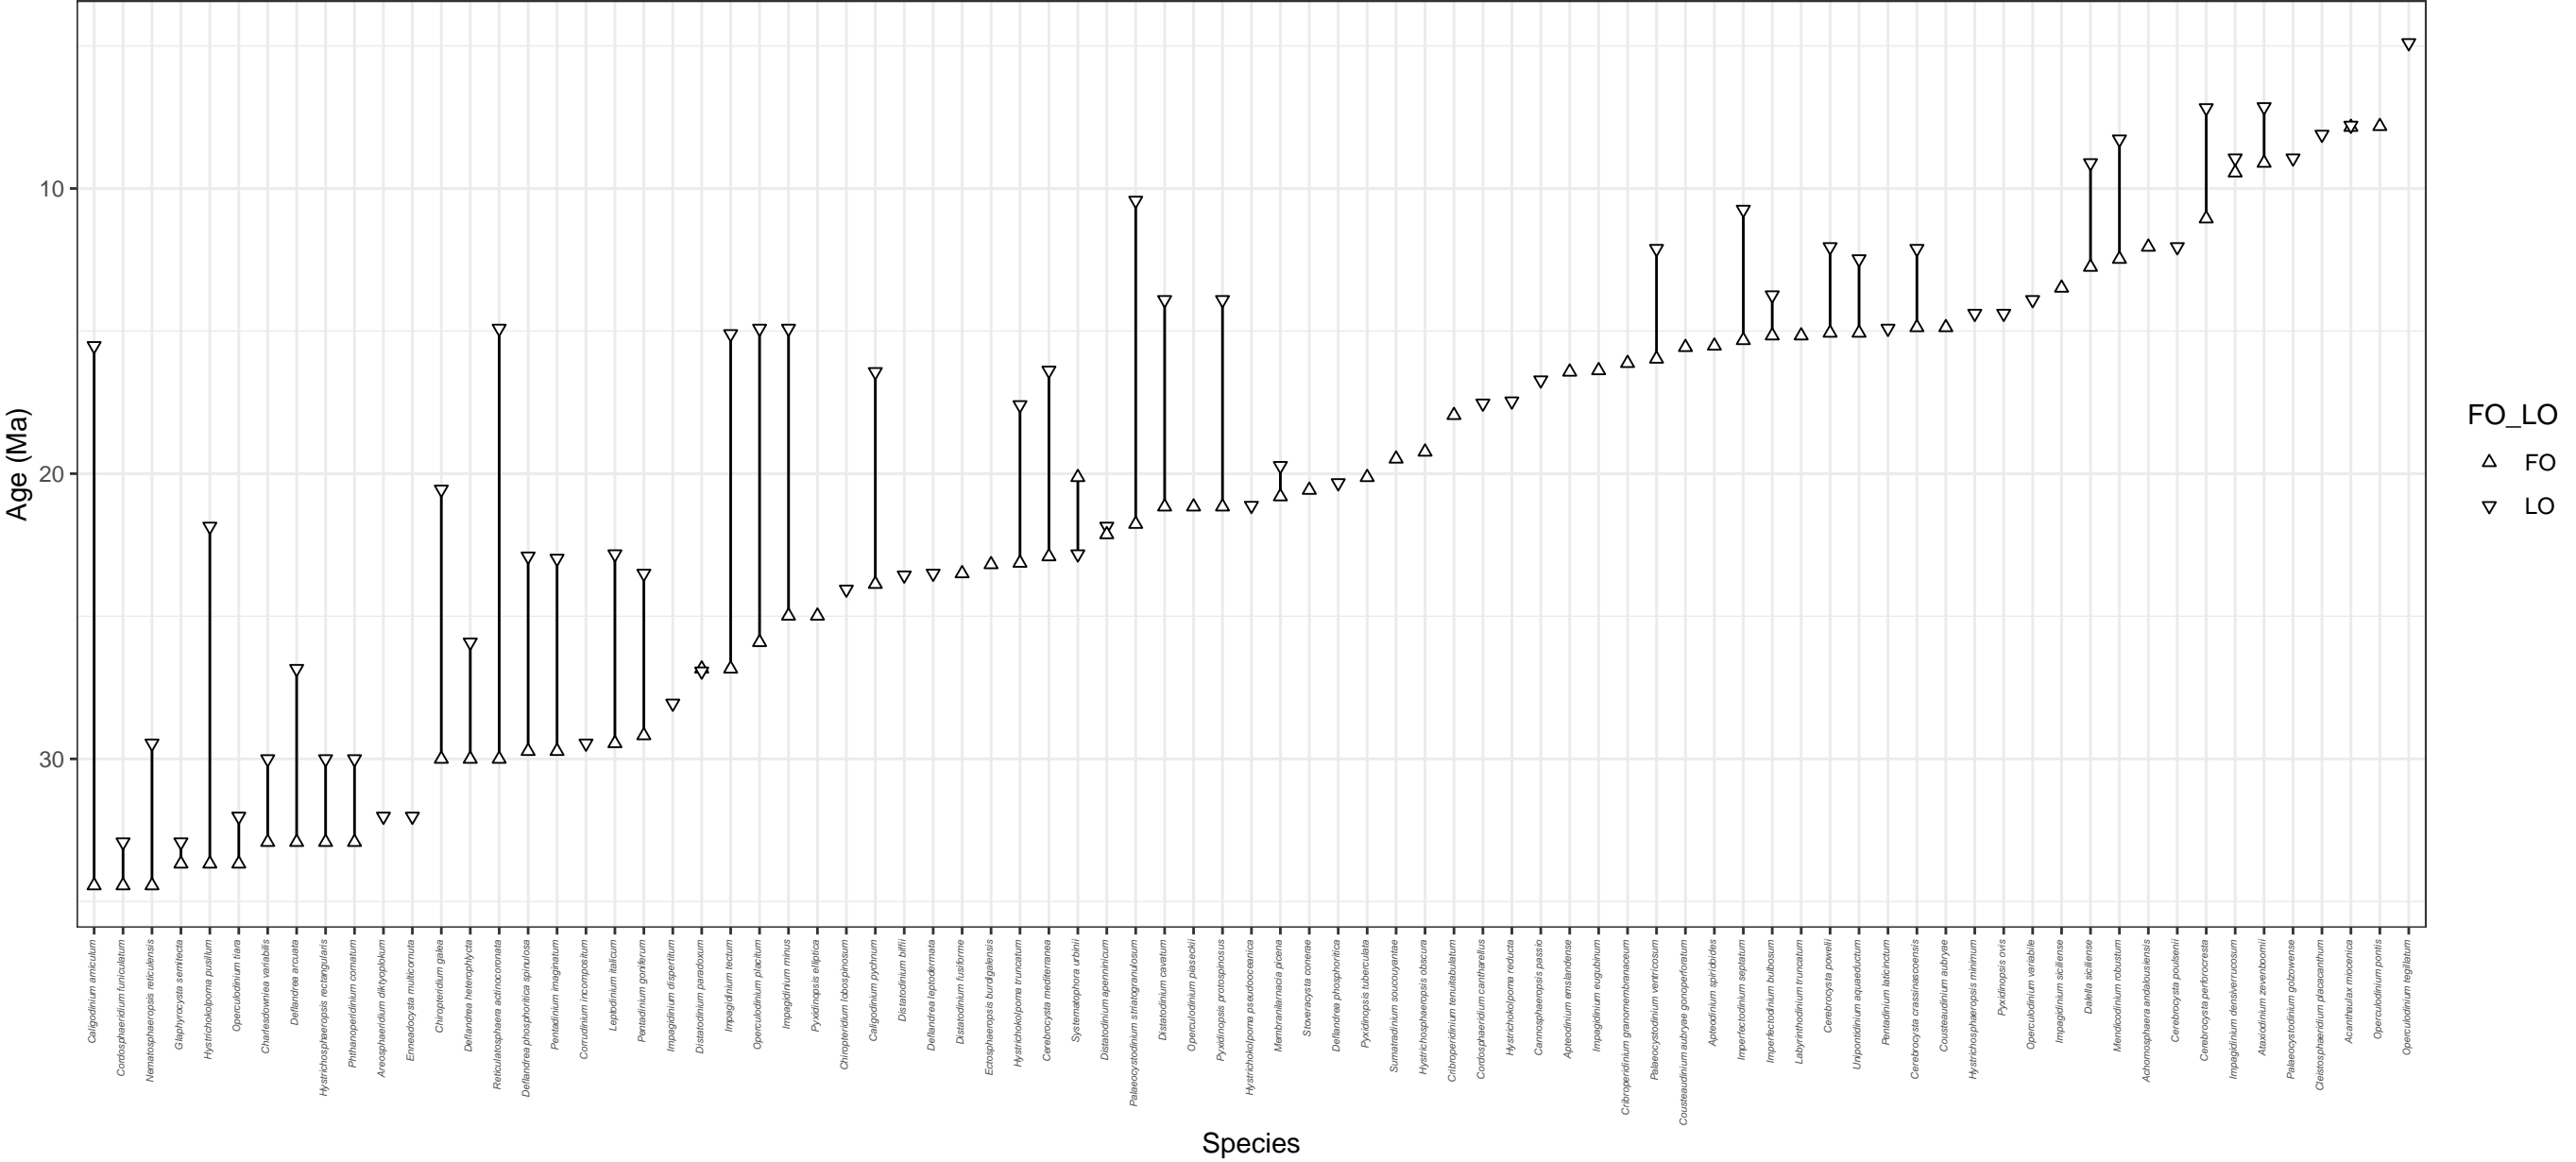

Supplement: Supplementary file 696 [file Site_Marche.pdf › Supplement/Supplement 2/Sites 188 plots/Site_Marche.pdf]

# Site

## Massignano

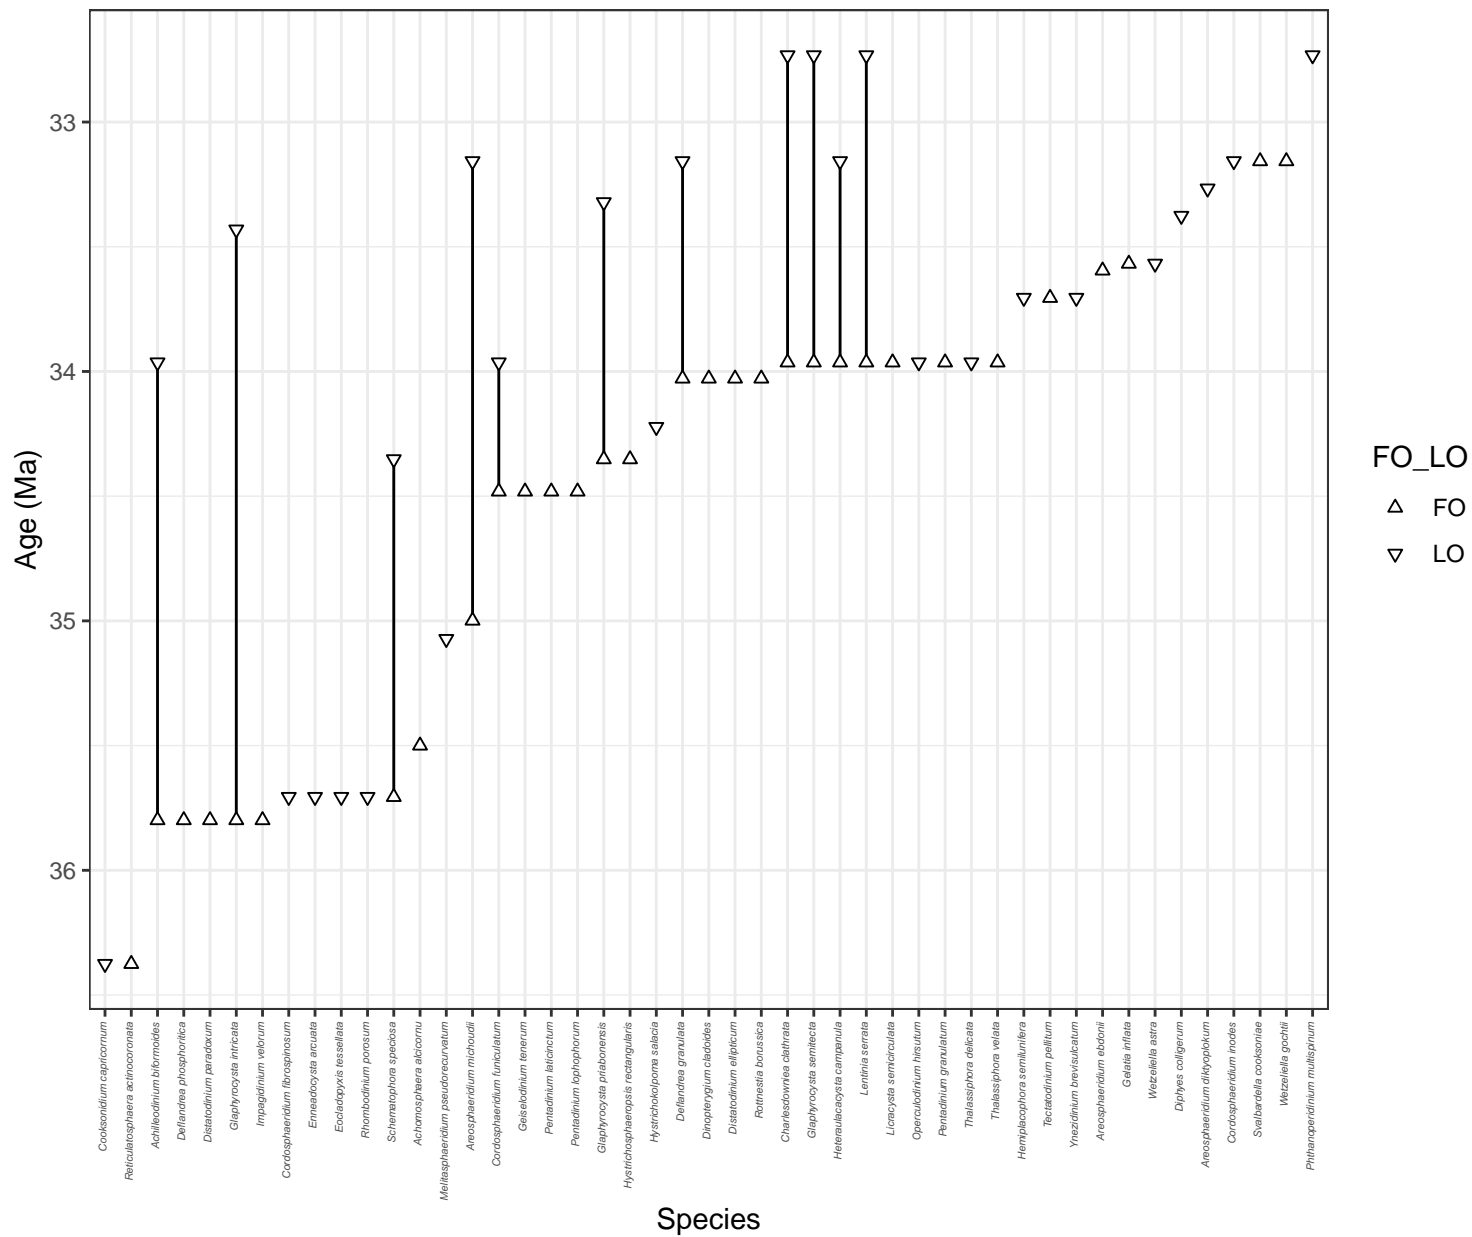

Supplement: Supplementary file 697 [file Site_Massignano.pdf › Supplement/Supplement 2/Sites 188 plots/Site_Massignano.pdf]

Site  
Massignano\_Monte Cagnero

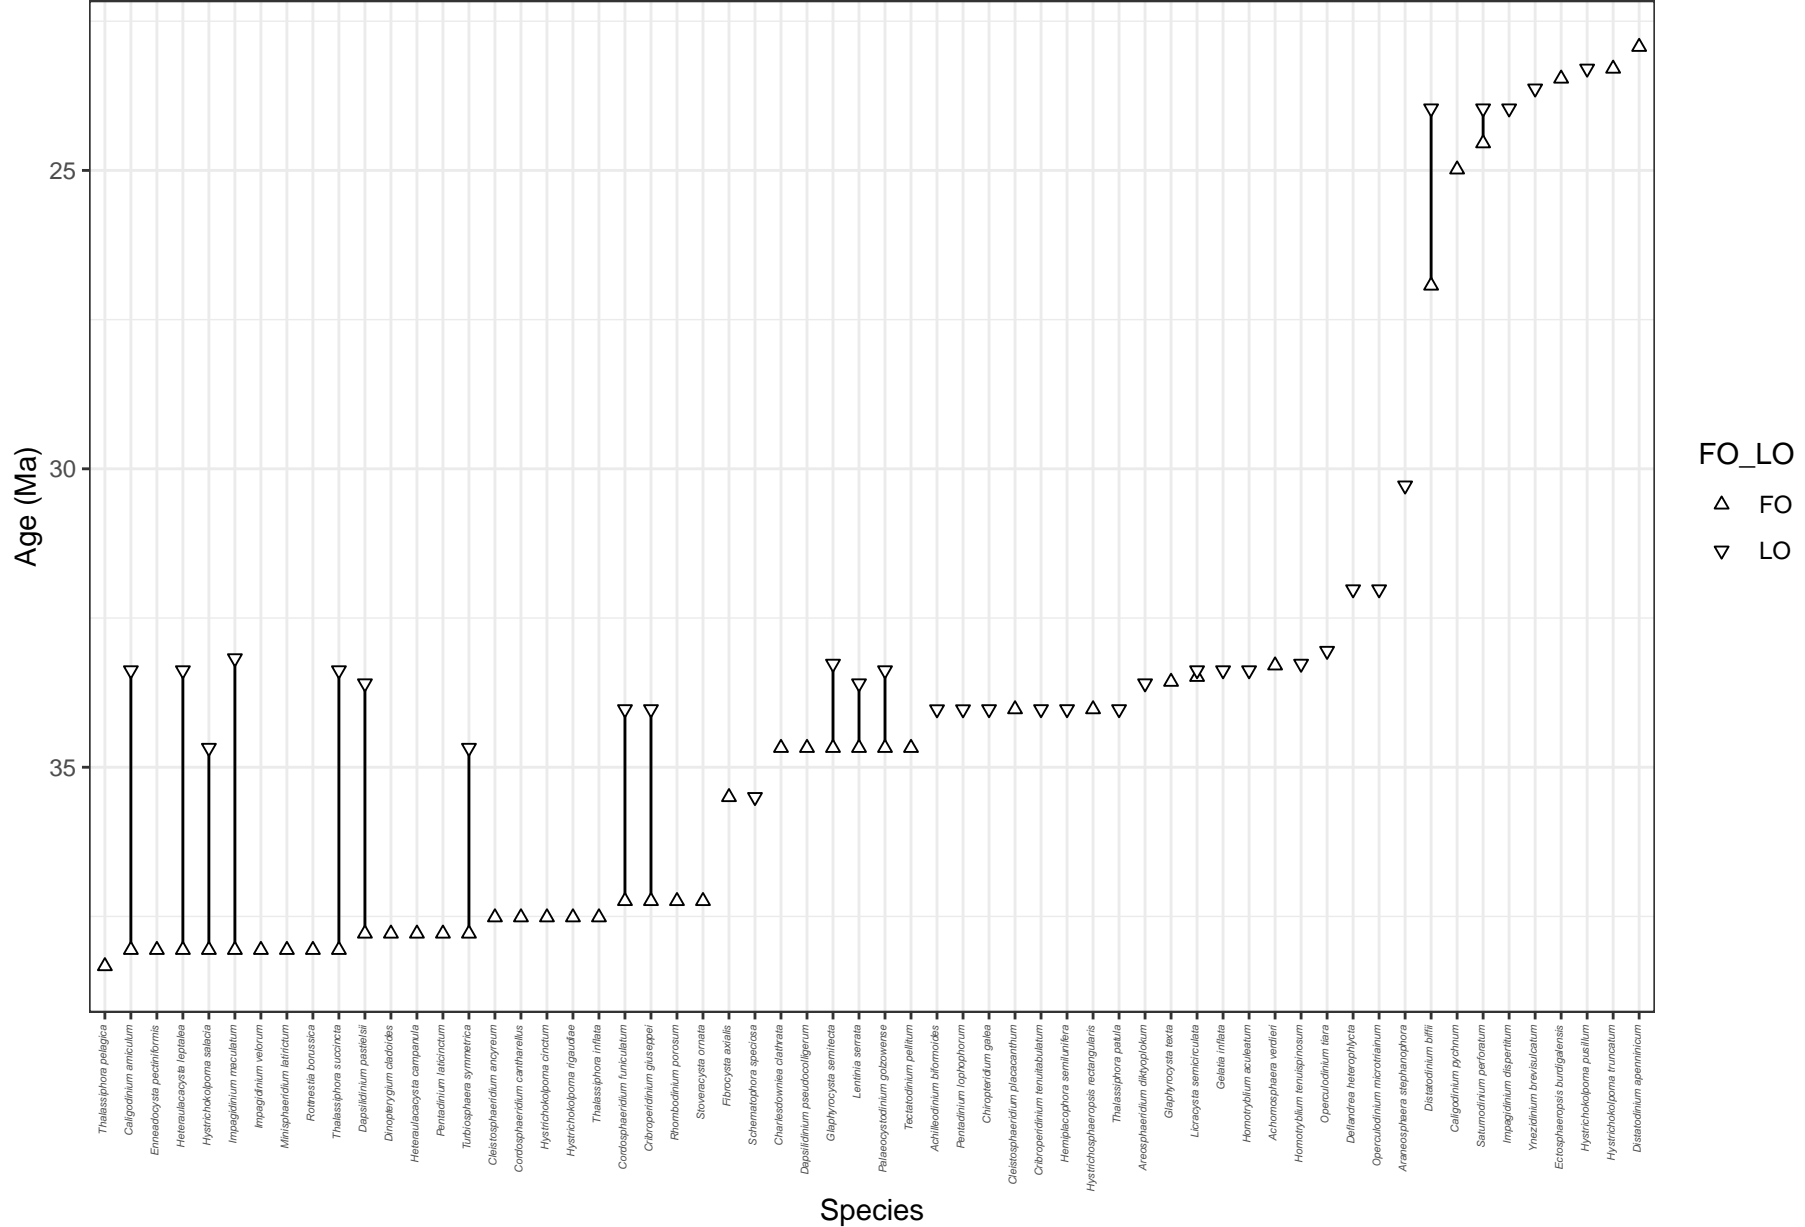

Supplement: Supplementary file 698 [file Site_Massignano_Monte Cagnero.pdf › Supplement/Supplement 2/Sites 188 plots/Site_Massignano_Monte Cagnero.pdf]

# Site Meer

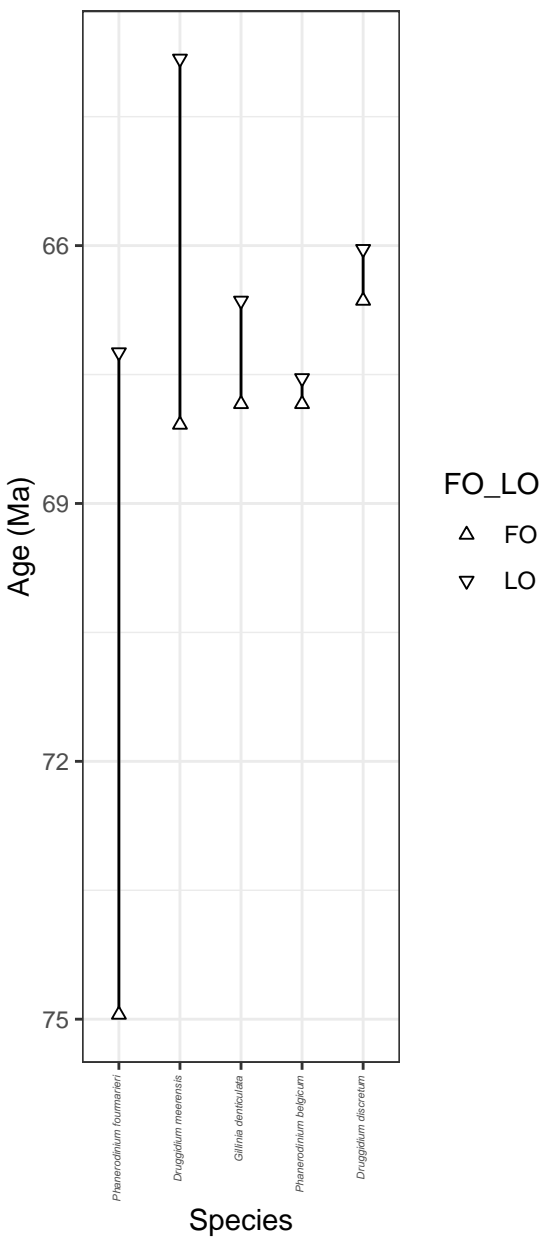

Supplement: Supplementary file 699 [file Site_Meer.pdf › Supplement/Supplement 2/Sites 188 plots/Site_Meer.pdf]

Site  
Milne Land

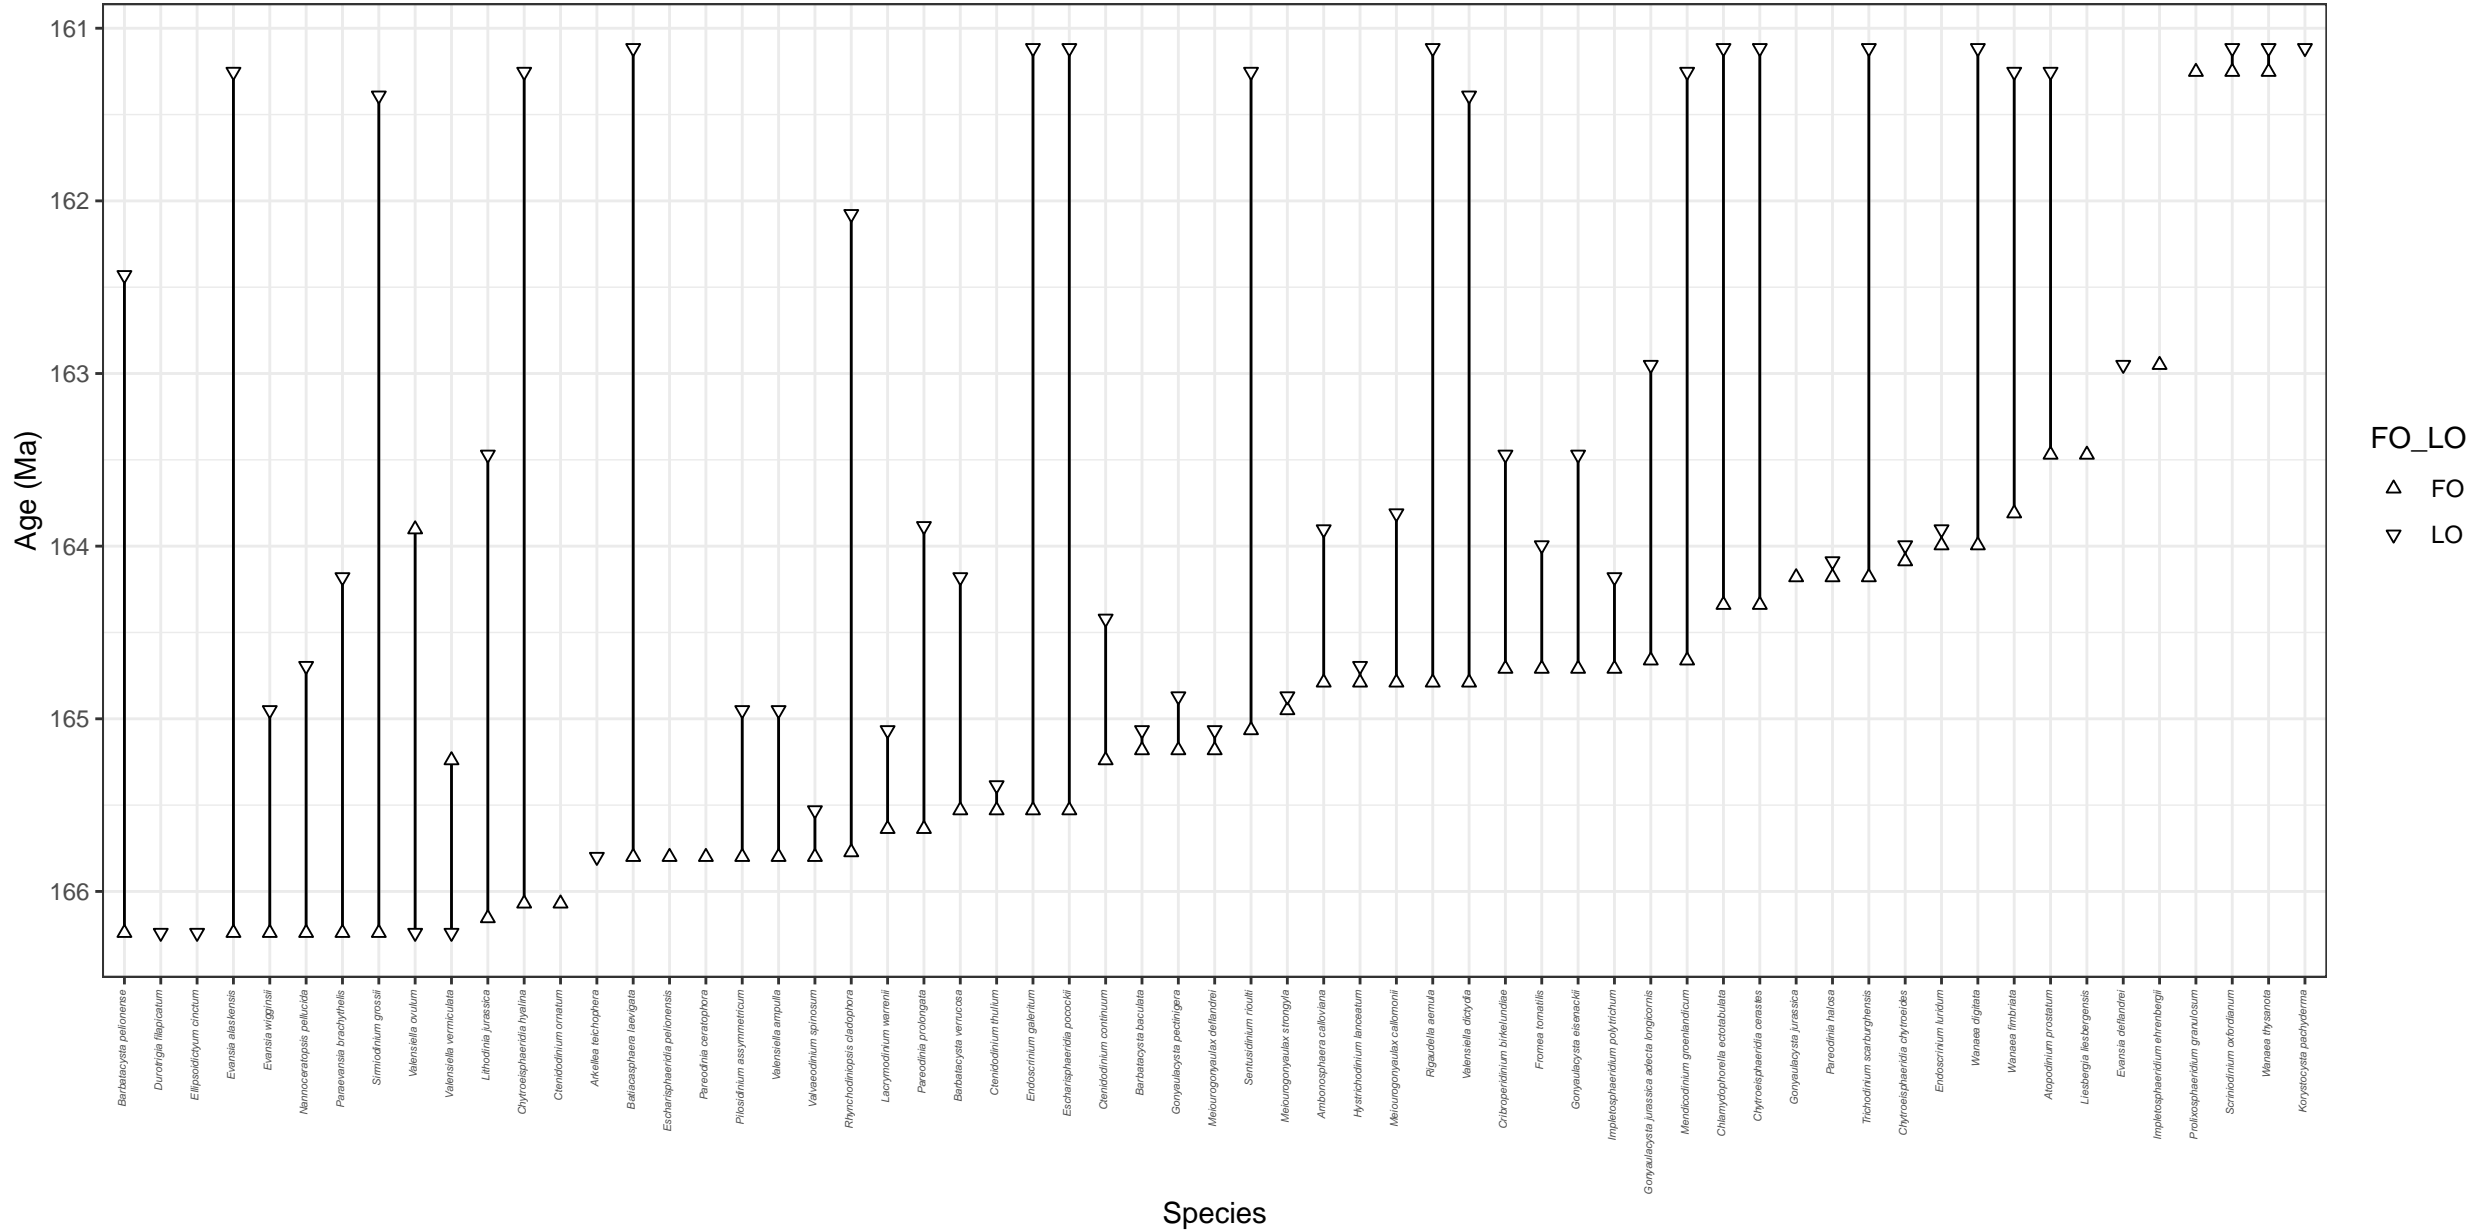

Supplement: Supplementary file 700 [file Site_Milne Land.pdf › Supplement/Supplement 2/Sites 188 plots/Site_Milne Land.pdf]

Site

Mudurnu Basin

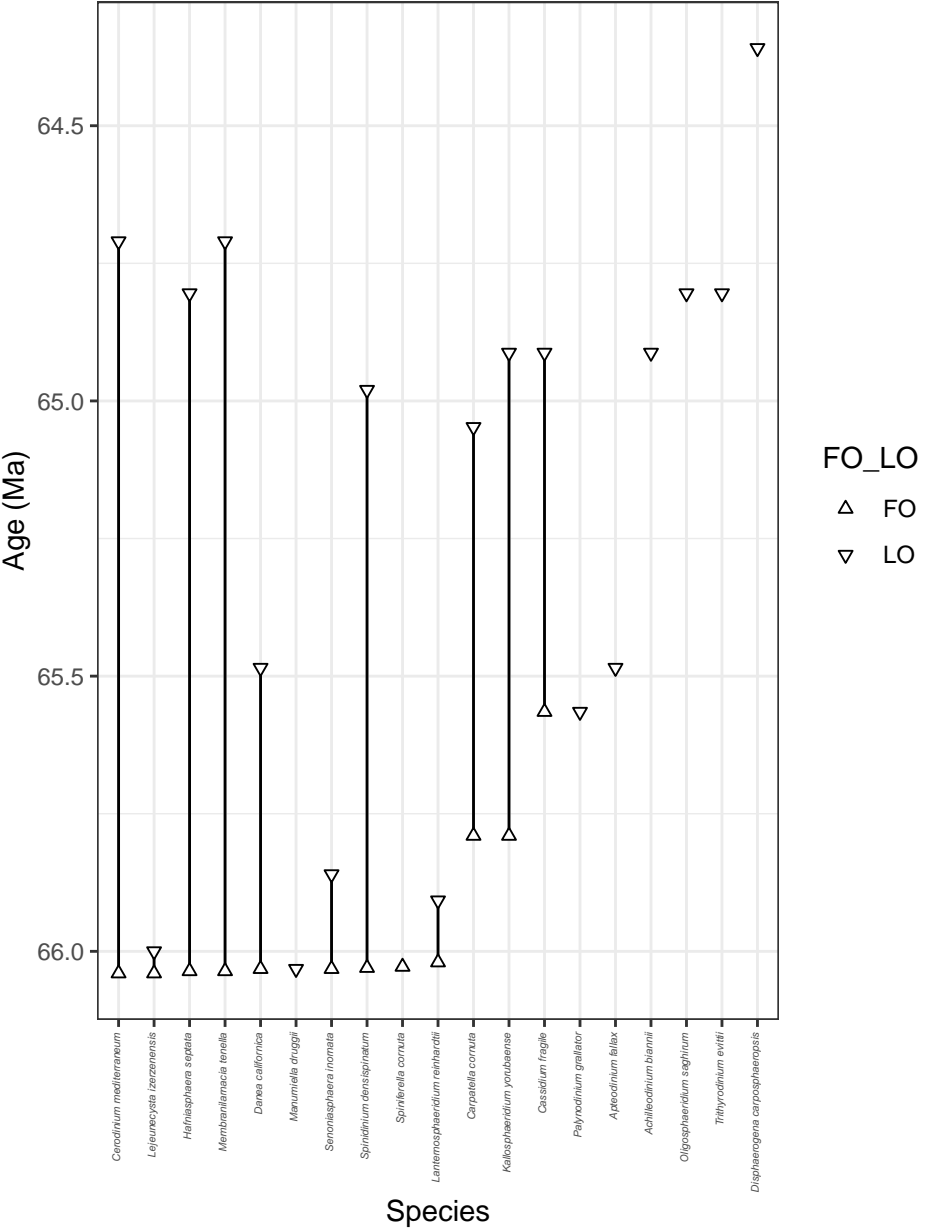

Supplement: Supplementary file 702 [file Site_Mudurnu Basin.pdf › Supplement/Supplement 2/Sites 188 plots/Site_Mudurnu Basin.pdf]

# Site

## Nordvik Peninsula

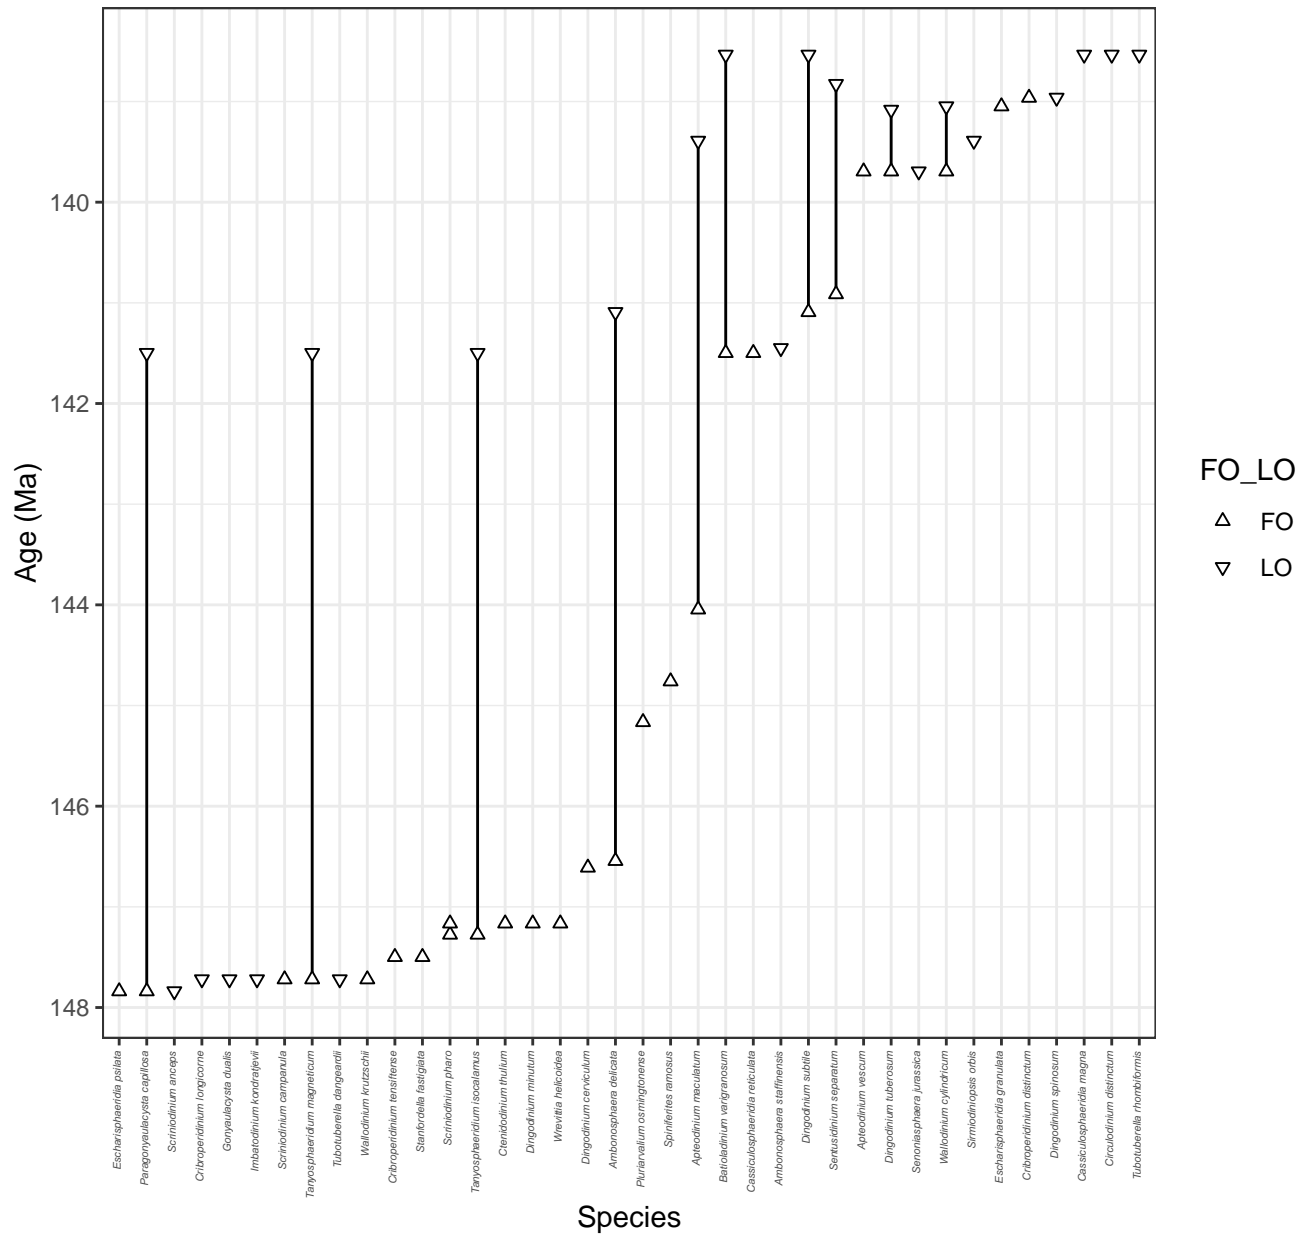

Supplement: Supplementary file 703 [file Site_Nordvik Peninsula.pdf › Supplement/Supplement 2/Sites 188 plots/Site_Nordvik Peninsula.pdf]

# Site

## North Sea Central Graben

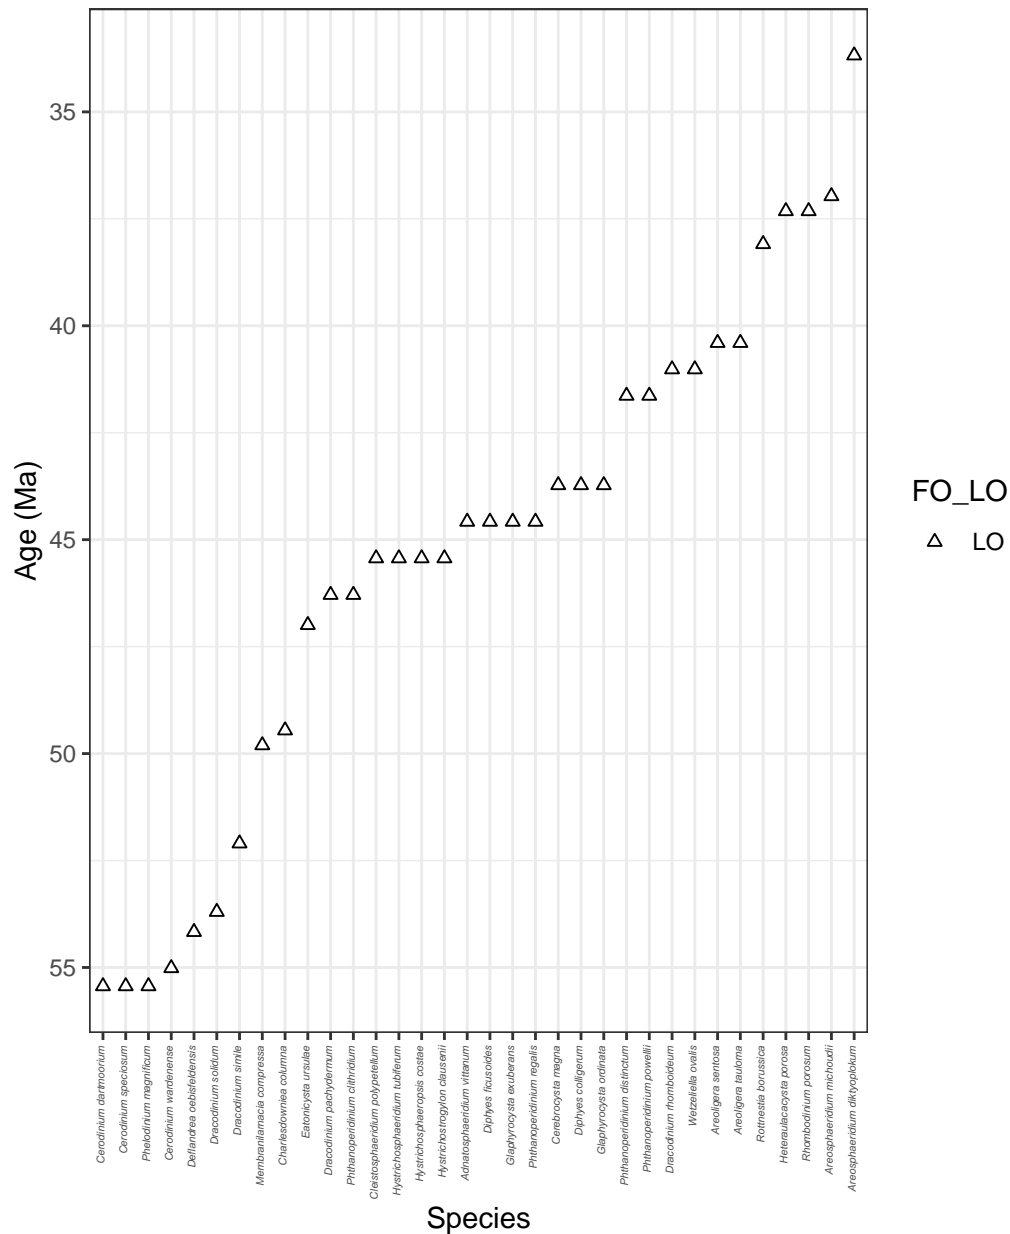

Supplement: Supplementary file 704 [file Site_North Sea Central Graben.pdf › Supplement/Supplement 2/Sites 188 plots/Site_North Sea Central Graben.pdf]

# Site

## North Sea Coast

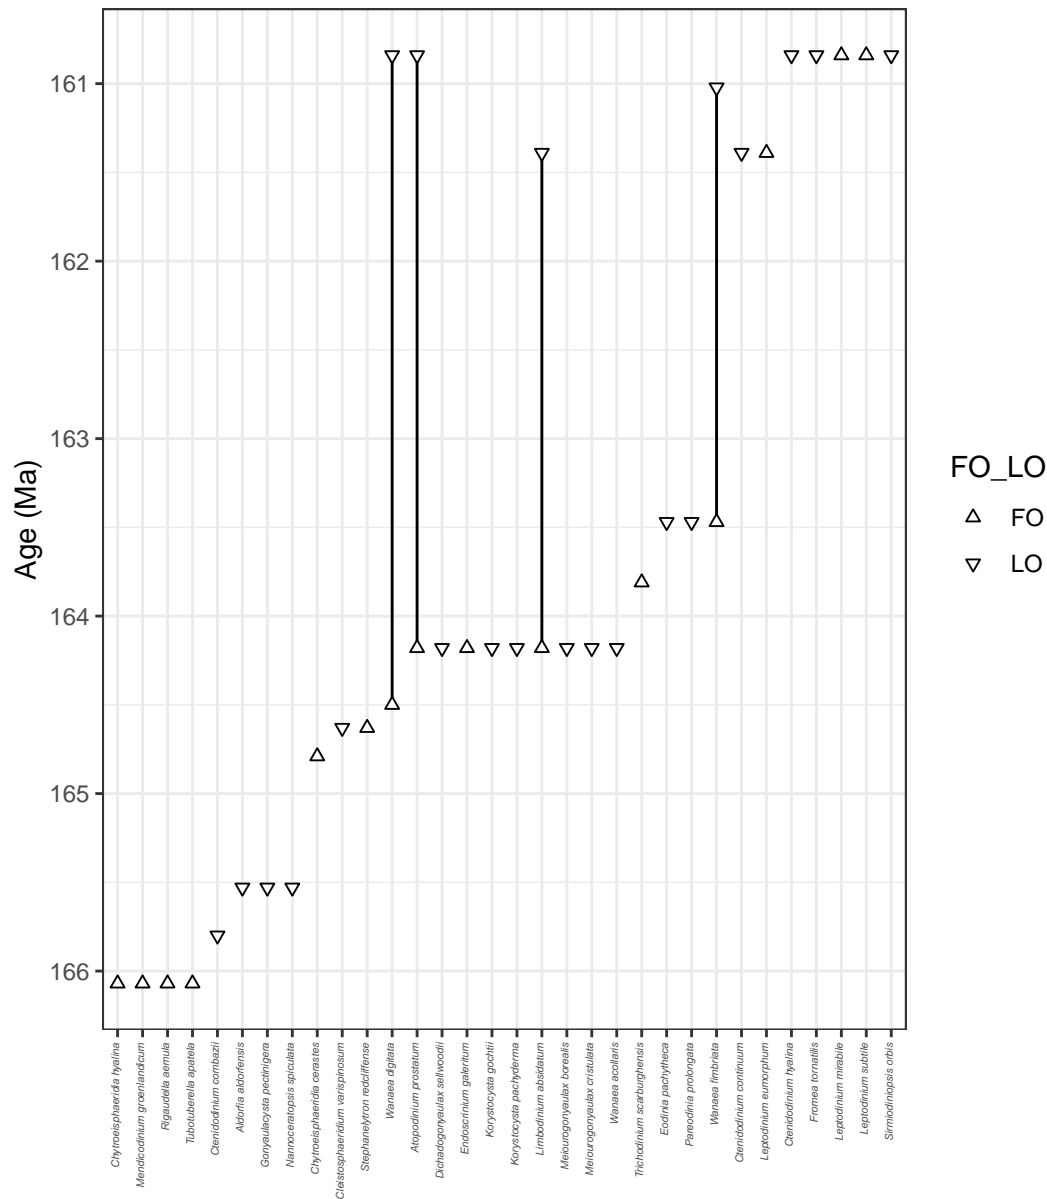

Supplement: Supplementary file 705 [file Site_North Sea Coast.pdf › Supplement/Supplement 2/Sites 188 plots/Site_North Sea Coast.pdf]

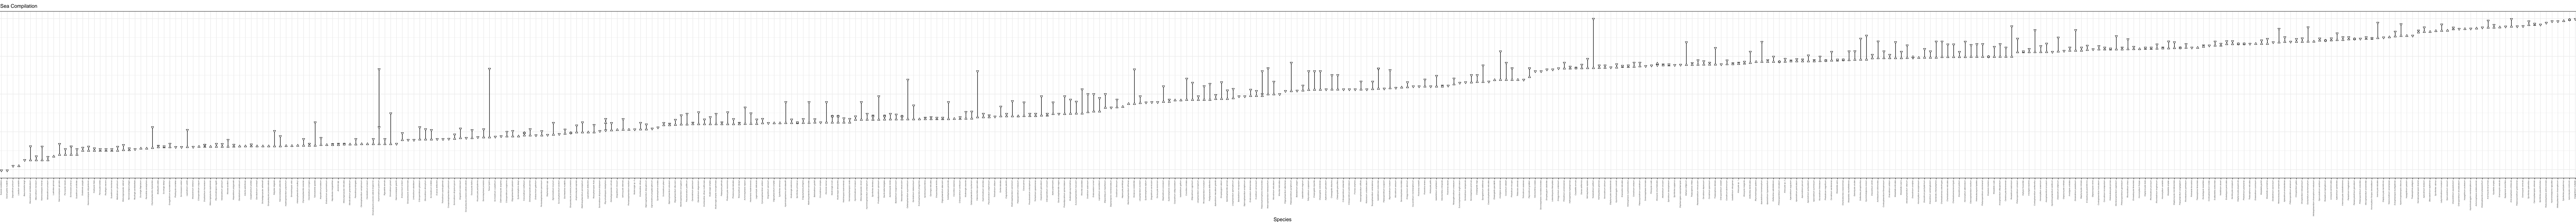

FO\_LO  
△ FO  
▽ LO

Supplement: Supplementary file 706 [file Site_North Sea Compilation.pdf › Supplement/Supplement 2/Sites 188 plots/Site_North Sea Compilation.pdf]

# Site

## North Yorkshire

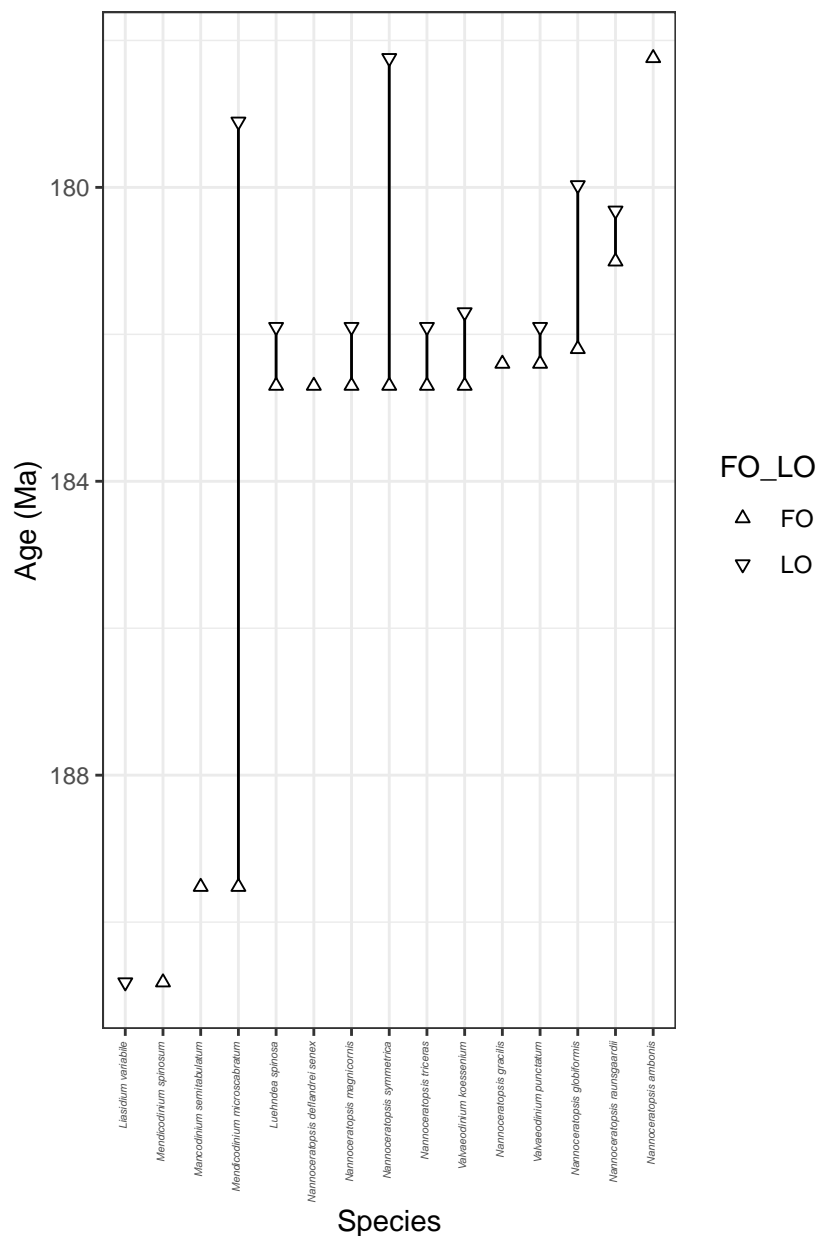

Supplement: Supplementary file 707 [file Site_North Yorkshire.pdf › Supplement/Supplement 2/Sites 188 plots/Site_North Yorkshire.pdf]

# Site

Nuussuaq basin

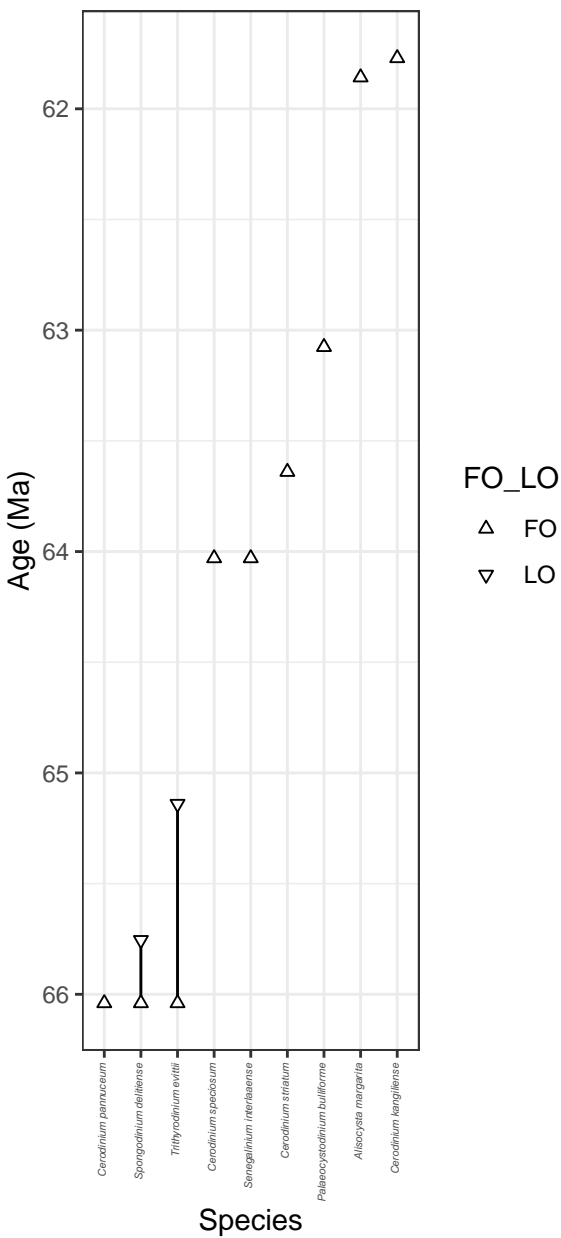

Supplement: Supplementary file 708 [file Site_Nuussuaq basin.pdf › Supplement/Supplement 2/Sites 188 plots/Site_Nuussuaq basin.pdf]

Site  
Oga

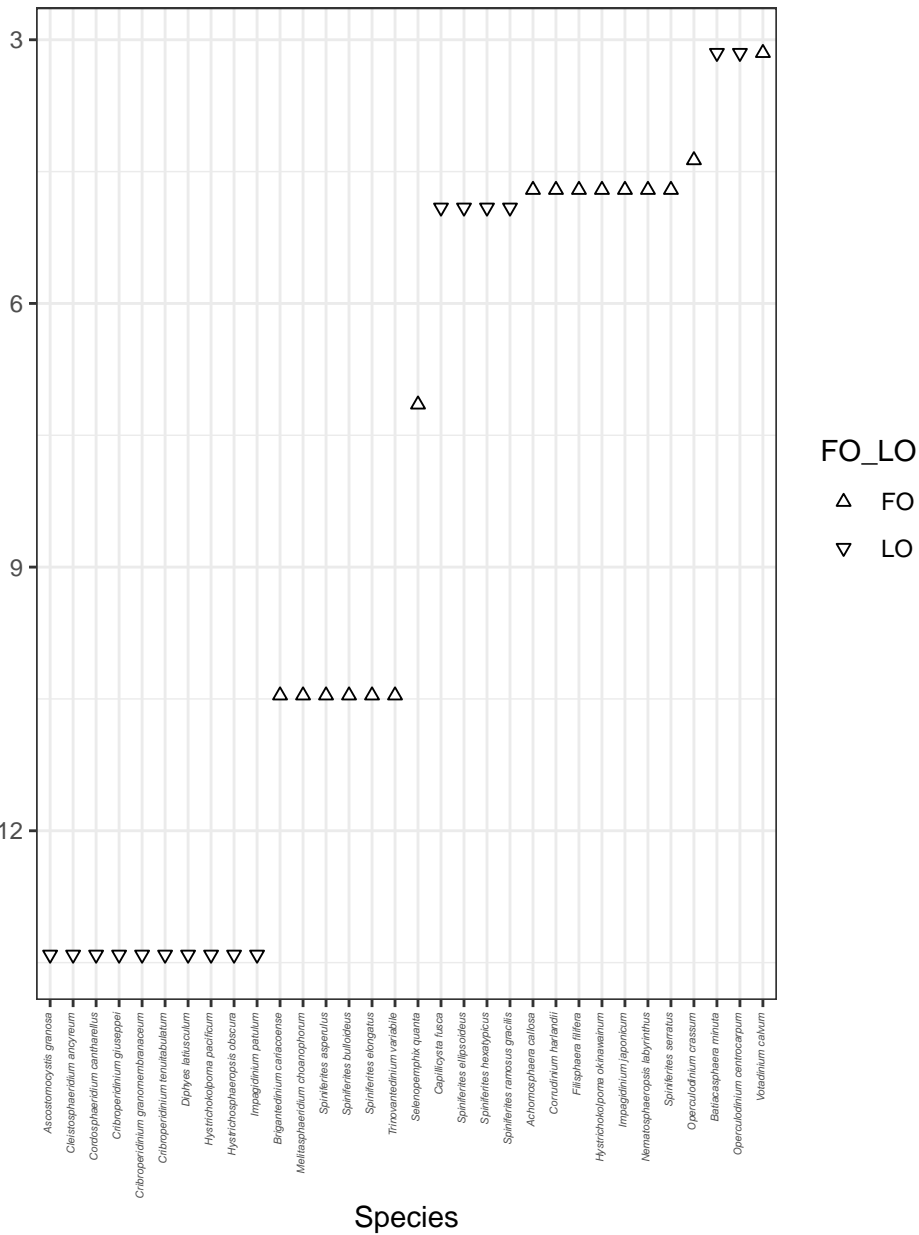

Supplement: Supplementary file 709 [file Site_Oga.pdf › Supplement/Supplement 2/Sites 188 plots/Site_Oga.pdf]

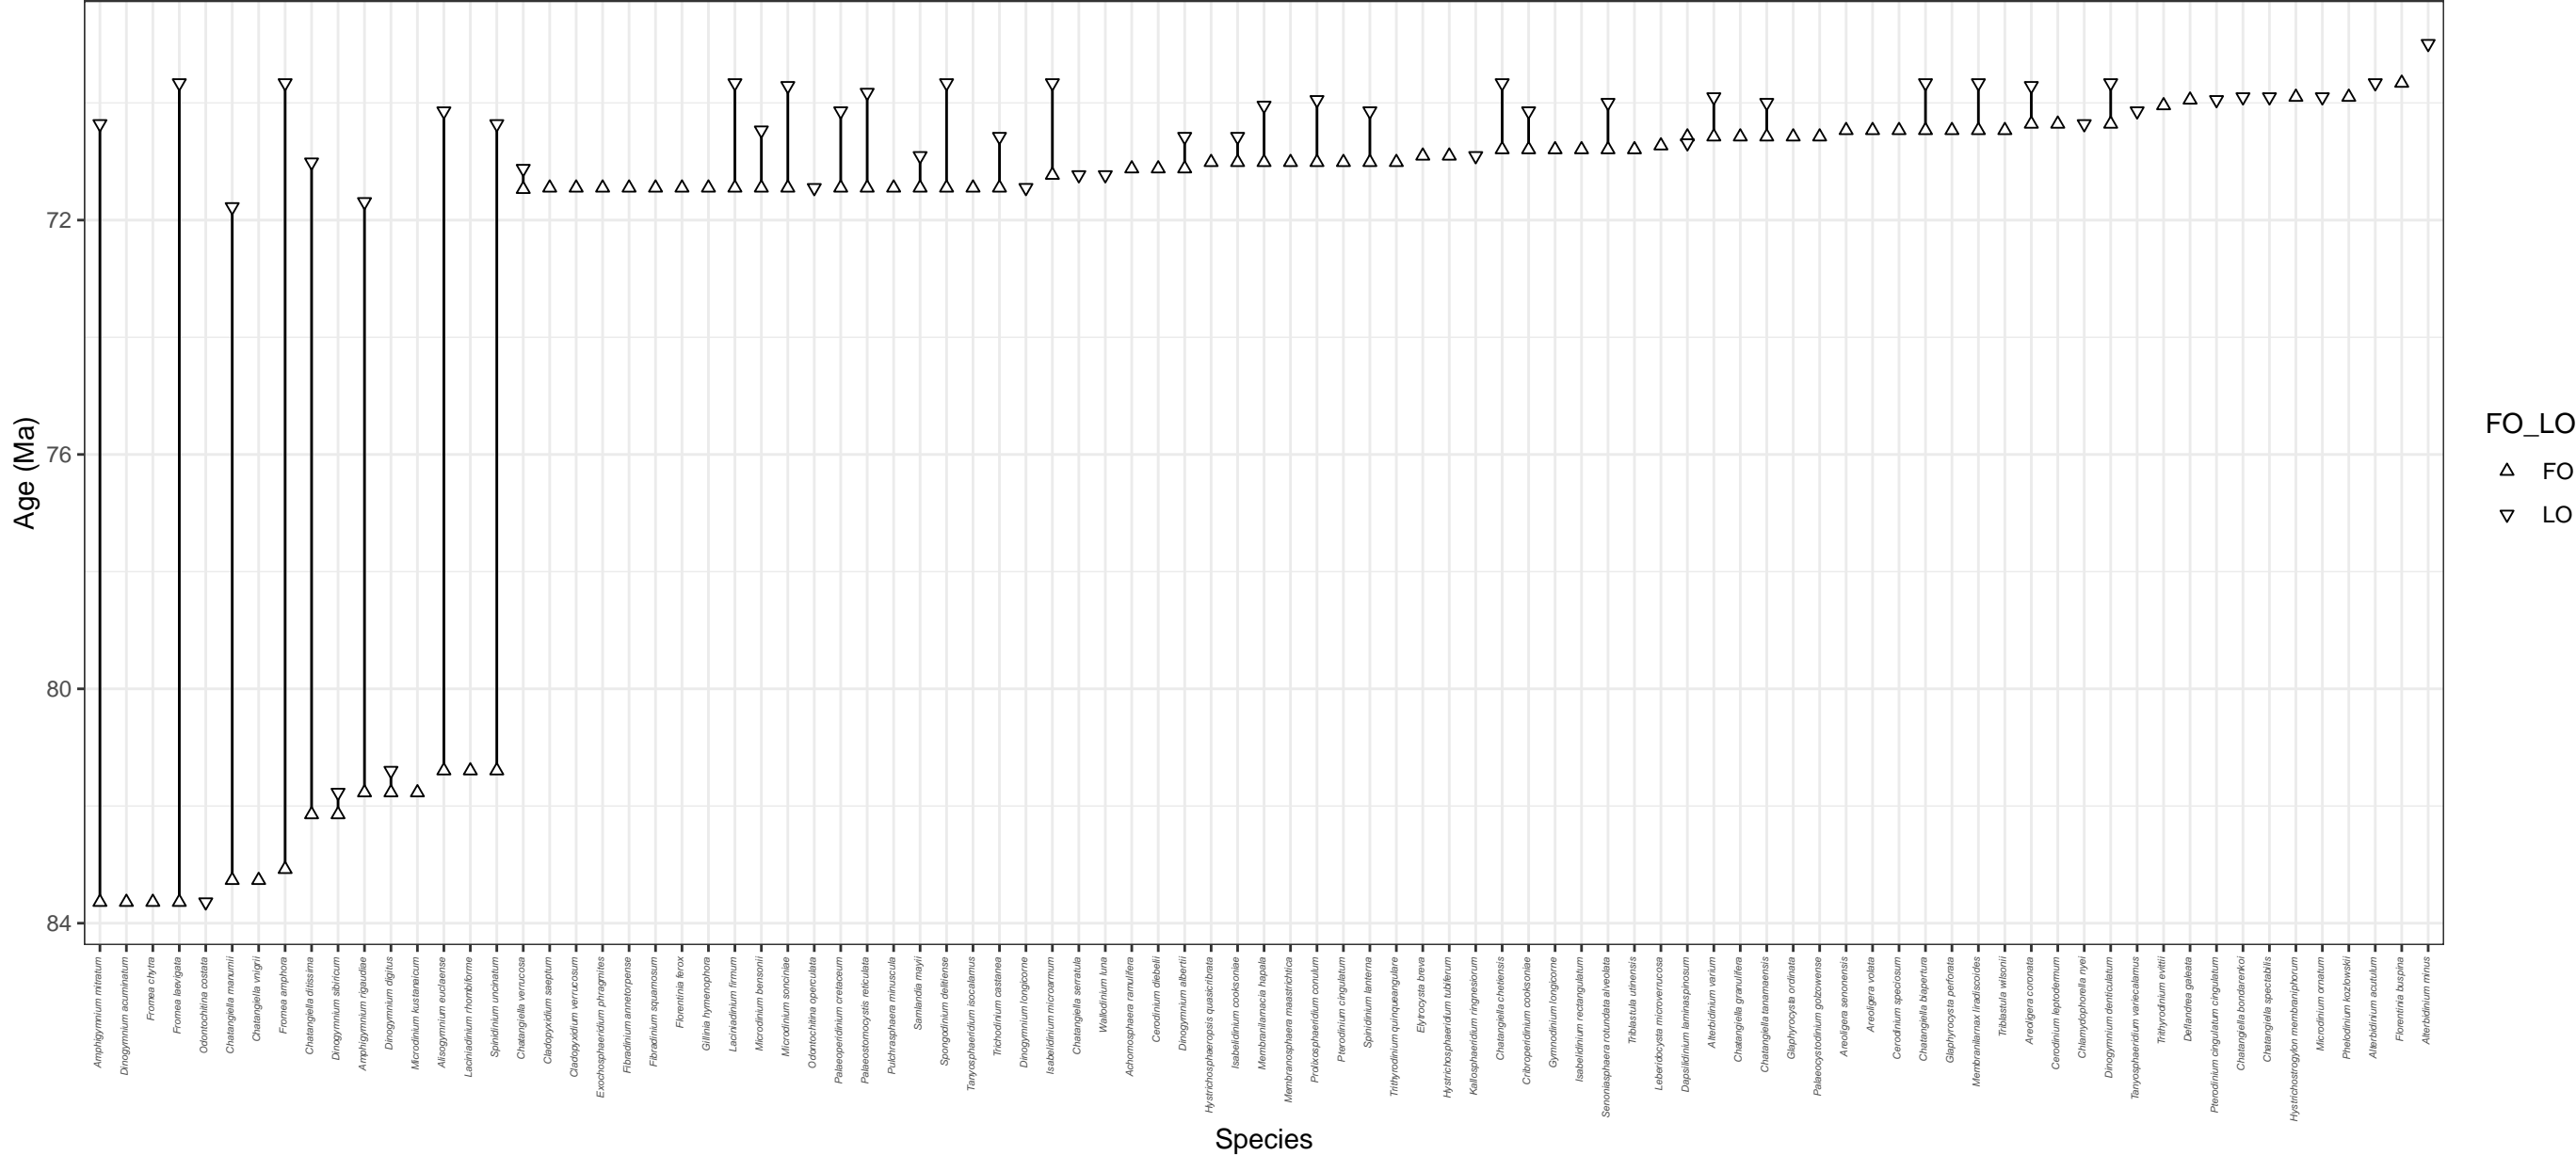

Supplement: Supplementary file 710 [file Site_Omsk No. 8.pdf › Supplement/Supplement 2/Sites 188 plots/Site_Omsk No. 8.pdf]

Site

Paksa

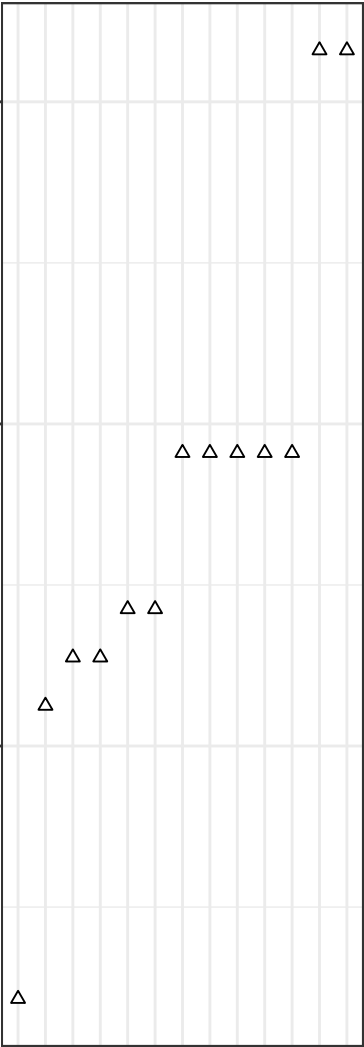

FO\_LO

△

LO

Species

Supplement: Supplementary file 711 [file Site_Paksa.pdf › Supplement/Supplement 2/Sites 188 plots/Site_Paksa.pdf]

Site

Papendorf

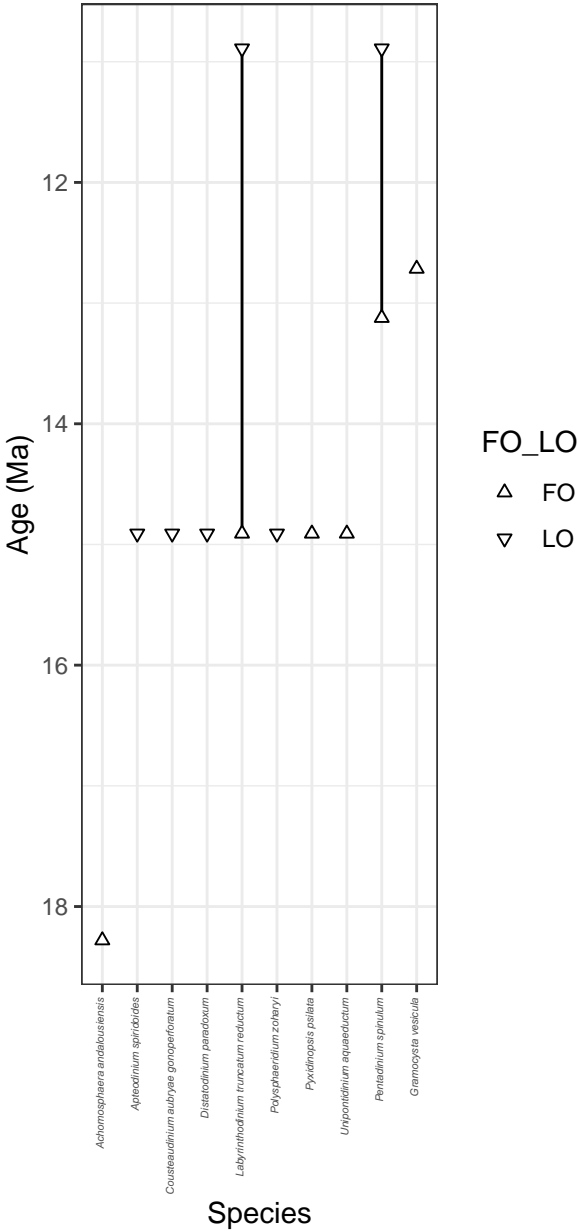

Supplement: Supplementary file 712 [file Site_Papendorf.pdf › Supplement/Supplement 2/Sites 188 plots/Site_Papendorf.pdf]

Site

Portugal

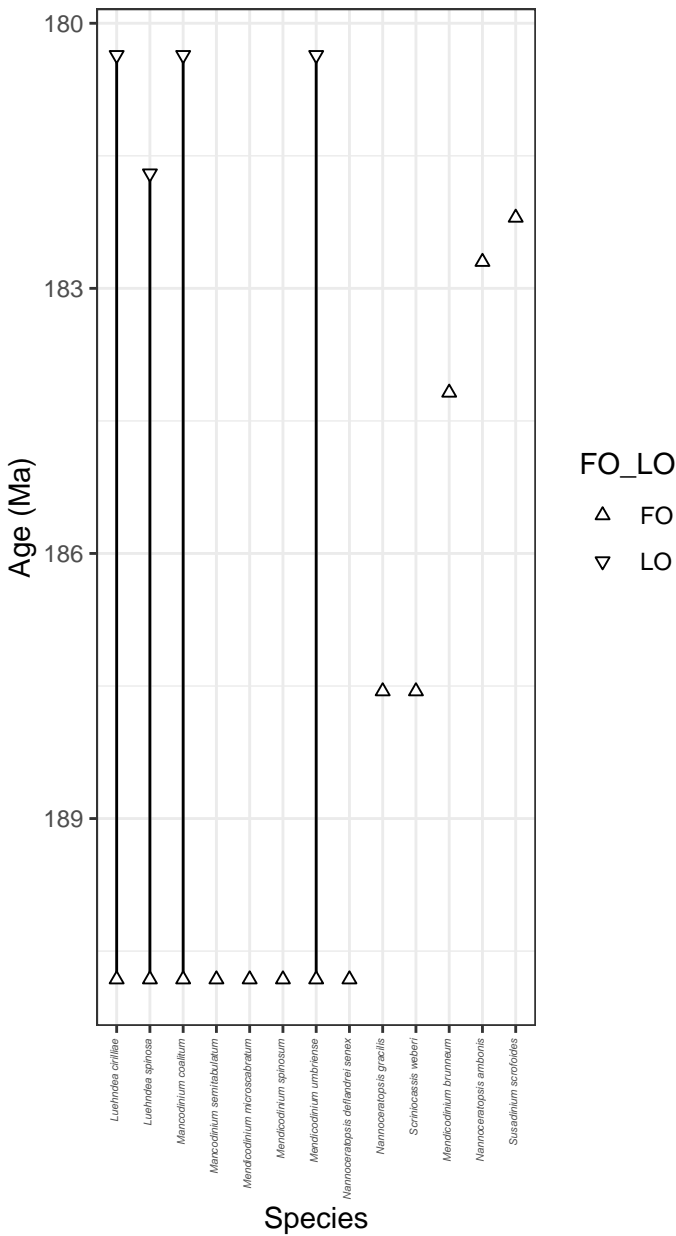

Supplement: Supplementary file 714 [file Site_Portugal.pdf › Supplement/Supplement 2/Sites 188 plots/Site_Portugal.pdf]

# Site

## Pozzale

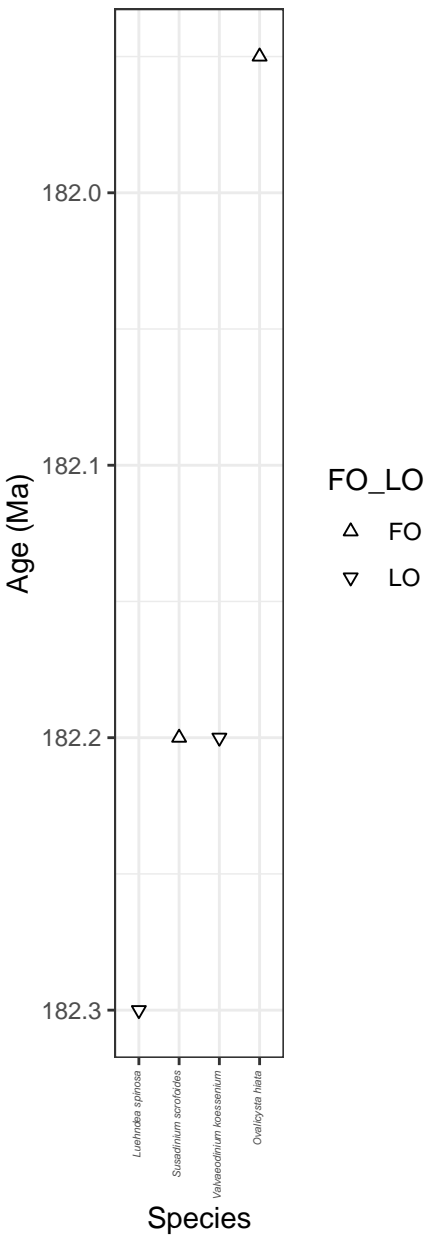

Supplement: Supplementary file 715 [file Site_Pozzale.pdf › Supplement/Supplement 2/Sites 188 plots/Site_Pozzale.pdf]

Site  
Priabona

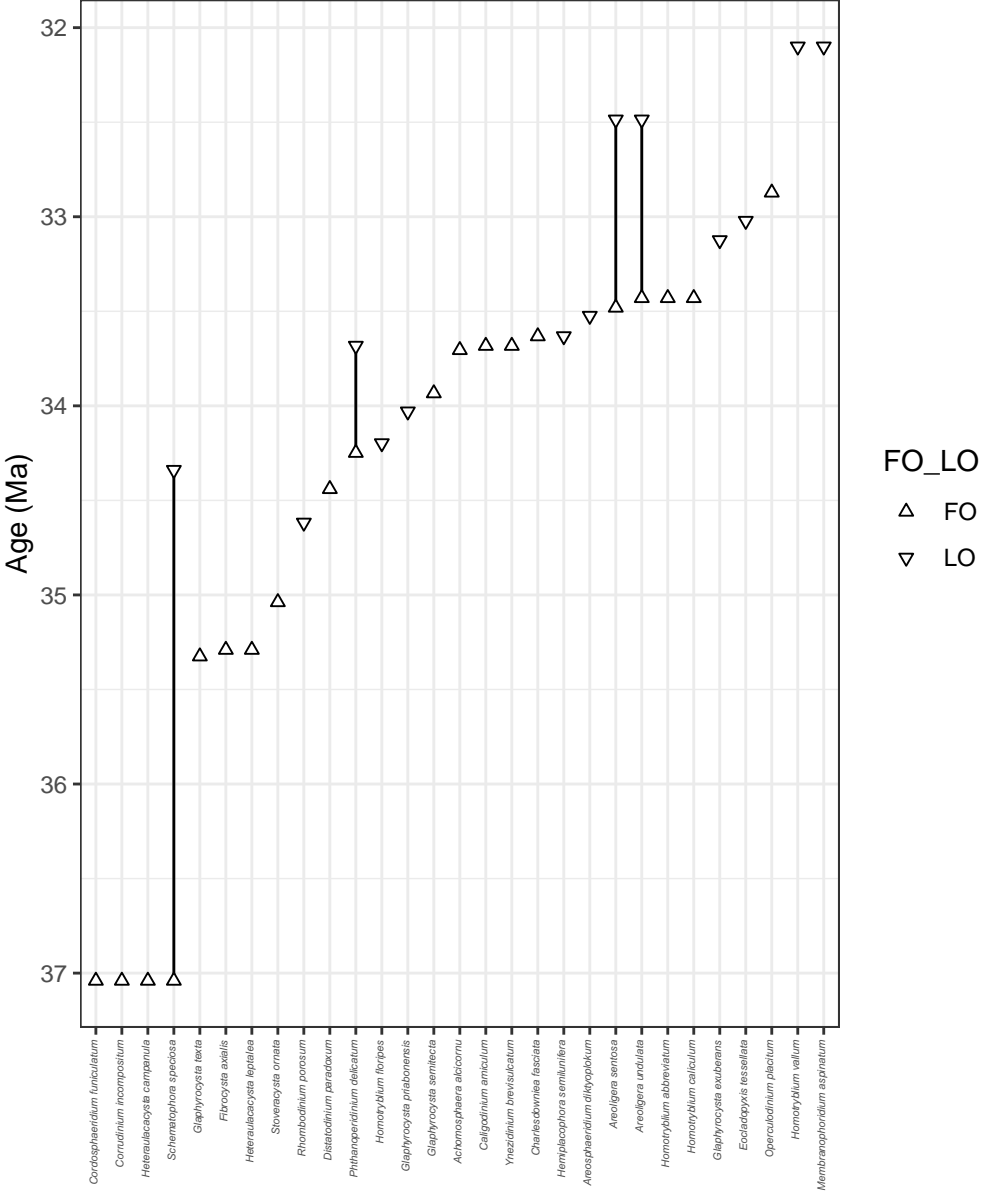

Supplement: Supplementary file 716 [file Site_Priabona.pdf › Supplement/Supplement 2/Sites 188 plots/Site_Priabona.pdf]

# Site Pueblo

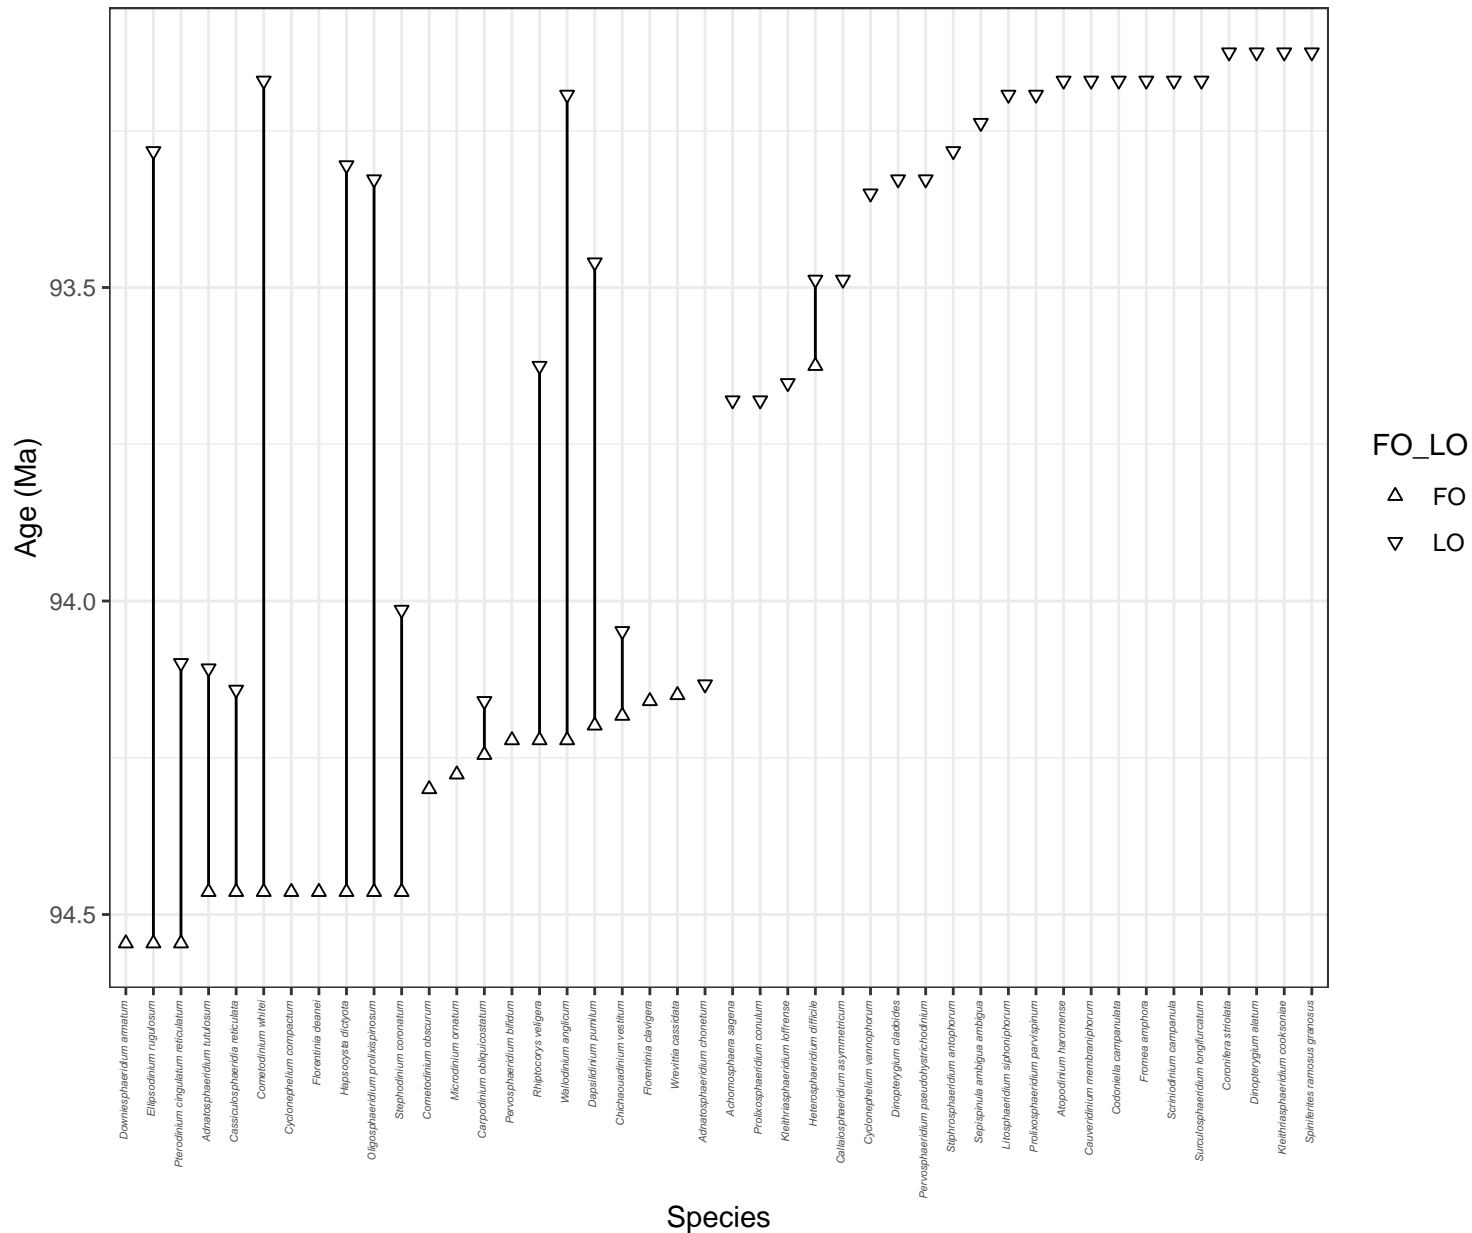

Supplement: Supplementary file 717 [file Site_Pueblo.pdf › Supplement/Supplement 2/Sites 188 plots/Site_Pueblo.pdf]

Site  
Q13\_14

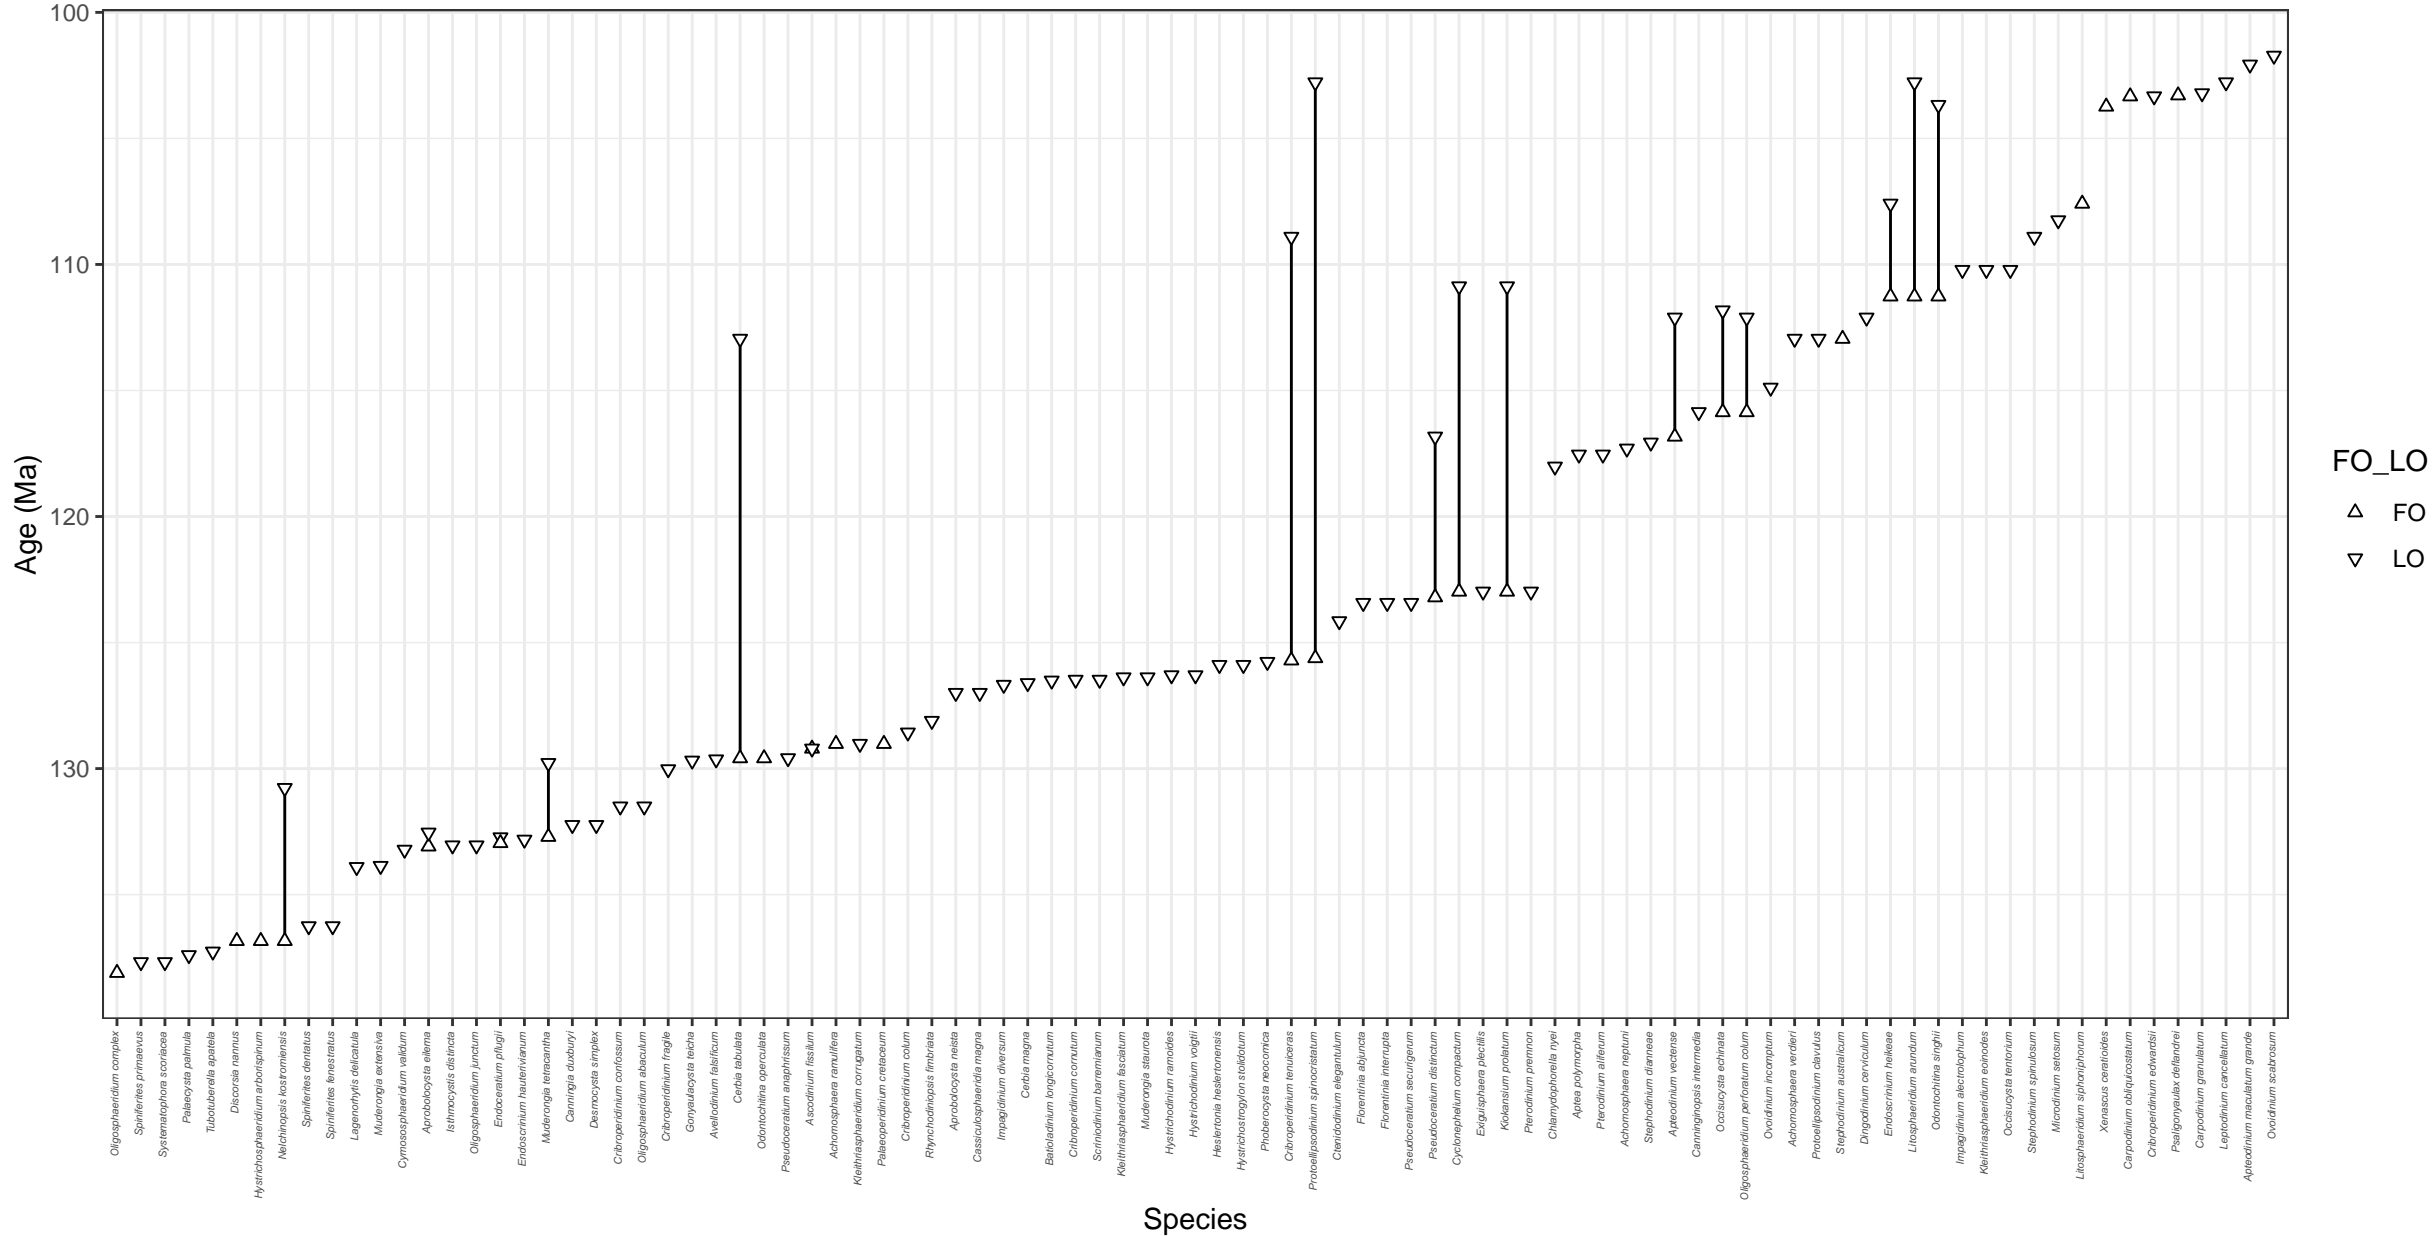

Supplement: Supplementary file 718 [file Site_Q13_14.pdf › Supplement/Supplement 2/Sites 188 plots/Site_Q13_14.pdf]

# Site Quercy

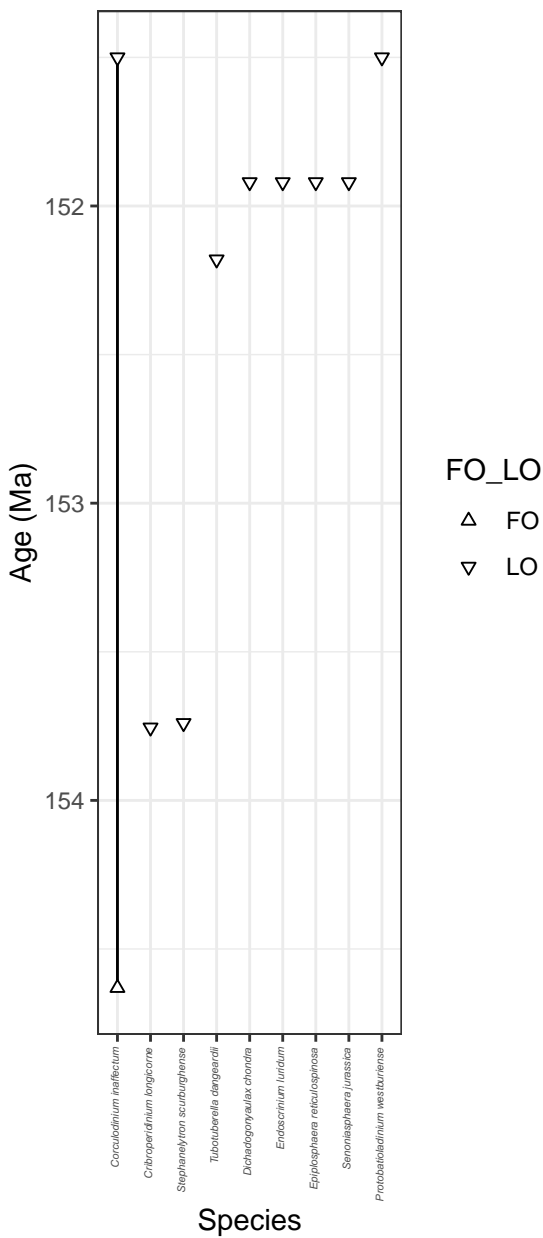

Supplement: Supplementary file 719 [file Site_Quercy.pdf › Supplement/Supplement 2/Sites 188 plots/Site_Quercy.pdf]

# Site

## Quercy2

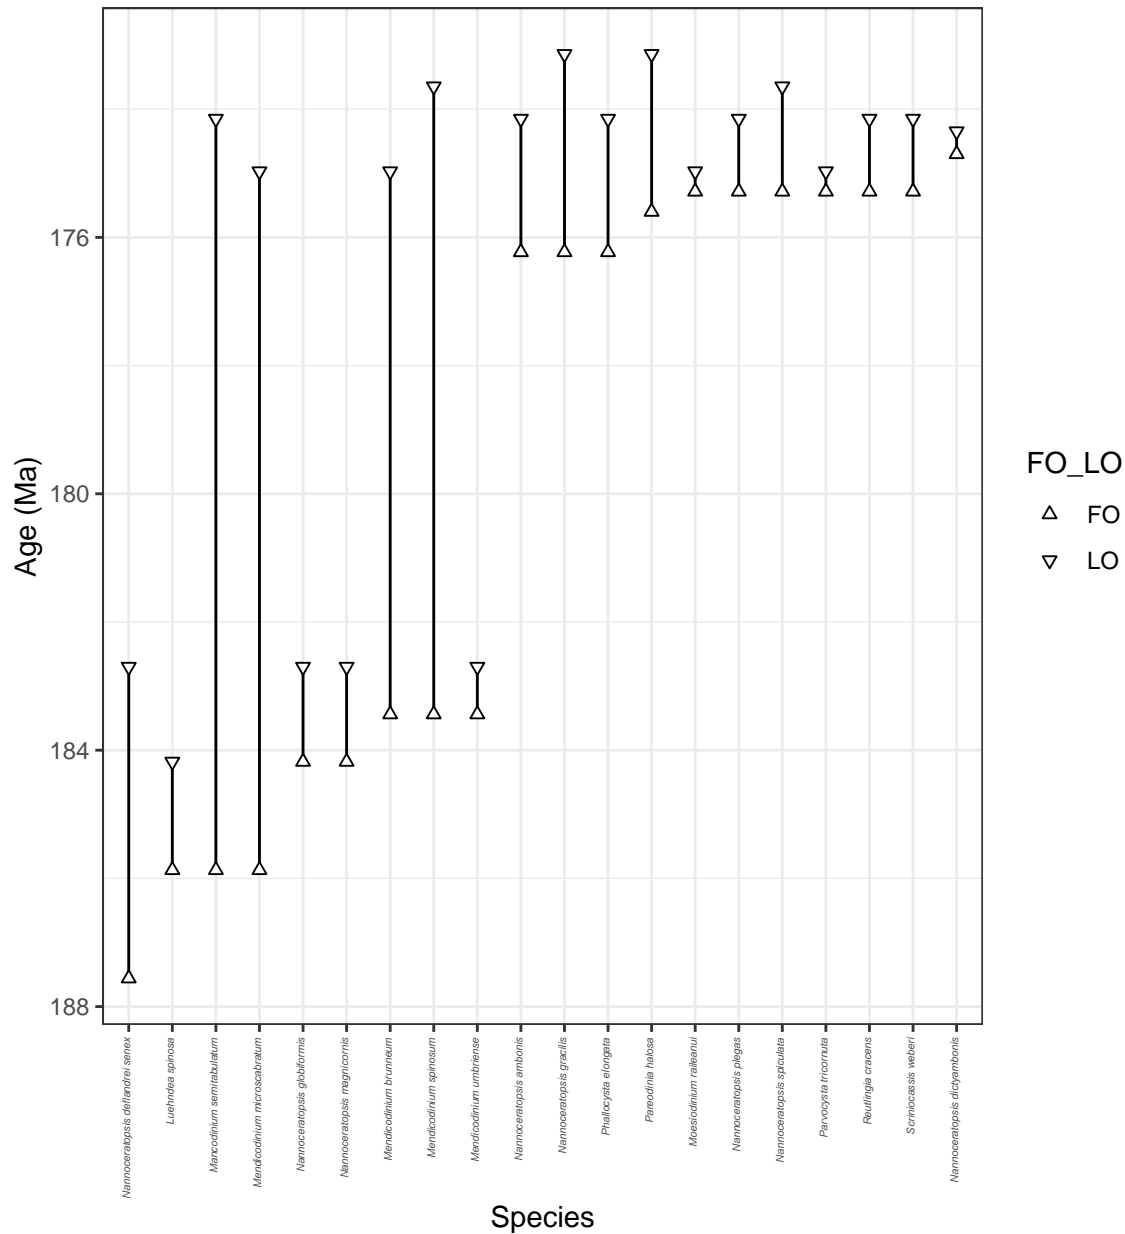

Supplement: Supplementary file 720 [file Site_Quercy2.pdf › Supplement/Supplement 2/Sites 188 plots/Site_Quercy2.pdf]

# Site

Rhine graben

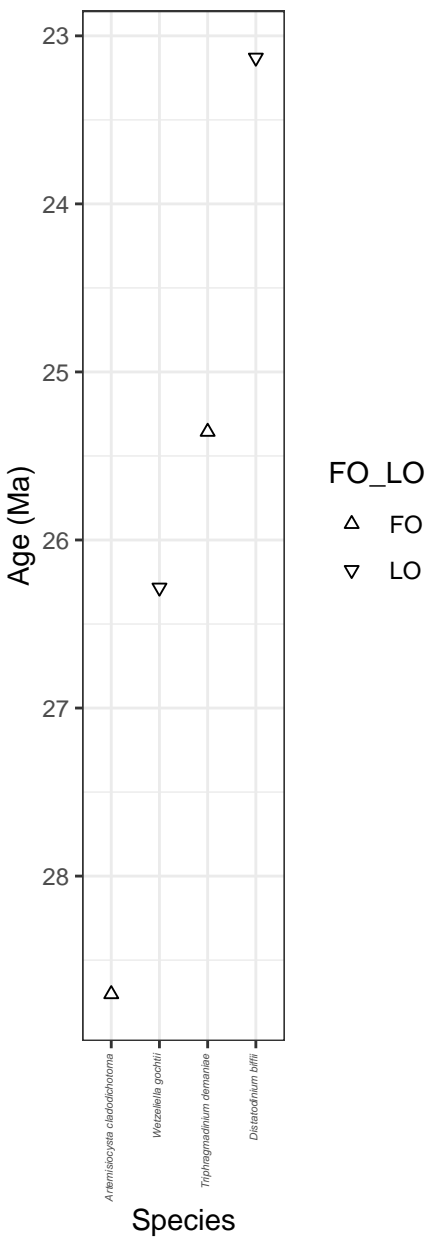

Supplement: Supplementary file 721 [file Site_Rhine graben.pdf › Supplement/Supplement 2/Sites 188 plots/Site_Rhine graben.pdf]

Site

Rio Argos

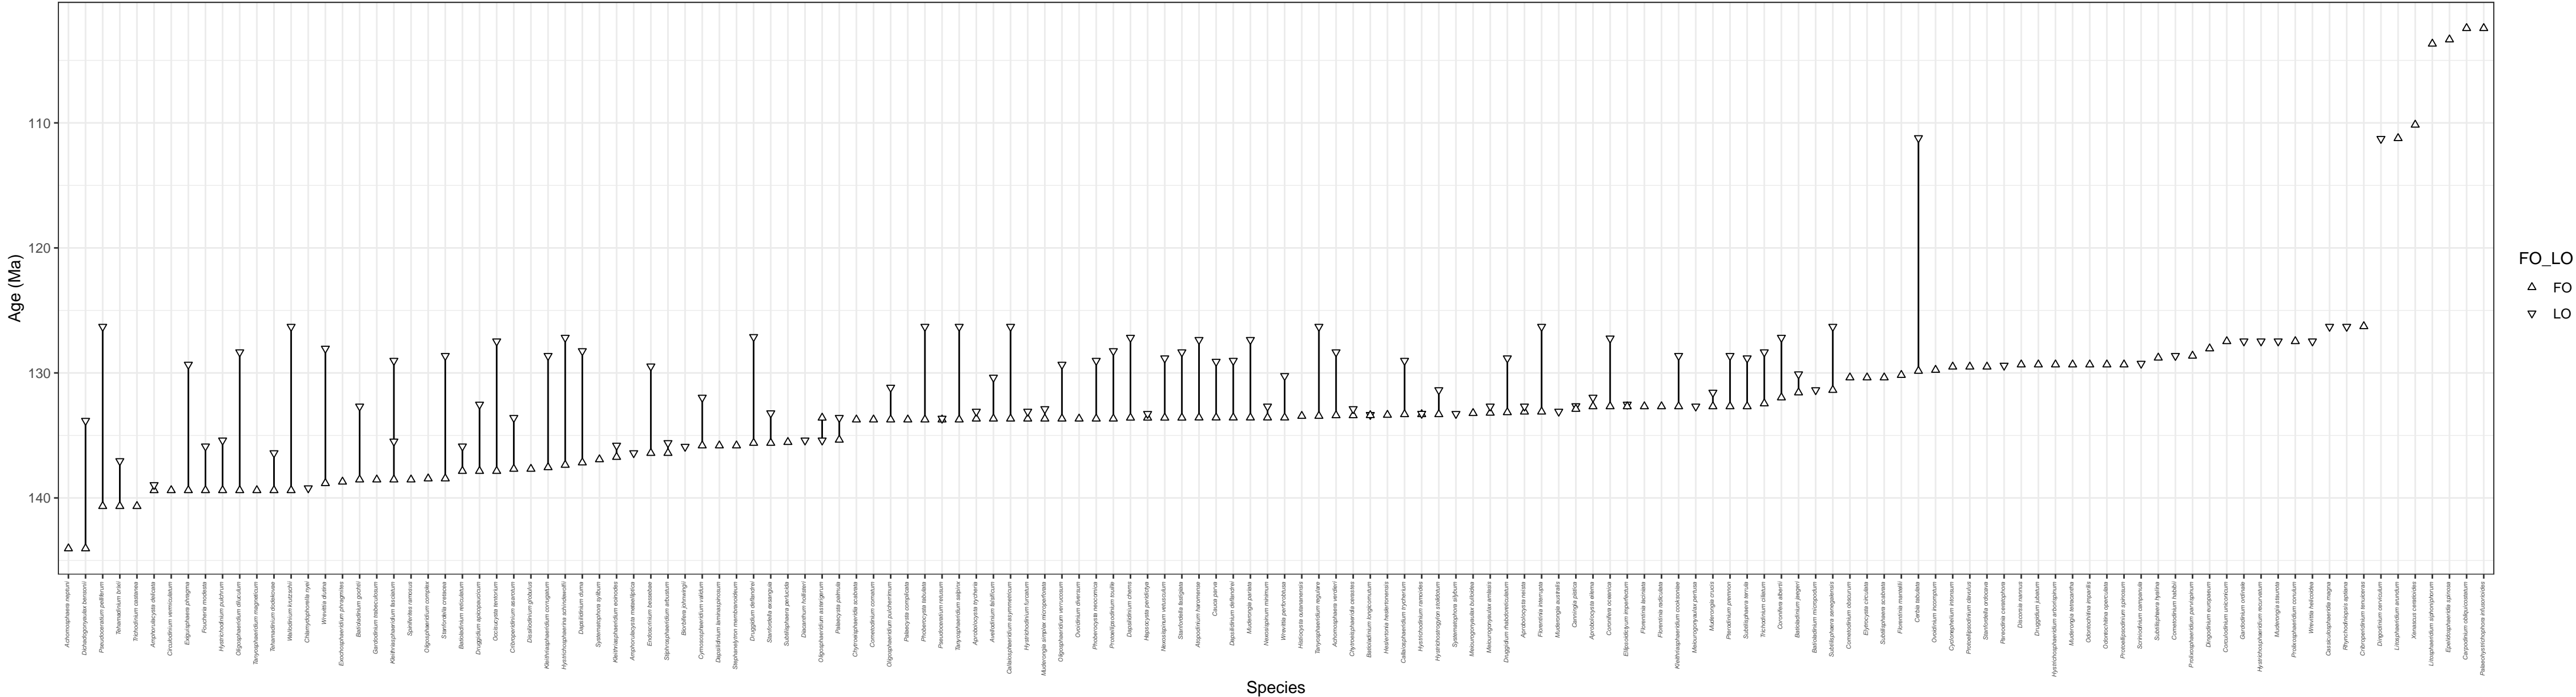

Supplement: Supplementary file 722 [file Site_Rio Argos.pdf › Supplement/Supplement 2/Sites 188 plots/Site_Rio Argos.pdf]

Site  
Rodmell

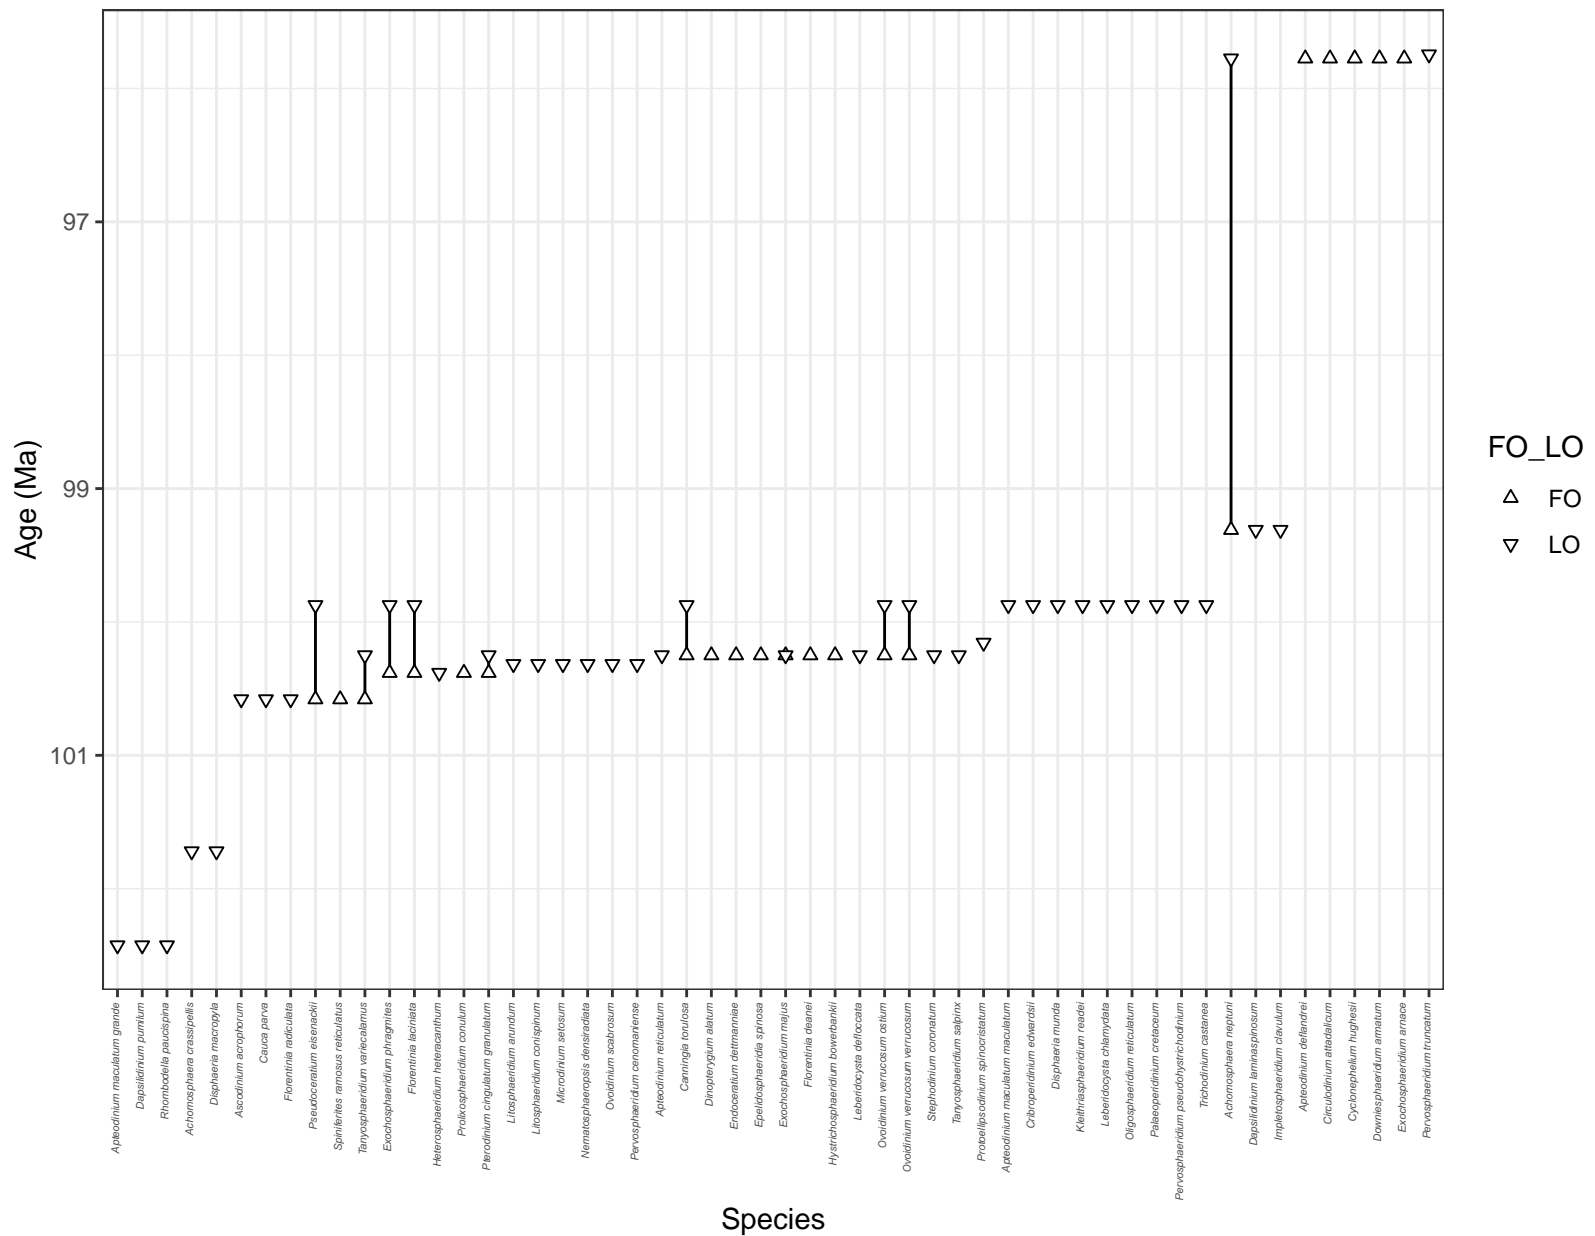

Supplement: Supplementary file 723 [file Site_Rodmell.pdf › Supplement/Supplement 2/Sites 188 plots/Site_Rodmell.pdf]

# Site Rupel

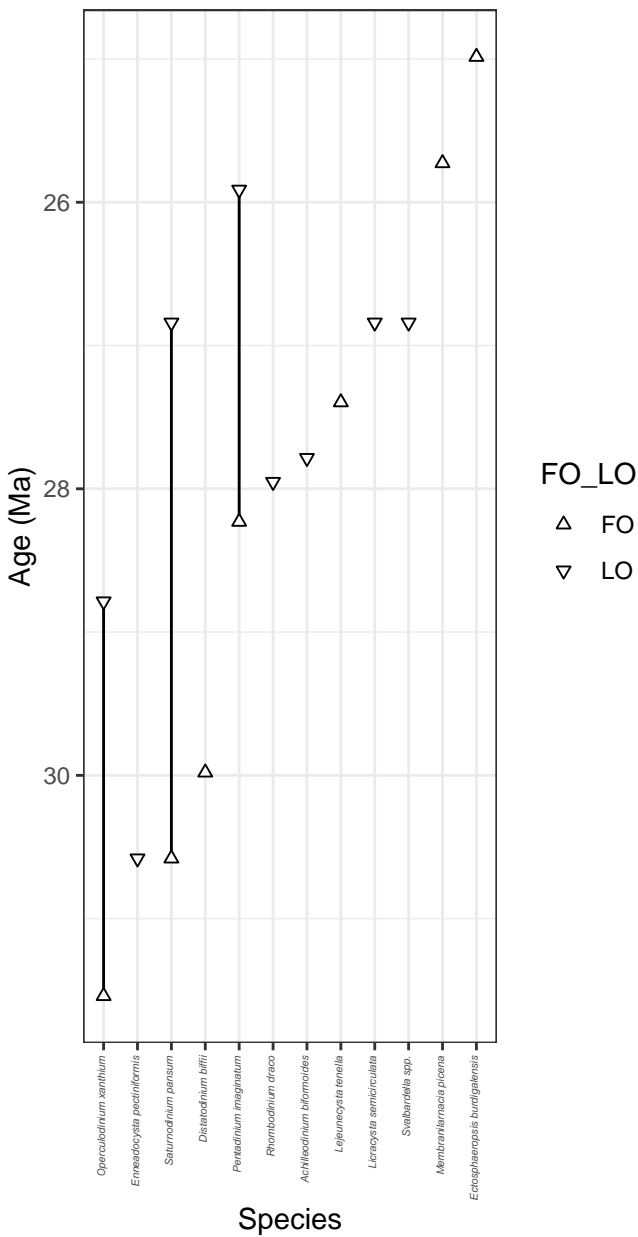

Supplement: Supplementary file 724 [file Site_Rupel.pdf › Supplement/Supplement 2/Sites 188 plots/Site_Rupel.pdf]

Site  
SSQ

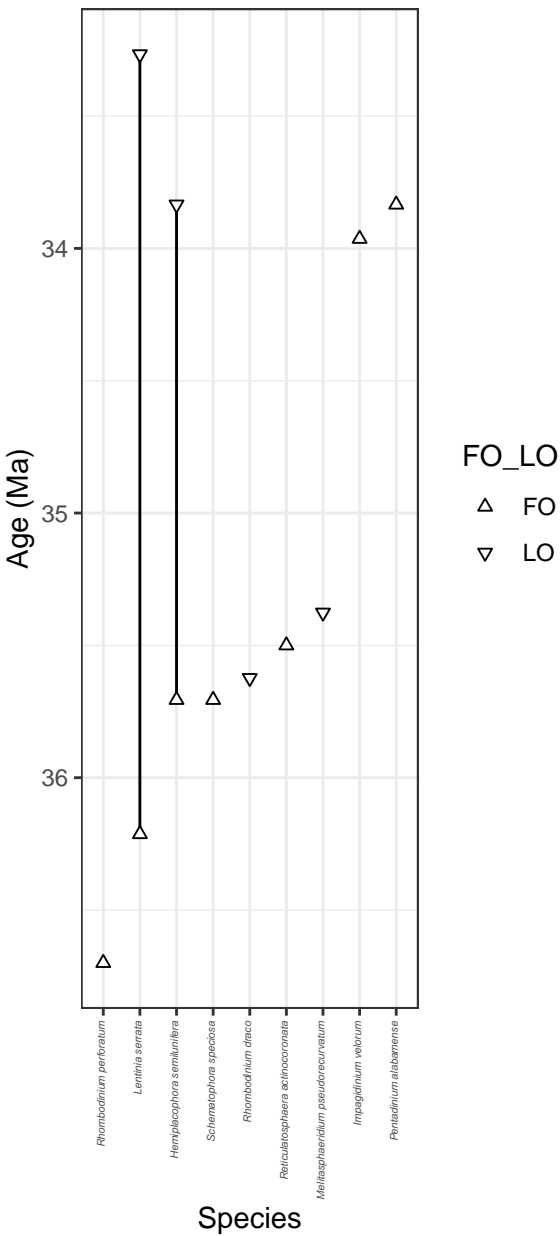

Supplement: Supplementary file 725 [file Site_SSQ.pdf › Supplement/Supplement 2/Sites 188 plots/Site_SSQ.pdf]

Site

Salt Range

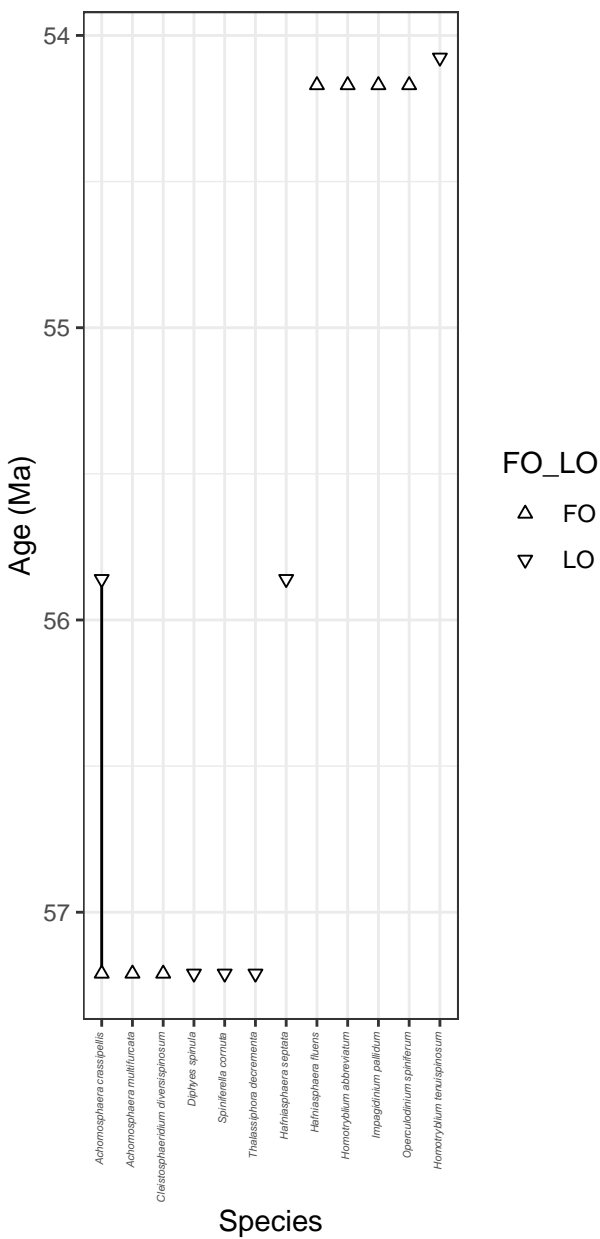

Supplement: Supplementary file 726 [file Site_Salt Range.pdf › Supplement/Supplement 2/Sites 188 plots/Site_Salt Range.pdf]

Site

Seymour Island

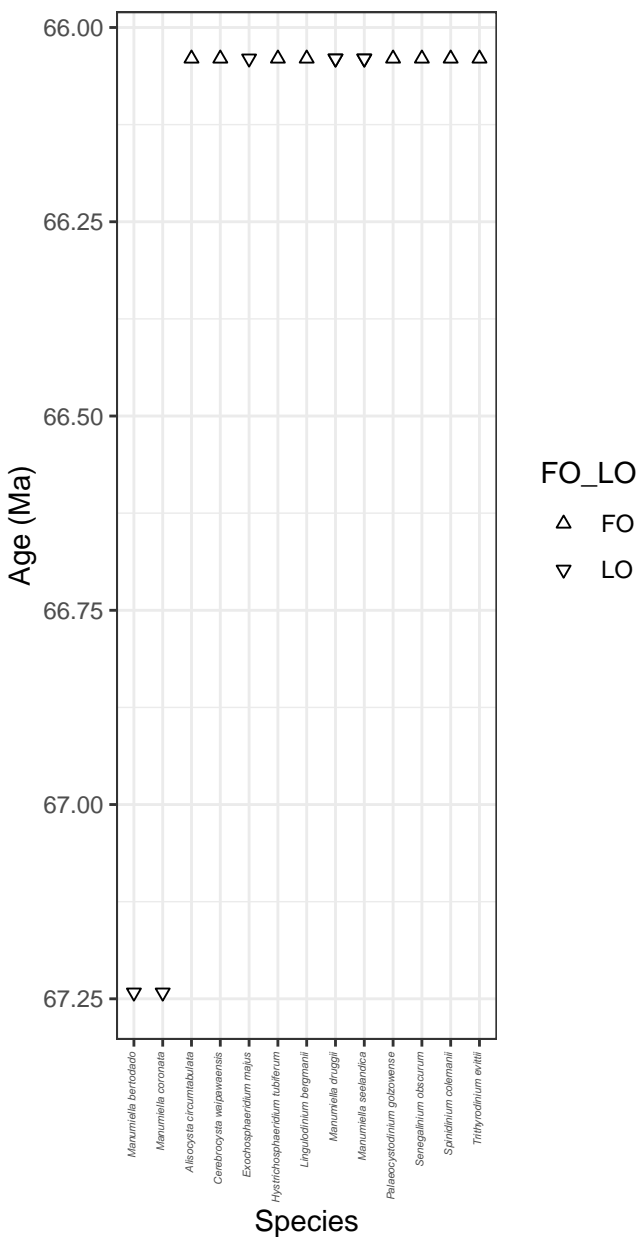

Supplement: Supplementary file 729 [file Site_Seymour Island.pdf › Supplement/Supplement 2/Sites 188 plots/Site_Seymour Island.pdf]

Site  
Shukheir-1

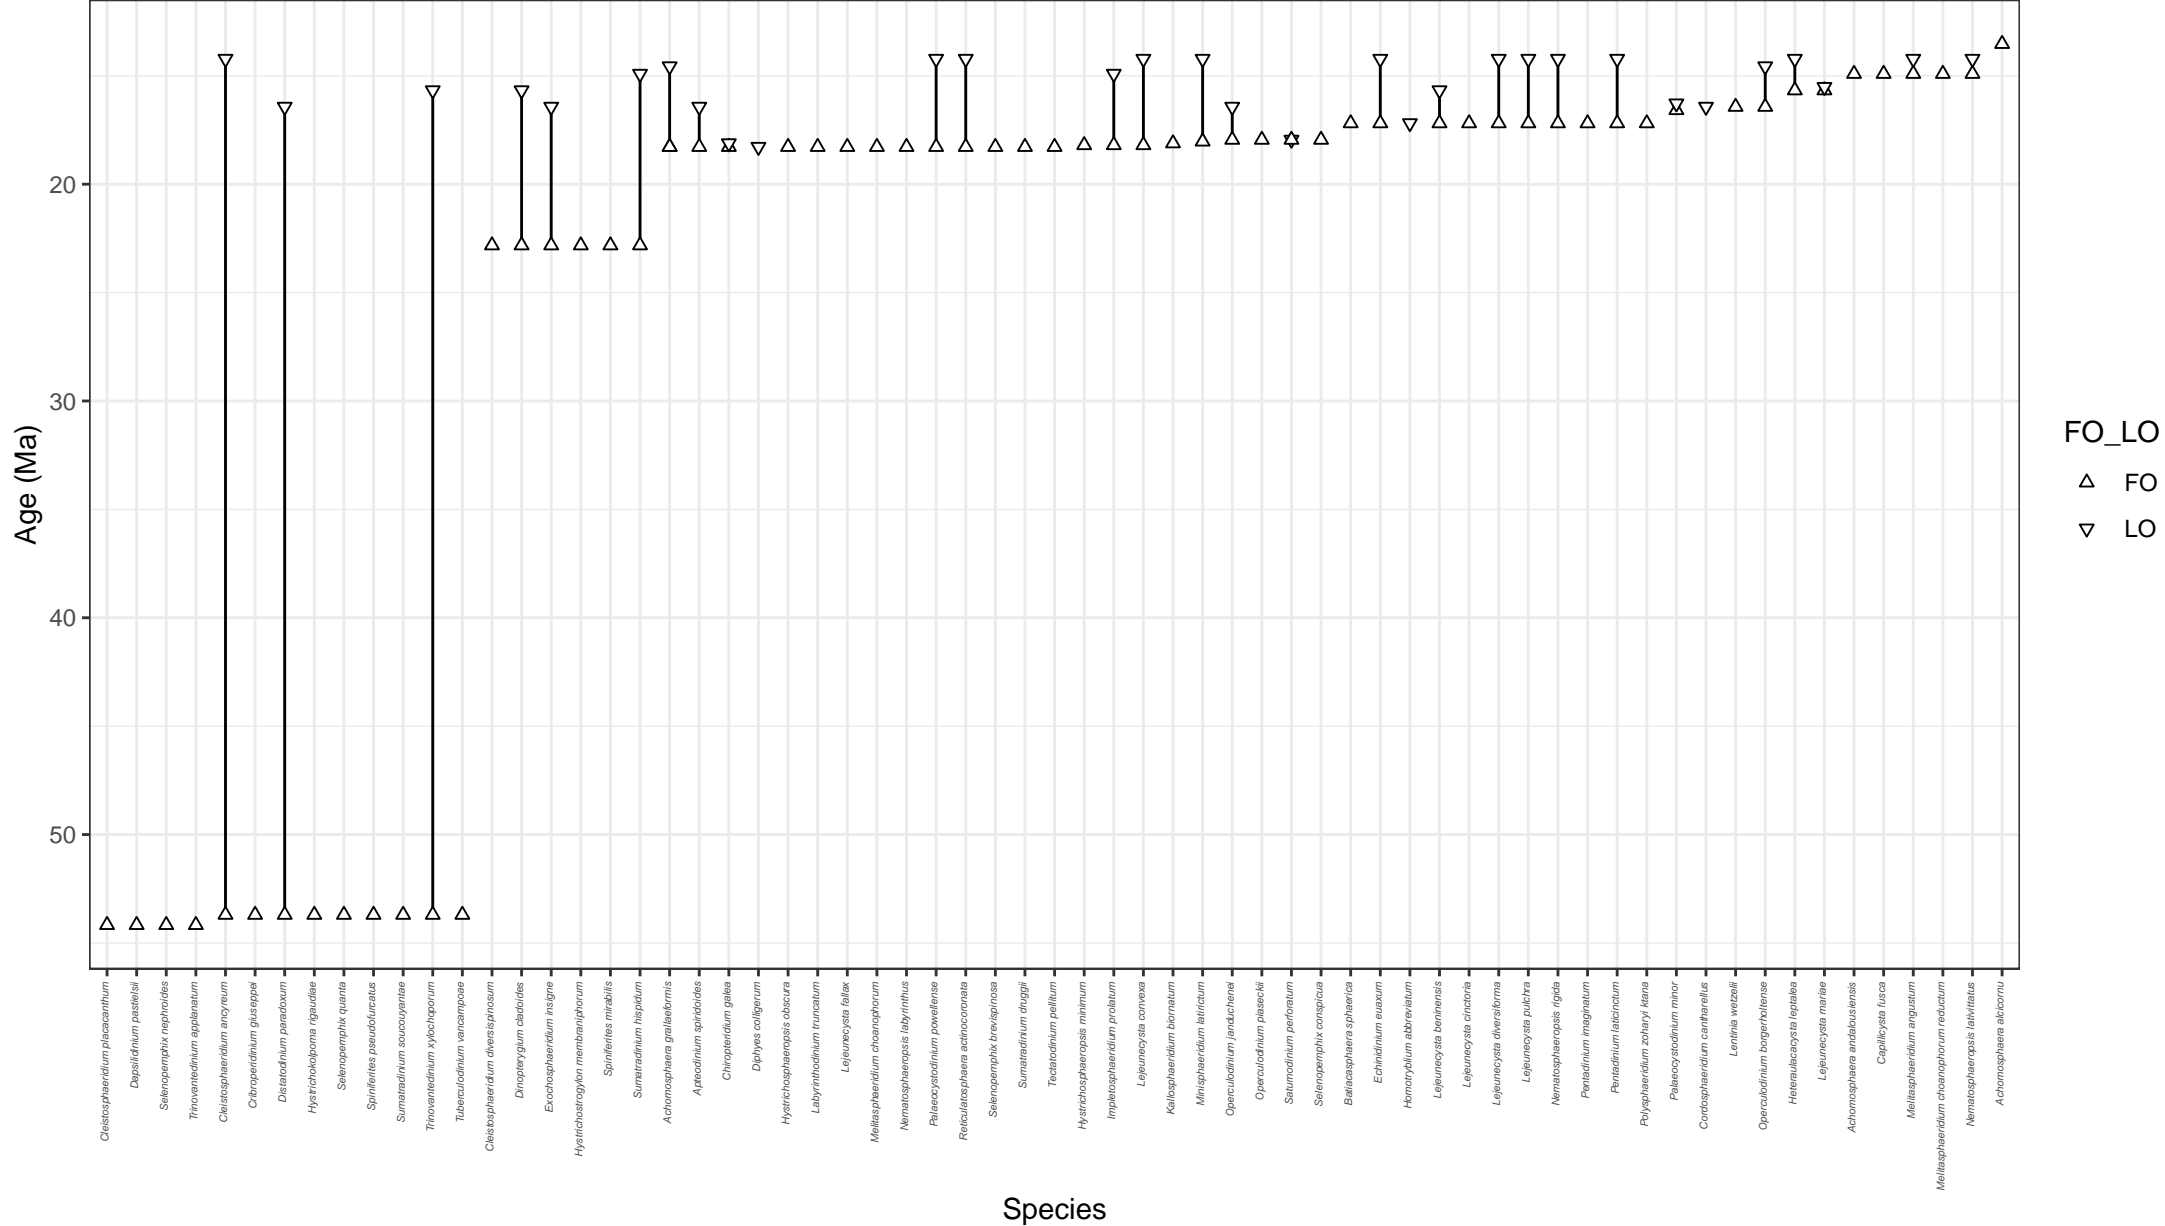

Supplement: Supplementary file 730 [file Site_Shukheir-1.pdf › Supplement/Supplement 2/Sites 188 plots/Site_Shukheir-1.pdf]
