# Supplementary figures and images for: DINOSTRAT: a global database of the stratigraphic and paleolatitudinal distribution of Mesozoic–Cenozoic organic-walled dinoflagellate cysts (part 8 of 27)
Source: Copernicus journal article supplement (doi:10.5194/essd-14-579-2022), 2022-02-09

Site  
Silesian Basin

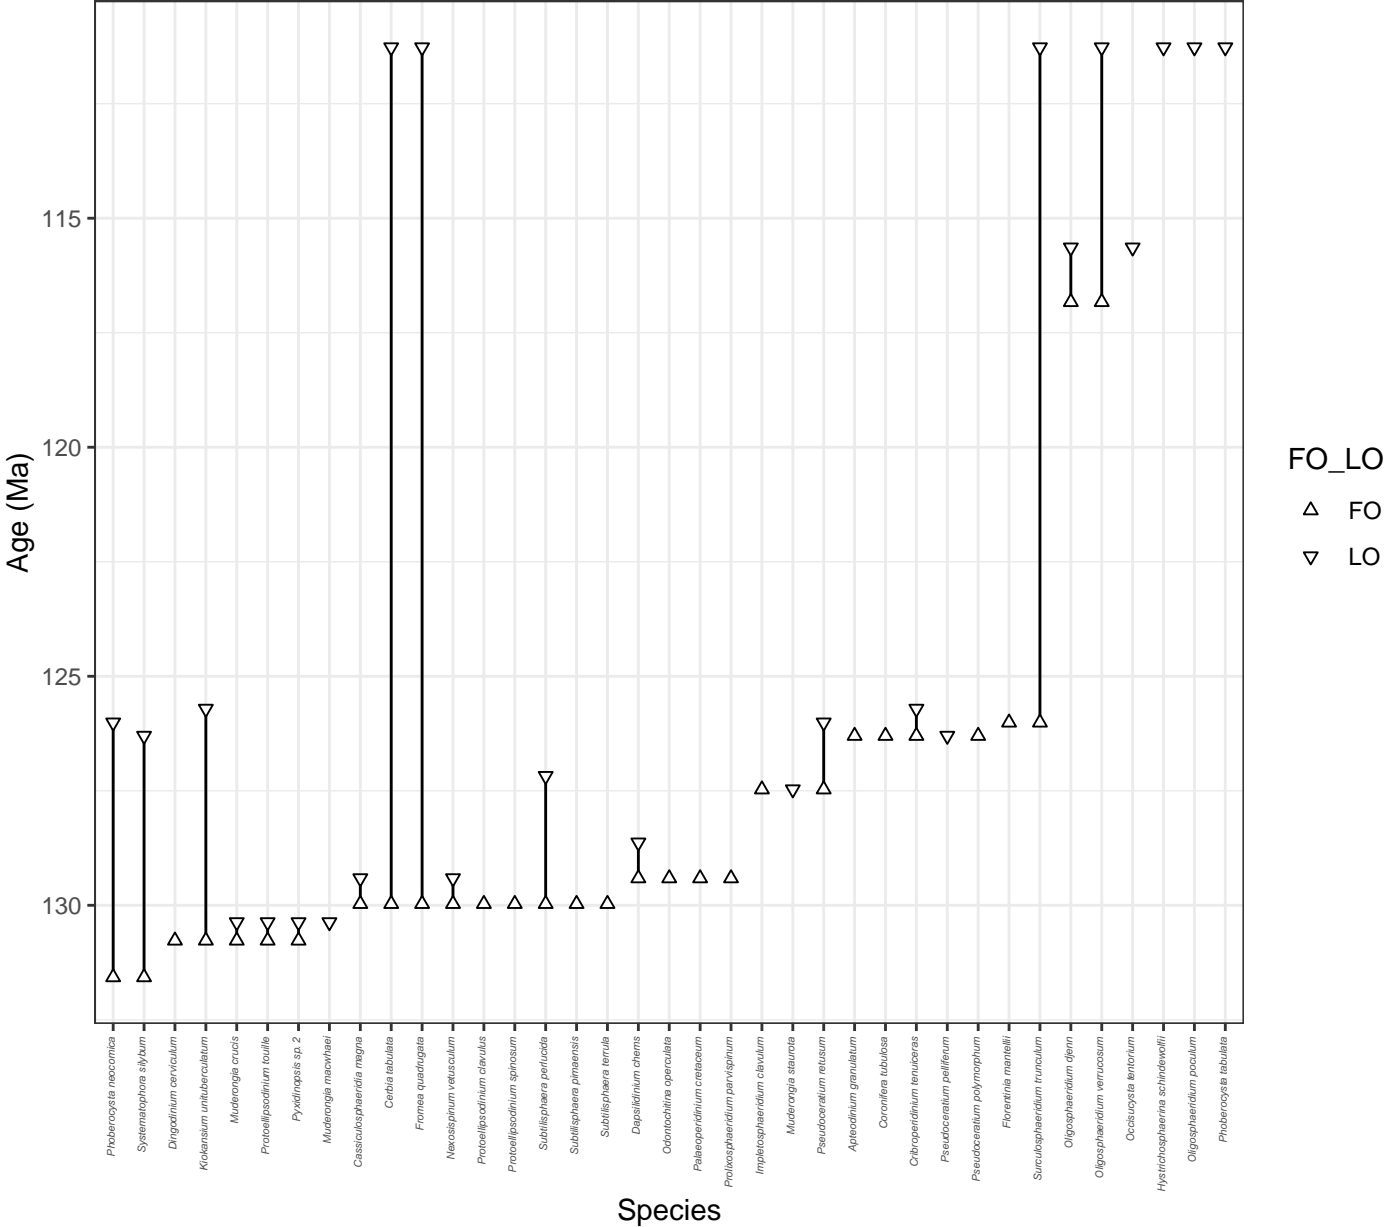

Supplement: Supplementary file 731 [file Site_Silesian Basin.pdf › Supplement/Supplement 2/Sites 188 plots/Site_Silesian Basin.pdf]

# Site Singa

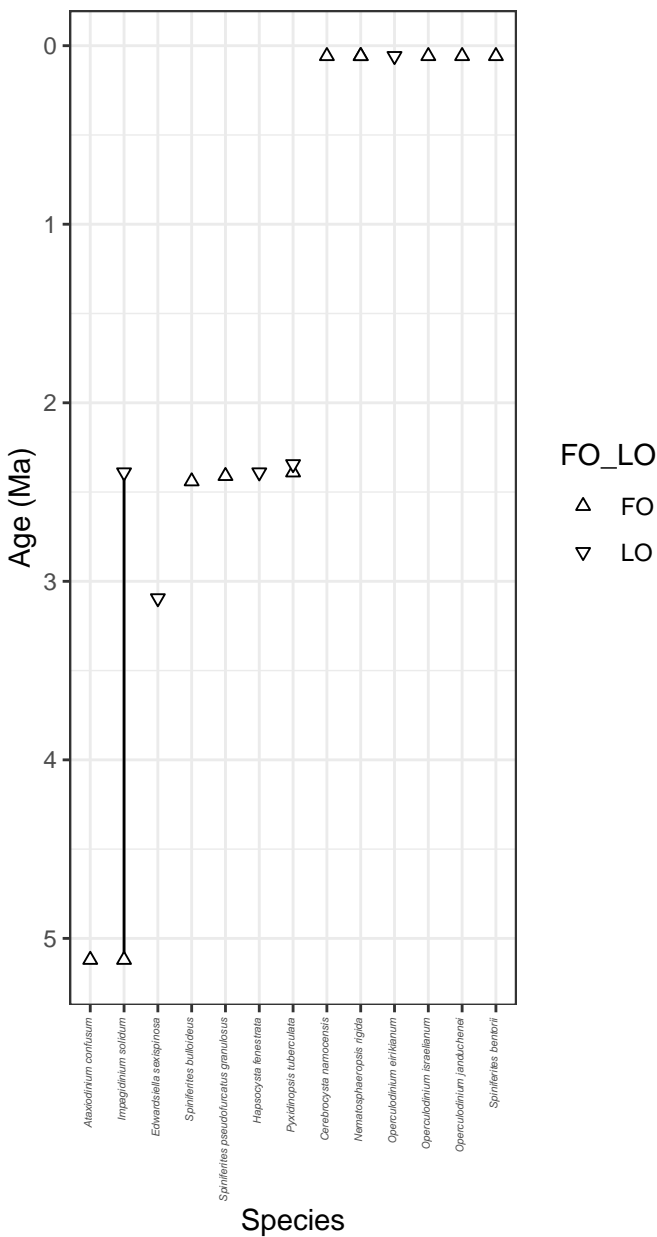

Supplement: Supplementary file 732 [file Site_Singa.pdf › Supplement/Supplement 2/Sites 188 plots/Site_Singa.pdf]

Site

Snøvit field

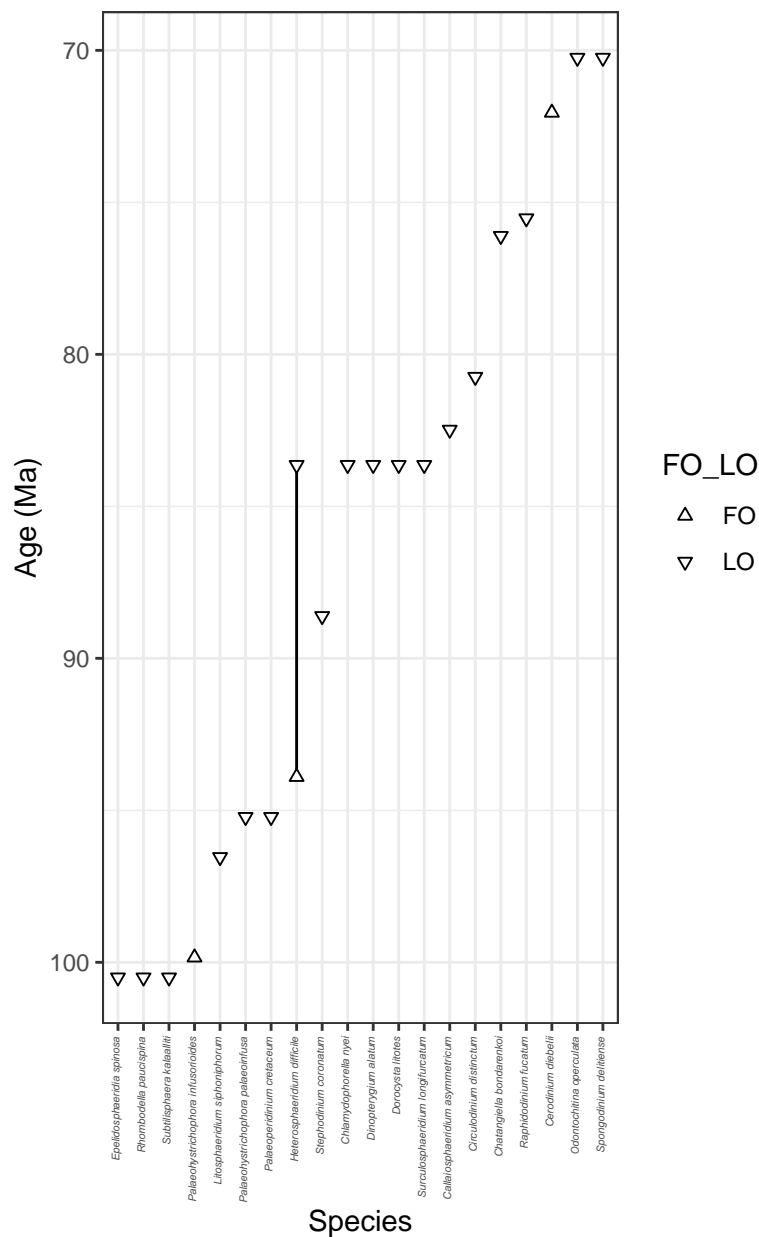

Supplement: Supplementary file 733 [file Site_Snøvit field.pdf › Supplement/Supplement 2/Sites 188 plots/Site_Snøvit field.pdf]

# Site

Southern North Sea

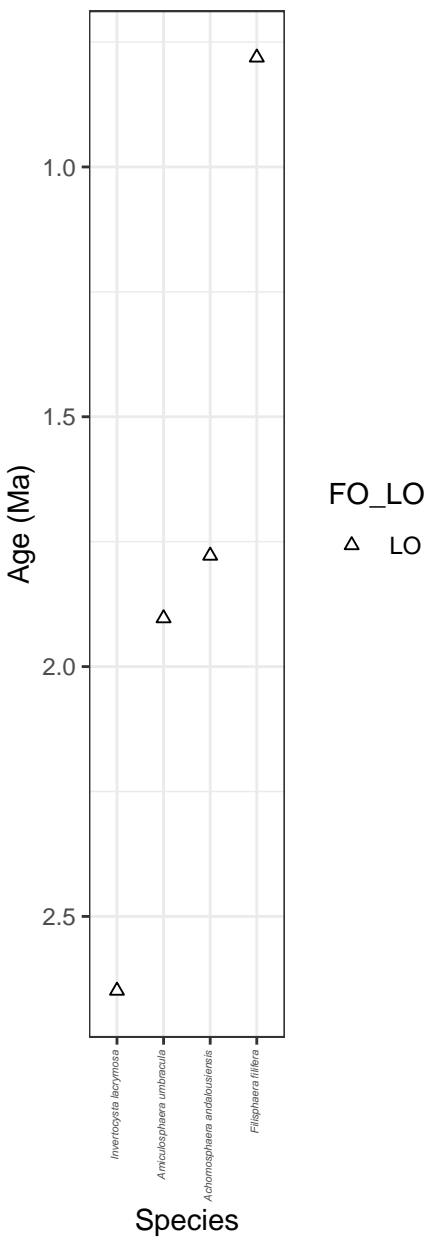

Supplement: Supplementary file 734 [file Site_Southern North Sea.pdf › Supplement/Supplement 2/Sites 188 plots/Site_Southern North Sea.pdf]

Site  
Speeton

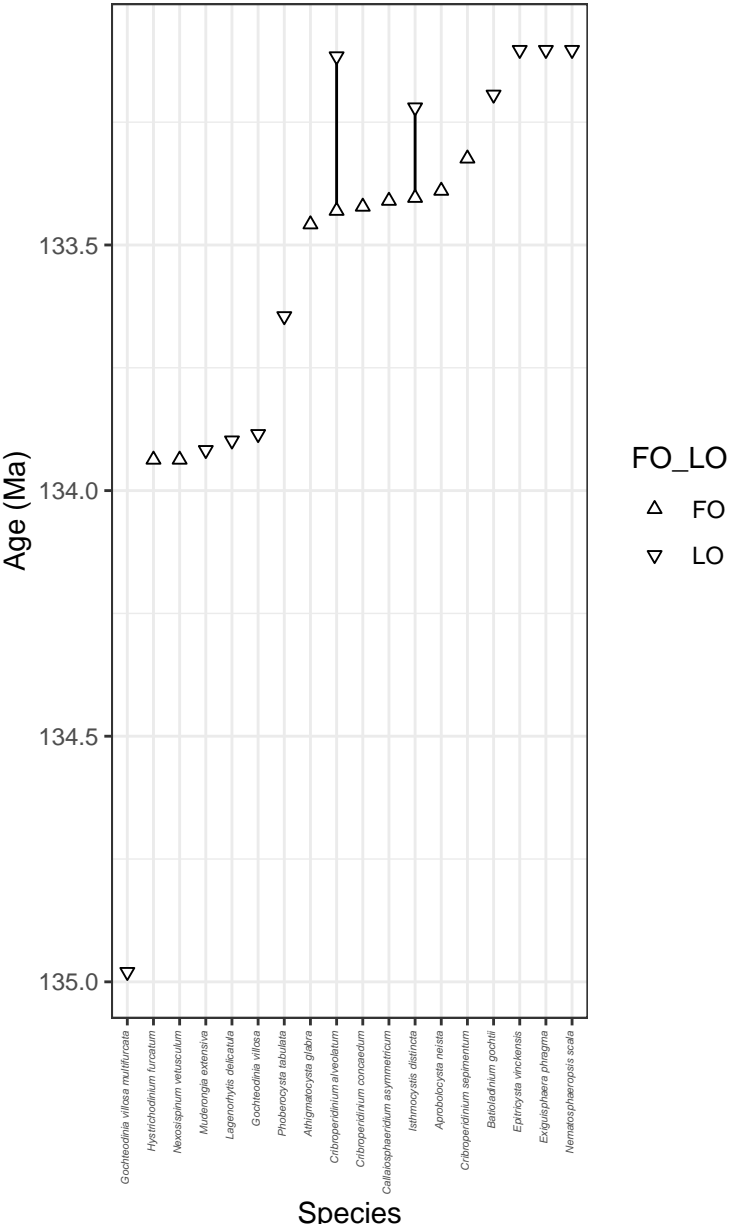

Supplement: Supplementary file 735 [file Site_Speeton.pdf › Supplement/Supplement 2/Sites 188 plots/Site_Speeton.pdf]

# Site

Stevns Klint

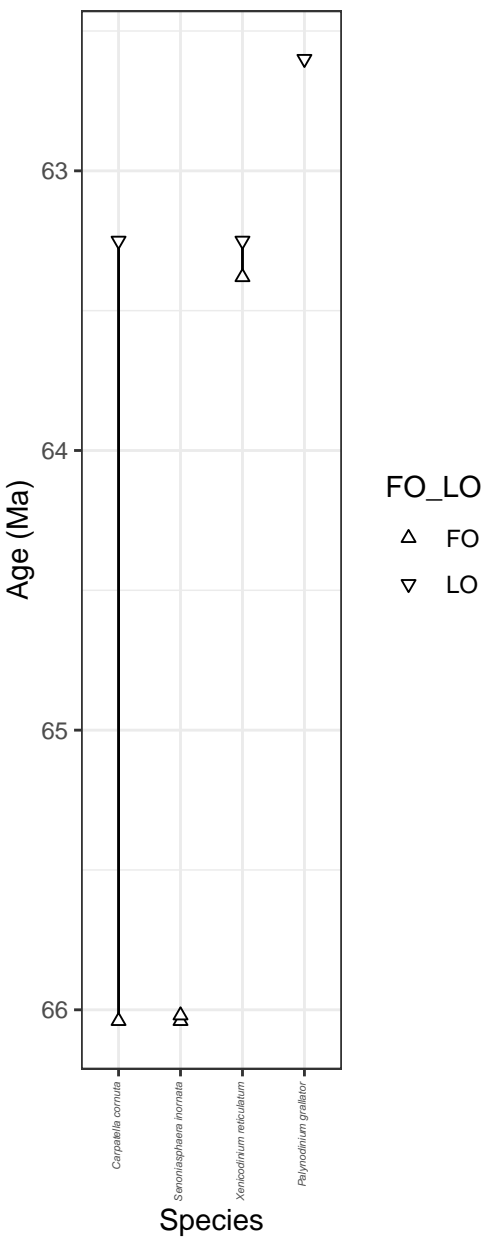

Supplement: Supplementary file 736 [file Site_Stevns Klint.pdf › Supplement/Supplement 2/Sites 188 plots/Site_Stevns Klint.pdf]

Site  
Suvlu

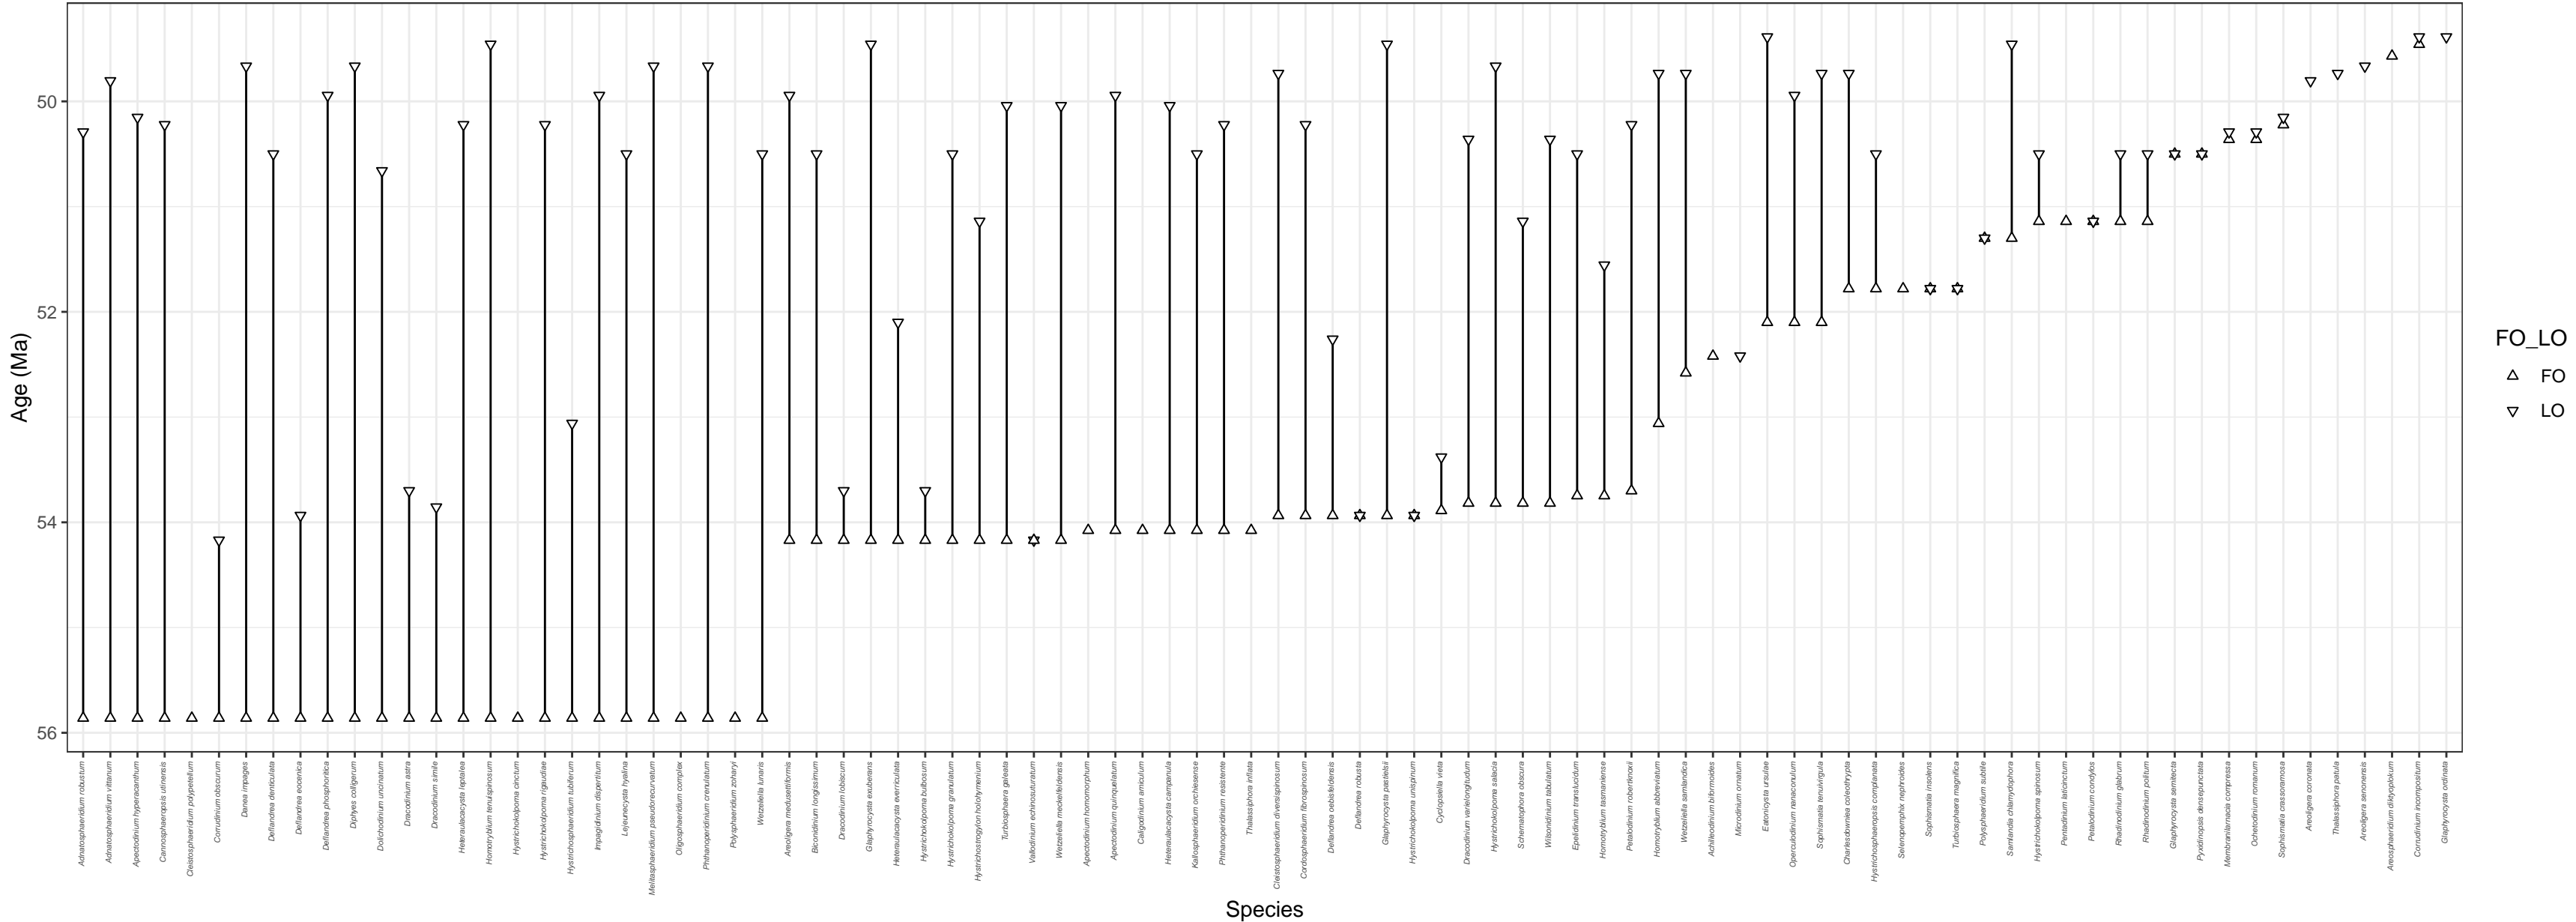

Supplement: Supplementary file 737 [file Site_Suvlu.pdf › Supplement/Supplement 2/Sites 188 plots/Site_Suvlu.pdf]

Site

Tremp

Age (Ma)

53.2

53.4

53.6

FO\_LO

△ FO

▽ LO

*Graptocysta exuberans*

*Dracodinium varicongitutum*

Species

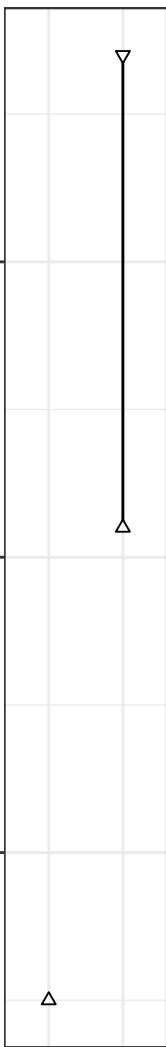

Supplement: Supplementary file 739 [file Site_Tremp.pdf › Supplement/Supplement 2/Sites 188 plots/Site_Tremp.pdf]

Site

Trunch borehole

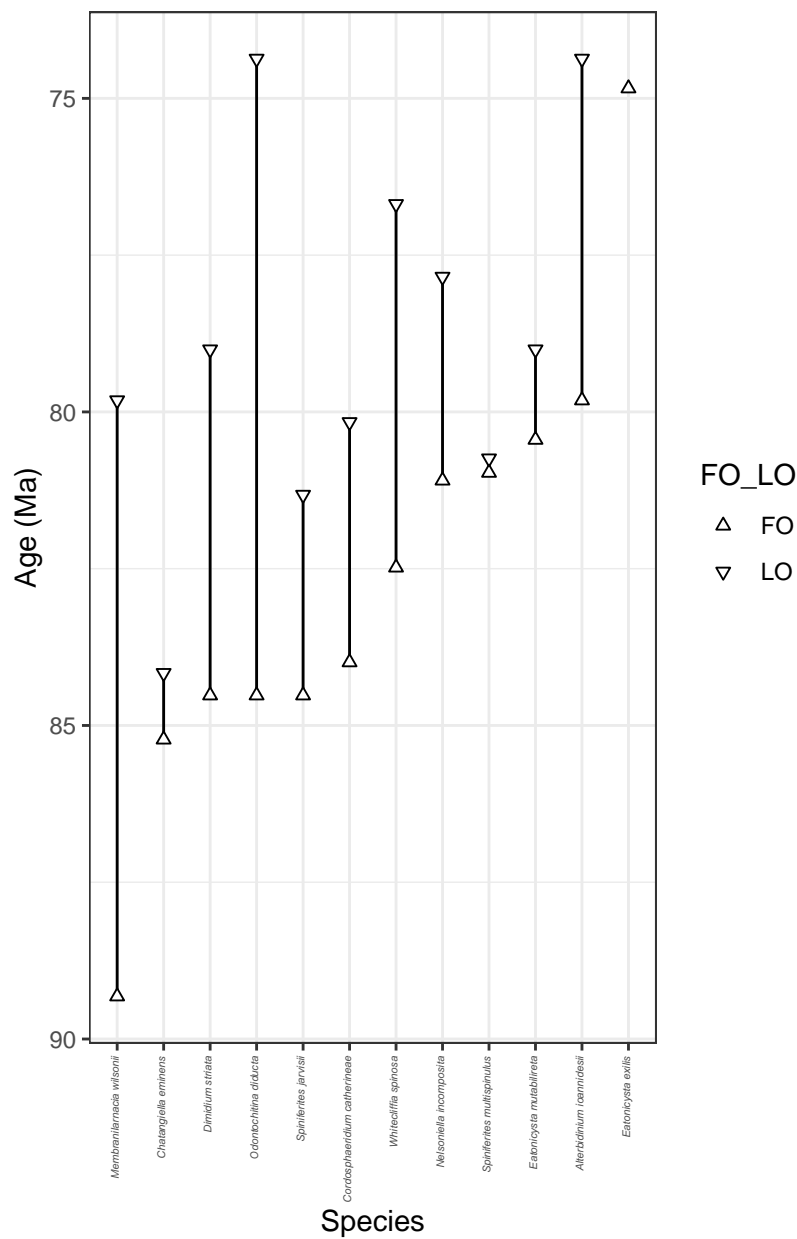

Supplement: Supplementary file 740 [file Site_Trunch borehole.pdf › Supplement/Supplement 2/Sites 188 plots/Site_Trunch borehole.pdf]

# Site U1307

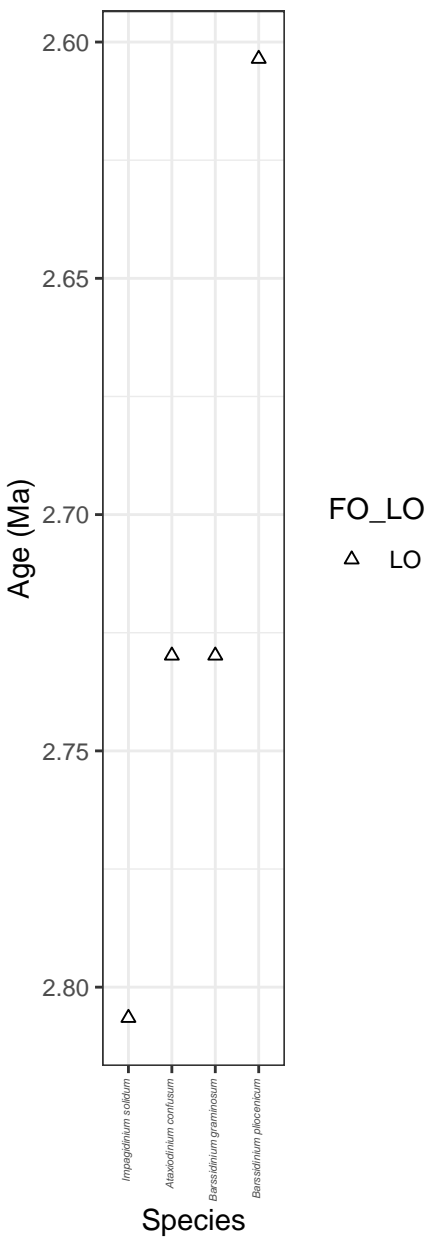

Supplement: Supplementary file 742 [file Site_U1307.pdf › Supplement/Supplement 2/Sites 188 plots/Site_U1307.pdf]

Site

U1318

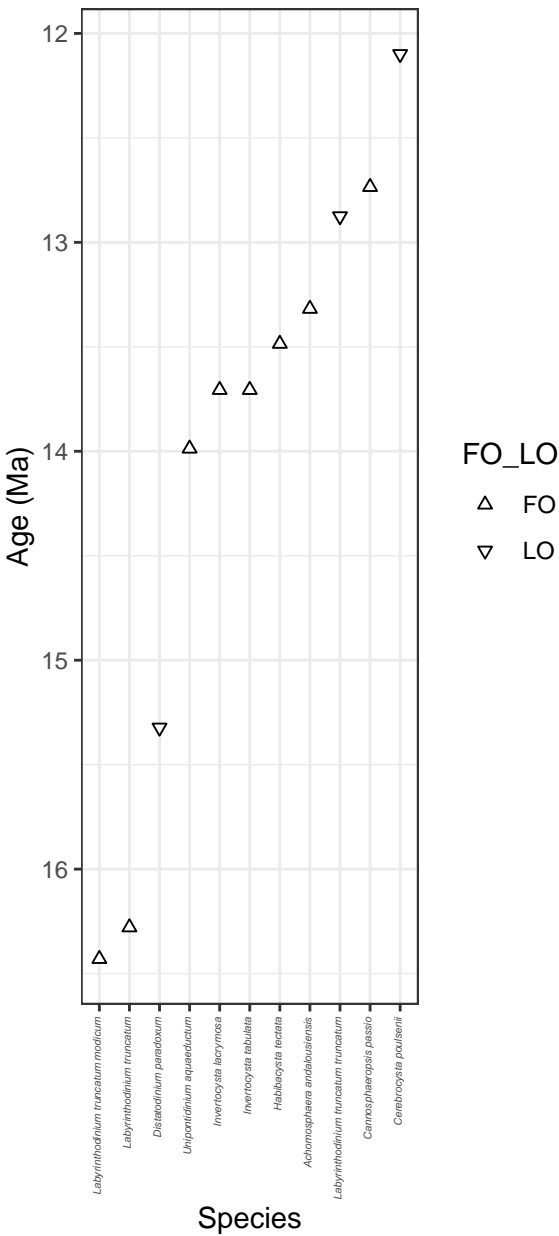

Supplement: Supplementary file 743 [file Site_U1318.pdf › Supplement/Supplement 2/Sites 188 plots/Site_U1318.pdf]

Site  
U1356

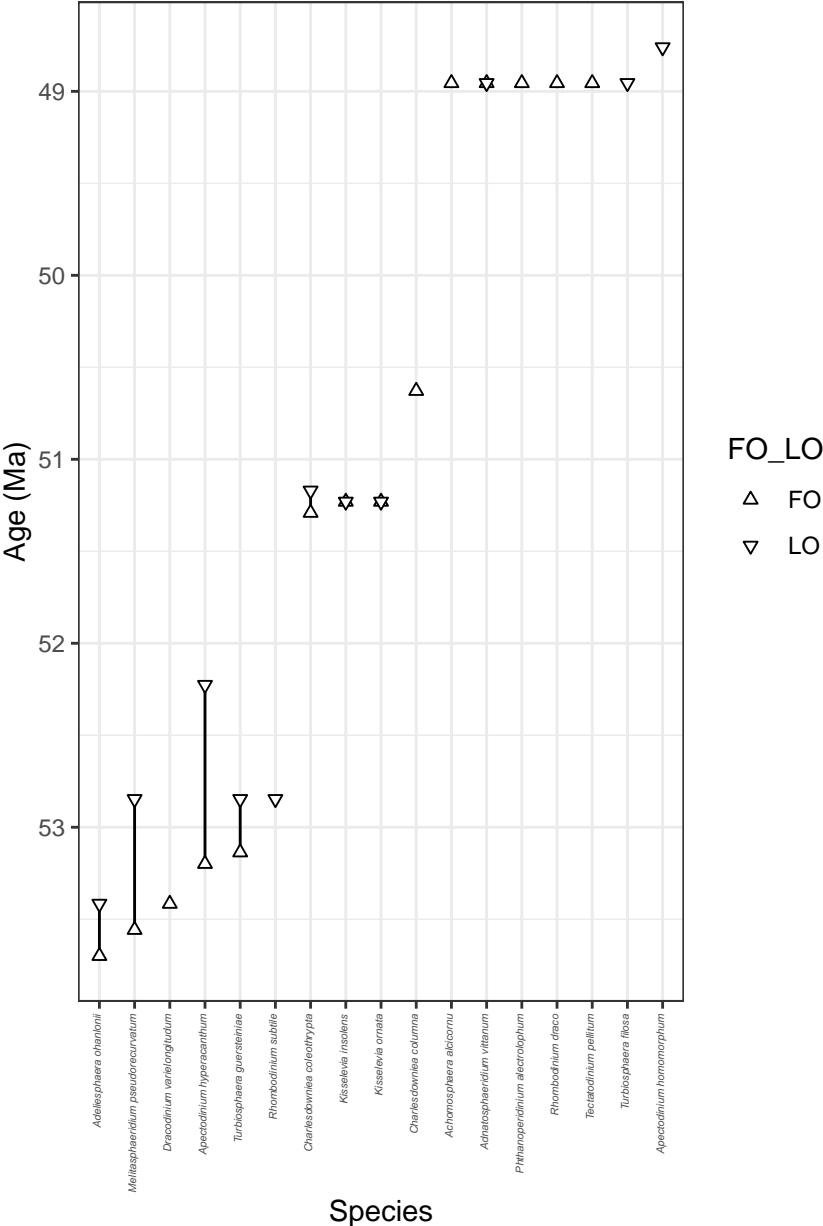

Supplement: Supplementary file 744 [file Site_U1356.pdf › Supplement/Supplement 2/Sites 188 plots/Site_U1356.pdf]

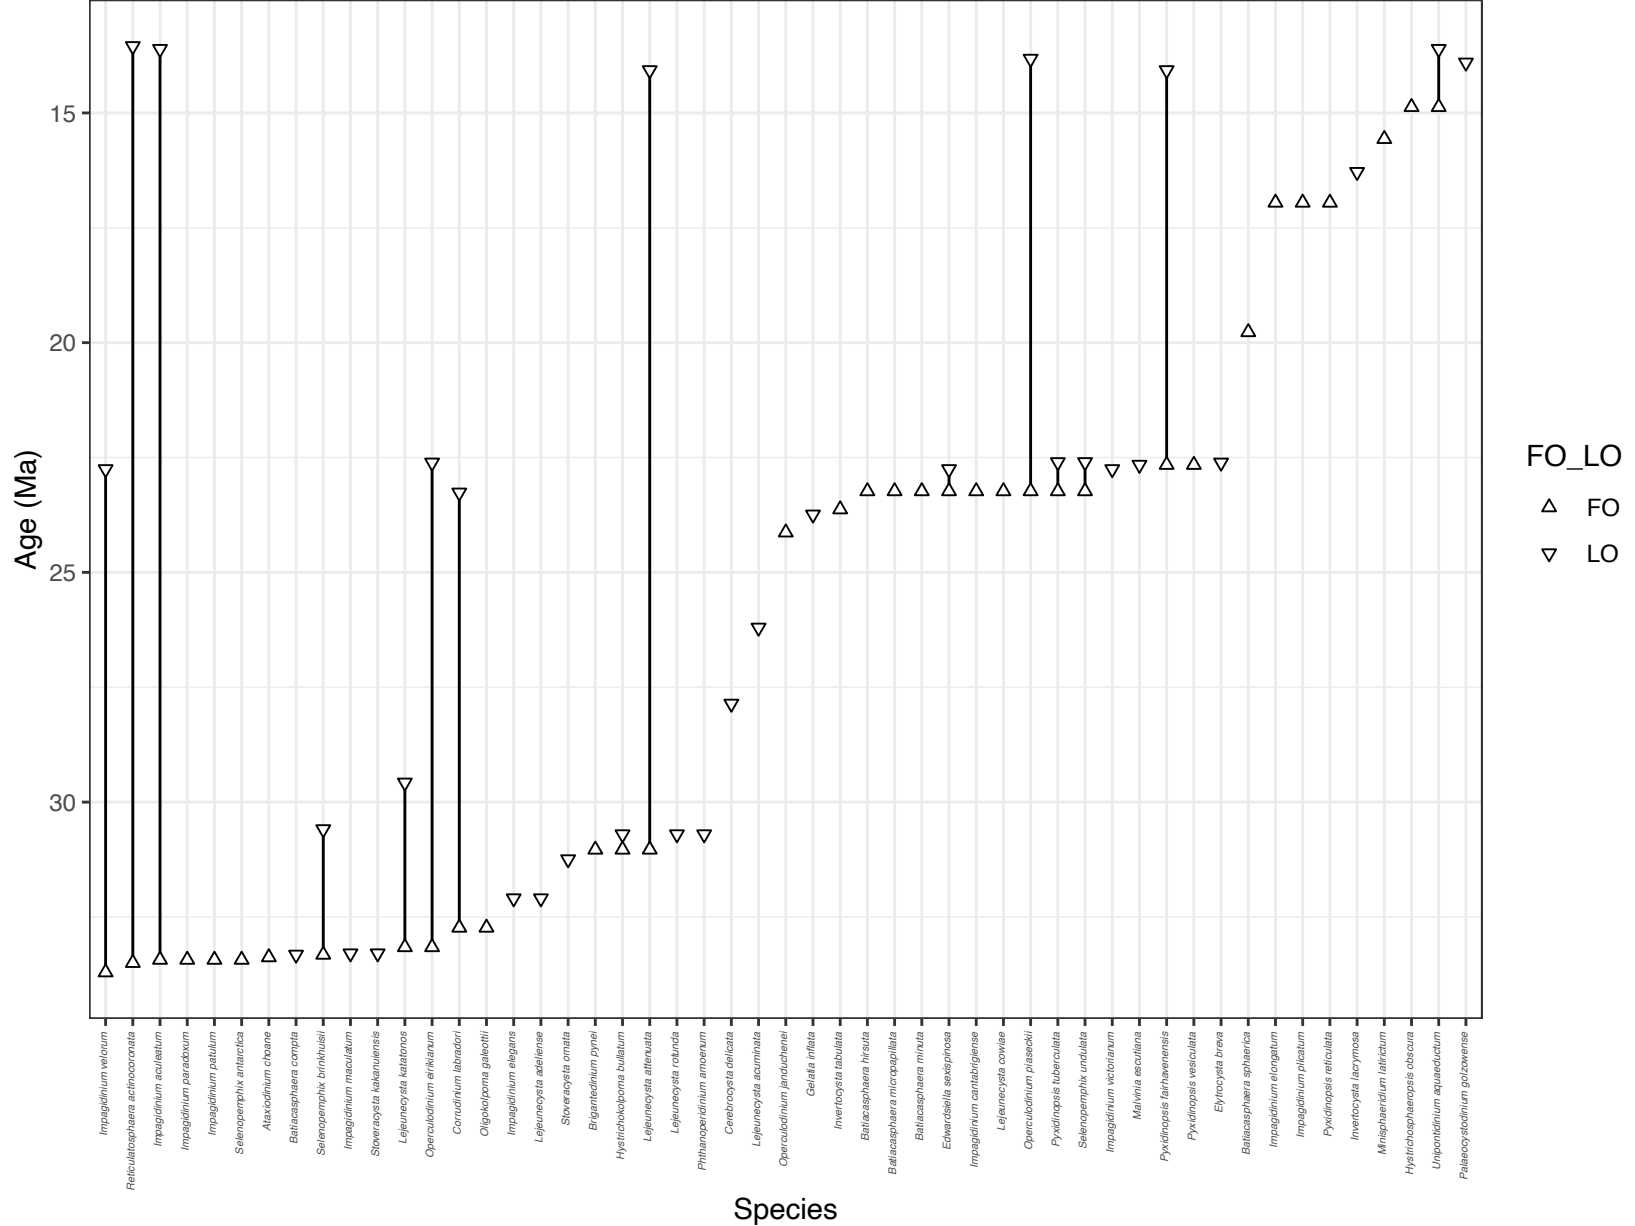

Supplement: Supplementary file 745 [file Site_U1356A.pdf › Supplement/Supplement 2/Sites 188 plots/Site_U1356A.pdf]

Site  
Umbria–Marche

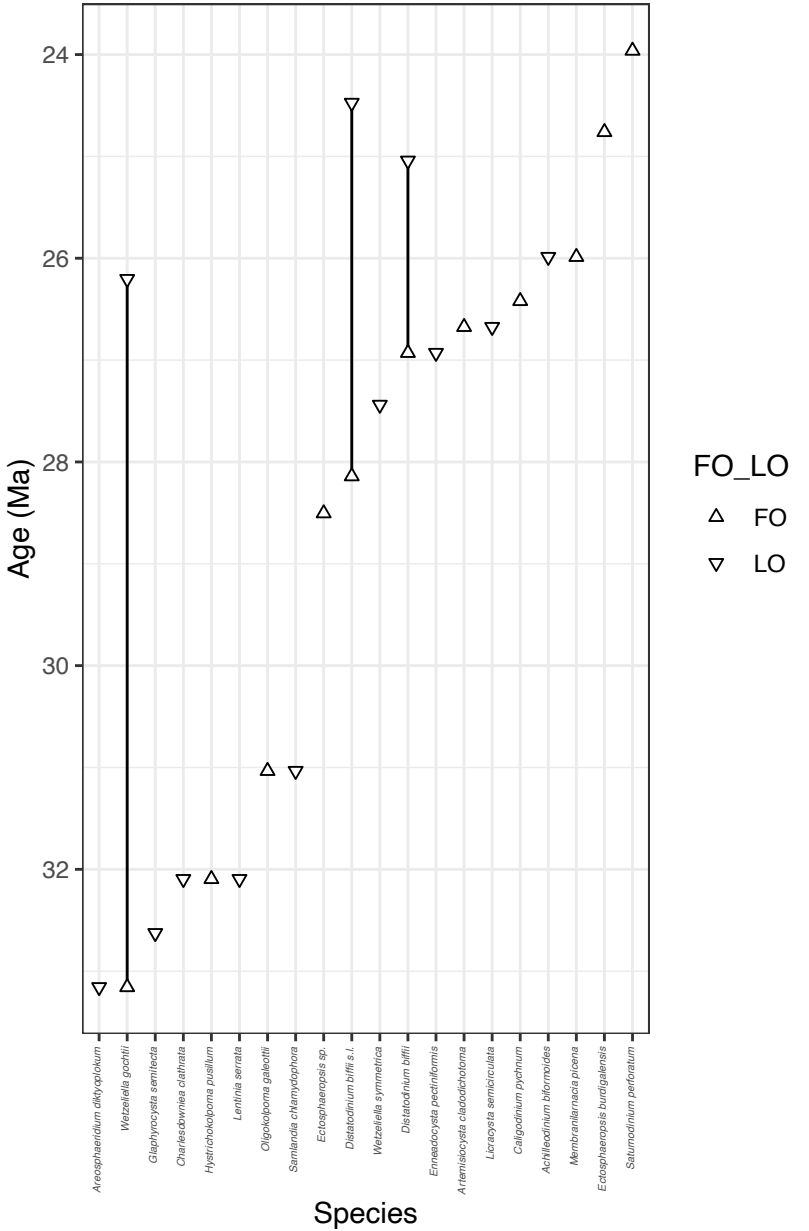

Supplement: Supplementary file 746 [file Site_Umbria-Marche.pdf › Supplement/Supplement 2/Sites 188 plots/Site_Umbria-Marche.pdf]

Site

Vallentigny

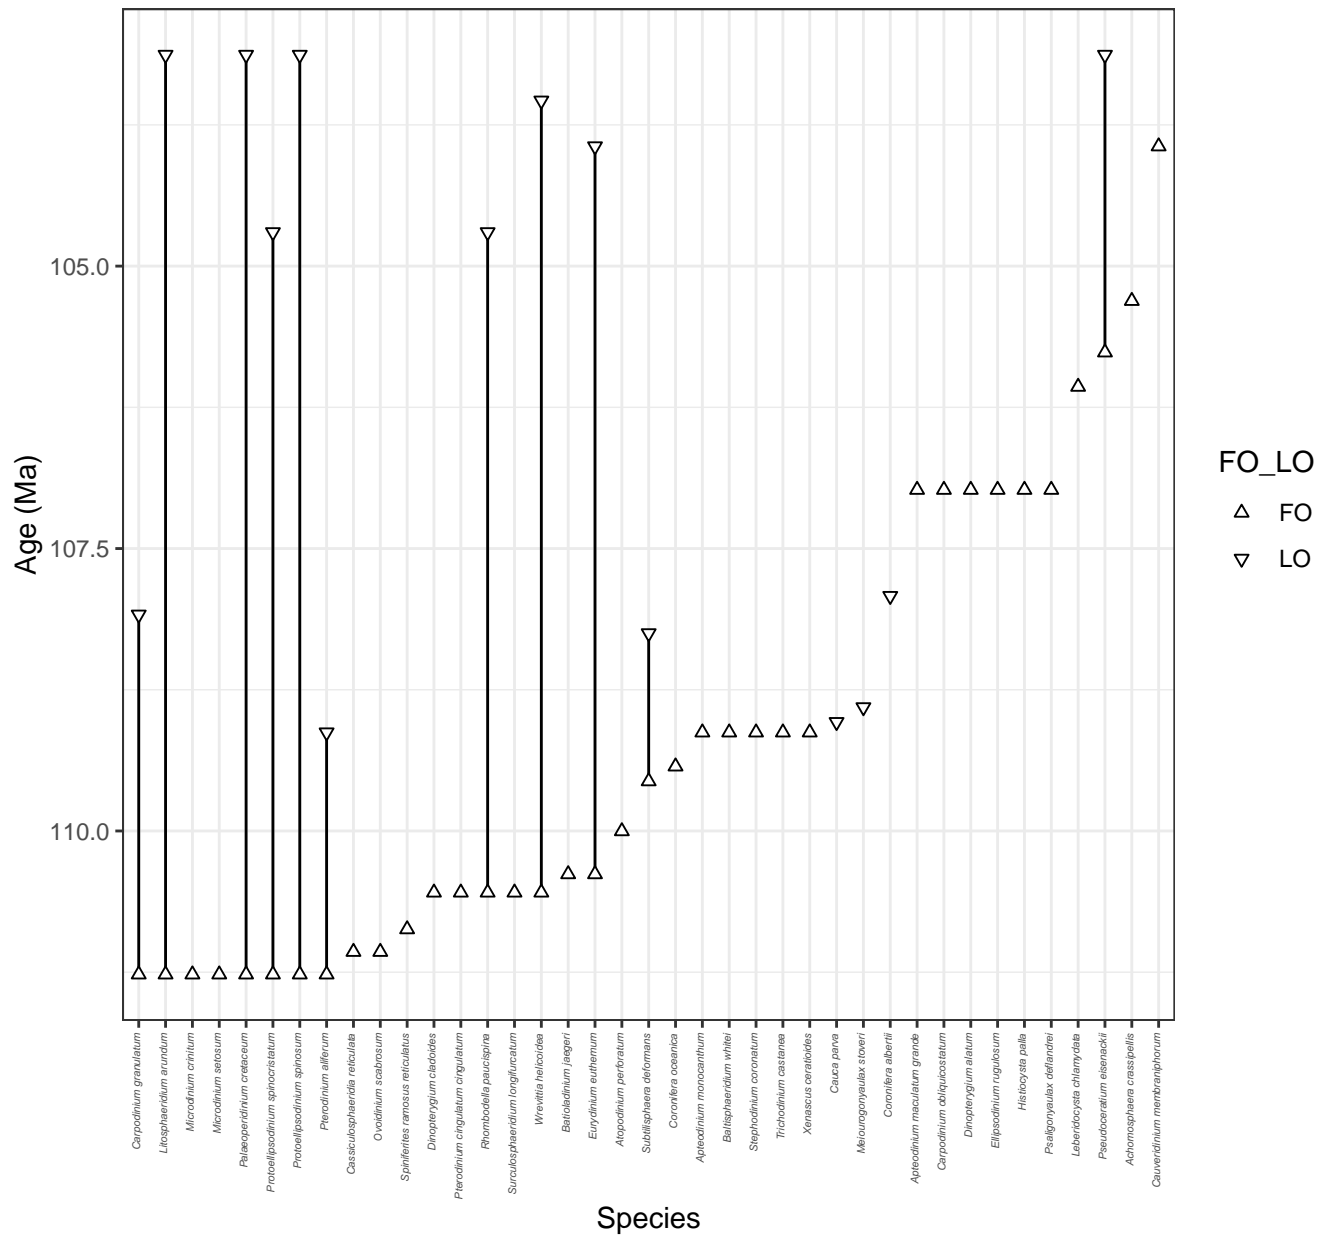

Supplement: Supplementary file 747 [file Site_Vallentigny.pdf › Supplement/Supplement 2/Sites 188 plots/Site_Vallentigny.pdf]

Site  
Vega

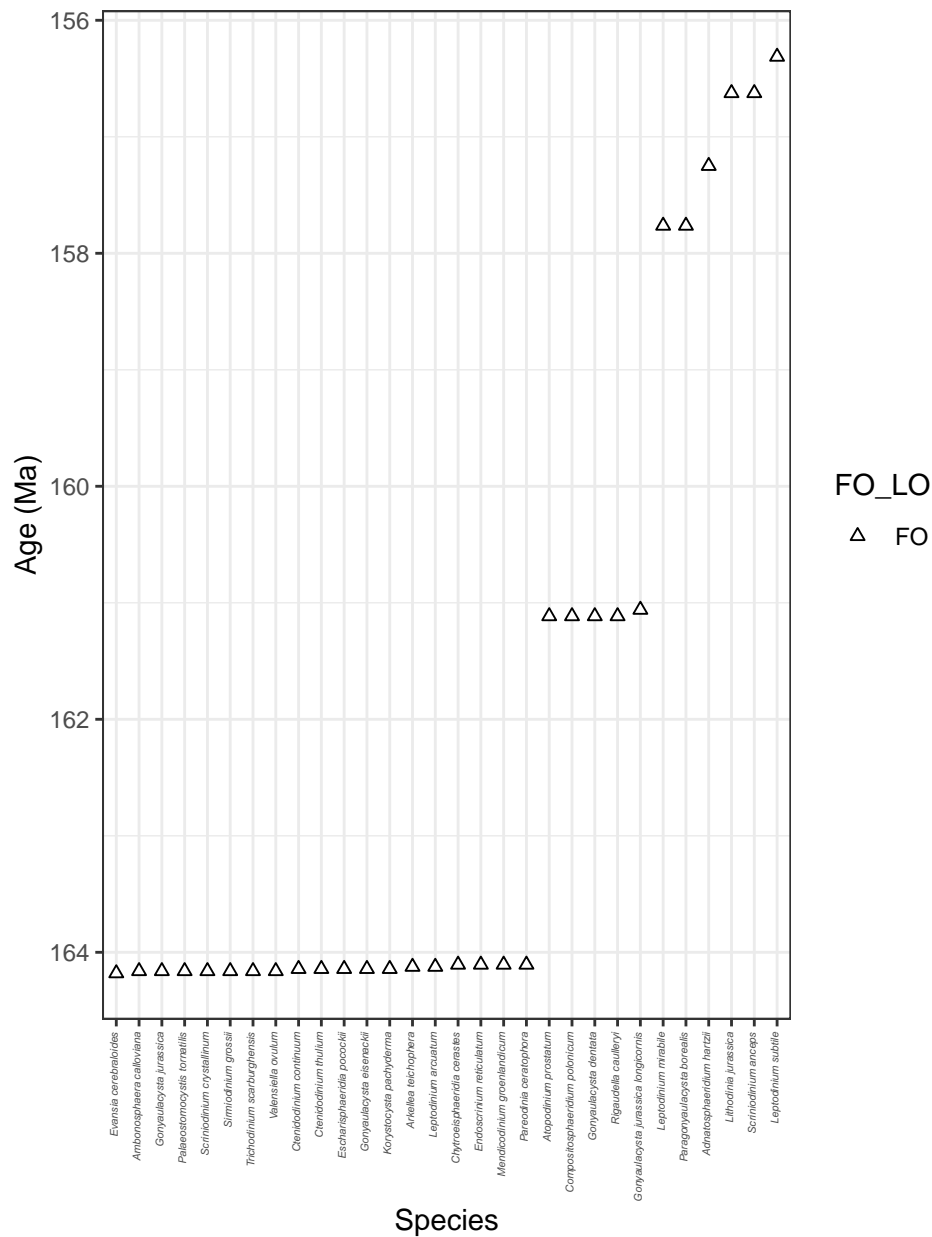

Supplement: Supplementary file 748 [file Site_Vega.pdf › Supplement/Supplement 2/Sites 188 plots/Site_Vega.pdf]

# Site

## Viborg-1

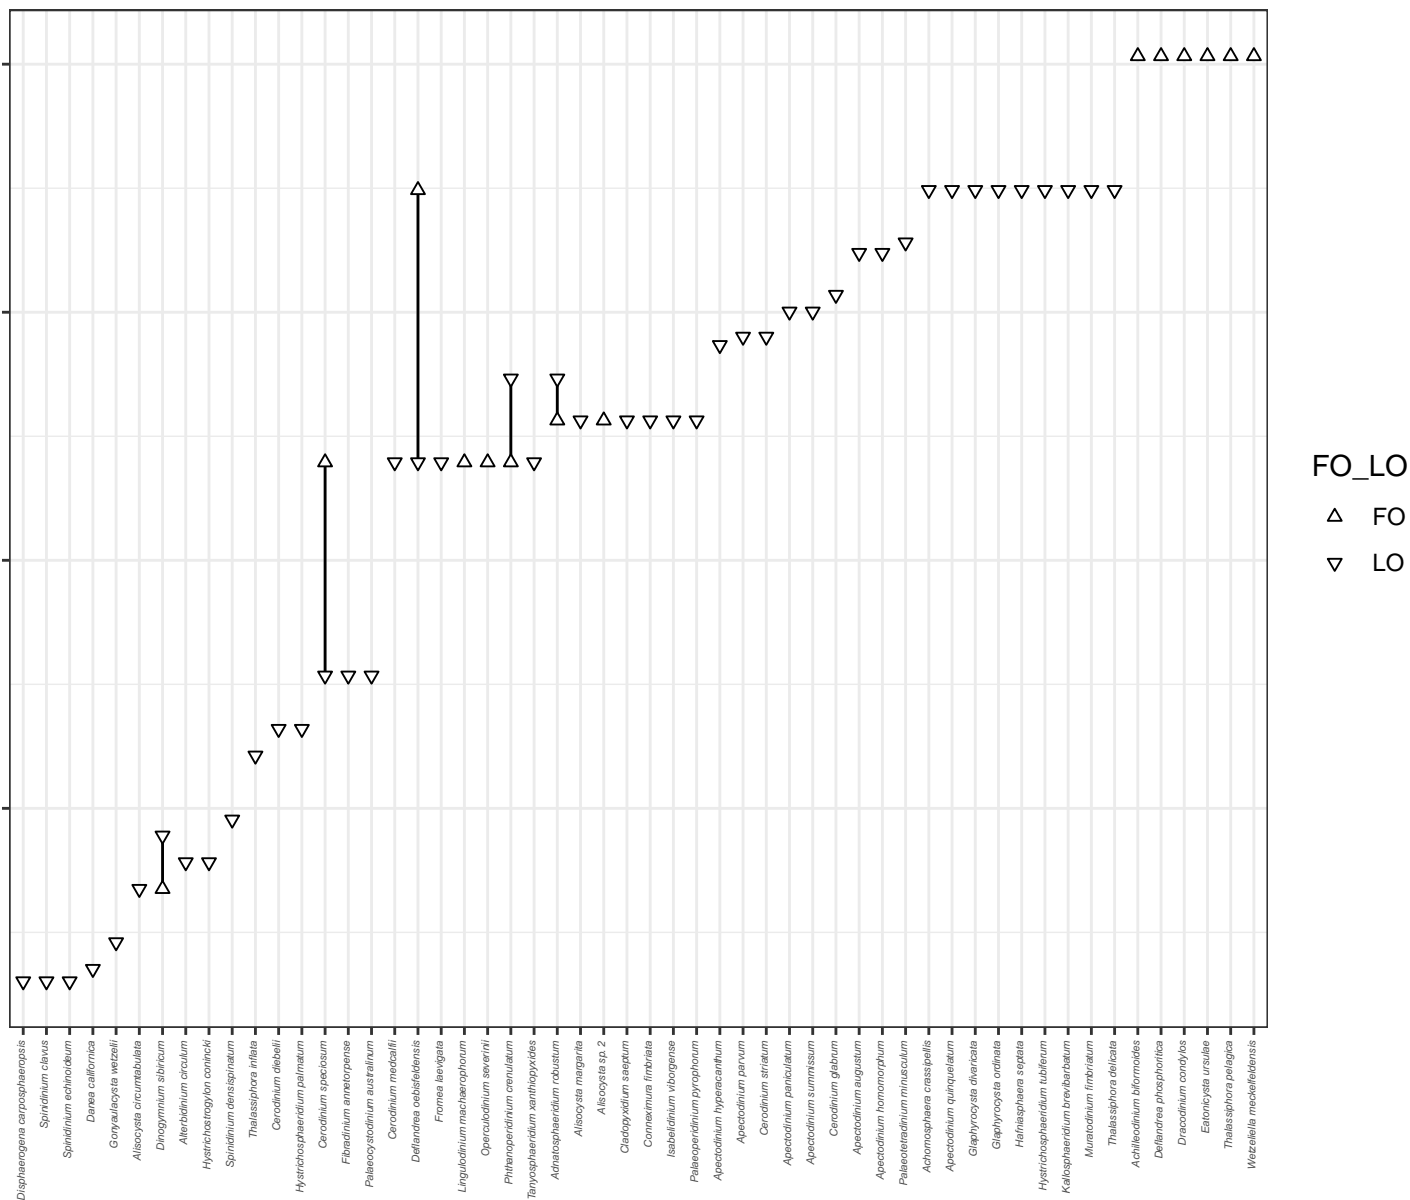

Supplement: Supplementary file 749 [file Site_Viborg-1.pdf › Supplement/Supplement 2/Sites 188 plots/Site_Viborg-1.pdf]

# Site

## Volga Basin

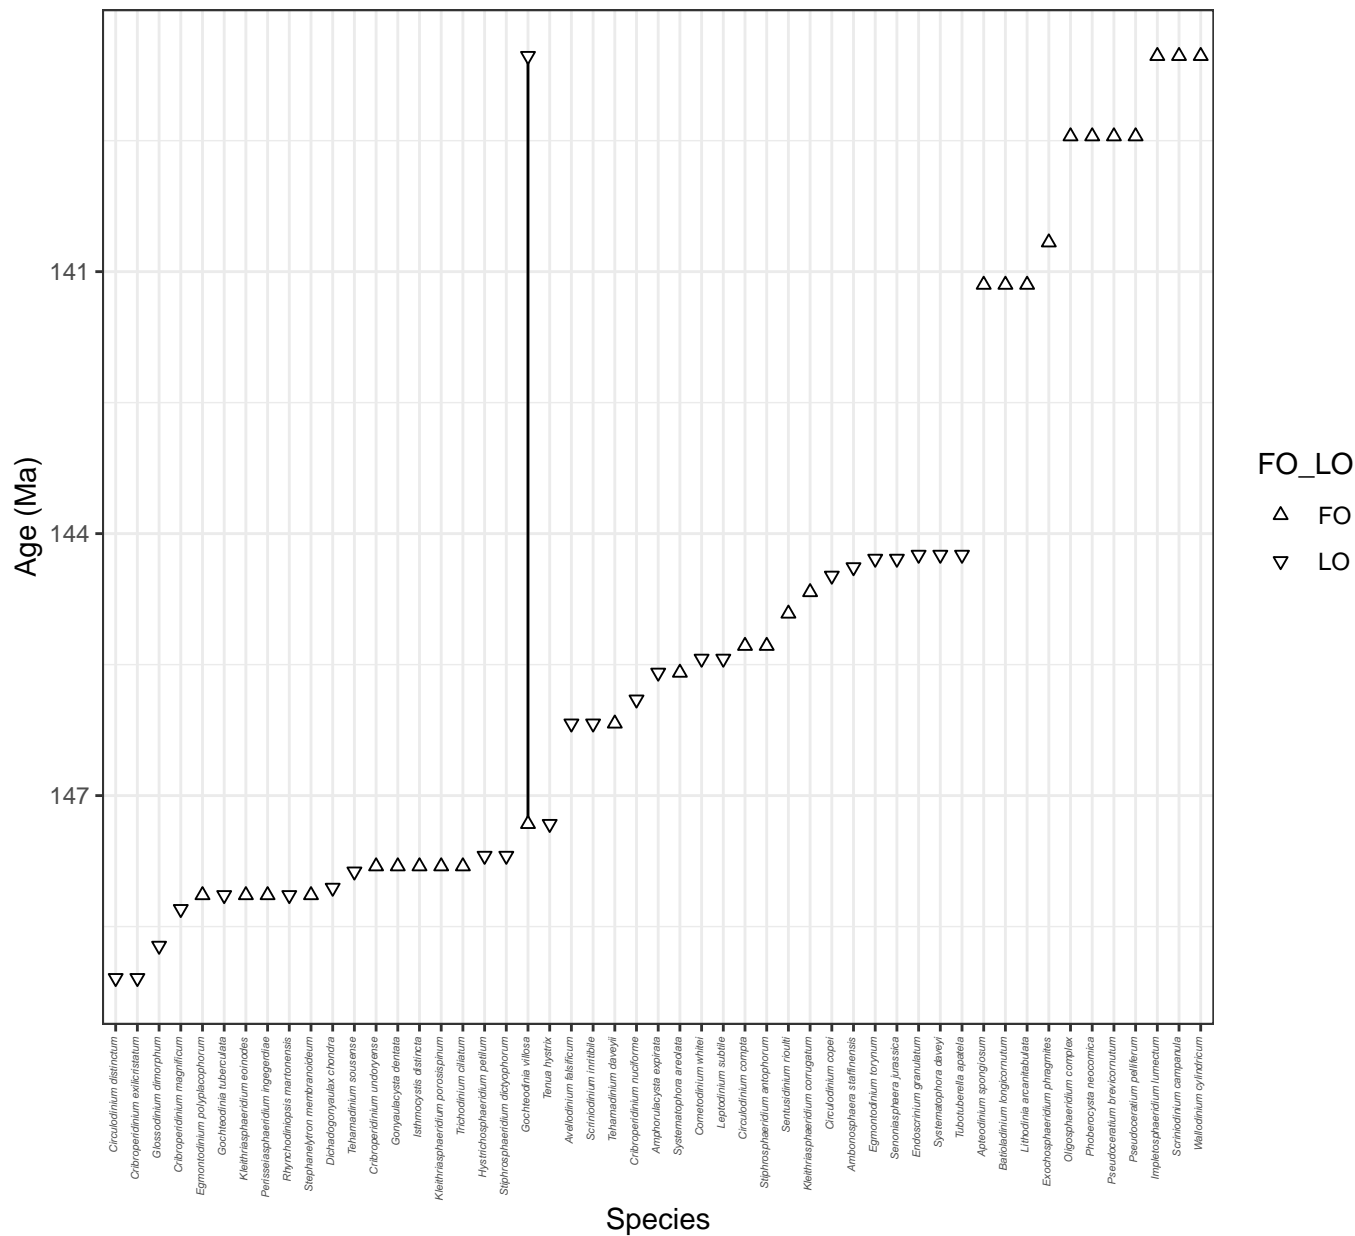

Supplement: Supplementary file 750 [file Site_Volga Basin.pdf › Supplement/Supplement 2/Sites 188 plots/Site_Volga Basin.pdf]

Site

Well 10

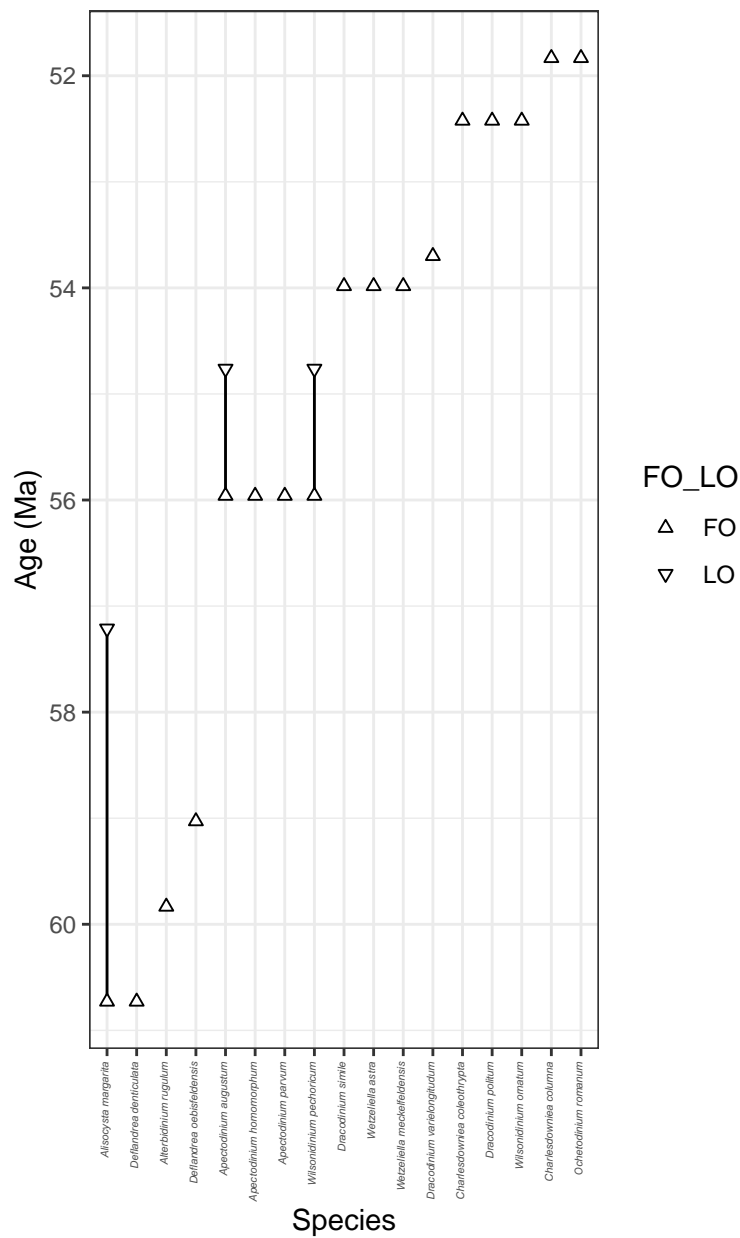

Supplement: Supplementary file 751 [file Site_Well 10.pdf › Supplement/Supplement 2/Sites 188 plots/Site_Well 10.pdf]

# Site

Wells 15, 21

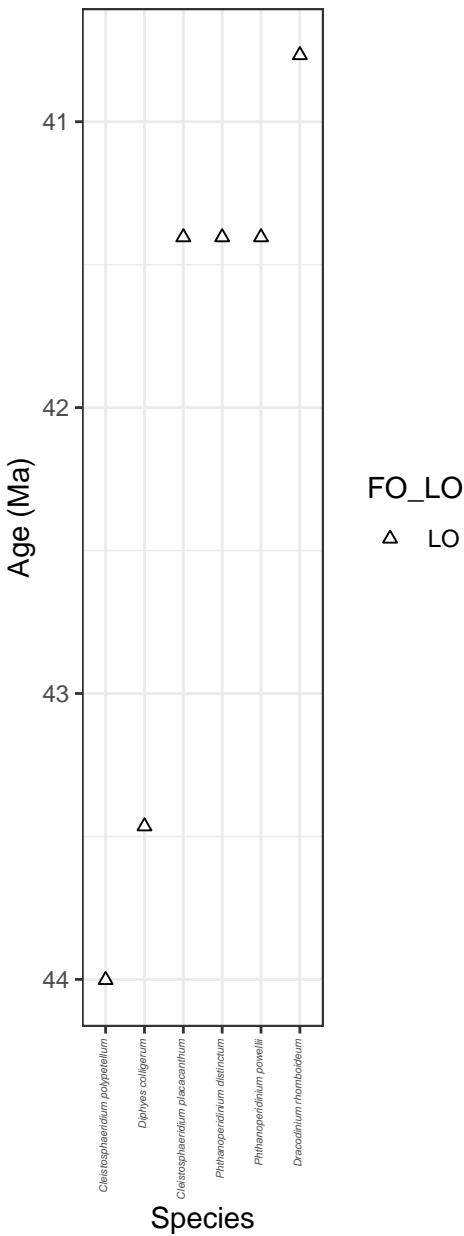

Supplement: Supplementary file 752 [file Site_Wells 15, 21.pdf › Supplement/Supplement 2/Sites 188 plots/Site_Wells 15, 21.pdf]

Site  
Western Carpathians

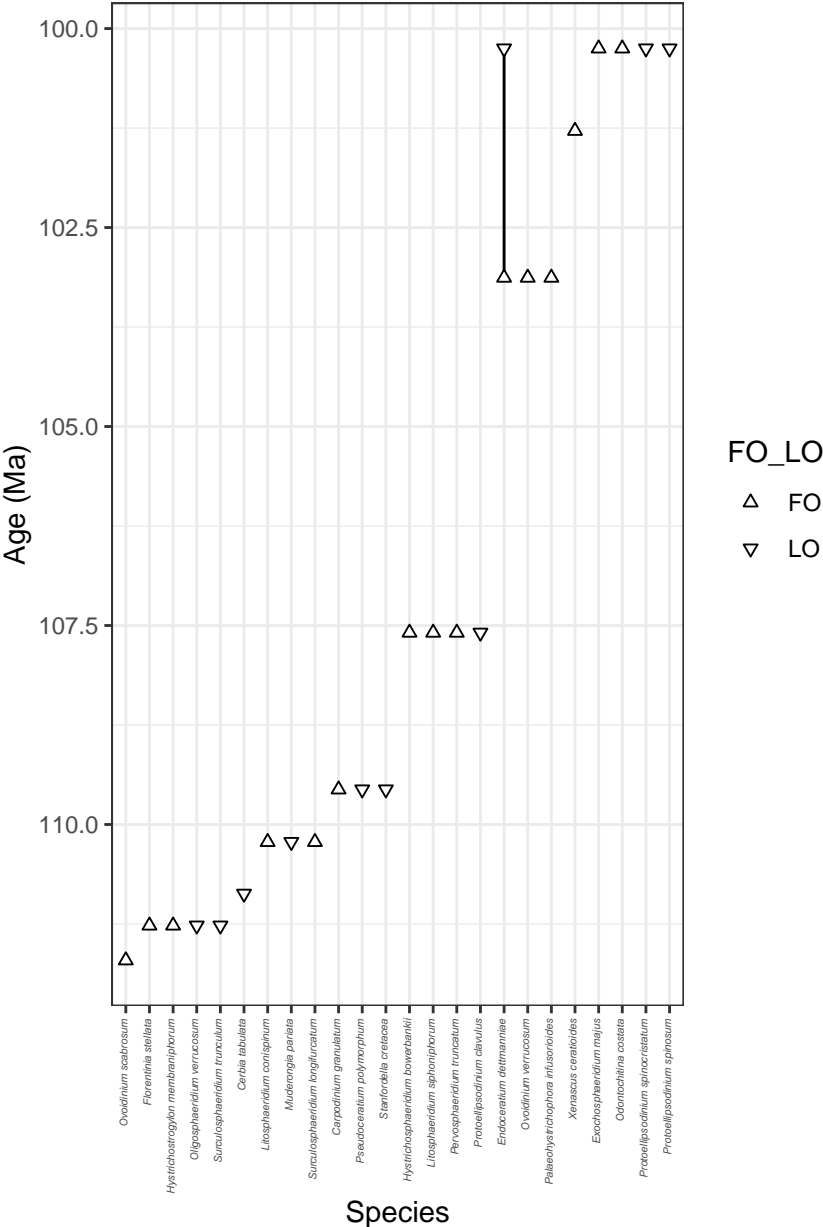

Supplement: Supplementary file 753 [file Site_Western Carpathians.pdf › Supplement/Supplement 2/Sites 188 plots/Site_Western Carpathians.pdf]

# Site Whitby

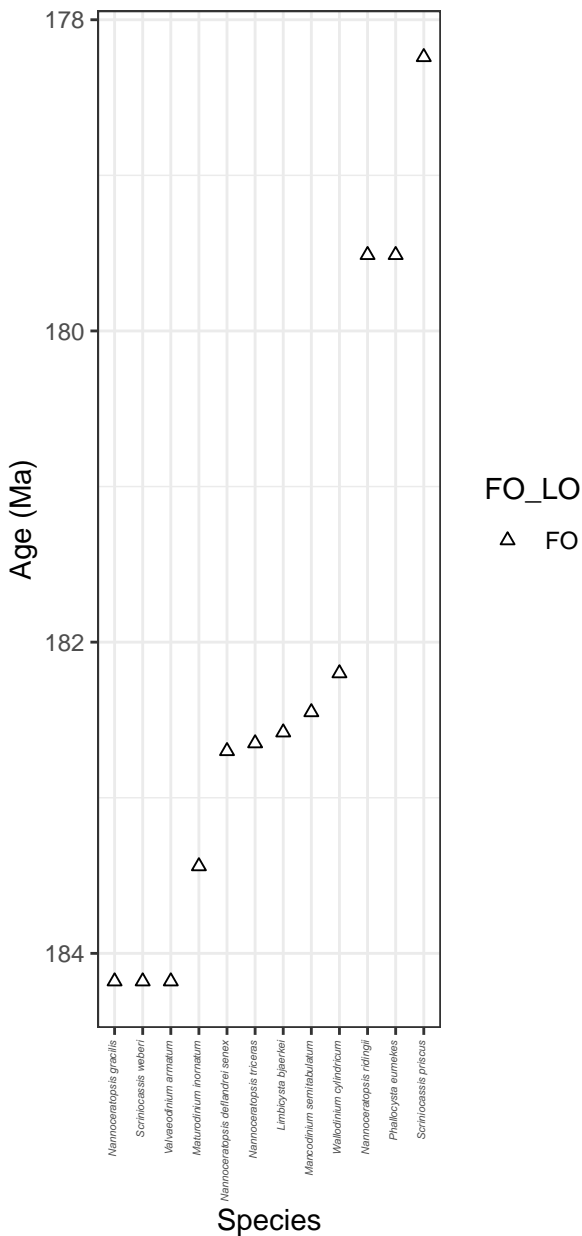

Supplement: Supplementary file 754 [file Site_Whitby.pdf › Supplement/Supplement 2/Sites 188 plots/Site_Whitby.pdf]

Site  
Yorkshire

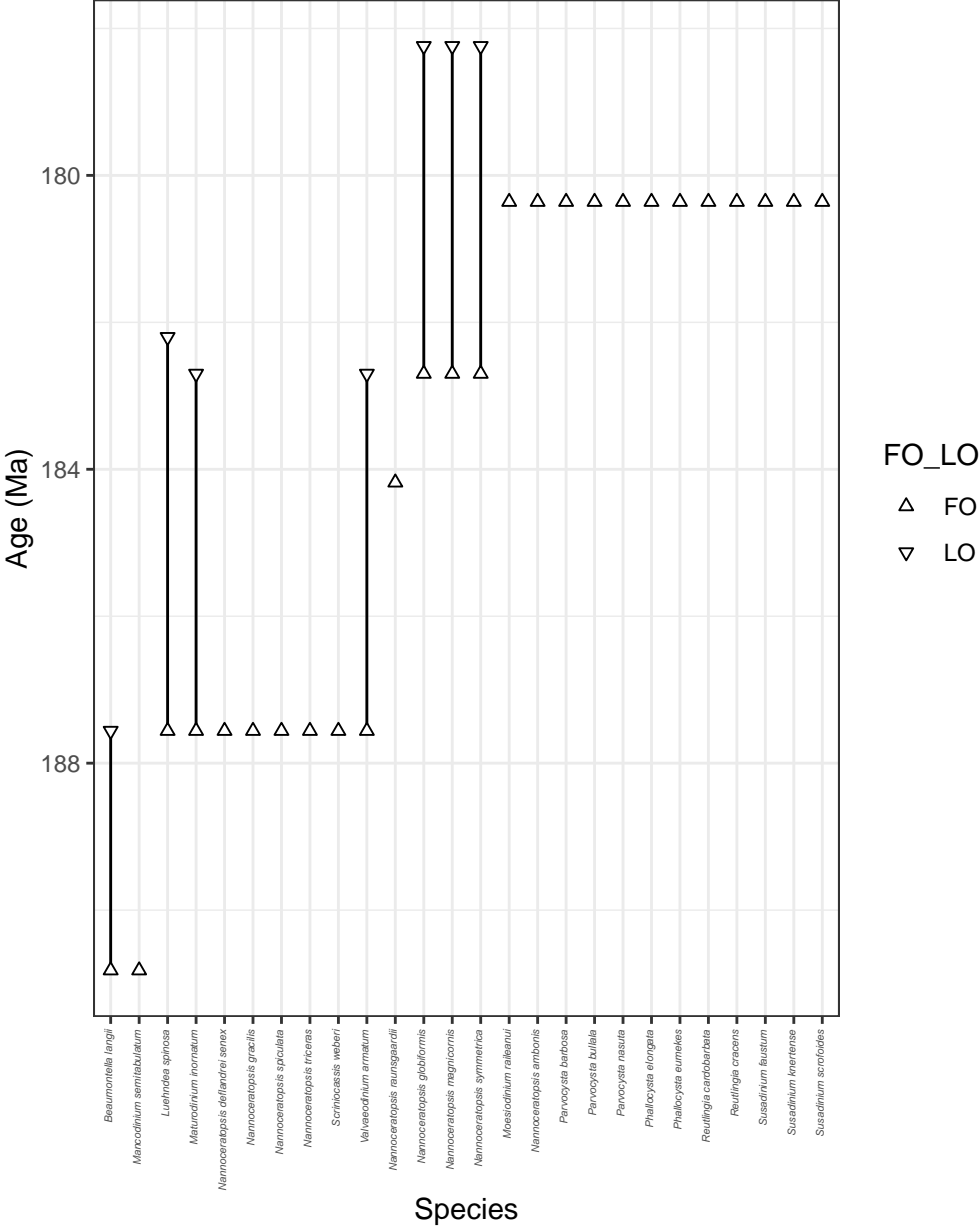

Supplement: Supplementary file 755 [file Site_Yorkshire.pdf › Supplement/Supplement 2/Sites 188 plots/Site_Yorkshire.pdf]

# Site

## Zaragoza

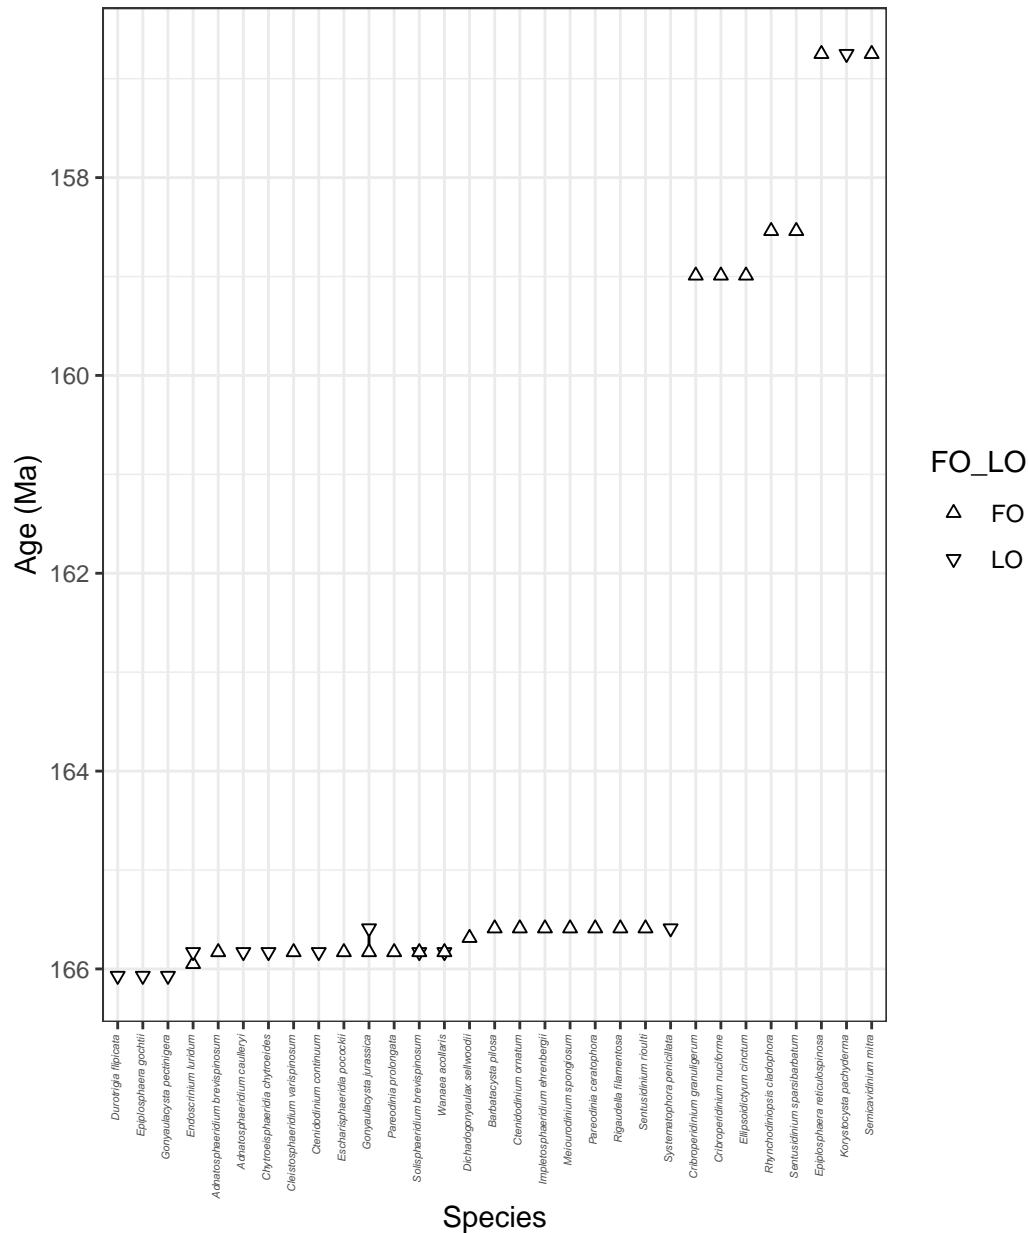

Supplement: Supplementary file 756 [file Site_Zaragoza.pdf › Supplement/Supplement 2/Sites 188 plots/Site_Zaragoza.pdf]

Site

Zumaia

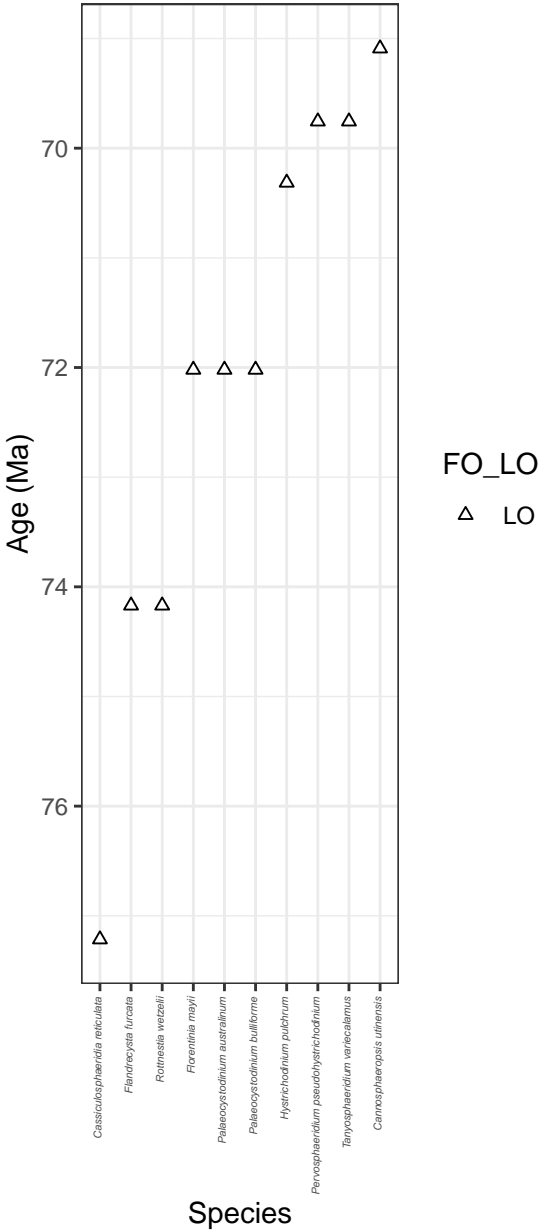

Supplement: Supplementary file 757 [file Site_Zumaia.pdf › Supplement/Supplement 2/Sites 188 plots/Site_Zumaia.pdf]

# Site compilation1

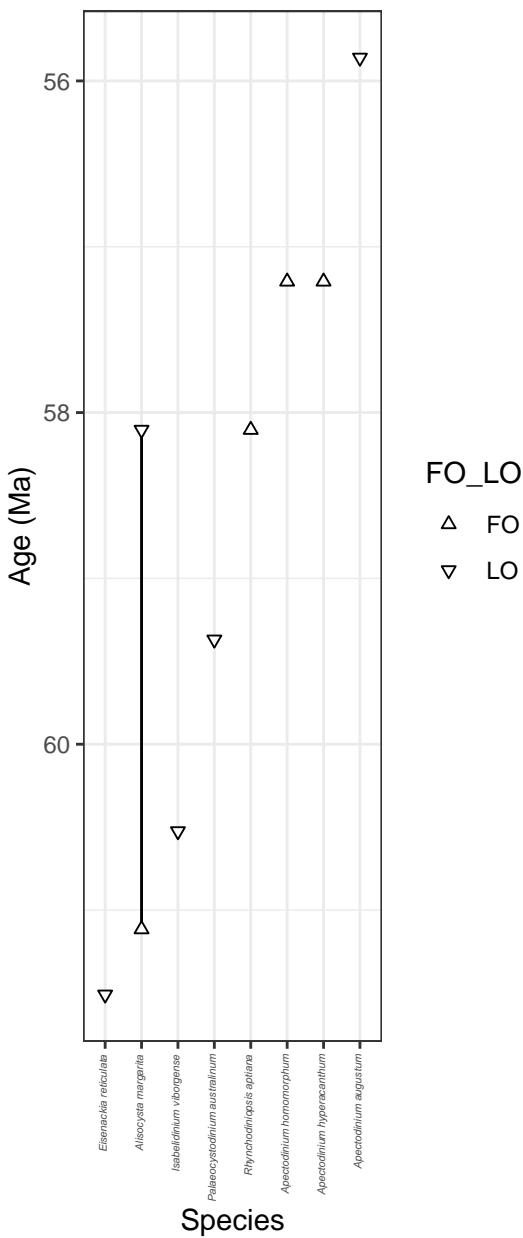

Supplement: Supplementary file 758 [file Site_compilation1.pdf › Supplement/Supplement 2/Sites 188 plots/Site_compilation1.pdf]

Site  
compilation2

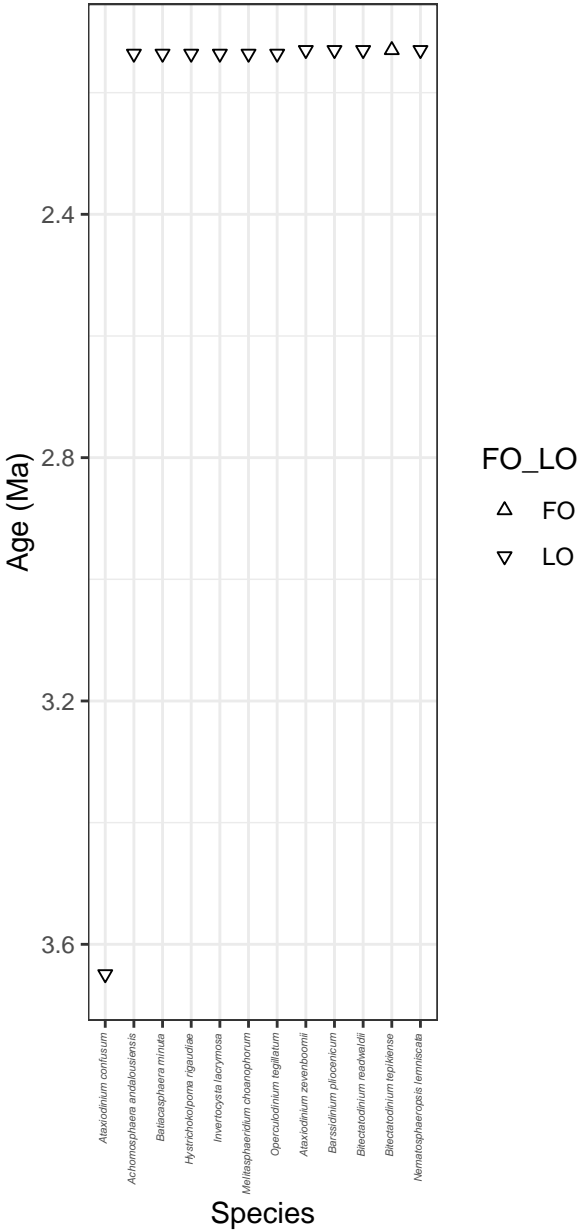

Supplement: Supplementary file 759 [file Site_compilation2.pdf › Supplement/Supplement 2/Sites 188 plots/Site_compilation2.pdf]

Site  
east Kent

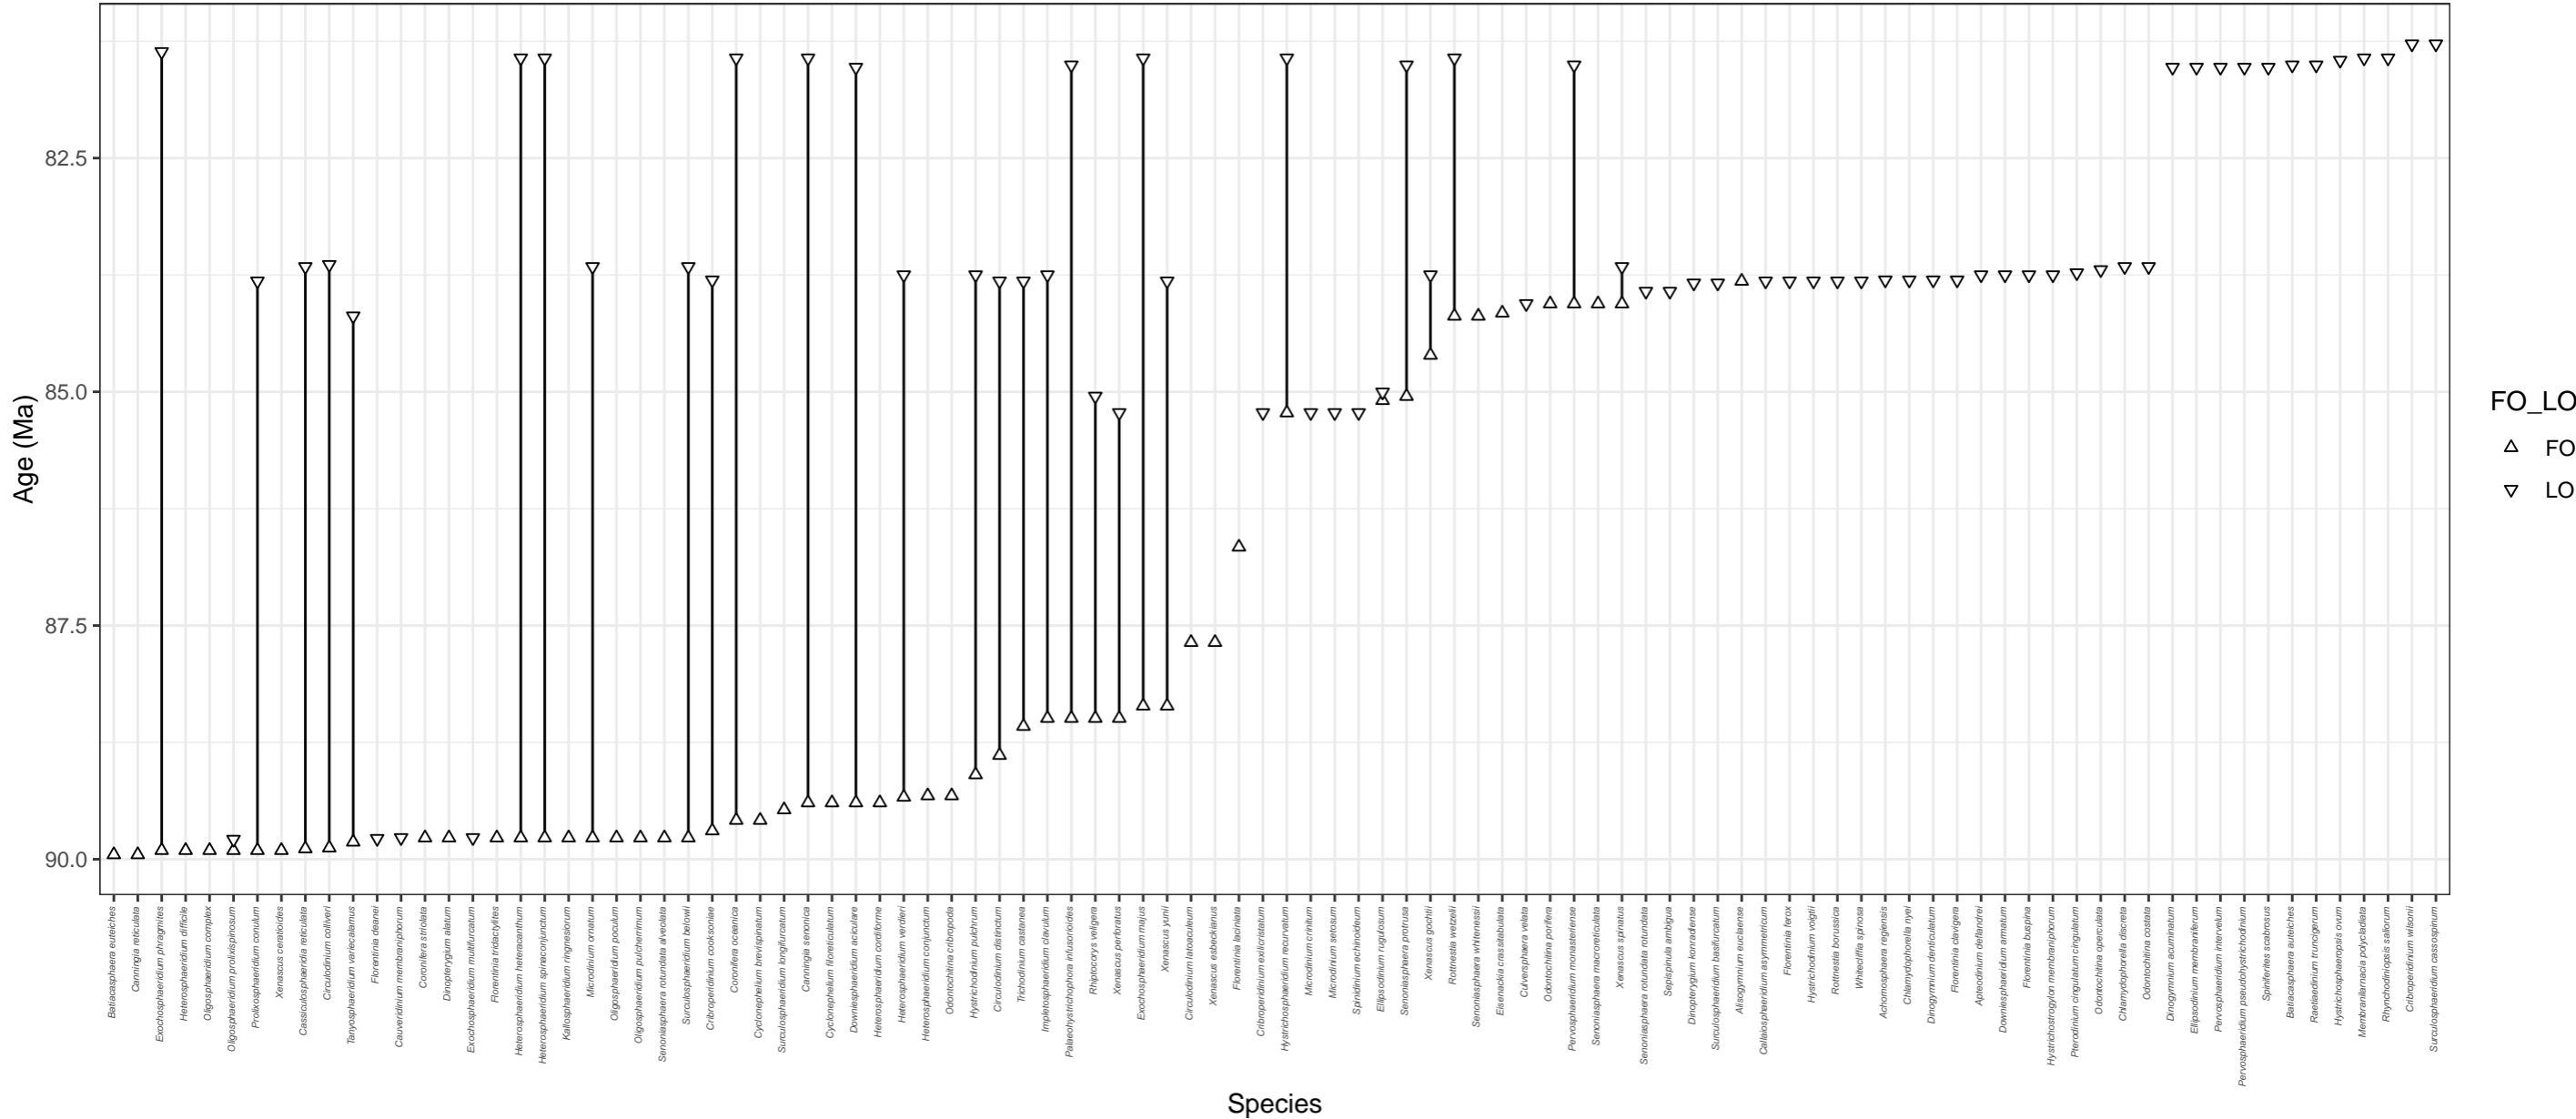

Supplement: Supplementary file 760 [file Site_east Kent.pdf › Supplement/Supplement 2/Sites 188 plots/Site_east Kent.pdf]

# Site

## mid-Waipara

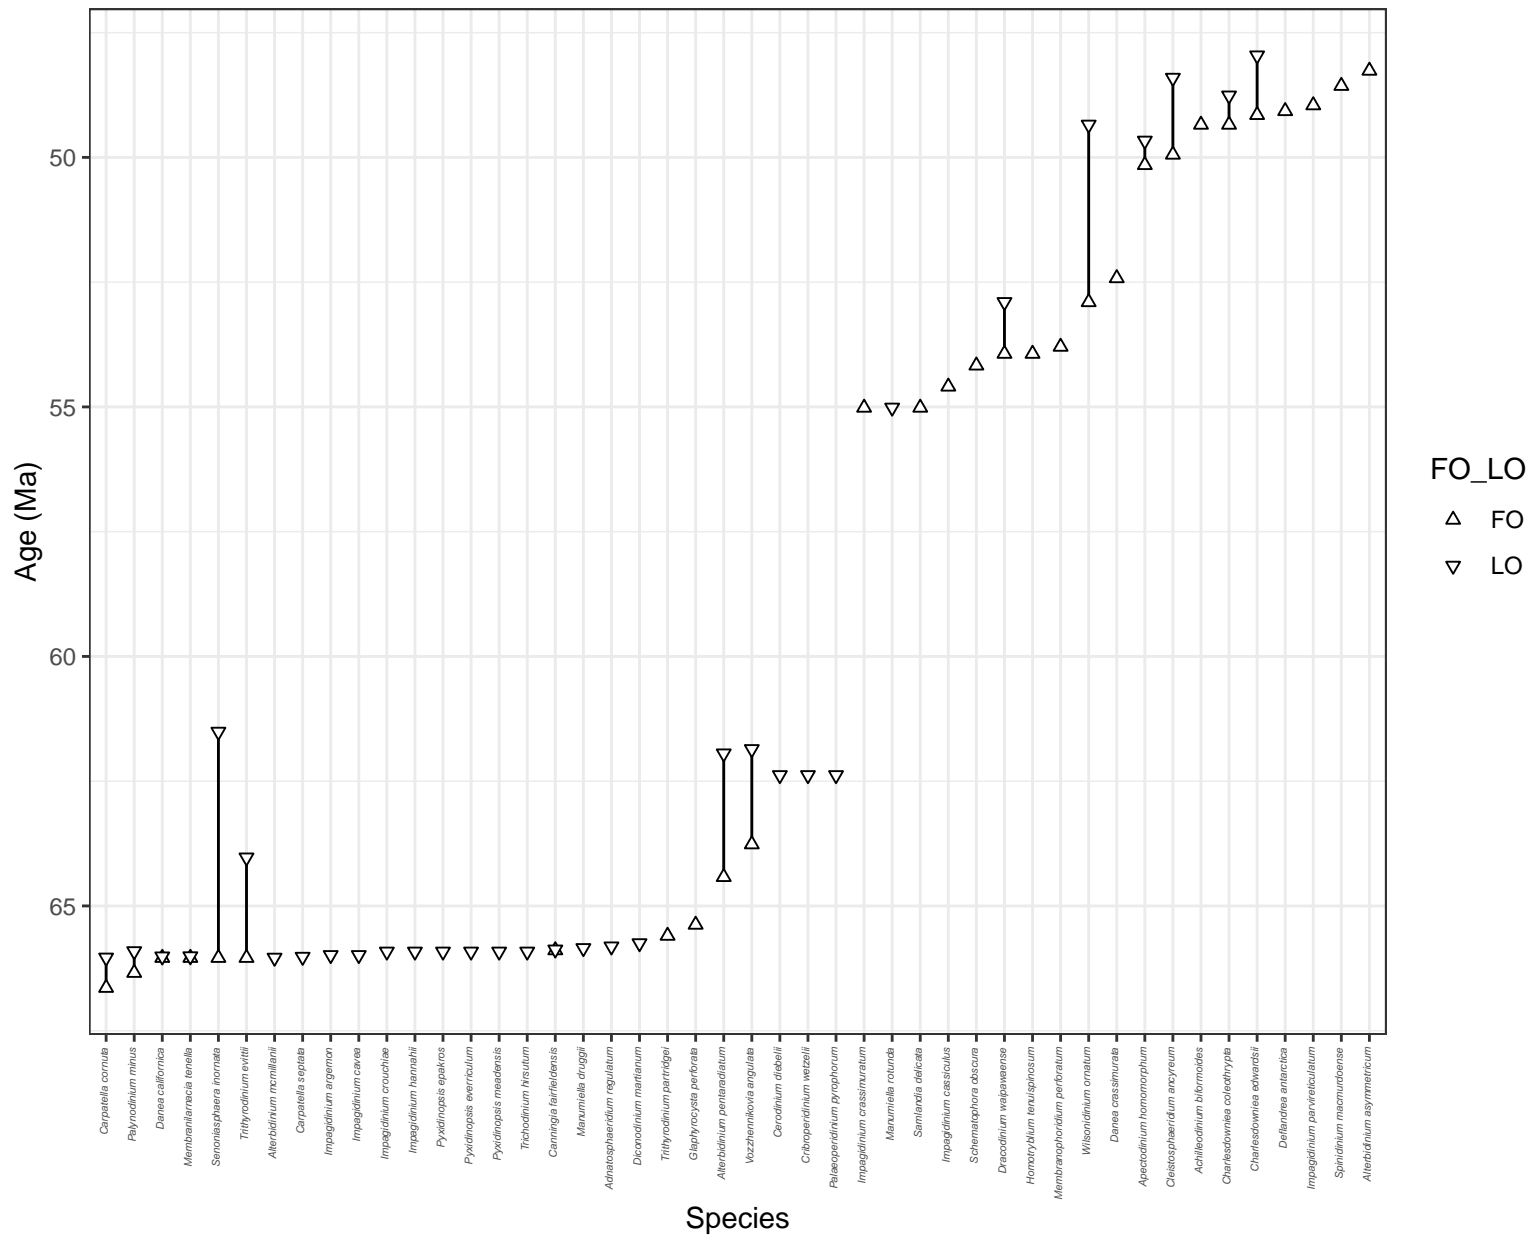

Supplement: Supplementary file 761 [file Site_mid-Waipara.pdf › Supplement/Supplement 2/Sites 188 plots/Site_mid-Waipara.pdf]

Site  
nw Australia compilation

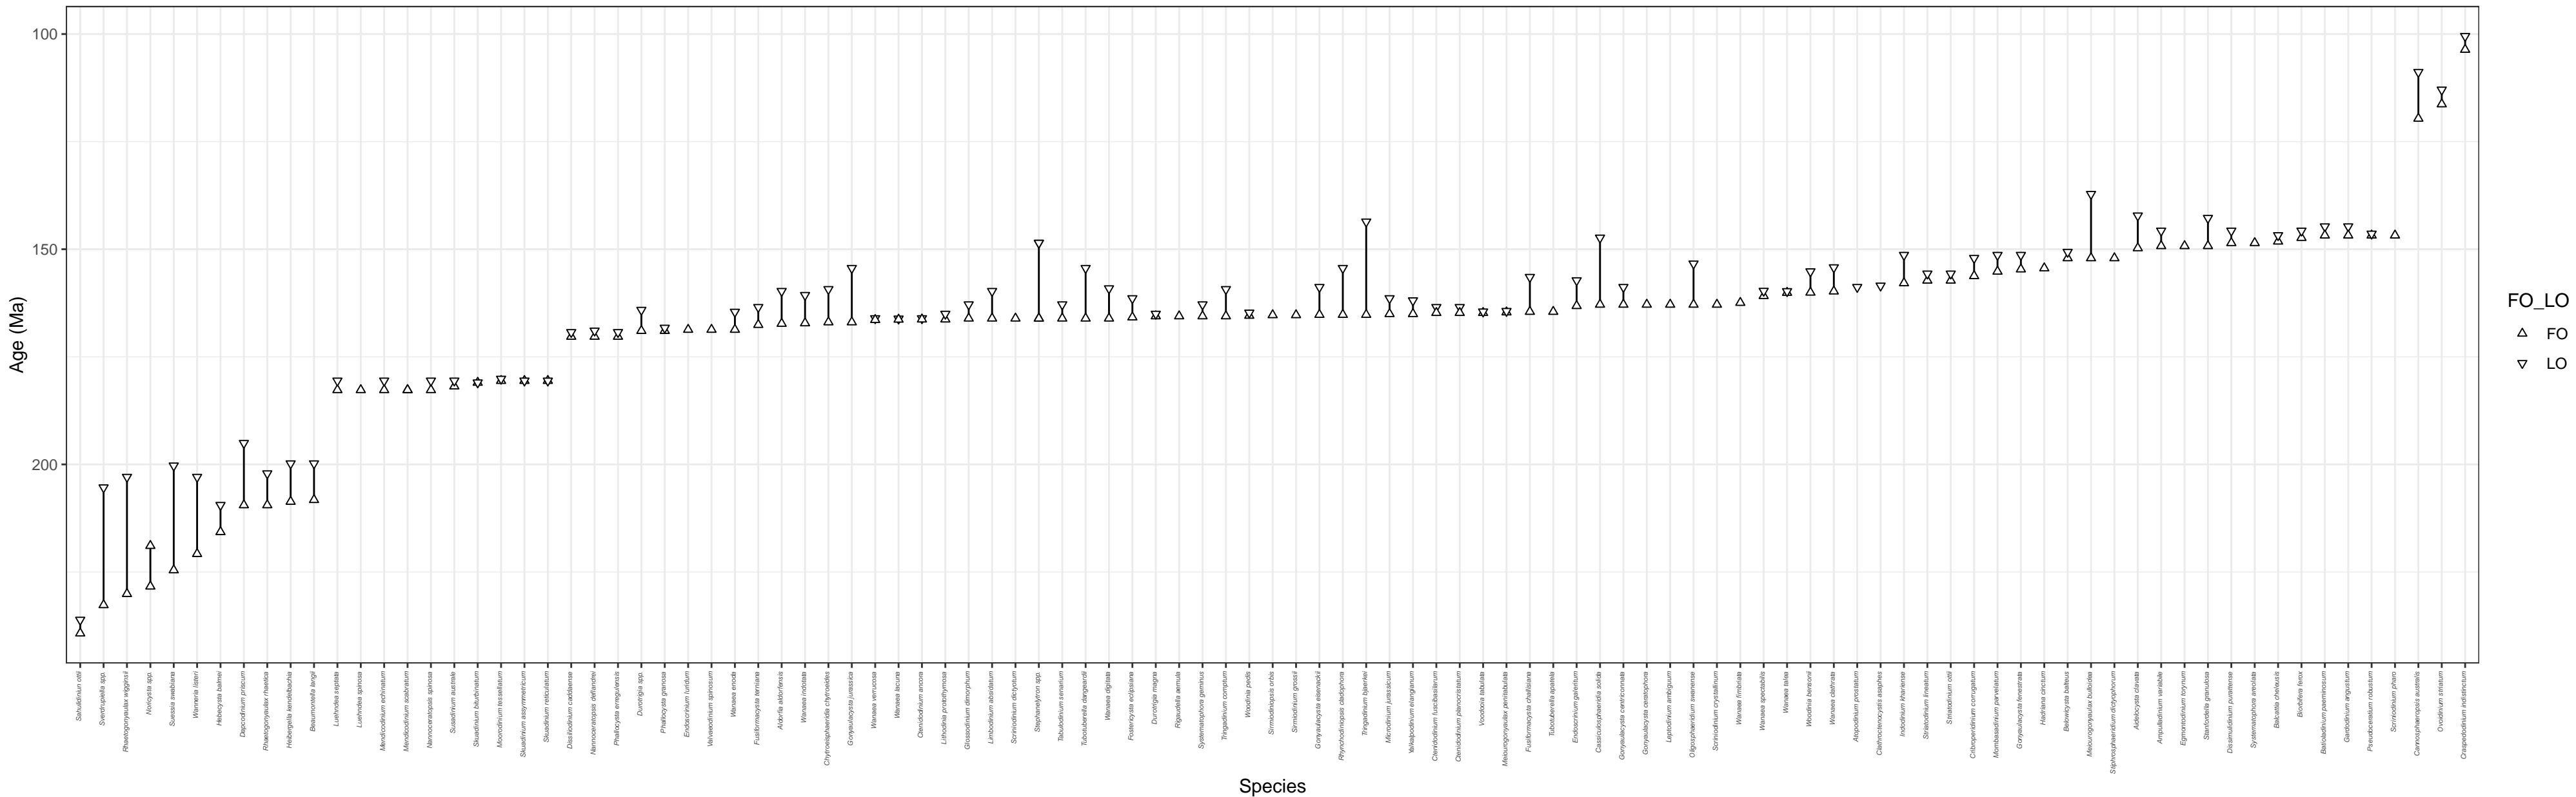

Supplement: Supplementary file 762 [file Site_nw Australia compilation.pdf › Supplement/Supplement 2/Sites 188 plots/Site_nw Australia compilation.pdf]

Site  
nw Pacific

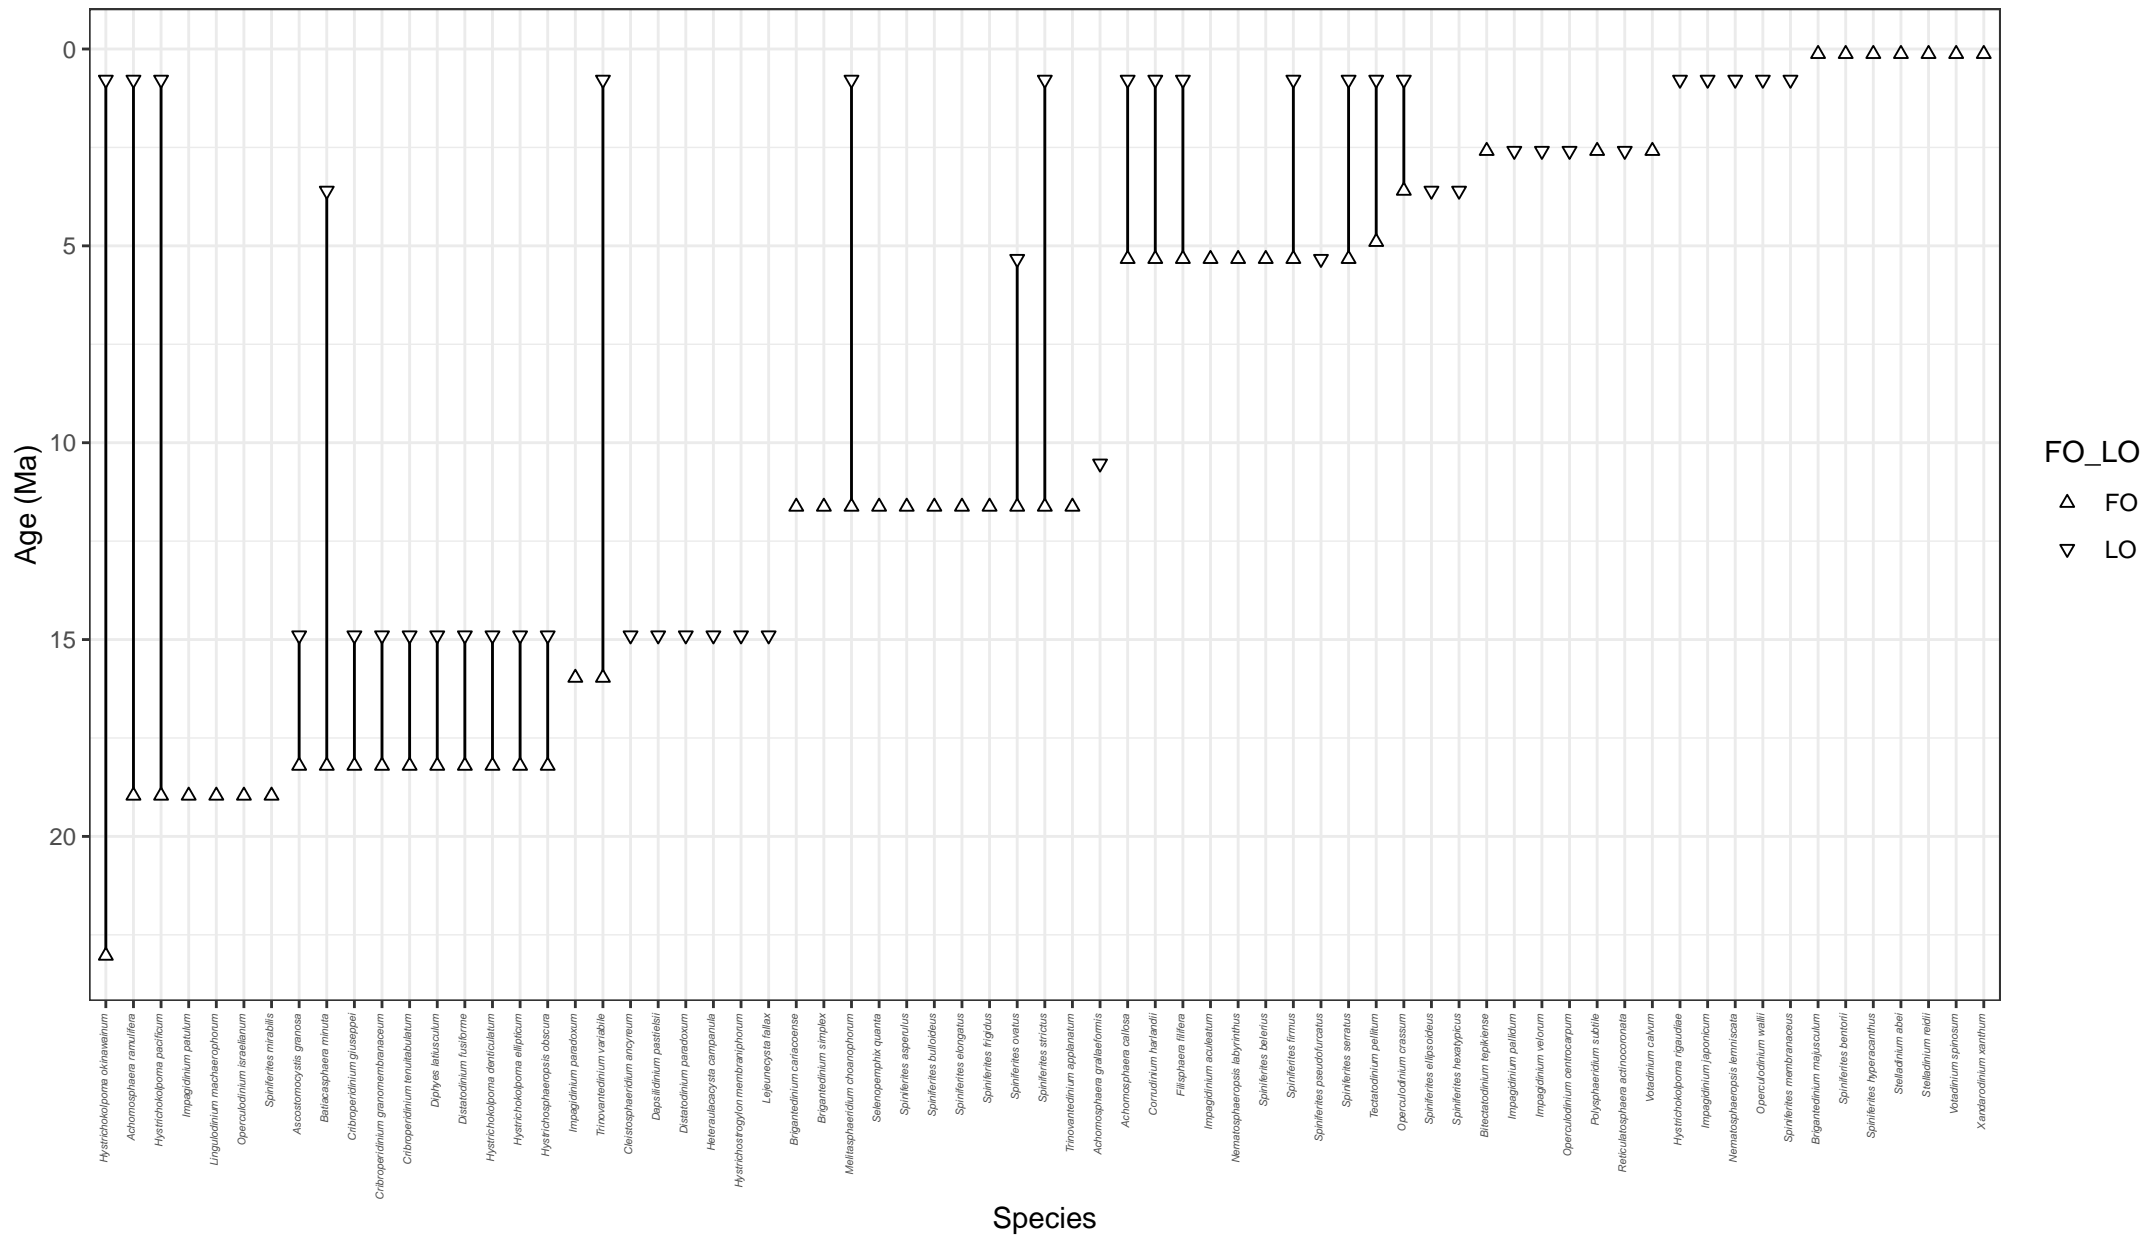

Supplement: Supplementary file 763 [file Site_nw Pacific.pdf › Supplement/Supplement 2/Sites 188 plots/Site_nw Pacific.pdf]

# Site

## southern France

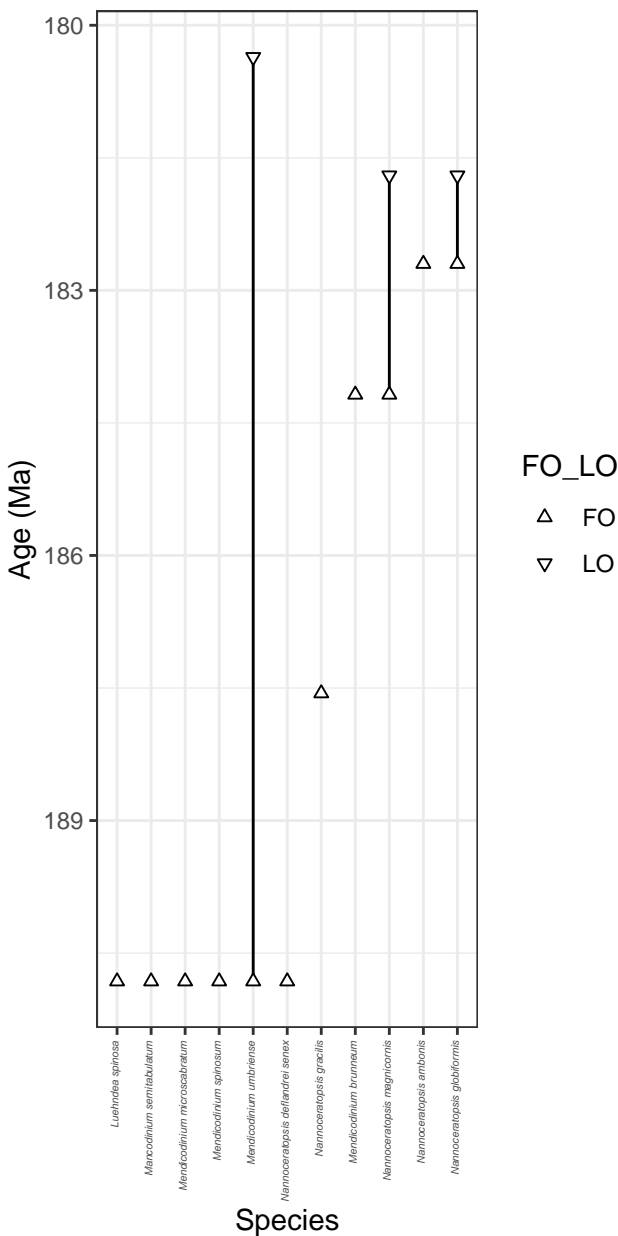

Supplement: Supplementary file 764 [file Site_southern France.pdf › Supplement/Supplement 2/Sites 188 plots/Site_southern France.pdf]

Site  
sw England

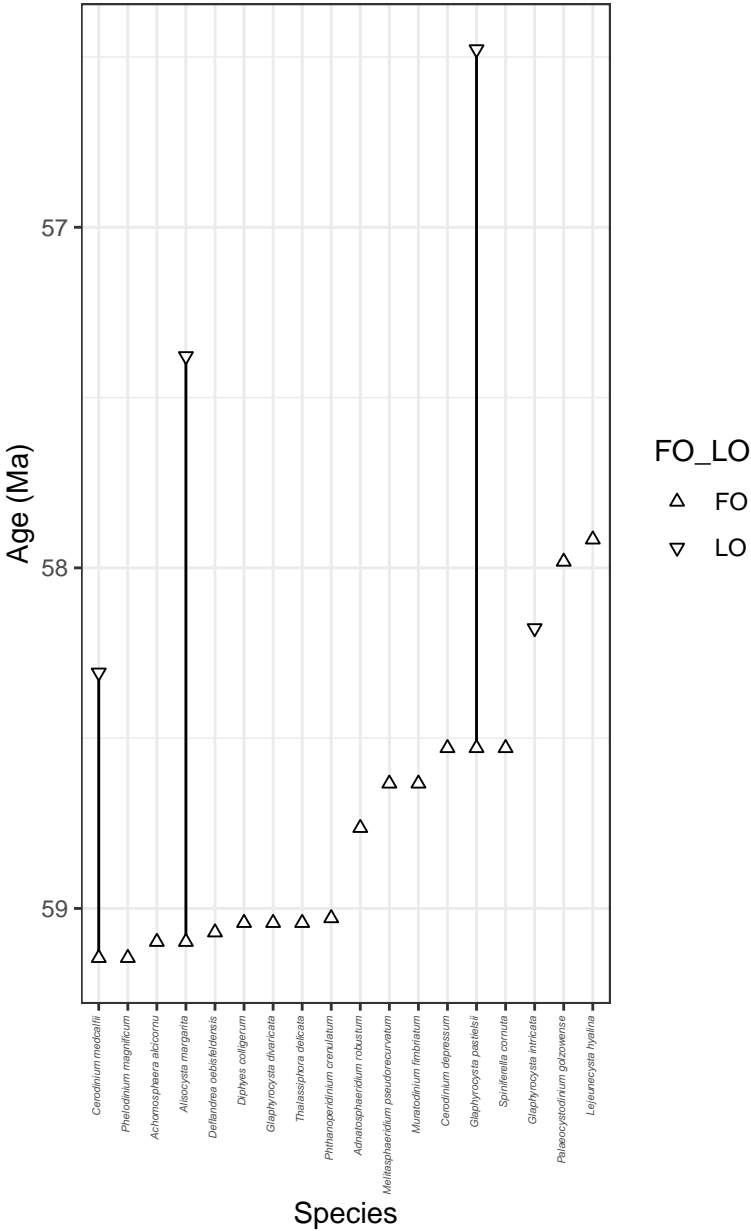

Supplement: Supplementary file 765 [file Site_sw England.pdf › Supplement/Supplement 2/Sites 188 plots/Site_sw England.pdf]

# Site

## synthesis N Germany

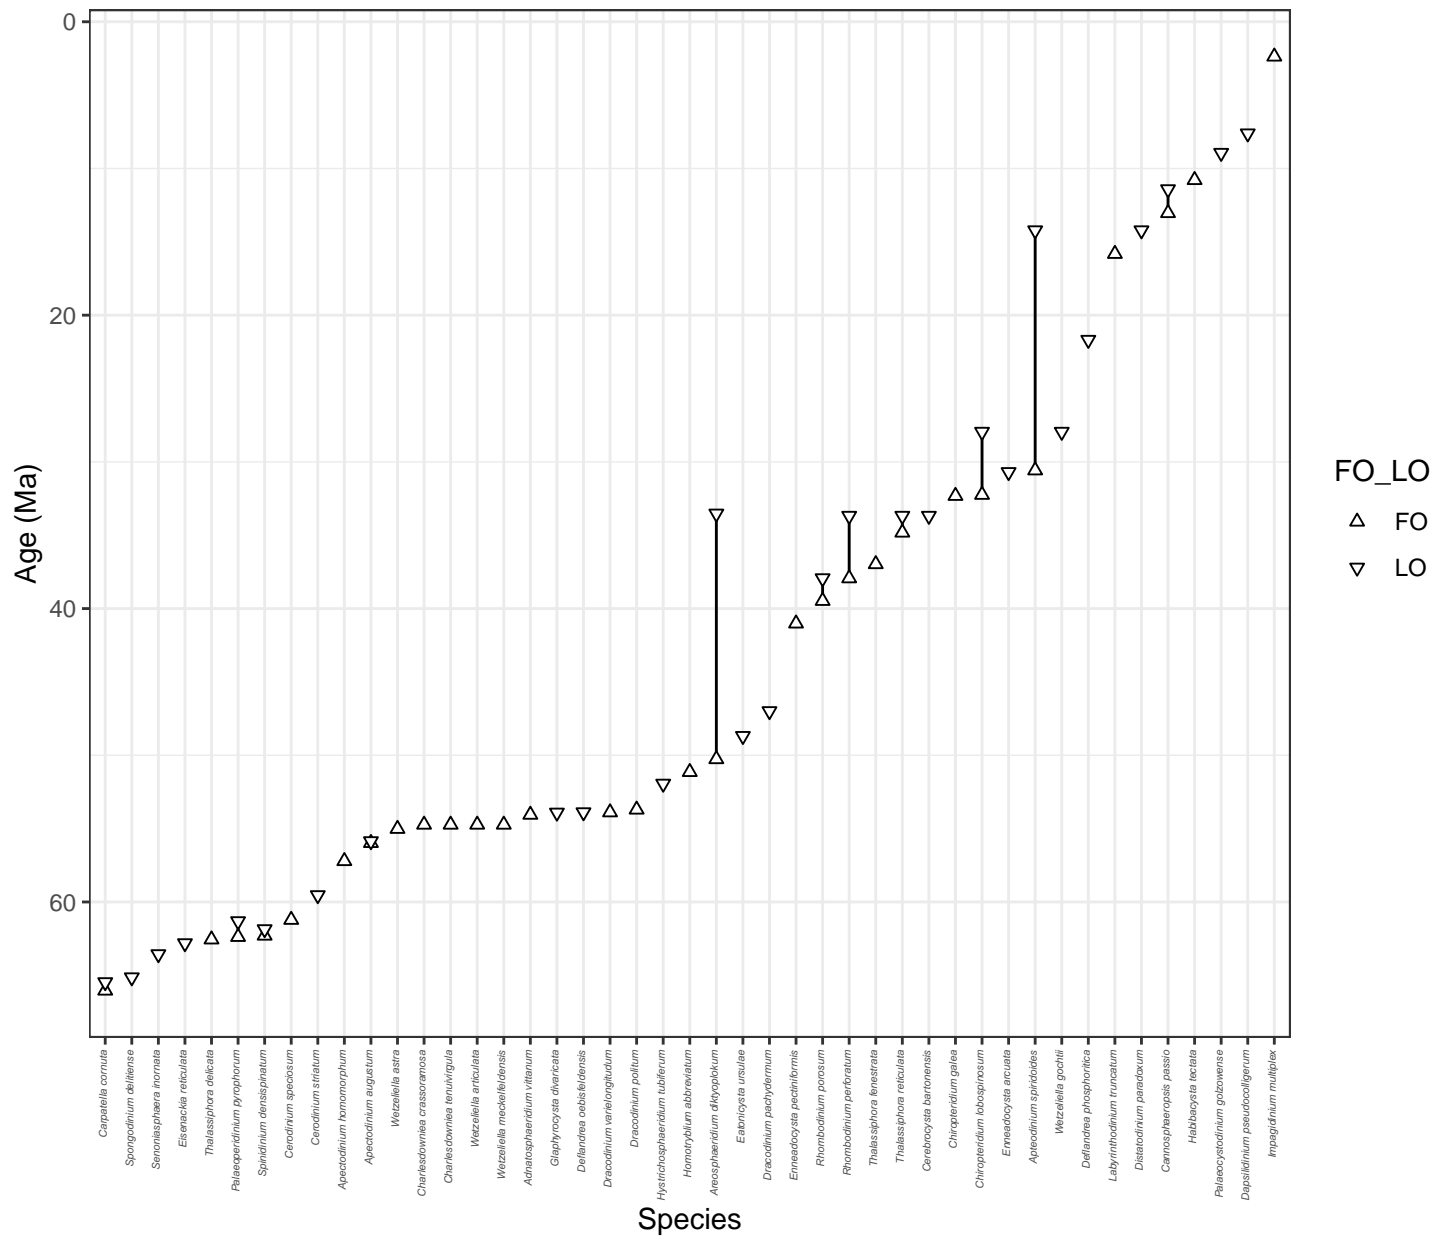

Supplement: Supplementary file 766 [file Site_synthesis N Germany.pdf › Supplement/Supplement 2/Sites 188 plots/Site_synthesis N Germany.pdf]

# Species *Abratopdinium cardioforme*

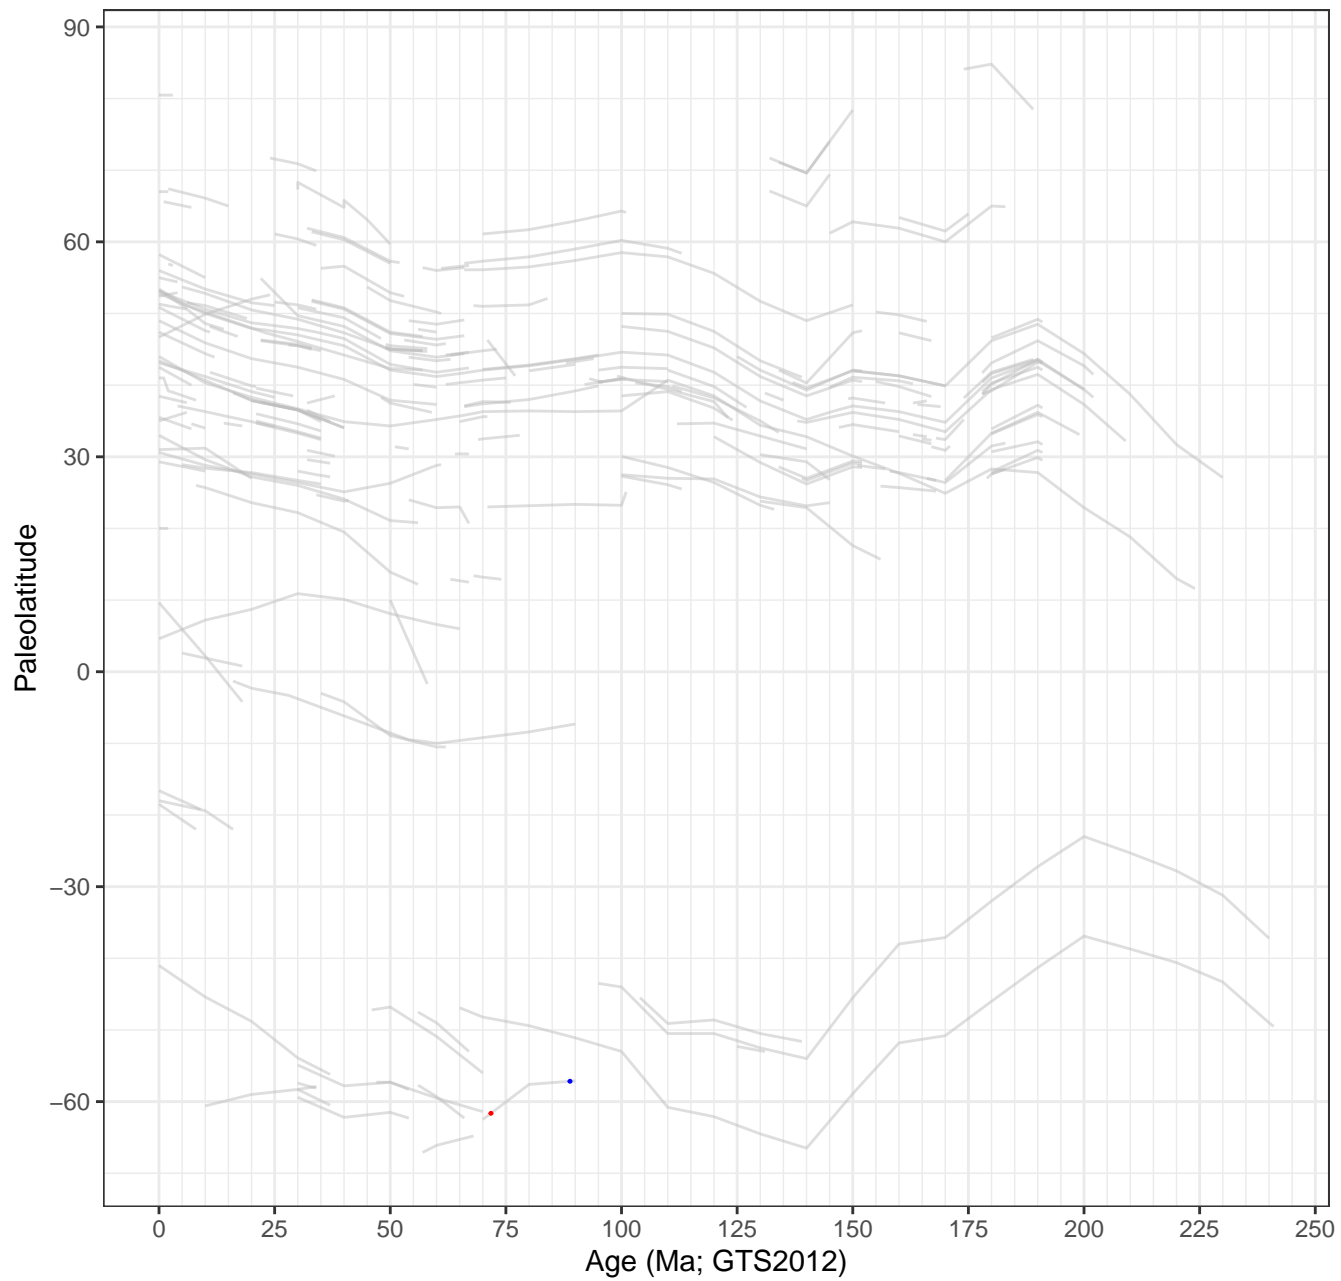

Supplement: Supplementary file 767 [file Abratopdinium cardioforme.pdf › Supplement/Supplement 2/Species 1914 plots/Abratopdinium cardioforme.pdf]

# Species *Abratopdinium kerguelense*

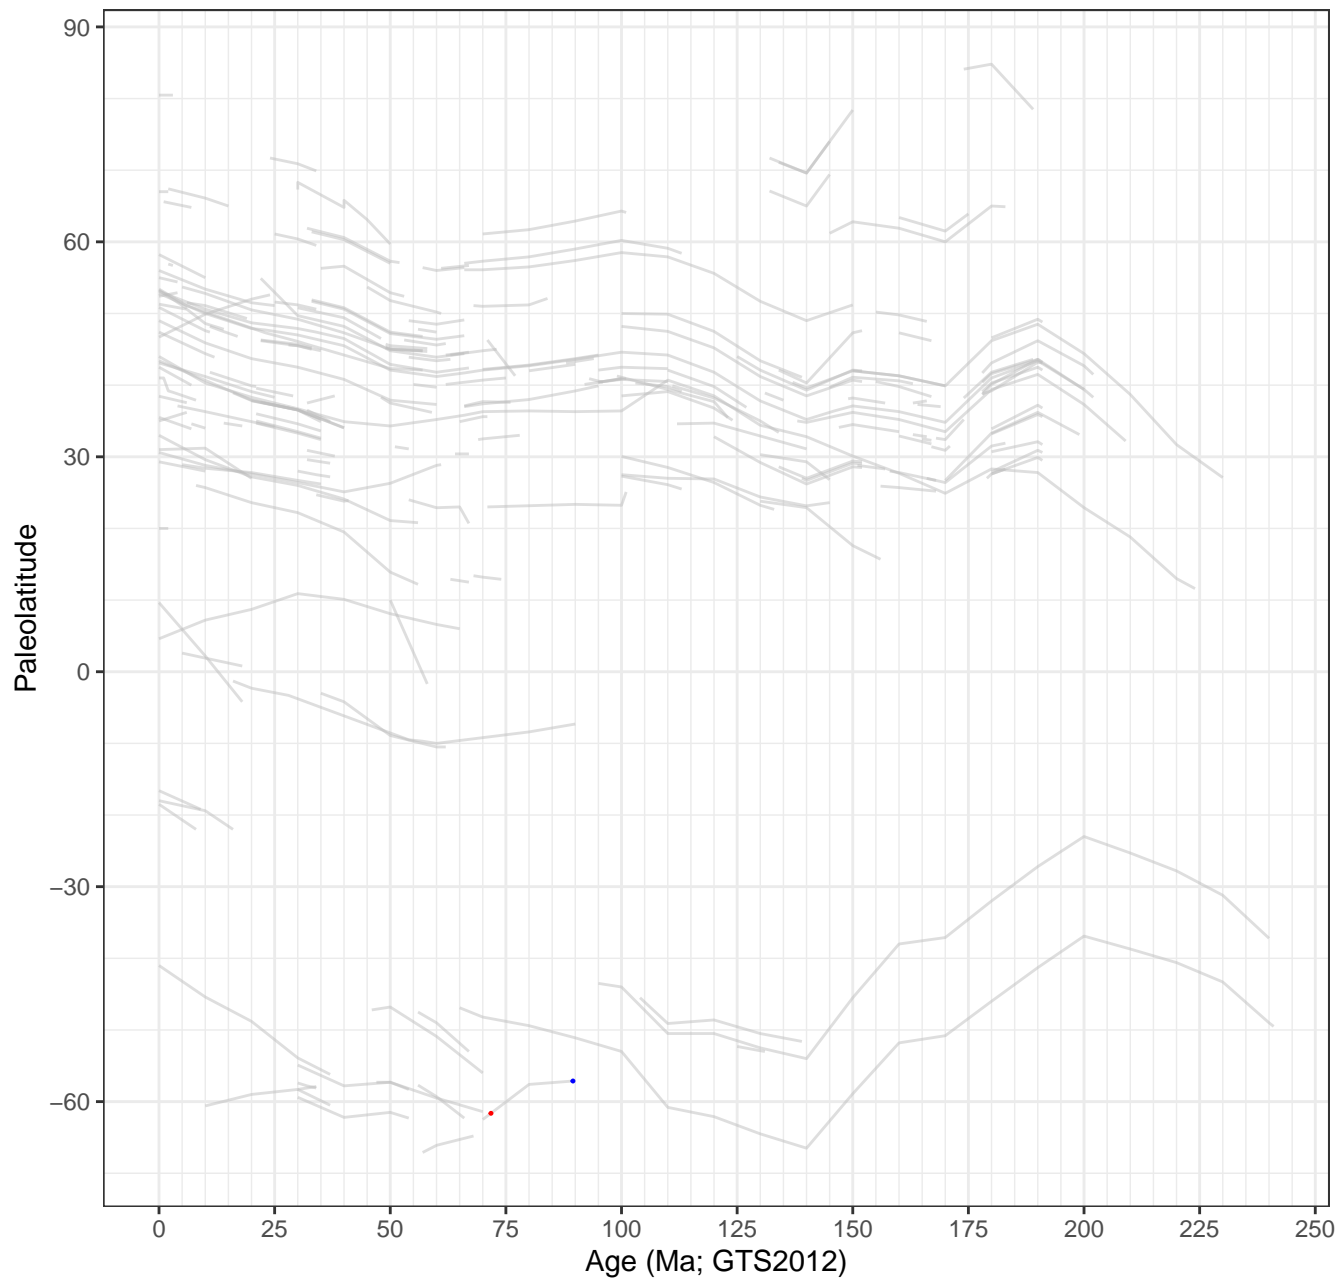

Supplement: Supplementary file 768 [file Abratopdinium kerguelense.pdf › Supplement/Supplement 2/Species 1914 plots/Abratopdinium kerguelense.pdf]

# Species *Acanthaulax miocenica*

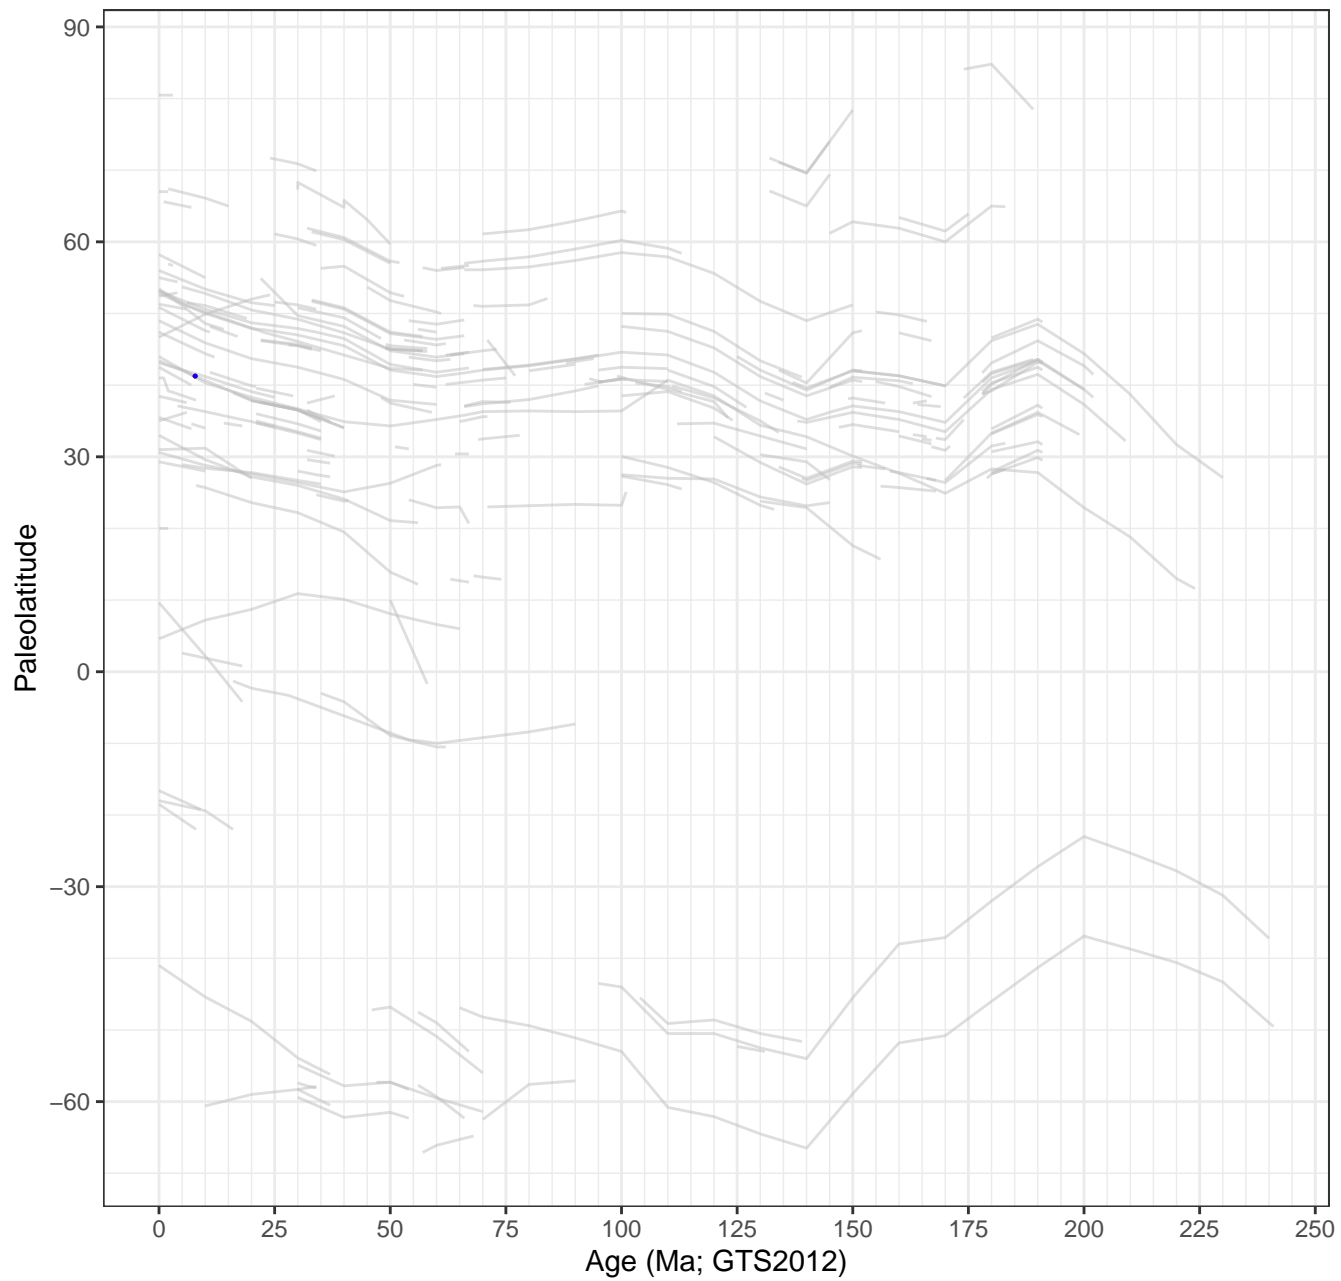

Supplement: Supplementary file 769 [file Acanthaulax miocenica.pdf › Supplement/Supplement 2/Species 1914 plots/Acanthaulax miocenica.pdf]

# Species *Achilleodinium biannii*

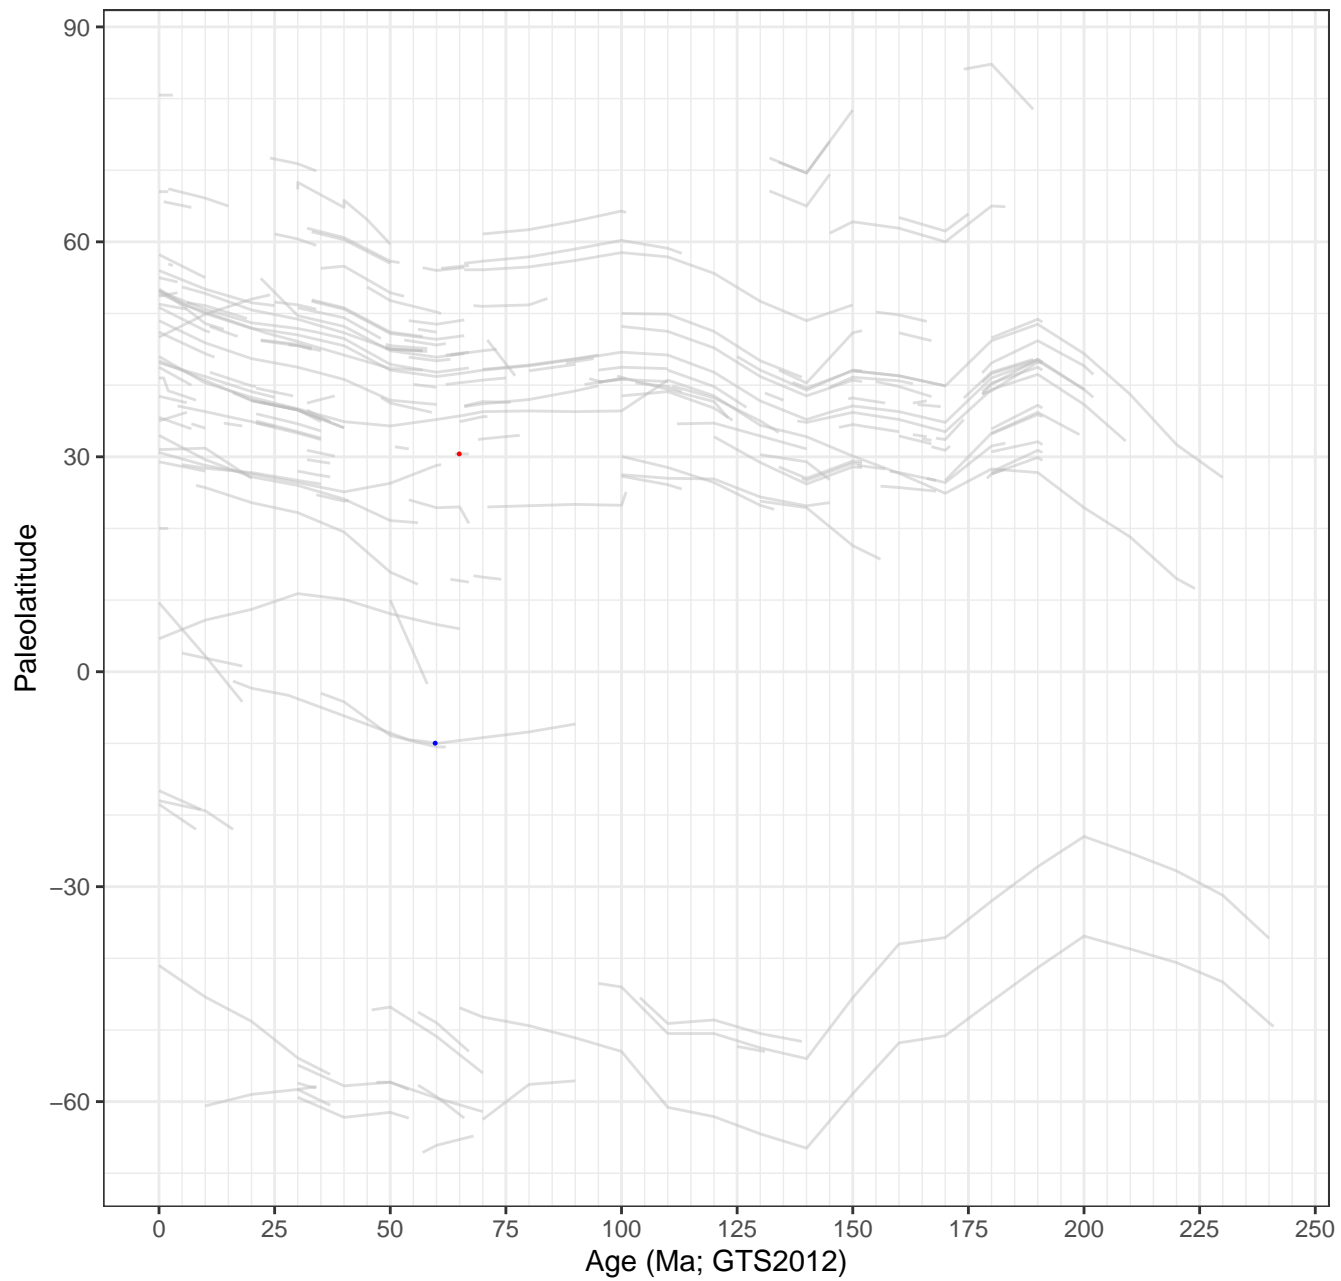

Supplement: Supplementary file 770 [file Achilleodinium biannii.pdf › Supplement/Supplement 2/Species 1914 plots/Achilleodinium biannii.pdf]

# Species *Achilleodinium biformoides*

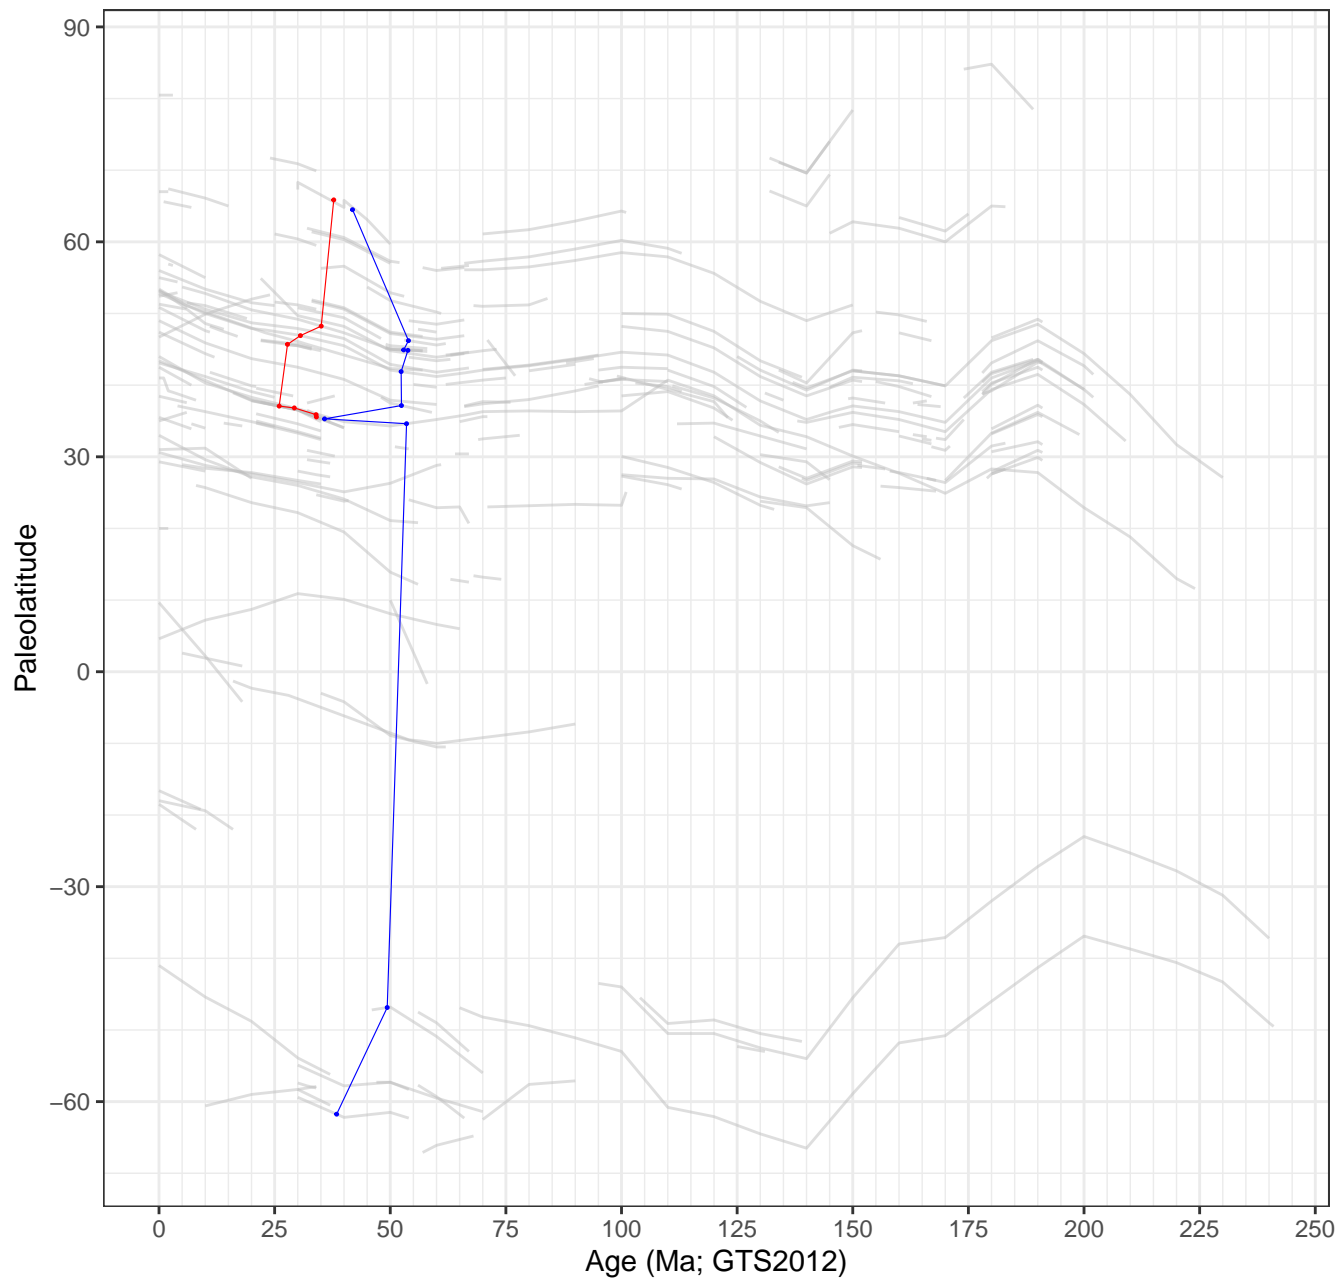

Supplement: Supplementary file 771 [file Achilleodinium biformoides.pdf › Supplement/Supplement 2/Species 1914 plots/Achilleodinium biformoides.pdf]

# Species *Achomosphæra alcornu*

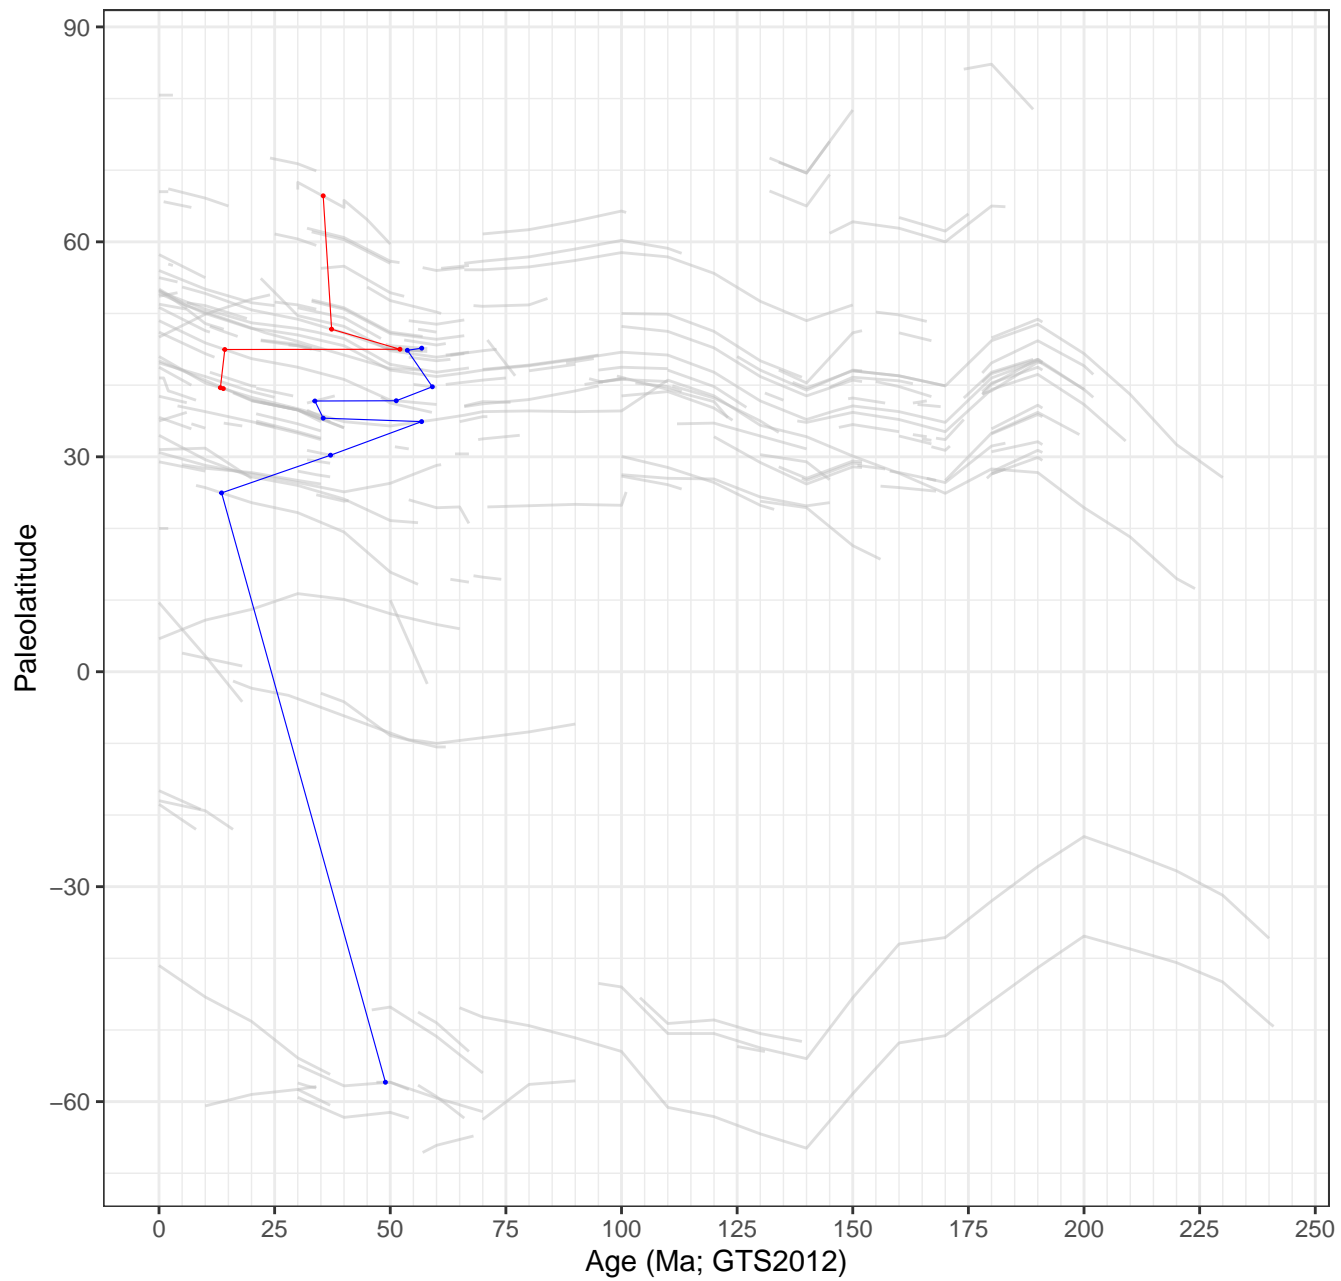

Supplement: Supplementary file 772 [file Achomosphaera alcicornu.pdf › Supplement/Supplement 2/Species 1914 plots/Achomosphaera alcicornu.pdf]

# Species *Achomospaera andalousiensis*

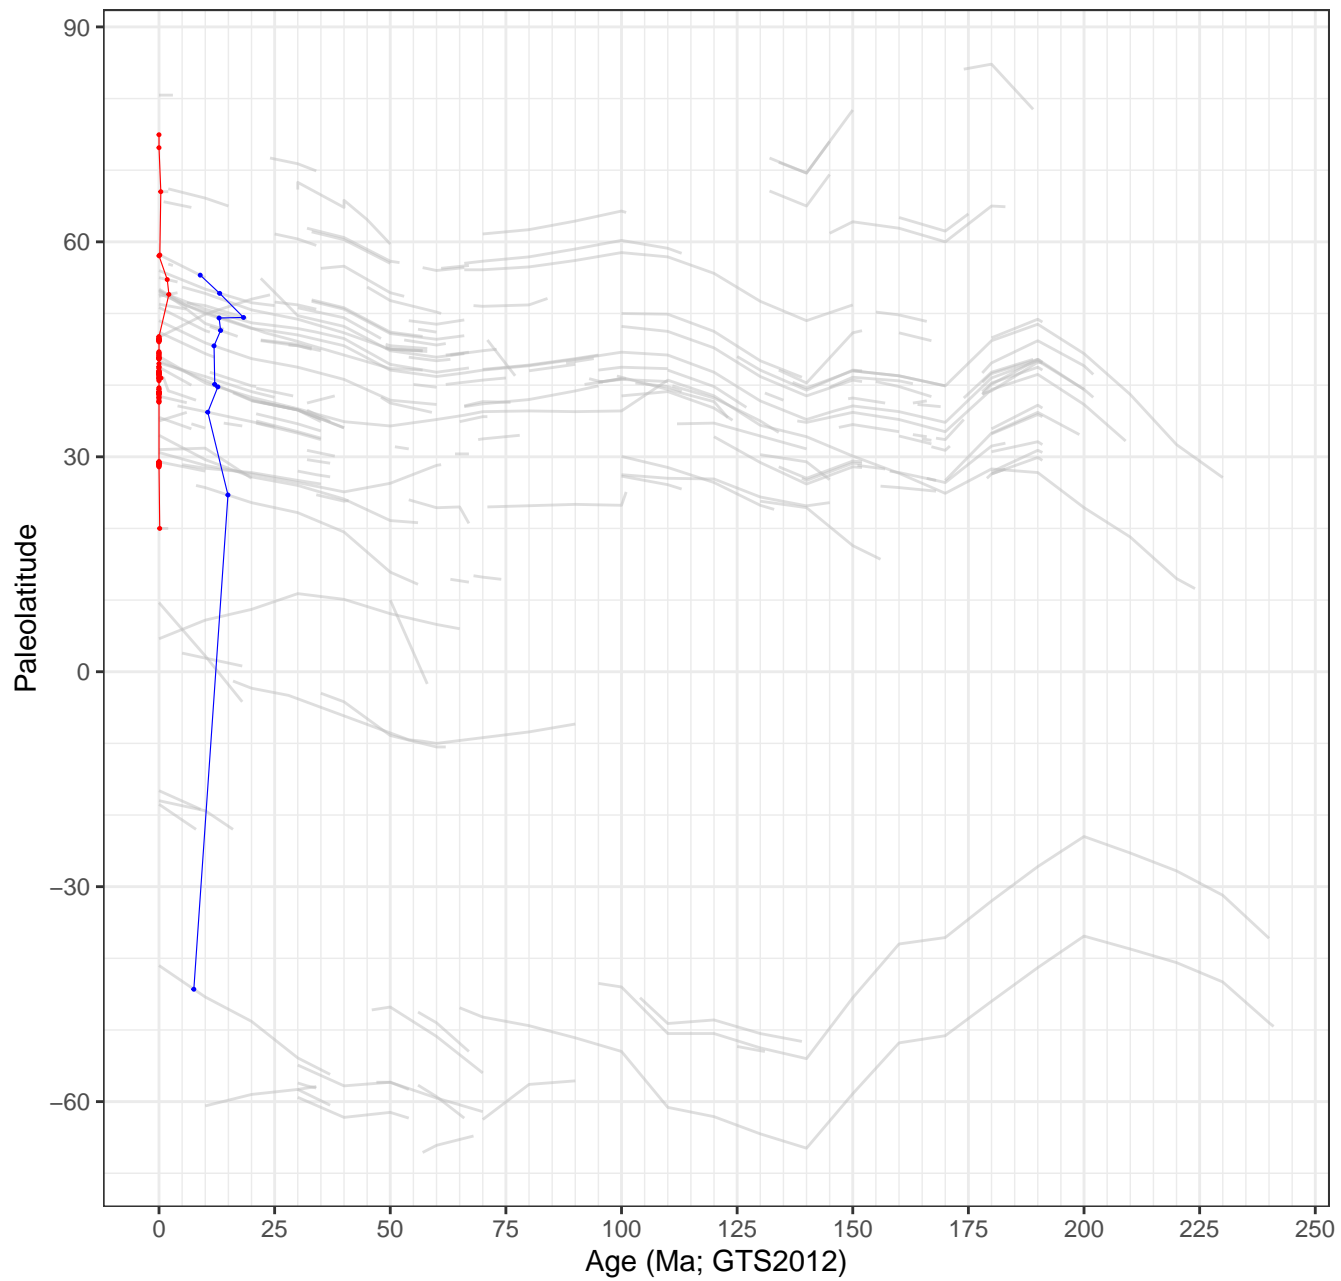

Supplement: Supplementary file 773 [file Achomosphaera andalousiensis.pdf › Supplement/Supplement 2/Species 1914 plots/Achomosphaera andalousiensis.pdf]

# Species *Achomosphaera antleriformis*

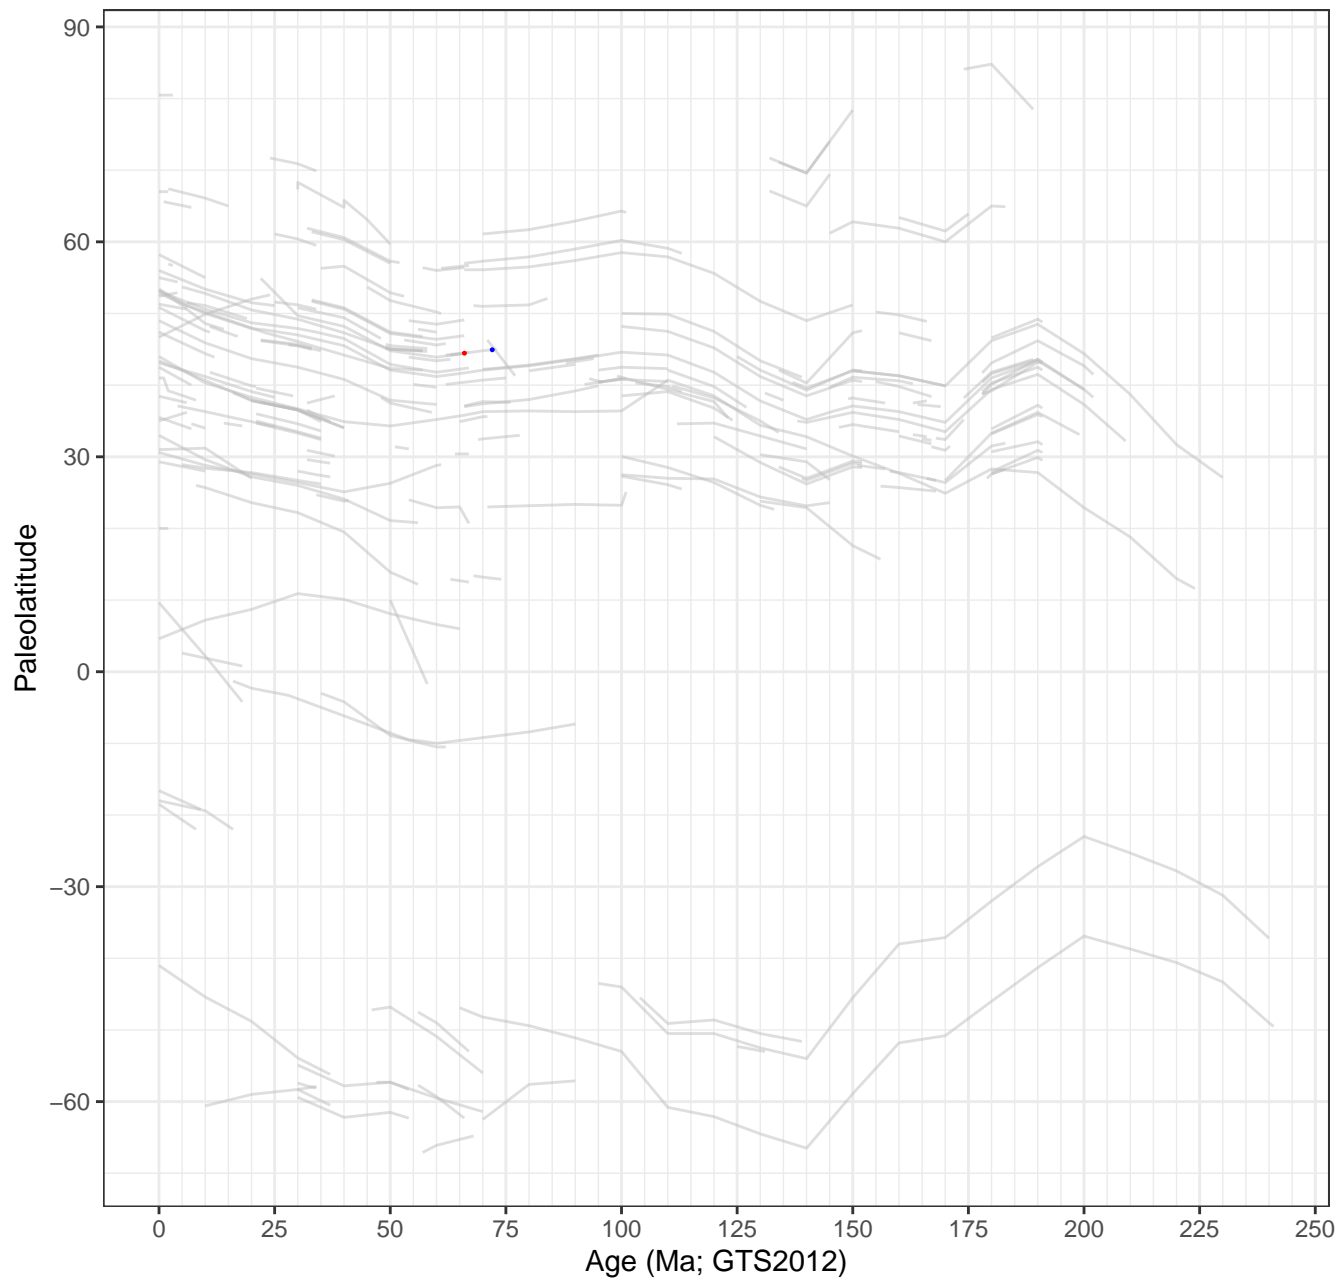

Supplement: Supplementary file 774 [file Achomosphaera antleriformis.pdf › Supplement/Supplement 2/Species 1914 plots/Achomosphaera antleriformis.pdf]

# Species *Achomosphaera callosa*

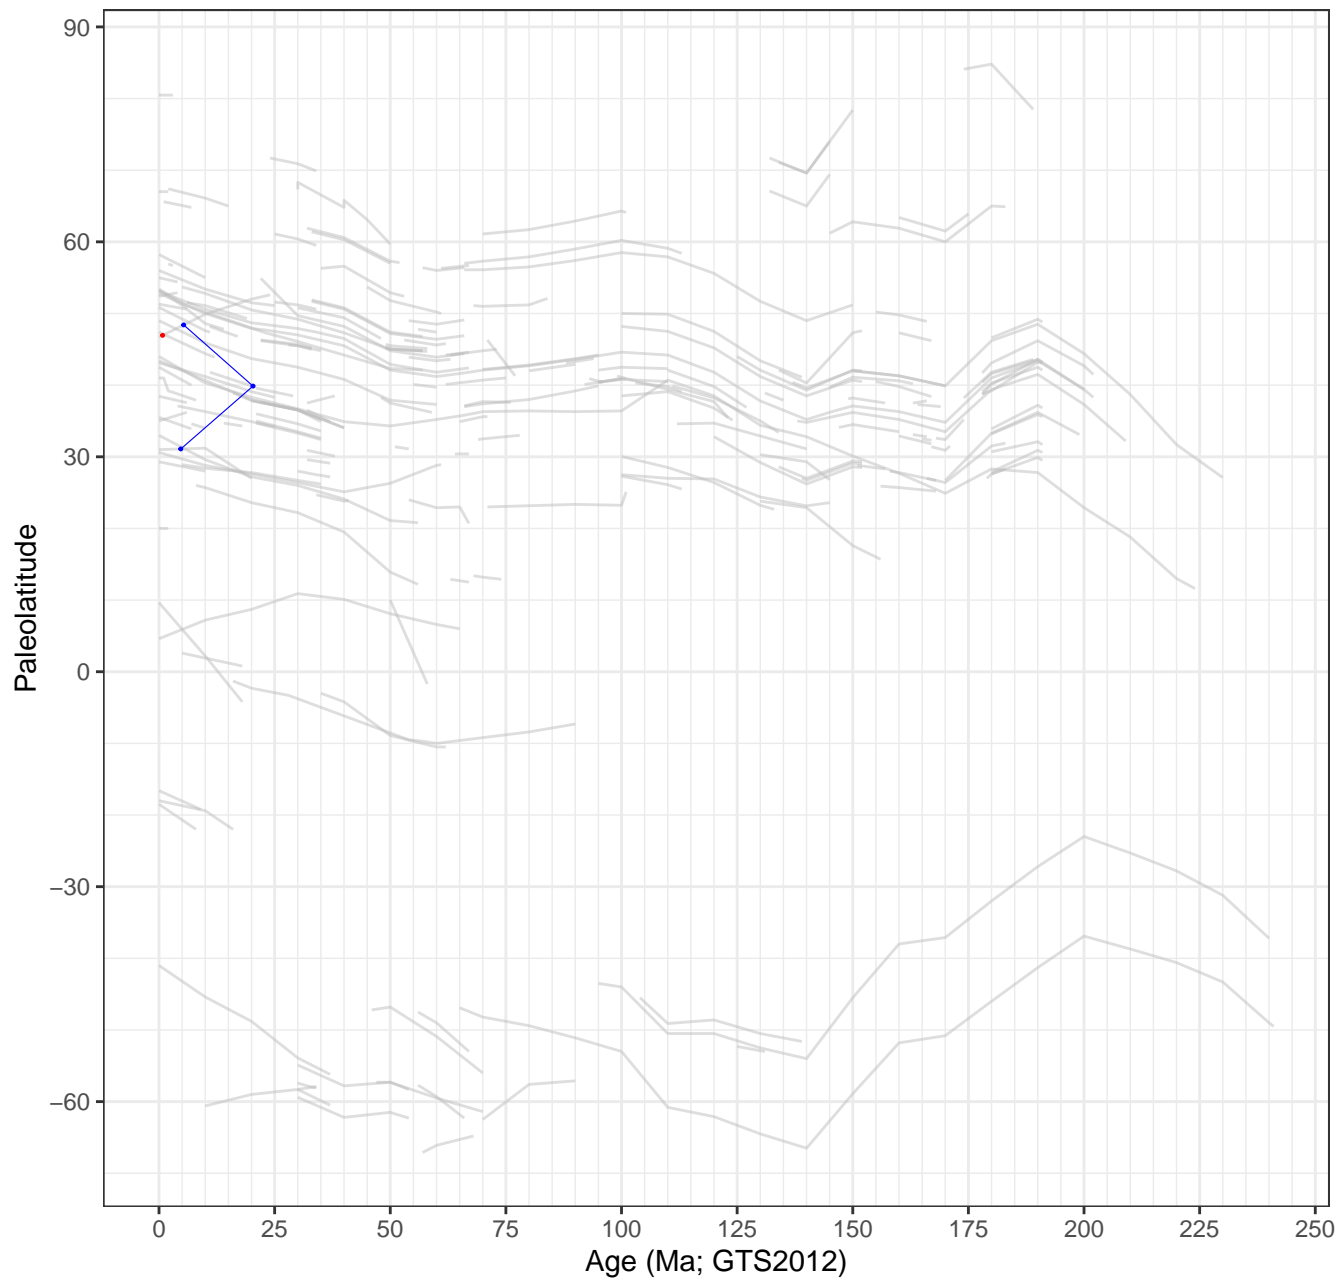

Supplement: Supplementary file 775 [file Achomosphaera callosa.pdf › Supplement/Supplement 2/Species 1914 plots/Achomosphaera callosa.pdf]

# Species *Achomosphæra crassipellis*

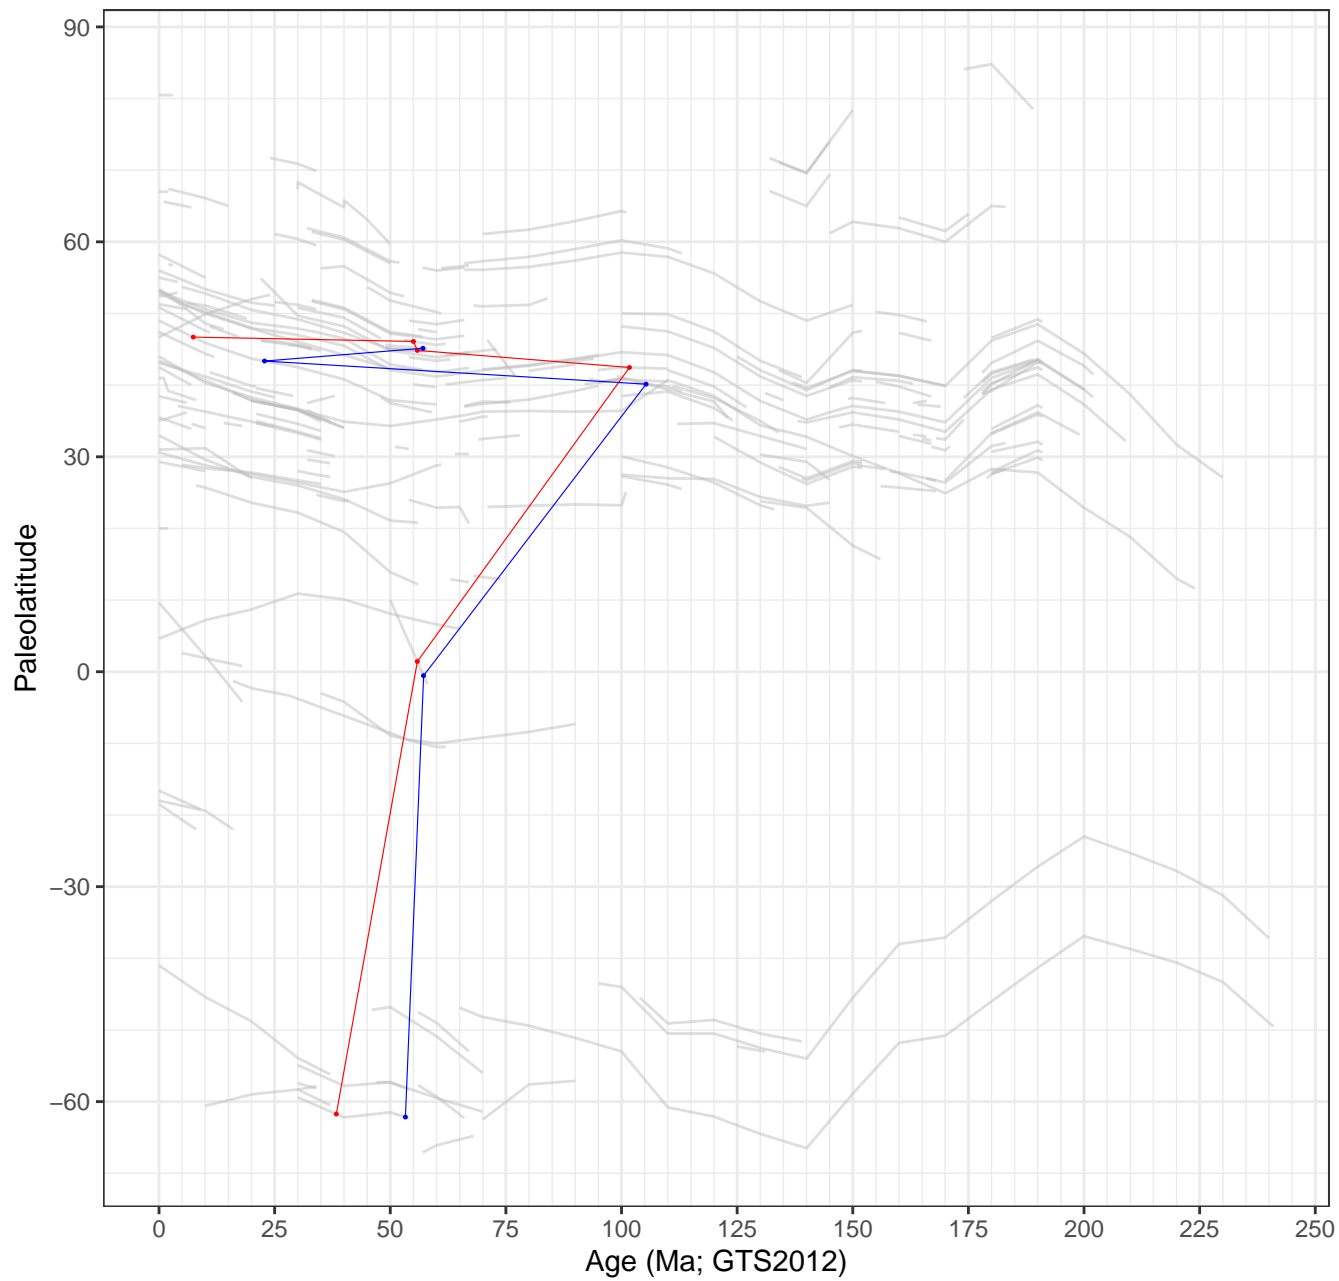

Supplement: Supplementary file 776 [file Achomosphaera crassipellis.pdf › Supplement/Supplement 2/Species 1914 plots/Achomosphaera crassipellis.pdf]

# Species *Achomosphaera grallaeformis*

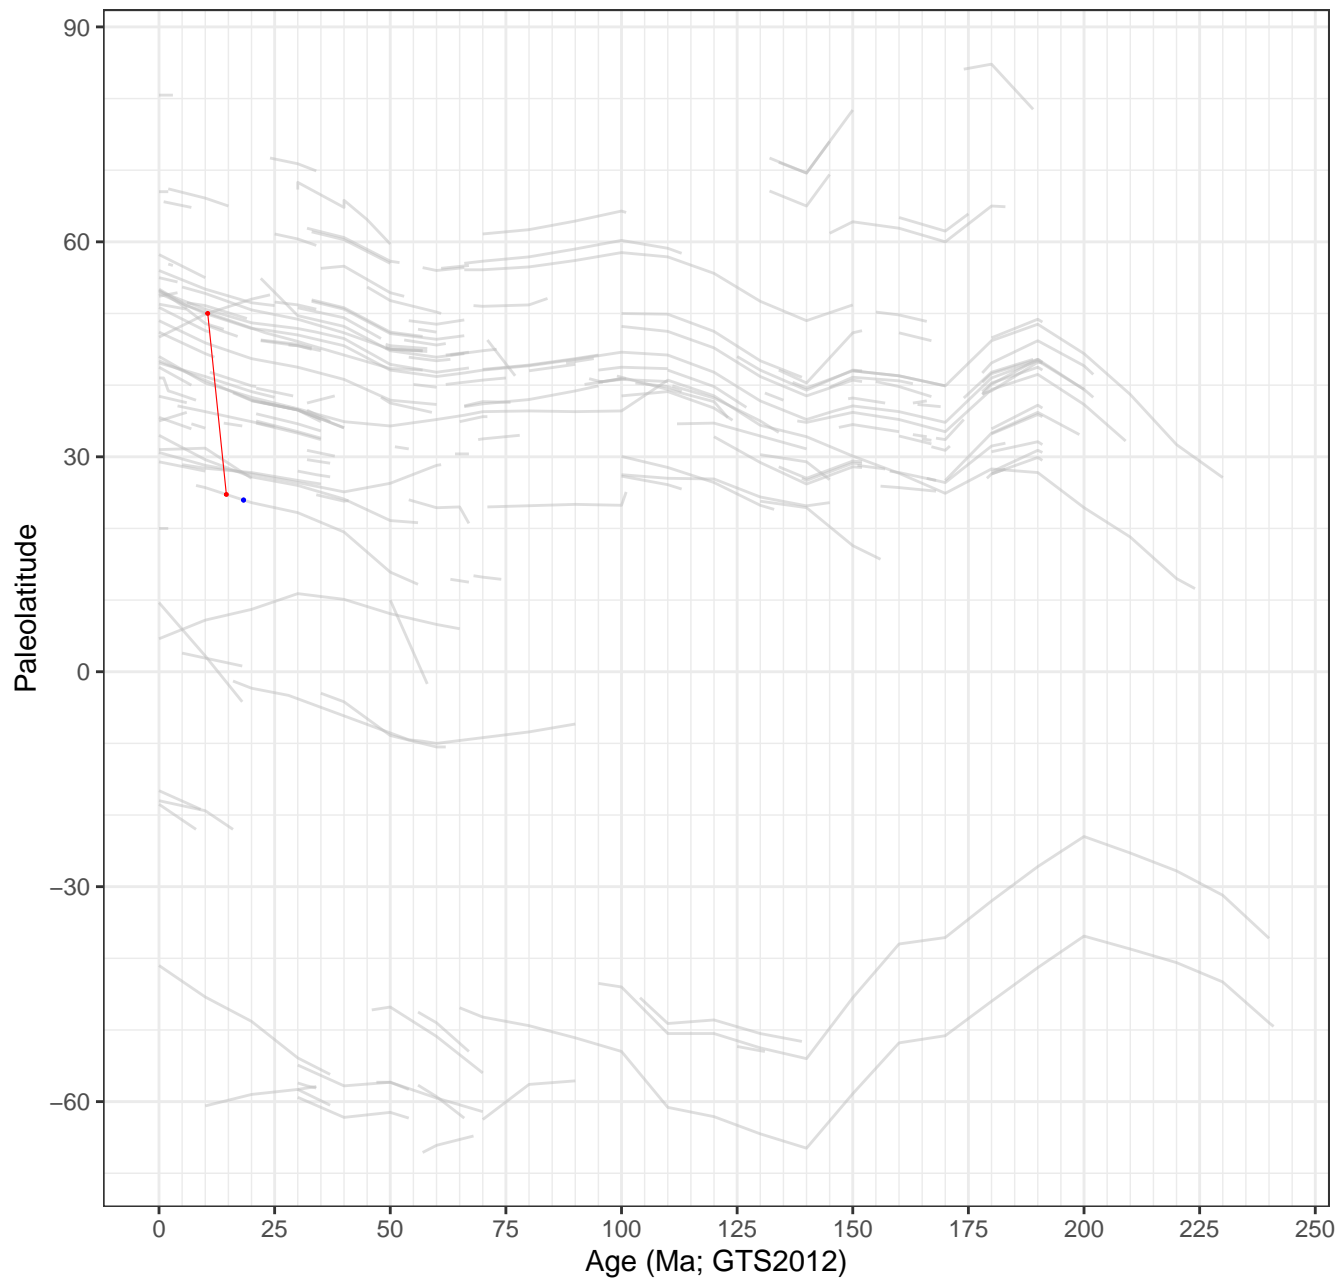

Supplement: Supplementary file 777 [file Achomosphaera grallaeformis.pdf › Supplement/Supplement 2/Species 1914 plots/Achomosphaera grallaeformis.pdf]

# Species *Achomosphaera membraniphora*

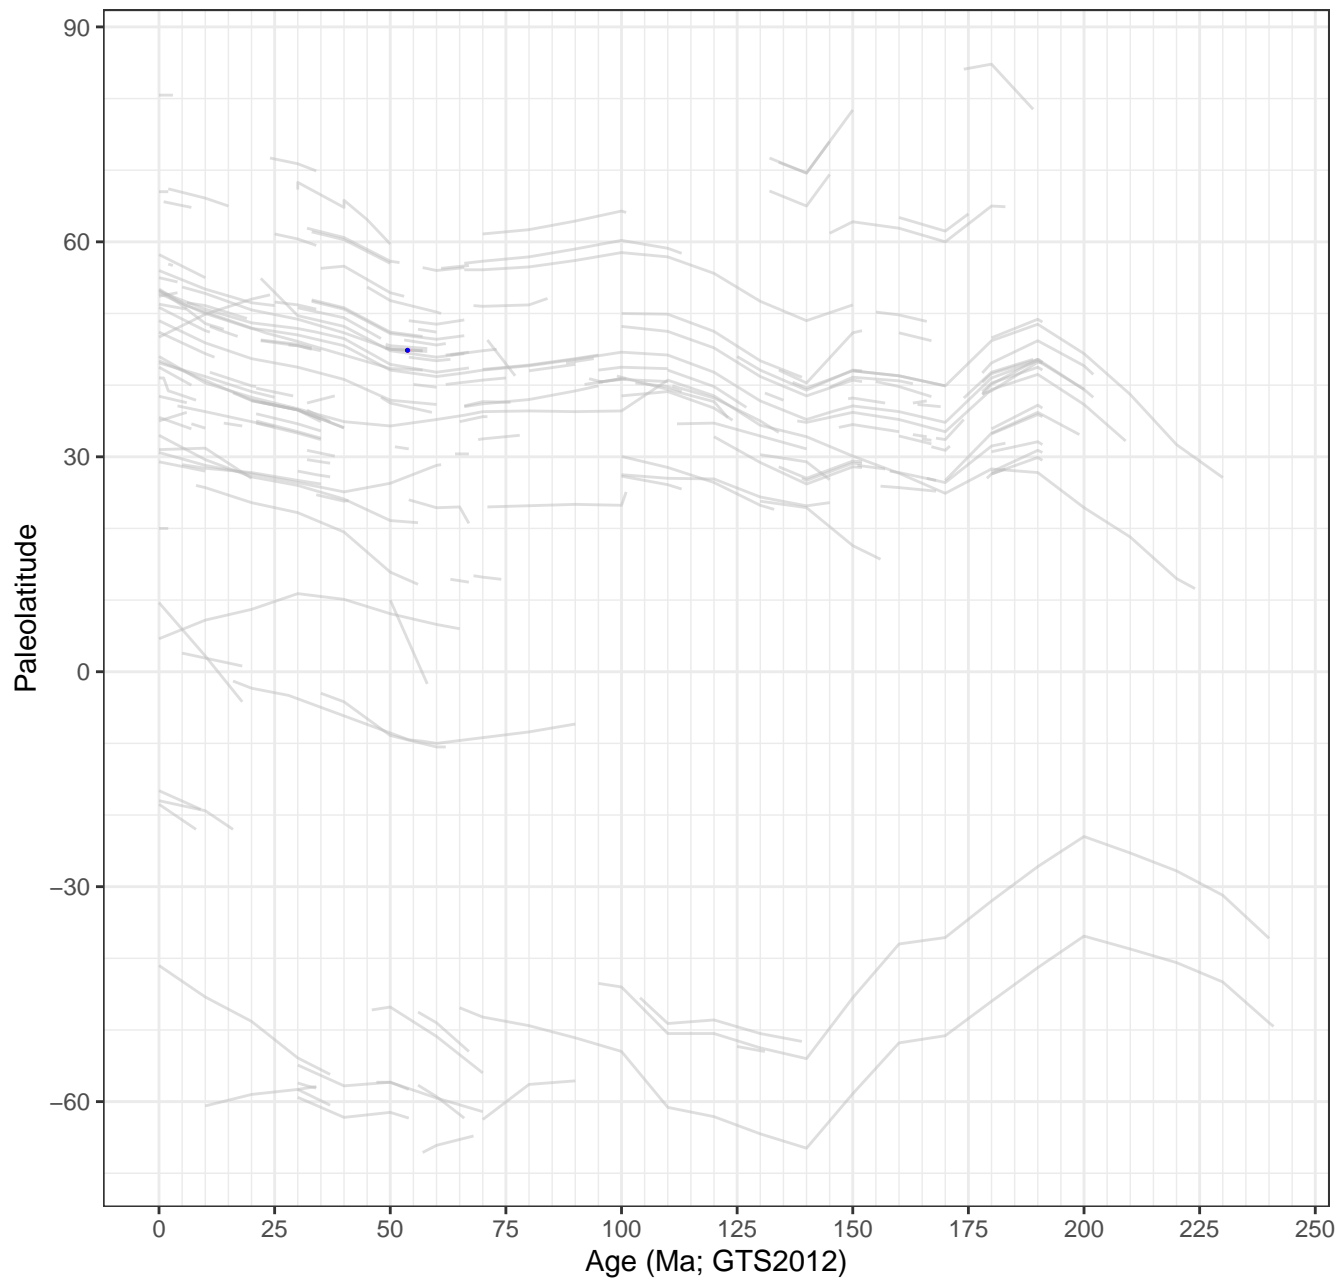

Supplement: Supplementary file 778 [file Achomosphaera membraniphora.pdf › Supplement/Supplement 2/Species 1914 plots/Achomosphaera membraniphora.pdf]

# Species *Achomosphaera multifurcata*

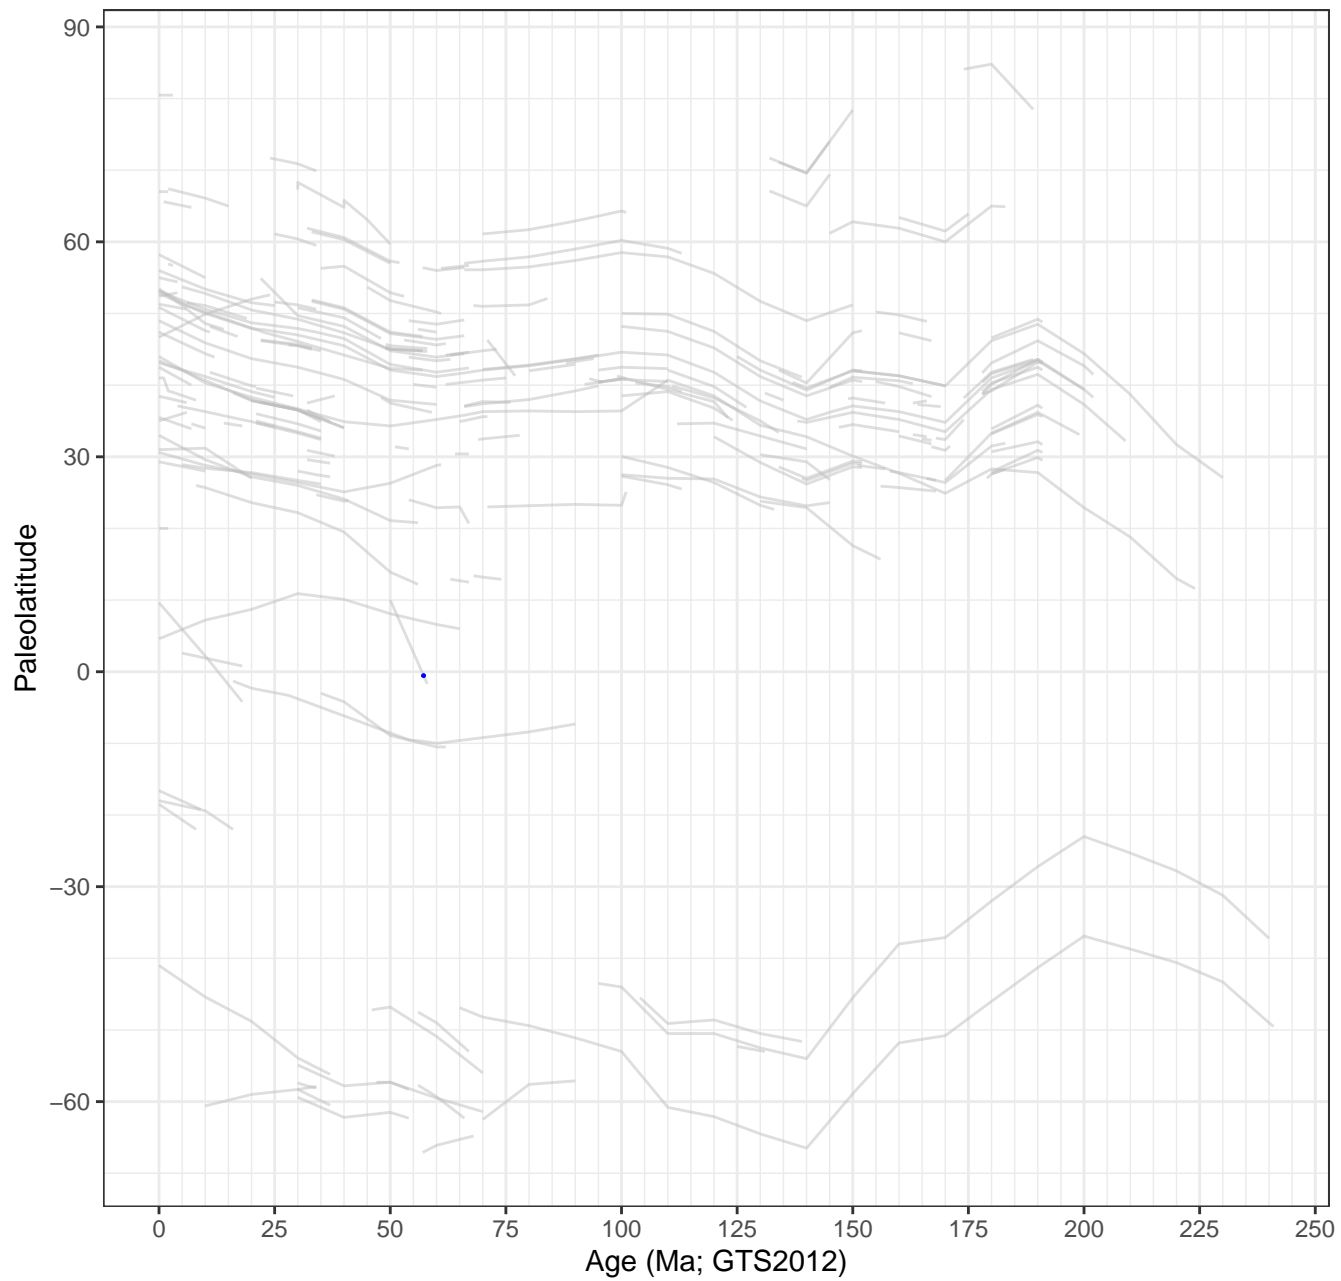

Supplement: Supplementary file 779 [file Achomosphaera multifurcata.pdf › Supplement/Supplement 2/Species 1914 plots/Achomosphaera multifurcata.pdf]

# Species *Achomosphaera neptuni*

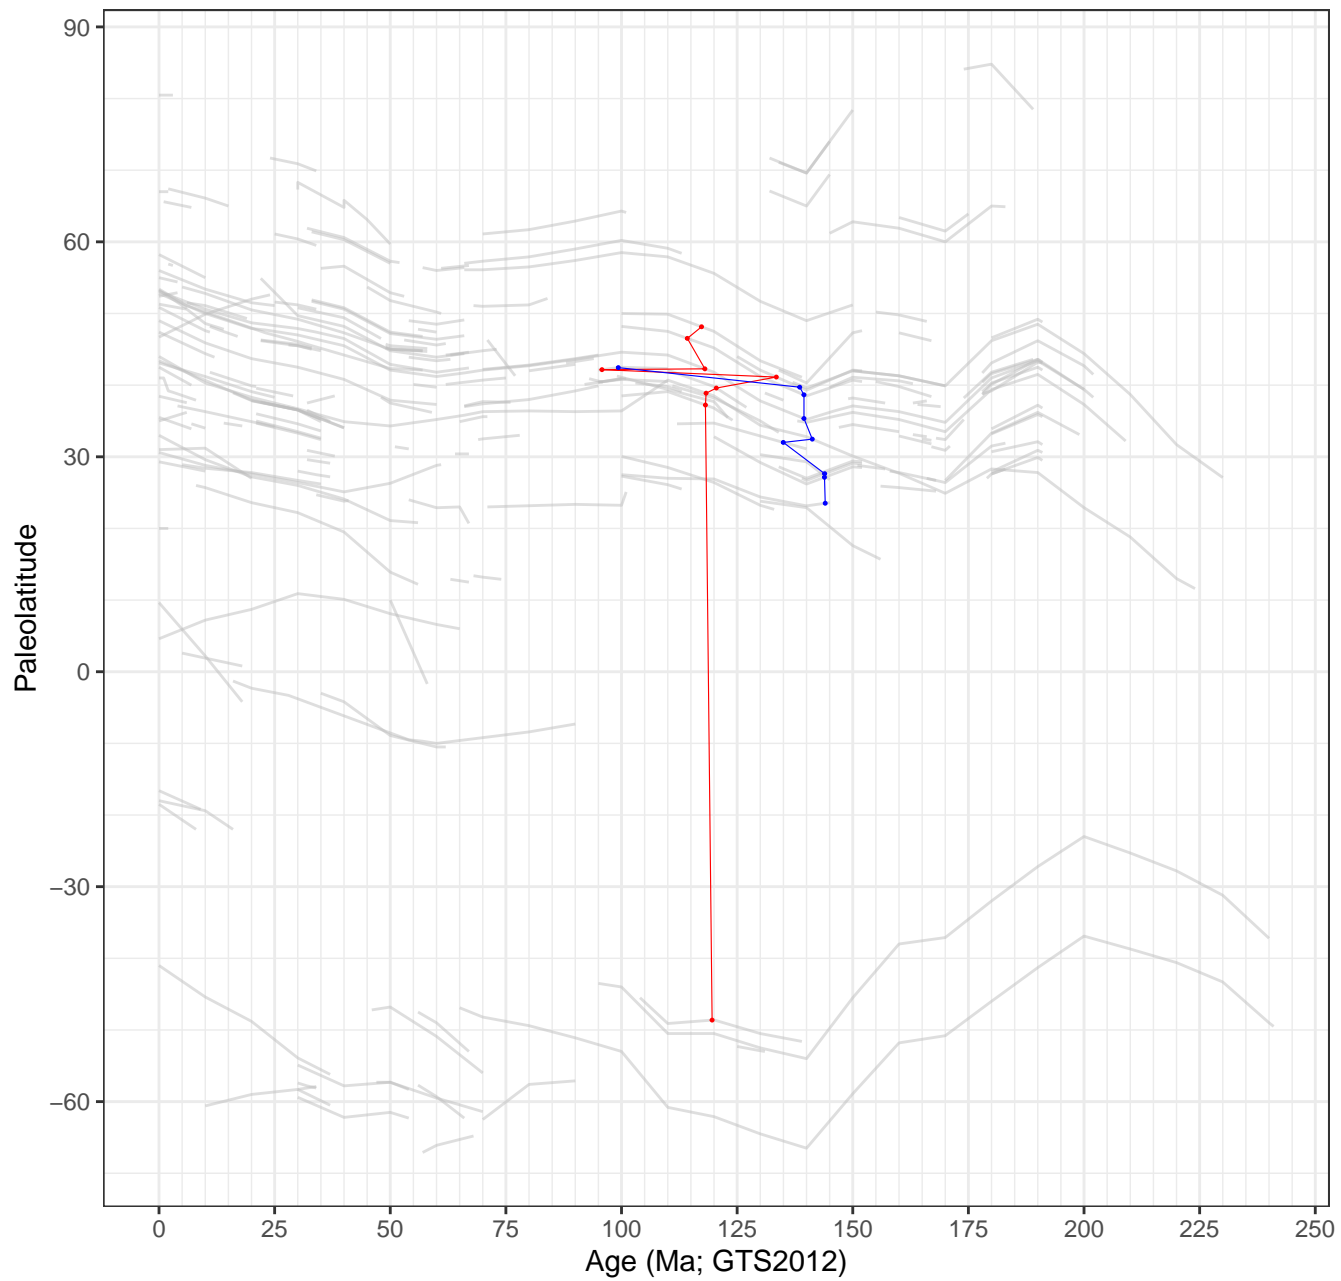

Supplement: Supplementary file 780 [file Achomosphaera neptuni.pdf › Supplement/Supplement 2/Species 1914 plots/Achomosphaera neptuni.pdf]

# Species *Achomosphaera ramulifera*

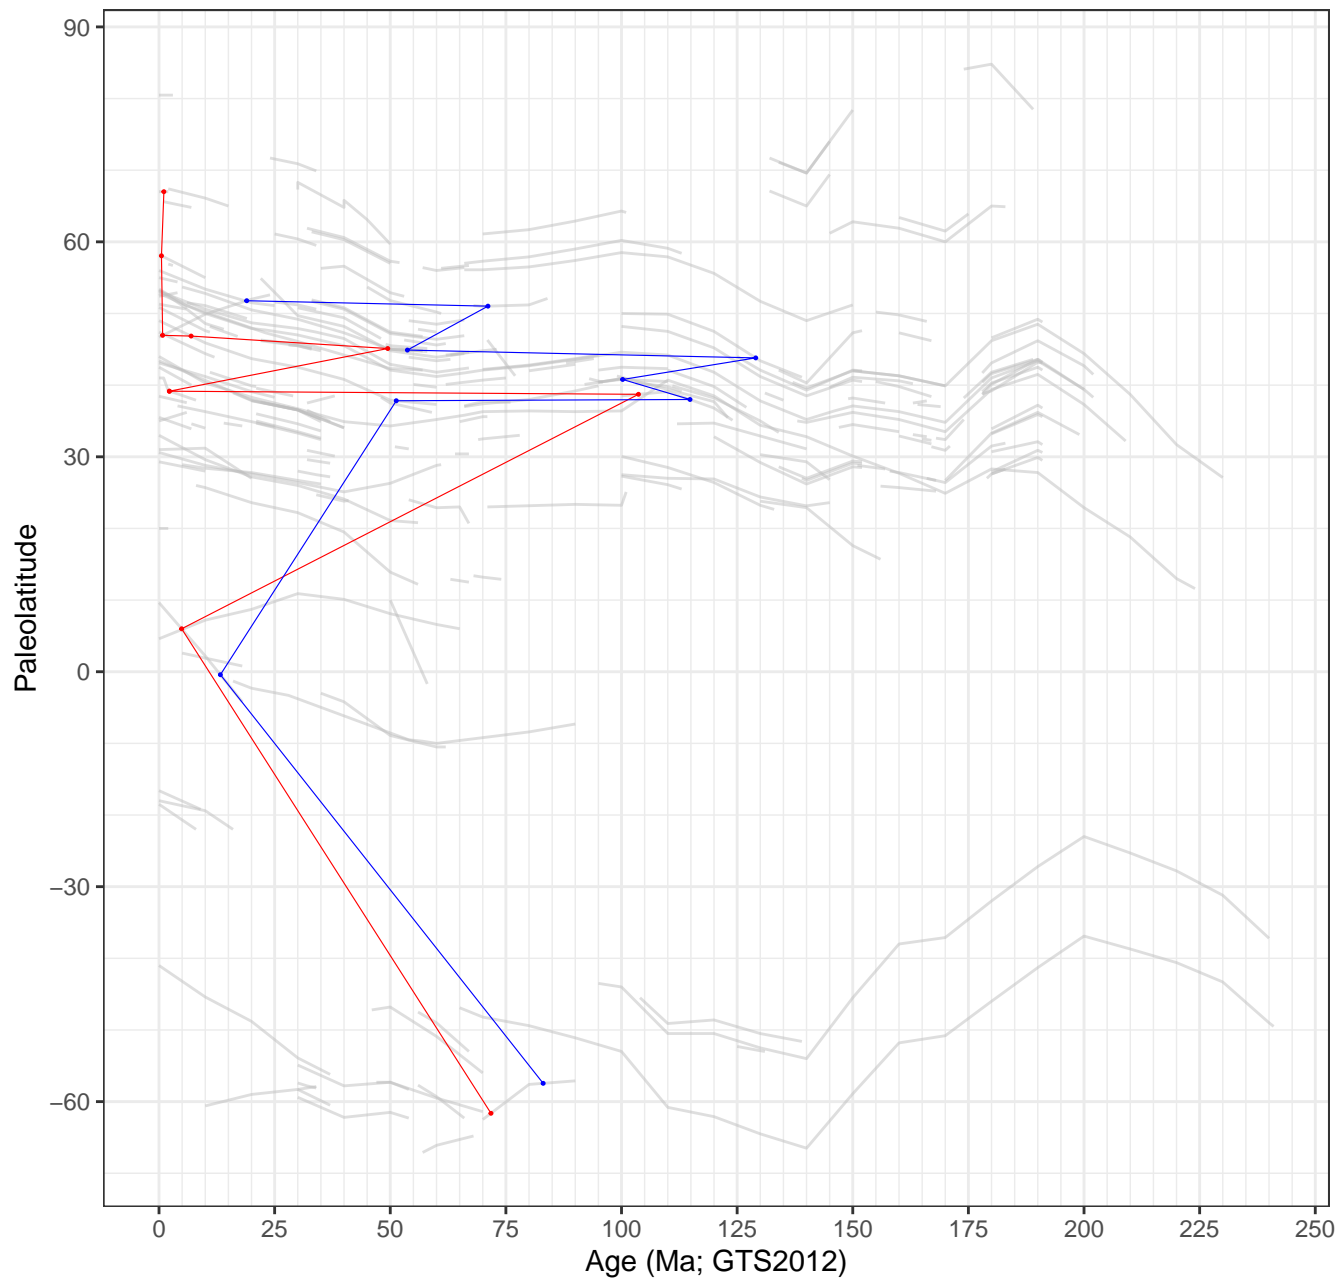

Supplement: Supplementary file 781 [file Achomosphaera ramulifera.pdf › Supplement/Supplement 2/Species 1914 plots/Achomosphaera ramulifera.pdf]

# Species *Achomosphaera regiensis*

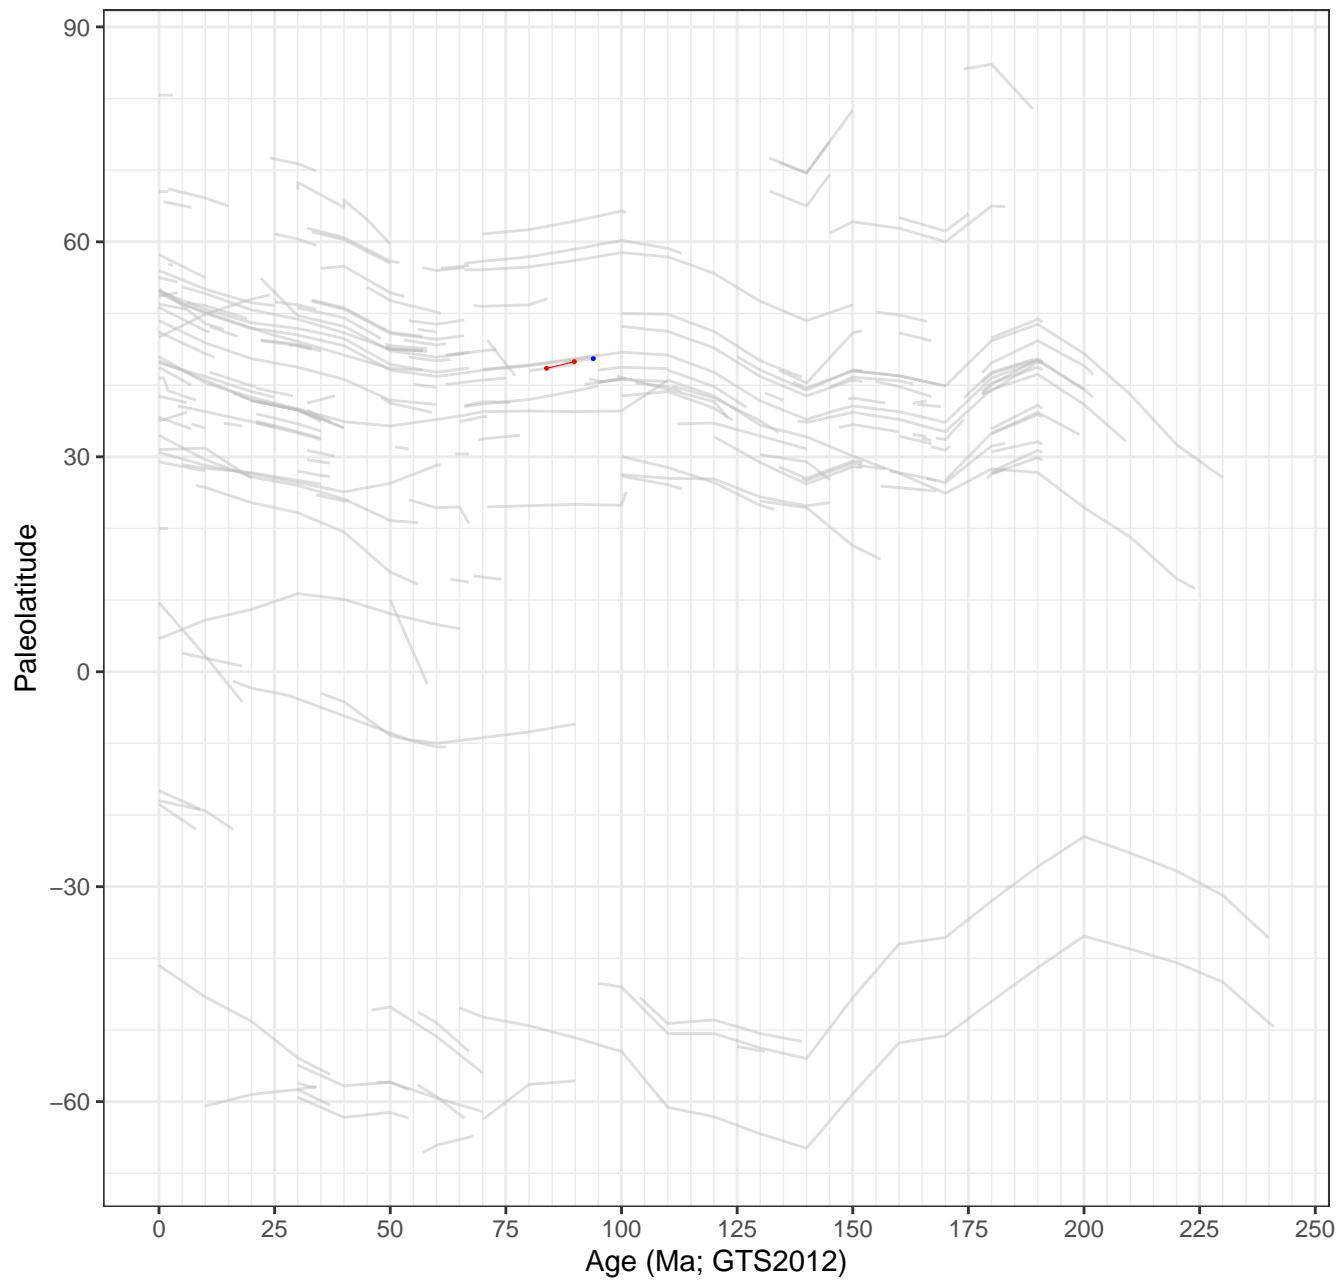

Supplement: Supplementary file 782 [file Achomosphaera regiensis.pdf › Supplement/Supplement 2/Species 1914 plots/Achomosphaera regiensis.pdf]

# Species *Achomospaera sagena*

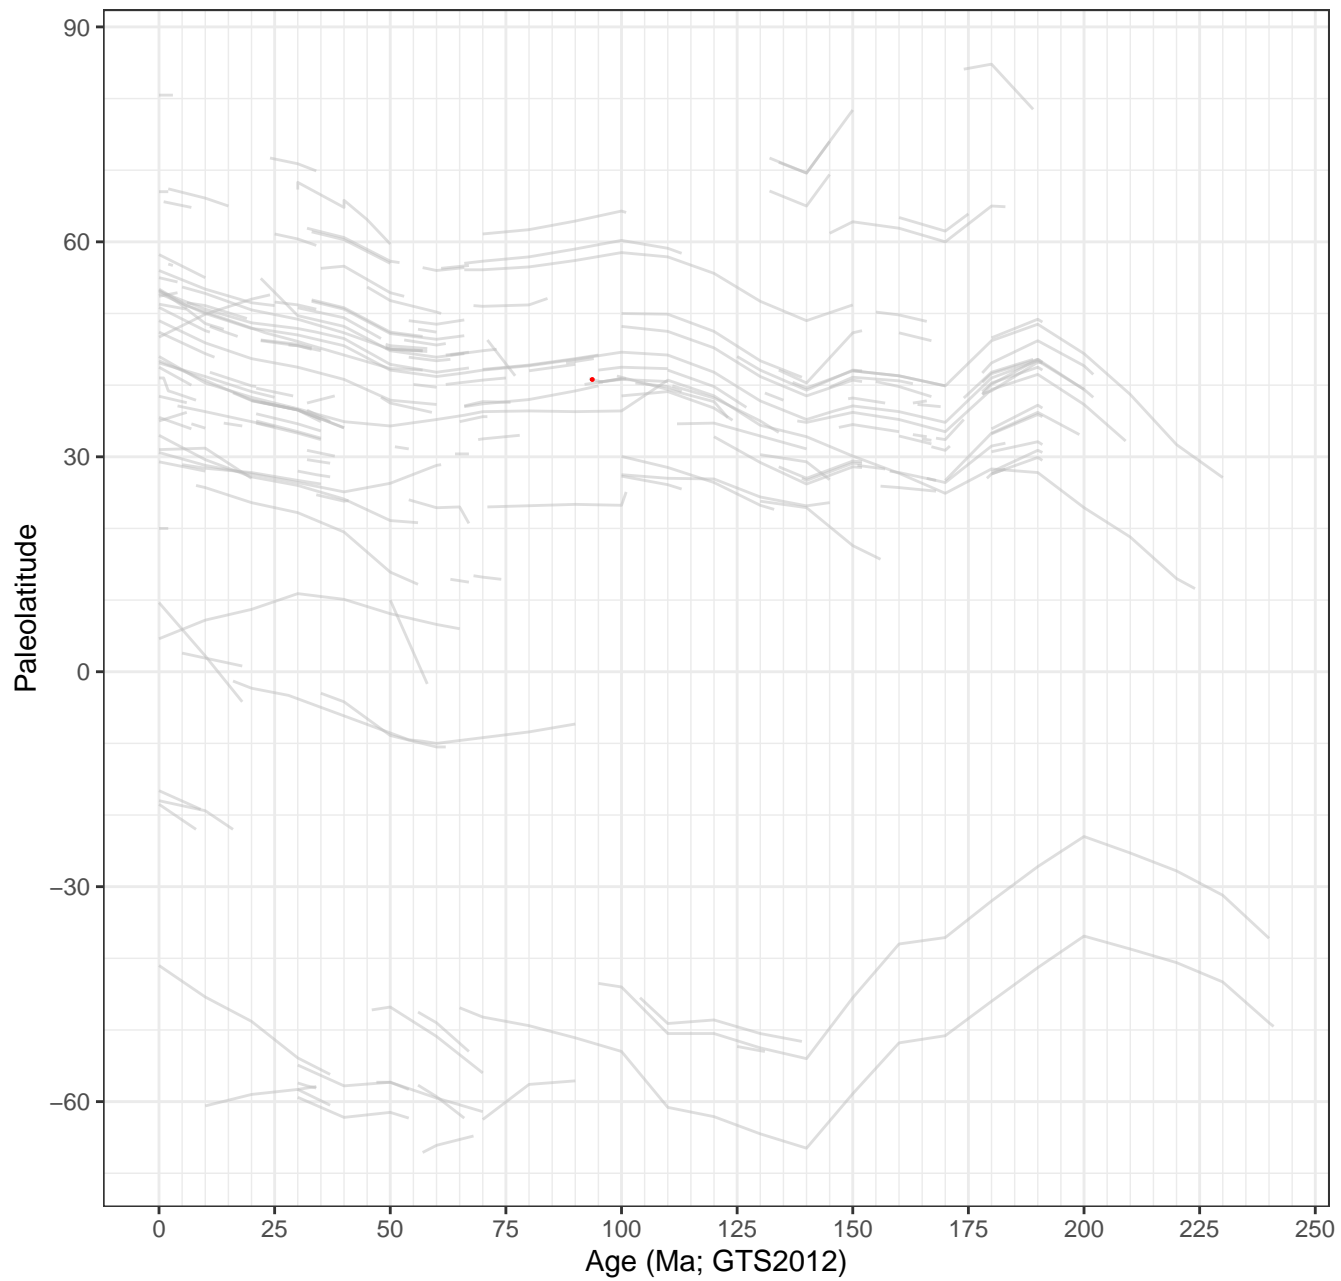

Supplement: Supplementary file 783 [file Achomosphaera sagena.pdf › Supplement/Supplement 2/Species 1914 plots/Achomosphaera sagena.pdf]

# Species *Achomosphaera triangulata*

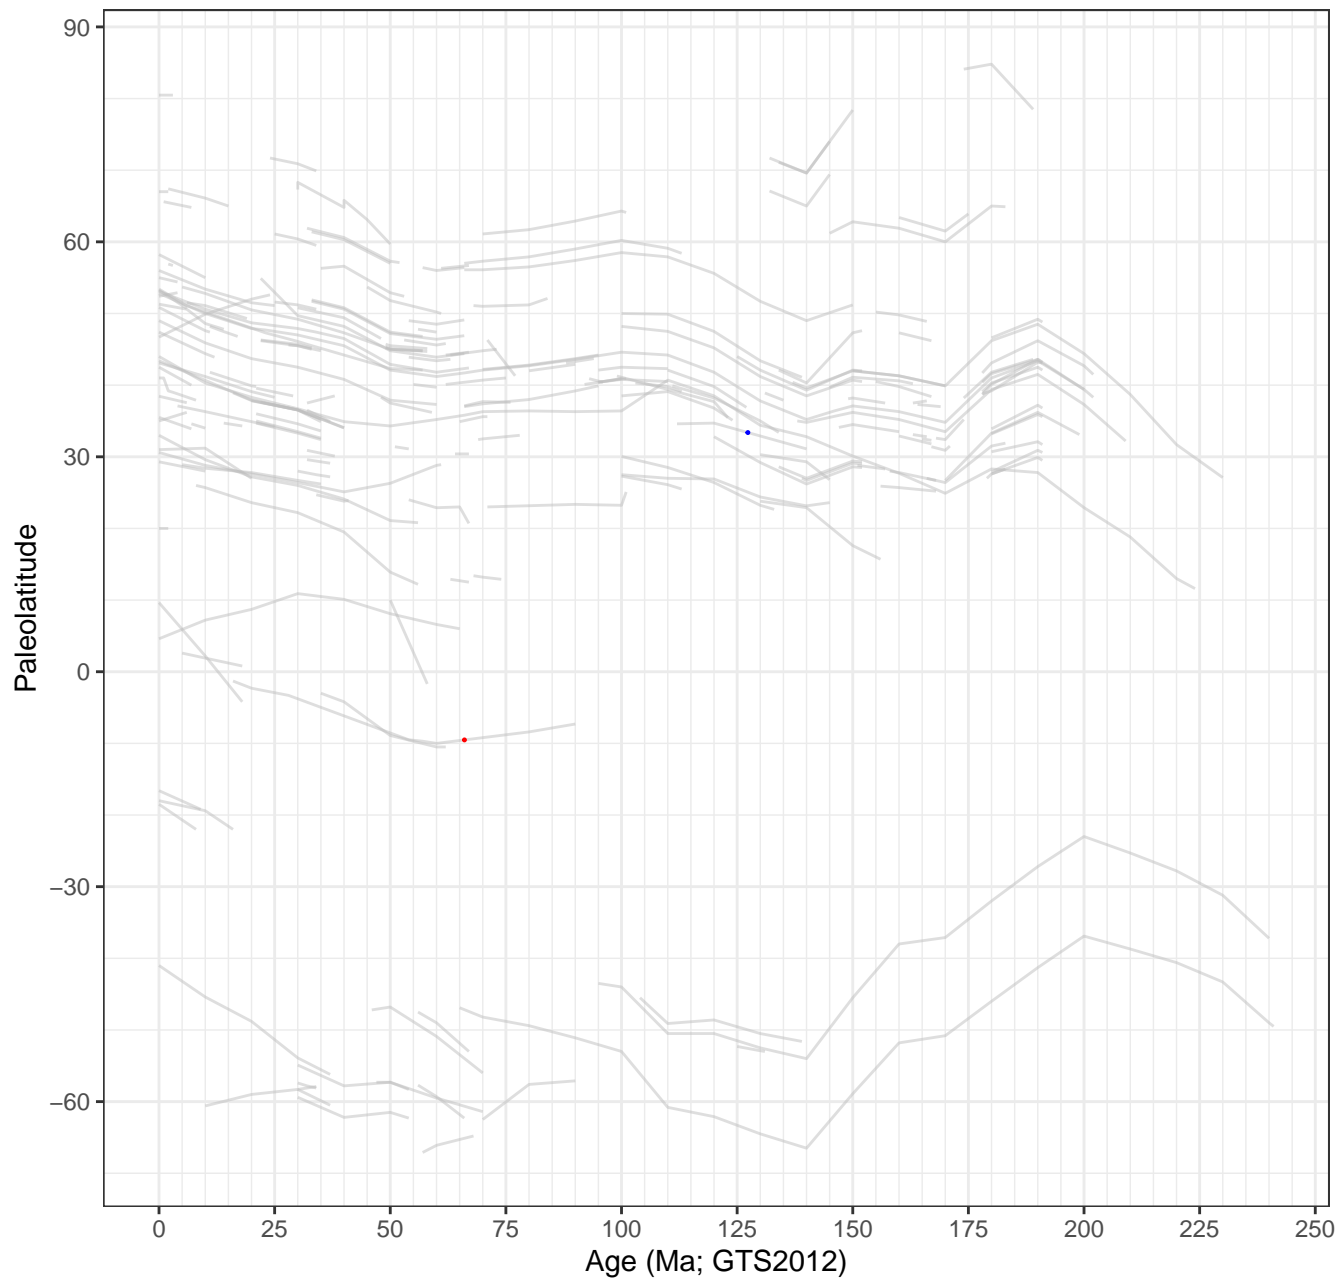

Supplement: Supplementary file 784 [file Achomosphaera triangulata.pdf › Supplement/Supplement 2/Species 1914 plots/Achomosphaera triangulata.pdf]

# Species *Achomosphaera verdieri*

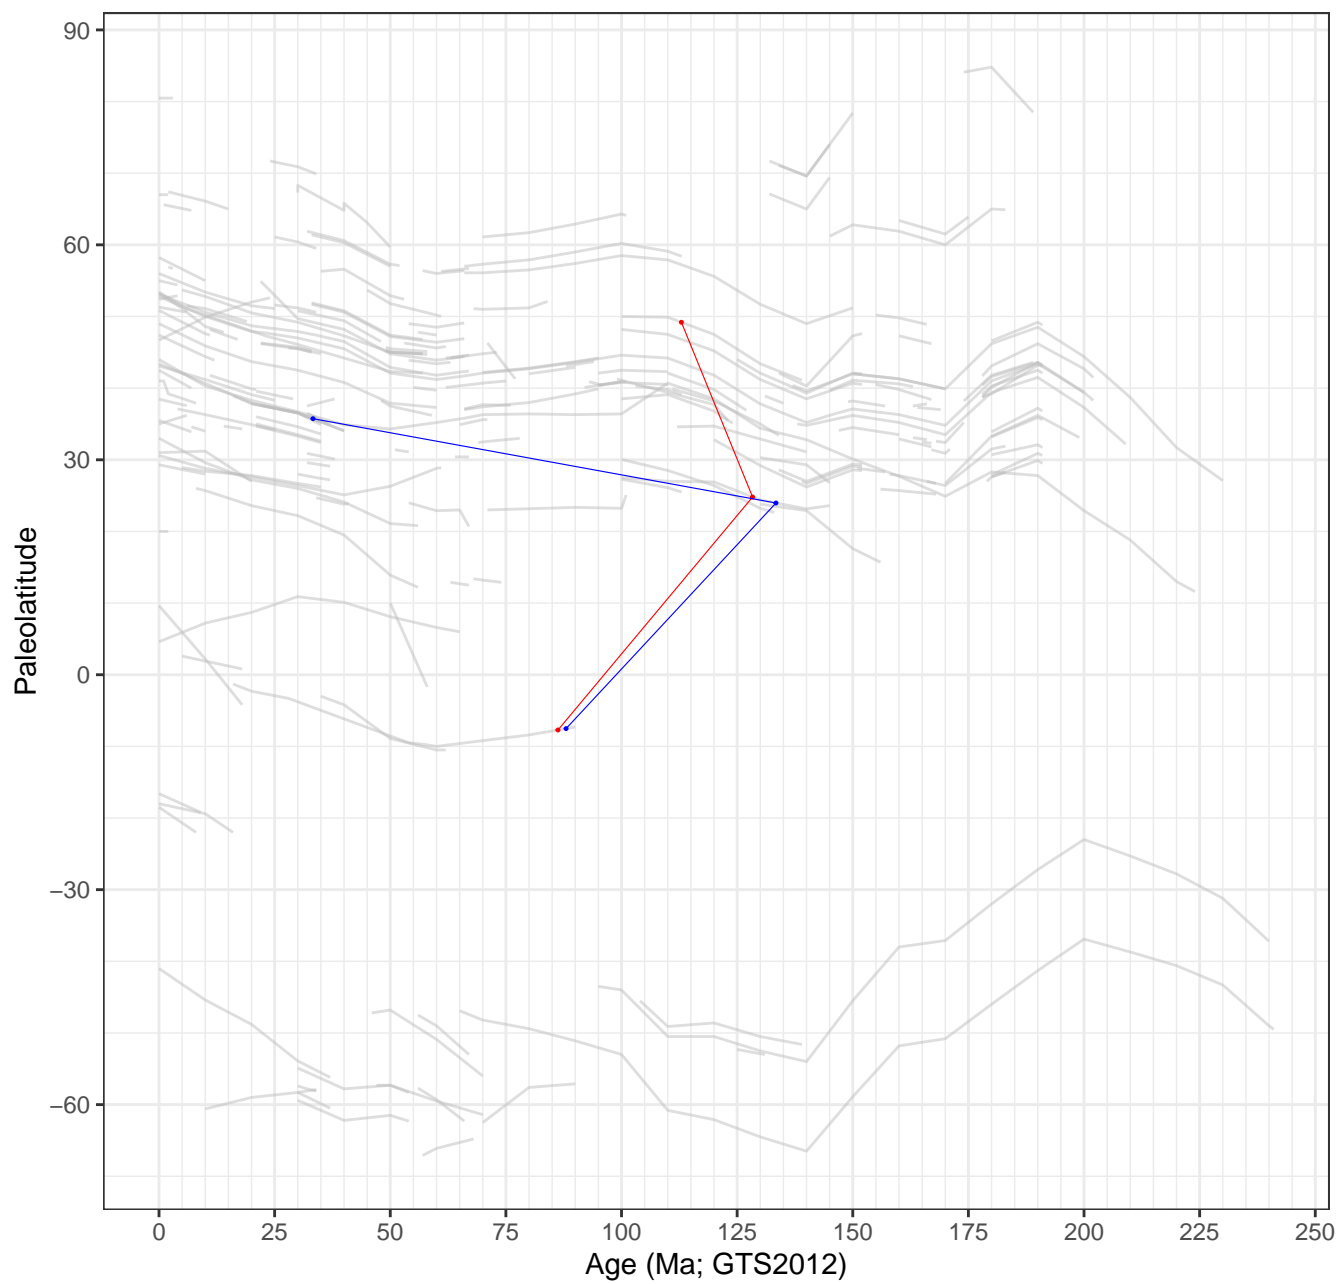

Supplement: Supplementary file 785 [file Achomosphaera verdieri.pdf › Supplement/Supplement 2/Species 1914 plots/Achomosphaera verdieri.pdf]

# Species *Actinotheca aphroditae*

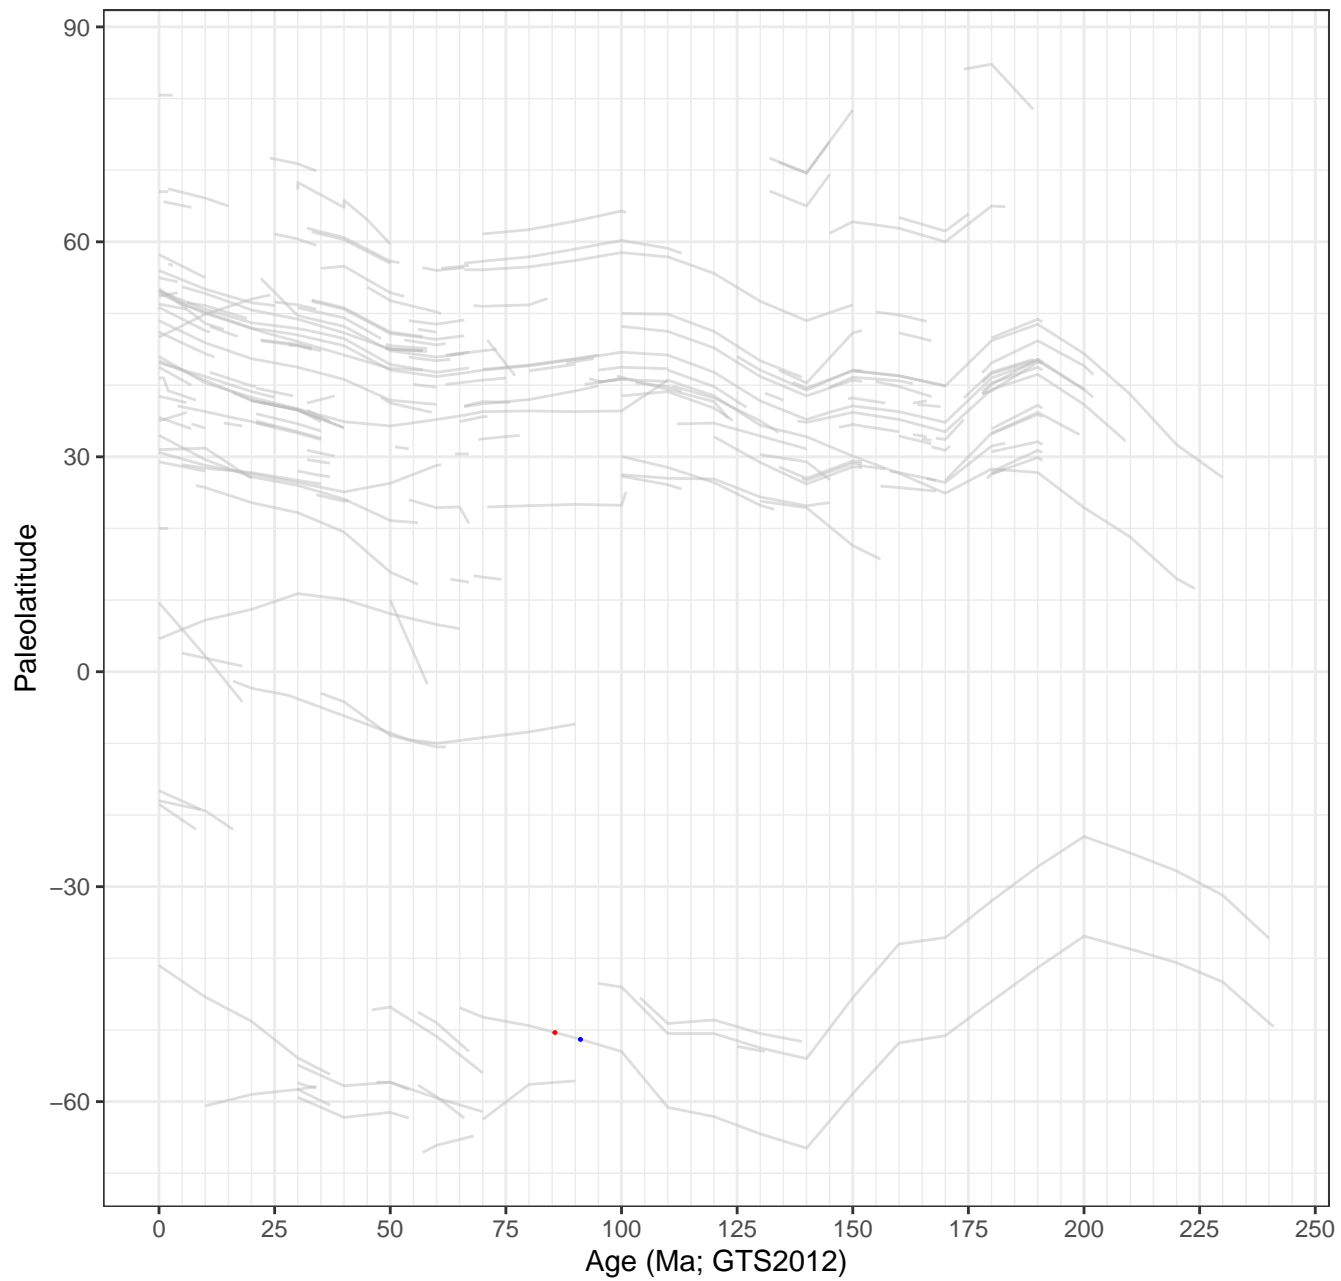

Supplement: Supplementary file 786 [file Actinotheca aphroditae.pdf › Supplement/Supplement 2/Species 1914 plots/Actinotheca aphroditae.pdf]

# Species *Adeliesphaera ohanlonii*

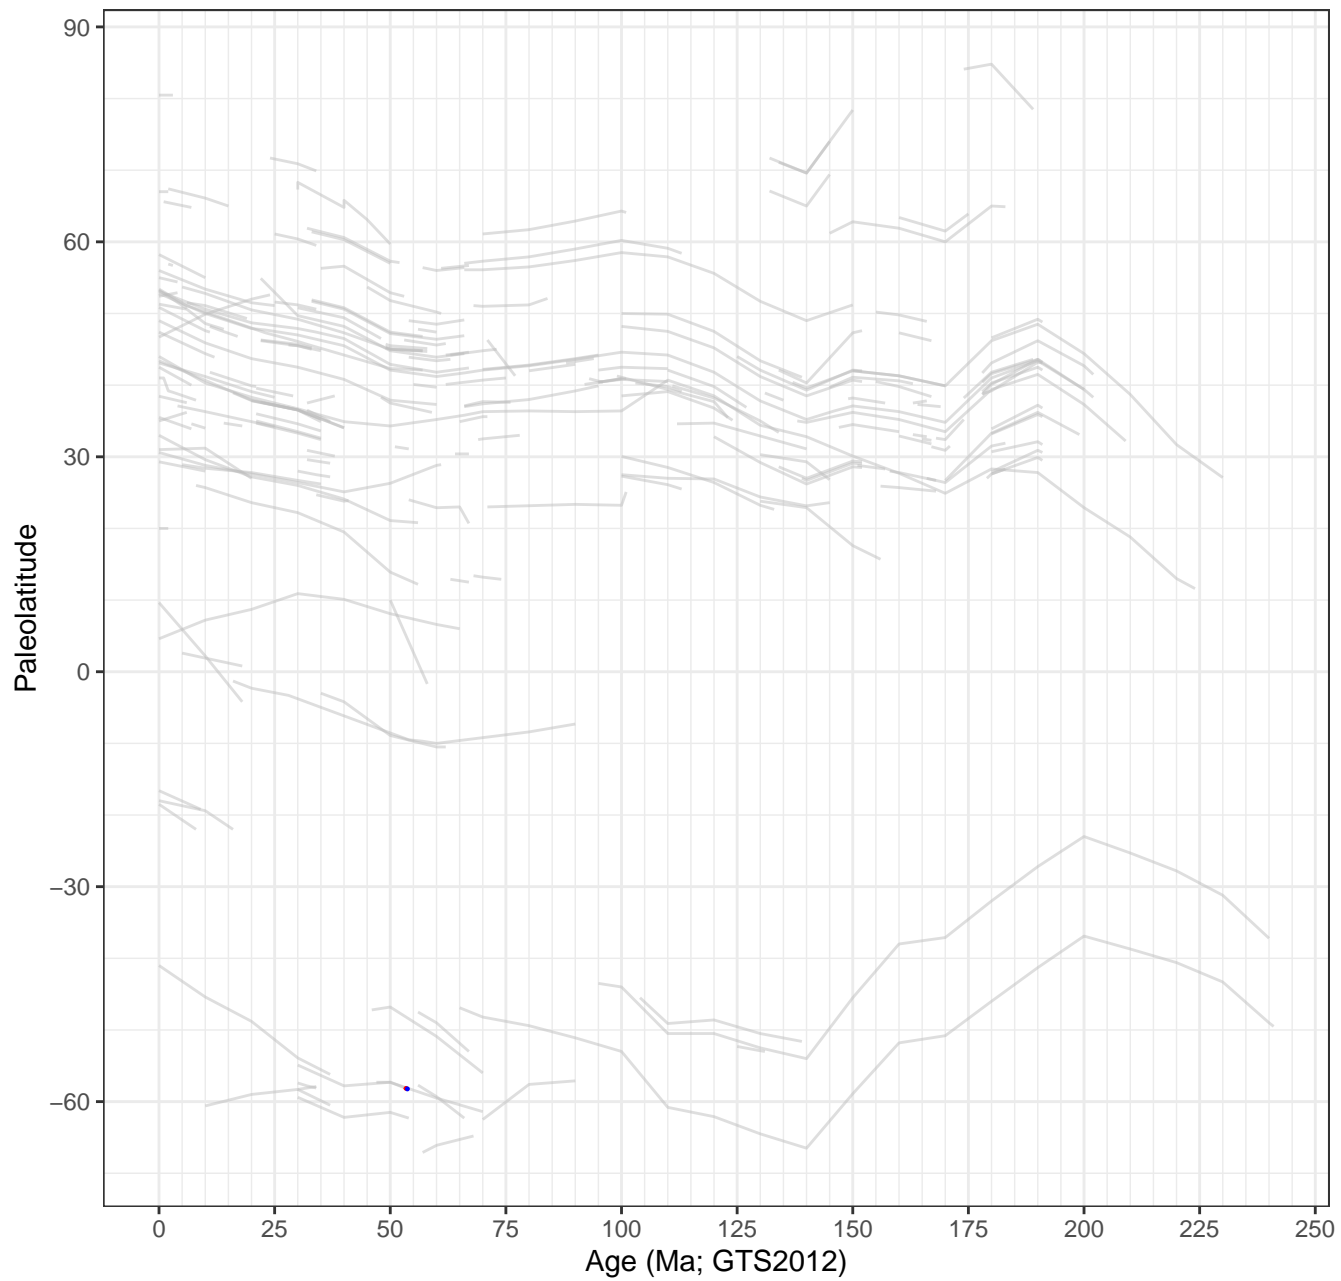

Supplement: Supplementary file 787 [file Adeliesphaera ohanlonii.pdf › Supplement/Supplement 2/Species 1914 plots/Adeliesphaera ohanlonii.pdf]

# Species *Adnatosphaeridium brevispinosum*

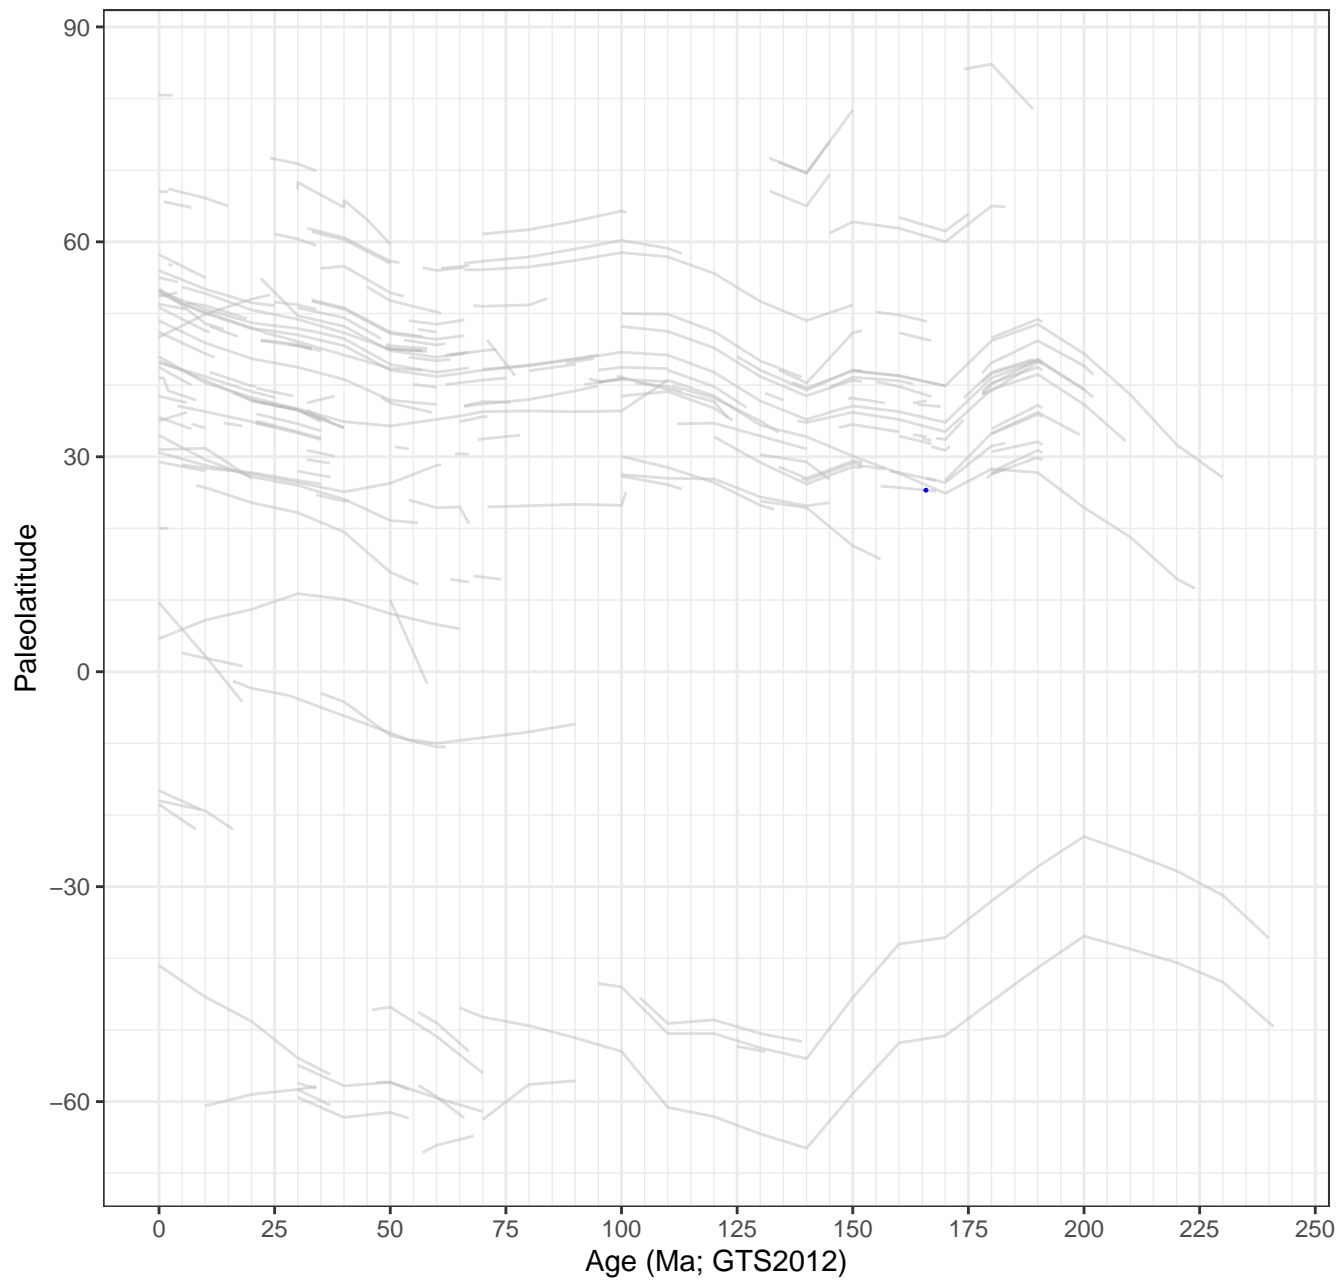

Supplement: Supplementary file 788 [file Adnatosphaeridium brevispinosum.pdf › Supplement/Supplement 2/Species 1914 plots/Adnatosphaeridium brevispinosum.pdf]

# Species *Adnatosphaeridium caulleryi*

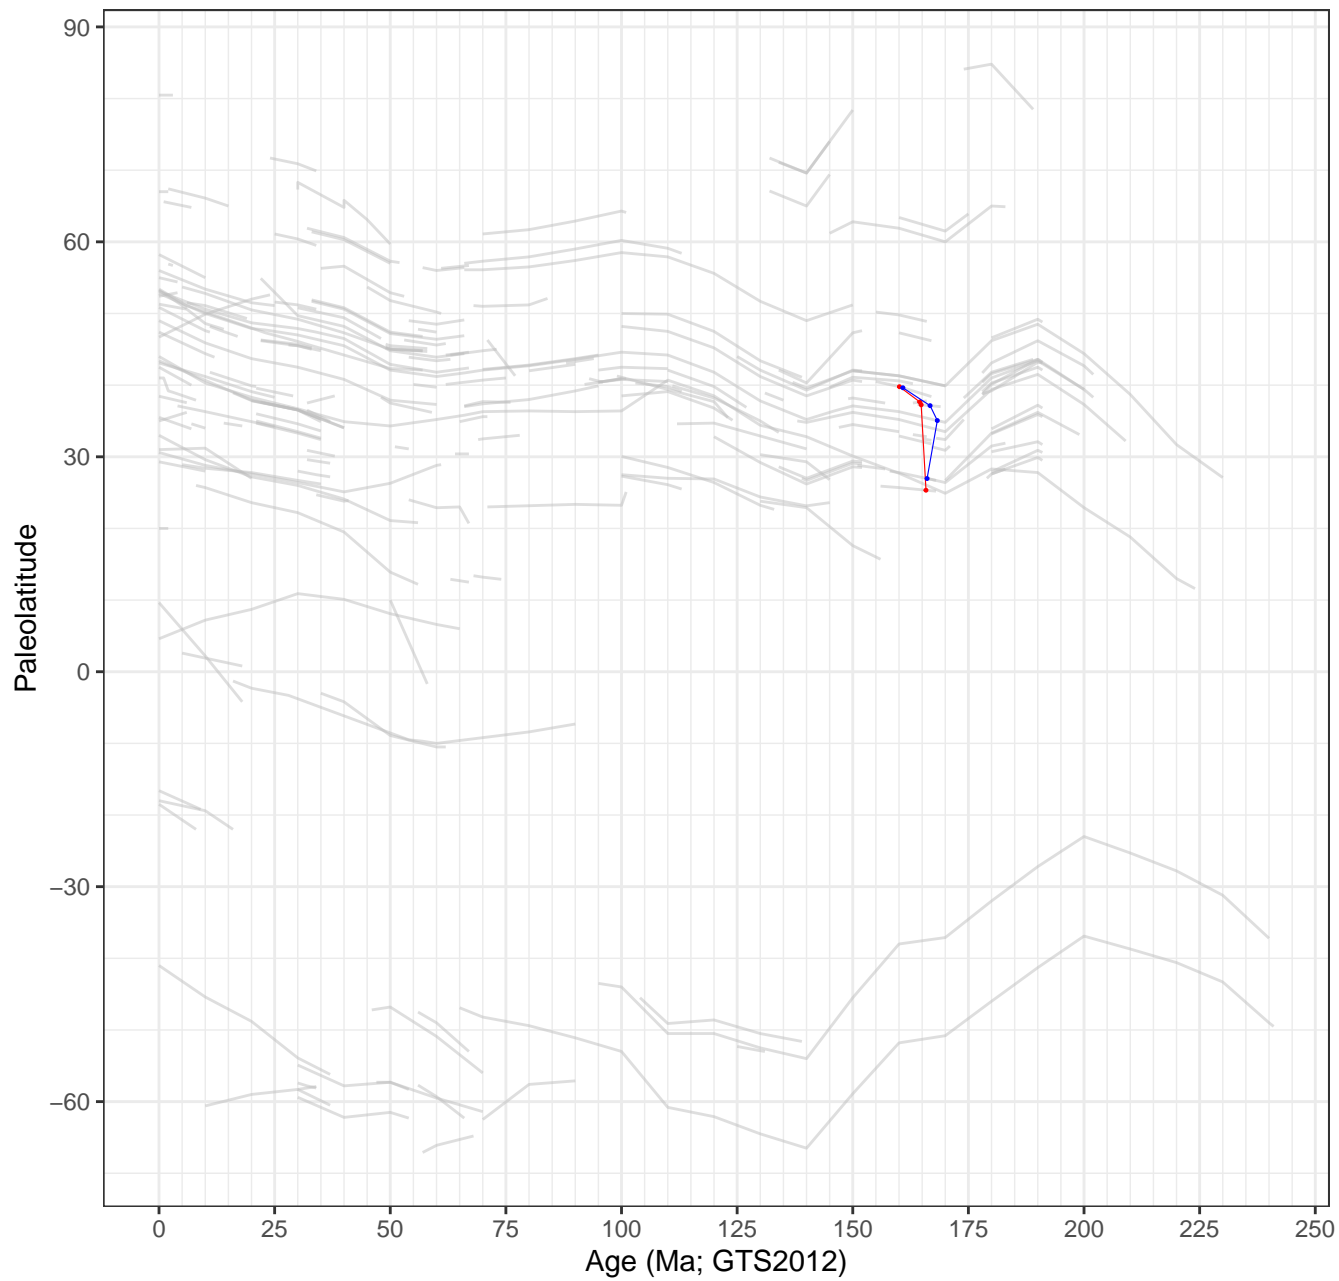

Supplement: Supplementary file 789 [file Adnatosphaeridium caulleryi.pdf › Supplement/Supplement 2/Species 1914 plots/Adnatosphaeridium caulleryi.pdf]

# Species *Adnatosphaeridium chonetum*

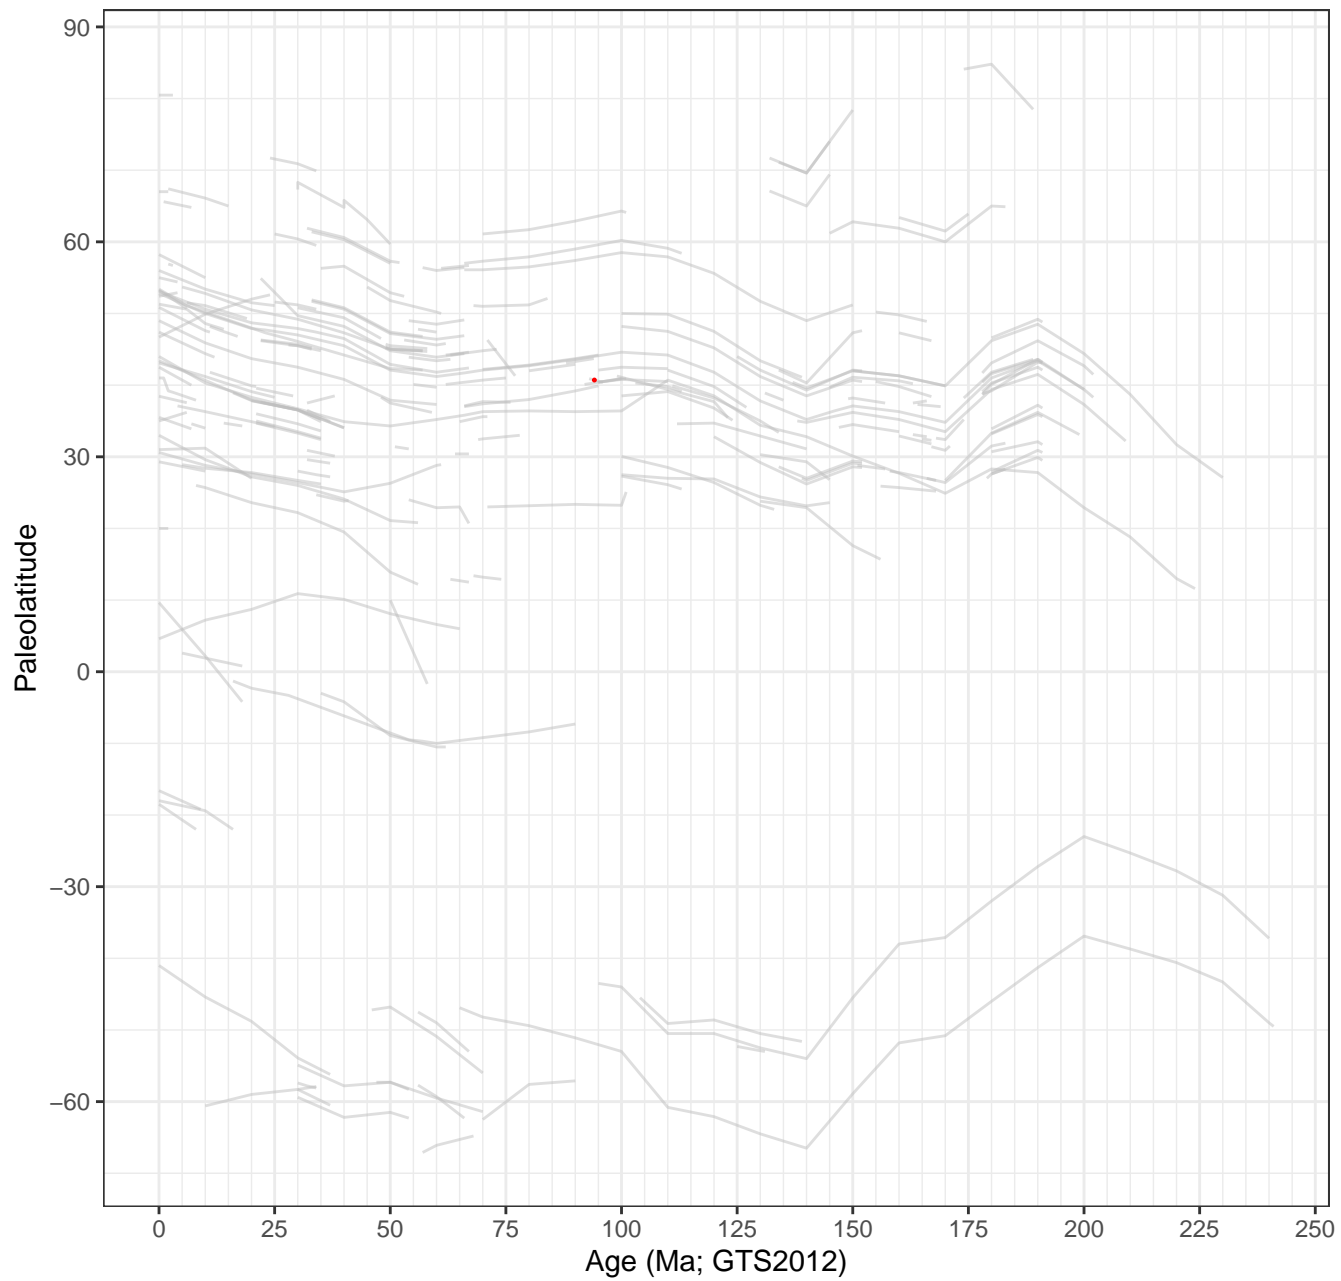

Supplement: Supplementary file 790 [file Adnatosphaeridium chonetum.pdf › Supplement/Supplement 2/Species 1914 plots/Adnatosphaeridium chonetum.pdf]

# Species *Adnatosphaeridium hartzii*

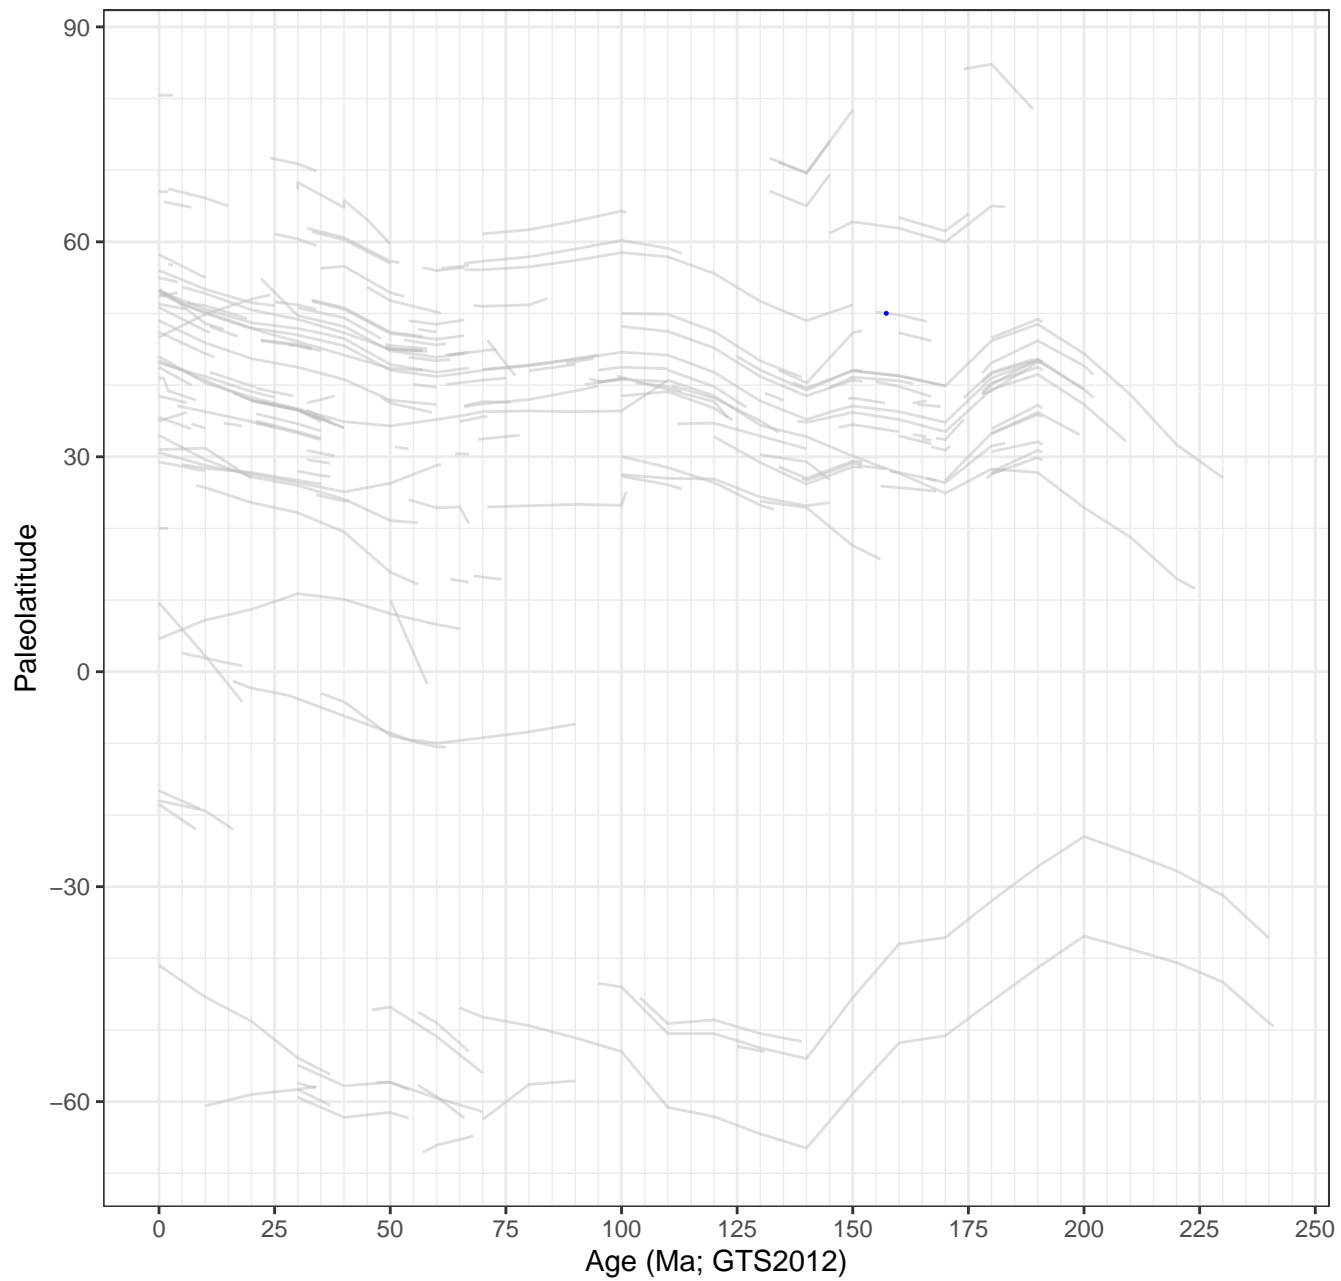

Supplement: Supplementary file 791 [file Adnatosphaeridium hartzii.pdf › Supplement/Supplement 2/Species 1914 plots/Adnatosphaeridium hartzii.pdf]

# Species *Adnatosphaeridium ivoriense*

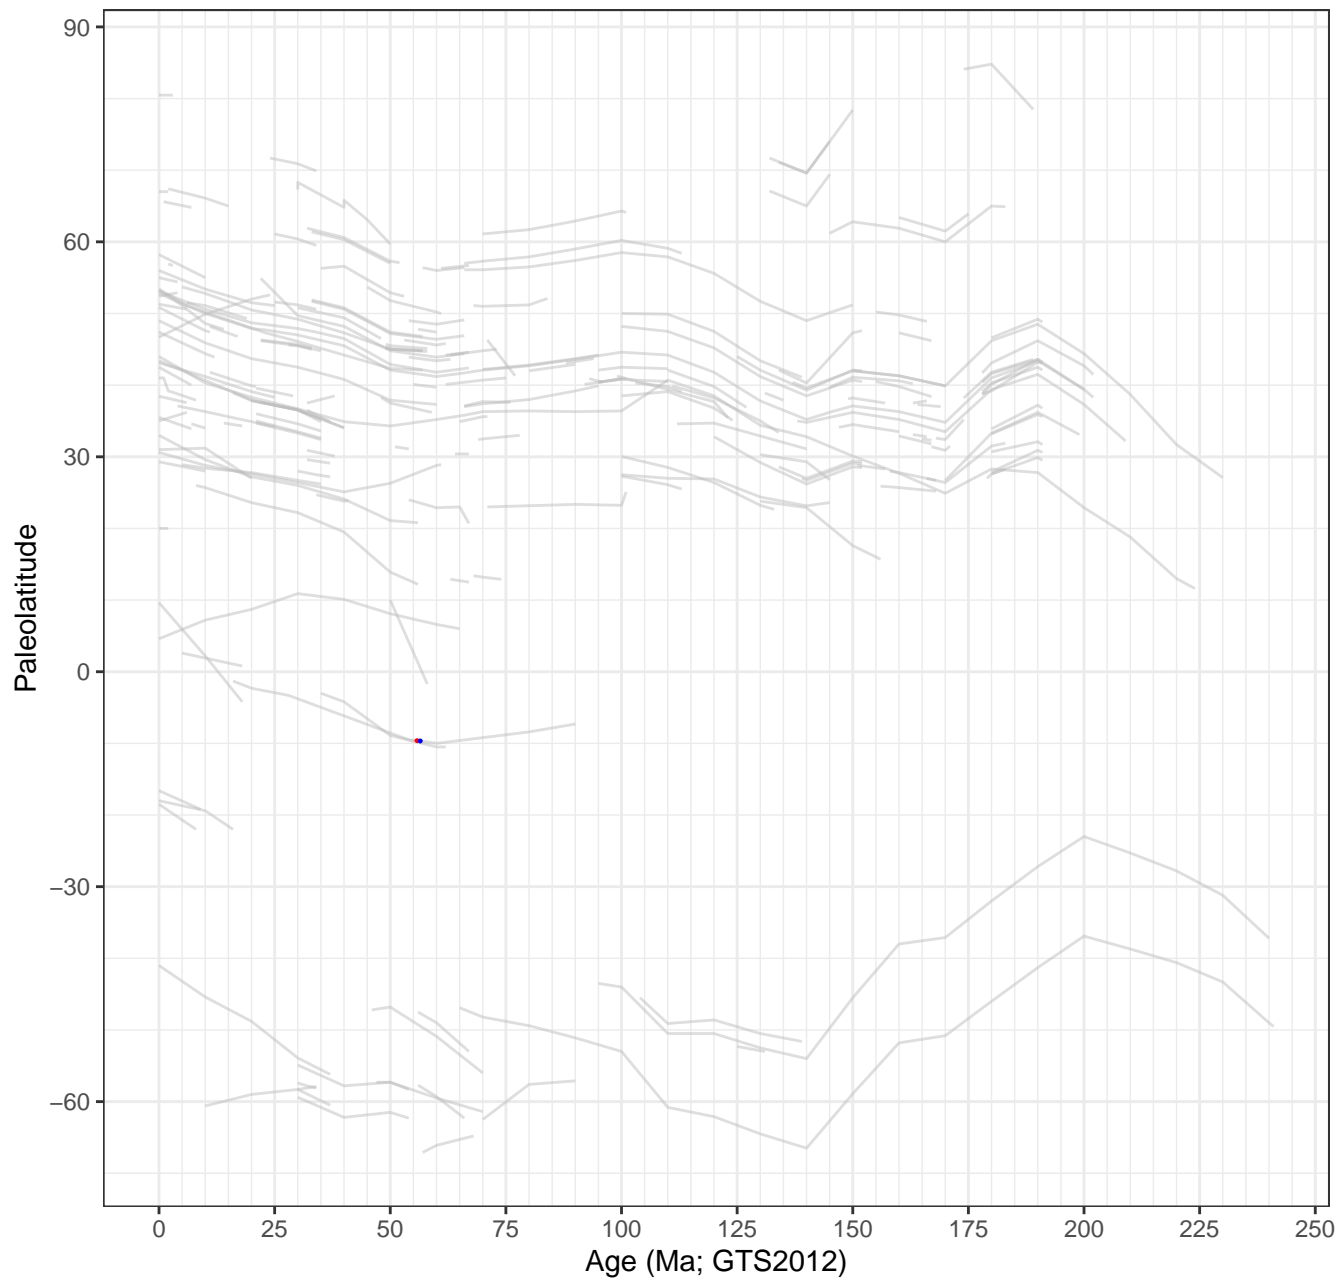

Supplement: Supplementary file 792 [file Adnatosphaeridium ivoriense.pdf › Supplement/Supplement 2/Species 1914 plots/Adnatosphaeridium ivoriense.pdf]

# Species *Adnatosphaeridium membraniphorum*

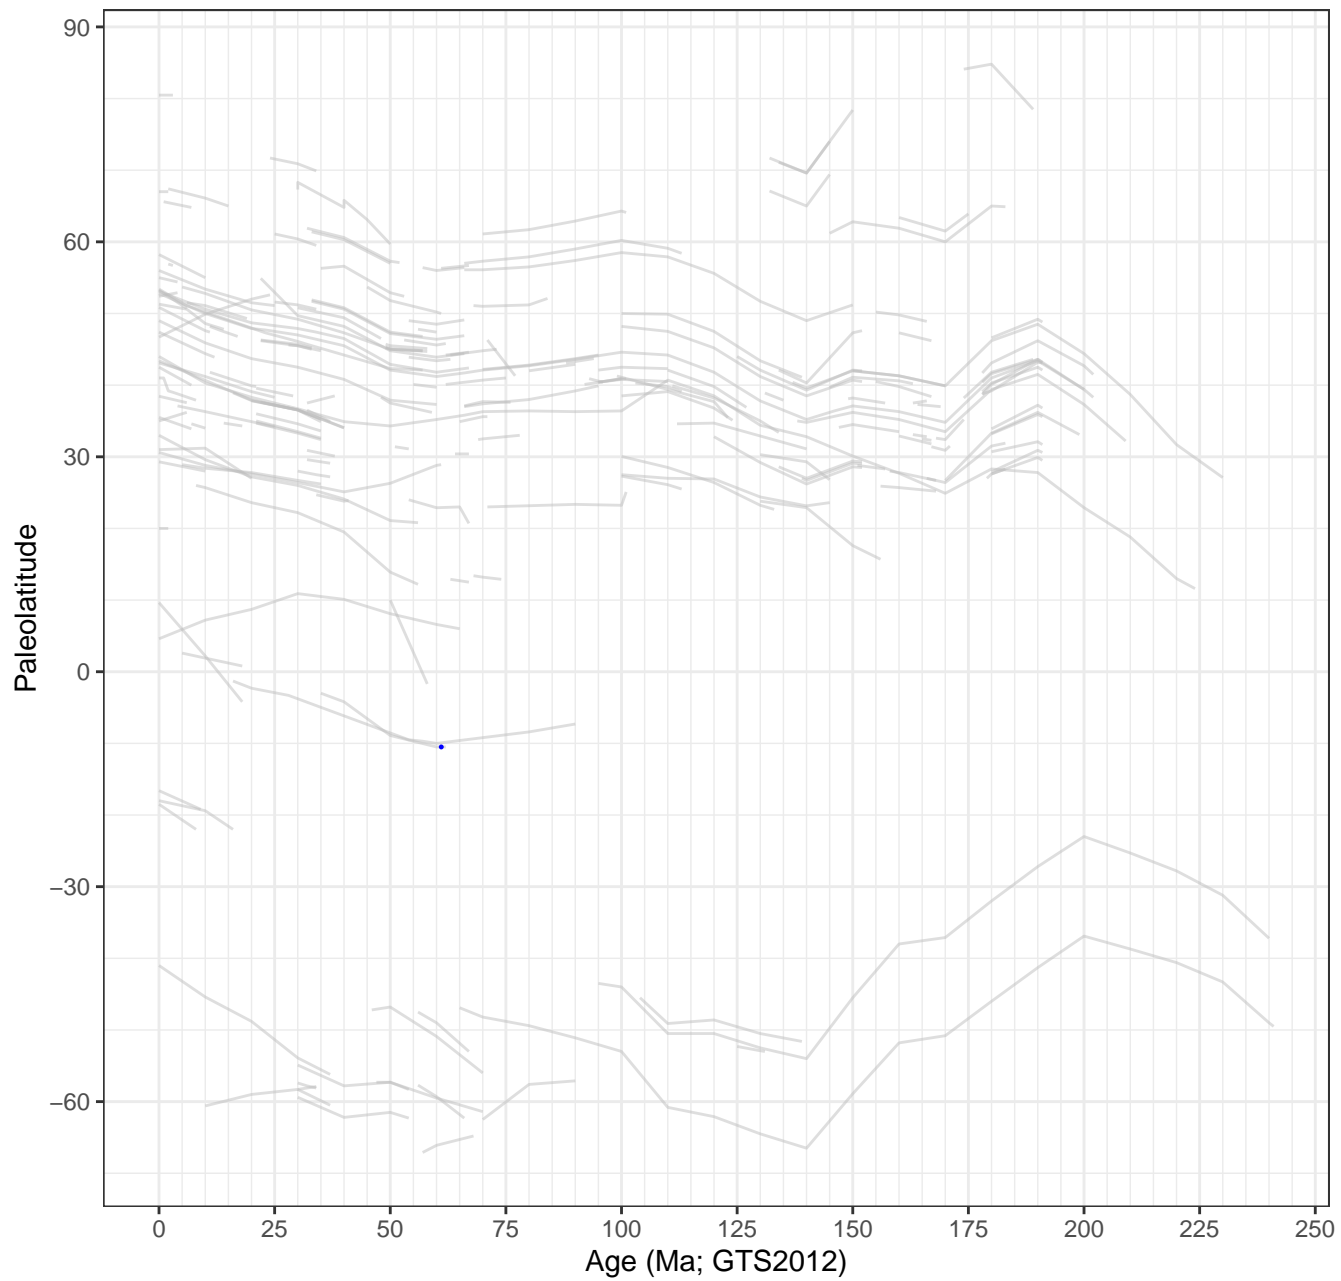

Supplement: Supplementary file 793 [file Adnatosphaeridium membraniphorum.pdf › Supplement/Supplement 2/Species 1914 plots/Adnatosphaeridium membraniphorum.pdf]

# Species *Adnatosphaeridium regulatum*

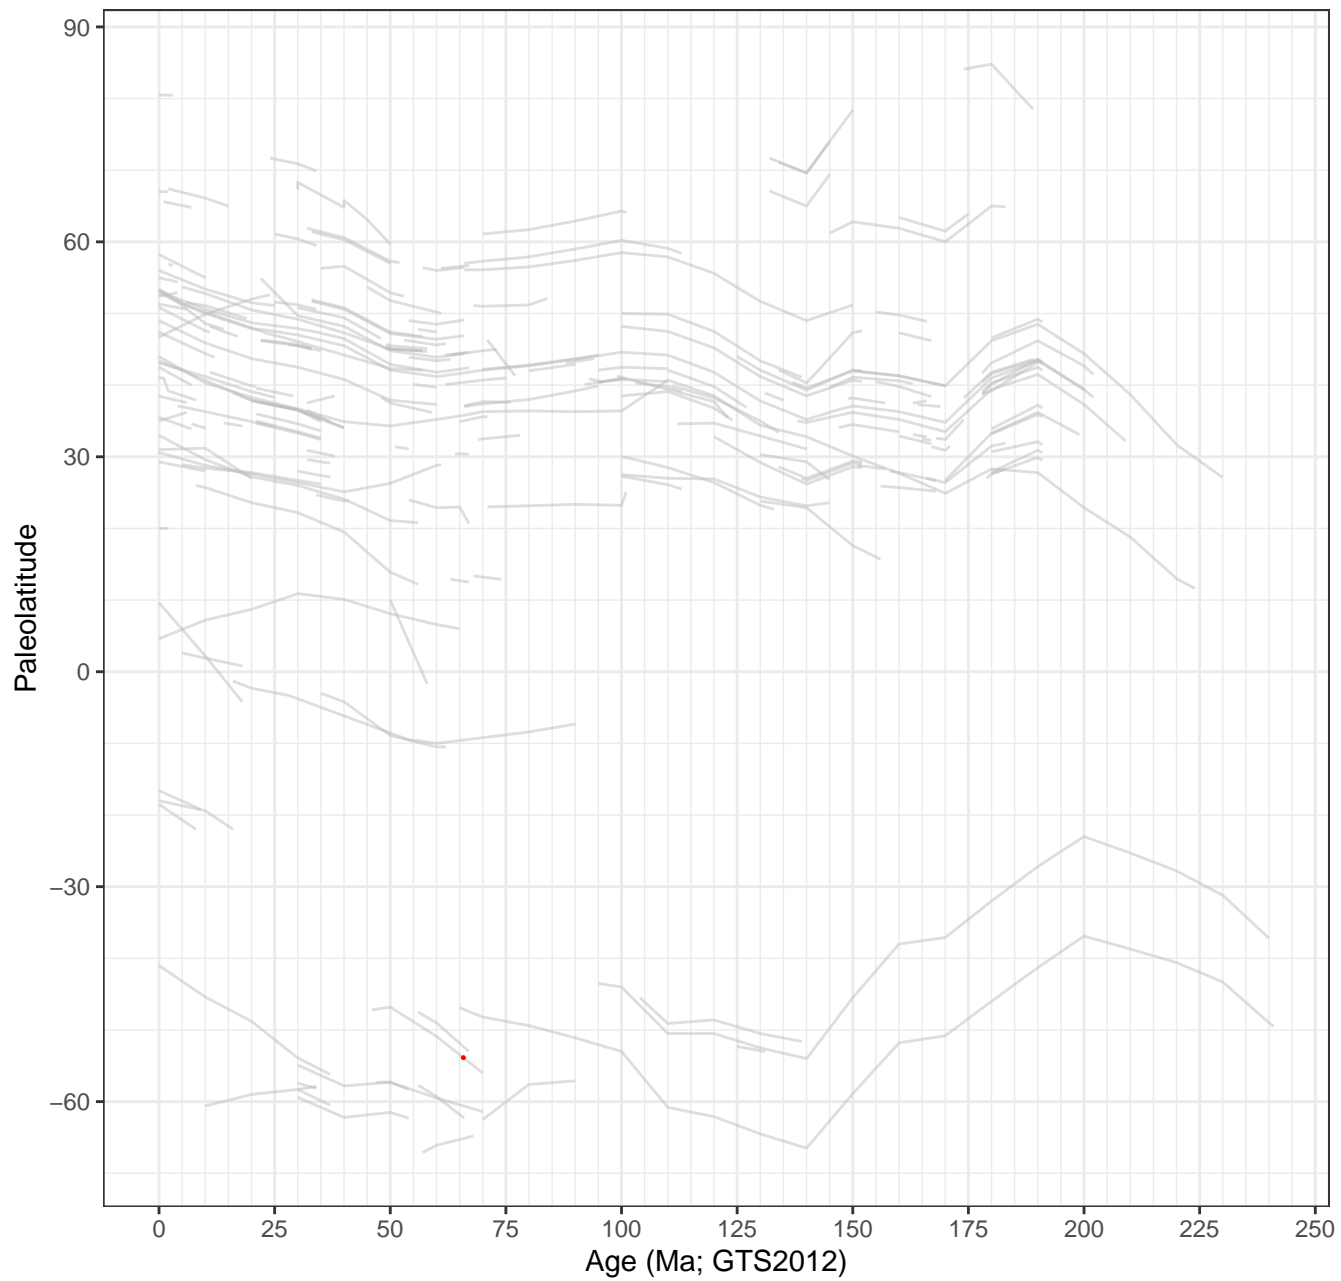

Supplement: Supplementary file 794 [file Adnatosphaeridium regulatum.pdf › Supplement/Supplement 2/Species 1914 plots/Adnatosphaeridium regulatum.pdf]

# Species *Adnatosphaeridium robustum*

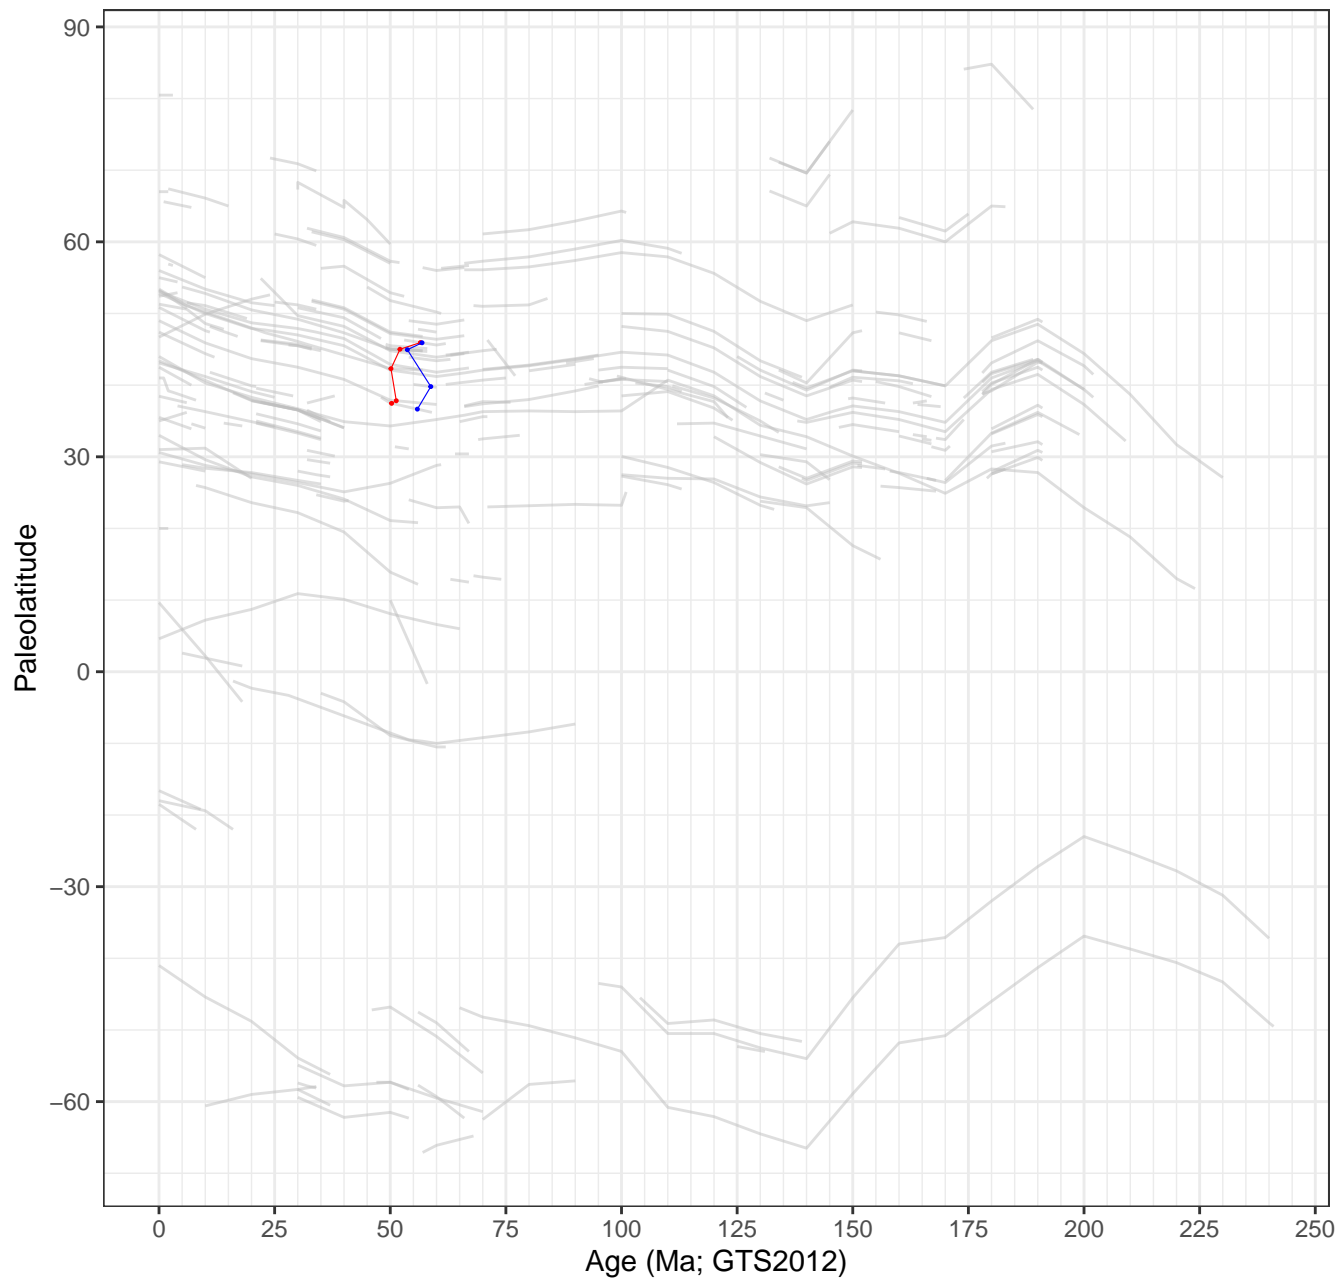

Supplement: Supplementary file 795 [file Adnatosphaeridium robustum.pdf › Supplement/Supplement 2/Species 1914 plots/Adnatosphaeridium robustum.pdf]

# Species *Adnatosphaeridium tutulosum*

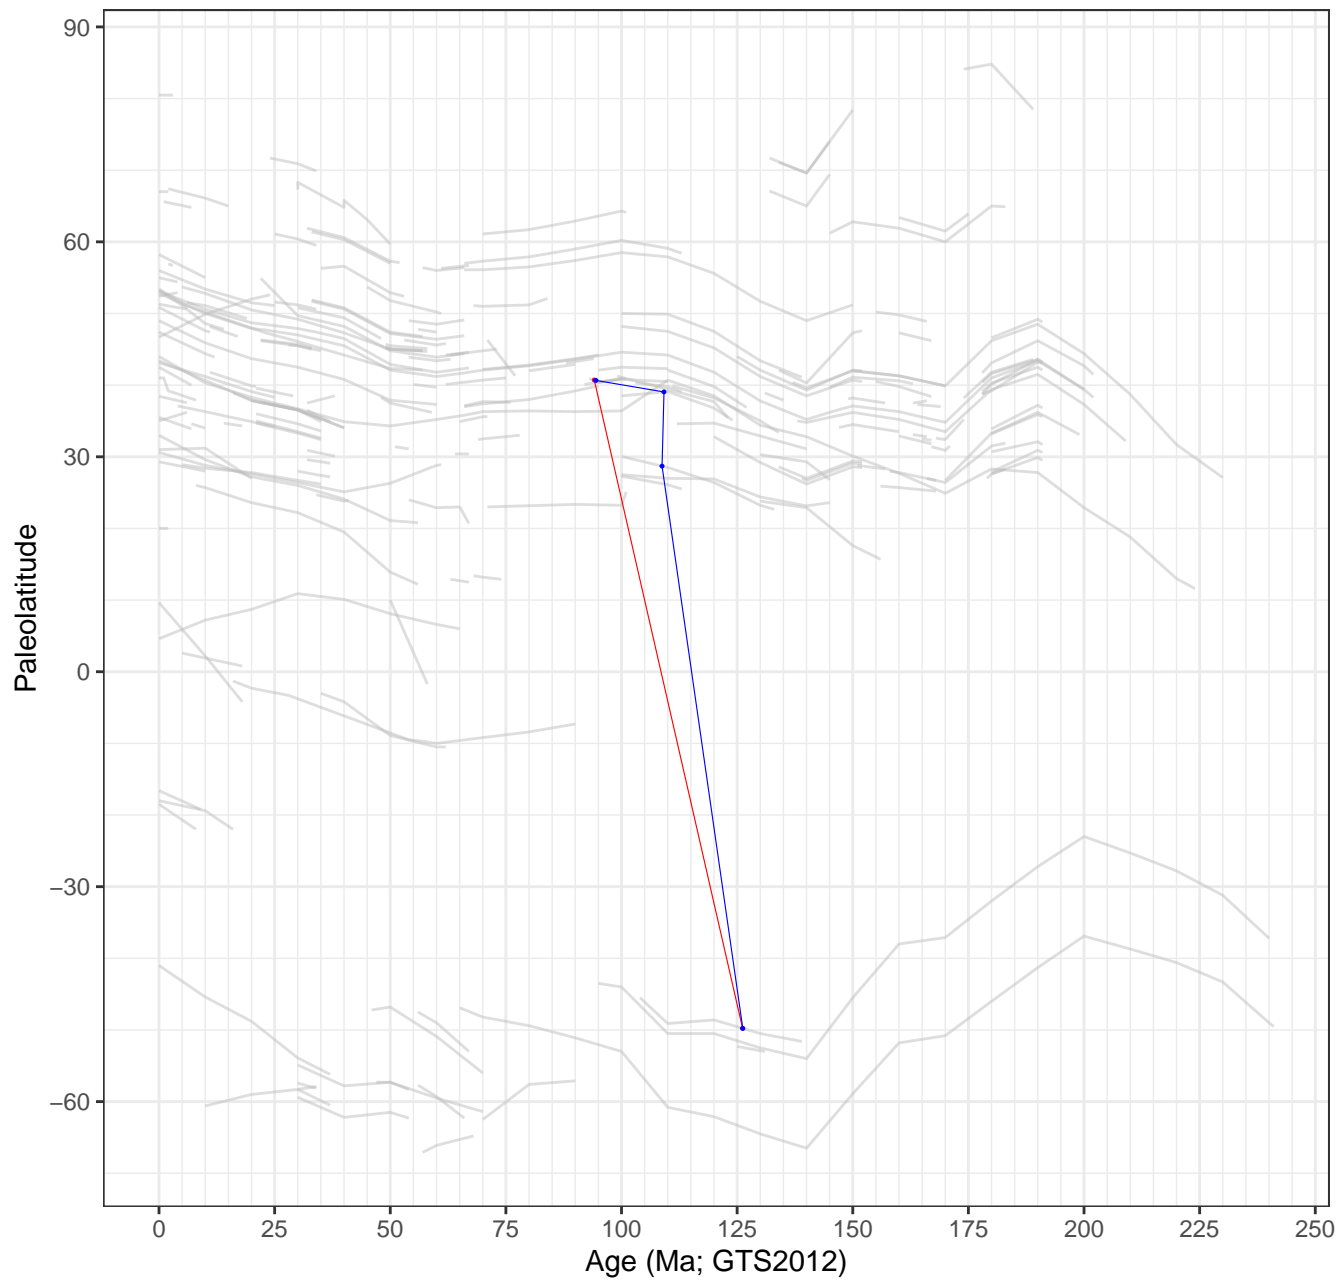

Supplement: Supplementary file 796 [file Adnatosphaeridium tutulosum.pdf › Supplement/Supplement 2/Species 1914 plots/Adnatosphaeridium tutulosum.pdf]

# Species *Adnatosphaeridium vittatum*

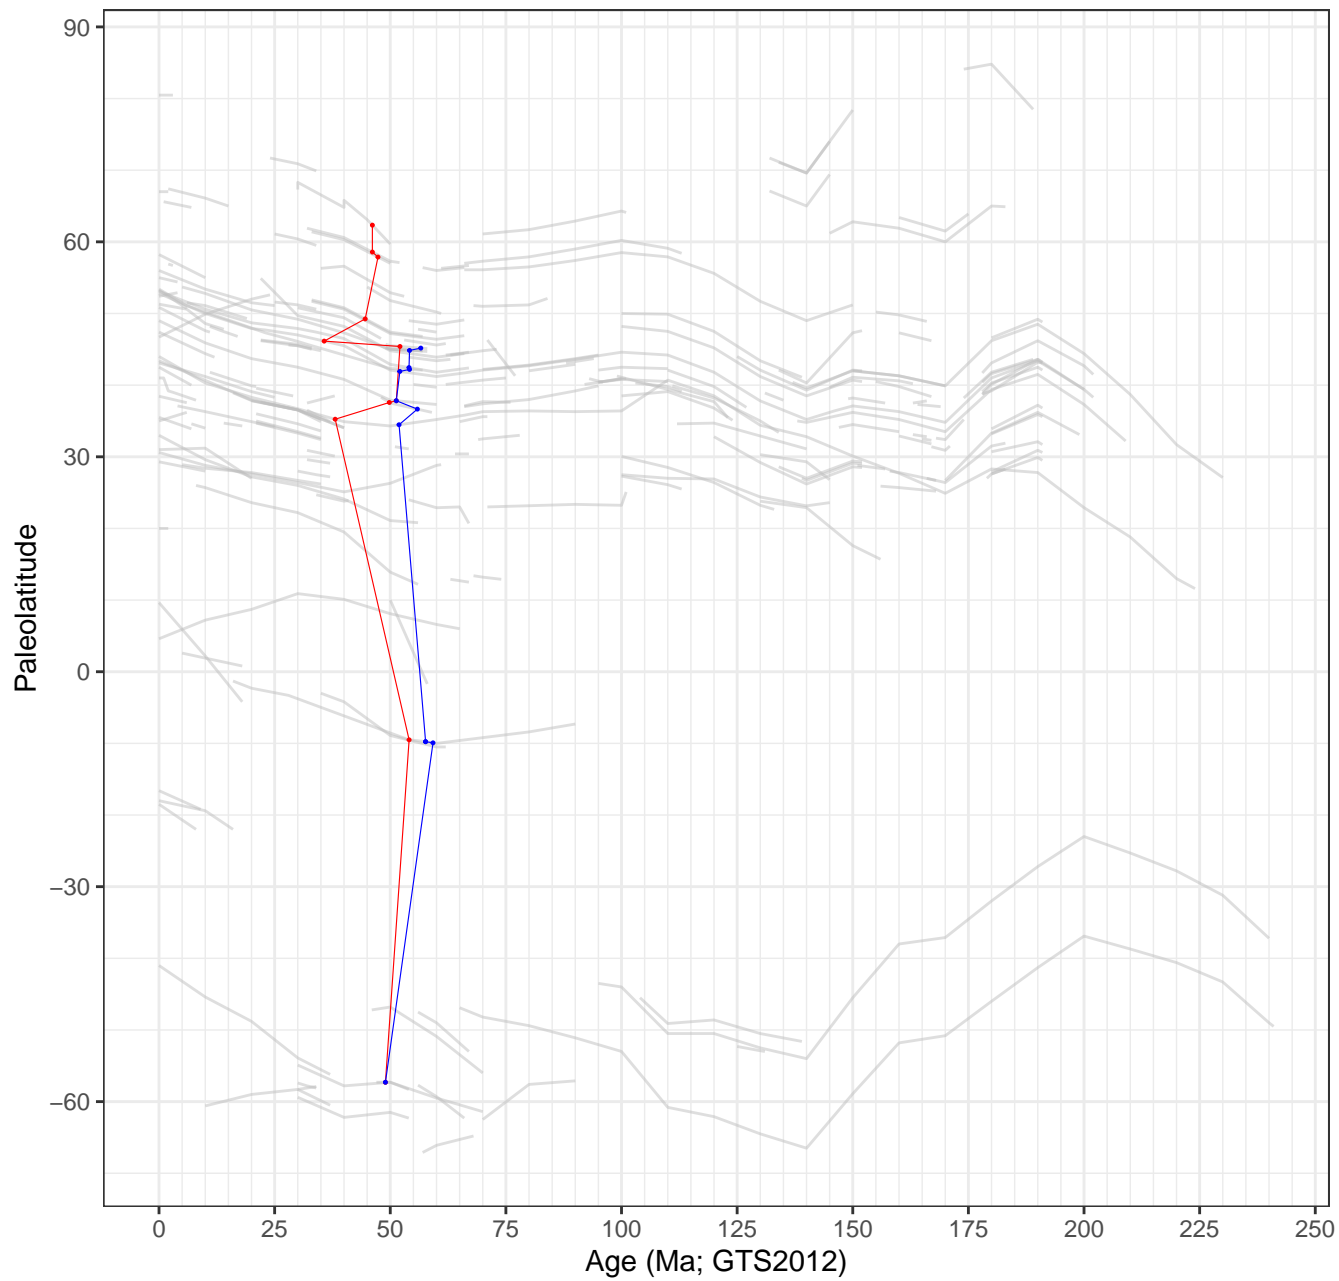

Supplement: Supplementary file 797 [file Adnatosphaeridium vittanum.pdf › Supplement/Supplement 2/Species 1914 plots/Adnatosphaeridium vittanum.pdf]

# Species *Aidelocysta clavata*

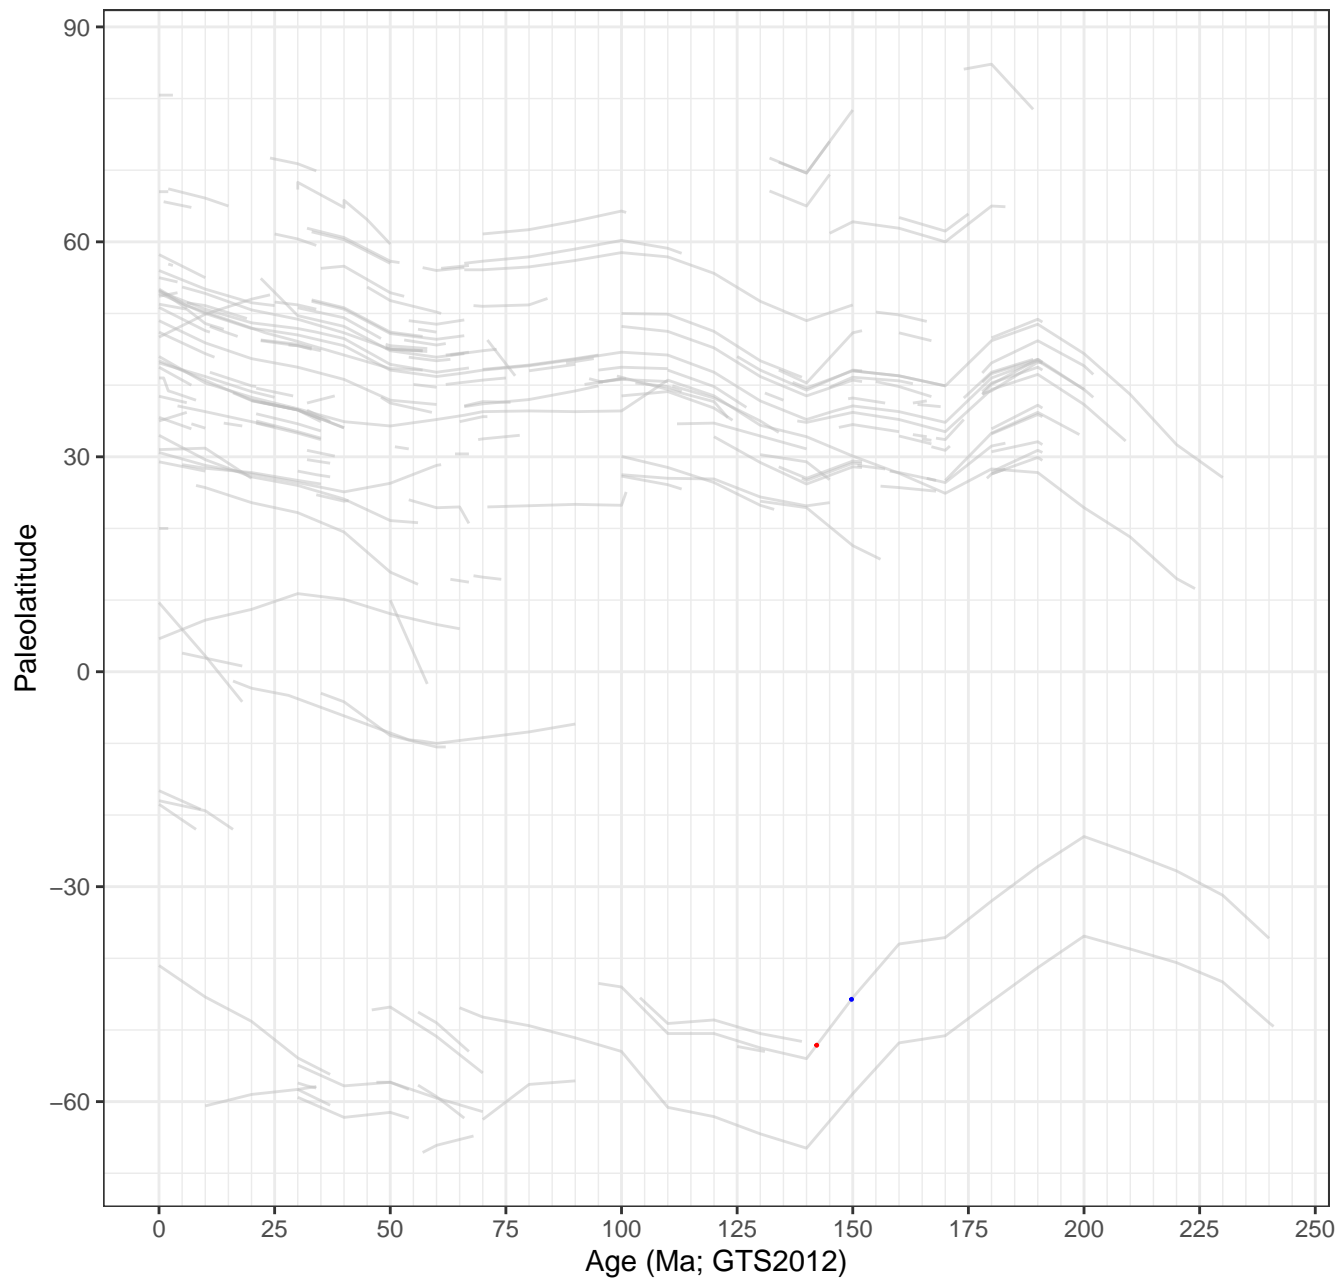

Supplement: Supplementary file 798 [file Aidelocysta clavata.pdf › Supplement/Supplement 2/Species 1914 plots/Aidelocysta clavata.pdf]

# Species *Aireiana verrucosa*

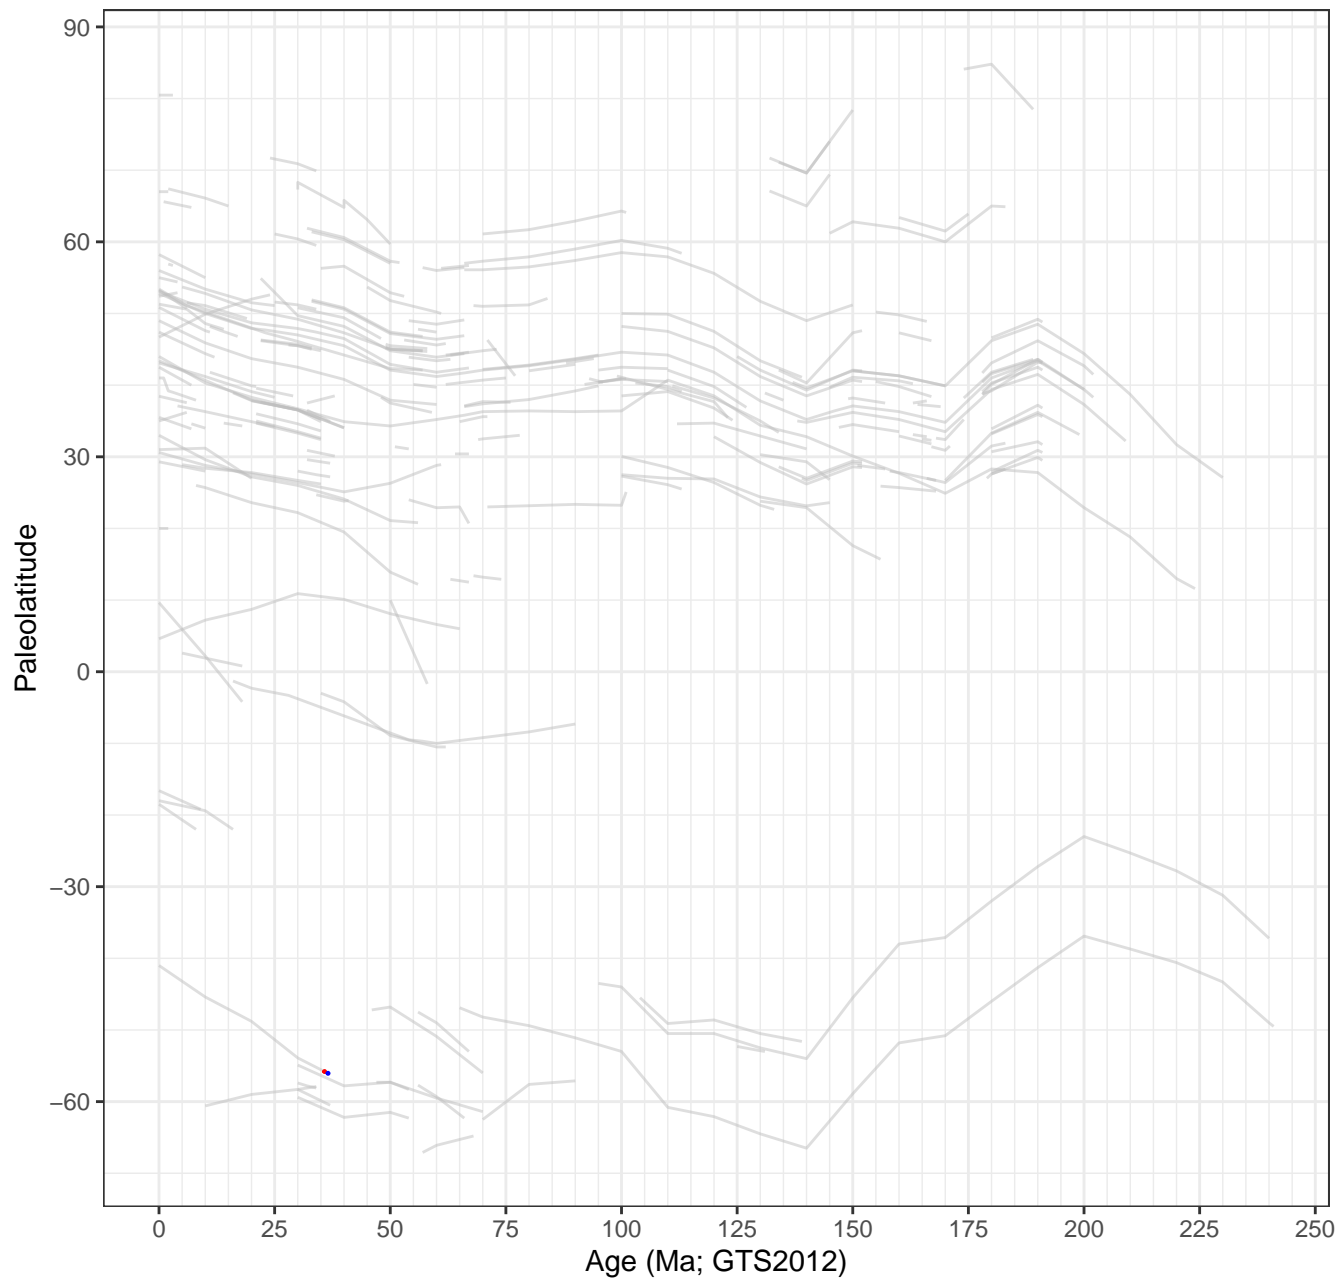

Supplement: Supplementary file 799 [file Aireiana verrucosa.pdf › Supplement/Supplement 2/Species 1914 plots/Aireiana verrucosa.pdf]

# Species *Aldorfia alдорфensis*

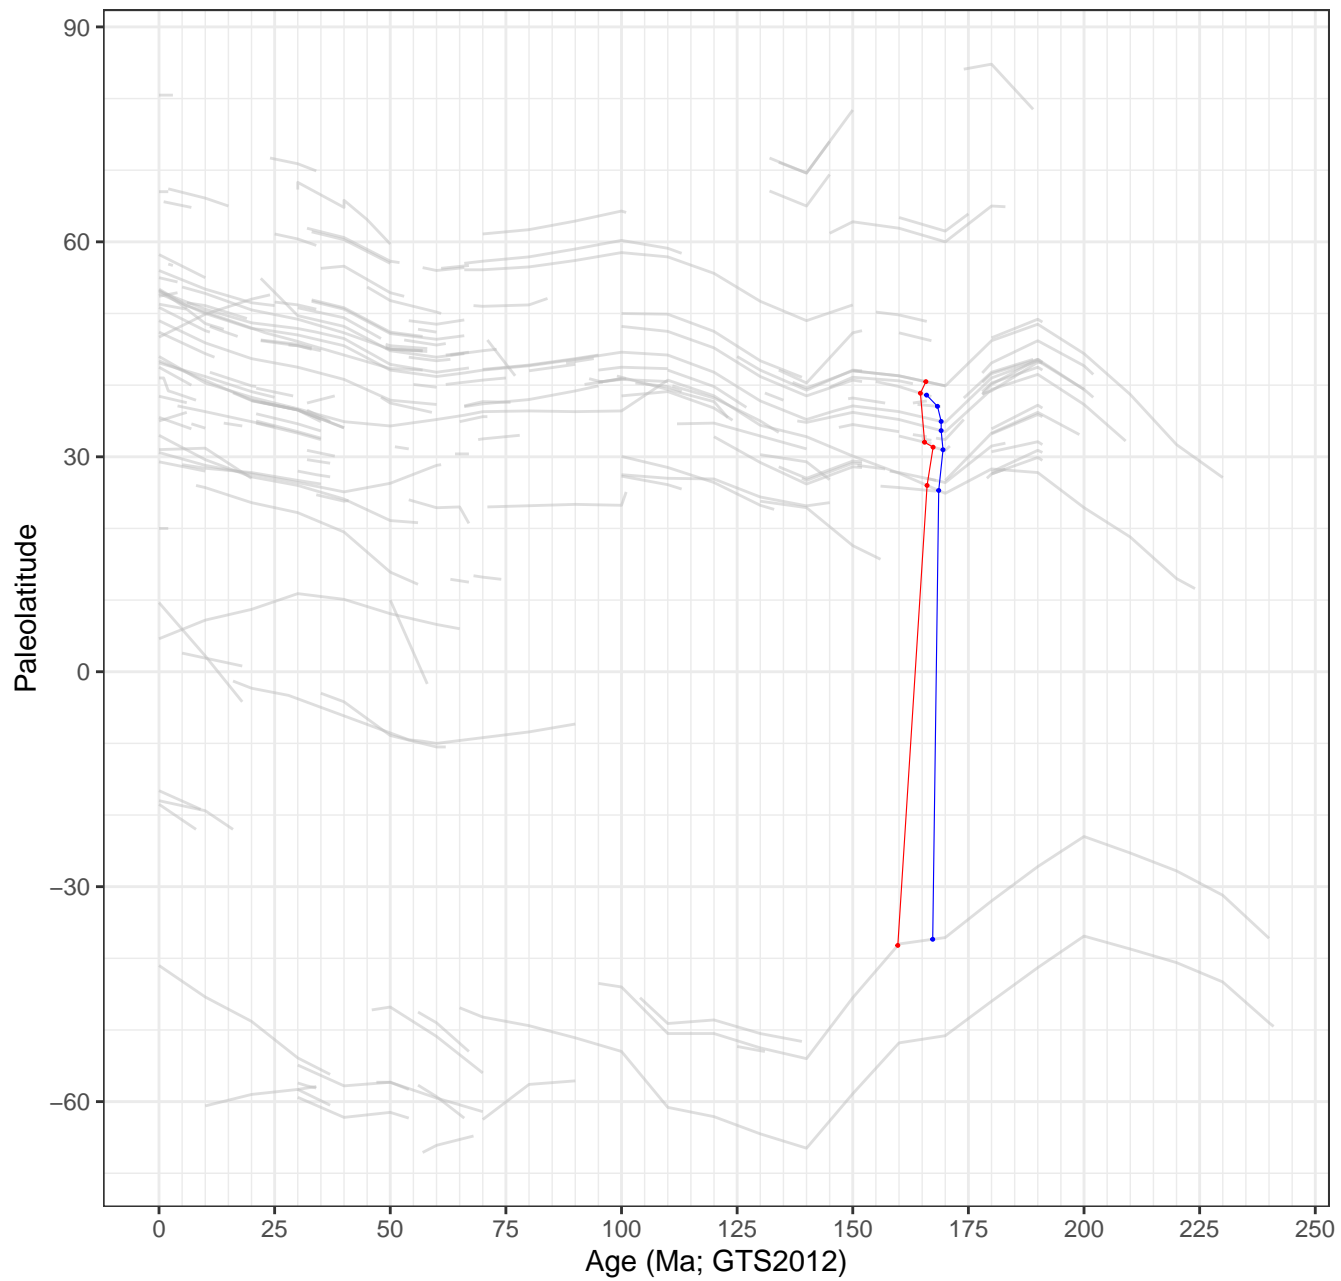

Supplement: Supplementary file 800 [file Aldorfia aldorfensis.pdf › Supplement/Supplement 2/Species 1914 plots/Aldorfia aldorfensis.pdf]

# Species *Algidasphaeridium minutum cesare*

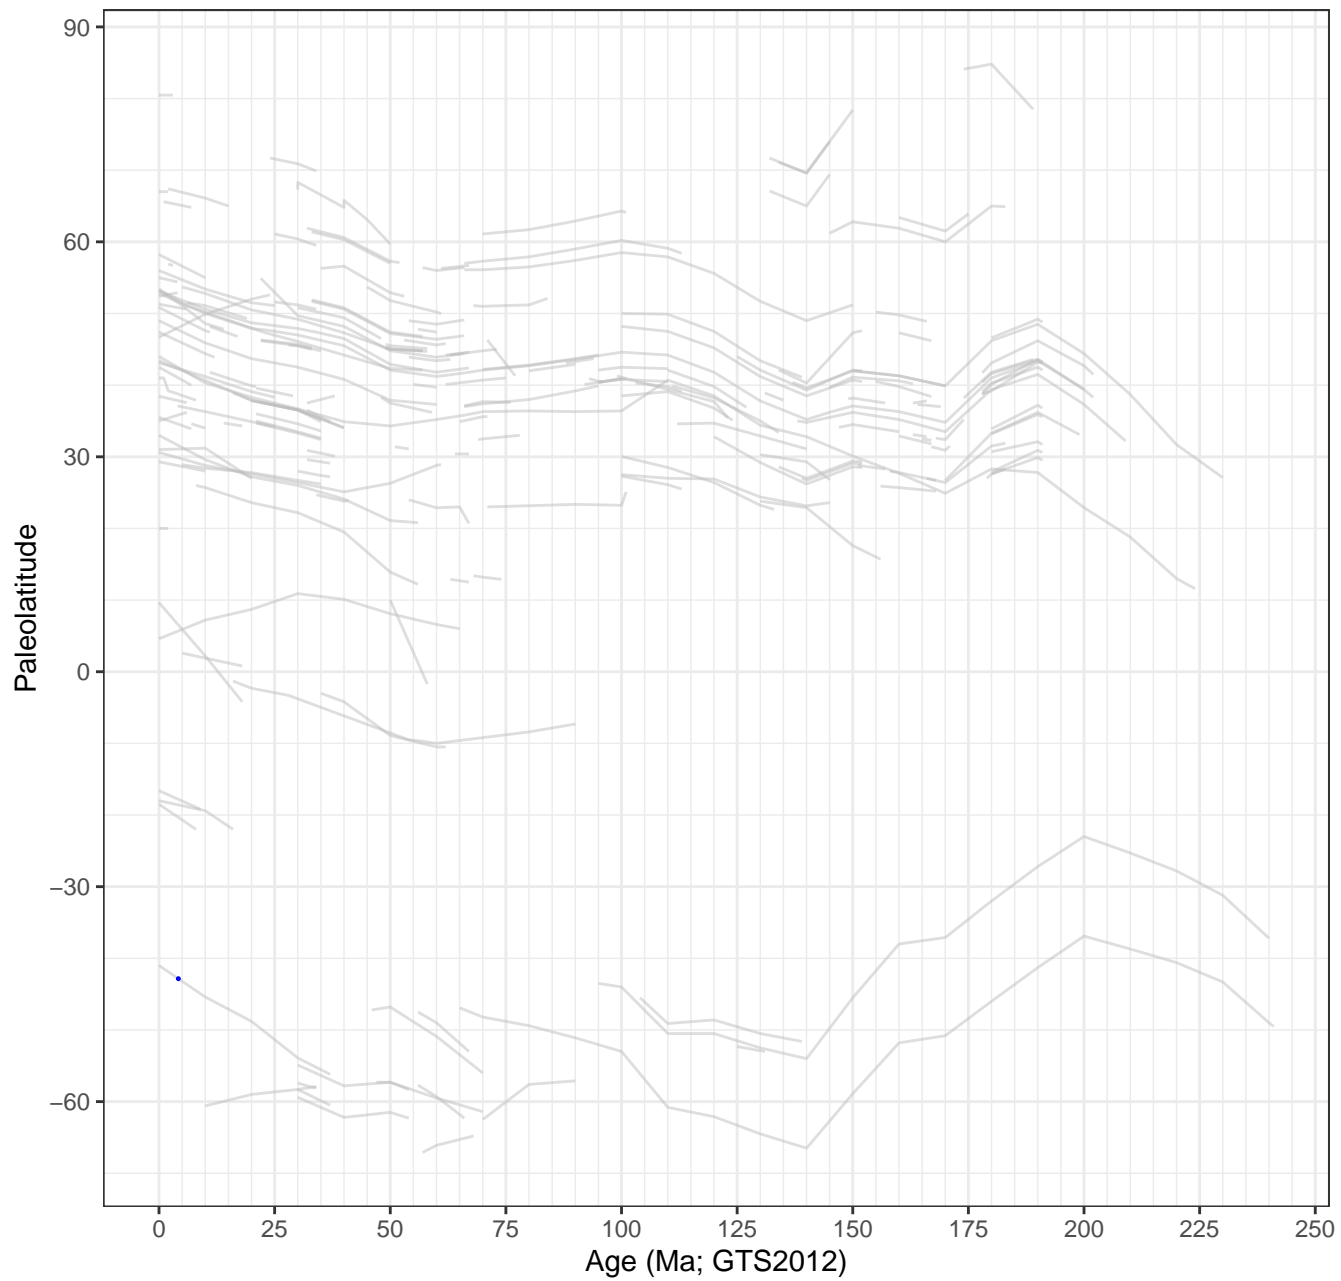

Supplement: Supplementary file 801 [file Algidasphaeridium minutum cesare.pdf › Supplement/Supplement 2/Species 1914 plots/Algidasphaeridium minutum cesare.pdf]

# Species *Algidasphaeridium minutum minutum*

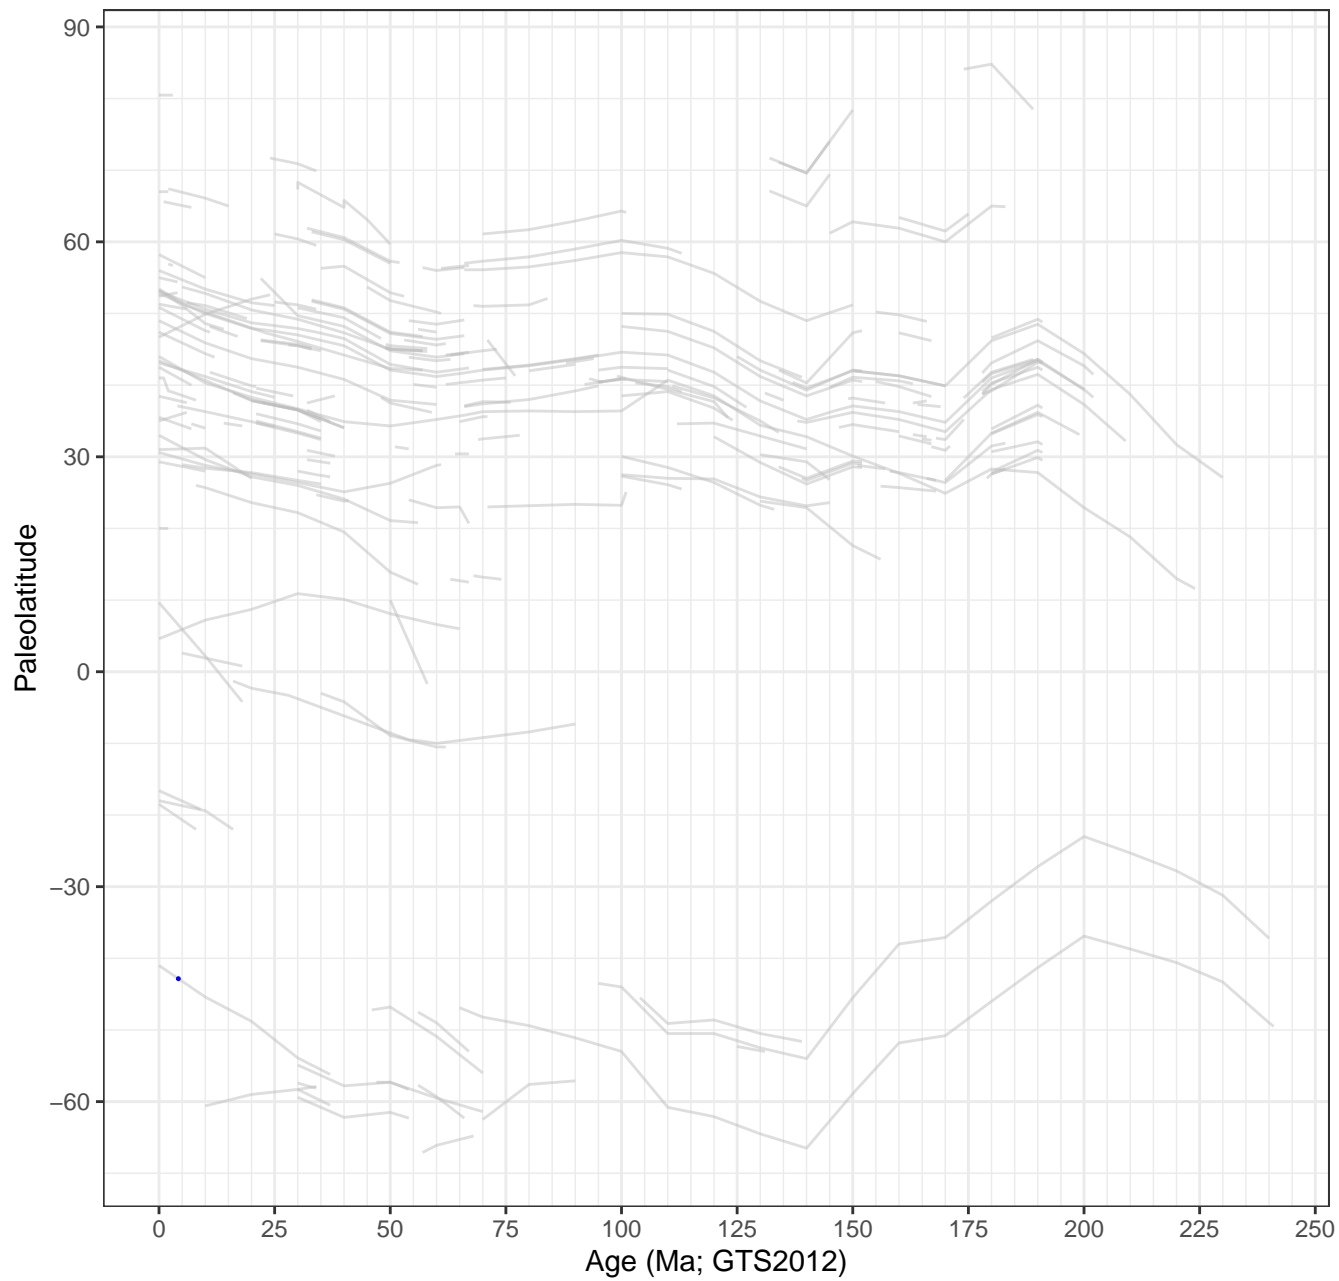

Supplement: Supplementary file 802 [file Algidasphaeridium minutum minutum.pdf › Supplement/Supplement 2/Species 1914 plots/Algidasphaeridium minutum minutum.pdf]

# Species *Alisocysta circumtabulata*

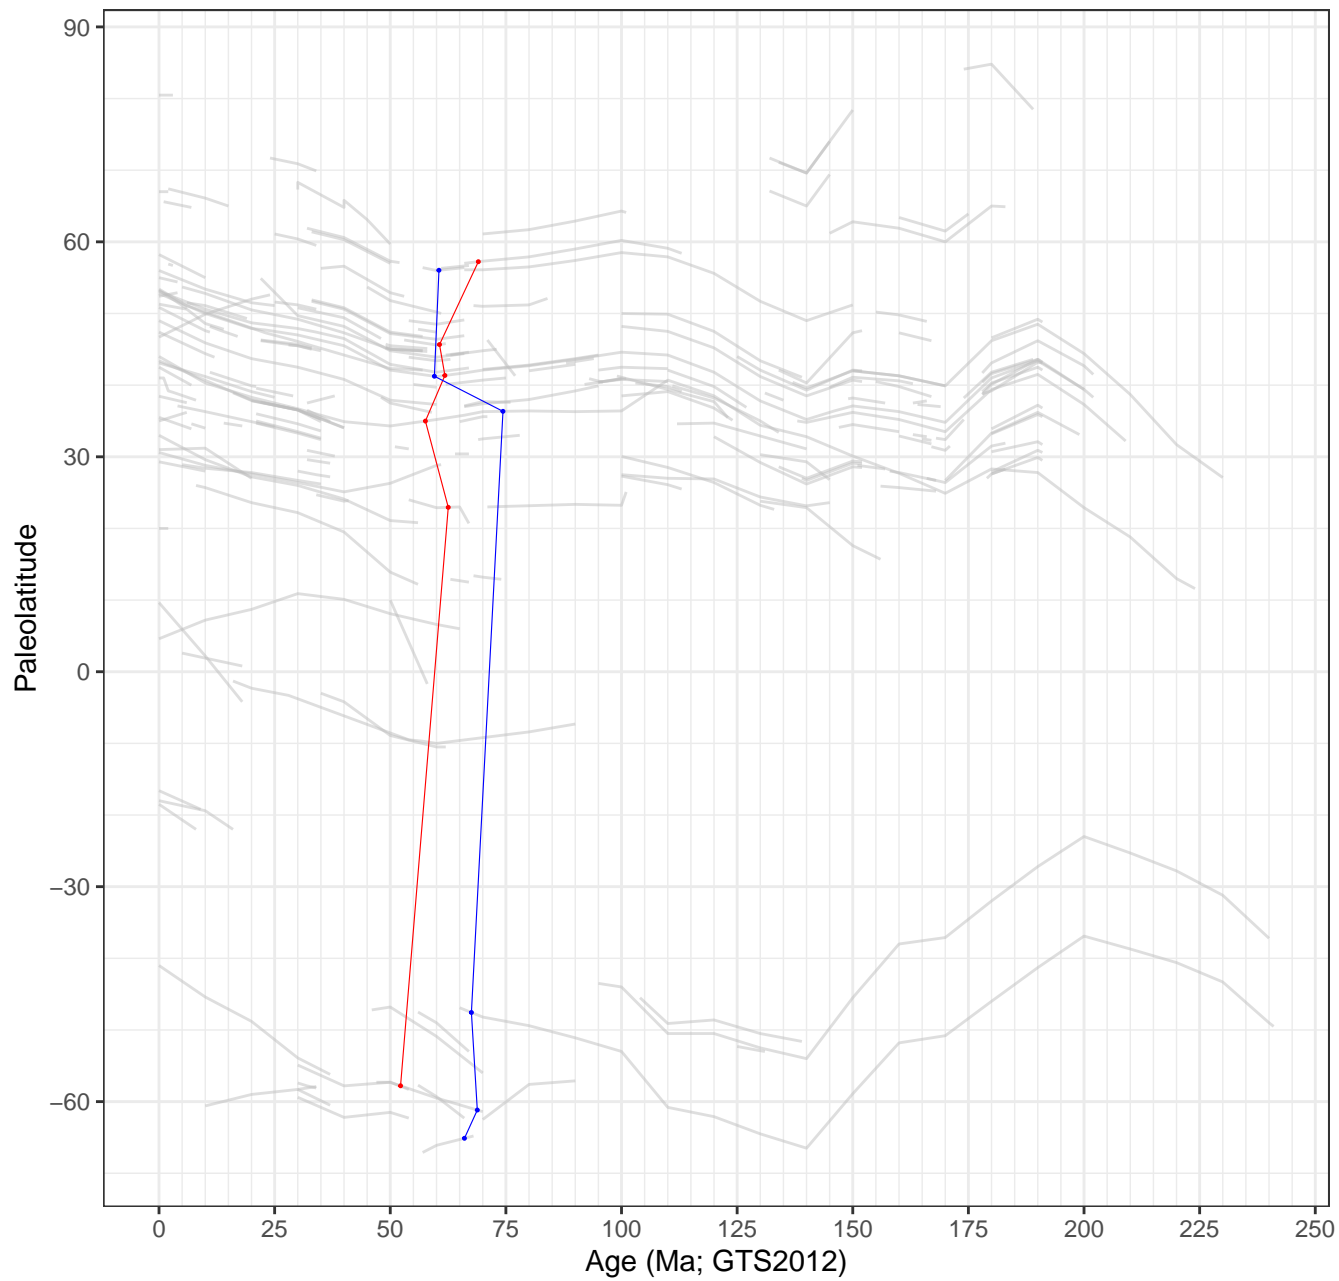

Supplement: Supplementary file 803 [file Alisocysta circumtabulata.pdf › Supplement/Supplement 2/Species 1914 plots/Alisocysta circumtabulata.pdf]

# Species *Alisocysta margarita*

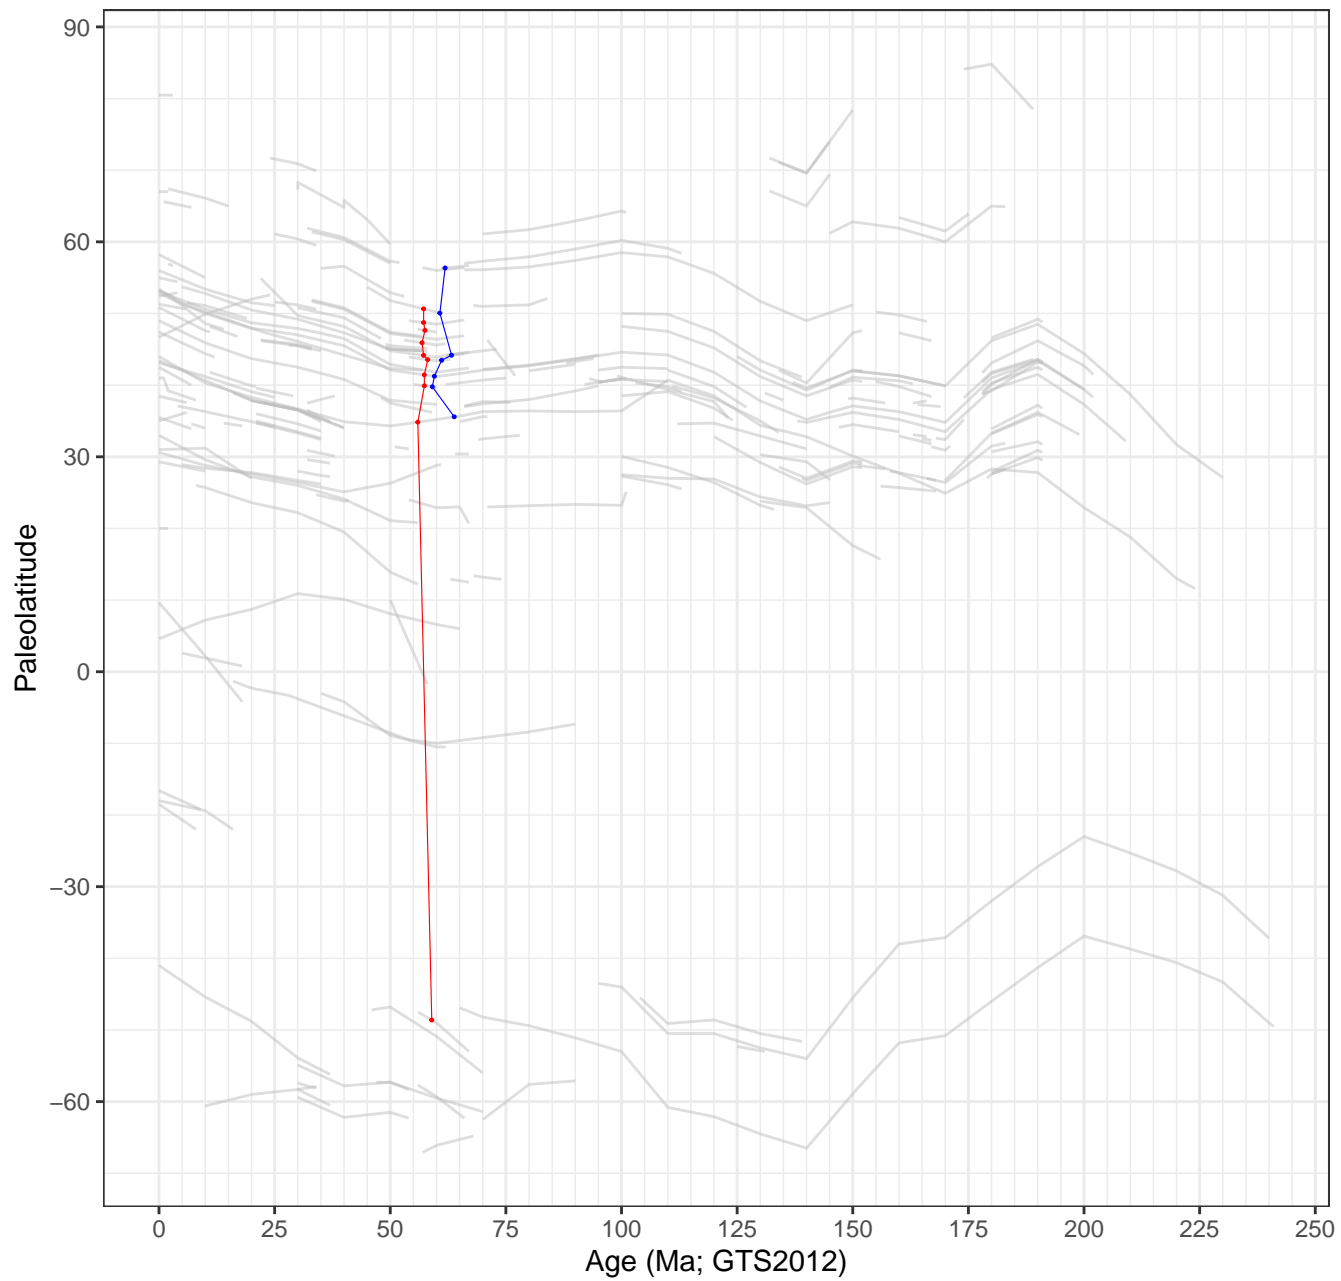

Supplement: Supplementary file 804 [file Alisocysta margarita.pdf › Supplement/Supplement 2/Species 1914 plots/Alisocysta margarita.pdf]

# Species *Alisocysta* sp. 1

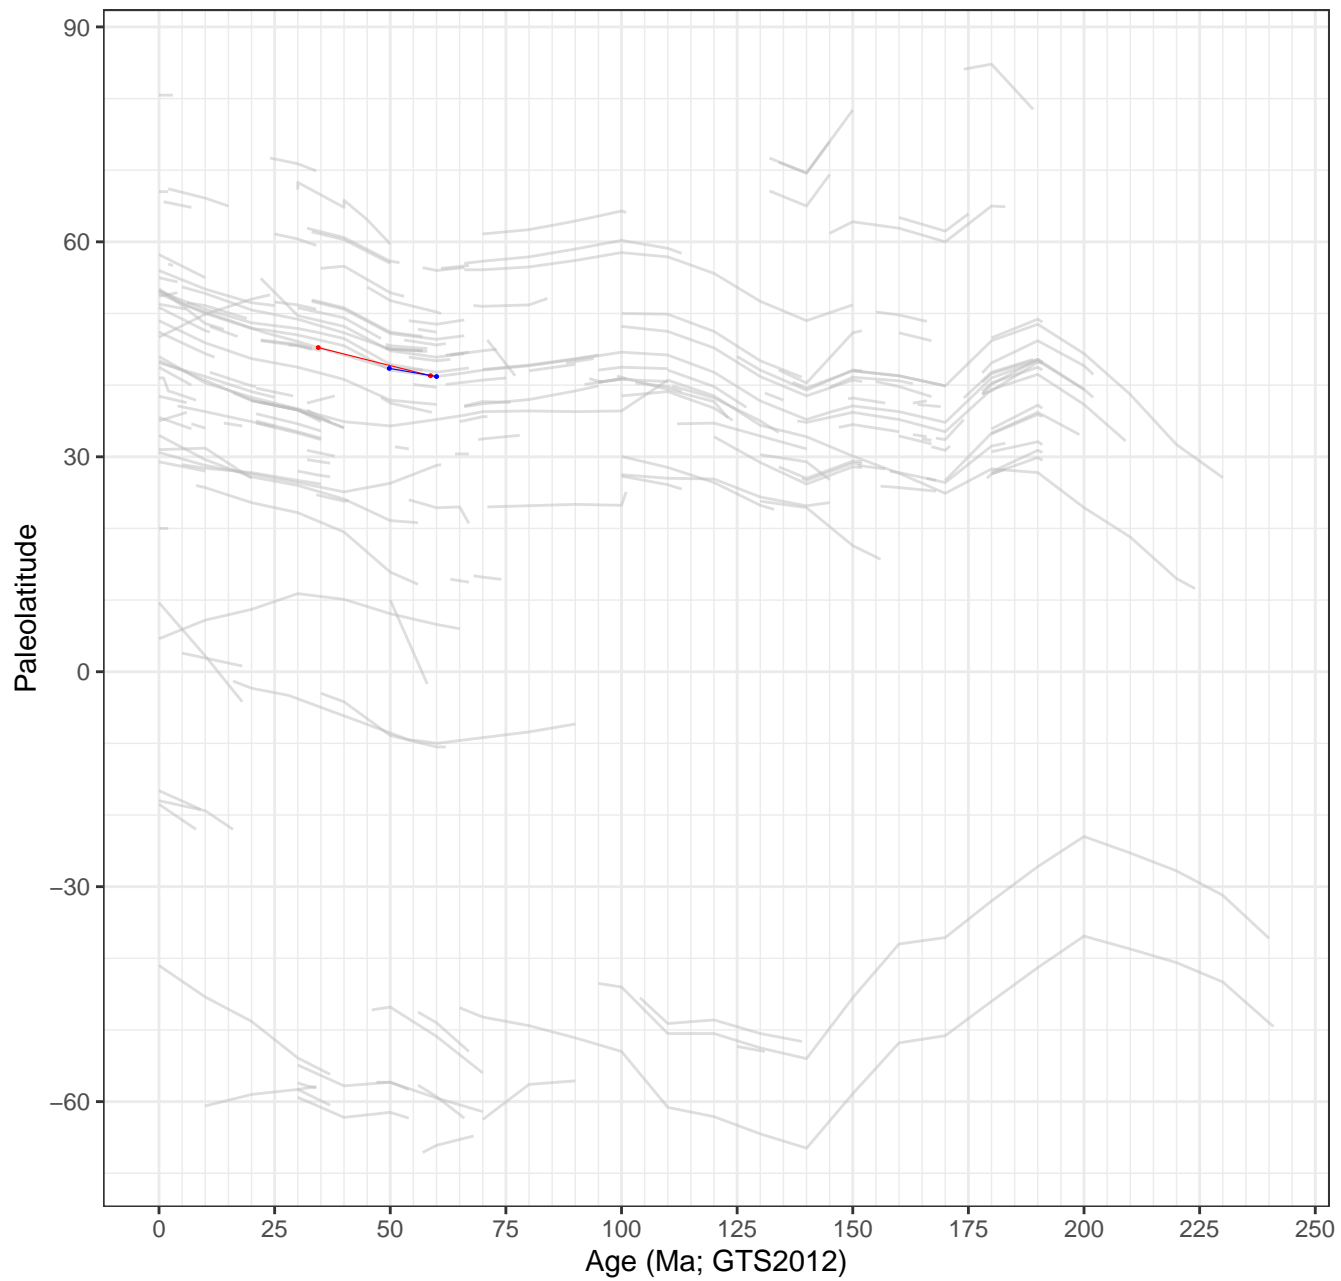

Supplement: Supplementary file 805 [file Alisocysta sp. 1.pdf › Supplement/Supplement 2/Species 1914 plots/Alisocysta sp. 1.pdf]

# Species *Alisocysta* sp. 2

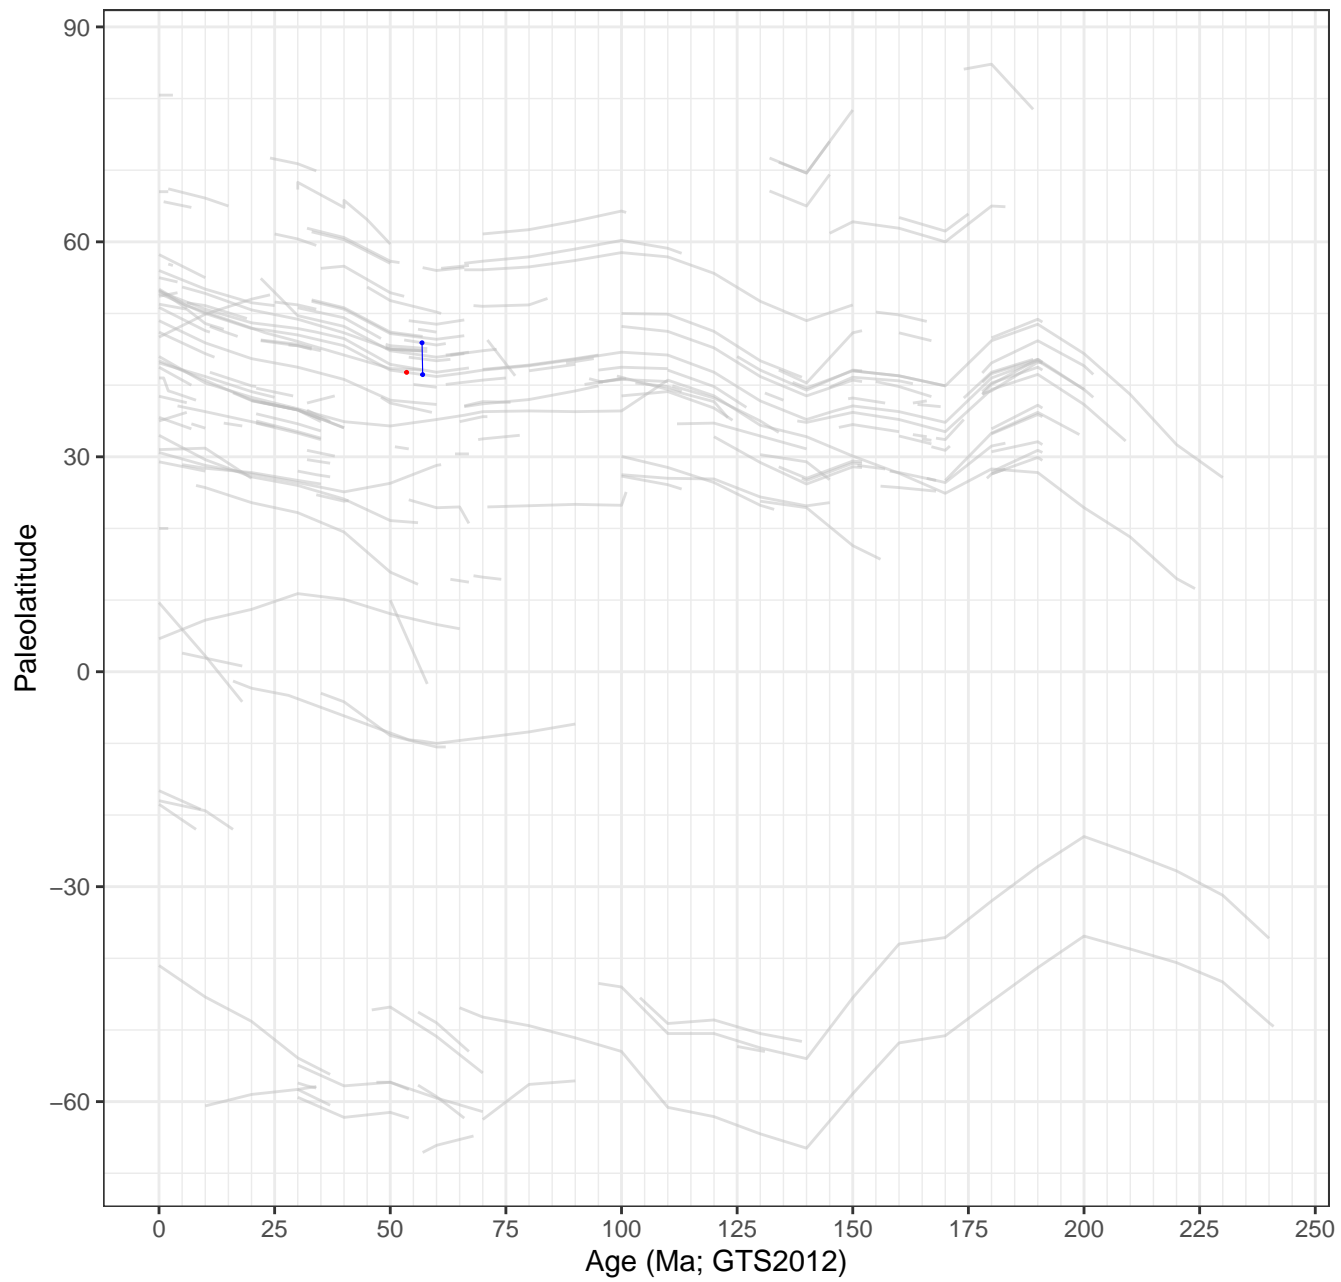

Supplement: Supplementary file 806 [file Alisocysta sp. 2.pdf › Supplement/Supplement 2/Species 1914 plots/Alisocysta sp. 2.pdf]

# Species *Alisogymnium euclaense*

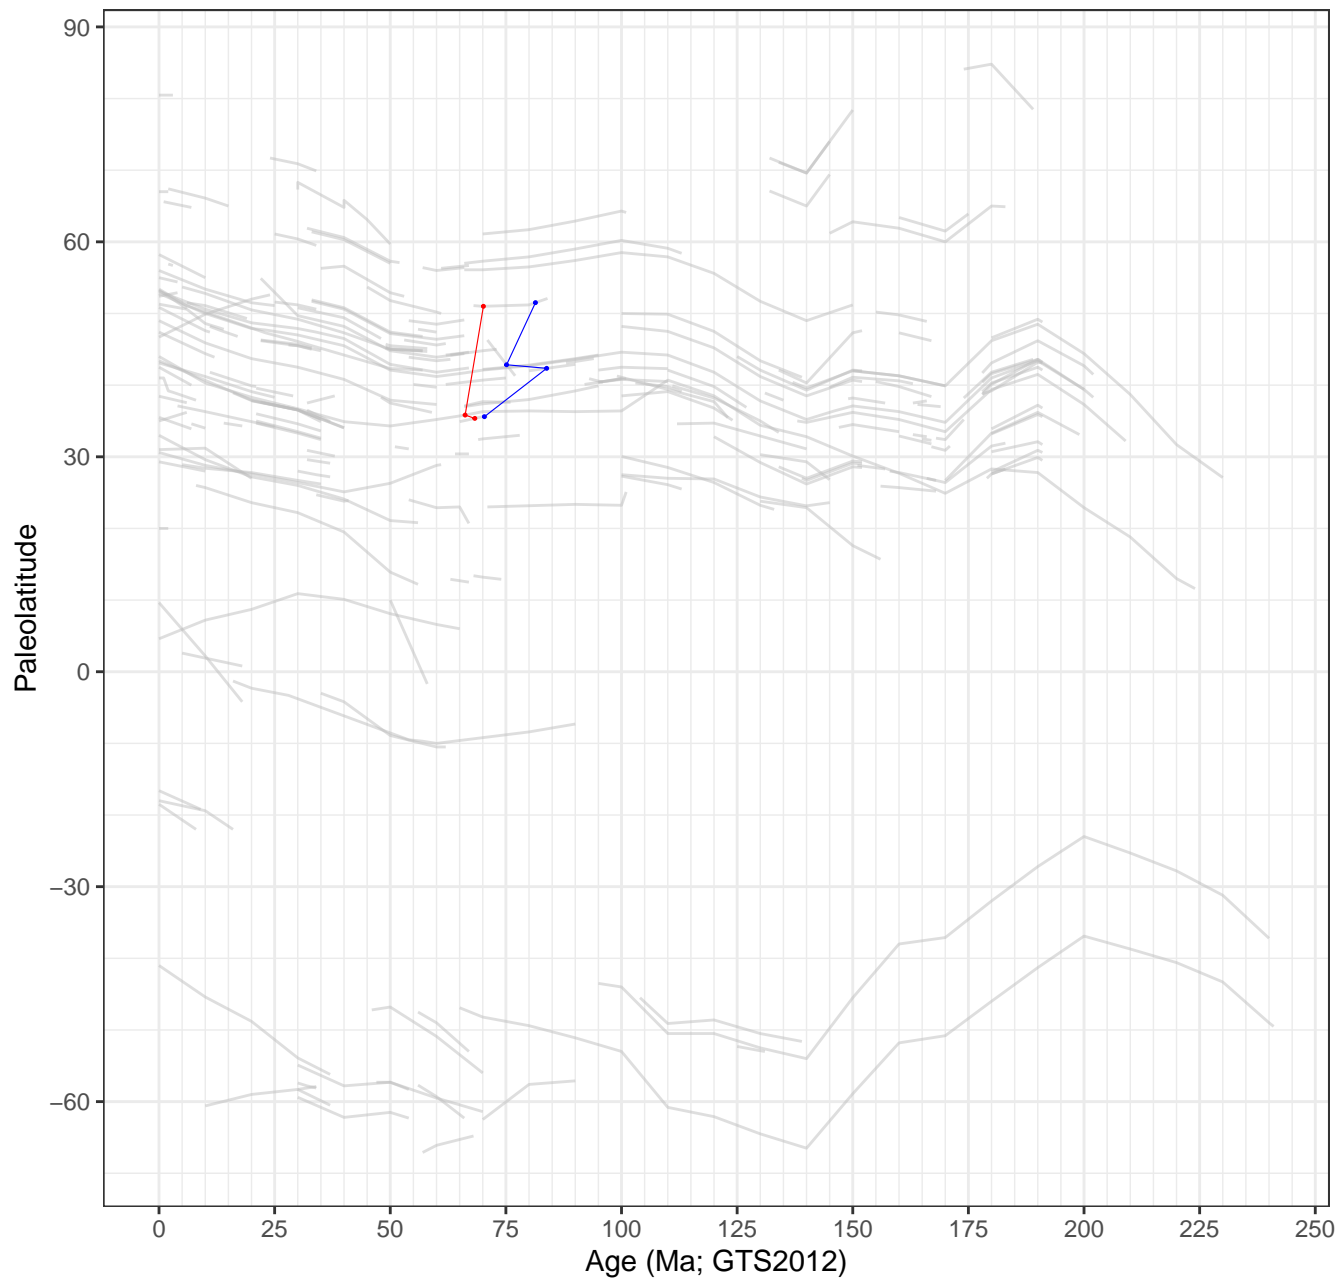

Supplement: Supplementary file 807 [file Alisogymnium euclaense.pdf › Supplement/Supplement 2/Species 1914 plots/Alisogymnium euclaense.pdf]

# Species *Alterbidinium acutulum*

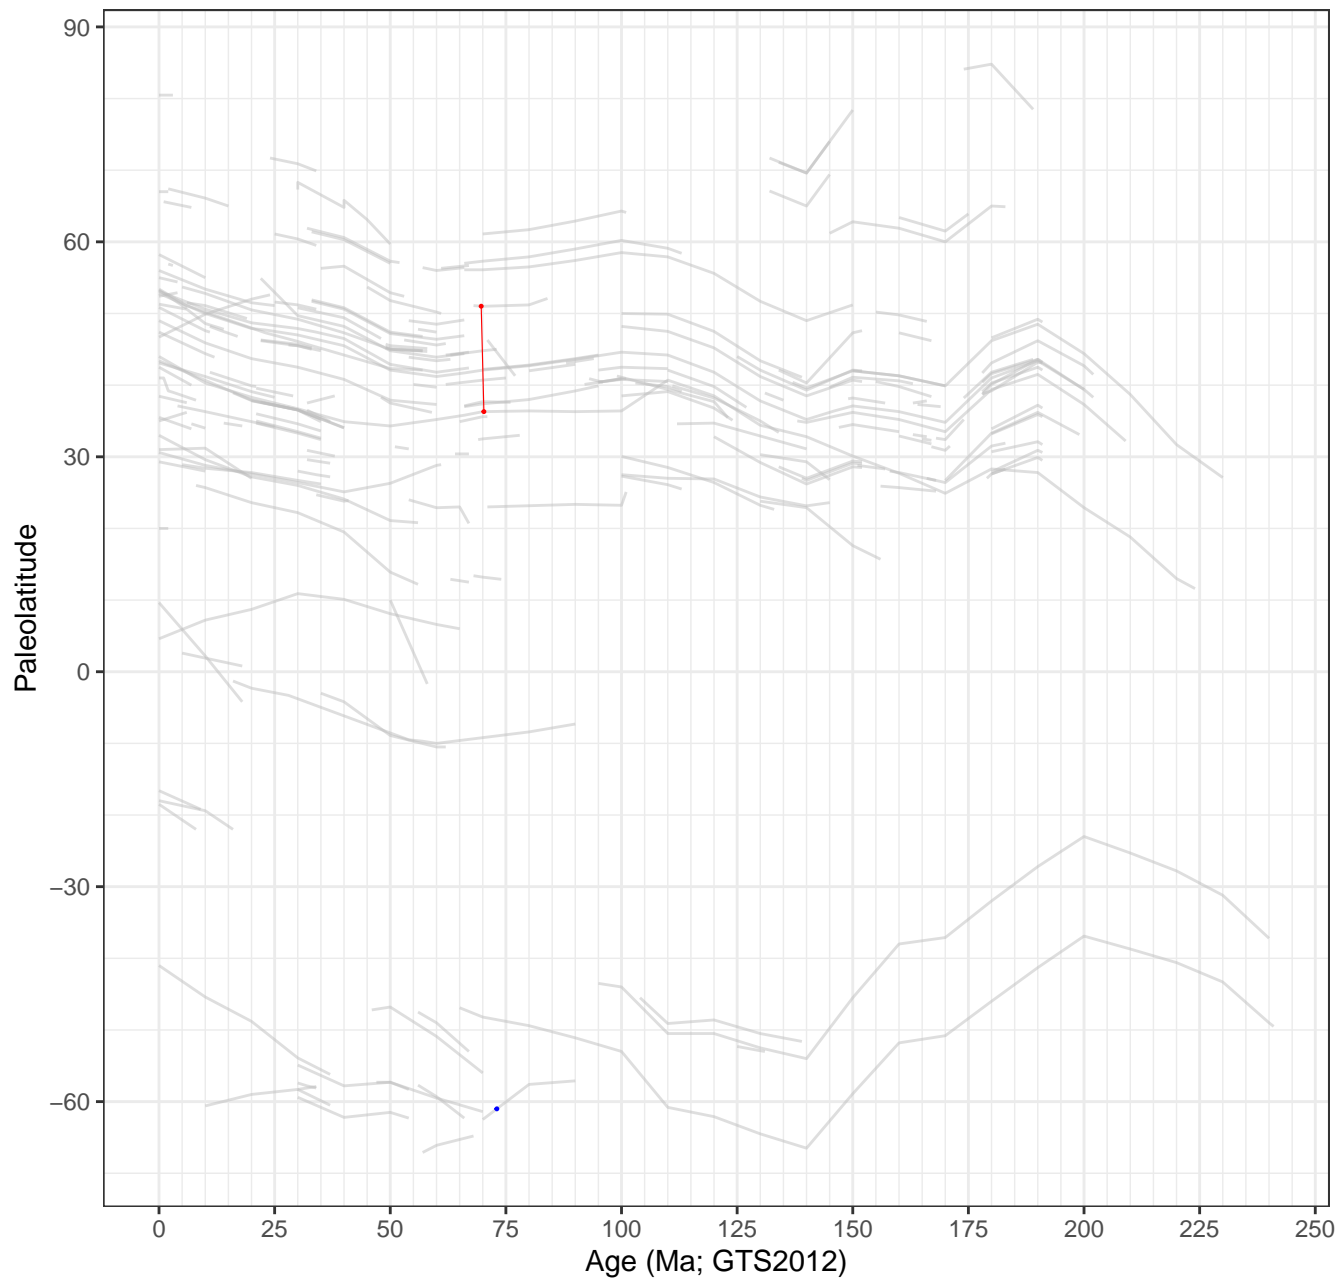

Supplement: Supplementary file 808 [file Alterbidinium acutulum.pdf › Supplement/Supplement 2/Species 1914 plots/Alterbidinium acutulum.pdf]

# Species *Alterbidinium asymmetricum*

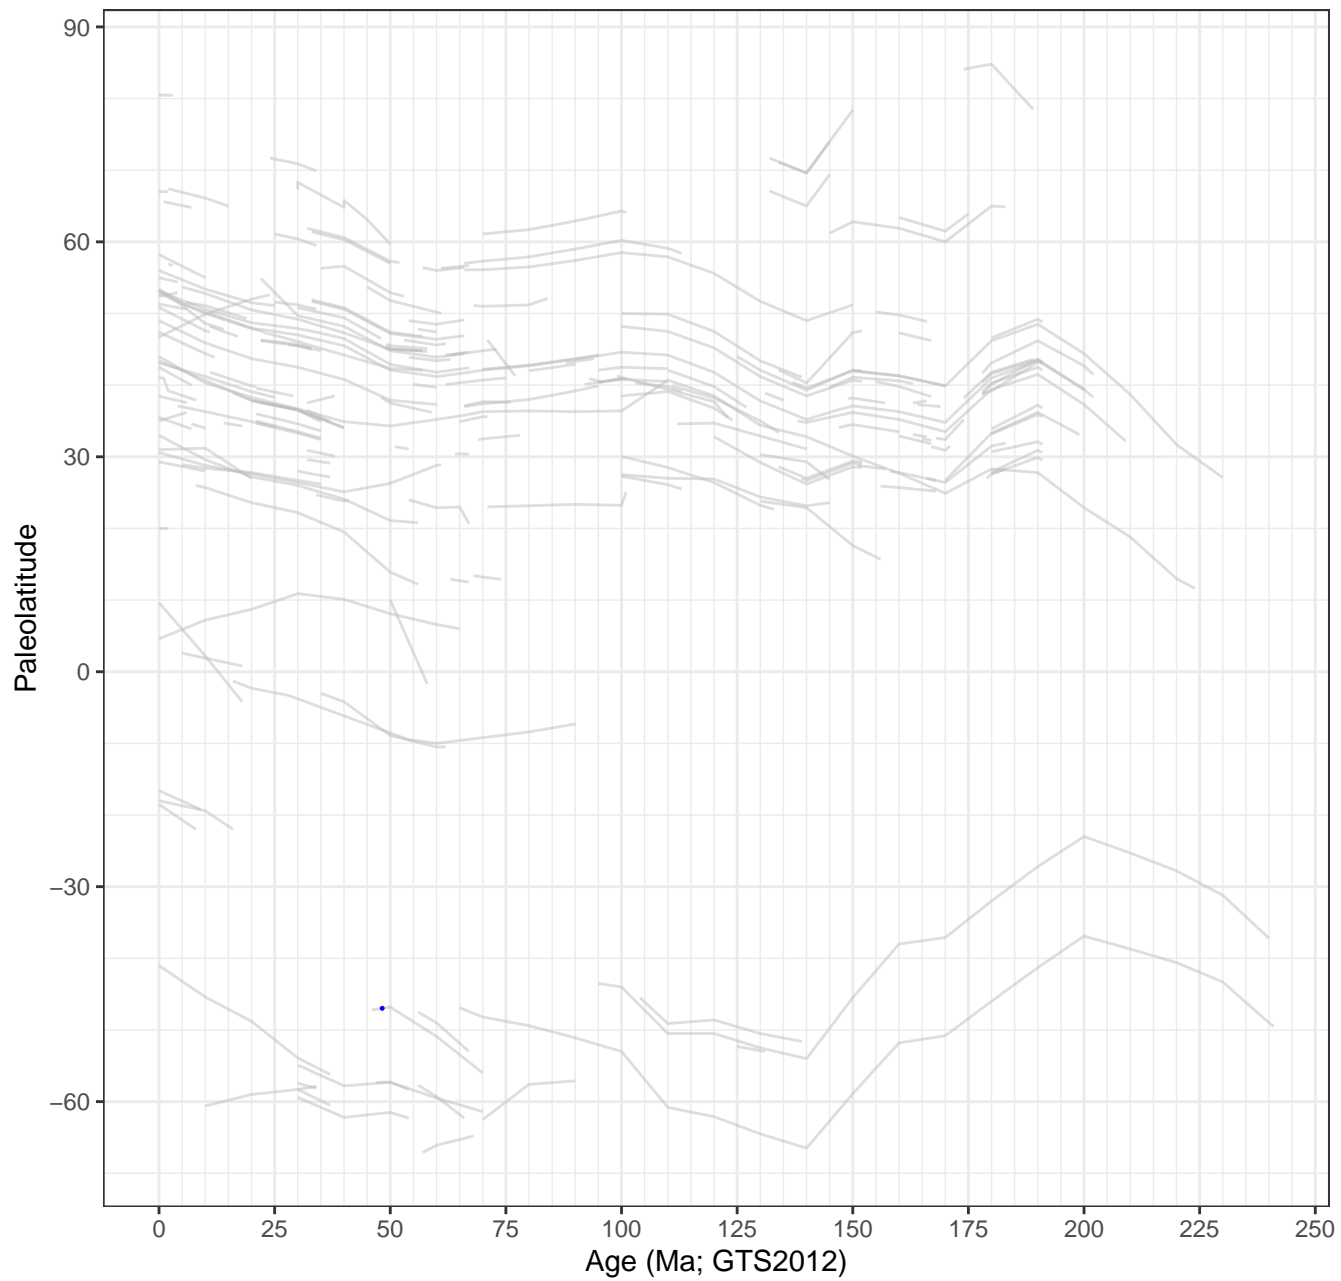

Supplement: Supplementary file 809 [file Alterbidinium asymmetricum.pdf › Supplement/Supplement 2/Species 1914 plots/Alterbidinium asymmetricum.pdf]

# Species *Alterbidinium circulum*

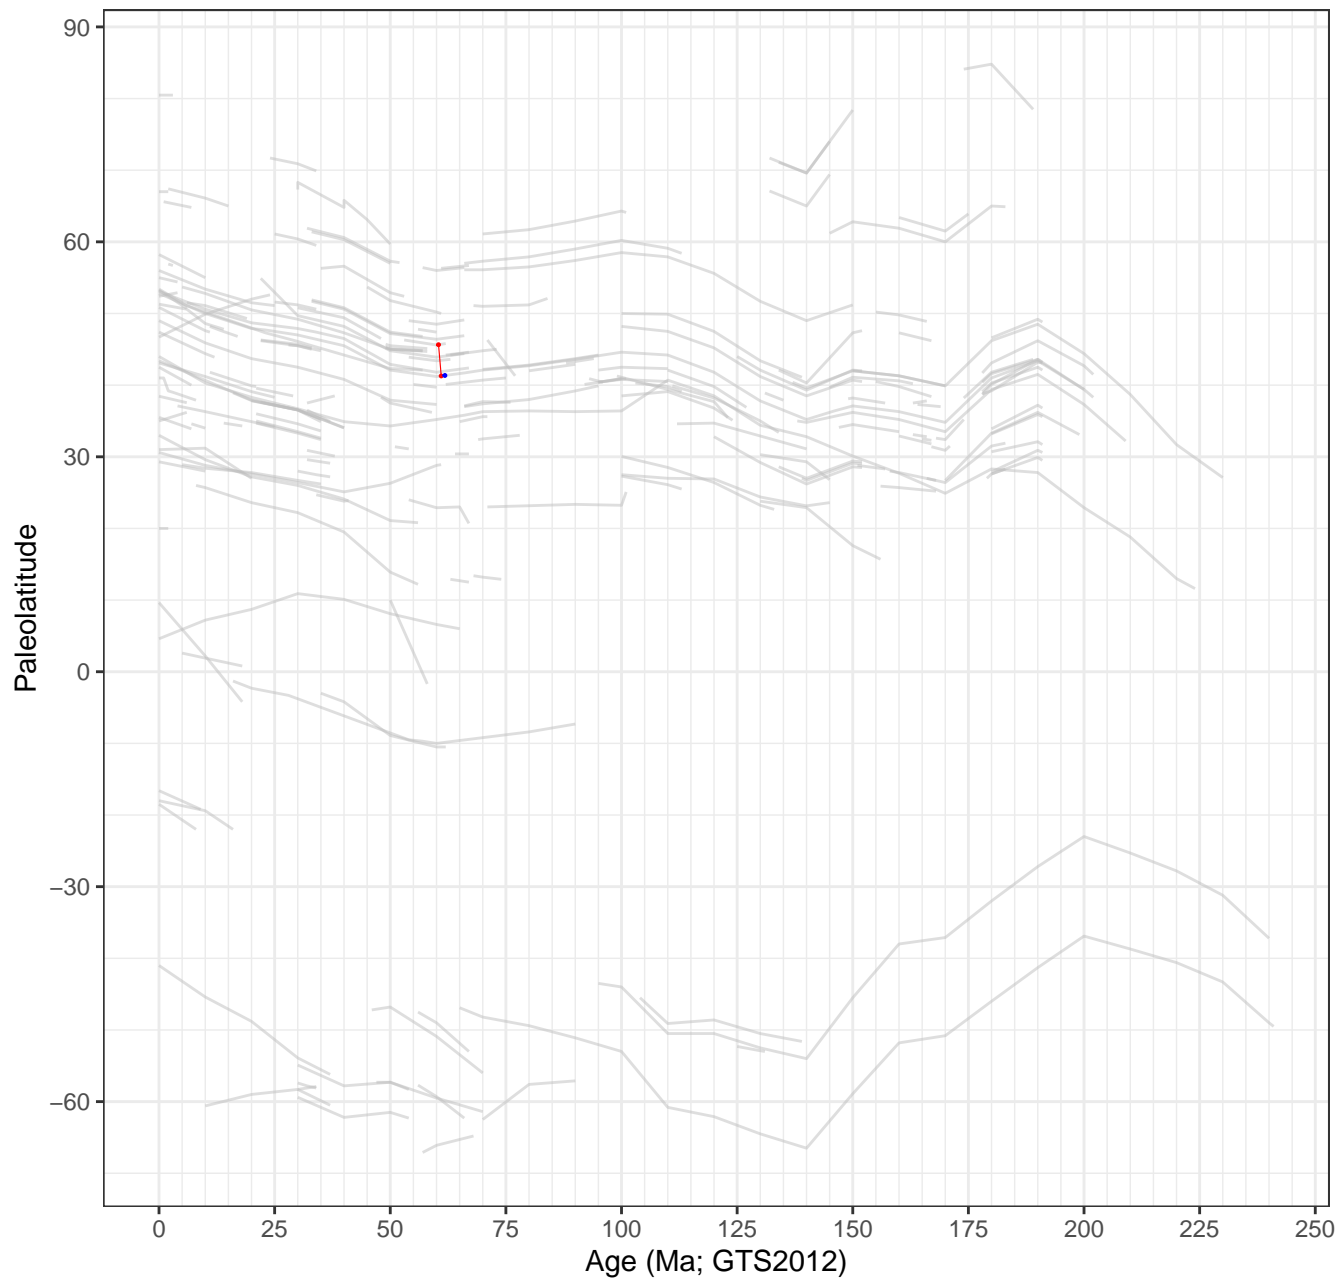

Supplement: Supplementary file 810 [file Alterbidinium circulum.pdf › Supplement/Supplement 2/Species 1914 plots/Alterbidinium circulum.pdf]

# Species *Alterbidinium ioannidesii*

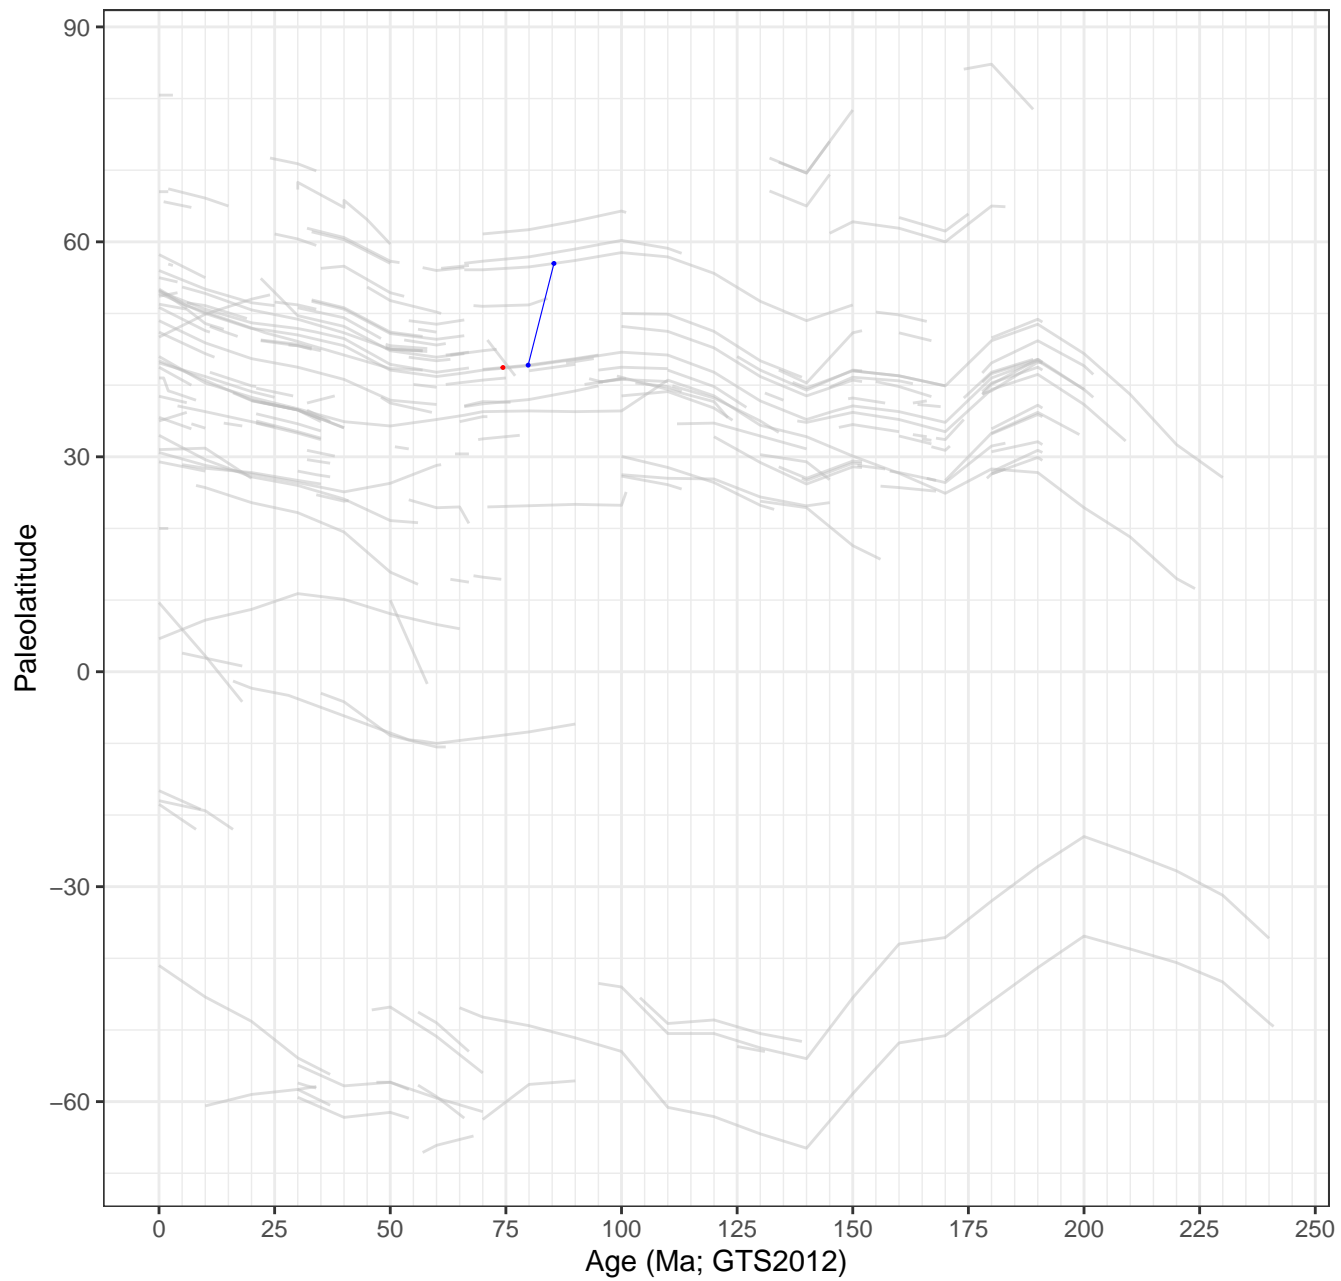

Supplement: Supplementary file 811 [file Alterbidinium ioannidesii.pdf › Supplement/Supplement 2/Species 1914 plots/Alterbidinium ioannidesii.pdf]

# Species *Alterbidinium mcmillanii*

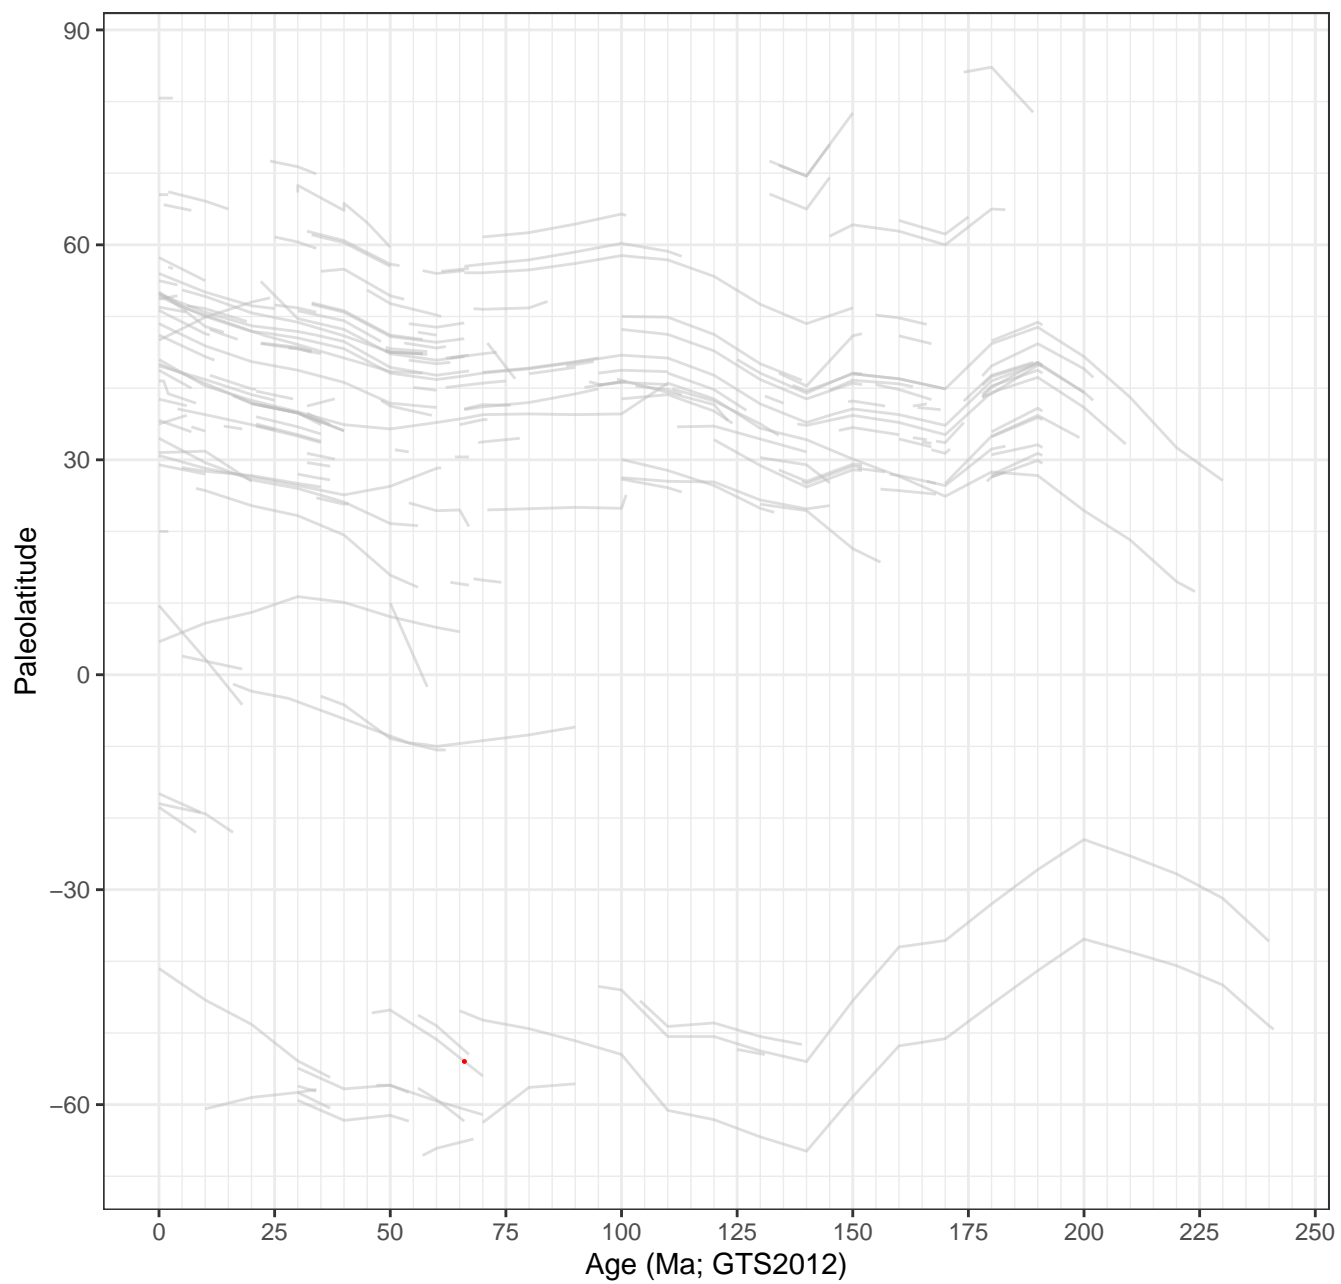

Supplement: Supplementary file 812 [file Alterbidinium mcmillanii.pdf › Supplement/Supplement 2/Species 1914 plots/Alterbidinium mcmillanii.pdf]

# Species *Alterbidinium minus*

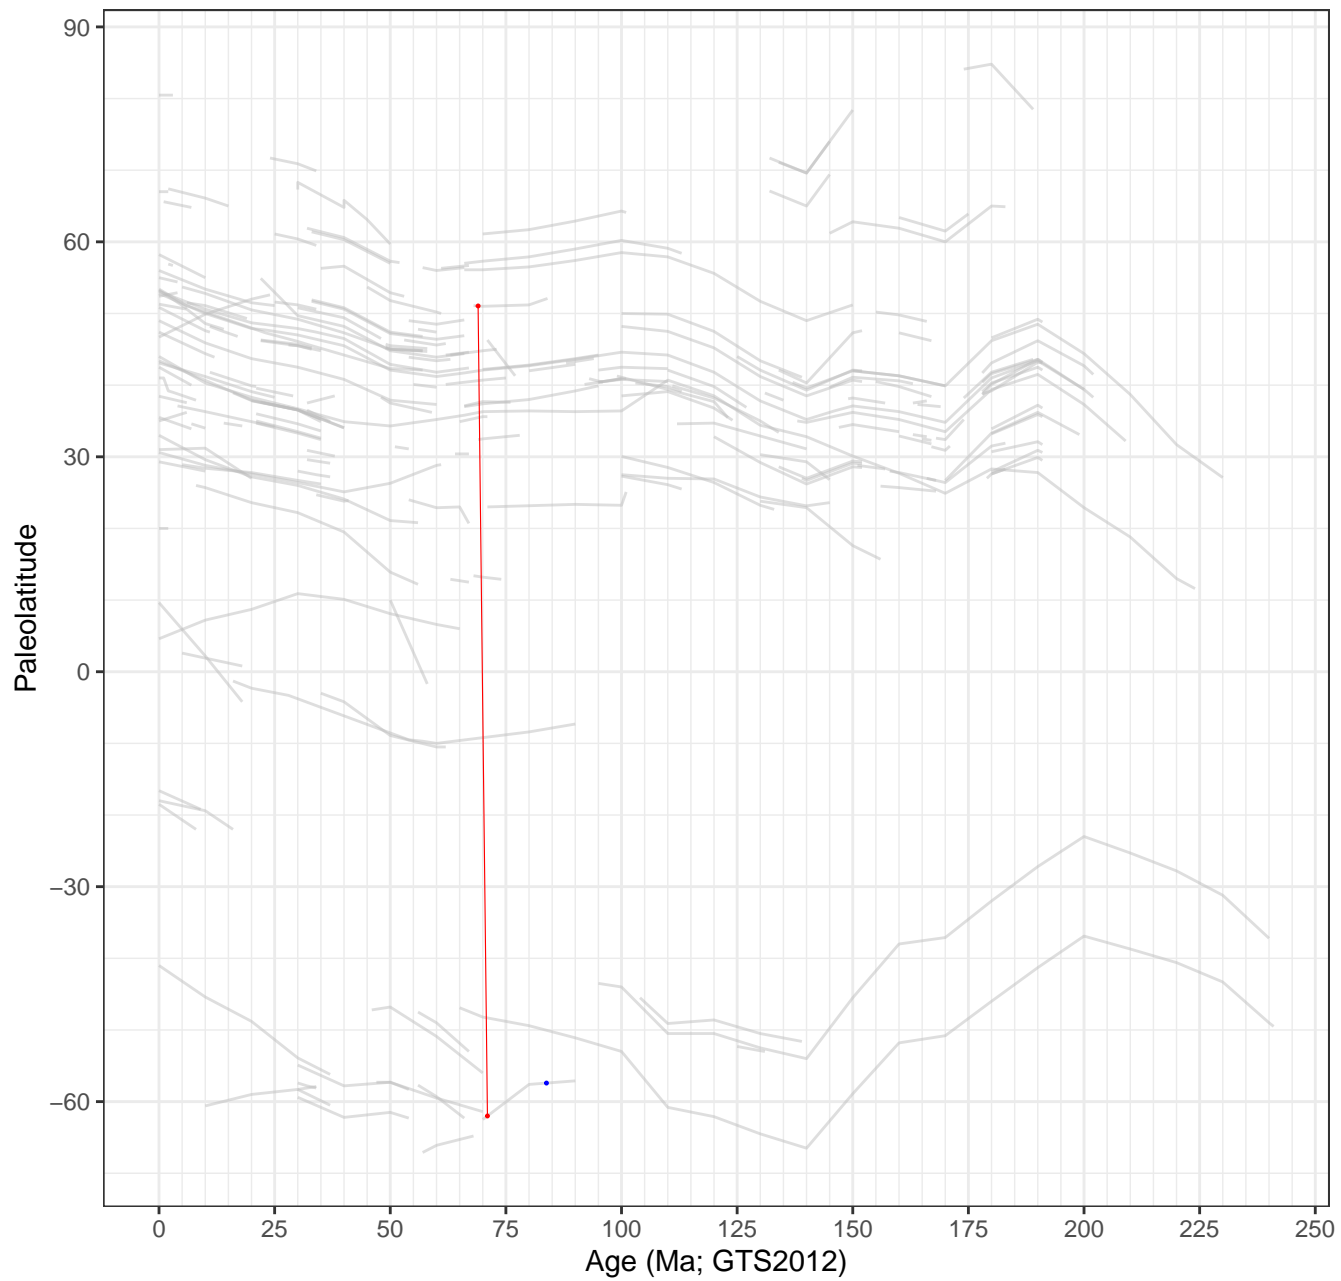

Supplement: Supplementary file 813 [file Alterbidinium minus.pdf › Supplement/Supplement 2/Species 1914 plots/Alterbidinium minus.pdf]

# Species *Alterbidinium pentaradiatum*

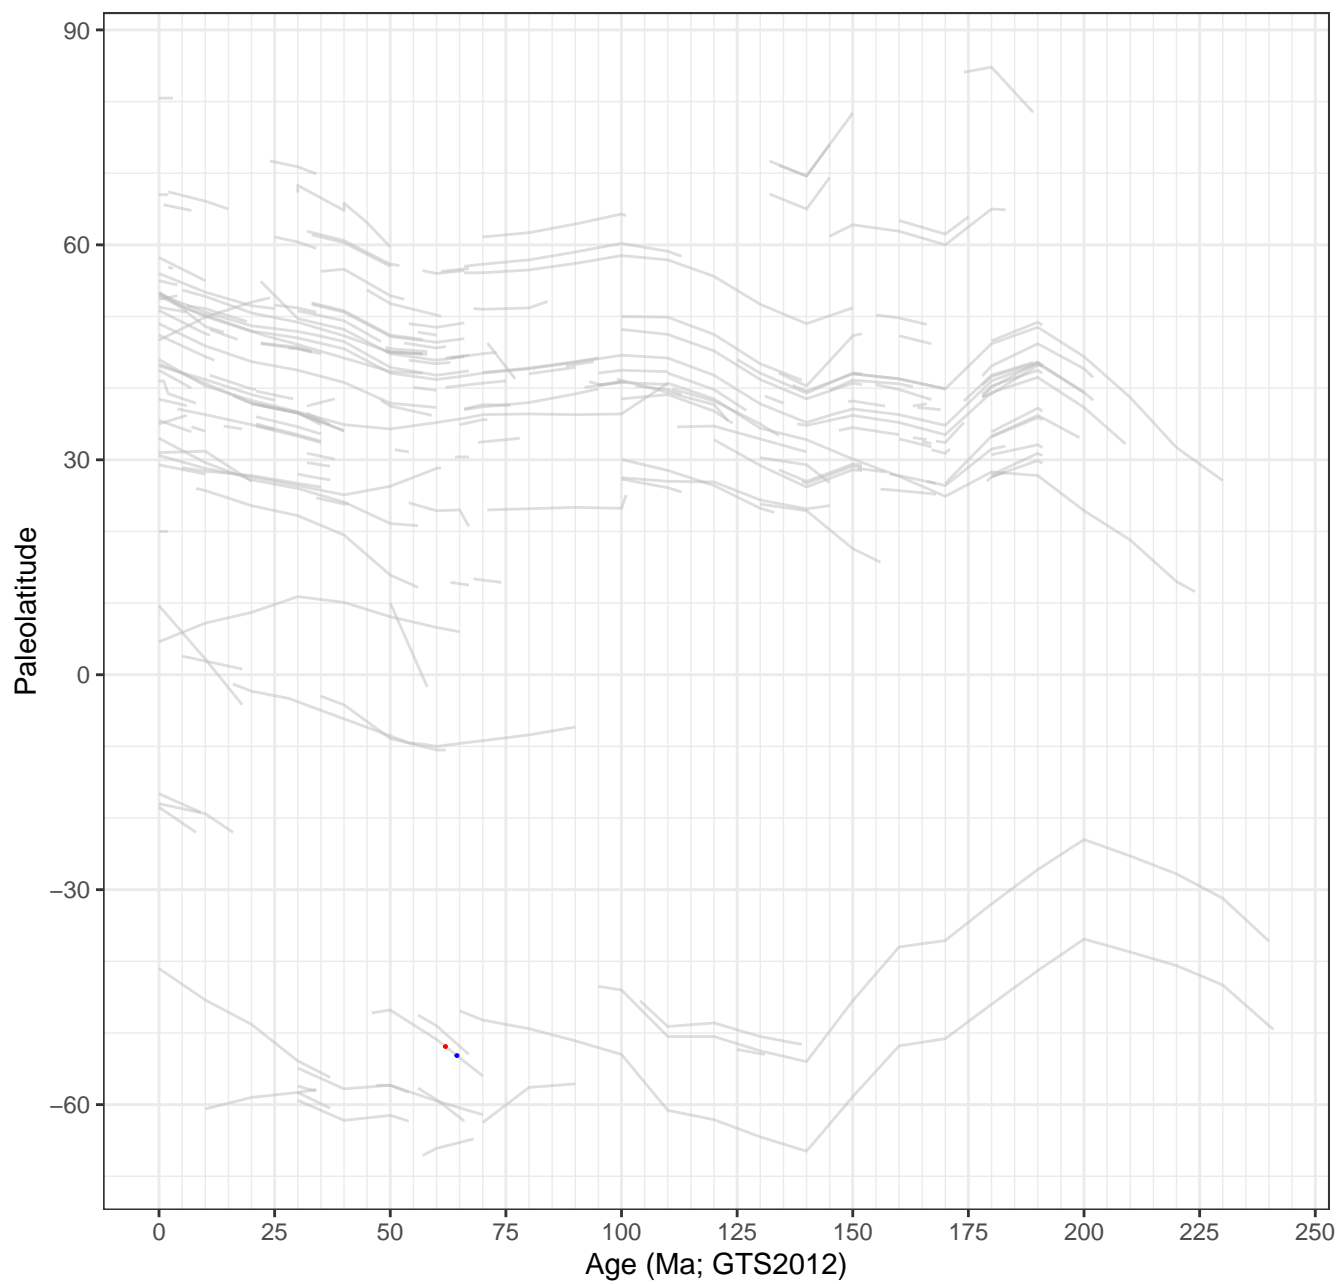

Supplement: Supplementary file 814 [file Alterbidinium pentaradiatum.pdf › Supplement/Supplement 2/Species 1914 plots/Alterbidinium pentaradiatum.pdf]

# Species *Alterbidinium rugulum*

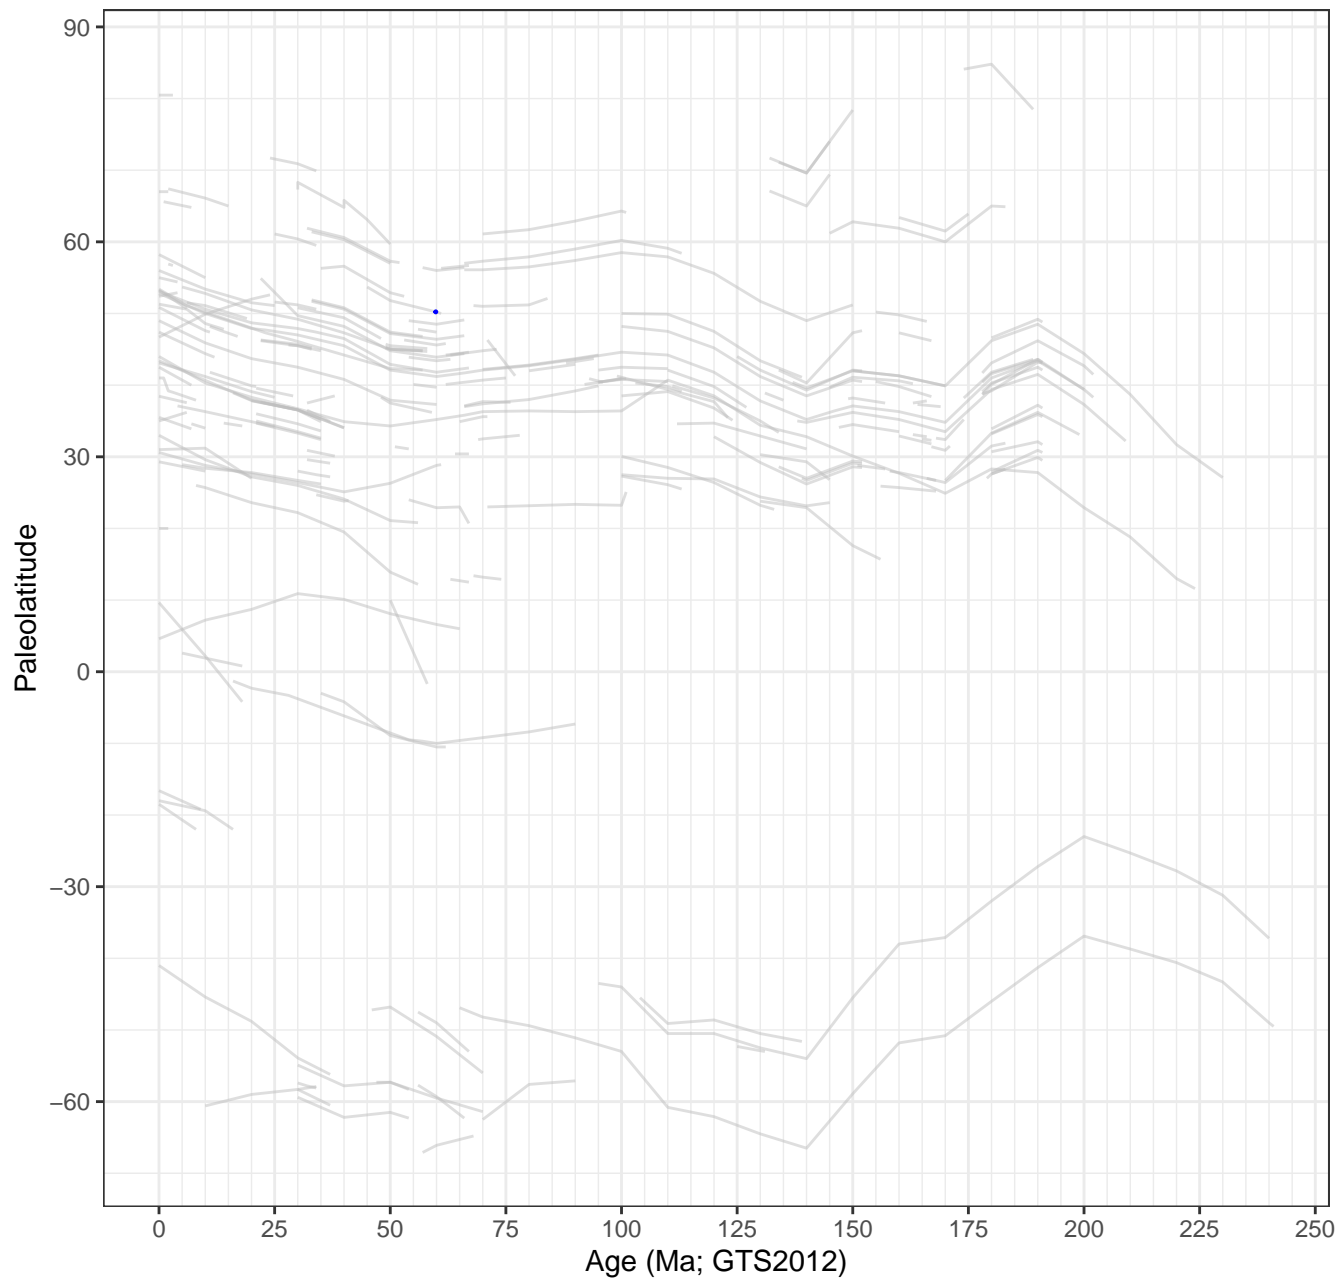

Supplement: Supplementary file 815 [file Alterbidinium rugulum.pdf › Supplement/Supplement 2/Species 1914 plots/Alterbidinium rugulum.pdf]

# Species *Alterbidinium varium*

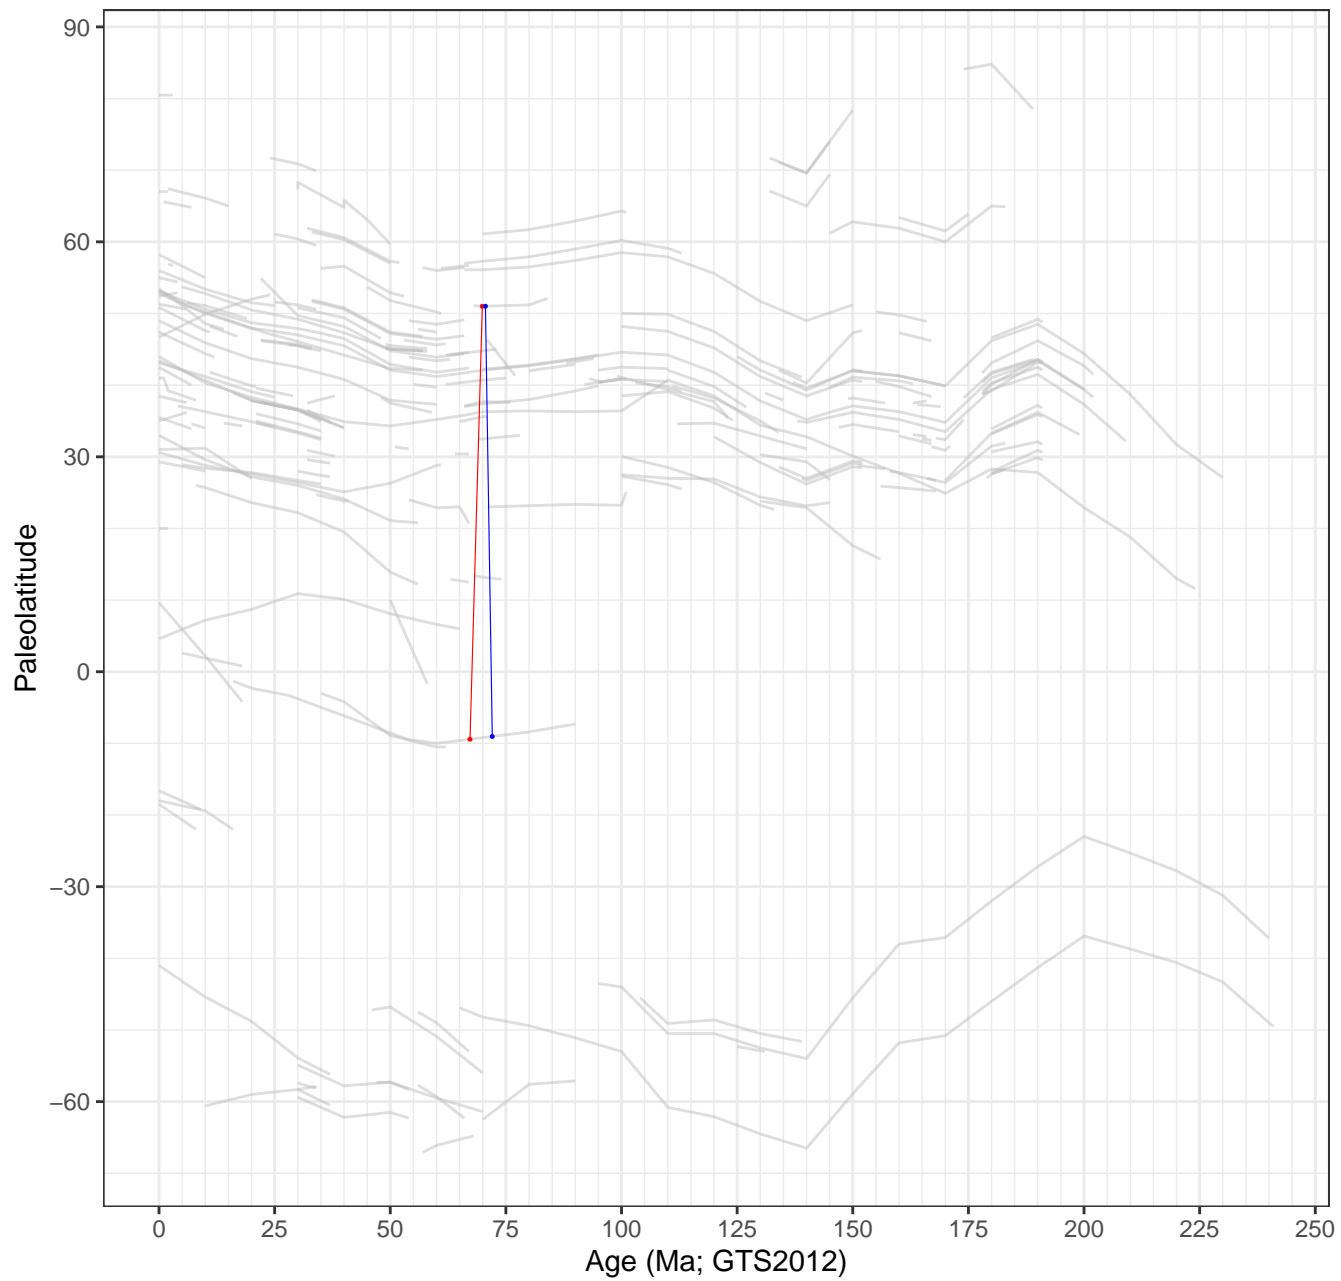

Supplement: Supplementary file 816 [file Alterbidinium varium.pdf › Supplement/Supplement 2/Species 1914 plots/Alterbidinium varium.pdf]

# Species *Ambonosphaera calloviana*

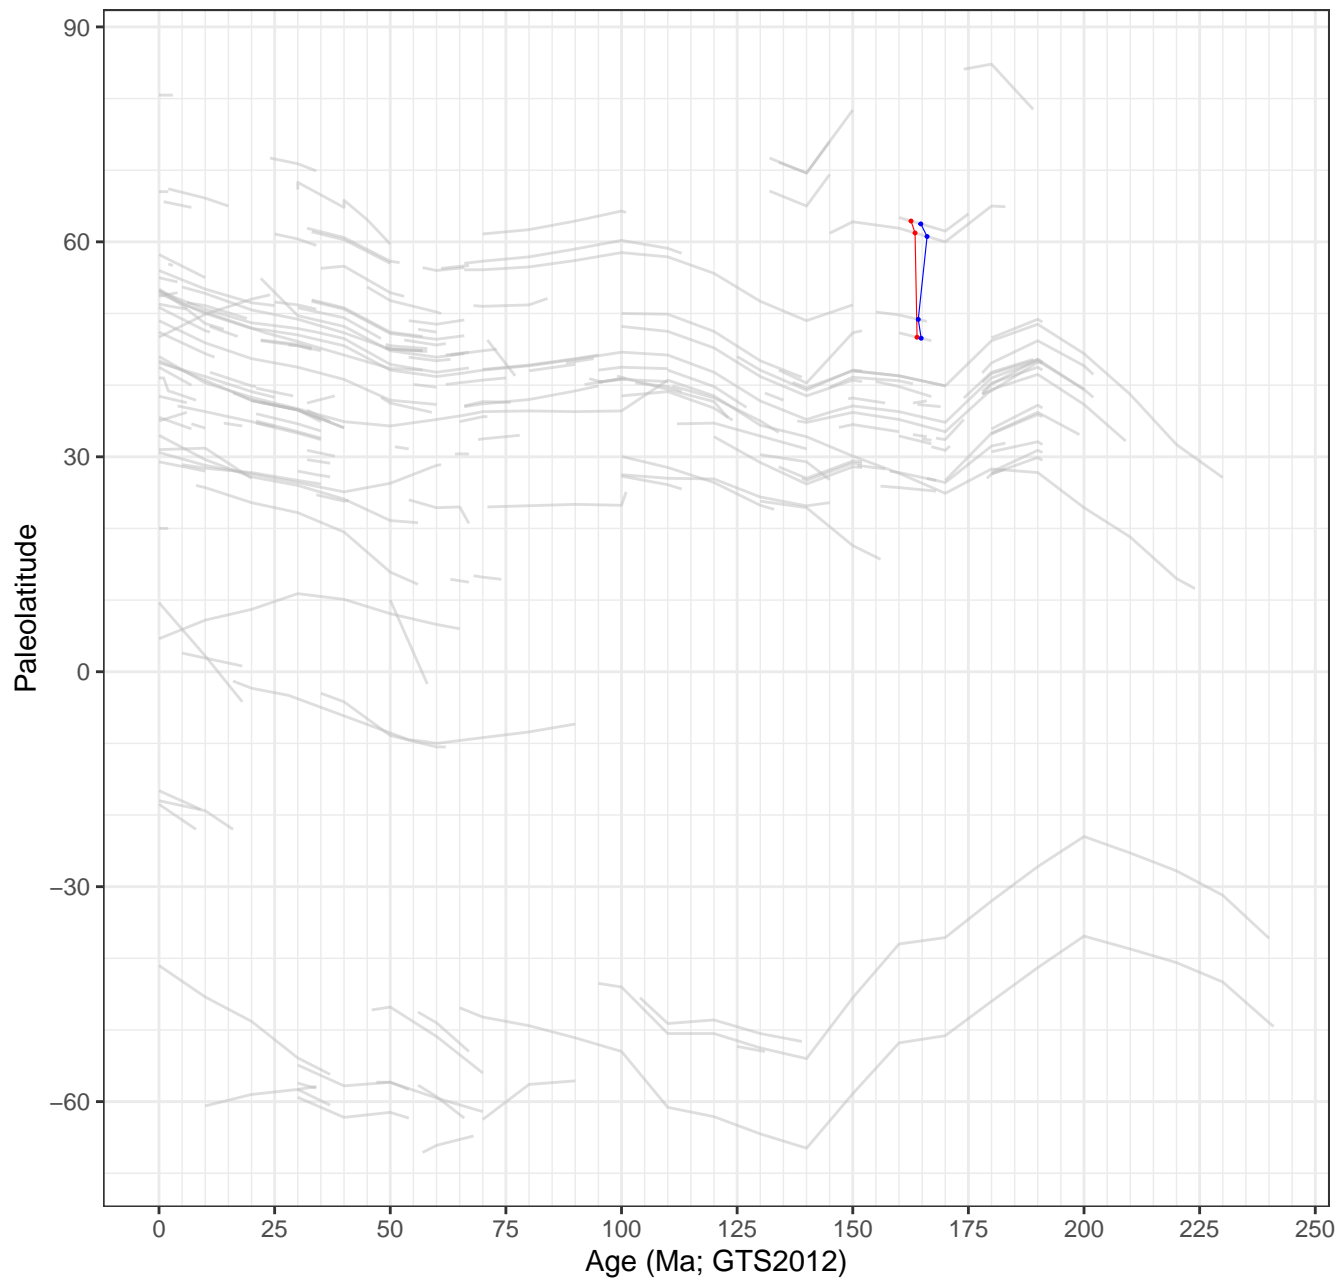

Supplement: Supplementary file 817 [file Ambonosphaera calloviana.pdf › Supplement/Supplement 2/Species 1914 plots/Ambonosphaera calloviana.pdf]

# Species *Ambonosphaera delicata*

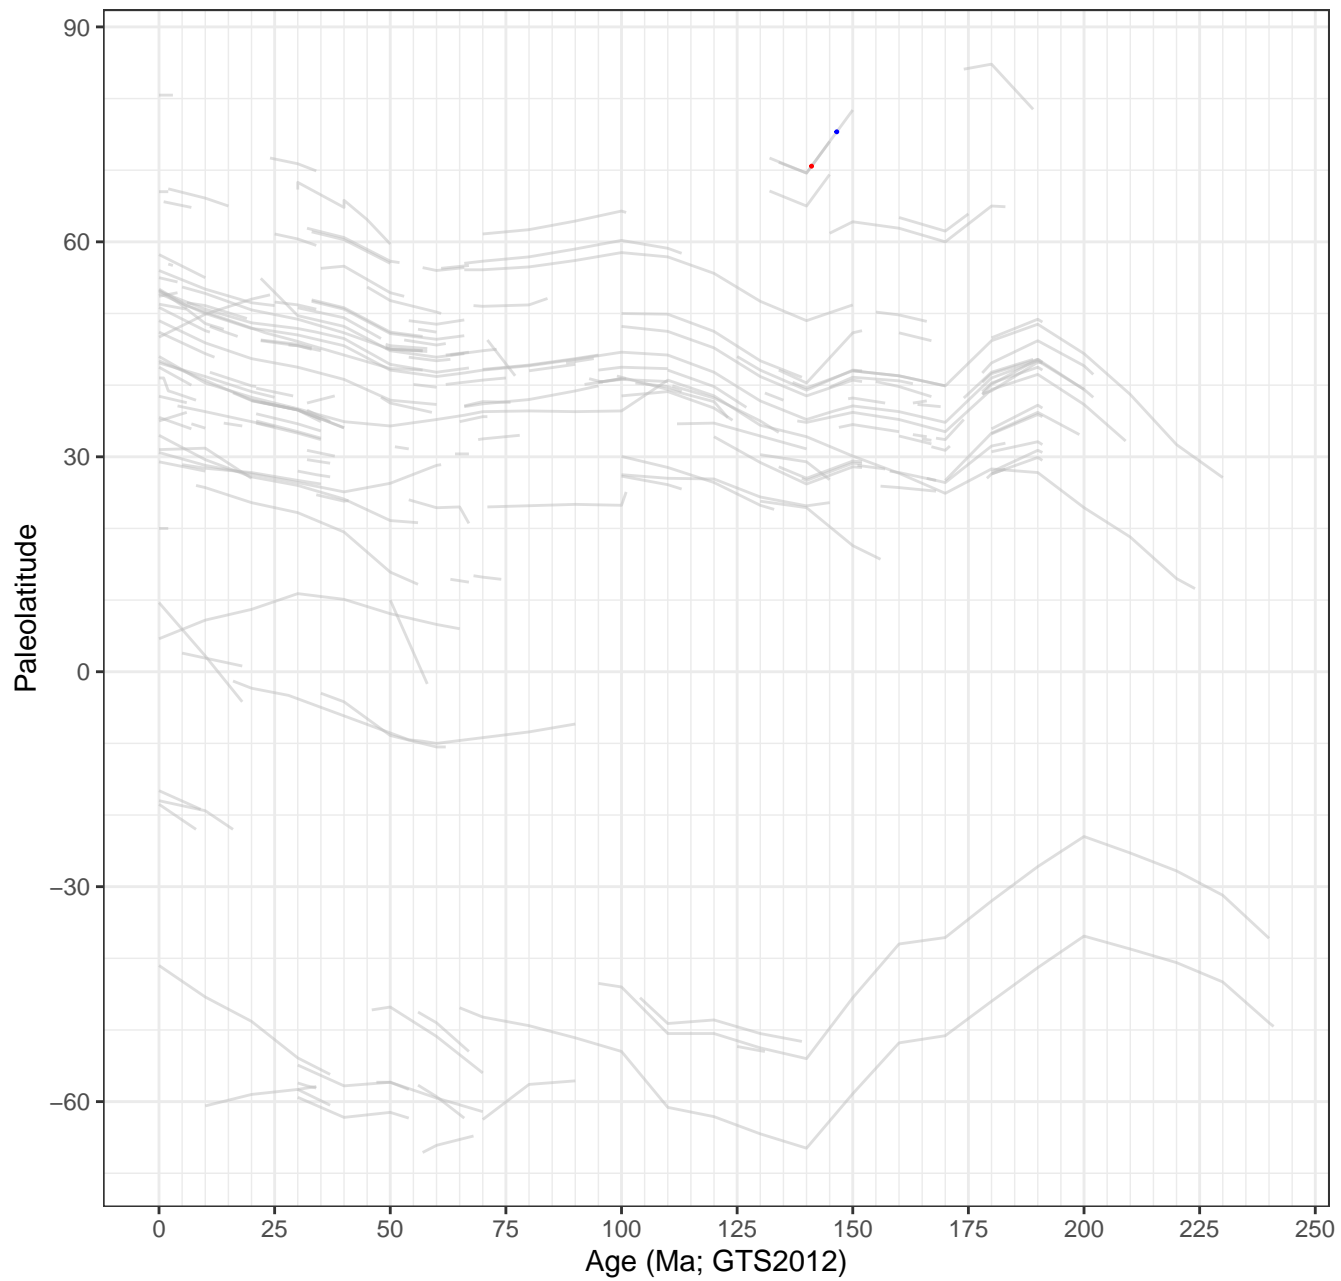

Supplement: Supplementary file 818 [file Ambonosphaera delicata.pdf › Supplement/Supplement 2/Species 1914 plots/Ambonosphaera delicata.pdf]

# Species *Ambonosphaera staffinensis*

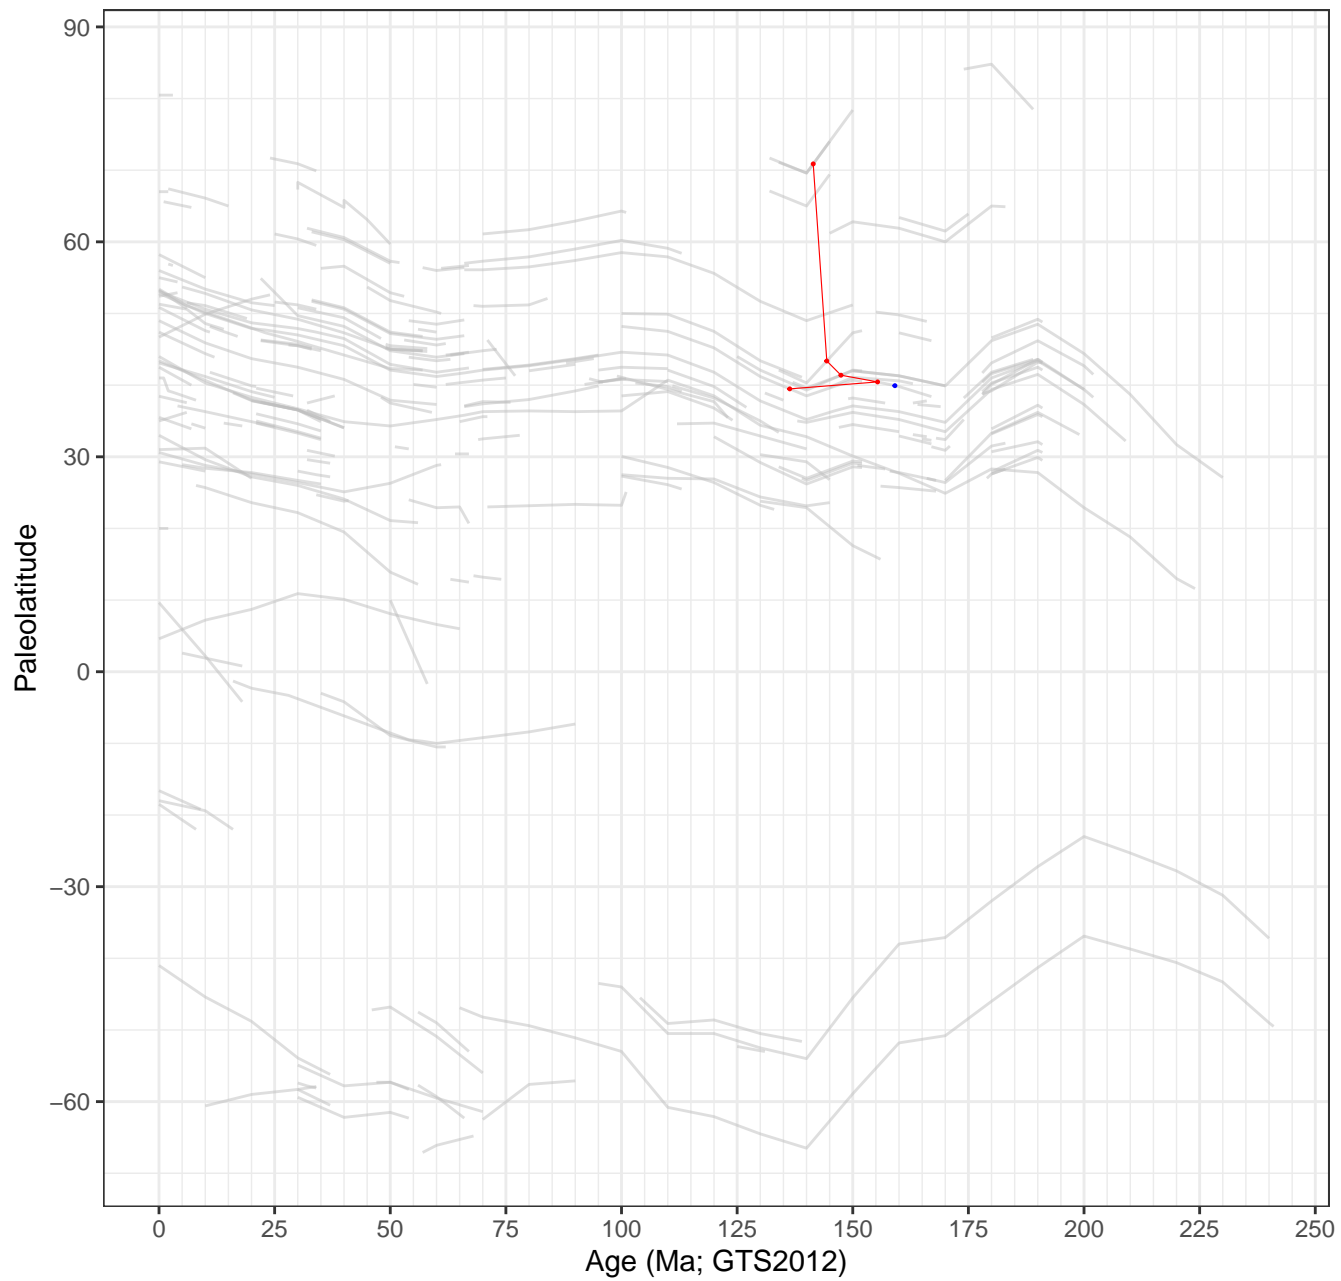

Supplement: Supplementary file 819 [file Ambonosphaera staffinensis.pdf › Supplement/Supplement 2/Species 1914 plots/Ambonosphaera staffinensis.pdf]

# Species *Ambonosphaera utera*

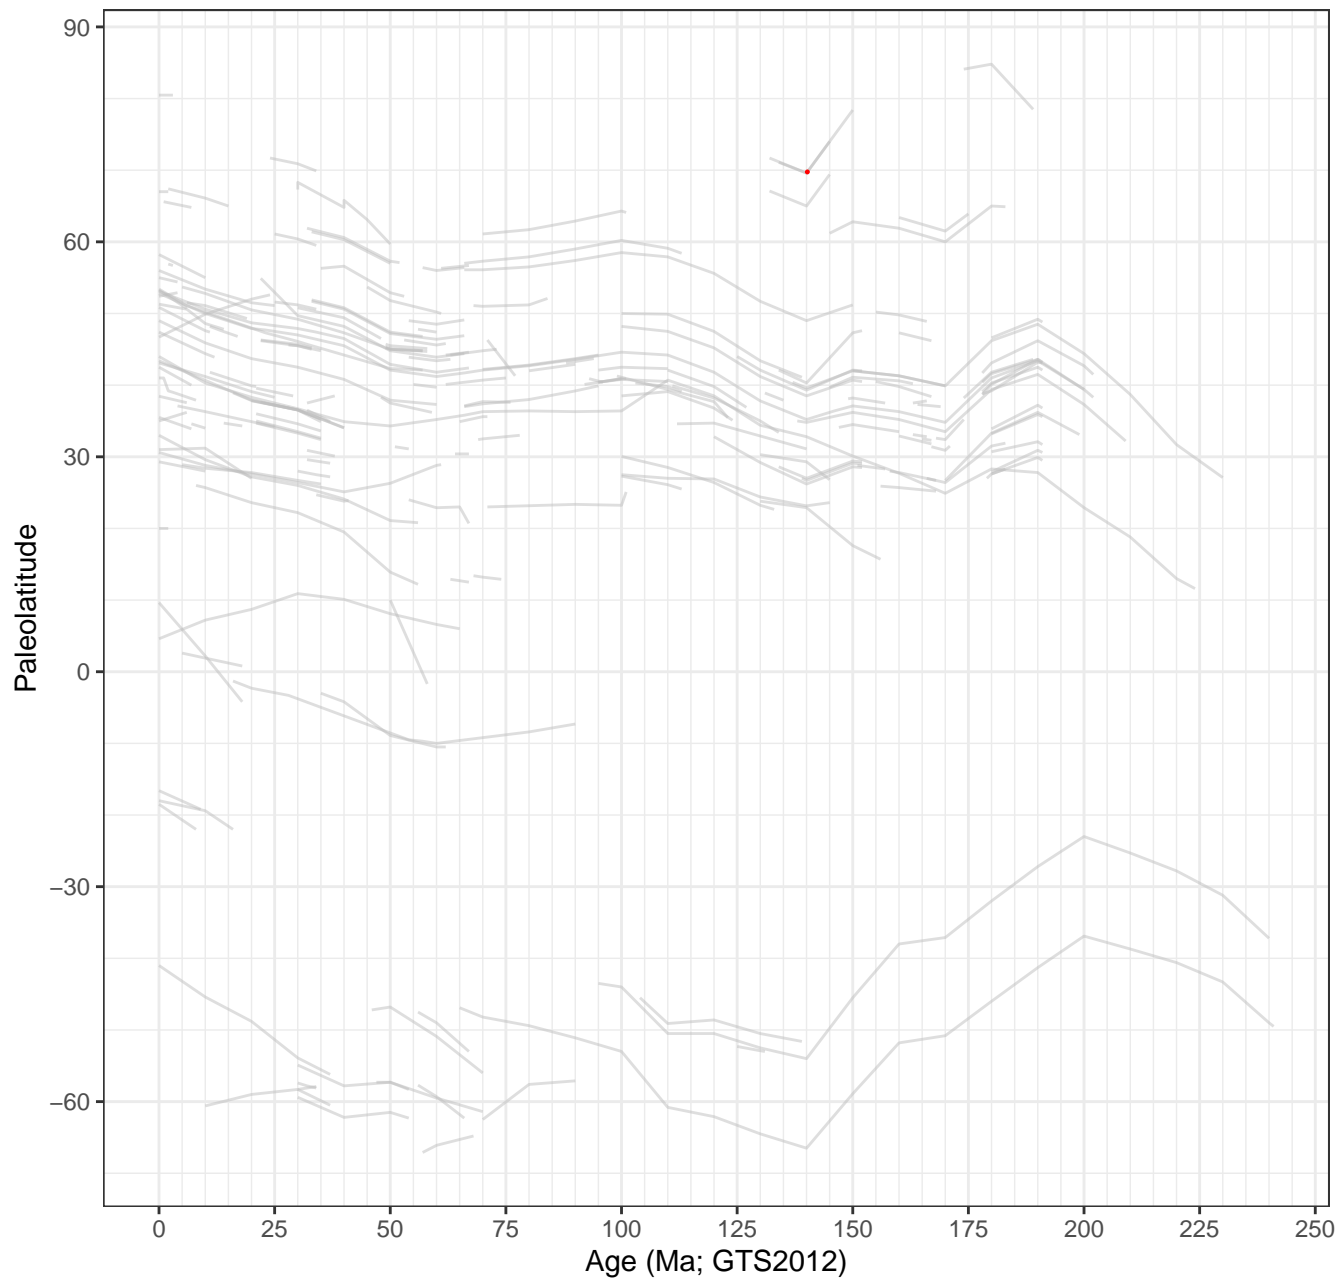

Supplement: Supplementary file 820 [file Ambonosphaera utera.pdf › Supplement/Supplement 2/Species 1914 plots/Ambonosphaera utera.pdf]

# Species *Amiculospaera umbracula*

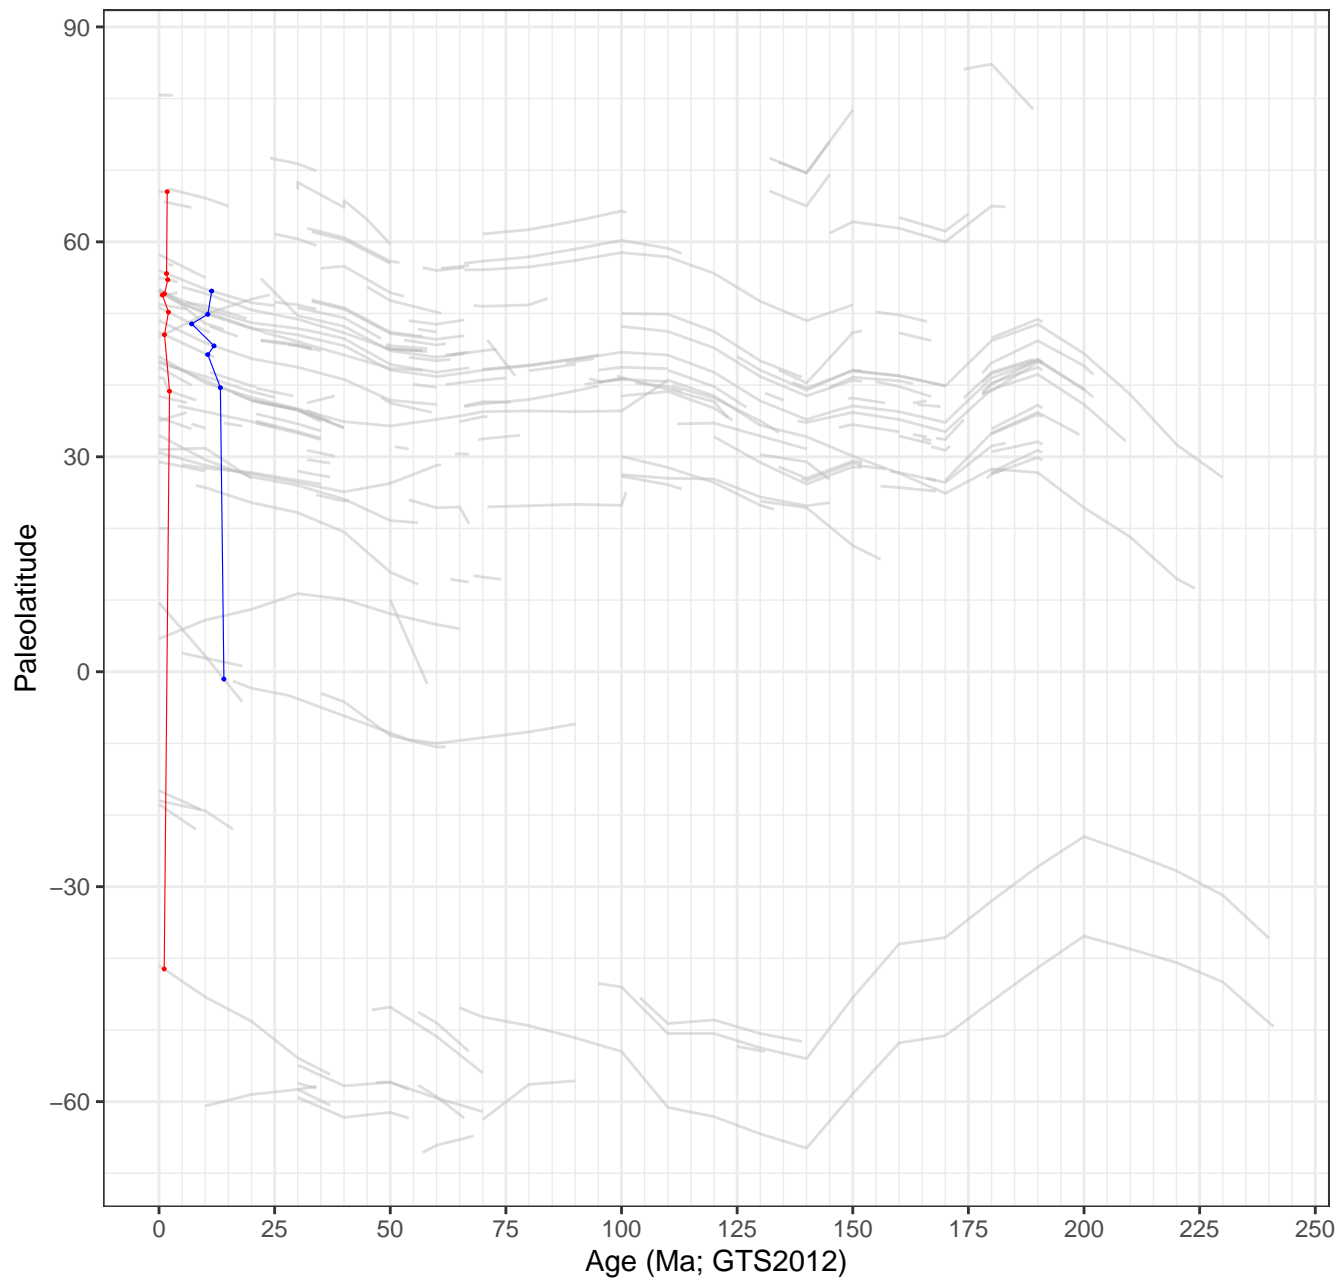

Supplement: Supplementary file 821 [file Amiculosphaera umbracula.pdf › Supplement/Supplement 2/Species 1914 plots/Amiculosphaera umbracula.pdf]

# Species *Amphidiadema denticulata*

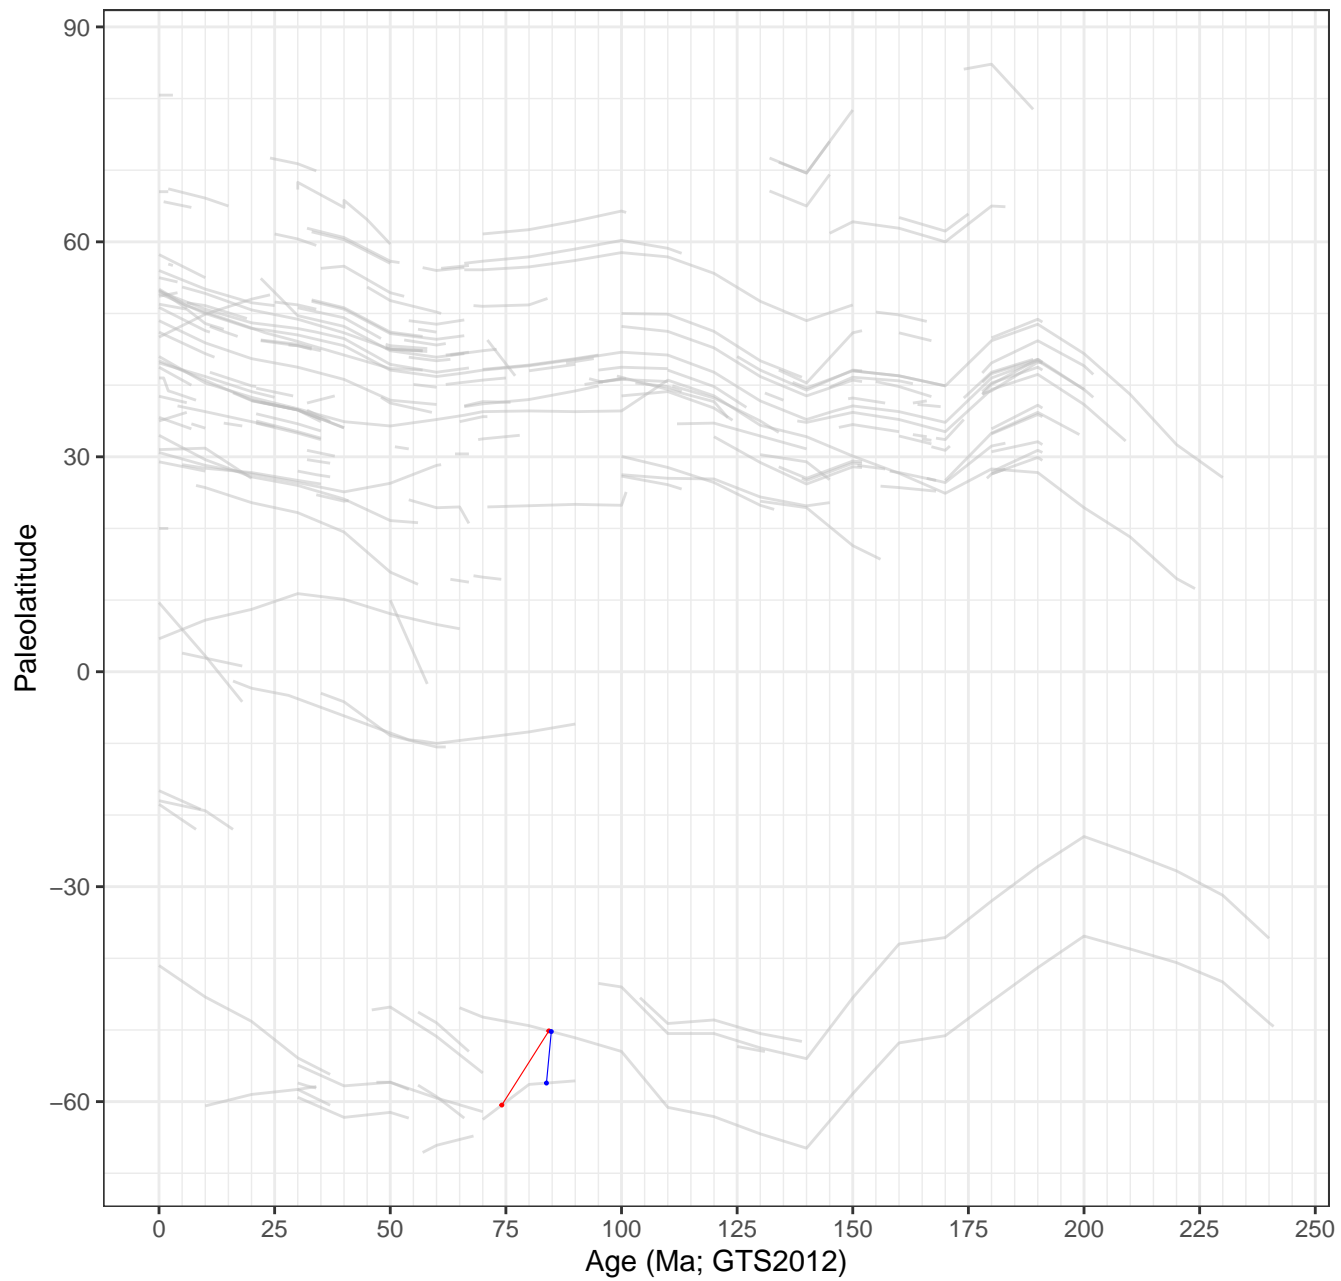

Supplement: Supplementary file 822 [file Amphidiadema denticulata.pdf › Supplement/Supplement 2/Species 1914 plots/Amphidiadema denticulata.pdf]

# Species *Amphigymnium mitratum*

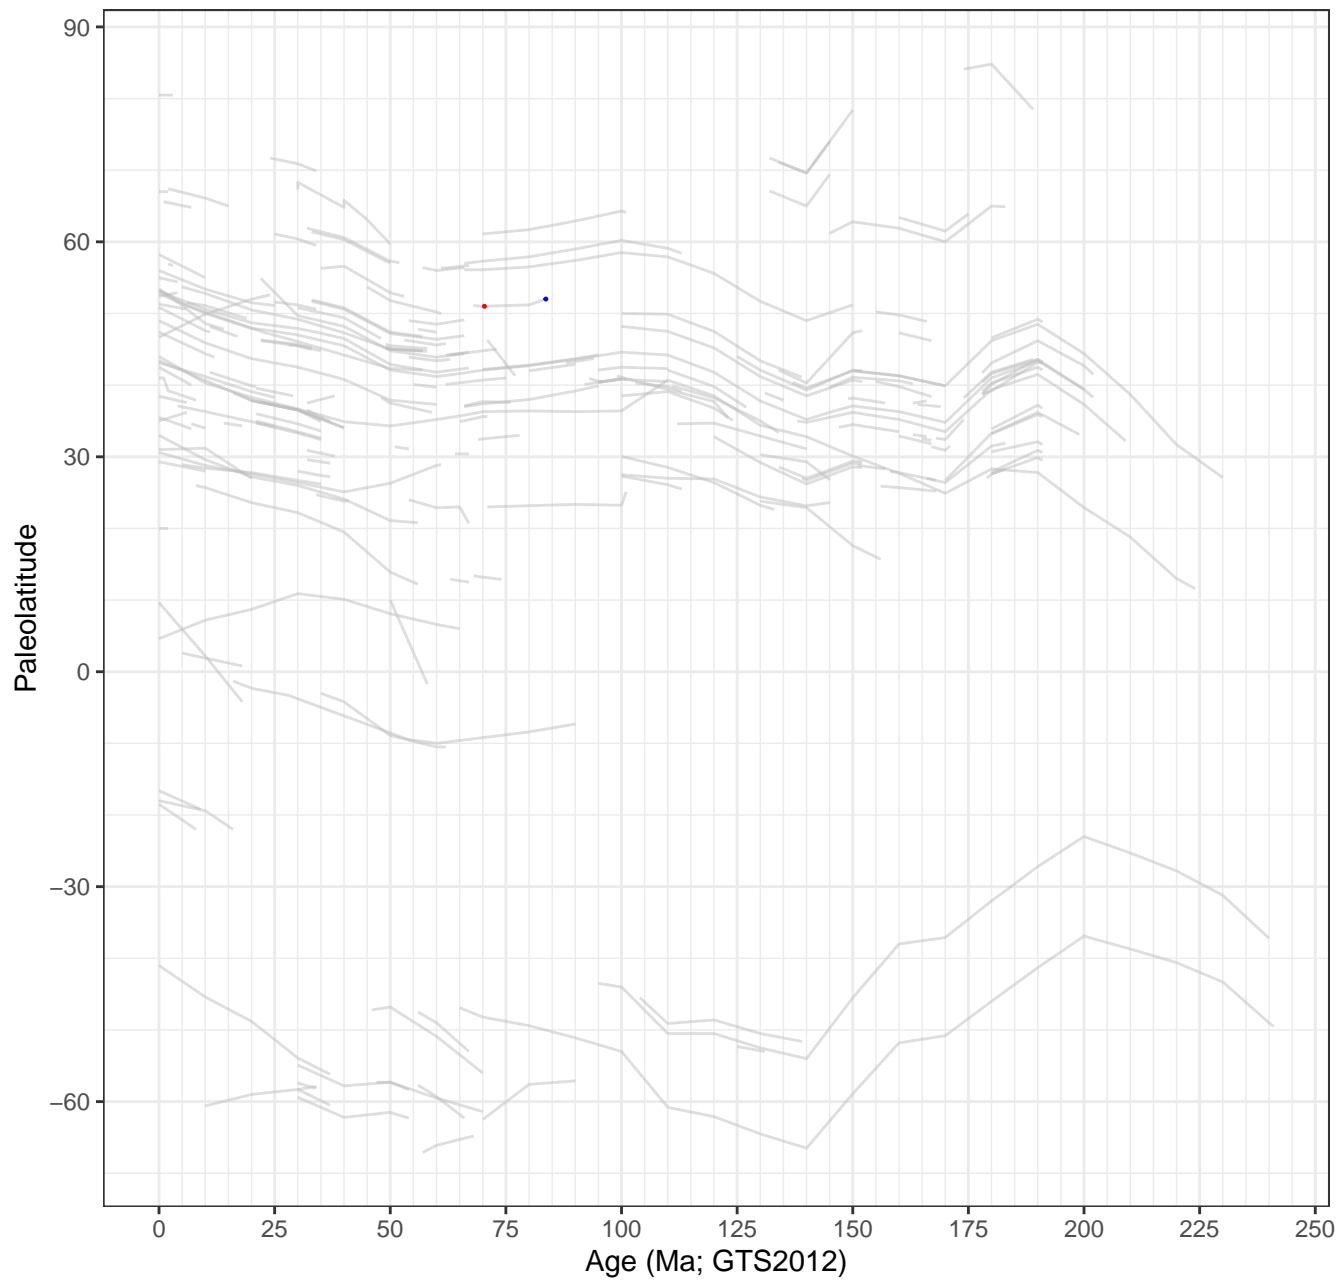

Supplement: Supplementary file 823 [file Amphigymnium mitratum.pdf › Supplement/Supplement 2/Species 1914 plots/Amphigymnium mitratum.pdf]

# Species *Amphigymnium rigaudiae*

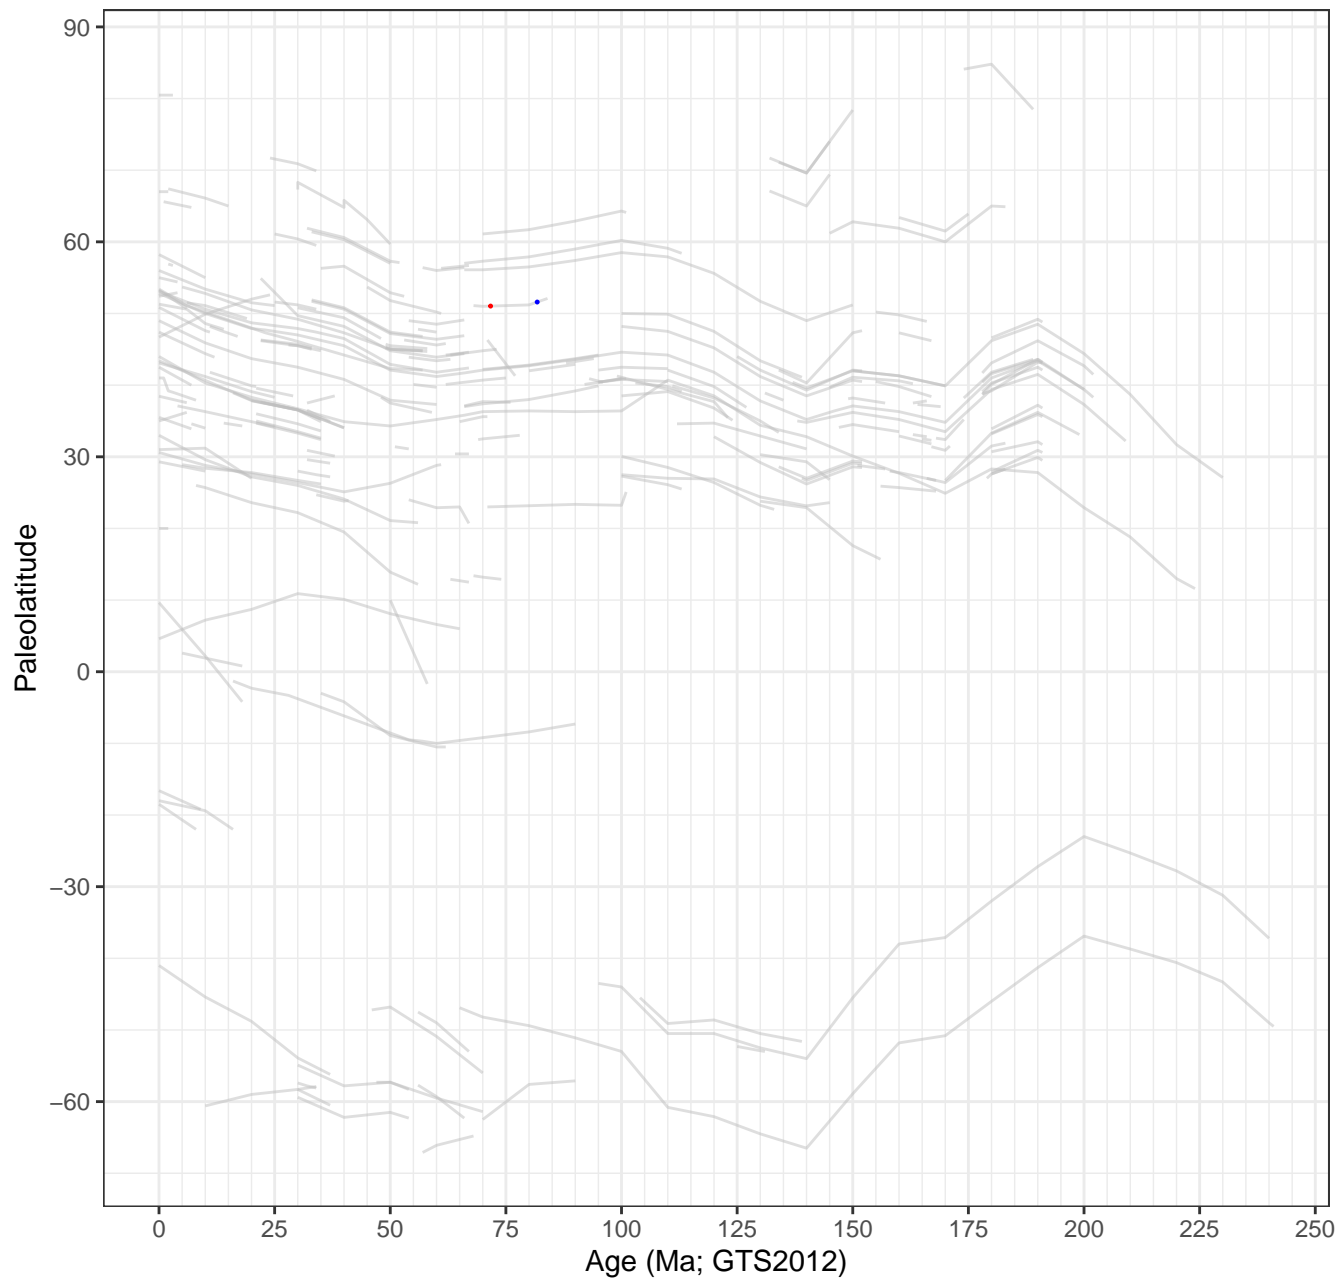

Supplement: Supplementary file 824 [file Amphigymnium rigaudiae.pdf › Supplement/Supplement 2/Species 1914 plots/Amphigymnium rigaudiae.pdf]

# Species *Amphorosphaeridium fenestratum*

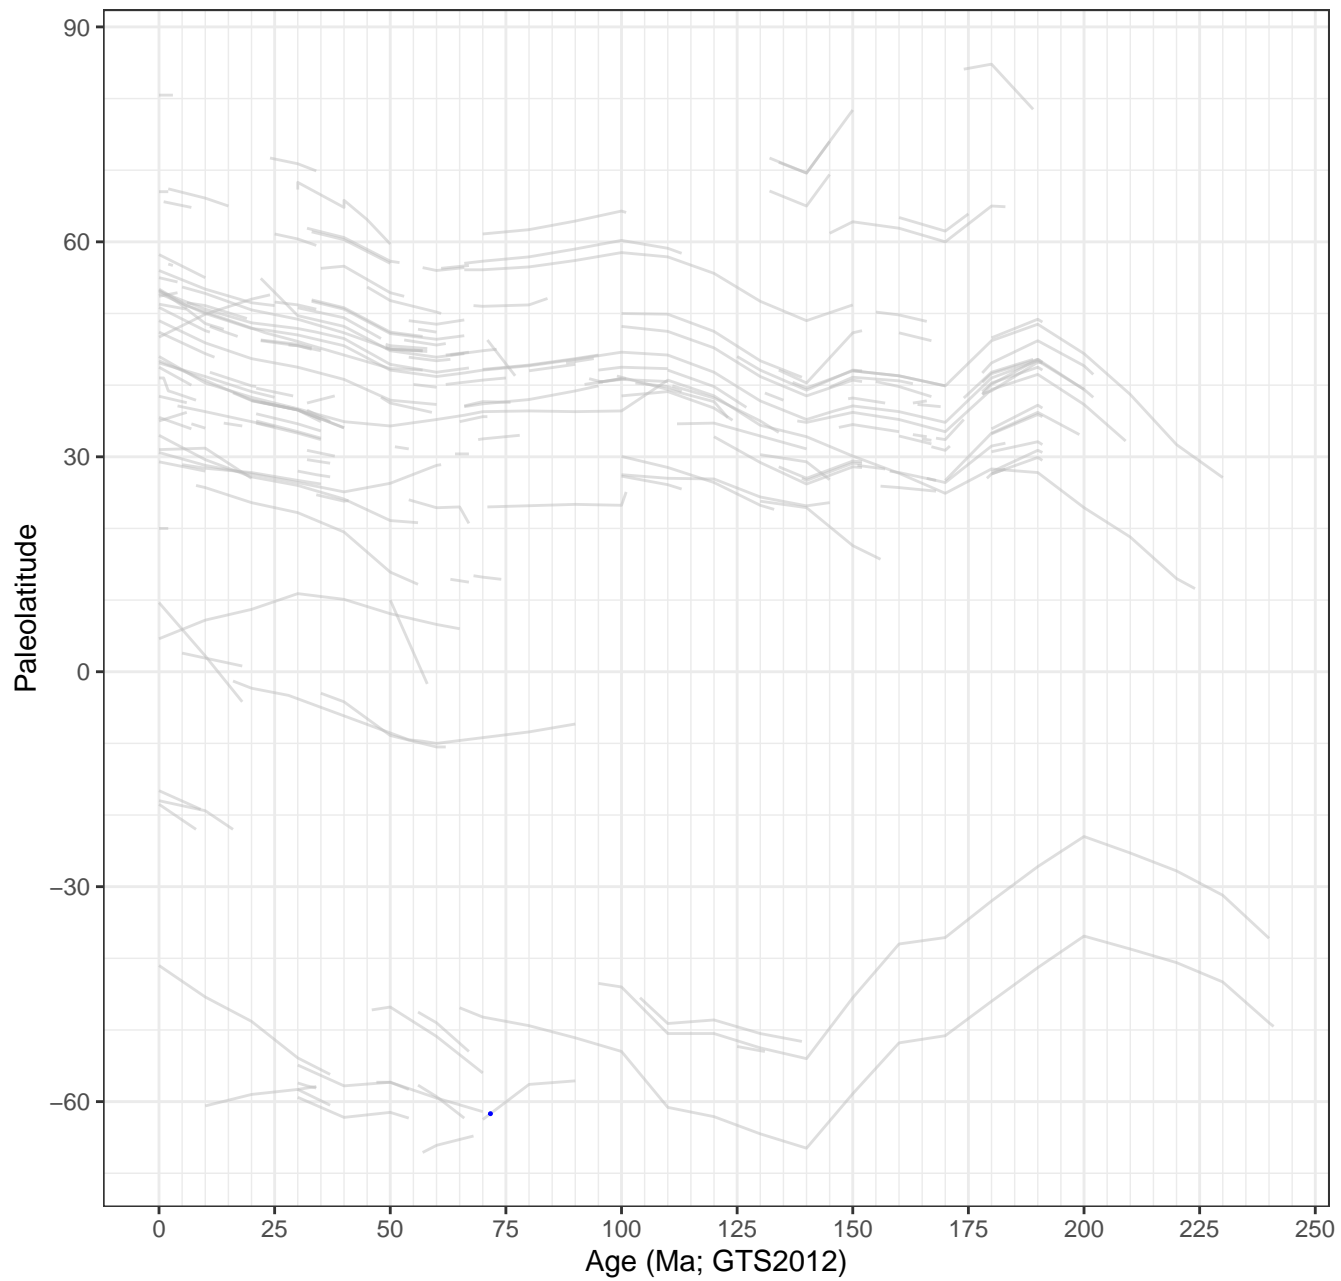

Supplement: Supplementary file 825 [file Amphorosphaeridium fenestratum.pdf › Supplement/Supplement 2/Species 1914 plots/Amphorosphaeridium fenestratum.pdf]

# Species *Amphorosphaeridium multispinosum*

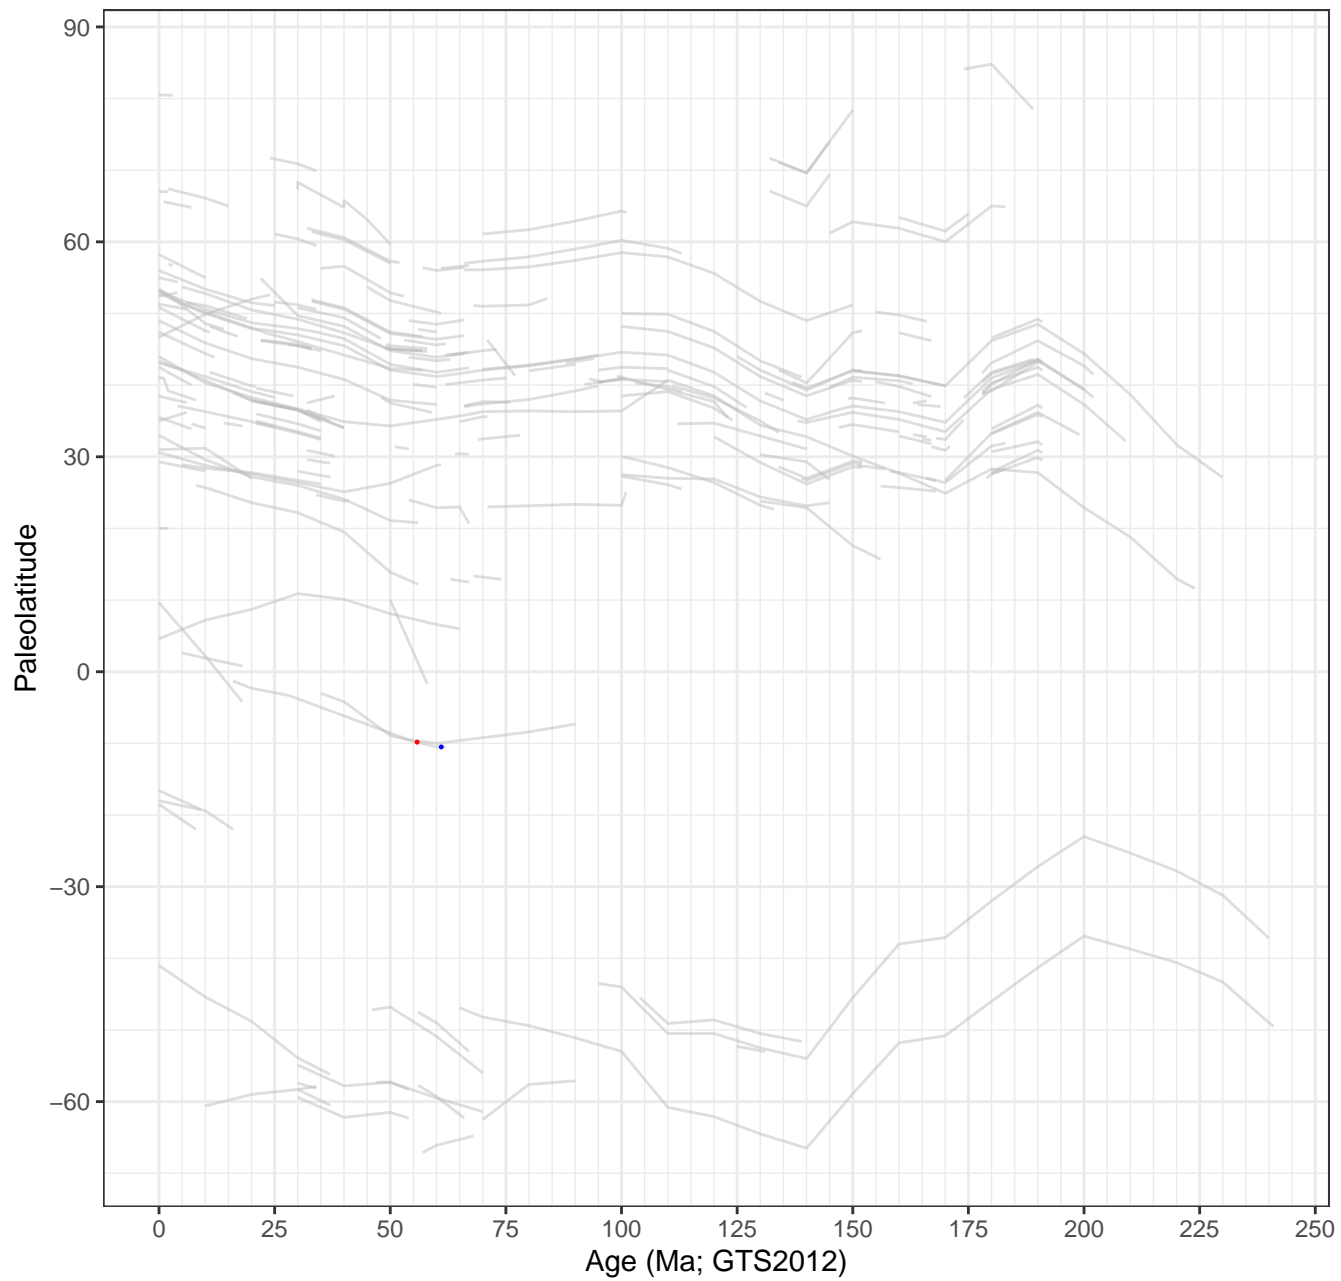

Supplement: Supplementary file 826 [file Amphorosphaeridium multispinosum.pdf › Supplement/Supplement 2/Species 1914 plots/Amphorosphaeridium multispinosum.pdf]

# Species *Amphorulacysta delicata*

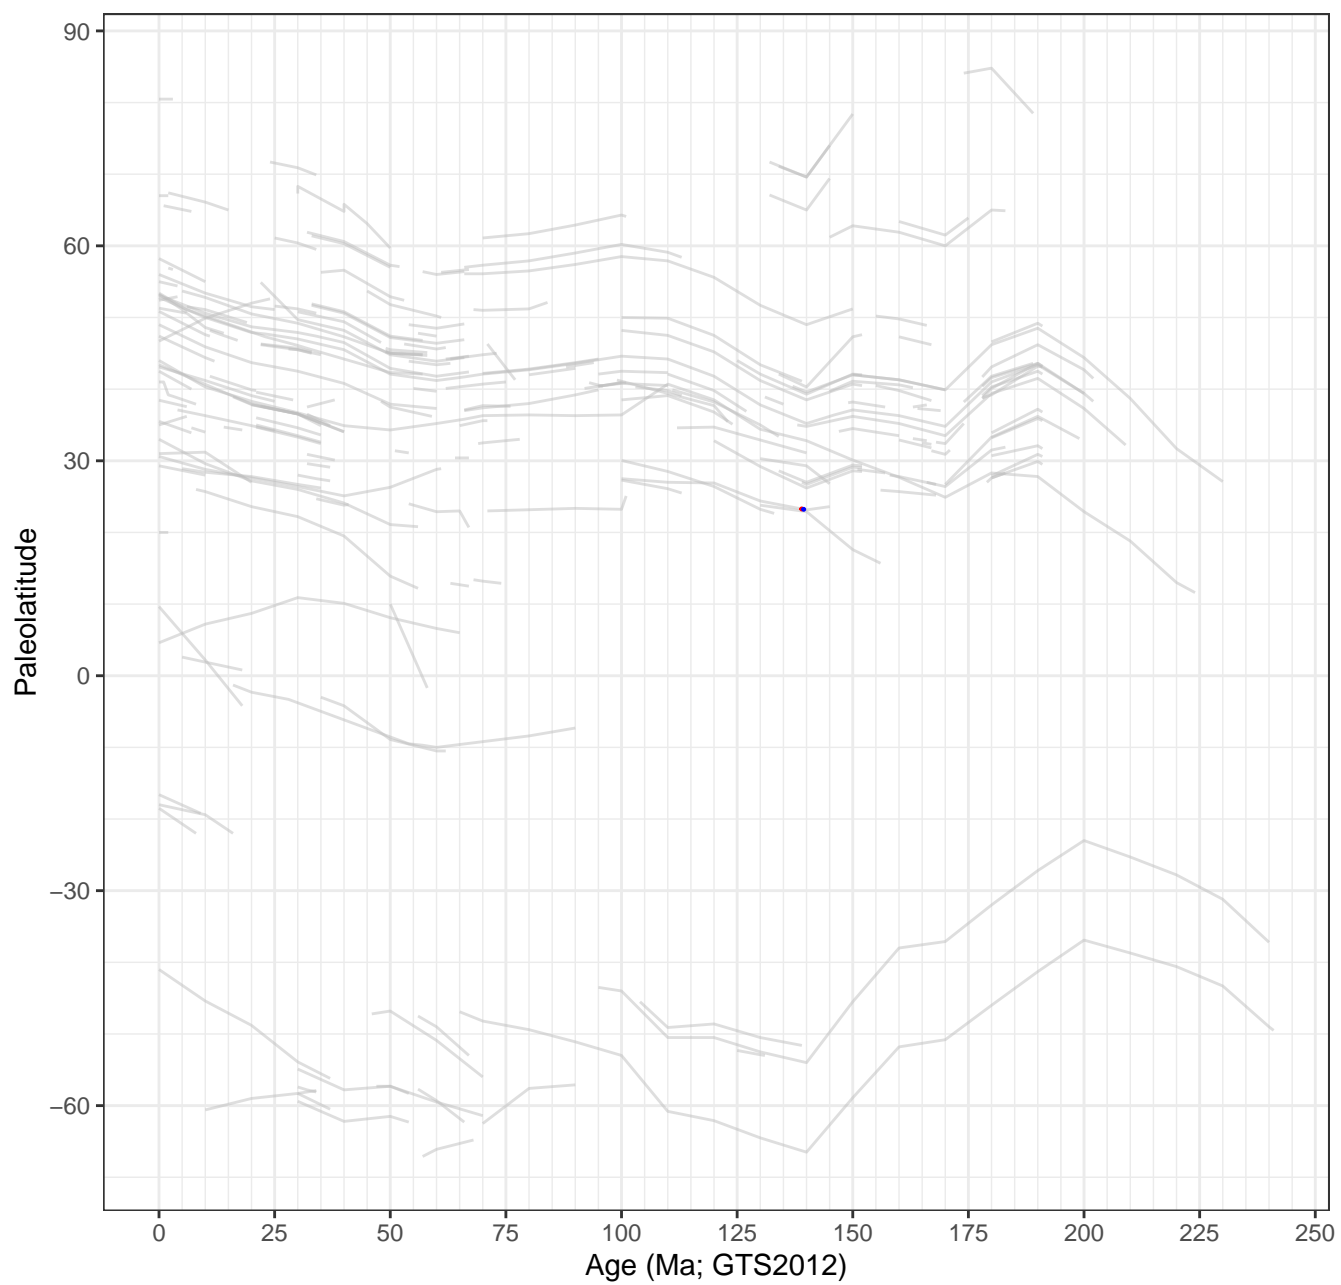

Supplement: Supplementary file 827 [file Amphorulacysta delicata.pdf › Supplement/Supplement 2/Species 1914 plots/Amphorulacysta delicata.pdf]

# Species *Amphorulacysta expirata*

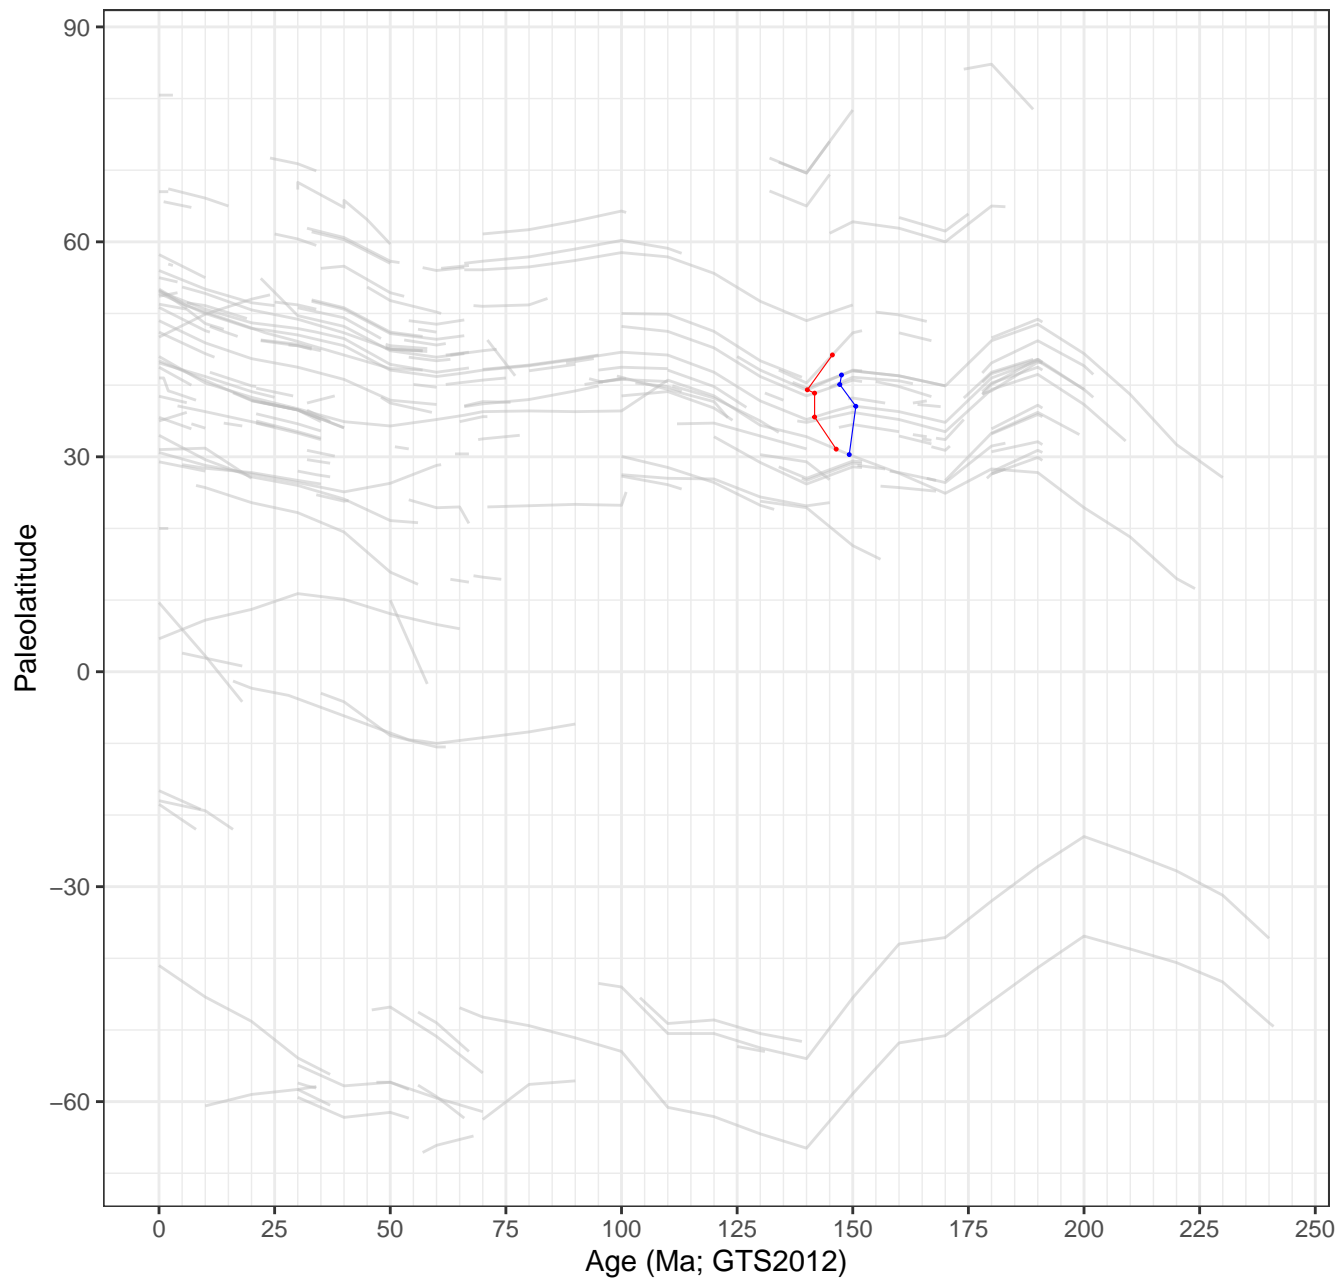

Supplement: Supplementary file 828 [file Amphorulacysta expirata.pdf › Supplement/Supplement 2/Species 1914 plots/Amphorulacysta expirata.pdf]

# Species *Amphorulacysta metaelliptica*

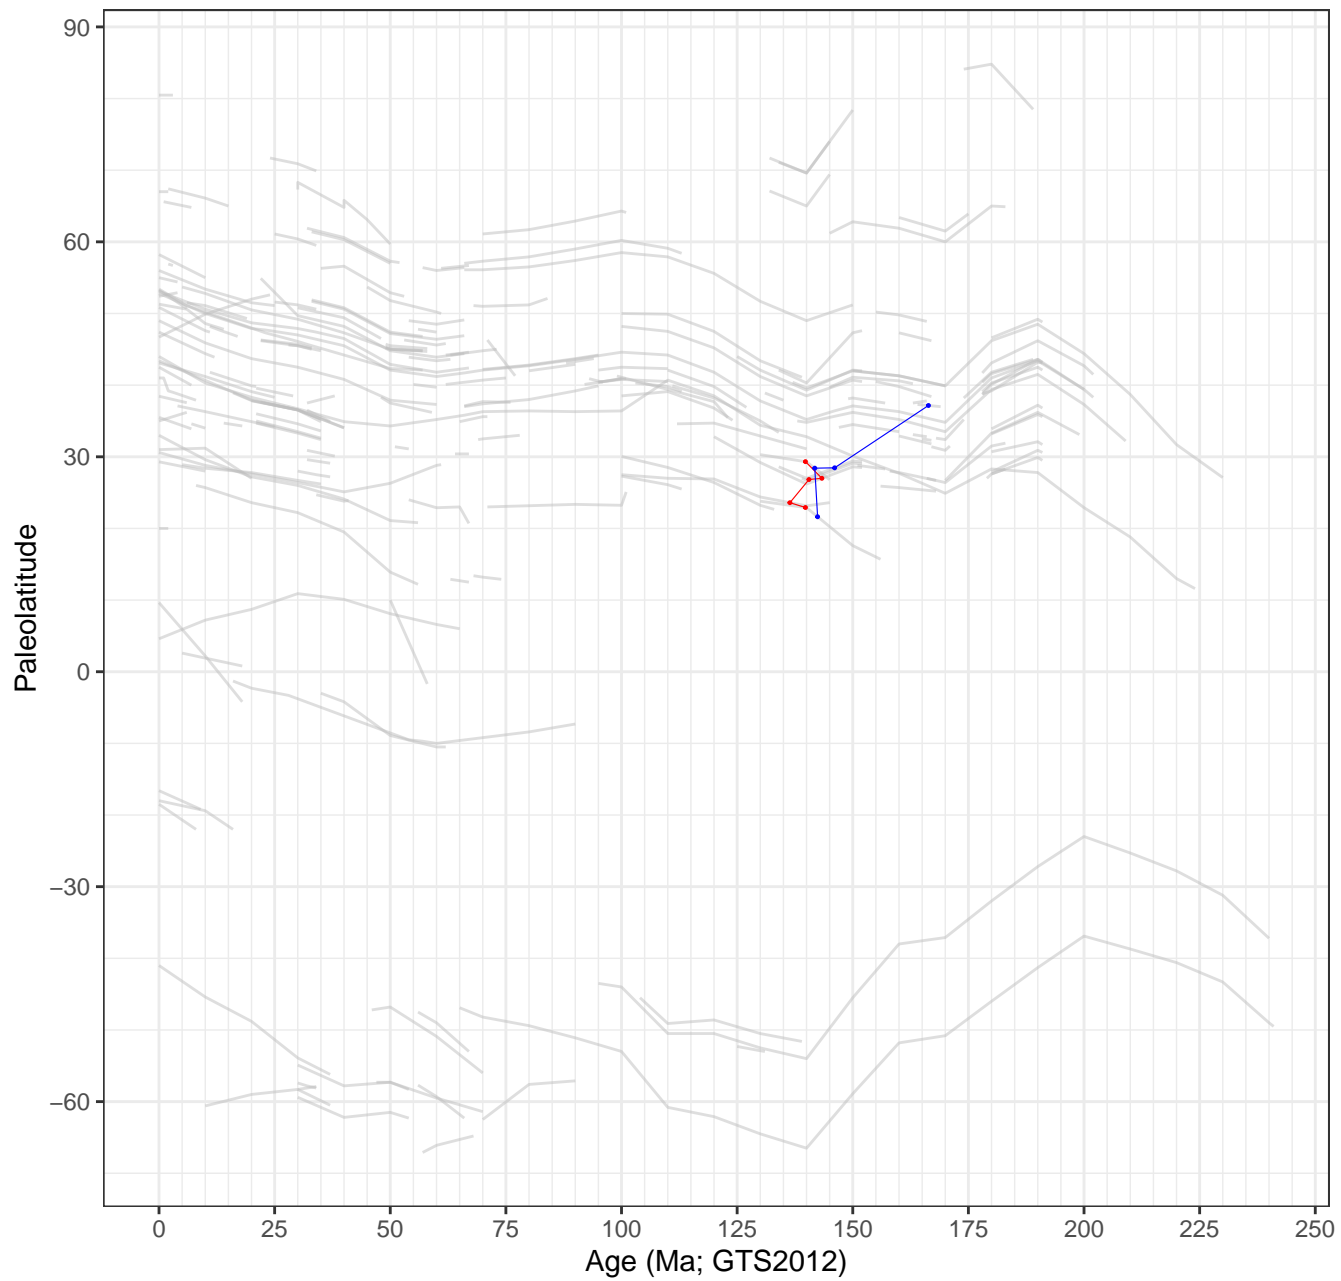

Supplement: Supplementary file 829 [file Amphorulacysta metaelliptica.pdf › Supplement/Supplement 2/Species 1914 plots/Amphorulacysta metaelliptica.pdf]

# Species *Ampulladinium variabile*

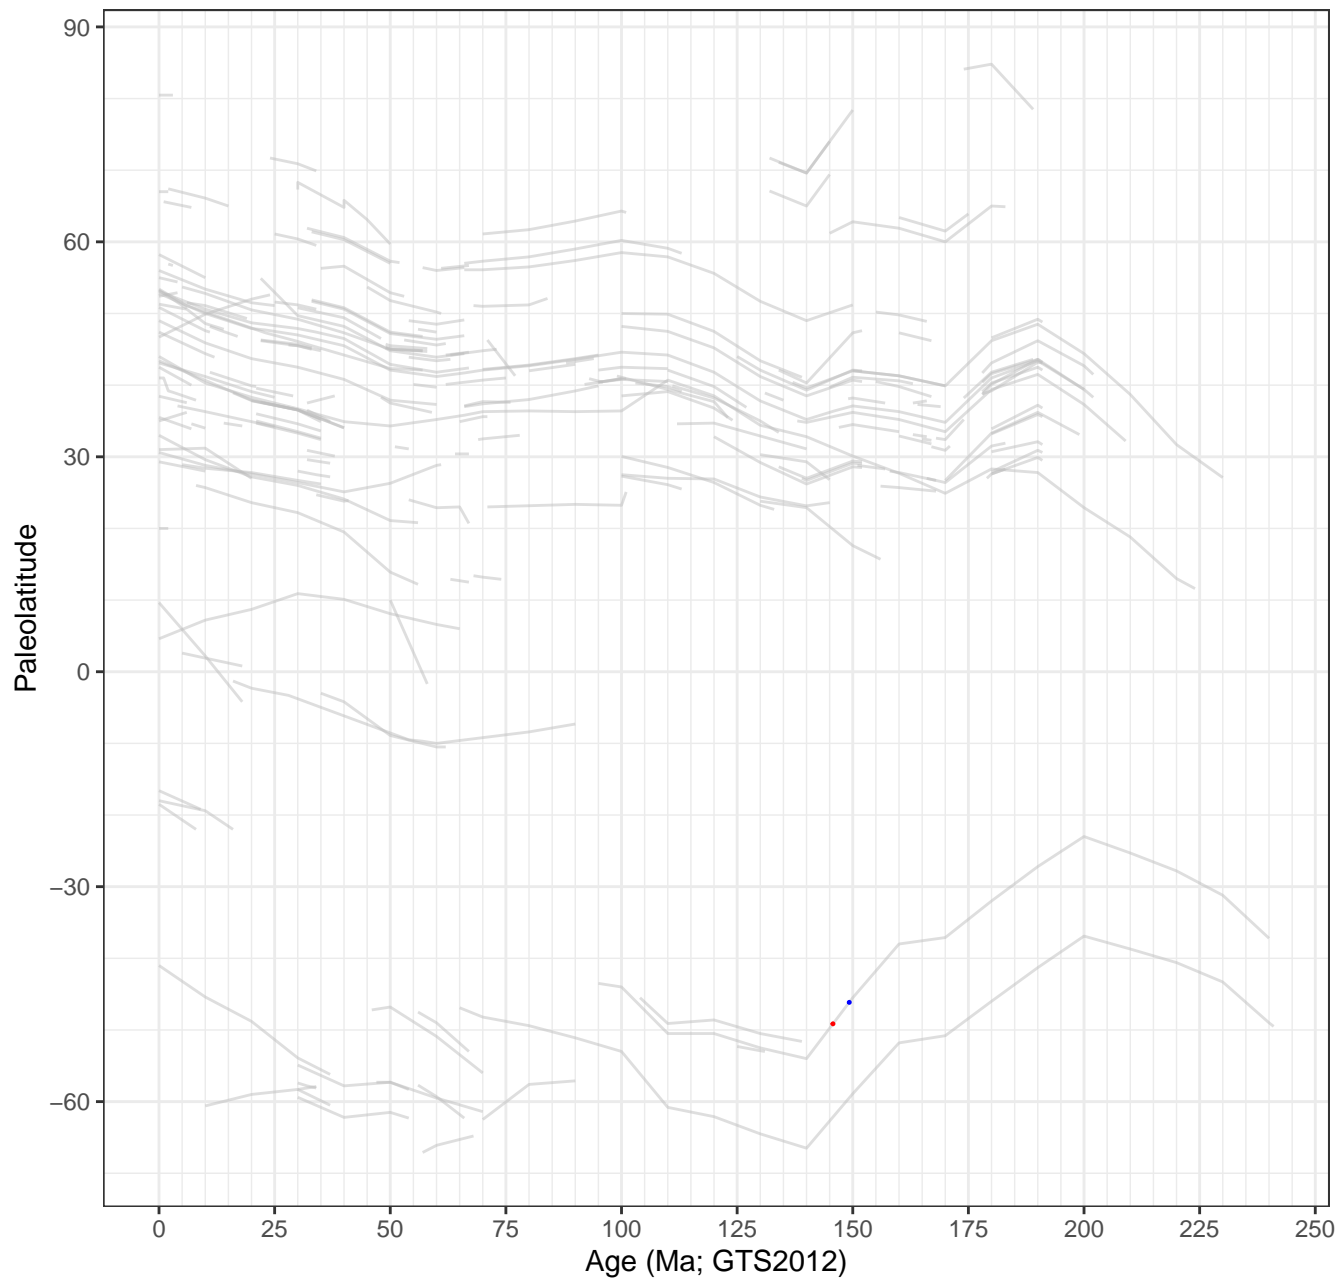

Supplement: Supplementary file 830 [file Ampulladinium variabile.pdf › Supplement/Supplement 2/Species 1914 plots/Ampulladinium variabile.pdf]

# Species *Andalusiella dubia*

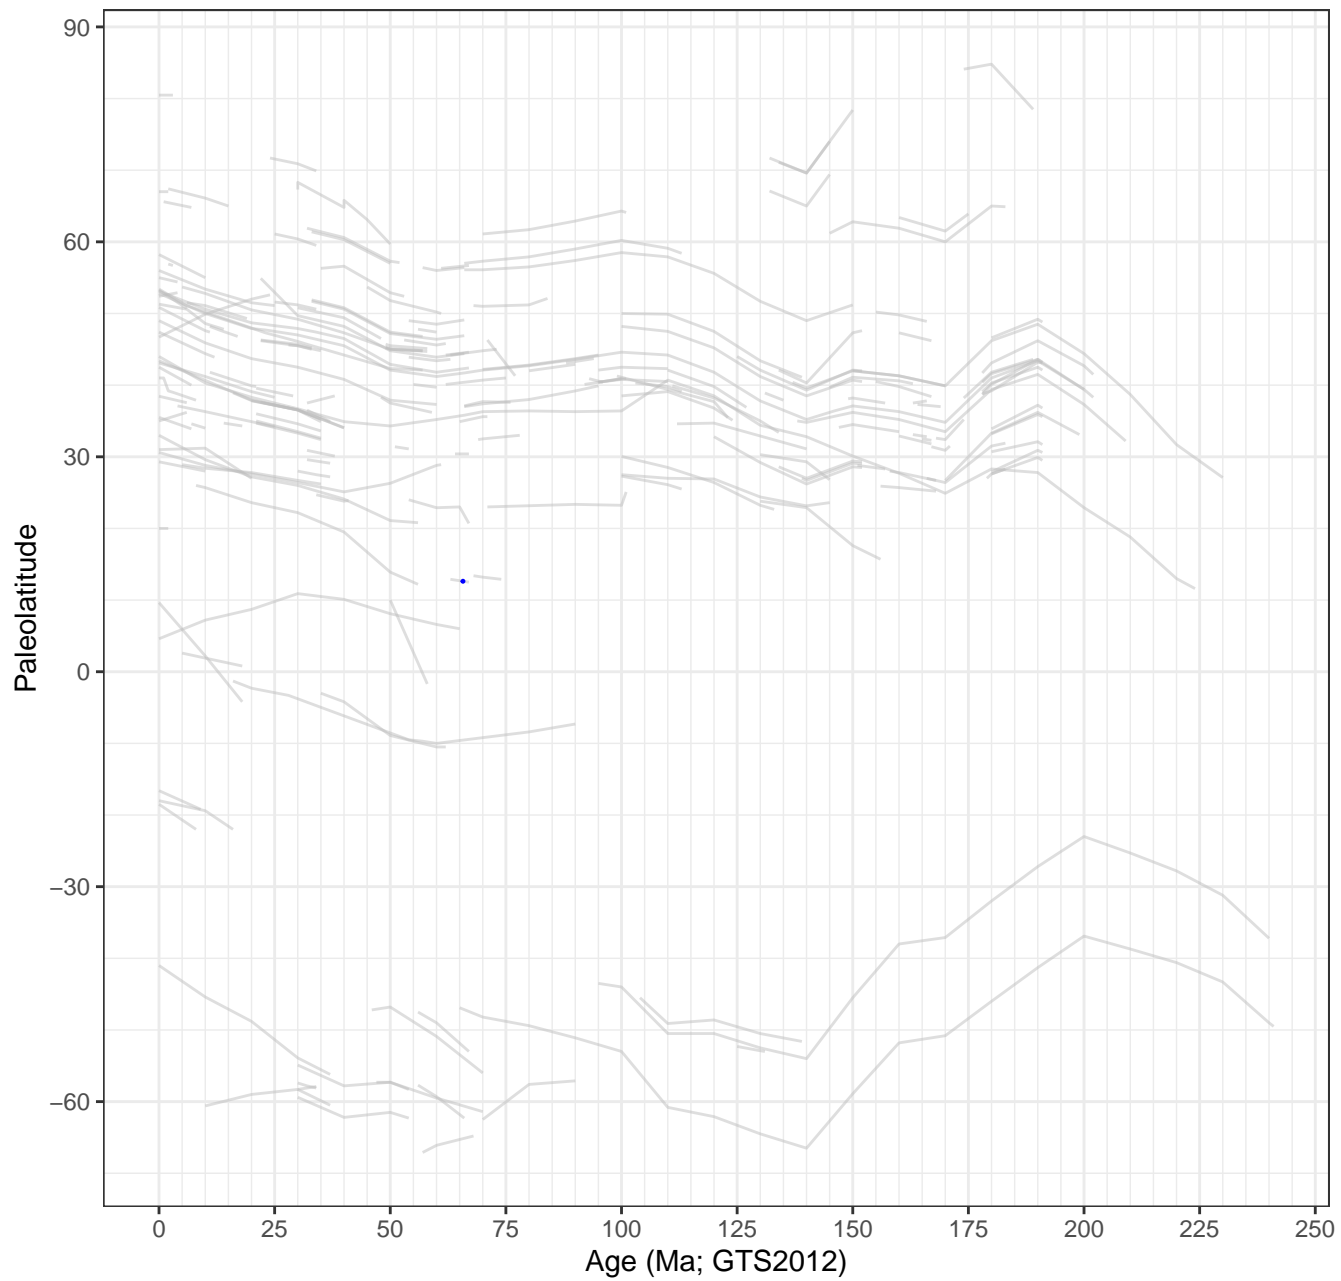

Supplement: Supplementary file 831 [file Andalusiella dubia.pdf › Supplement/Supplement 2/Species 1914 plots/Andalusiella dubia.pdf]

# Species *Andalusiella gabonensis*

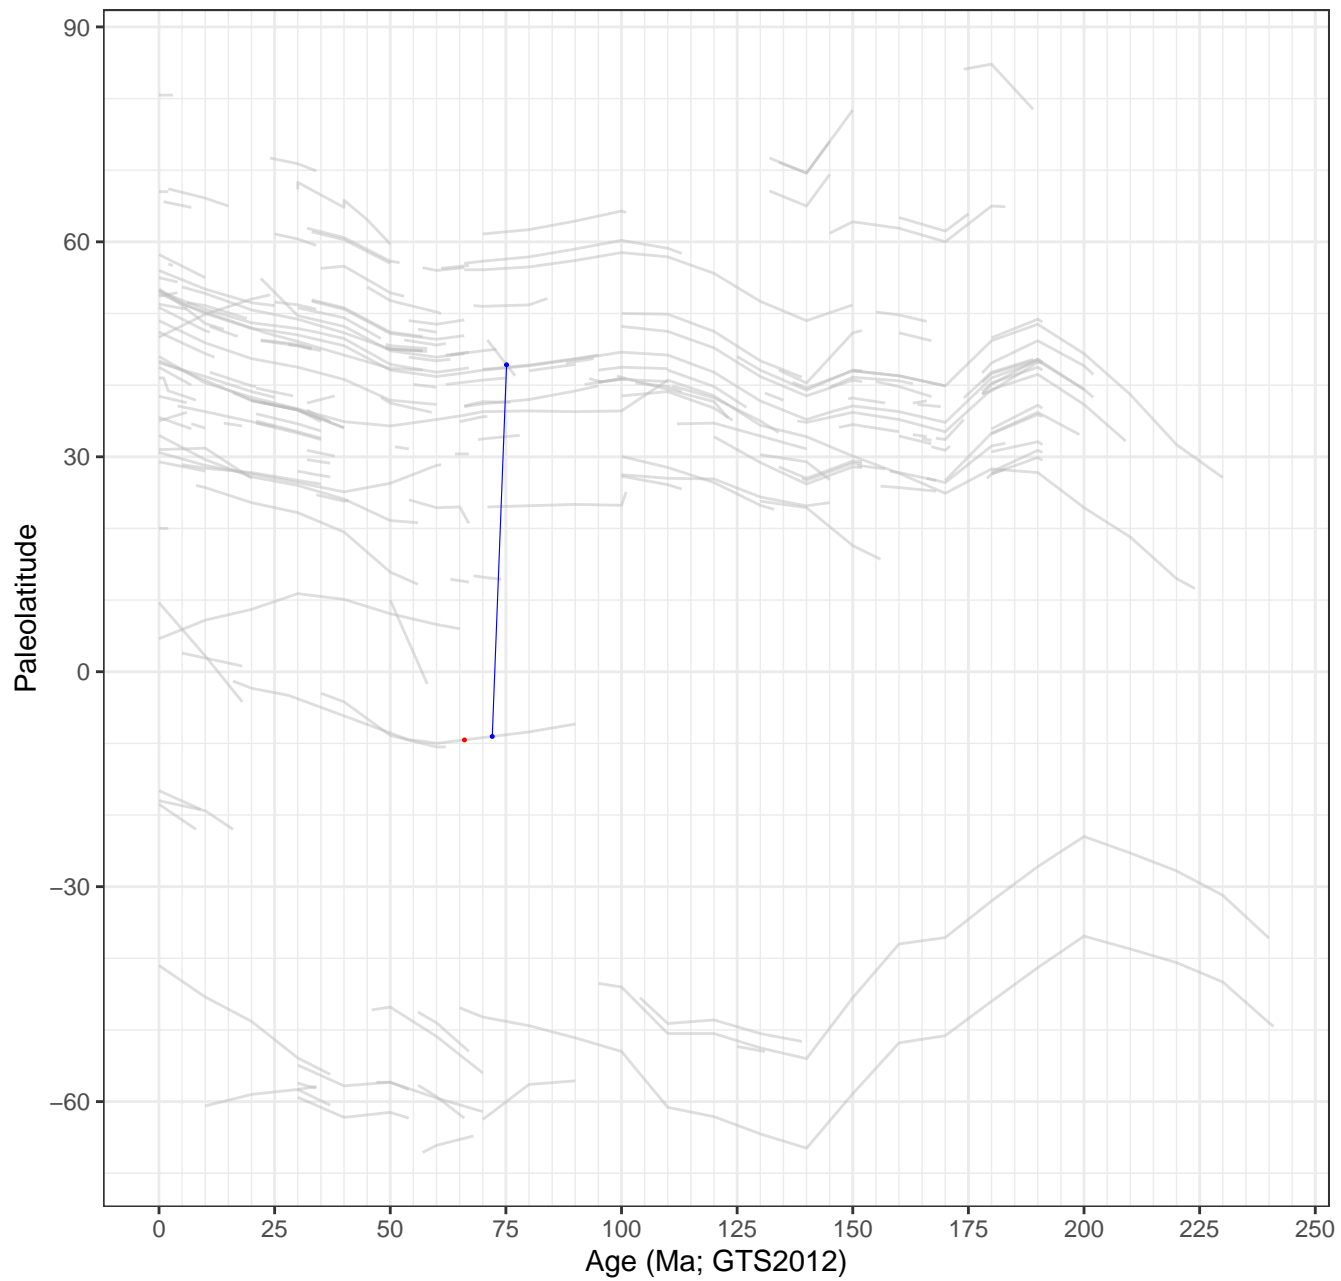

Supplement: Supplementary file 832 [file Andalusiella gabonensis.pdf › Supplement/Supplement 2/Species 1914 plots/Andalusiella gabonensis.pdf]
