# Supplementary figures and images for: DINOSTRAT: a global database of the stratigraphic and paleolatitudinal distribution of Mesozoic–Cenozoic organic-walled dinoflagellate cysts (part 9 of 27)
Source: Copernicus journal article supplement (doi:10.5194/essd-14-579-2022), 2022-02-09

# Species *Andalusiella ivoirensis*

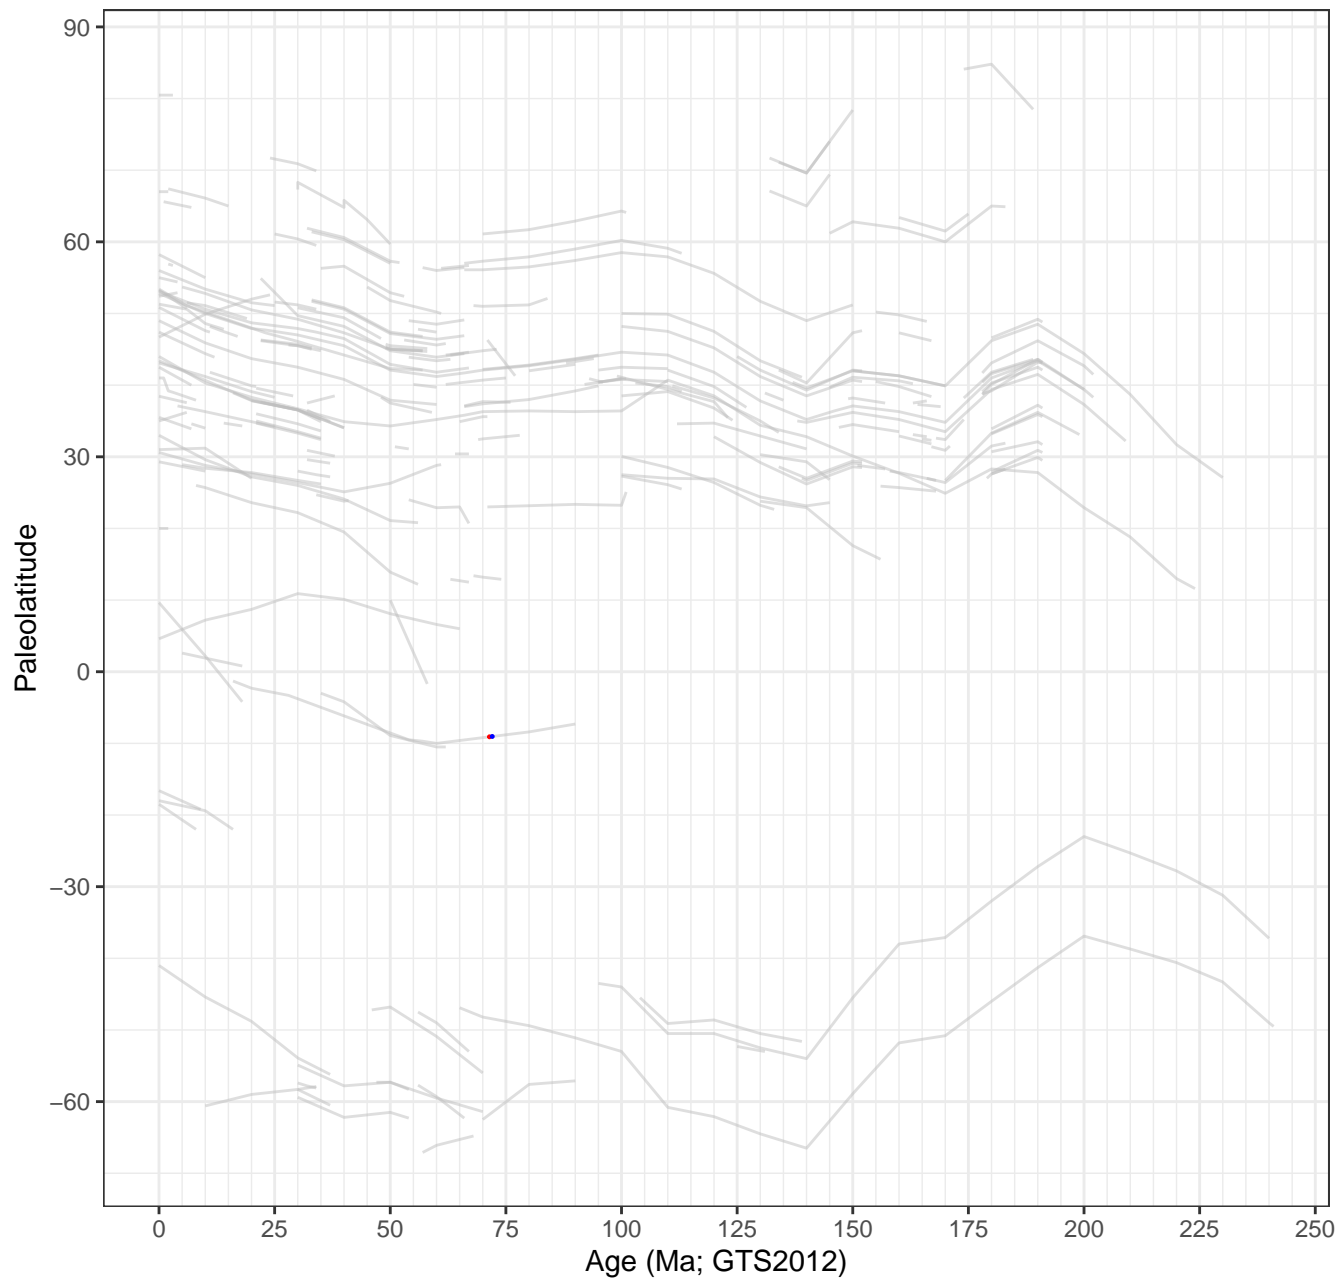

Supplement: Supplementary file 833 [file Andalusiella ivoirensis.pdf › Supplement/Supplement 2/Species 1914 plots/Andalusiella ivoirensis.pdf]

# Species *Andalusiella mauthei*

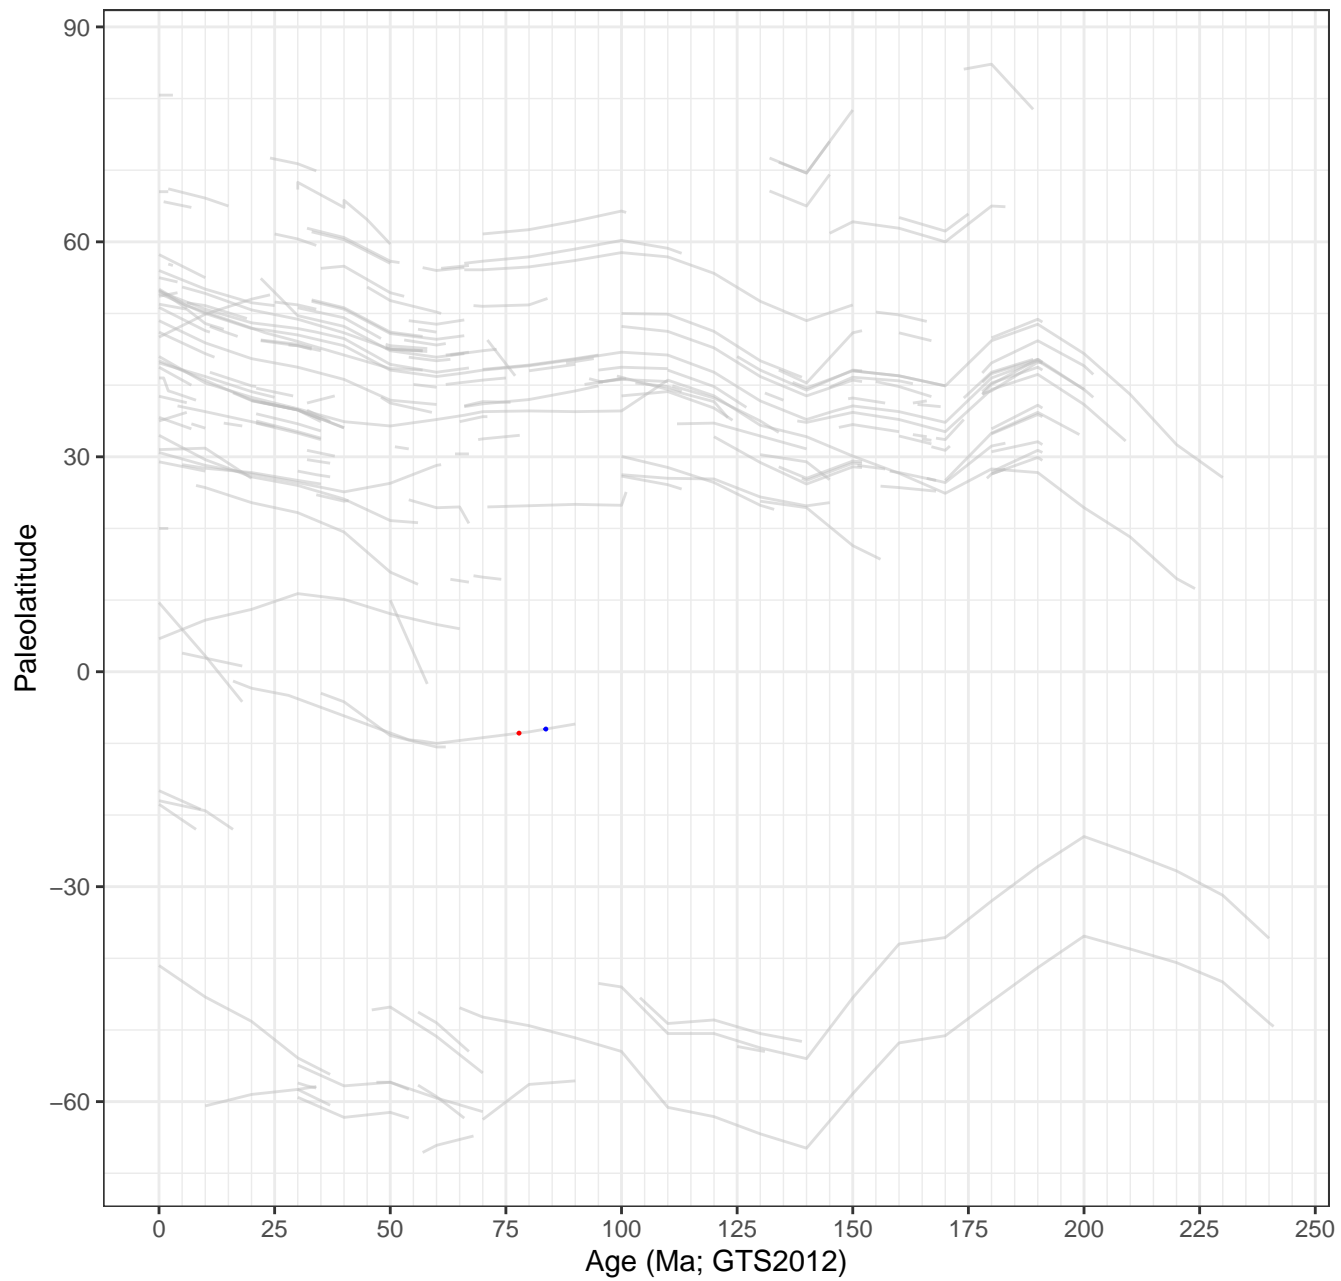

Supplement: Supplementary file 834 [file Andalusiella mauthei.pdf › Supplement/Supplement 2/Species 1914 plots/Andalusiella mauthei.pdf]

# Species *Andalusiella polymorpha*

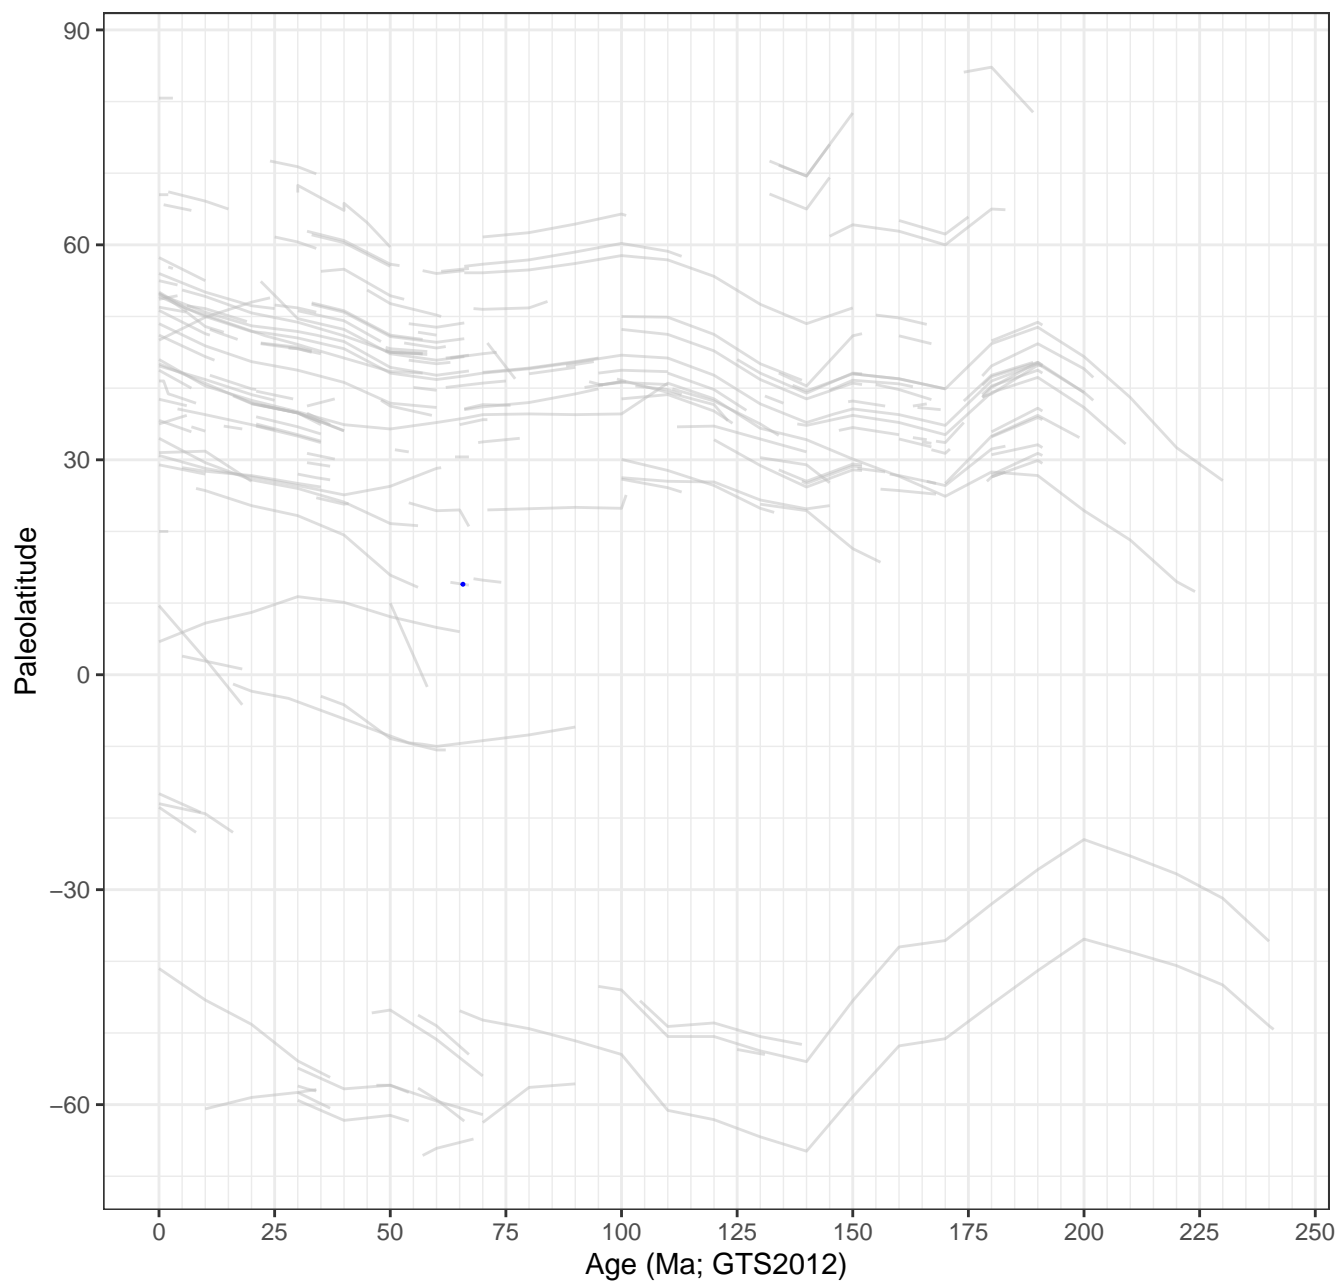

Supplement: Supplementary file 835 [file Andalusiella polymorpha.pdf › Supplement/Supplement 2/Species 1914 plots/Andalusiella polymorpha.pdf]

# Species *Andalusiella rhomboides*

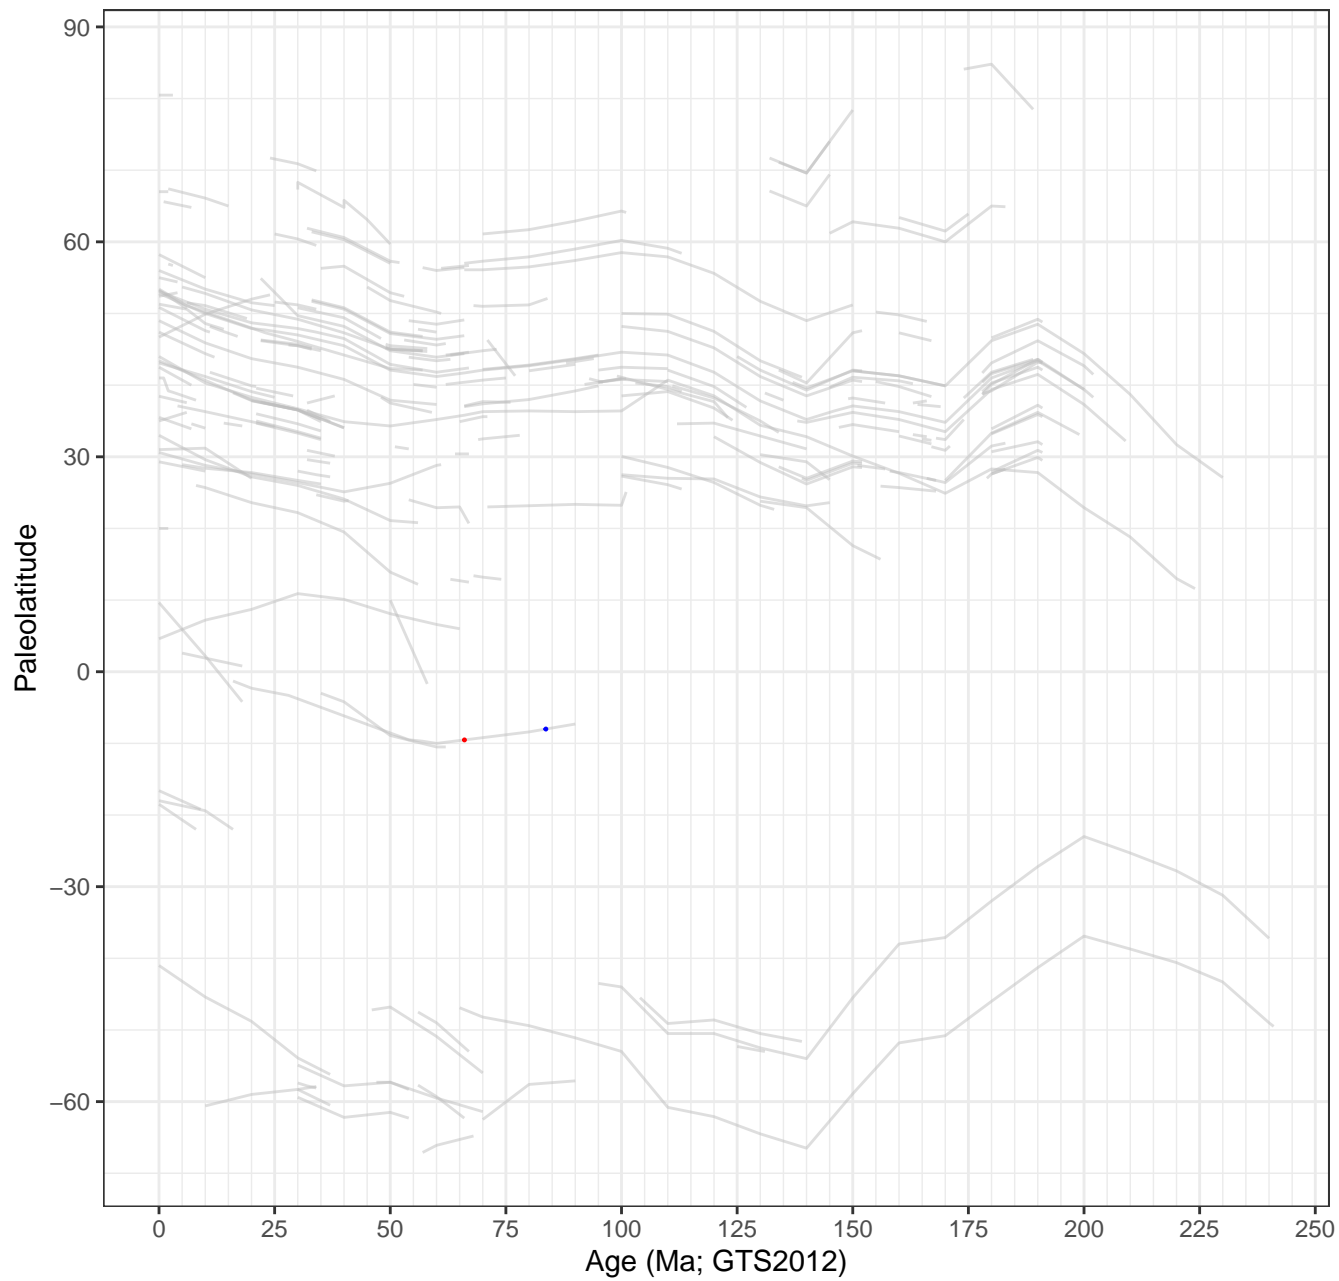

Supplement: Supplementary file 836 [file Andalusiella rhomboides.pdf › Supplement/Supplement 2/Species 1914 plots/Andalusiella rhomboides.pdf]

# Species *Angustidinium acribes*

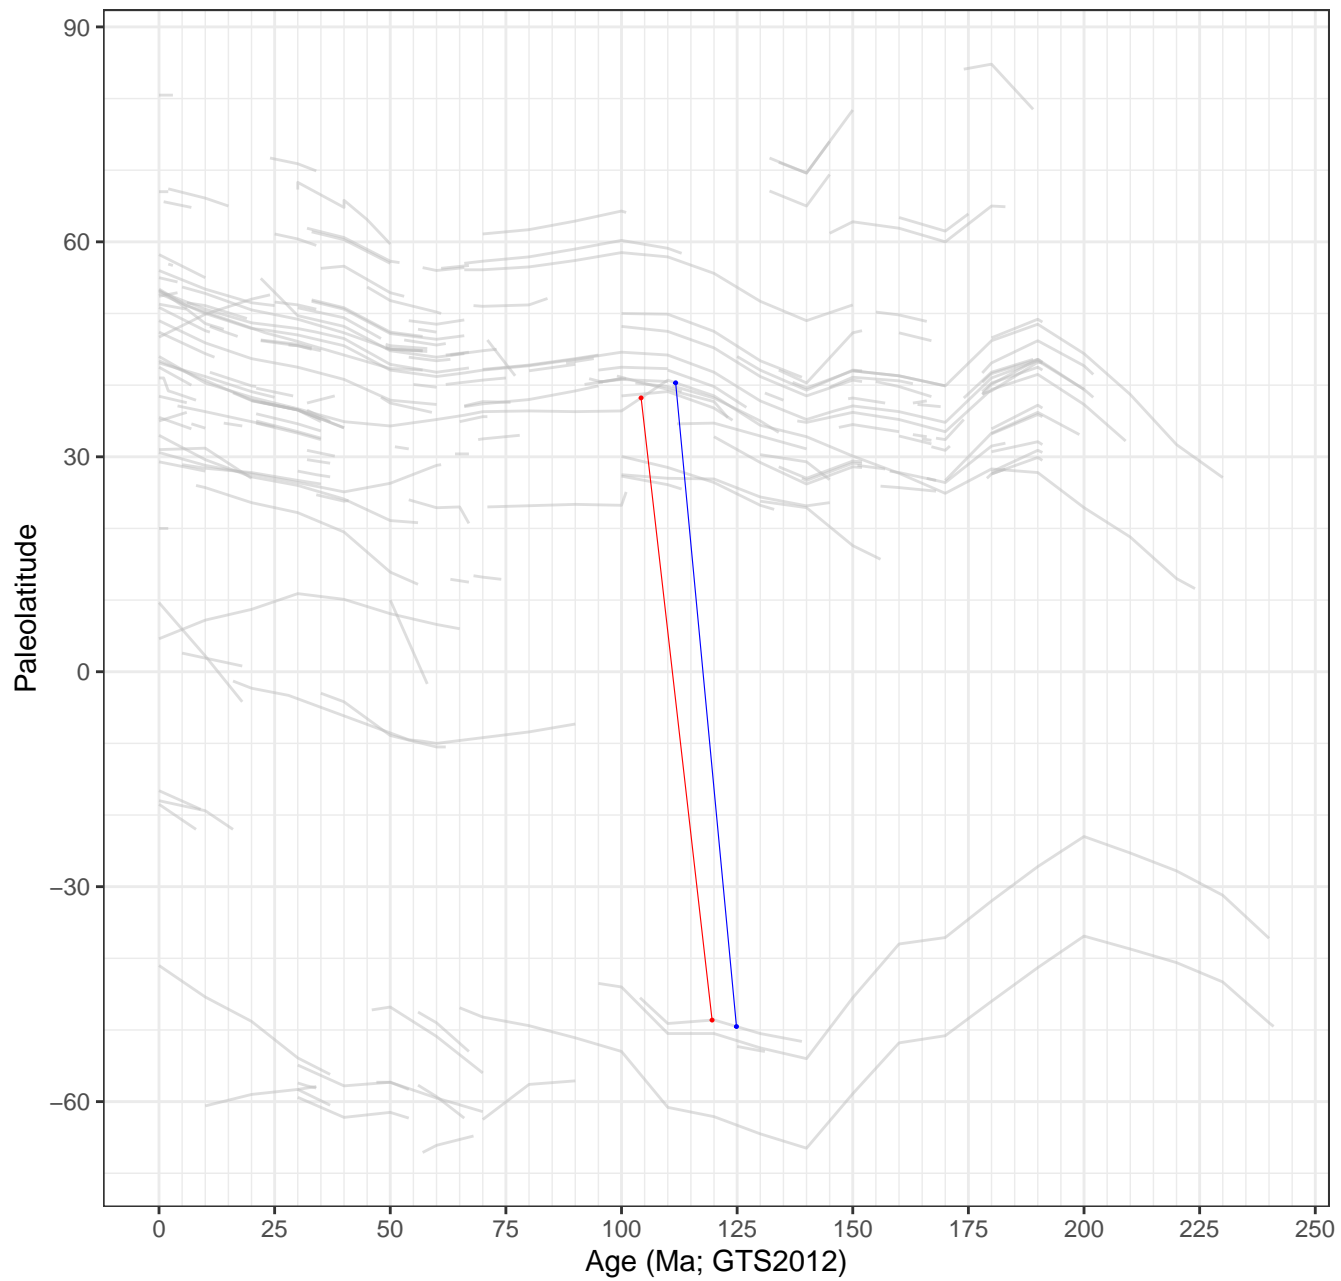

Supplement: Supplementary file 837 [file Angustidinium acribes.pdf › Supplement/Supplement 2/Species 1914 plots/Angustidinium acribes.pdf]

# Species *Apectodinium augustum*

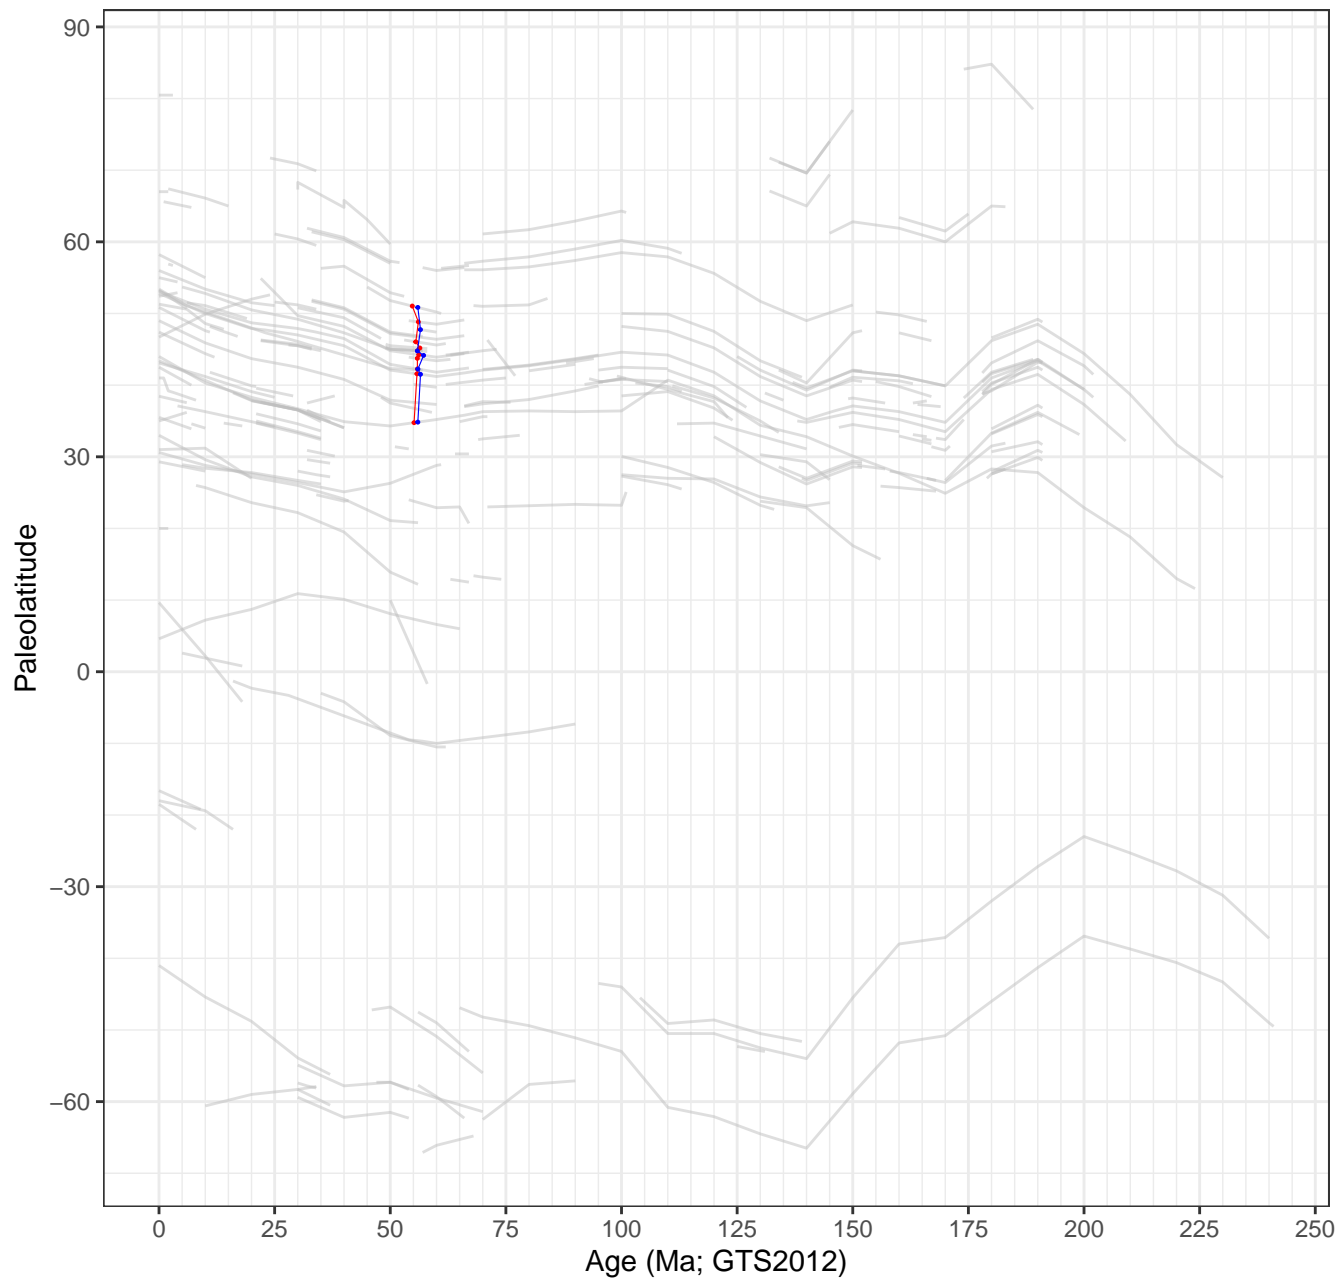

Supplement: Supplementary file 838 [file Apectodinium augustum.pdf › Supplement/Supplement 2/Species 1914 plots/Apectodinium augustum.pdf]

# Species *Apectodinium homomorphum*

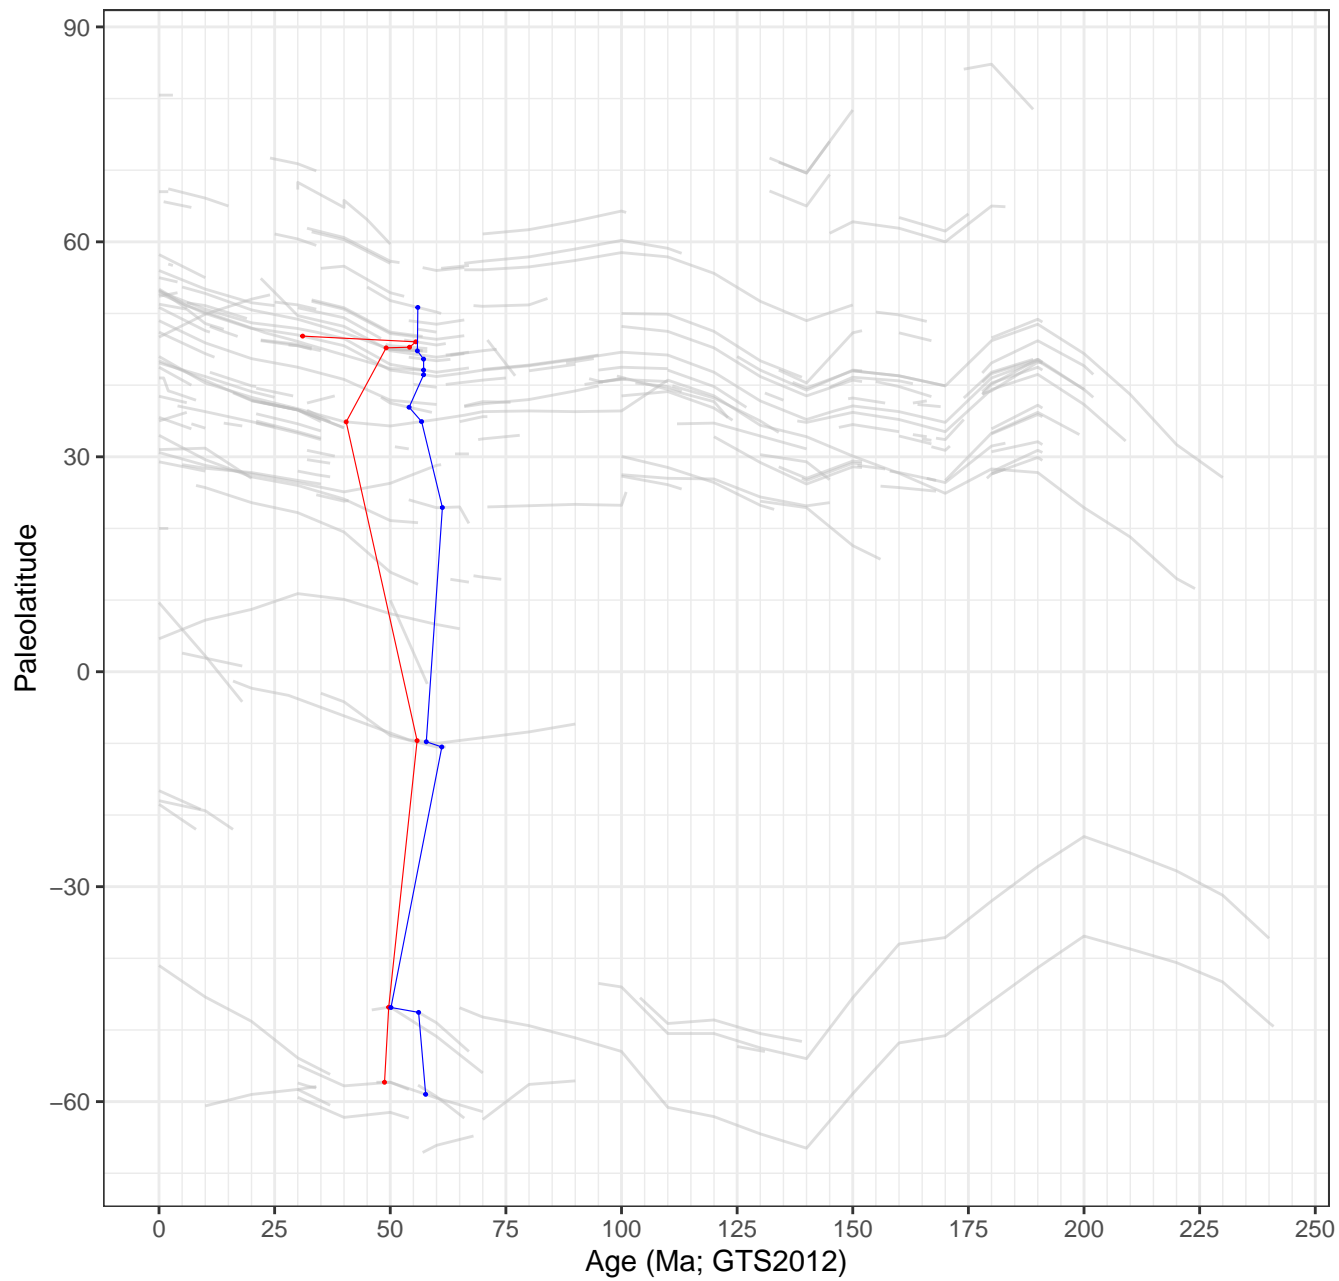

Supplement: Supplementary file 839 [file Apectodinium homomorphum.pdf › Supplement/Supplement 2/Species 1914 plots/Apectodinium homomorphum.pdf]

# Species *Apectodinium hyperacanthum*

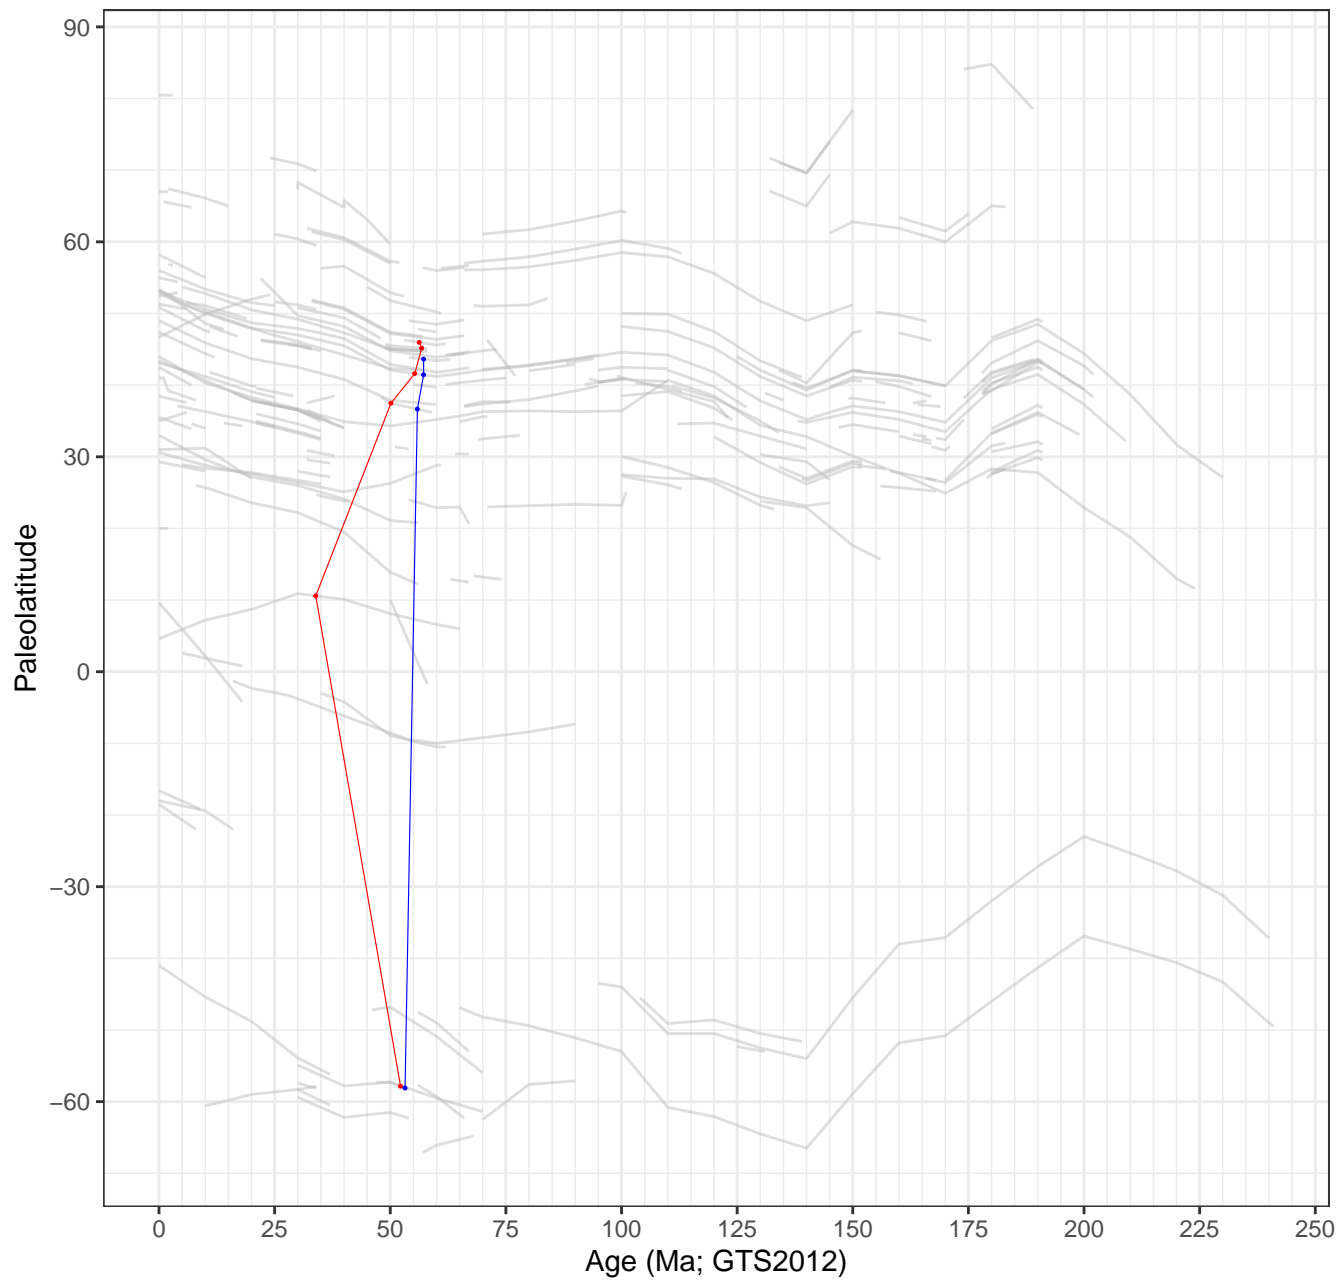

Supplement: Supplementary file 840 [file Apectodinium hyperacanthum.pdf › Supplement/Supplement 2/Species 1914 plots/Apectodinium hyperacanthum.pdf]

# Species *Apectodinium paniculatum*

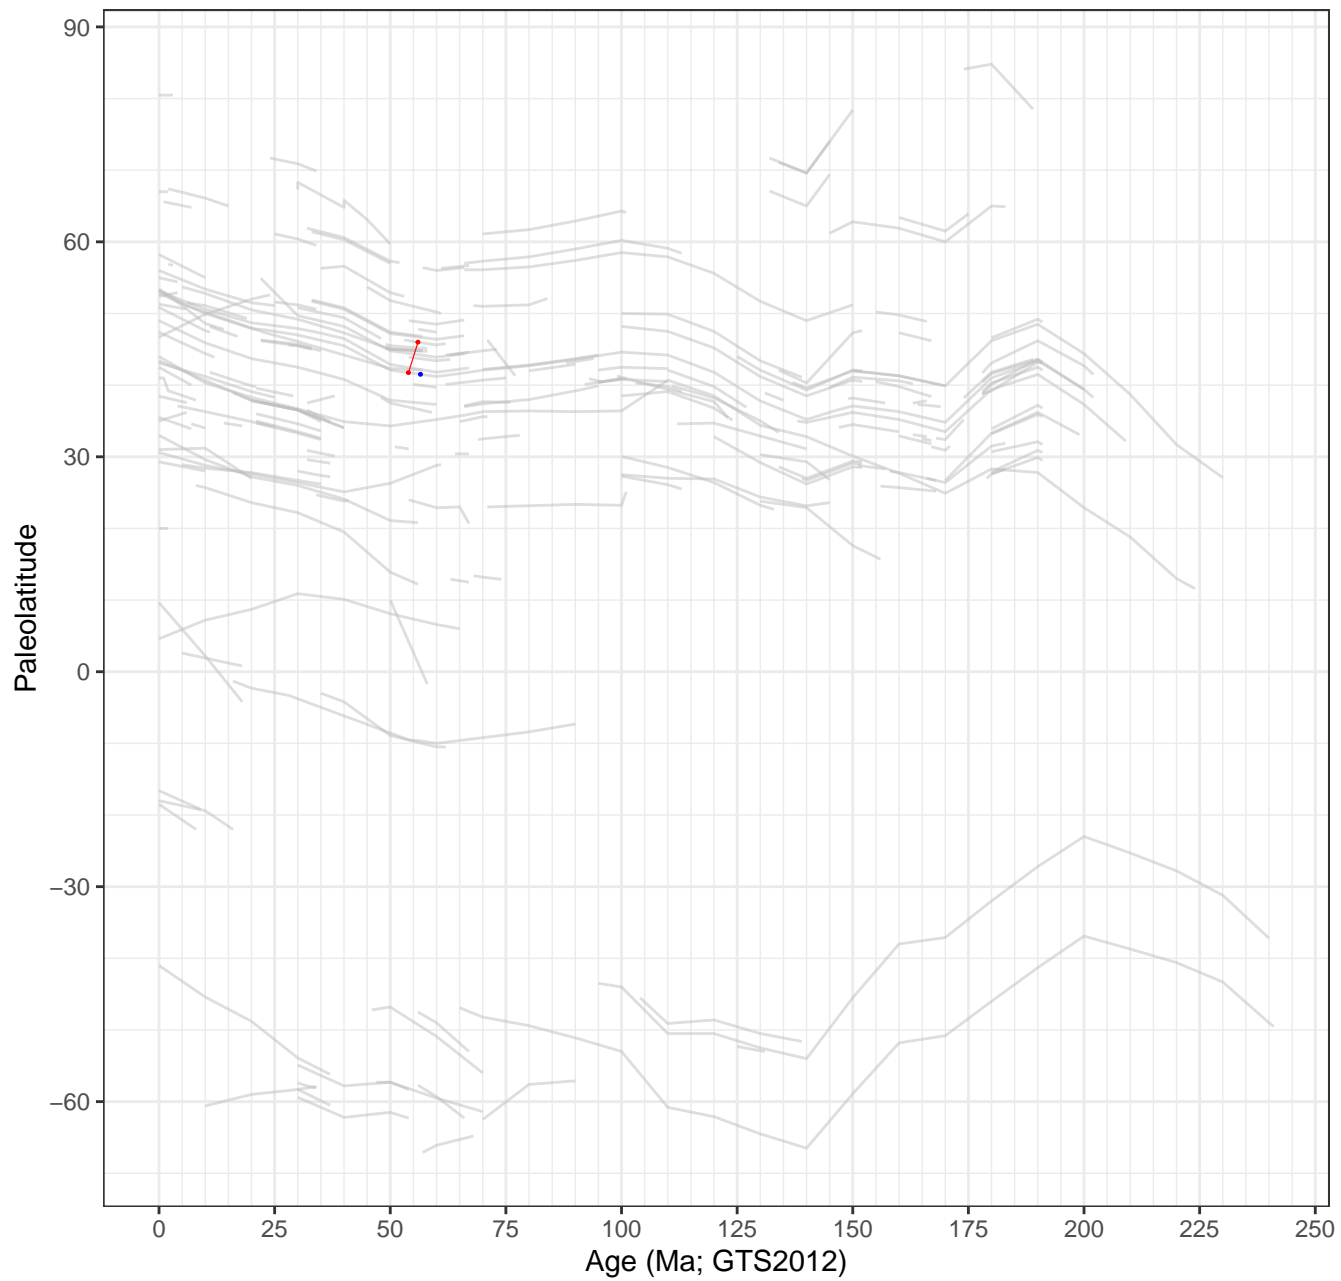

Supplement: Supplementary file 841 [file Apectodinium paniculatum.pdf › Supplement/Supplement 2/Species 1914 plots/Apectodinium paniculatum.pdf]

# Species *Apectodinium parvum*

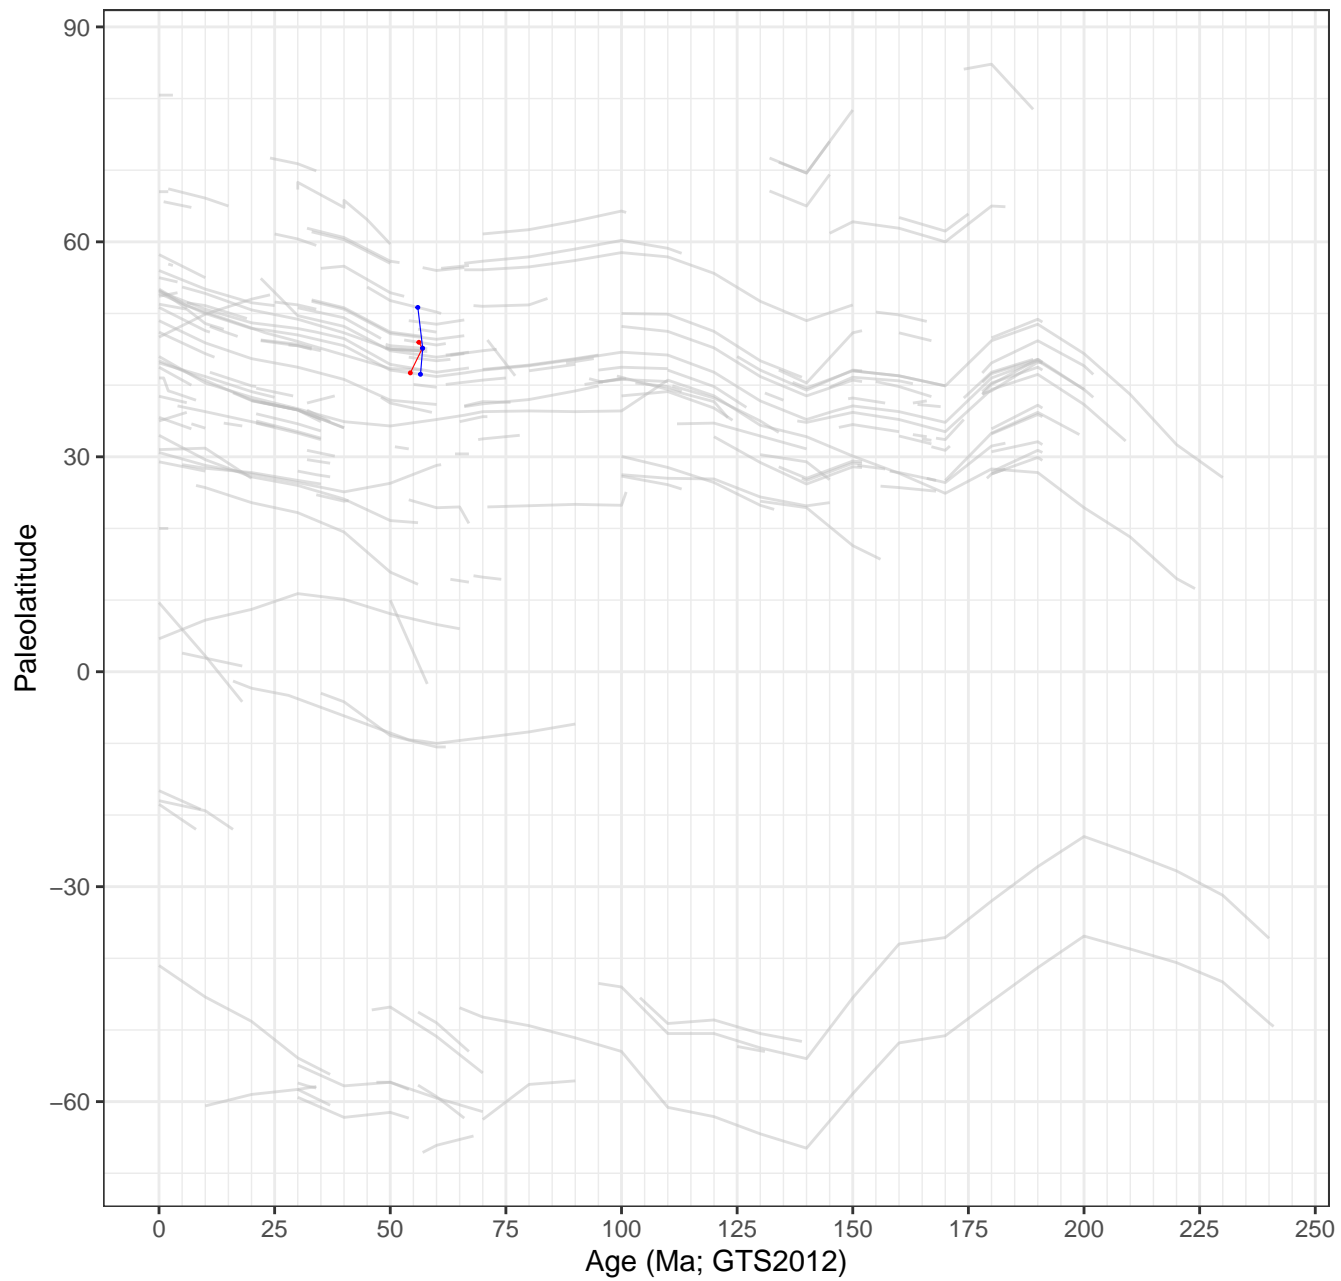

Supplement: Supplementary file 842 [file Apectodinium parvum.pdf › Supplement/Supplement 2/Species 1914 plots/Apectodinium parvum.pdf]

# Species *Apectodinium quinquelatum*

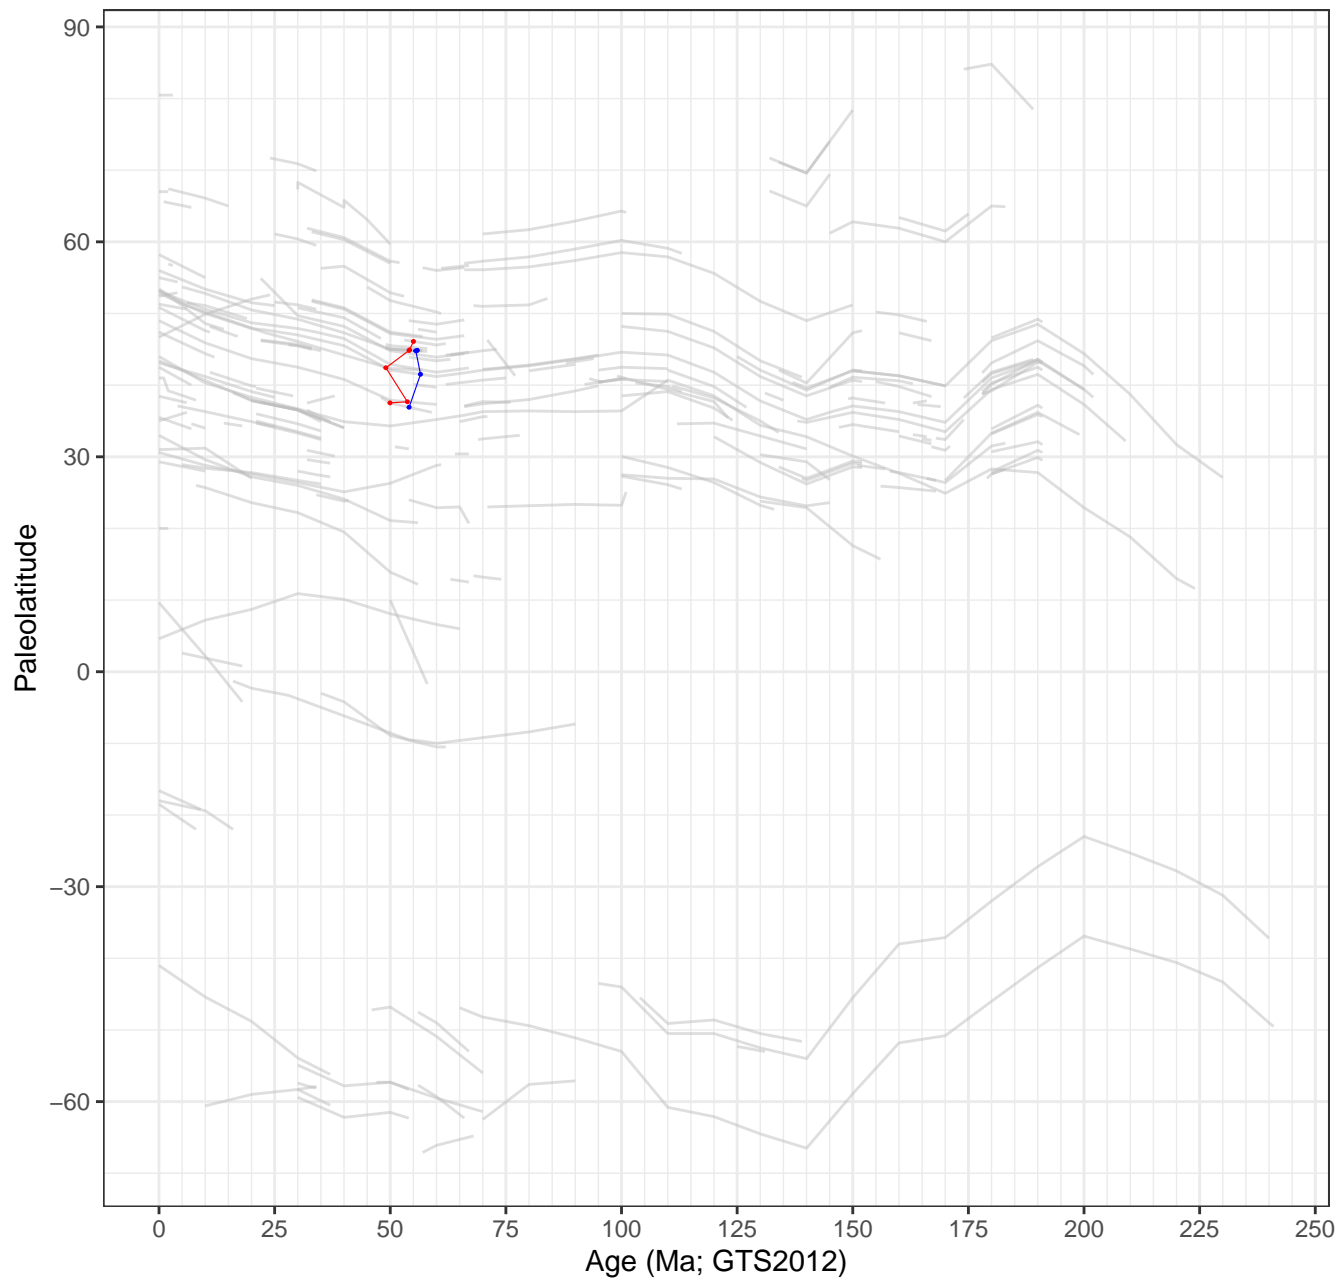

Supplement: Supplementary file 843 [file Apectodinium quinquelatum.pdf › Supplement/Supplement 2/Species 1914 plots/Apectodinium quinquelatum.pdf]

# Species Apectodinium summissum

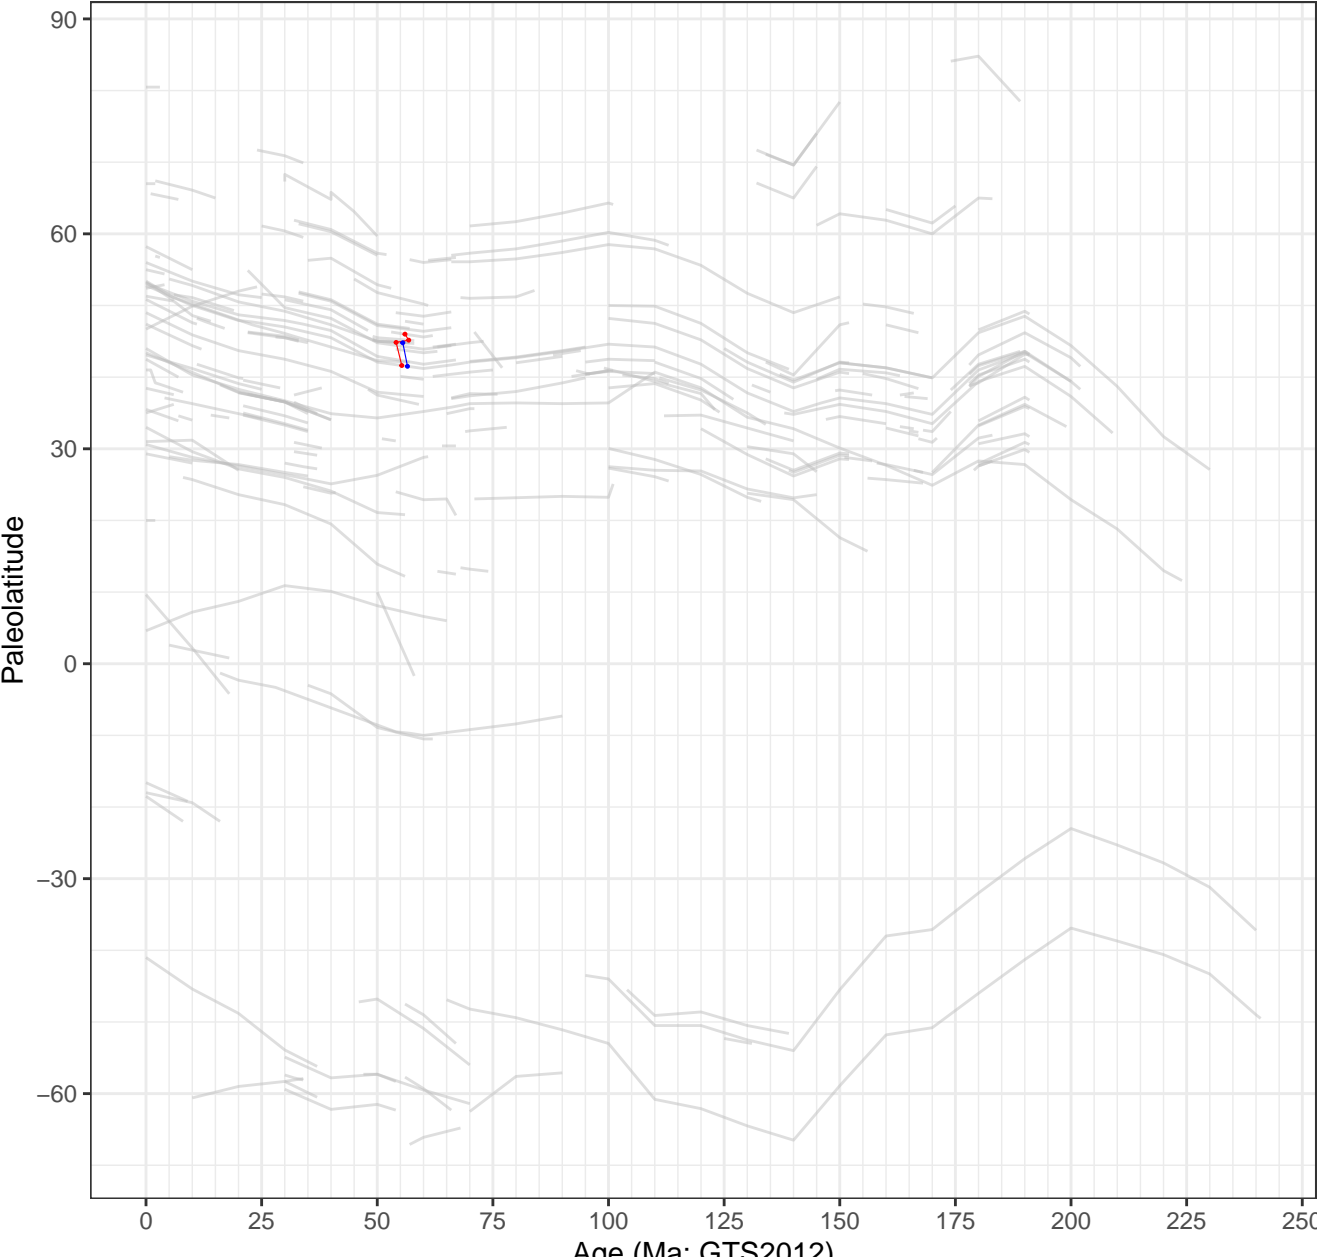

Supplement: Supplementary file 844 [file Apectodinium summissum.pdf › Supplement/Supplement 2/Species 1914 plots/Apectodinium summissum.pdf]

# Species *Aprobolocysta eilema*

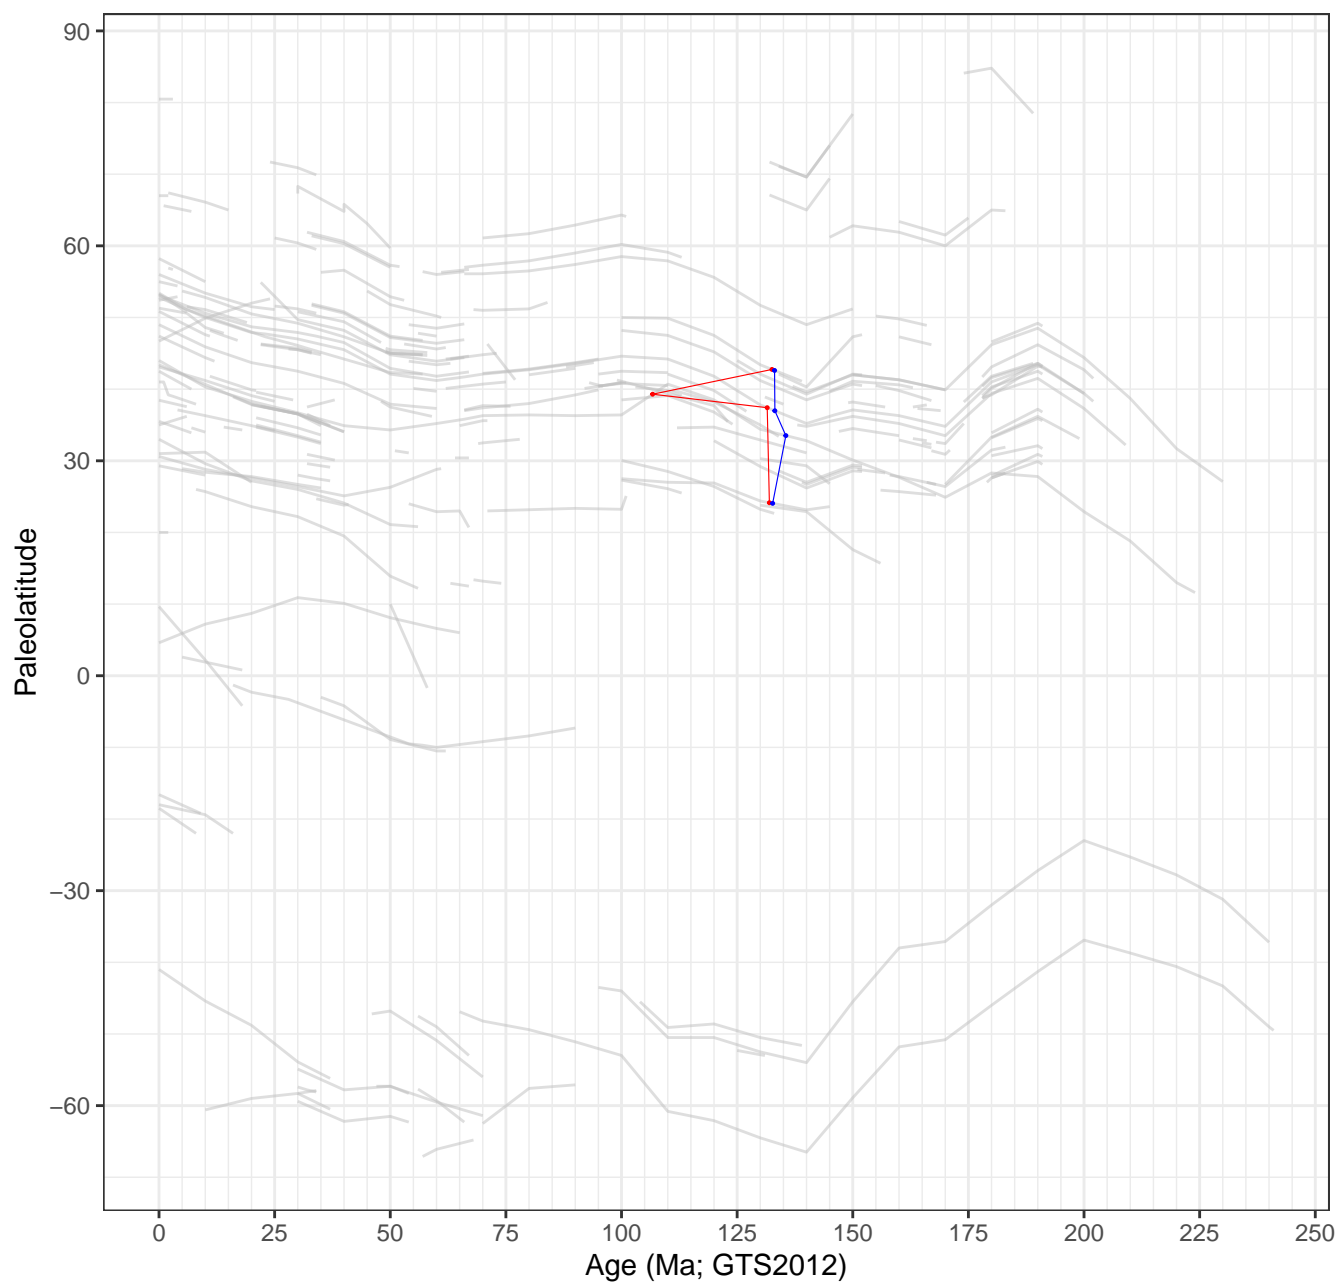

Supplement: Supplementary file 845 [file Aprobolocysta eilema.pdf › Supplement/Supplement 2/Species 1914 plots/Aprobolocysta eilema.pdf]

# Species *Aprobolocysta galeata*

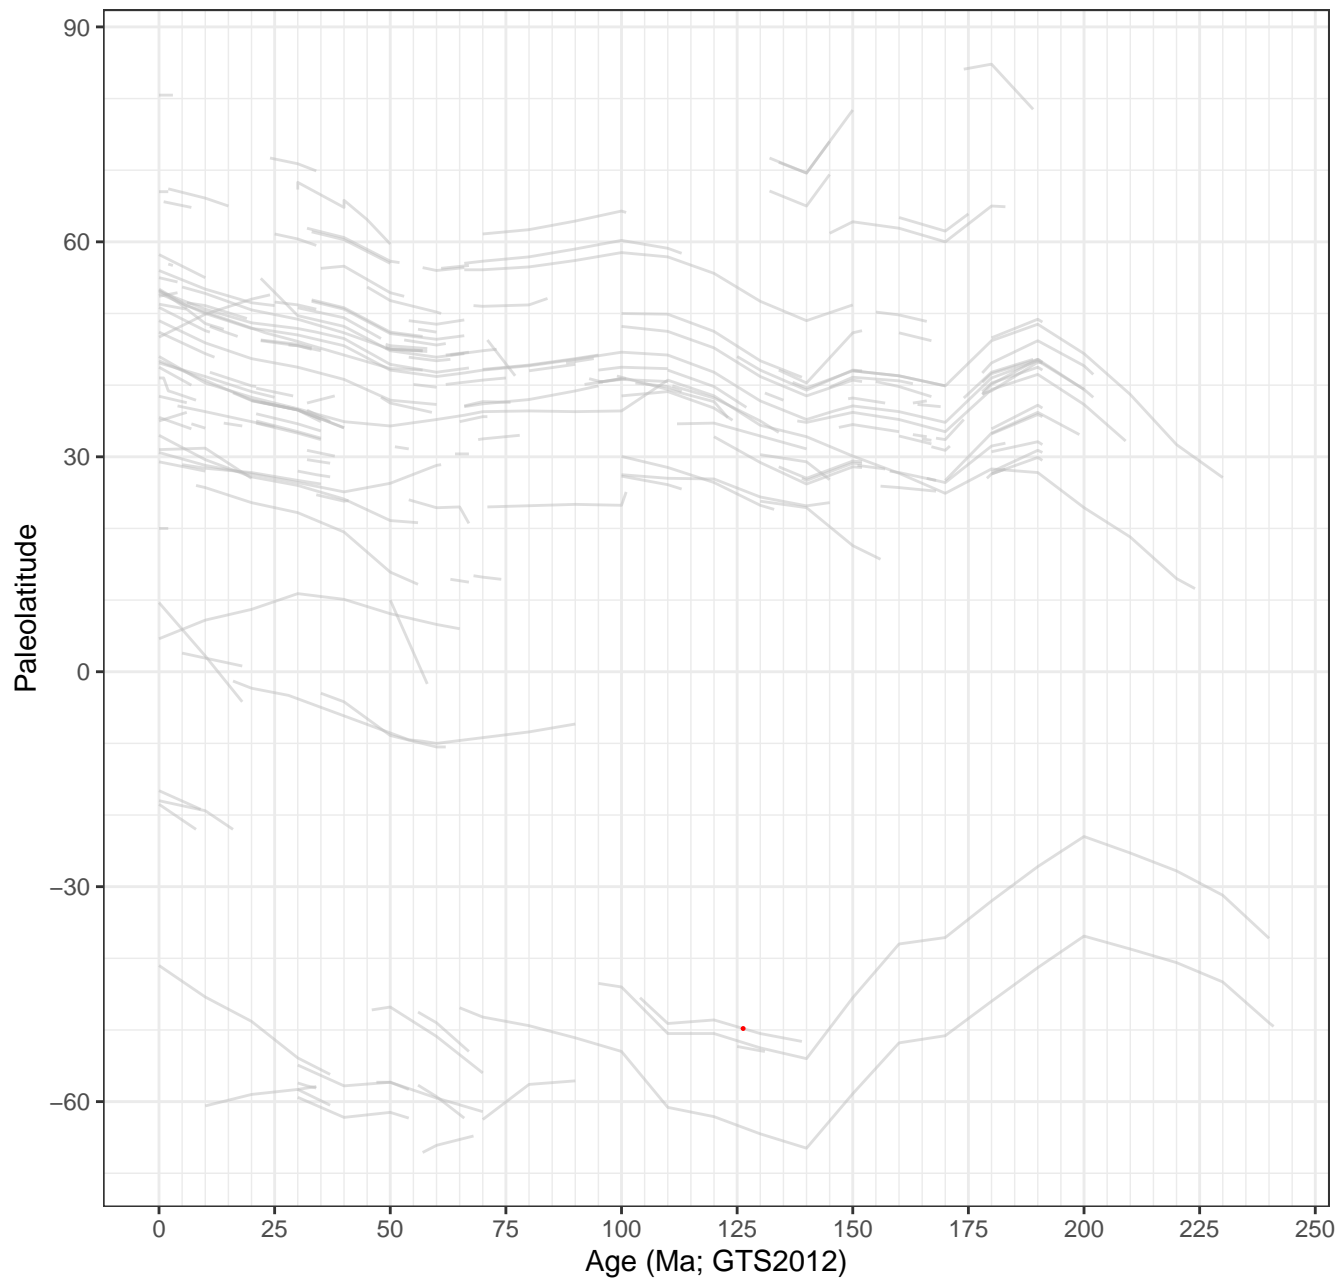

Supplement: Supplementary file 846 [file Aprobolocysta galeata.pdf › Supplement/Supplement 2/Species 1914 plots/Aprobolocysta galeata.pdf]

# Species *Aprobolocysta neista*

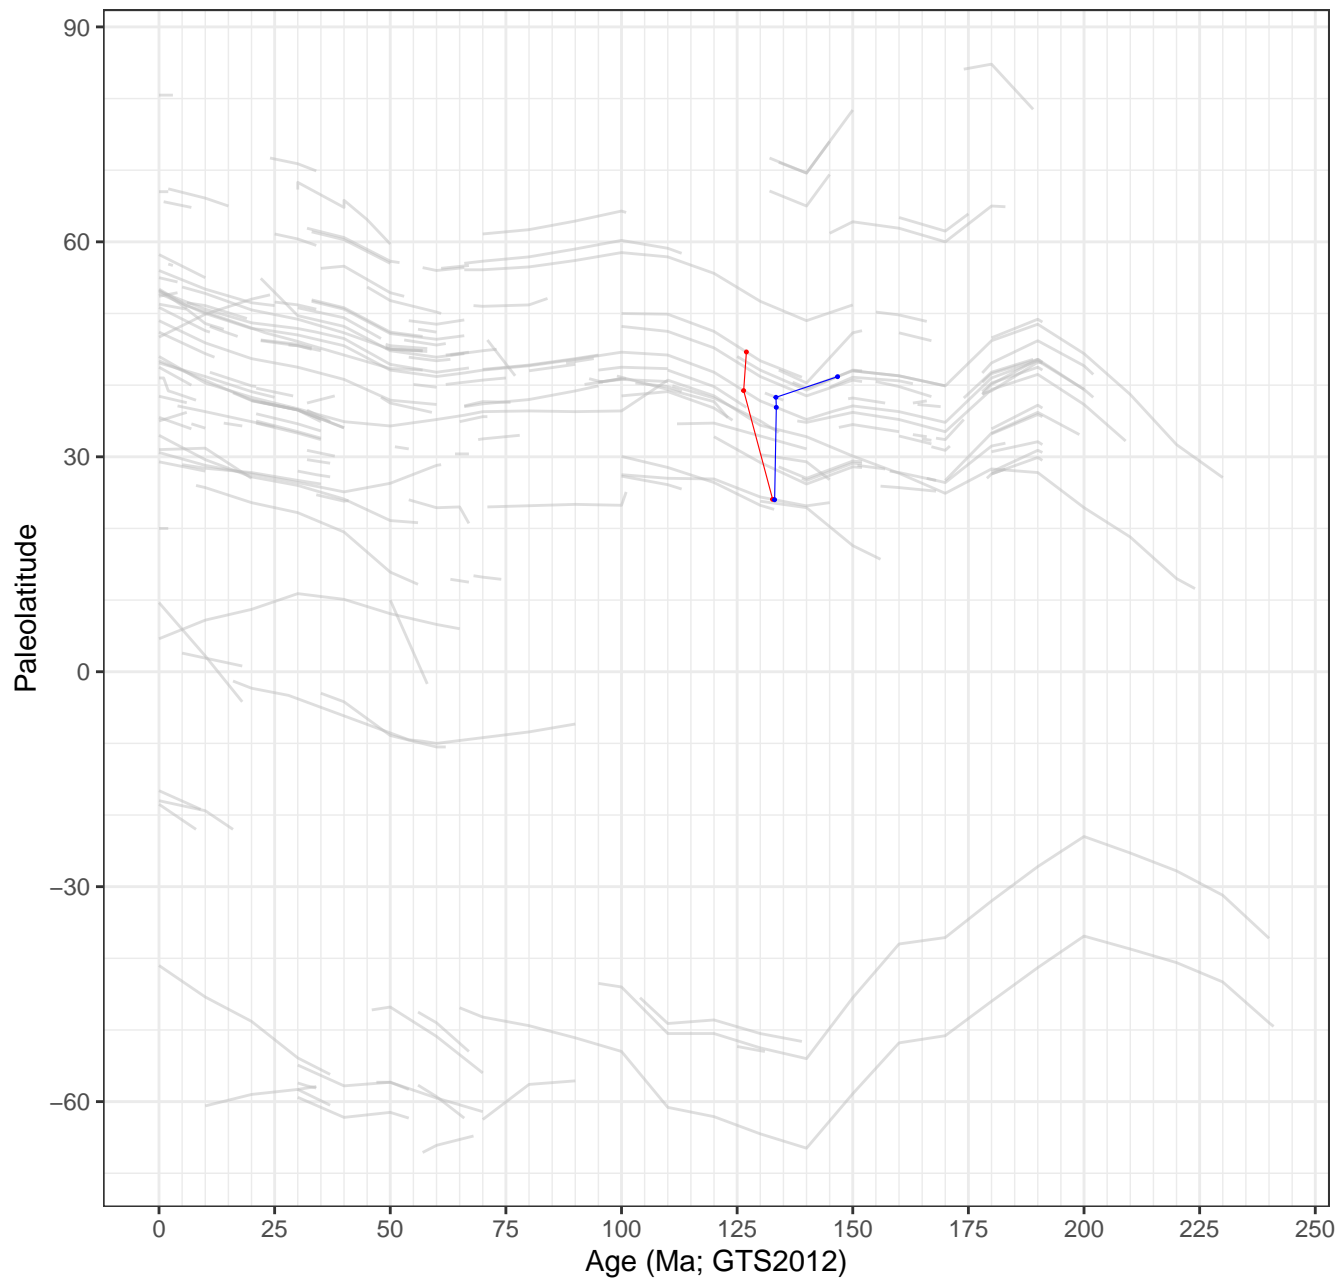

Supplement: Supplementary file 847 [file Aprobolocysta neista.pdf › Supplement/Supplement 2/Species 1914 plots/Aprobolocysta neista.pdf]

# Species *Aprobolocysta trycheria*

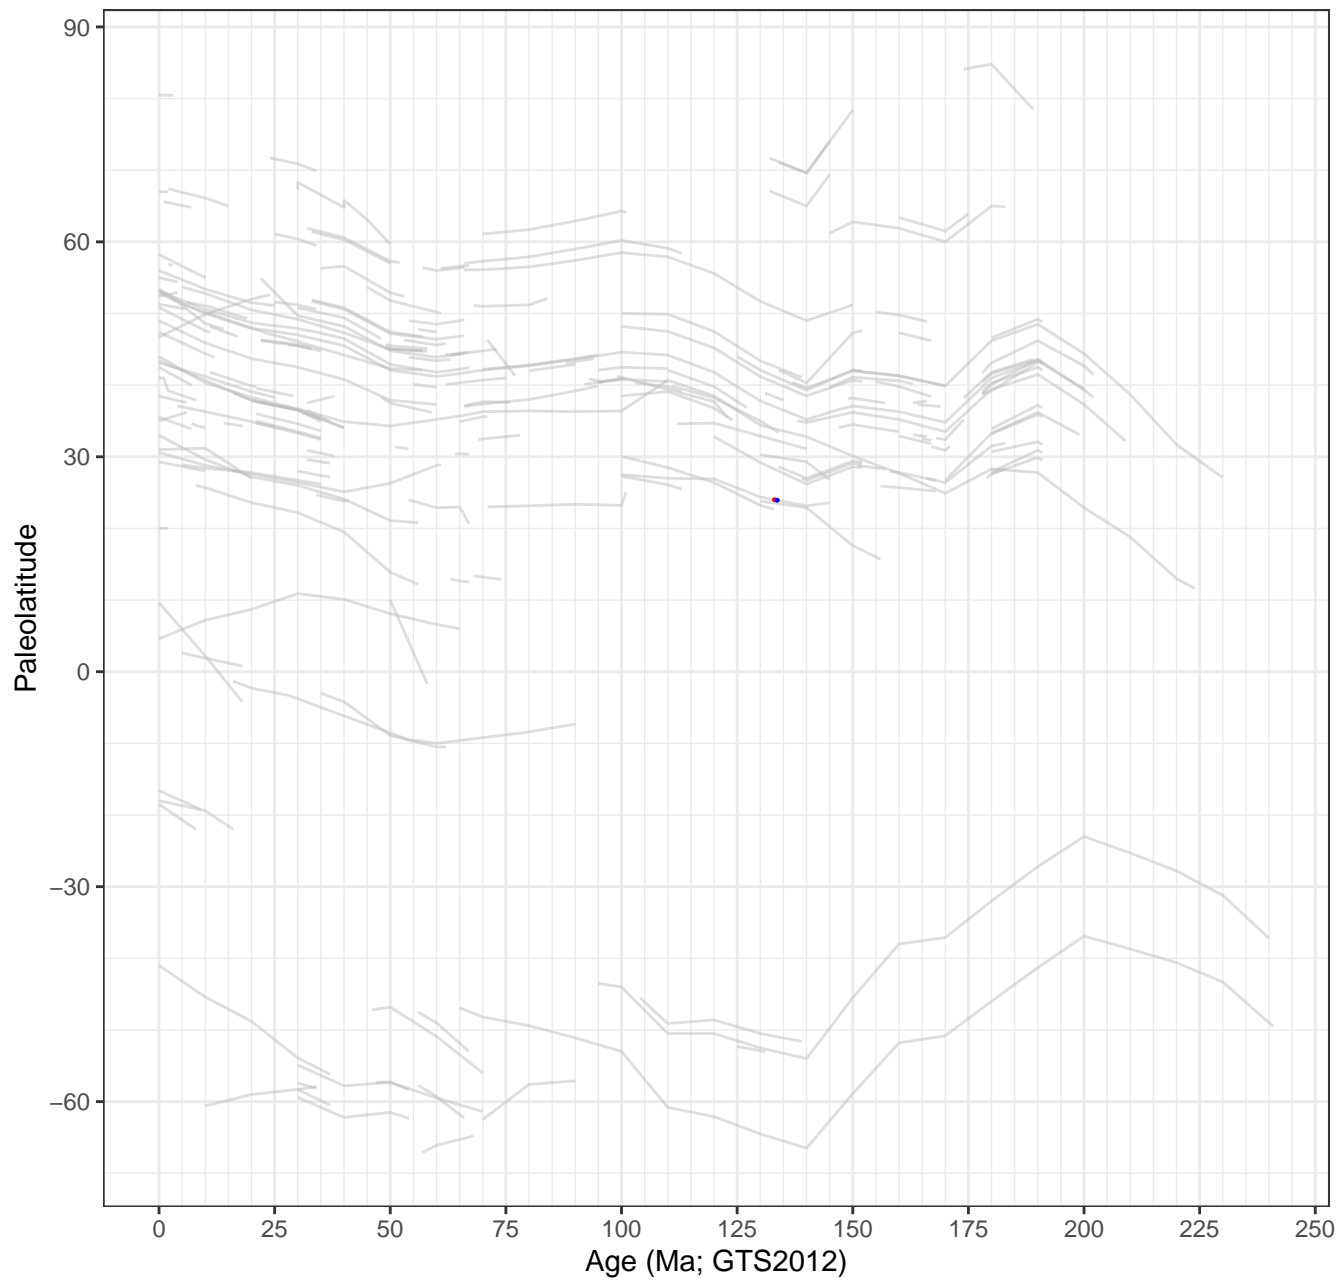

Supplement: Supplementary file 848 [file Aprobolocysta trycheria.pdf › Supplement/Supplement 2/Species 1914 plots/Aprobolocysta trycheria.pdf]

# Species *Aptea polymorpha*

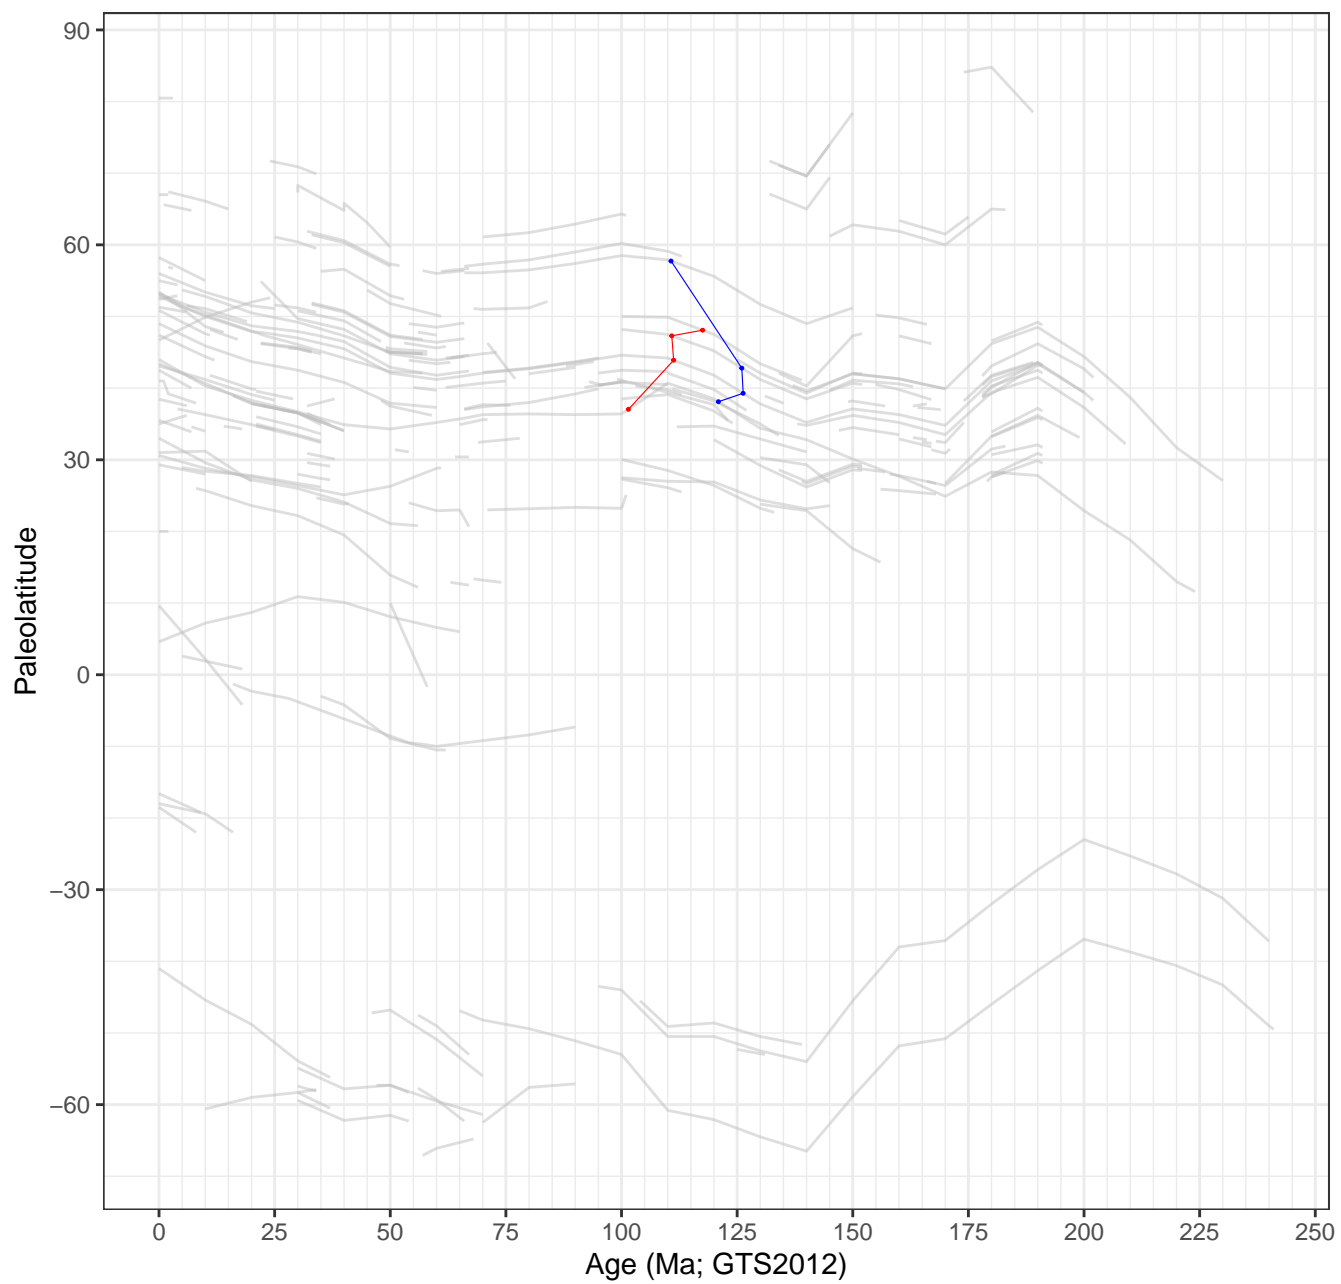

Supplement: Supplementary file 849 [file Aptea polymorpha.pdf › Supplement/Supplement 2/Species 1914 plots/Aptea polymorpha.pdf]

# Species *Apteodinium australiense*

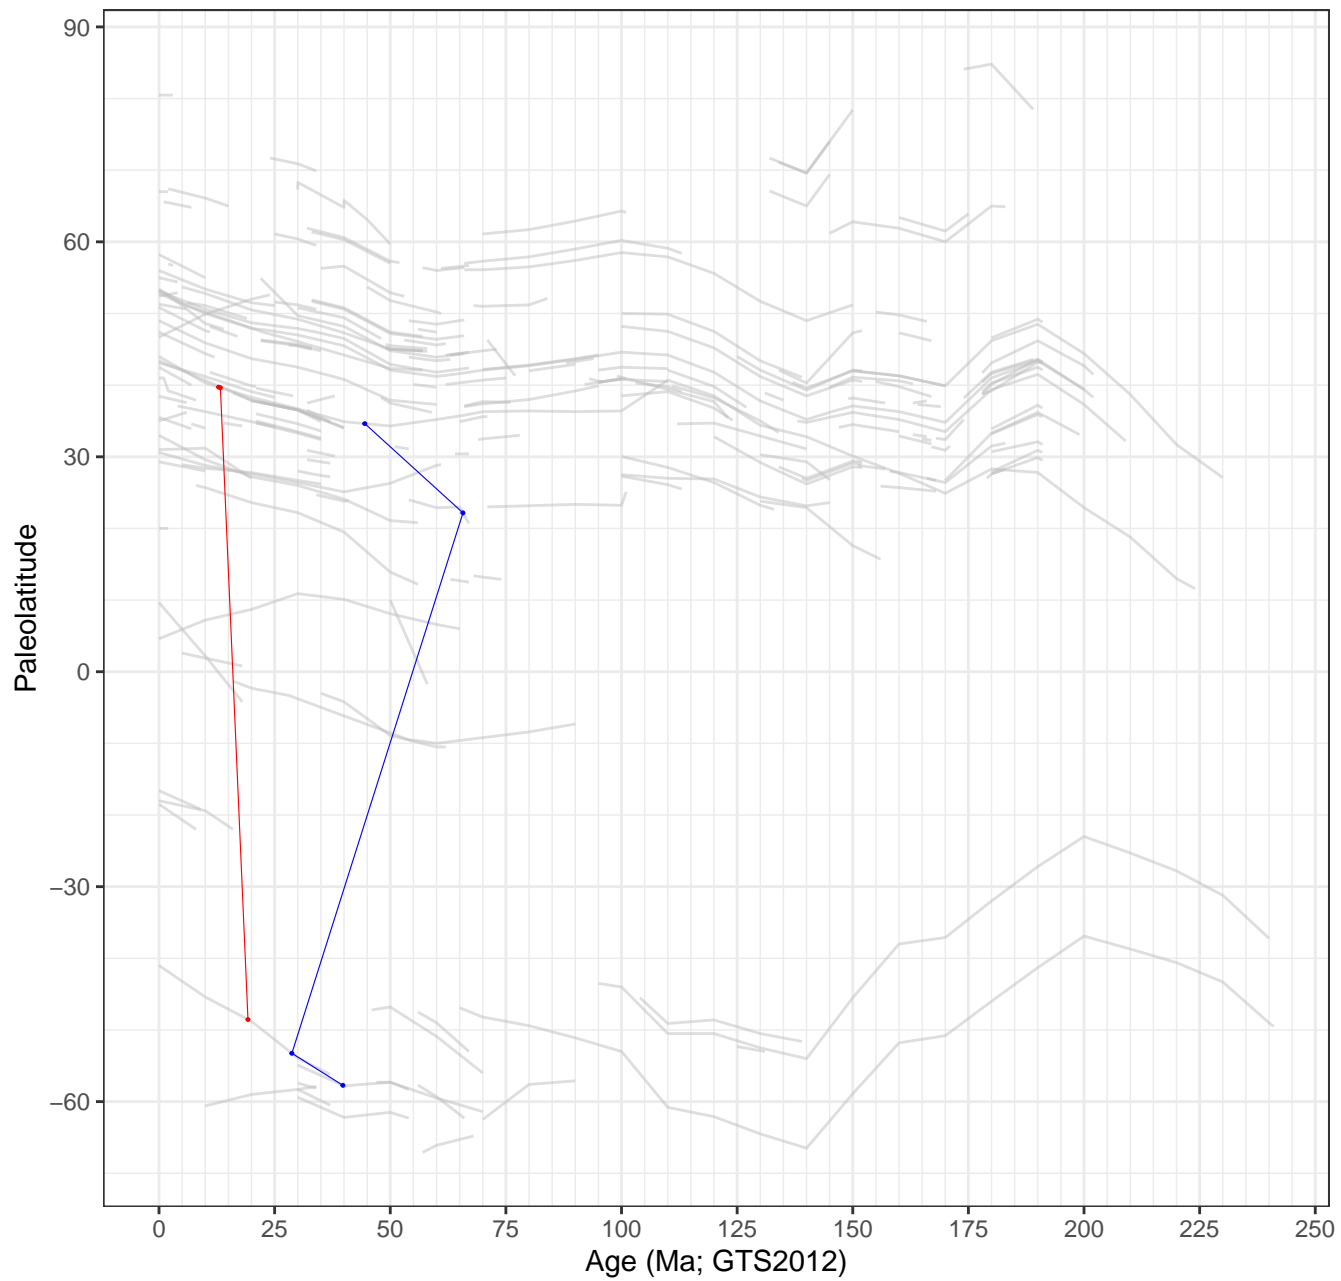

Supplement: Supplementary file 850 [file Apteodinium australiense.pdf › Supplement/Supplement 2/Species 1914 plots/Apteodinium australiense.pdf]

# Species *Apteodinium deflandrei*

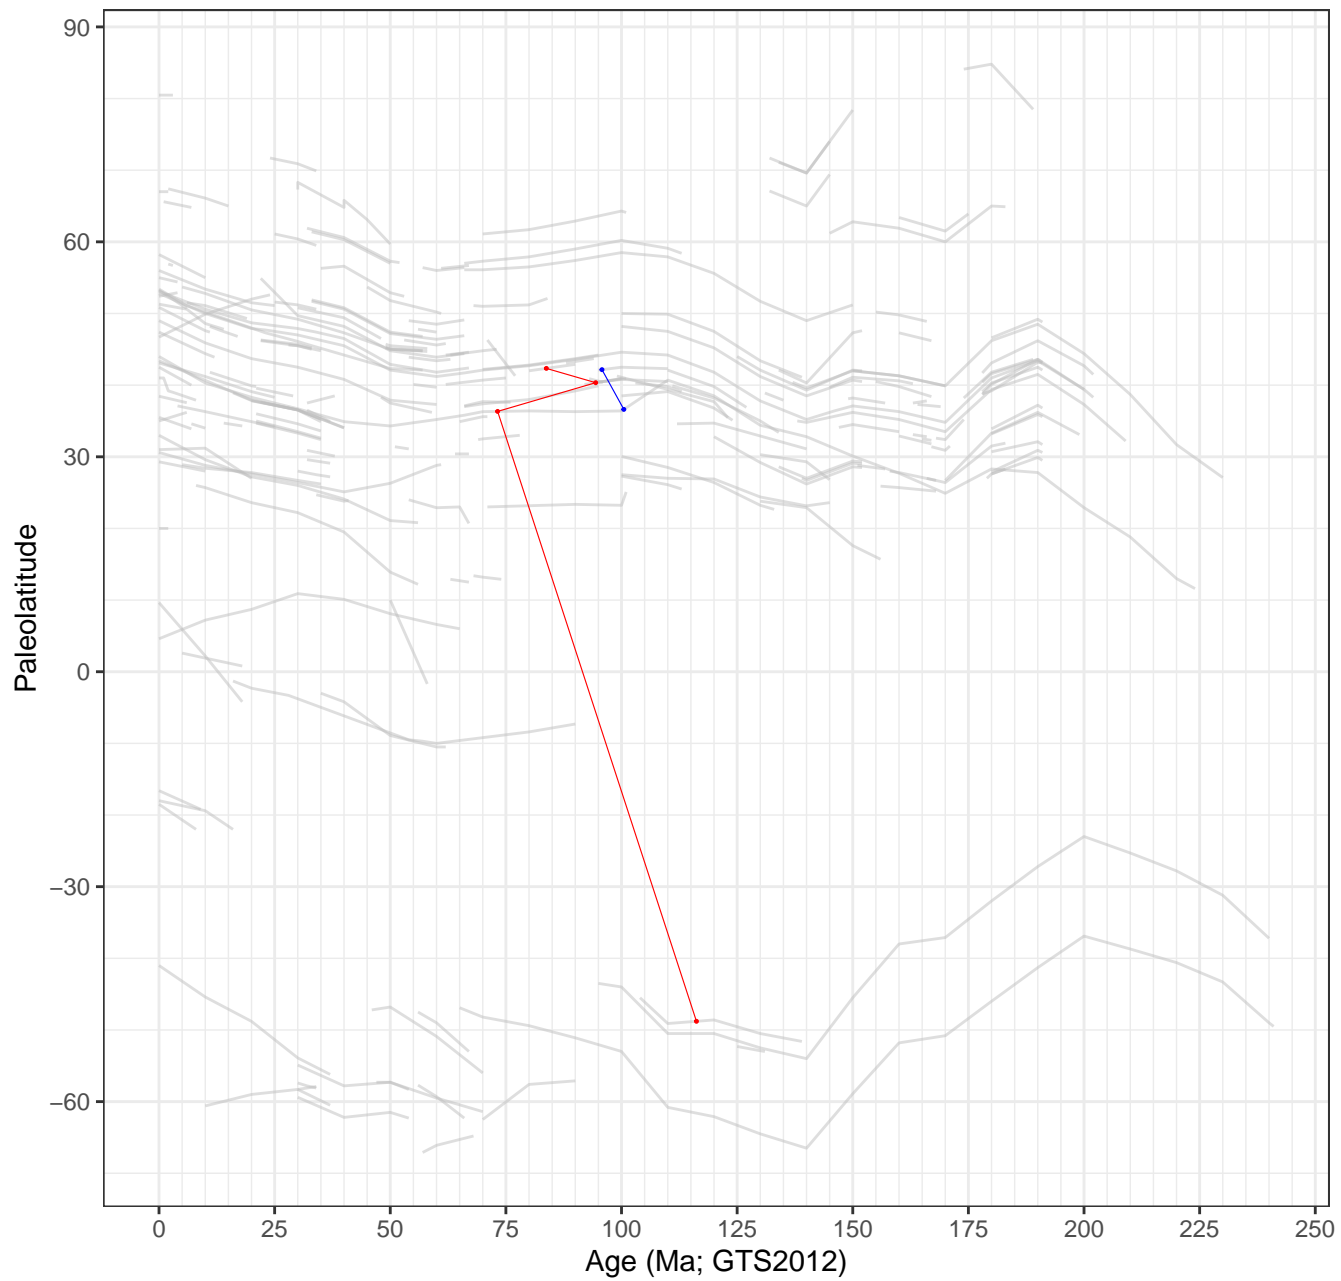

Supplement: Supplementary file 851 [file Apteodinium deflandrei.pdf › Supplement/Supplement 2/Species 1914 plots/Apteodinium deflandrei.pdf]

# Species *Apteodinium emslandense*

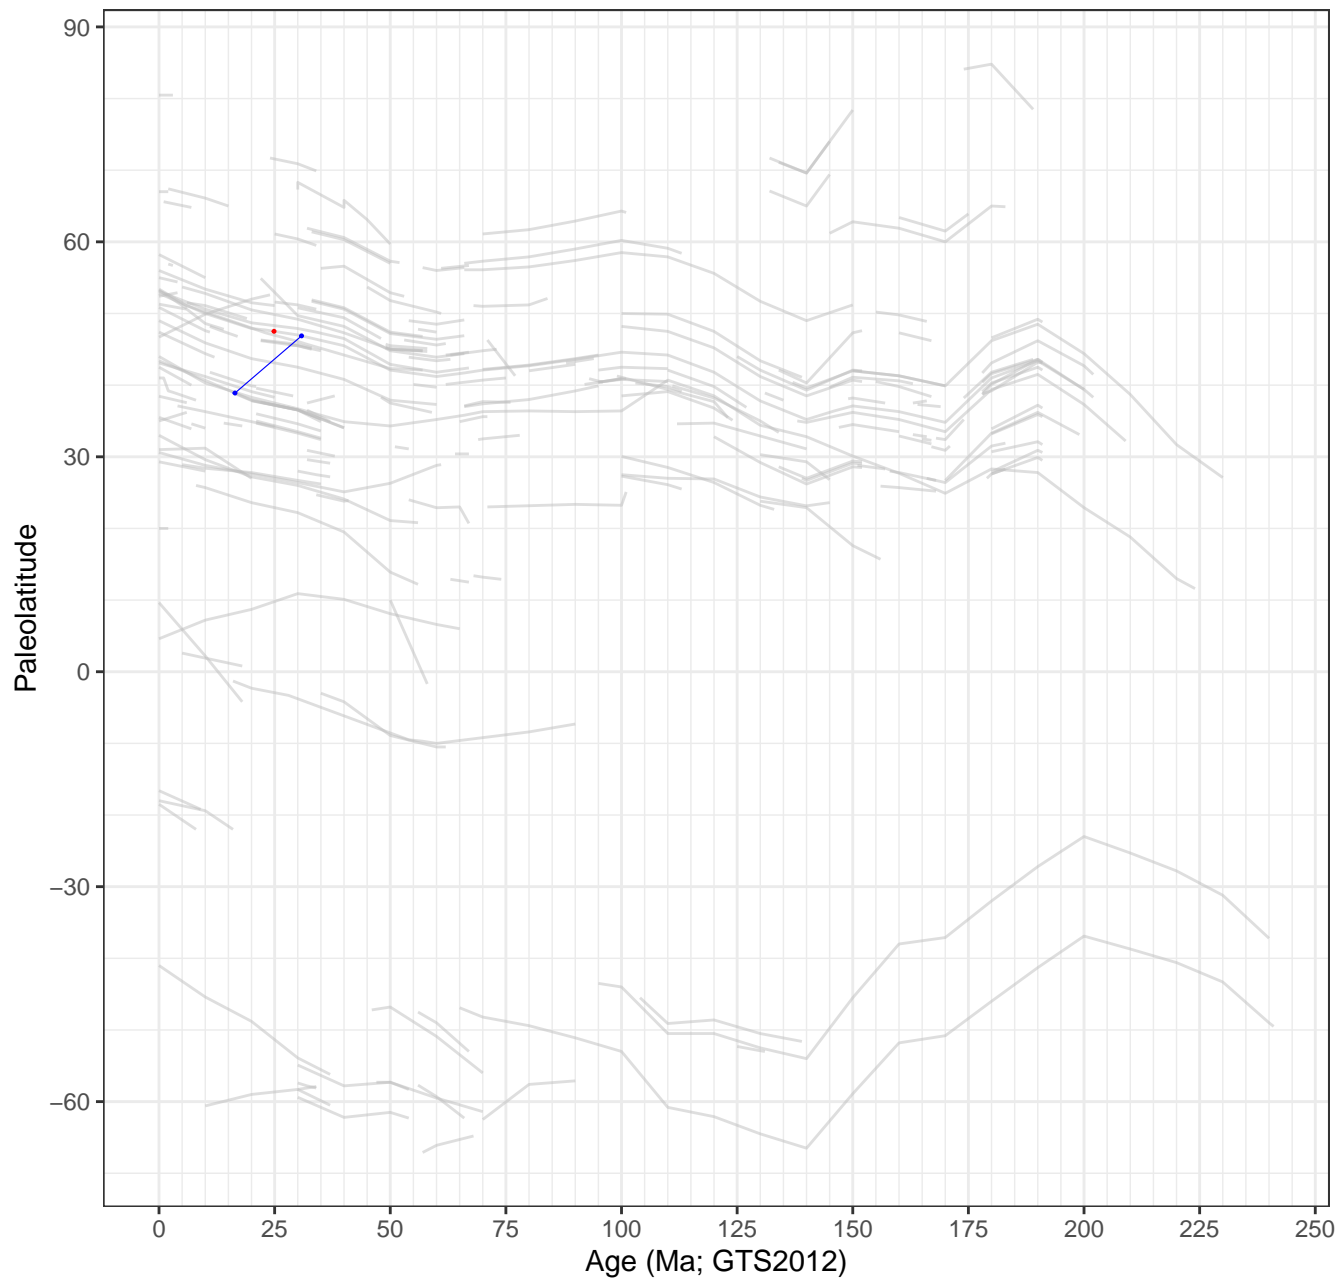

Supplement: Supplementary file 852 [file Apteodinium emslandense.pdf › Supplement/Supplement 2/Species 1914 plots/Apteodinium emslandense.pdf]

# Species *Apteodinium fallax*

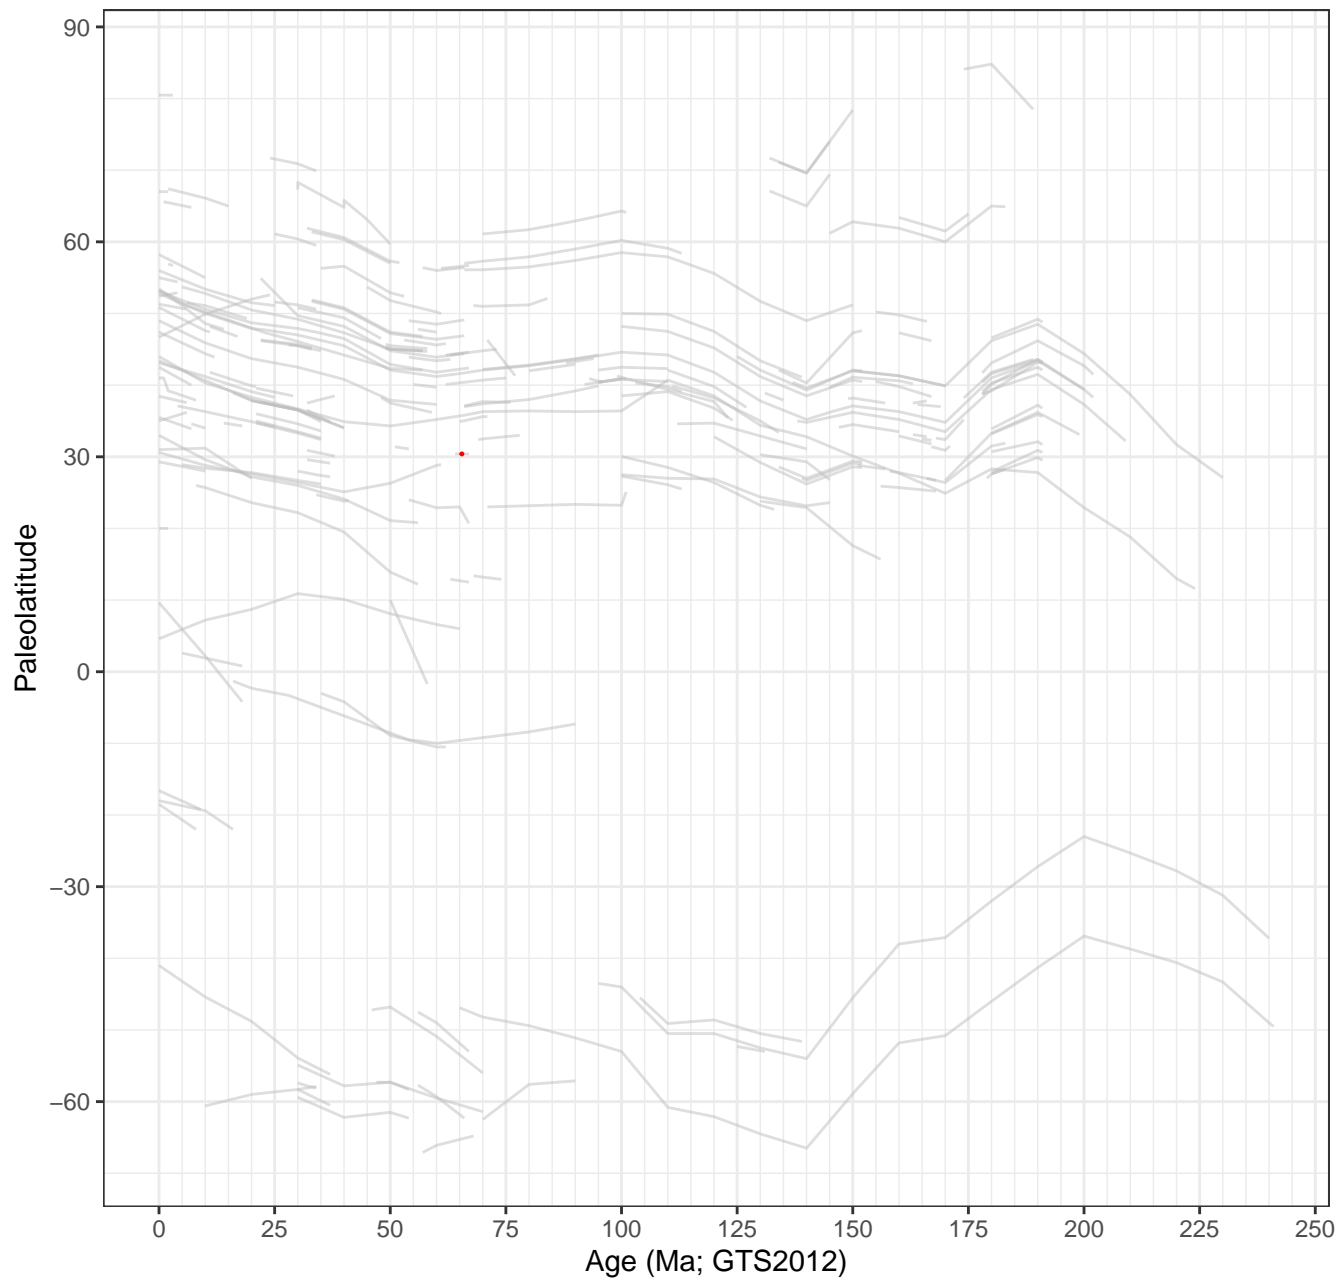

Supplement: Supplementary file 853 [file Apteodinium fallax.pdf › Supplement/Supplement 2/Species 1914 plots/Apteodinium fallax.pdf]

# Species *Apteodinium granulatum*

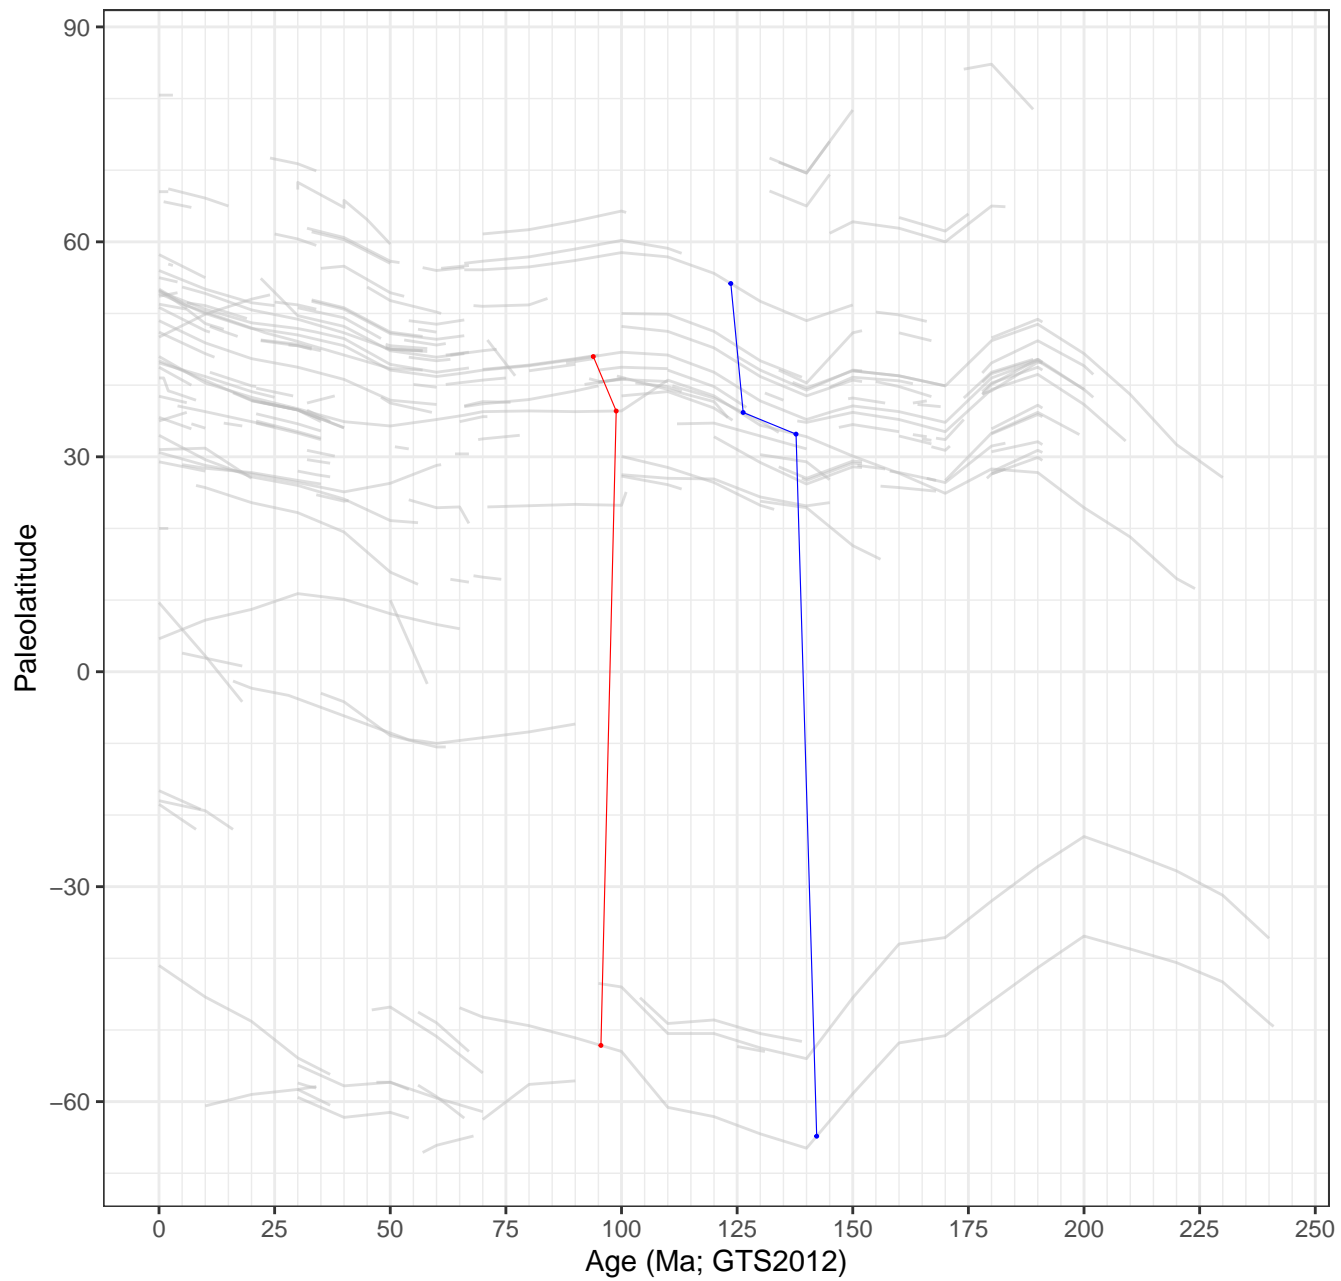

Supplement: Supplementary file 854 [file Apteodinium granulatum.pdf › Supplement/Supplement 2/Species 1914 plots/Apteodinium granulatum.pdf]

# Species *Apteodinium maculatum grande*

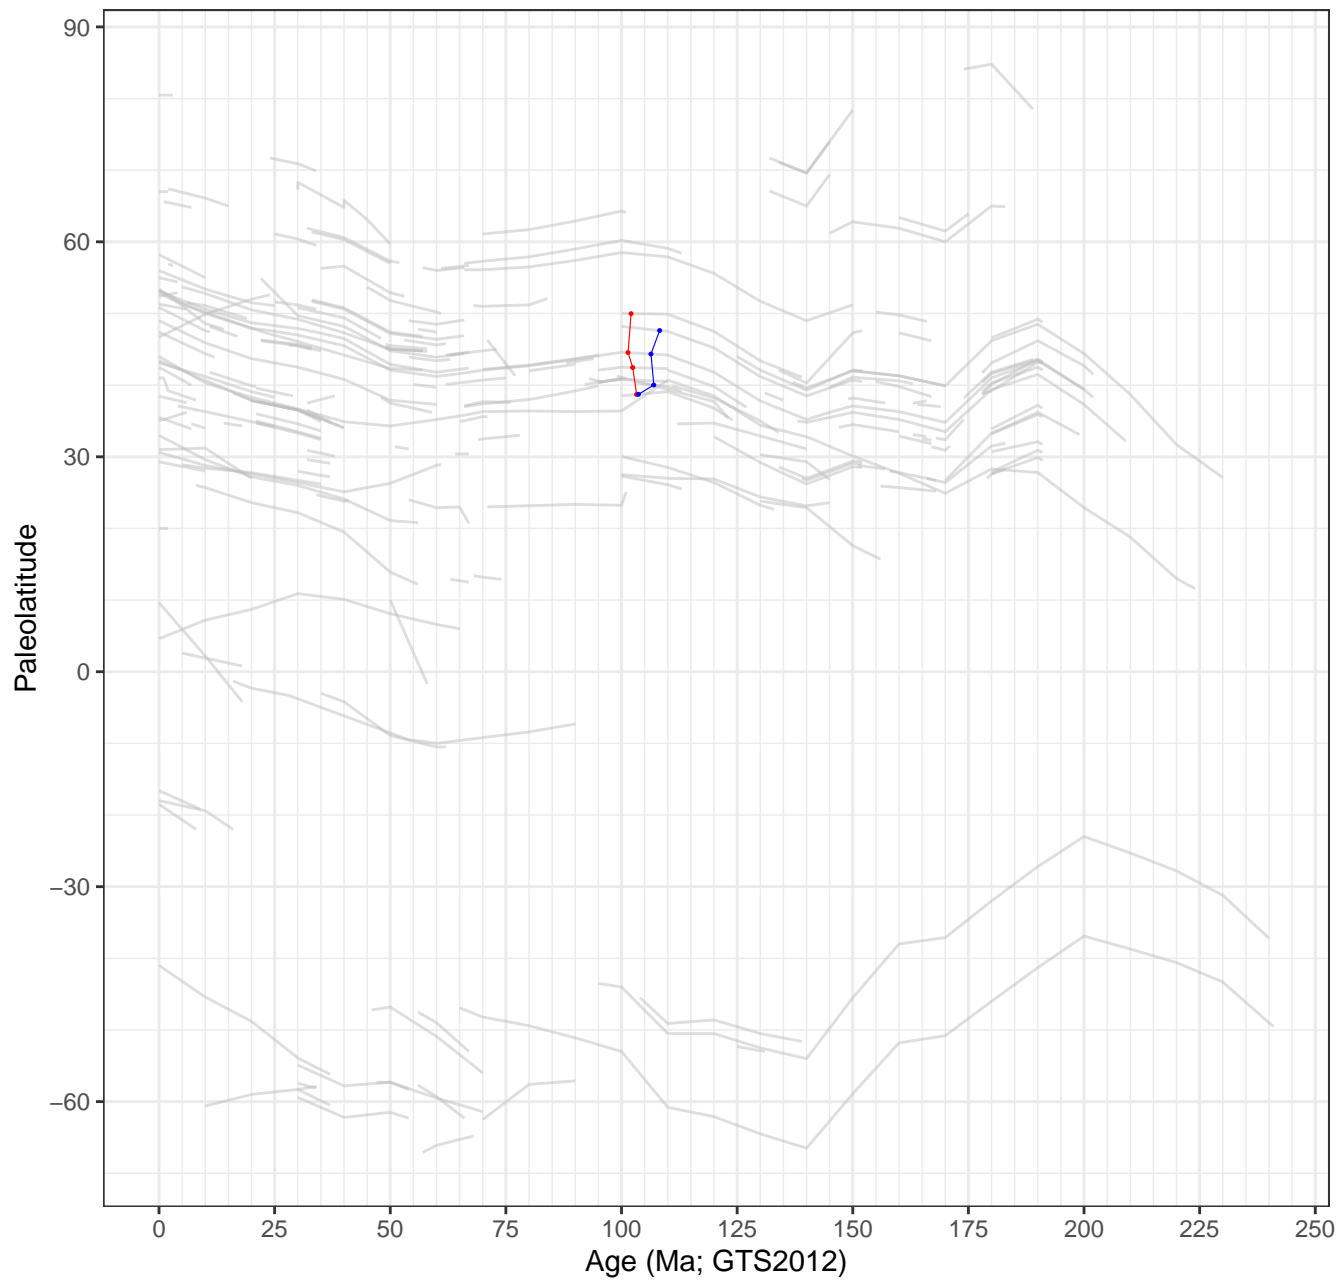

Supplement: Supplementary file 855 [file Apteodinium maculatum grande.pdf › Supplement/Supplement 2/Species 1914 plots/Apteodinium maculatum grande.pdf]

# Species *Apteodinium maculatum maculatum*

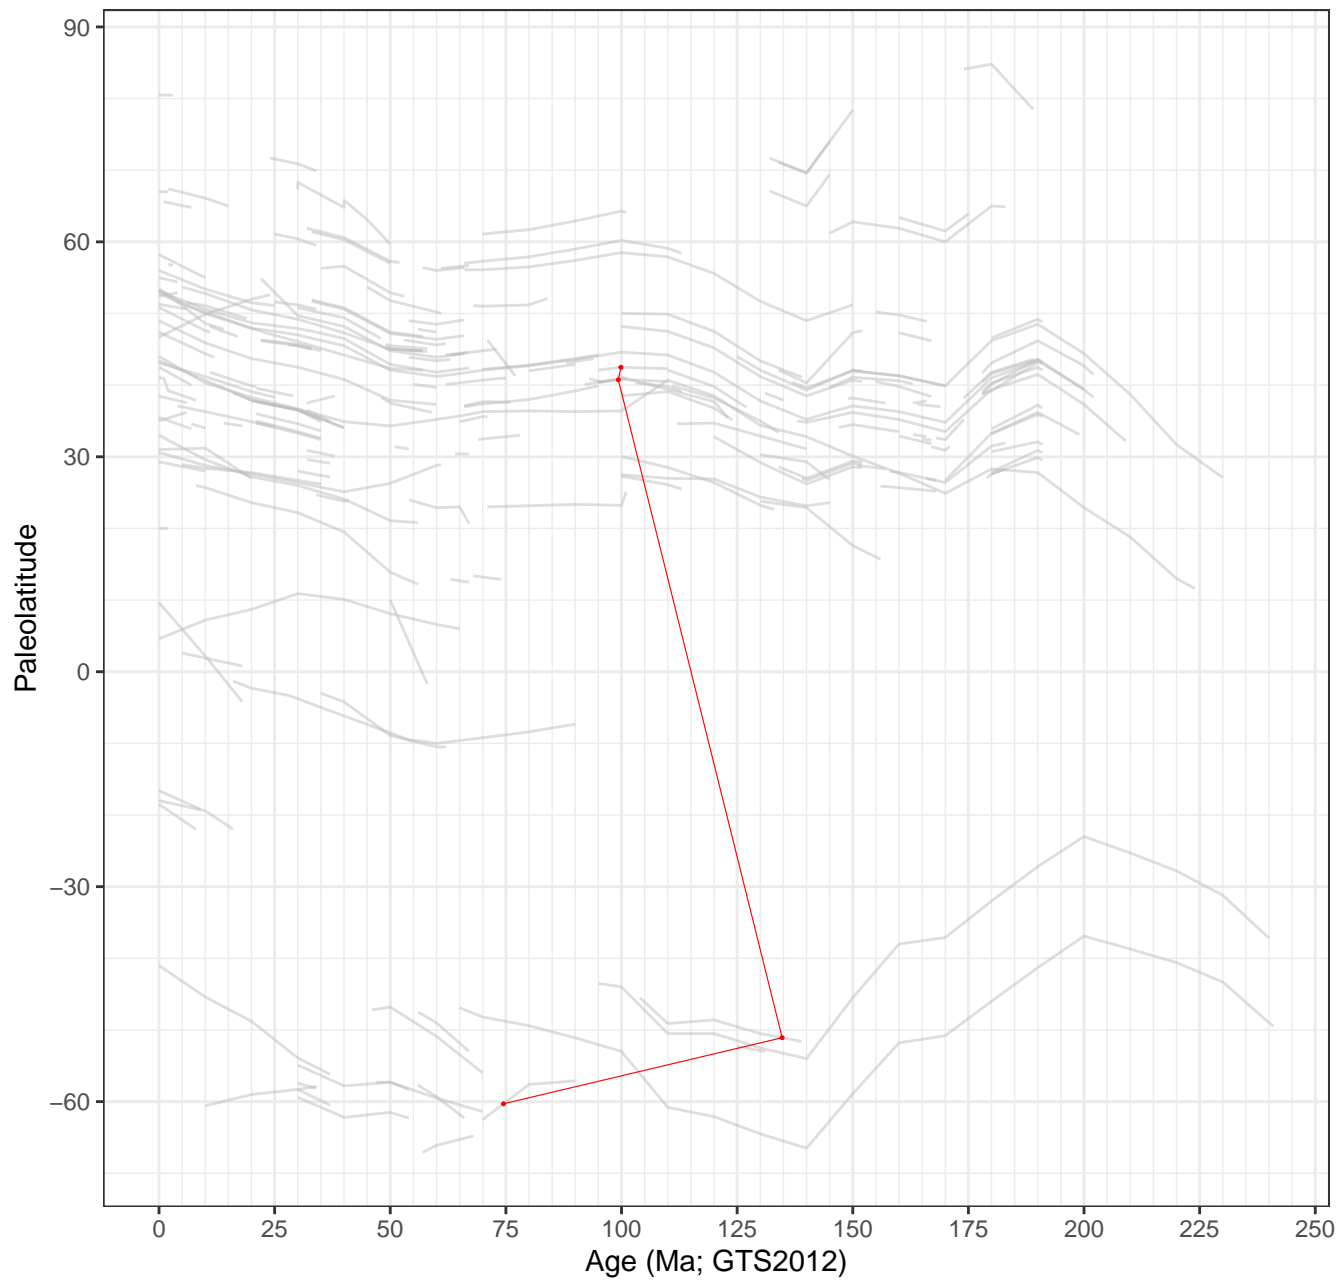

Supplement: Supplementary file 856 [file Apteodinium maculatum maculatum.pdf › Supplement/Supplement 2/Species 1914 plots/Apteodinium maculatum maculatum.pdf]

# Species *Apteodinium maculatum*

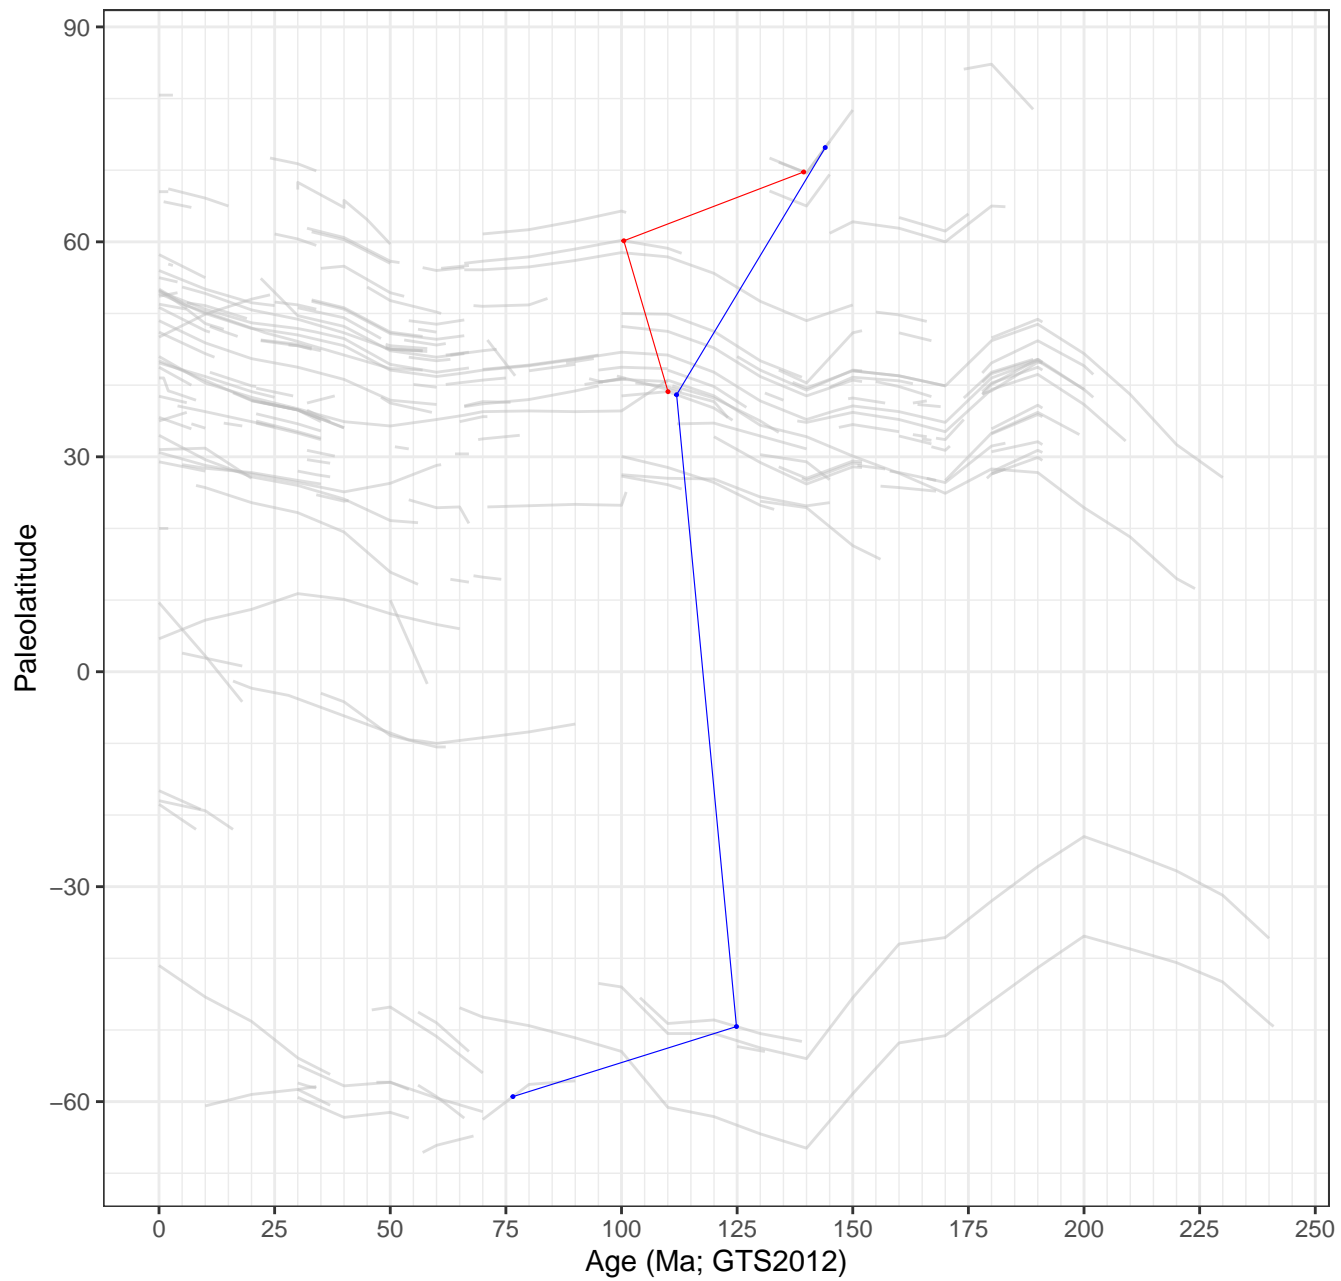

Supplement: Supplementary file 857 [file Apteodinium maculatum.pdf › Supplement/Supplement 2/Species 1914 plots/Apteodinium maculatum.pdf]

# Species *Apteodinium monocanthum*

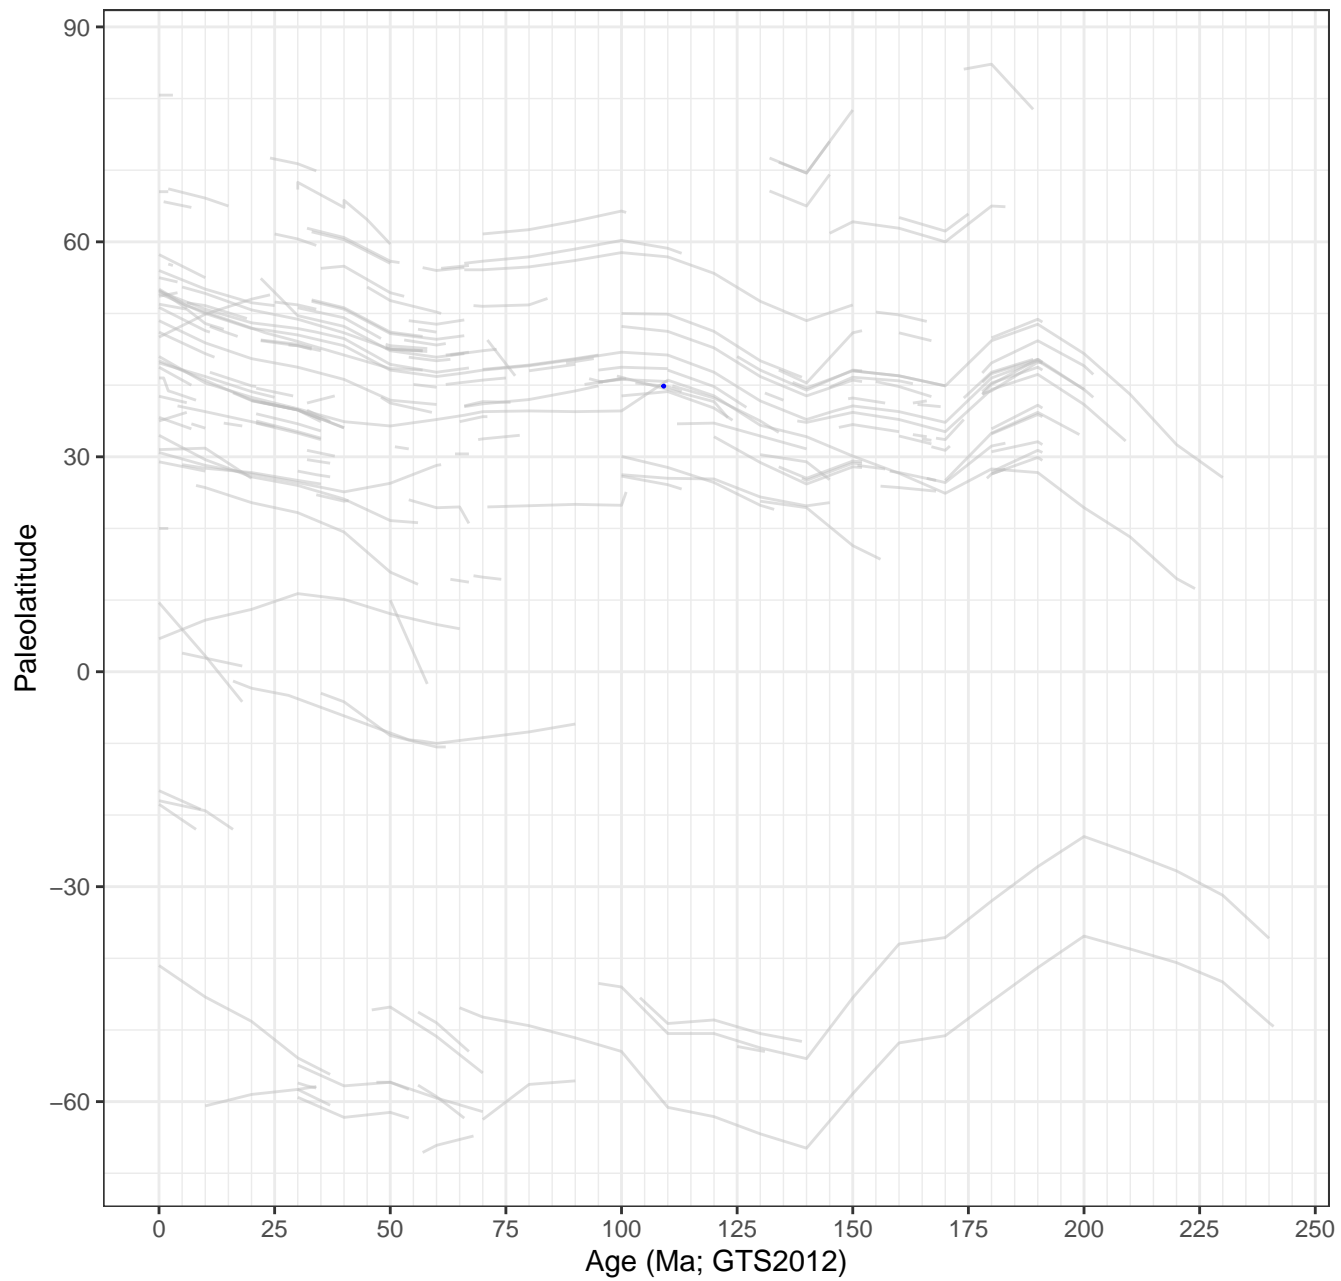

Supplement: Supplementary file 858 [file Apteodinium monocanthum.pdf › Supplement/Supplement 2/Species 1914 plots/Apteodinium monocanthum.pdf]

# Species *Apteodinium reticulatum*

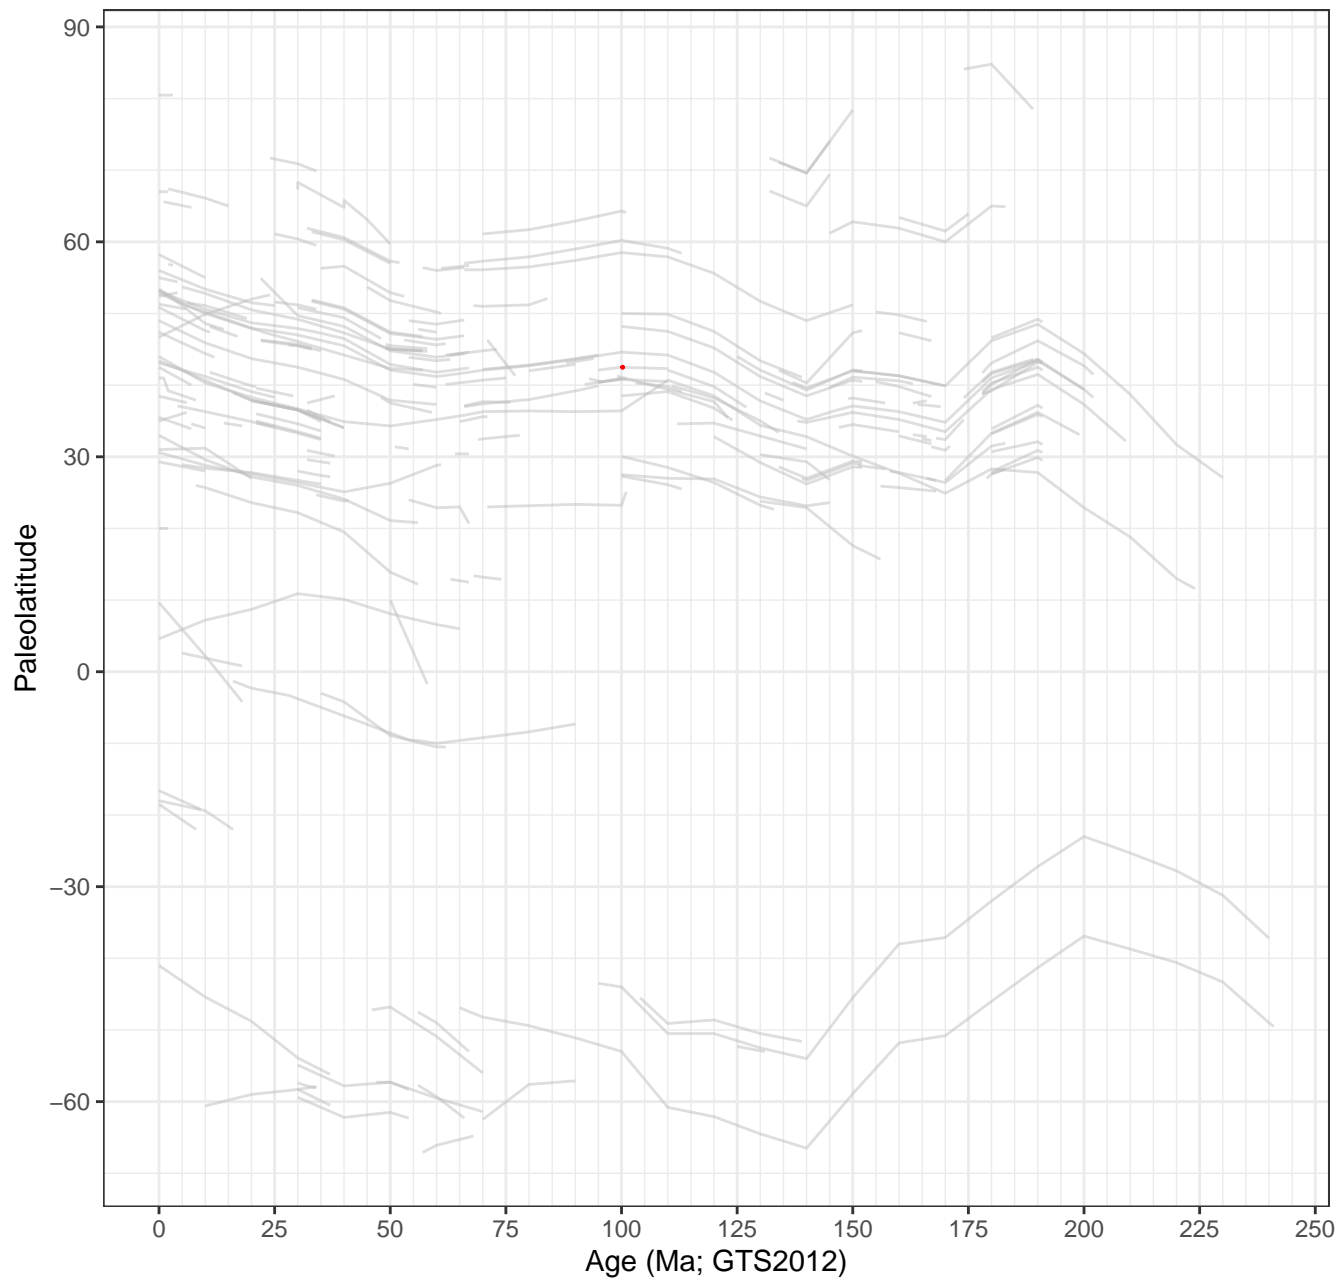

Supplement: Supplementary file 859 [file Apteodinium reticulatum.pdf › Supplement/Supplement 2/Species 1914 plots/Apteodinium reticulatum.pdf]

# Species *Apteodinium spiridoides*

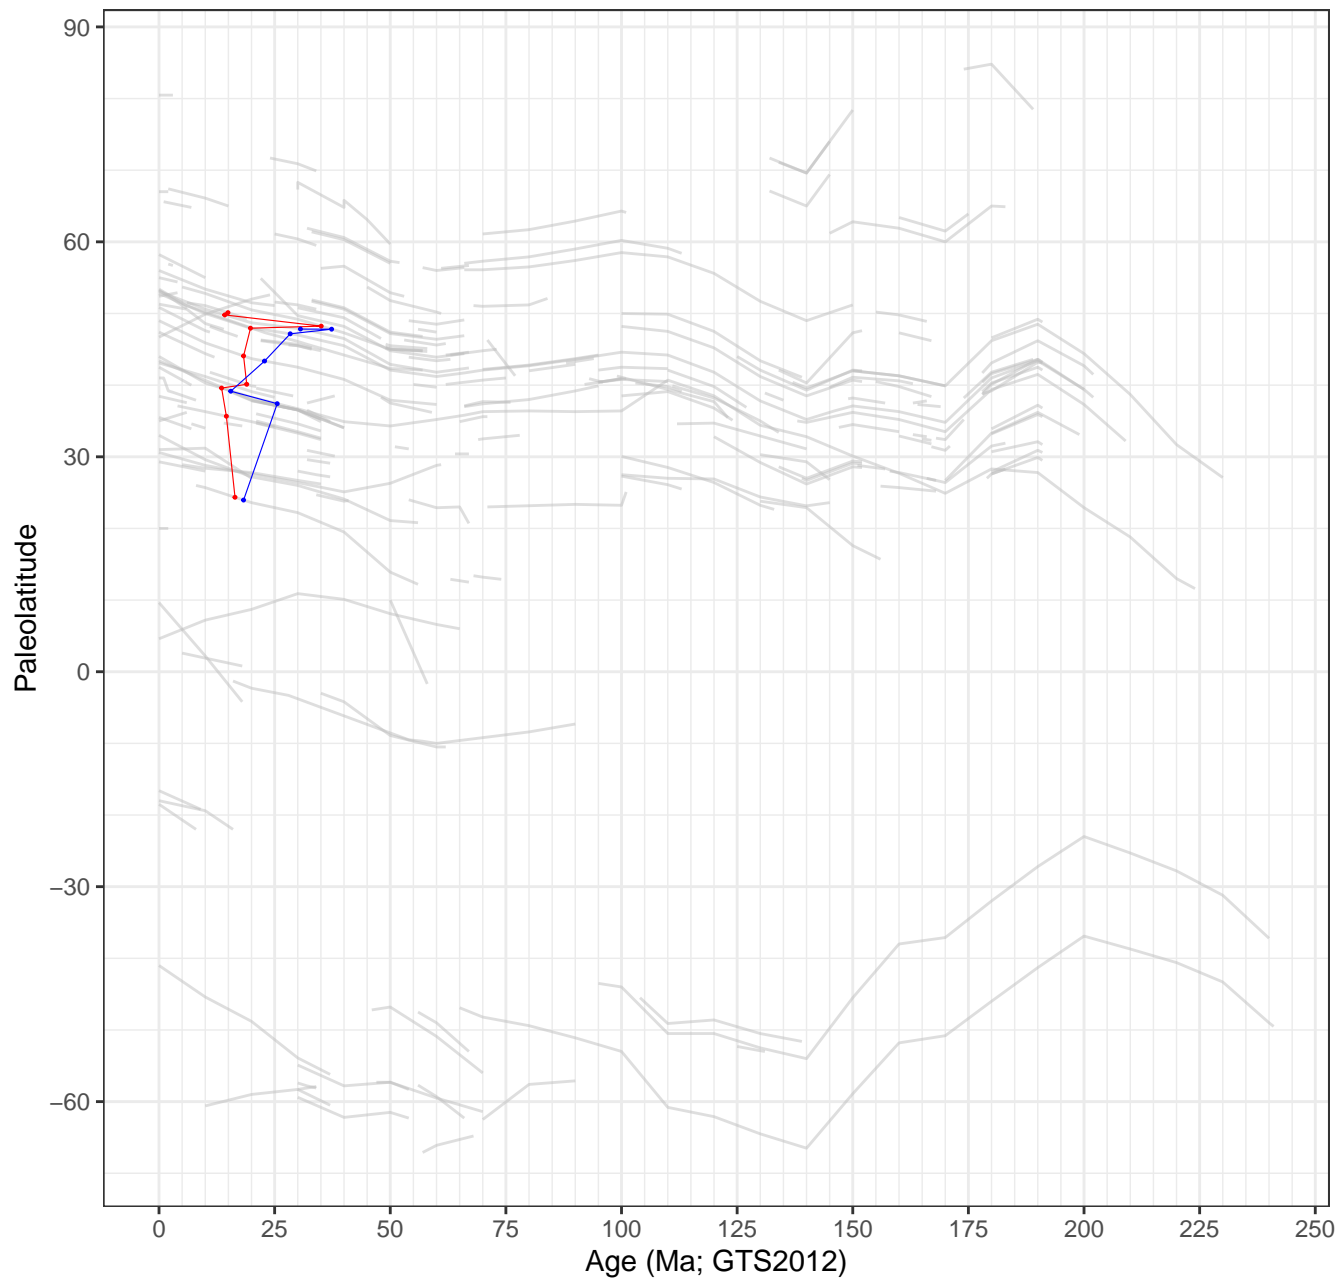

Supplement: Supplementary file 860 [file Apteodinium spiridoides.pdf › Supplement/Supplement 2/Species 1914 plots/Apteodinium spiridoides.pdf]

# Species *Apteodinium spongiosum*

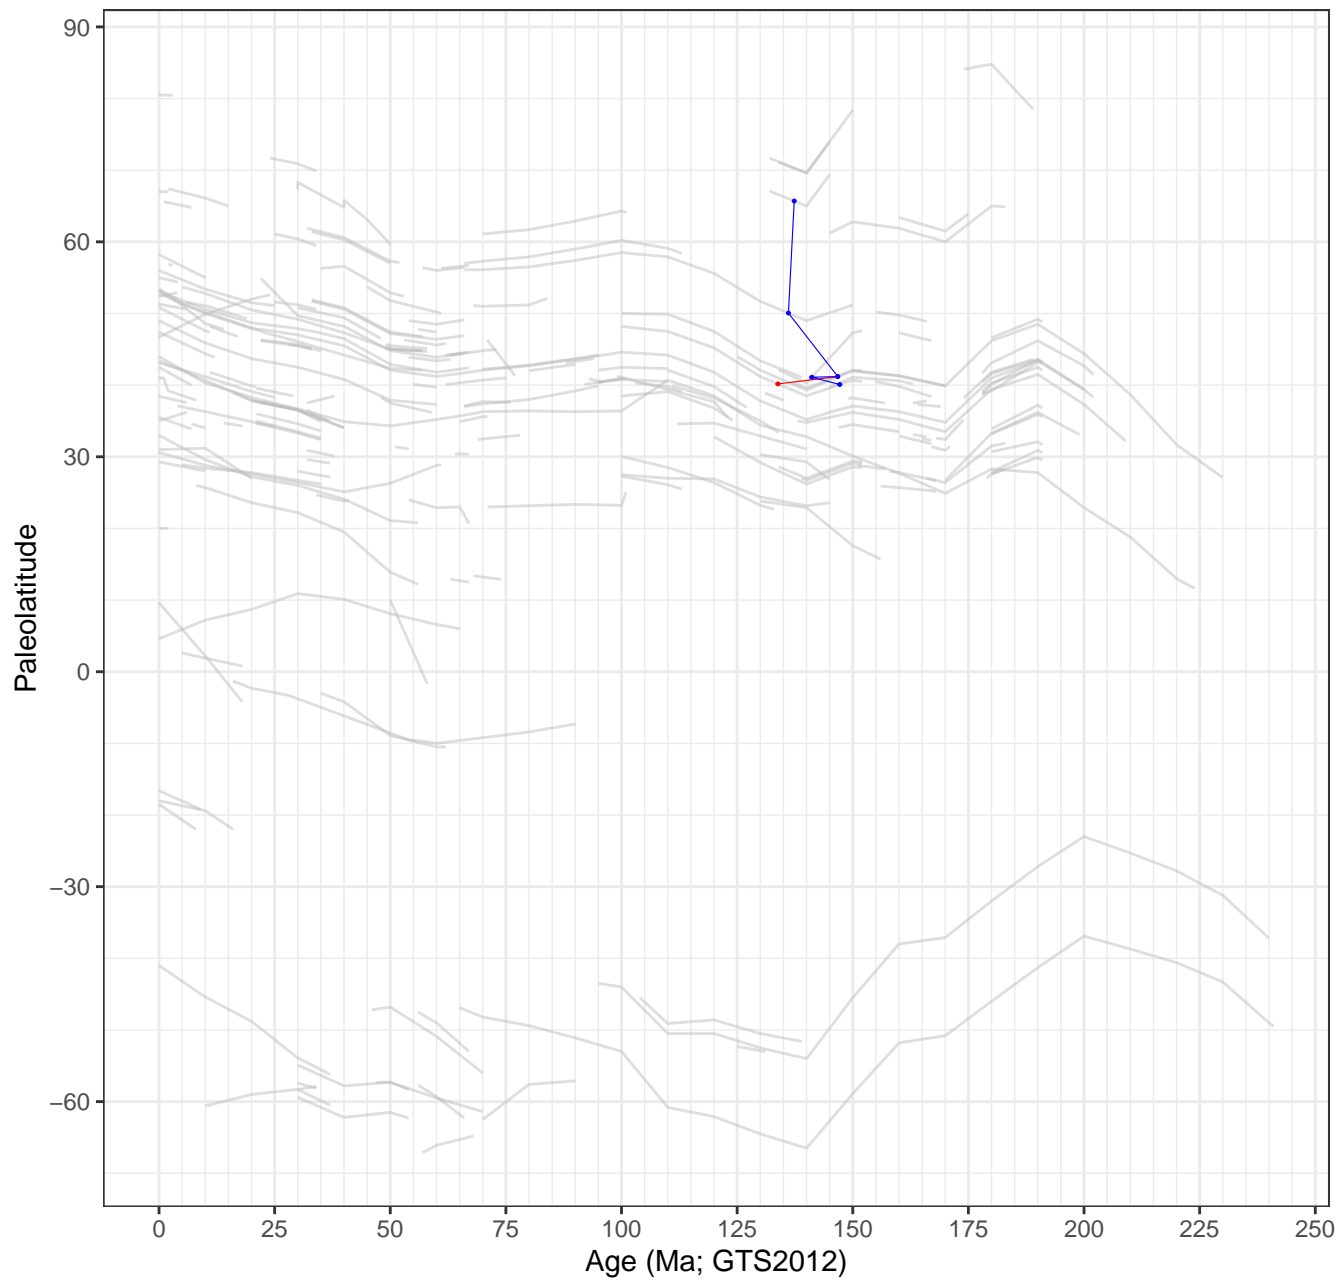

Supplement: Supplementary file 861 [file Apteodinium spongiosum.pdf › Supplement/Supplement 2/Species 1914 plots/Apteodinium spongiosum.pdf]

# Species *Apteodinium tectatum*

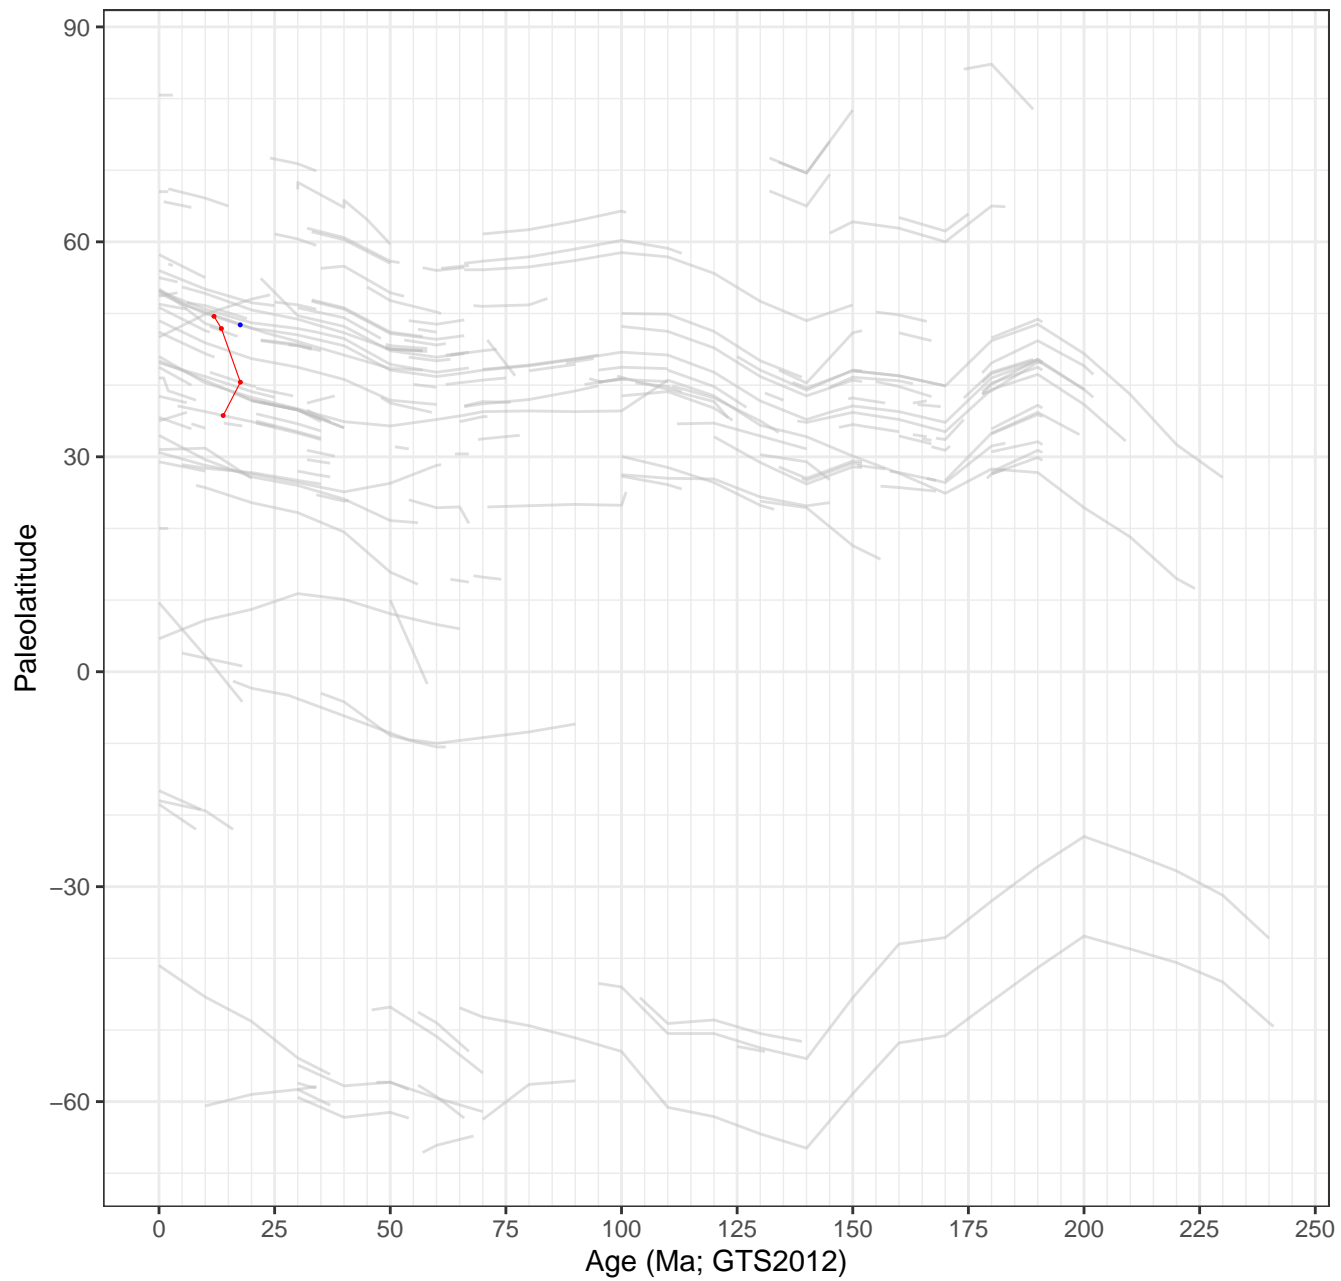

Supplement: Supplementary file 862 [file Apteodinium tectatum.pdf › Supplement/Supplement 2/Species 1914 plots/Apteodinium tectatum.pdf]

# Species *Apteodinium vectense*

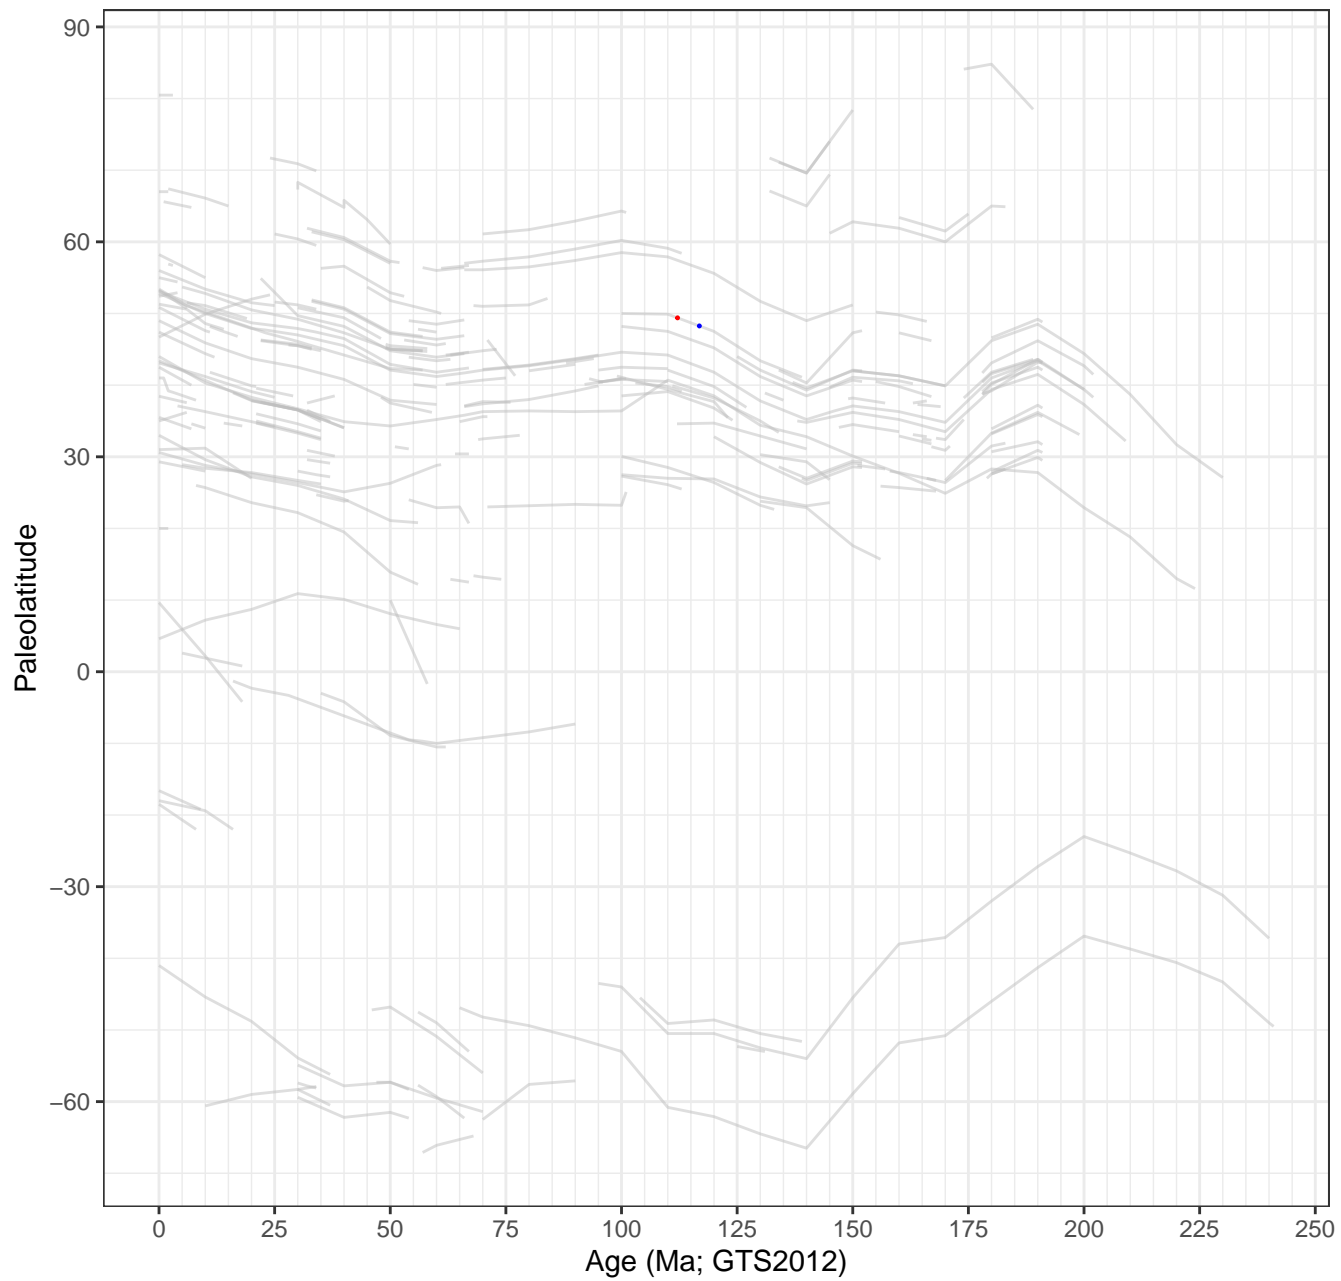

Supplement: Supplementary file 863 [file Apteodinium vectense.pdf › Supplement/Supplement 2/Species 1914 plots/Apteodinium vectense.pdf]

# Species *Apteodinium vesicum*

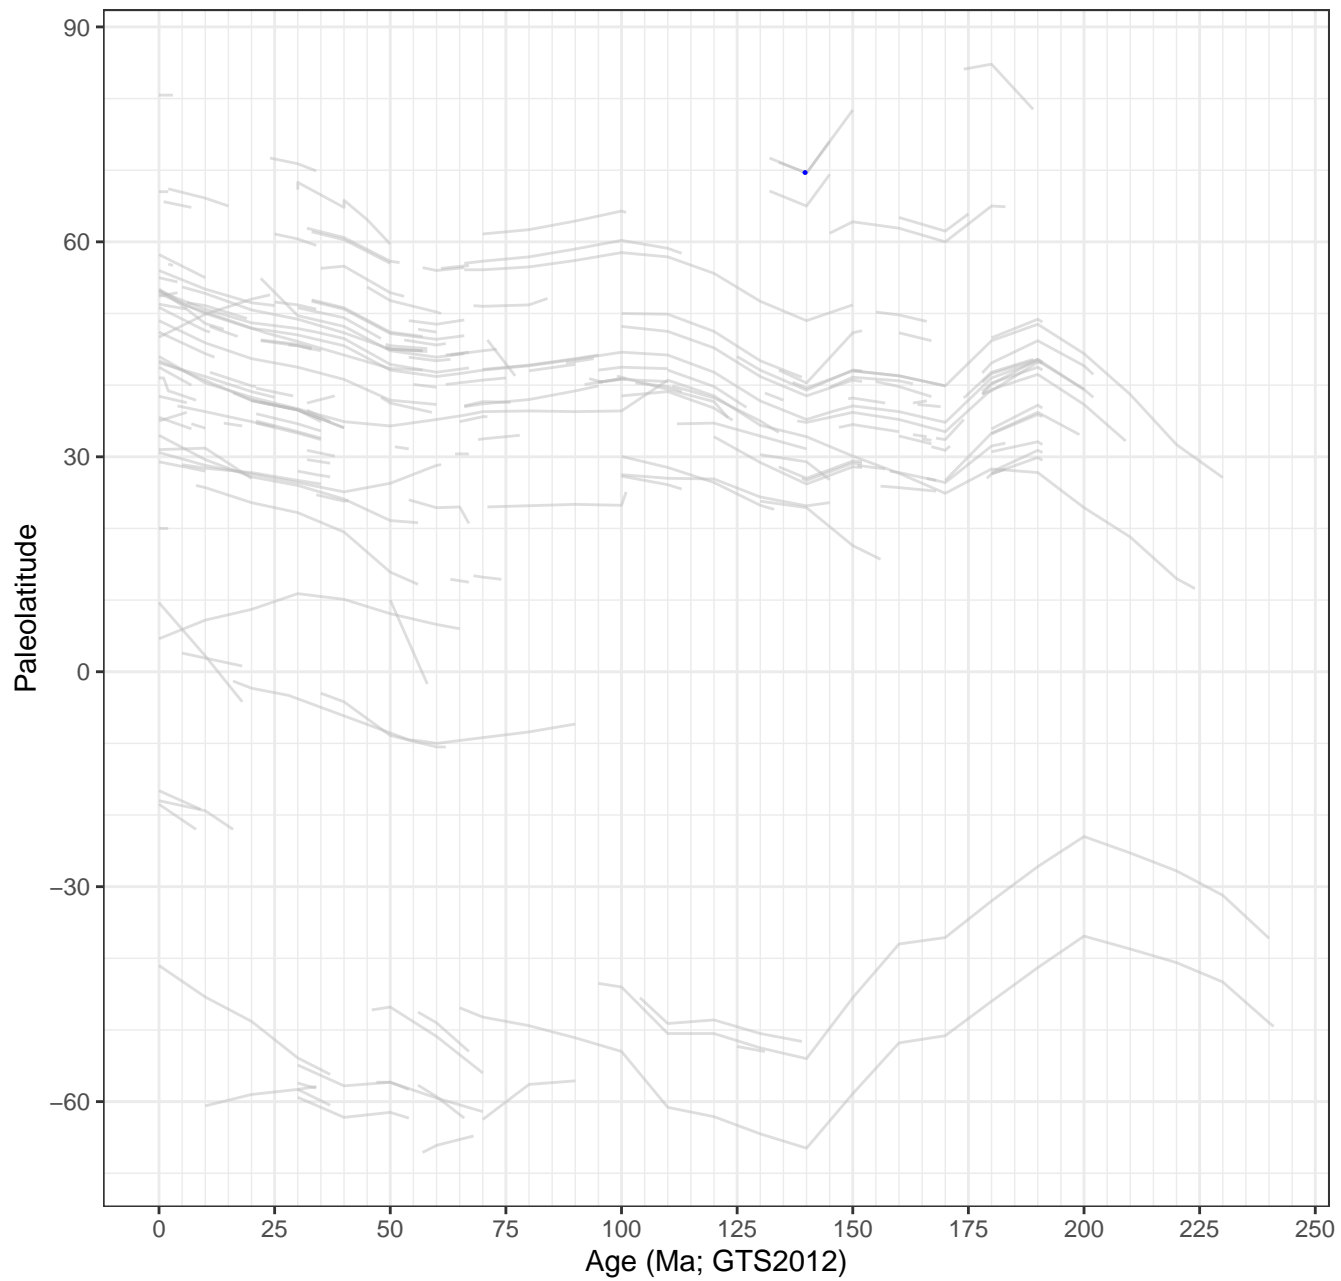

Supplement: Supplementary file 864 [file Apteodinium vescum.pdf › Supplement/Supplement 2/Species 1914 plots/Apteodinium vescum.pdf]

# Species *Arachnoidinium antarcticum*

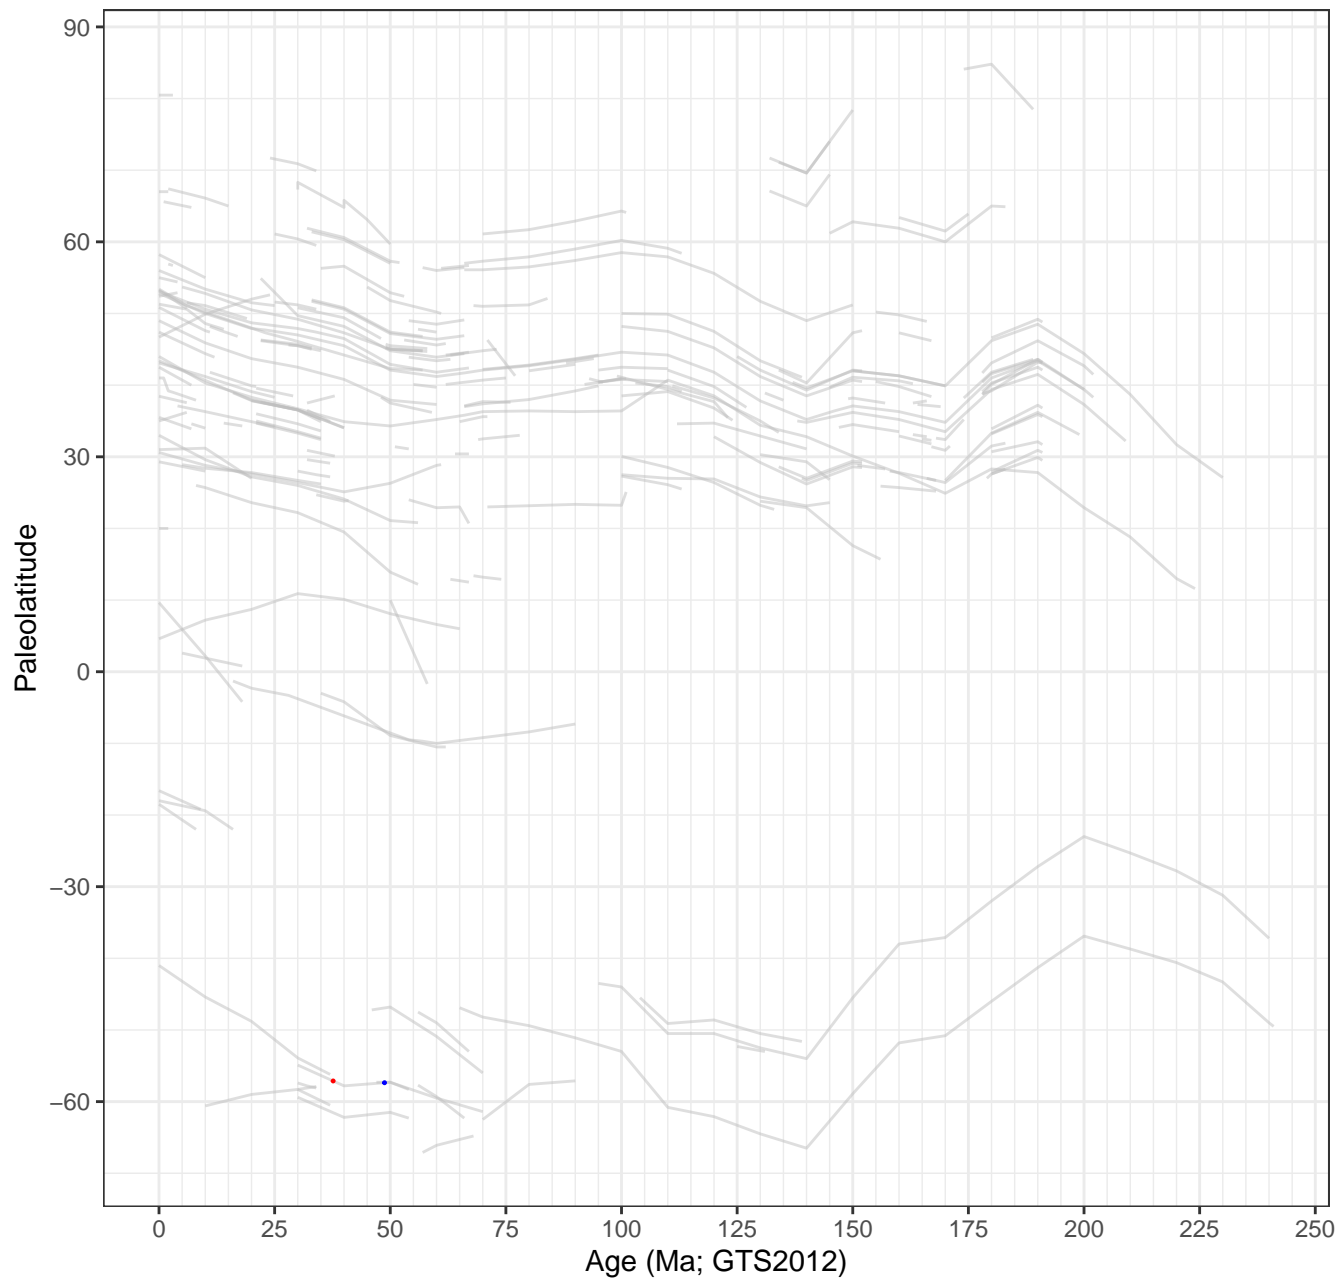

Supplement: Supplementary file 865 [file Arachnodinium antarcticum.pdf › Supplement/Supplement 2/Species 1914 plots/Arachnodinium antarcticum.pdf]

# Species *Araneosphaera araneosa*

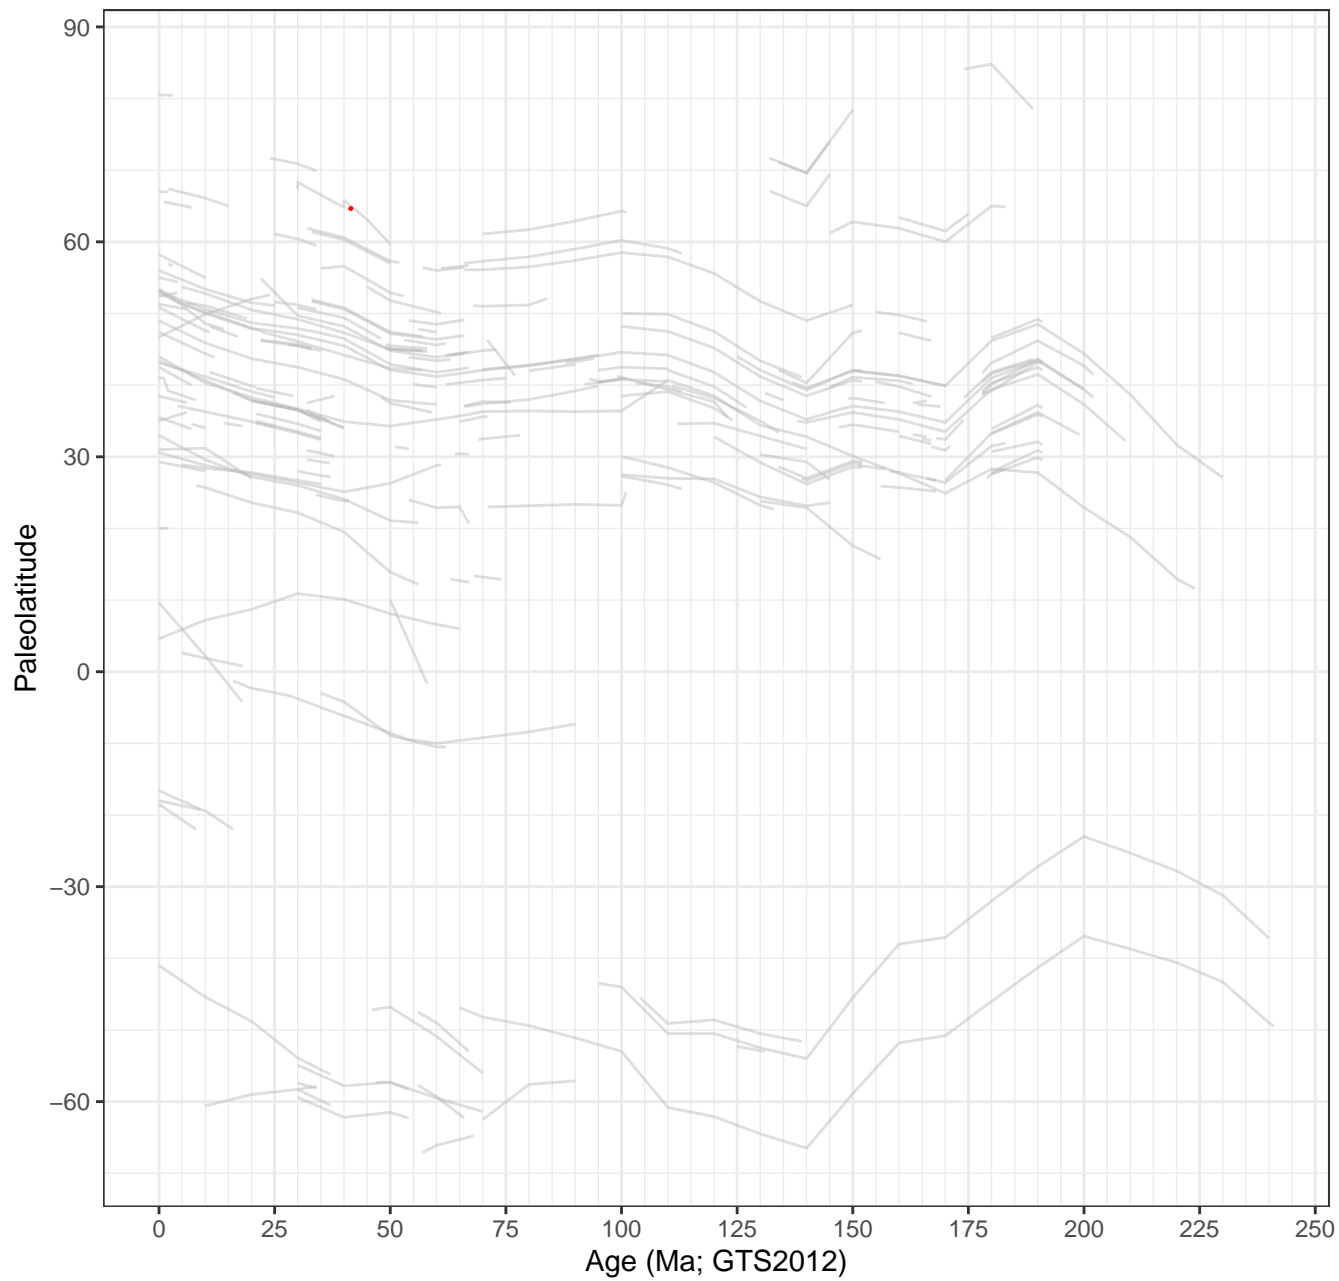

Supplement: Supplementary file 866 [file Araneosphaera araneosa.pdf › Supplement/Supplement 2/Species 1914 plots/Araneosphaera araneosa.pdf]

# Species *Araneosphaera stephanophora*

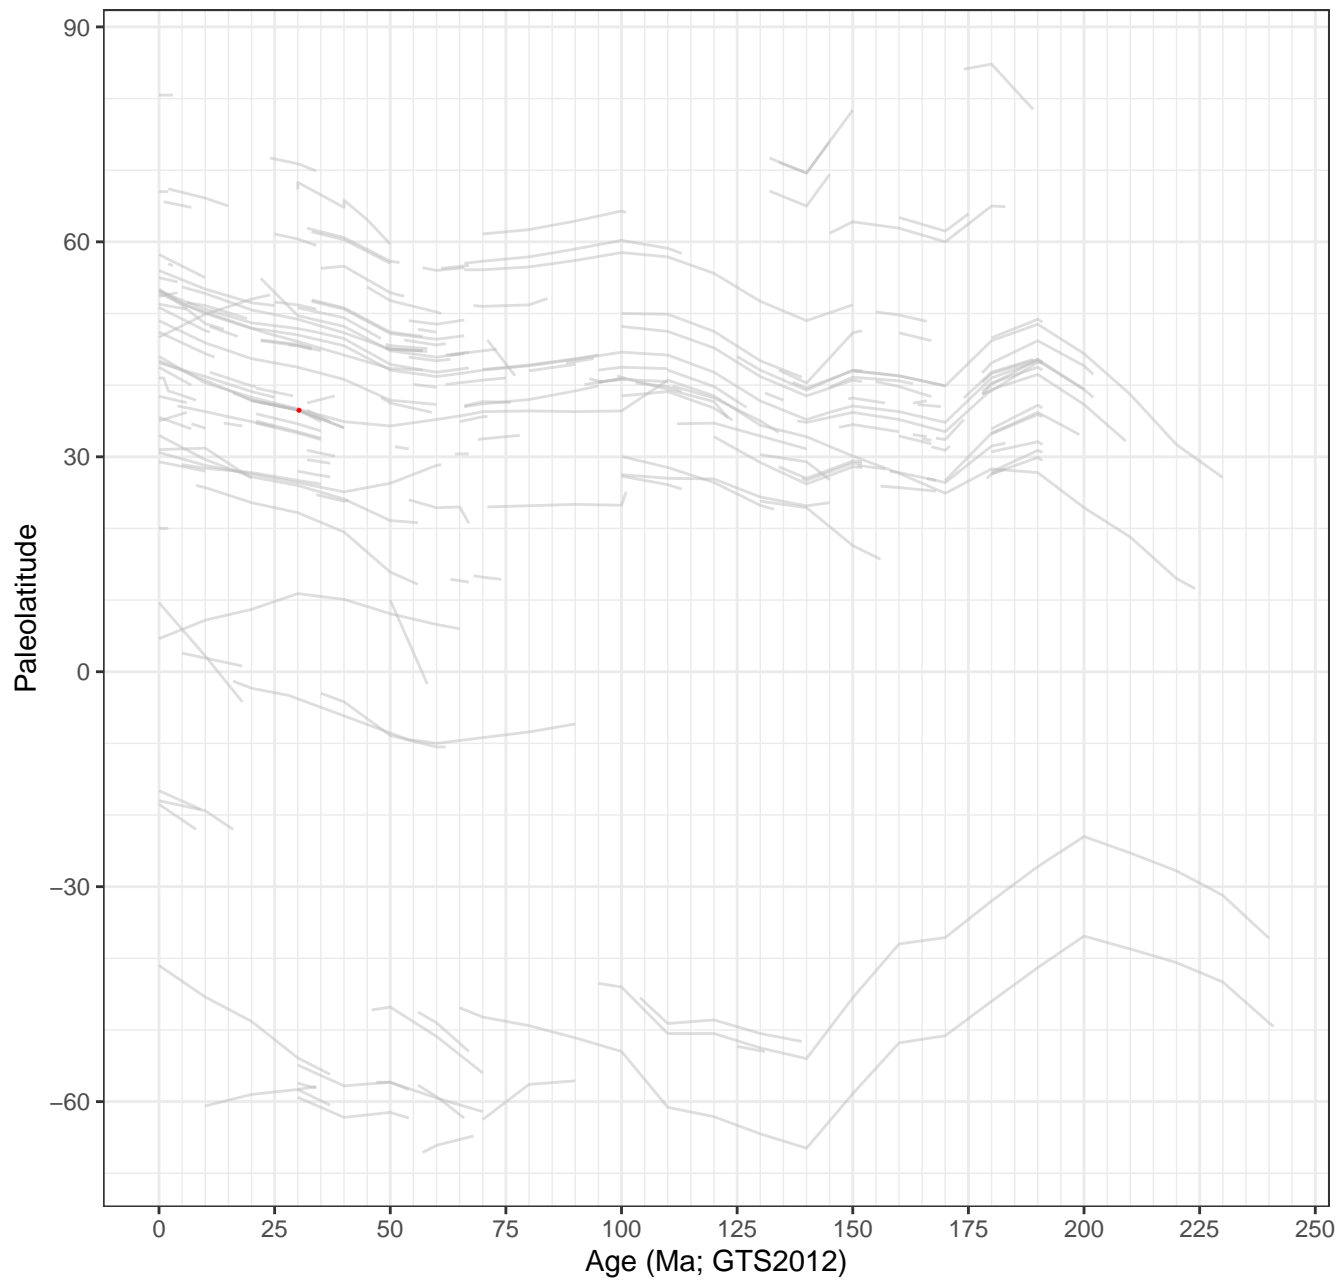

Supplement: Supplementary file 867 [file Araneosphaera stephanophora.pdf › Supplement/Supplement 2/Species 1914 plots/Araneosphaera stephanophora.pdf]

# Species *Areoligera campoensis*

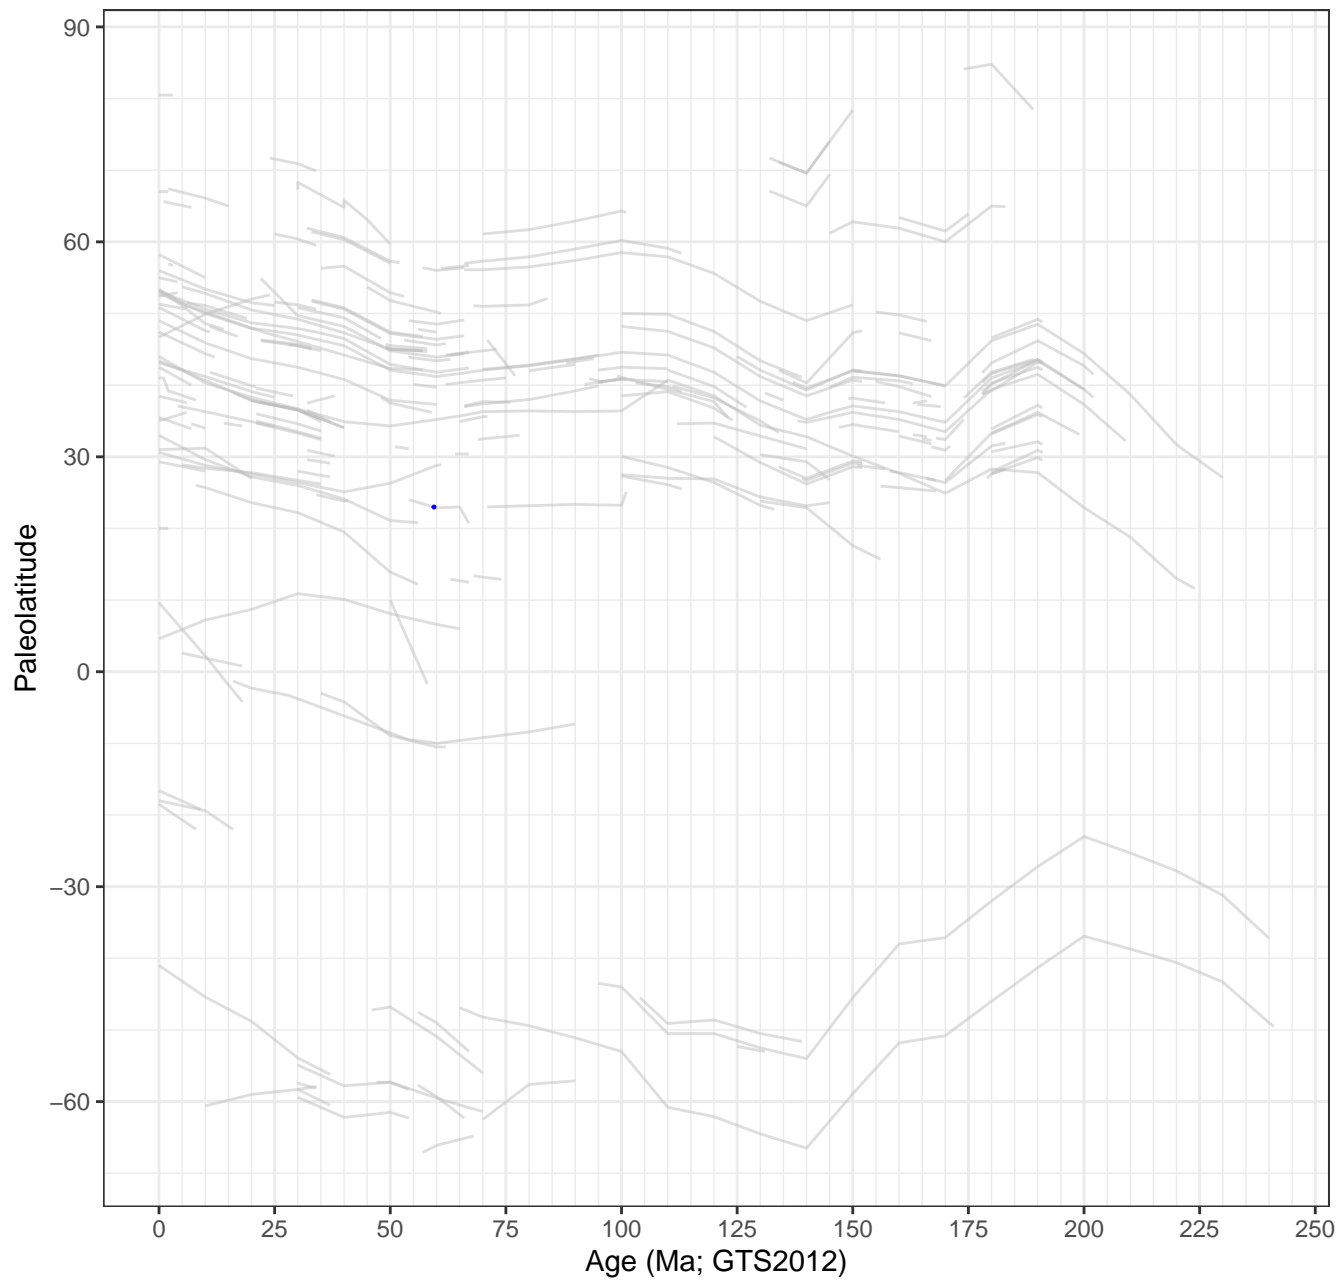

Supplement: Supplementary file 868 [file Areoligera campoensis.pdf › Supplement/Supplement 2/Species 1914 plots/Areoligera campoensis.pdf]

# Species *Areoligera coronata*

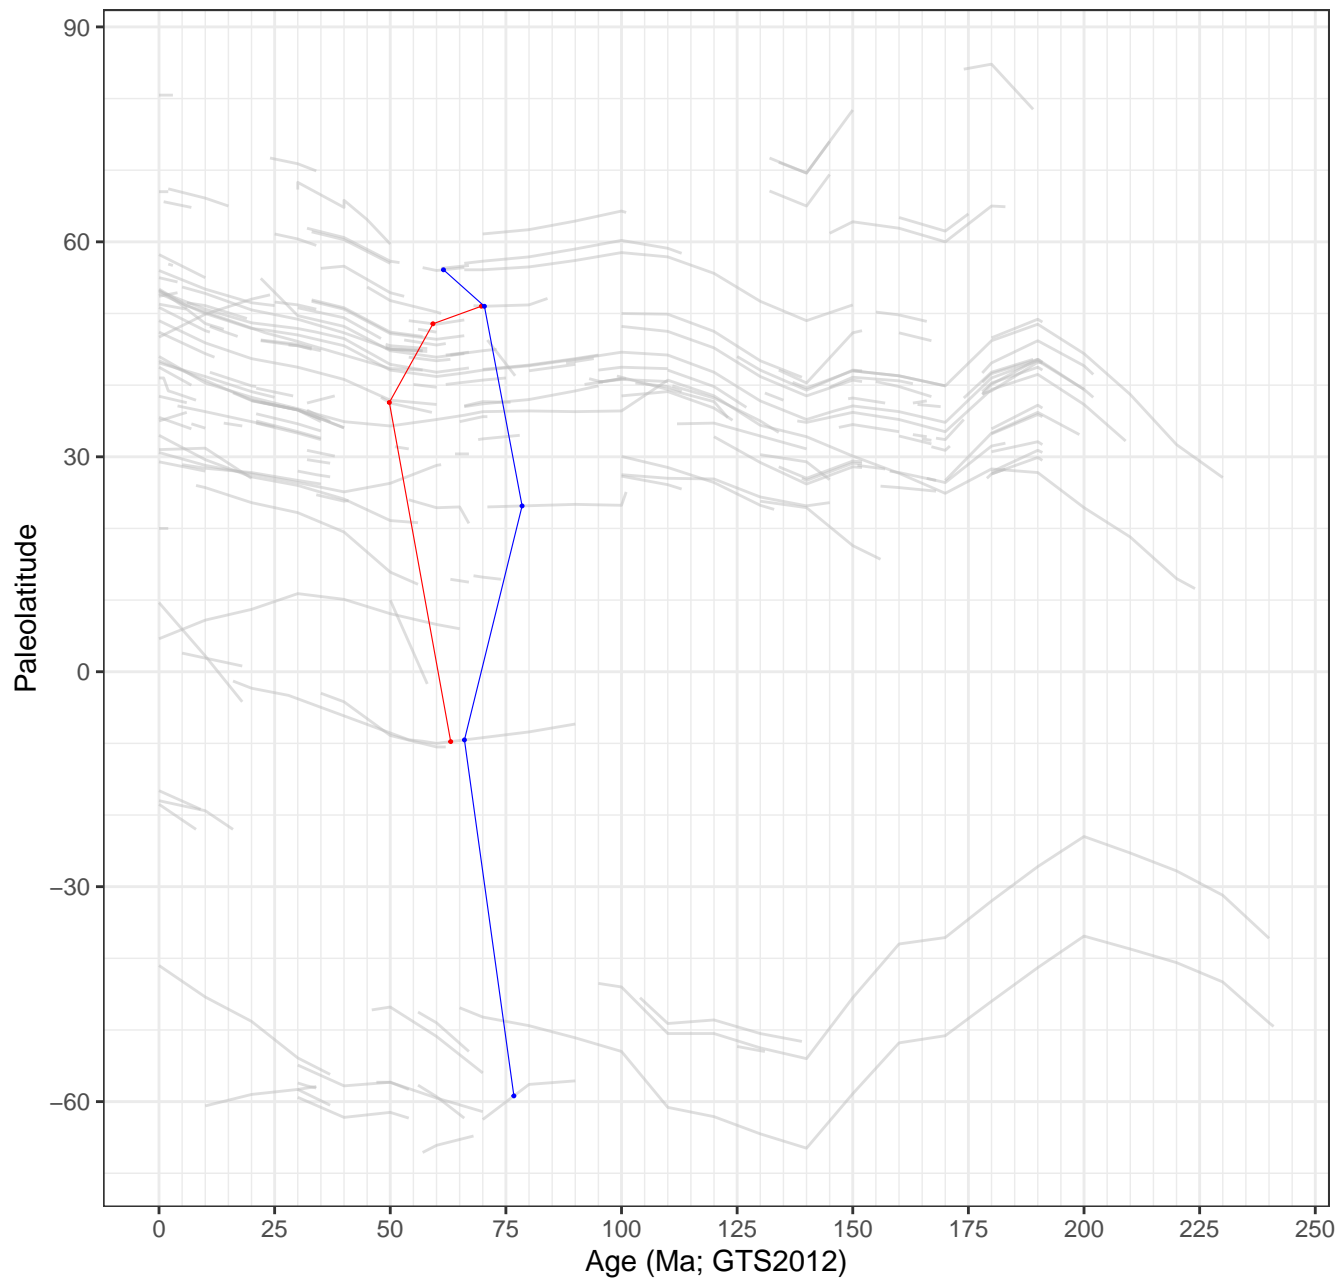

Supplement: Supplementary file 869 [file Areoligera coronata.pdf › Supplement/Supplement 2/Species 1914 plots/Areoligera coronata.pdf]

# Species *Areoligera gippingensis*

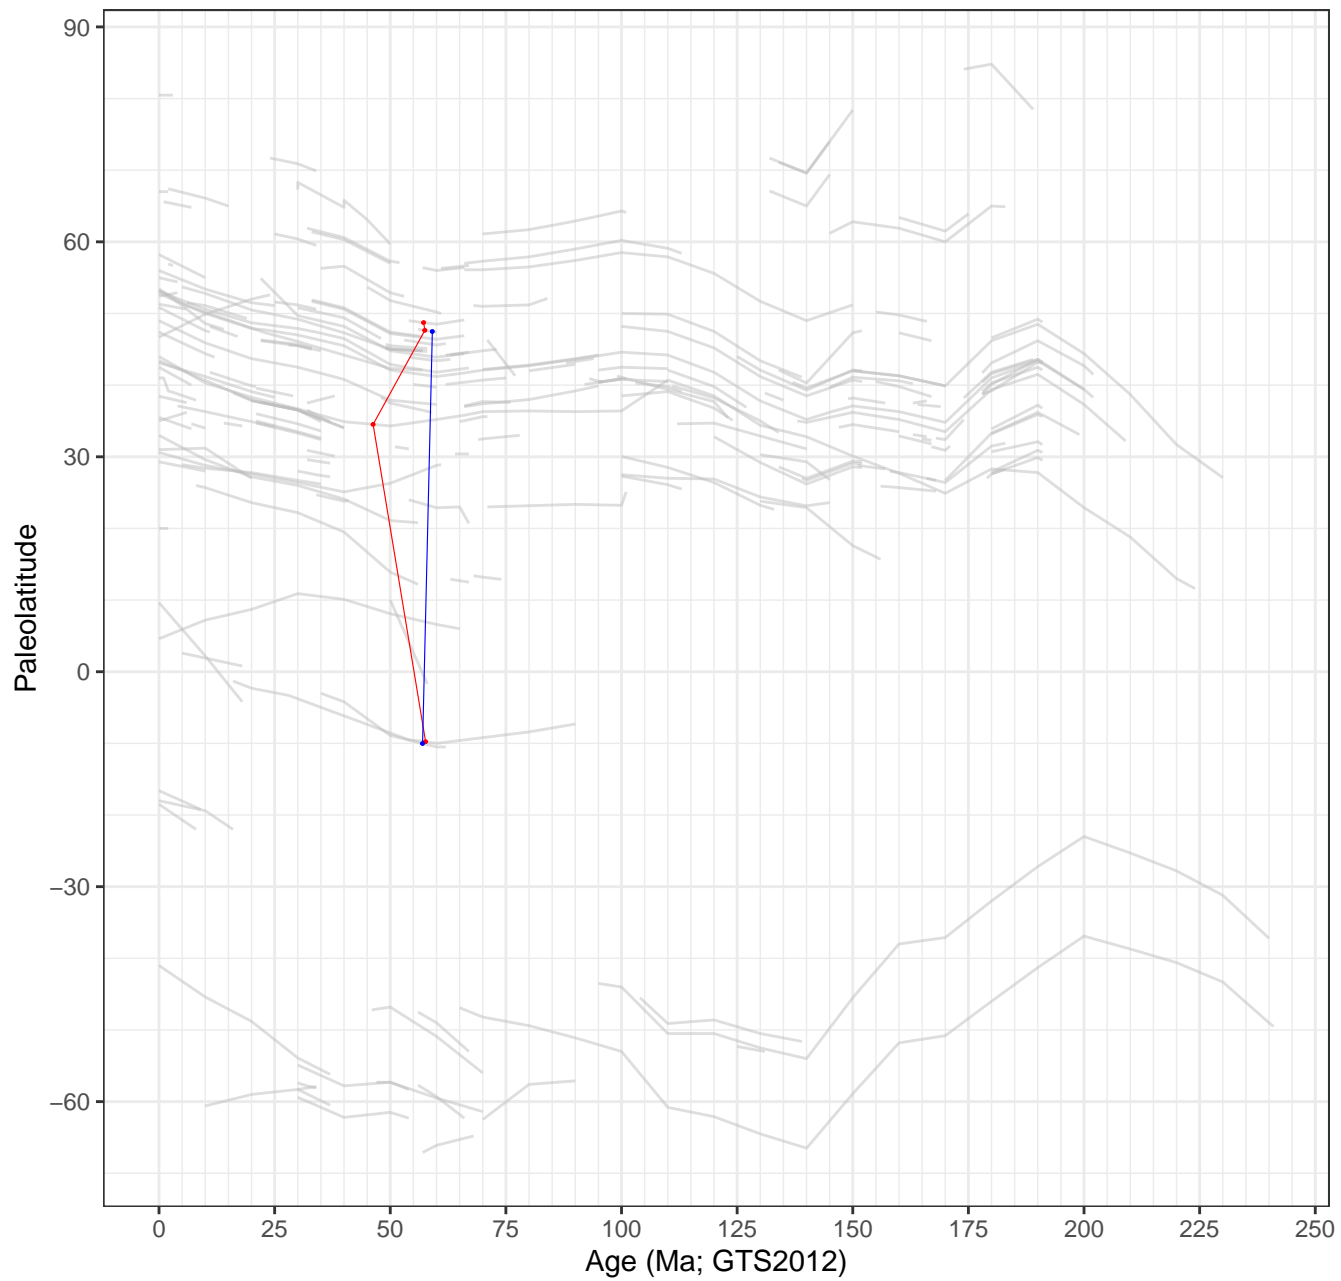

Supplement: Supplementary file 870 [file Areoligera gippingensis.pdf › Supplement/Supplement 2/Species 1914 plots/Areoligera gippingensis.pdf]

# Species *Areoligera medusettiformis*

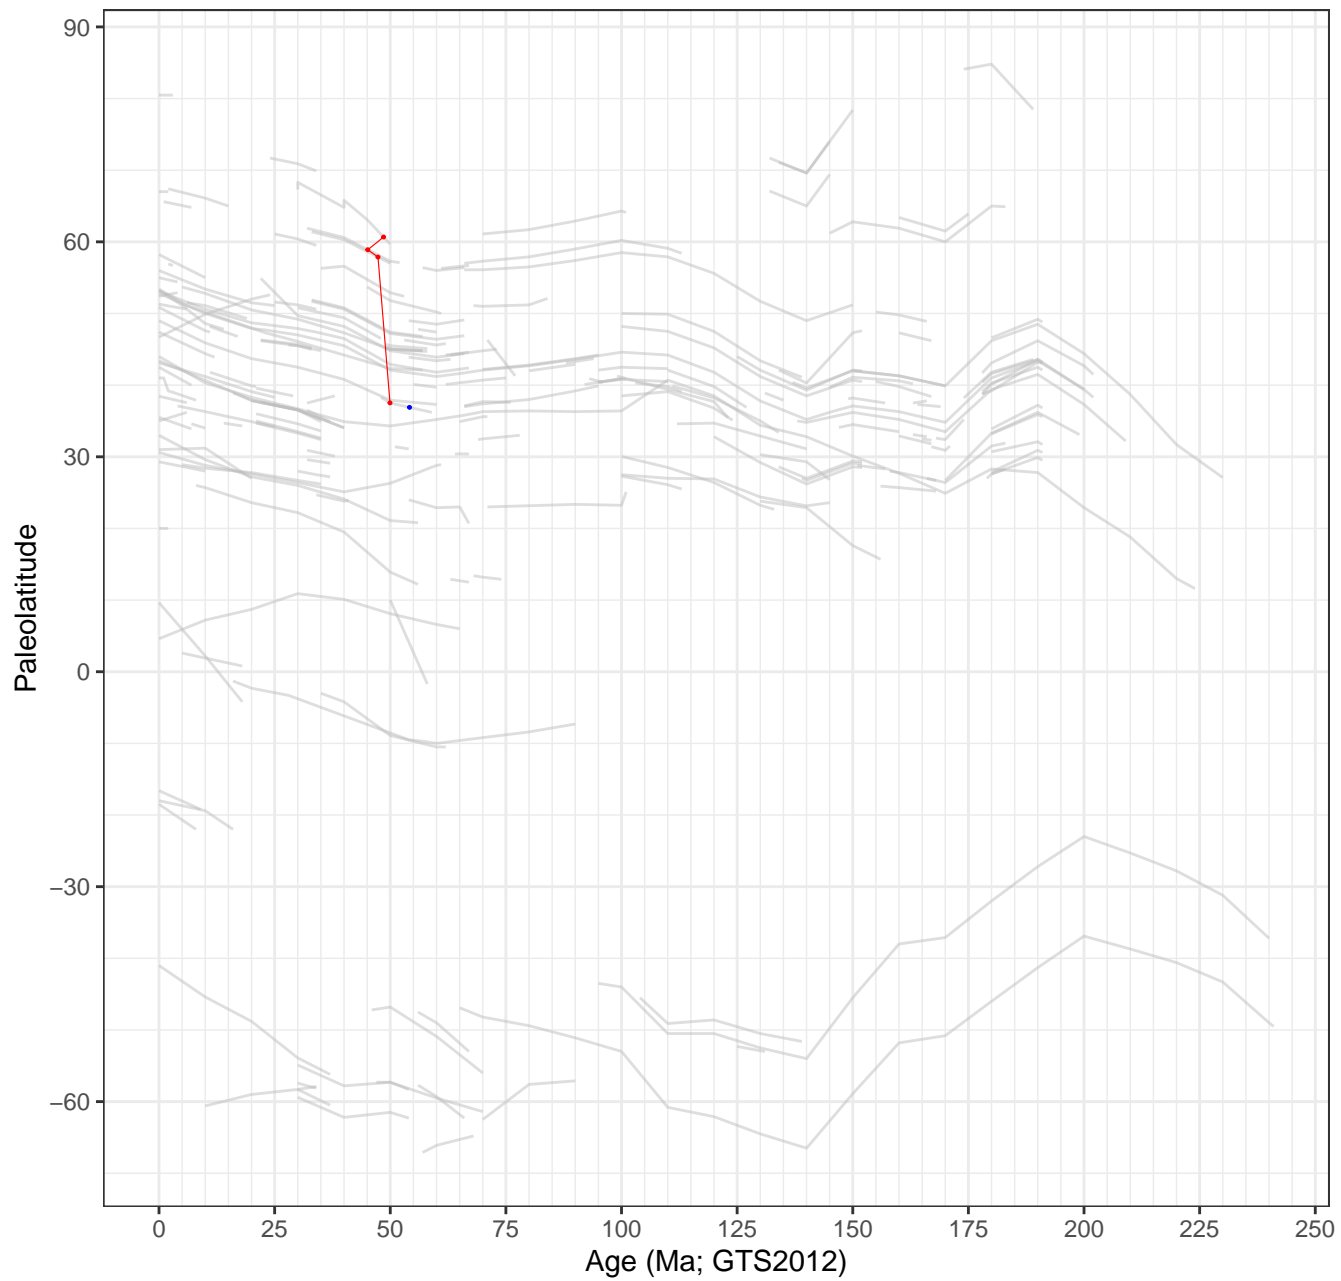

Supplement: Supplementary file 871 [file Areoligera medusettiformis.pdf › Supplement/Supplement 2/Species 1914 plots/Areoligera medusettiformis.pdf]

# Species *Areoligera senonensis*

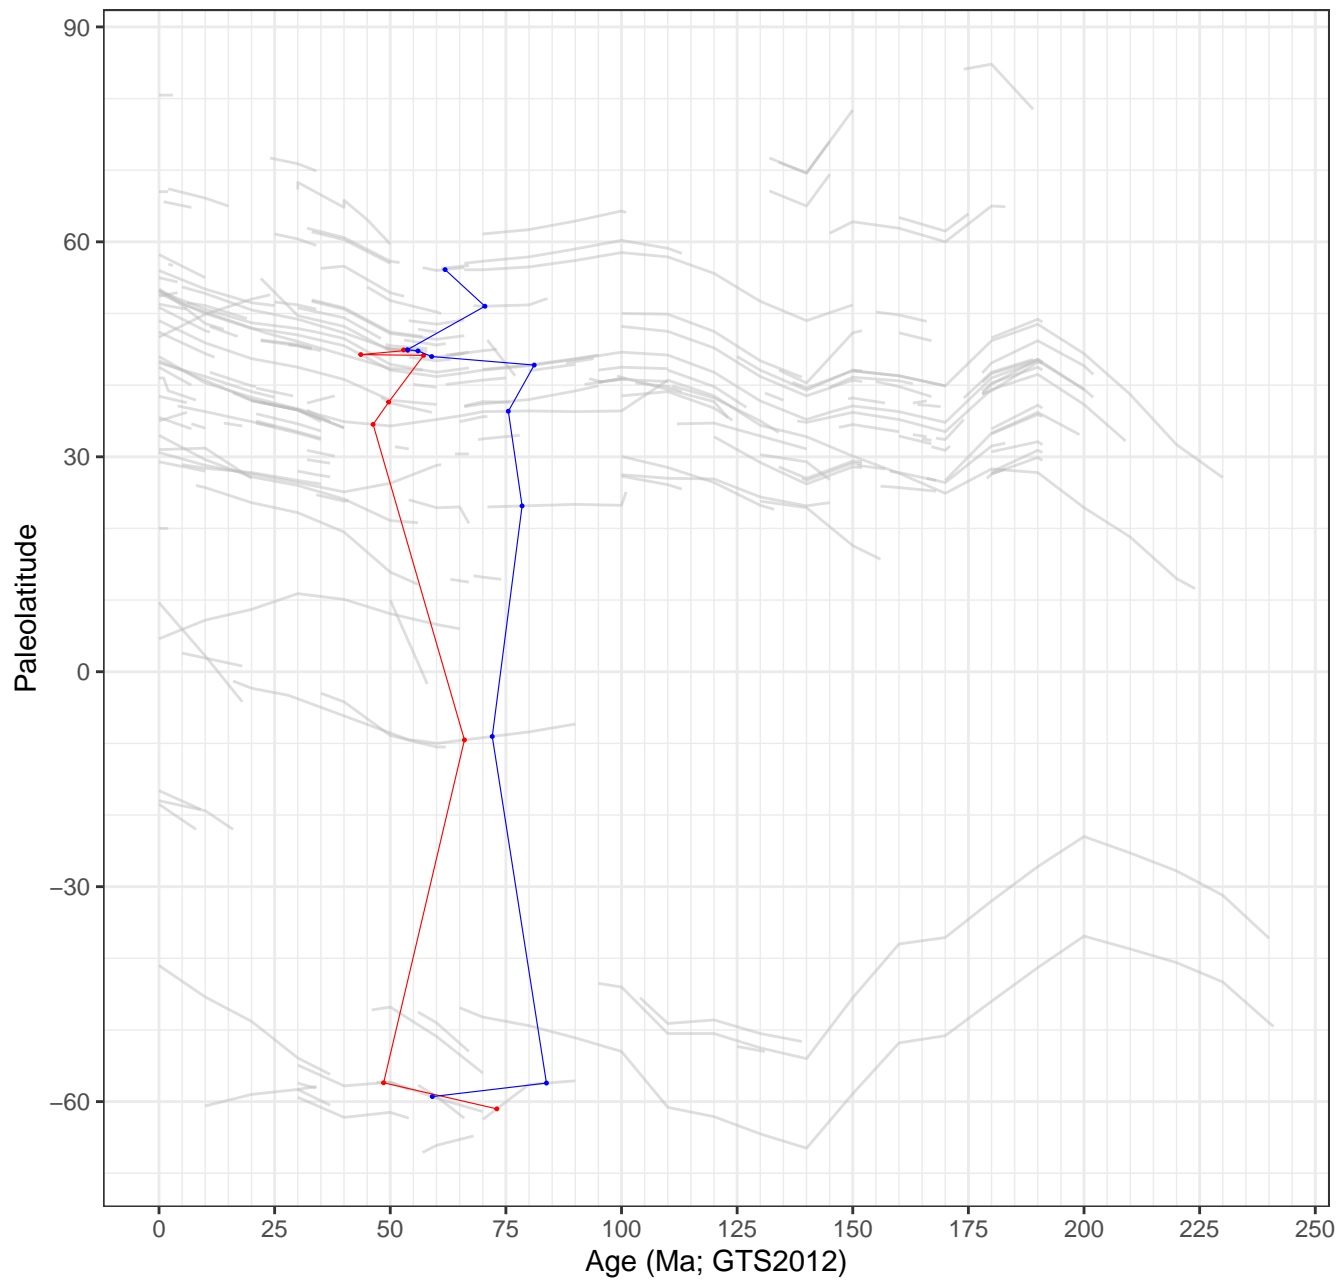

Supplement: Supplementary file 872 [file Areoligera senonensis.pdf › Supplement/Supplement 2/Species 1914 plots/Areoligera senonensis.pdf]

# Species *Areoligera sentosa*

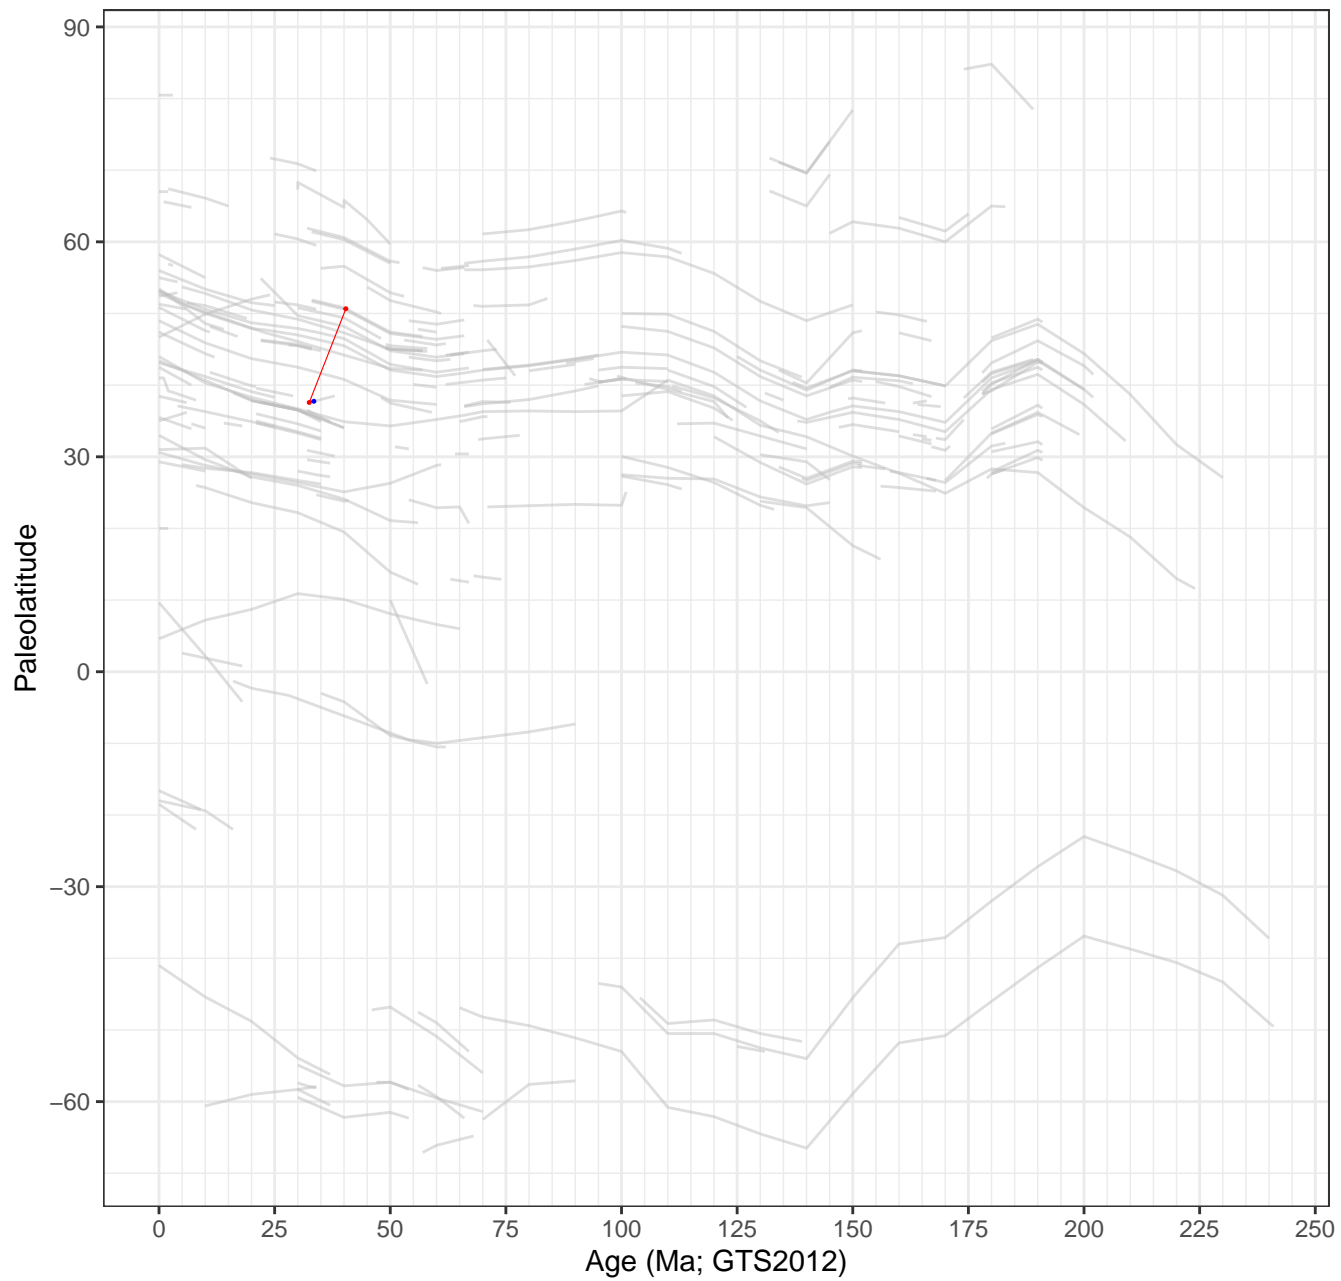

Supplement: Supplementary file 873 [file Areoligera sentosa.pdf › Supplement/Supplement 2/Species 1914 plots/Areoligera sentosa.pdf]

# Species *Areoligera tauloma*

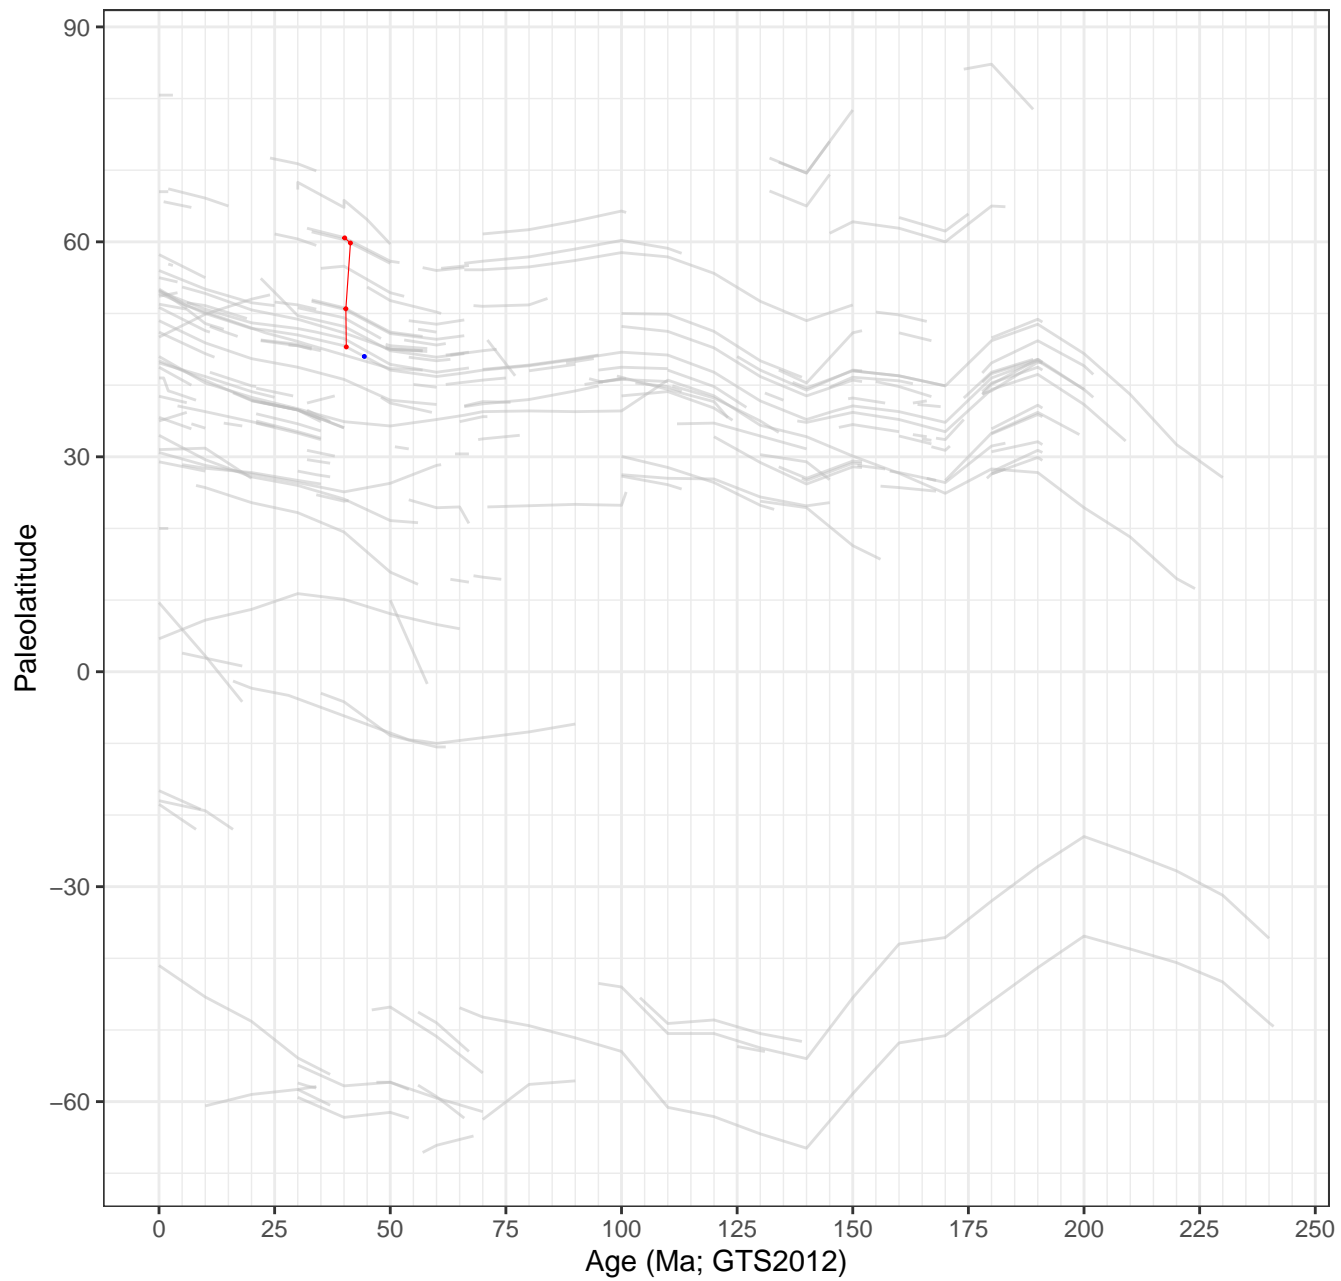

Supplement: Supplementary file 874 [file Areoligera tauloma.pdf › Supplement/Supplement 2/Species 1914 plots/Areoligera tauloma.pdf]

# Species *Areoligera undulata*

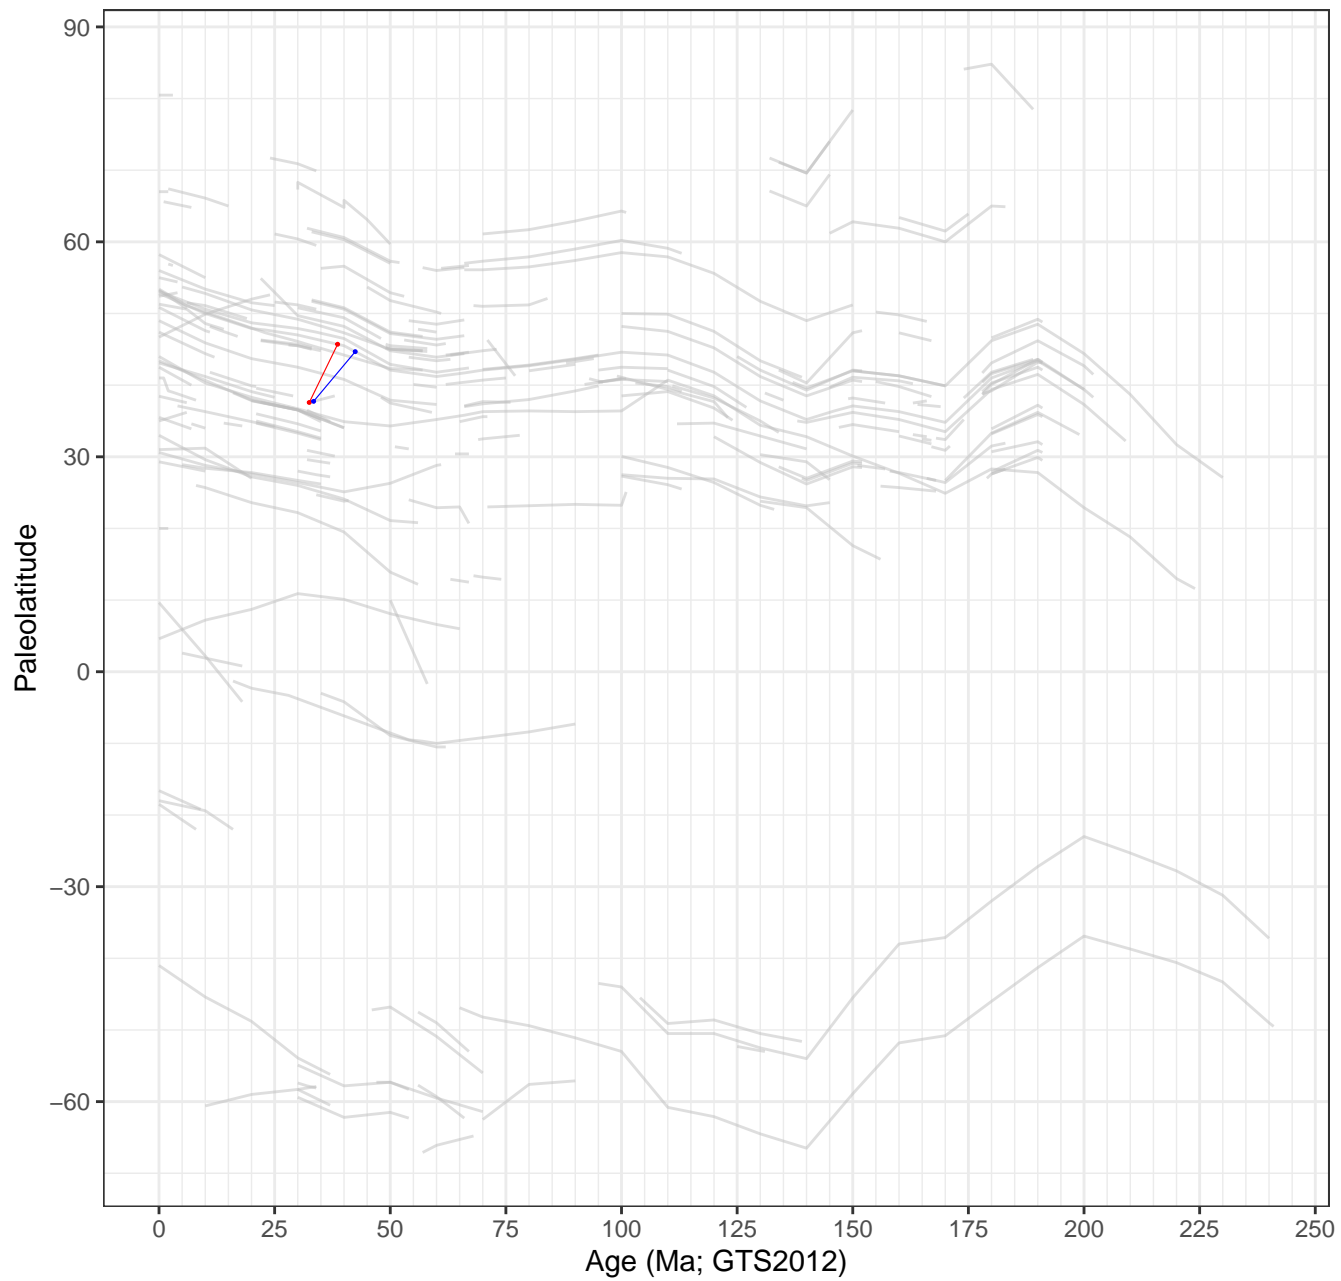

Supplement: Supplementary file 875 [file Areoligera undulata.pdf › Supplement/Supplement 2/Species 1914 plots/Areoligera undulata.pdf]

# Species *Areoligera volata*

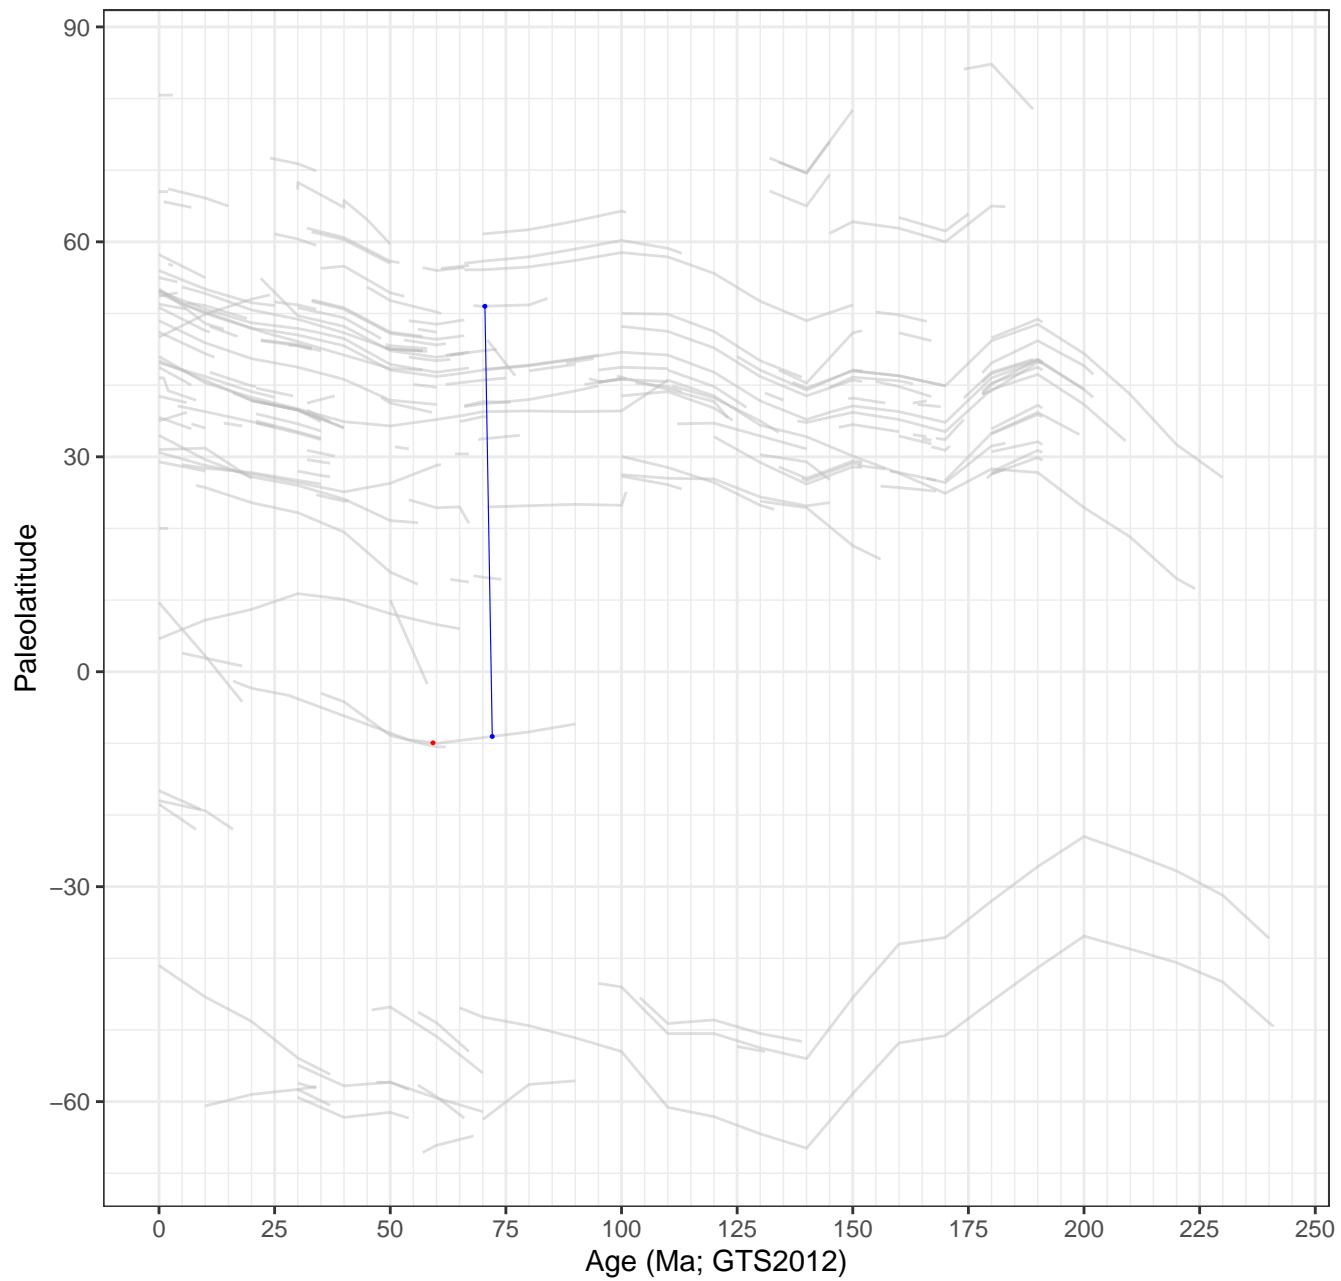

Supplement: Supplementary file 876 [file Areoligera volata.pdf › Supplement/Supplement 2/Species 1914 plots/Areoligera volata.pdf]

# Species *Areosphaeridium arcuatum*

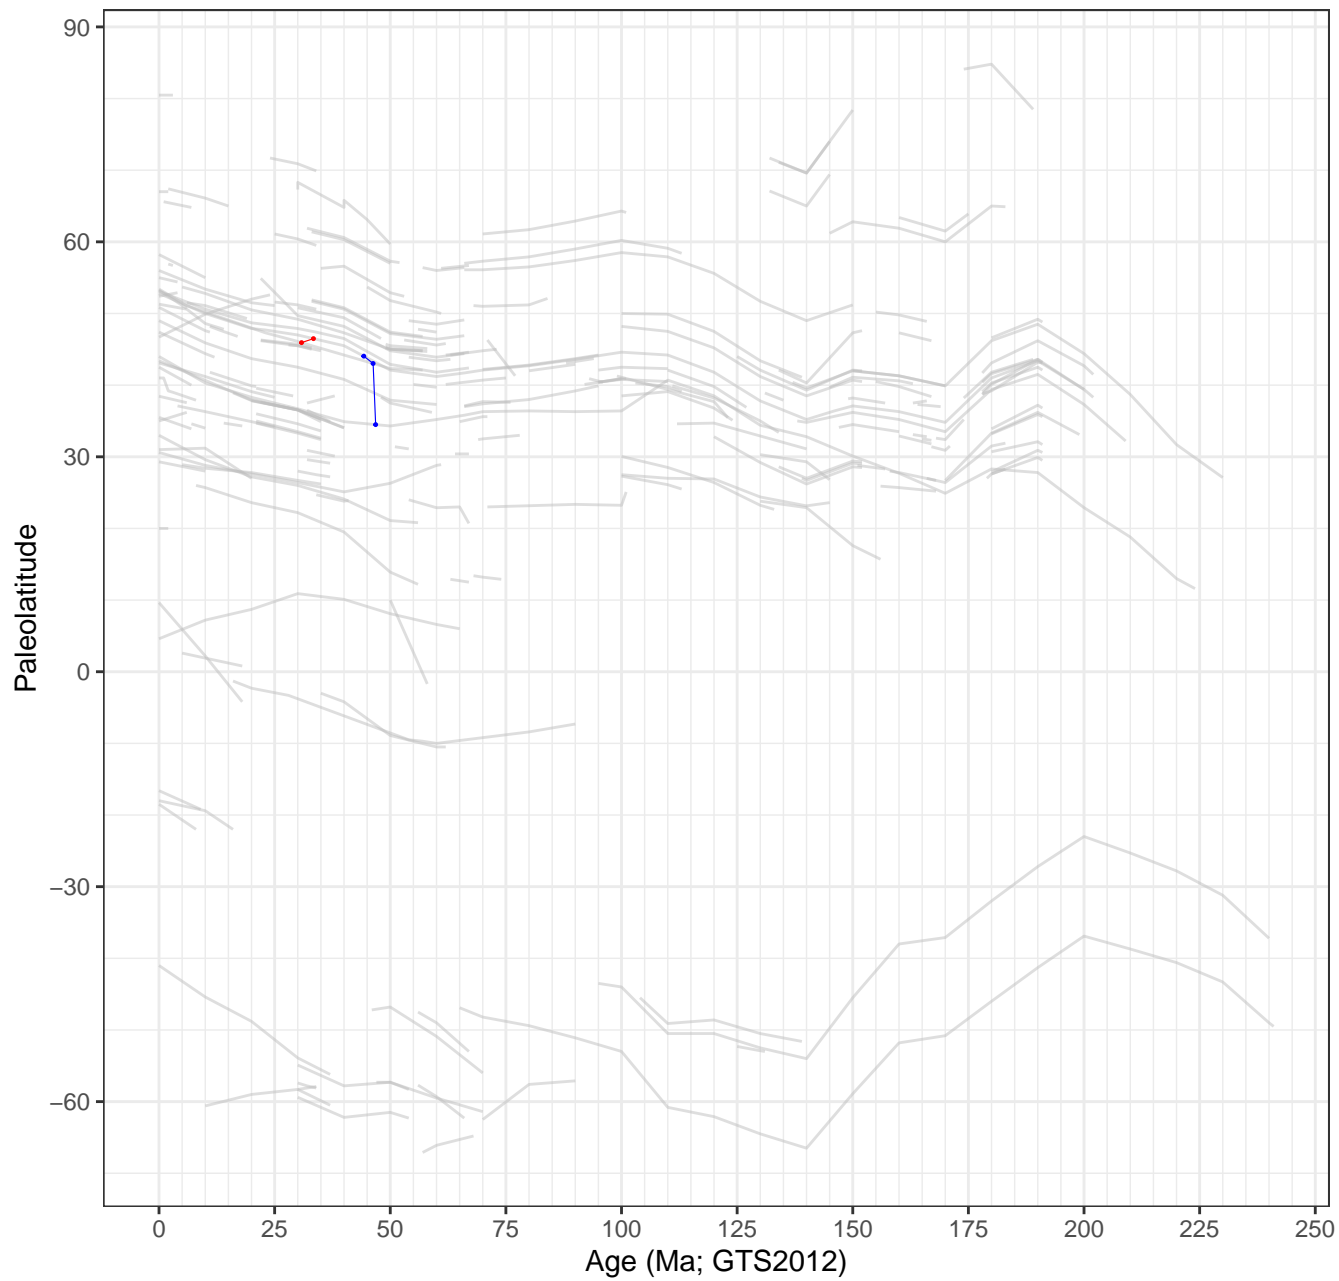

Supplement: Supplementary file 877 [file Areosphaeridium arcuatum.pdf › Supplement/Supplement 2/Species 1914 plots/Areosphaeridium arcuatum.pdf]

# Species *Areosphaeridium diktyoplokum*

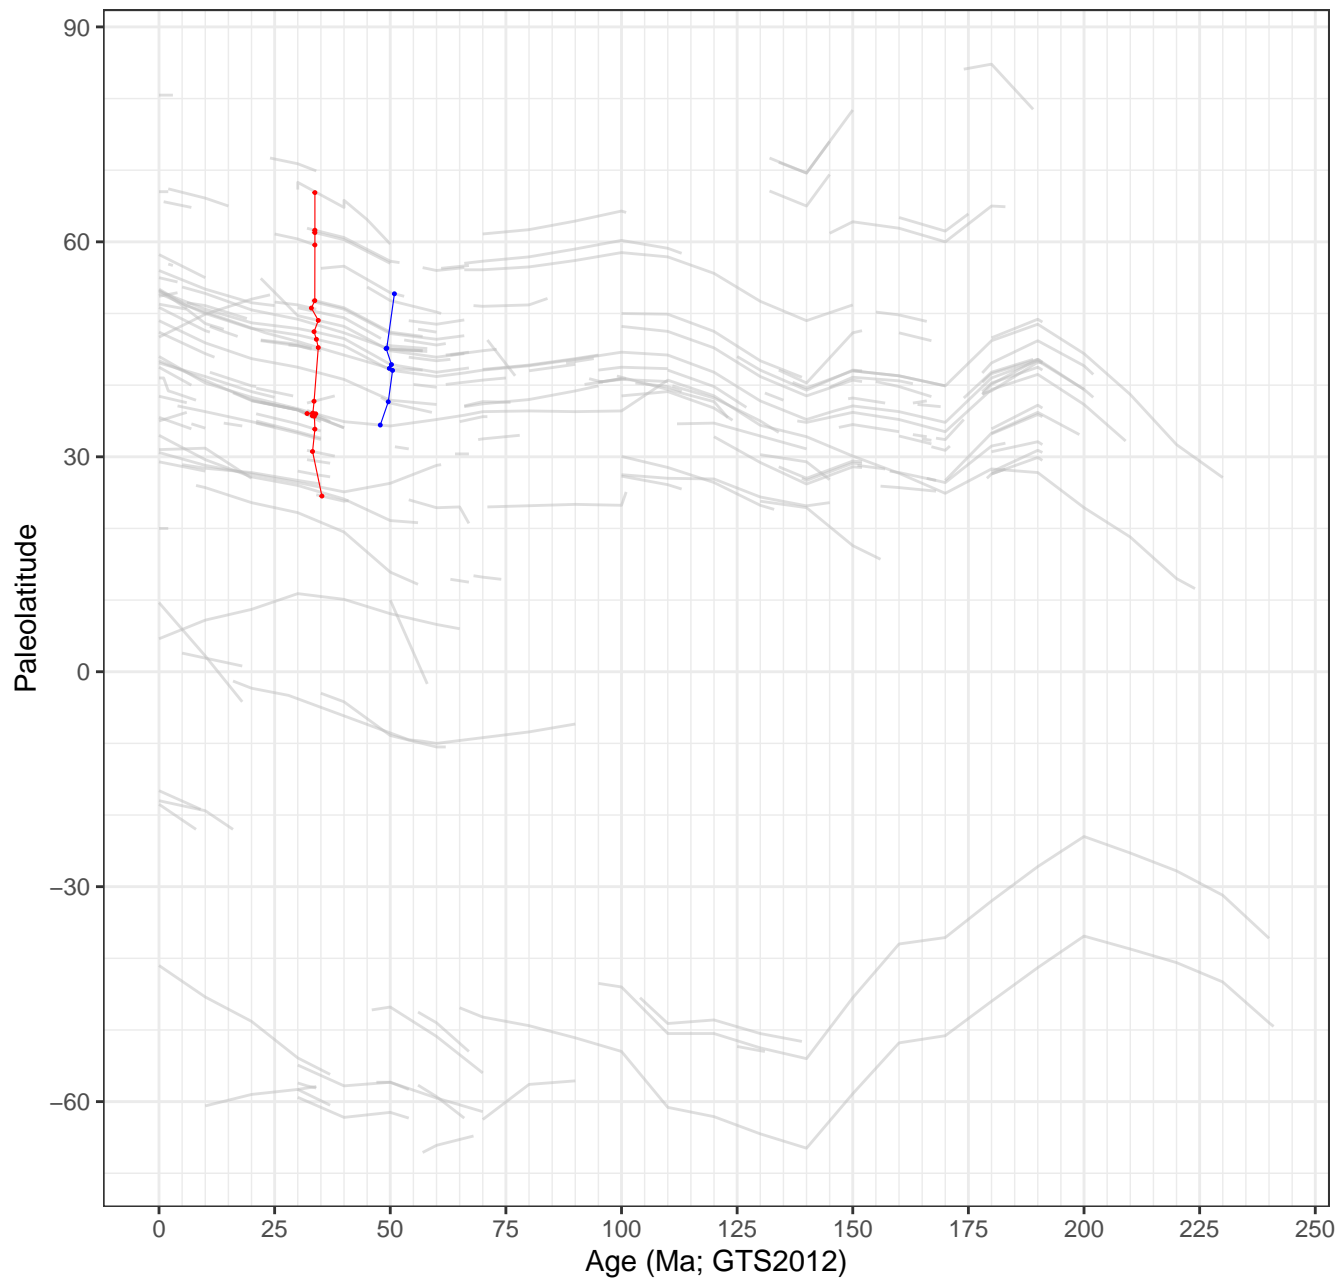

Supplement: Supplementary file 878 [file Areosphaeridium diktyoplokum.pdf › Supplement/Supplement 2/Species 1914 plots/Areosphaeridium diktyoplokum.pdf]

# Species *Areosphaeridium ebdonii*

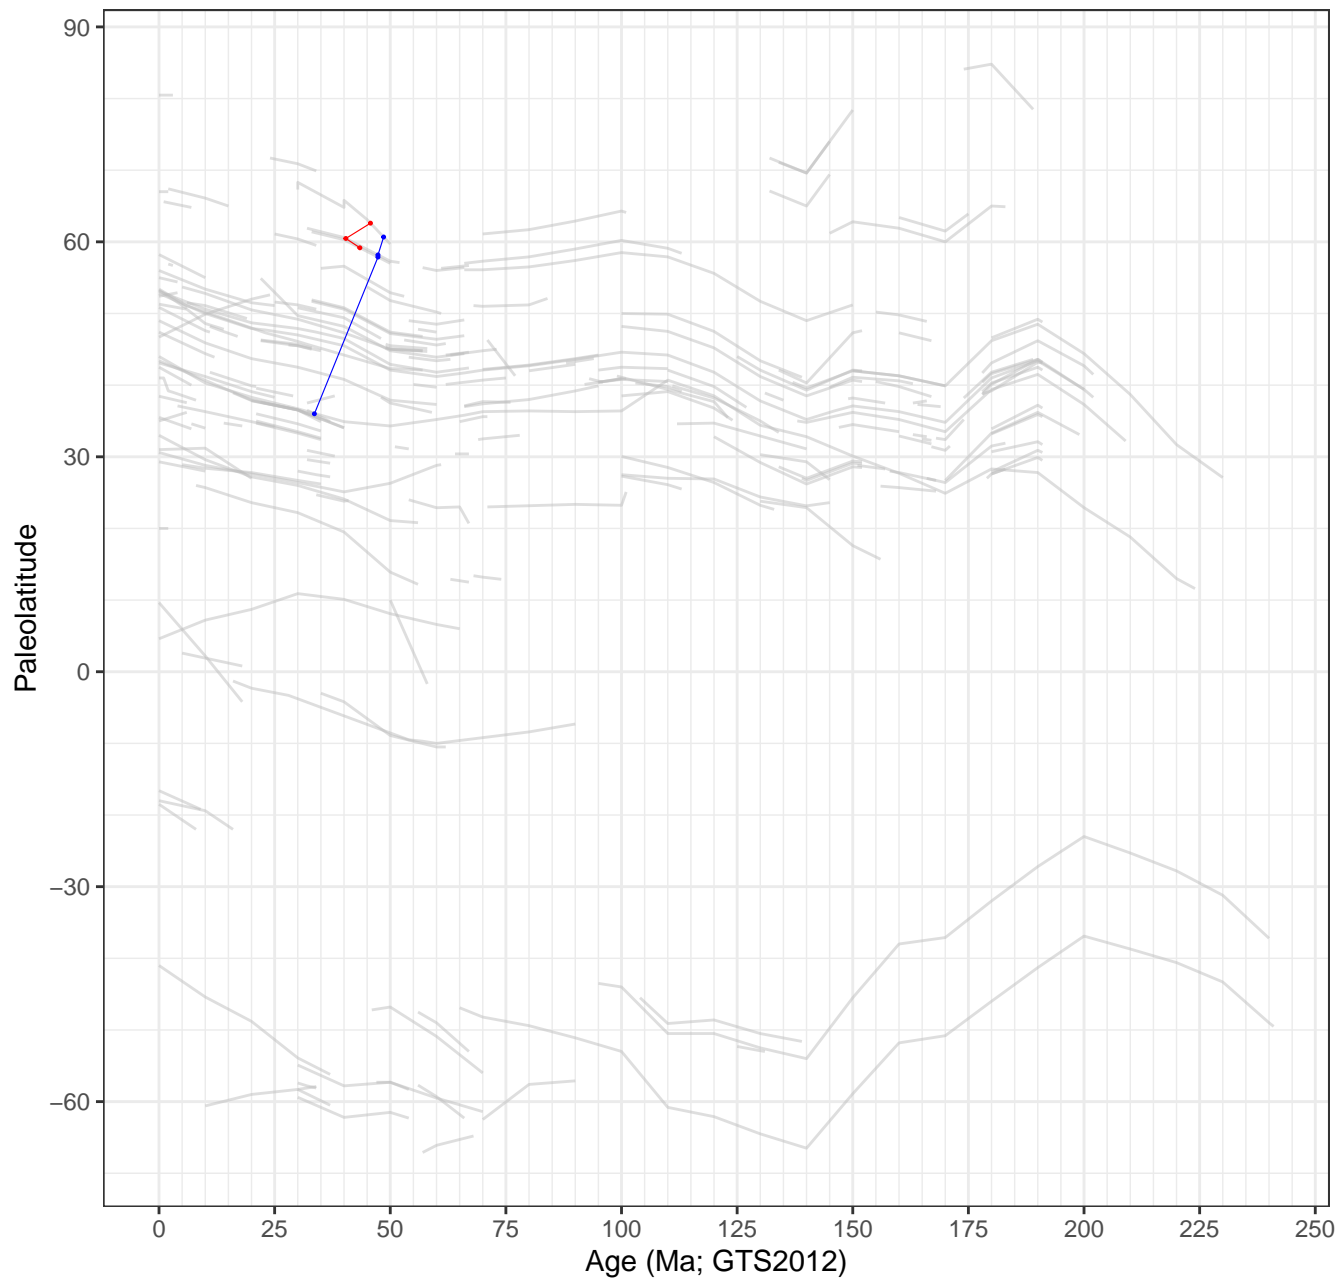

Supplement: Supplementary file 879 [file Areosphaeridium ebdonii.pdf › Supplement/Supplement 2/Species 1914 plots/Areosphaeridium ebdonii.pdf]

# Species *Areosphaeridium michoudii*

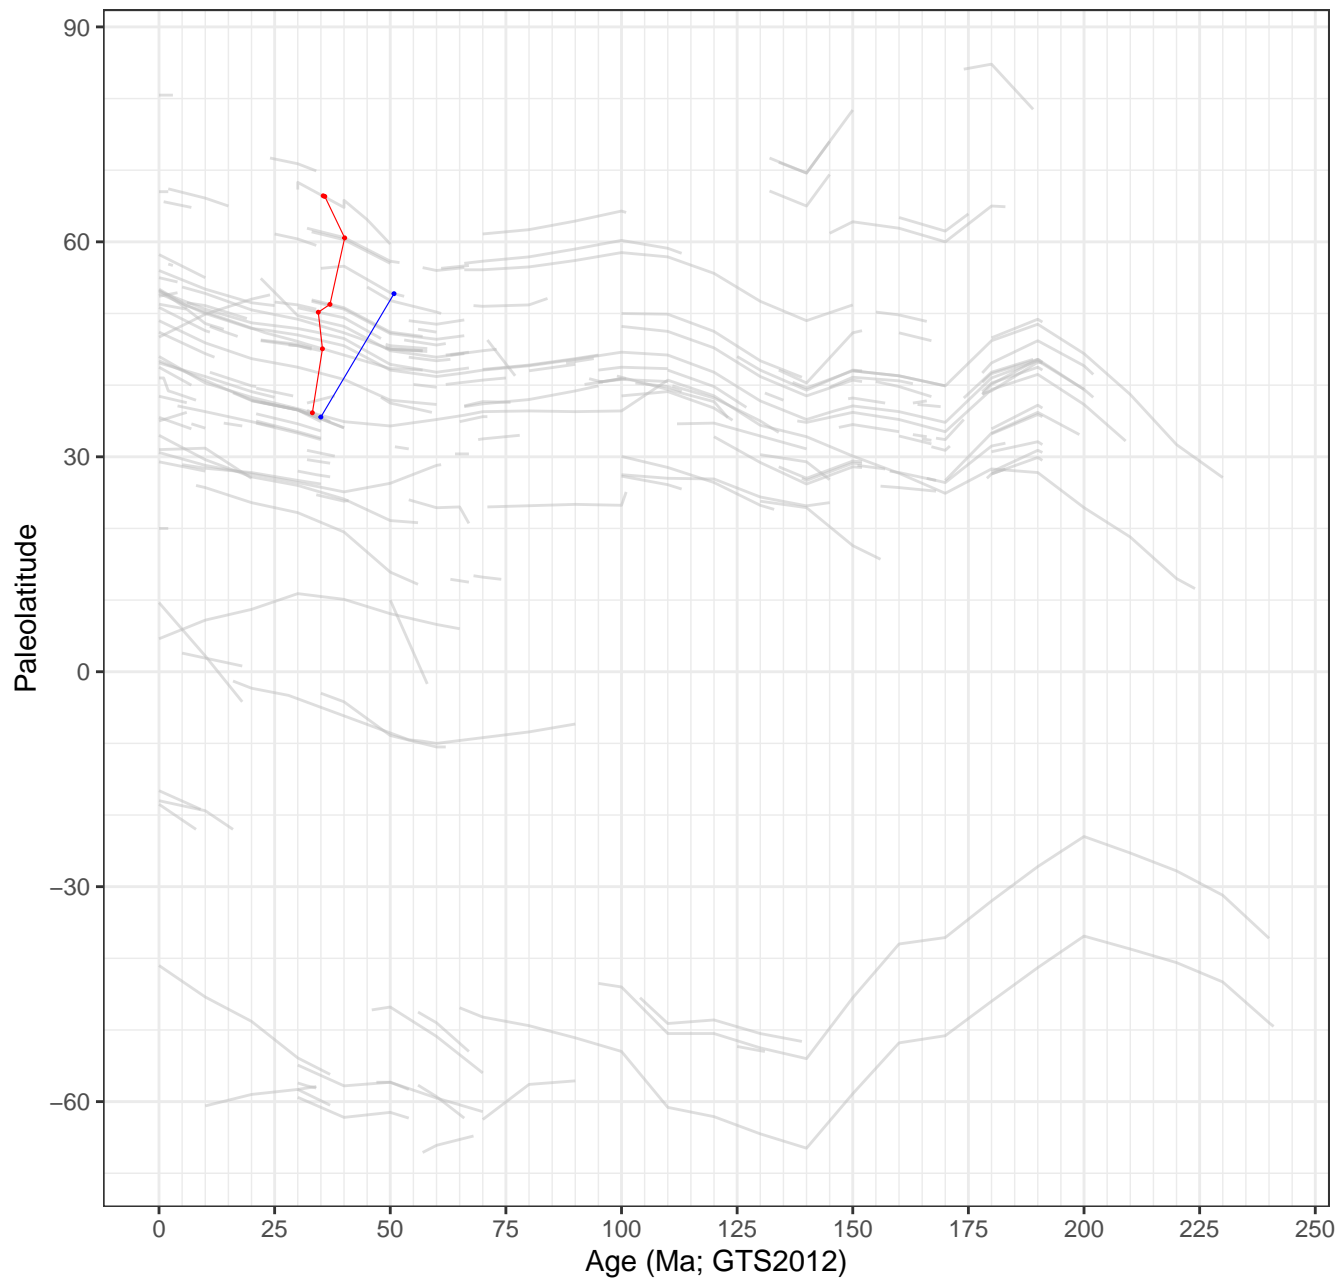

Supplement: Supplementary file 880 [file Areosphaeridium michoudii.pdf › Supplement/Supplement 2/Species 1914 plots/Areosphaeridium michoudii.pdf]

# Species *Arkellea teichophera*

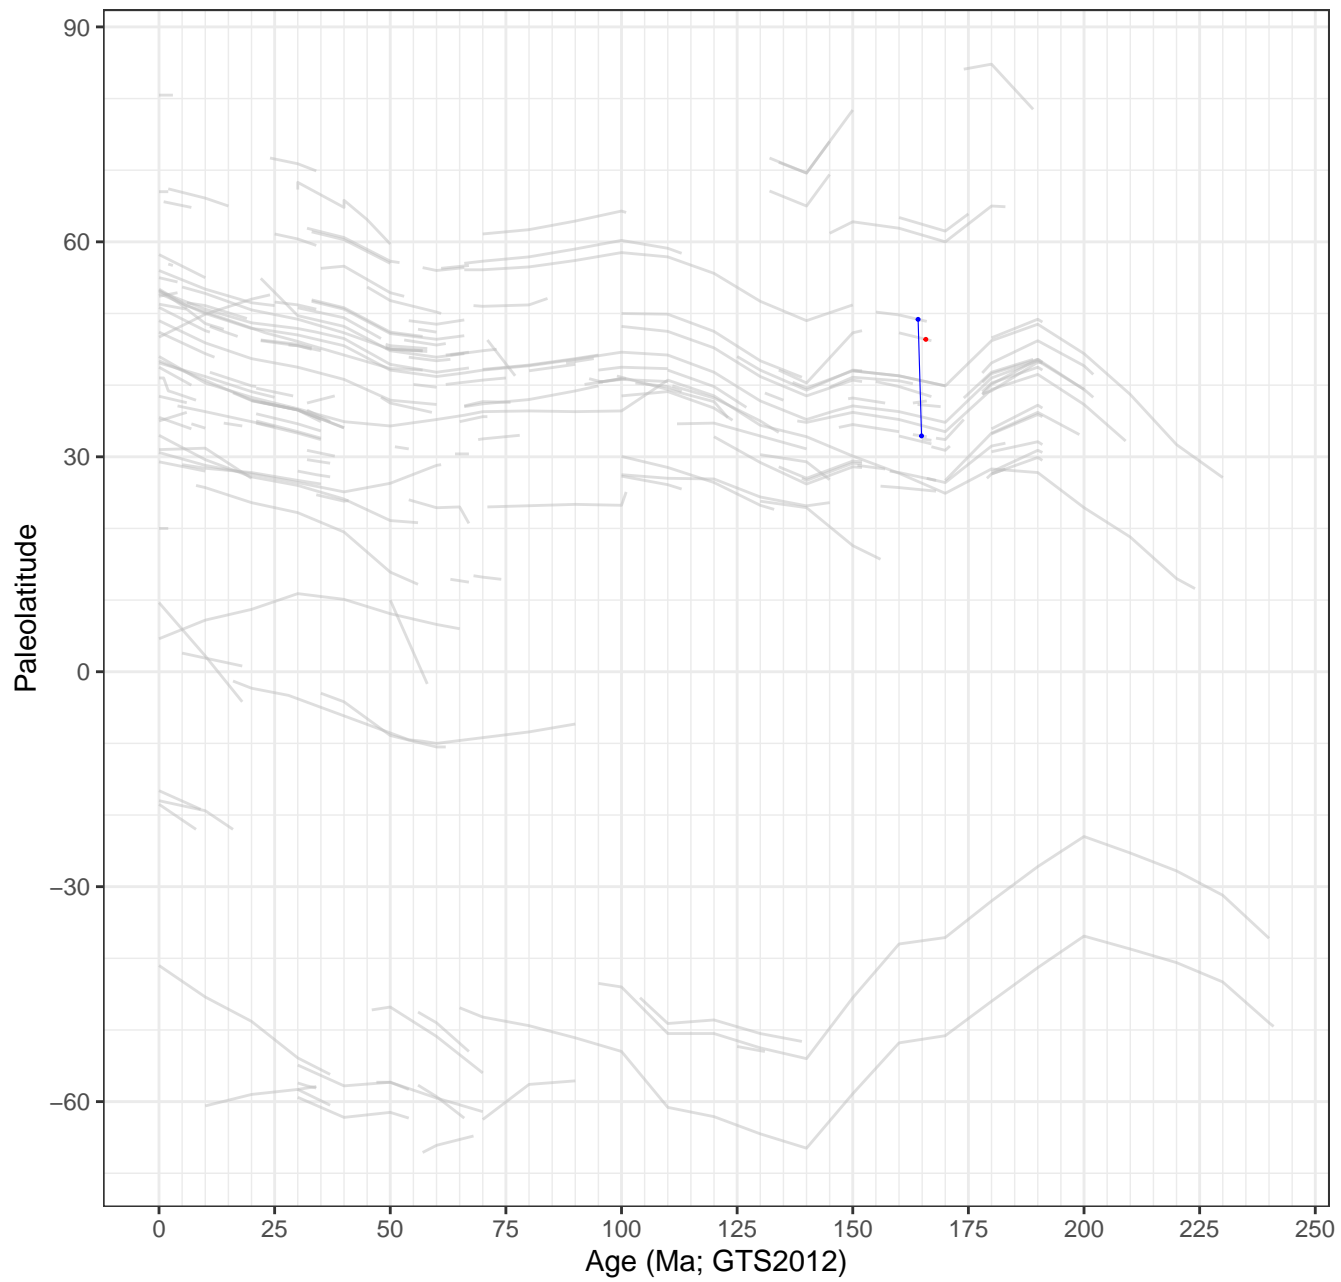

Supplement: Supplementary file 881 [file Arkellea teichophera.pdf › Supplement/Supplement 2/Species 1914 plots/Arkellea teichophera.pdf]

# Species *Artemisiocysta cladodichotoma*

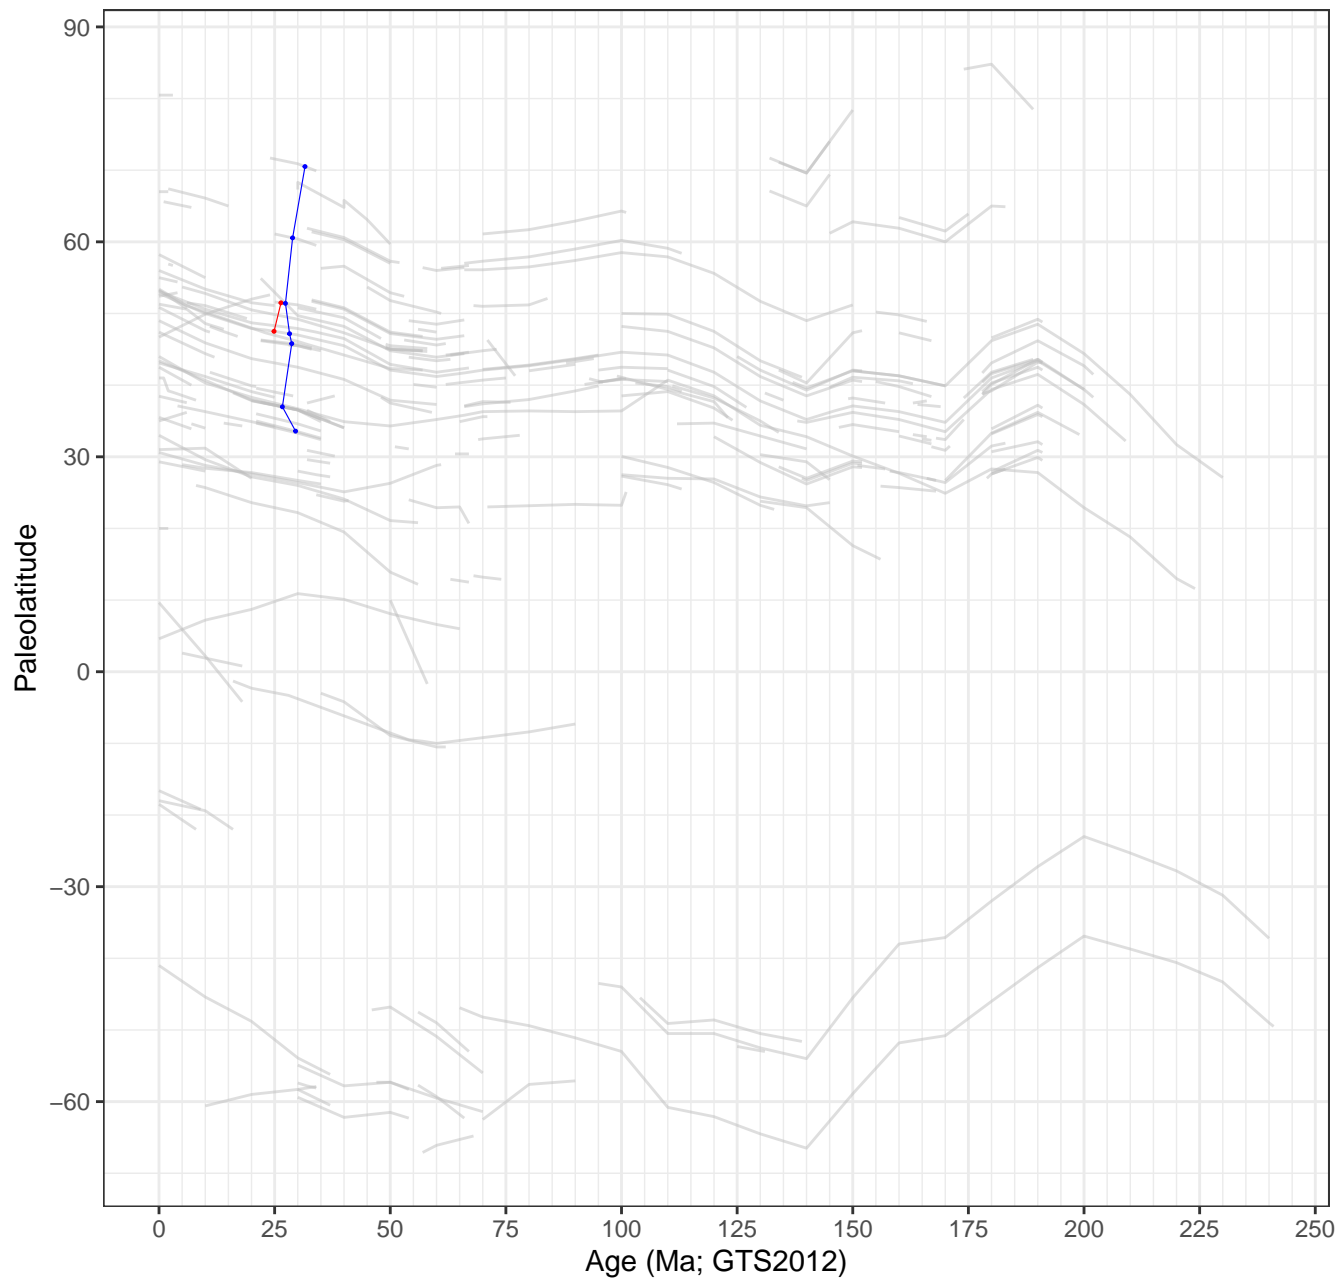

Supplement: Supplementary file 882 [file Artemisiocysta cladodichotoma.pdf › Supplement/Supplement 2/Species 1914 plots/Artemisiocysta cladodichotoma.pdf]

# Species *Ascodinium acrophorum*

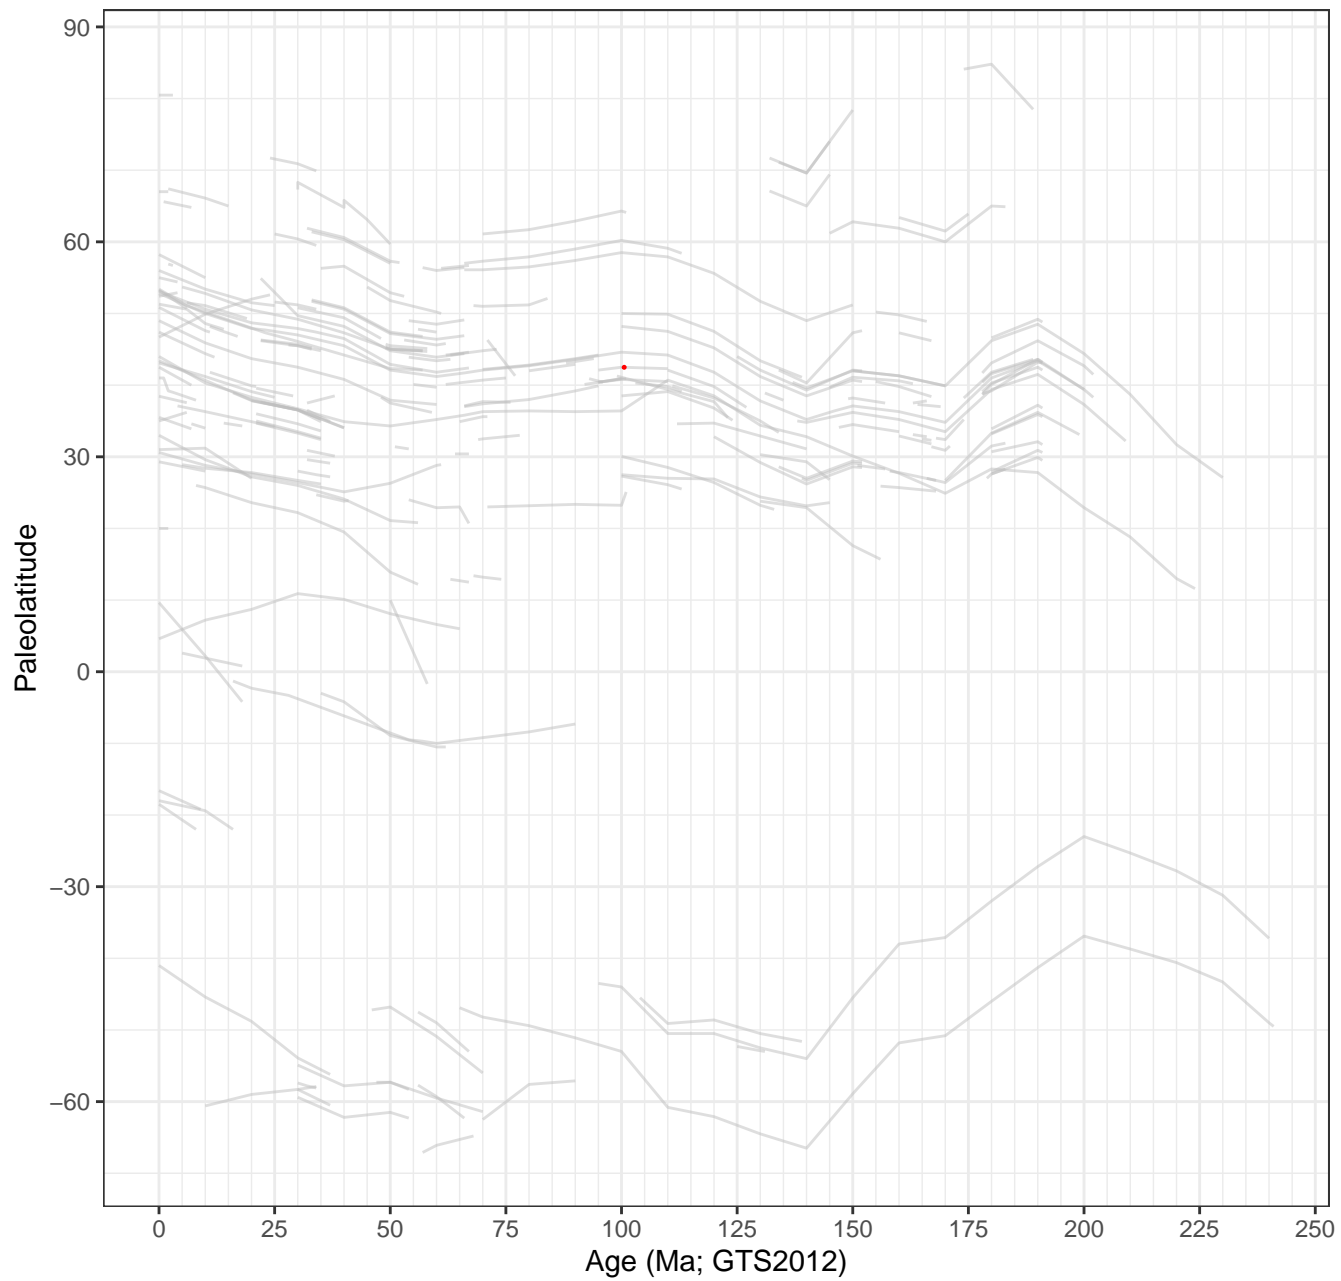

Supplement: Supplementary file 883 [file Ascodinium acrophorum.pdf › Supplement/Supplement 2/Species 1914 plots/Ascodinium acrophorum.pdf]

# Species *Ascodinium fissilum*

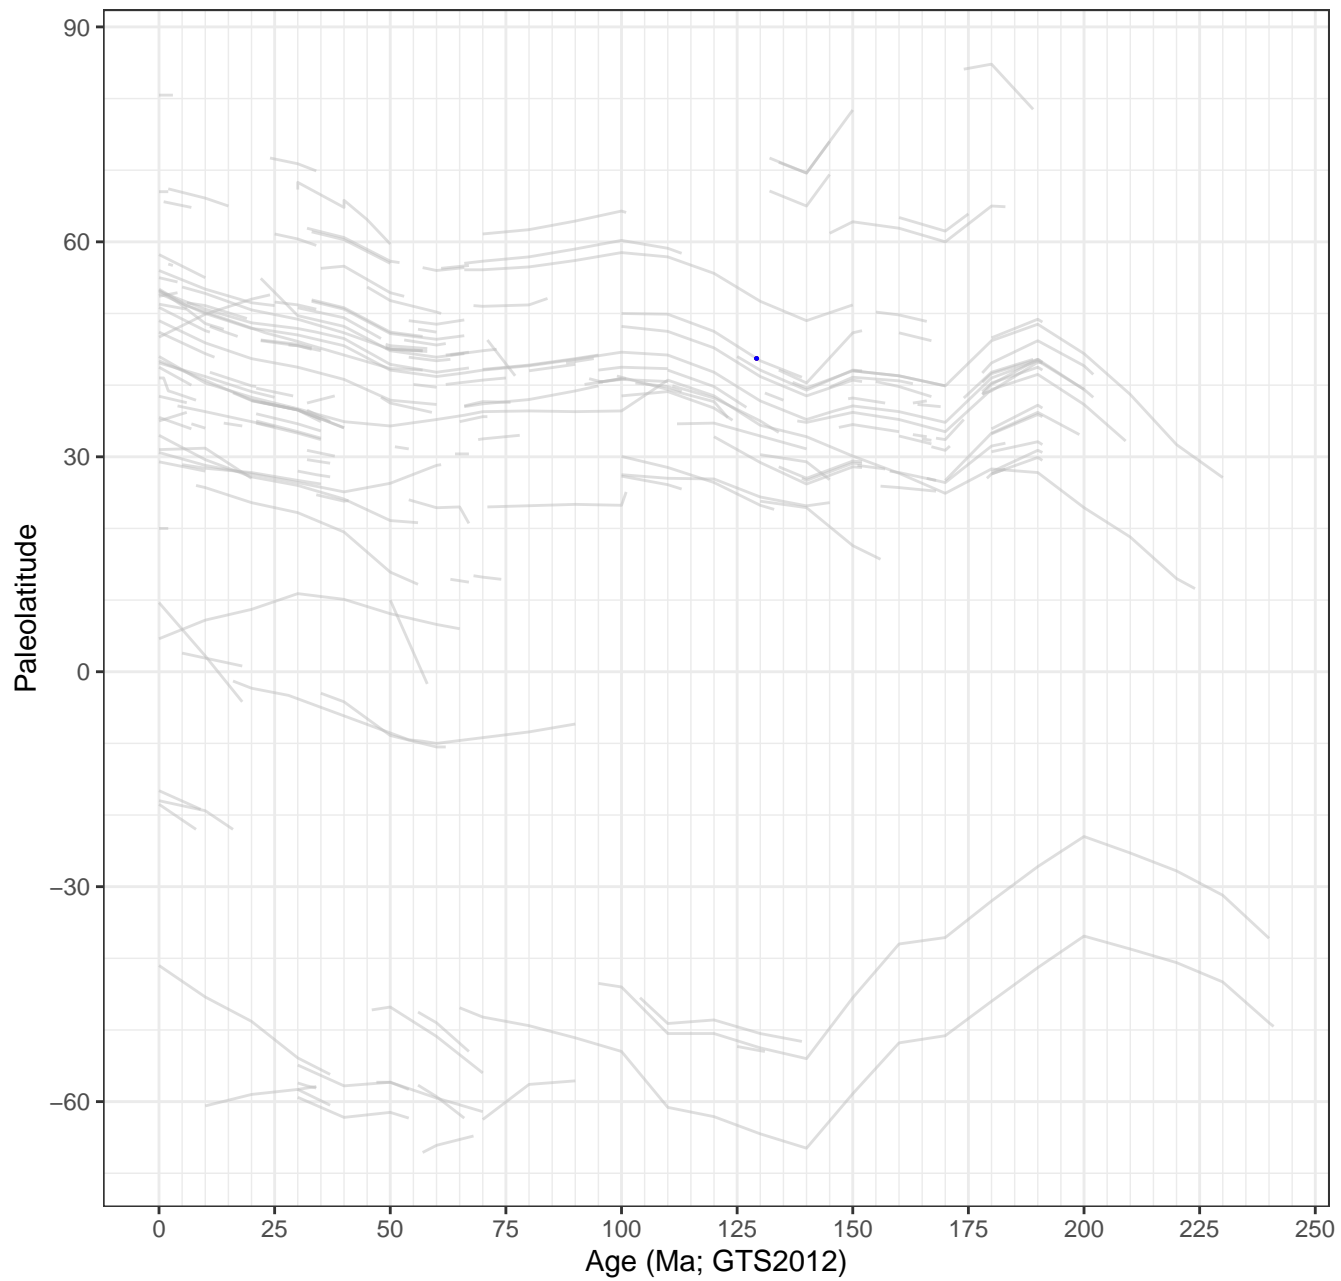

Supplement: Supplementary file 884 [file Ascodinium fissilum.pdf › Supplement/Supplement 2/Species 1914 plots/Ascodinium fissilum.pdf]

# Species *Ascodinium parvum*

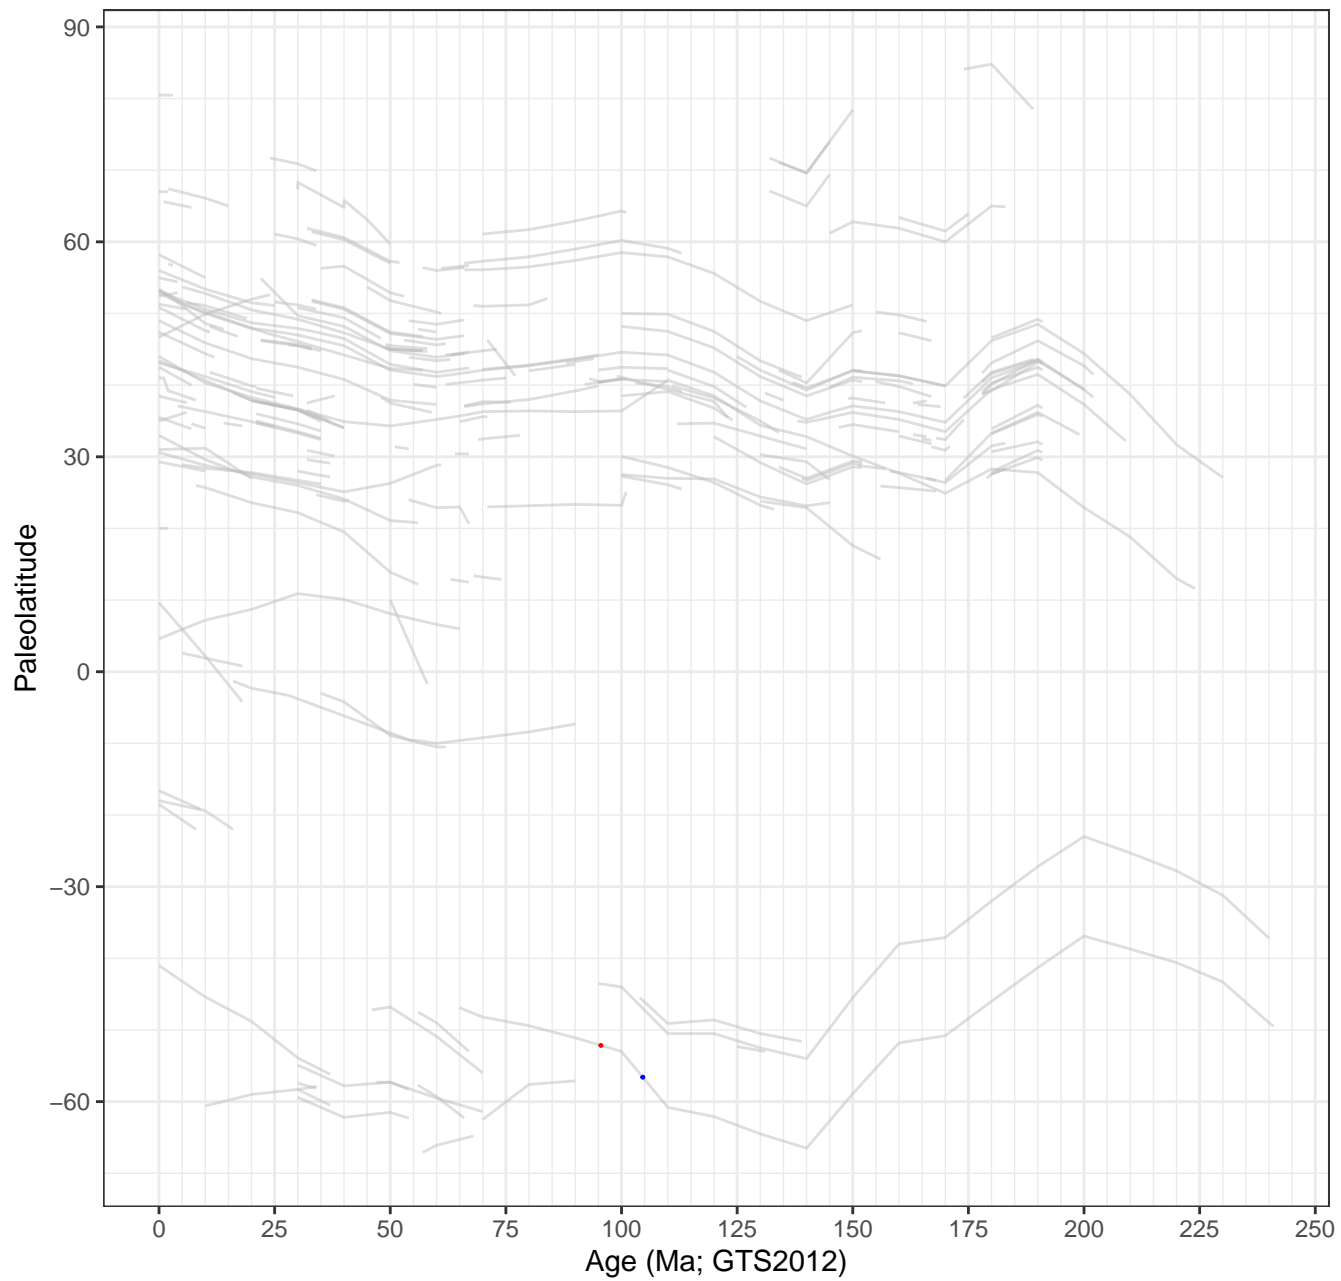

Supplement: Supplementary file 885 [file Ascodinium parvum.pdf › Supplement/Supplement 2/Species 1914 plots/Ascodinium parvum.pdf]

# Species *Ascostomocystis granosa*

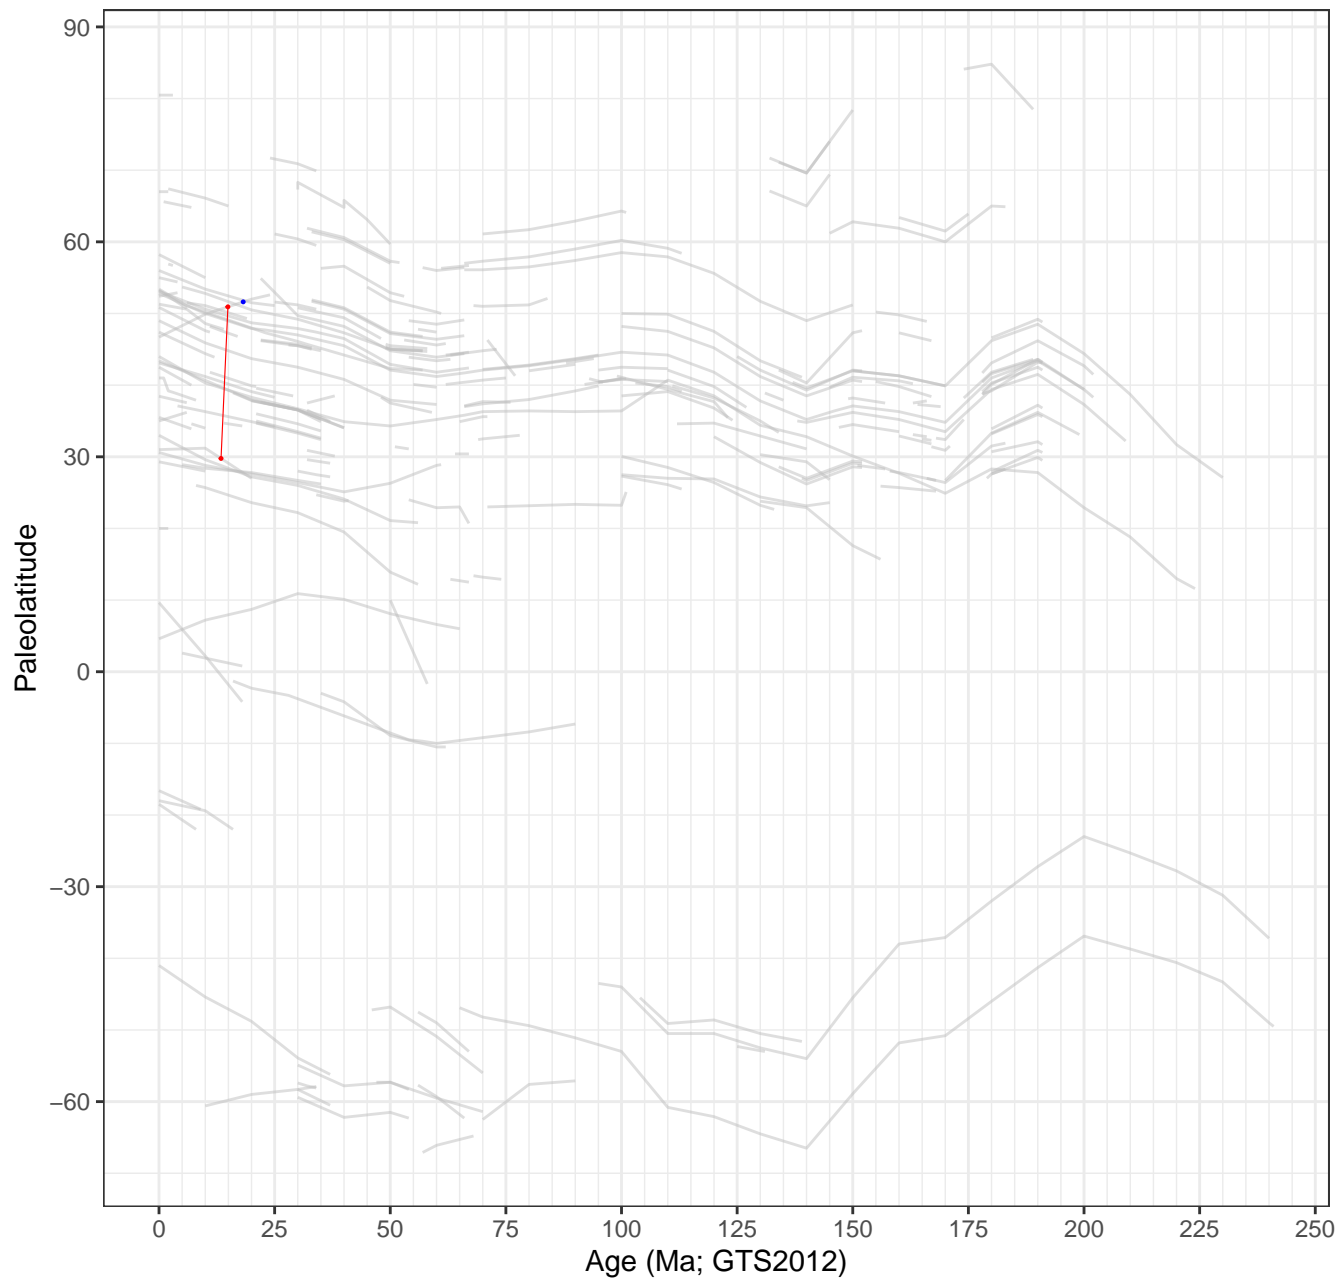

Supplement: Supplementary file 886 [file Ascostomocystis granosa.pdf › Supplement/Supplement 2/Species 1914 plots/Ascostomocystis granosa.pdf]

# Species *Ataxiodinium choane*

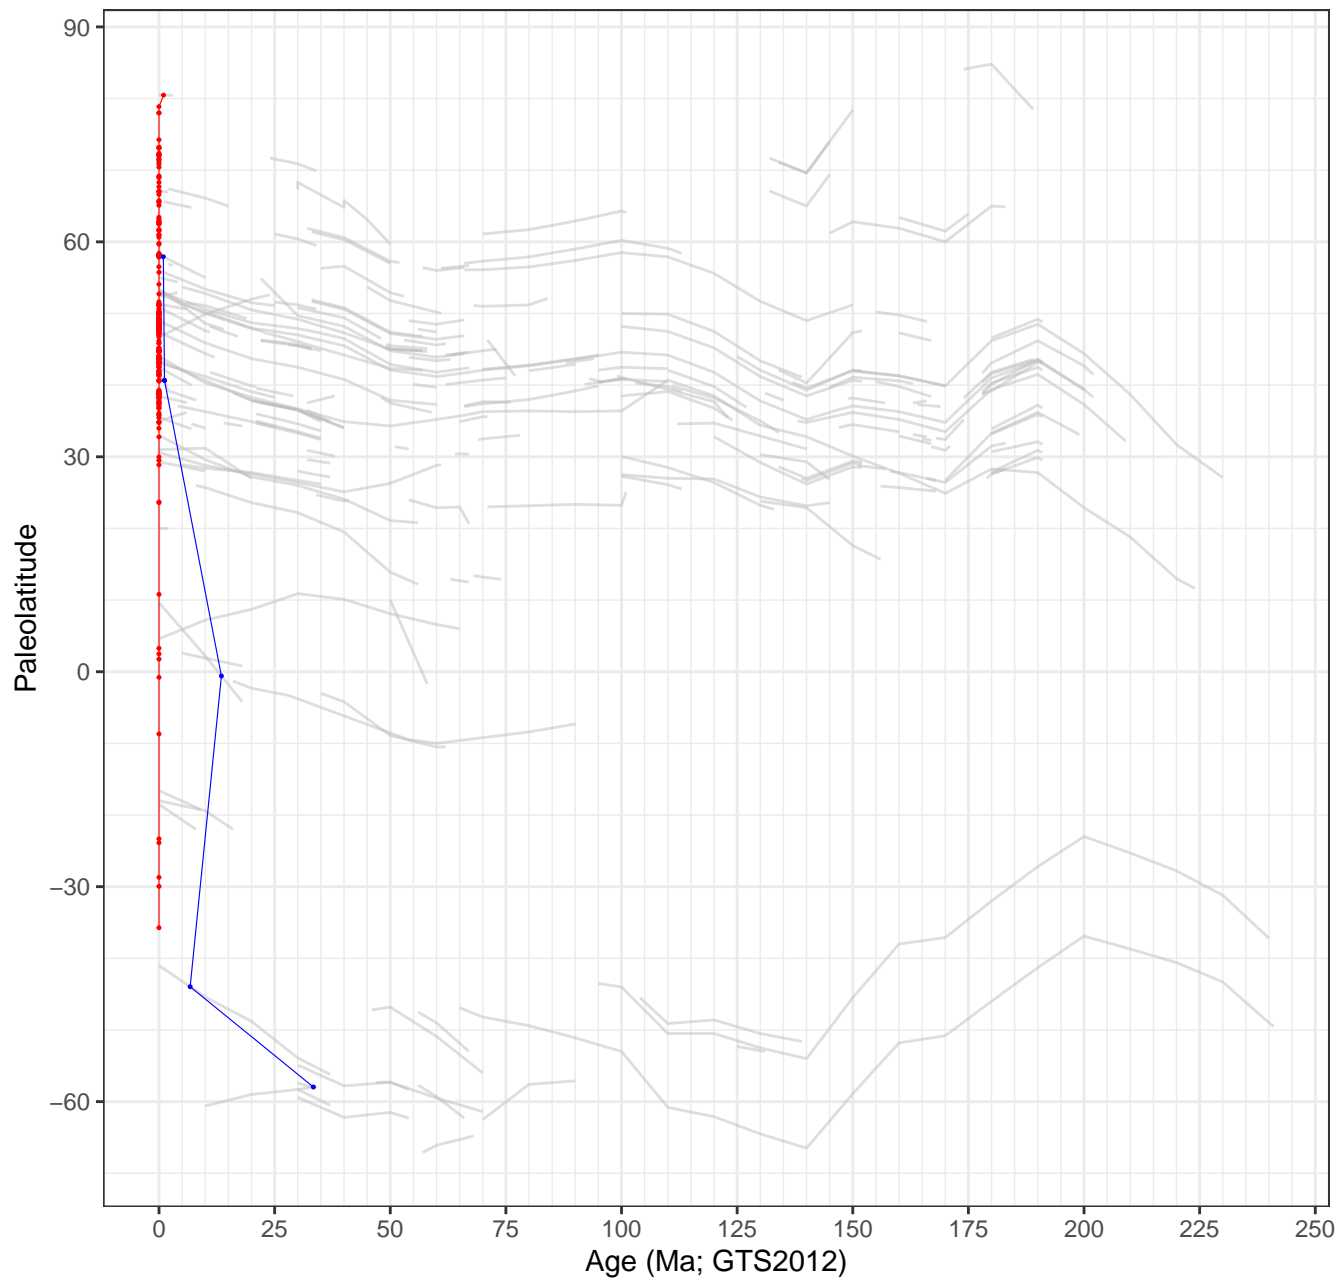

Supplement: Supplementary file 887 [file Ataxiodinium choane.pdf › Supplement/Supplement 2/Species 1914 plots/Ataxiodinium choane.pdf]

# Species *Ataxiodinium confusum*

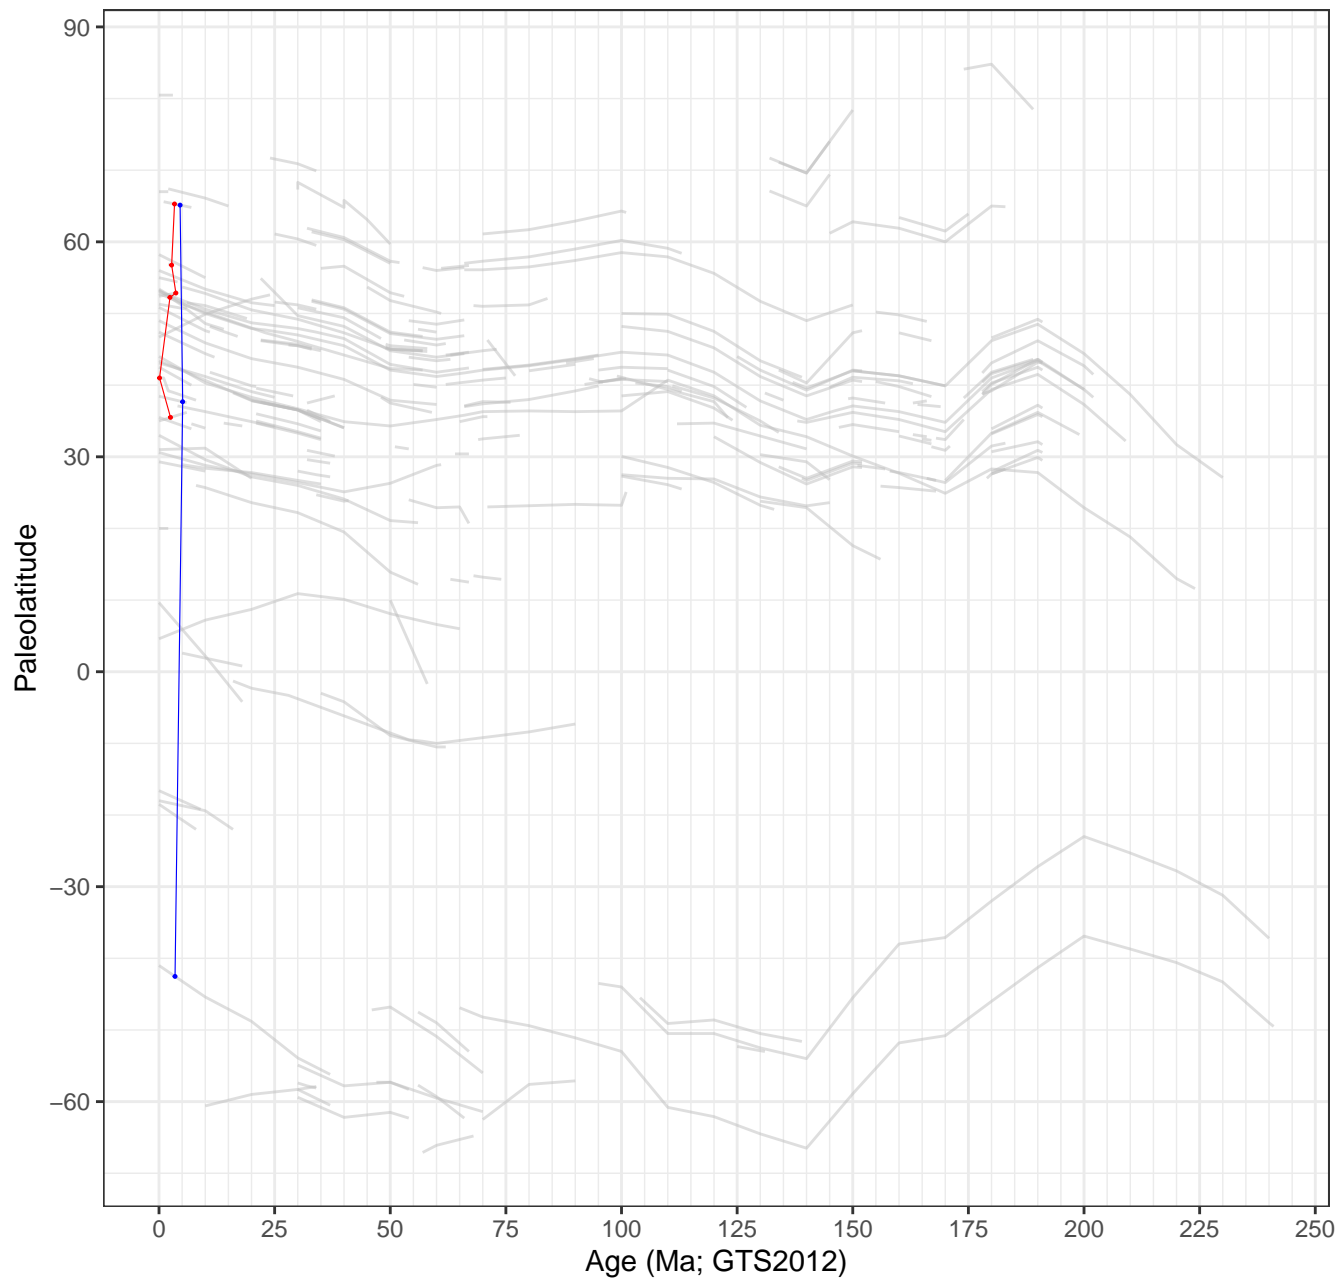

Supplement: Supplementary file 888 [file Ataxiodinium confusum.pdf › Supplement/Supplement 2/Species 1914 plots/Ataxiodinium confusum.pdf]

# Species *Ataxiodinium zevenboomii*

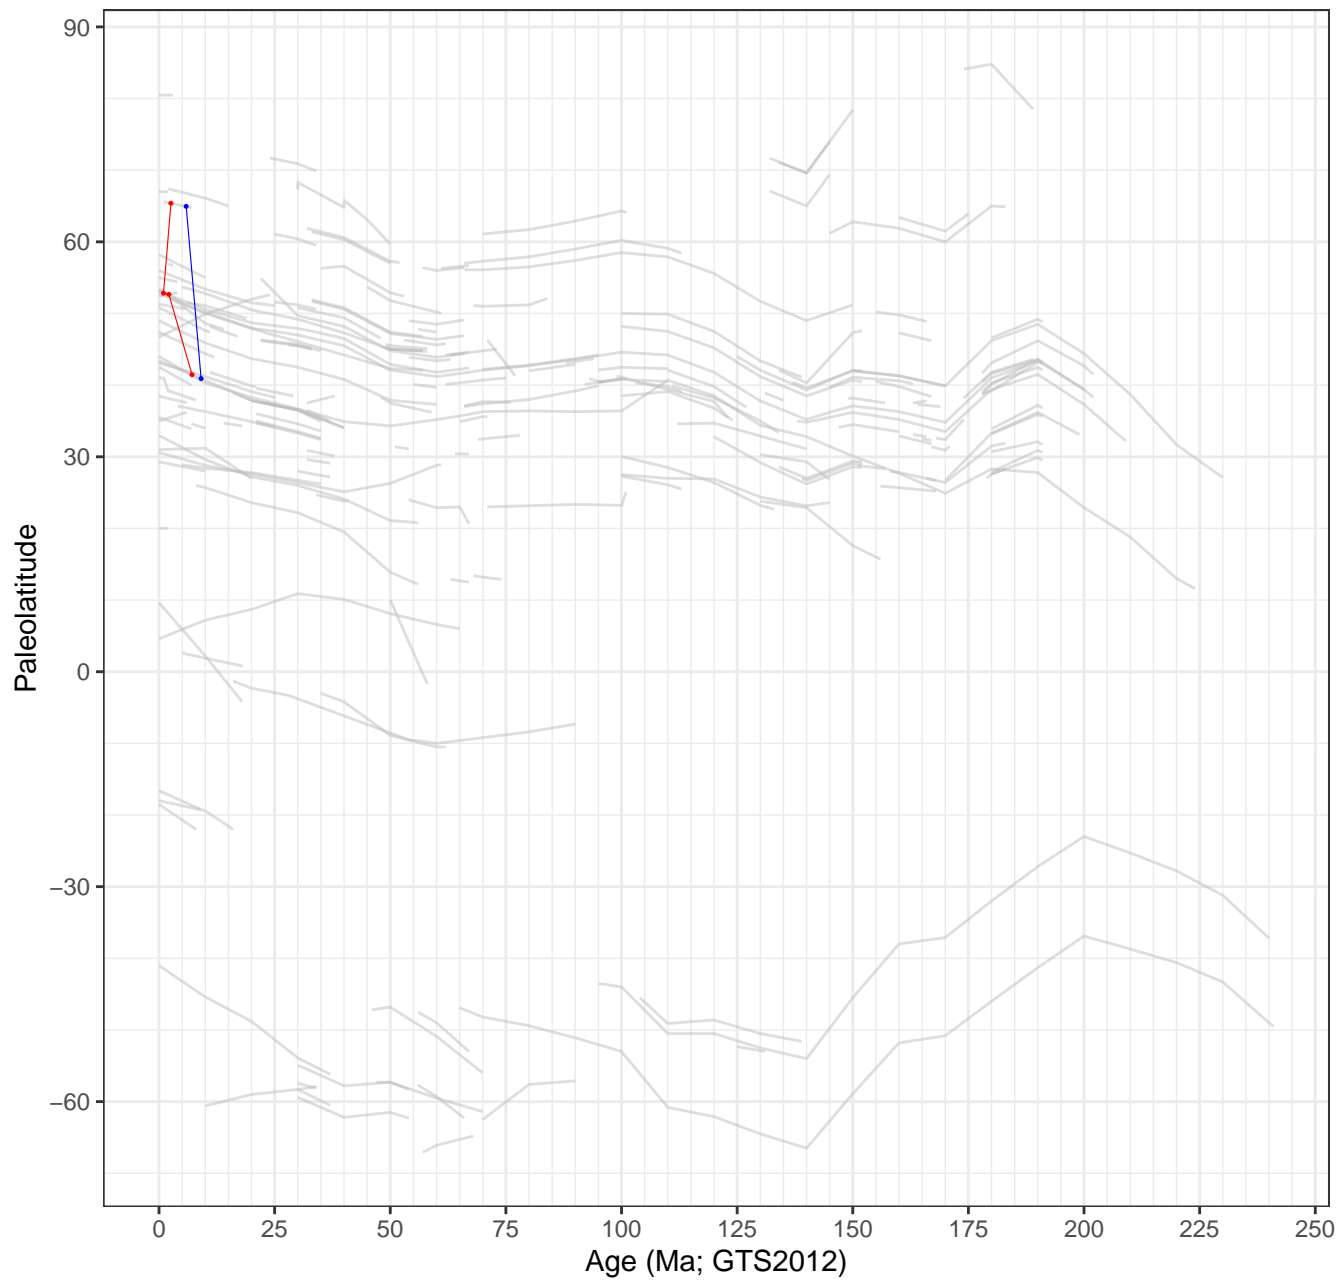

Supplement: Supplementary file 889 [file Ataxiodinium zevenboomii.pdf › Supplement/Supplement 2/Species 1914 plots/Ataxiodinium zevenboomii.pdf]

# Species *Athigmatocysta glabra*

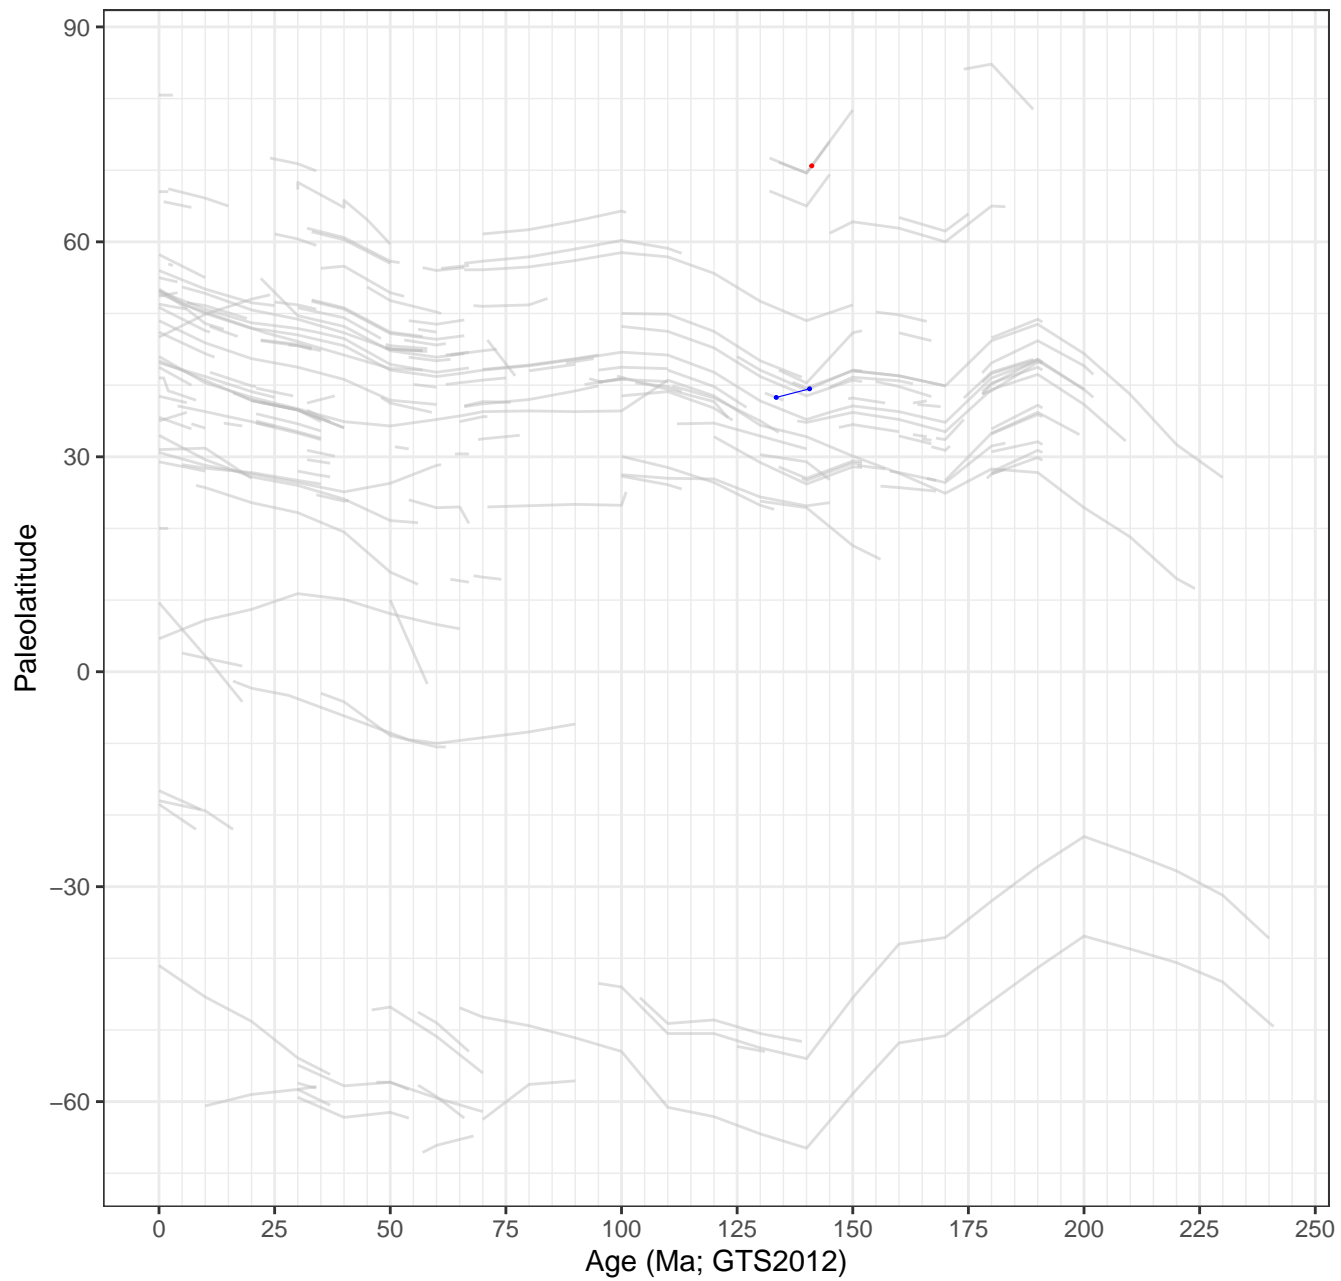

Supplement: Supplementary file 890 [file Athigmatocysta glabra.pdf › Supplement/Supplement 2/Species 1914 plots/Athigmatocysta glabra.pdf]

# Species *Atopodinium haromense*

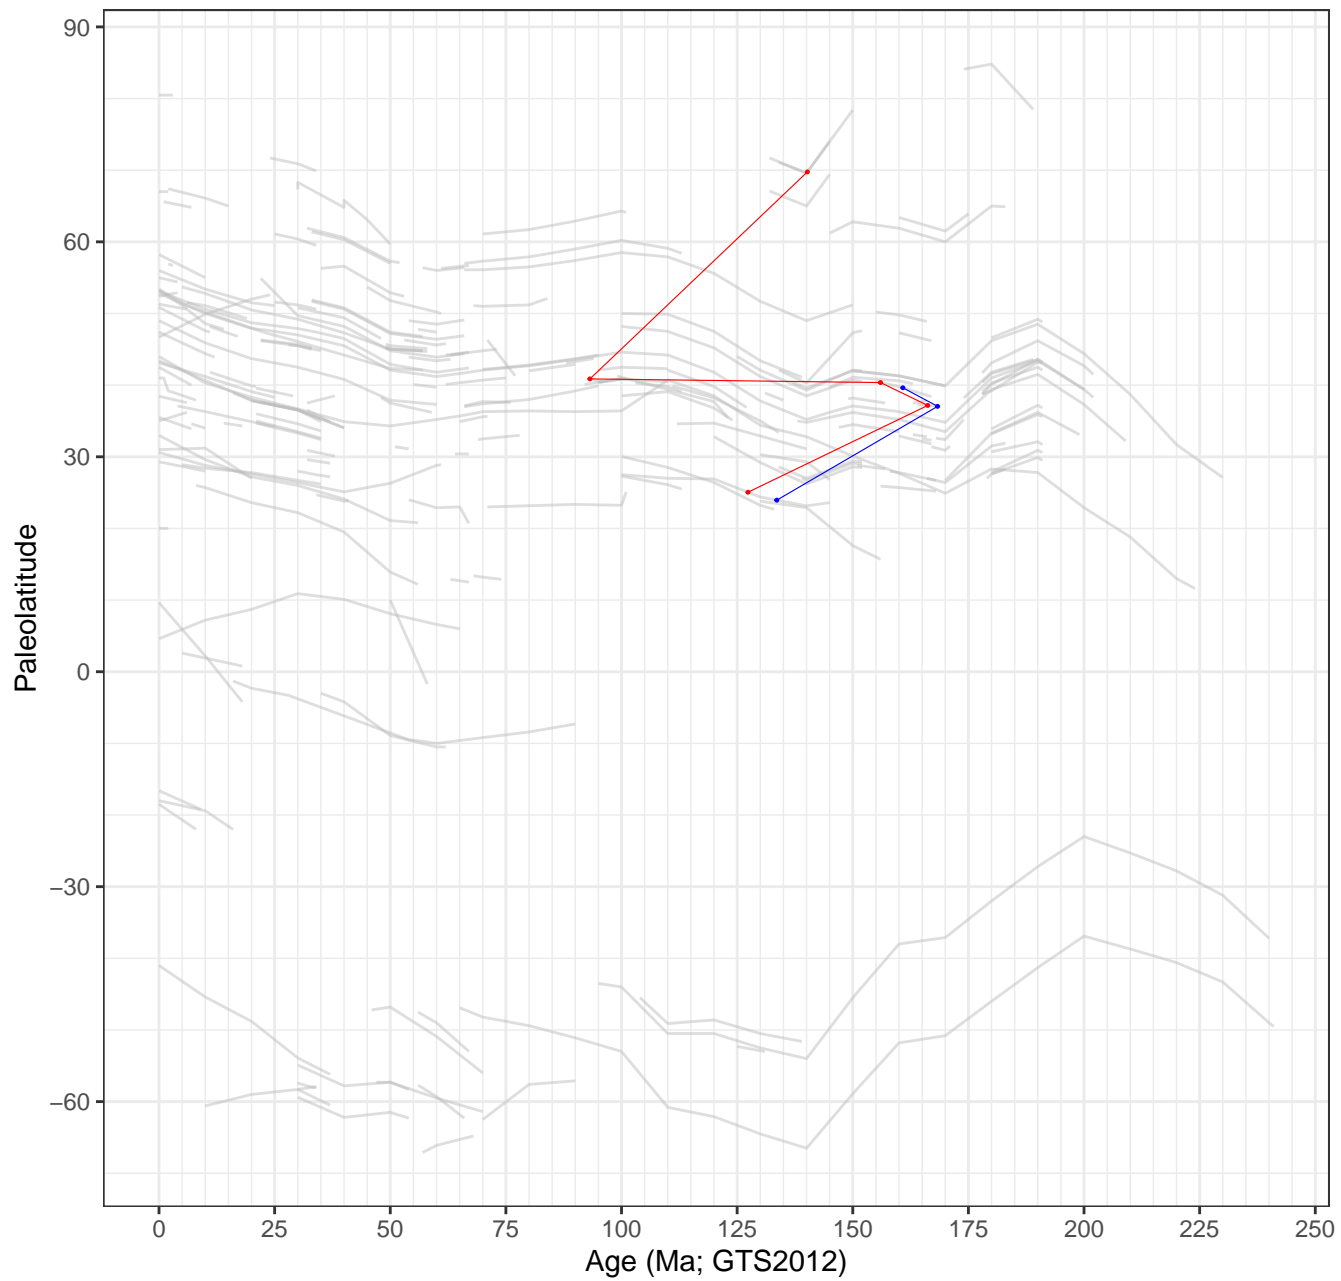

Supplement: Supplementary file 891 [file Atopodinium haromense.pdf › Supplement/Supplement 2/Species 1914 plots/Atopodinium haromense.pdf]

# Species *Atopodinium perforatum*

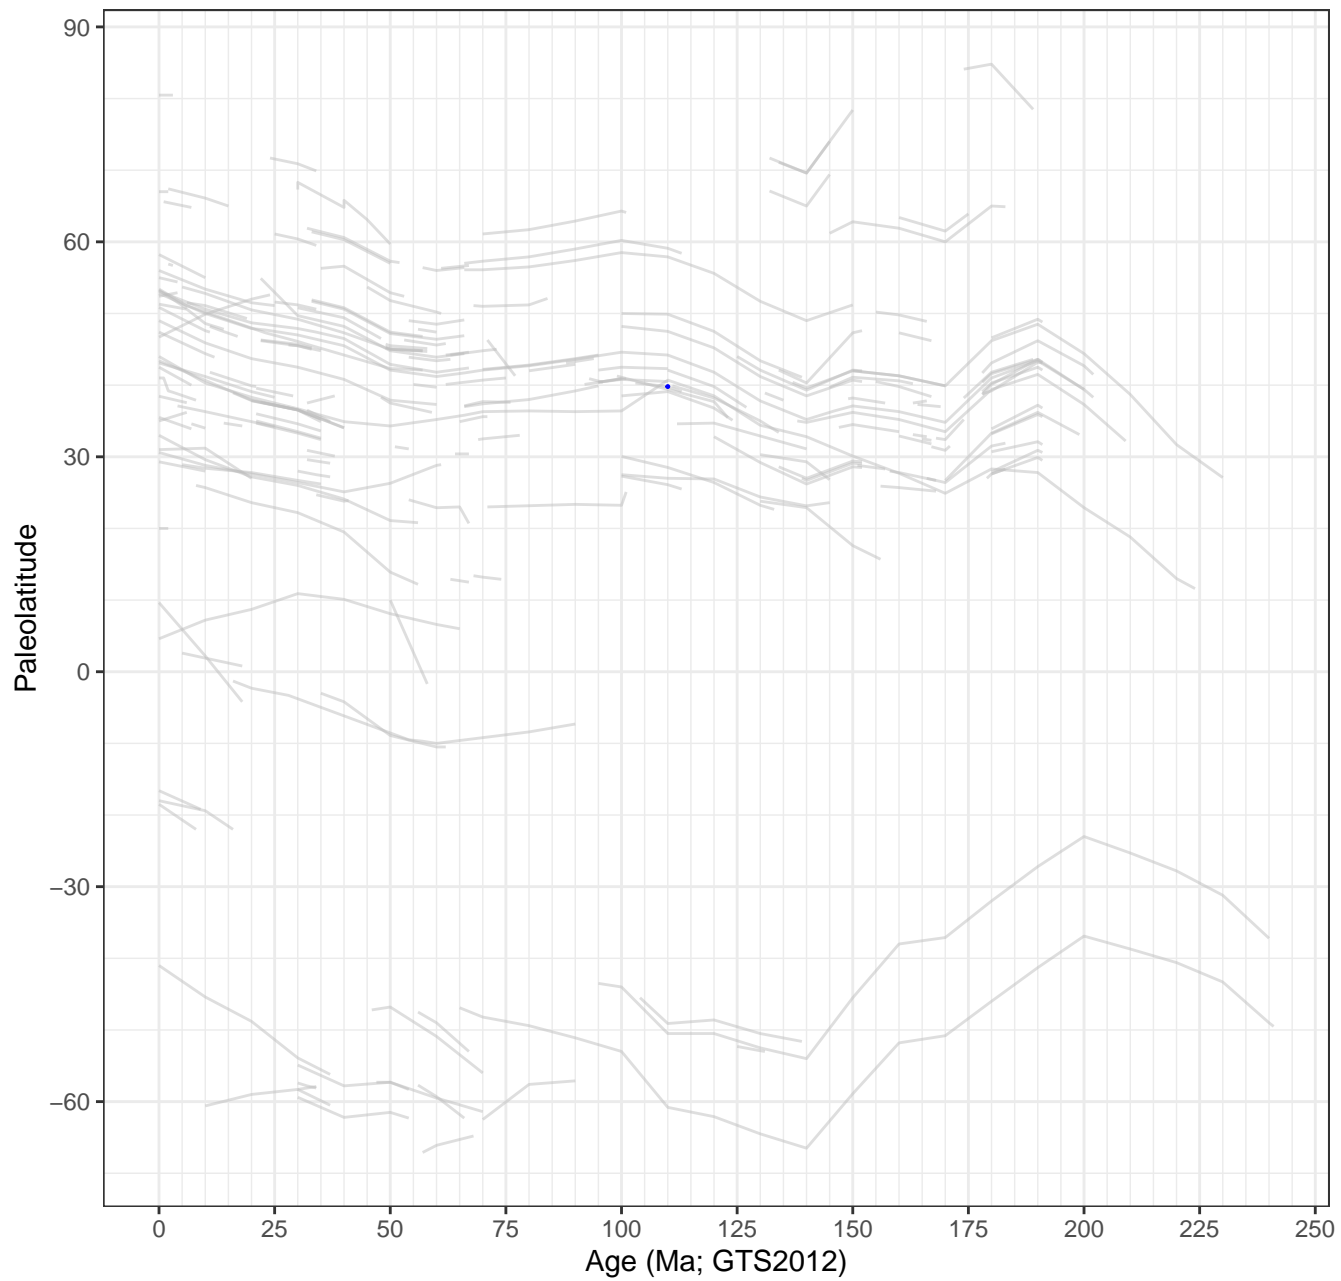

Supplement: Supplementary file 892 [file Atopodinium perforatum.pdf › Supplement/Supplement 2/Species 1914 plots/Atopodinium perforatum.pdf]

# Species *Atopodinium polygonale*

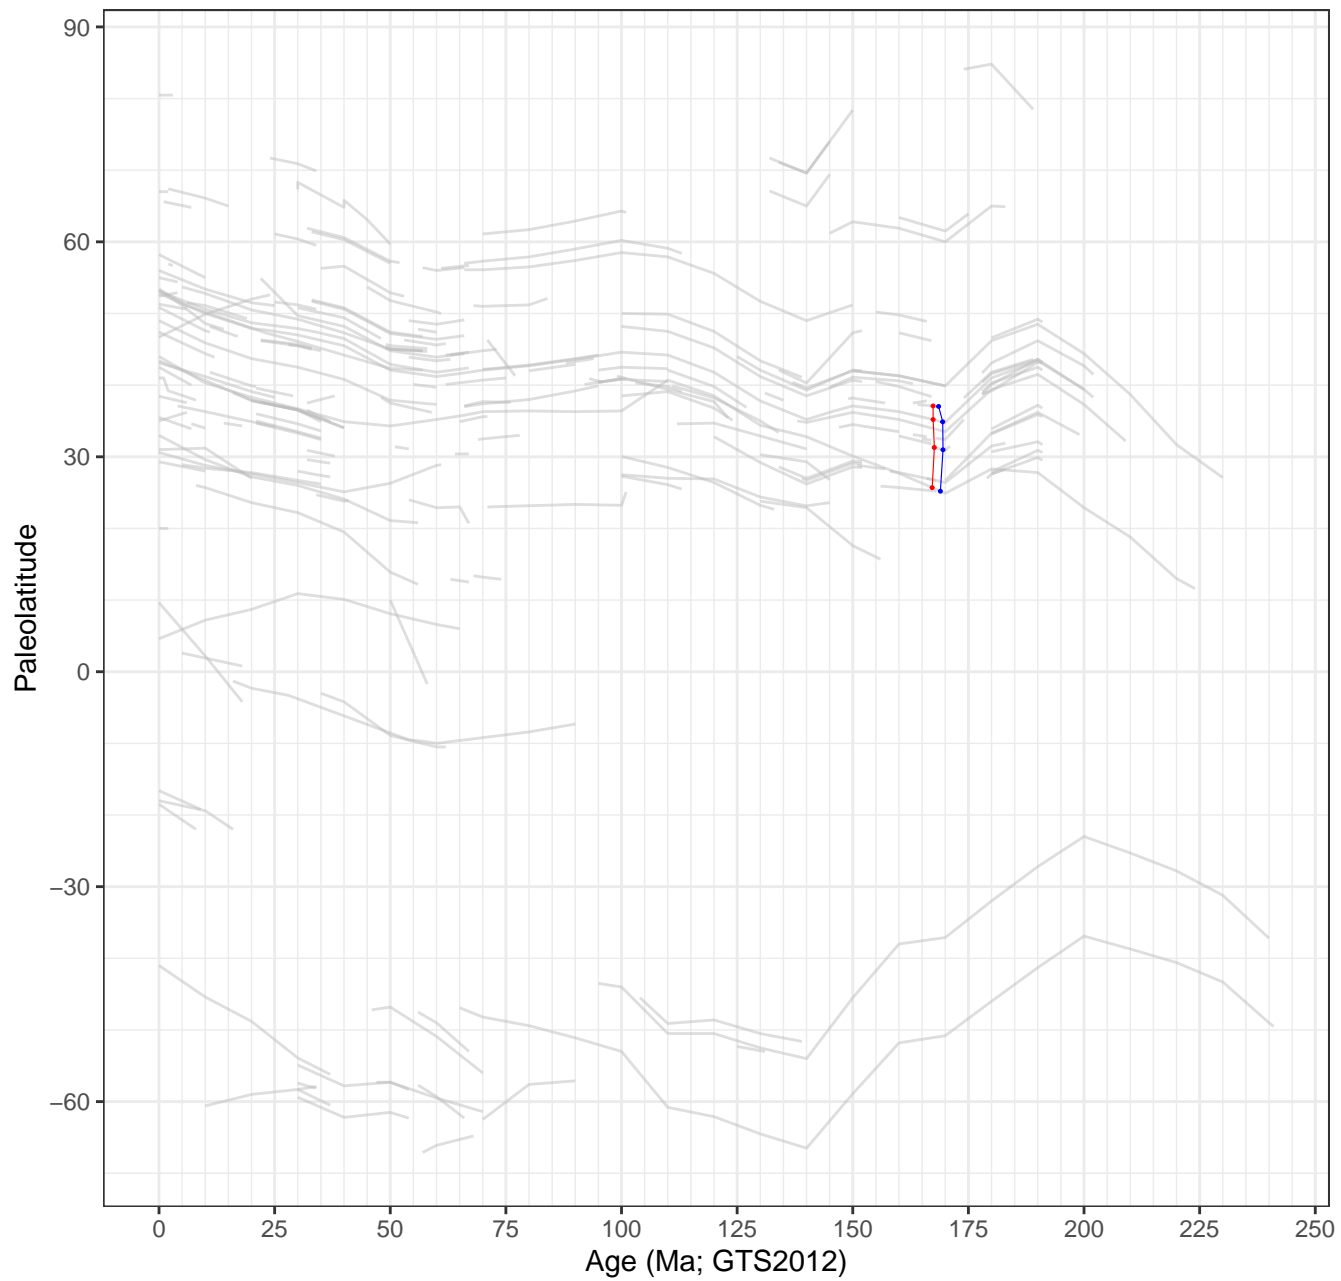

Supplement: Supplementary file 893 [file Atopodinium polygonale.pdf › Supplement/Supplement 2/Species 1914 plots/Atopodinium polygonale.pdf]

# Species *Atopodinium prostaticum*

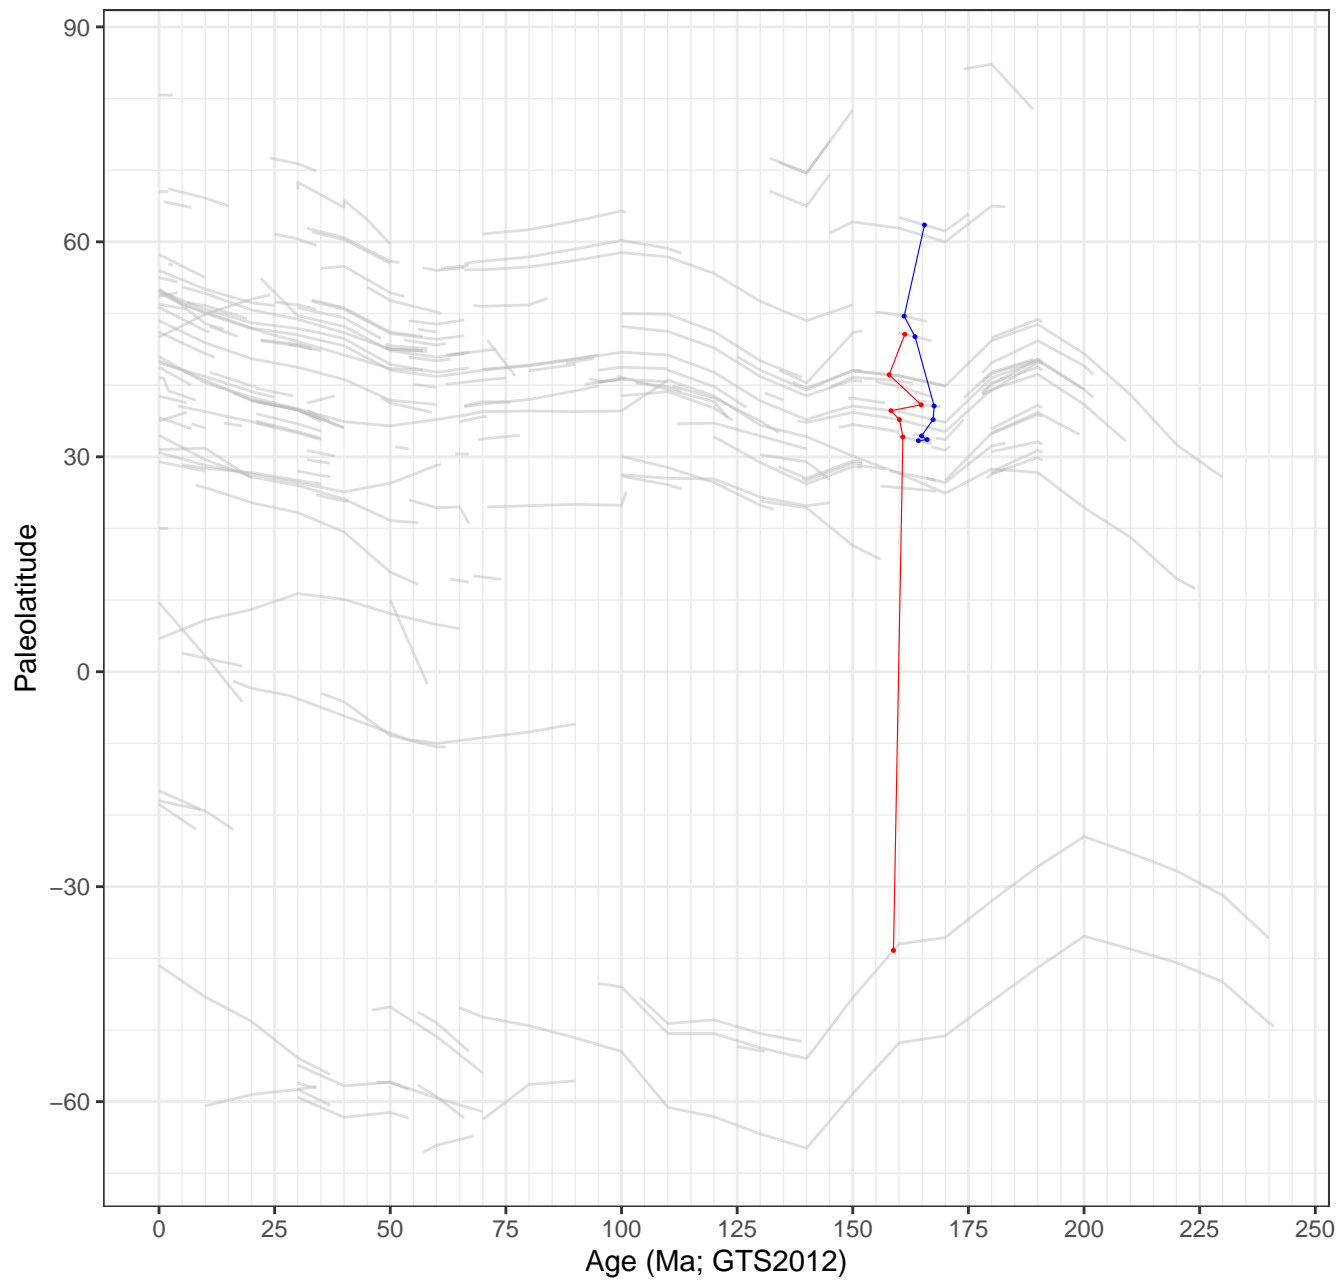

Supplement: Supplementary file 894 [file Atopodinium prostatum.pdf › Supplement/Supplement 2/Species 1914 plots/Atopodinium prostatum.pdf]

# Species *Avellodinium falsificum*

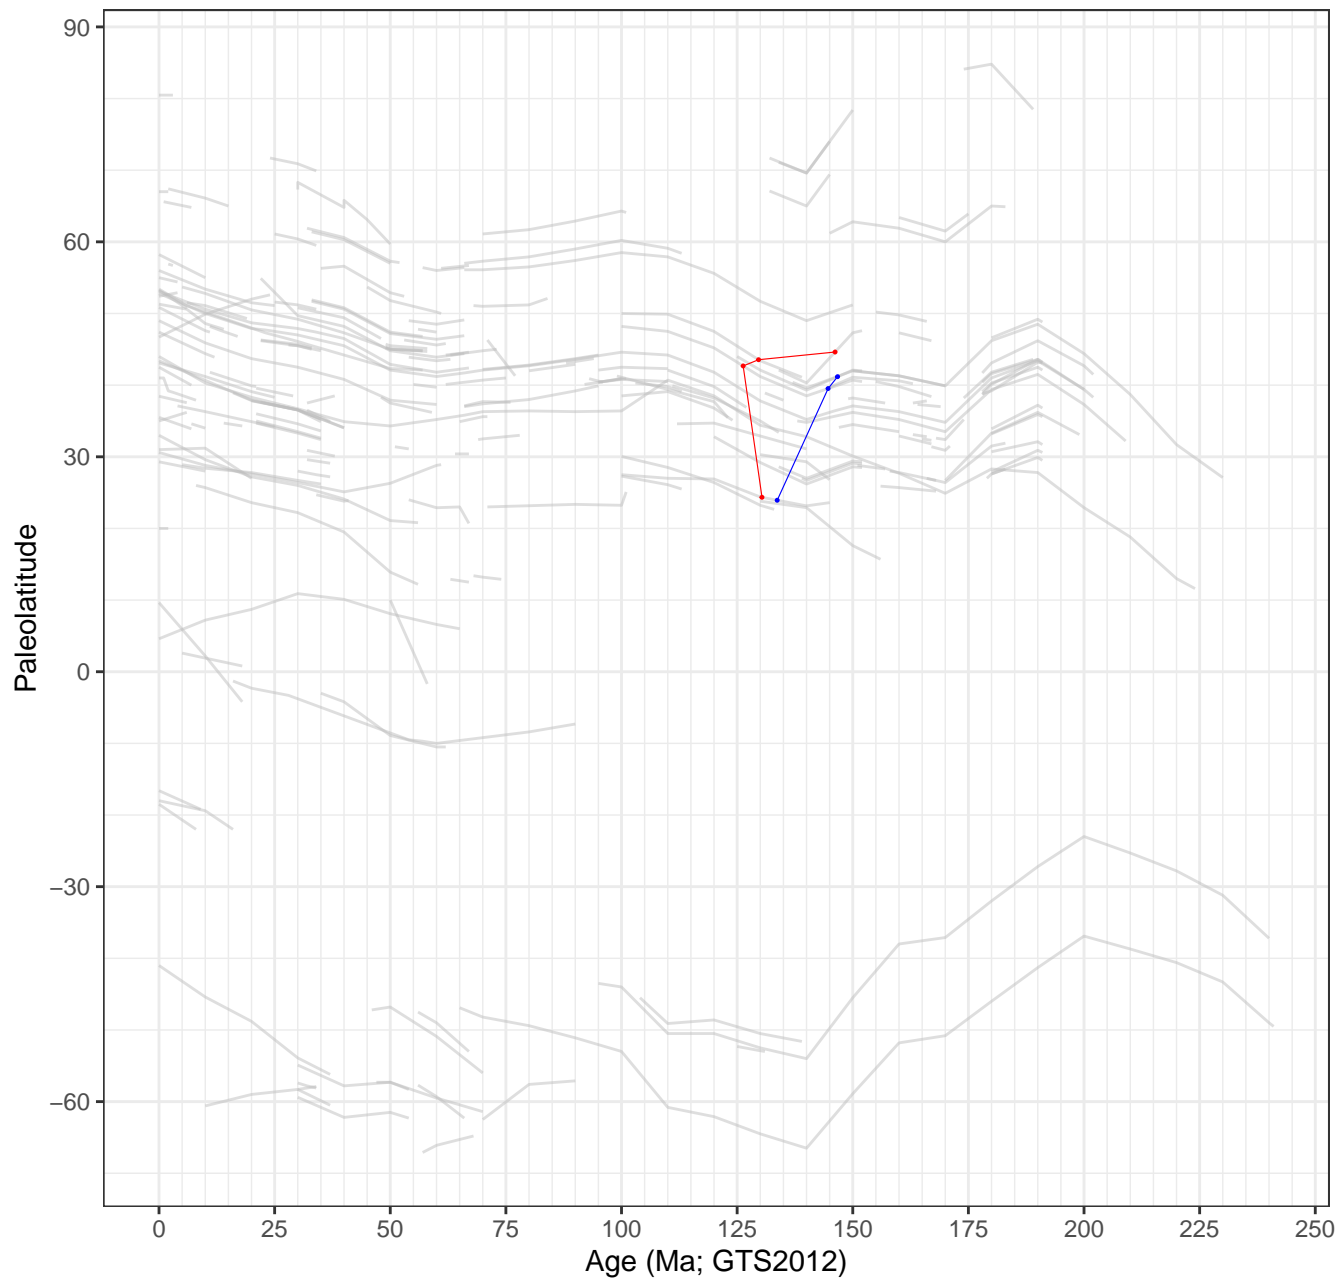

Supplement: Supplementary file 895 [file Avellodinium falsificum.pdf › Supplement/Supplement 2/Species 1914 plots/Avellodinium falsificum.pdf]

# Species *Axioidinium prearticulatum*

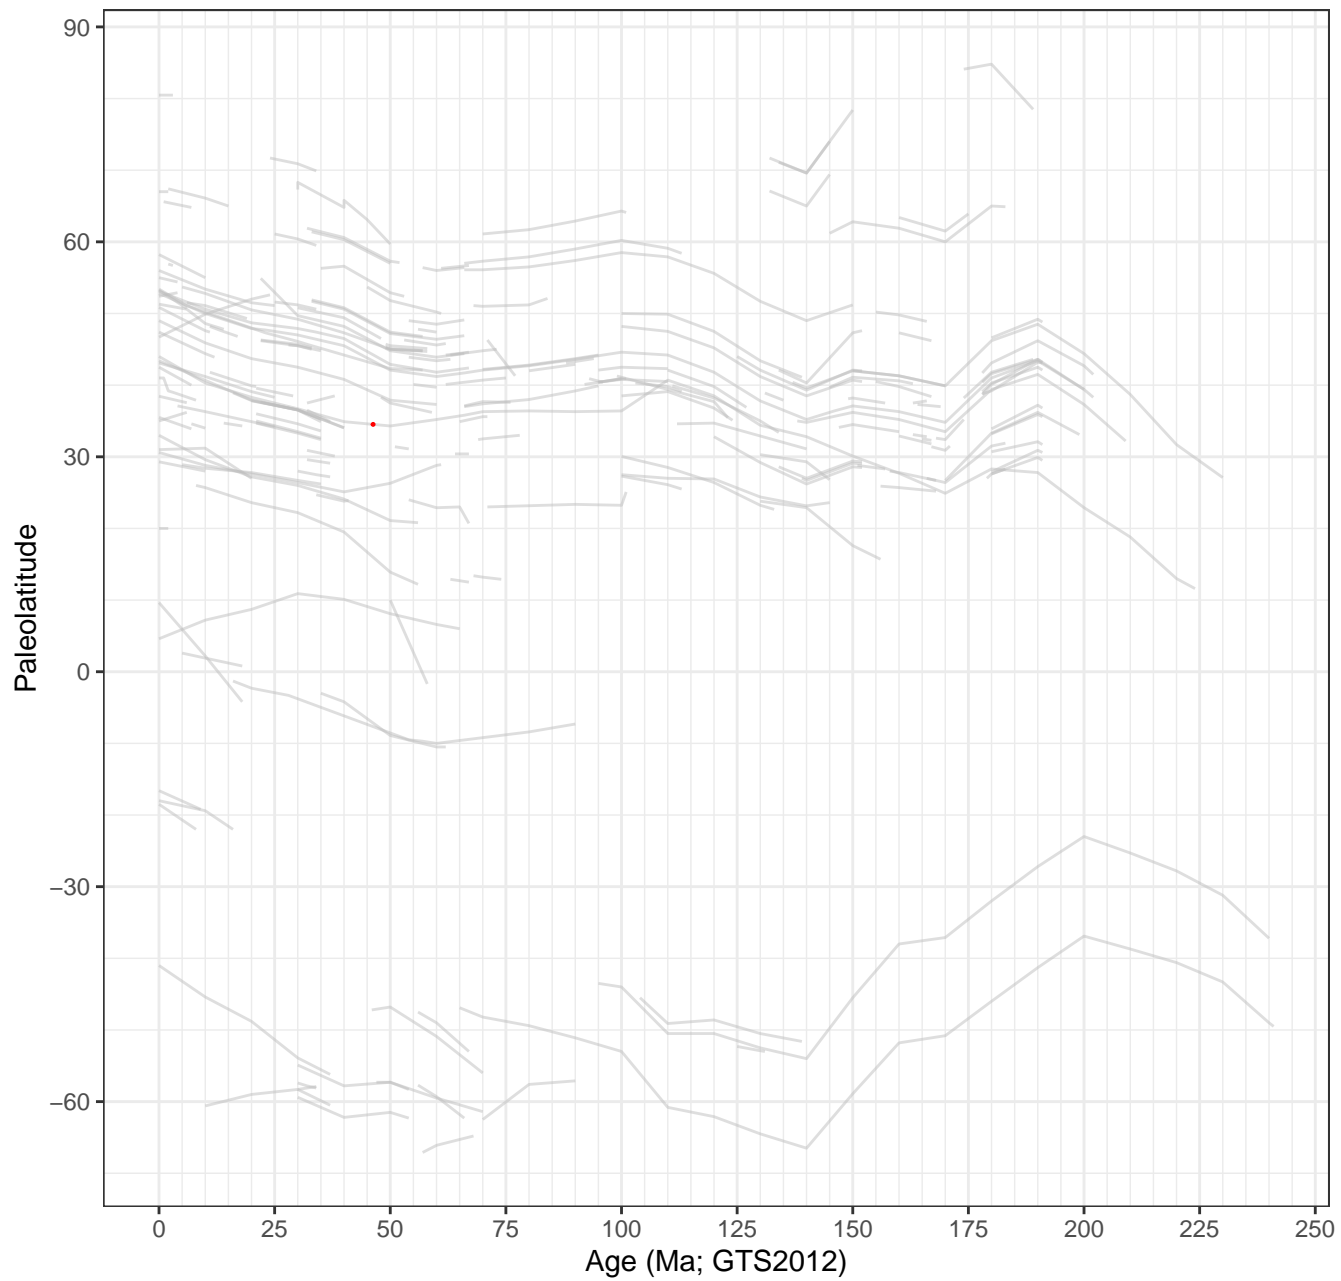

Supplement: Supplementary file 896 [file Axiodinium prearticulatum.pdf › Supplement/Supplement 2/Species 1914 plots/Axiodinium prearticulatum.pdf]

# Species *Balcattia cheleusis*

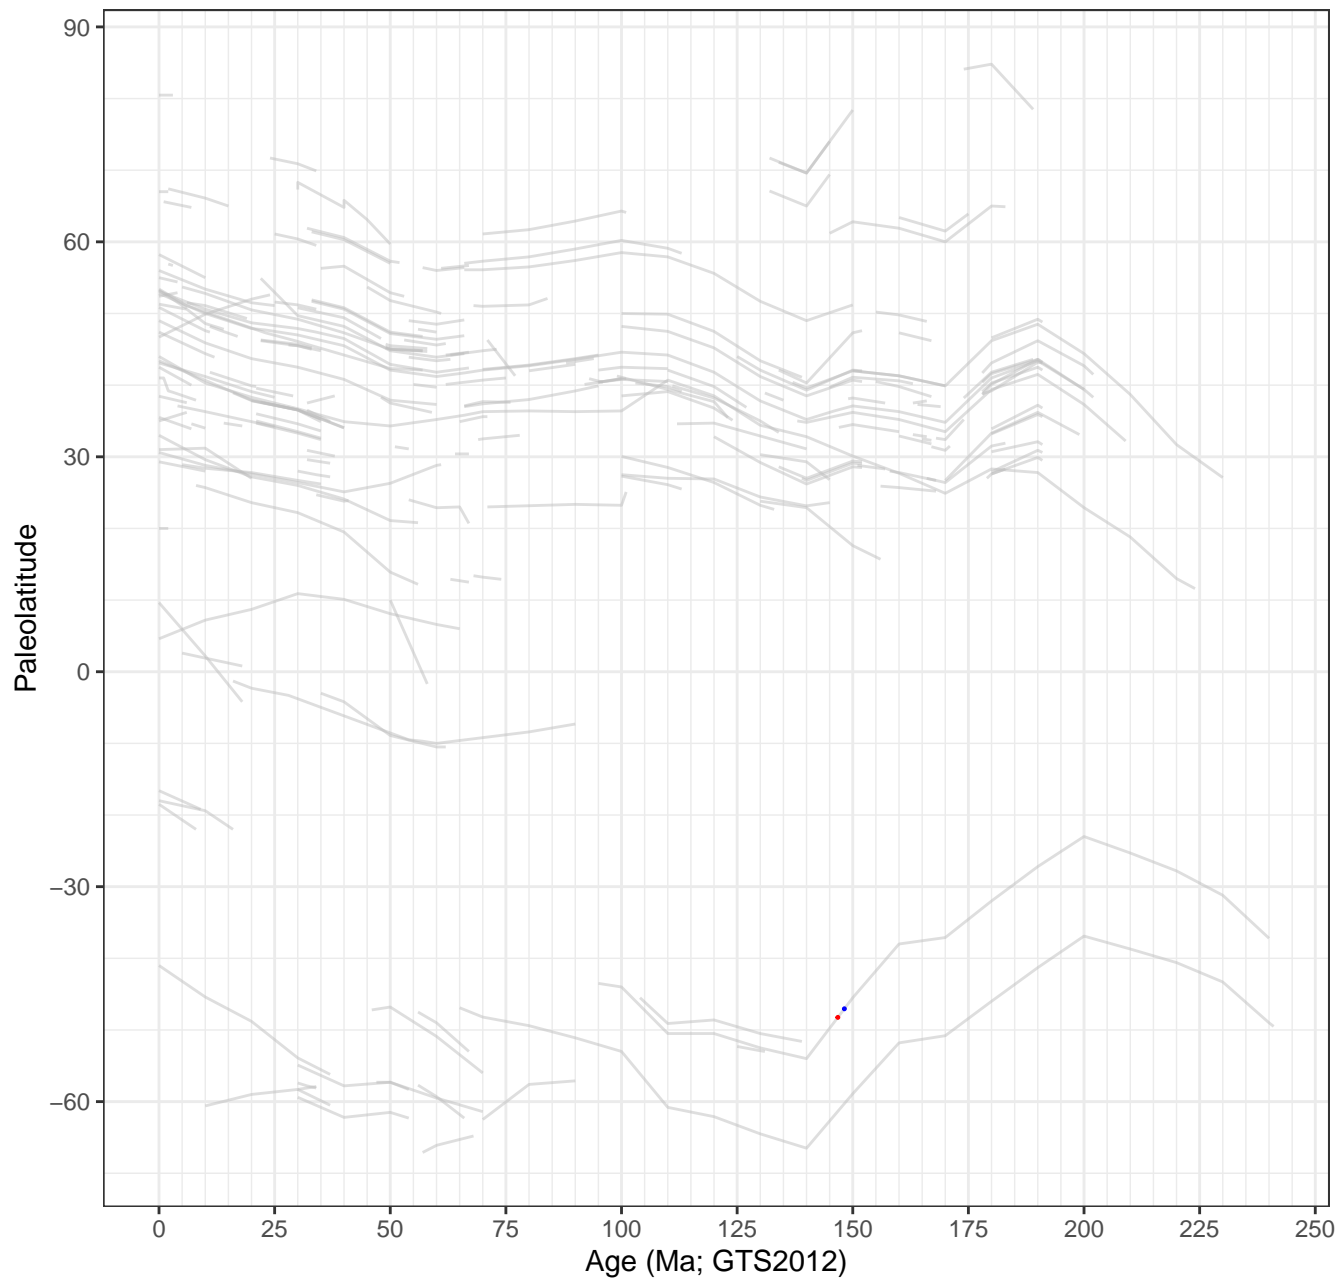

Supplement: Supplementary file 897 [file Balcattia cheleusis.pdf › Supplement/Supplement 2/Species 1914 plots/Balcattia cheleusis.pdf]

# Species *Balteocysta perforata*

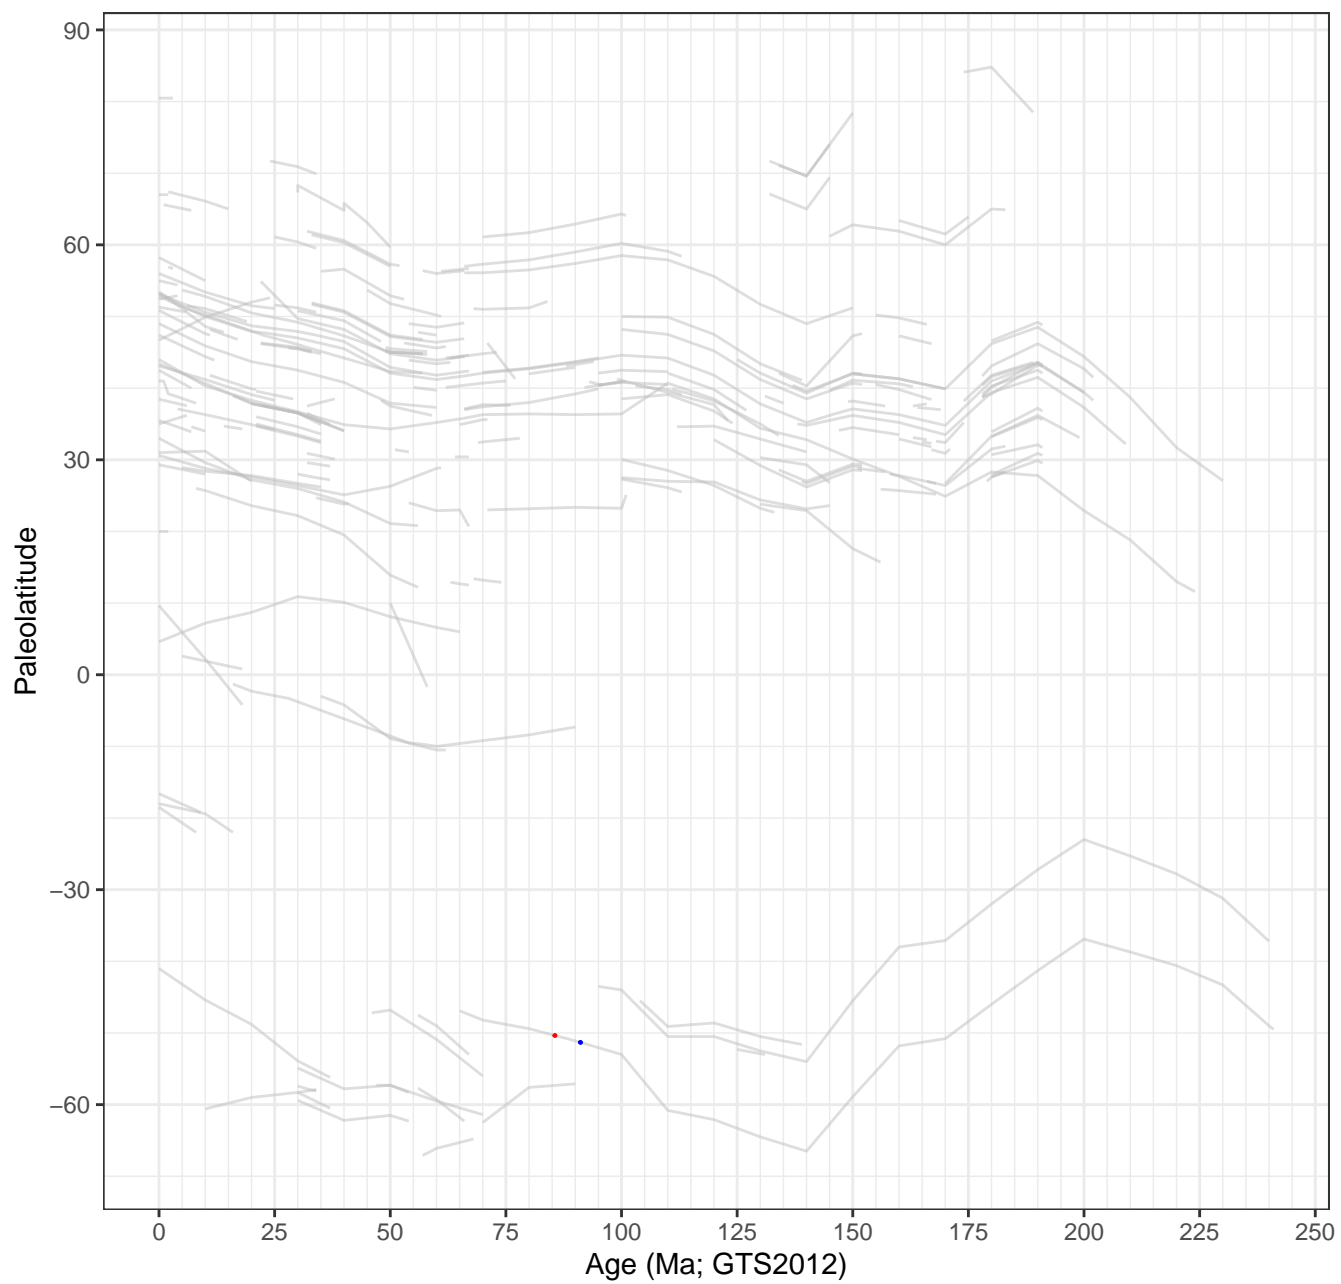

Supplement: Supplementary file 898 [file Balteocysta perforata.pdf › Supplement/Supplement 2/Species 1914 plots/Balteocysta perforata.pdf]

# Species *Baltisphaeridium crameri*

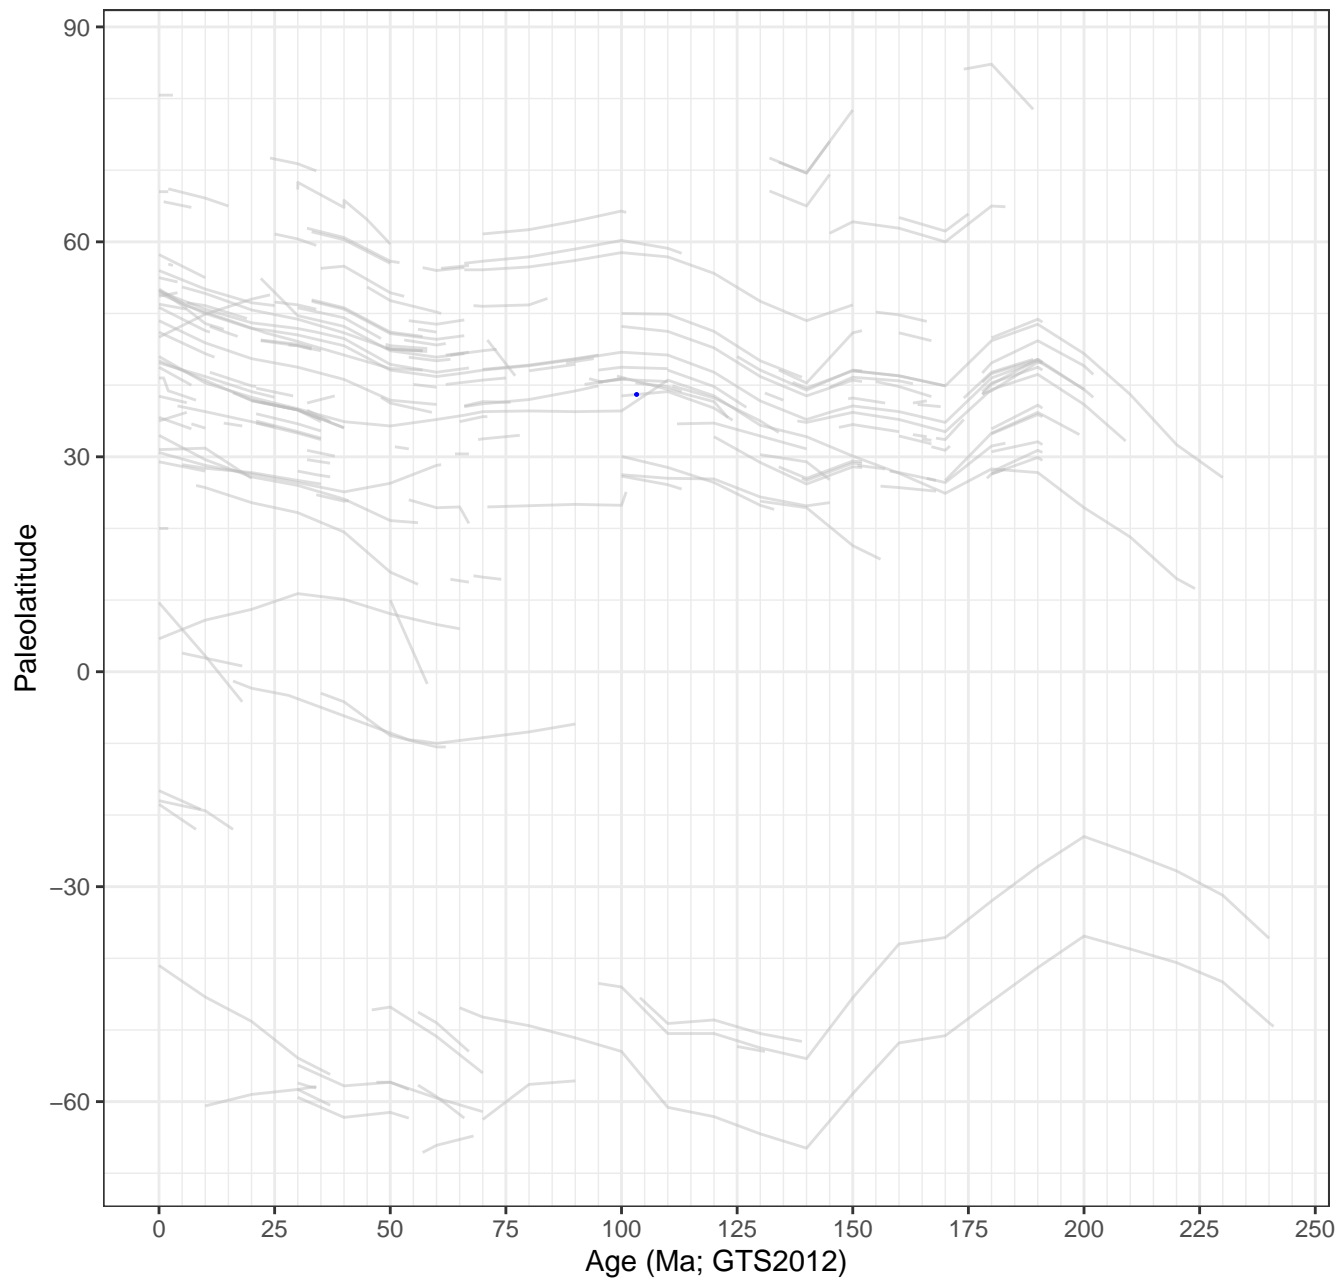

Supplement: Supplementary file 899 [file Baltisphaeridium crameri.pdf › Supplement/Supplement 2/Species 1914 plots/Baltisphaeridium crameri.pdf]

# Species *Baltisphaeridium whitei*

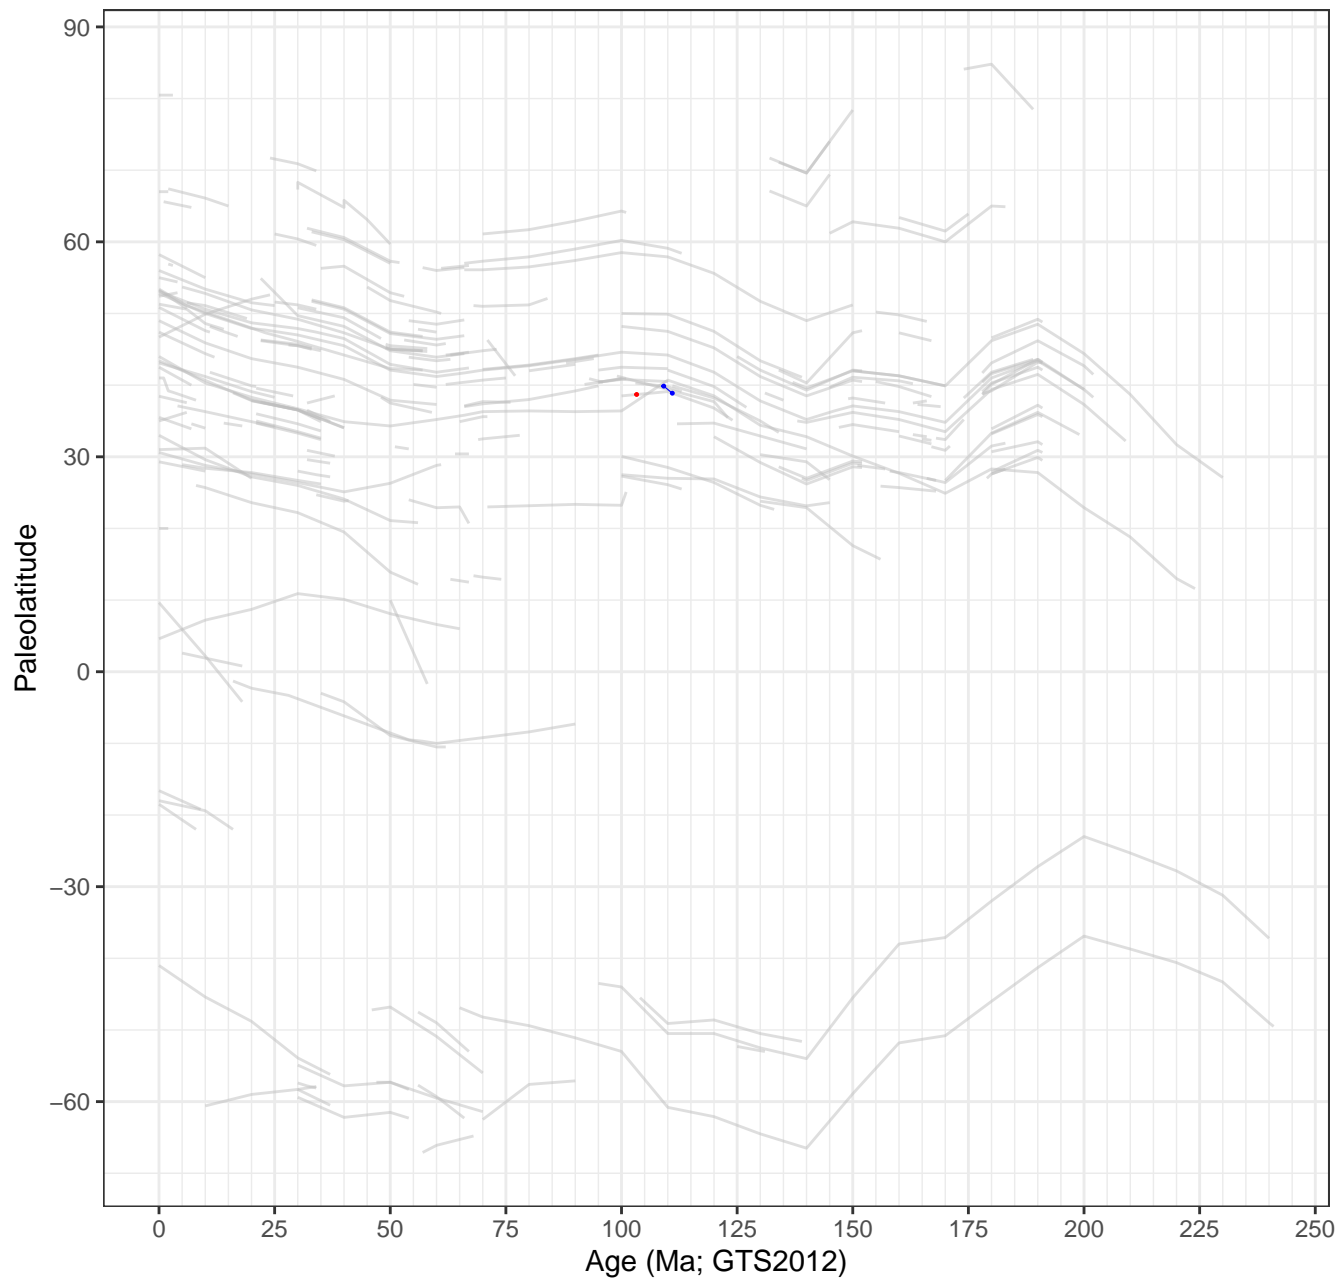

Supplement: Supplementary file 900 [file Baltisphaeridium whitei.pdf › Supplement/Supplement 2/Species 1914 plots/Baltisphaeridium whitei.pdf]

# Species *Barbatacysta baculata*

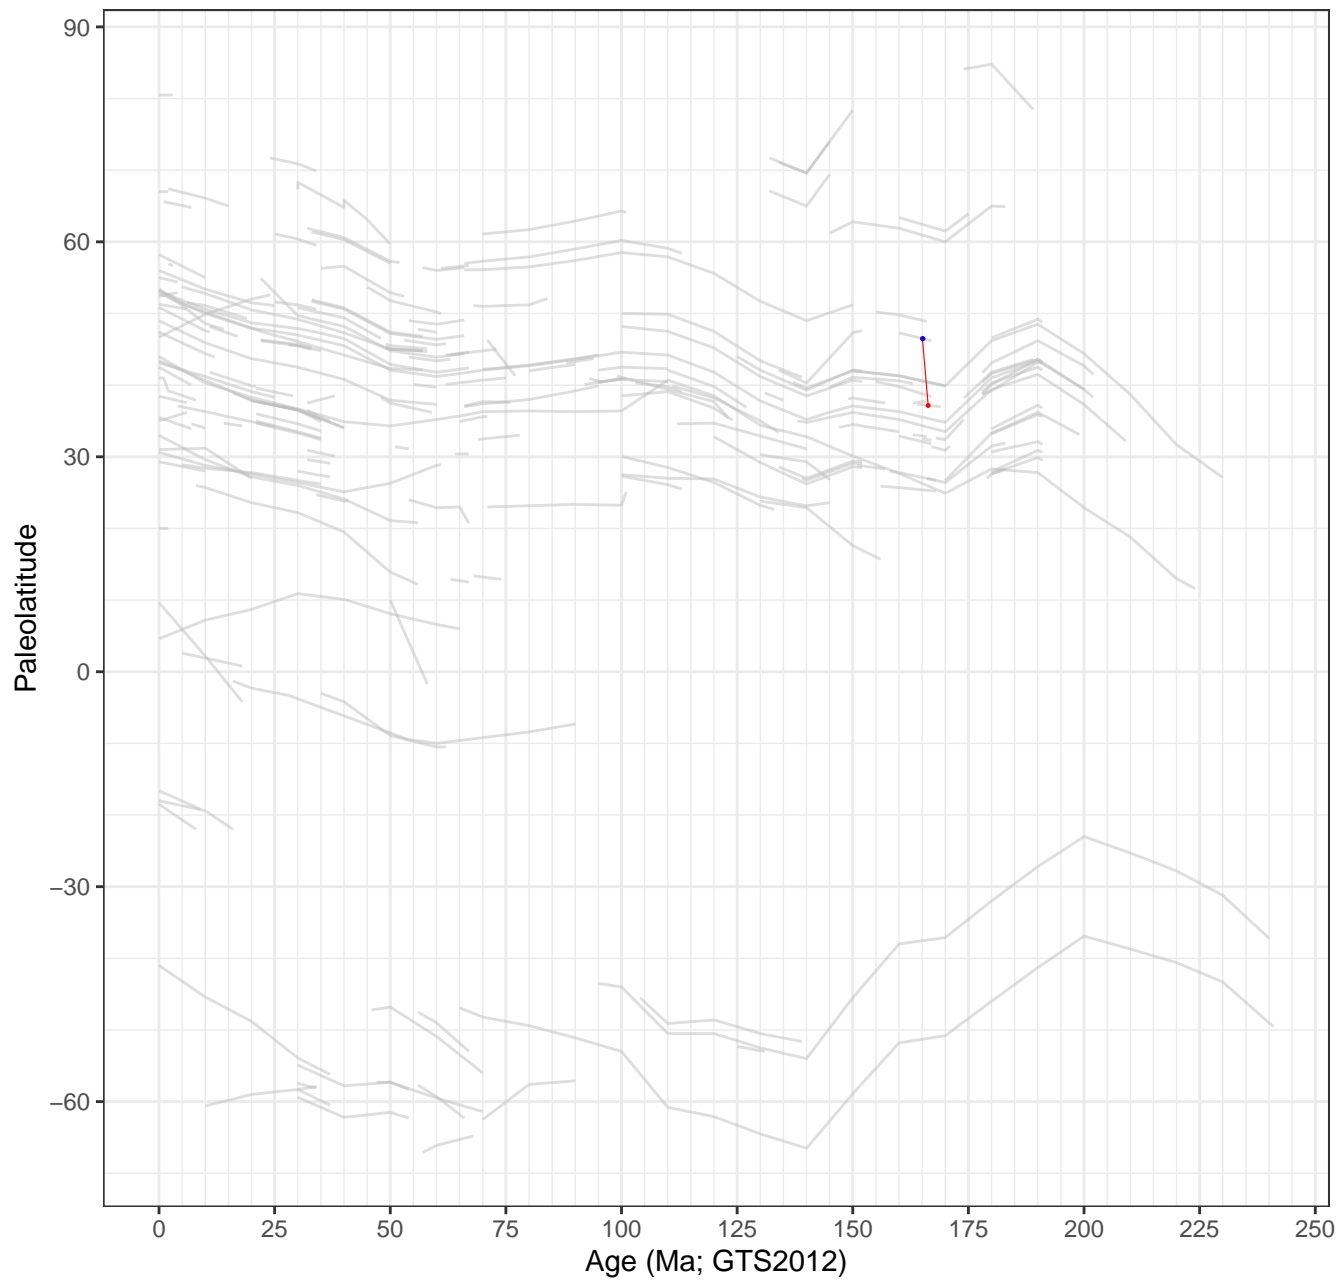

Supplement: Supplementary file 901 [file Barbatacysta baculata.pdf › Supplement/Supplement 2/Species 1914 plots/Barbatacysta baculata.pdf]

# Species *Barbatacysta capitata*

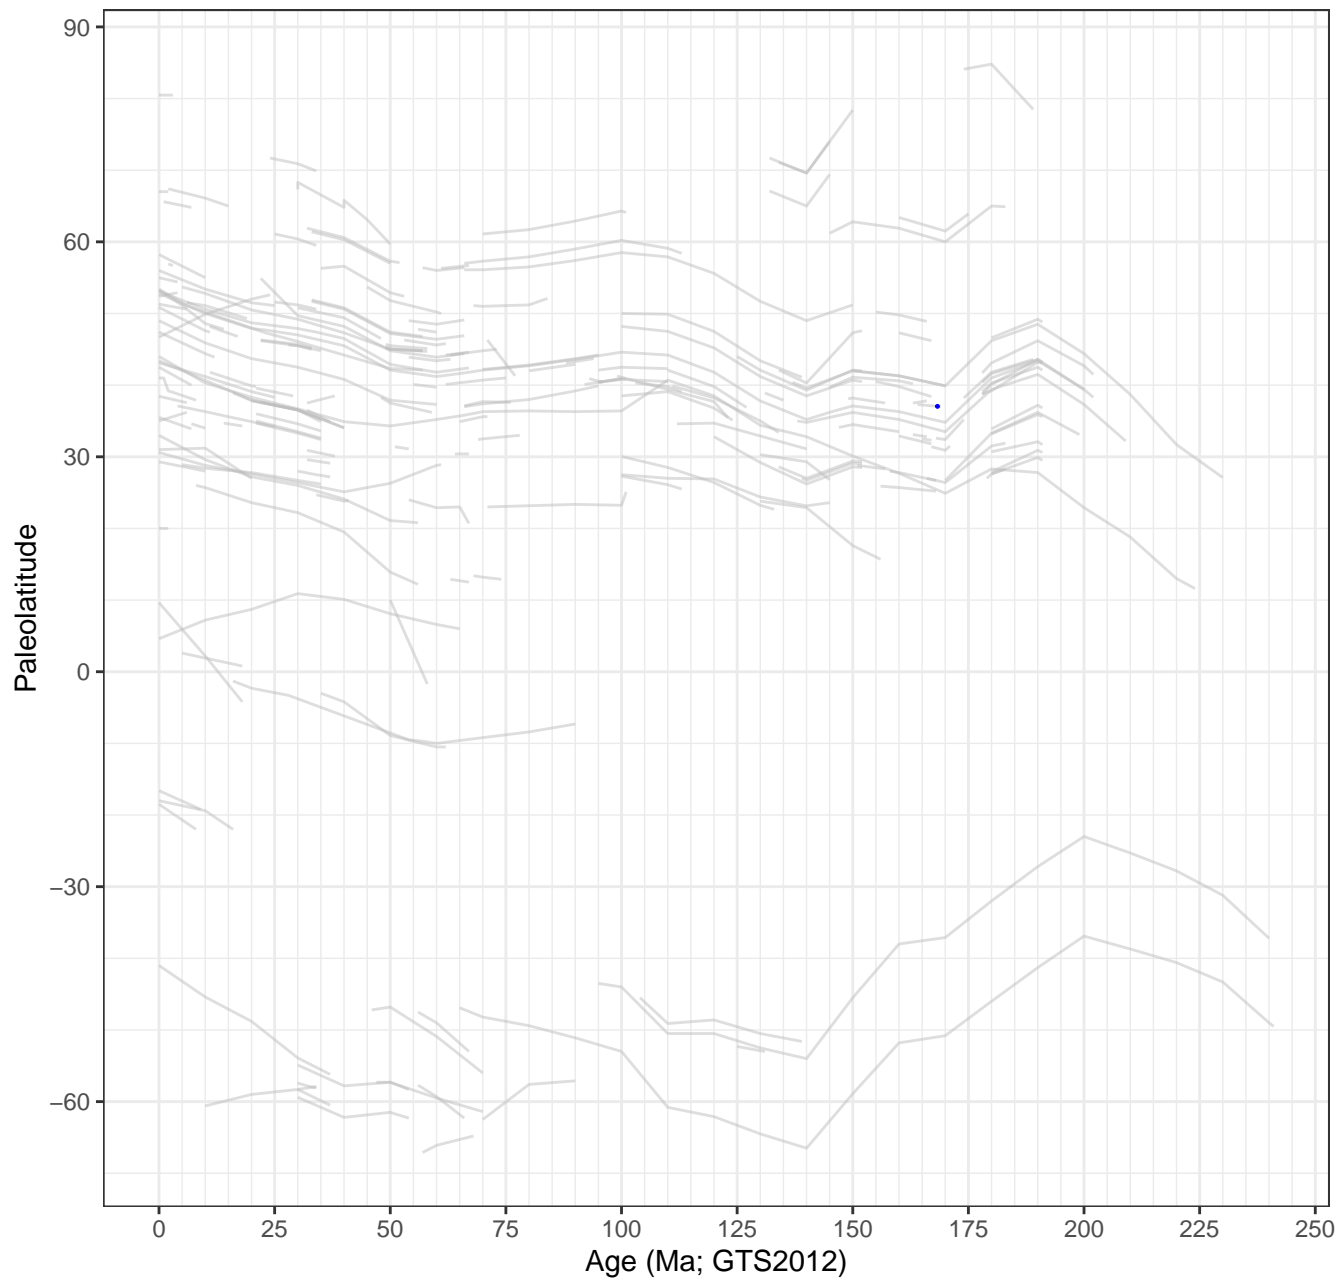

Supplement: Supplementary file 902 [file Barbatacysta capitata.pdf › Supplement/Supplement 2/Species 1914 plots/Barbatacysta capitata.pdf]

# Species *Barbatacysta pelionense*

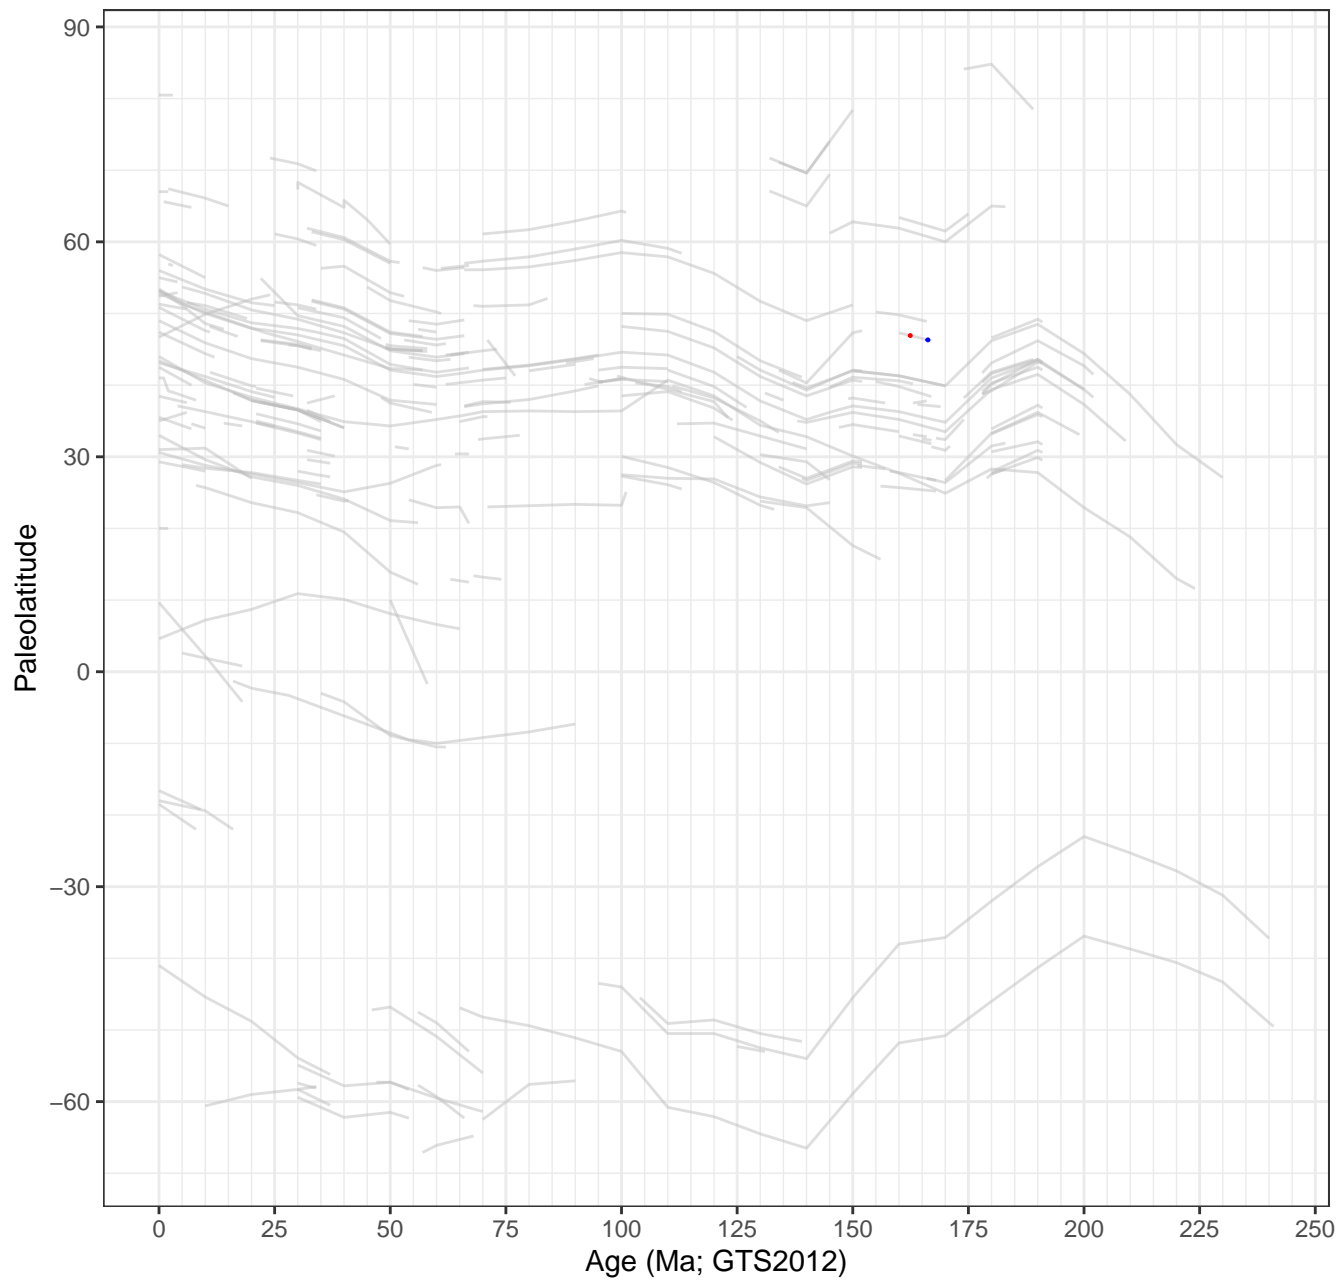

Supplement: Supplementary file 903 [file Barbatacysta pelionense.pdf › Supplement/Supplement 2/Species 1914 plots/Barbatacysta pelionense.pdf]

# Species *Barbatacysta pilosa*

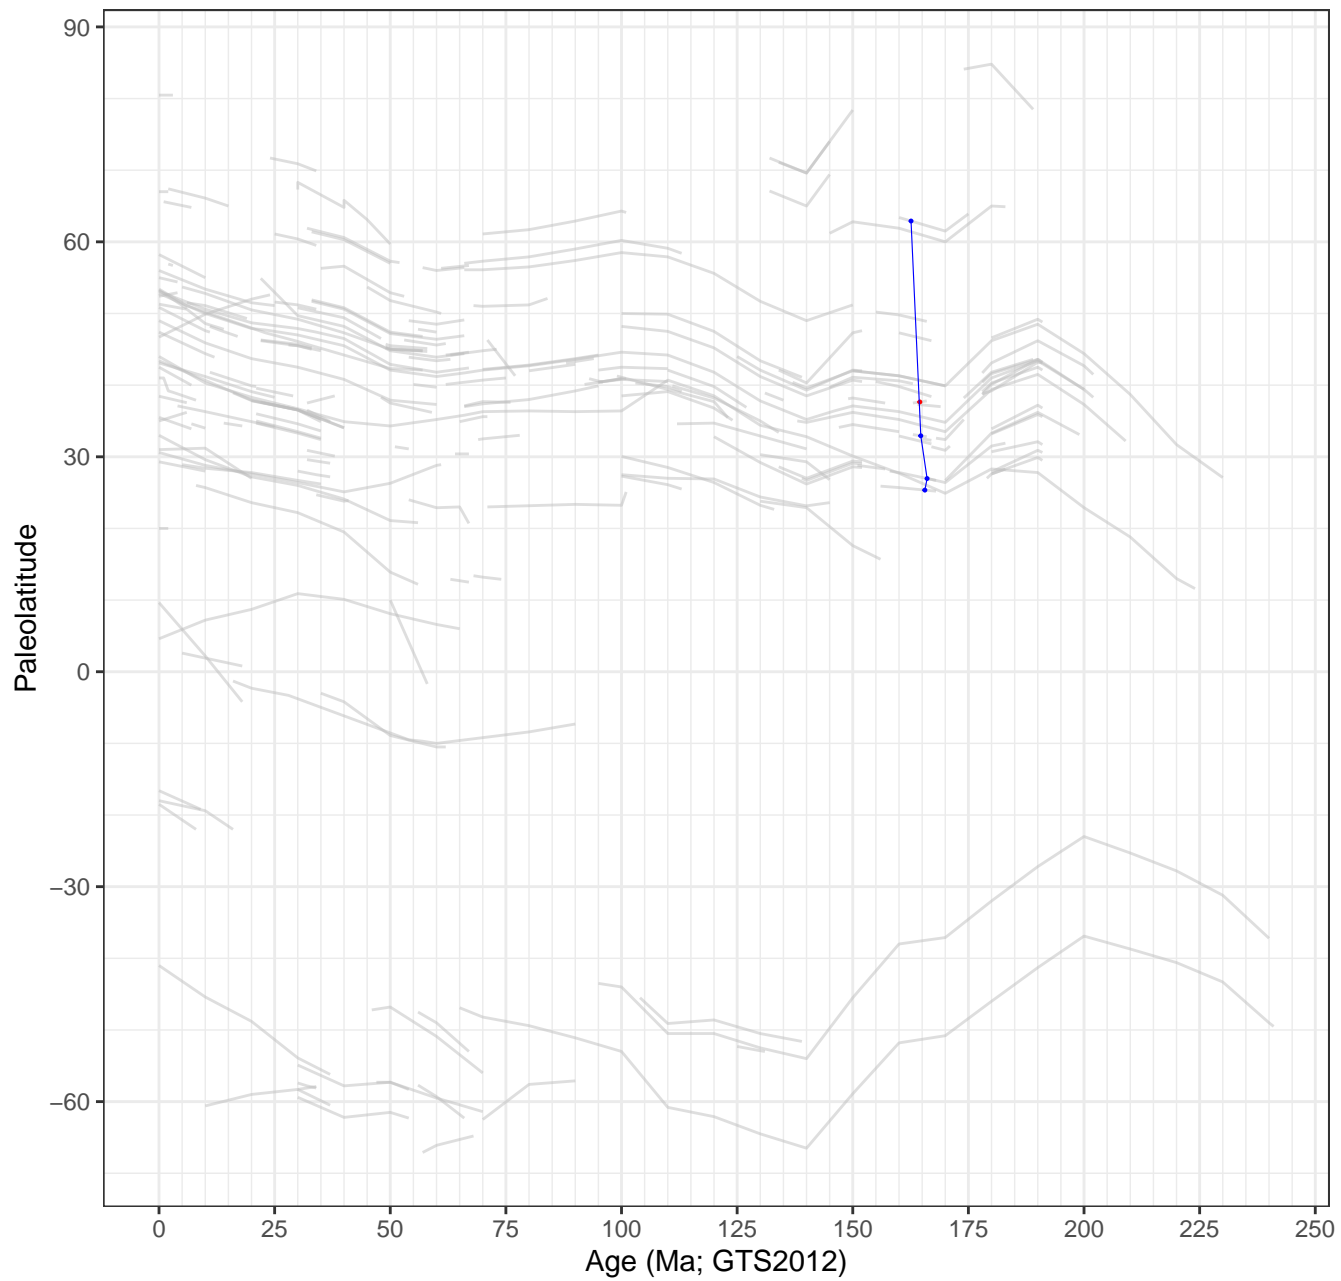

Supplement: Supplementary file 904 [file Barbatacysta pilosa.pdf › Supplement/Supplement 2/Species 1914 plots/Barbatacysta pilosa.pdf]

# Species *Barbatacysta verrucosa*

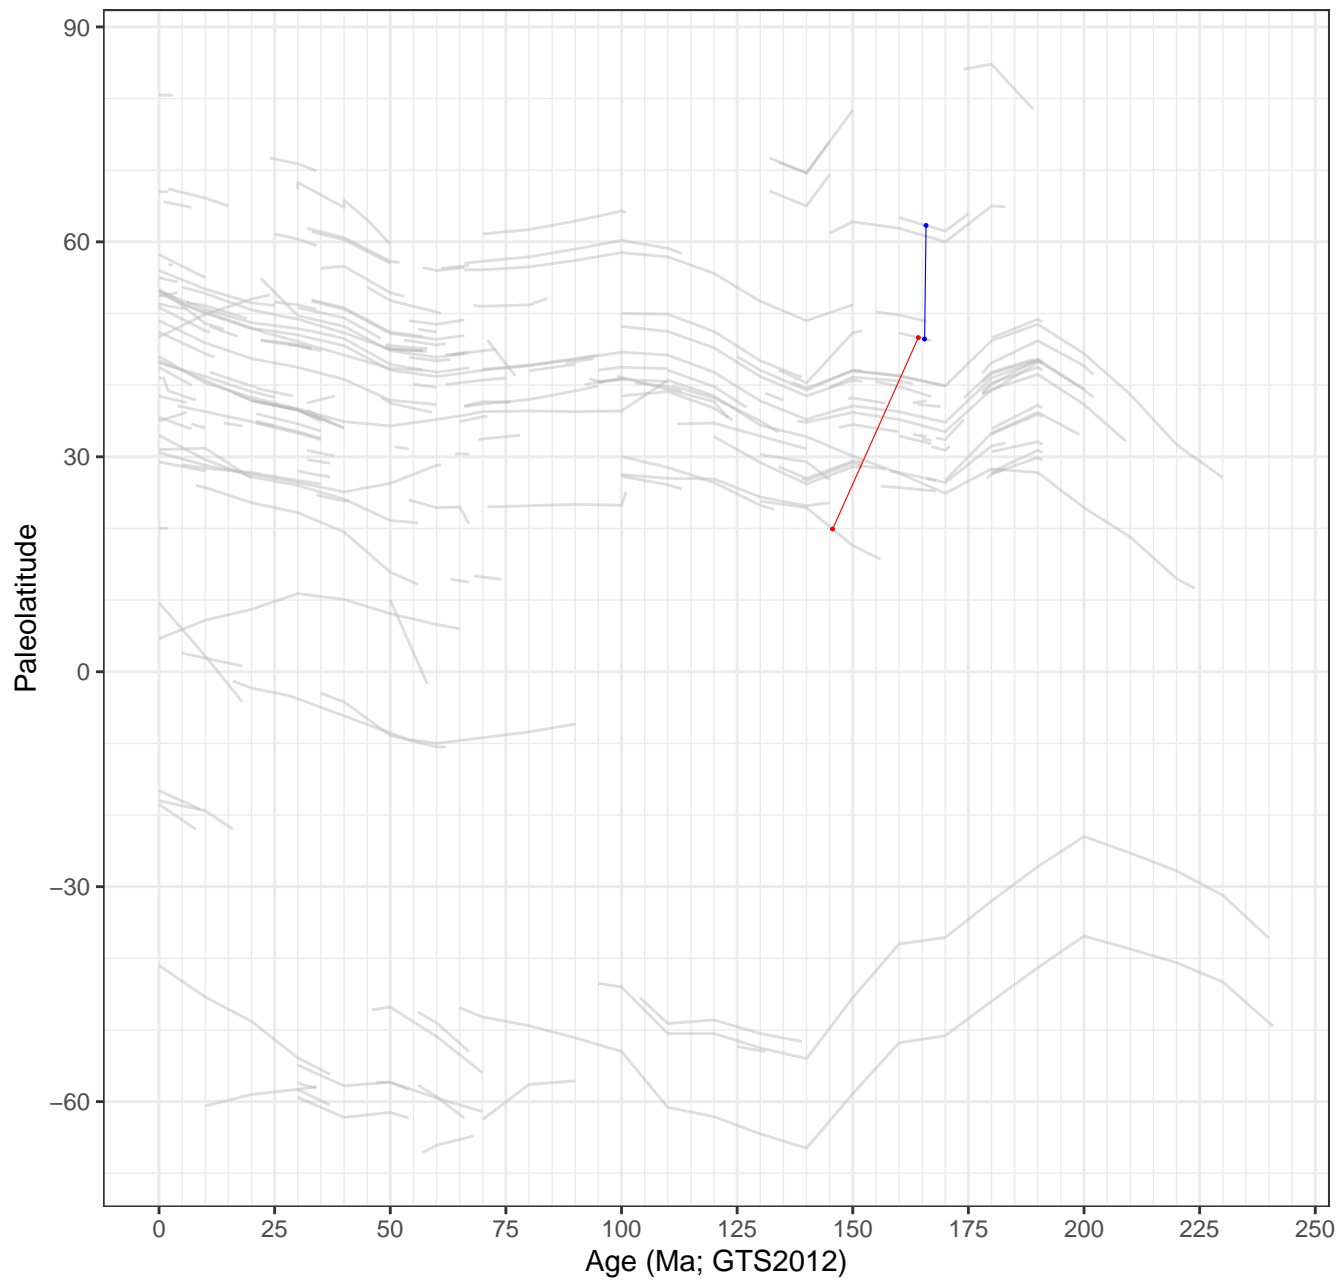

Supplement: Supplementary file 905 [file Barbatacysta verrucosa.pdf › Supplement/Supplement 2/Species 1914 plots/Barbatacysta verrucosa.pdf]

# Species *Barssidinium evangelinae*

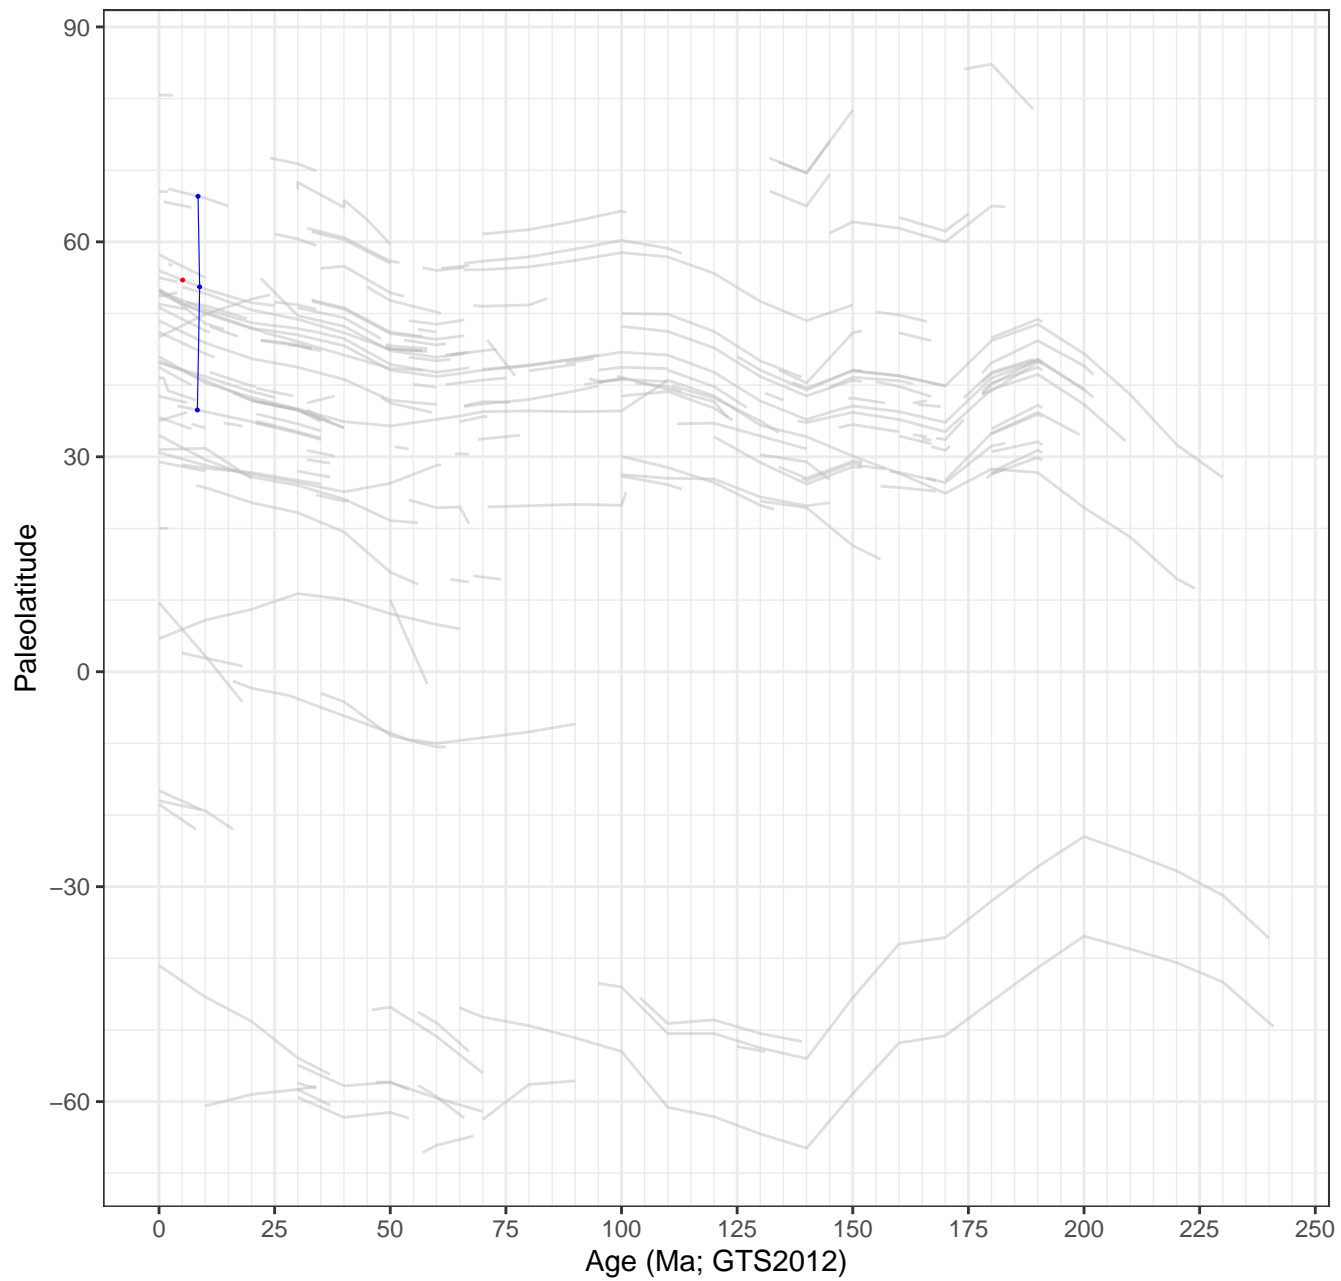

Supplement: Supplementary file 906 [file Barssidinium evangelineae.pdf › Supplement/Supplement 2/Species 1914 plots/Barssidinium evangelineae.pdf]

# Species *Barssidinium graminosum*

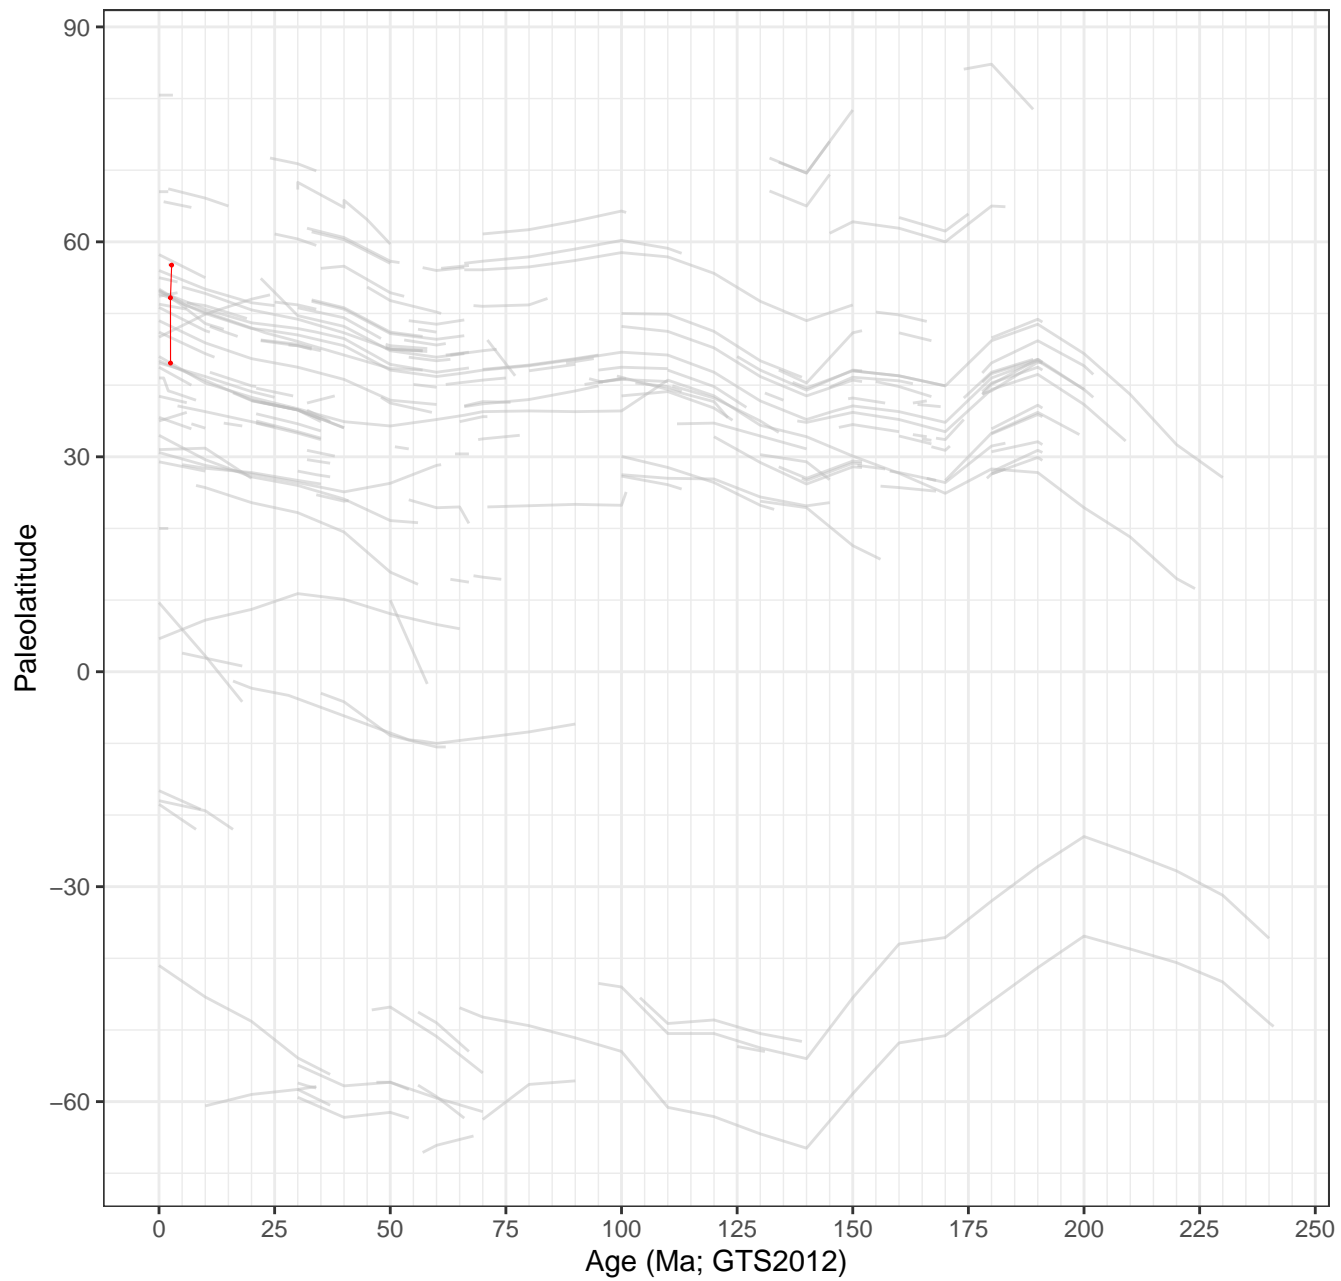

Supplement: Supplementary file 907 [file Barssidinium graminosum.pdf › Supplement/Supplement 2/Species 1914 plots/Barssidinium graminosum.pdf]

# Species *Barssidinium pliocenicum*

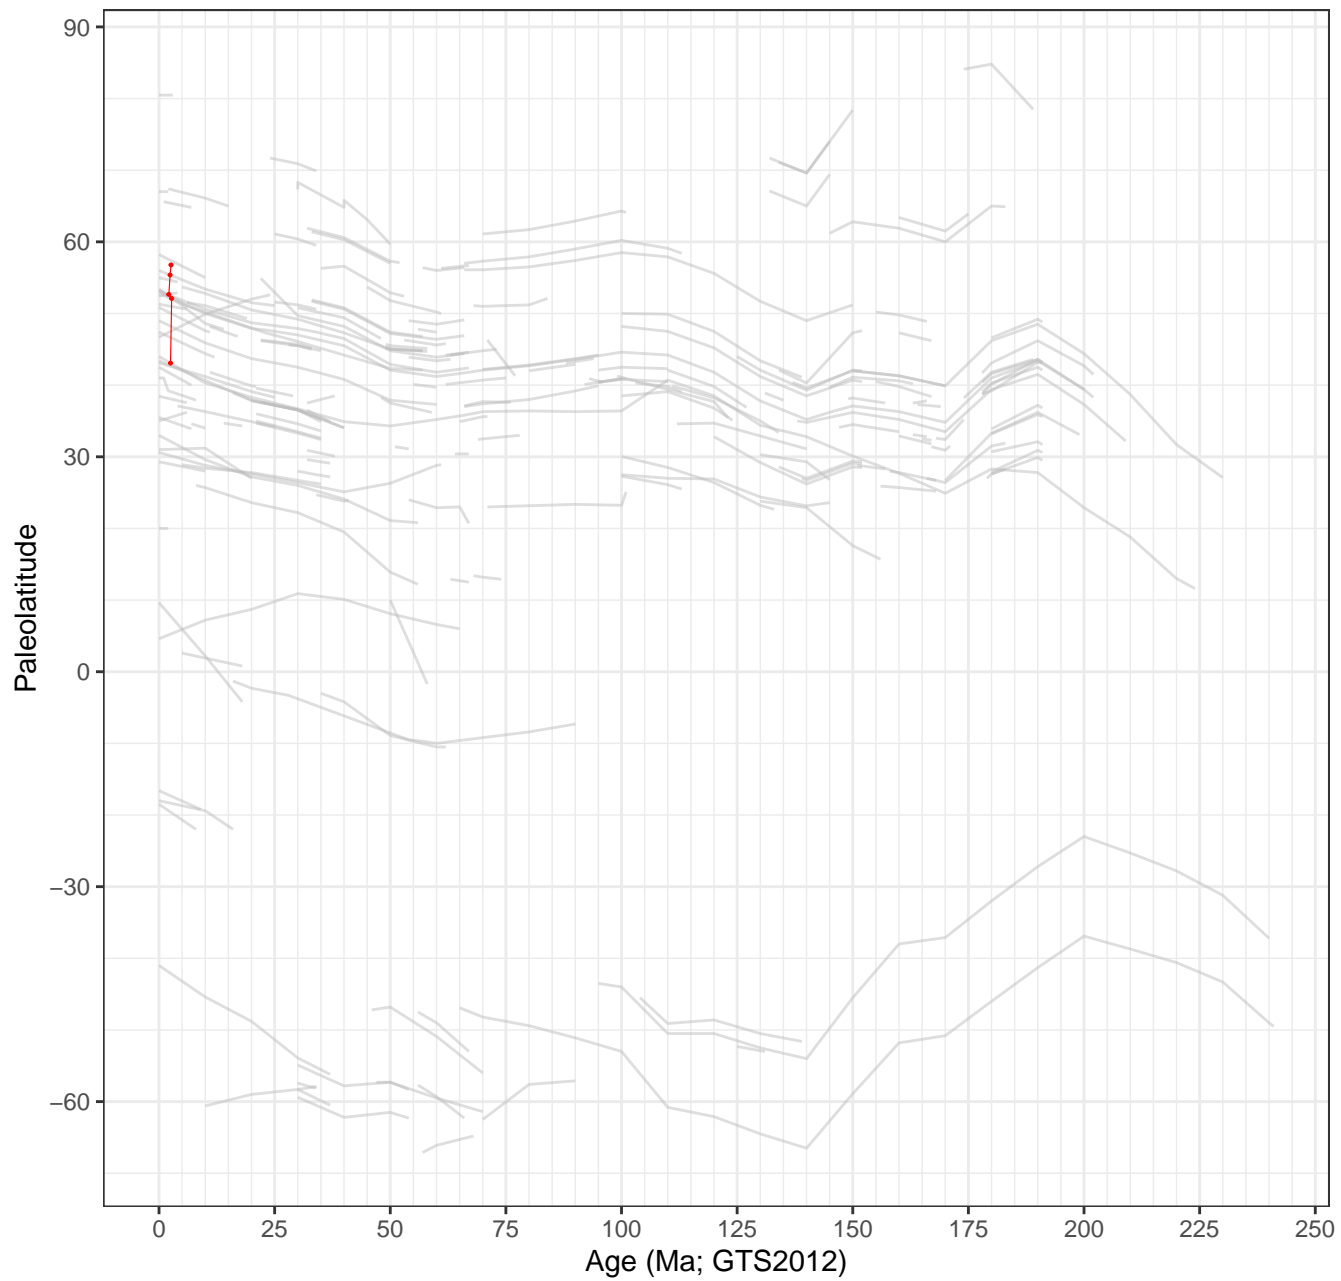

Supplement: Supplementary file 908 [file Barssidinium pliocenicum.pdf › Supplement/Supplement 2/Species 1914 plots/Barssidinium pliocenicum.pdf]

# Species *Batiacasphaera auteiches*

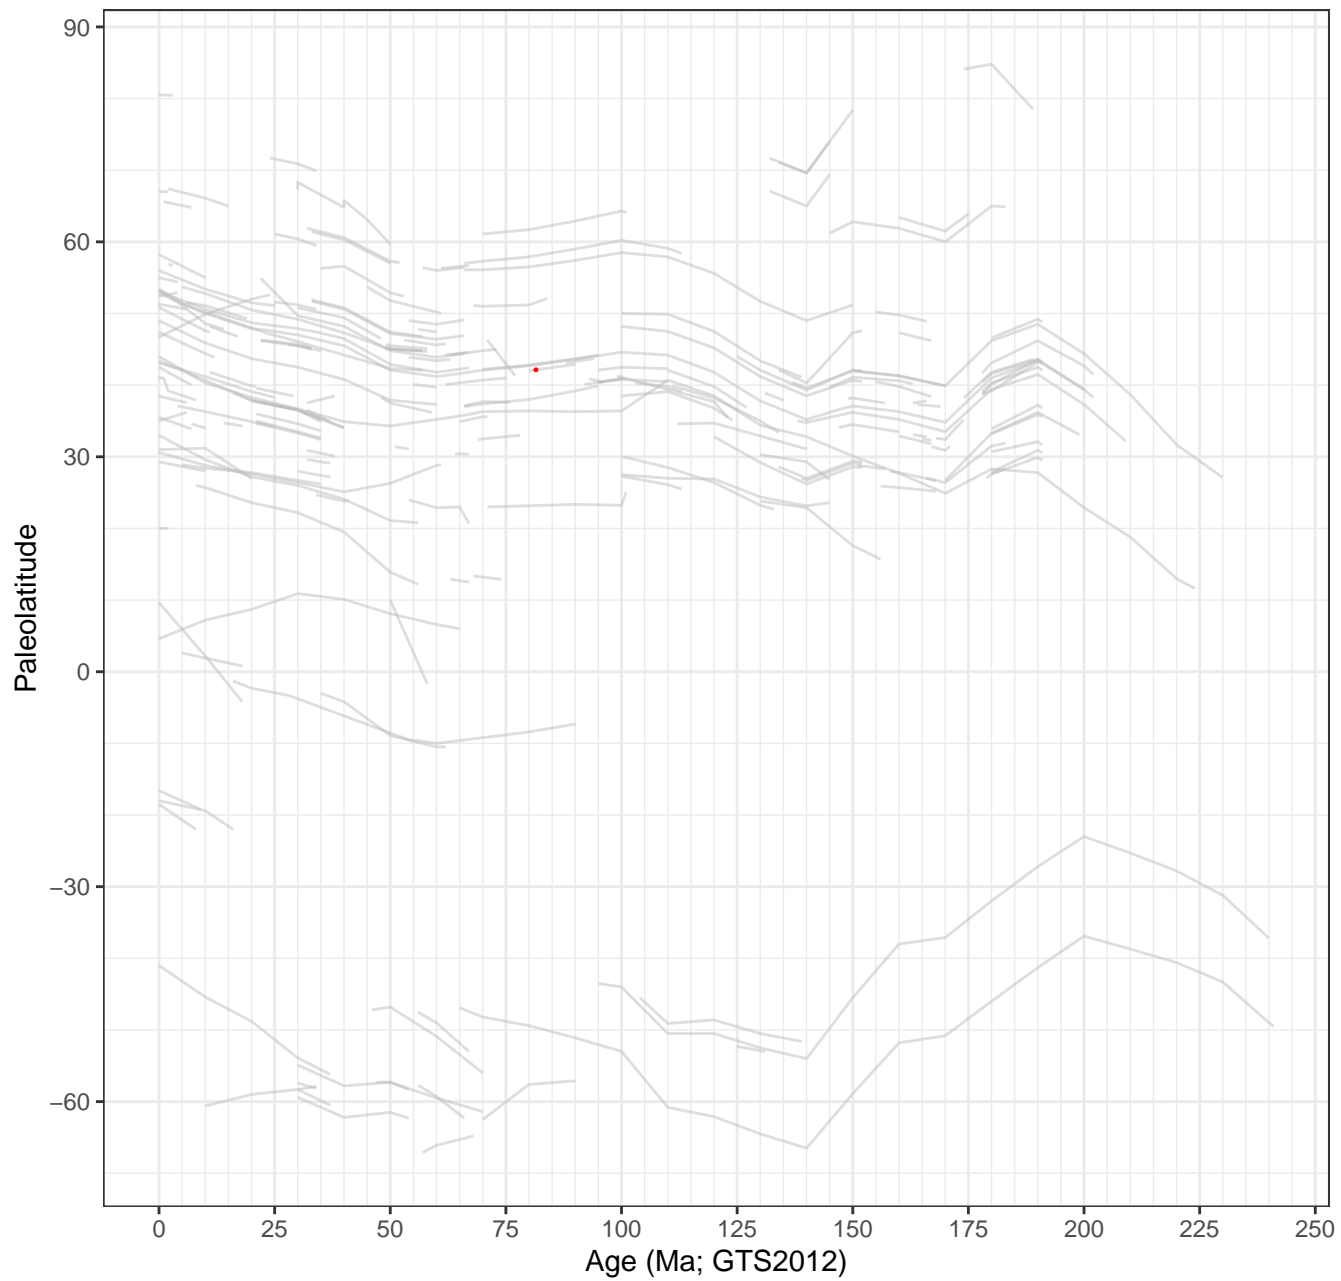

Supplement: Supplementary file 909 [file Batiacasphaera auteiches.pdf › Supplement/Supplement 2/Species 1914 plots/Batiacasphaera auteiches.pdf]

# Species *Batiacasphaera baculata*

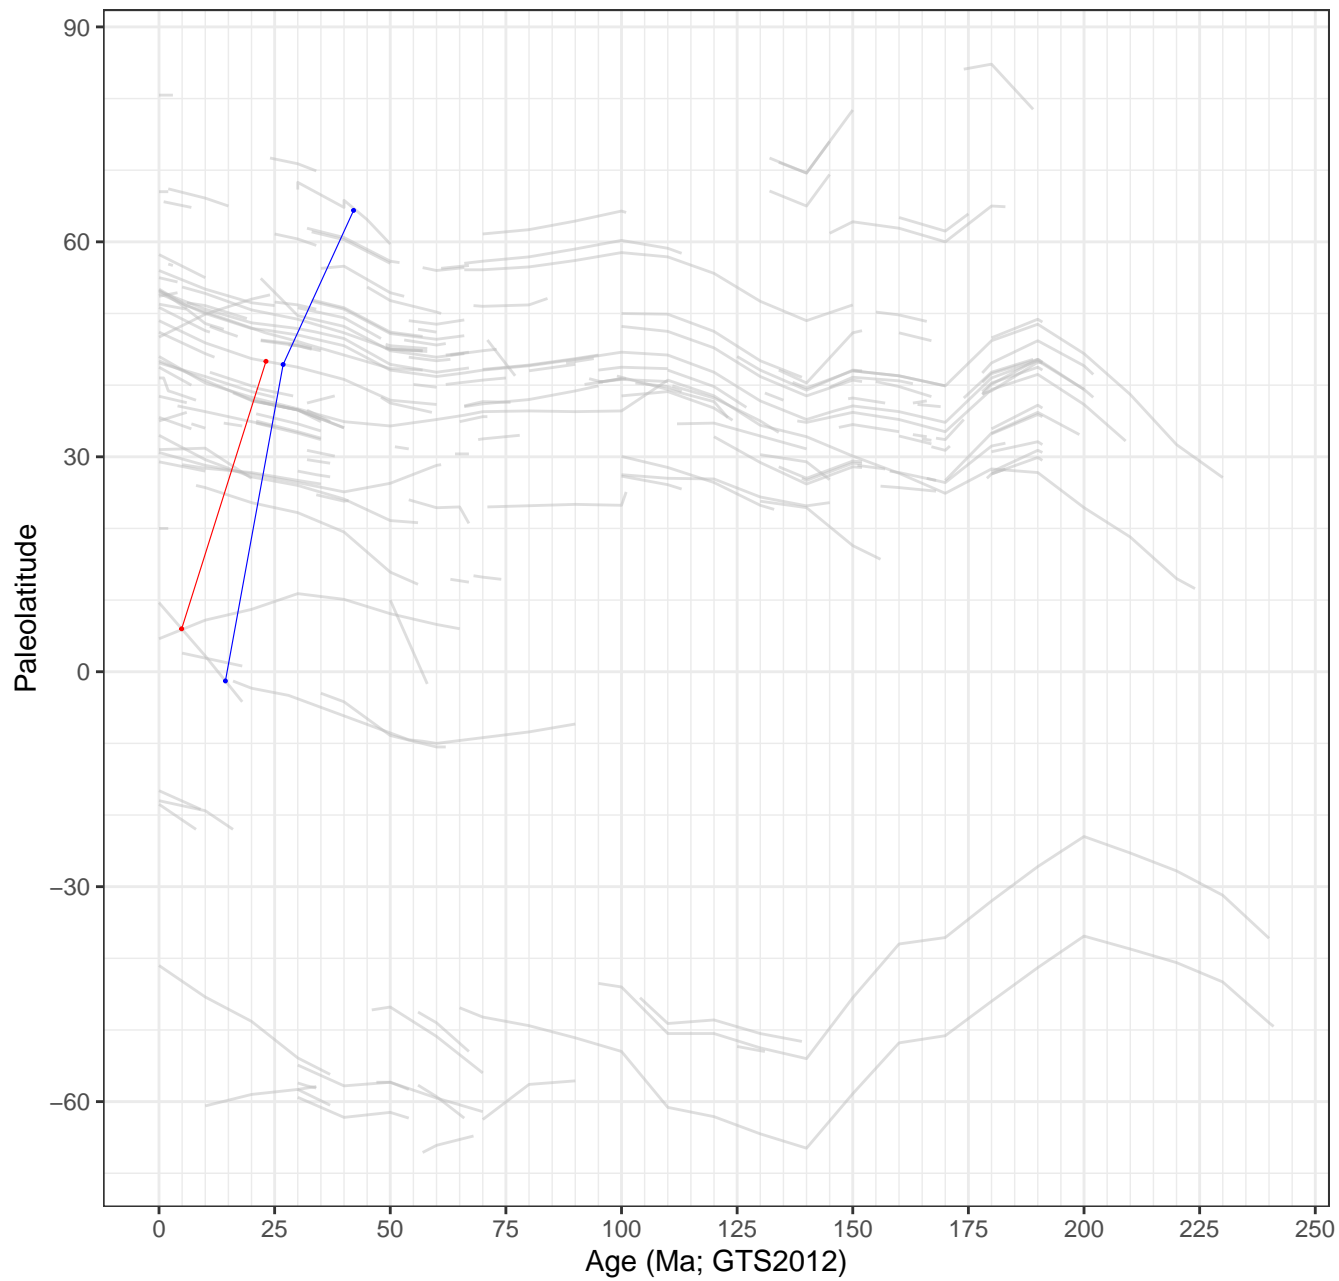

Supplement: Supplementary file 910 [file Batiacasphaera baculata.pdf › Supplement/Supplement 2/Species 1914 plots/Batiacasphaera baculata.pdf]

# Species *Batiacasphaera bergenensis*

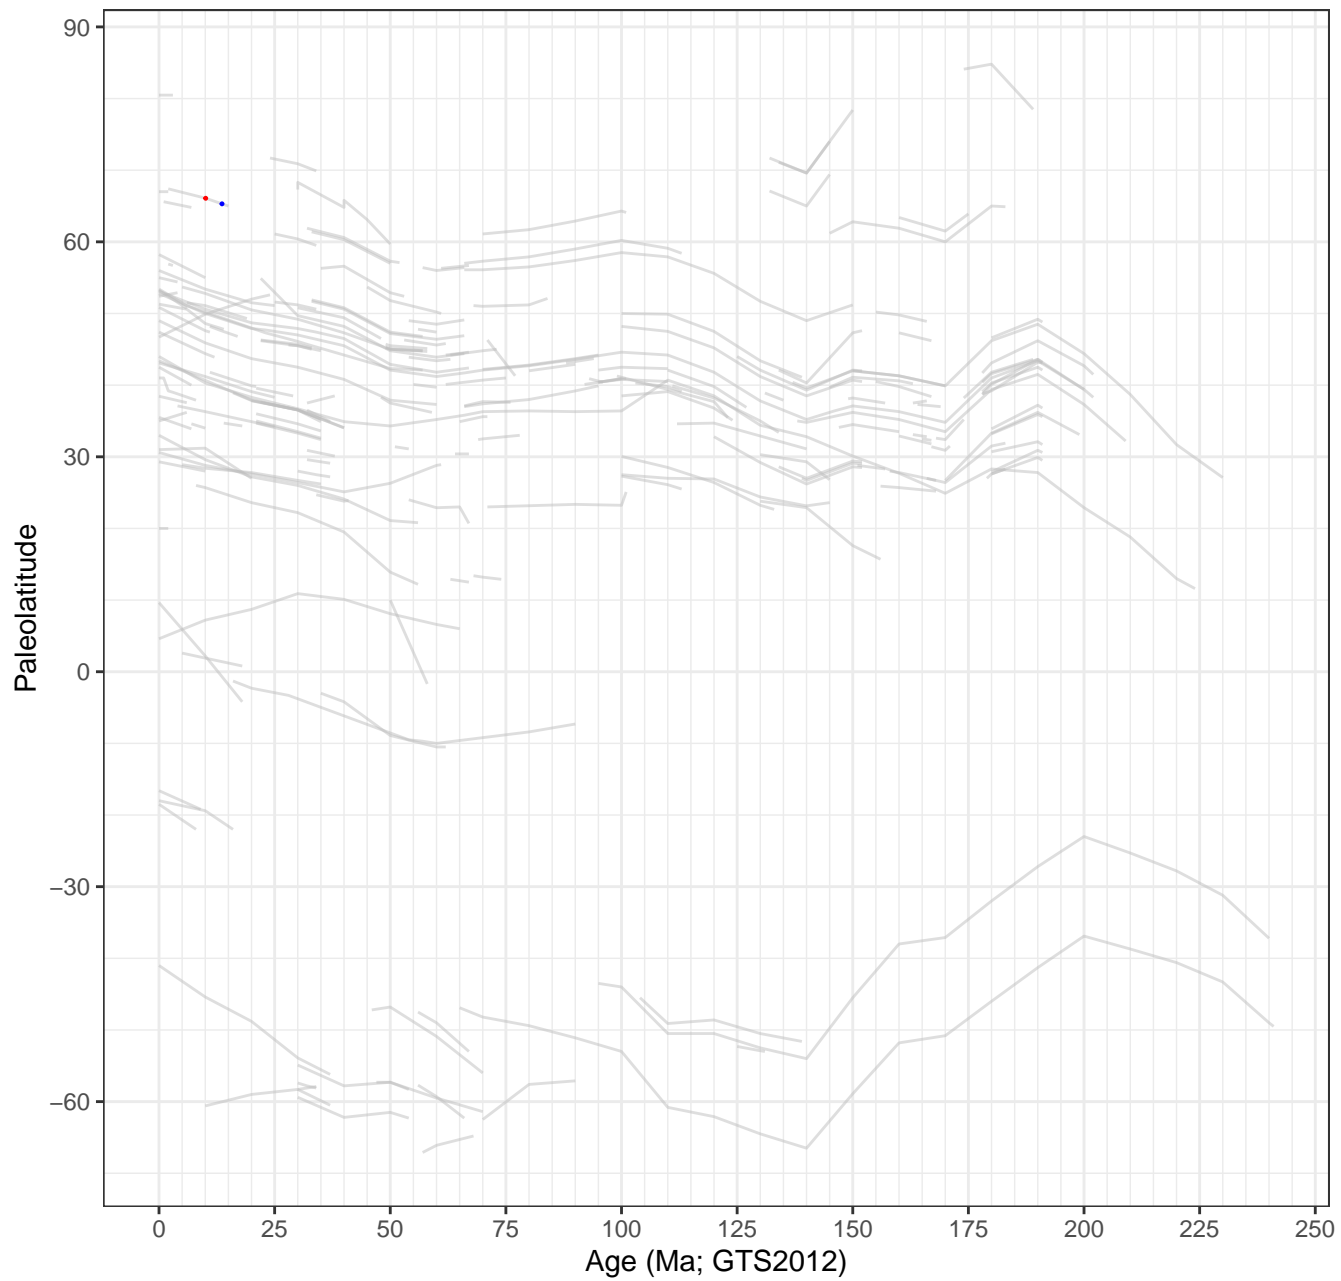

Supplement: Supplementary file 911 [file Batiacasphaera bergenensis.pdf › Supplement/Supplement 2/Species 1914 plots/Batiacasphaera bergenensis.pdf]

# Species *Batiacasphaera cassiculus*

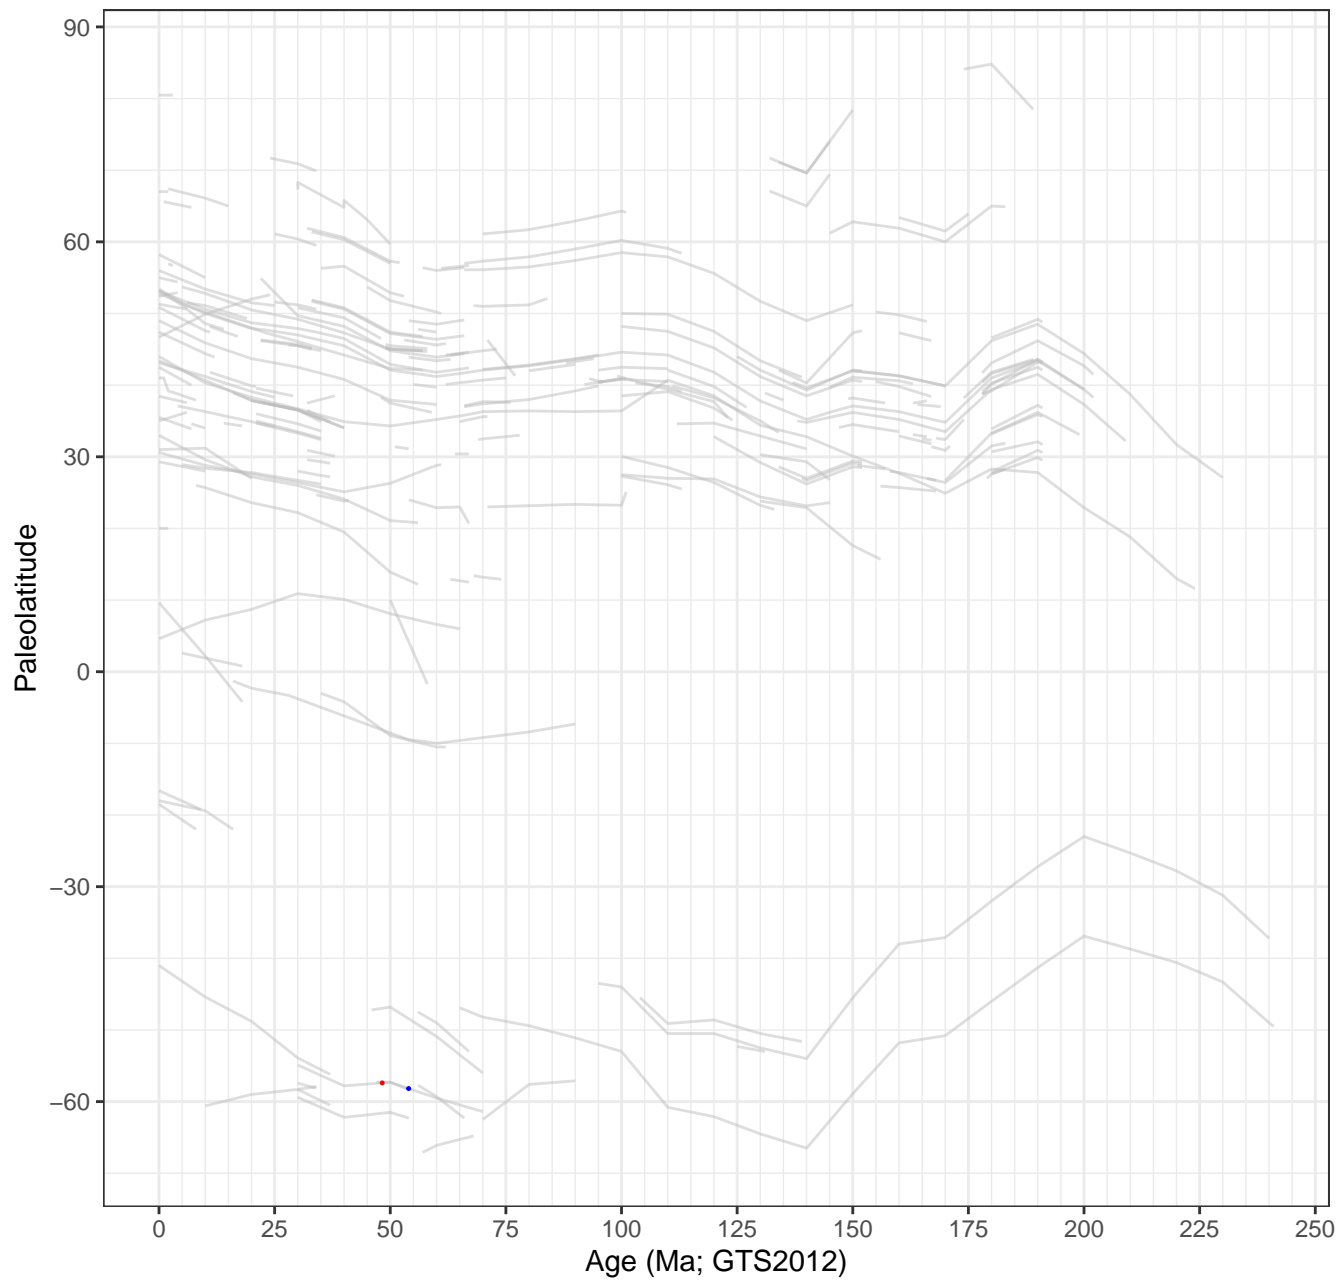

Supplement: Supplementary file 912 [file Batiacasphaera cassiculus.pdf › Supplement/Supplement 2/Species 1914 plots/Batiacasphaera cassiculus.pdf]

# Species *Batiacasphaera compta*

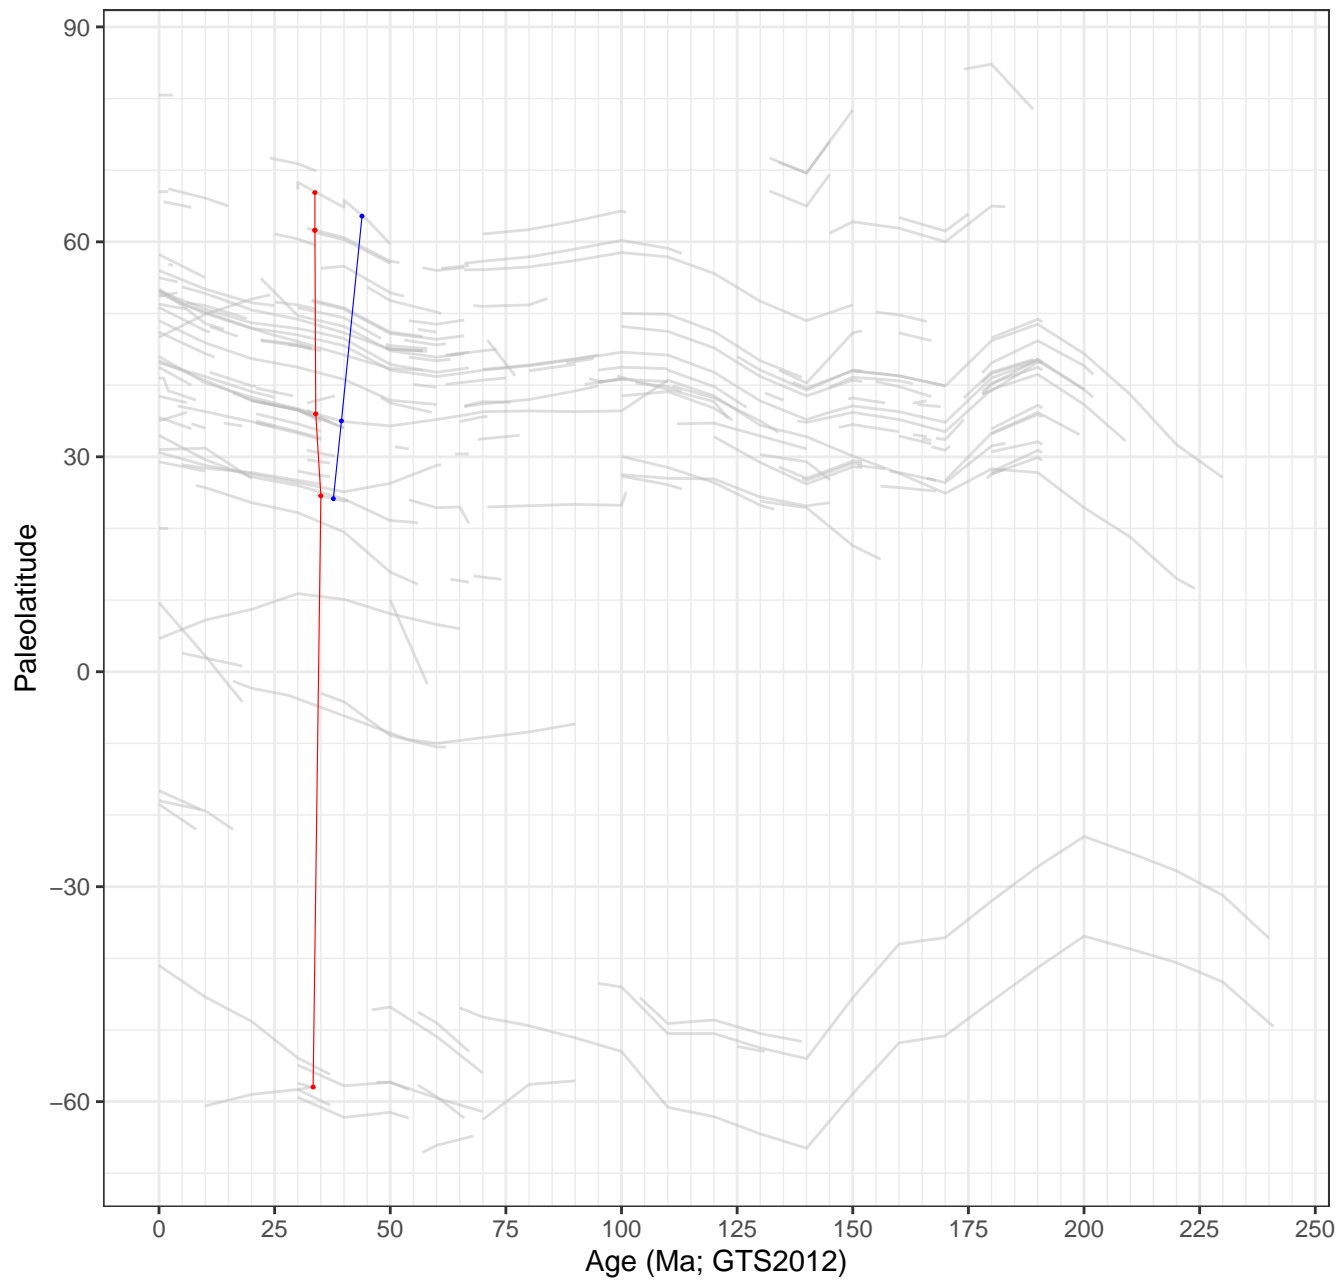

Supplement: Supplementary file 913 [file Batiacasphaera compta.pdf › Supplement/Supplement 2/Species 1914 plots/Batiacasphaera compta.pdf]

# Species *Batiacasphaera edwardsiae*

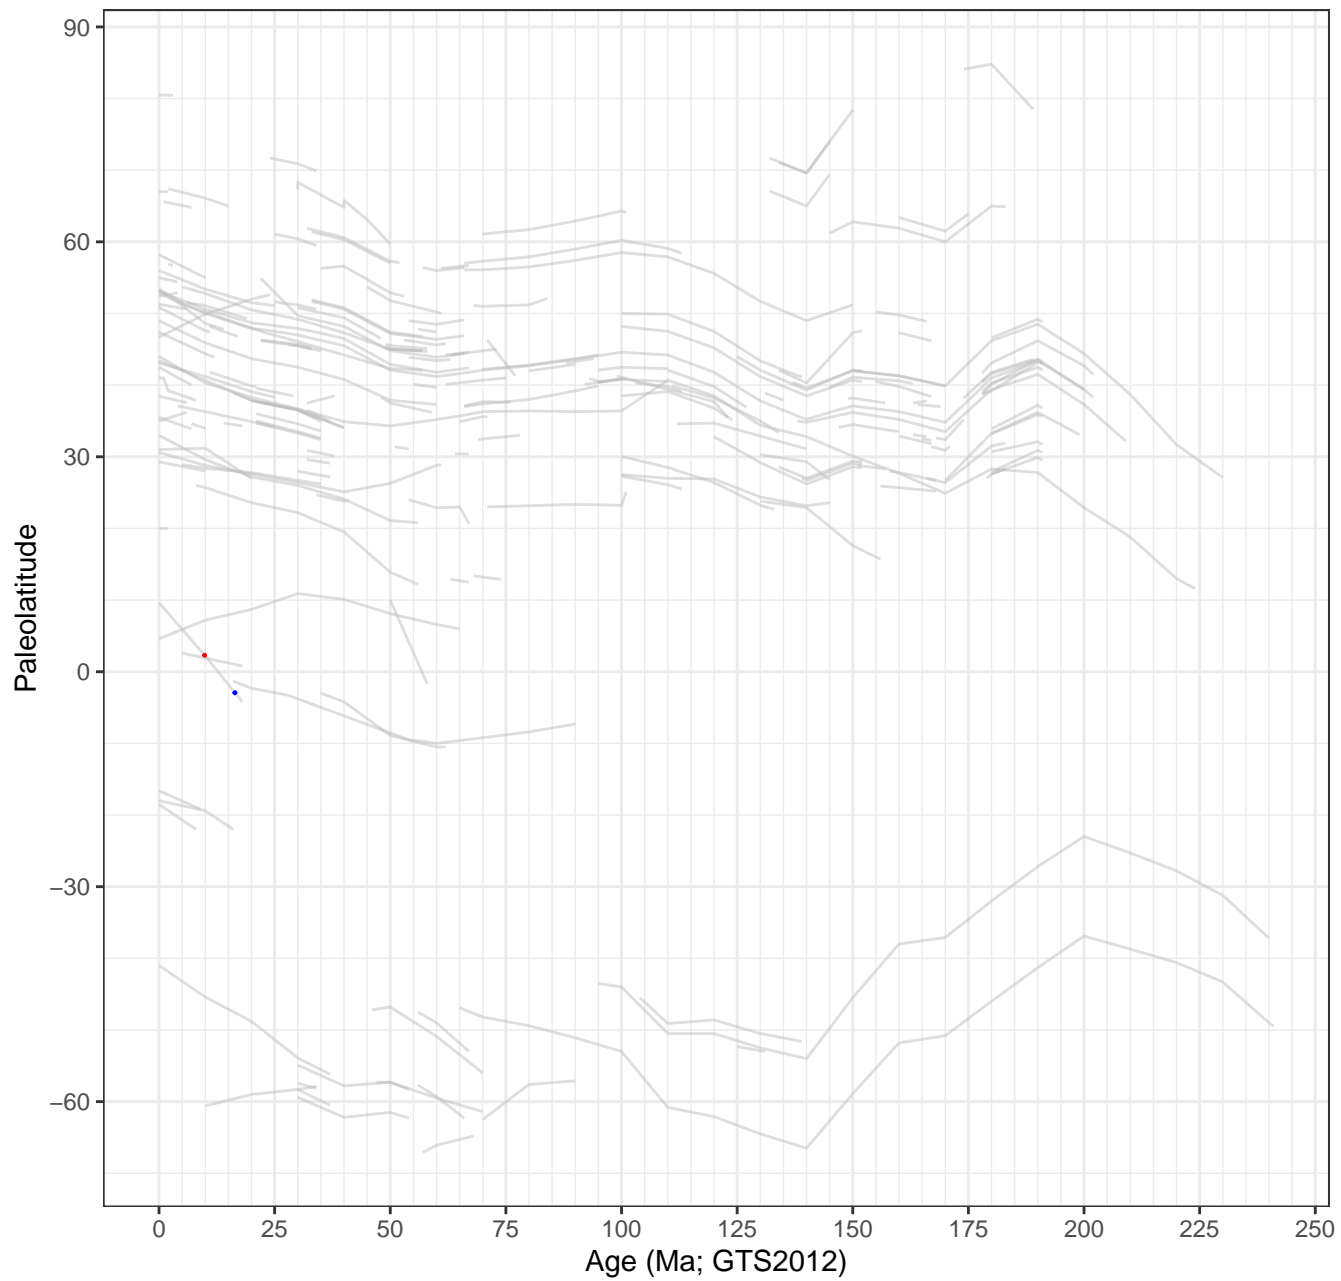

Supplement: Supplementary file 914 [file Batiacasphaera edwardsiae.pdf › Supplement/Supplement 2/Species 1914 plots/Batiacasphaera edwardsiae.pdf]

# Species *Batiacasphaera euteiches*

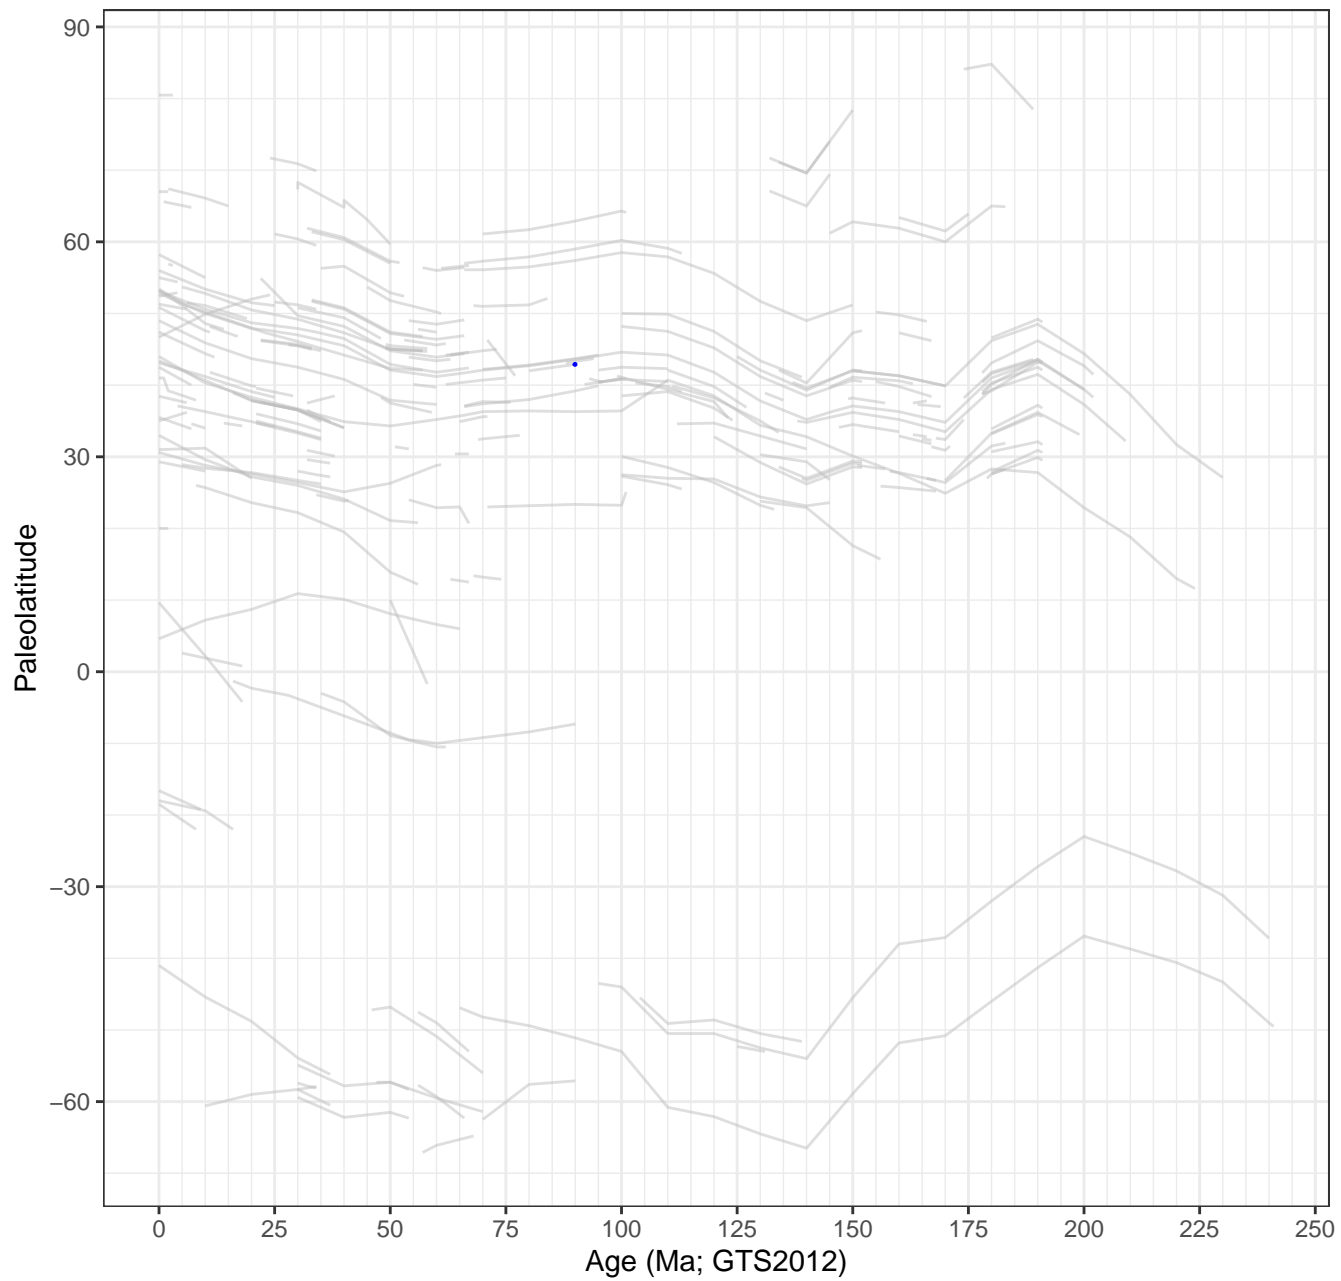

Supplement: Supplementary file 915 [file Batiacasphaera euteiches.pdf › Supplement/Supplement 2/Species 1914 plots/Batiacasphaera euteiches.pdf]

# Species *Batiacasphaera hirsuta*

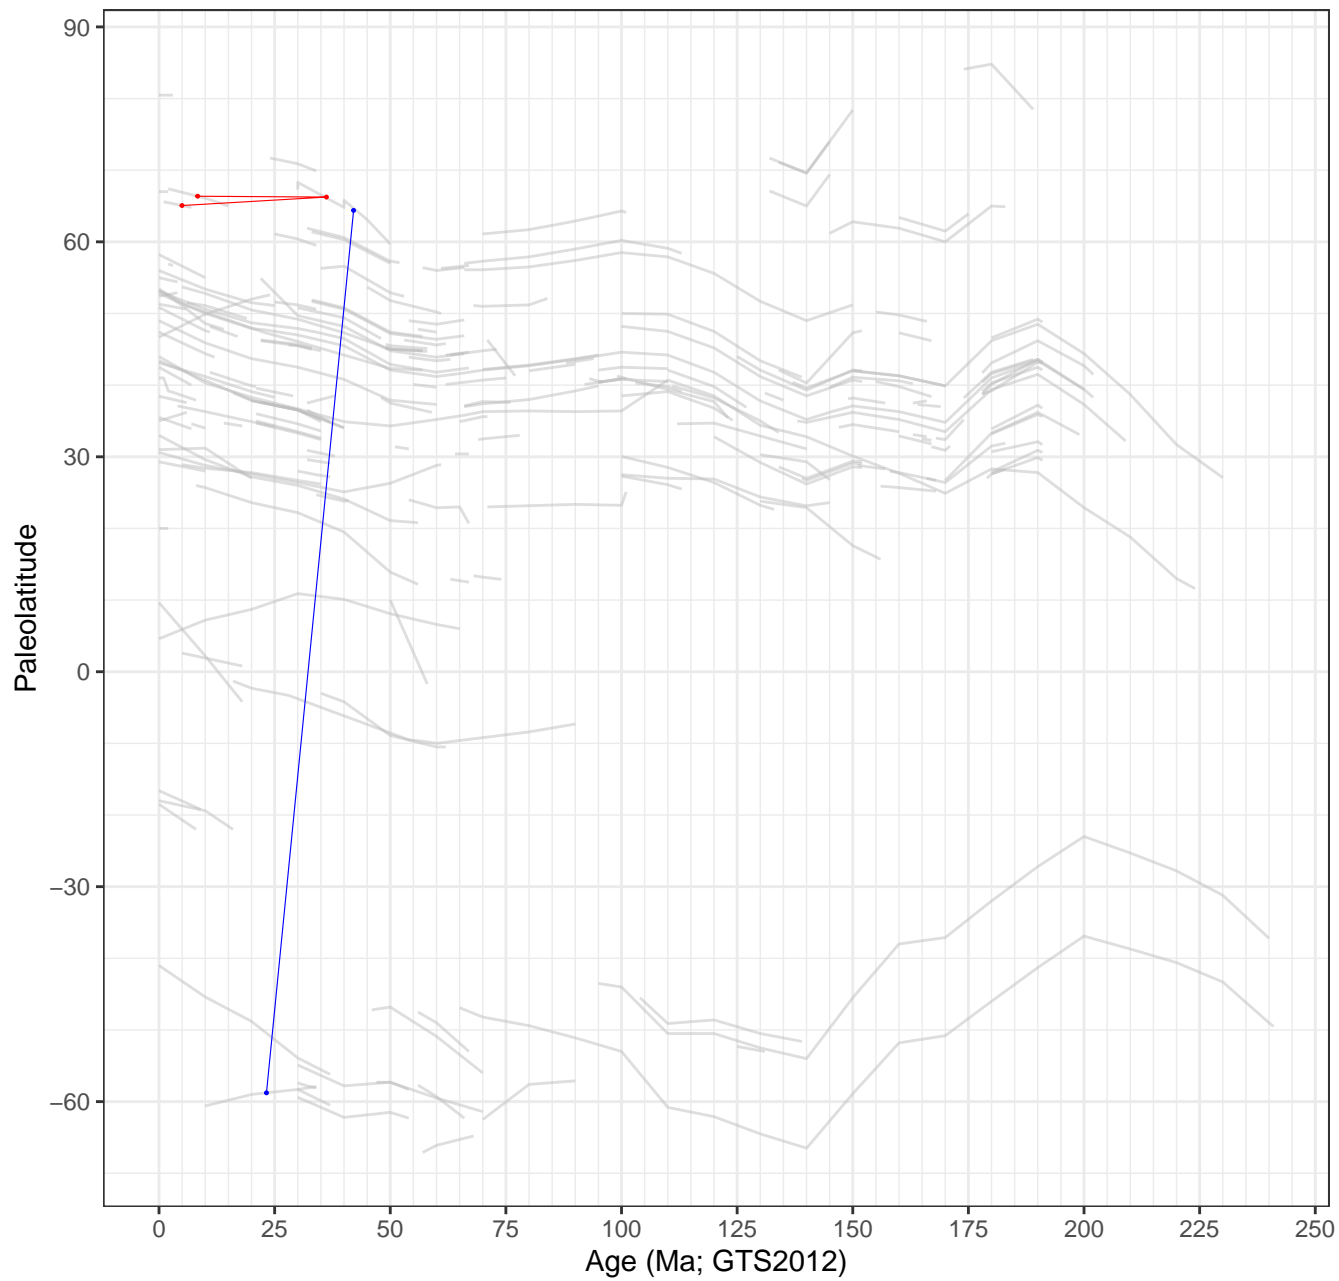

Supplement: Supplementary file 916 [file Batiacasphaera hirsuta.pdf › Supplement/Supplement 2/Species 1914 plots/Batiacasphaera hirsuta.pdf]

# Species *Batiacasphaera imperfecta*

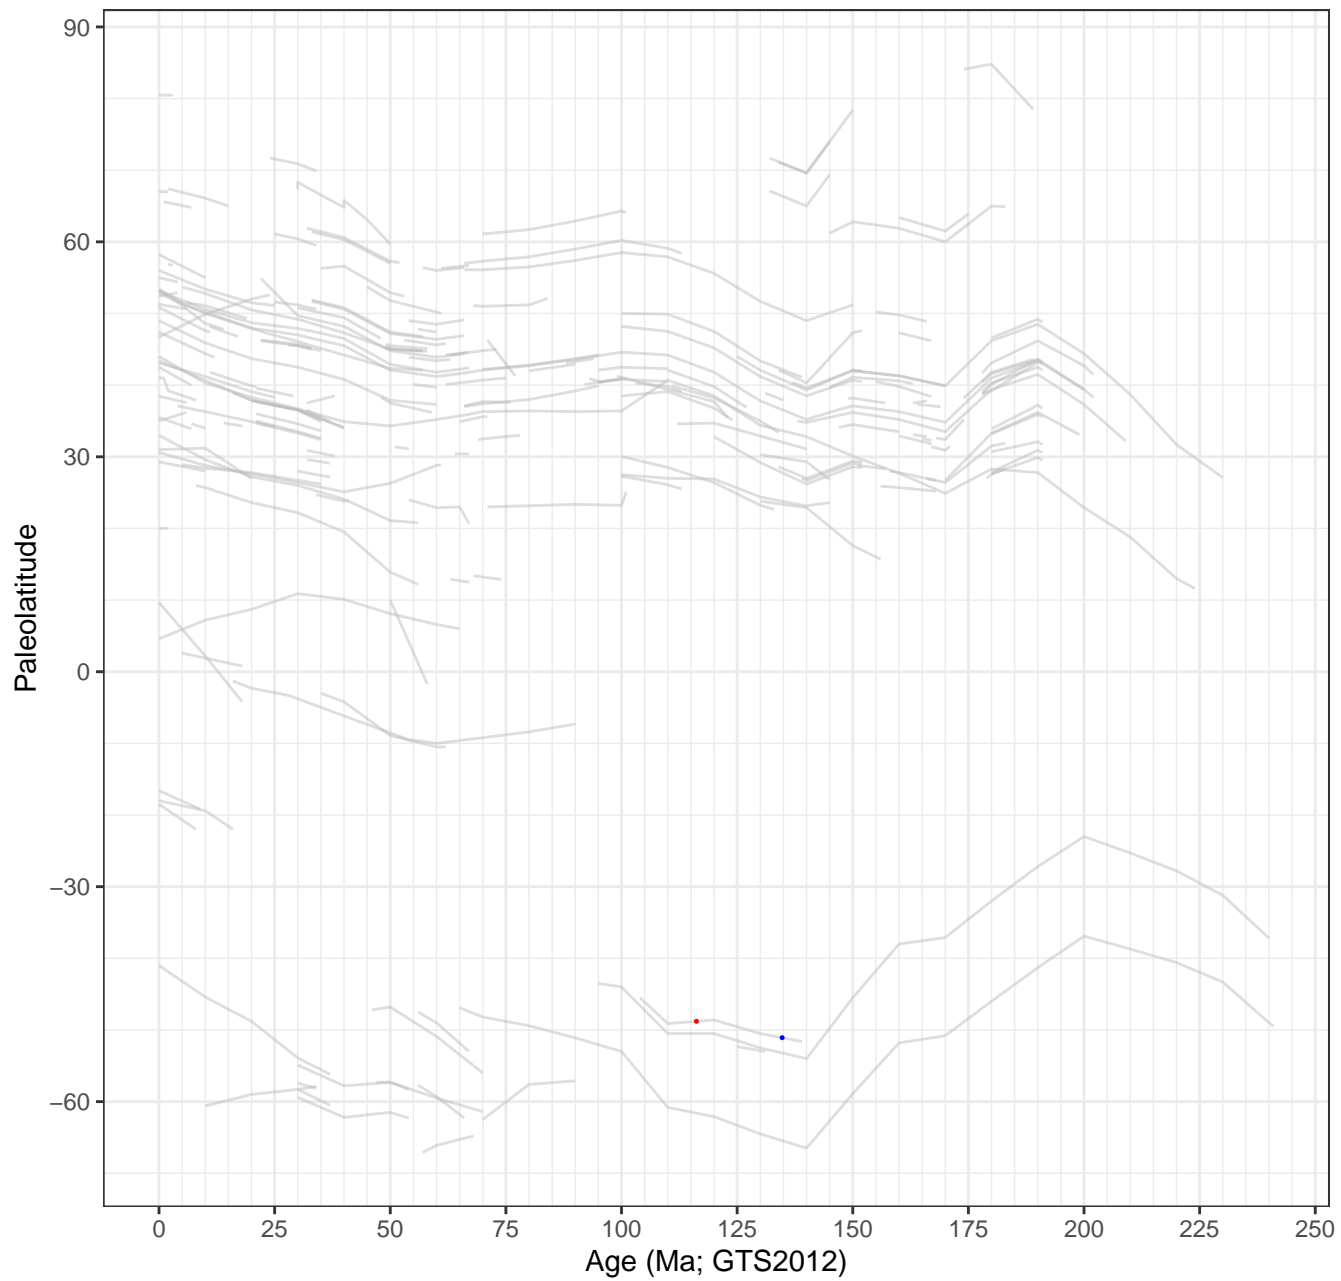

Supplement: Supplementary file 917 [file Batiacasphaera imperfecta.pdf › Supplement/Supplement 2/Species 1914 plots/Batiacasphaera imperfecta.pdf]

# Species *Batiacasphaera laevigata*

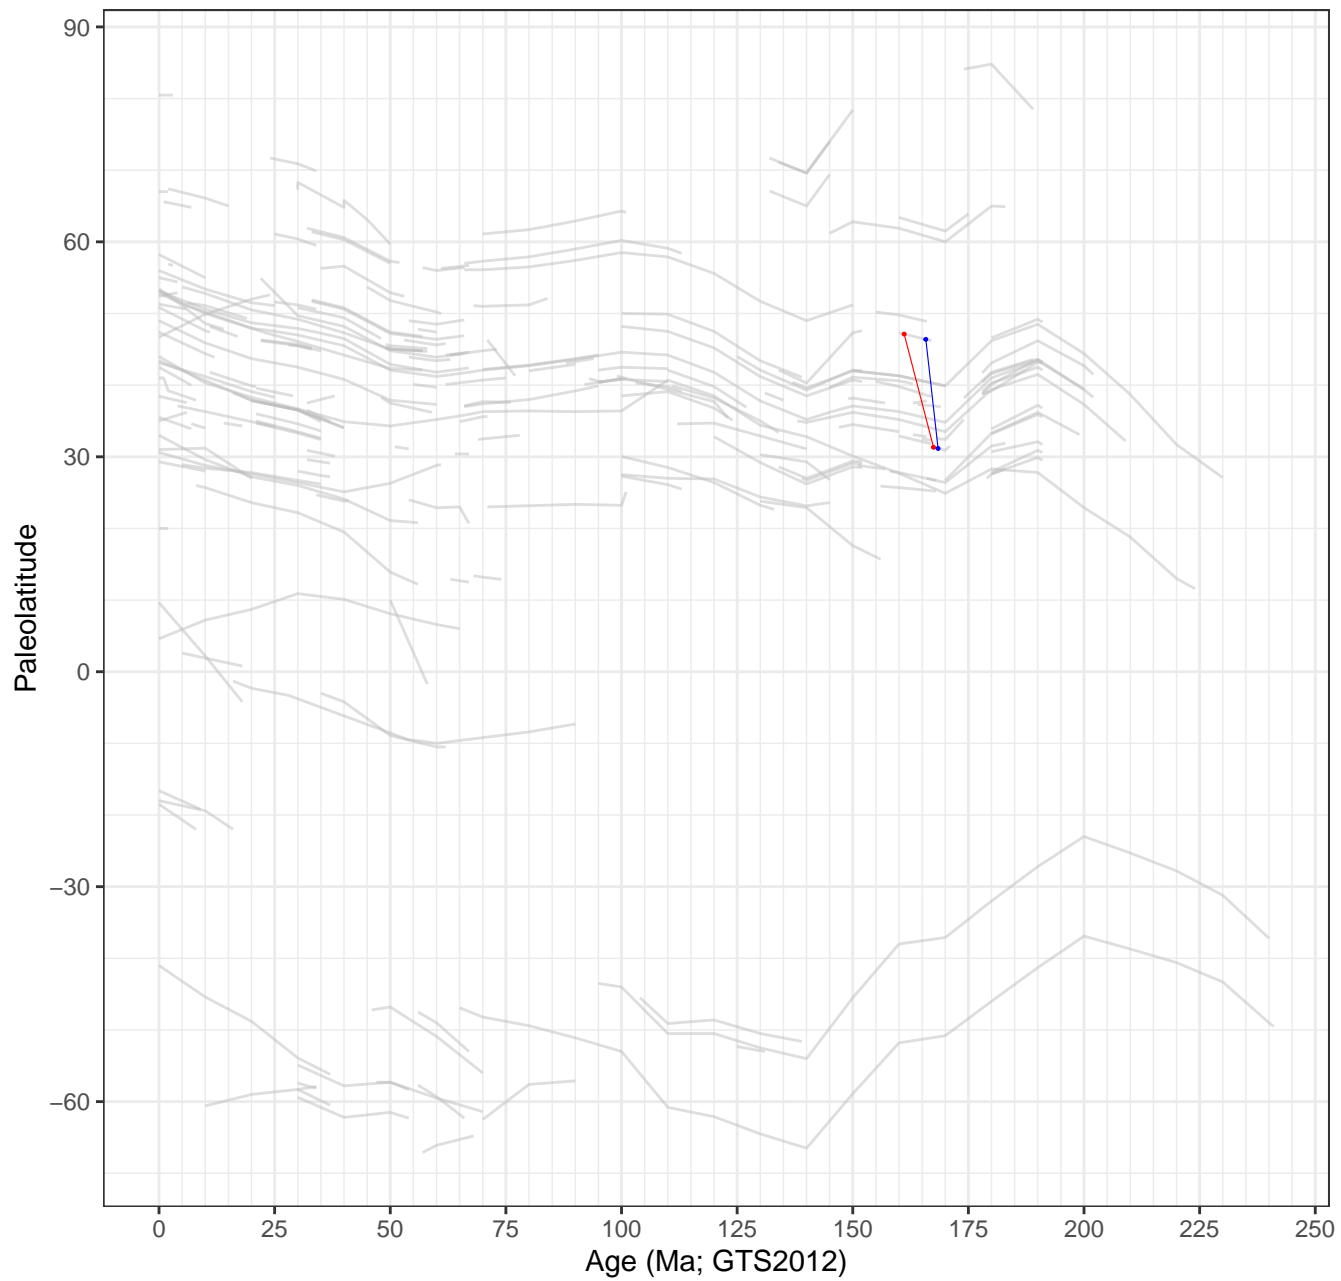

Supplement: Supplementary file 918 [file Batiacasphaera laevigata.pdf › Supplement/Supplement 2/Species 1914 plots/Batiacasphaera laevigata.pdf]

# Species *Batiacasphaera micropapillata*

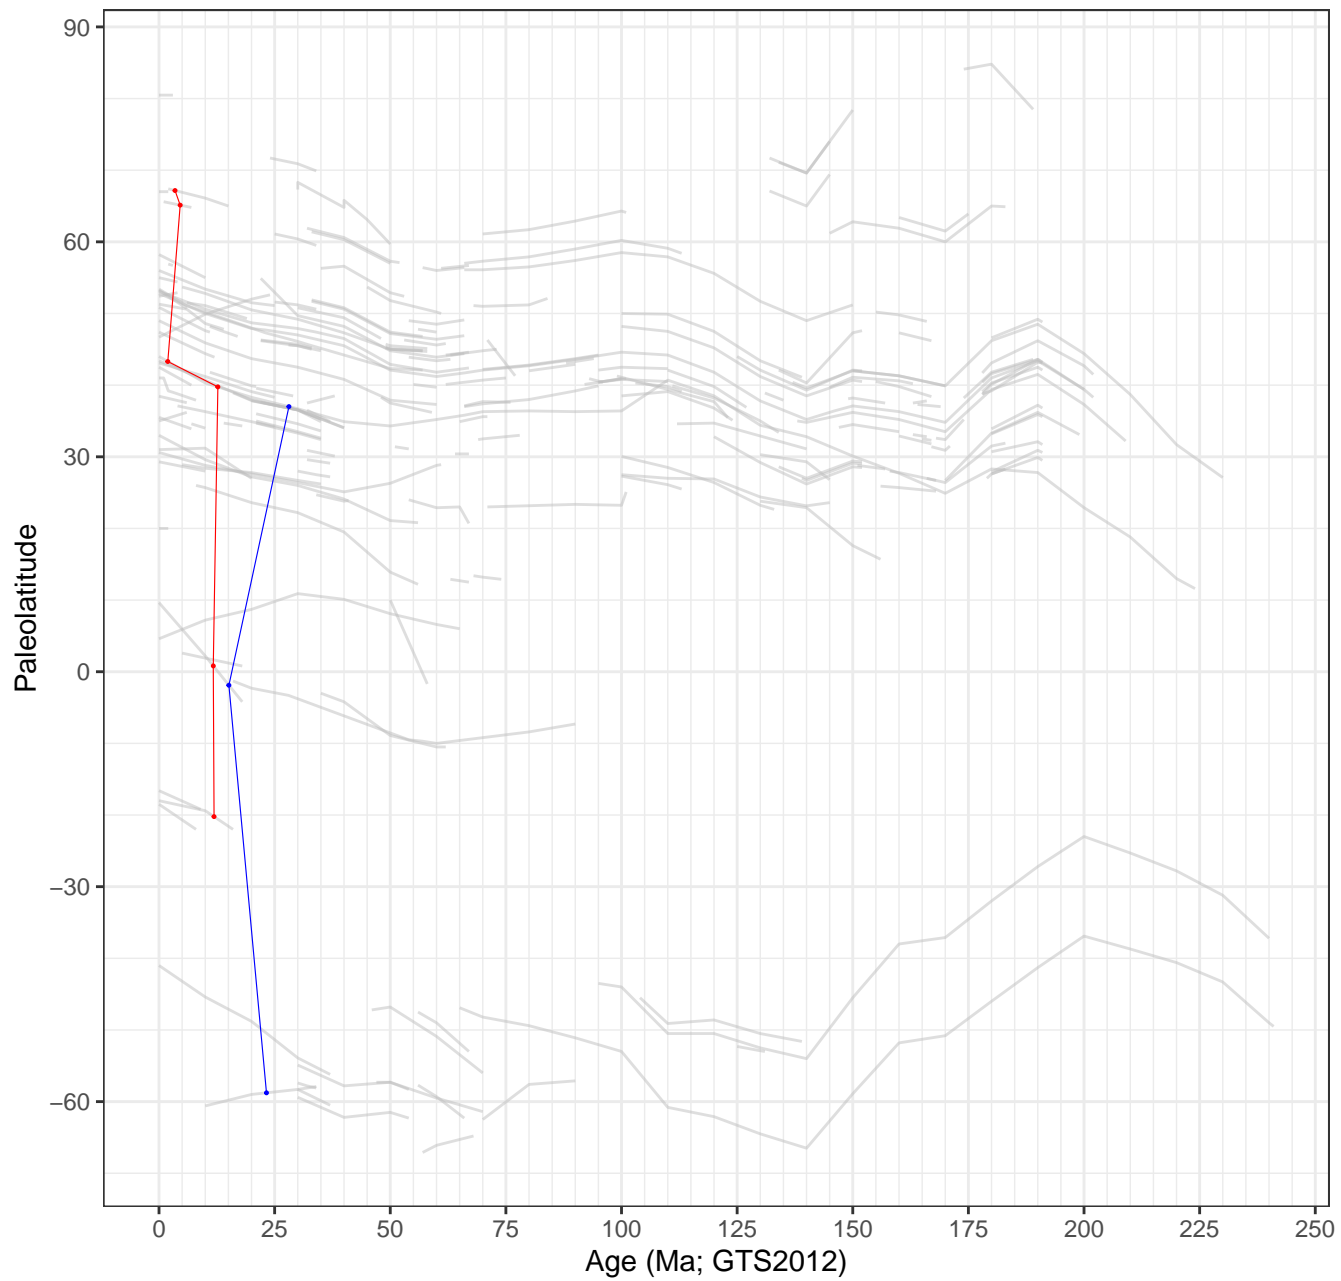

Supplement: Supplementary file 919 [file Batiacasphaera micropapillata.pdf › Supplement/Supplement 2/Species 1914 plots/Batiacasphaera micropapillata.pdf]

# Species *Batiacasphaera minuta*

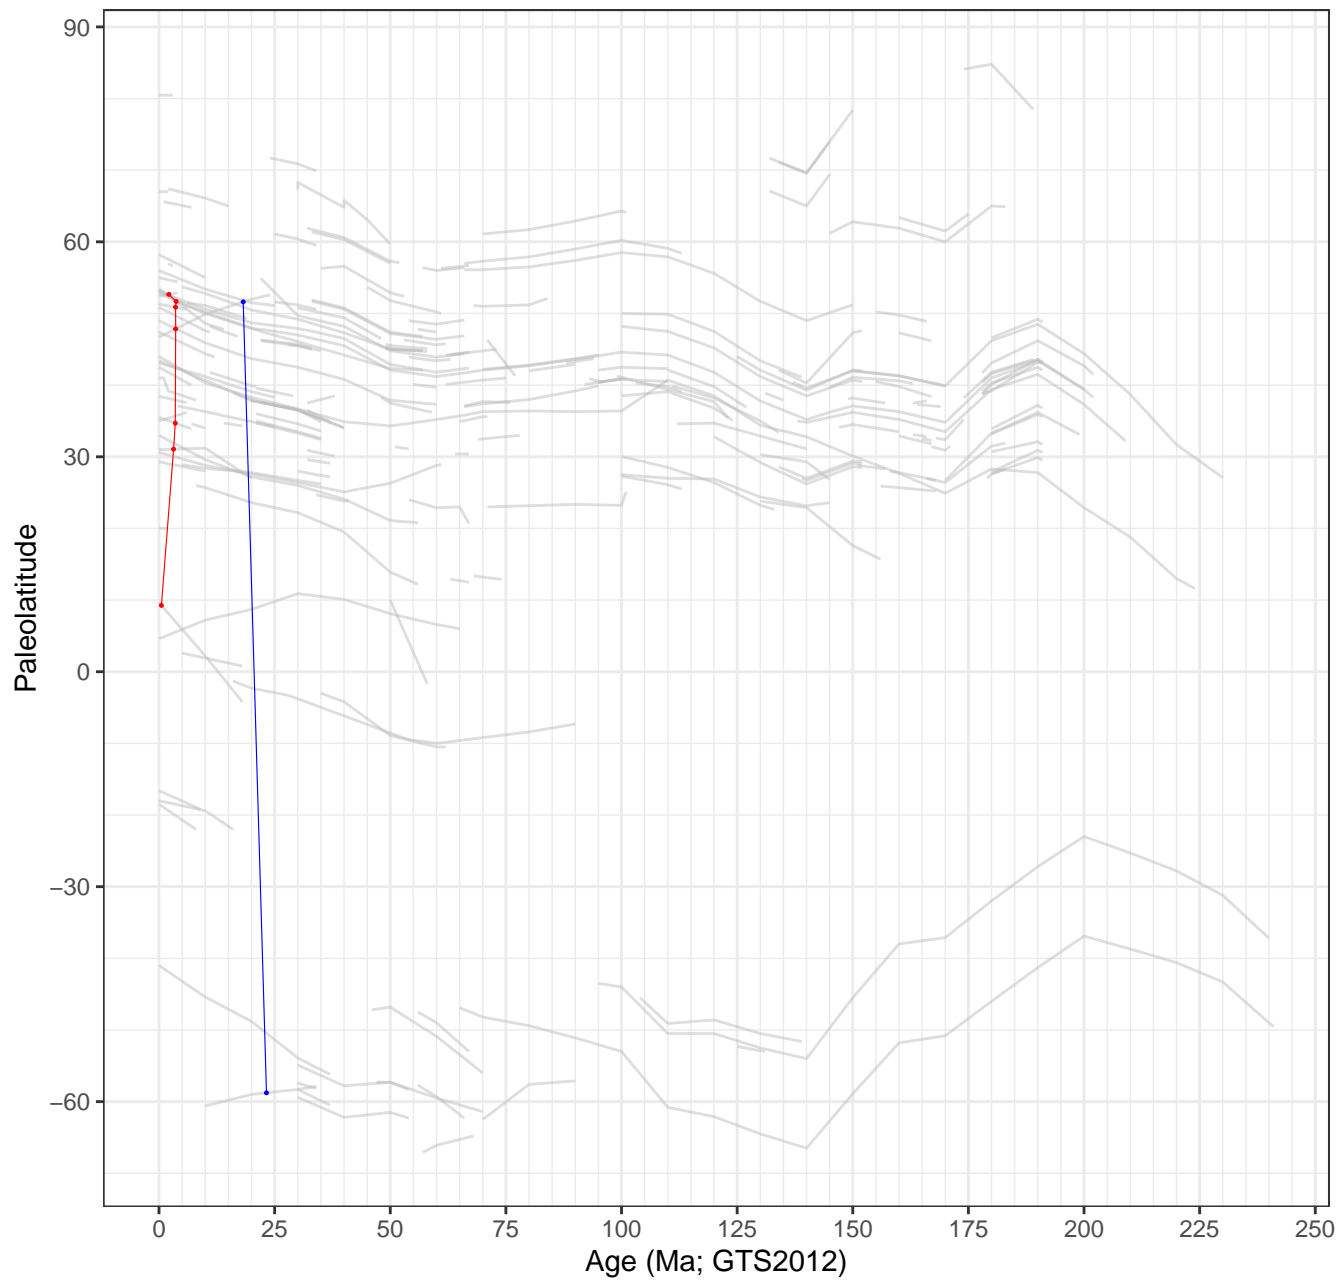

Supplement: Supplementary file 920 [file Batiacasphaera minuta.pdf › Supplement/Supplement 2/Species 1914 plots/Batiacasphaera minuta.pdf]

# Species *Batiacasphaera reticulata*

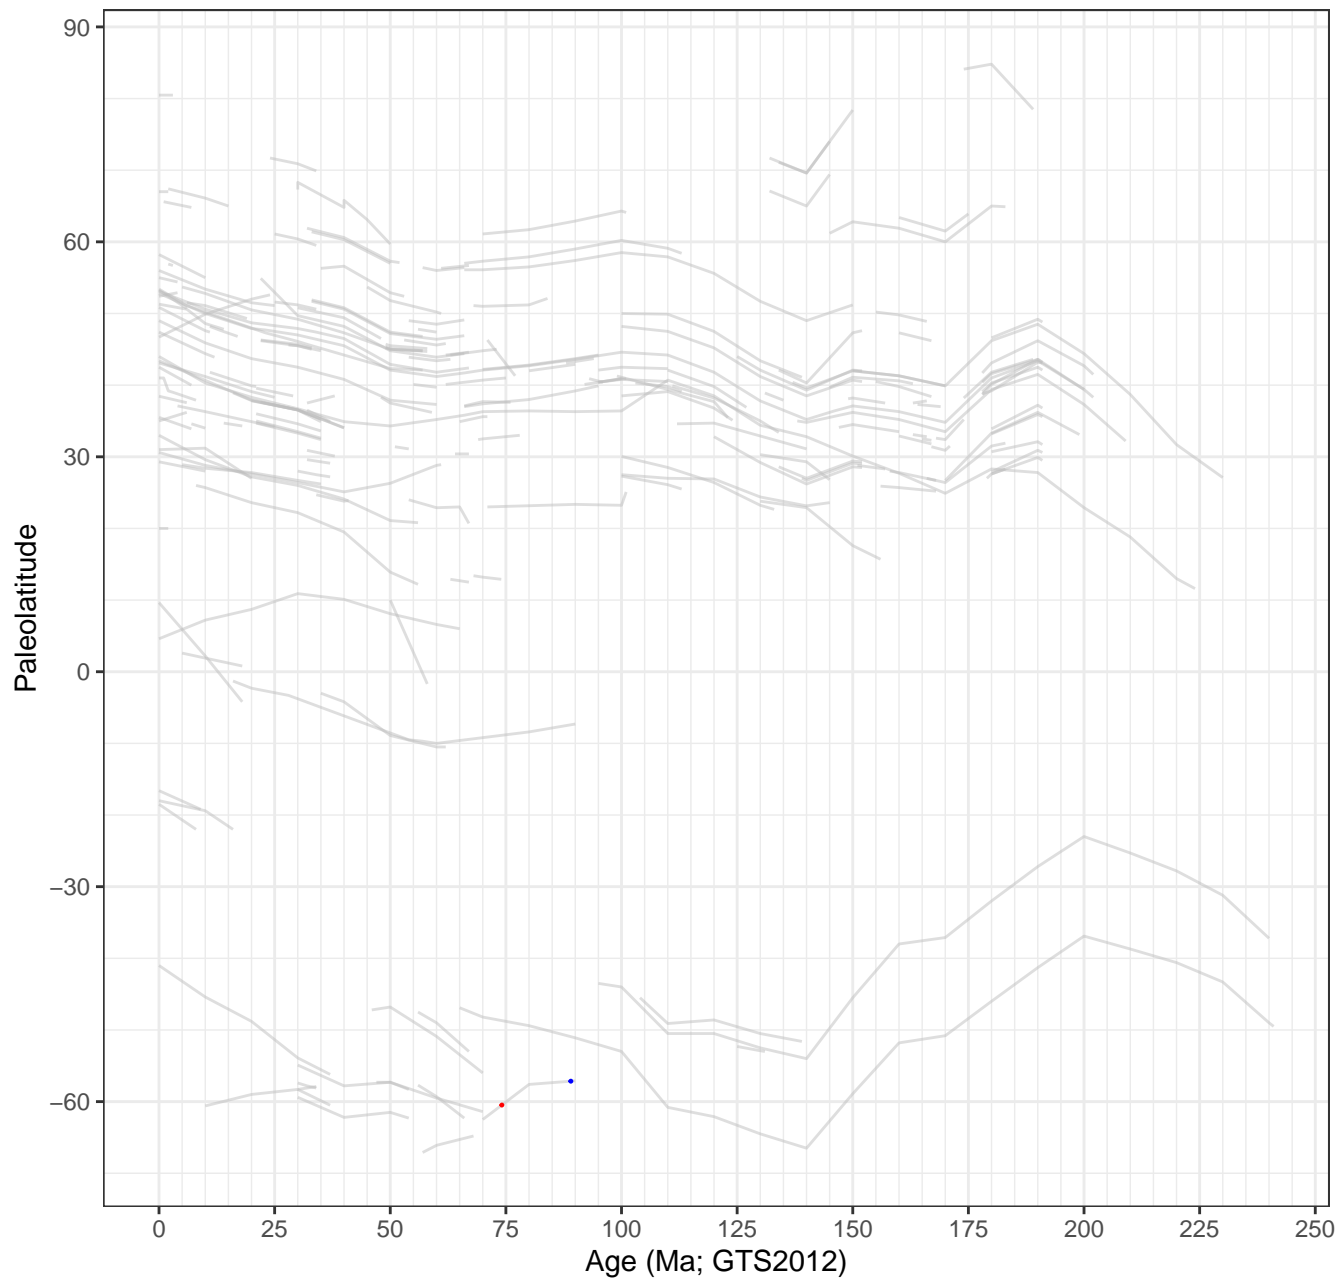

Supplement: Supplementary file 921 [file Batiacasphaera reticulata.pdf › Supplement/Supplement 2/Species 1914 plots/Batiacasphaera reticulata.pdf]

# Species *Batiacasphaera sphaerica*

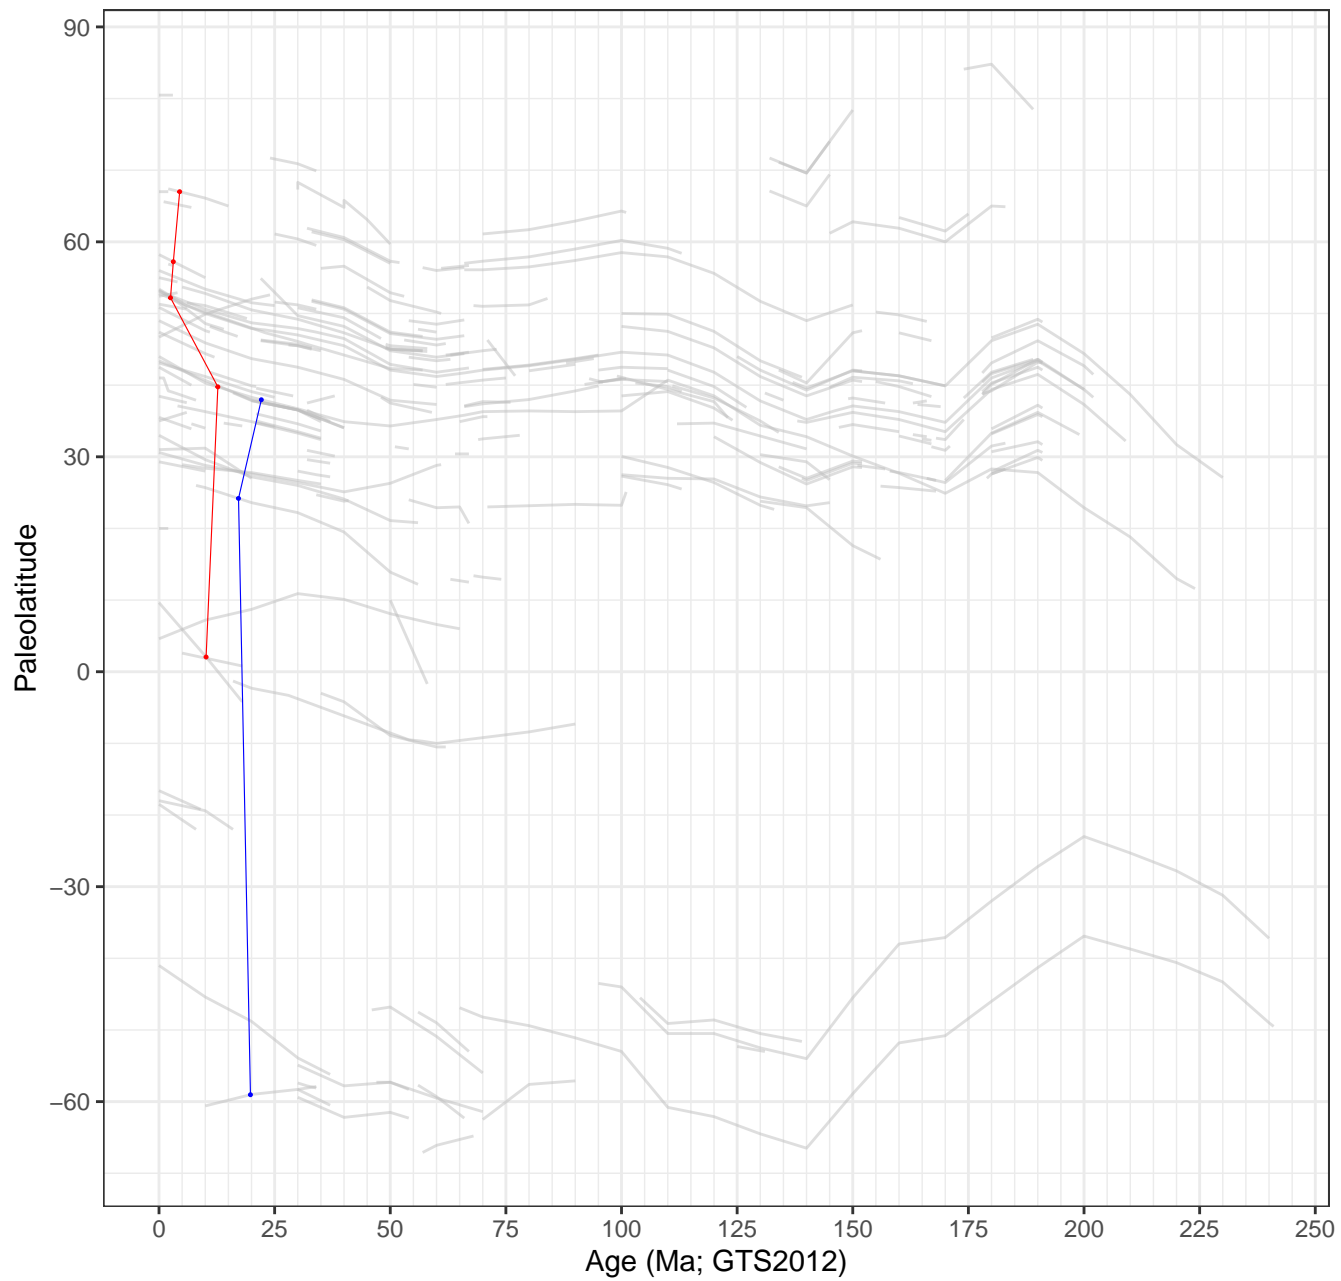

Supplement: Supplementary file 922 [file Batiacasphaera sphaerica.pdf › Supplement/Supplement 2/Species 1914 plots/Batiacasphaera sphaerica.pdf]

# Species *Batiacasphaera* spp.

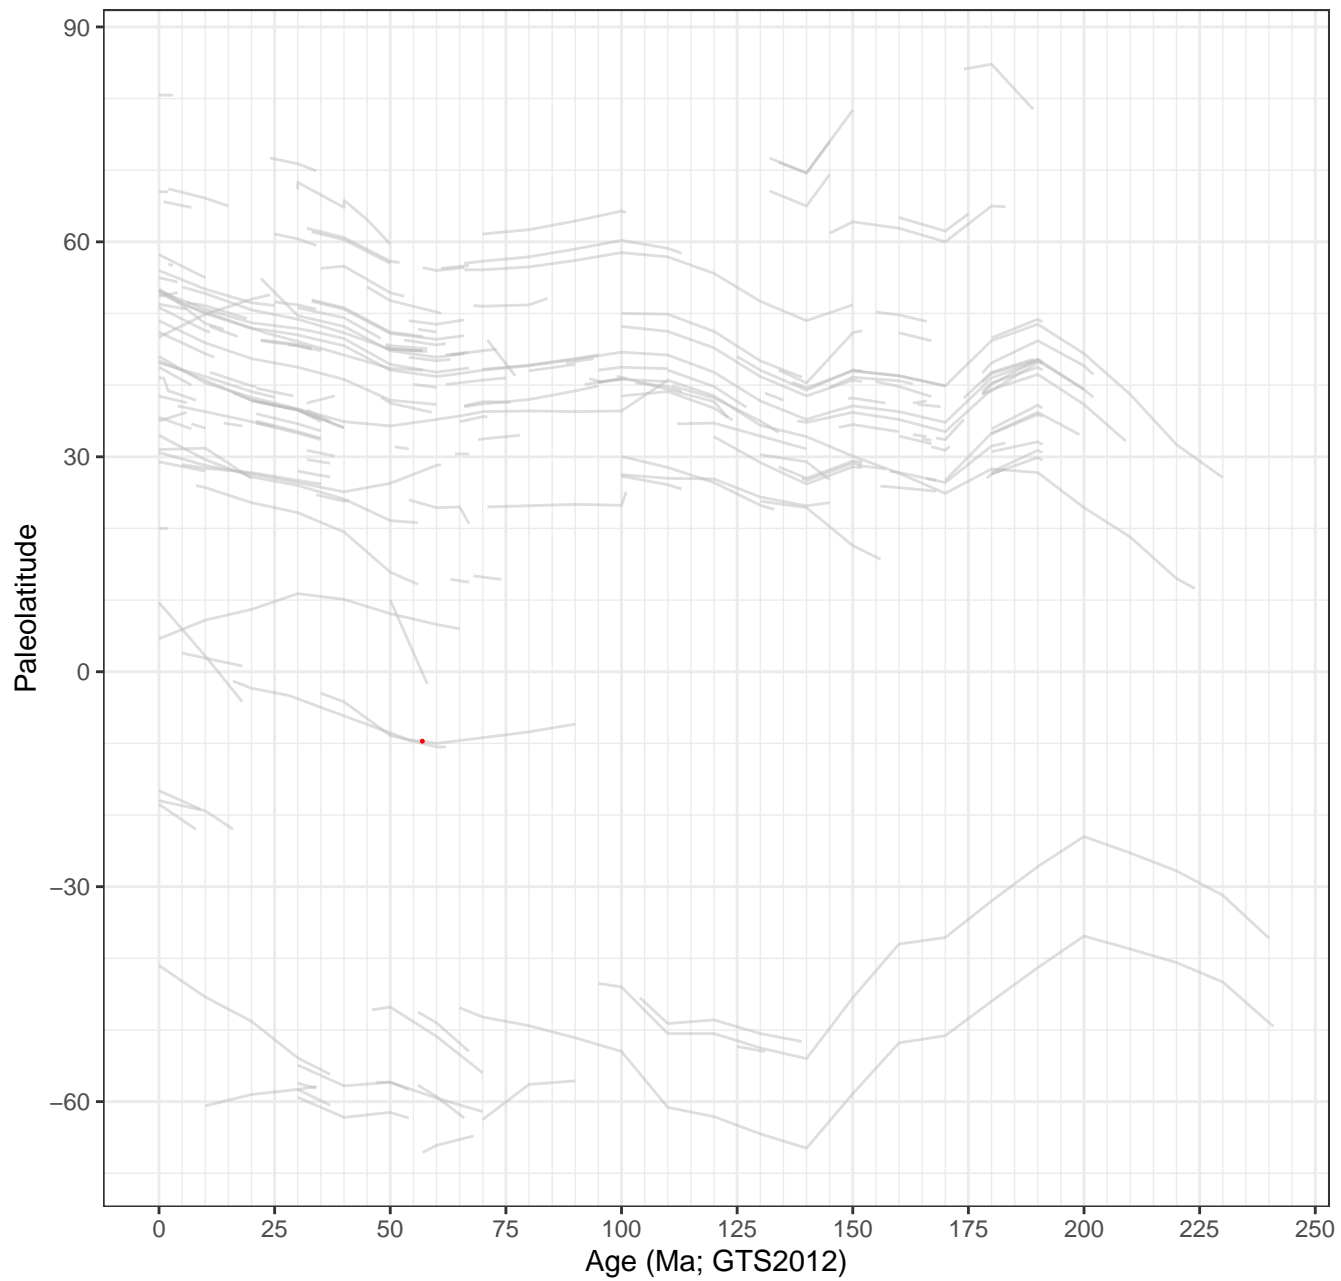

Supplement: Supplementary file 923 [file Batiacasphaera spp..pdf › Supplement/Supplement 2/Species 1914 plots/Batiacasphaera spp..pdf]

# Species *Batiacasphaera subtilis*

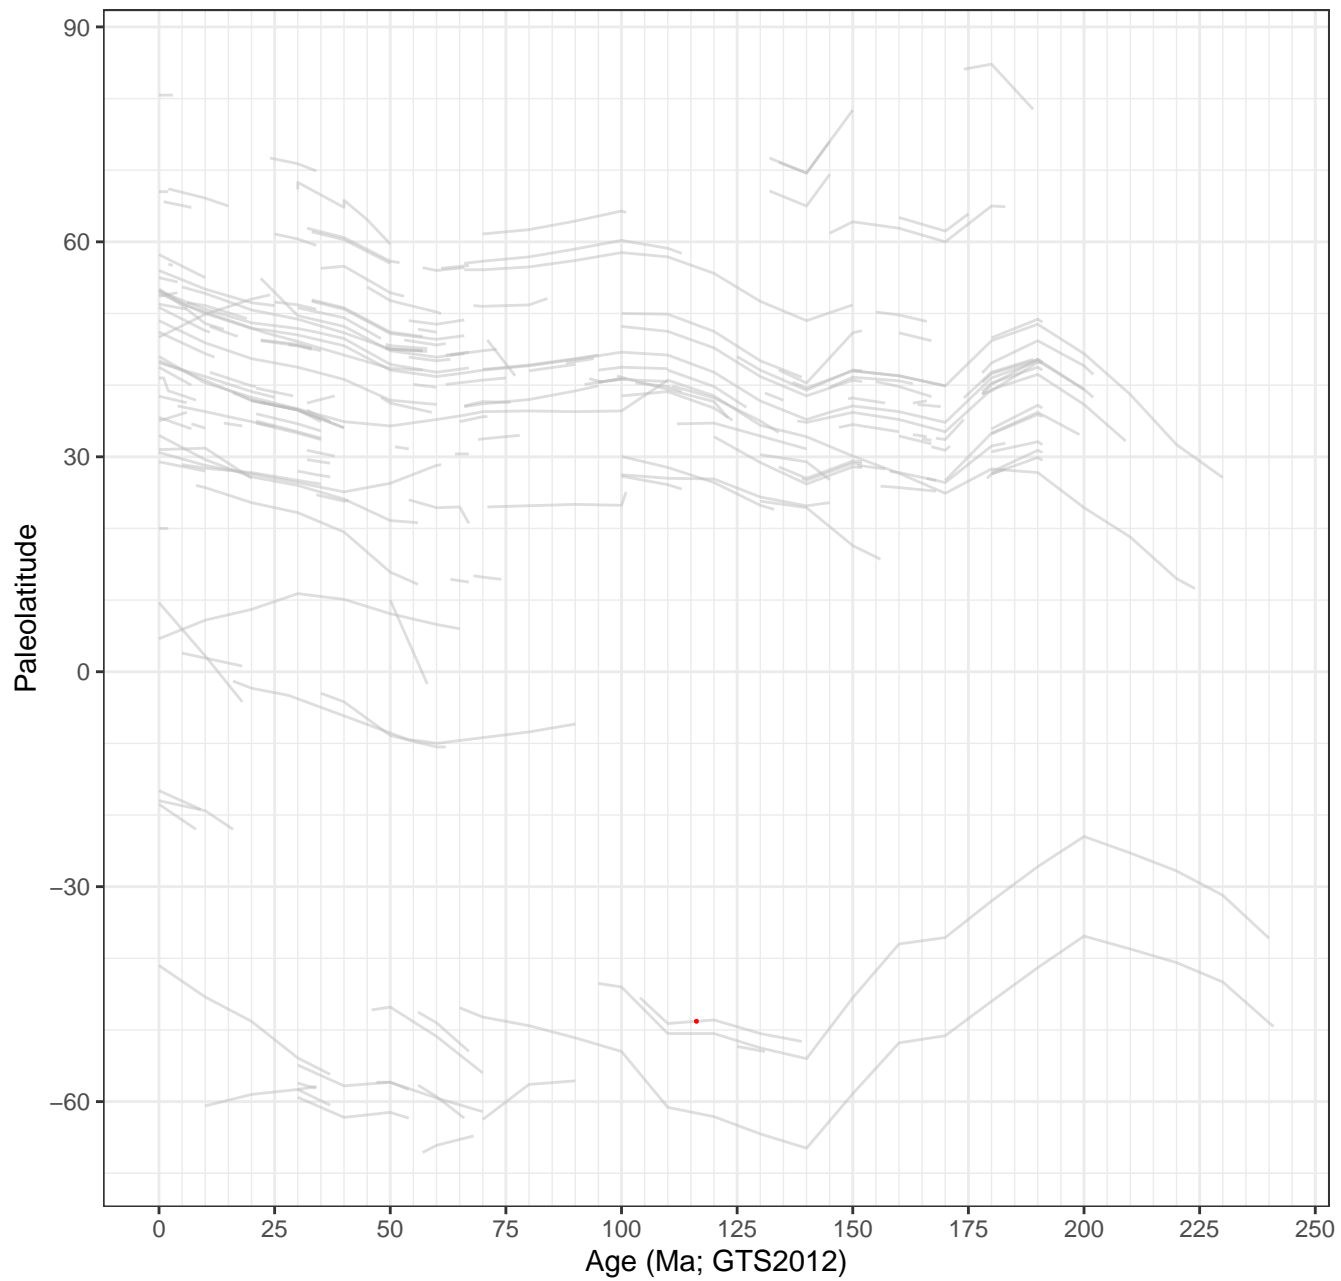

Supplement: Supplementary file 924 [file Batiacasphaera subtilis.pdf › Supplement/Supplement 2/Species 1914 plots/Batiacasphaera subtilis.pdf]

# Species *Batioladinium gochtii*

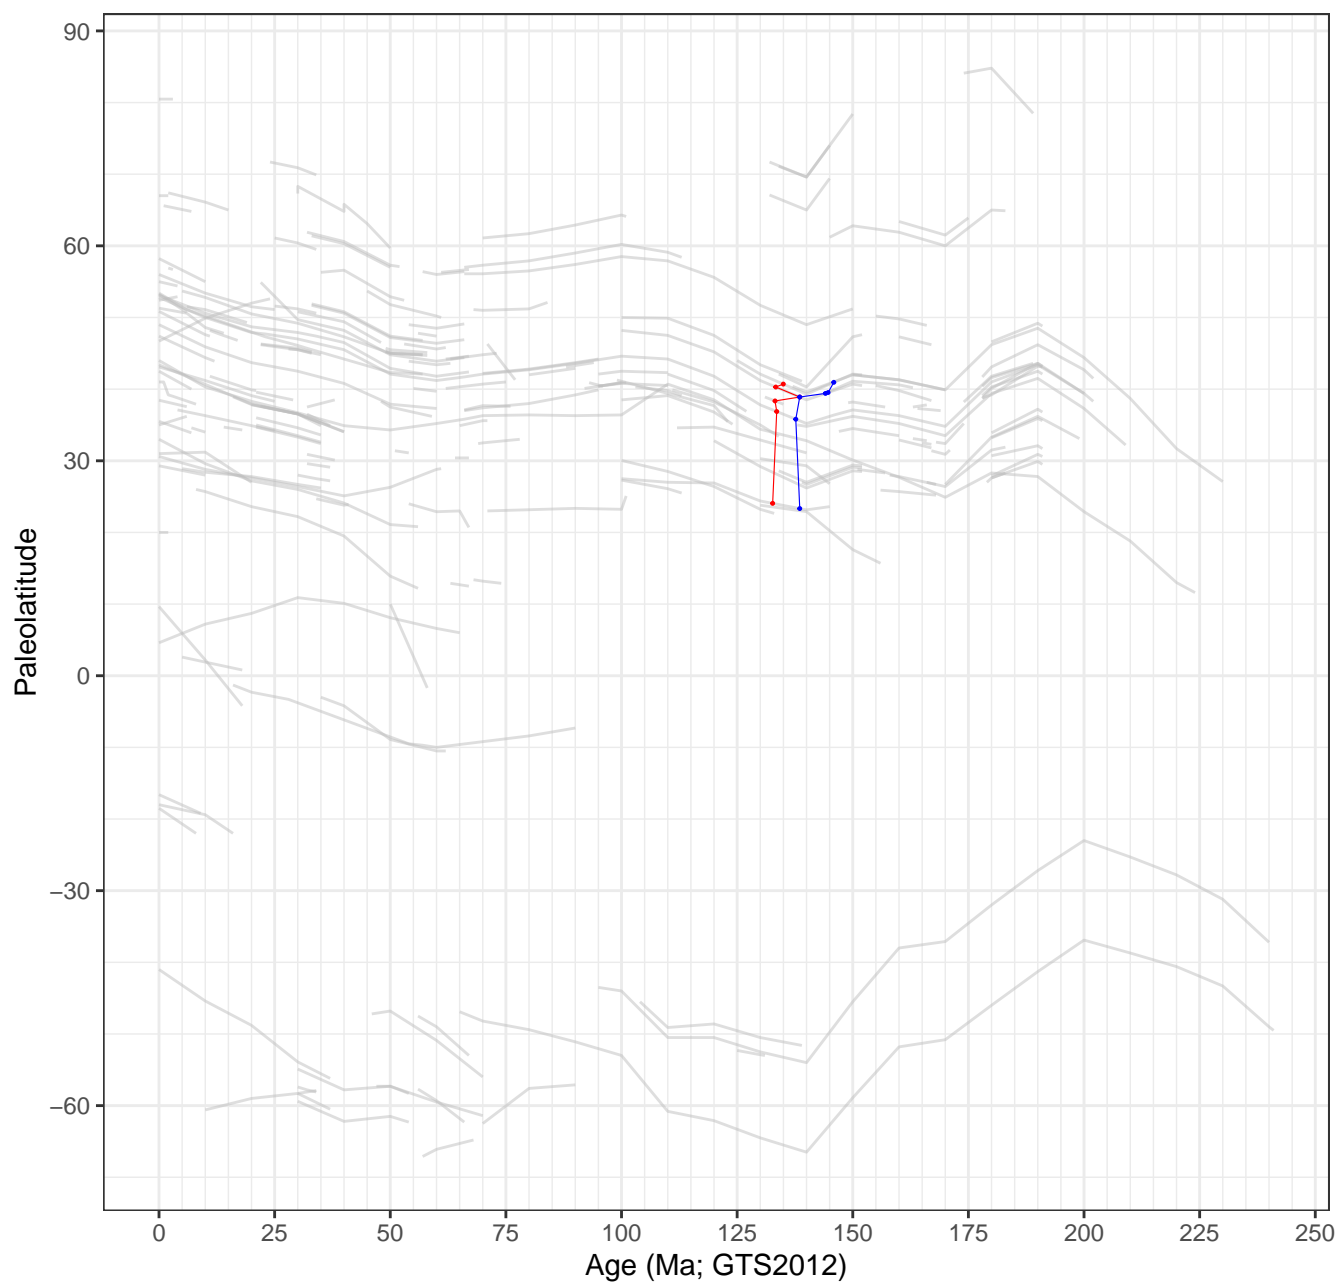

Supplement: Supplementary file 925 [file Batioladinium gochtii.pdf › Supplement/Supplement 2/Species 1914 plots/Batioladinium gochtii.pdf]

# Species *Batioladinium jaegeri*

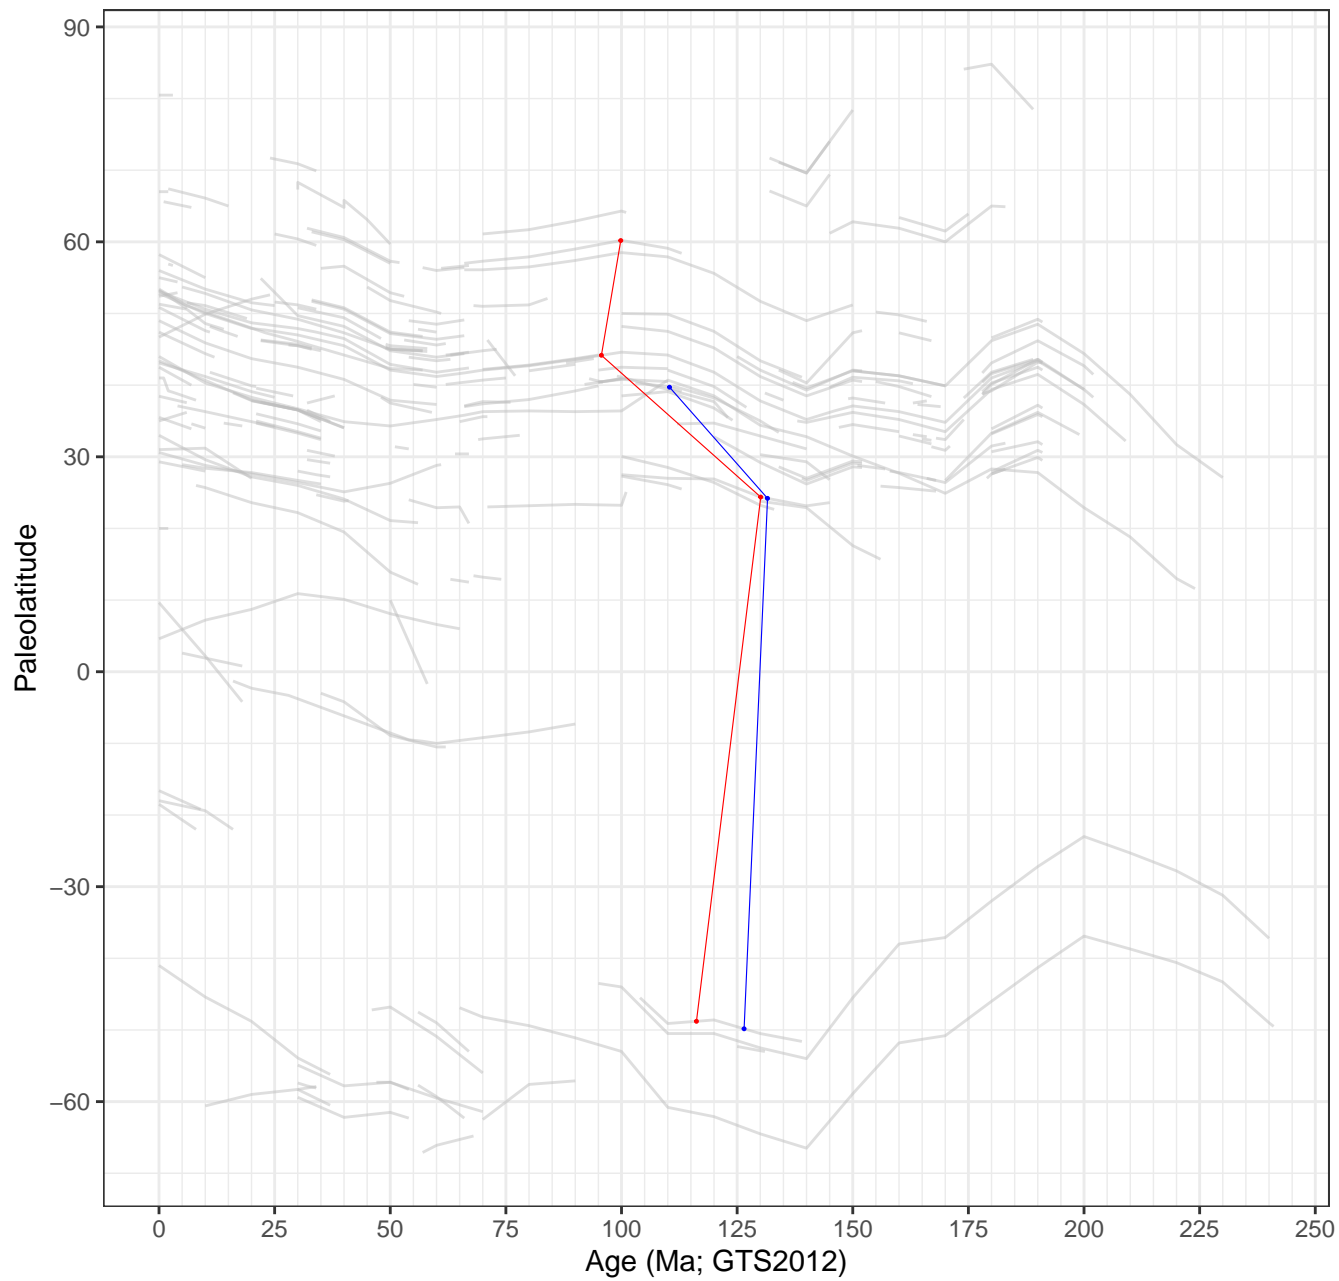

Supplement: Supplementary file 926 [file Batioladinium jaegeri.pdf › Supplement/Supplement 2/Species 1914 plots/Batioladinium jaegeri.pdf]

# Species *Batioladinium longicornutum*

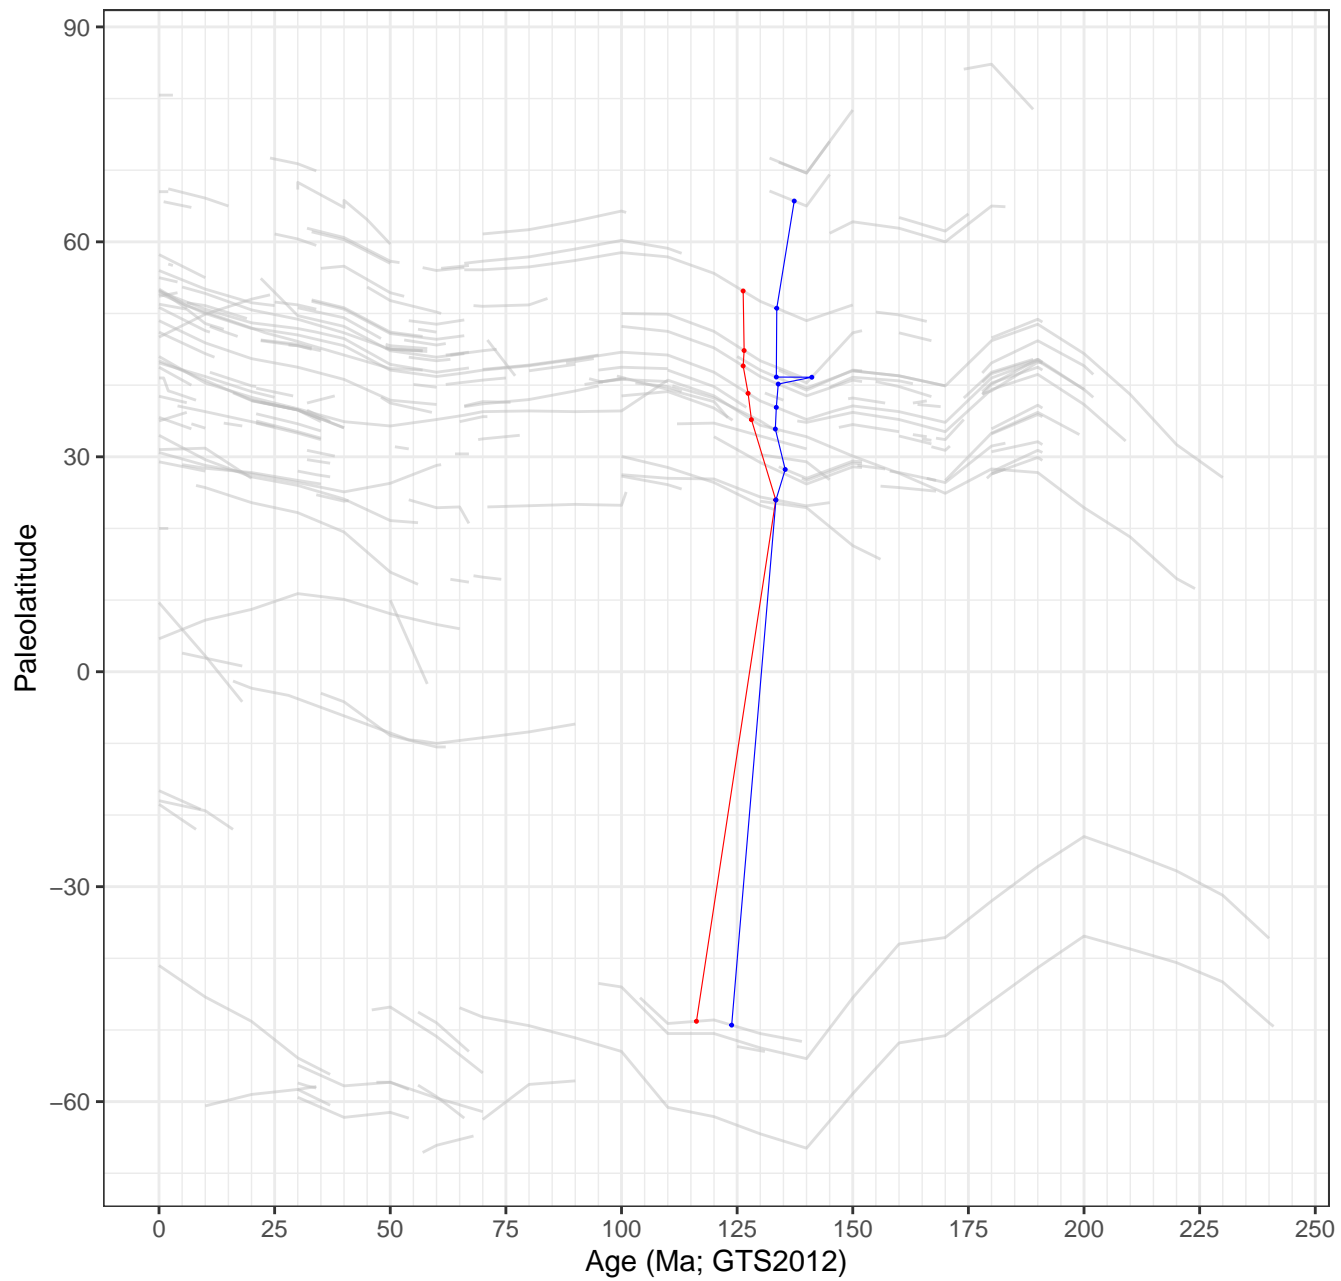

Supplement: Supplementary file 927 [file Batioladinium longicornutum.pdf › Supplement/Supplement 2/Species 1914 plots/Batioladinium longicornutum.pdf]

# Species *Batioladinium micropodum*

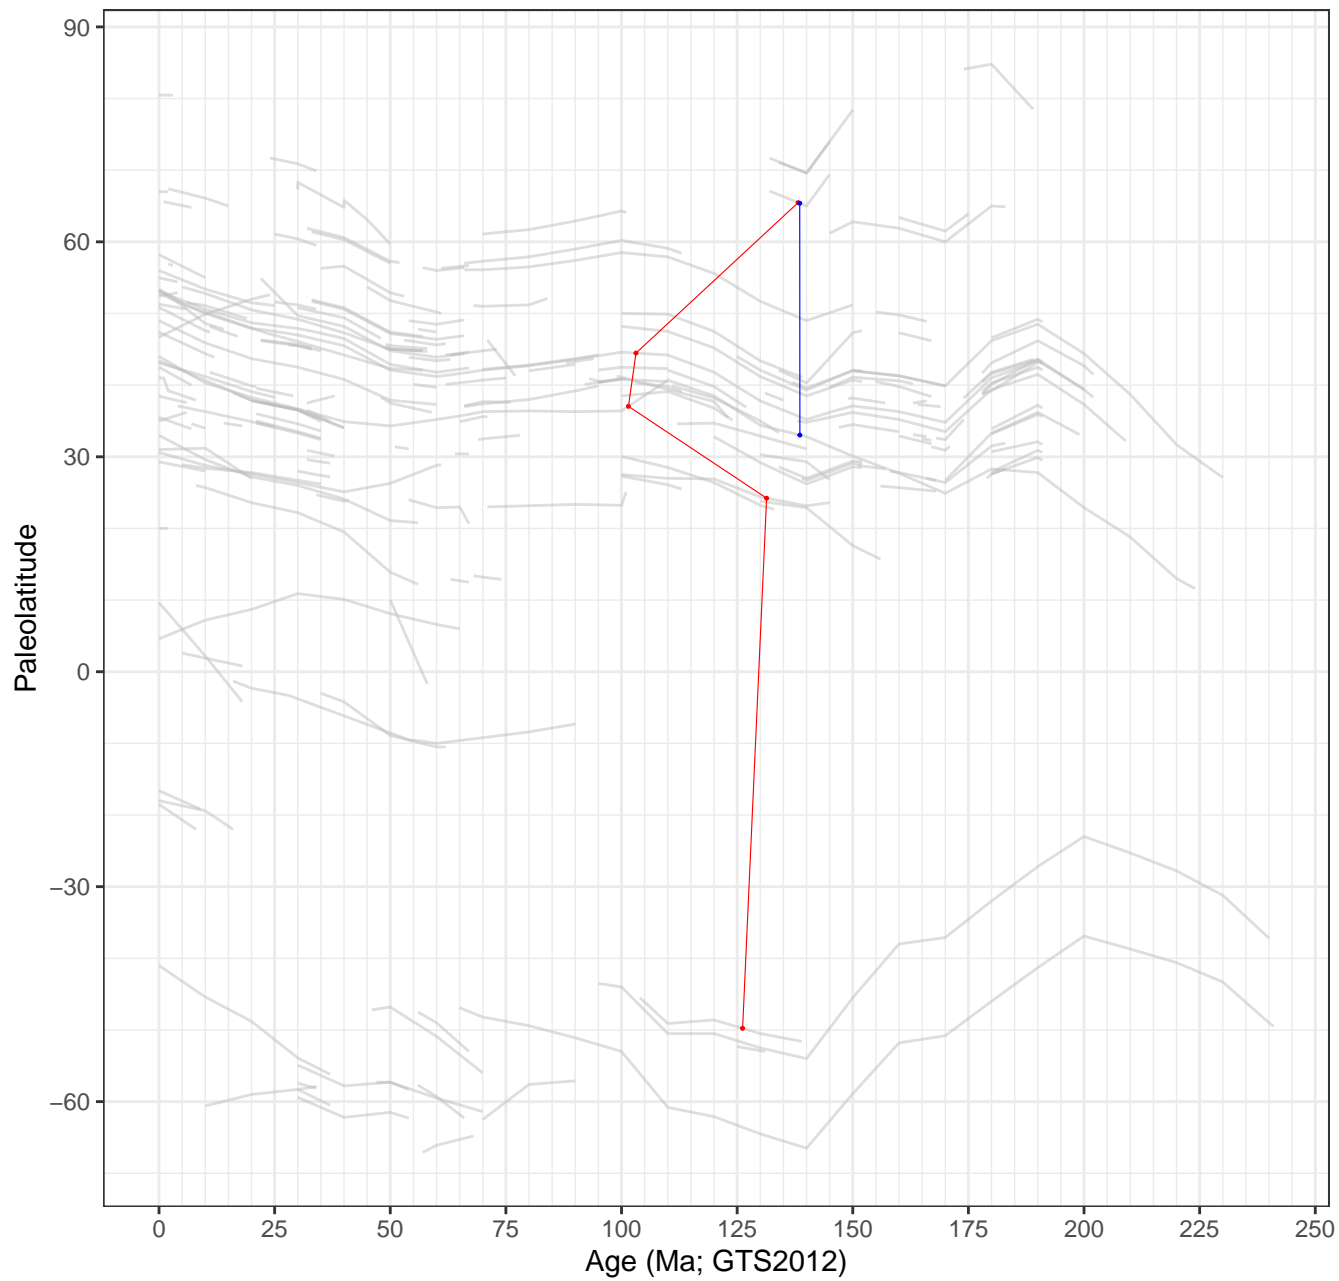

Supplement: Supplementary file 928 [file Batioladinium micropodum.pdf › Supplement/Supplement 2/Species 1914 plots/Batioladinium micropodum.pdf]

# Species *Batioladinium paeminosum*

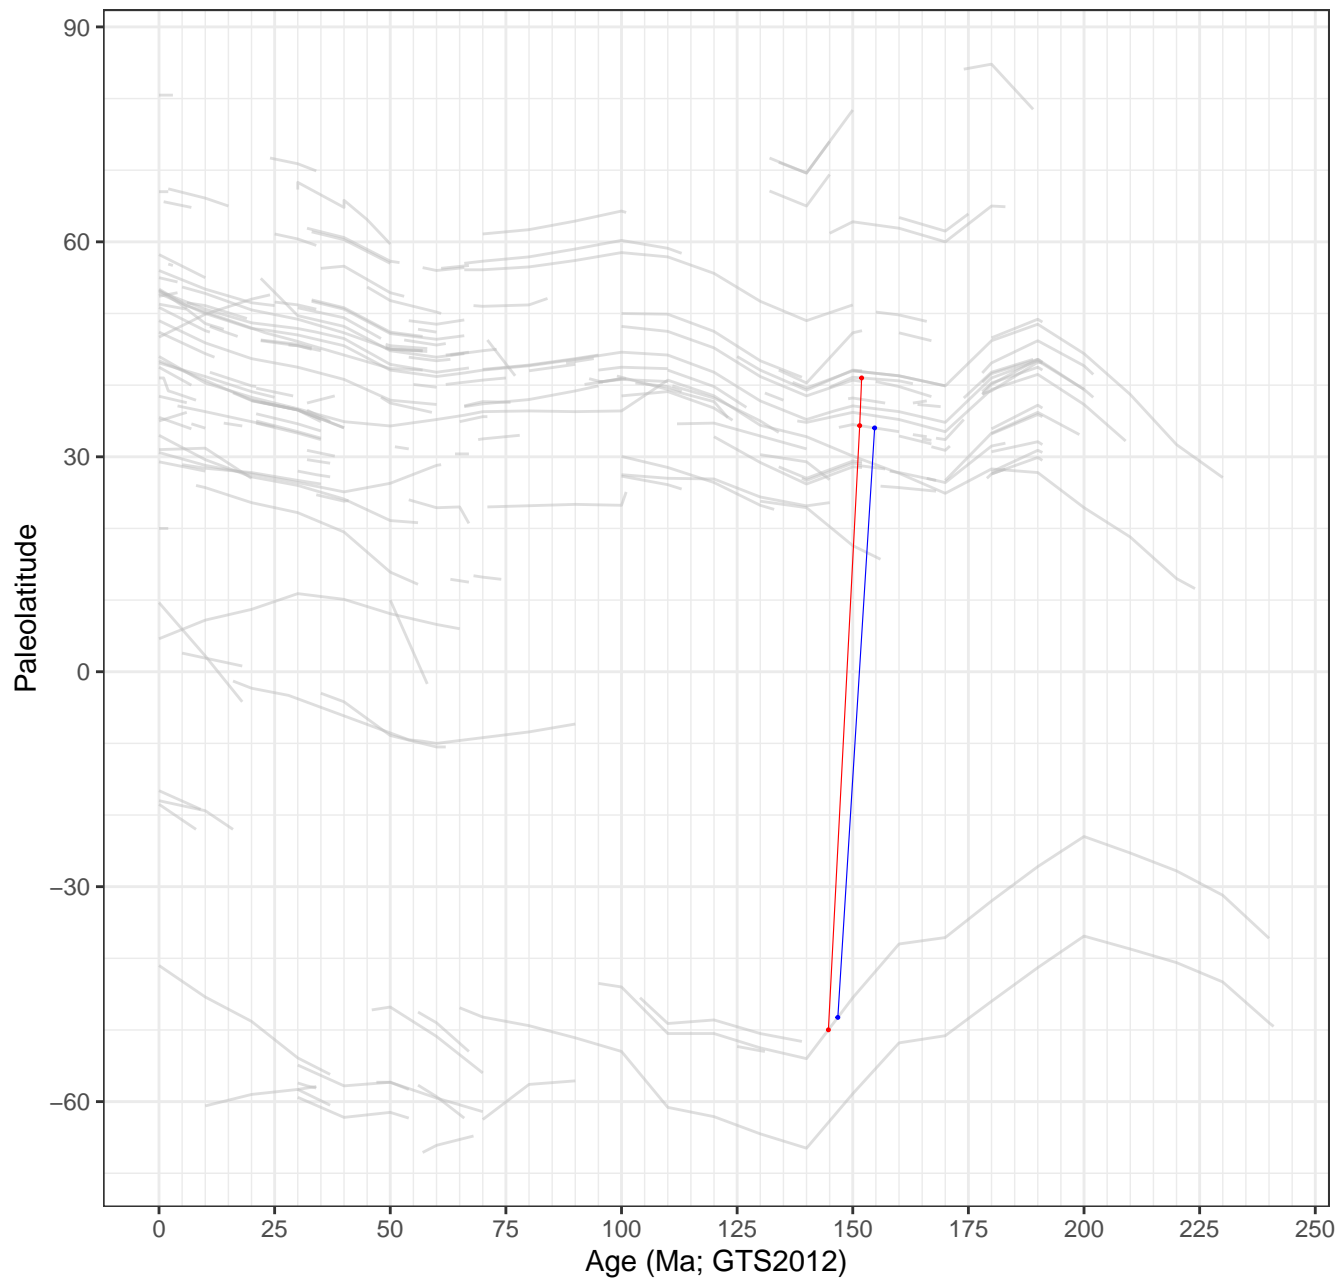

Supplement: Supplementary file 929 [file Batioladinium paeminosum.pdf › Supplement/Supplement 2/Species 1914 plots/Batioladinium paeminosum.pdf]

# Species *Batioladinium reticulatum*

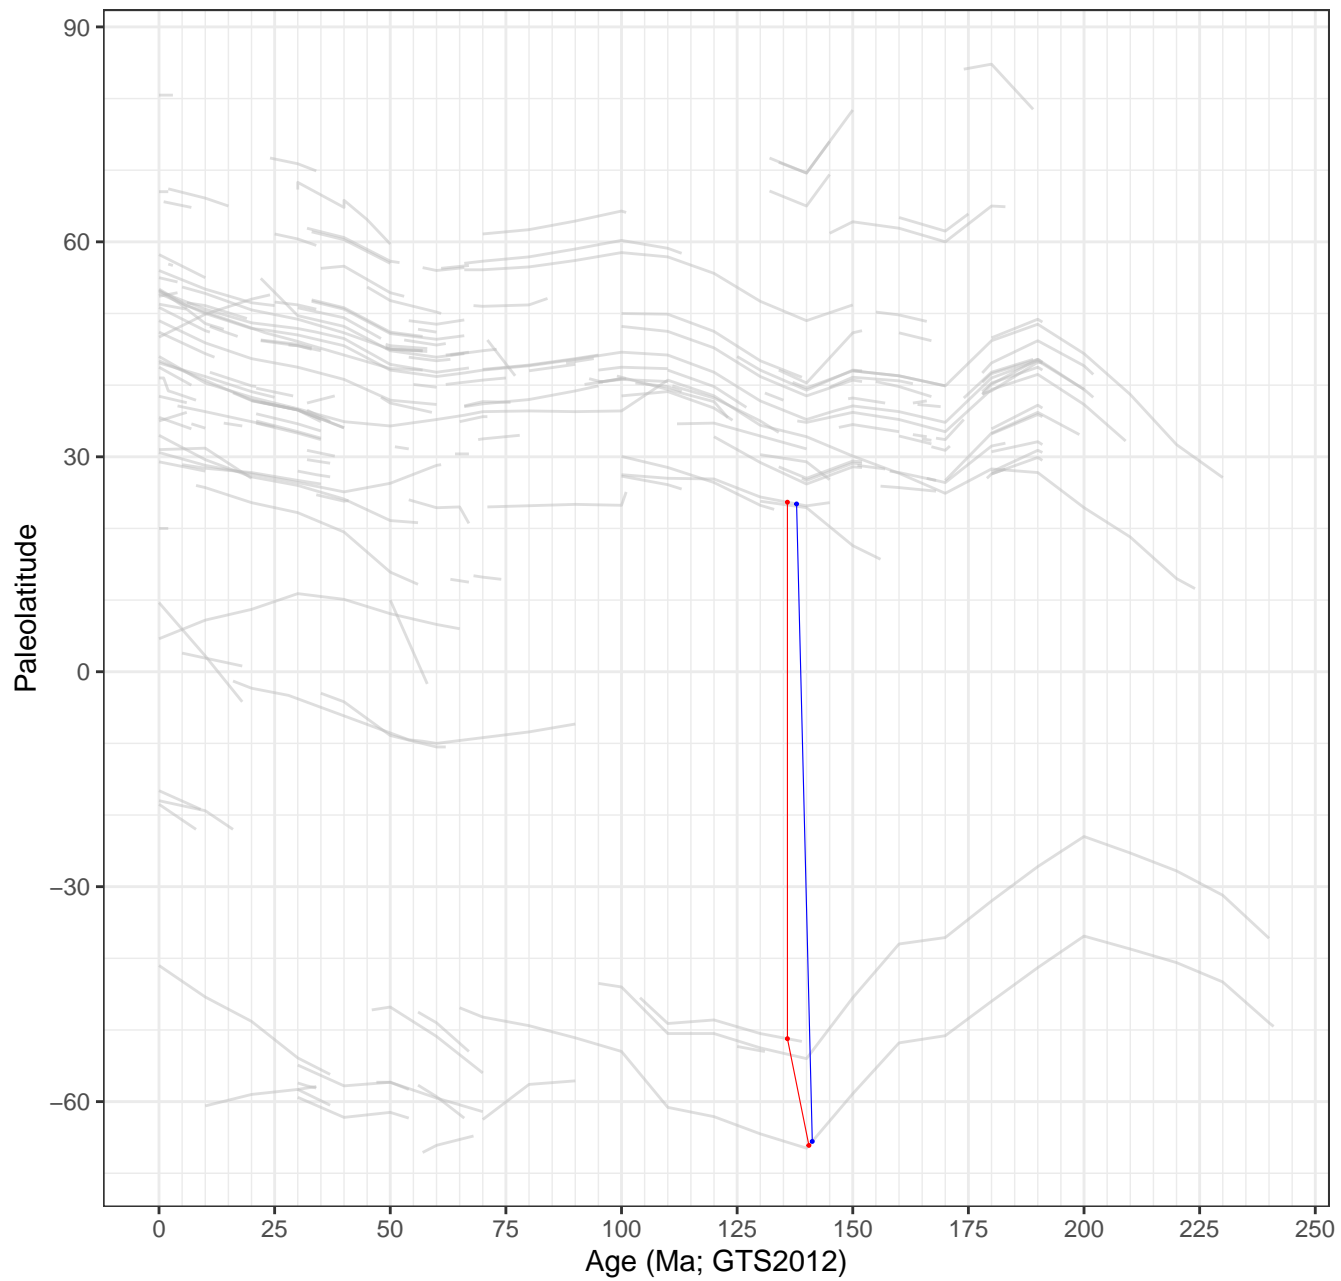

Supplement: Supplementary file 930 [file Batioladinium reticulatum.pdf › Supplement/Supplement 2/Species 1914 plots/Batioladinium reticulatum.pdf]

# Species *Batioladinium shaftesburiense*

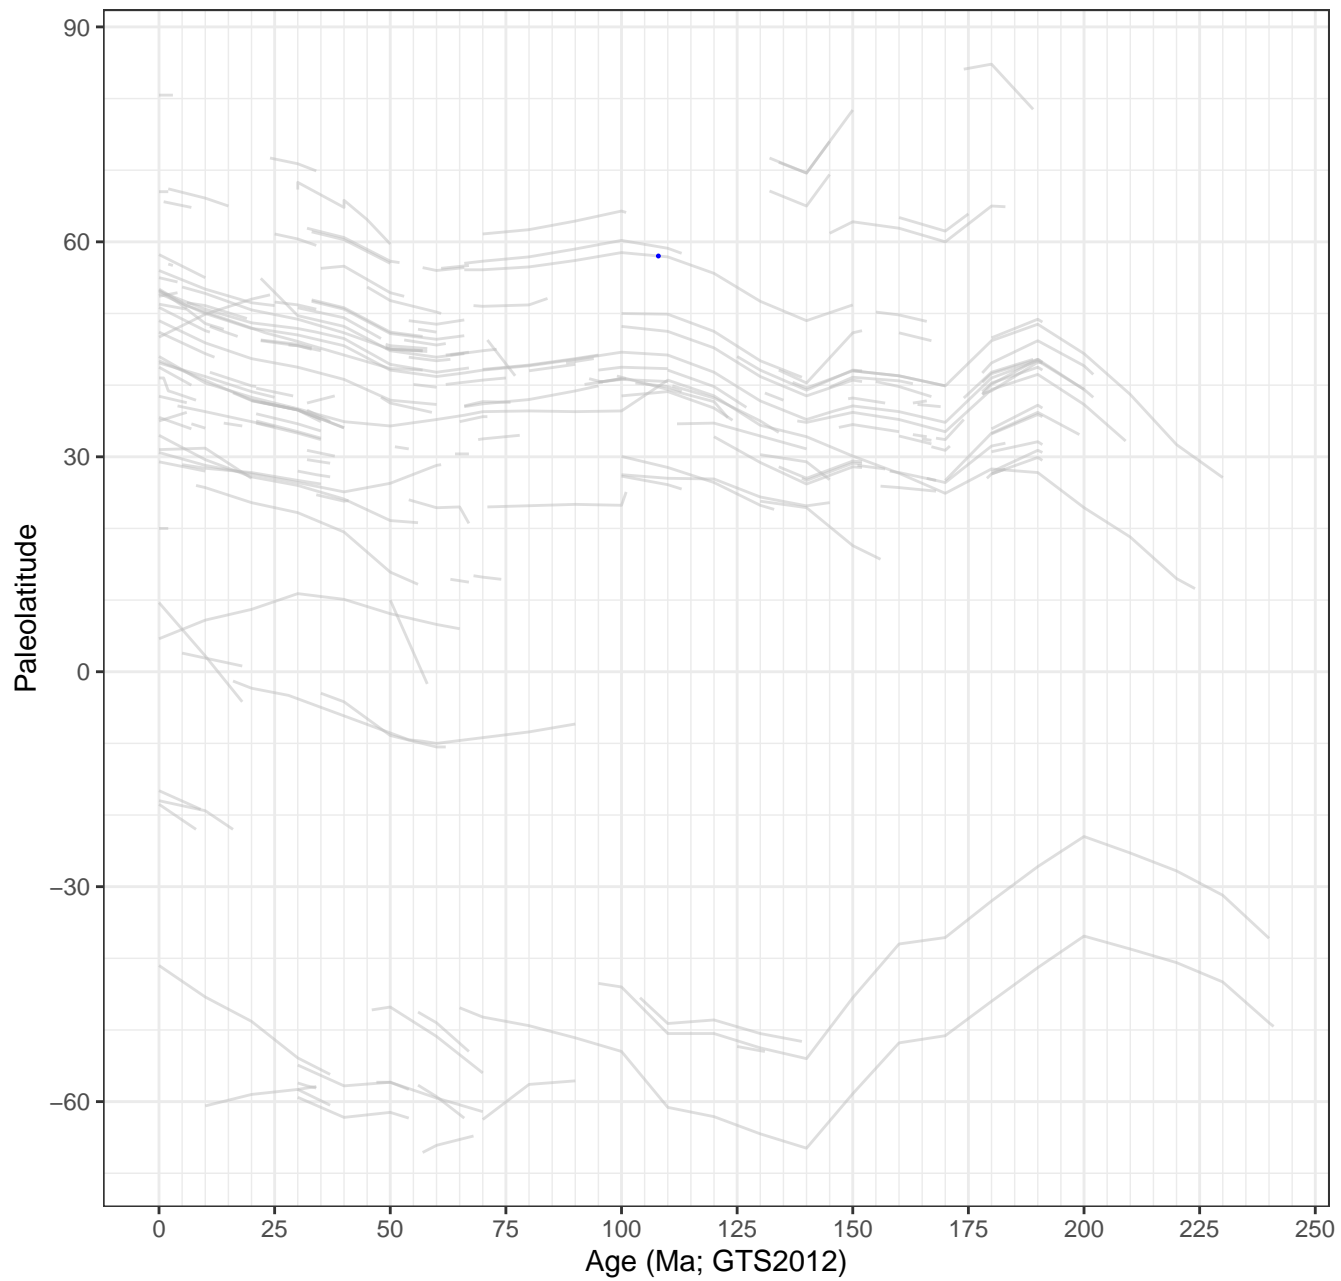

Supplement: Supplementary file 931 [file Batioladinium shaftesburiense.pdf › Supplement/Supplement 2/Species 1914 plots/Batioladinium shaftesburiense.pdf]

# Species *Batioladinium varigranosum*

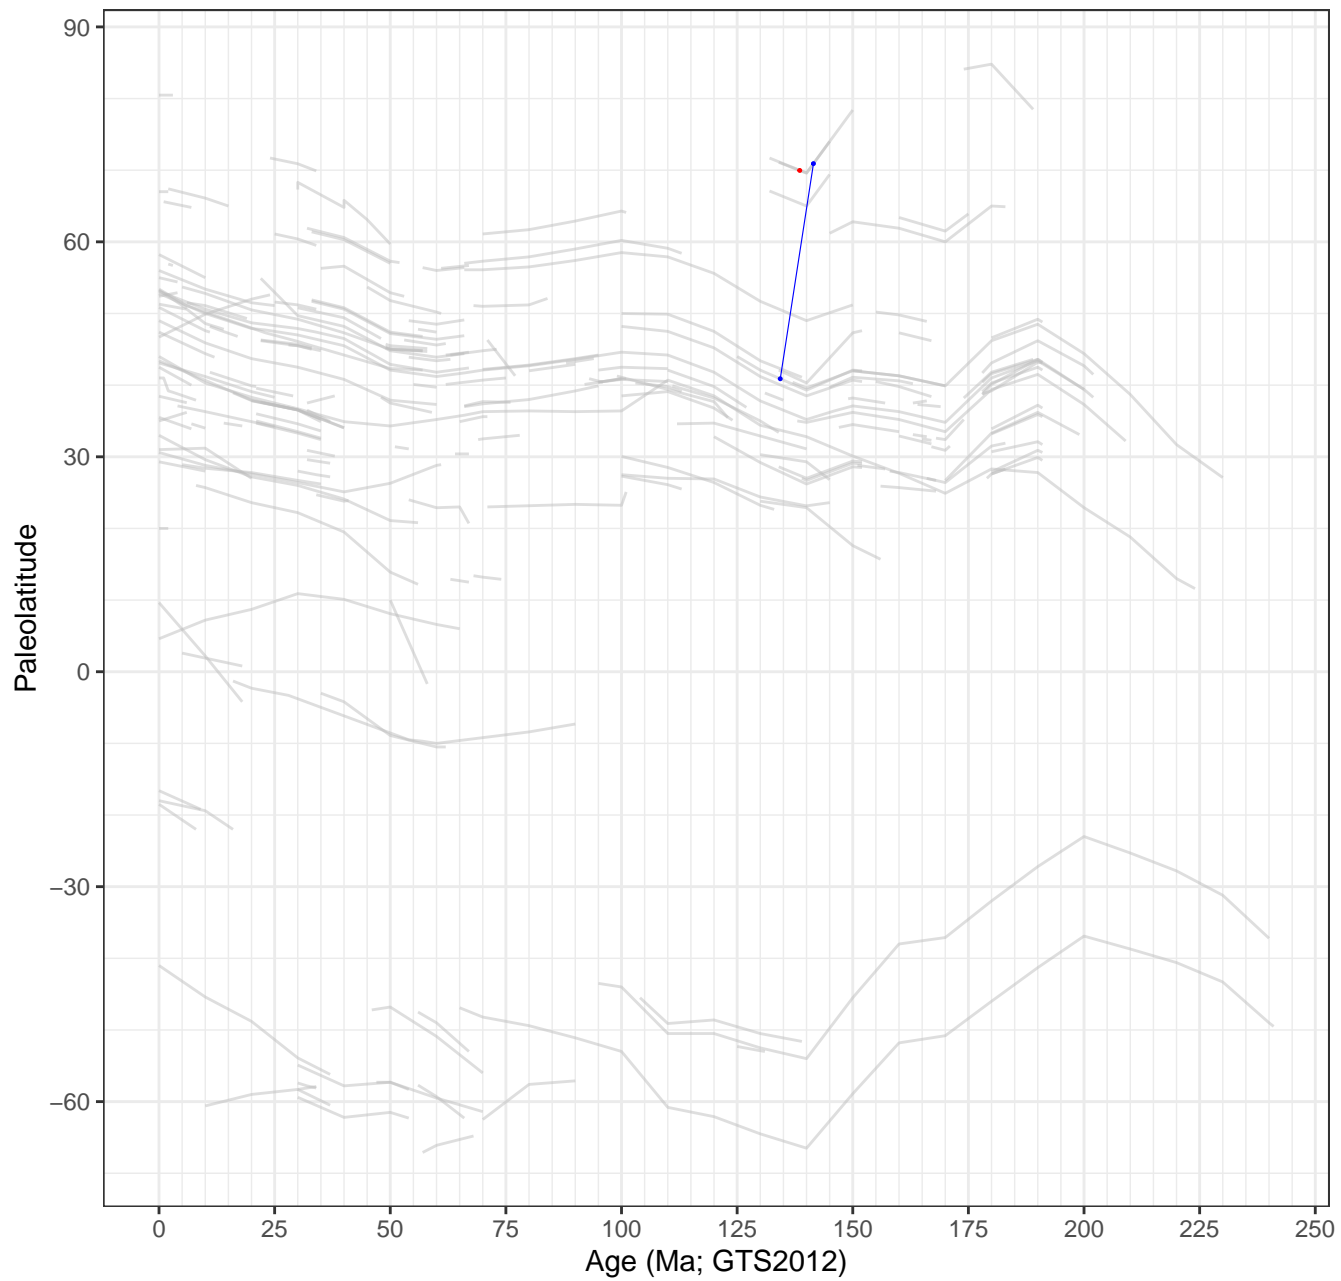

Supplement: Supplementary file 932 [file Batioladinium varigranosum.pdf › Supplement/Supplement 2/Species 1914 plots/Batioladinium varigranosum.pdf]
