# Supplementary figures and images for: DINOSTRAT: a global database of the stratigraphic and paleolatitudinal distribution of Mesozoic–Cenozoic organic-walled dinoflagellate cysts (part 10 of 27)
Source: Copernicus journal article supplement (doi:10.5194/essd-14-579-2022), 2022-02-09

# Species *Beaumontella caminuspinia*

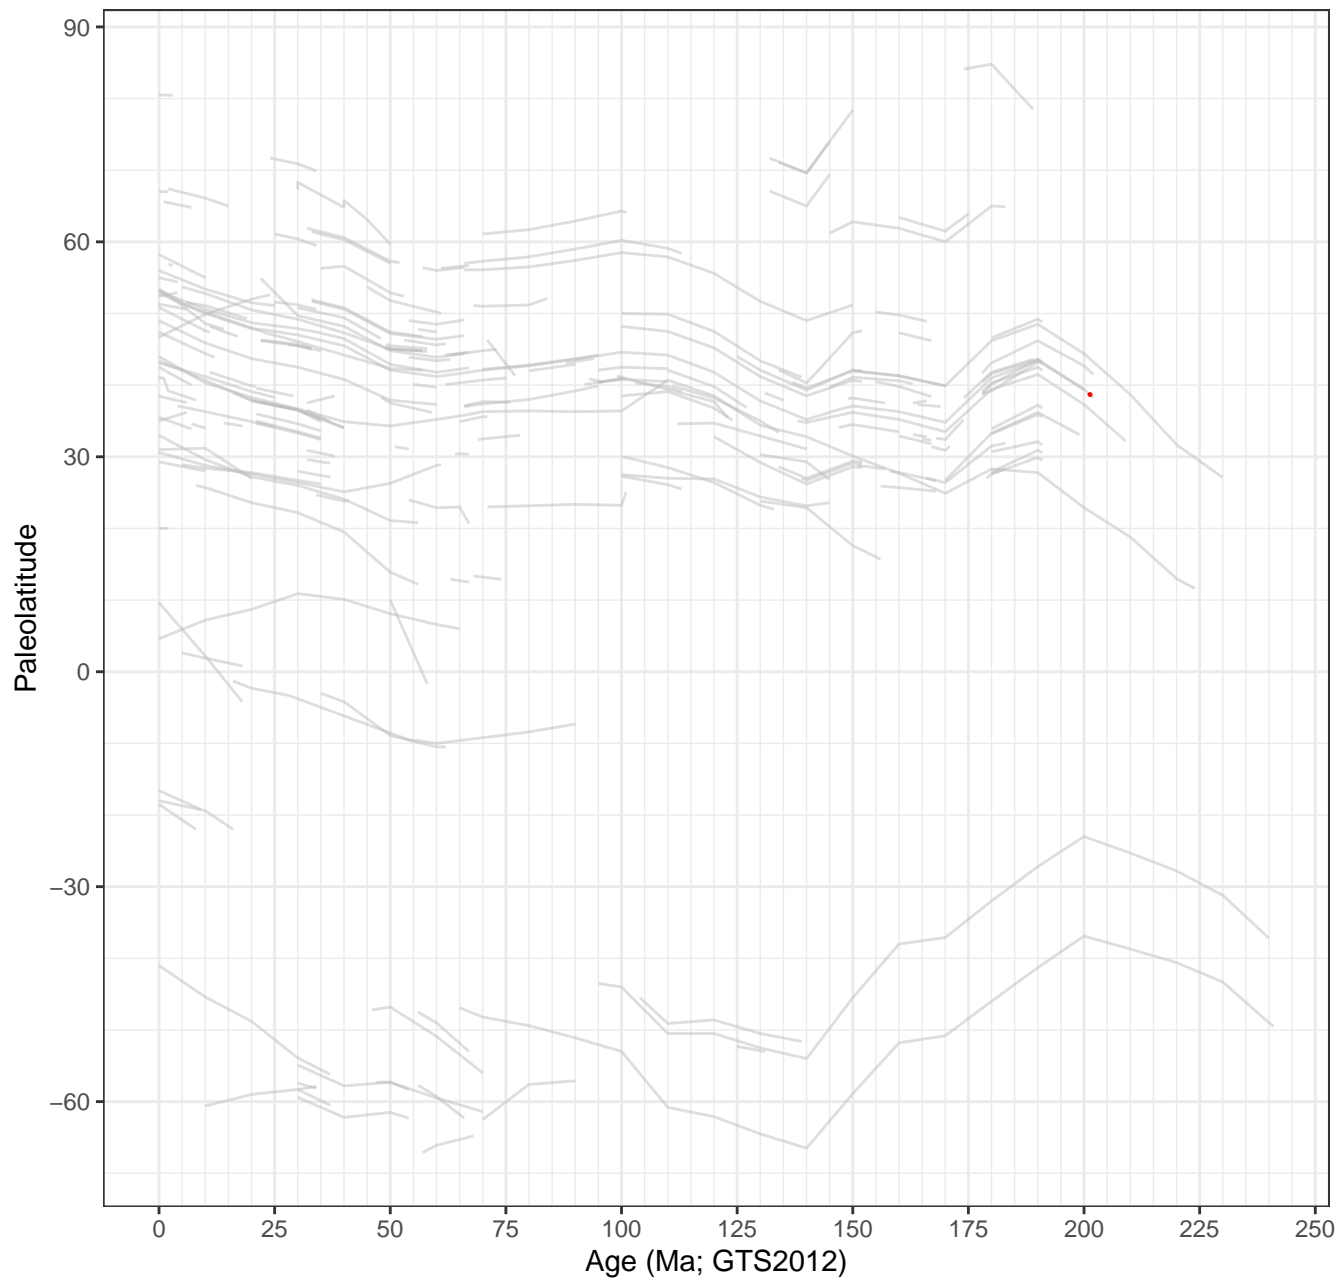

Supplement: Supplementary file 933 [file Beaumontella caminuspina.pdf › Supplement/Supplement 2/Species 1914 plots/Beaumontella caminuspina.pdf]

# Species *Beaumontella langii*

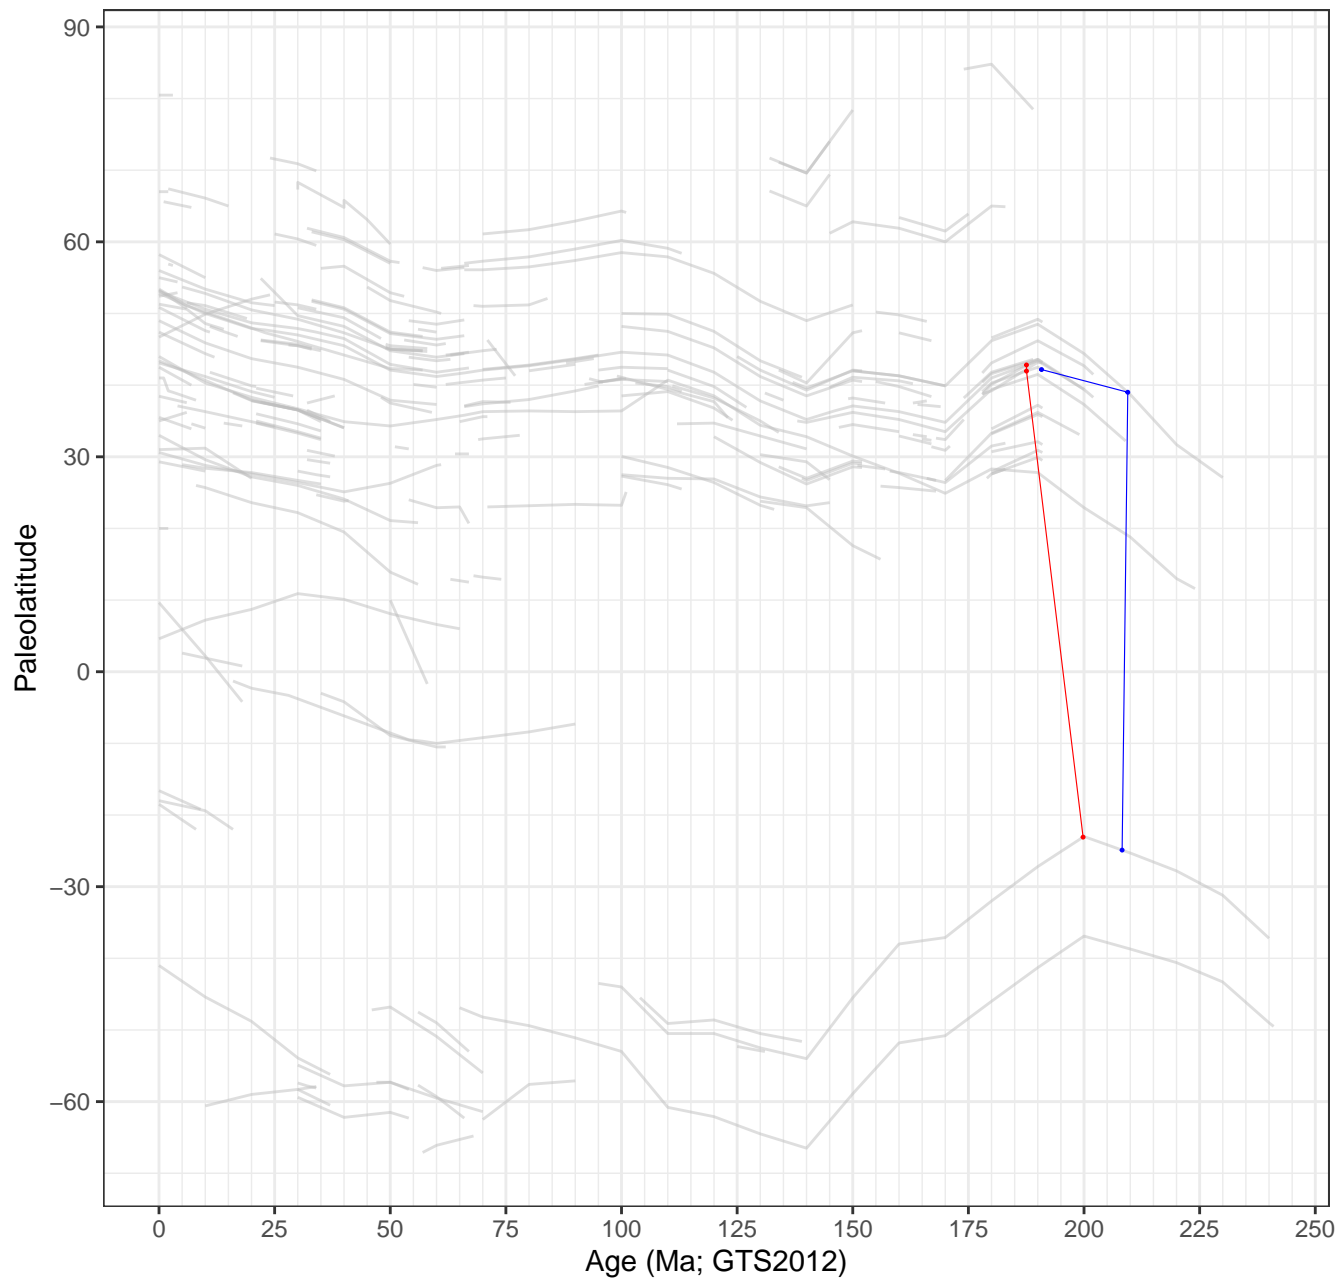

Supplement: Supplementary file 934 [file Beaumontella langii.pdf › Supplement/Supplement 2/Species 1914 plots/Beaumontella langii.pdf]

# Species *Belodinium dysculum*

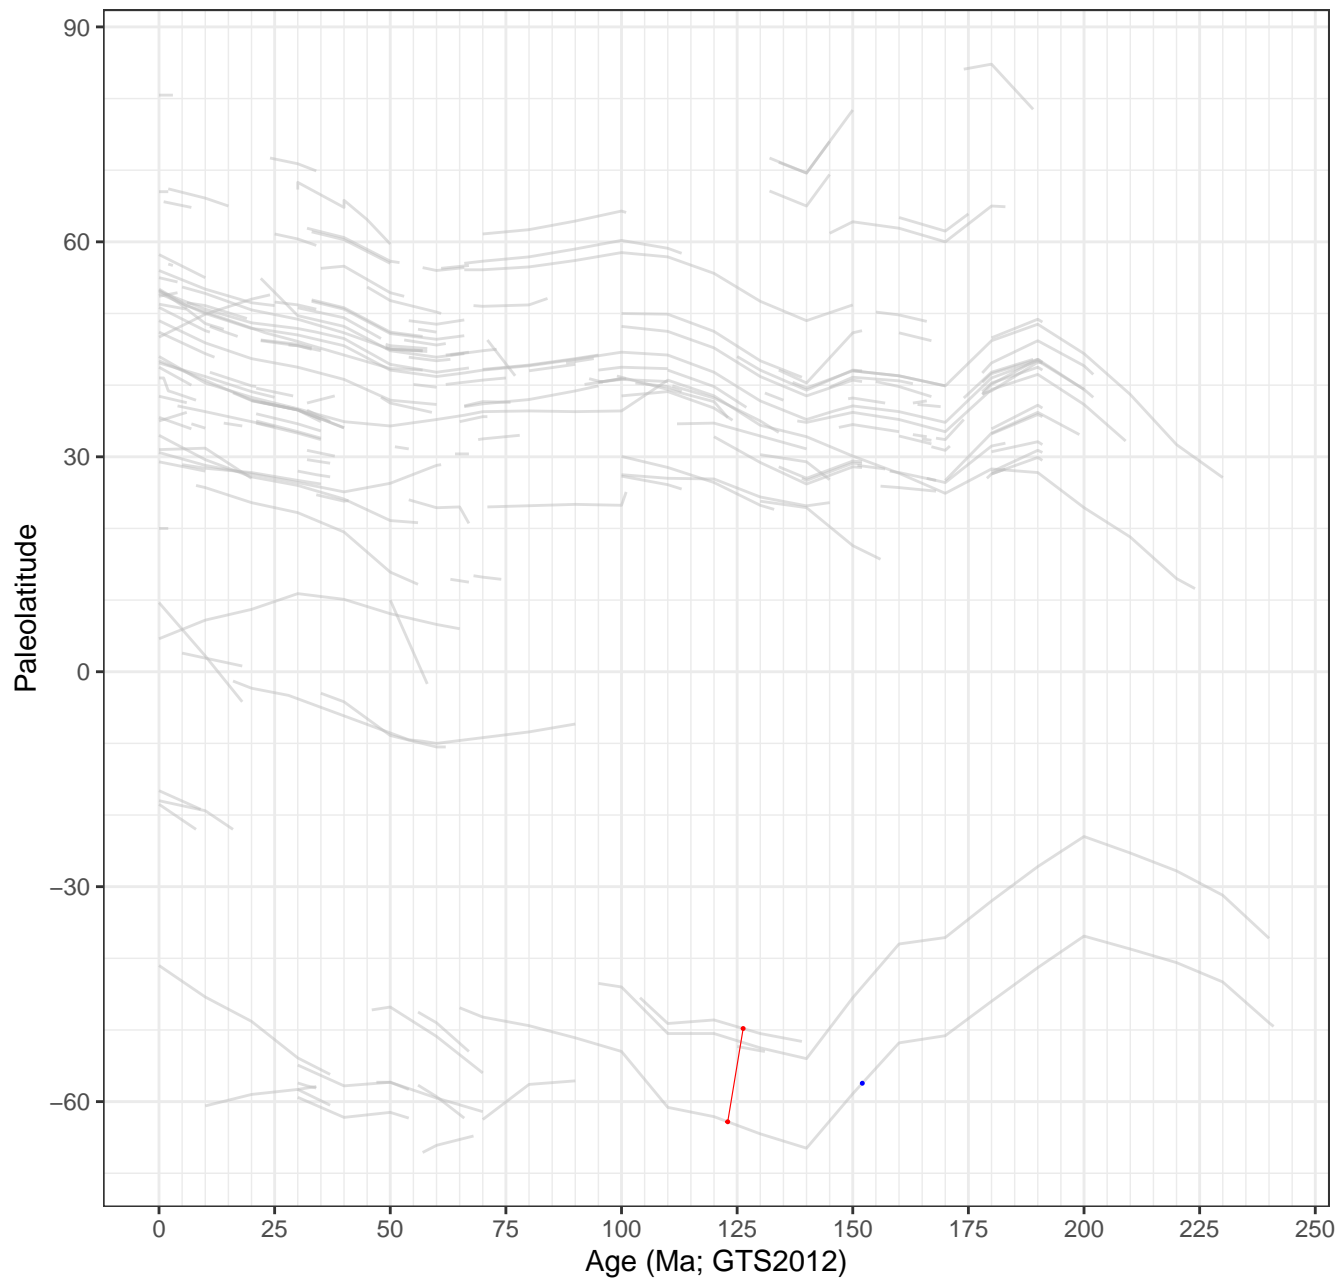

Supplement: Supplementary file 935 [file Belodinium dysculum.pdf › Supplement/Supplement 2/Species 1914 plots/Belodinium dysculum.pdf]

# Species *Belodinium nereidis*

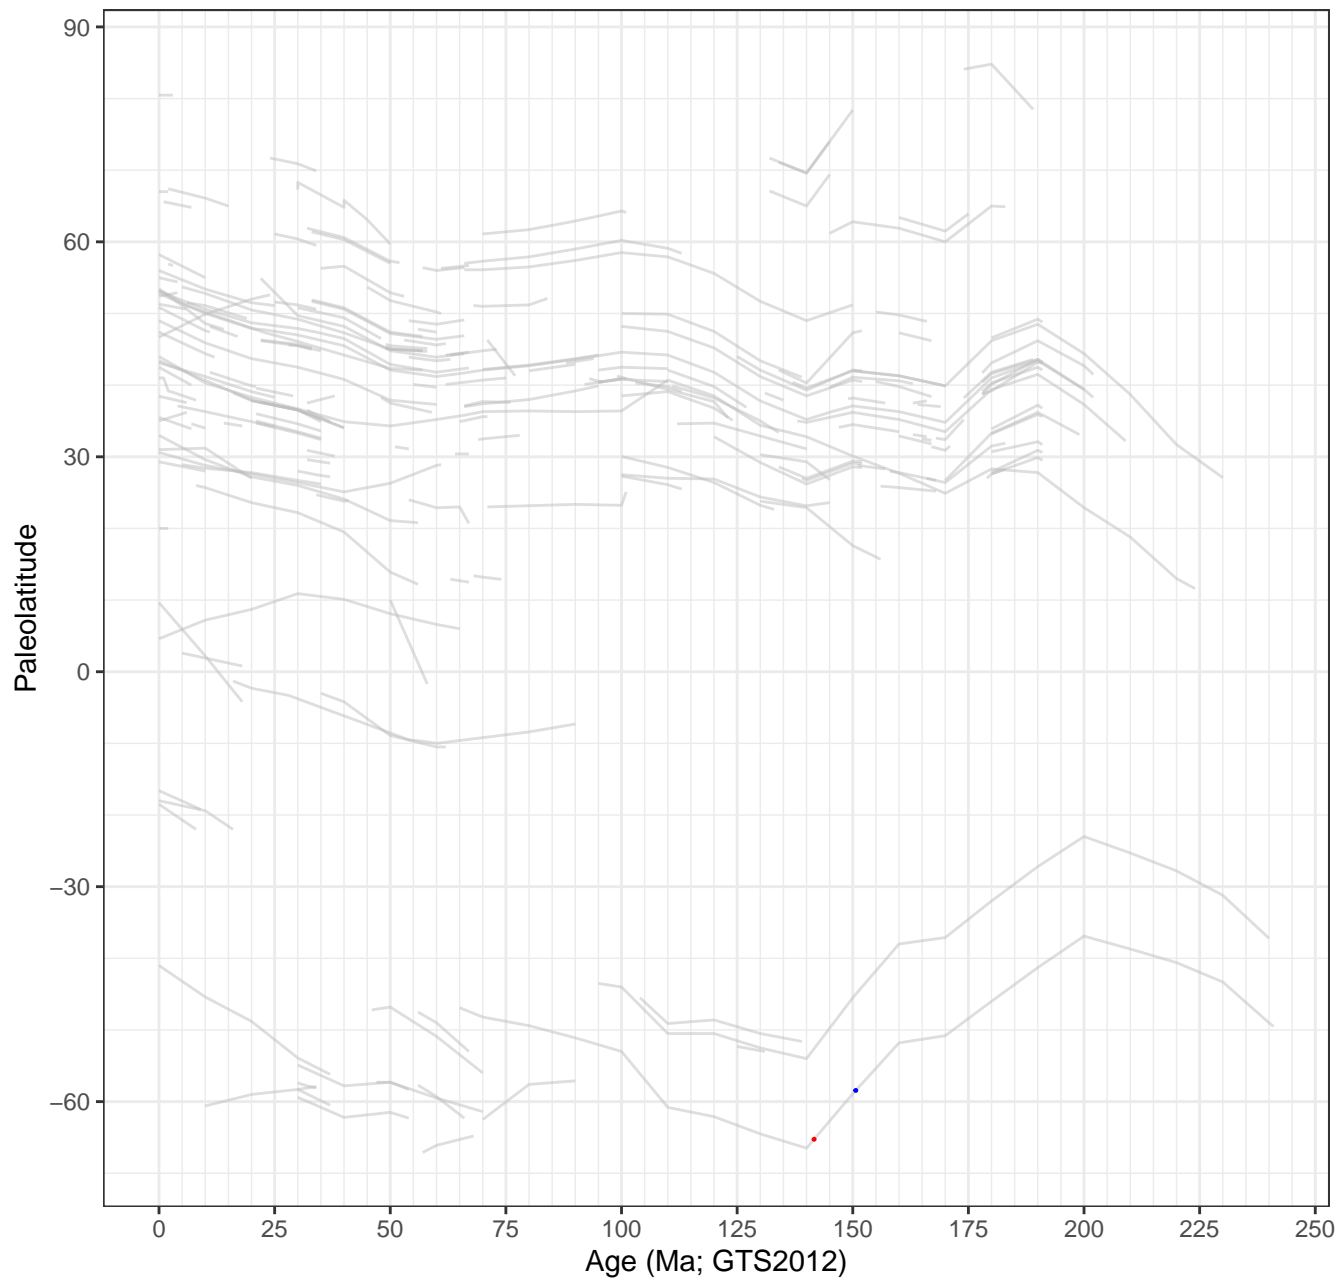

Supplement: Supplementary file 936 [file Belodinium nereidis.pdf › Supplement/Supplement 2/Species 1914 plots/Belodinium nereidis.pdf]

# Species *Belodinium* spp.

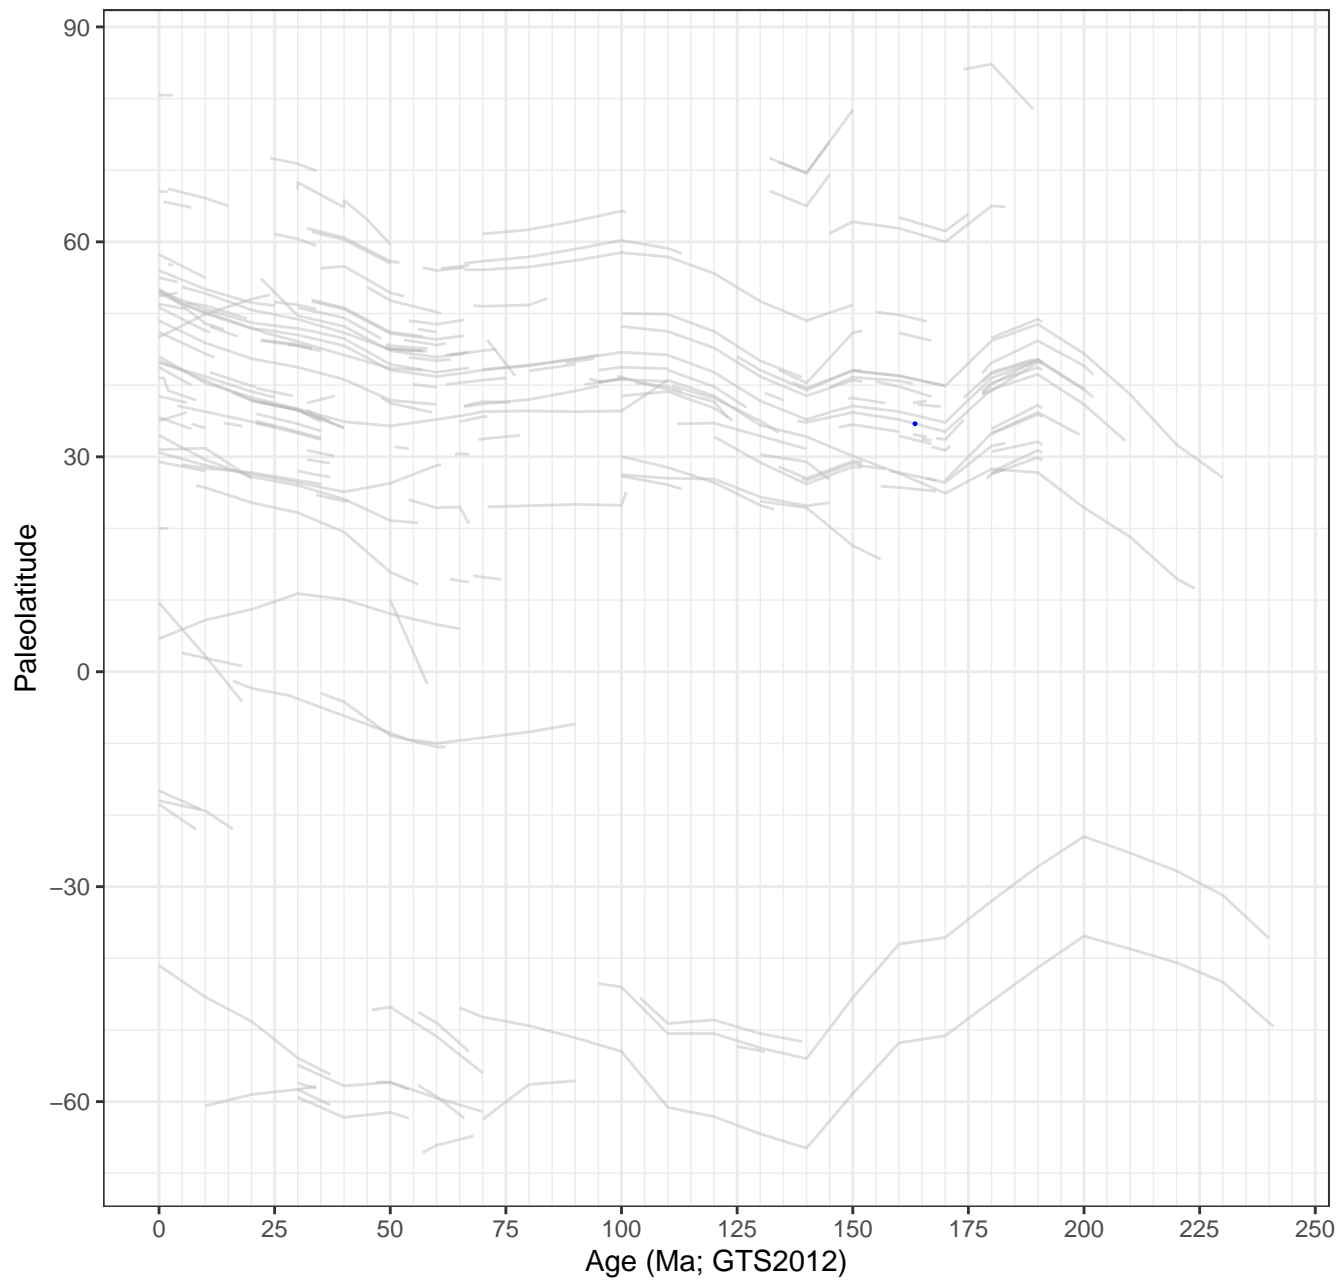

Supplement: Supplementary file 937 [file Belodinium spp..pdf › Supplement/Supplement 2/Species 1914 plots/Belodinium spp..pdf]

# Species *Belowicysta balteus*

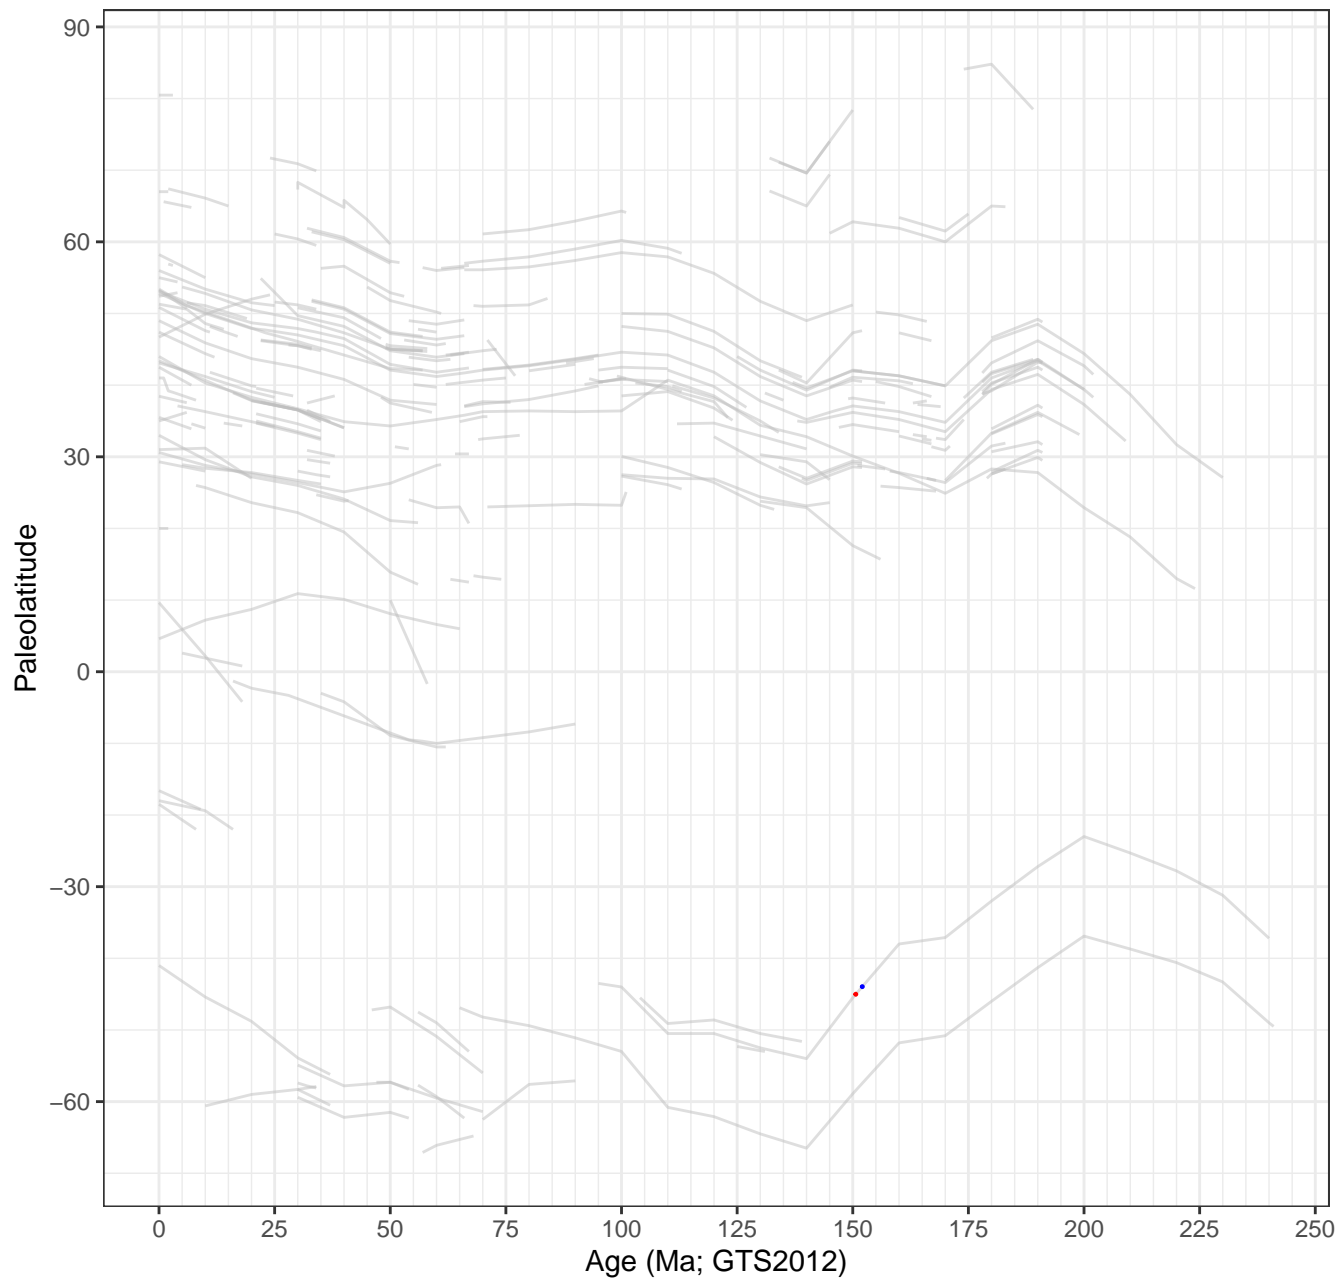

Supplement: Supplementary file 938 [file Belowicysta balteus.pdf › Supplement/Supplement 2/Species 1914 plots/Belowicysta balteus.pdf]

# Species *Biconidinium longissimum*

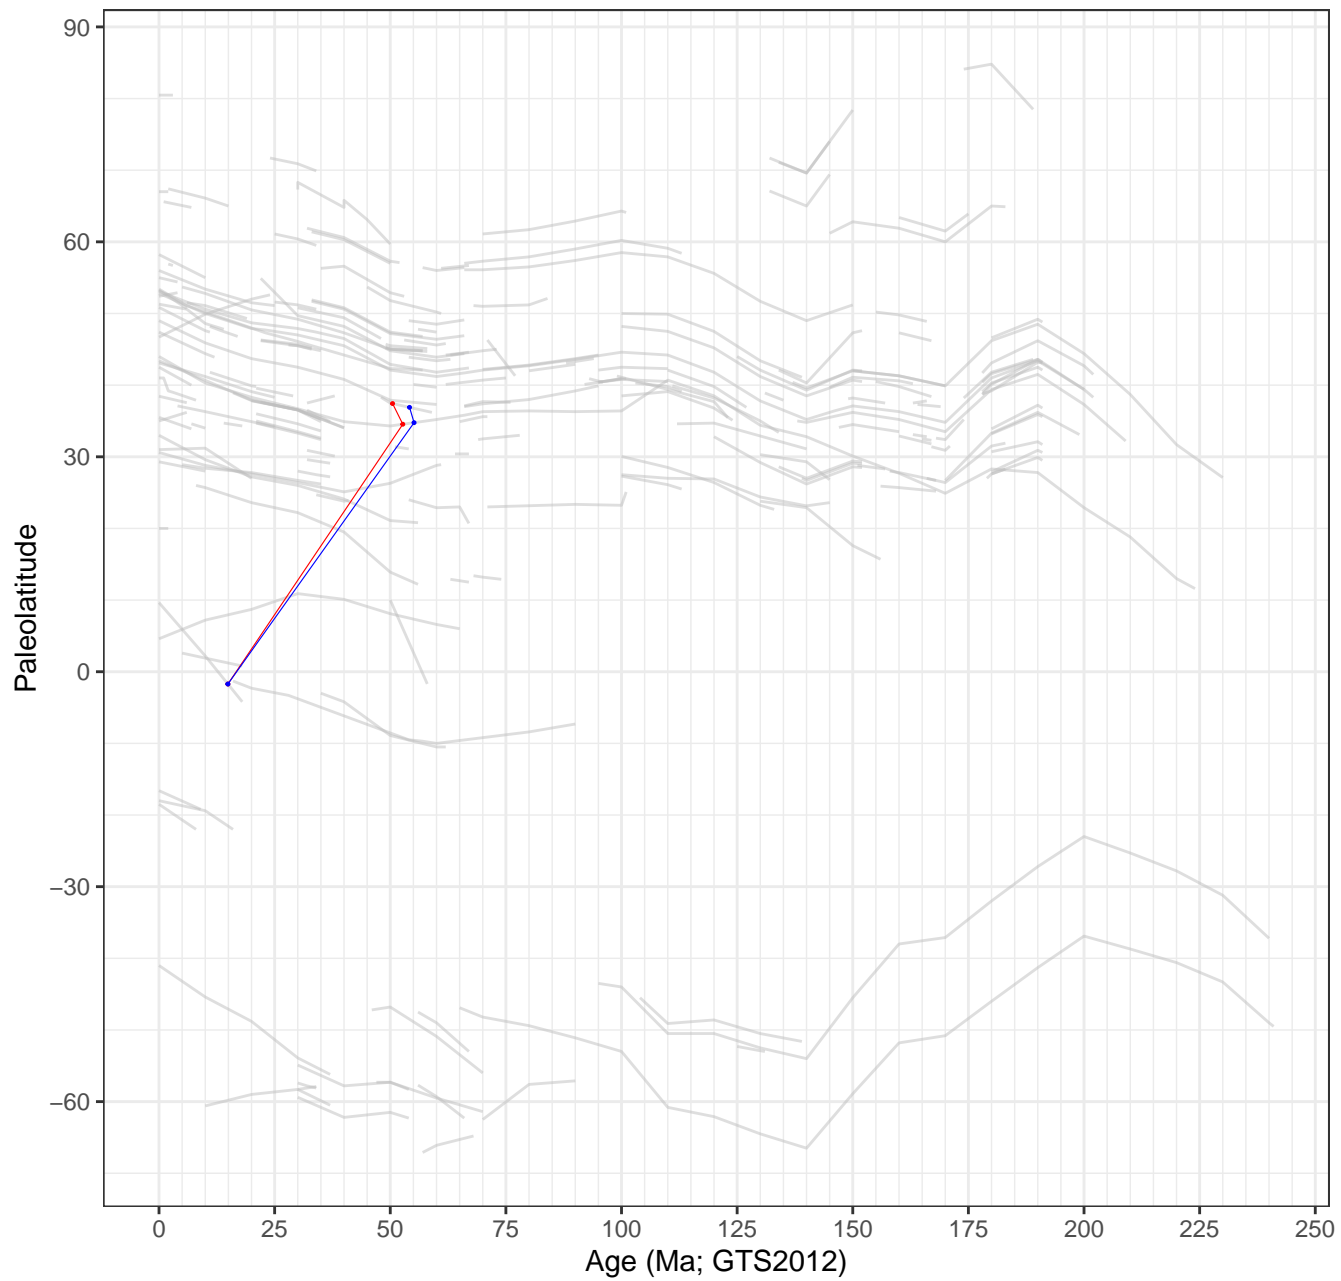

Supplement: Supplementary file 939 [file Biconidinium longissimum.pdf › Supplement/Supplement 2/Species 1914 plots/Biconidinium longissimum.pdf]

# Species *Biecheleria baltica*

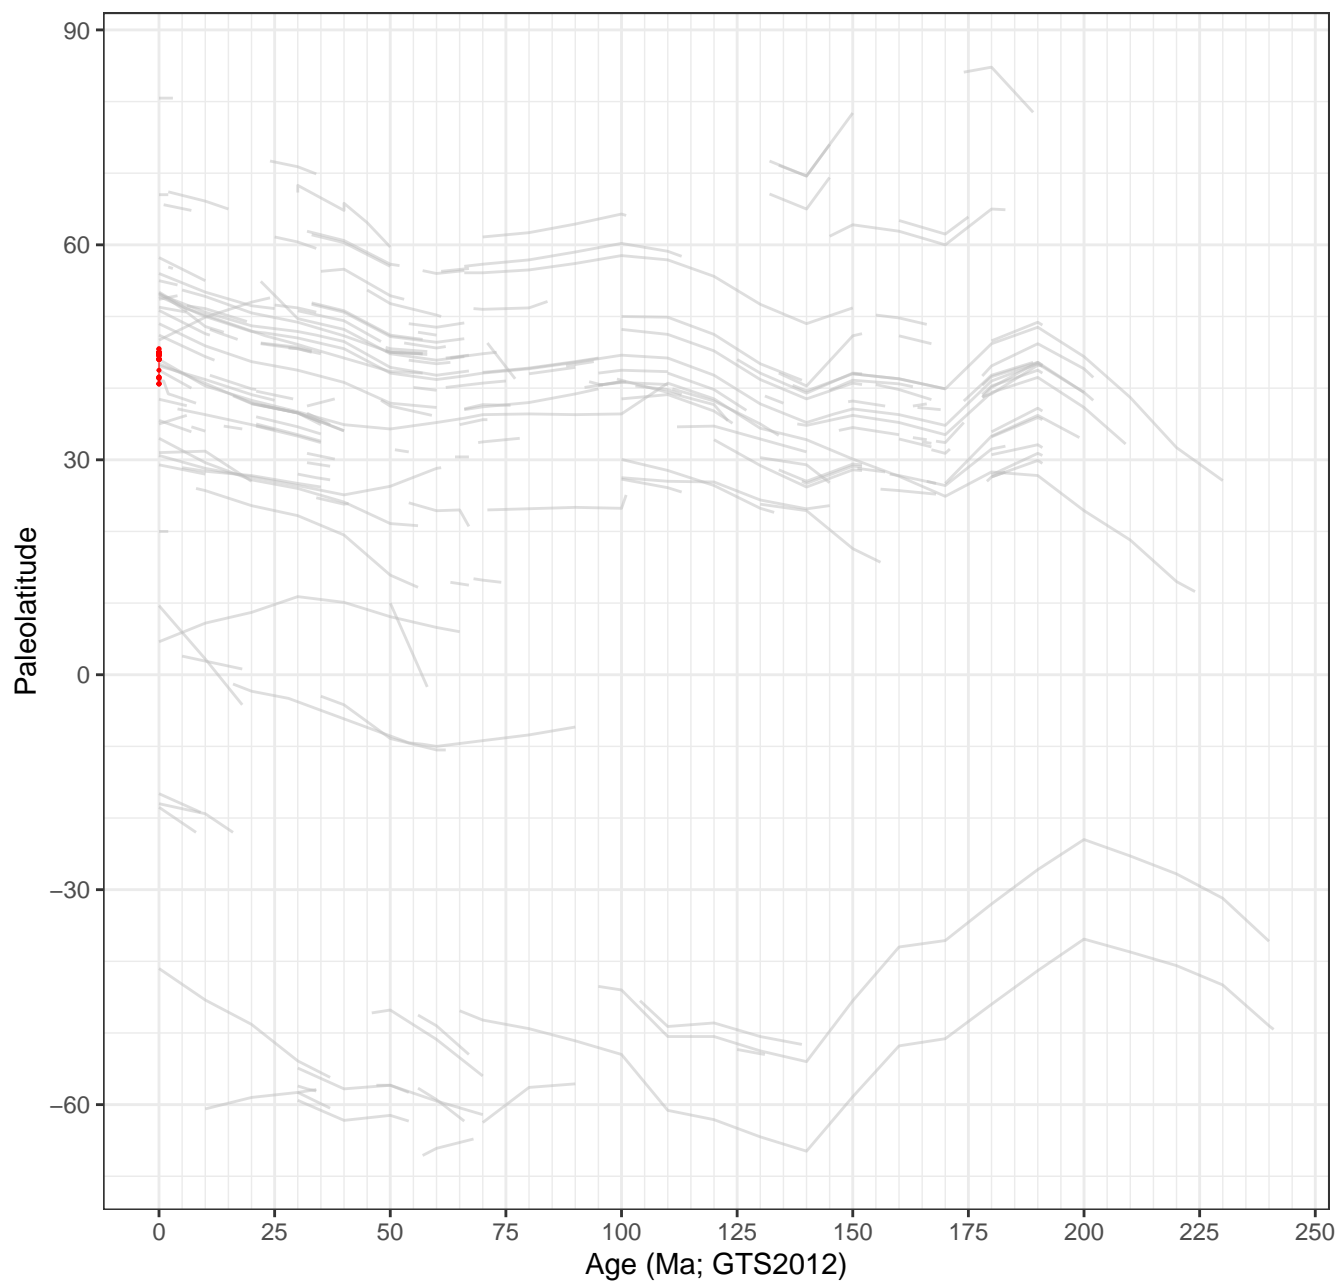

Supplement: Supplementary file 940 [file Biecheleria baltica.pdf › Supplement/Supplement 2/Species 1914 plots/Biecheleria baltica.pdf]

# Species *Biorbifera ferox*

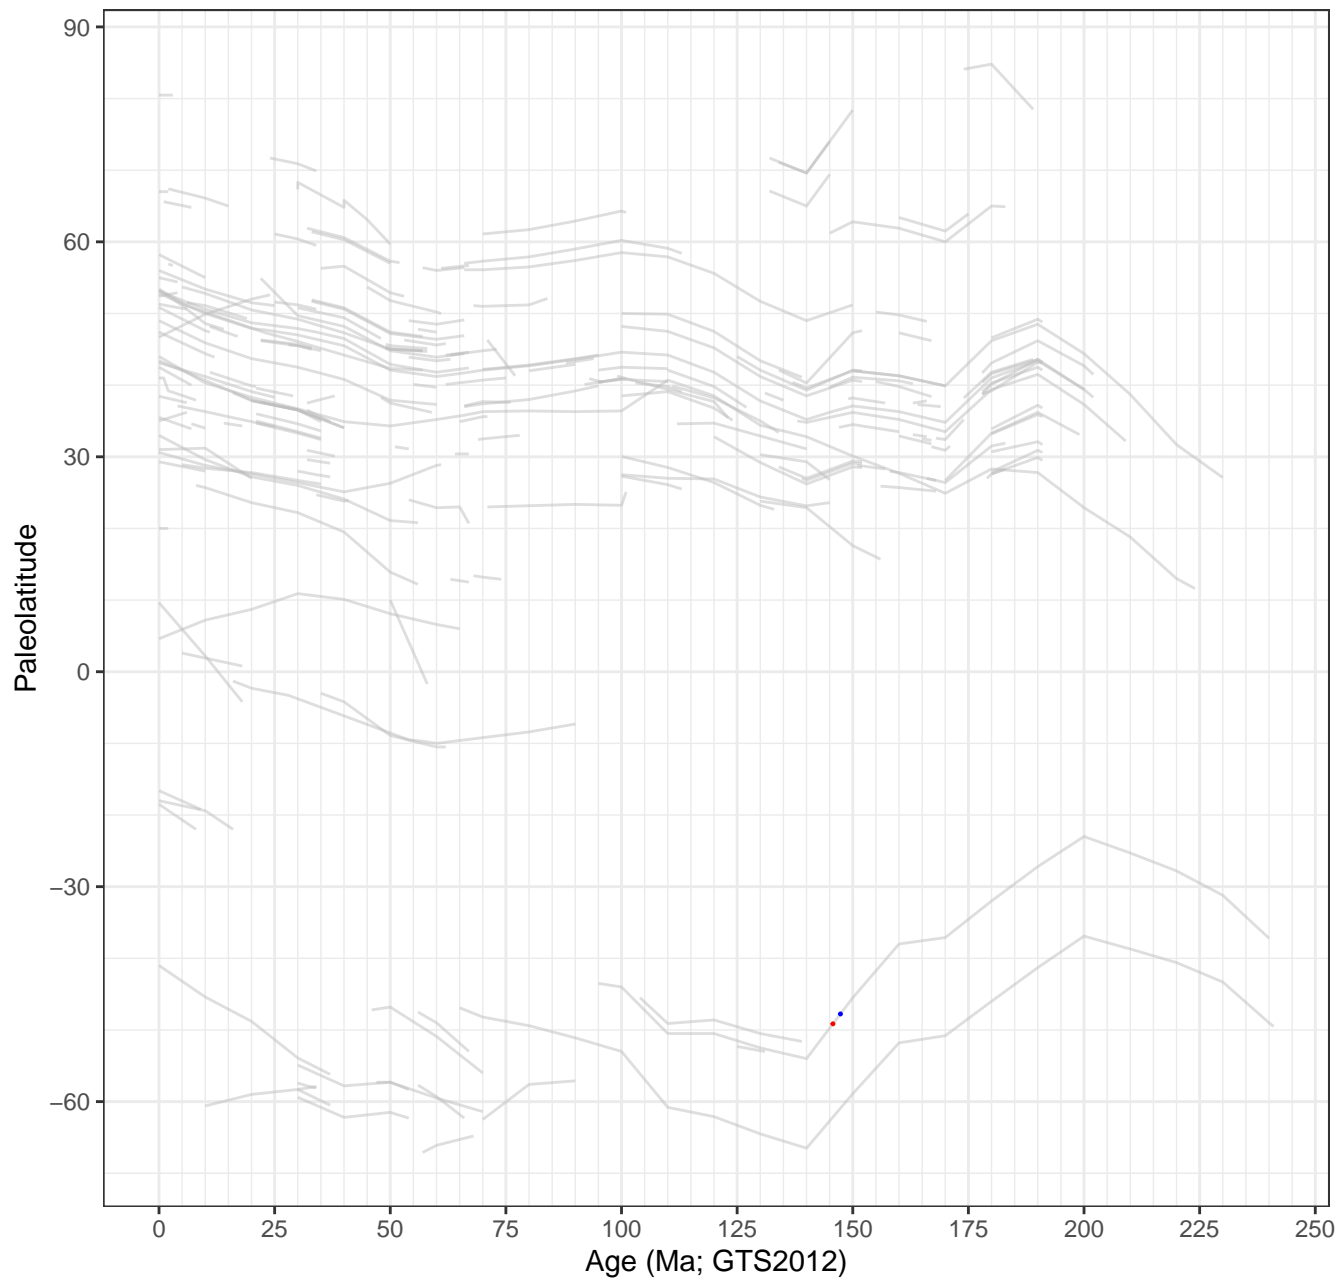

Supplement: Supplementary file 941 [file Biorbifera ferox.pdf › Supplement/Supplement 2/Species 1914 plots/Biorbifera ferox.pdf]

# Species *Biorbifera johnwingii*

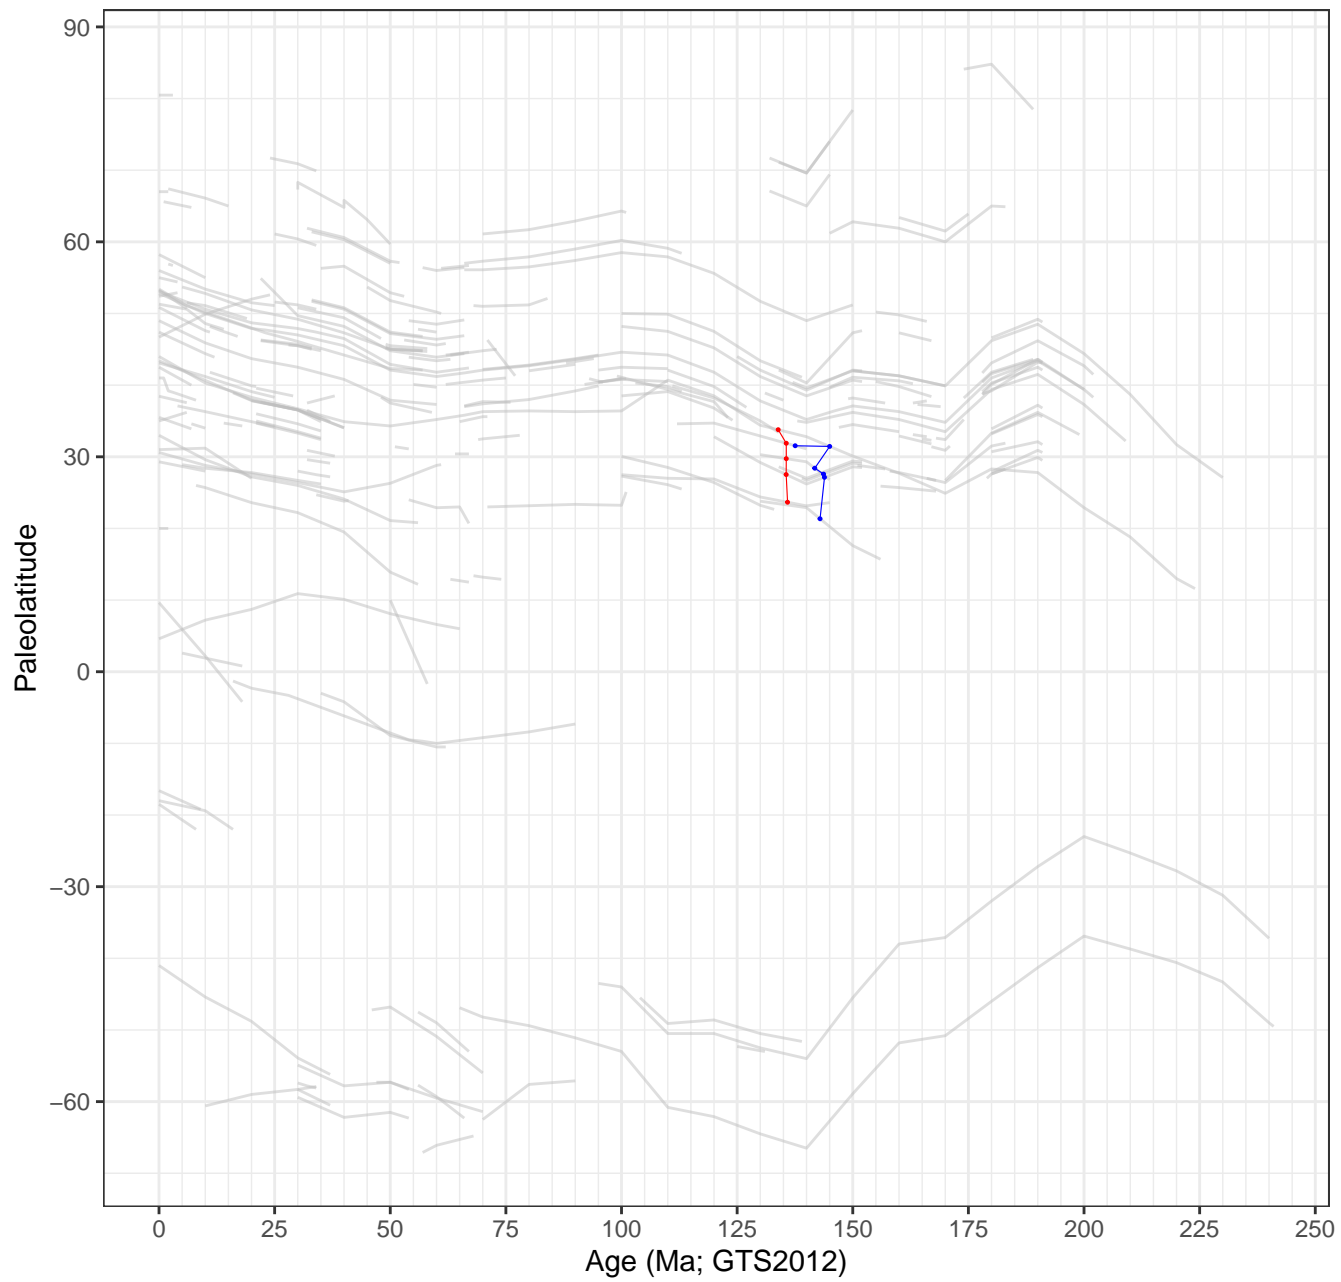

Supplement: Supplementary file 942 [file Biorbifera johnwingii.pdf › Supplement/Supplement 2/Species 1914 plots/Biorbifera johnwingii.pdf]

# Species *Bitectatodinium readwaldii*

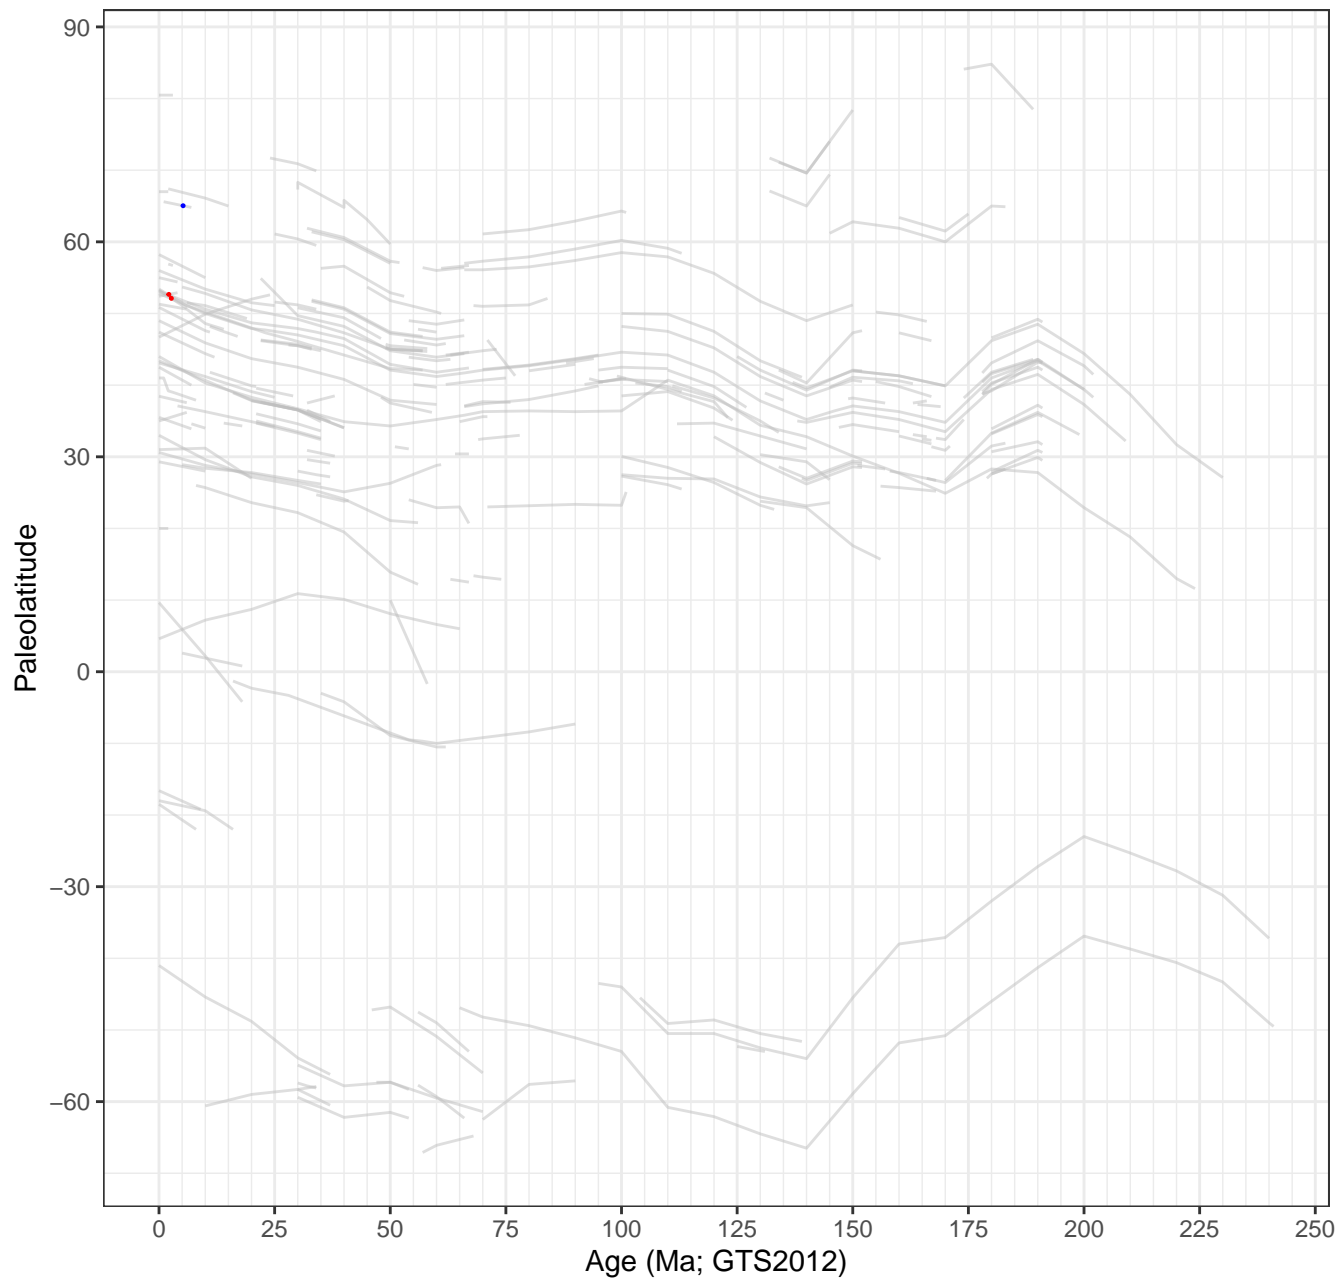

Supplement: Supplementary file 943 [file Bitectatodinium readwaldii.pdf › Supplement/Supplement 2/Species 1914 plots/Bitectatodinium readwaldii.pdf]

# Species *Bitectatodinium serratum*

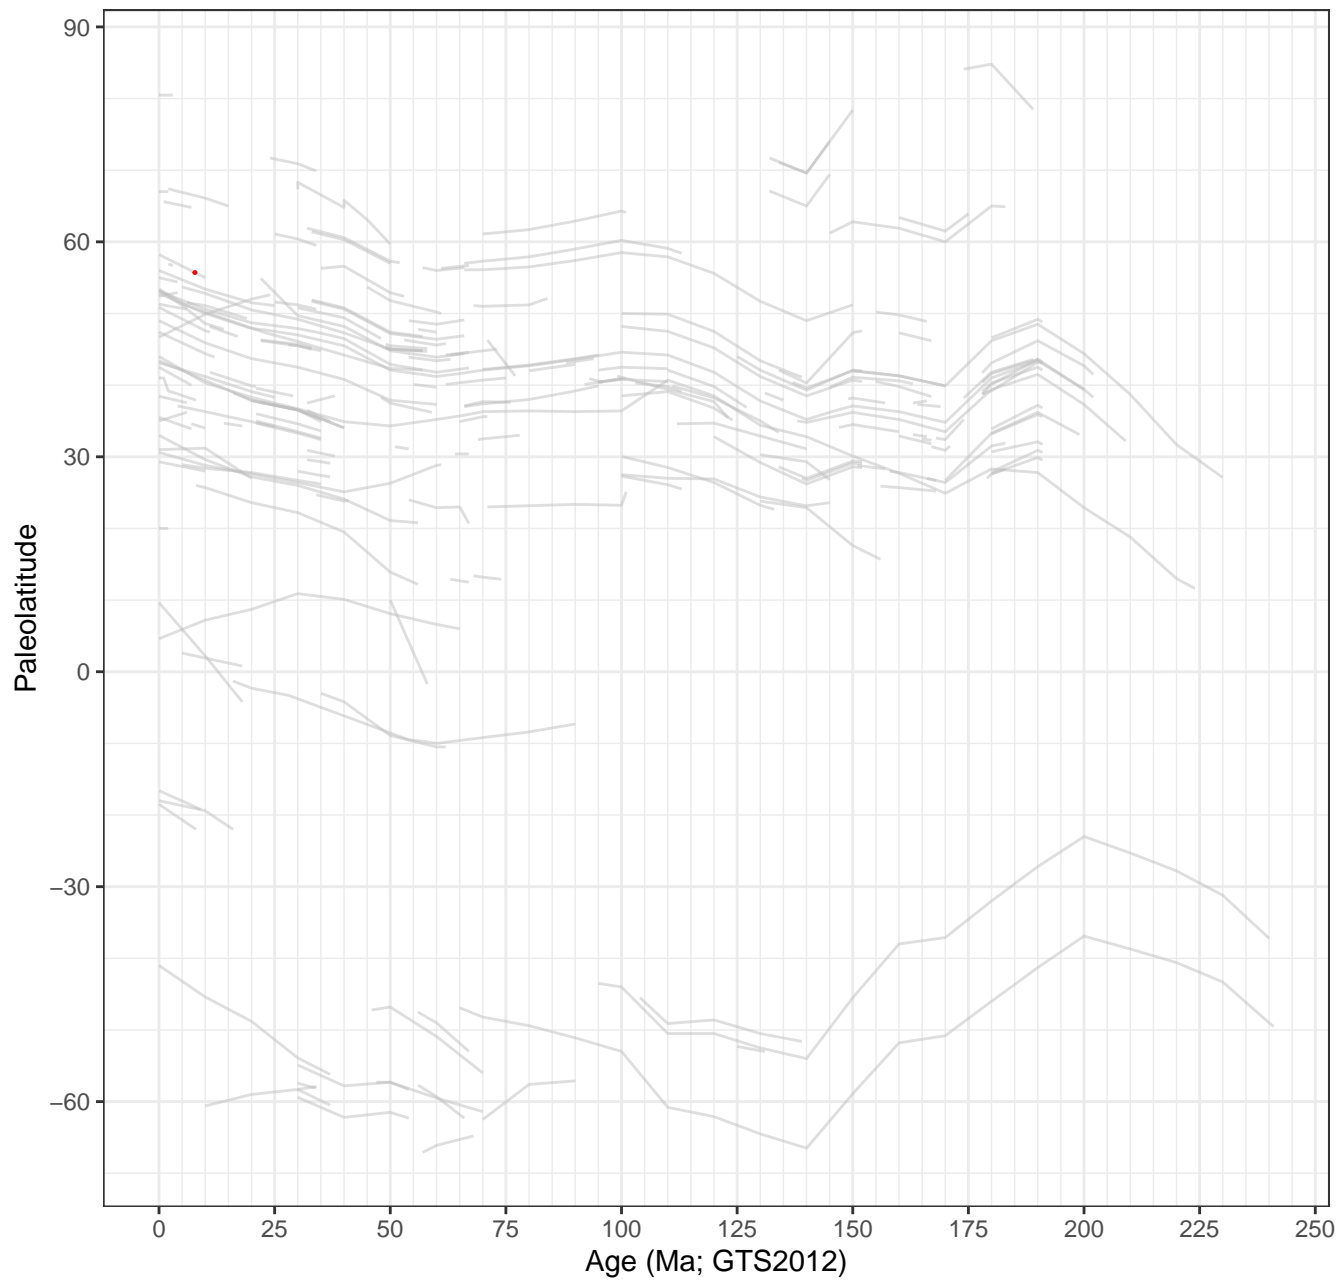

Supplement: Supplementary file 944 [file Bitectatodinium serratum.pdf › Supplement/Supplement 2/Species 1914 plots/Bitectatodinium serratum.pdf]

# Species *Bitectatodinium spongium*

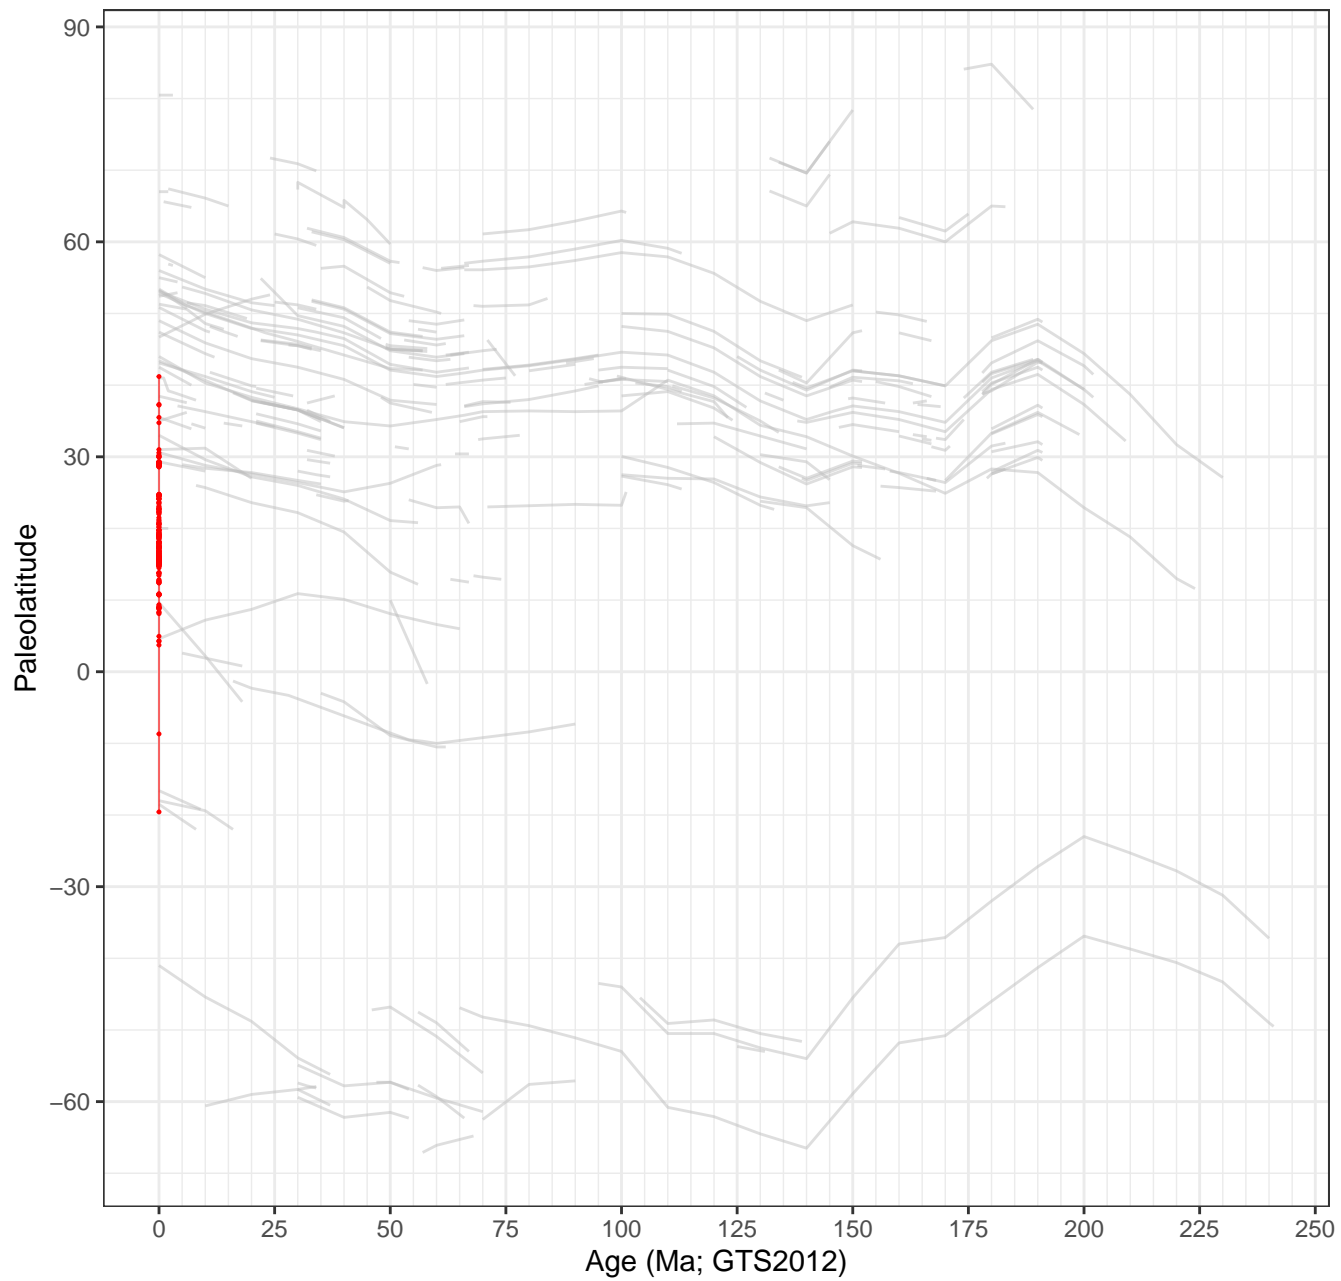

Supplement: Supplementary file 945 [file Bitectatodinium spongium.pdf › Supplement/Supplement 2/Species 1914 plots/Bitectatodinium spongium.pdf]

# Species *Bitectatodinium tepikiense*

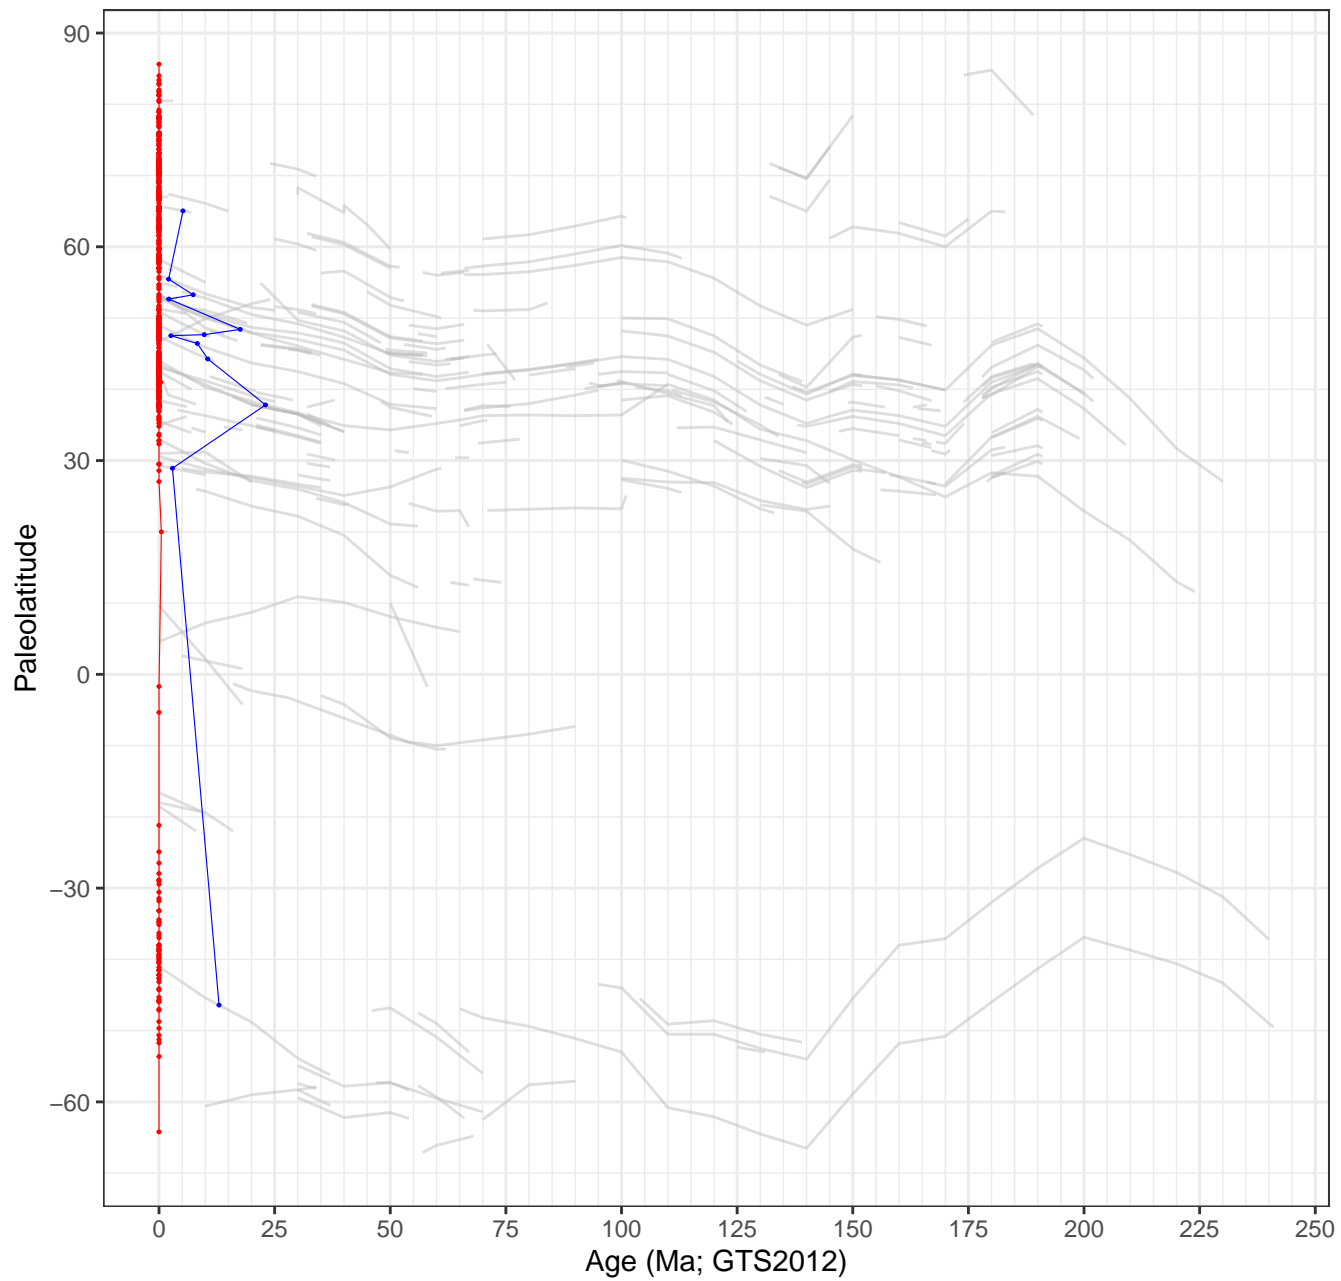

Supplement: Supplementary file 946 [file Bitectatodinium tepikiense.pdf › Supplement/Supplement 2/Species 1914 plots/Bitectatodinium tepikiense.pdf]

# Species *Blysmatodinium argoi*

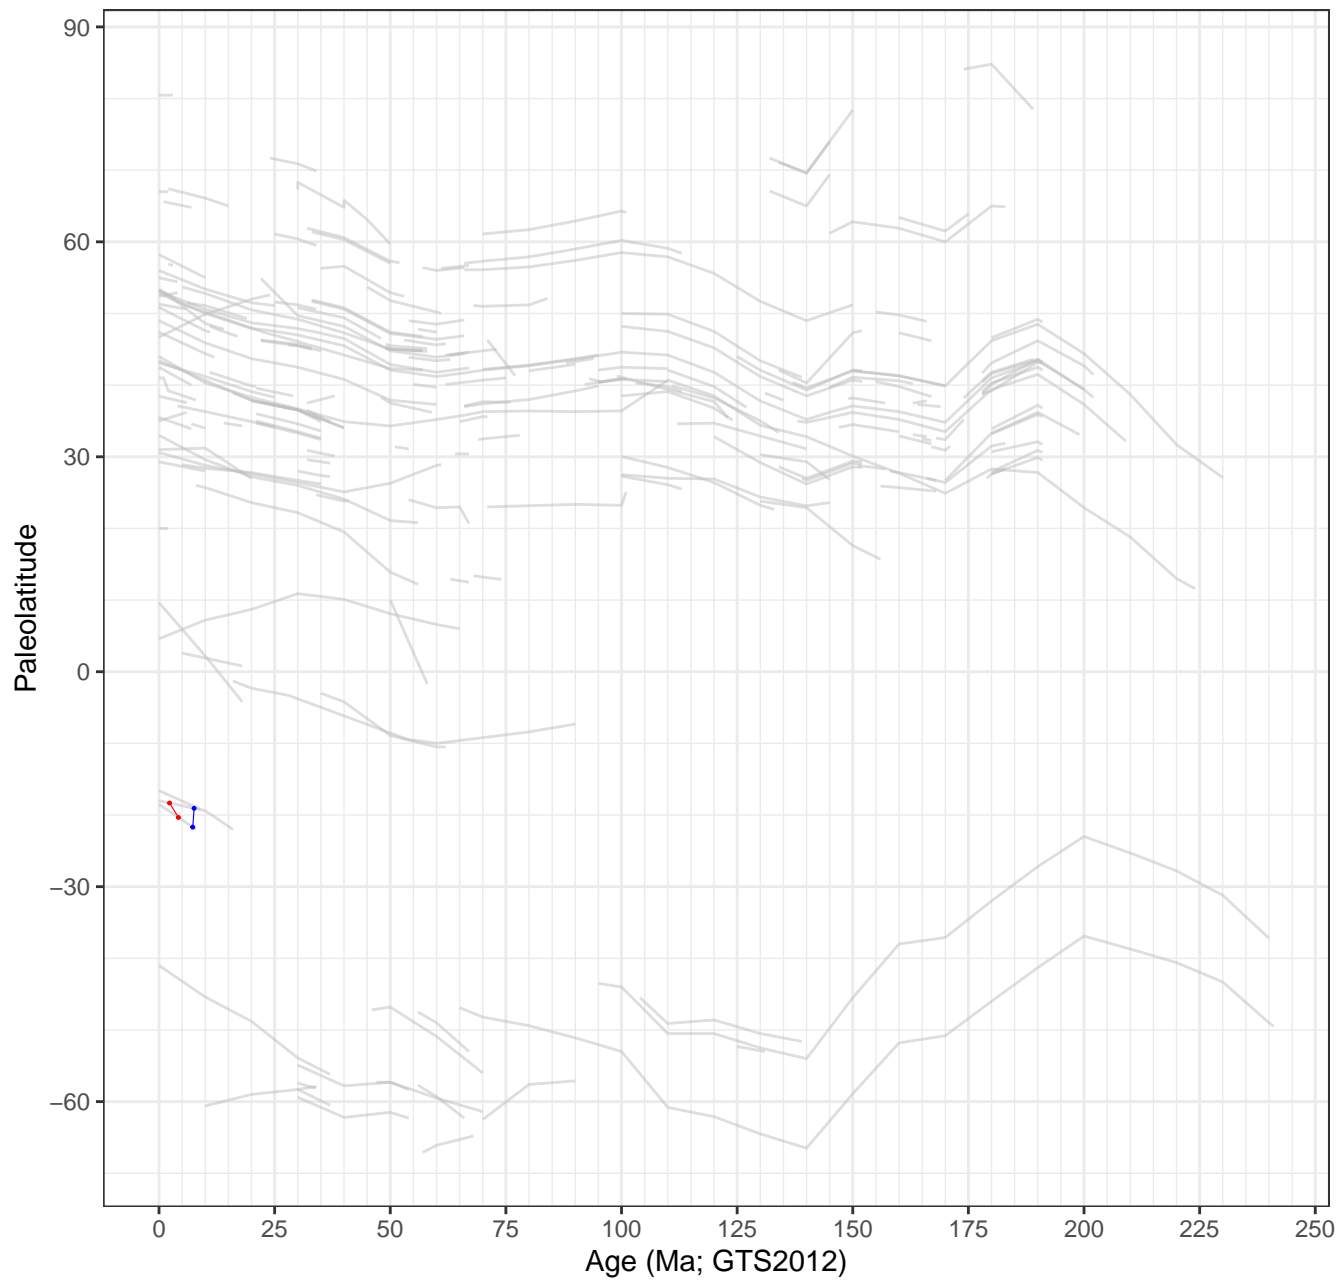

Supplement: Supplementary file 947 [file Blysmatodinium argoi.pdf › Supplement/Supplement 2/Species 1914 plots/Blysmatodinium argoi.pdf]

# Species *Boreocysta isfordica*

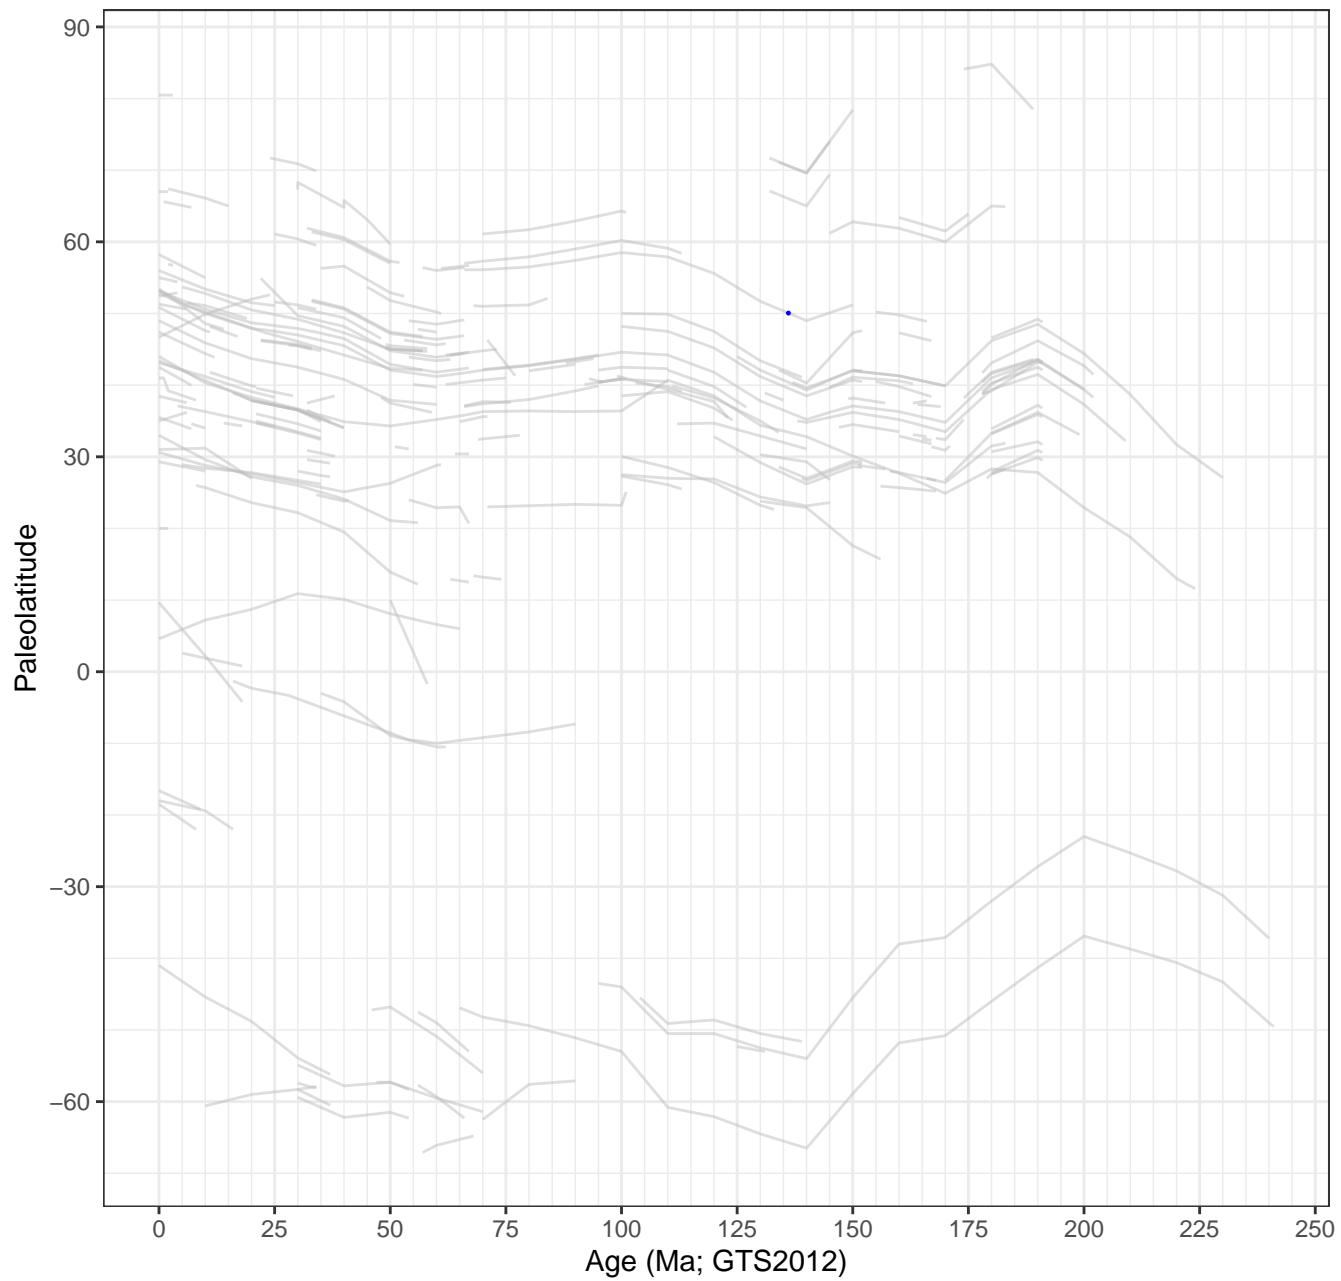

Supplement: Supplementary file 948 [file Boreocysta isfordica.pdf › Supplement/Supplement 2/Species 1914 plots/Boreocysta isfordica.pdf]

# Species *Bourkidinium granulatum*

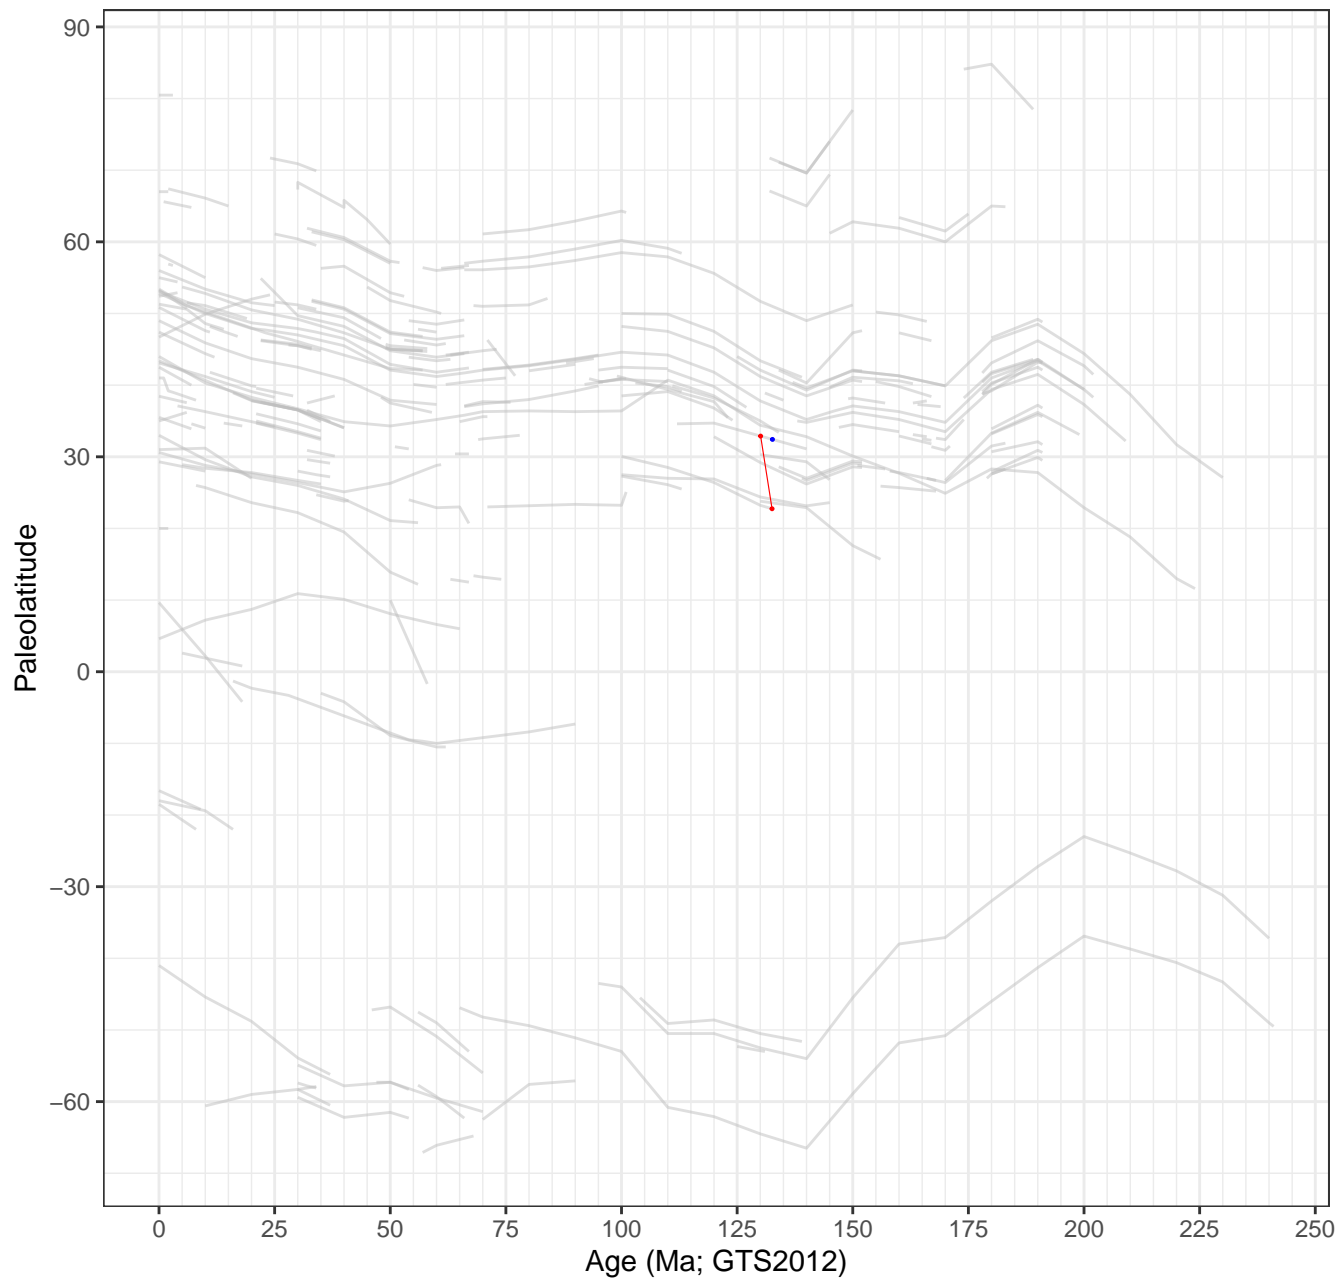

Supplement: Supplementary file 949 [file Bourkidinium granulatum.pdf › Supplement/Supplement 2/Species 1914 plots/Bourkidinium granulatum.pdf]

# Species *Bradleyella adela*

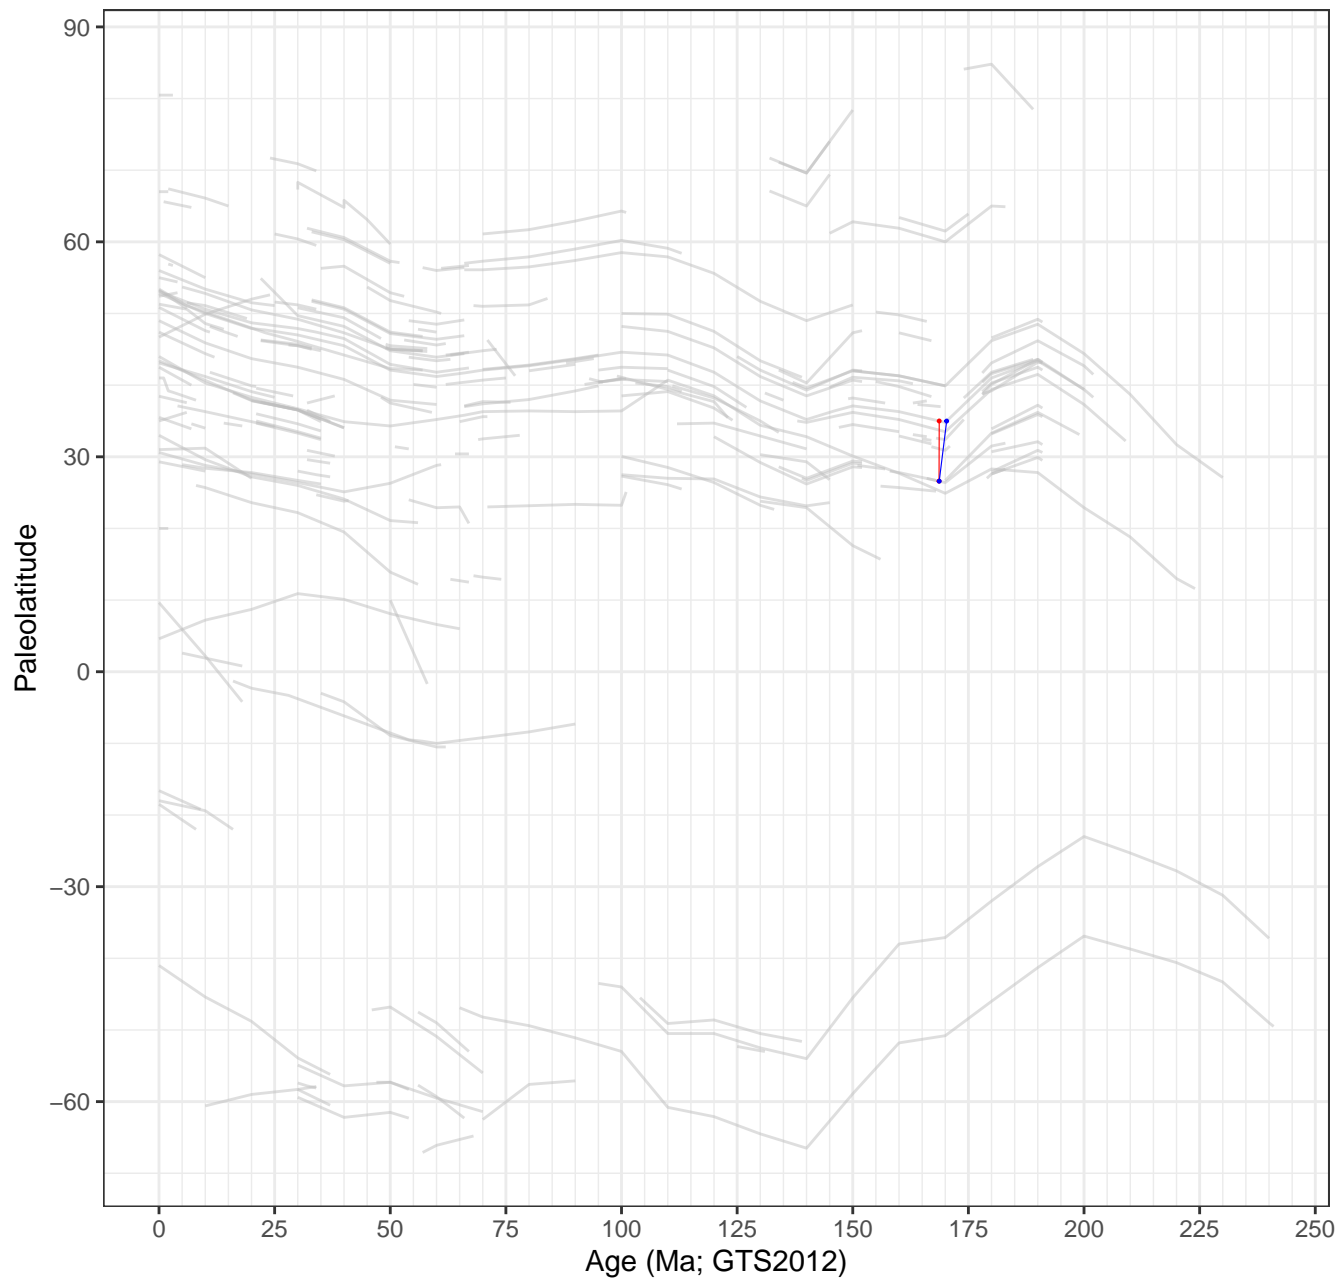

Supplement: Supplementary file 950 [file Bradleyella adela.pdf › Supplement/Supplement 2/Species 1914 plots/Bradleyella adela.pdf]

# Species *Brigantedinium auranteum*

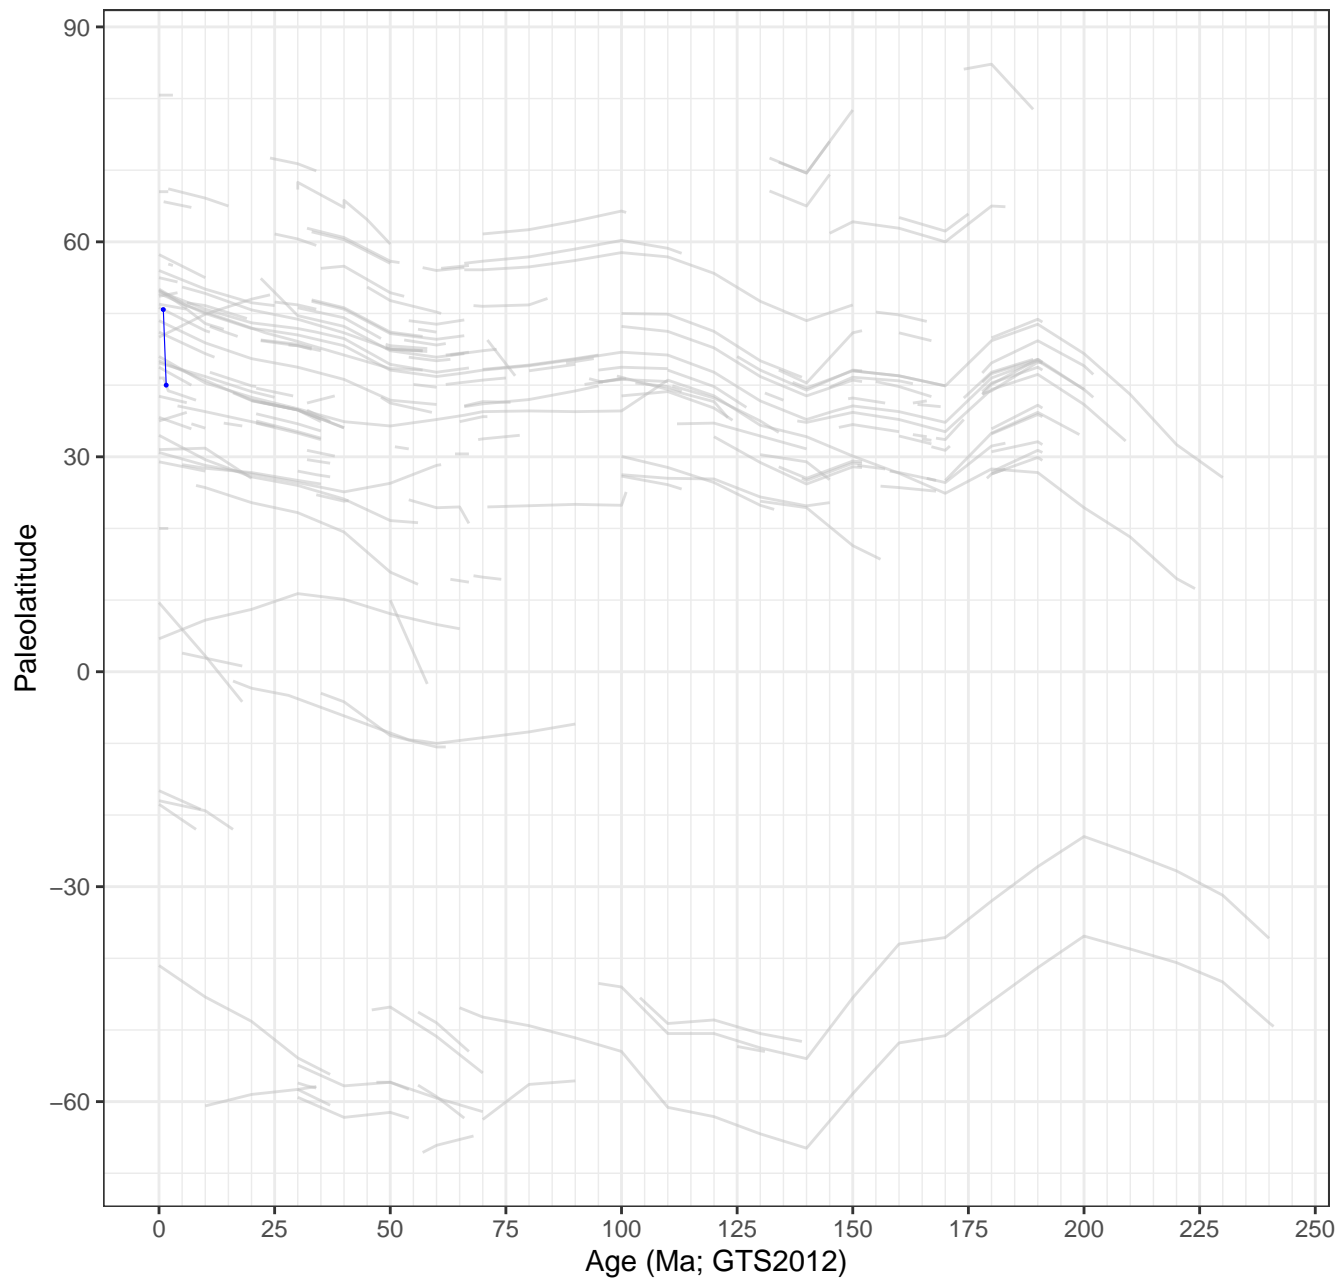

Supplement: Supplementary file 951 [file Brigantedinium auranteum.pdf › Supplement/Supplement 2/Species 1914 plots/Brigantedinium auranteum.pdf]

# Species *Brigantedinium cariacense*

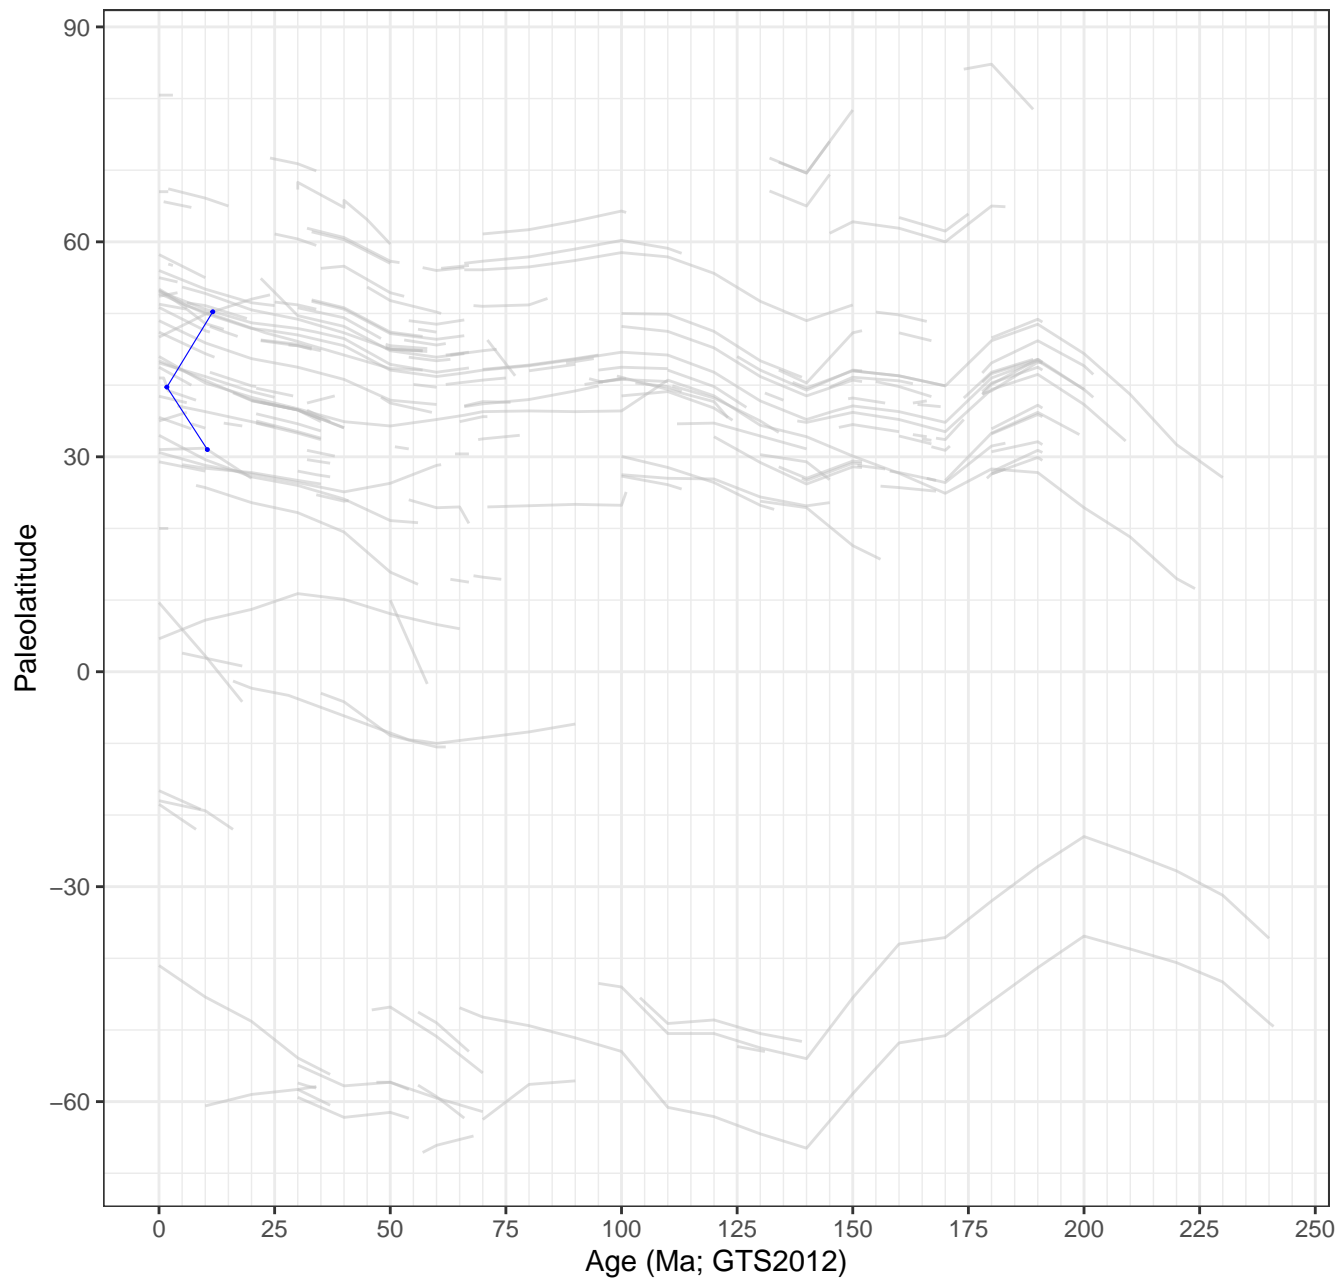

Supplement: Supplementary file 952 [file Brigantedinium cariacoense.pdf › Supplement/Supplement 2/Species 1914 plots/Brigantedinium cariacoense.pdf]

# Species *Brigantedinium majusculum*

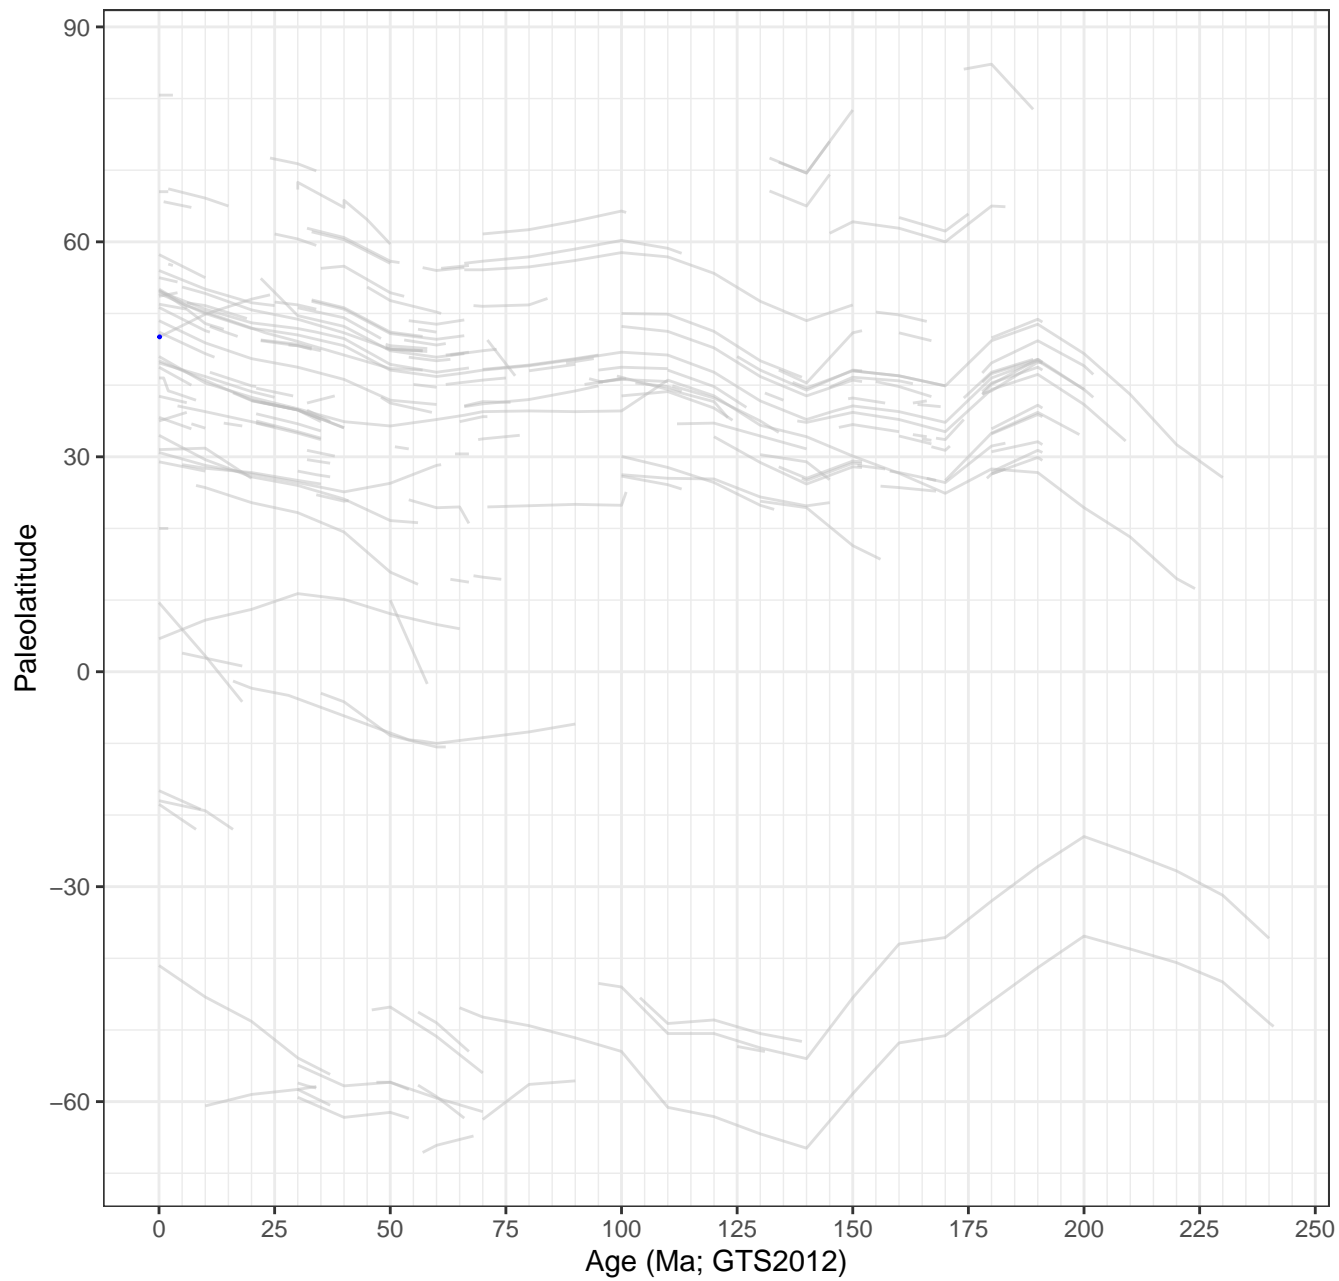

Supplement: Supplementary file 953 [file Brigantedinium majusculum.pdf › Supplement/Supplement 2/Species 1914 plots/Brigantedinium majusculum.pdf]

# Species *Brigantedinium pynei*

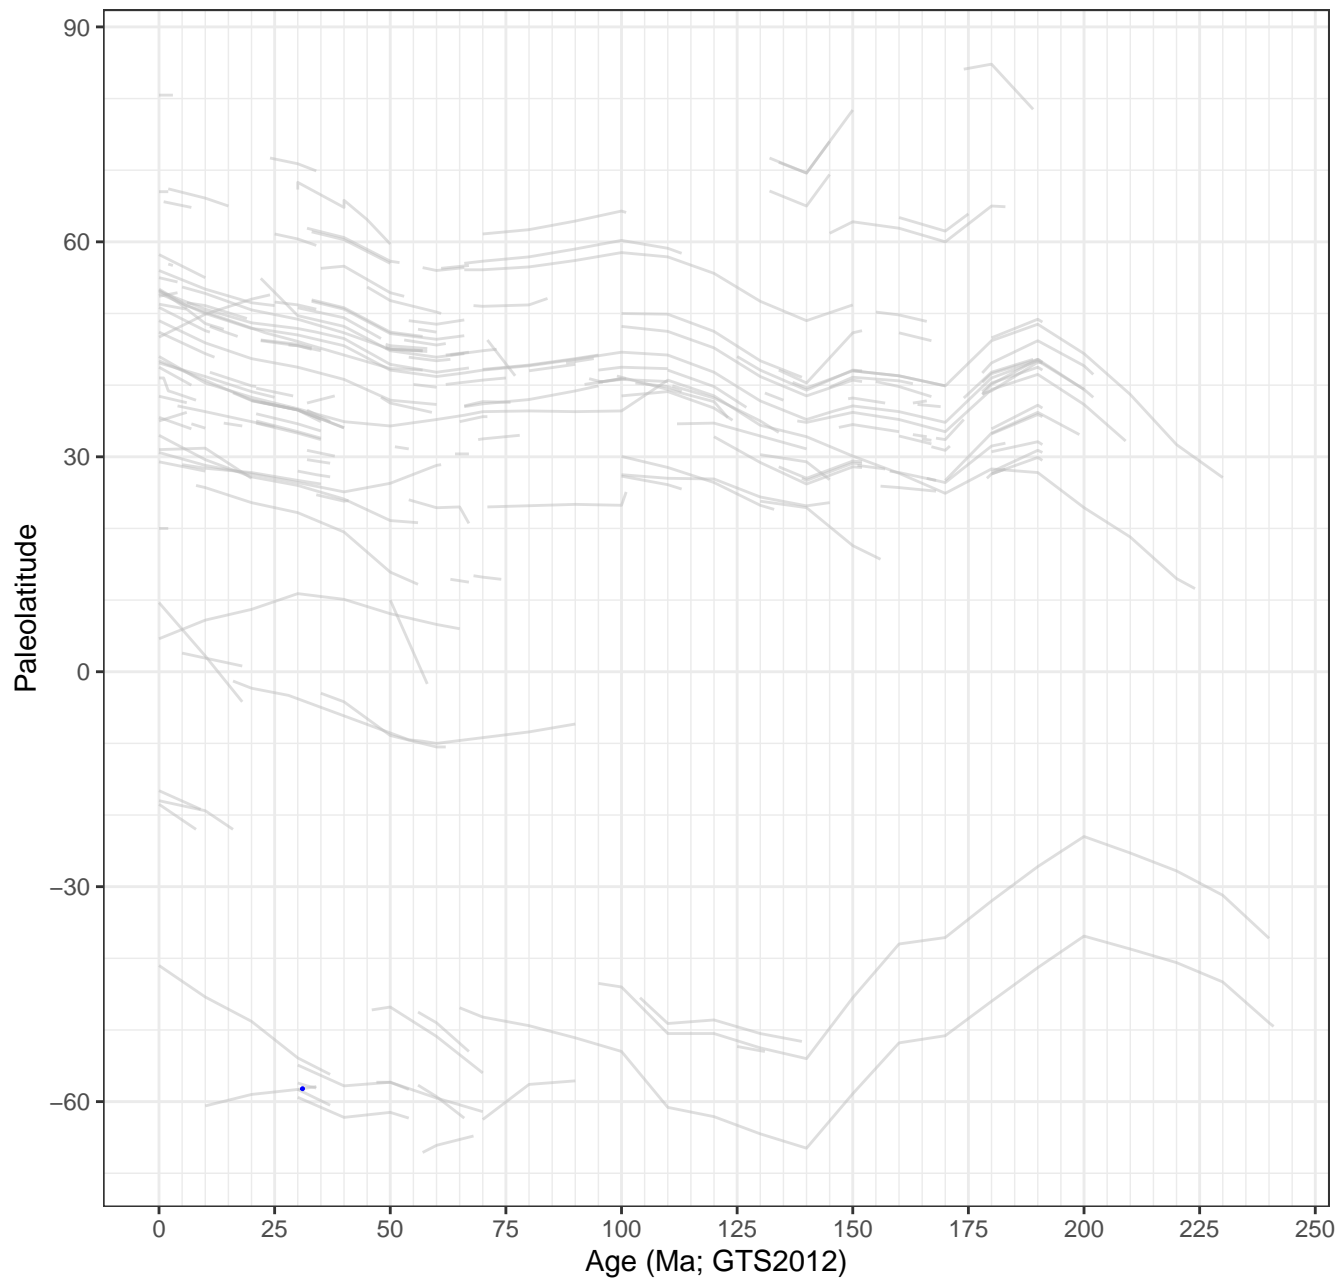

Supplement: Supplementary file 954 [file Brigantedinium pynei.pdf › Supplement/Supplement 2/Species 1914 plots/Brigantedinium pynei.pdf]

# Species *Brigantedinium simplex*

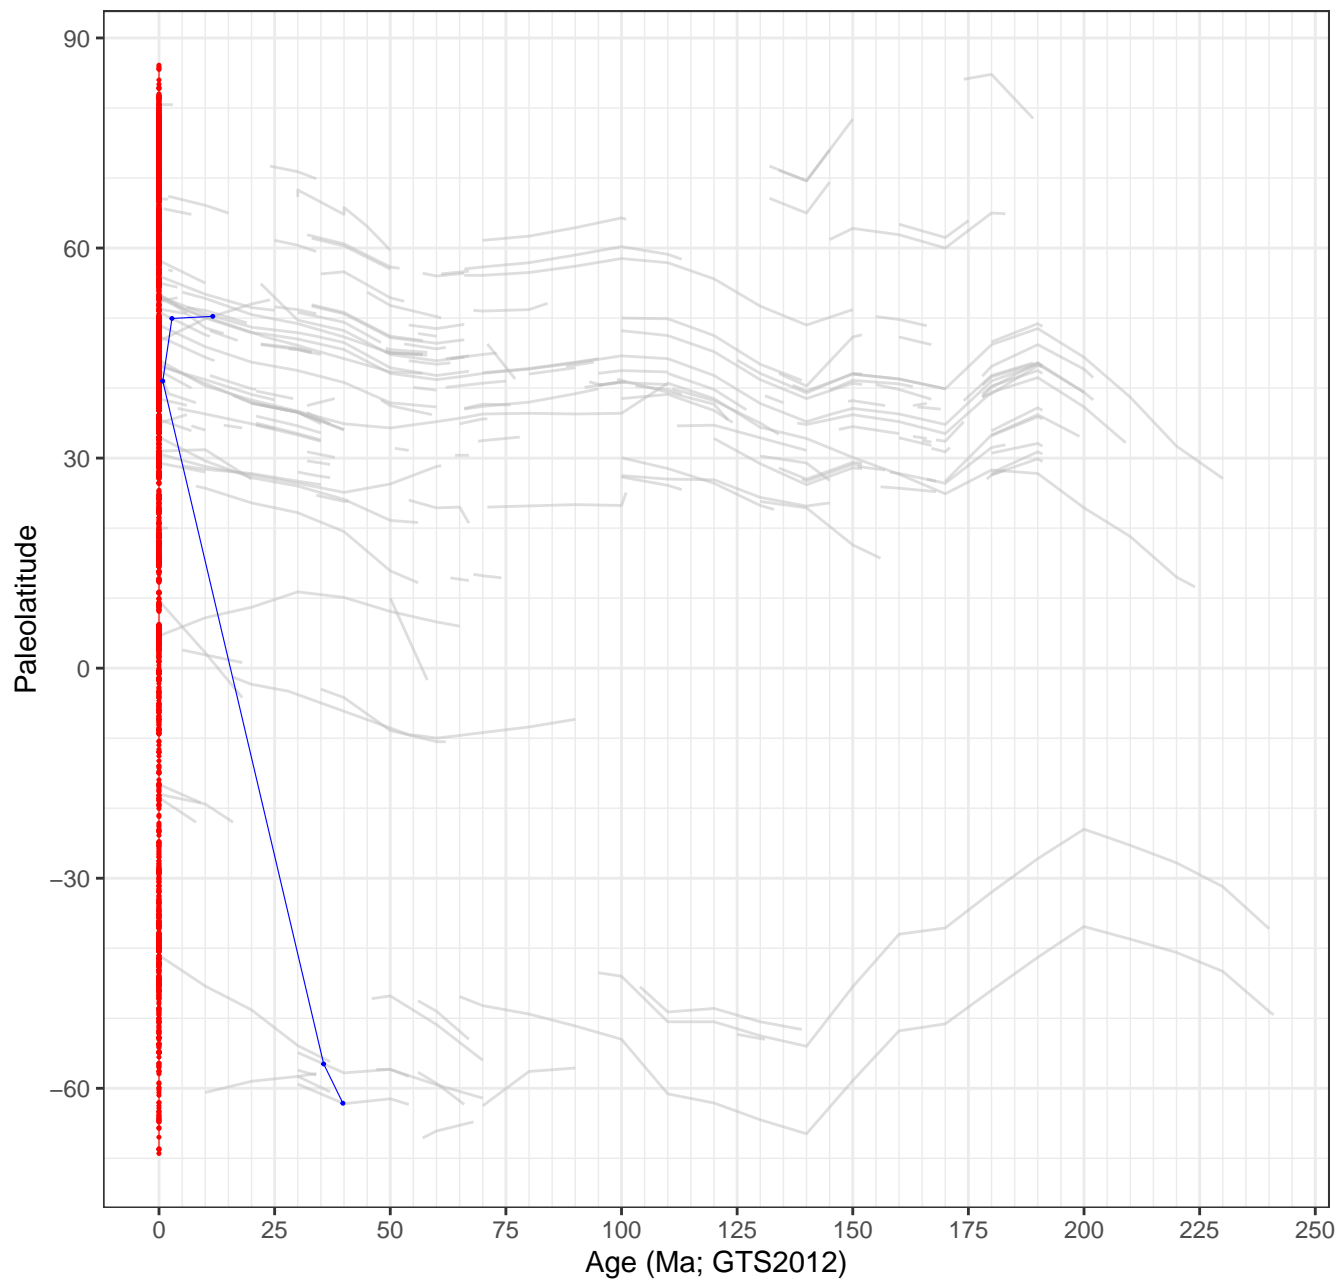

Supplement: Supplementary file 955 [file Brigantedinium simplex.pdf › Supplement/Supplement 2/Species 1914 plots/Brigantedinium simplex.pdf]

# Species *Broomea simplex*

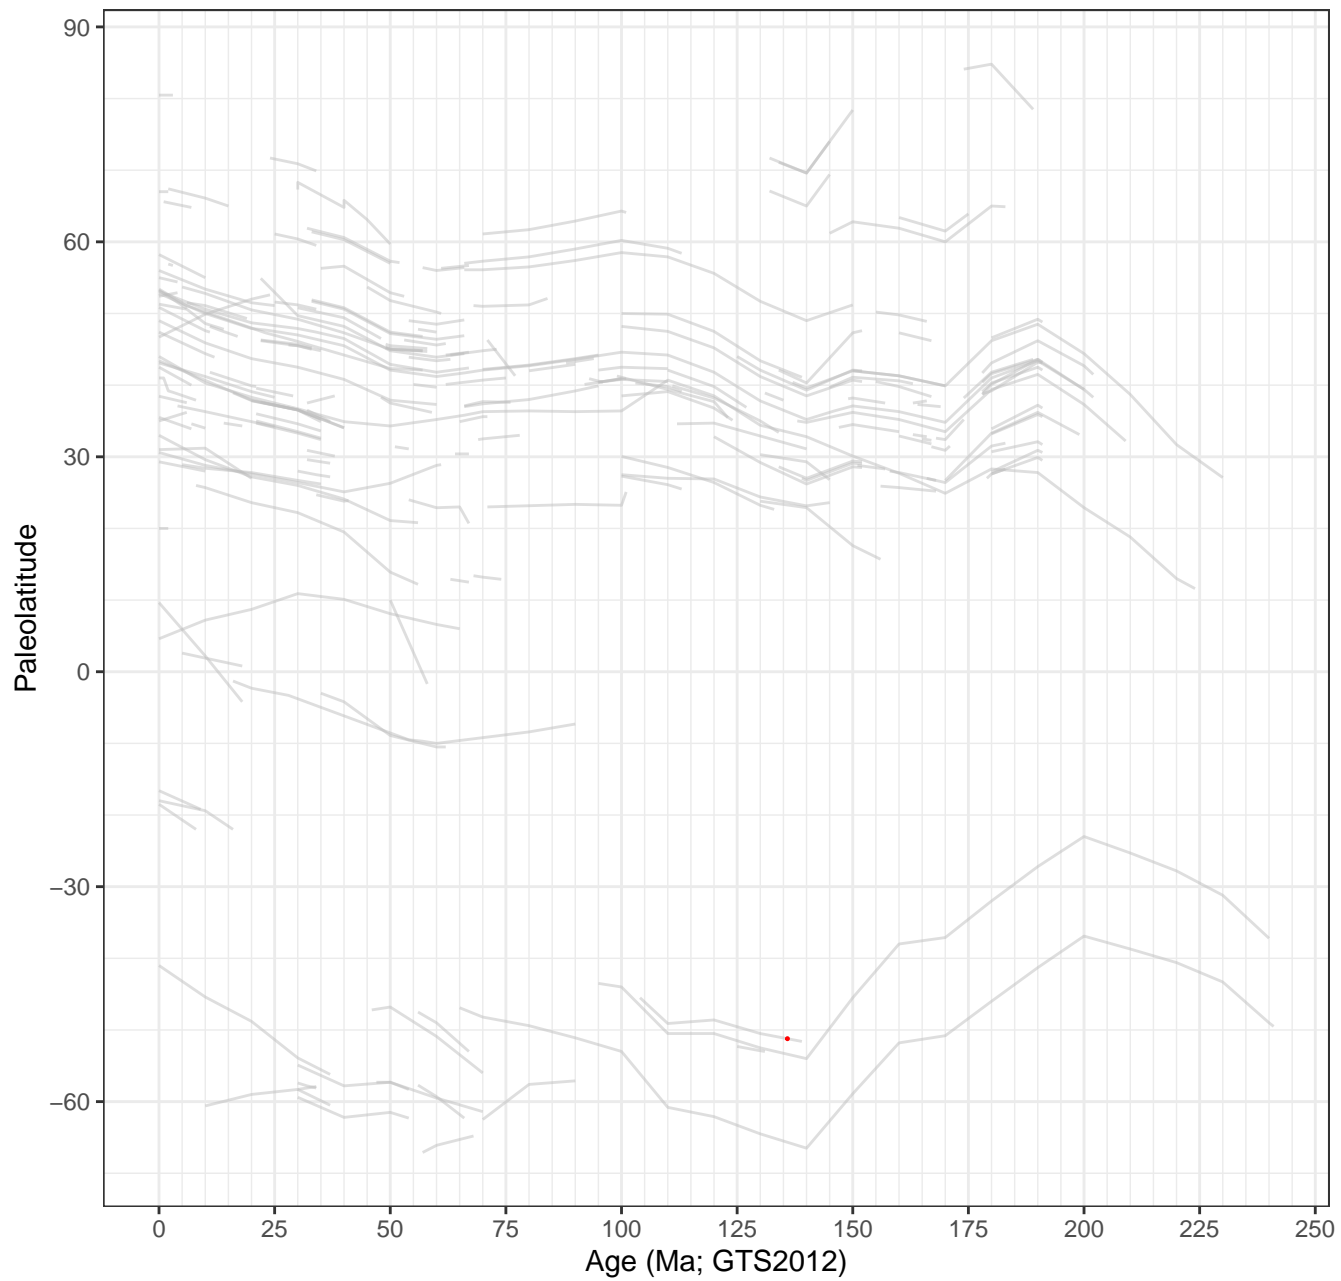

Supplement: Supplementary file 956 [file Broomea simplex.pdf › Supplement/Supplement 2/Species 1914 plots/Broomea simplex.pdf]

# Species *Bulbodinium seitzii*

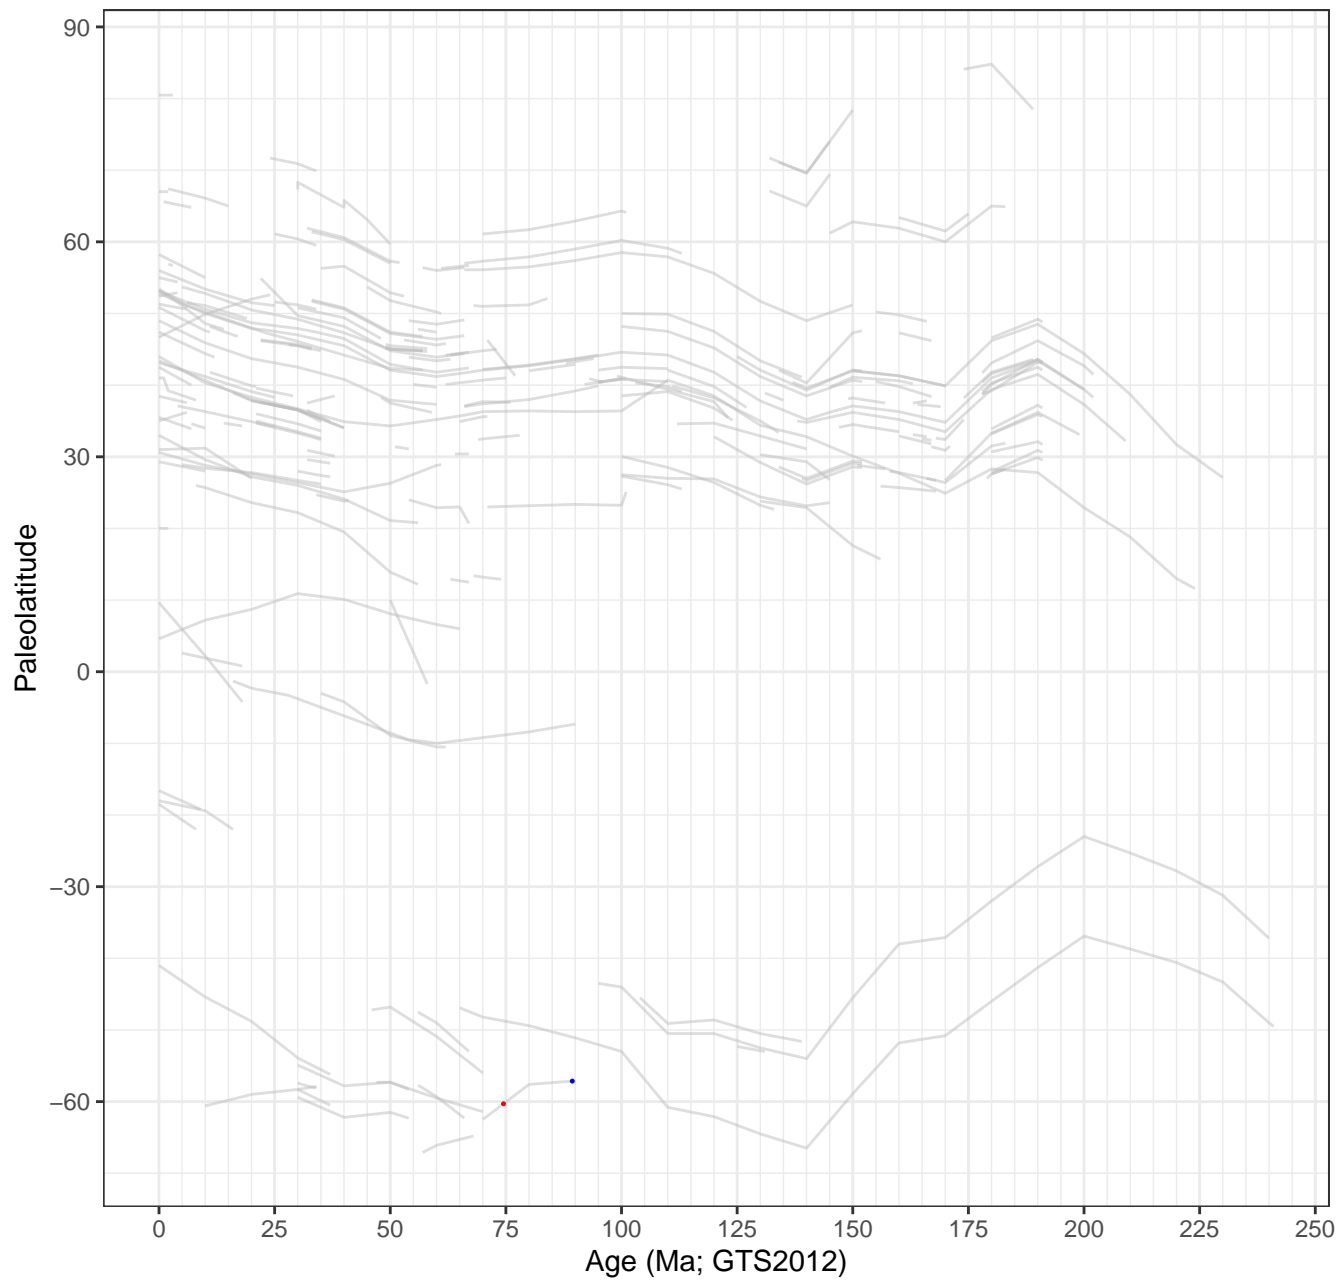

Supplement: Supplementary file 957 [file Bulbodinium seitzii.pdf › Supplement/Supplement 2/Species 1914 plots/Bulbodinium seitzii.pdf]

# Species *Caligodinium amiculum*

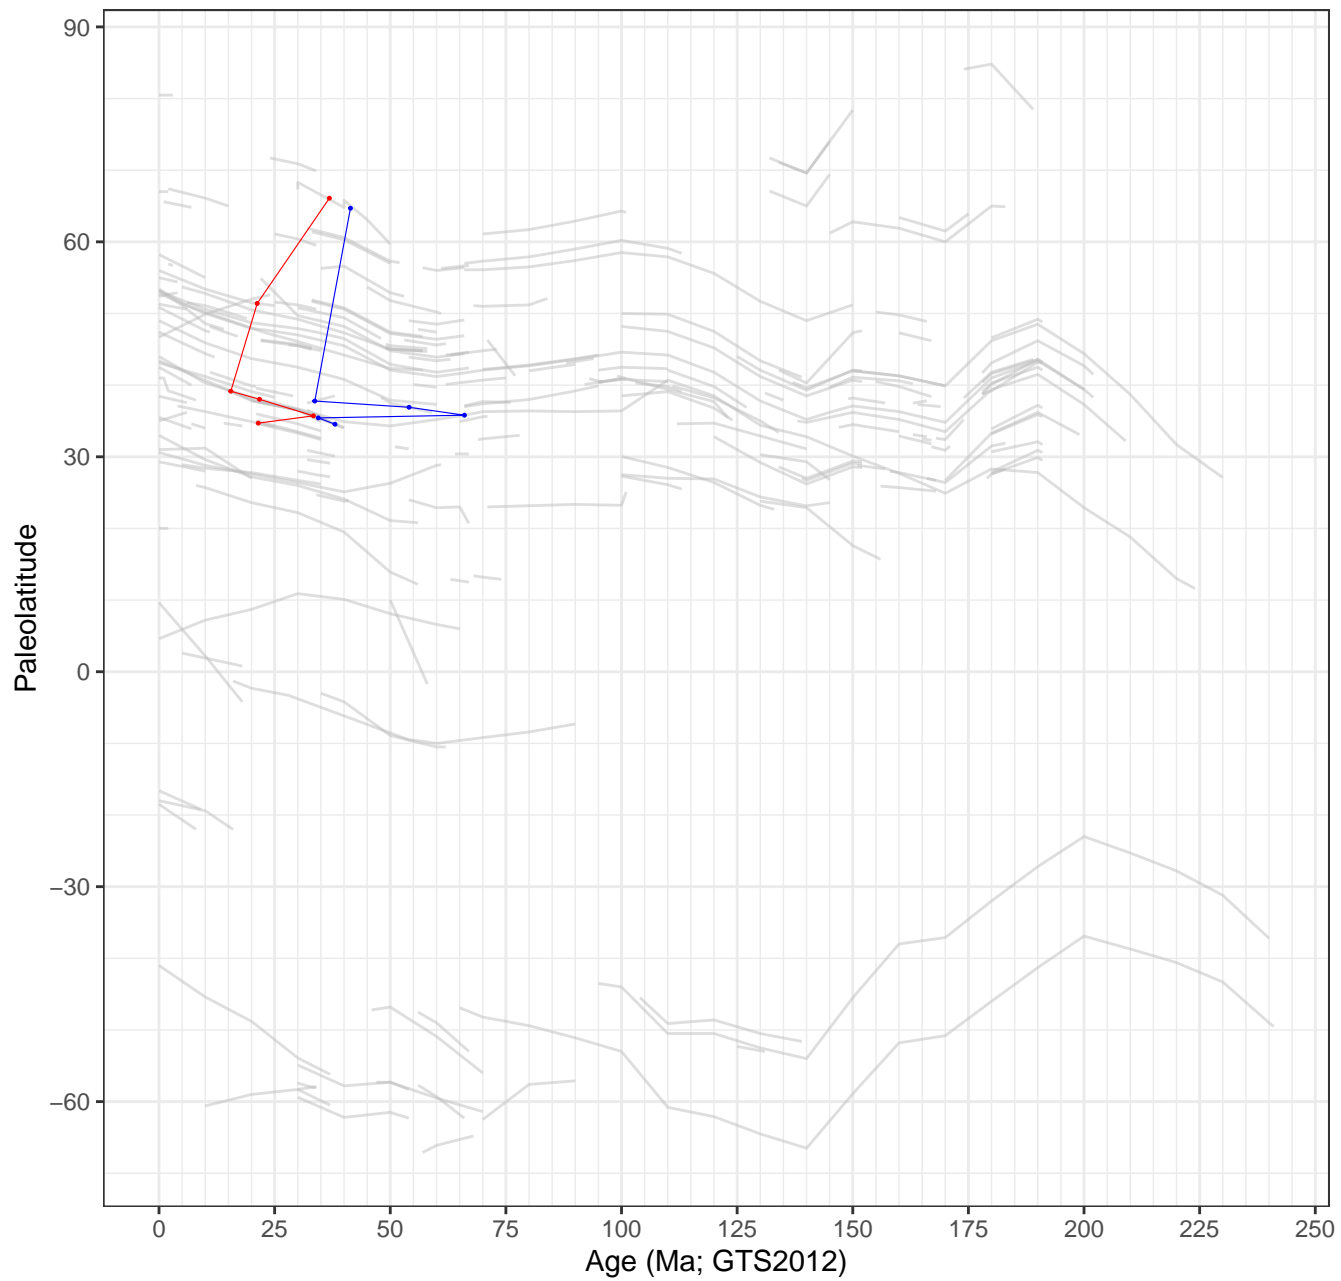

Supplement: Supplementary file 958 [file Caligodinium amiculum.pdf › Supplement/Supplement 2/Species 1914 plots/Caligodinium amiculum.pdf]

# Species *Caligodinium pychnum*

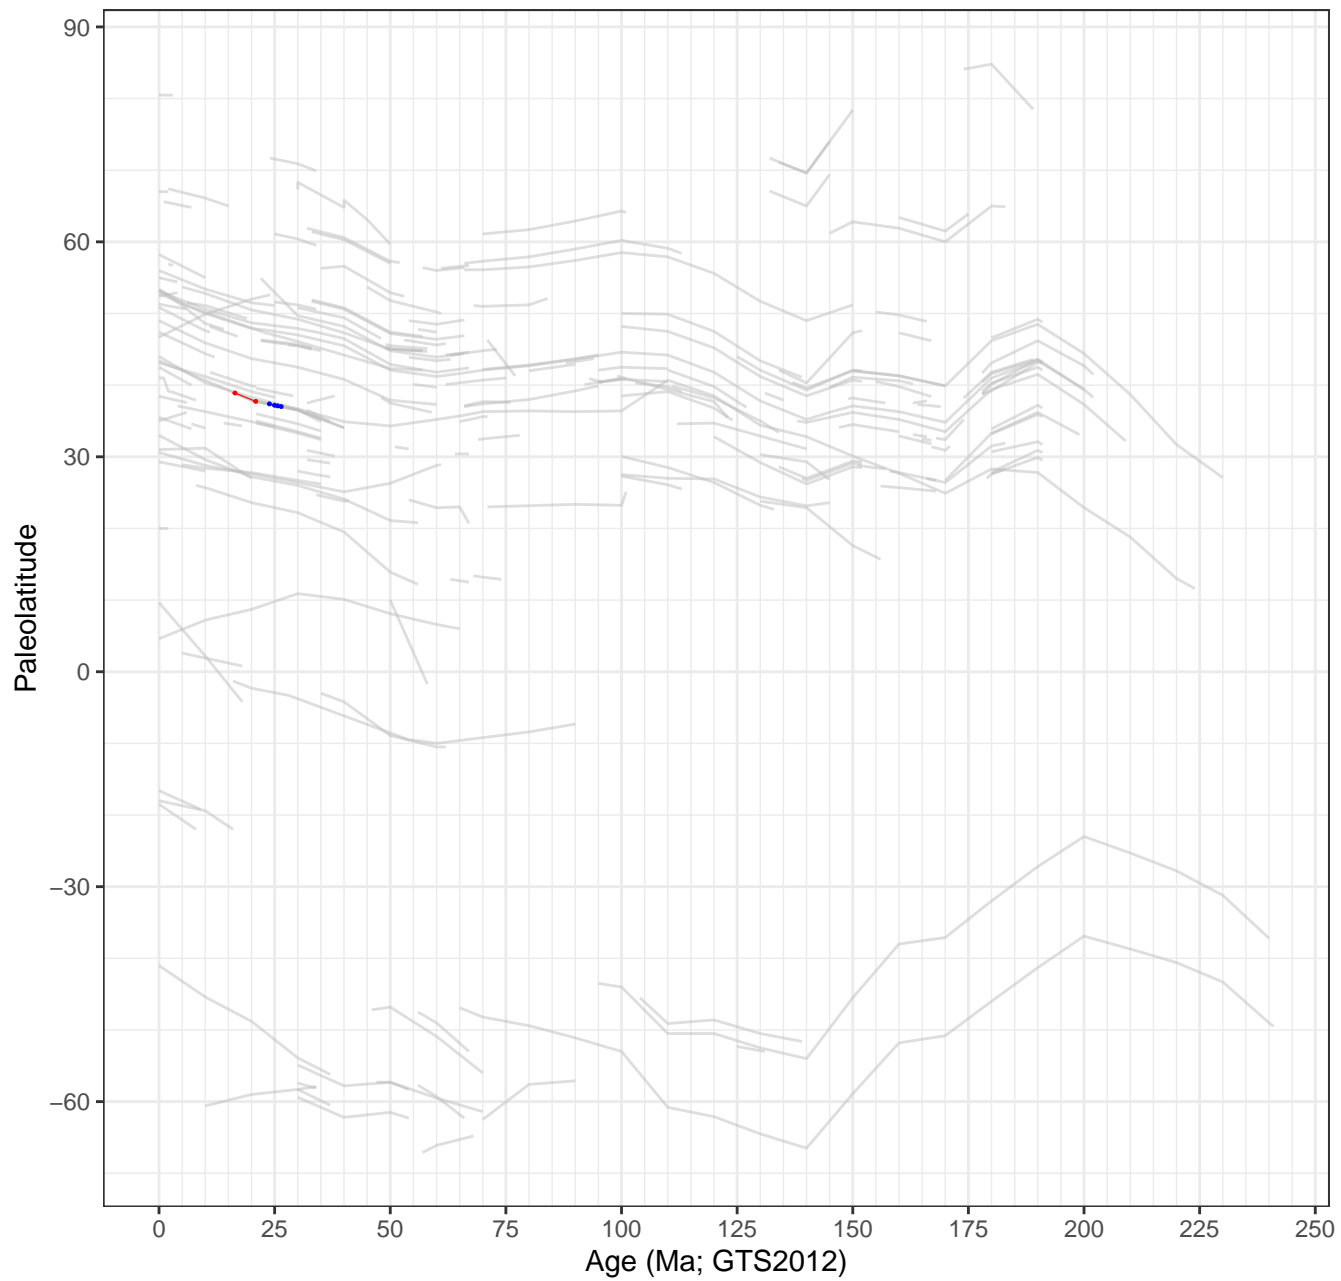

Supplement: Supplementary file 959 [file Caligodinium pychnum.pdf › Supplement/Supplement 2/Species 1914 plots/Caligodinium pychnum.pdf]

# Species *Caligodinium pygnum*

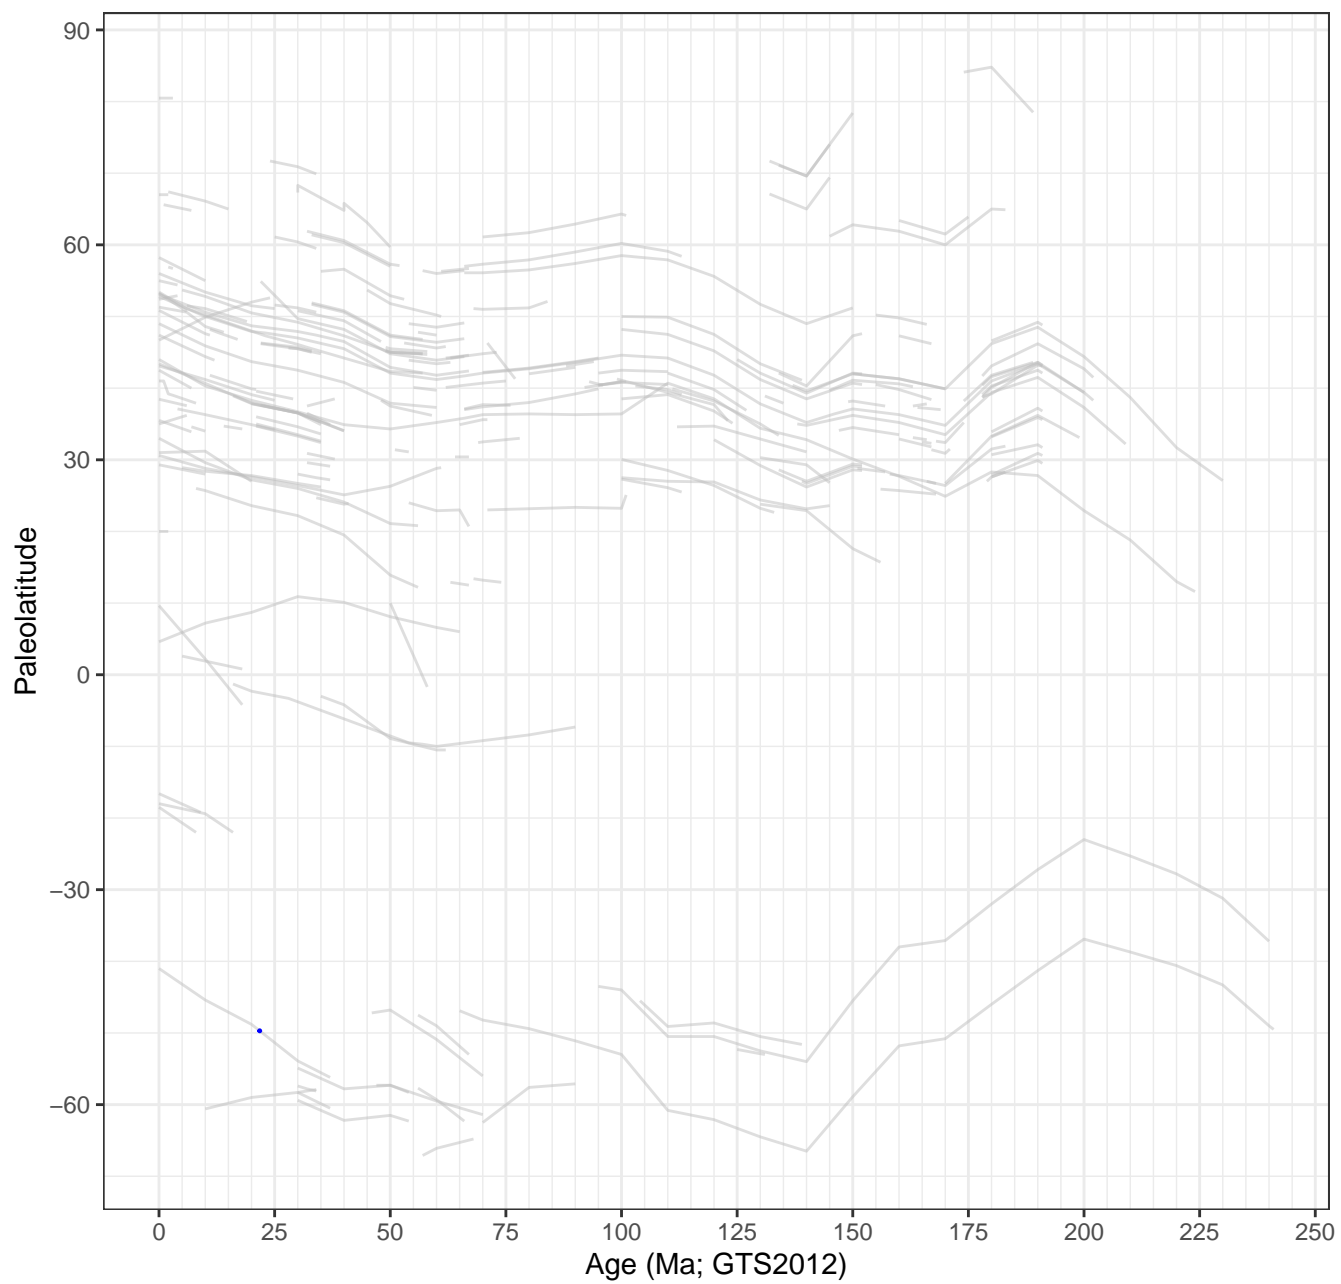

Supplement: Supplementary file 960 [file Caligodinium pygnum.pdf › Supplement/Supplement 2/Species 1914 plots/Caligodinium pygnum.pdf]

# Species *Callaiosphaeridium asymmetricum*

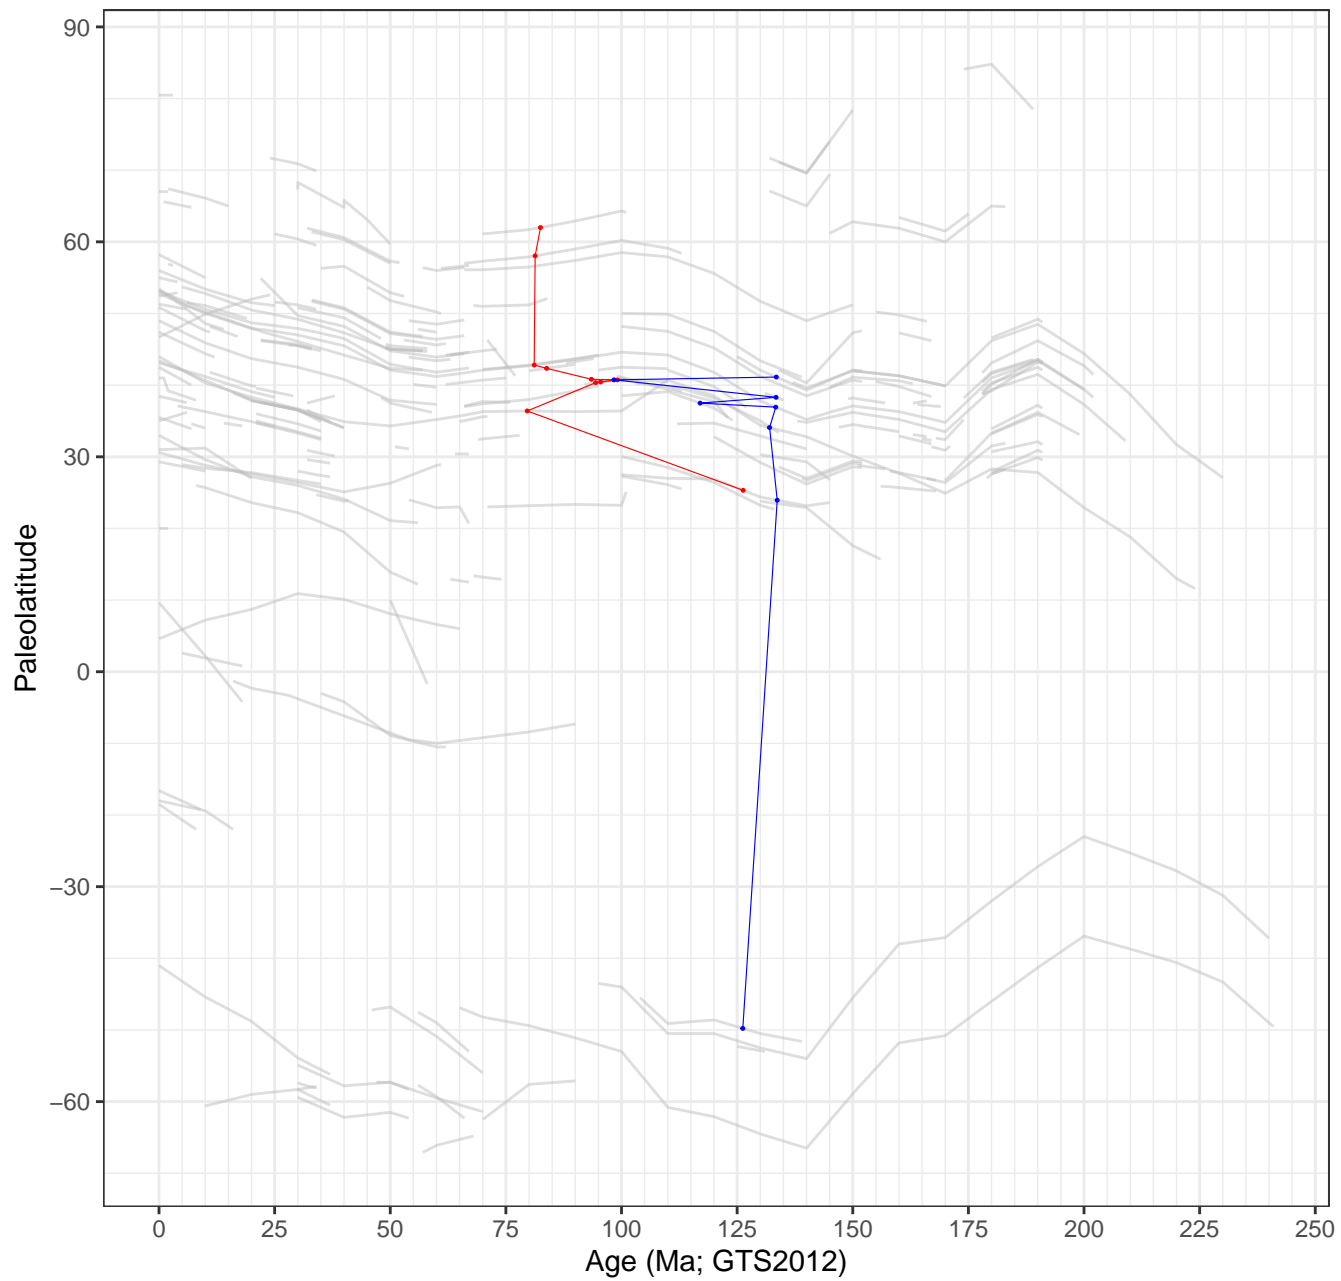

Supplement: Supplementary file 961 [file Callaiosphaeridium asymmetricum.pdf › Supplement/Supplement 2/Species 1914 plots/Callaiosphaeridium asymmetricum.pdf]

# Species *Callaiosphaeridium trycherium*

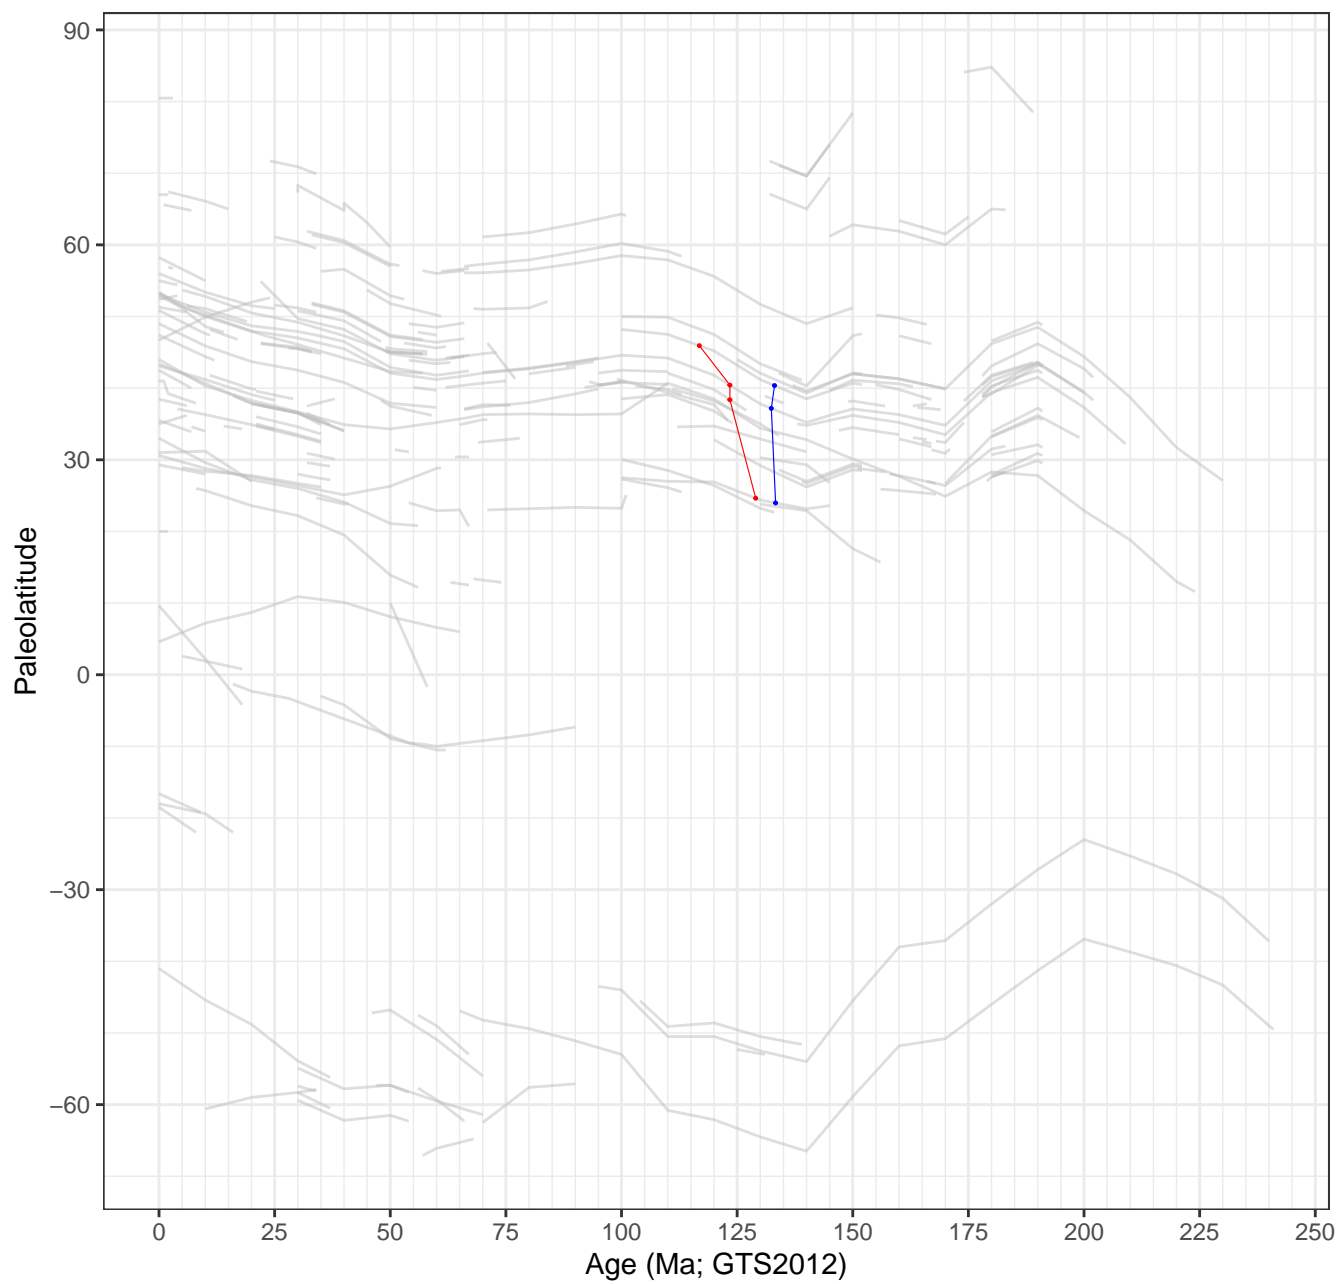

Supplement: Supplementary file 962 [file Callaiosphaeridium trycherium.pdf › Supplement/Supplement 2/Species 1914 plots/Callaiosphaeridium trycherium.pdf]

# Species *Canningia duxburyi*

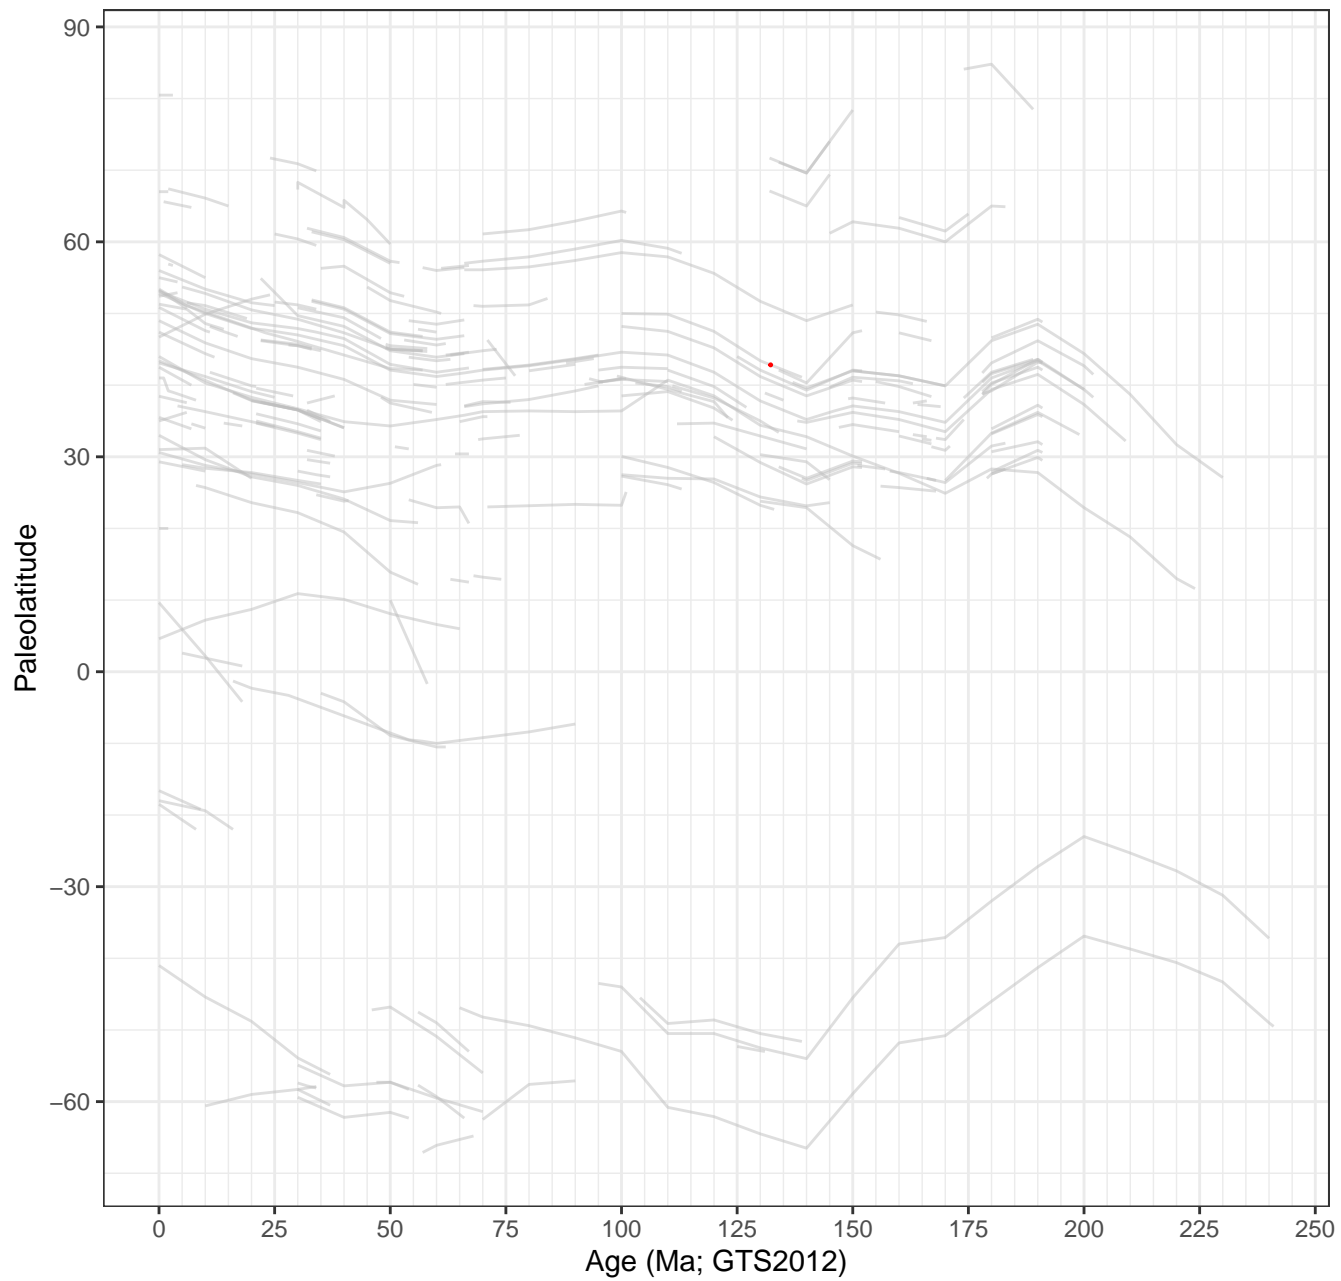

Supplement: Supplementary file 963 [file Canningia duxburyi.pdf › Supplement/Supplement 2/Species 1914 plots/Canningia duxburyi.pdf]

# Species *Canningia fairfieldensis*

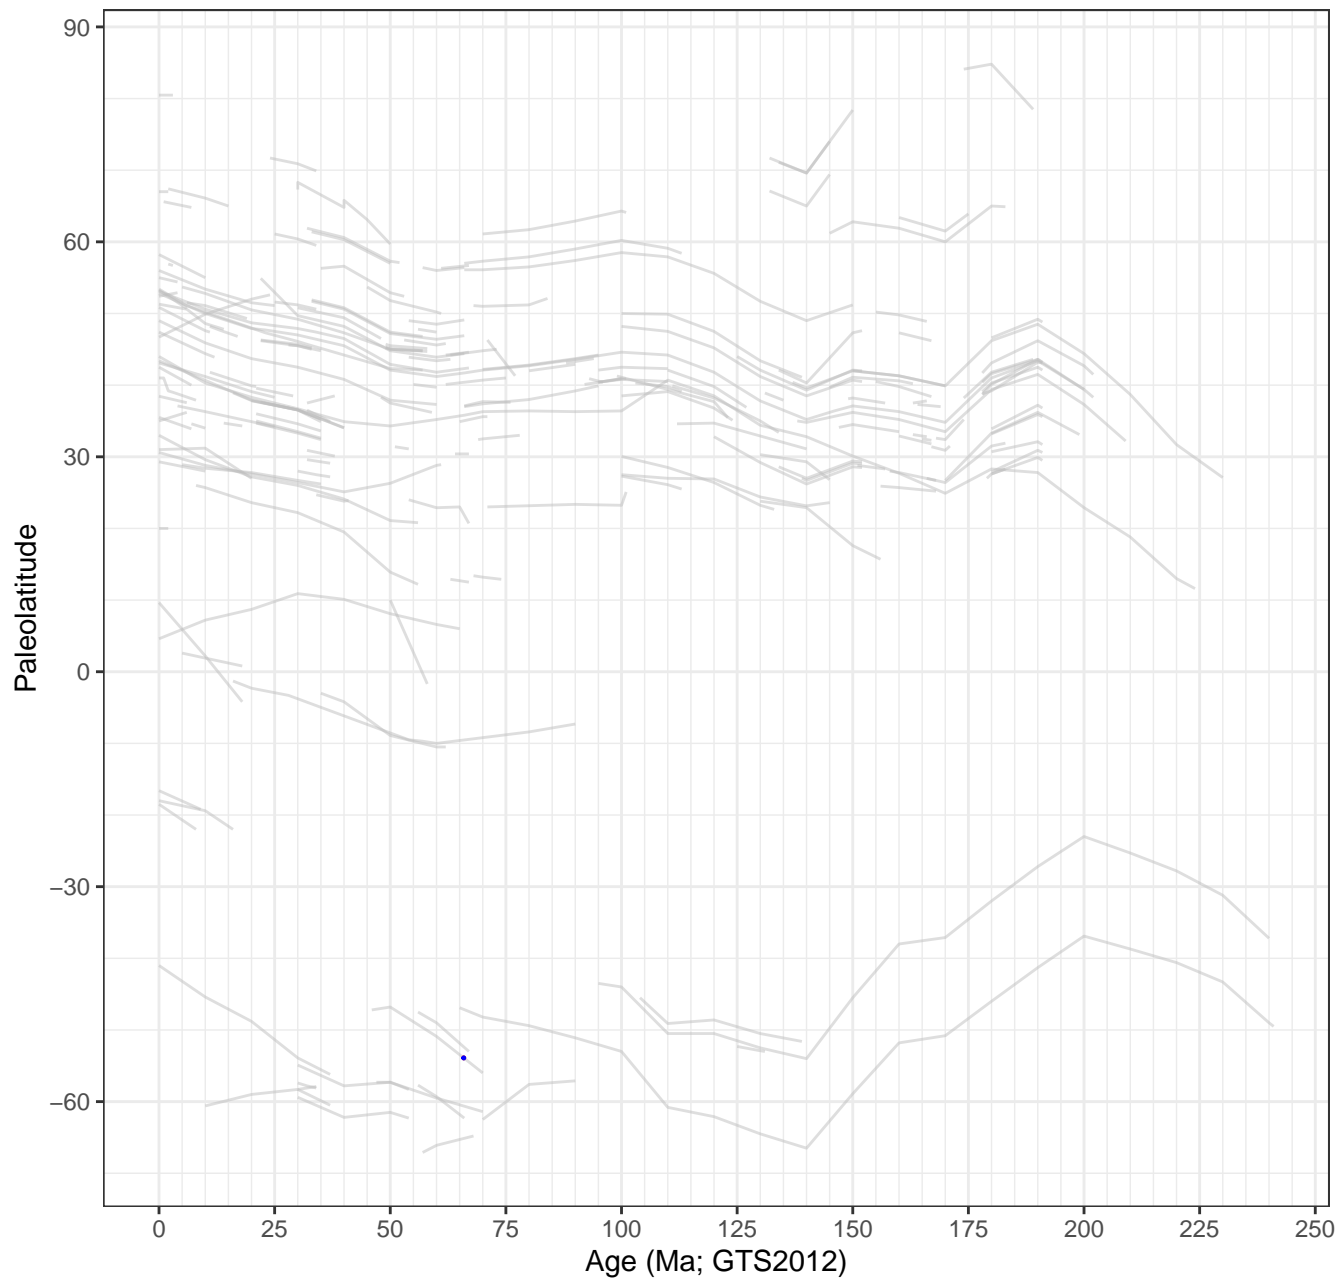

Supplement: Supplementary file 964 [file Canningia fairfieldensis.pdf › Supplement/Supplement 2/Species 1914 plots/Canningia fairfieldensis.pdf]

# Species *Canningia pistica*

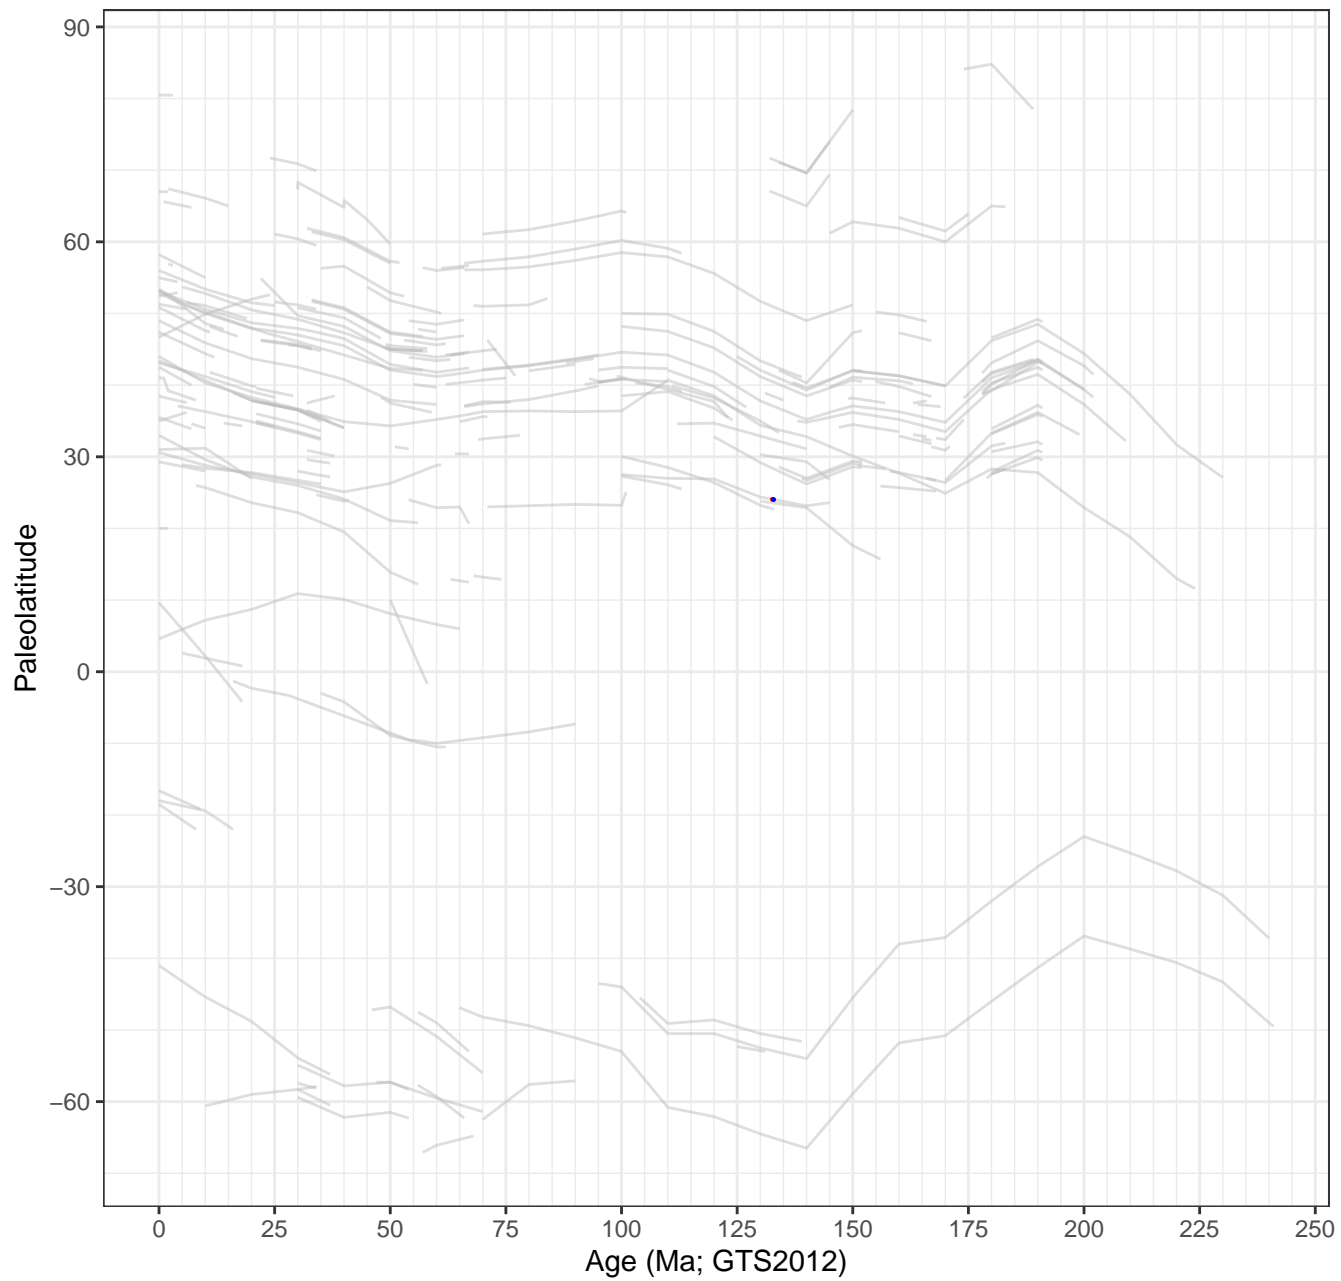

Supplement: Supplementary file 965 [file Canningia pistica.pdf › Supplement/Supplement 2/Species 1914 plots/Canningia pistica.pdf]

# Species *Canningia reticulata*

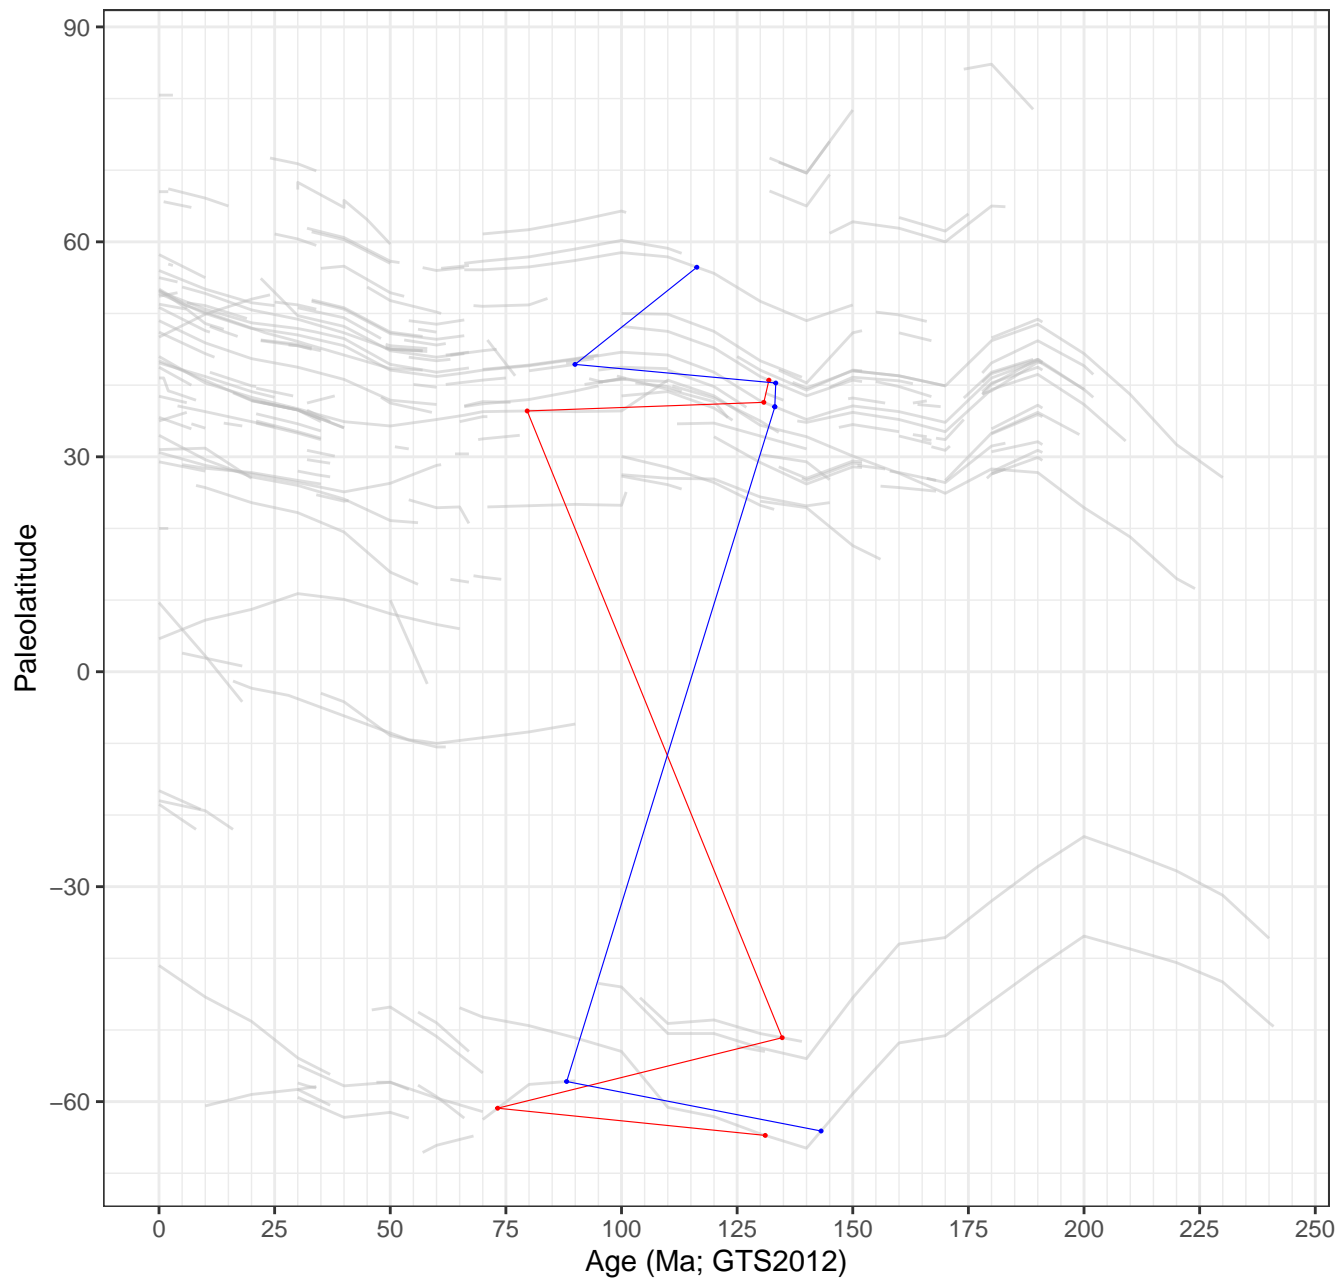

Supplement: Supplementary file 966 [file Canningia reticulata.pdf › Supplement/Supplement 2/Species 1914 plots/Canningia reticulata.pdf]

# Species *Canningia senonica*

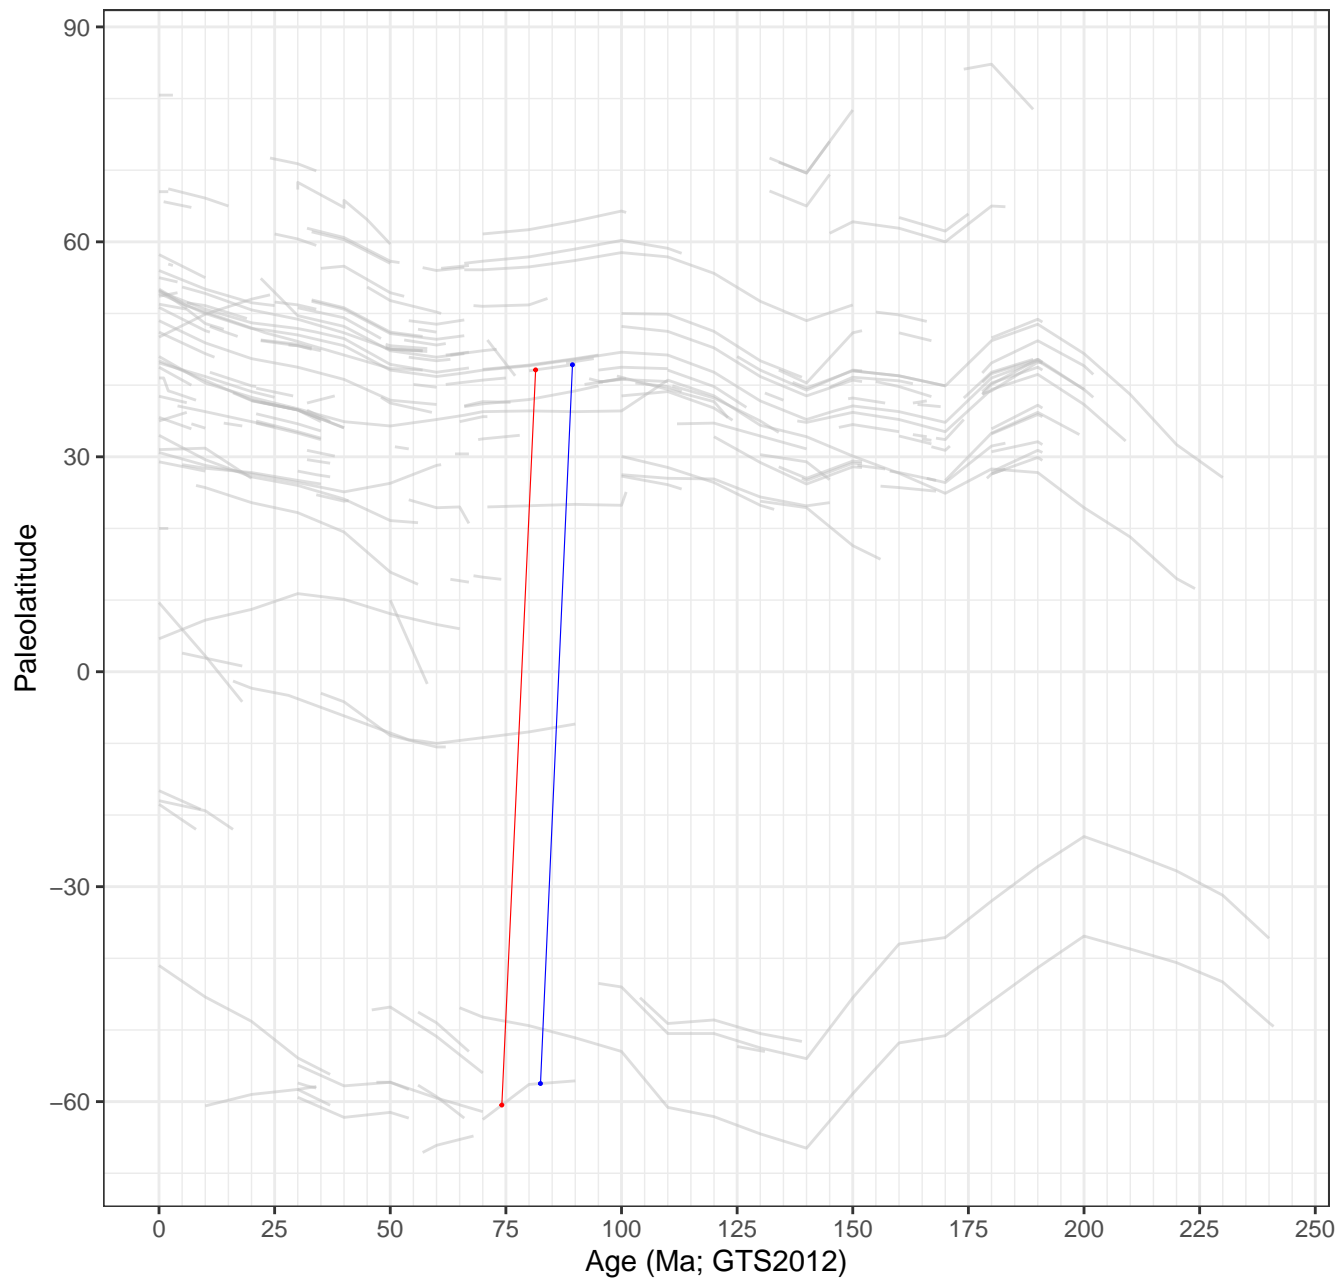

Supplement: Supplementary file 967 [file Canningia senonica.pdf › Supplement/Supplement 2/Species 1914 plots/Canningia senonica.pdf]

# Species *Canningia torulosa*

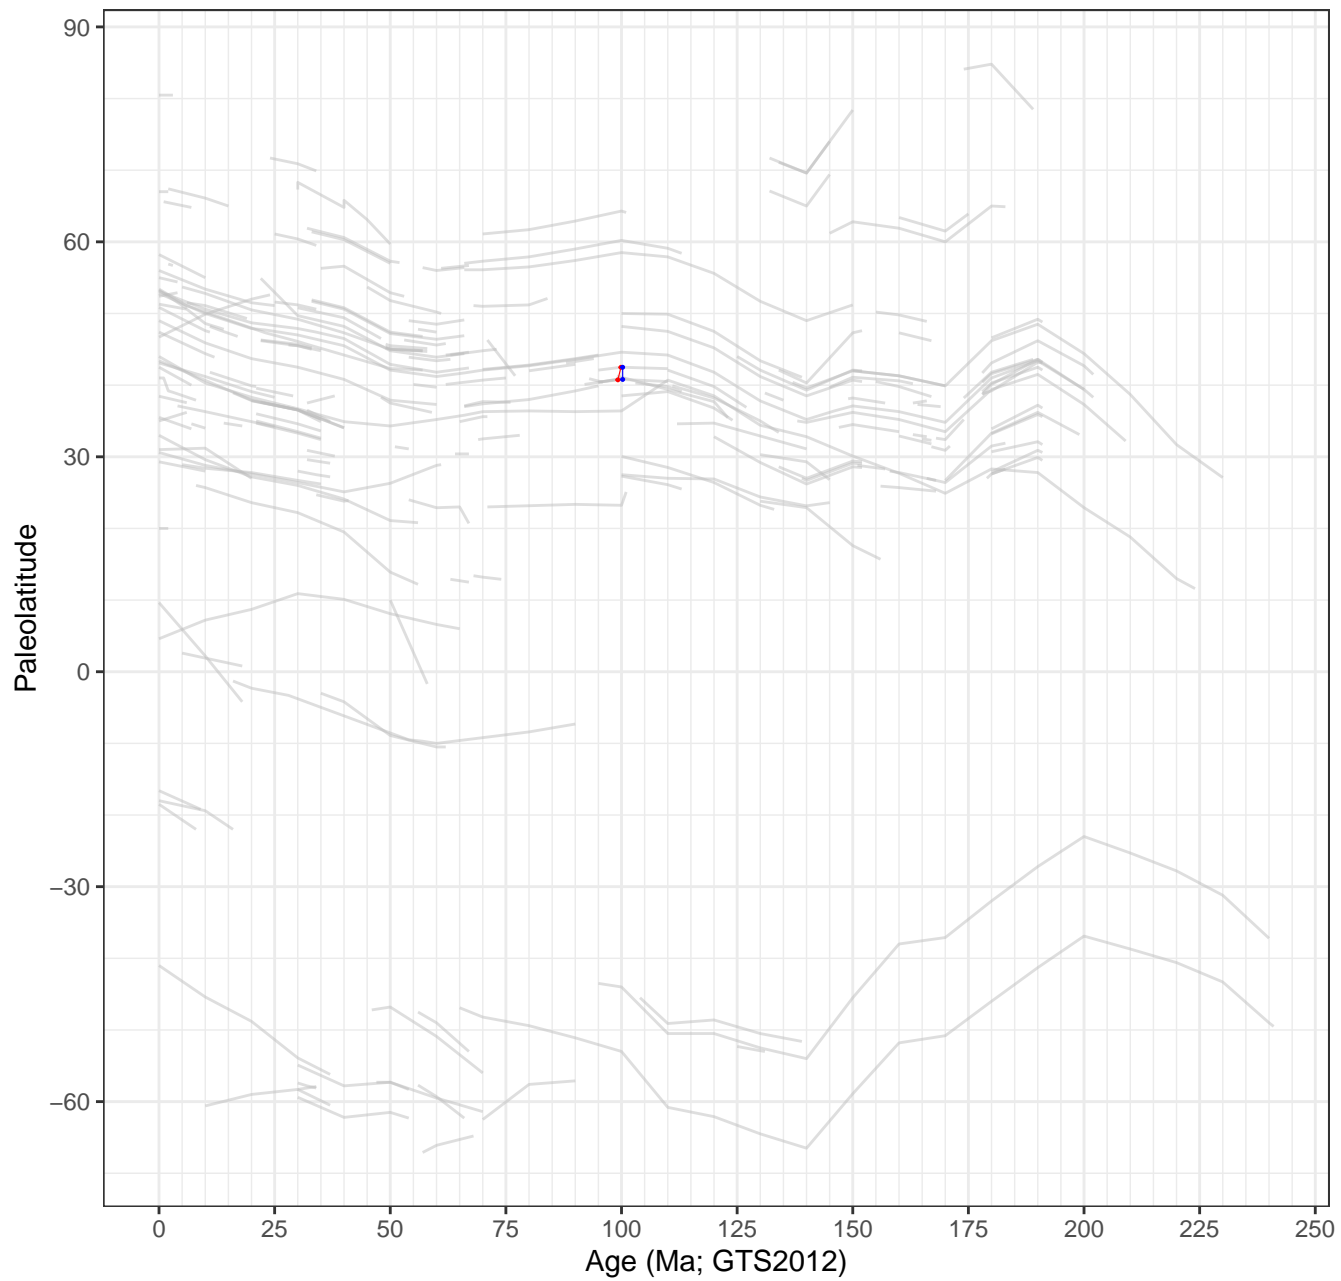

Supplement: Supplementary file 968 [file Canningia torulosa.pdf › Supplement/Supplement 2/Species 1914 plots/Canningia torulosa.pdf]

# Species *Canninginopsis denticulata*

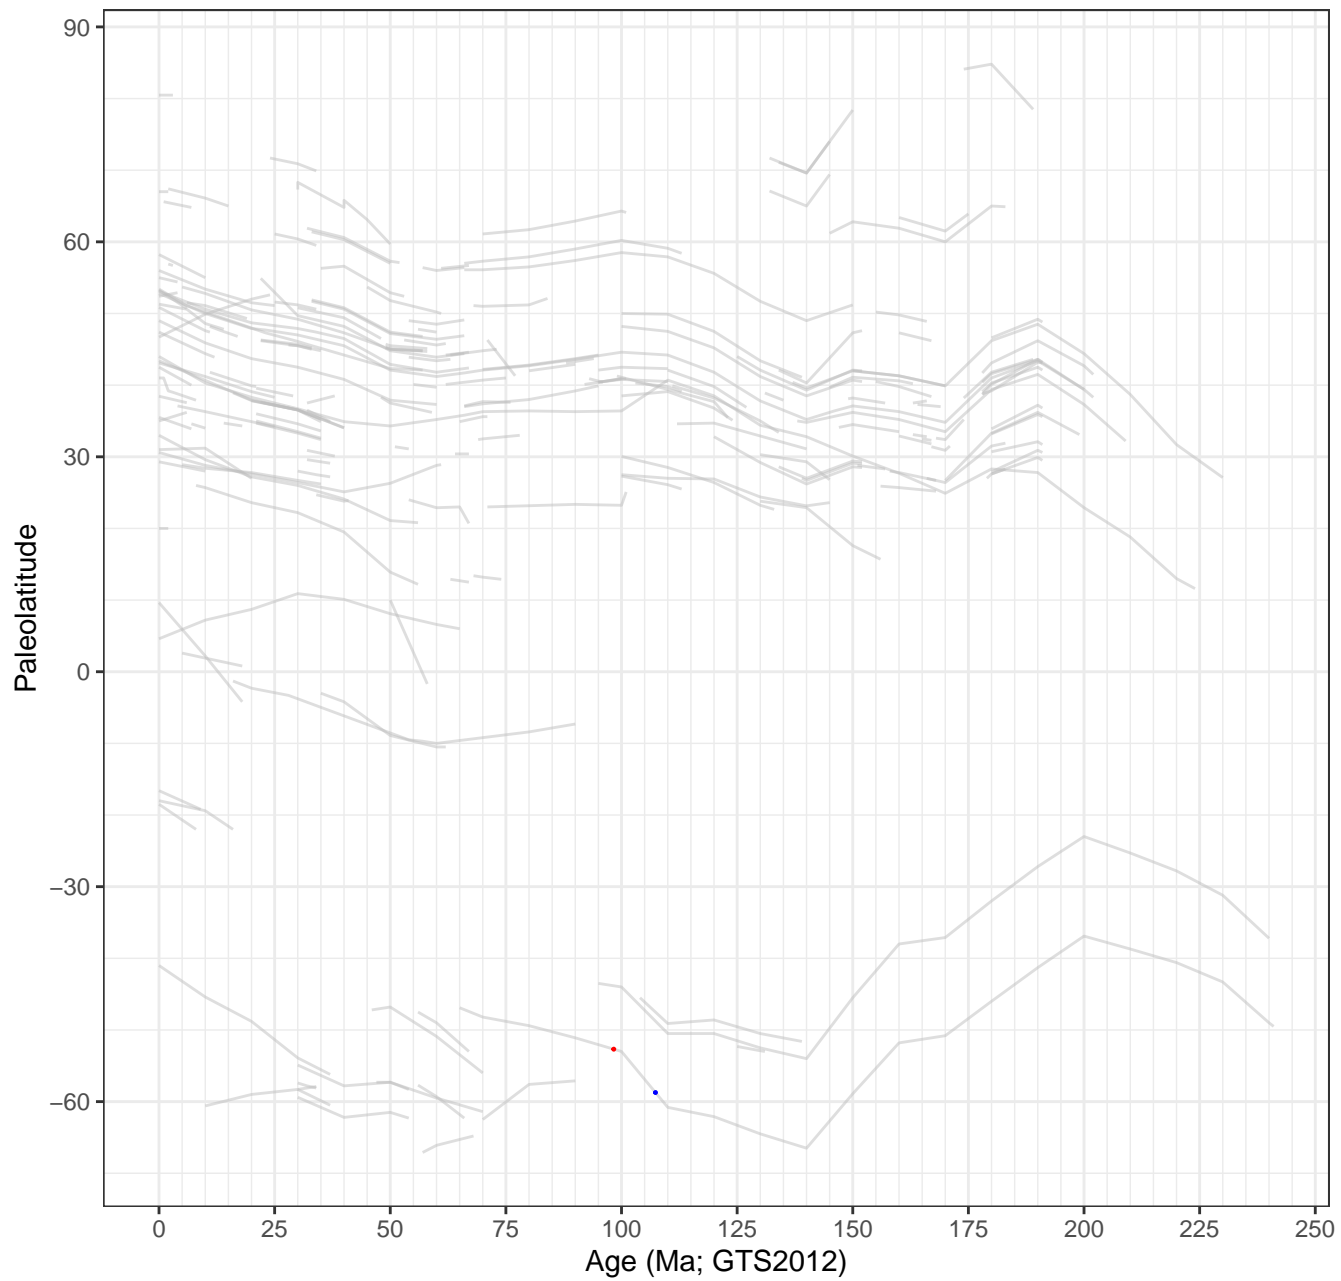

Supplement: Supplementary file 969 [file Canninginopsis denticulata.pdf › Supplement/Supplement 2/Species 1914 plots/Canninginopsis denticulata.pdf]

# Species *Canninginopsis intermedia*

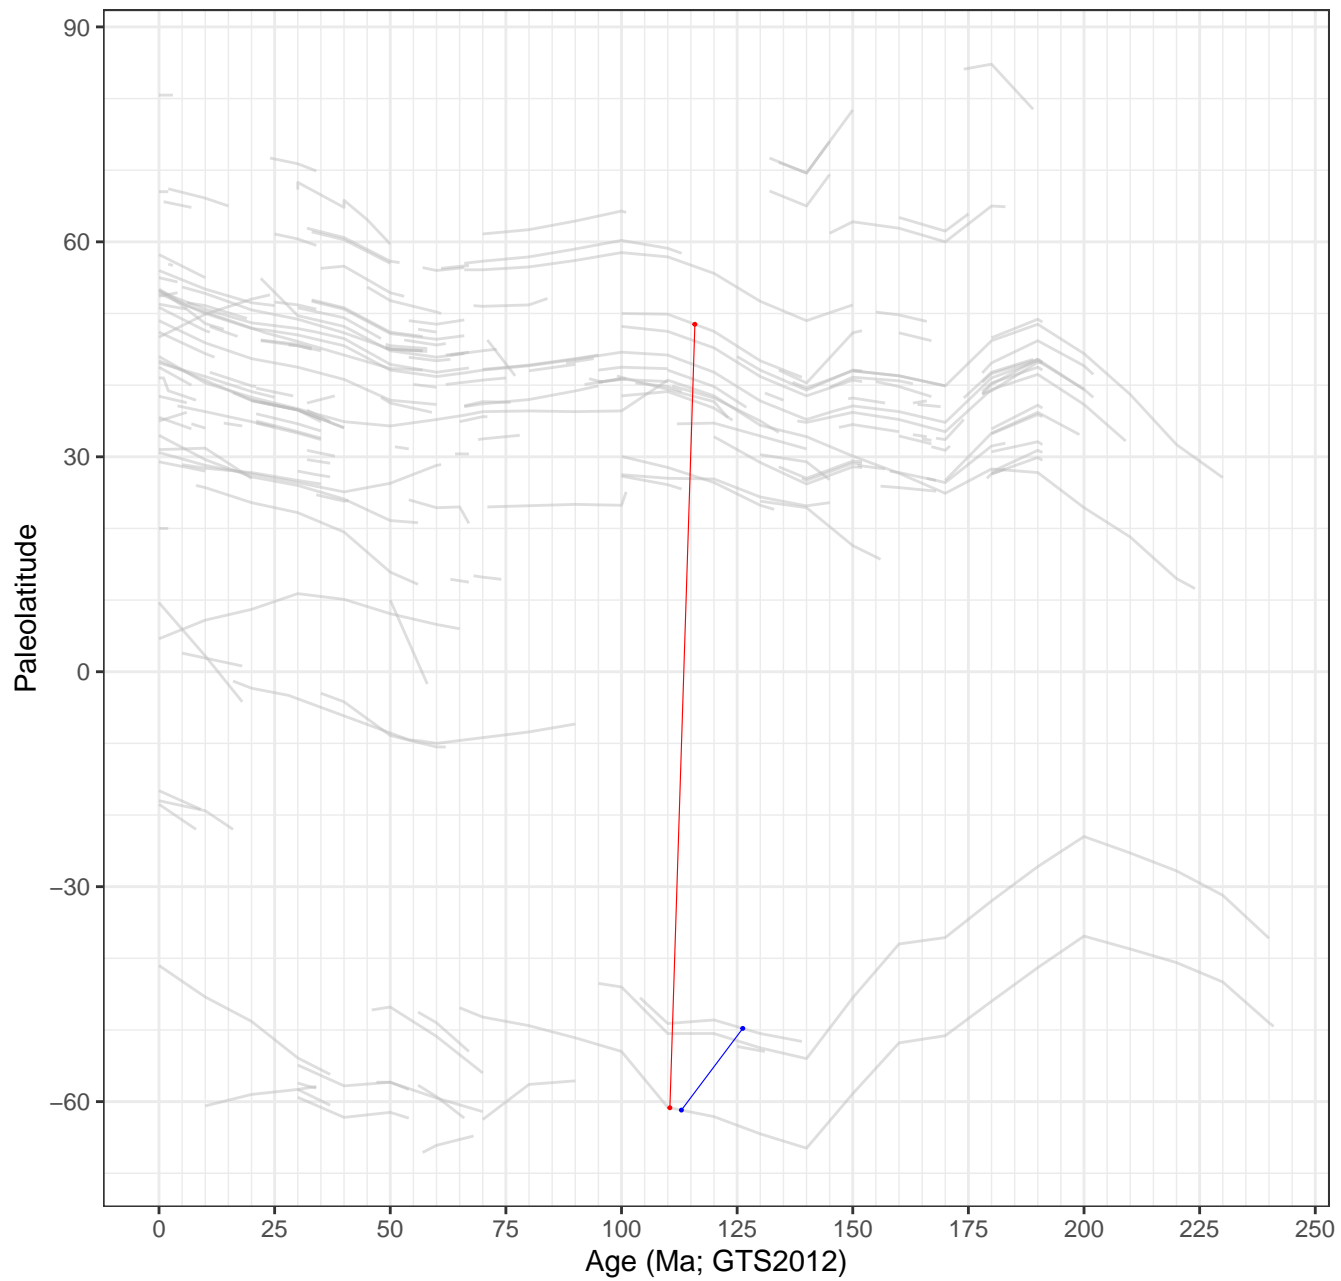

Supplement: Supplementary file 970 [file Canninginopsis intermedia.pdf › Supplement/Supplement 2/Species 1914 plots/Canninginopsis intermedia.pdf]

# Species *Canninginopsis maastrichtiensis*

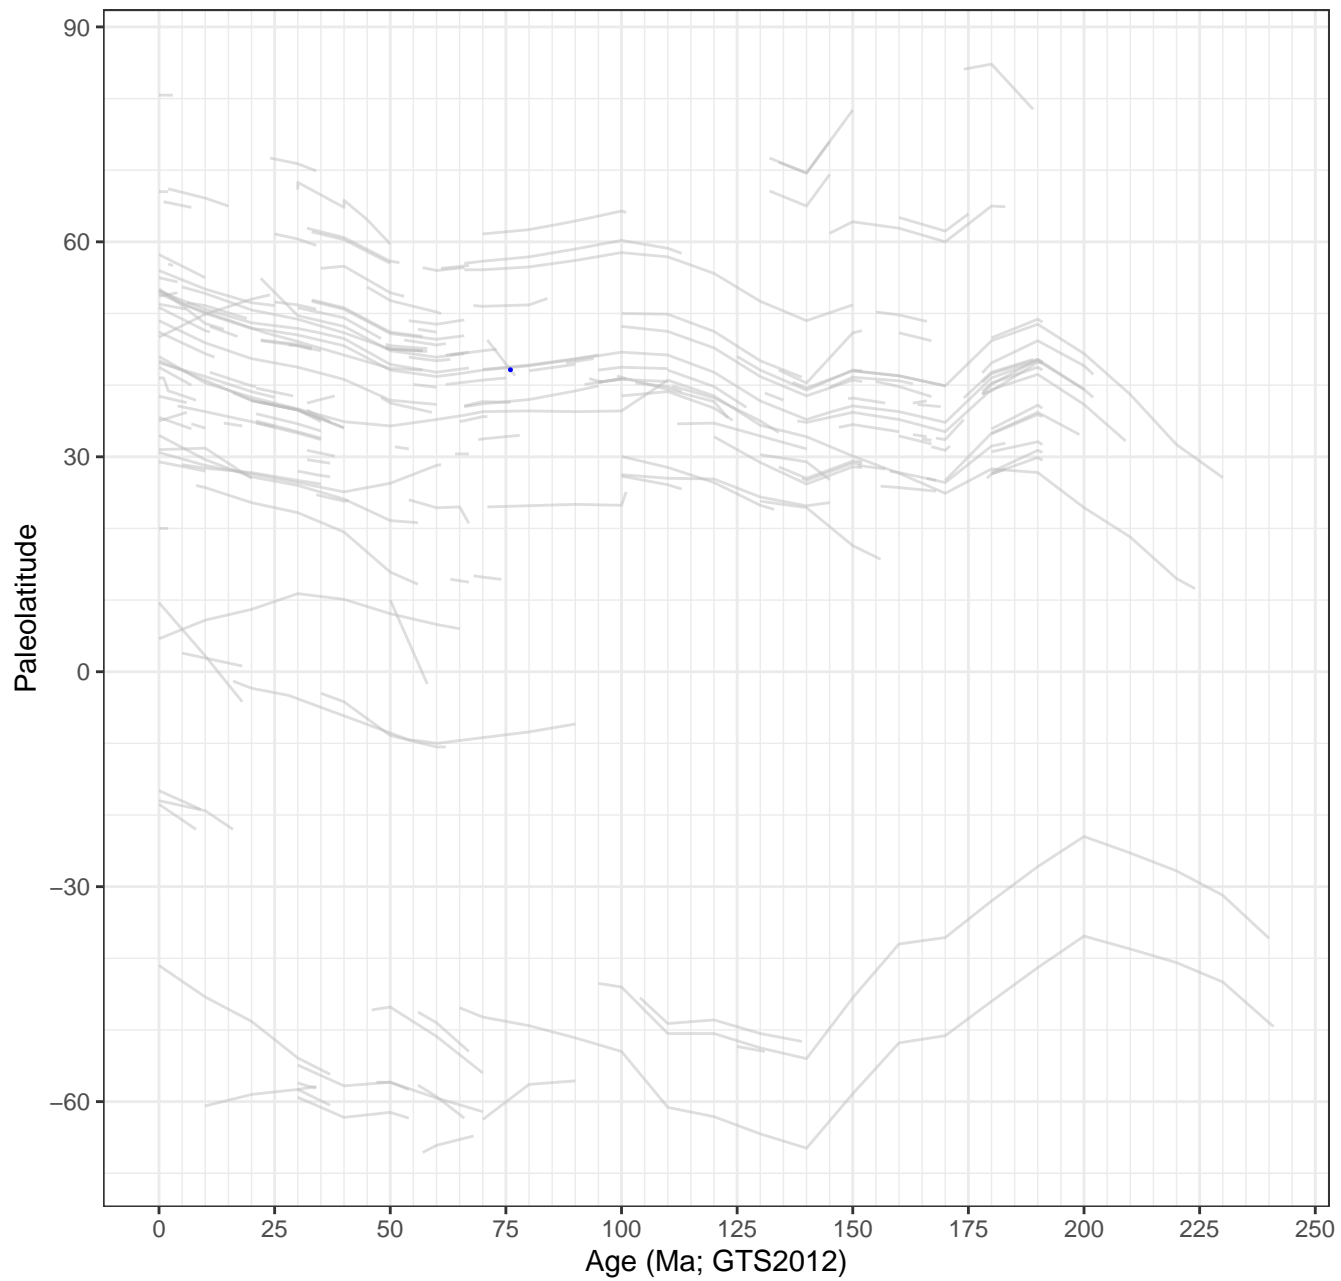

Supplement: Supplementary file 971 [file Canninginopsis maastrichtiensis.pdf › Supplement/Supplement 2/Species 1914 plots/Canninginopsis maastrichtiensis.pdf]

# Species *Cannosphaeropsis australis*

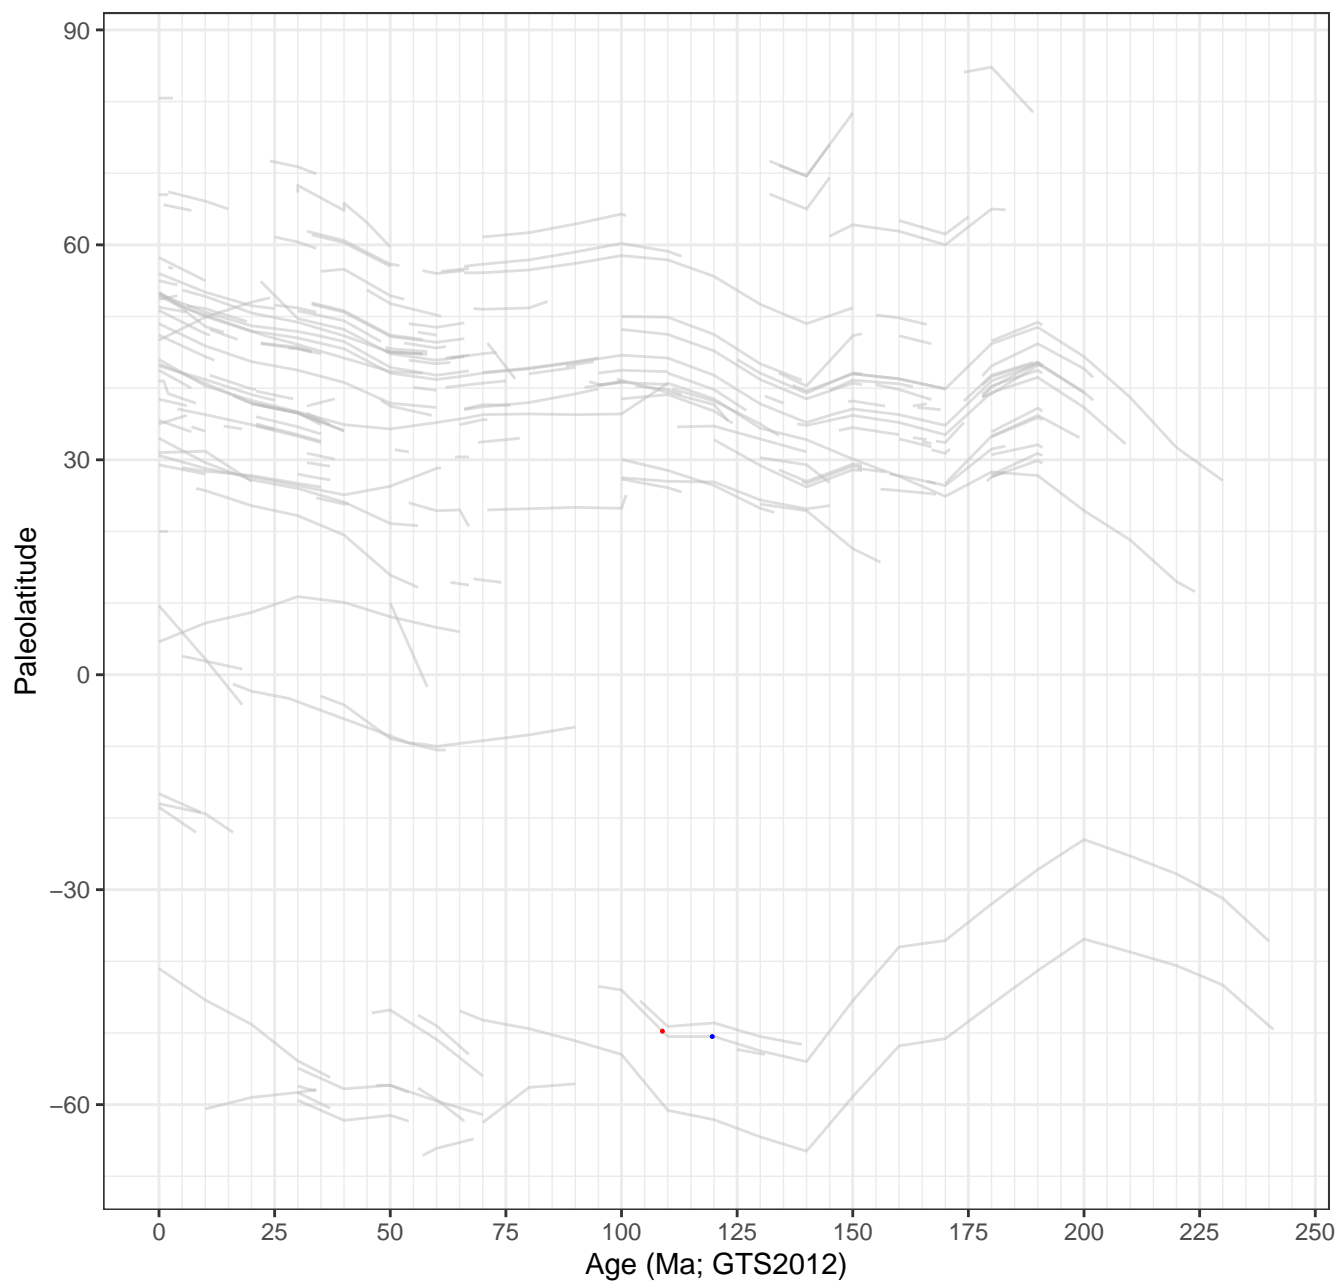

Supplement: Supplementary file 972 [file Cannosphaeropsis australis.pdf › Supplement/Supplement 2/Species 1914 plots/Cannosphaeropsis australis.pdf]

# Species *Cannosphaeropsis passio*

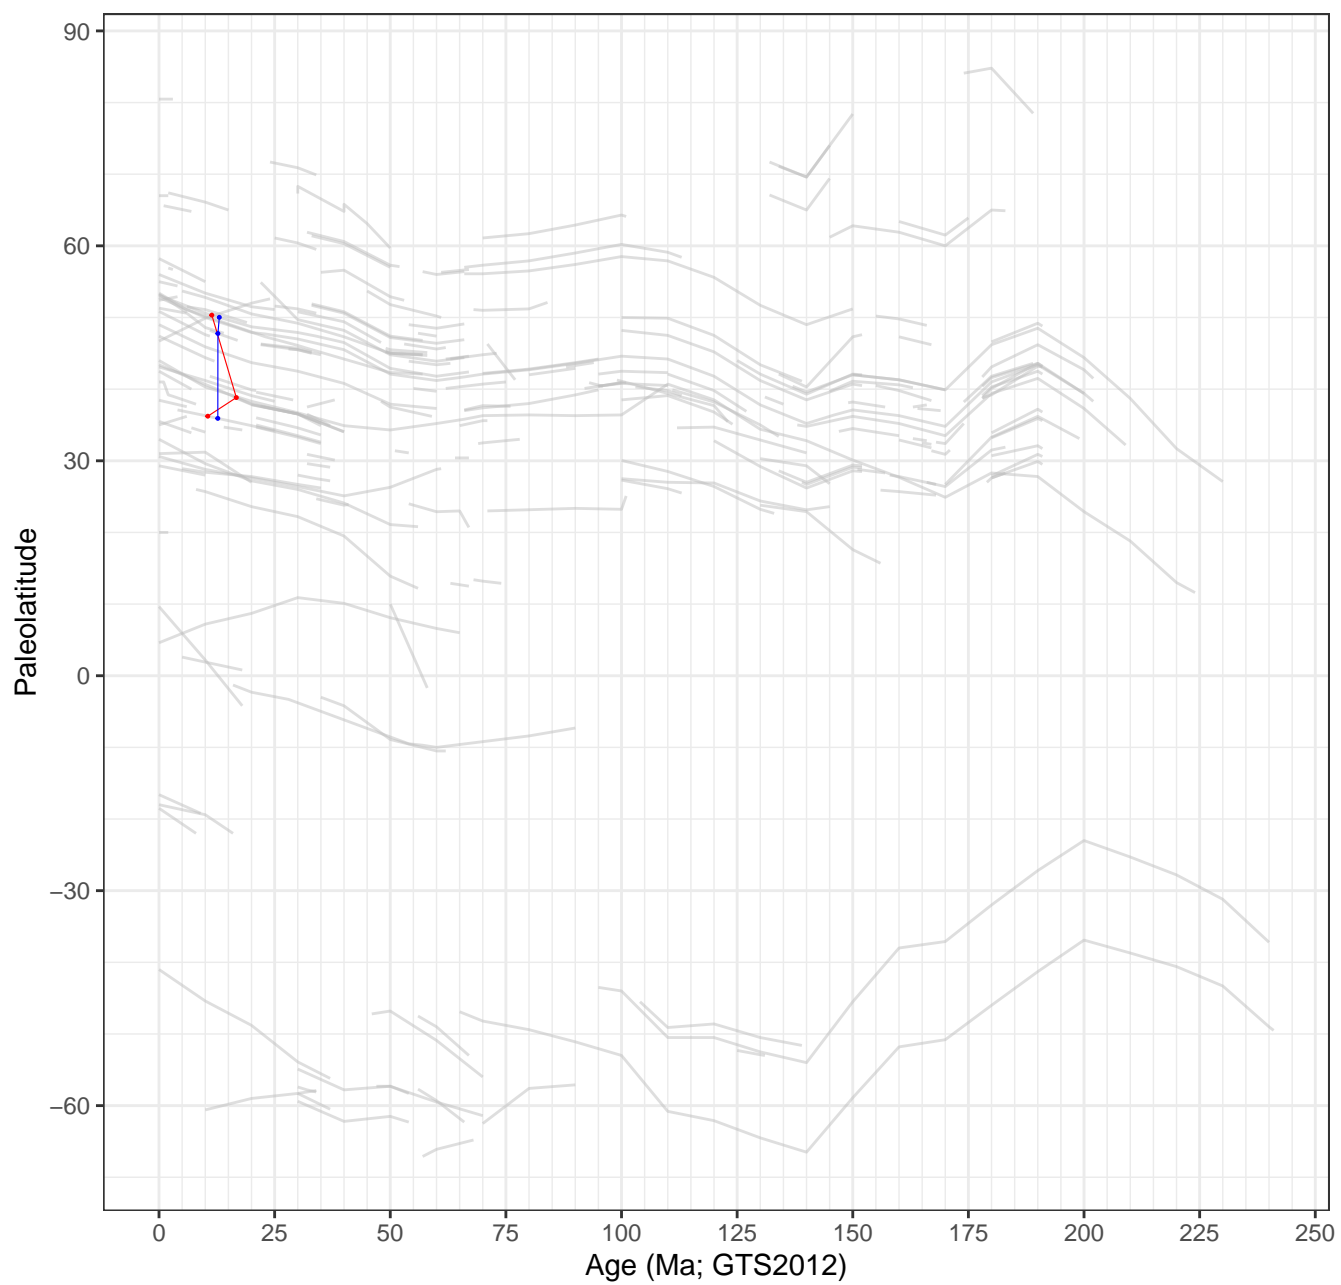

Supplement: Supplementary file 973 [file Cannosphaeropsis passio.pdf › Supplement/Supplement 2/Species 1914 plots/Cannosphaeropsis passio.pdf]

# Species *Cannosphaeropsis utinensis*

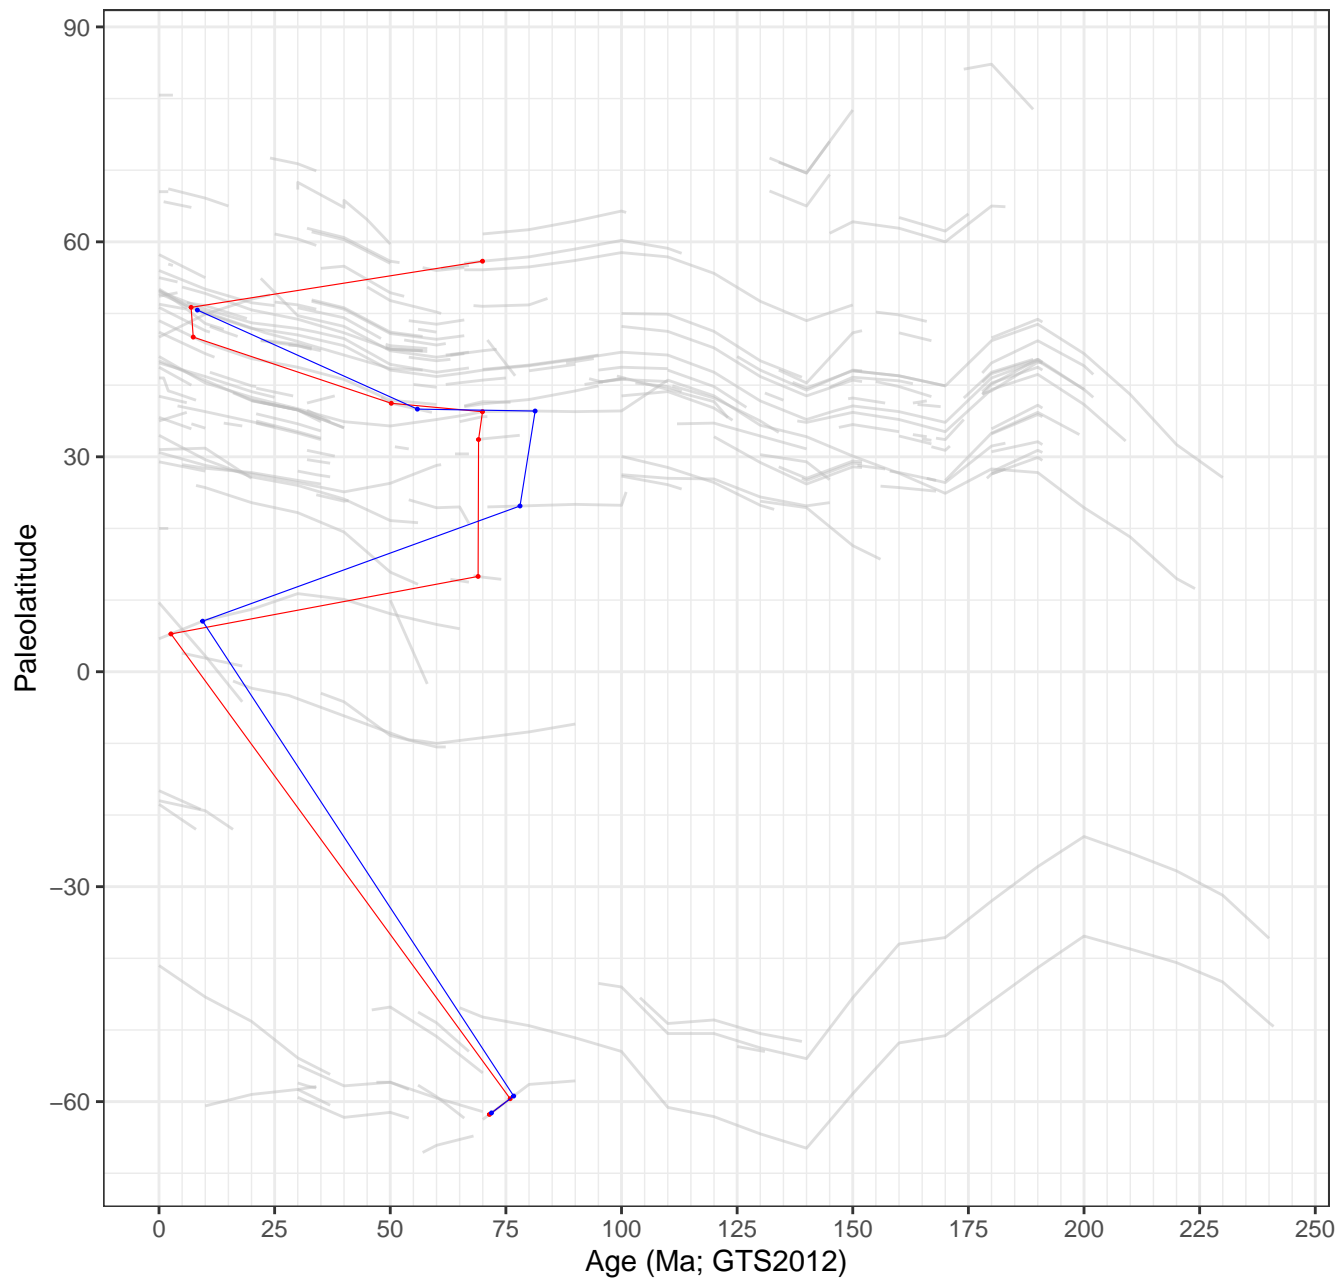

Supplement: Supplementary file 974 [file Cannosphaeropsis utinensis.pdf › Supplement/Supplement 2/Species 1914 plots/Cannosphaeropsis utinensis.pdf]

# Species *Cantulodinium speciosum*

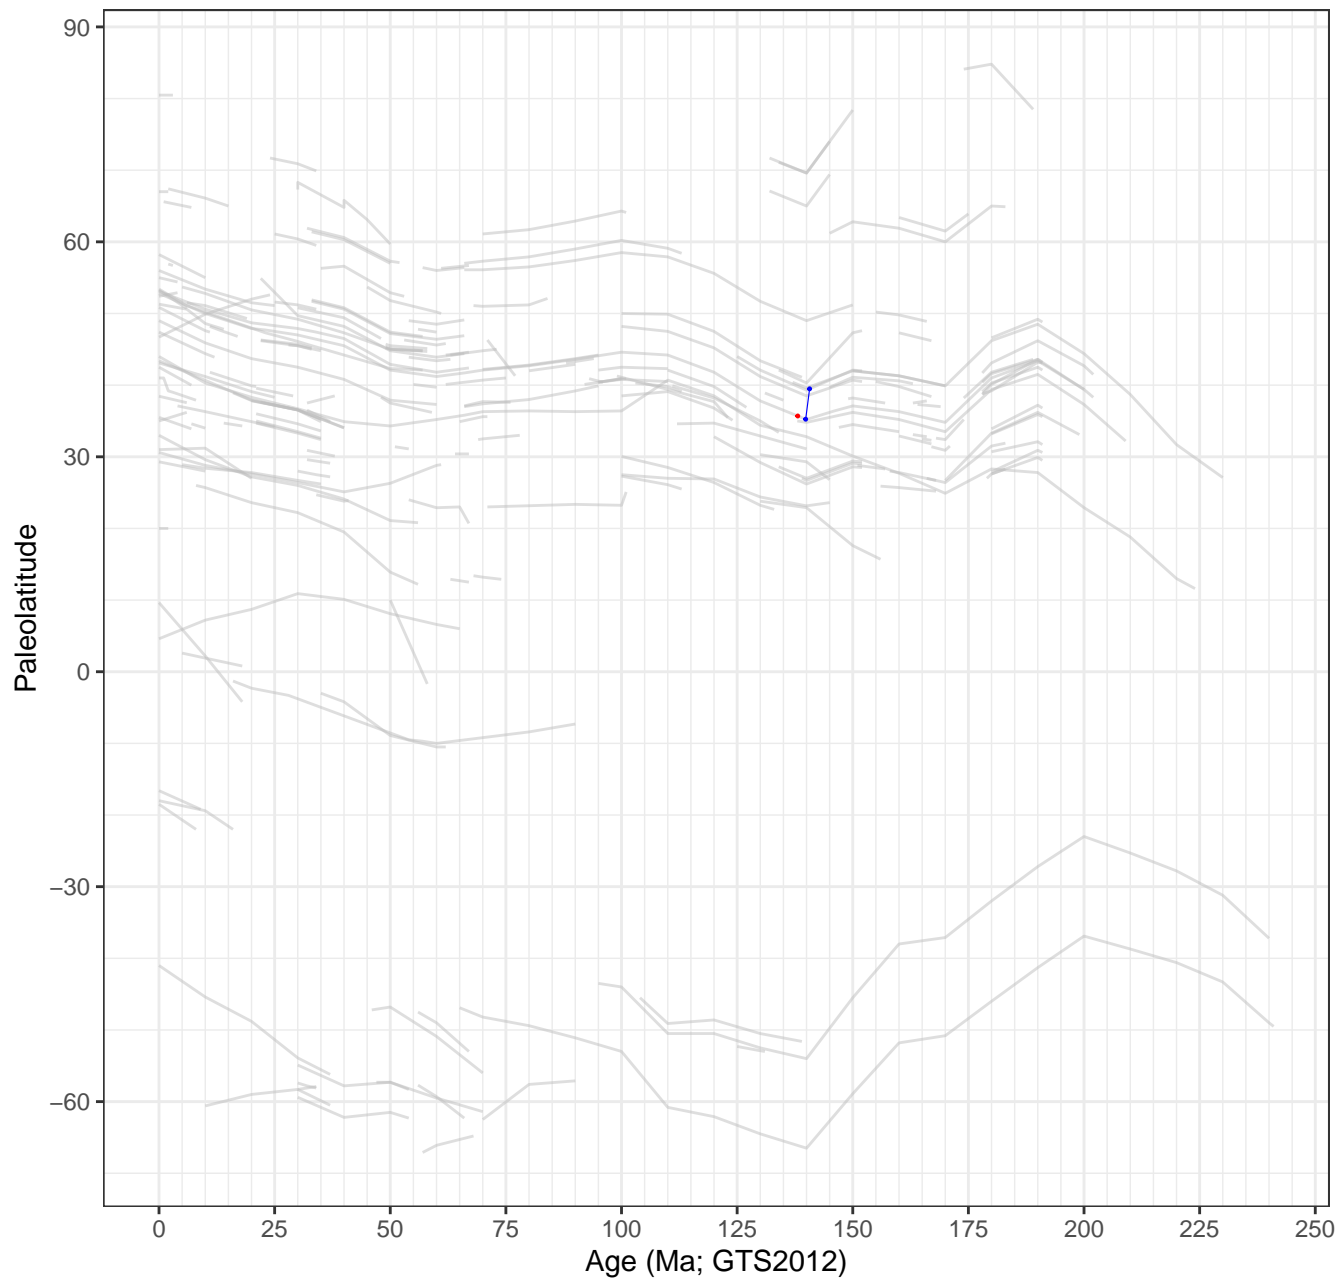

Supplement: Supplementary file 975 [file Cantulodinium speciosum.pdf › Supplement/Supplement 2/Species 1914 plots/Cantulodinium speciosum.pdf]

# Species *Capillicysta fusca*

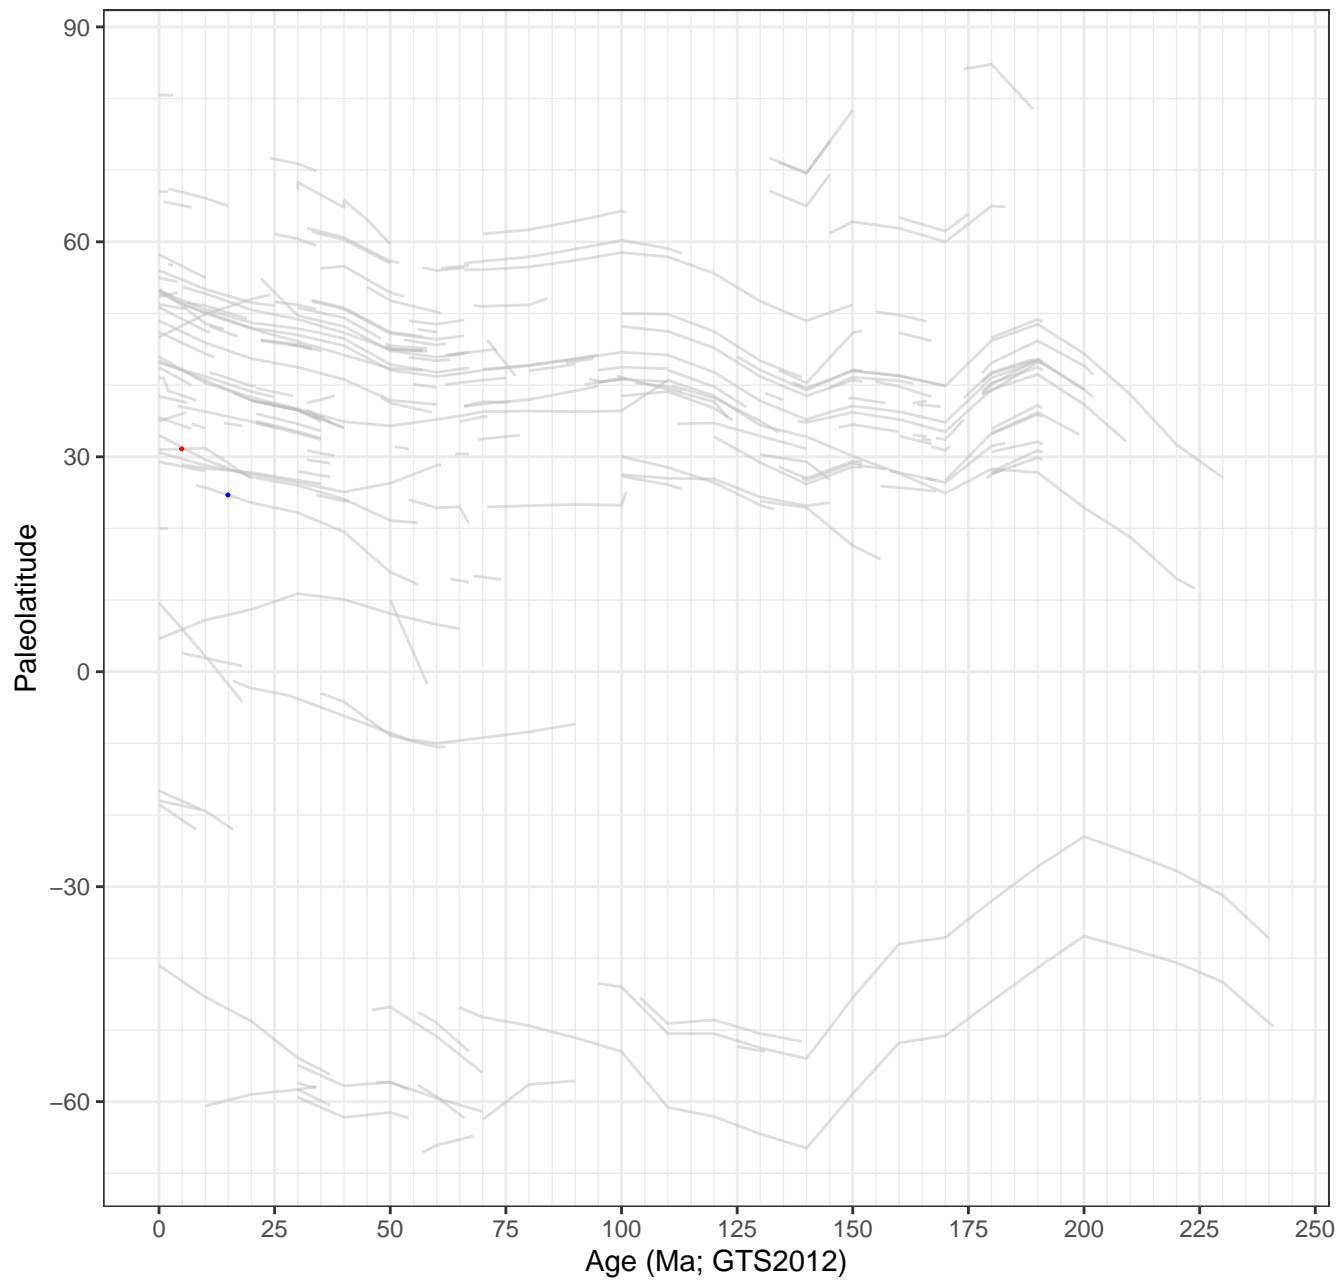

Supplement: Supplementary file 976 [file Capillicysta fusca.pdf › Supplement/Supplement 2/Species 1914 plots/Capillicysta fusca.pdf]

# Species *Carpatella cornuta*

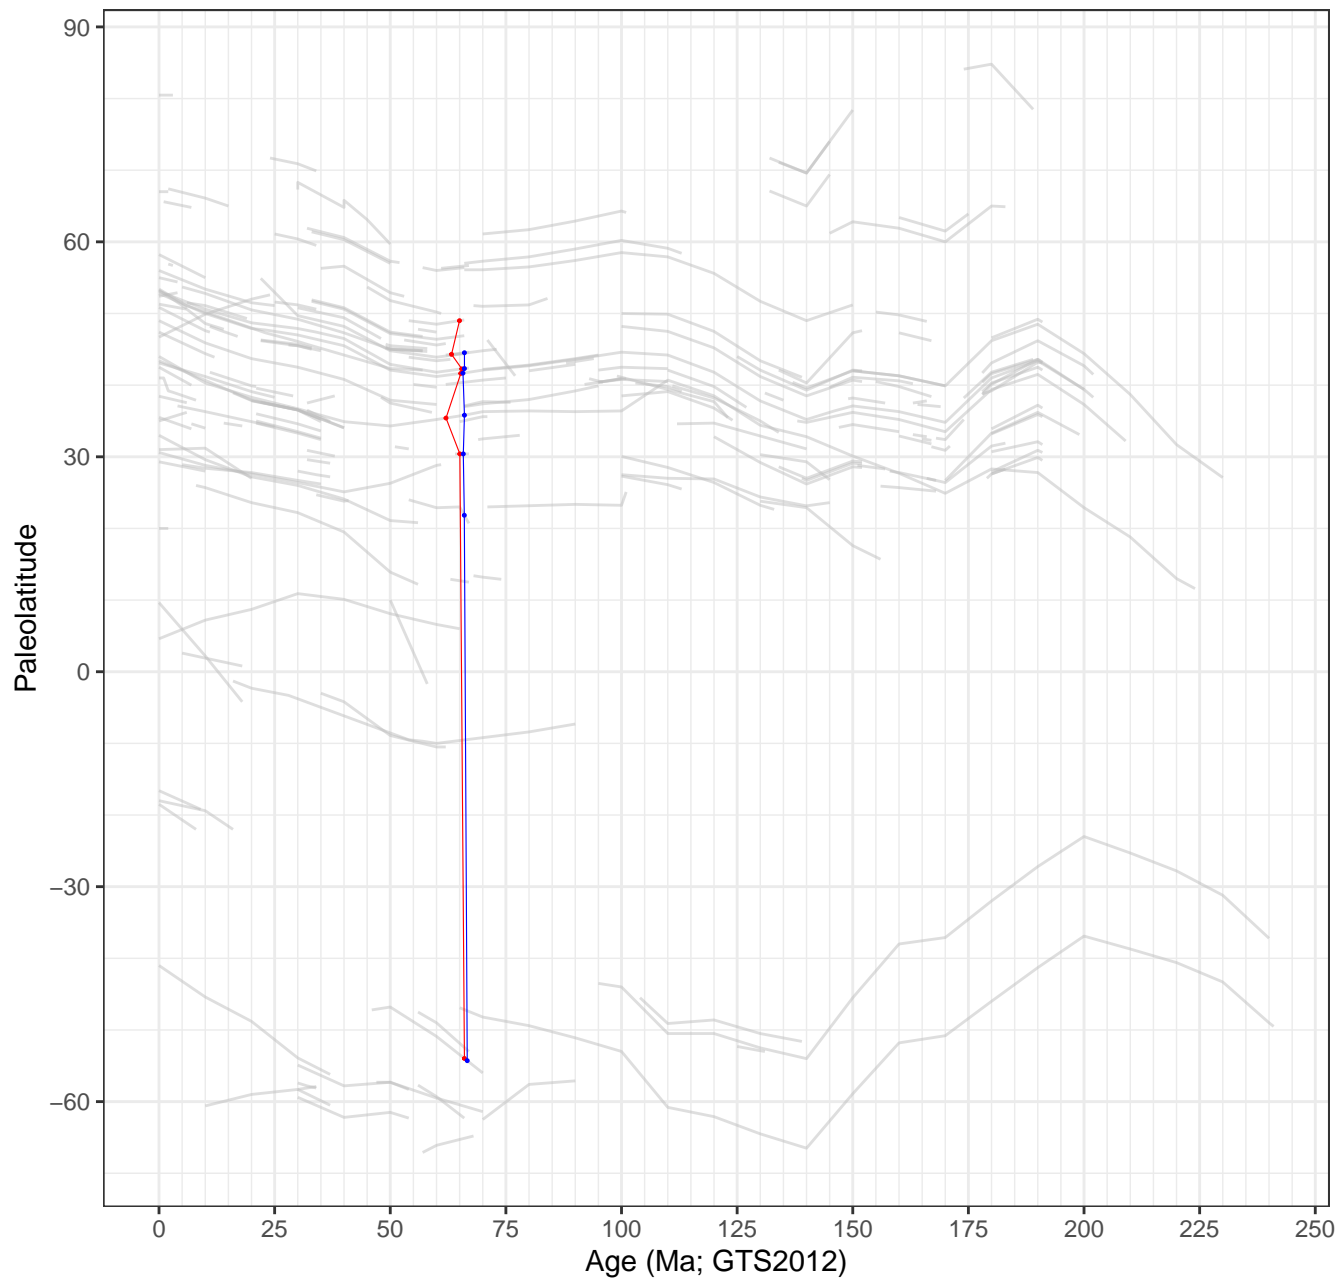

Supplement: Supplementary file 977 [file Carpatella cornuta.pdf › Supplement/Supplement 2/Species 1914 plots/Carpatella cornuta.pdf]

# Species *Carpatella septata*

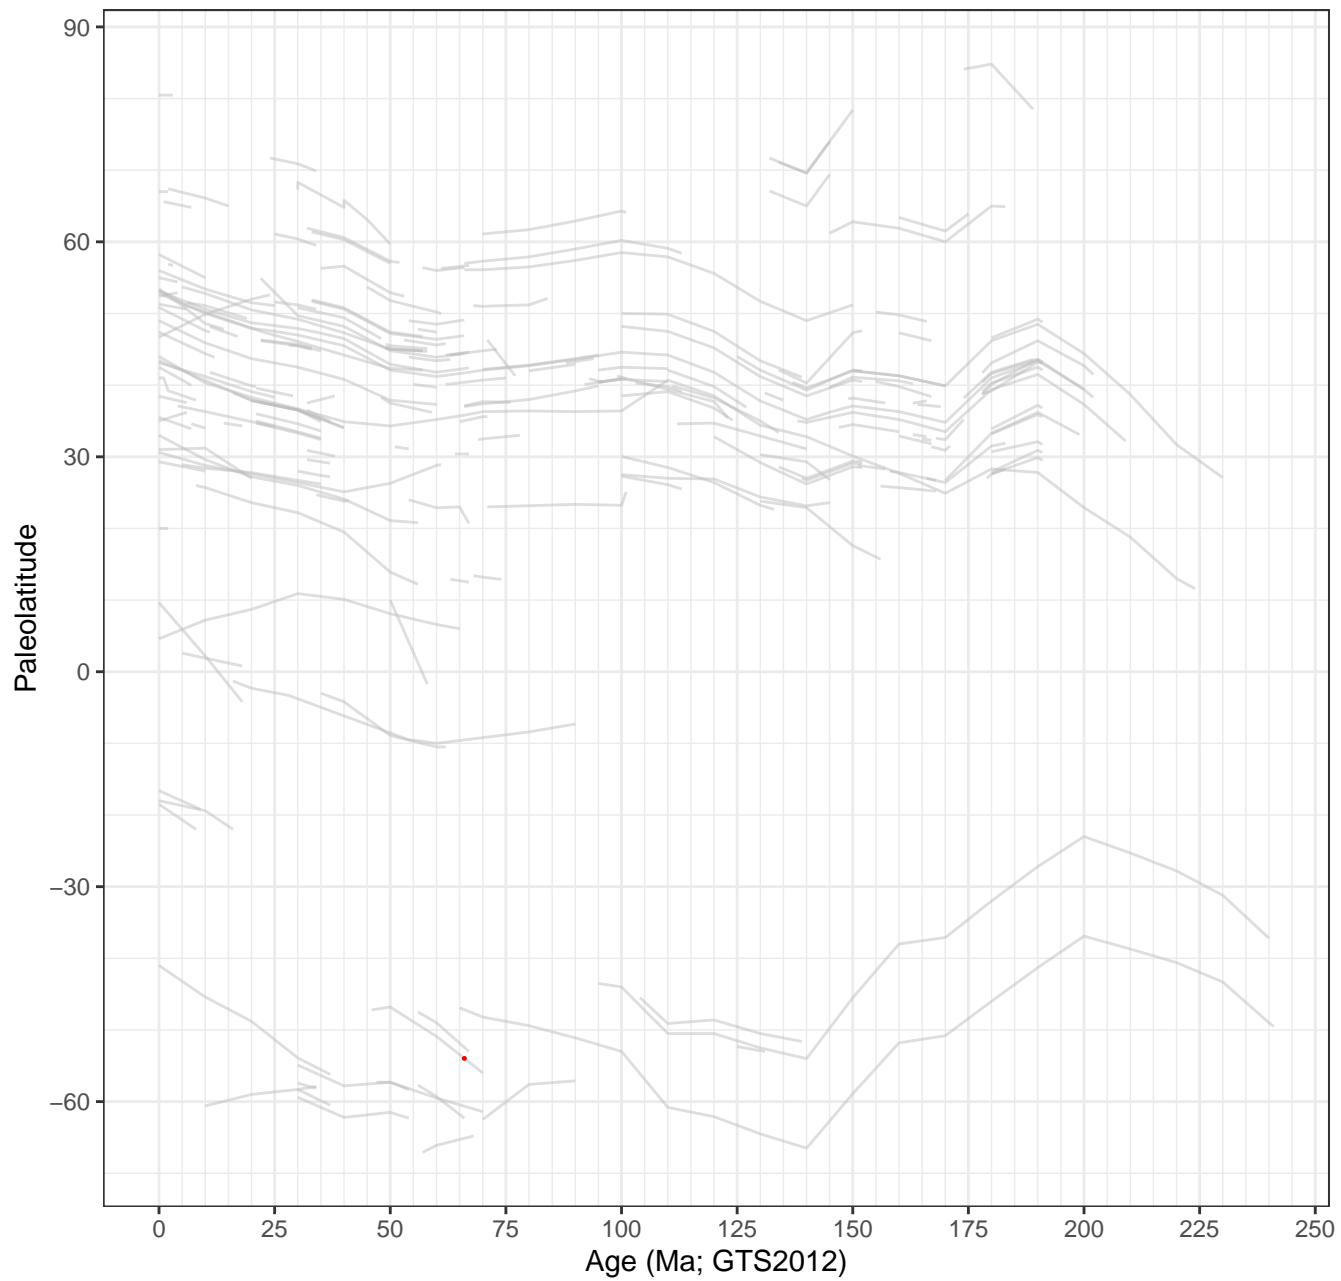

Supplement: Supplementary file 978 [file Carpatella septata.pdf › Supplement/Supplement 2/Species 1914 plots/Carpatella septata.pdf]

# Species *Carpathodinium predae*

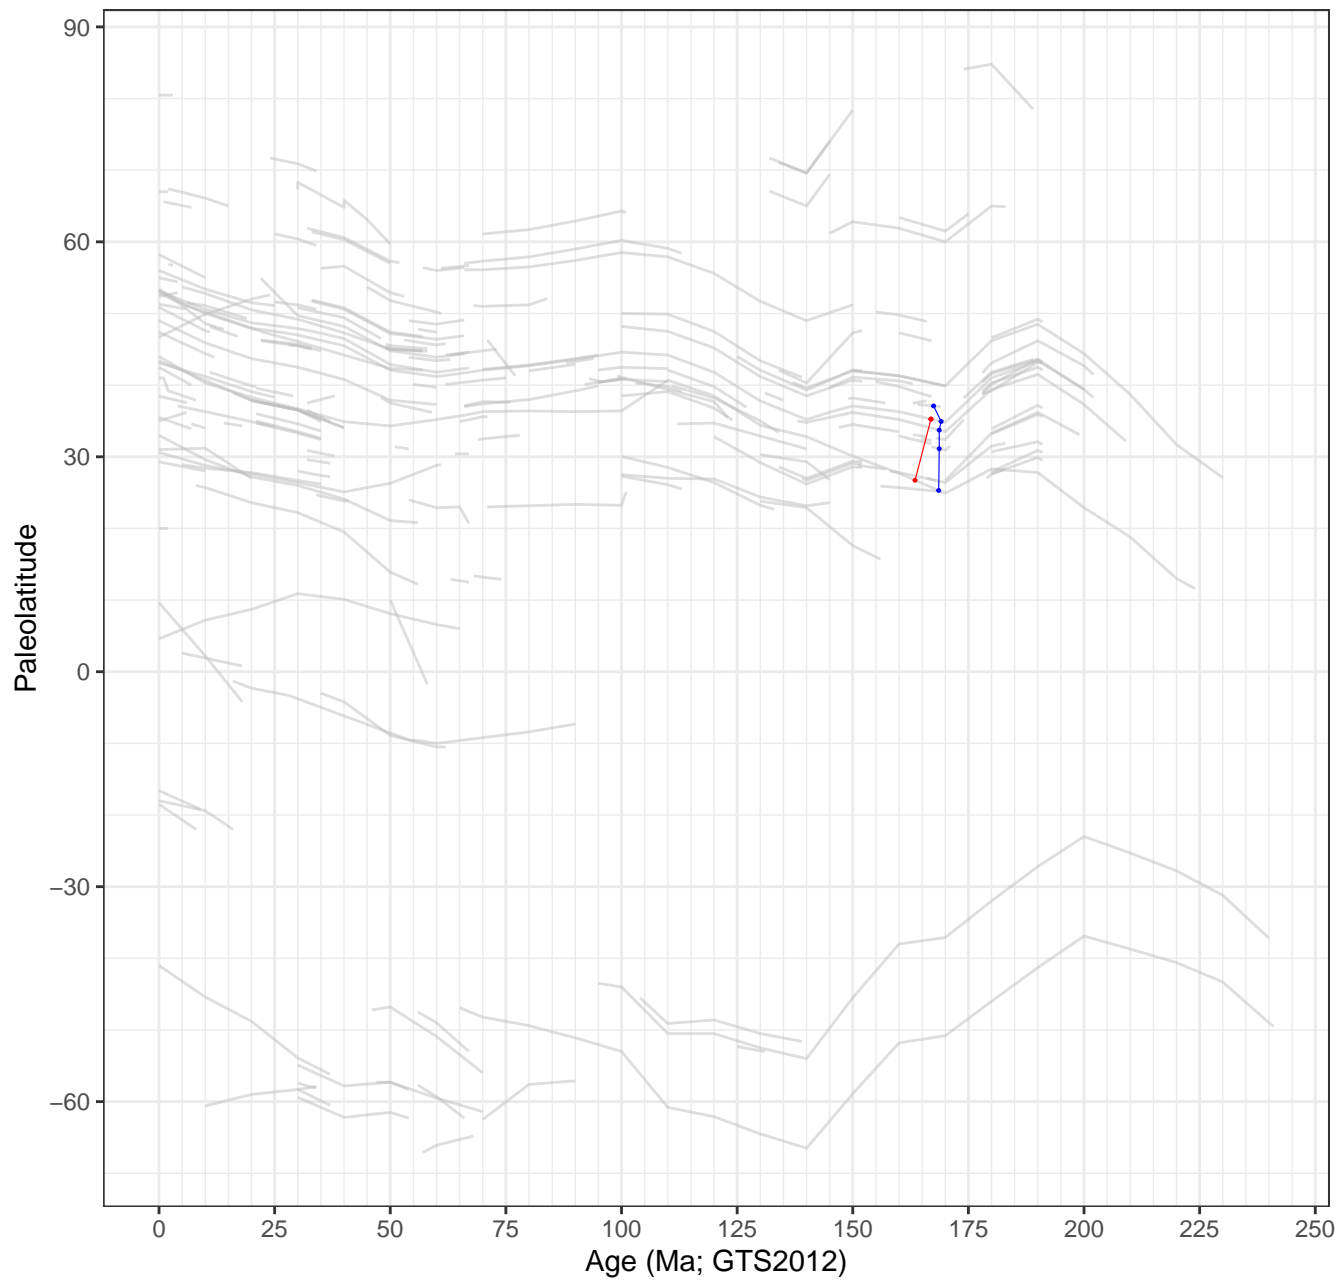

Supplement: Supplementary file 979 [file Carpathodinium predae.pdf › Supplement/Supplement 2/Species 1914 plots/Carpathodinium predae.pdf]

# Species *Carpodinium granulatum*

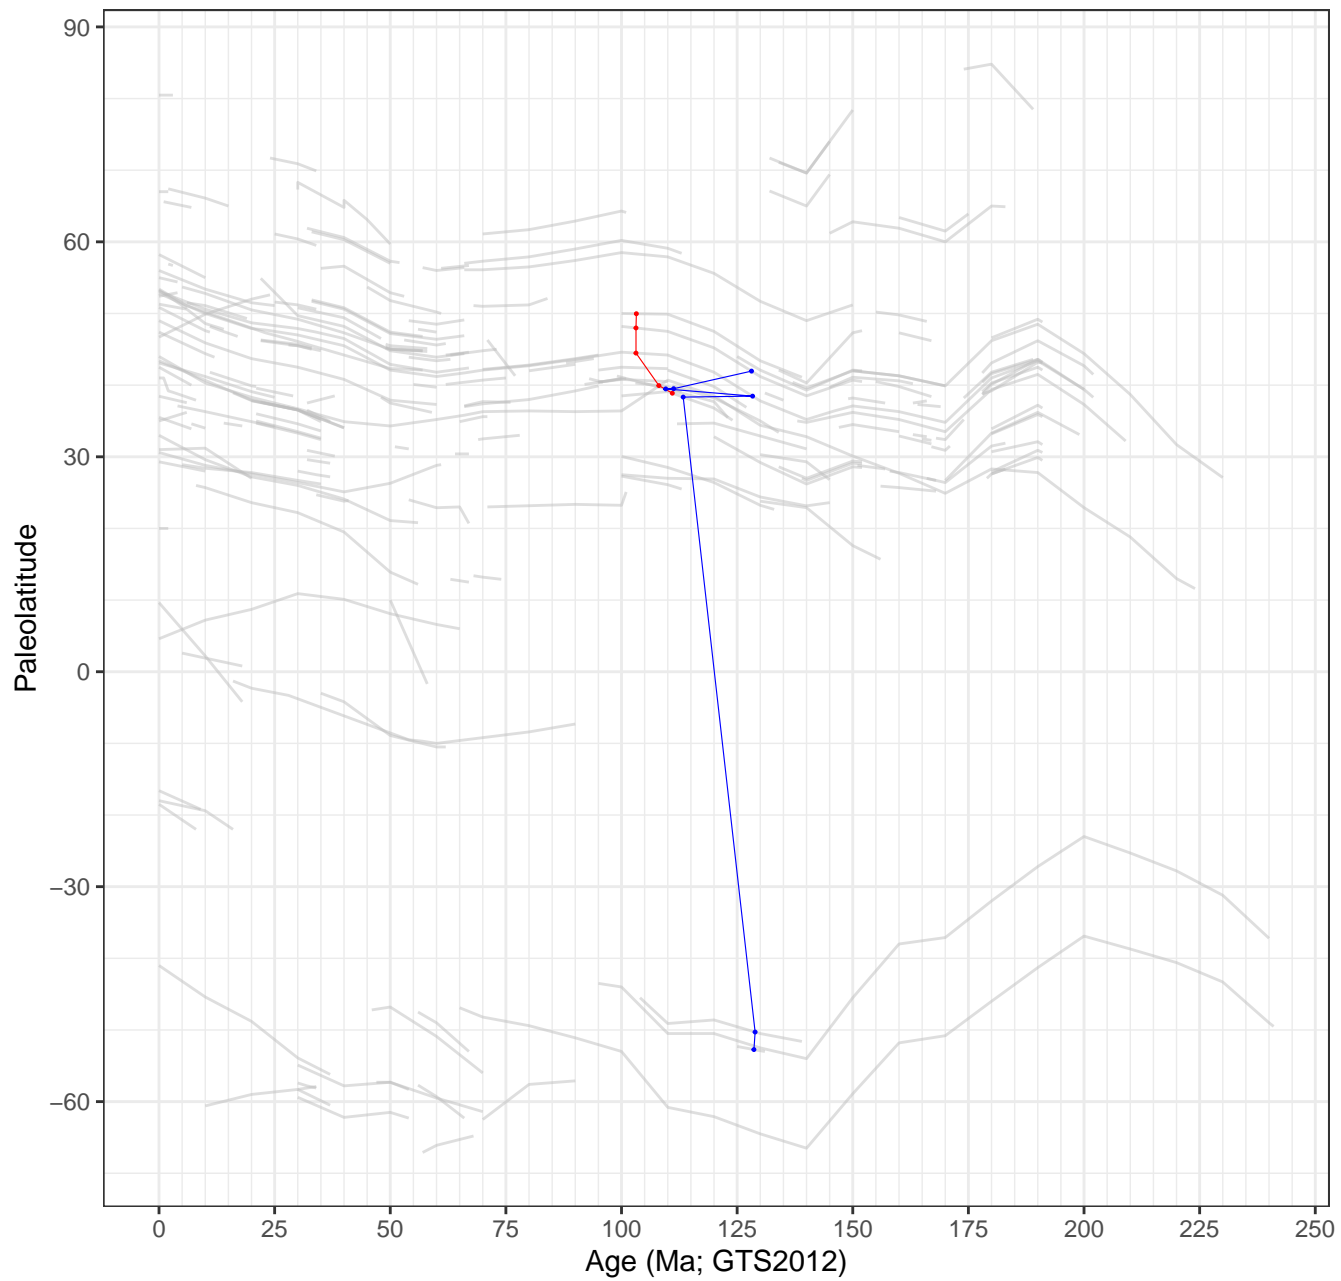

Supplement: Supplementary file 980 [file Carpodinium granulatum.pdf › Supplement/Supplement 2/Species 1914 plots/Carpodinium granulatum.pdf]

# Species *Carpodinium obliquicostatum*

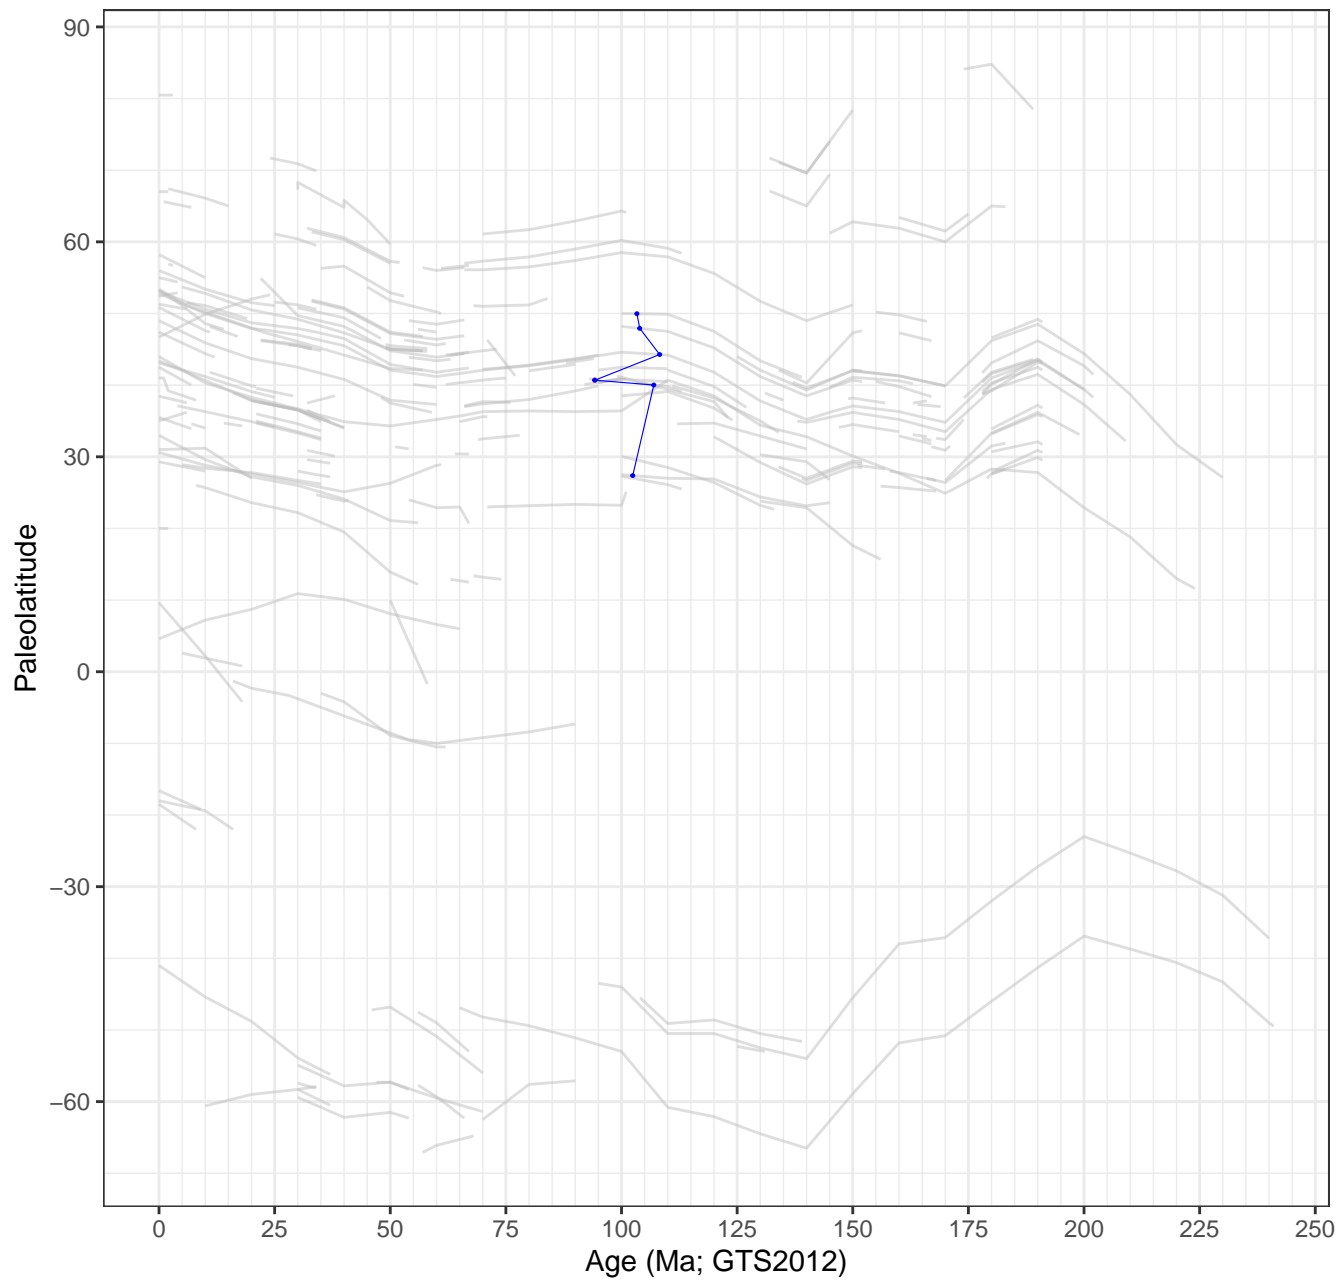

Supplement: Supplementary file 981 [file Carpodinium obliquicostatum.pdf › Supplement/Supplement 2/Species 1914 plots/Carpodinium obliquicostatum.pdf]

# Species *Caspidinium rugosum*

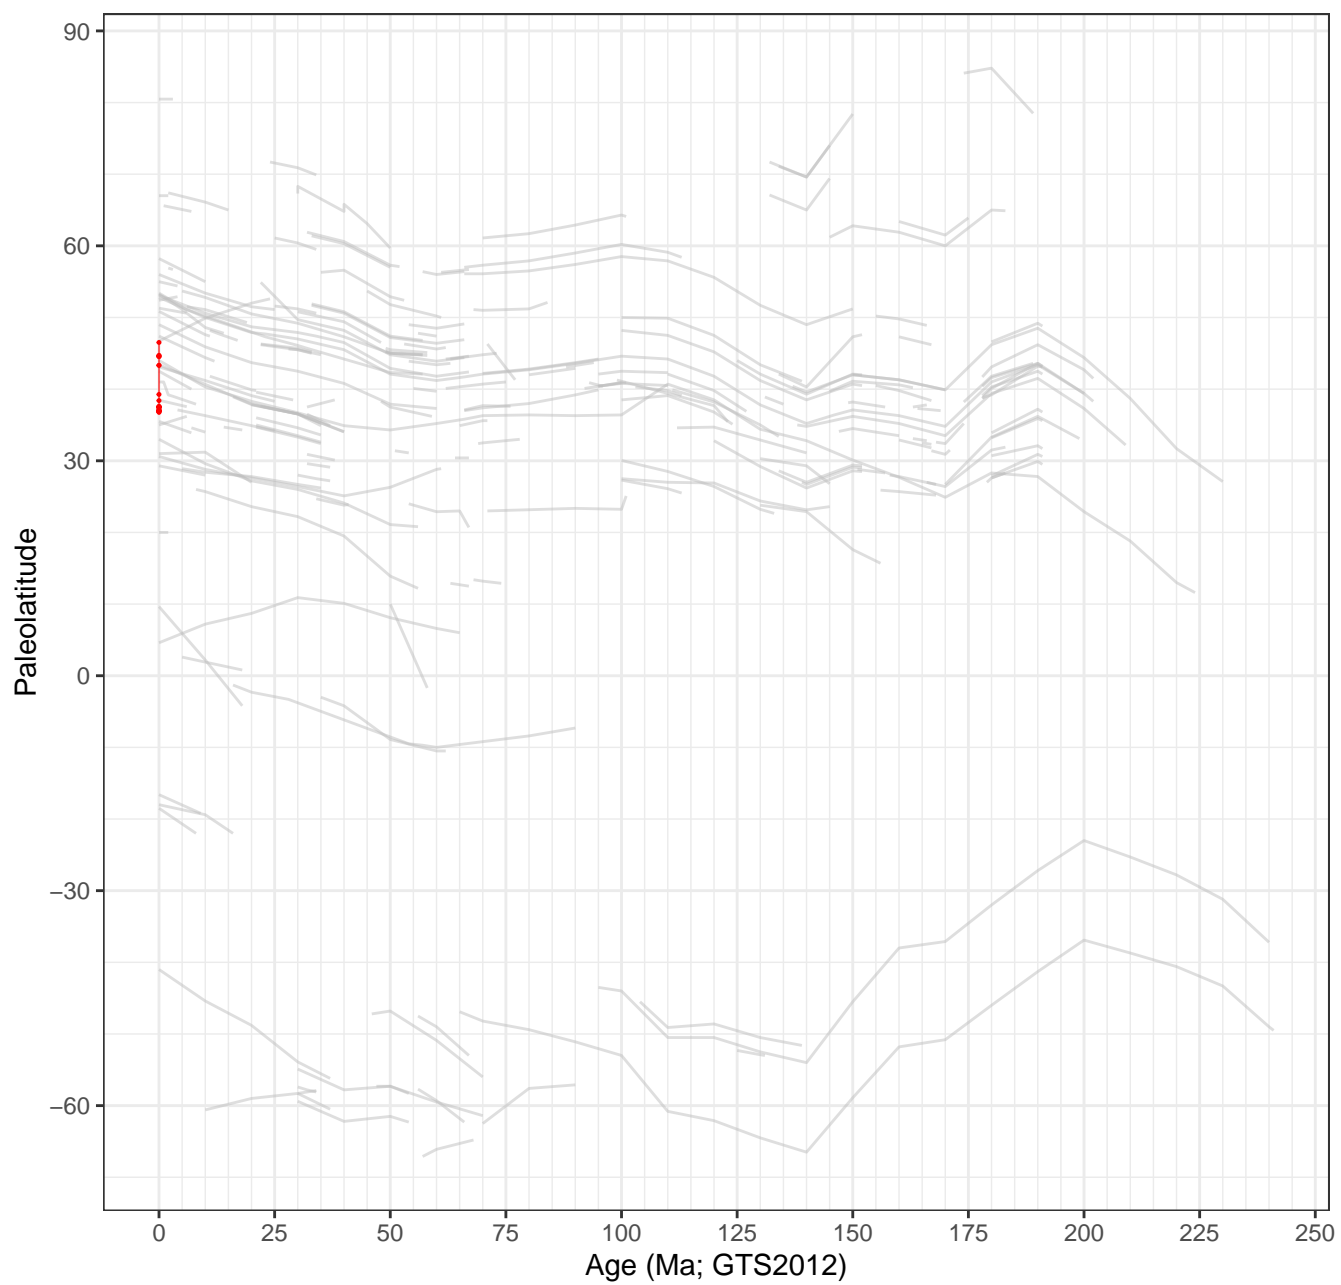

Supplement: Supplementary file 982 [file Caspidinium rugosum.pdf › Supplement/Supplement 2/Species 1914 plots/Caspidinium rugosum.pdf]

# Species *Cassiculosphaeridia magna*

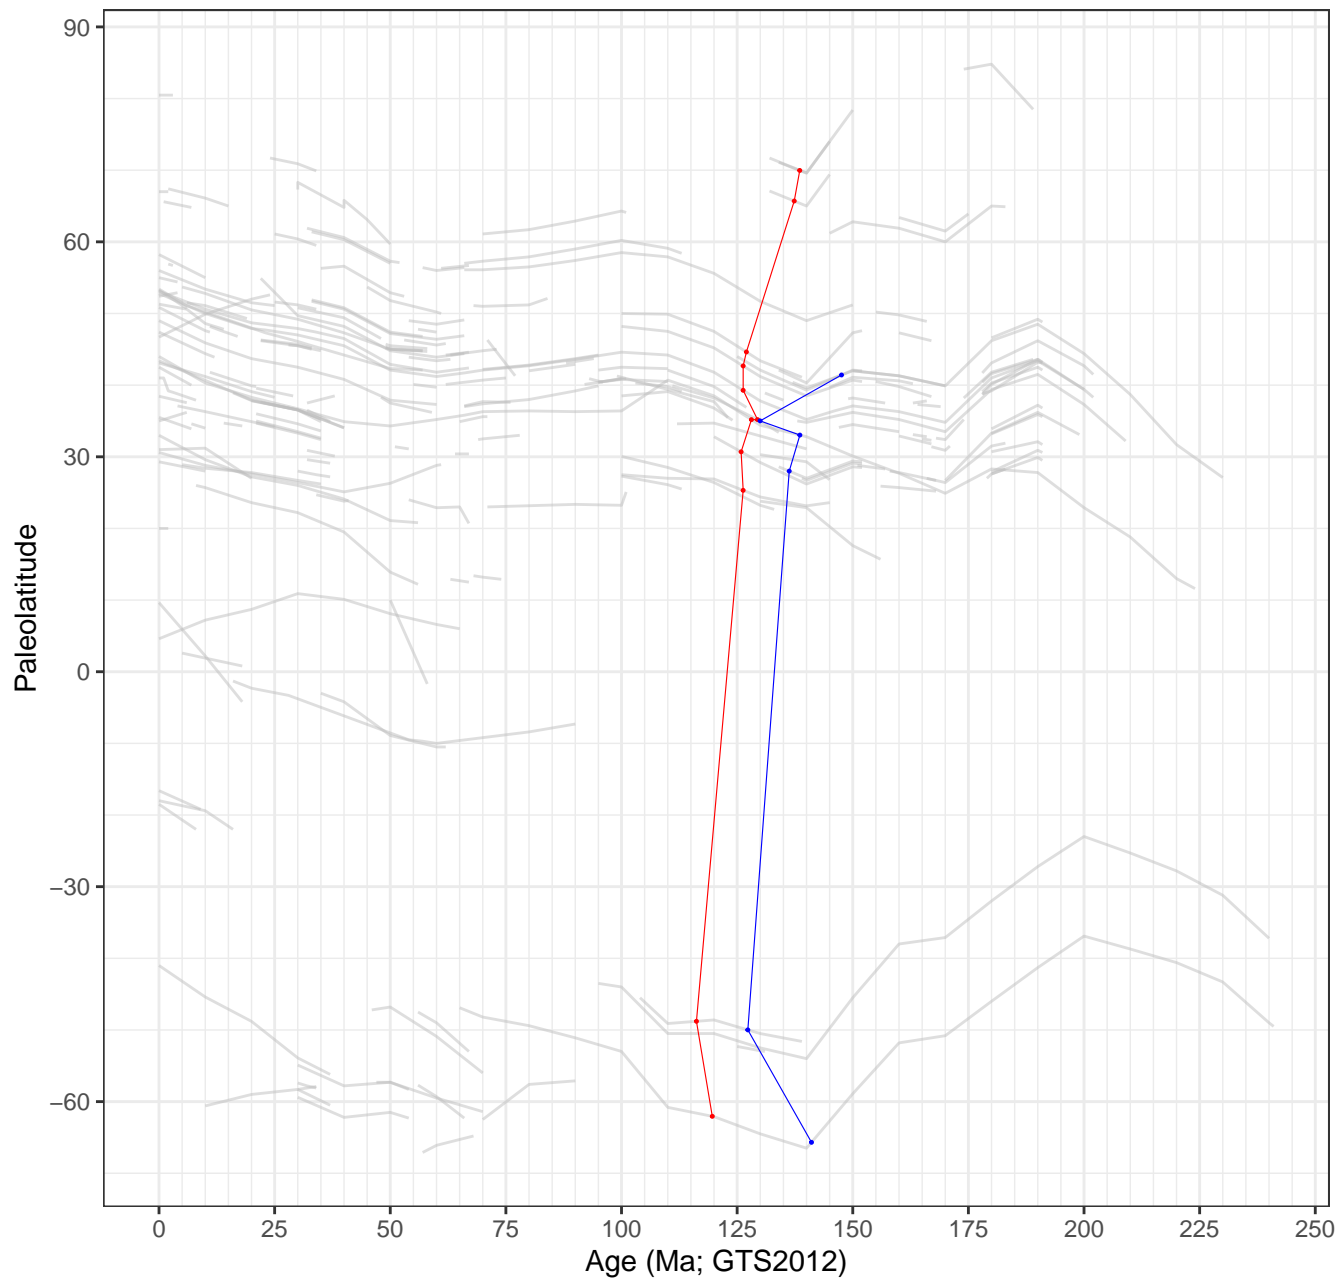

Supplement: Supplementary file 983 [file Cassiculosphaeridia magna.pdf › Supplement/Supplement 2/Species 1914 plots/Cassiculosphaeridia magna.pdf]

# Species *Cassiculosphaeridia pygmaea*

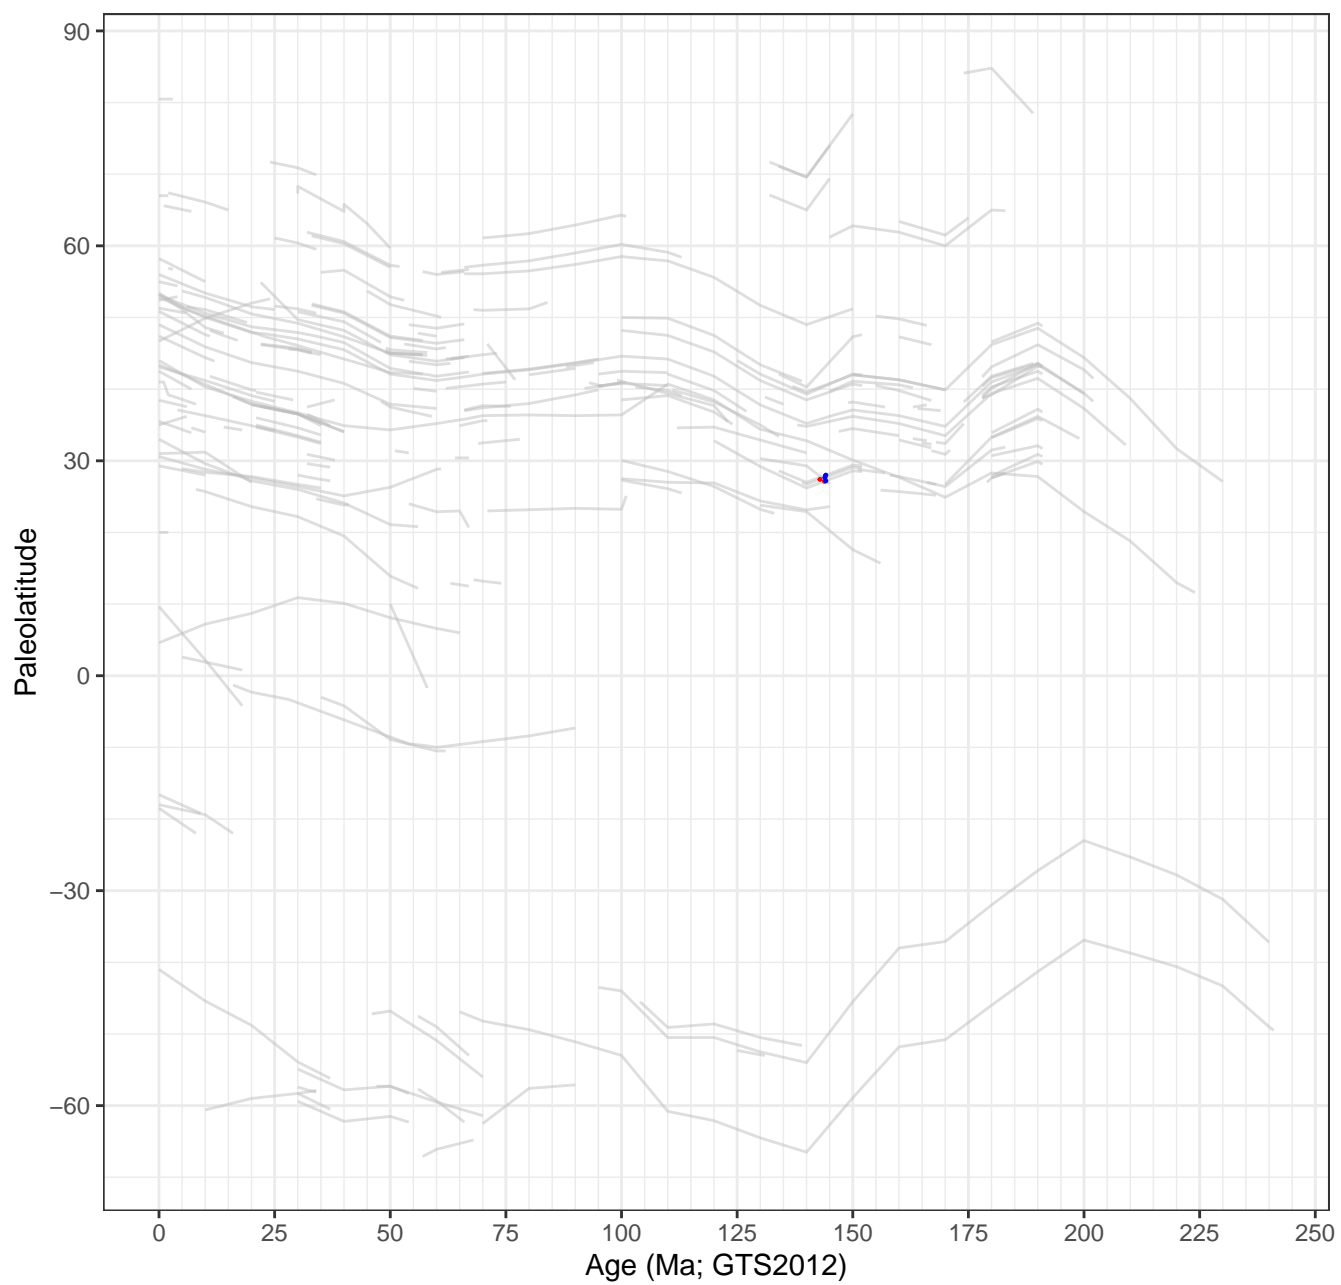

Supplement: Supplementary file 984 [file Cassiculosphaeridia pygmaea.pdf › Supplement/Supplement 2/Species 1914 plots/Cassiculosphaeridia pygmaea.pdf]

# Species *Cassiculosphaeridia reticulata*

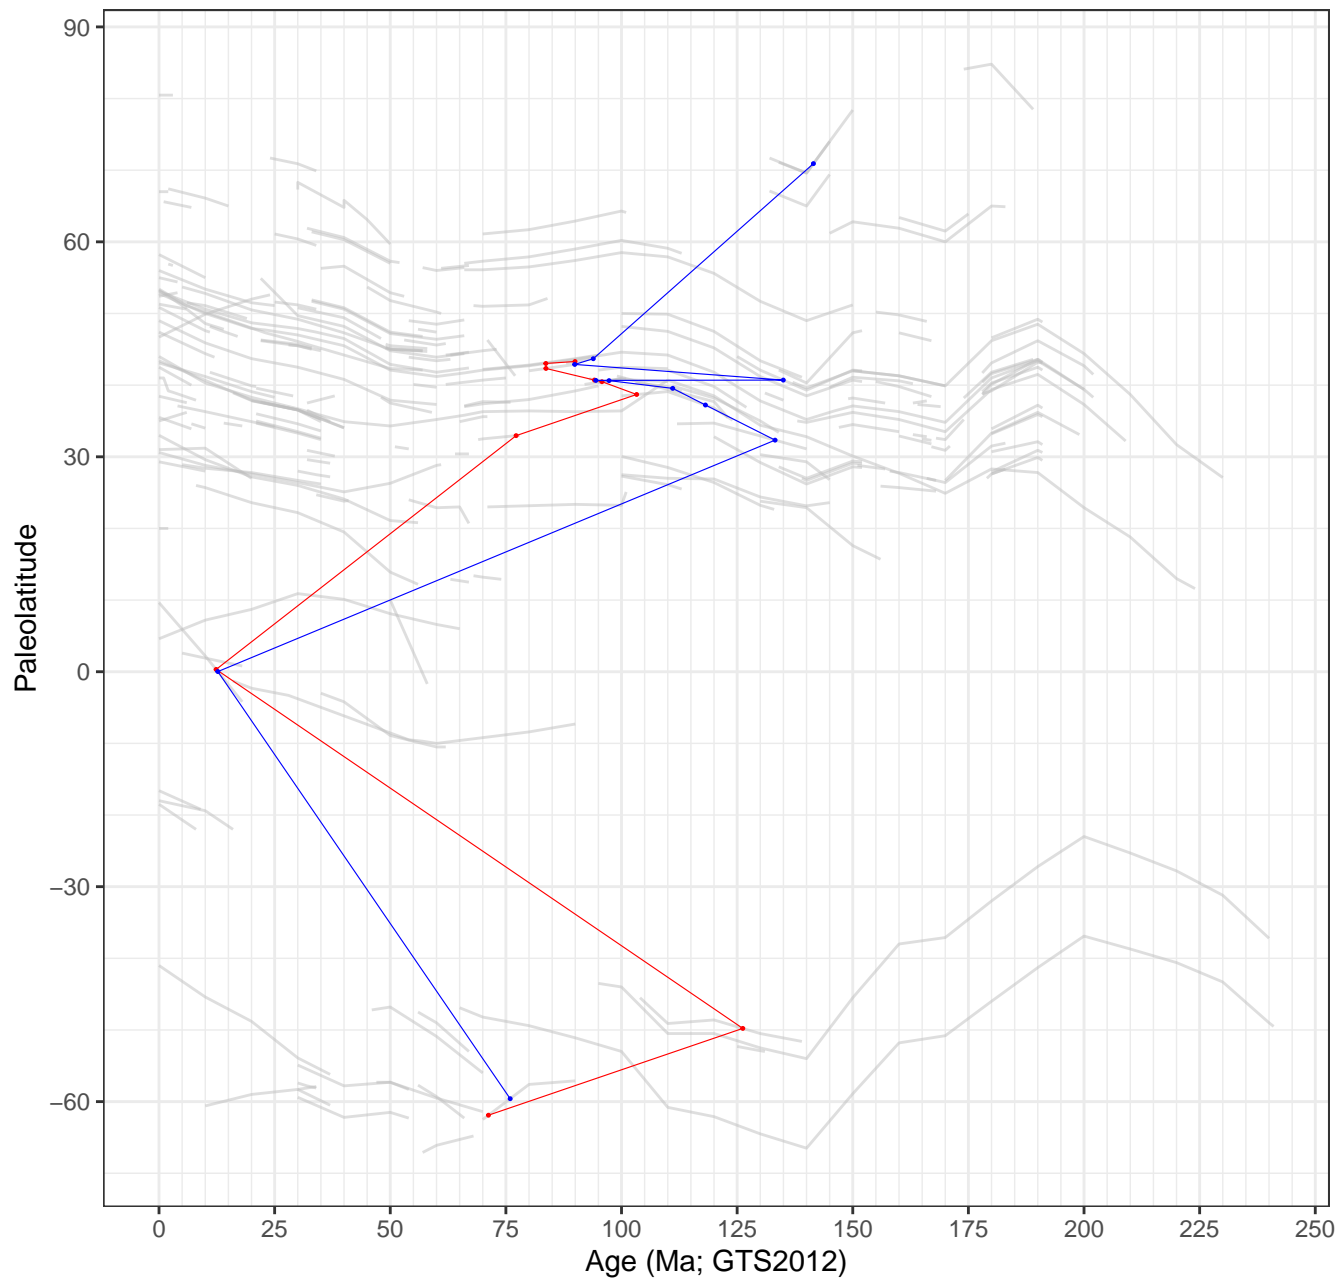

Supplement: Supplementary file 985 [file Cassiculosphaeridia reticulata.pdf › Supplement/Supplement 2/Species 1914 plots/Cassiculosphaeridia reticulata.pdf]

# Species *Cassiculosphaeridia solida*

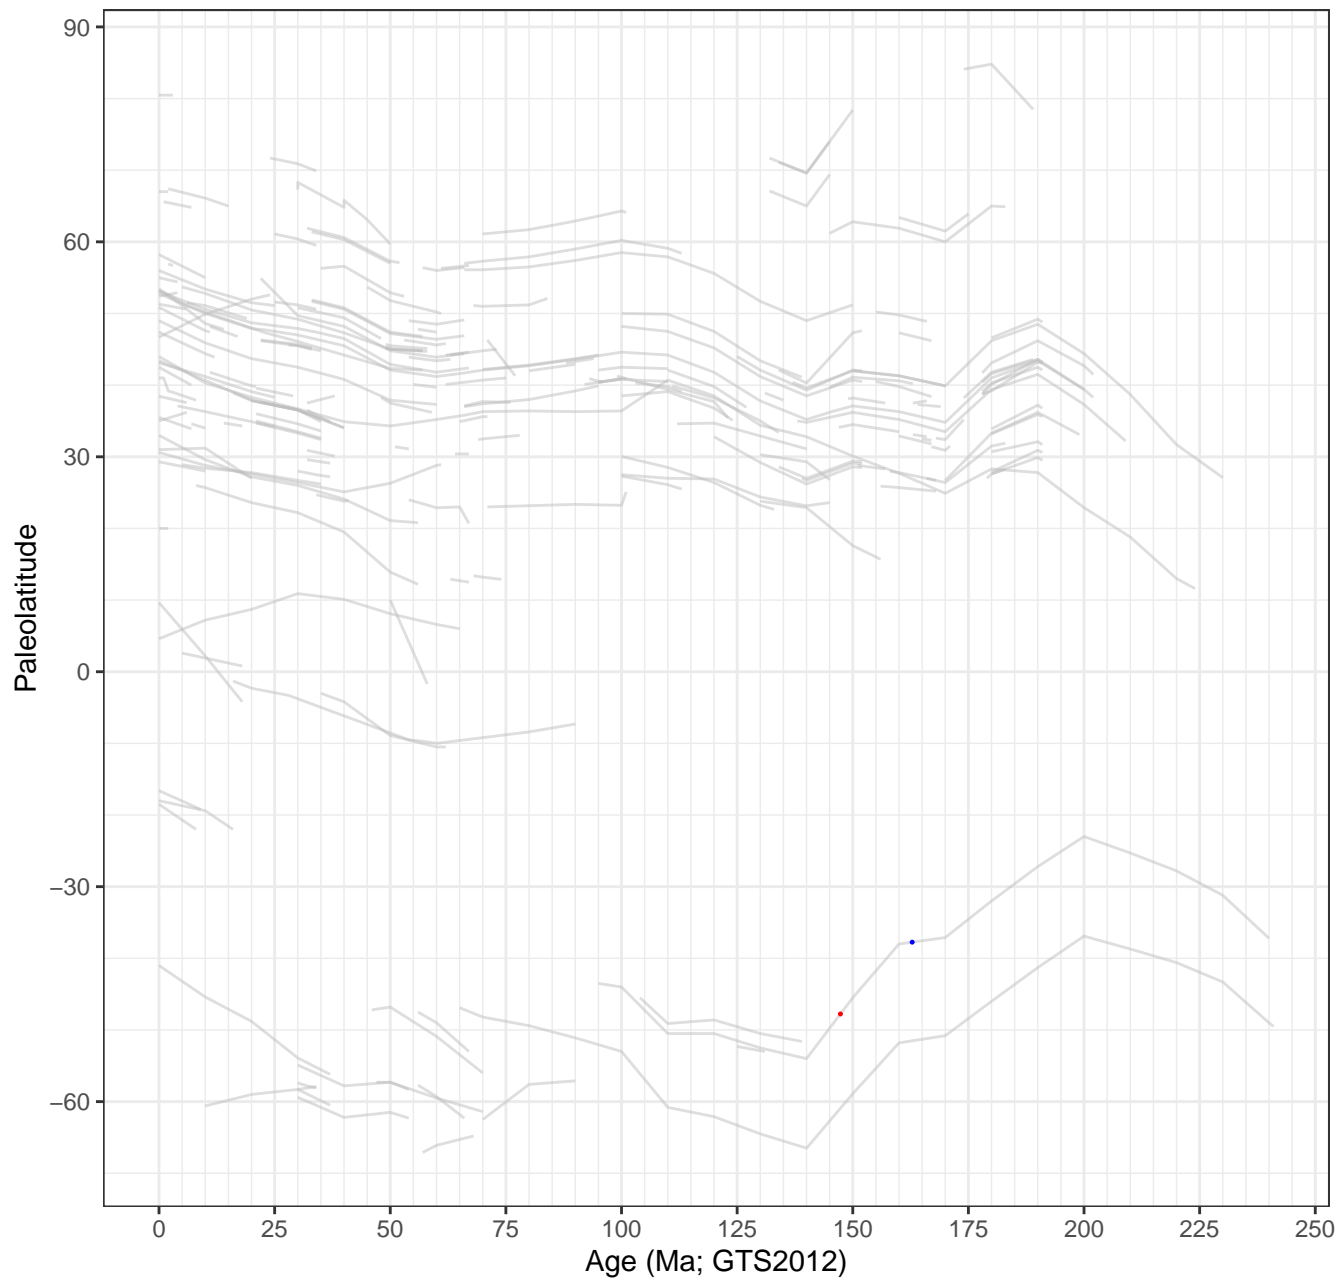

Supplement: Supplementary file 986 [file Cassiculosphaeridia solida.pdf › Supplement/Supplement 2/Species 1914 plots/Cassiculosphaeridia solida.pdf]

# Species *Cassiculosphaeridia tocheri*

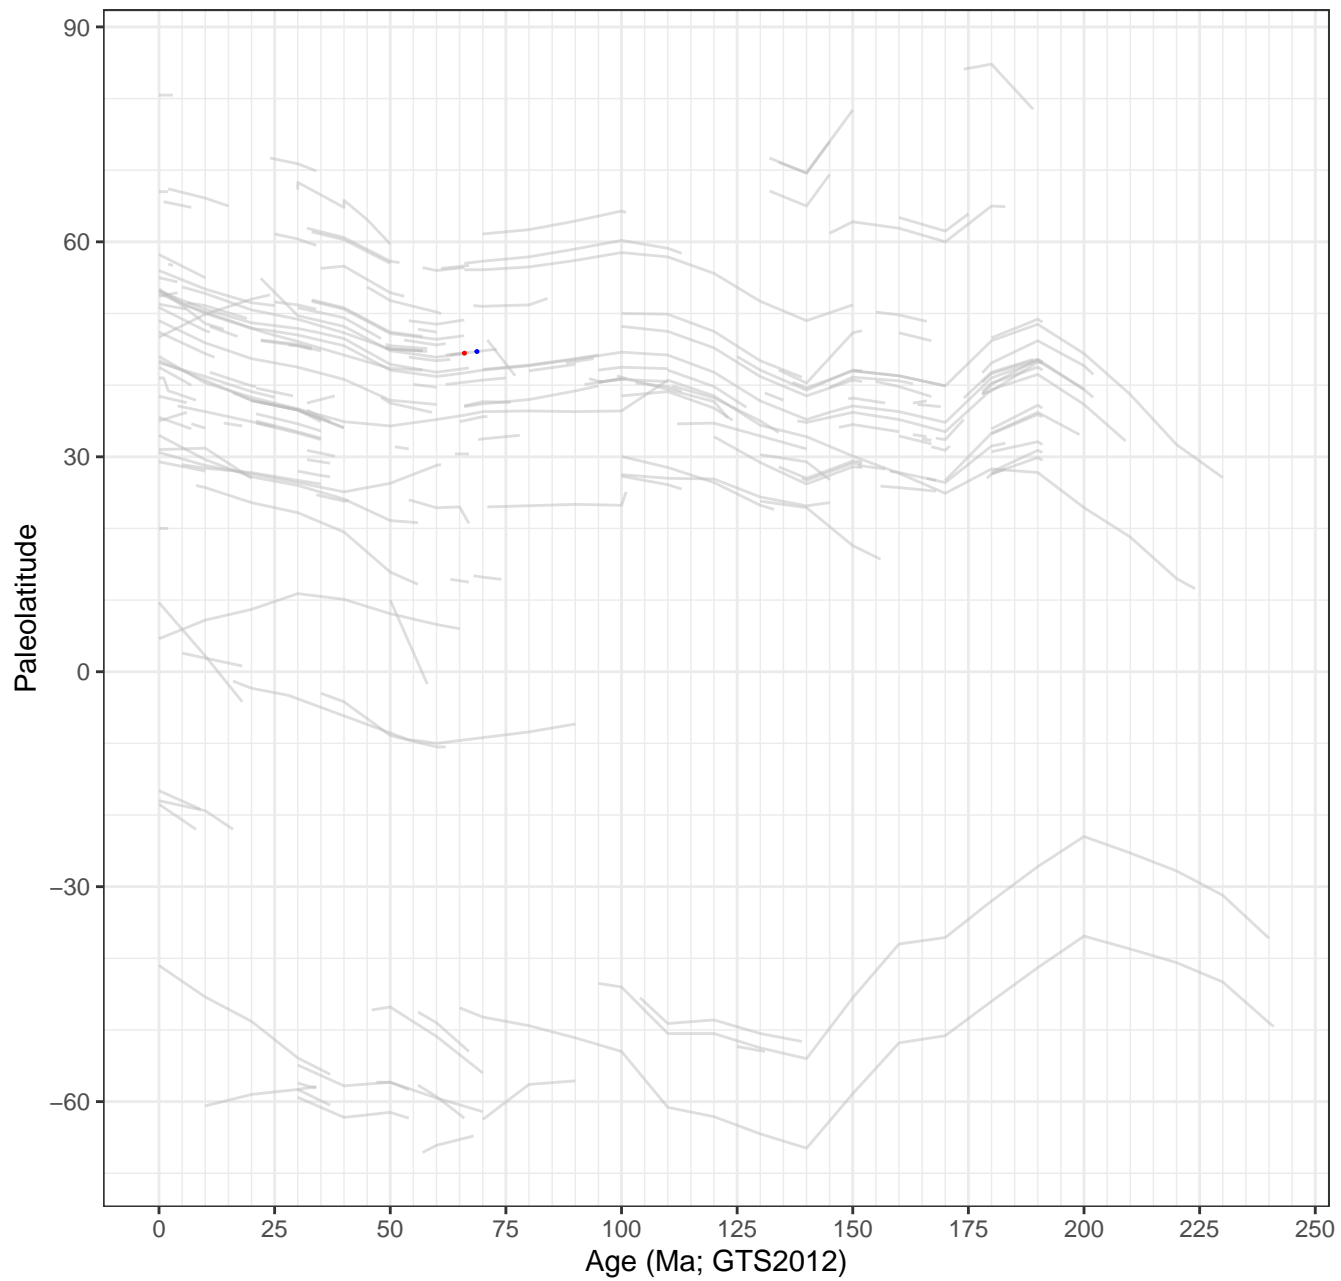

Supplement: Supplementary file 987 [file Cassiculosphaeridia tocheri.pdf › Supplement/Supplement 2/Species 1914 plots/Cassiculosphaeridia tocheri.pdf]

# Species *Cassidium filosum*

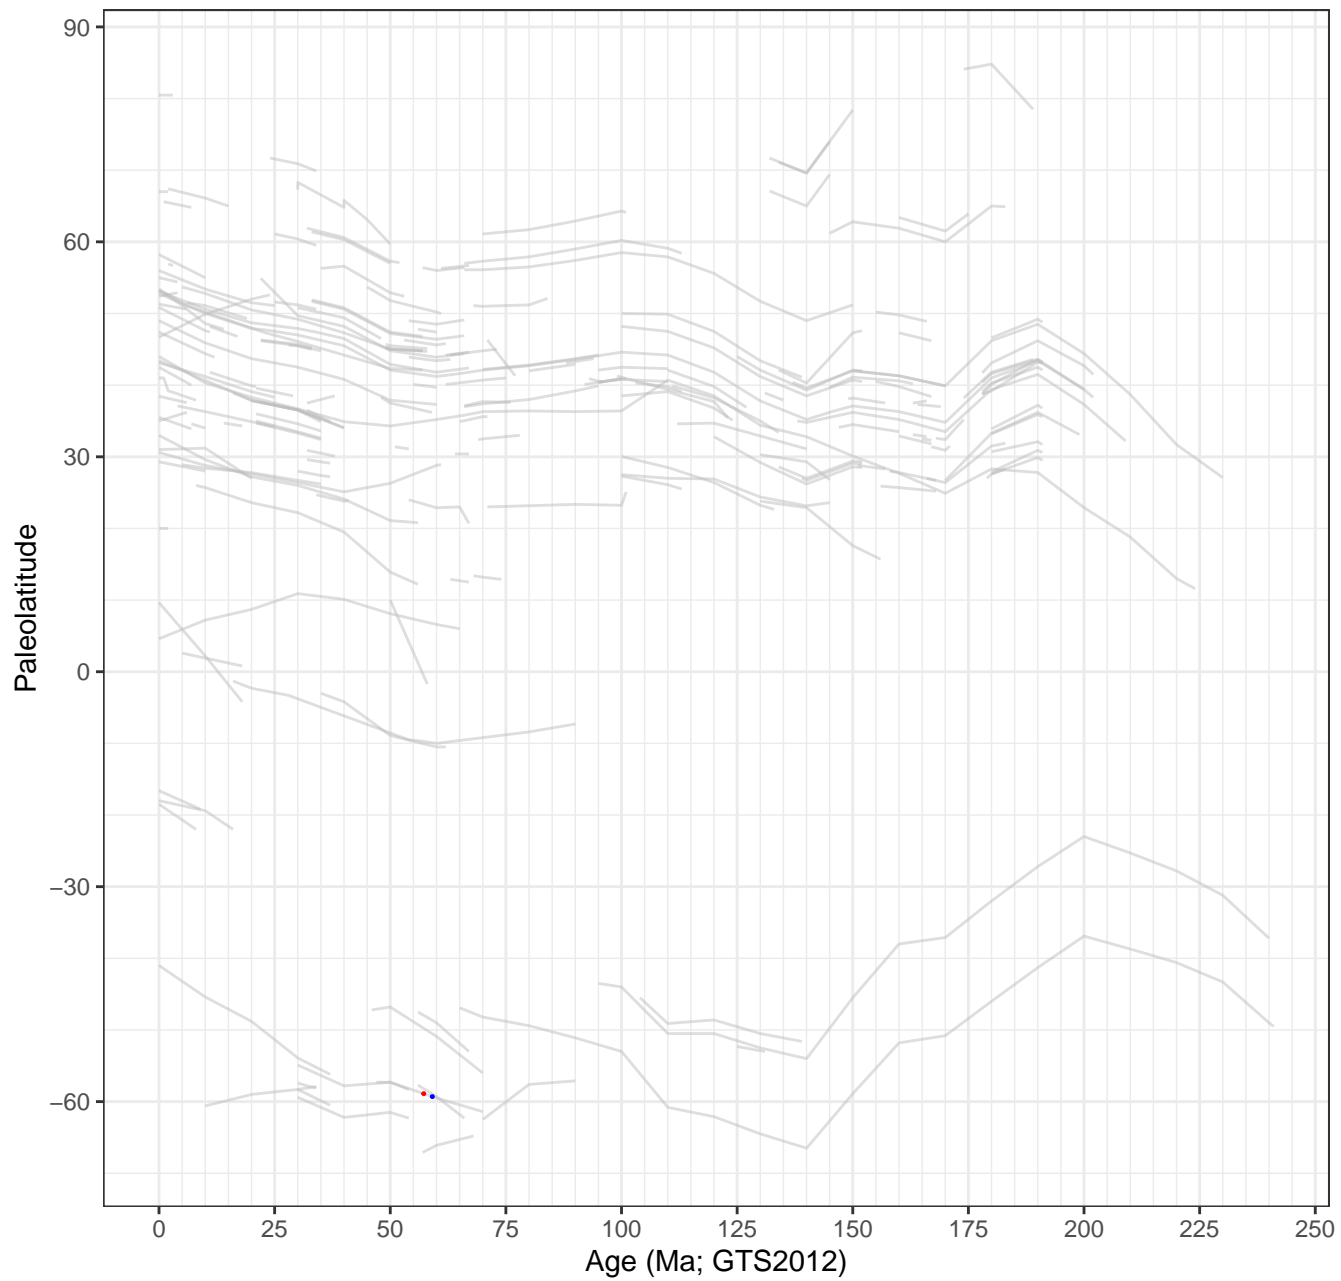

Supplement: Supplementary file 988 [file Cassidium filosum.pdf › Supplement/Supplement 2/Species 1914 plots/Cassidium filosum.pdf]

# Species *Cassidium fragile*

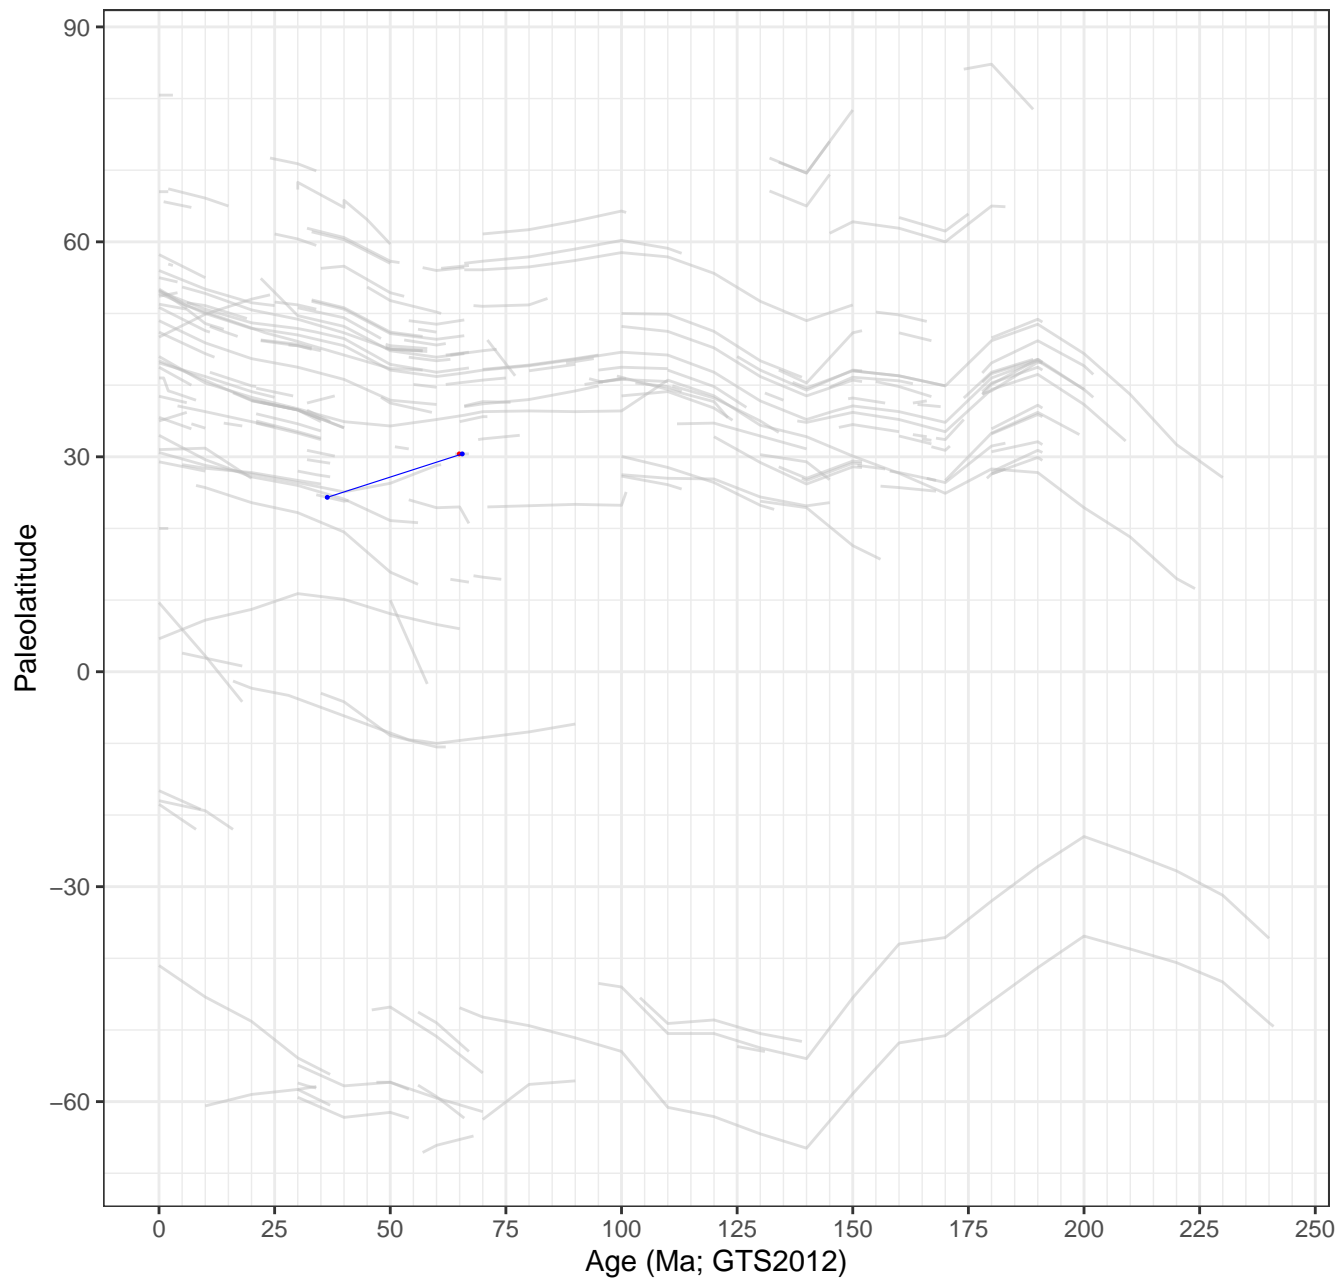

Supplement: Supplementary file 989 [file Cassidium fragile.pdf › Supplement/Supplement 2/Species 1914 plots/Cassidium fragile.pdf]

# Species *Cauca parva*

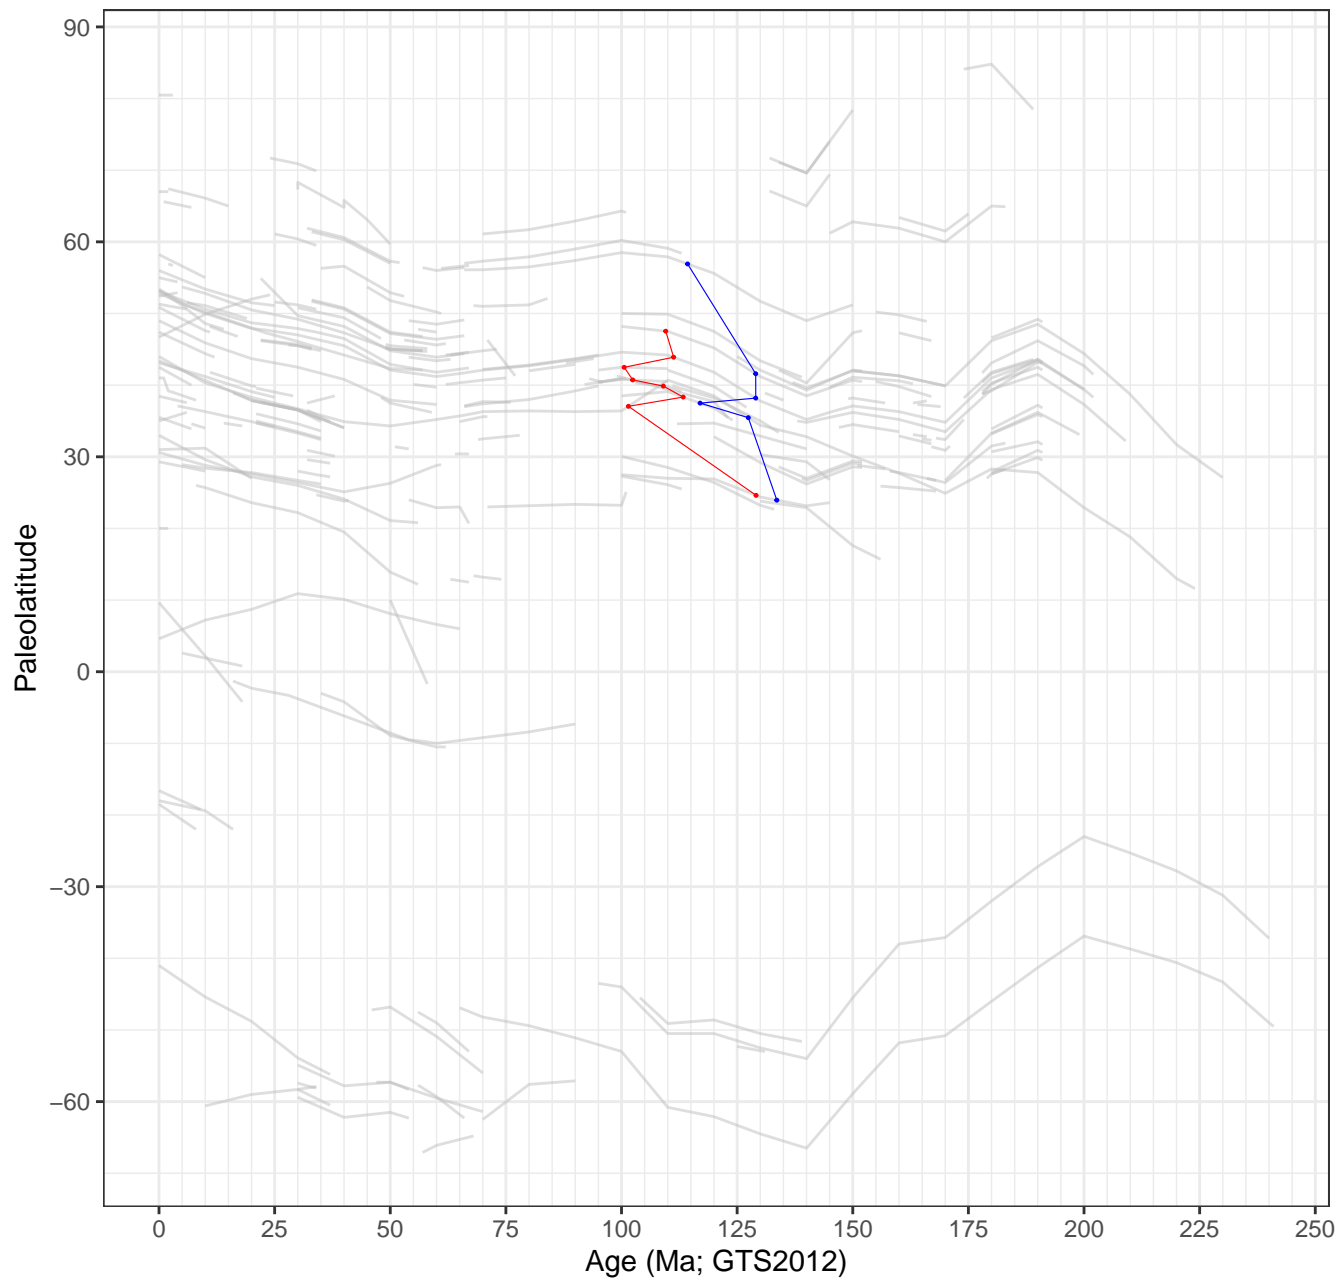

Supplement: Supplementary file 990 [file Cauca parva.pdf › Supplement/Supplement 2/Species 1914 plots/Cauca parva.pdf]

# Species *Cauveridinium membraniphorum*

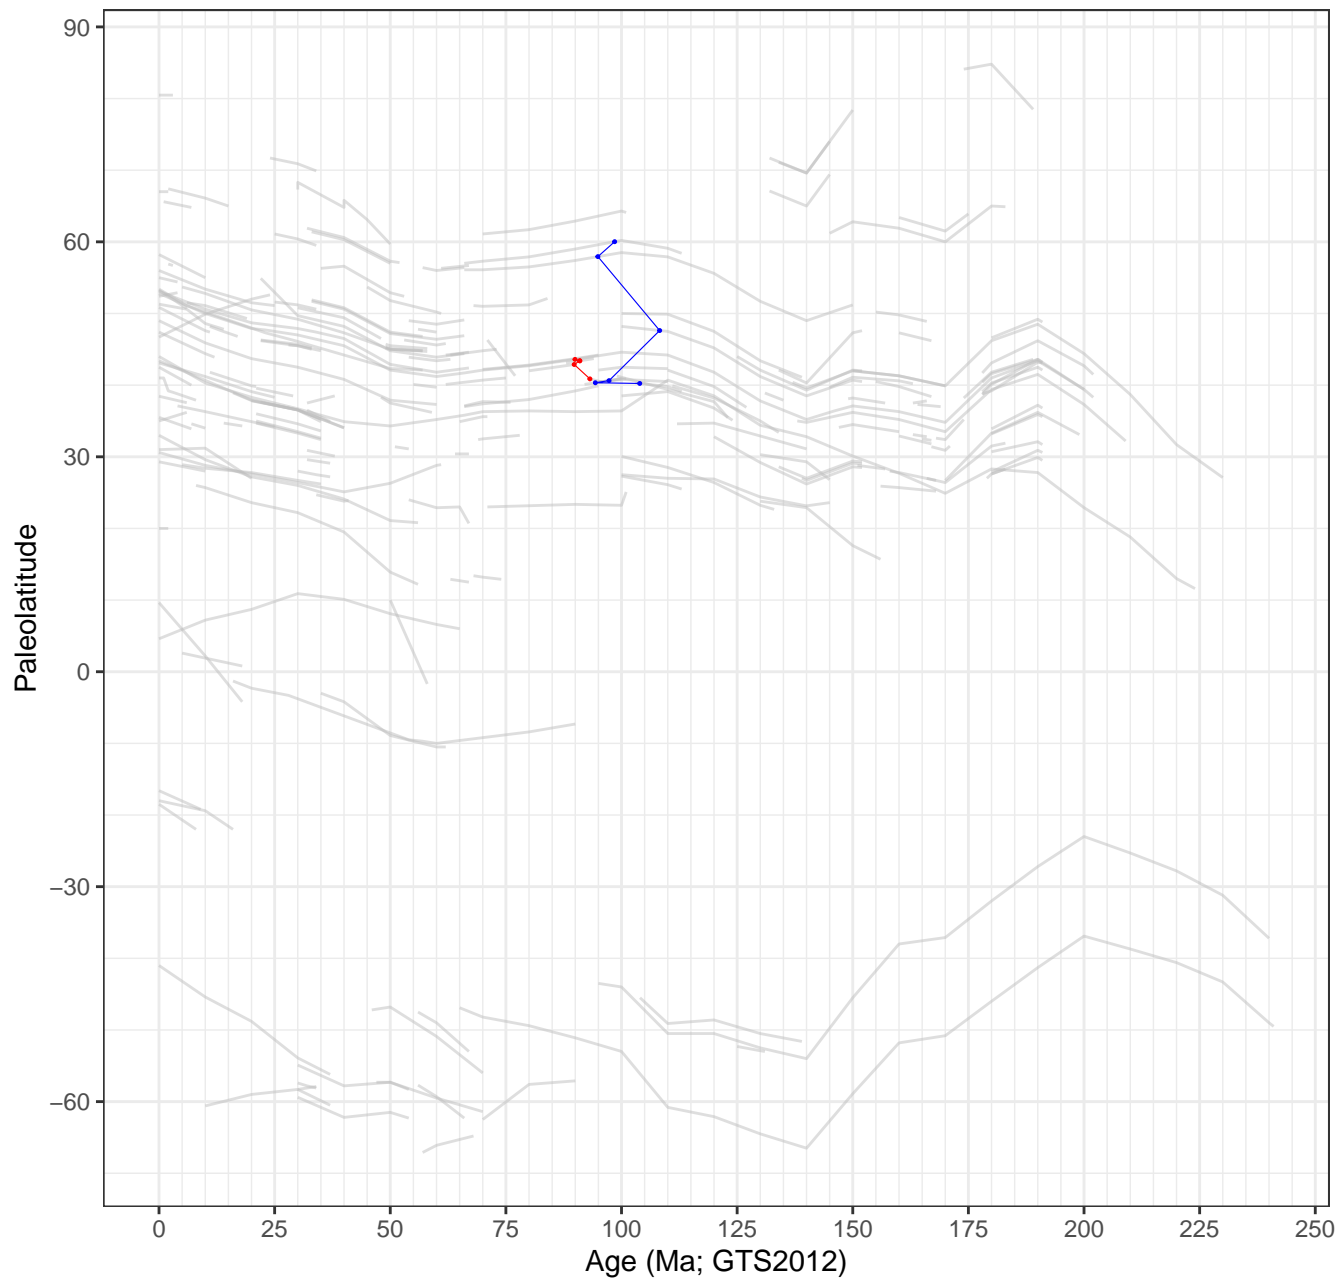

Supplement: Supplementary file 991 [file Cauveridinium membraniphorum.pdf › Supplement/Supplement 2/Species 1914 plots/Cauveridinium membraniphorum.pdf]

# Species *Cepadinium ventriosum*

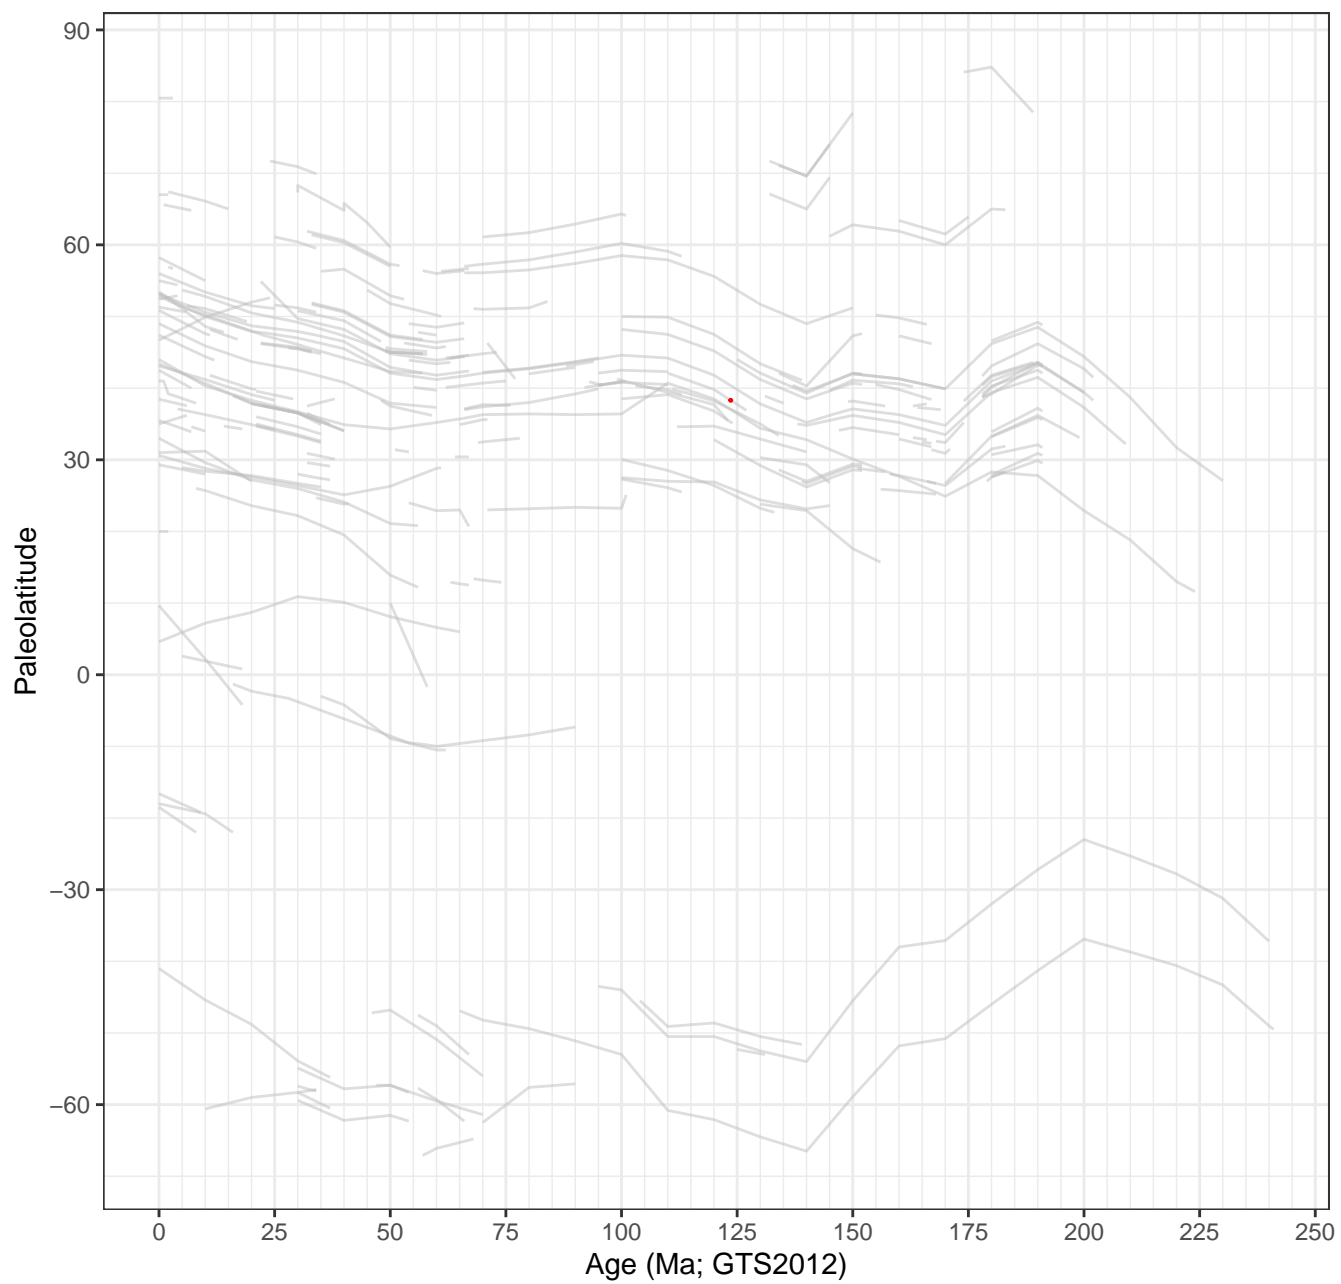

Supplement: Supplementary file 992 [file Cepadinium ventriosum.pdf › Supplement/Supplement 2/Species 1914 plots/Cepadinium ventriosum.pdf]

# Species *Cerbia magna*

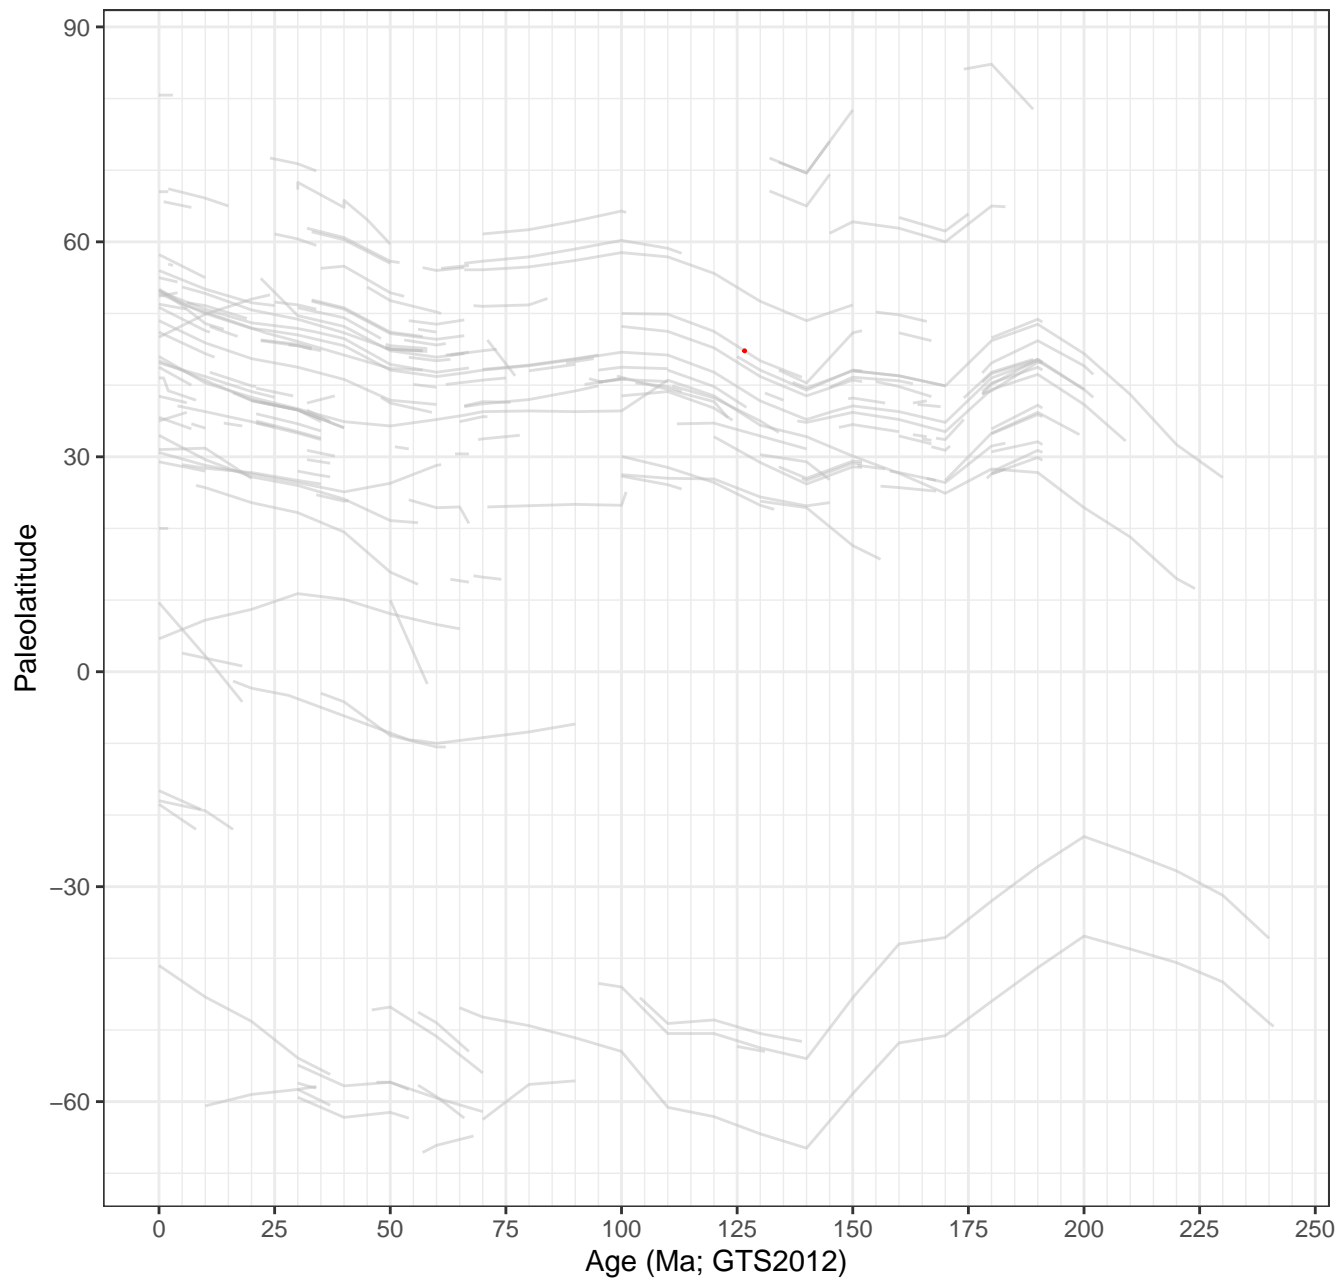

Supplement: Supplementary file 993 [file Cerbia magna.pdf › Supplement/Supplement 2/Species 1914 plots/Cerbia magna.pdf]

# Species *Cerbia tabulata*

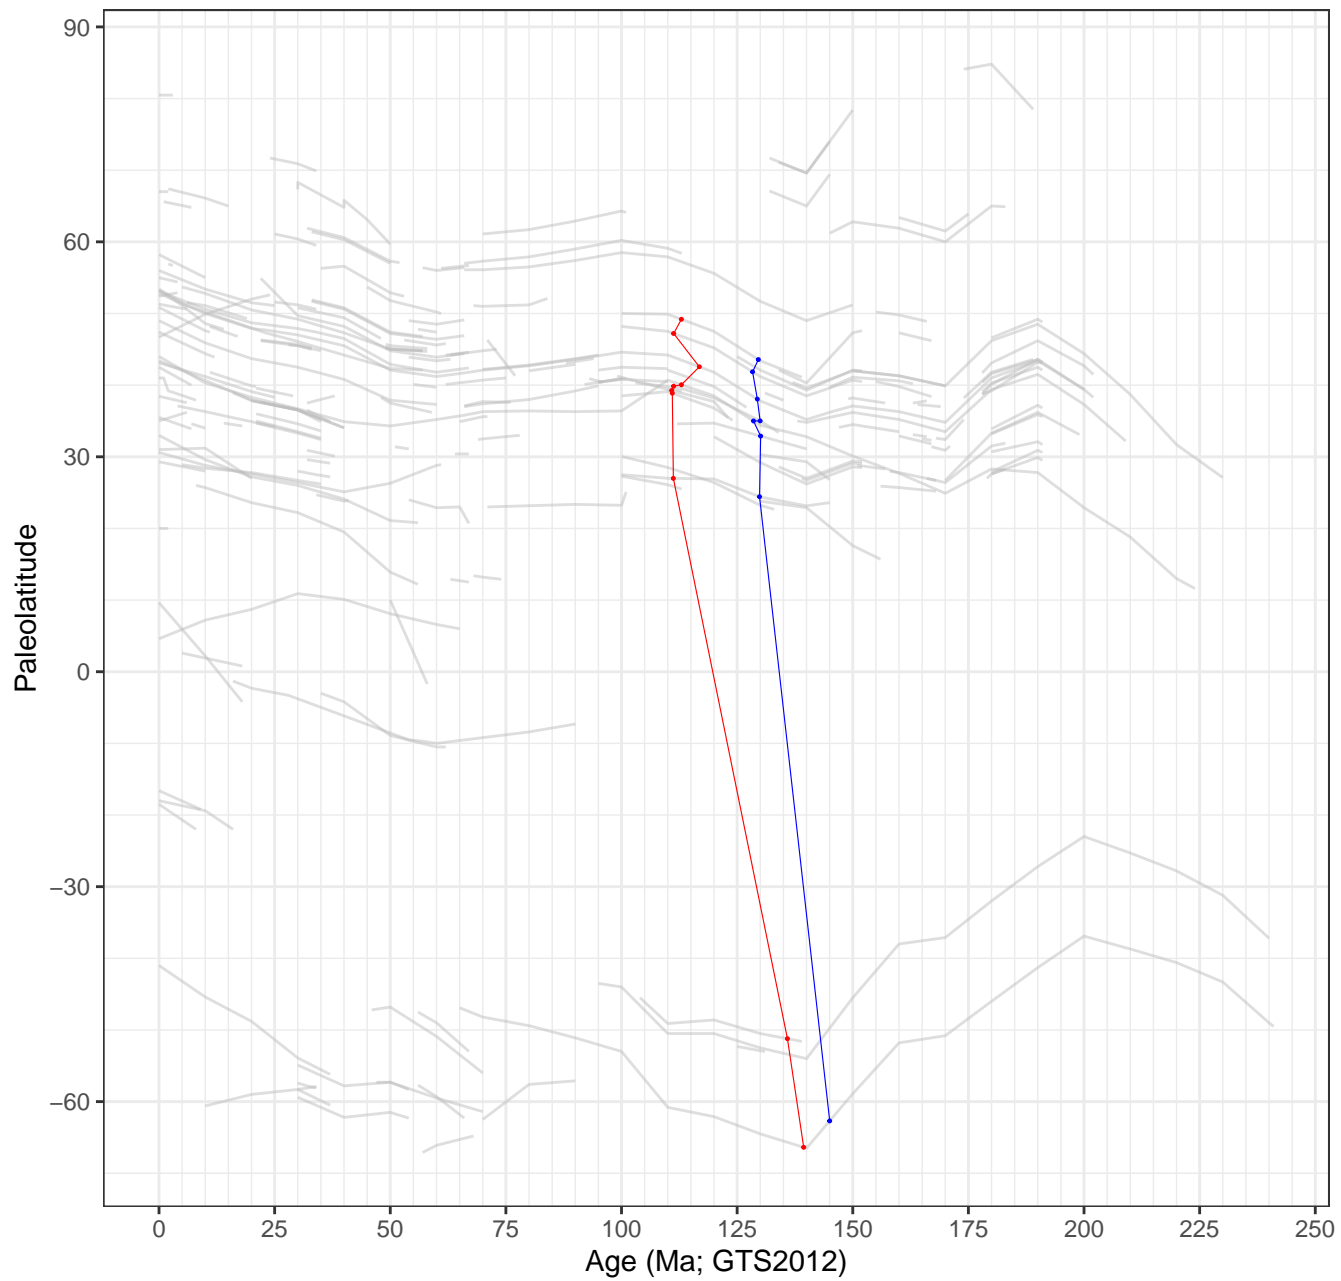

Supplement: Supplementary file 994 [file Cerbia tabulata.pdf › Supplement/Supplement 2/Species 1914 plots/Cerbia tabulata.pdf]

# Species *Cerebrocysta bartonensis*

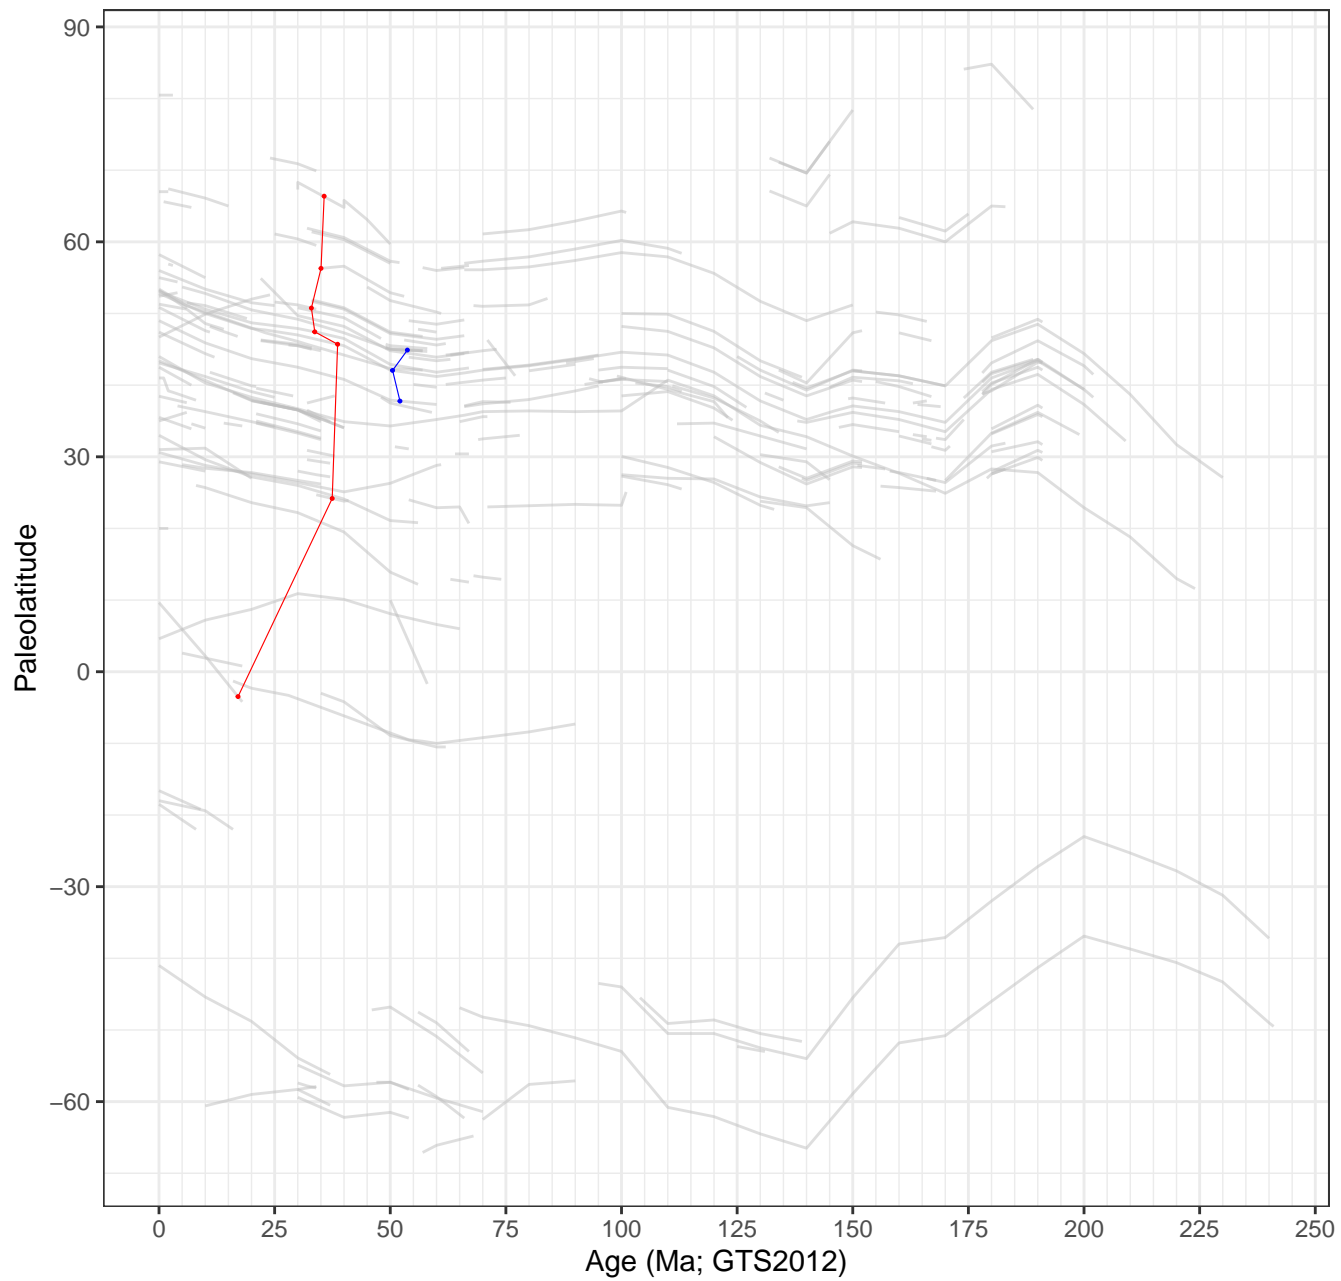

Supplement: Supplementary file 995 [file Cerebrocysta bartonensis.pdf › Supplement/Supplement 2/Species 1914 plots/Cerebrocysta bartonensis.pdf]

# Species *Cerebrocysta crassinascoensis*

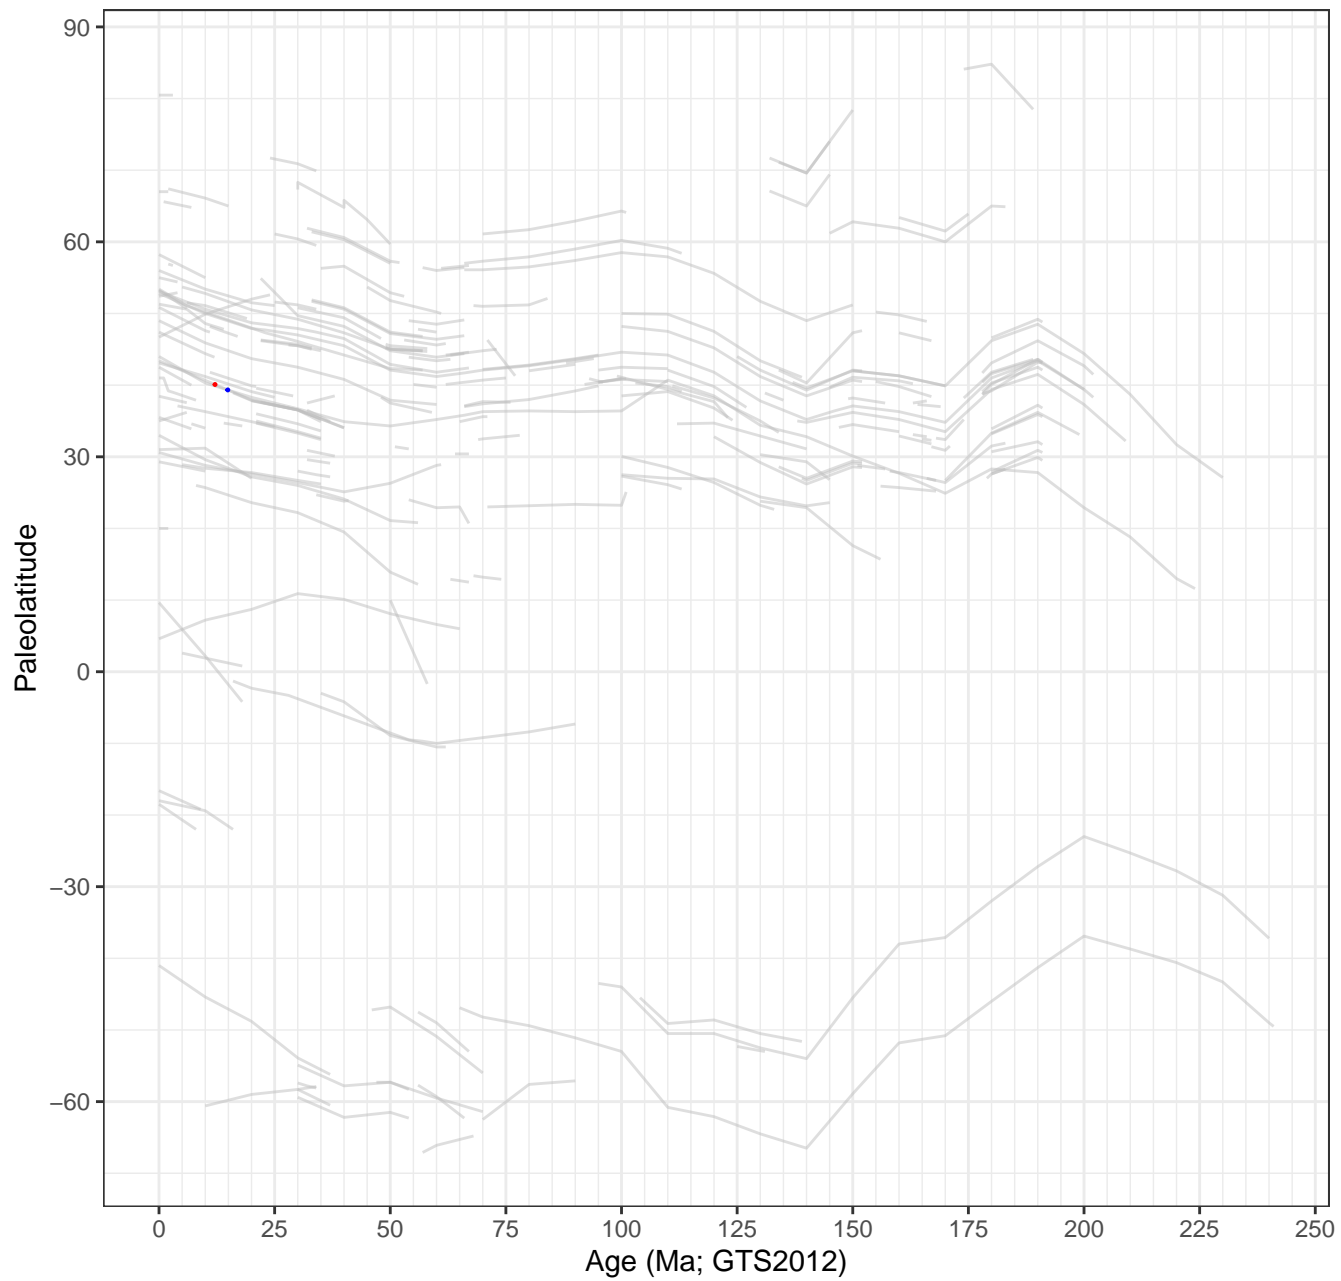

Supplement: Supplementary file 996 [file Cerebrocysta crassinascoensis.pdf › Supplement/Supplement 2/Species 1914 plots/Cerebrocysta crassinascoensis.pdf]

# Species *Cerebrocysta delicata*

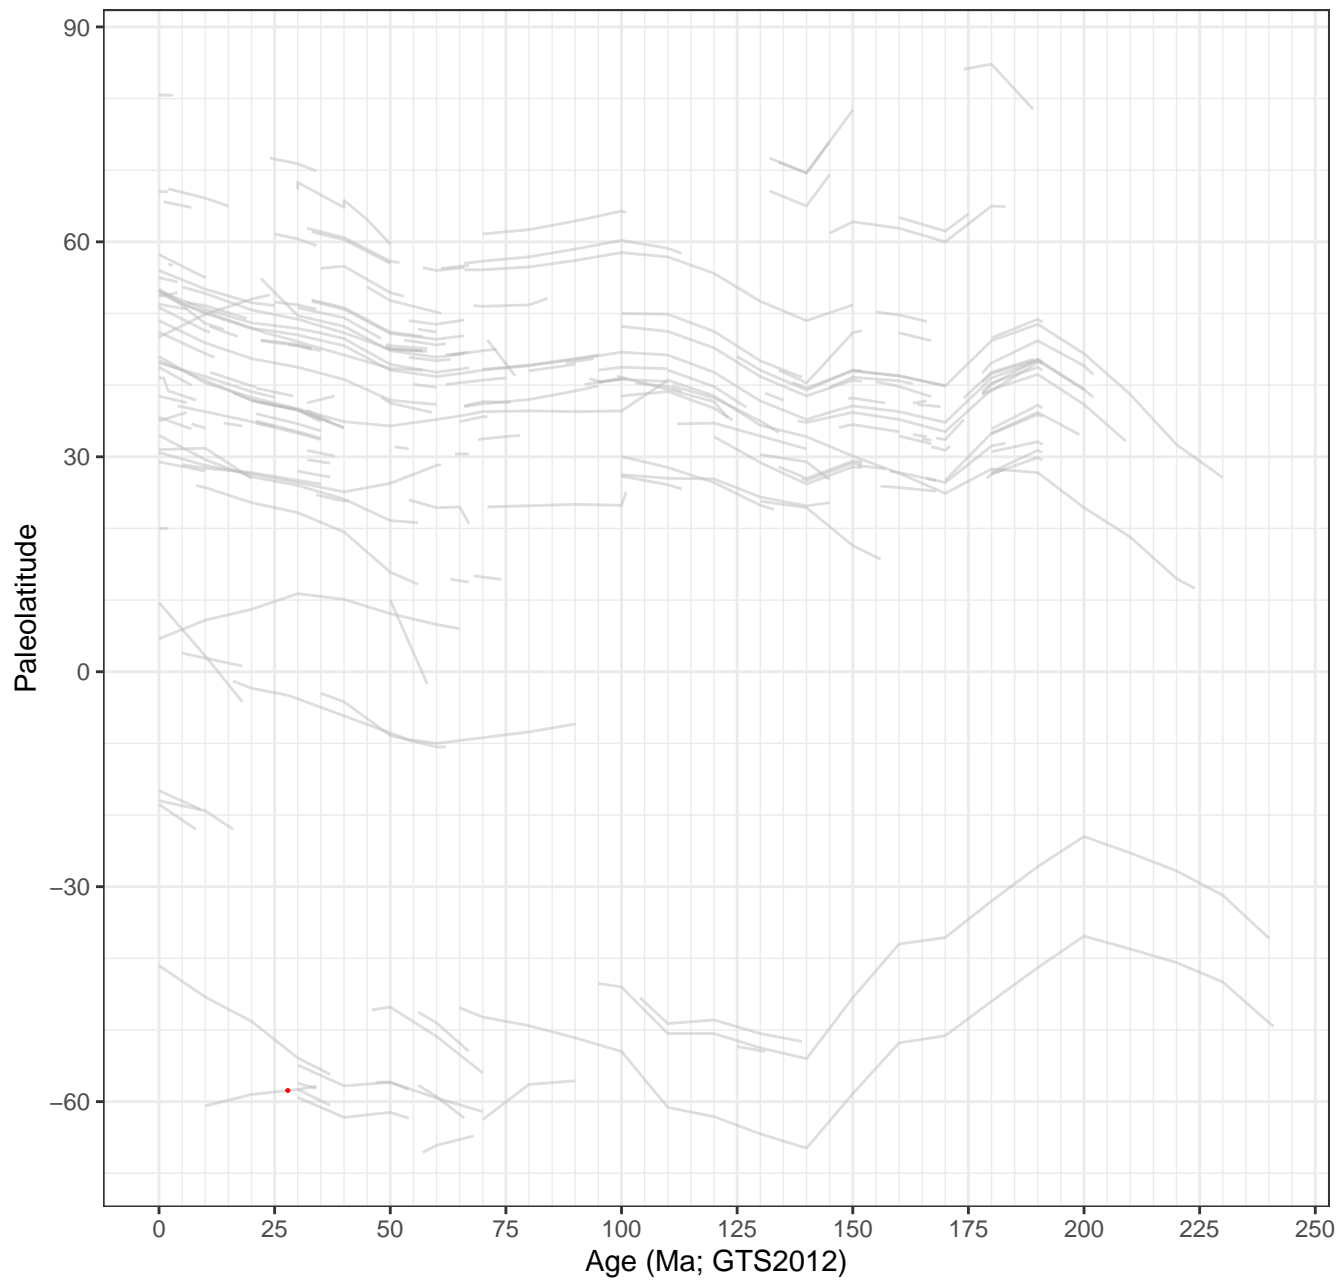

Supplement: Supplementary file 997 [file Cerebrocysta delicata.pdf › Supplement/Supplement 2/Species 1914 plots/Cerebrocysta delicata.pdf]

# Species *Cerebrocysta irregularis*

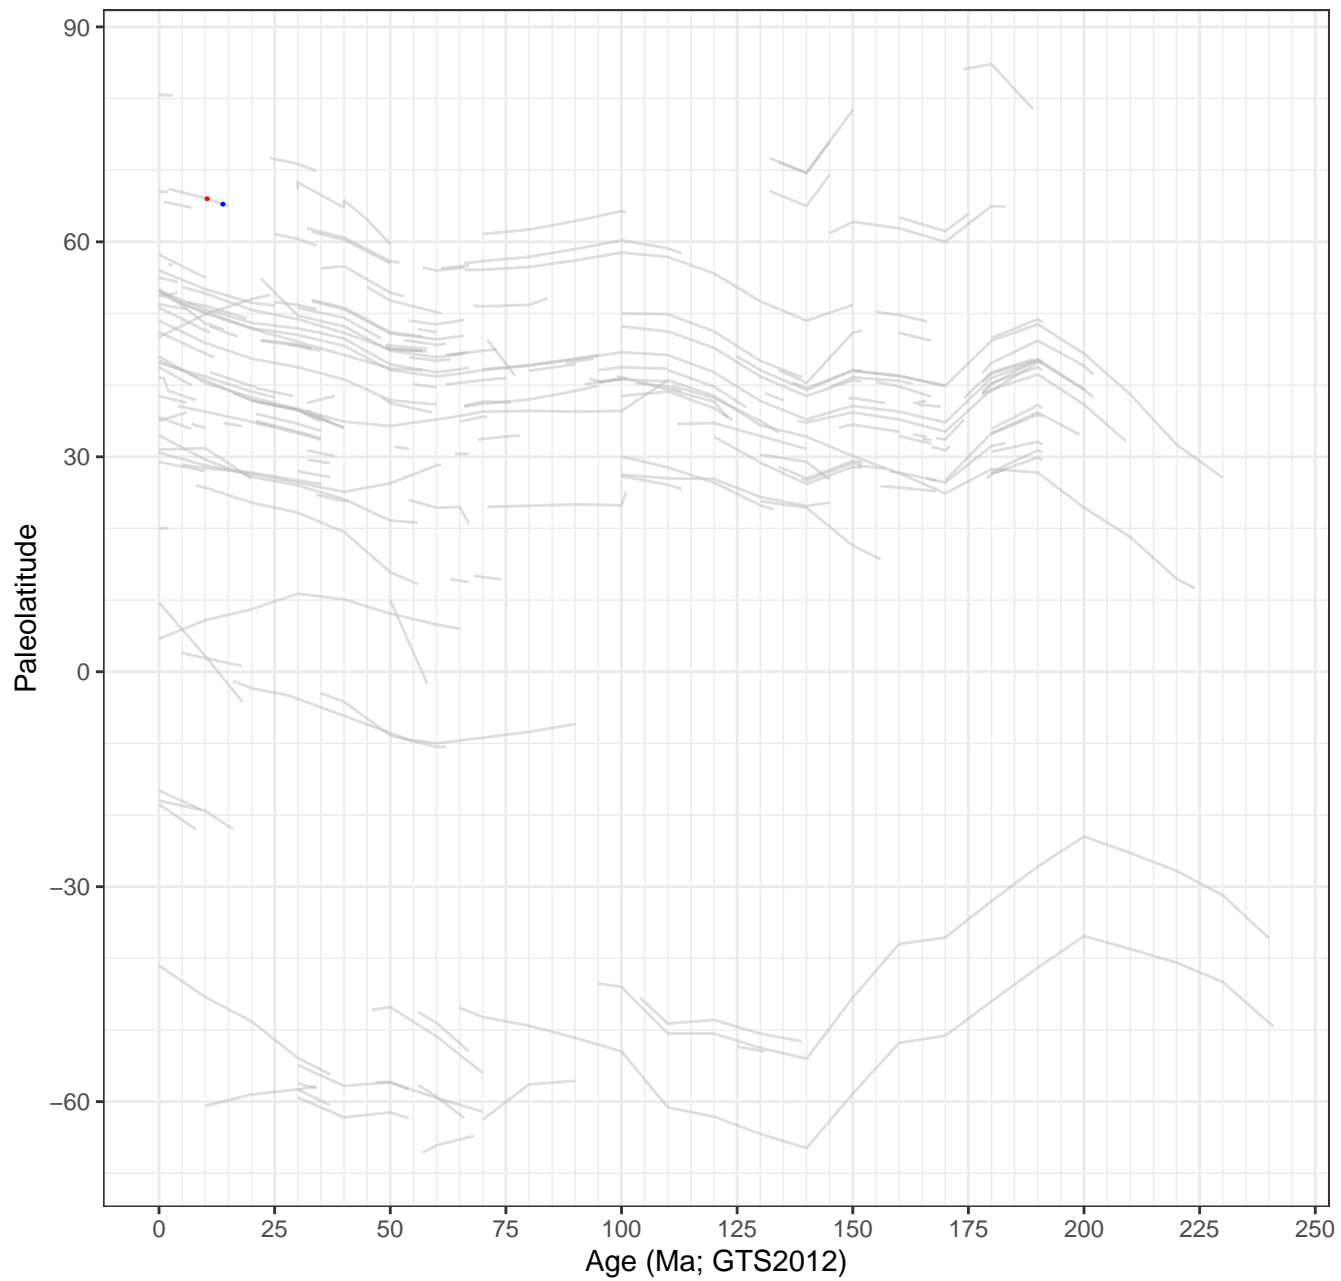

Supplement: Supplementary file 998 [file Cerebrocysta irregularis.pdf › Supplement/Supplement 2/Species 1914 plots/Cerebrocysta irregularis.pdf]

# Species *Cerebrocysta magna*

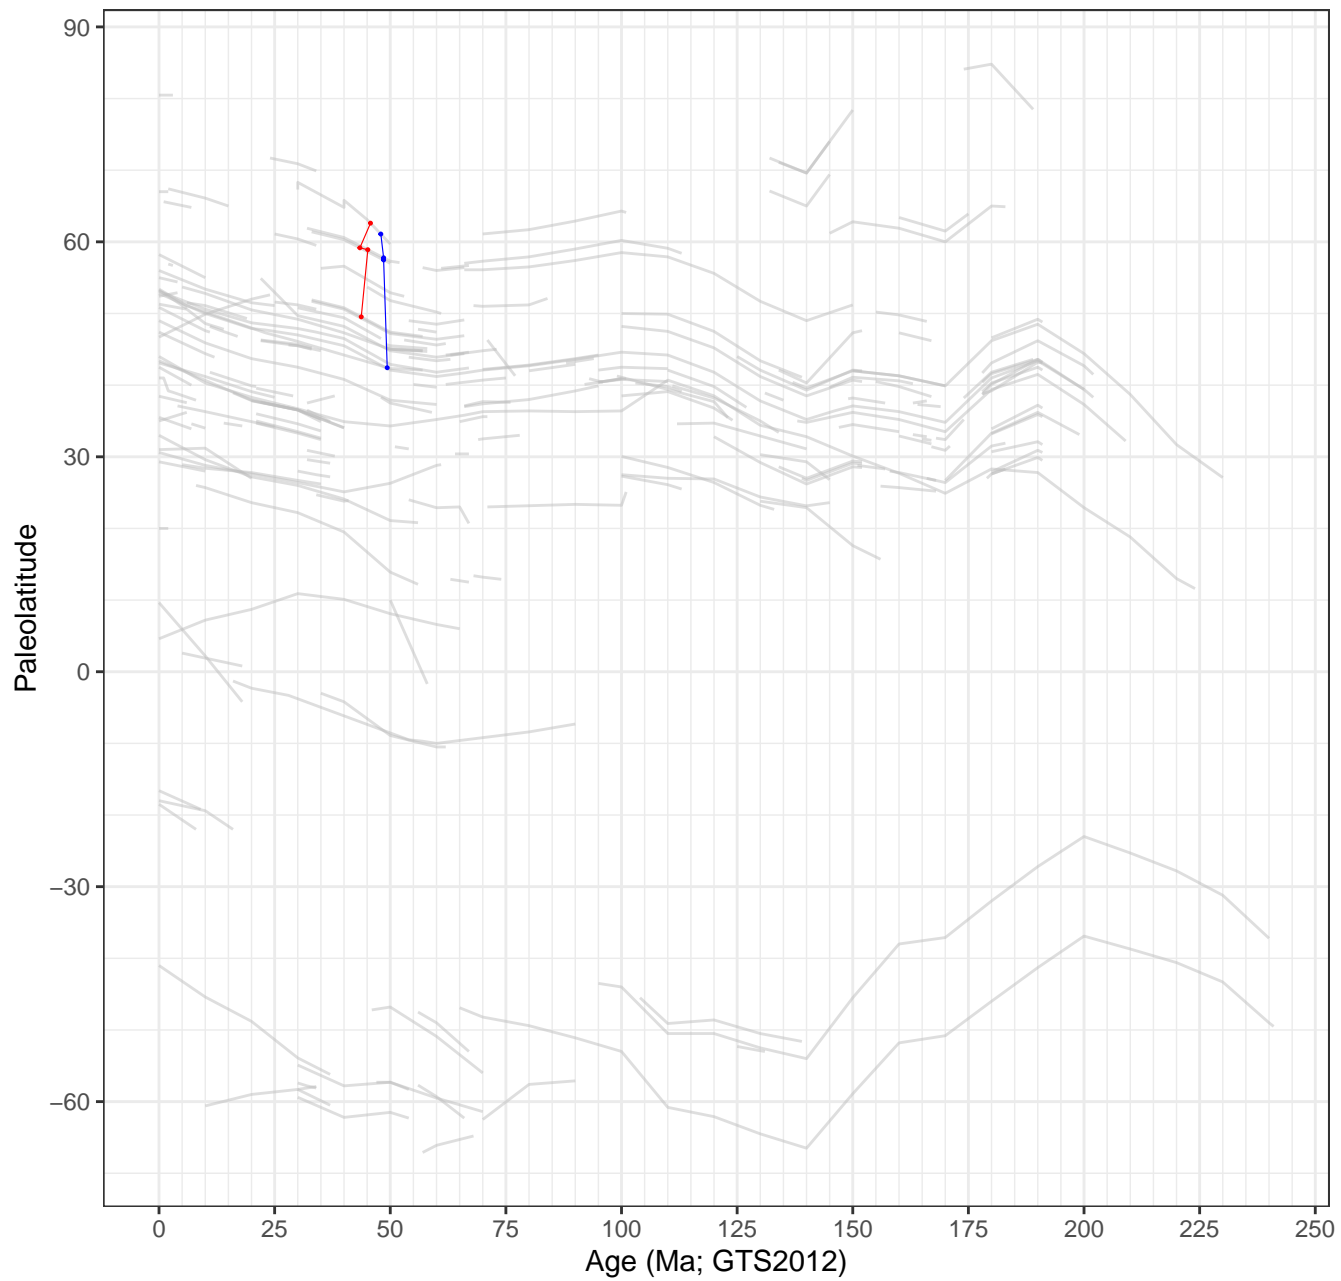

Supplement: Supplementary file 999 [file Cerebrocysta magna.pdf › Supplement/Supplement 2/Species 1914 plots/Cerebrocysta magna.pdf]

# Species *Cerebrocysta mediterranea*

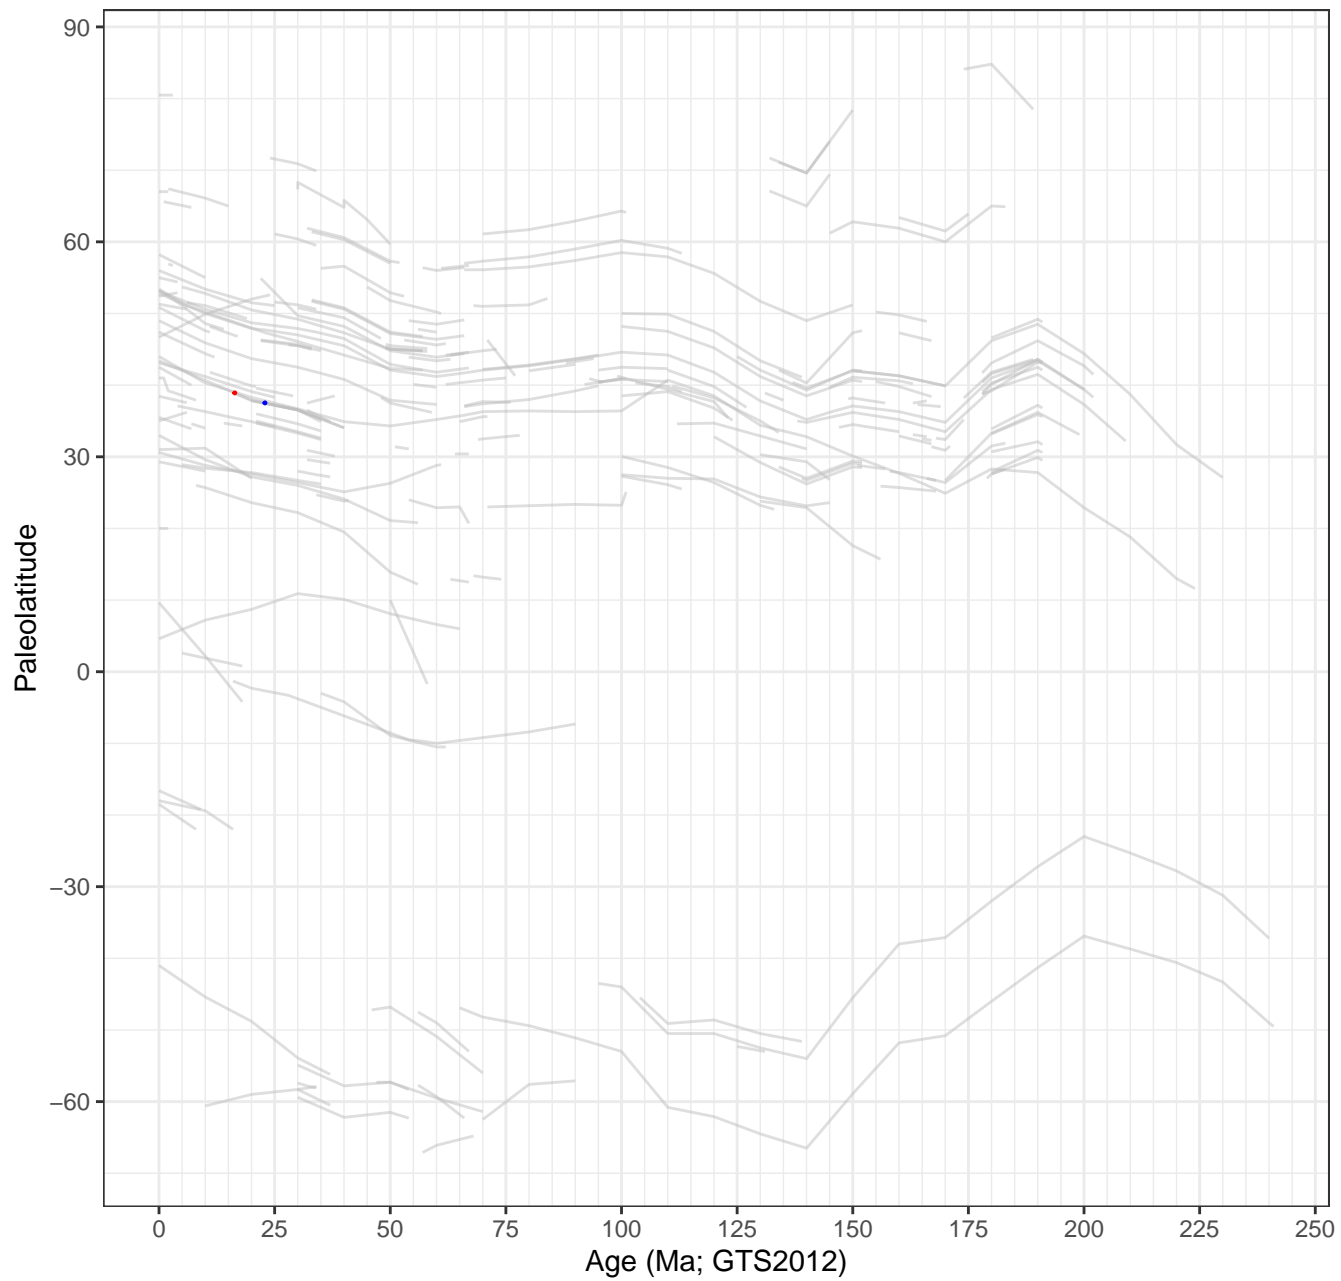

Supplement: Supplementary file 1000 [file Cerebrocysta mediterranea.pdf › Supplement/Supplement 2/Species 1914 plots/Cerebrocysta mediterranea.pdf]

# Species *Cerebrocysta namocensis*

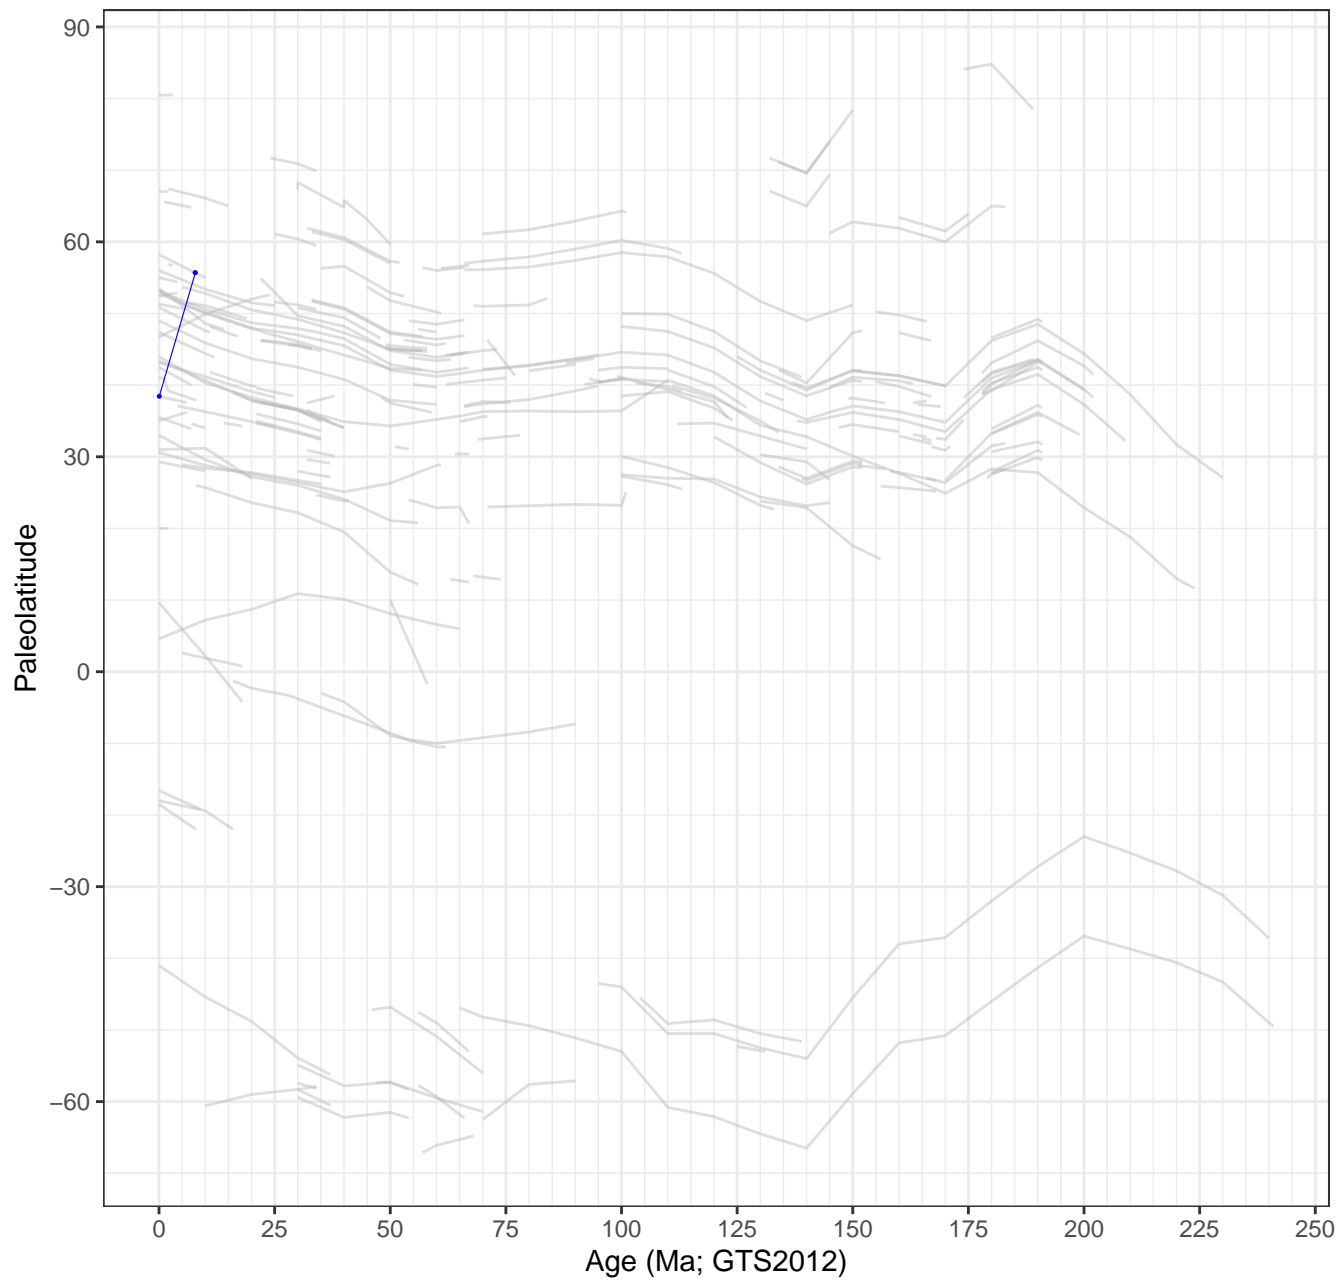

Supplement: Supplementary file 1001 [file Cerebrocysta namocensis.pdf › Supplement/Supplement 2/Species 1914 plots/Cerebrocysta namocensis.pdf]

# Species *Cerebrocysta perforocresta*

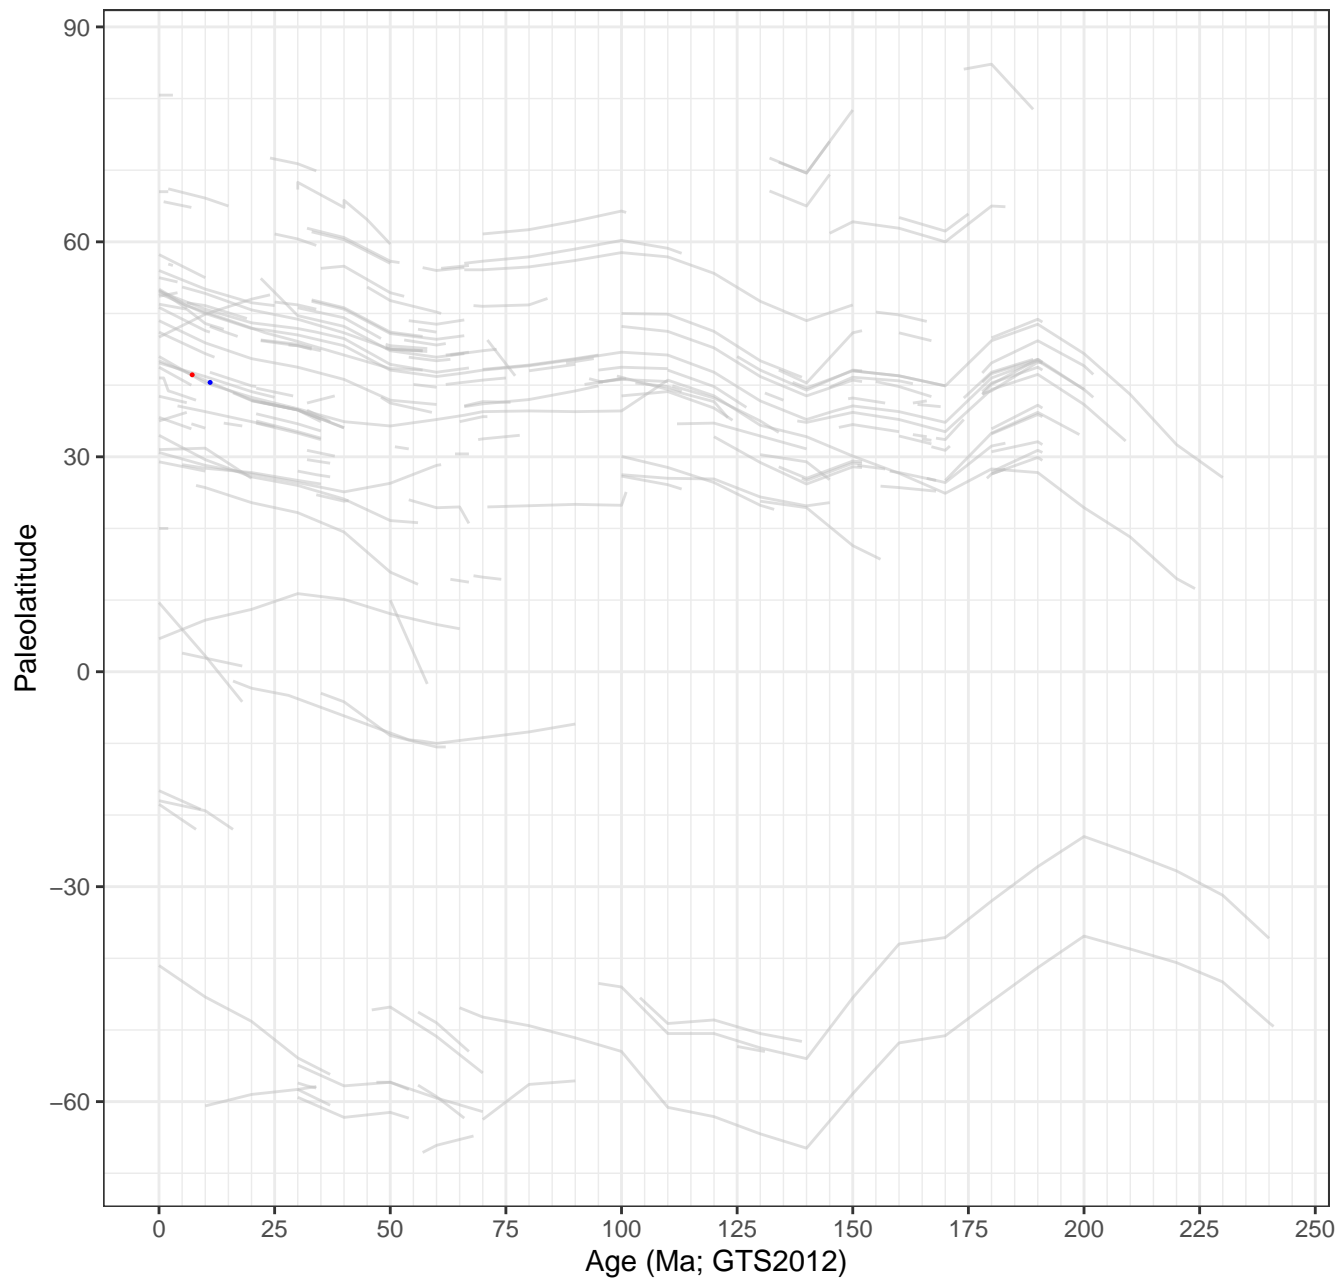

Supplement: Supplementary file 1002 [file Cerebrocysta perforocresta.pdf › Supplement/Supplement 2/Species 1914 plots/Cerebrocysta perforocresta.pdf]

# Species *Cerebrocysta poulsenii*

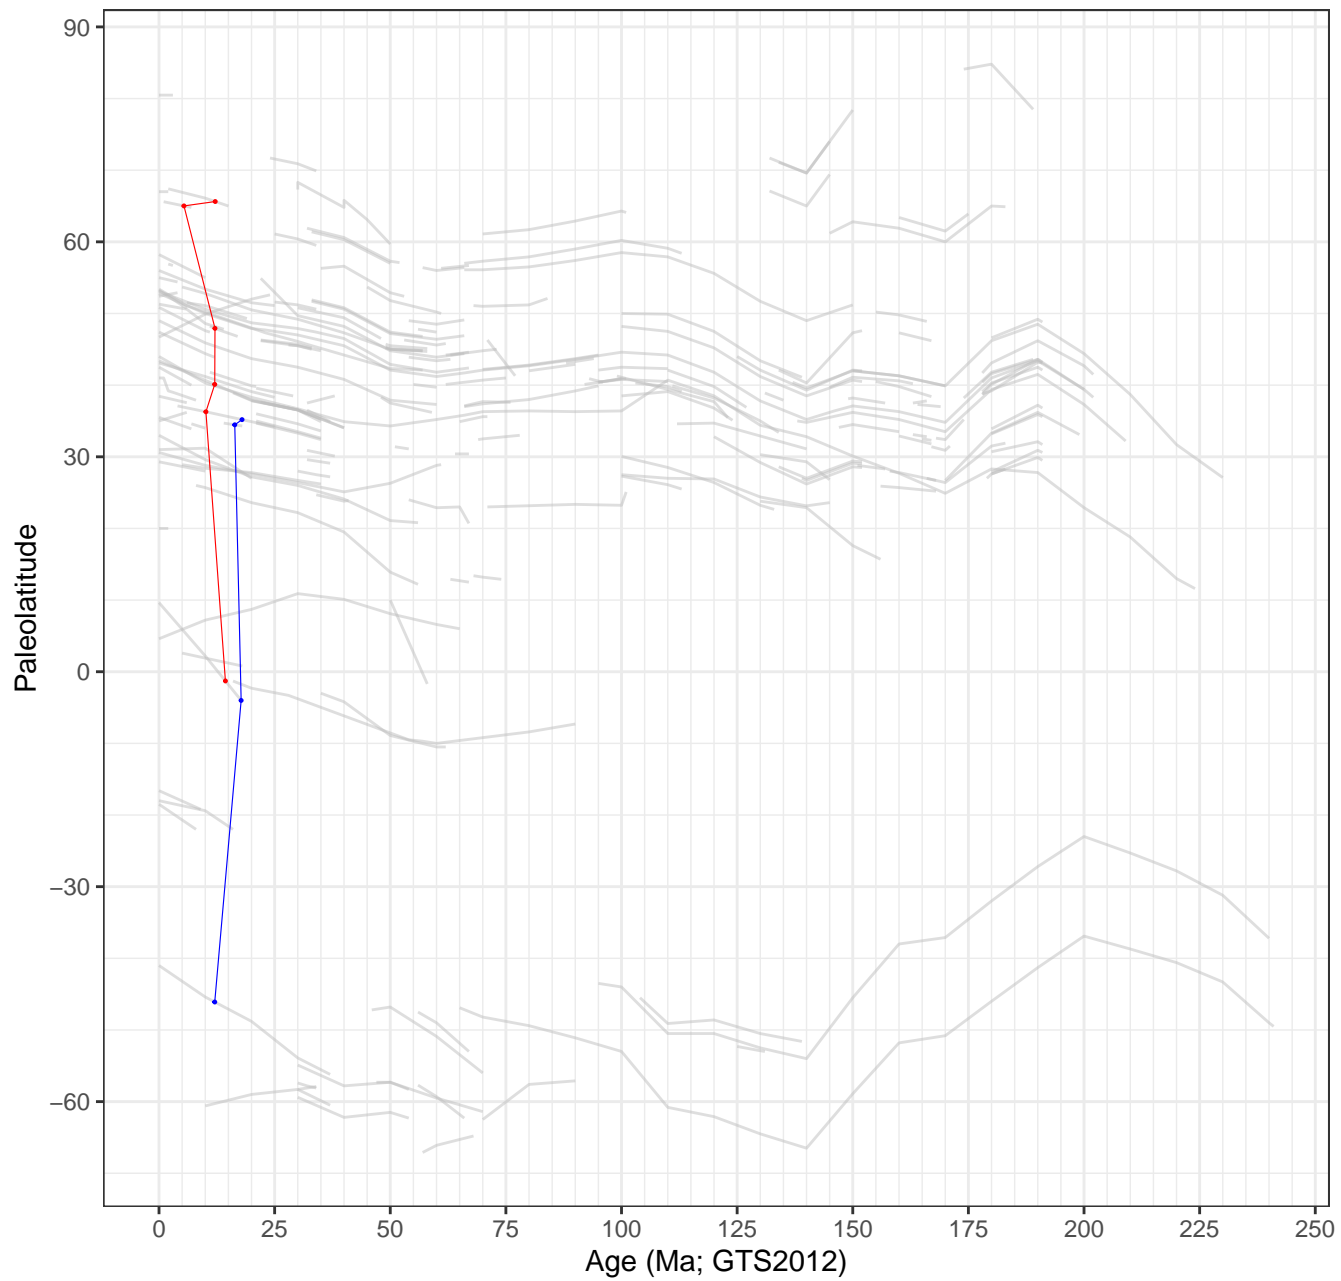

Supplement: Supplementary file 1003 [file Cerebrocysta poulsenii.pdf › Supplement/Supplement 2/Species 1914 plots/Cerebrocysta poulsenii.pdf]

# Species *Cerebrocysta powellii*

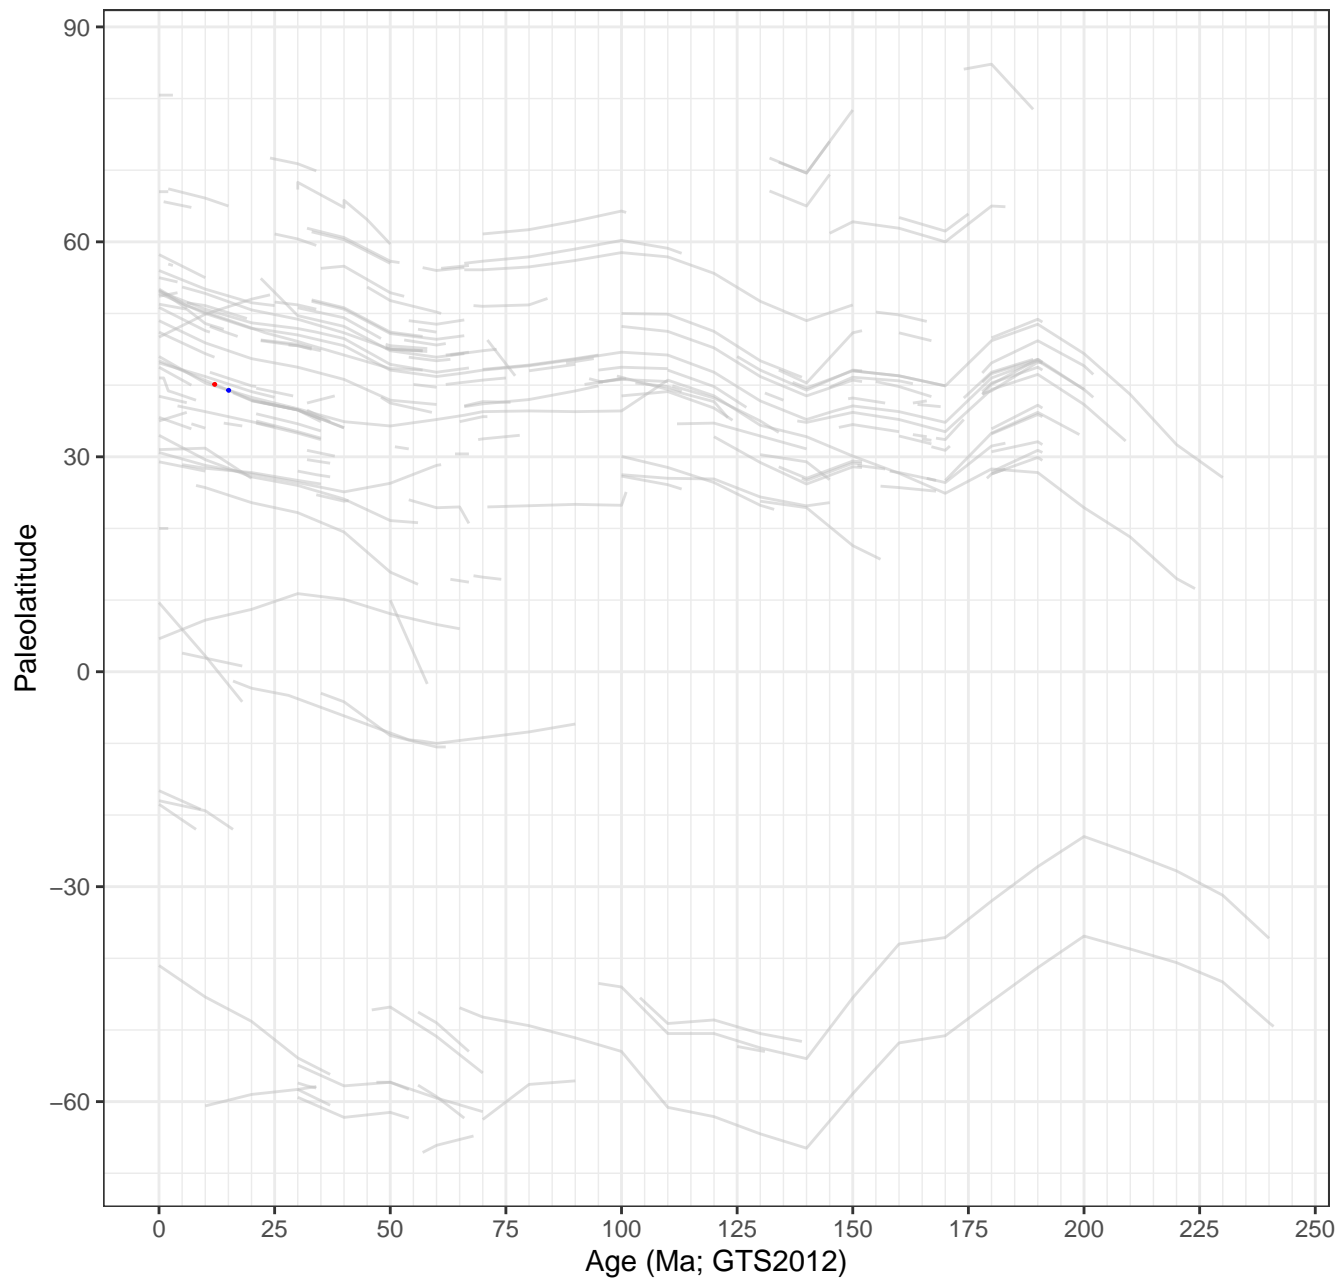

Supplement: Supplementary file 1004 [file Cerebrocysta powelii.pdf › Supplement/Supplement 2/Species 1914 plots/Cerebrocysta powelii.pdf]

# Species *Cerebrocysta satchelliae*

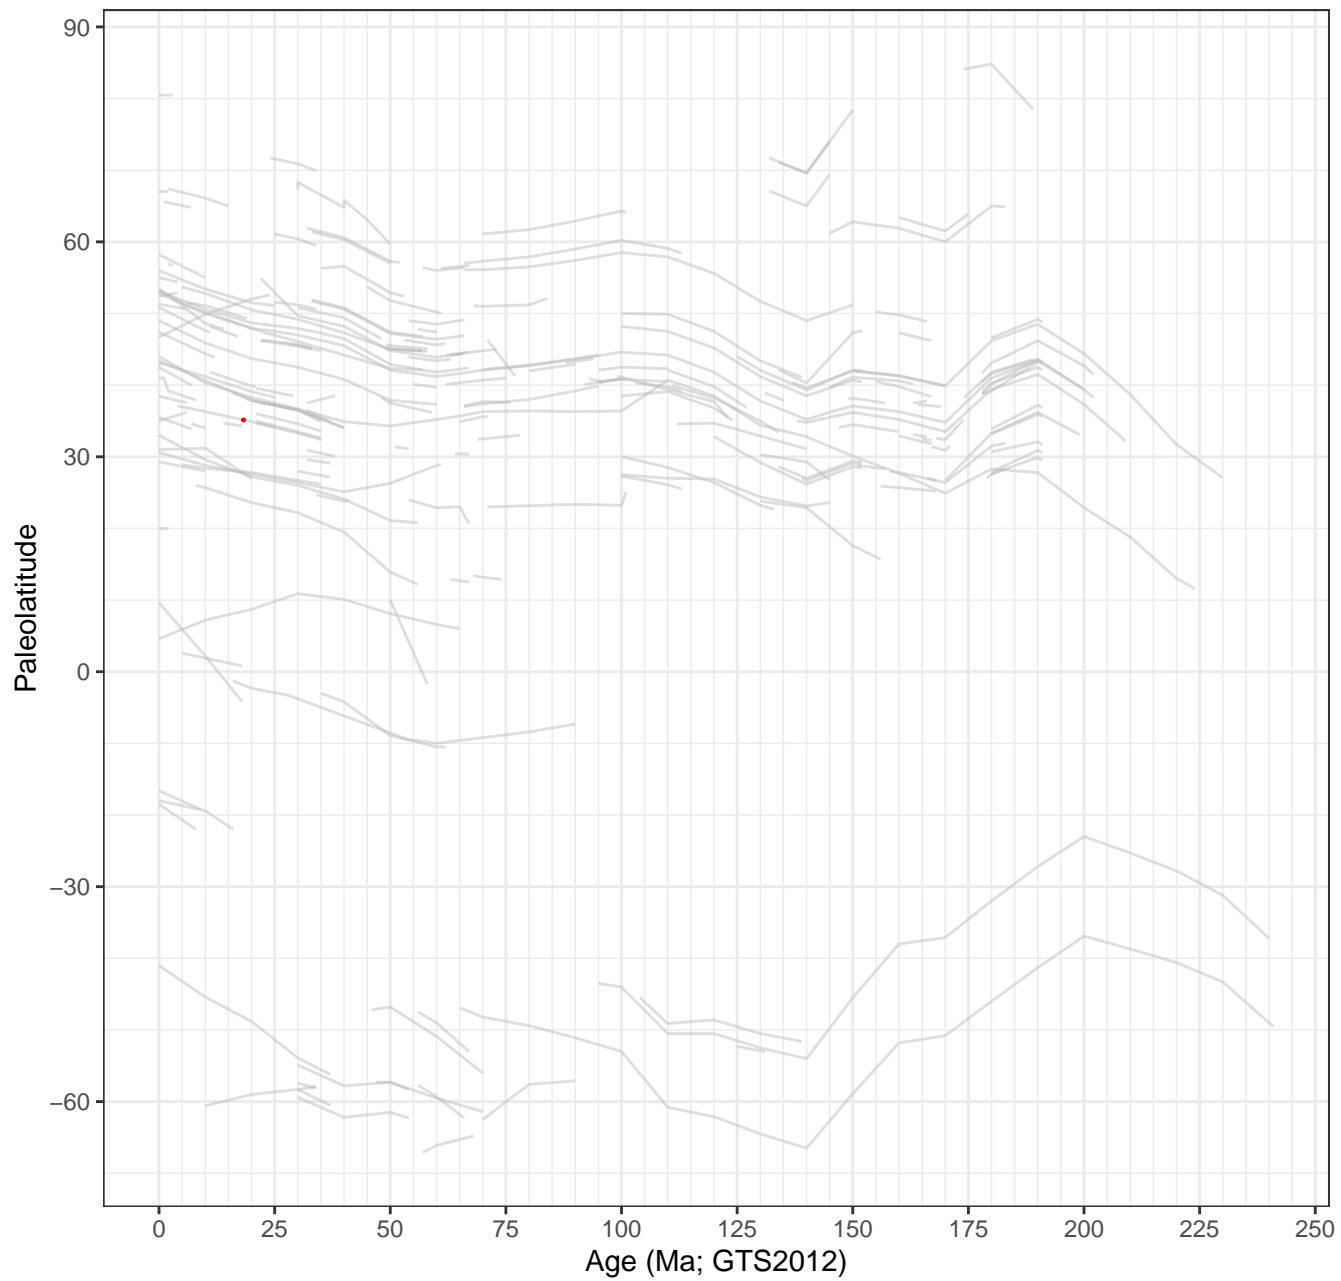

Supplement: Supplementary file 1005 [file Cerebrocysta satchelliae.pdf › Supplement/Supplement 2/Species 1914 plots/Cerebrocysta satchelliae.pdf]

# Species *Cerebrocysta waipawaensis*

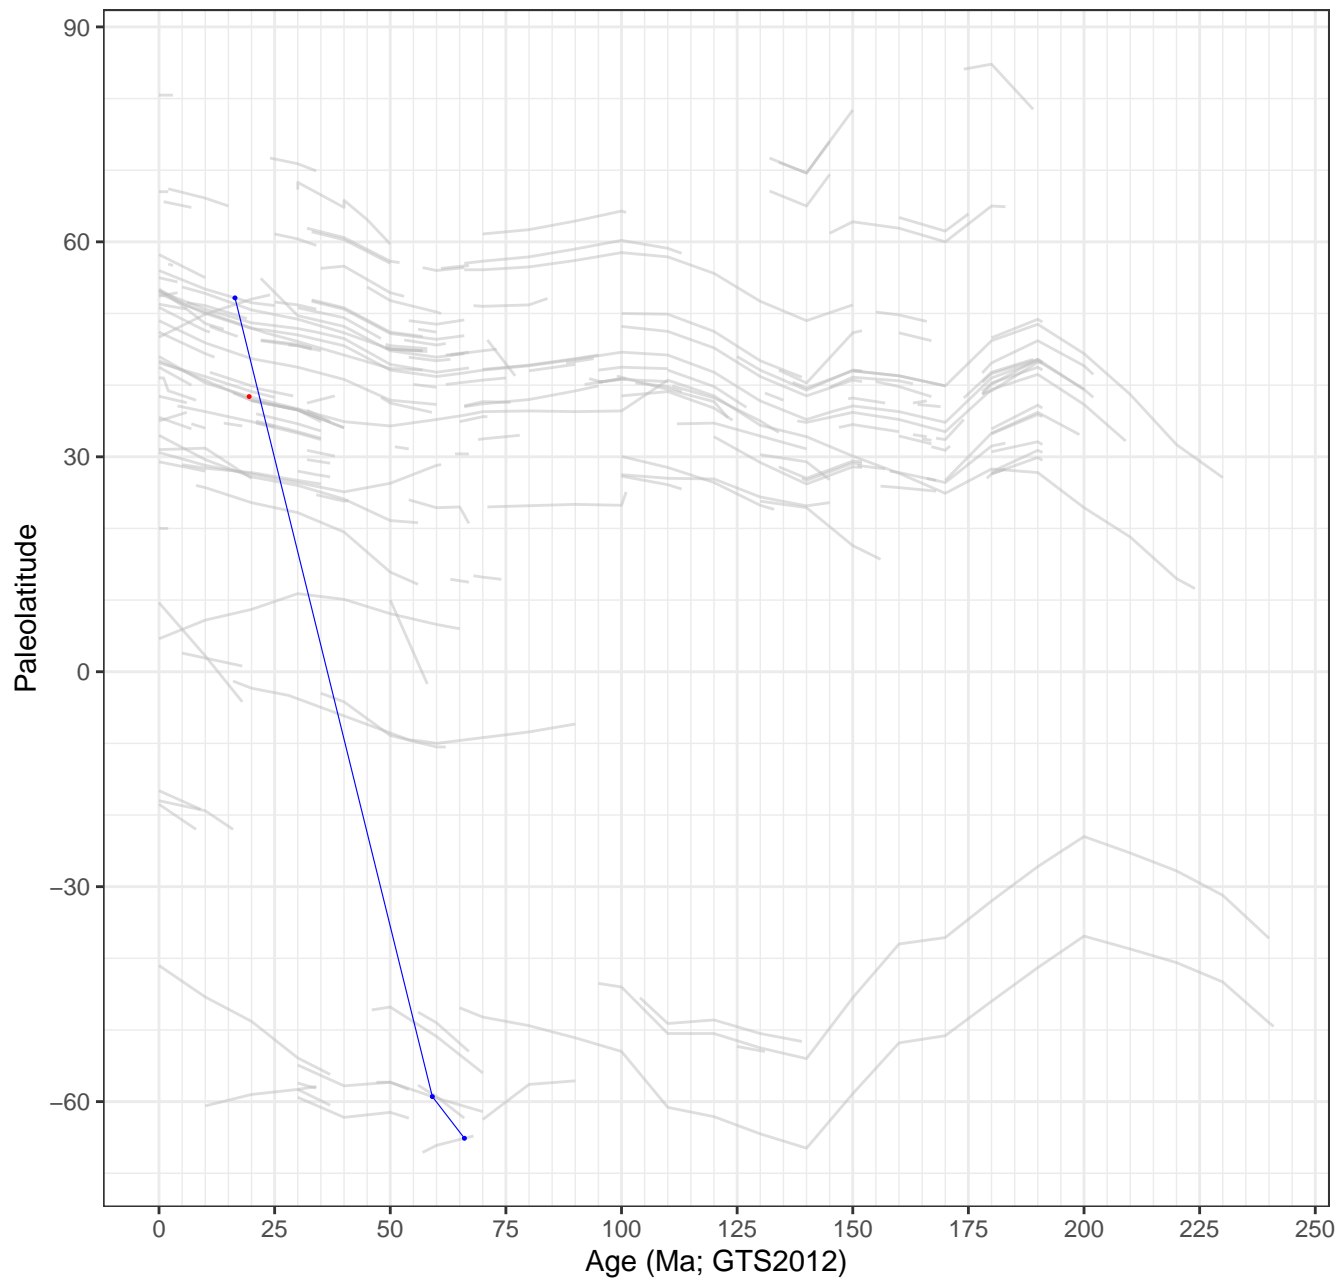

Supplement: Supplementary file 1006 [file Cerebrocysta waipawaensis.pdf › Supplement/Supplement 2/Species 1914 plots/Cerebrocysta waipawaensis.pdf]

# Species *Cernicysta helbyi*

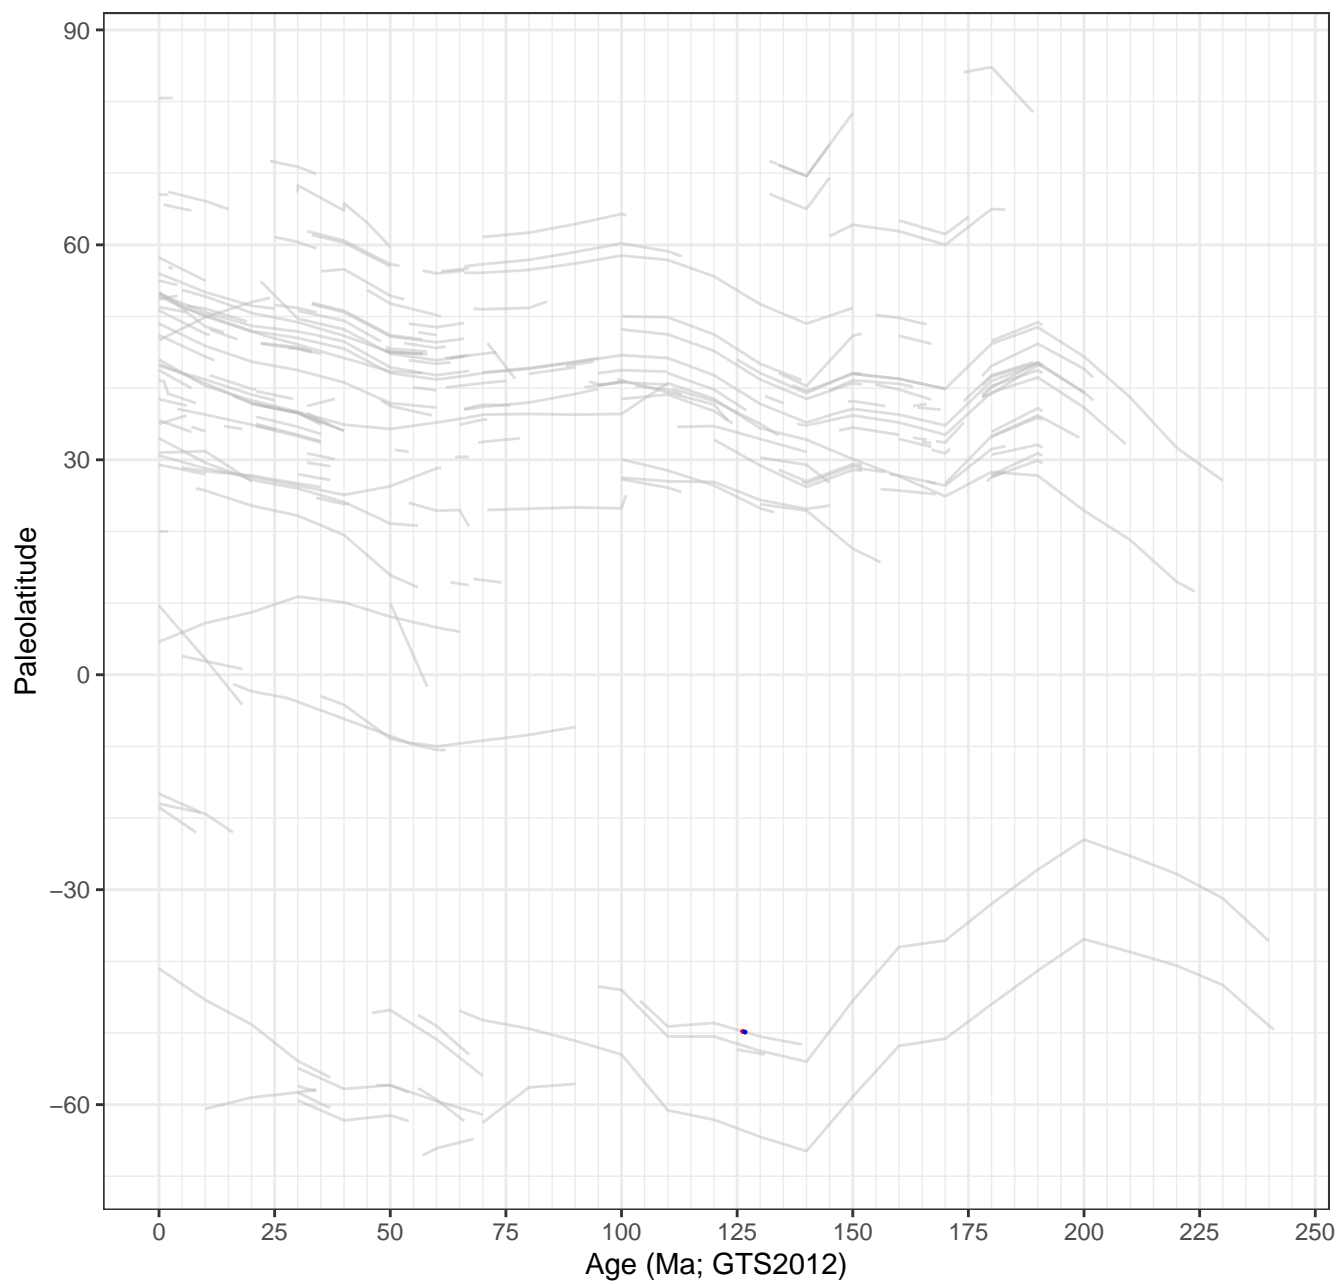

Supplement: Supplementary file 1007 [file Cernicysta helbyi.pdf › Supplement/Supplement 2/Species 1914 plots/Cernicysta helbyi.pdf]

# Species *Cerodinium dartmoorium*

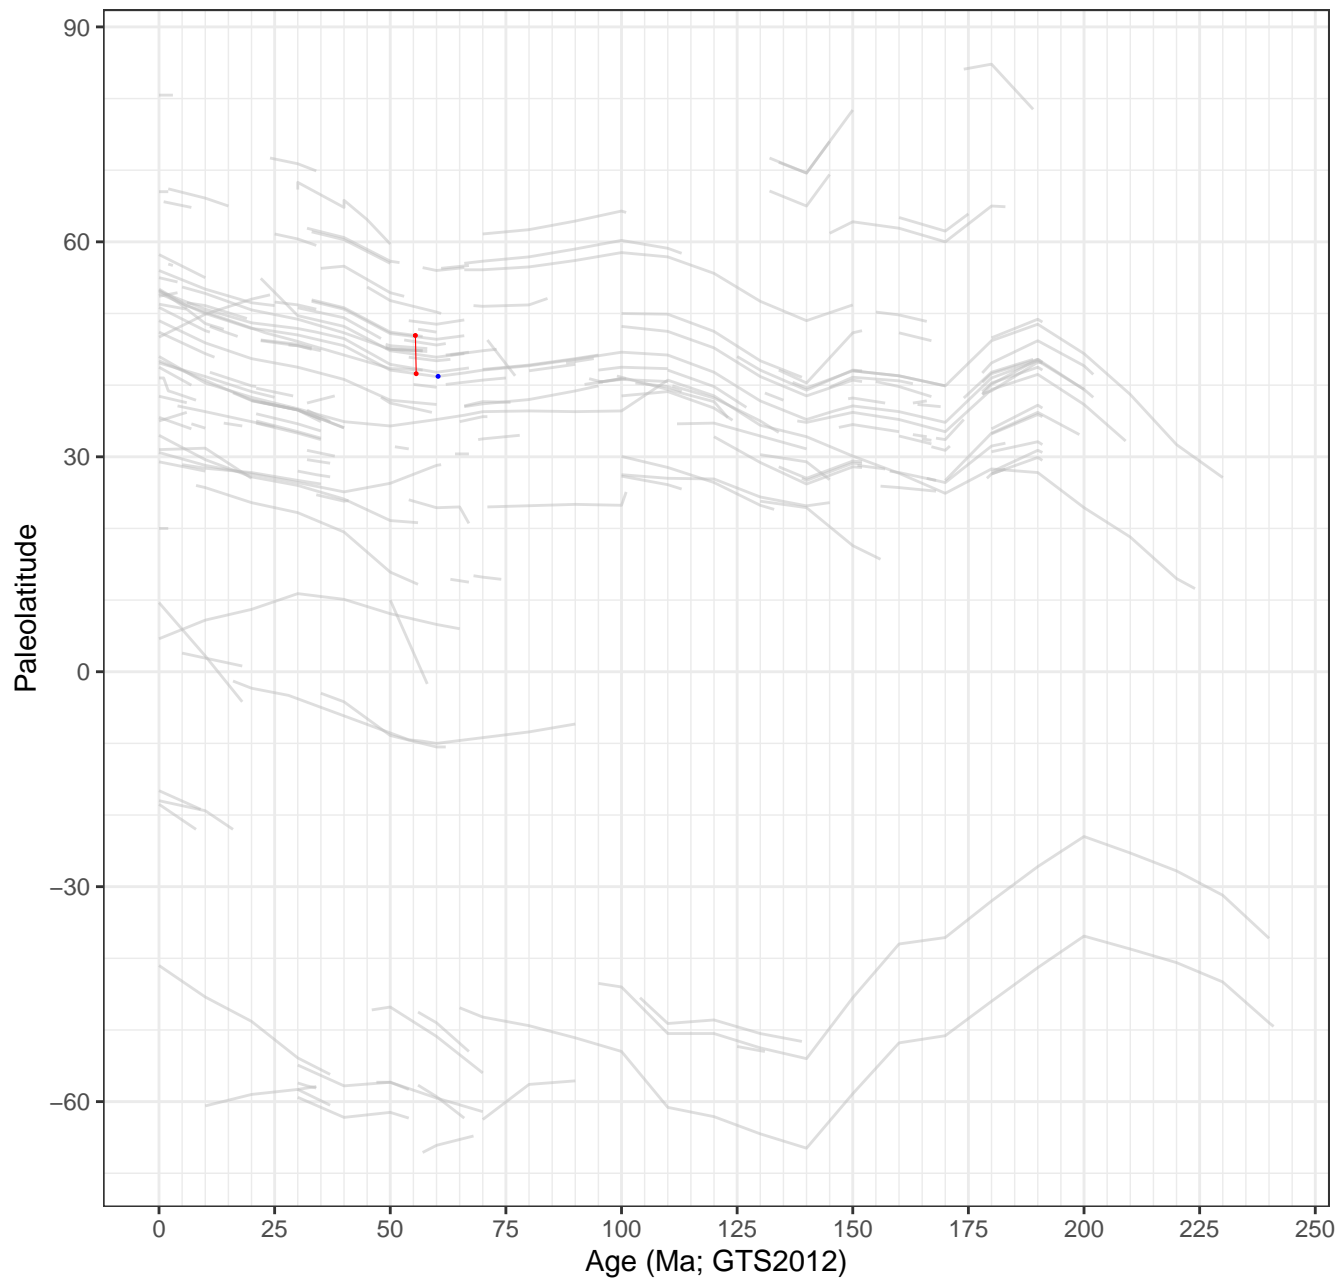

Supplement: Supplementary file 1008 [file Cerodinium dartmoorium.pdf › Supplement/Supplement 2/Species 1914 plots/Cerodinium dartmoorium.pdf]

# Species *Cerodinium depressum*

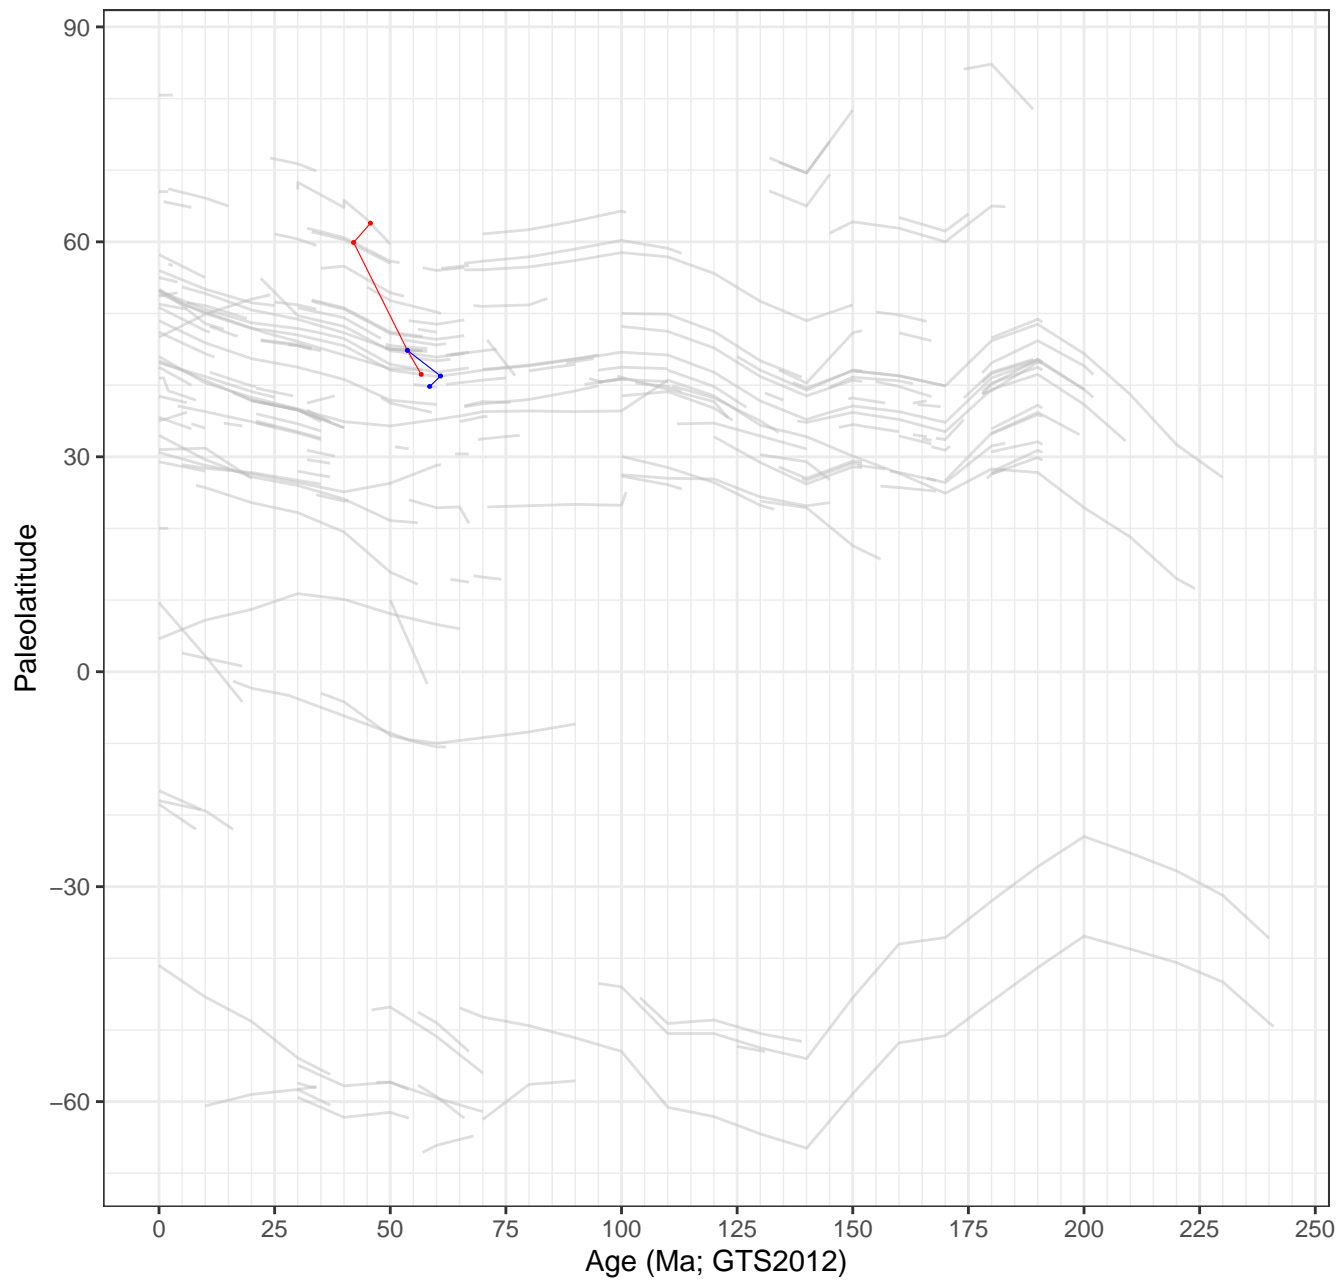

Supplement: Supplementary file 1009 [file Cerodinium depressum.pdf › Supplement/Supplement 2/Species 1914 plots/Cerodinium depressum.pdf]

# Species *Cerodinium diebelii*

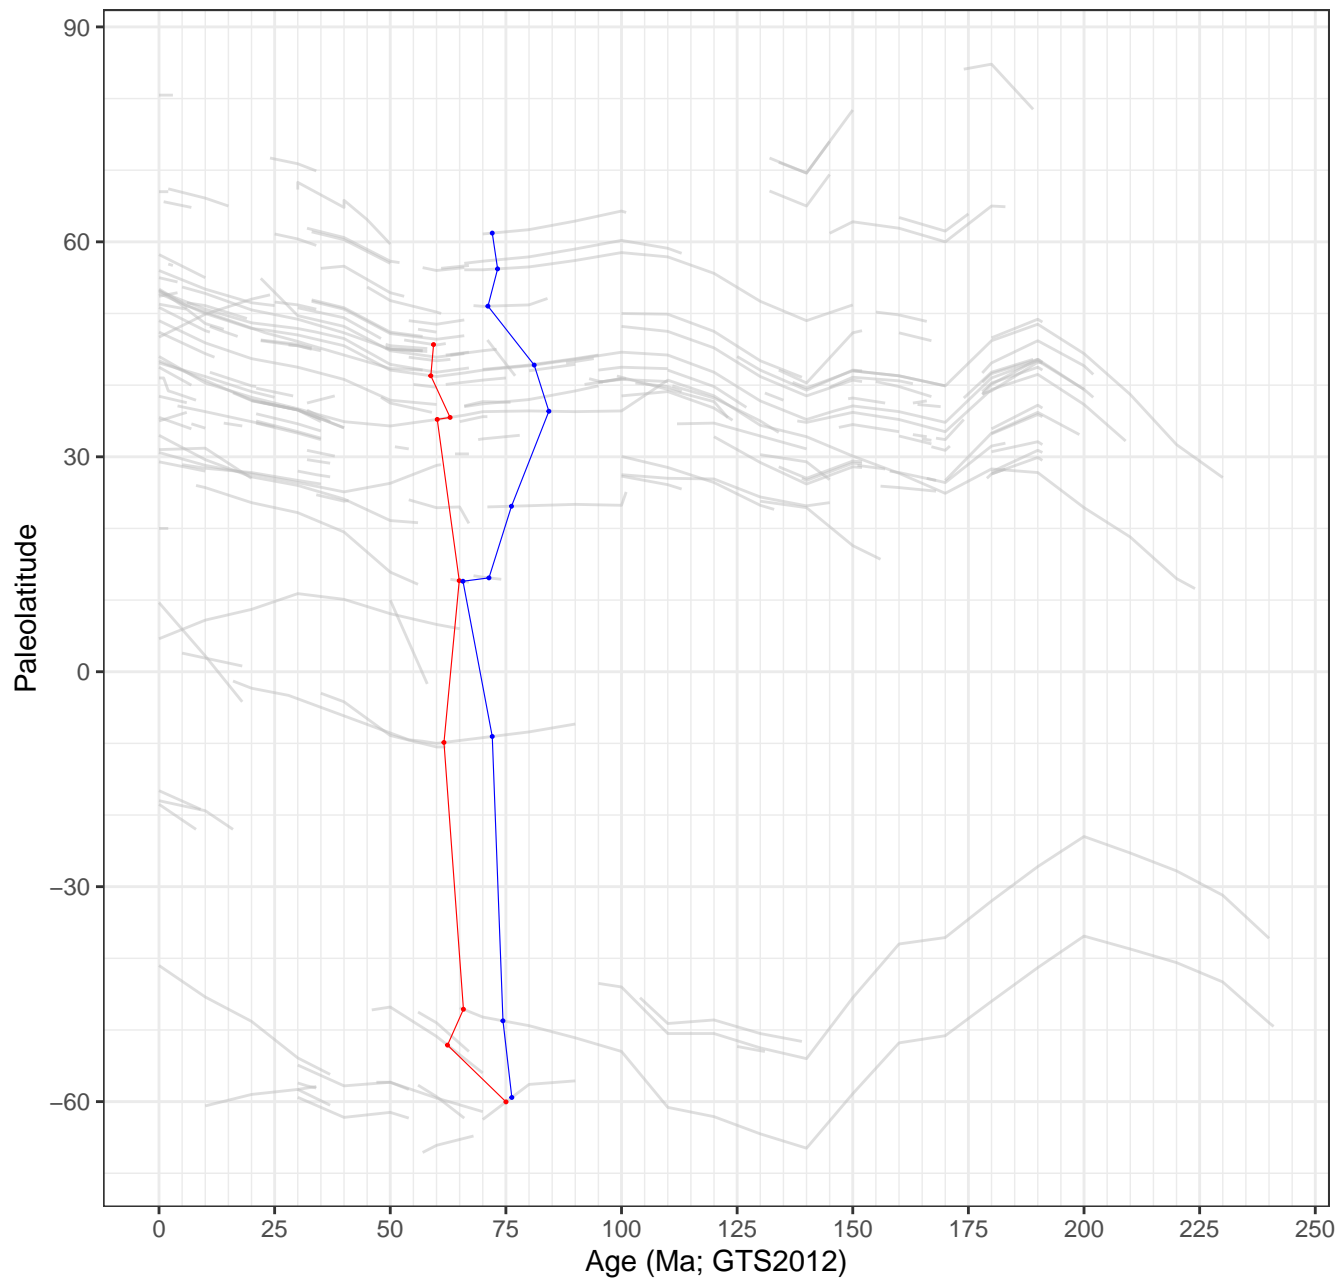

Supplement: Supplementary file 1010 [file Cerodinium diebelii.pdf › Supplement/Supplement 2/Species 1914 plots/Cerodinium diebelii.pdf]

# Species *Cerodinium glabrum*

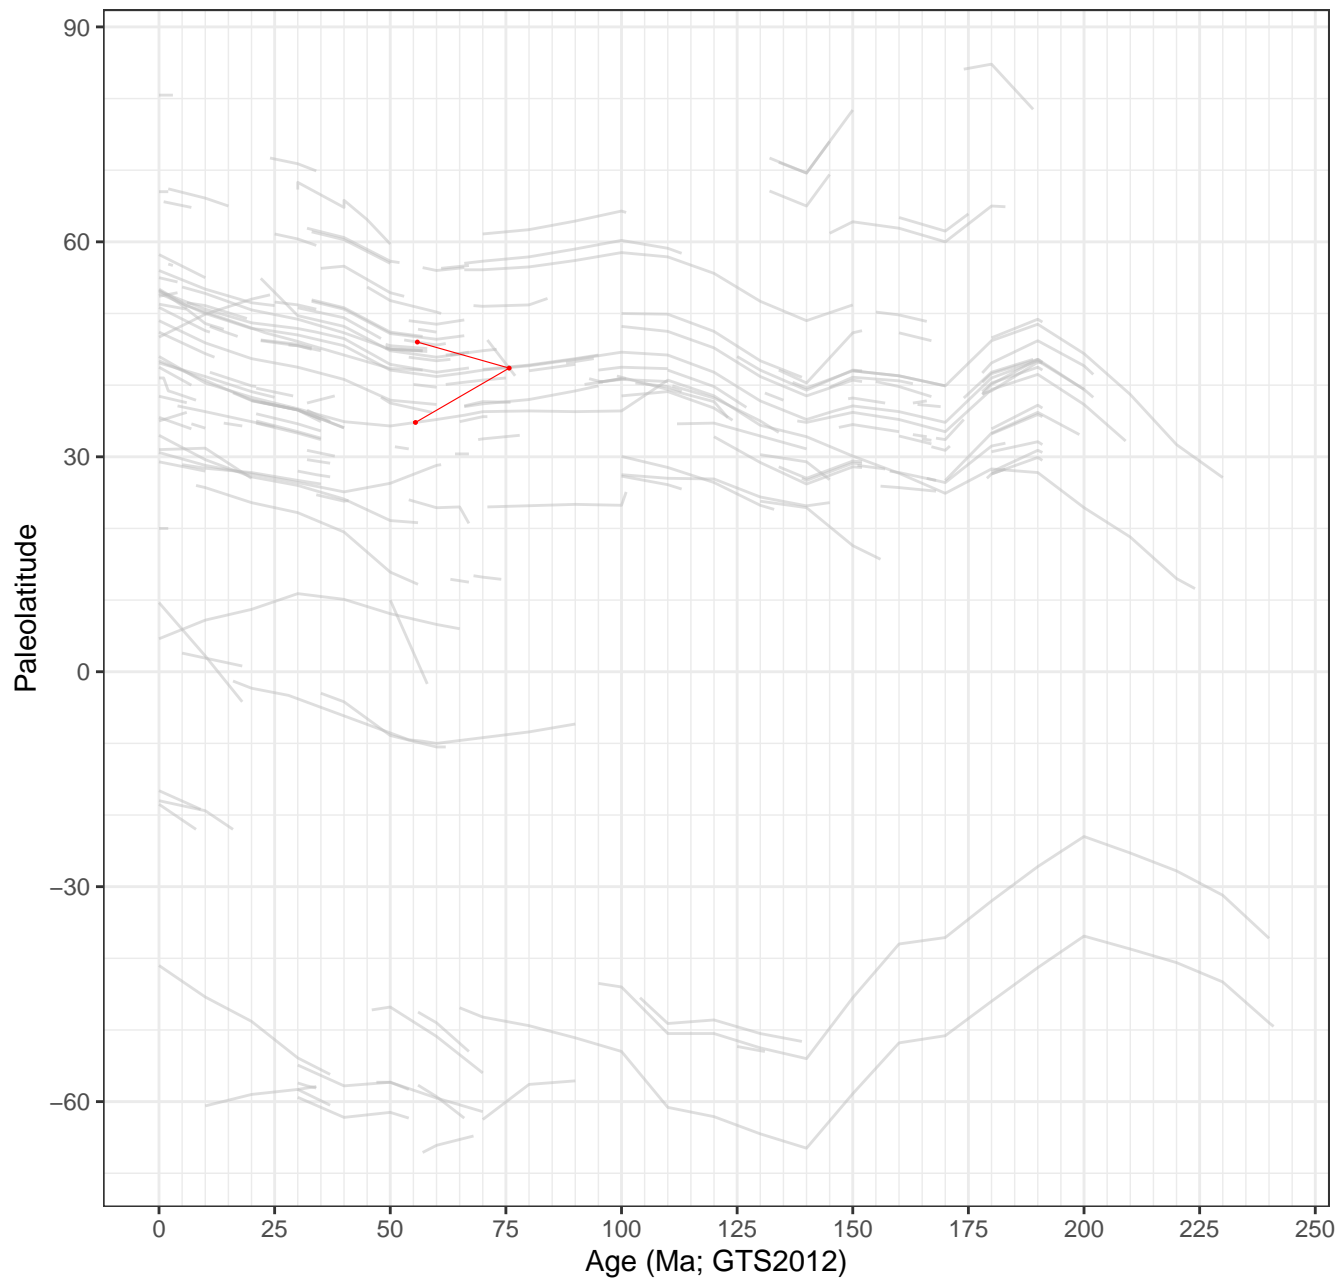

Supplement: Supplementary file 1011 [file Cerodinium glabrum.pdf › Supplement/Supplement 2/Species 1914 plots/Cerodinium glabrum.pdf]

# Species *Cerodinium granulostriatum*

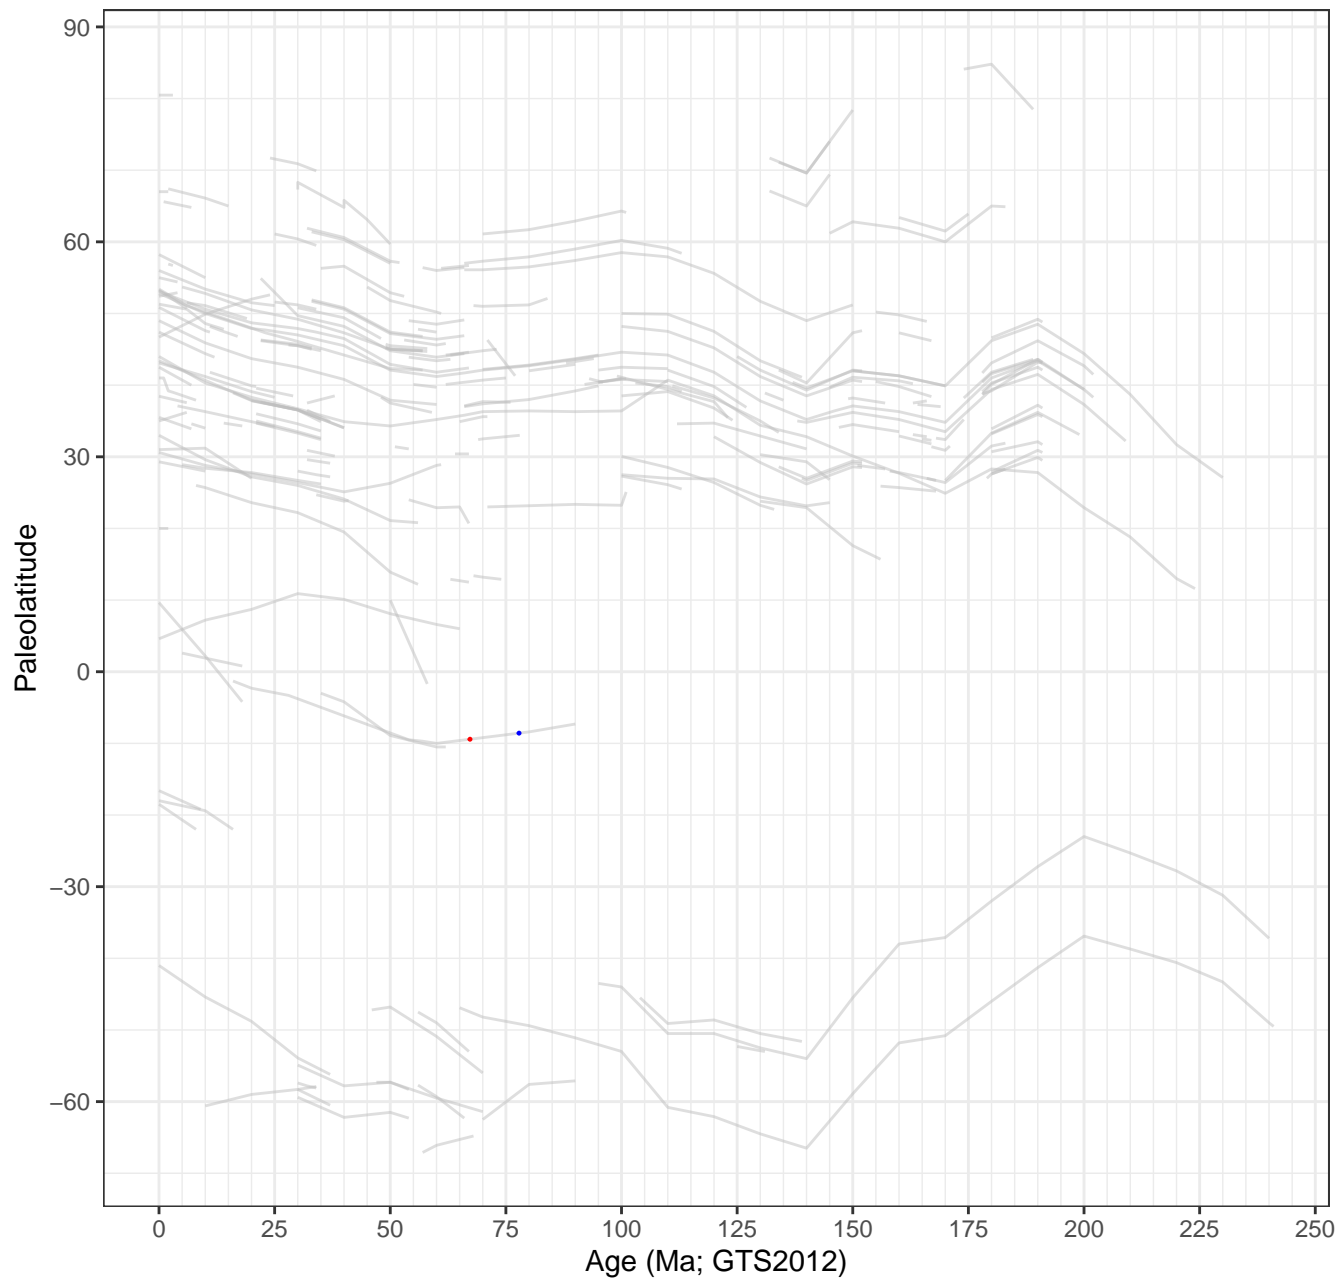

Supplement: Supplementary file 1012 [file Cerodinium granulostriatum.pdf › Supplement/Supplement 2/Species 1914 plots/Cerodinium granulostriatum.pdf]

# Species *Cerodinium kangiliense*

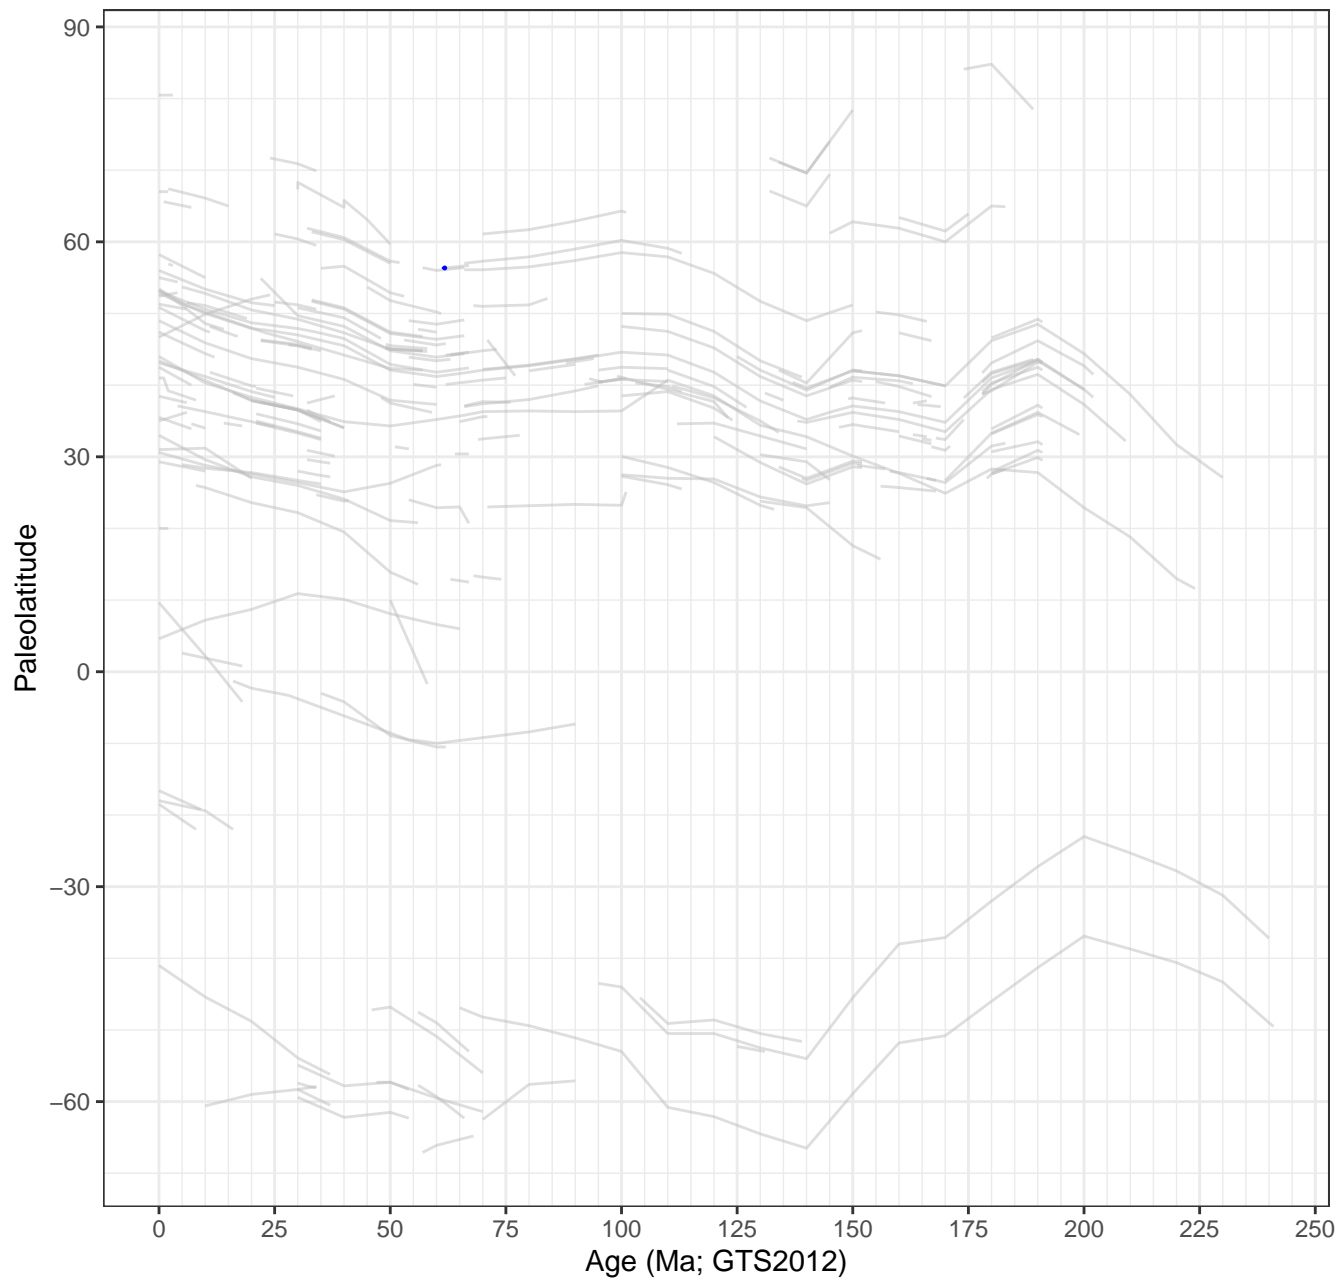

Supplement: Supplementary file 1013 [file Cerodinium kangiliense.pdf › Supplement/Supplement 2/Species 1914 plots/Cerodinium kangiliense.pdf]

# Species *Cerodinium leptodermum*

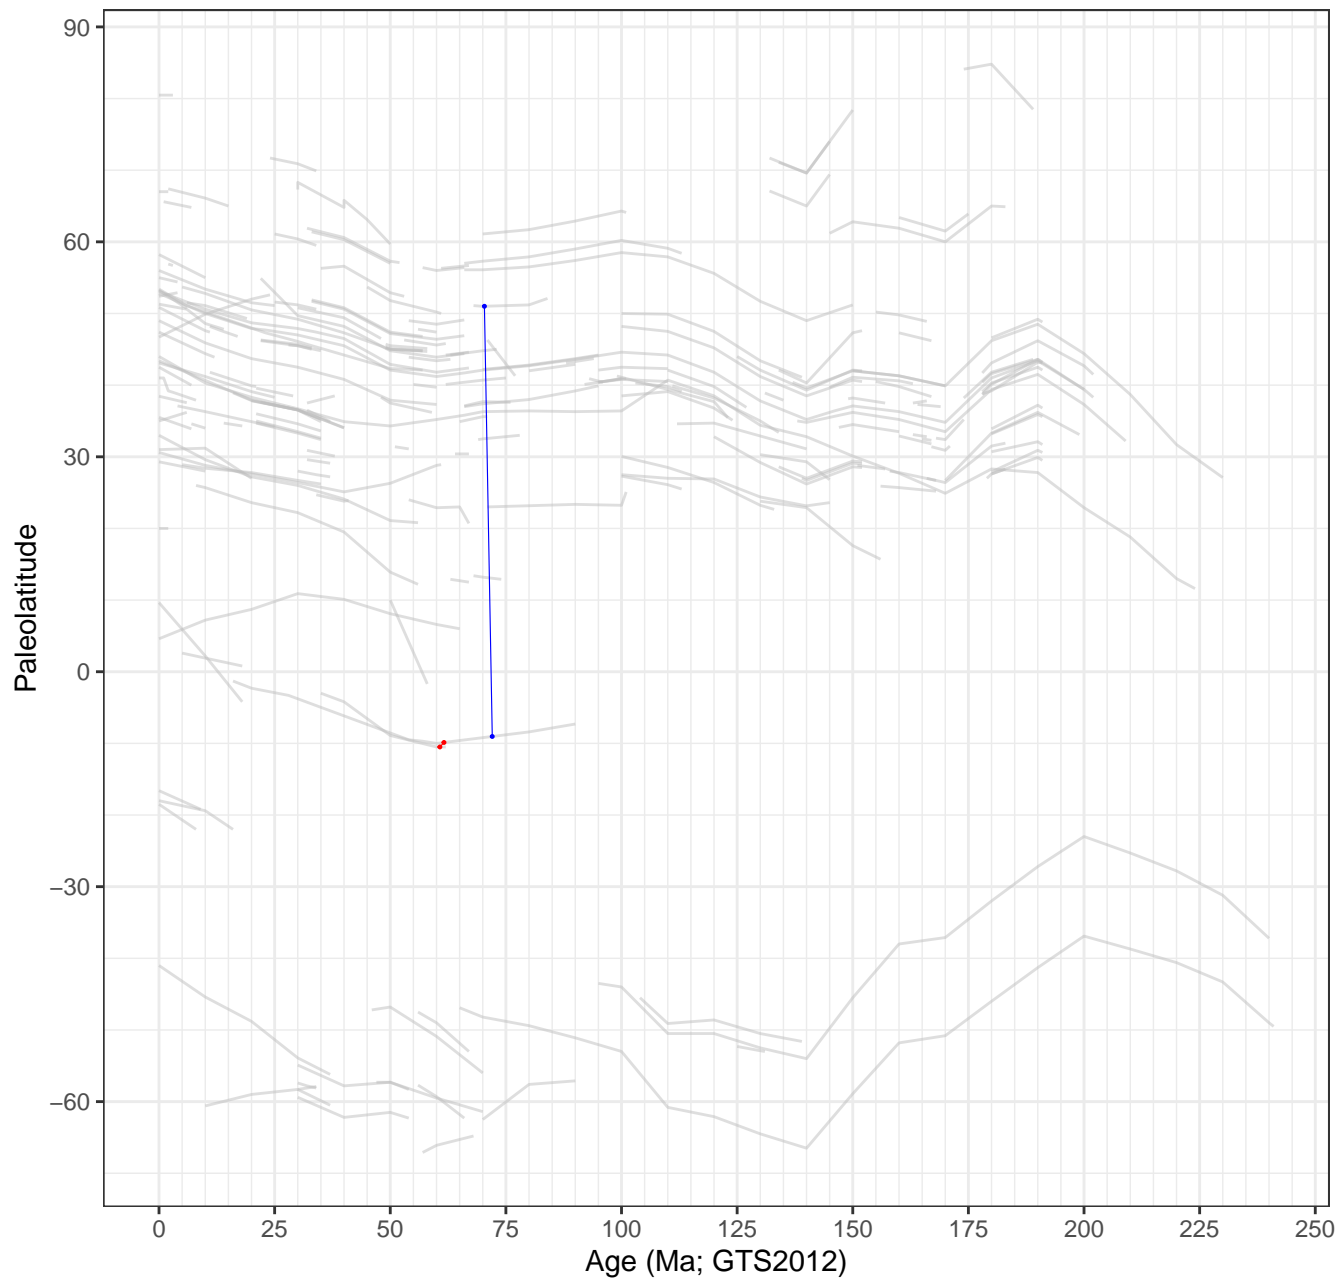

Supplement: Supplementary file 1014 [file Cerodinium leptodermum.pdf › Supplement/Supplement 2/Species 1914 plots/Cerodinium leptodermum.pdf]

# Species *Cerodinium medcalfii*

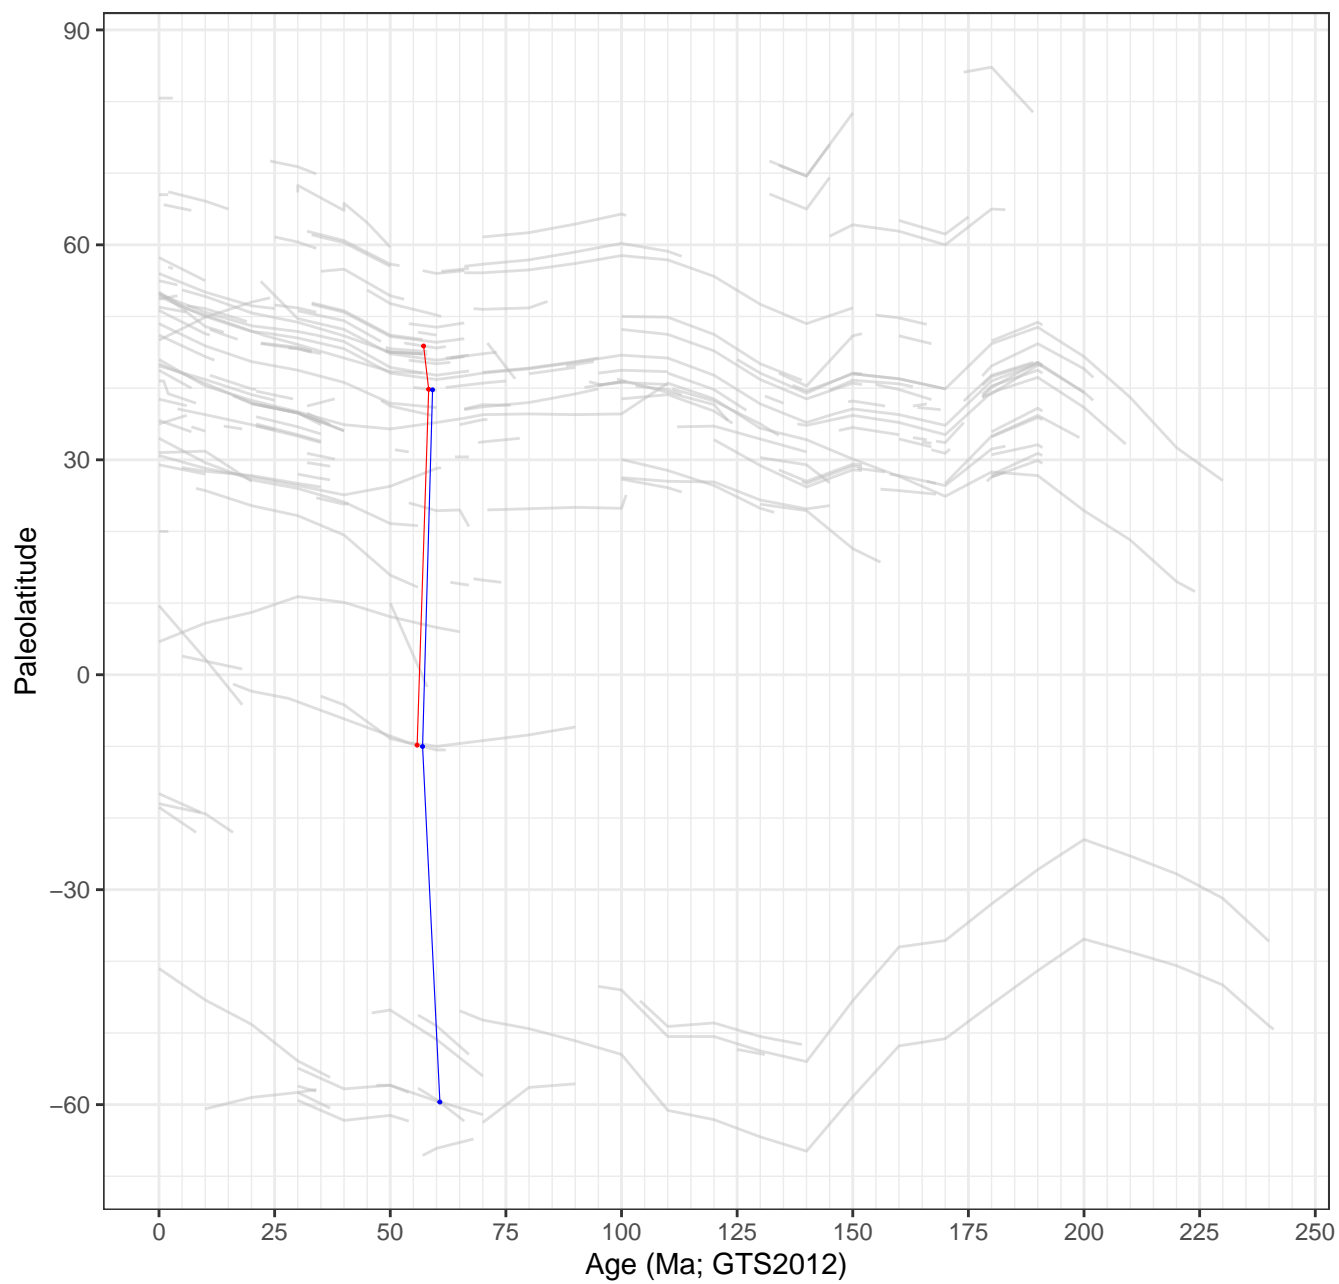

Supplement: Supplementary file 1015 [file Cerodinium medcalfii.pdf › Supplement/Supplement 2/Species 1914 plots/Cerodinium medcalfii.pdf]

# Species *Cerodinium mediterraneum*

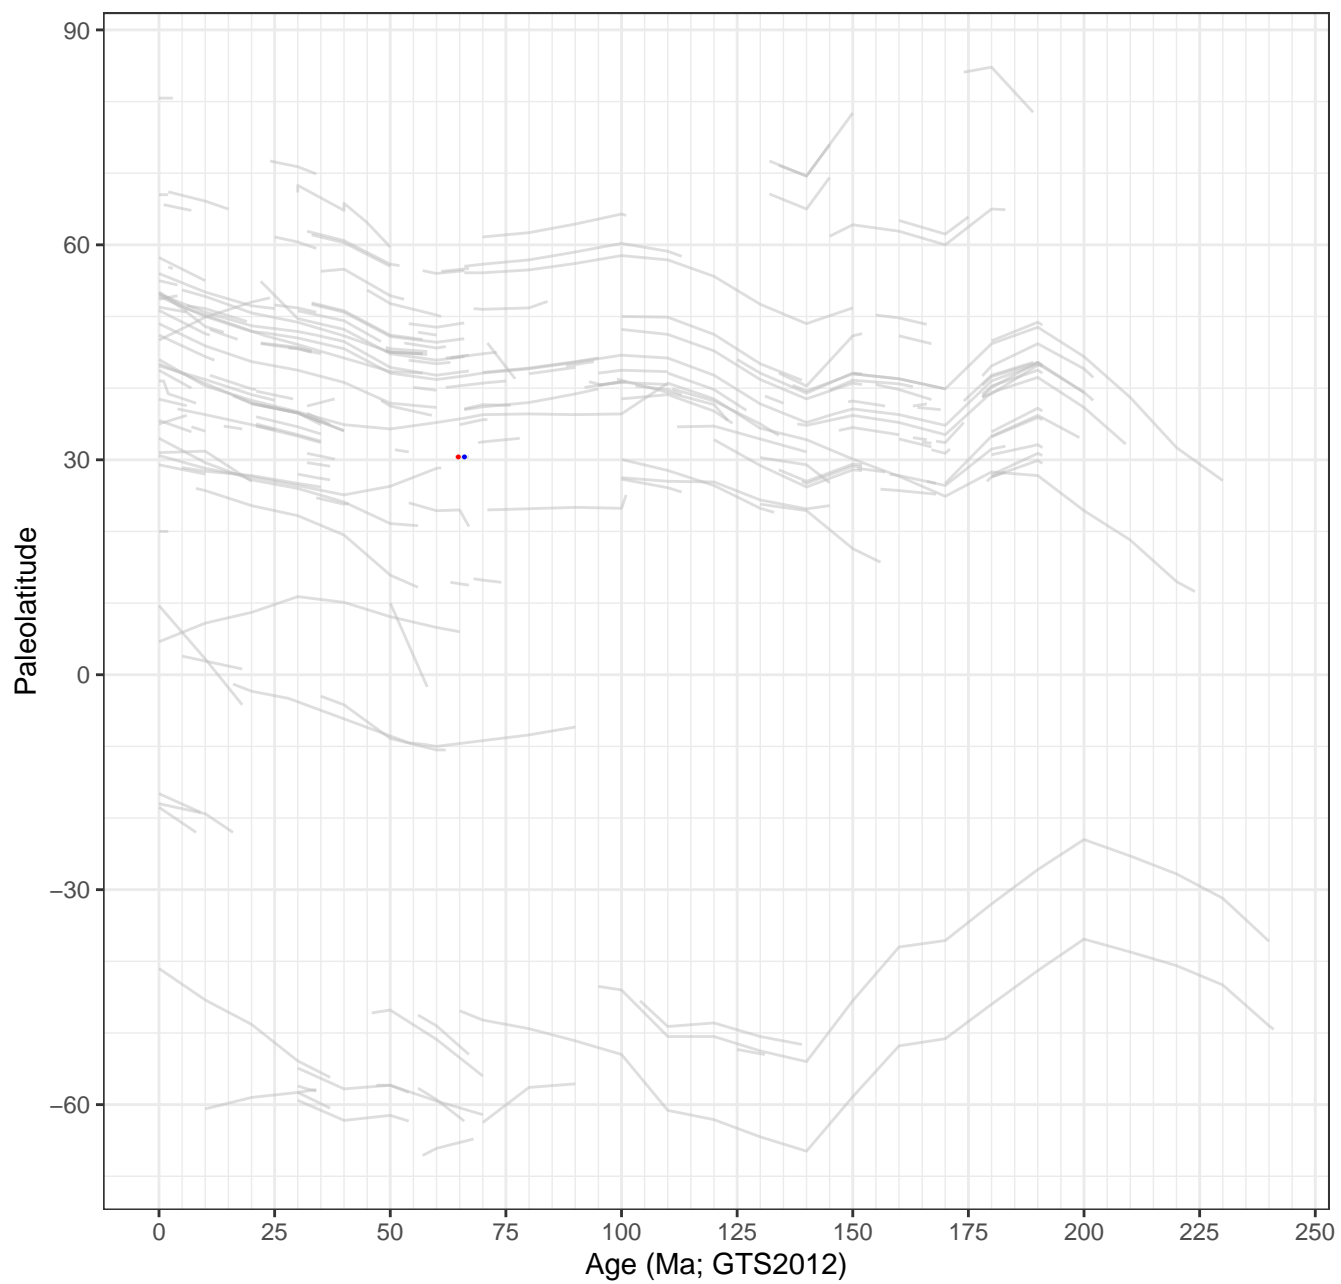

Supplement: Supplementary file 1016 [file Cerodinium mediterraneum.pdf › Supplement/Supplement 2/Species 1914 plots/Cerodinium mediterraneum.pdf]

# Species *Cerodinium pannuceum*

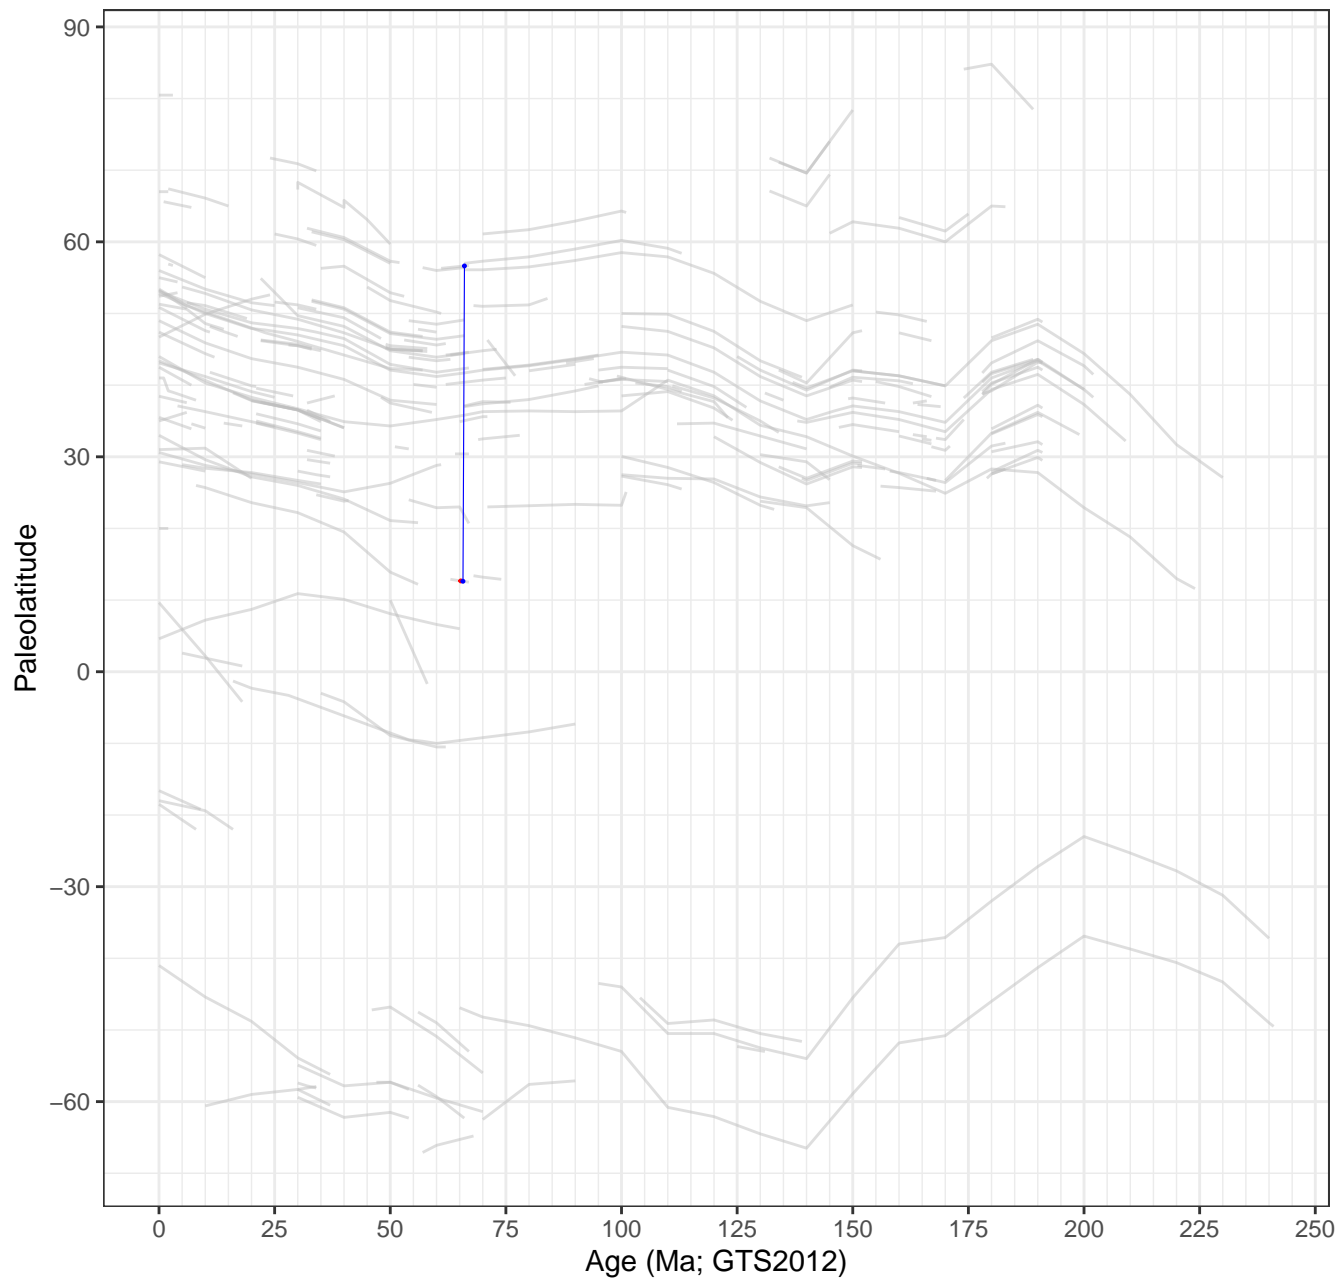

Supplement: Supplementary file 1017 [file Cerodinium pannuceum.pdf › Supplement/Supplement 2/Species 1914 plots/Cerodinium pannuceum.pdf]

# Species *Cerodinium speciosum*

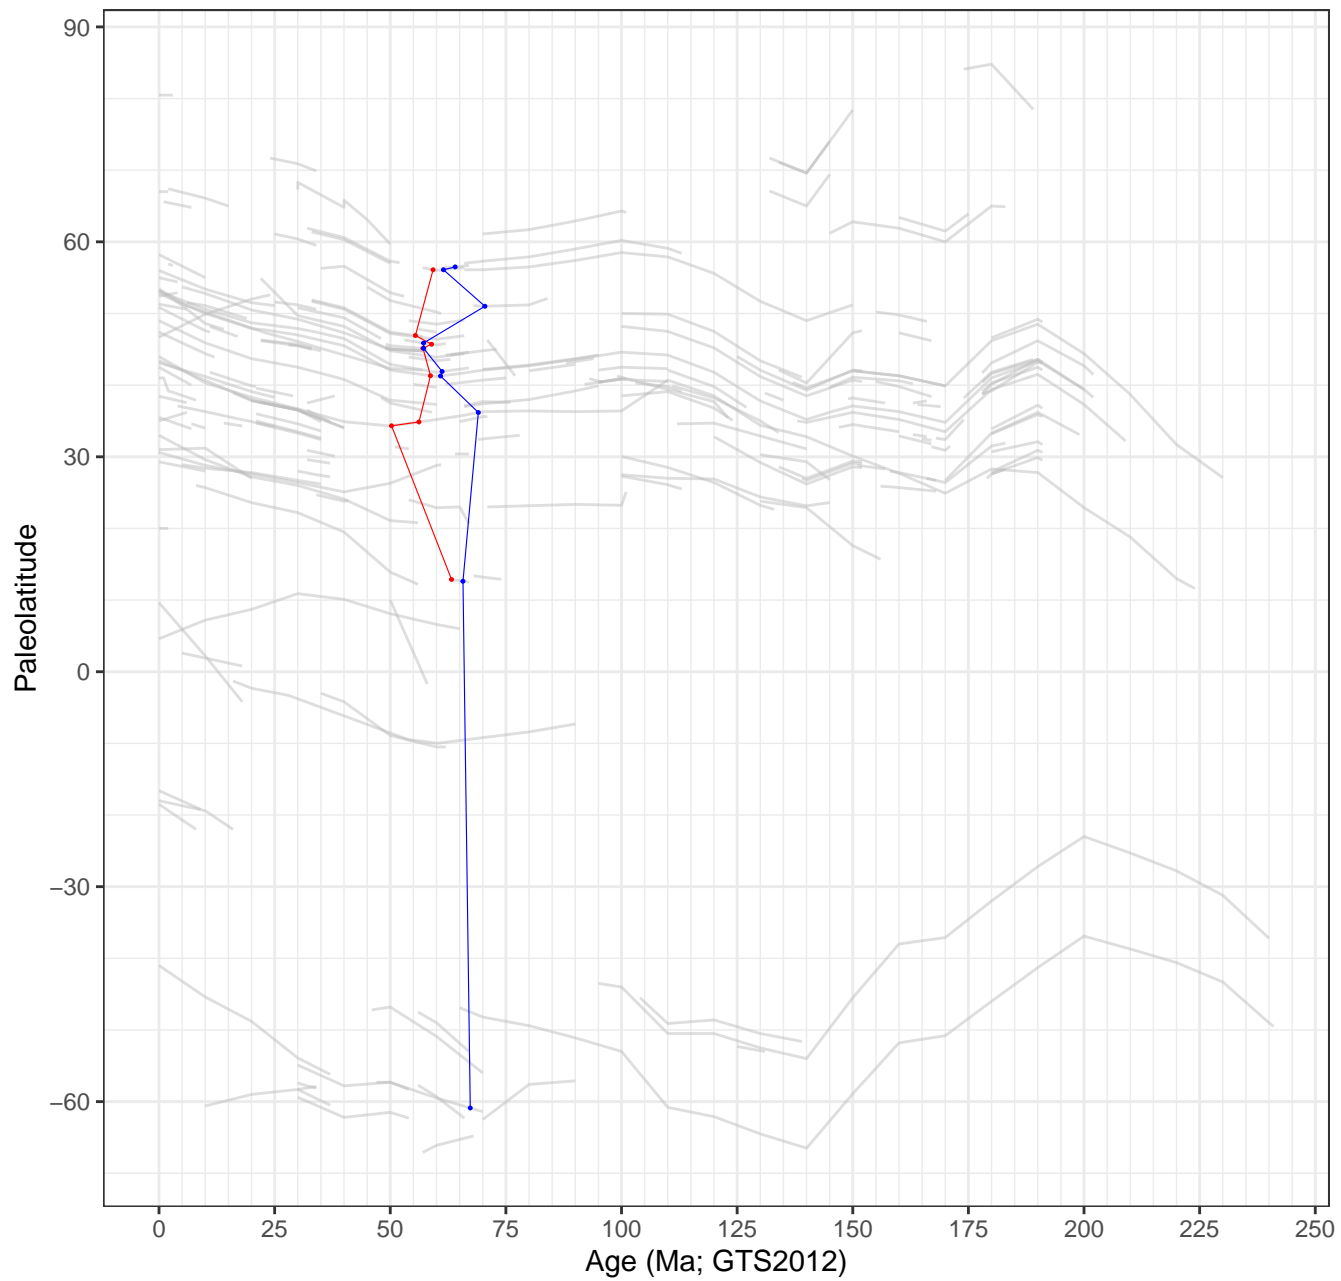

Supplement: Supplementary file 1018 [file Cerodinium speciosum.pdf › Supplement/Supplement 2/Species 1914 plots/Cerodinium speciosum.pdf]

# Species *Cerodinium striatum*

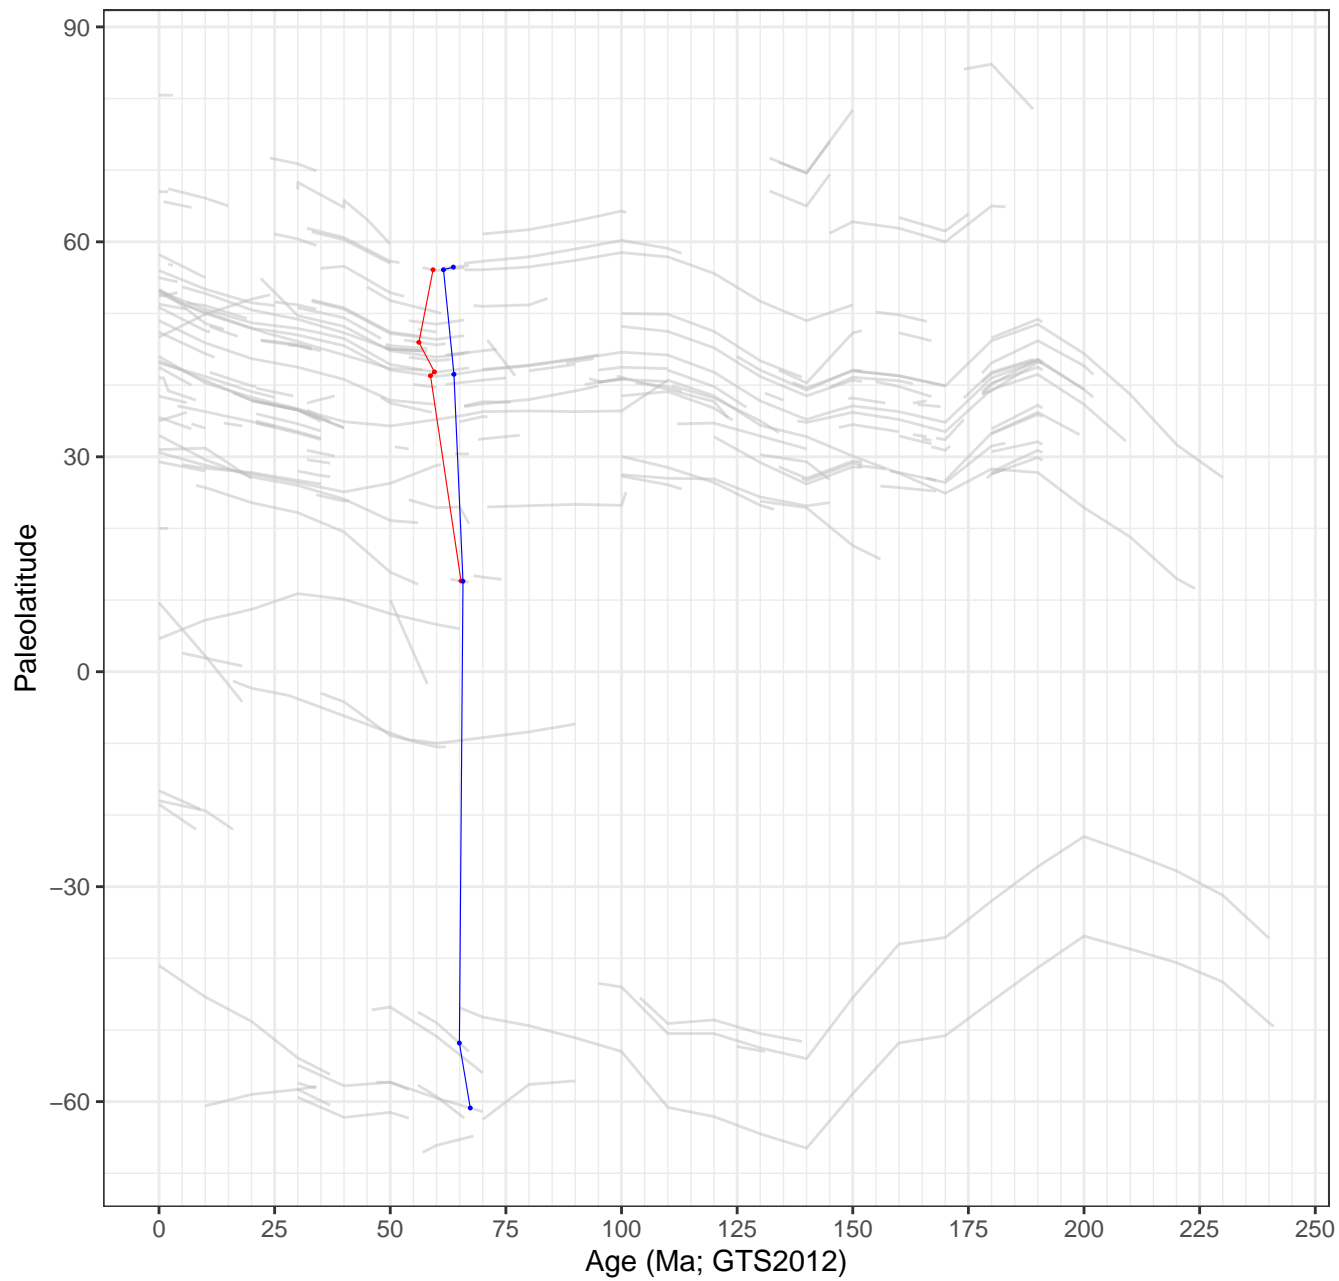

Supplement: Supplementary file 1019 [file Cerodinium striatum.pdf › Supplement/Supplement 2/Species 1914 plots/Cerodinium striatum.pdf]

# Species *Cerodinium wardenense*

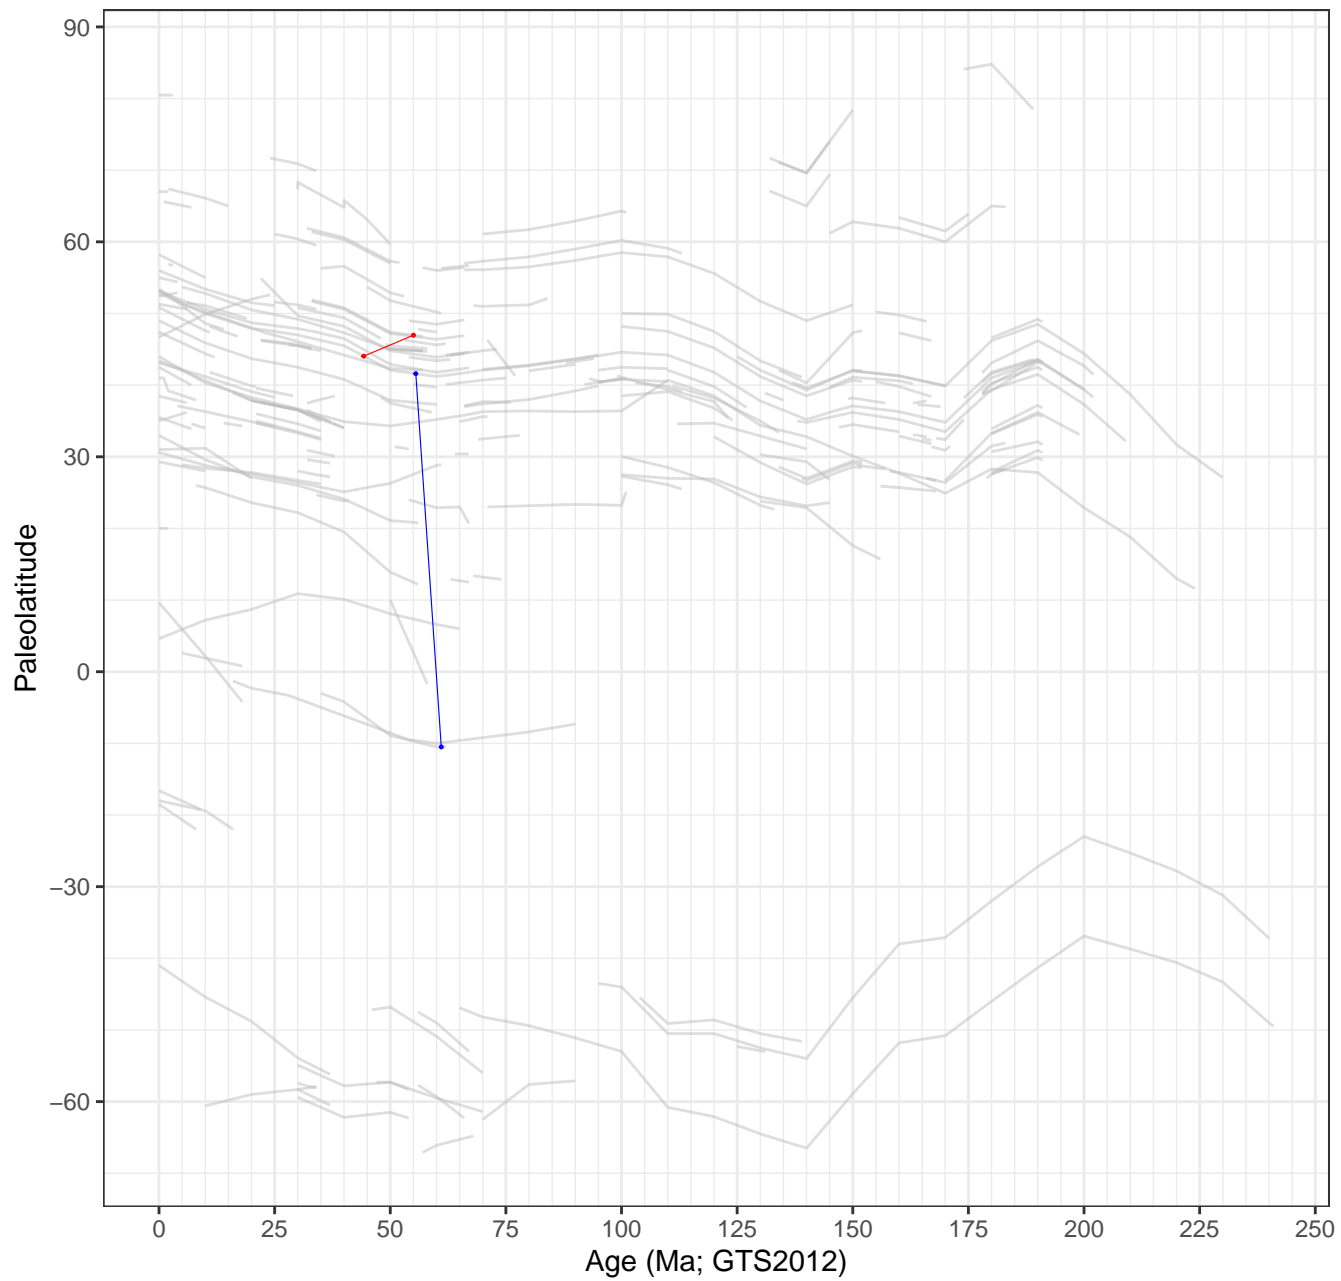

Supplement: Supplementary file 1020 [file Cerodinium wardenense.pdf › Supplement/Supplement 2/Species 1914 plots/Cerodinium wardenense.pdf]

# Species *Charlesdowniea clathrata*

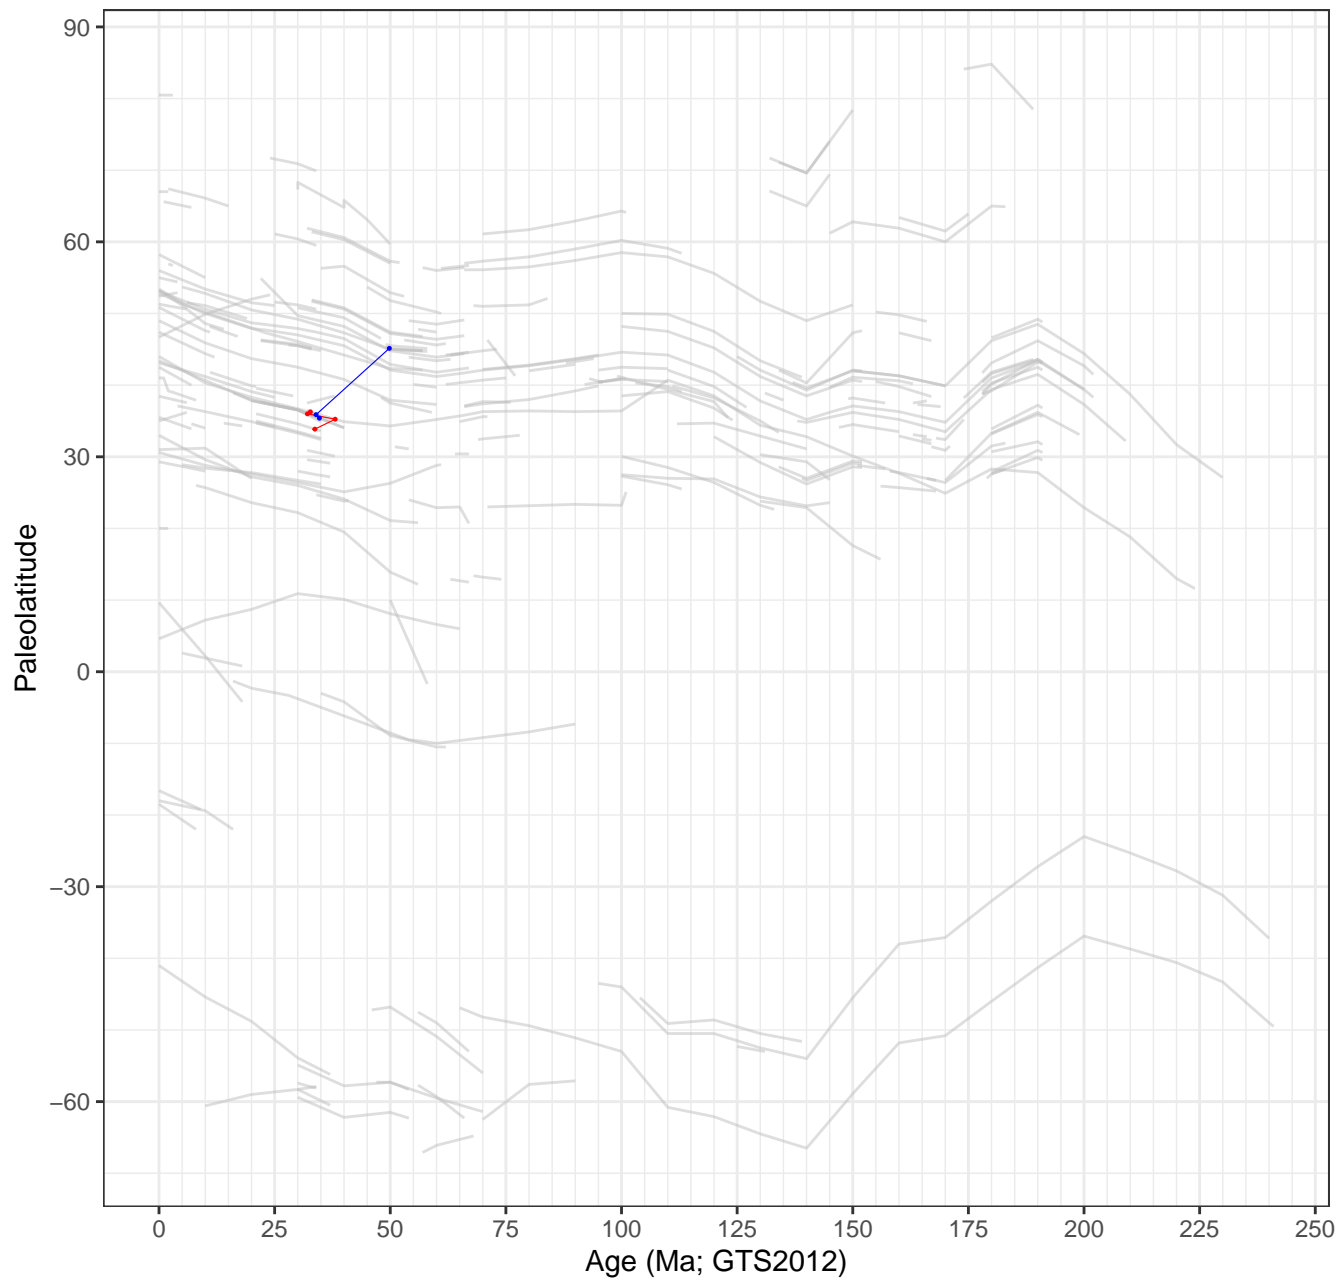

Supplement: Supplementary file 1021 [file Charlesdowniea clathrata.pdf › Supplement/Supplement 2/Species 1914 plots/Charlesdowniea clathrata.pdf]

# Species *Charlesdowniea coleothrypta*

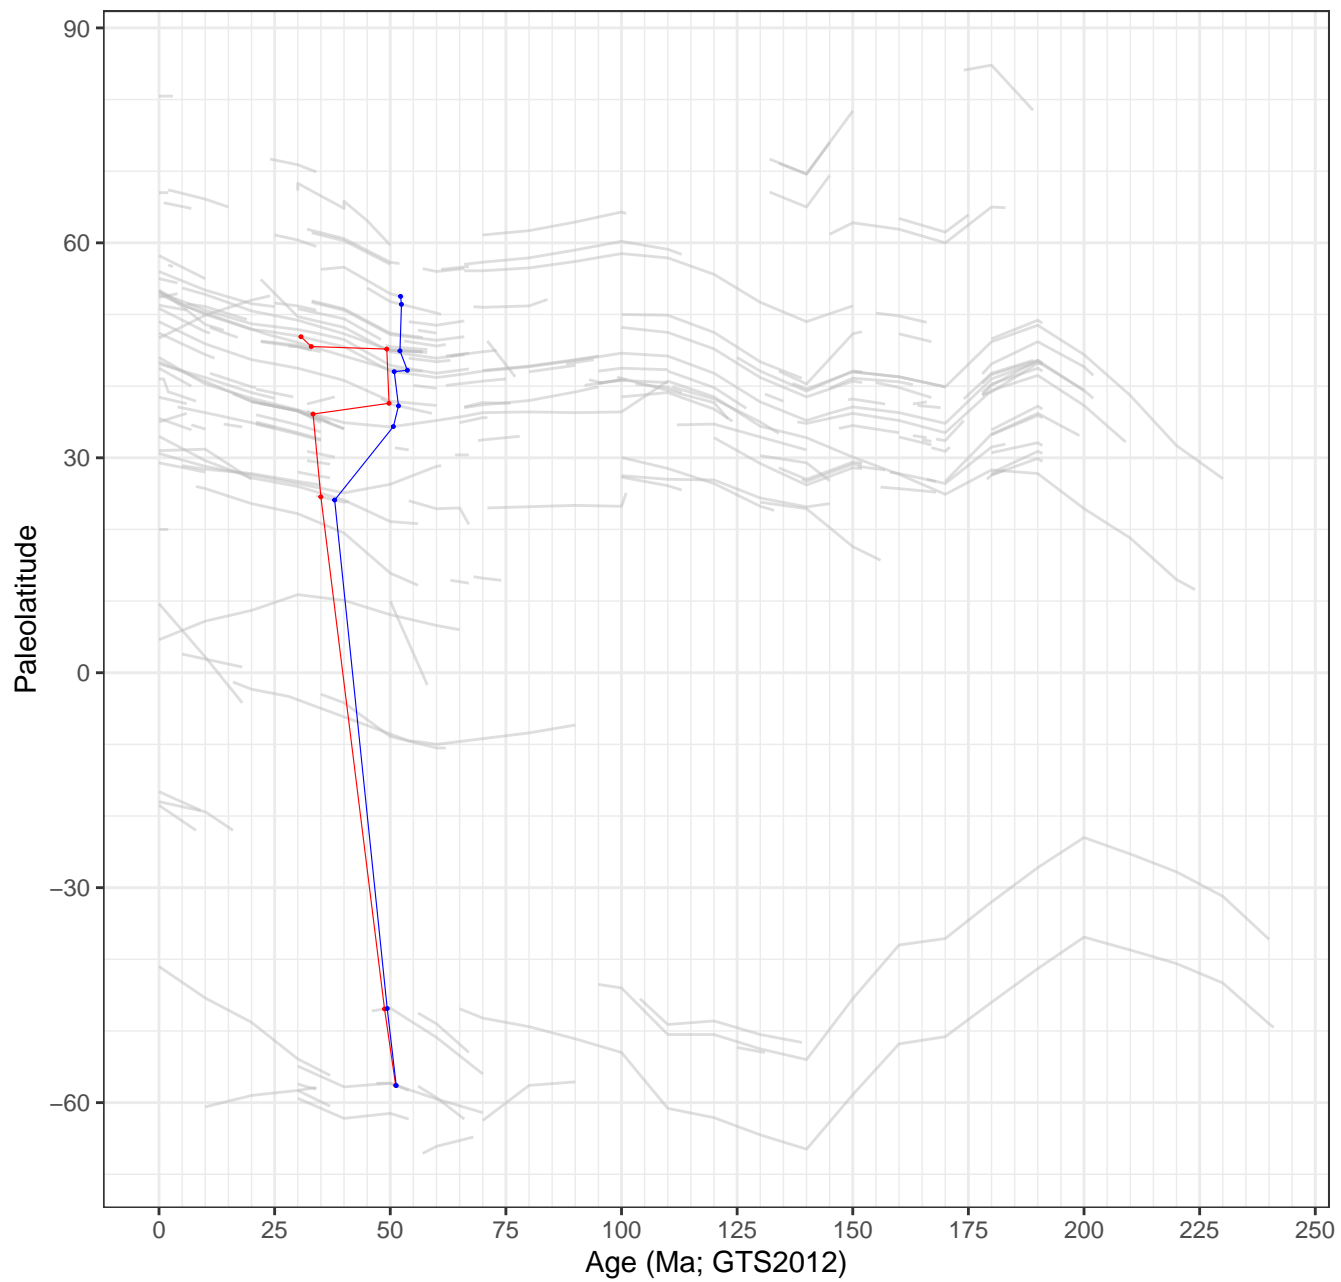

Supplement: Supplementary file 1022 [file Charlesdowniea coleothrypta.pdf › Supplement/Supplement 2/Species 1914 plots/Charlesdowniea coleothrypta.pdf]

# Species *Charlesdowniea columna*

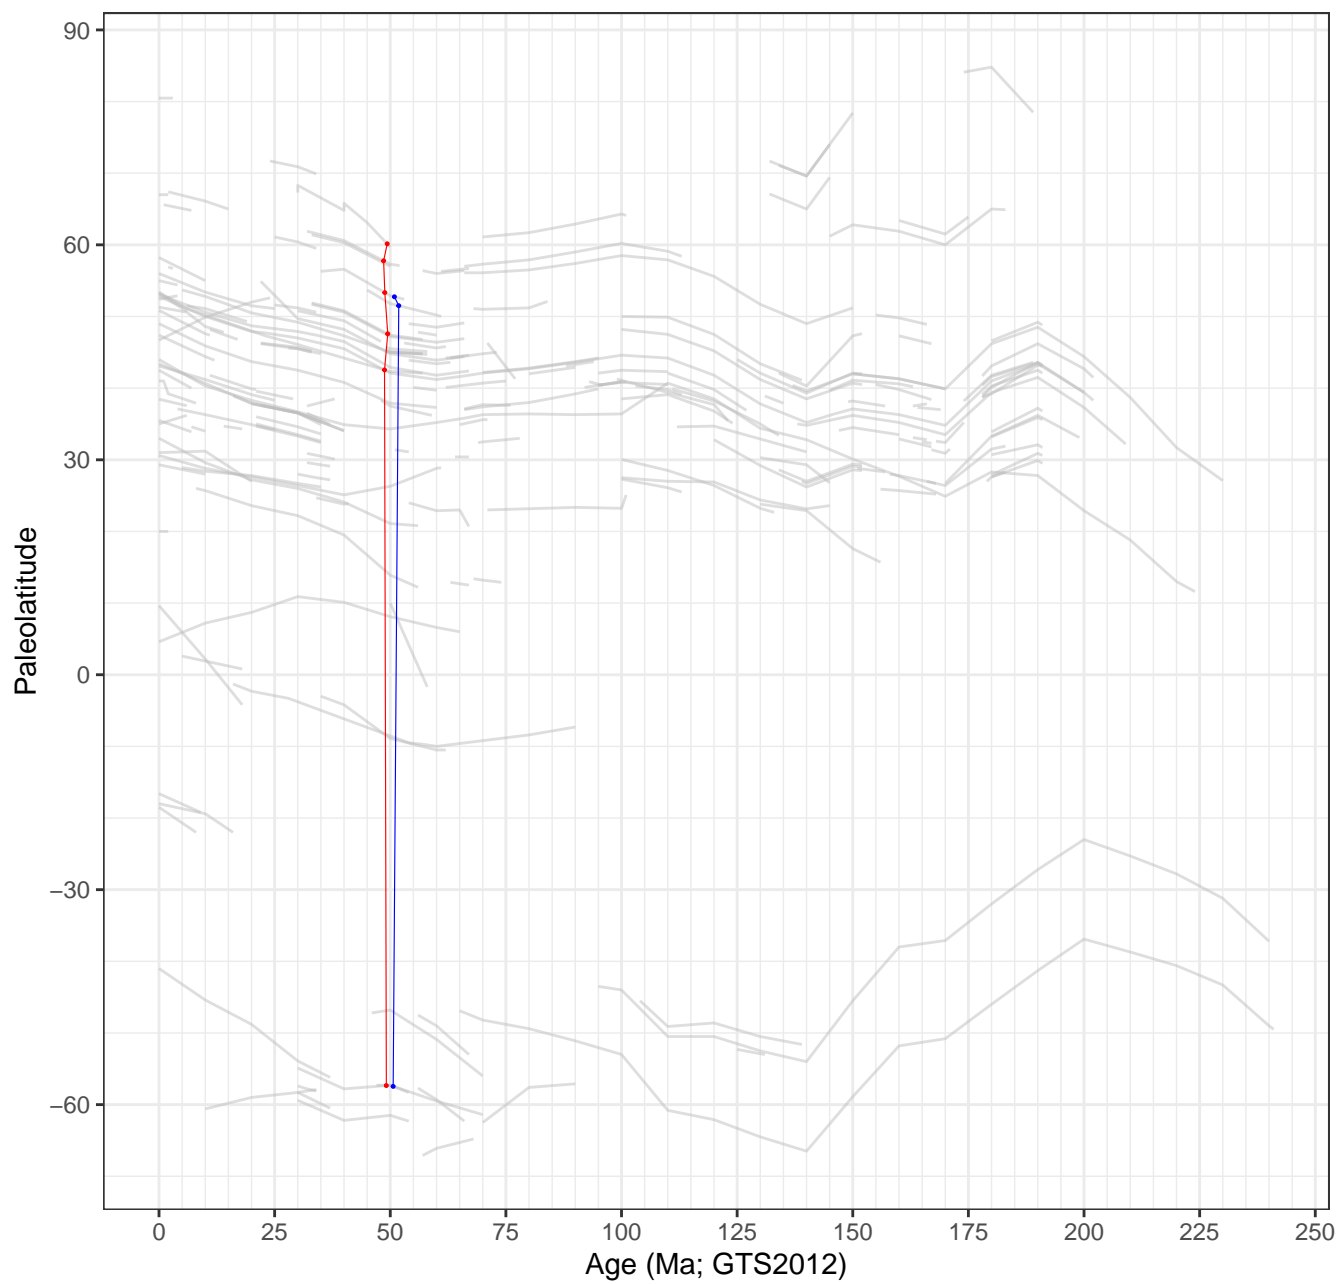

Supplement: Supplementary file 1023 [file Charlesdowniea columna.pdf › Supplement/Supplement 2/Species 1914 plots/Charlesdowniea columna.pdf]

# Species *Charlesdowniea crassoramosa*

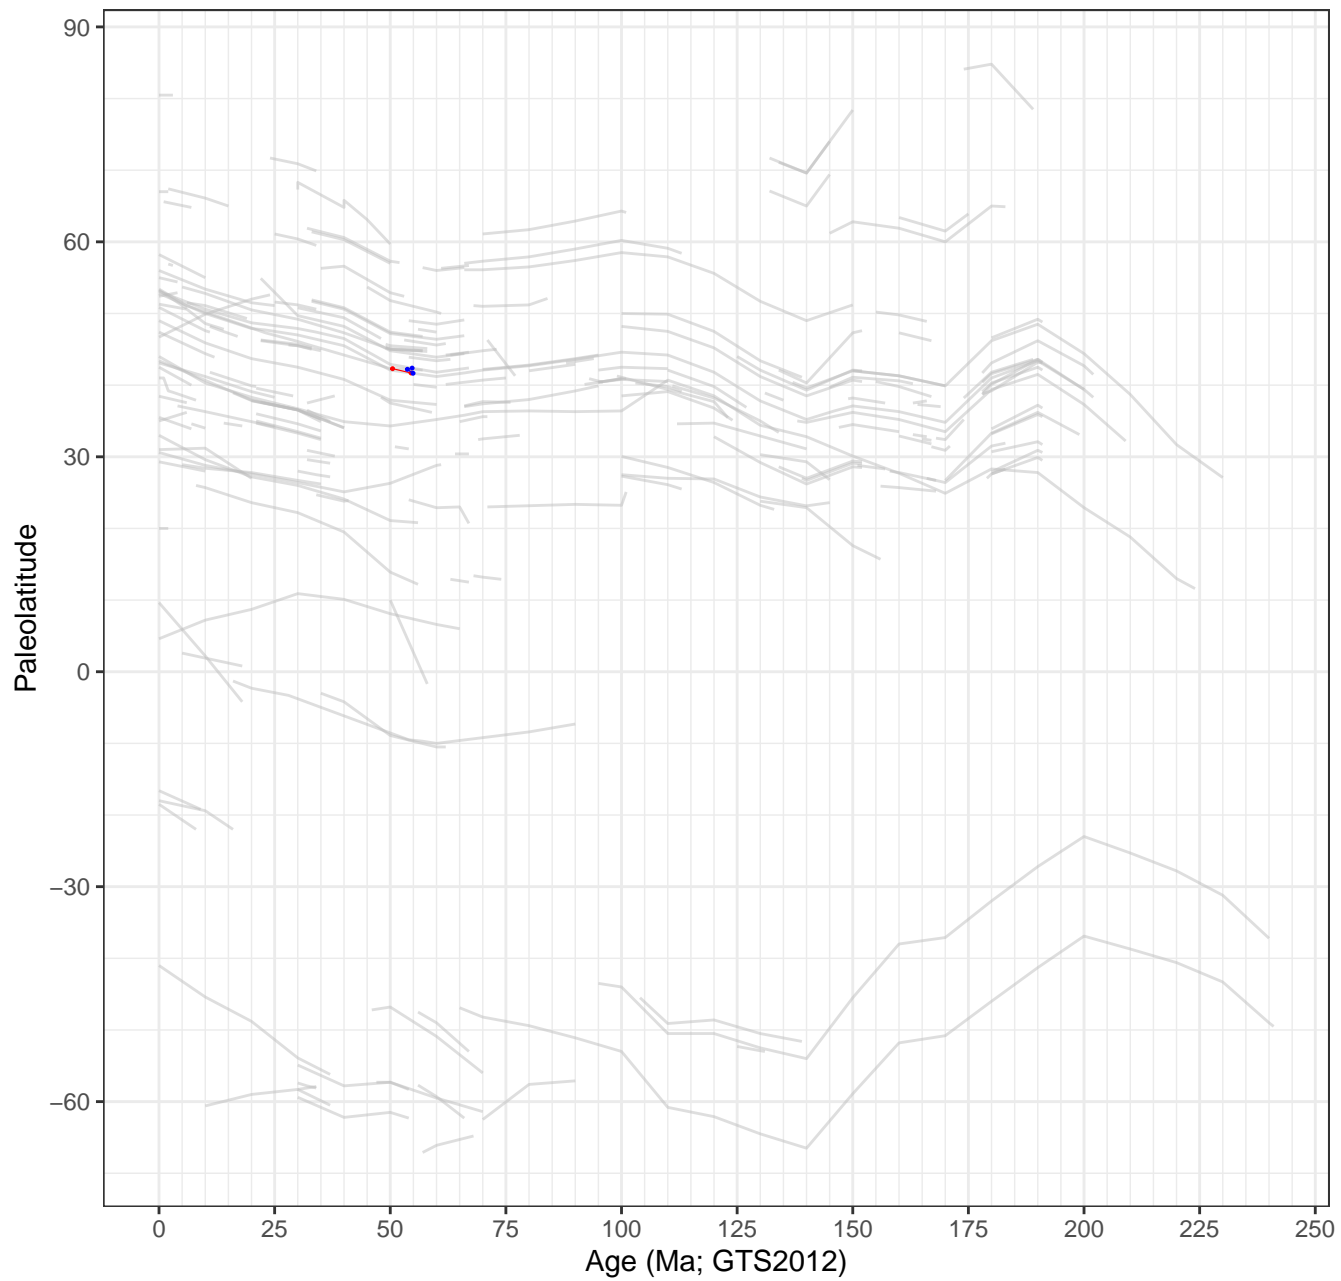

Supplement: Supplementary file 1024 [file Charlesdowniea crassoramosa.pdf › Supplement/Supplement 2/Species 1914 plots/Charlesdowniea crassoramosa.pdf]

# Species *Charlesdowniea edwardsii*

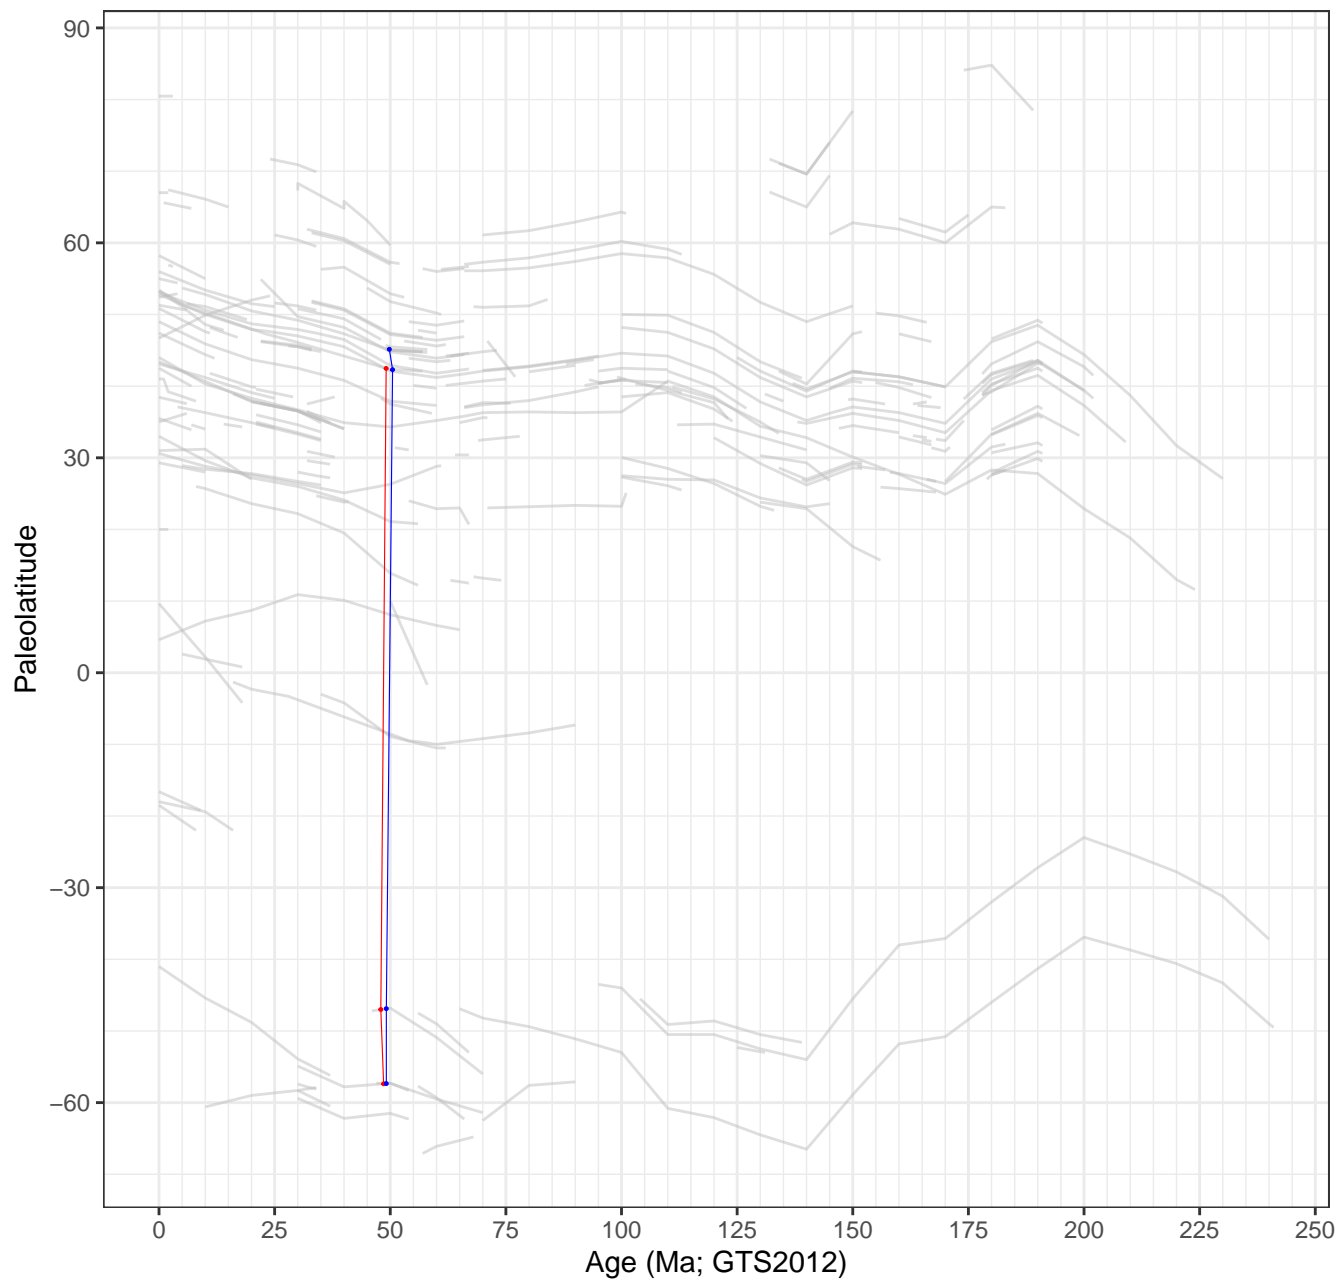

Supplement: Supplementary file 1025 [file Charlesdowniea edwardsii.pdf › Supplement/Supplement 2/Species 1914 plots/Charlesdowniea edwardsii.pdf]

# Species *Charlesdowniea fasciata*

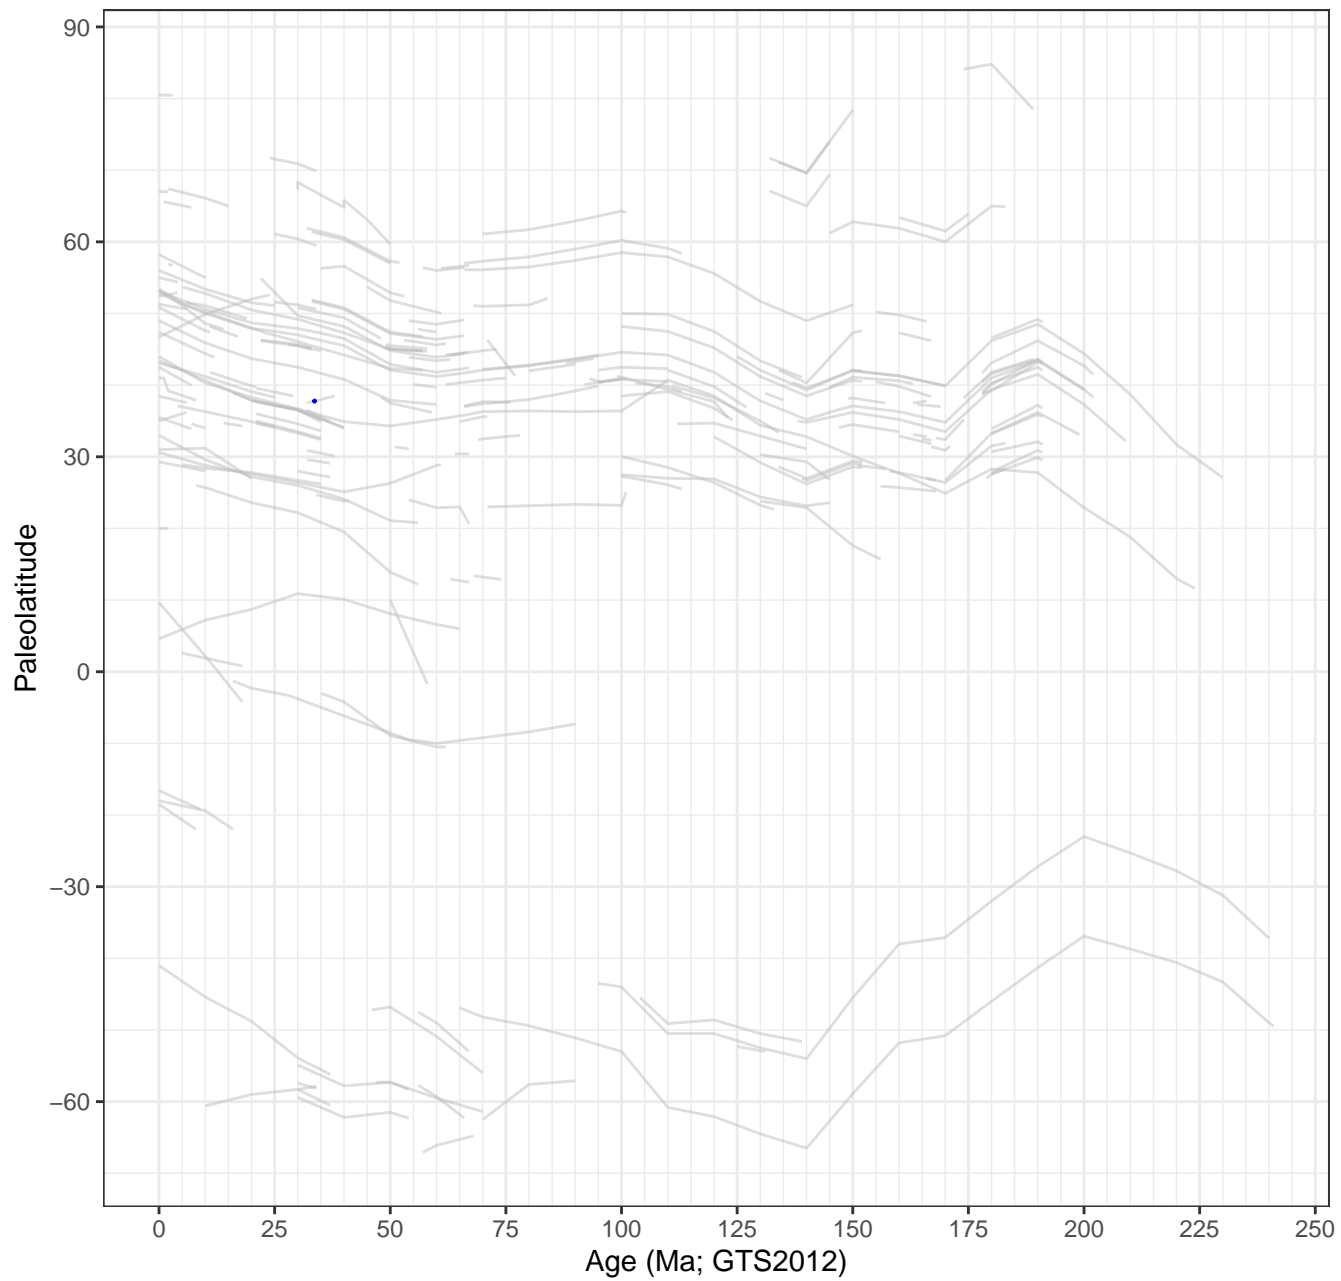

Supplement: Supplementary file 1026 [file Charlesdowniea fasciata.pdf › Supplement/Supplement 2/Species 1914 plots/Charlesdowniea fasciata.pdf]

# Species *Charlesdowniea proserpina*

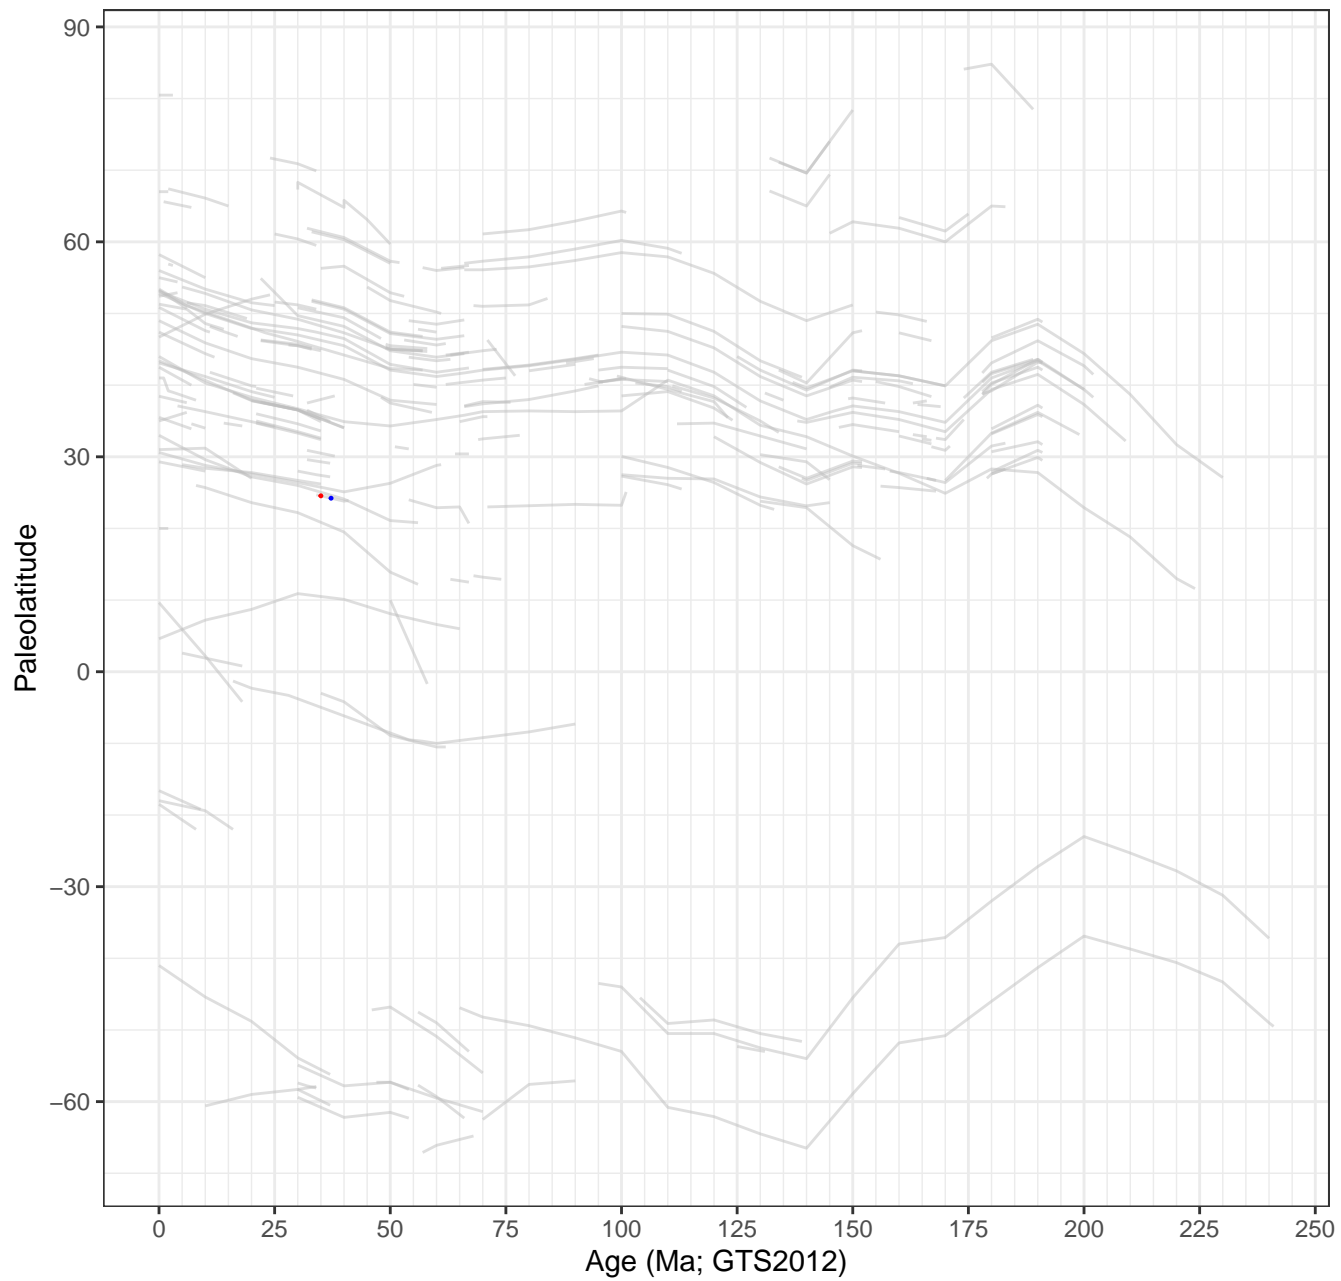

Supplement: Supplementary file 1027 [file Charlesdowniea proserpina.pdf › Supplement/Supplement 2/Species 1914 plots/Charlesdowniea proserpina.pdf]

# Species *Charlesdowniea reticulata*

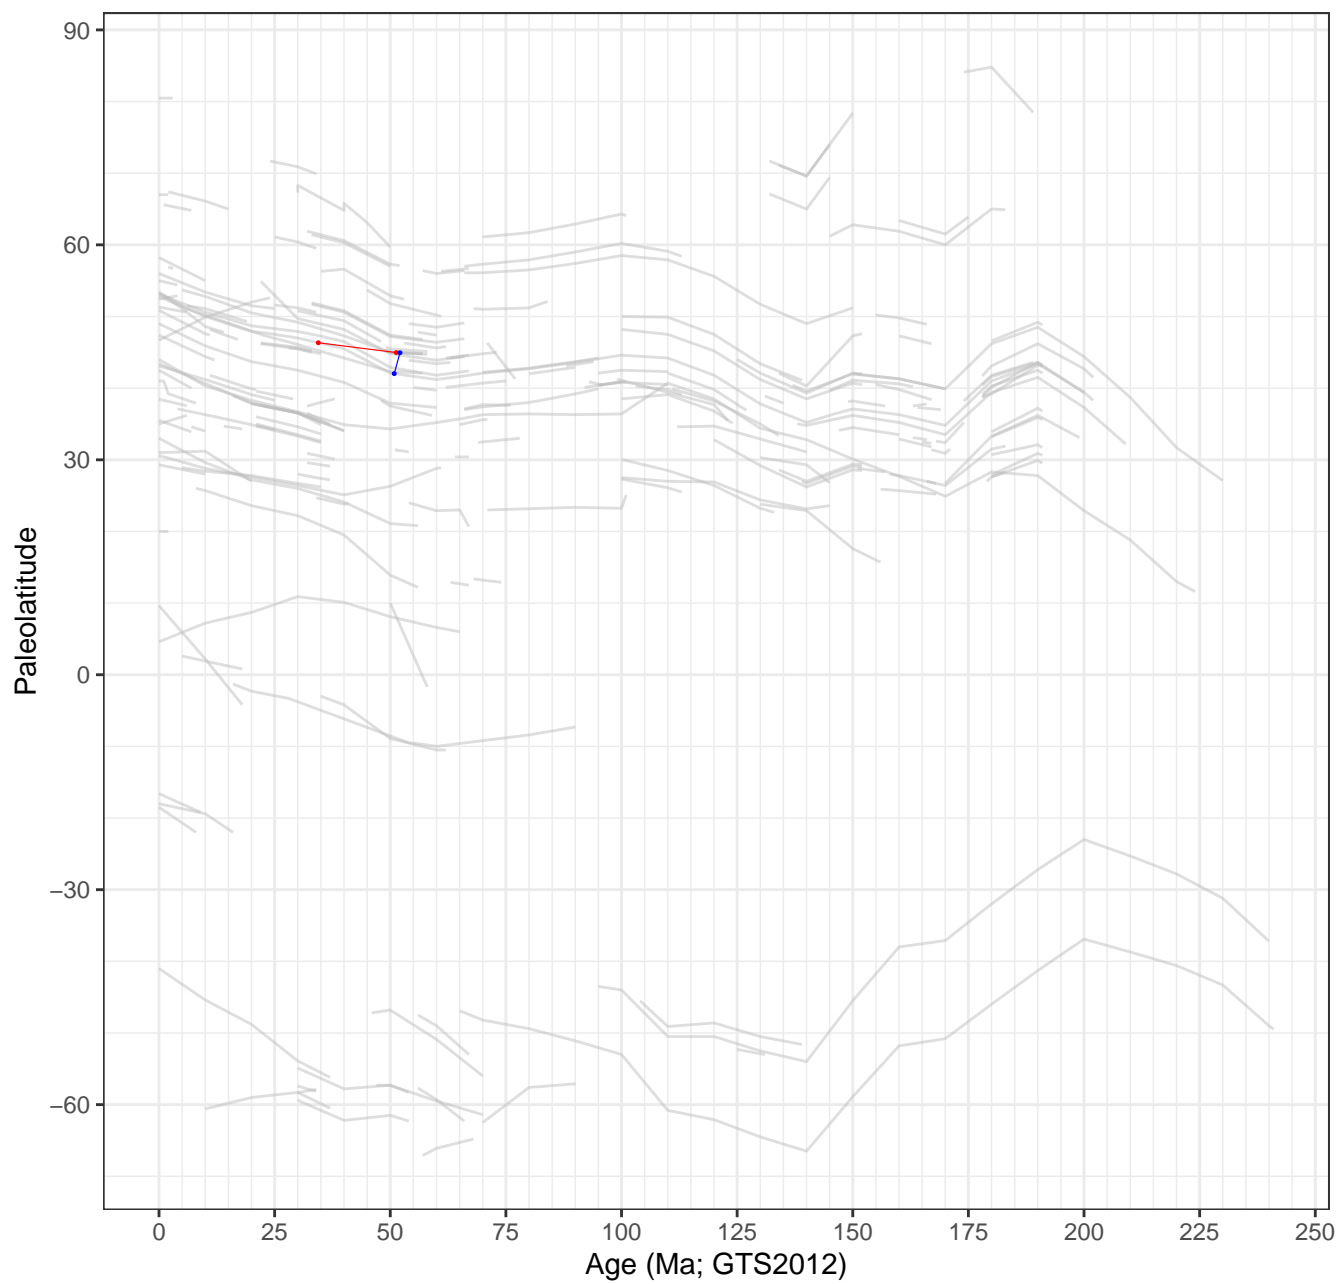

Supplement: Supplementary file 1028 [file Charlesdowniea reticulata.pdf › Supplement/Supplement 2/Species 1914 plots/Charlesdowniea reticulata.pdf]

# Species *Charlesdowniea tenuivirgula*

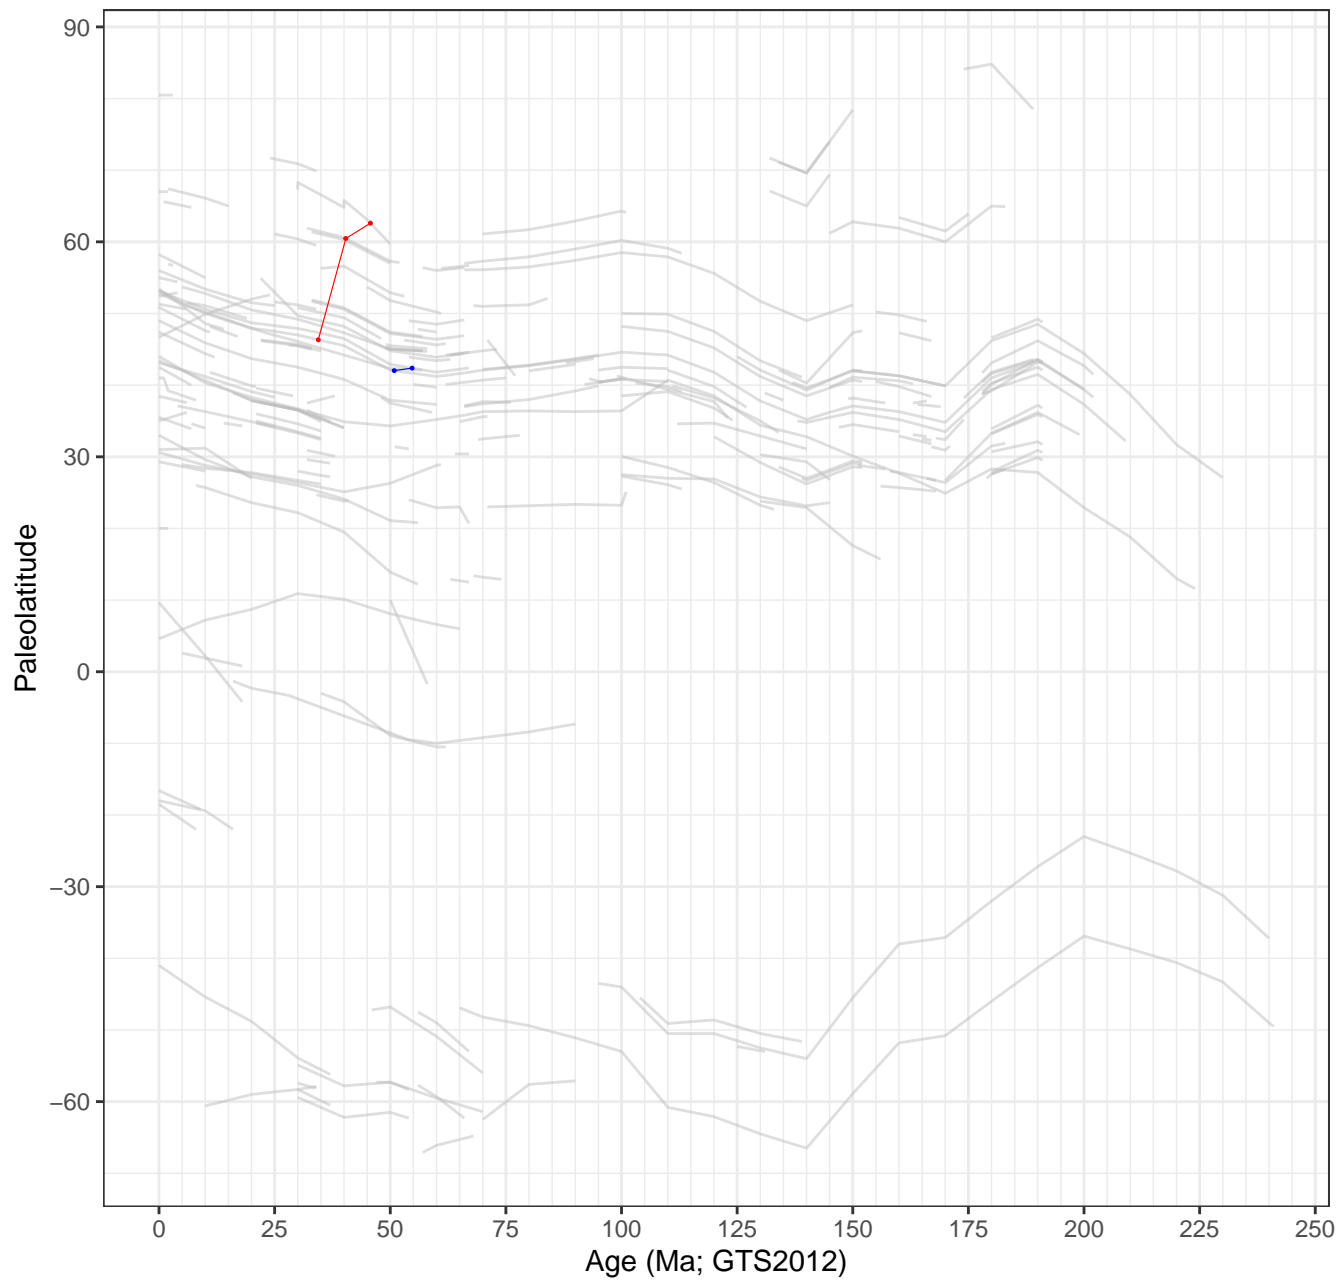

Supplement: Supplementary file 1029 [file Charlesdowniea tenuivirgula.pdf › Supplement/Supplement 2/Species 1914 plots/Charlesdowniea tenuivirgula.pdf]

# Species *Charlesdowniea variabilis*

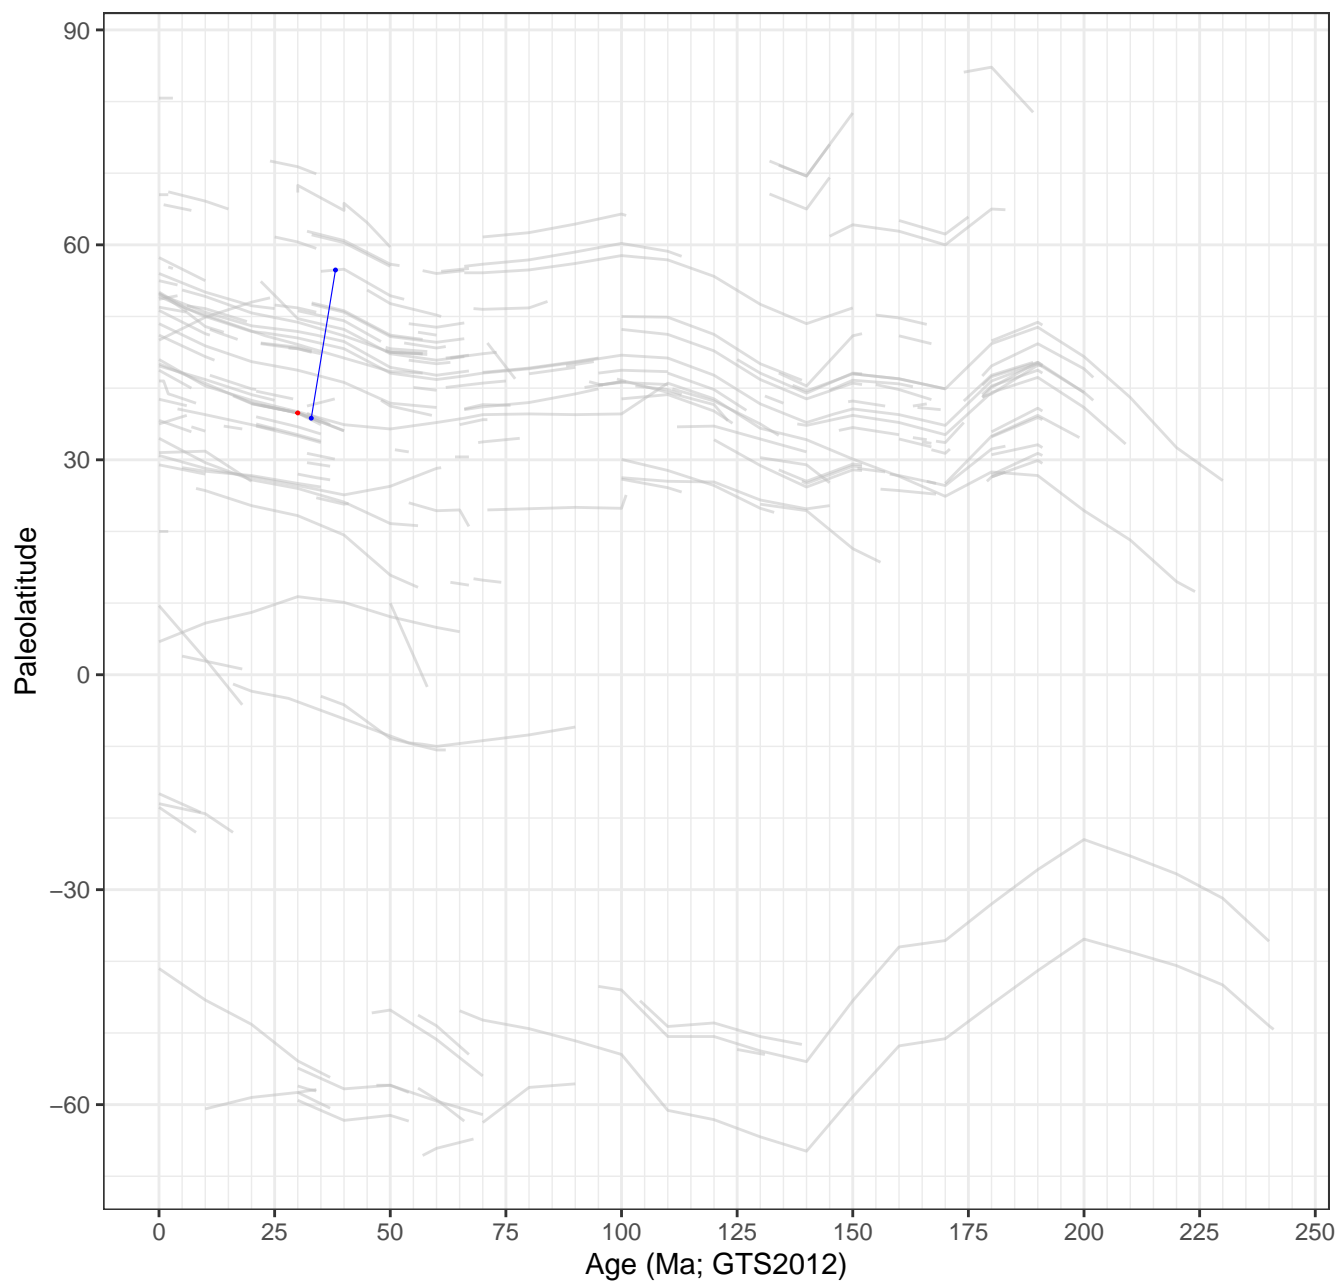

Supplement: Supplementary file 1030 [file Charlesdowniea variabilis.pdf › Supplement/Supplement 2/Species 1914 plots/Charlesdowniea variabilis.pdf]

# Species *Chatangiella biapertura*

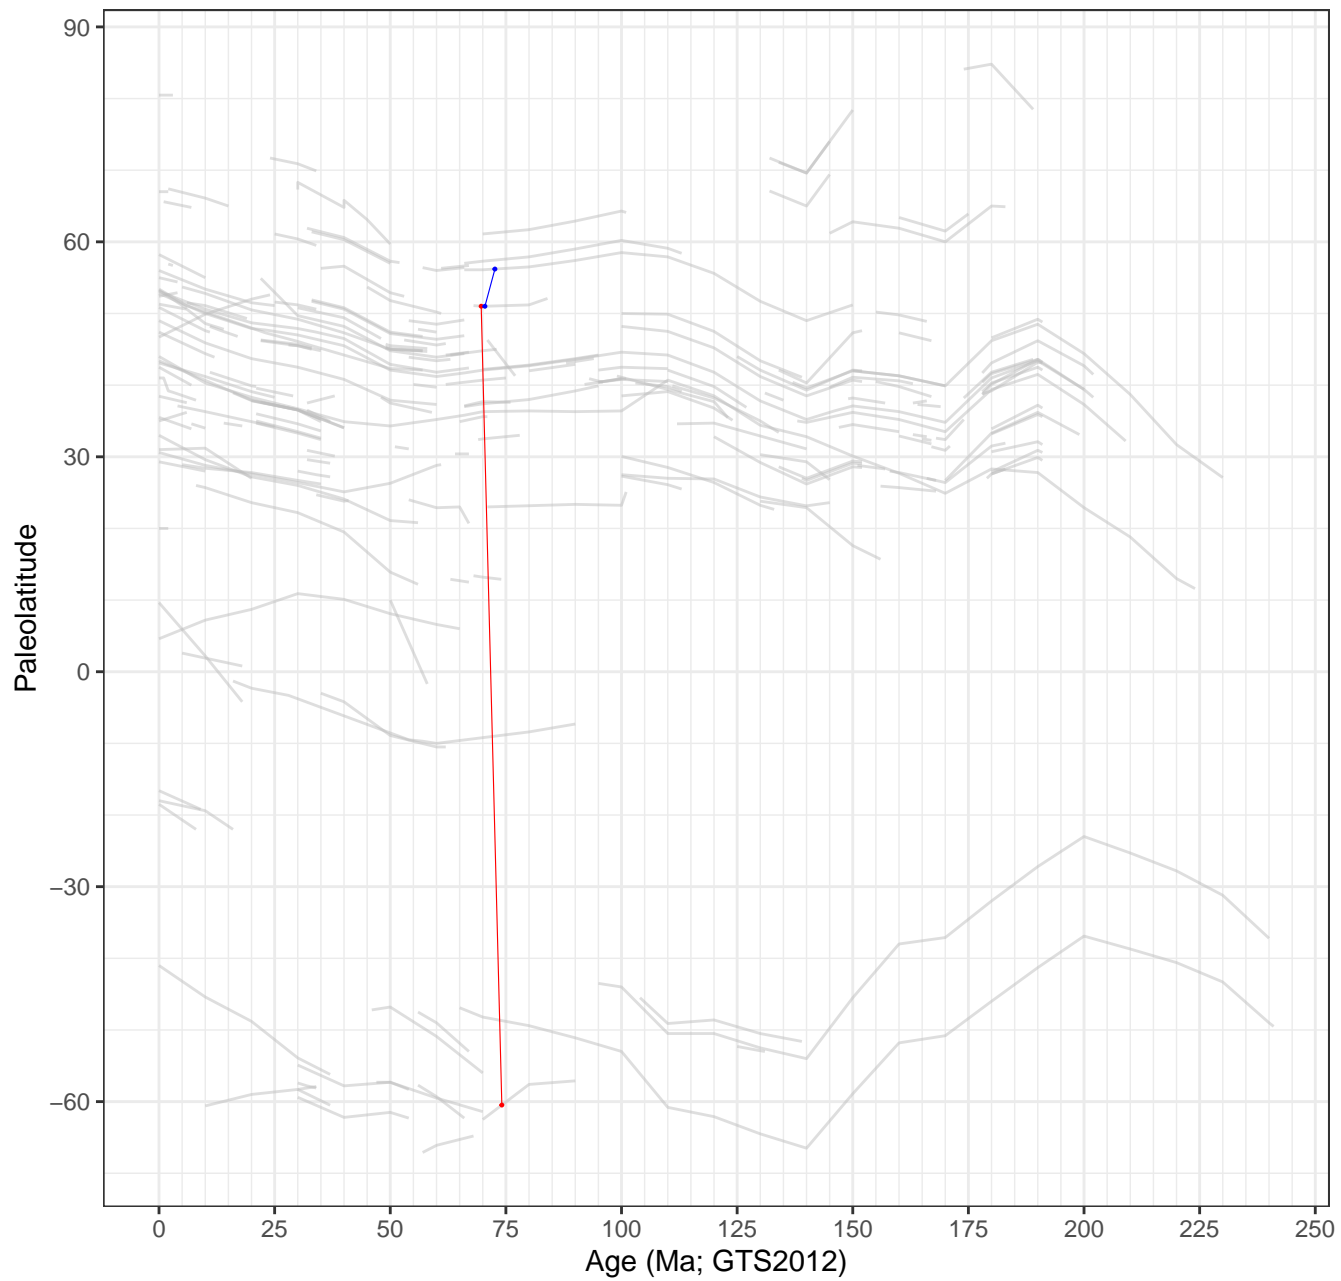

Supplement: Supplementary file 1031 [file Chatangiella biapertura.pdf › Supplement/Supplement 2/Species 1914 plots/Chatangiella biapertura.pdf]

# Species *Chatangiella bondarenkoi*

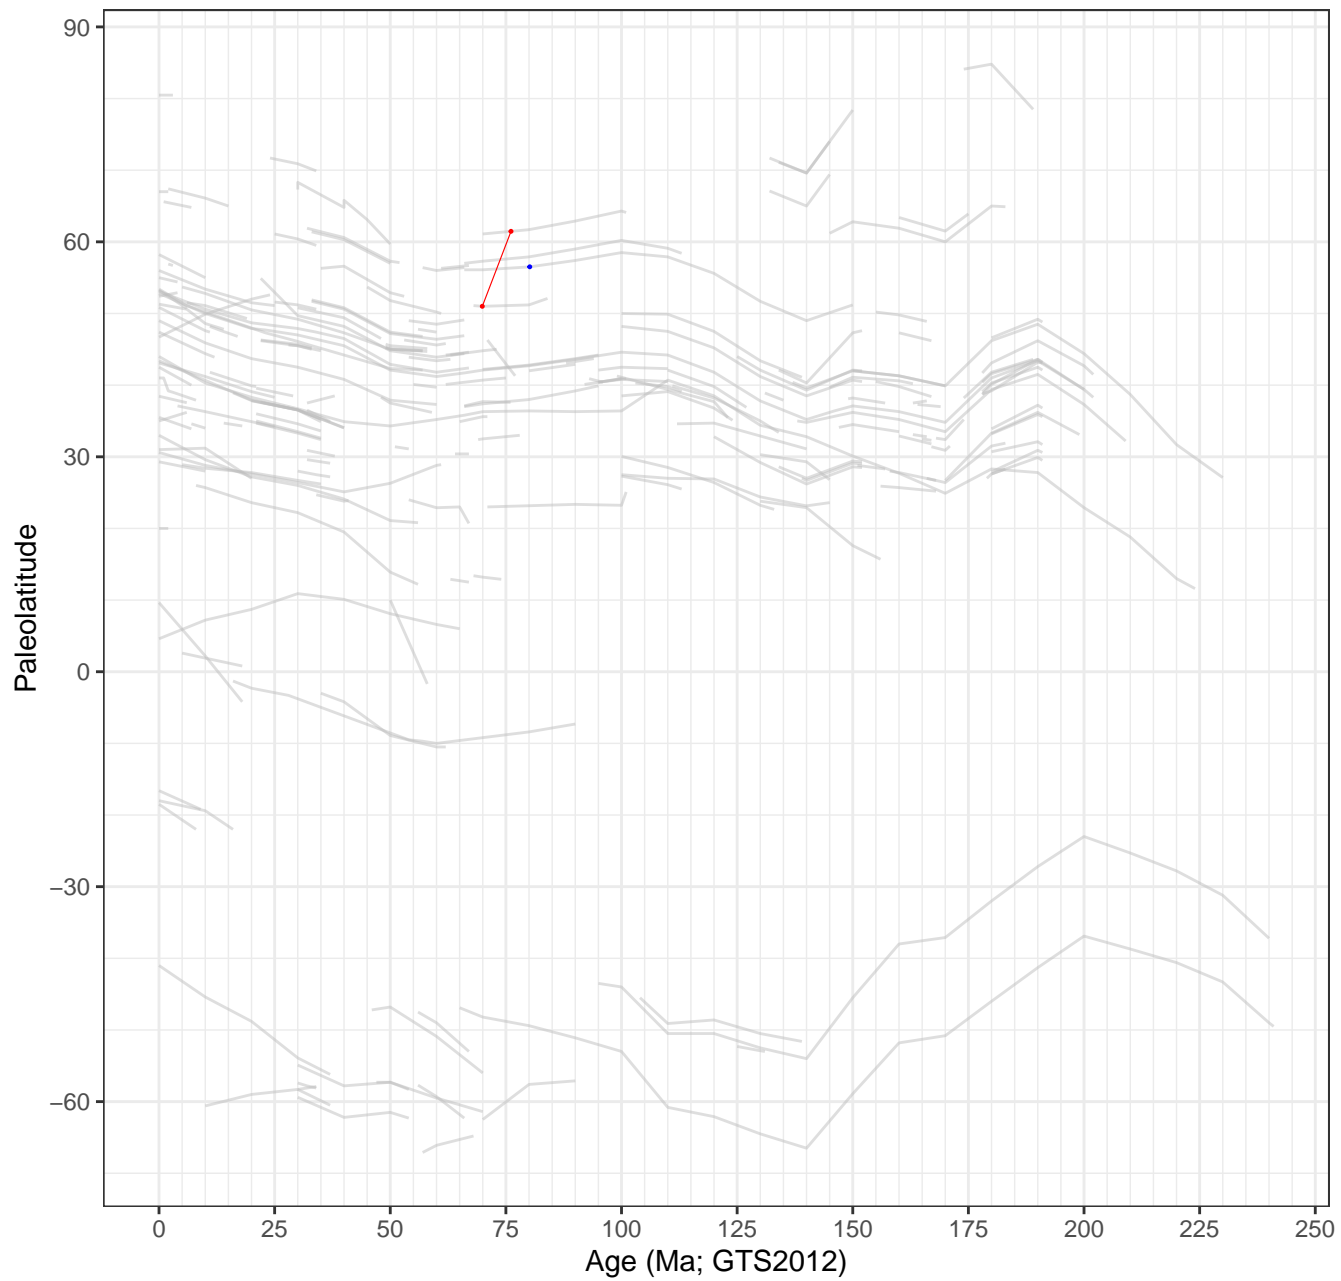

Supplement: Supplementary file 1032 [file Chatangiella bondarenkoi.pdf › Supplement/Supplement 2/Species 1914 plots/Chatangiella bondarenkoi.pdf]
