# Supplementary figures and images for: DINOSTRAT: a global database of the stratigraphic and paleolatitudinal distribution of Mesozoic–Cenozoic organic-walled dinoflagellate cysts (part 11 of 27)
Source: Copernicus journal article supplement (doi:10.5194/essd-14-579-2022), 2022-02-09

# Species *Chatangiella chetiensis*

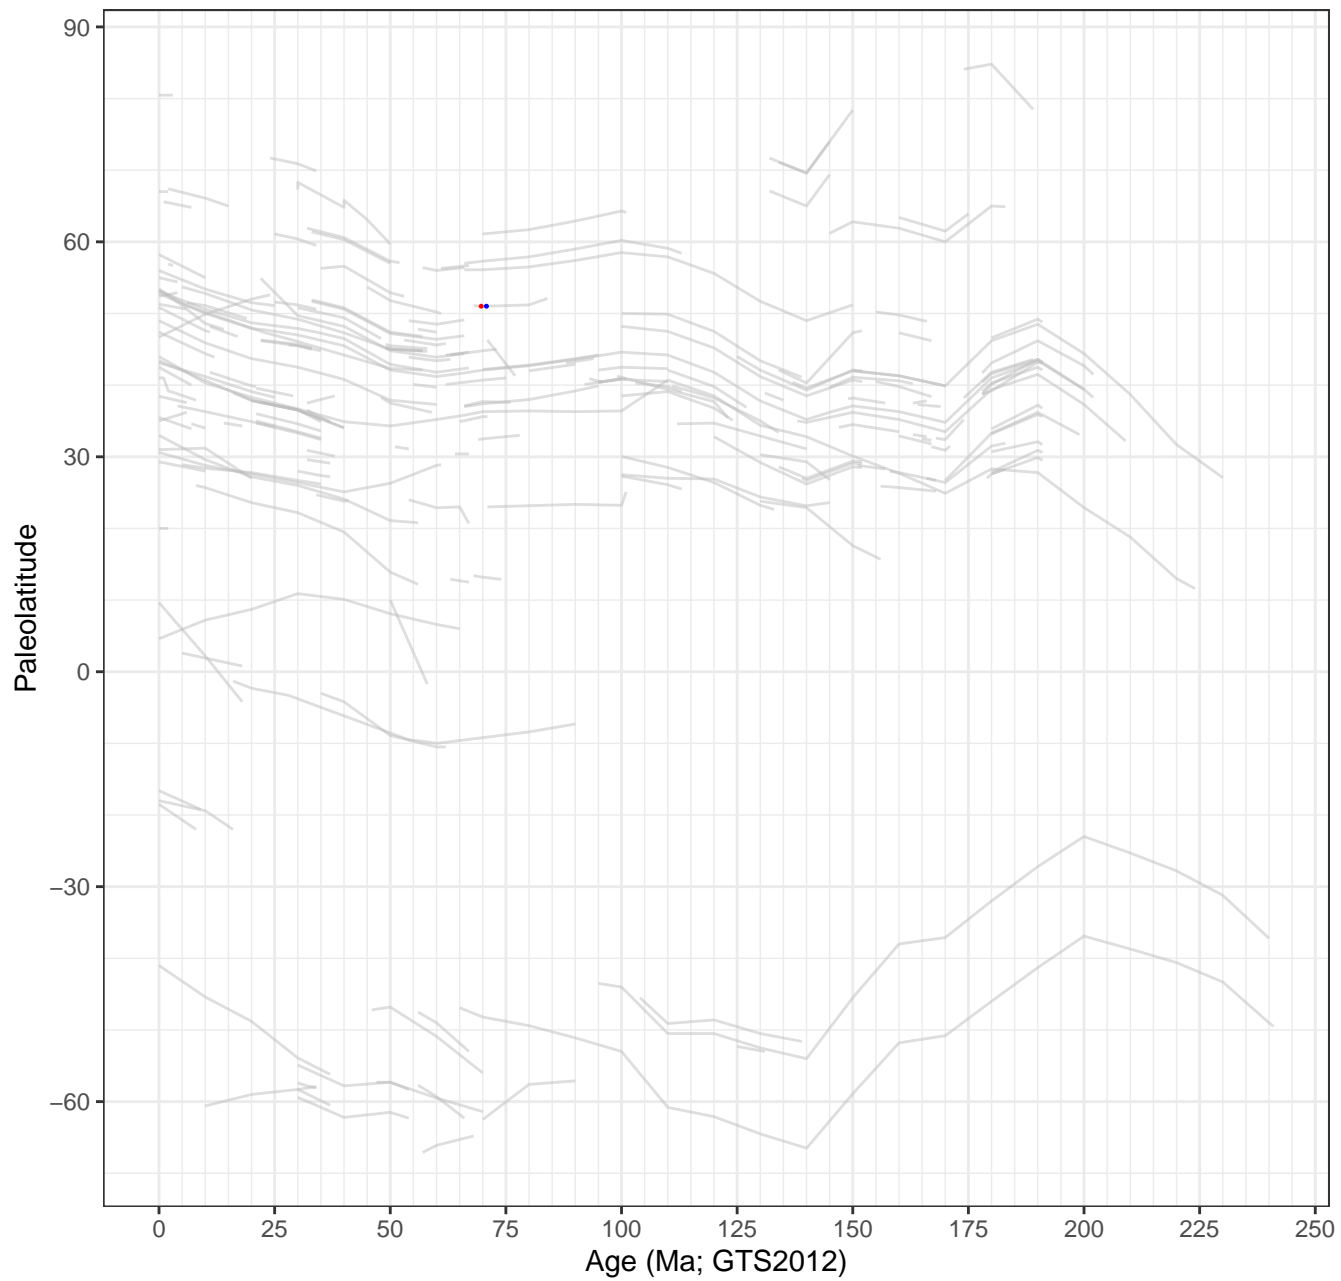

Supplement: Supplementary file 1033 [file Chatangiella chetiensis.pdf › Supplement/Supplement 2/Species 1914 plots/Chatangiella chetiensis.pdf]

# Species *Chatangiella ditissima*

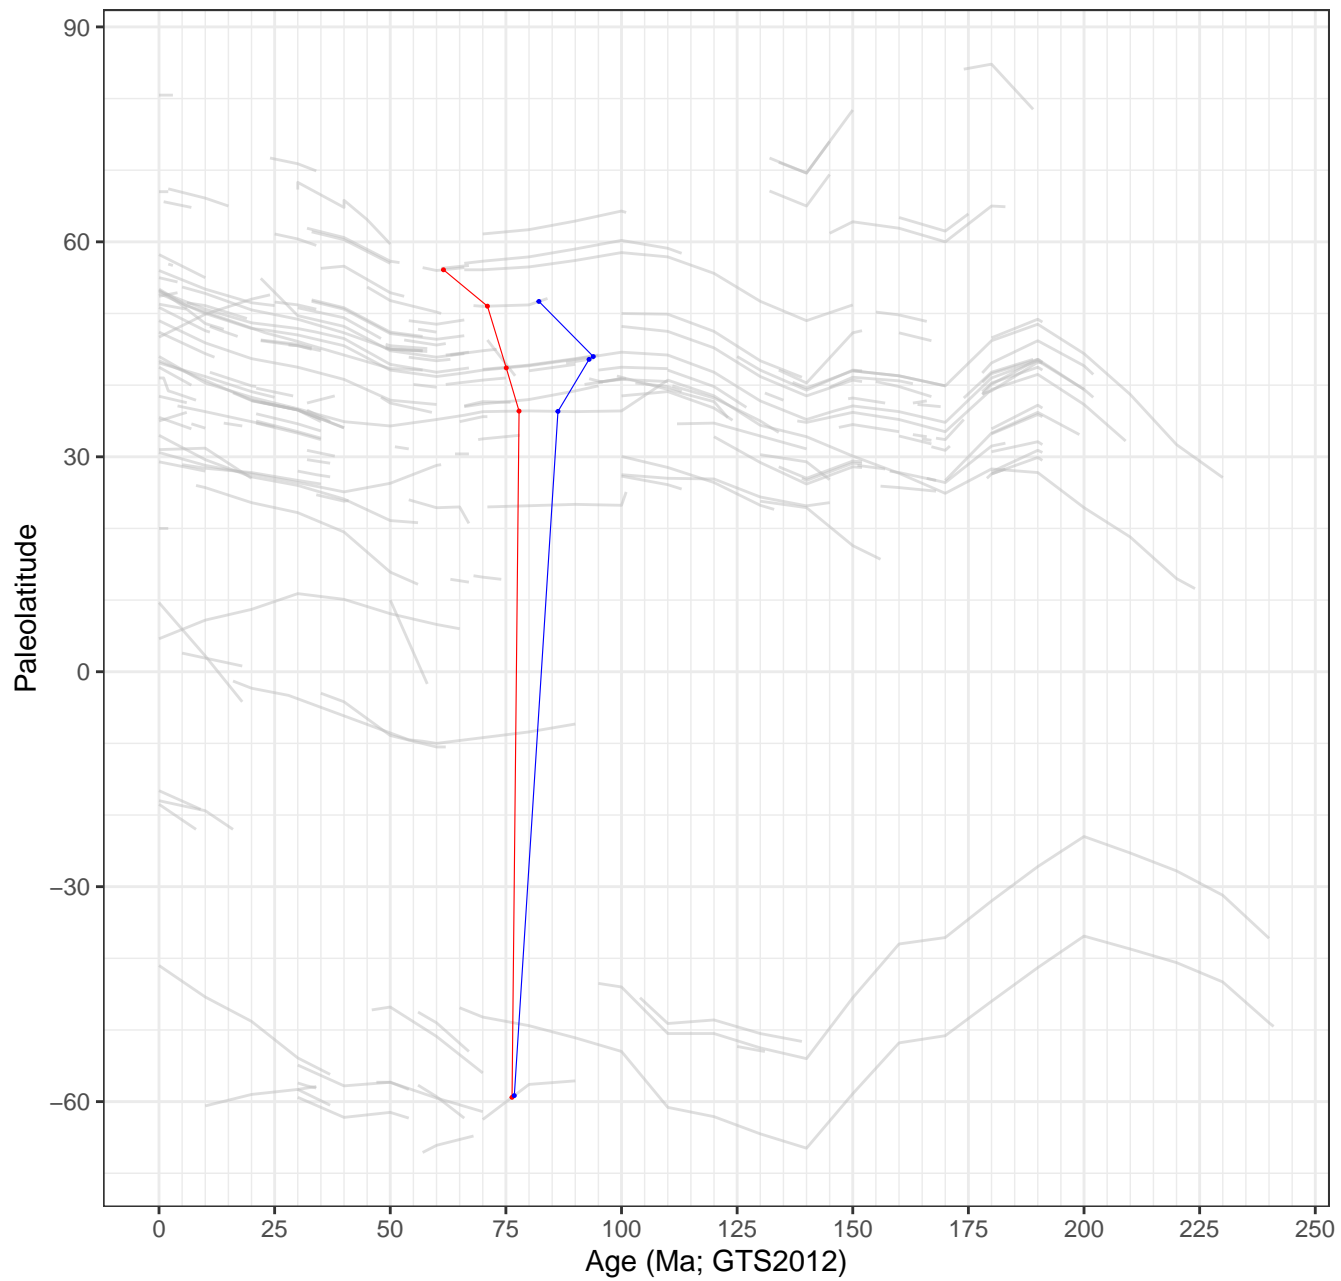

Supplement: Supplementary file 1034 [file Chatangiella ditissima.pdf › Supplement/Supplement 2/Species 1914 plots/Chatangiella ditissima.pdf]

# Species *Chatangiella eminens*

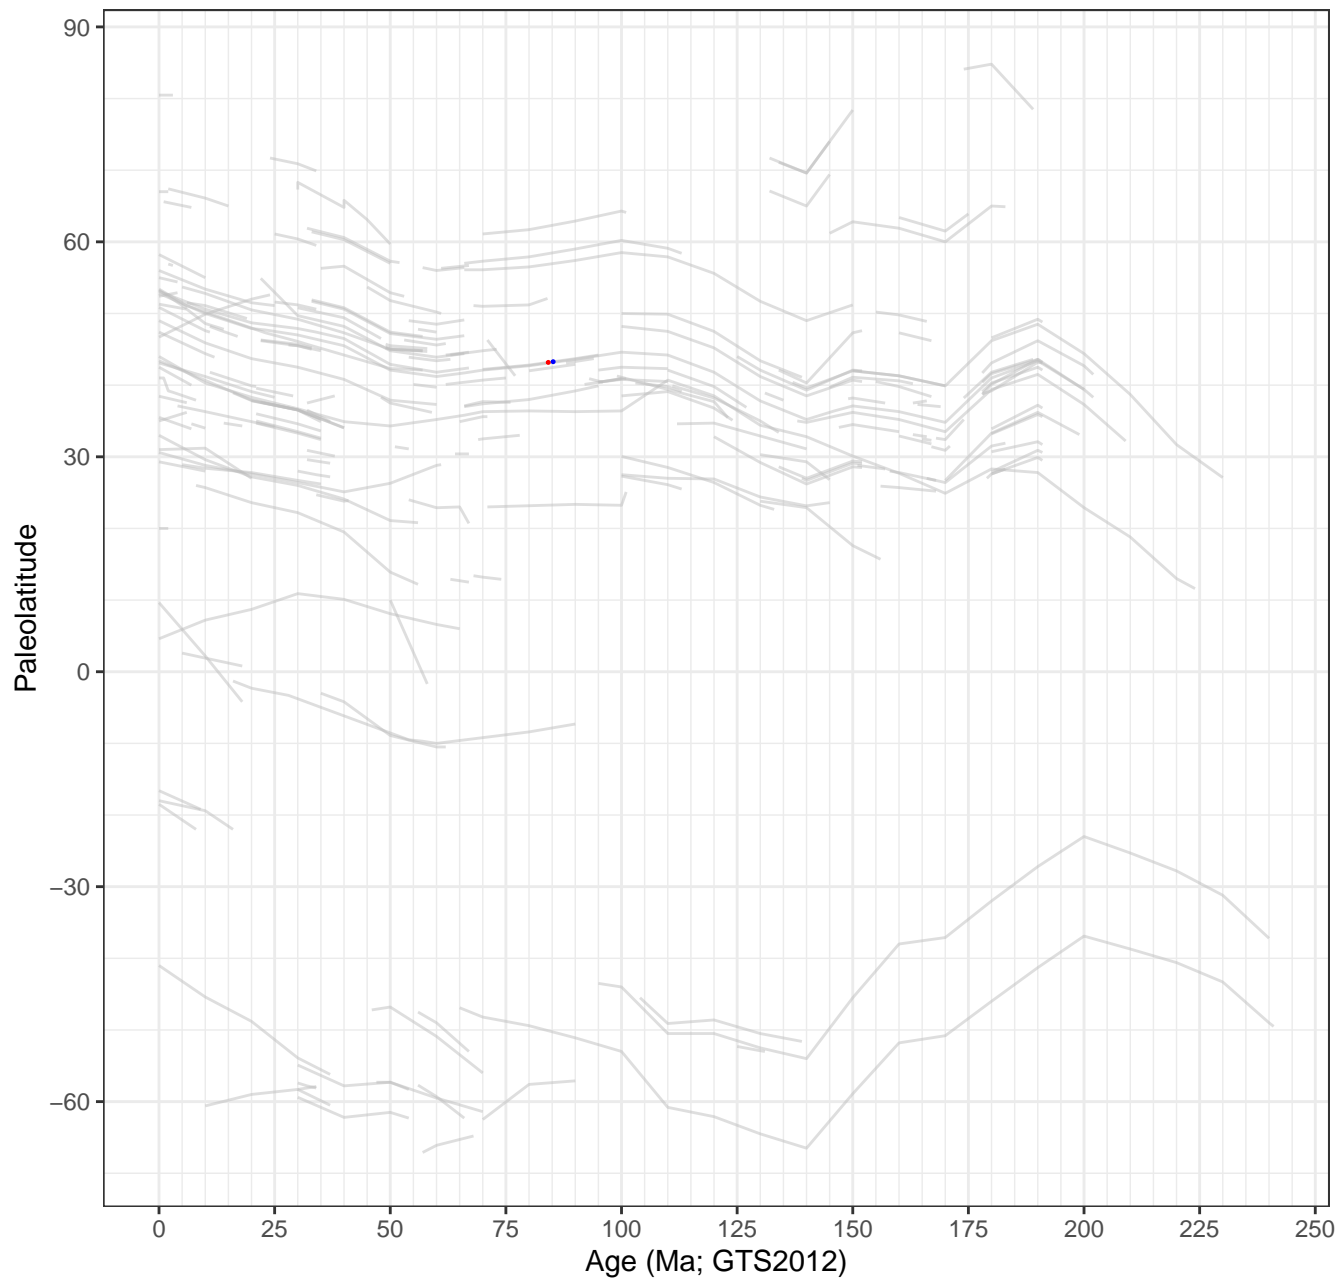

Supplement: Supplementary file 1035 [file Chatangiella eminens.pdf › Supplement/Supplement 2/Species 1914 plots/Chatangiella eminens.pdf]

# Species *Chatangiella granulifera*

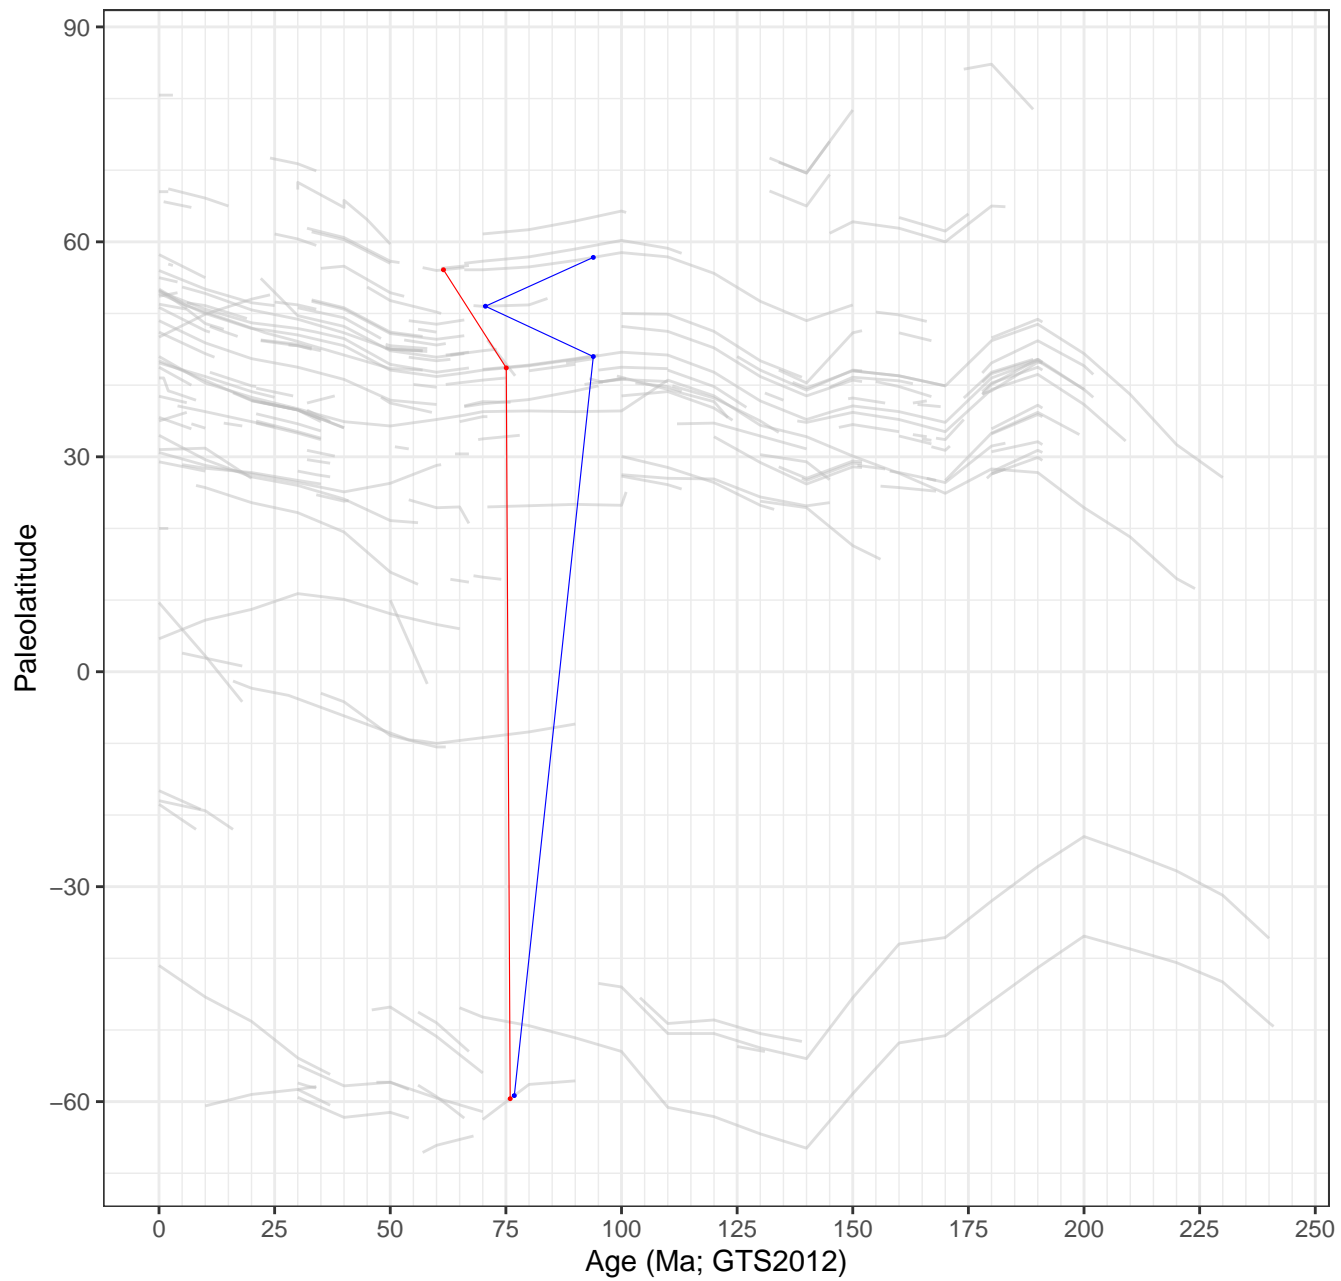

Supplement: Supplementary file 1036 [file Chatangiella granulifera.pdf › Supplement/Supplement 2/Species 1914 plots/Chatangiella granulifera.pdf]

# Species *Chatangiella manumii*

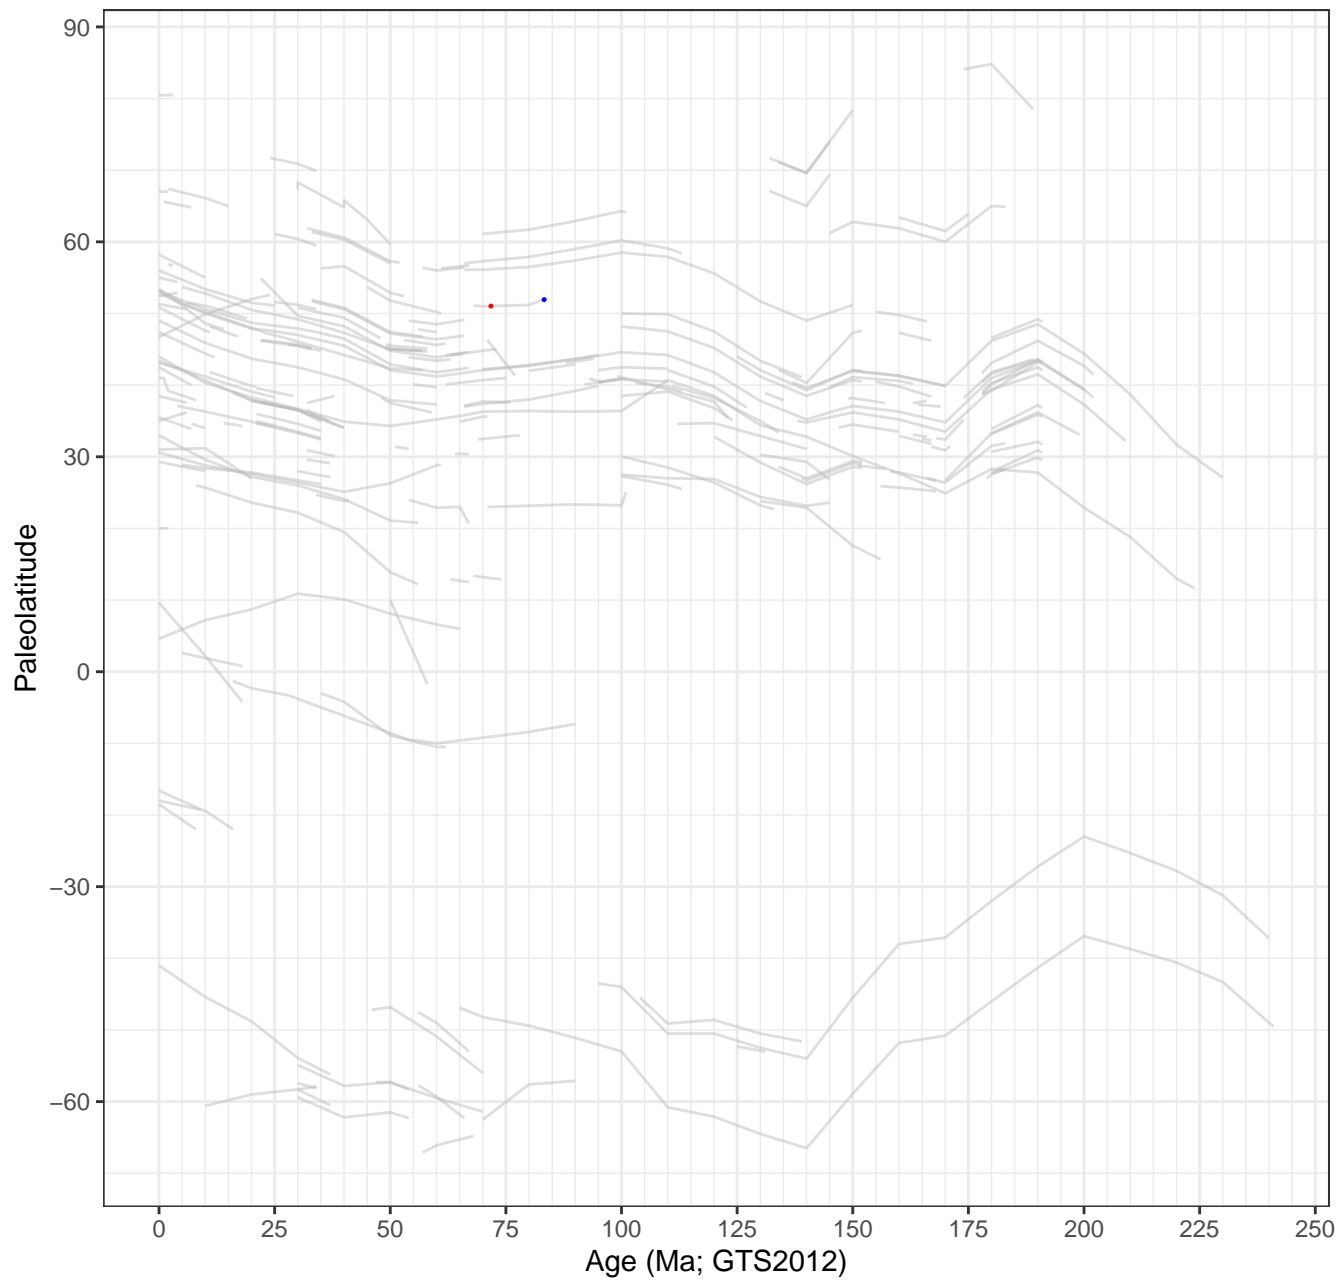

Supplement: Supplementary file 1037 [file Chatangiella manumii.pdf › Supplement/Supplement 2/Species 1914 plots/Chatangiella manumii.pdf]

# Species *Chatangiella niiga*

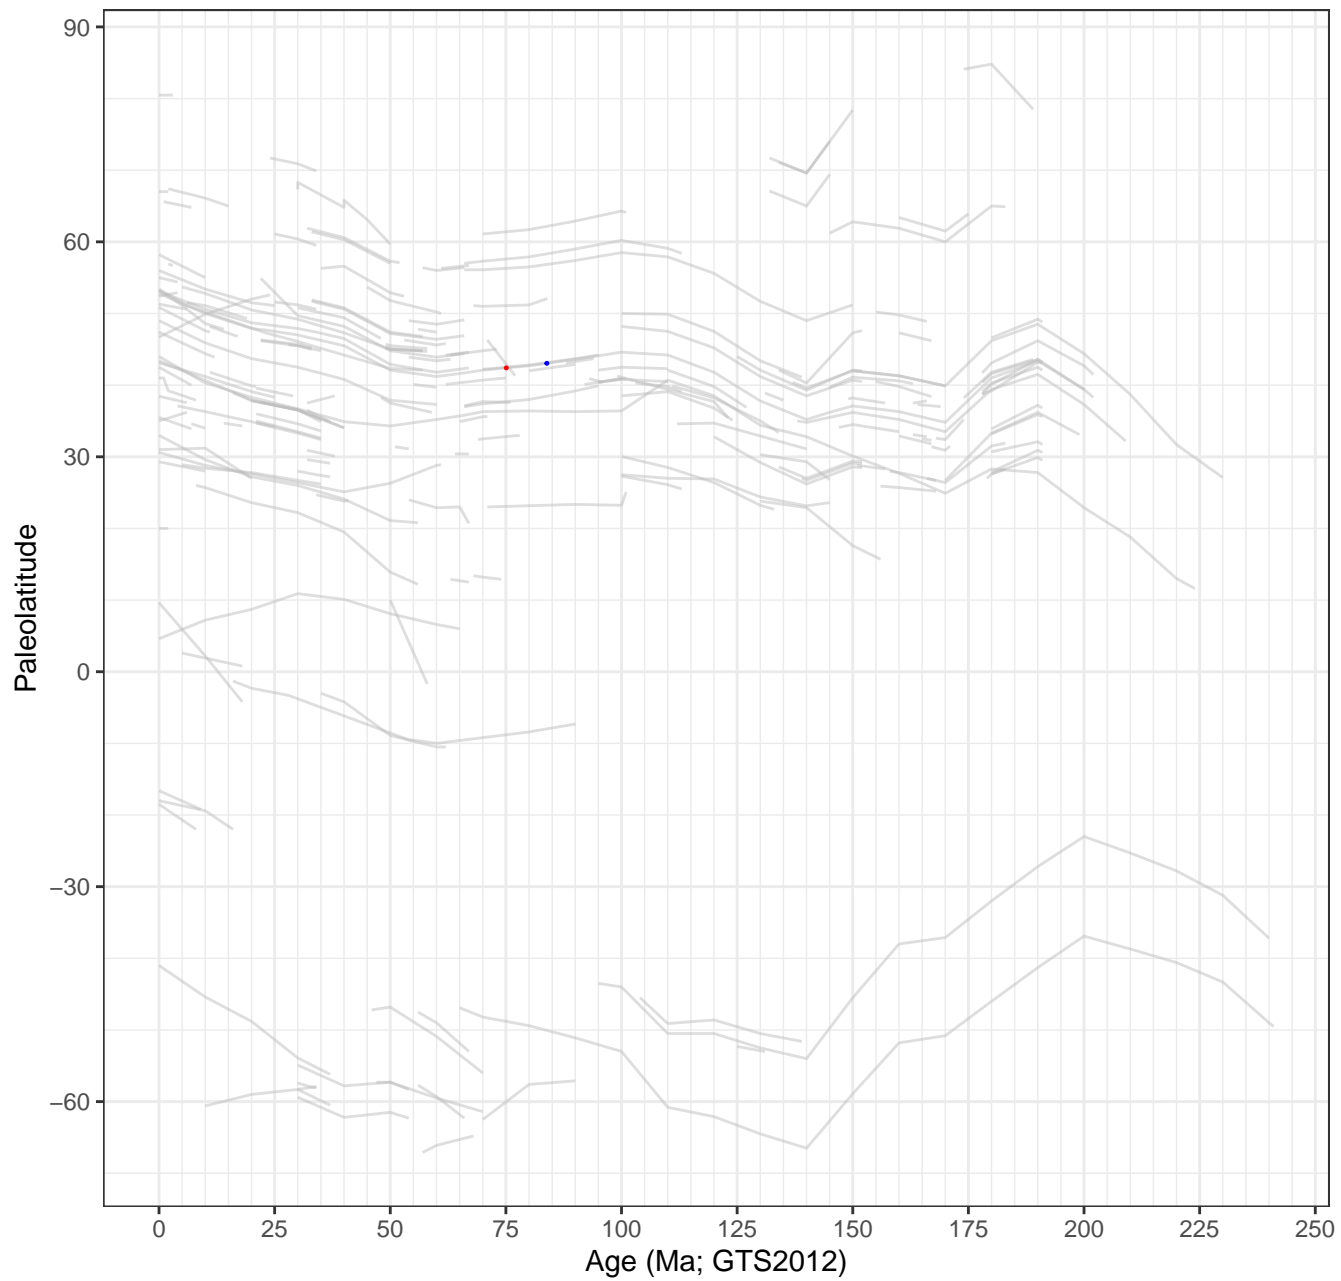

Supplement: Supplementary file 1038 [file Chatangiella niiga.pdf › Supplement/Supplement 2/Species 1914 plots/Chatangiella niiga.pdf]

# Species *Chatangiella serratula*

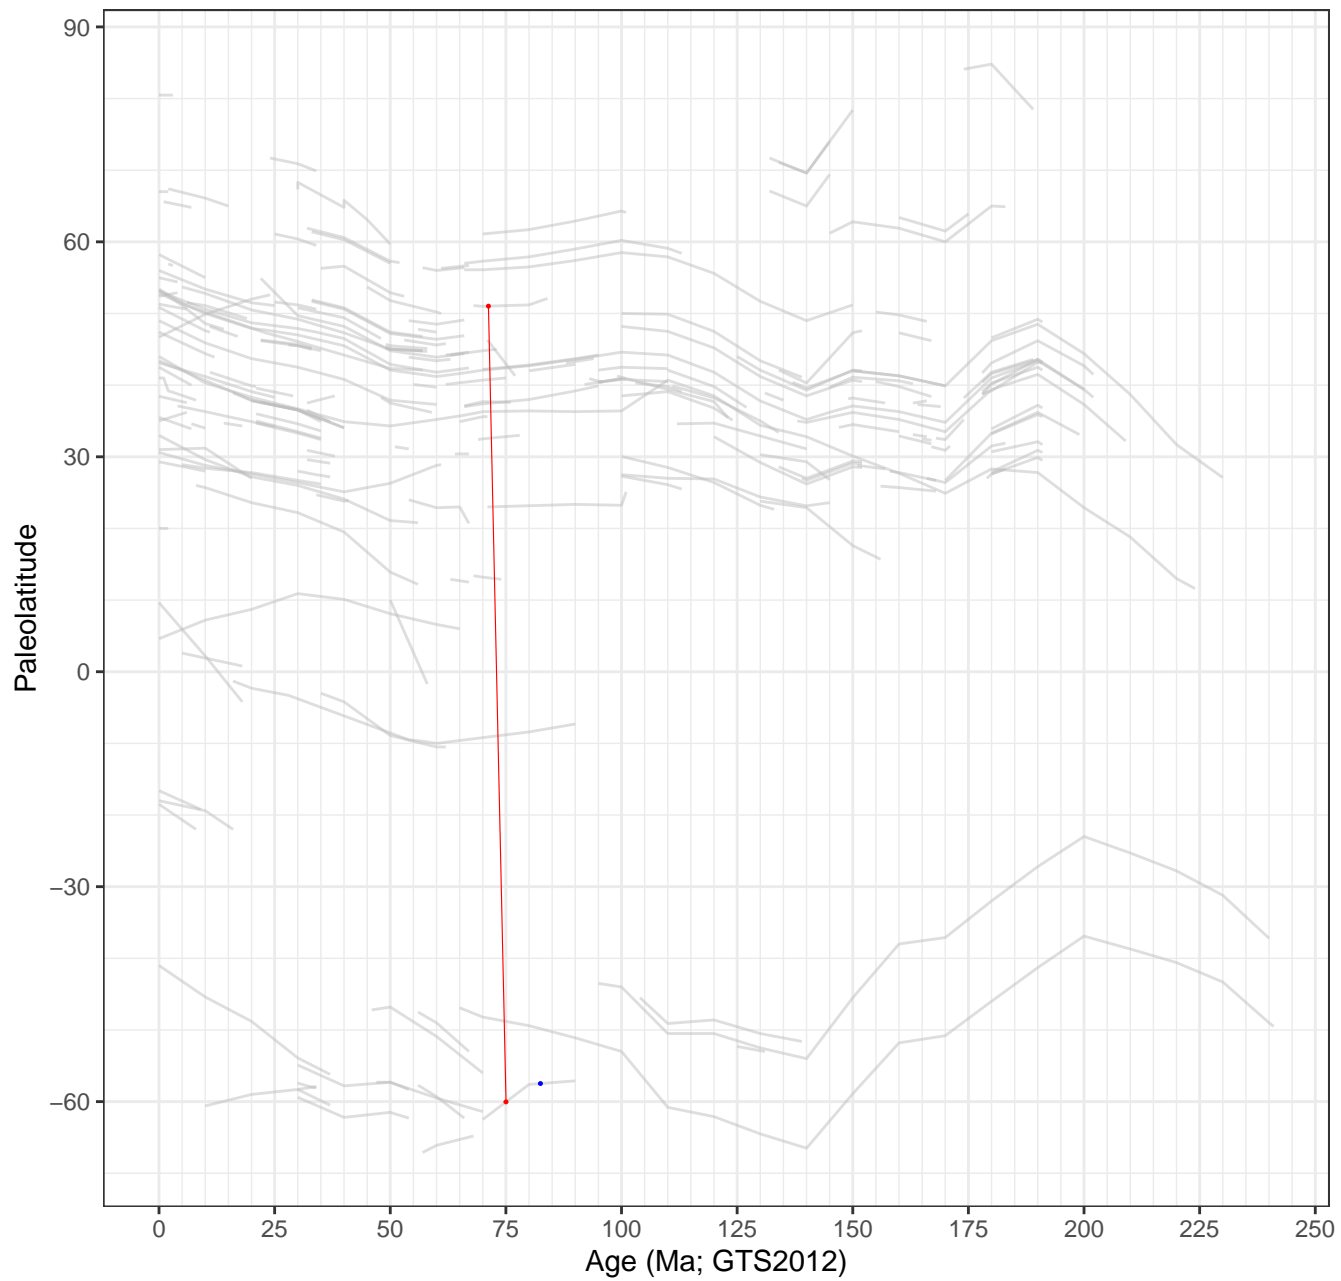

Supplement: Supplementary file 1039 [file Chatangiella serratula.pdf › Supplement/Supplement 2/Species 1914 plots/Chatangiella serratula.pdf]

# Species *Chatangiella spectabilis*

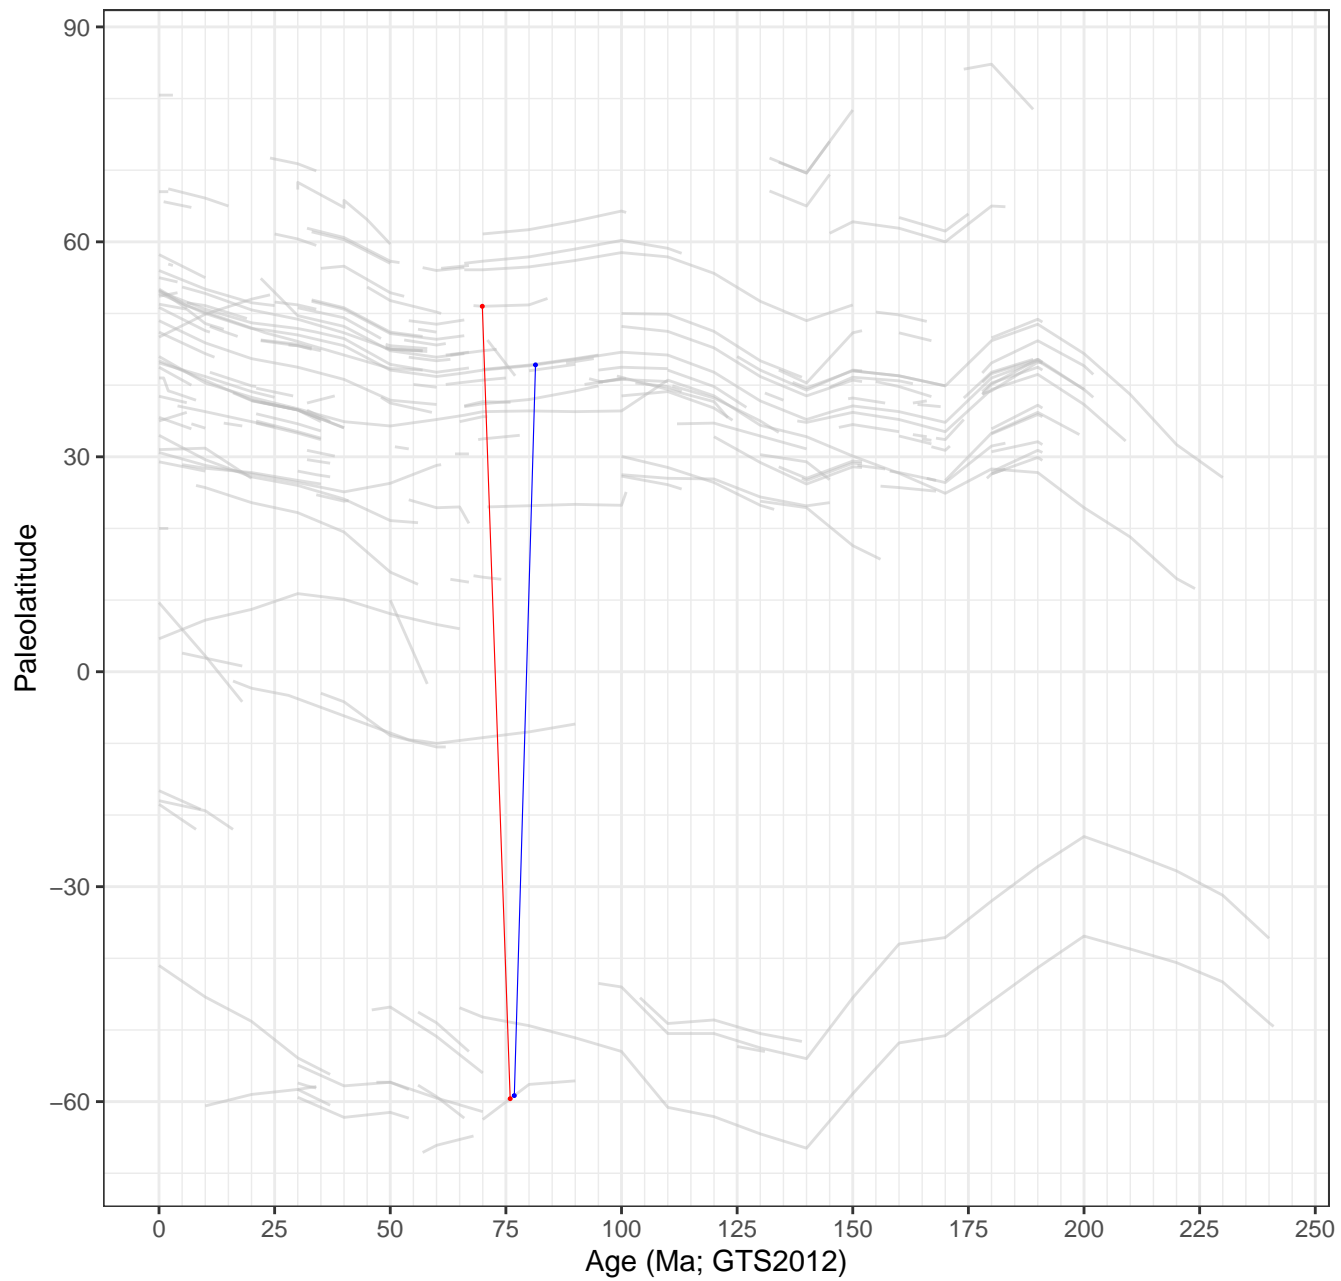

Supplement: Supplementary file 1040 [file Chatangiella spectabilis.pdf › Supplement/Supplement 2/Species 1914 plots/Chatangiella spectabilis.pdf]

# Species *Chatangiella spinosa*

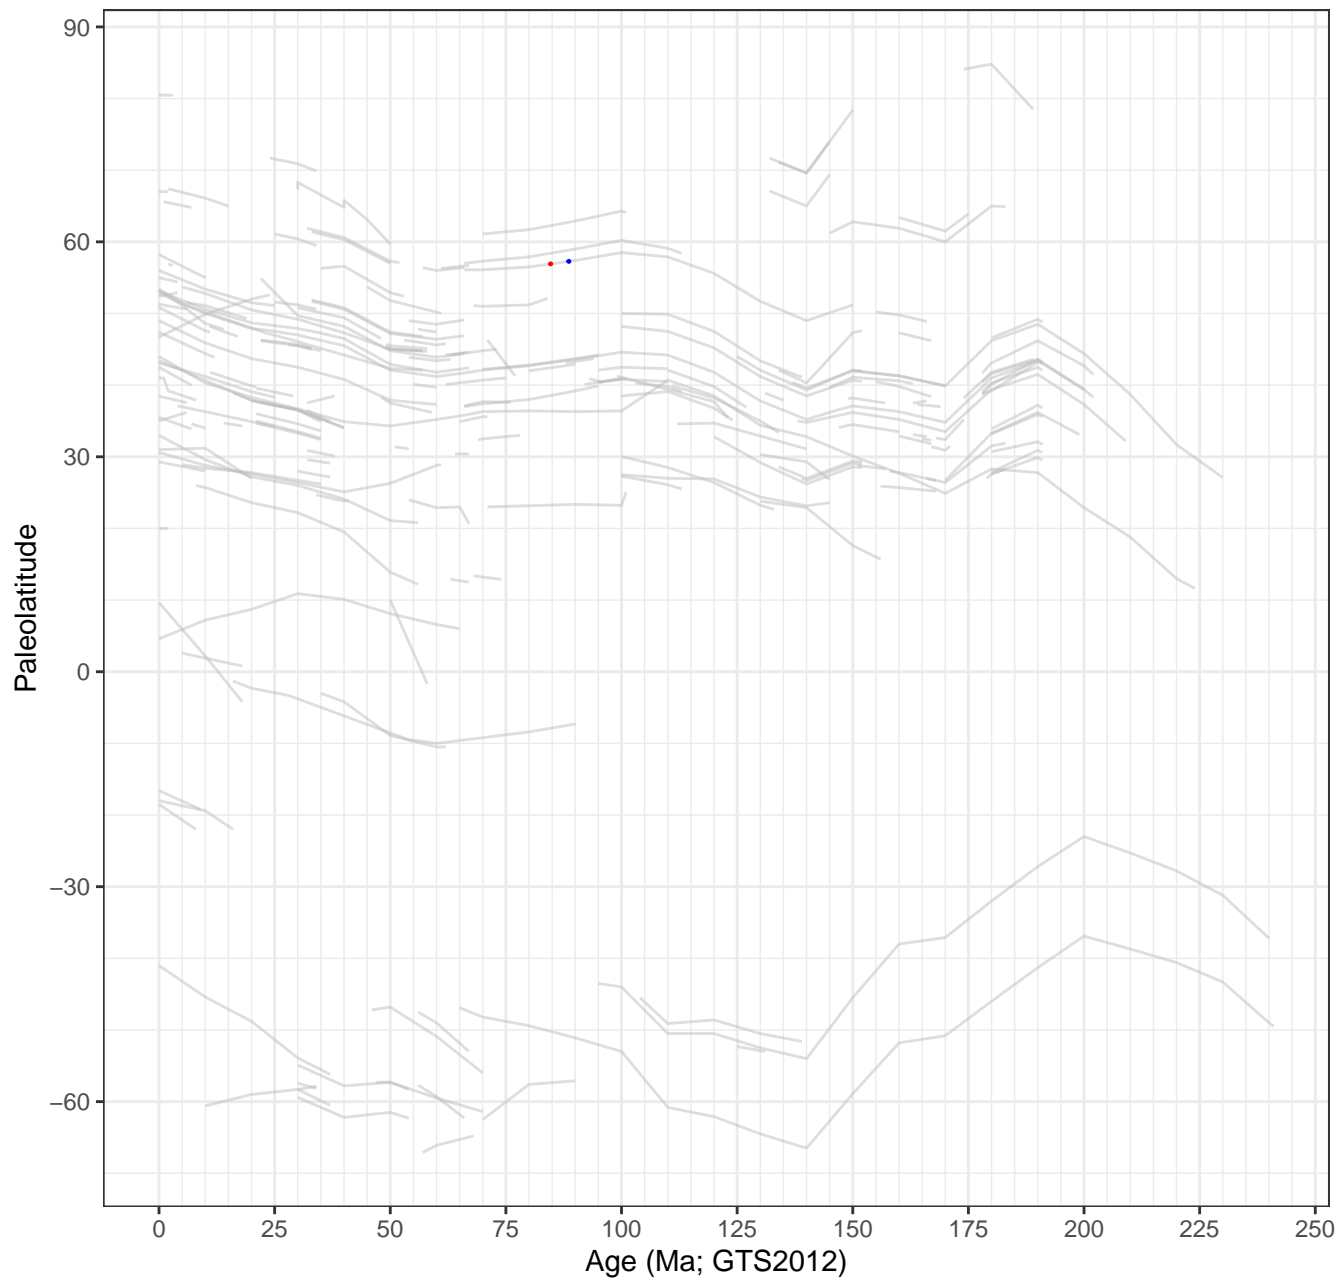

Supplement: Supplementary file 1041 [file Chatangiella spinosa.pdf › Supplement/Supplement 2/Species 1914 plots/Chatangiella spinosa.pdf]

# Species *Chatangiella tanamaensis*

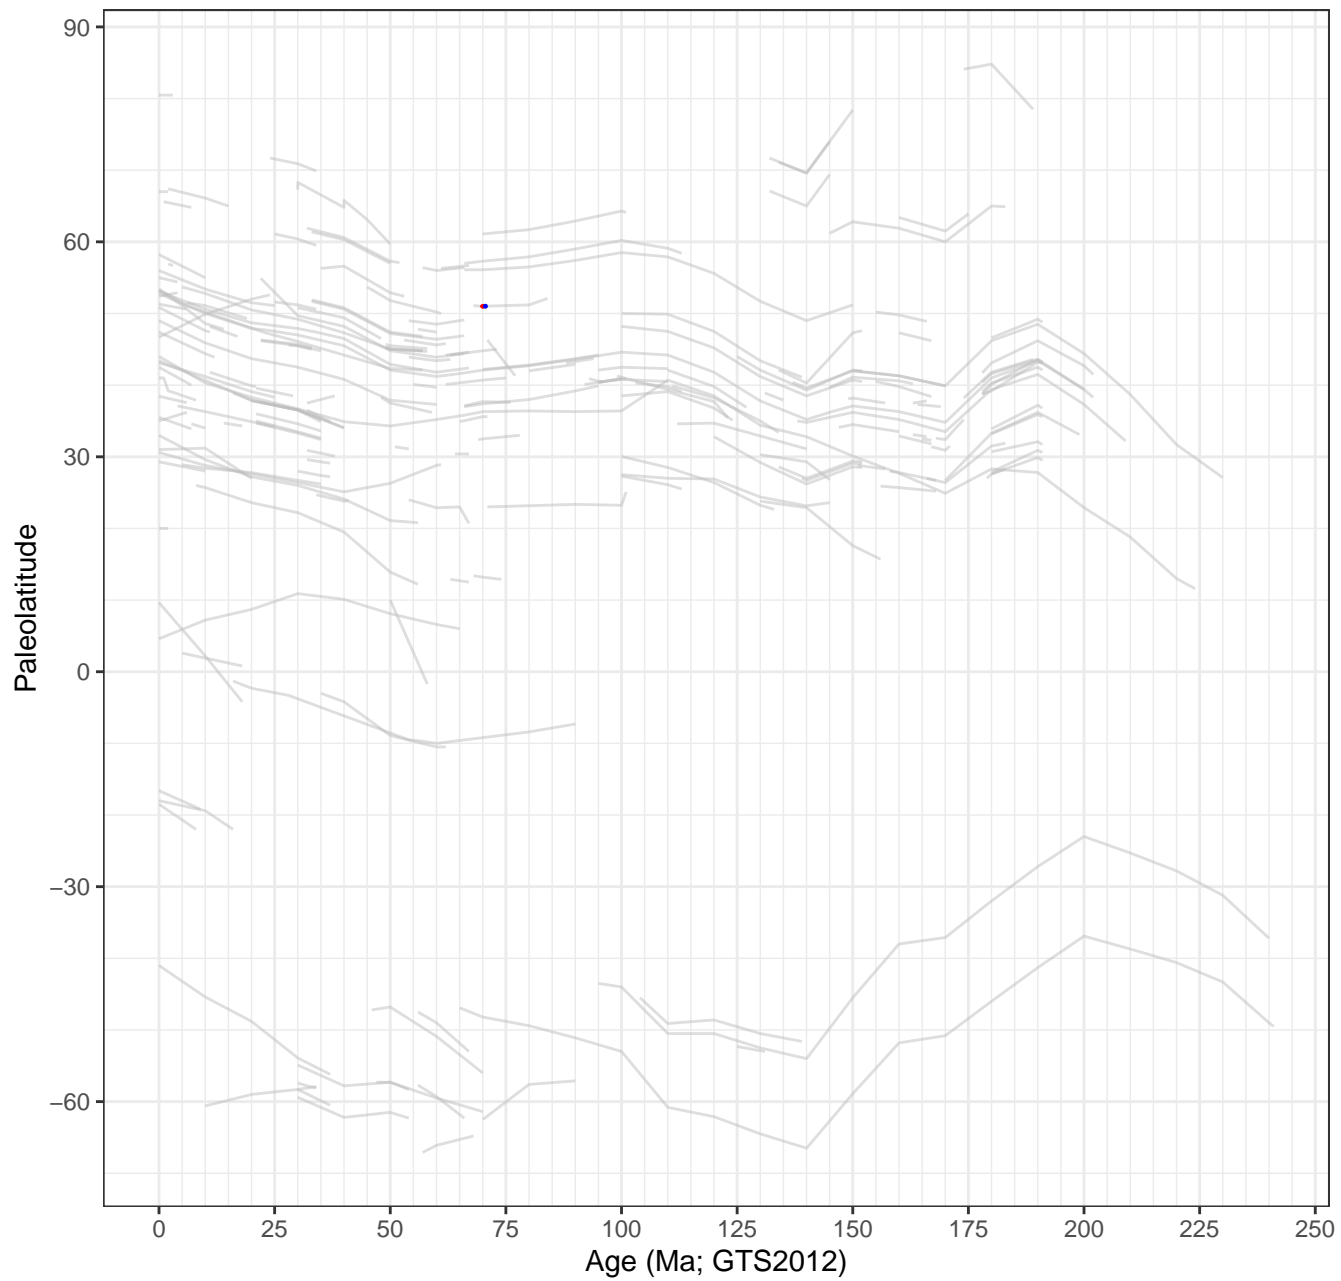

Supplement: Supplementary file 1042 [file Chatangiella tanamaensis.pdf › Supplement/Supplement 2/Species 1914 plots/Chatangiella tanamaensis.pdf]

# Species *Chatangiella tripartita*

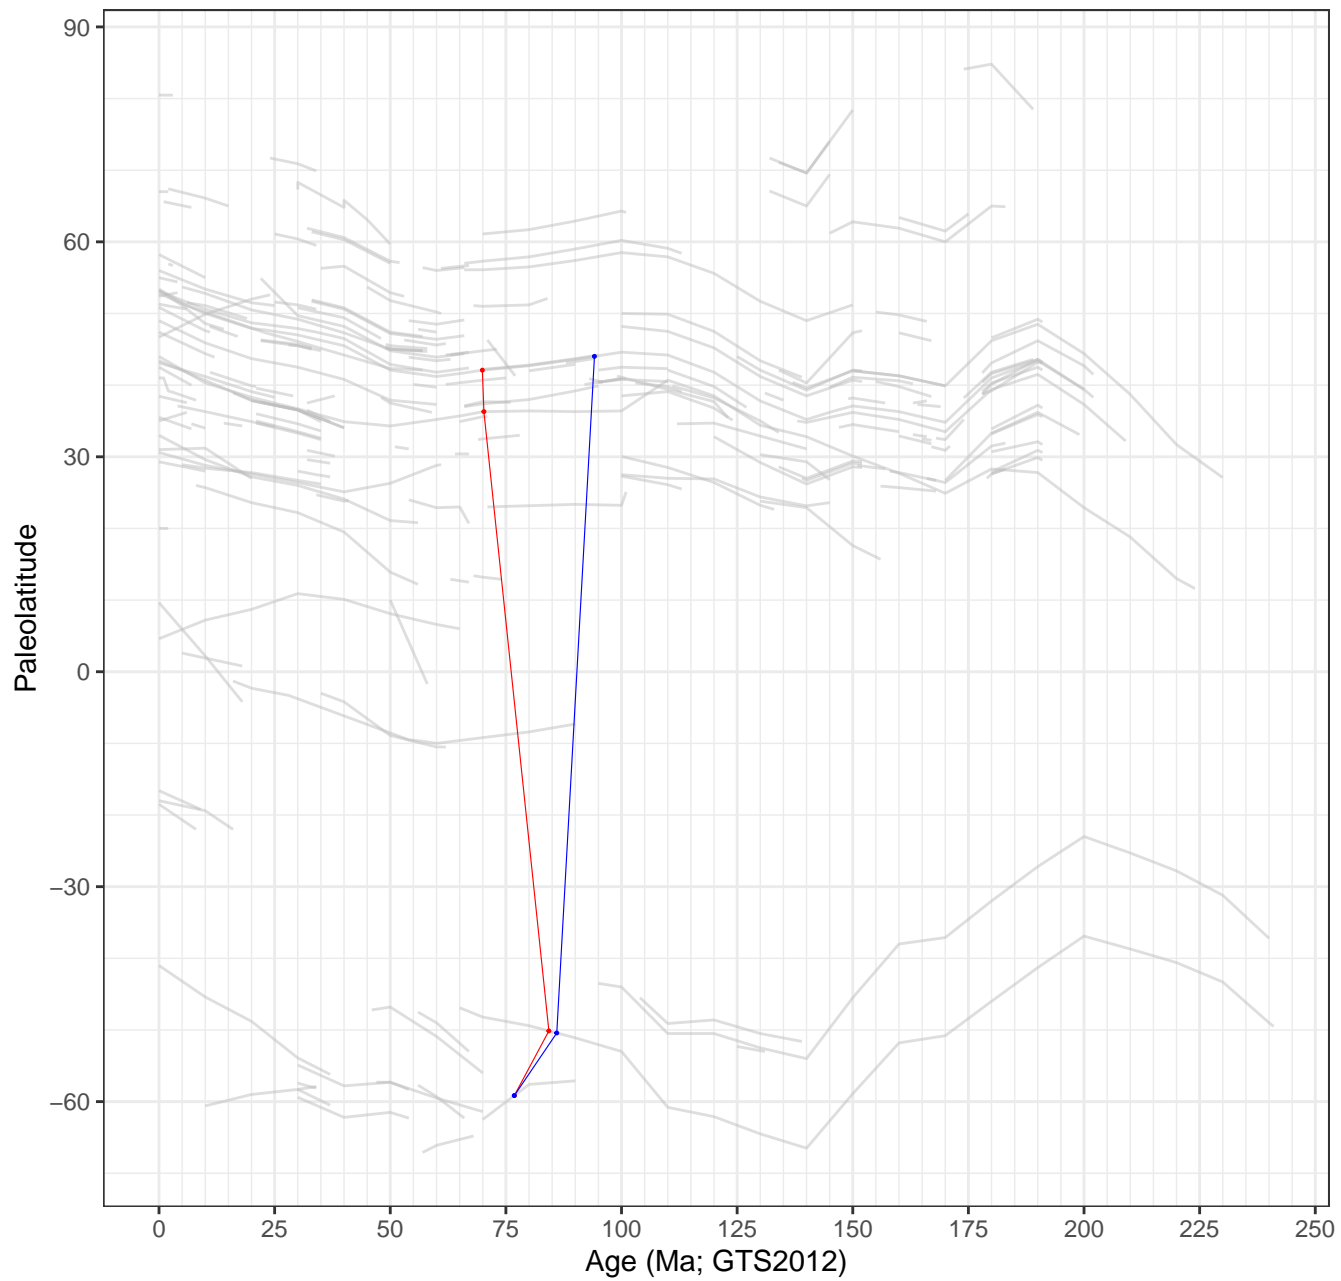

Supplement: Supplementary file 1043 [file Chatangiella tripartita.pdf › Supplement/Supplement 2/Species 1914 plots/Chatangiella tripartita.pdf]

# Species *Chatangiella verrucosa*

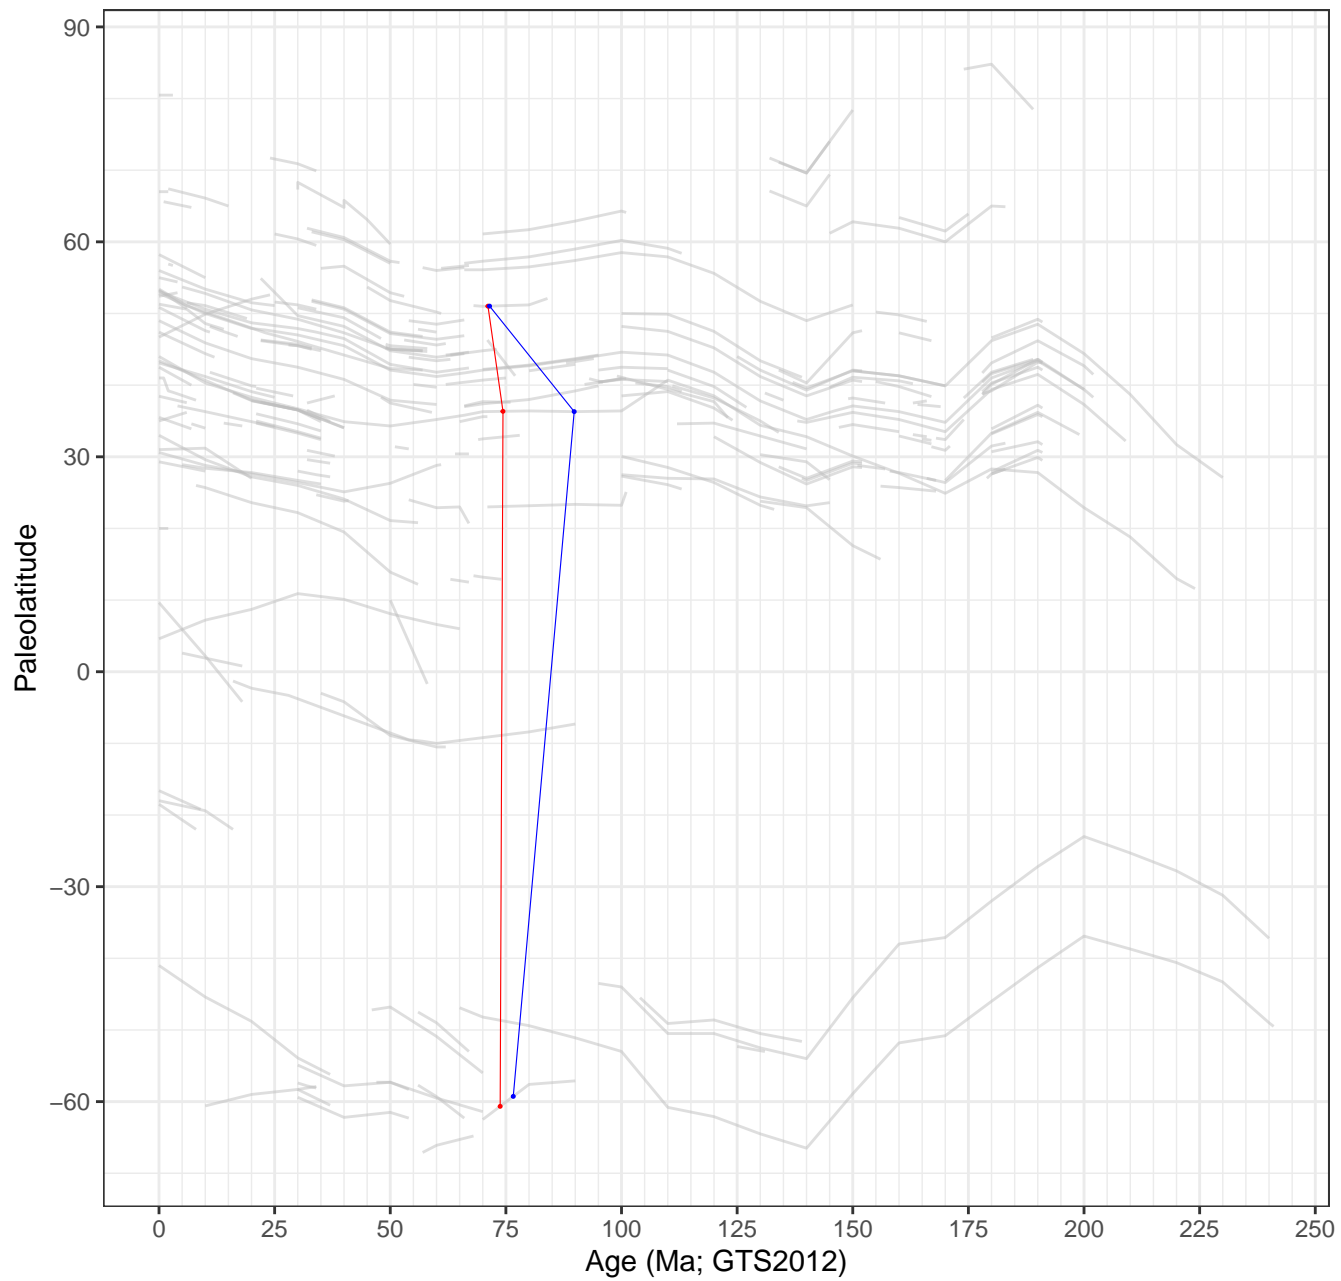

Supplement: Supplementary file 1044 [file Chatangiella verrucosa.pdf › Supplement/Supplement 2/Species 1914 plots/Chatangiella verrucosa.pdf]

# Species *Chatangiella victoriensis*

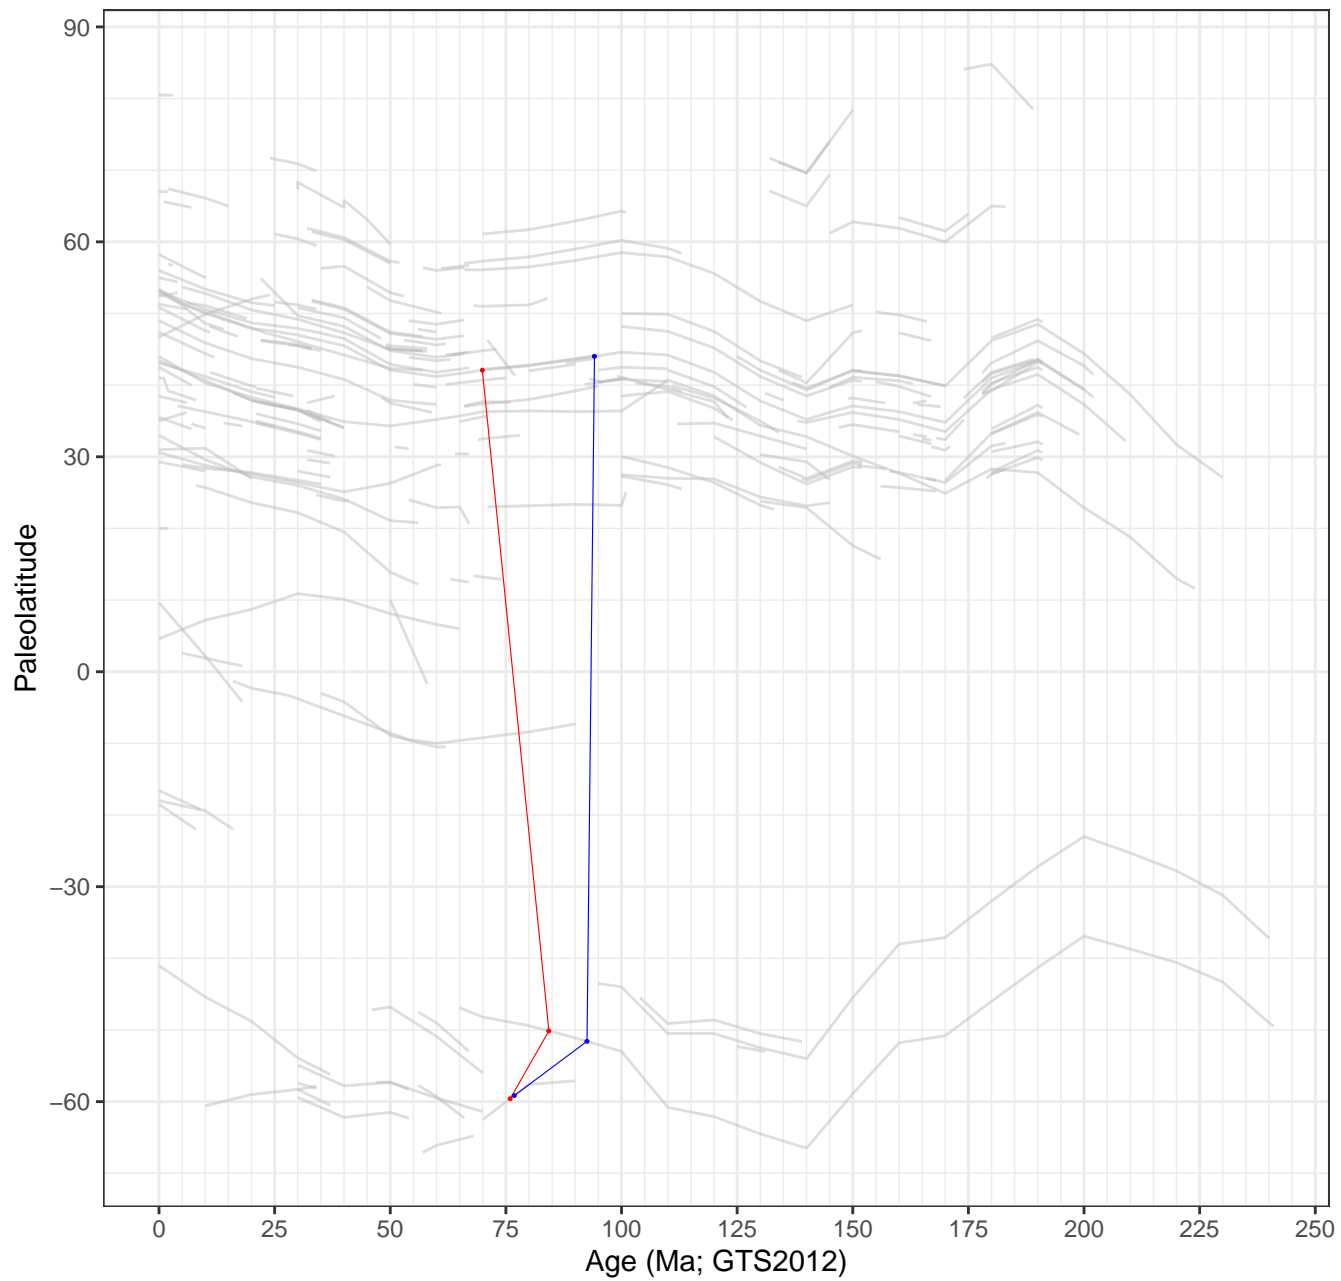

Supplement: Supplementary file 1045 [file Chatangiella victoriensis.pdf › Supplement/Supplement 2/Species 1914 plots/Chatangiella victoriensis.pdf]

# Species *Chatangiella vnigrii*

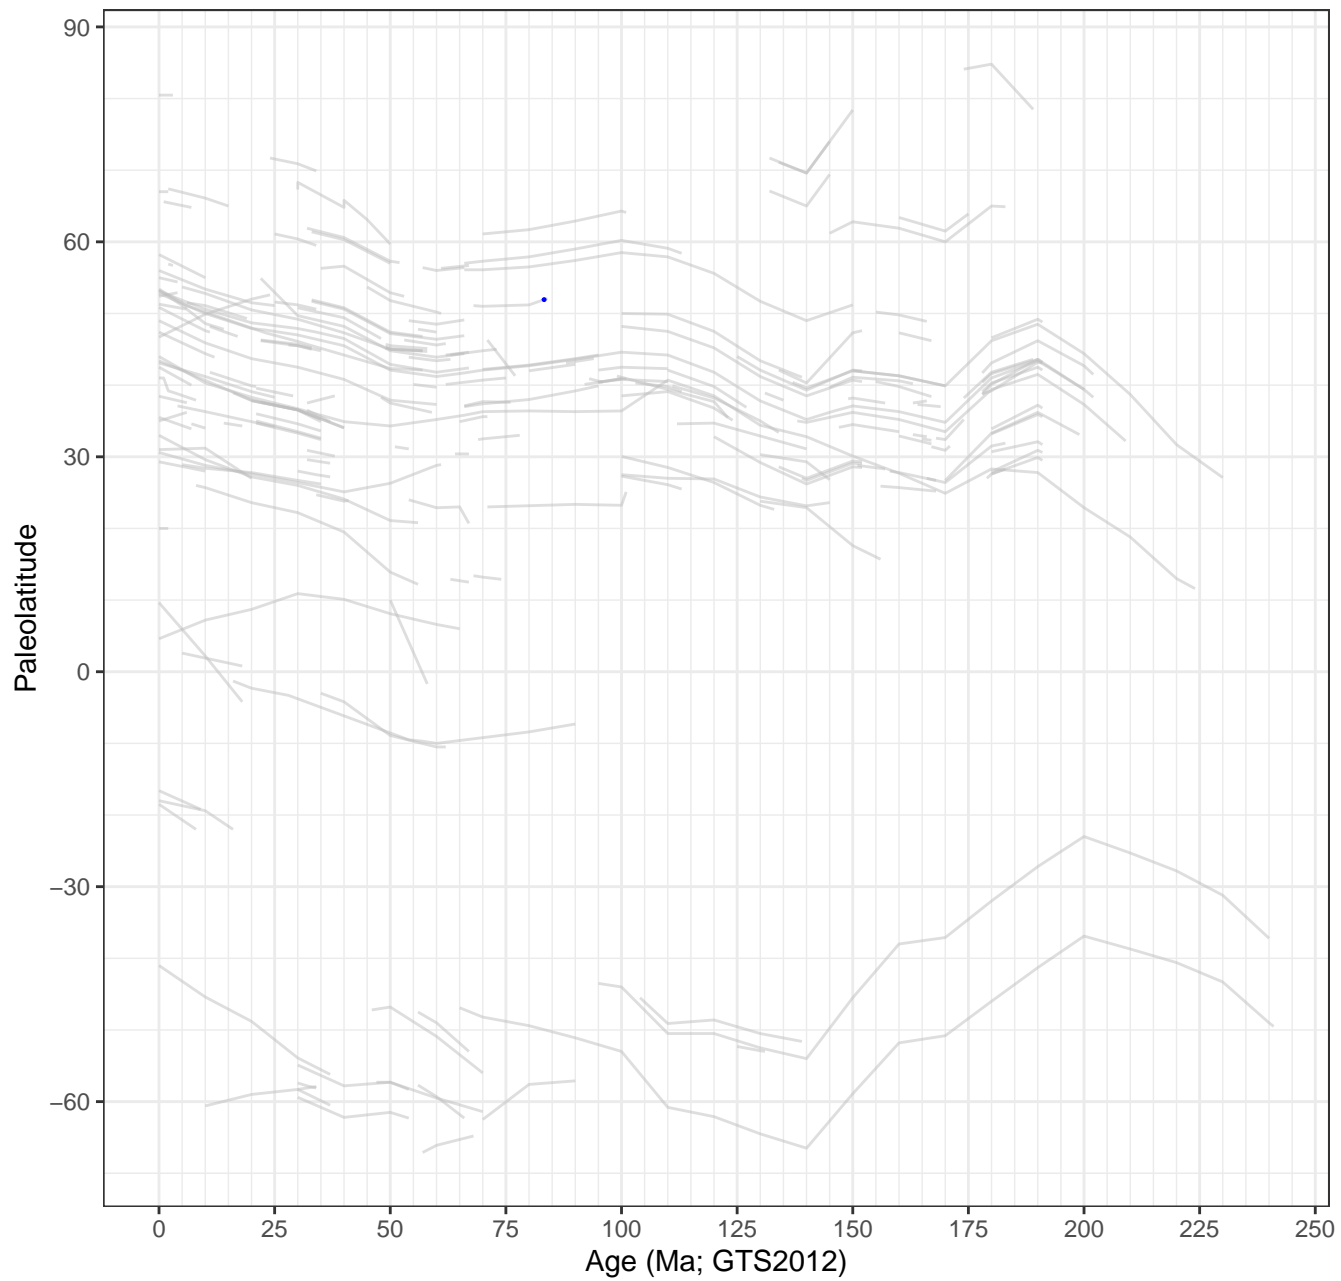

Supplement: Supplementary file 1046 [file Chatangiella vnigrii.pdf › Supplement/Supplement 2/Species 1914 plots/Chatangiella vnigrii.pdf]

# Species *Chichaouadinium arabicum*

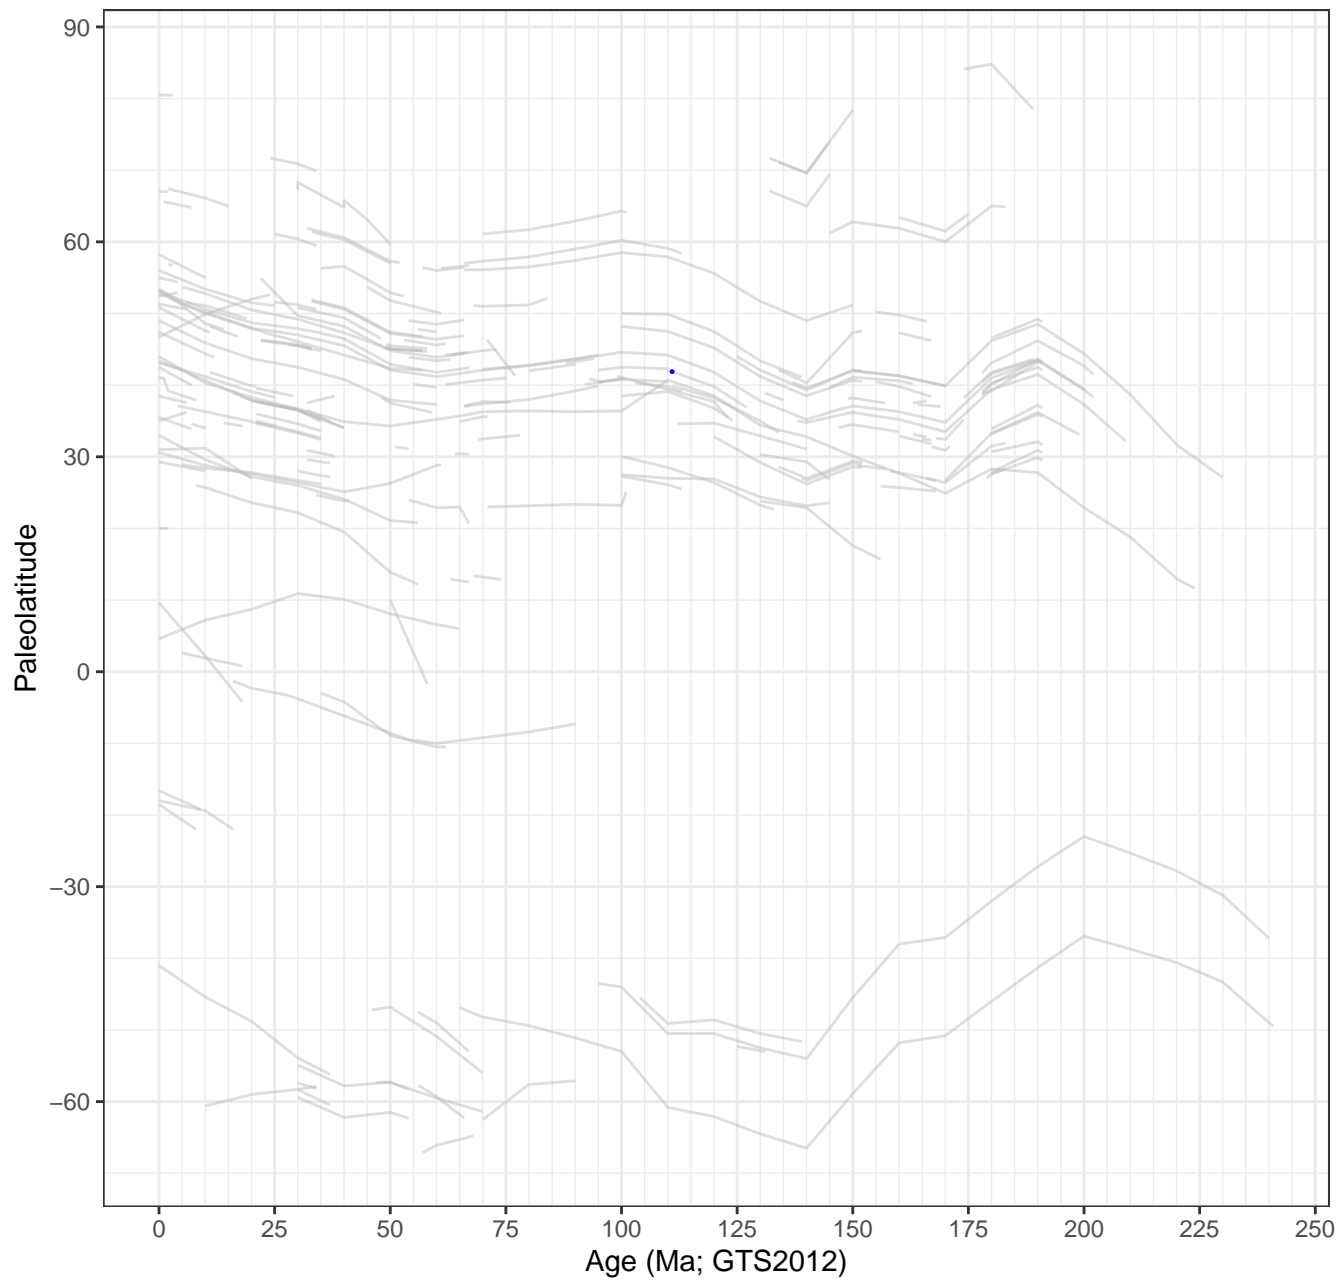

Supplement: Supplementary file 1047 [file Chichaouadinium arabicum.pdf › Supplement/Supplement 2/Species 1914 plots/Chichaouadinium arabicum.pdf]

# Species *Chichaouadinium boydii*

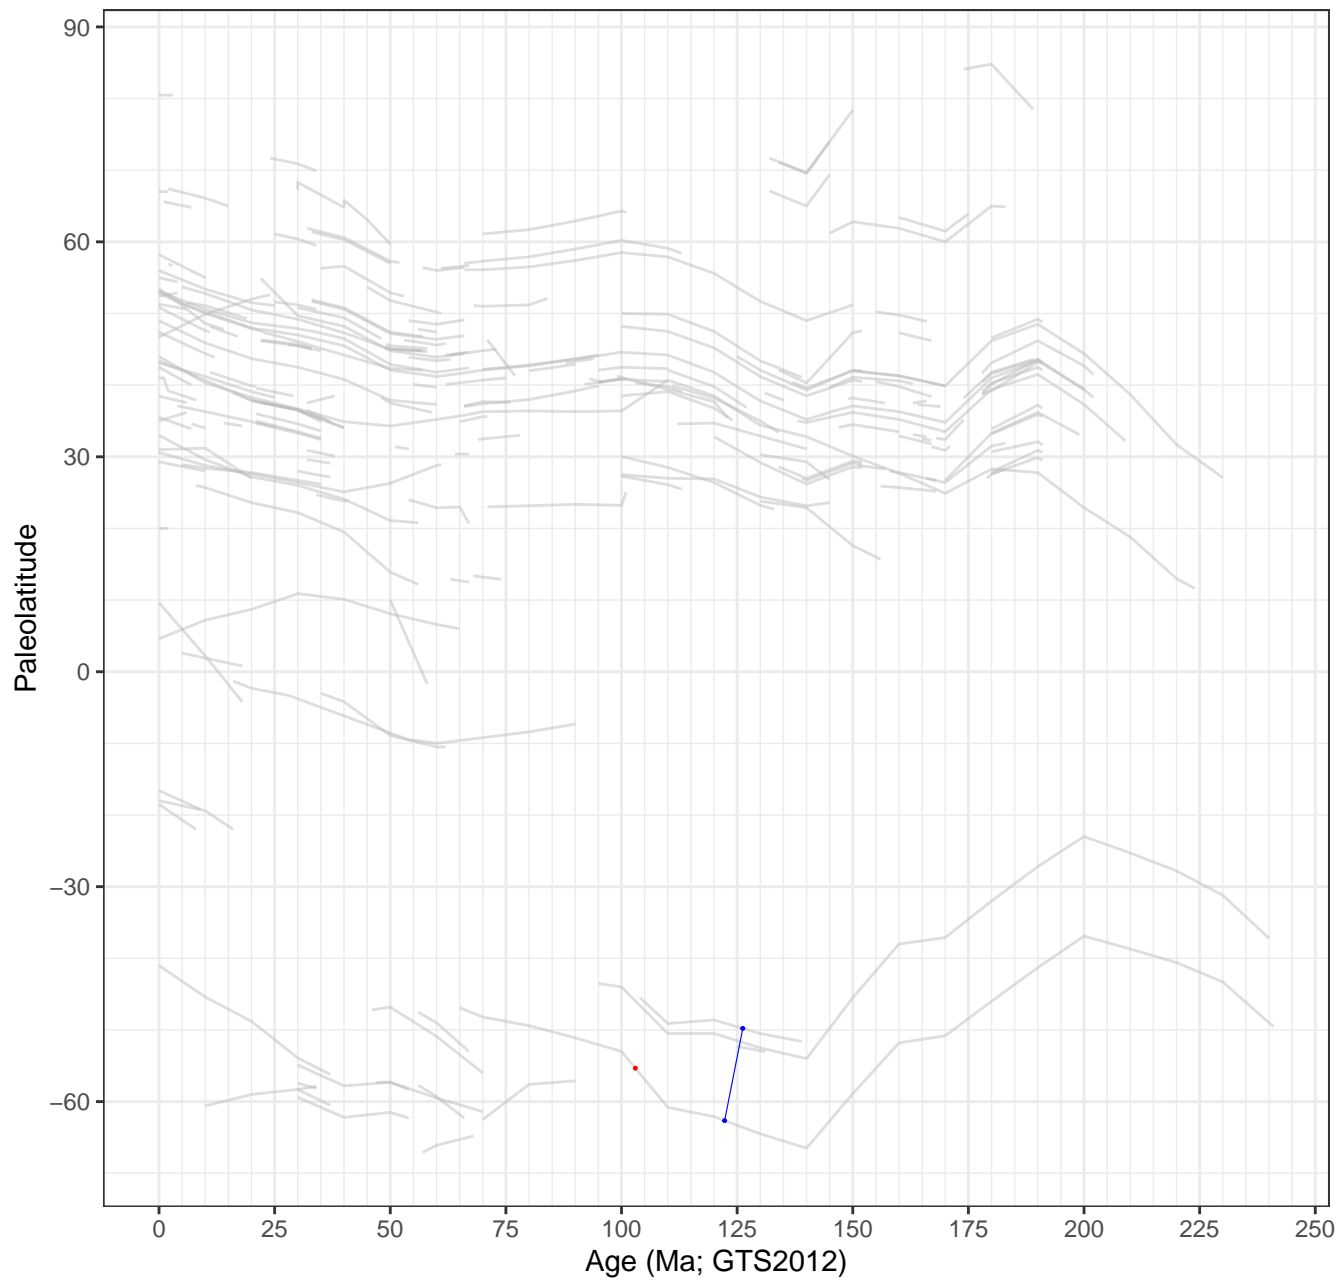

Supplement: Supplementary file 1048 [file Chichaouadinium boydii.pdf › Supplement/Supplement 2/Species 1914 plots/Chichaouadinium boydii.pdf]

# Species *Chichaouadinium vestitum*

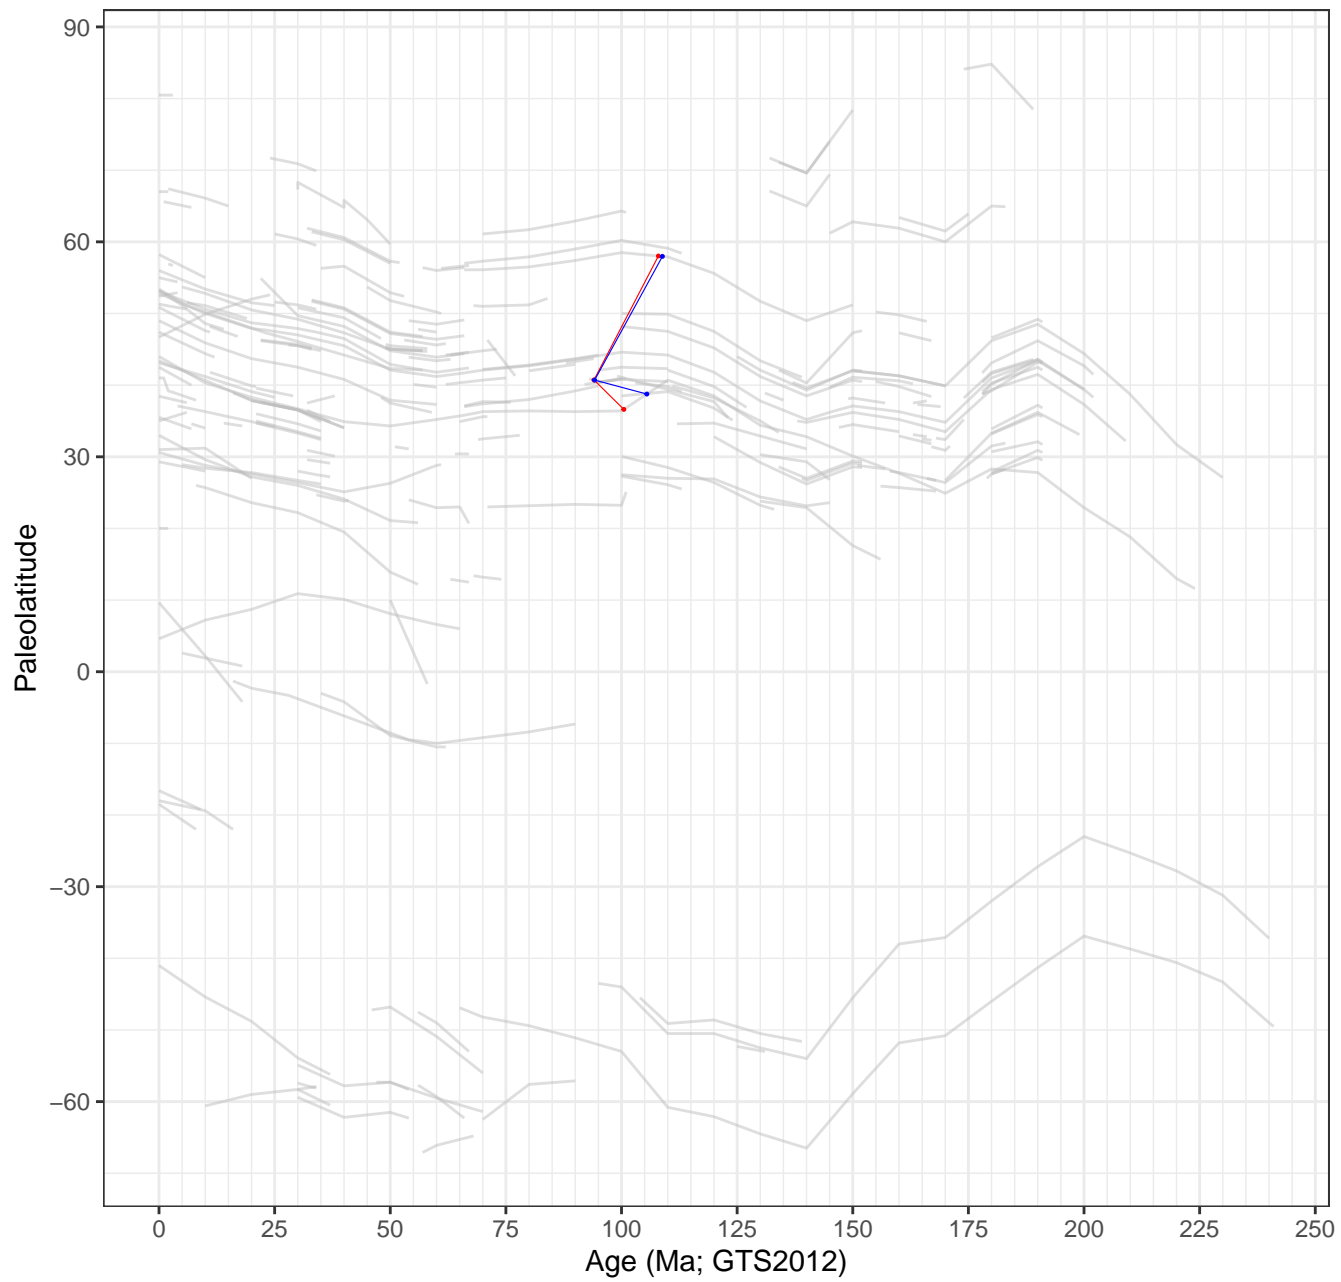

Supplement: Supplementary file 1049 [file Chichaouadinium vestitum.pdf › Supplement/Supplement 2/Species 1914 plots/Chichaouadinium vestitum.pdf]

# Species *Chiropteridium eocenicum*

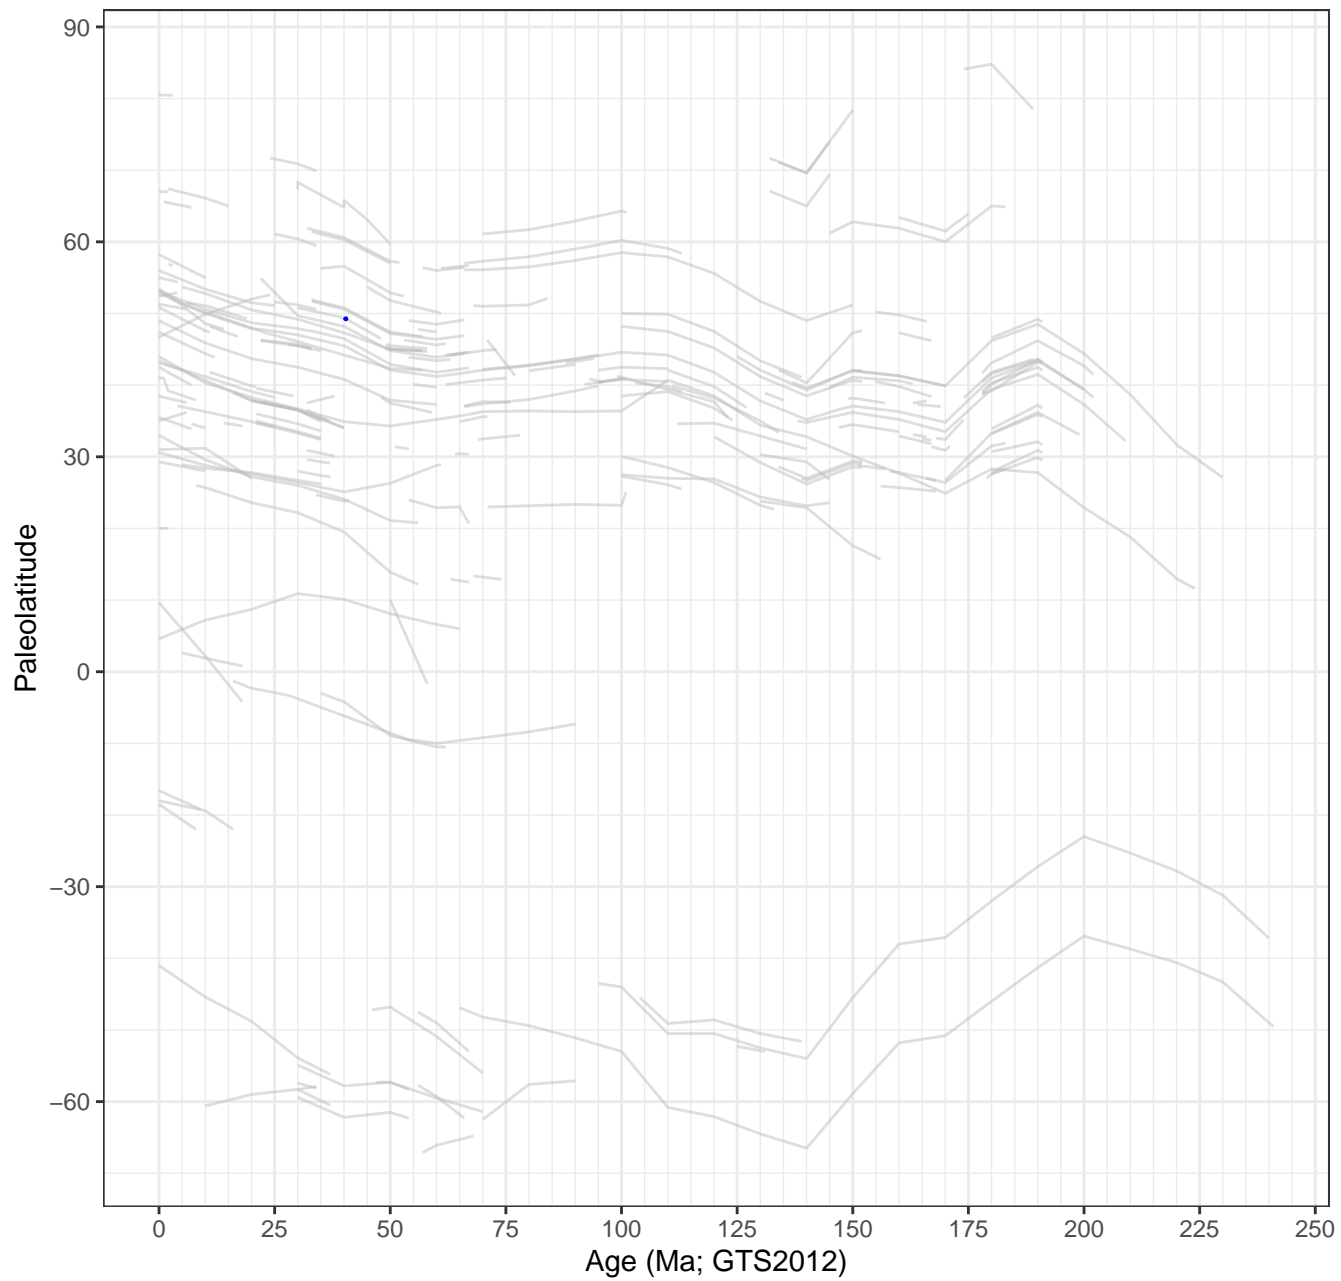

Supplement: Supplementary file 1050 [file Chiropteridium eocenicum.pdf › Supplement/Supplement 2/Species 1914 plots/Chiropteridium eocenicum.pdf]

# Species *Chiropteridium galea*

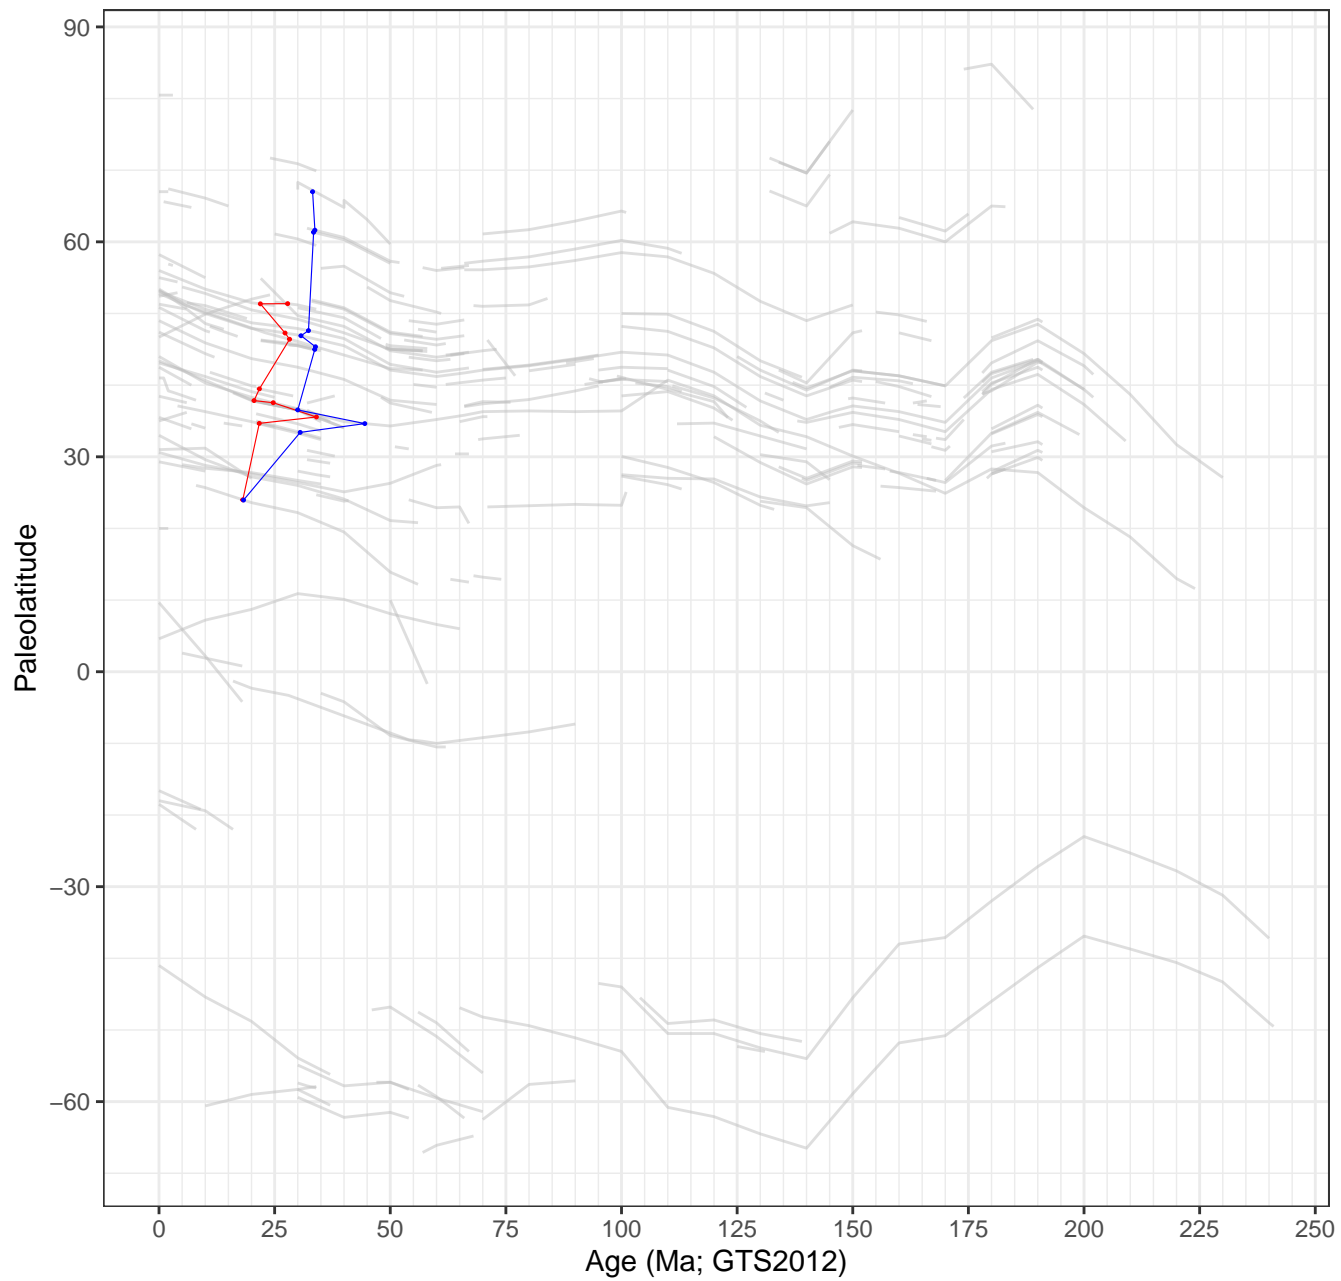

Supplement: Supplementary file 1051 [file Chiropteridium galea.pdf › Supplement/Supplement 2/Species 1914 plots/Chiropteridium galea.pdf]

# Species *Chiropteridium lobospinosum*

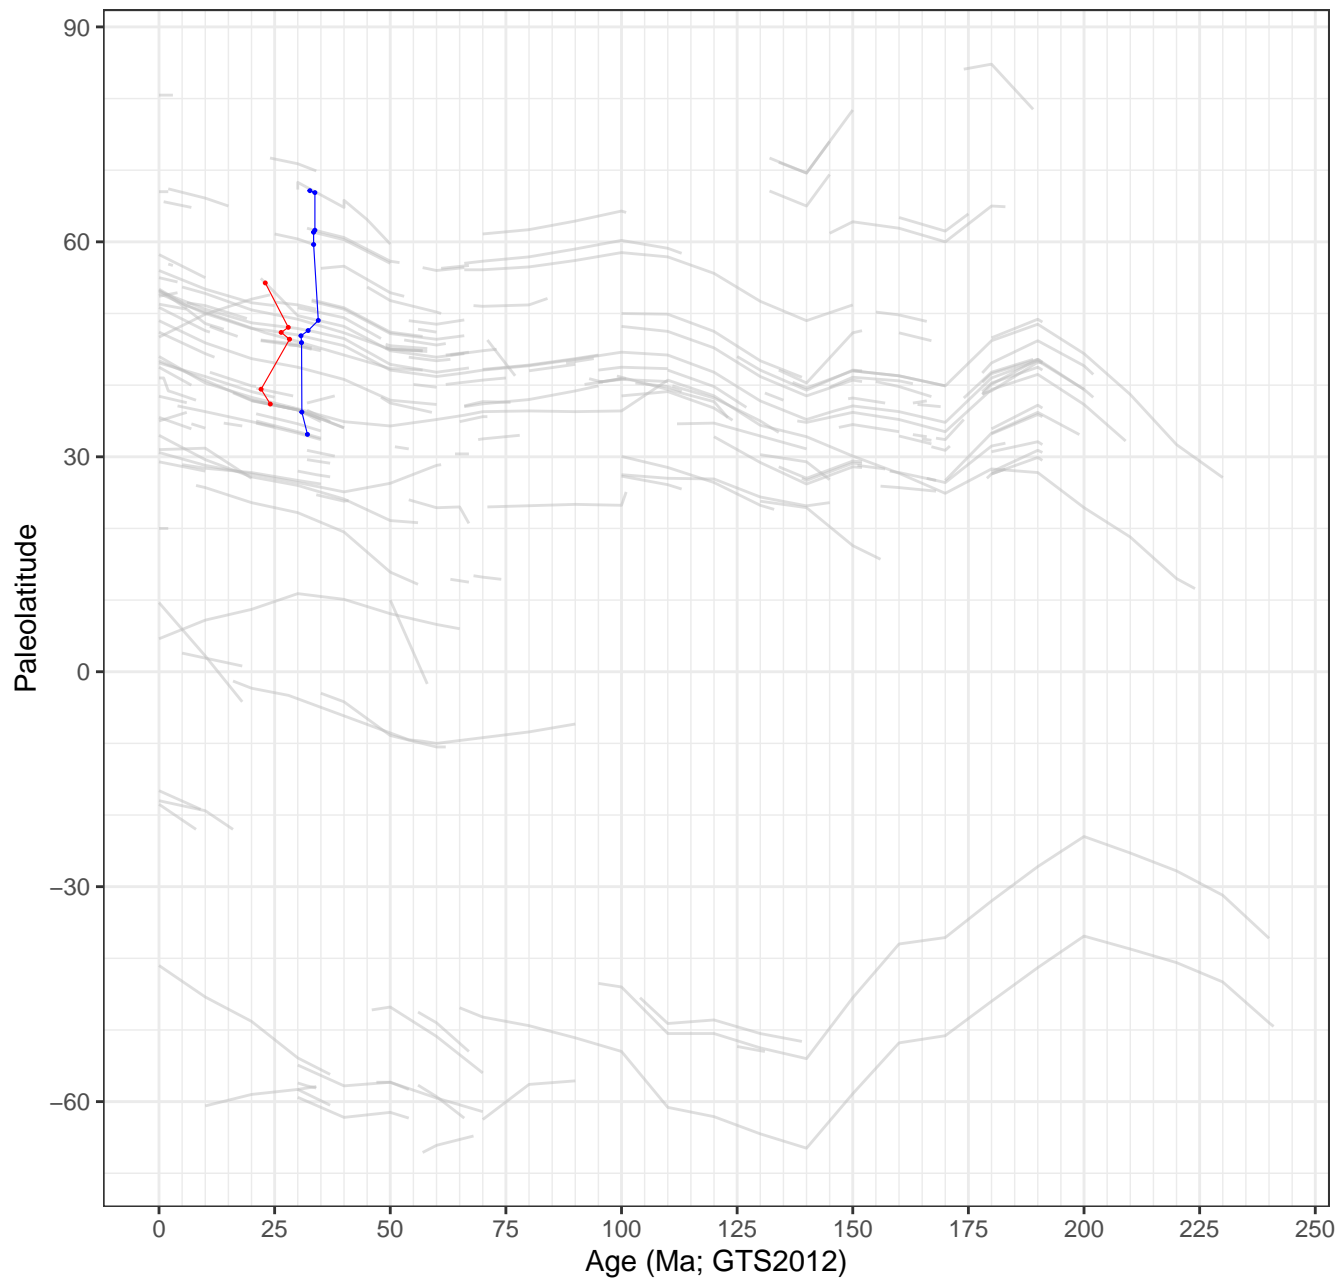

Supplement: Supplementary file 1052 [file Chiropteridium lobospinosum.pdf › Supplement/Supplement 2/Species 1914 plots/Chiropteridium lobospinosum.pdf]

# Species *Chlamydochorella discreta*

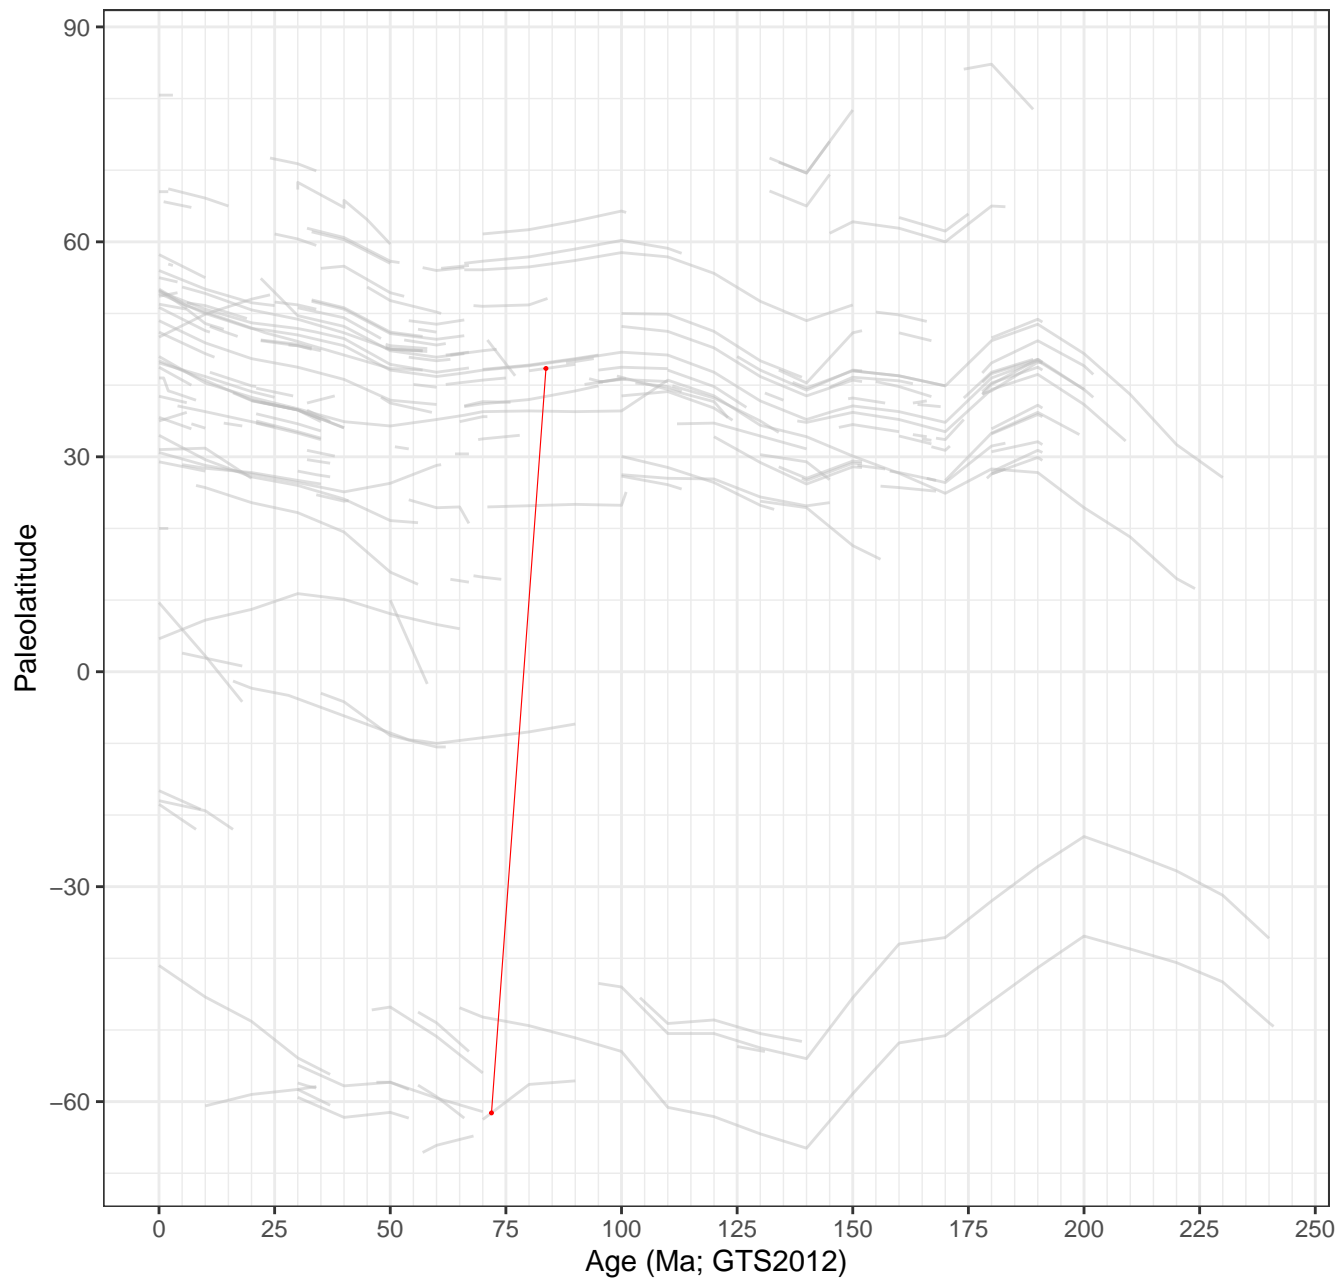

Supplement: Supplementary file 1053 [file Chlamydophorella discreta.pdf › Supplement/Supplement 2/Species 1914 plots/Chlamydophorella discreta.pdf]

# Species *Chlamydochorella ectotabulata*

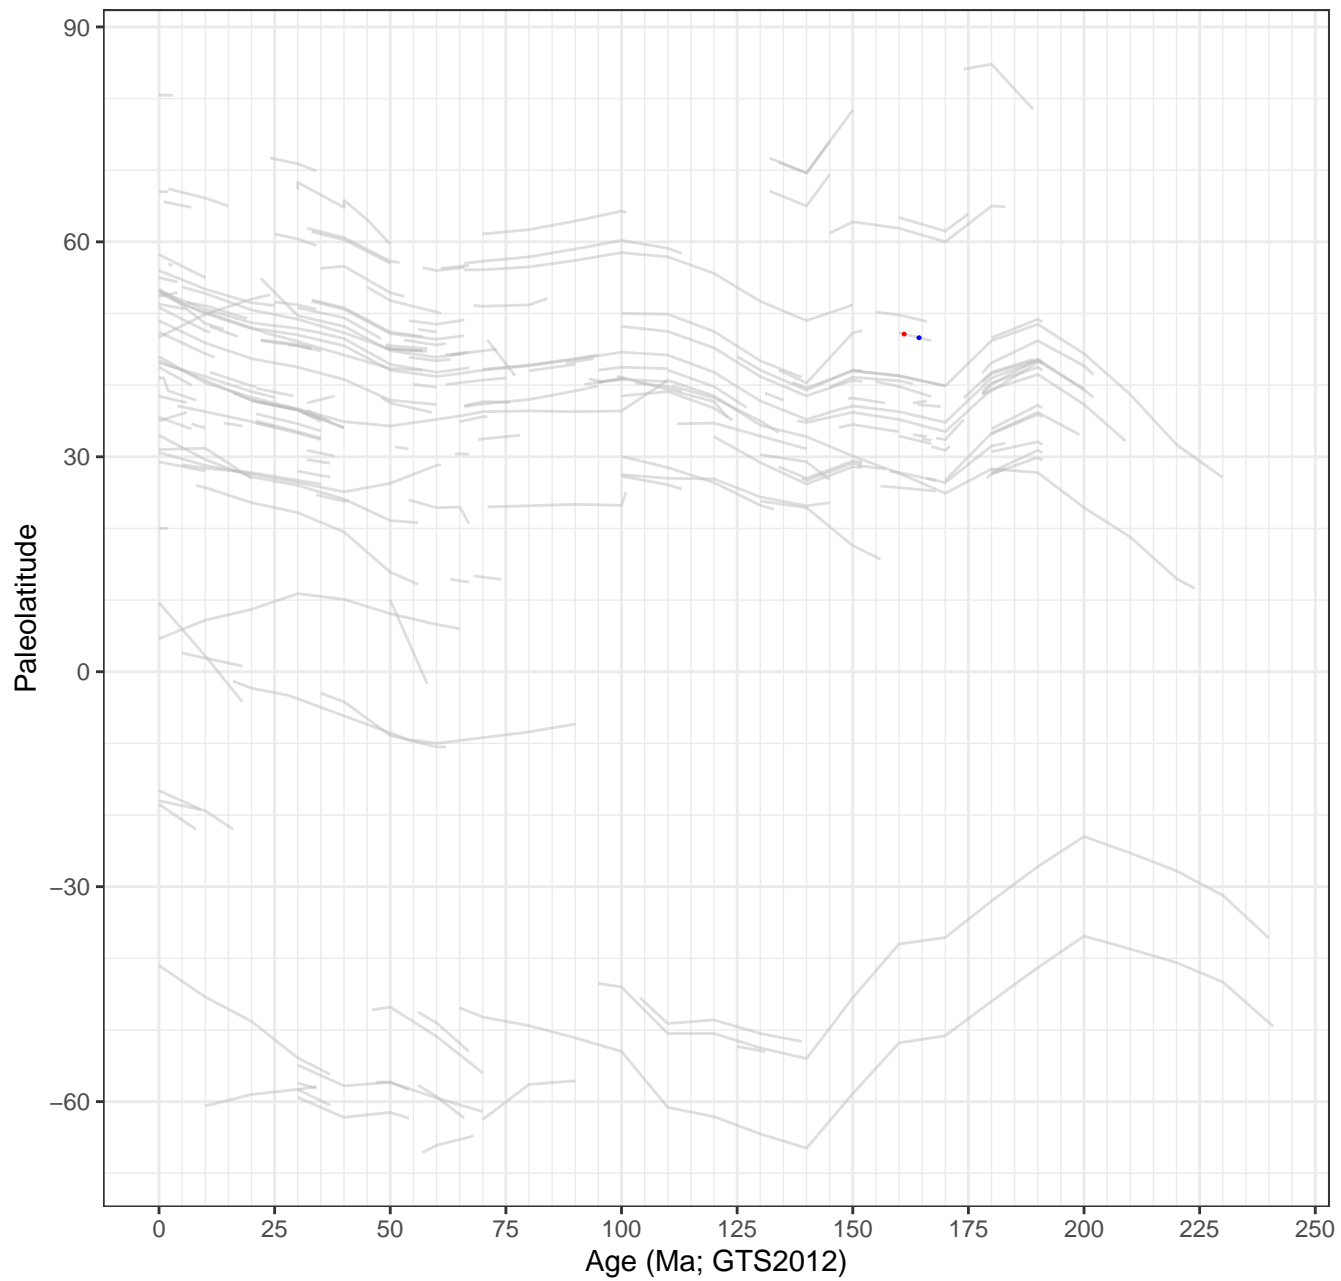

Supplement: Supplementary file 1054 [file Chlamydophorella ectotabulata.pdf › Supplement/Supplement 2/Species 1914 plots/Chlamydophorella ectotabulata.pdf]

# Species *Chlamydochorella multifibrata*

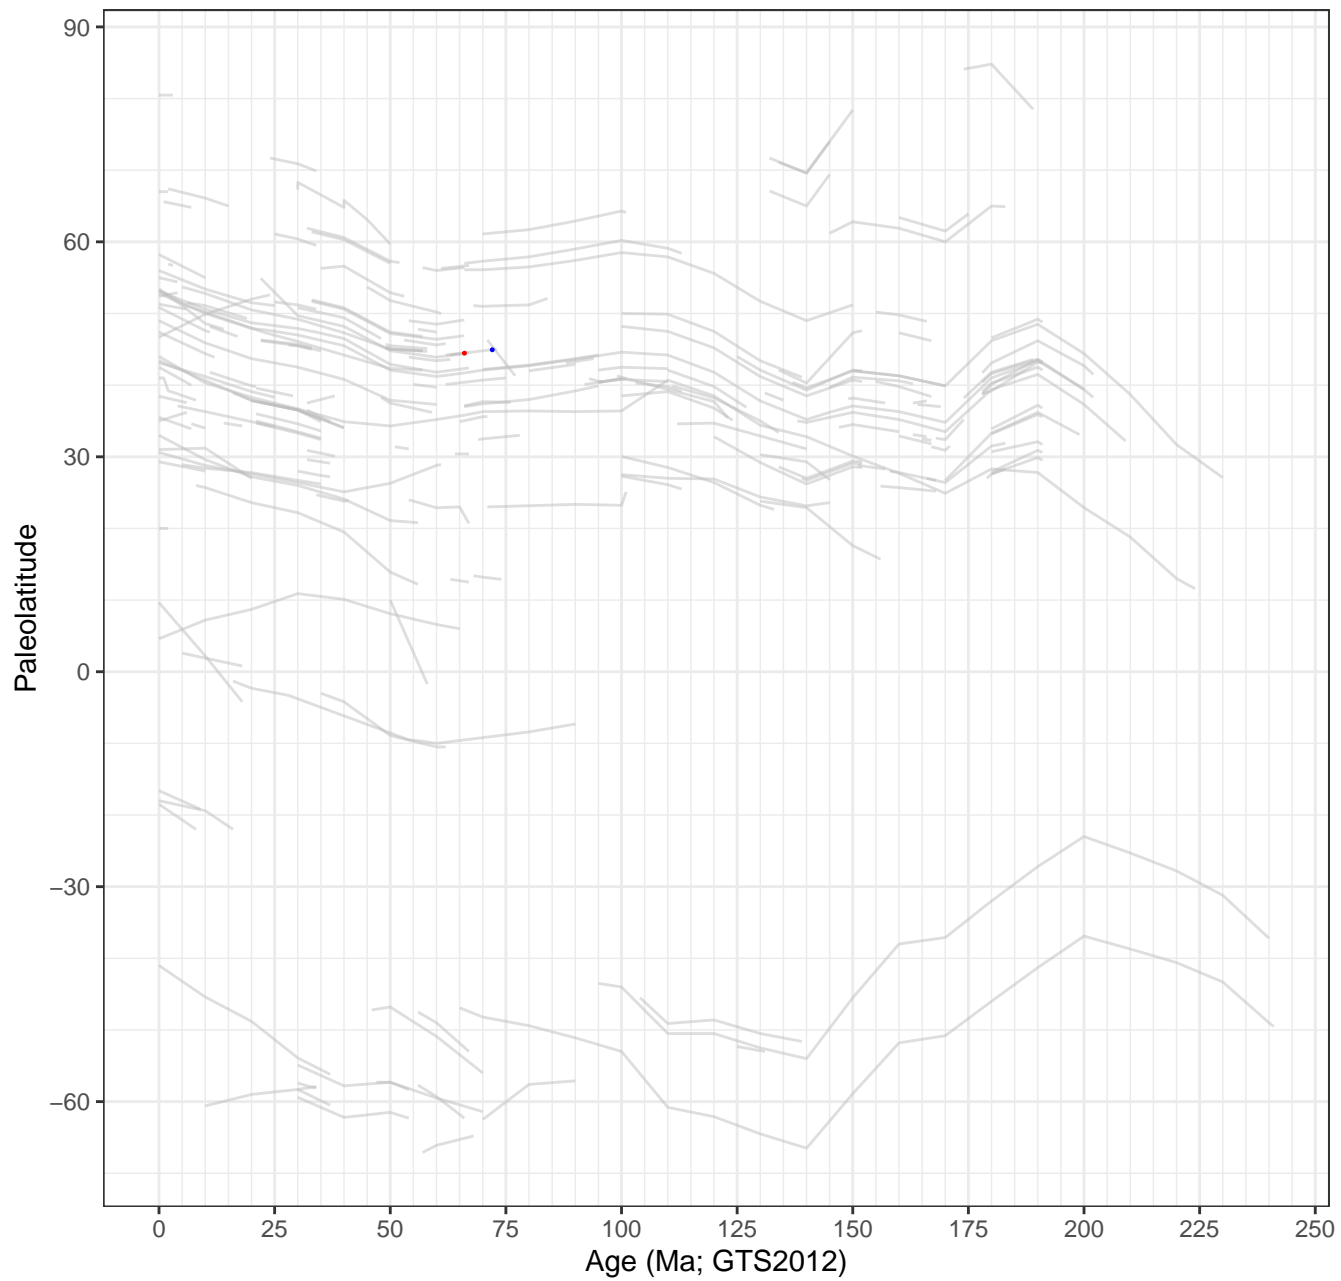

Supplement: Supplementary file 1055 [file Chlamydophorella multifibrata.pdf › Supplement/Supplement 2/Species 1914 plots/Chlamydophorella multifibrata.pdf]

# Species *Chlamydophorella nyei*

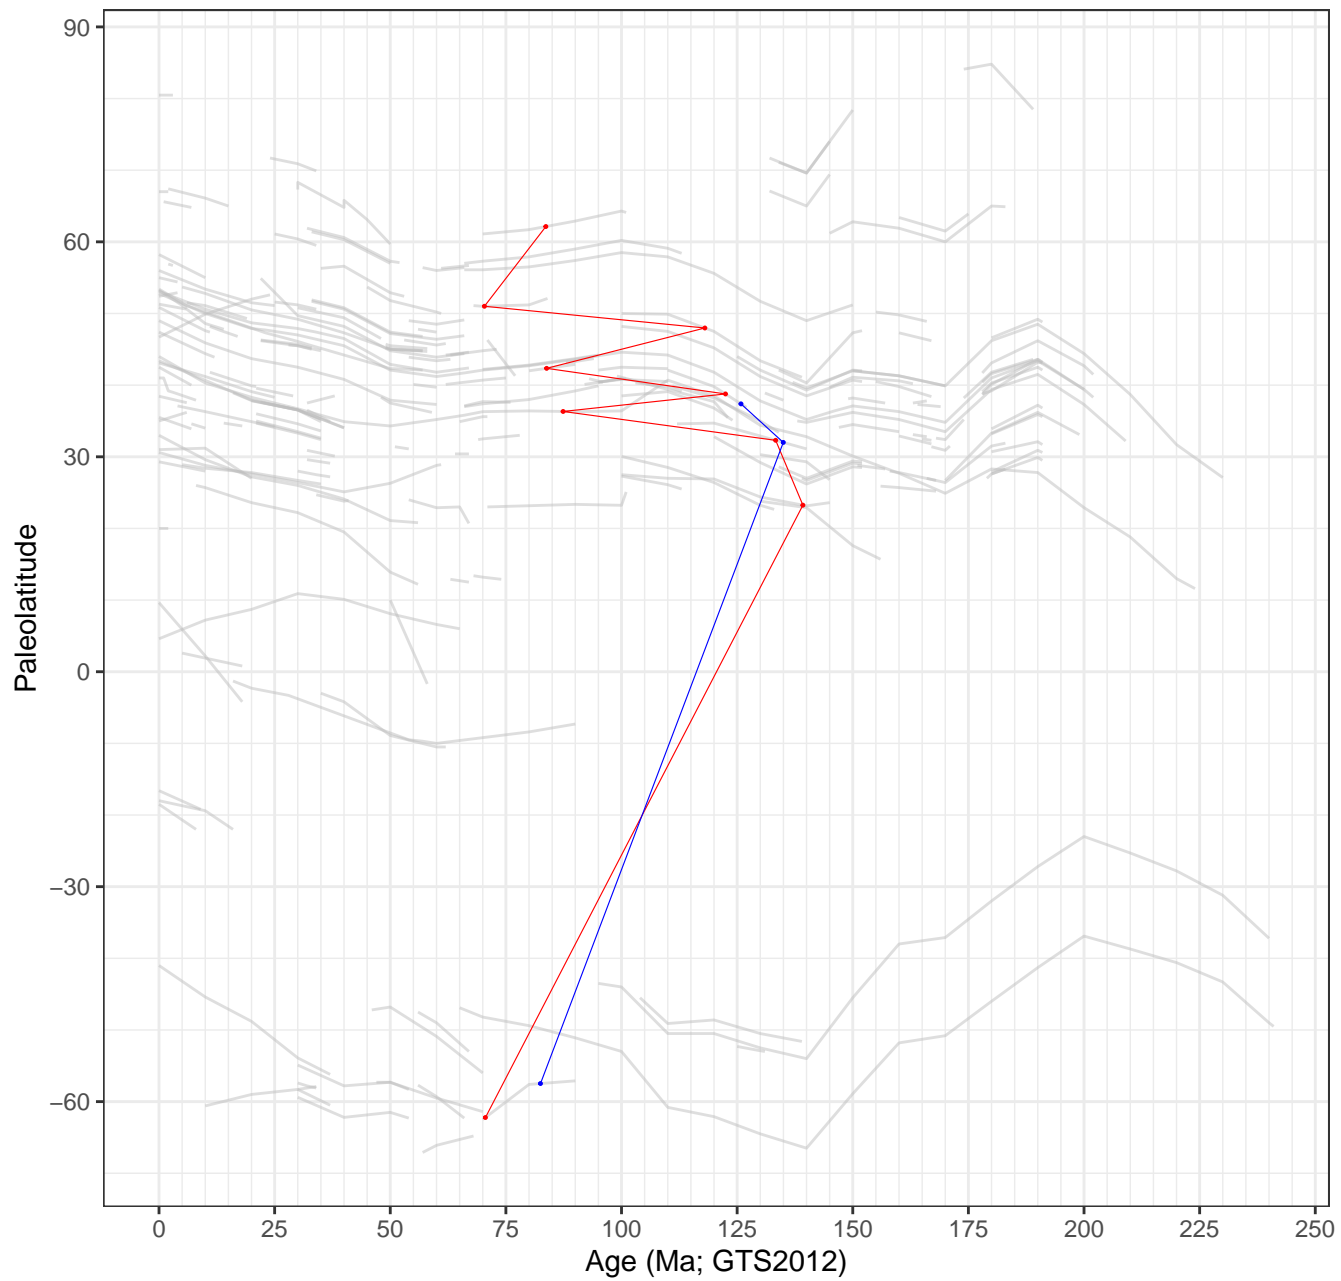

Supplement: Supplementary file 1056 [file Chlamydophorella nyei.pdf › Supplement/Supplement 2/Species 1914 plots/Chlamydophorella nyei.pdf]

# Species Chytroeisphaeridia cerastes

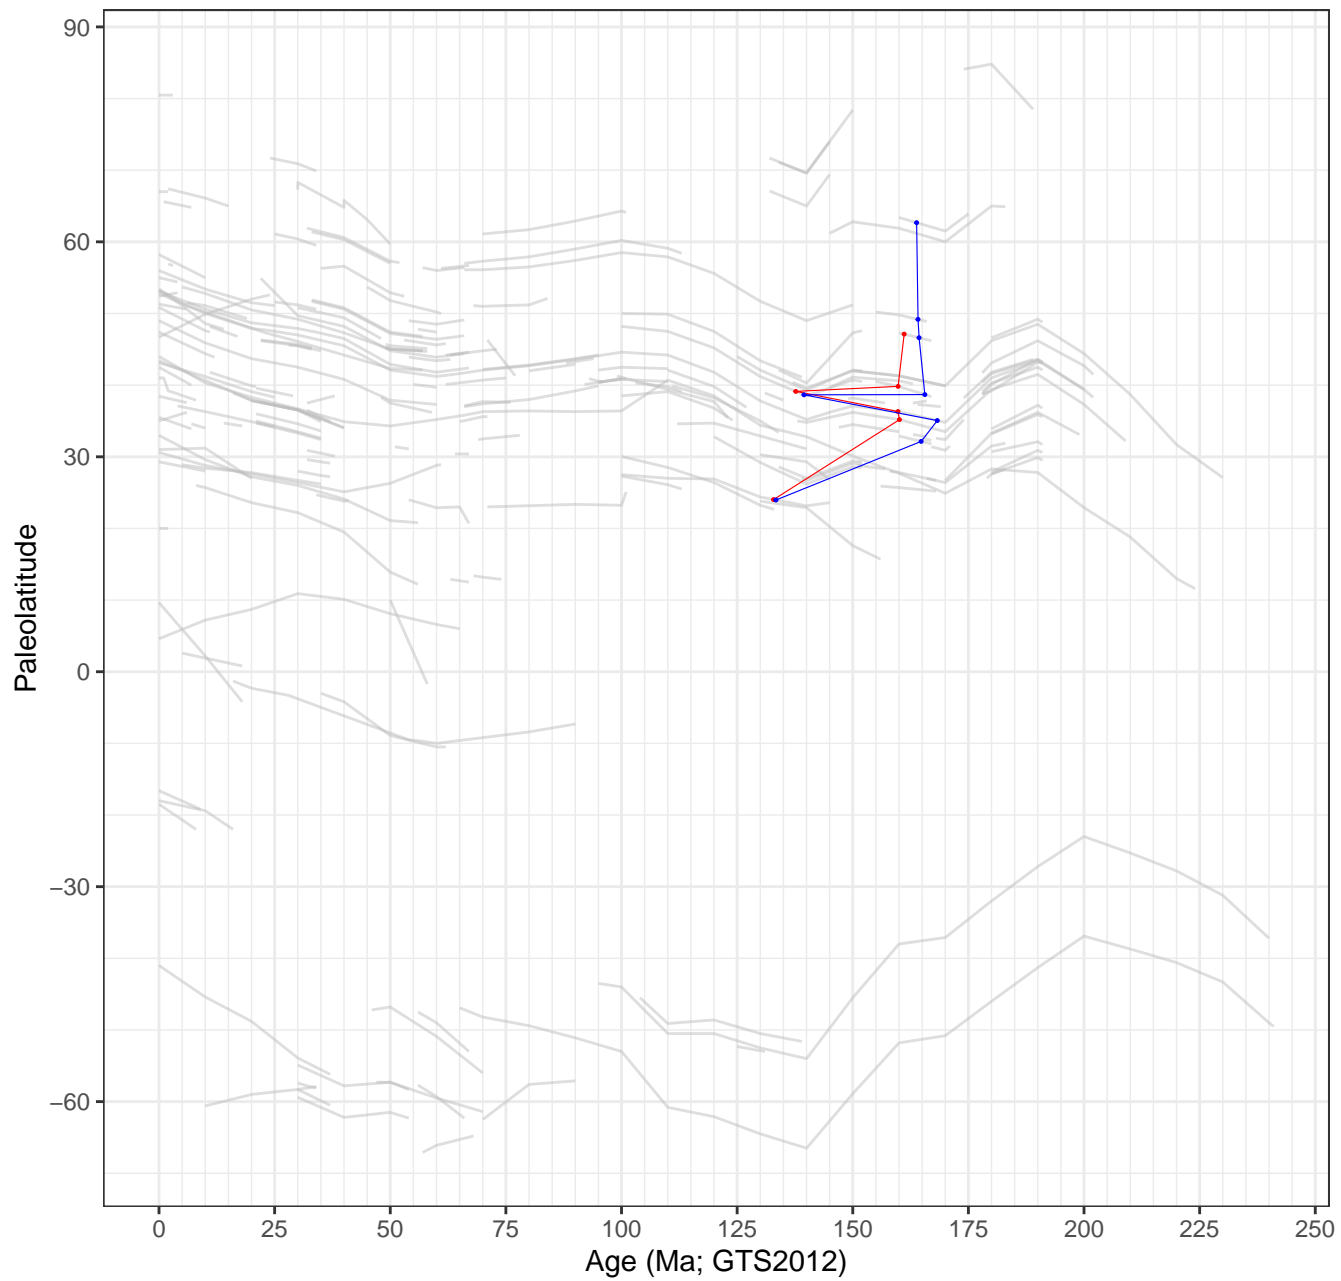

Supplement: Supplementary file 1057 [file Chytroeisphaeridia cerastes.pdf › Supplement/Supplement 2/Species 1914 plots/Chytroeisphaeridia cerastes.pdf]

# Species *Chytroeisphaeridia chytroeides*

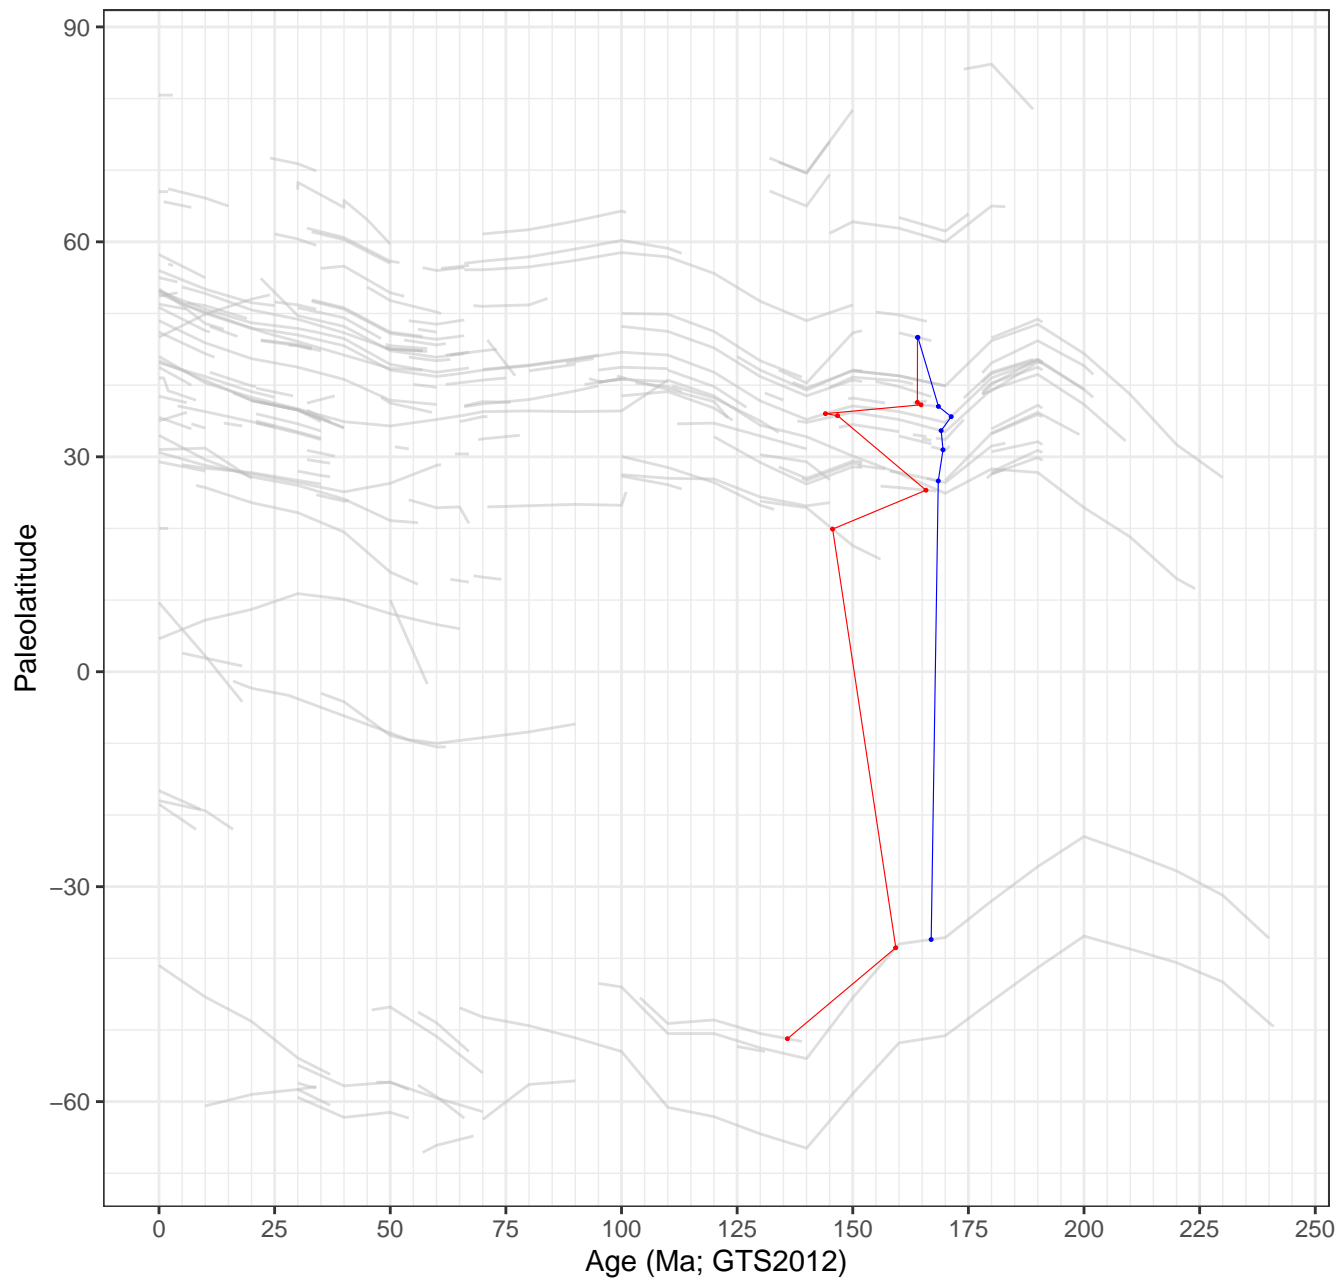

Supplement: Supplementary file 1058 [file Chytroeisphaeridia chytroeides.pdf › Supplement/Supplement 2/Species 1914 plots/Chytroeisphaeridia chytroeides.pdf]

# Species *Chytroeisphaeridia hyalina*

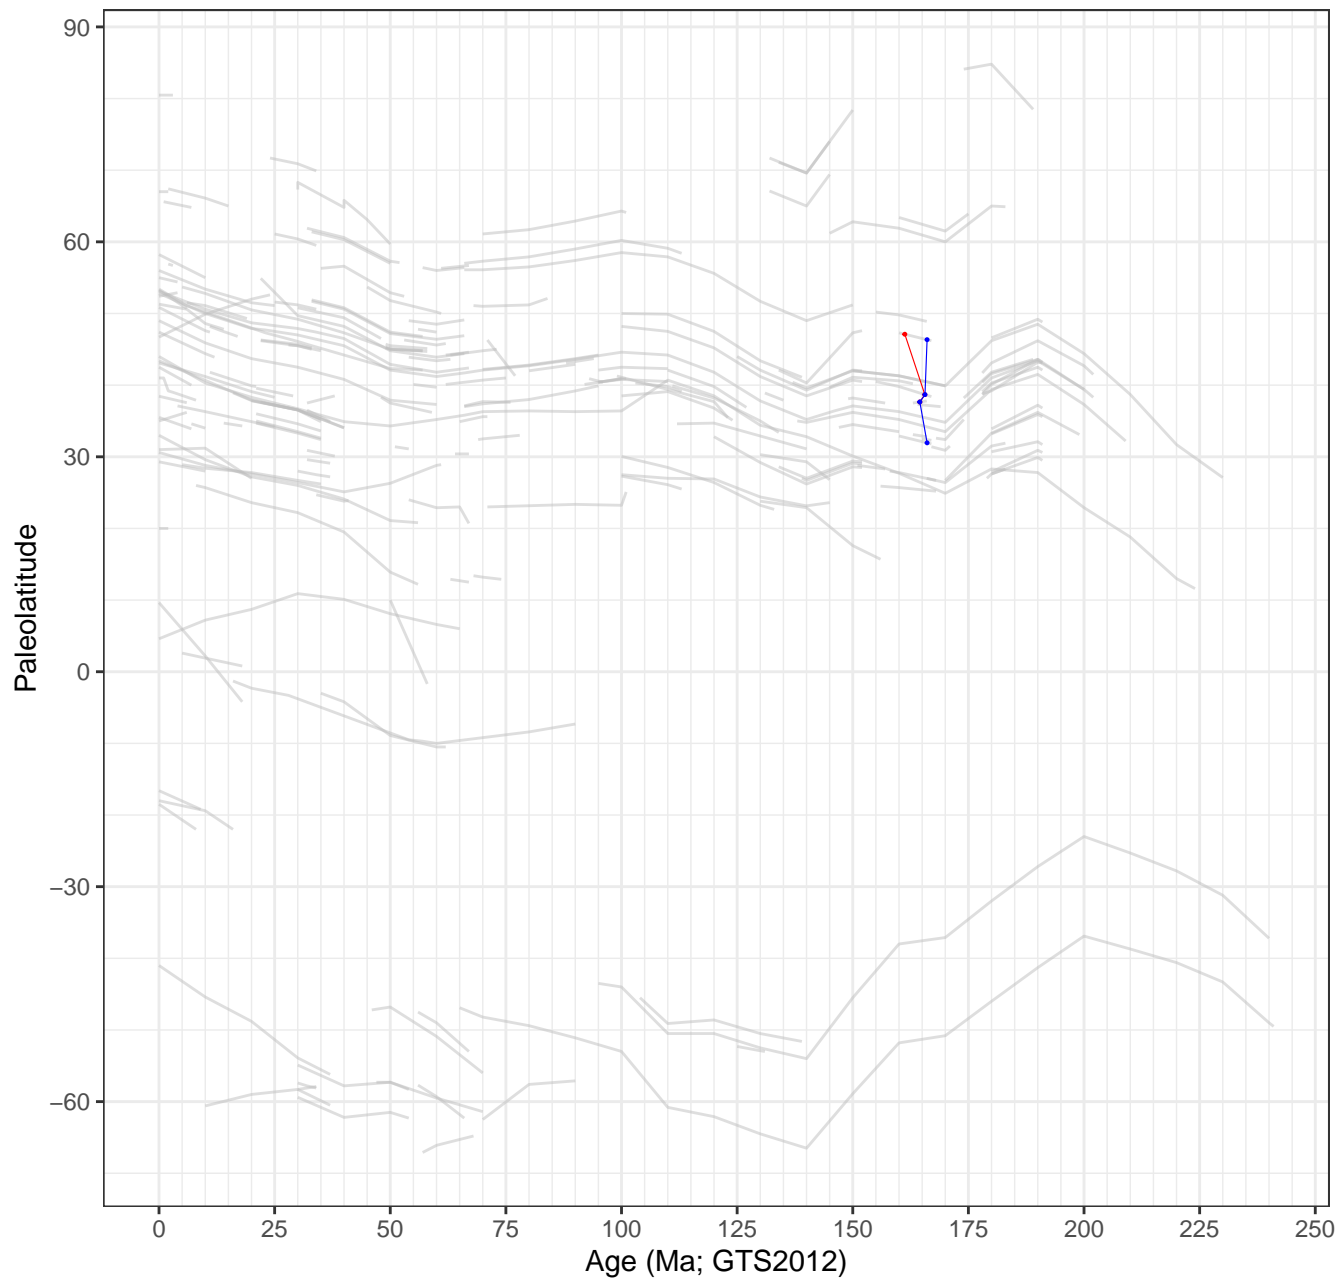

Supplement: Supplementary file 1059 [file Chytroeisphaeridia hyalina.pdf › Supplement/Supplement 2/Species 1914 plots/Chytroeisphaeridia hyalina.pdf]

# Species *Chytroeisphaeridia scabrata*

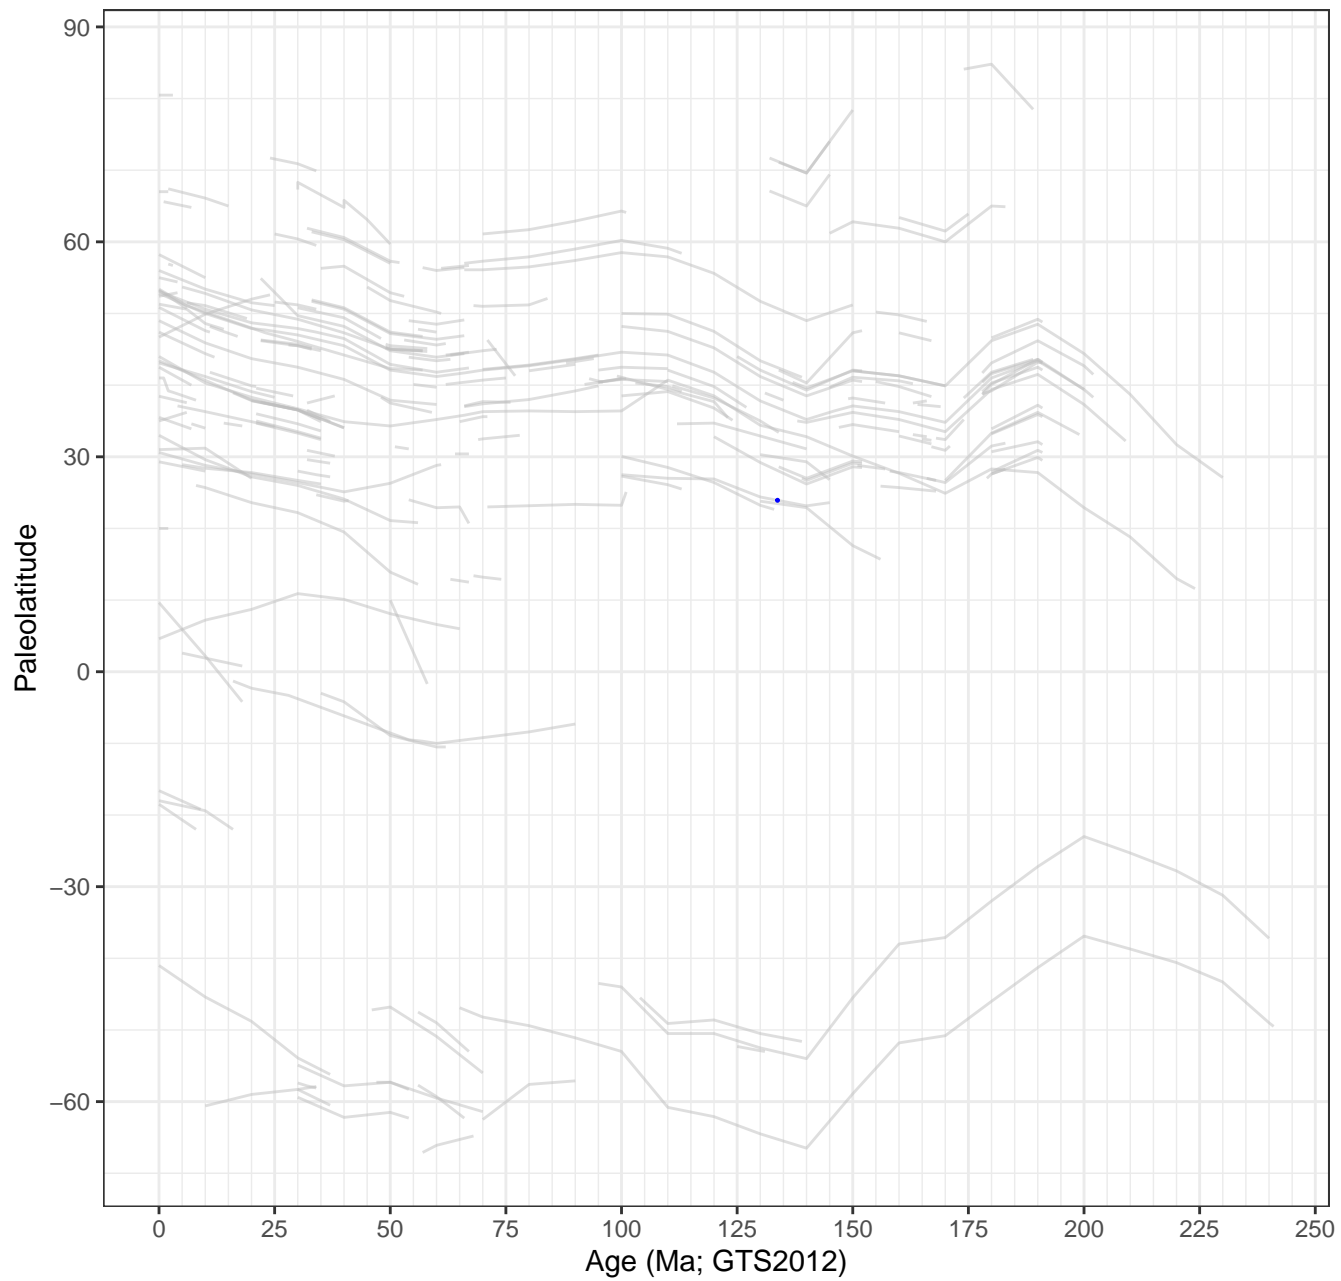

Supplement: Supplementary file 1060 [file Chytroeisphaeridia scabrata.pdf › Supplement/Supplement 2/Species 1914 plots/Chytroeisphaeridia scabrata.pdf]

# Species *Circulodinium attadalicum*

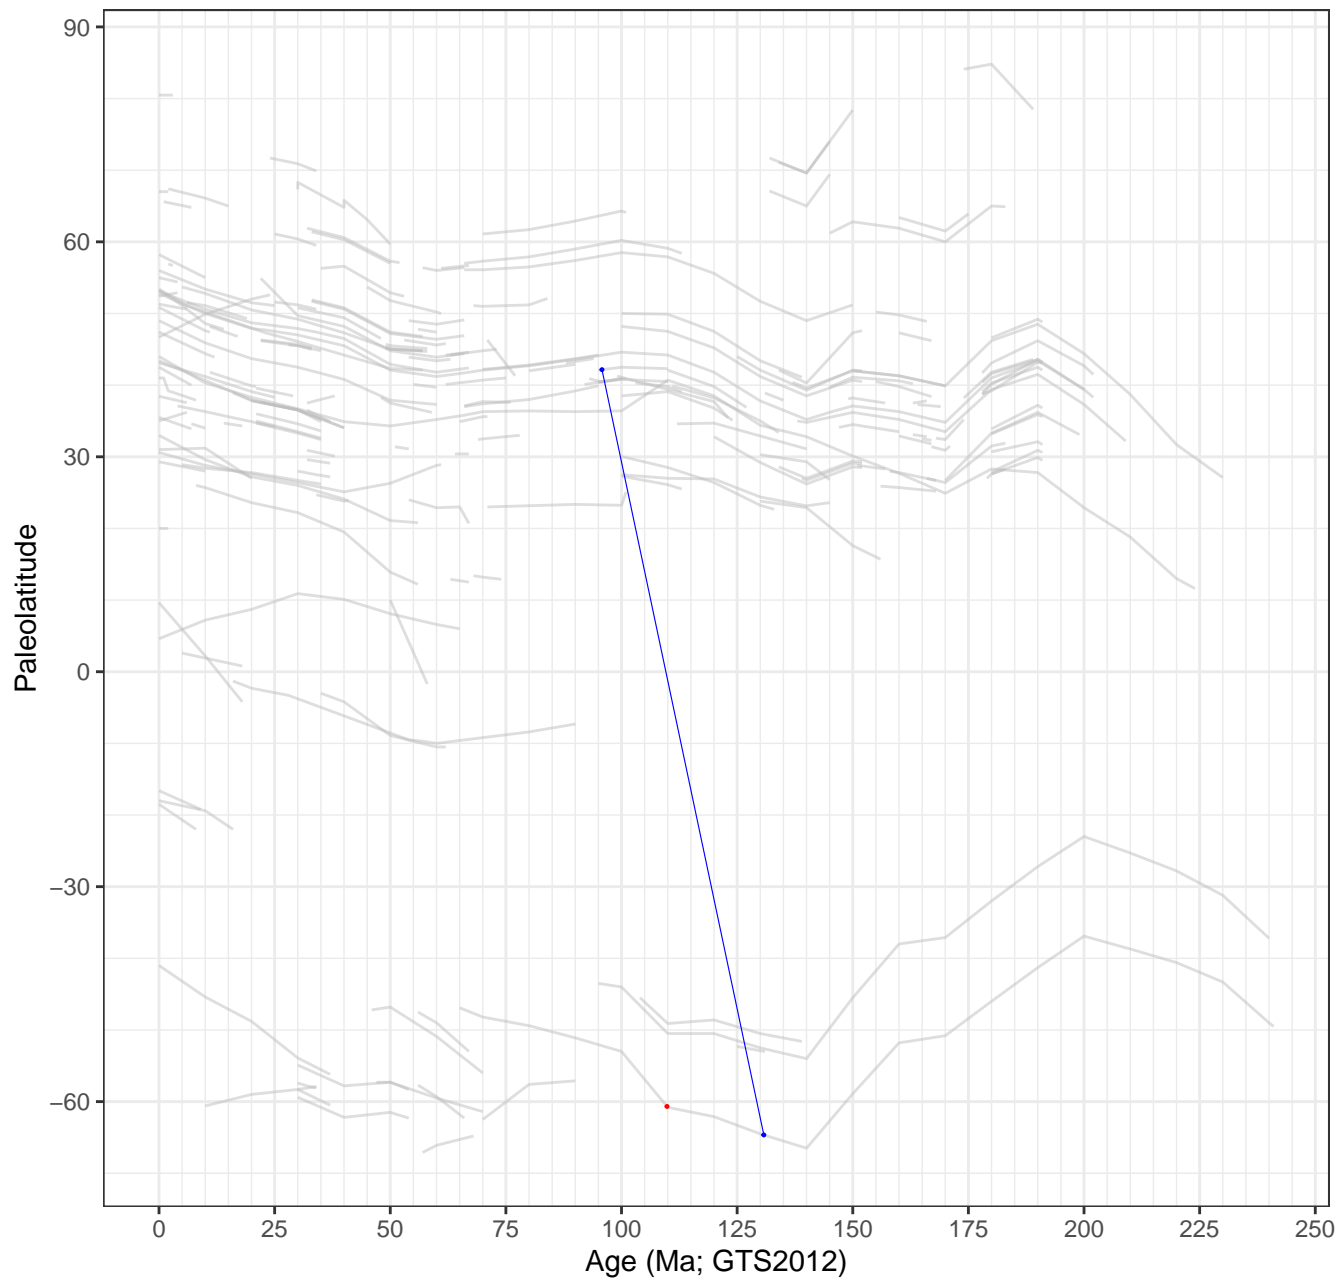

Supplement: Supplementary file 1061 [file Circulodinium attadalicum.pdf › Supplement/Supplement 2/Species 1914 plots/Circulodinium attadalicum.pdf]

# Species *Circulodinium brevispinosum*

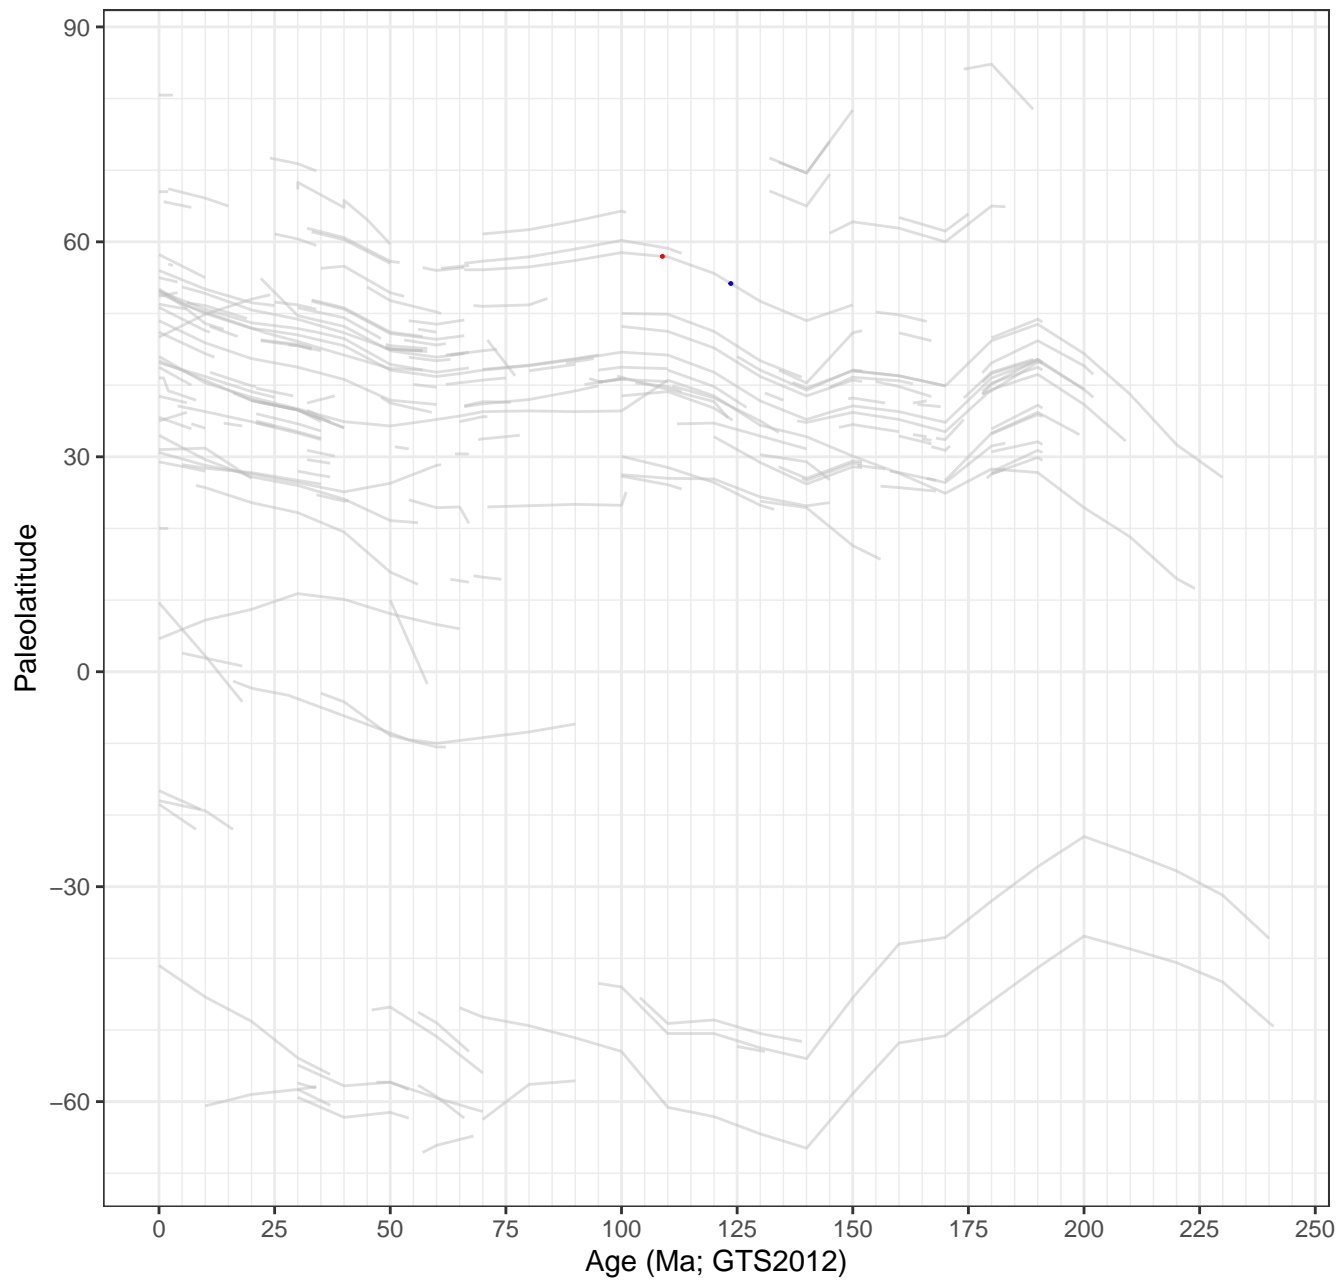

Supplement: Supplementary file 1062 [file Circulodinium brevispinosum.pdf › Supplement/Supplement 2/Species 1914 plots/Circulodinium brevispinosum.pdf]

# Species *Circulodinium colliveri*

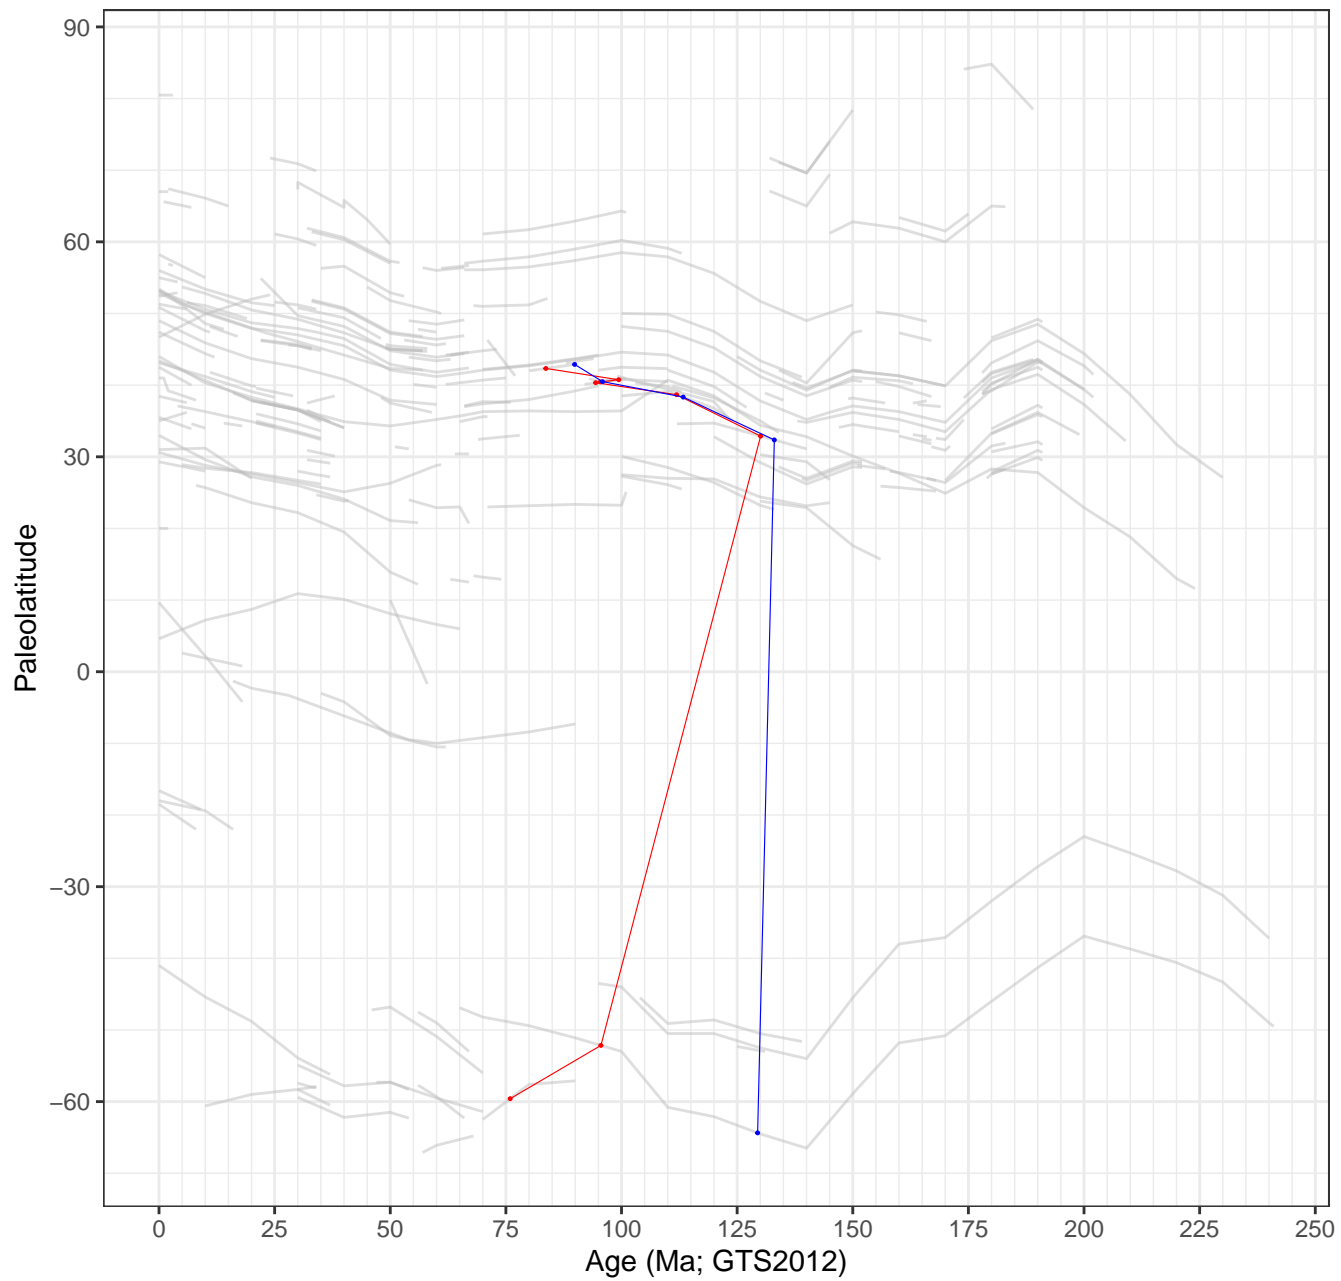

Supplement: Supplementary file 1063 [file Circulodinium colliveri.pdf › Supplement/Supplement 2/Species 1914 plots/Circulodinium colliveri.pdf]

# Species *Circulodinium compta*

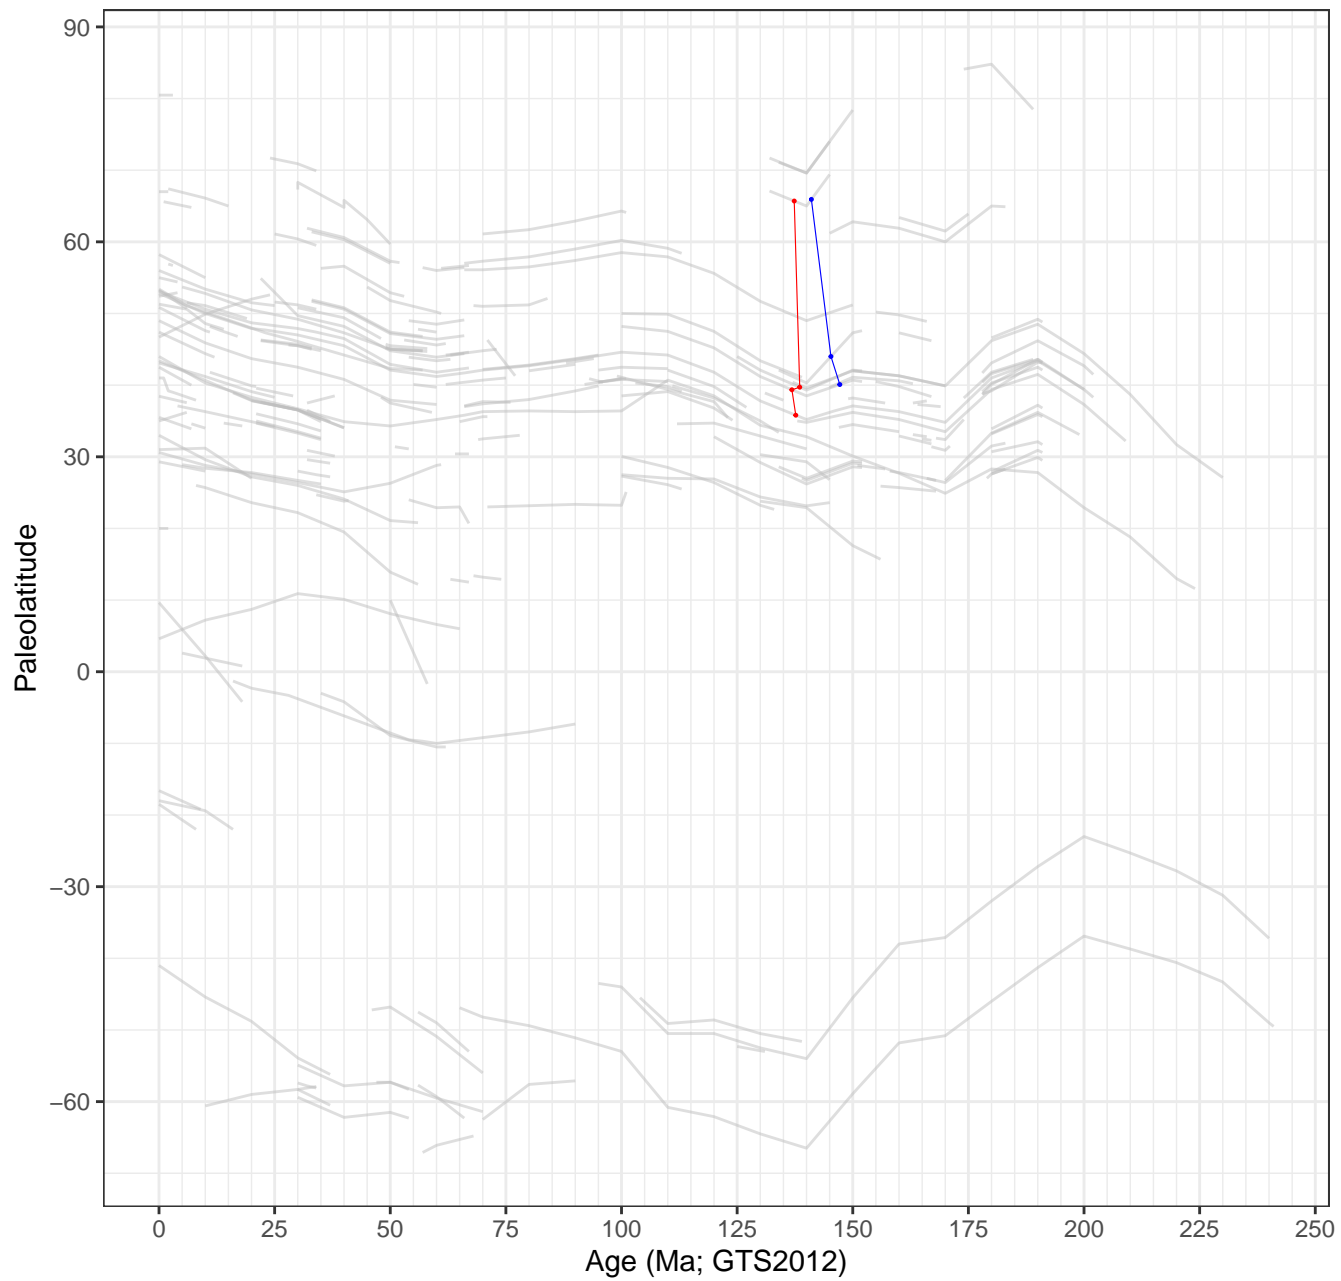

Supplement: Supplementary file 1064 [file Circulodinium compta.pdf › Supplement/Supplement 2/Species 1914 plots/Circulodinium compta.pdf]

# Species *Circulodinium copei*

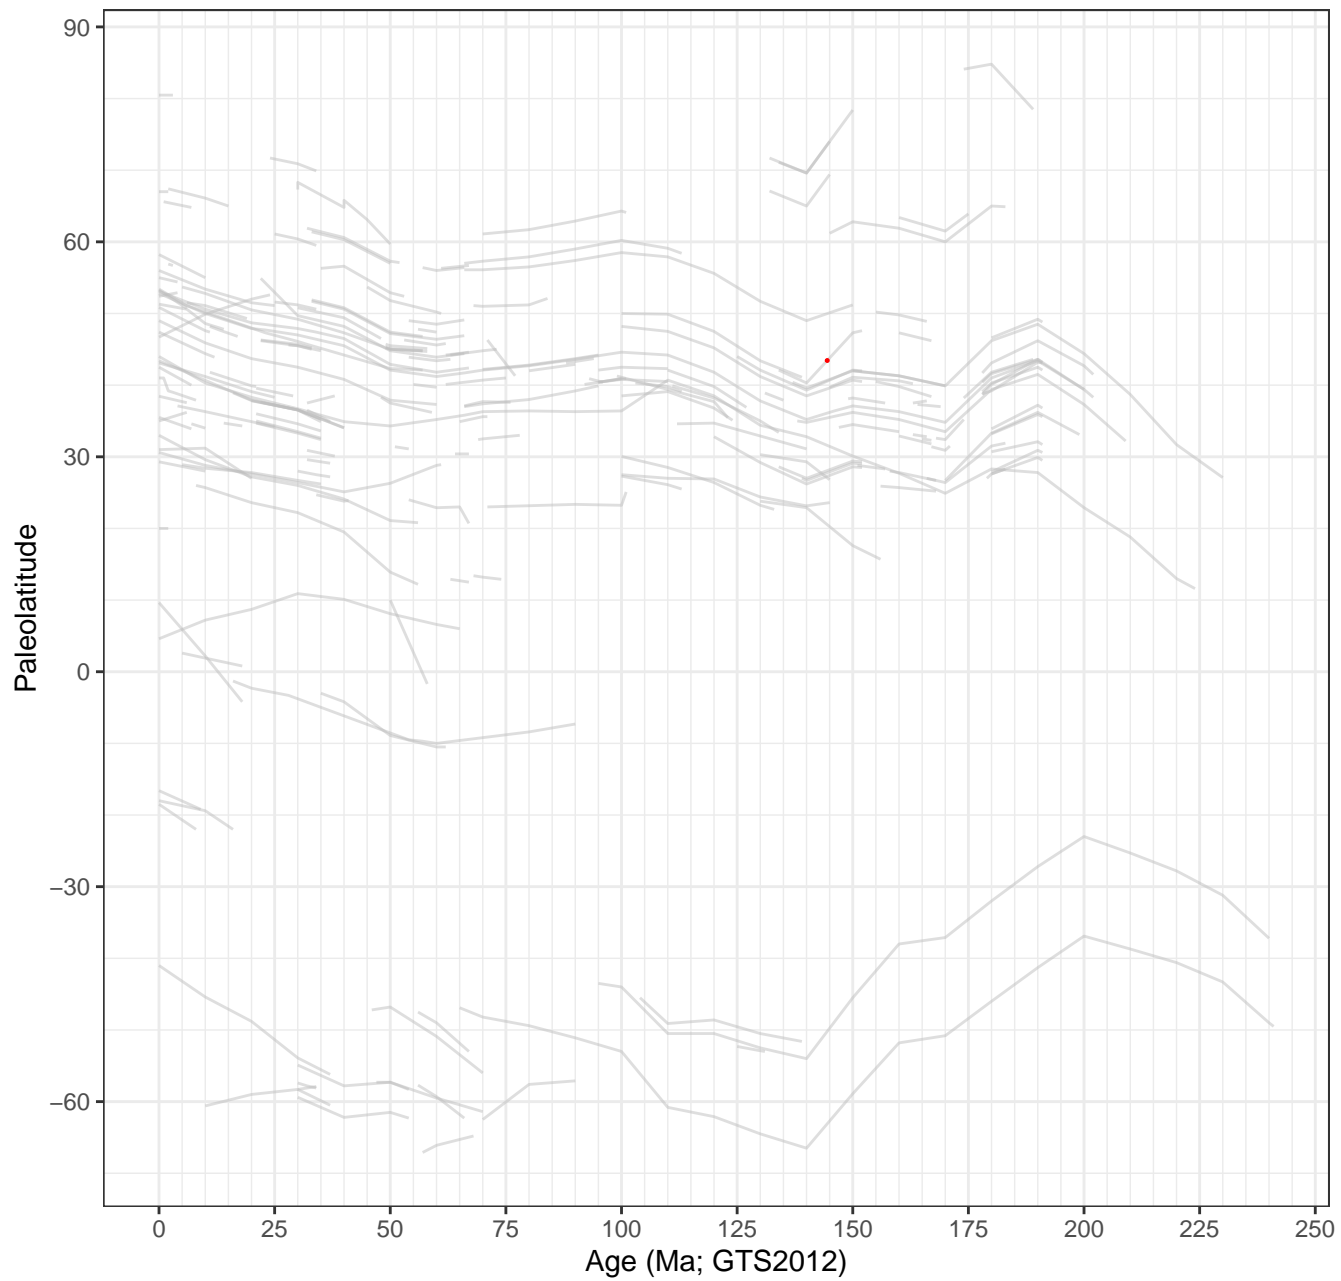

Supplement: Supplementary file 1065 [file Circulodinium copei.pdf › Supplement/Supplement 2/Species 1914 plots/Circulodinium copei.pdf]

# Species *Circulodinium deflandrei*

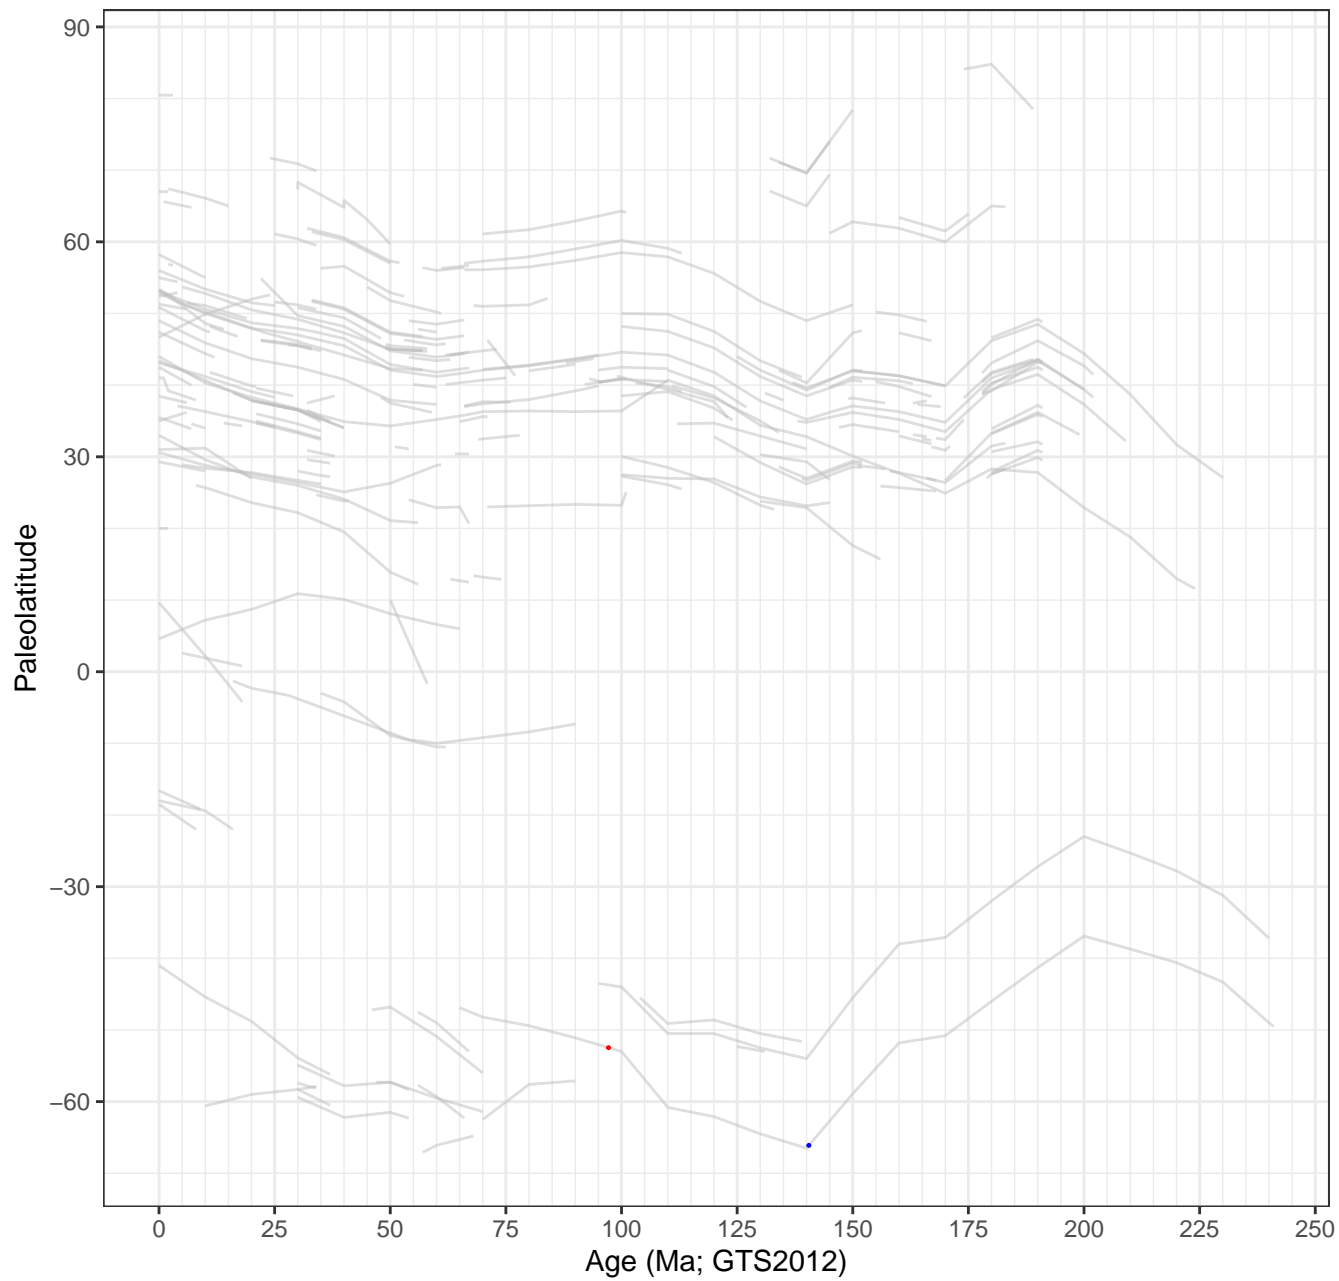

Supplement: Supplementary file 1066 [file Circulodinium deflandrei.pdf › Supplement/Supplement 2/Species 1914 plots/Circulodinium deflandrei.pdf]

# Species *Circulodinium densebarbatum*

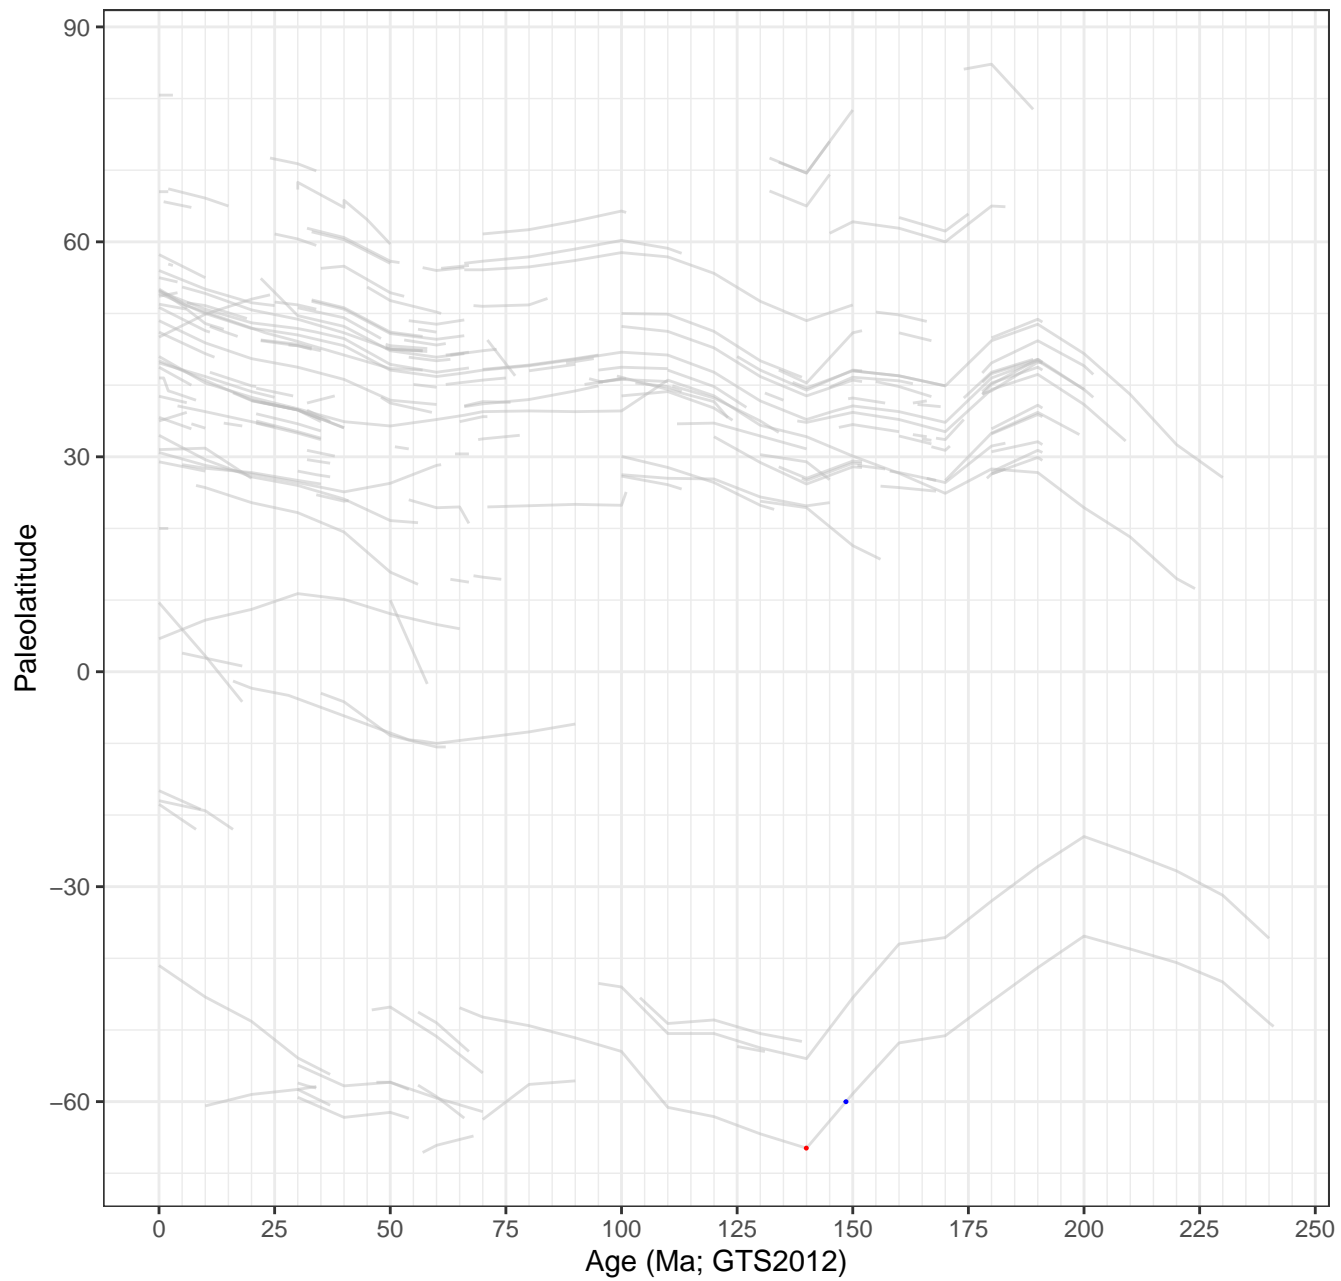

Supplement: Supplementary file 1067 [file Circulodinium densebarbatum.pdf › Supplement/Supplement 2/Species 1914 plots/Circulodinium densebarbatum.pdf]

# Species *Circulodinium distinctum brevispinatum*

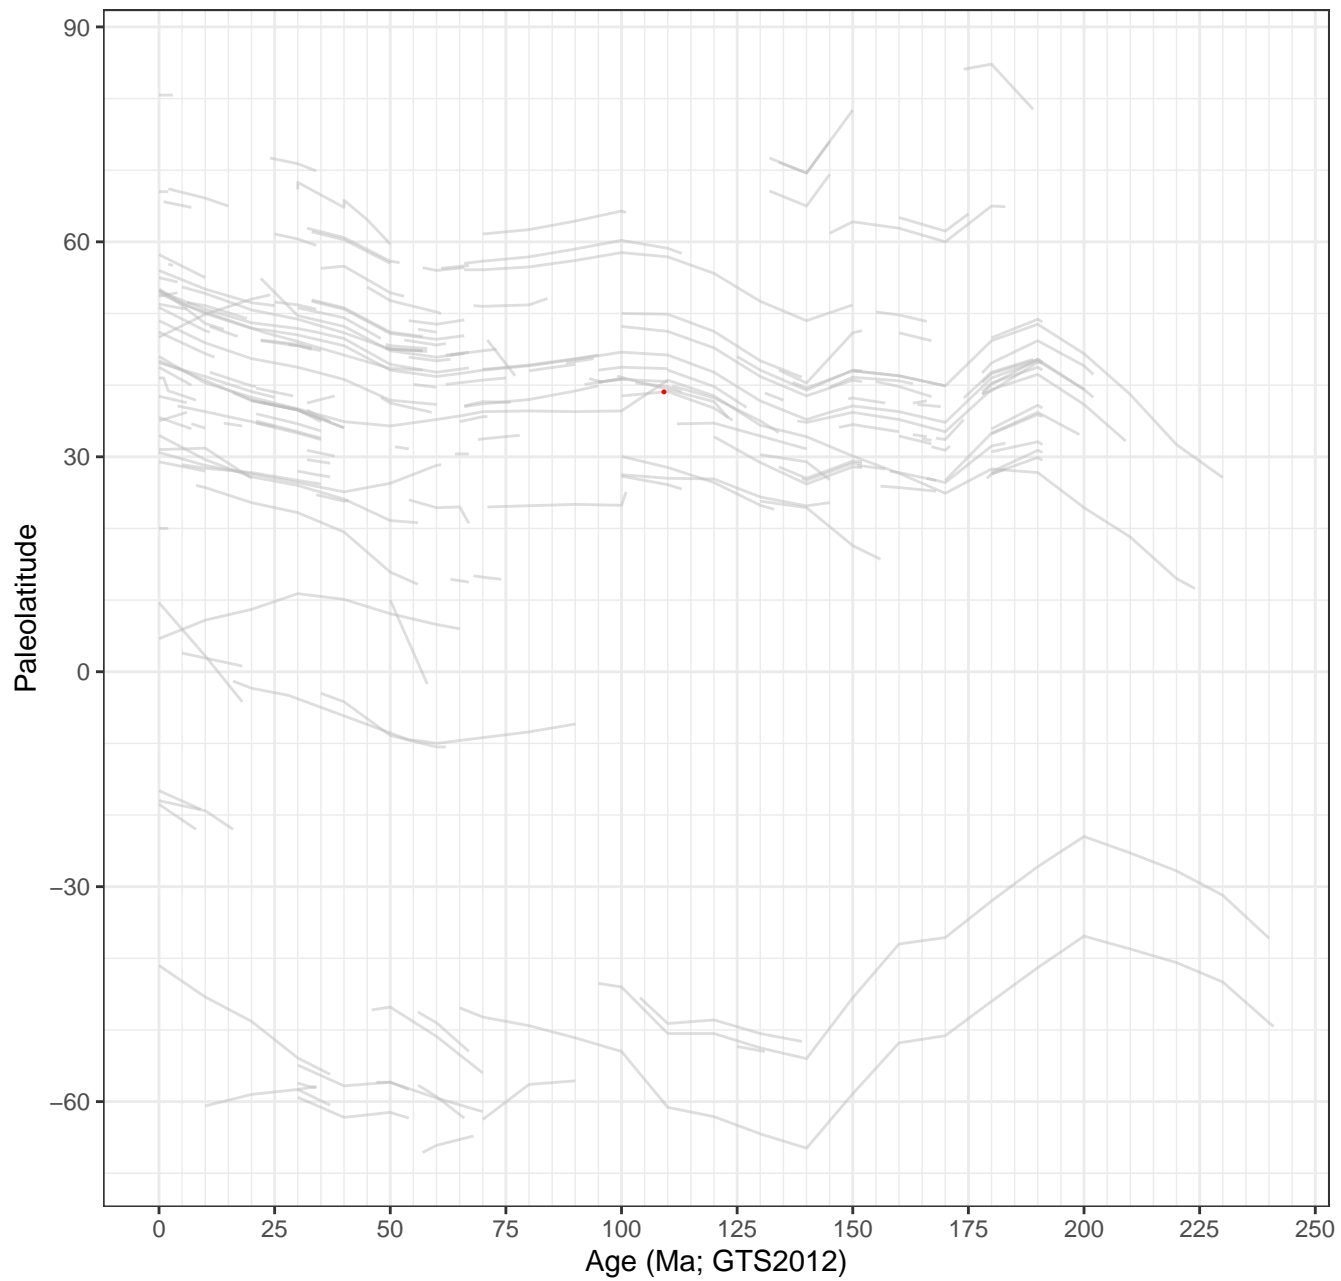

Supplement: Supplementary file 1068 [file Circulodinium distinctum brevispinatum.pdf › Supplement/Supplement 2/Species 1914 plots/Circulodinium distinctum brevispinatum.pdf]

# Species *Circulodinium distinctum longispinatum*

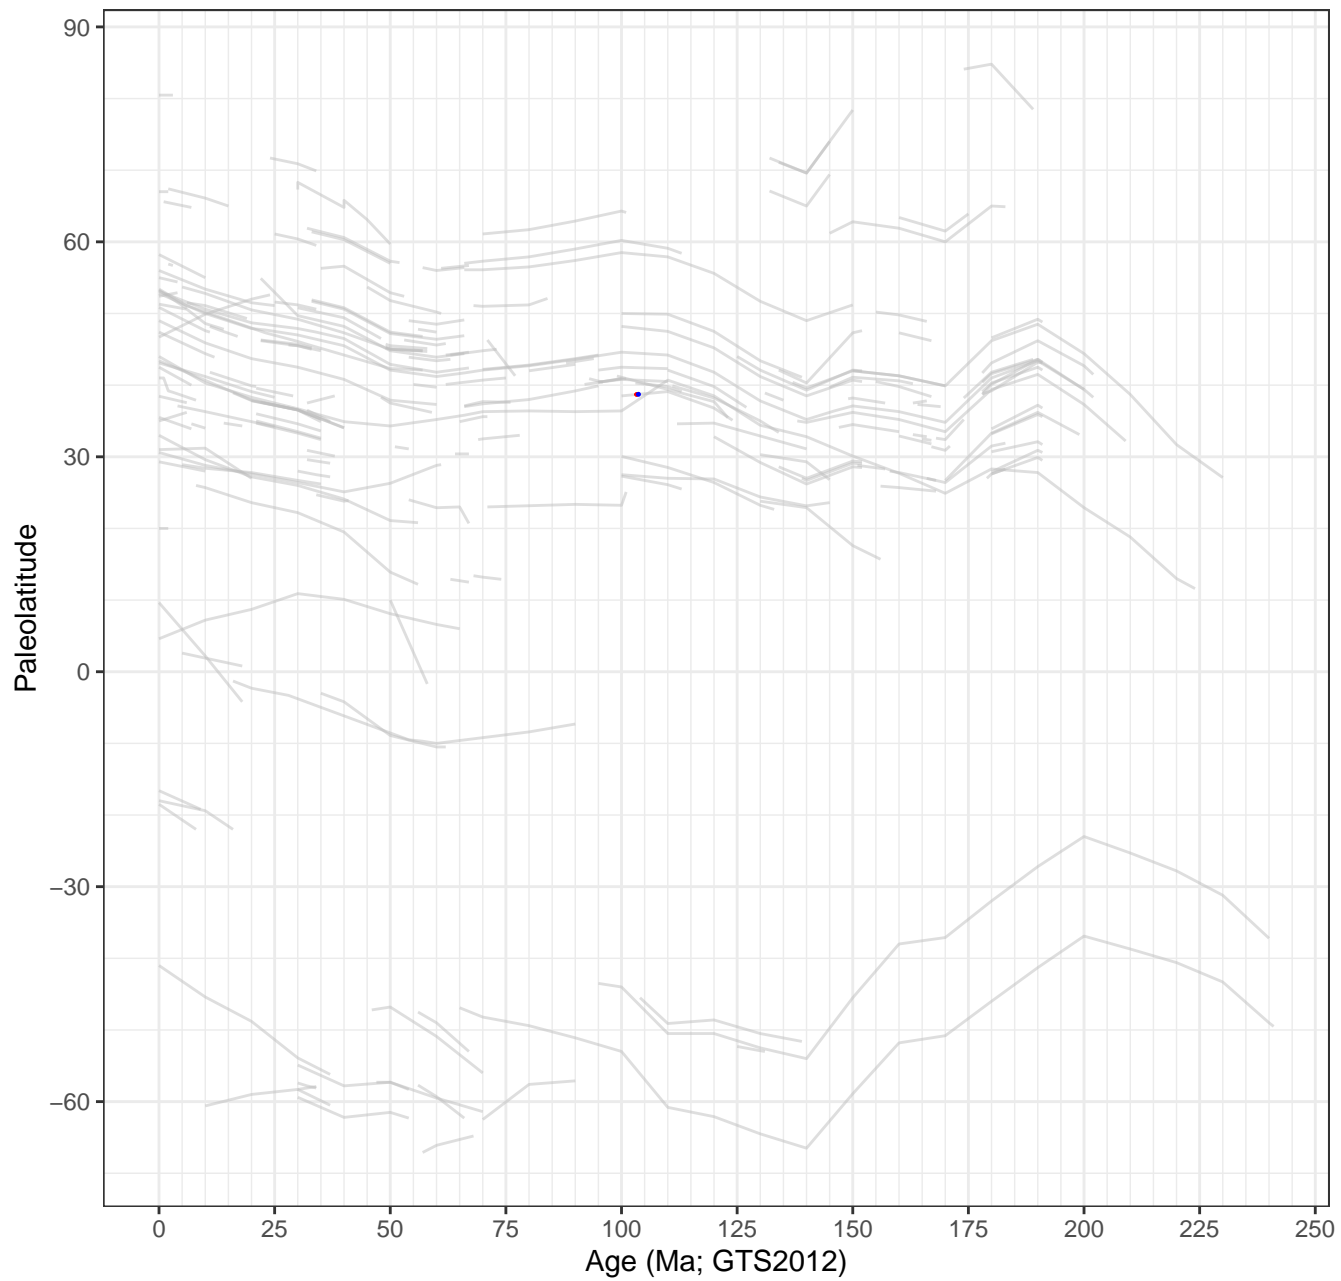

Supplement: Supplementary file 1069 [file Circulodinium distinctum longispinatum.pdf › Supplement/Supplement 2/Species 1914 plots/Circulodinium distinctum longispinatum.pdf]

# Species *Circulodinium distinctum*

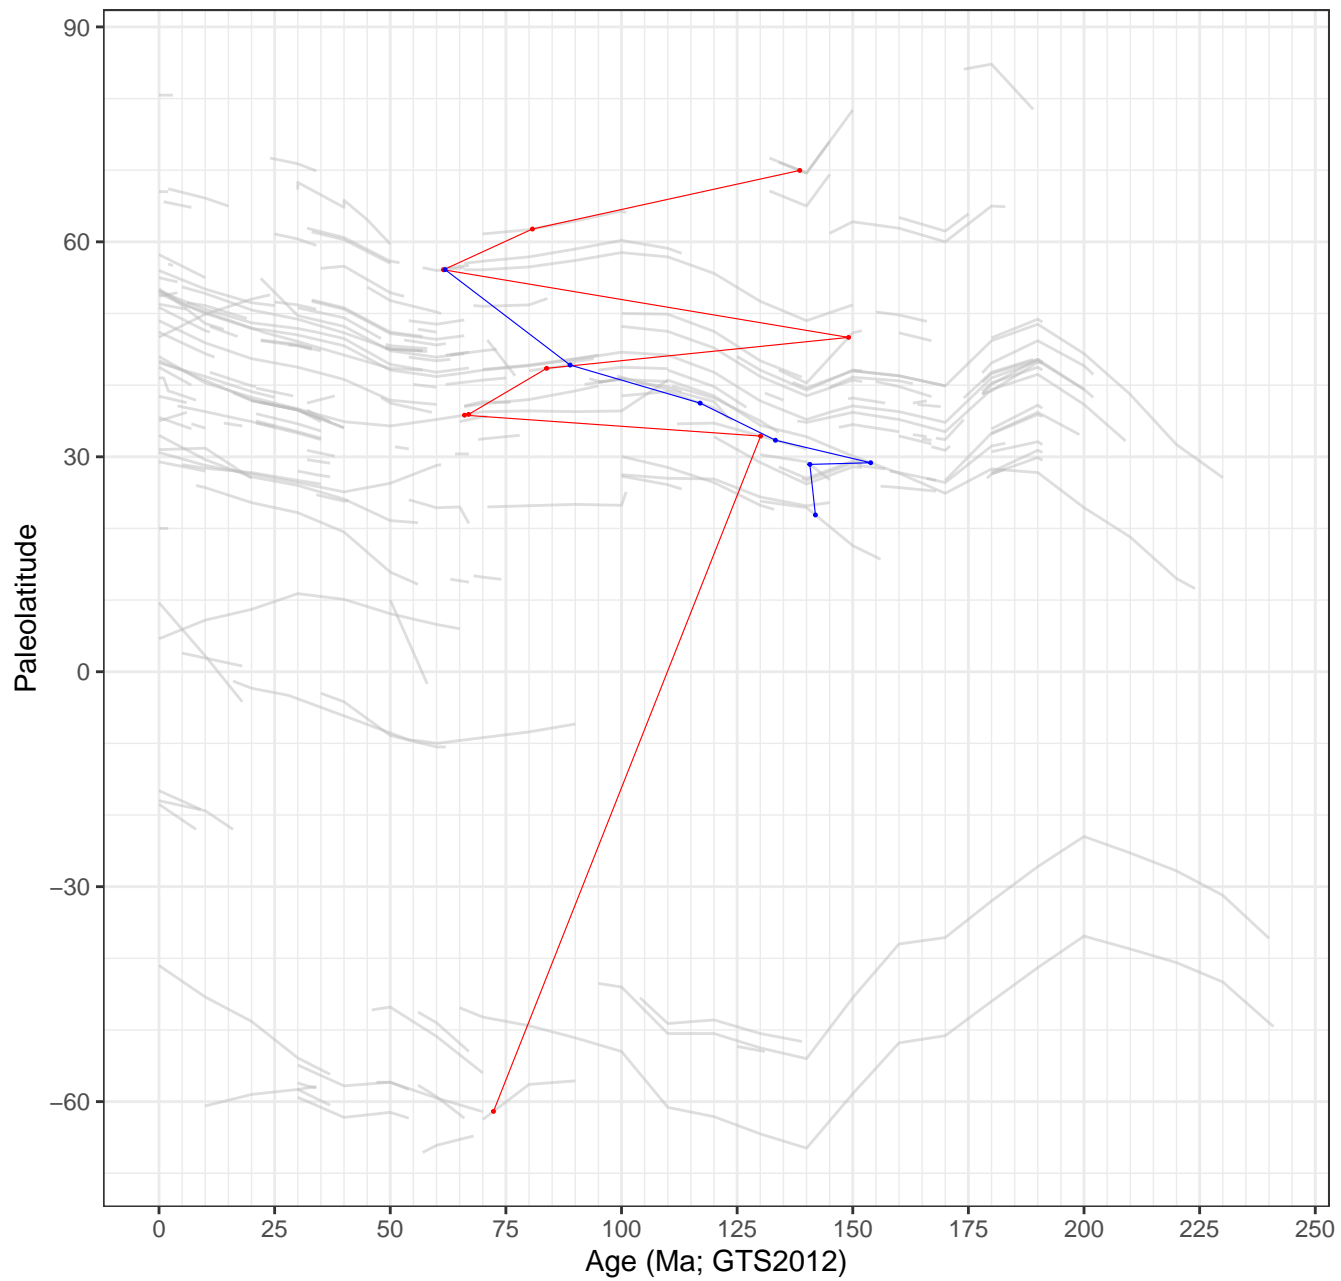

Supplement: Supplementary file 1070 [file Circulodinium distinctum.pdf › Supplement/Supplement 2/Species 1914 plots/Circulodinium distinctum.pdf]

# Species *Circulodinium hirtellum*

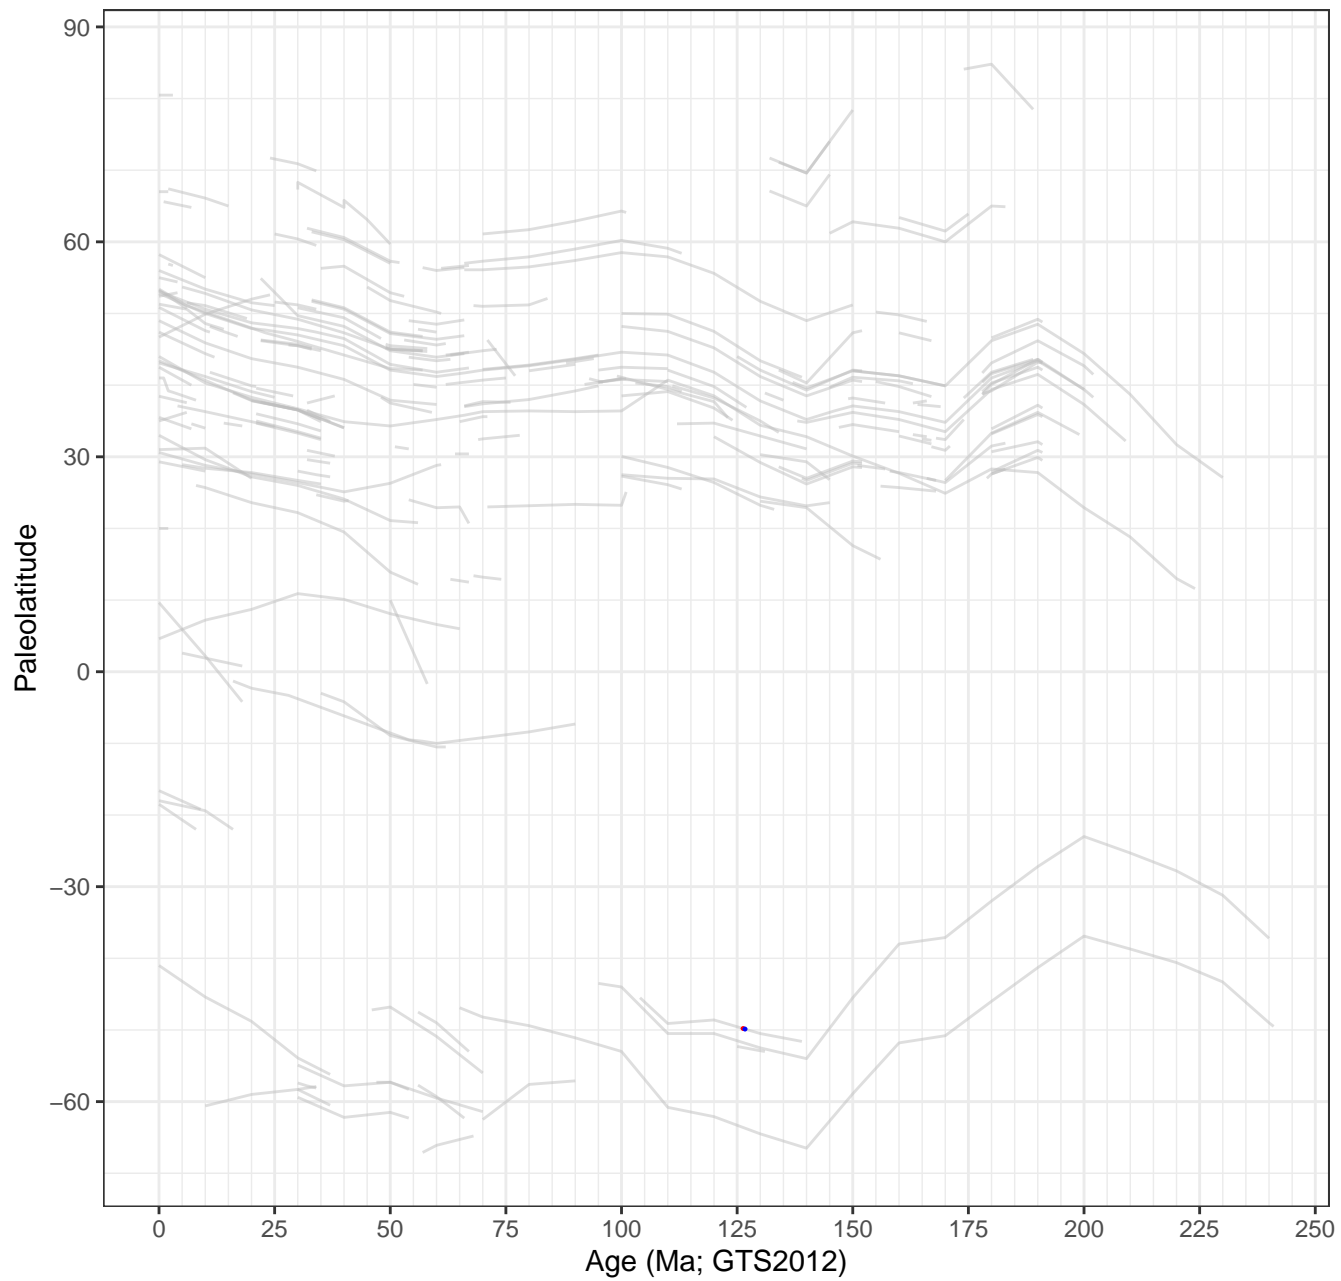

Supplement: Supplementary file 1071 [file Circulodinium hirtellum.pdf › Supplement/Supplement 2/Species 1914 plots/Circulodinium hirtellum.pdf]

# Species *Circulodinium kukebaiense*

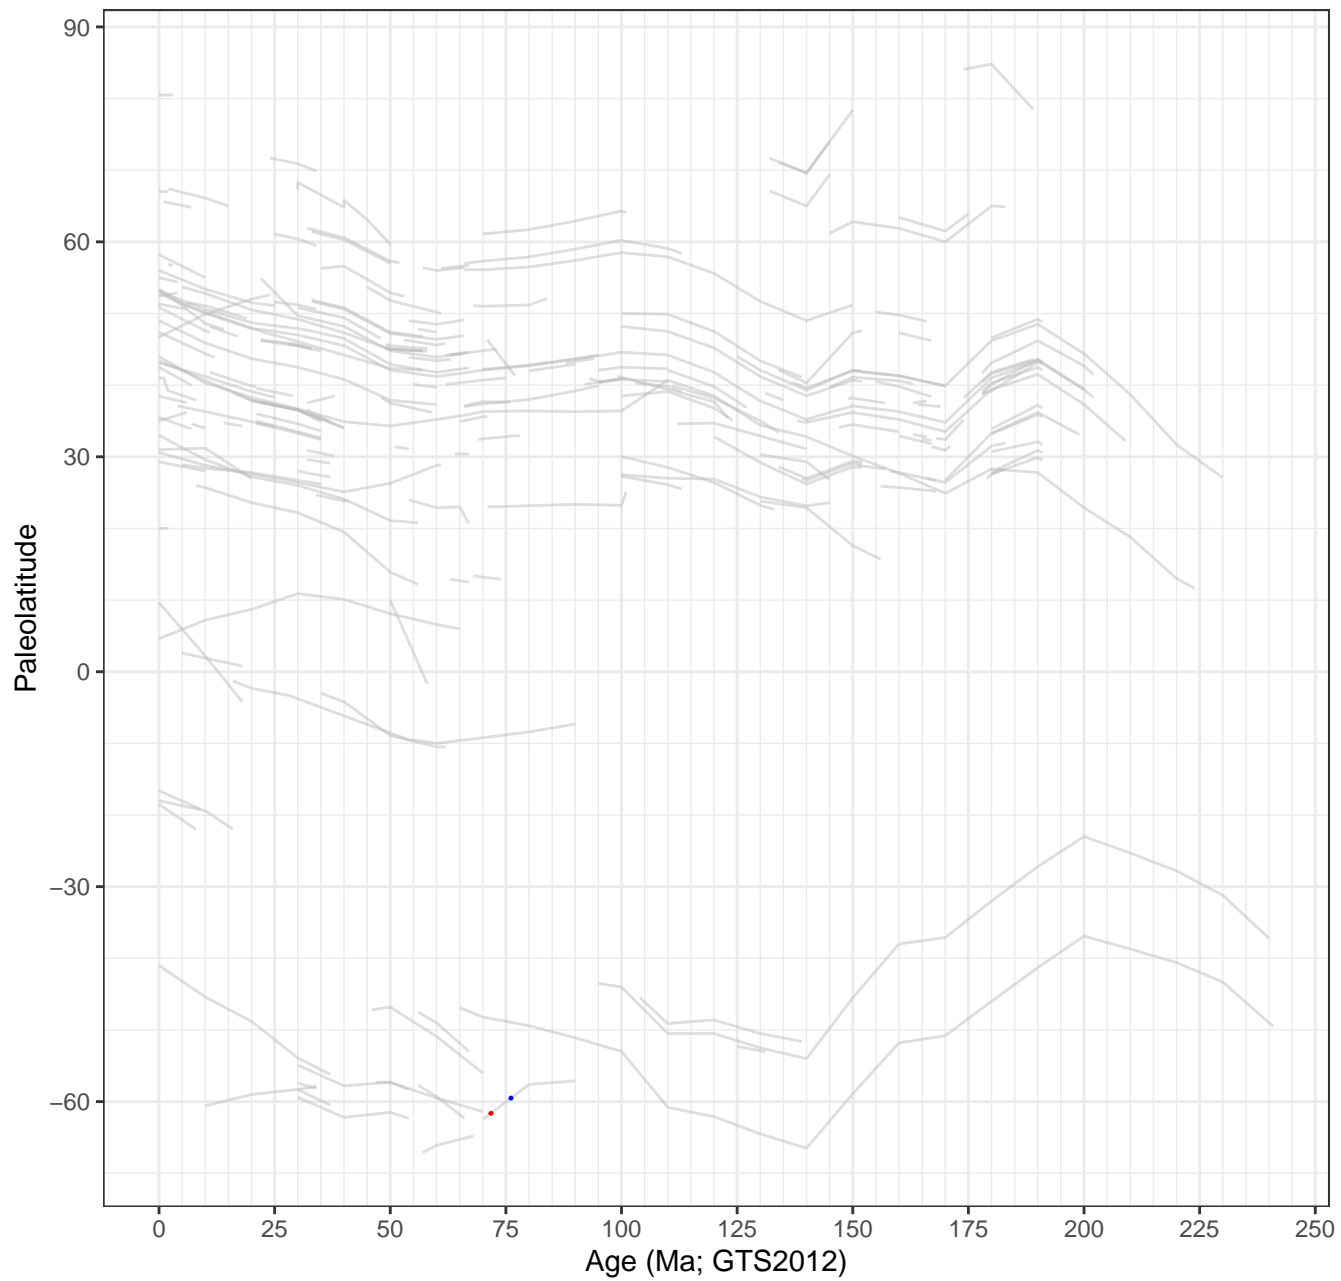

Supplement: Supplementary file 1072 [file Circulodinium kukebaiense.pdf › Supplement/Supplement 2/Species 1914 plots/Circulodinium kukebaiense.pdf]

# Species *Circulodinium latoaculeum*

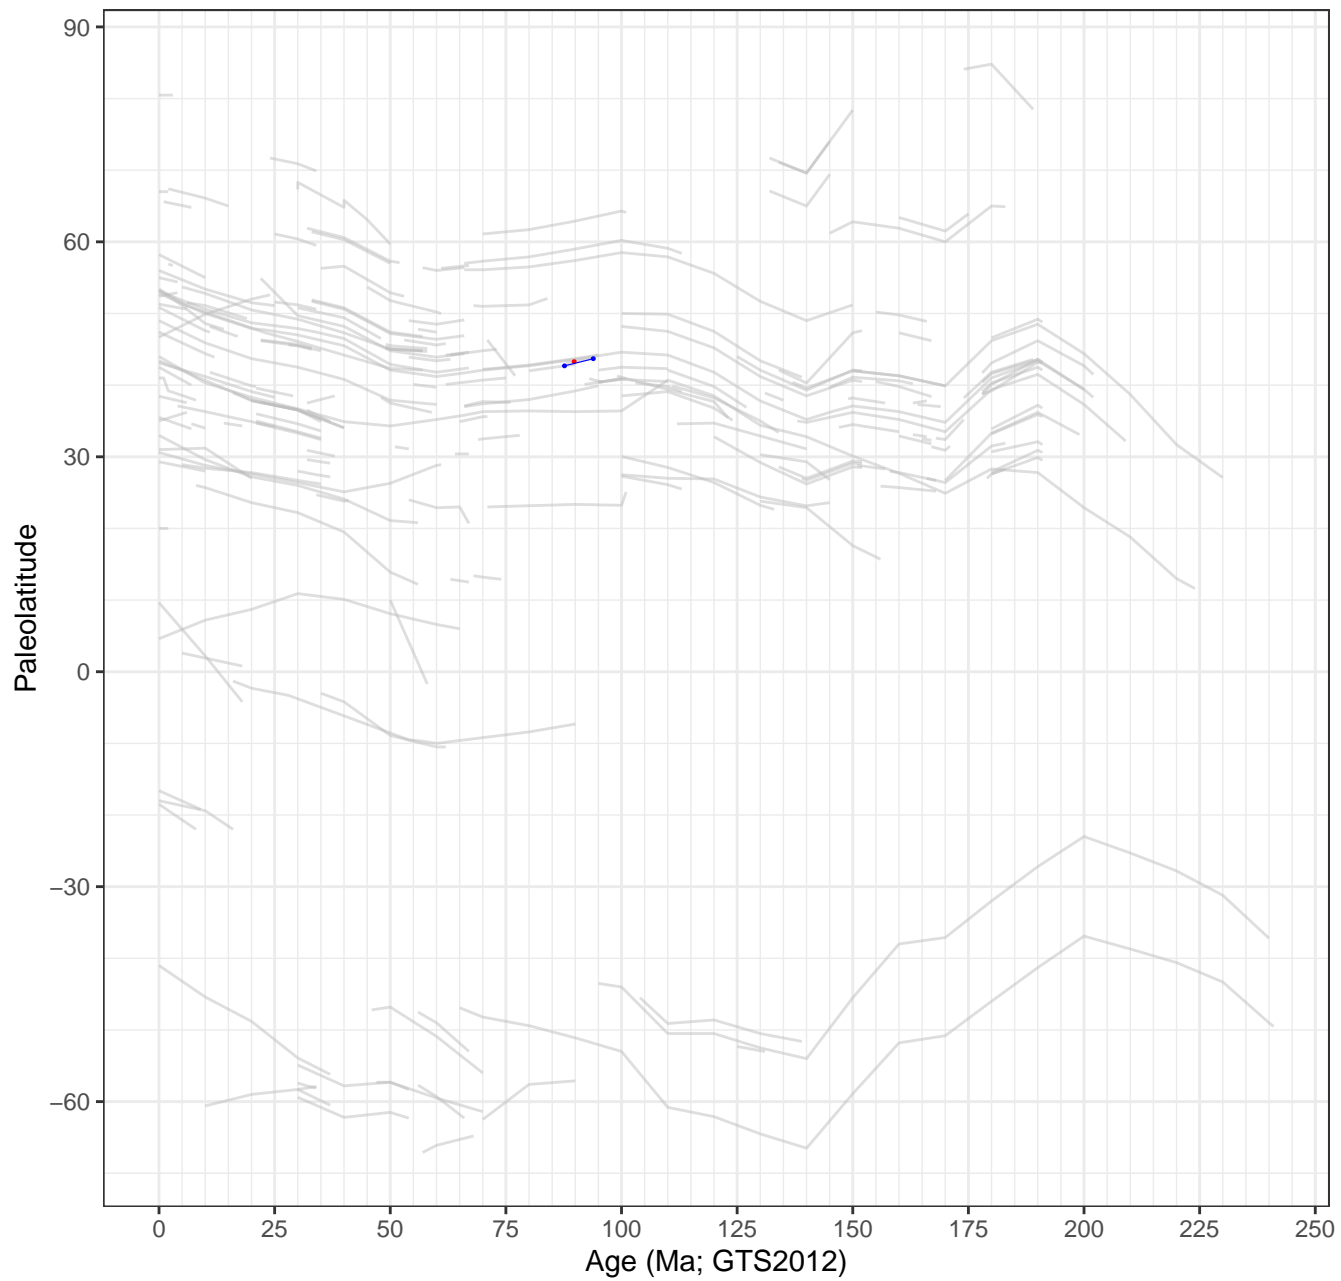

Supplement: Supplementary file 1073 [file Circulodinium latoaculeum.pdf › Supplement/Supplement 2/Species 1914 plots/Circulodinium latoaculeum.pdf]

# Species *Circulodinium vermiculatum*

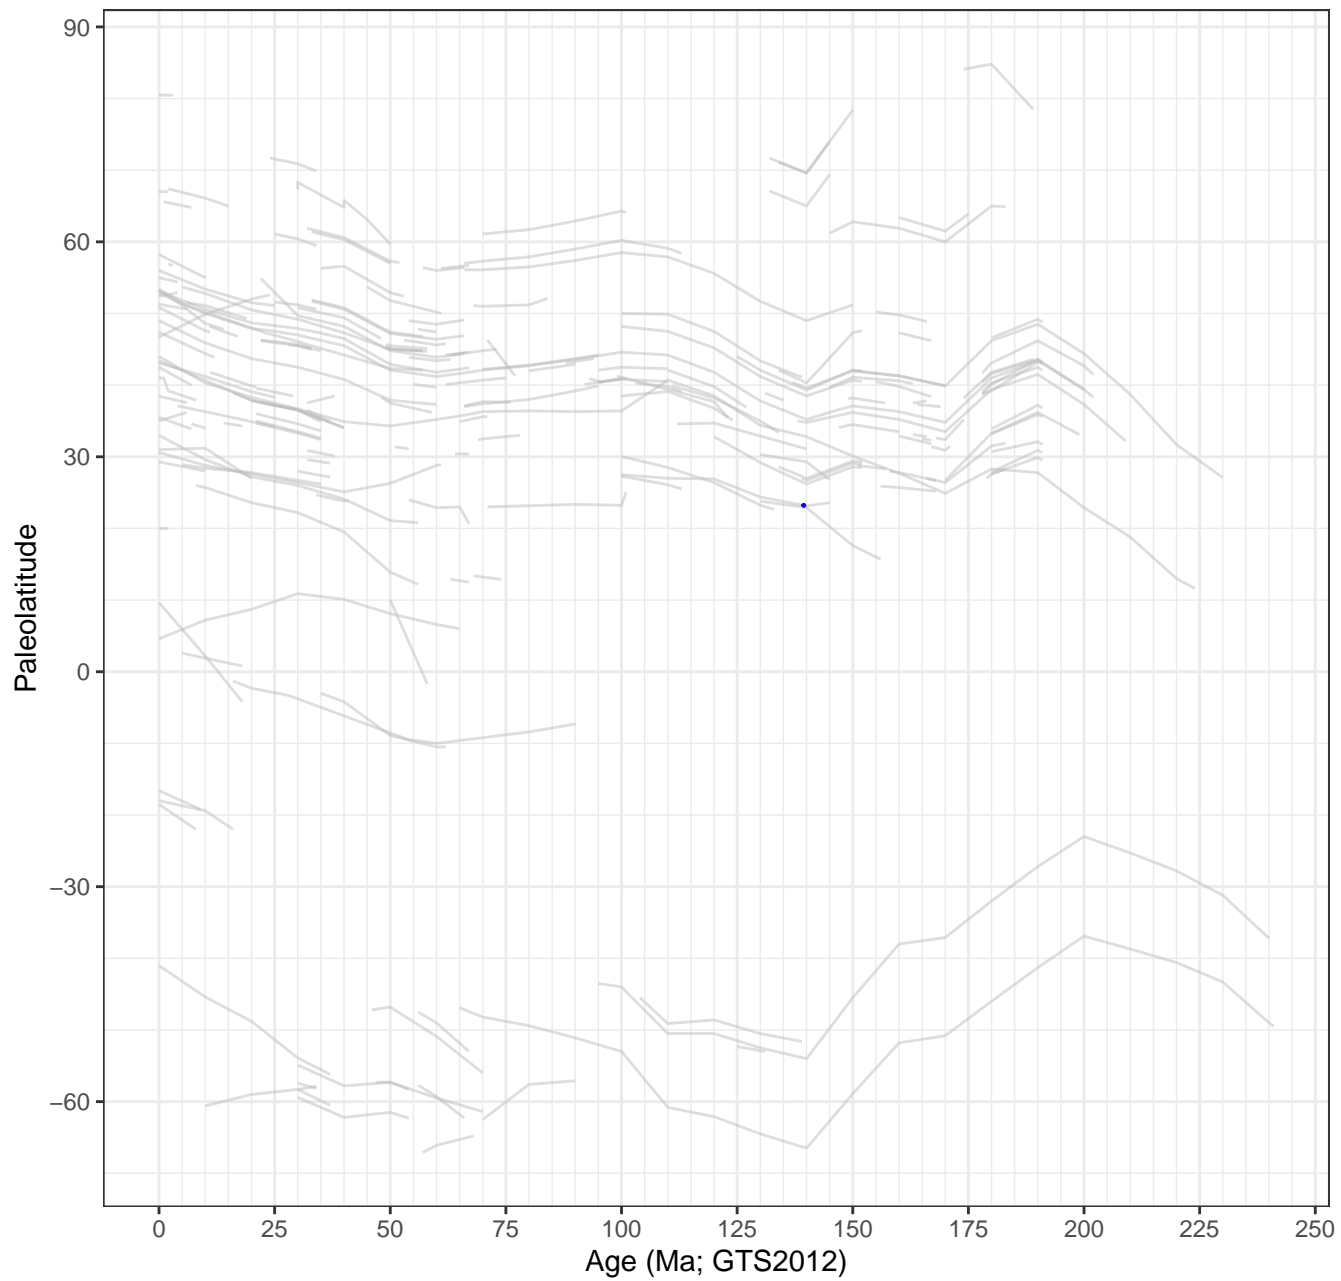

Supplement: Supplementary file 1074 [file Circulodinium vermiculatum.pdf › Supplement/Supplement 2/Species 1914 plots/Circulodinium vermiculatum.pdf]

# Species *Cirrusphaera dissimilis*

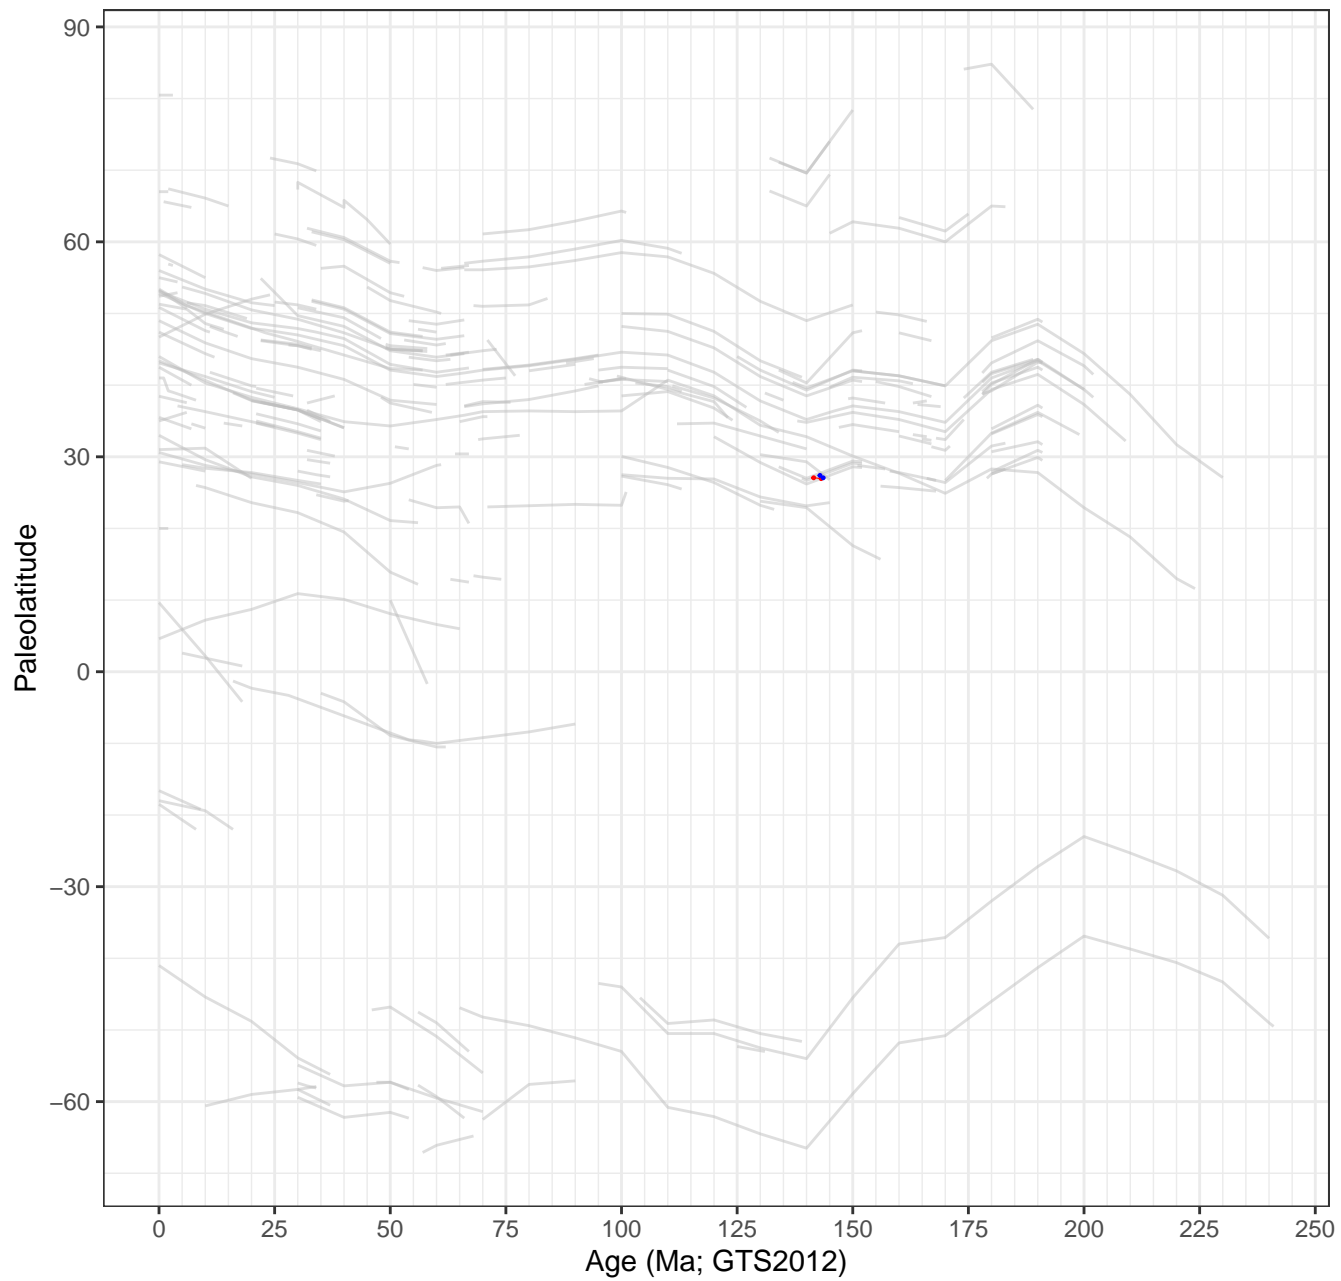

Supplement: Supplementary file 1075 [file Cirrusphaera dissimilis.pdf › Supplement/Supplement 2/Species 1914 plots/Cirrusphaera dissimilis.pdf]

# Species *Cladopyxidium saeptum*

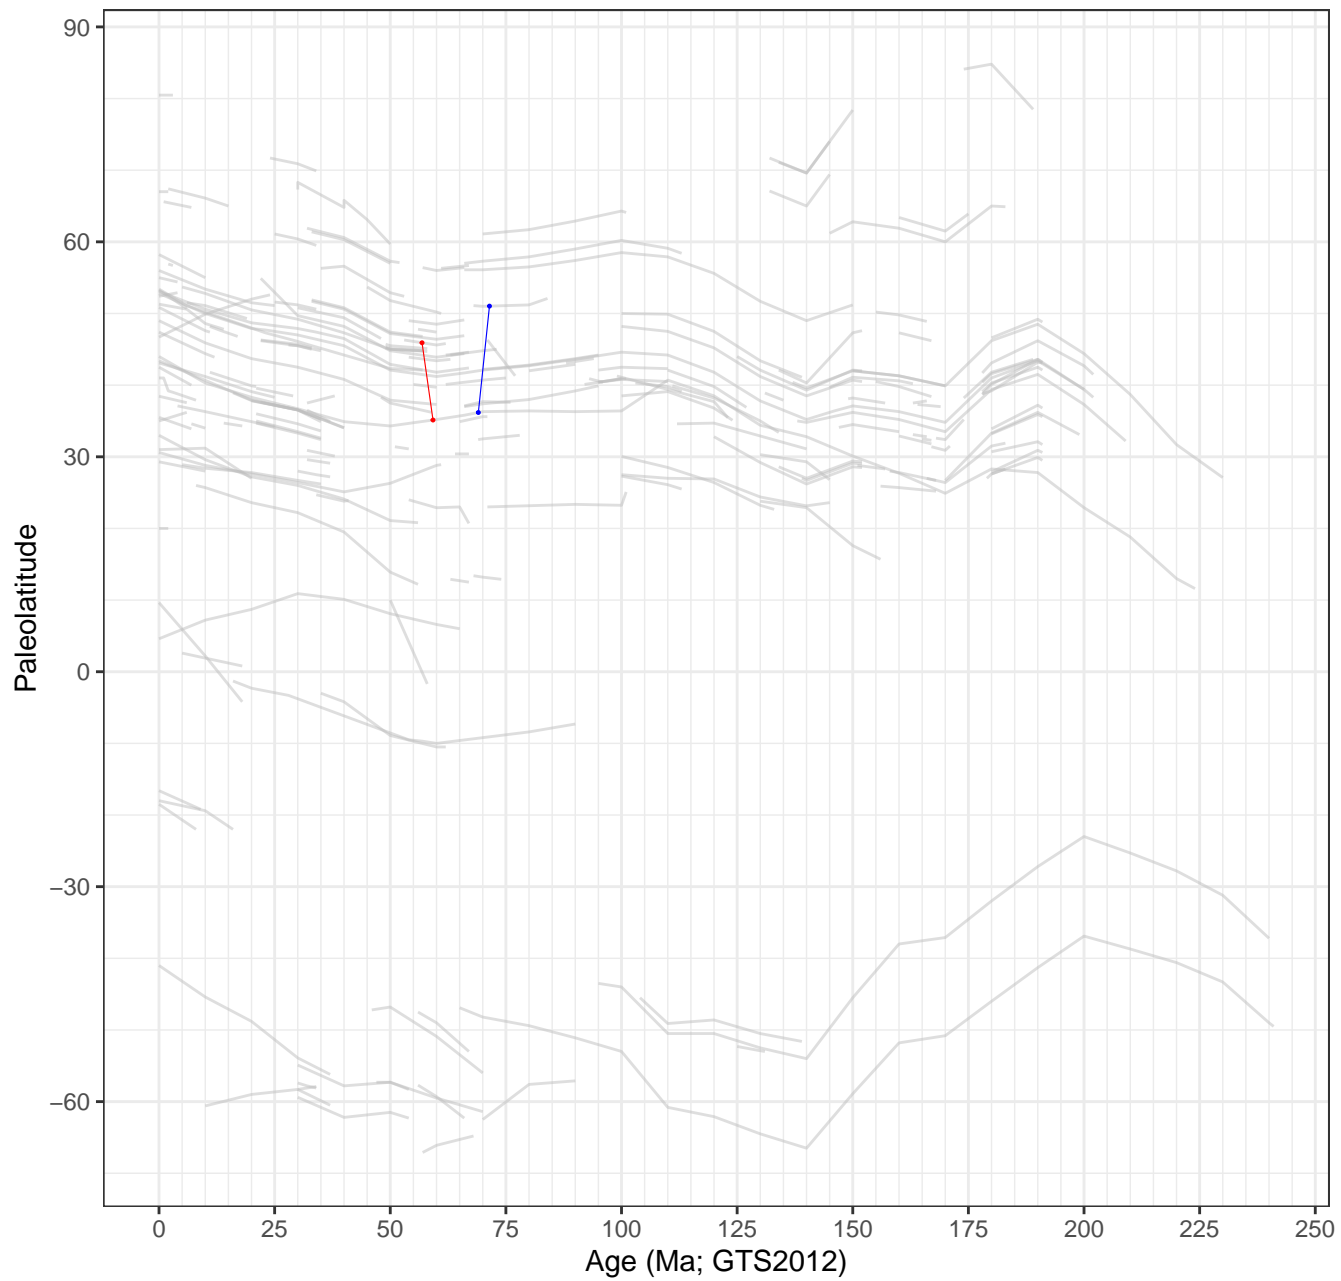

Supplement: Supplementary file 1076 [file Cladopyxidium saeptum.pdf › Supplement/Supplement 2/Species 1914 plots/Cladopyxidium saeptum.pdf]

# Species *Cladopyxidium verrucosum*

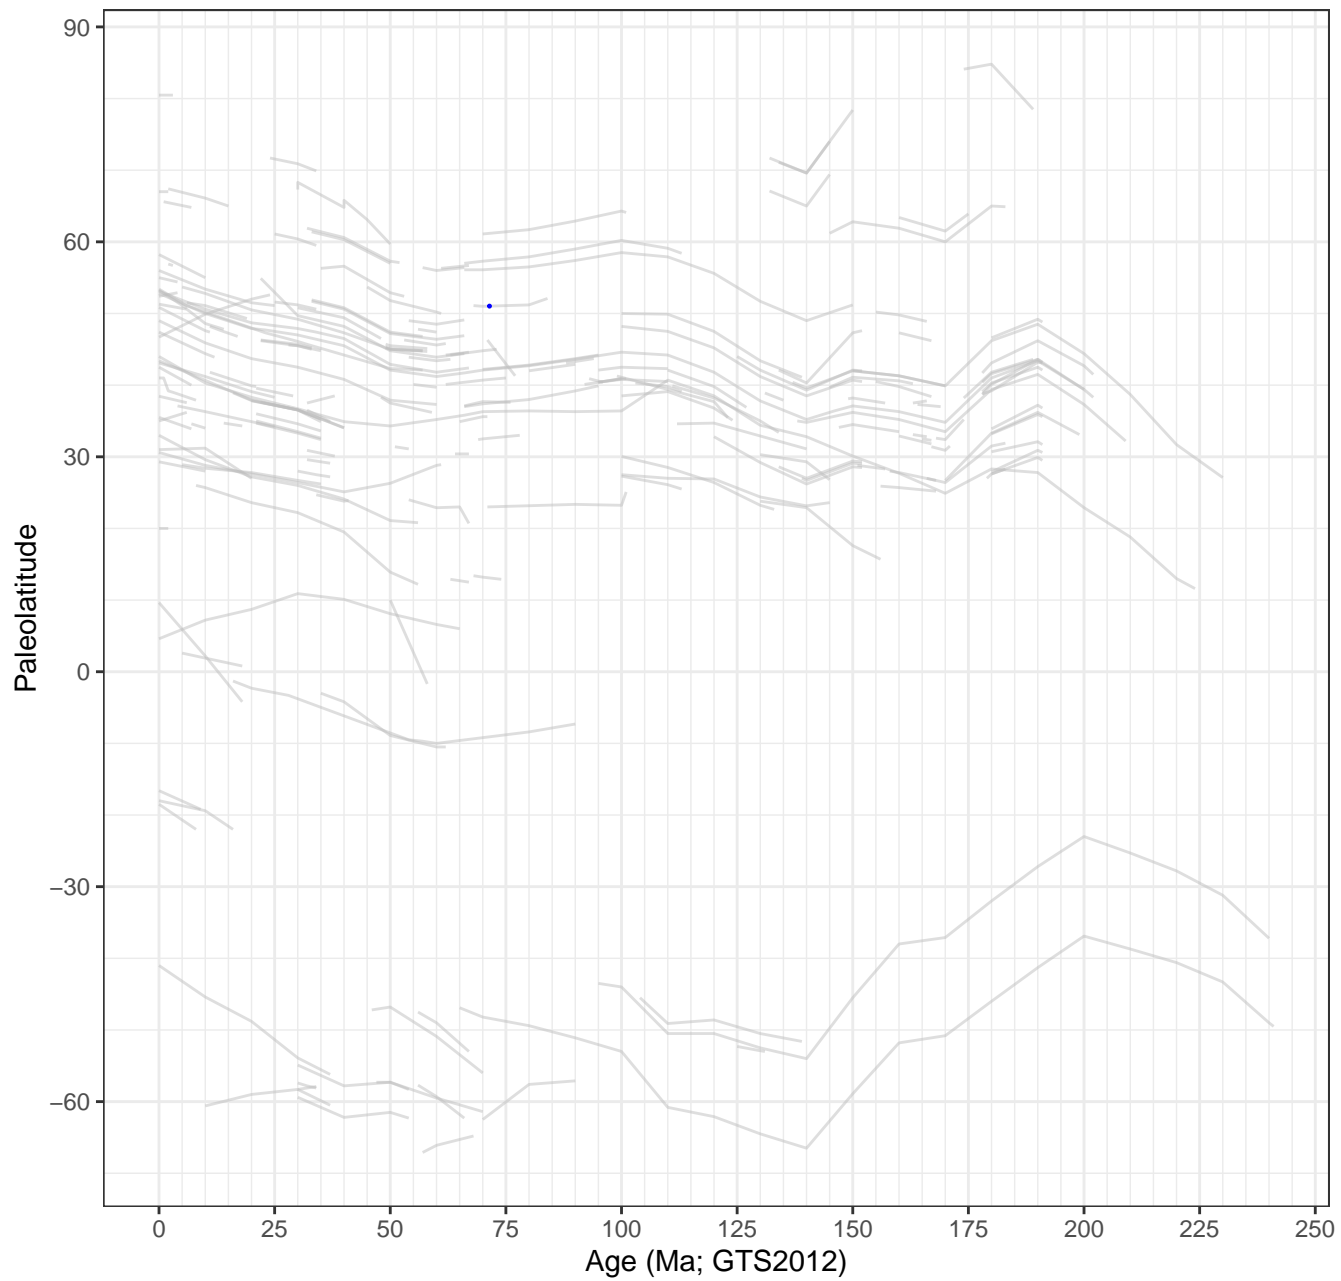

Supplement: Supplementary file 1077 [file Cladopyxidium verrucosum.pdf › Supplement/Supplement 2/Species 1914 plots/Cladopyxidium verrucosum.pdf]

# Species *Clathroctenocystis asaphes*

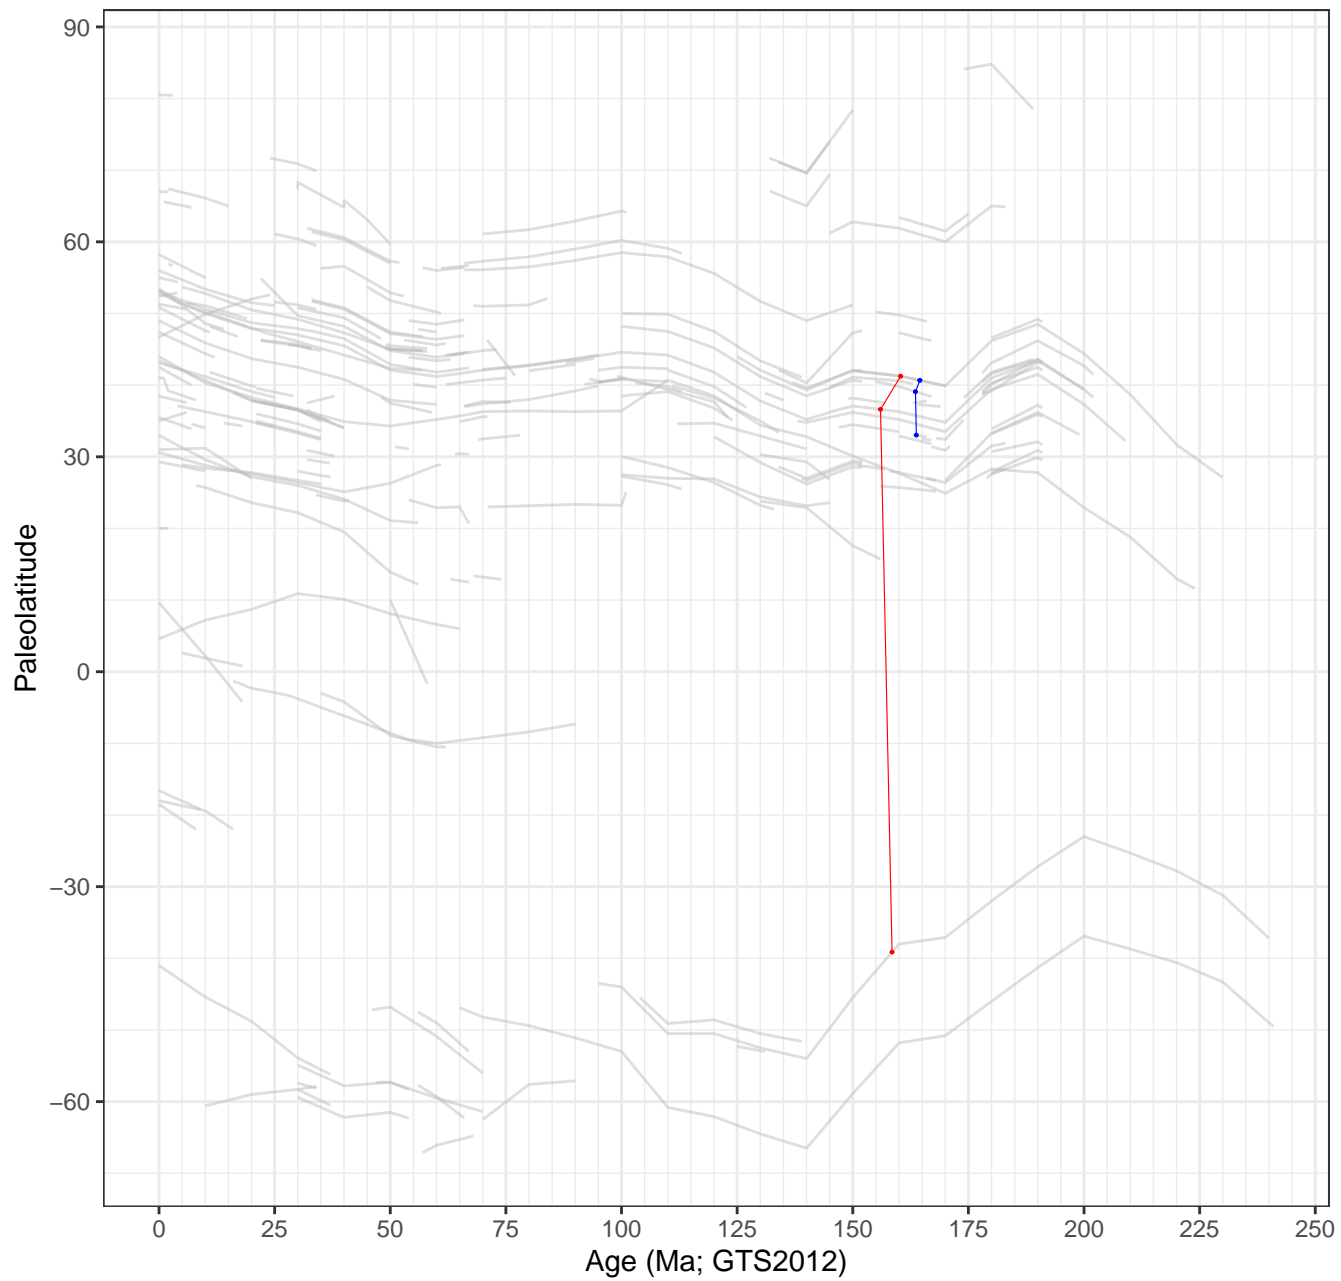

Supplement: Supplementary file 1078 [file Clathroctenocystis asaphes.pdf › Supplement/Supplement 2/Species 1914 plots/Clathroctenocystis asaphes.pdf]

# Species *Cleistosphaeridium ancyreum*

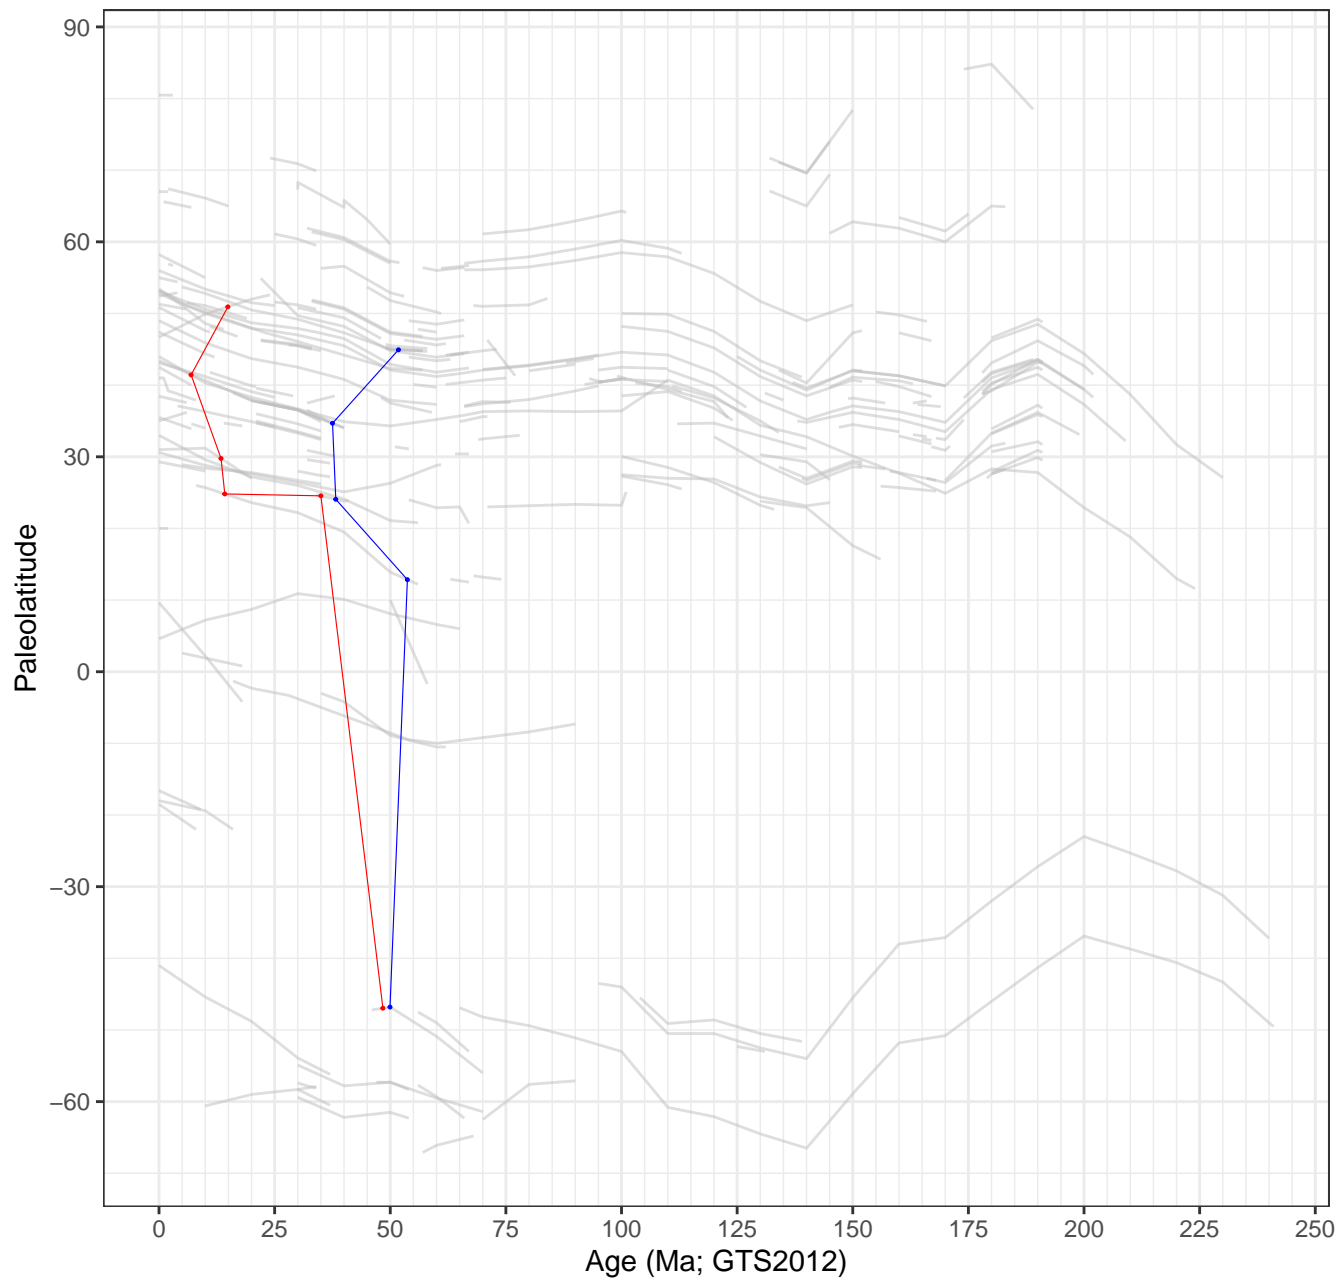

Supplement: Supplementary file 1079 [file Cleistosphaeridium ancyreum.pdf › Supplement/Supplement 2/Species 1914 plots/Cleistosphaeridium ancyreum.pdf]

# Species *Cleistosphaeridium diversispinosum*

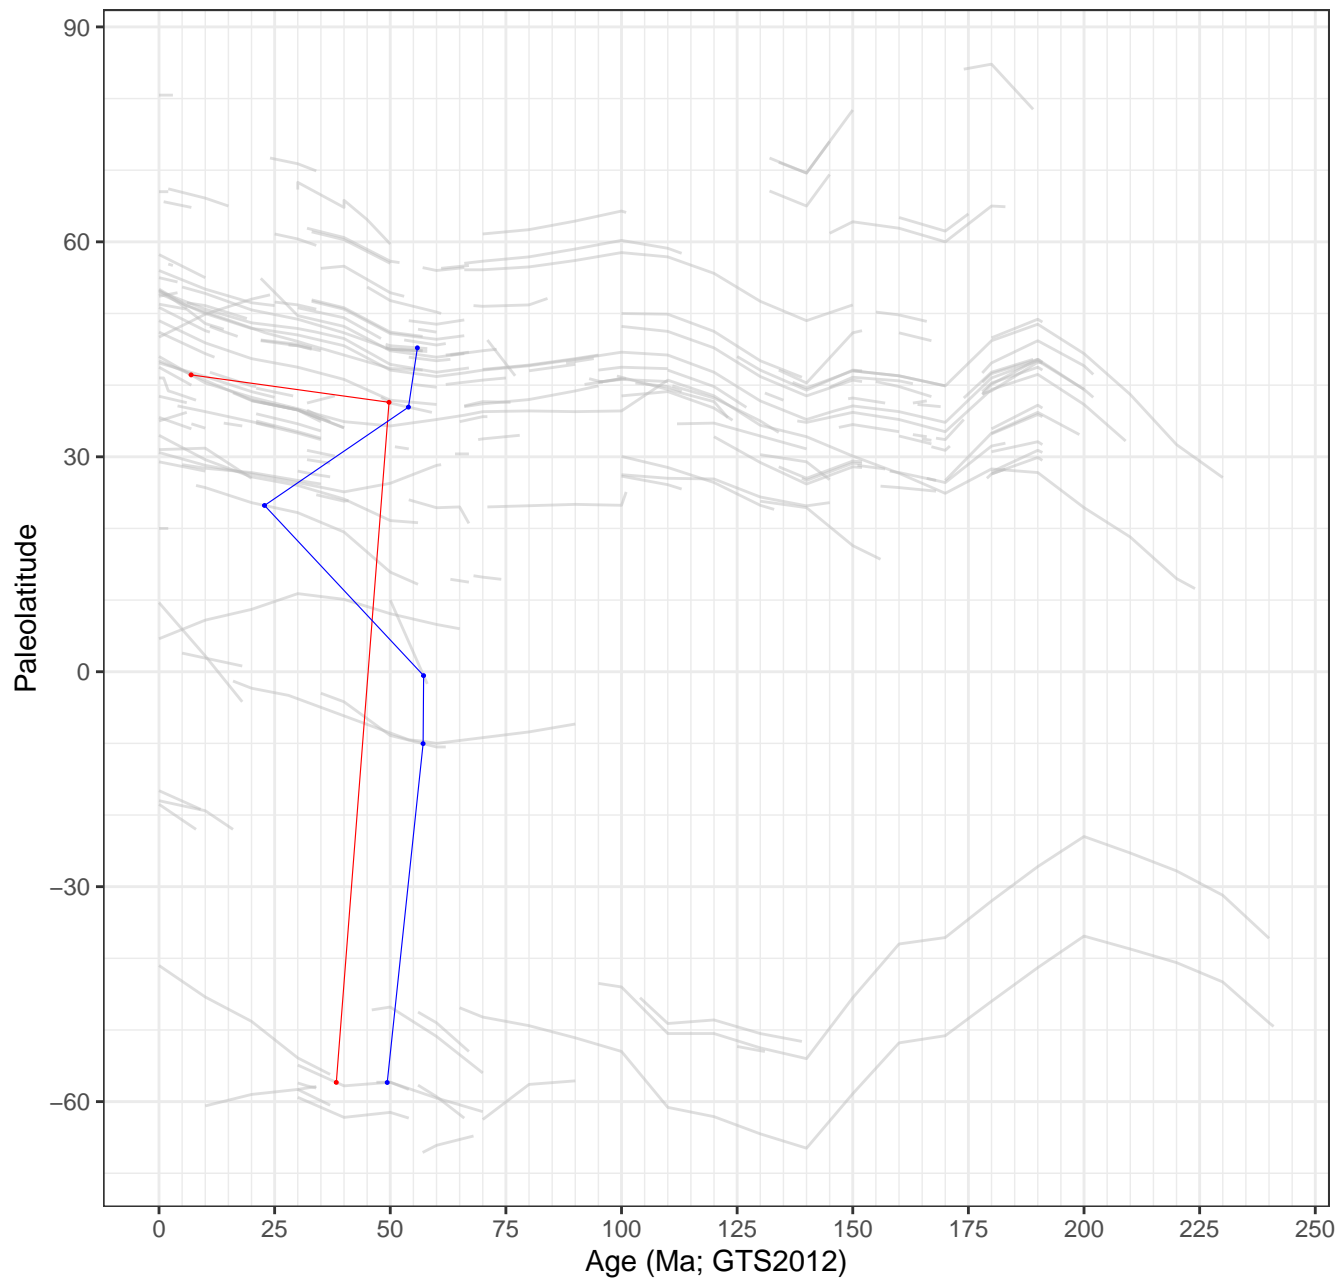

Supplement: Supplementary file 1080 [file Cleistosphaeridium diversispinosum.pdf › Supplement/Supplement 2/Species 1914 plots/Cleistosphaeridium diversispinosum.pdf]

# Species *Cleistosphaeridium insolitum*

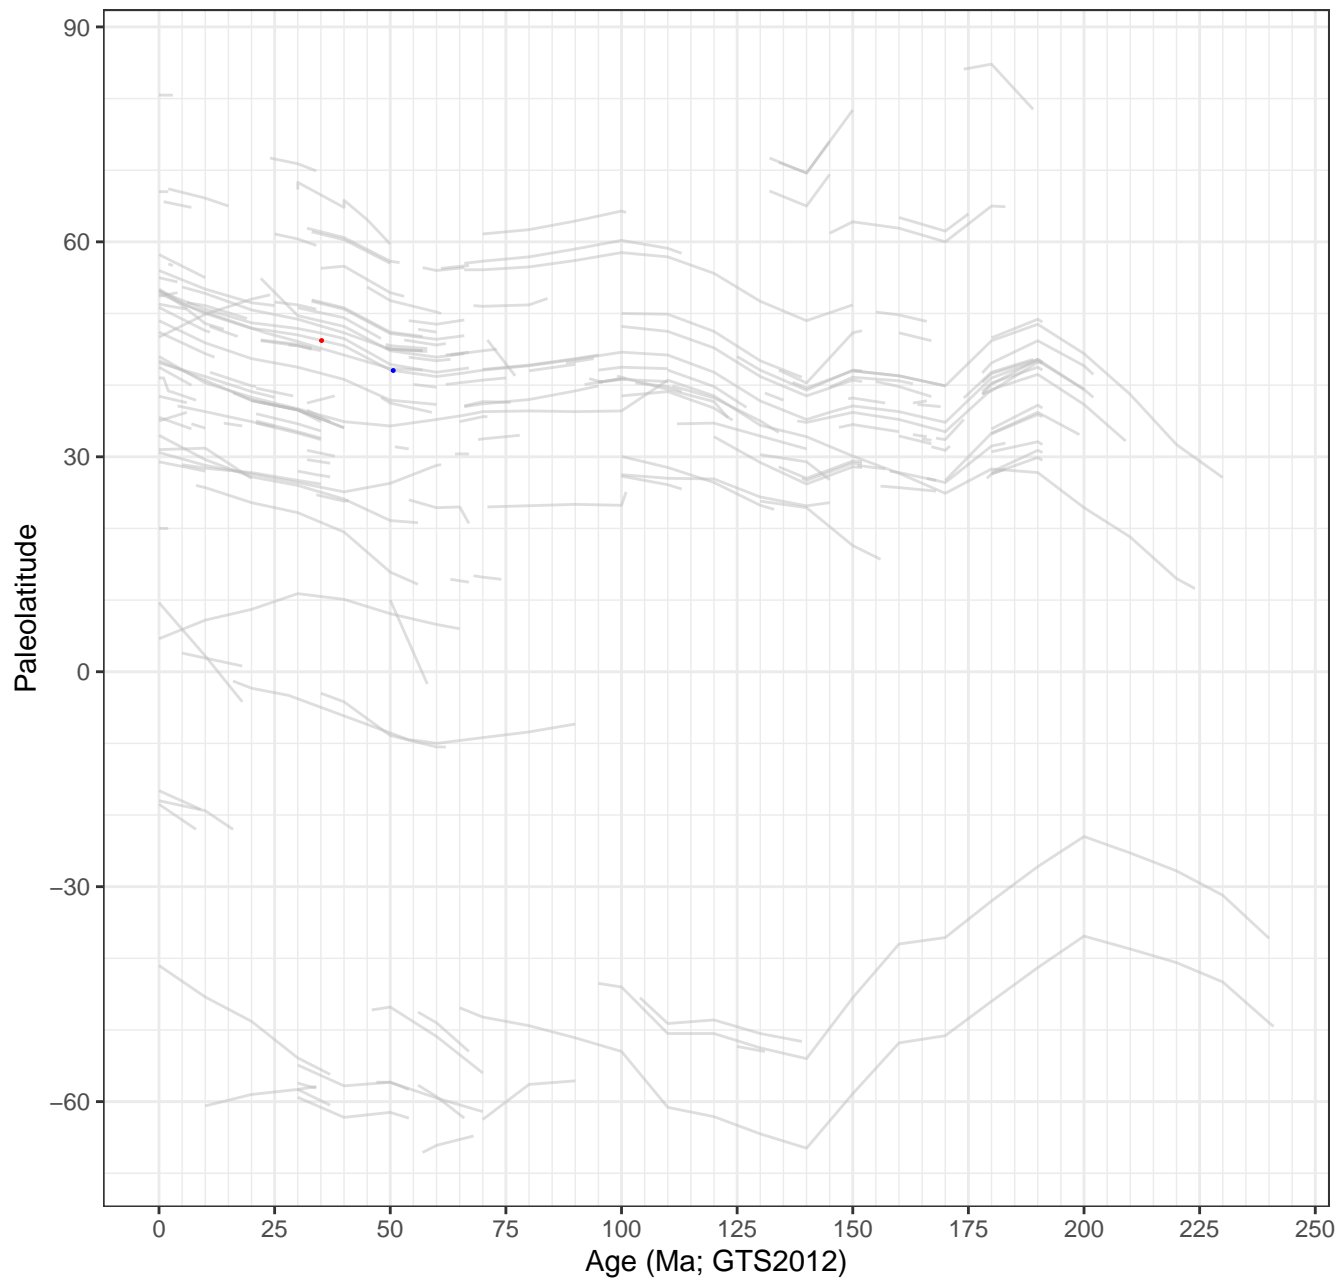

Supplement: Supplementary file 1081 [file Cleistosphaeridium insolitum.pdf › Supplement/Supplement 2/Species 1914 plots/Cleistosphaeridium insolitum.pdf]

# Species *Cleistosphaeridium placacanthum*

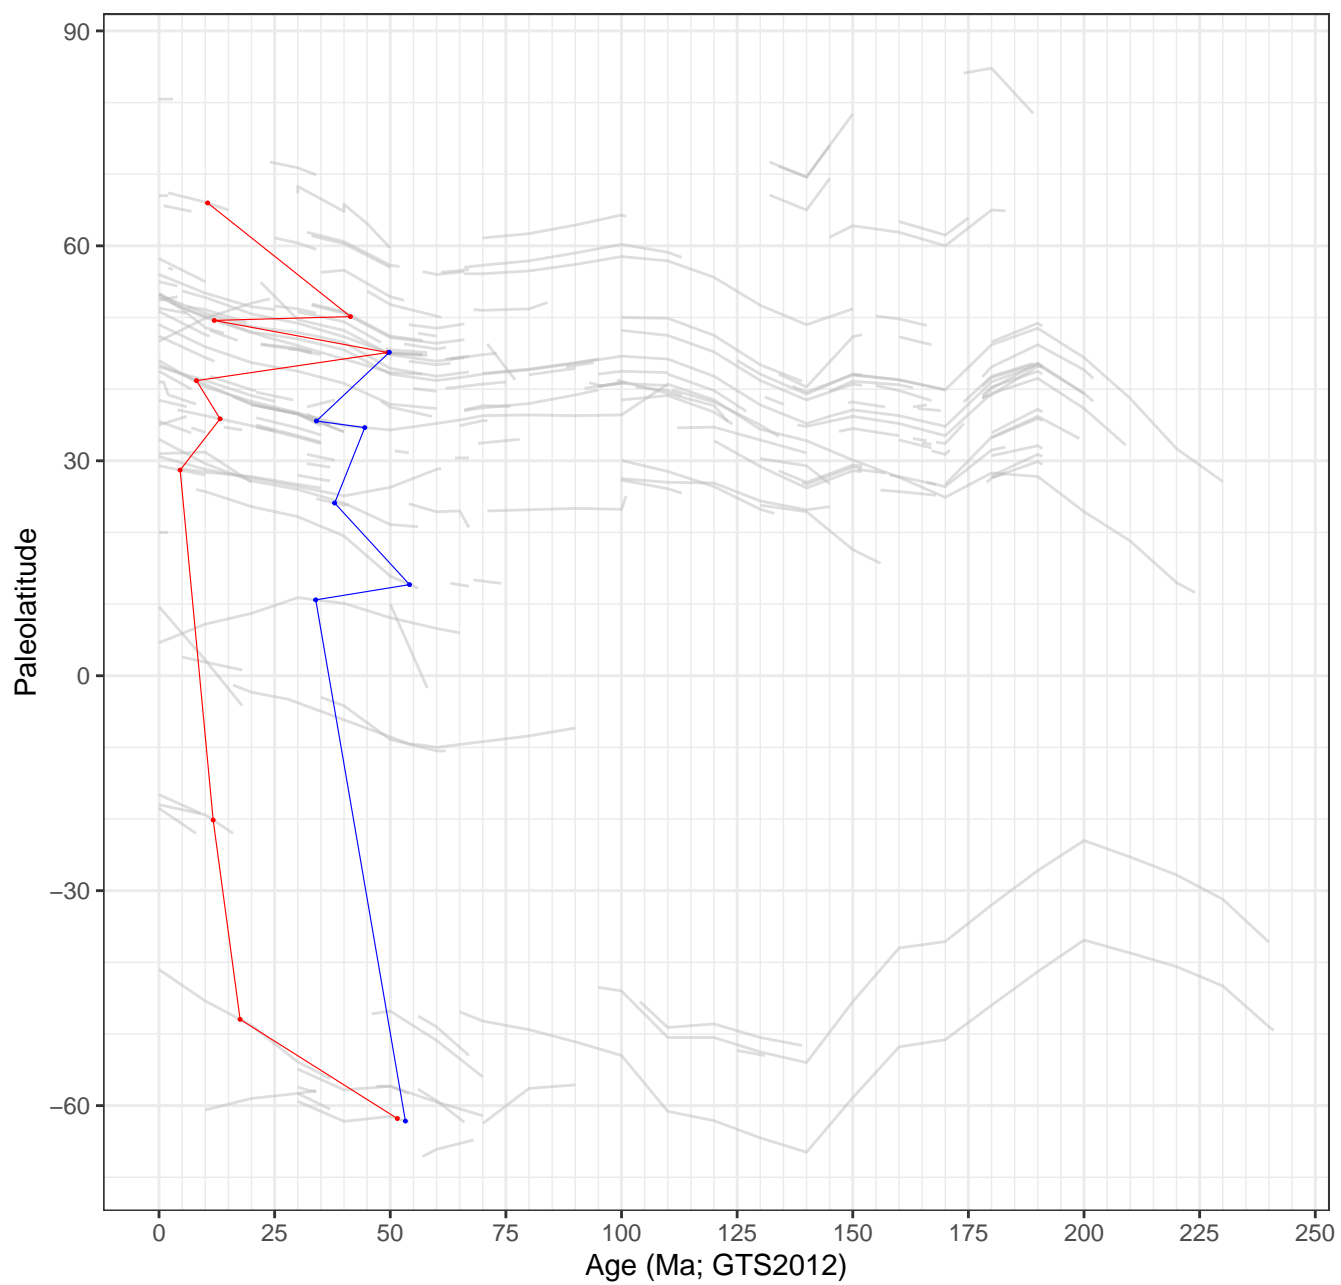

Supplement: Supplementary file 1082 [file Cleistosphaeridium placacanthum.pdf › Supplement/Supplement 2/Species 1914 plots/Cleistosphaeridium placacanthum.pdf]

# Species *Cleistosphaeridium polypetellum*

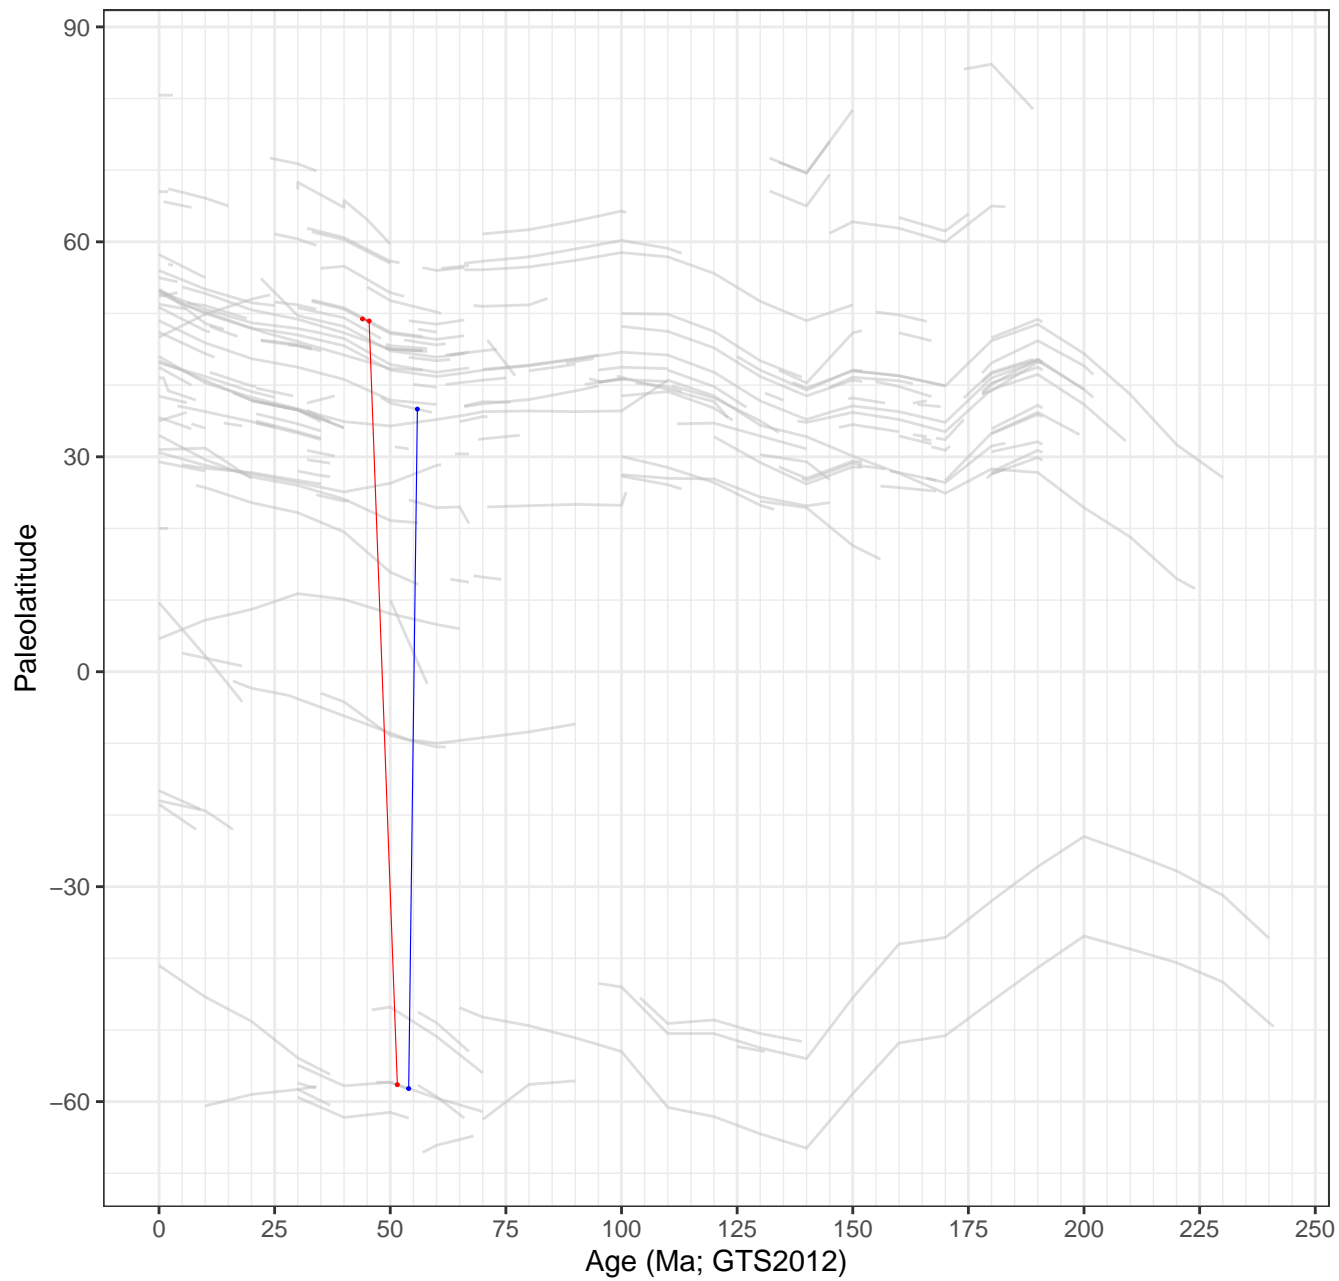

Supplement: Supplementary file 1083 [file Cleistosphaeridium polypetellum.pdf › Supplement/Supplement 2/Species 1914 plots/Cleistosphaeridium polypetellum.pdf]

# Species *Cleistosphaeridium polytrichum*

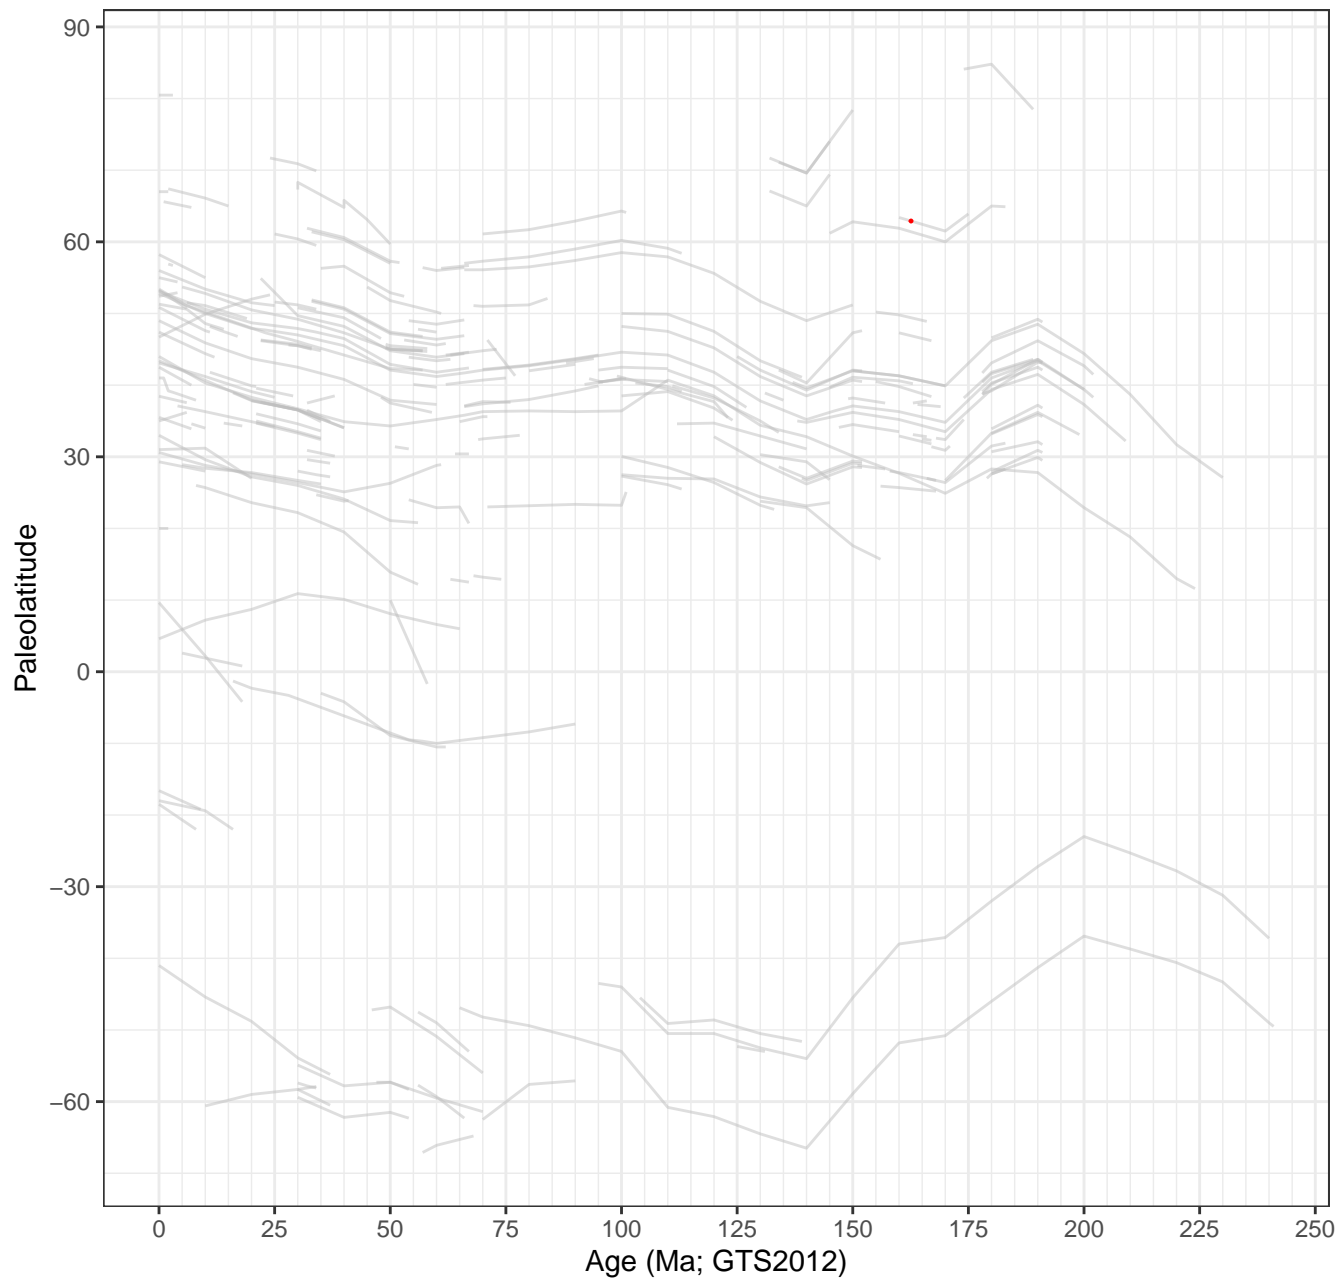

Supplement: Supplementary file 1084 [file Cleistosphaeridium polytrichum.pdf › Supplement/Supplement 2/Species 1914 plots/Cleistosphaeridium polytrichum.pdf]

# Species *Cleistosphaeridium varispinosum*

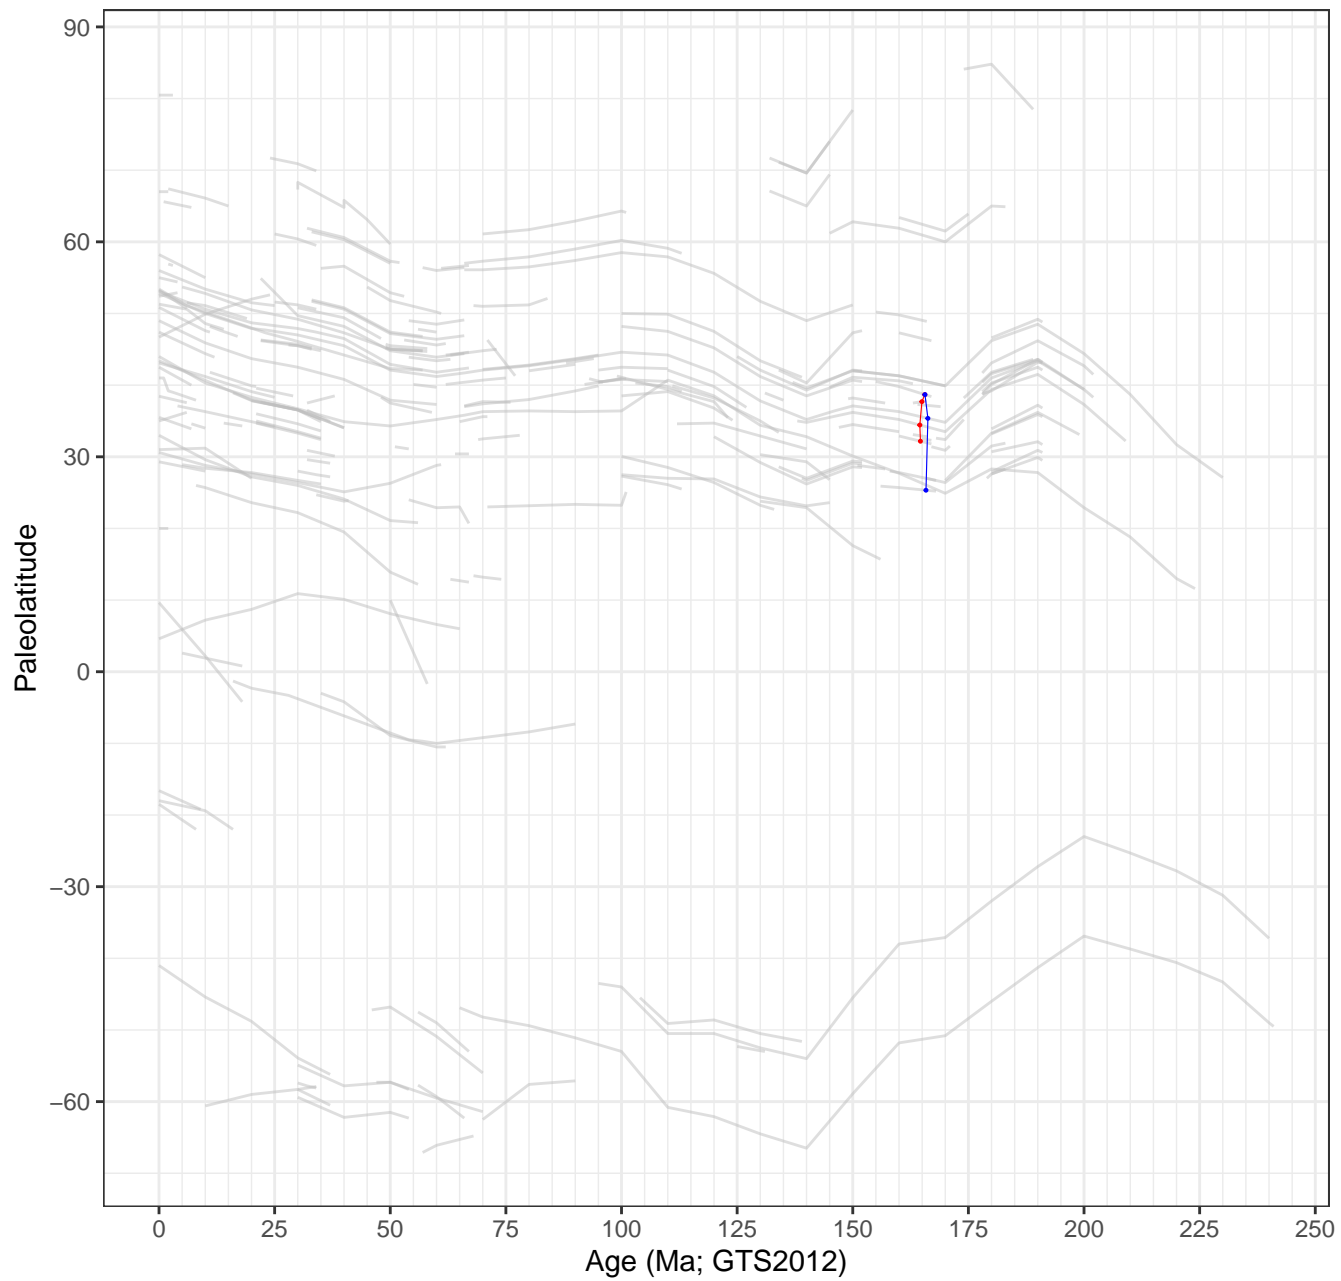

Supplement: Supplementary file 1085 [file Cleistosphaeridium varispinosum.pdf › Supplement/Supplement 2/Species 1914 plots/Cleistosphaeridium varispinosum.pdf]

# Species *Codoniella campanulata*

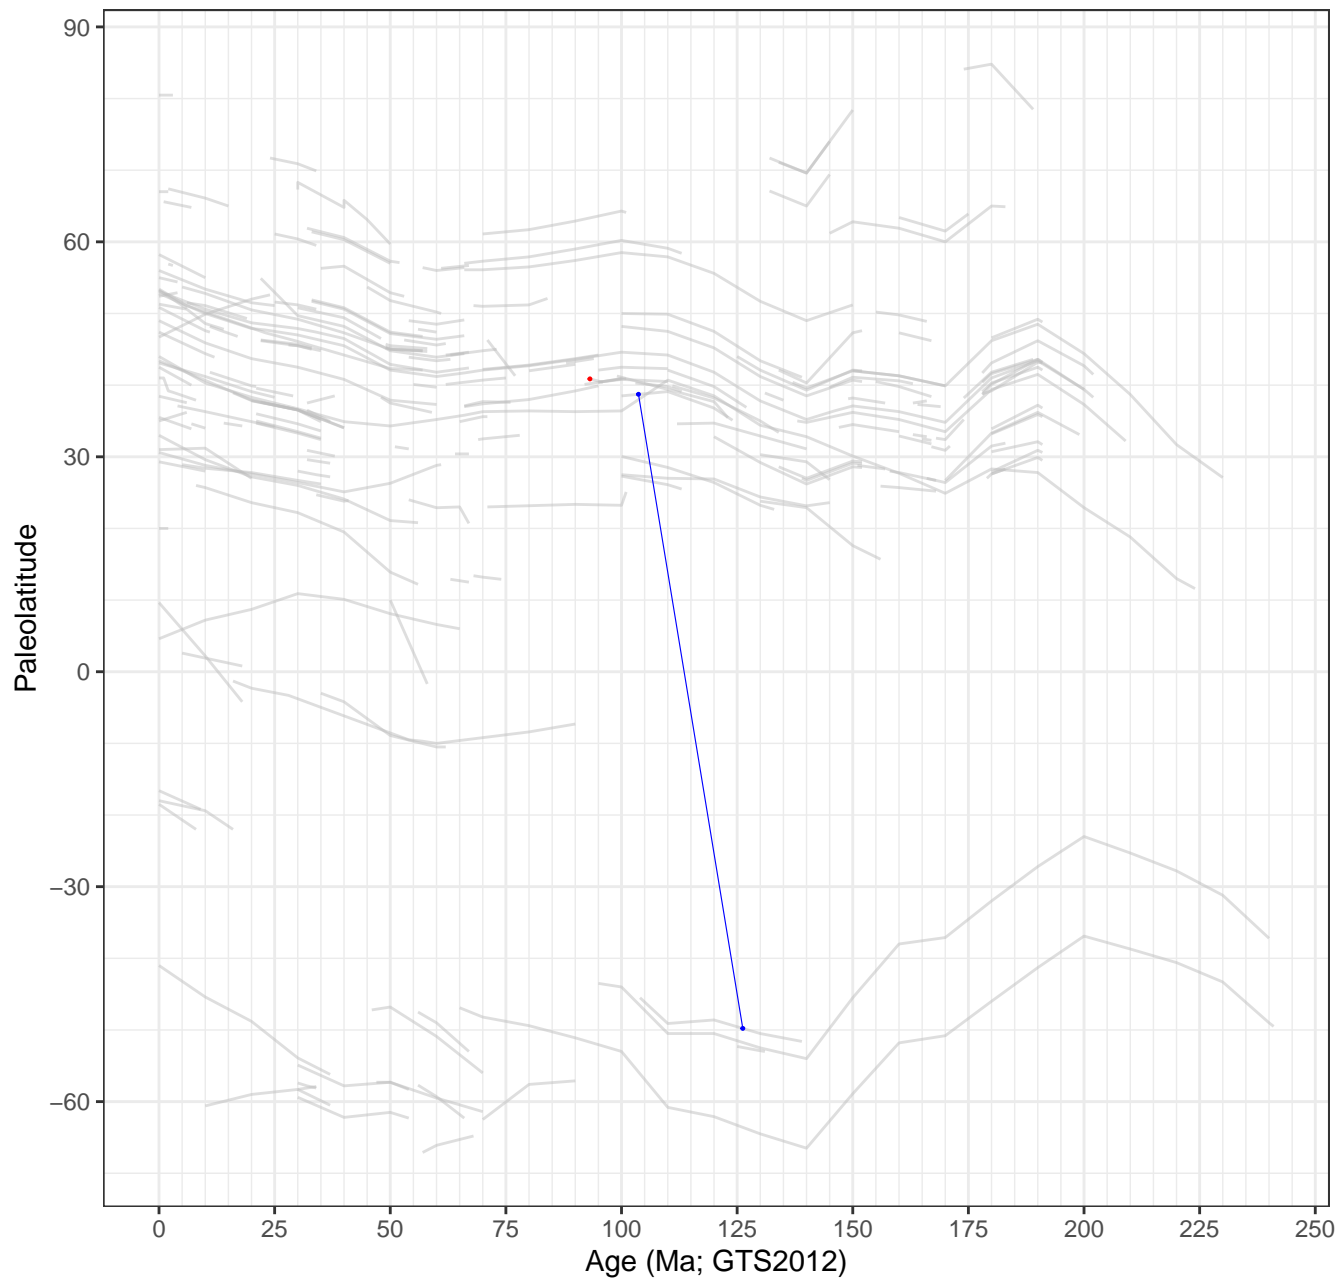

Supplement: Supplementary file 1086 [file Codoniella campanulata.pdf › Supplement/Supplement 2/Species 1914 plots/Codoniella campanulata.pdf]

# Species *Codoniella psygma*

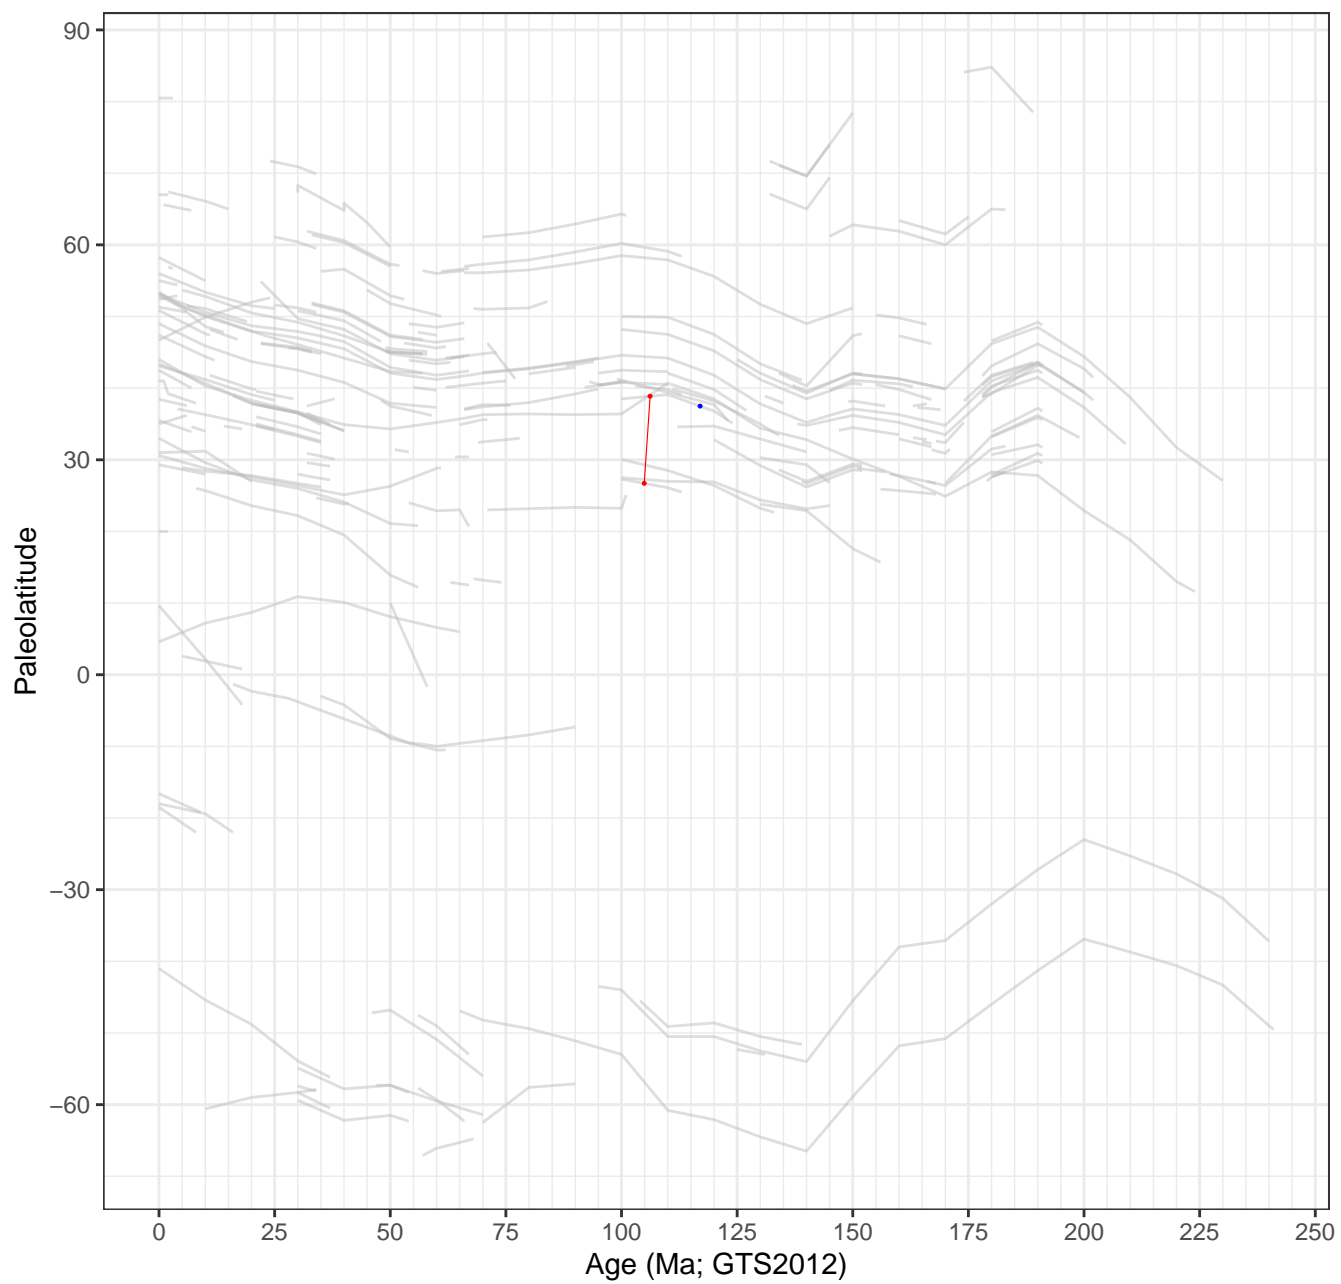

Supplement: Supplementary file 1087 [file Codoniella psygma.pdf › Supplement/Supplement 2/Species 1914 plots/Codoniella psygma.pdf]

# Species *Comasphaeridium cometes*

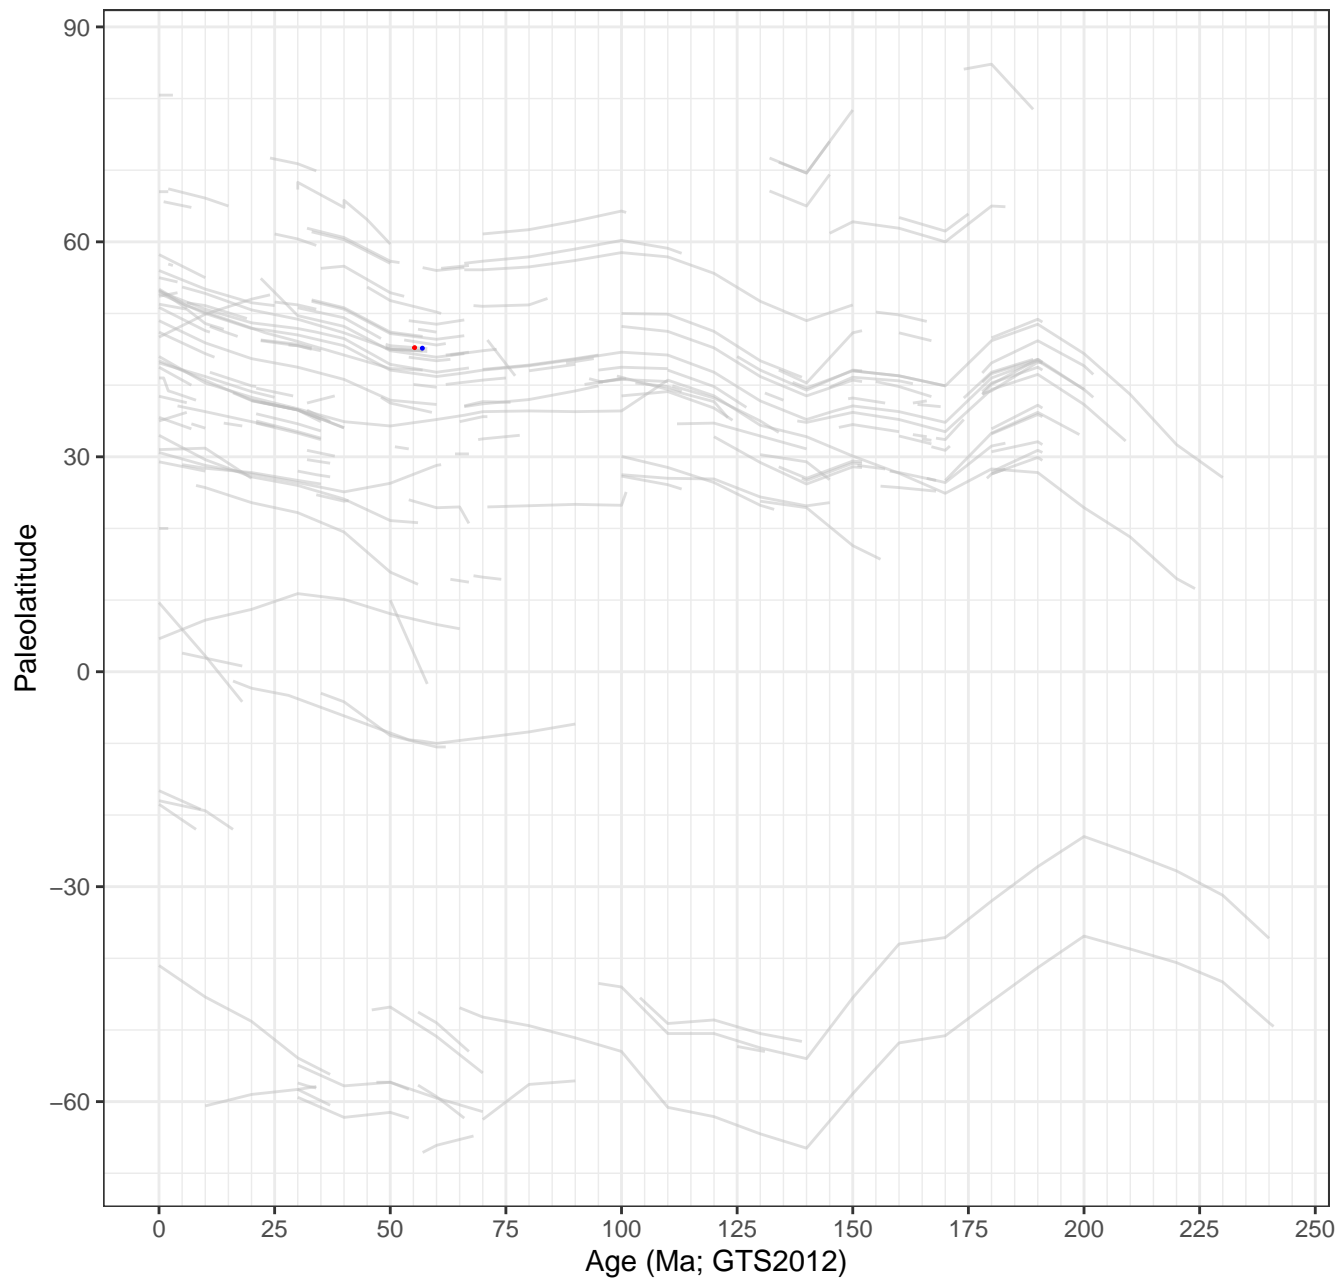

Supplement: Supplementary file 1088 [file Comasphaeridium cometes.pdf › Supplement/Supplement 2/Species 1914 plots/Comasphaeridium cometes.pdf]

# Species *Cometodinium comatum*



Supplement: Supplementary file 1089 [file Cometodinium comatum.pdf › Supplement/Supplement 2/Species 1914 plots/Cometodinium comatum.pdf]

# Species *Cometodinium habibii*

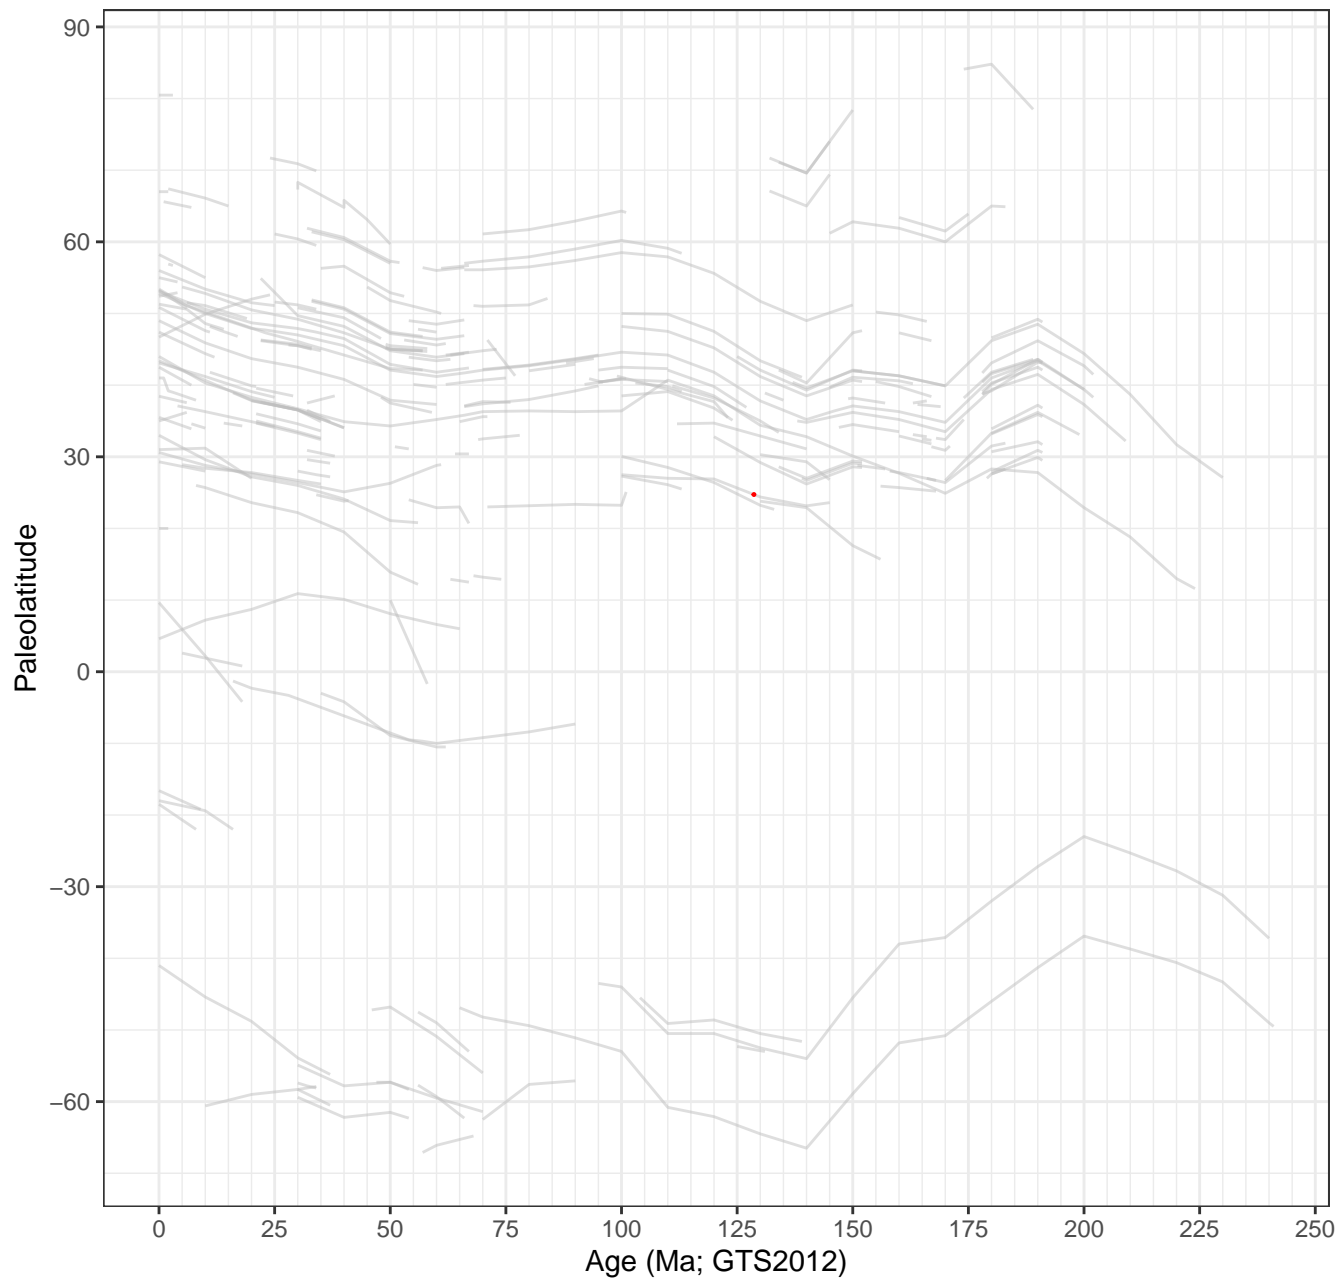

Supplement: Supplementary file 1090 [file Cometodinium habibii.pdf › Supplement/Supplement 2/Species 1914 plots/Cometodinium habibii.pdf]

# Species *Cometodinium jurassicum*

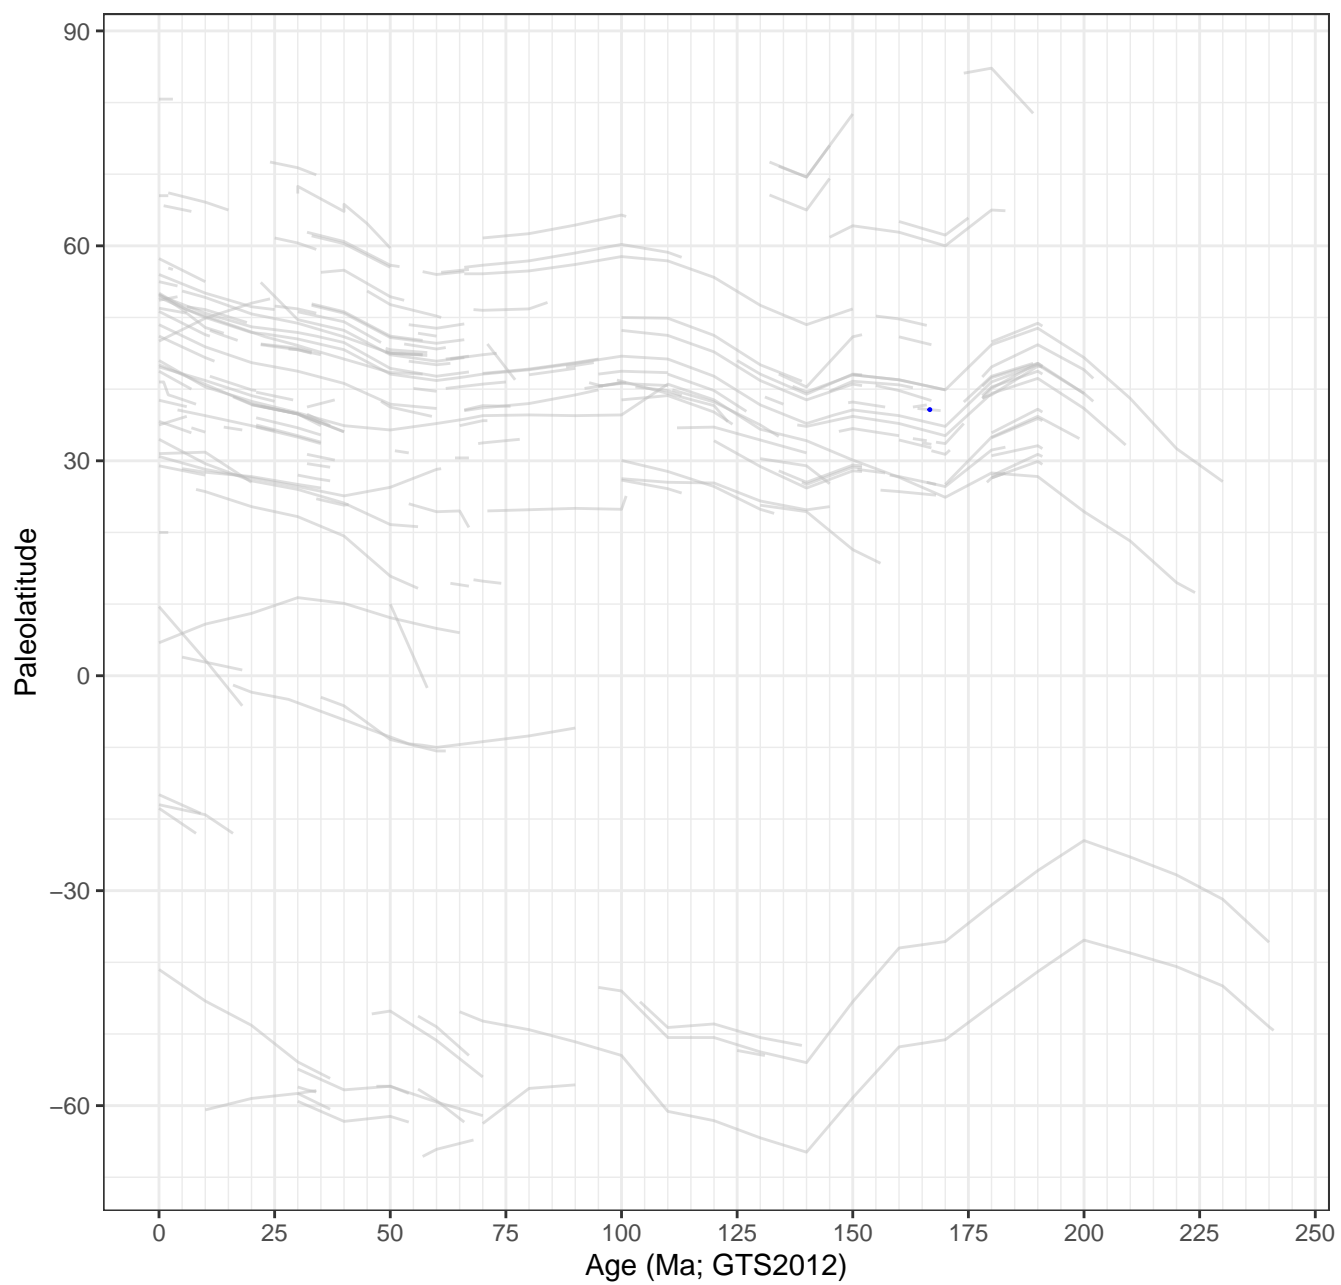

Supplement: Supplementary file 1091 [file Cometodinium jurassicum.pdf › Supplement/Supplement 2/Species 1914 plots/Cometodinium jurassicum.pdf]

# Species *Cometodinium obscurum*

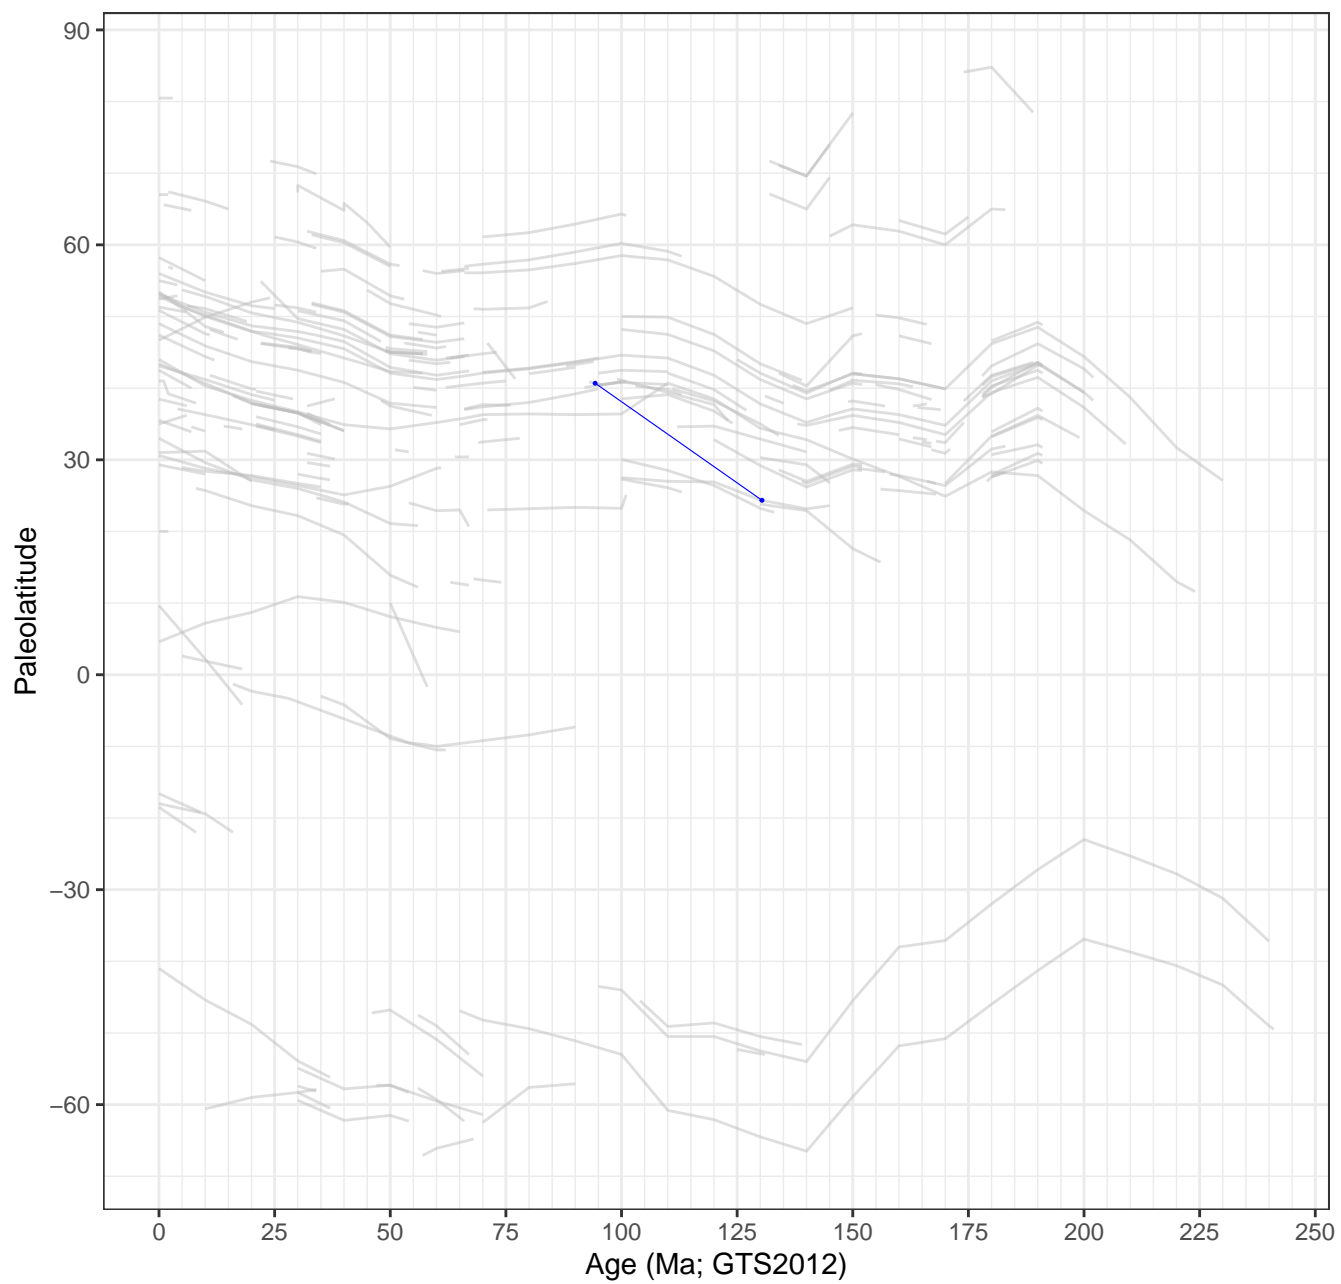

Supplement: Supplementary file 1092 [file Cometodinium obscurum.pdf › Supplement/Supplement 2/Species 1914 plots/Cometodinium obscurum.pdf]

# Species *Cometodinium whitei*

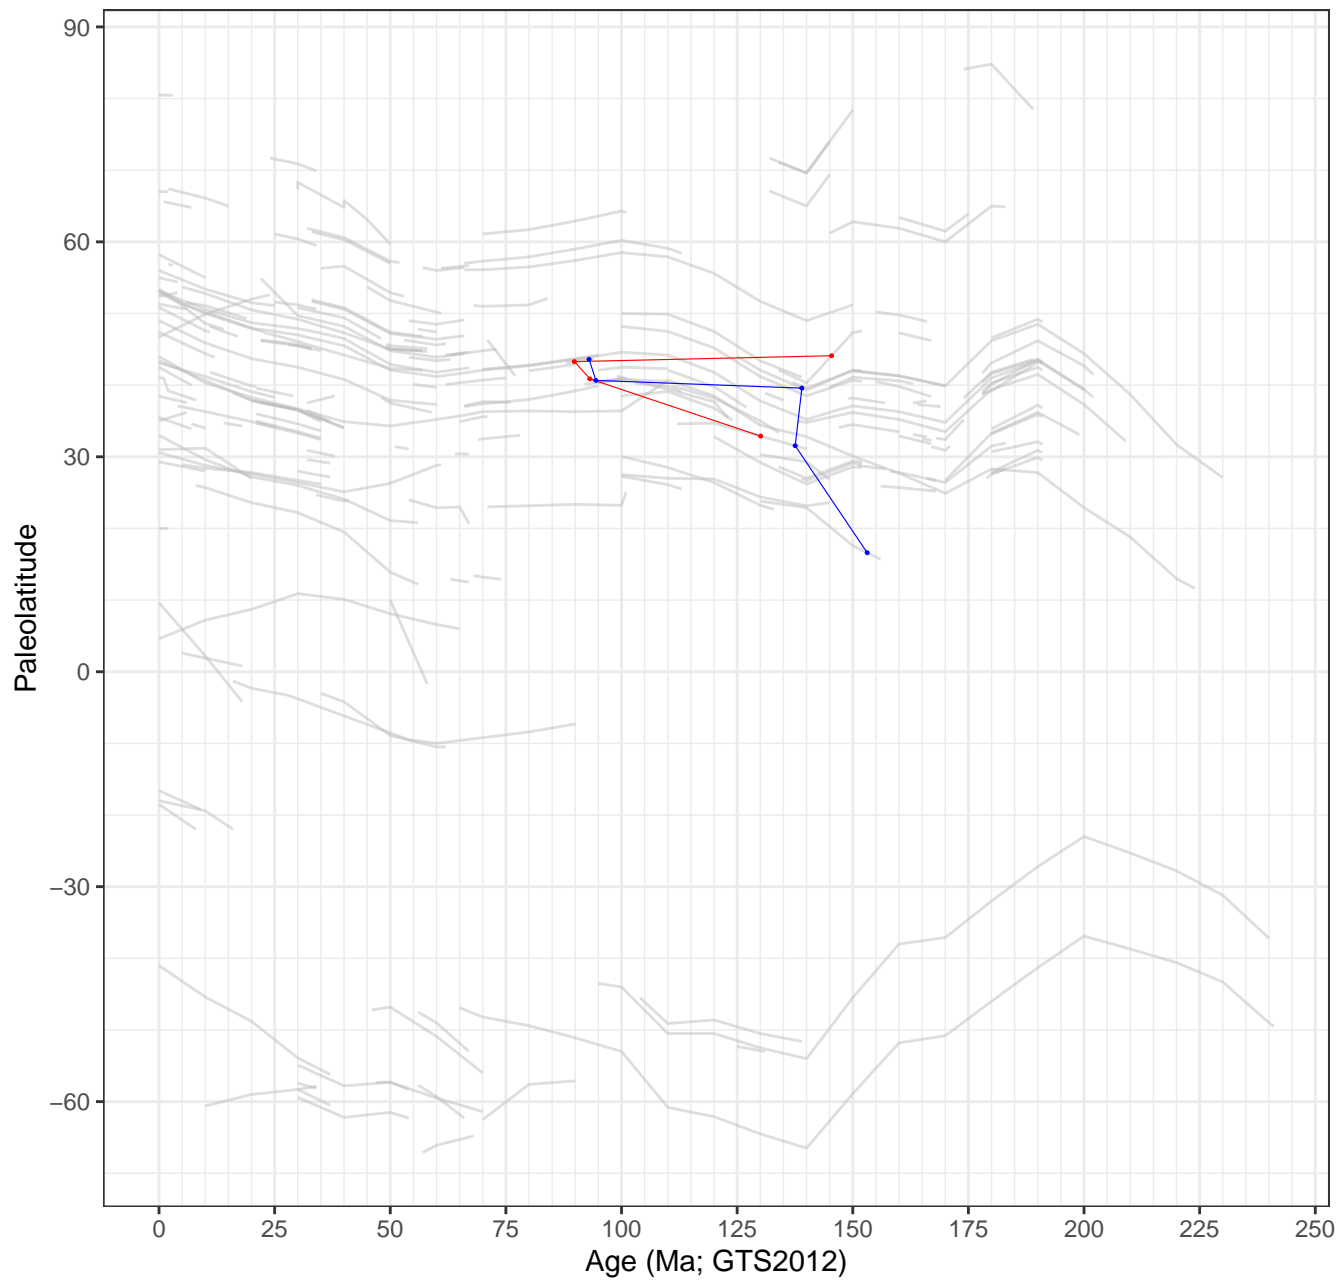

Supplement: Supplementary file 1093 [file Cometodinium whitei.pdf › Supplement/Supplement 2/Species 1914 plots/Cometodinium whitei.pdf]

# Species Compositosphaeridium polonicum

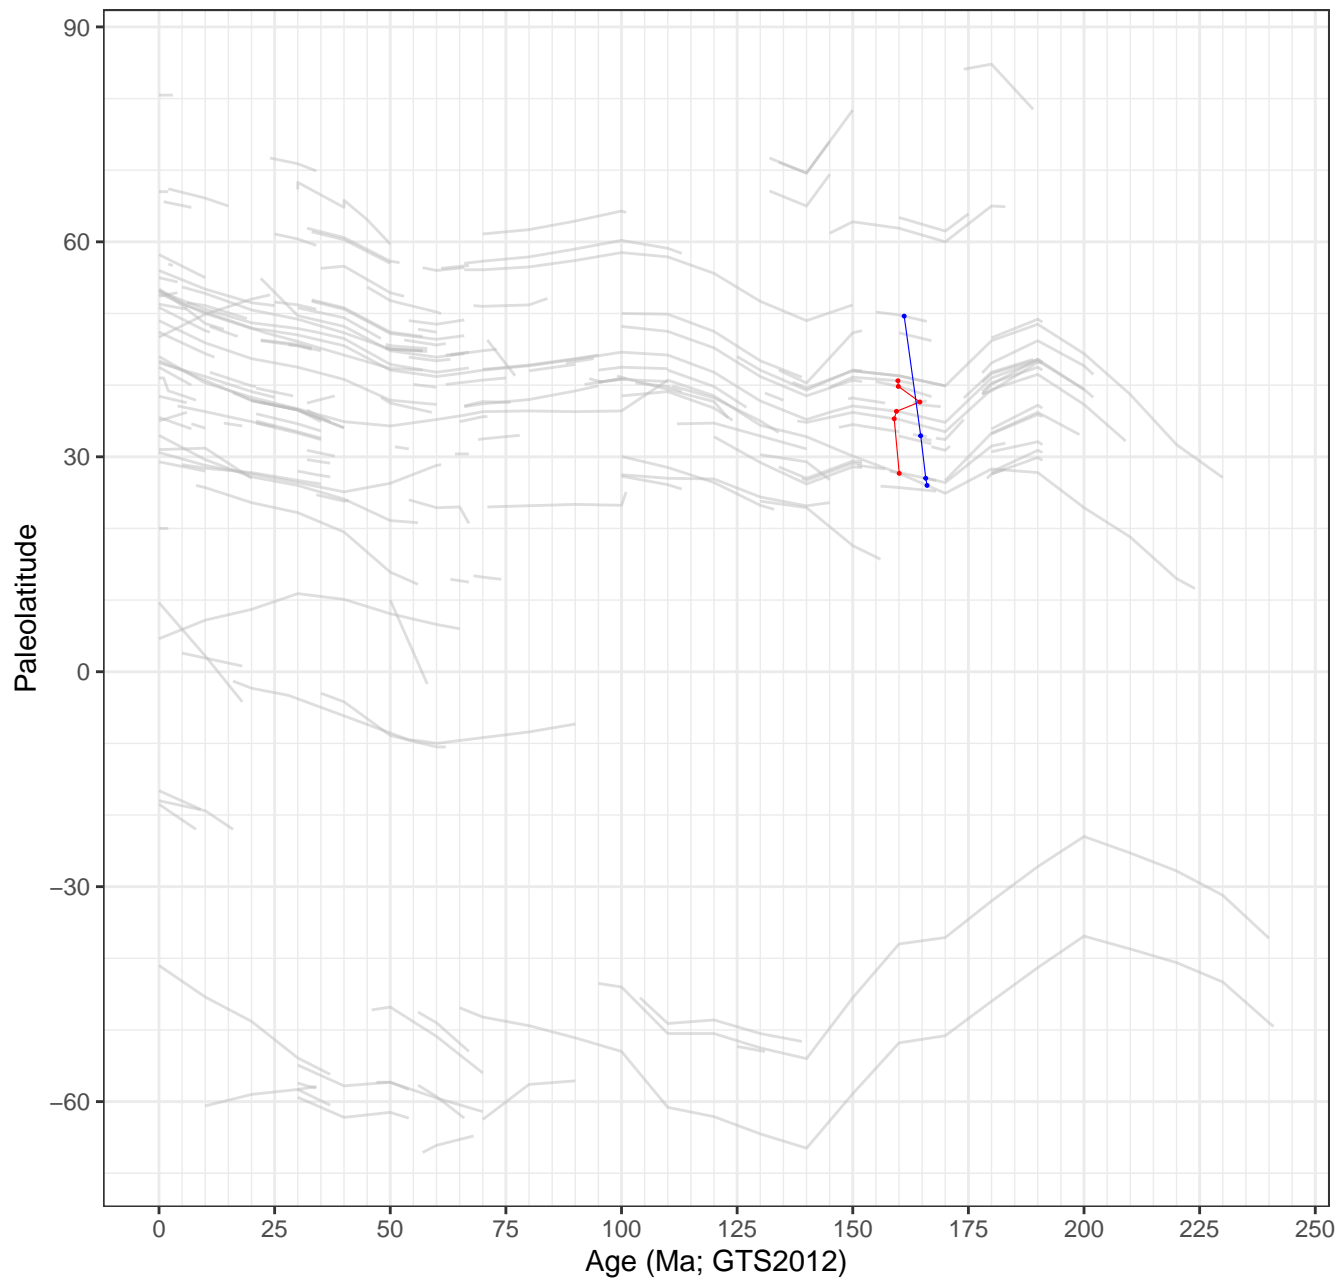

Supplement: Supplementary file 1094 [file Compositosphaeridium polonicum.pdf › Supplement/Supplement 2/Species 1914 plots/Compositosphaeridium polonicum.pdf]

# Species *Conneximura fimbriata*

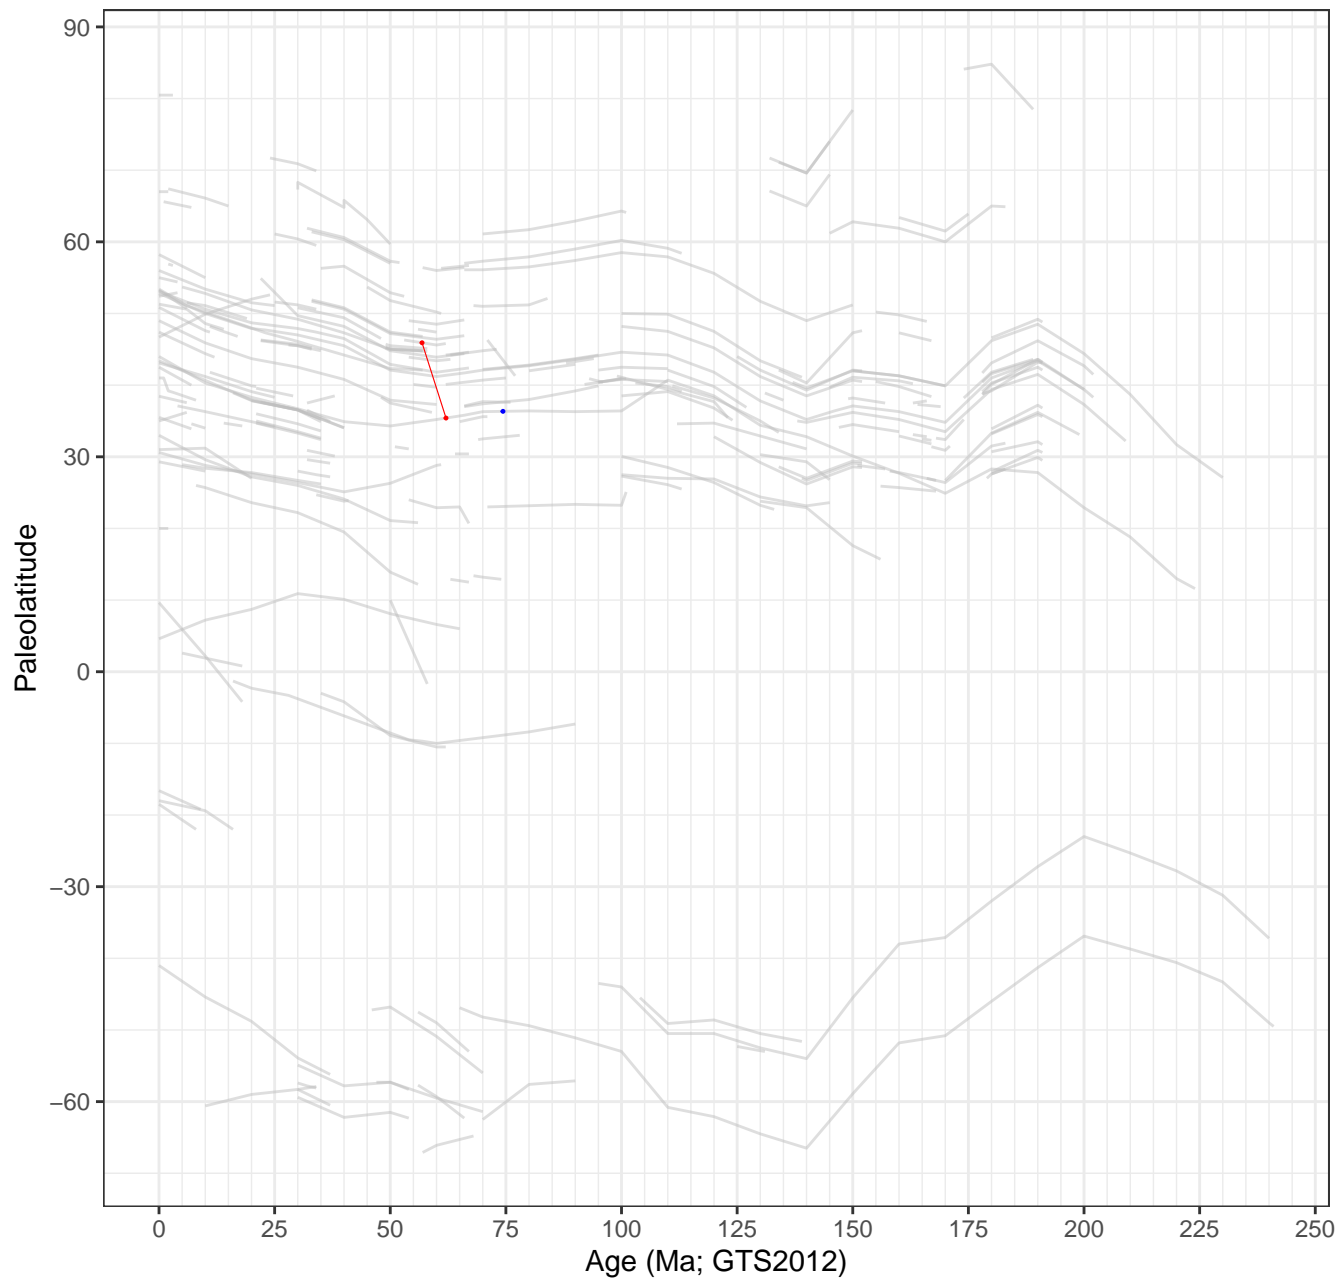

Supplement: Supplementary file 1095 [file Conneximura fimbriata.pdf › Supplement/Supplement 2/Species 1914 plots/Conneximura fimbriata.pdf]

# Species *Conosphaeridium striatoconus*

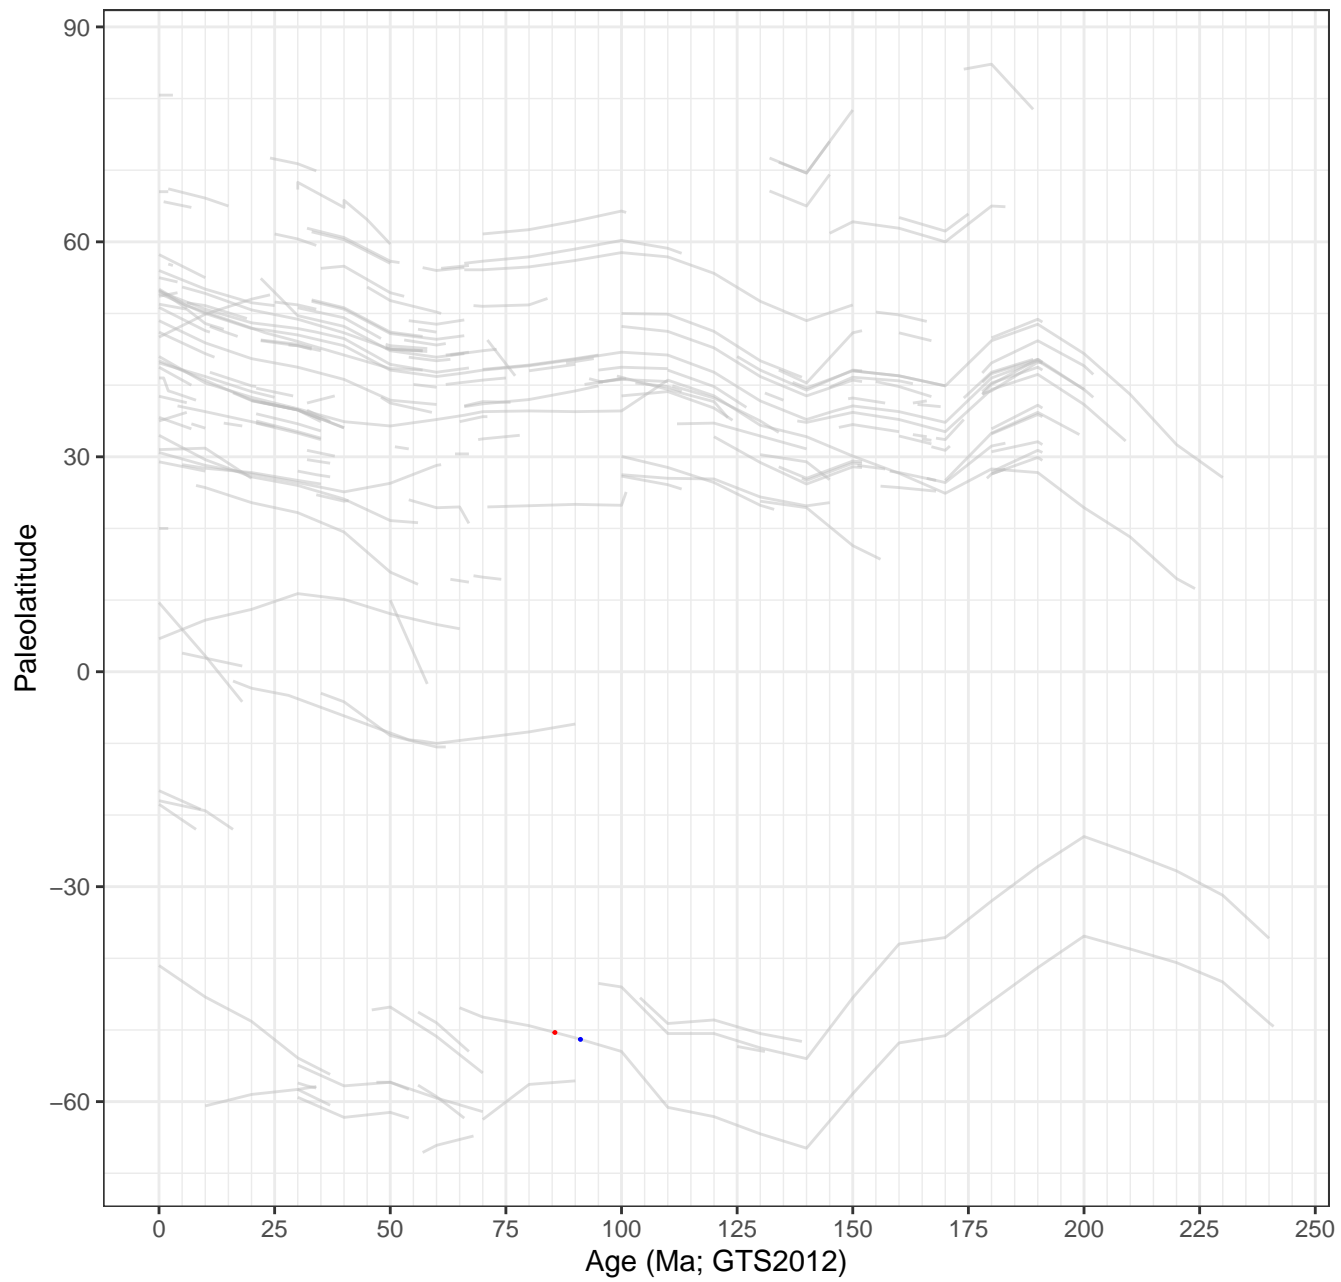

Supplement: Supplementary file 1096 [file Conosphaeridium striatoconus.pdf › Supplement/Supplement 2/Species 1914 plots/Conosphaeridium striatoconus.pdf]

# Species *Cooksonidium capricornum*

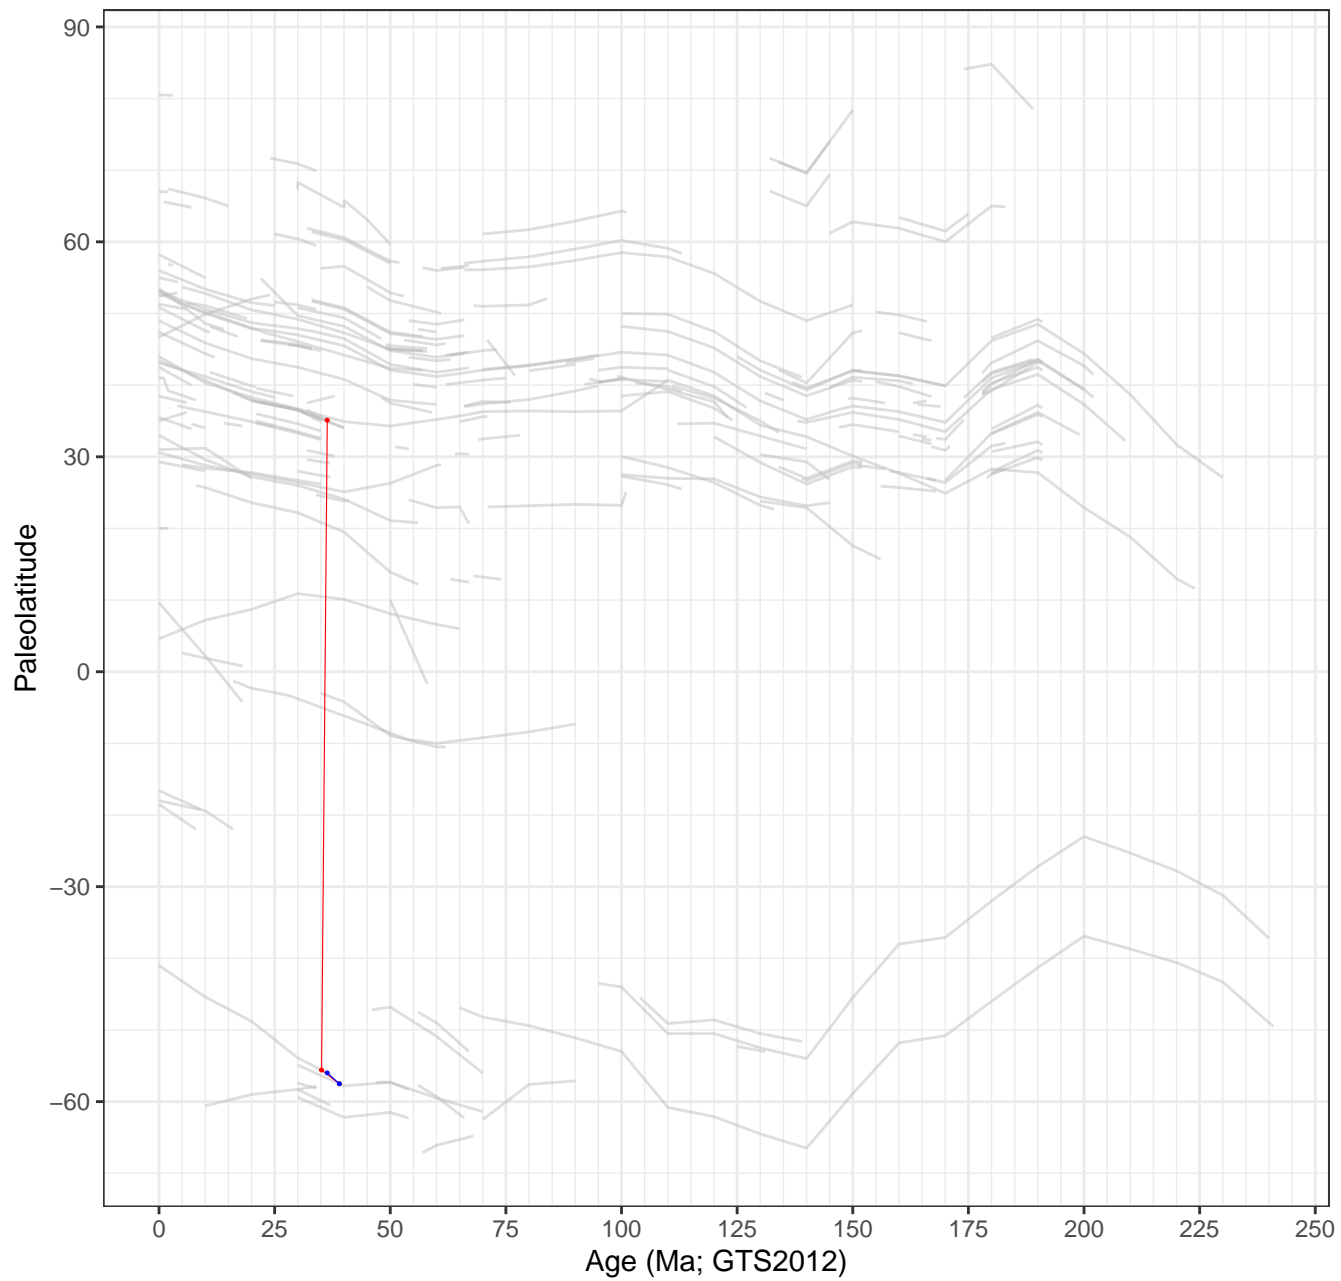

Supplement: Supplementary file 1097 [file Cooksonidium capricornum.pdf › Supplement/Supplement 2/Species 1914 plots/Cooksonidium capricornum.pdf]

# Species *Corculodinium inaeffectum*

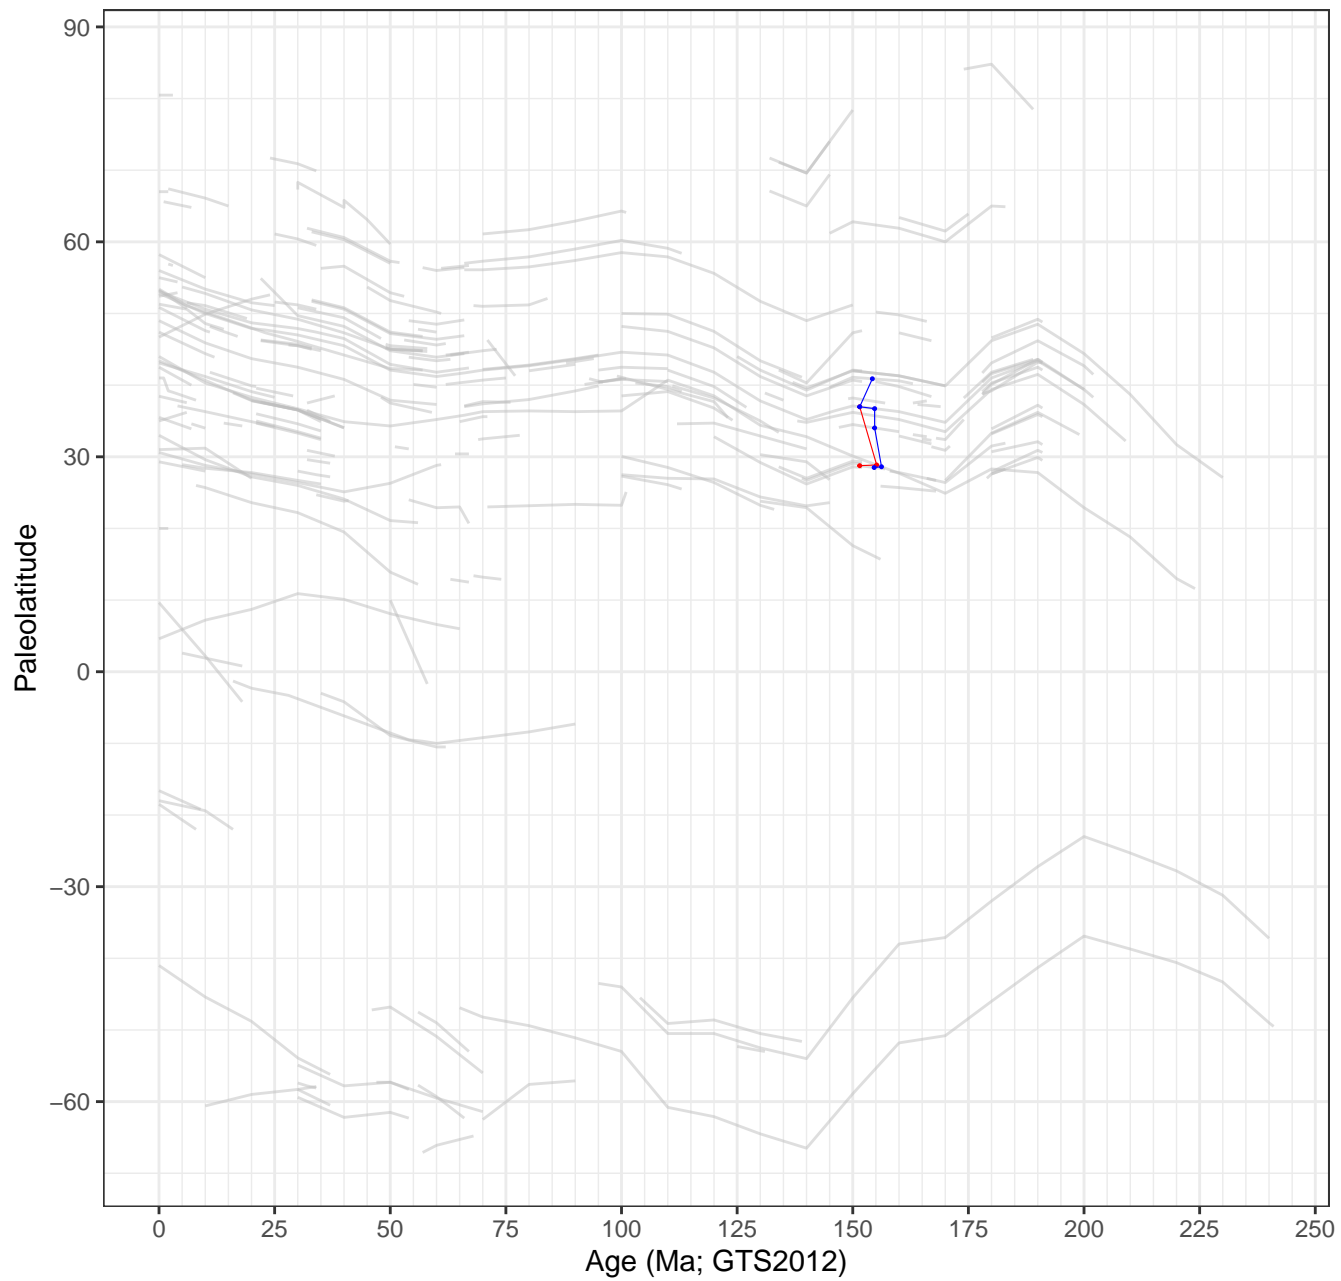

Supplement: Supplementary file 1098 [file Corculodinium inaffectum.pdf › Supplement/Supplement 2/Species 1914 plots/Corculodinium inaffectum.pdf]

# Species *Corculodinium uniconicum*

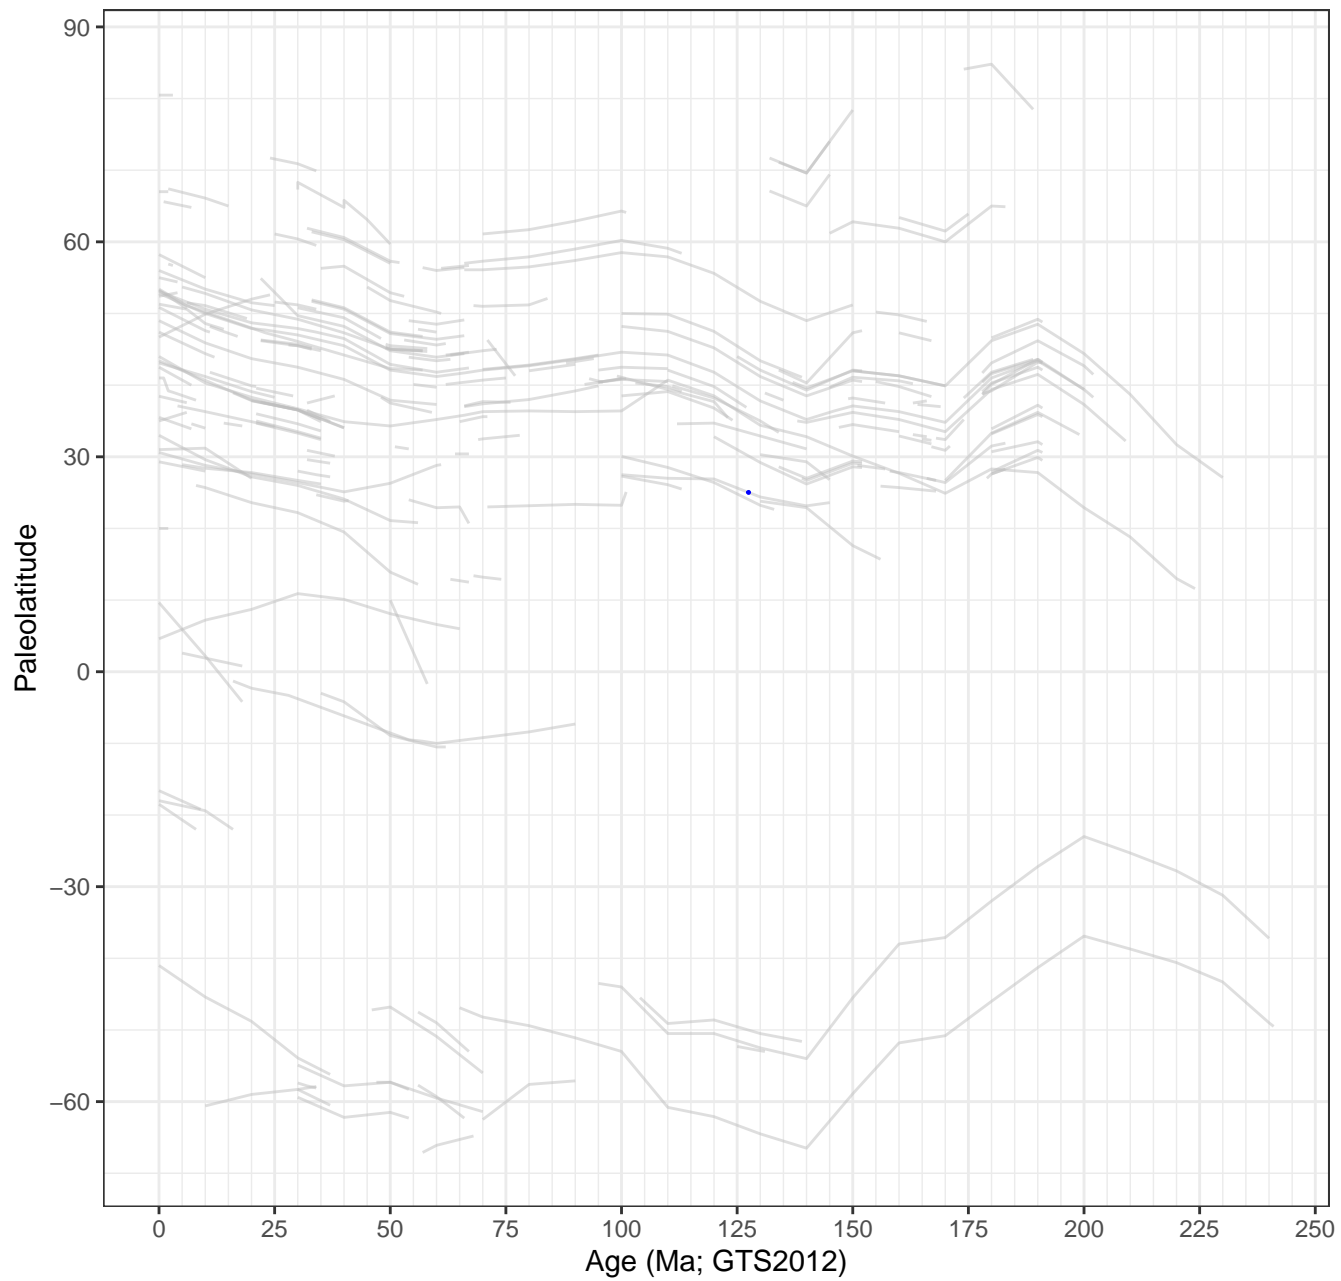

Supplement: Supplementary file 1099 [file Corculodinium uniconicum.pdf › Supplement/Supplement 2/Species 1914 plots/Corculodinium uniconicum.pdf]

# Species *Cordosphaeridium biarmatum*

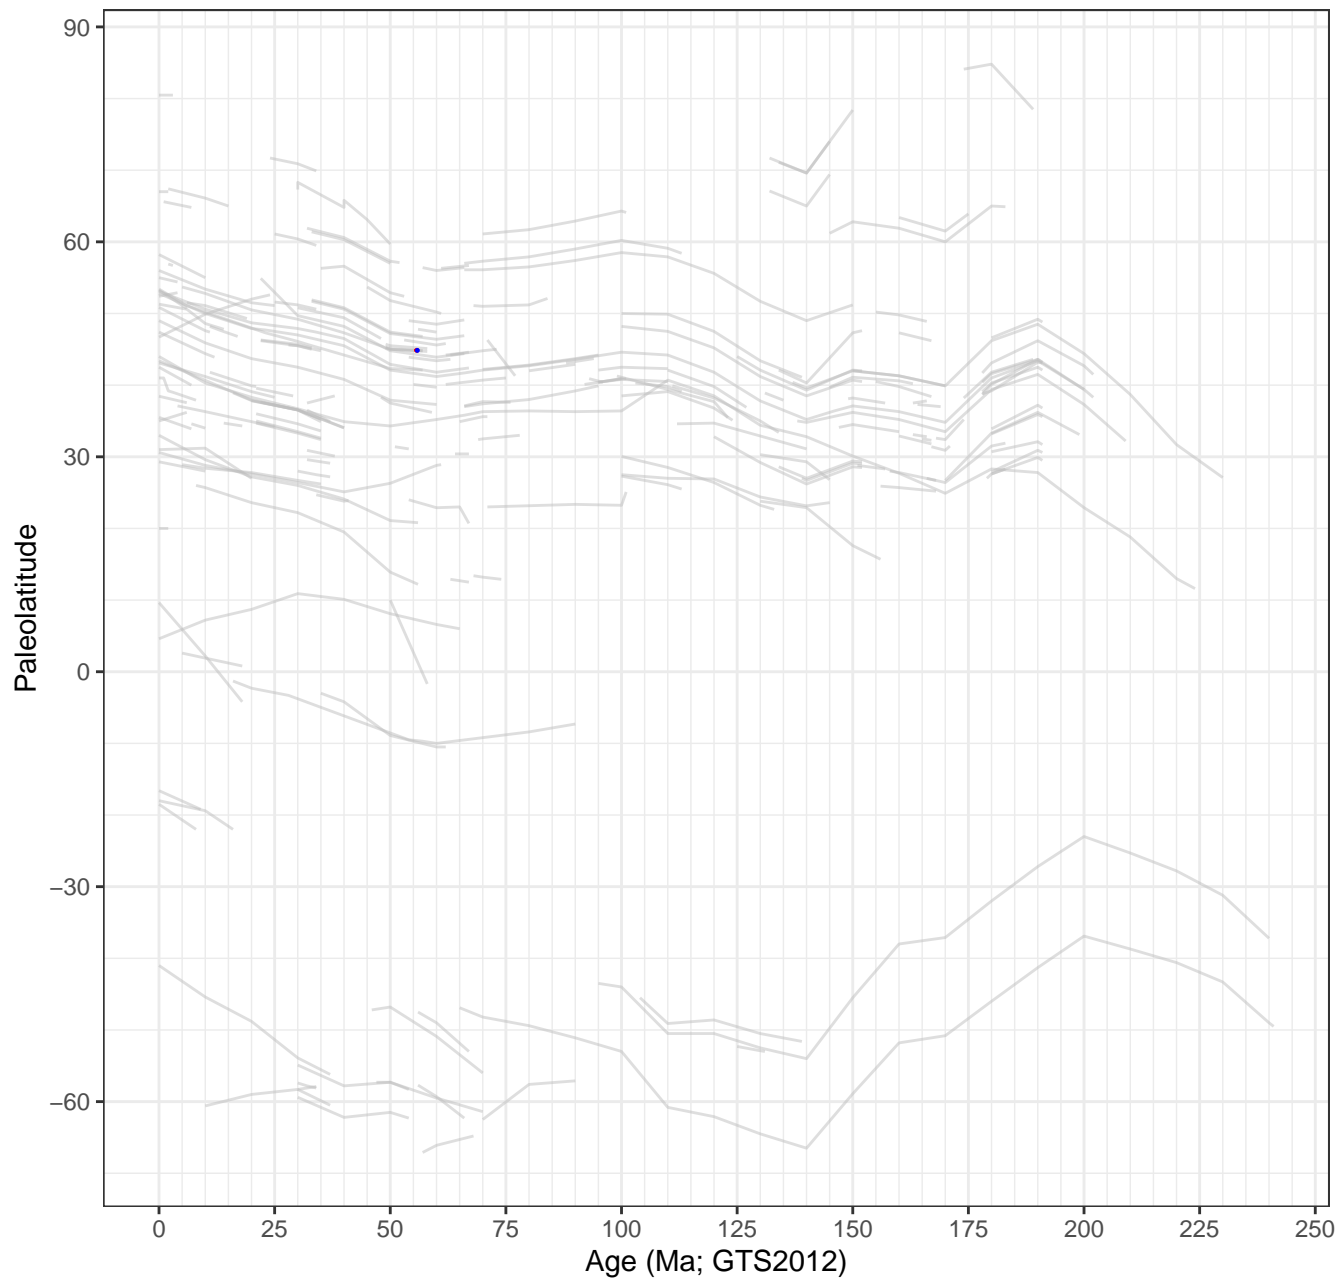

Supplement: Supplementary file 1100 [file Cordosphaeridium biarmatum.pdf › Supplement/Supplement 2/Species 1914 plots/Cordosphaeridium biarmatum.pdf]

# Species *Cordosphaeridium callosum*

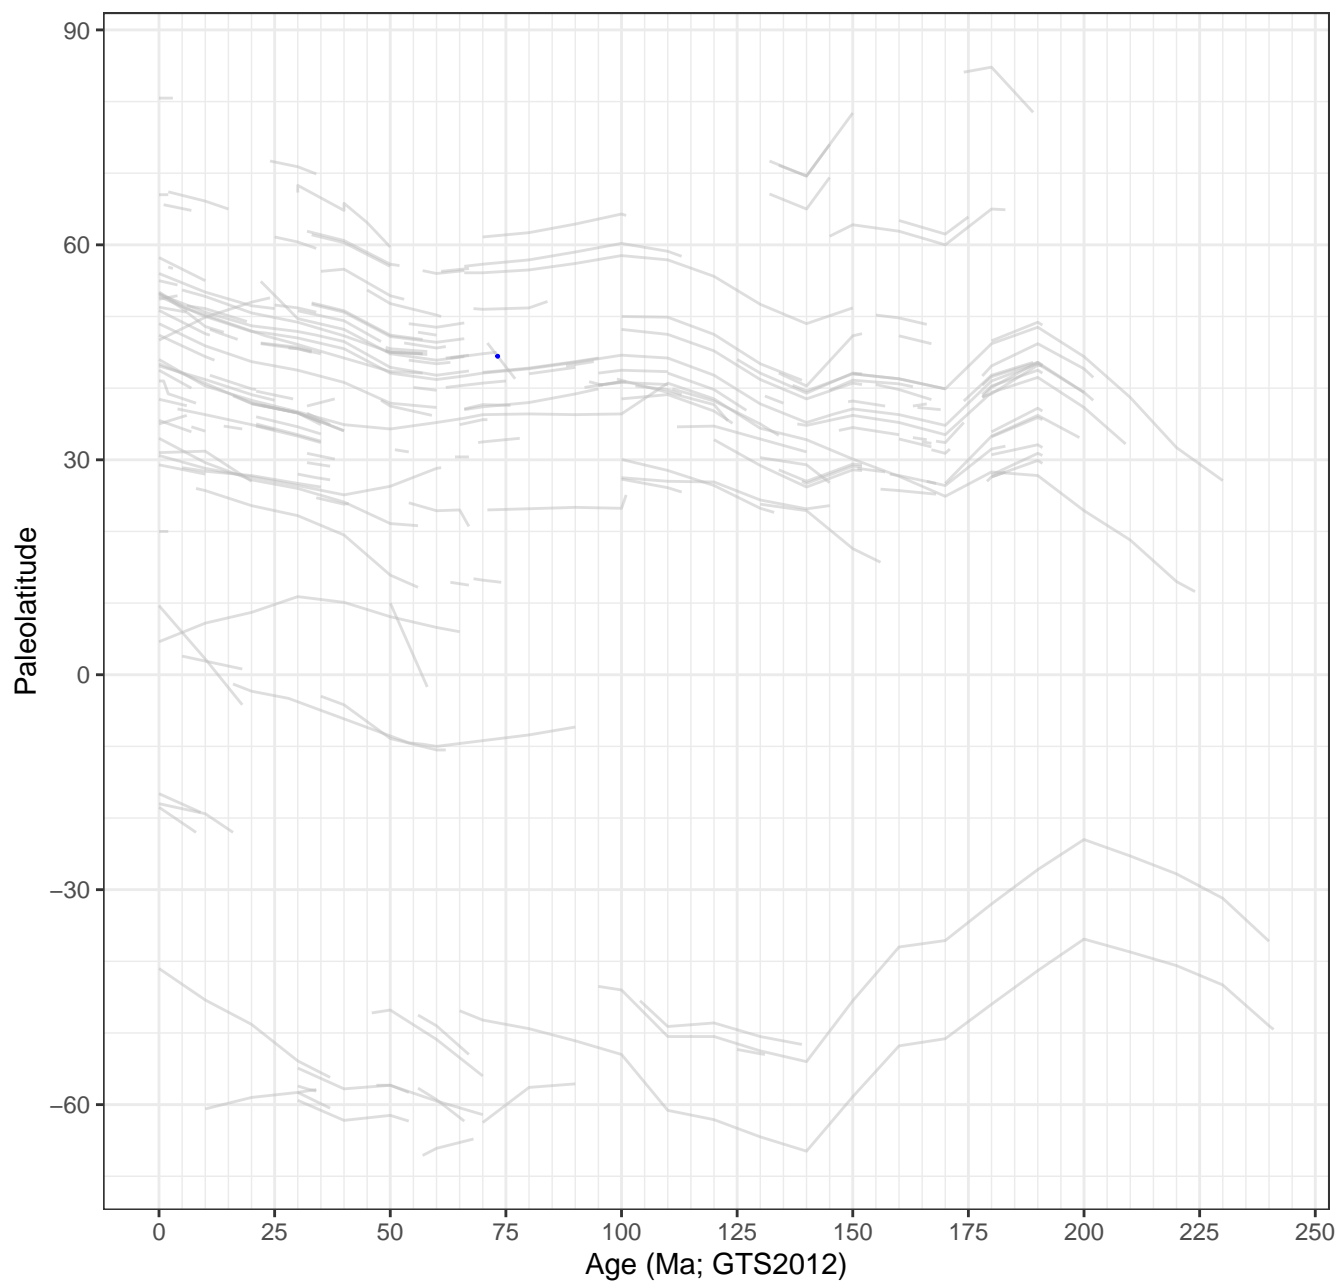

Supplement: Supplementary file 1101 [file Cordosphaeridium callosum.pdf › Supplement/Supplement 2/Species 1914 plots/Cordosphaeridium callosum.pdf]

# Species *Cordosphaeridium cantharellum*

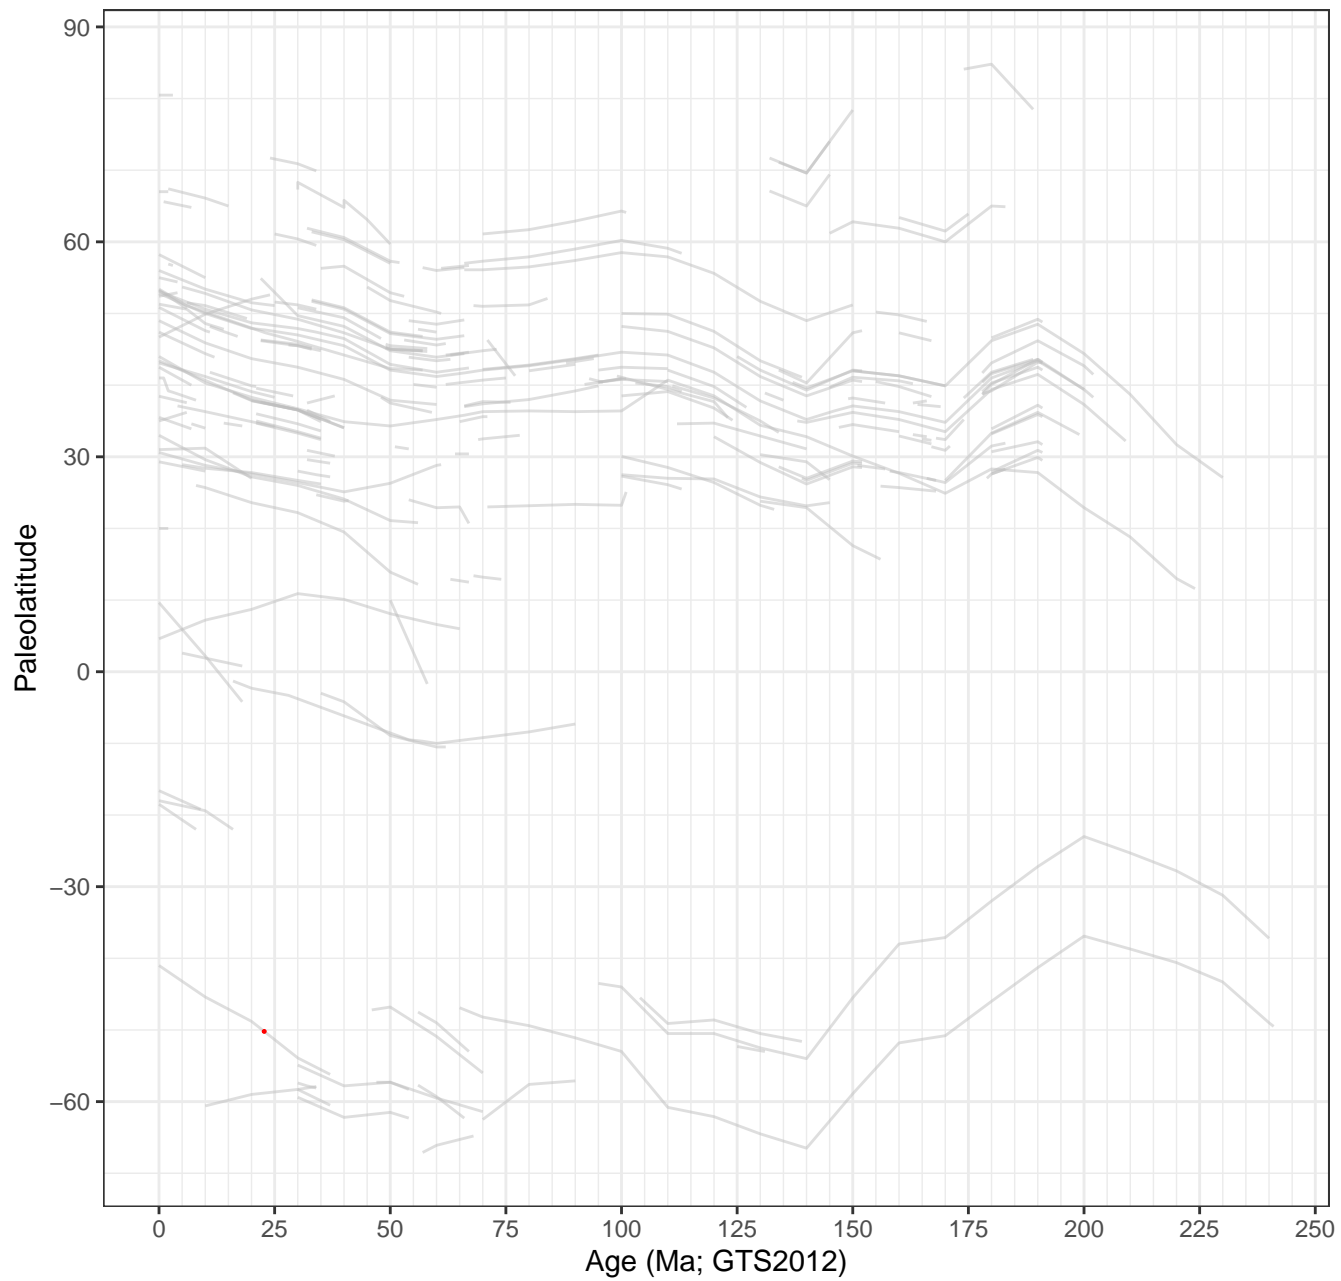

Supplement: Supplementary file 1102 [file Cordosphaeridium cantharellum.pdf › Supplement/Supplement 2/Species 1914 plots/Cordosphaeridium cantharellum.pdf]

# Species *Cordosphaeridium cantharellus*

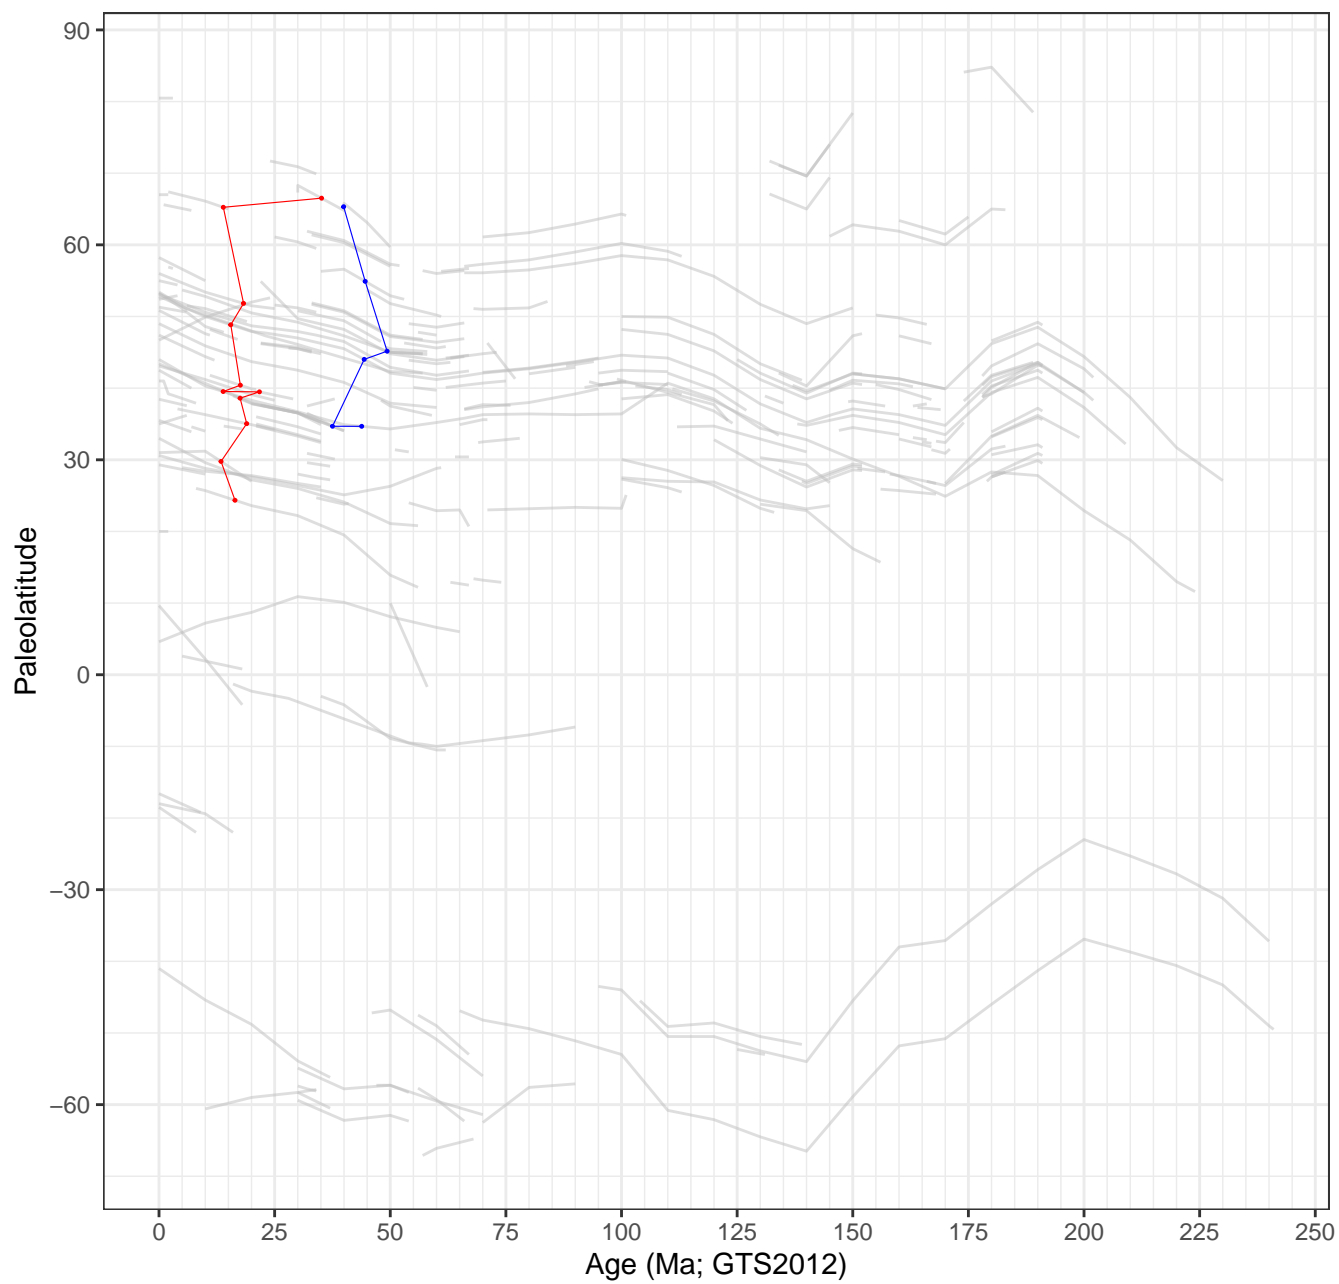

Supplement: Supplementary file 1103 [file Cordosphaeridium cantharellus.pdf › Supplement/Supplement 2/Species 1914 plots/Cordosphaeridium cantharellus.pdf]

# Species *Cordosphaeridium catherineae*

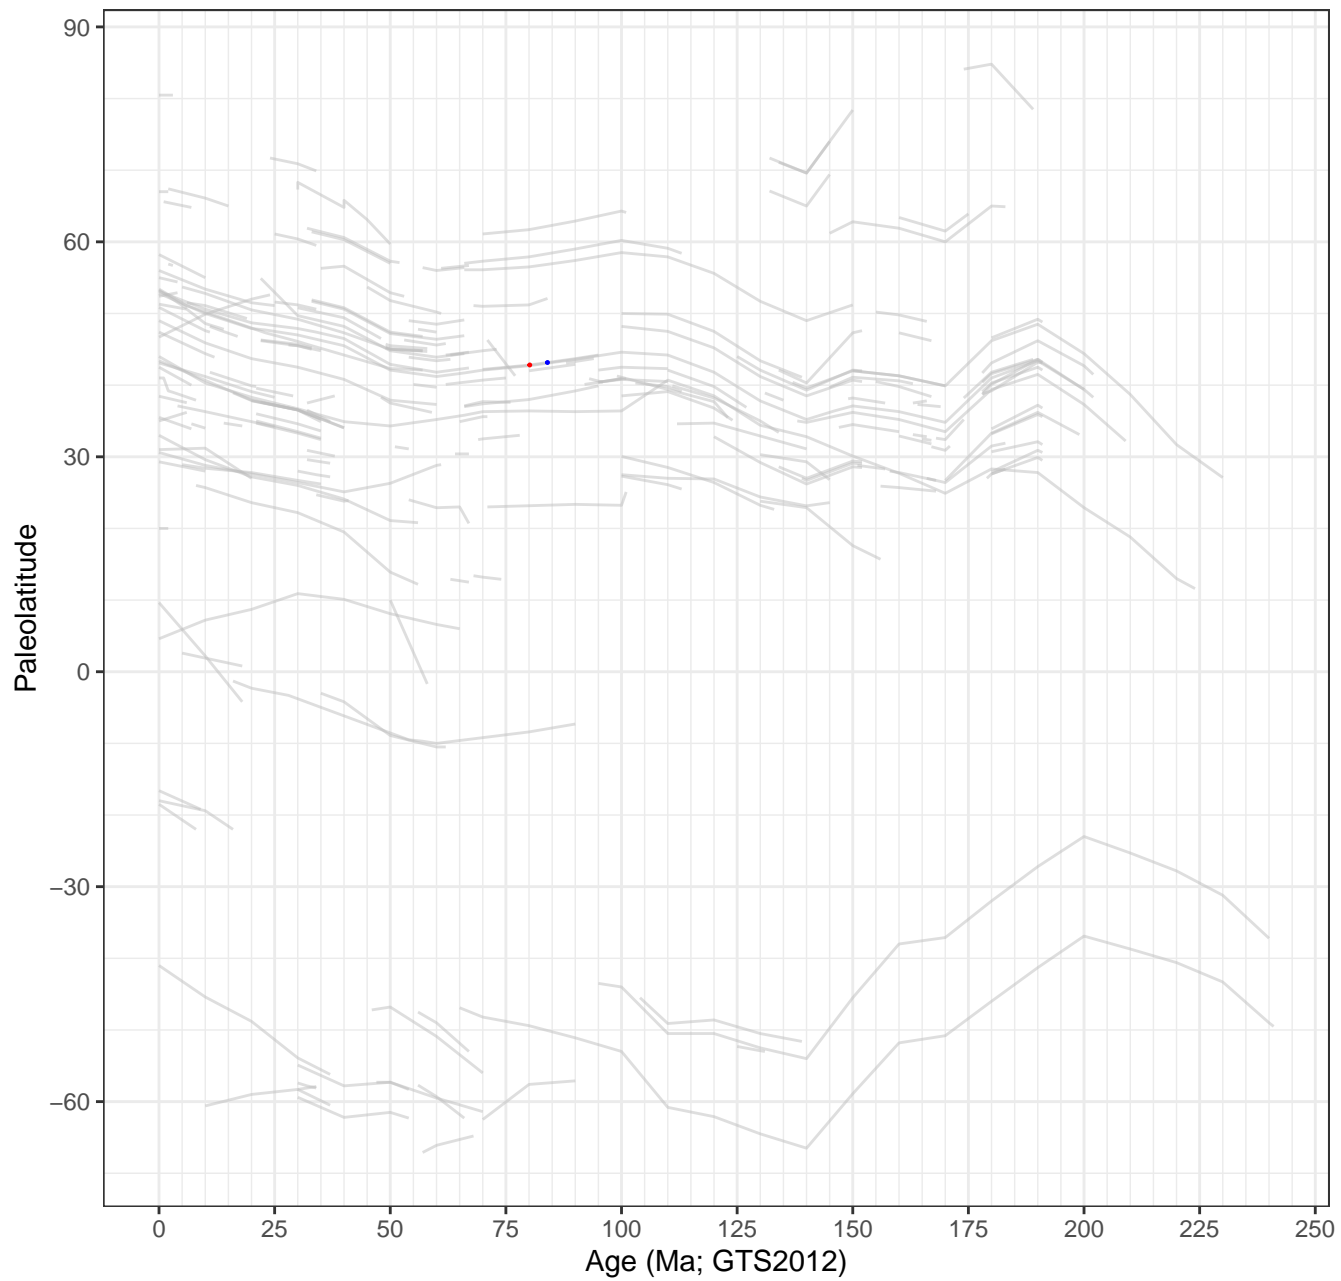

Supplement: Supplementary file 1104 [file Cordosphaeridium catherineae.pdf › Supplement/Supplement 2/Species 1914 plots/Cordosphaeridium catherineae.pdf]

# Species *Cordosphaeridium delimurum*

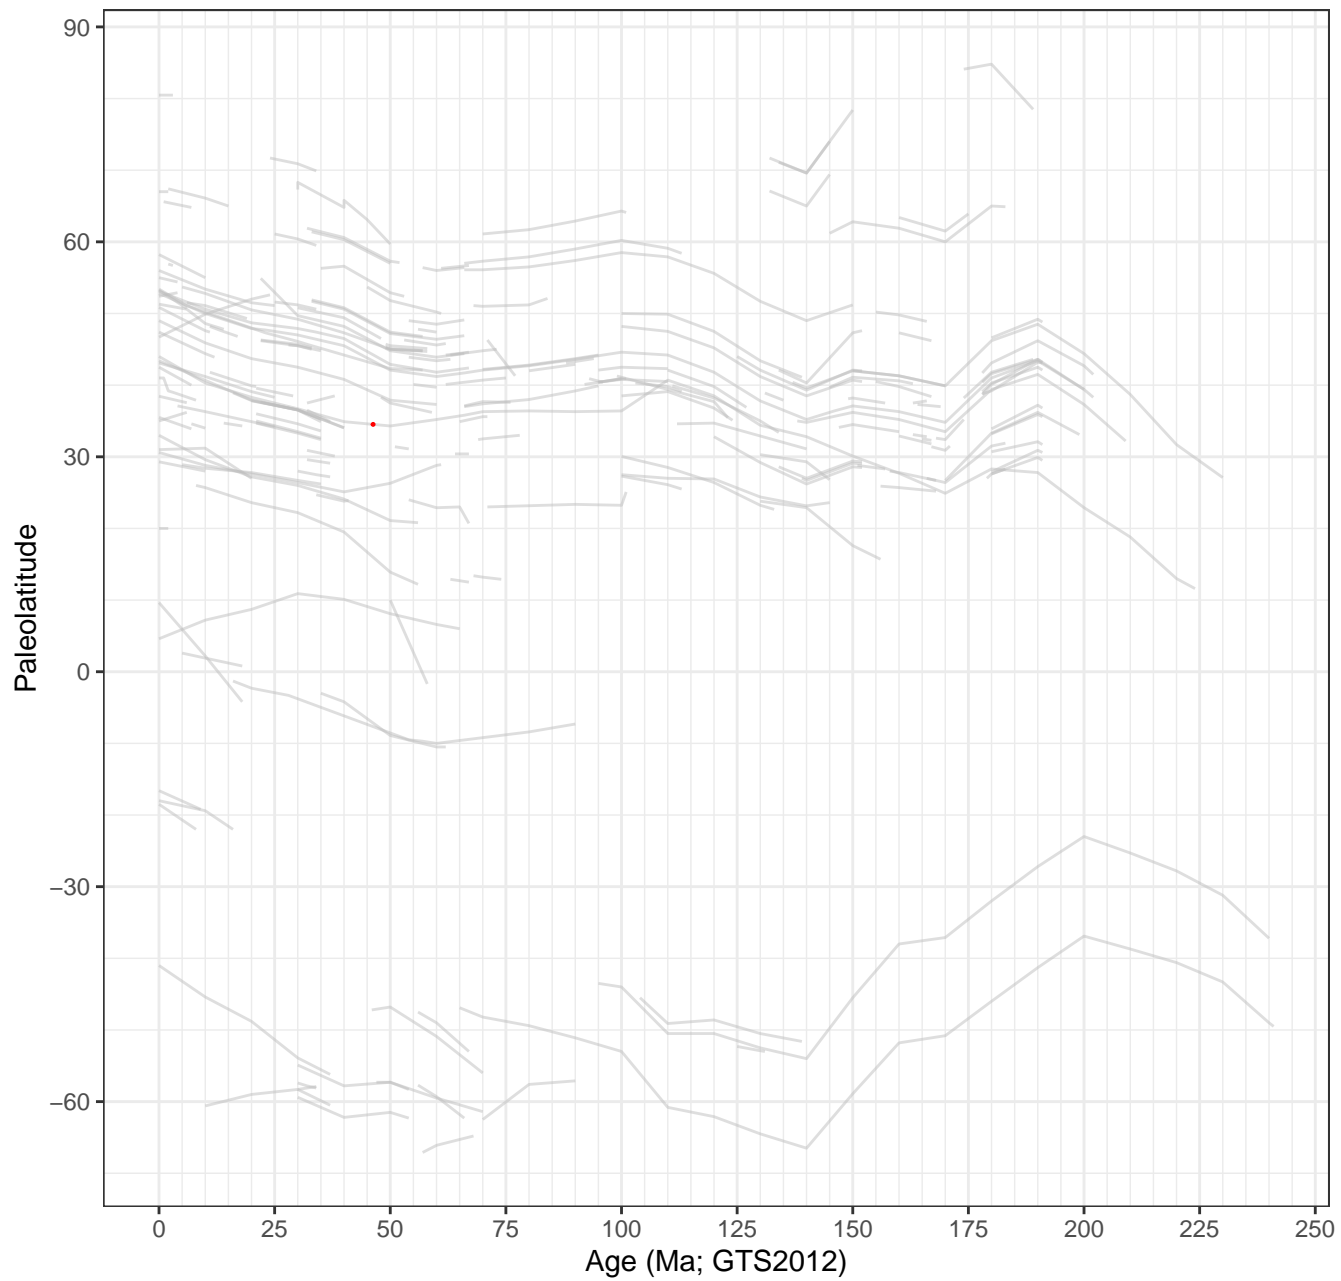

Supplement: Supplementary file 1105 [file Cordosphaeridium delimurum.pdf › Supplement/Supplement 2/Species 1914 plots/Cordosphaeridium delimurum.pdf]

# Species *Cordosphaeridium fibrospinosum*

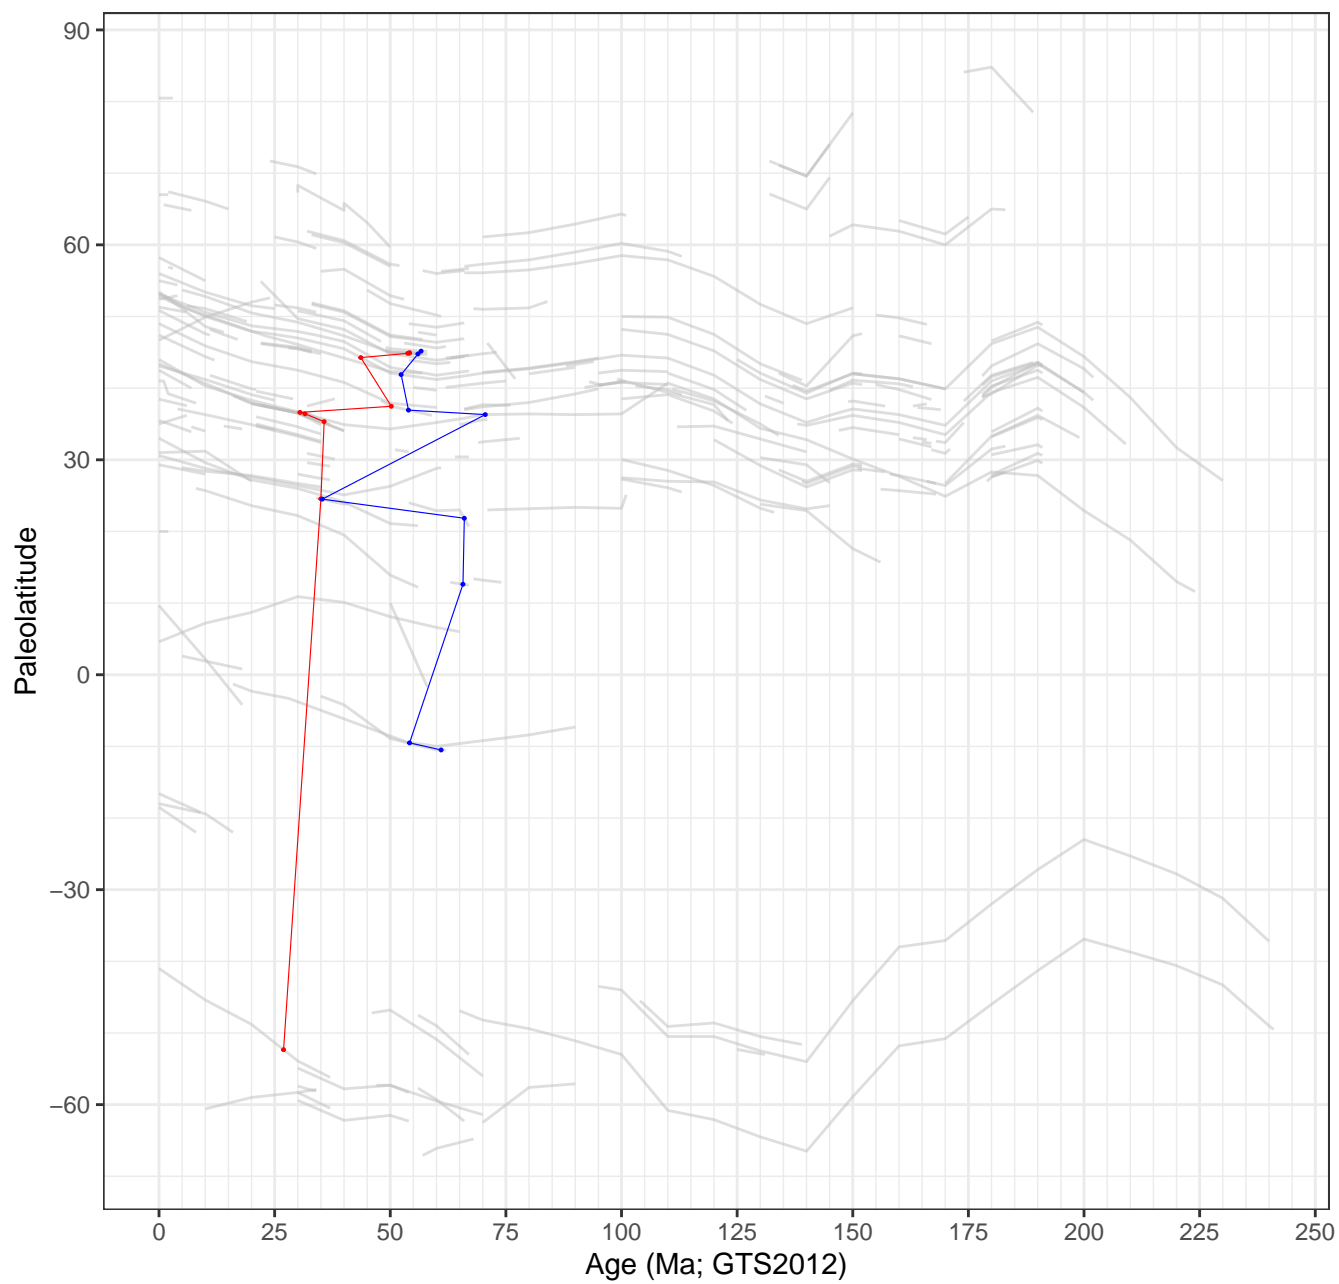

Supplement: Supplementary file 1106 [file Cordosphaeridium fibrospinosum.pdf › Supplement/Supplement 2/Species 1914 plots/Cordosphaeridium fibrospinosum.pdf]

# Species *Cordosphaeridium funiculatum*

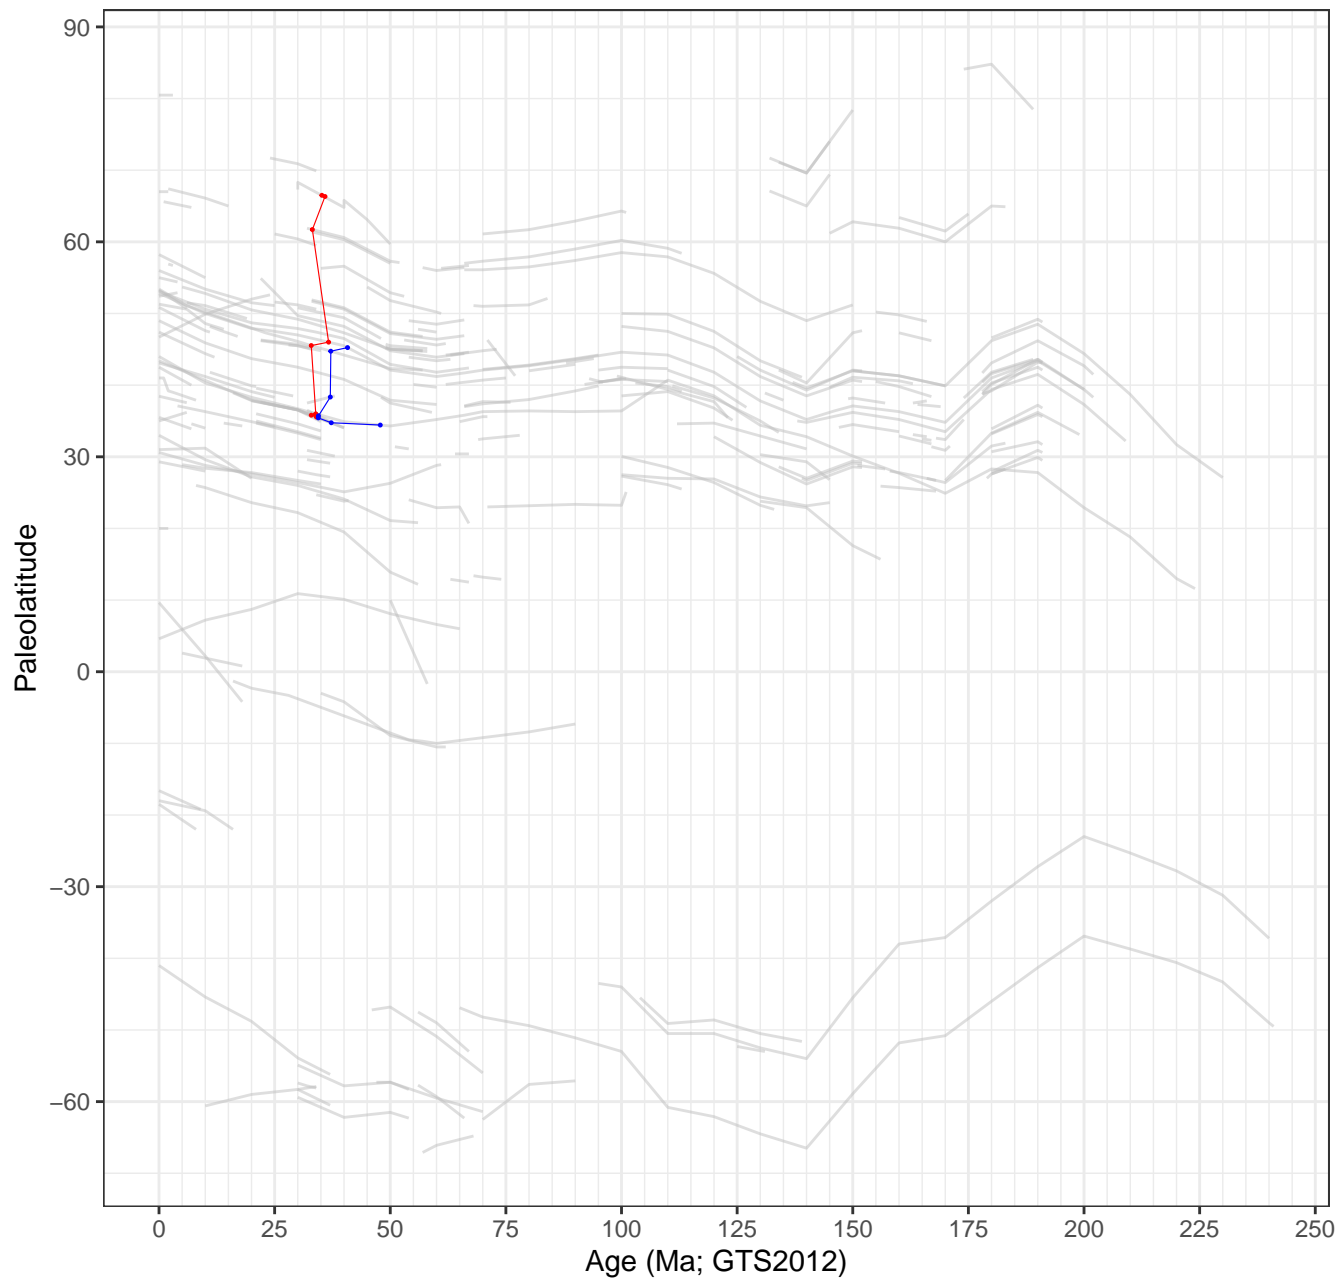

Supplement: Supplementary file 1107 [file Cordosphaeridium funiculatum.pdf › Supplement/Supplement 2/Species 1914 plots/Cordosphaeridium funiculatum.pdf]

# Species *Cordosphaeridium gracile*

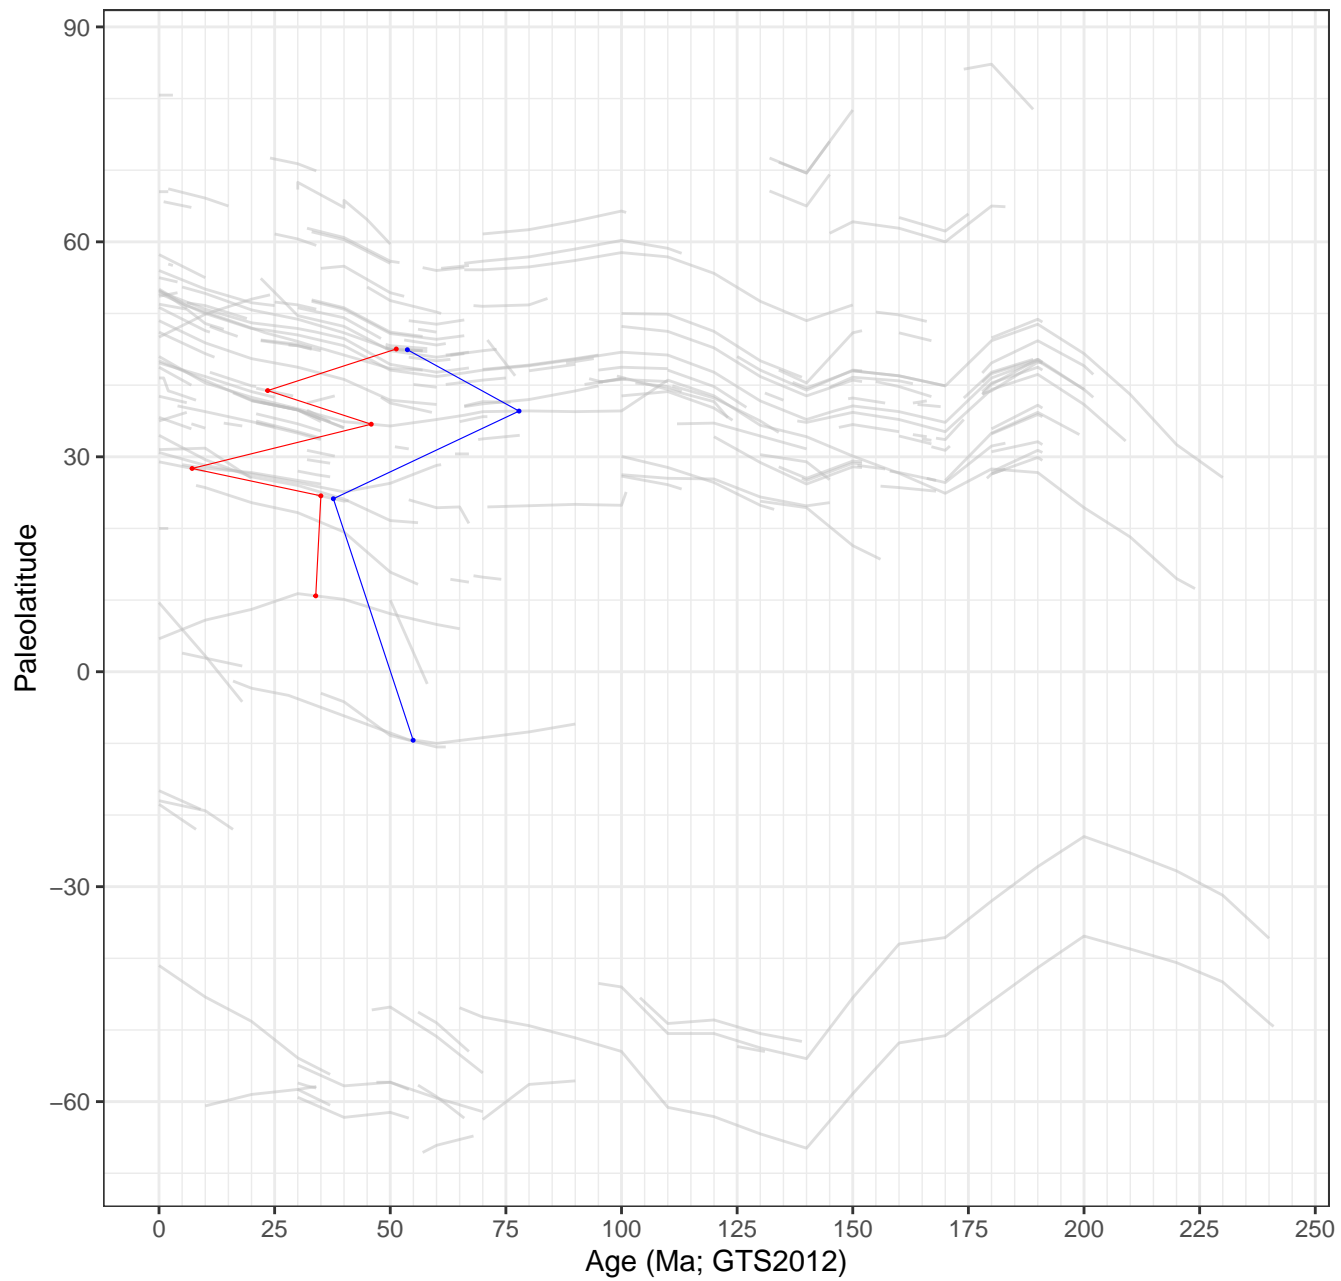

Supplement: Supplementary file 1108 [file Cordosphaeridium gracile.pdf › Supplement/Supplement 2/Species 1914 plots/Cordosphaeridium gracile.pdf]

# Species Cordosphaeridium inodes

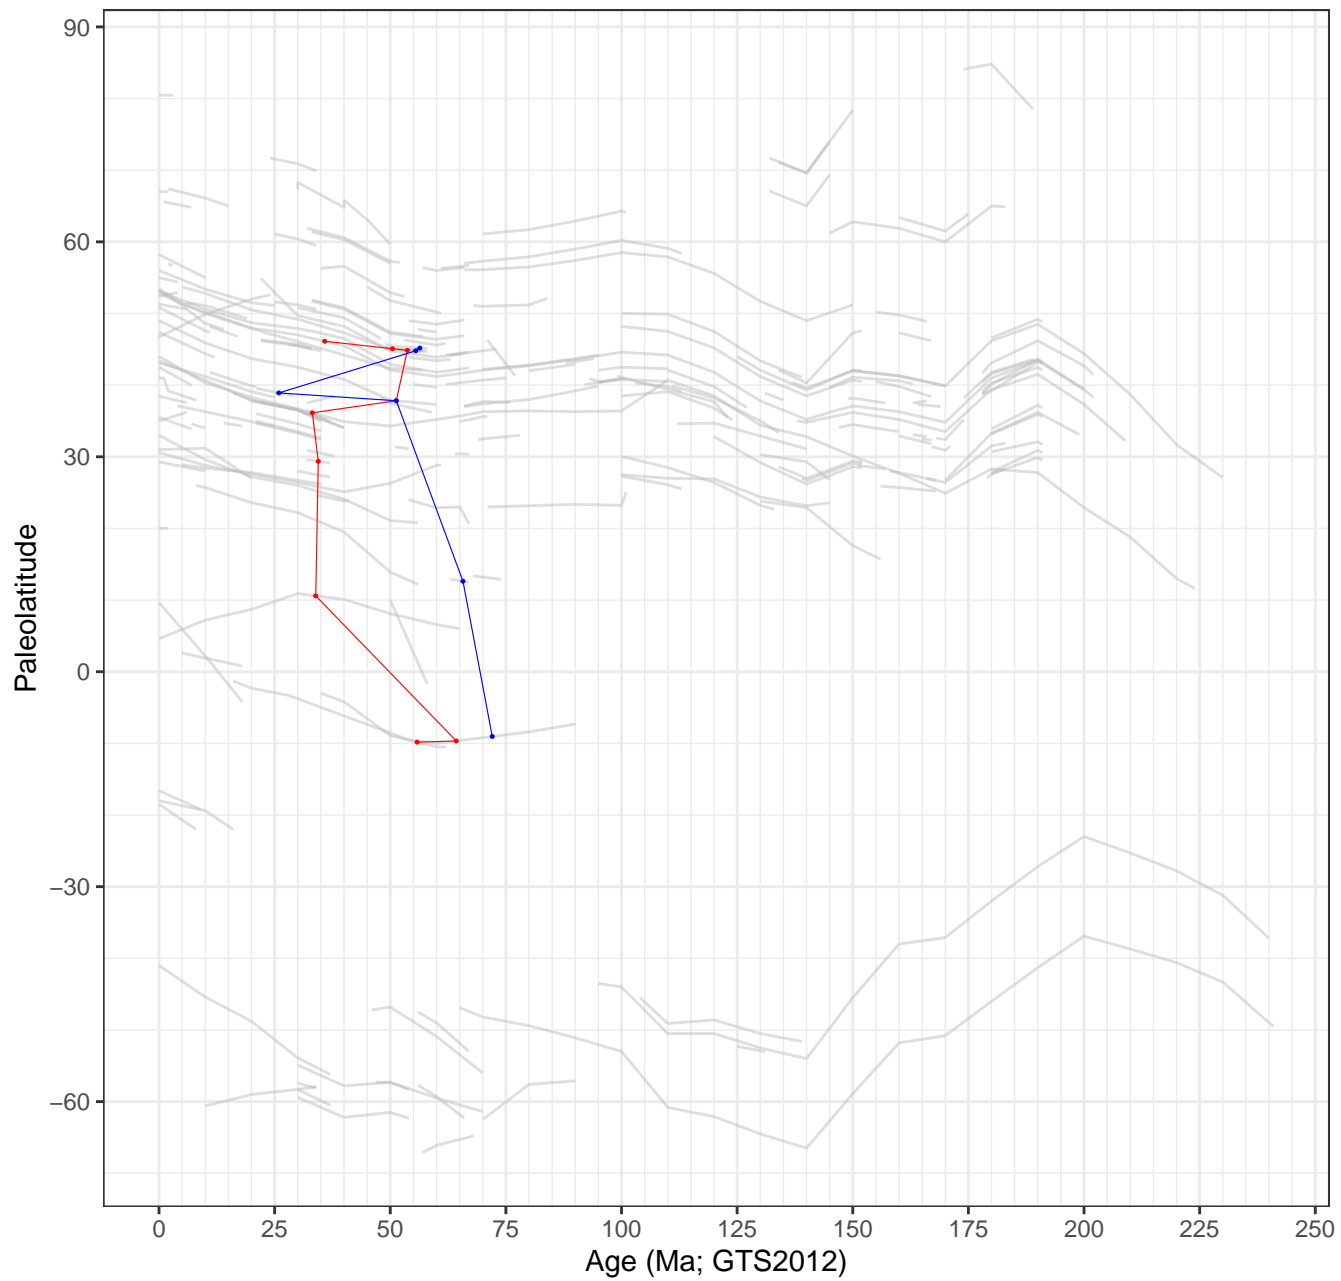

Supplement: Supplementary file 1109 [file Cordosphaeridium inodes.pdf › Supplement/Supplement 2/Species 1914 plots/Cordosphaeridium inodes.pdf]

# Species *Cordosphaeridium robustum*

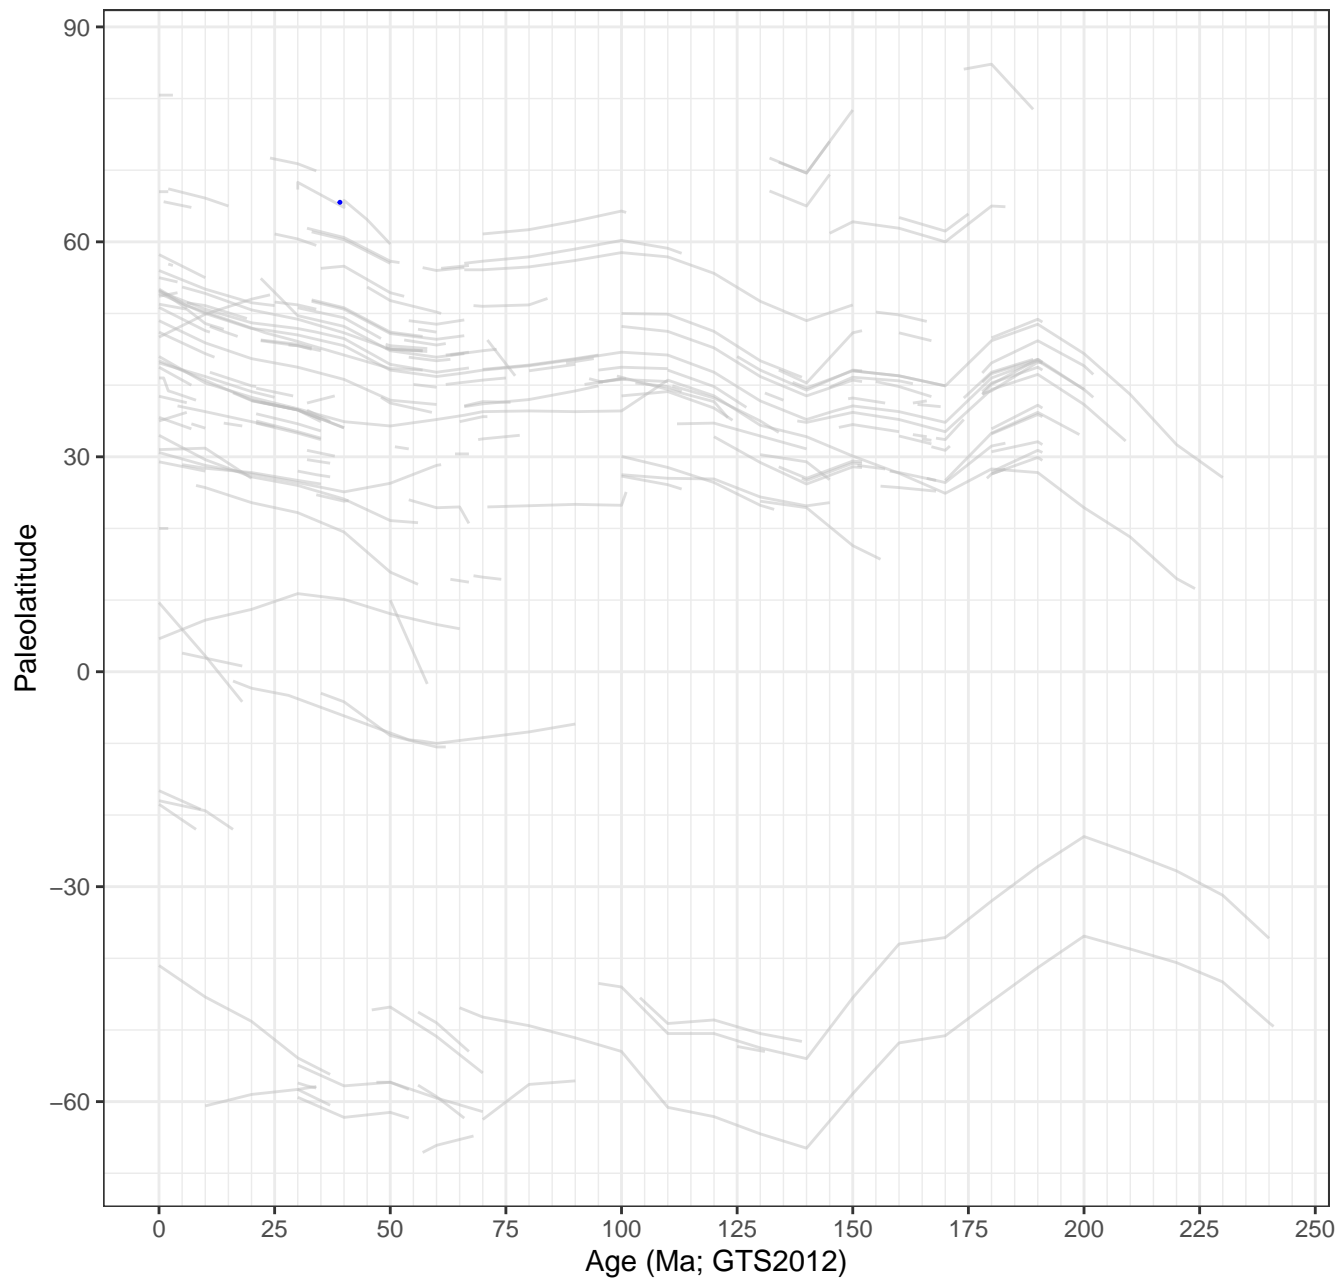

Supplement: Supplementary file 1110 [file Cordosphaeridium robustum.pdf › Supplement/Supplement 2/Species 1914 plots/Cordosphaeridium robustum.pdf]

# Species Cordosphaeridium varians

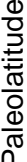

Supplement: Supplementary file 1111 [file Cordosphaeridium varians.pdf › Supplement/Supplement 2/Species 1914 plots/Cordosphaeridium varians.pdf]

# Species *Coronifera albertii*

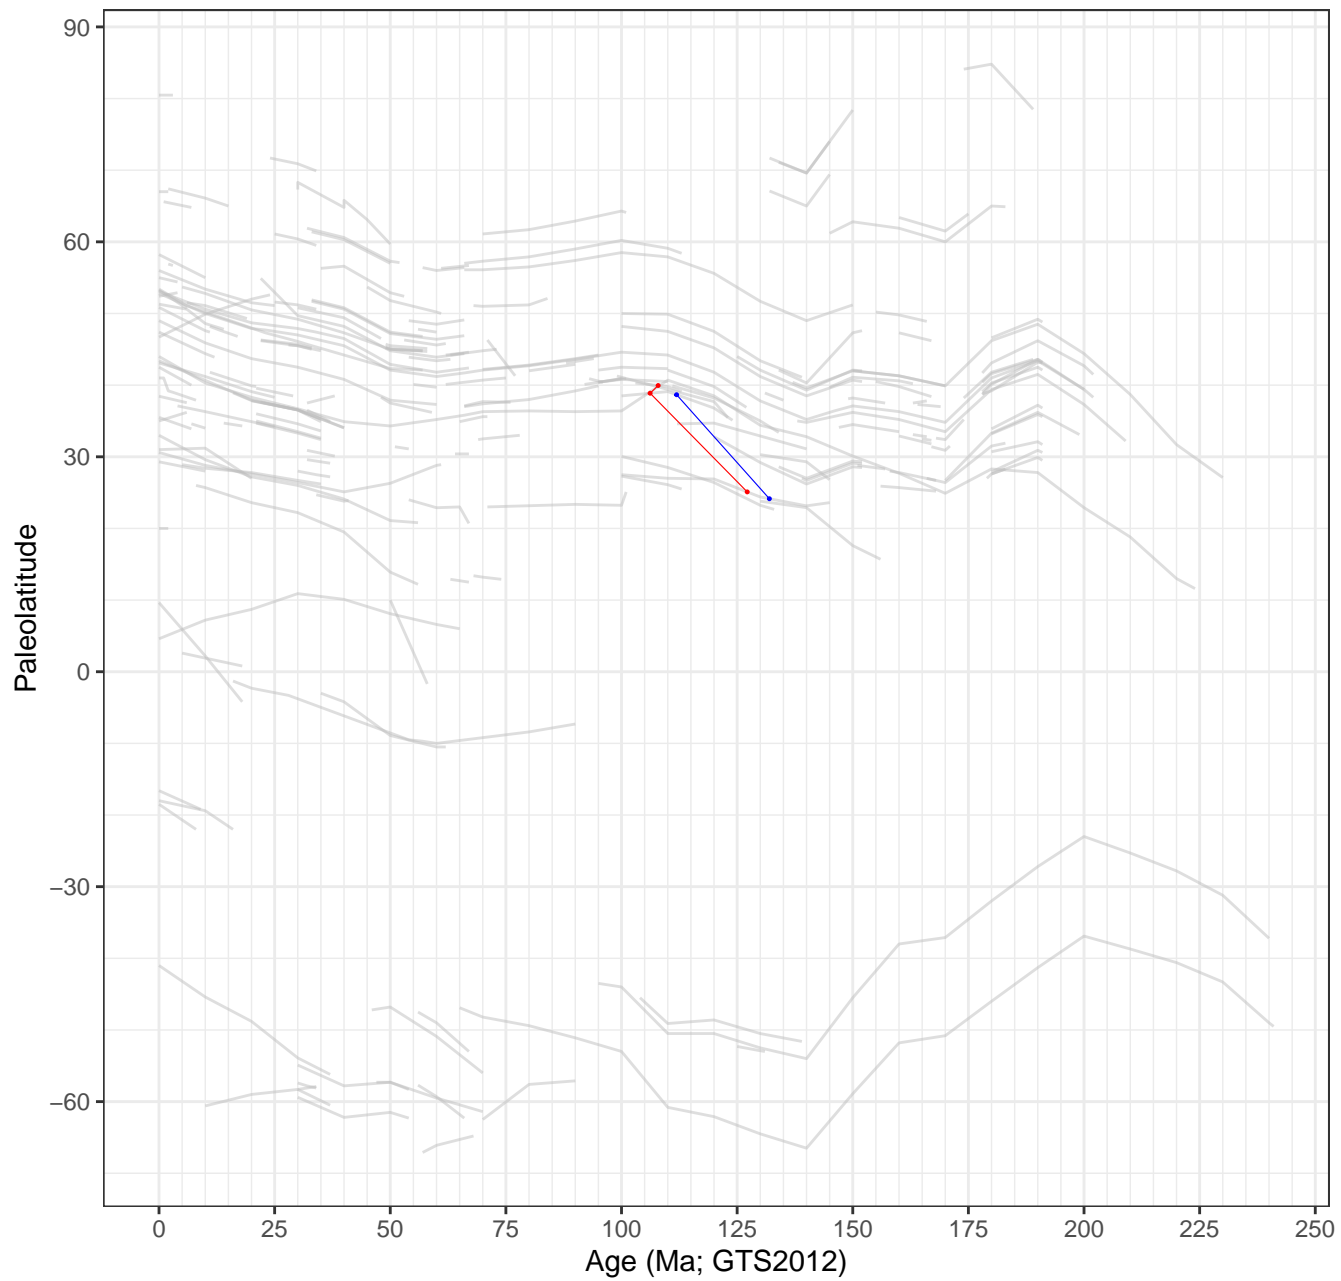

Supplement: Supplementary file 1112 [file Coronifera albertii.pdf › Supplement/Supplement 2/Species 1914 plots/Coronifera albertii.pdf]

# Species *Coronifera oceanica*

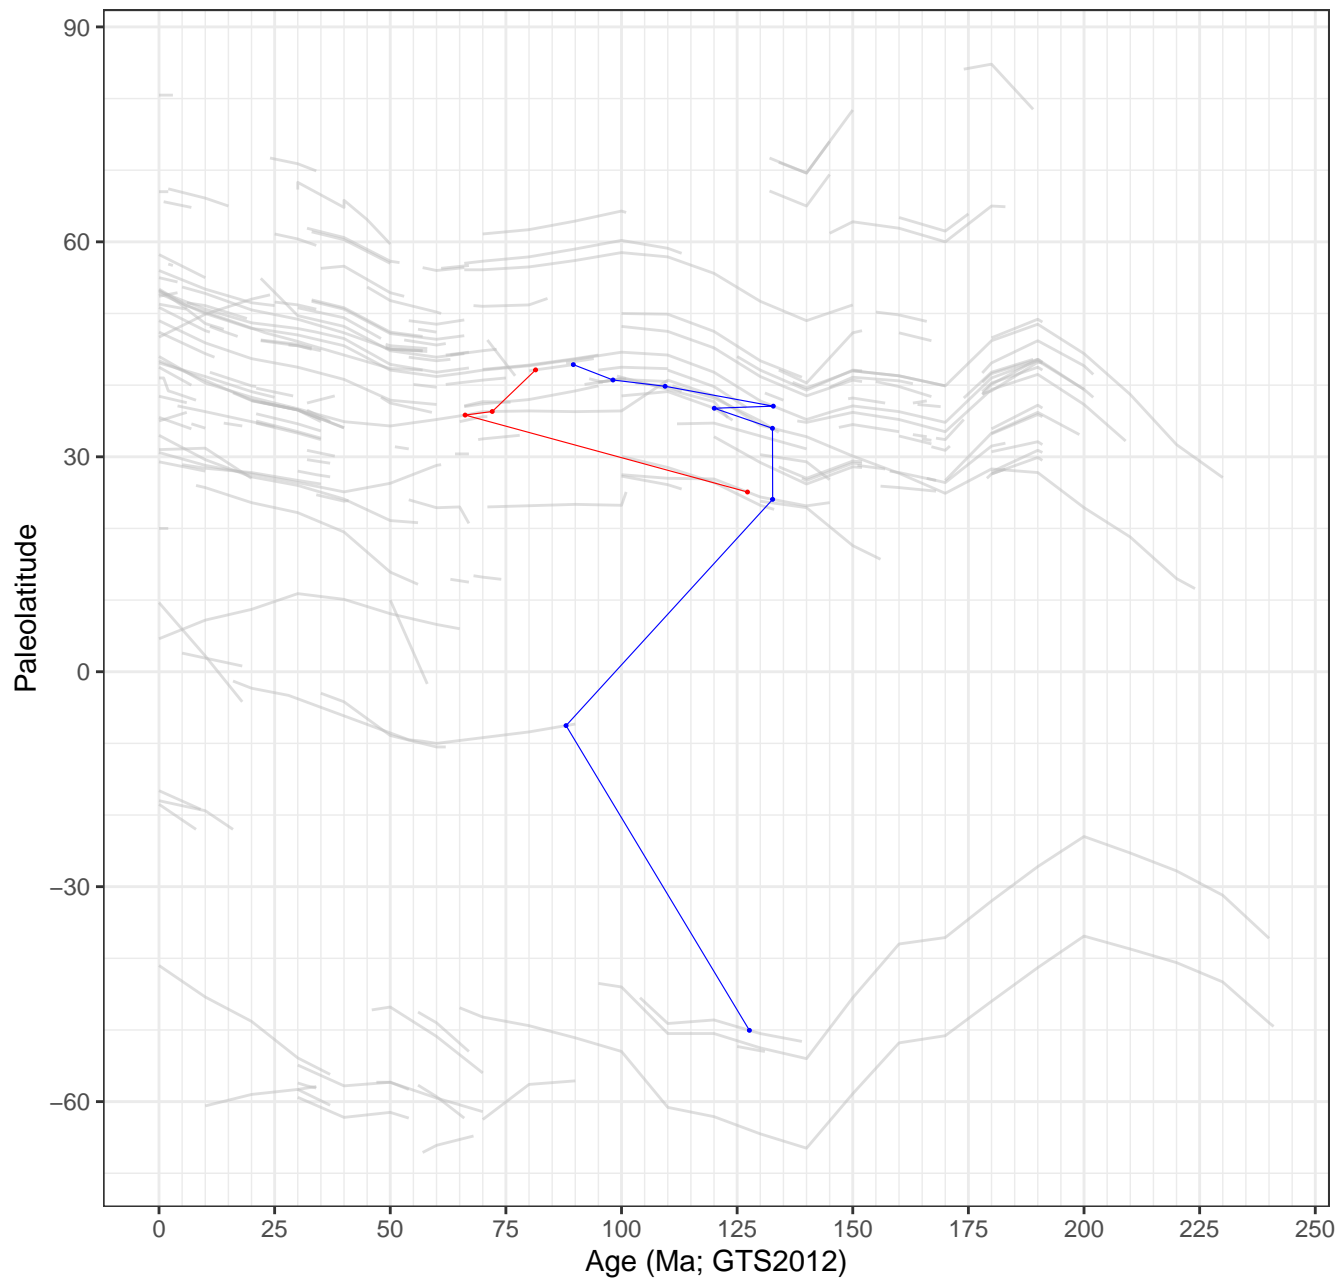

Supplement: Supplementary file 1113 [file Coronifera oceanica.pdf › Supplement/Supplement 2/Species 1914 plots/Coronifera oceanica.pdf]

# Species *Coronifera striolata*

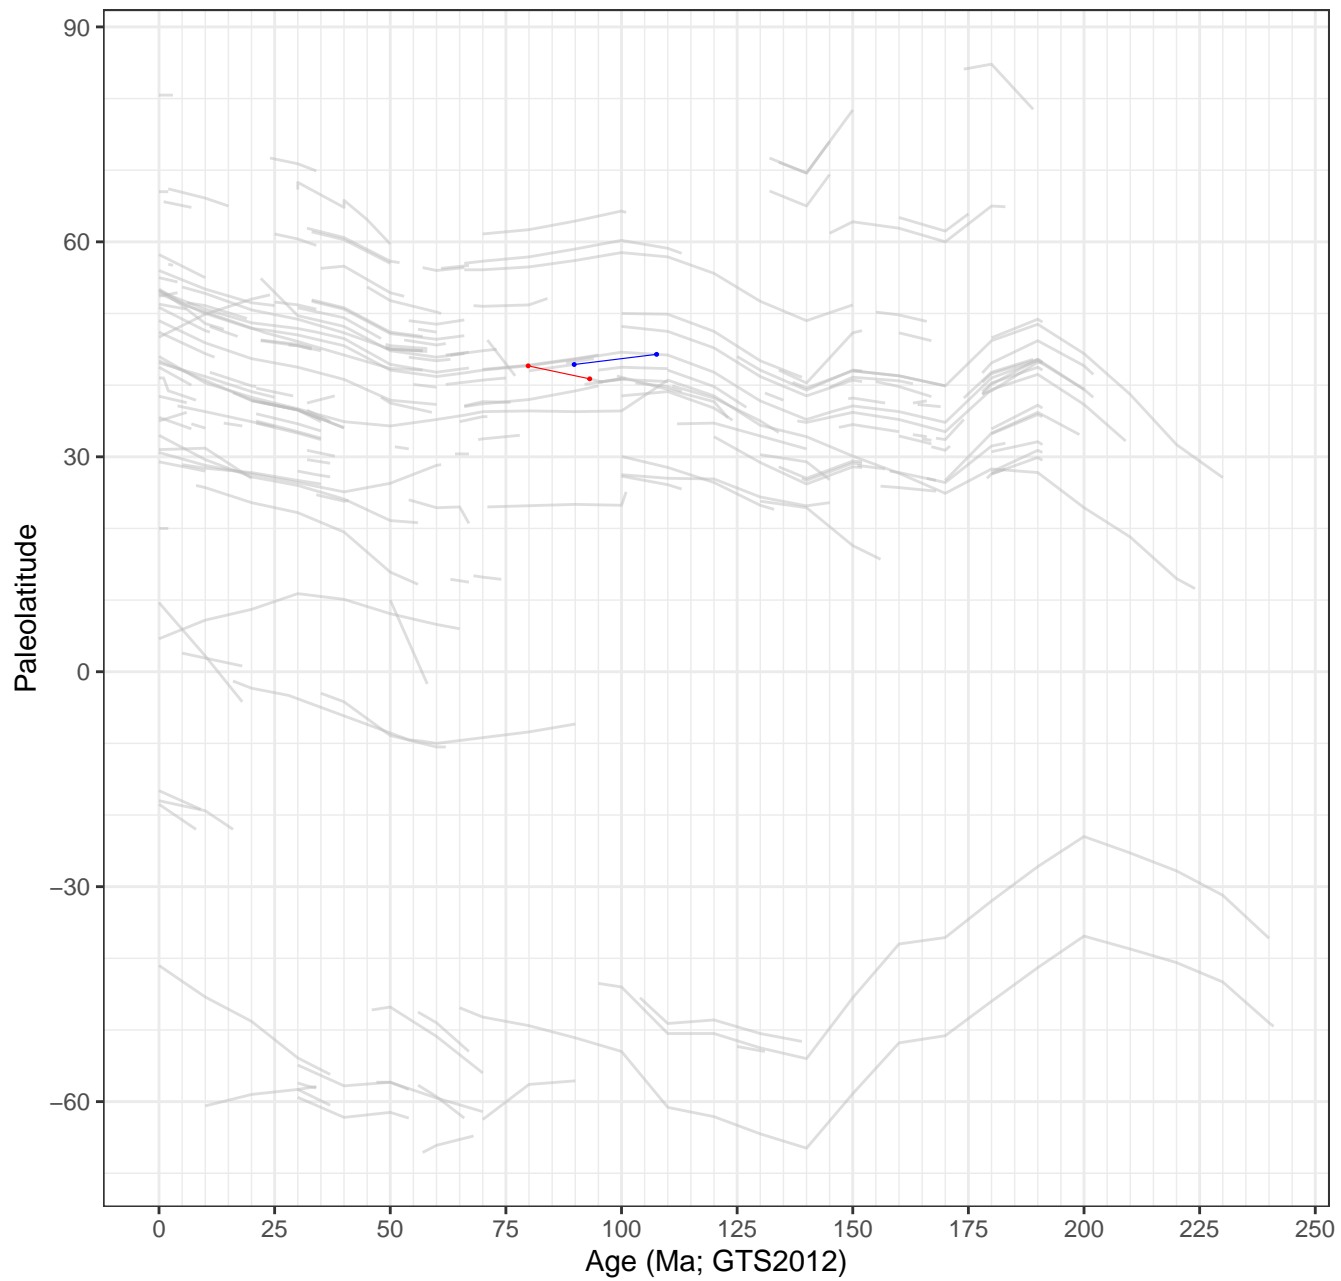

Supplement: Supplementary file 1114 [file Coronifera striolata.pdf › Supplement/Supplement 2/Species 1914 plots/Coronifera striolata.pdf]

# Species *Coronifera tubulosa*

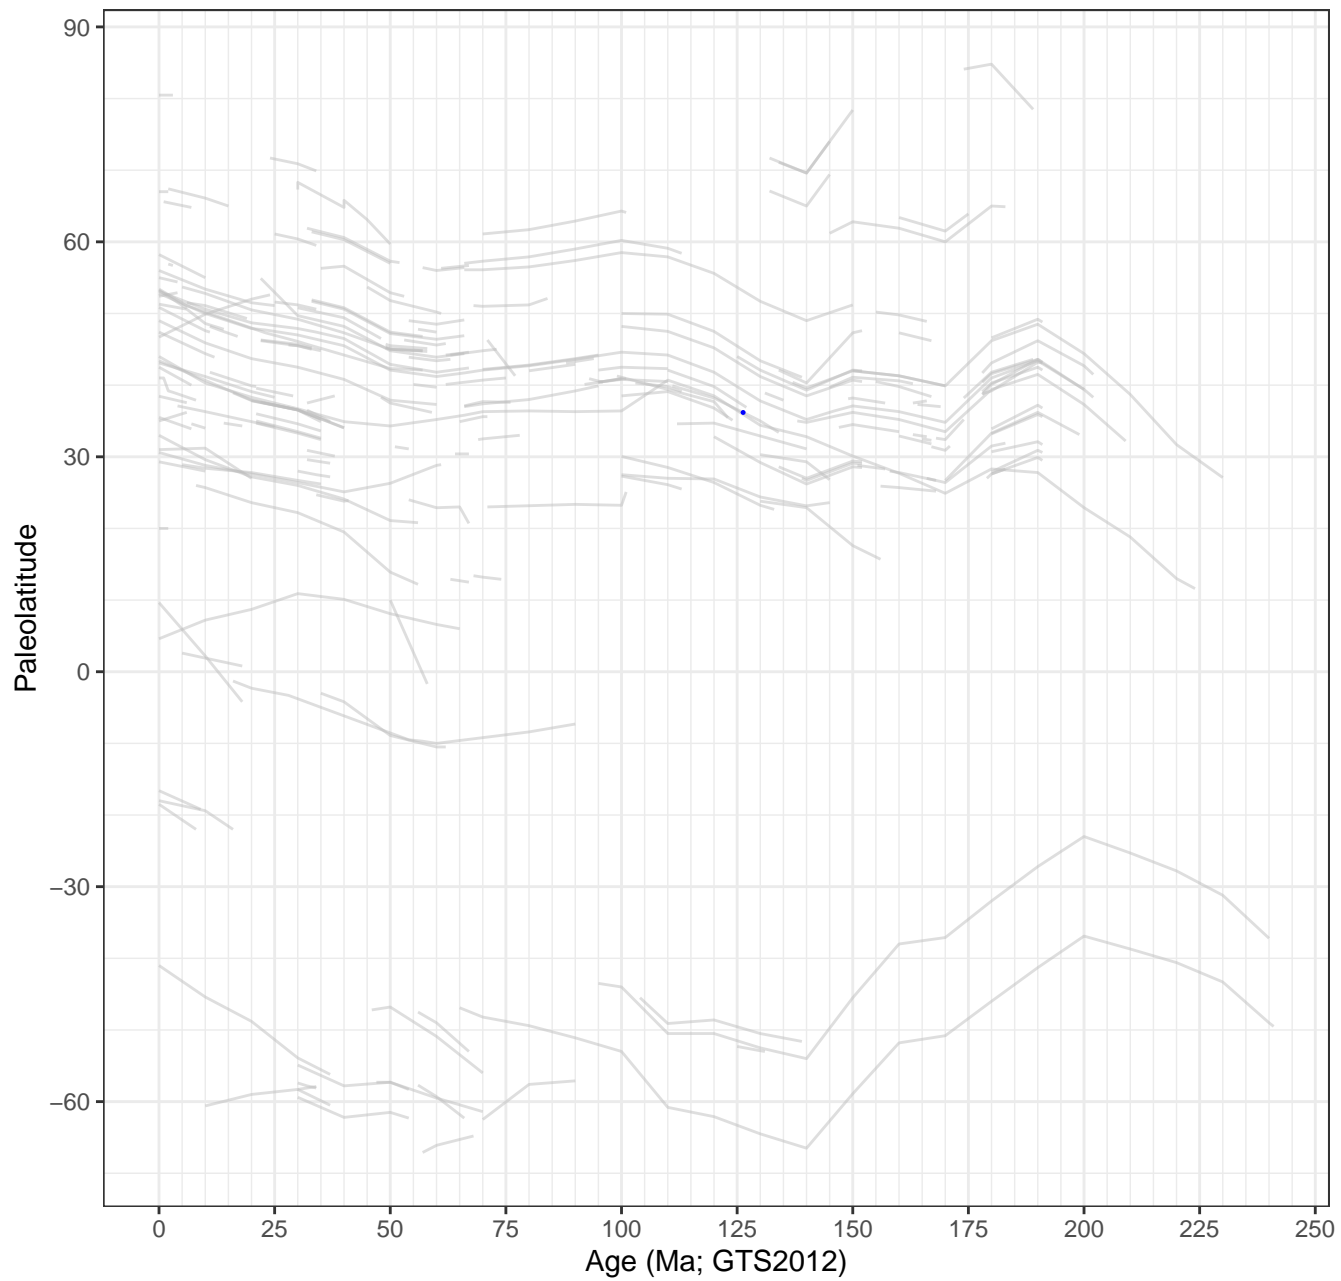

Supplement: Supplementary file 1115 [file Coronifera tubulosa.pdf › Supplement/Supplement 2/Species 1914 plots/Coronifera tubulosa.pdf]

# Species *Corruidinium devernaliae*

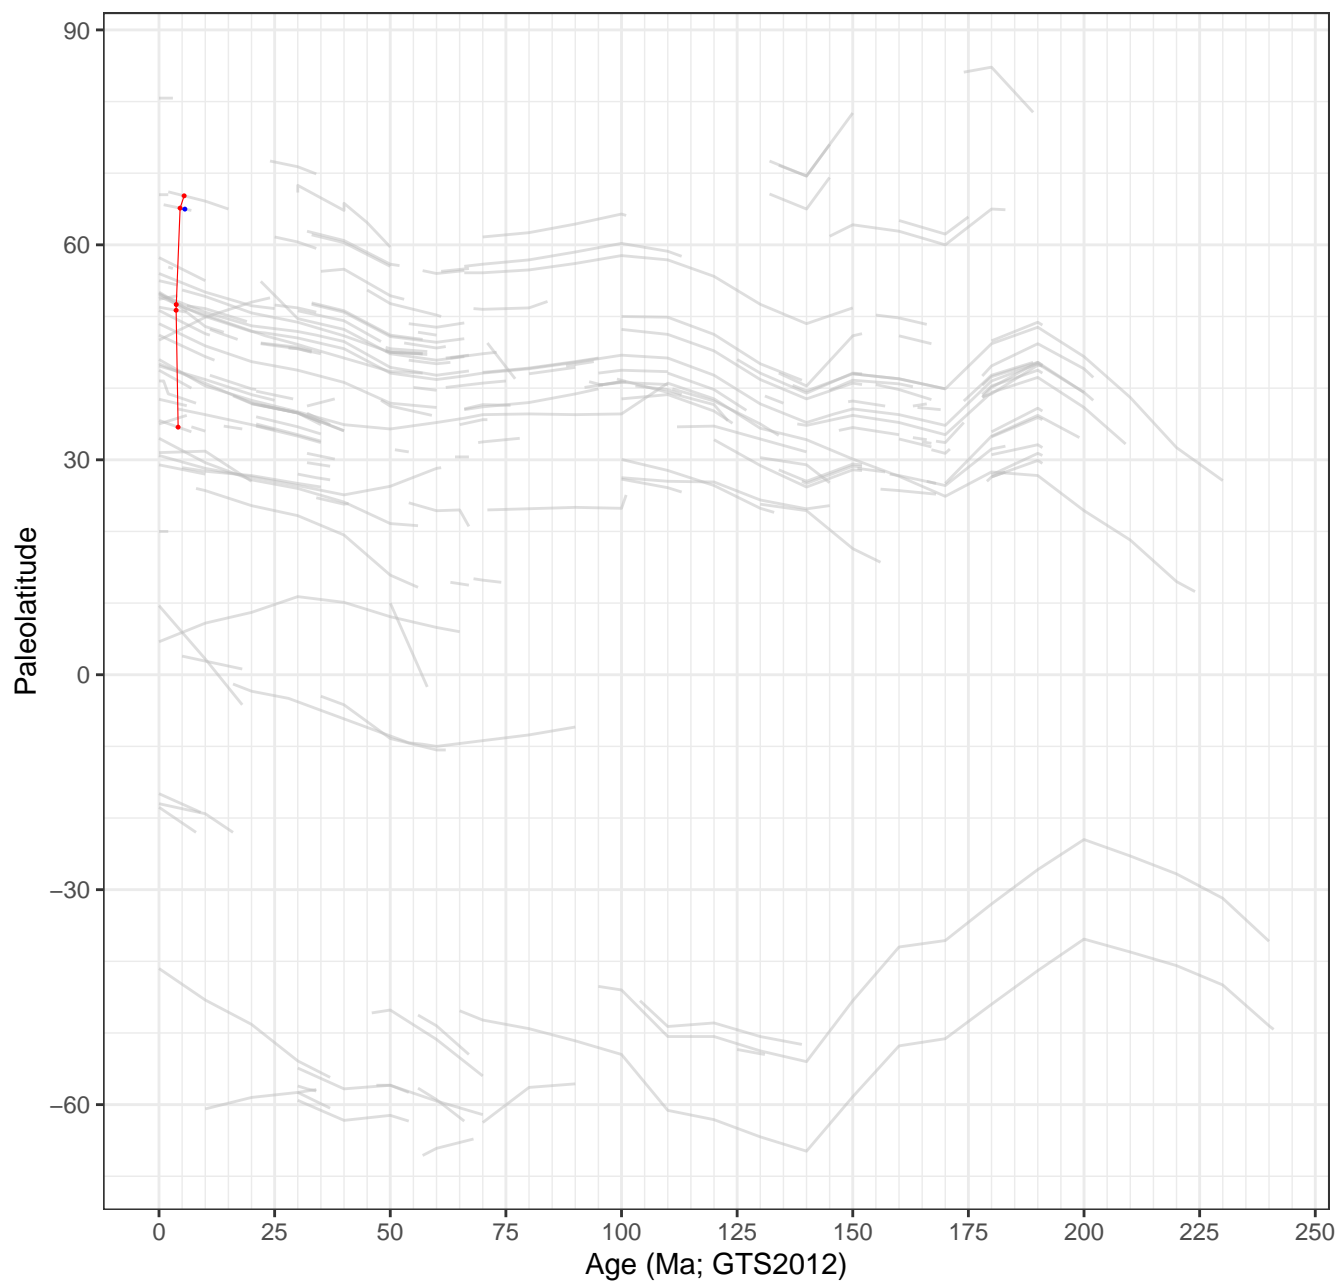

Supplement: Supplementary file 1116 [file Corrudinium devernaliae.pdf › Supplement/Supplement 2/Species 1914 plots/Corrudinium devernaliae.pdf]

# Species *Corrudinium harlandii*

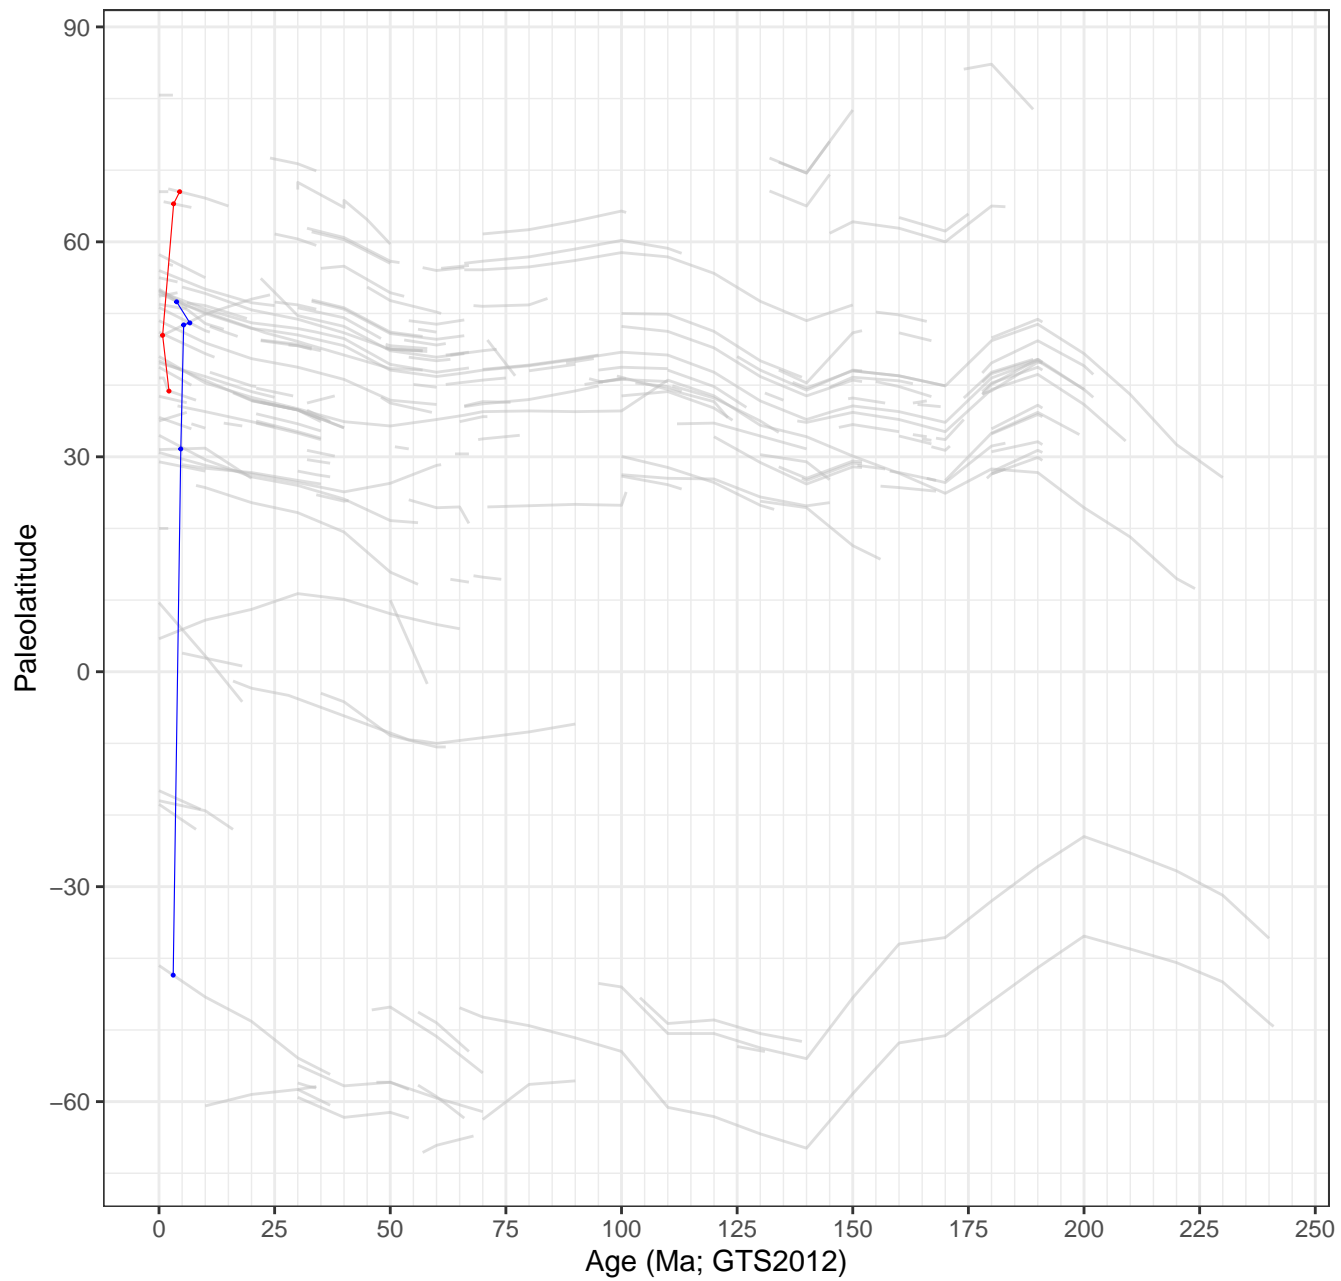

Supplement: Supplementary file 1117 [file Corrudinium harlandii.pdf › Supplement/Supplement 2/Species 1914 plots/Corrudinium harlandii.pdf]

# Species *Corrudinium incompositum*

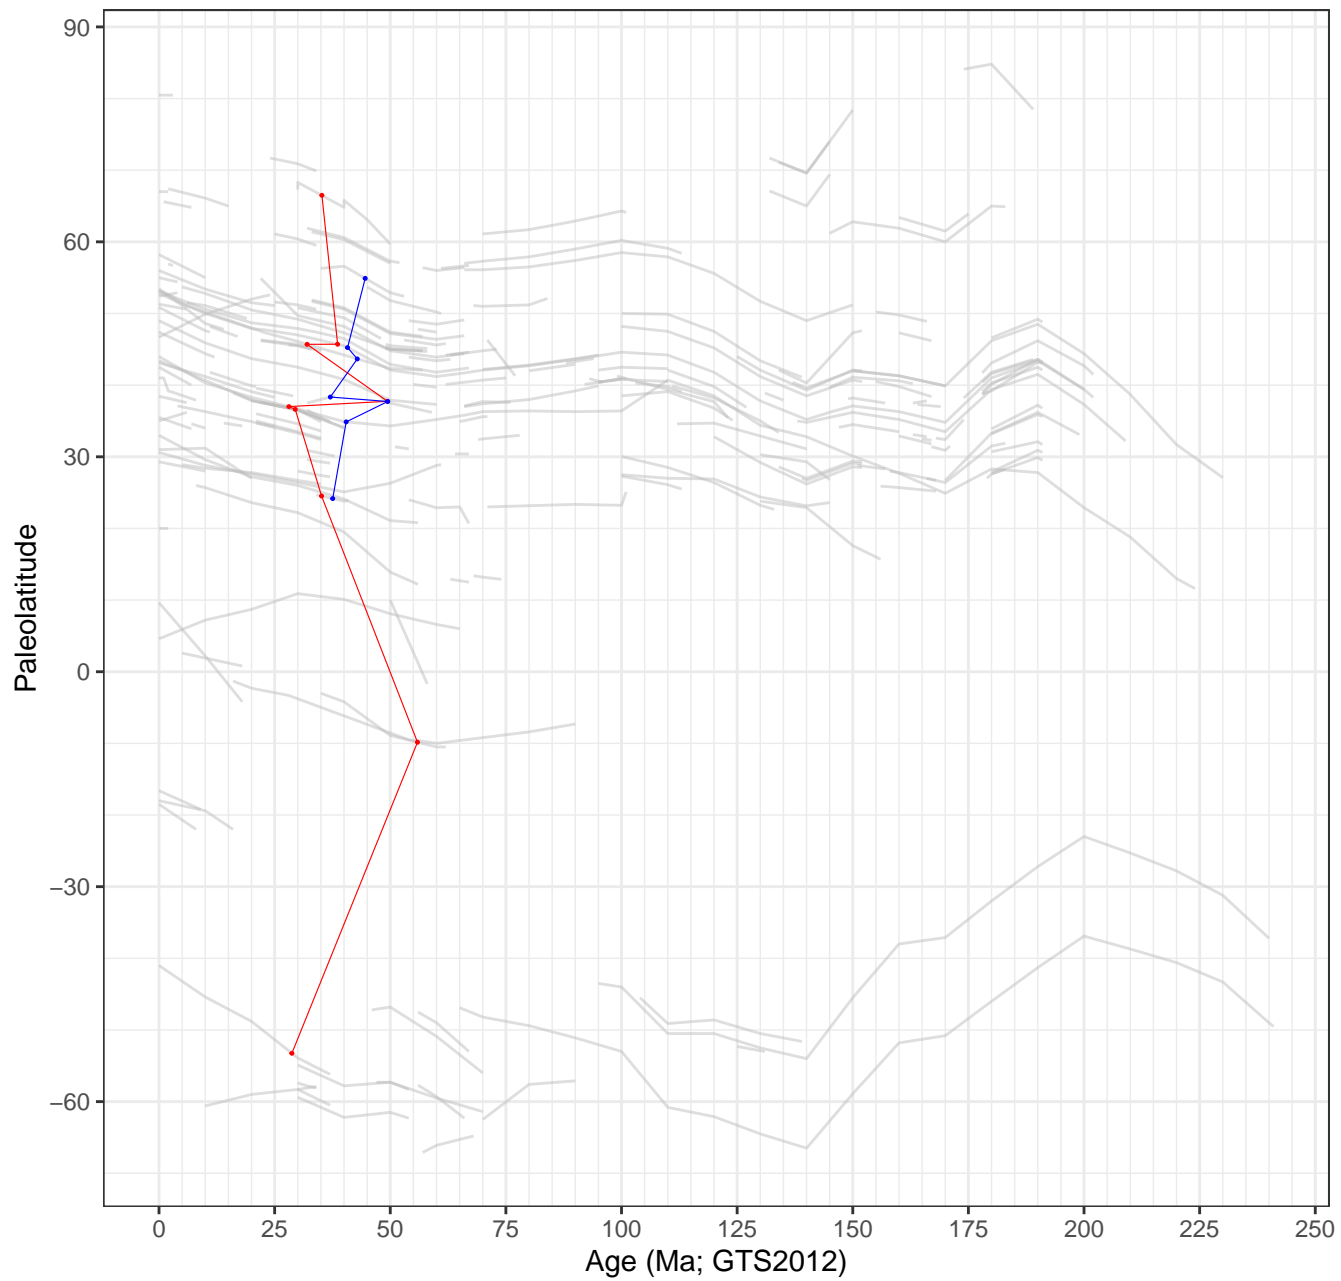

Supplement: Supplementary file 1118 [file Corrudinium incompositum.pdf › Supplement/Supplement 2/Species 1914 plots/Corrudinium incompositum.pdf]

# Species *Corrudinium labradori*

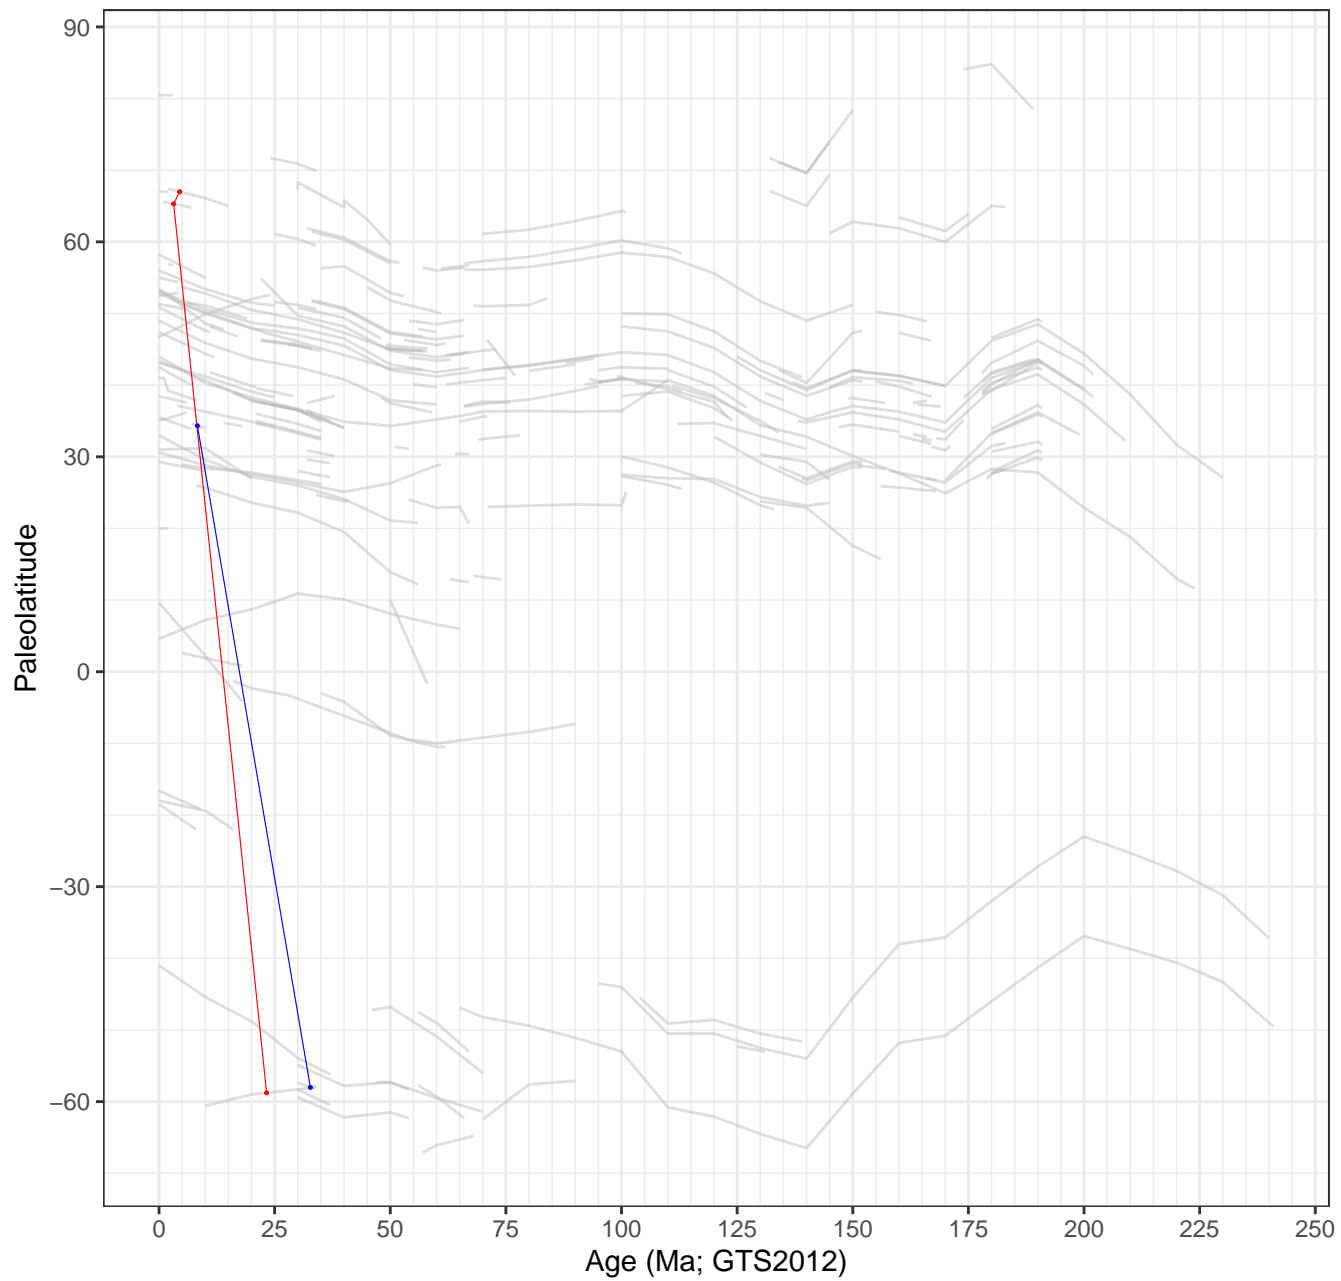

Supplement: Supplementary file 1119 [file Corrudinium labradori.pdf › Supplement/Supplement 2/Species 1914 plots/Corrudinium labradori.pdf]

# Species *Corrudinium obscurum*

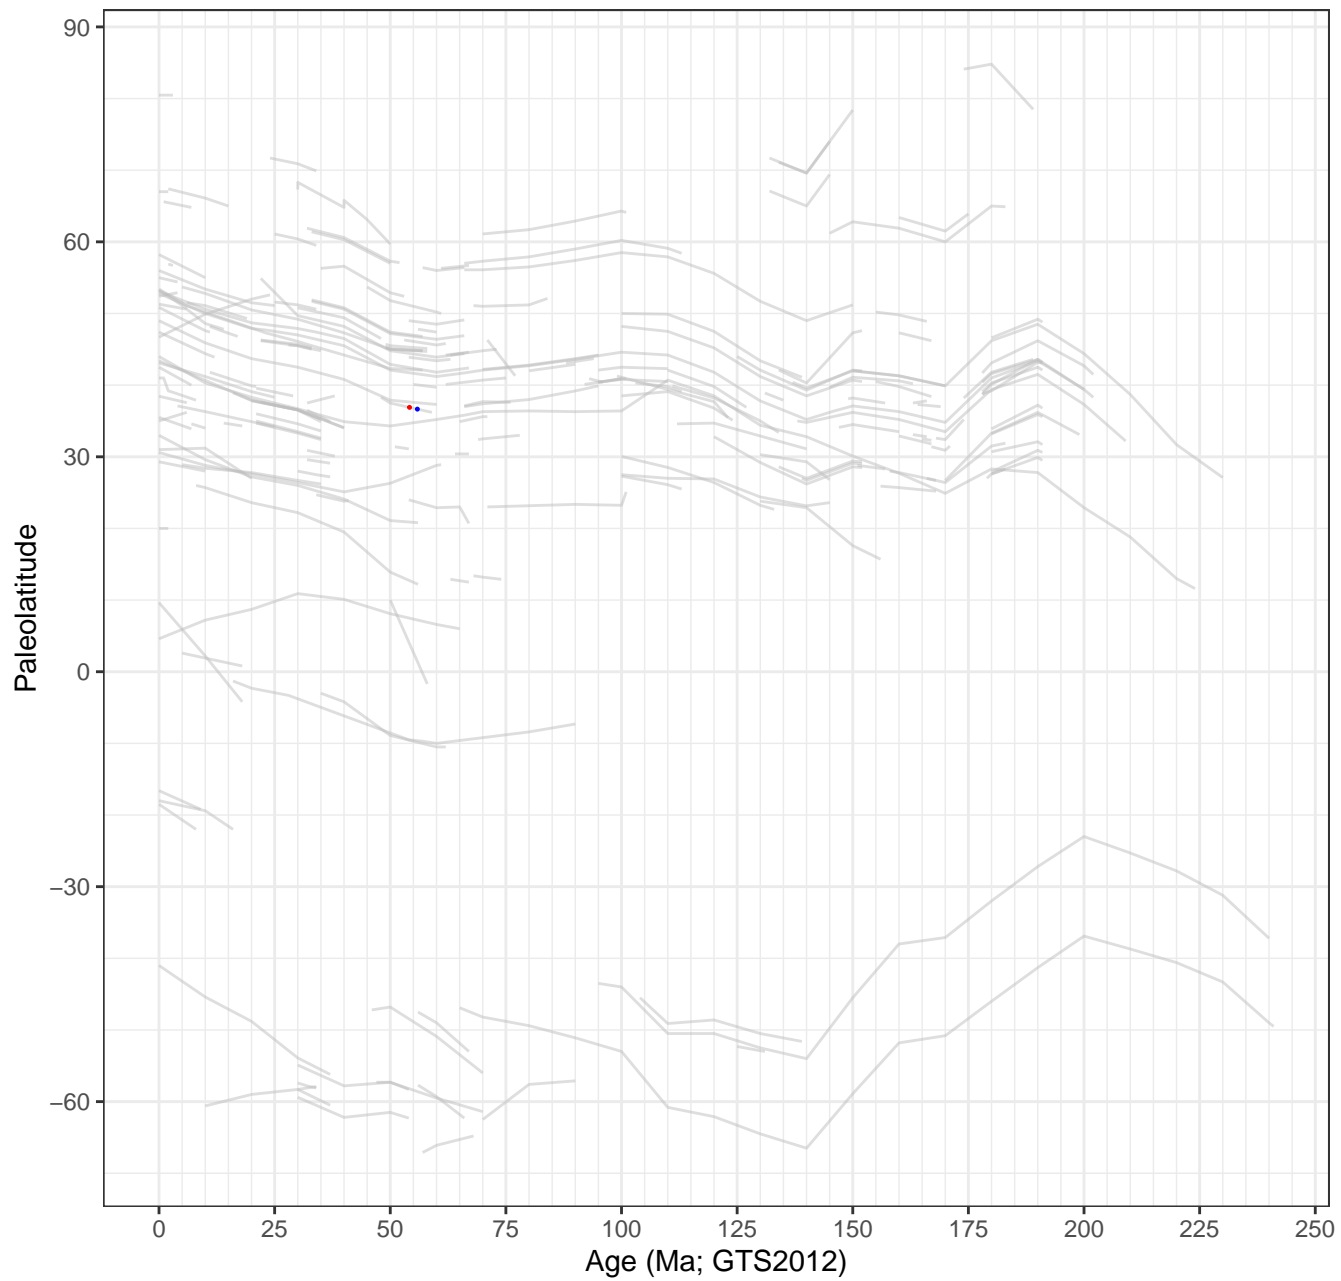

Supplement: Supplementary file 1120 [file Corrudinium obscurum.pdf › Supplement/Supplement 2/Species 1914 plots/Corrudinium obscurum.pdf]

# Species *Corrudinium regulare*

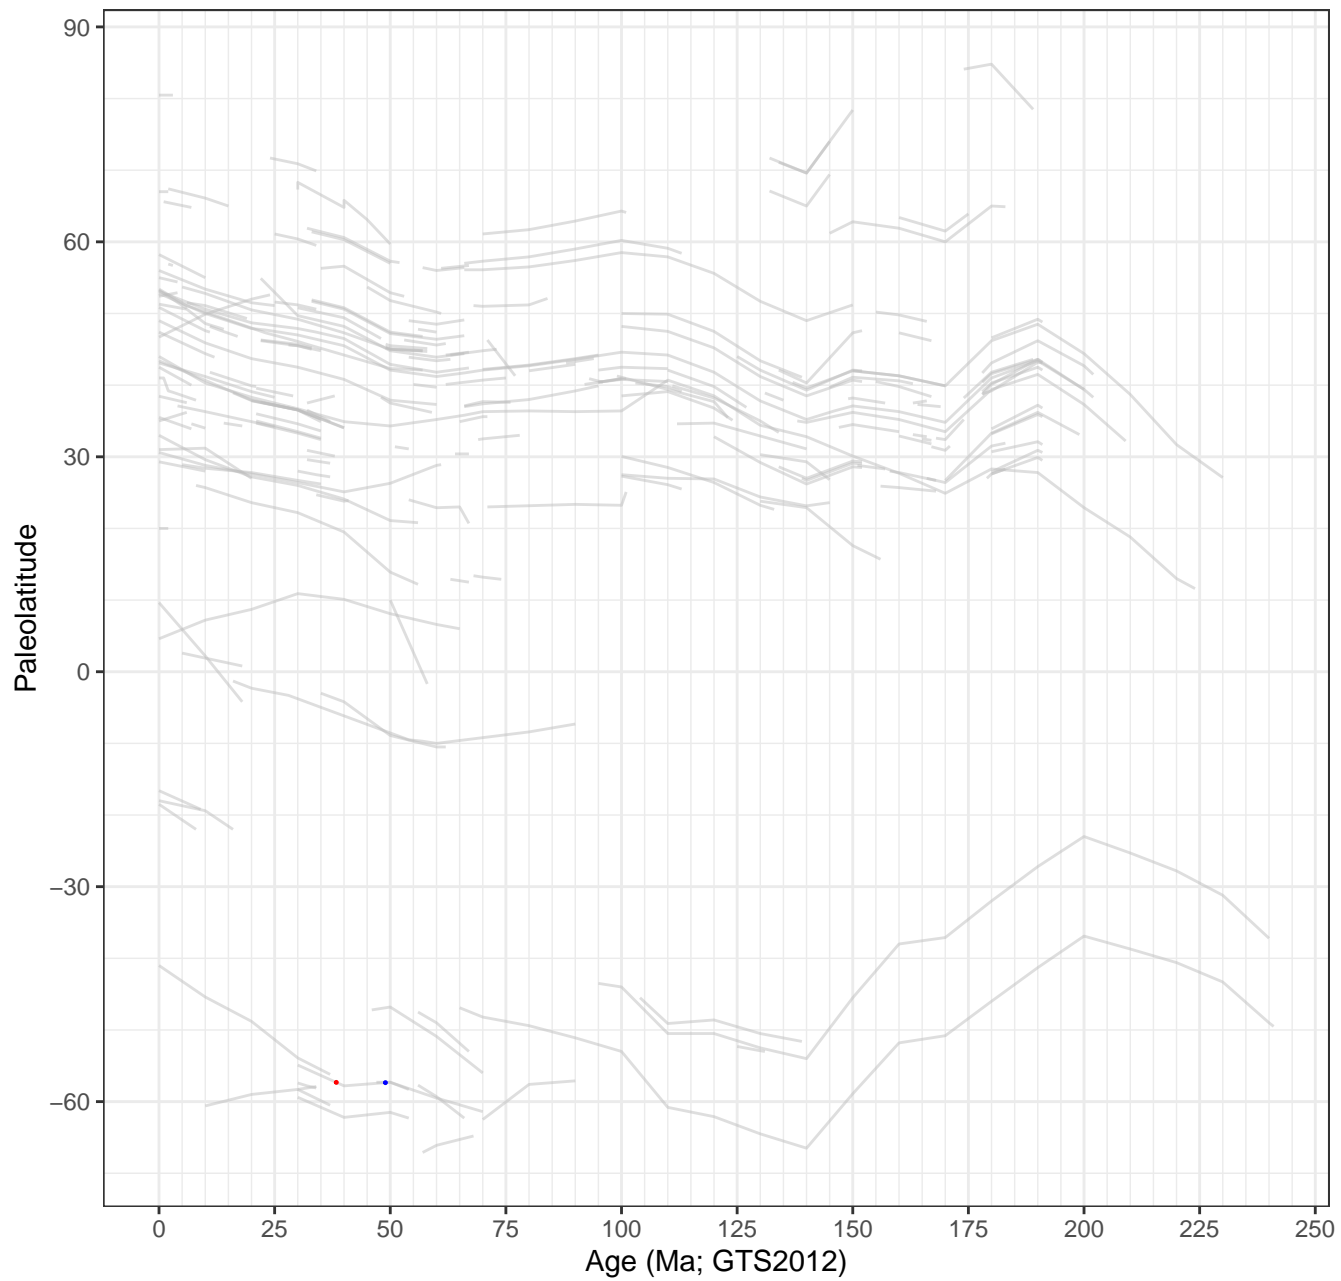

Supplement: Supplementary file 1121 [file Corrudinium regulare.pdf › Supplement/Supplement 2/Species 1914 plots/Corrudinium regulare.pdf]

# Species *Costacysta bucina*

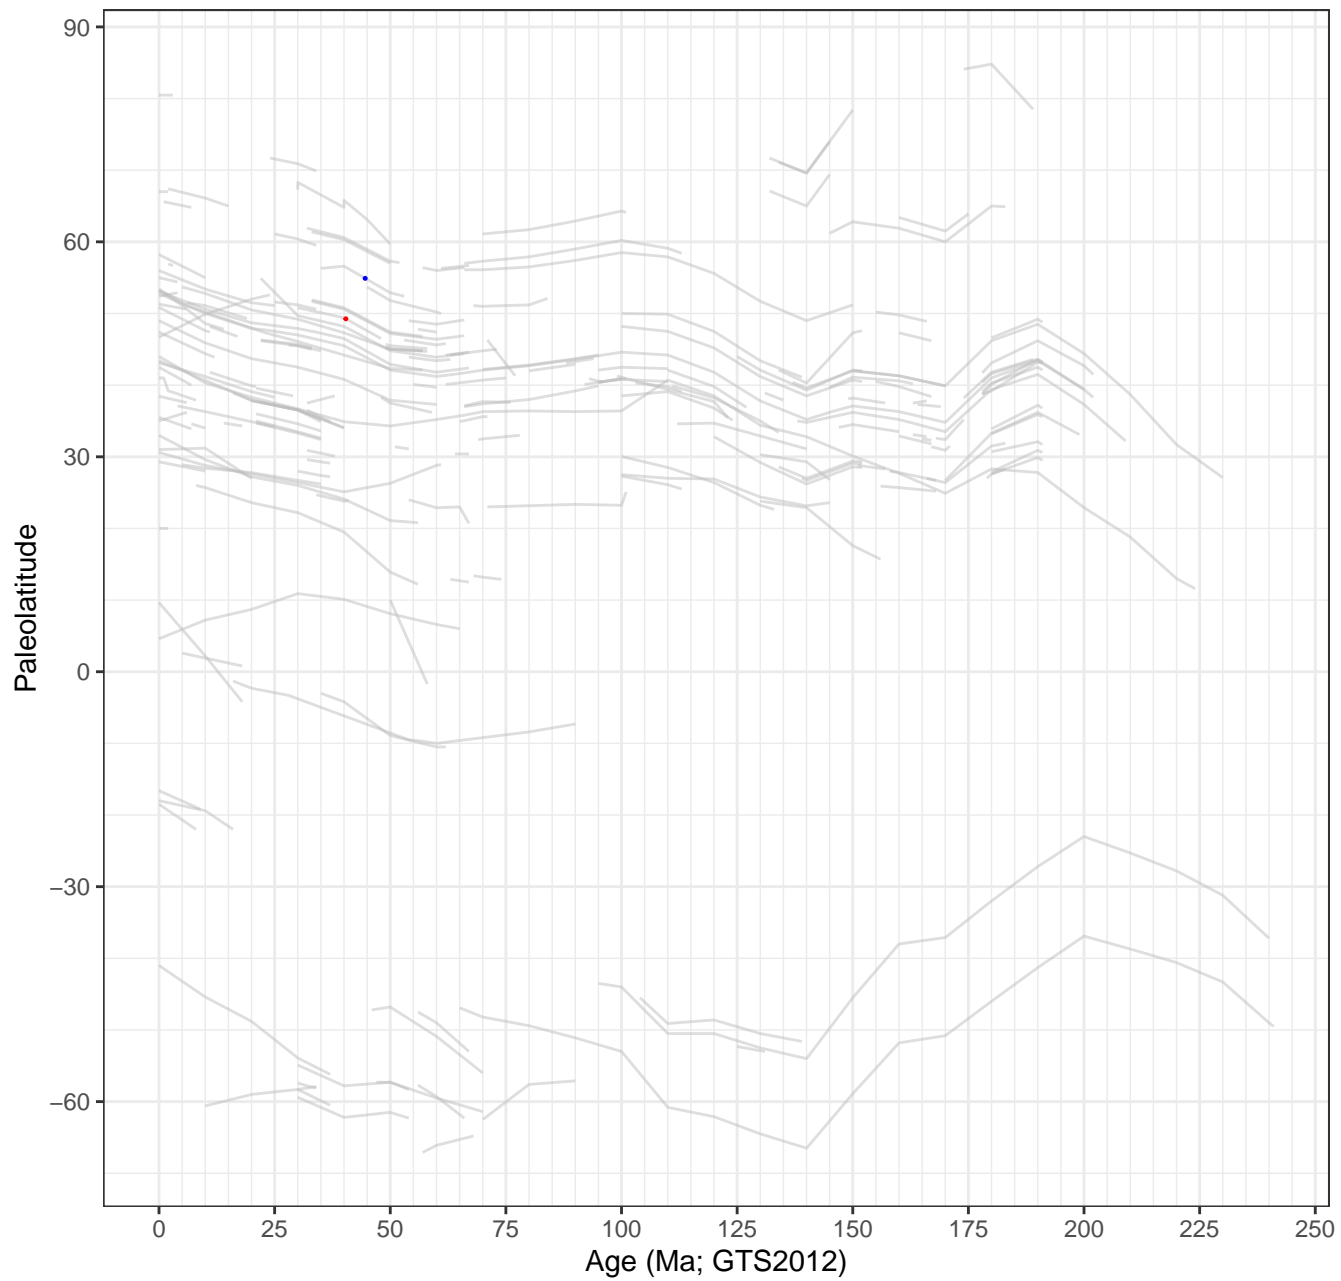

Supplement: Supplementary file 1122 [file Costacysta bucina.pdf › Supplement/Supplement 2/Species 1914 plots/Costacysta bucina.pdf]

# Species *Cousteaudinium aubryae gonoperforatum*

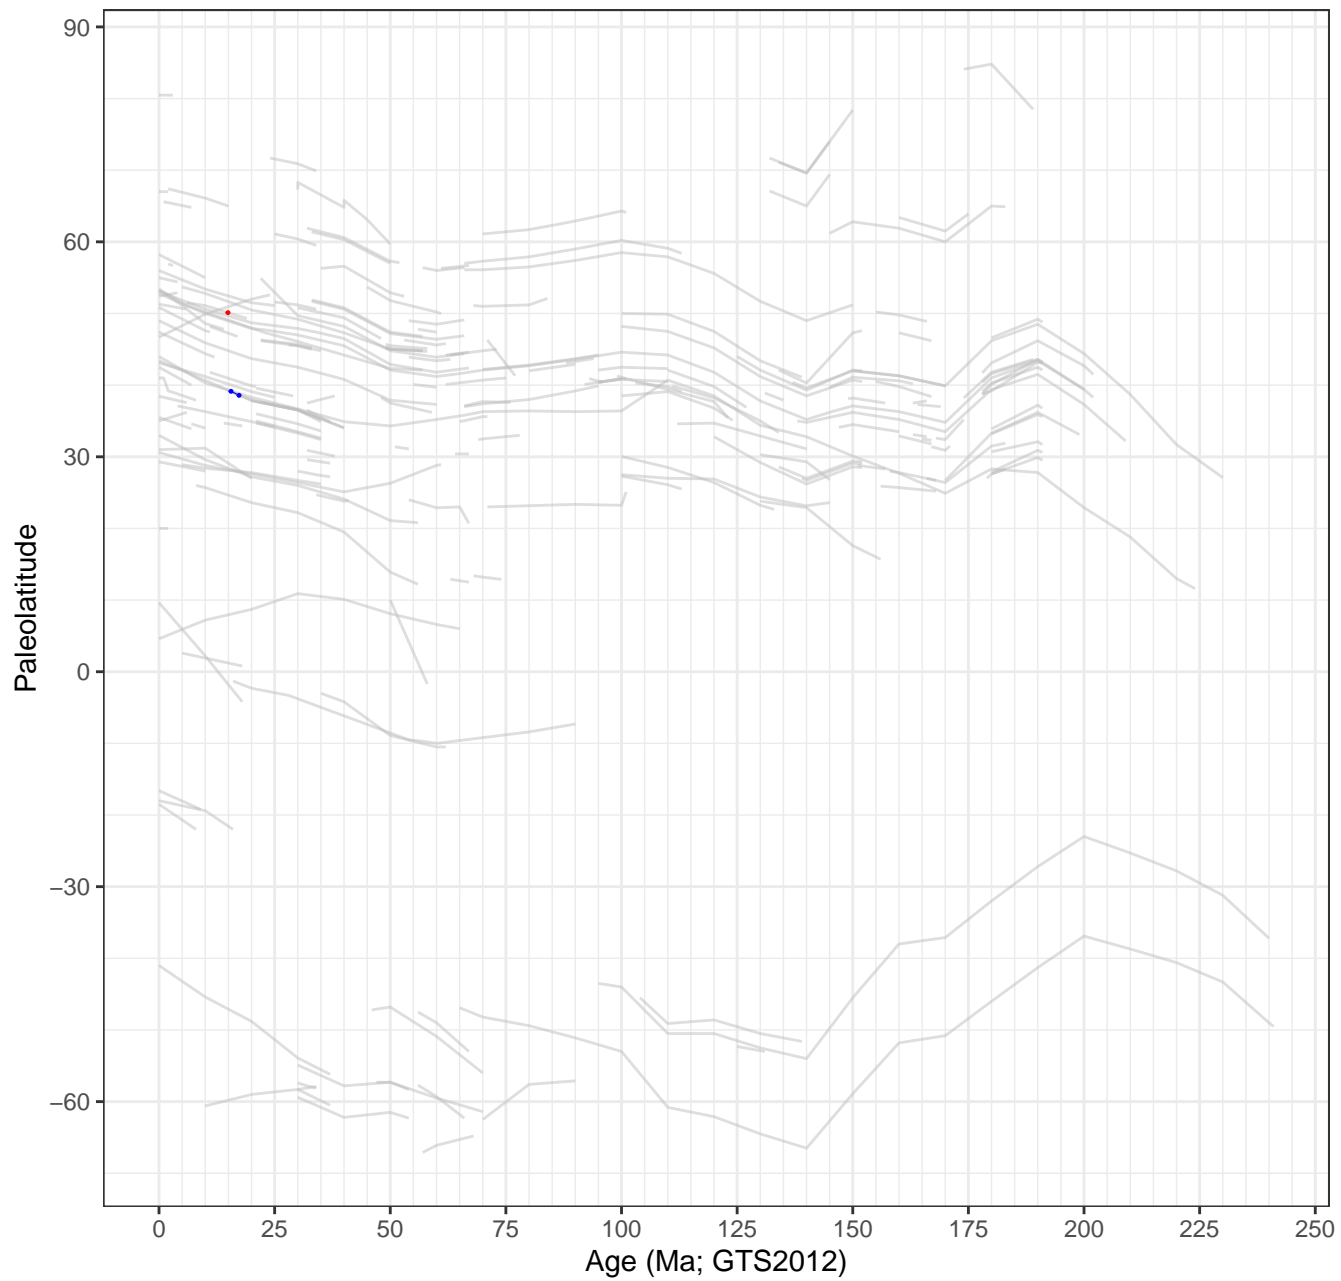

Supplement: Supplementary file 1123 [file Cousteaudinium aubryae gonoperforatum.pdf › Supplement/Supplement 2/Species 1914 plots/Cousteaudinium aubryae gonoperforatum.pdf]

# Species *Cousteaudinium aubryae*

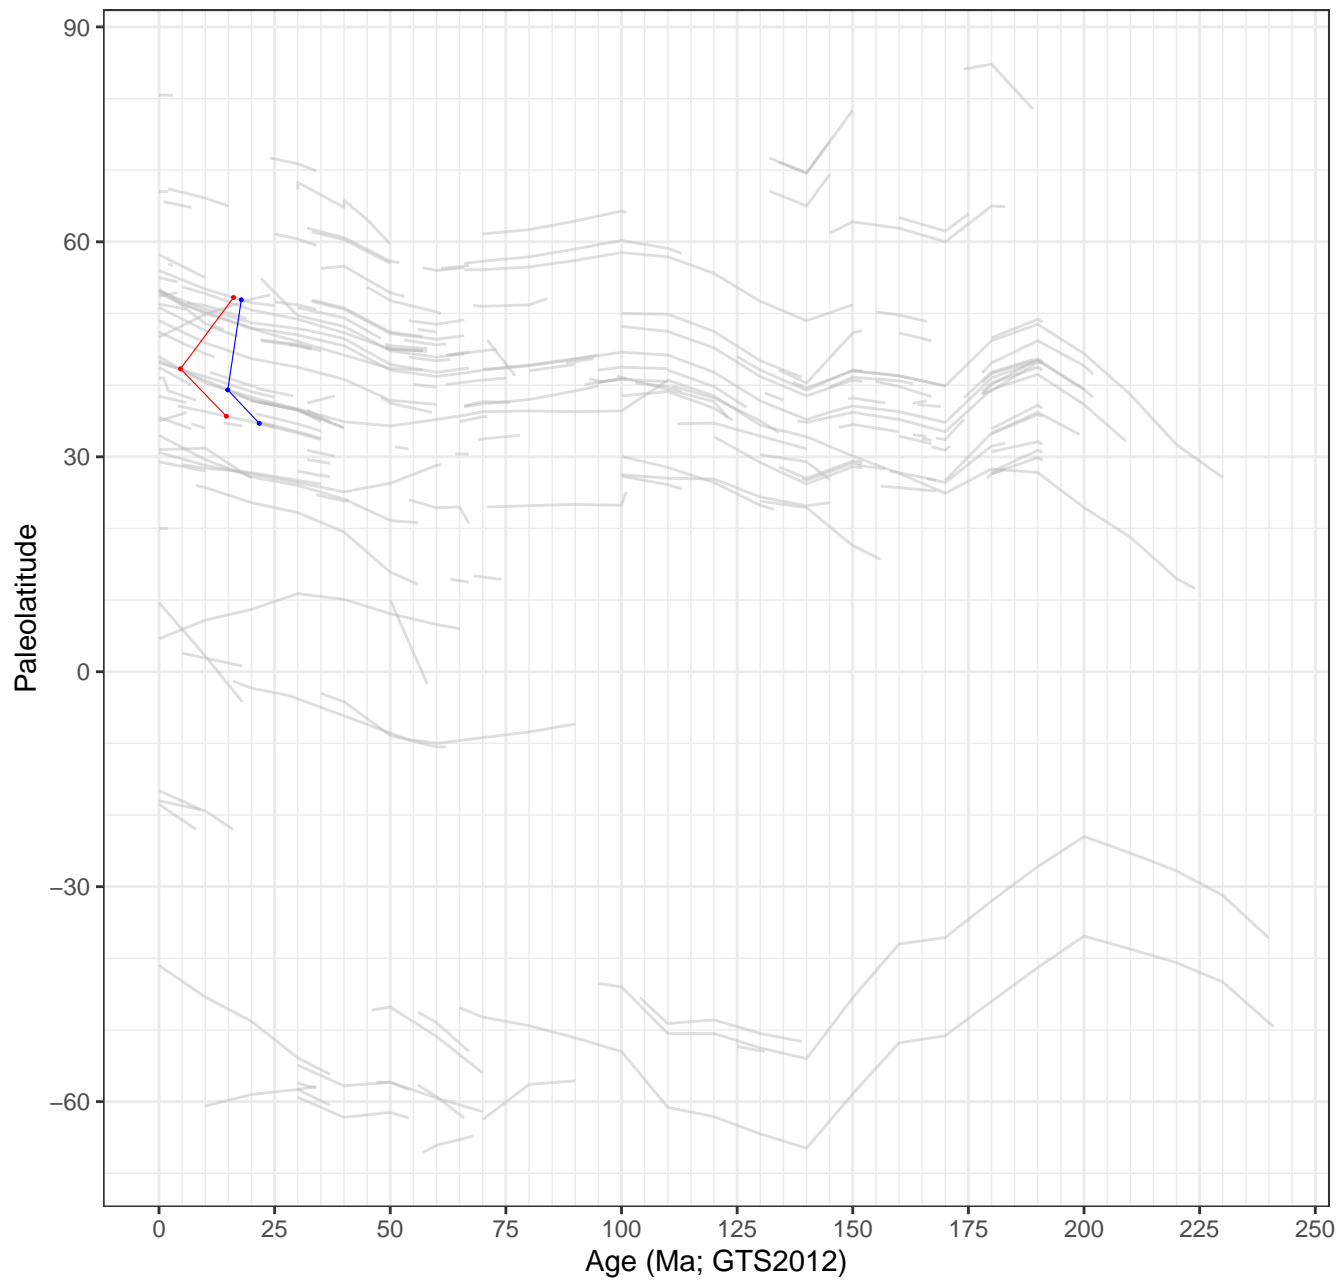

Supplement: Supplementary file 1124 [file Cousteaudinium aubryae.pdf › Supplement/Supplement 2/Species 1914 plots/Cousteaudinium aubryae.pdf]

# Species *Craspedodinium indistinctum*

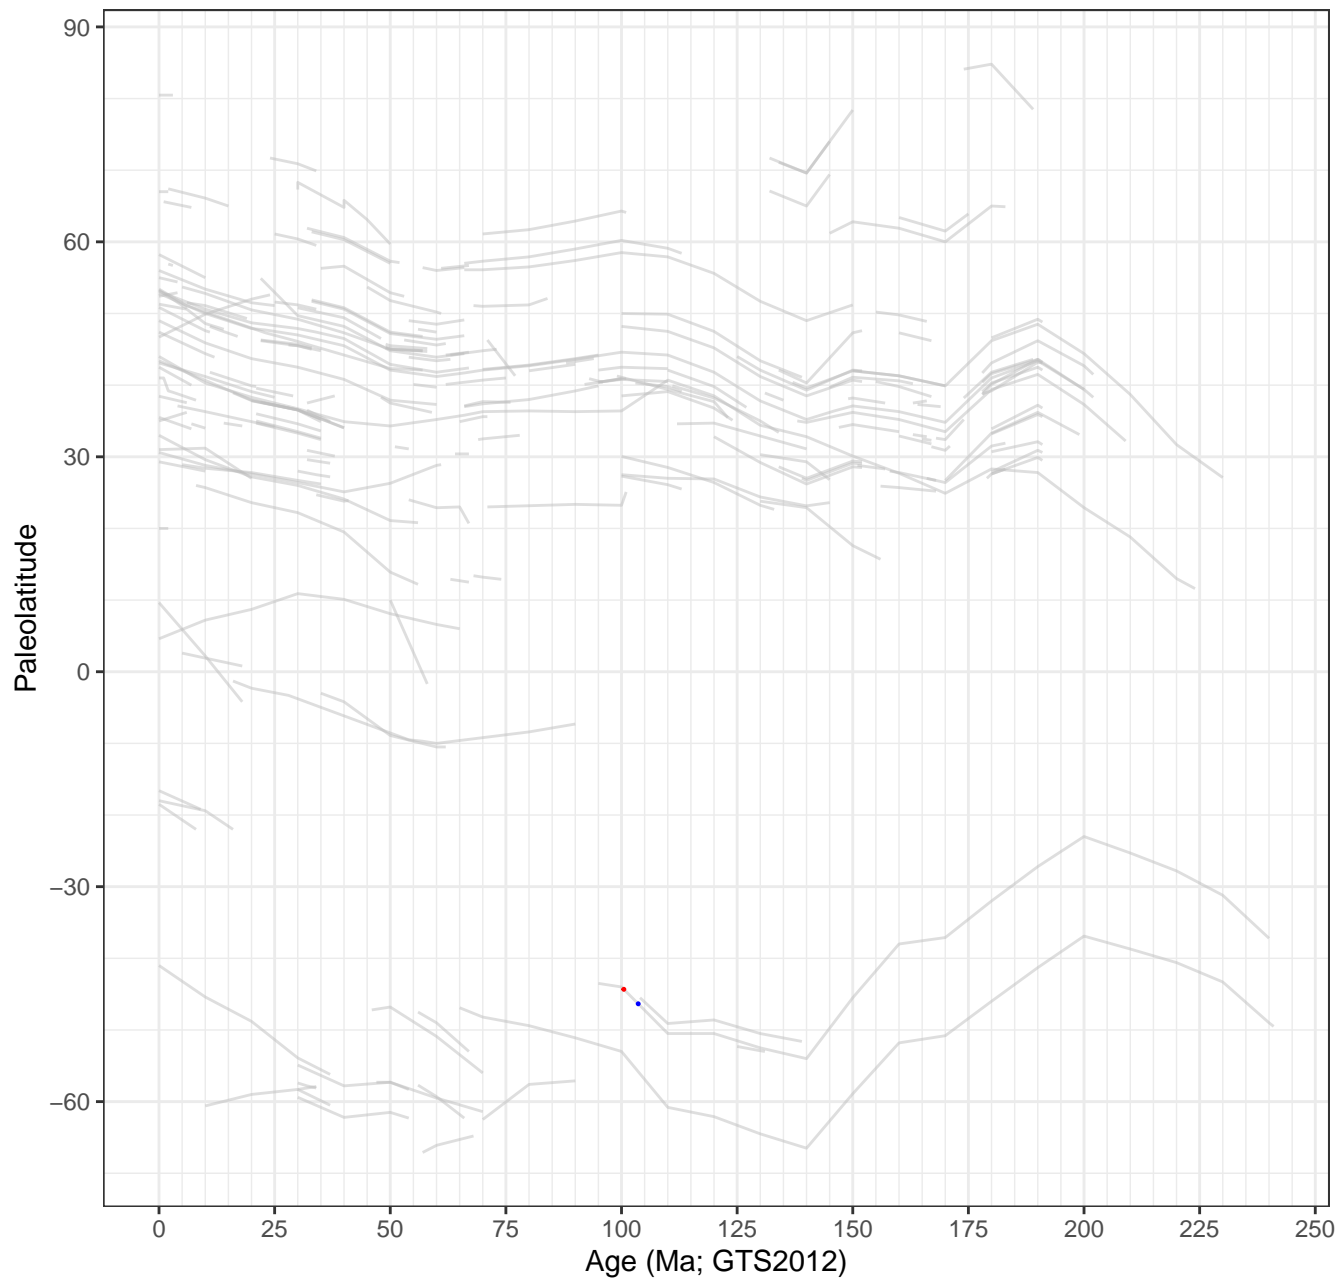

Supplement: Supplementary file 1125 [file Craspedodinium indistinctum.pdf › Supplement/Supplement 2/Species 1914 plots/Craspedodinium indistinctum.pdf]

# Species *Cribrroperidinium aichmetes*

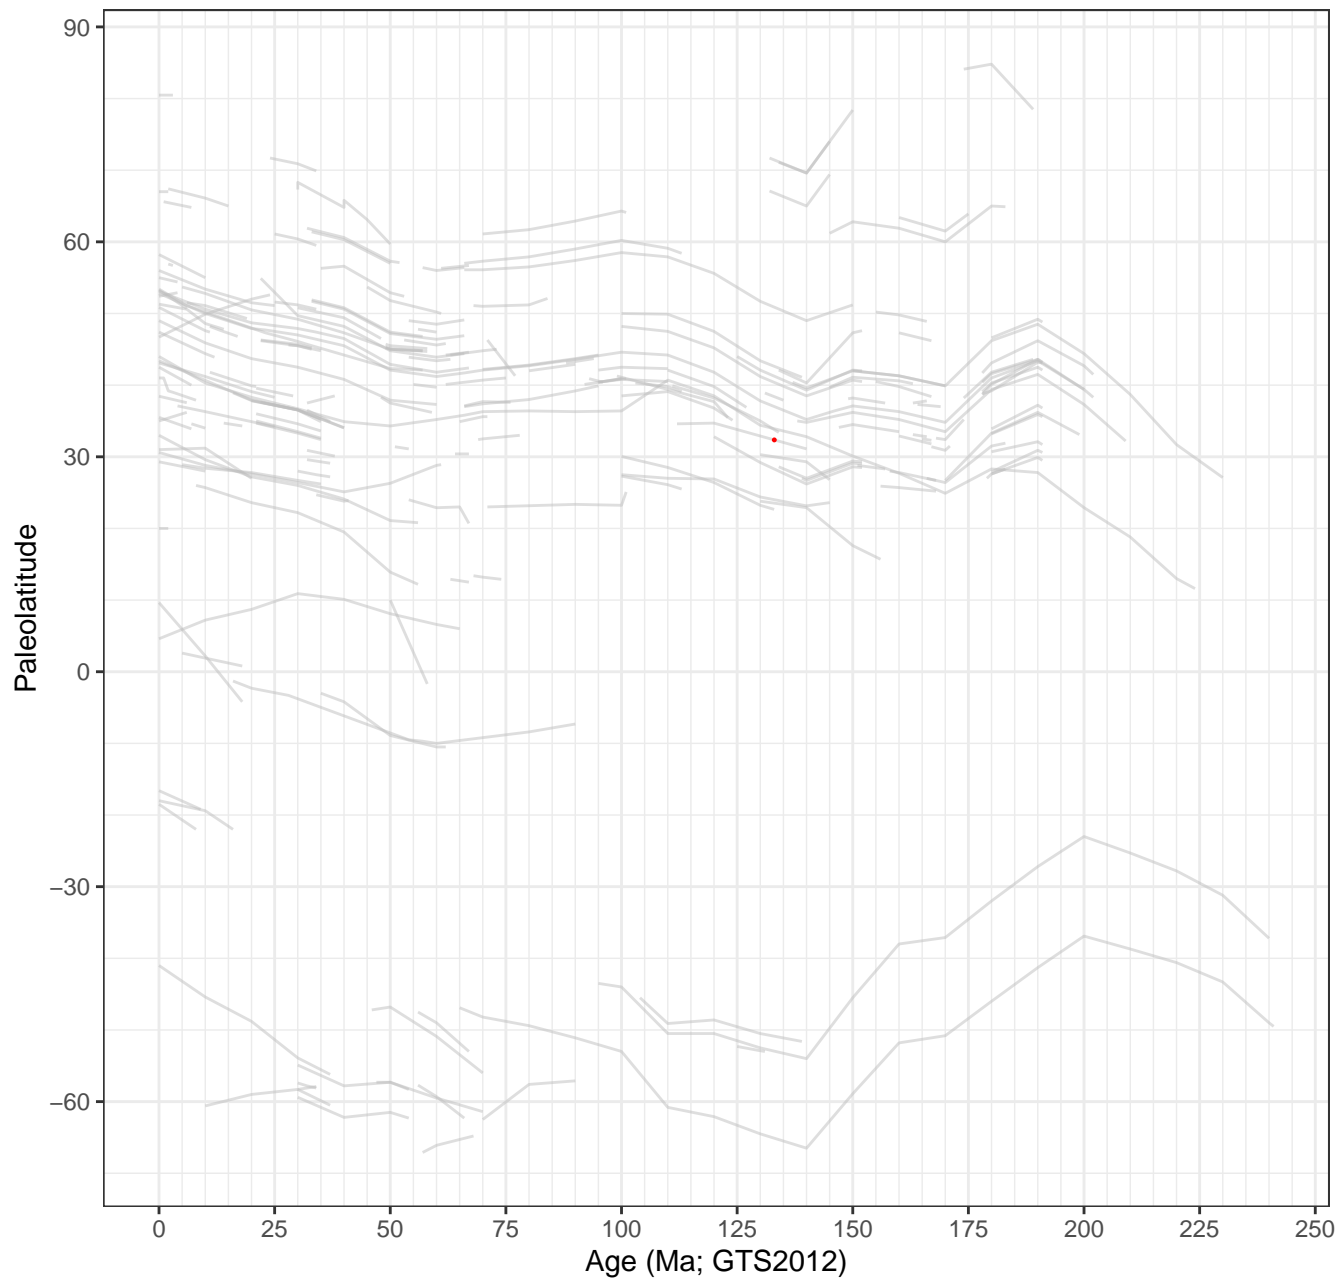

Supplement: Supplementary file 1126 [file Cribroperidinium aichmetes.pdf › Supplement/Supplement 2/Species 1914 plots/Cribroperidinium aichmetes.pdf]

# Species *Cribroperidinium alveolatum*

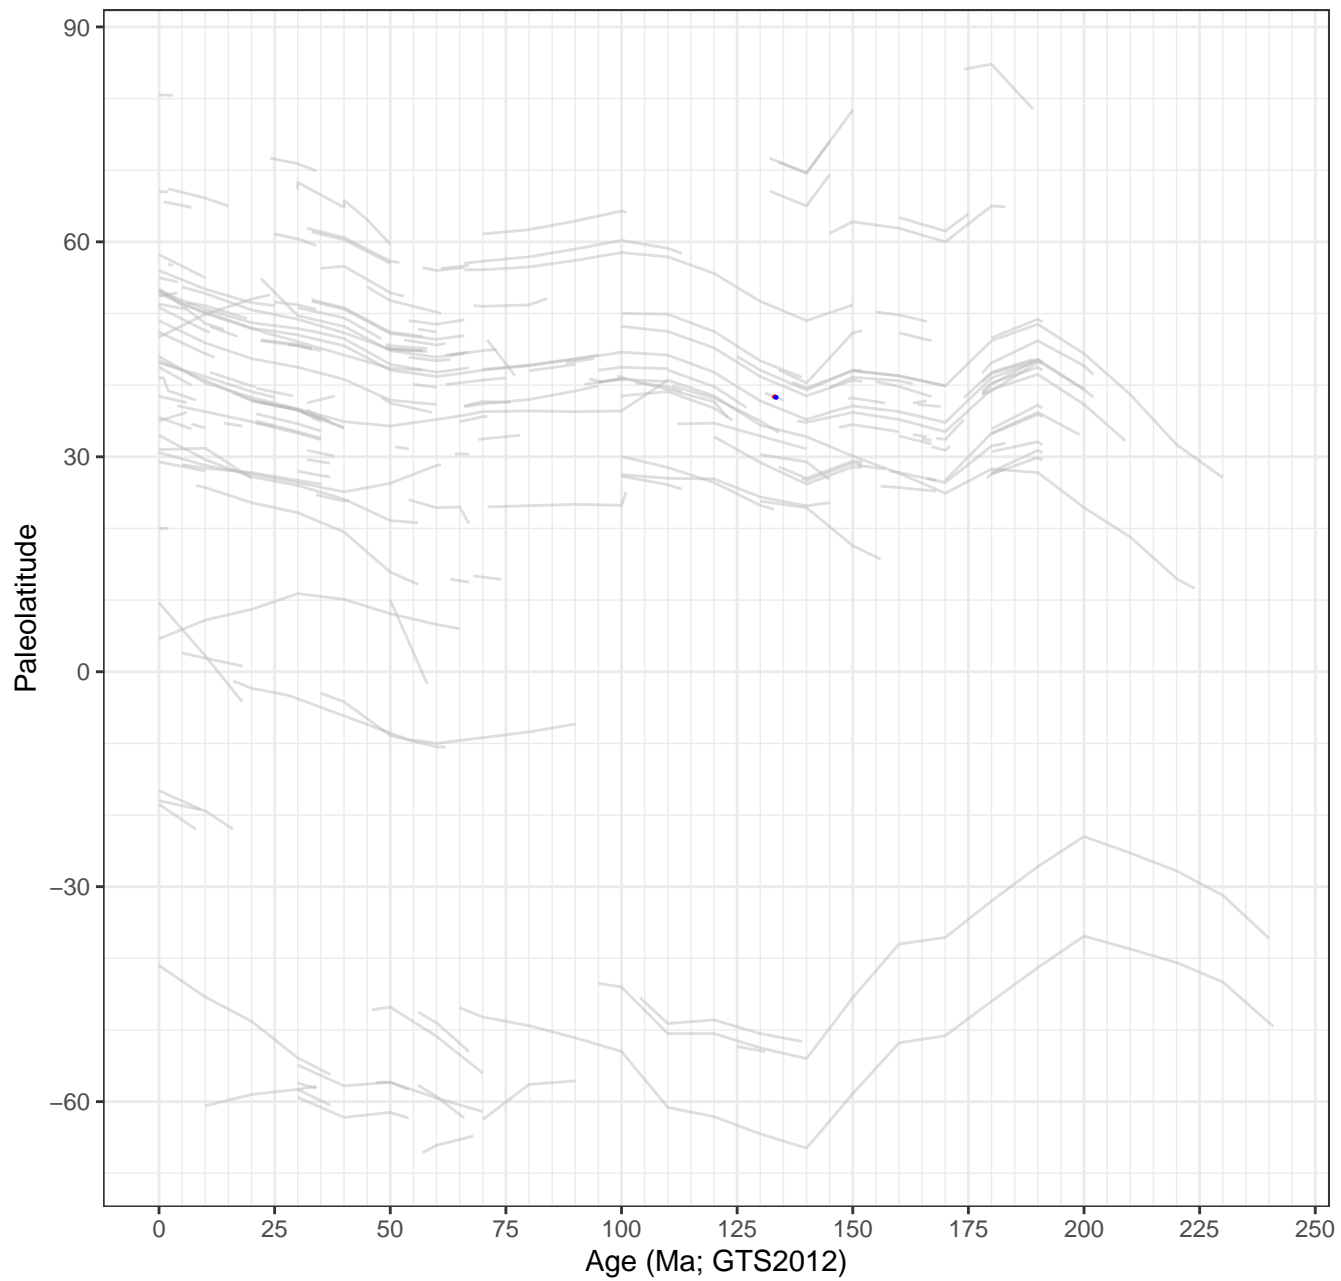

Supplement: Supplementary file 1127 [file Cribroperidinium alveolatum.pdf › Supplement/Supplement 2/Species 1914 plots/Cribroperidinium alveolatum.pdf]

# Species *Cribroperidinium aparsium*

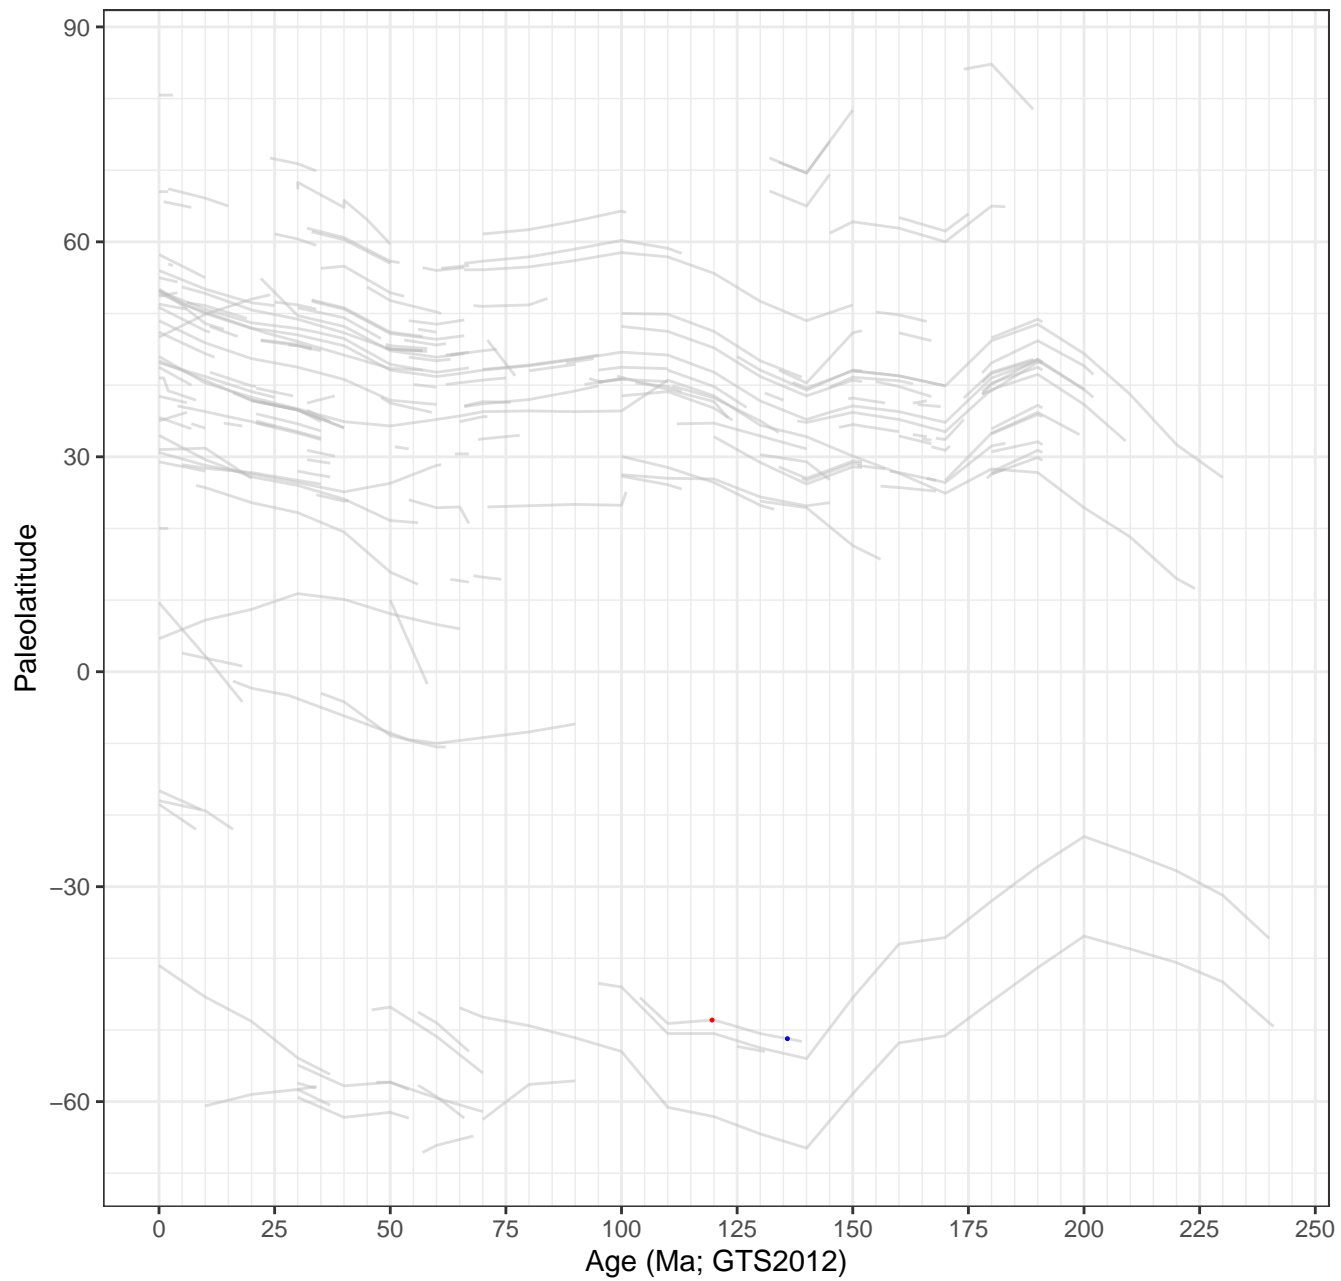

Supplement: Supplementary file 1128 [file Cribroperidinium aparsium.pdf › Supplement/Supplement 2/Species 1914 plots/Cribroperidinium aparsium.pdf]

# Species *Cribroperidinium asarotum*

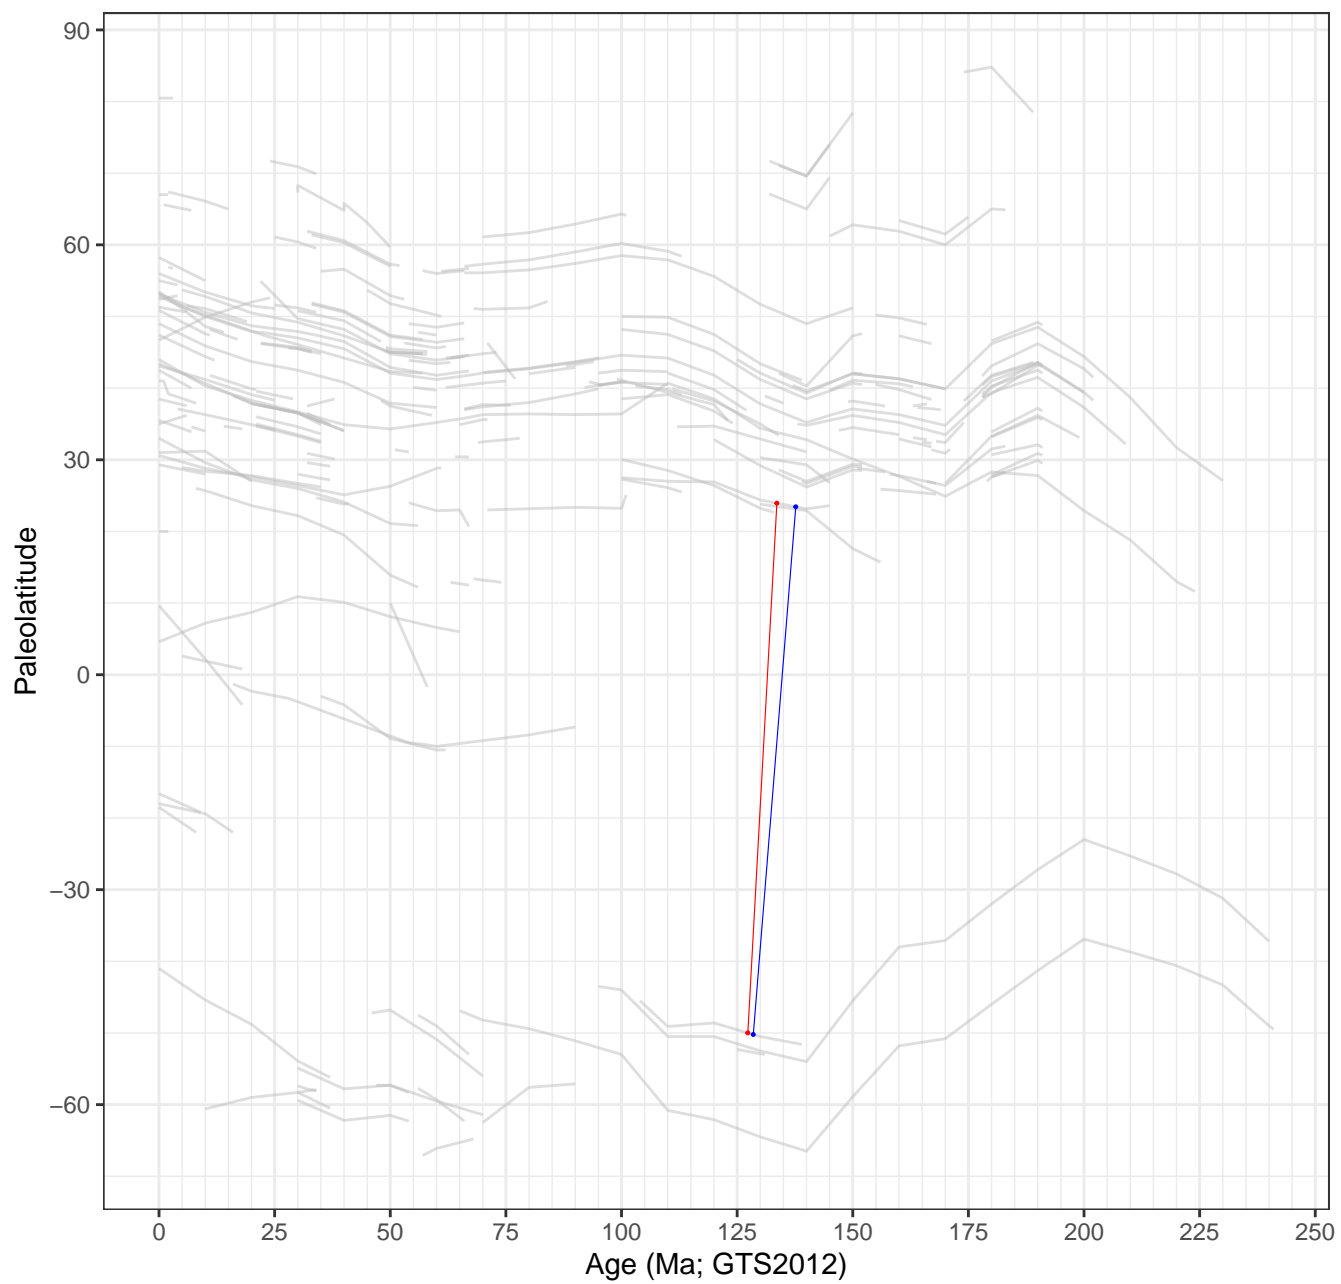

Supplement: Supplementary file 1129 [file Cribroperidinium asarotum.pdf › Supplement/Supplement 2/Species 1914 plots/Cribroperidinium asarotum.pdf]

# Species *Cribroperidinium birkelundiae*

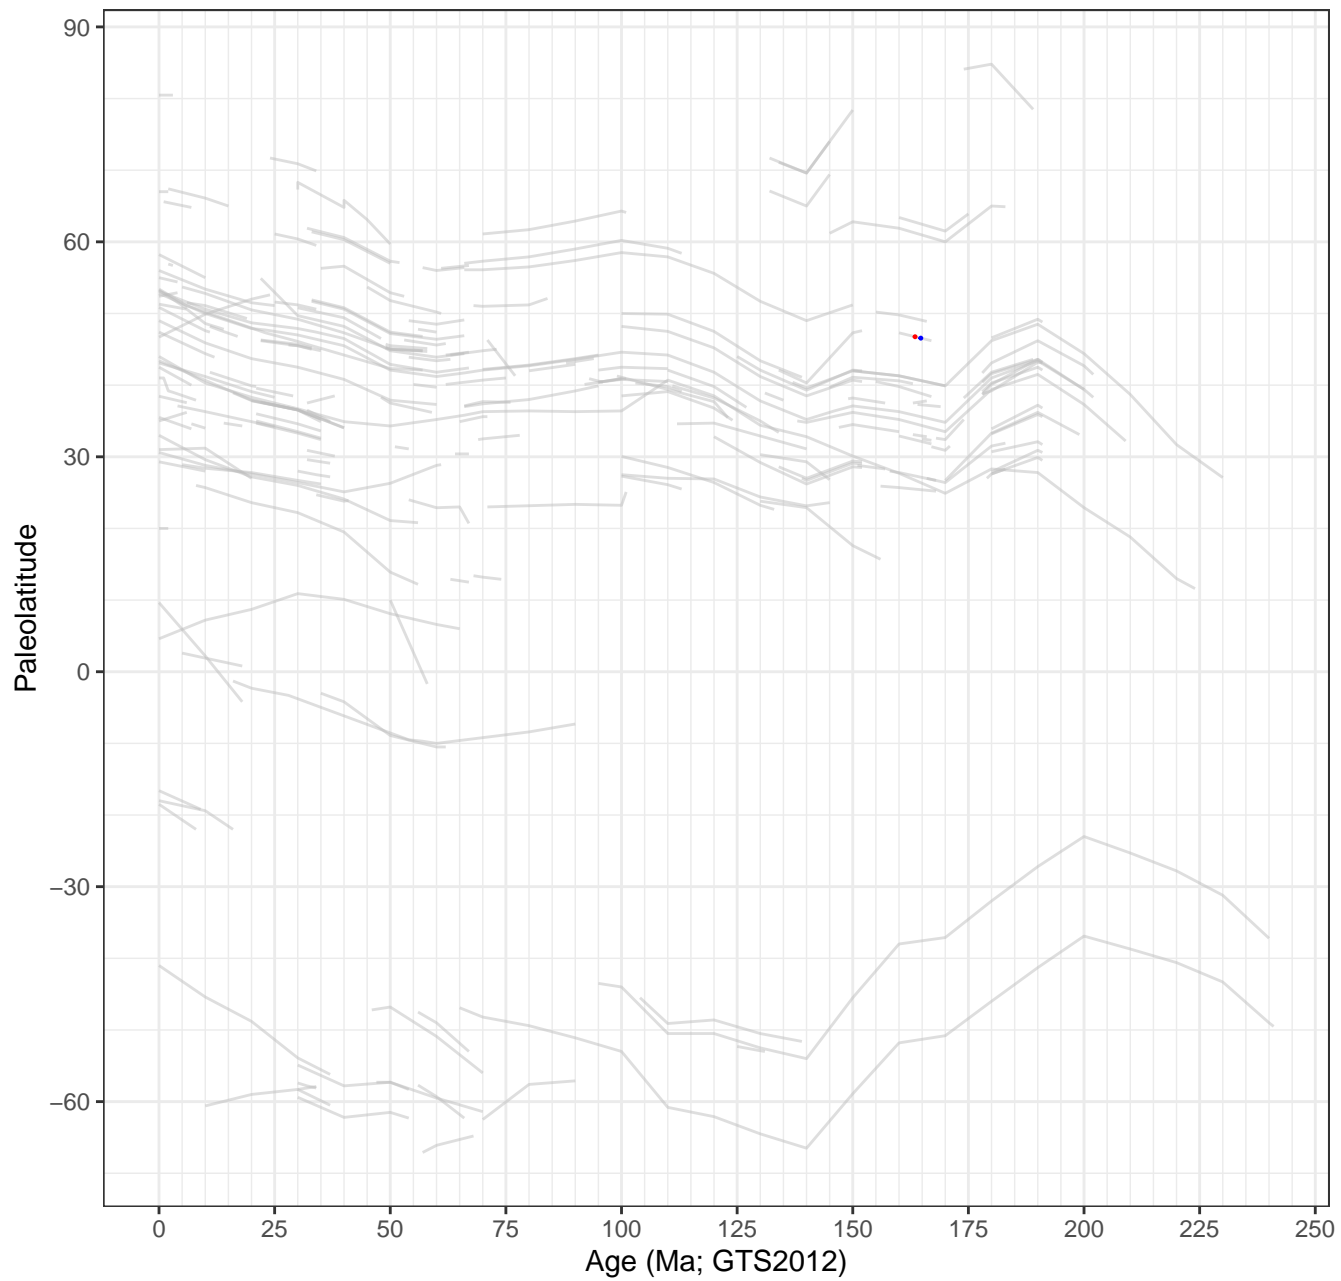

Supplement: Supplementary file 1130 [file Cribroperidinium birkelundiae.pdf › Supplement/Supplement 2/Species 1914 plots/Cribroperidinium birkelundiae.pdf]

# Species *Cribrroperidinium boreas*

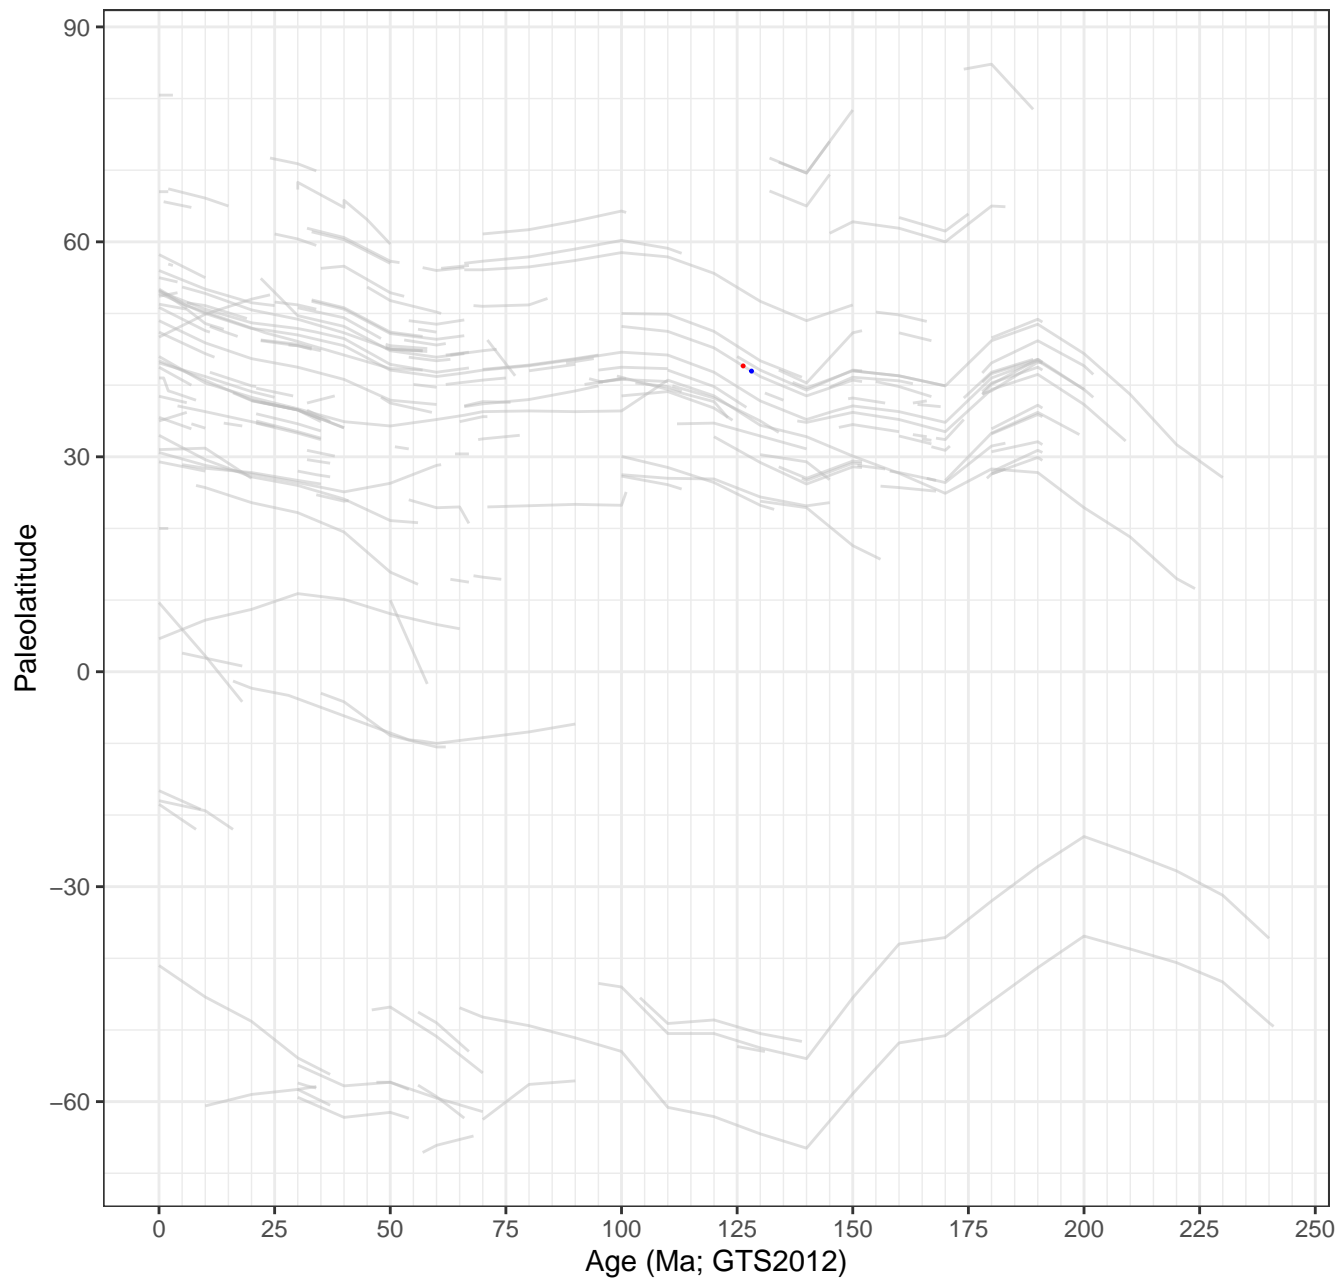

Supplement: Supplementary file 1131 [file Cribroperidinium boreas.pdf › Supplement/Supplement 2/Species 1914 plots/Cribroperidinium boreas.pdf]

# Species Cribroperidinium colum

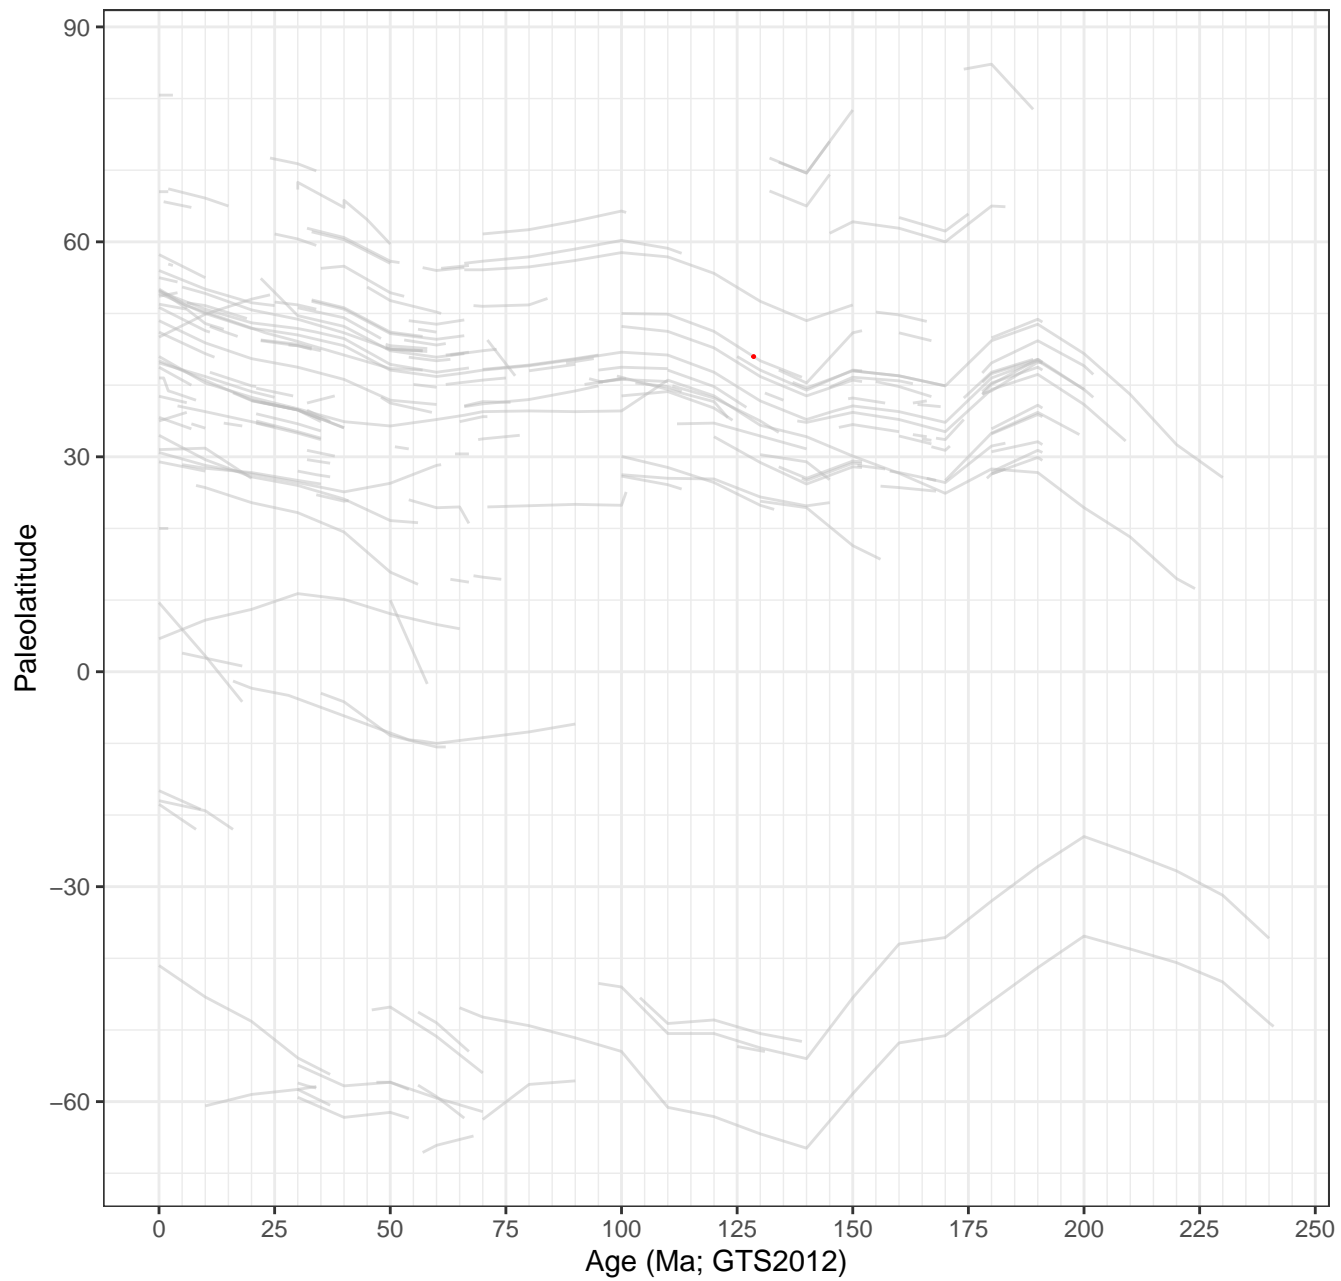

Supplement: Supplementary file 1132 [file Cribroperidinium colum.pdf › Supplement/Supplement 2/Species 1914 plots/Cribroperidinium colum.pdf]
