# Supplementary figures and images for: DINOSTRAT: a global database of the stratigraphic and paleolatitudinal distribution of Mesozoic–Cenozoic organic-walled dinoflagellate cysts (part 12 of 27)
Source: Copernicus journal article supplement (doi:10.5194/essd-14-579-2022), 2022-02-09

# Species *Cribroperidinium concaedum*

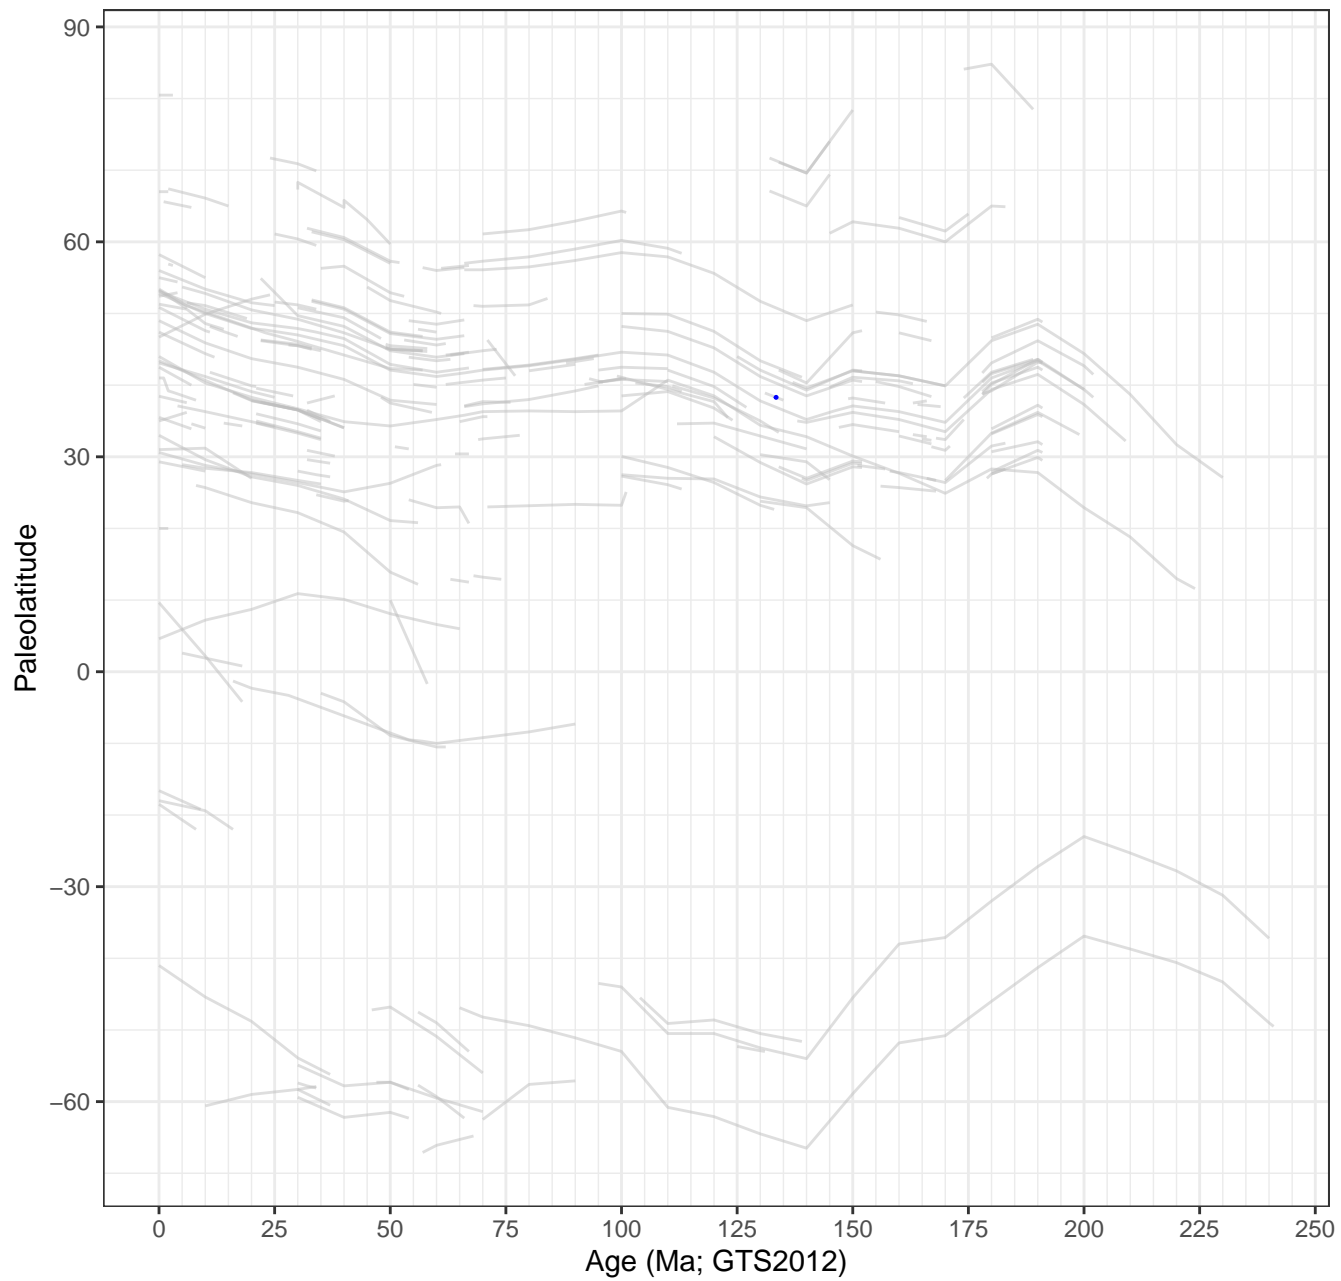

Supplement: Supplementary file 1133 [file Cribroperidinium concaedum.pdf › Supplement/Supplement 2/Species 1914 plots/Cribroperidinium concaedum.pdf]

# Species *Cribroperidinium confossum*

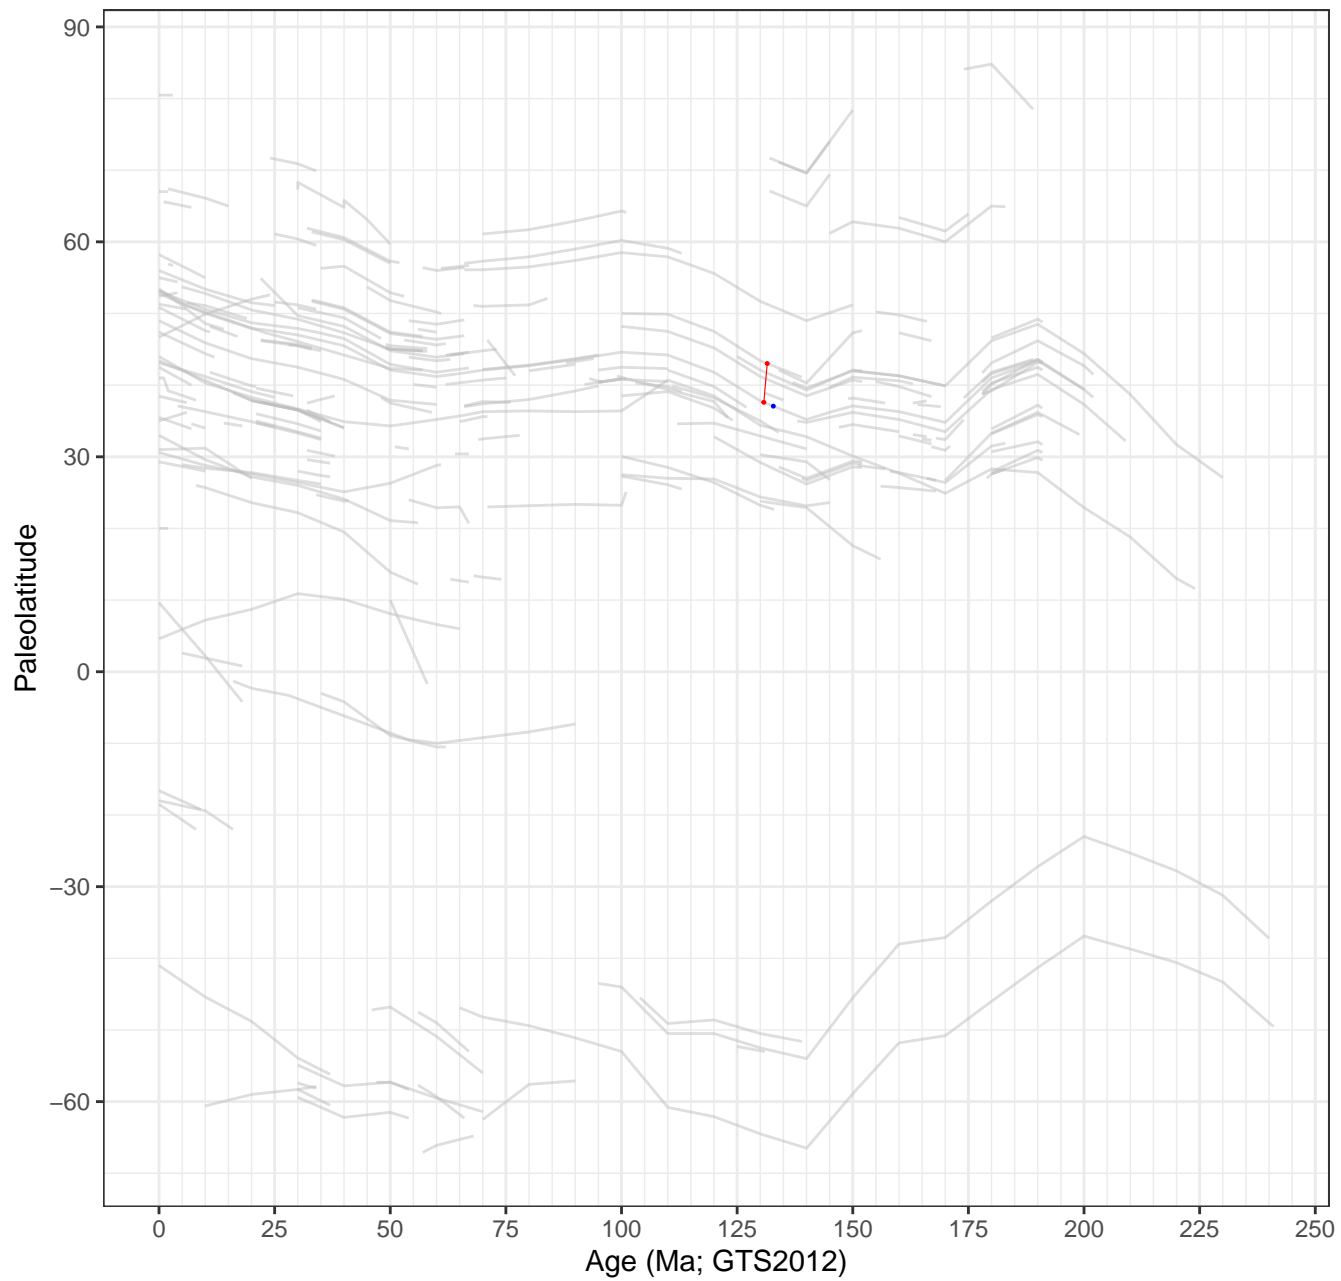

Supplement: Supplementary file 1134 [file Cribroperidinium confossum.pdf › Supplement/Supplement 2/Species 1914 plots/Cribroperidinium confossum.pdf]

# Species *Cribroperidinium conopium*

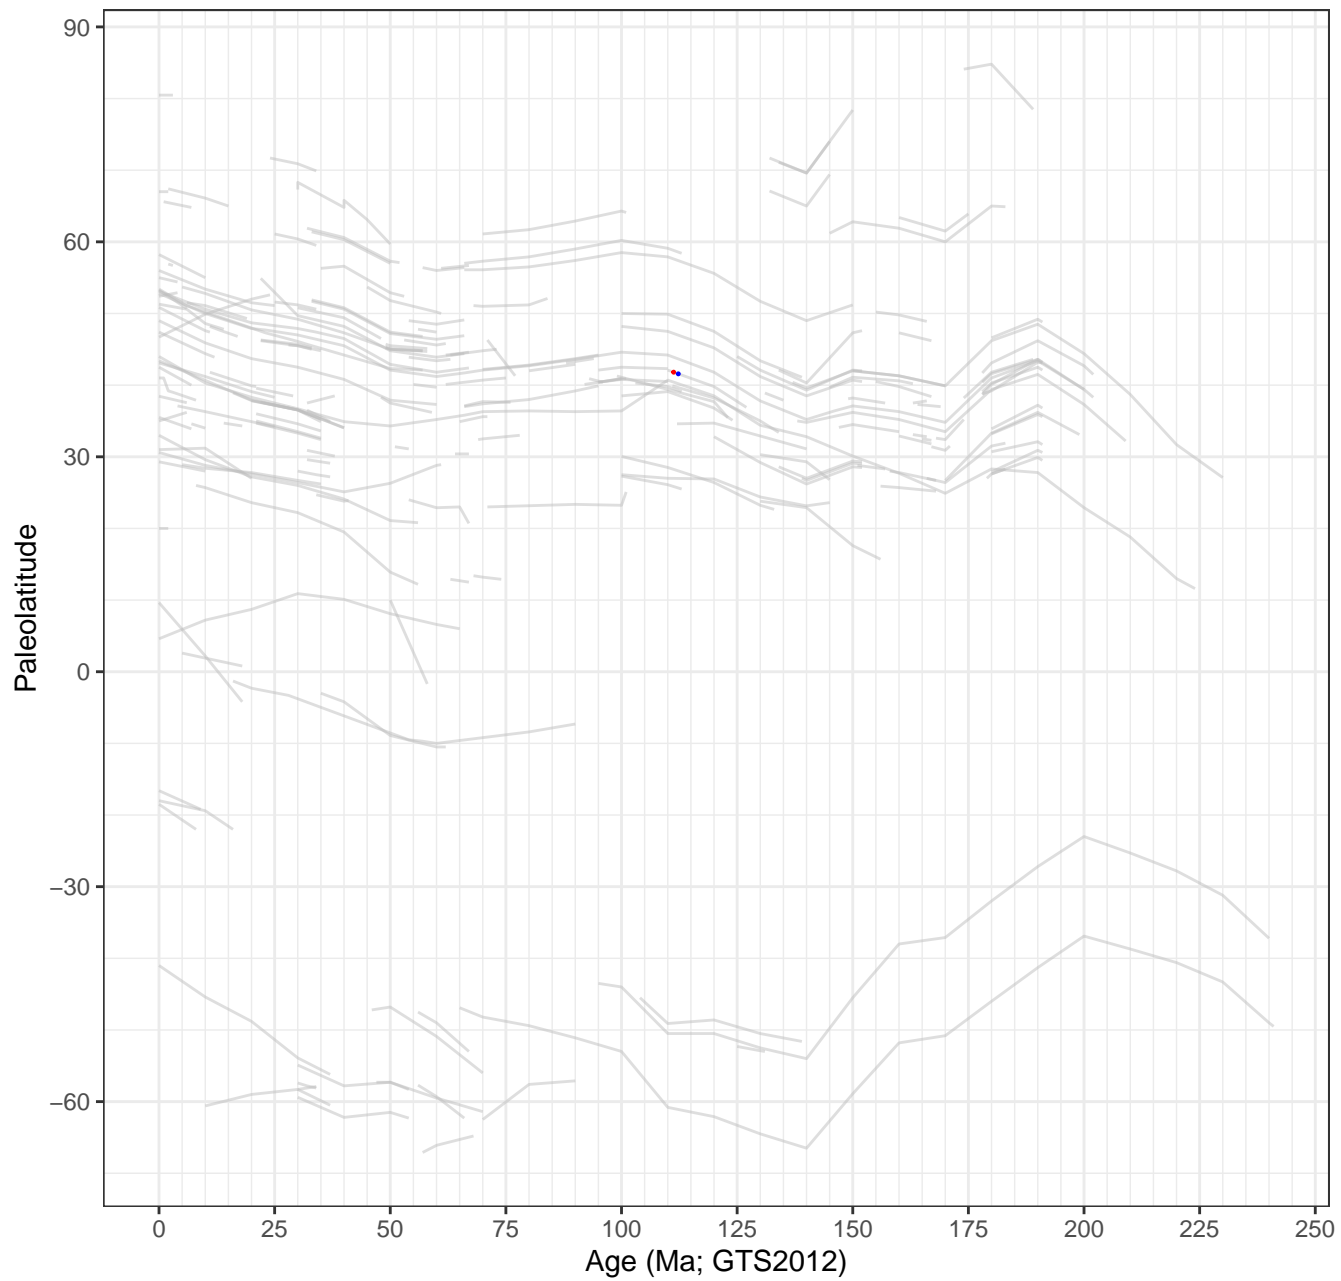

Supplement: Supplementary file 1135 [file Cribroperidinium conopium.pdf › Supplement/Supplement 2/Species 1914 plots/Cribroperidinium conopium.pdf]

# Species *Cribrroperidinium cooksoniae*

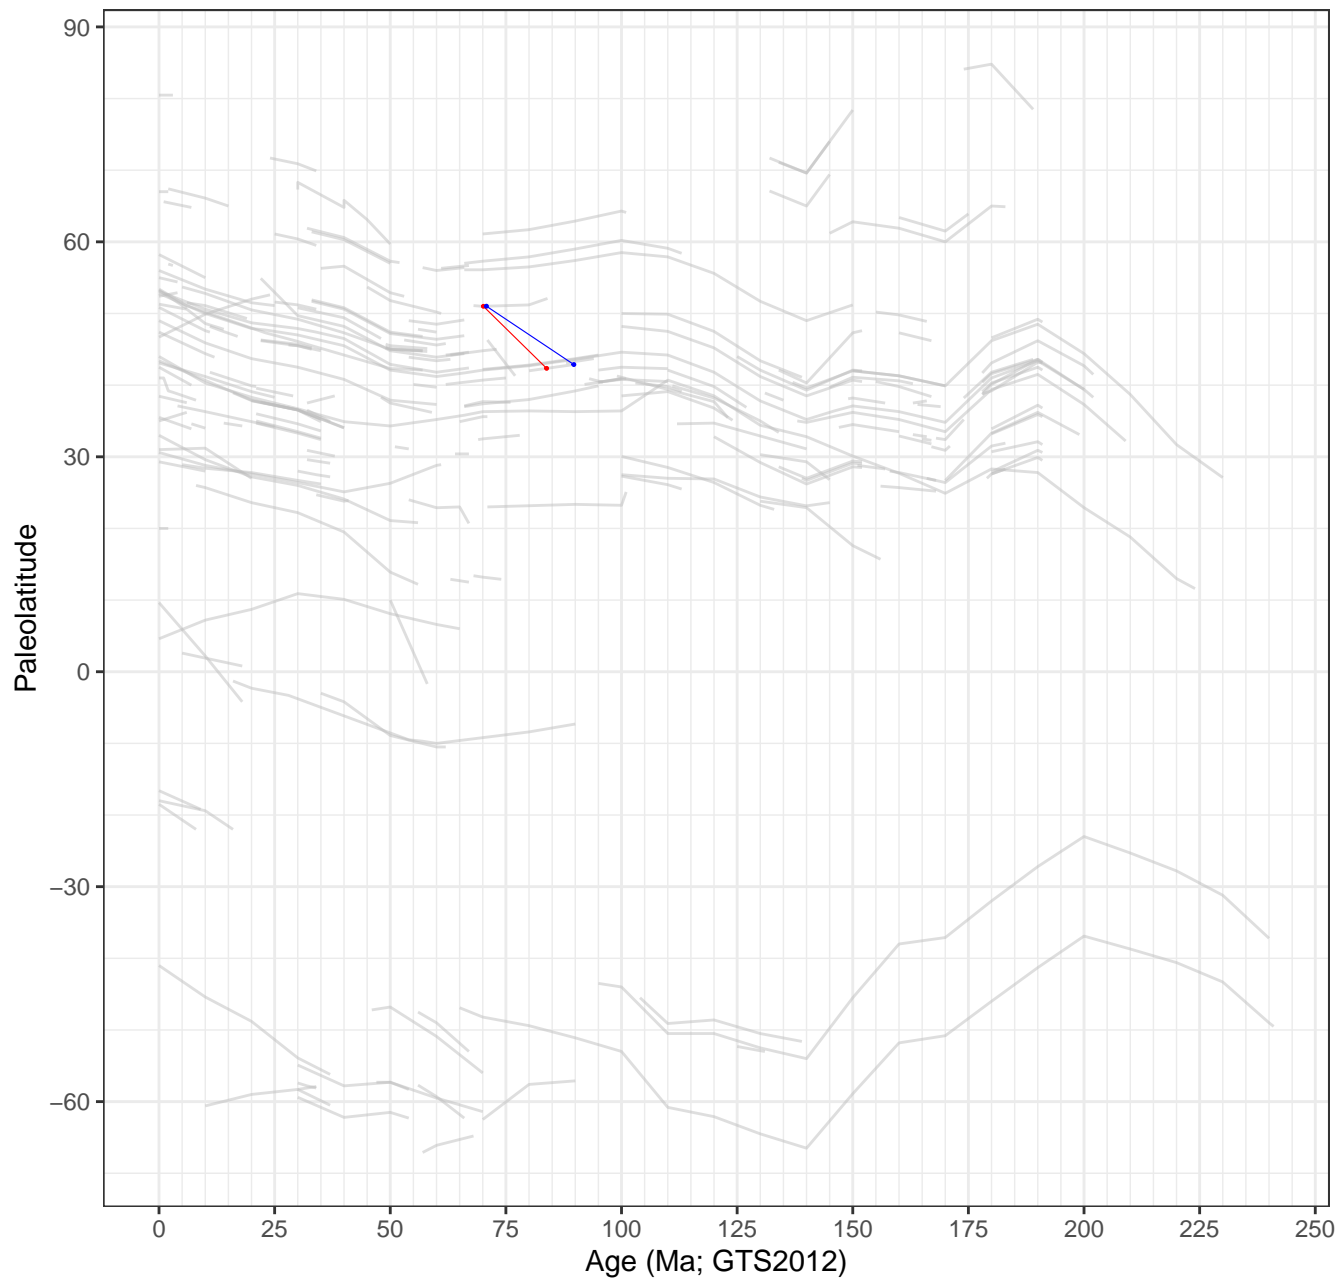

Supplement: Supplementary file 1136 [file Cribroperidinium cooksoniae.pdf › Supplement/Supplement 2/Species 1914 plots/Cribroperidinium cooksoniae.pdf]

# Species *Cribroperidinium cornutum*

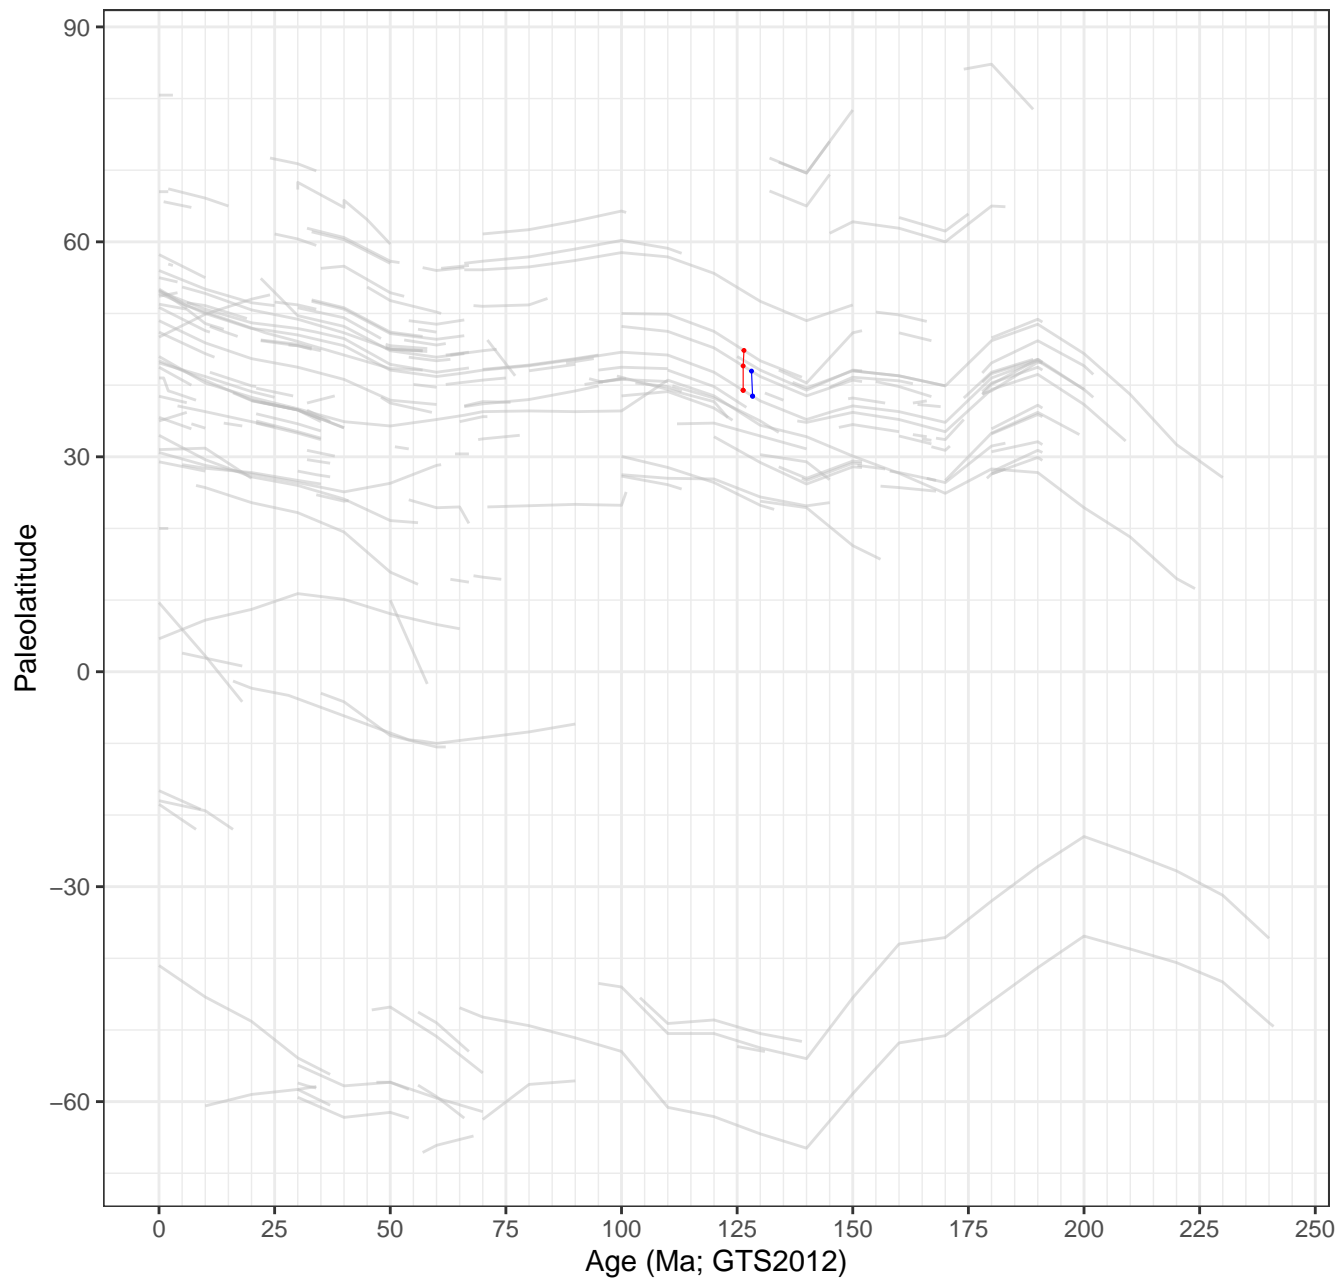

Supplement: Supplementary file 1137 [file Cribroperidinium cornutum.pdf › Supplement/Supplement 2/Species 1914 plots/Cribroperidinium cornutum.pdf]

# Species *Cribroperidinium corrugatum*

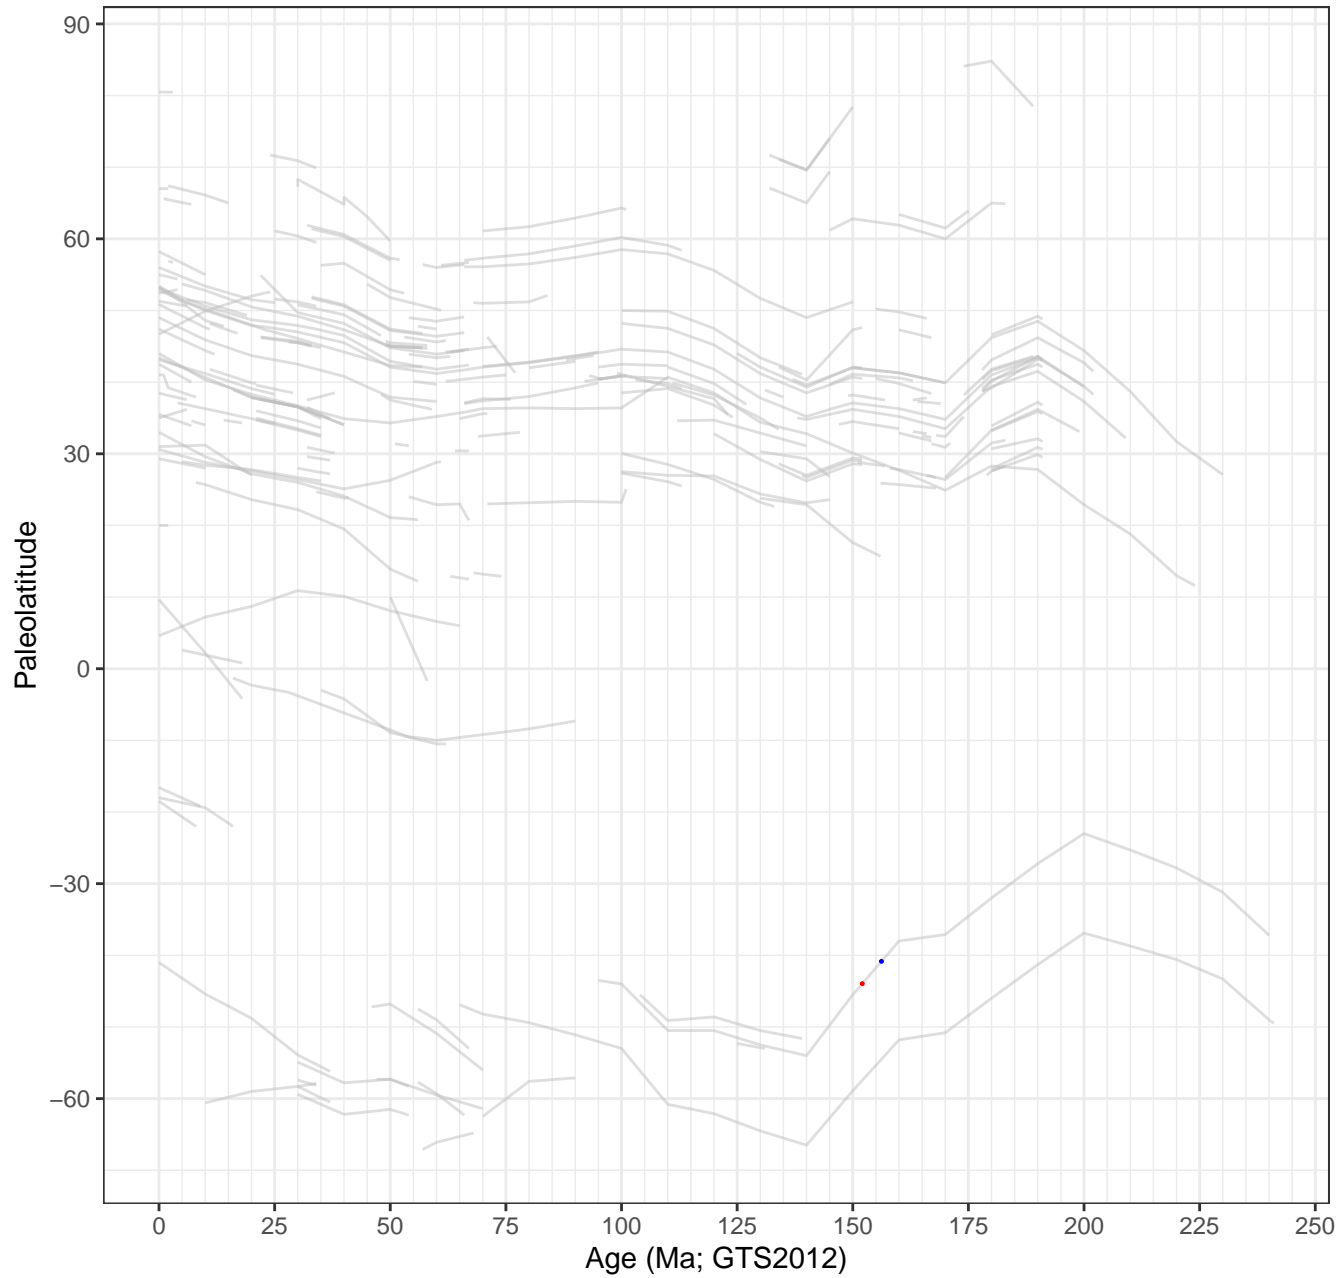

Supplement: Supplementary file 1138 [file Cribroperidinium corrugatum.pdf › Supplement/Supplement 2/Species 1914 plots/Cribroperidinium corrugatum.pdf]

# Species *Cribroperidinium crispum*

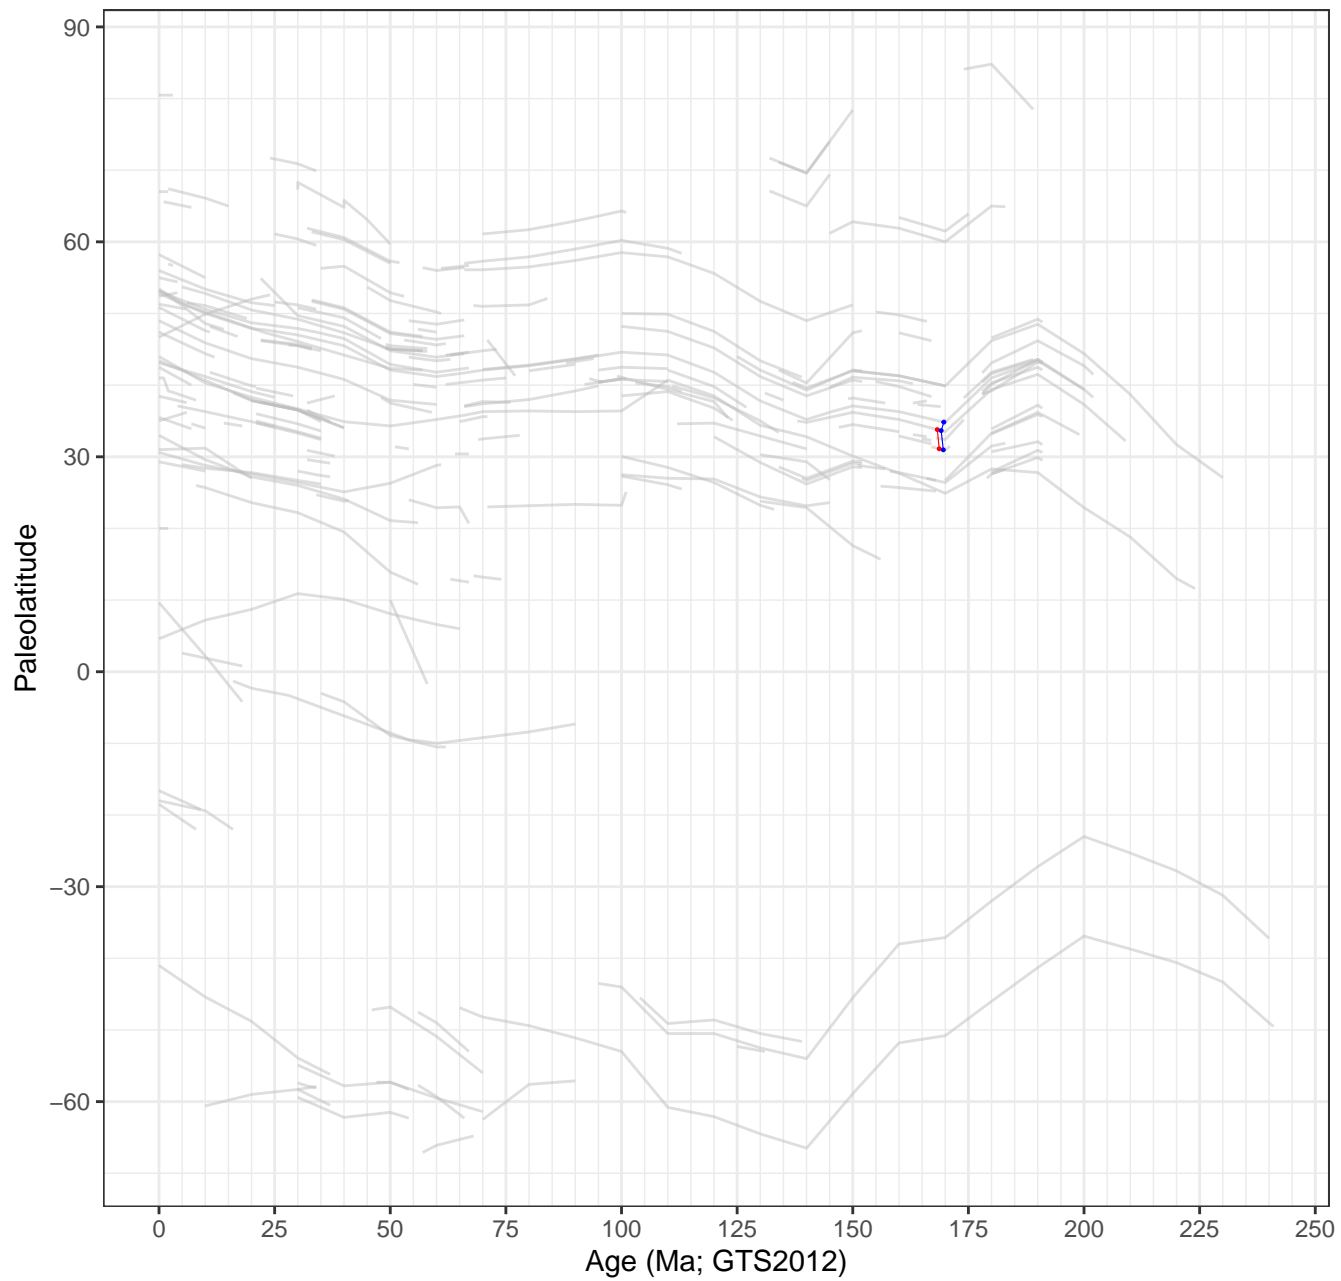

Supplement: Supplementary file 1139 [file Cribroperidinium crispum.pdf › Supplement/Supplement 2/Species 1914 plots/Cribroperidinium crispum.pdf]

# Species *Cribroperidinium distinctum*

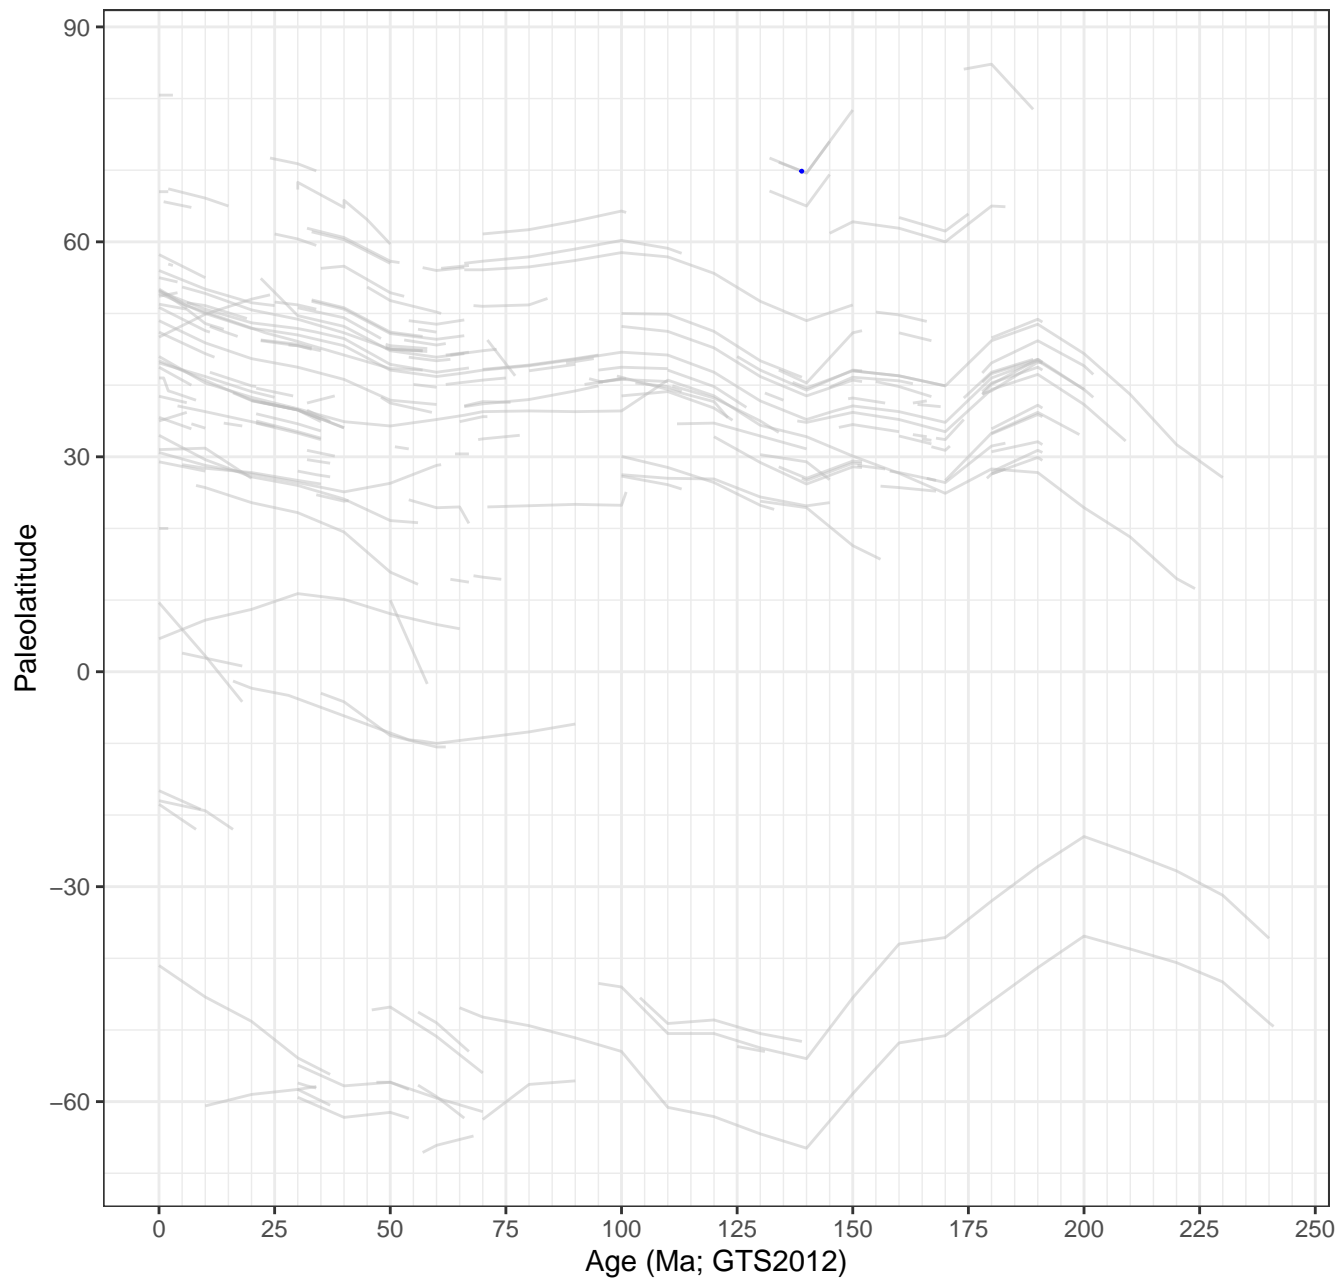

Supplement: Supplementary file 1140 [file Cribroperidinium distinctum.pdf › Supplement/Supplement 2/Species 1914 plots/Cribroperidinium distinctum.pdf]

# Species *Cribroperidinium edwardsii*

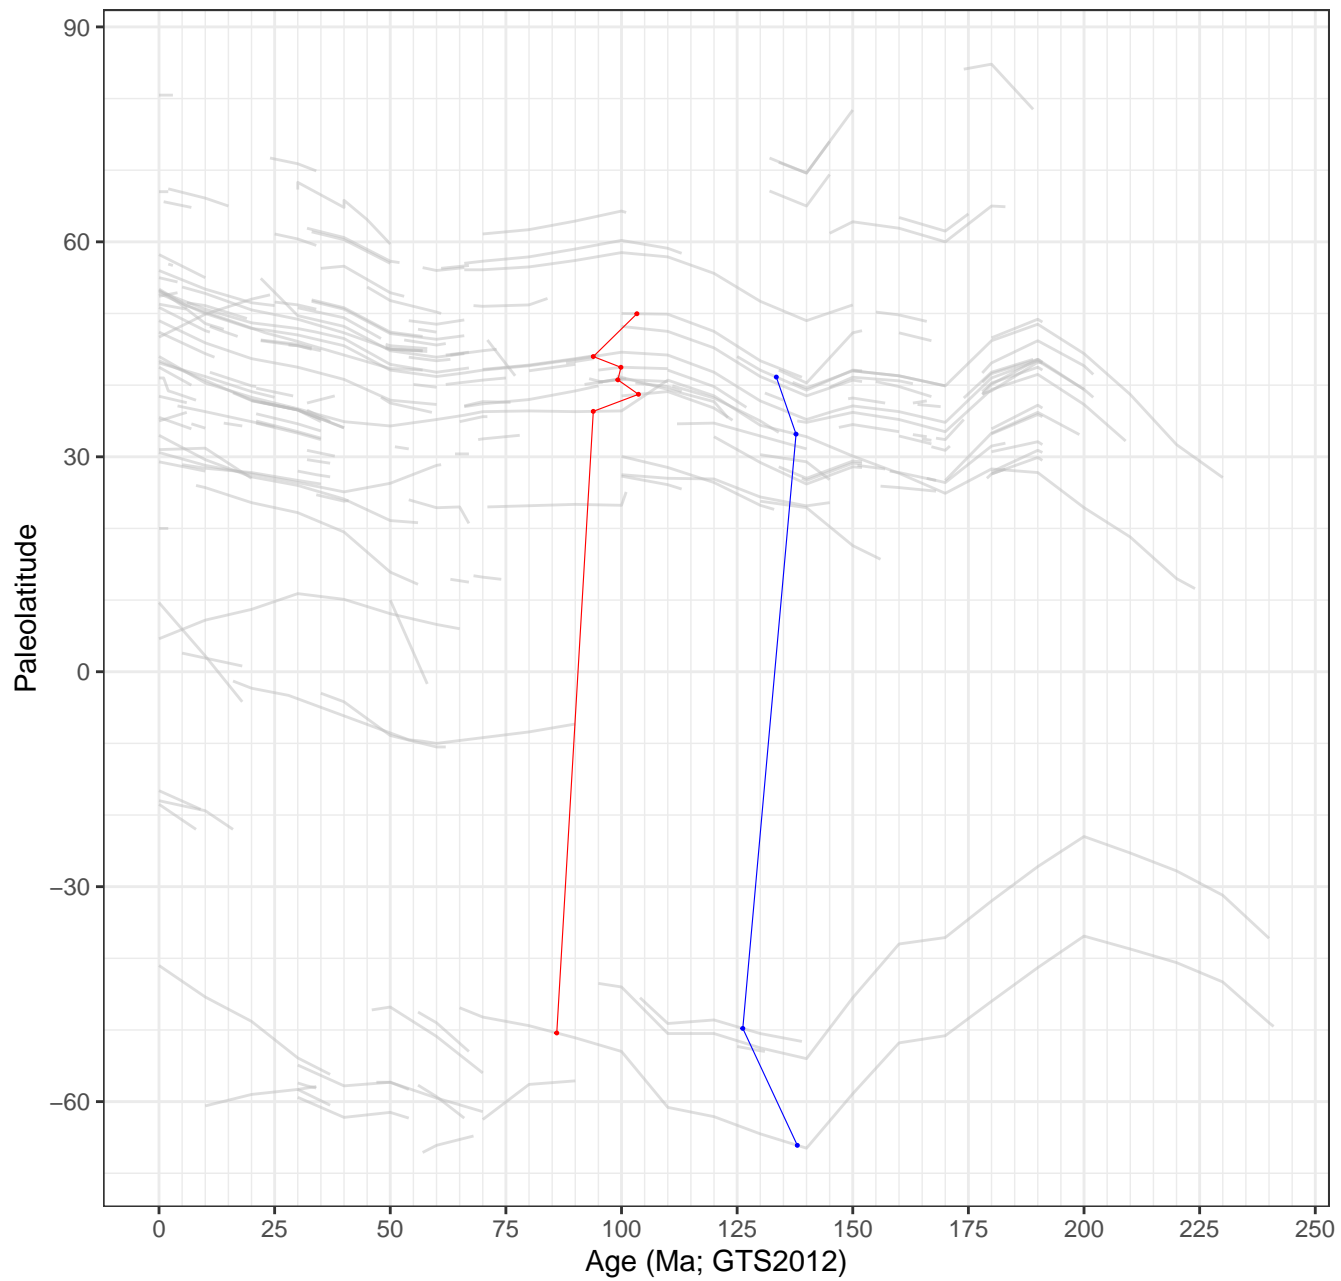

Supplement: Supplementary file 1141 [file Cribroperidinium edwardsii.pdf › Supplement/Supplement 2/Species 1914 plots/Cribroperidinium edwardsii.pdf]

# Species *Cribroperidinium exilicristatum*

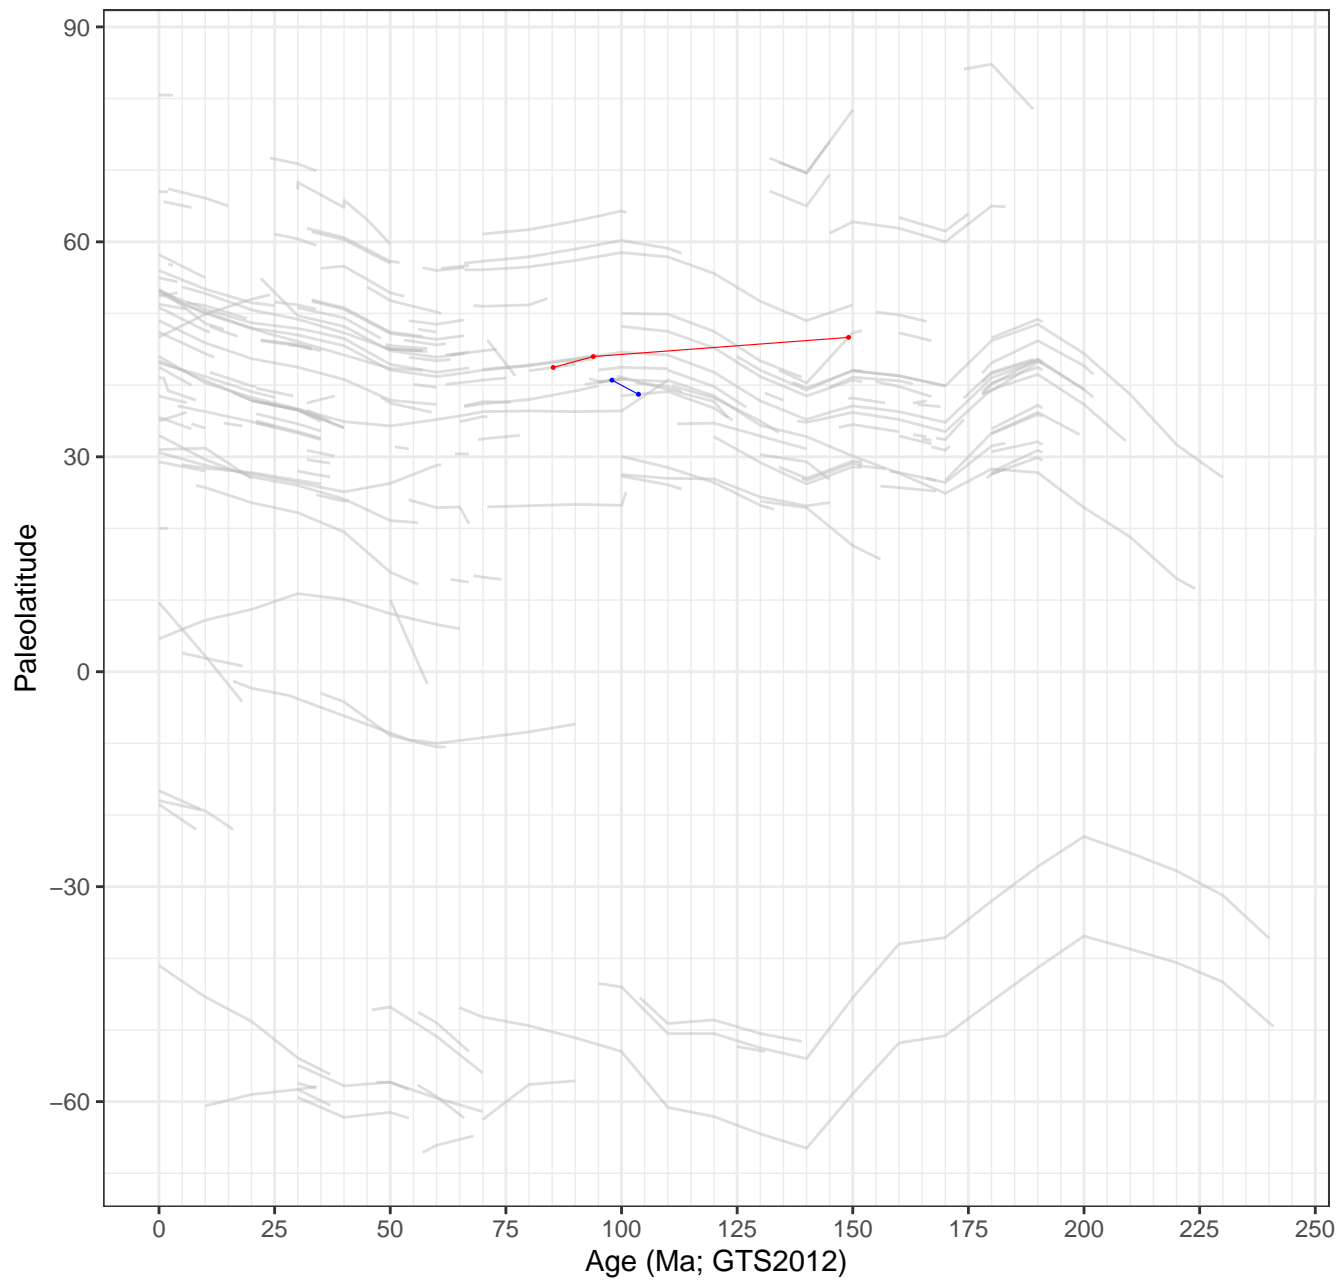

Supplement: Supplementary file 1142 [file Cribroperidinium exilicristatum.pdf › Supplement/Supplement 2/Species 1914 plots/Cribroperidinium exilicristatum.pdf]

# Species *Cribroperidinium fetchamense*

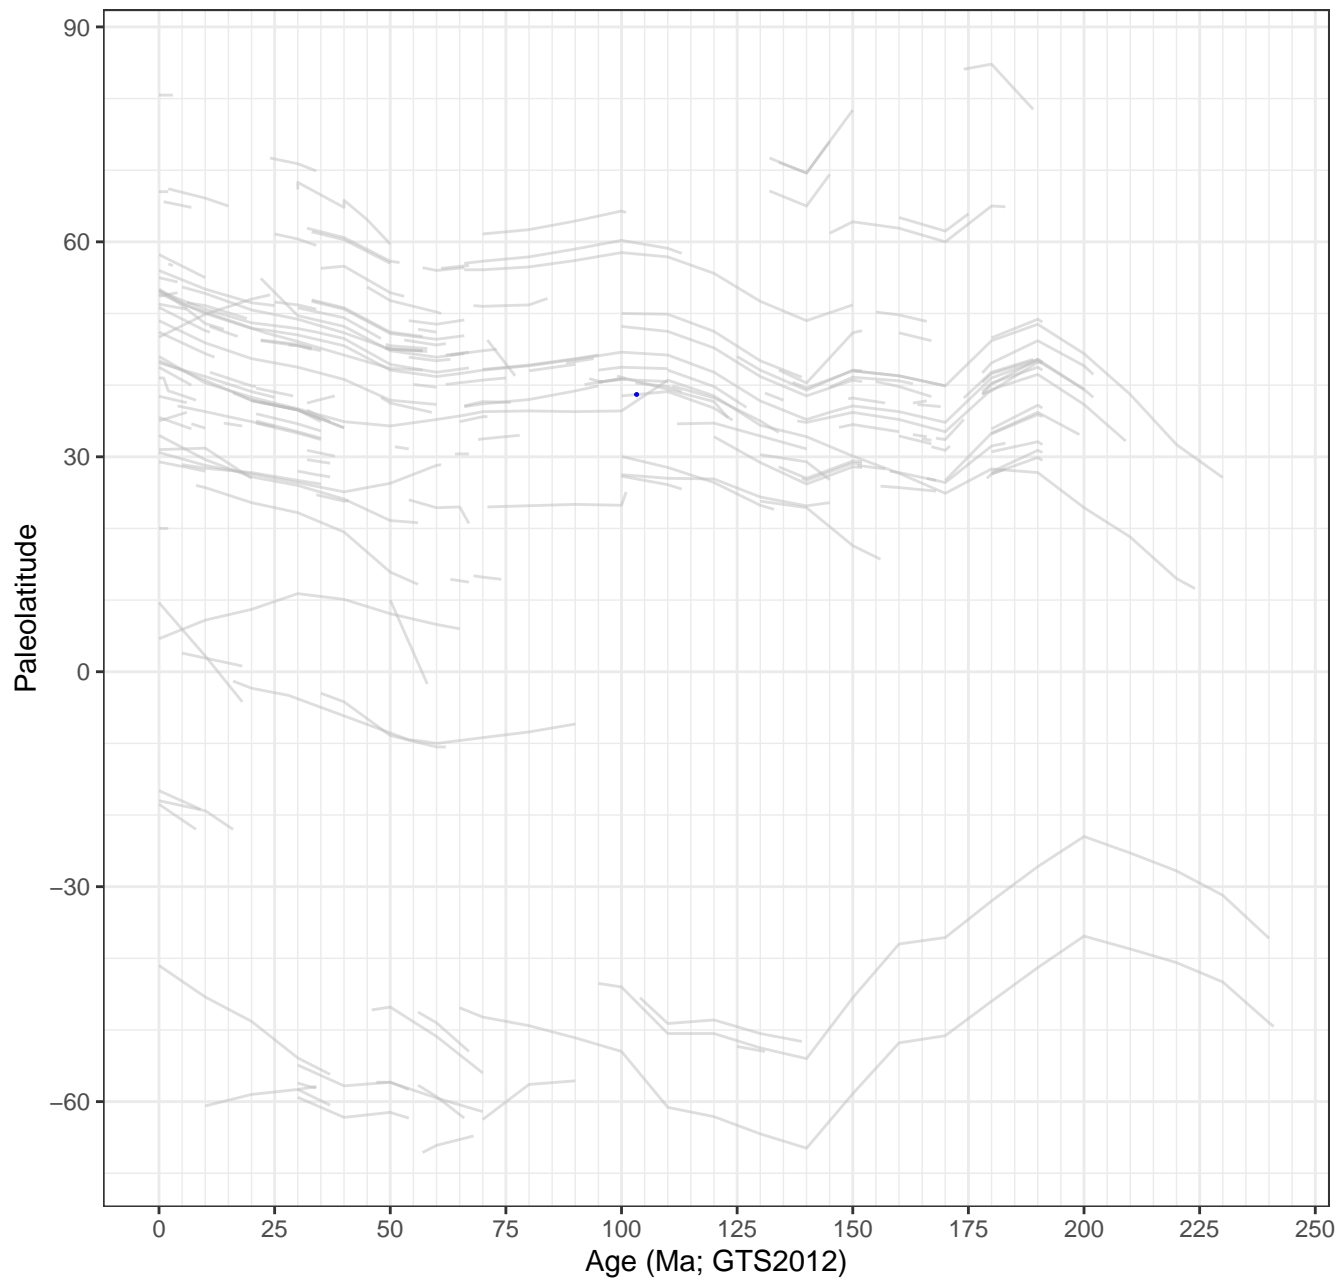

Supplement: Supplementary file 1143 [file Cribroperidinium fetchamense.pdf › Supplement/Supplement 2/Species 1914 plots/Cribroperidinium fetchamense.pdf]

# Species *Cribroperidinium fragile*

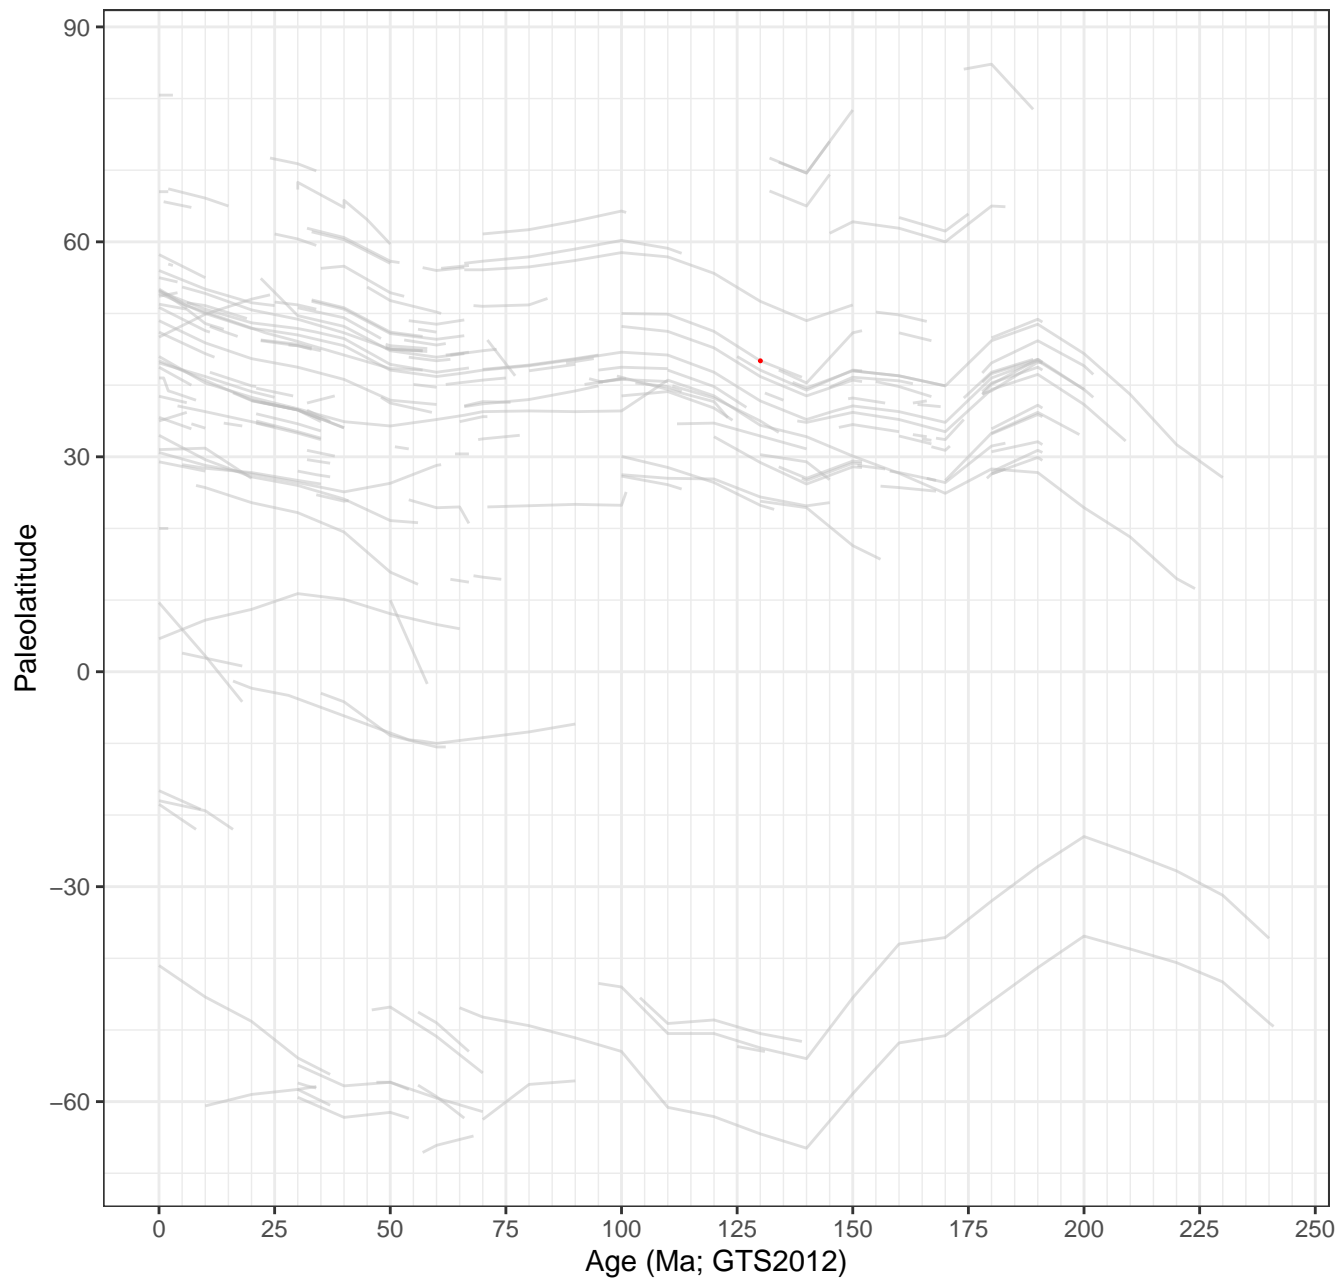

Supplement: Supplementary file 1144 [file Cribroperidinium fragile.pdf › Supplement/Supplement 2/Species 1914 plots/Cribroperidinium fragile.pdf]

# Species *Cribroperidinium gigas*

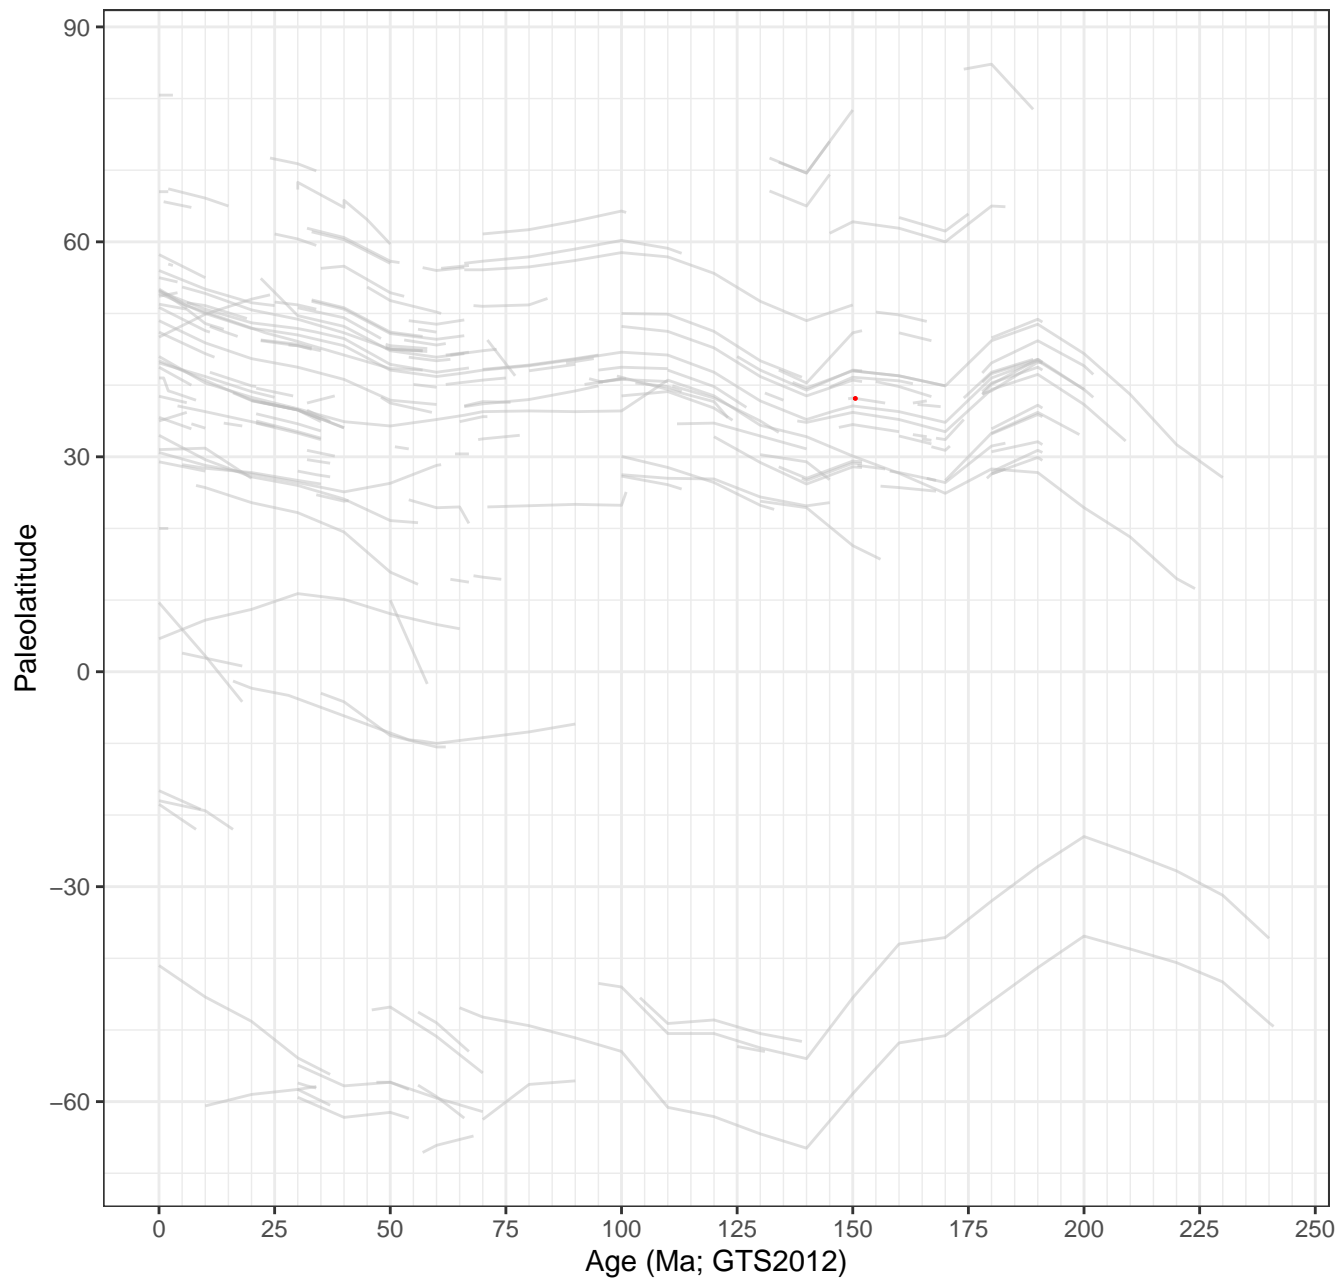

Supplement: Supplementary file 1145 [file Cribroperidinium gigas.pdf › Supplement/Supplement 2/Species 1914 plots/Cribroperidinium gigas.pdf]

# Species *Cribroperidinium giuseppeii*

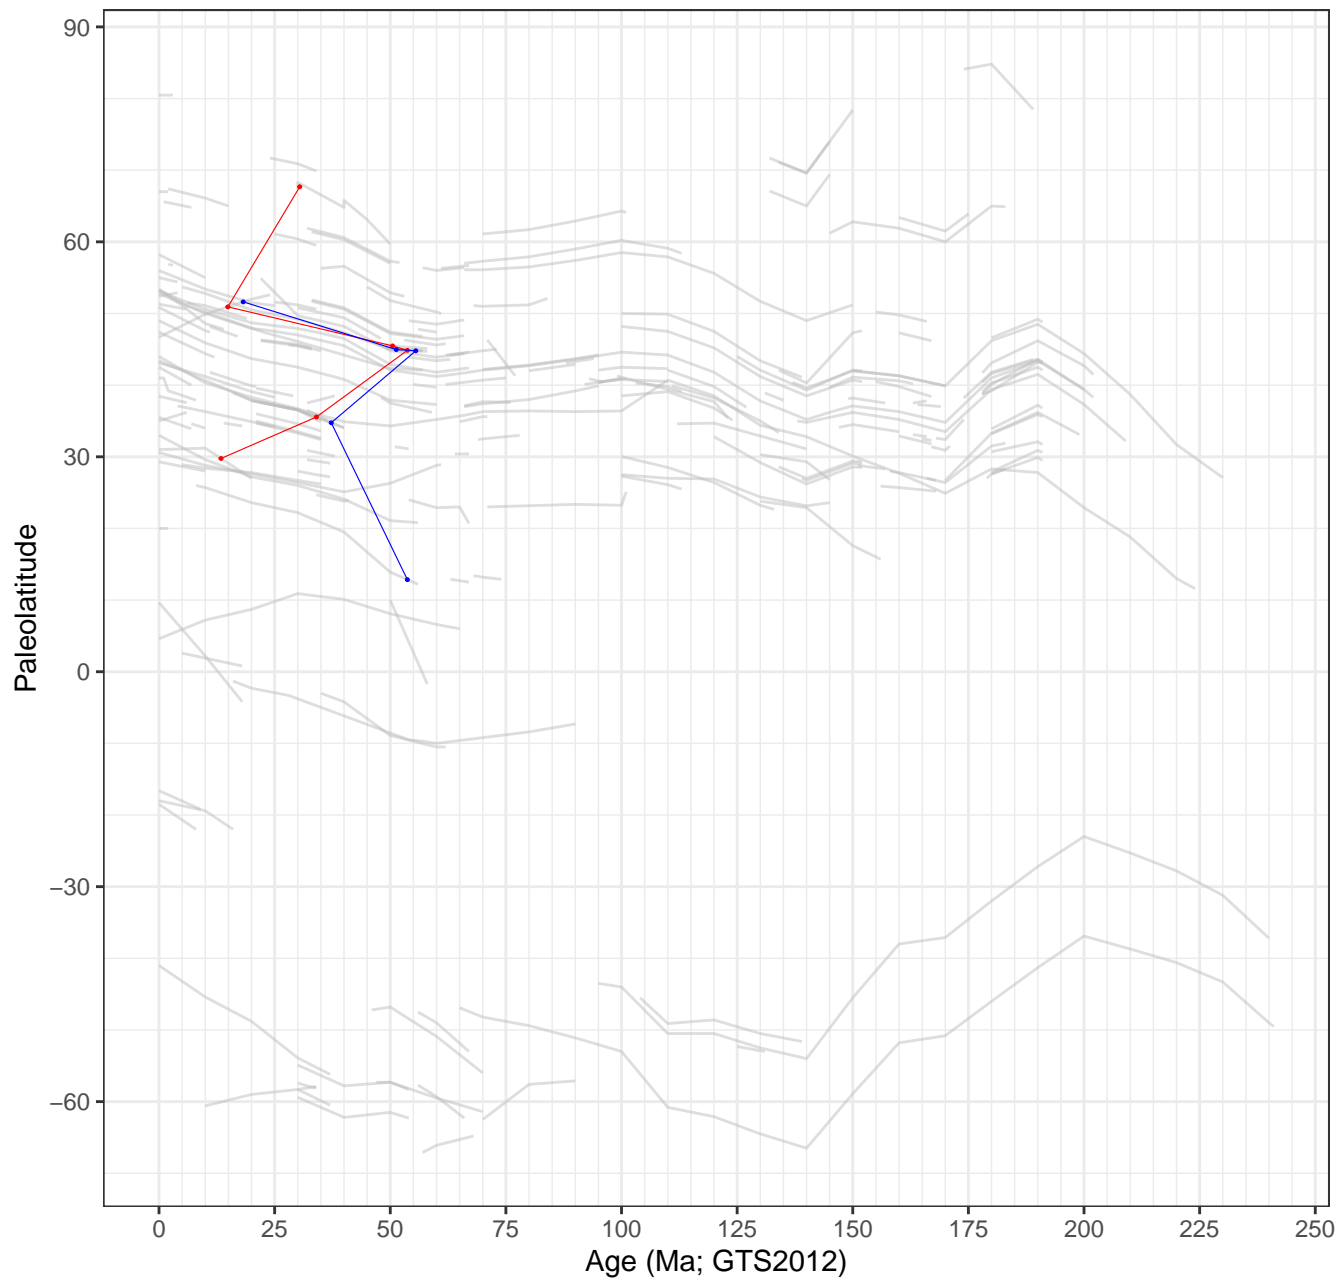

Supplement: Supplementary file 1146 [file Cribroperidinium giuseppei.pdf › Supplement/Supplement 2/Species 1914 plots/Cribroperidinium giuseppei.pdf]

# Species *Cribroperidinium globatum*

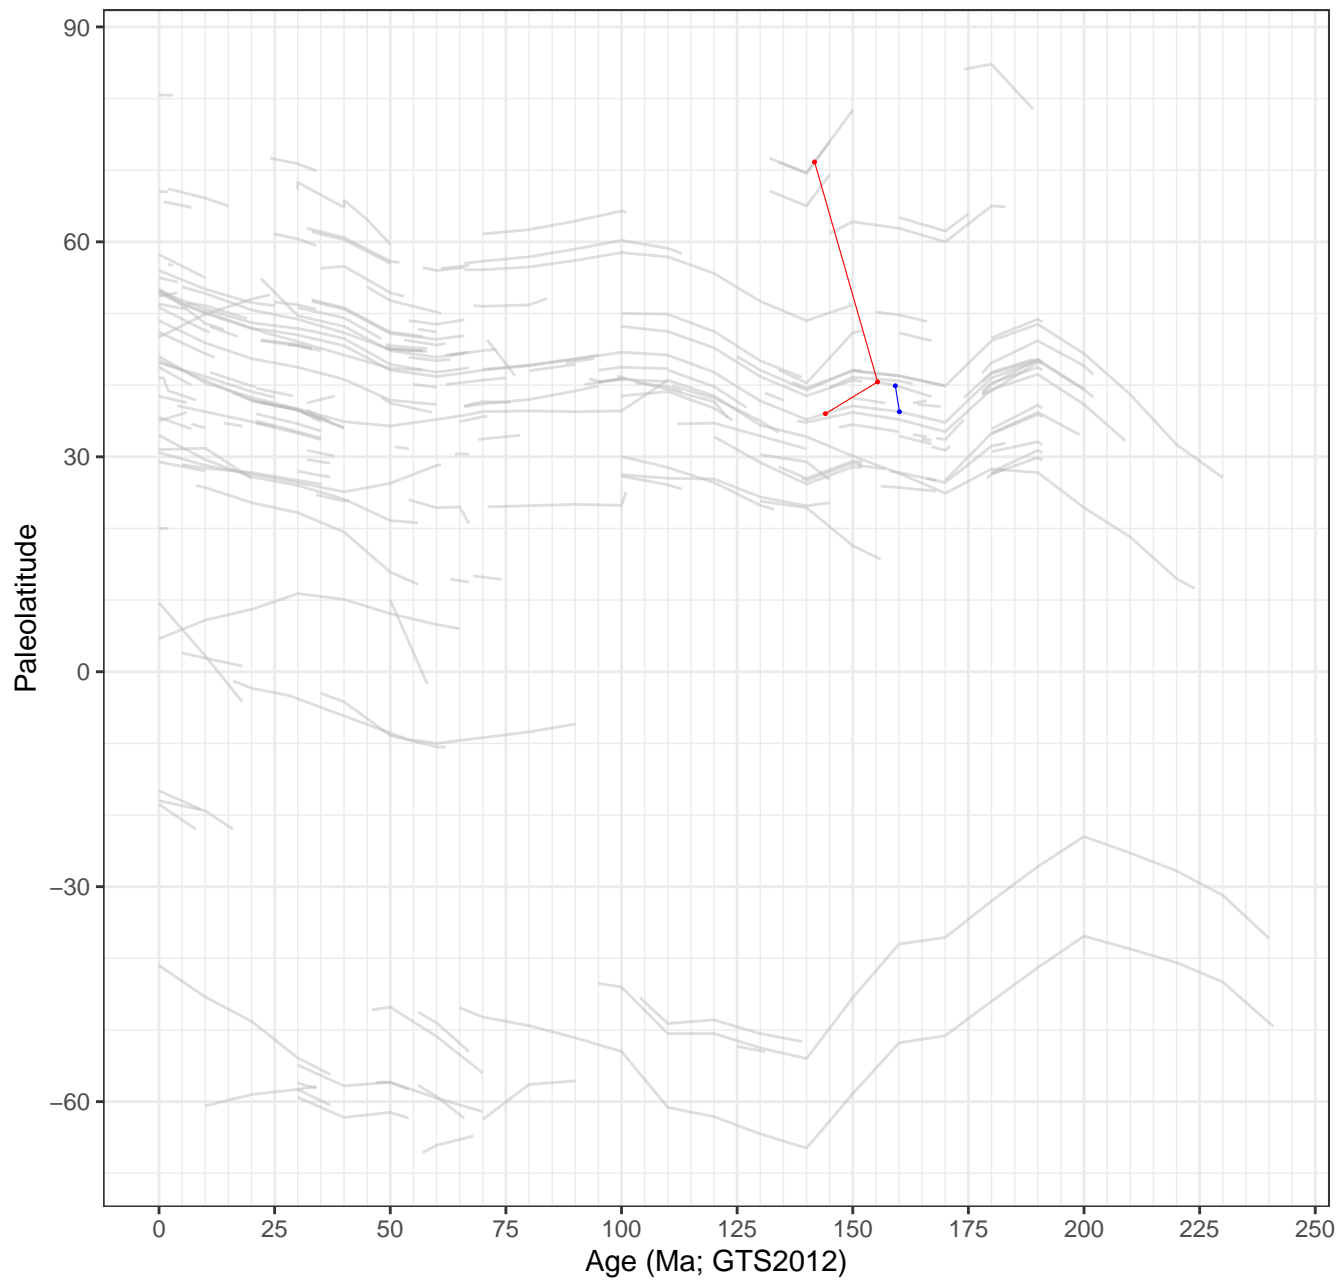

Supplement: Supplementary file 1147 [file Cribroperidinium globatum.pdf › Supplement/Supplement 2/Species 1914 plots/Cribroperidinium globatum.pdf]

# Species *Cribroperidinium granomembranaceum*

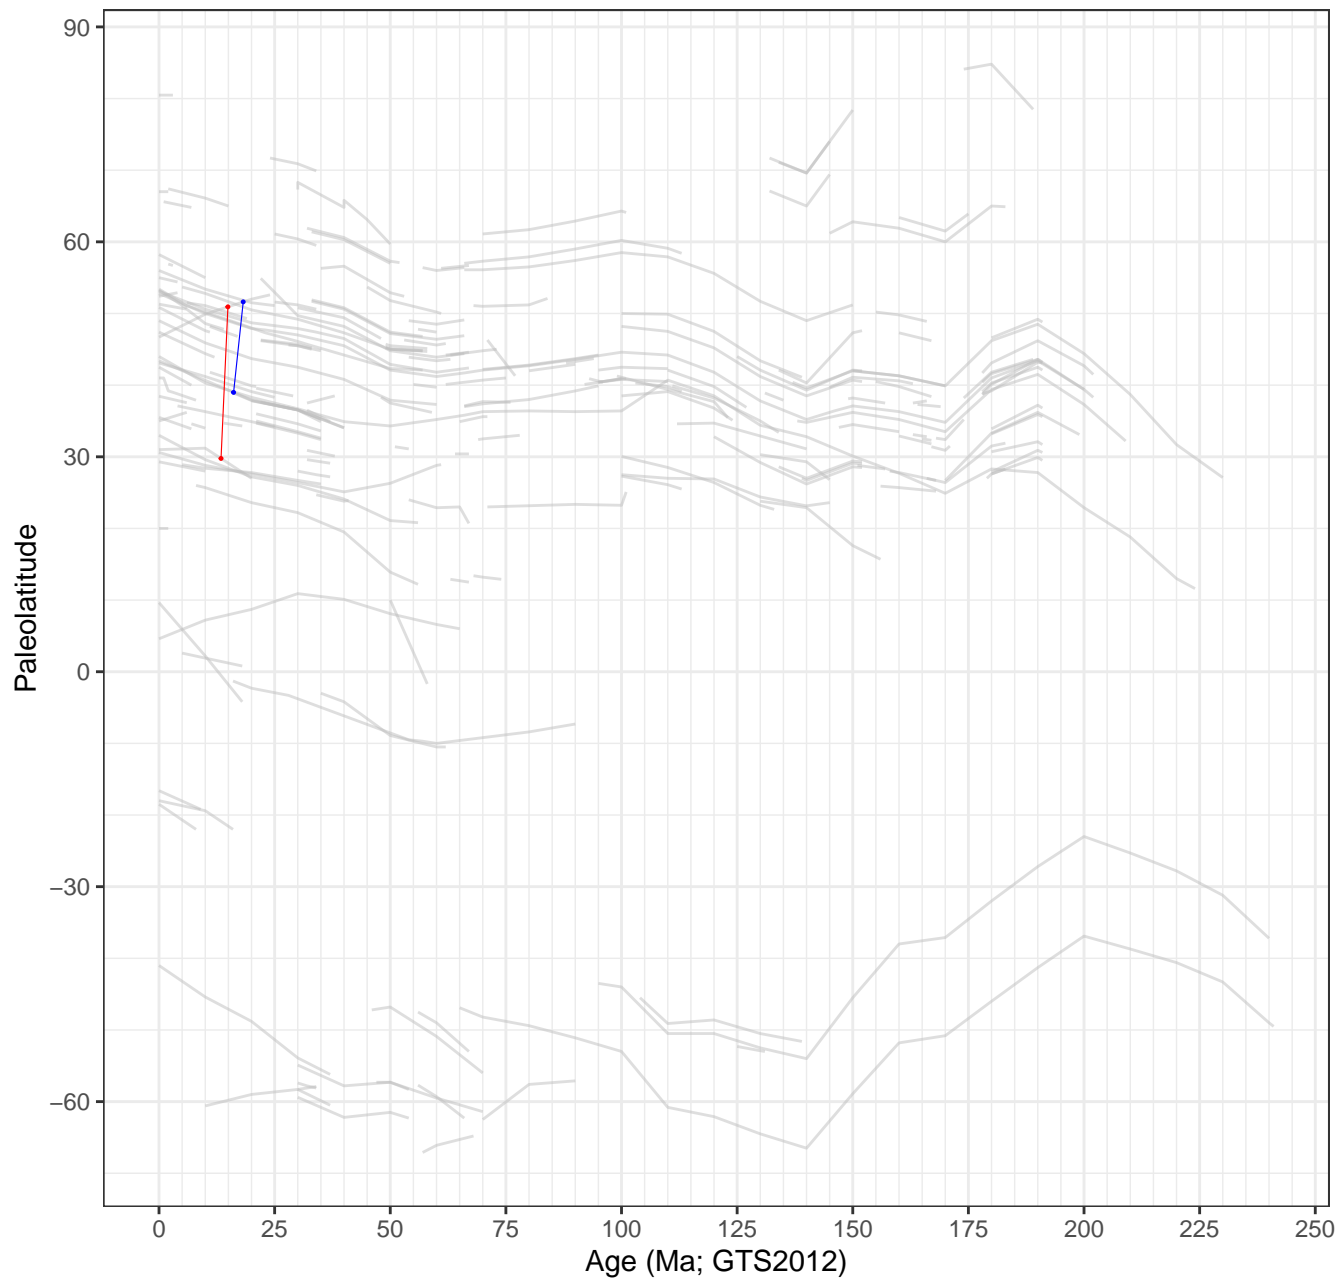

Supplement: Supplementary file 1148 [file Cribroperidinium granomembranaceum.pdf › Supplement/Supplement 2/Species 1914 plots/Cribroperidinium granomembranaceum.pdf]

# Species *Cribroperidinium granuligerum*

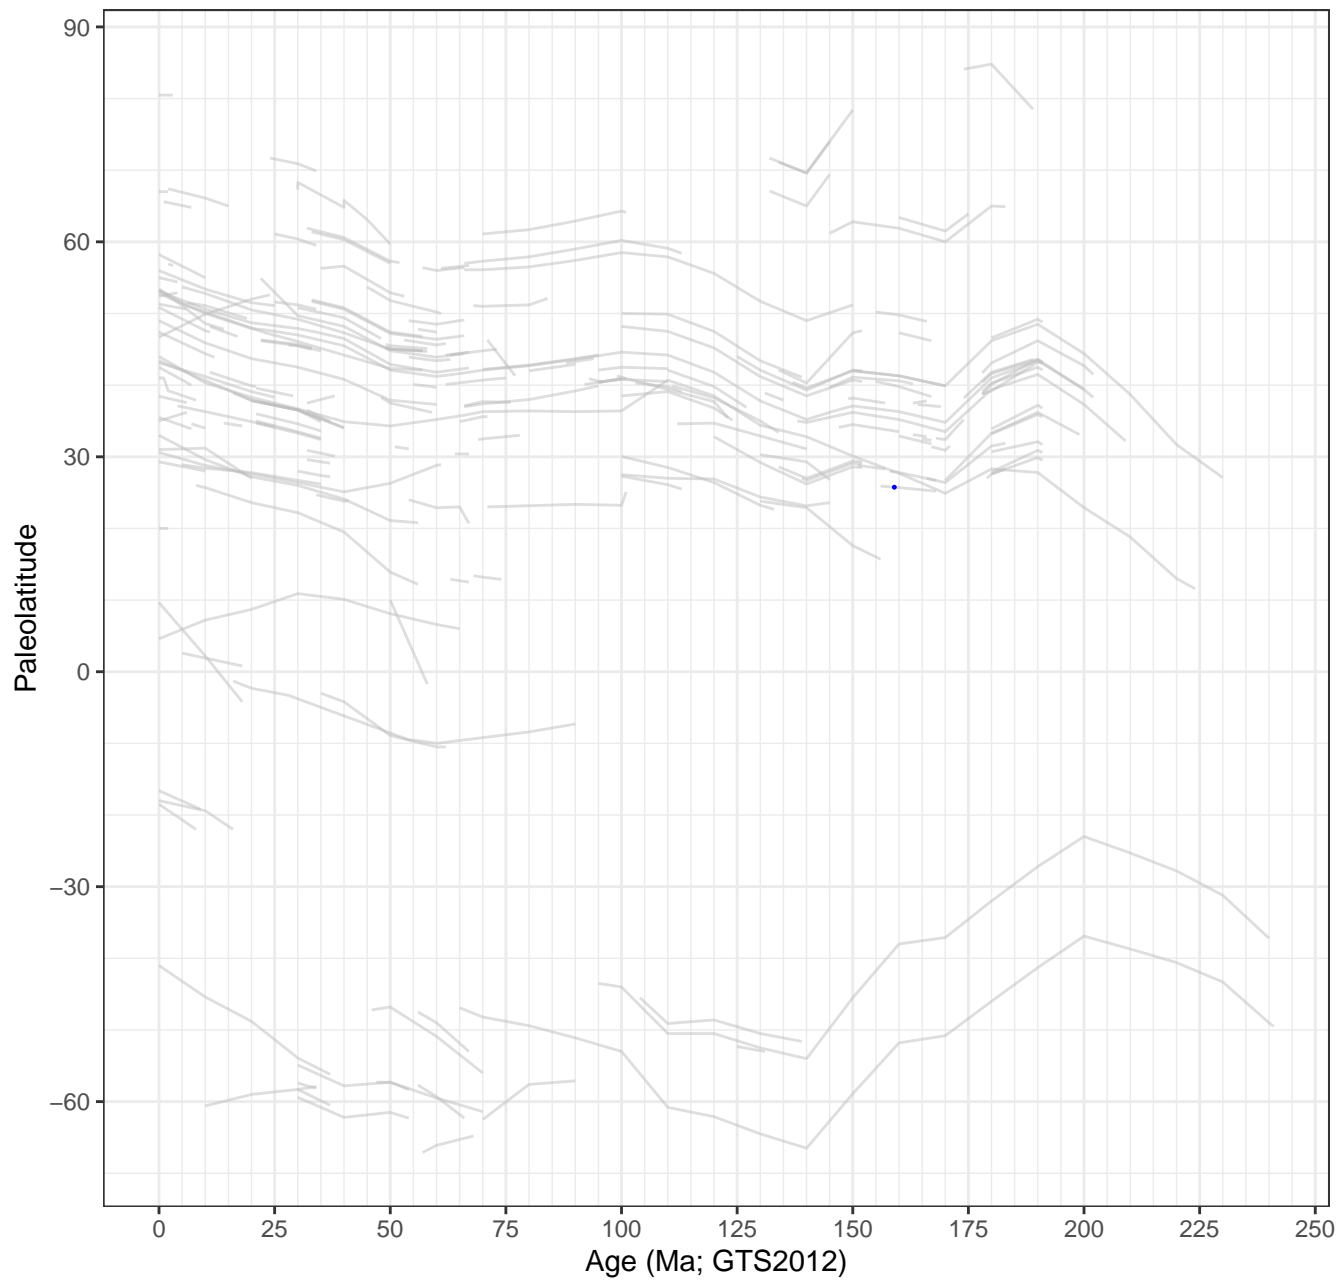

Supplement: Supplementary file 1149 [file Cribroperidinium granuligerum.pdf › Supplement/Supplement 2/Species 1914 plots/Cribroperidinium granuligerum.pdf]

# Species *Cribroperidinium guiseppii*

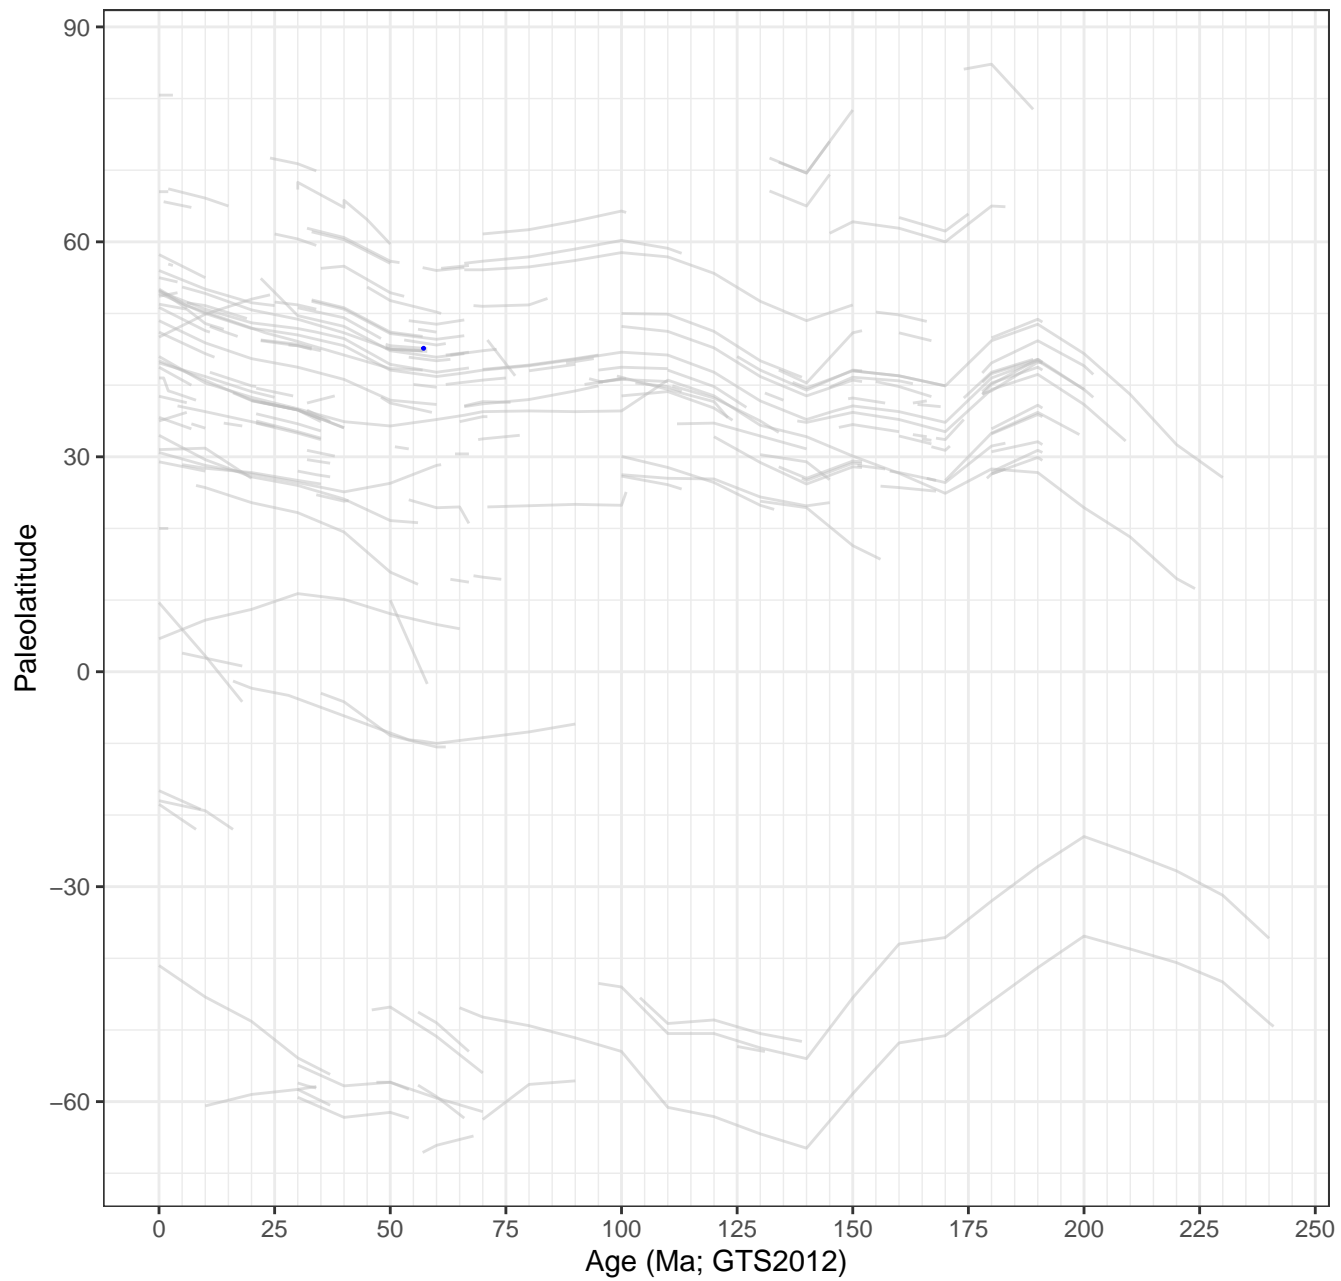

Supplement: Supplementary file 1150 [file Cribroperidinium guiseppii.pdf › Supplement/Supplement 2/Species 1914 plots/Cribroperidinium guiseppii.pdf]

# Species *Cribroperidinium intricatum*



Supplement: Supplementary file 1151 [file Cribroperidinium intricatum.pdf › Supplement/Supplement 2/Species 1914 plots/Cribroperidinium intricatum.pdf]

# Species *Cribrroperidinium leedervilense*

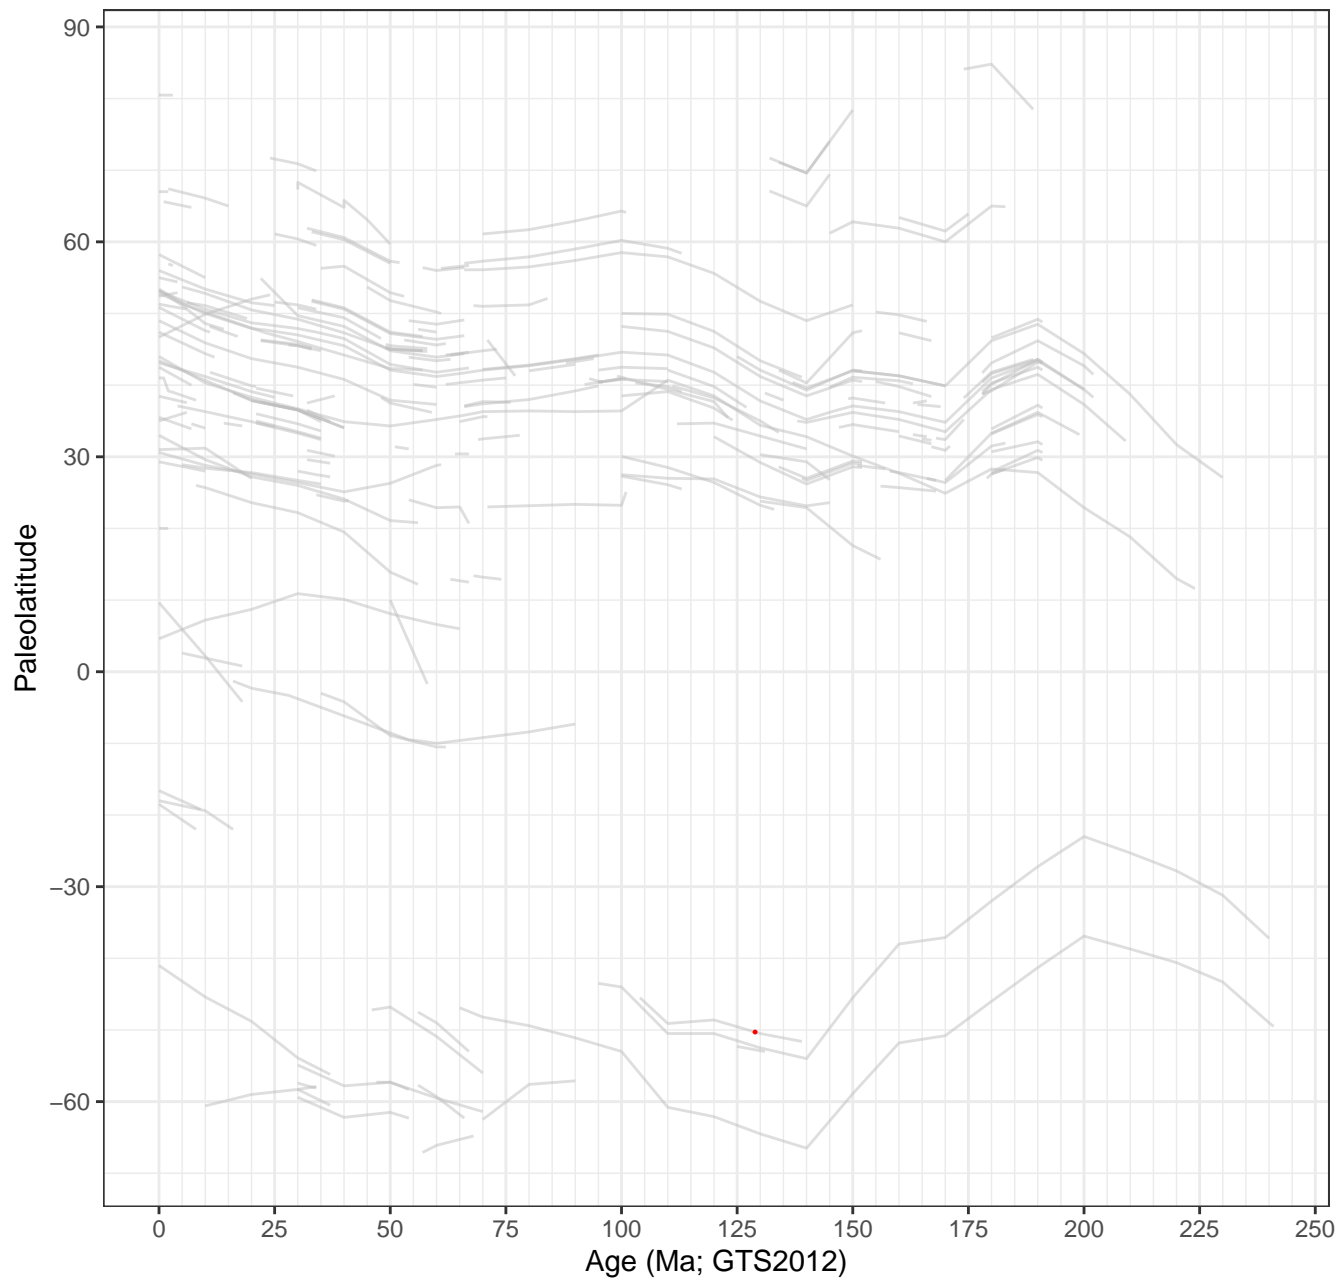

Supplement: Supplementary file 1152 [file Cribroperidinium leedervilense.pdf › Supplement/Supplement 2/Species 1914 plots/Cribroperidinium leedervilense.pdf]

# Species *Cribroperidinium longicorne*

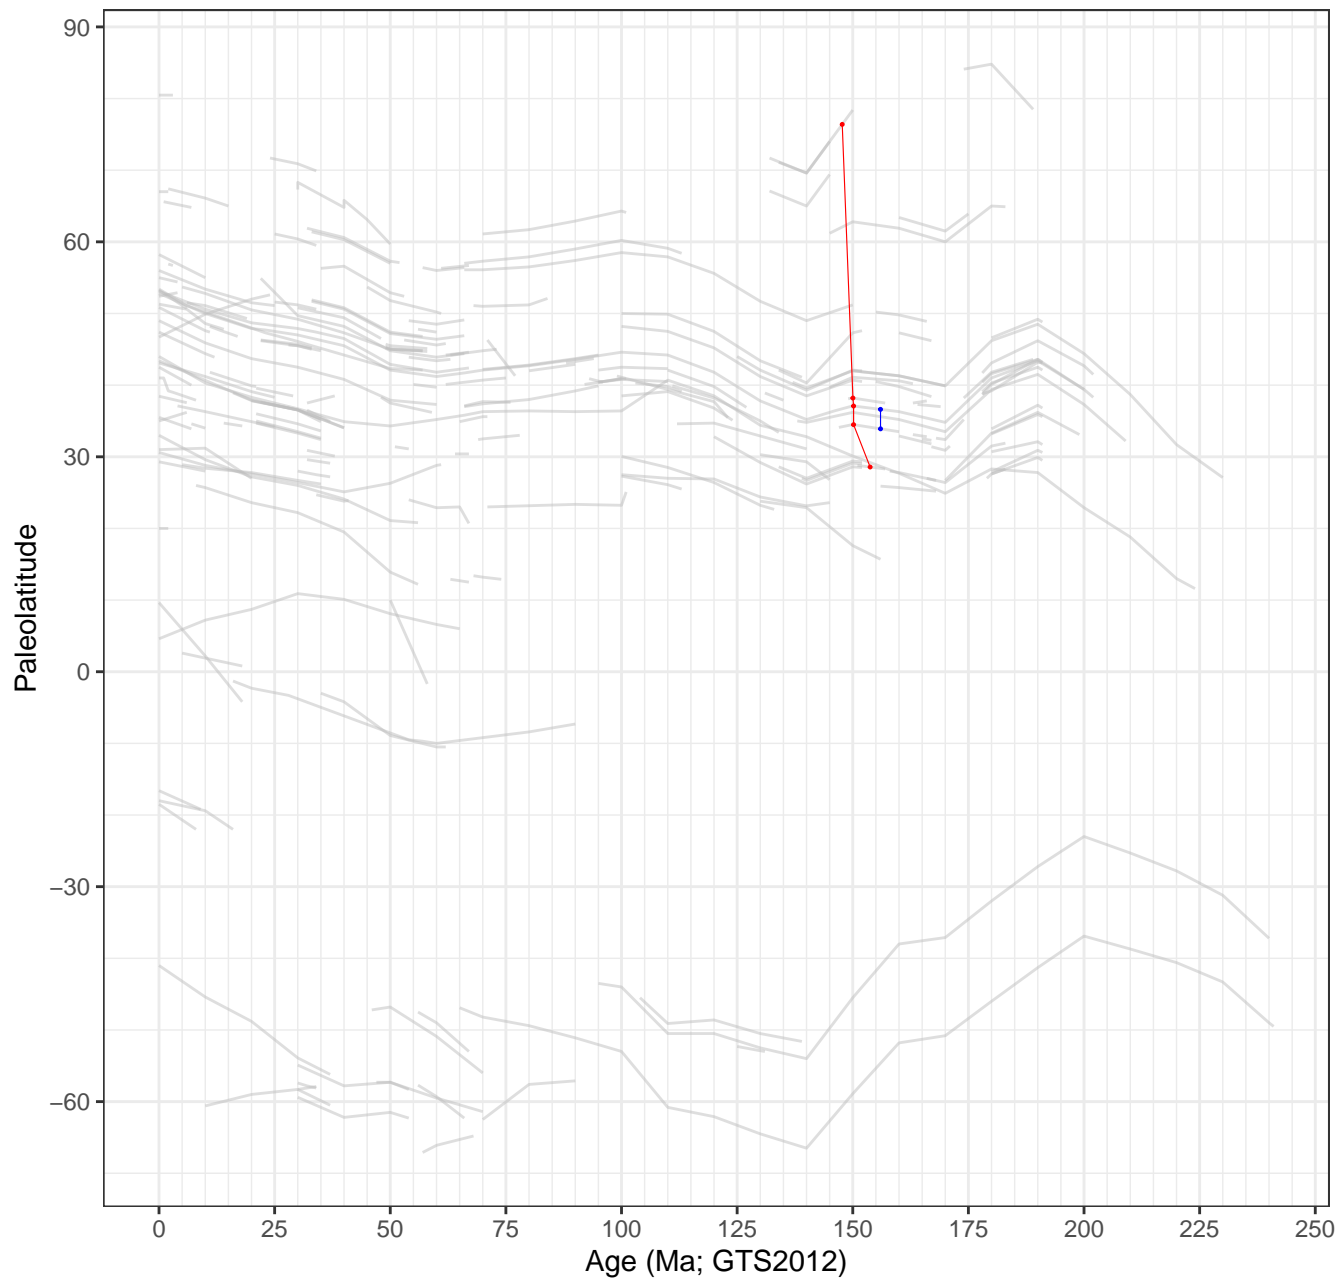

Supplement: Supplementary file 1153 [file Cribroperidinium longicorne.pdf › Supplement/Supplement 2/Species 1914 plots/Cribroperidinium longicorne.pdf]

# Species *Cribroperidinium magnificum*

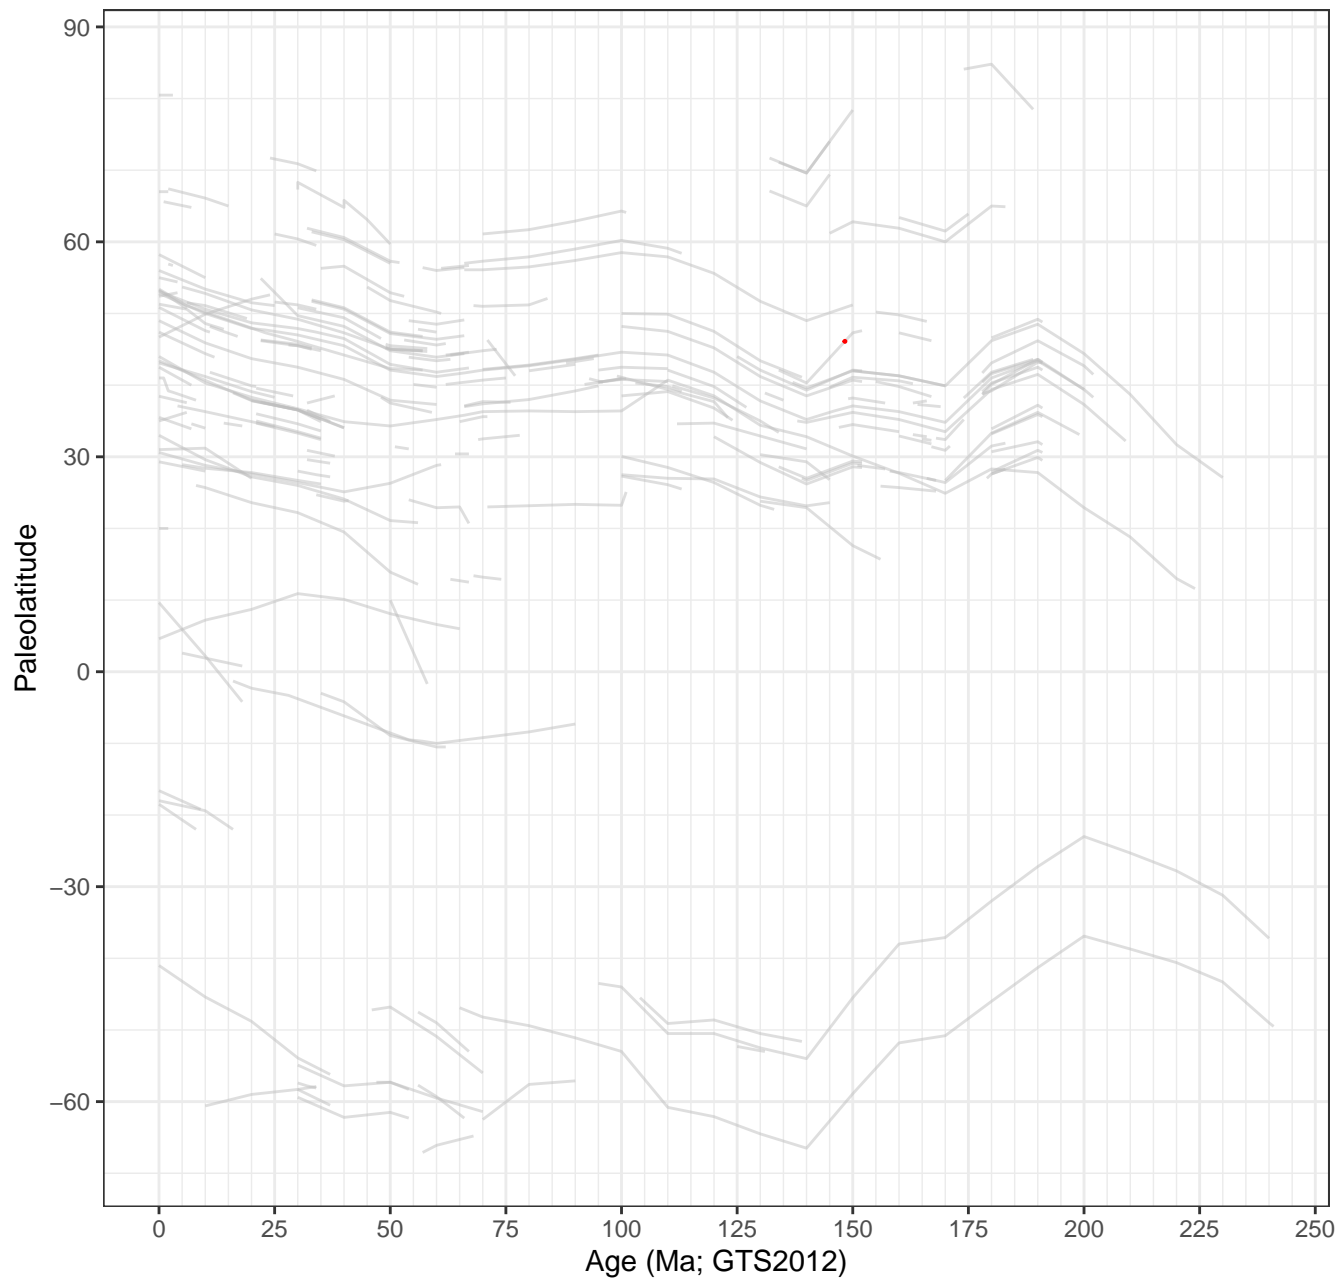

Supplement: Supplementary file 1154 [file Cribroperidinium magnificum.pdf › Supplement/Supplement 2/Species 1914 plots/Cribroperidinium magnificum.pdf]

# Species *Cribroperidinium muderongense*

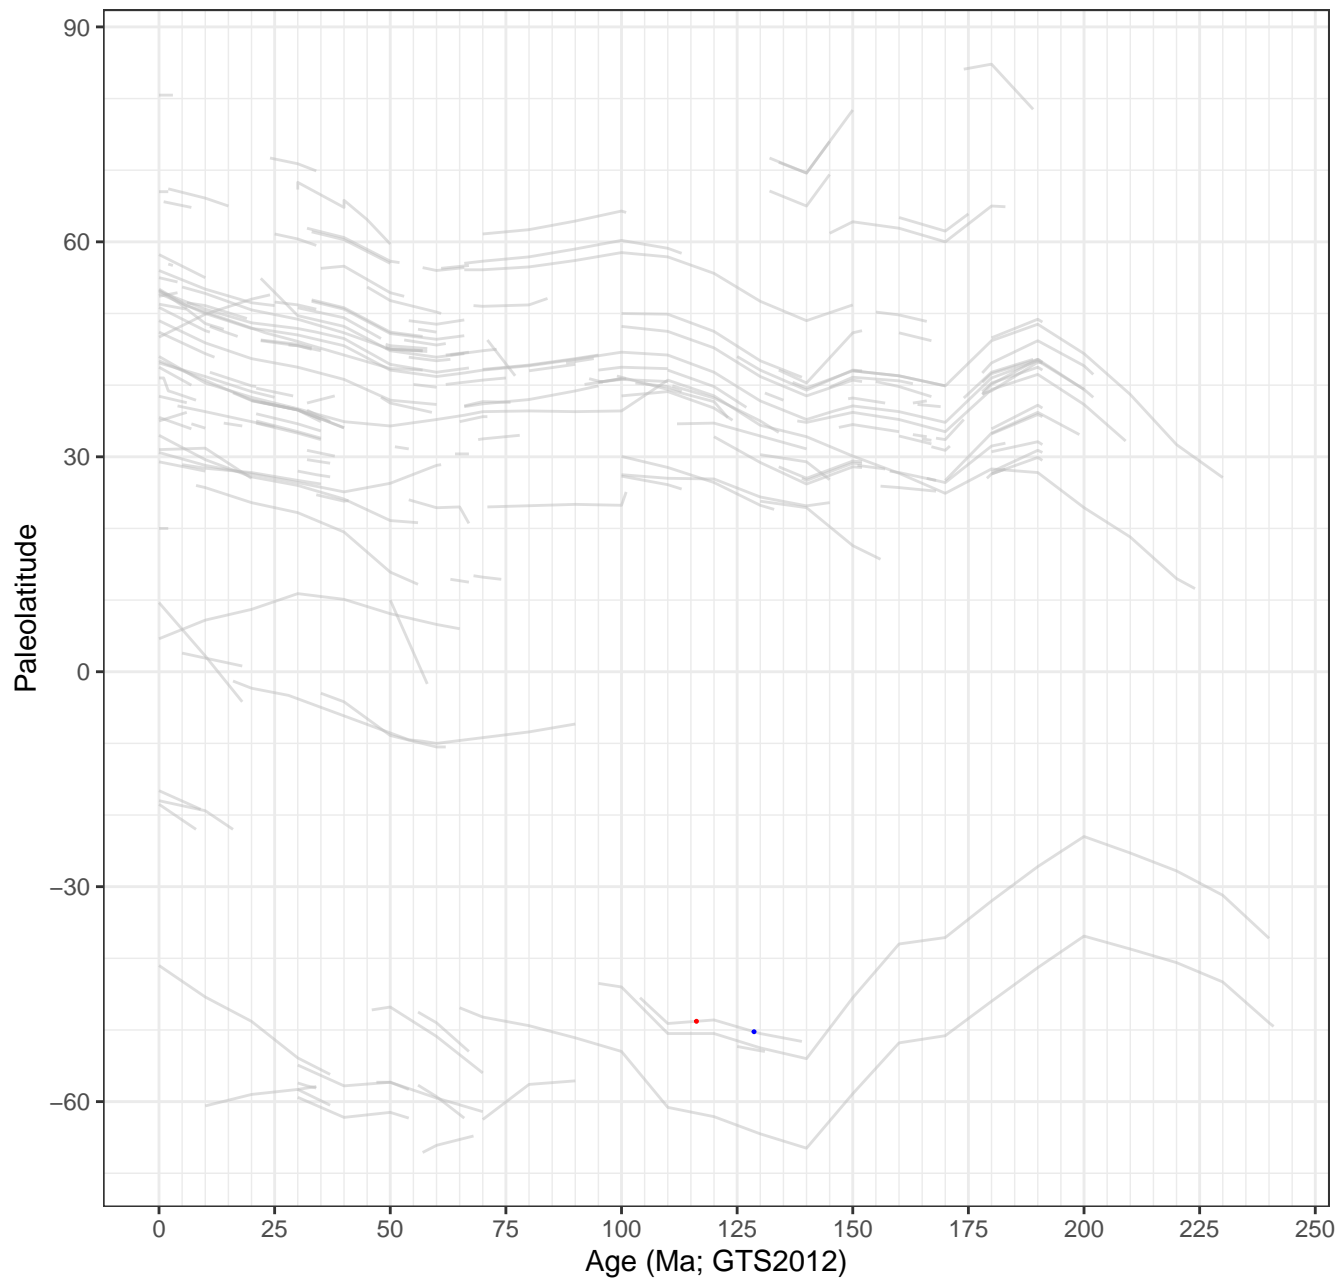

Supplement: Supplementary file 1155 [file Cribroperidinium muderongense.pdf › Supplement/Supplement 2/Species 1914 plots/Cribroperidinium muderongense.pdf]

# Species *Cribrroperidinium nuciforme*

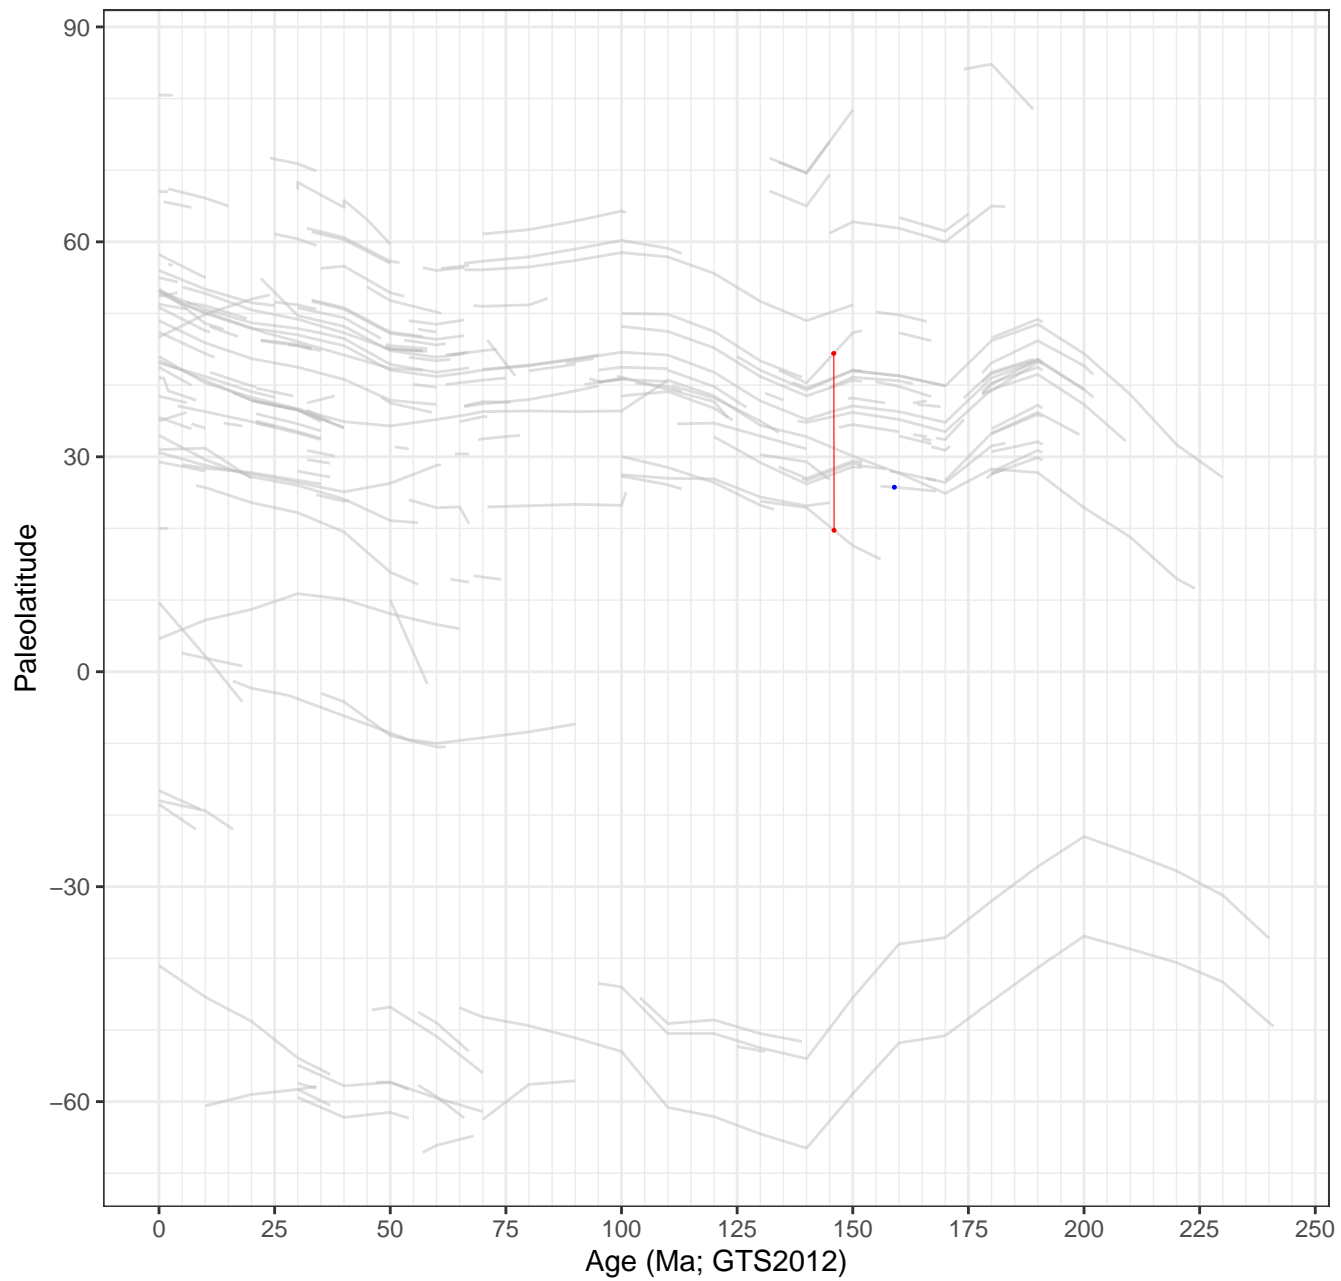

Supplement: Supplementary file 1156 [file Cribroperidinium nuciforme.pdf › Supplement/Supplement 2/Species 1914 plots/Cribroperidinium nuciforme.pdf]

# Species *Cribroperidinium orthoceras*

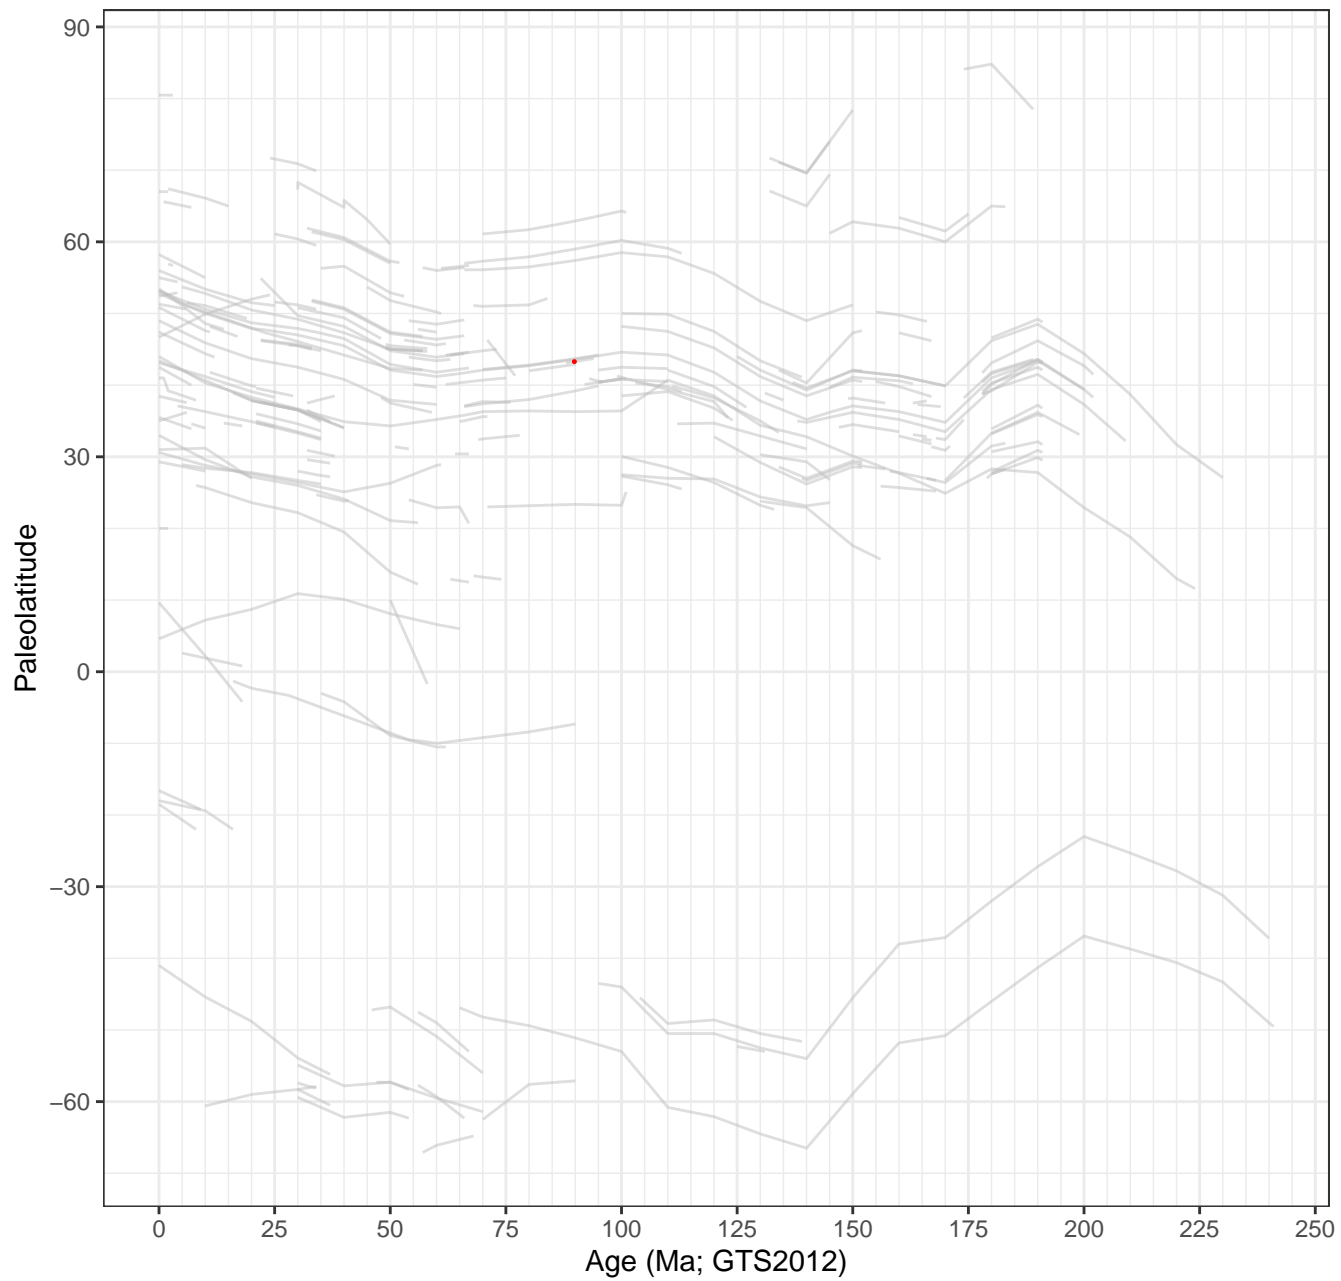

Supplement: Supplementary file 1157 [file Cribroperidinium orthoceras.pdf › Supplement/Supplement 2/Species 1914 plots/Cribroperidinium orthoceras.pdf]

# Species *Cribroperidinium perforans*

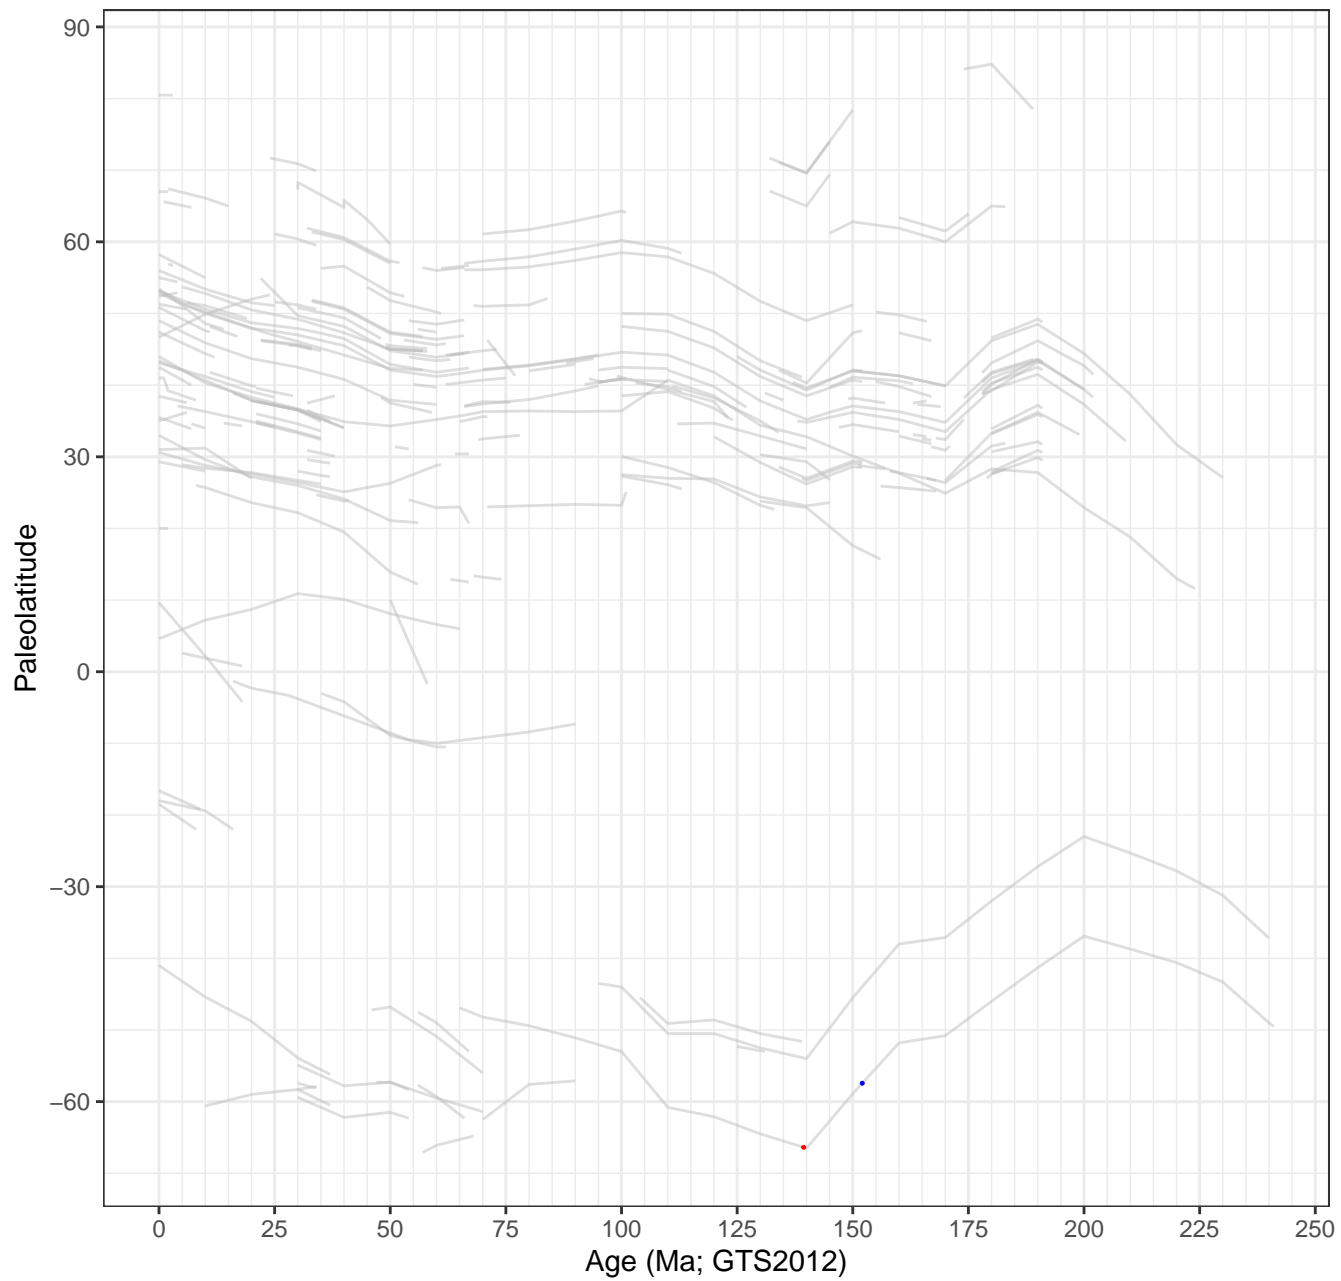

Supplement: Supplementary file 1158 [file Cribroperidinium perforans.pdf › Supplement/Supplement 2/Species 1914 plots/Cribroperidinium perforans.pdf]

# Species *Cribroperidinium pyrum*

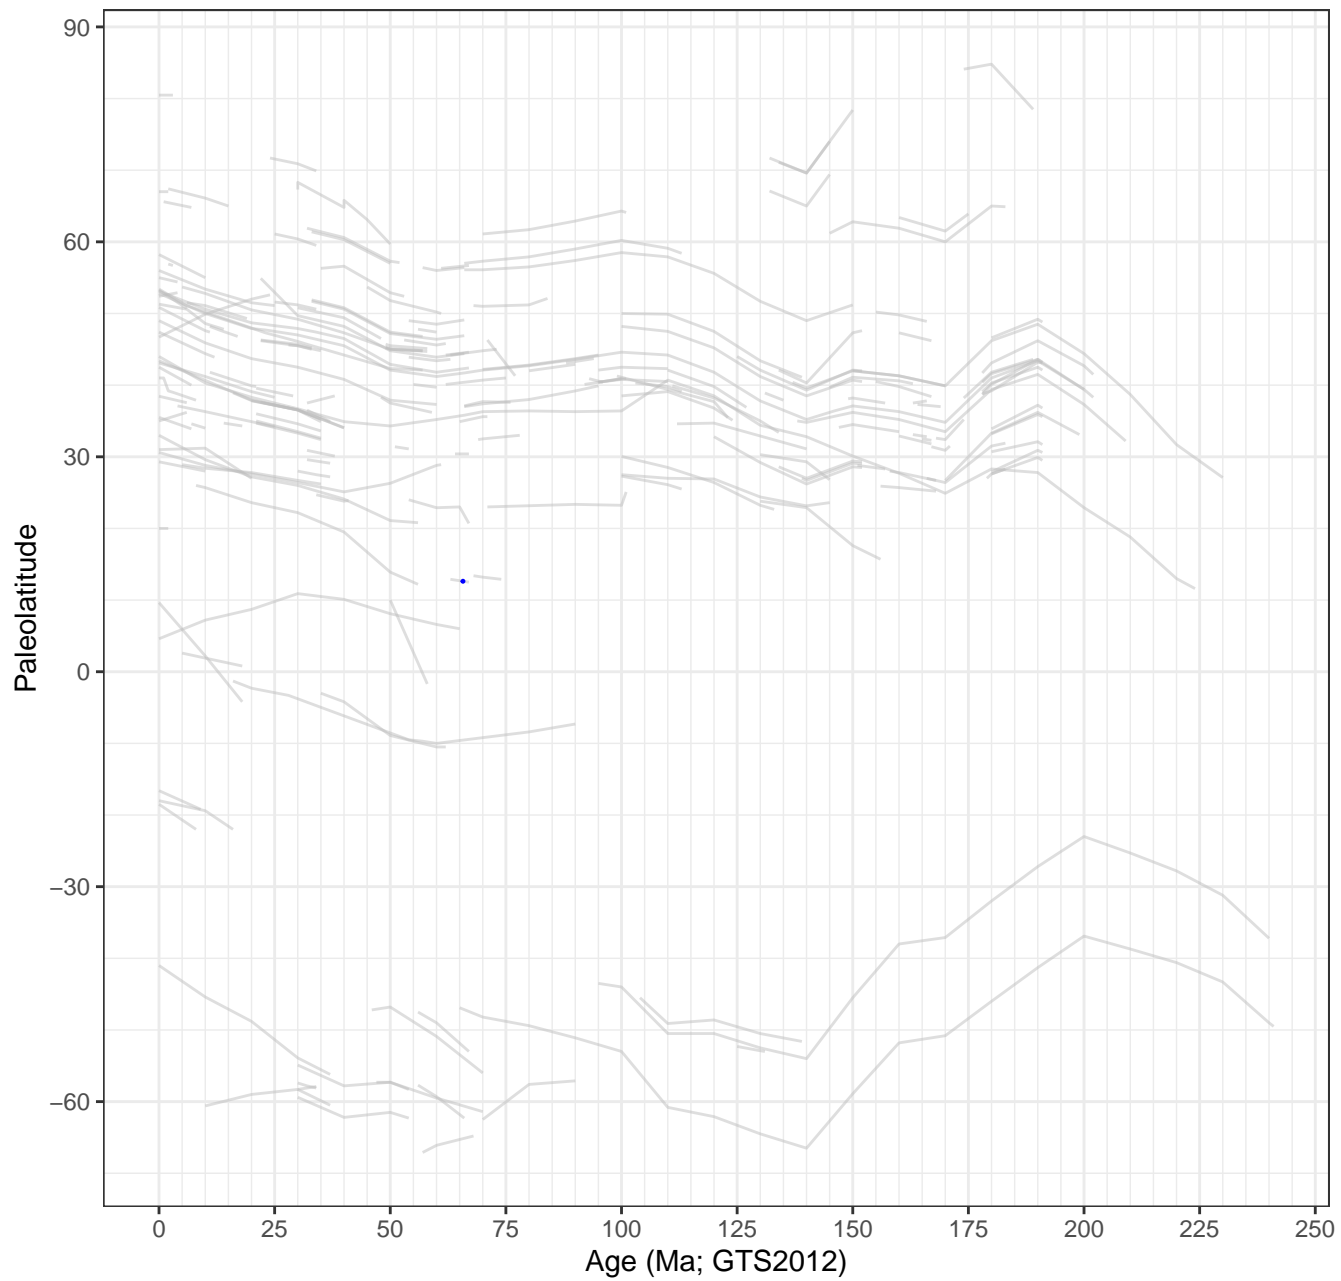

Supplement: Supplementary file 1159 [file Cribroperidinium pyrum.pdf › Supplement/Supplement 2/Species 1914 plots/Cribroperidinium pyrum.pdf]

# Species *Cribroperidinium sarjeantii*

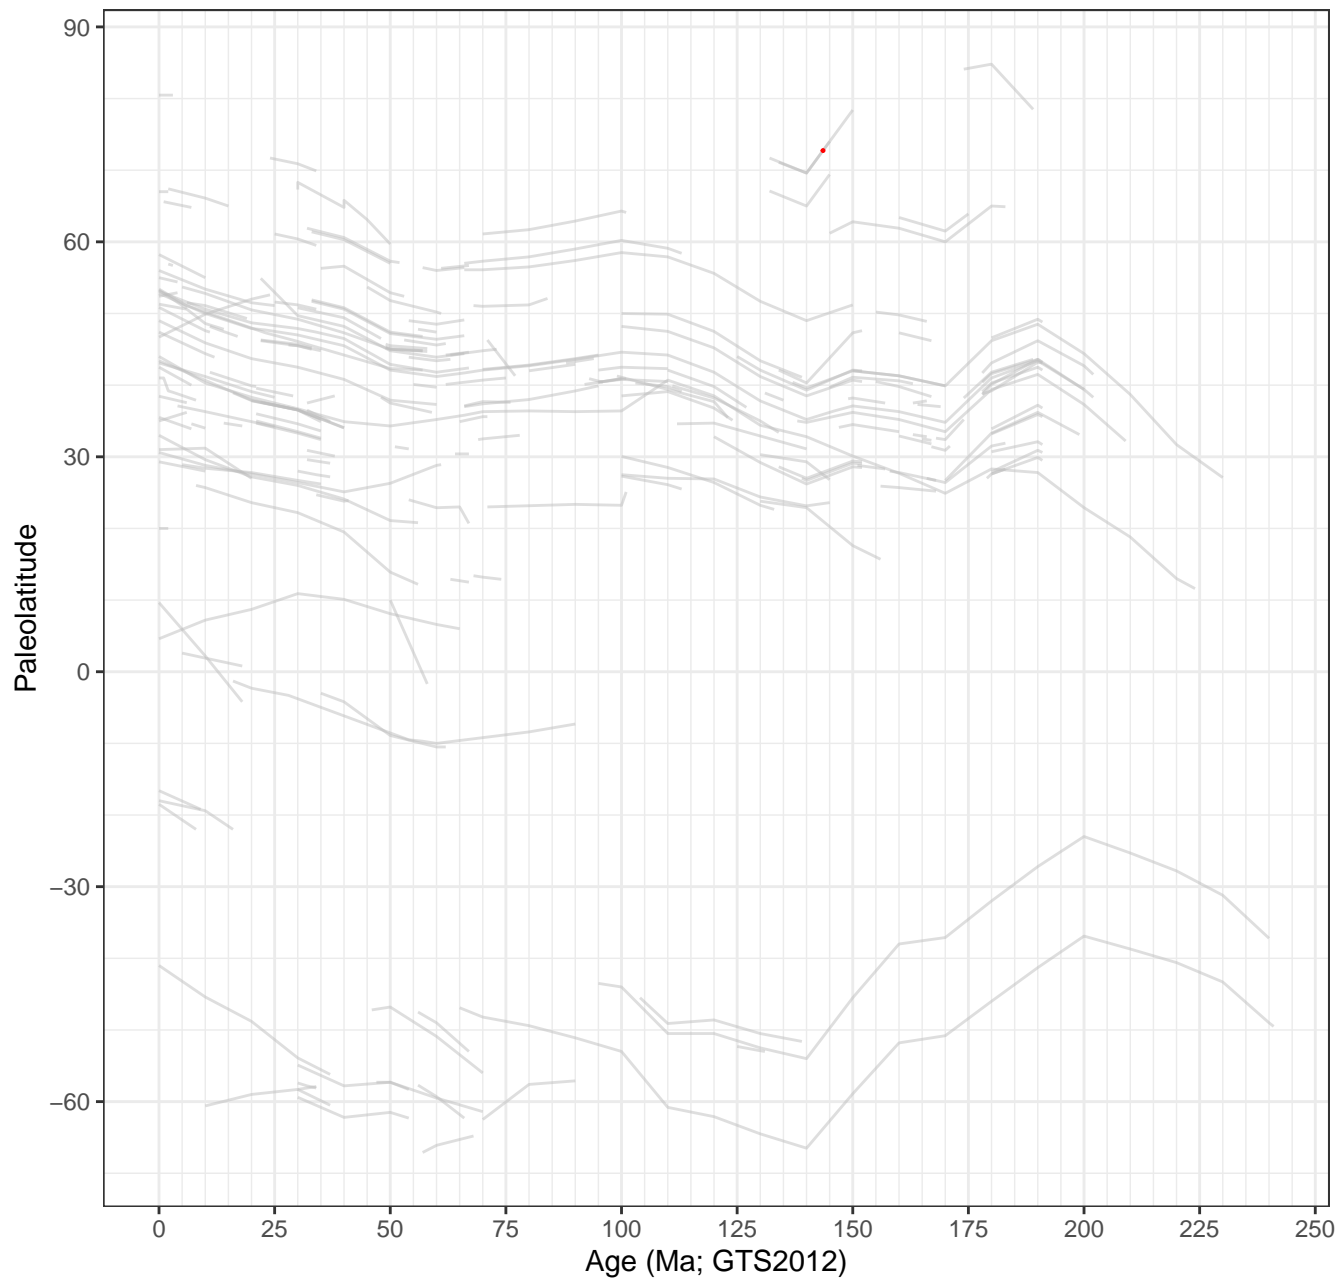

Supplement: Supplementary file 1160 [file Cribroperidinium sarjeantii.pdf › Supplement/Supplement 2/Species 1914 plots/Cribroperidinium sarjeantii.pdf]

# Species *Cribroperidinium sepimentum*

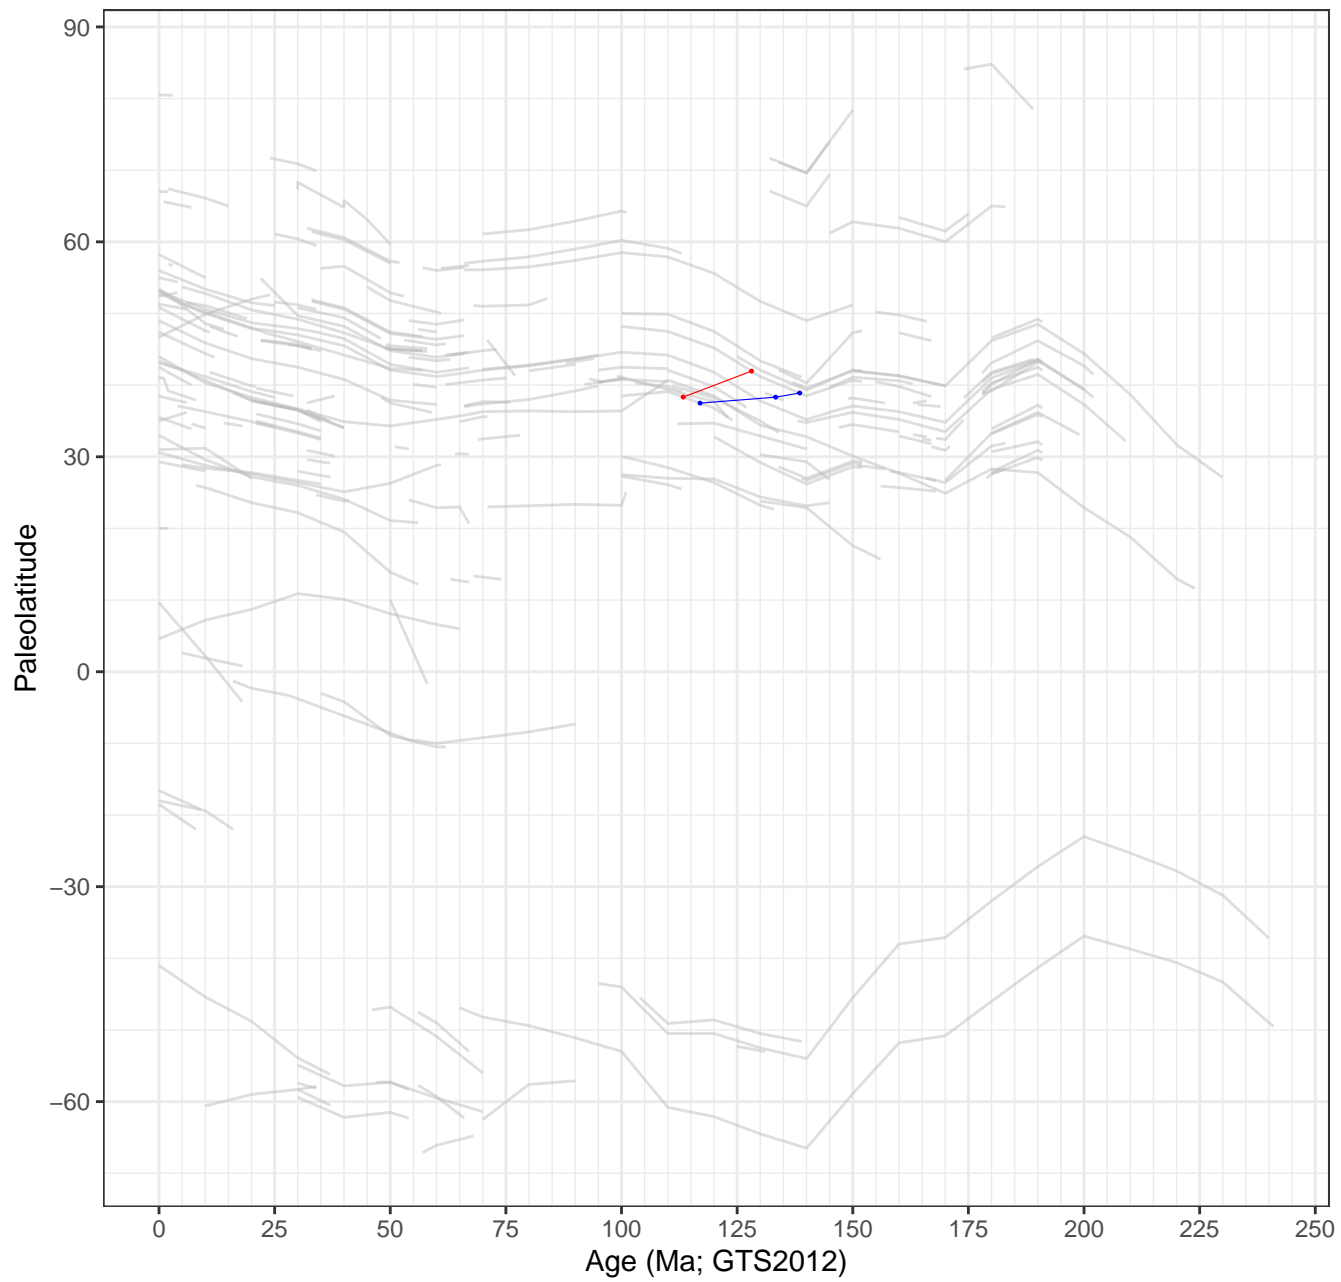

Supplement: Supplementary file 1161 [file Cribroperidinium sepimentum.pdf › Supplement/Supplement 2/Species 1914 plots/Cribroperidinium sepimentum.pdf]

# Species *Cribroperidinium spinocristatum*

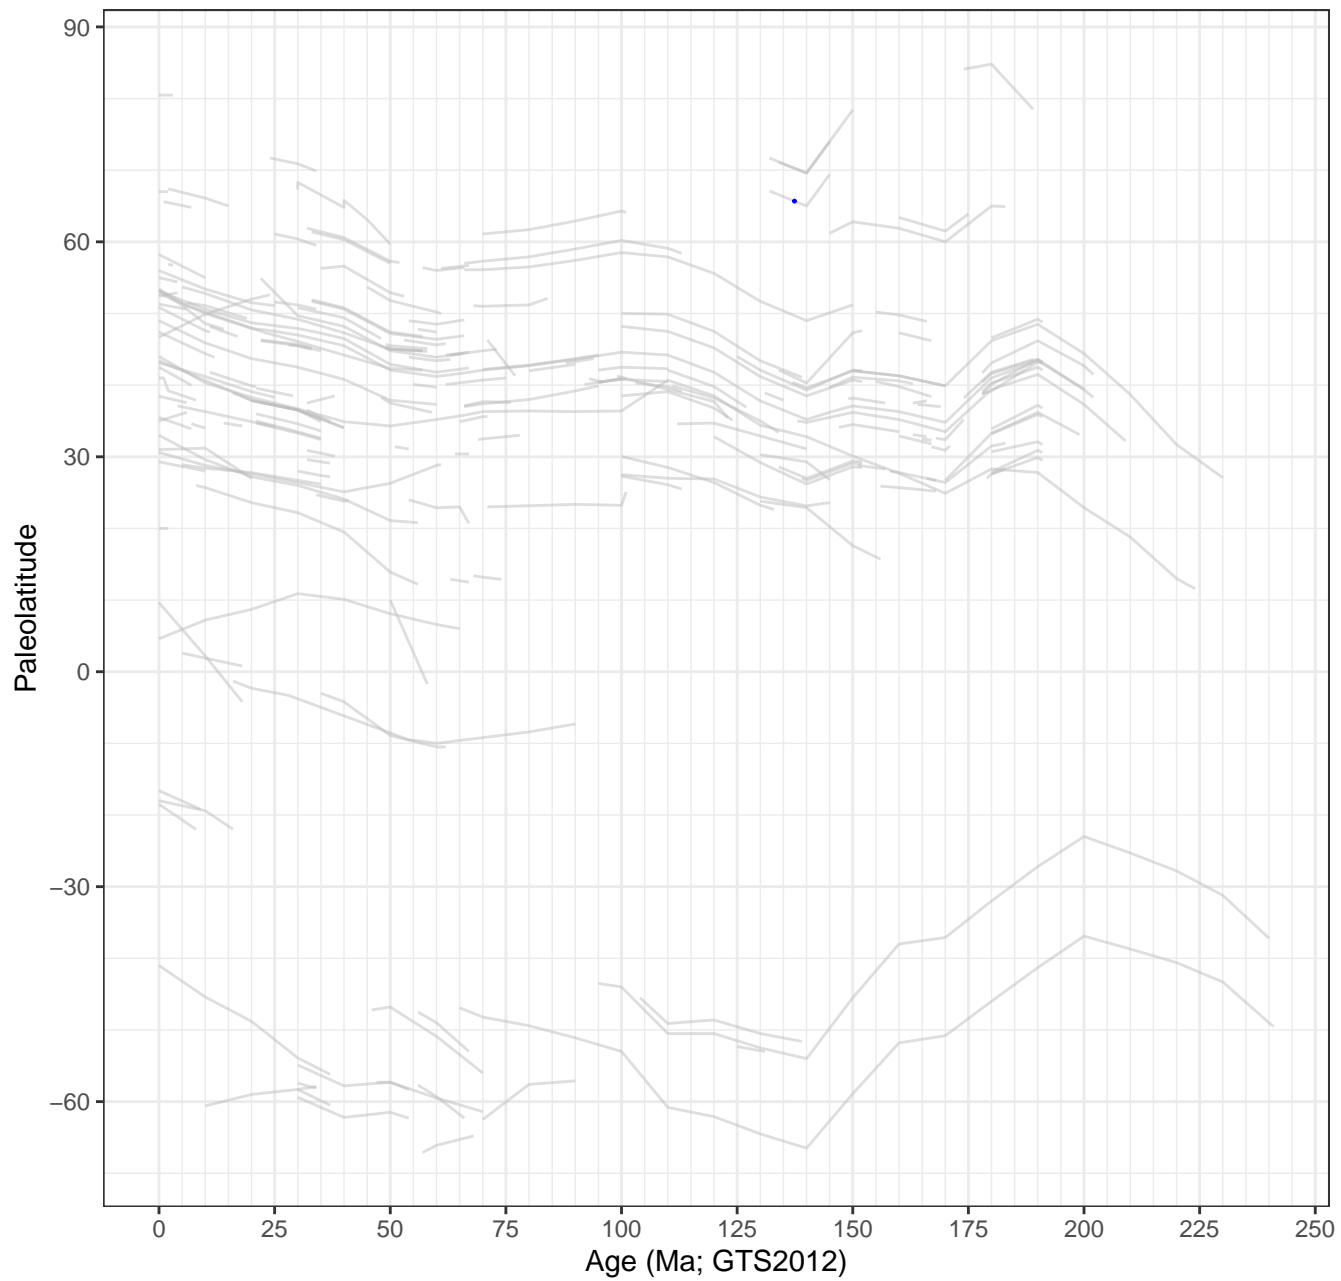

Supplement: Supplementary file 1162 [file Cribroperidinium spinocristatum.pdf › Supplement/Supplement 2/Species 1914 plots/Cribroperidinium spinocristatum.pdf]

# Species *Cribroperidinium spinoreticulatum*

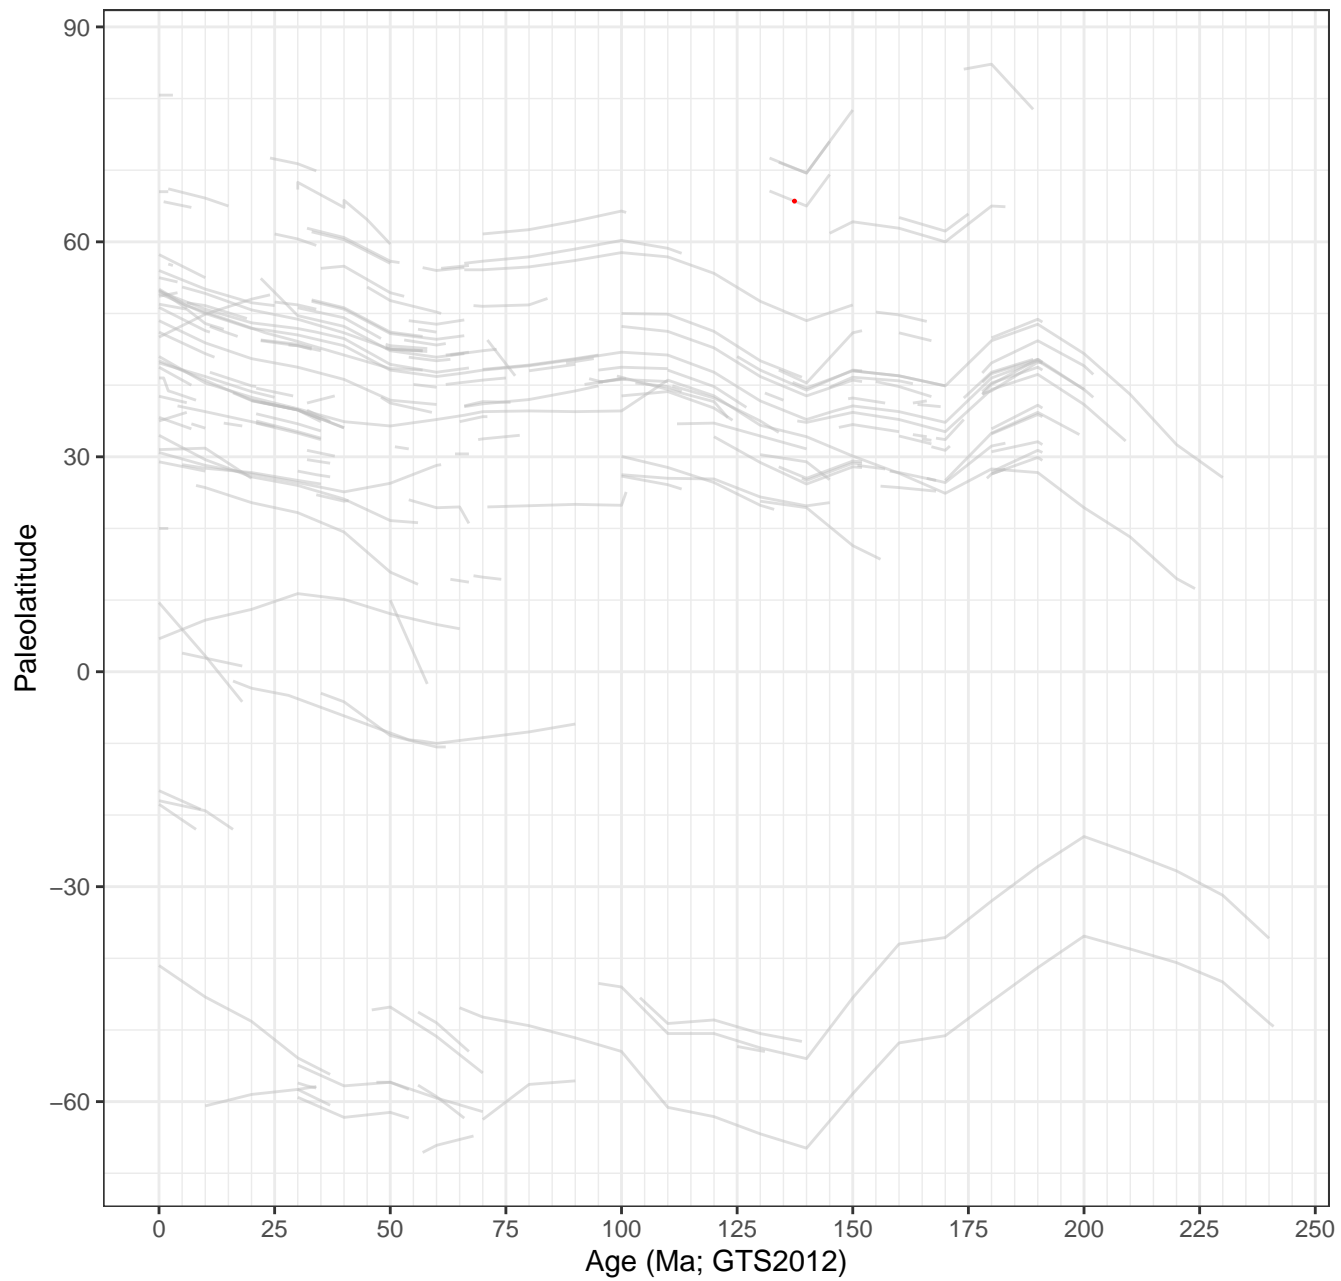

Supplement: Supplementary file 1163 [file Cribroperidinium spinoreticulatum.pdf › Supplement/Supplement 2/Species 1914 plots/Cribroperidinium spinoreticulatum.pdf]

# Species *Cribroperidinium tensifense*

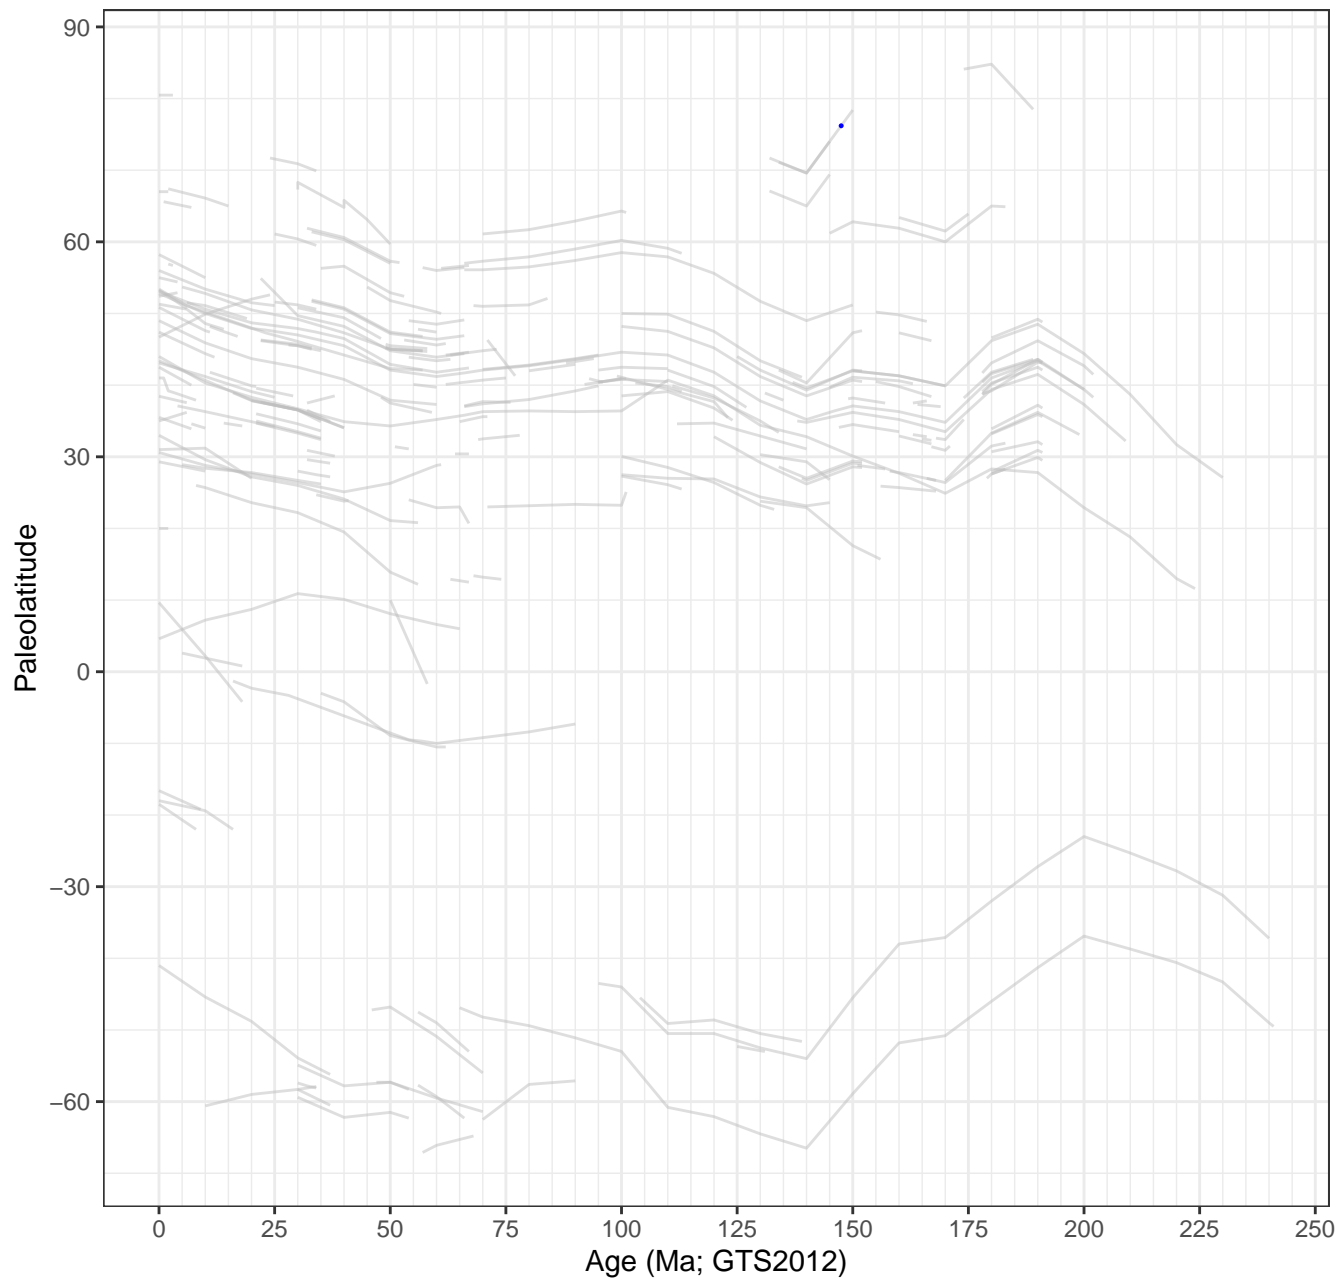

Supplement: Supplementary file 1164 [file Cribroperidinium tensiftense.pdf › Supplement/Supplement 2/Species 1914 plots/Cribroperidinium tensiftense.pdf]

# Species *Cribroperidinium tenuiceras*

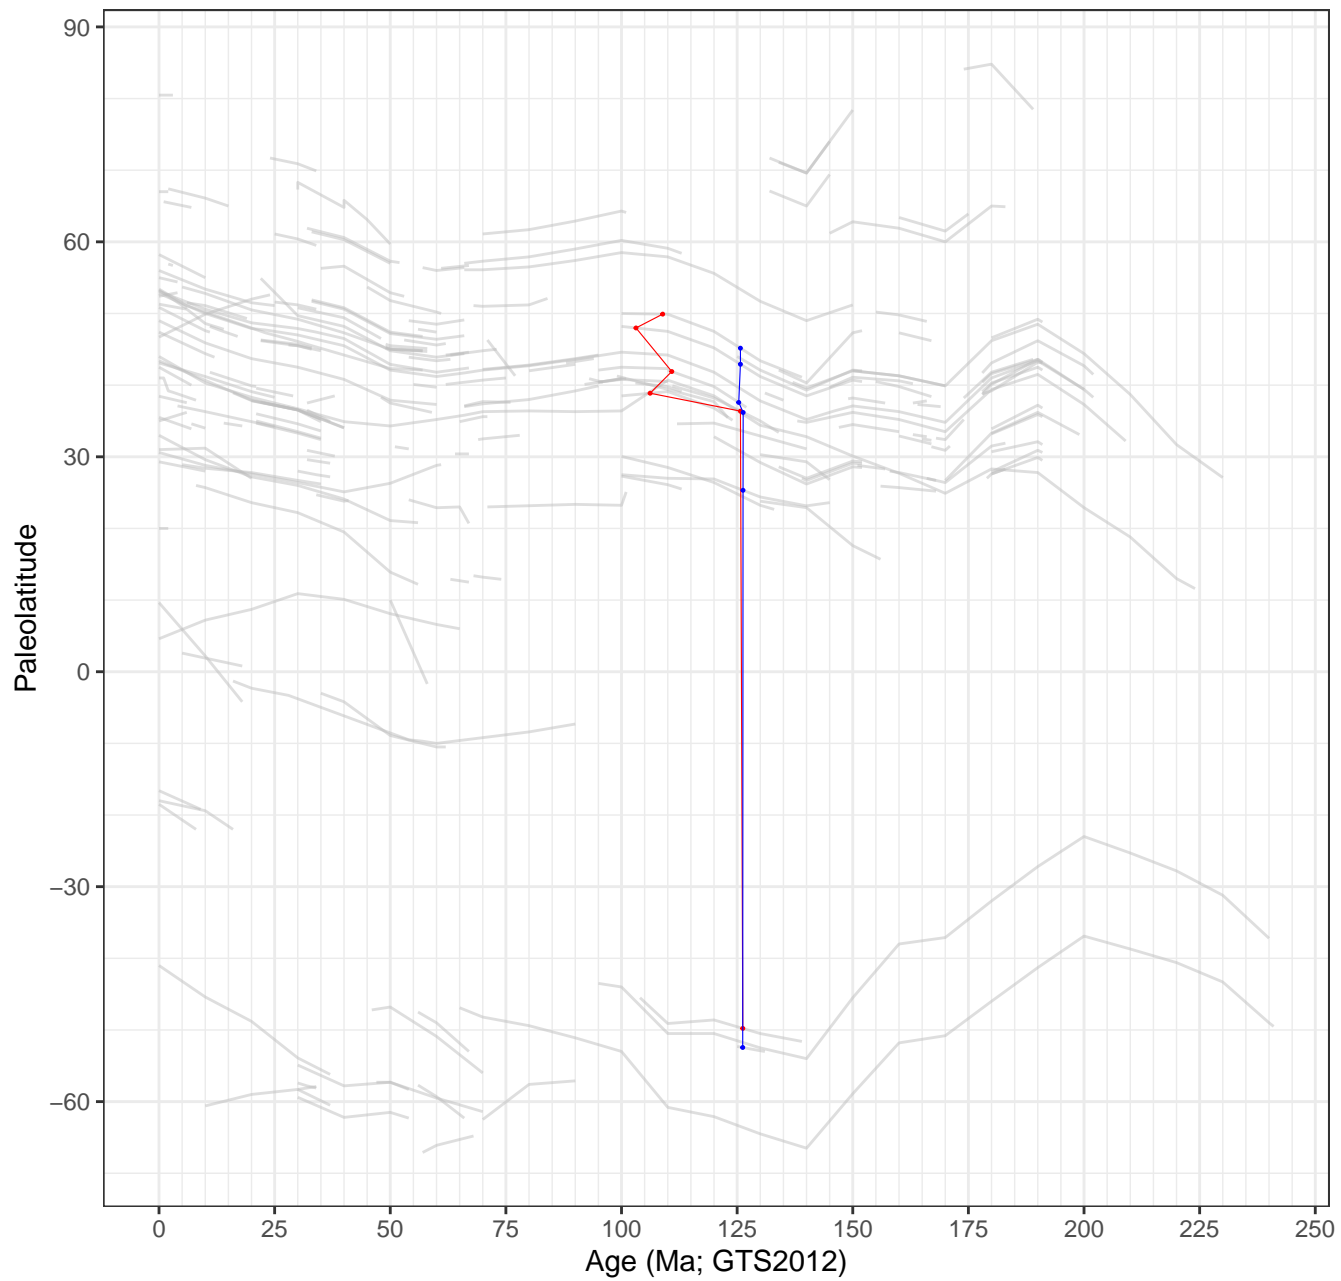

Supplement: Supplementary file 1165 [file Cribroperidinium tenuiceras.pdf › Supplement/Supplement 2/Species 1914 plots/Cribroperidinium tenuiceras.pdf]

# Species *Cribrroperidinium tenuitabulatum*

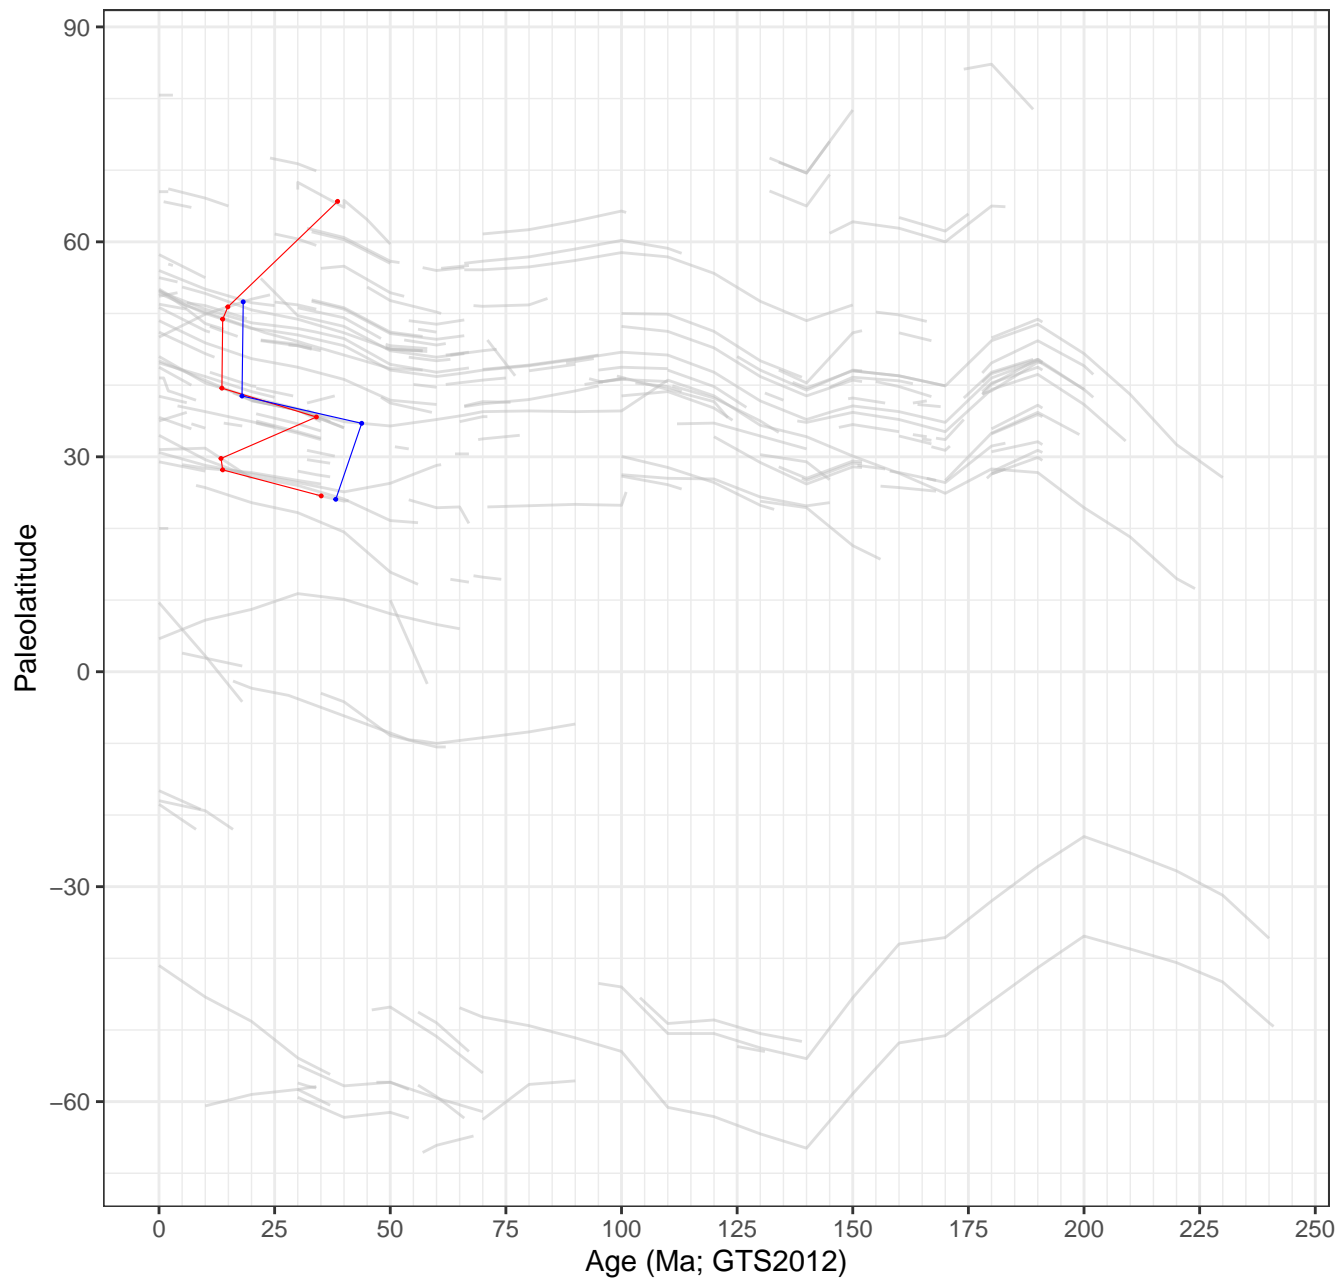

Supplement: Supplementary file 1166 [file Cribroperidinium tenuitabulatum.pdf › Supplement/Supplement 2/Species 1914 plots/Cribroperidinium tenuitabulatum.pdf]

# Species *Cribroperidinium undoryense*

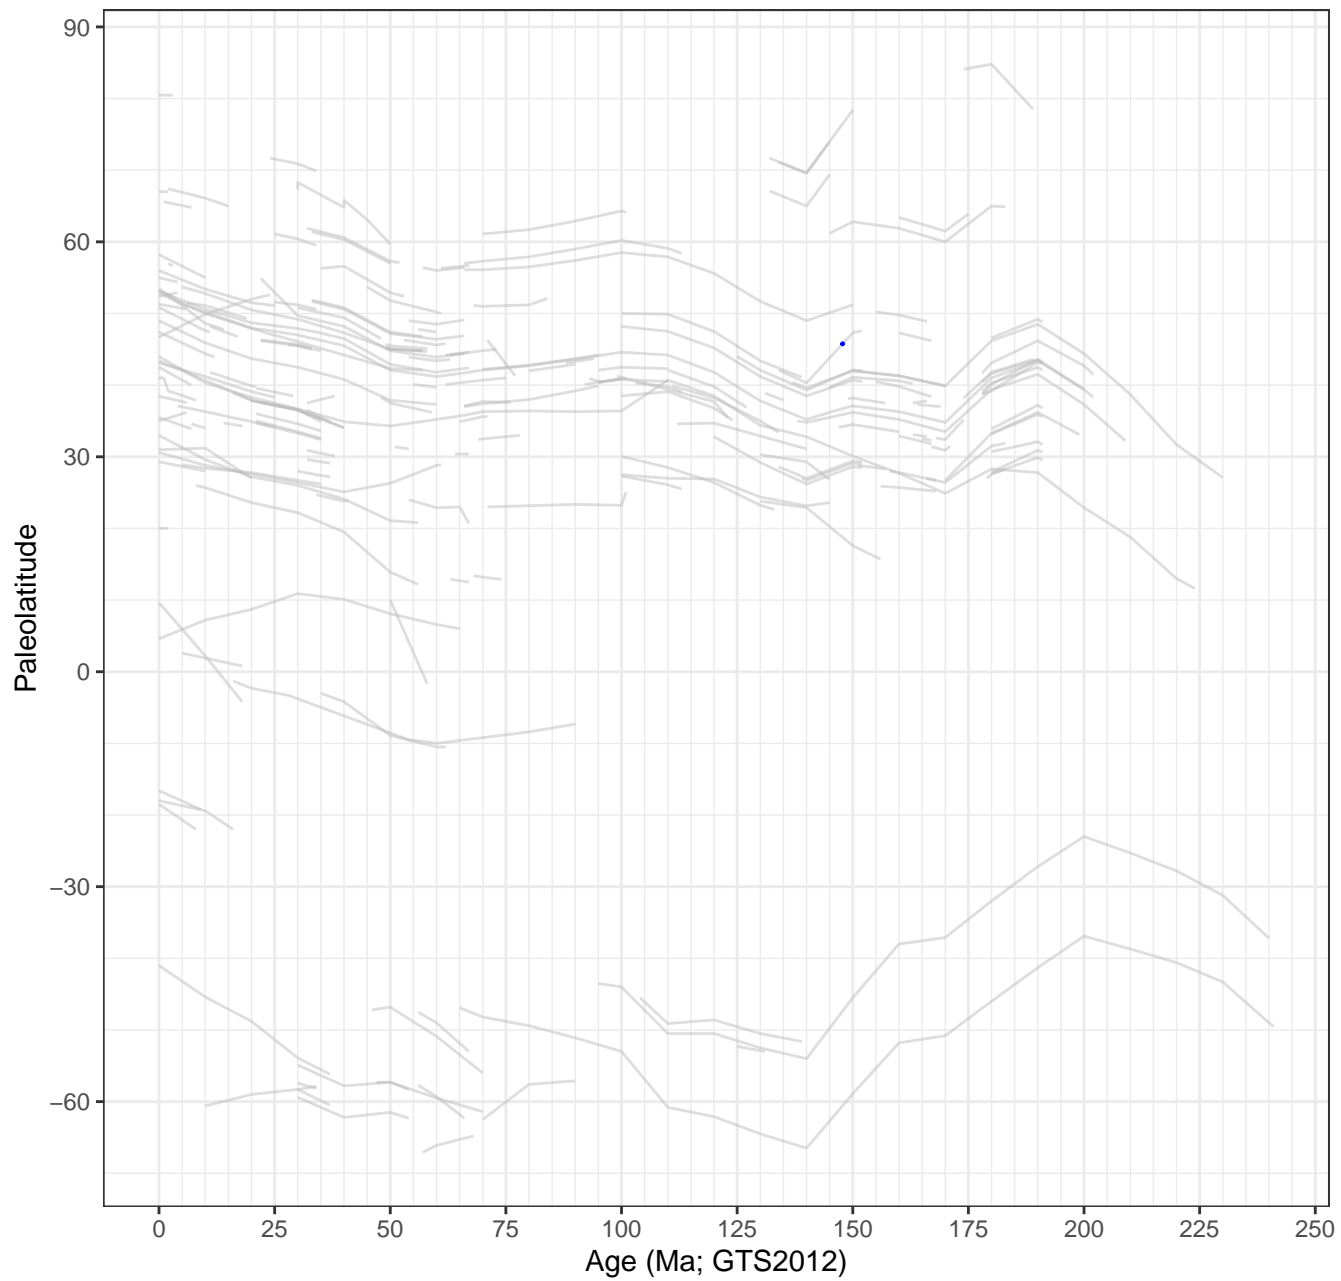

Supplement: Supplementary file 1167 [file Cribroperidinium undoryense.pdf › Supplement/Supplement 2/Species 1914 plots/Cribroperidinium undoryense.pdf]

# Species *Cribroperidinium wetzeli*

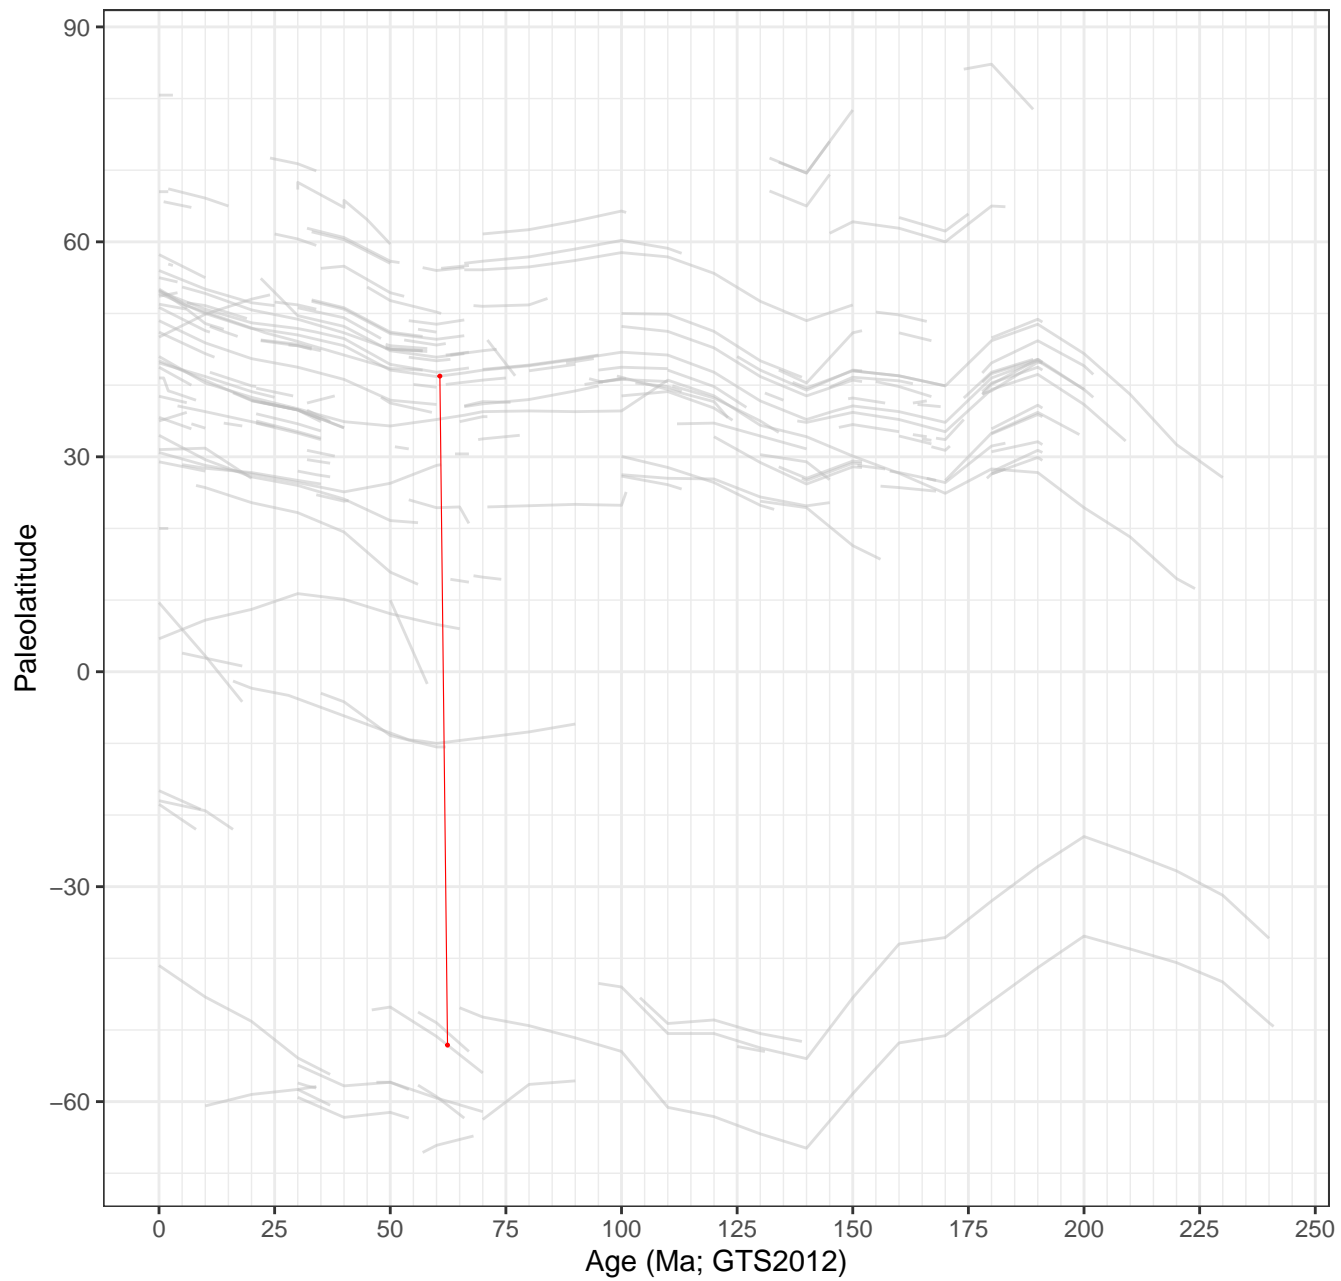

Supplement: Supplementary file 1168 [file Cribroperidinium wetzelii.pdf › Supplement/Supplement 2/Species 1914 plots/Cribroperidinium wetzelii.pdf]

# Species *Cribroperidinium wilsonii*

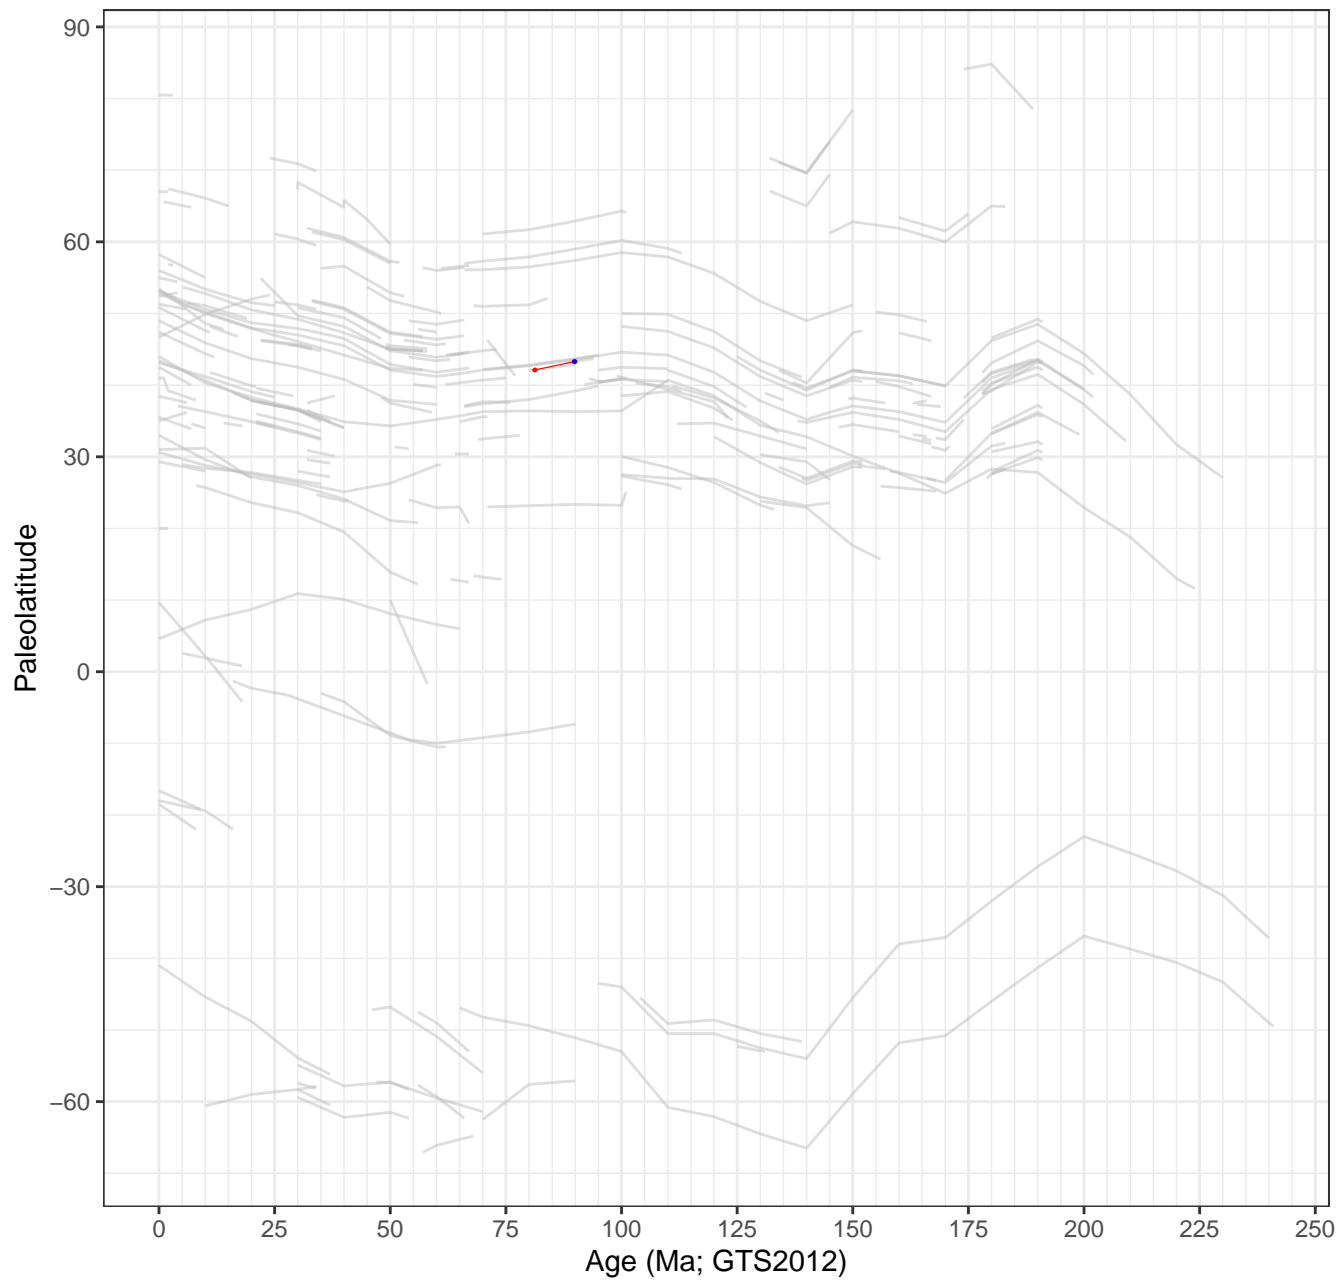

Supplement: Supplementary file 1169 [file Cribroperidinium wilsonii.pdf › Supplement/Supplement 2/Species 1914 plots/Cribroperidinium wilsonii.pdf]

# Species *Cristadinium cristatoserratum*

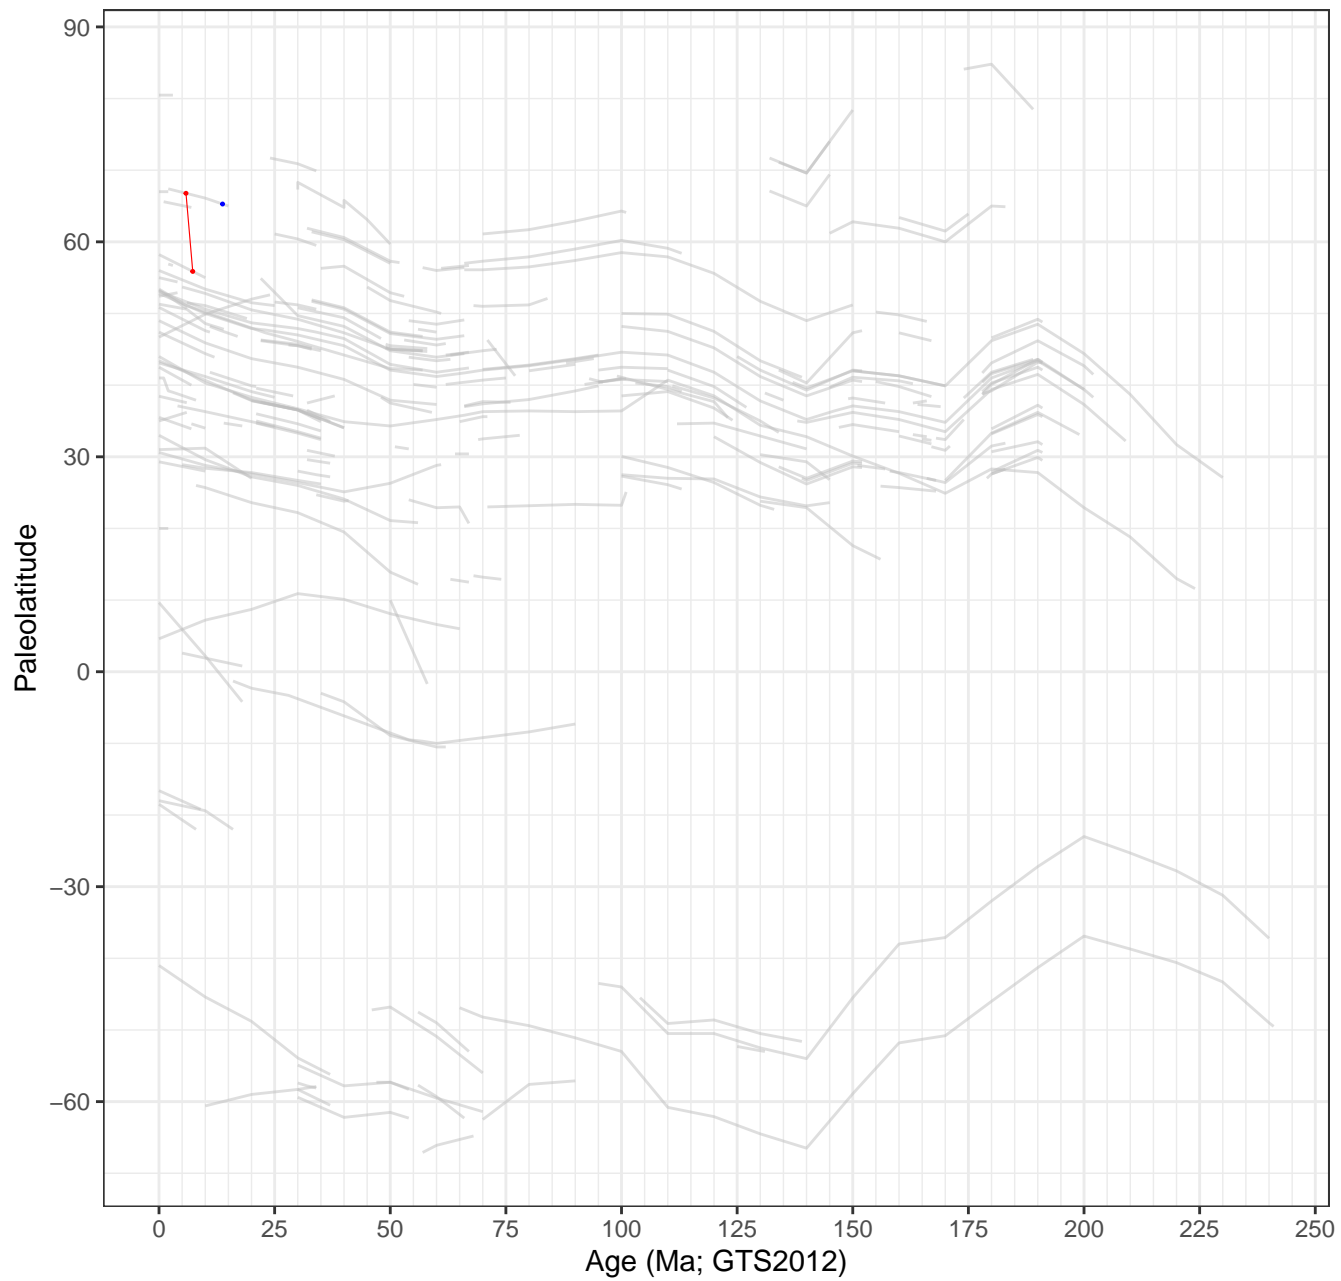

Supplement: Supplementary file 1170 [file Cristadinium cristatoserratum.pdf › Supplement/Supplement 2/Species 1914 plots/Cristadinium cristatoserratum.pdf]

# Species *Cristadinium diminutivum*

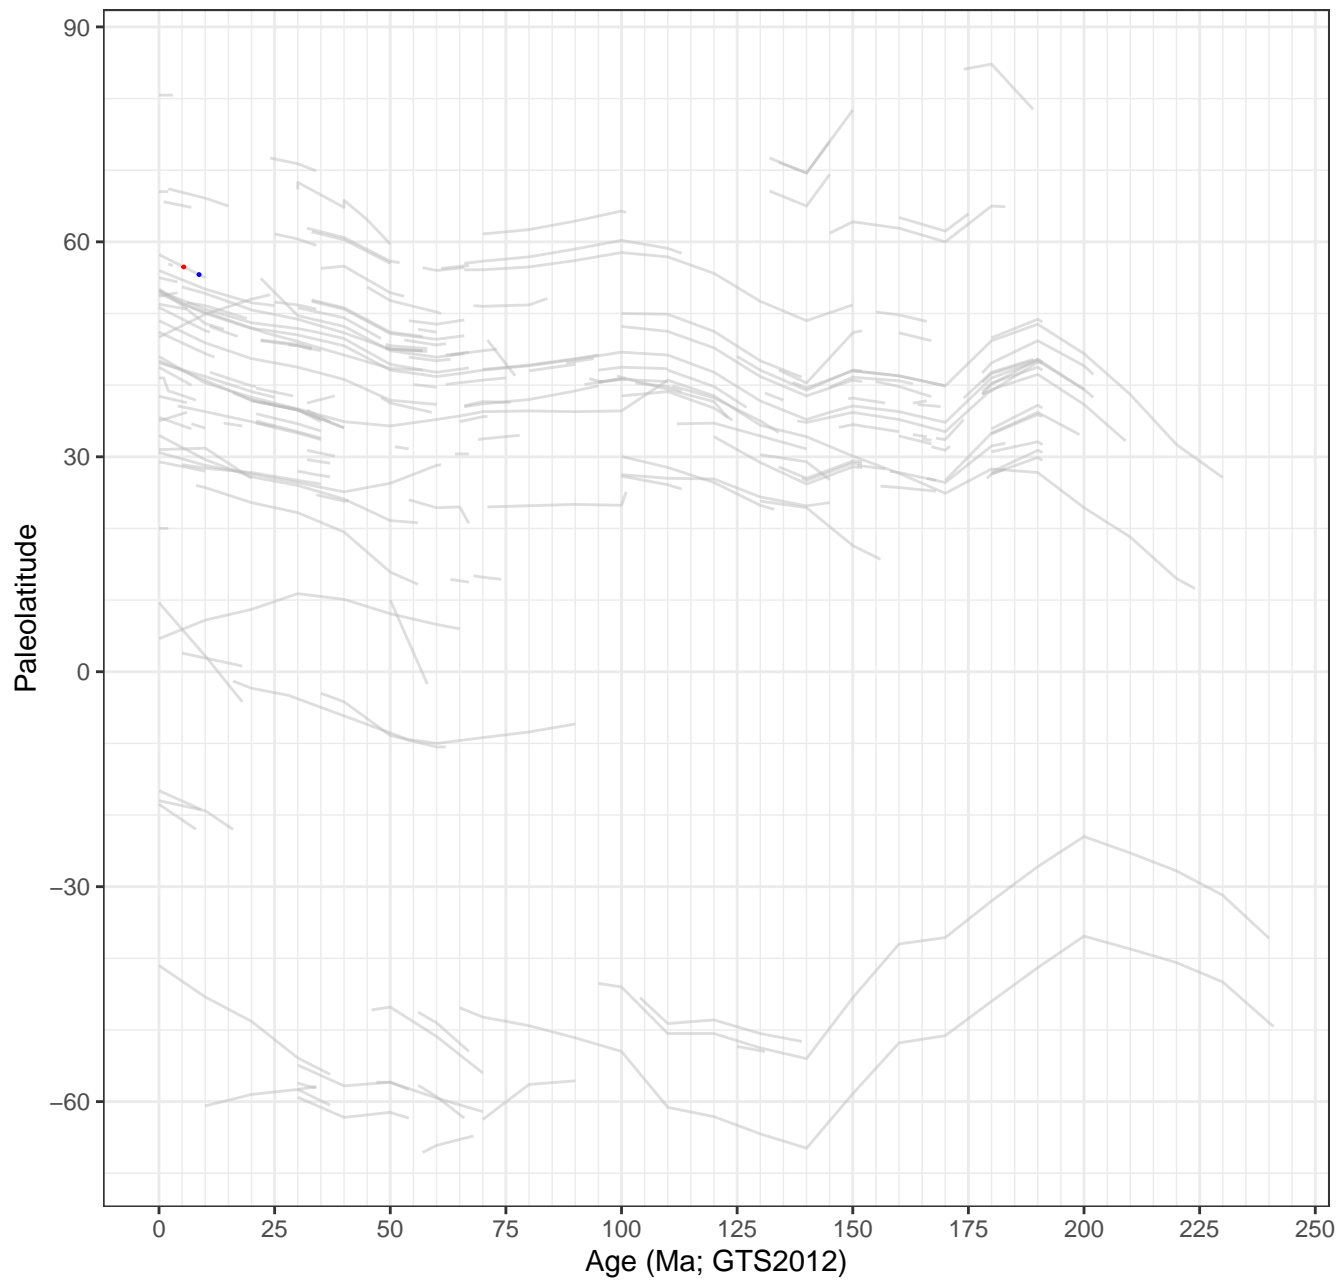

Supplement: Supplementary file 1171 [file Cristadinium diminutivum.pdf › Supplement/Supplement 2/Species 1914 plots/Cristadinium diminutivum.pdf]

# Species *Cryodinium meridianum*

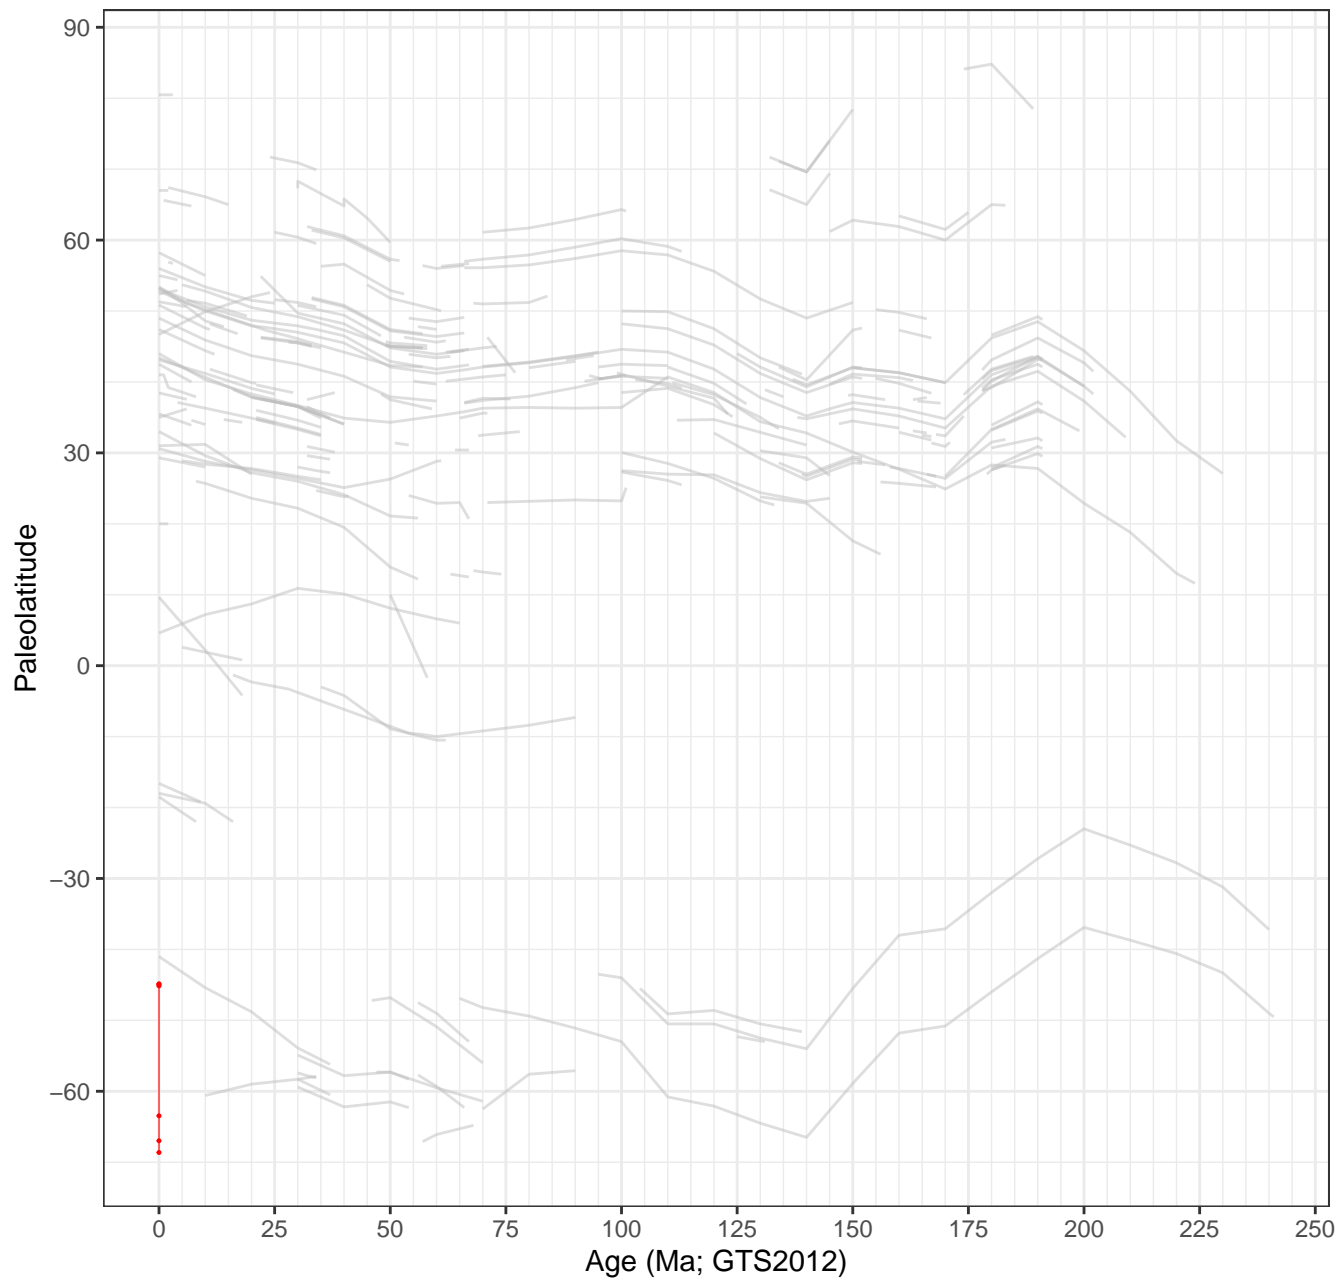

Supplement: Supplementary file 1172 [file Cryodinium meridianum.pdf › Supplement/Supplement 2/Species 1914 plots/Cryodinium meridianum.pdf]

# Species *Ctenidodinium ancora*

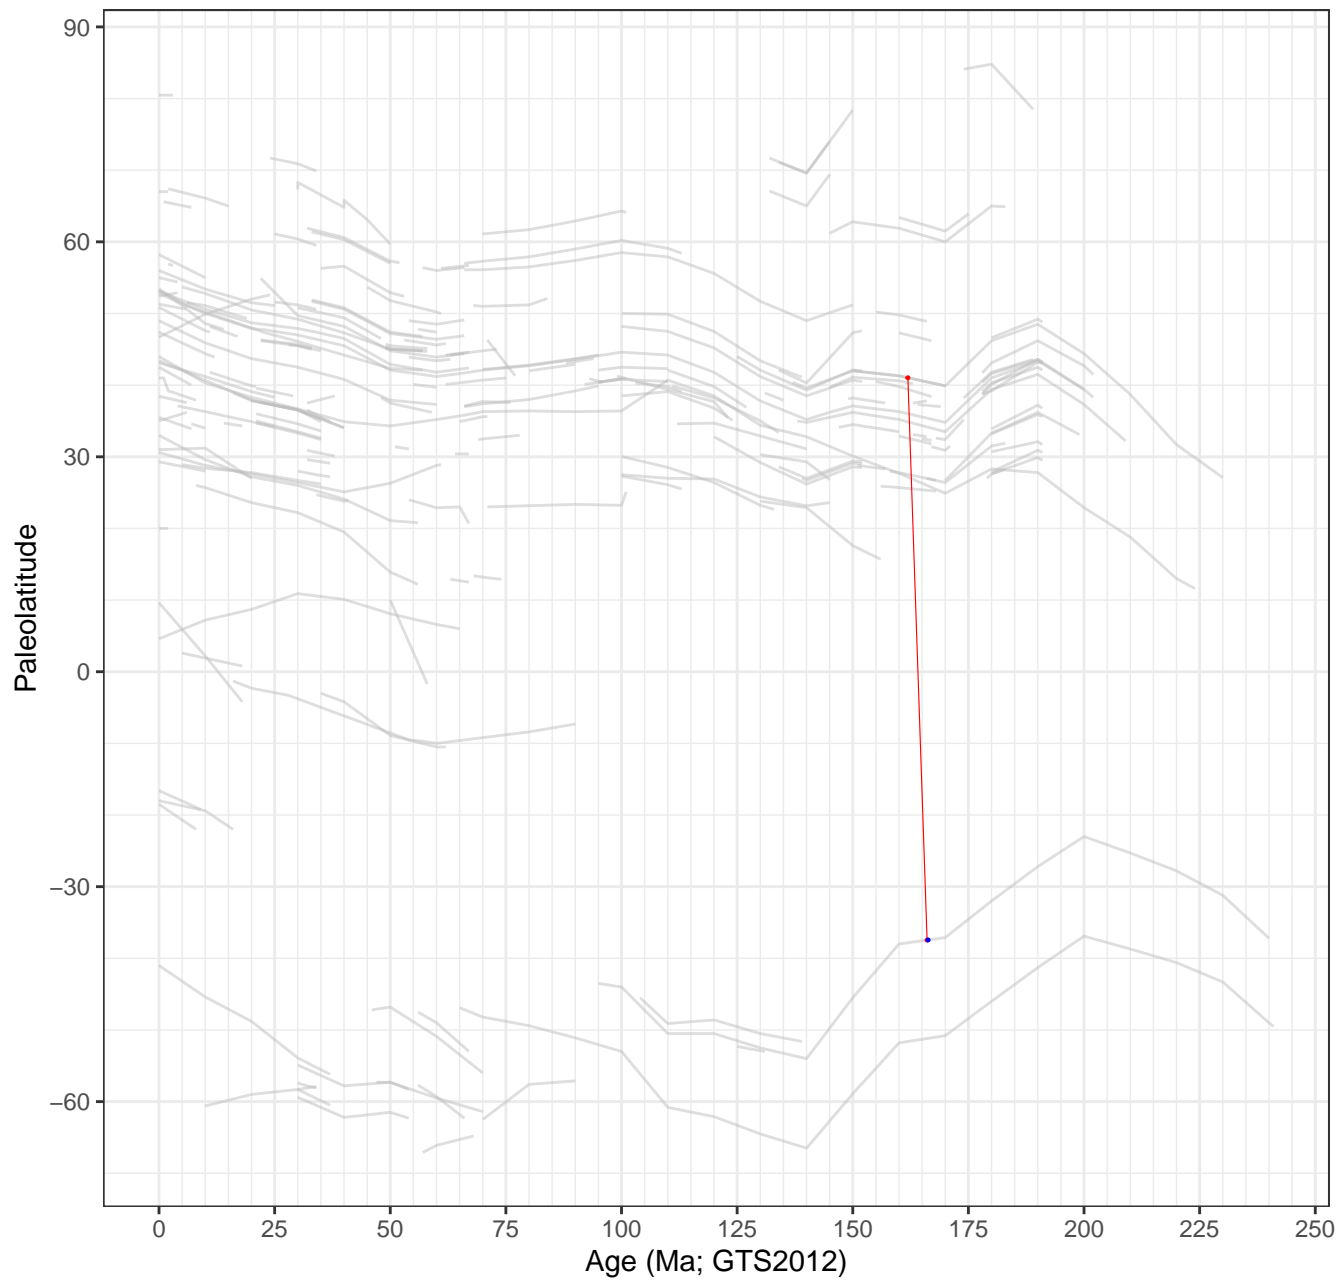

Supplement: Supplementary file 1173 [file Ctenidodinium ancora.pdf › Supplement/Supplement 2/Species 1914 plots/Ctenidodinium ancora.pdf]

# Species *Ctenidodinium combazii*

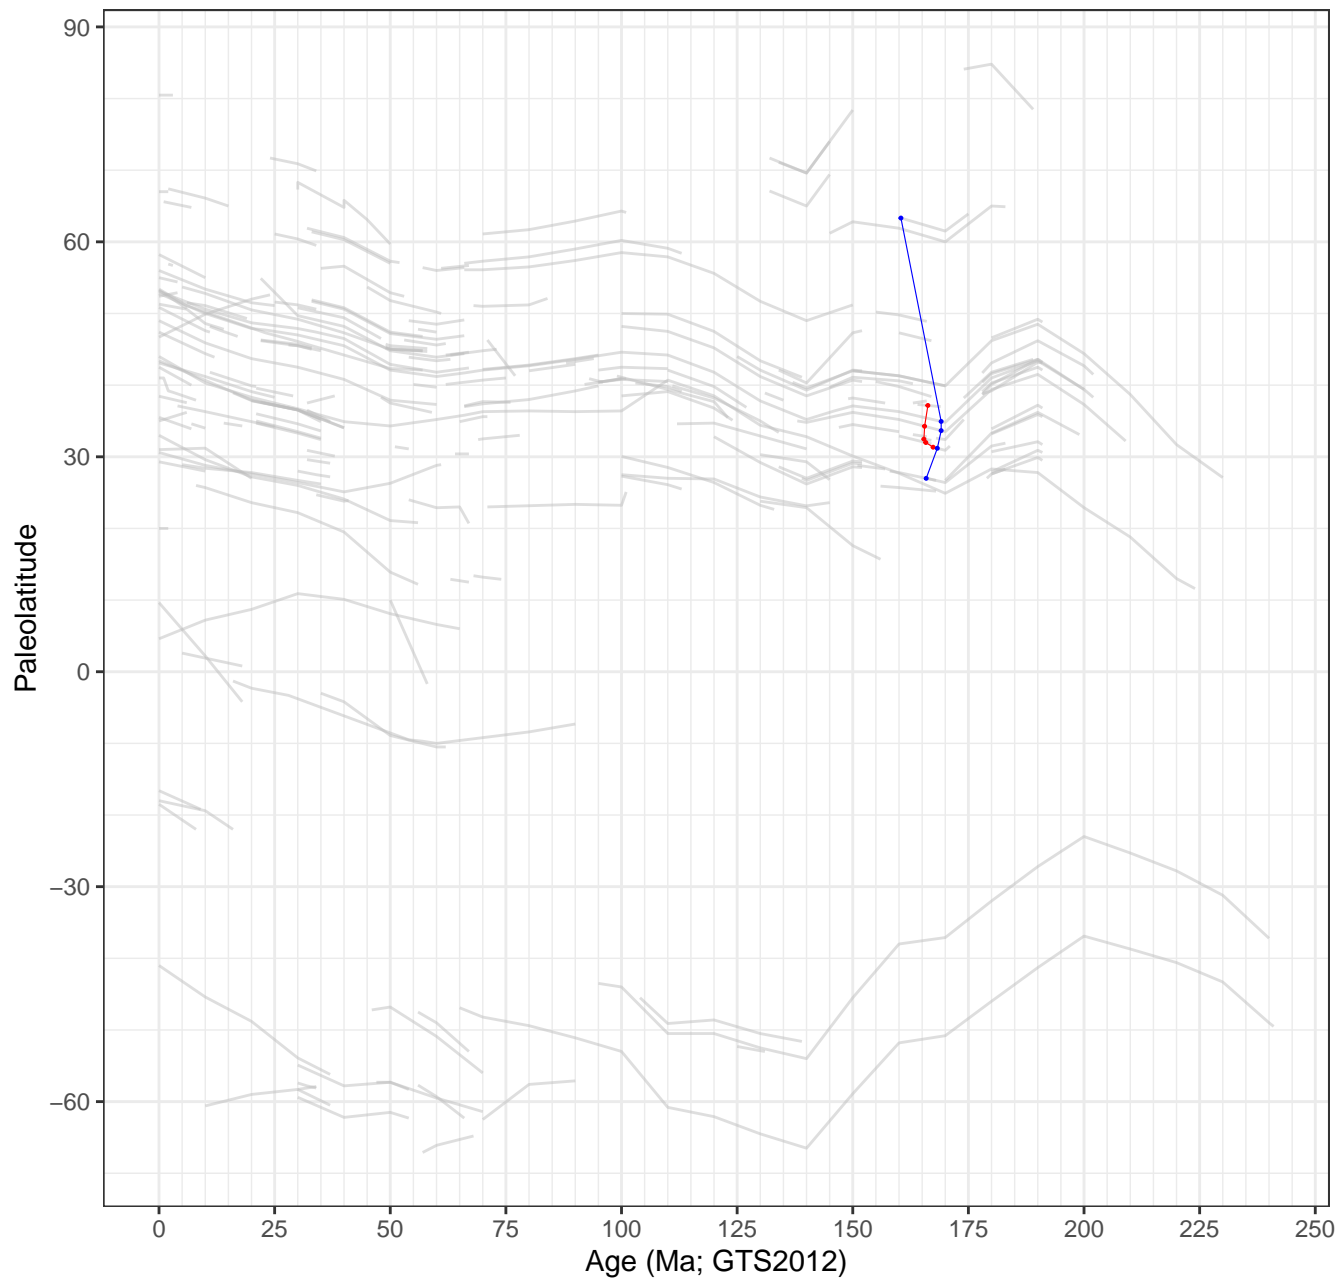

Supplement: Supplementary file 1174 [file Ctenidodinium combazii.pdf › Supplement/Supplement 2/Species 1914 plots/Ctenidodinium combazii.pdf]

# Species *Ctenidodinium continuum*

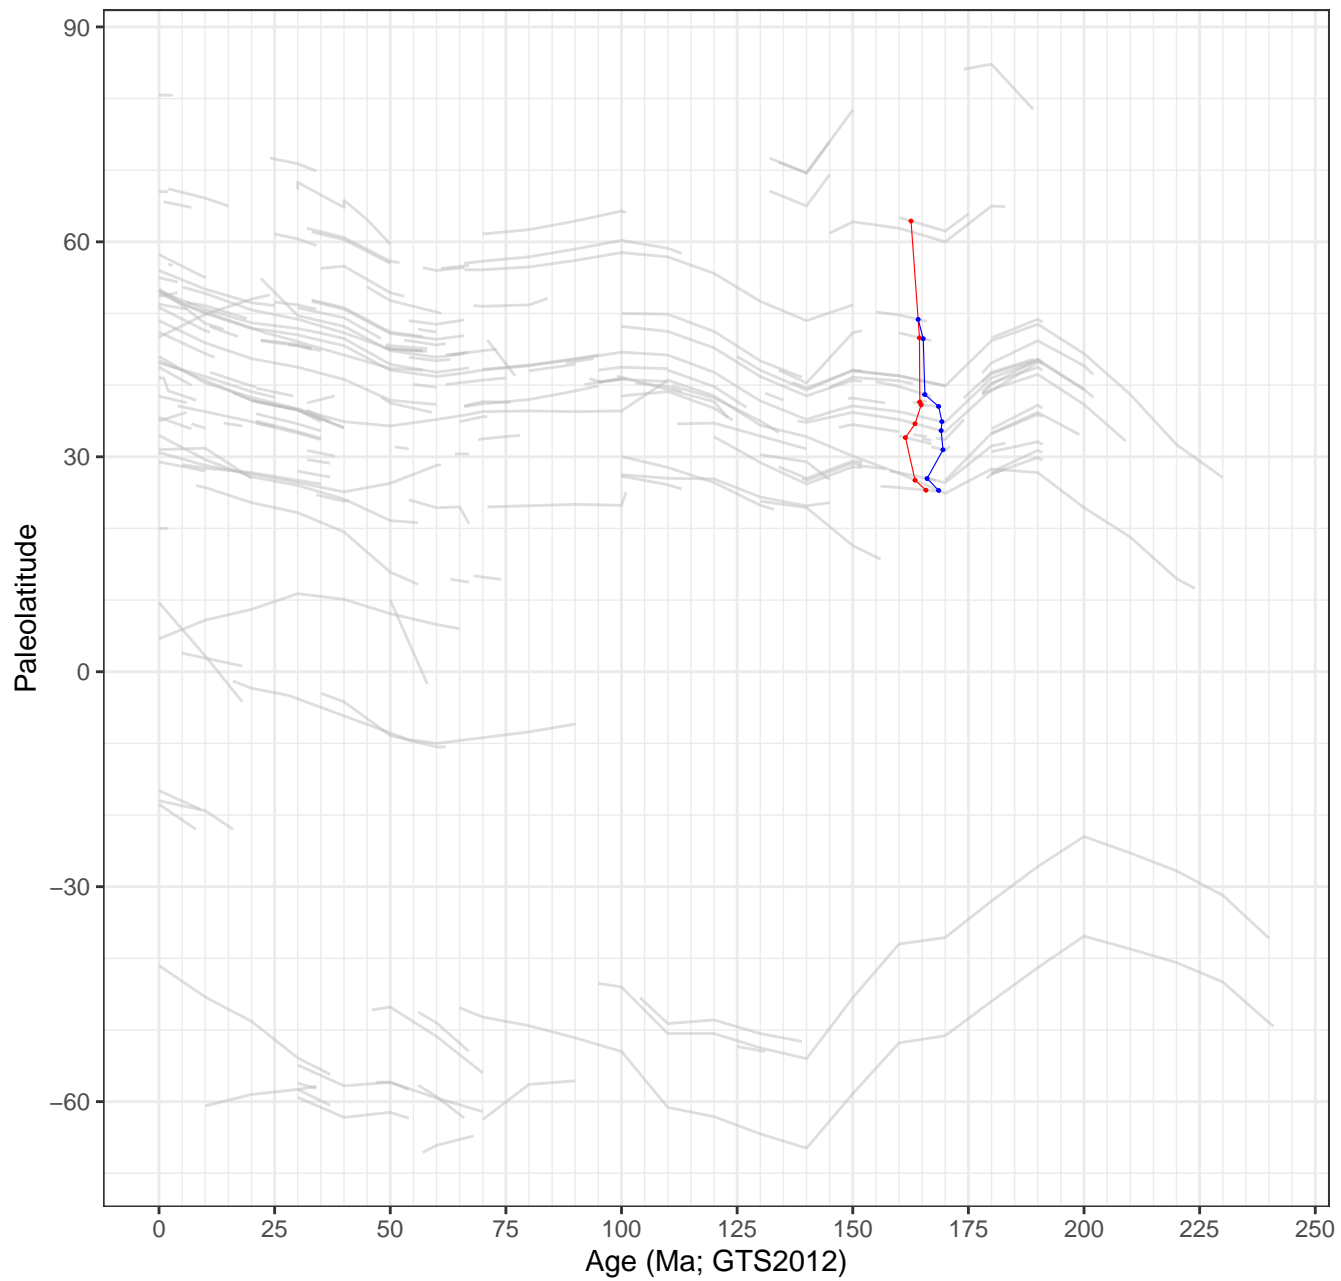

Supplement: Supplementary file 1175 [file Ctenidodinium continuum.pdf › Supplement/Supplement 2/Species 1914 plots/Ctenidodinium continuum.pdf]

# Species *Ctenidodinium cornigera*

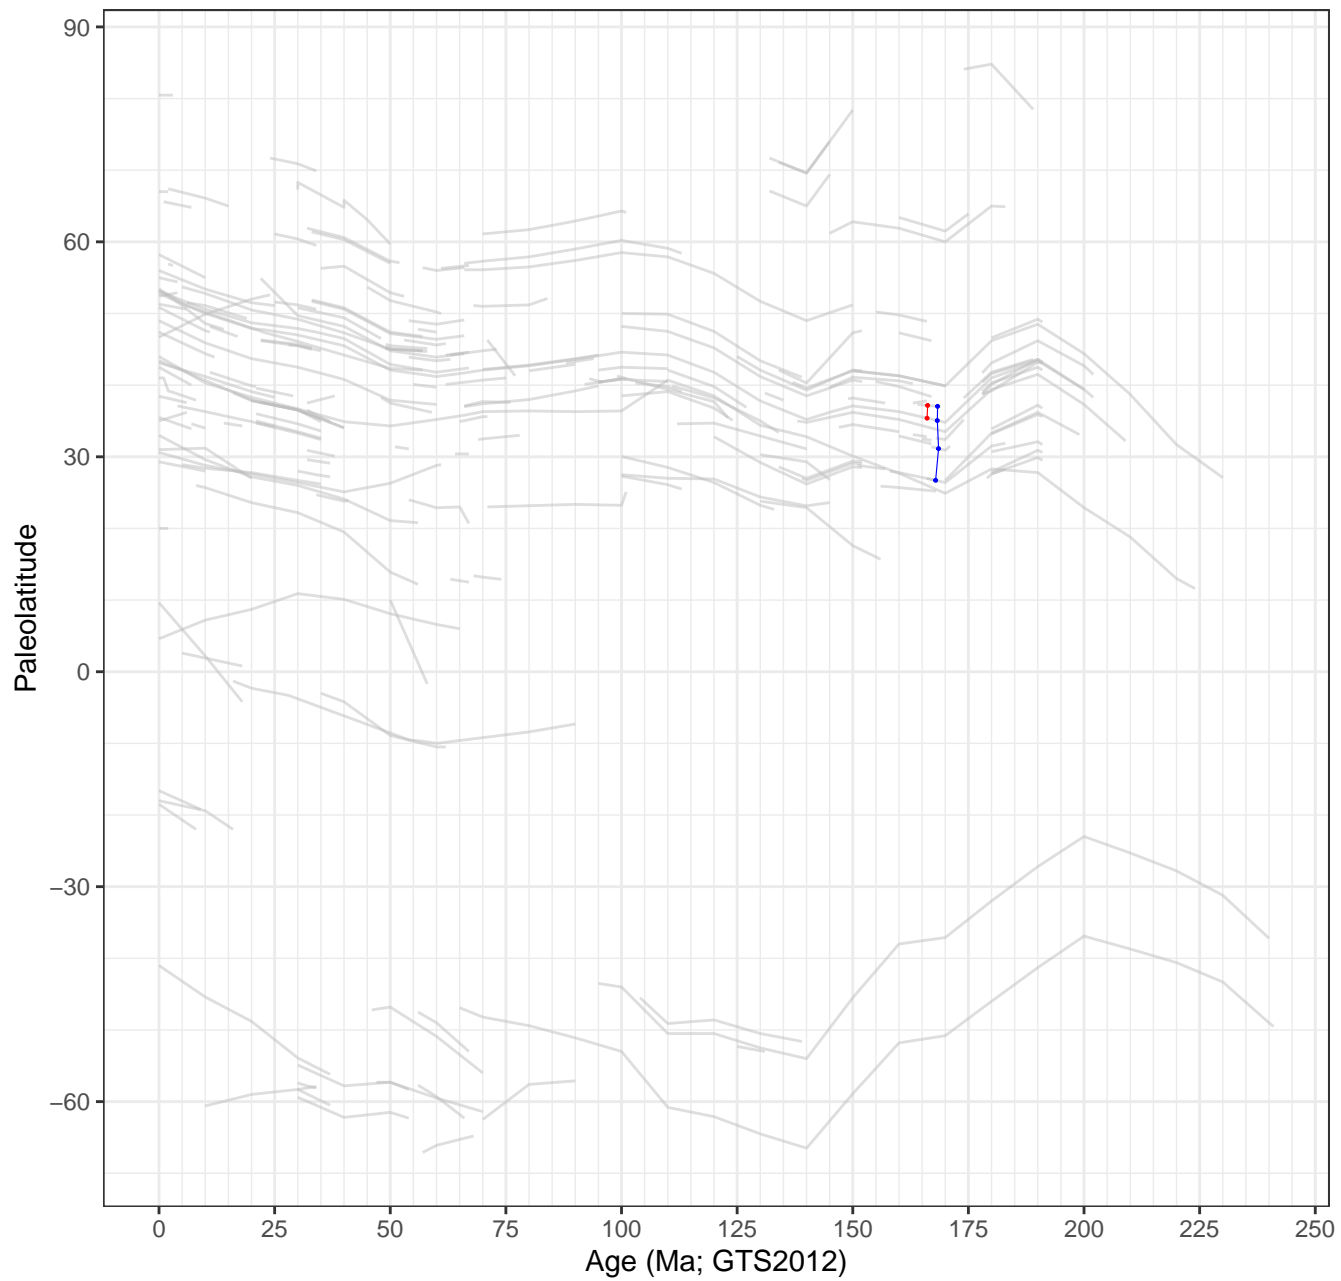

Supplement: Supplementary file 1176 [file Ctenidodinium cornigera.pdf › Supplement/Supplement 2/Species 1914 plots/Ctenidodinium cornigera.pdf]

# Species *Ctenidodinium elegantulum*

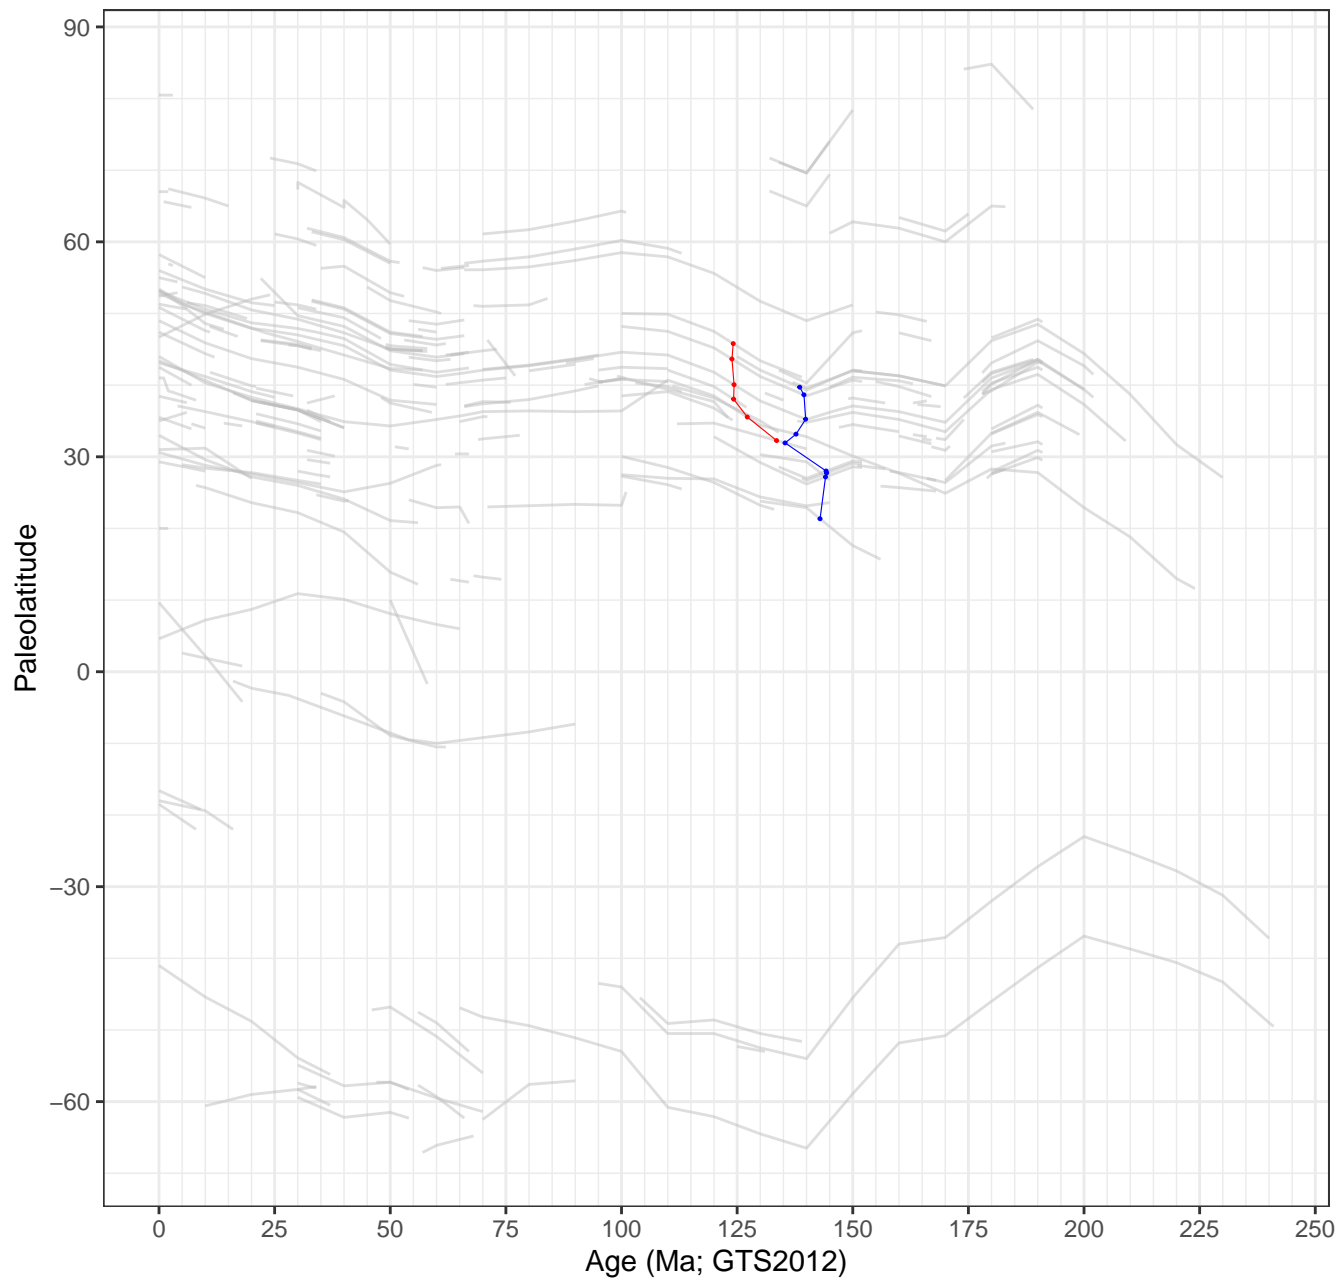

Supplement: Supplementary file 1177 [file Ctenidodinium elegantulum.pdf › Supplement/Supplement 2/Species 1914 plots/Ctenidodinium elegantulum.pdf]

# Species *Ctenidodinium fuscibasilarum*

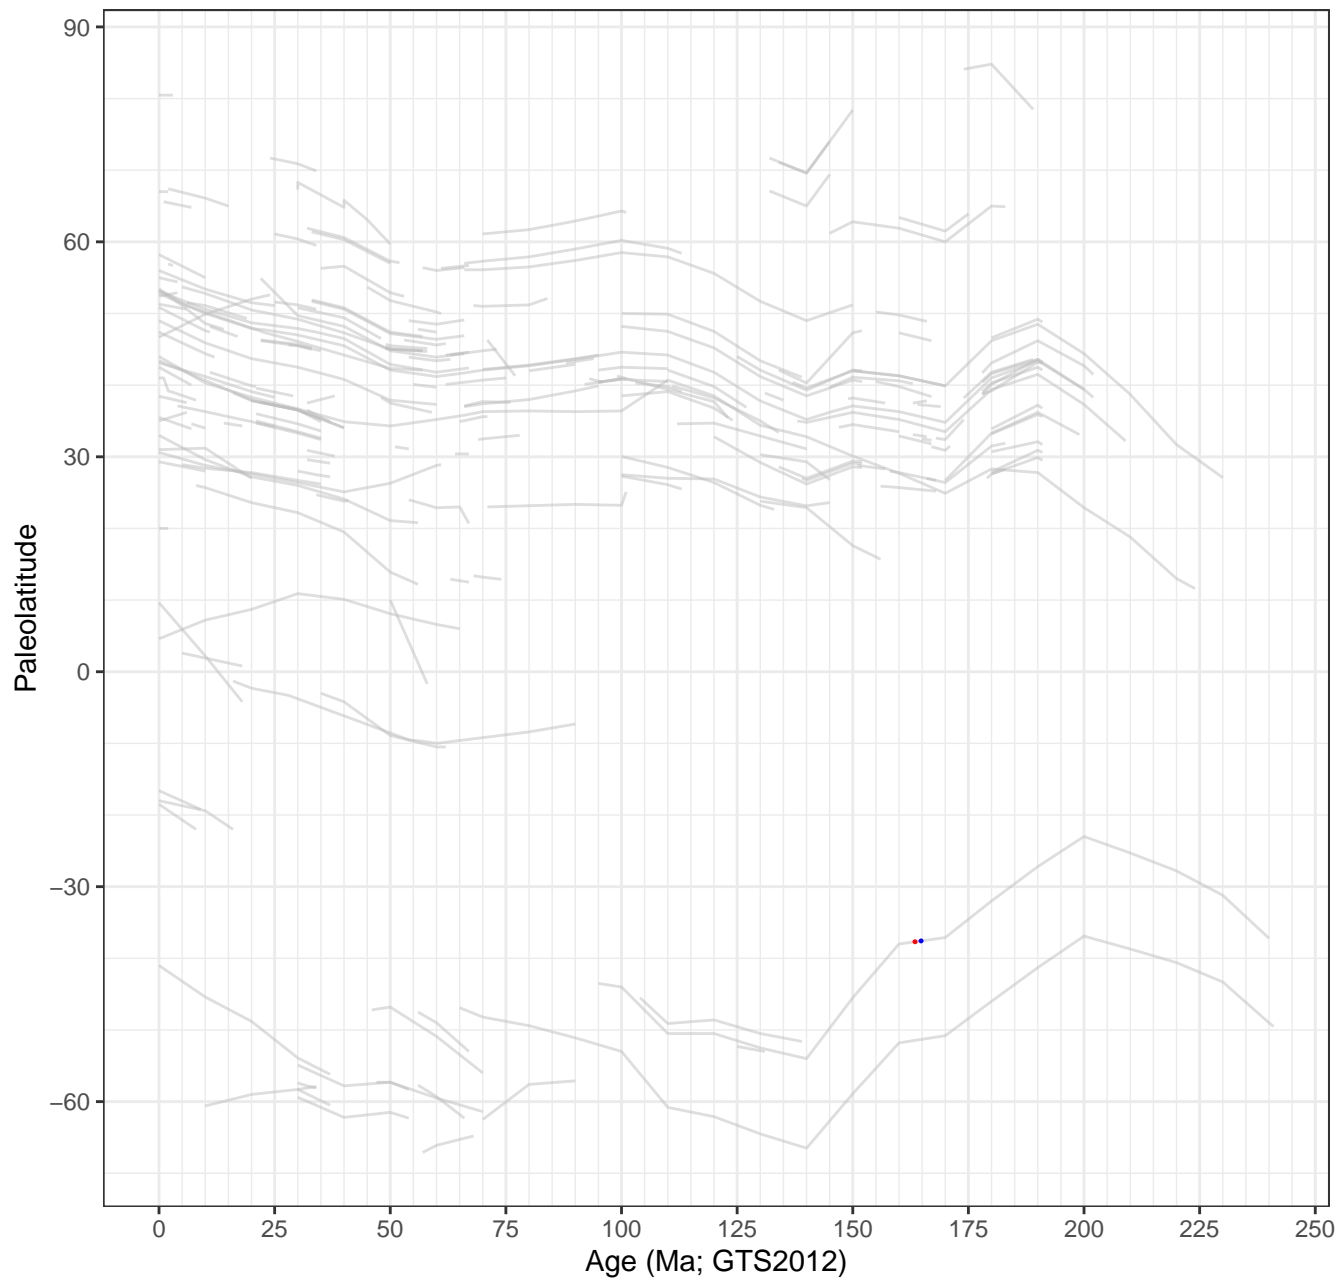

Supplement: Supplementary file 1178 [file Ctenidodinium fuscibasilarum.pdf › Supplement/Supplement 2/Species 1914 plots/Ctenidodinium fuscibasilarum.pdf]

# Species *Ctenidodinium hyalina*

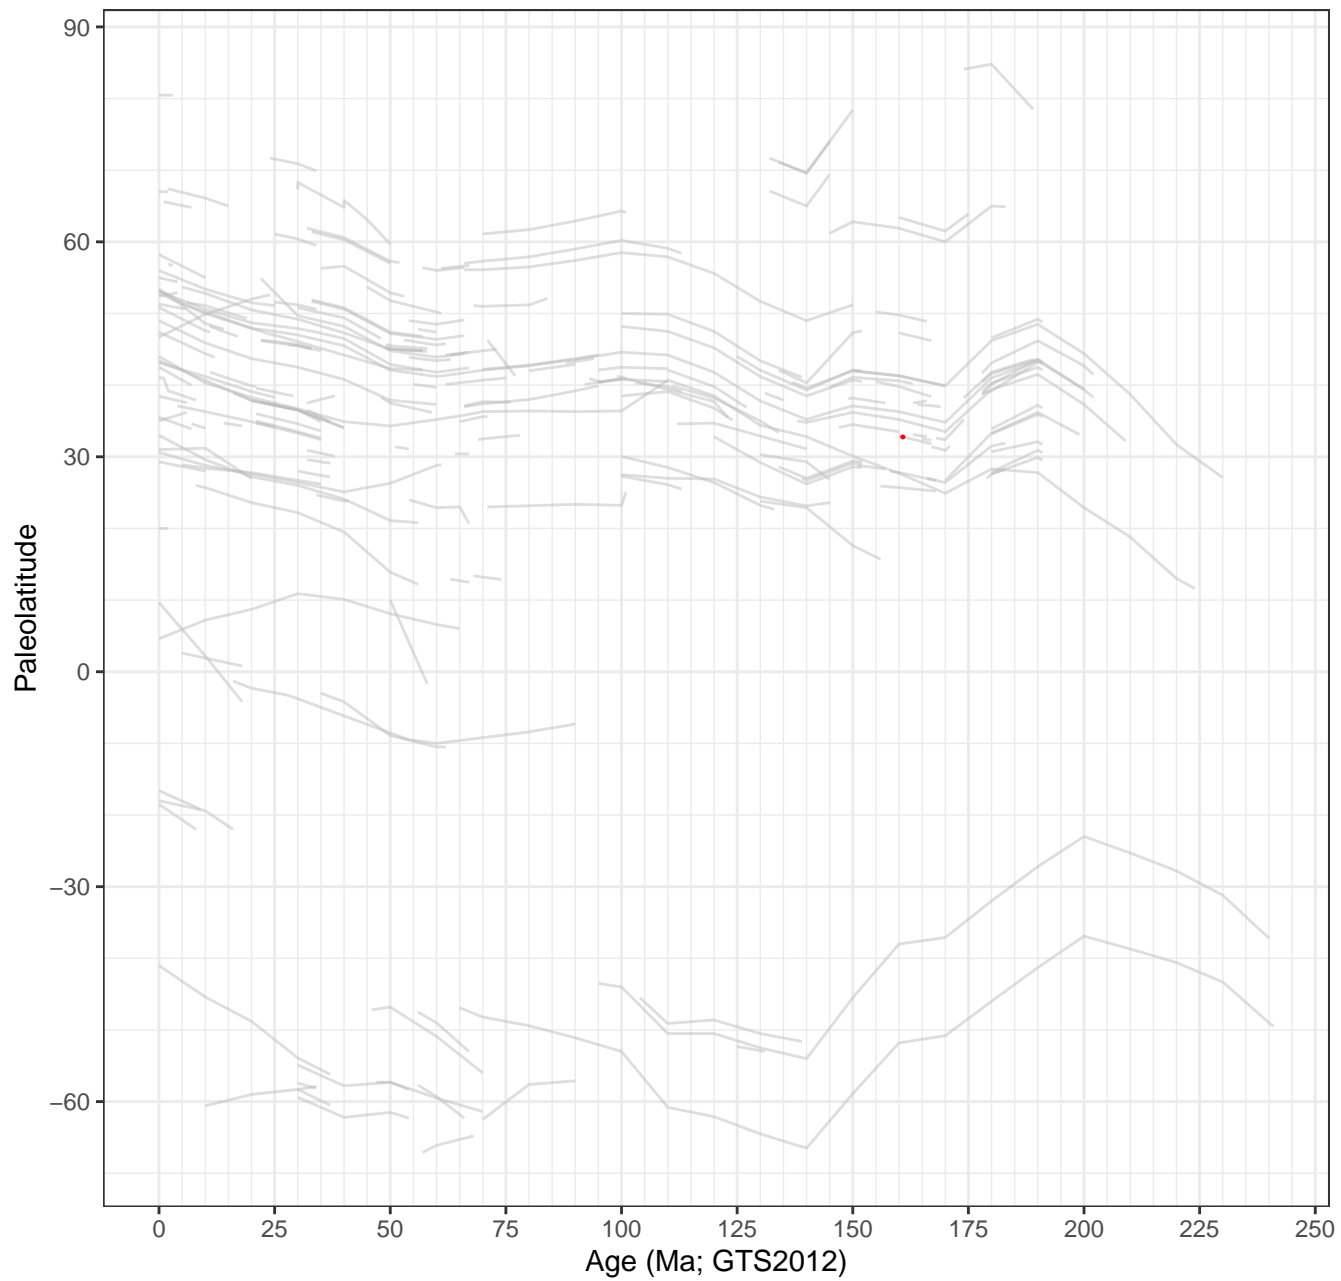

Supplement: Supplementary file 1179 [file Ctenidodinium hyalina.pdf › Supplement/Supplement 2/Species 1914 plots/Ctenidodinium hyalina.pdf]

# Species *Ctenidodinium ornatum*

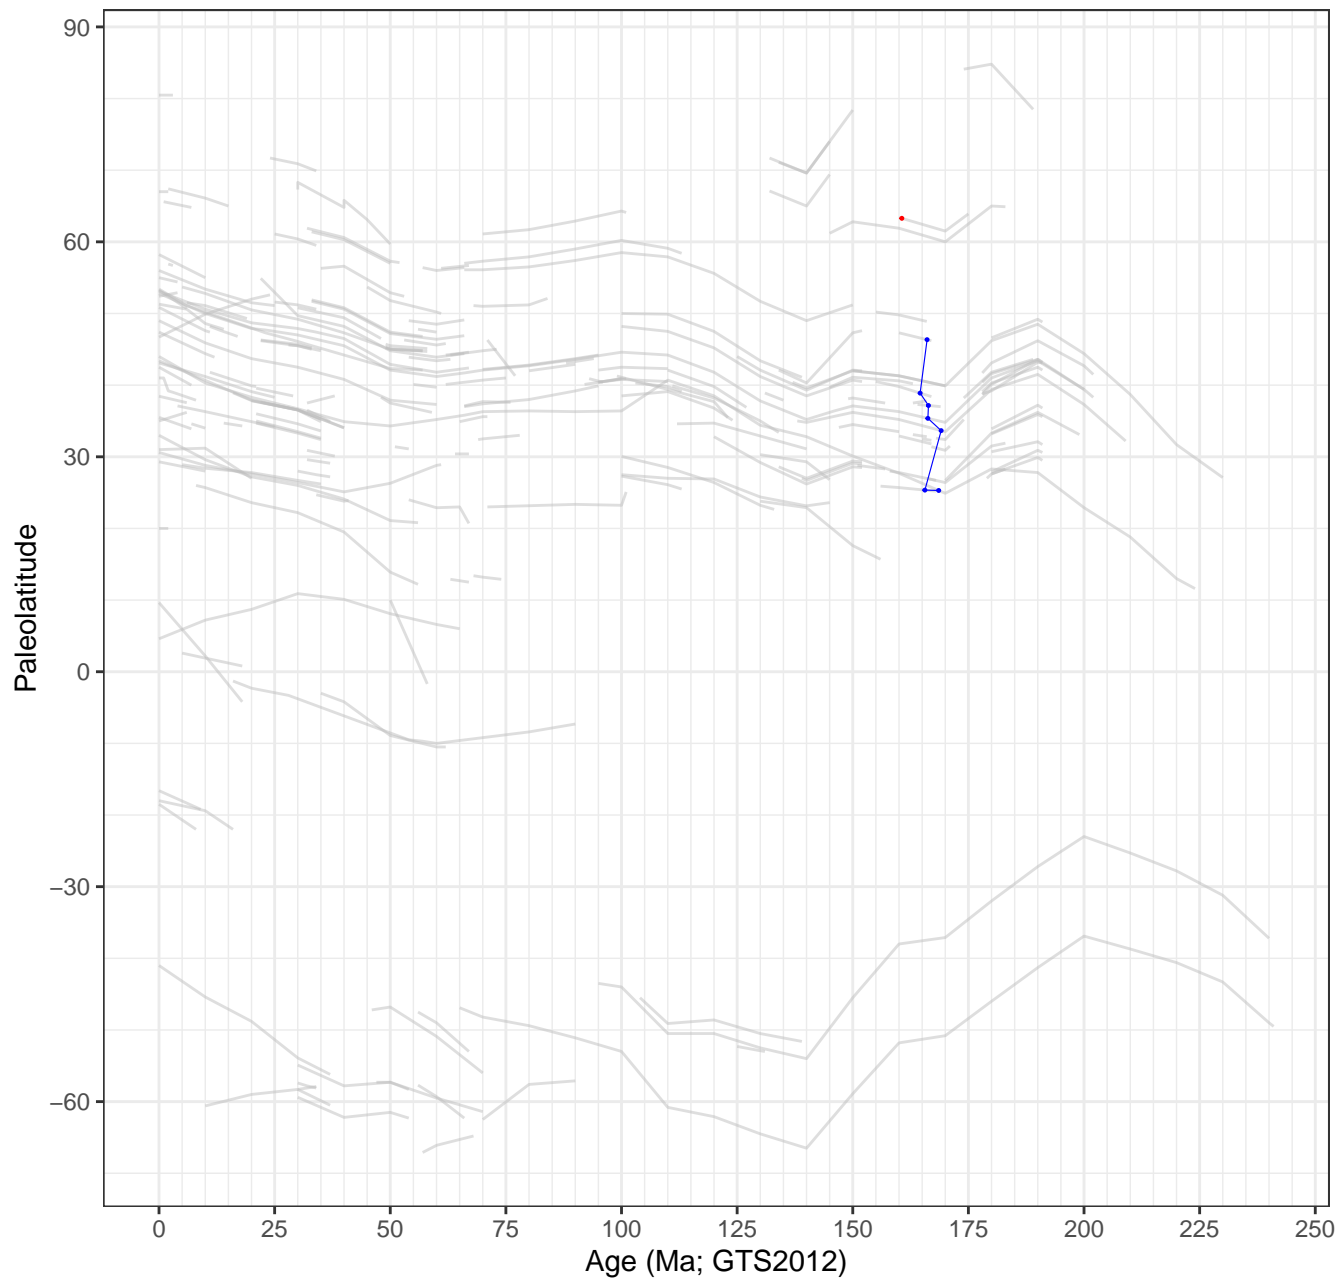

Supplement: Supplementary file 1180 [file Ctenidodinium ornatum.pdf › Supplement/Supplement 2/Species 1914 plots/Ctenidodinium ornatum.pdf]

# Species *Ctenidodinium planocristatum*



Supplement: Supplementary file 1181 [file Ctenidodinium planocristatum.pdf › Supplement/Supplement 2/Species 1914 plots/Ctenidodinium planocristatum.pdf]

# Species *Ctenidodinium tenellum*

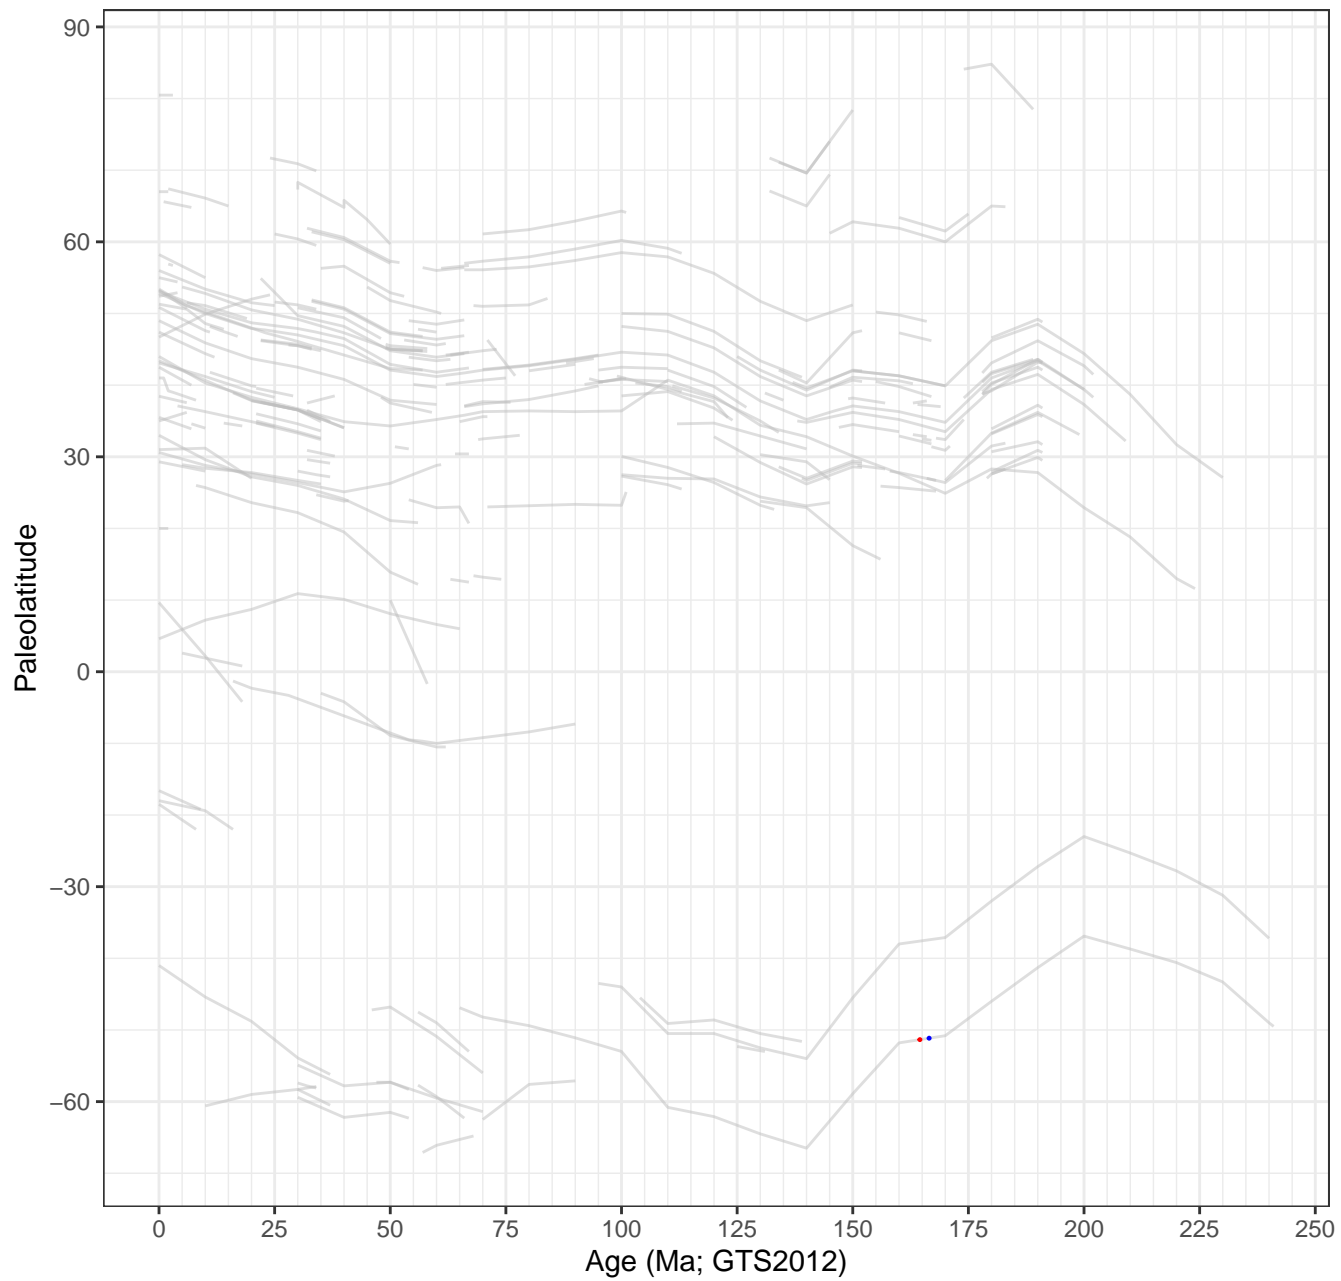

Supplement: Supplementary file 1182 [file Ctenidodinium tenellum.pdf › Supplement/Supplement 2/Species 1914 plots/Ctenidodinium tenellum.pdf]

# Species *Ctenidodinium thulium*

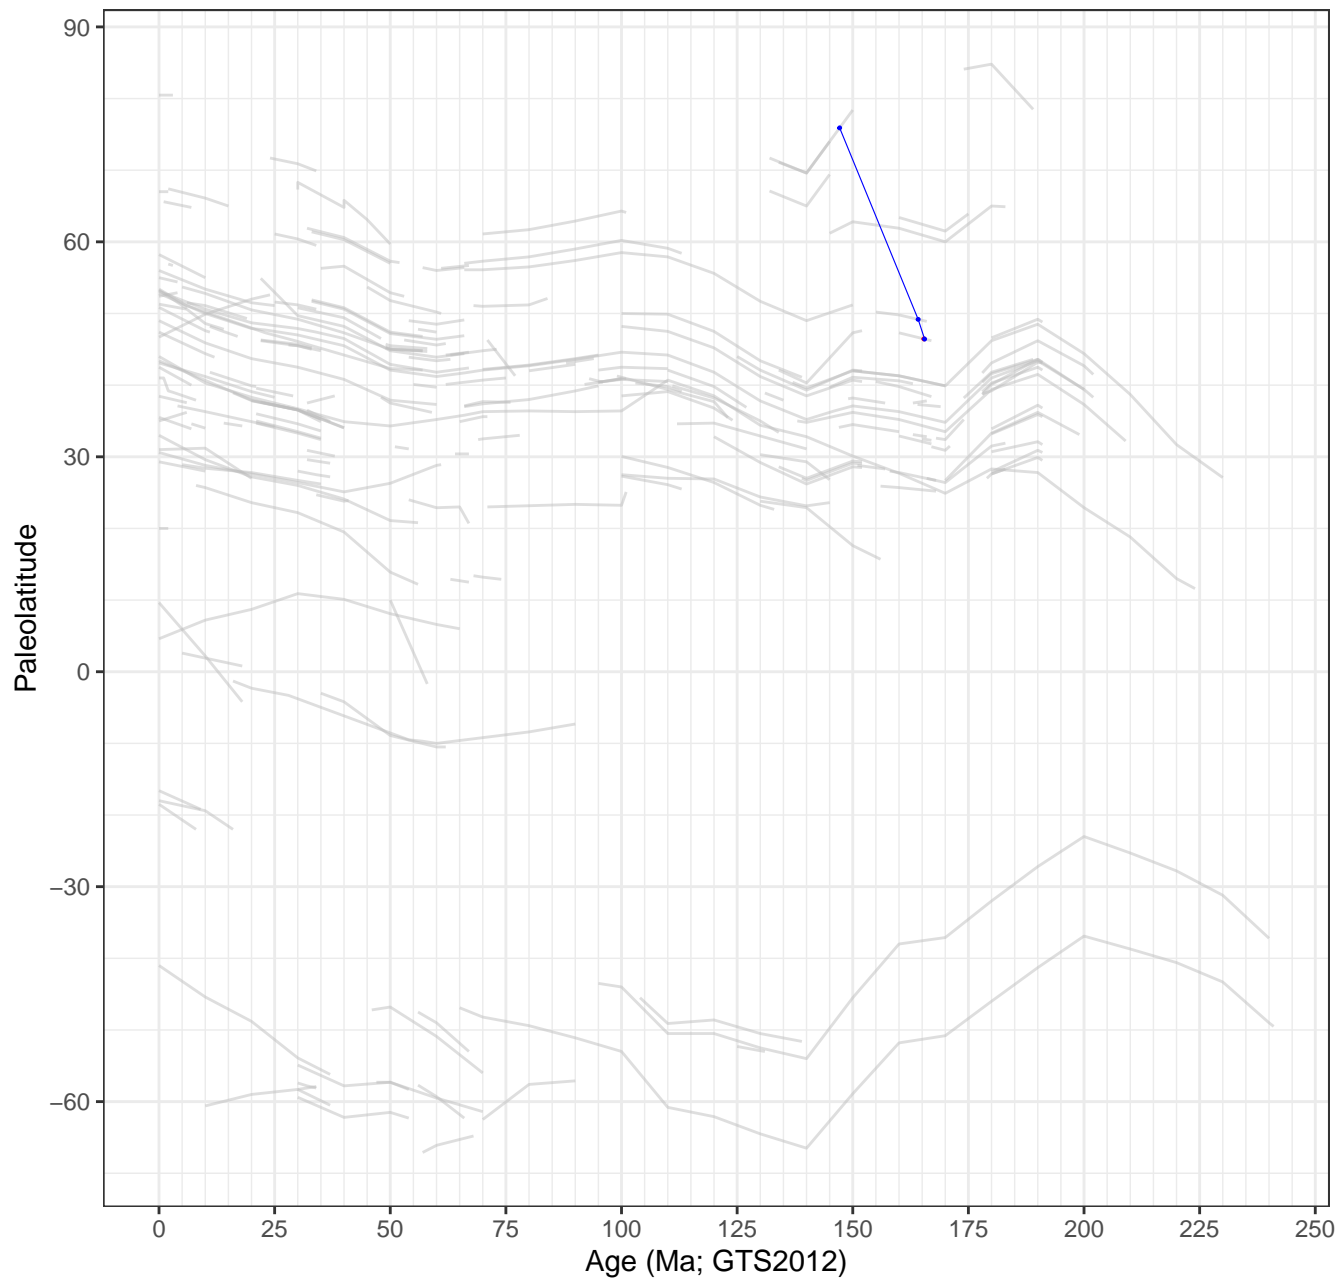

Supplement: Supplementary file 1183 [file Ctenidodinium thulium.pdf › Supplement/Supplement 2/Species 1914 plots/Ctenidodinium thulium.pdf]

# Species *Culversphaera velata*

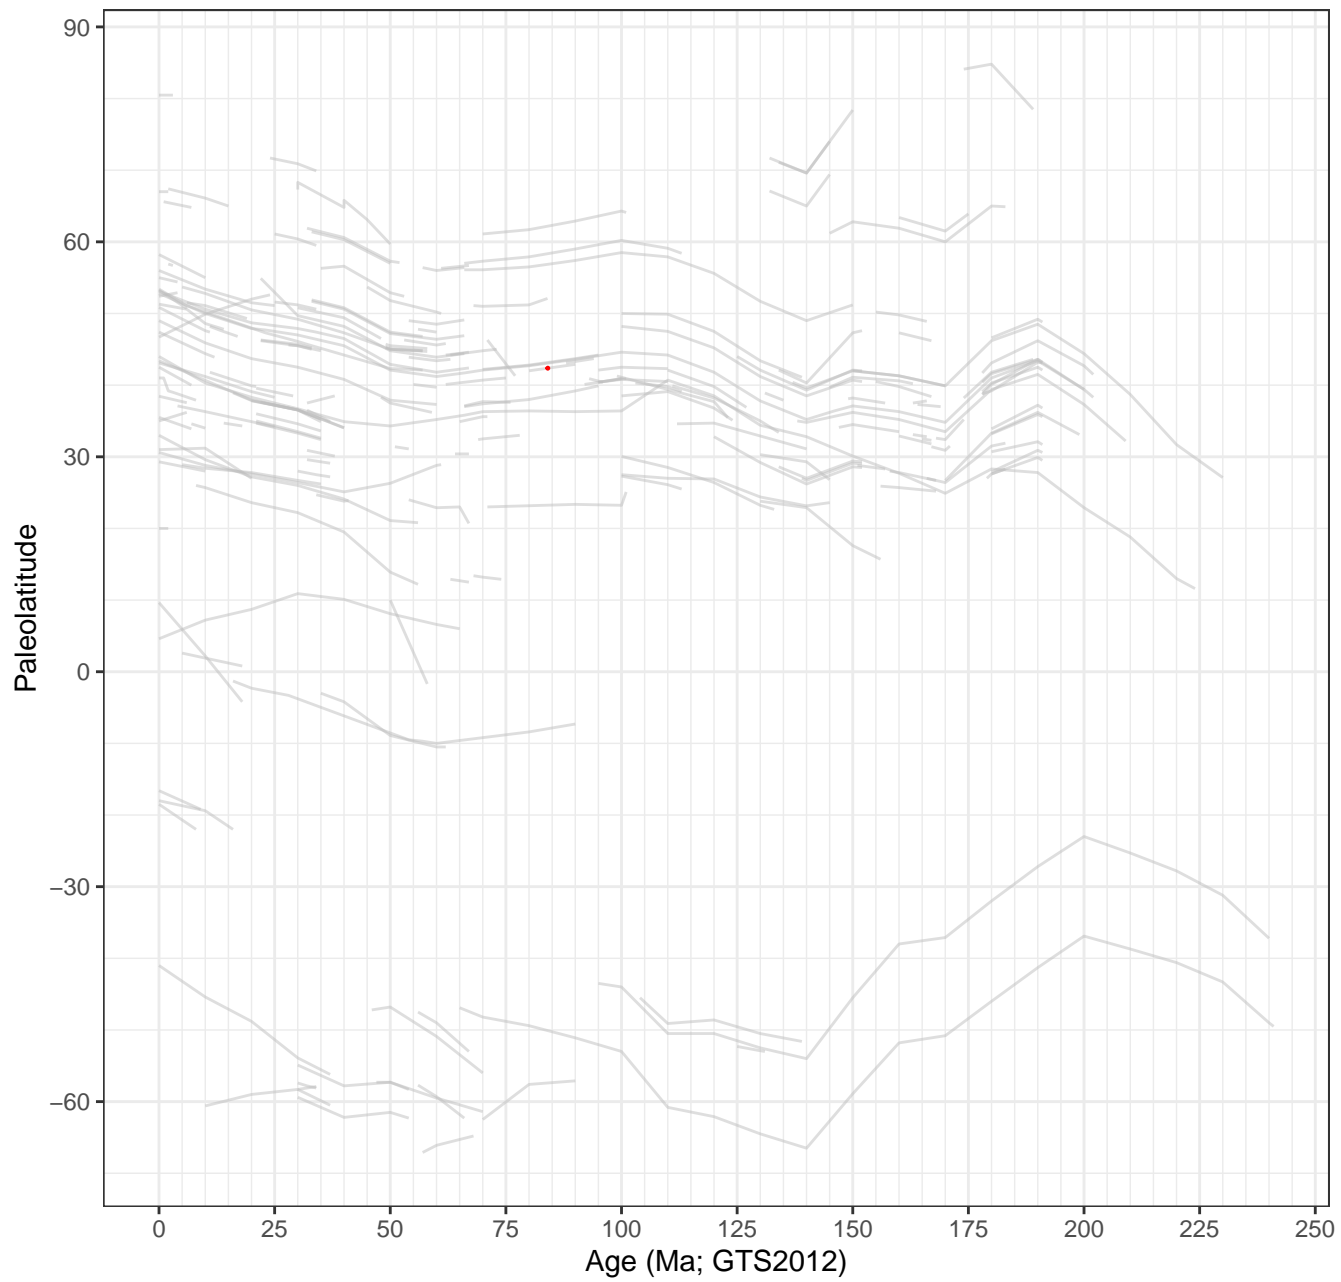

Supplement: Supplementary file 1184 [file Culversphaera velata.pdf › Supplement/Supplement 2/Species 1914 plots/Culversphaera velata.pdf]

# Species *Cyclonephelium brevispinatum*

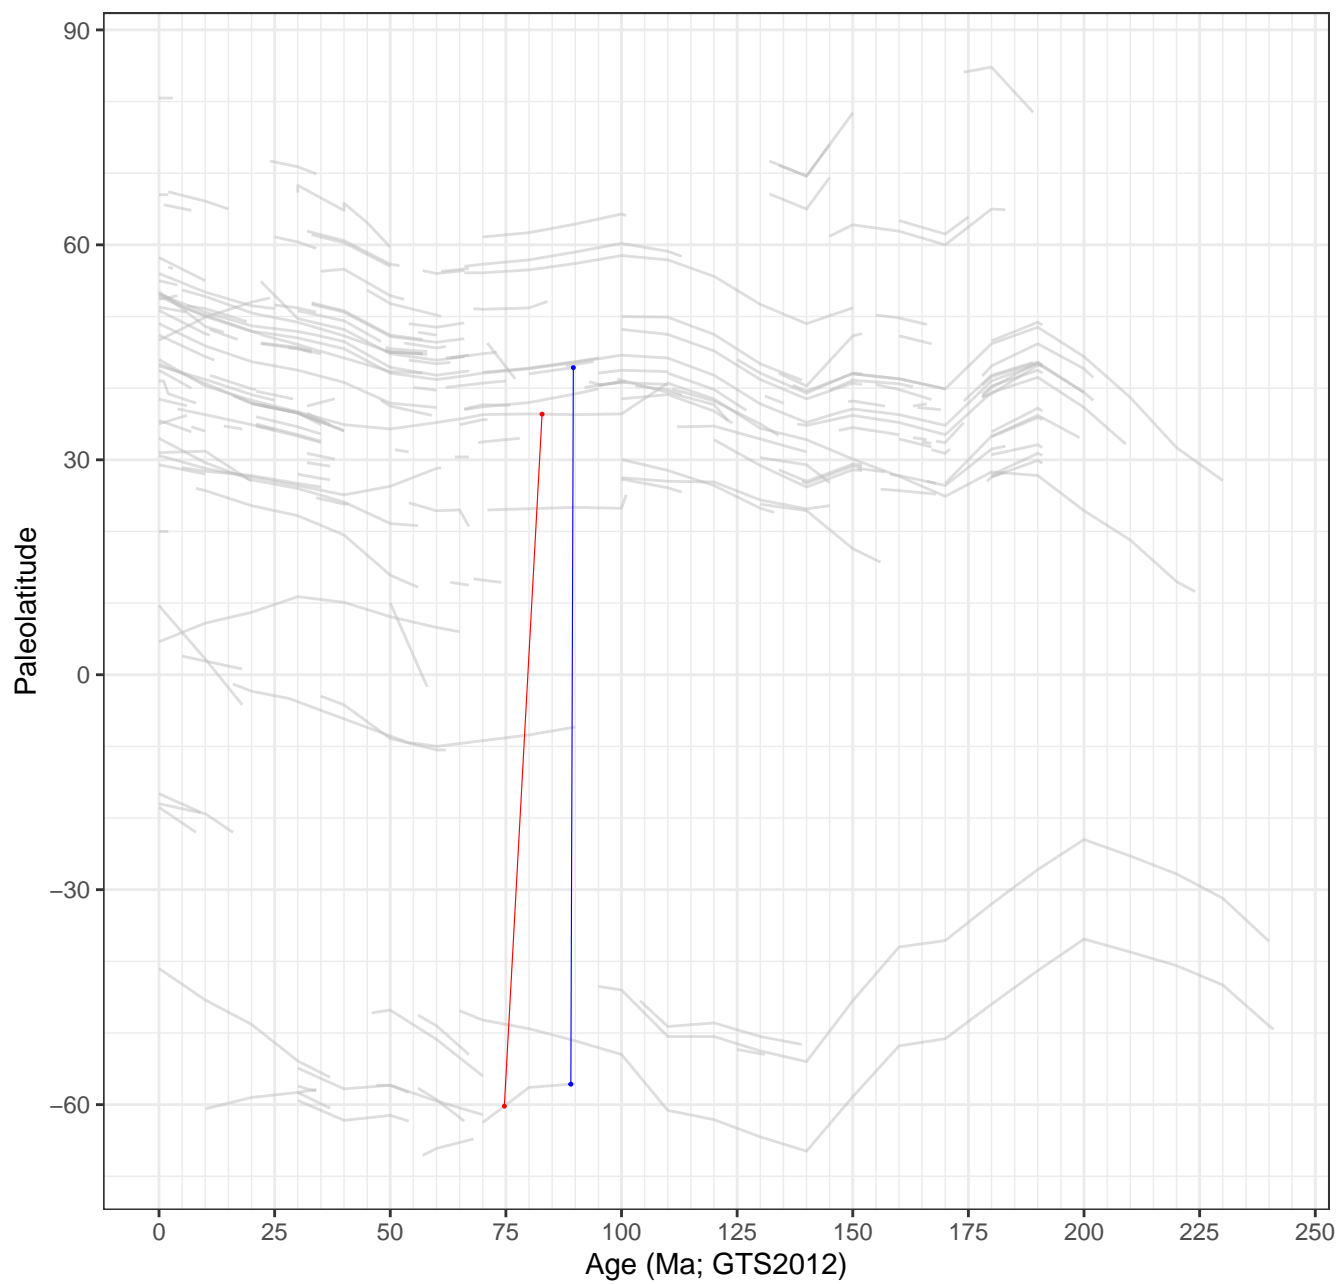

Supplement: Supplementary file 1185 [file Cyclonephelium brevispinatum.pdf › Supplement/Supplement 2/Species 1914 plots/Cyclonephelium brevispinatum.pdf]

# Species *Cyclonephelium clathromarginatum*

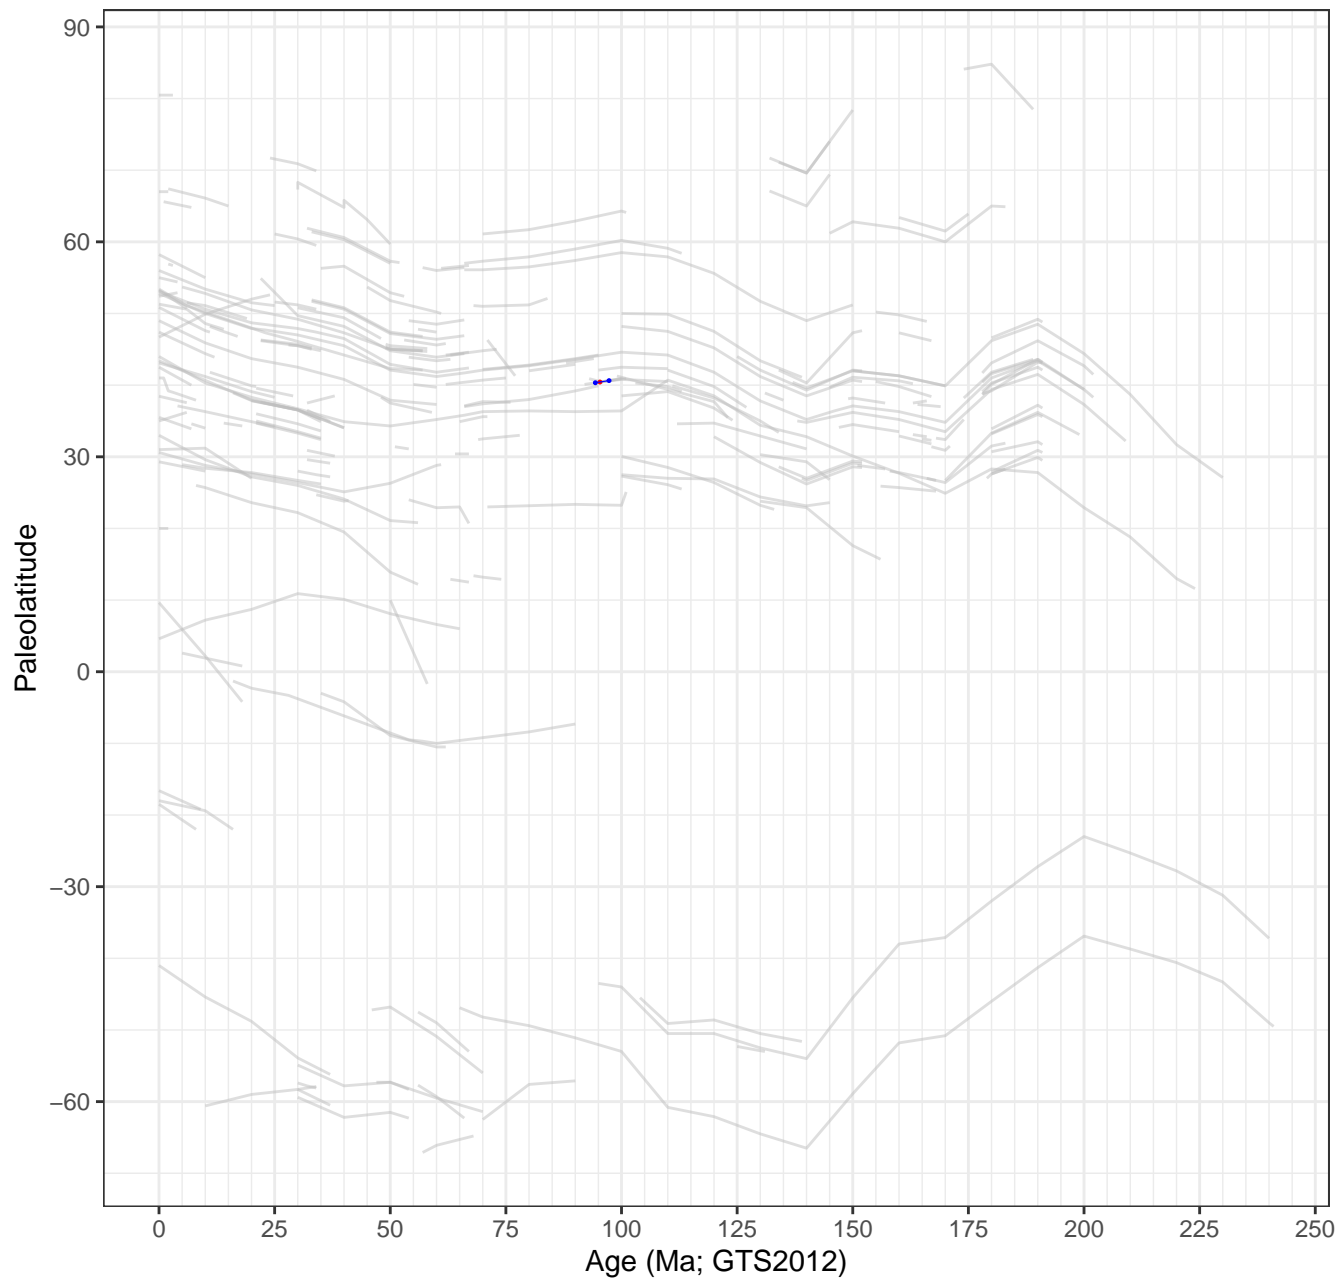

Supplement: Supplementary file 1186 [file Cyclonephelium clathromarginatum.pdf › Supplement/Supplement 2/Species 1914 plots/Cyclonephelium clathromarginatum.pdf]

# Species *Cyclonephelium compactum*

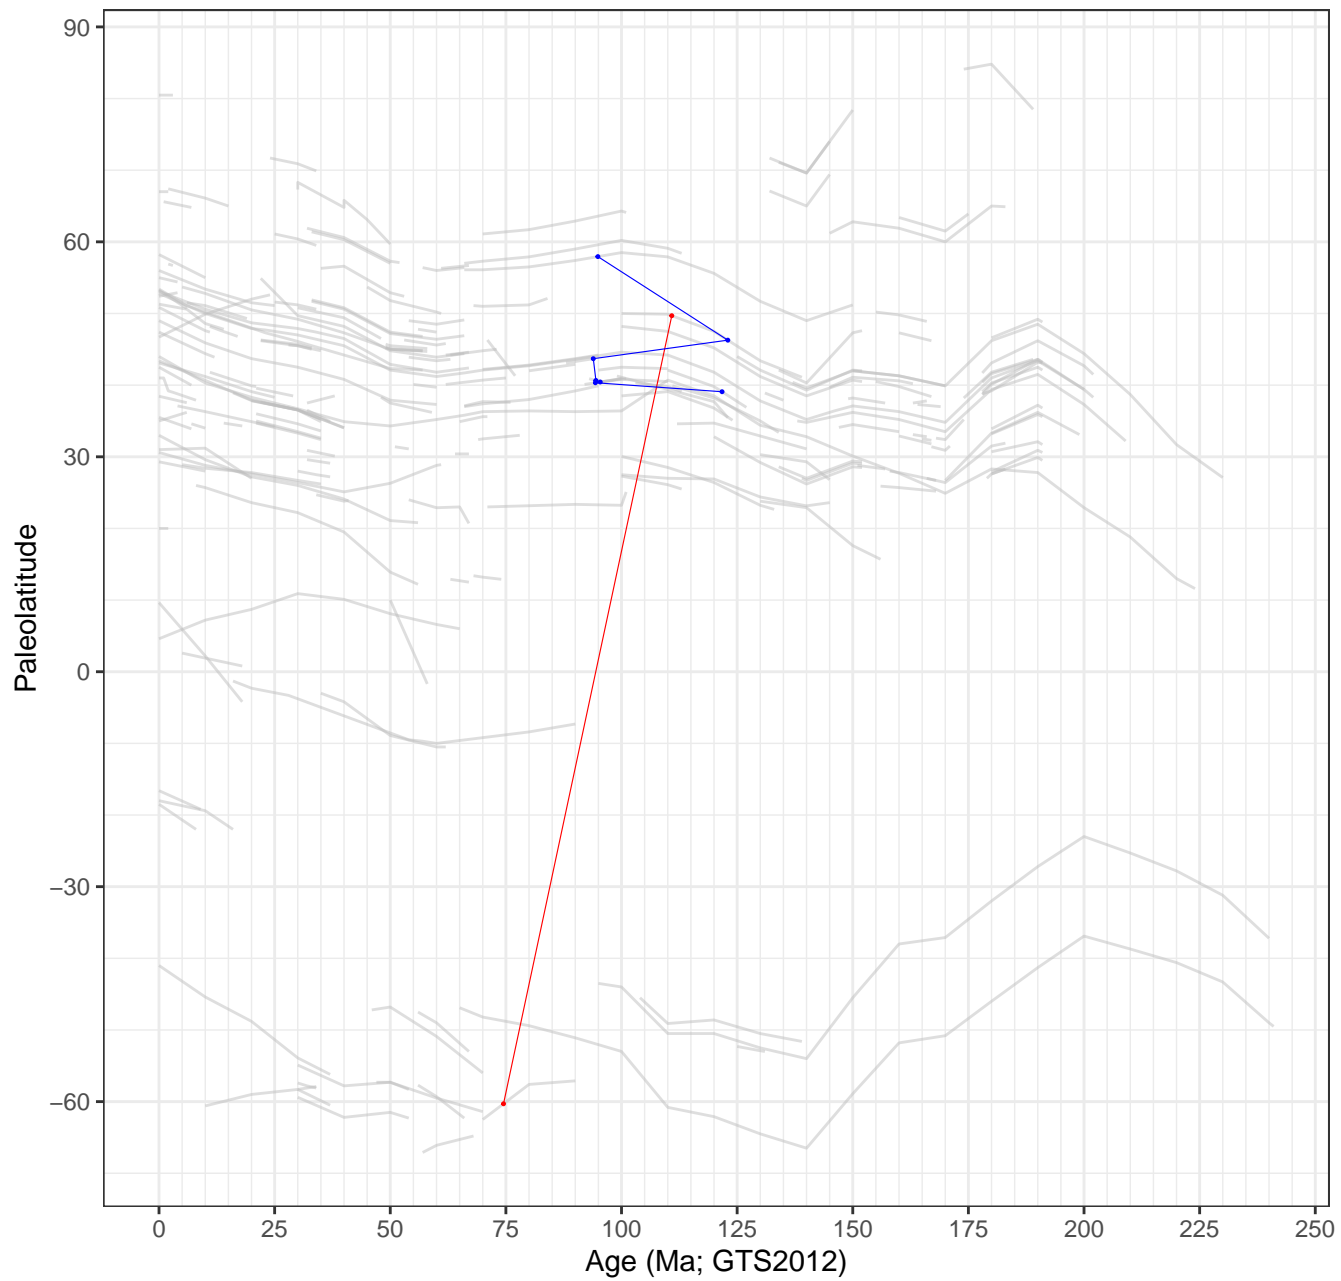

Supplement: Supplementary file 1187 [file Cyclonephelium compactum.pdf › Supplement/Supplement 2/Species 1914 plots/Cyclonephelium compactum.pdf]

# Species *Cyclonephelium crassimarginatum*

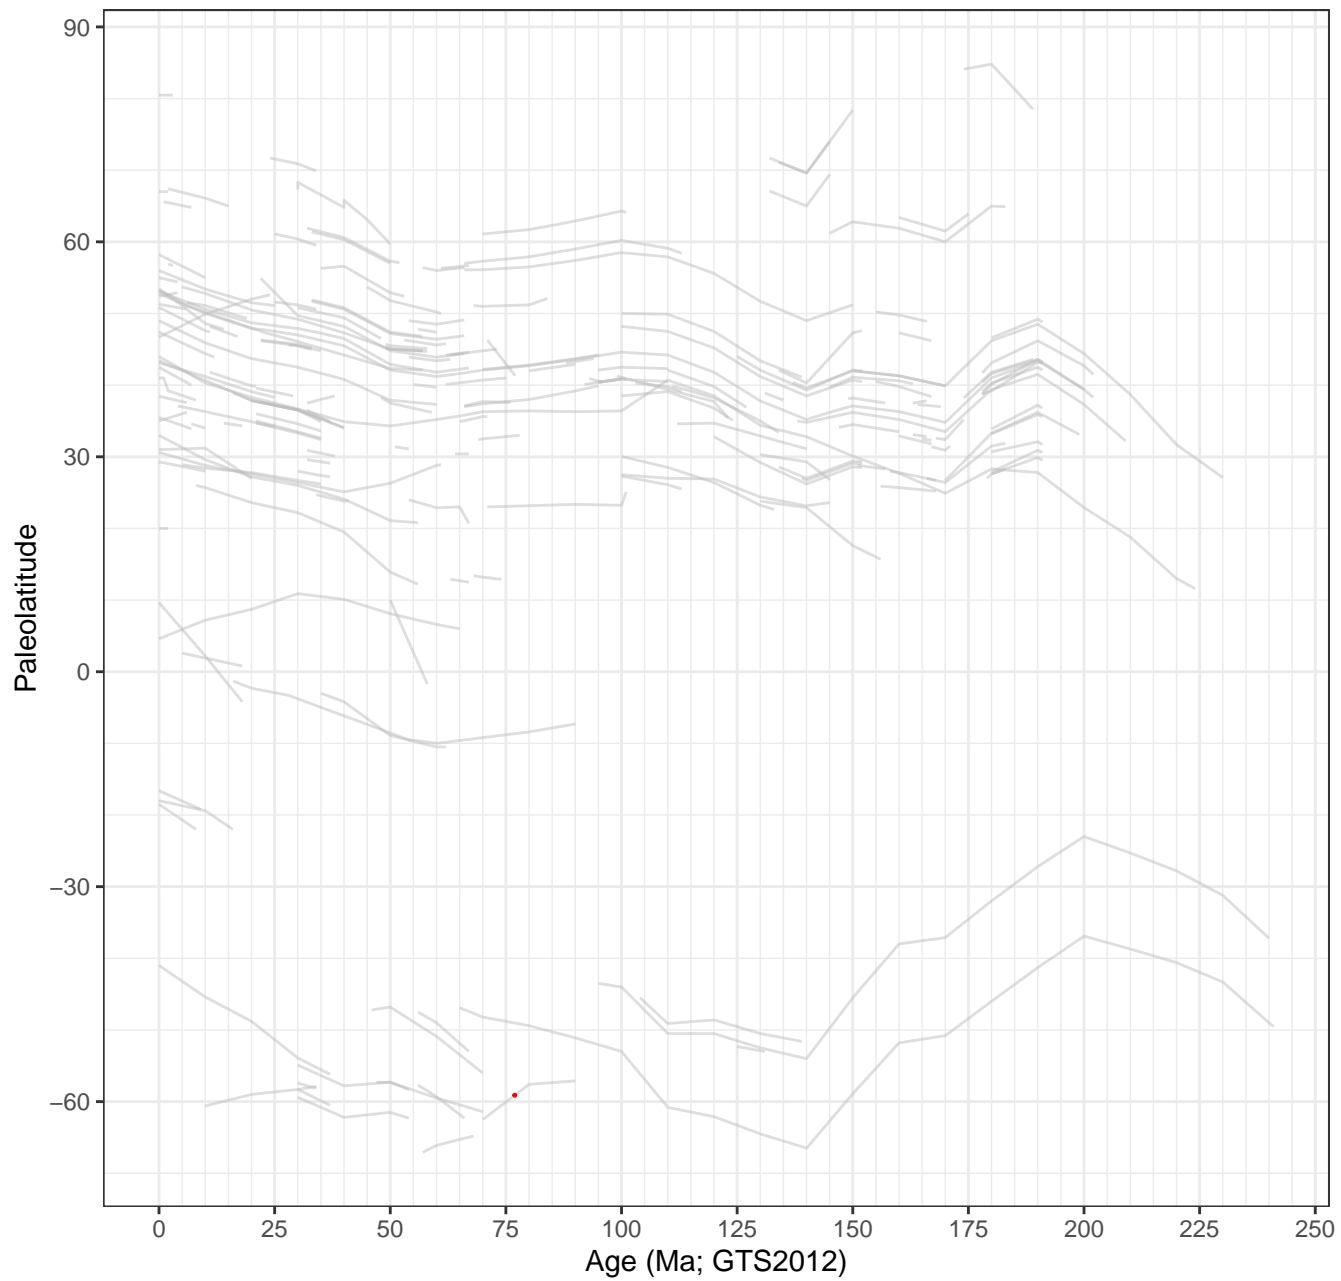

Supplement: Supplementary file 1188 [file Cyclonephelium crassimarginatum.pdf › Supplement/Supplement 2/Species 1914 plots/Cyclonephelium crassimarginatum.pdf]

# Species *Cyclonephelium deconinckii*

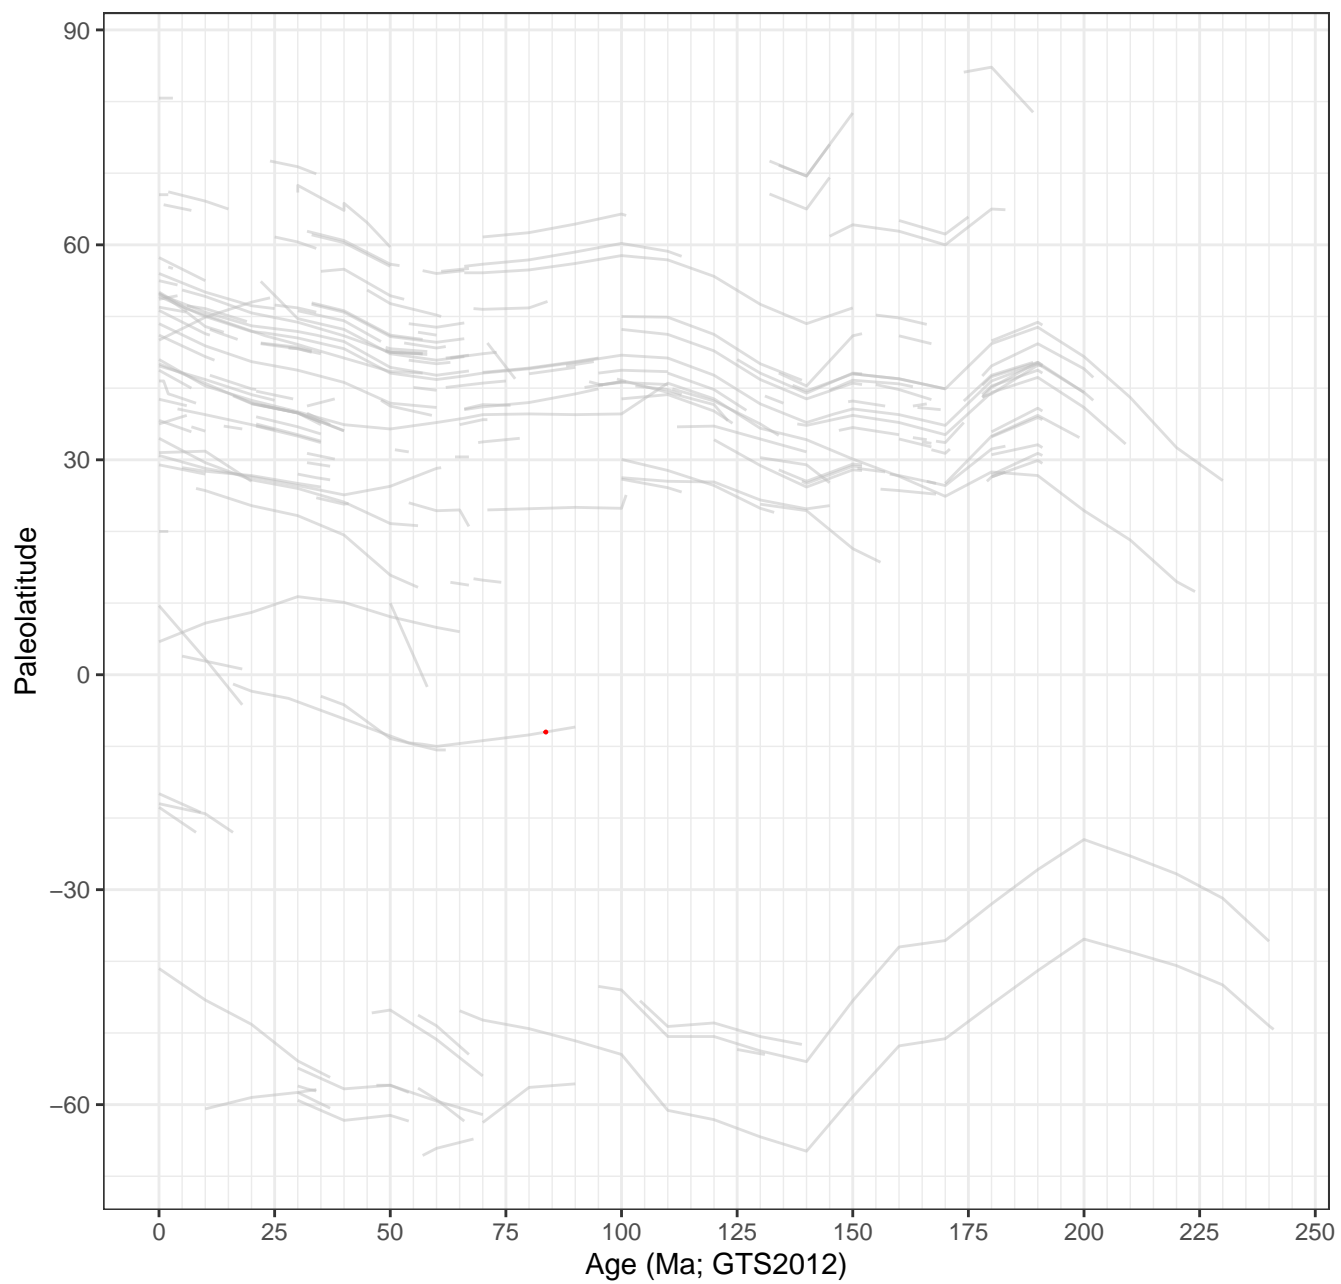

Supplement: Supplementary file 1189 [file Cyclonephelium deconinckii.pdf › Supplement/Supplement 2/Species 1914 plots/Cyclonephelium deconinckii.pdf]

# Species *Cyclonephelium filoreticulatum*

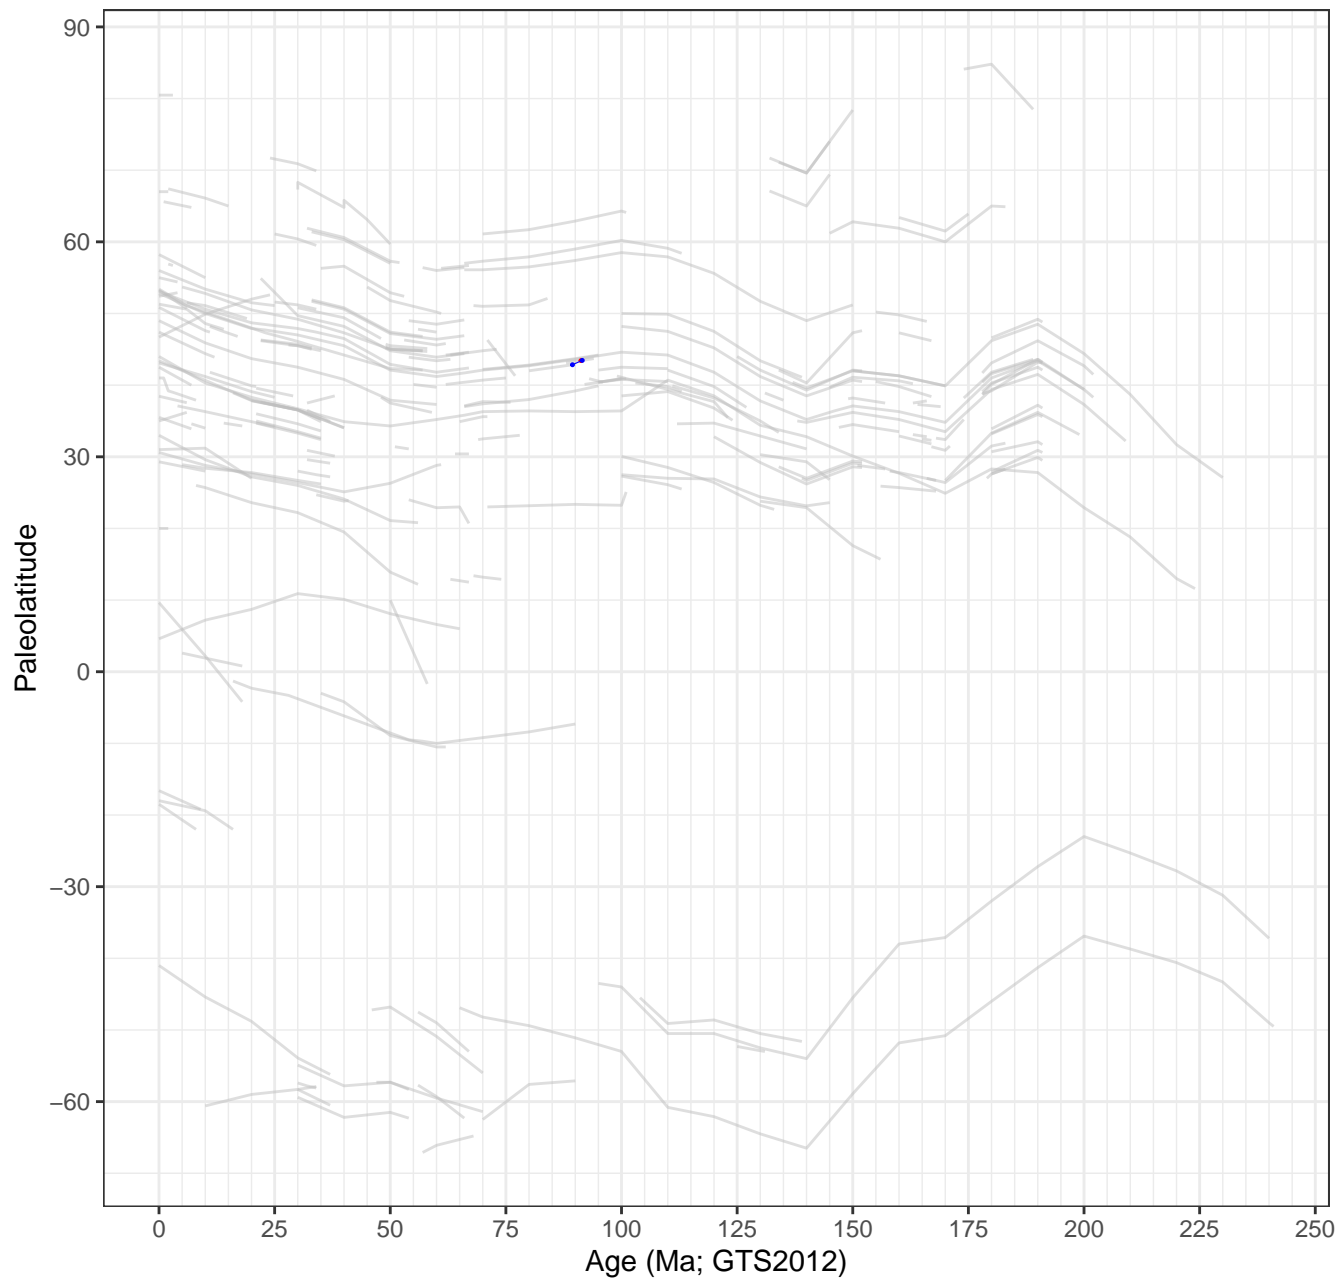

Supplement: Supplementary file 1190 [file Cyclonephelium filoreticulatum.pdf › Supplement/Supplement 2/Species 1914 plots/Cyclonephelium filoreticulatum.pdf]

# Species *Cyclonephelium hughesii*

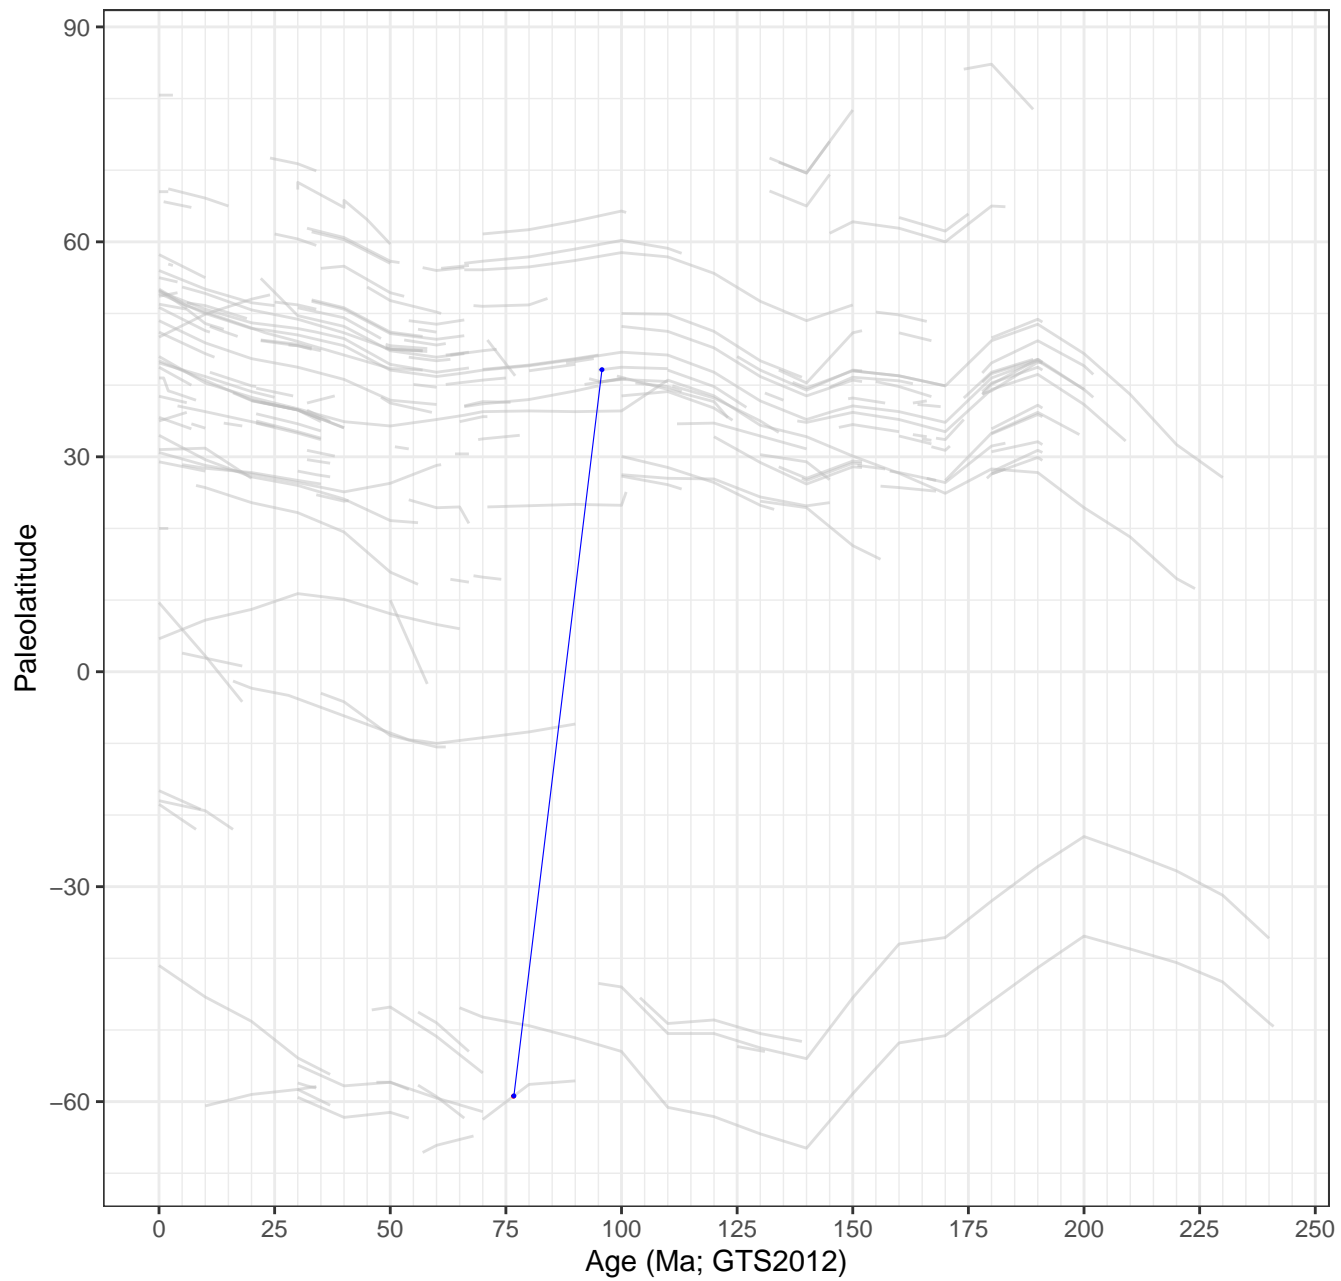

Supplement: Supplementary file 1191 [file Cyclonephelium hughesii.pdf › Supplement/Supplement 2/Species 1914 plots/Cyclonephelium hughesii.pdf]

# Species *Cyclonephelium intonsum*

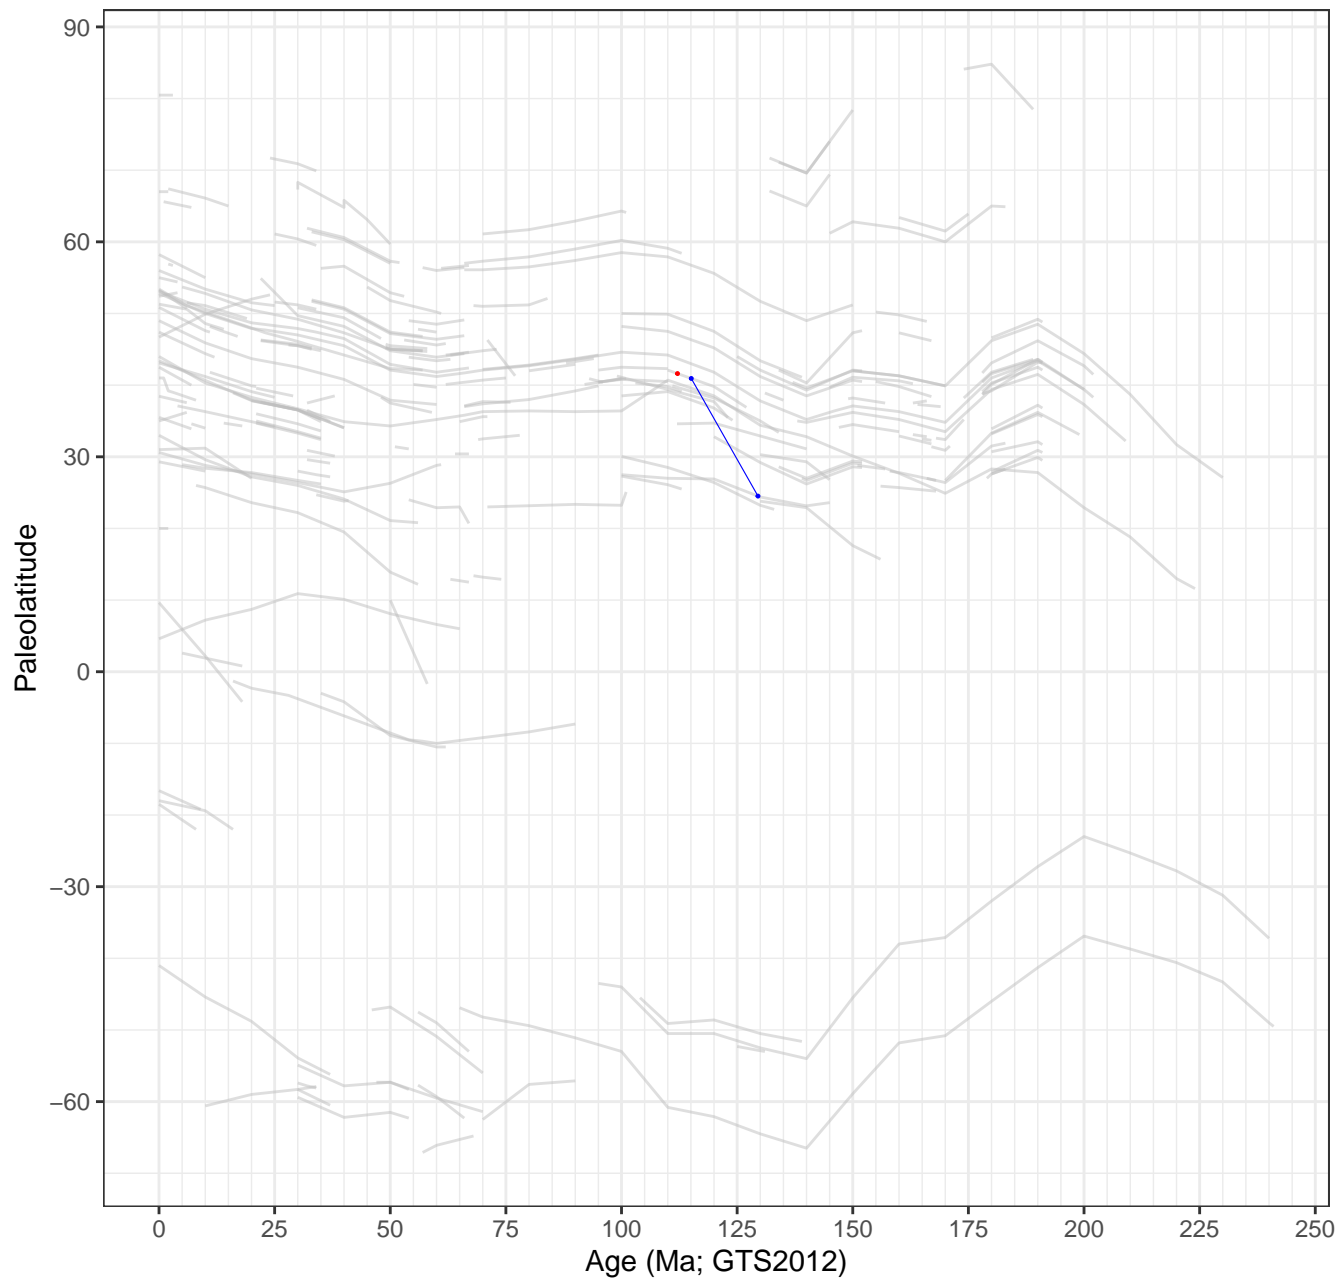

Supplement: Supplementary file 1192 [file Cyclonephelium intonsum.pdf › Supplement/Supplement 2/Species 1914 plots/Cyclonephelium intonsum.pdf]

# Species *Cyclonephelium longispinosum*

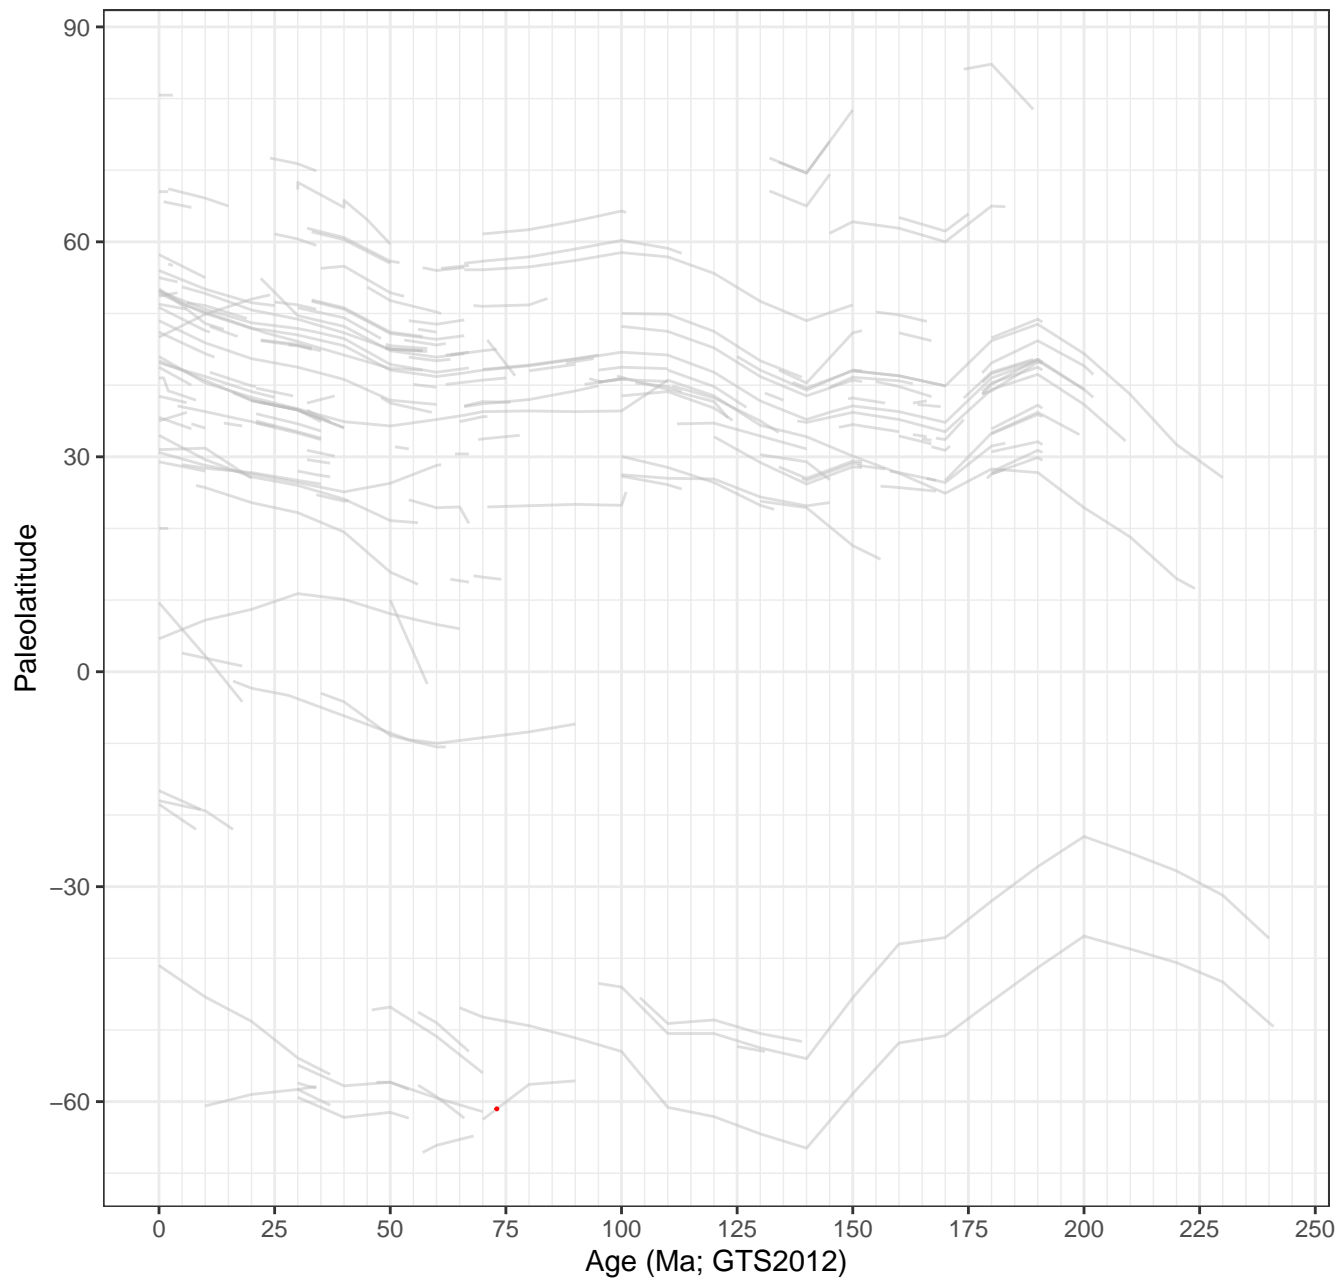

Supplement: Supplementary file 1193 [file Cyclonephelium longispinosum.pdf › Supplement/Supplement 2/Species 1914 plots/Cyclonephelium longispinosum.pdf]

# Species *Cyclonephelium paucimarginatum*

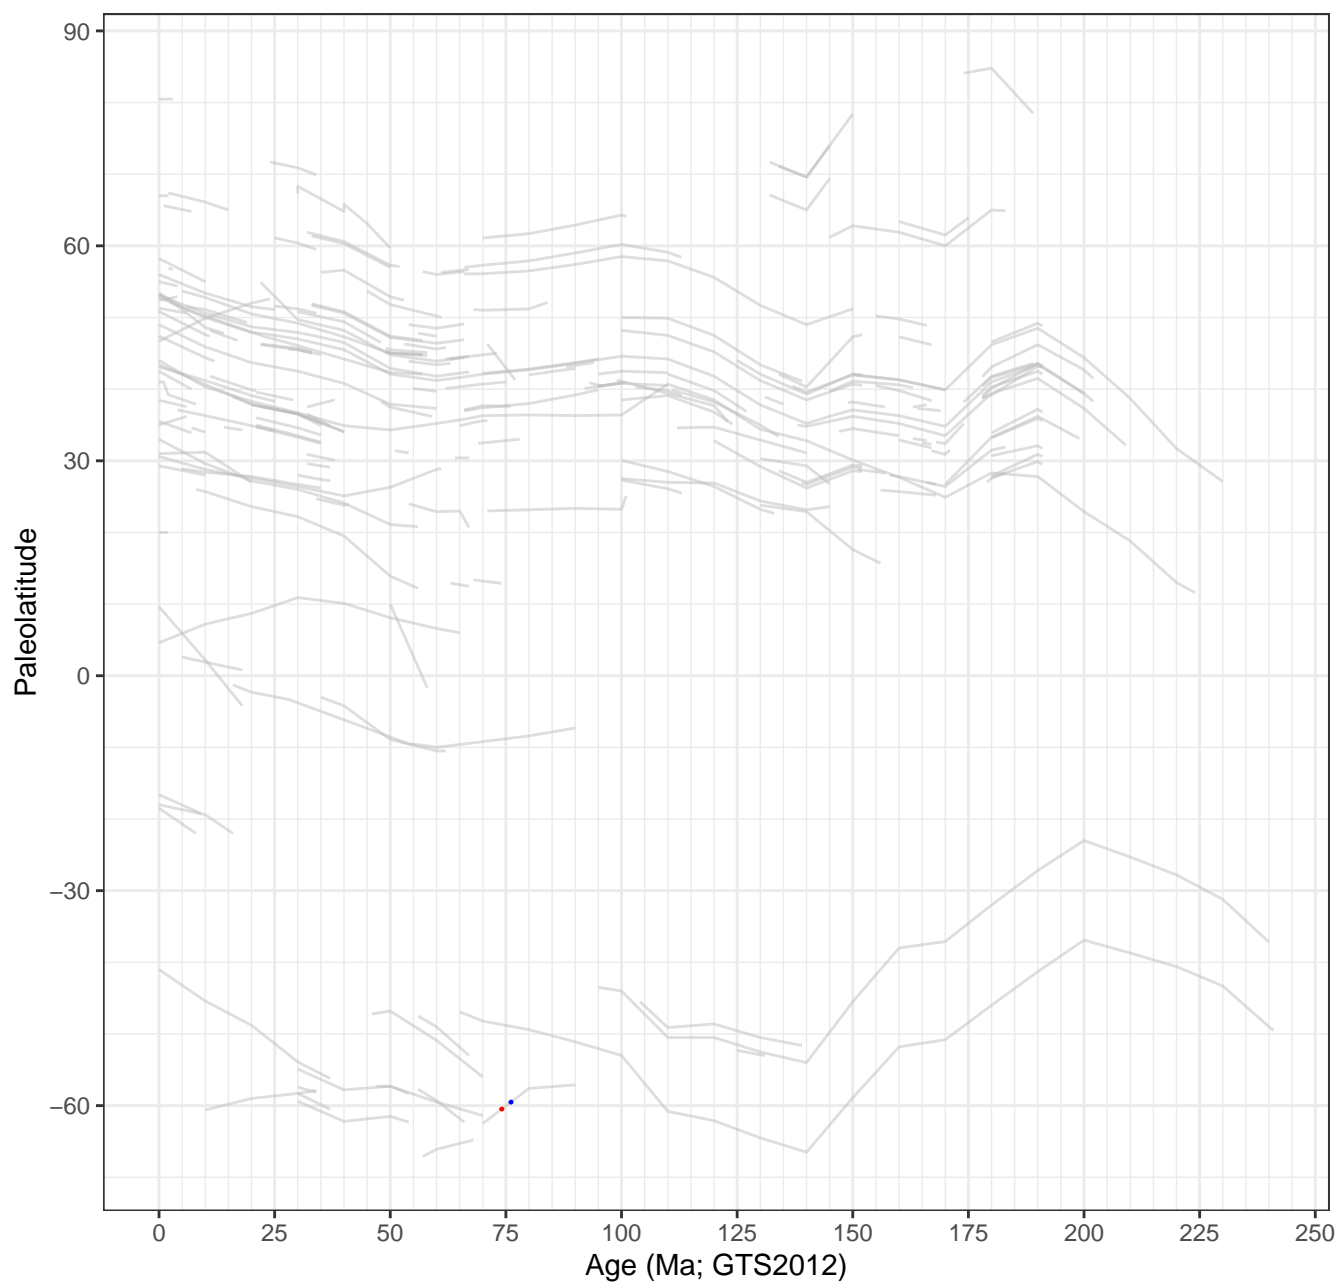

Supplement: Supplementary file 1194 [file Cyclonephelium paucimarginatum.pdf › Supplement/Supplement 2/Species 1914 plots/Cyclonephelium paucimarginatum.pdf]

# Species *Cyclonephelium vannophorum*

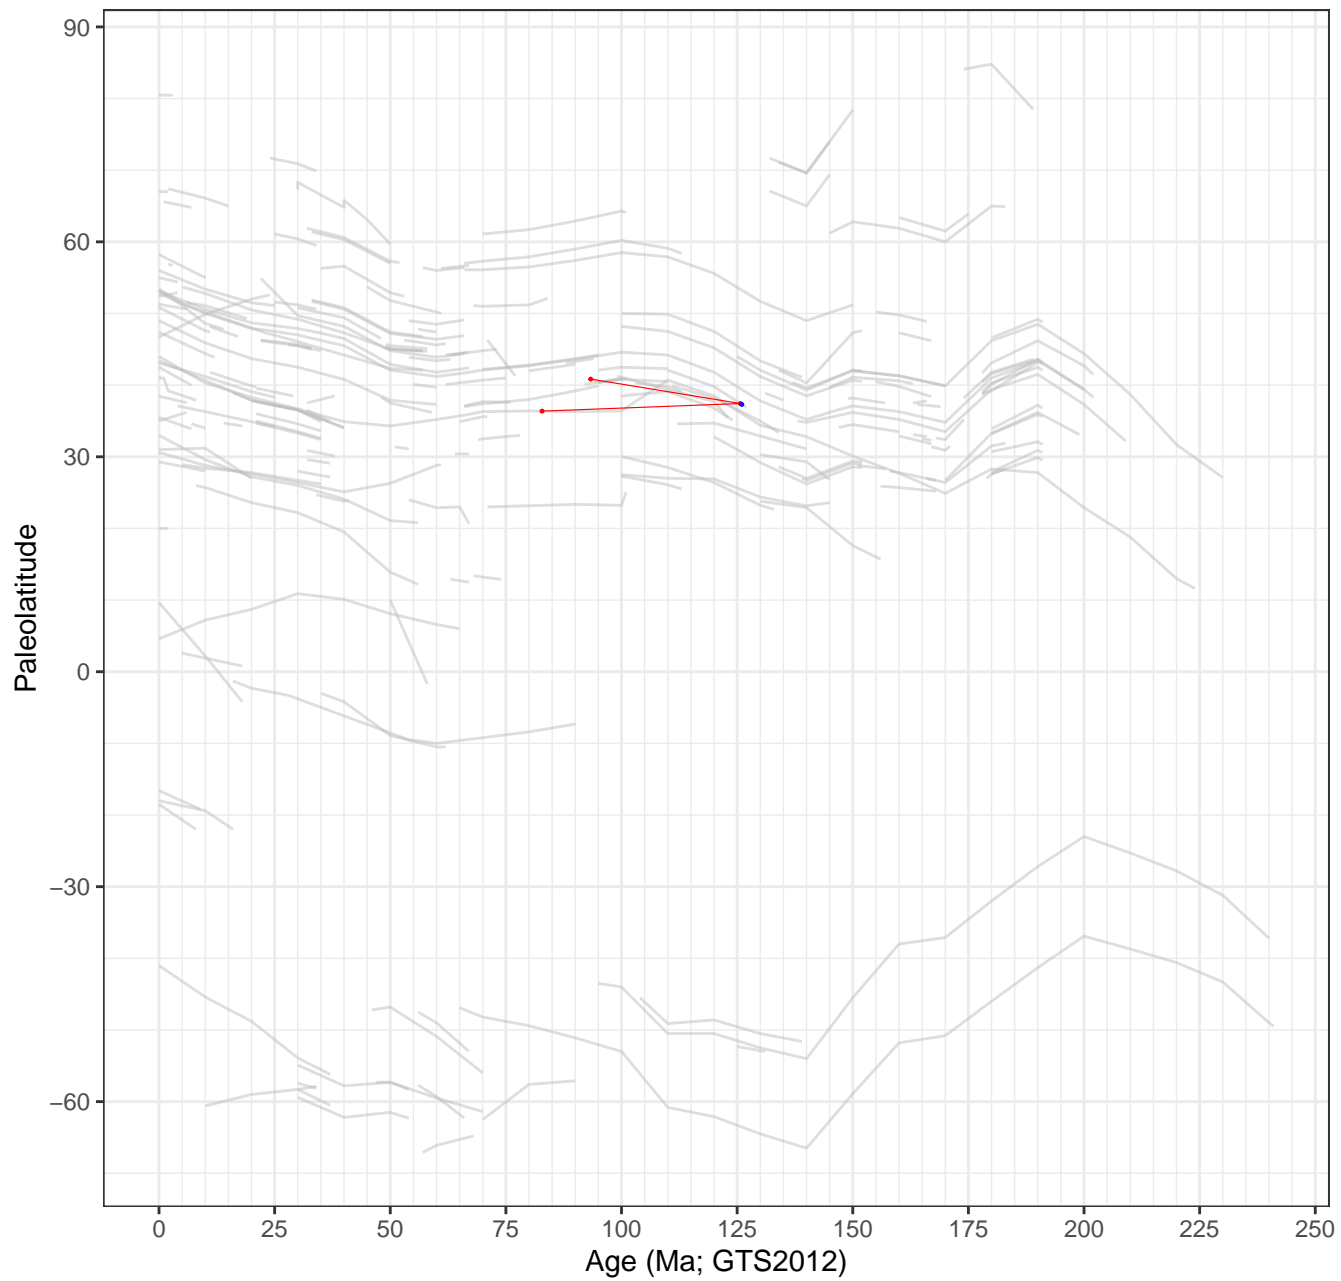

Supplement: Supplementary file 1195 [file Cyclonephelium vannophorum.pdf › Supplement/Supplement 2/Species 1914 plots/Cyclonephelium vannophorum.pdf]

# Species *Cyclopsiella mura*

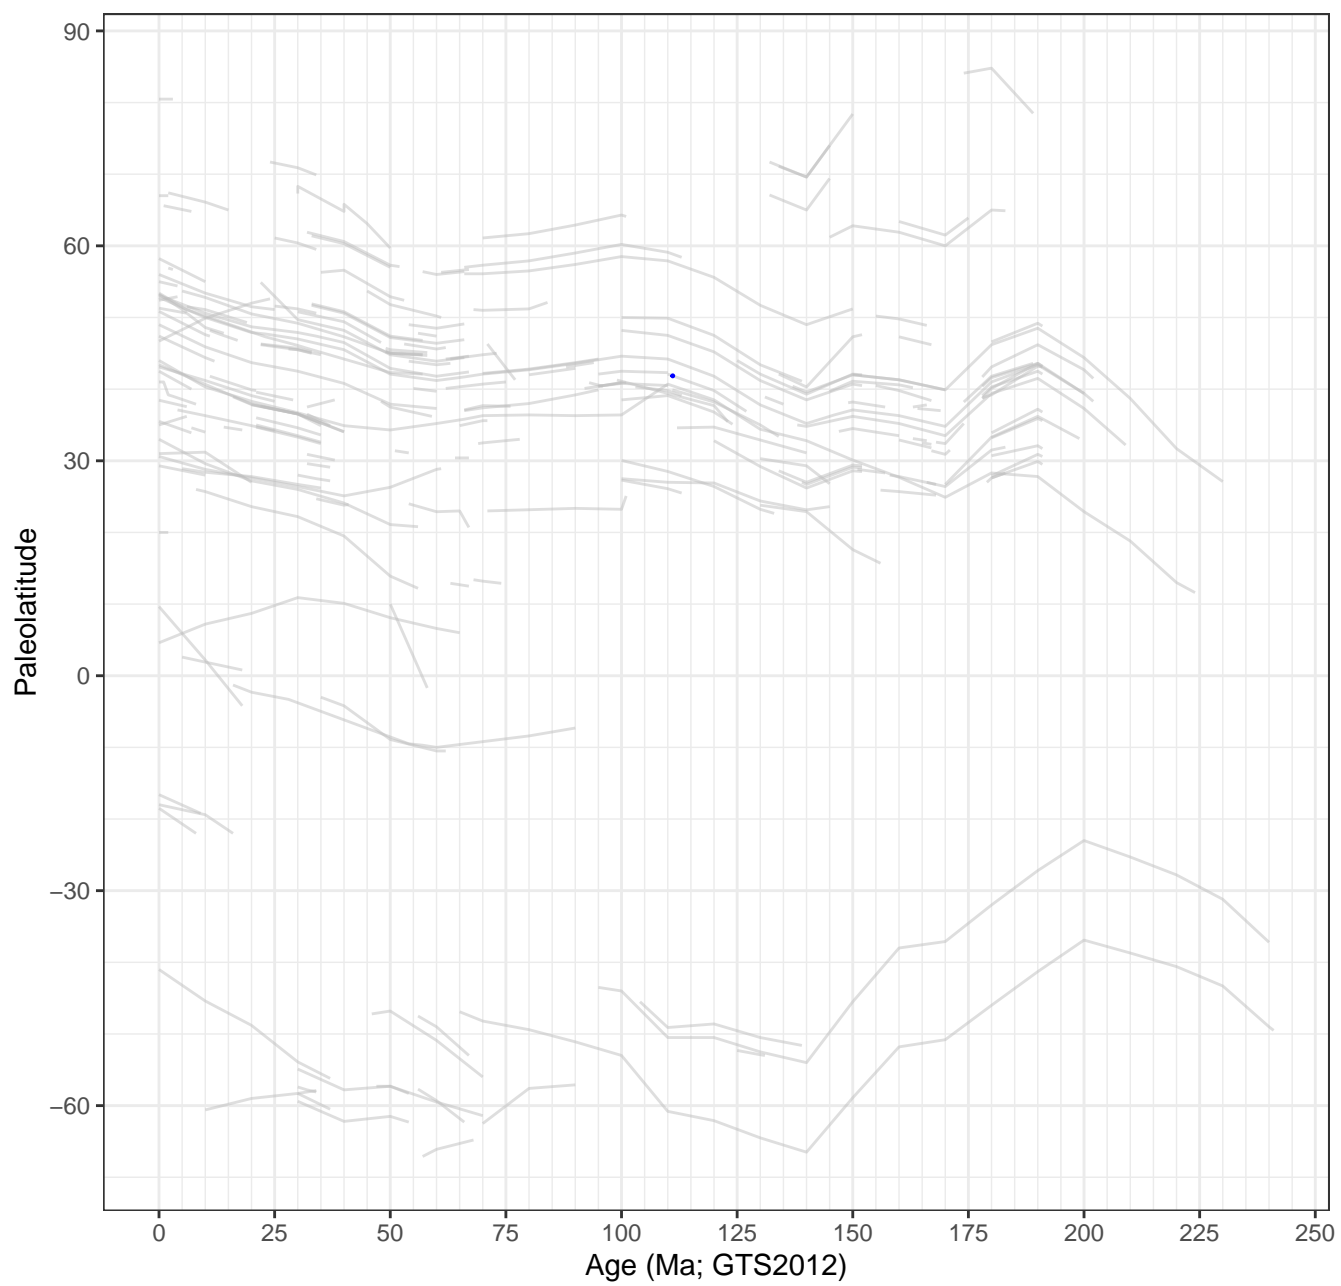

Supplement: Supplementary file 1196 [file Cyclopsiella mura.pdf › Supplement/Supplement 2/Species 1914 plots/Cyclopsiella mura.pdf]

# Species *Cyclopsiella trematophora*

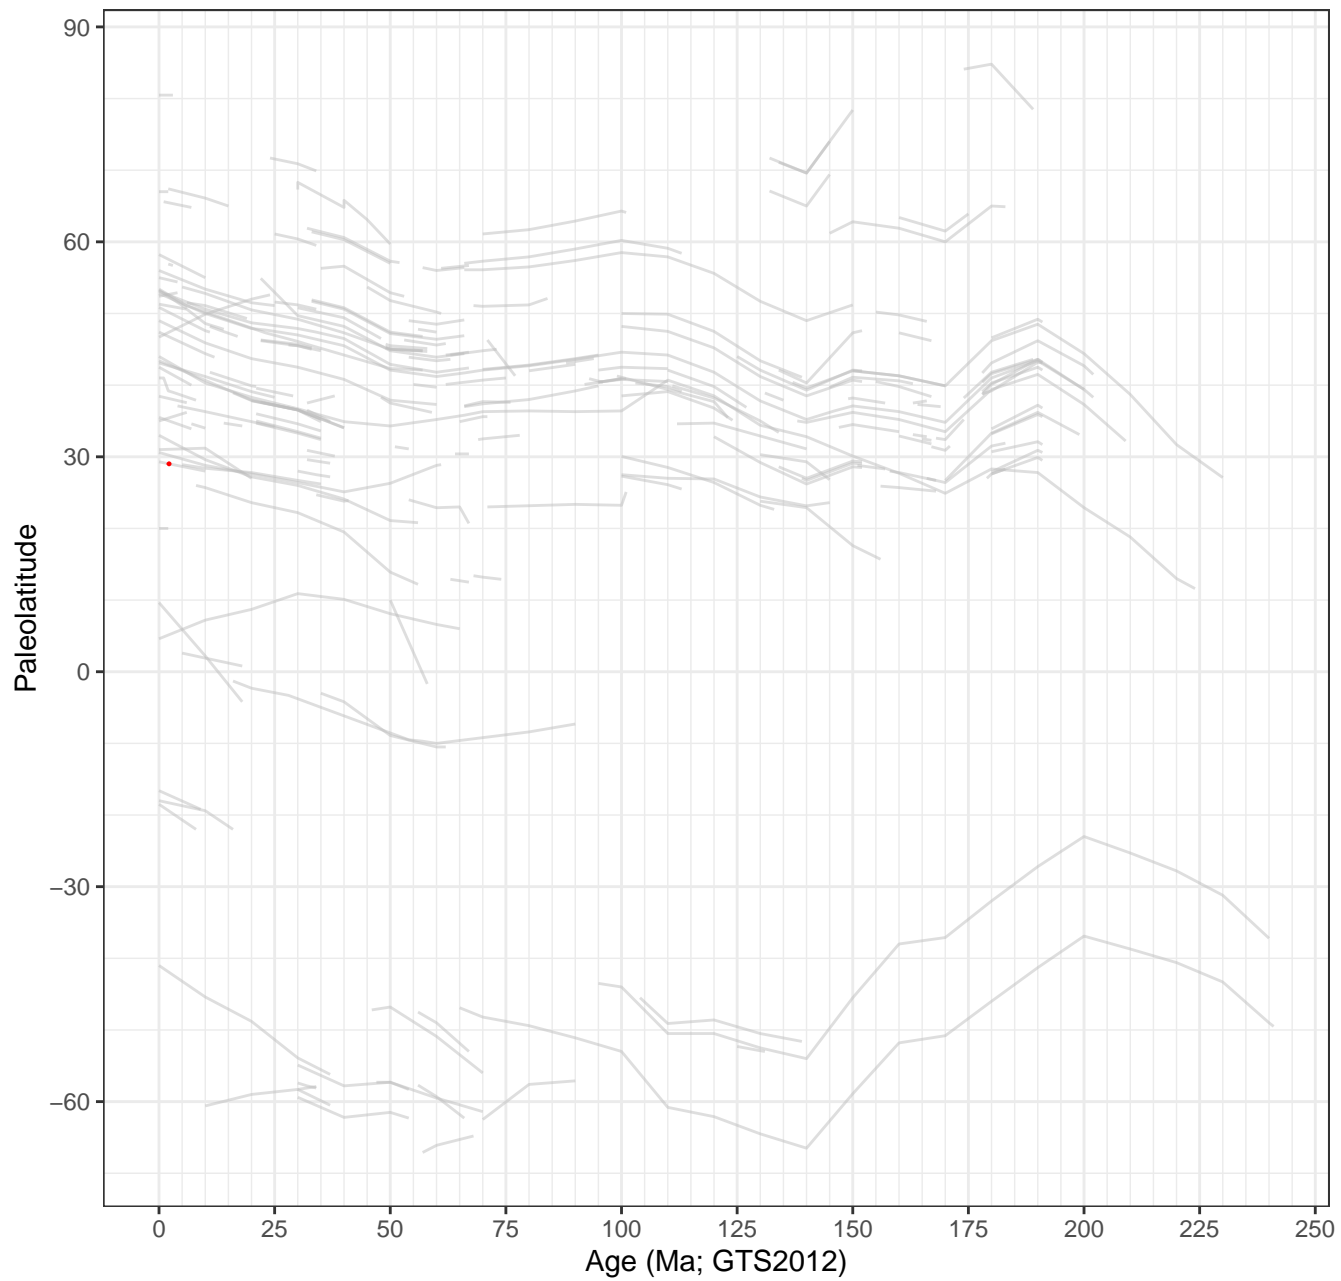

Supplement: Supplementary file 1197 [file Cyclopsiella trematophora.pdf › Supplement/Supplement 2/Species 1914 plots/Cyclopsiella trematophora.pdf]

# Species *Cyclopsiella vieta*

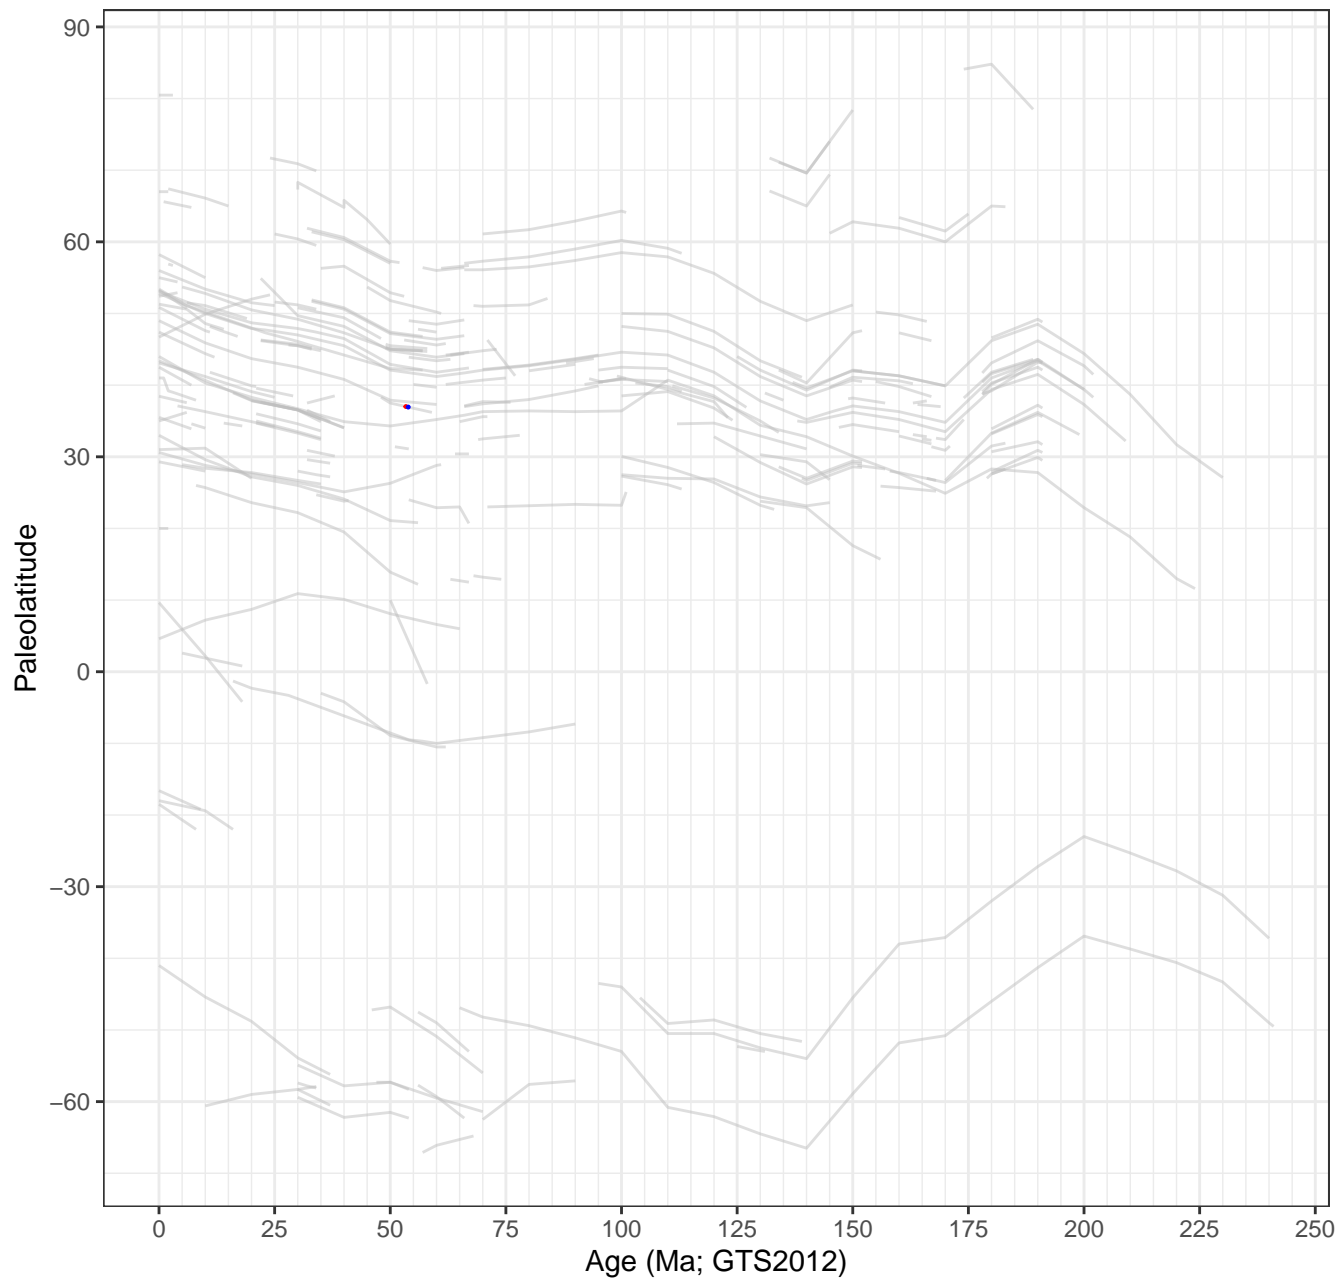

Supplement: Supplementary file 1198 [file Cyclopsiella vieta.pdf › Supplement/Supplement 2/Species 1914 plots/Cyclopsiella vieta.pdf]

# Species *Cymososphaeridium phoenix*

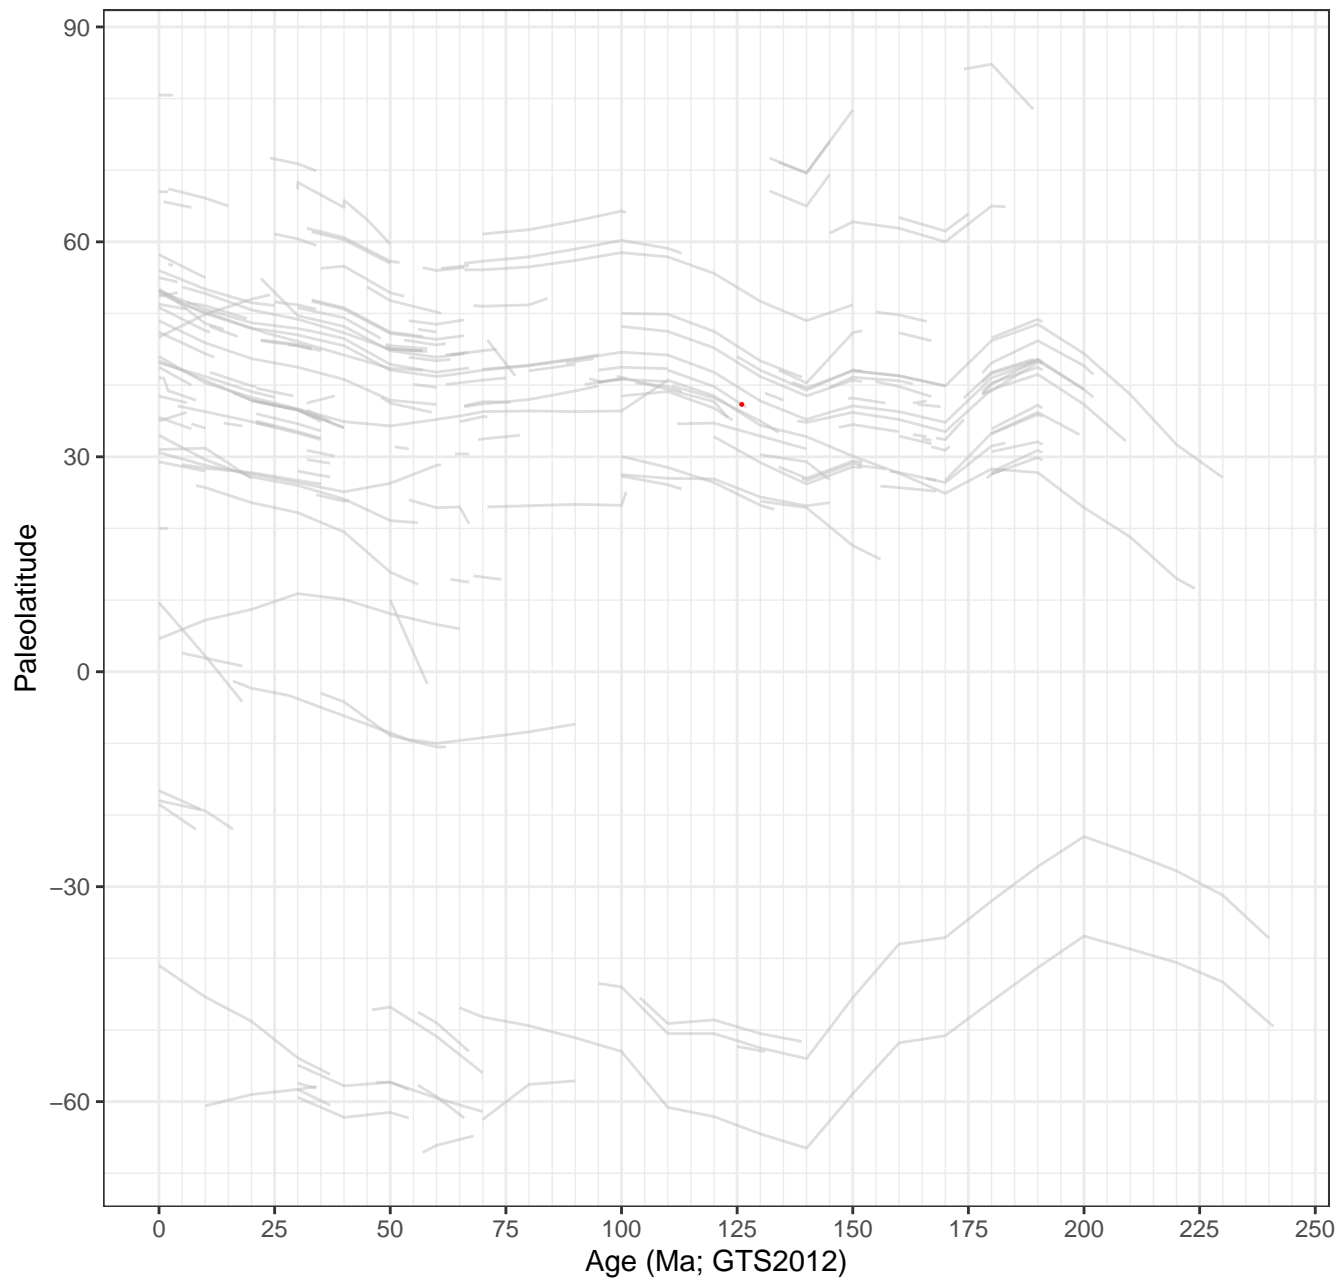

Supplement: Supplementary file 1199 [file Cymososphaeridium phoenix.pdf › Supplement/Supplement 2/Species 1914 plots/Cymososphaeridium phoenix.pdf]

# Species *Cymososphæridium validum*

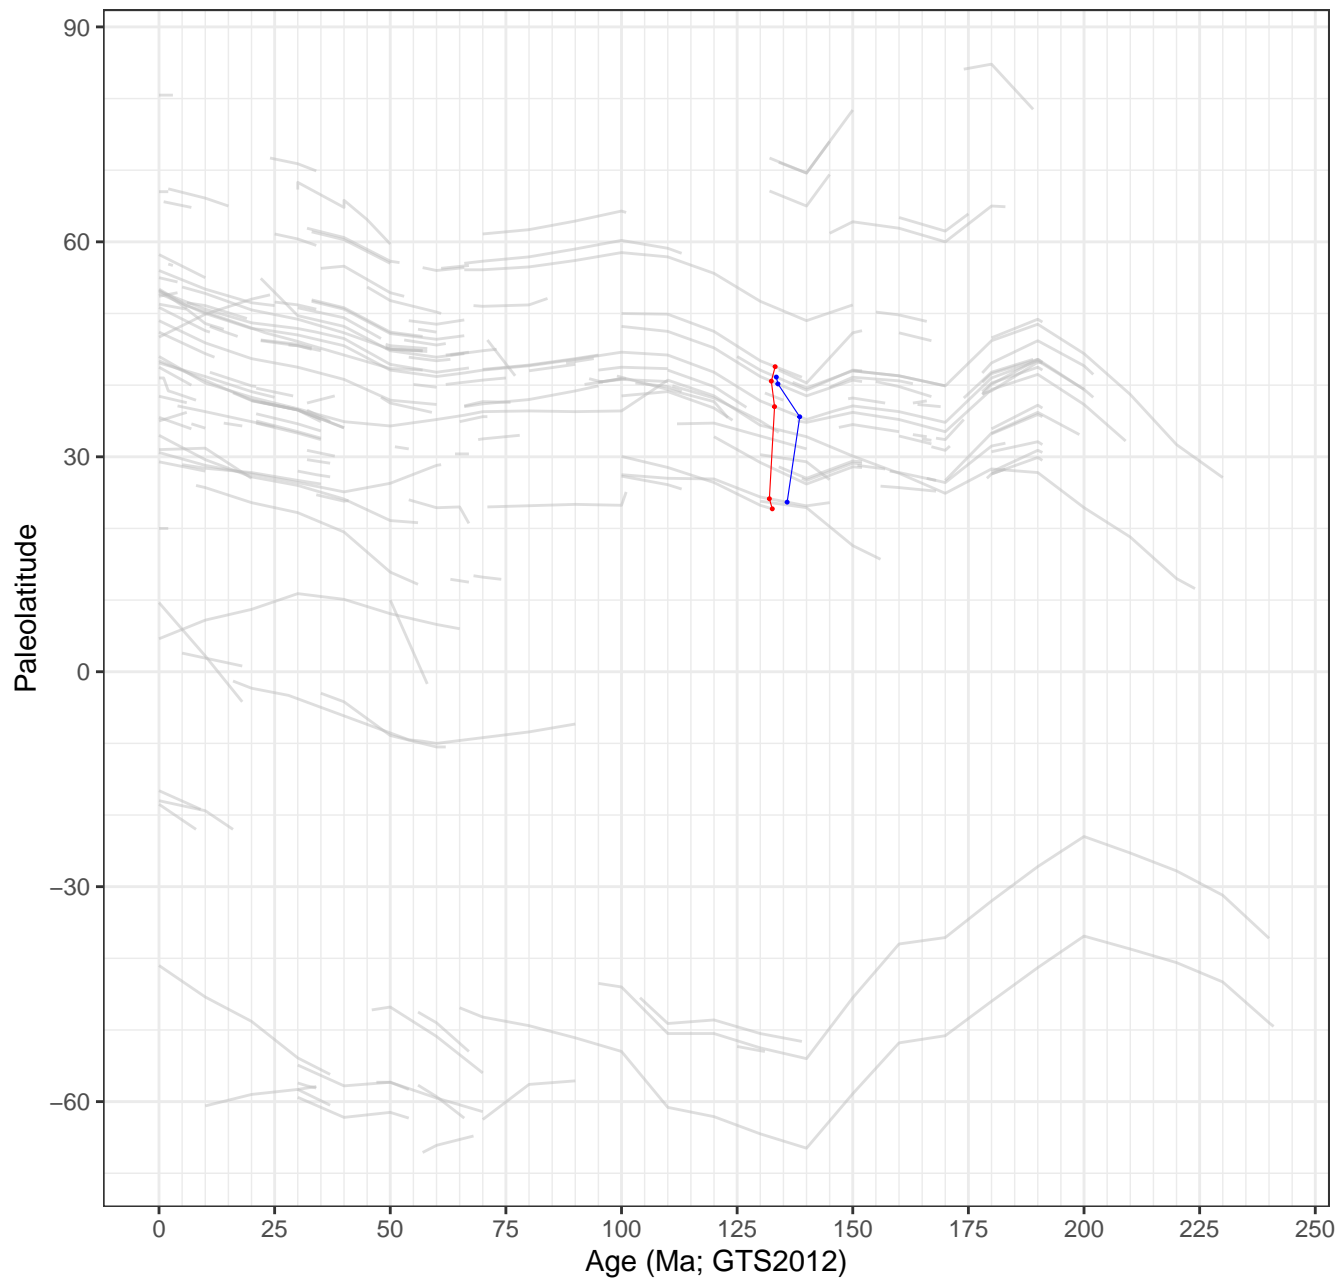

Supplement: Supplementary file 1200 [file Cymososphaeridium validum.pdf › Supplement/Supplement 2/Species 1914 plots/Cymososphaeridium validum.pdf]

# Species *Dalella chathamense*

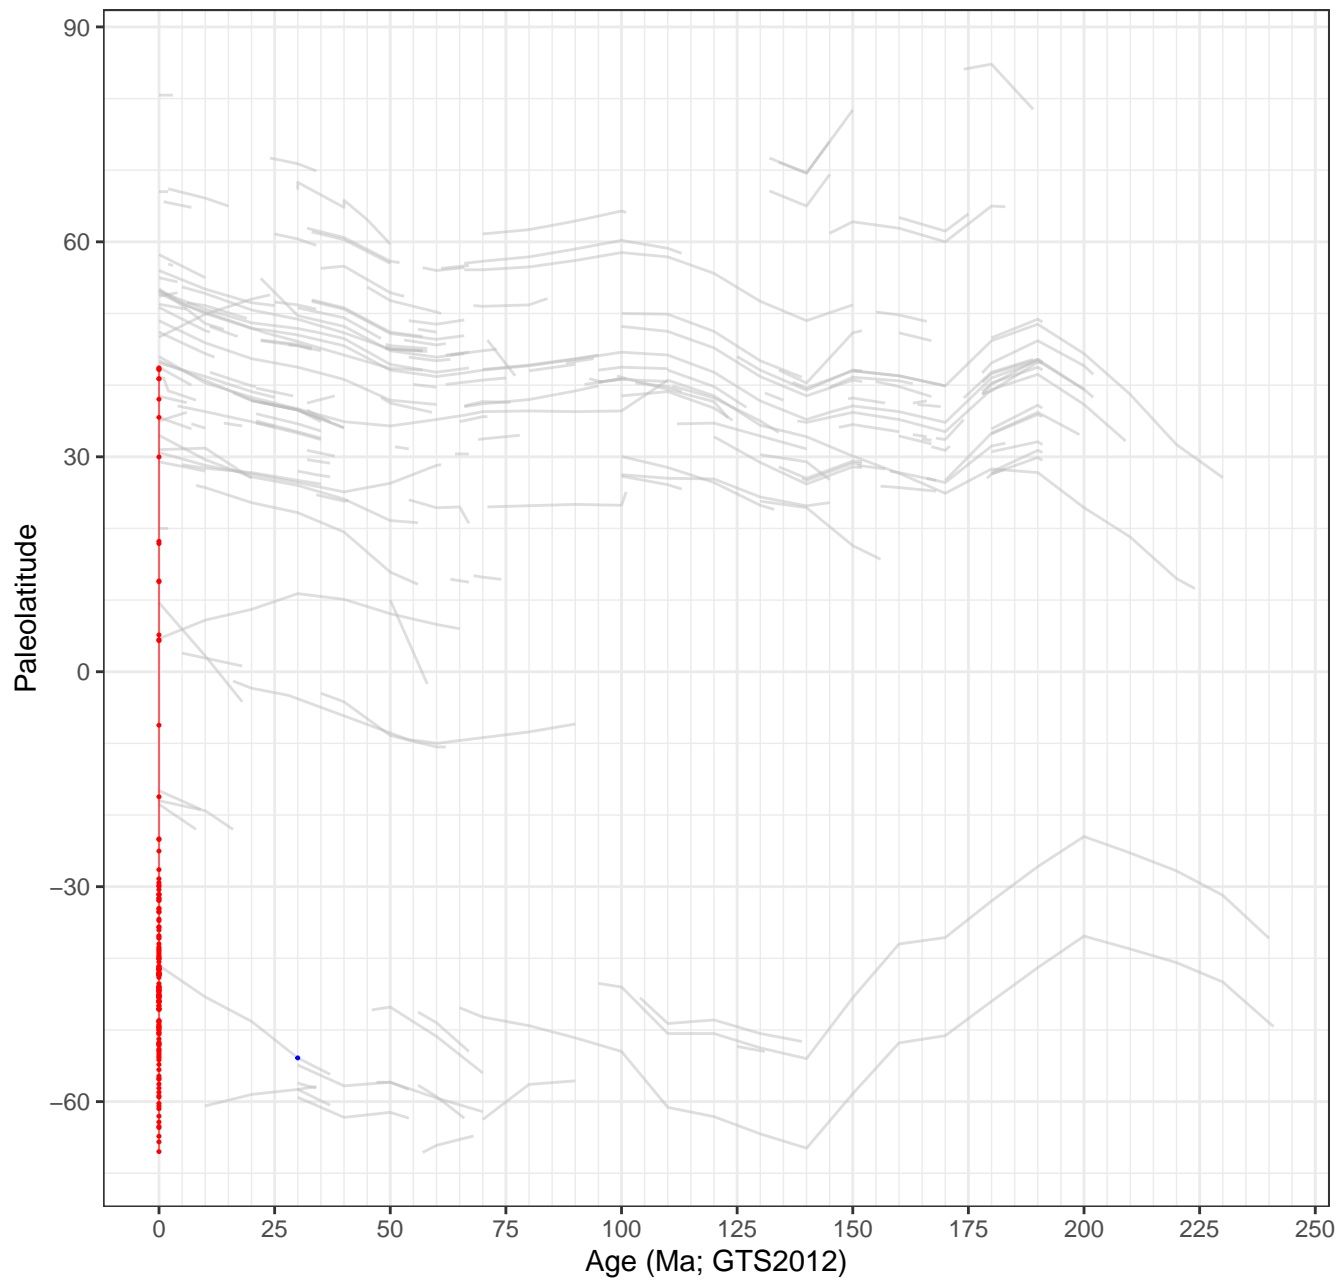

Supplement: Supplementary file 1201 [file Dalella chathamense.pdf › Supplement/Supplement 2/Species 1914 plots/Dalella chathamense.pdf]

# Species *Dalella siciliense*

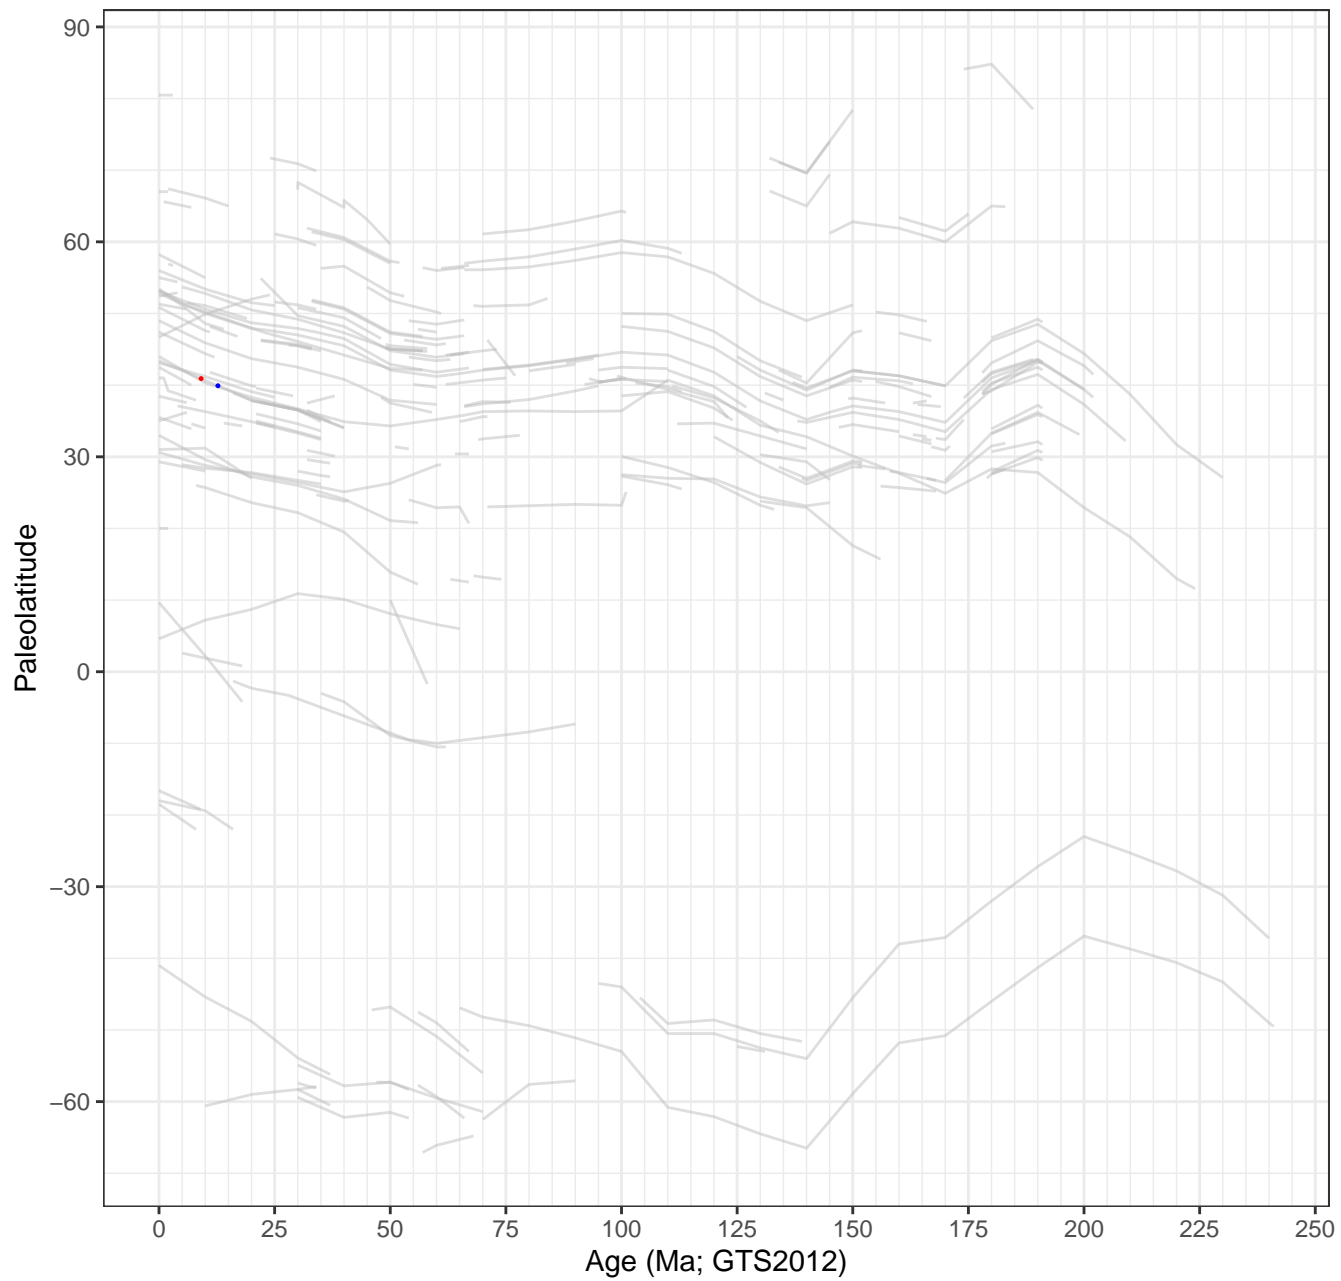

Supplement: Supplementary file 1202 [file Dalella siciliense.pdf › Supplement/Supplement 2/Species 1914 plots/Dalella siciliense.pdf]

# Species *Danea abbreviata*

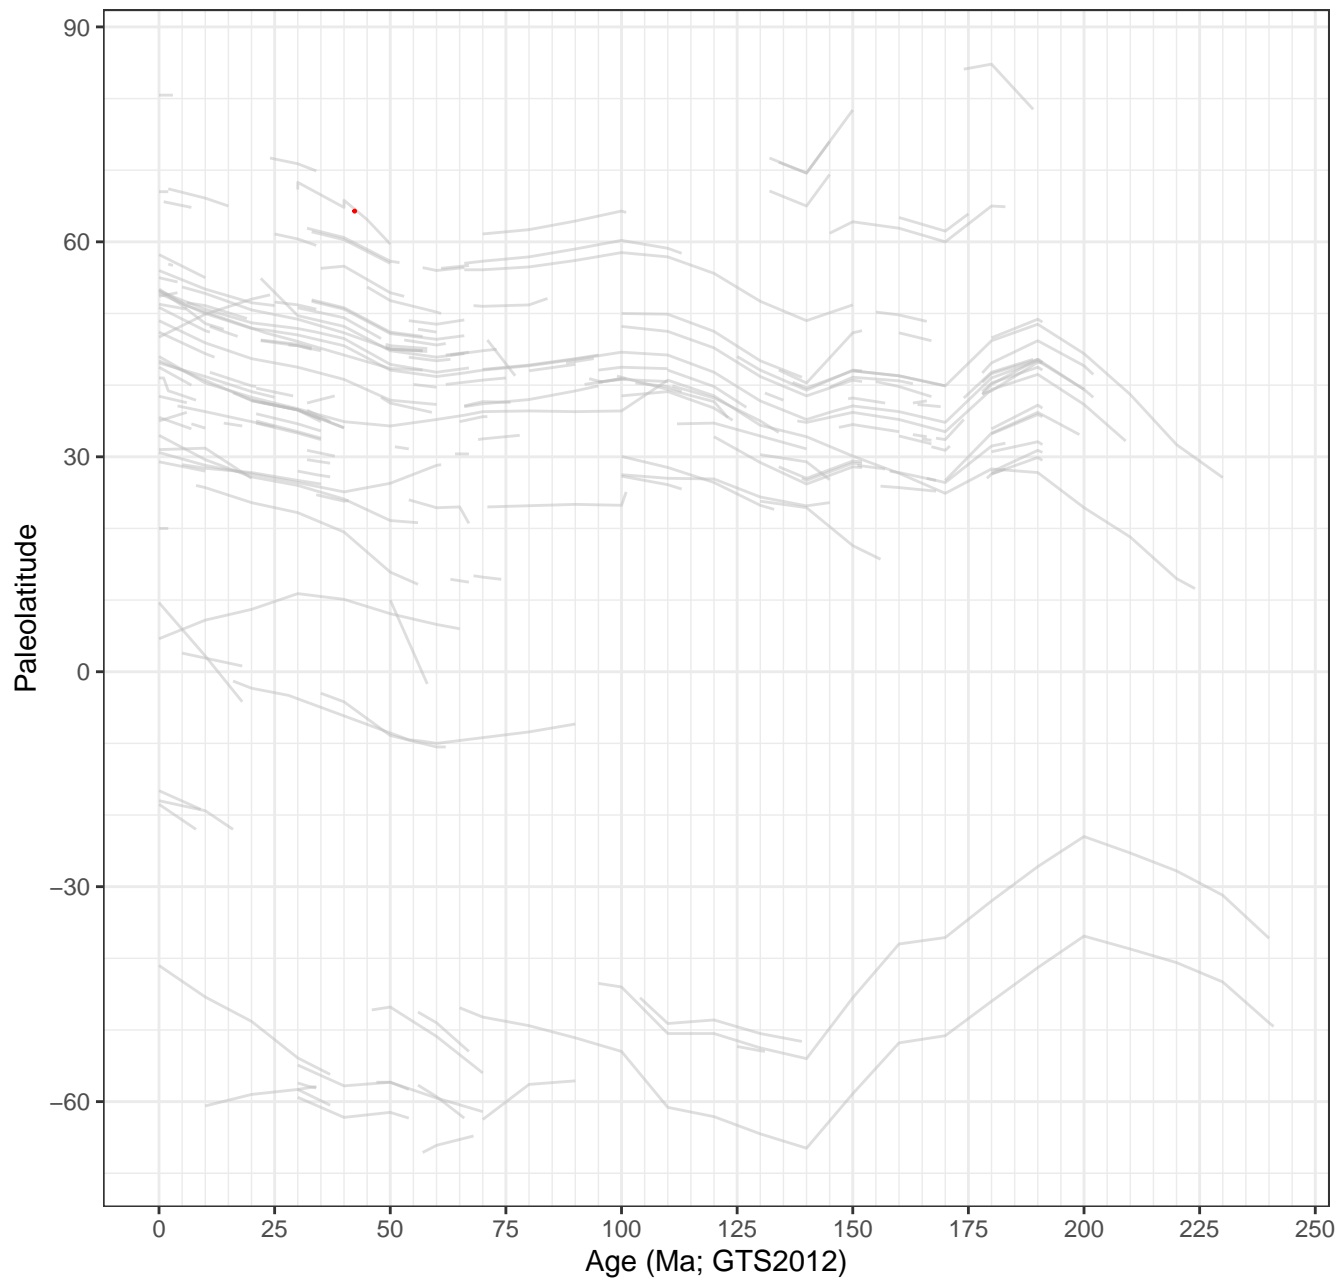

Supplement: Supplementary file 1203 [file Danea abbreviata.pdf › Supplement/Supplement 2/Species 1914 plots/Danea abbreviata.pdf]

# Species *Danea californica*

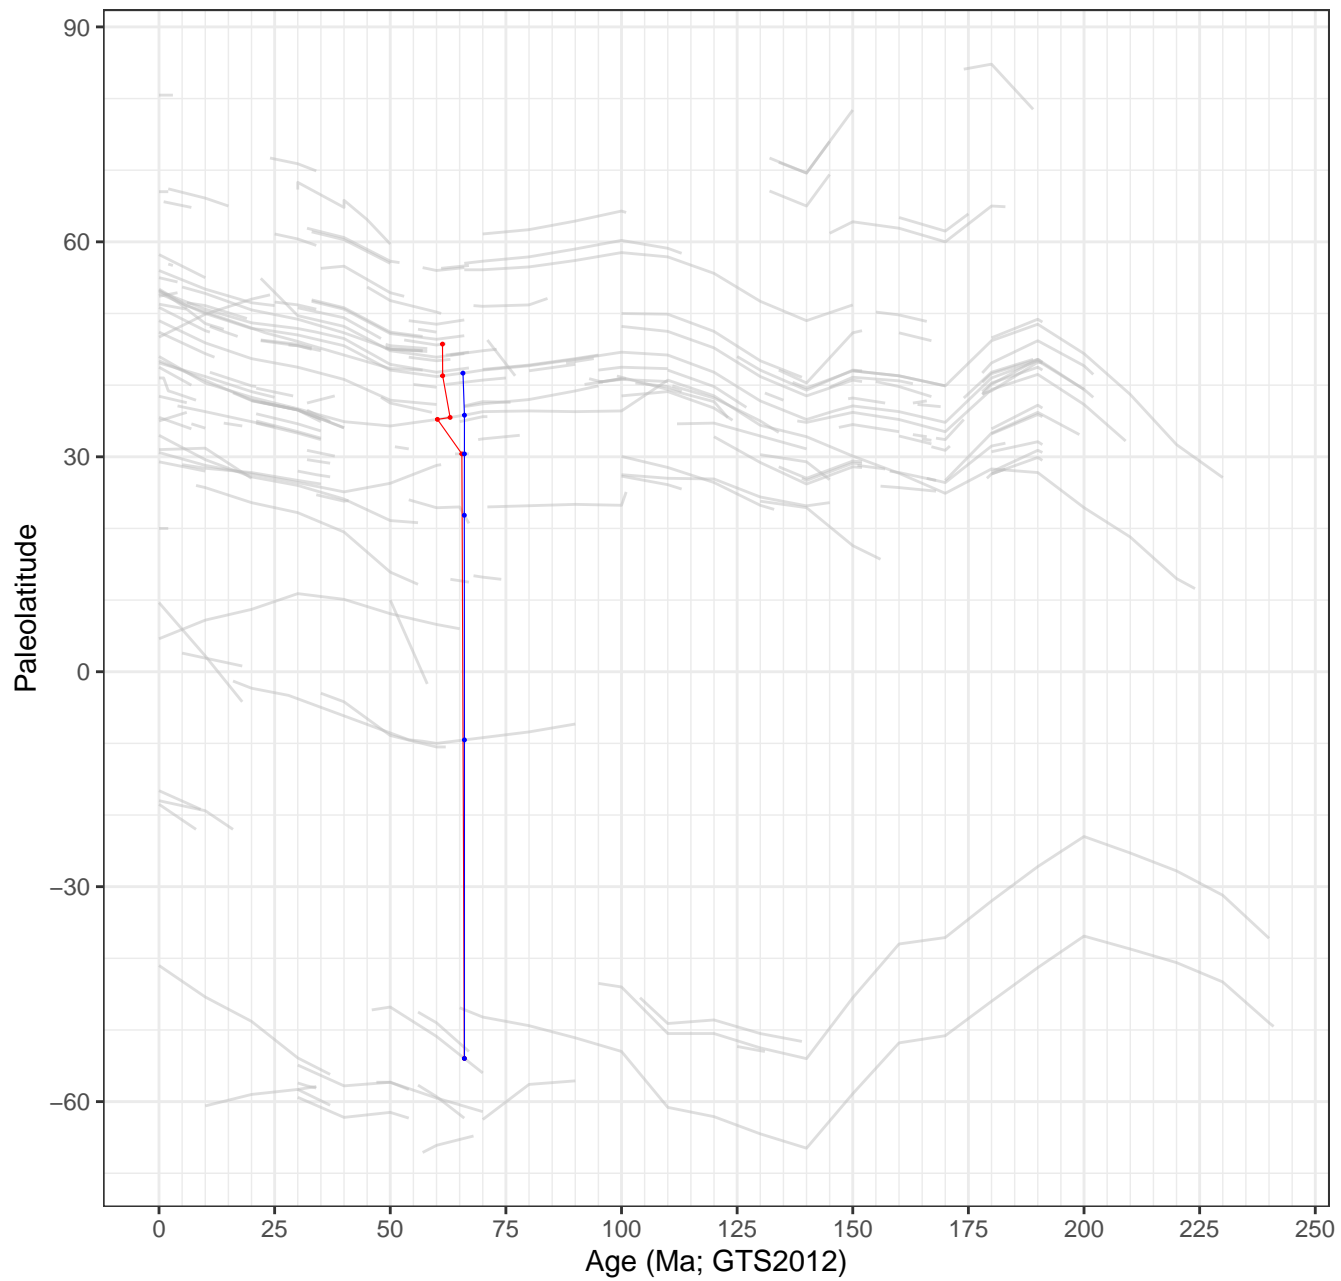

Supplement: Supplementary file 1204 [file Danea californica.pdf › Supplement/Supplement 2/Species 1914 plots/Danea californica.pdf]

# Species *Danea chibanis*

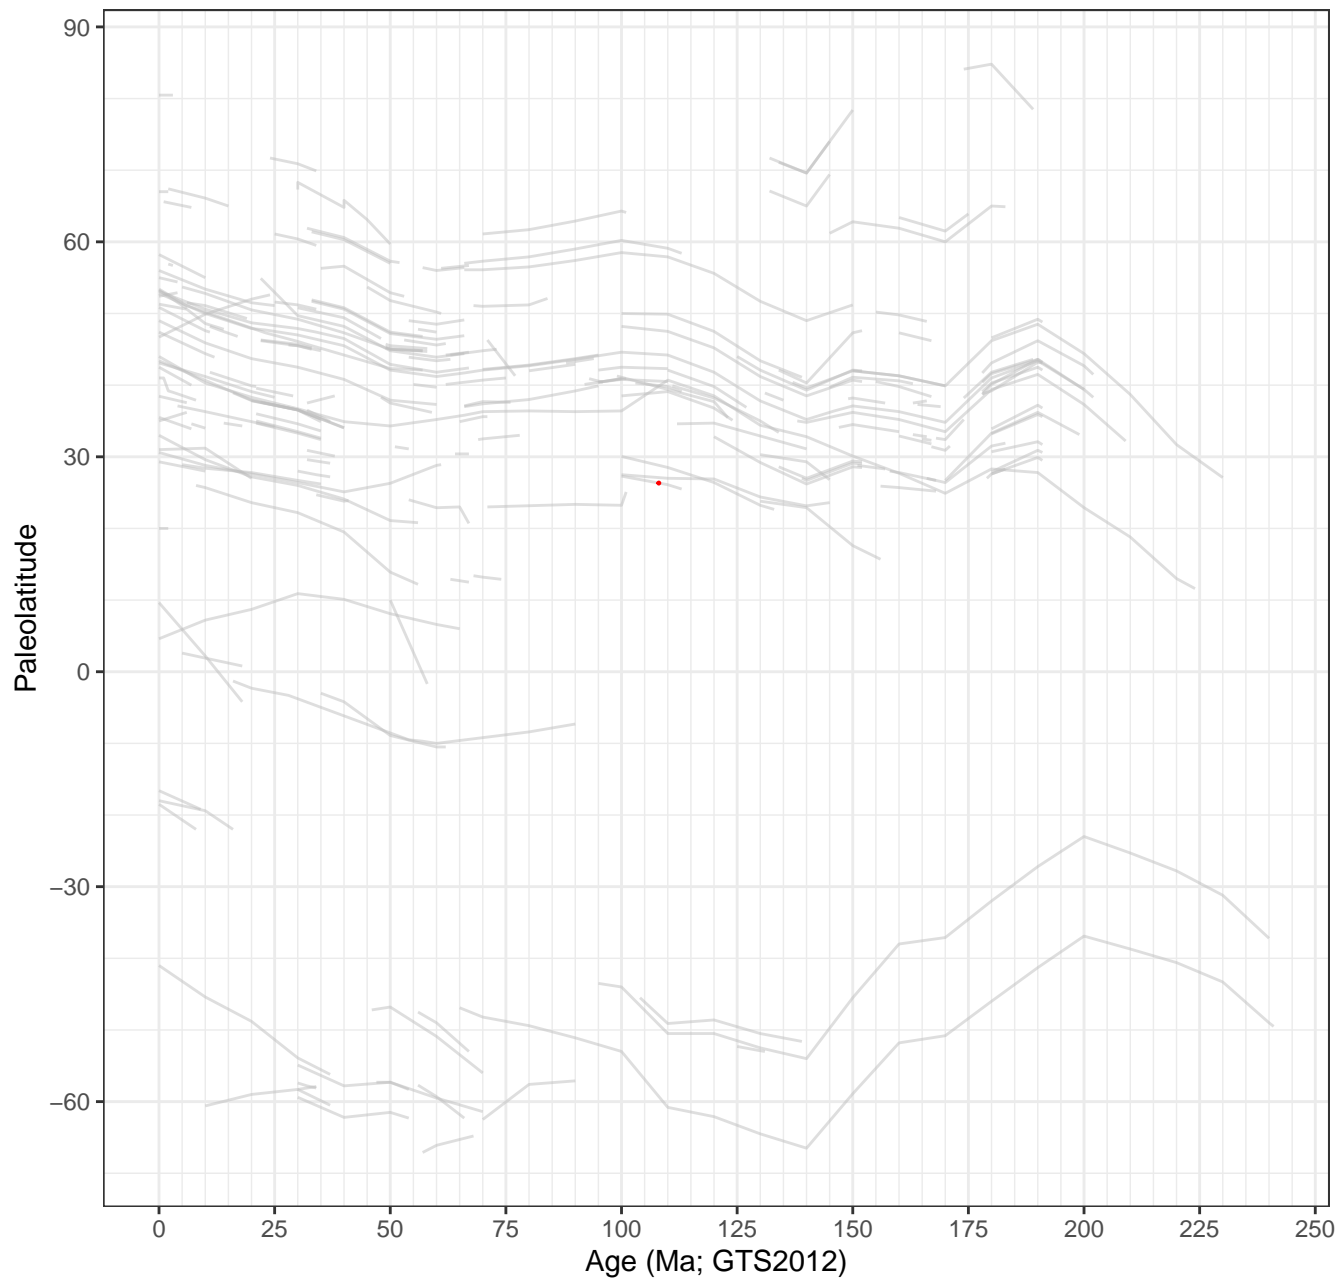

Supplement: Supplementary file 1205 [file Danea chibanis.pdf › Supplement/Supplement 2/Species 1914 plots/Danea chibanis.pdf]

# Species *Danea crassimurata*

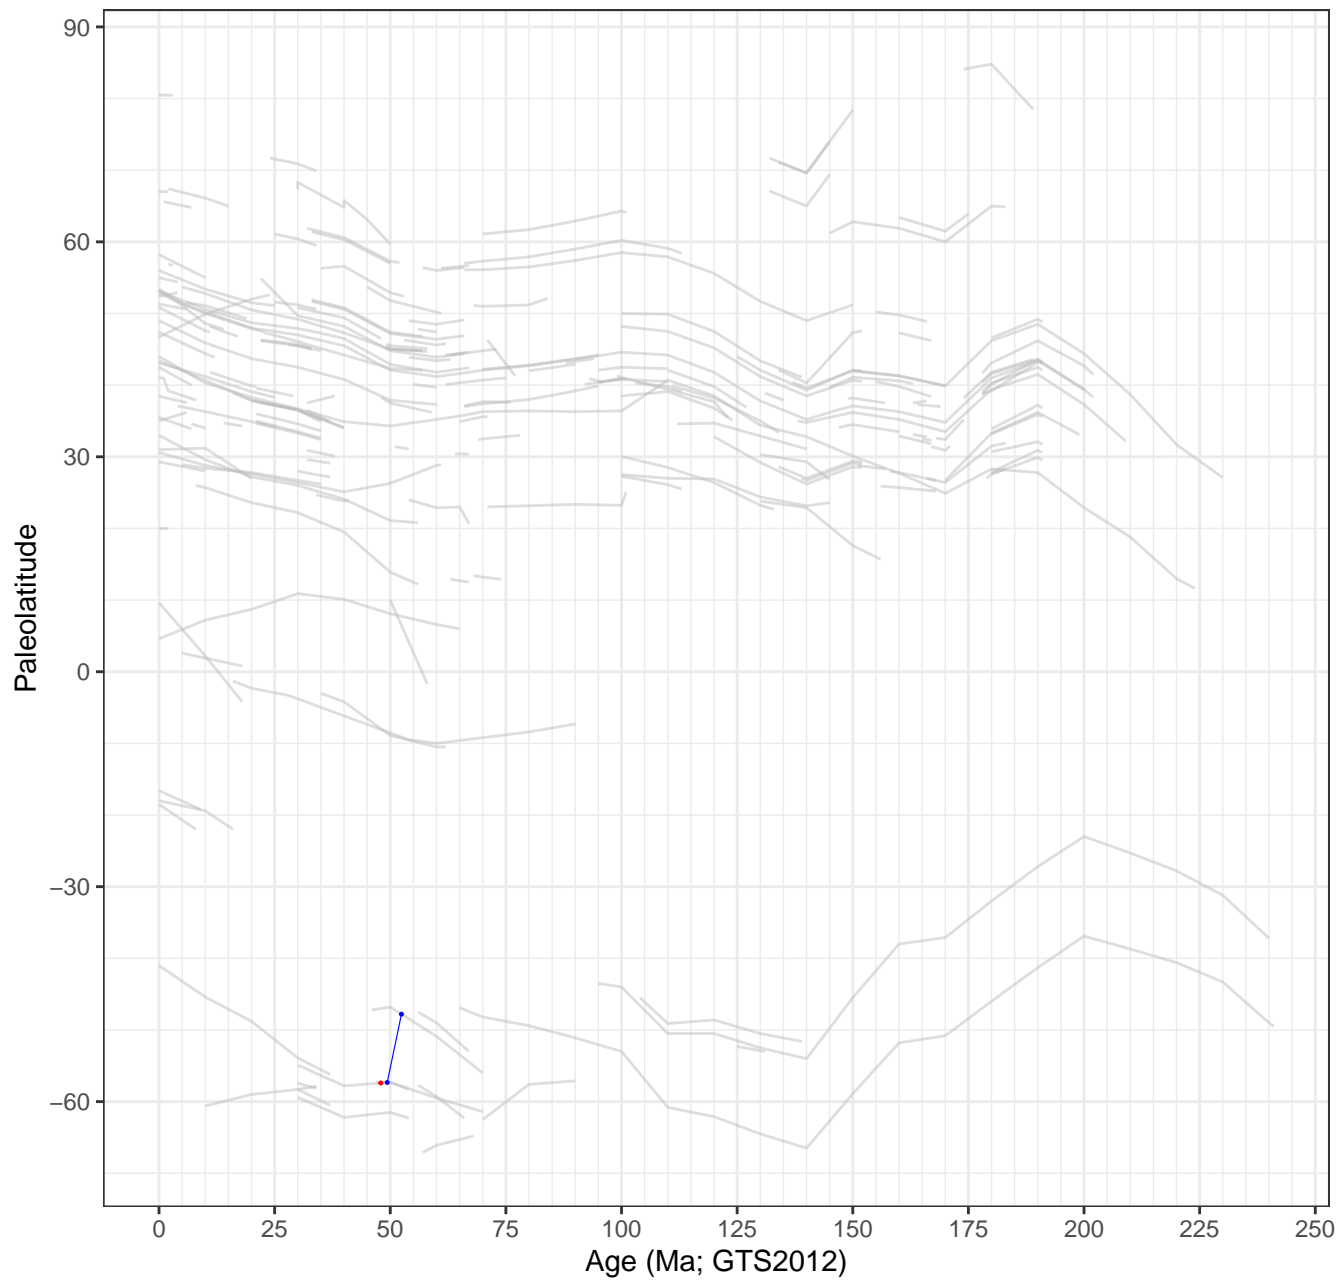

Supplement: Supplementary file 1206 [file Danea crassimurata.pdf › Supplement/Supplement 2/Species 1914 plots/Danea crassimurata.pdf]

# Species *Danea heterospinosa*

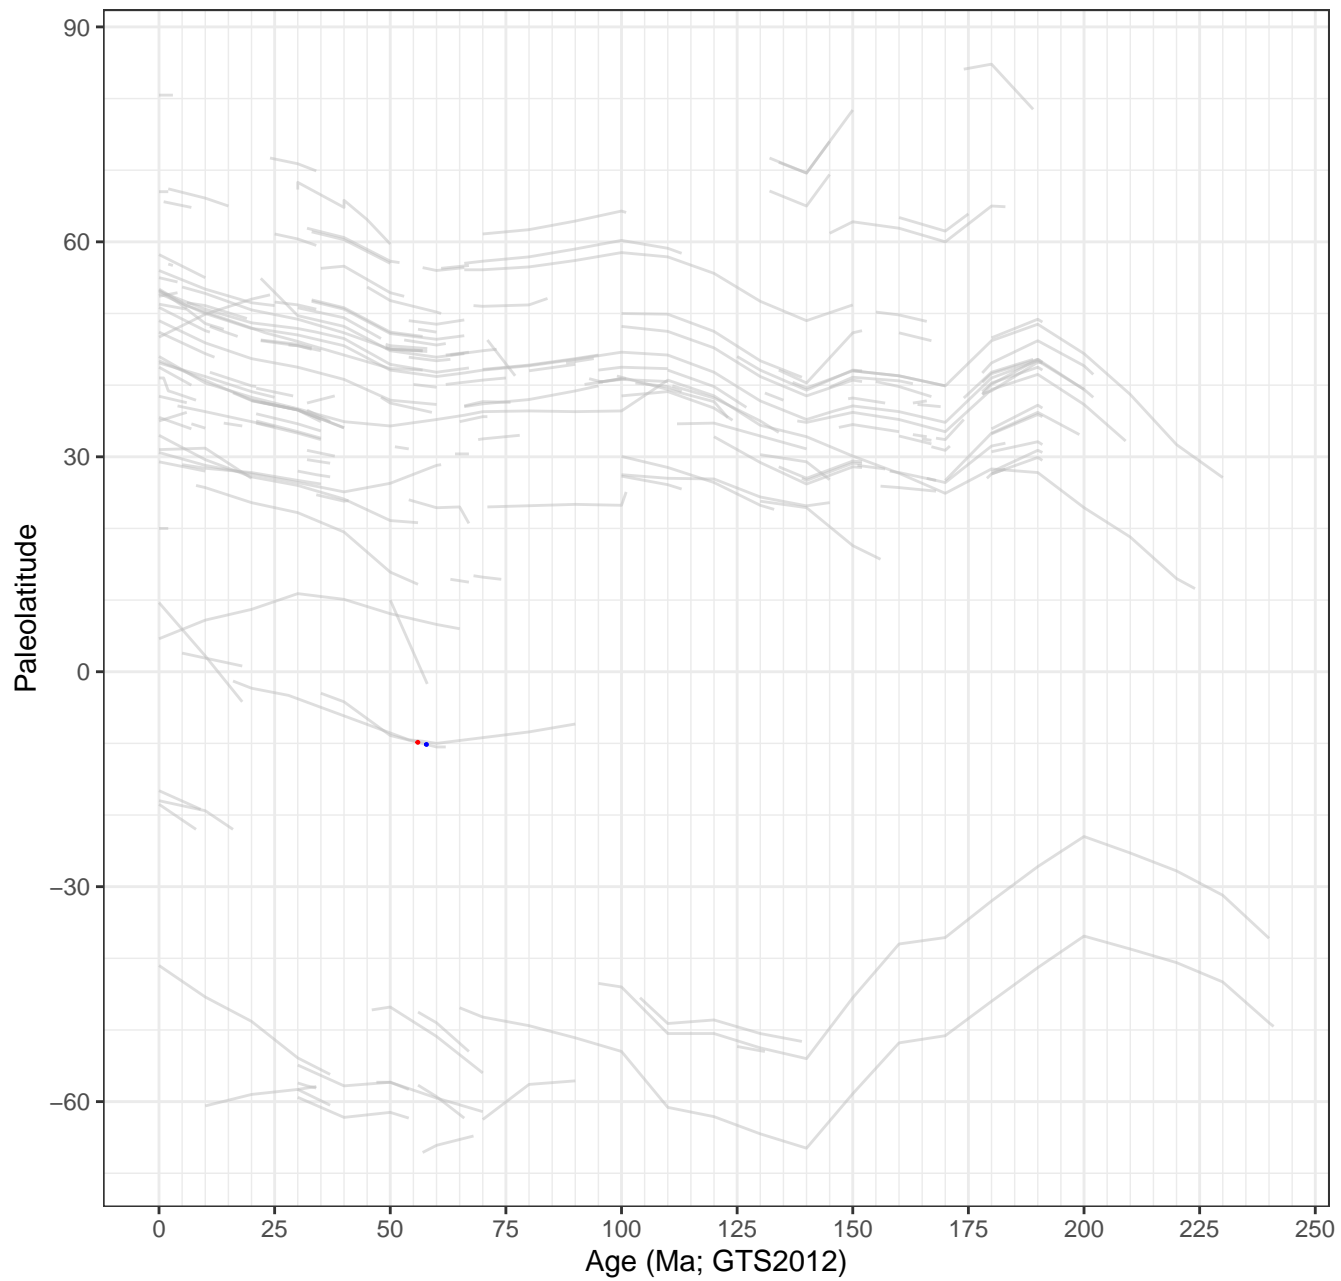

Supplement: Supplementary file 1207 [file Danea heterospinosa.pdf › Supplement/Supplement 2/Species 1914 plots/Danea heterospinosa.pdf]

# Species Danaea impages

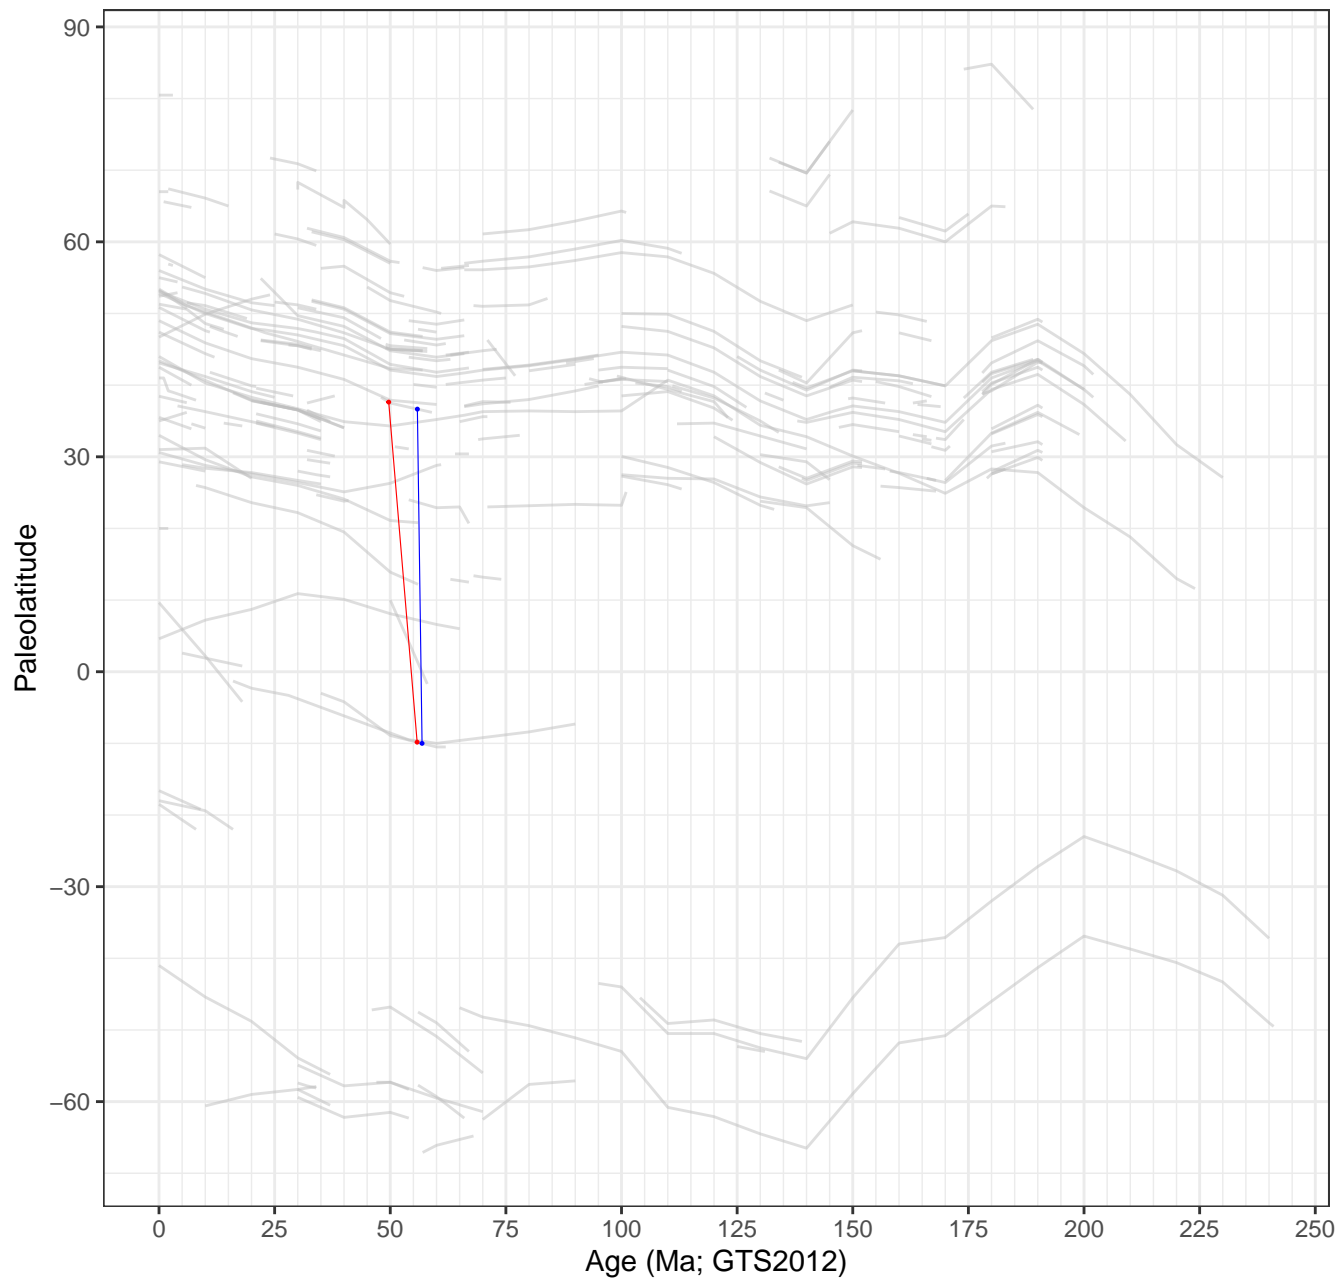

Supplement: Supplementary file 1208 [file Danea impages.pdf › Supplement/Supplement 2/Species 1914 plots/Danea impages.pdf]

# Species *Danea manicata*

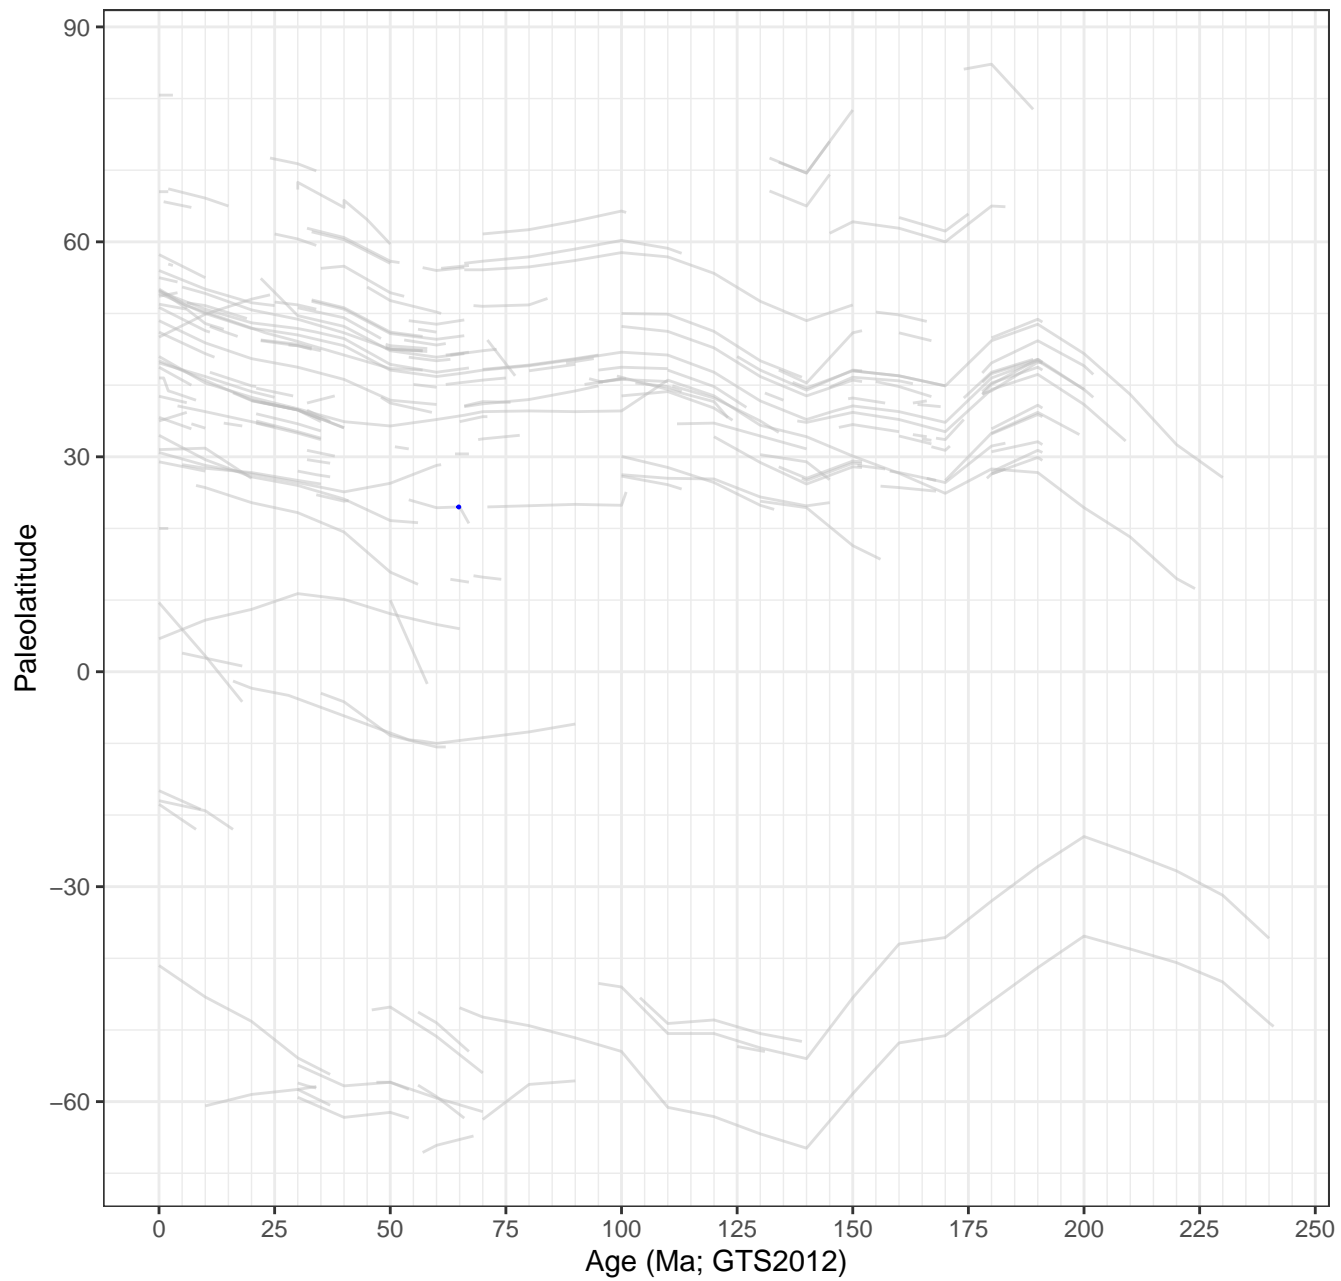

Supplement: Supplementary file 1209 [file Danea manicata.pdf › Supplement/Supplement 2/Species 1914 plots/Danea manicata.pdf]

# Species *Dapcodinium ovale*

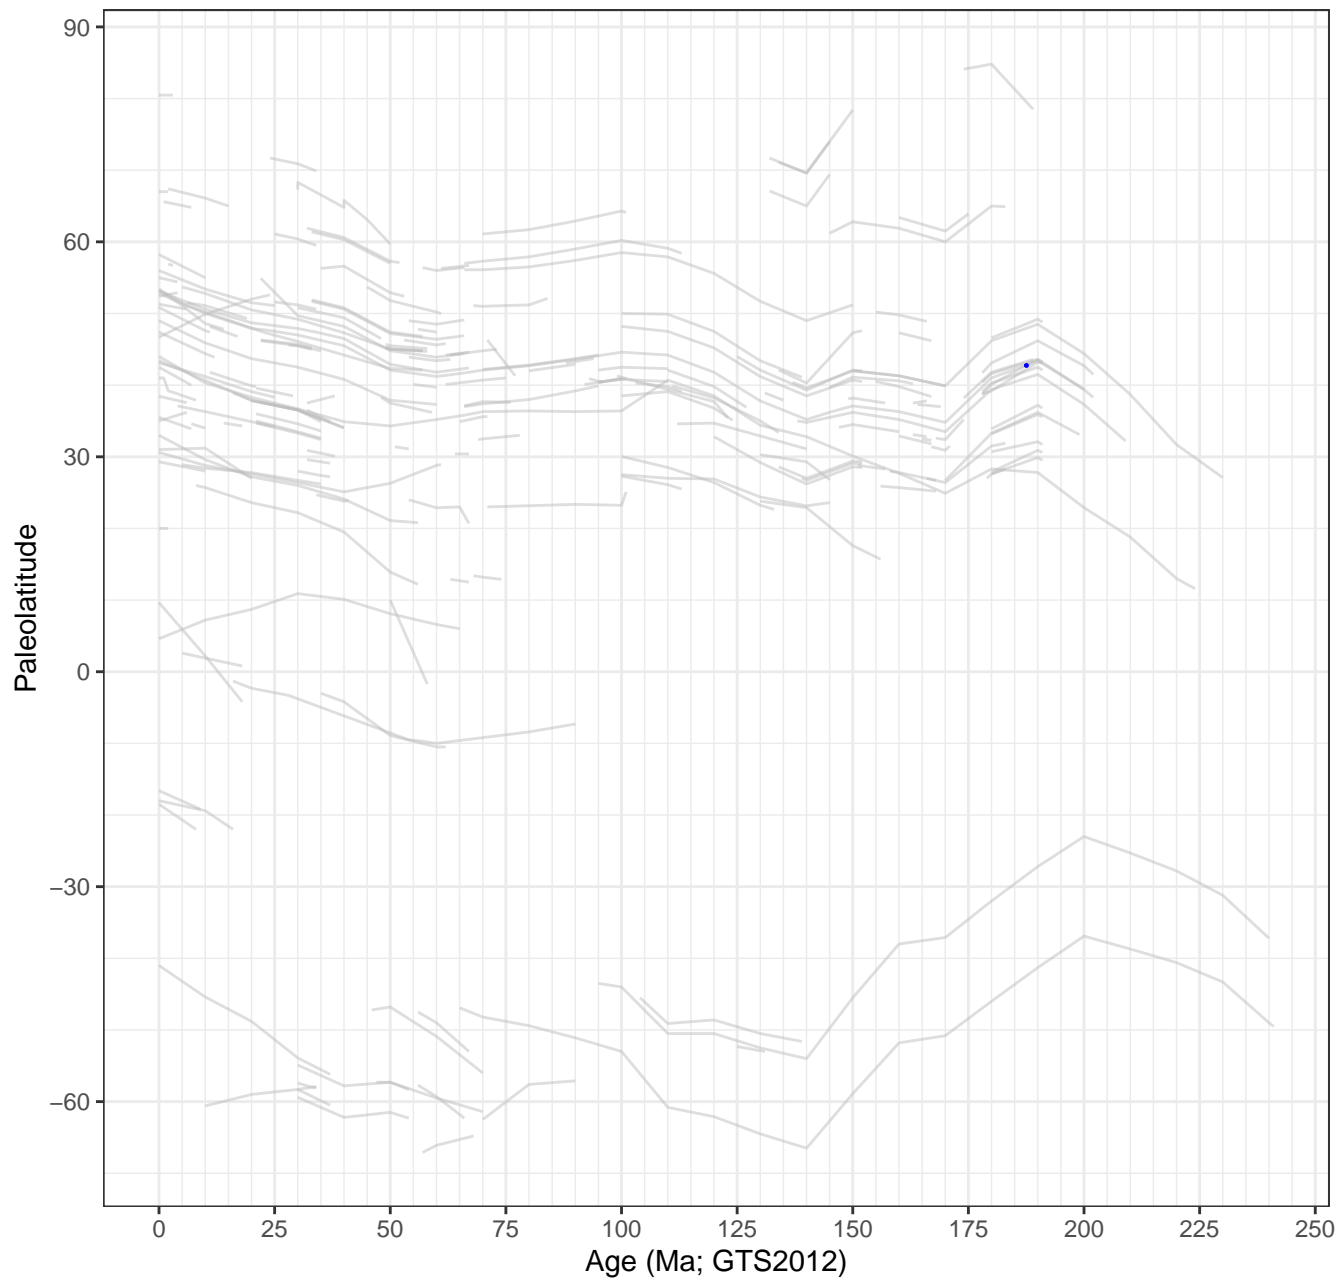

Supplement: Supplementary file 1210 [file Dapcodinium ovale.pdf › Supplement/Supplement 2/Species 1914 plots/Dapcodinium ovale.pdf]

# Species *Dapcodinium priscum*

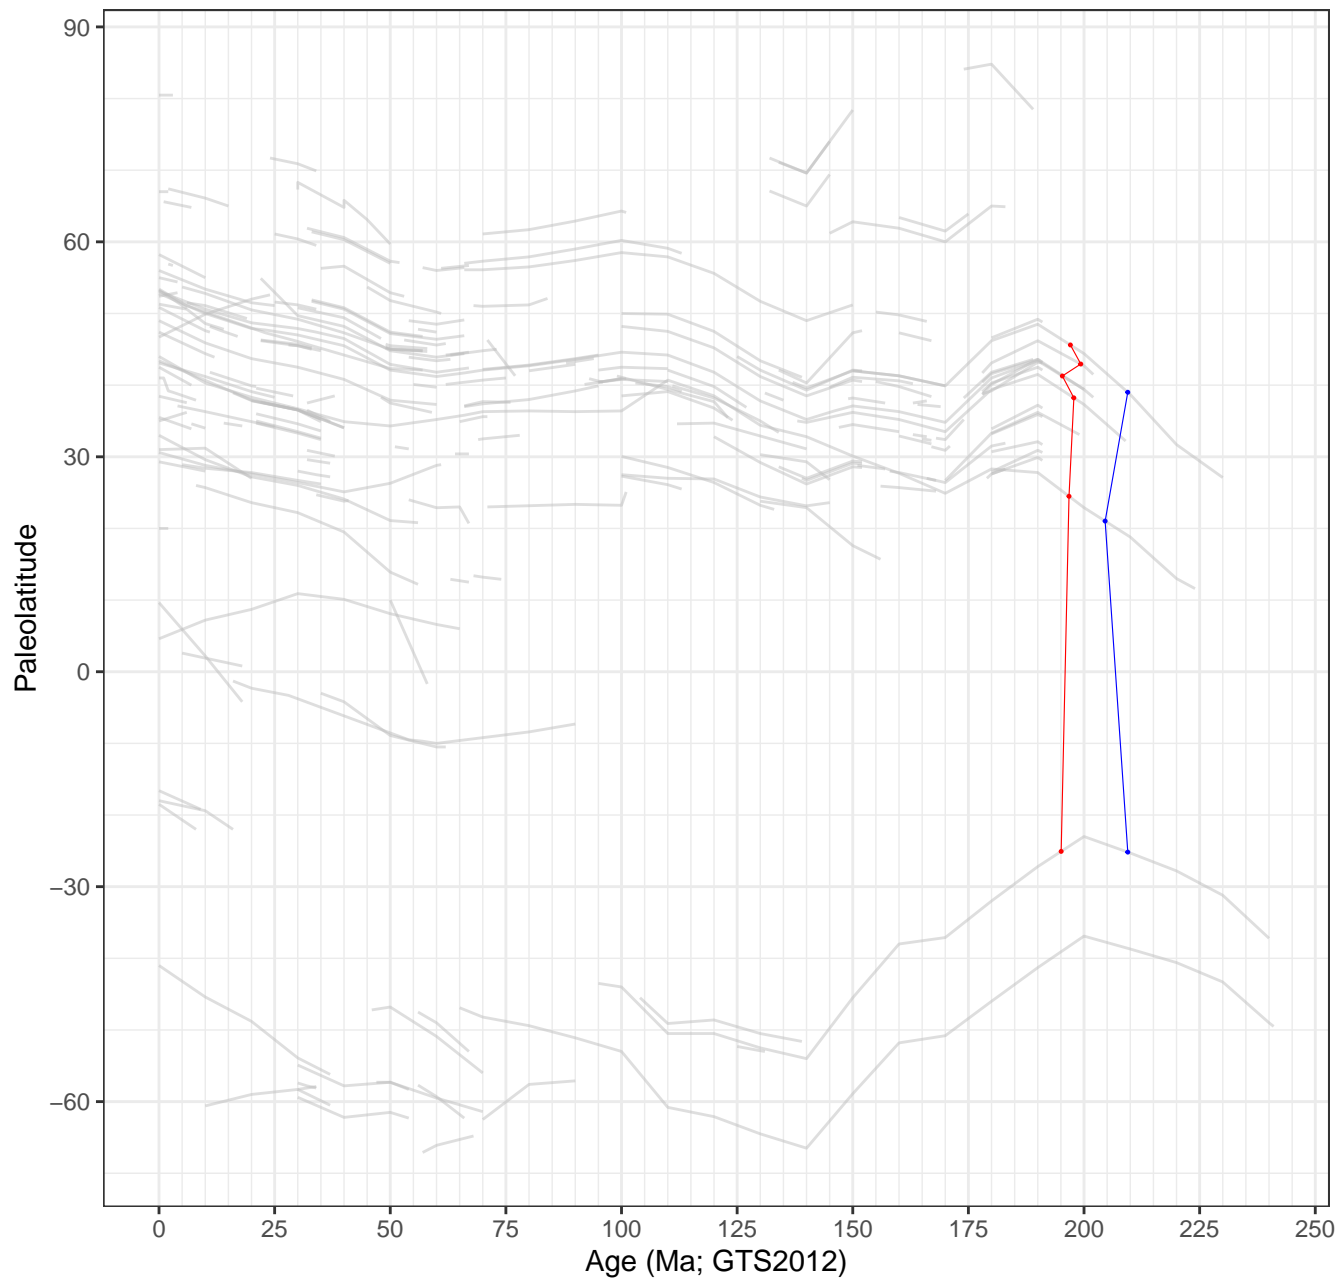

Supplement: Supplementary file 1211 [file Dapcodinium priscum.pdf › Supplement/Supplement 2/Species 1914 plots/Dapcodinium priscum.pdf]

# Species Dapcodinium sacculus

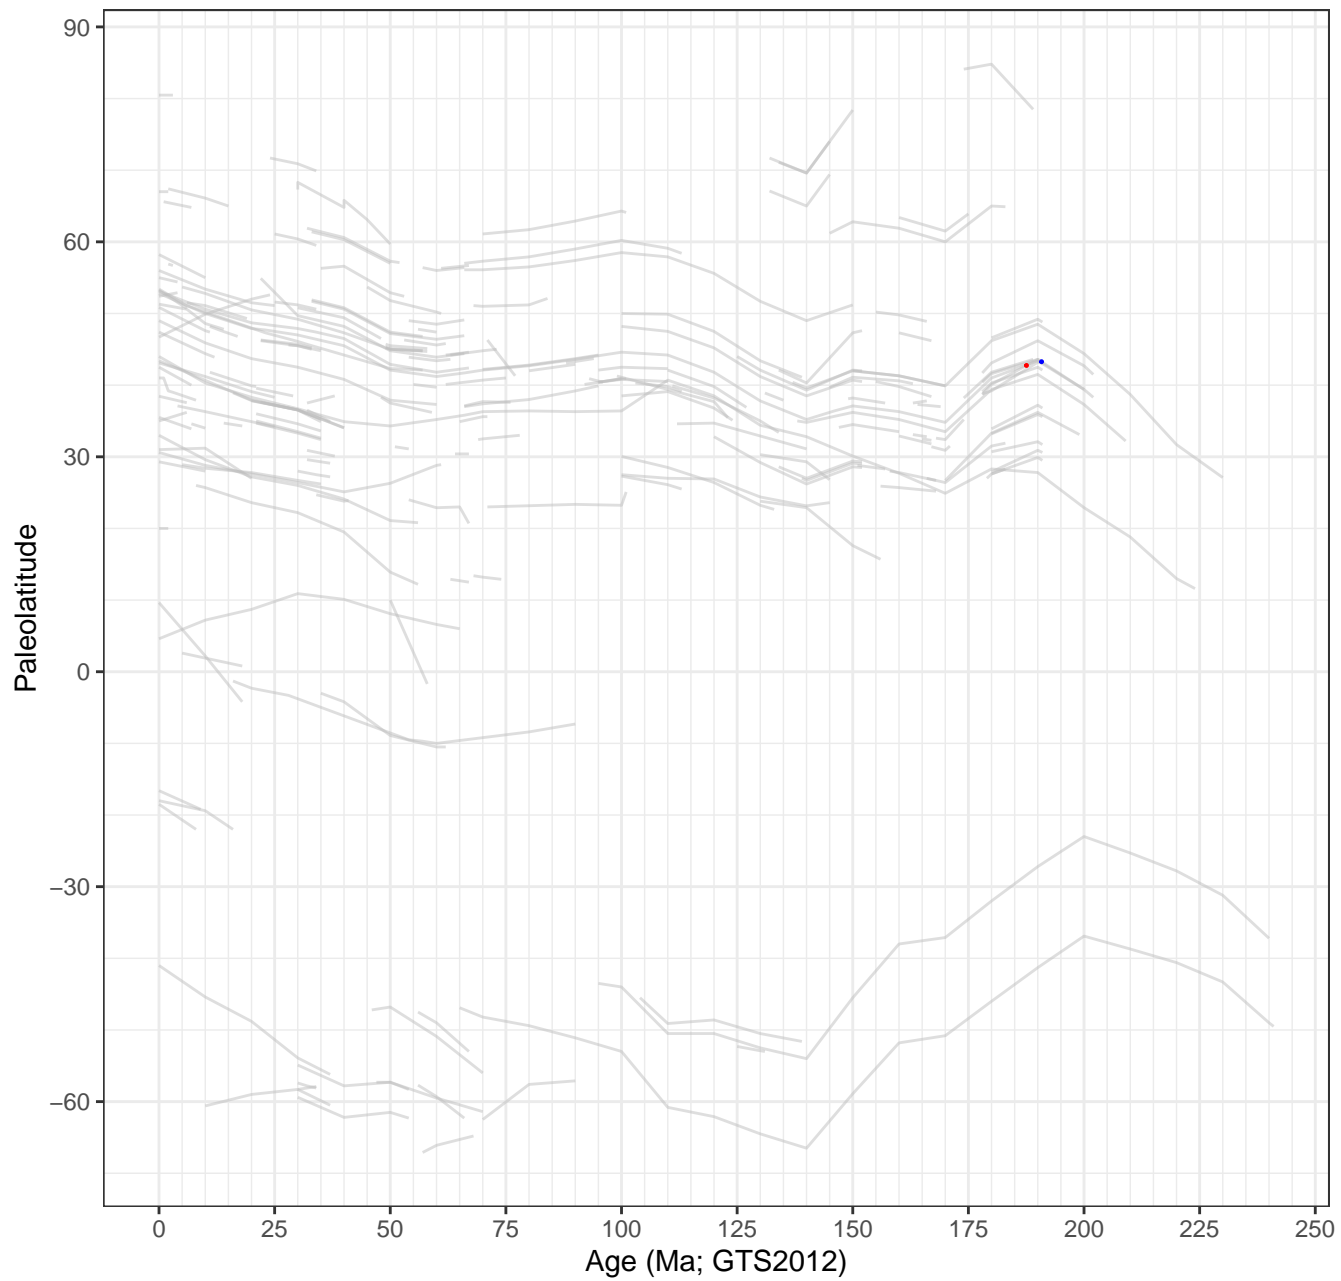

Supplement: Supplementary file 1212 [file Dapcodinium sacculus.pdf › Supplement/Supplement 2/Species 1914 plots/Dapcodinium sacculus.pdf]

# Species Dapsilidinium chems

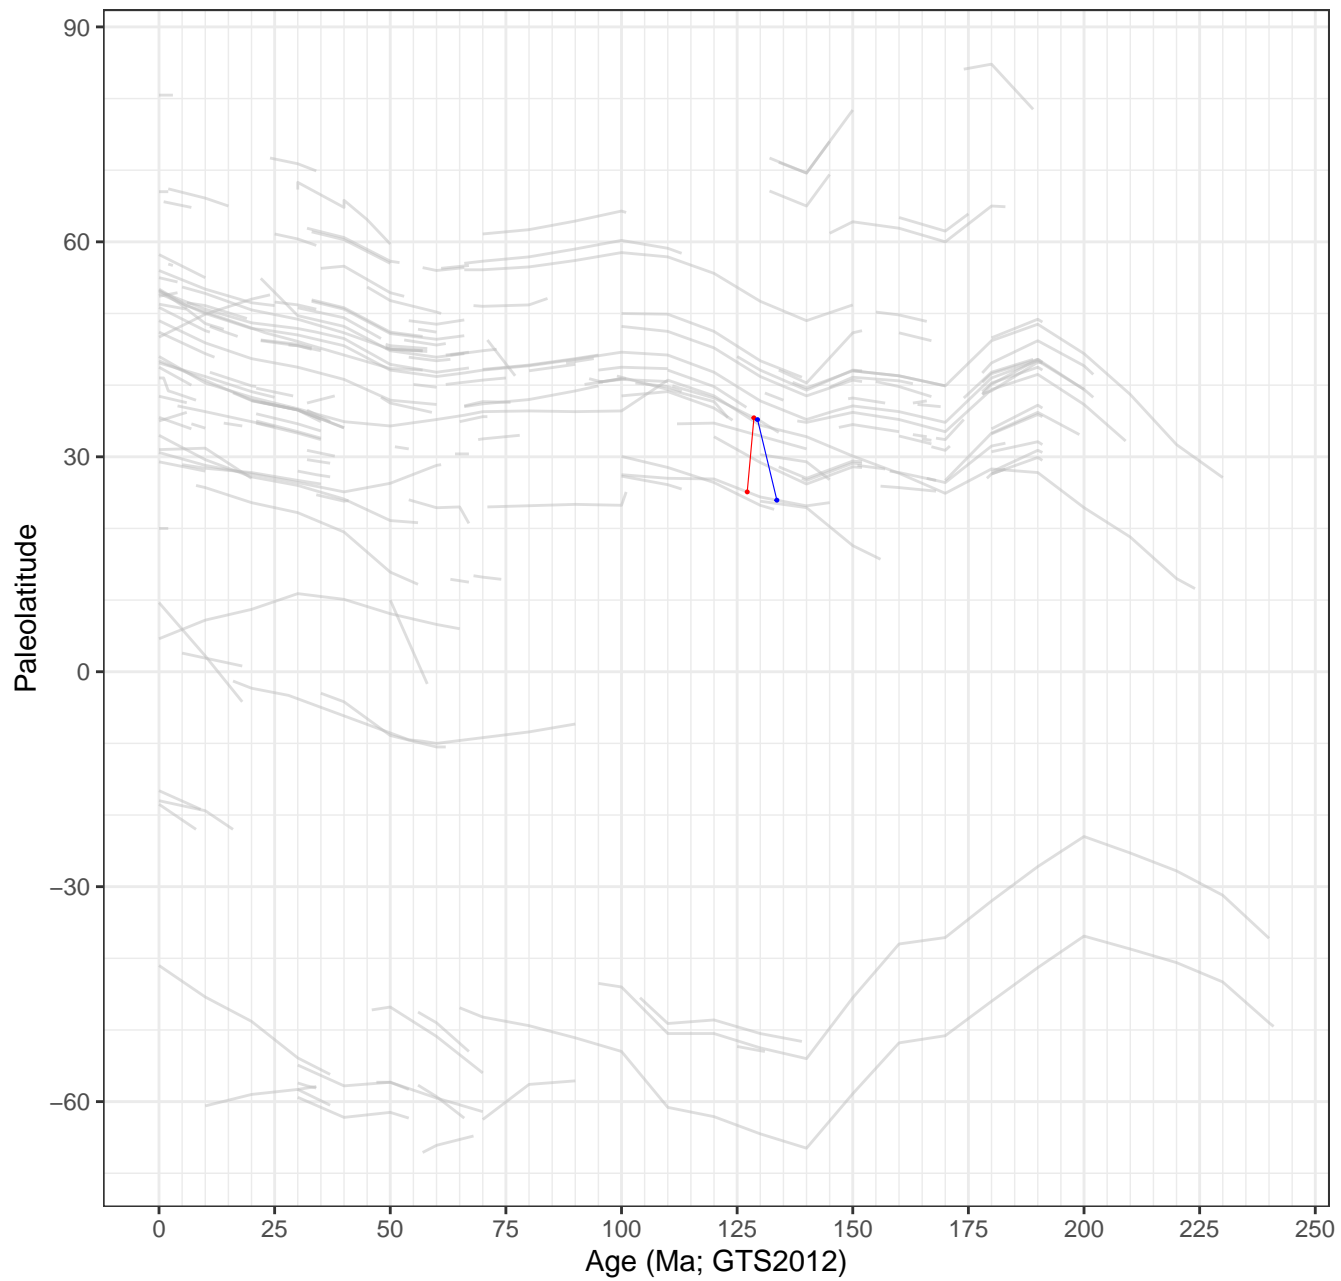

Supplement: Supplementary file 1213 [file Dapsilidinium chems.pdf › Supplement/Supplement 2/Species 1914 plots/Dapsilidinium chems.pdf]

# Species *Dapsilidinium deflandrei*

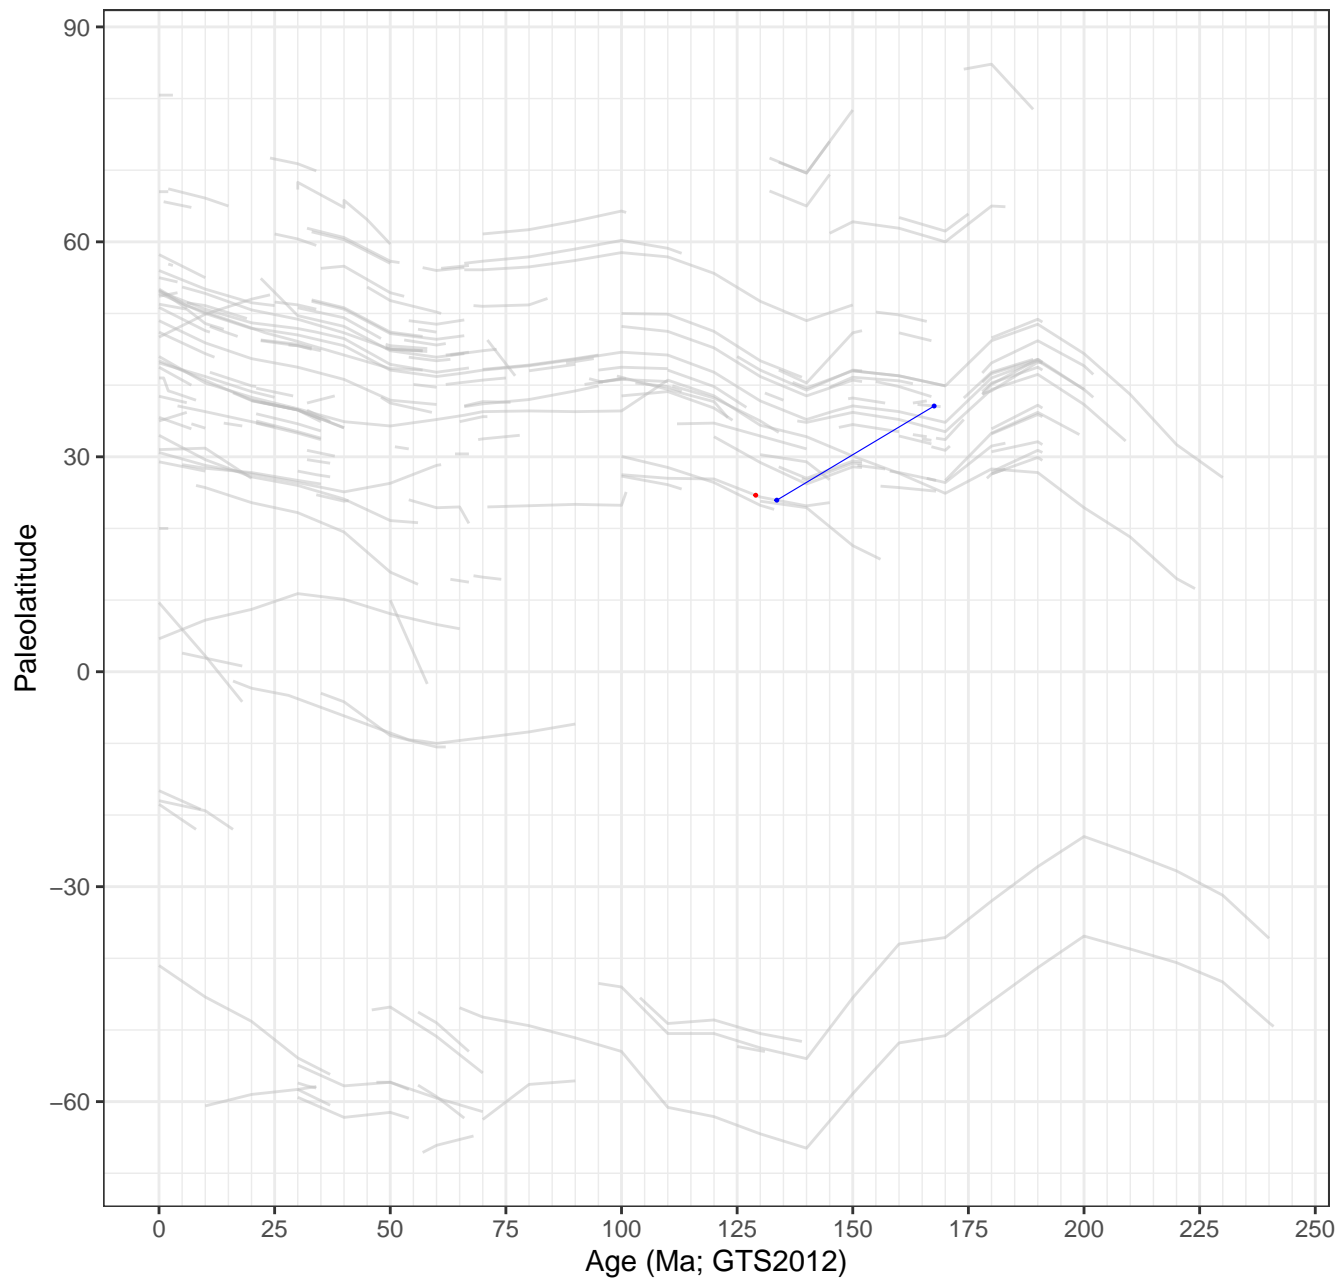

Supplement: Supplementary file 1214 [file Dapsilidinium deflandrei.pdf › Supplement/Supplement 2/Species 1914 plots/Dapsilidinium deflandrei.pdf]

# Species *Dapsilidinium duma*

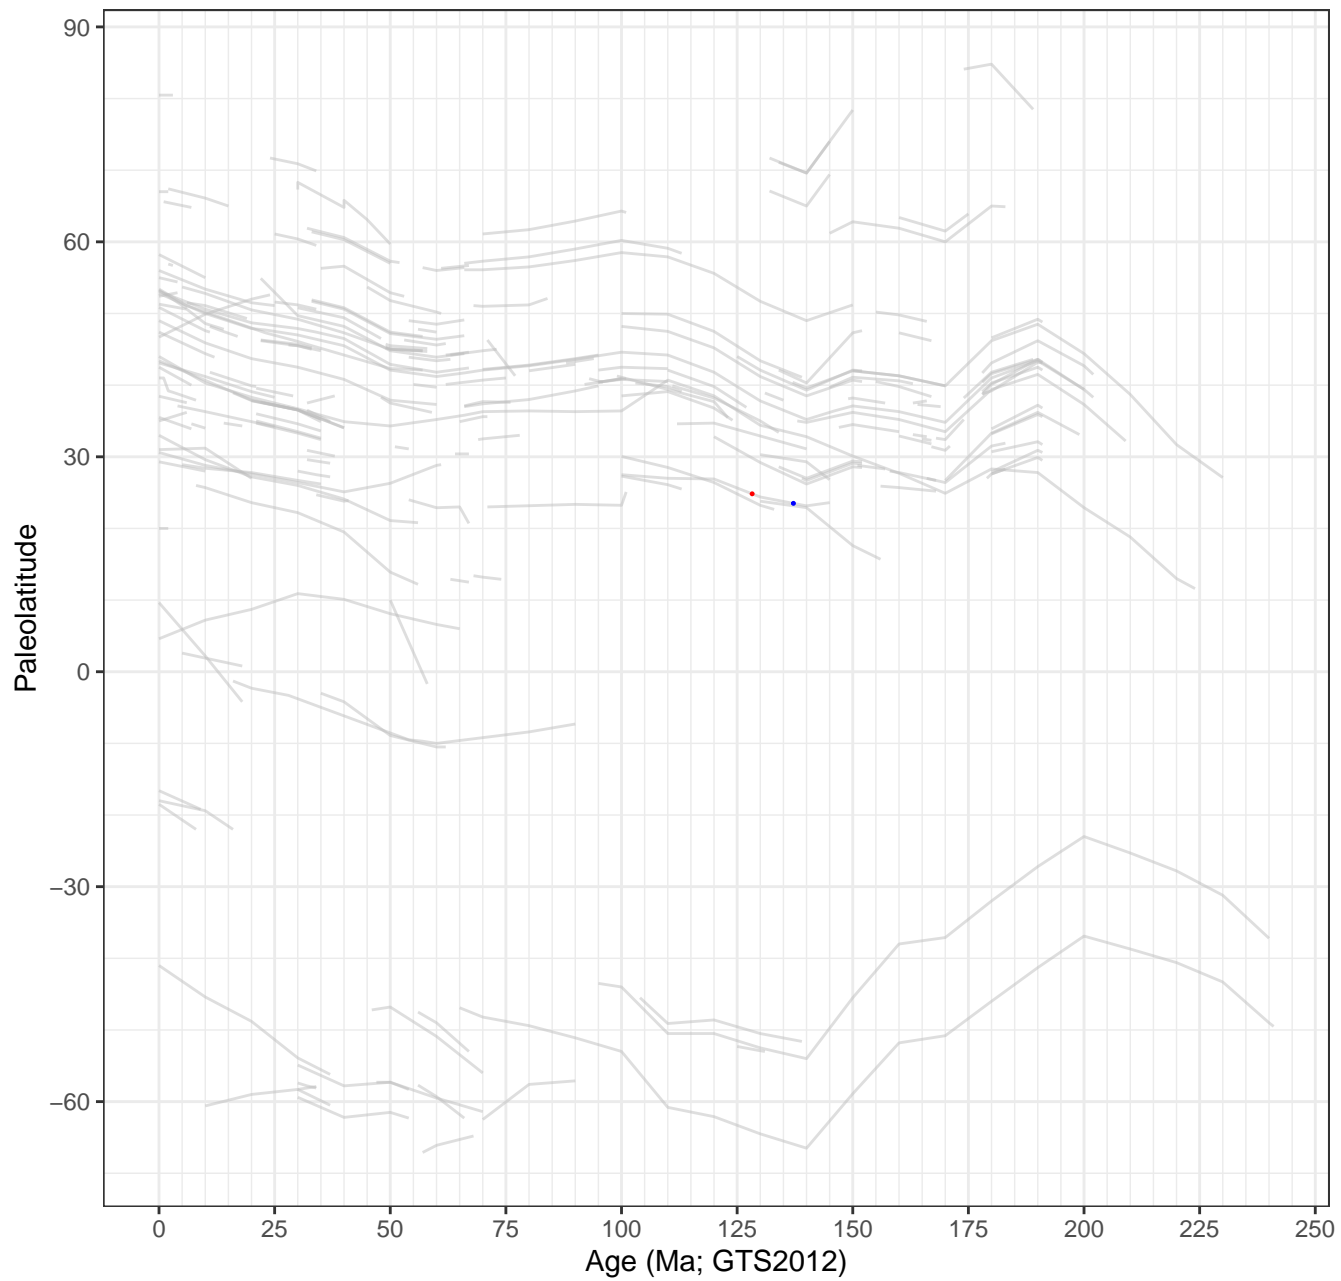

Supplement: Supplementary file 1215 [file Dapsilidinium duma.pdf › Supplement/Supplement 2/Species 1914 plots/Dapsilidinium duma.pdf]

# Species *Dapsilidinium laminaspinosum*

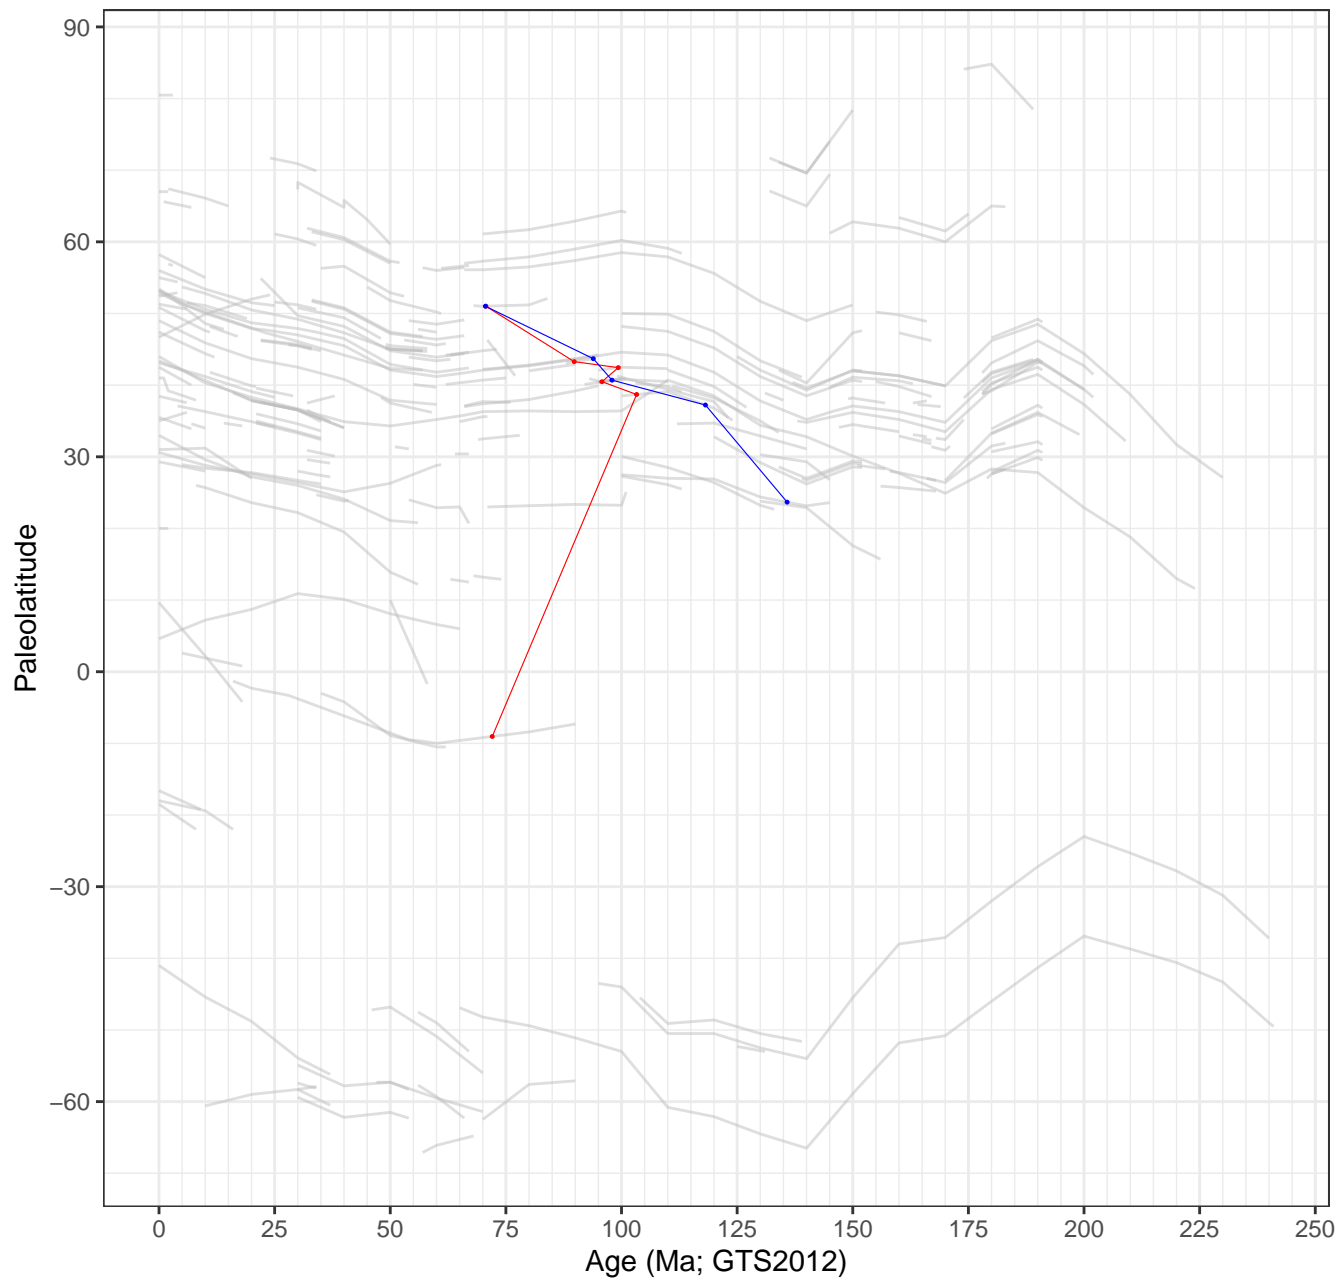

Supplement: Supplementary file 1216 [file Dapsilidinium laminaspinosum.pdf › Supplement/Supplement 2/Species 1914 plots/Dapsilidinium laminaspinosum.pdf]

# Species *Dapsilidinium pastielsii*

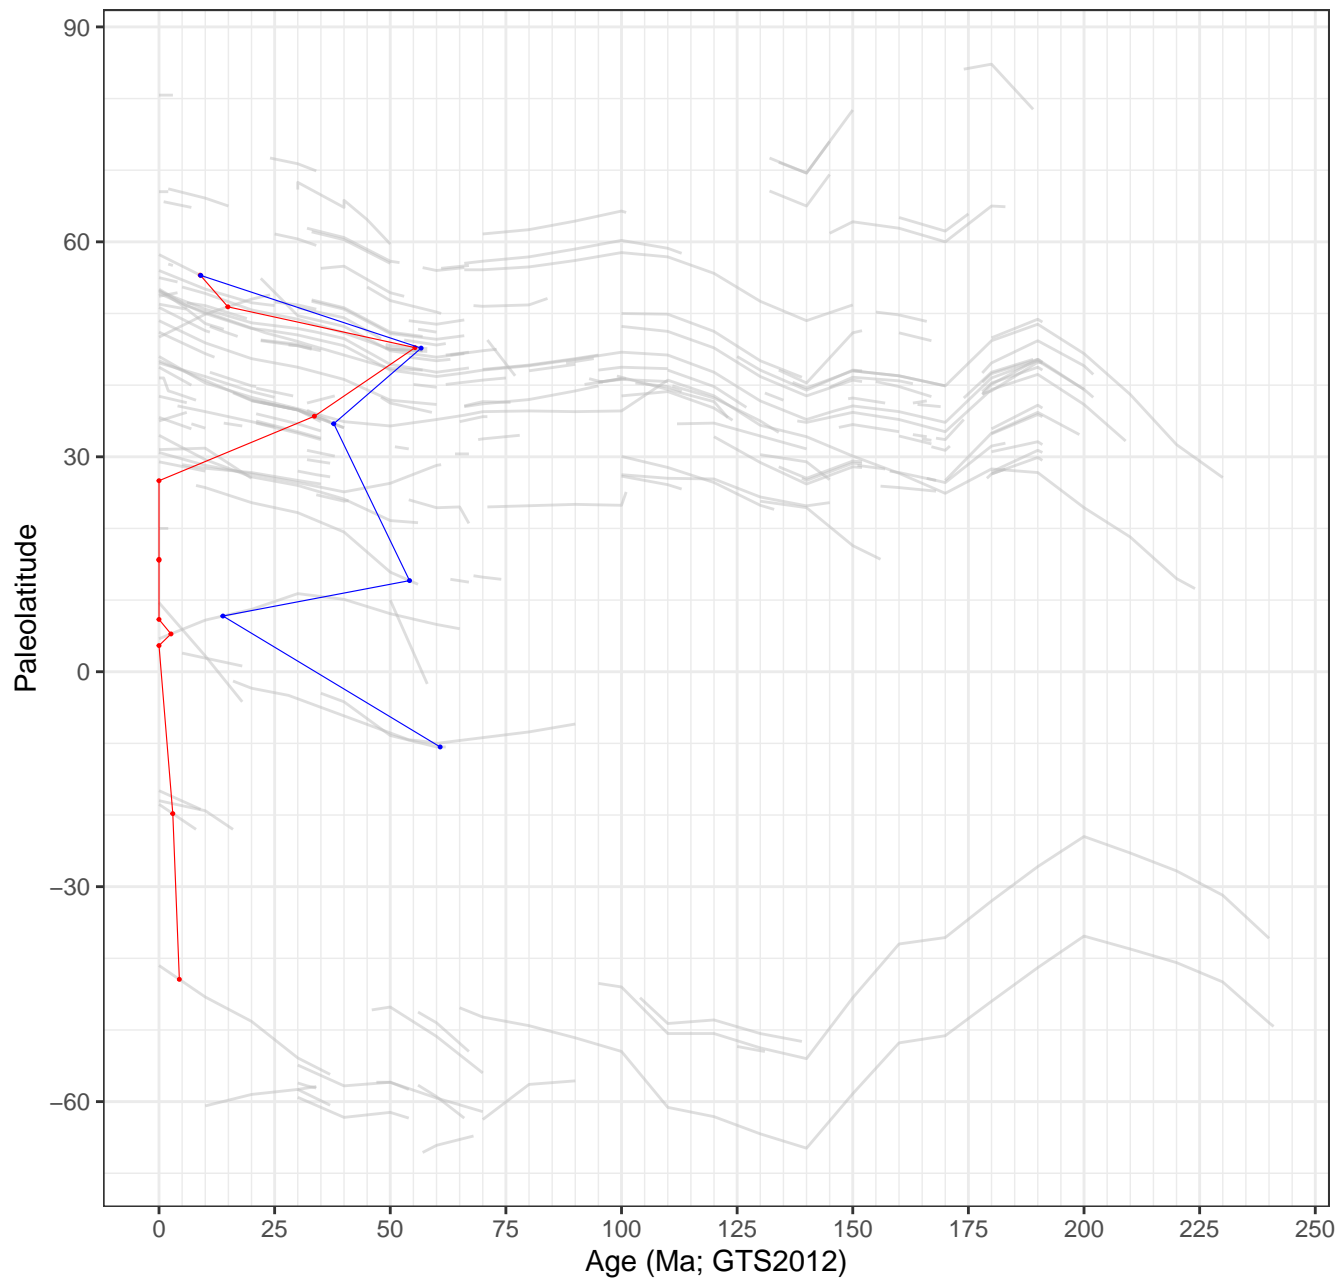

Supplement: Supplementary file 1217 [file Dapsilidinium pastielsii.pdf › Supplement/Supplement 2/Species 1914 plots/Dapsilidinium pastielsii.pdf]

# Species *Dapsilidinium pseudocolligerum*

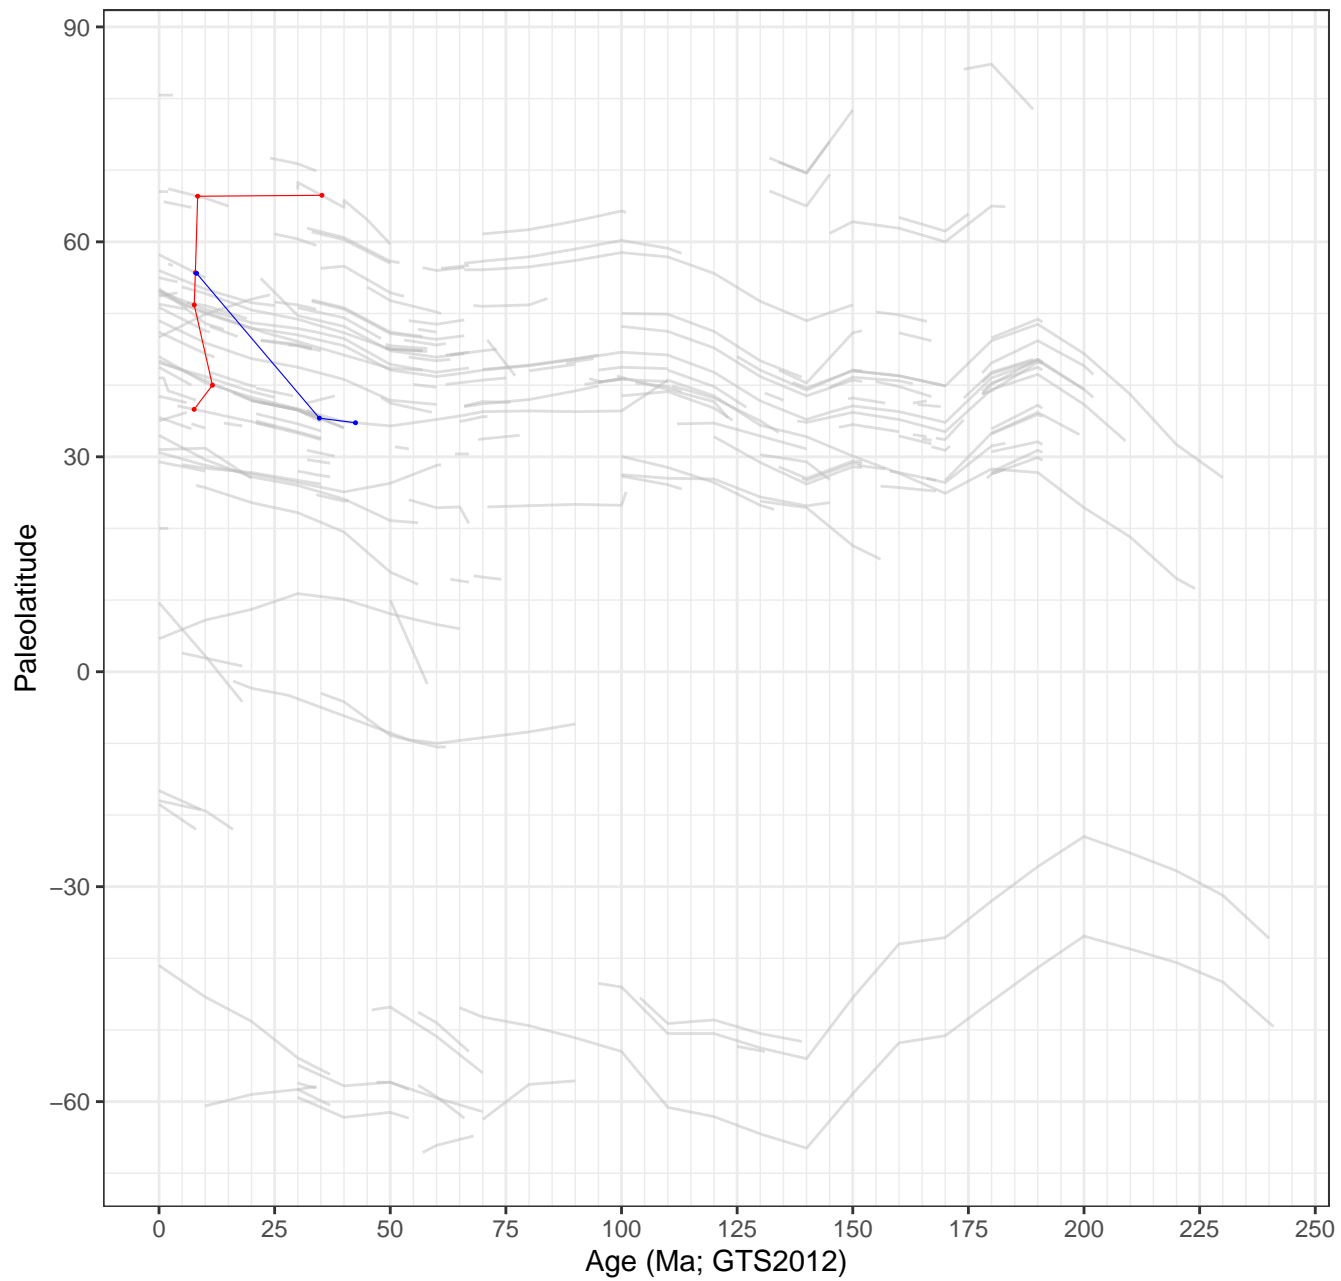

Supplement: Supplementary file 1218 [file Dapsilidinium pseudocolligerum.pdf › Supplement/Supplement 2/Species 1914 plots/Dapsilidinium pseudocolligerum.pdf]

# Species *Dapsilidinium pumilum*

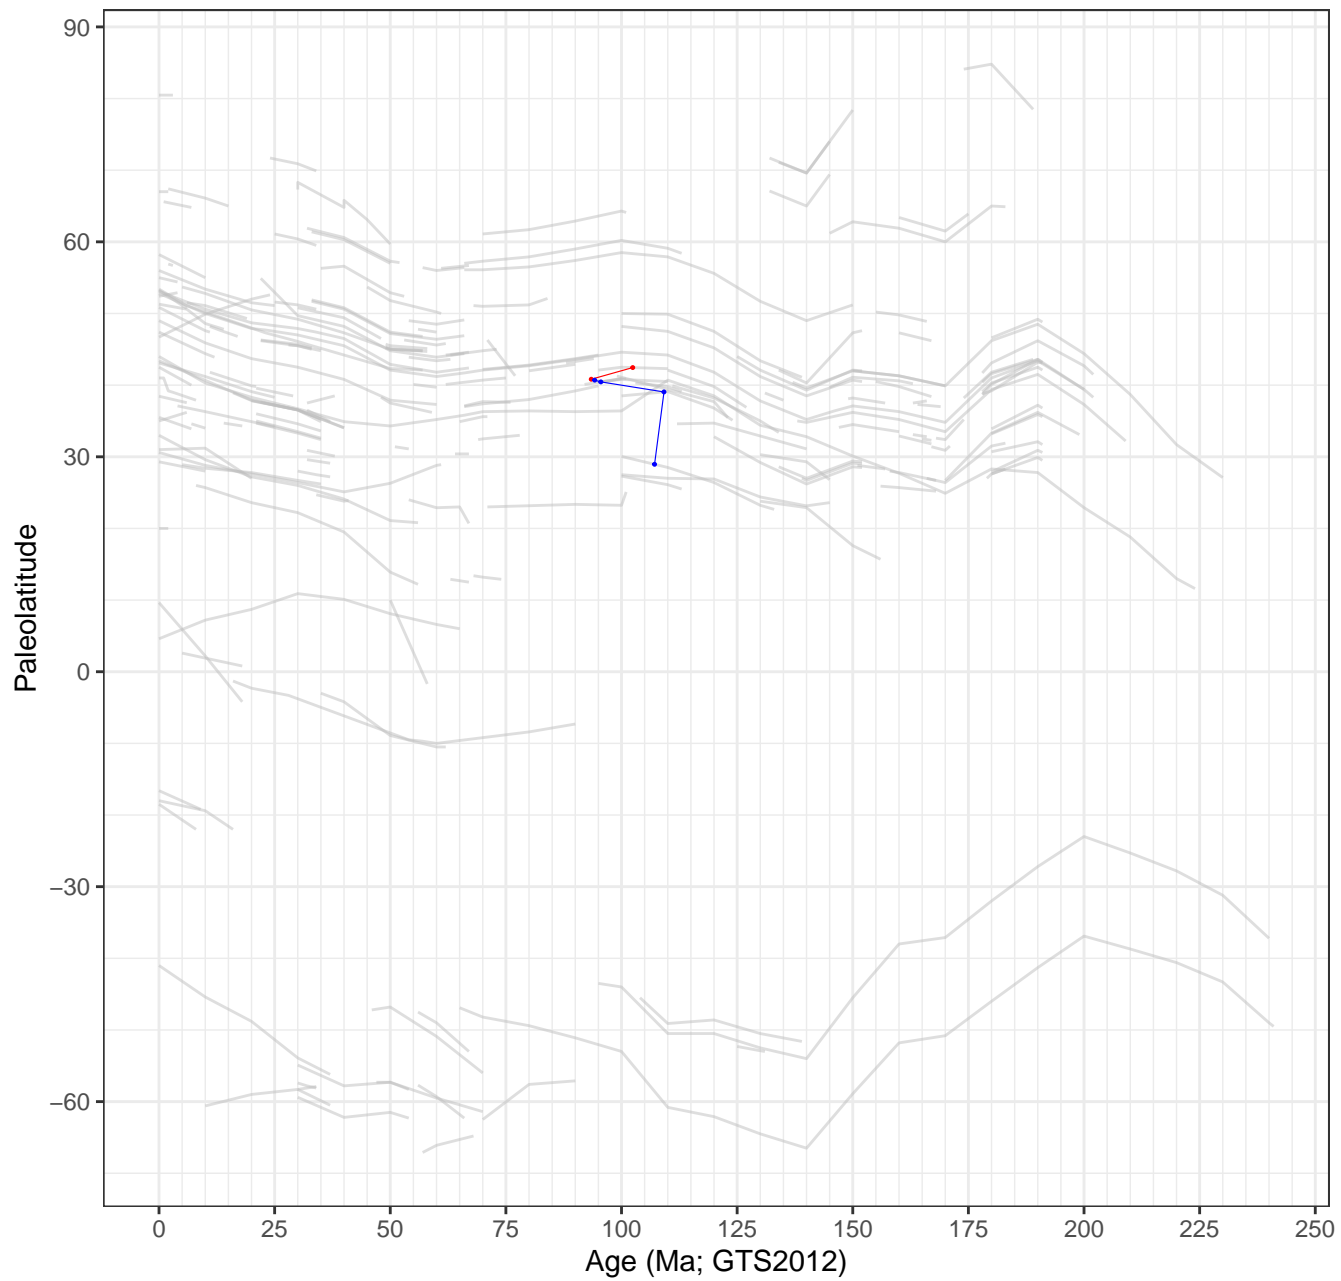

Supplement: Supplementary file 1219 [file Dapsilidinium pumilum.pdf › Supplement/Supplement 2/Species 1914 plots/Dapsilidinium pumilum.pdf]

# Species *Dapsilidinium simplex*

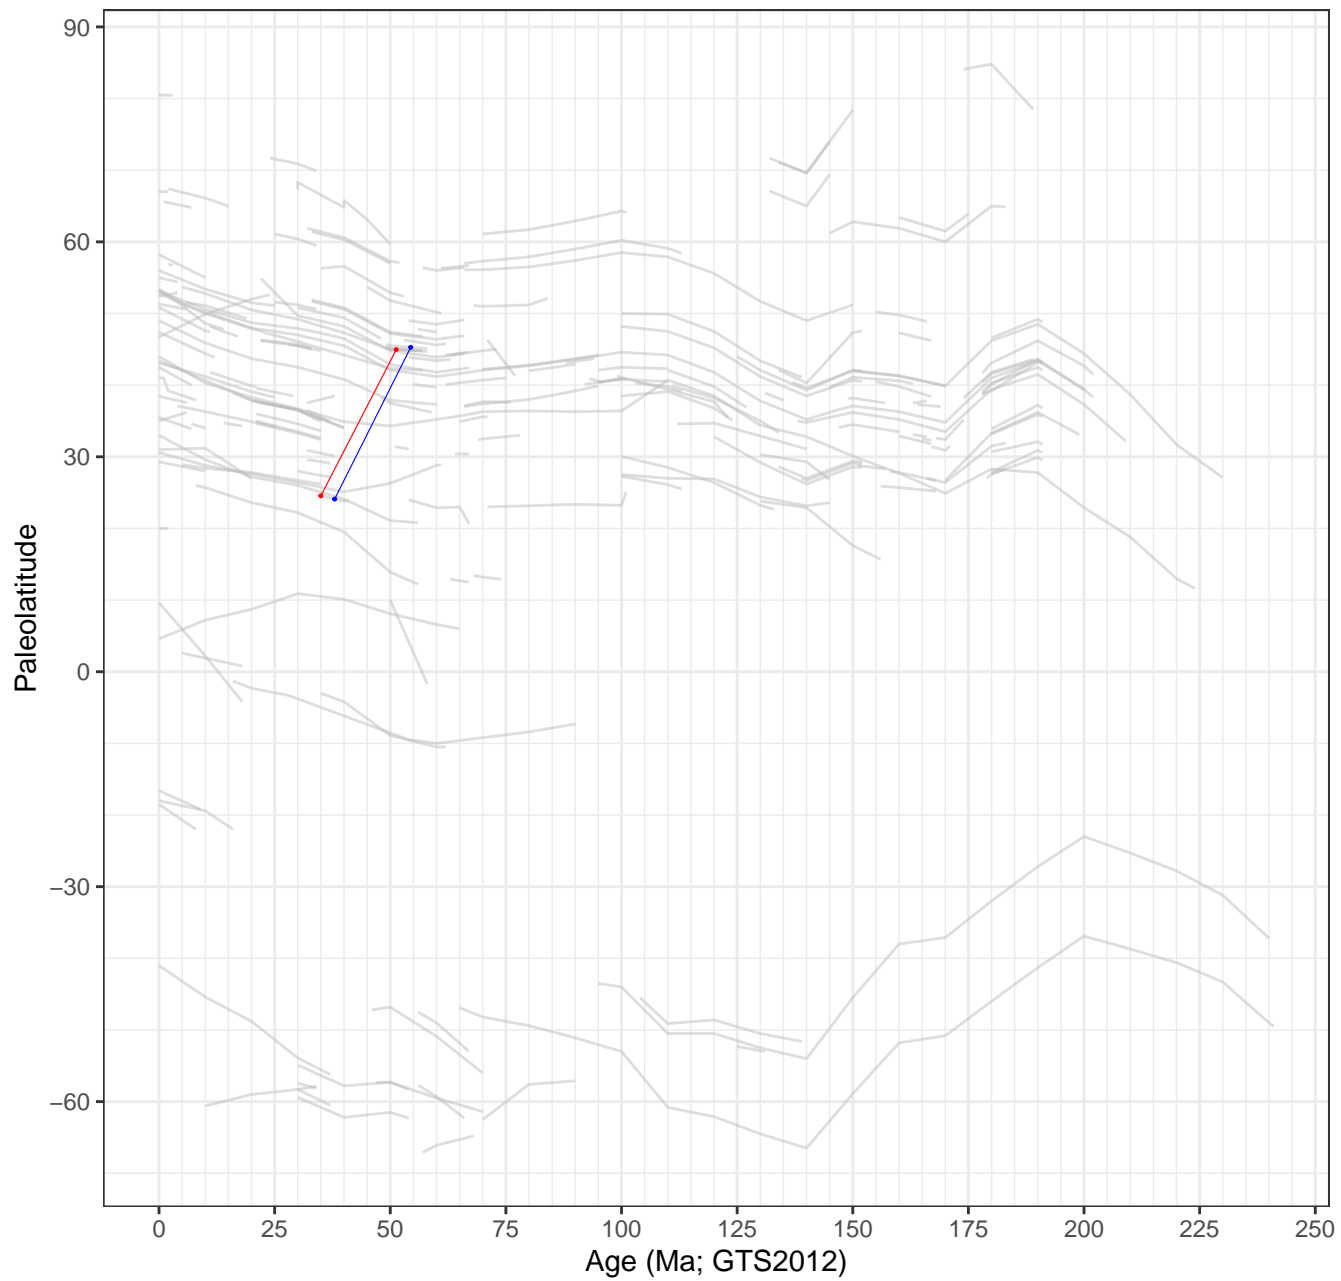

Supplement: Supplementary file 1220 [file Dapsilidinium simplex.pdf › Supplement/Supplement 2/Species 1914 plots/Dapsilidinium simplex.pdf]

# Species *Dapsilidinium warrenii*

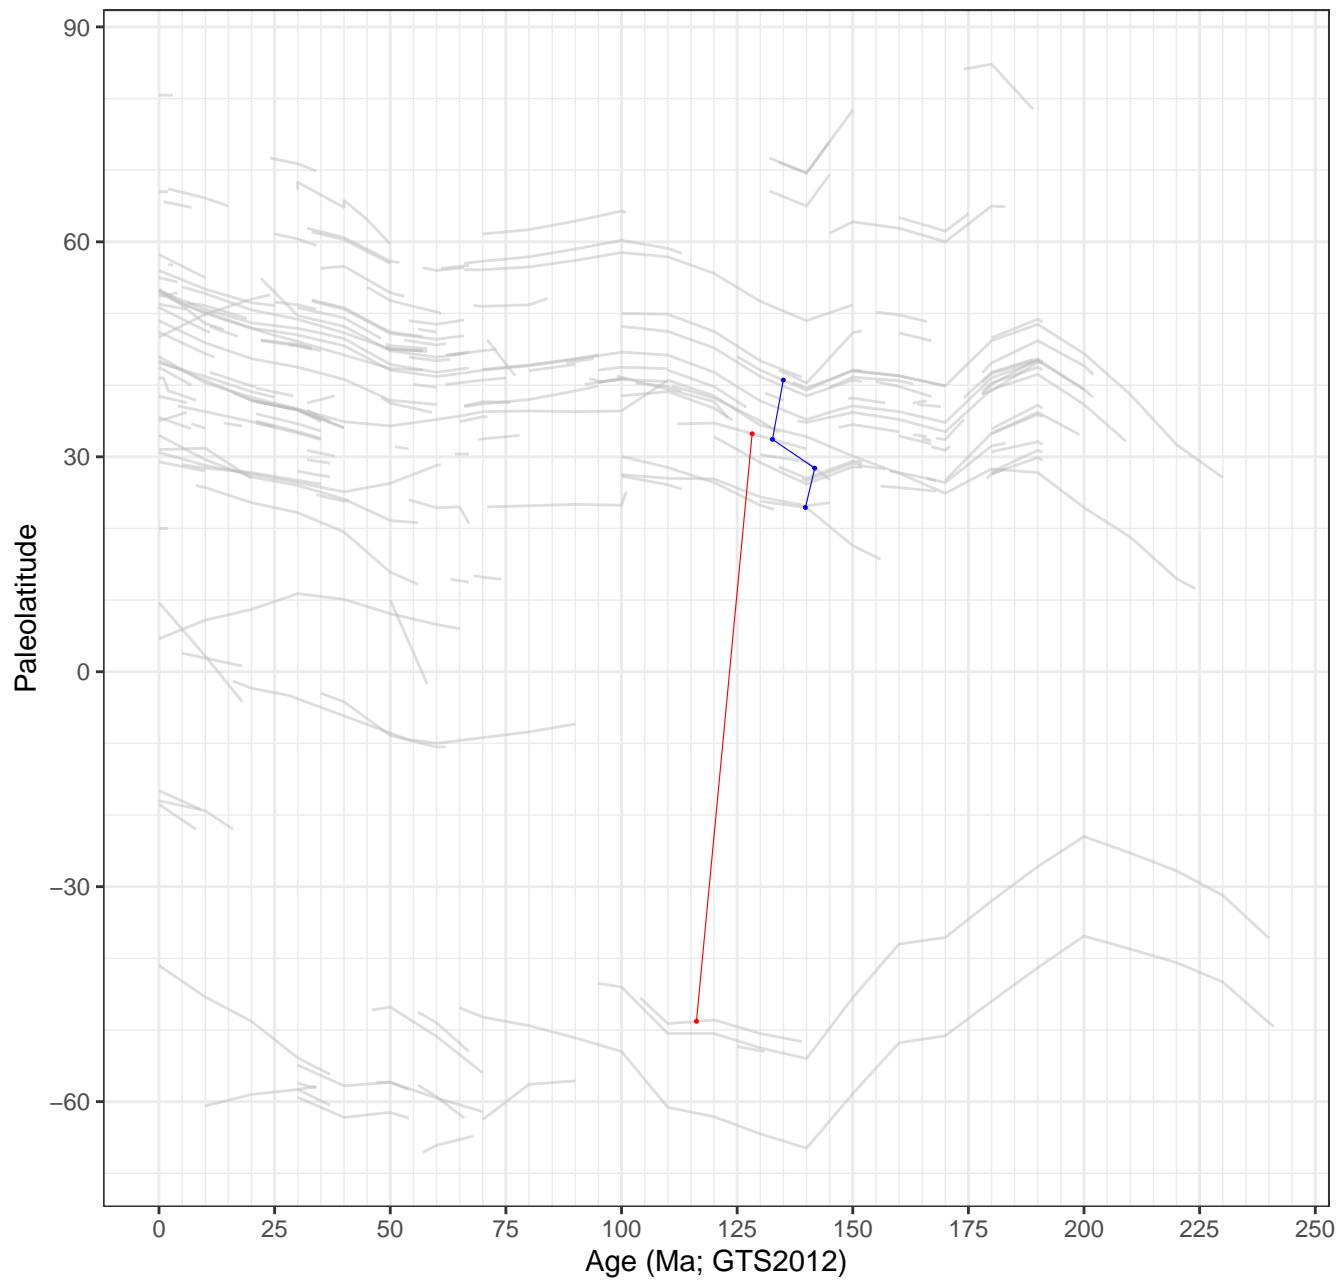

Supplement: Supplementary file 1221 [file Dapsilidinium warrenii.pdf › Supplement/Supplement 2/Species 1914 plots/Dapsilidinium warrenii.pdf]

# Species *Deflandrea antarctica*

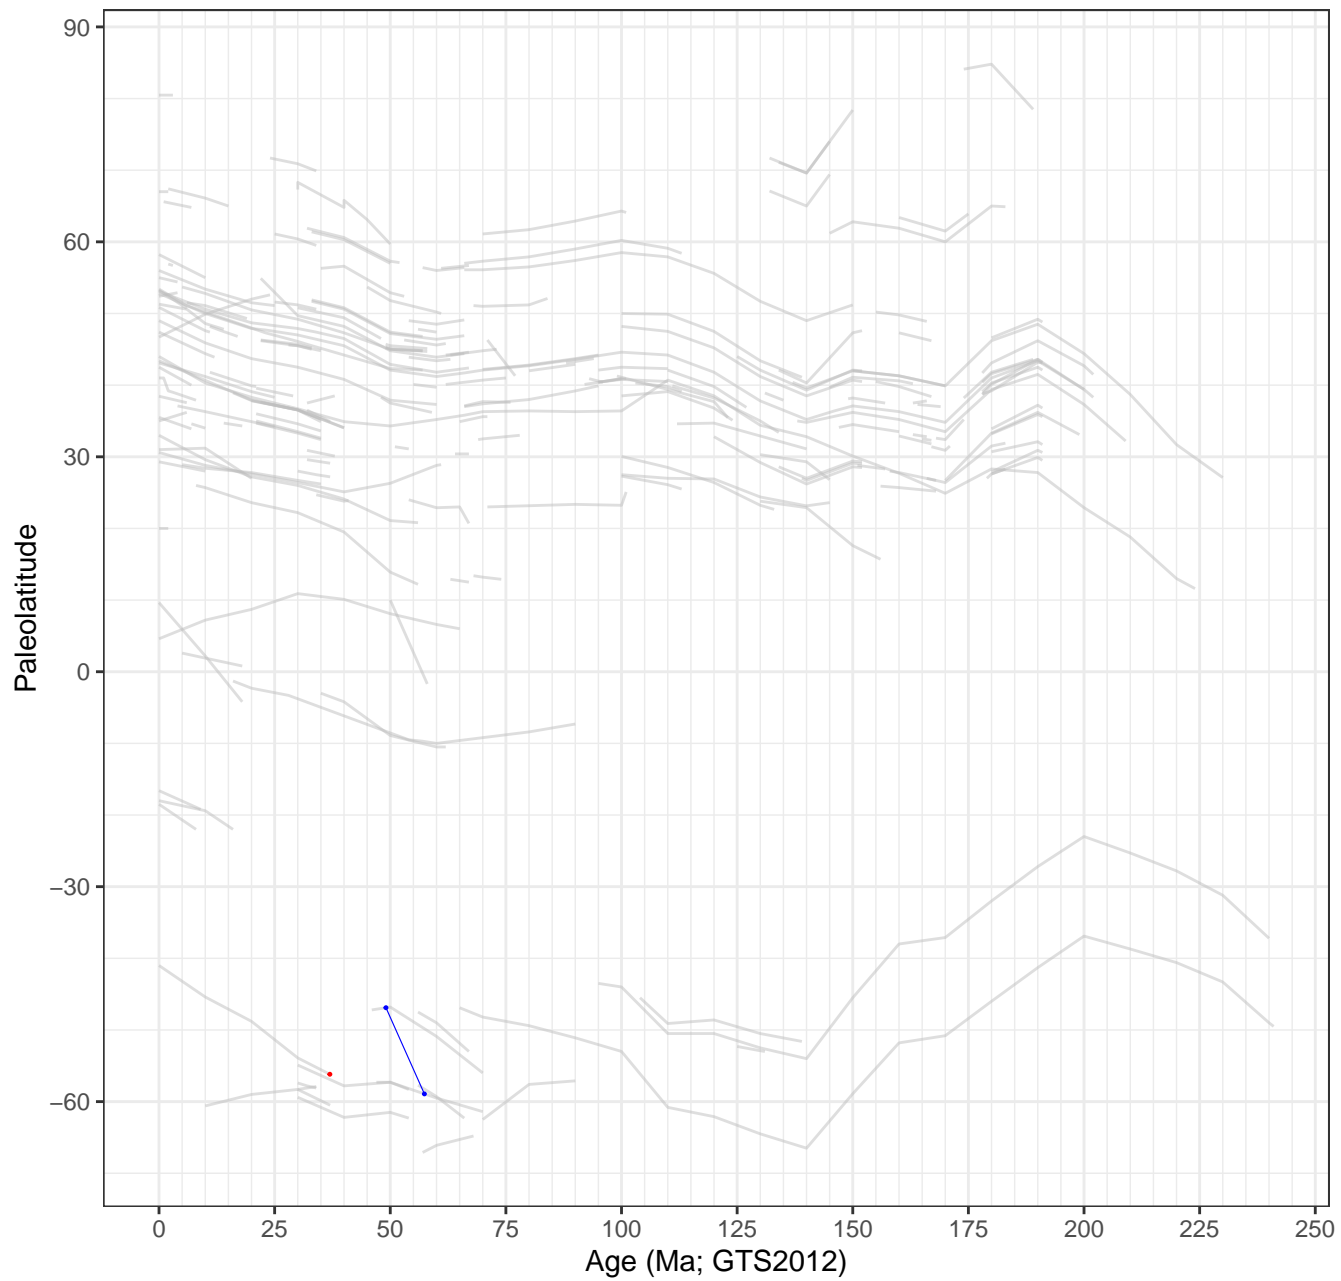

Supplement: Supplementary file 1222 [file Deflandrea antarctica.pdf › Supplement/Supplement 2/Species 1914 plots/Deflandrea antarctica.pdf]

# Species *Deflandrea arcuata*

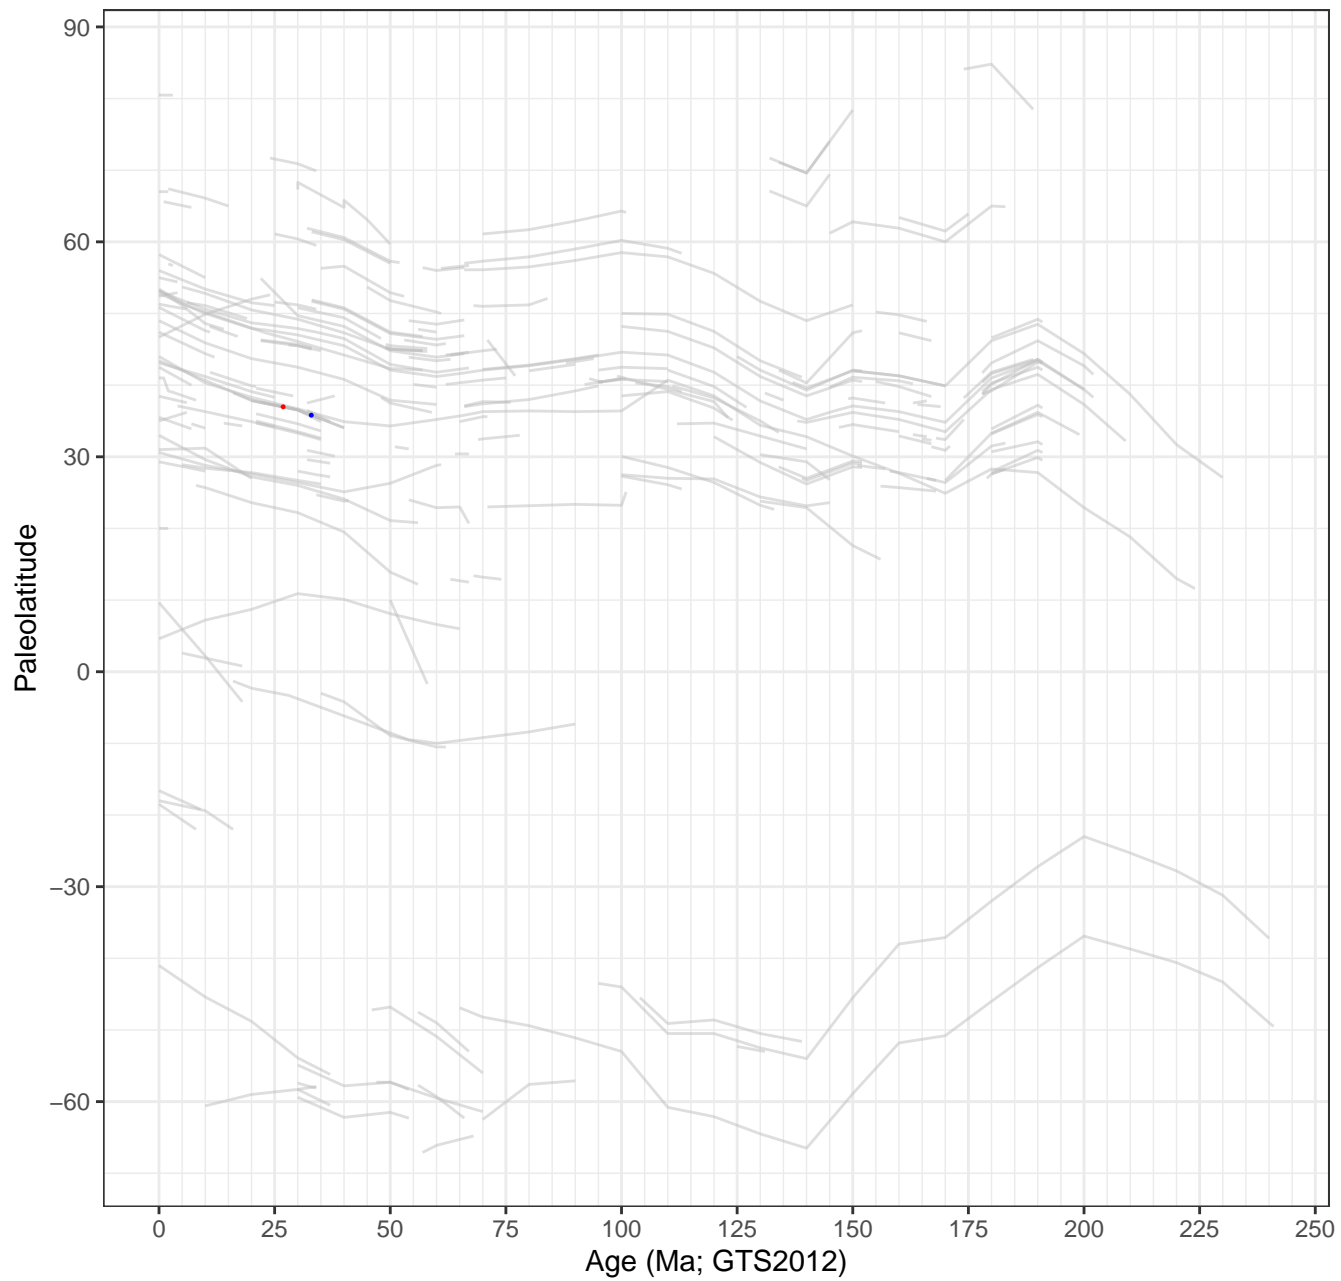

Supplement: Supplementary file 1223 [file Deflandrea arcuata.pdf › Supplement/Supplement 2/Species 1914 plots/Deflandrea arcuata.pdf]

# Species *Deflandrea convexa*

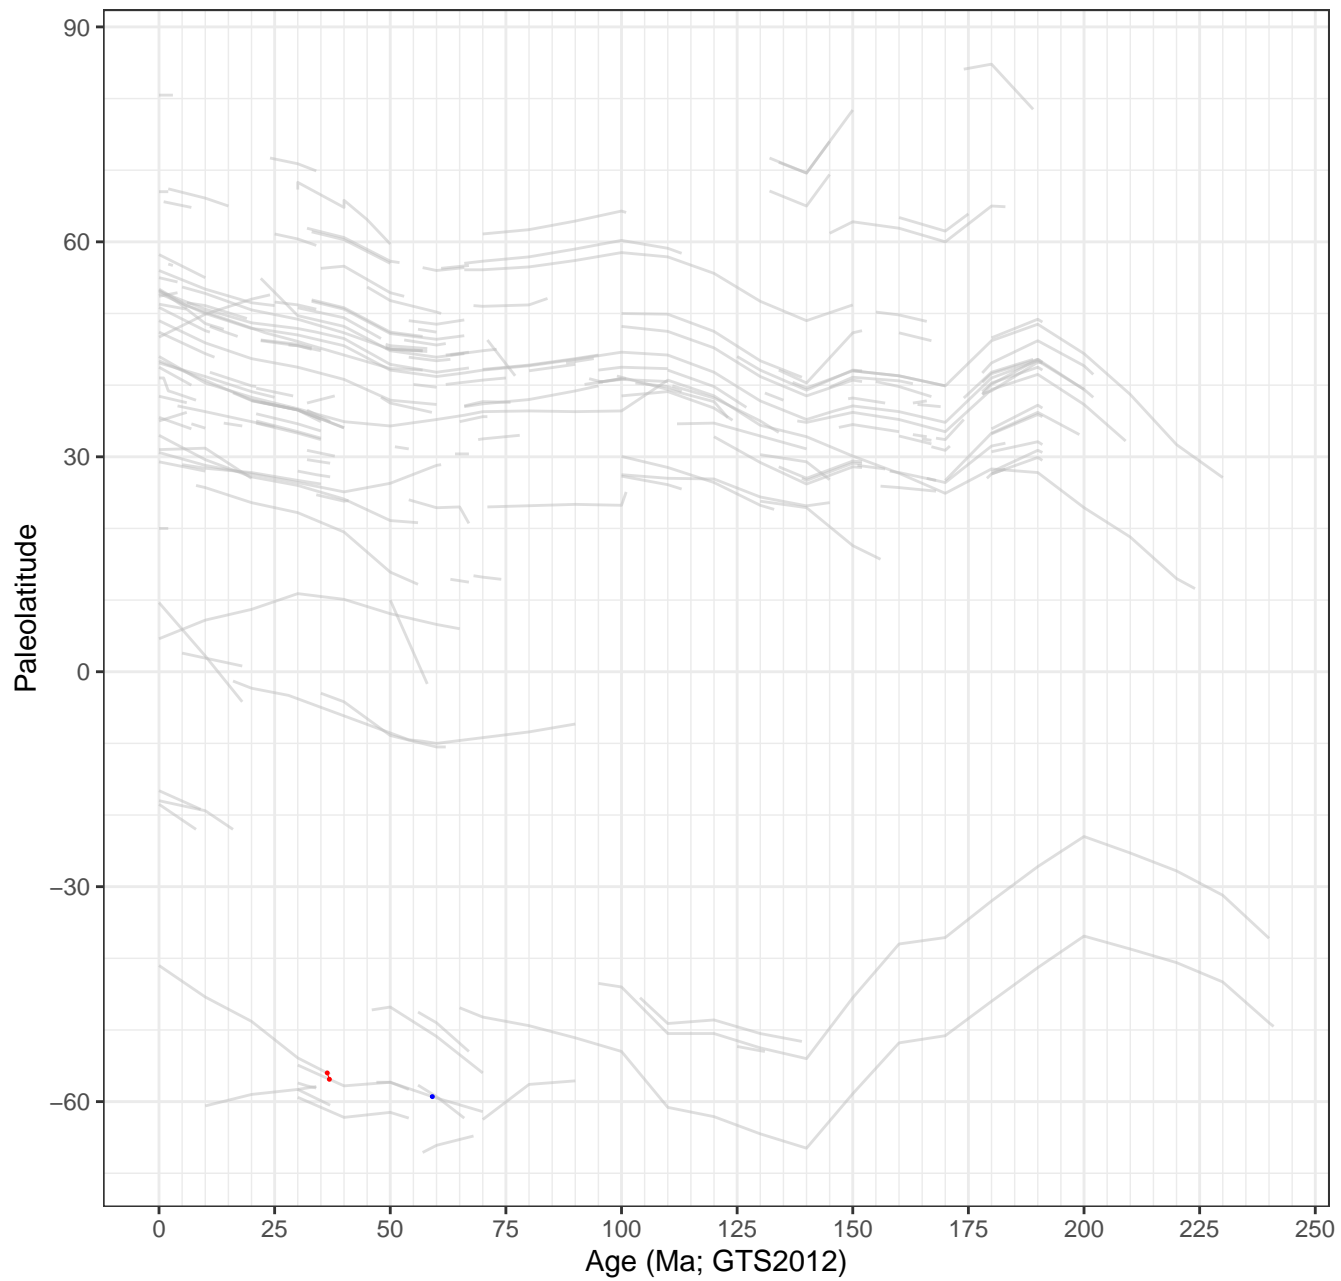

Supplement: Supplementary file 1224 [file Deflandrea convexa.pdf › Supplement/Supplement 2/Species 1914 plots/Deflandrea convexa.pdf]

# Species *Deflandrea denticulata*

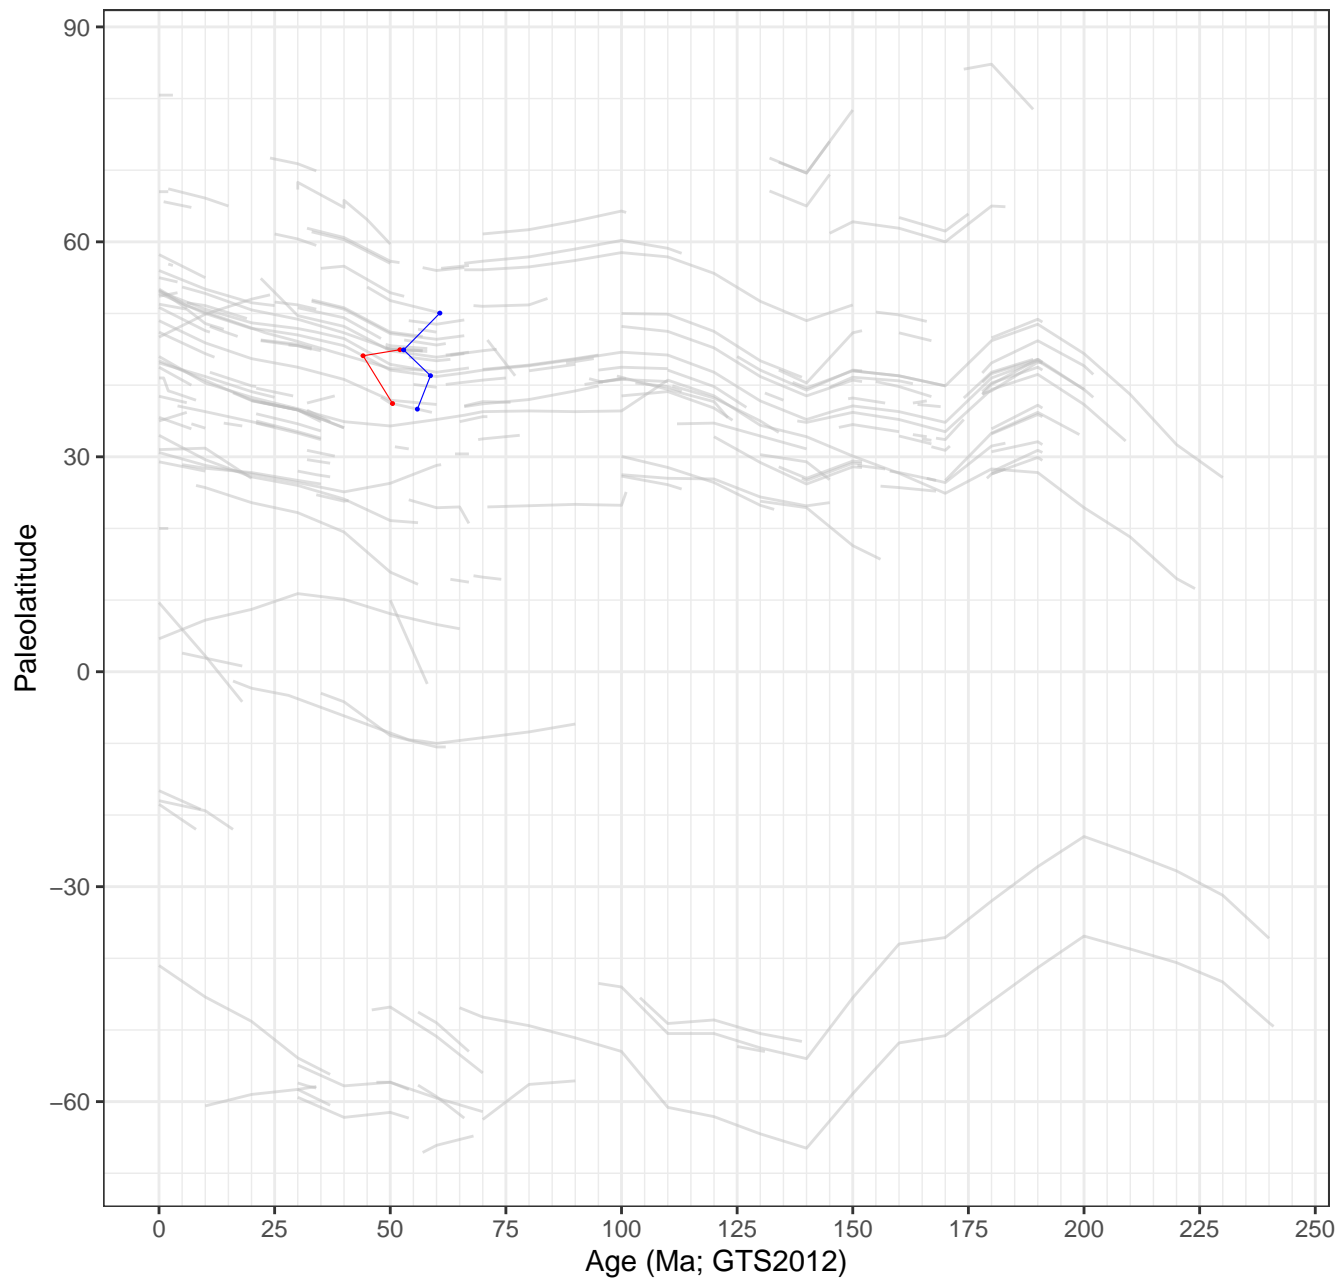

Supplement: Supplementary file 1225 [file Deflandrea denticulata.pdf › Supplement/Supplement 2/Species 1914 plots/Deflandrea denticulata.pdf]

# Species *Deflandrea eocenica*

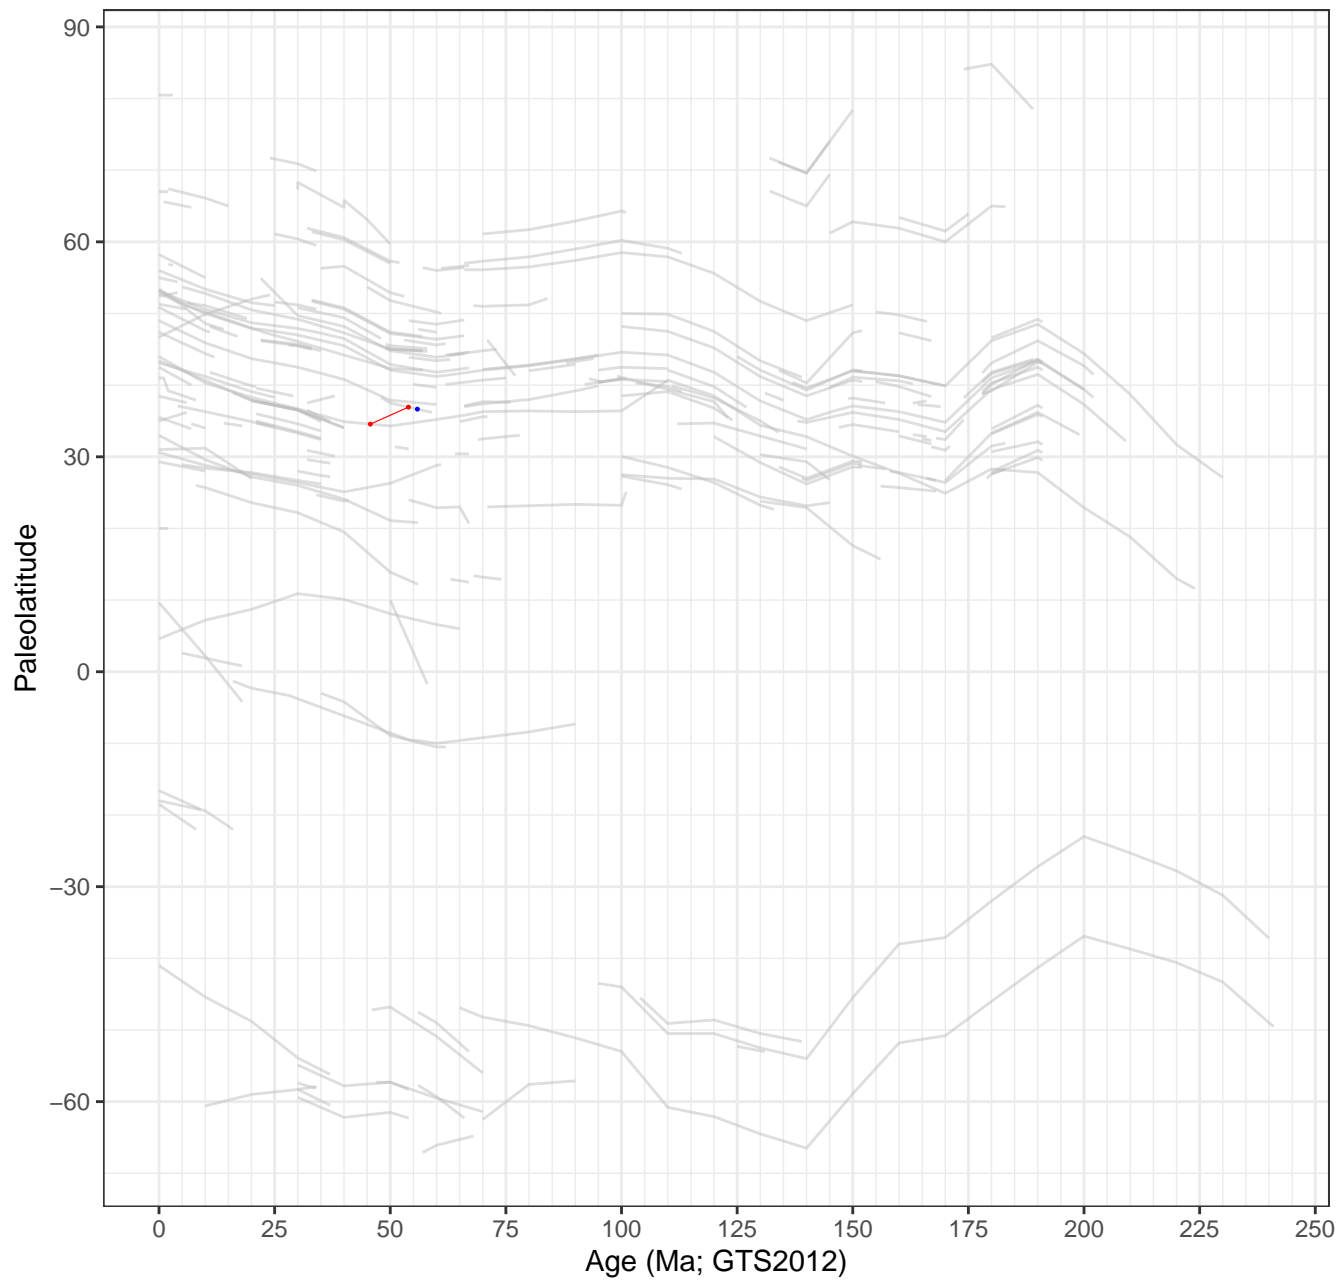

Supplement: Supplementary file 1226 [file Deflandrea eocenica.pdf › Supplement/Supplement 2/Species 1914 plots/Deflandrea eocenica.pdf]

# Species *Deflandrea foveolata*

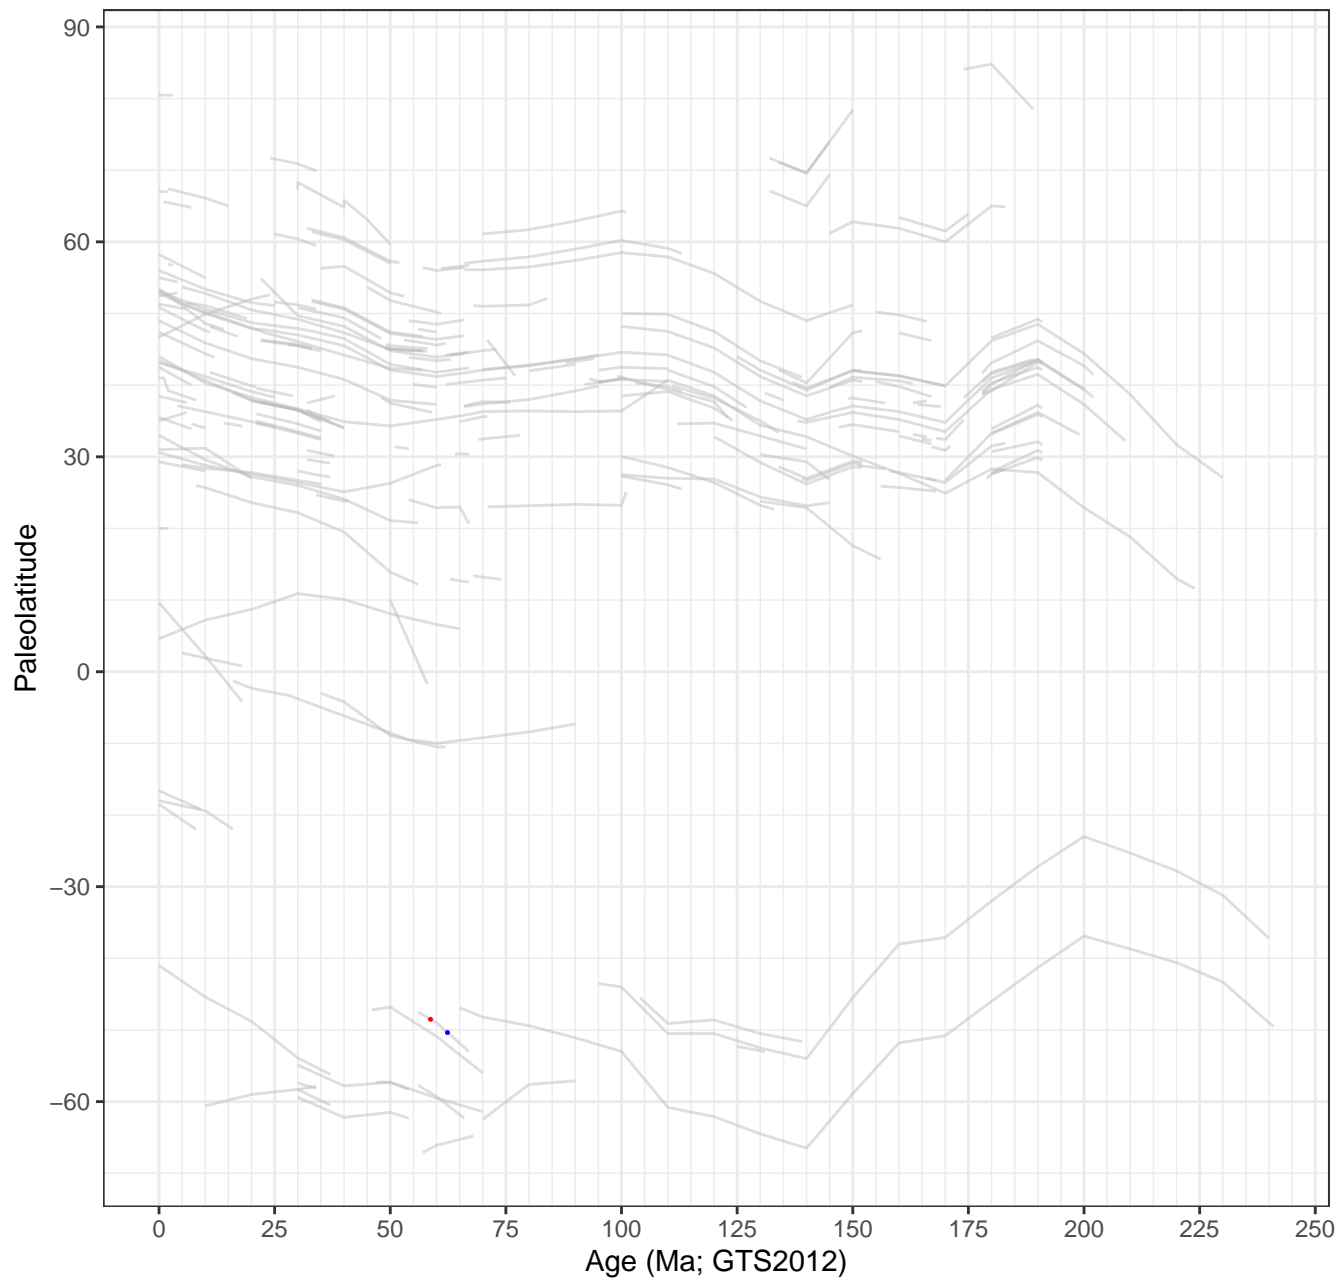

Supplement: Supplementary file 1227 [file Deflandrea foveolata.pdf › Supplement/Supplement 2/Species 1914 plots/Deflandrea foveolata.pdf]

# Species *Deflandrea galeata*

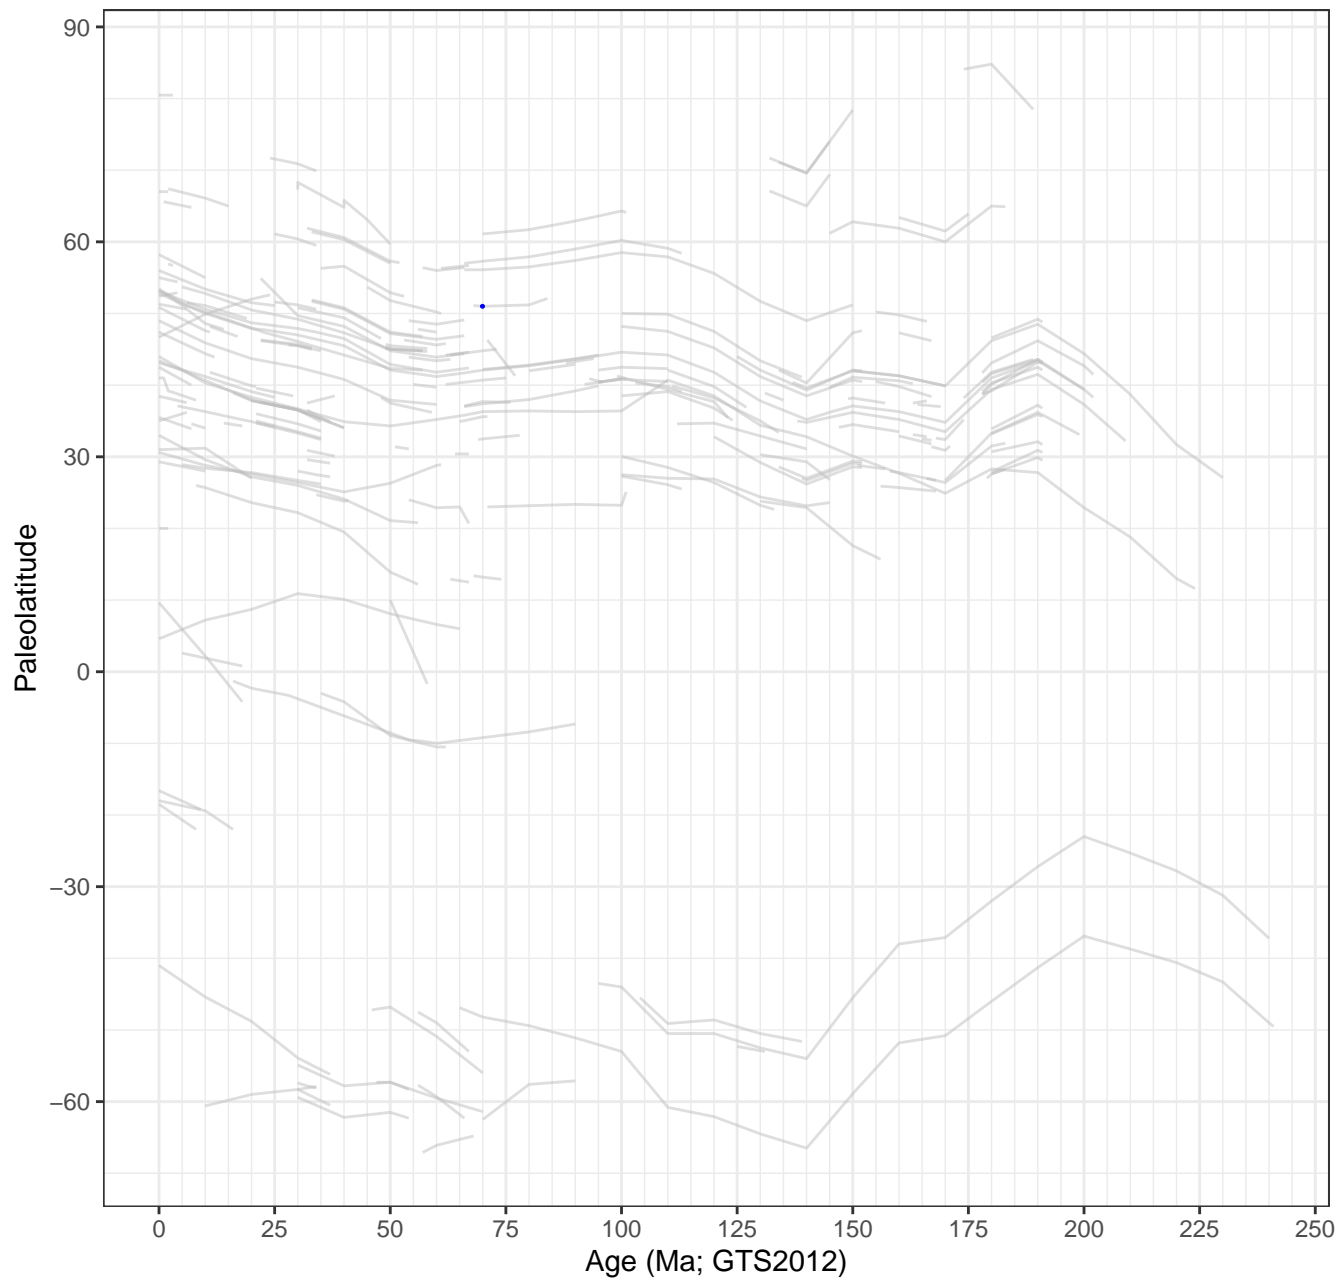

Supplement: Supplementary file 1228 [file Deflandrea galeata.pdf › Supplement/Supplement 2/Species 1914 plots/Deflandrea galeata.pdf]

# Species *Deflandrea granulata*

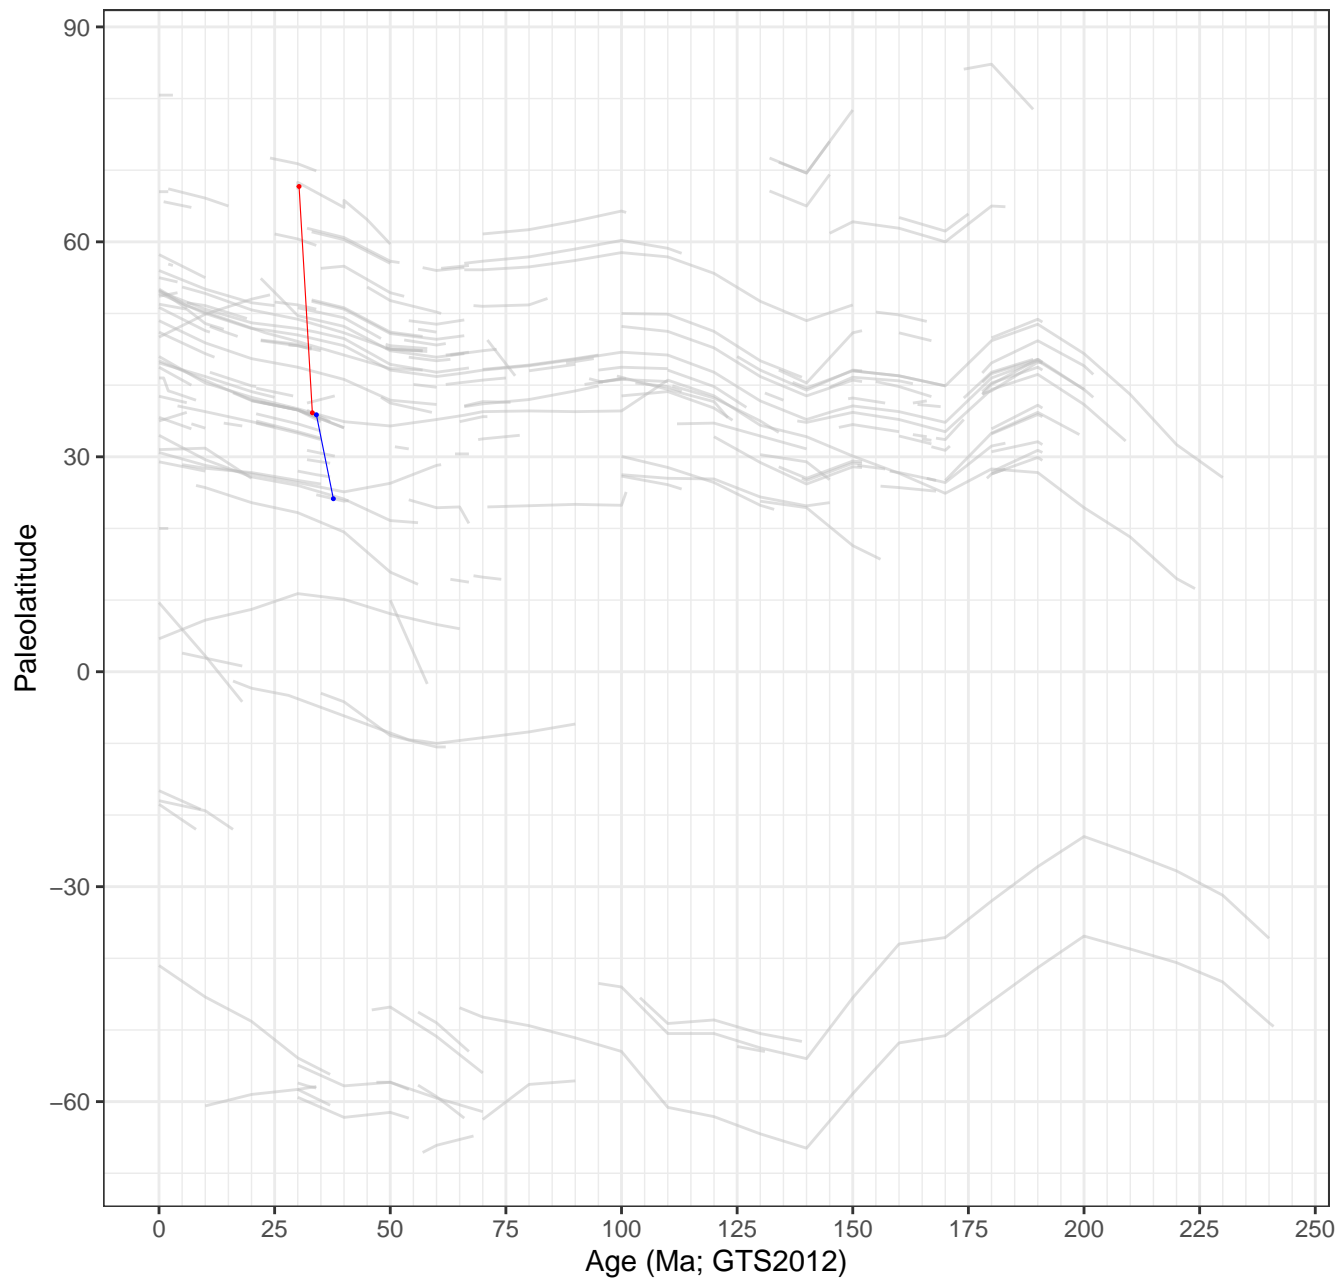

Supplement: Supplementary file 1229 [file Deflandrea granulata.pdf › Supplement/Supplement 2/Species 1914 plots/Deflandrea granulata.pdf]

# Species *Deflandrea heterophlycta*

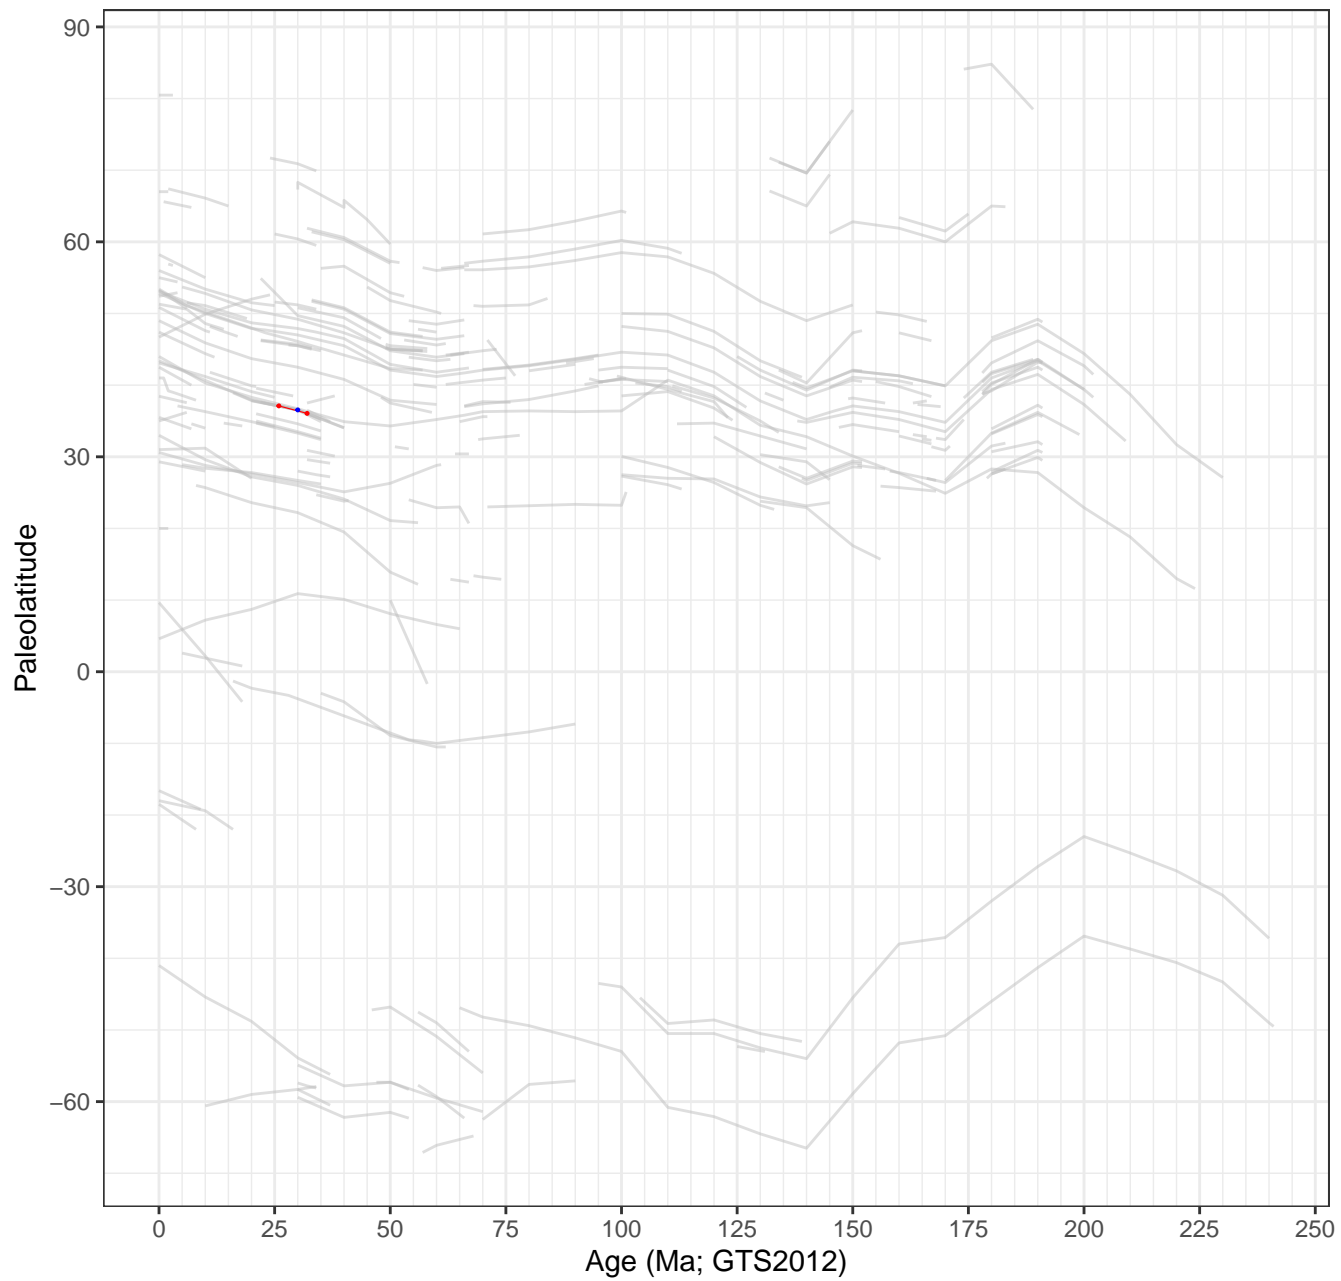

Supplement: Supplementary file 1230 [file Deflandrea heterophlycta.pdf › Supplement/Supplement 2/Species 1914 plots/Deflandrea heterophlycta.pdf]

# Species *Deflandrea leptodermata*

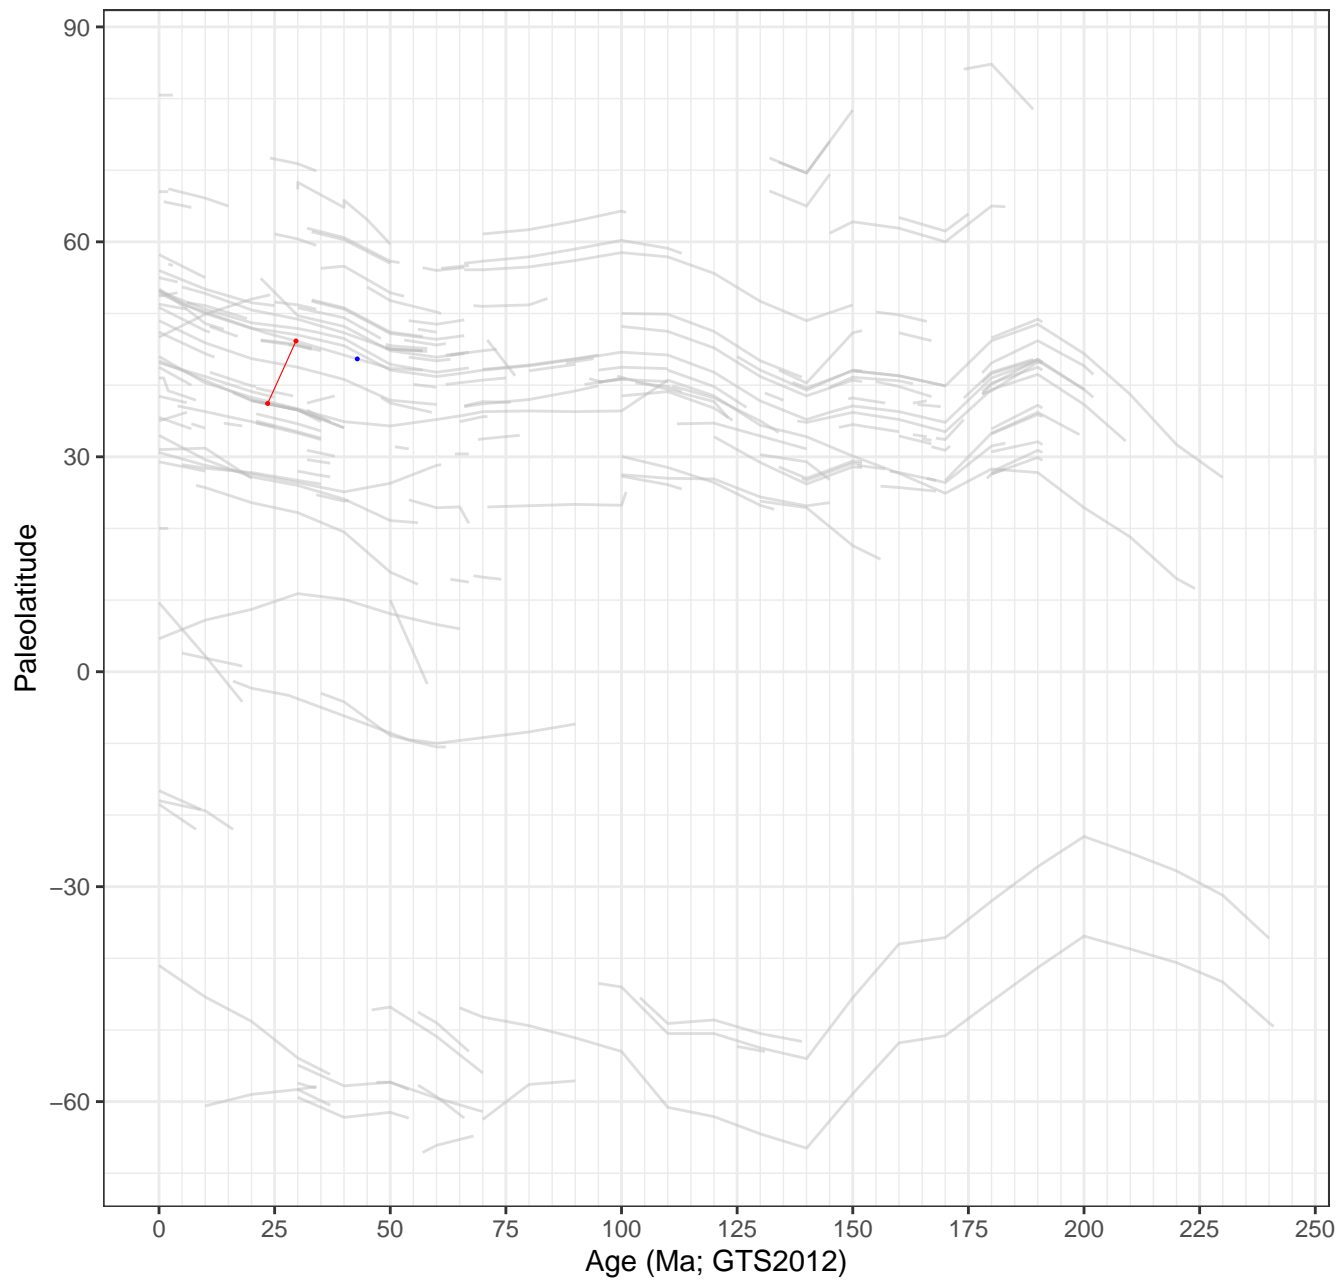

Supplement: Supplementary file 1231 [file Deflandrea leptodermata.pdf › Supplement/Supplement 2/Species 1914 plots/Deflandrea leptodermata.pdf]

# Species *Deflandrea oebisfeldensis*

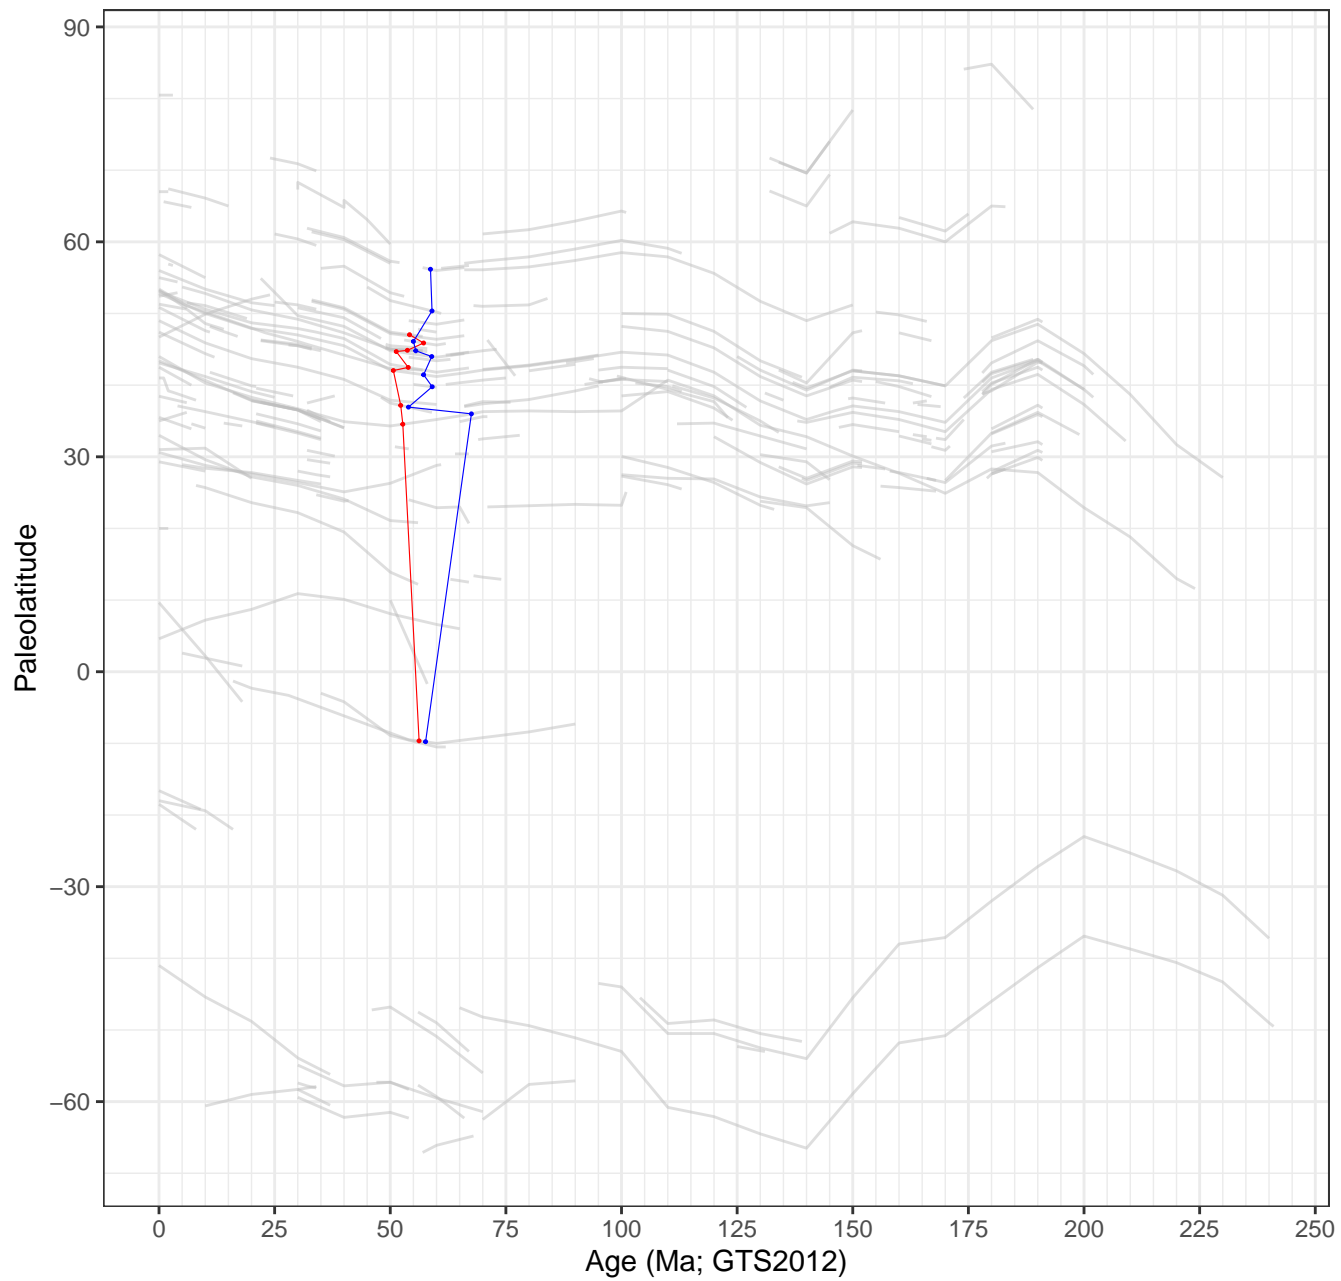

Supplement: Supplementary file 1232 [file Deflandrea oebisfeldensis.pdf › Supplement/Supplement 2/Species 1914 plots/Deflandrea oebisfeldensis.pdf]
