# Supplementary figures and images for: DINOSTRAT: a global database of the stratigraphic and paleolatitudinal distribution of Mesozoic–Cenozoic organic-walled dinoflagellate cysts (part 13 of 27)
Source: Copernicus journal article supplement (doi:10.5194/essd-14-579-2022), 2022-02-09

# Species *Deflandrea phosphoritica spinulosa*

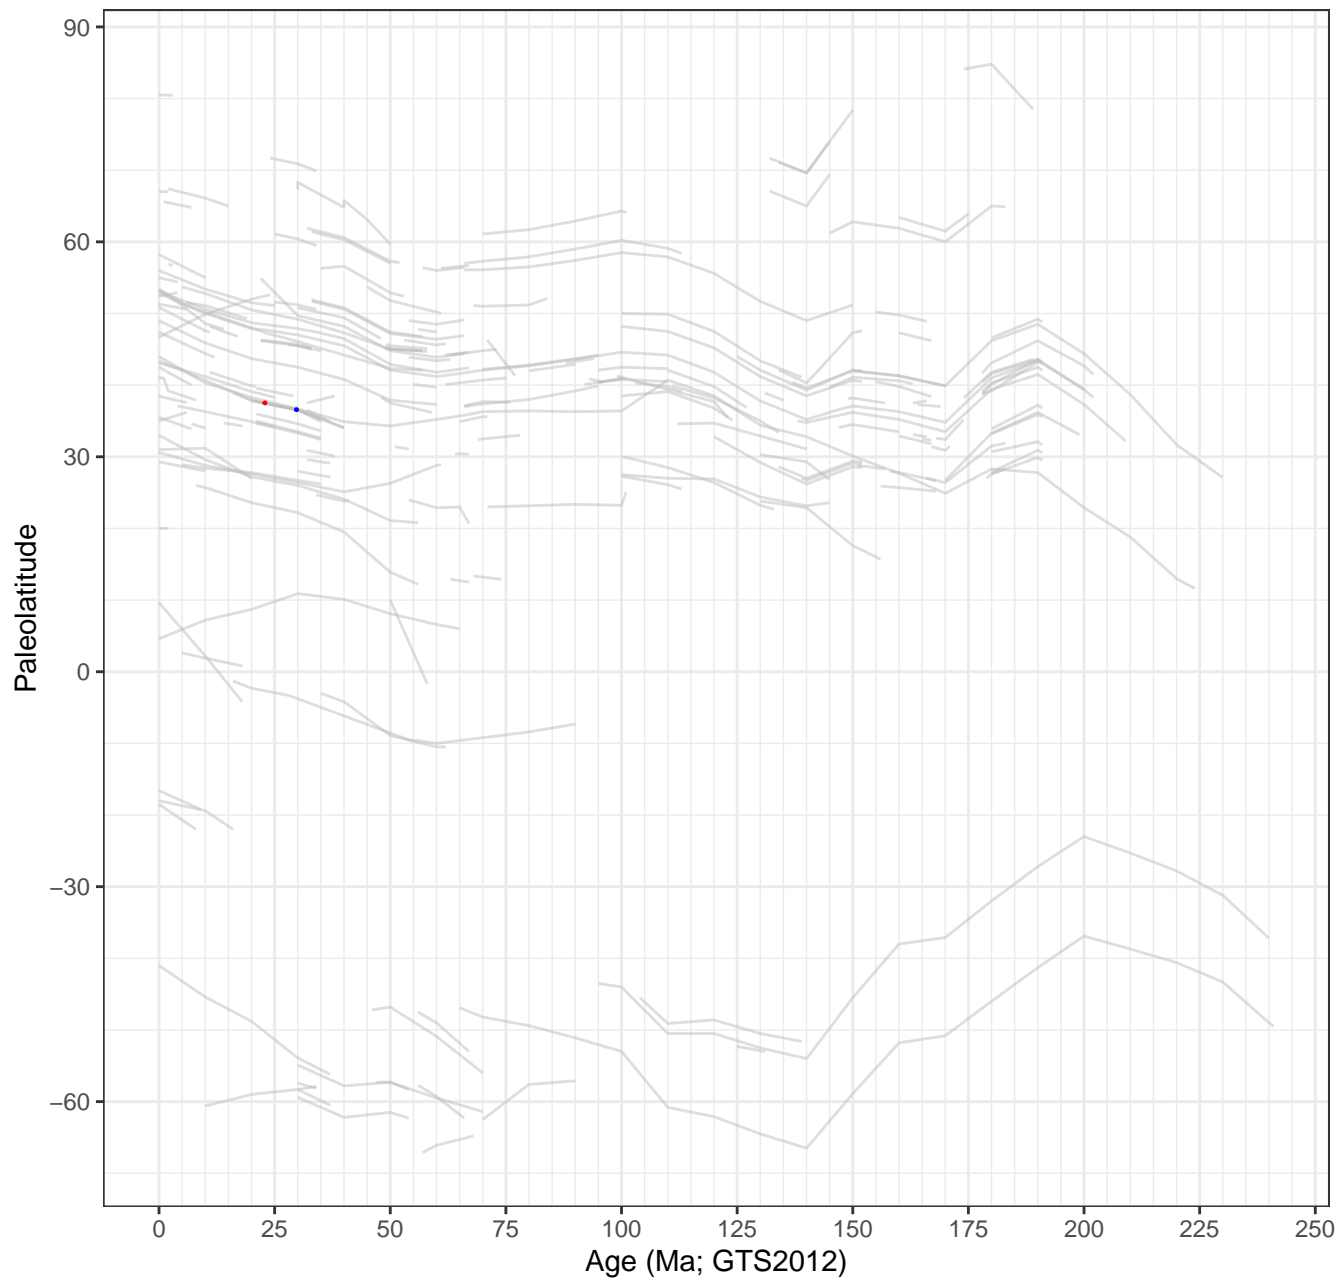

Supplement: Supplementary file 1233 [file Deflandrea phosphoritica spinulosa.pdf › Supplement/Supplement 2/Species 1914 plots/Deflandrea phosphoritica spinulosa.pdf]

# Species Deflandrea phosphoritica

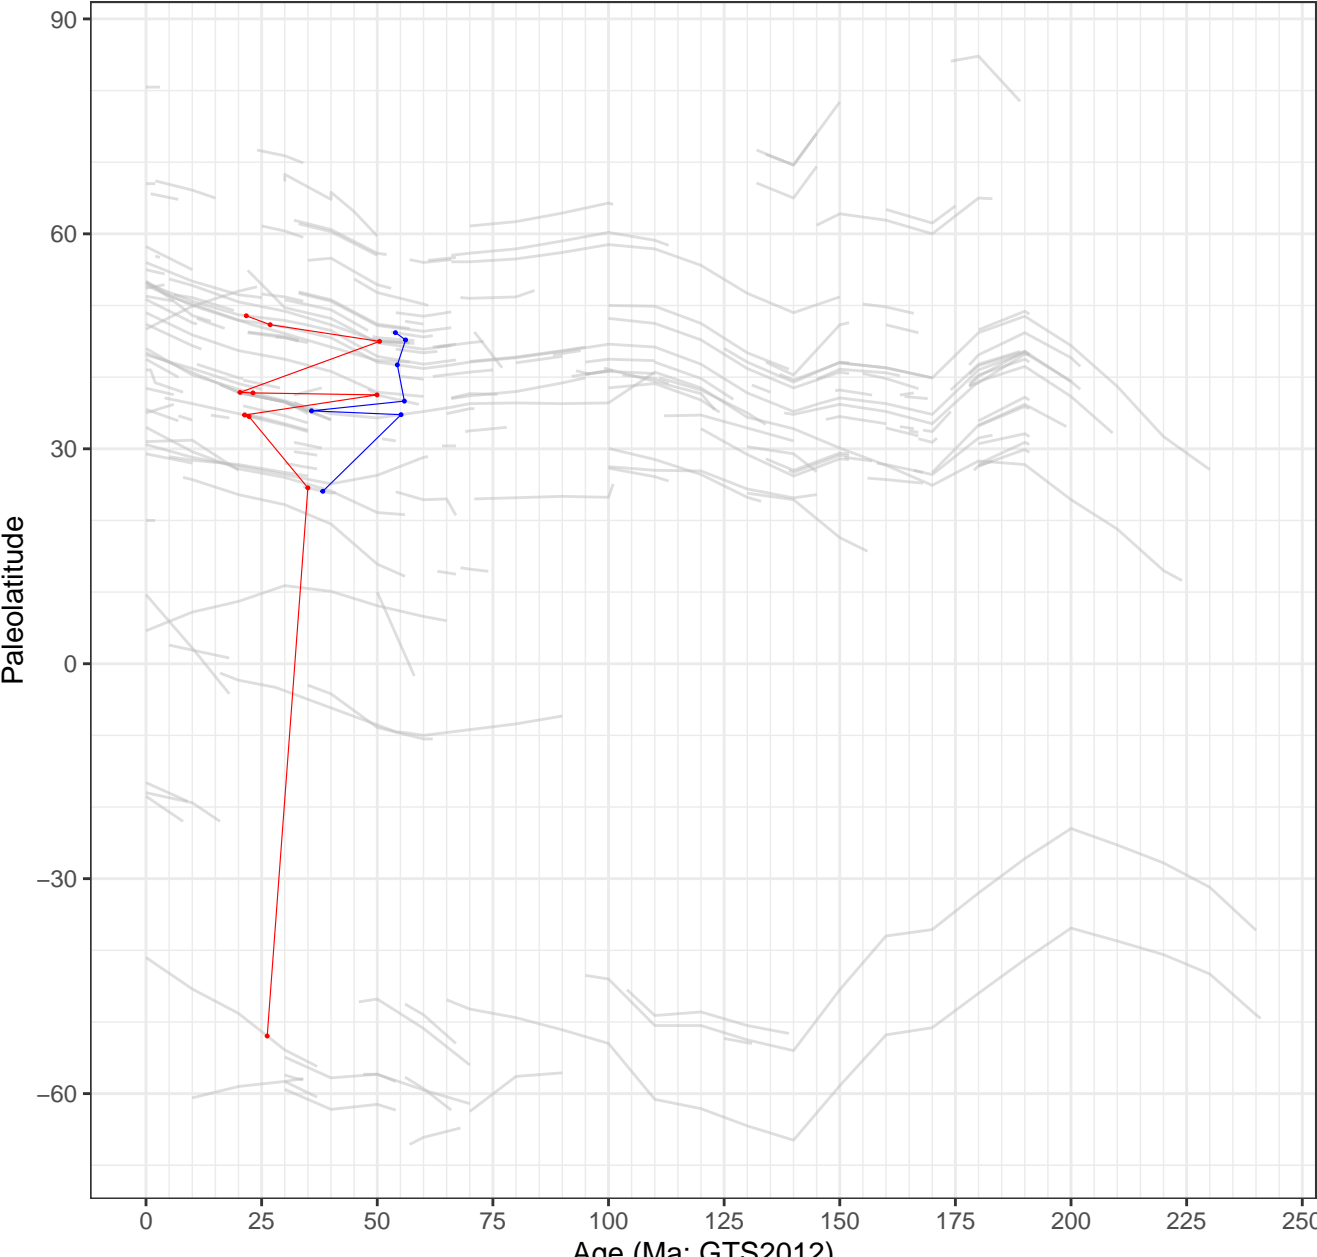

Supplement: Supplementary file 1234 [file Deflandrea phosphoritica.pdf › Supplement/Supplement 2/Species 1914 plots/Deflandrea phosphoritica.pdf]

# Species *Deflandrea robusta*

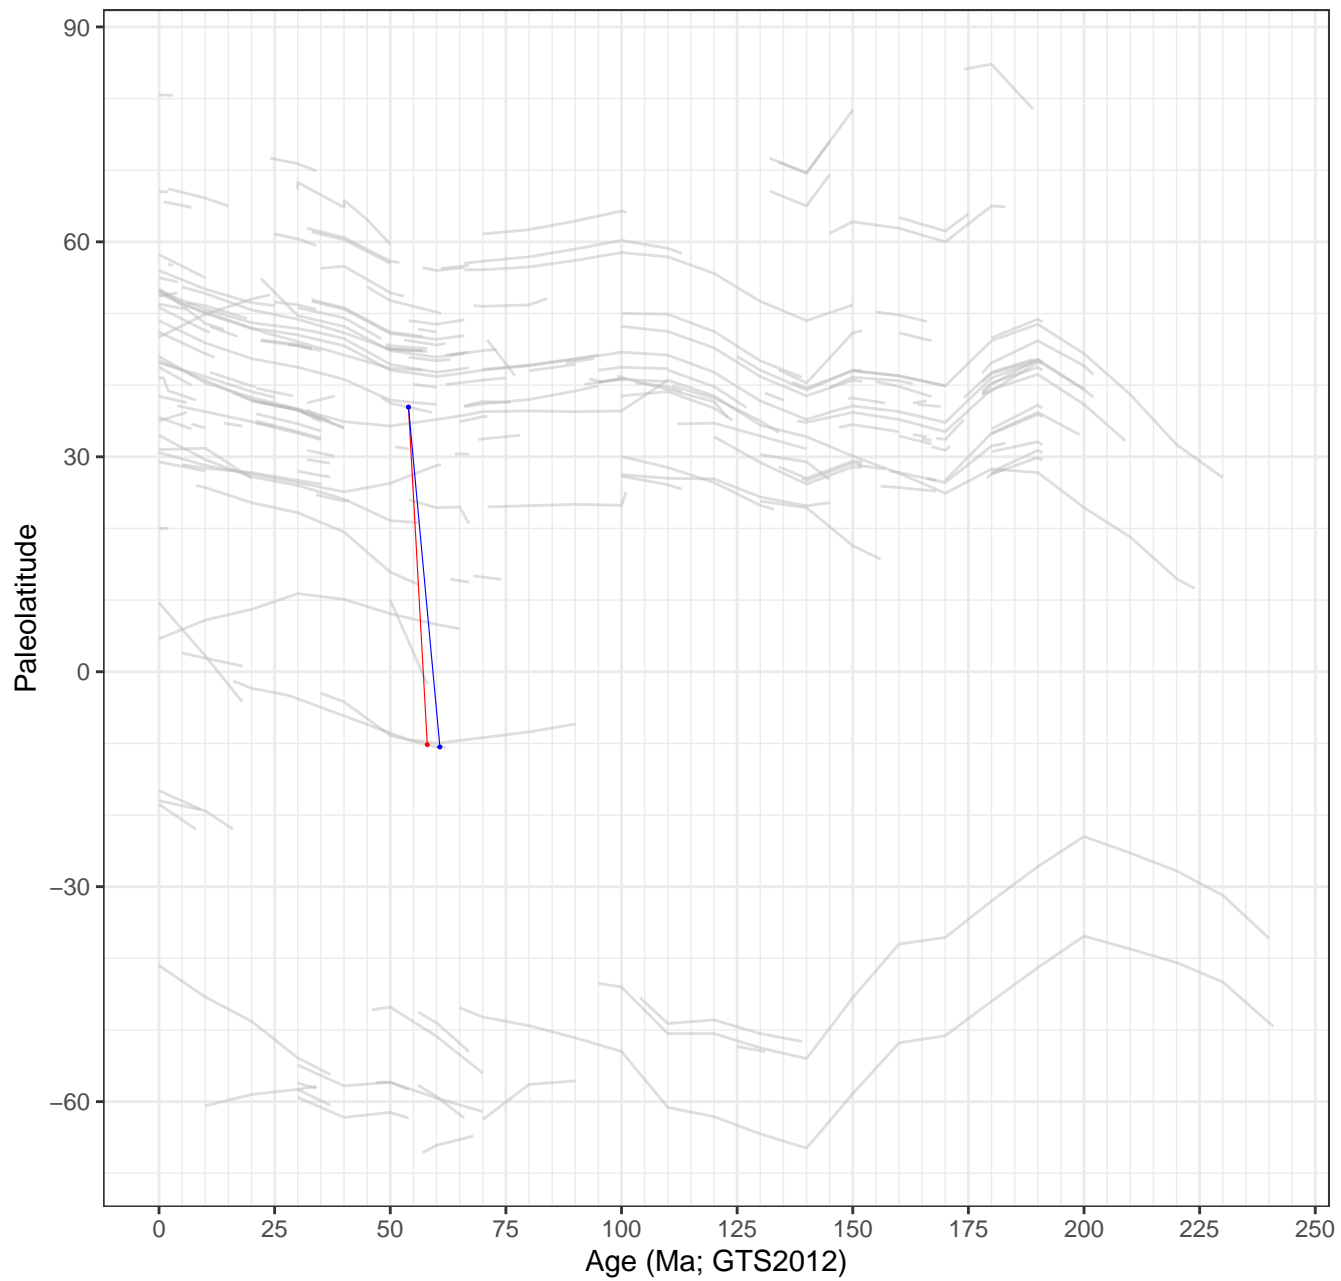

Supplement: Supplementary file 1235 [file Deflandrea robusta.pdf › Supplement/Supplement 2/Species 1914 plots/Deflandrea robusta.pdf]

# Species *Desmocysta simplex*

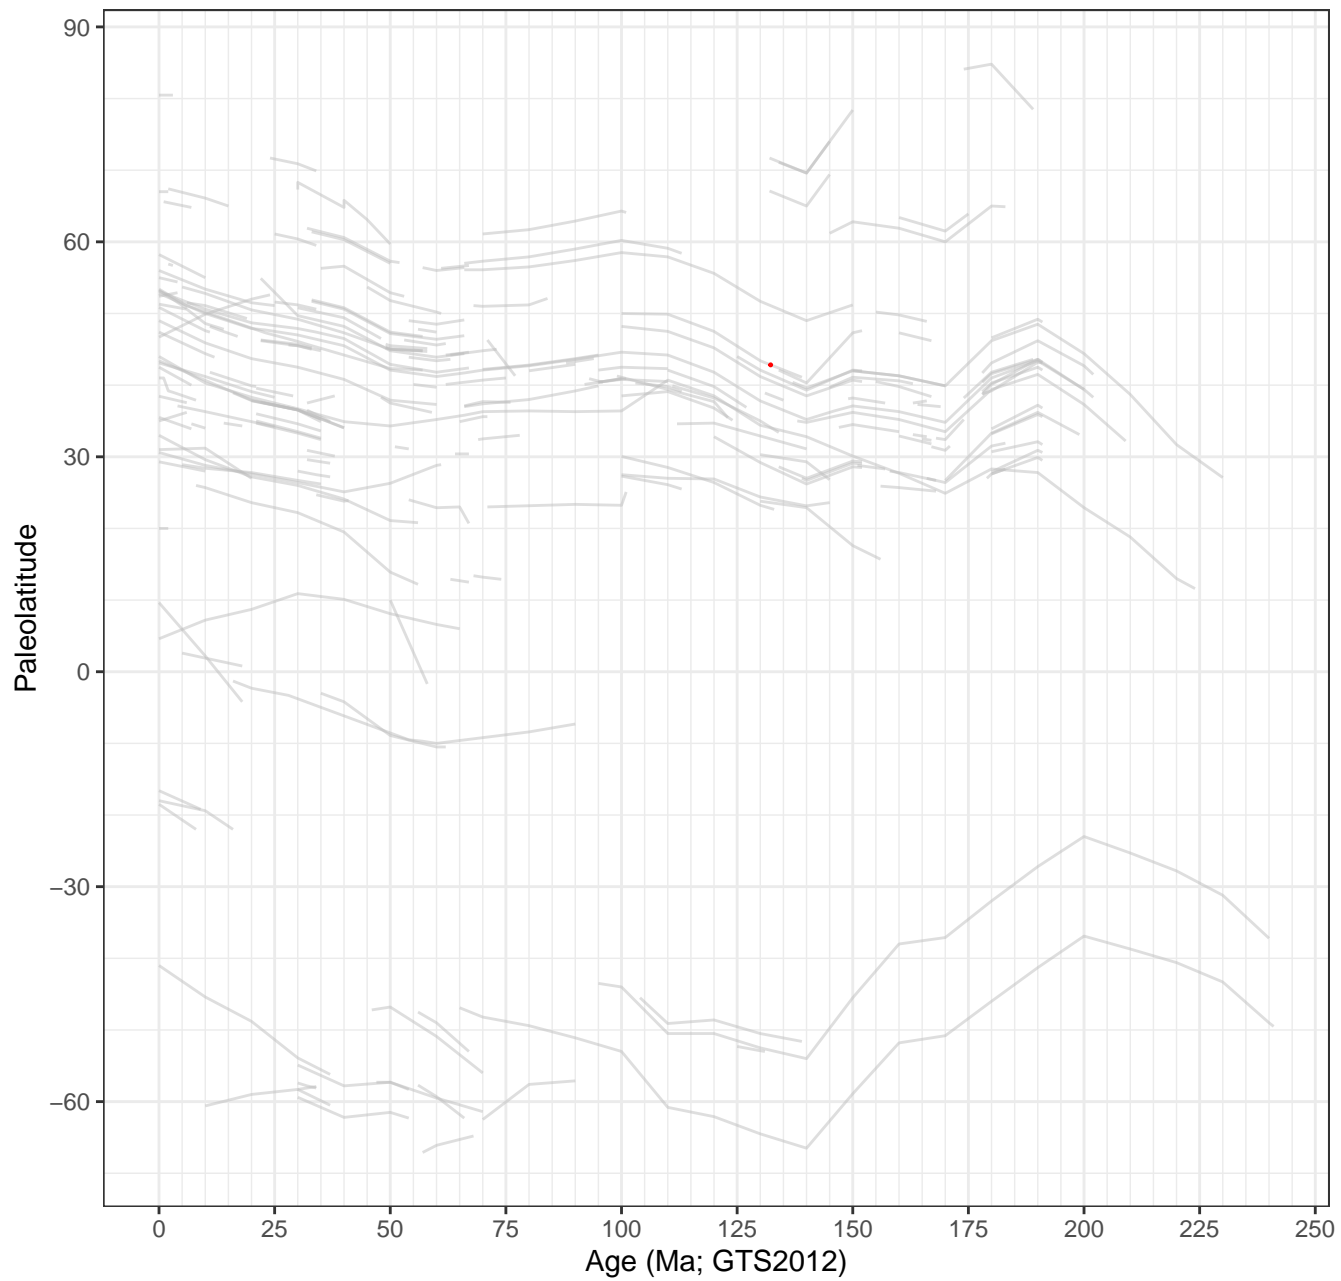

Supplement: Supplementary file 1236 [file Desmocysta simplex.pdf › Supplement/Supplement 2/Species 1914 plots/Desmocysta simplex.pdf]

# Species *Diacanthum hollisteri*

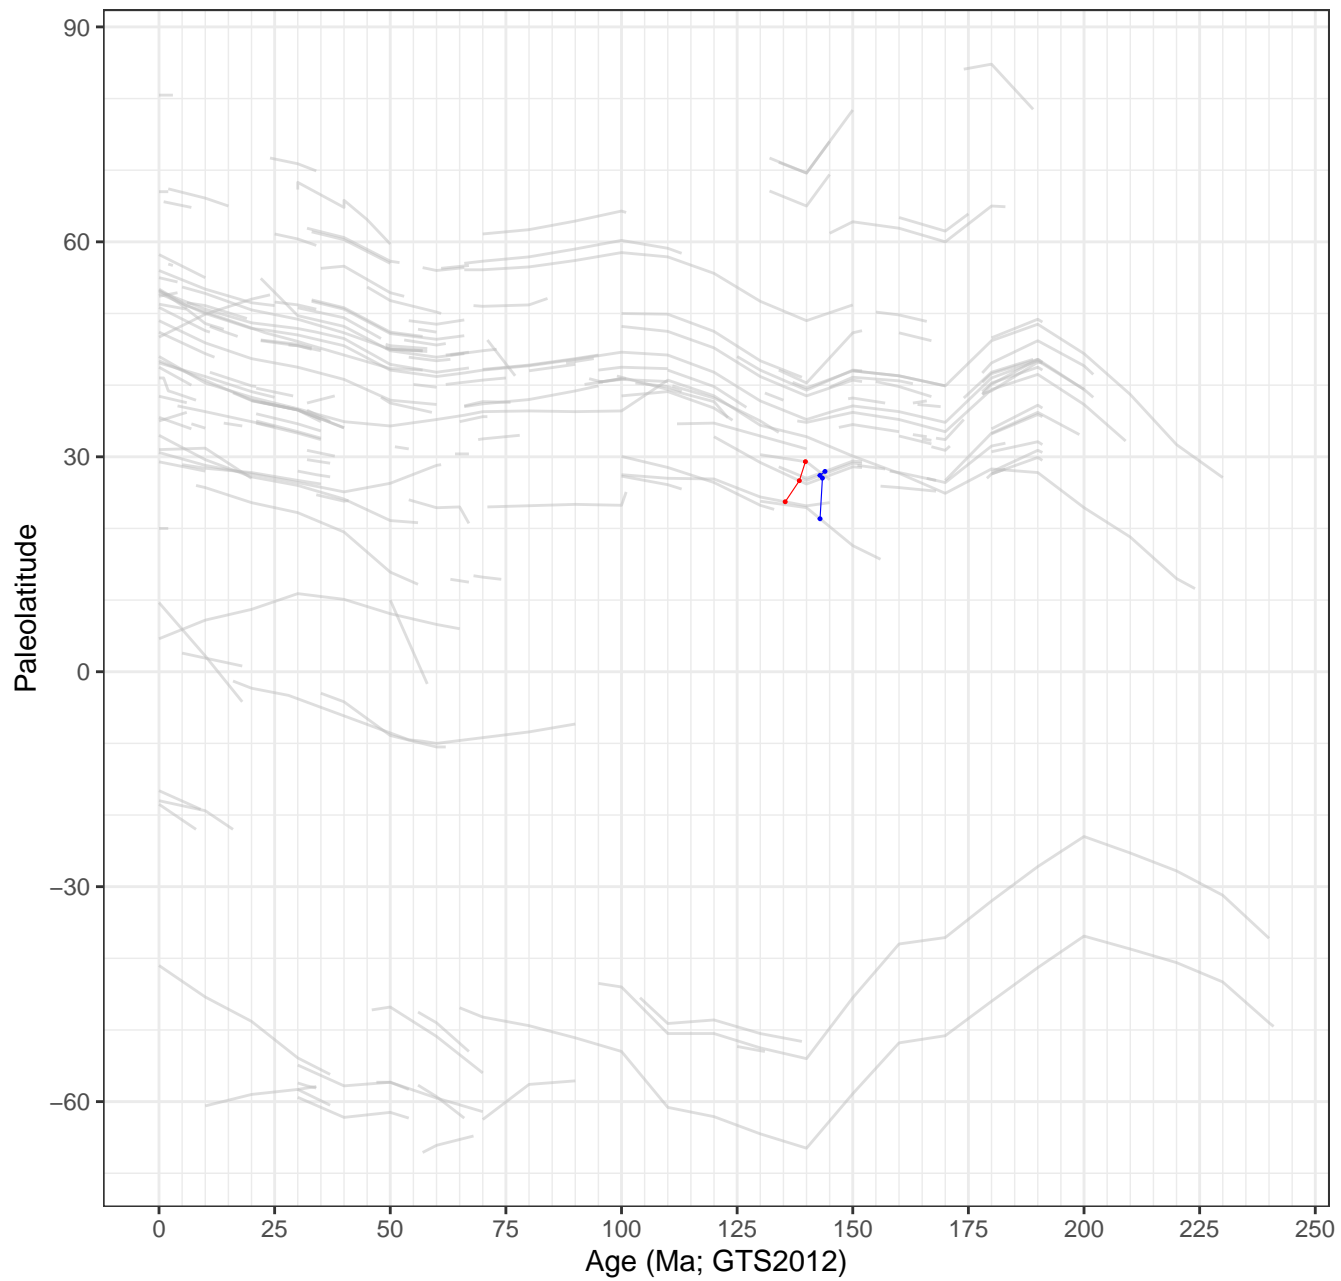

Supplement: Supplementary file 1237 [file Diacanthum hollisteri.pdf › Supplement/Supplement 2/Species 1914 plots/Diacanthum hollisteri.pdf]

# Species *Dichadogonyaulax bensonii*

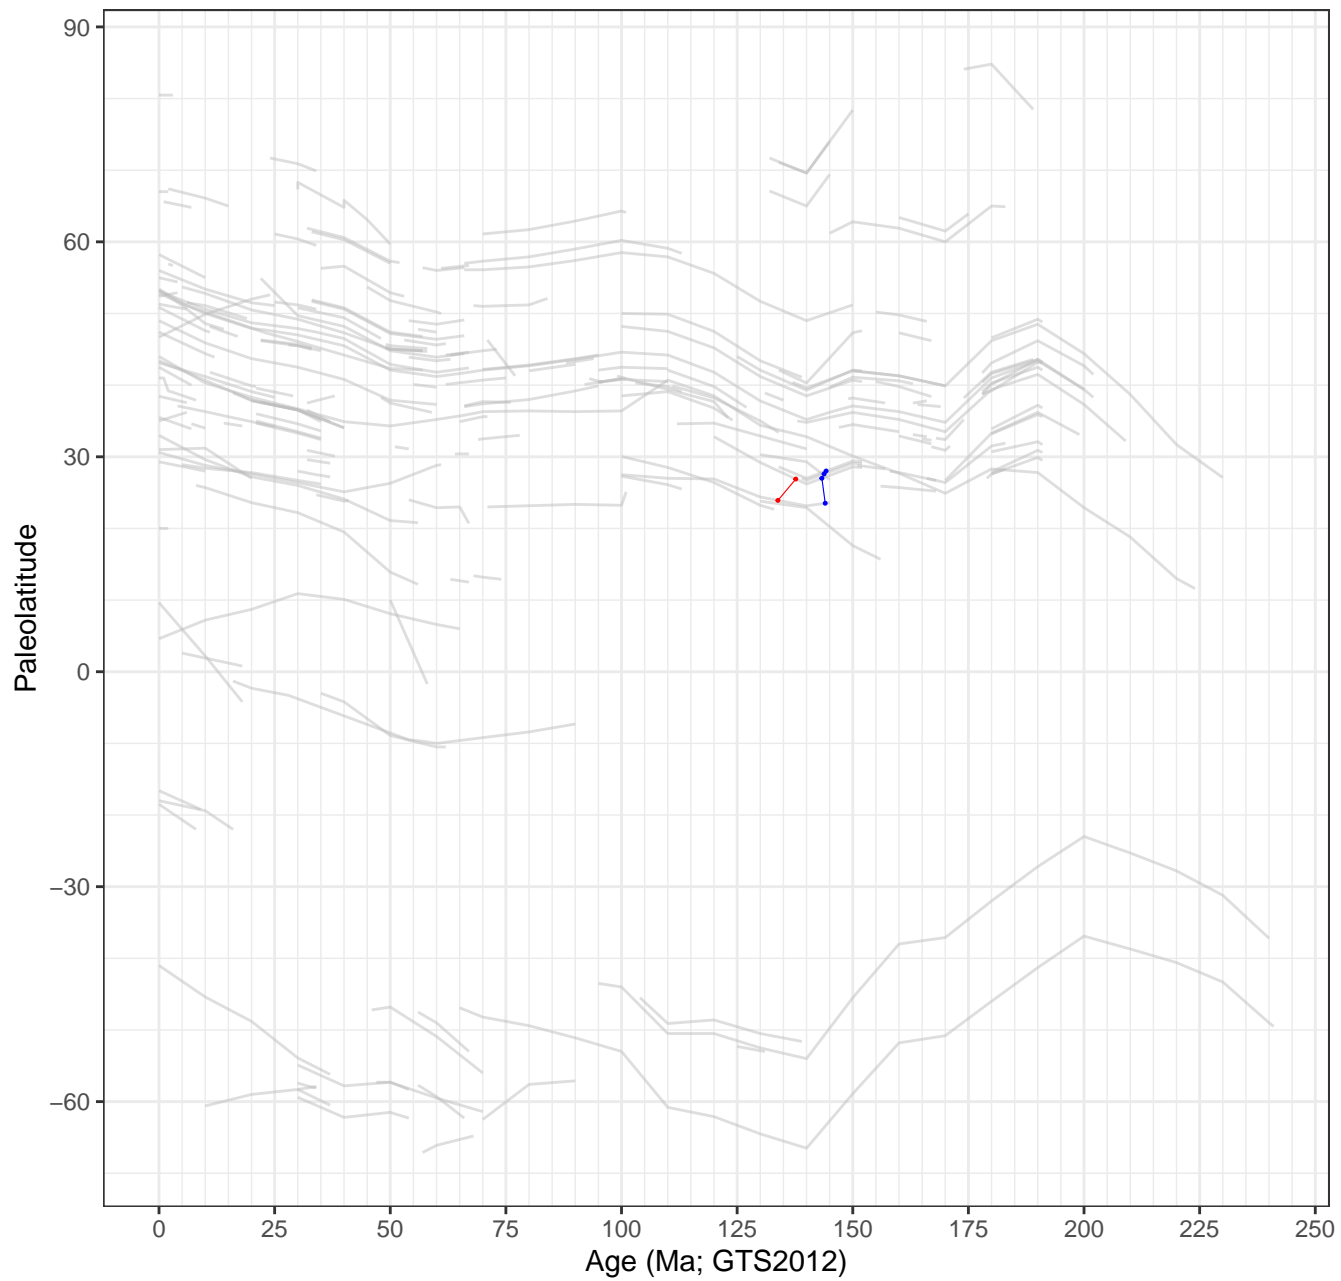

Supplement: Supplementary file 1238 [file Dichadogonyaulax bensonii.pdf › Supplement/Supplement 2/Species 1914 plots/Dichadogonyaulax bensonii.pdf]

# Species *Dichadogonyaulax chondra*

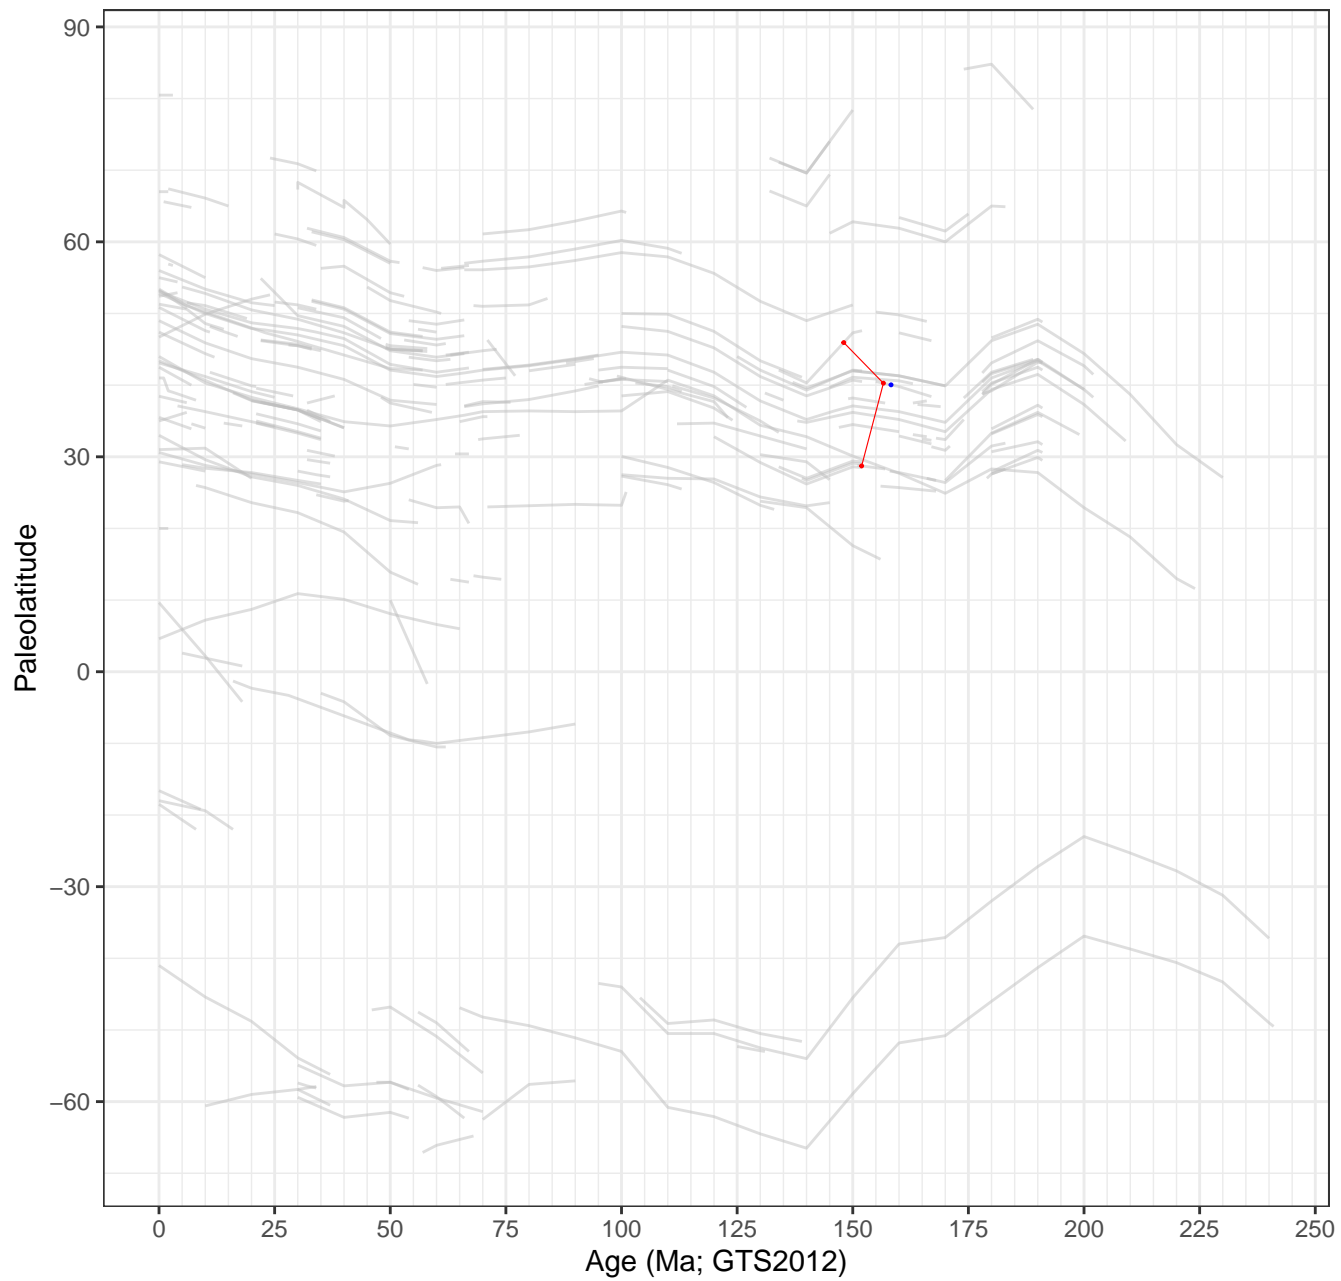

Supplement: Supplementary file 1239 [file Dichadogonyaulax chondra.pdf › Supplement/Supplement 2/Species 1914 plots/Dichadogonyaulax chondra.pdf]

# Species *Dichadogonyaulax culmula*

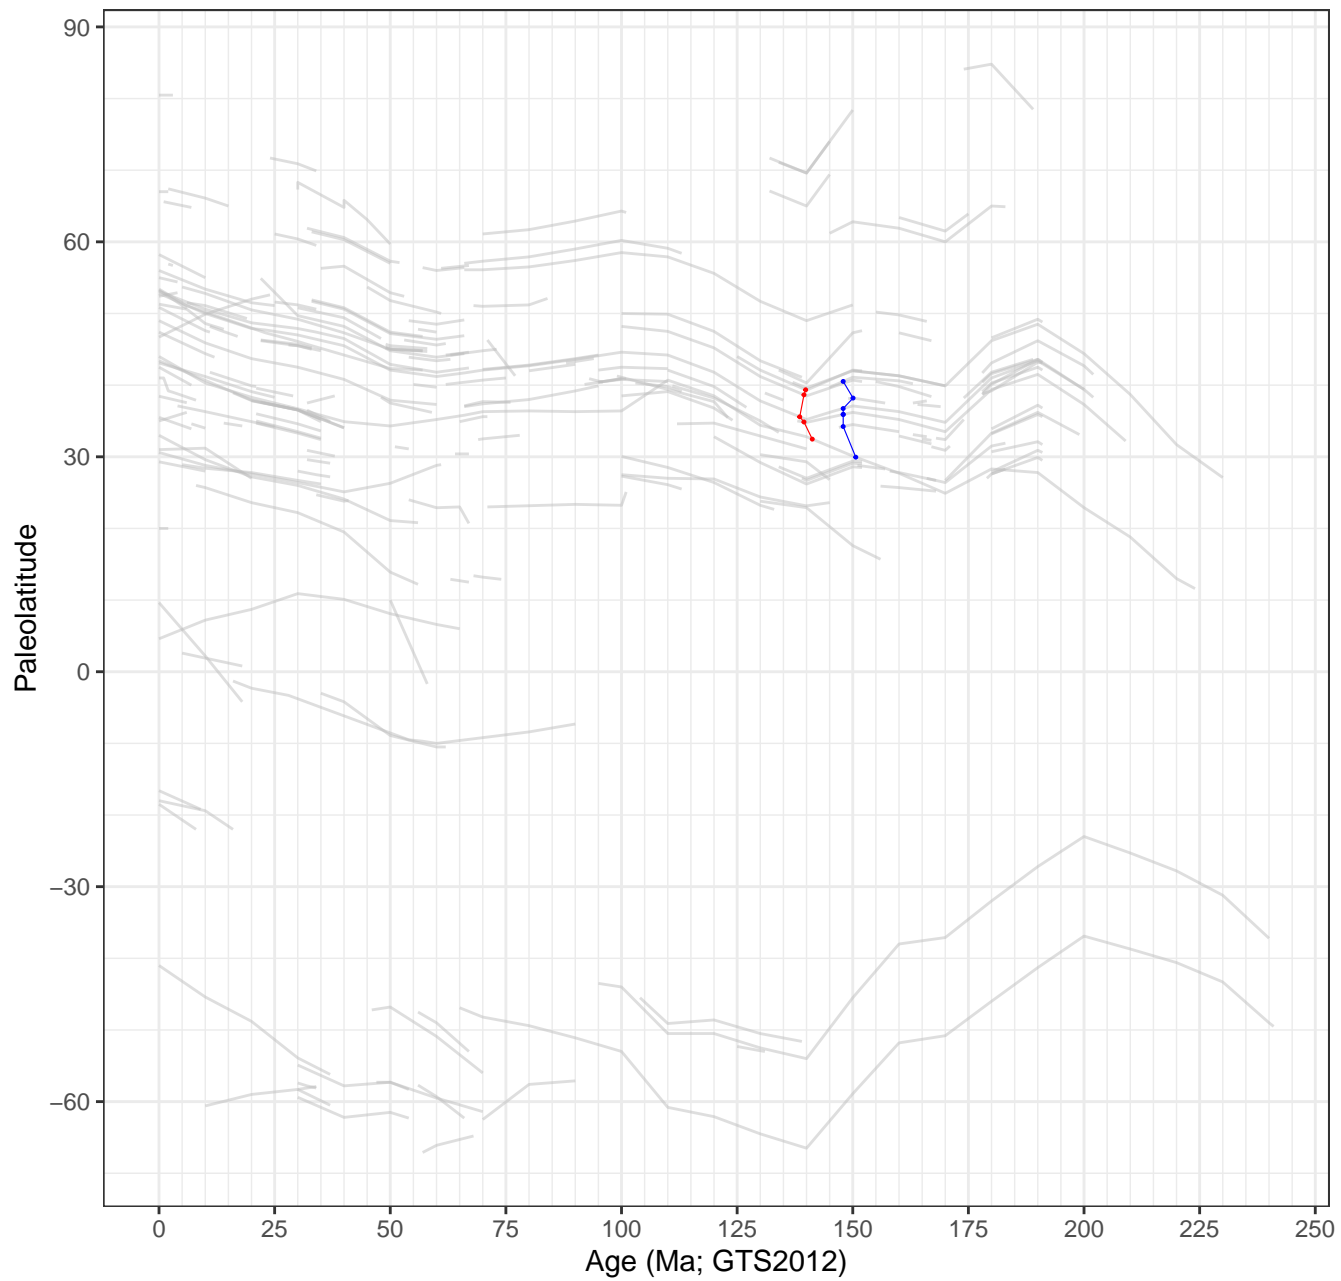

Supplement: Supplementary file 1240 [file Dichadogonyaulax culmula.pdf › Supplement/Supplement 2/Species 1914 plots/Dichadogonyaulax culmula.pdf]

# Species *Dichadogonyaulax pannea*

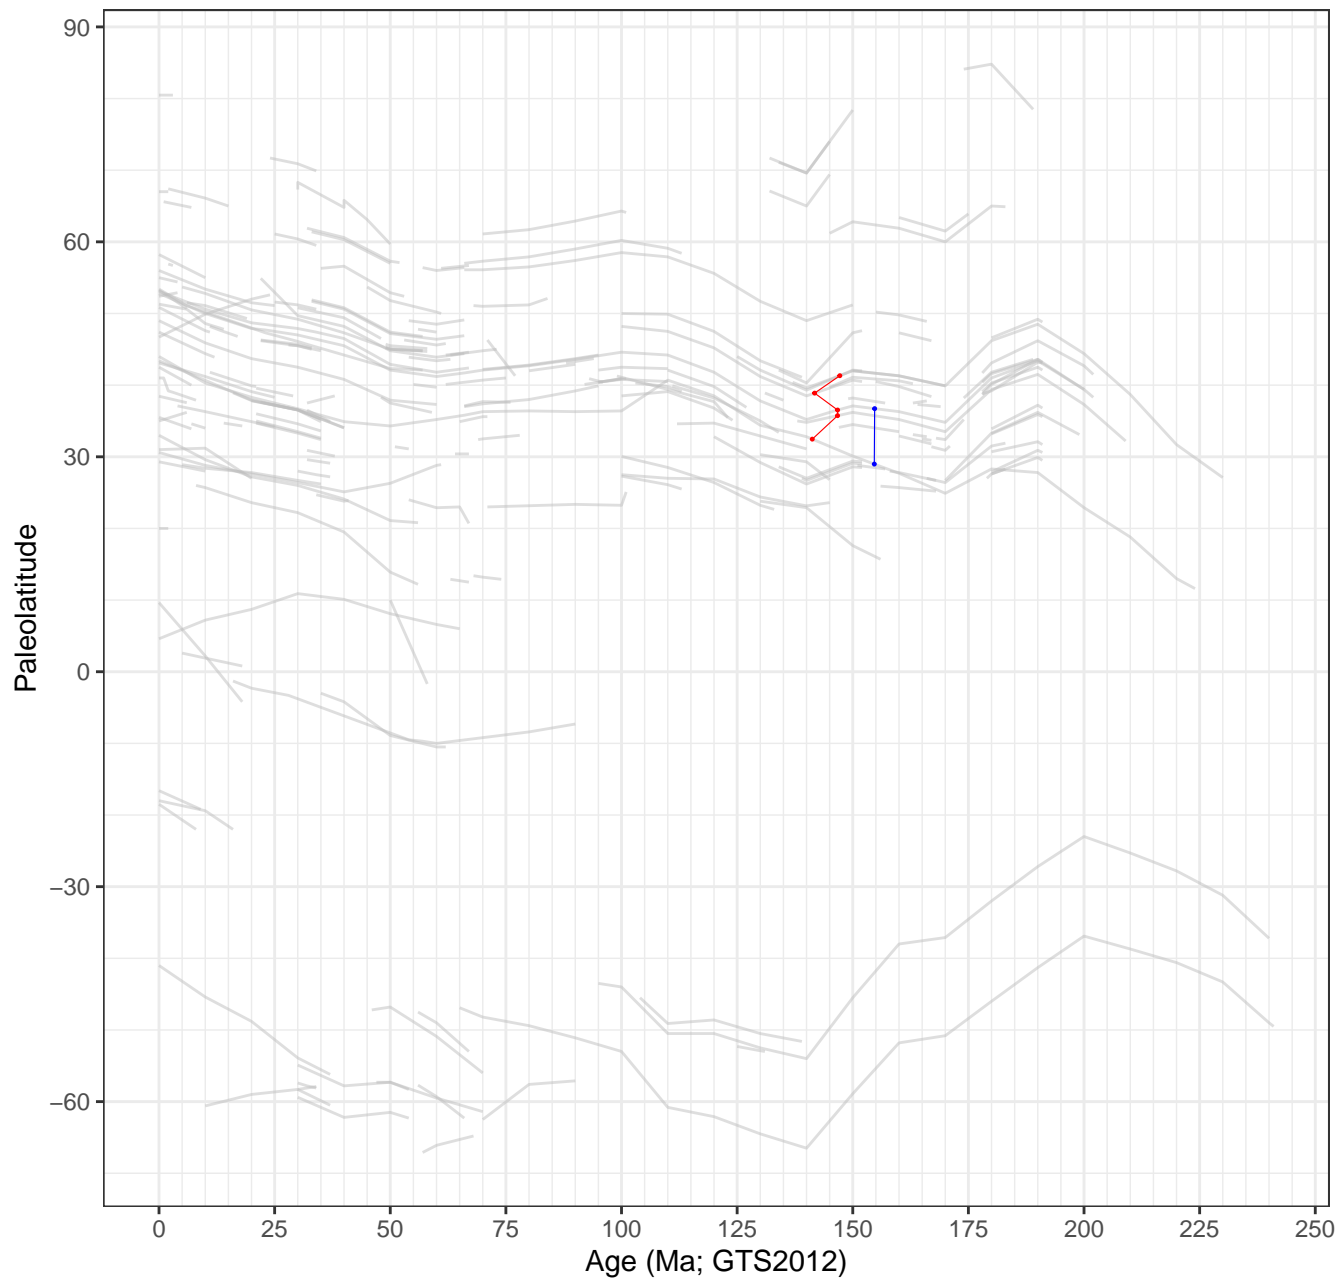

Supplement: Supplementary file 1241 [file Dichadogonyaulax pannea.pdf › Supplement/Supplement 2/Species 1914 plots/Dichadogonyaulax pannea.pdf]

# Species *Dichadogonyaulax sellwoodii*

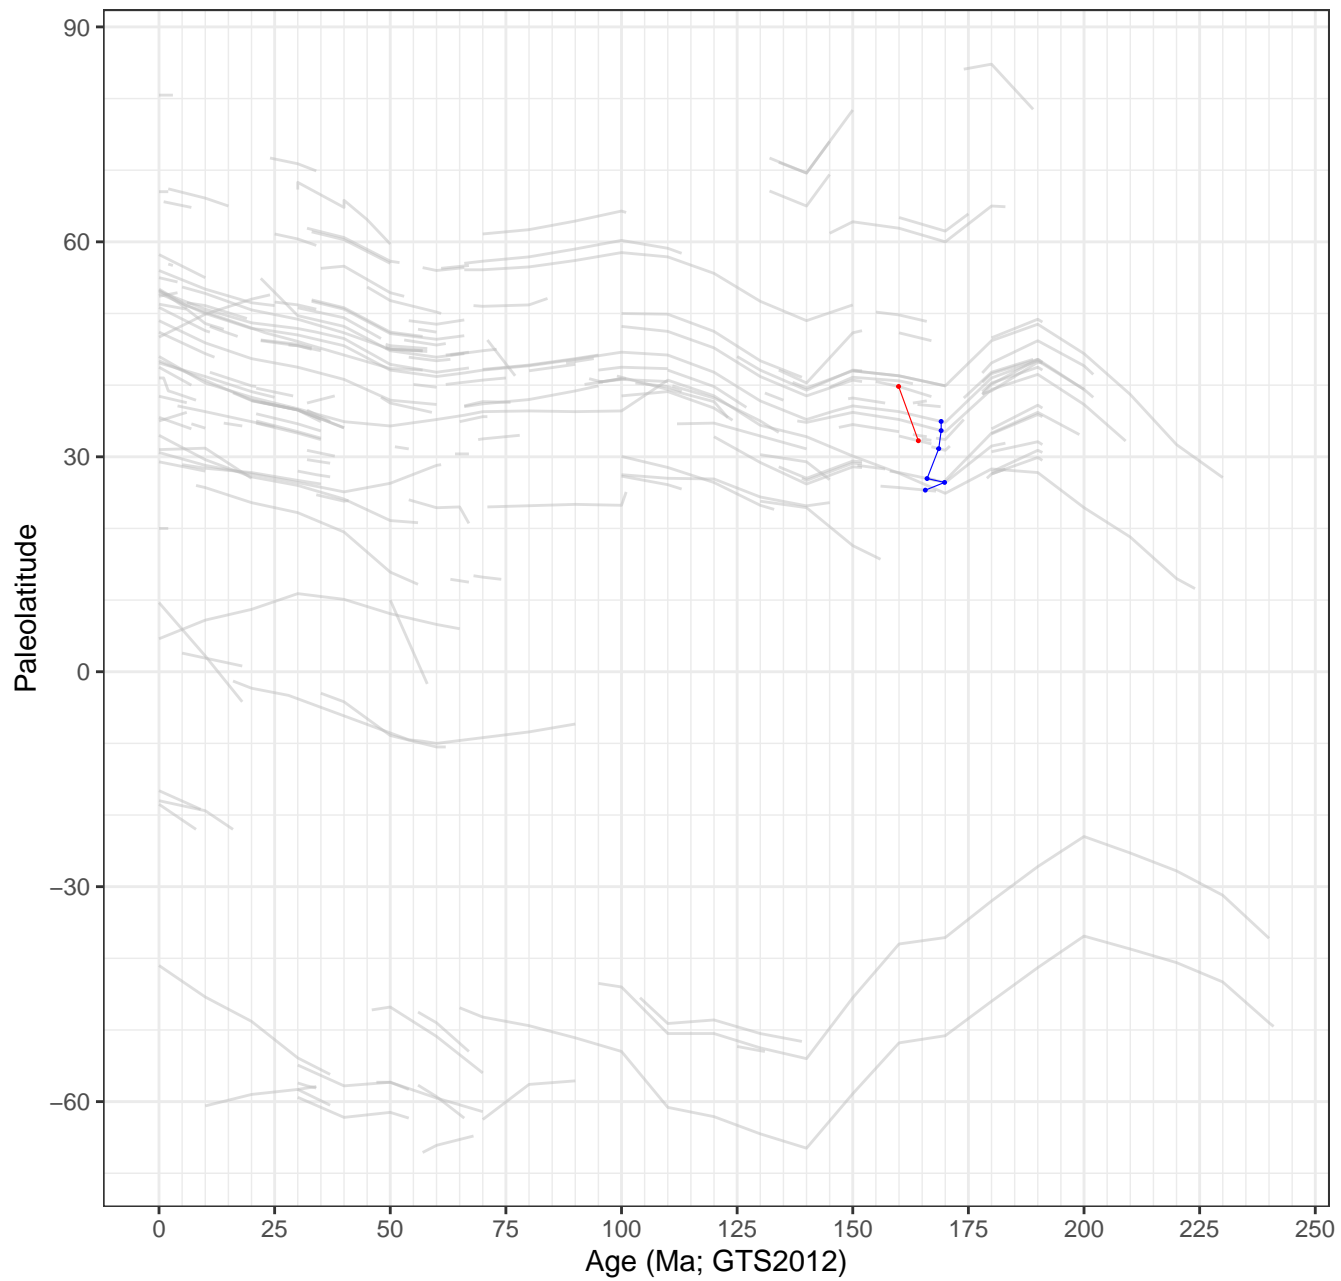

Supplement: Supplementary file 1242 [file Dichadogonyaulax sellwoodii.pdf › Supplement/Supplement 2/Species 1914 plots/Dichadogonyaulax sellwoodii.pdf]

# Species *Diconodinium davidii*

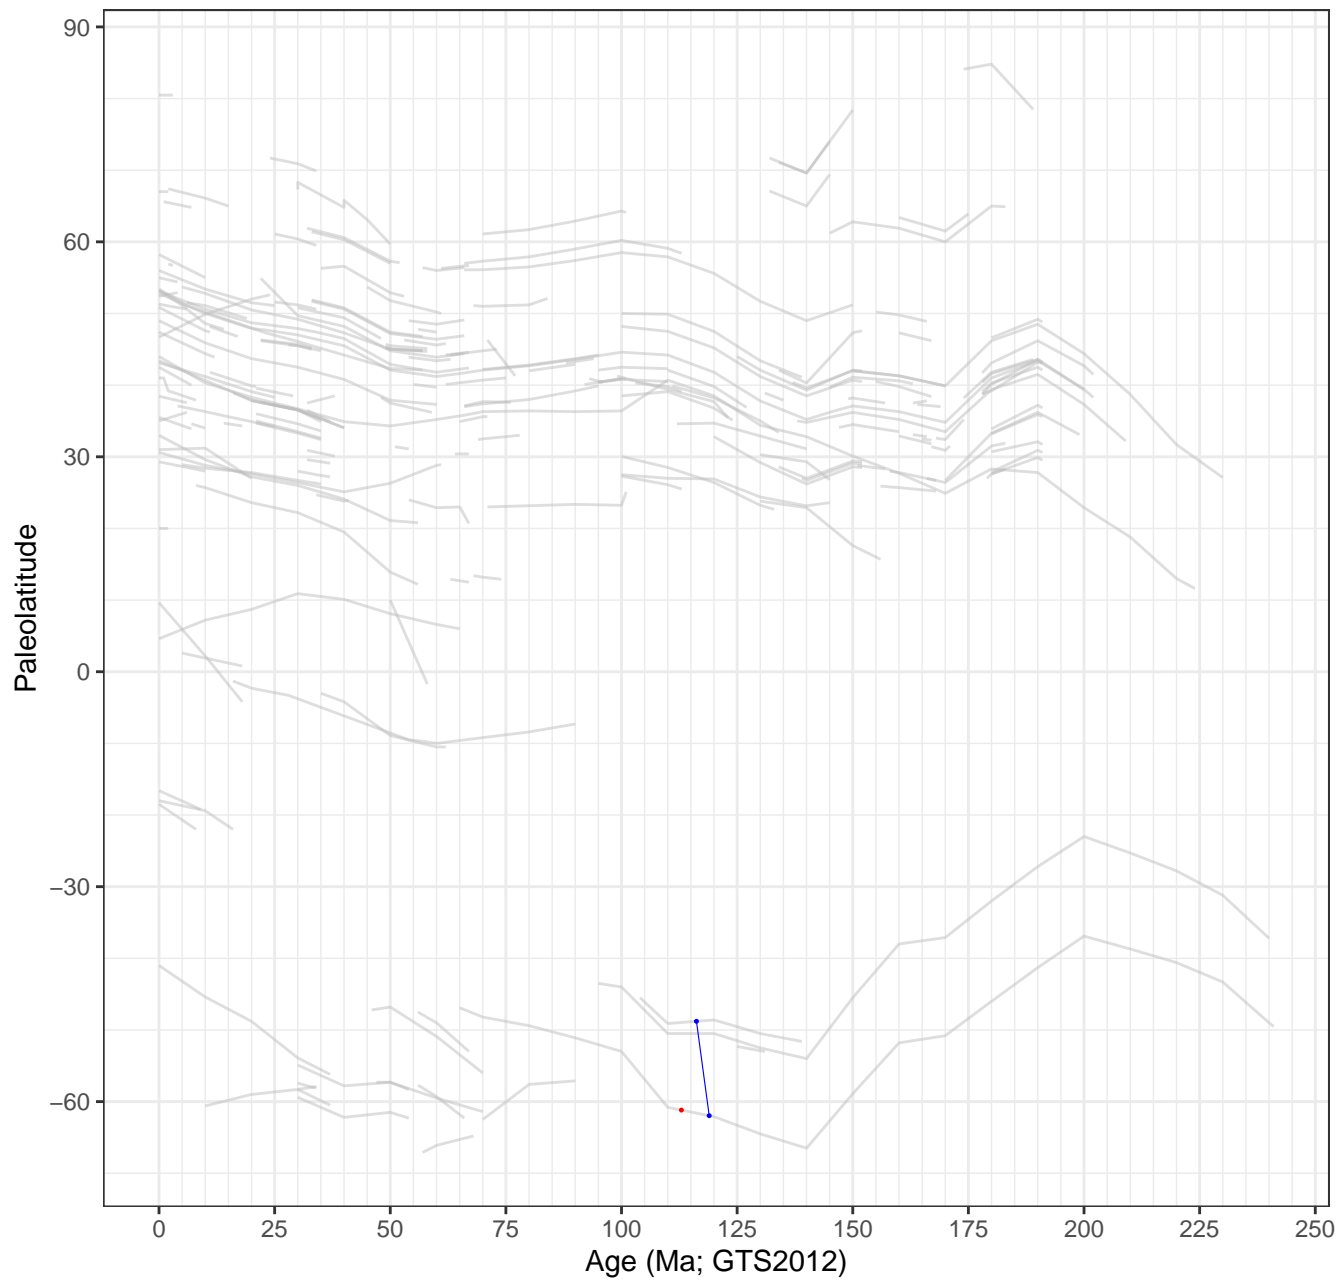

Supplement: Supplementary file 1243 [file Diconodinium davidii.pdf › Supplement/Supplement 2/Species 1914 plots/Diconodinium davidii.pdf]

# Species *Diconodinium martianum*

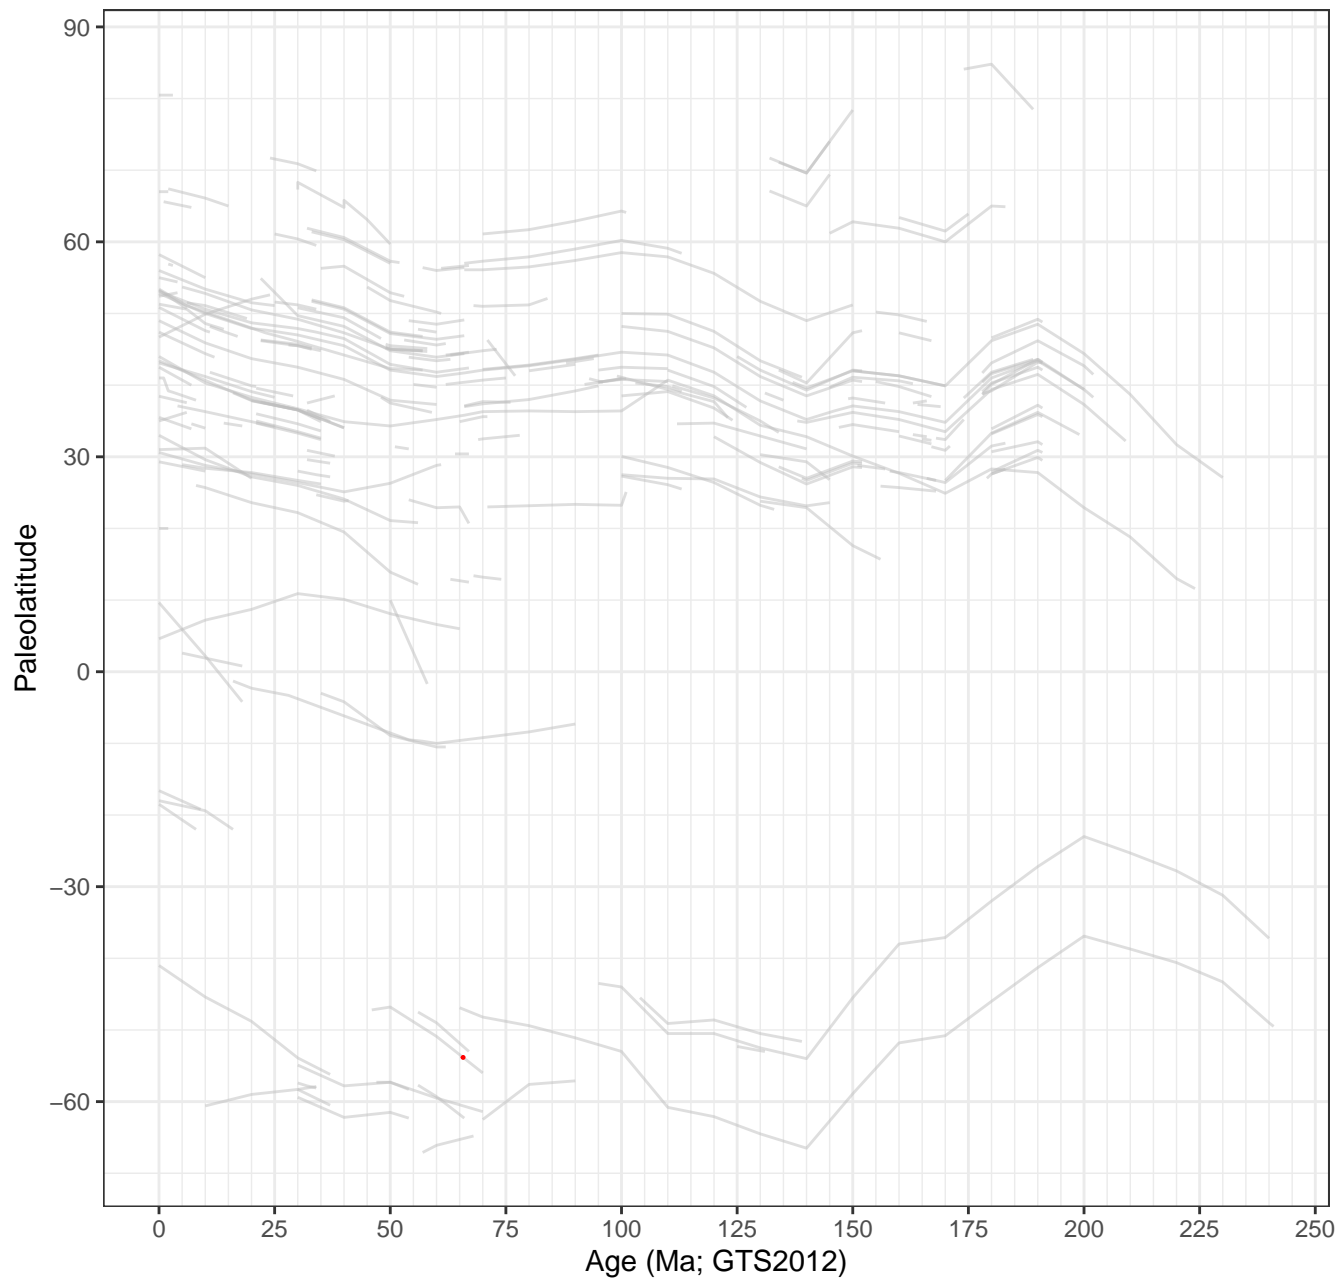

Supplement: Supplementary file 1244 [file Diconodinium martianum.pdf › Supplement/Supplement 2/Species 1914 plots/Diconodinium martianum.pdf]

# Species *Diconodinium multispinum*

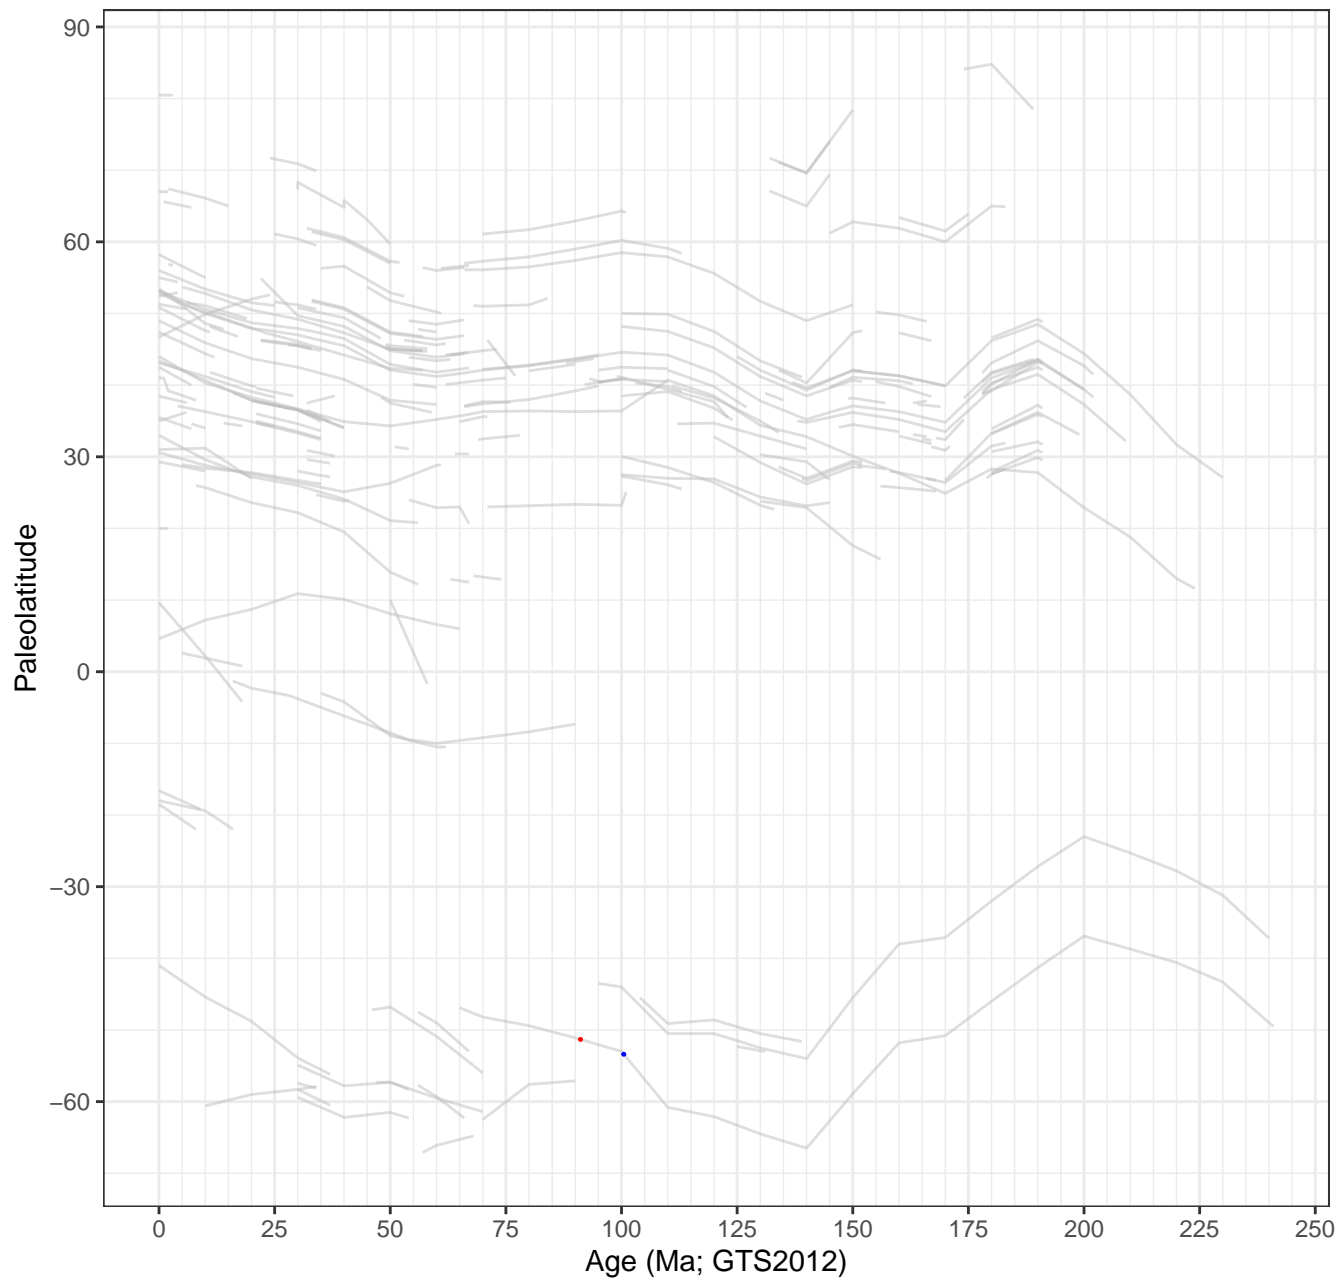

Supplement: Supplementary file 1245 [file Diconodinium multispinum.pdf › Supplement/Supplement 2/Species 1914 plots/Diconodinium multispinum.pdf]

# Species *Diconodinium psilatium*

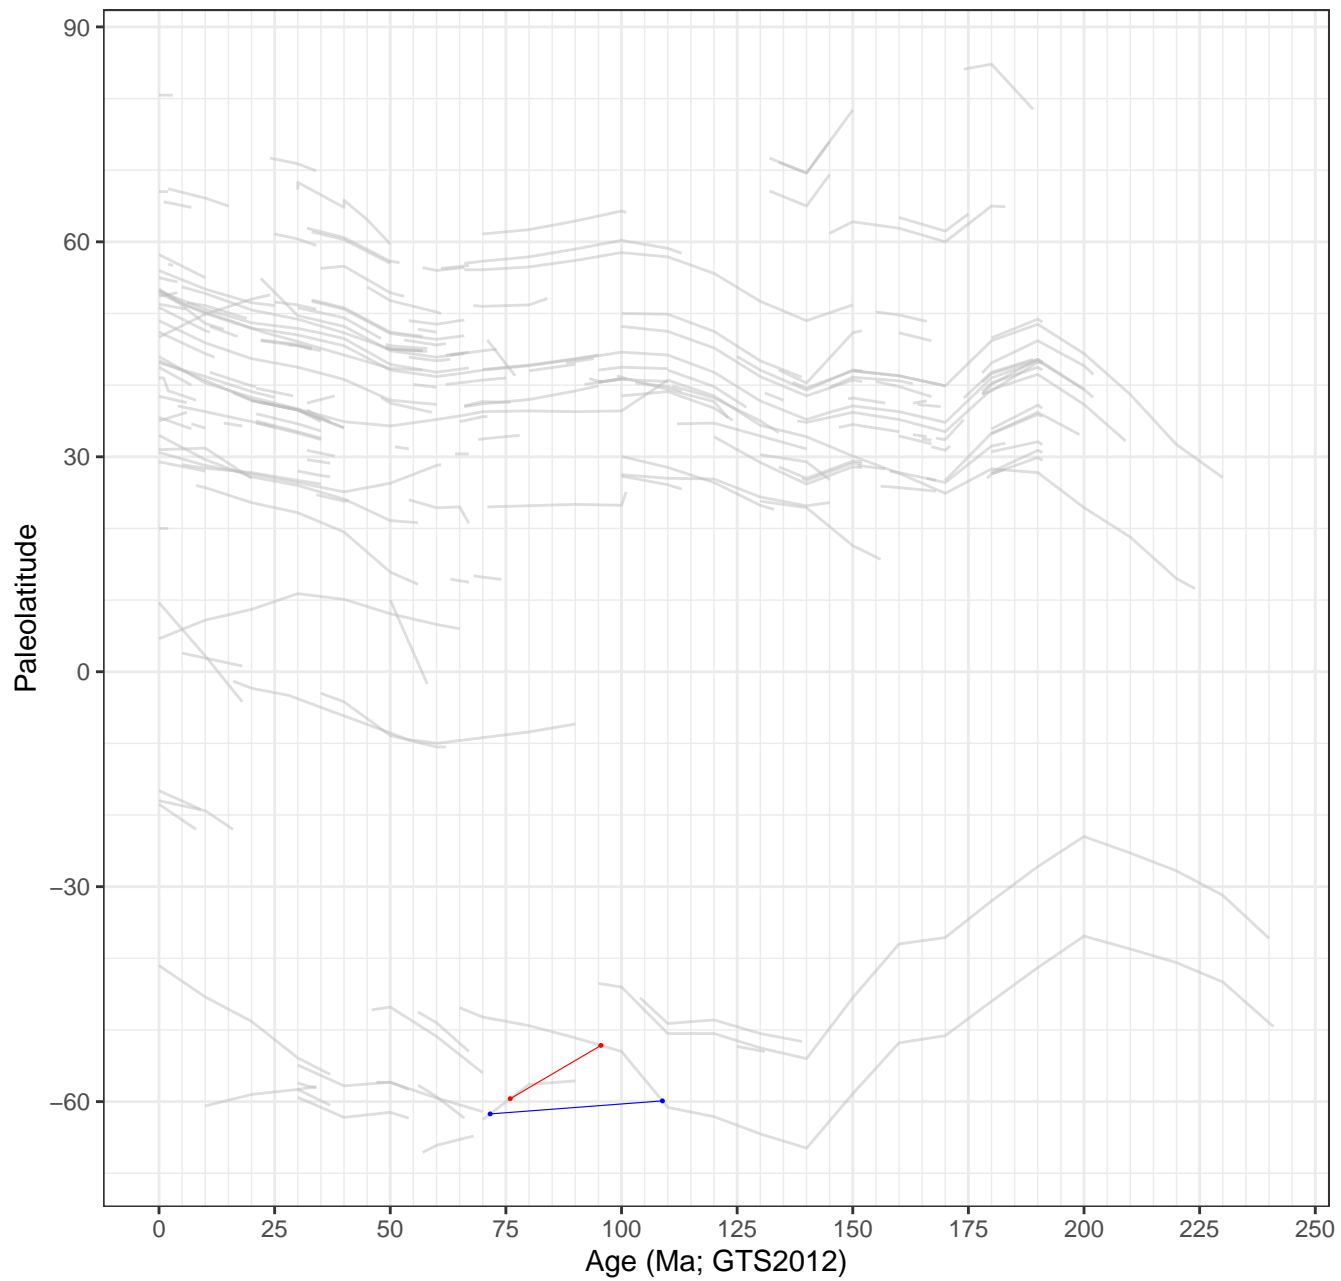

Supplement: Supplementary file 1246 [file Diconodinium psilatum.pdf › Supplement/Supplement 2/Species 1914 plots/Diconodinium psilatum.pdf]

# Species *Diconodinium pusillum*

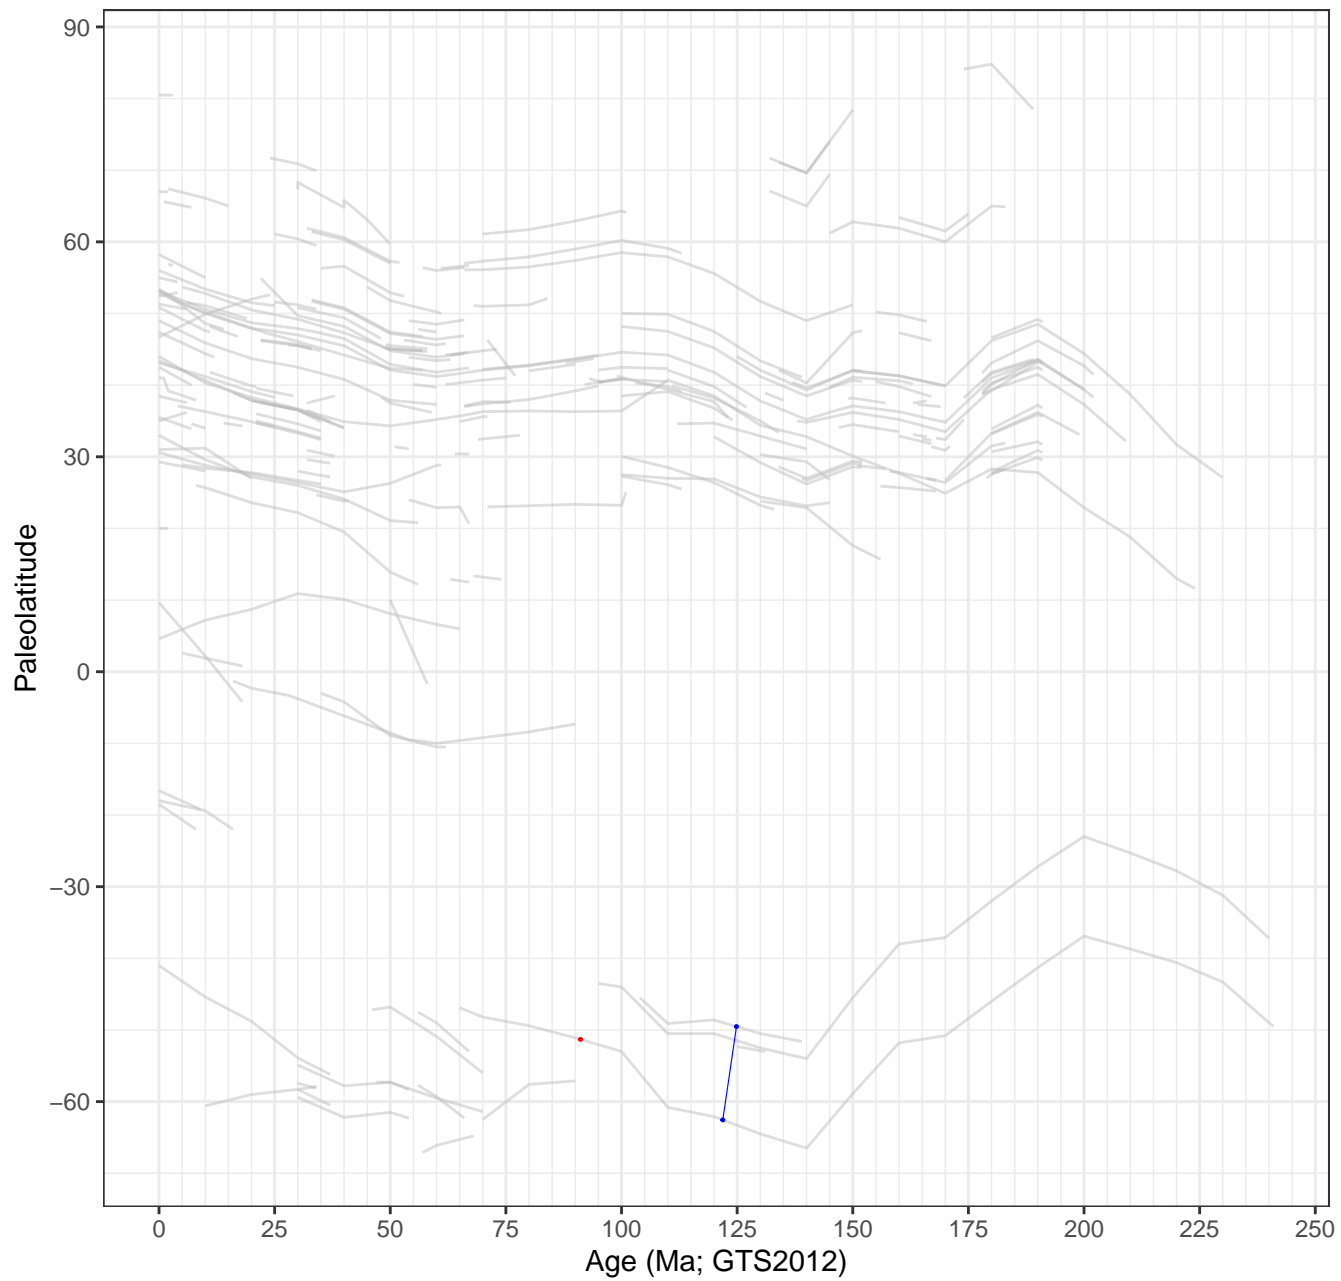

Supplement: Supplementary file 1247 [file Diconodinium pusillum.pdf › Supplement/Supplement 2/Species 1914 plots/Diconodinium pusillum.pdf]

# Species *Dimidium striata*

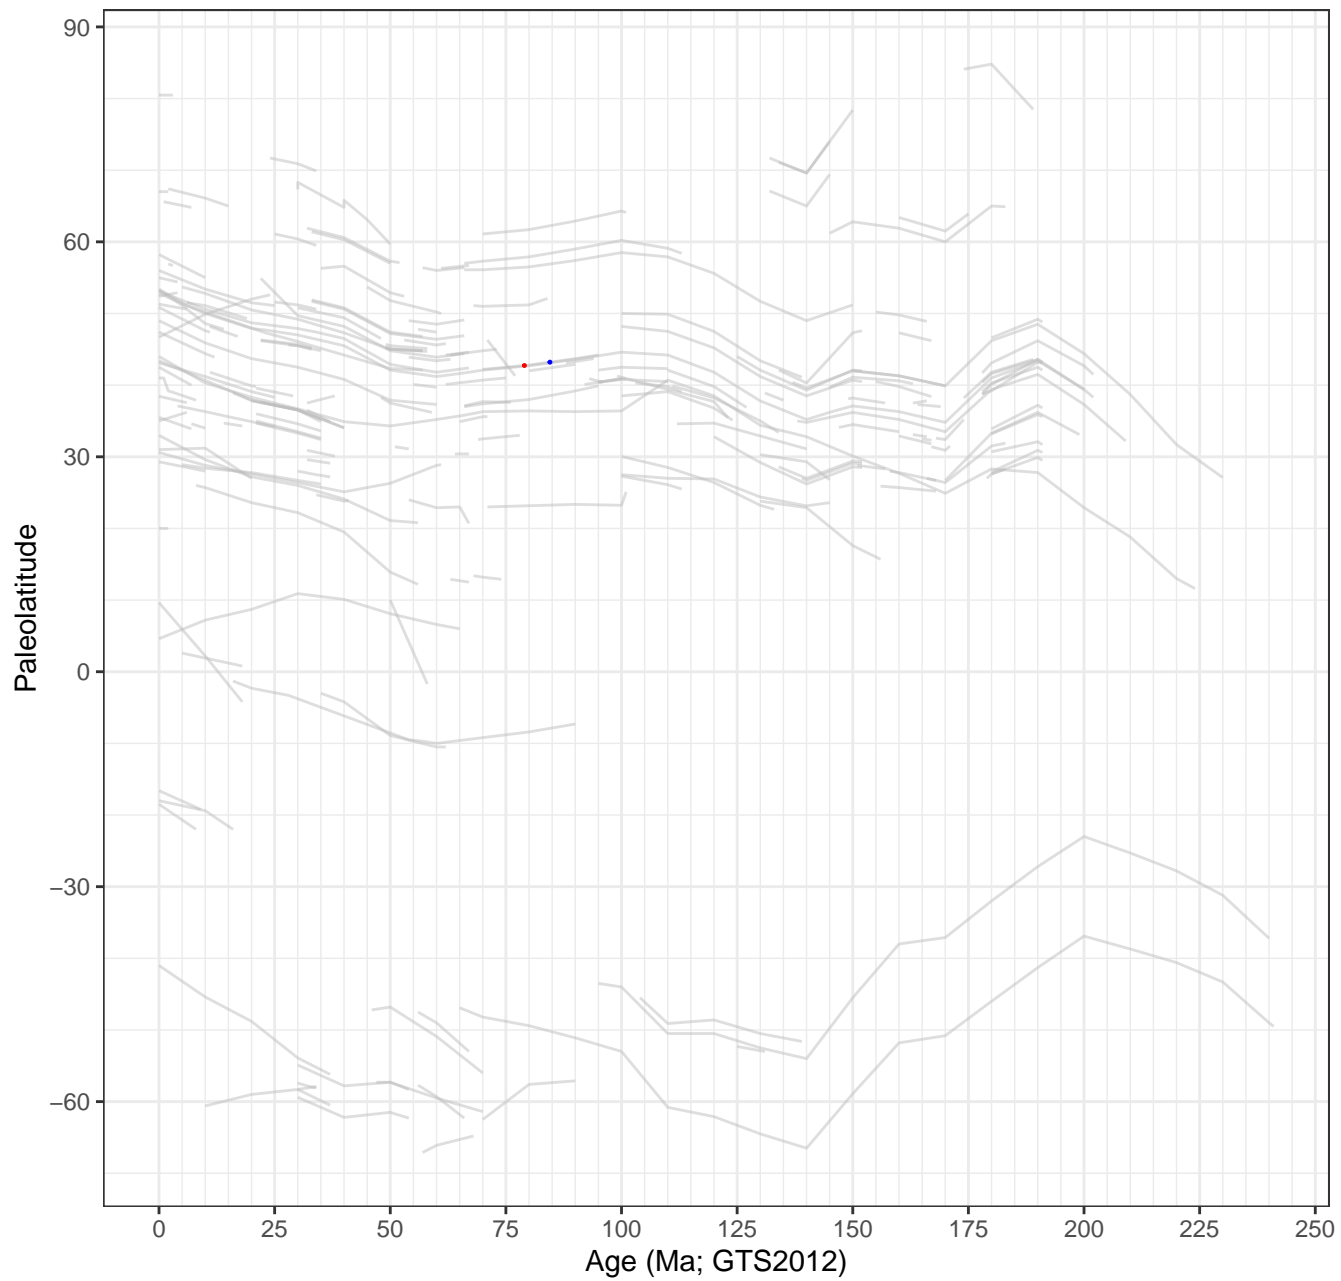

Supplement: Supplementary file 1248 [file Dimidium striata.pdf › Supplement/Supplement 2/Species 1914 plots/Dimidium striata.pdf]

# Species *Dinaurella pyrgos*

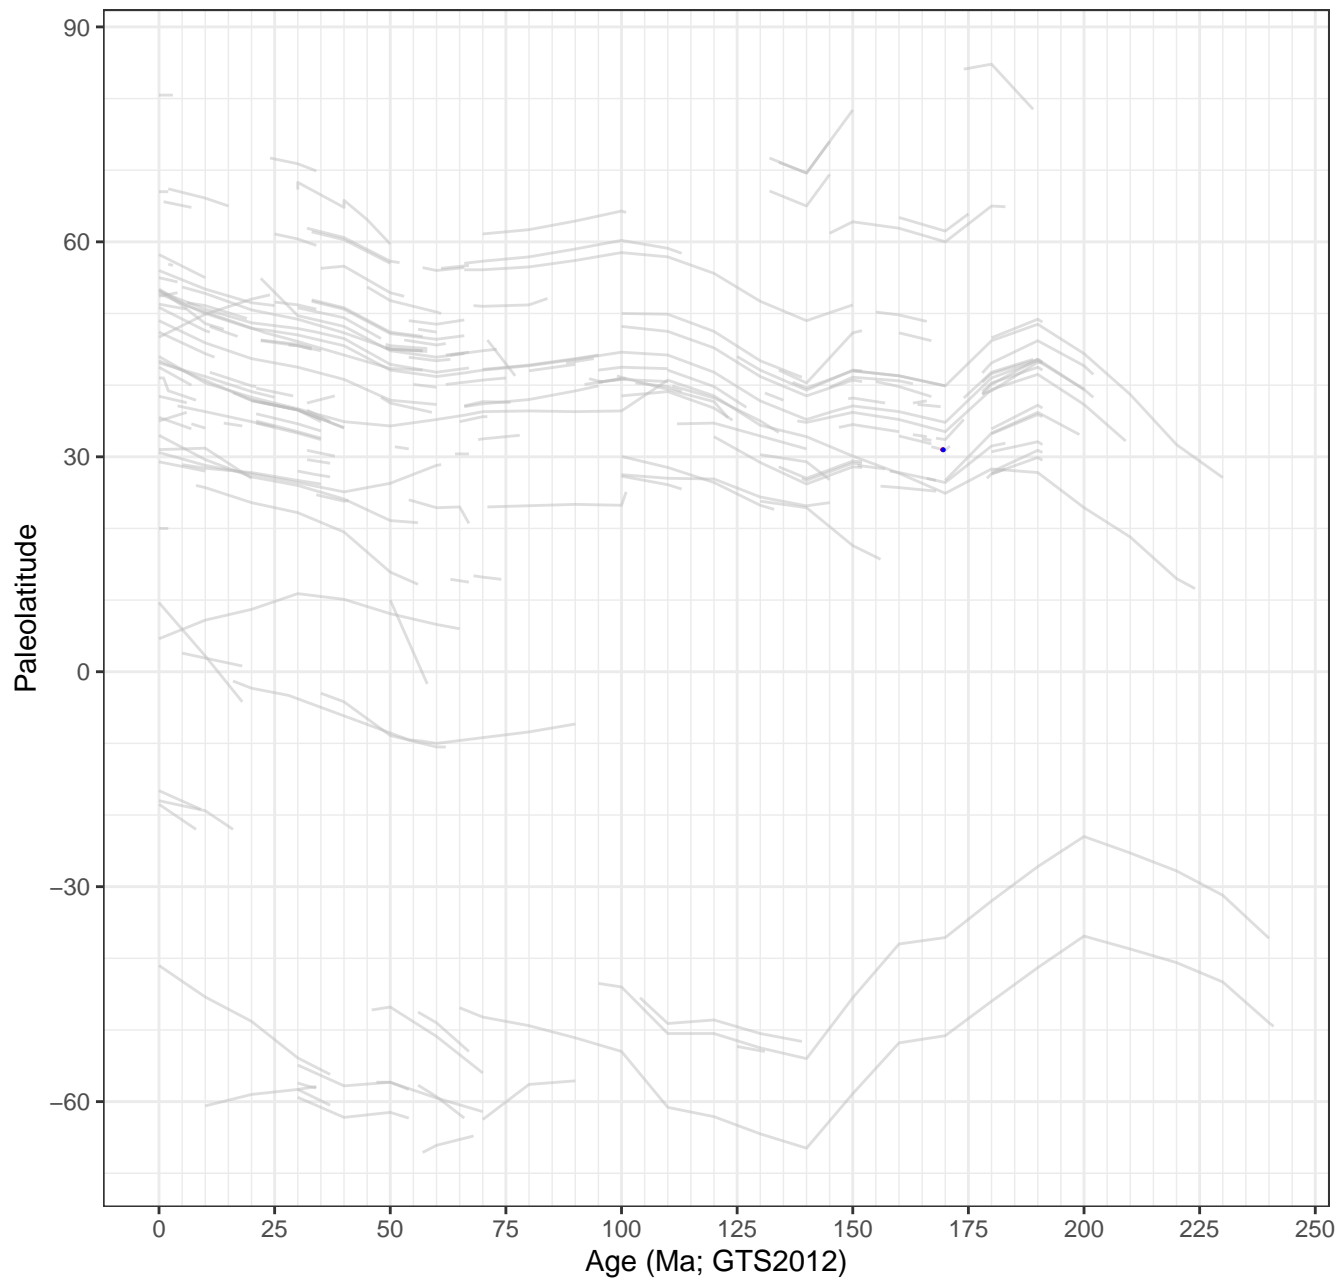

Supplement: Supplementary file 1249 [file Dinaurella pyrgos.pdf › Supplement/Supplement 2/Species 1914 plots/Dinaurella pyrgos.pdf]

# Species *Dingodinium cerviculum*

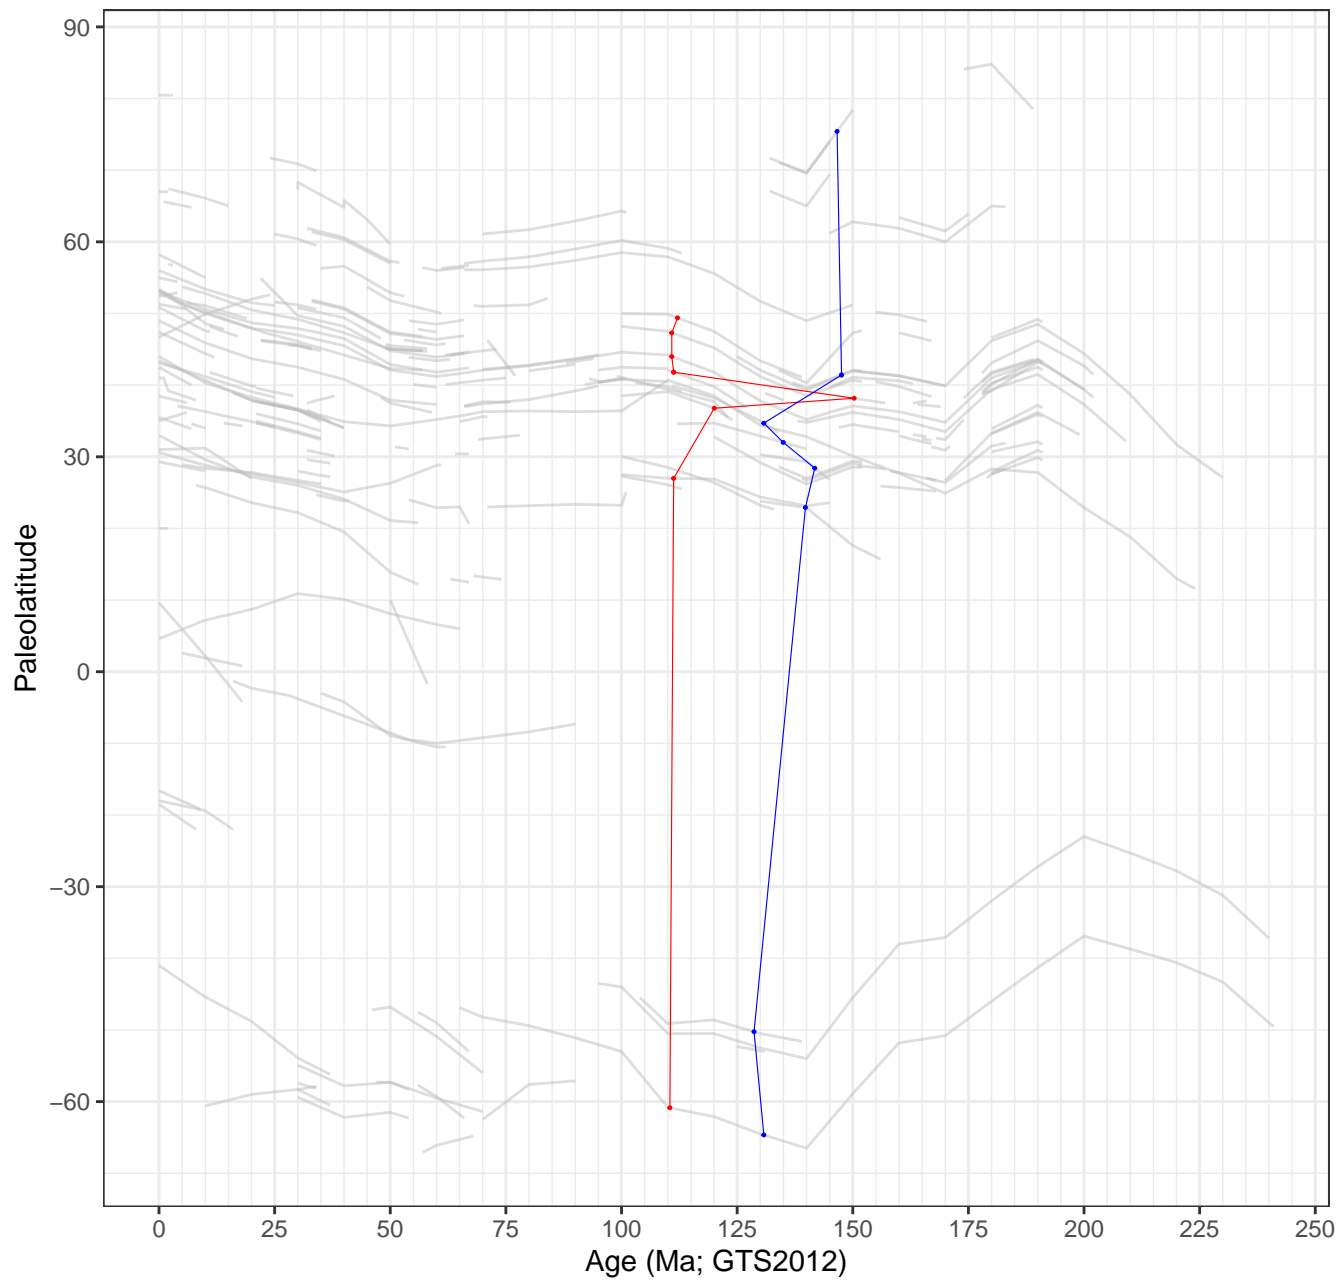

Supplement: Supplementary file 1250 [file Dingodinium cerviculum.pdf › Supplement/Supplement 2/Species 1914 plots/Dingodinium cerviculum.pdf]

# Species *Dingodinium europaeum*

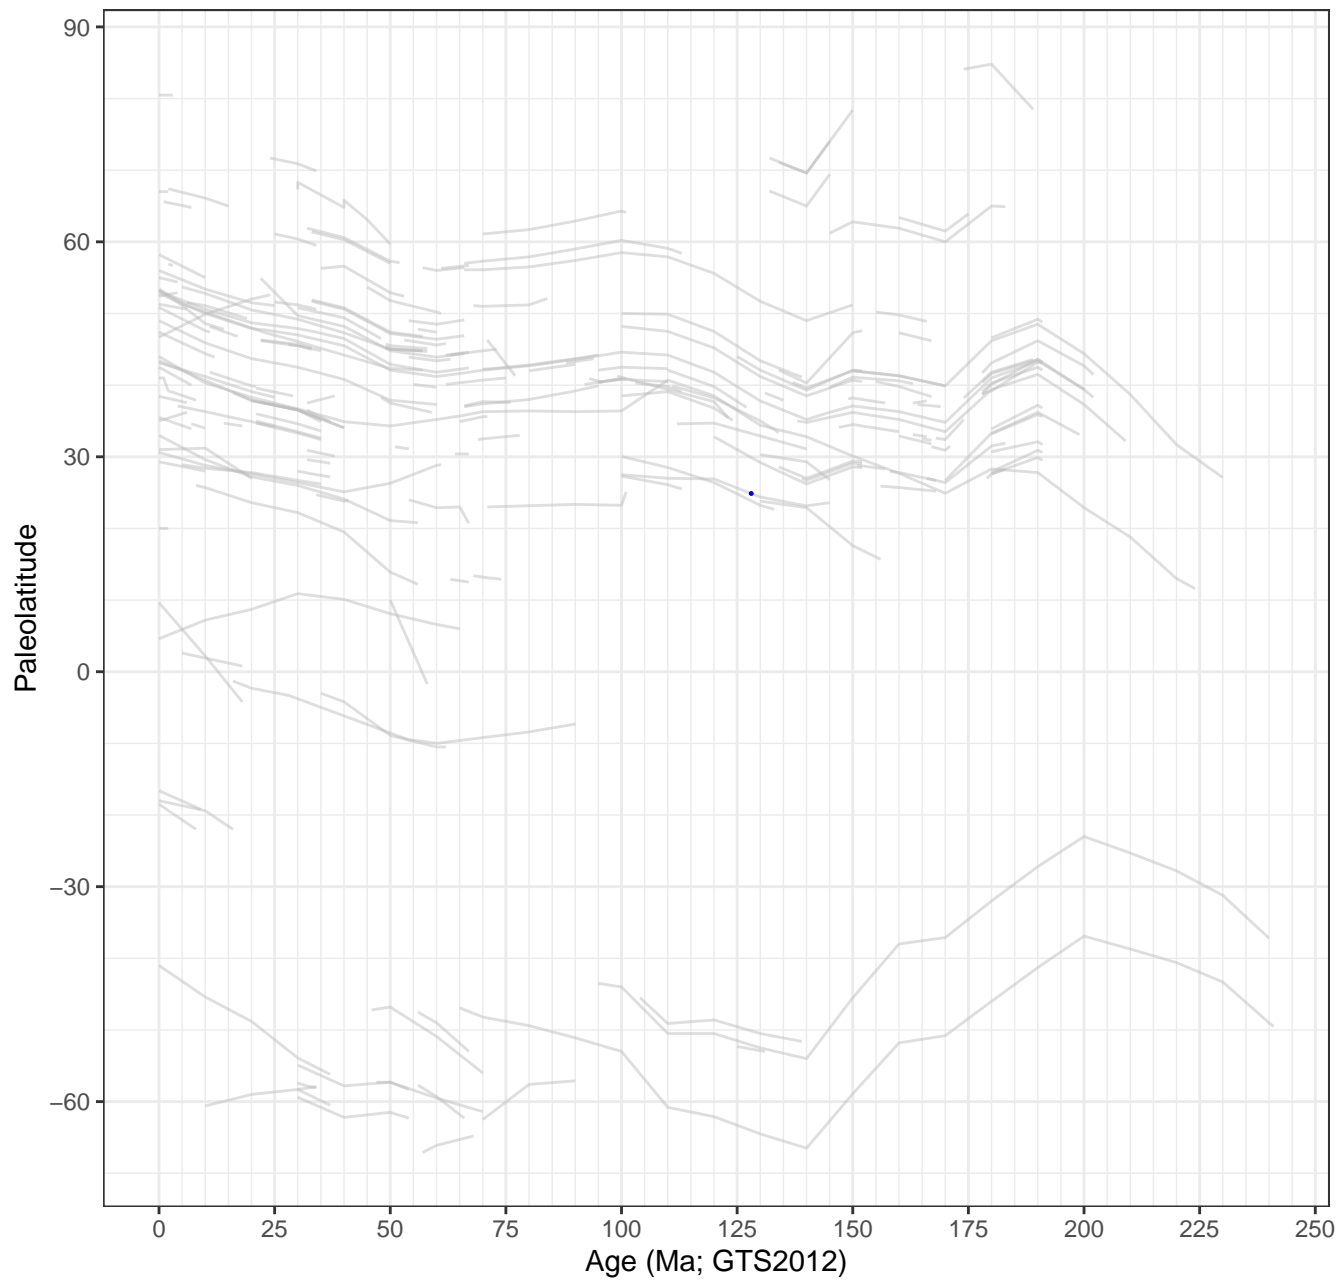

Supplement: Supplementary file 1251 [file Dingodinium europaeum.pdf › Supplement/Supplement 2/Species 1914 plots/Dingodinium europaeum.pdf]

# Species *Dingodinium harsveldtii*

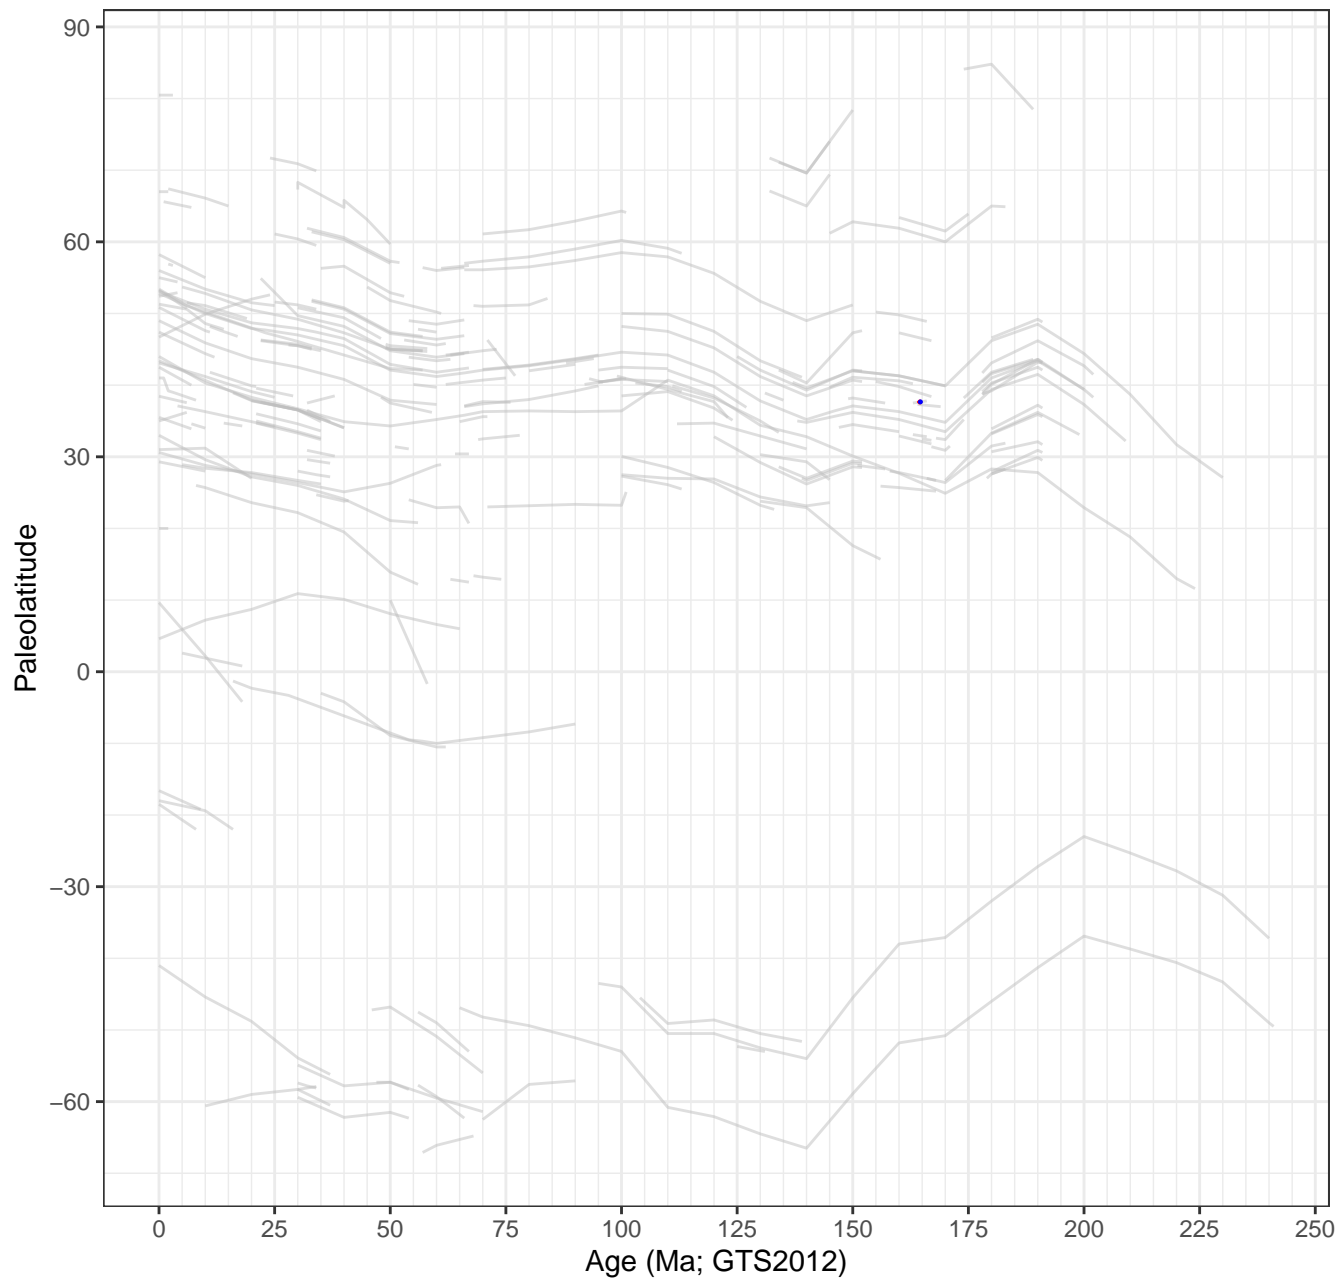

Supplement: Supplementary file 1252 [file Dingodinium harsveldtii.pdf › Supplement/Supplement 2/Species 1914 plots/Dingodinium harsveldtii.pdf]

# Species *Dingodinium jurassicum*

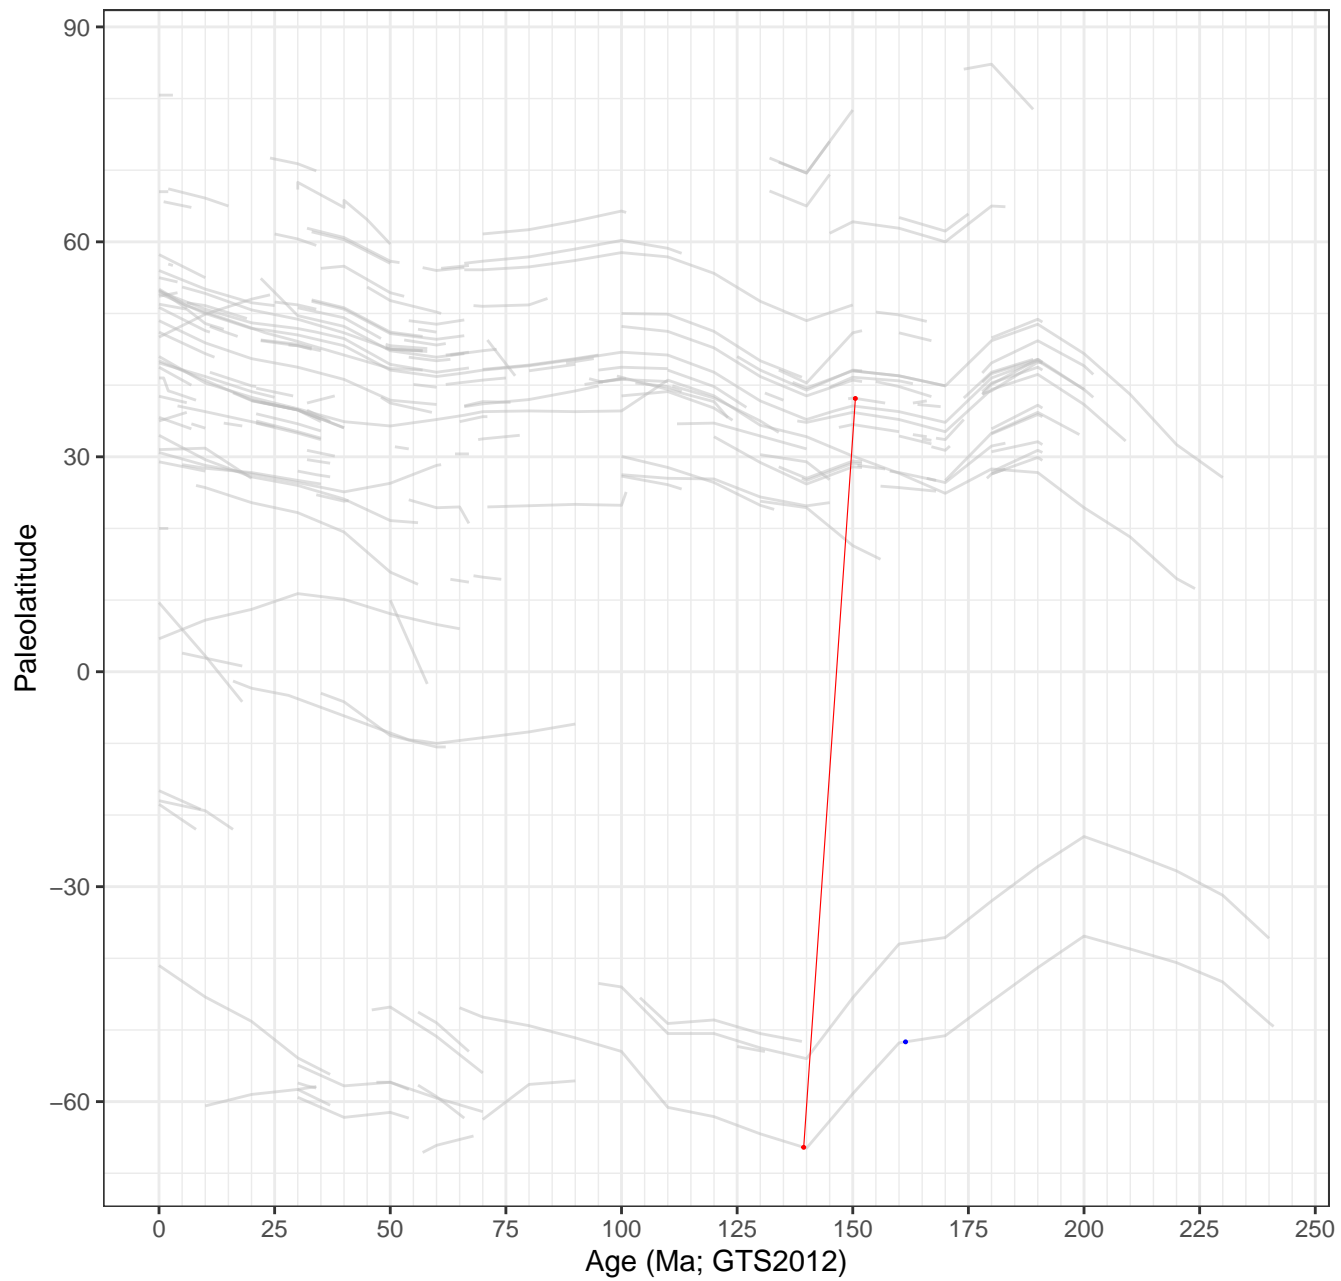

Supplement: Supplementary file 1253 [file Dingodinium jurassicum.pdf › Supplement/Supplement 2/Species 1914 plots/Dingodinium jurassicum.pdf]

# Species *Dingodinium minutum*

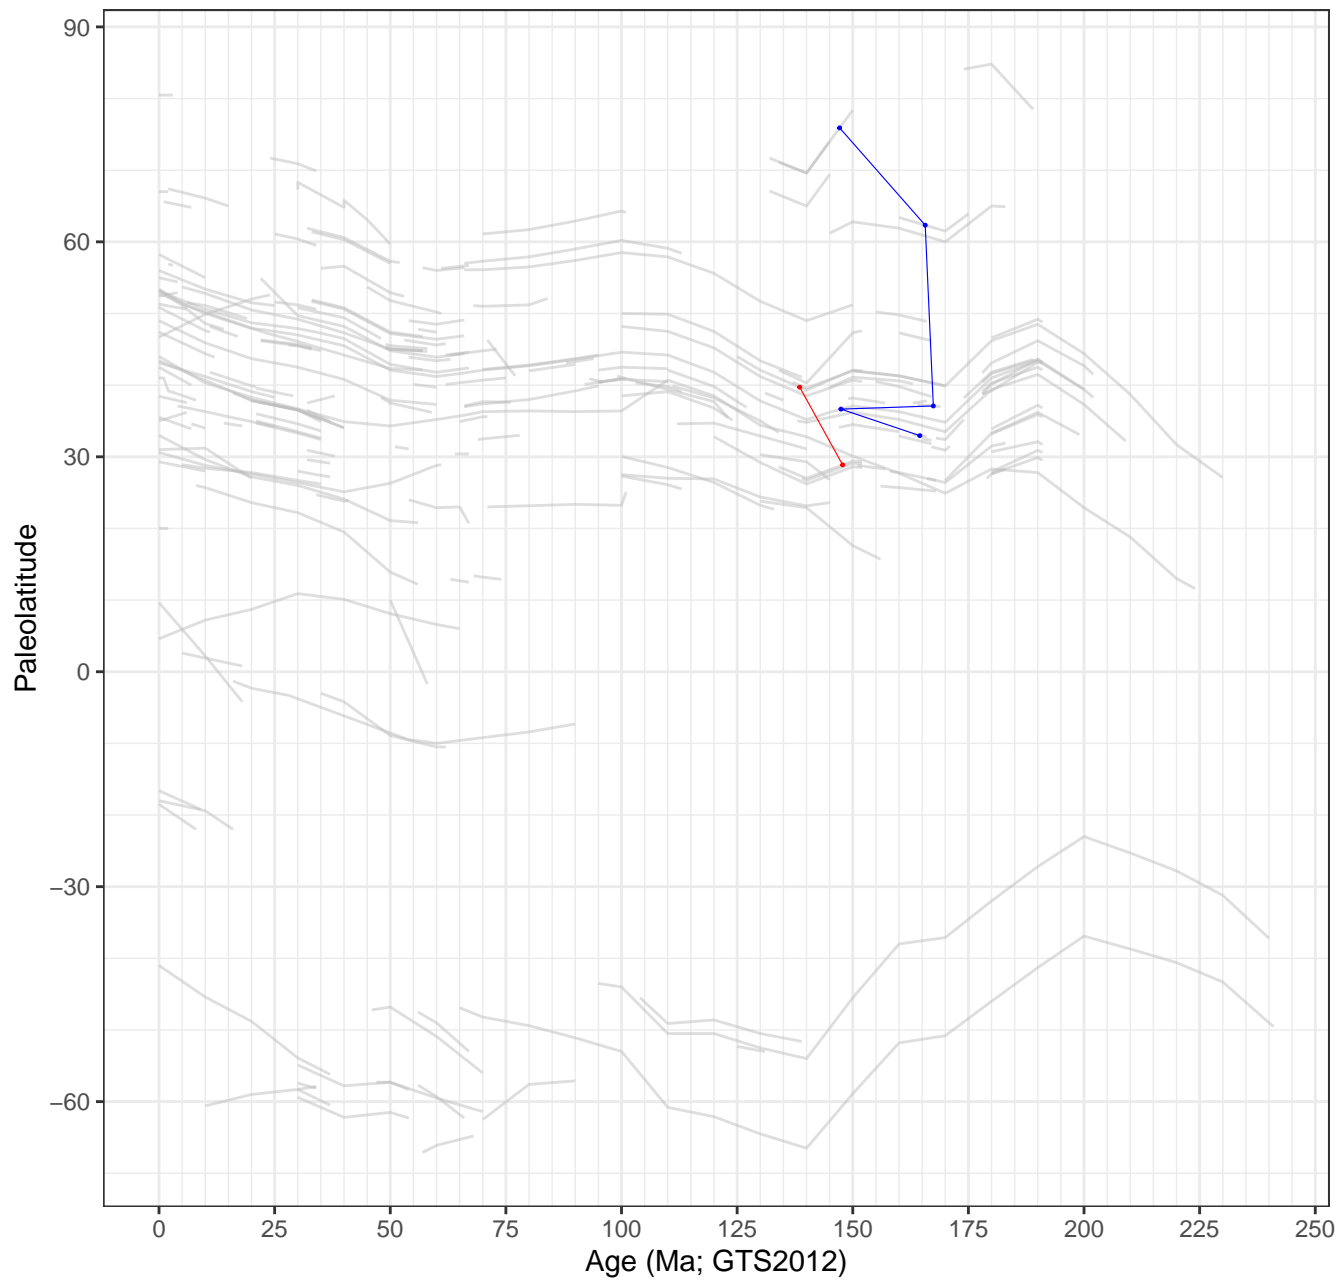

Supplement: Supplementary file 1254 [file Dingodinium minutum.pdf › Supplement/Supplement 2/Species 1914 plots/Dingodinium minutum.pdf]

# Species *Dingodinium spinosum*

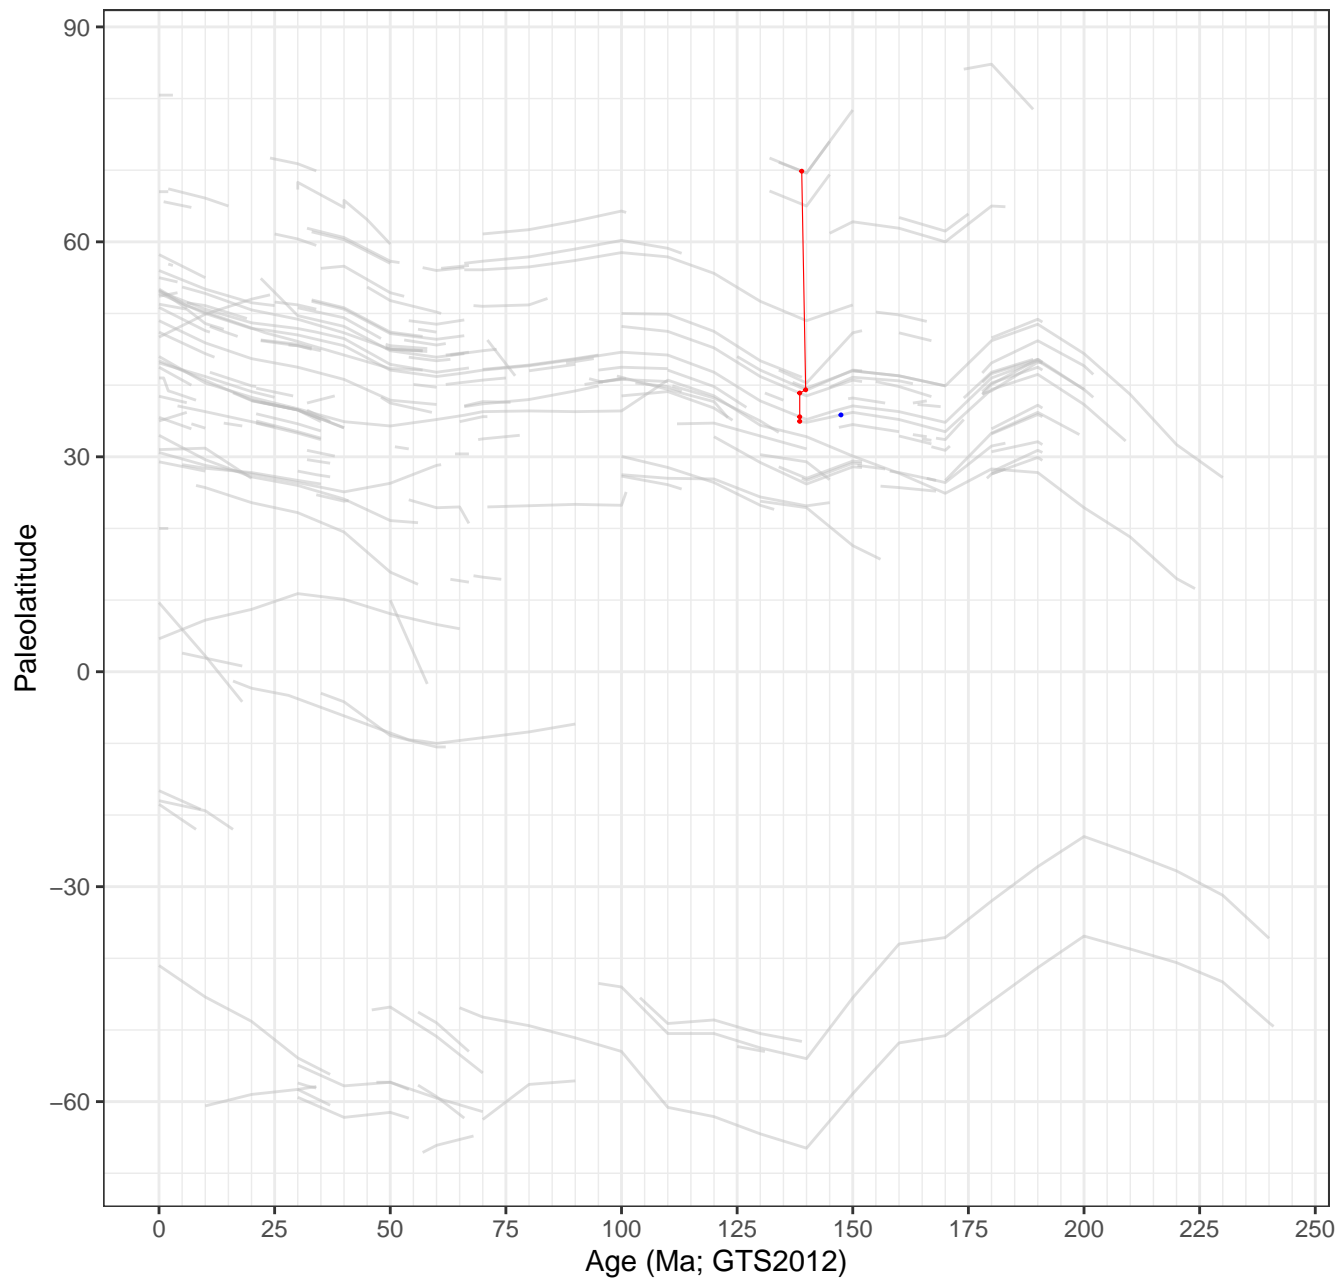

Supplement: Supplementary file 1255 [file Dingodinium spinosum.pdf › Supplement/Supplement 2/Species 1914 plots/Dingodinium spinosum.pdf]

# Species *Dingodinium subtile*

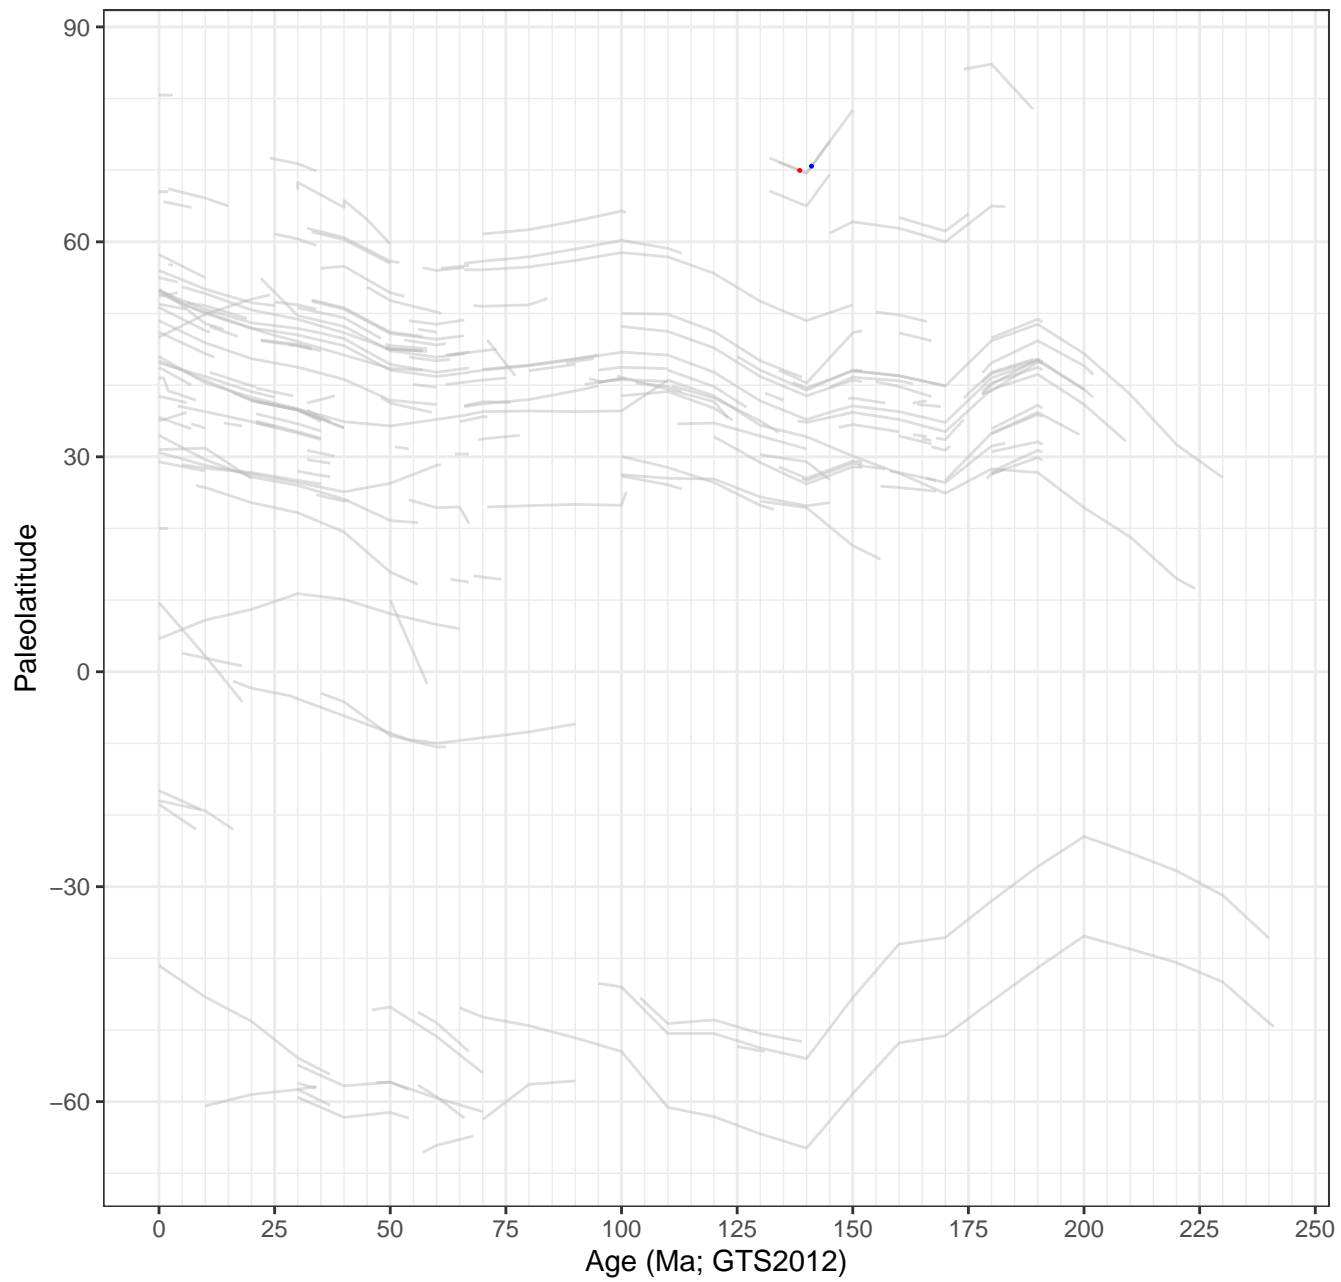

Supplement: Supplementary file 1256 [file Dingodinium subtile.pdf › Supplement/Supplement 2/Species 1914 plots/Dingodinium subtile.pdf]

# Species *Dingodinium swanense*

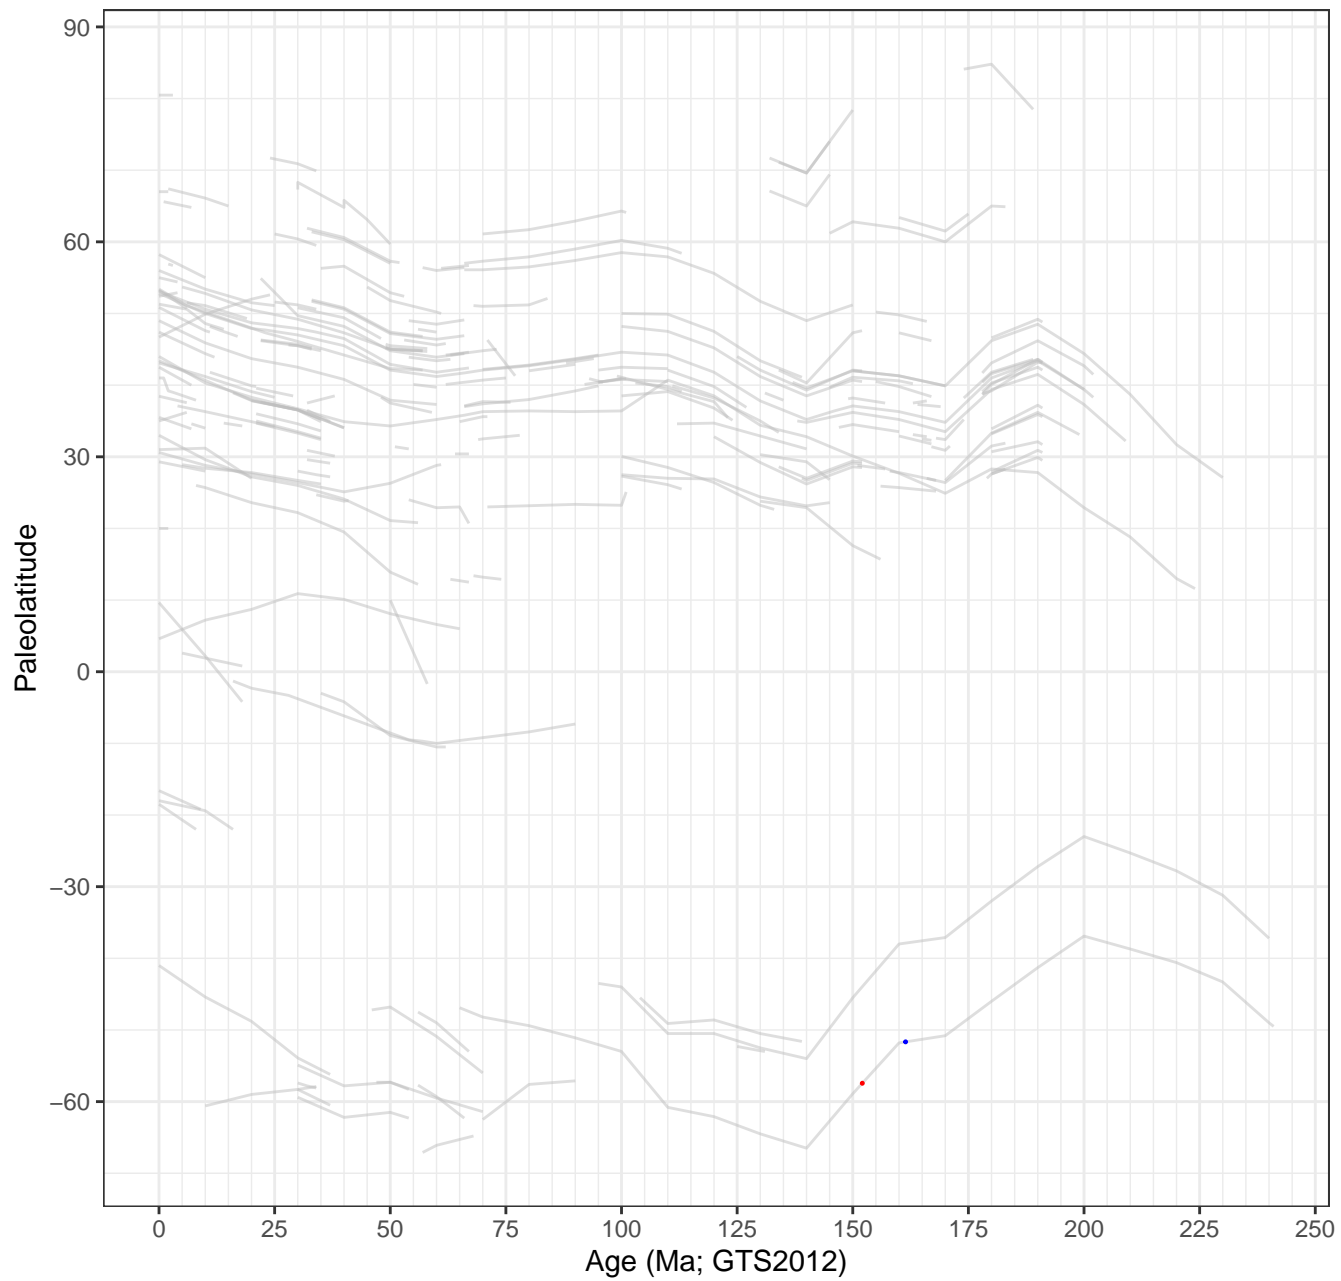

Supplement: Supplementary file 1257 [file Dingodinium swanense.pdf › Supplement/Supplement 2/Species 1914 plots/Dingodinium swanense.pdf]

# Species *Dingodinium tuberosum*

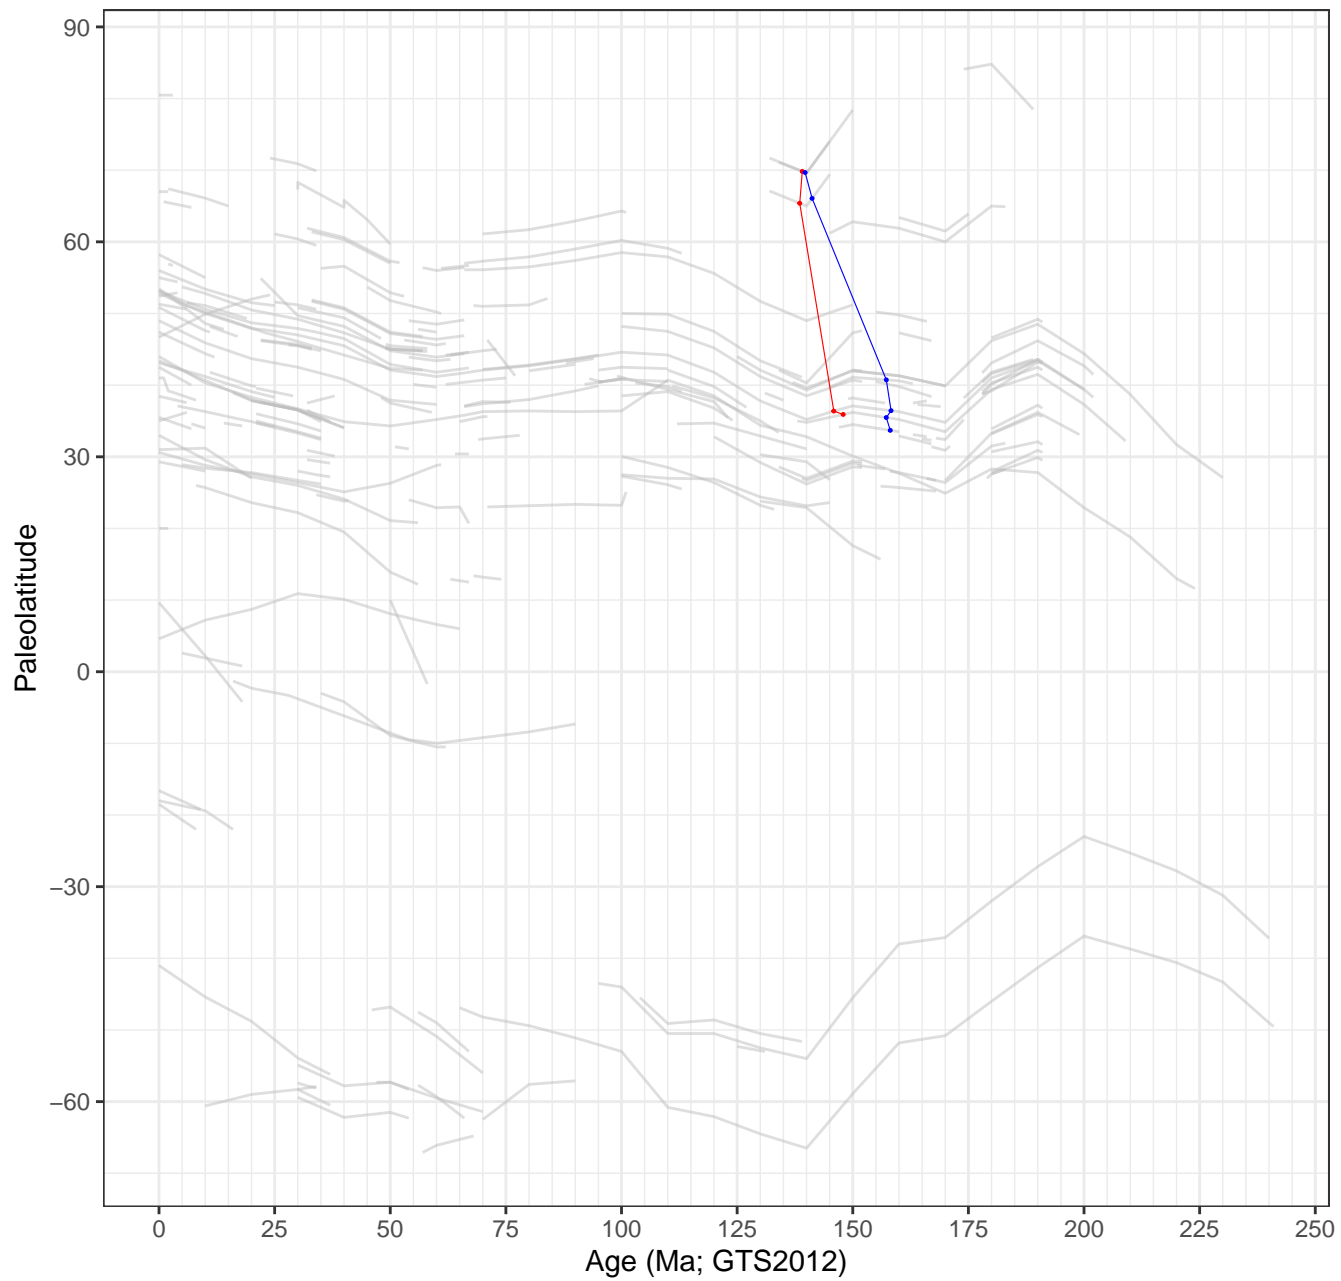

Supplement: Supplementary file 1258 [file Dingodinium tuberosum.pdf › Supplement/Supplement 2/Species 1914 plots/Dingodinium tuberosum.pdf]

# Species *Dinogymnium acuminatum*

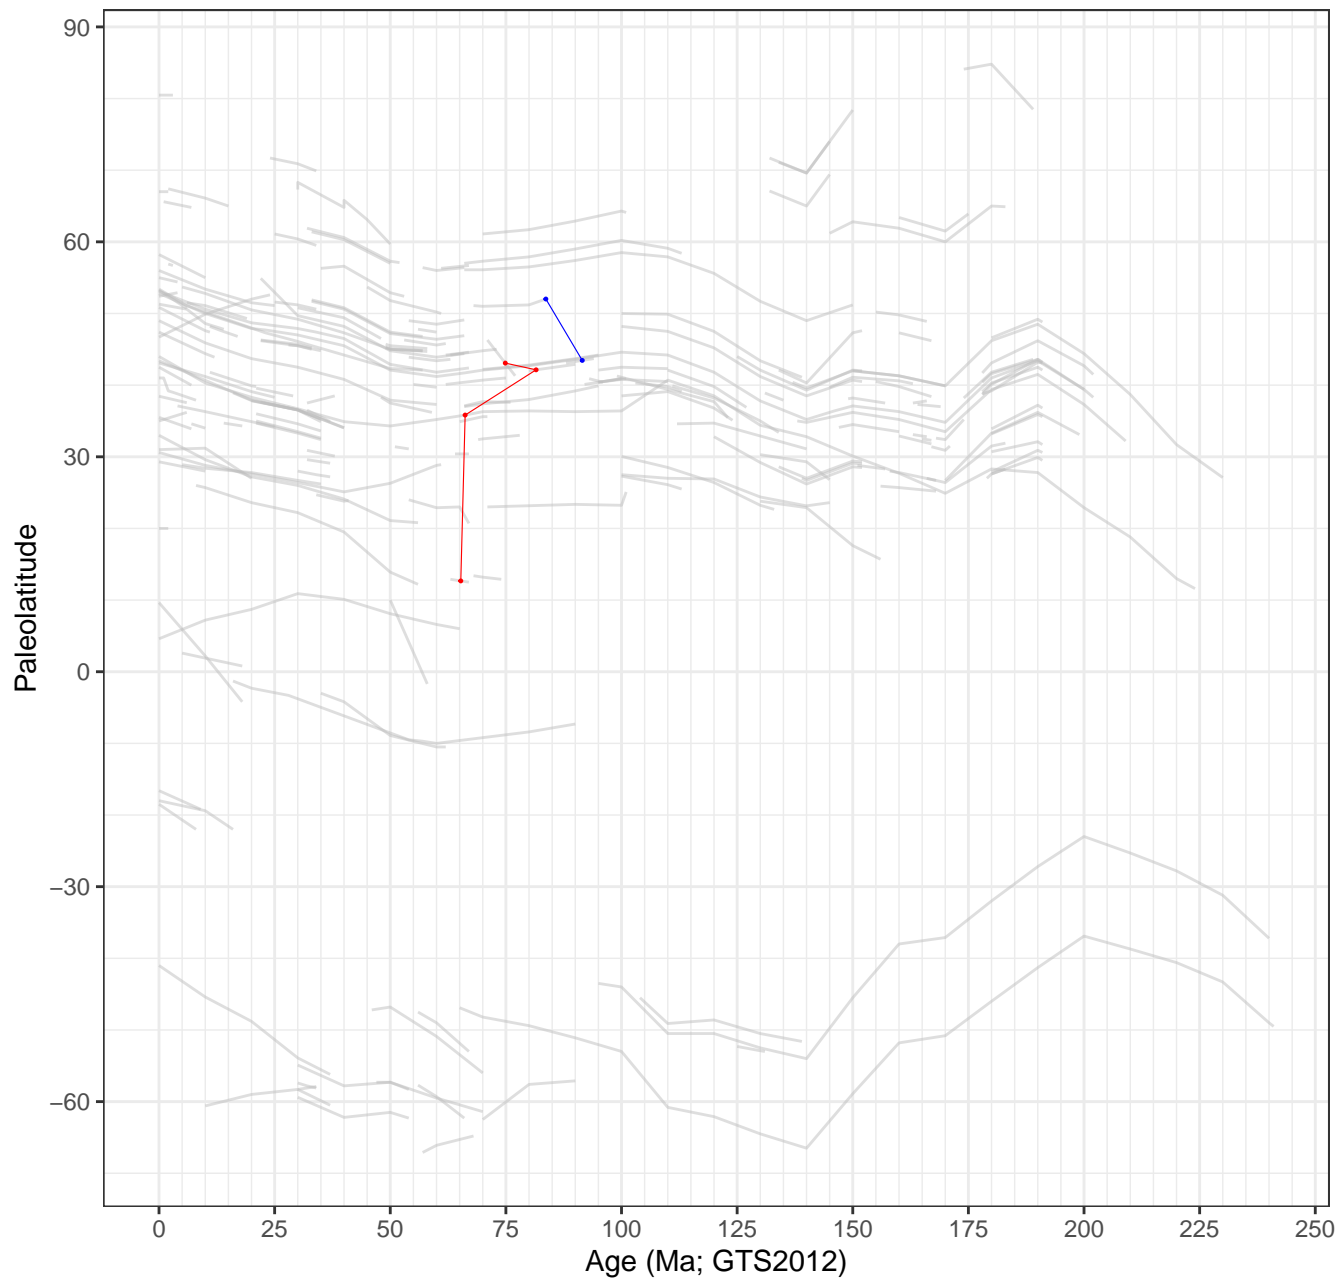

Supplement: Supplementary file 1259 [file Dinogymnium acuminatum.pdf › Supplement/Supplement 2/Species 1914 plots/Dinogymnium acuminatum.pdf]

# Species *Dinogymnium albertii*

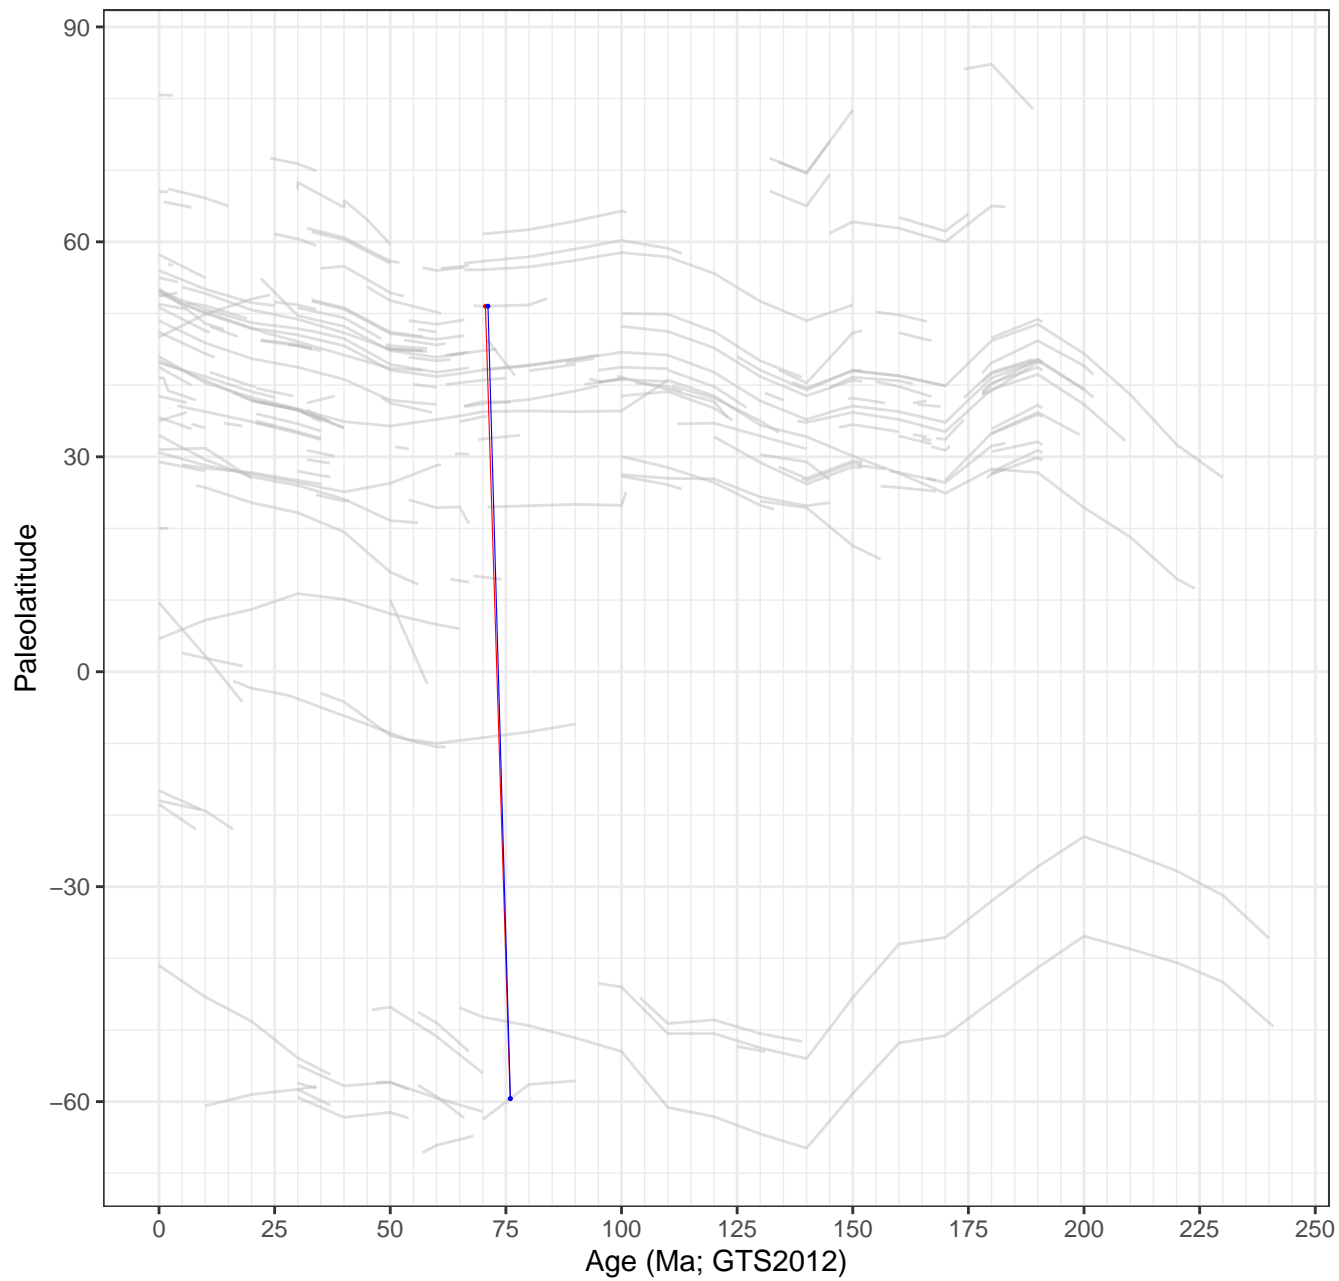

Supplement: Supplementary file 1260 [file Dinogymnium albertii.pdf › Supplement/Supplement 2/Species 1914 plots/Dinogymnium albertii.pdf]

# Species *Dinogymnium cretaceum*

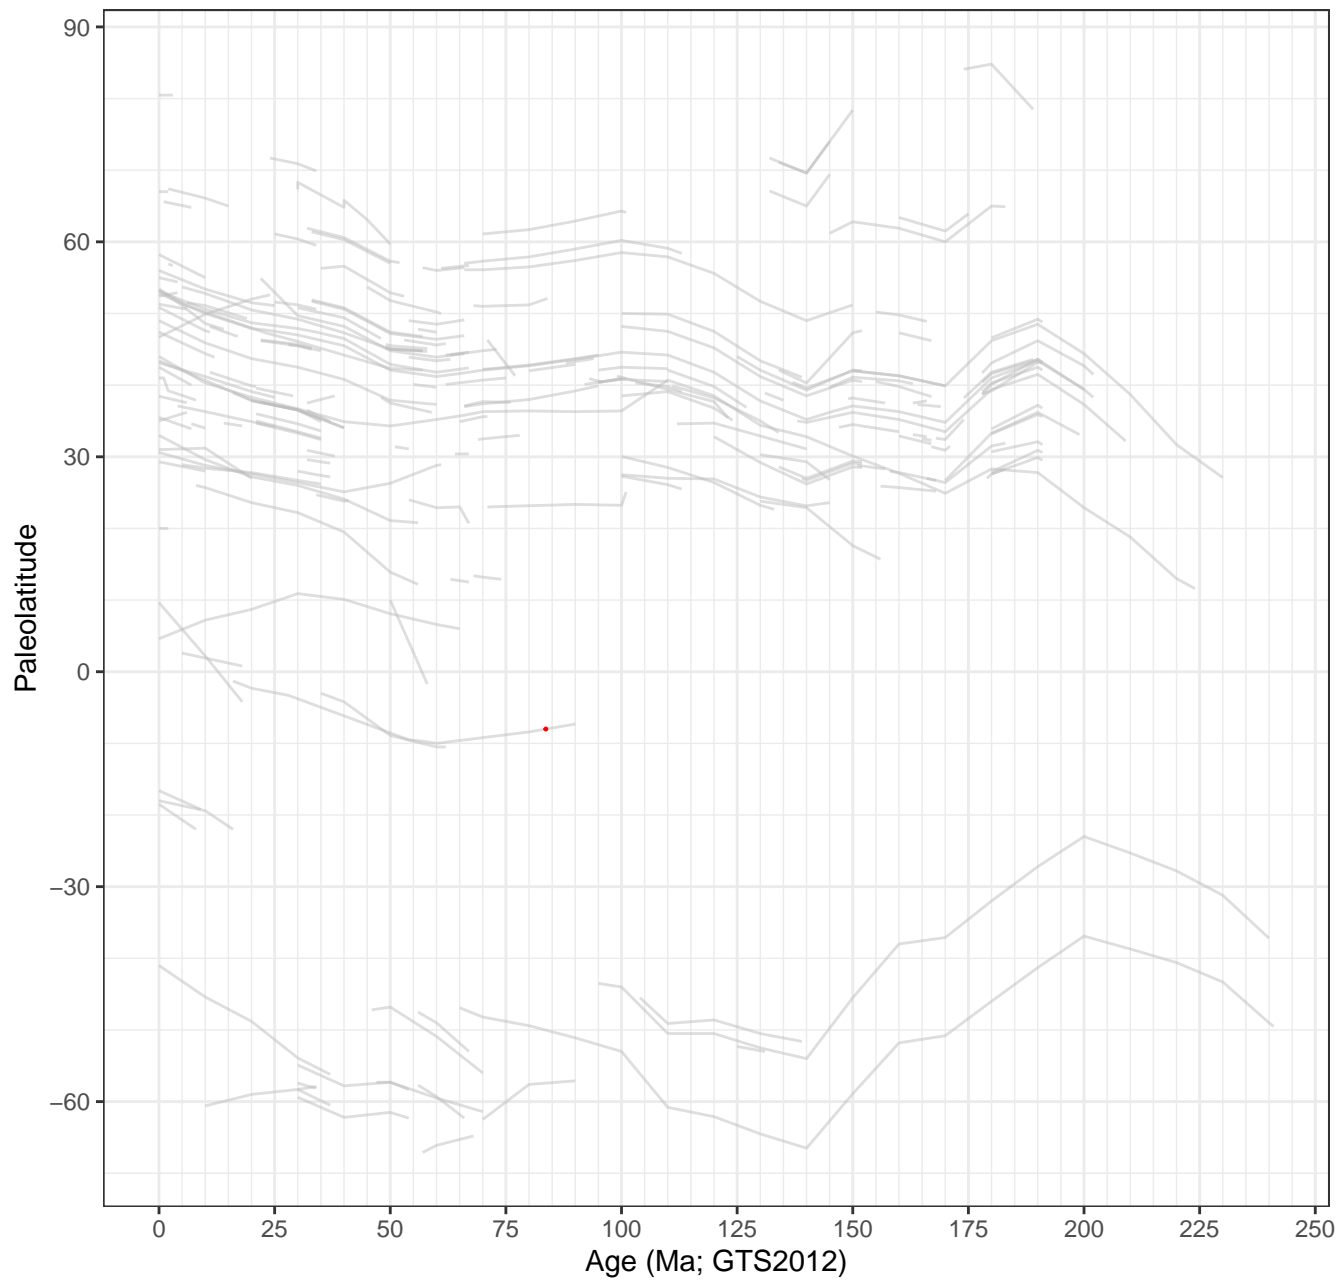

Supplement: Supplementary file 1261 [file Dinogymnium cretaceum.pdf › Supplement/Supplement 2/Species 1914 plots/Dinogymnium cretaceum.pdf]

# Species *Dinogymnium denticulatum*

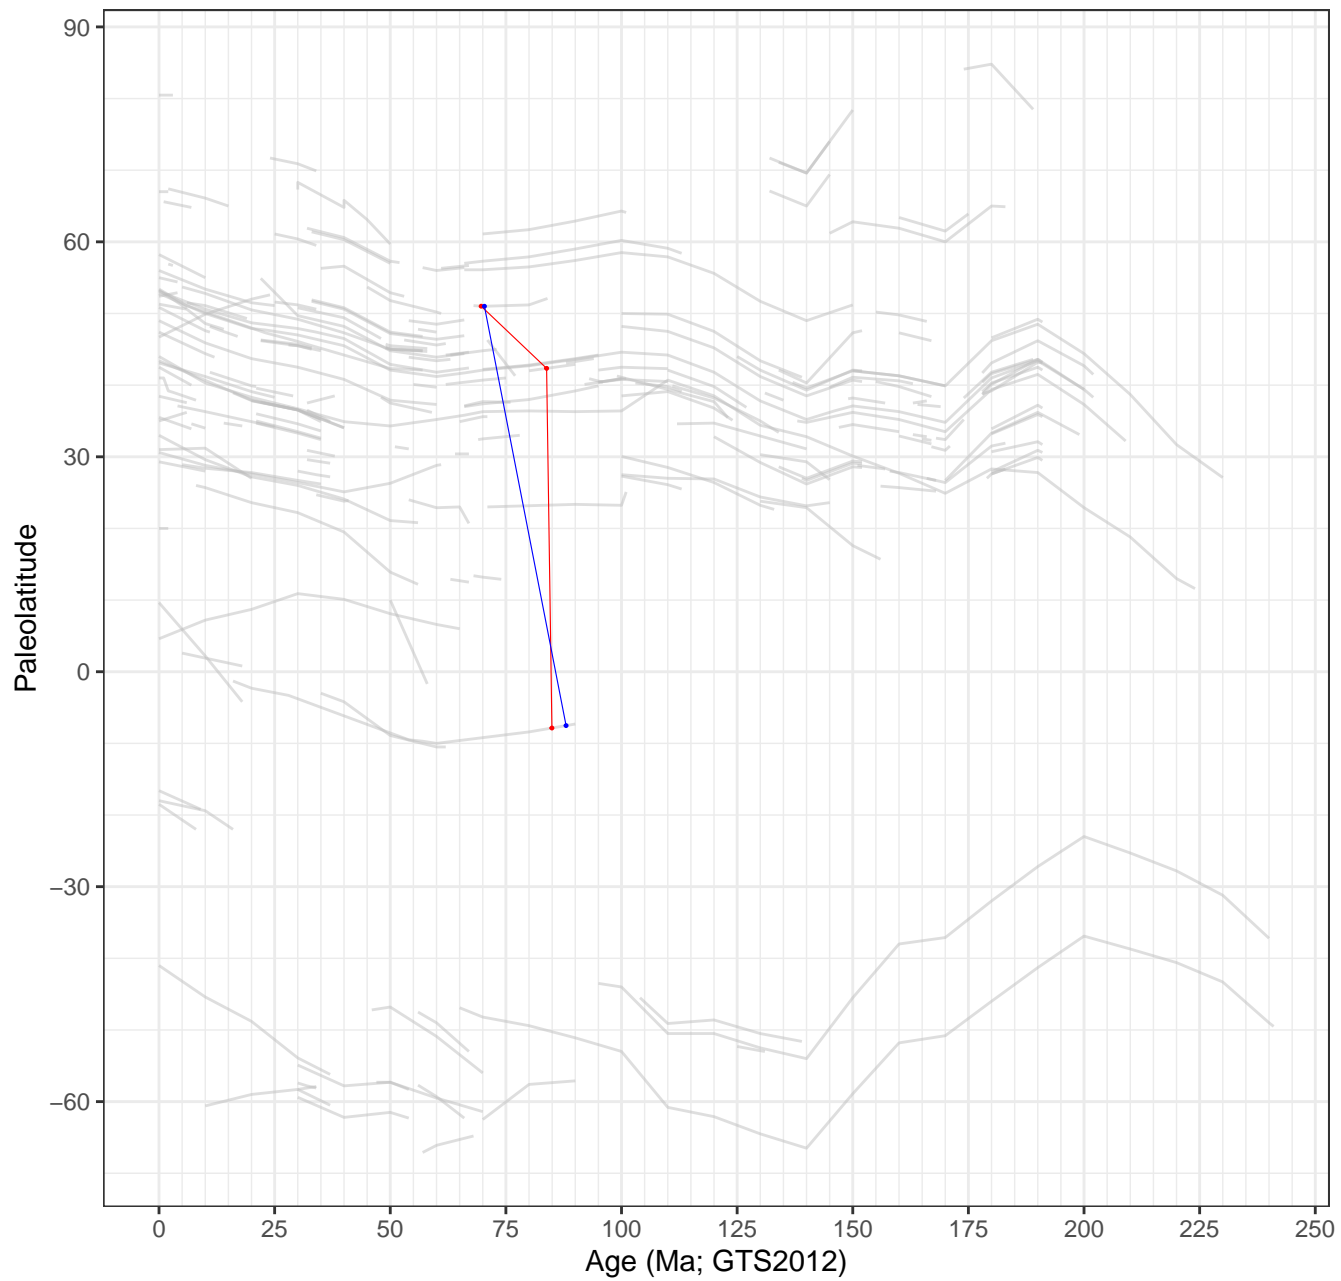

Supplement: Supplementary file 1262 [file Dinogymnium denticulatum.pdf › Supplement/Supplement 2/Species 1914 plots/Dinogymnium denticulatum.pdf]

# Species *Dinogymnium digitus*

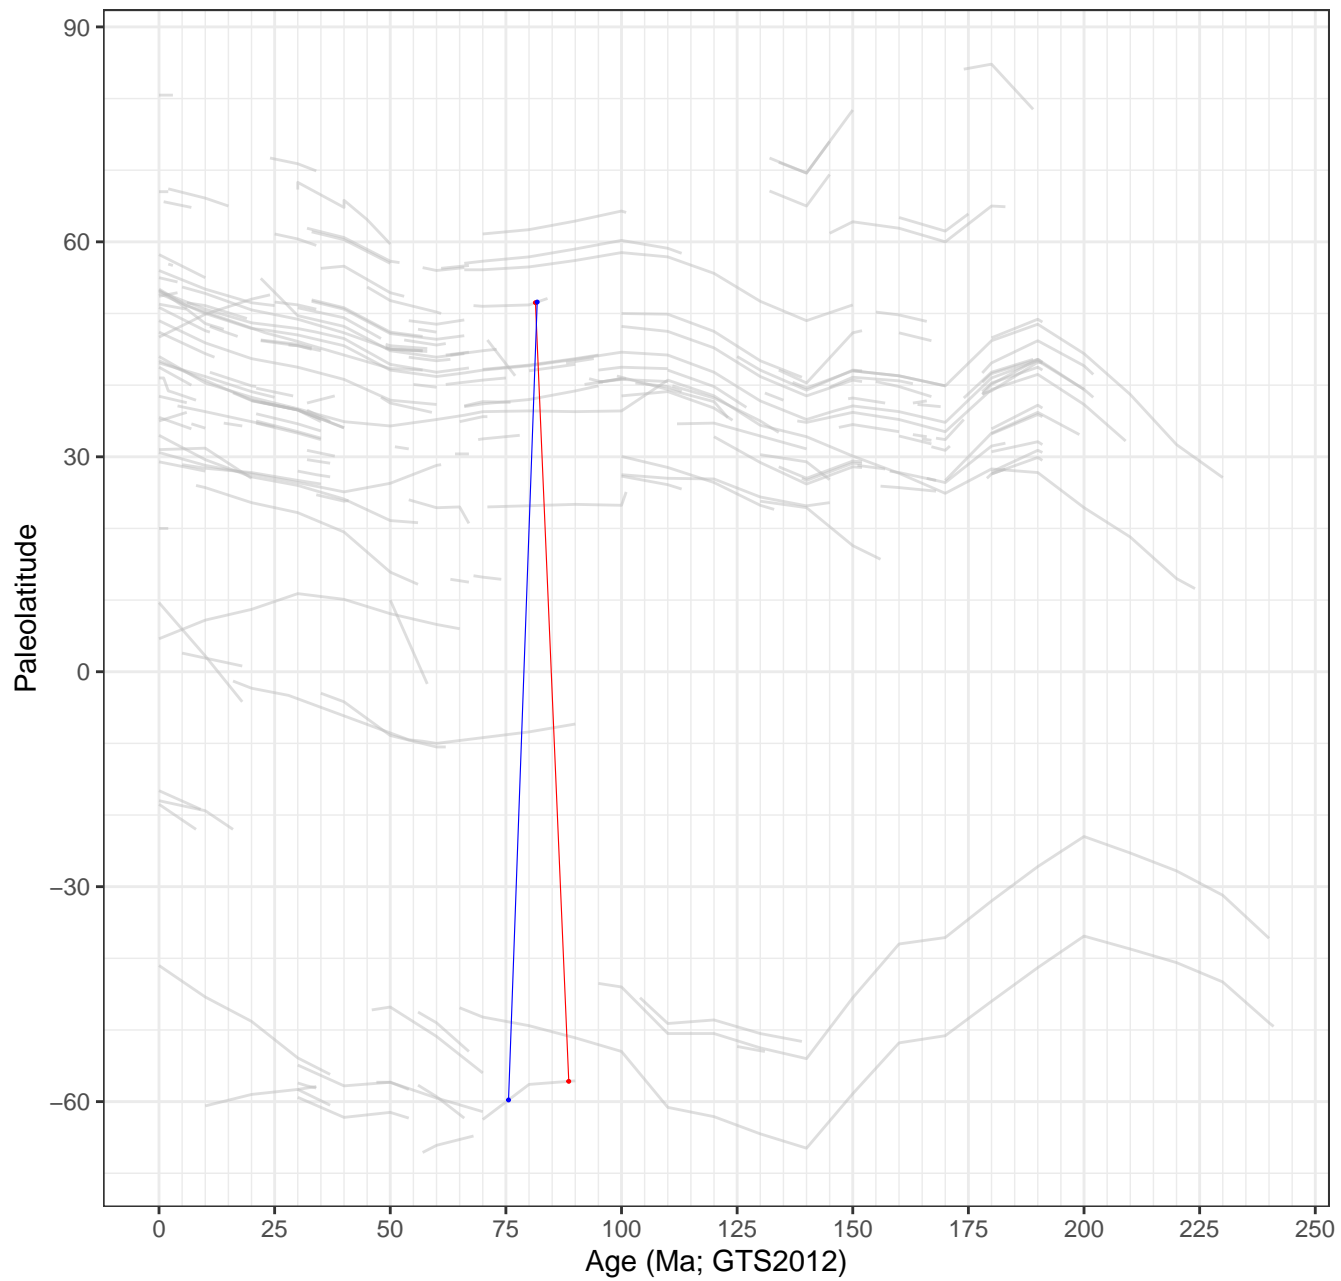

Supplement: Supplementary file 1263 [file Dinogymnium digitus.pdf › Supplement/Supplement 2/Species 1914 plots/Dinogymnium digitus.pdf]

# Species *Dinogymnium longicorne*

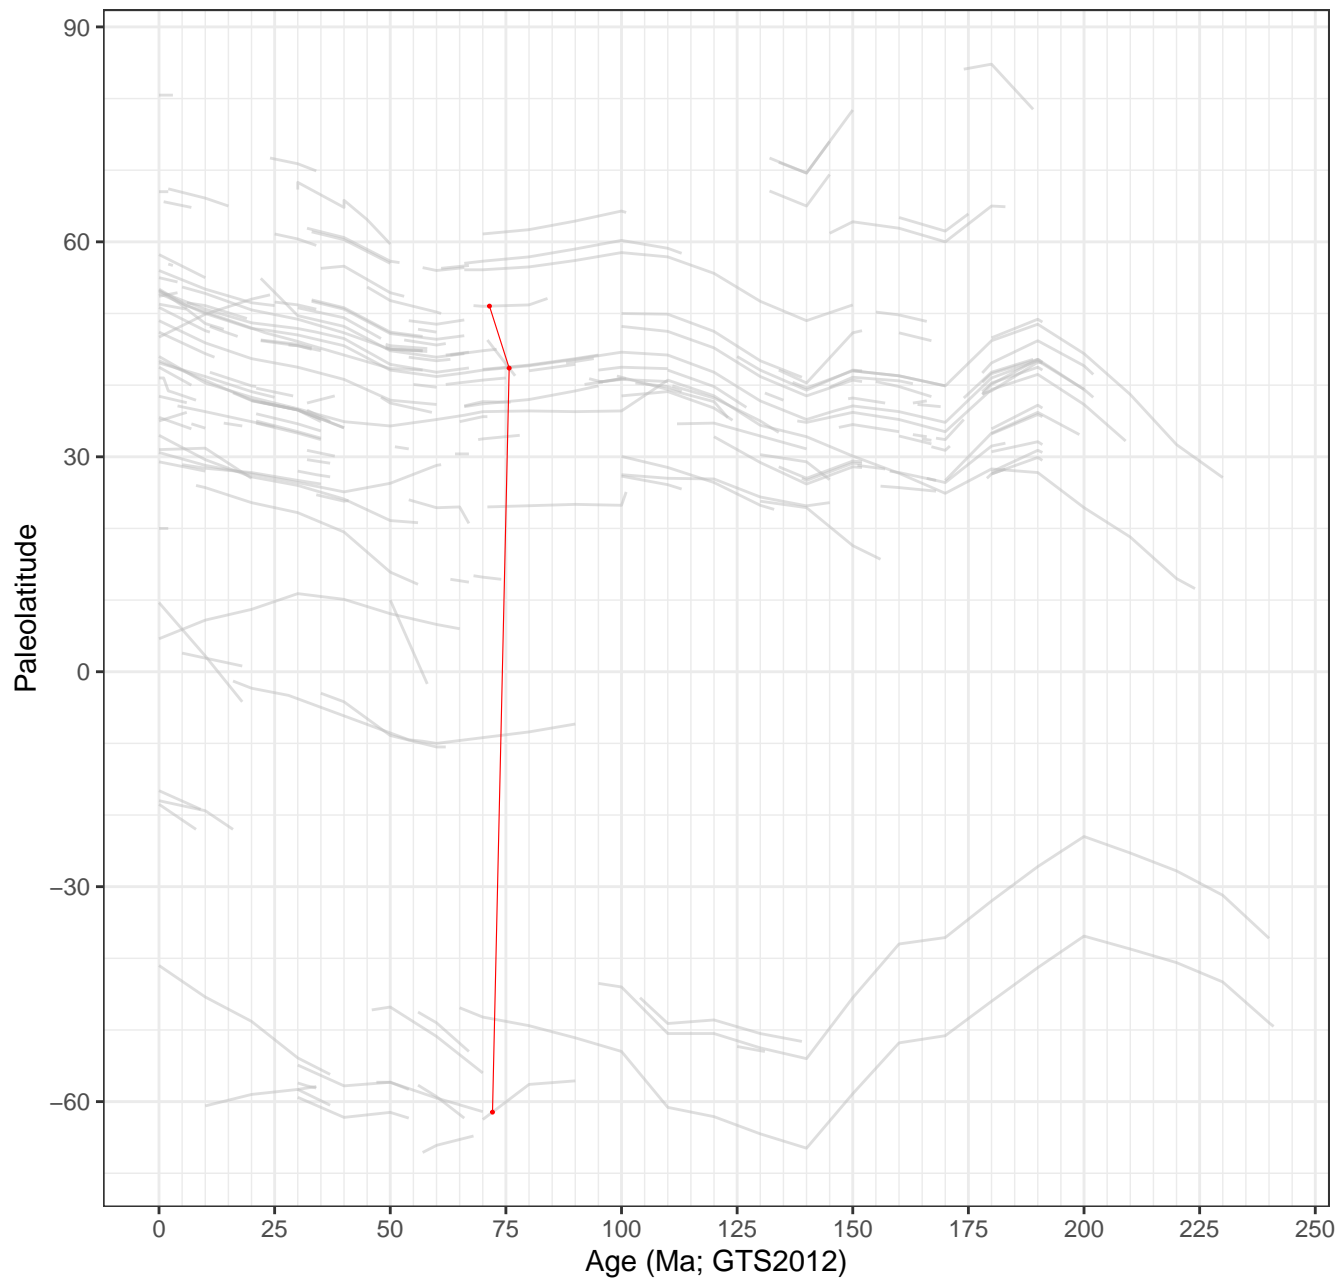

Supplement: Supplementary file 1264 [file Dinogymnium longicorne.pdf › Supplement/Supplement 2/Species 1914 plots/Dinogymnium longicorne.pdf]

# Species *Dinogymnium nelsonense*

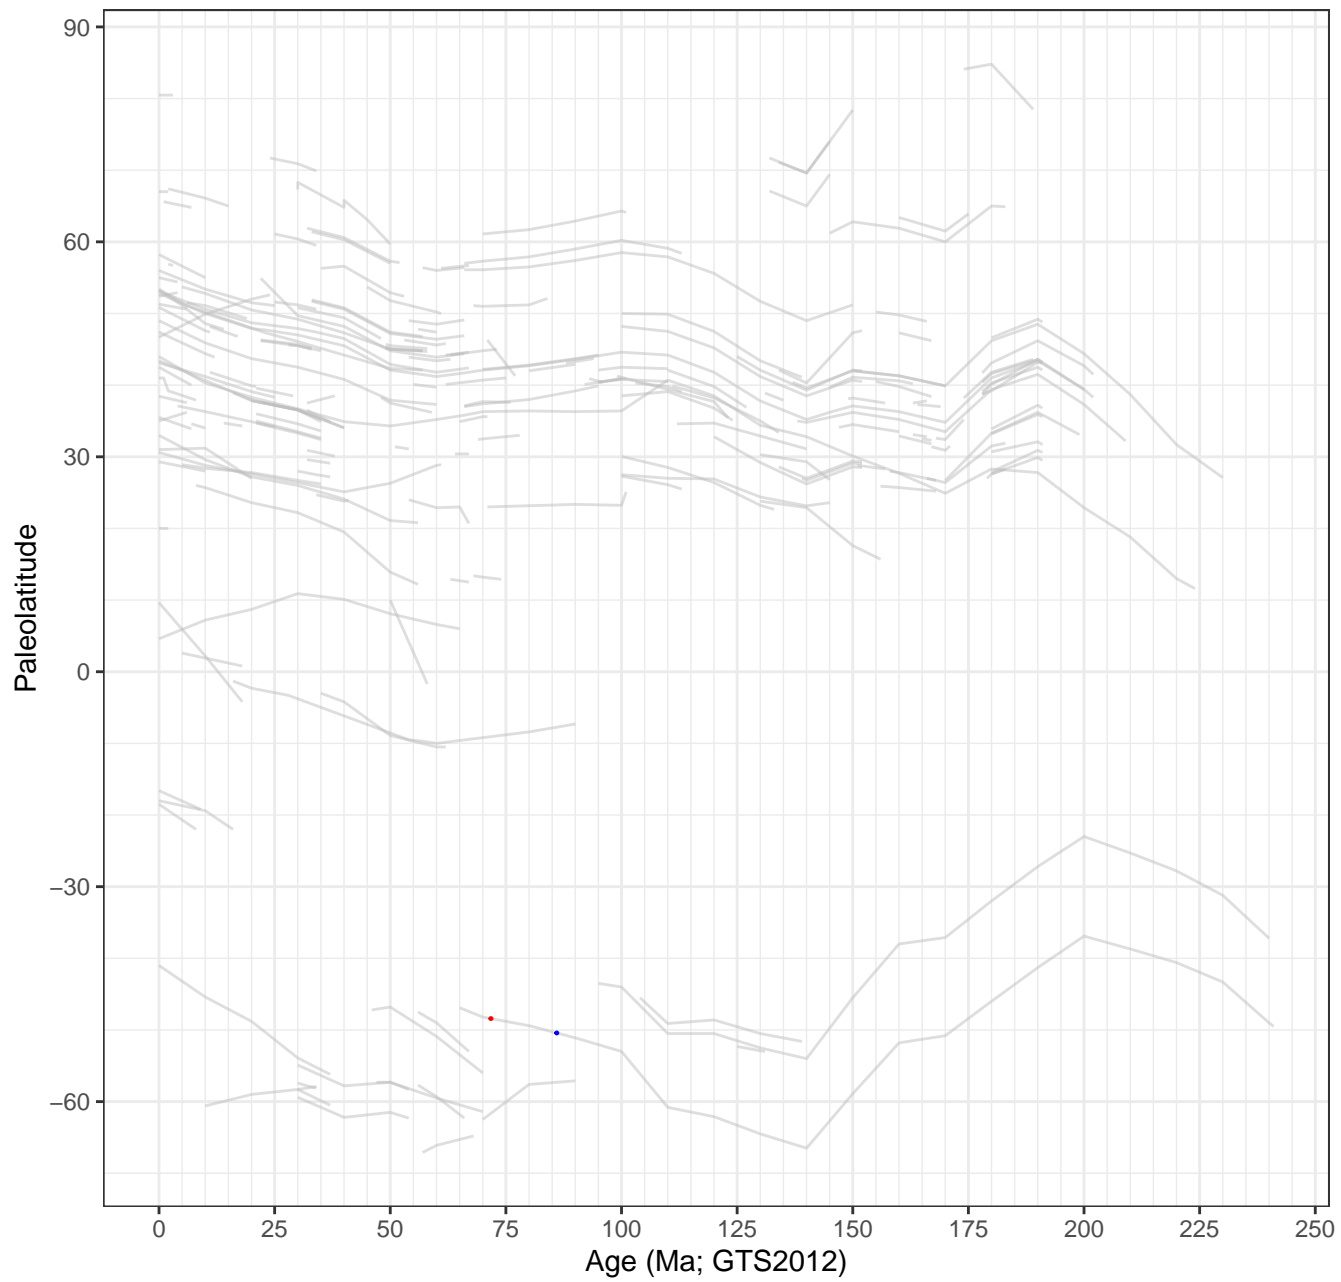

Supplement: Supplementary file 1265 [file Dinogymnium nelsonense.pdf › Supplement/Supplement 2/Species 1914 plots/Dinogymnium nelsonense.pdf]

# Species *Dinogymnium sibiricum*

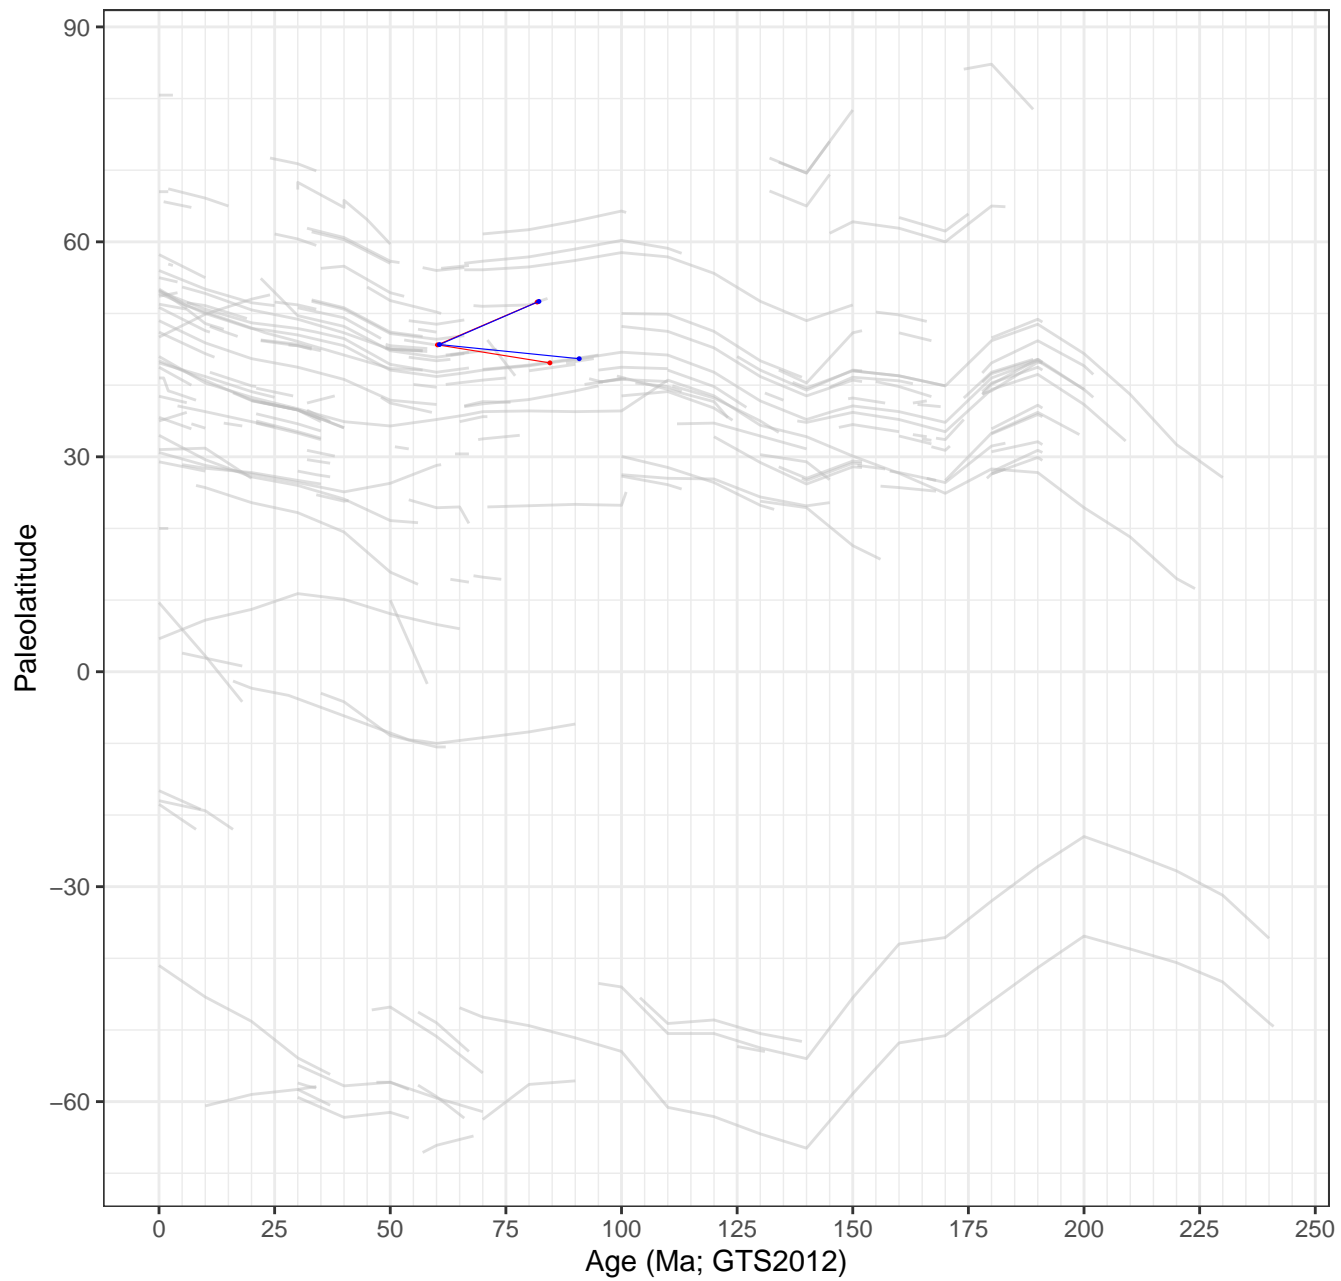

Supplement: Supplementary file 1266 [file Dinogymnium sibiricum.pdf › Supplement/Supplement 2/Species 1914 plots/Dinogymnium sibiricum.pdf]

# Species *Dinogymnium undulosum*

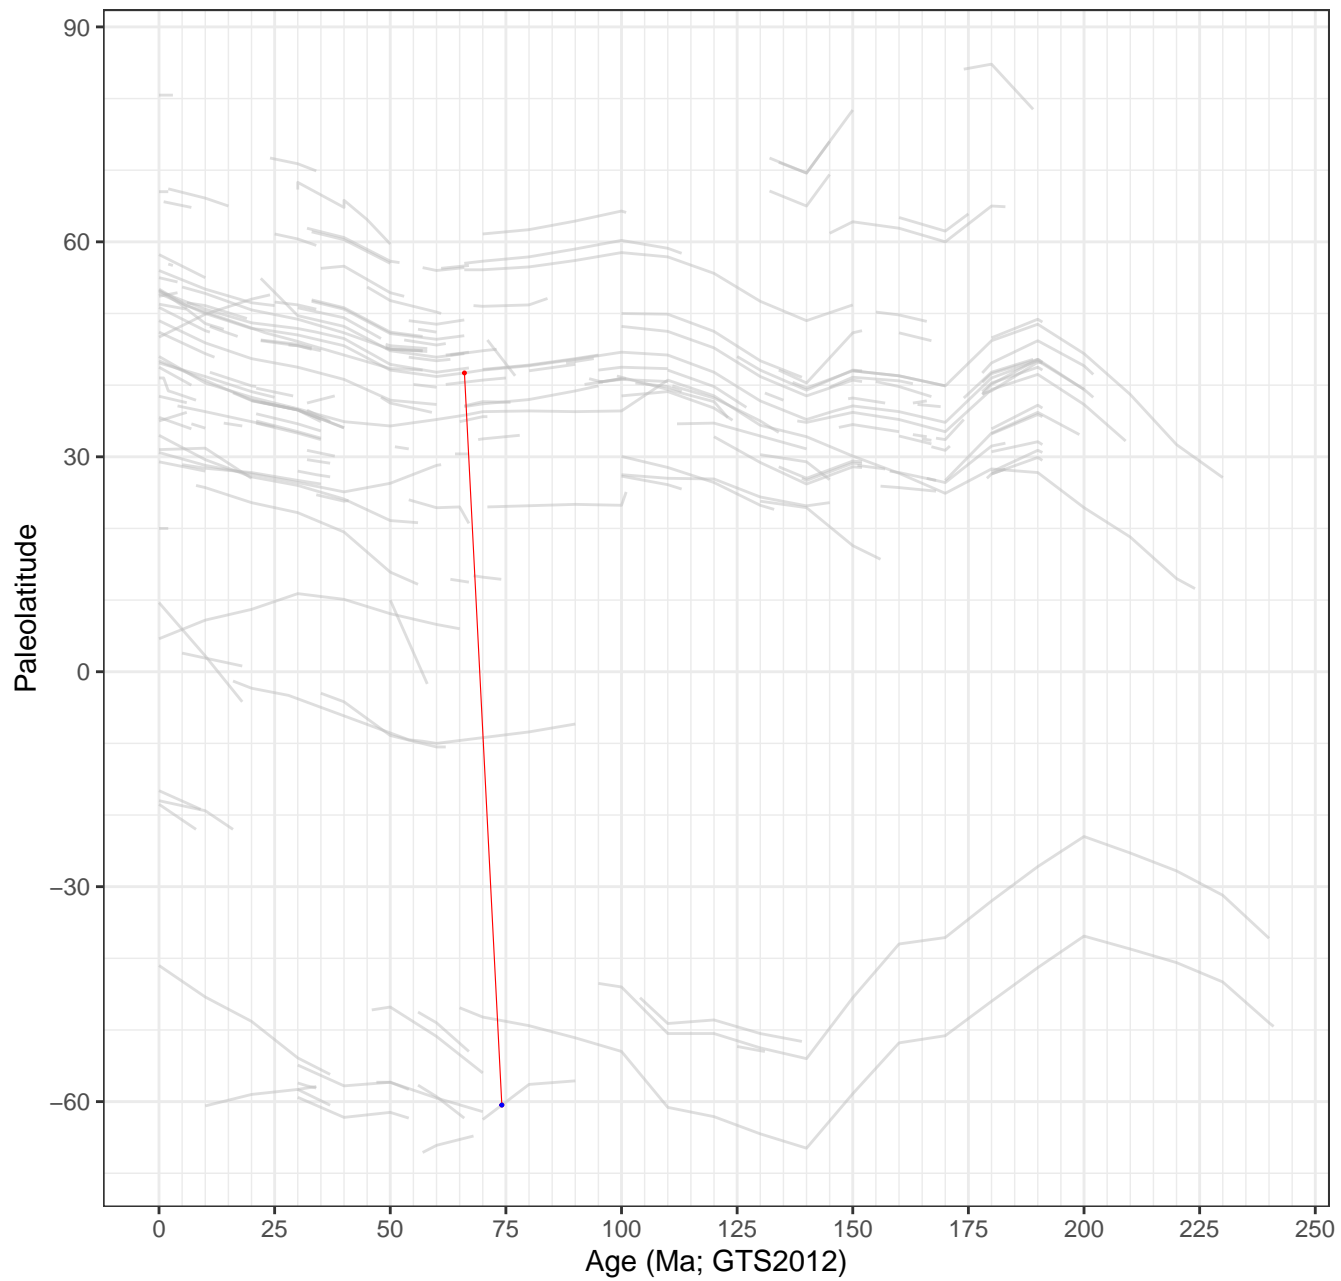

Supplement: Supplementary file 1267 [file Dinogymnium undulosum.pdf › Supplement/Supplement 2/Species 1914 plots/Dinogymnium undulosum.pdf]

# Species *Dinogymnium westralium*

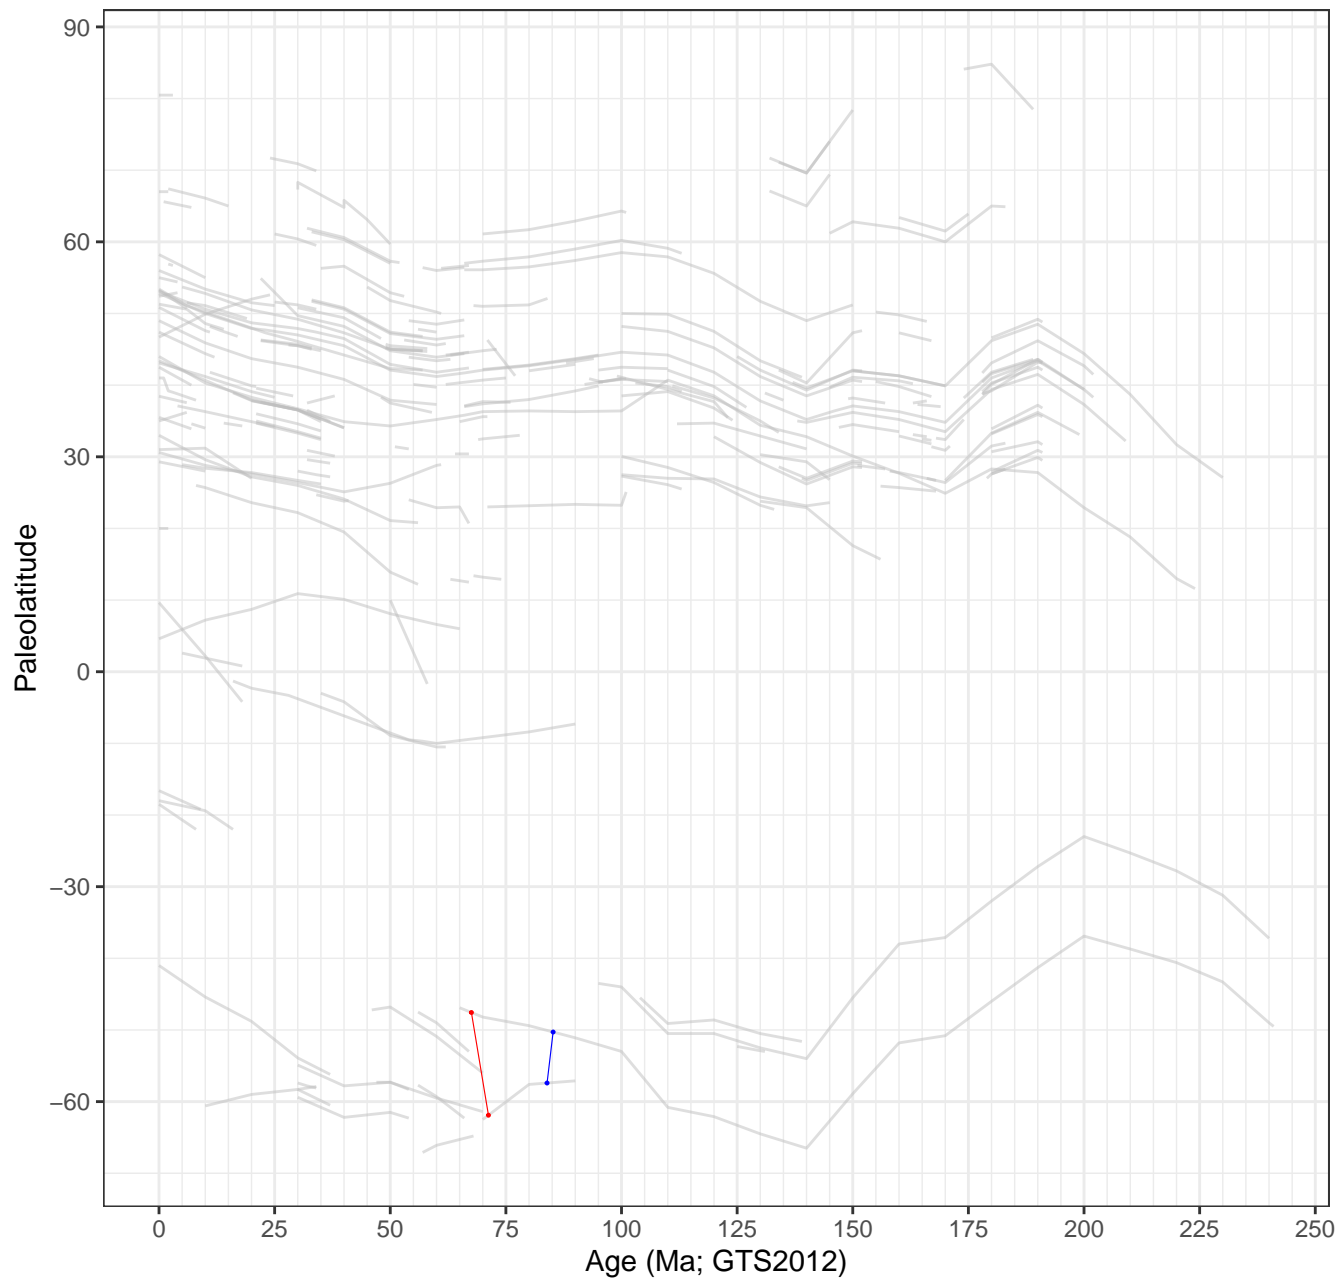

Supplement: Supplementary file 1268 [file Dinogymnium westralium.pdf › Supplement/Supplement 2/Species 1914 plots/Dinogymnium westralium.pdf]

# Species *Dinopterygium alatum*

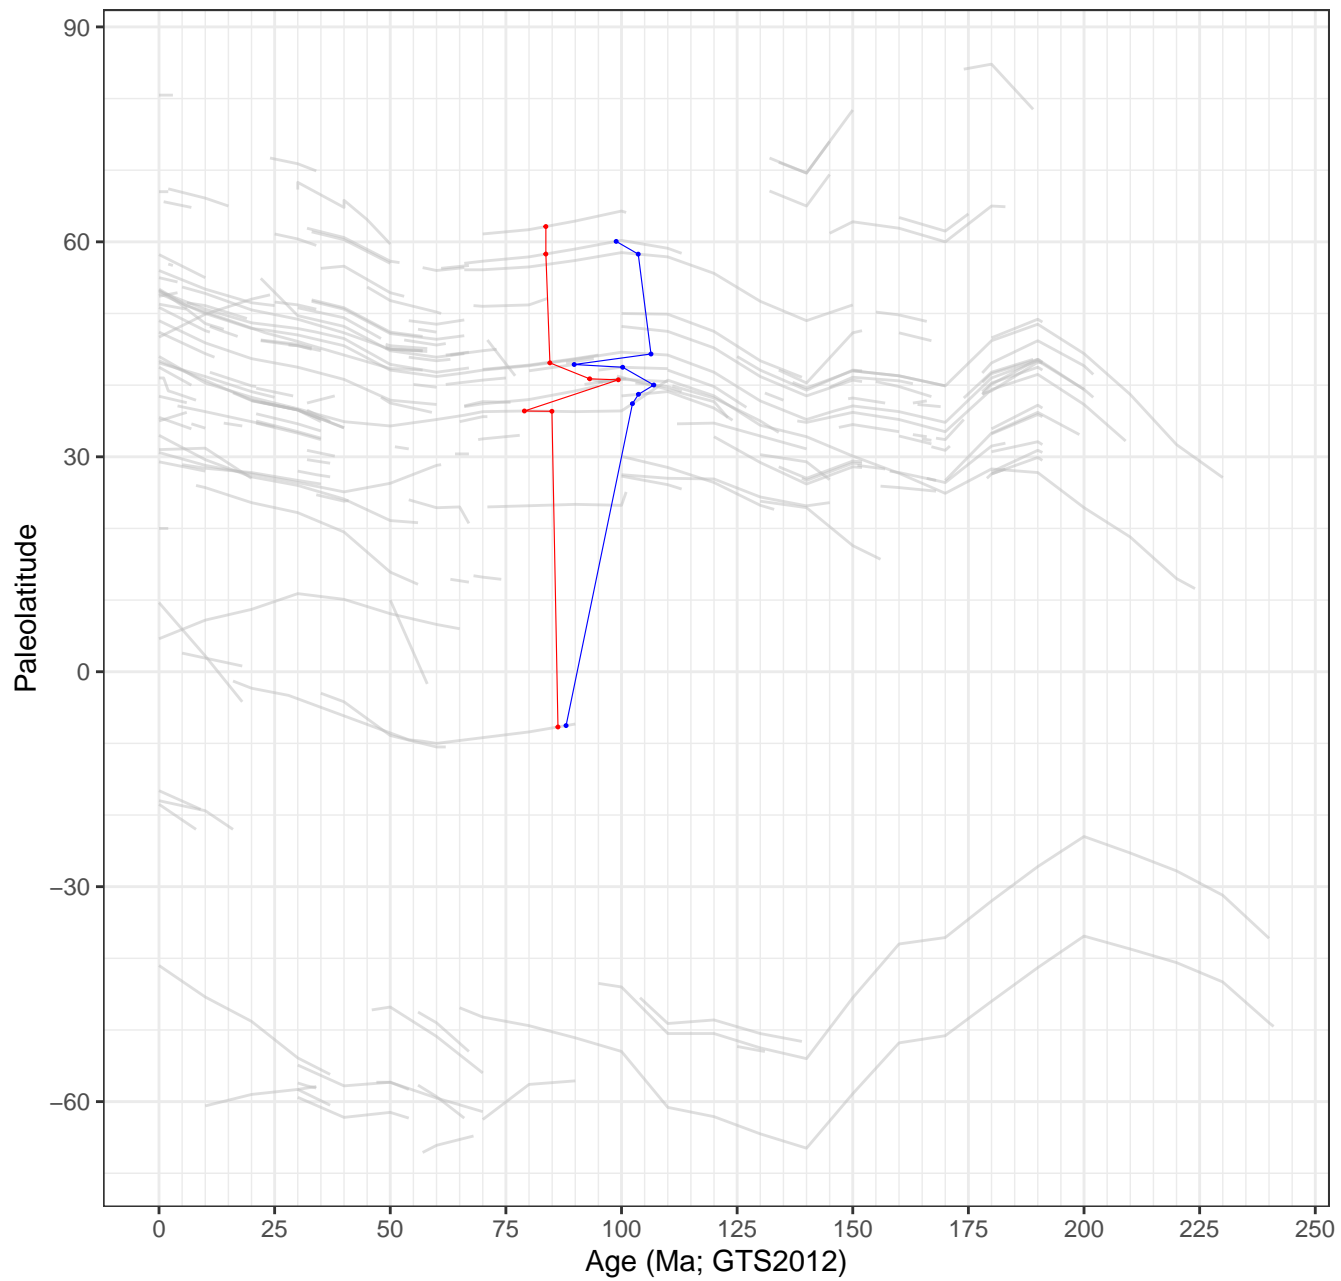

Supplement: Supplementary file 1269 [file Dinopterygium alatum.pdf › Supplement/Supplement 2/Species 1914 plots/Dinopterygium alatum.pdf]

# Species *Dinopterygium asteriforme*

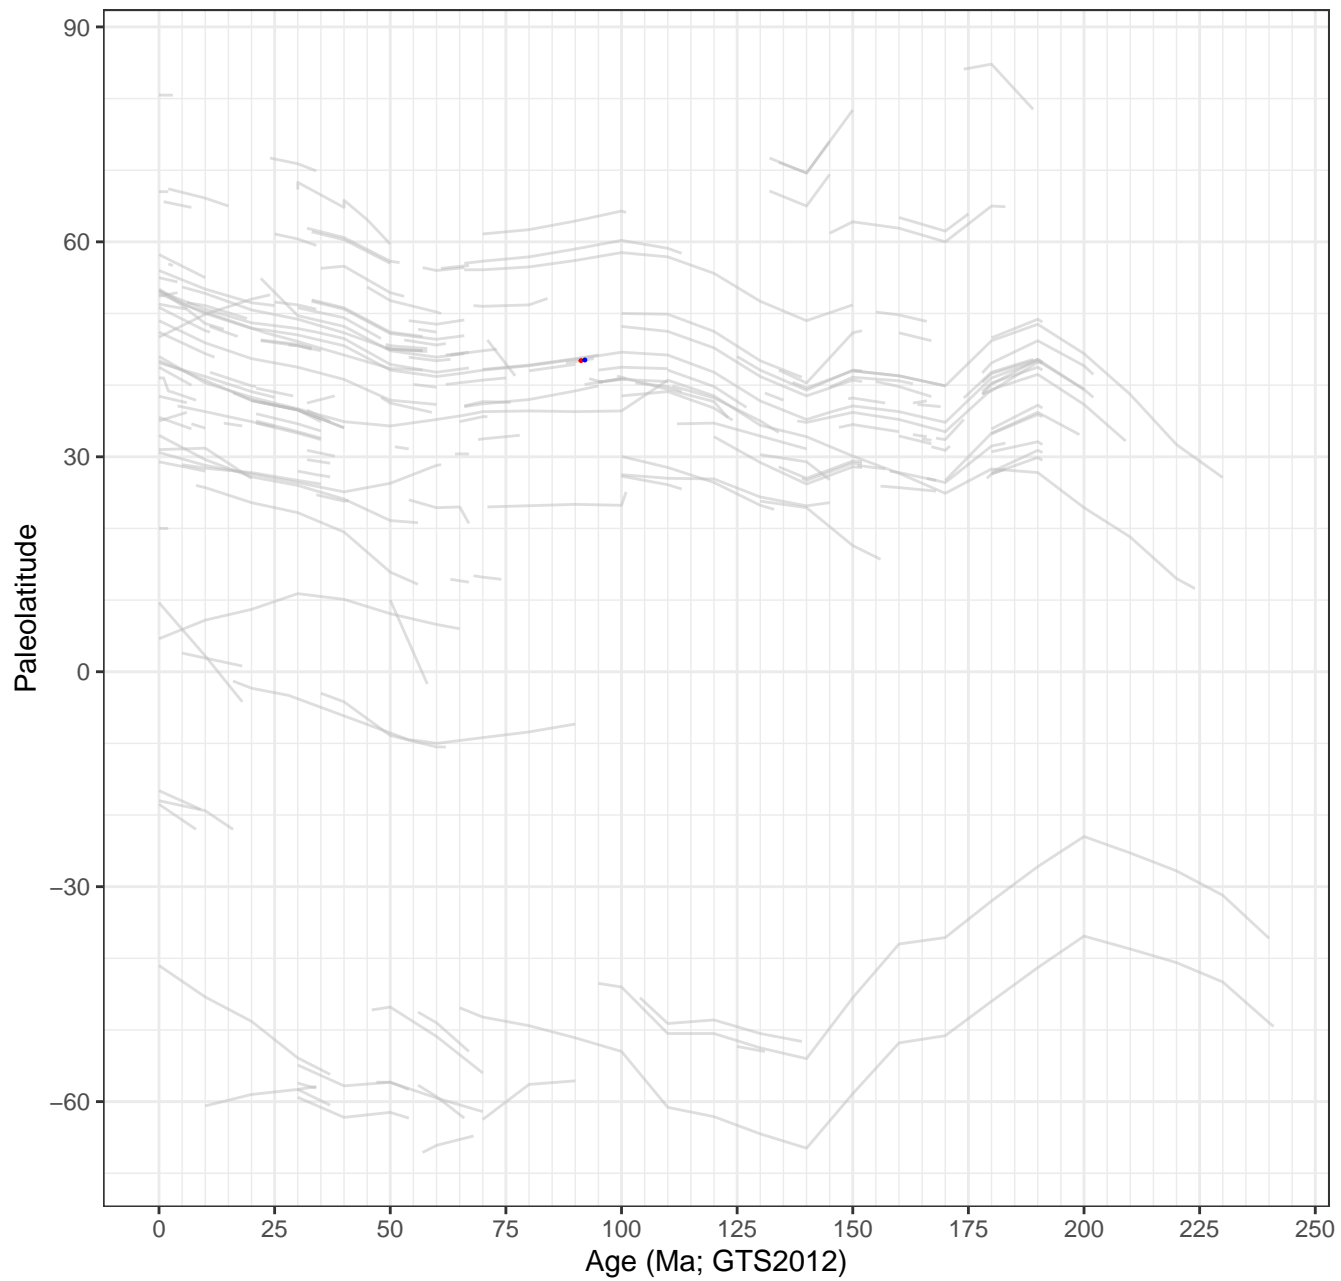

Supplement: Supplementary file 1270 [file Dinopterygium asteriforme.pdf › Supplement/Supplement 2/Species 1914 plots/Dinopterygium asteriforme.pdf]

# Species *Dinopterygium cladoides*

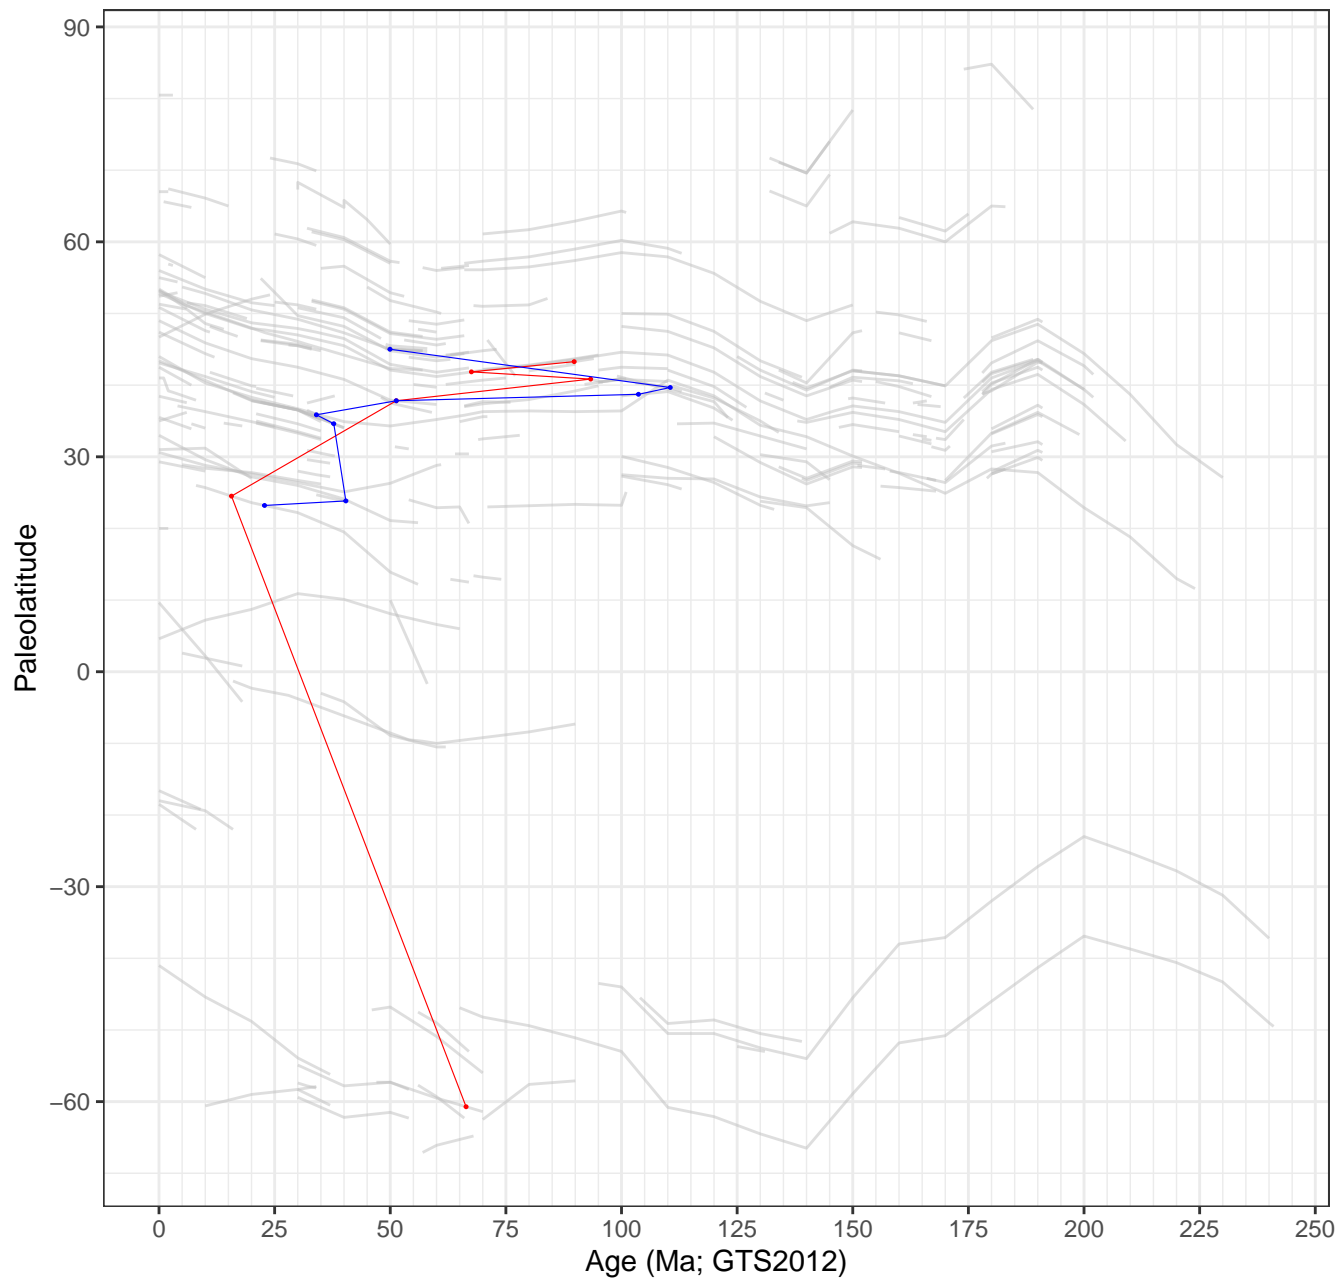

Supplement: Supplementary file 1271 [file Dinopterygium cladoides.pdf › Supplement/Supplement 2/Species 1914 plots/Dinopterygium cladoides.pdf]

# Species *Dinopterygium konradiense*

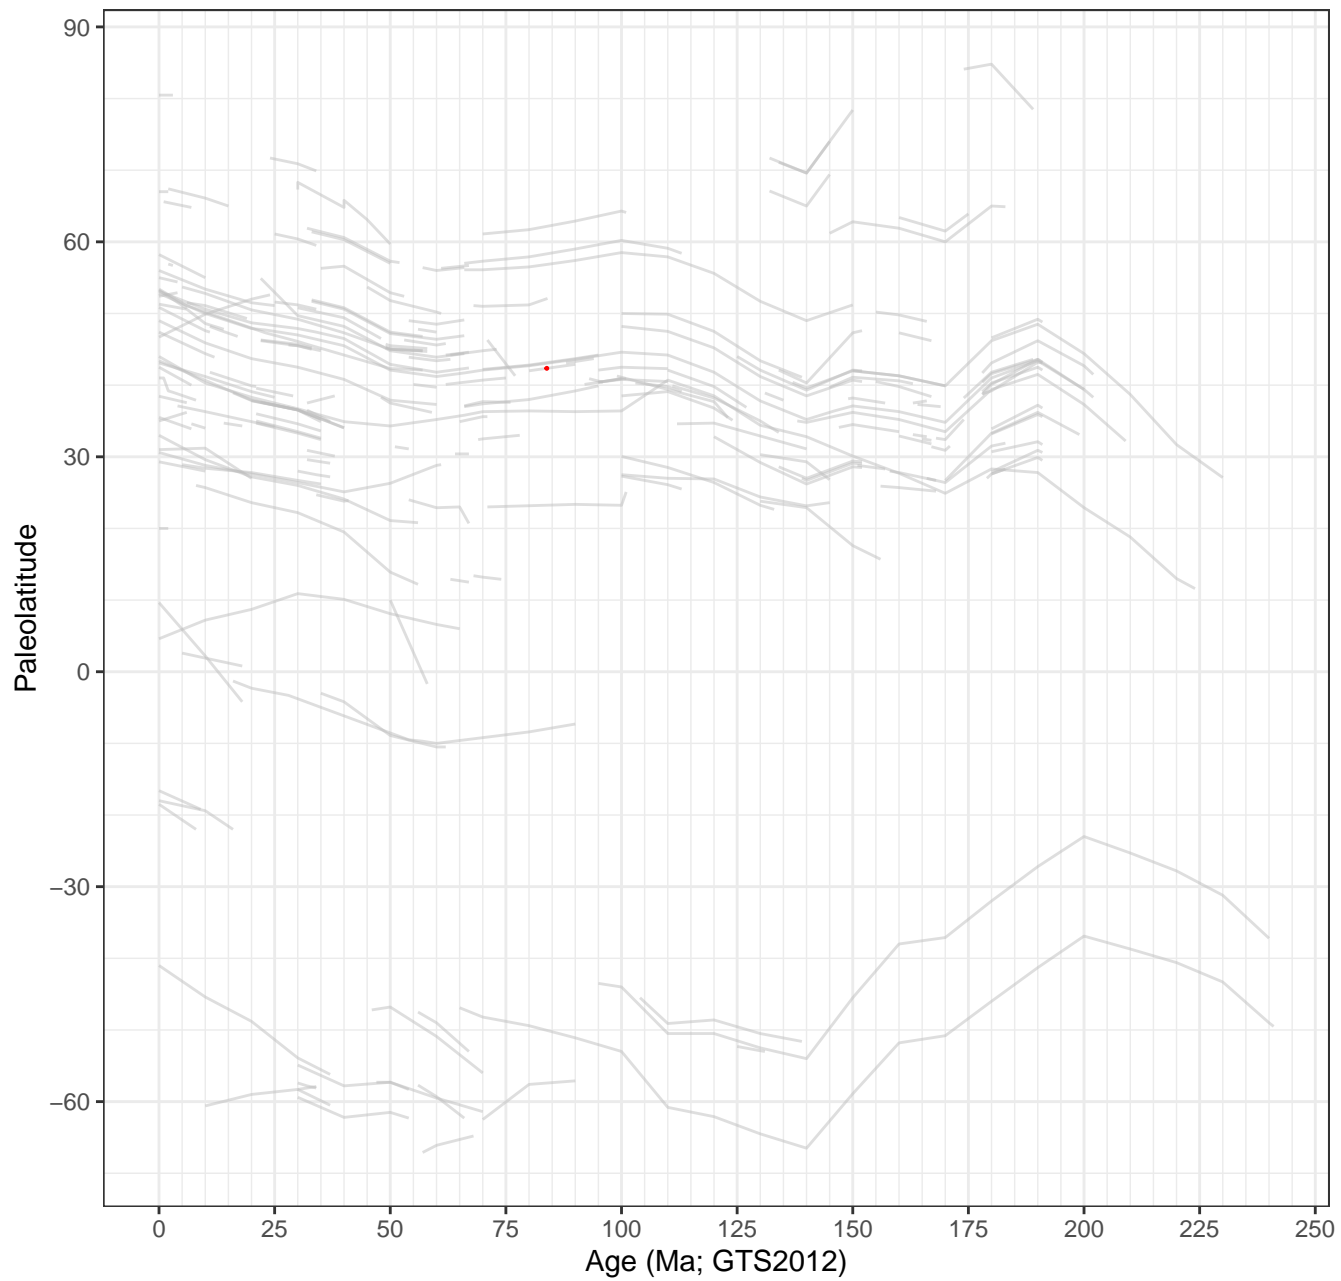

Supplement: Supplementary file 1272 [file Dinopterygium konradiense.pdf › Supplement/Supplement 2/Species 1914 plots/Dinopterygium konradiense.pdf]

# Species *Dinopterygium tuberculatum*

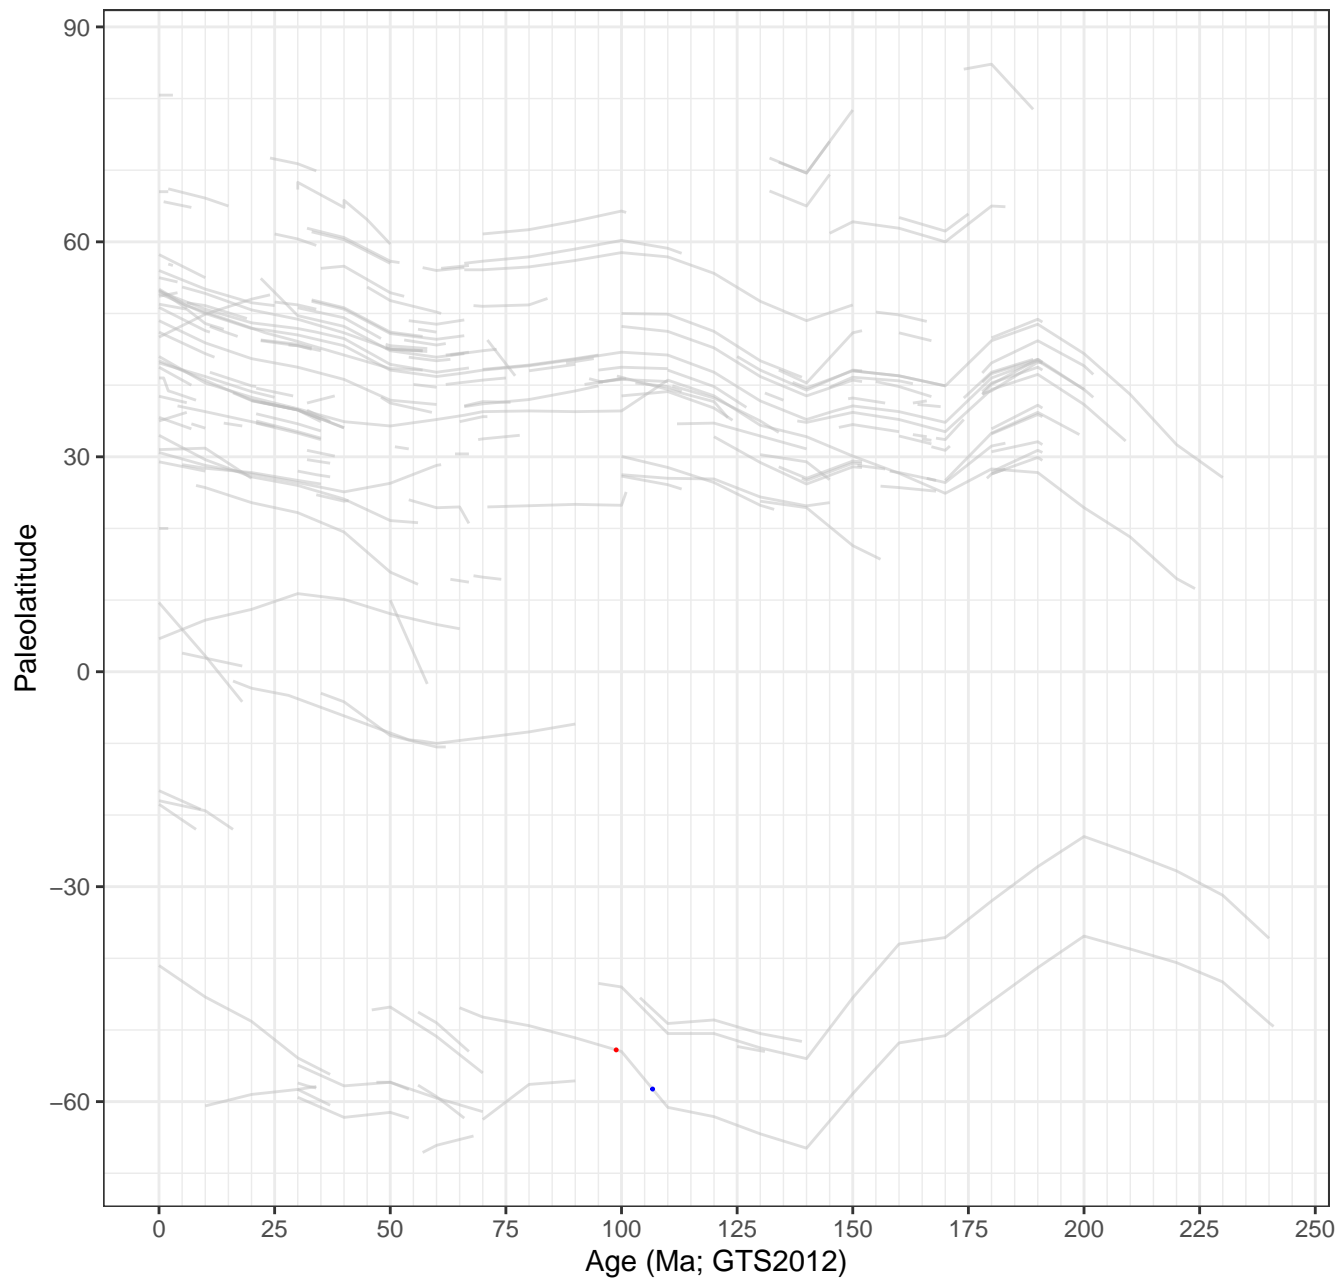

Supplement: Supplementary file 1273 [file Dinopterygium tuberculatum.pdf › Supplement/Supplement 2/Species 1914 plots/Dinopterygium tuberculatum.pdf]

# Species *Dinopterygium vozzhennikovae*

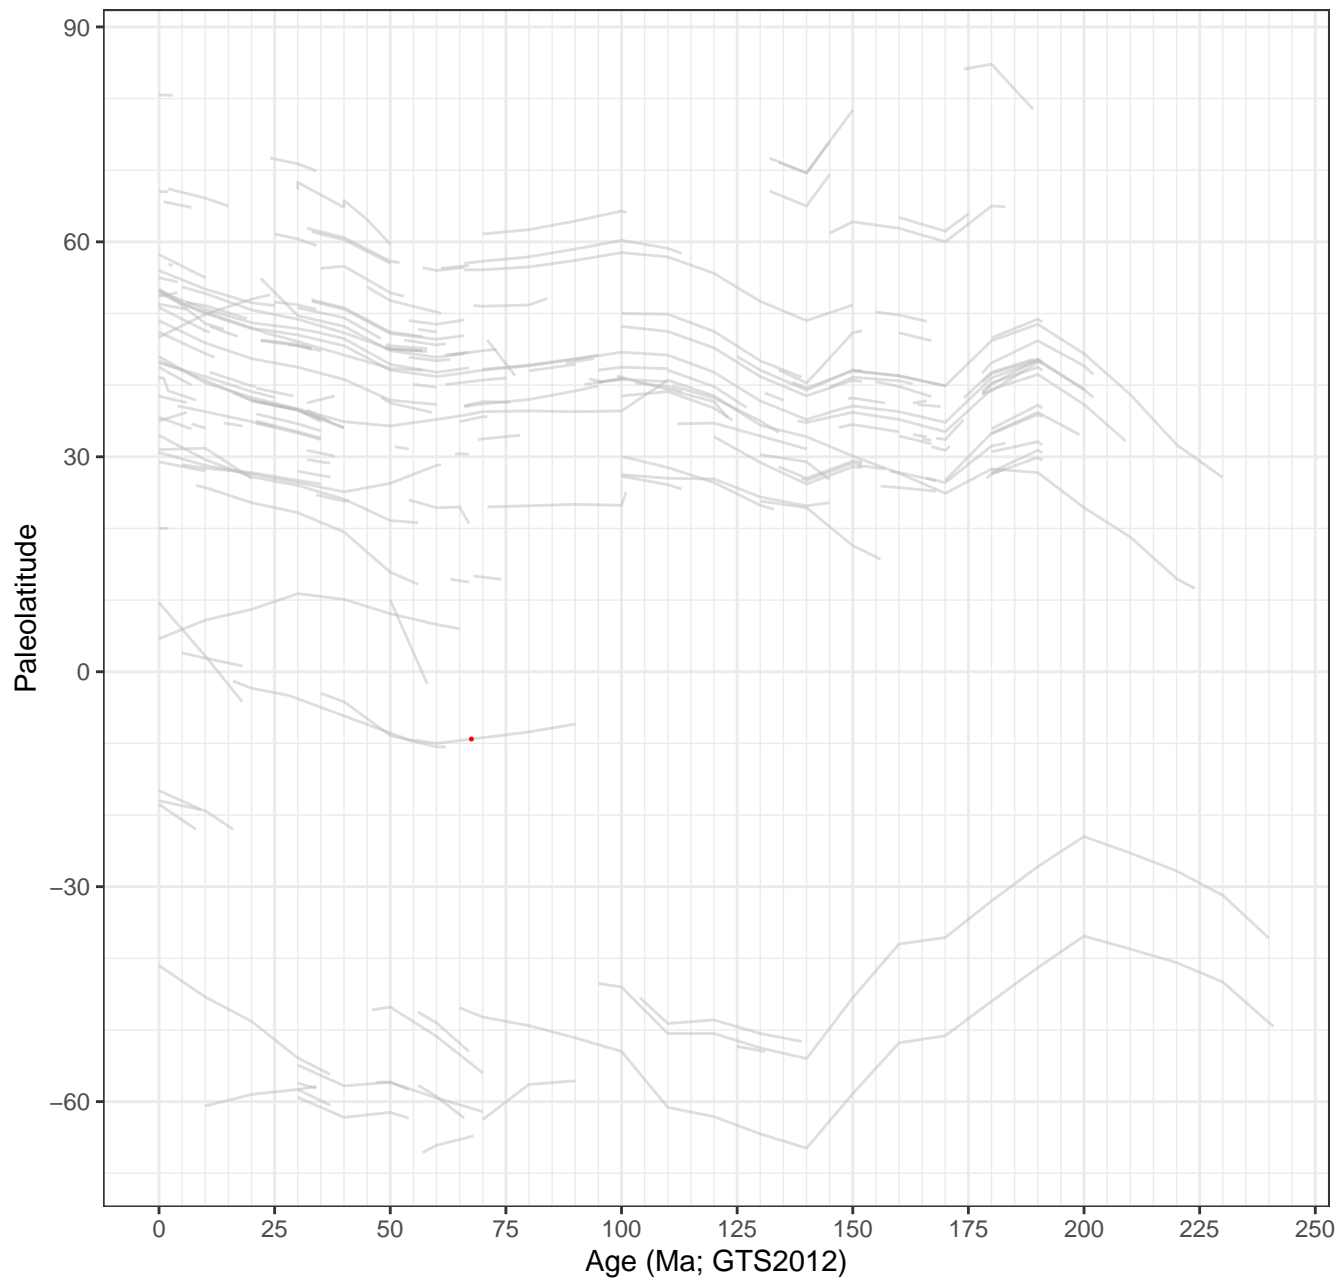

Supplement: Supplementary file 1274 [file Dinopterygium vozzhennikovae.pdf › Supplement/Supplement 2/Species 1914 plots/Dinopterygium vozzhennikovae.pdf]

# Species *Diphyes bifidum*

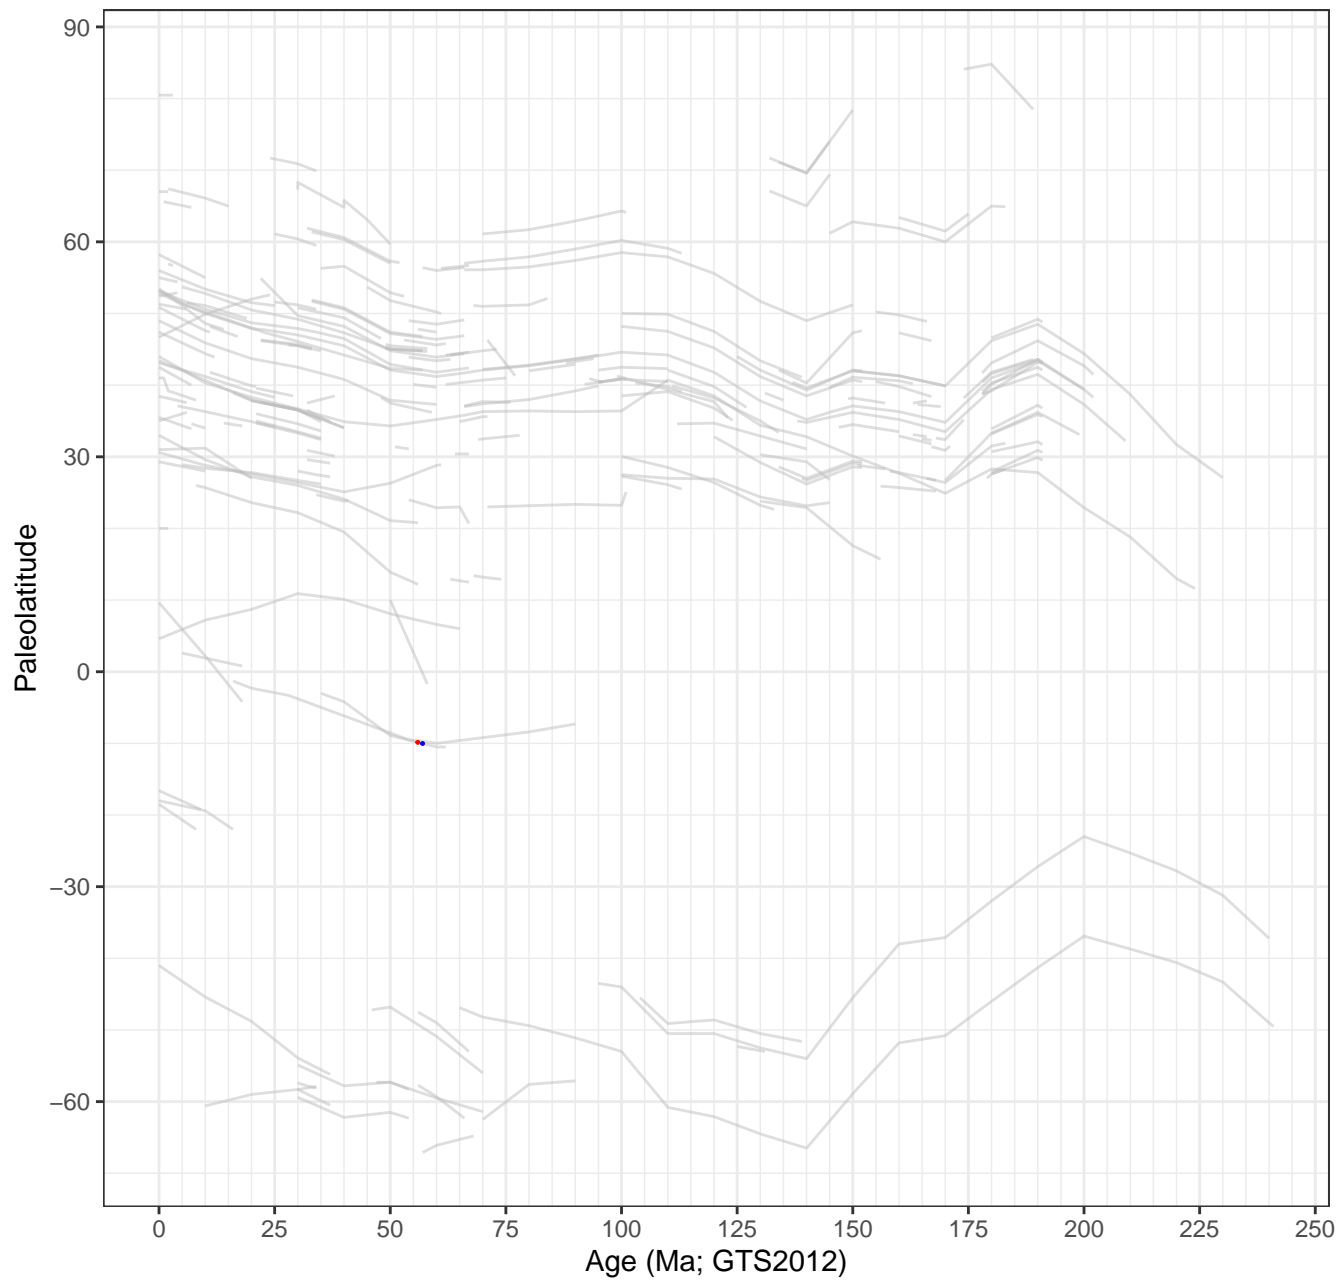

Supplement: Supplementary file 1275 [file Diphyes bifidum.pdf › Supplement/Supplement 2/Species 1914 plots/Diphyes bifidum.pdf]

# Species *Diphyes colligerum*

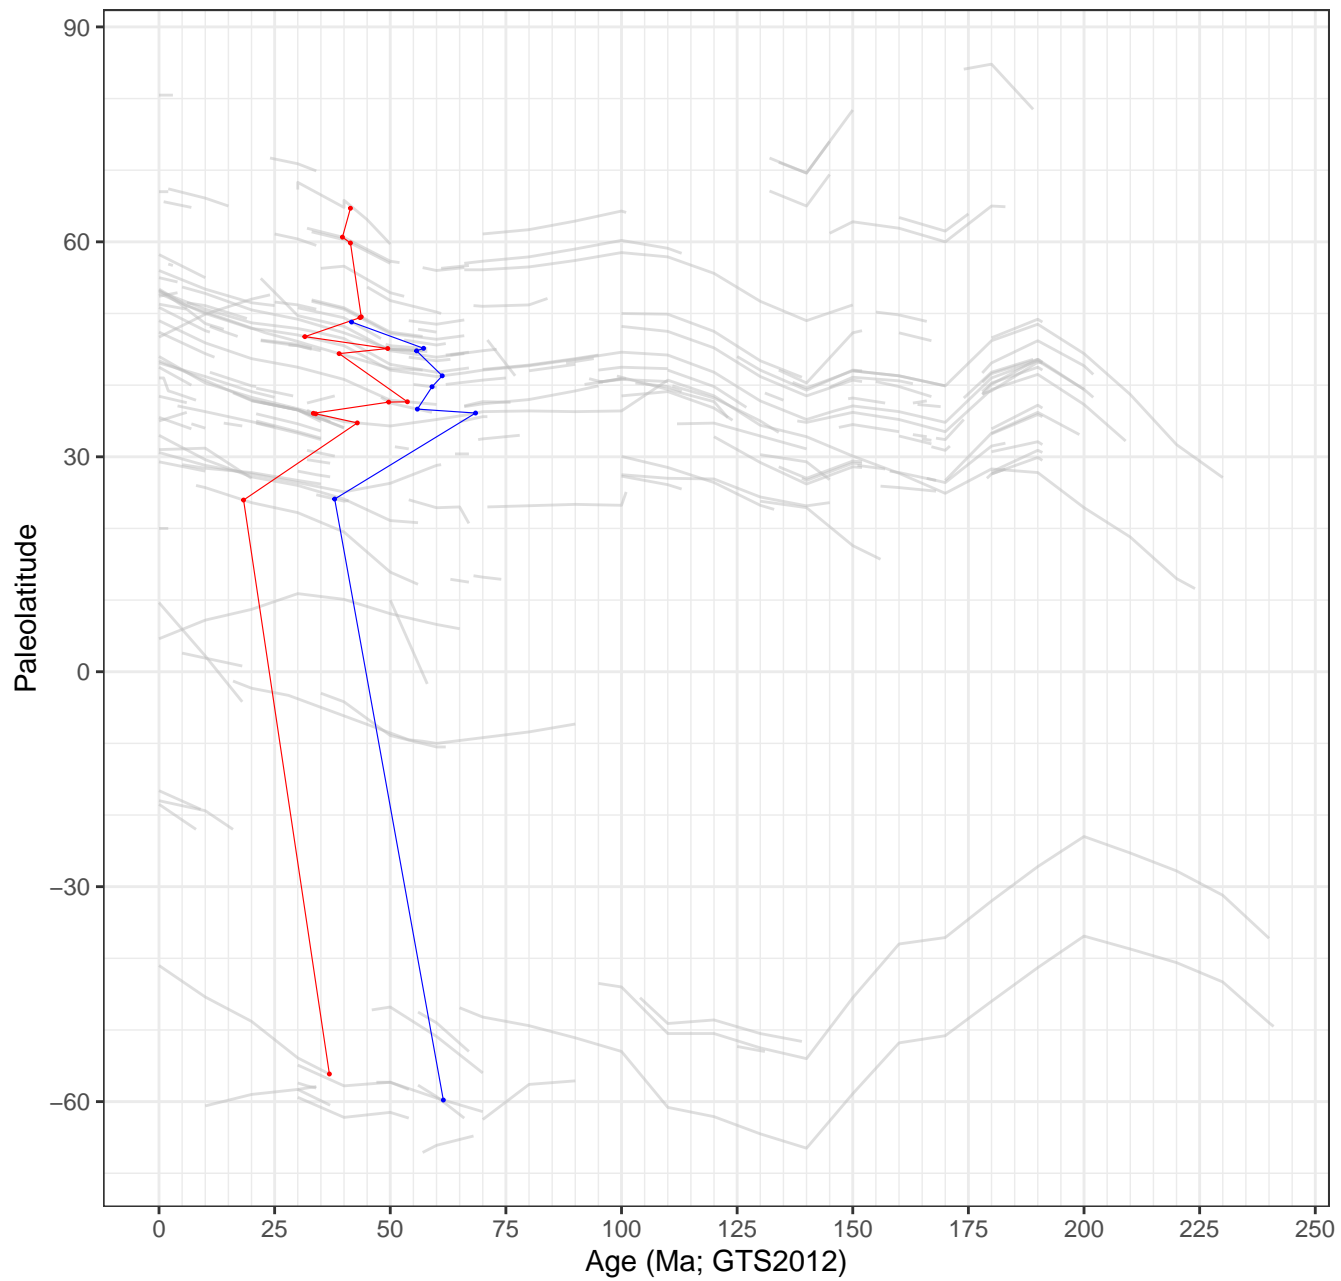

Supplement: Supplementary file 1276 [file Diphyes colligerum.pdf › Supplement/Supplement 2/Species 1914 plots/Diphyes colligerum.pdf]

# Species *Diphyes ficusoides*

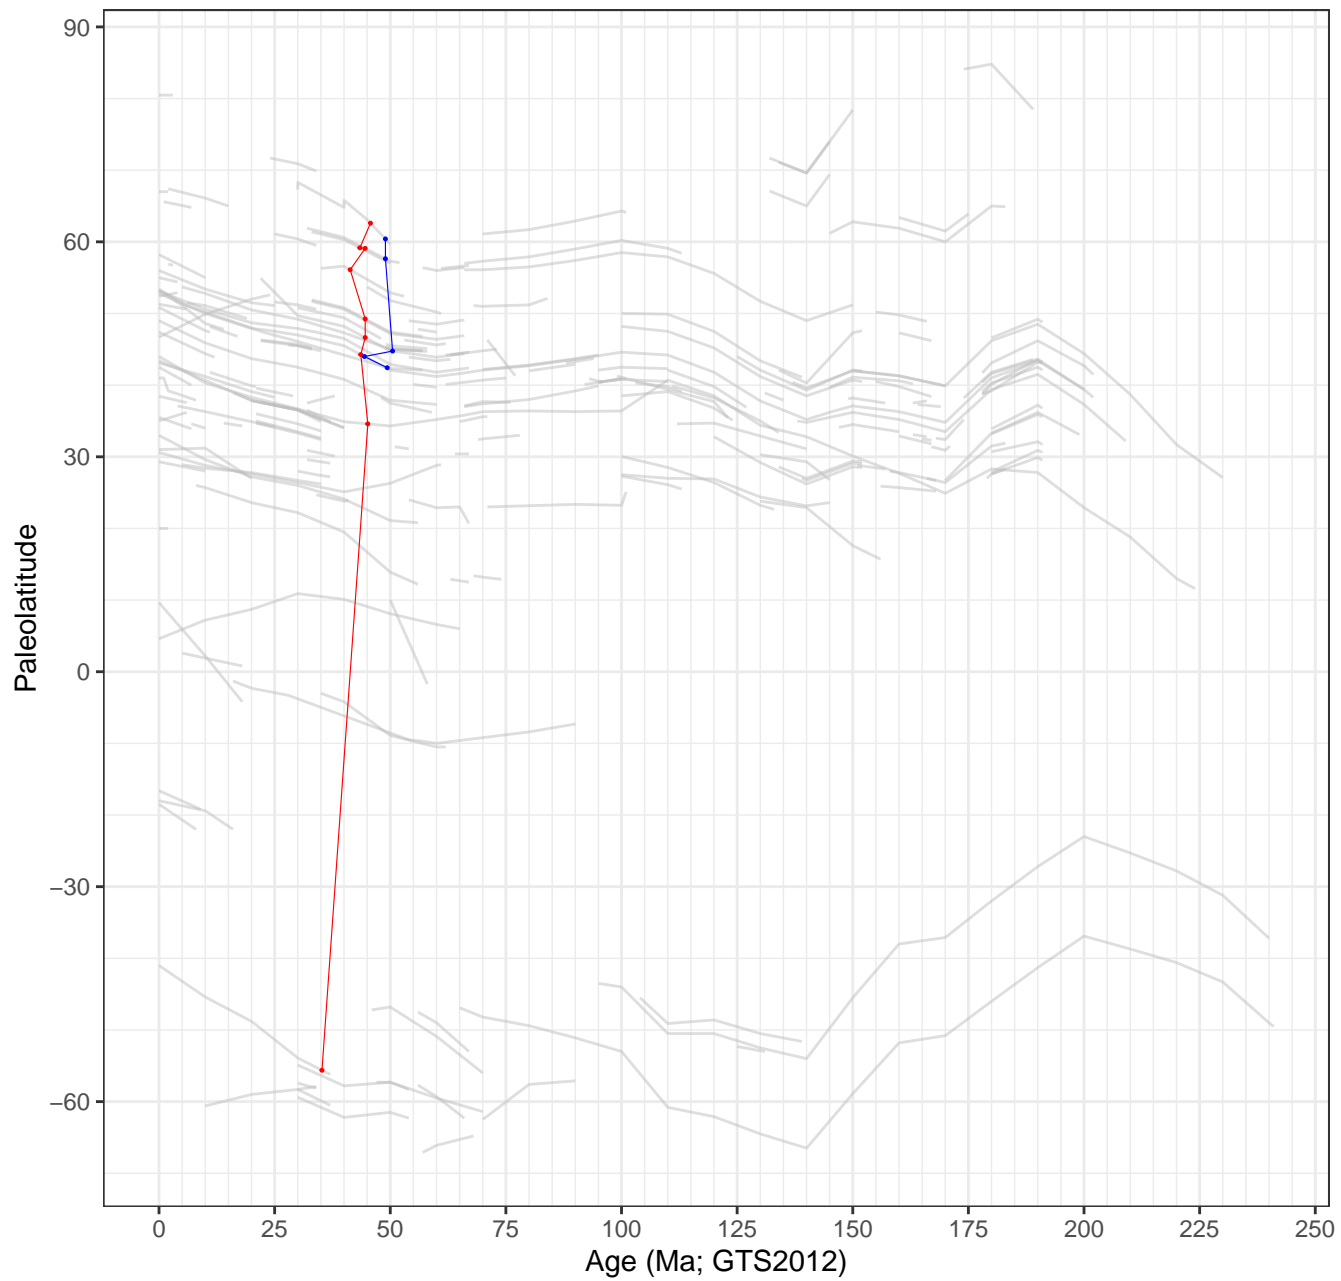

Supplement: Supplementary file 1277 [file Diphyes ficusoides.pdf › Supplement/Supplement 2/Species 1914 plots/Diphyes ficusoides.pdf]

# Species *Diphyes latiusculum*

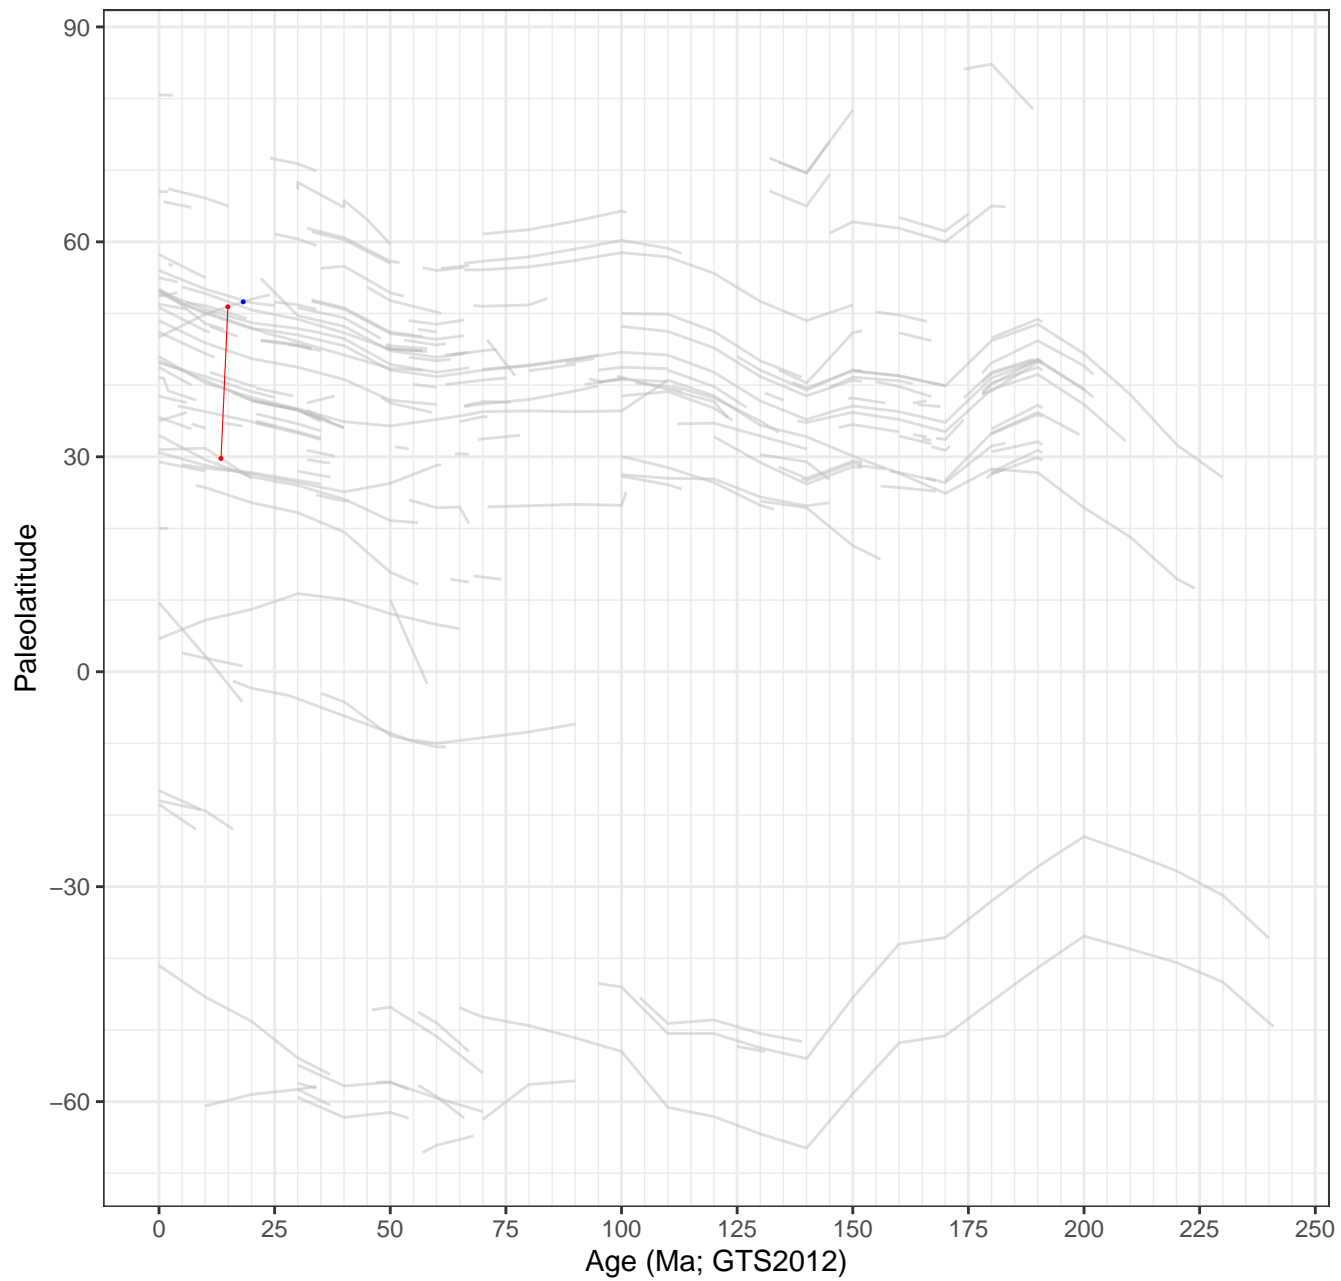

Supplement: Supplementary file 1278 [file Diphyes latiusculum.pdf › Supplement/Supplement 2/Species 1914 plots/Diphyes latiusculum.pdf]

# Species *Diphyes spinula*

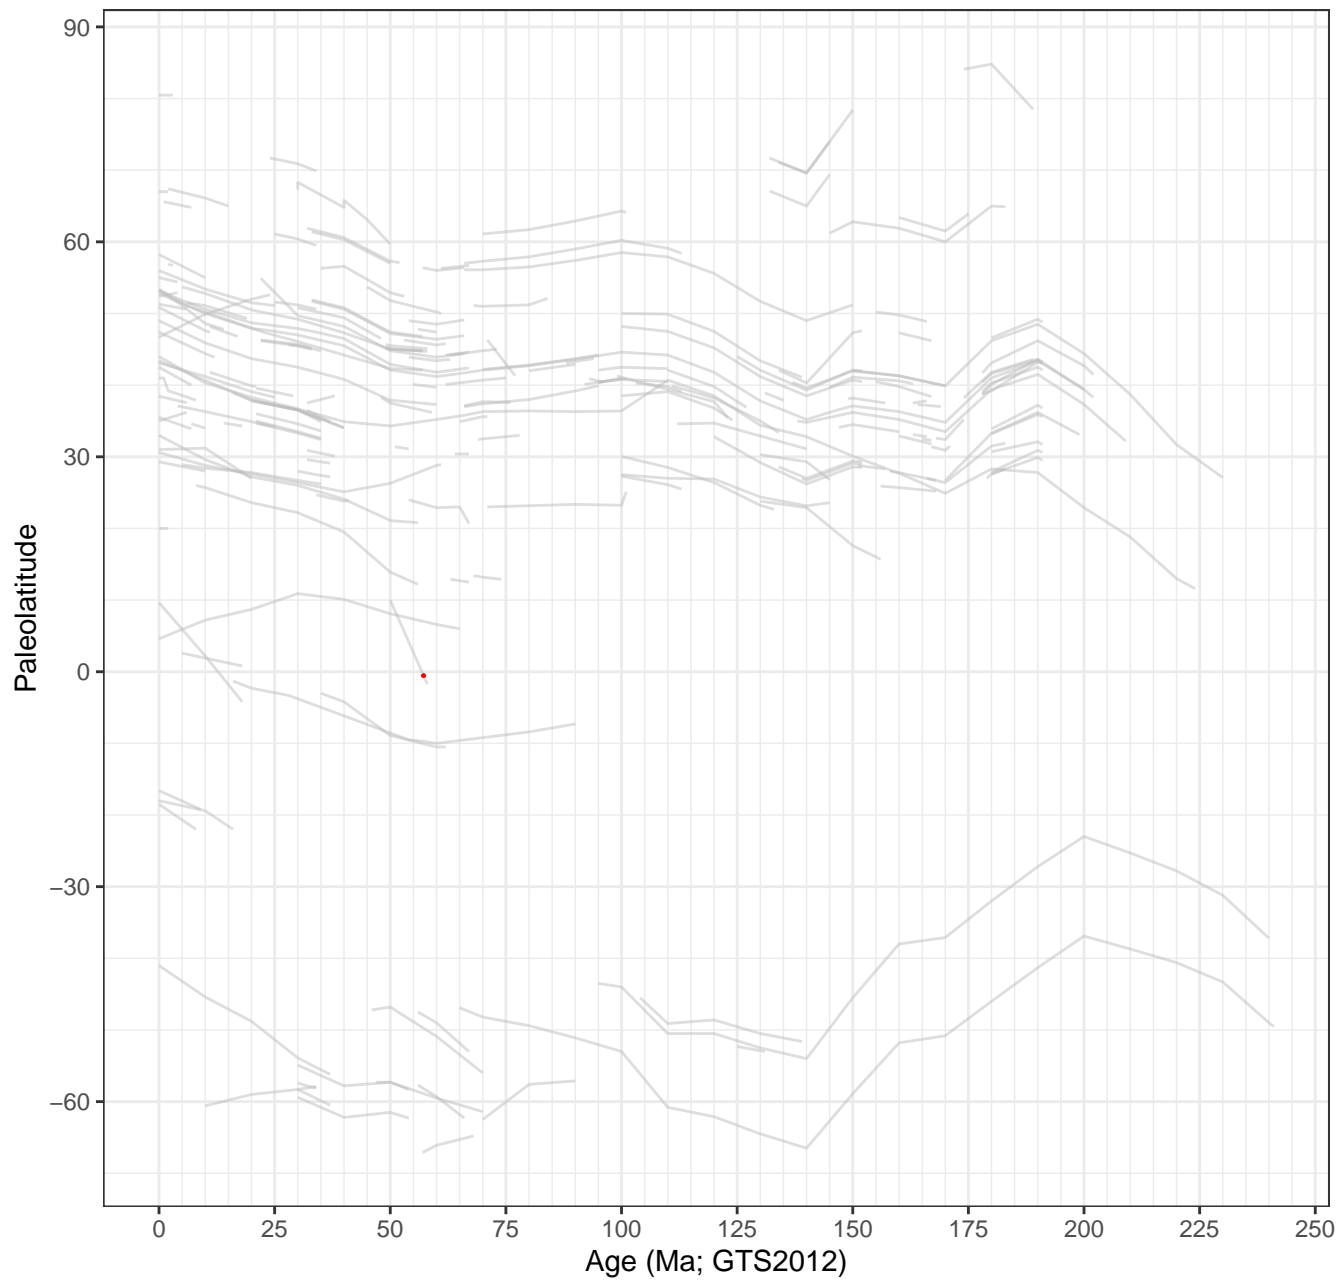

Supplement: Supplementary file 1279 [file Diphyes spinula.pdf › Supplement/Supplement 2/Species 1914 plots/Diphyes spinula.pdf]

# Species *Discorsia nannus*

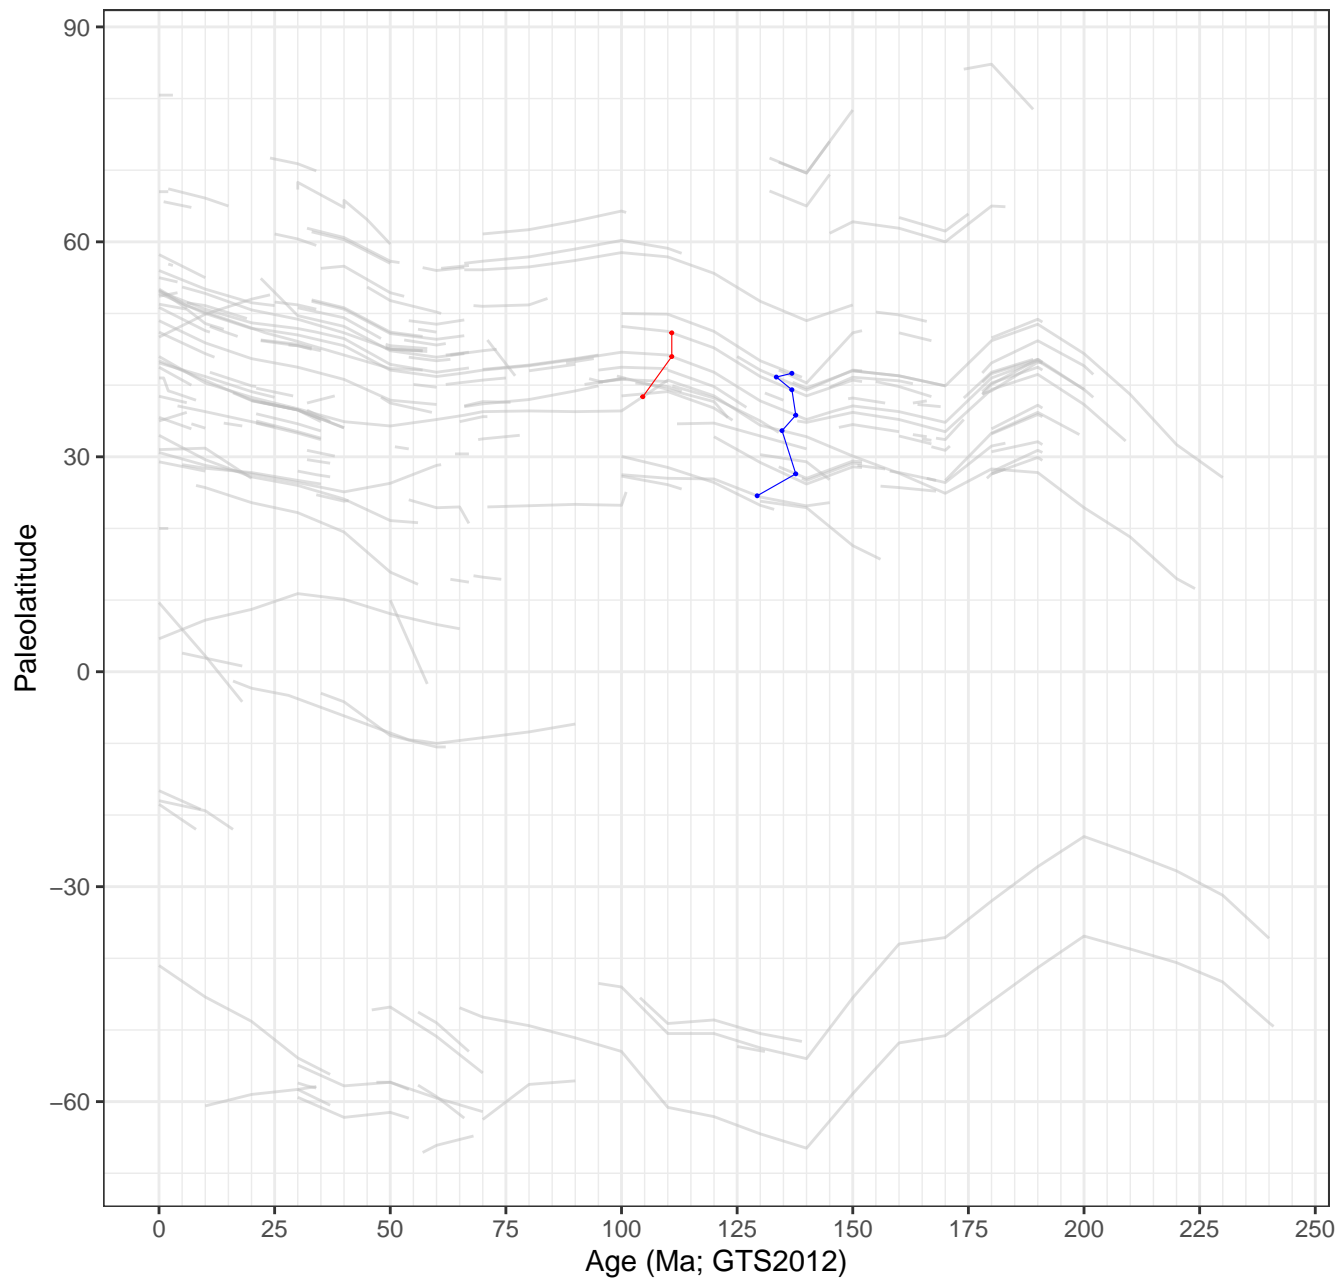

Supplement: Supplementary file 1280 [file Discorsia nannus.pdf › Supplement/Supplement 2/Species 1914 plots/Discorsia nannus.pdf]

# Species *Disphaeria macropyla*

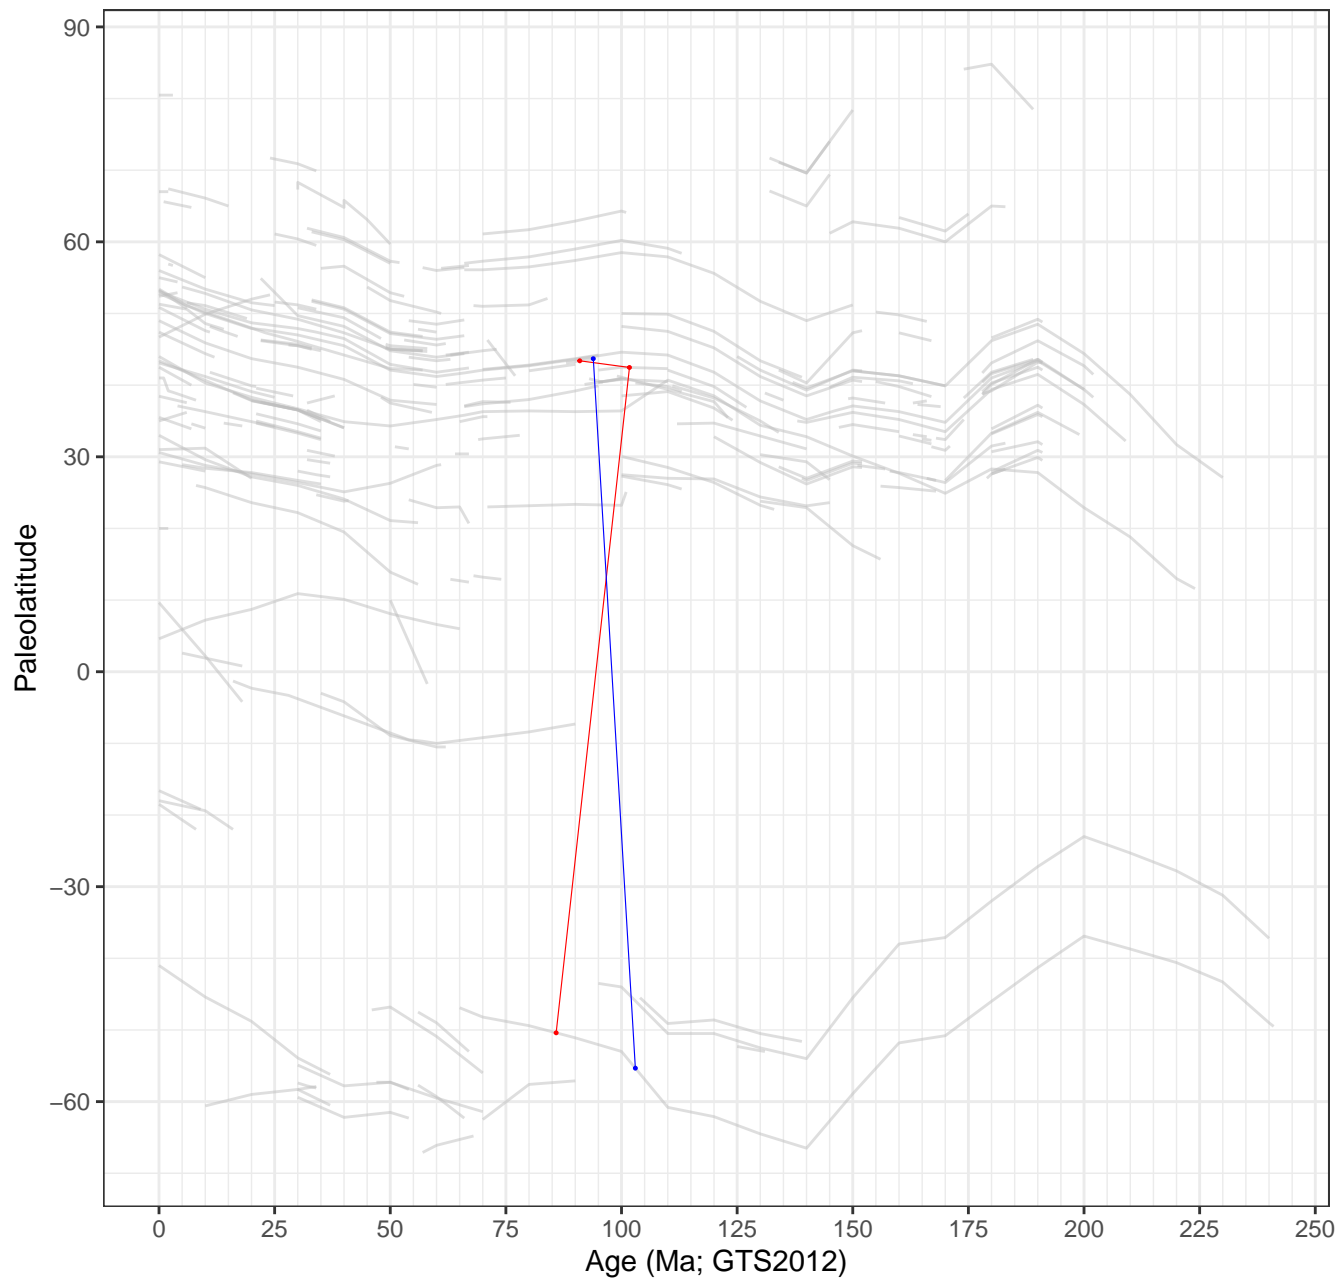

Supplement: Supplementary file 1281 [file Disphaeria macropyla.pdf › Supplement/Supplement 2/Species 1914 plots/Disphaeria macropyla.pdf]

# Species *Disphaeria munda*

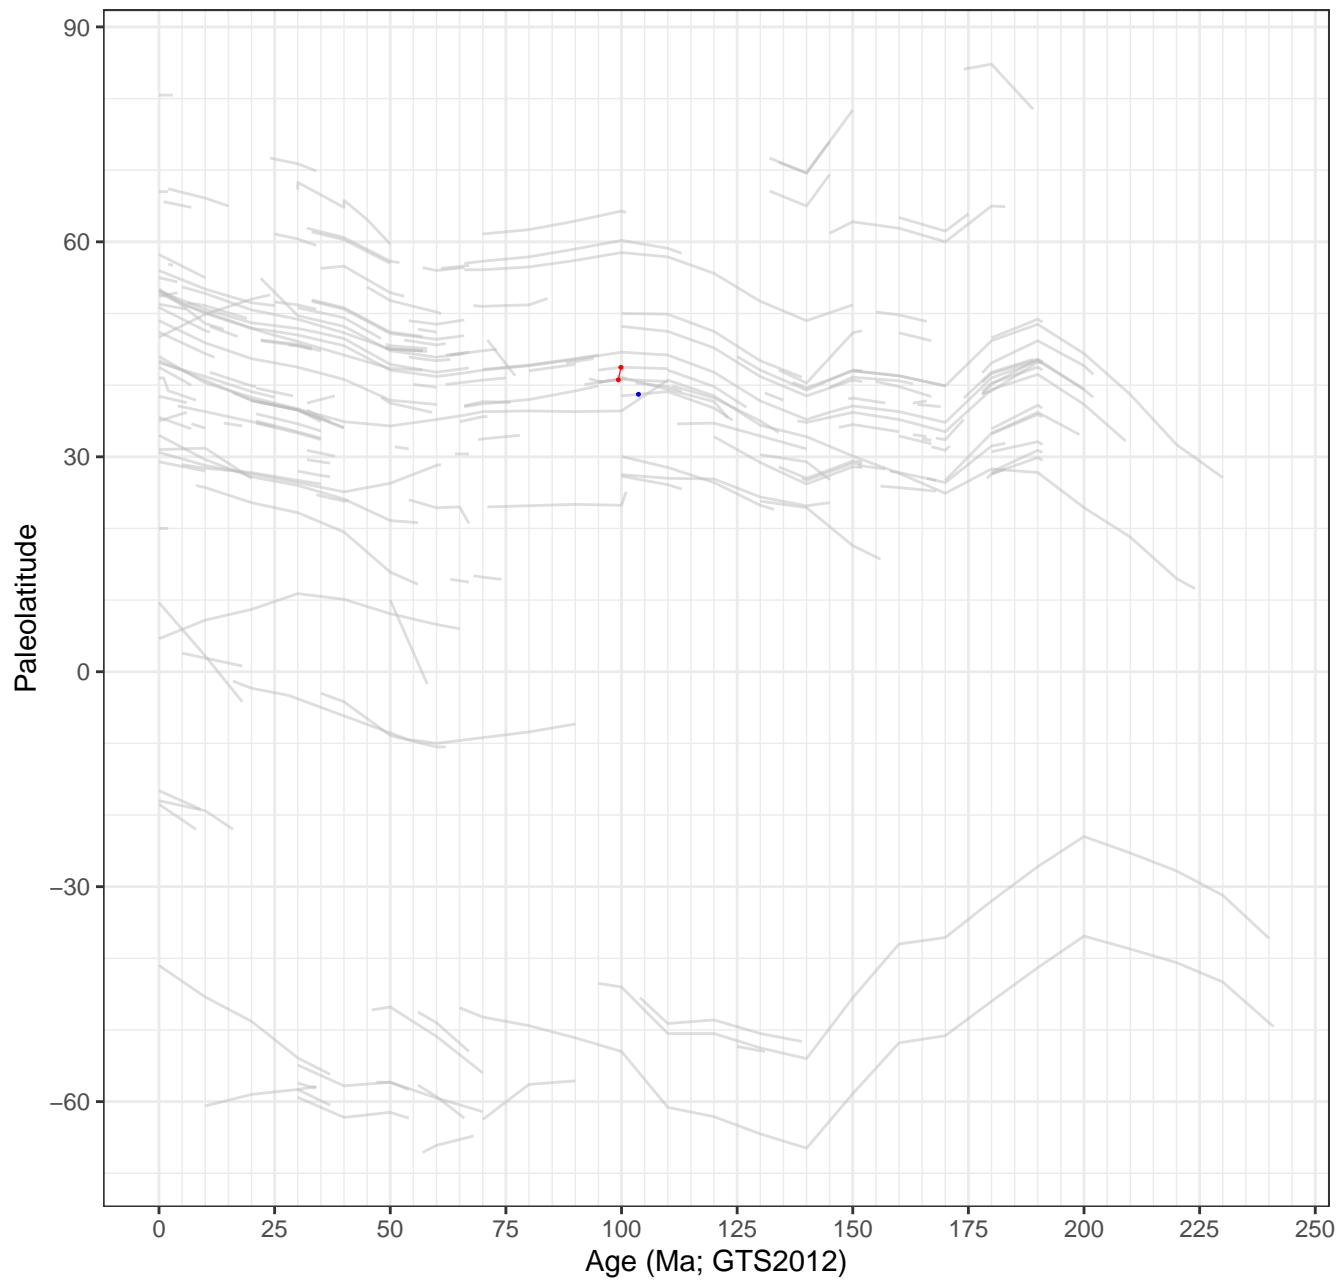

Supplement: Supplementary file 1282 [file Disphaeria munda.pdf › Supplement/Supplement 2/Species 1914 plots/Disphaeria munda.pdf]

# Species *Disphaerogena carposphaeropsis*

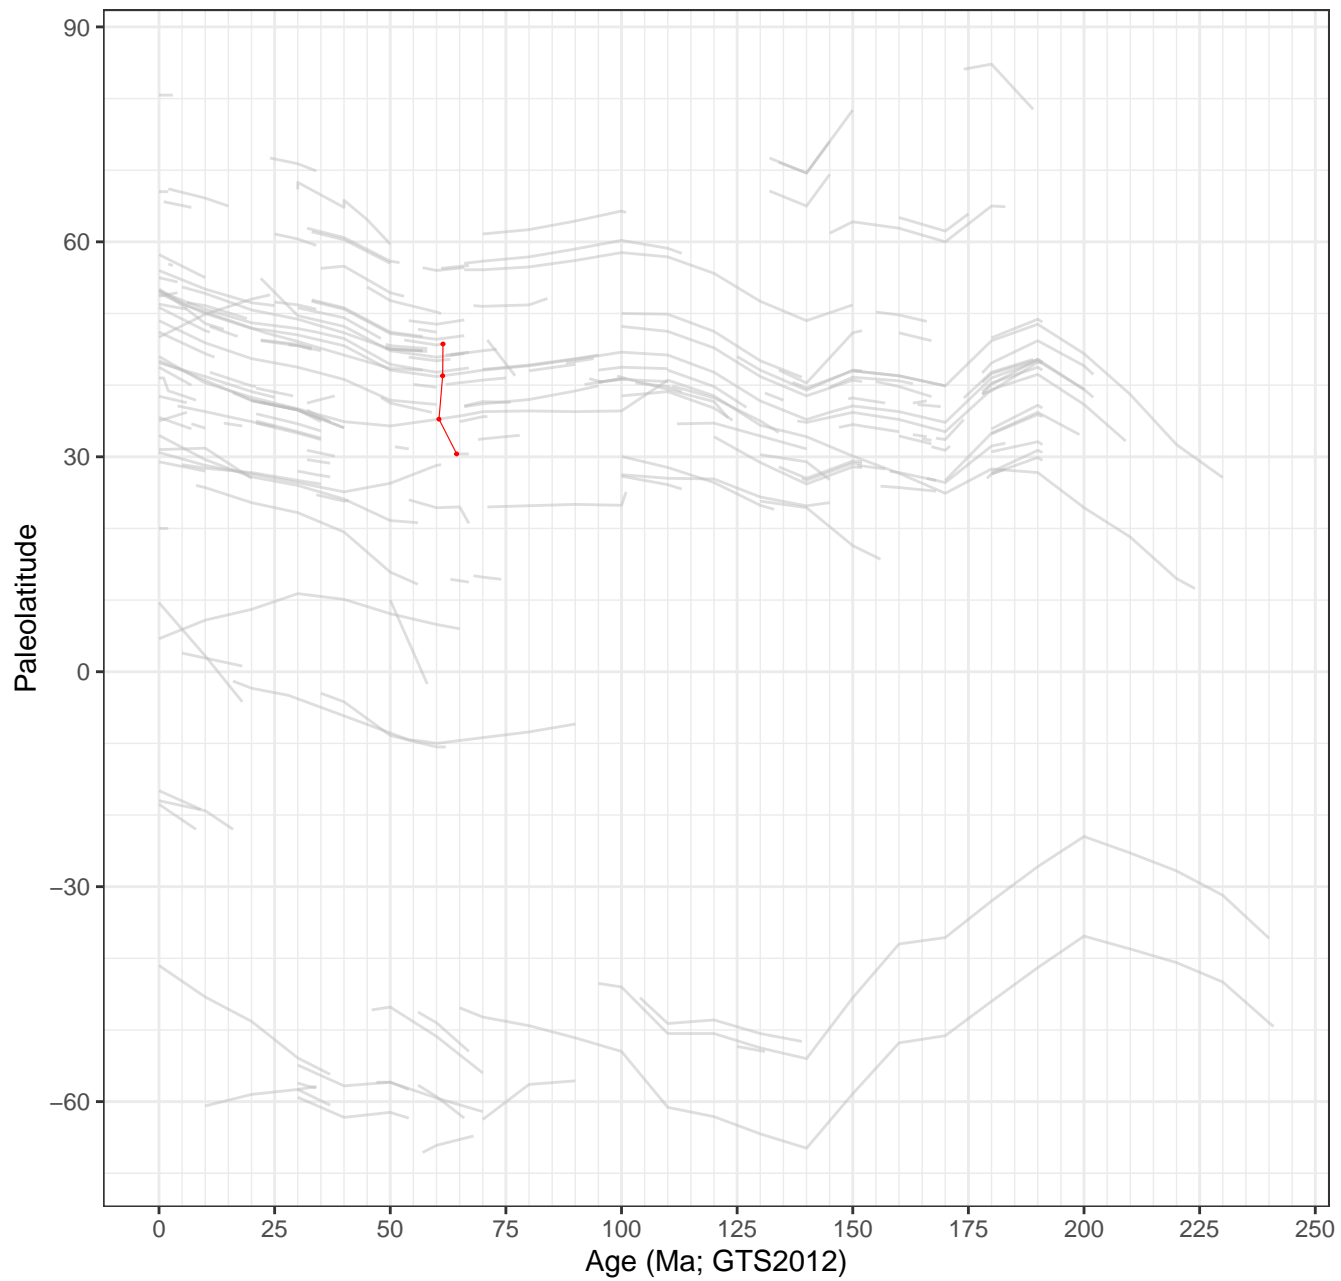

Supplement: Supplementary file 1283 [file Disphaerogena carposphaeropsis.pdf › Supplement/Supplement 2/Species 1914 plots/Disphaerogena carposphaeropsis.pdf]

# Species *Dissiliodinium acmeum*

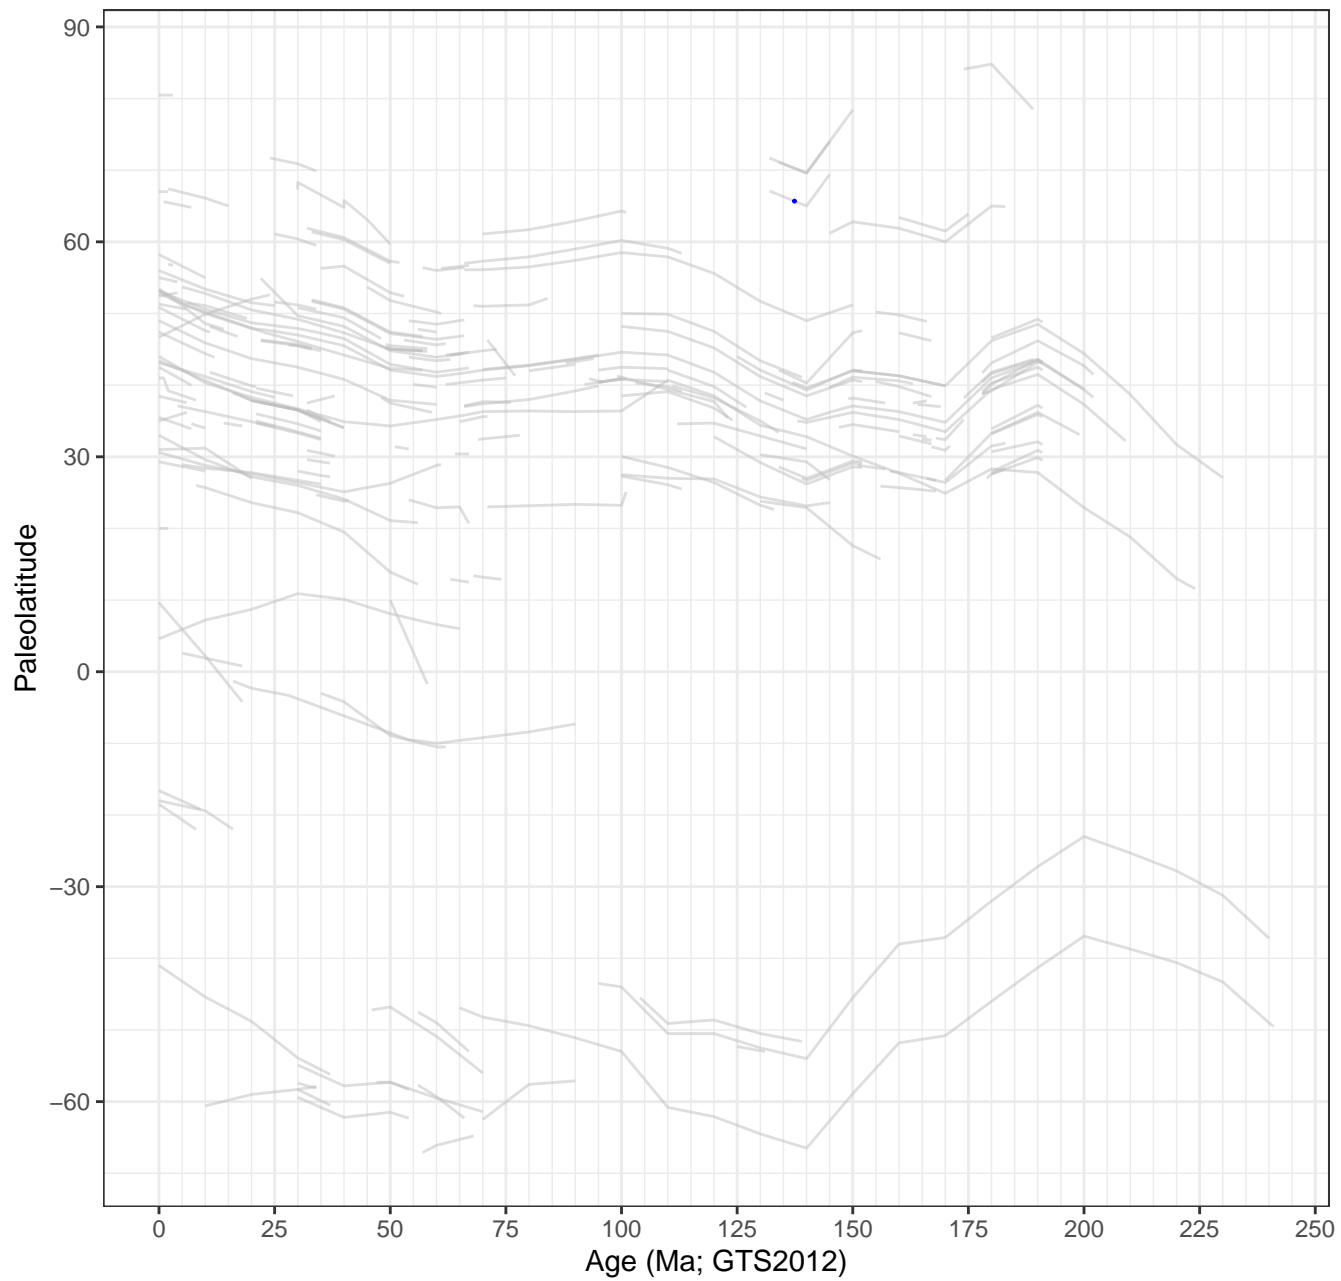

Supplement: Supplementary file 1284 [file Dissiliodinium acmeum.pdf › Supplement/Supplement 2/Species 1914 plots/Dissiliodinium acmeum.pdf]

# Species *Dissiliodinium caddaense*

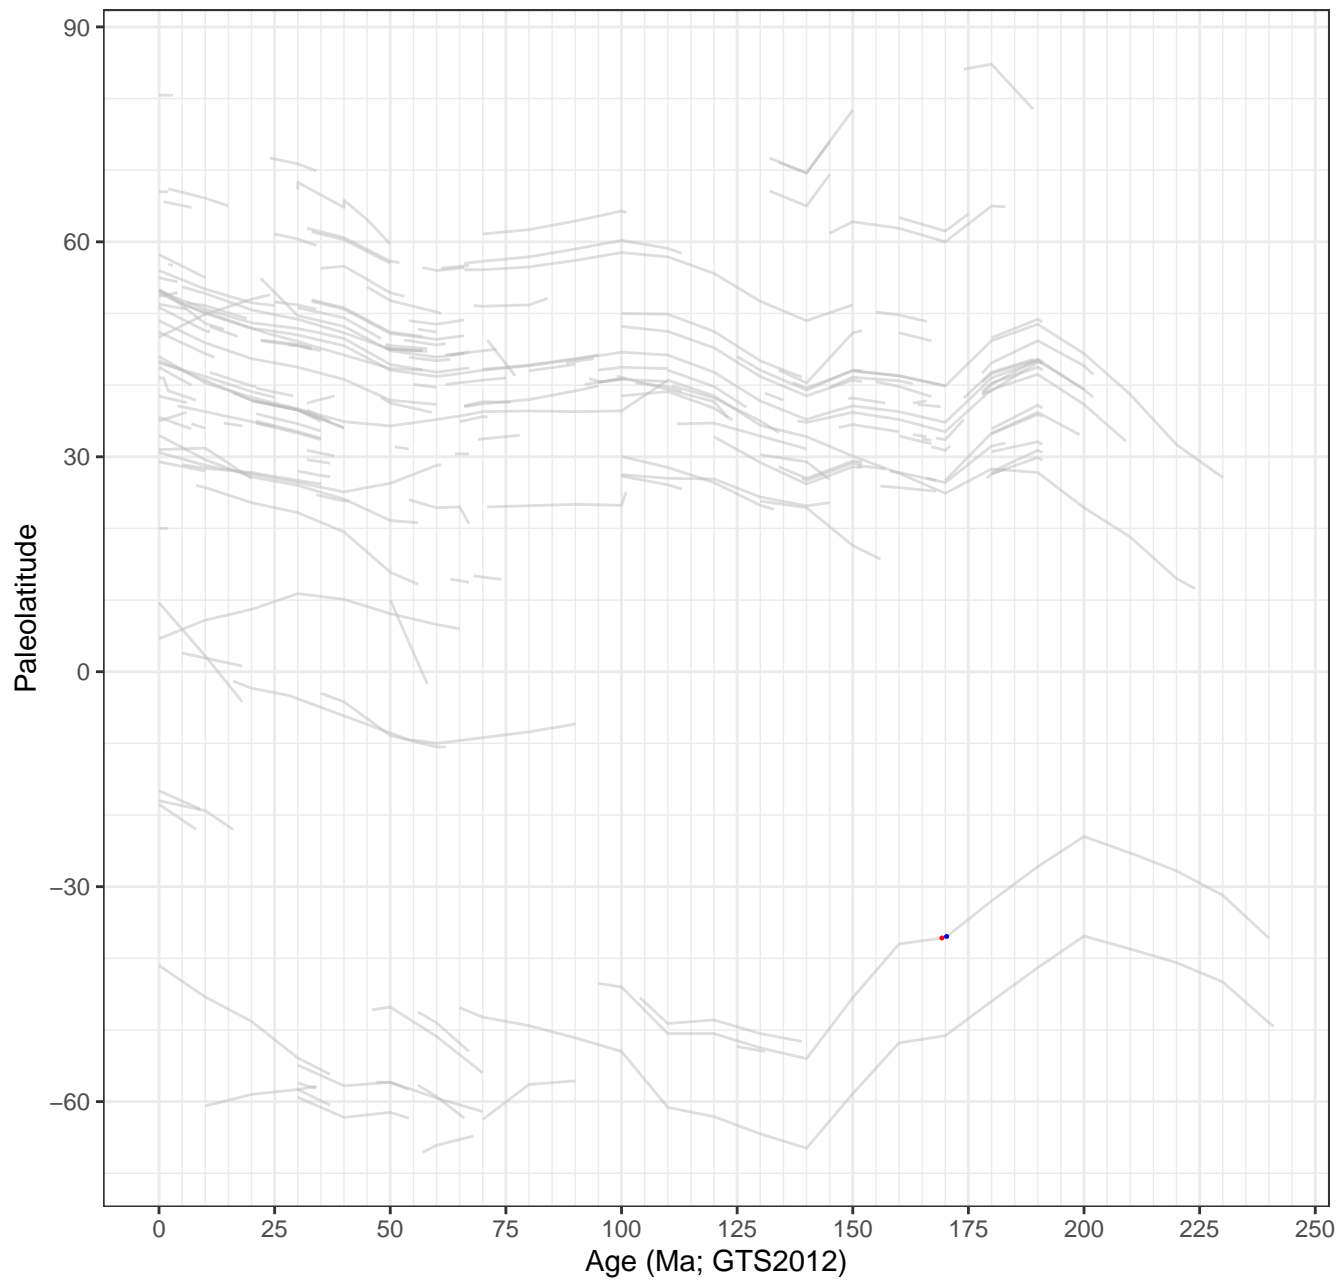

Supplement: Supplementary file 1285 [file Dissiliodinium caddaense.pdf › Supplement/Supplement 2/Species 1914 plots/Dissiliodinium caddaense.pdf]

# Species Dissiliodinium giganteum

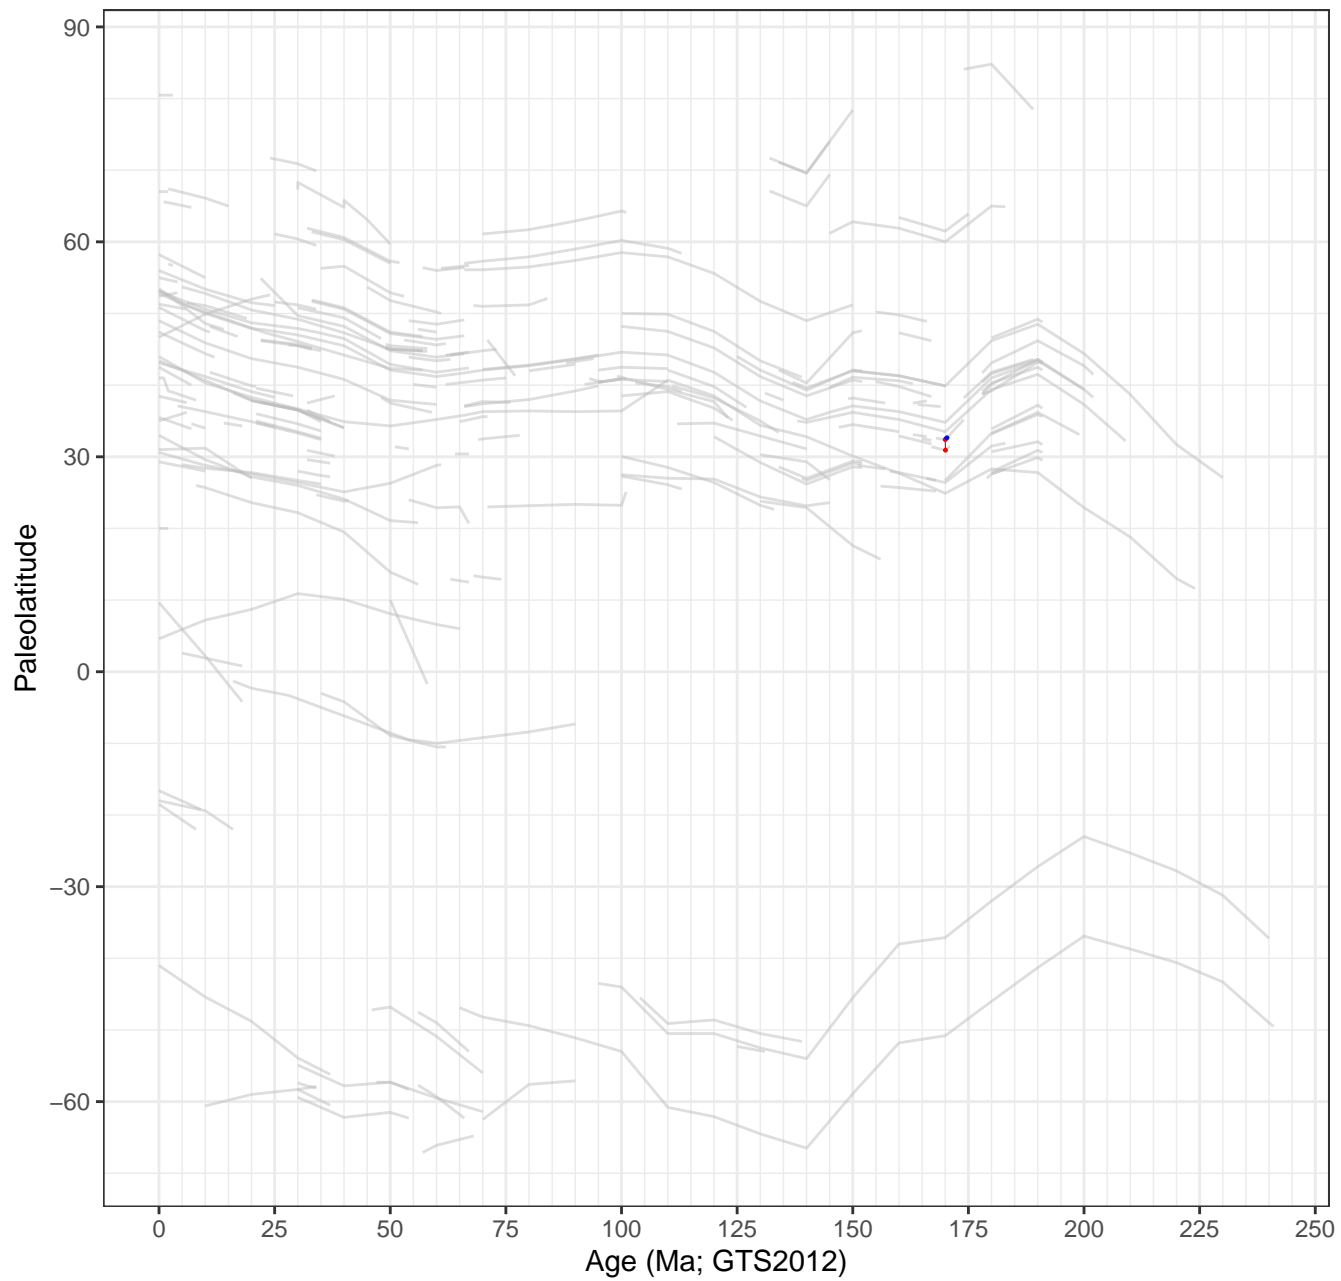

Supplement: Supplementary file 1286 [file Dissiliodinium giganteum.pdf › Supplement/Supplement 2/Species 1914 plots/Dissiliodinium giganteum.pdf]

# Species Dissiliodinium globulus

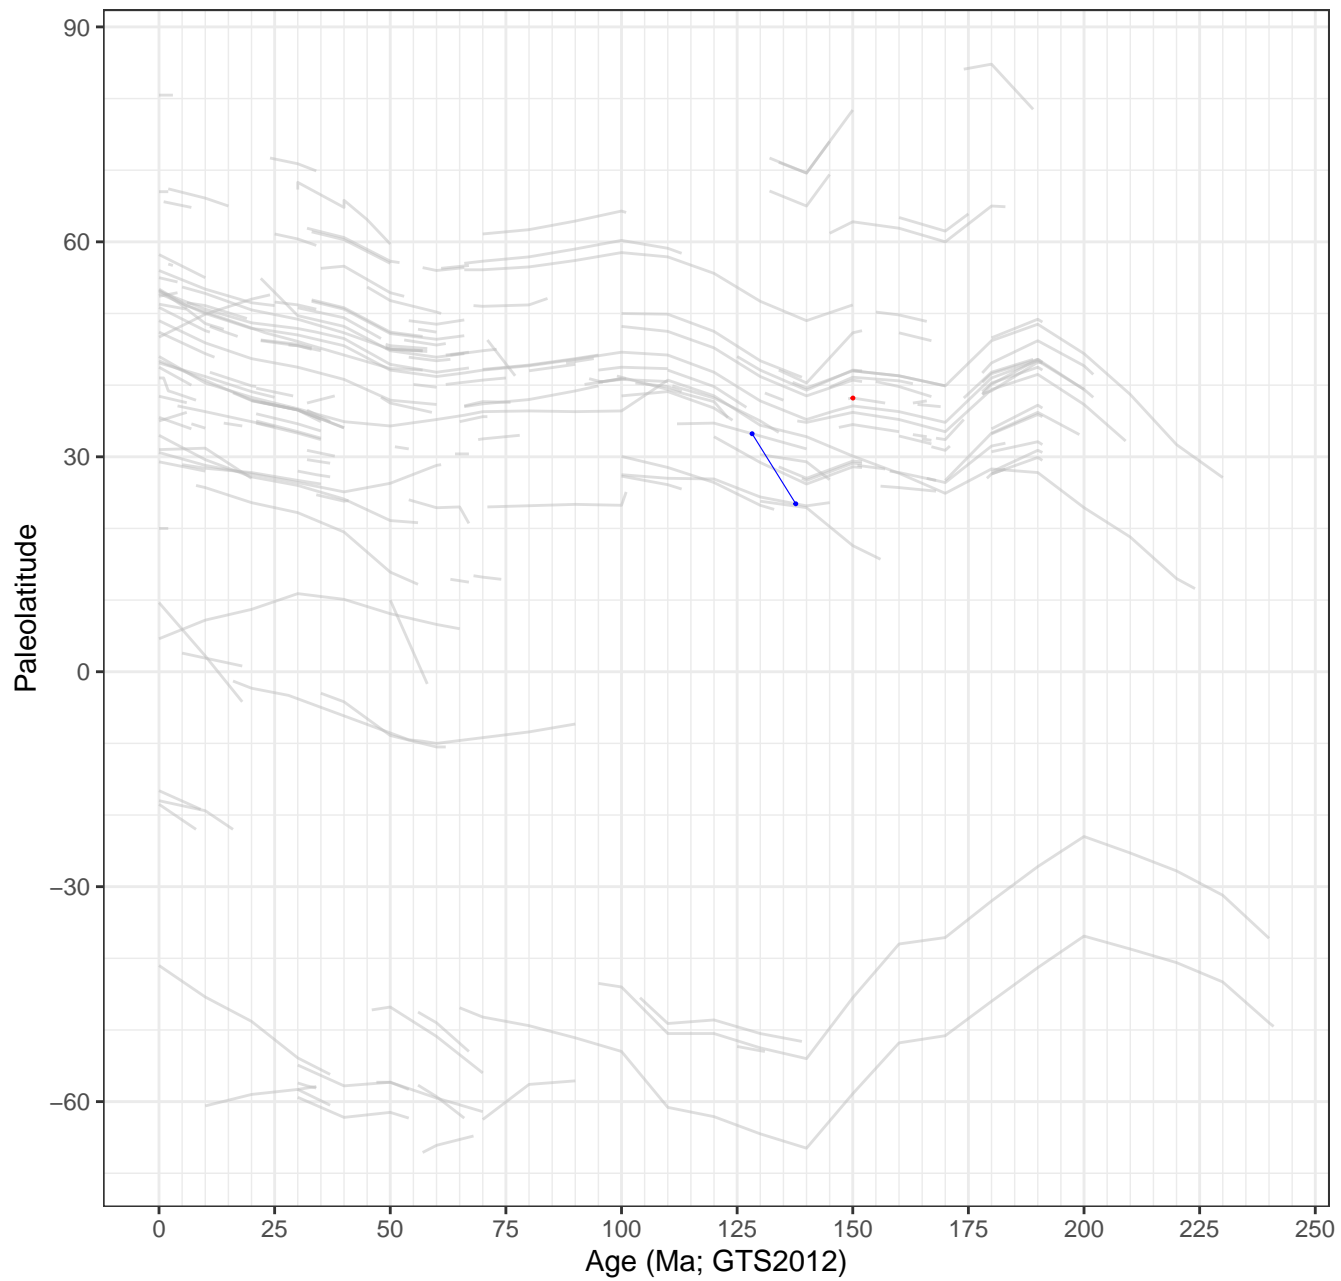

Supplement: Supplementary file 1287 [file Dissiliodinium globulus.pdf › Supplement/Supplement 2/Species 1914 plots/Dissiliodinium globulus.pdf]

# Species *Dissiliodinium hocneratum*

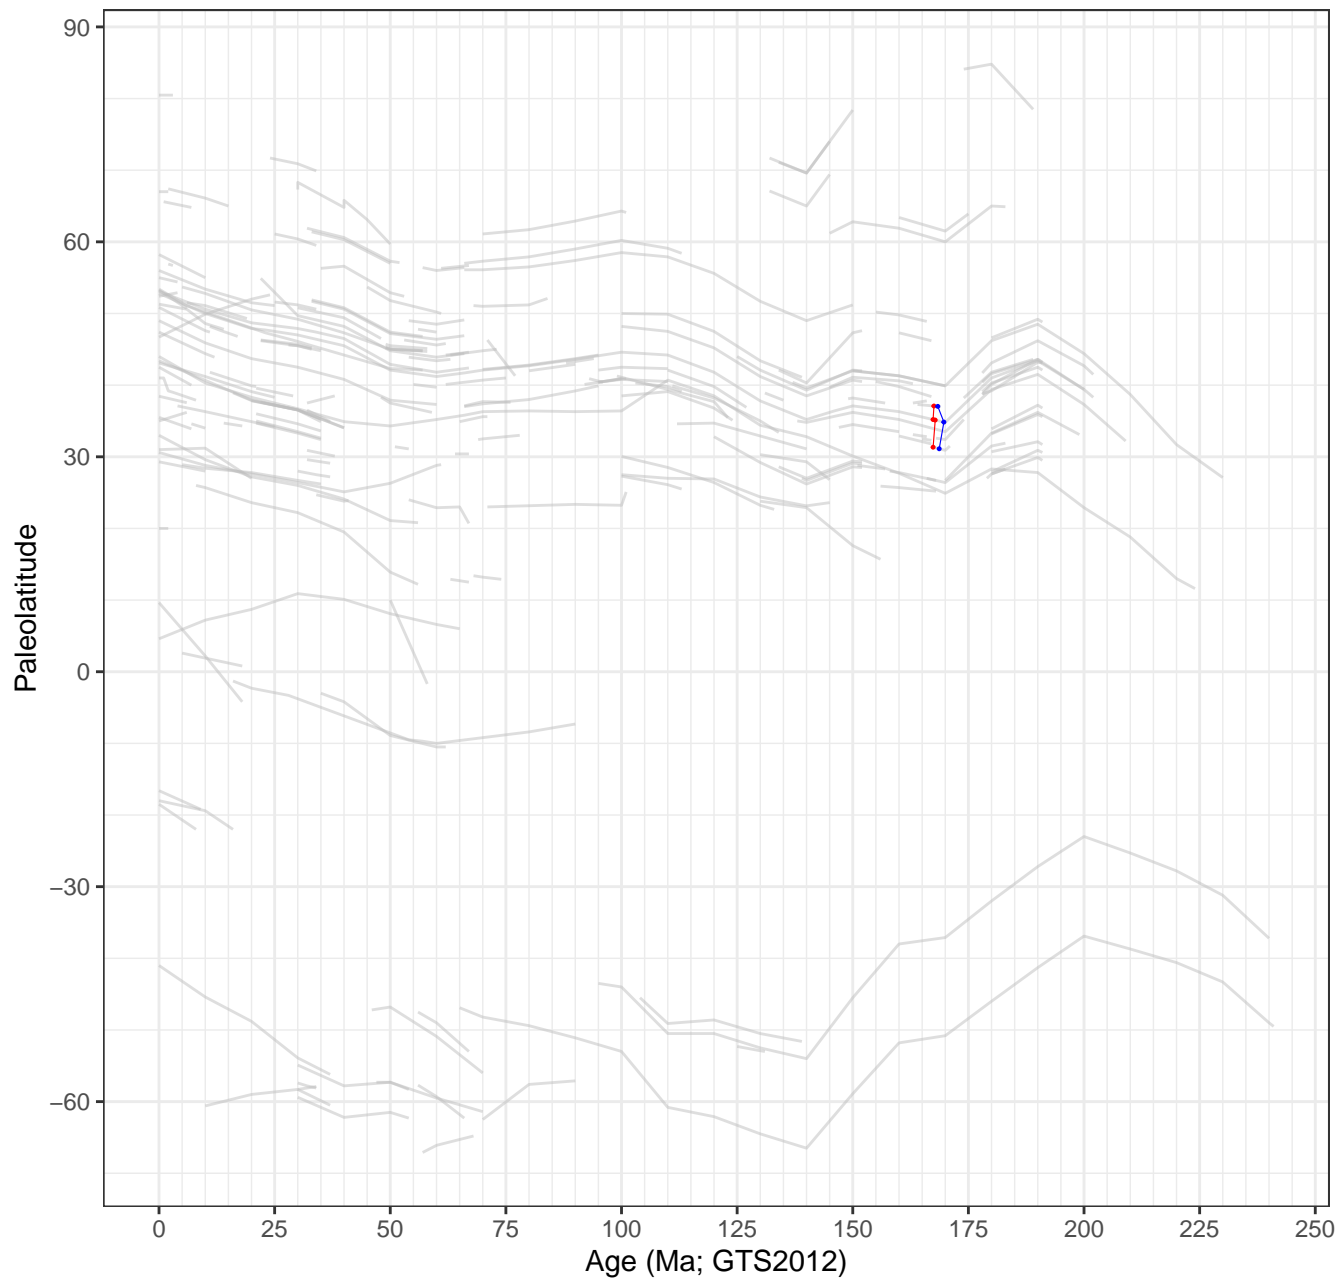

Supplement: Supplementary file 1288 [file Dissiliodinium hocneratum.pdf › Supplement/Supplement 2/Species 1914 plots/Dissiliodinium hocneratum.pdf]

# Species *Dissiliodinium psilatium*

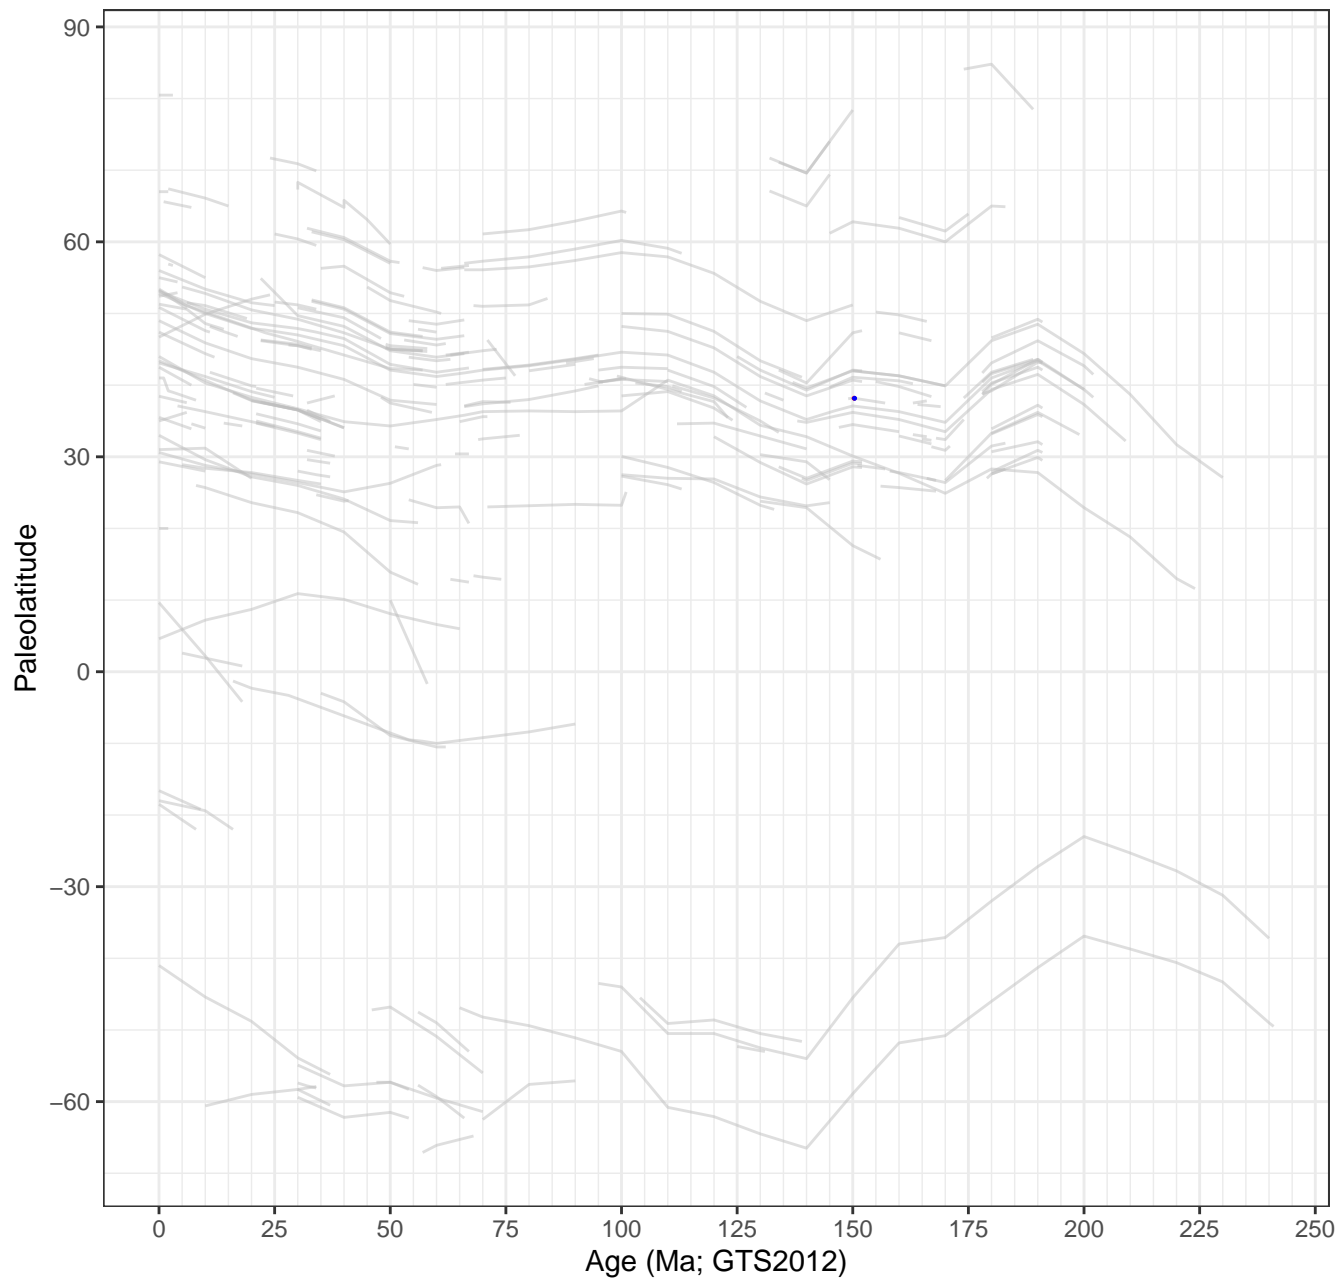

Supplement: Supplementary file 1289 [file Dissiliodinium psilatum.pdf › Supplement/Supplement 2/Species 1914 plots/Dissiliodinium psilatum.pdf]

# Species *Dissiliodinium willei*

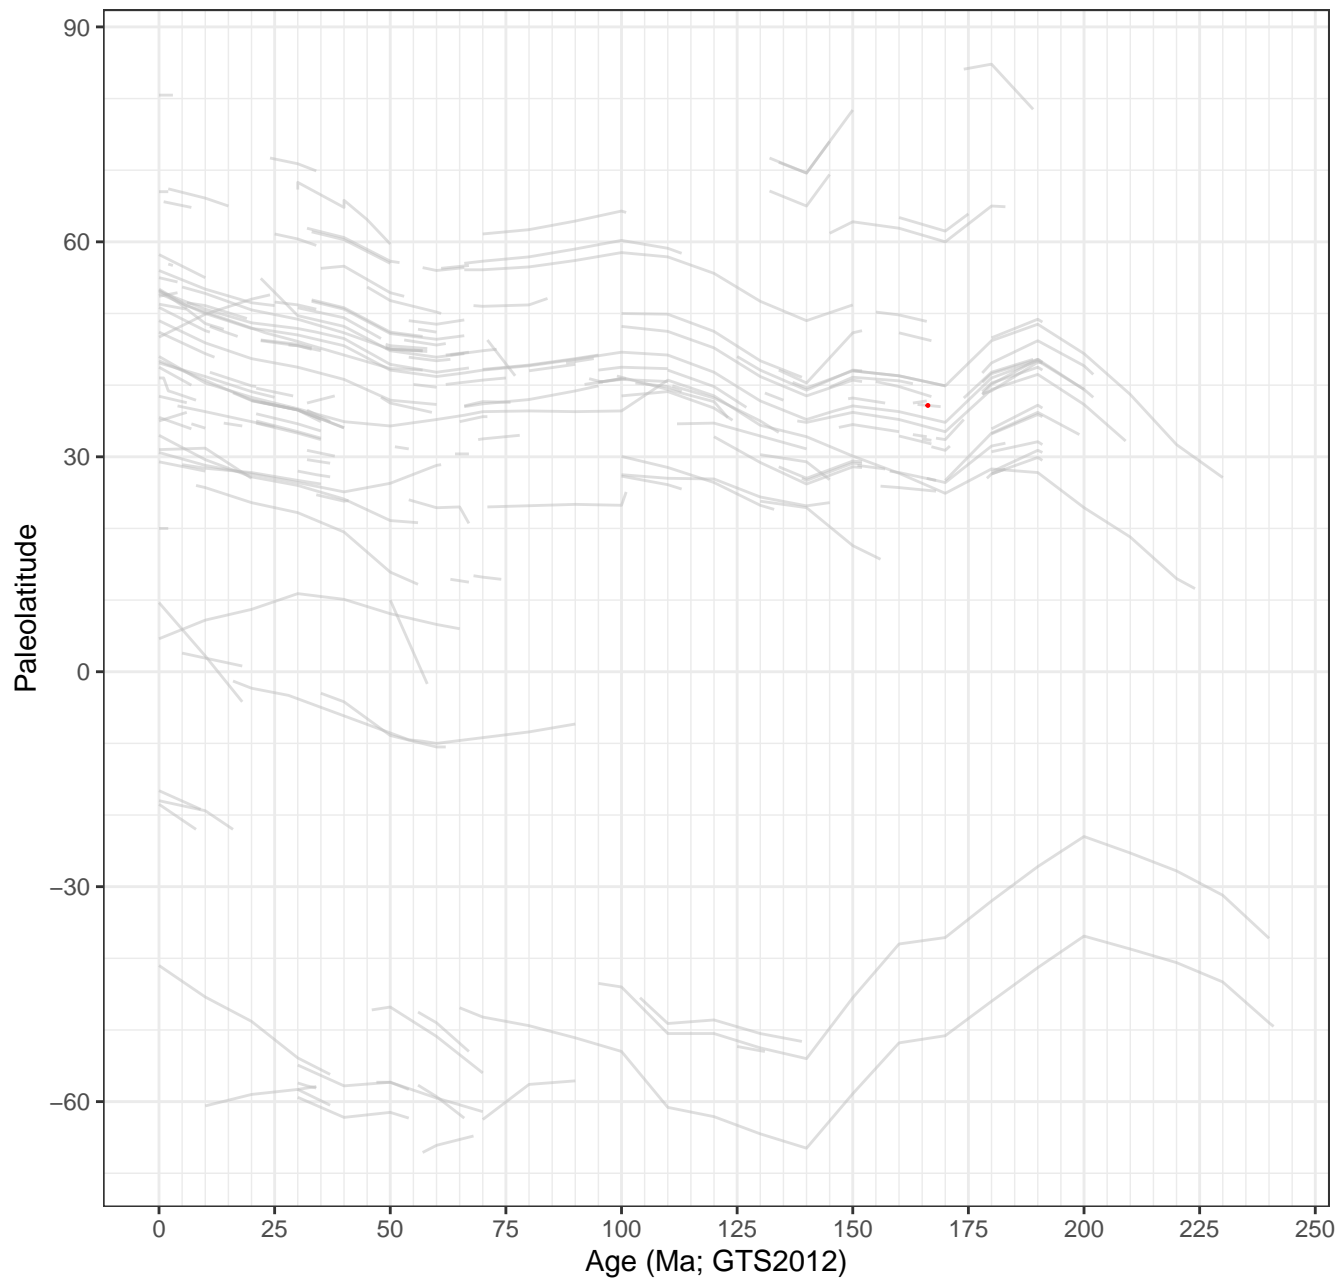

Supplement: Supplementary file 1290 [file Dissiliodinium willei.pdf › Supplement/Supplement 2/Species 1914 plots/Dissiliodinium willei.pdf]

# Species *Dissimulidinium lobispinosum*

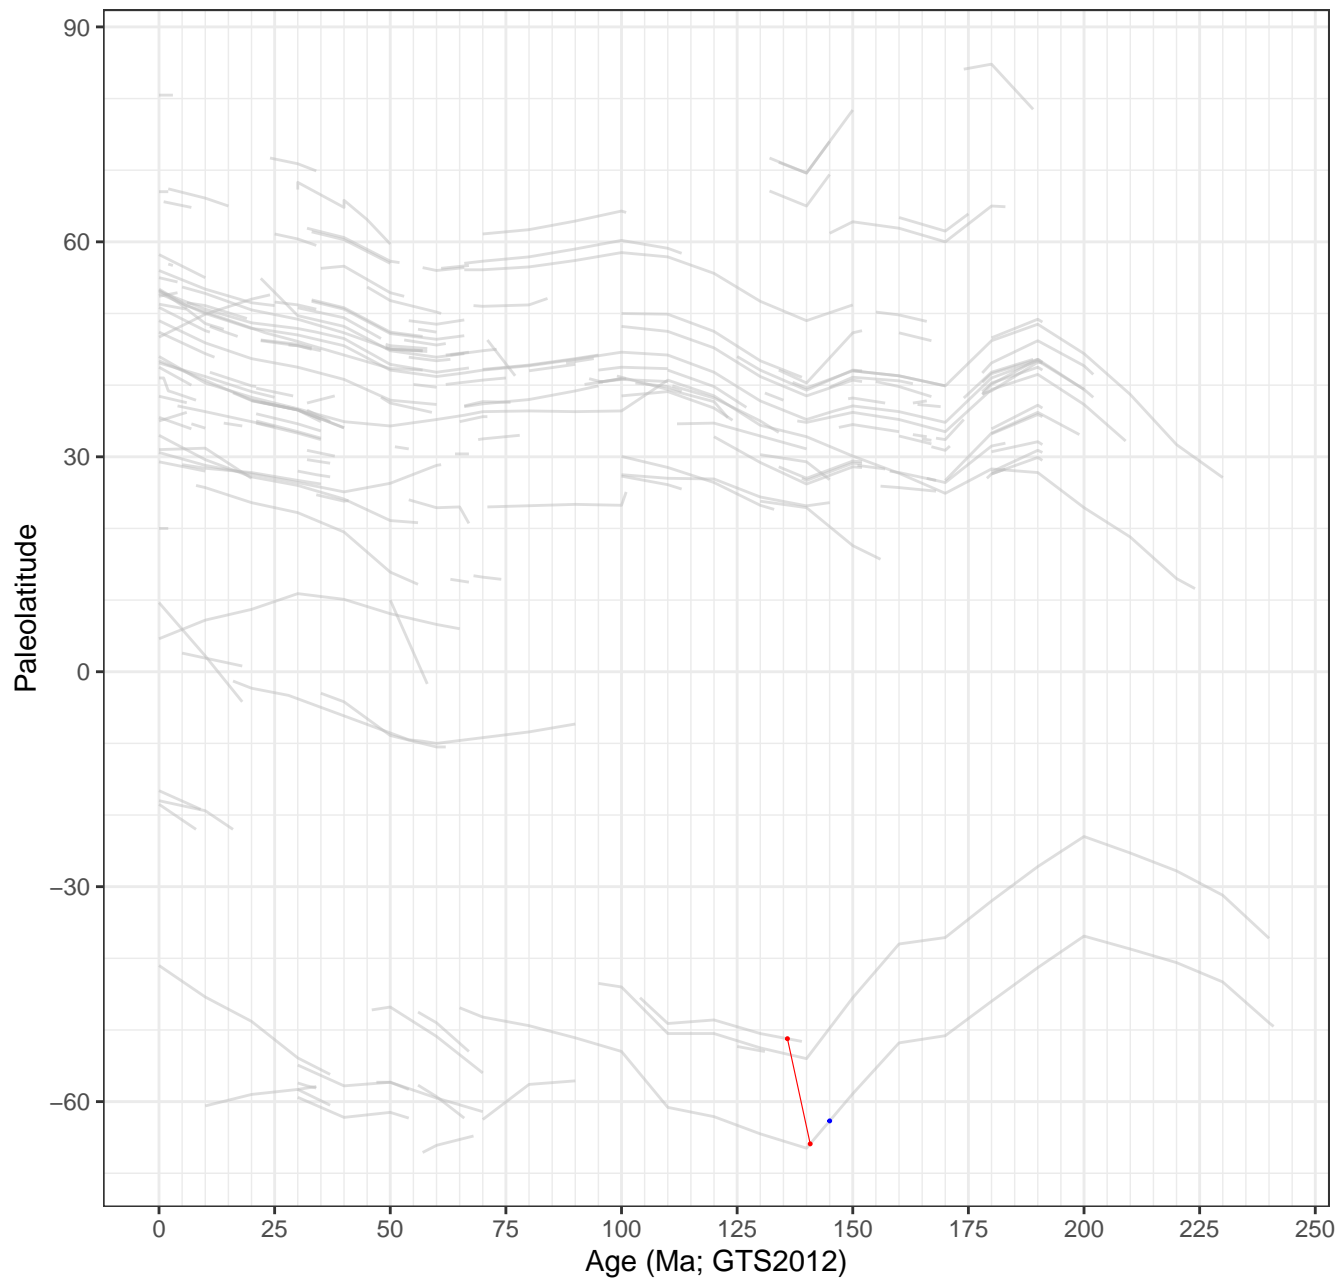

Supplement: Supplementary file 1291 [file Dissimulidinium lobispinosum.pdf › Supplement/Supplement 2/Species 1914 plots/Dissimulidinium lobispinosum.pdf]

# Species *Dissimulidinium purattense*

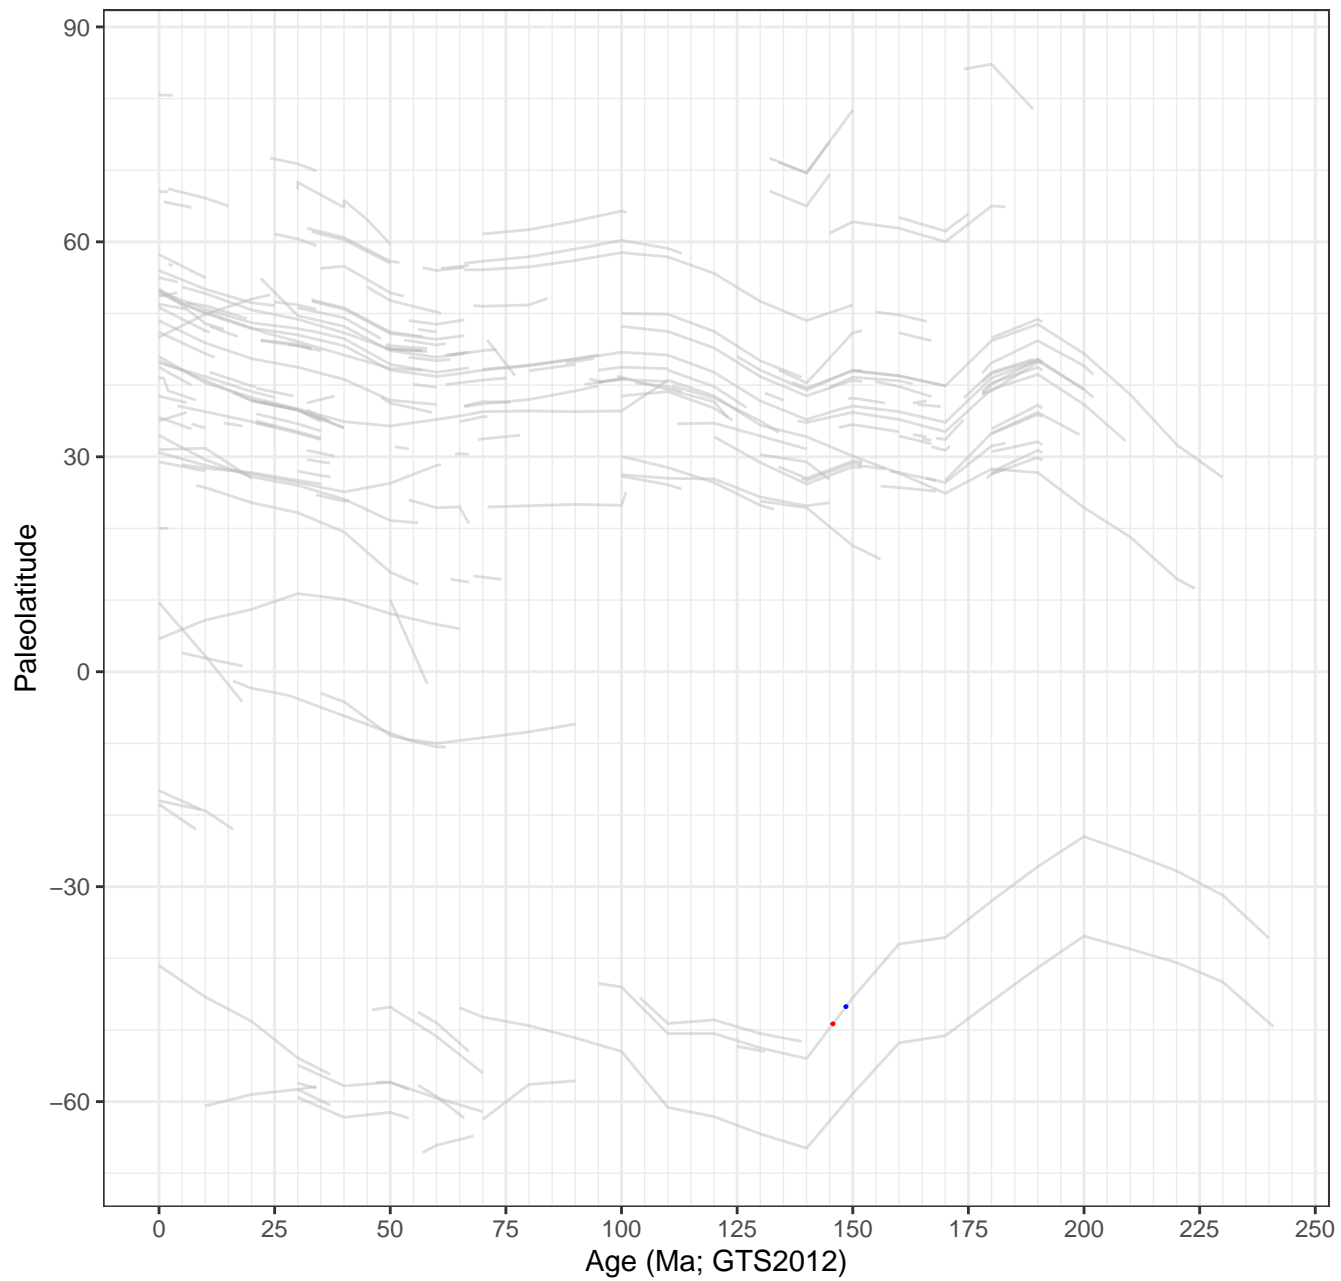

Supplement: Supplementary file 1292 [file Dissimulidinium purattense.pdf › Supplement/Supplement 2/Species 1914 plots/Dissimulidinium purattense.pdf]

# Species *Distatodinium apenninicum*

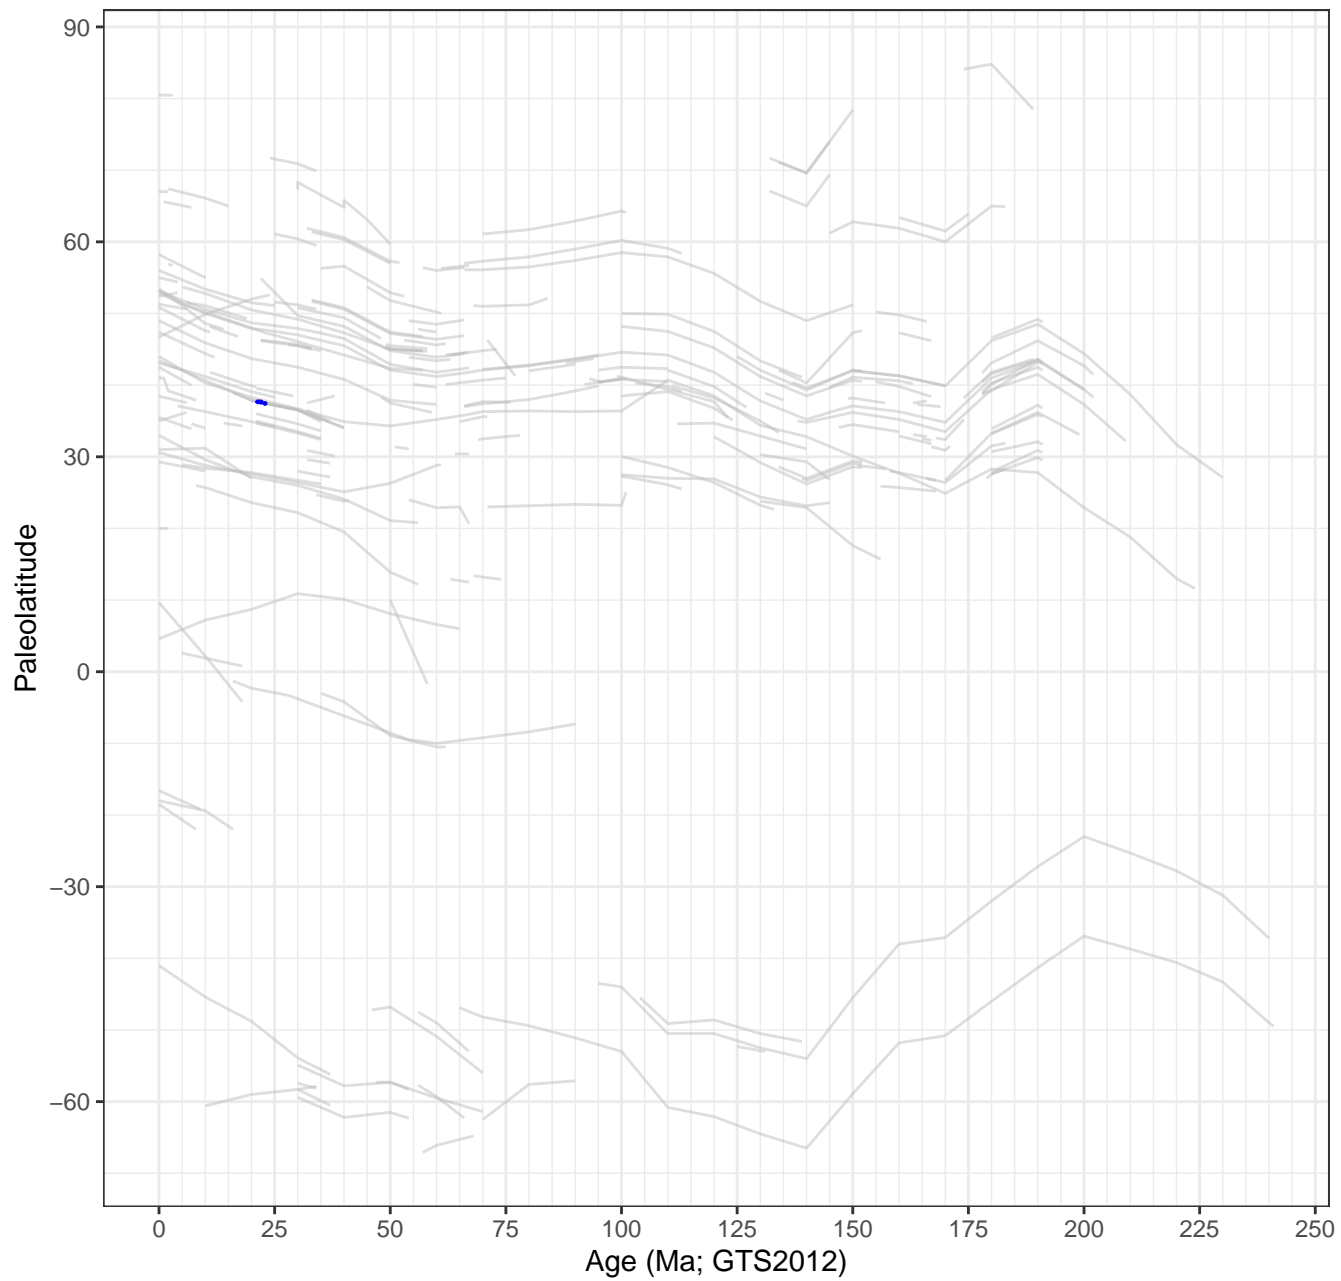

Supplement: Supplementary file 1293 [file Distatodinium apenninicum.pdf › Supplement/Supplement 2/Species 1914 plots/Distatodinium apenninicum.pdf]

# Species *Diatadinium biffii* s.l.

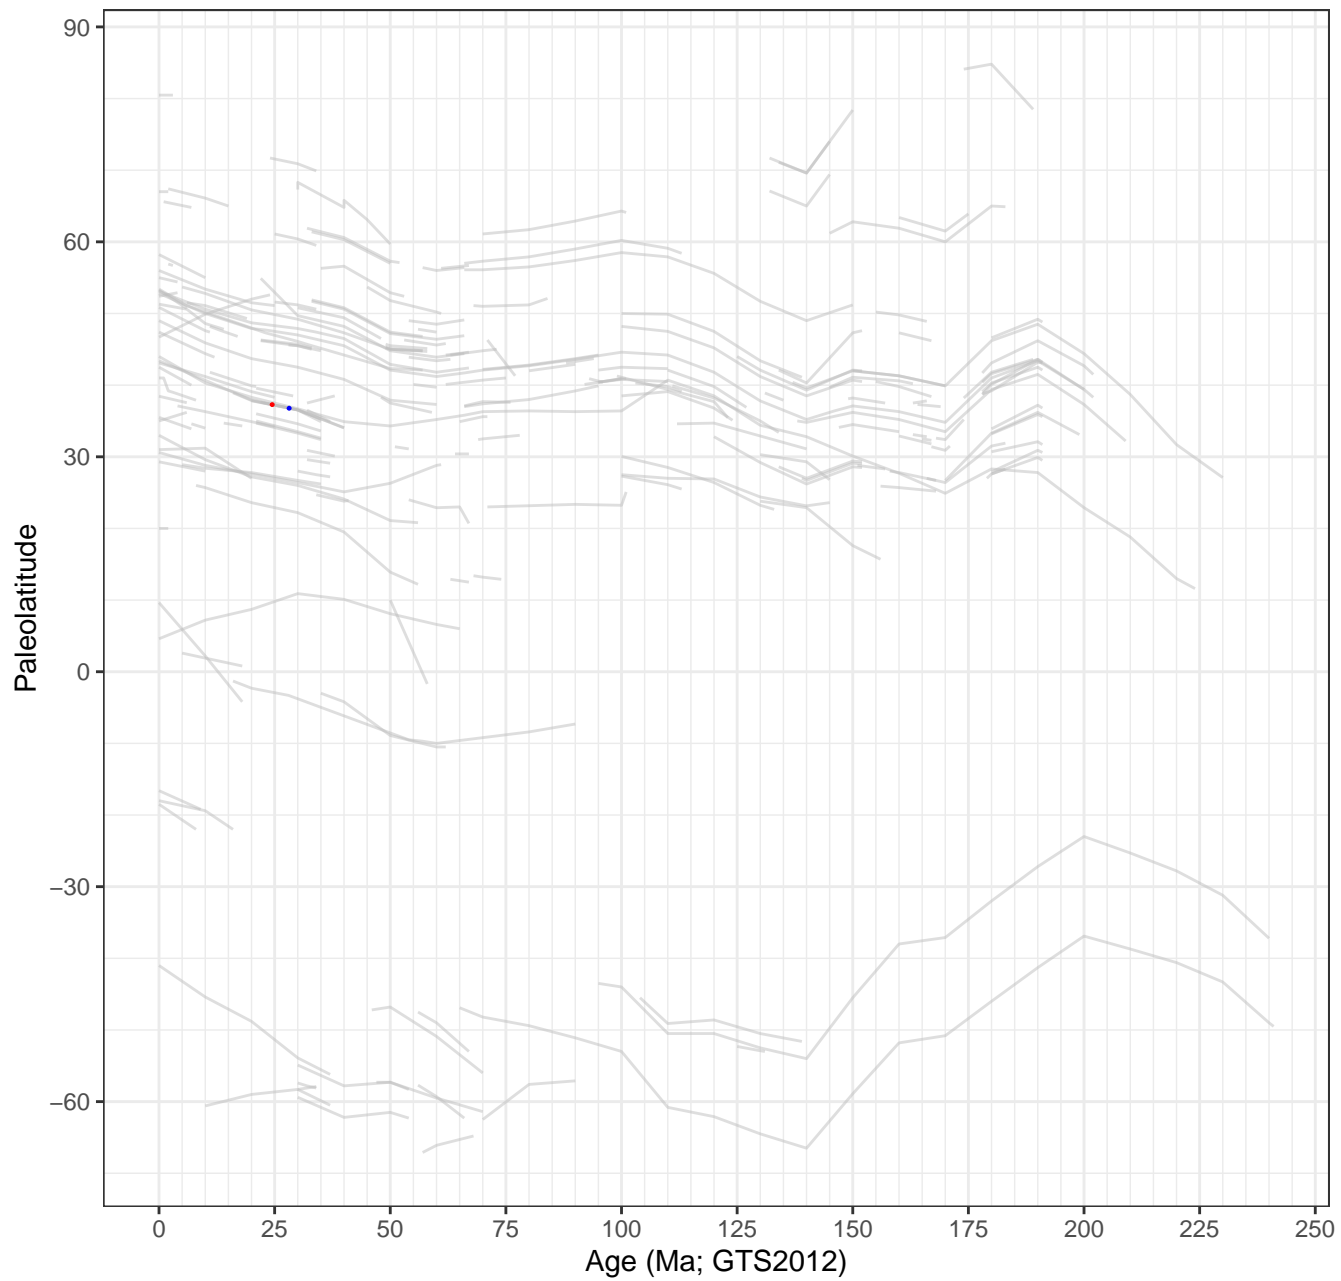

Supplement: Supplementary file 1294 [file Distatodinium biffii s.l..pdf › Supplement/Supplement 2/Species 1914 plots/Distatodinium biffii s.l..pdf]

# Species *Diatadinium biffii*

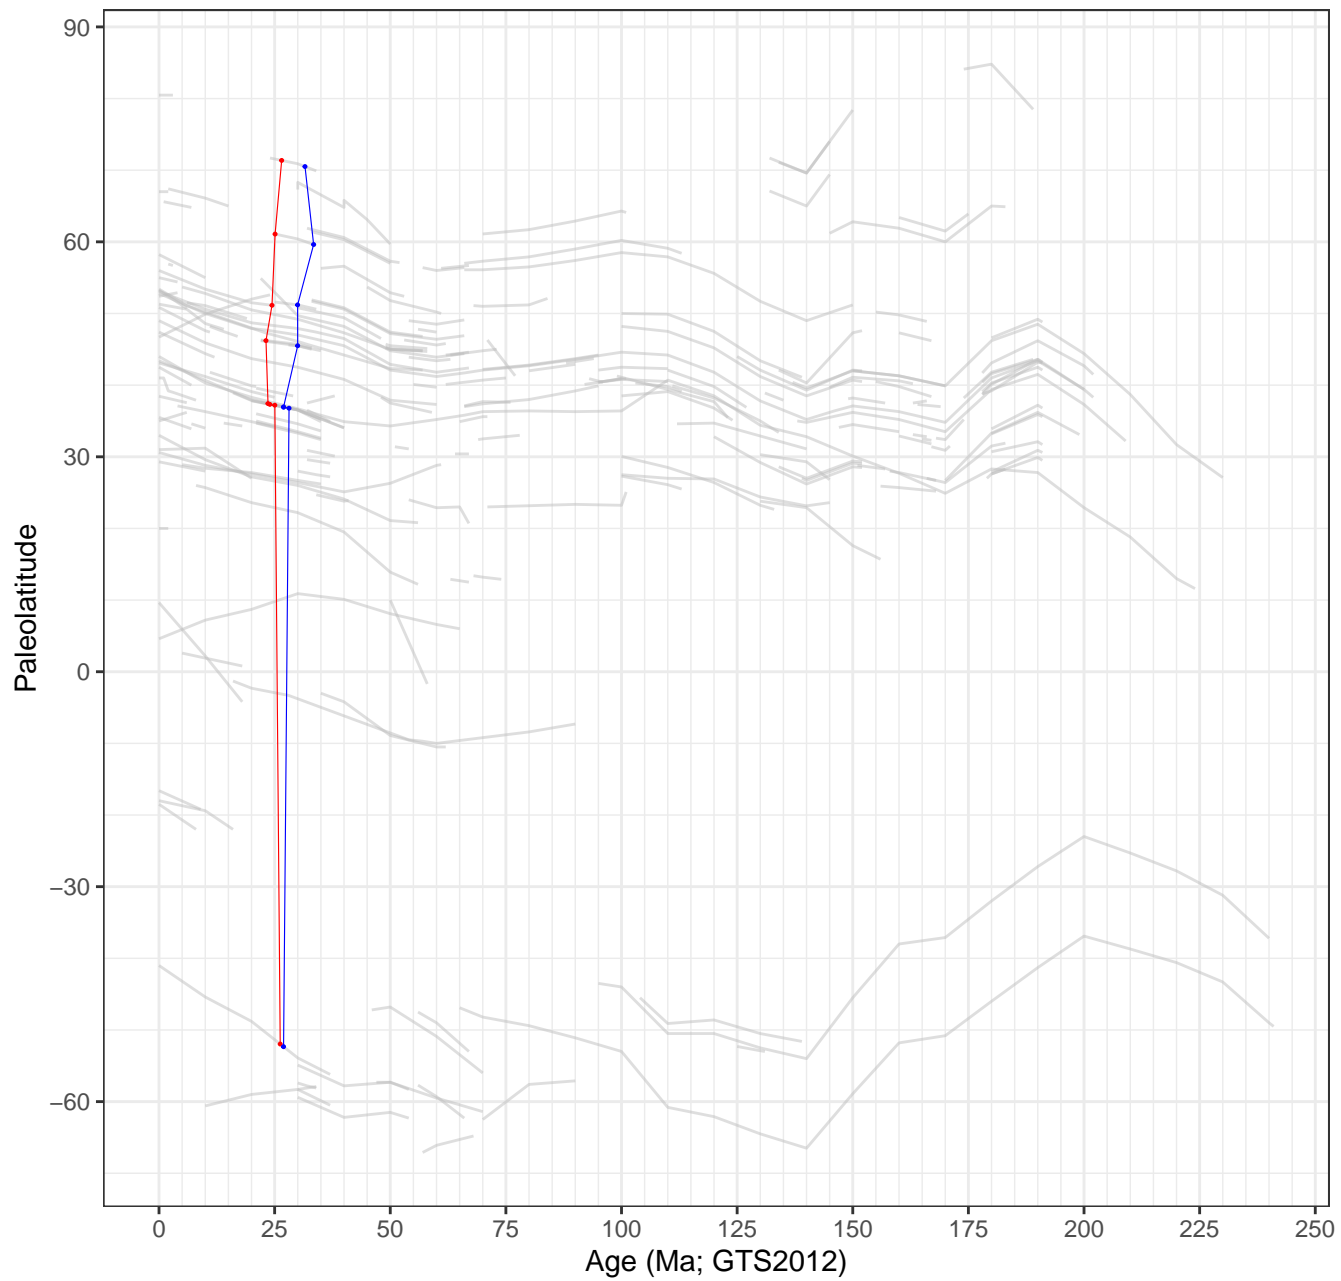

Supplement: Supplementary file 1295 [file Distatodinium biffii.pdf › Supplement/Supplement 2/Species 1914 plots/Distatodinium biffii.pdf]

# Species *Diatadinium cavatum*

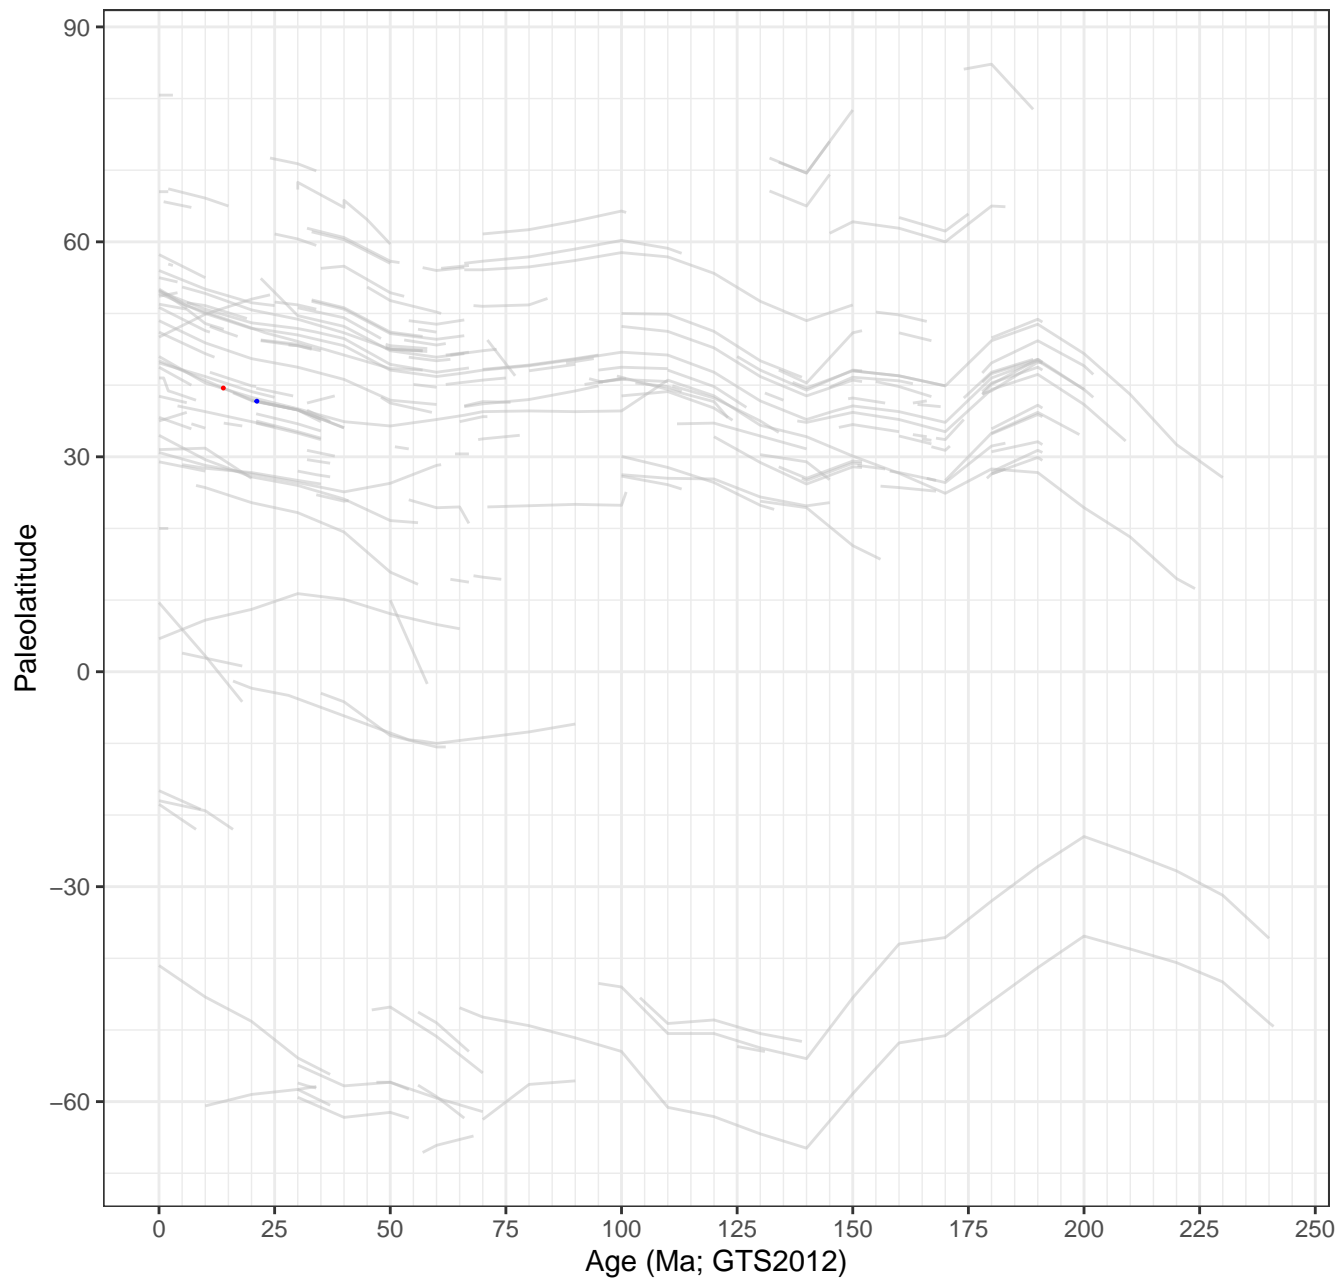

Supplement: Supplementary file 1296 [file Distatodinium cavatum.pdf › Supplement/Supplement 2/Species 1914 plots/Distatodinium cavatum.pdf]

# Species *Diatadinium ellipticum*

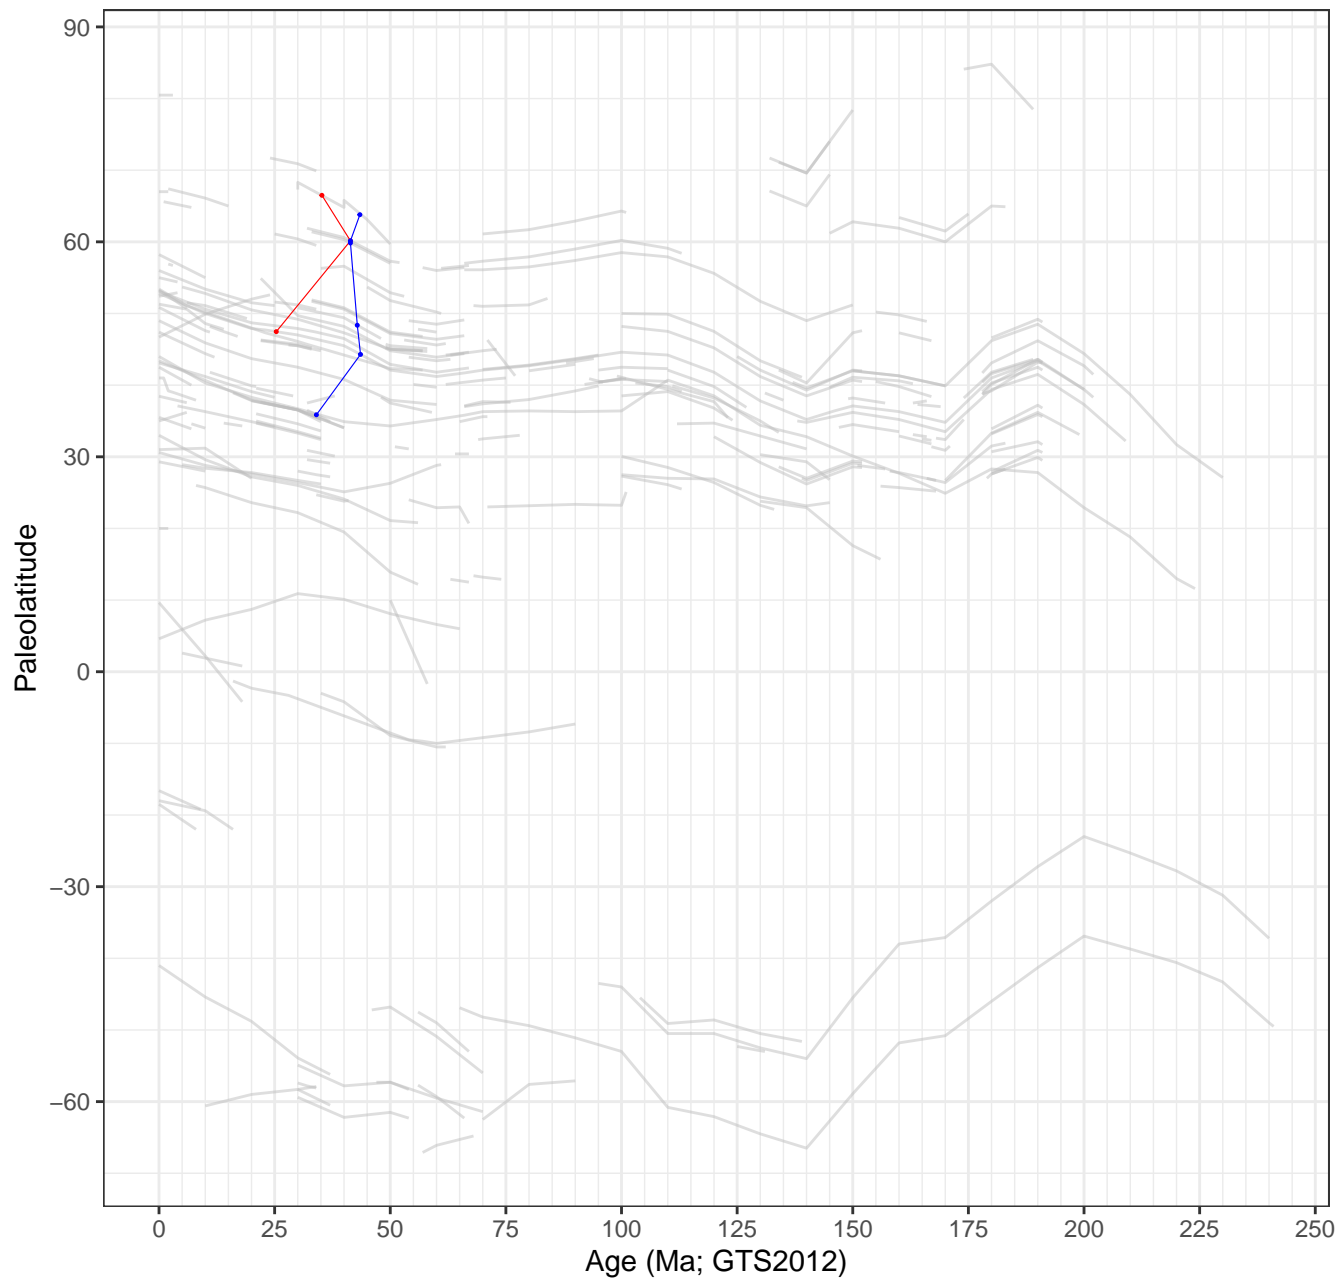

Supplement: Supplementary file 1297 [file Distatodinium ellipticum.pdf › Supplement/Supplement 2/Species 1914 plots/Distatodinium ellipticum.pdf]

# Species *Diatadinium fusiforme*

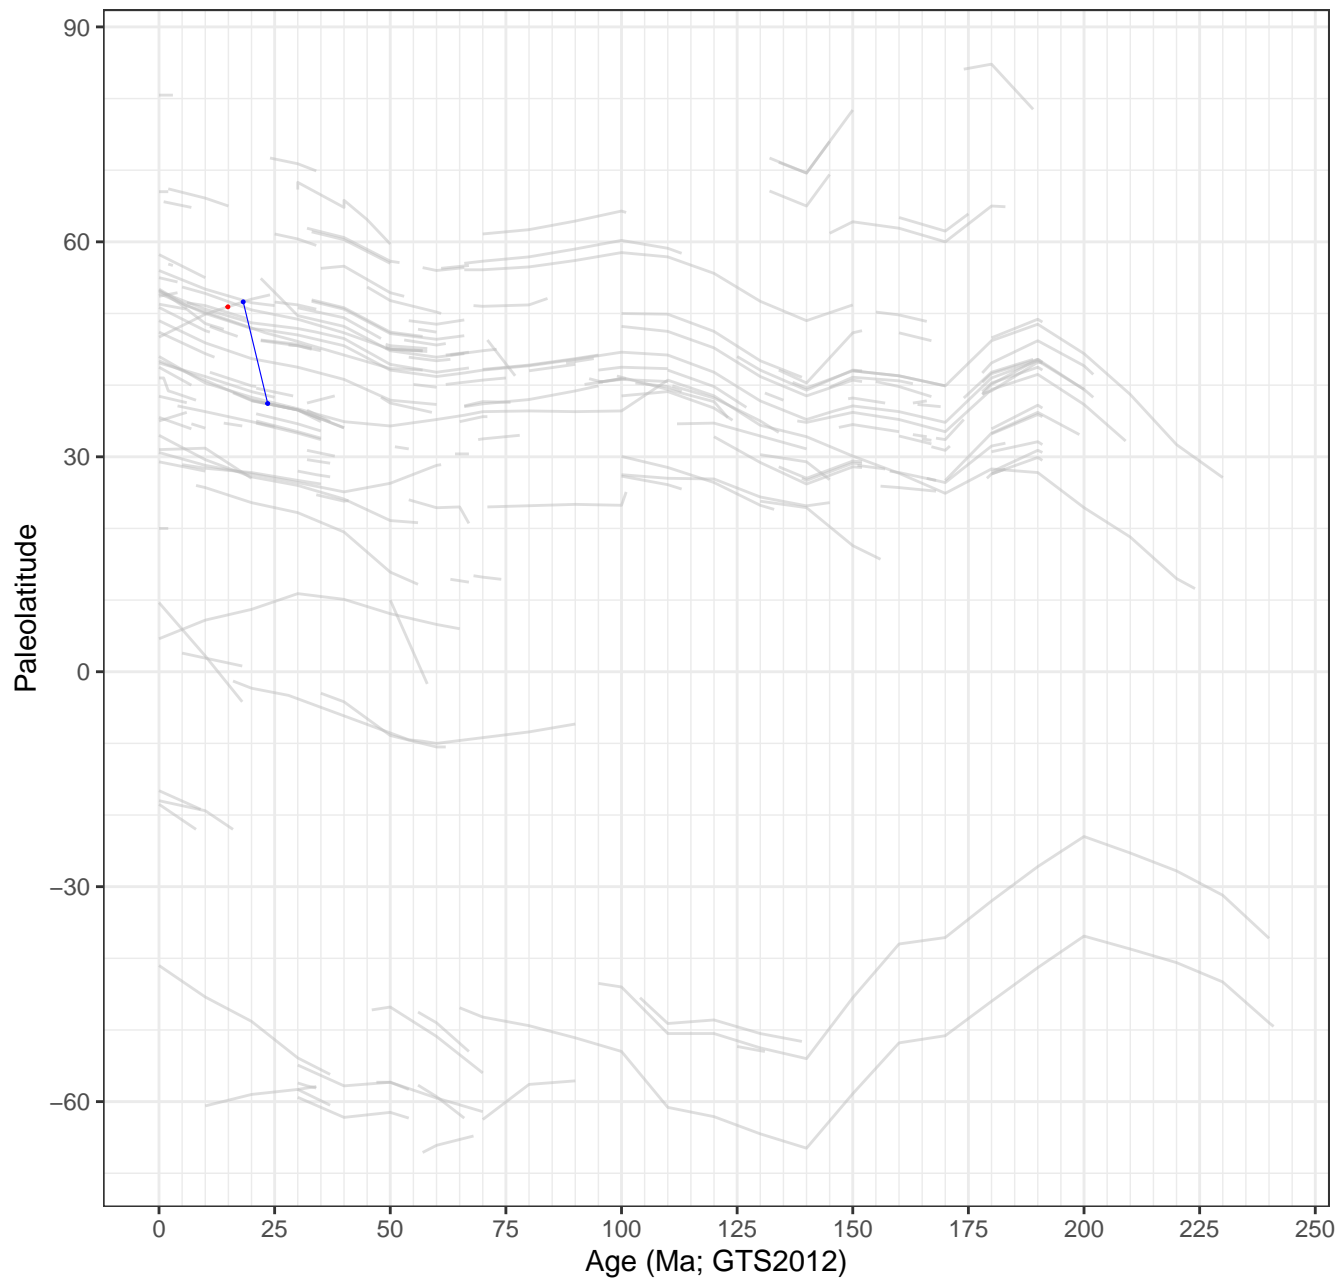

Supplement: Supplementary file 1298 [file Distatodinium fusiforme.pdf › Supplement/Supplement 2/Species 1914 plots/Distatodinium fusiforme.pdf]

# Species *Diatadinium paradoxum*

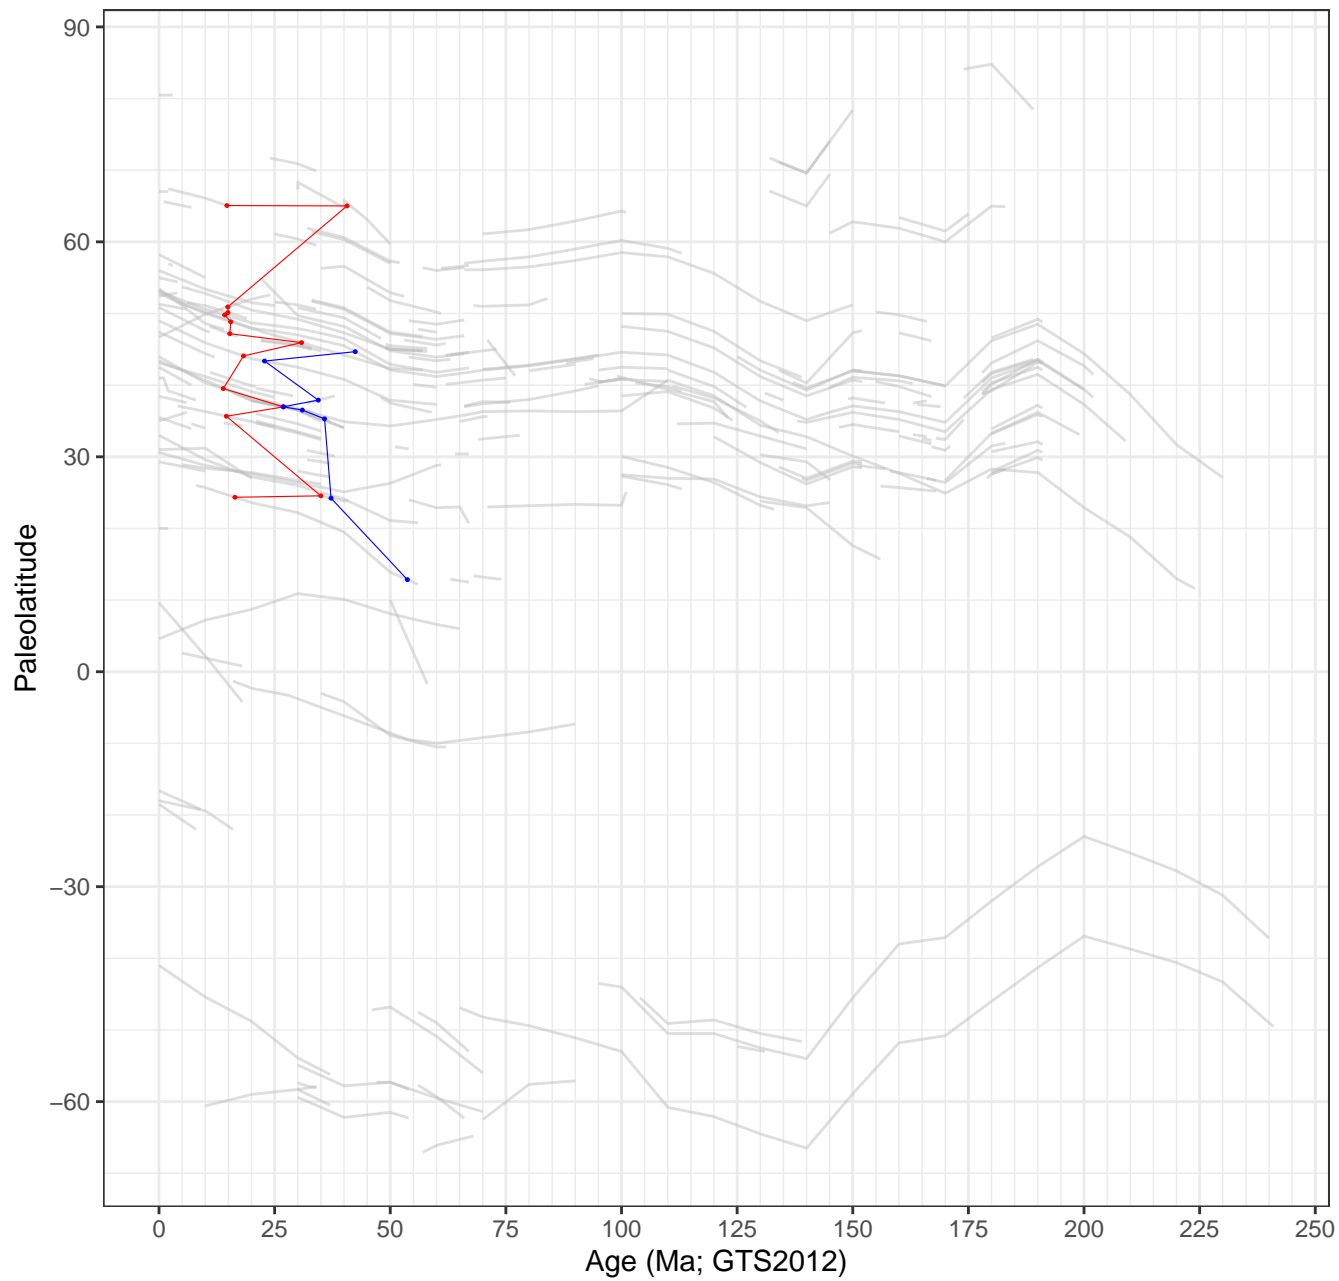

Supplement: Supplementary file 1299 [file Distatodinium paradoxum.pdf › Supplement/Supplement 2/Species 1914 plots/Distatodinium paradoxum.pdf]

# Species *Diatadinium scaricosum*

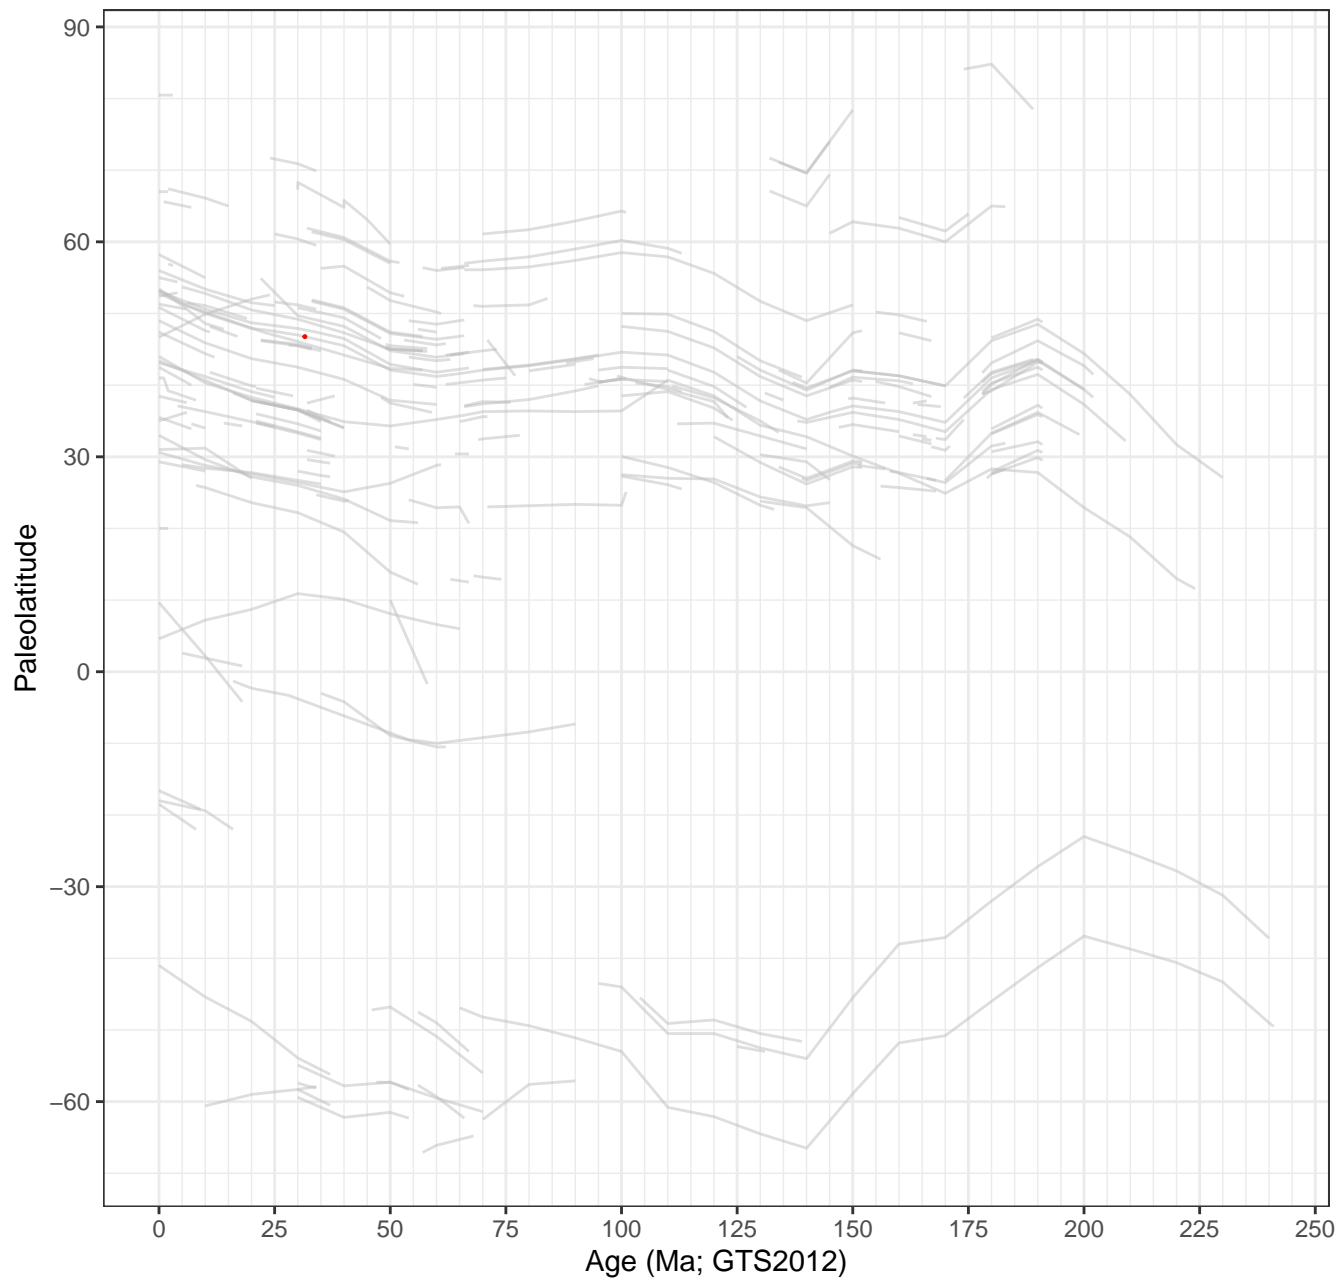

Supplement: Supplementary file 1300 [file Distatodinium scaricosum.pdf › Supplement/Supplement 2/Species 1914 plots/Distatodinium scaricosum.pdf]

# Species *Diatadinium scariosum*

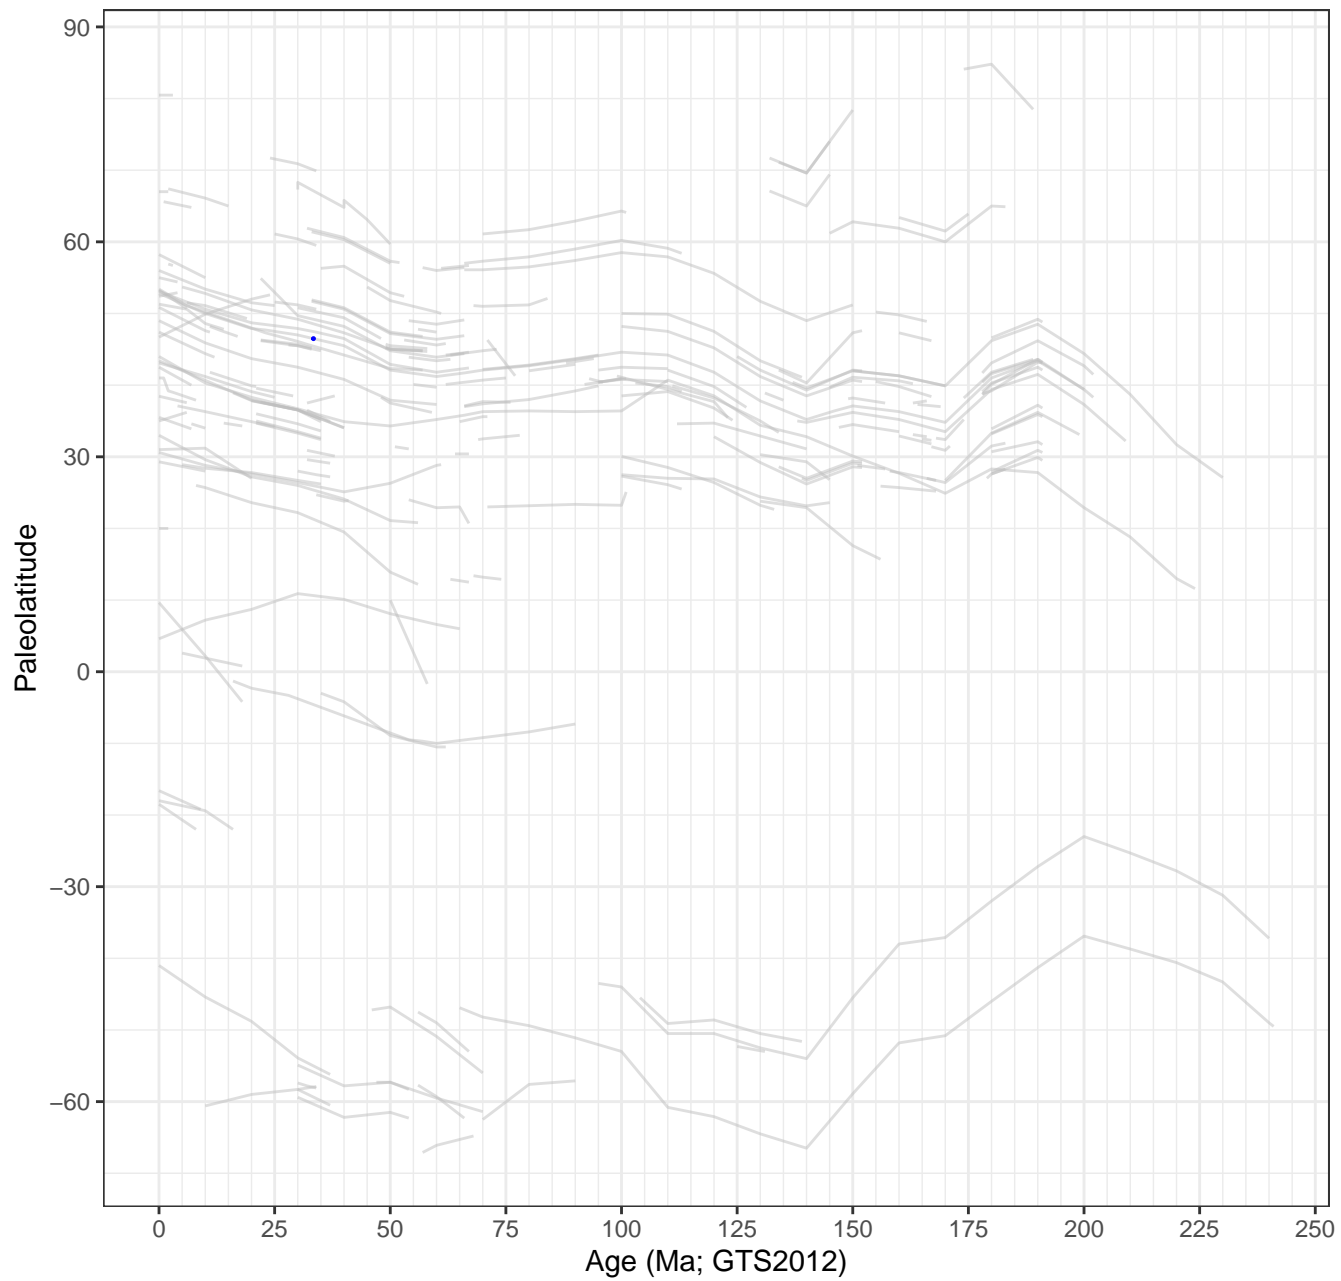

Supplement: Supplementary file 1301 [file Distatodinium scariosum.pdf › Supplement/Supplement 2/Species 1914 plots/Distatodinium scariosum.pdf]

# Species *Dodekovia syzygia*

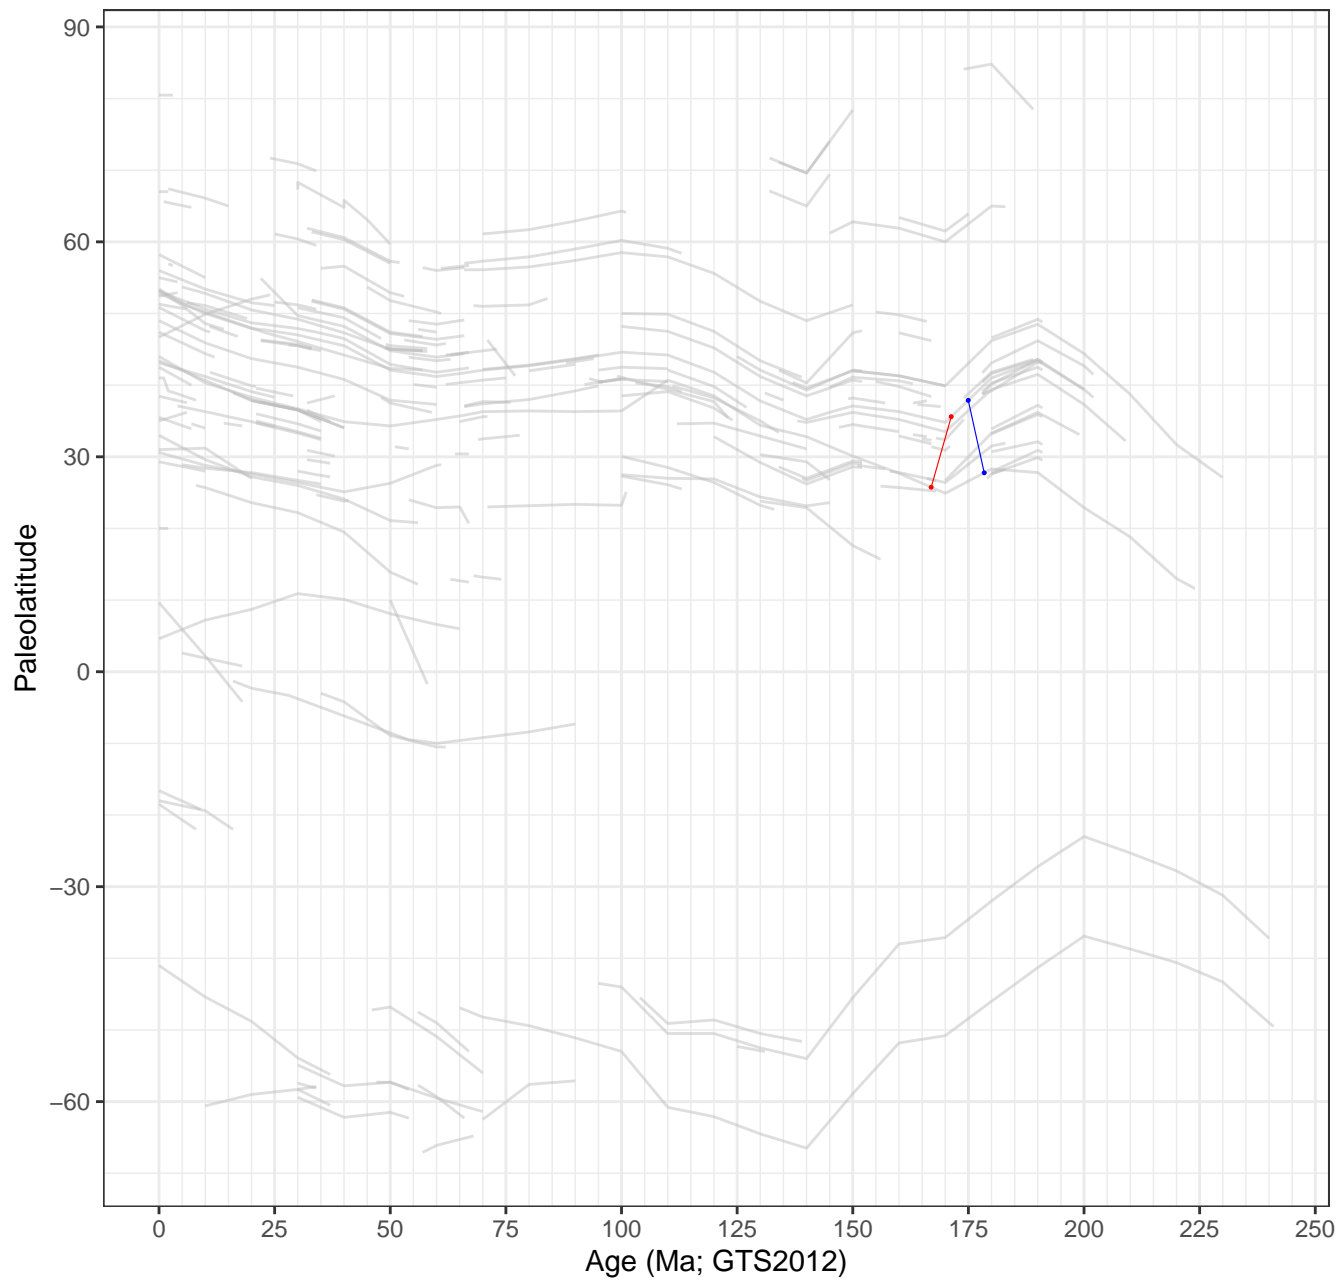

Supplement: Supplementary file 1302 [file Dodekovia syzygia.pdf › Supplement/Supplement 2/Species 1914 plots/Dodekovia syzygia.pdf]

# Species *Dolichodinium uncinatum*

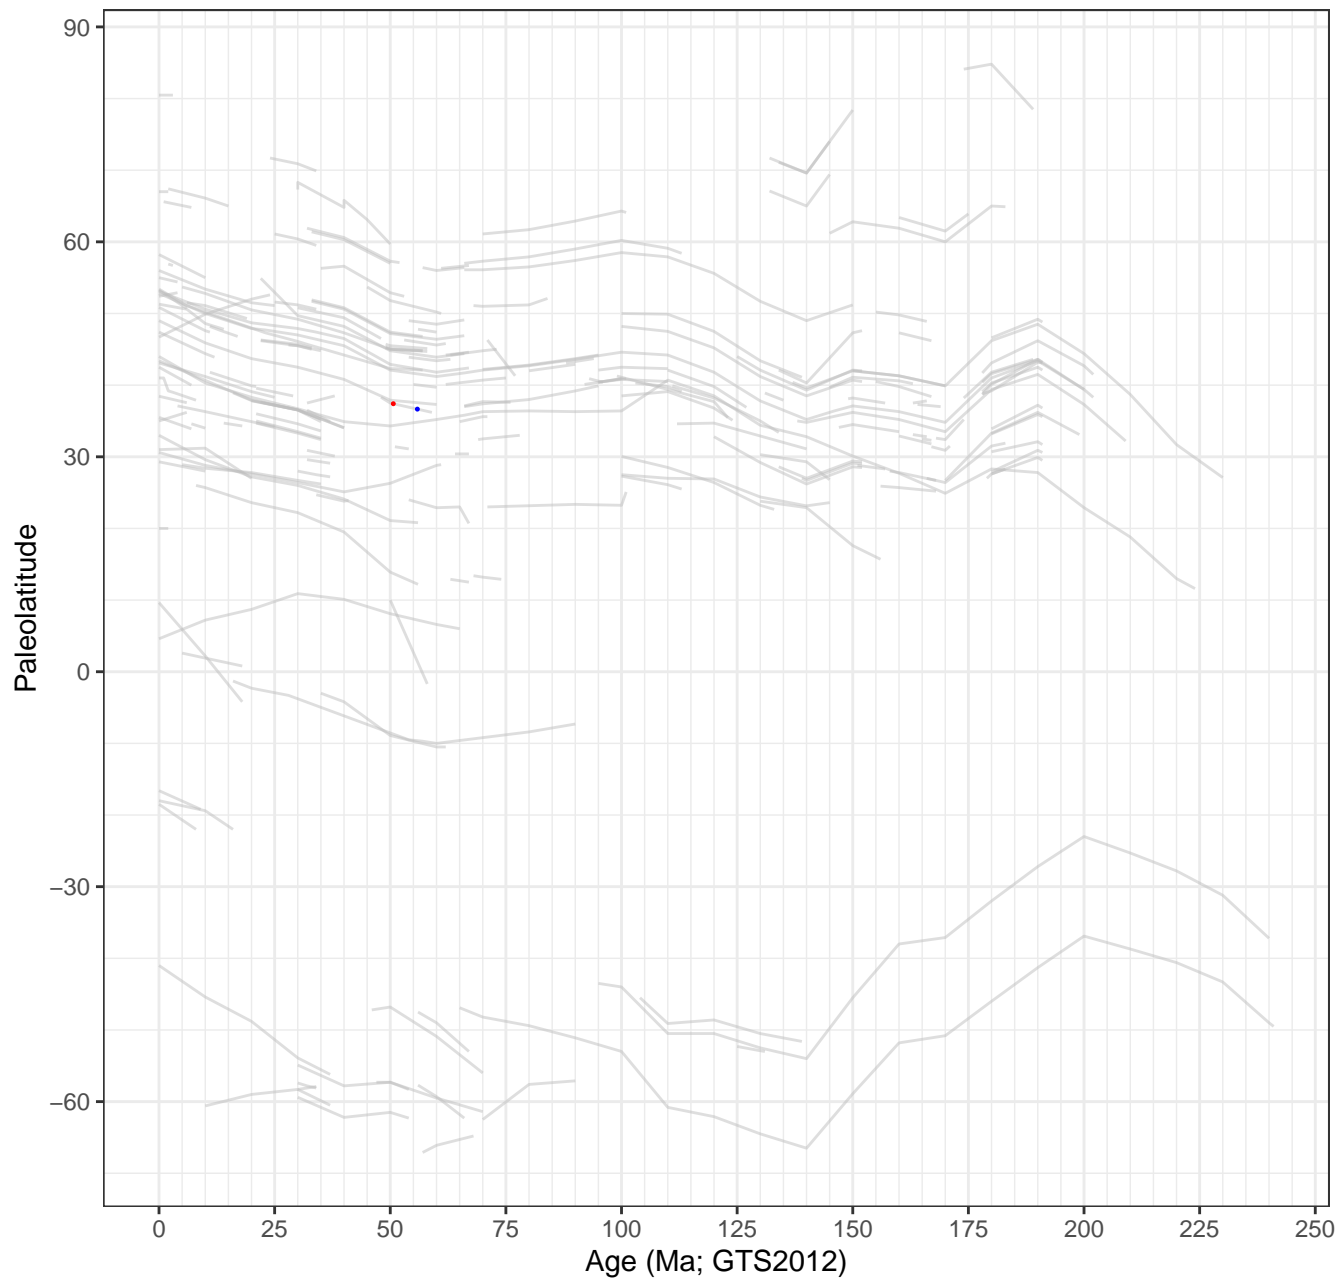

Supplement: Supplementary file 1303 [file Dolichodinium uncinatum.pdf › Supplement/Supplement 2/Species 1914 plots/Dolichodinium uncinatum.pdf]

# Species *Dollidinium sinuosum*

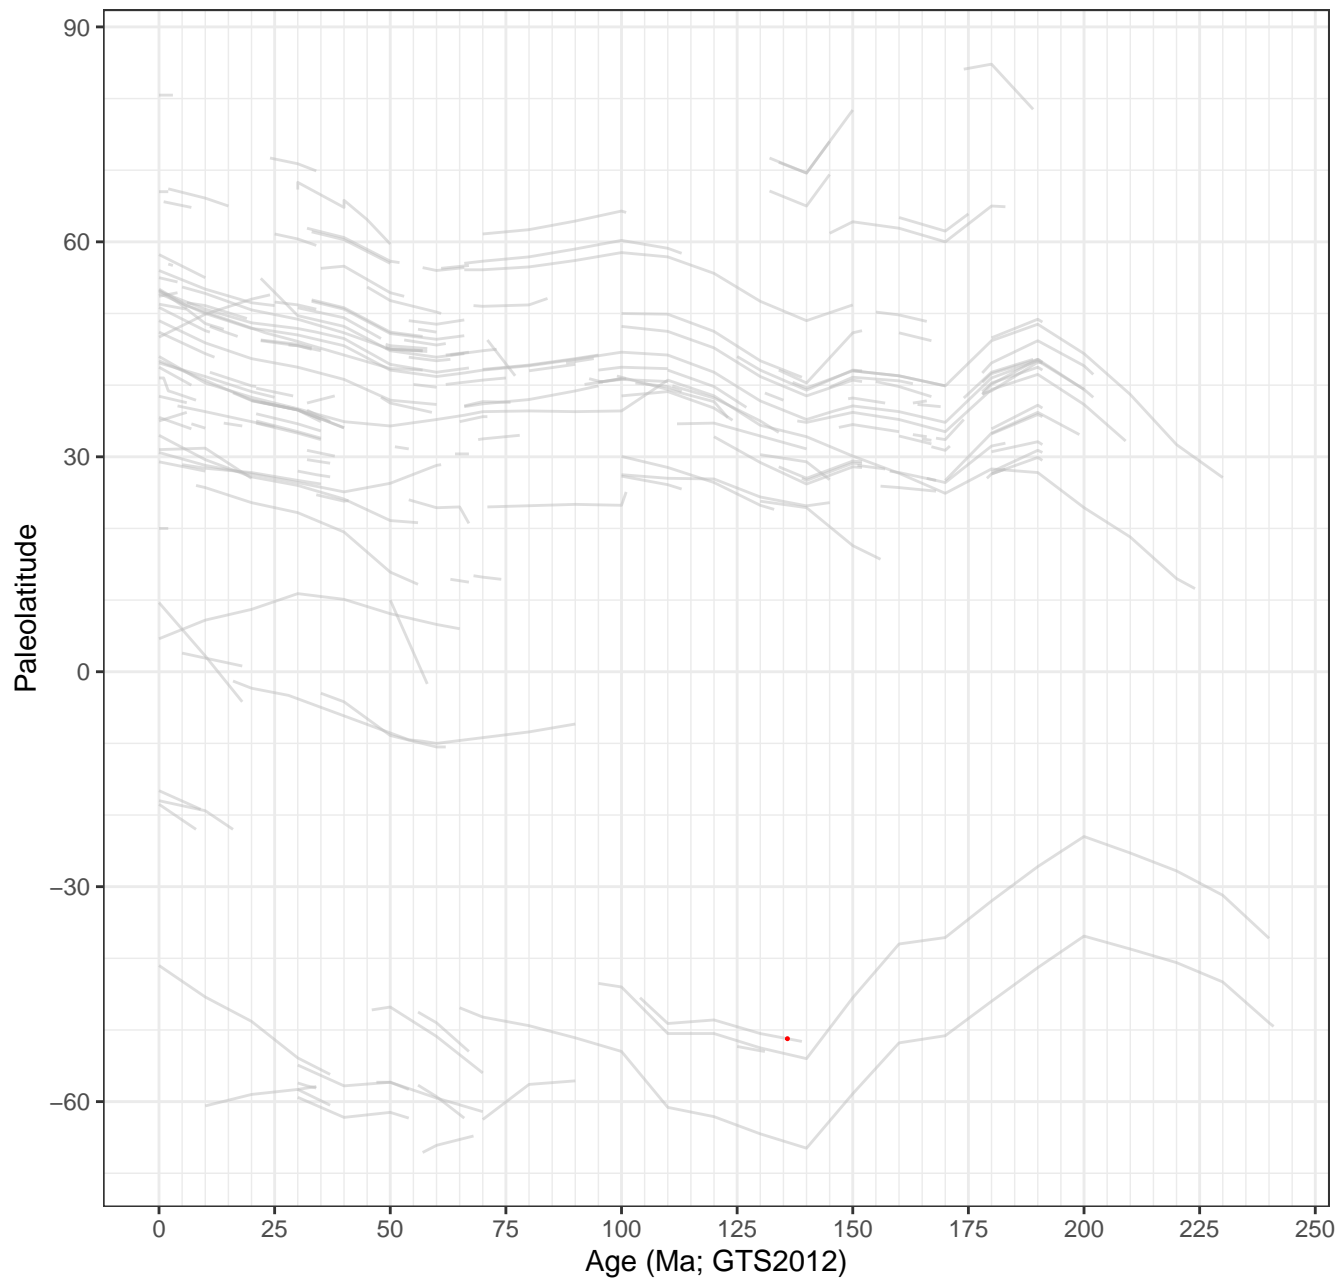

Supplement: Supplementary file 1304 [file Dollidinium sinuosum.pdf › Supplement/Supplement 2/Species 1914 plots/Dollidinium sinuosum.pdf]

# Species *Dorocysta litotes*

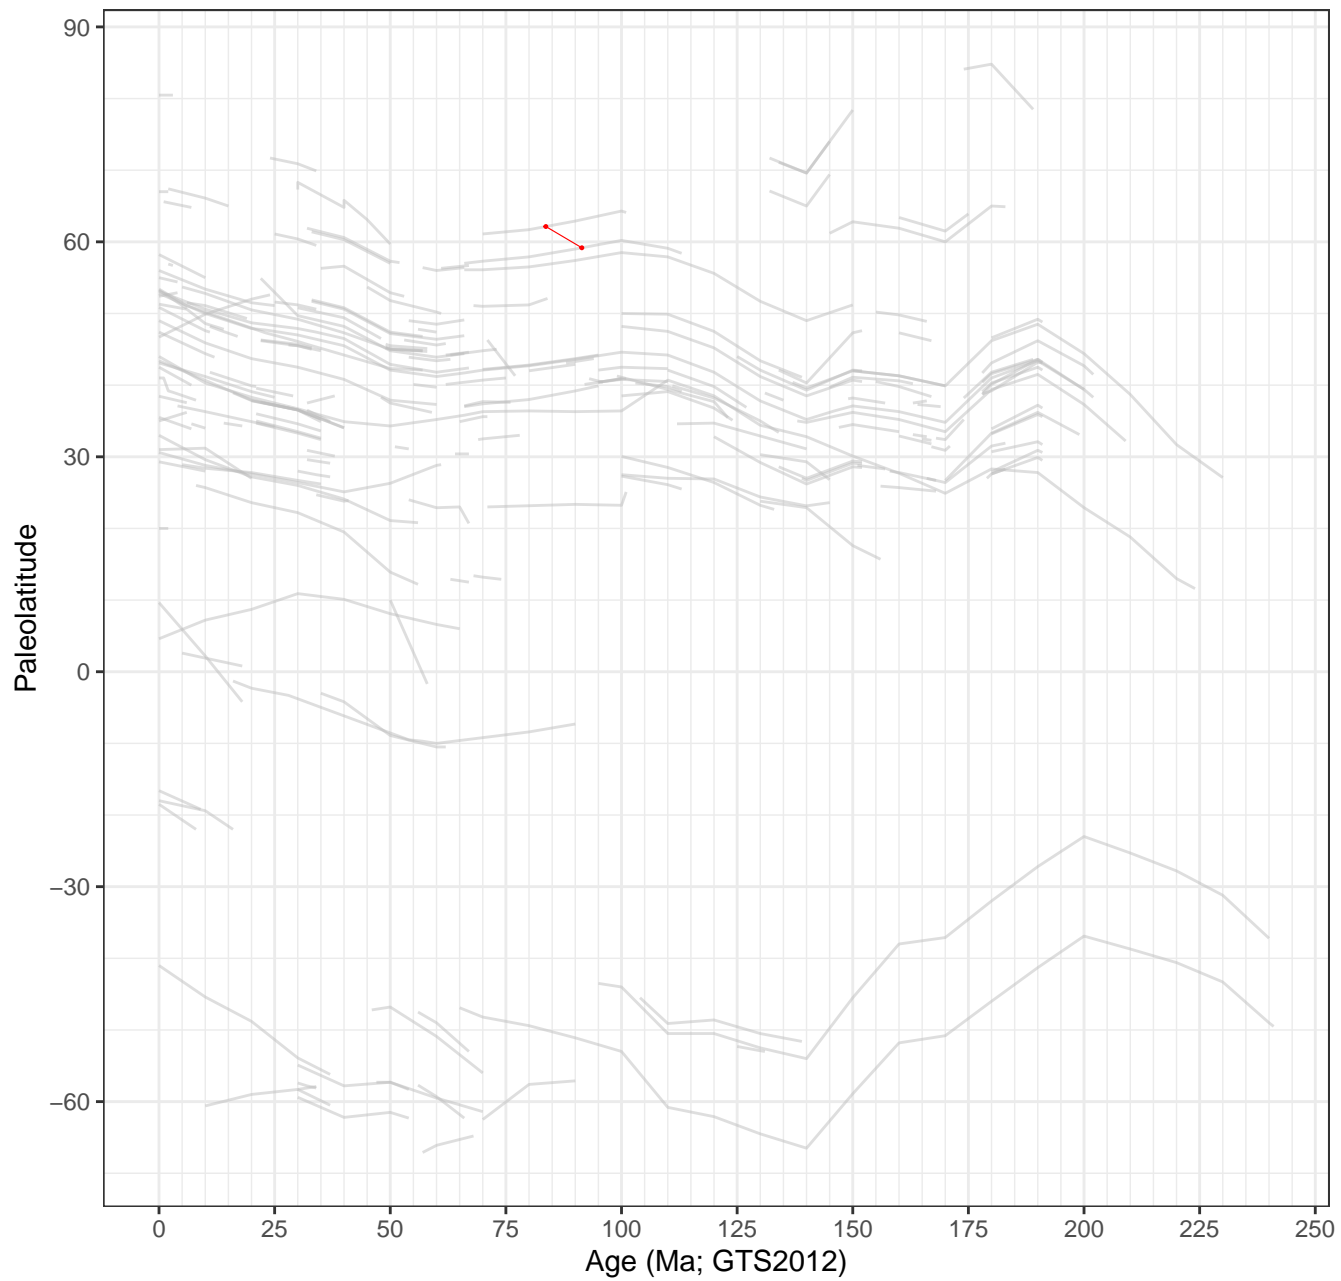

Supplement: Supplementary file 1305 [file Dorocysta litotes.pdf › Supplement/Supplement 2/Species 1914 plots/Dorocysta litotes.pdf]

# Species Downiesphaeridium aciculare

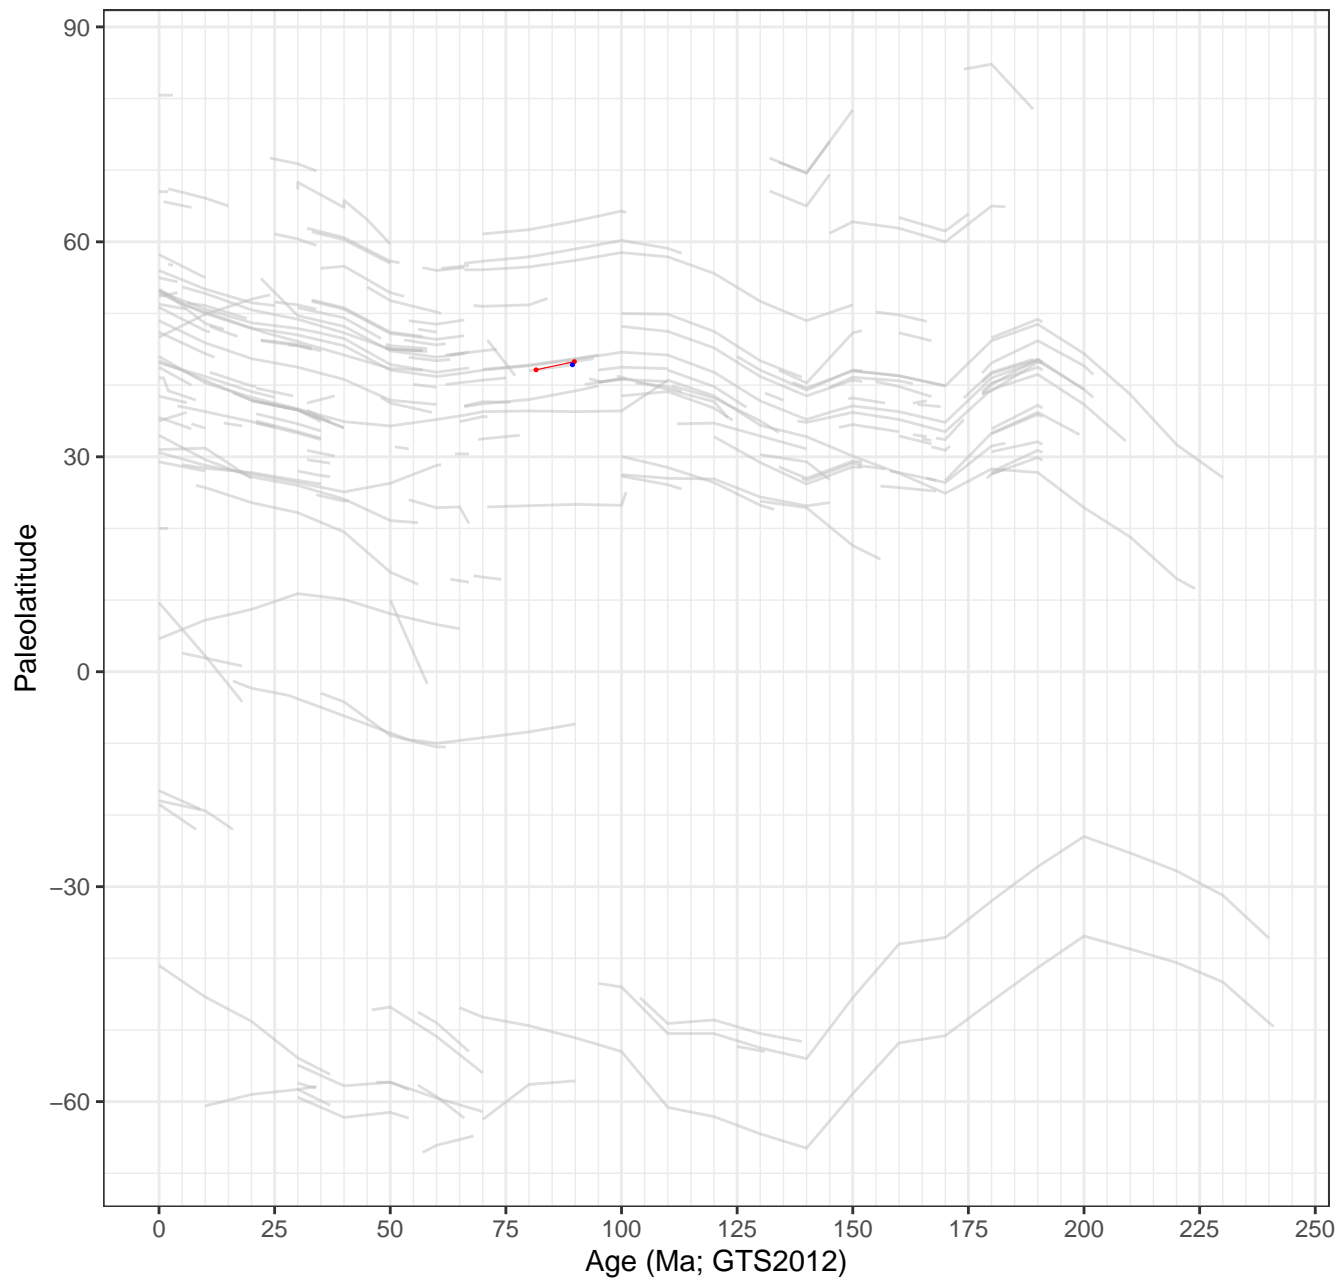

Supplement: Supplementary file 1306 [file Downiesphaeridium aciculare.pdf › Supplement/Supplement 2/Species 1914 plots/Downiesphaeridium aciculare.pdf]

# Species Downiesphaeridium armatum

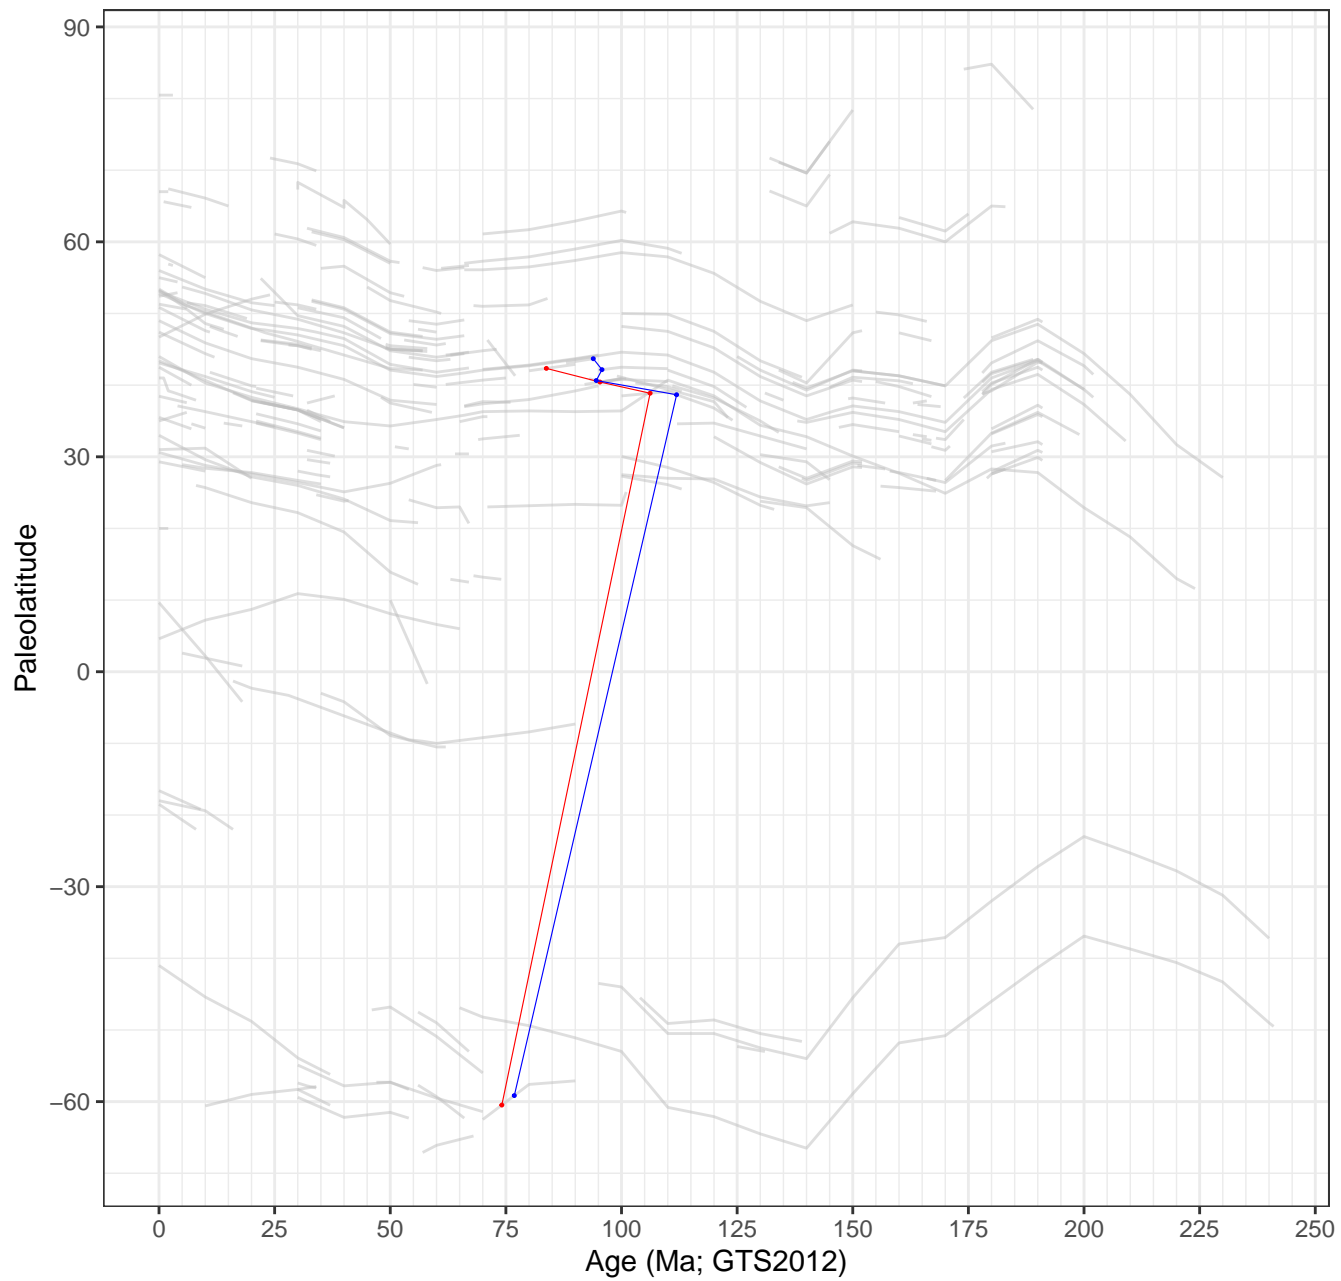

Supplement: Supplementary file 1307 [file Downiesphaeridium armatum.pdf › Supplement/Supplement 2/Species 1914 plots/Downiesphaeridium armatum.pdf]

# Species Downiesphaeridium flexuosum

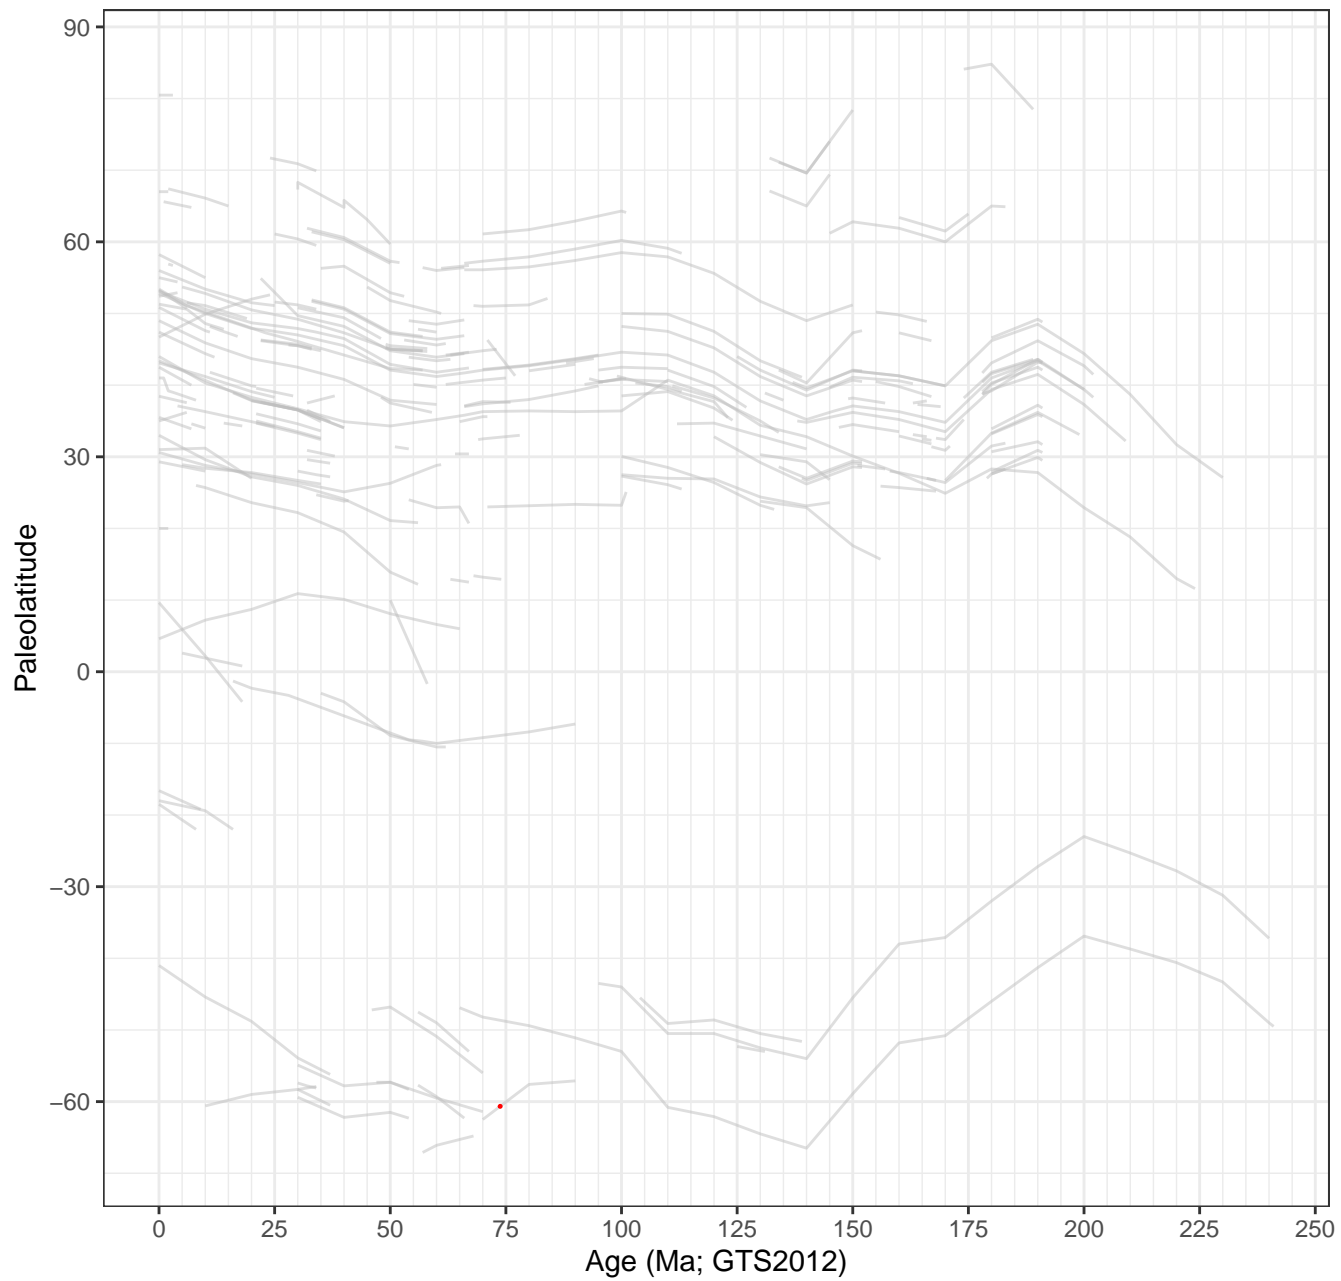

Supplement: Supplementary file 1308 [file Downiesphaeridium flexuosum.pdf › Supplement/Supplement 2/Species 1914 plots/Downiesphaeridium flexuosum.pdf]

# Species *Dracodinium astra*

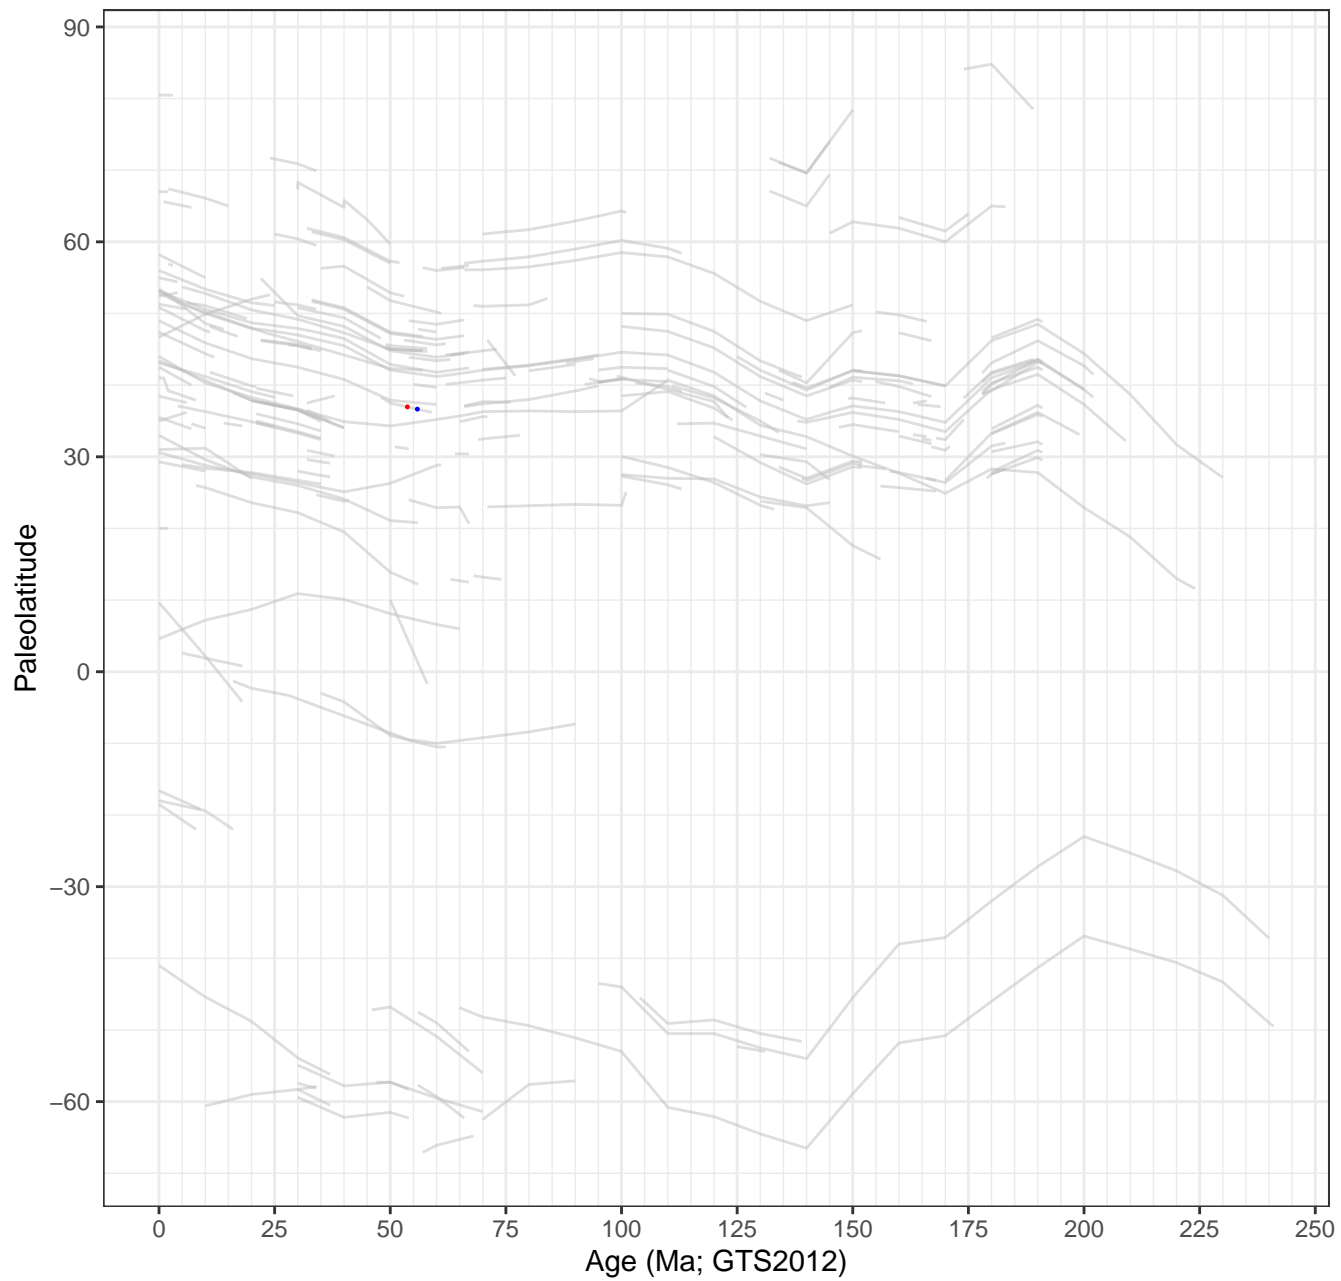

Supplement: Supplementary file 1309 [file Dracodinium astra.pdf › Supplement/Supplement 2/Species 1914 plots/Dracodinium astra.pdf]

# Species *Dracodinium condylos*

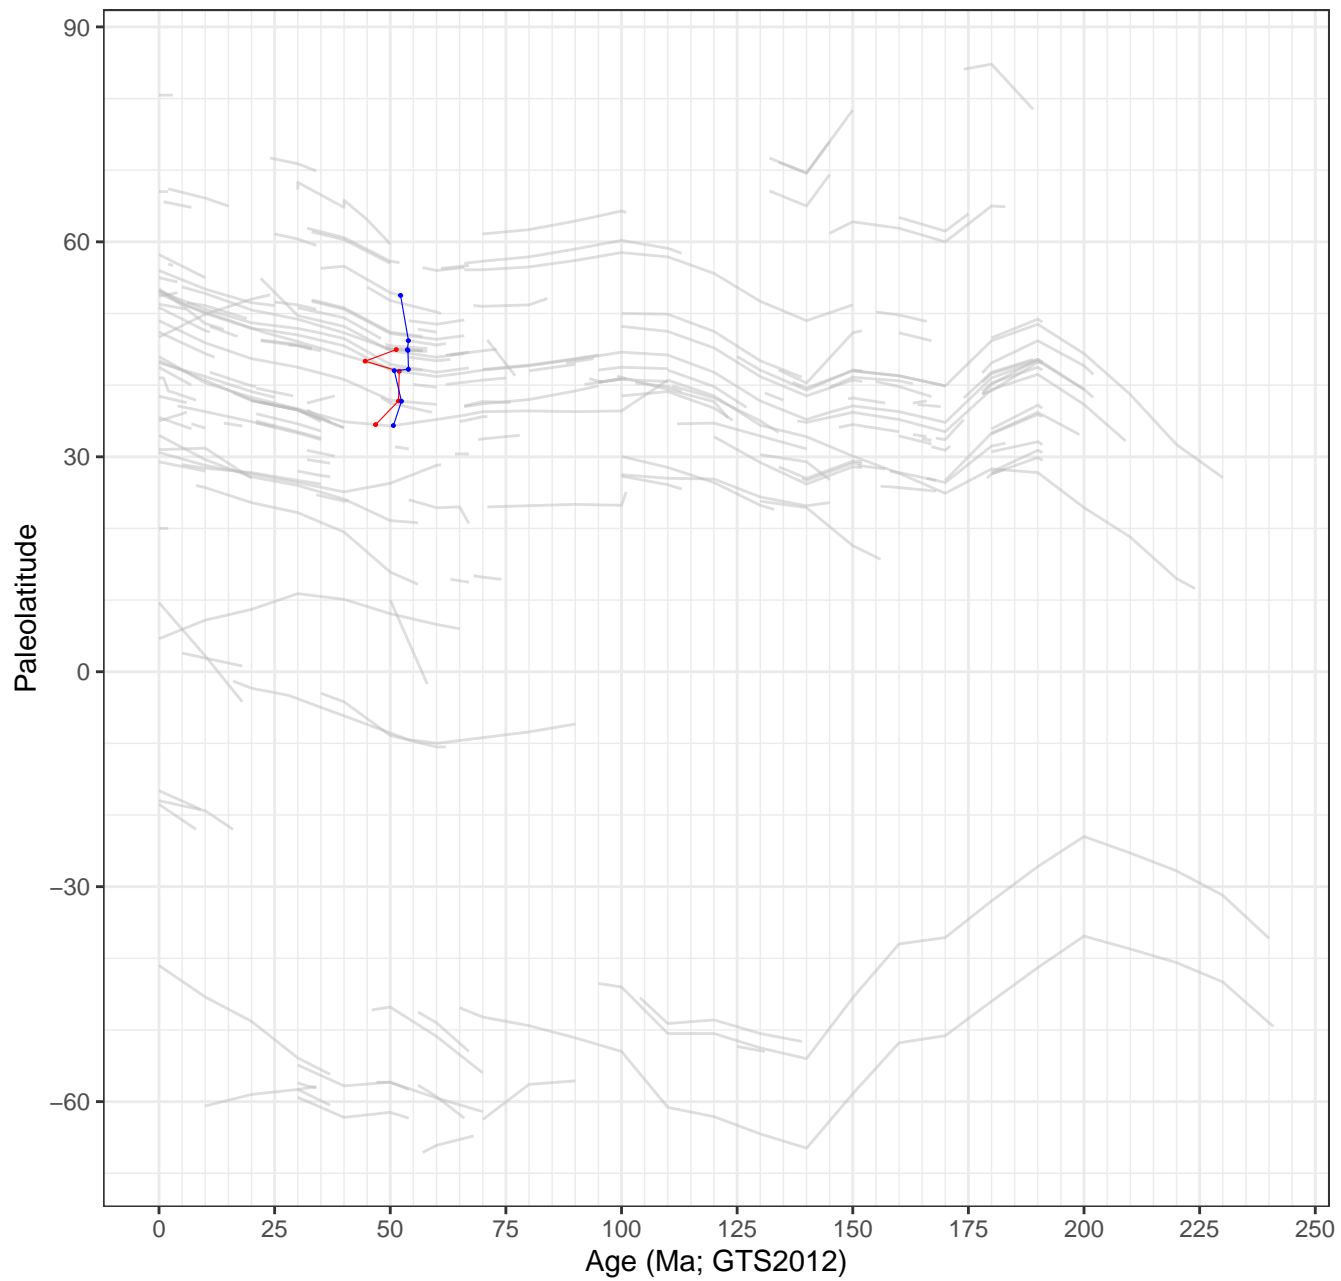

Supplement: Supplementary file 1310 [file Dracodinium condylos.pdf › Supplement/Supplement 2/Species 1914 plots/Dracodinium condylos.pdf]

# Species *Dracodinium lobiscum*

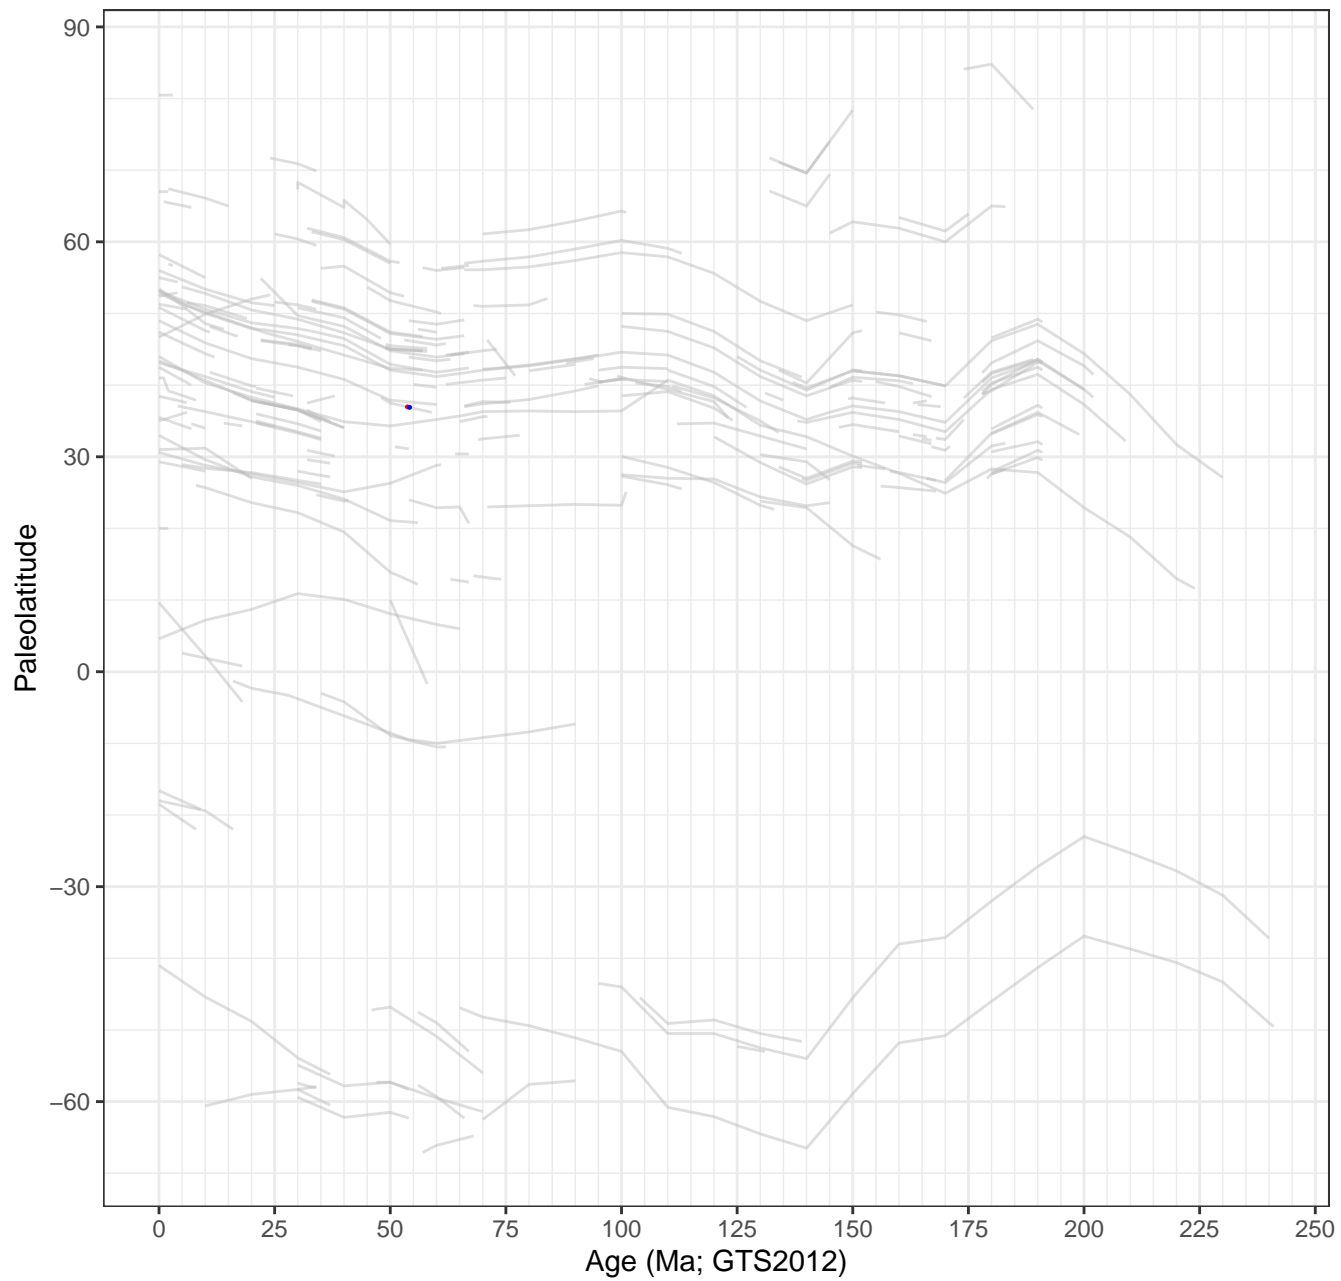

Supplement: Supplementary file 1311 [file Dracodinium lobiscum.pdf › Supplement/Supplement 2/Species 1914 plots/Dracodinium lobiscum.pdf]

# Species *Dracodinium pachydermum*

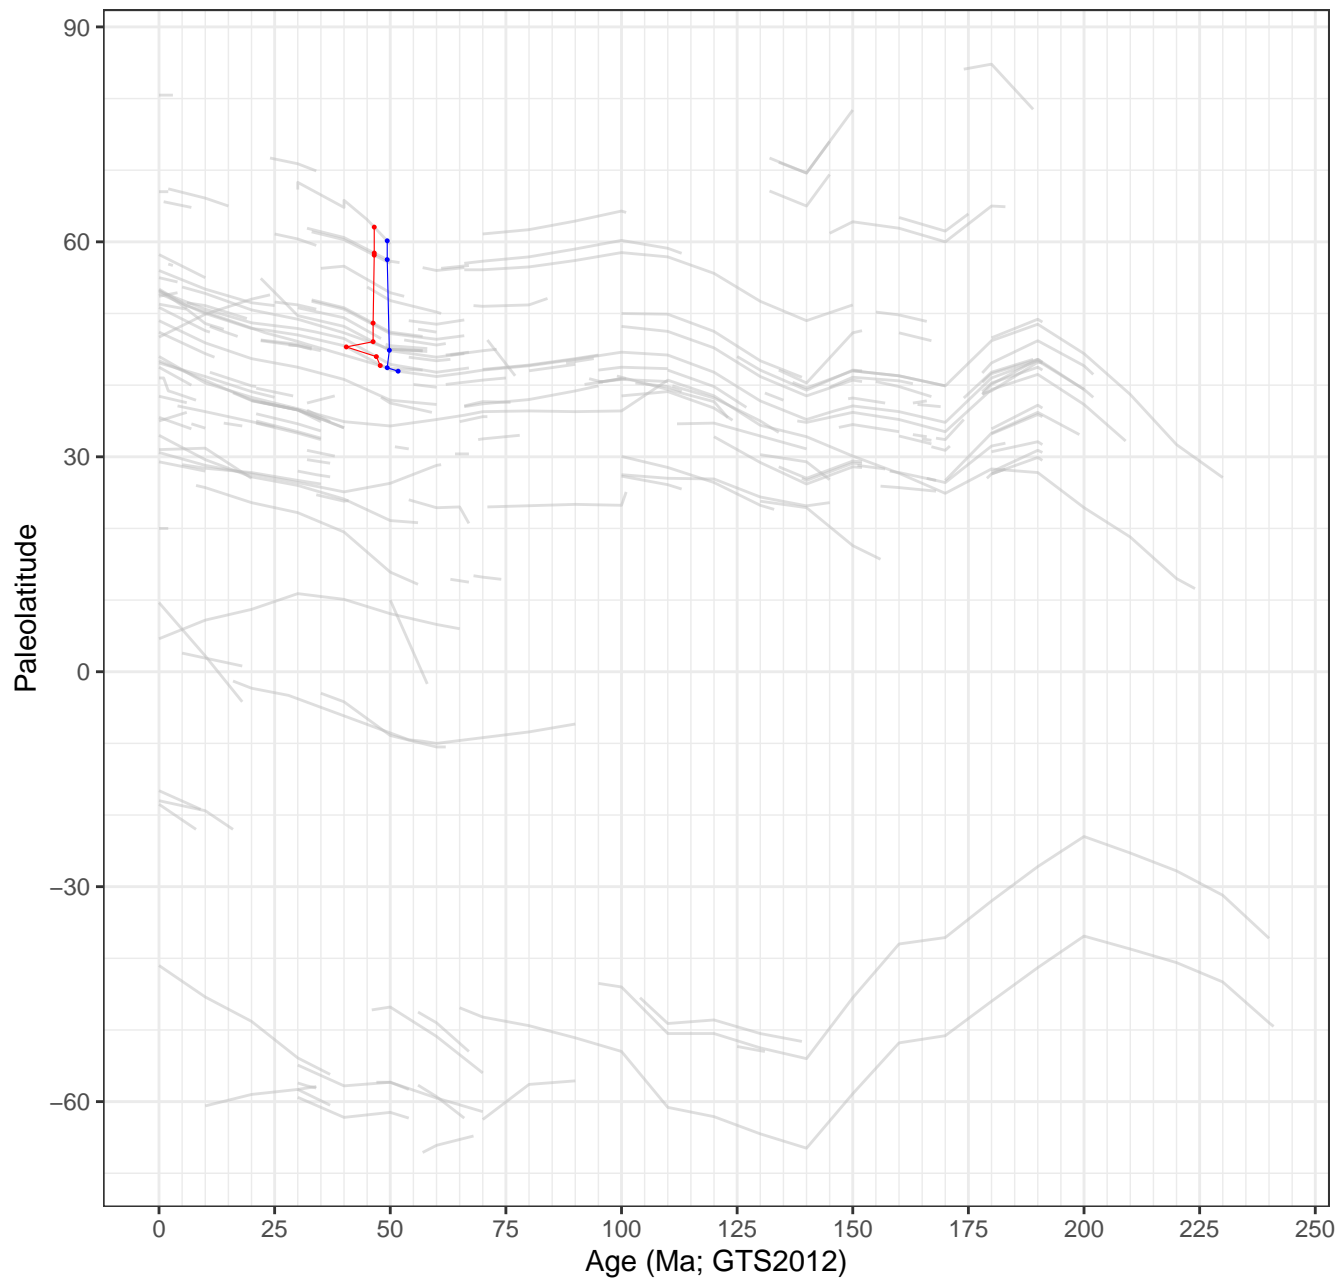

Supplement: Supplementary file 1312 [file Dracodinium pachydermum.pdf › Supplement/Supplement 2/Species 1914 plots/Dracodinium pachydermum.pdf]

# Species *Dracodinium politum*

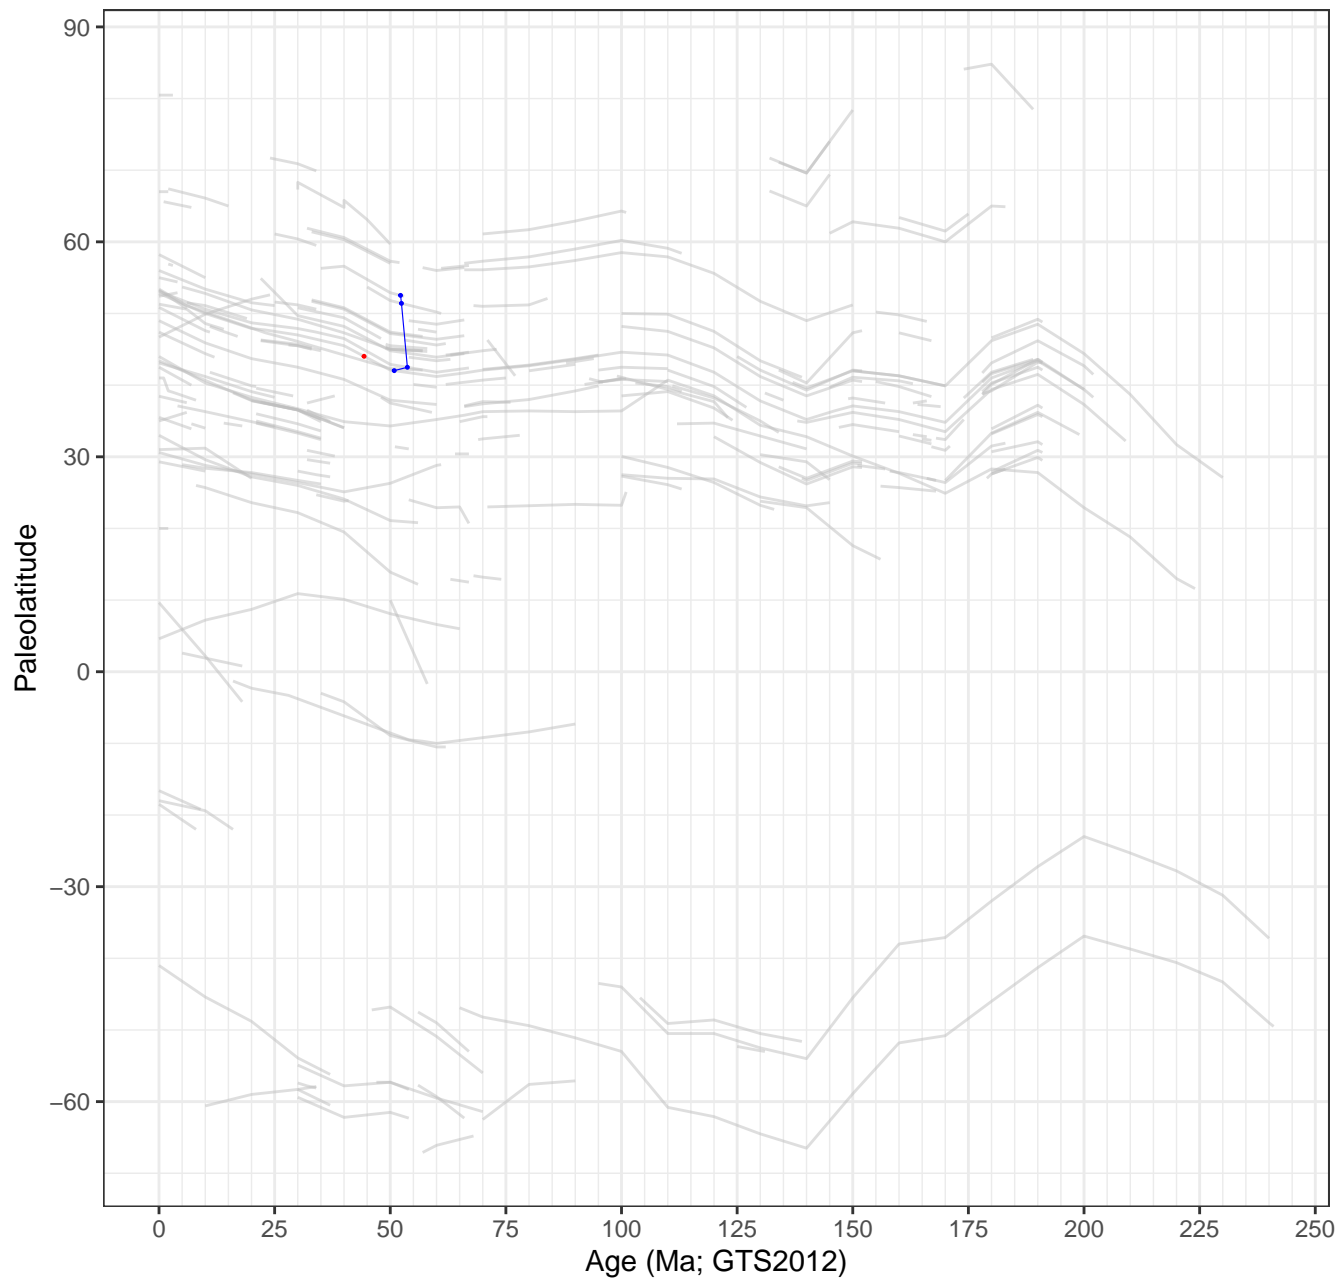

Supplement: Supplementary file 1313 [file Dracodinium politum.pdf › Supplement/Supplement 2/Species 1914 plots/Dracodinium politum.pdf]

# Species *Dracodinium rhomboideum*

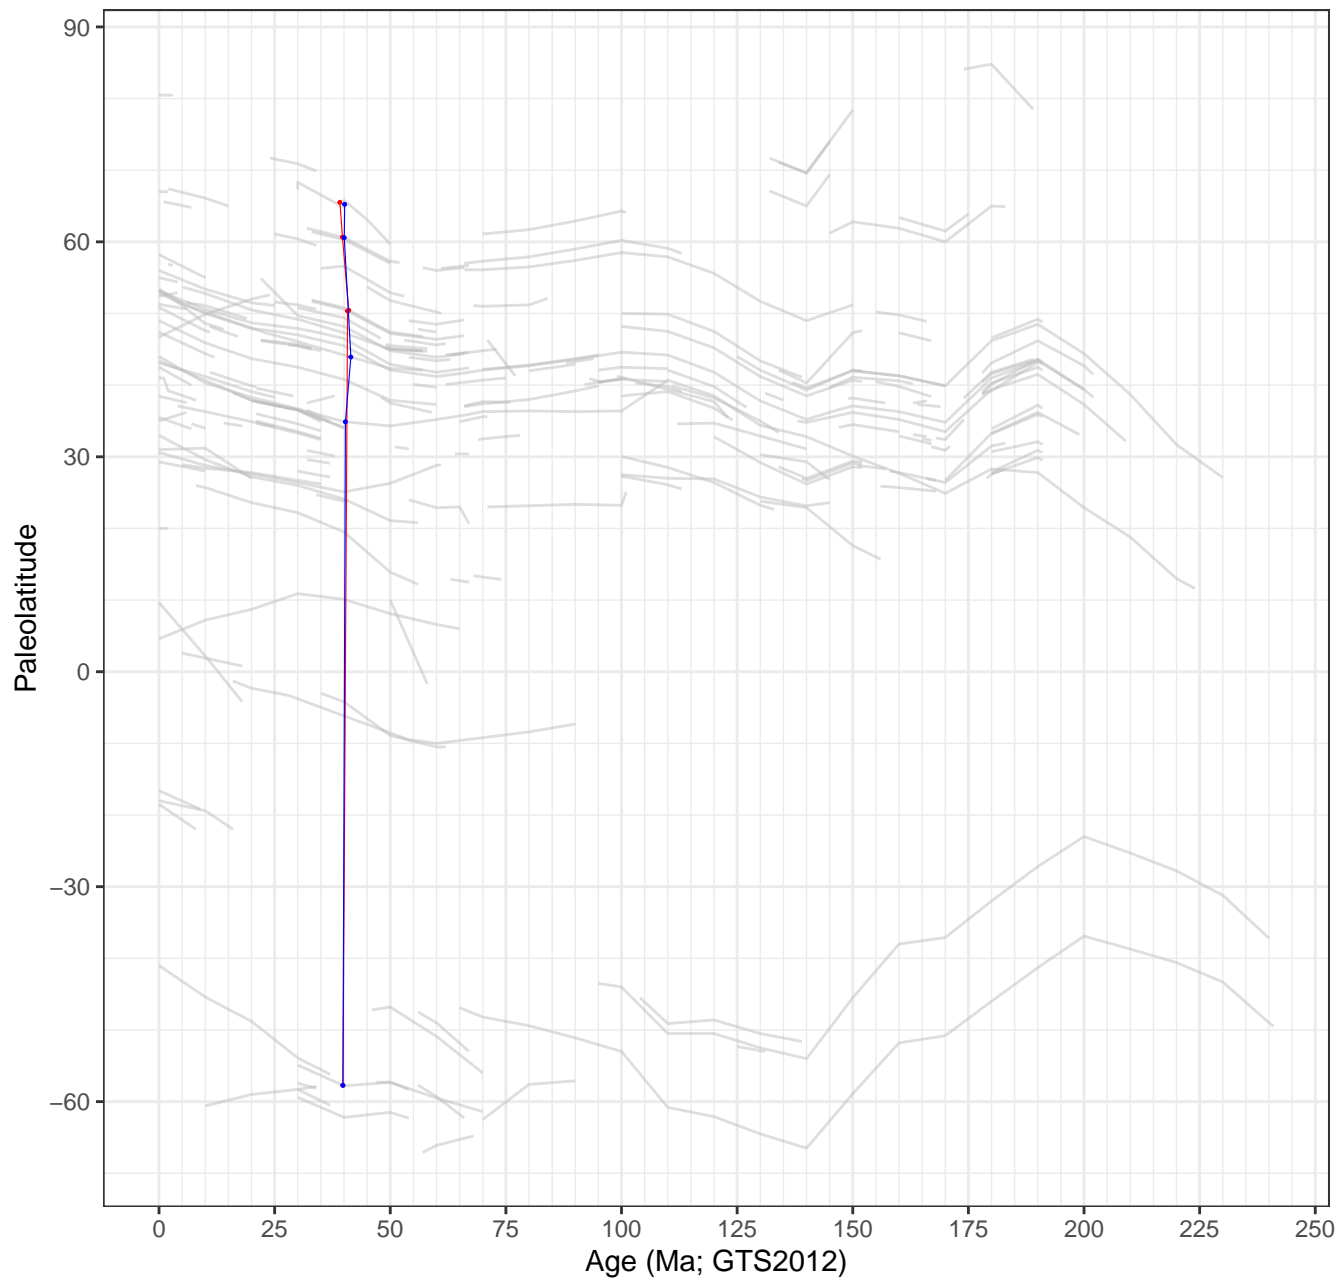

Supplement: Supplementary file 1314 [file Dracodinium rhomboideum.pdf › Supplement/Supplement 2/Species 1914 plots/Dracodinium rhomboideum.pdf]

# Species *Dracodinium simile*

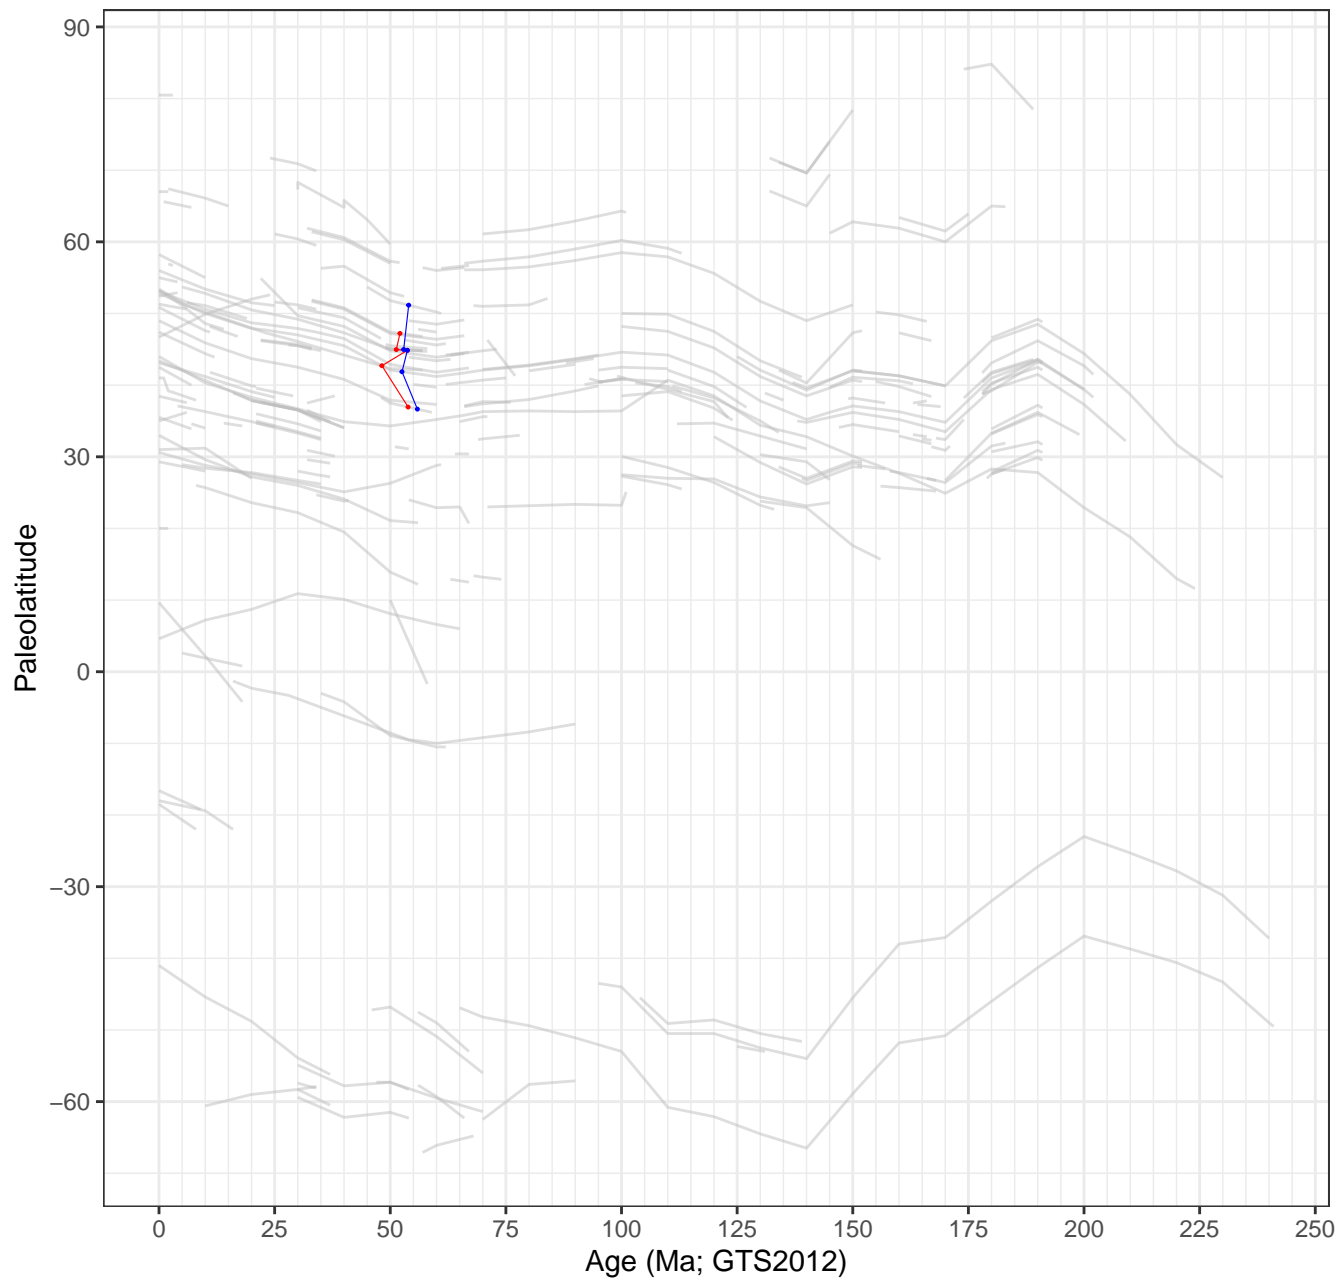

Supplement: Supplementary file 1315 [file Dracodinium simile.pdf › Supplement/Supplement 2/Species 1914 plots/Dracodinium simile.pdf]

# Species *Dracodinium solidum*

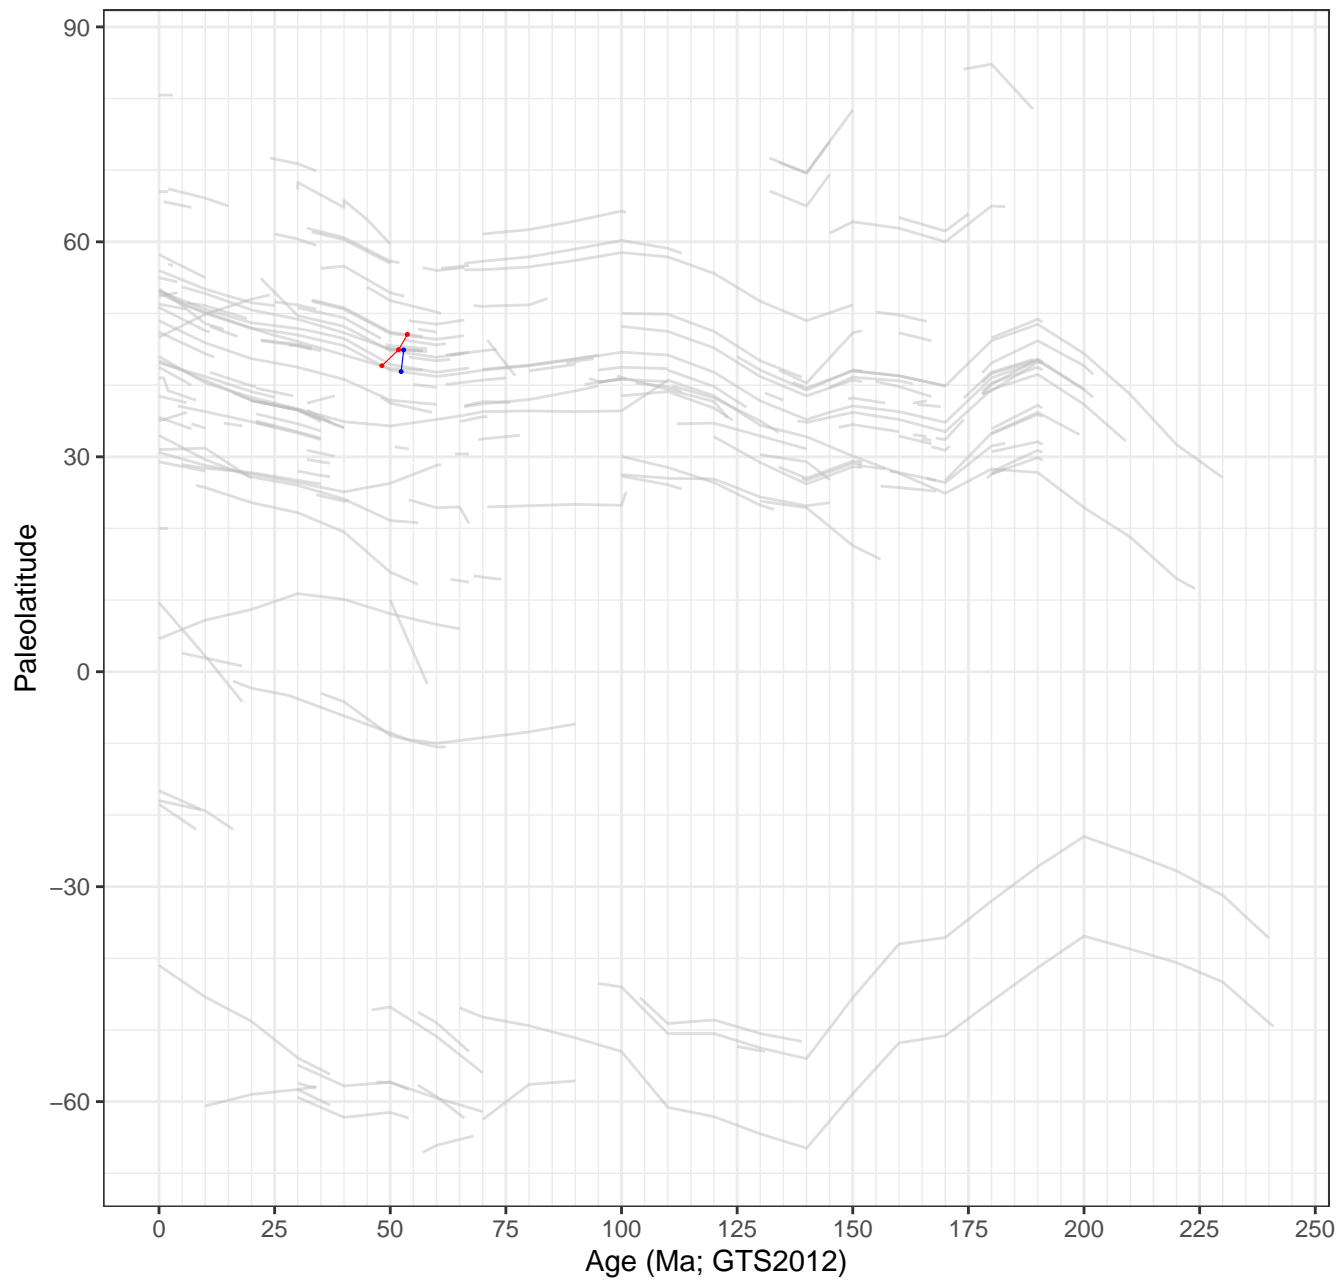

Supplement: Supplementary file 1316 [file Dracodinium solidum.pdf › Supplement/Supplement 2/Species 1914 plots/Dracodinium solidum.pdf]

# Species *Dracodinium varielongitudum*

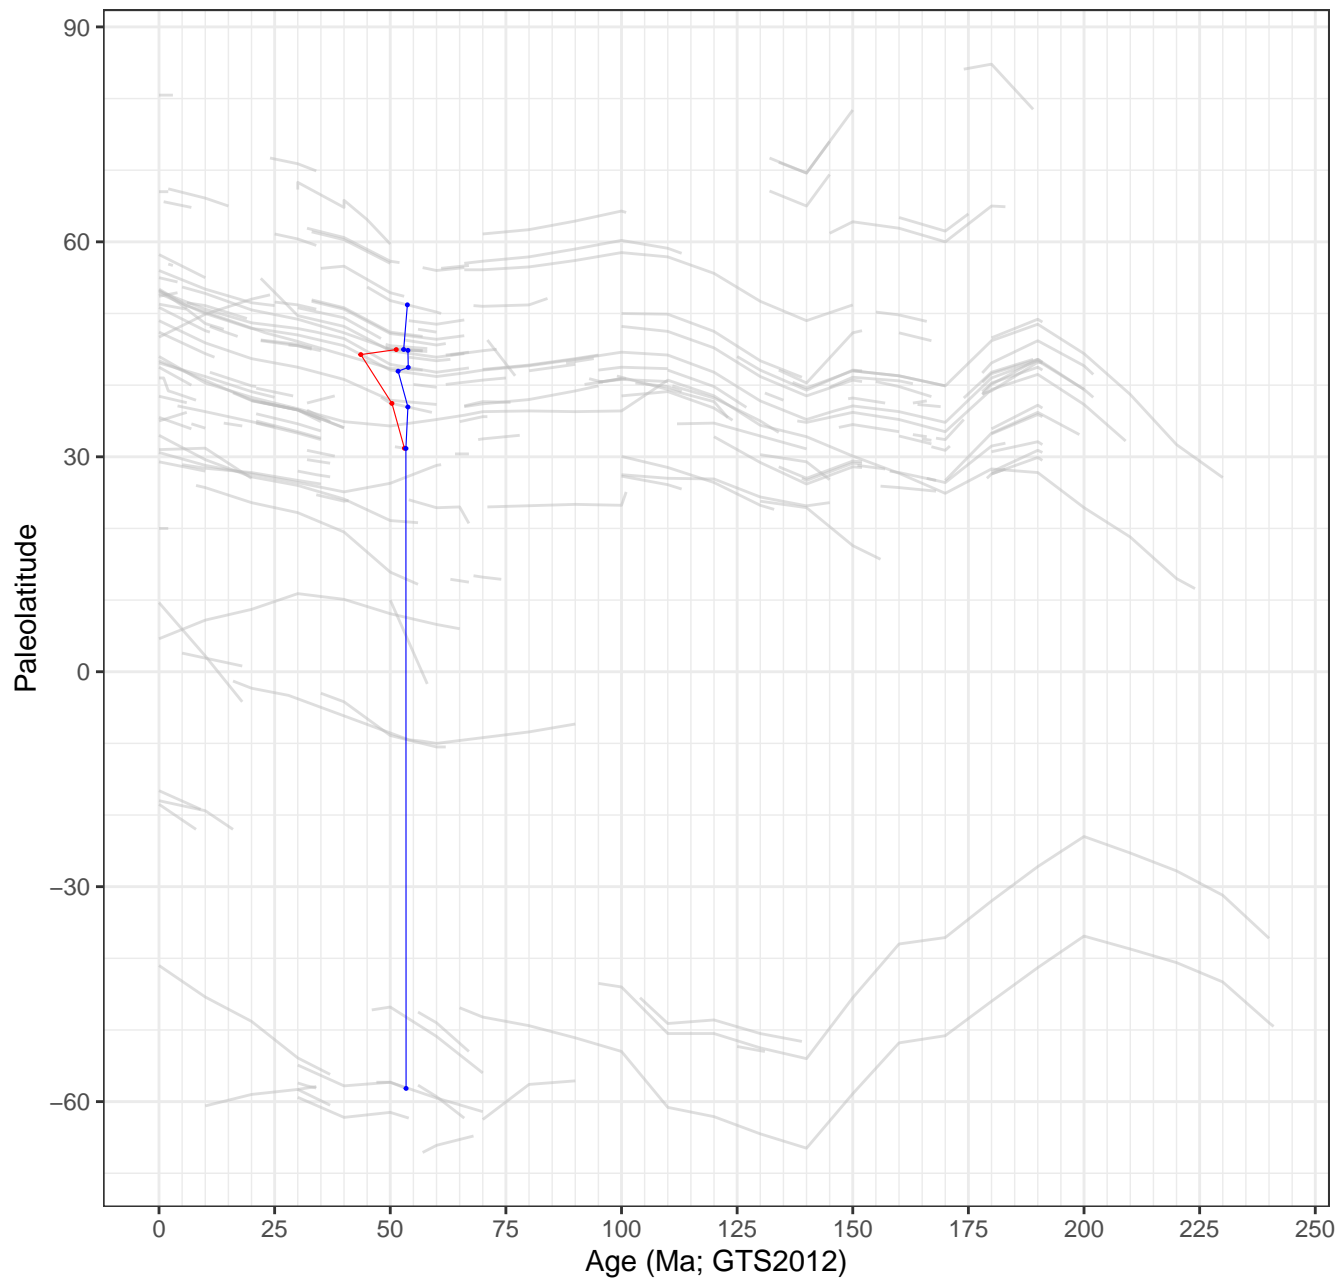

Supplement: Supplementary file 1317 [file Dracodinium varielongitudum.pdf › Supplement/Supplement 2/Species 1914 plots/Dracodinium varielongitudum.pdf]

# Species *Dracodinium waipawaense*

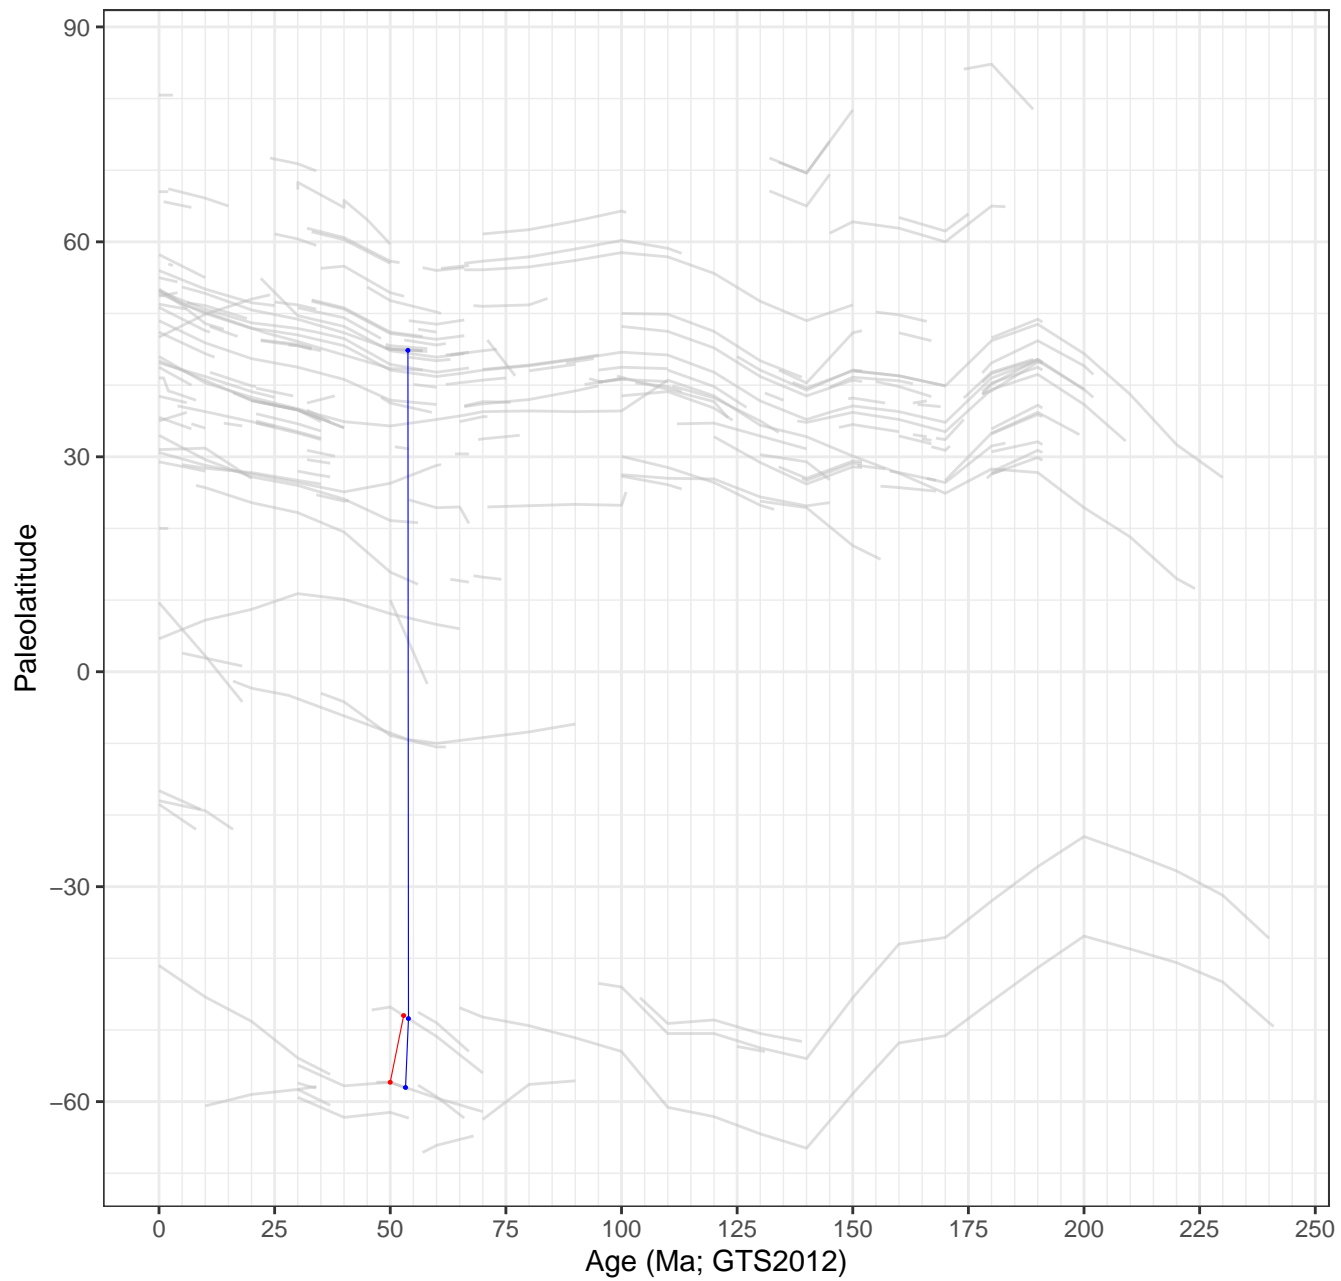

Supplement: Supplementary file 1318 [file Dracodinium waipawaense.pdf › Supplement/Supplement 2/Species 1914 plots/Dracodinium waipawaense.pdf]

# Species *Druggidium apicopaucicum*

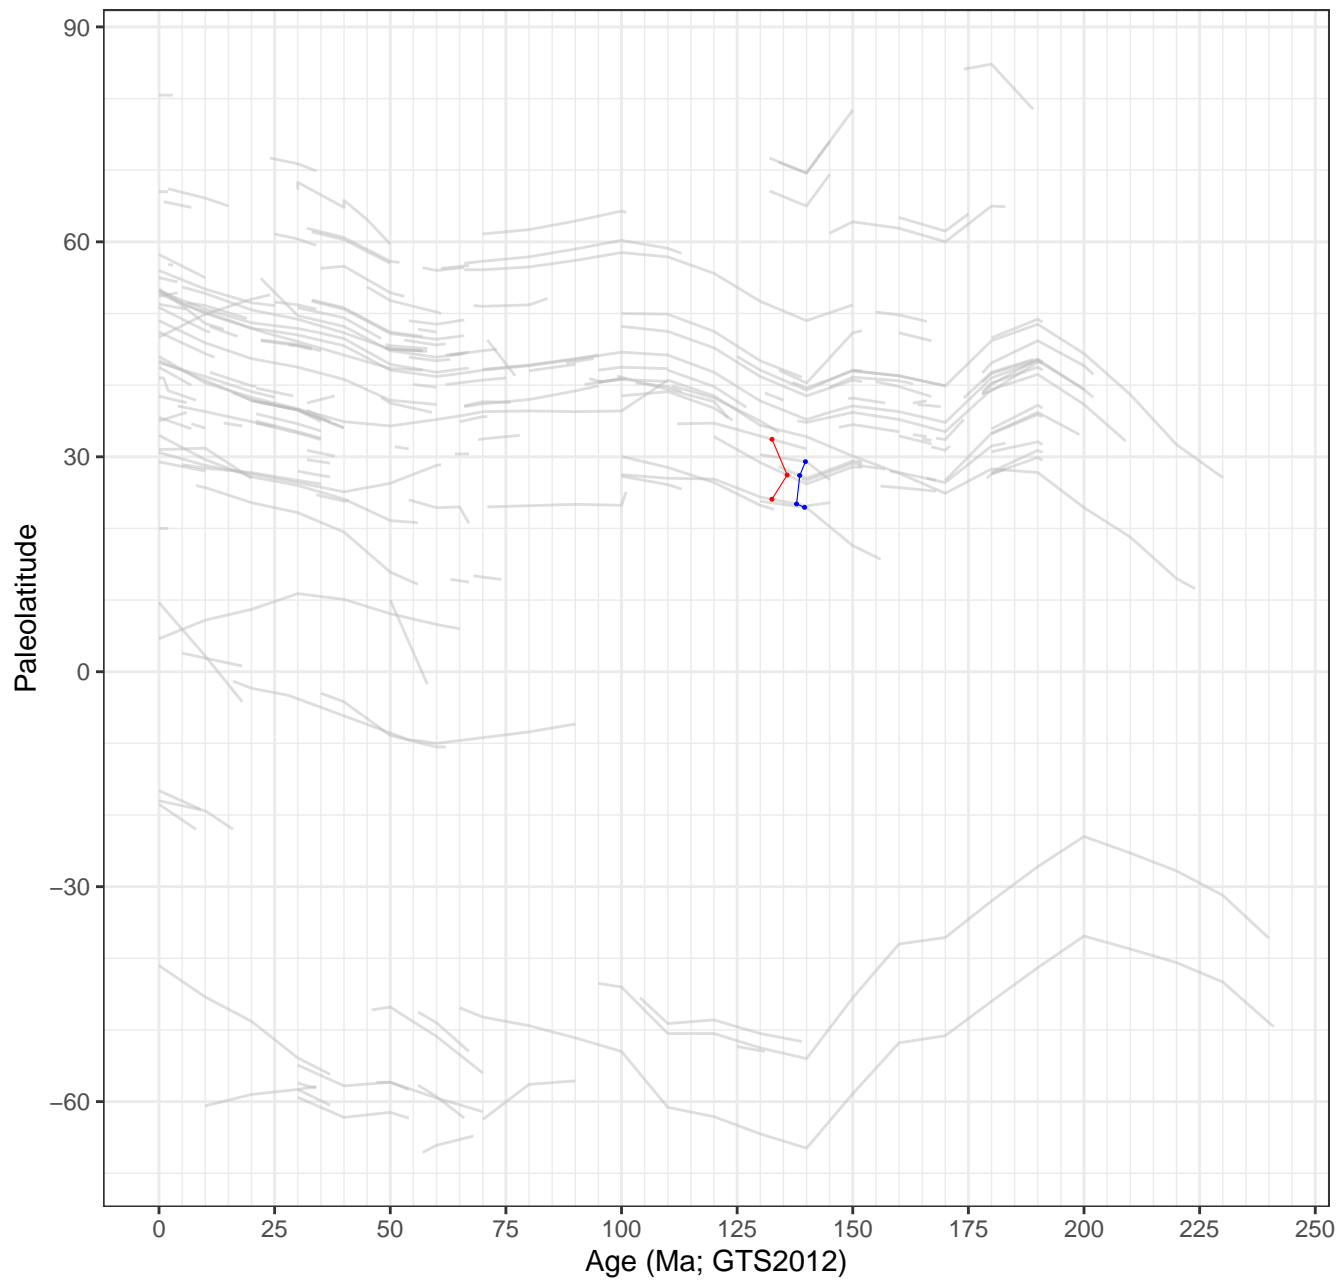

Supplement: Supplementary file 1319 [file Druggidium apicopaucicum.pdf › Supplement/Supplement 2/Species 1914 plots/Druggidium apicopaucicum.pdf]

# Species *Druggidium deflandrei*

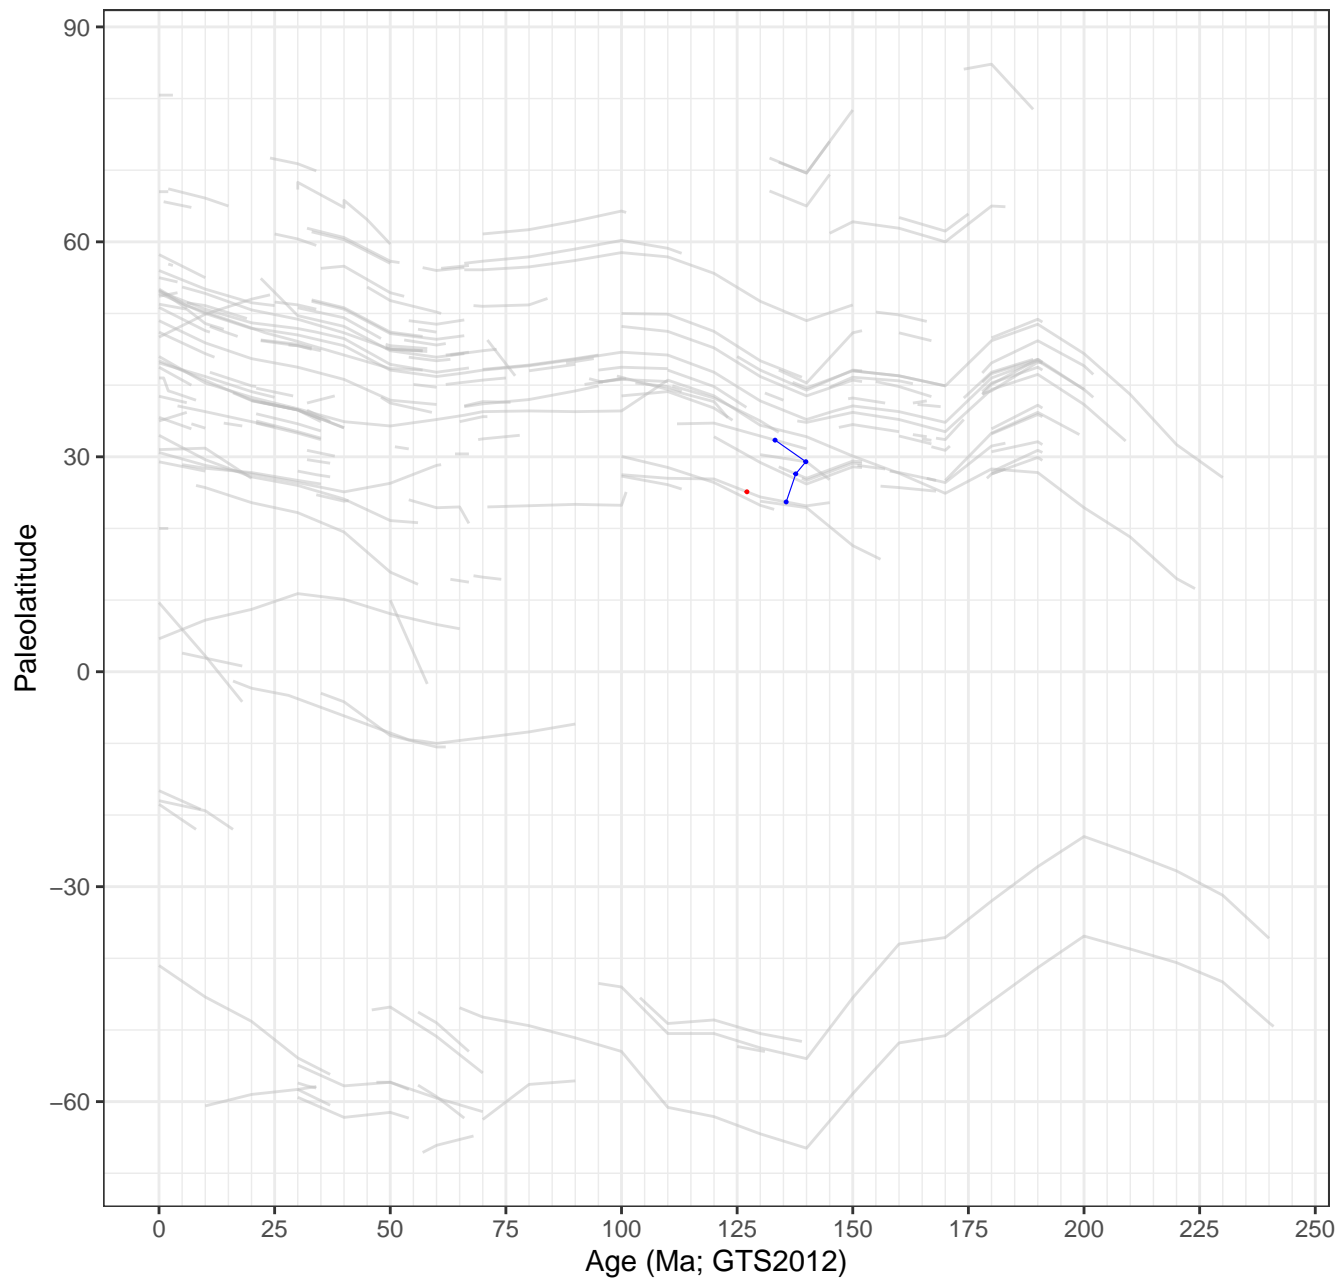

Supplement: Supplementary file 1320 [file Druggidium deflandrei.pdf › Supplement/Supplement 2/Species 1914 plots/Druggidium deflandrei.pdf]

# Species *Druggidium discretum*

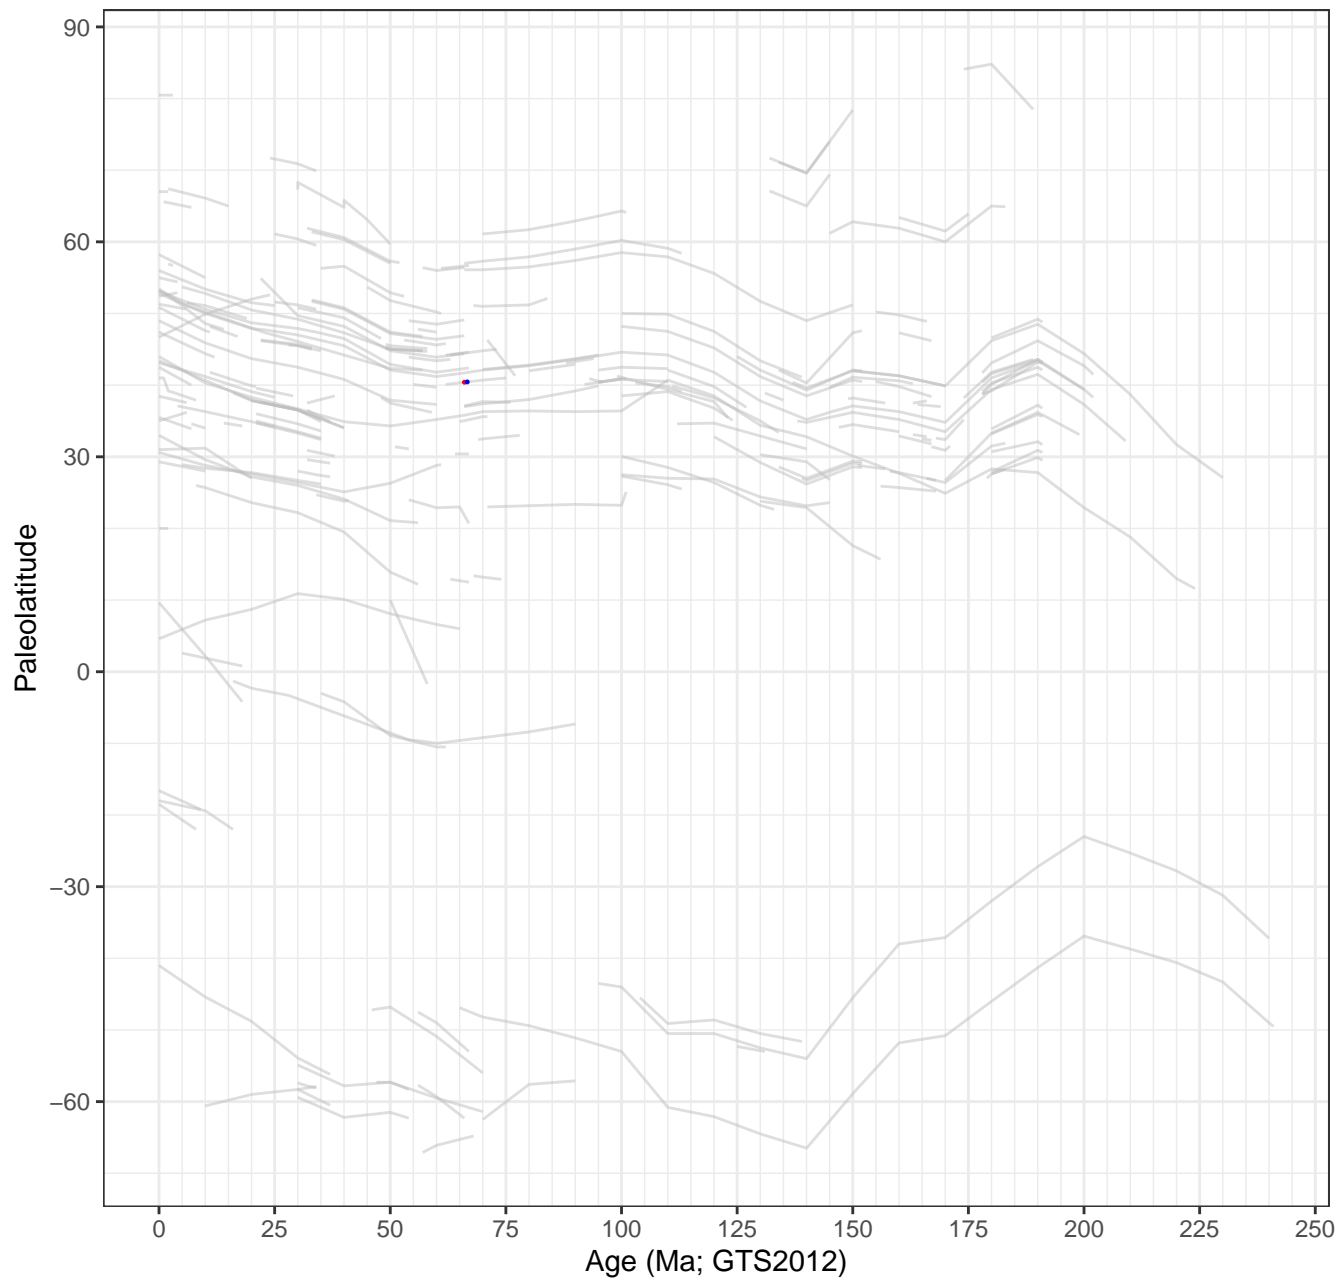

Supplement: Supplementary file 1321 [file Druggidium discretum.pdf › Supplement/Supplement 2/Species 1914 plots/Druggidium discretum.pdf]

# Species *Druggidium jubatum*

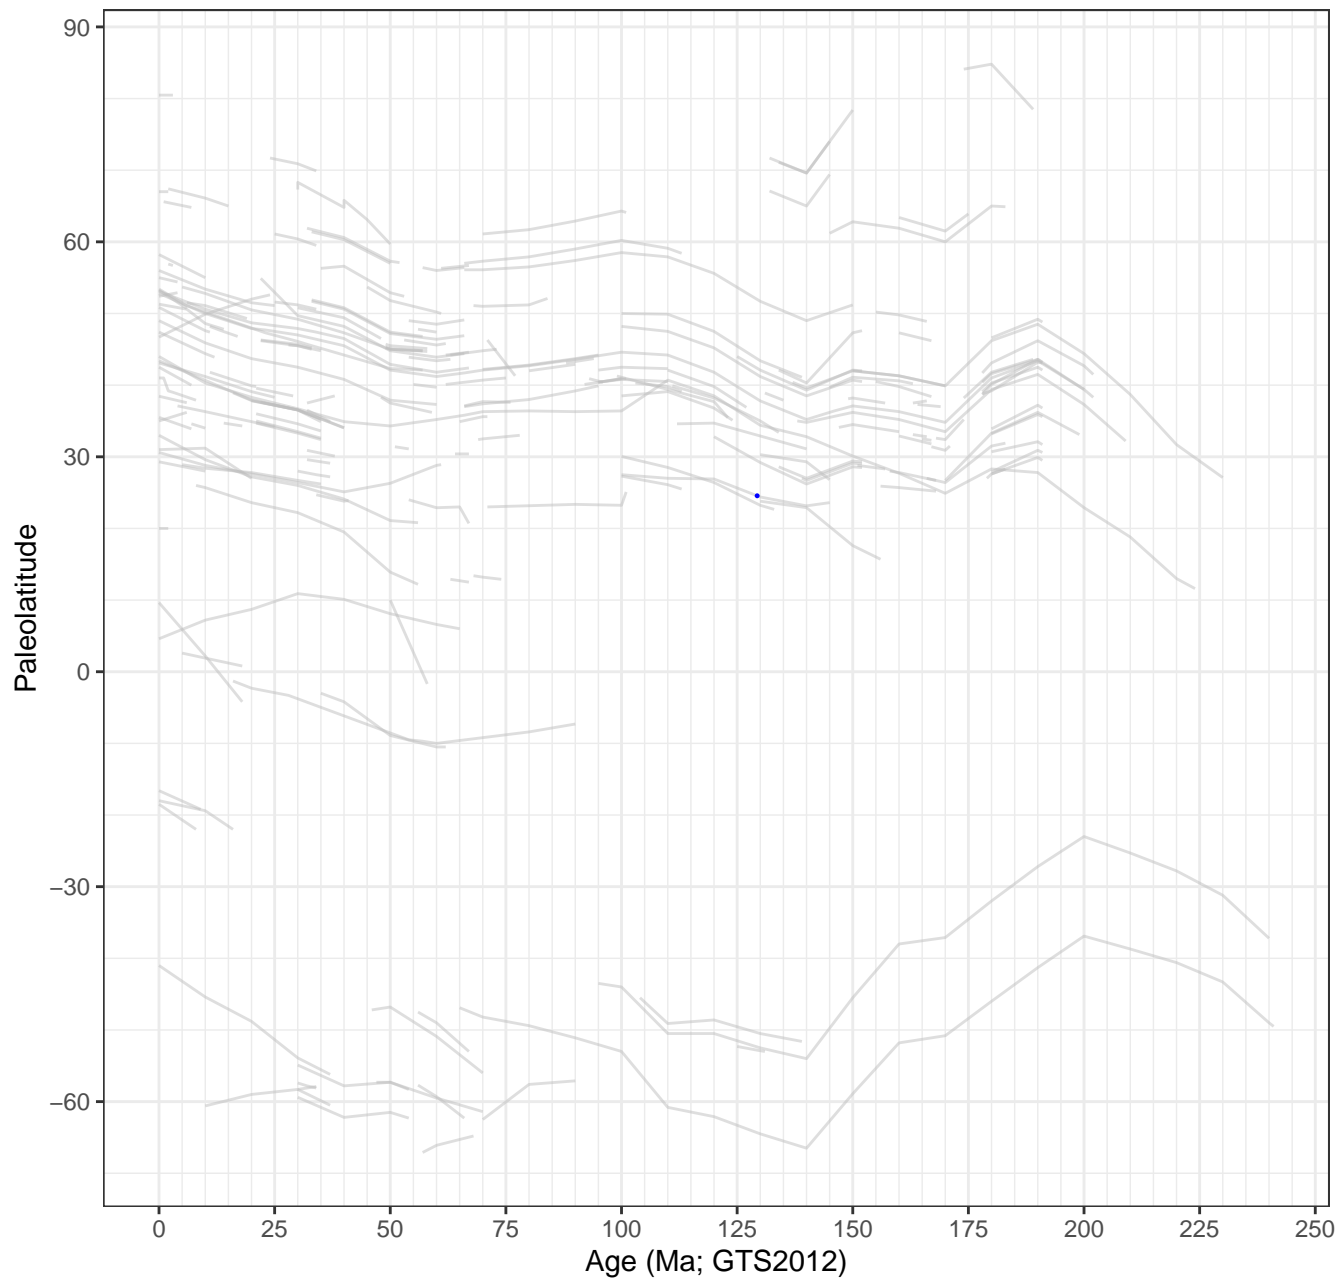

Supplement: Supplementary file 1322 [file Druggidium jubatum.pdf › Supplement/Supplement 2/Species 1914 plots/Druggidium jubatum.pdf]

# Species *Druggidium meerensis*

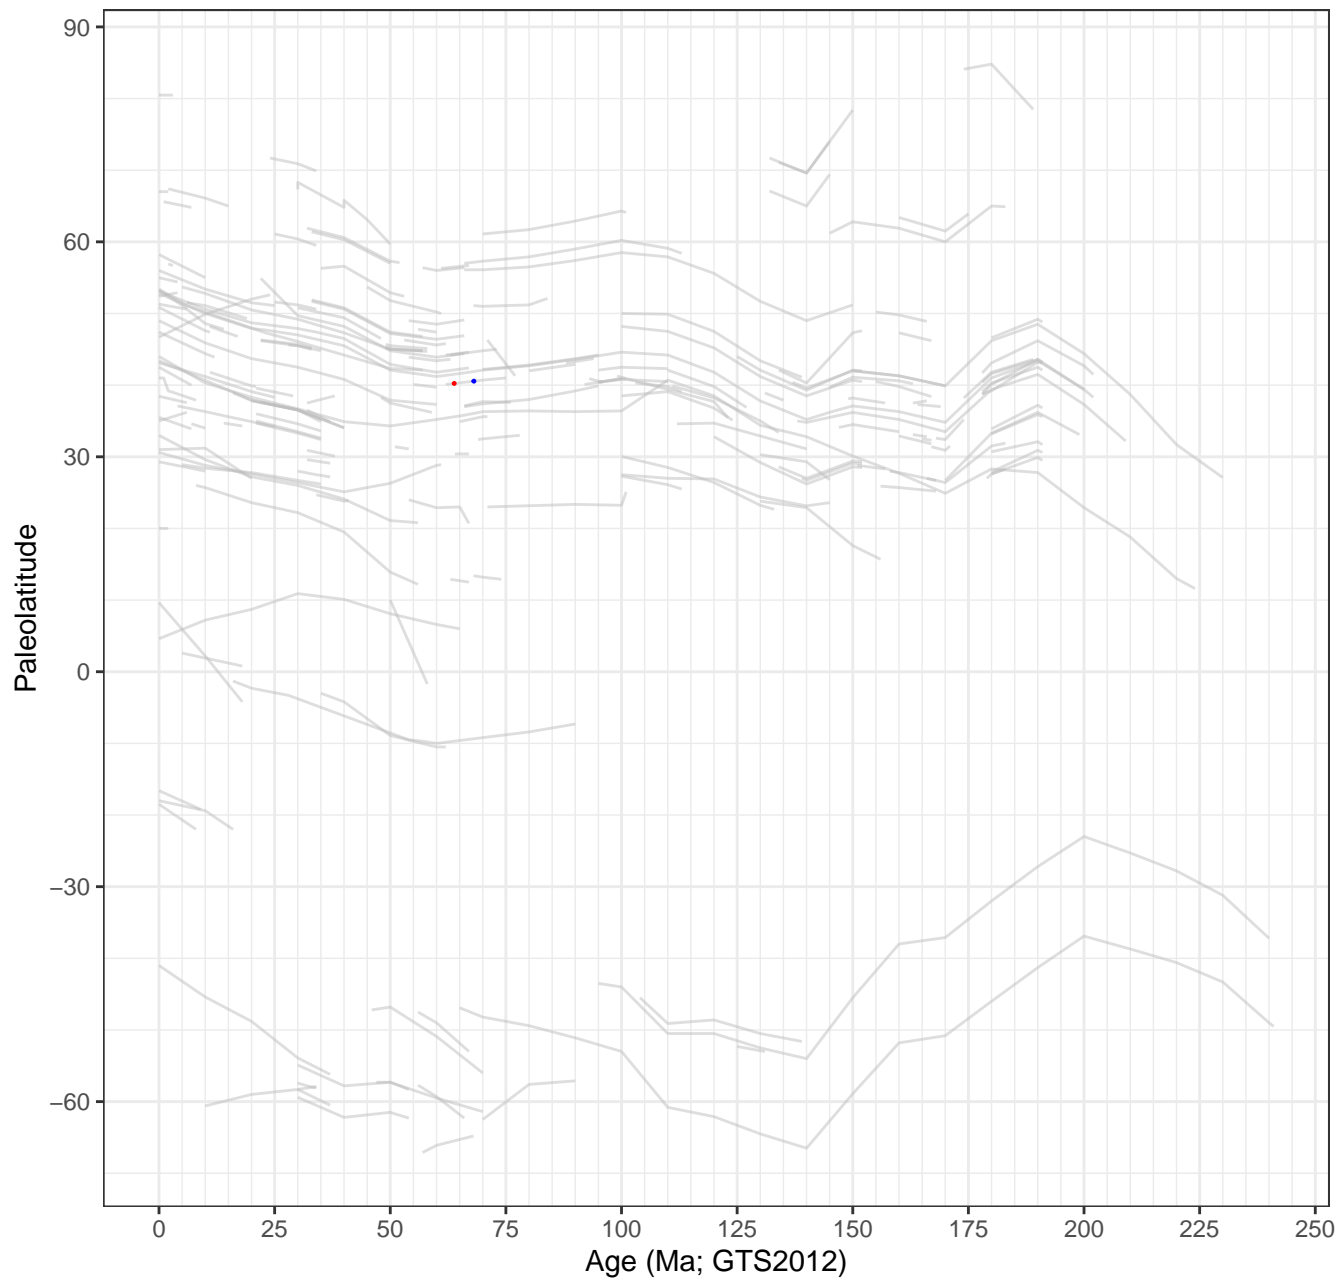

Supplement: Supplementary file 1323 [file Druggidium meerensis.pdf › Supplement/Supplement 2/Species 1914 plots/Druggidium meerensis.pdf]

# Species *Druggidium rhabdoreticulatum*

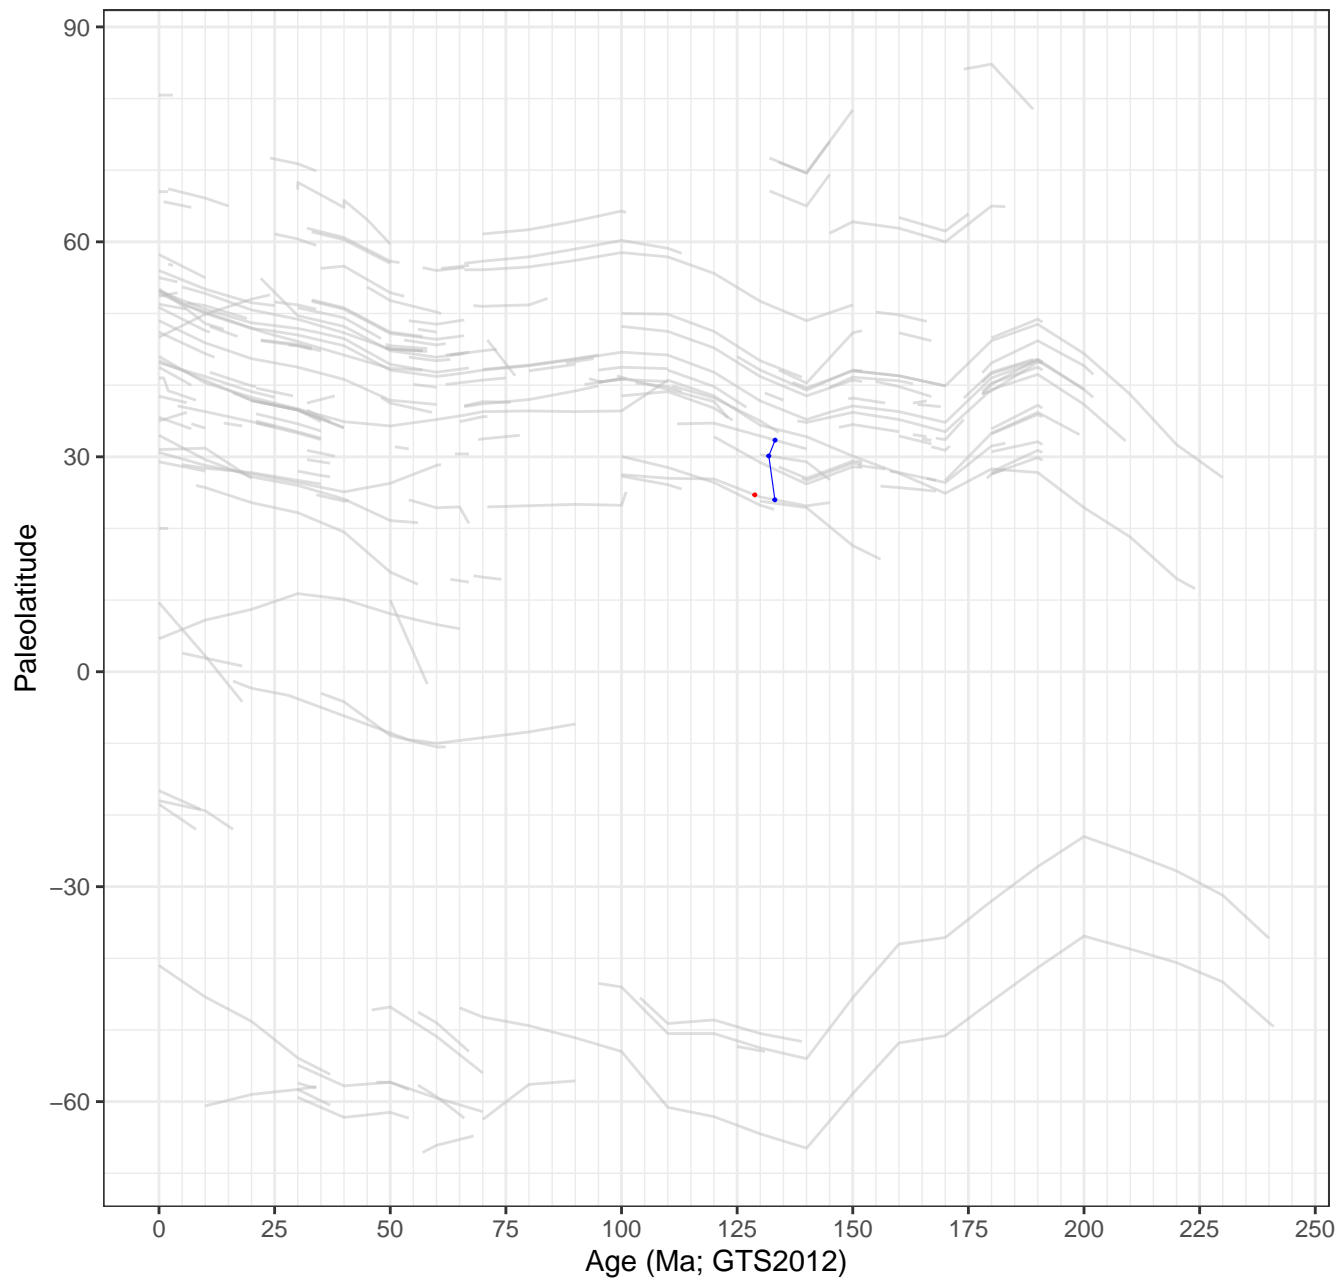

Supplement: Supplementary file 1324 [file Druggidium rhabdoreticulatum.pdf › Supplement/Supplement 2/Species 1914 plots/Druggidium rhabdoreticulatum.pdf]

# Species Dubridinium spp.

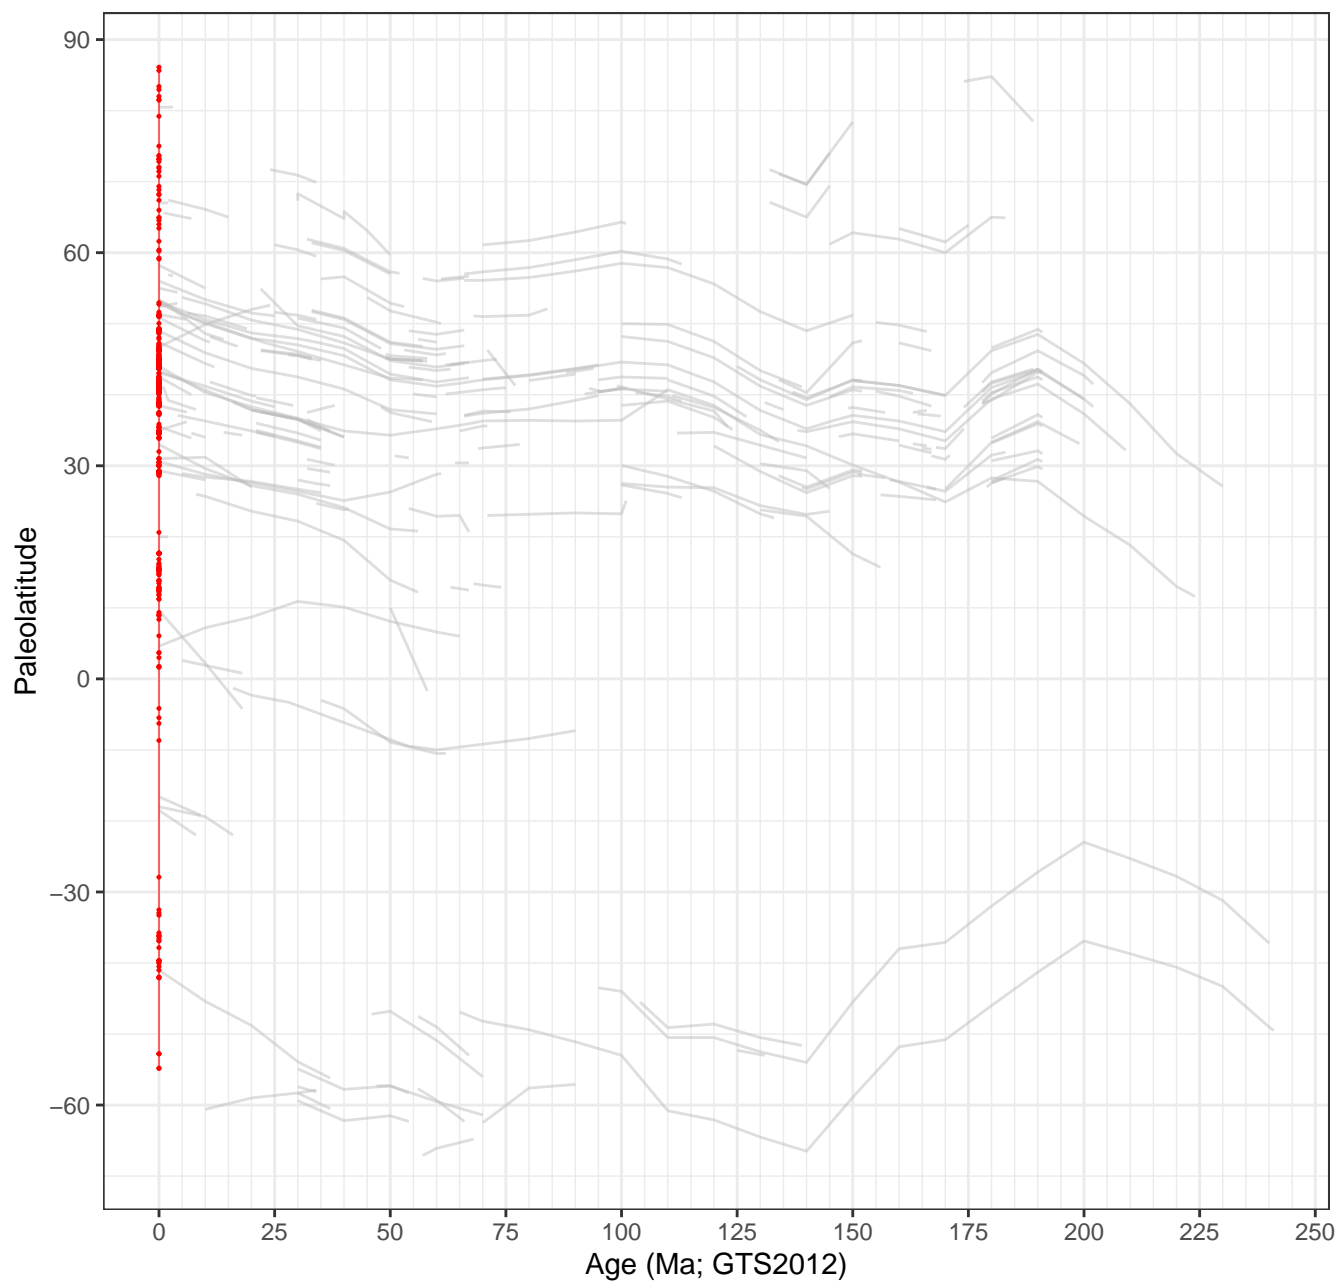

Supplement: Supplementary file 1325 [file Dubridinium spp..pdf › Supplement/Supplement 2/Species 1914 plots/Dubridinium spp..pdf]

# Species *Duosphaeridium nudum*

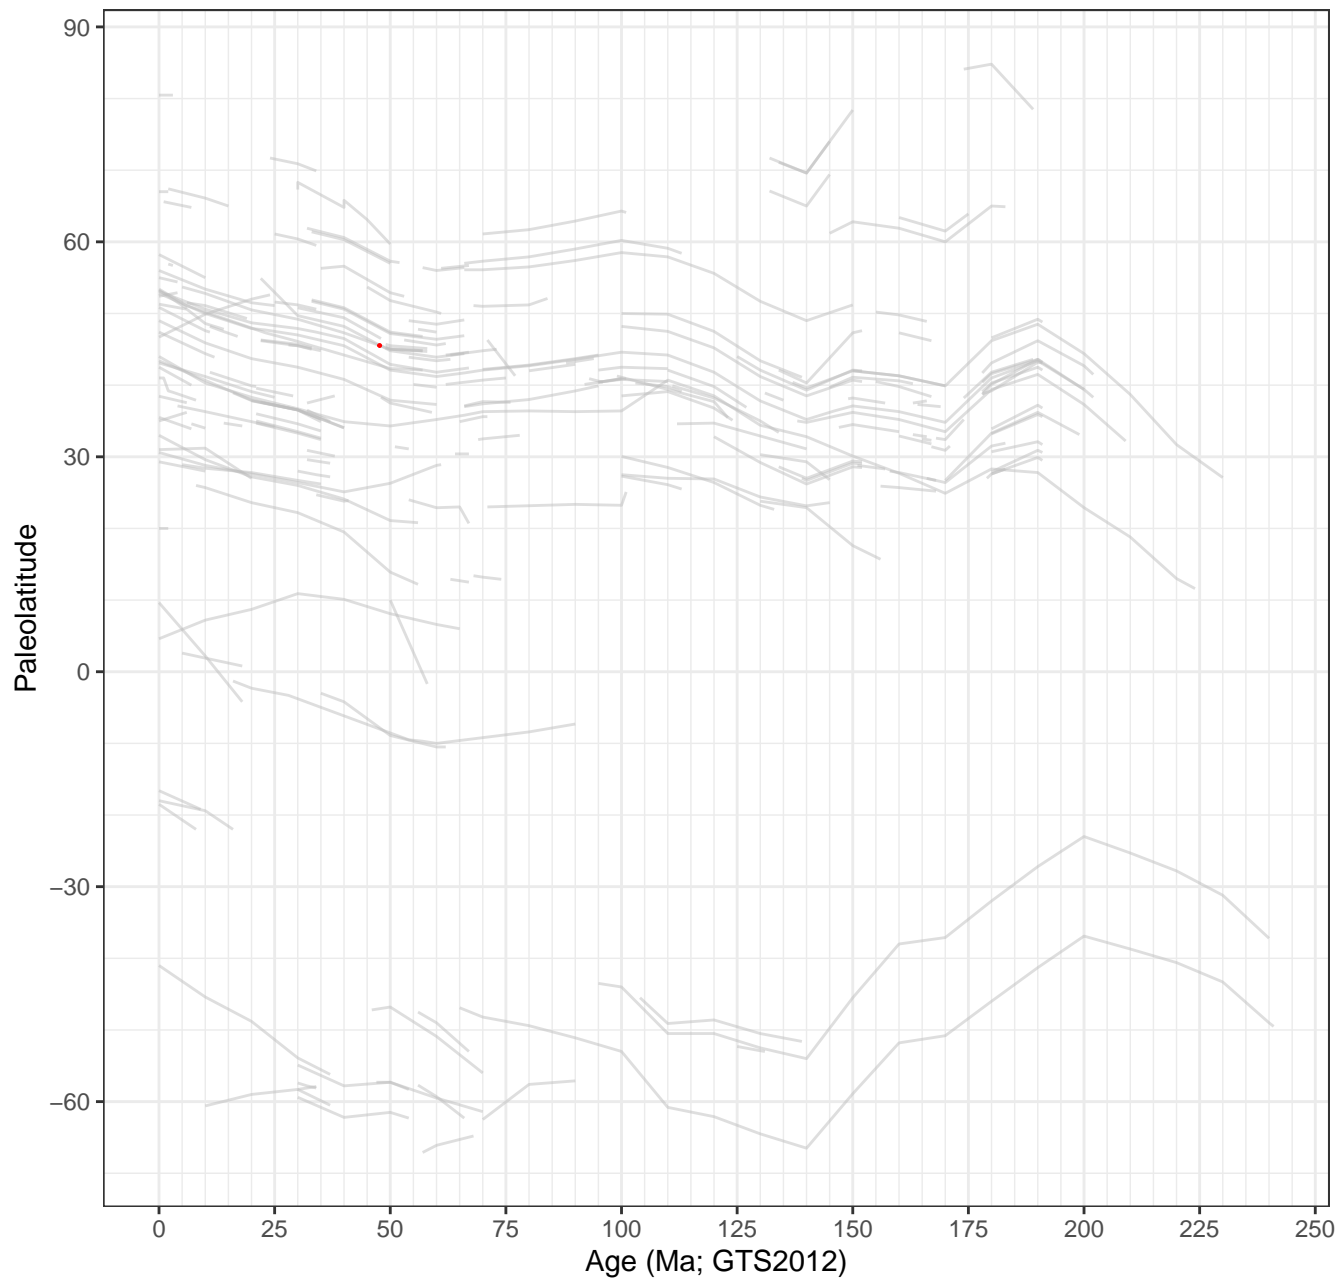

Supplement: Supplementary file 1326 [file Duosphaeridium nudum.pdf › Supplement/Supplement 2/Species 1914 plots/Duosphaeridium nudum.pdf]

# Species *Durotrigia daveyi*

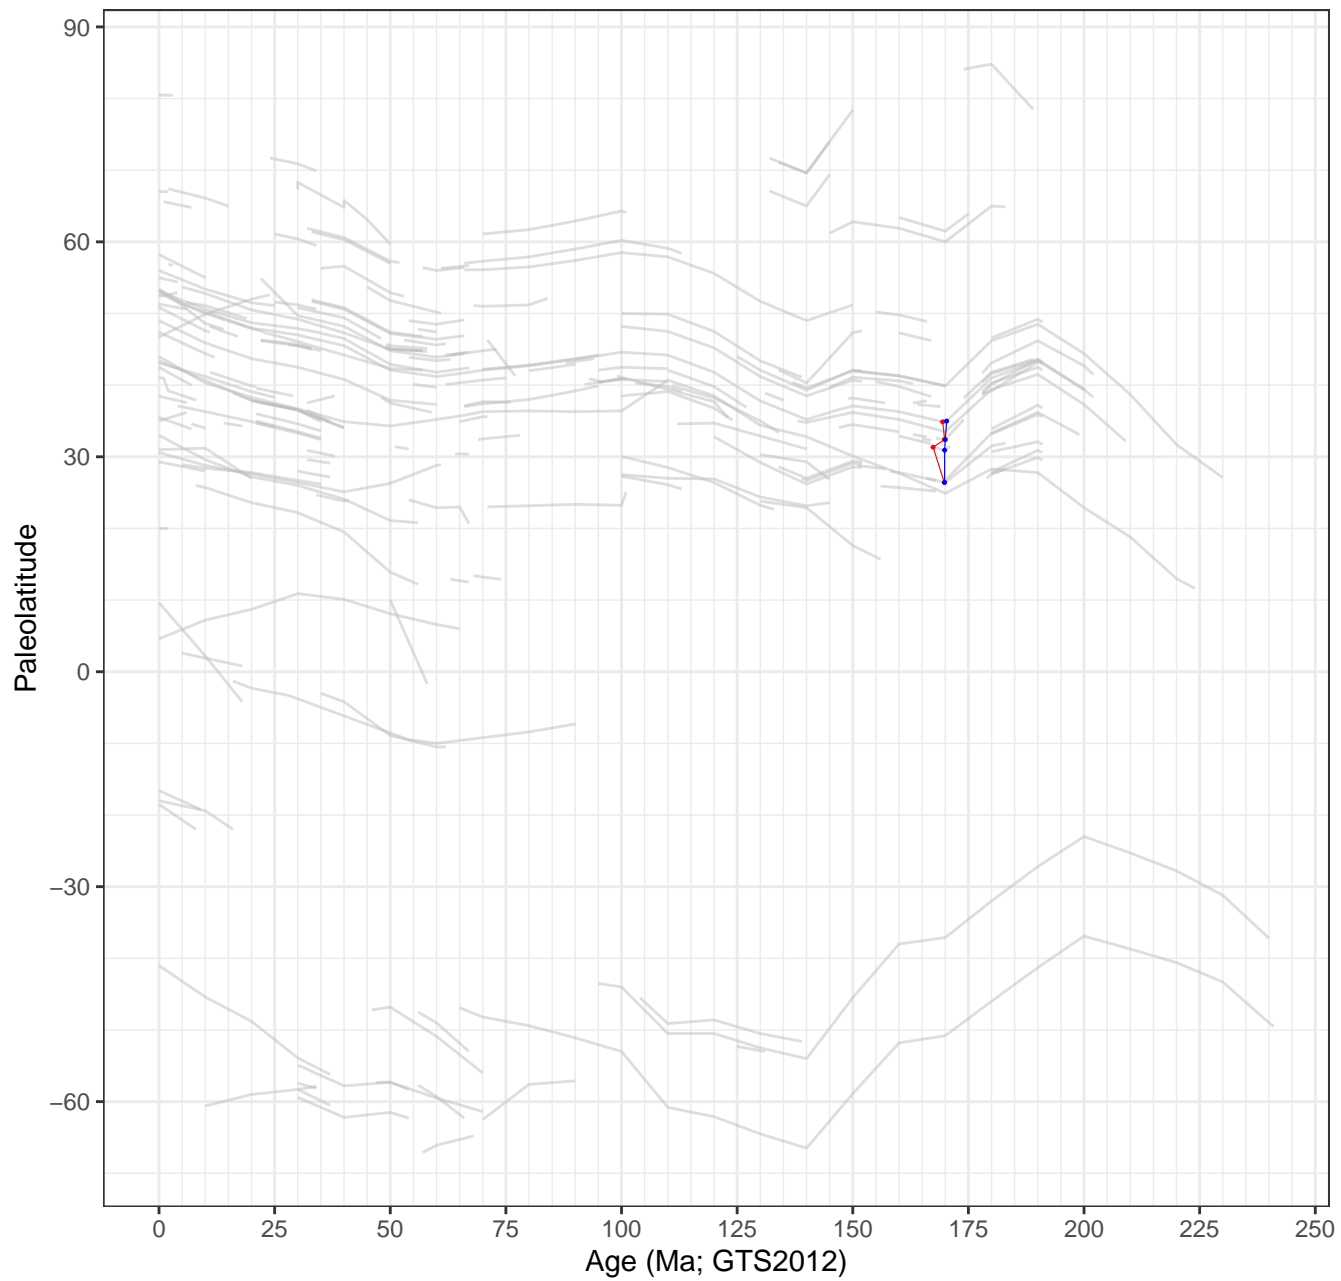

Supplement: Supplementary file 1327 [file Durotrigia daveyi.pdf › Supplement/Supplement 2/Species 1914 plots/Durotrigia daveyi.pdf]

# Species *Durotrigia filapicatum*

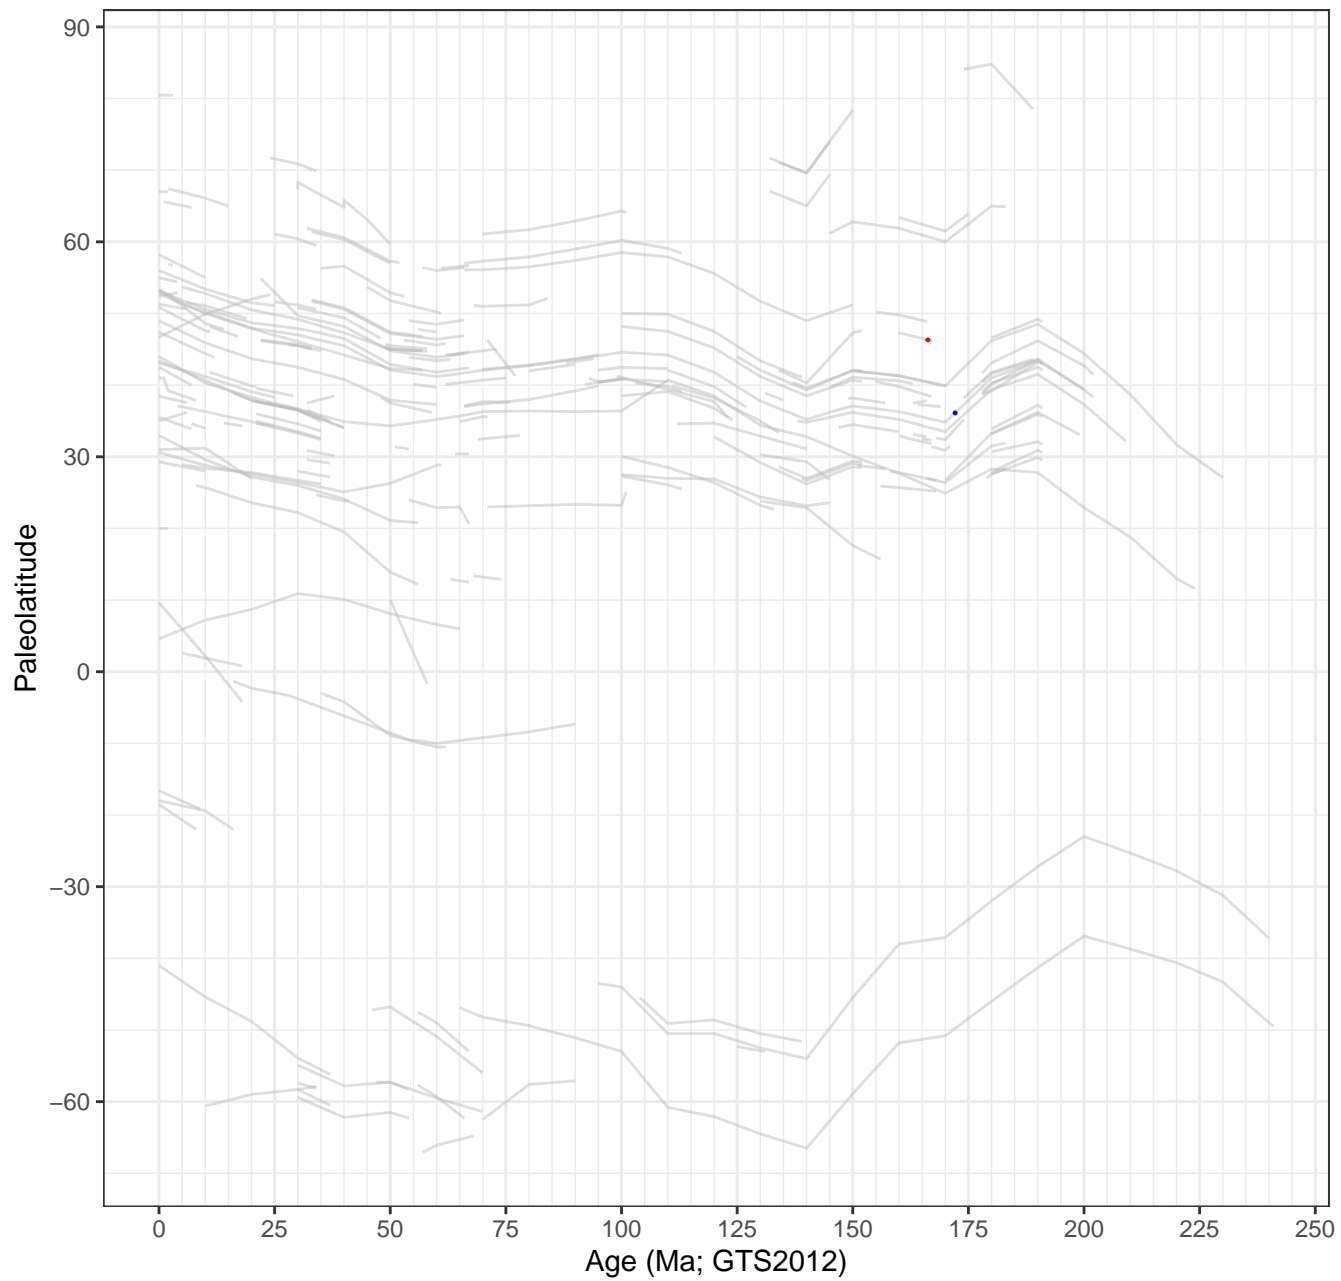

Supplement: Supplementary file 1328 [file Durotrigia filapicatum.pdf › Supplement/Supplement 2/Species 1914 plots/Durotrigia filapicatum.pdf]

# Species *Durotrigia flipicata*

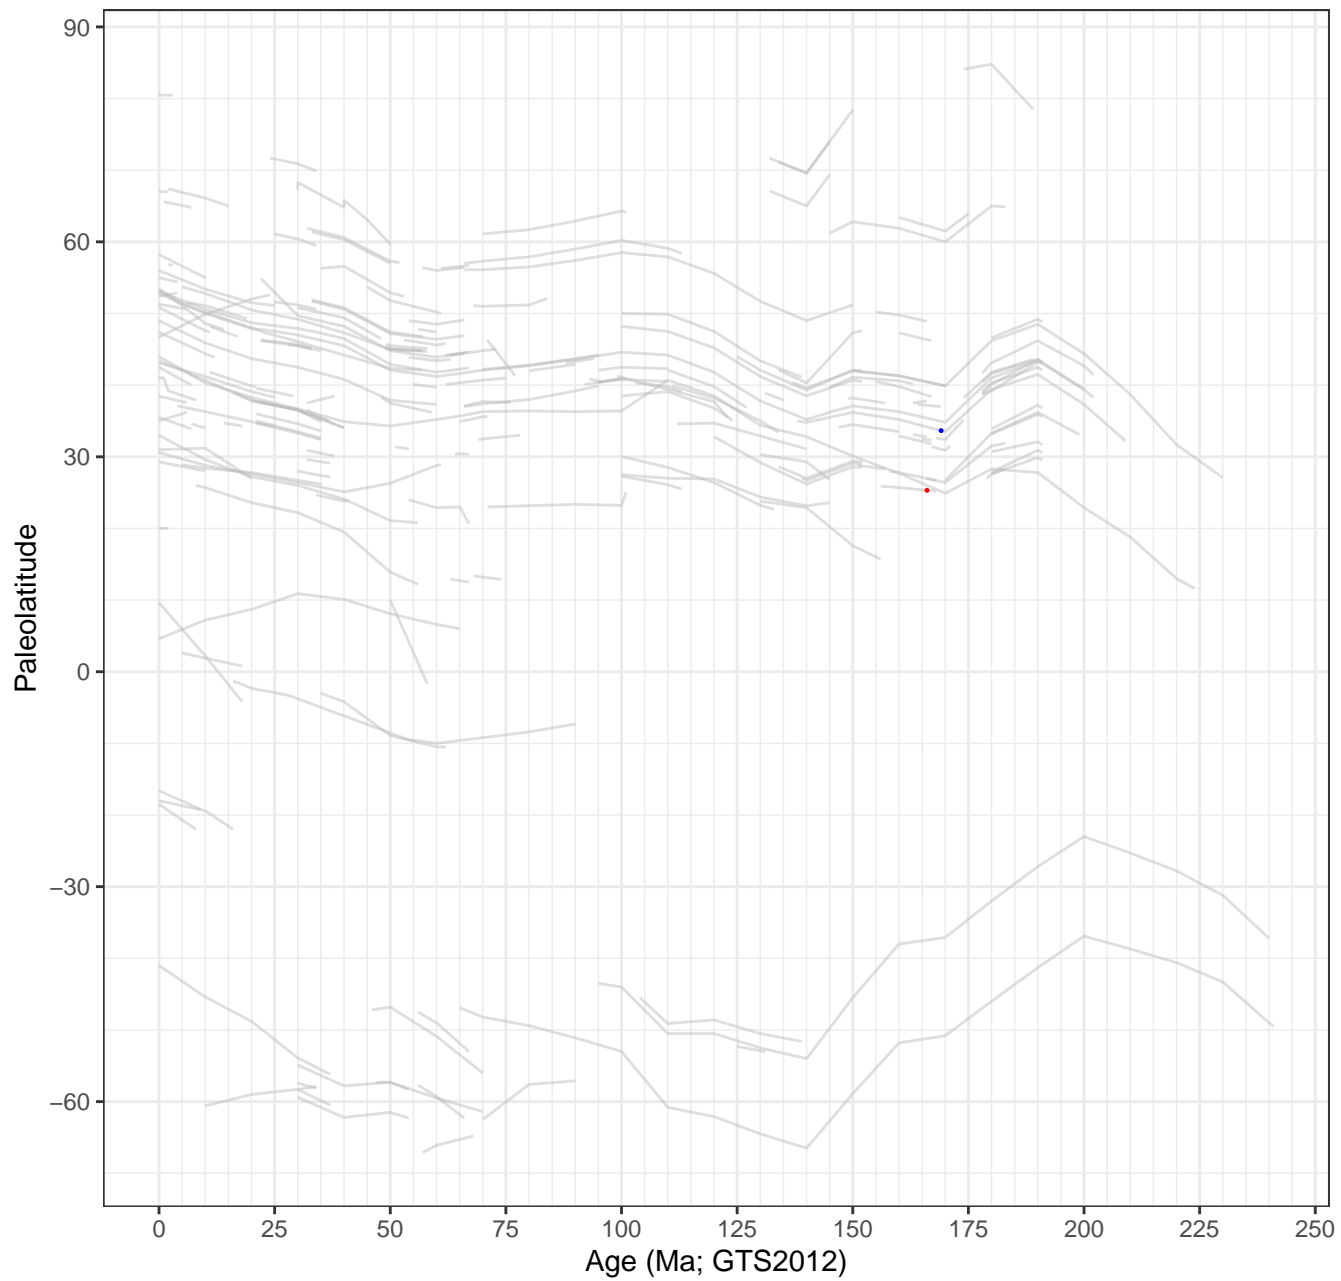

Supplement: Supplementary file 1329 [file Durotrigia flipicata.pdf › Supplement/Supplement 2/Species 1914 plots/Durotrigia flipicata.pdf]

# Species *Durotrigia magna*

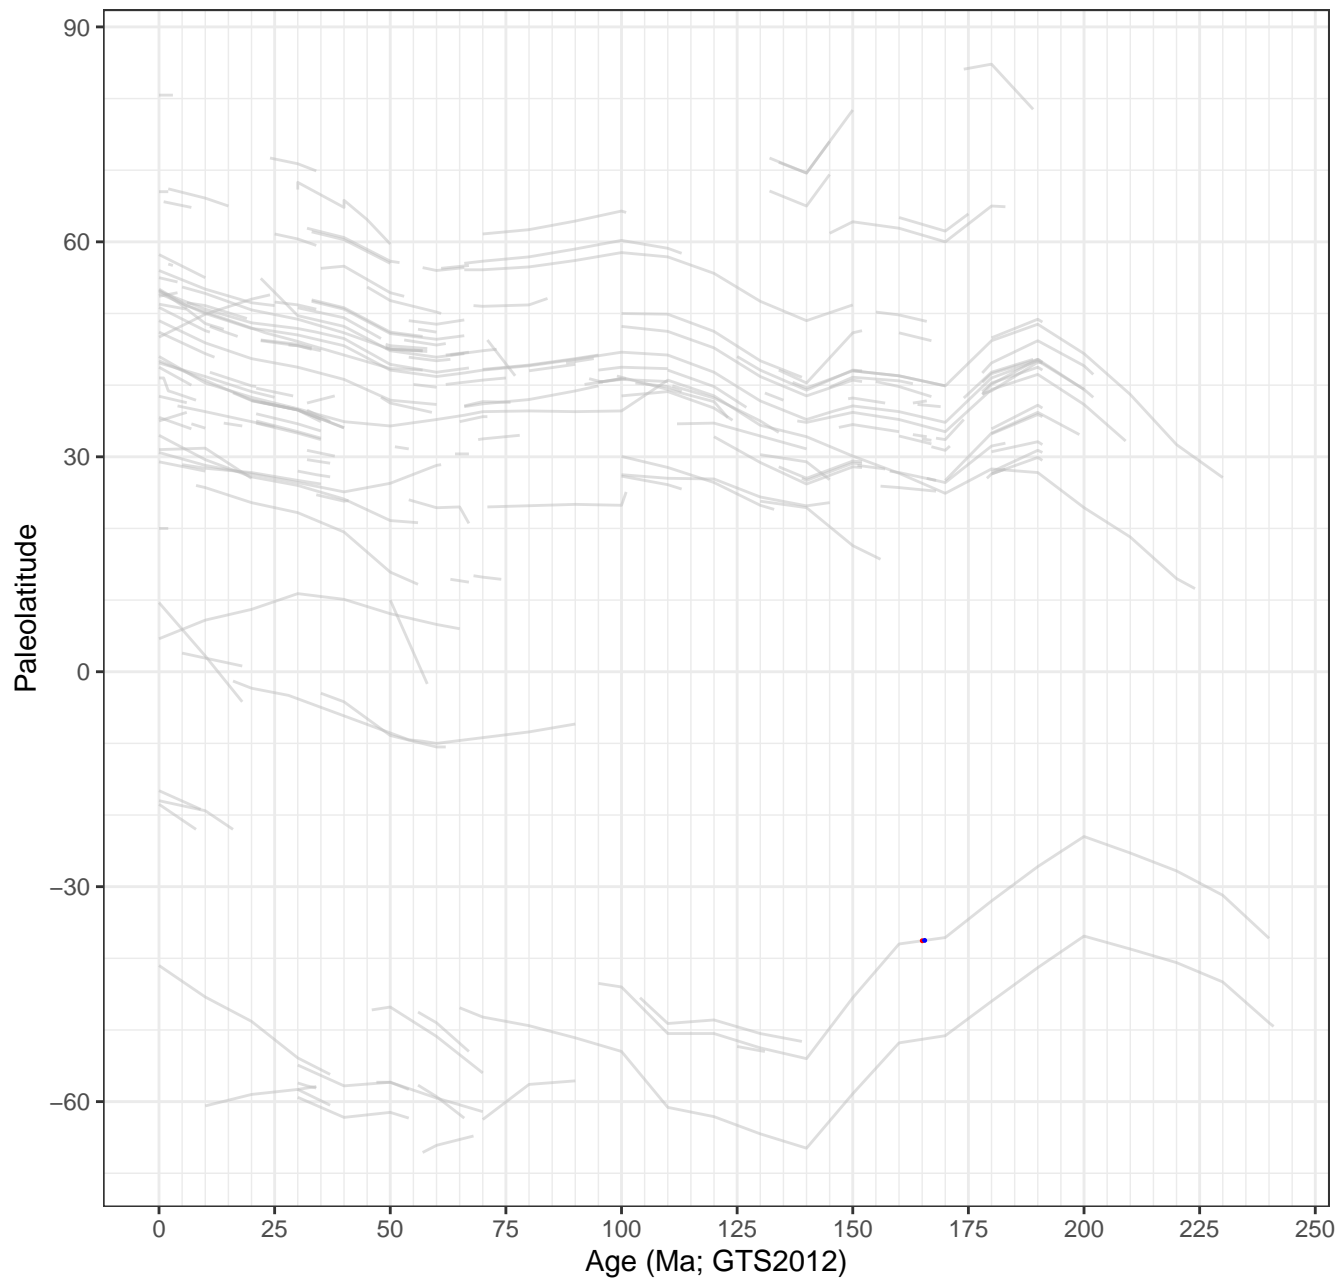

Supplement: Supplementary file 1330 [file Durotrigia magna.pdf › Supplement/Supplement 2/Species 1914 plots/Durotrigia magna.pdf]

# Species *Durotrigia* spp.

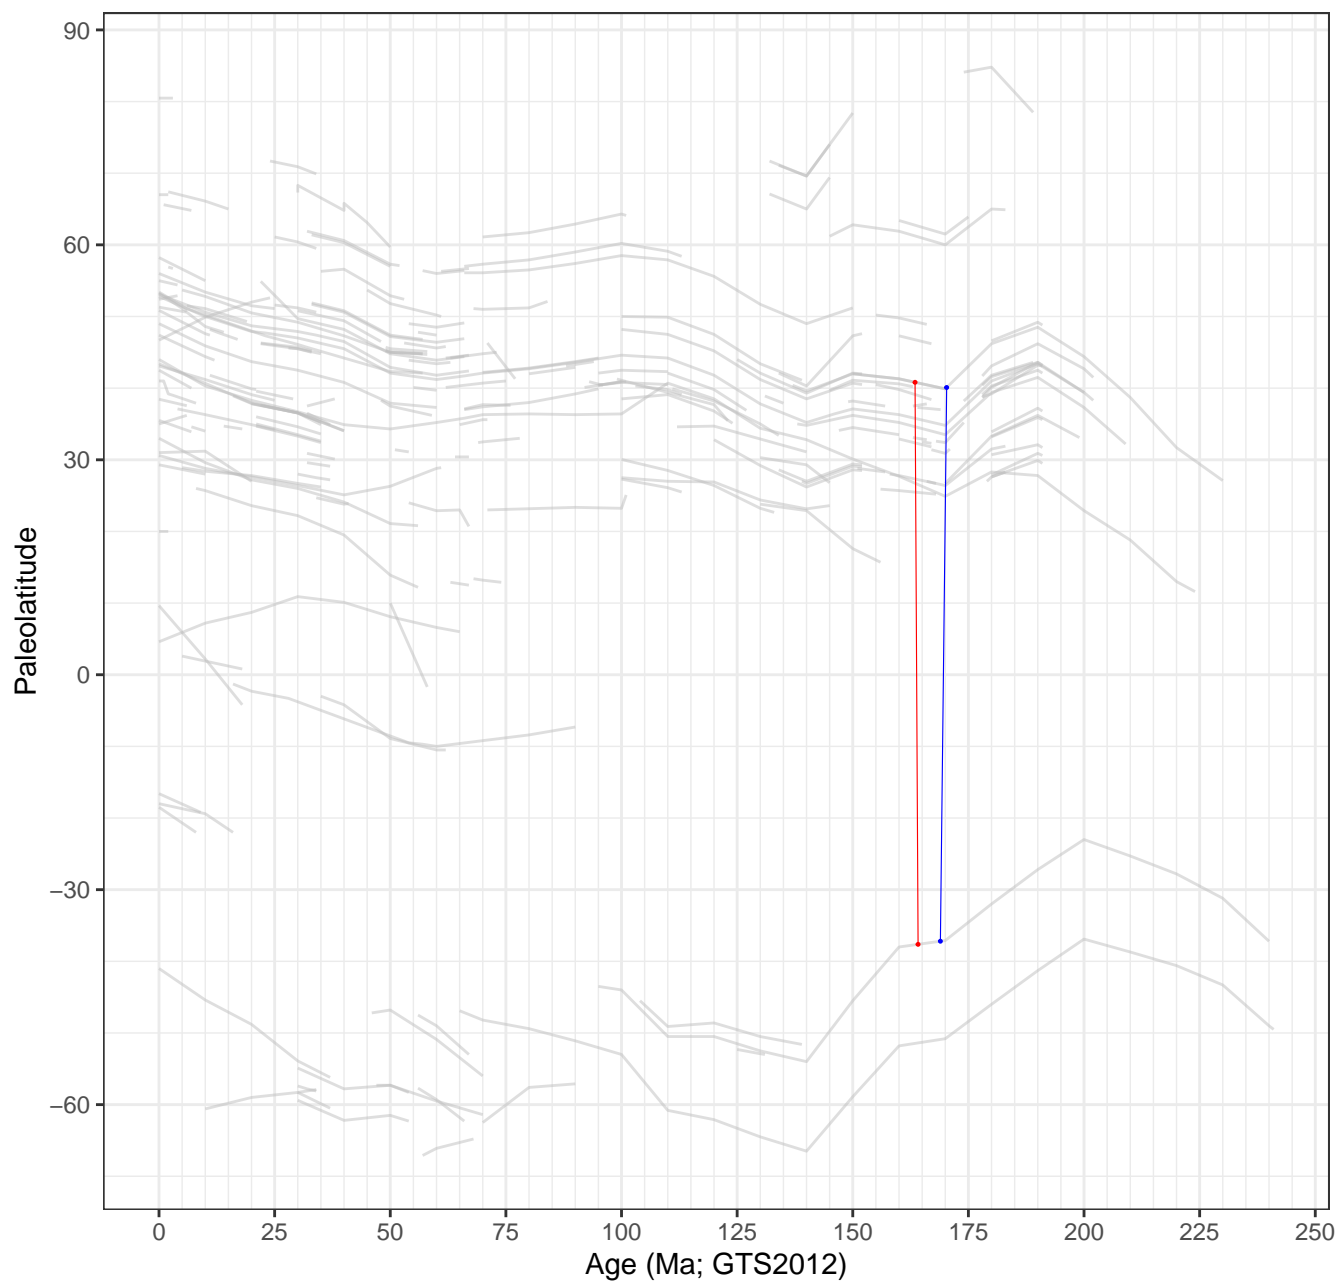

Supplement: Supplementary file 1331 [file Durotrigia spp..pdf › Supplement/Supplement 2/Species 1914 plots/Durotrigia spp..pdf]

# Species *Eatonicysta exilis*

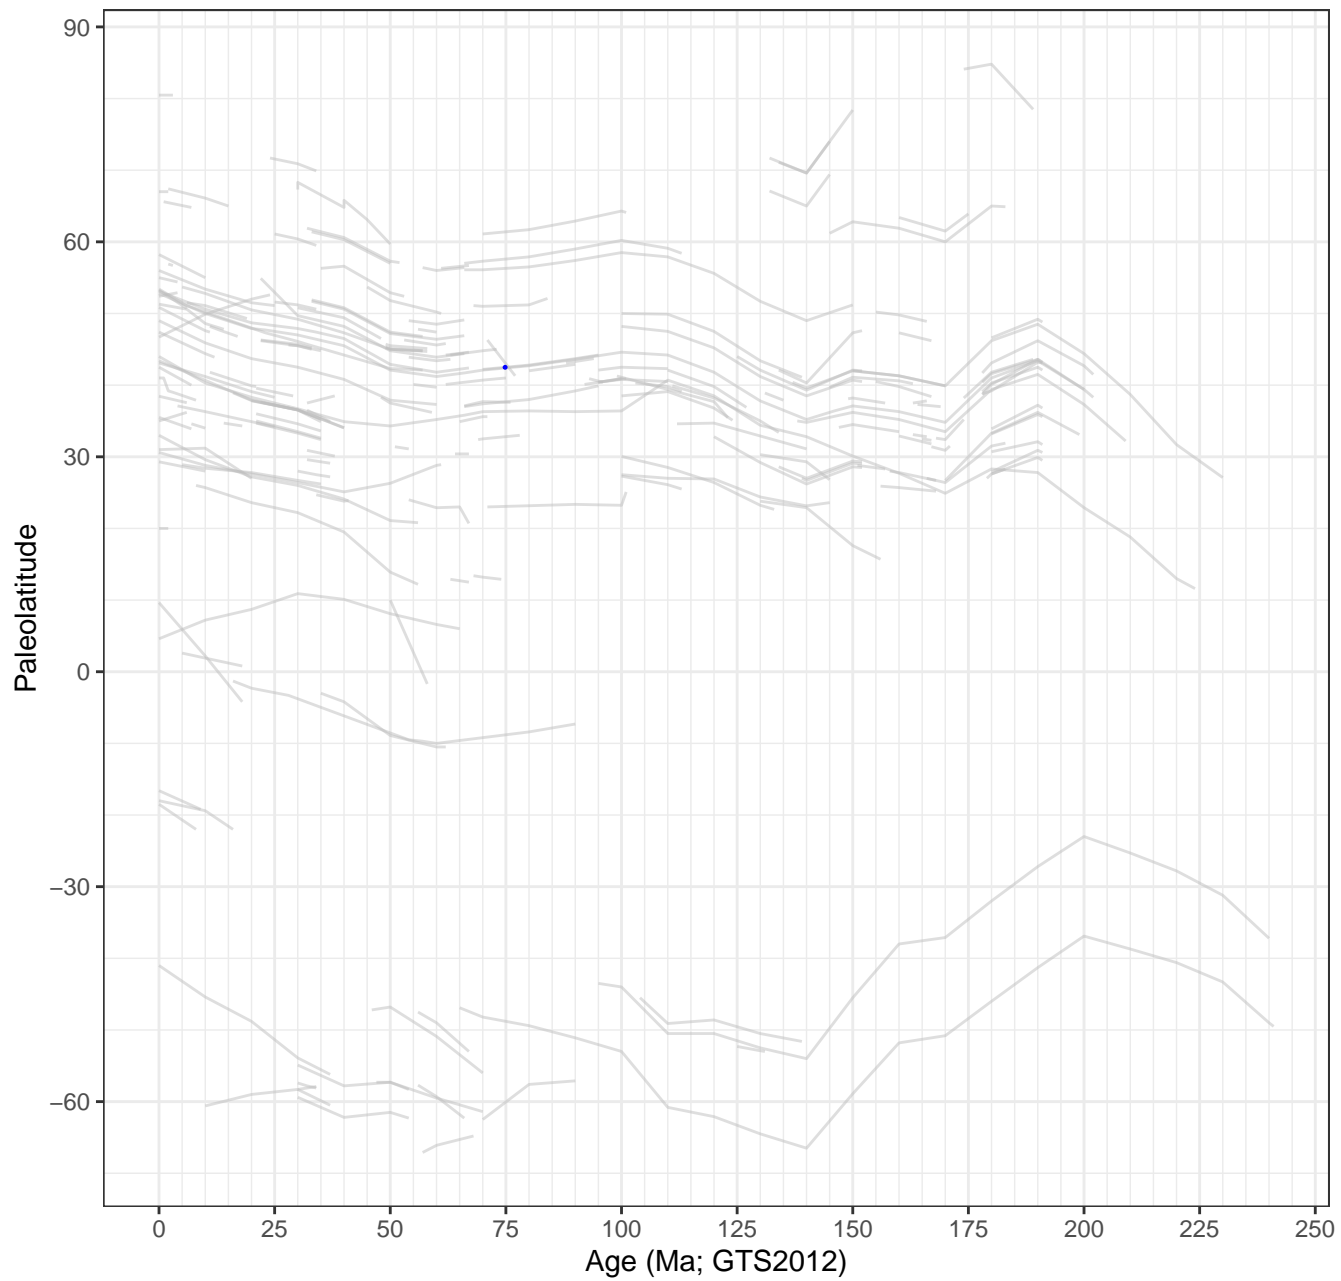

Supplement: Supplementary file 1332 [file Eatonicysta exilis.pdf › Supplement/Supplement 2/Species 1914 plots/Eatonicysta exilis.pdf]
