# Supplementary figures and images for: DINOSTRAT: a global database of the stratigraphic and paleolatitudinal distribution of Mesozoic–Cenozoic organic-walled dinoflagellate cysts (part 14 of 27)
Source: Copernicus journal article supplement (doi:10.5194/essd-14-579-2022), 2022-02-09

# Species *Eatonicysta mutabilireta*

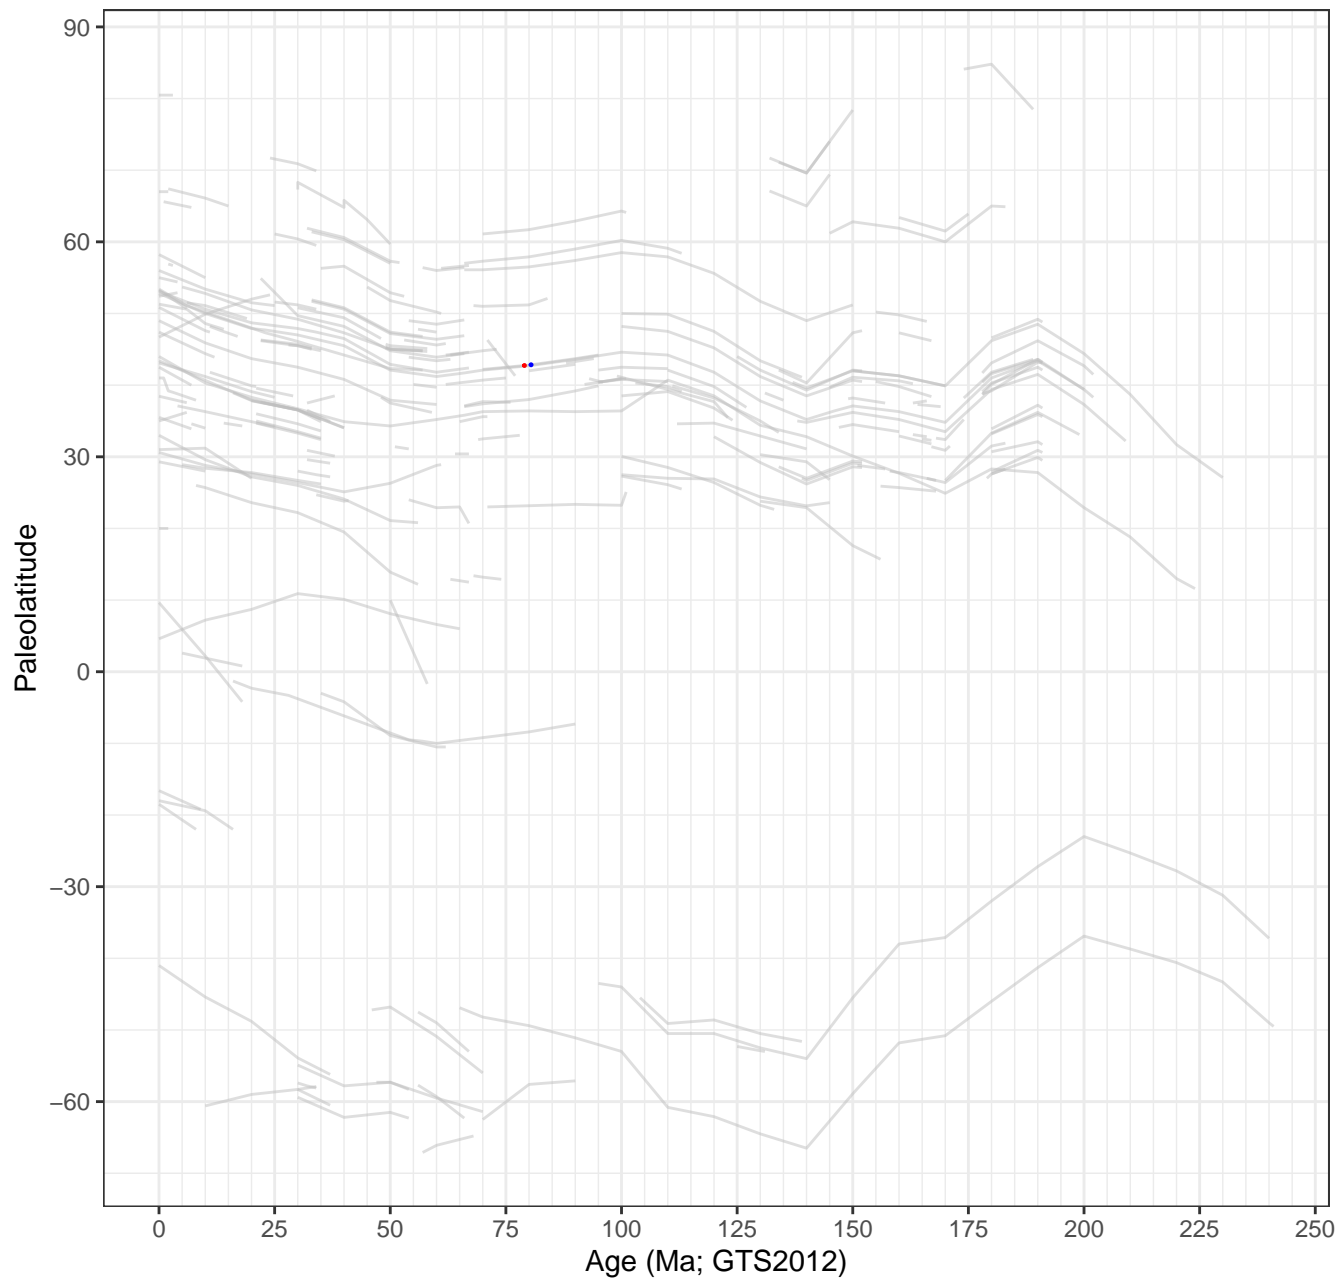

Supplement: Supplementary file 1333 [file Eatonicysta mutabilireta.pdf › Supplement/Supplement 2/Species 1914 plots/Eatonicysta mutabilireta.pdf]

# Species *Eatonicysta ursulae*

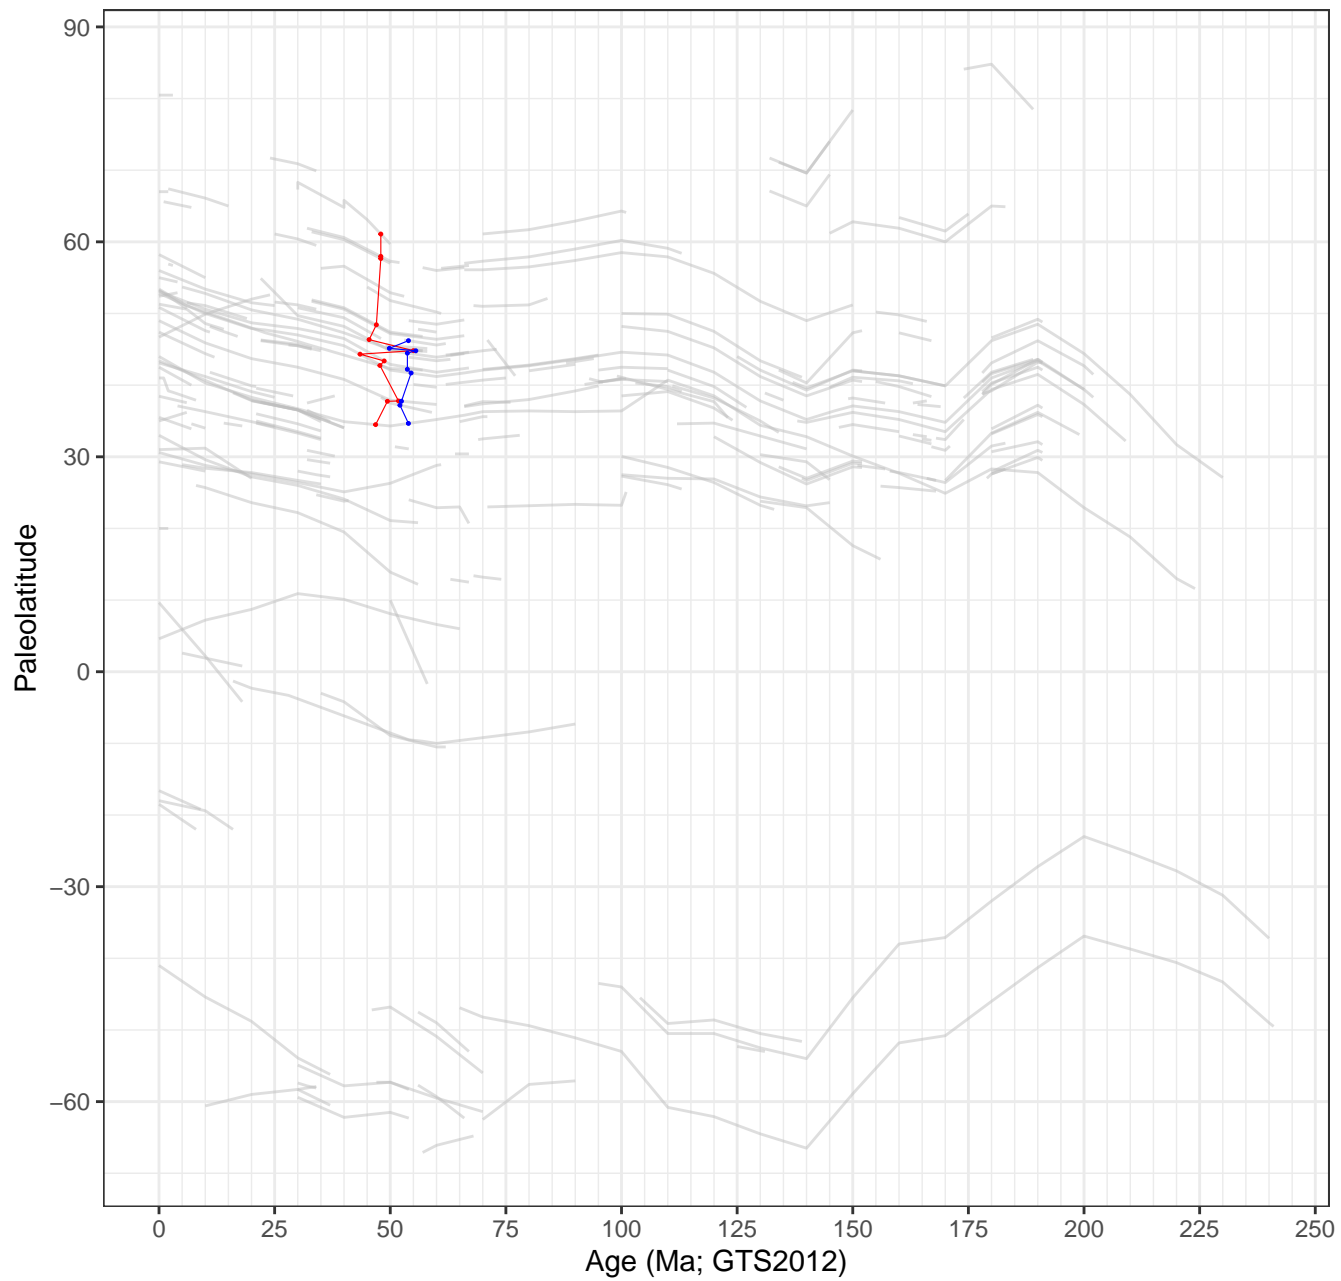

Supplement: Supplementary file 1334 [file Eatonicysta ursulae.pdf › Supplement/Supplement 2/Species 1914 plots/Eatonicysta ursulae.pdf]

# Species *Echinidinium aculeatum*

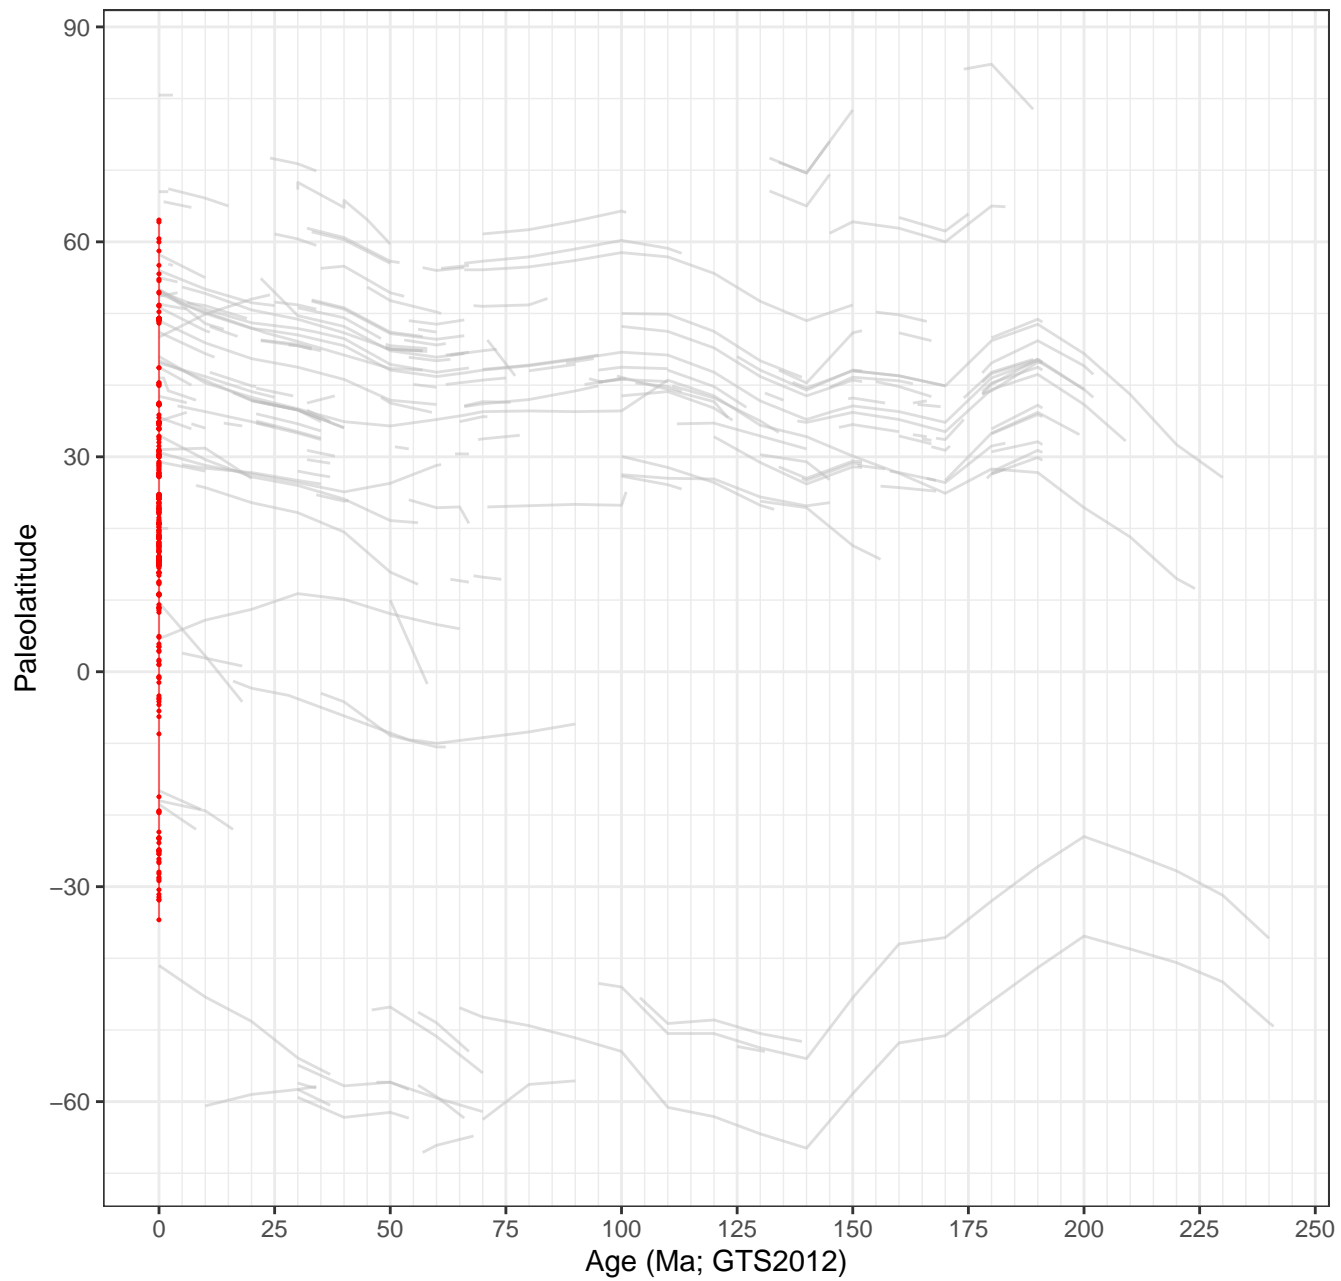

Supplement: Supplementary file 1335 [file Echinidinium aculeatum.pdf › Supplement/Supplement 2/Species 1914 plots/Echinidinium aculeatum.pdf]

# Species *Echinidinium bispiniformum*

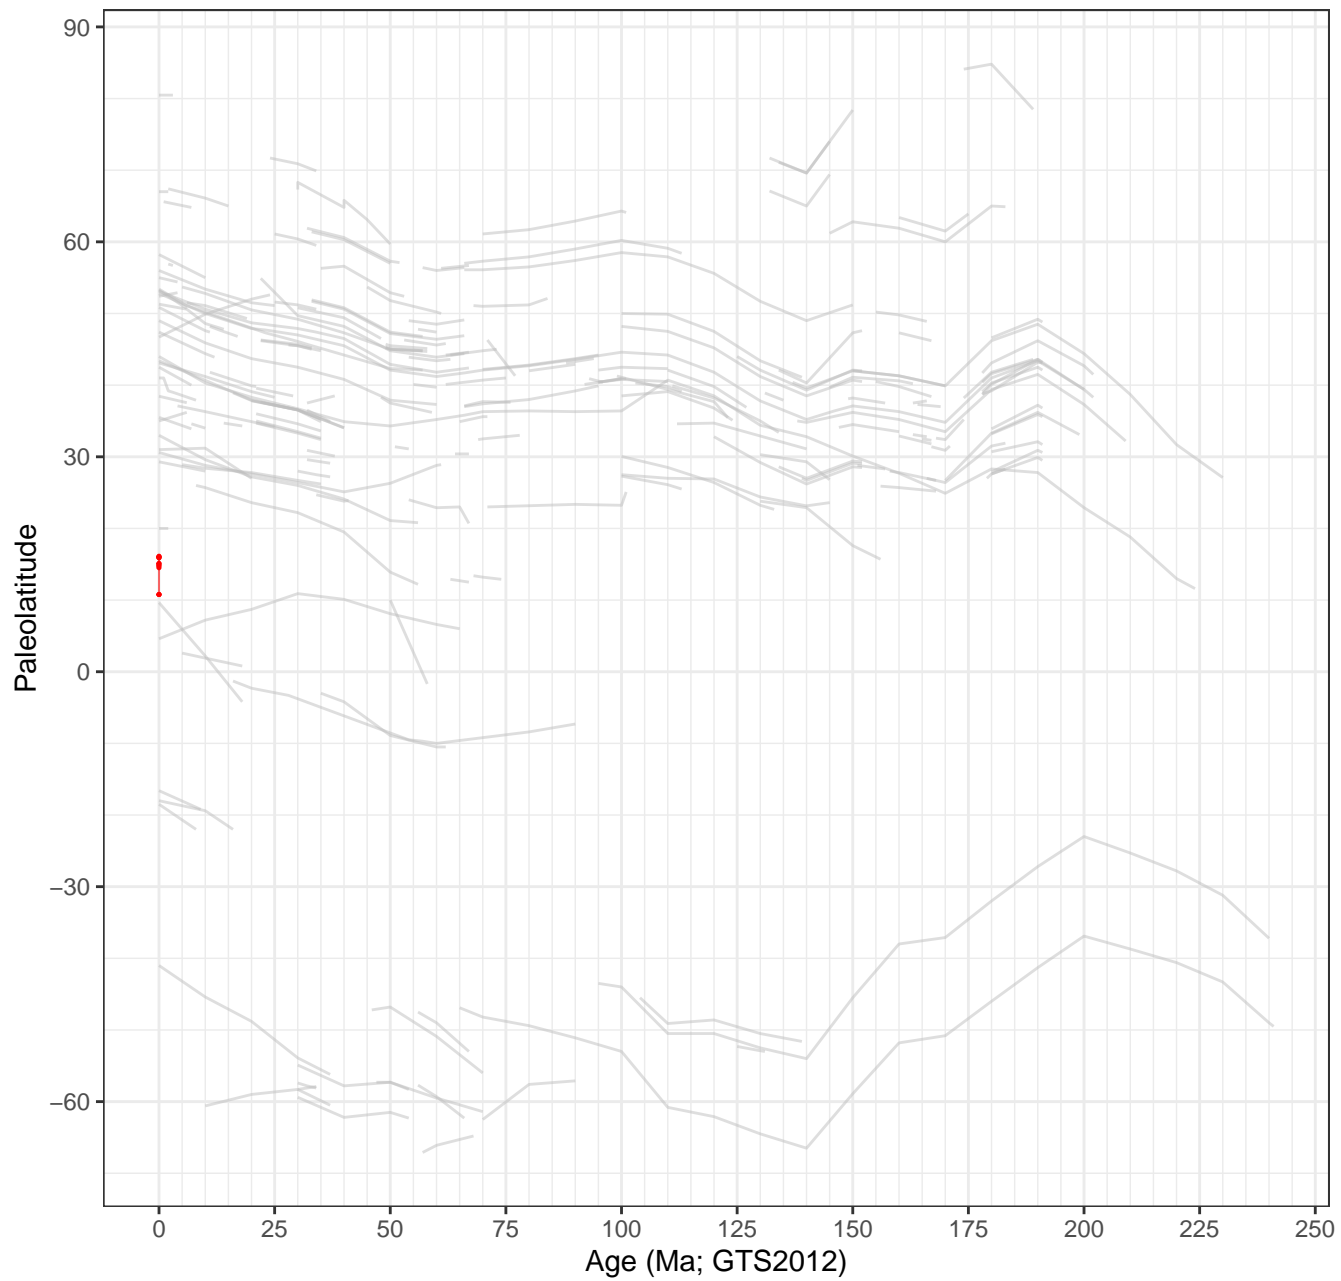

Supplement: Supplementary file 1336 [file Echinidinium bispiniformum.pdf › Supplement/Supplement 2/Species 1914 plots/Echinidinium bispiniformum.pdf]

# Species *Echinidinium delicatum*

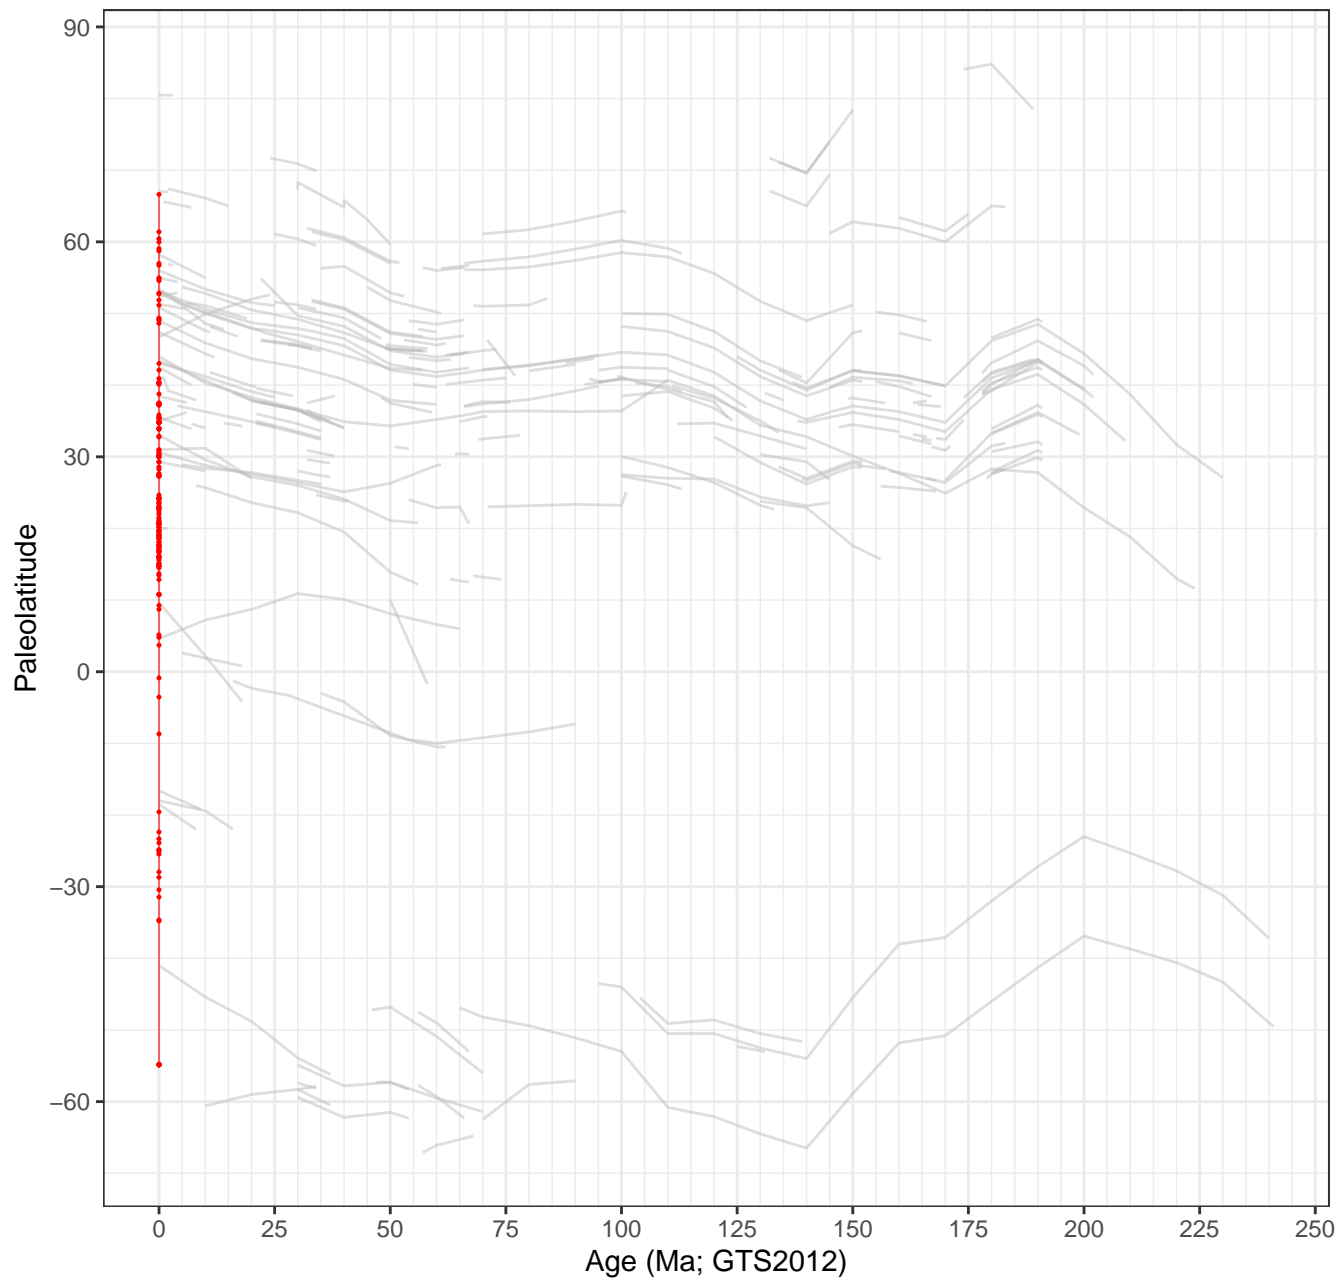

Supplement: Supplementary file 1337 [file Echinidinium delicatum.pdf › Supplement/Supplement 2/Species 1914 plots/Echinidinium delicatum.pdf]

# Species *Echinidinium euaxum*

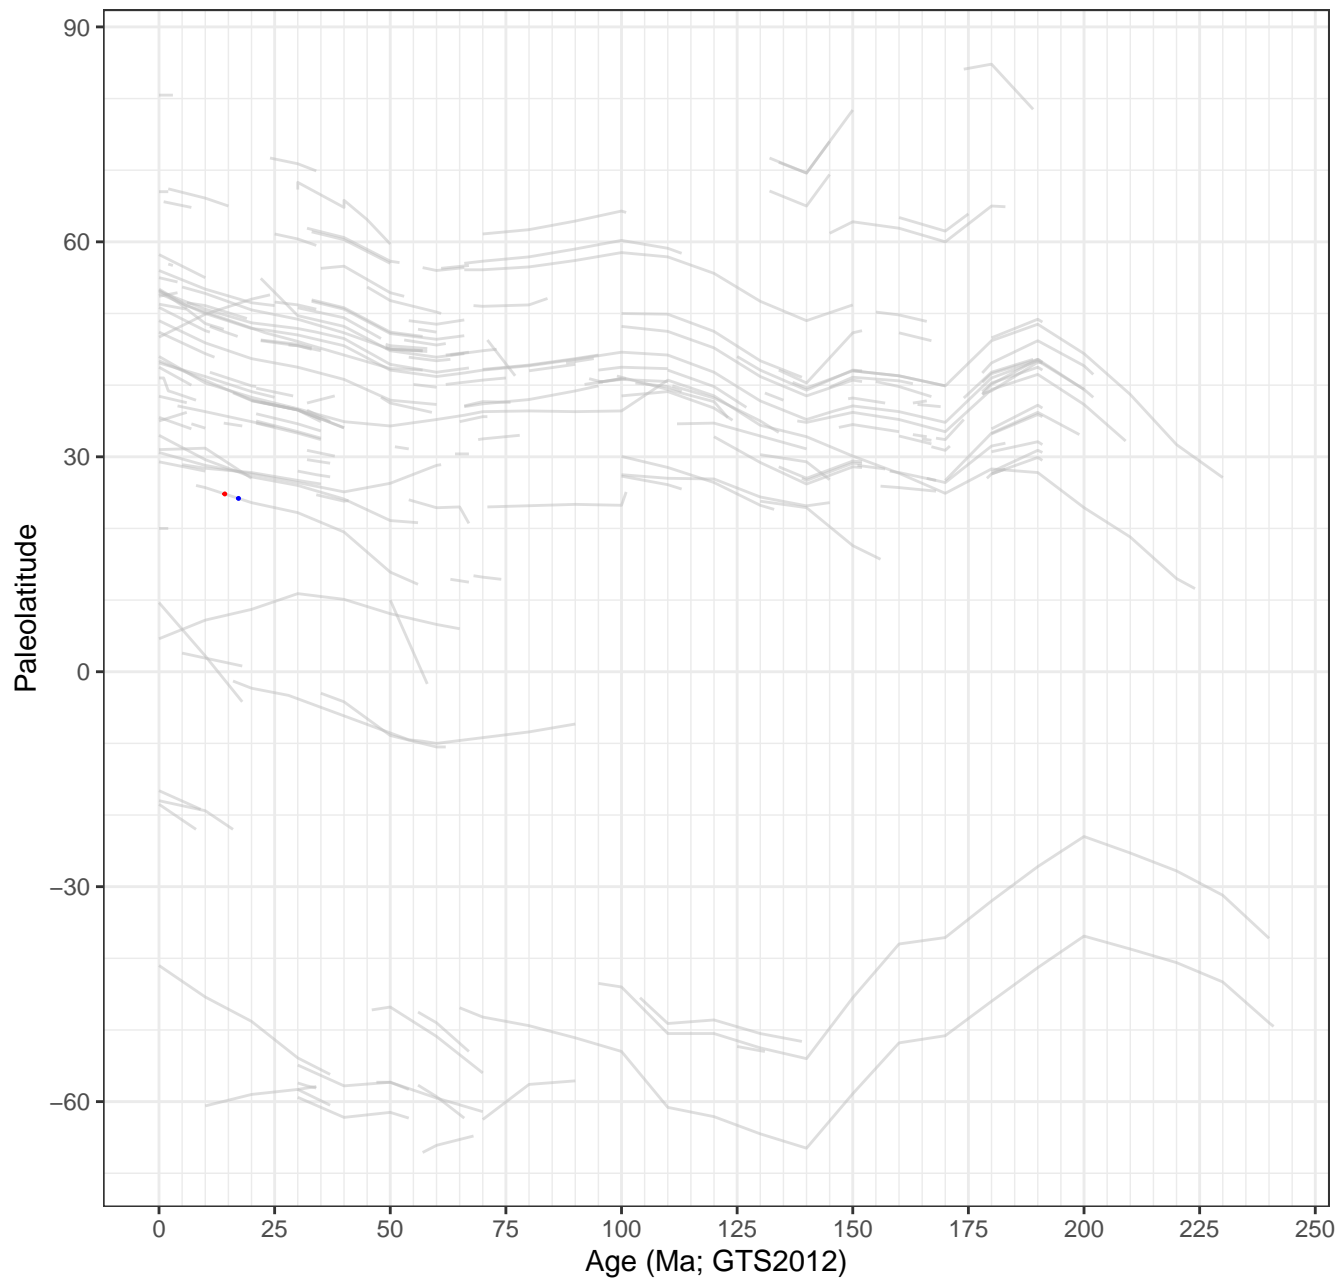

Supplement: Supplementary file 1338 [file Echinidinium euaxum.pdf › Supplement/Supplement 2/Species 1914 plots/Echinidinium euaxum.pdf]

# Species *Echinidinium granulatum*

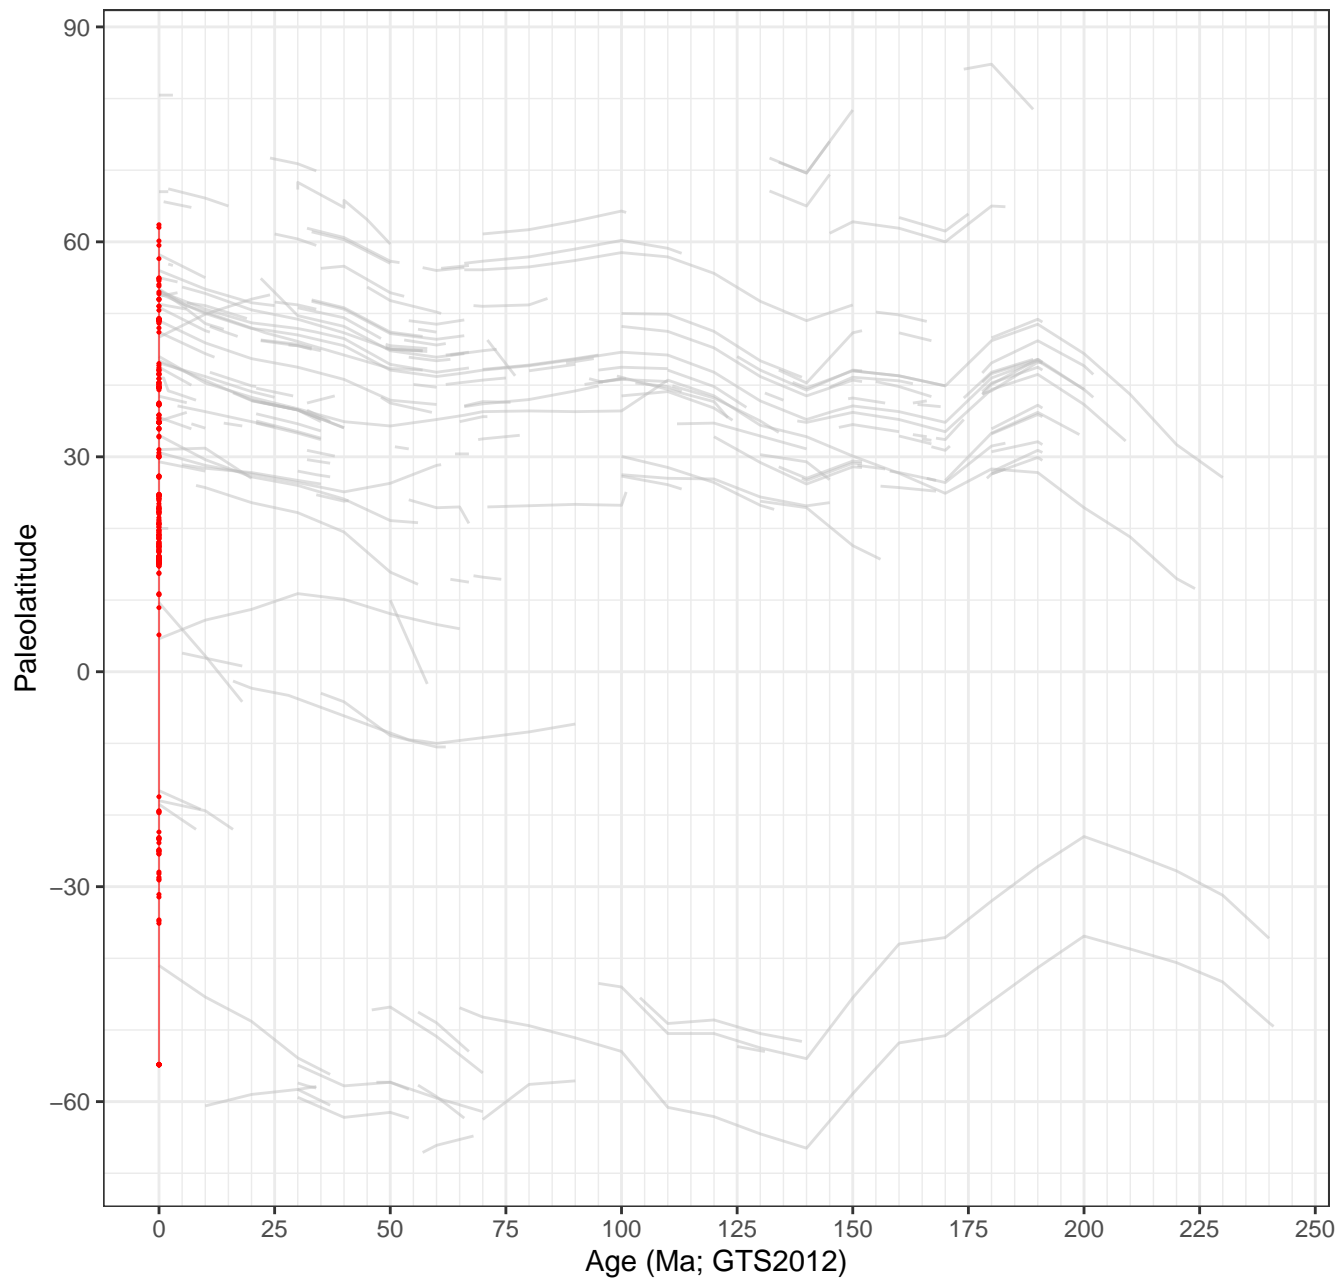

Supplement: Supplementary file 1339 [file Echinidinium granulatum.pdf › Supplement/Supplement 2/Species 1914 plots/Echinidinium granulatum.pdf]

# Species *Echinidinium karens*

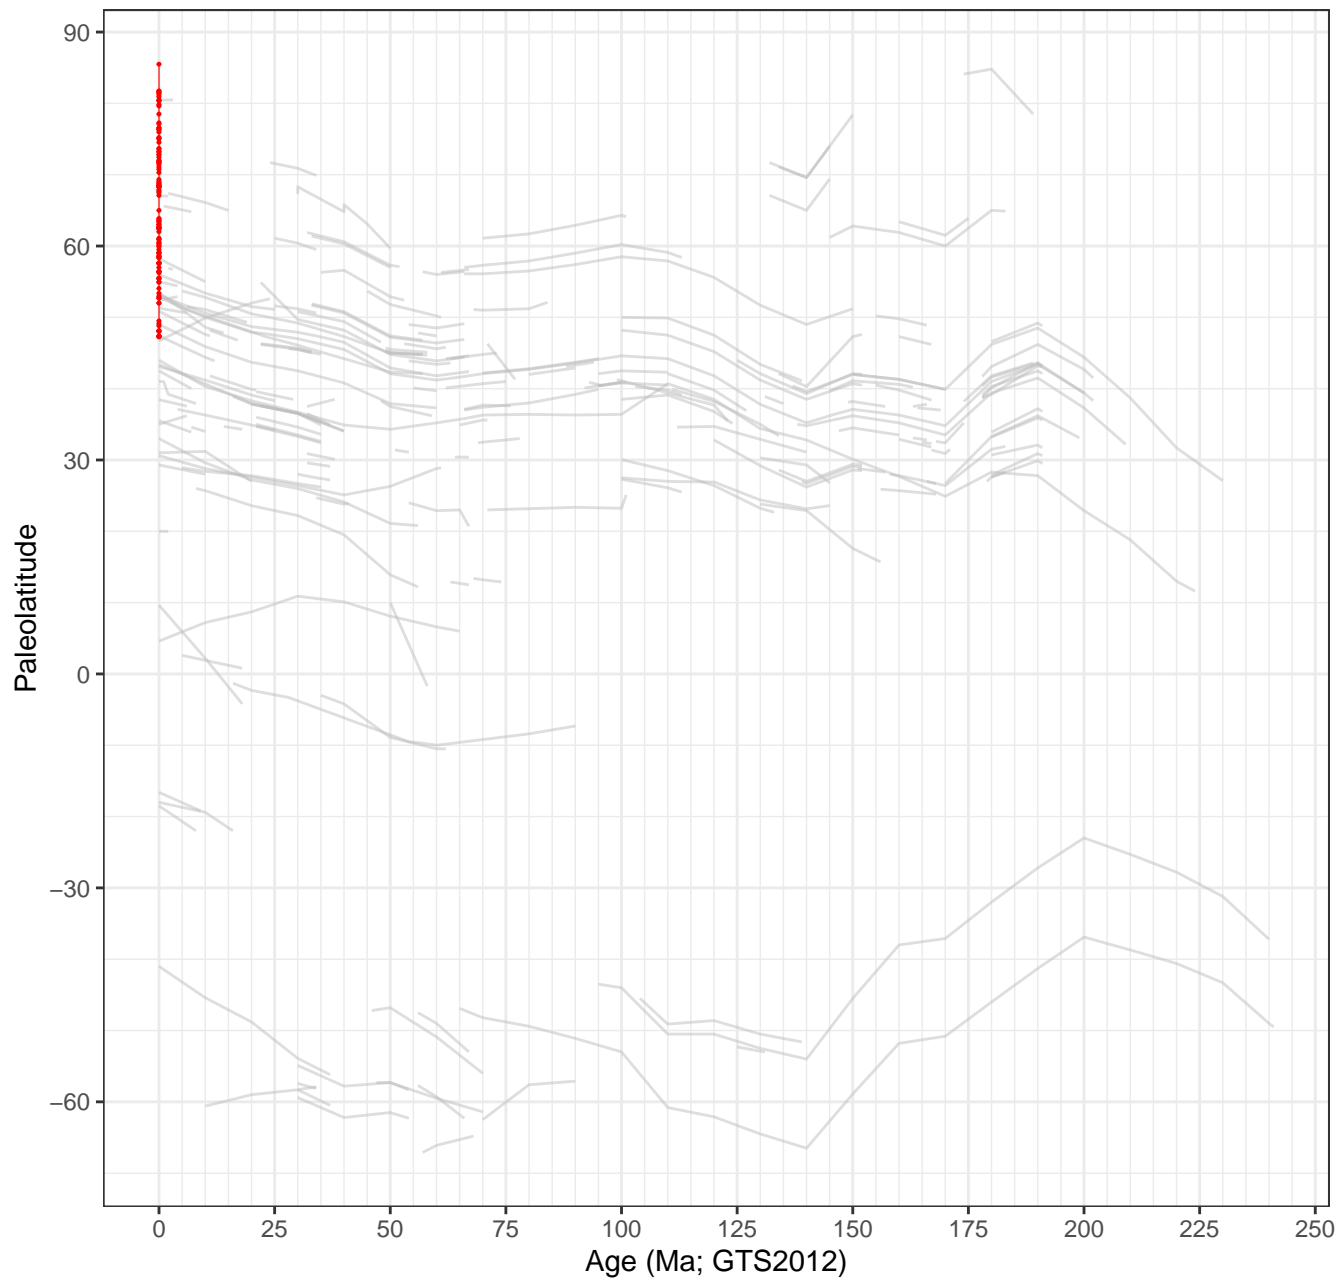

Supplement: Supplementary file 1340 [file Echinidinium karense.pdf › Supplement/Supplement 2/Species 1914 plots/Echinidinium karense.pdf]

# Species Echinidinium spp.

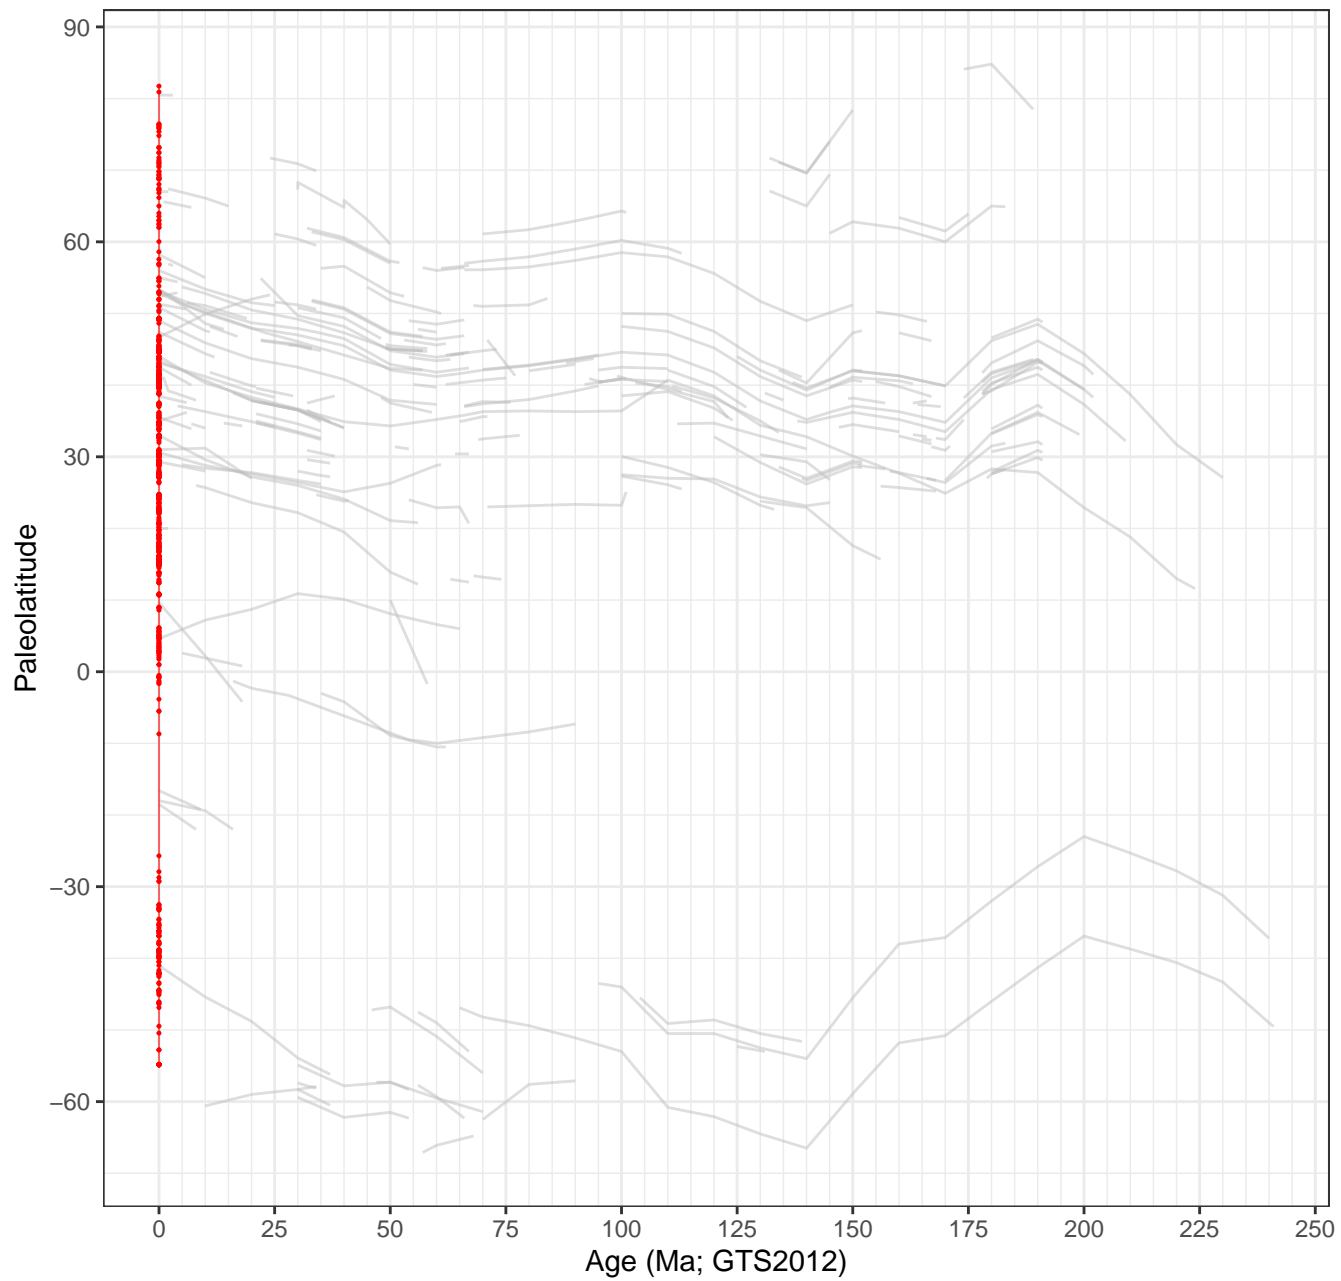

Supplement: Supplementary file 1341 [file Echinidinium spp..pdf › Supplement/Supplement 2/Species 1914 plots/Echinidinium spp..pdf]

# Species *Echinidinium transparantum*

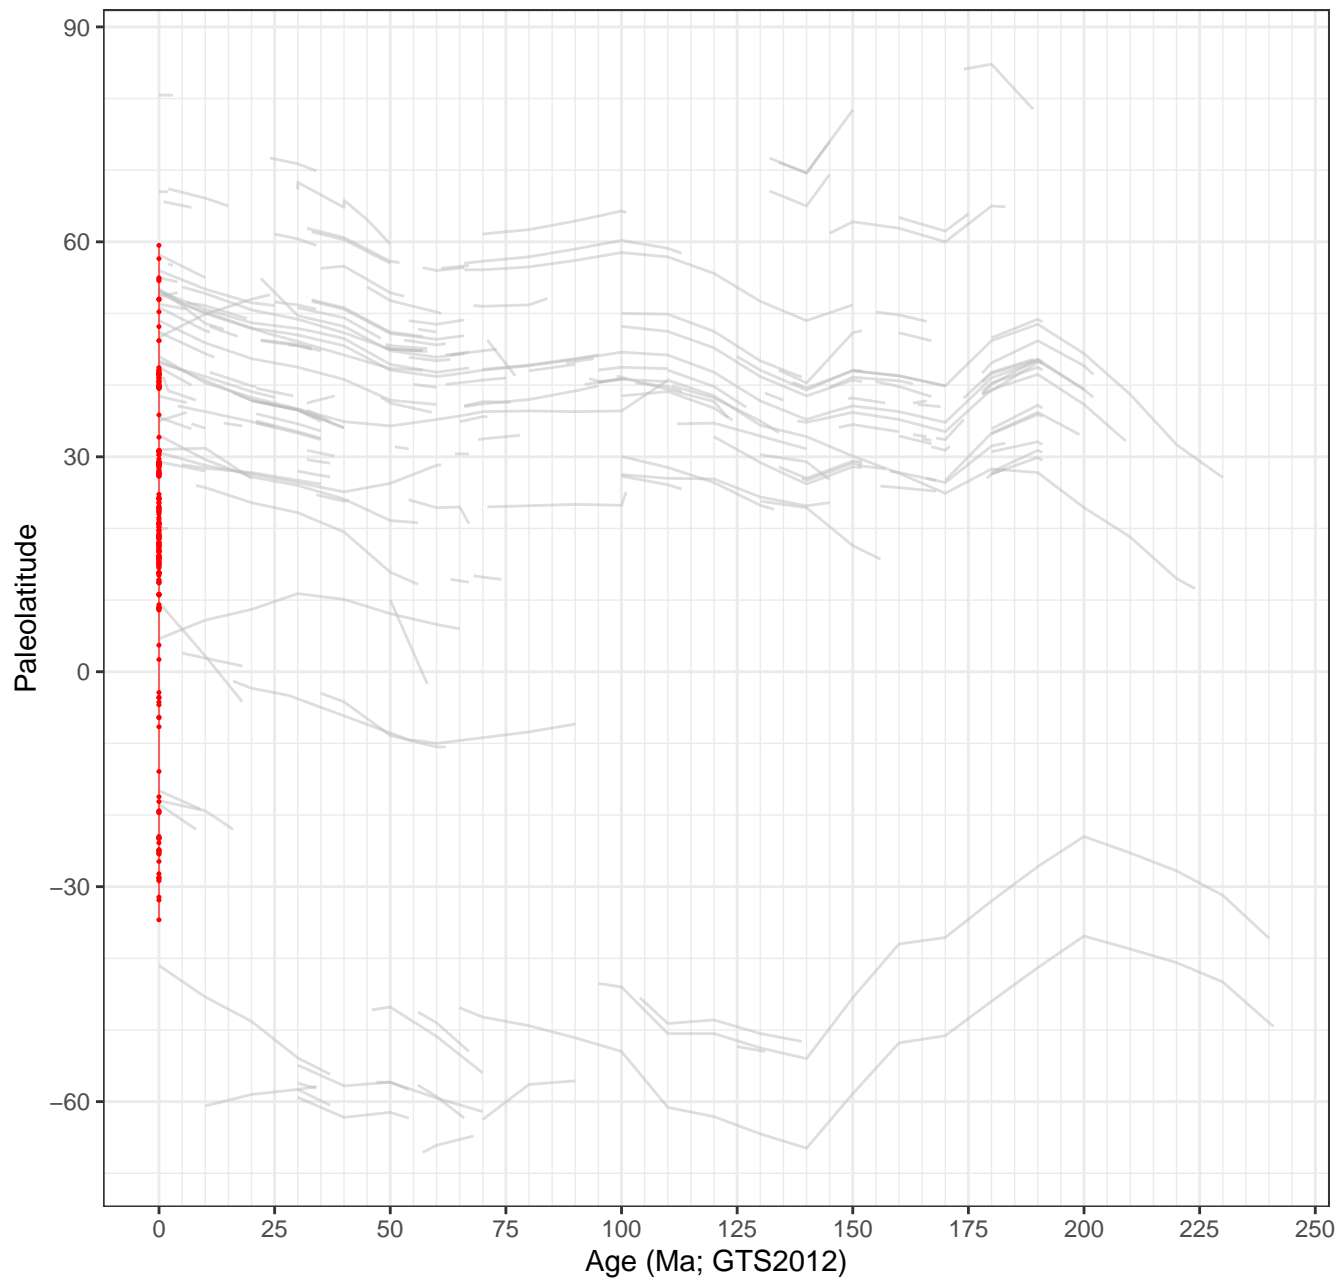

Supplement: Supplementary file 1342 [file Echinidinium transparantum.pdf › Supplement/Supplement 2/Species 1914 plots/Echinidinium transparantum.pdf]

# Species *Echinidinium zonneveldii*

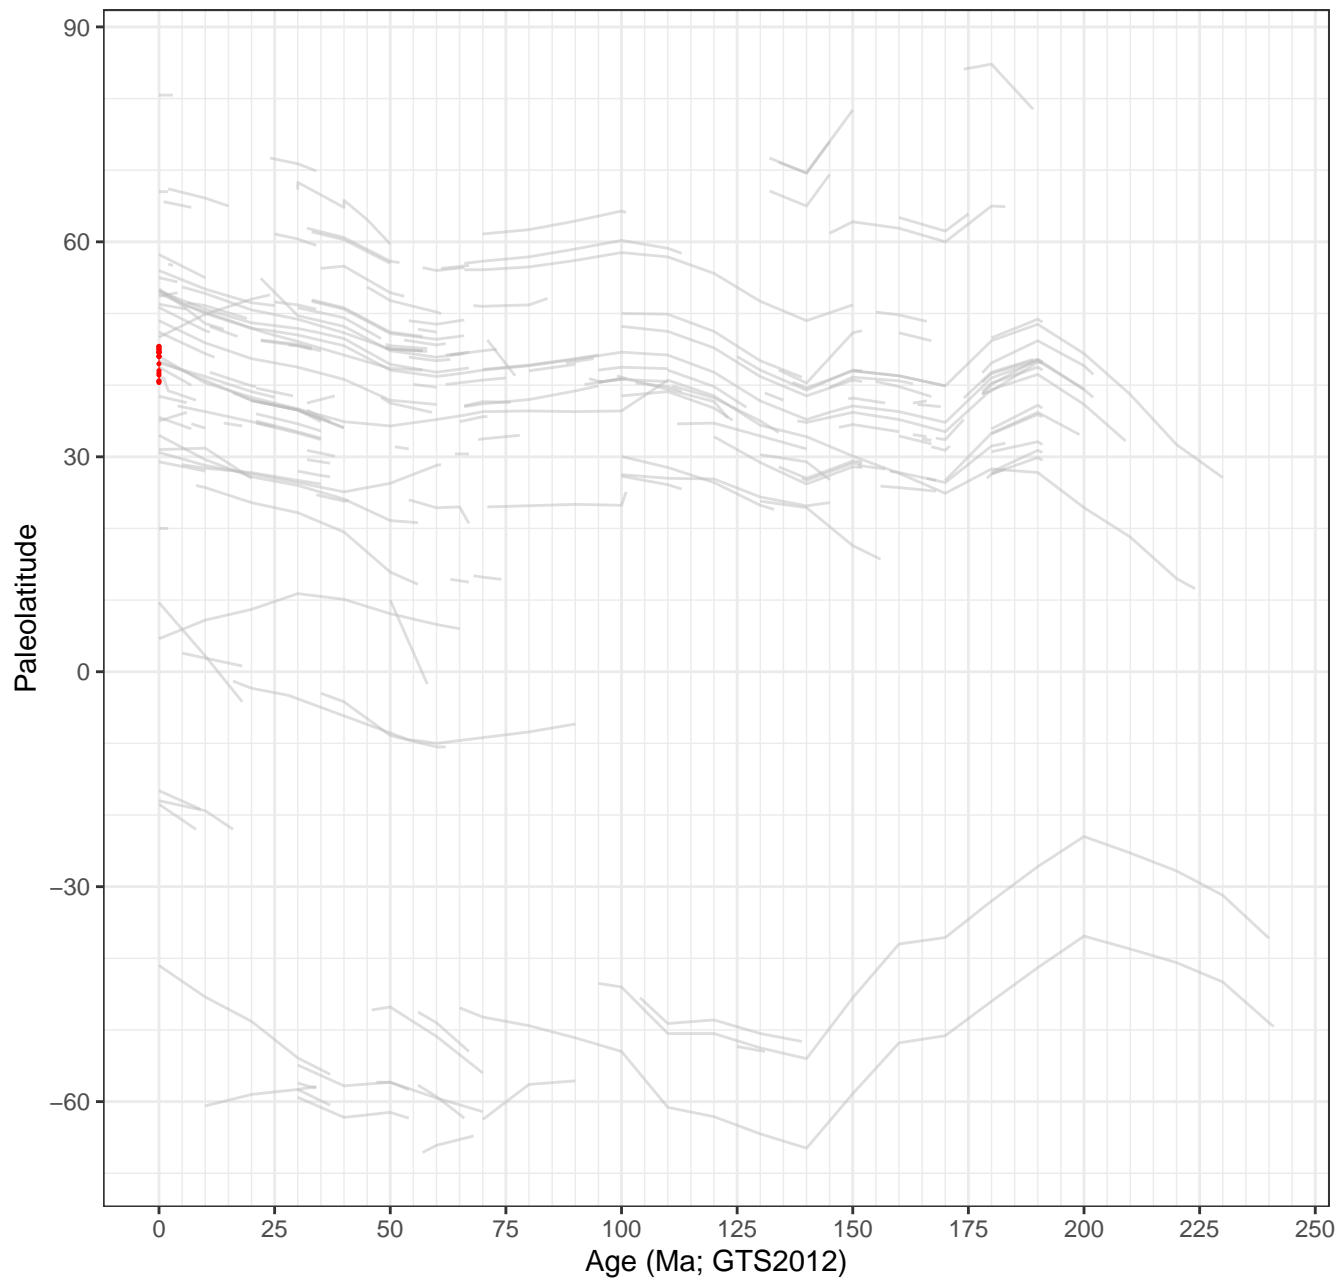

Supplement: Supplementary file 1343 [file Echinidinium zonneveldii.pdf › Supplement/Supplement 2/Species 1914 plots/Echinidinium zonneveldii.pdf]

# Species *Ectosphaeropsis burdigalensis*

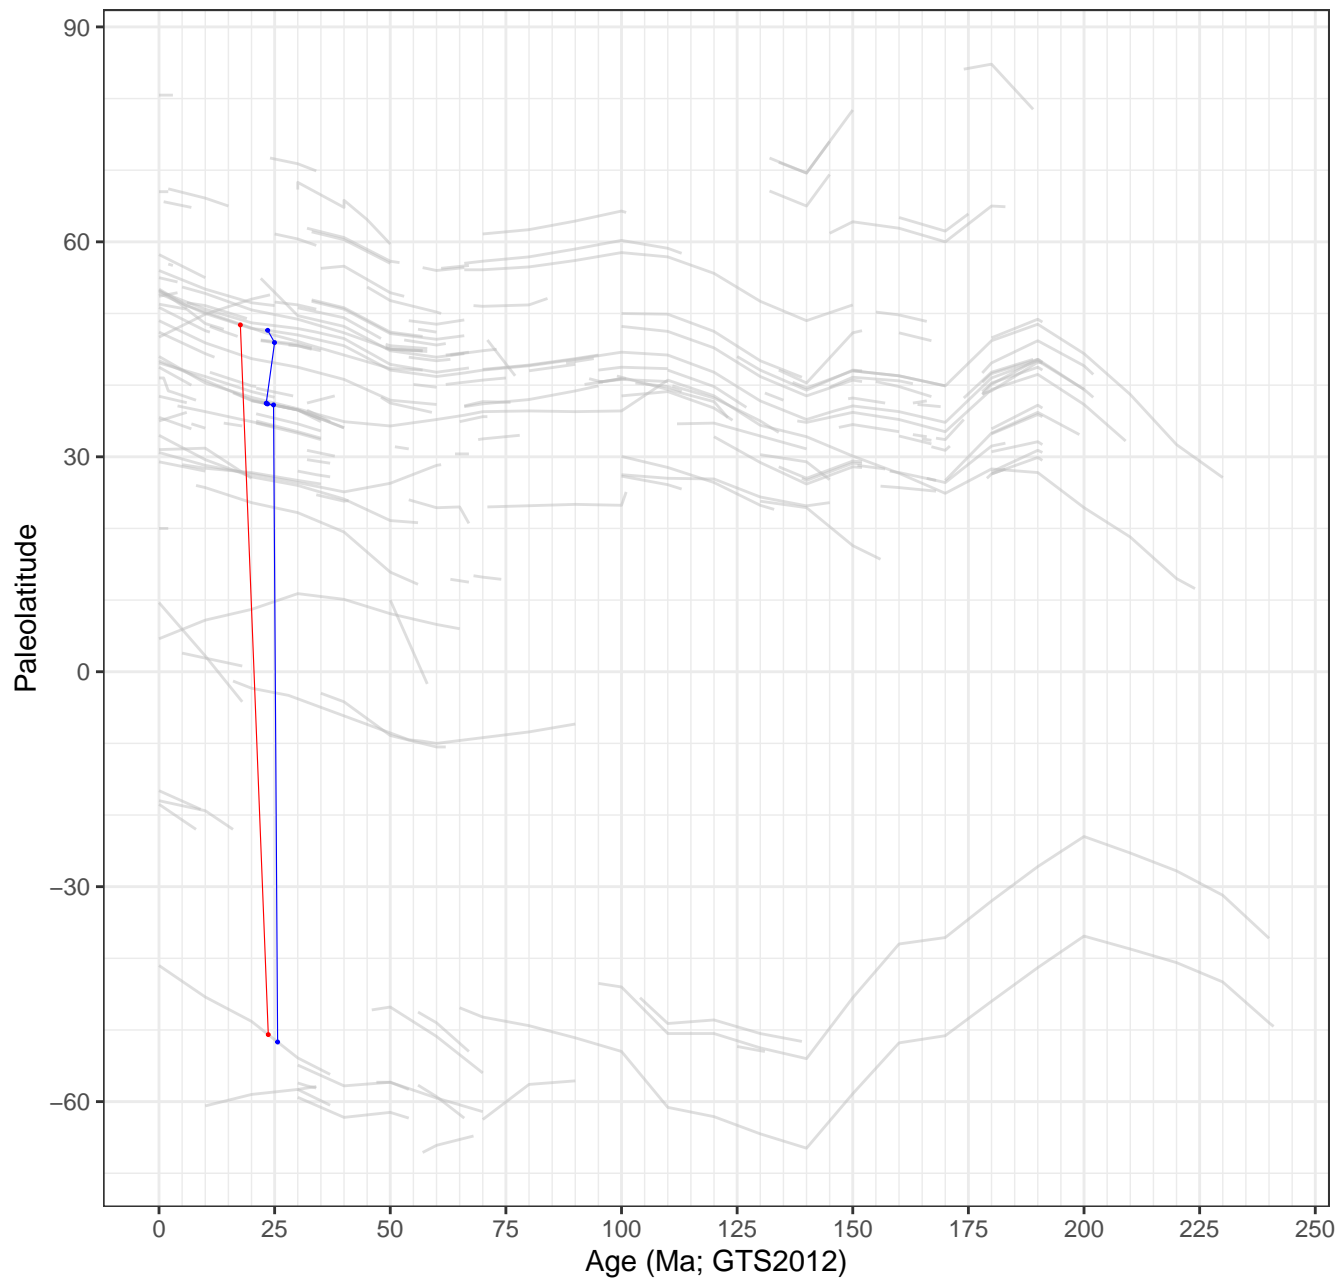

Supplement: Supplementary file 1344 [file Ectosphaeropsis burdigalensis.pdf › Supplement/Supplement 2/Species 1914 plots/Ectosphaeropsis burdigalensis.pdf]

# Species *Ectosphaeropsis* sp.

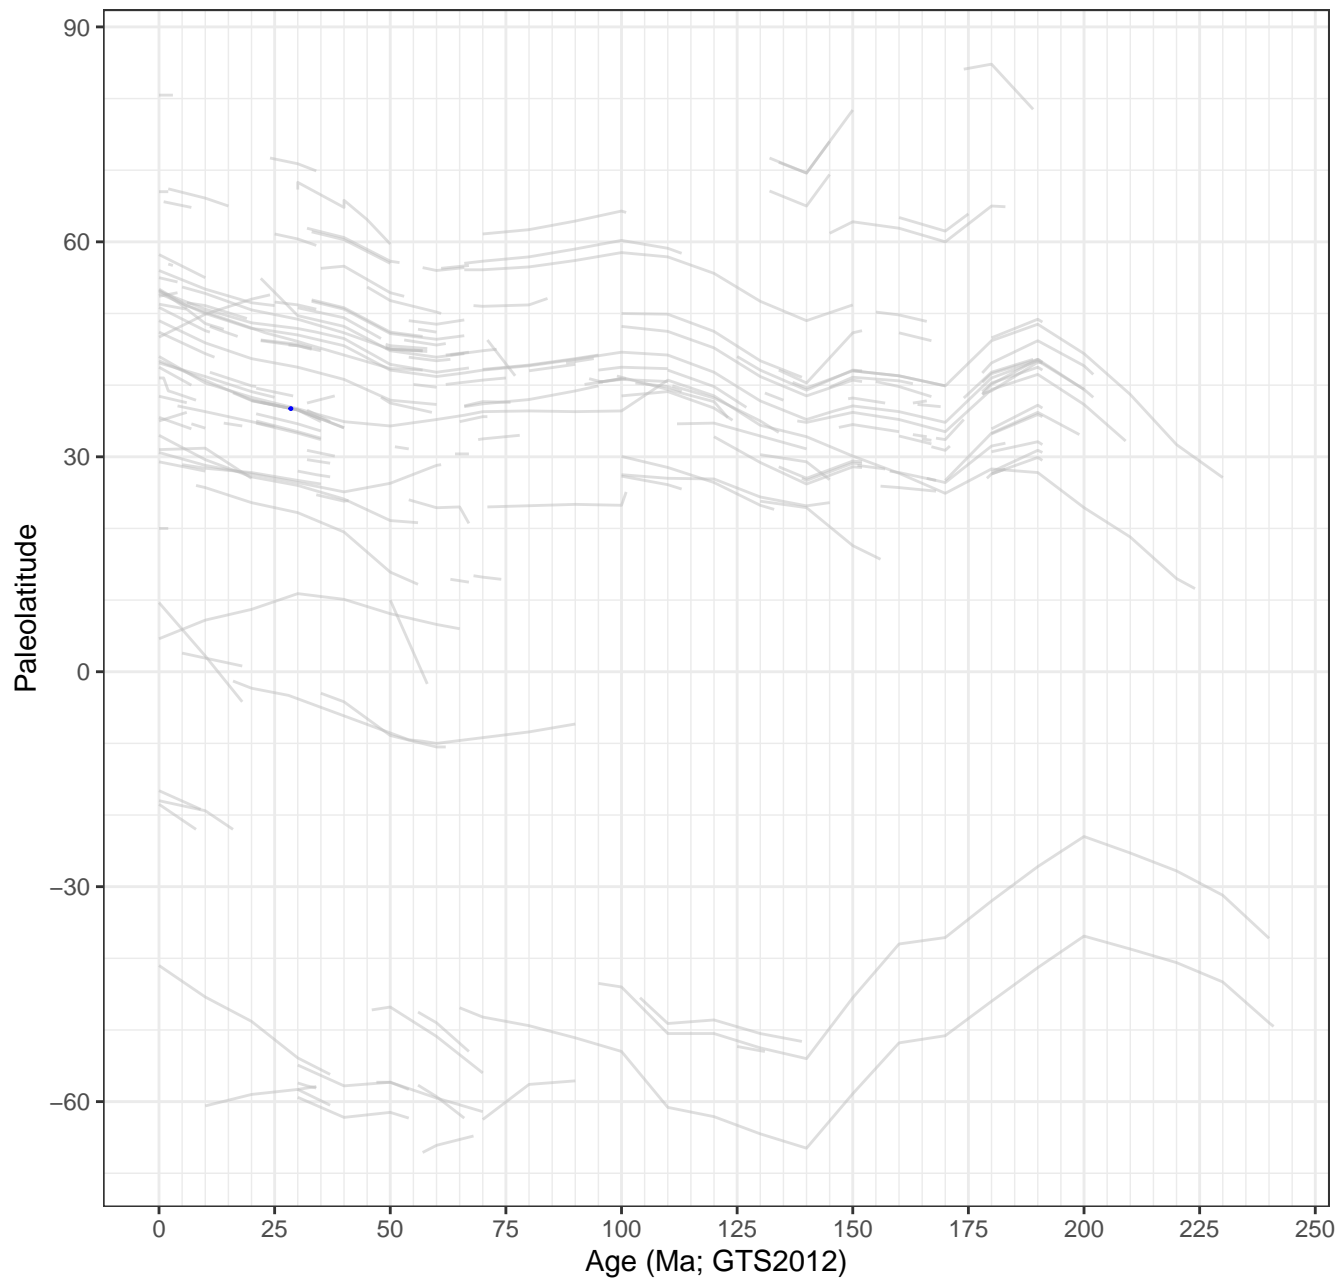

Supplement: Supplementary file 1345 [file Ectosphaeropsis sp..pdf › Supplement/Supplement 2/Species 1914 plots/Ectosphaeropsis sp..pdf]

# Species *Edwardsiella sexispinosa*

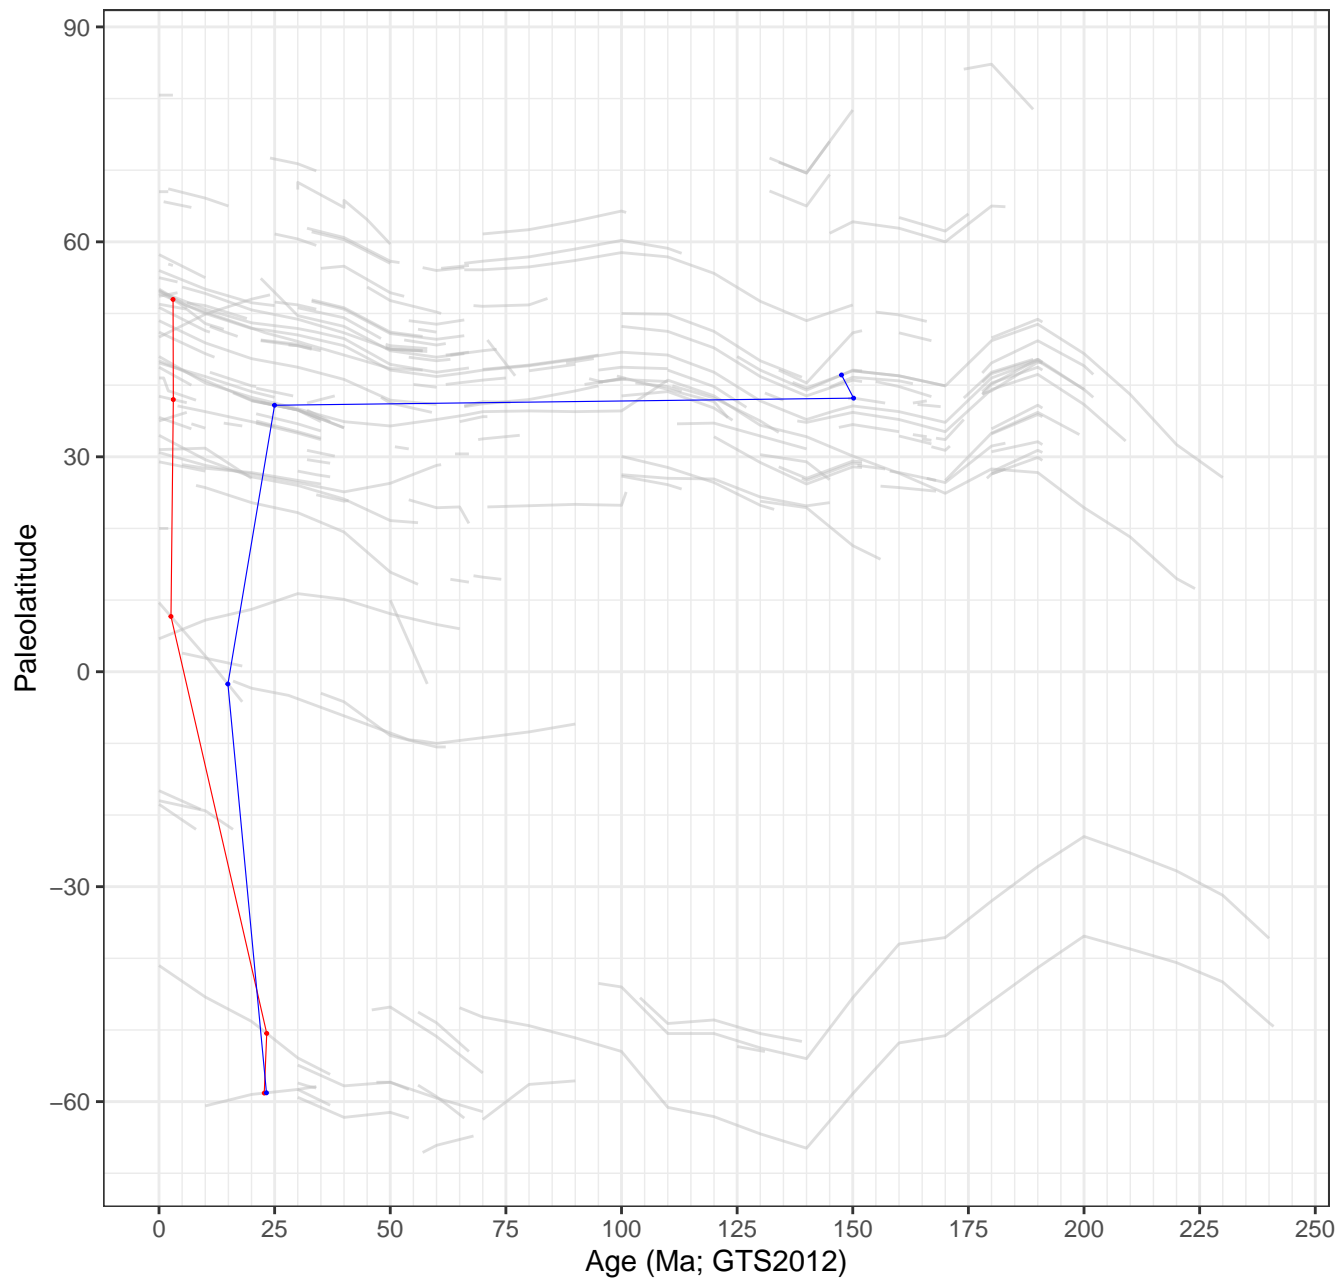

Supplement: Supplementary file 1346 [file Edwardsiella sexispinosa.pdf › Supplement/Supplement 2/Species 1914 plots/Edwardsiella sexispinosa.pdf]

# Species *Egmontodinium polyplacophorum*

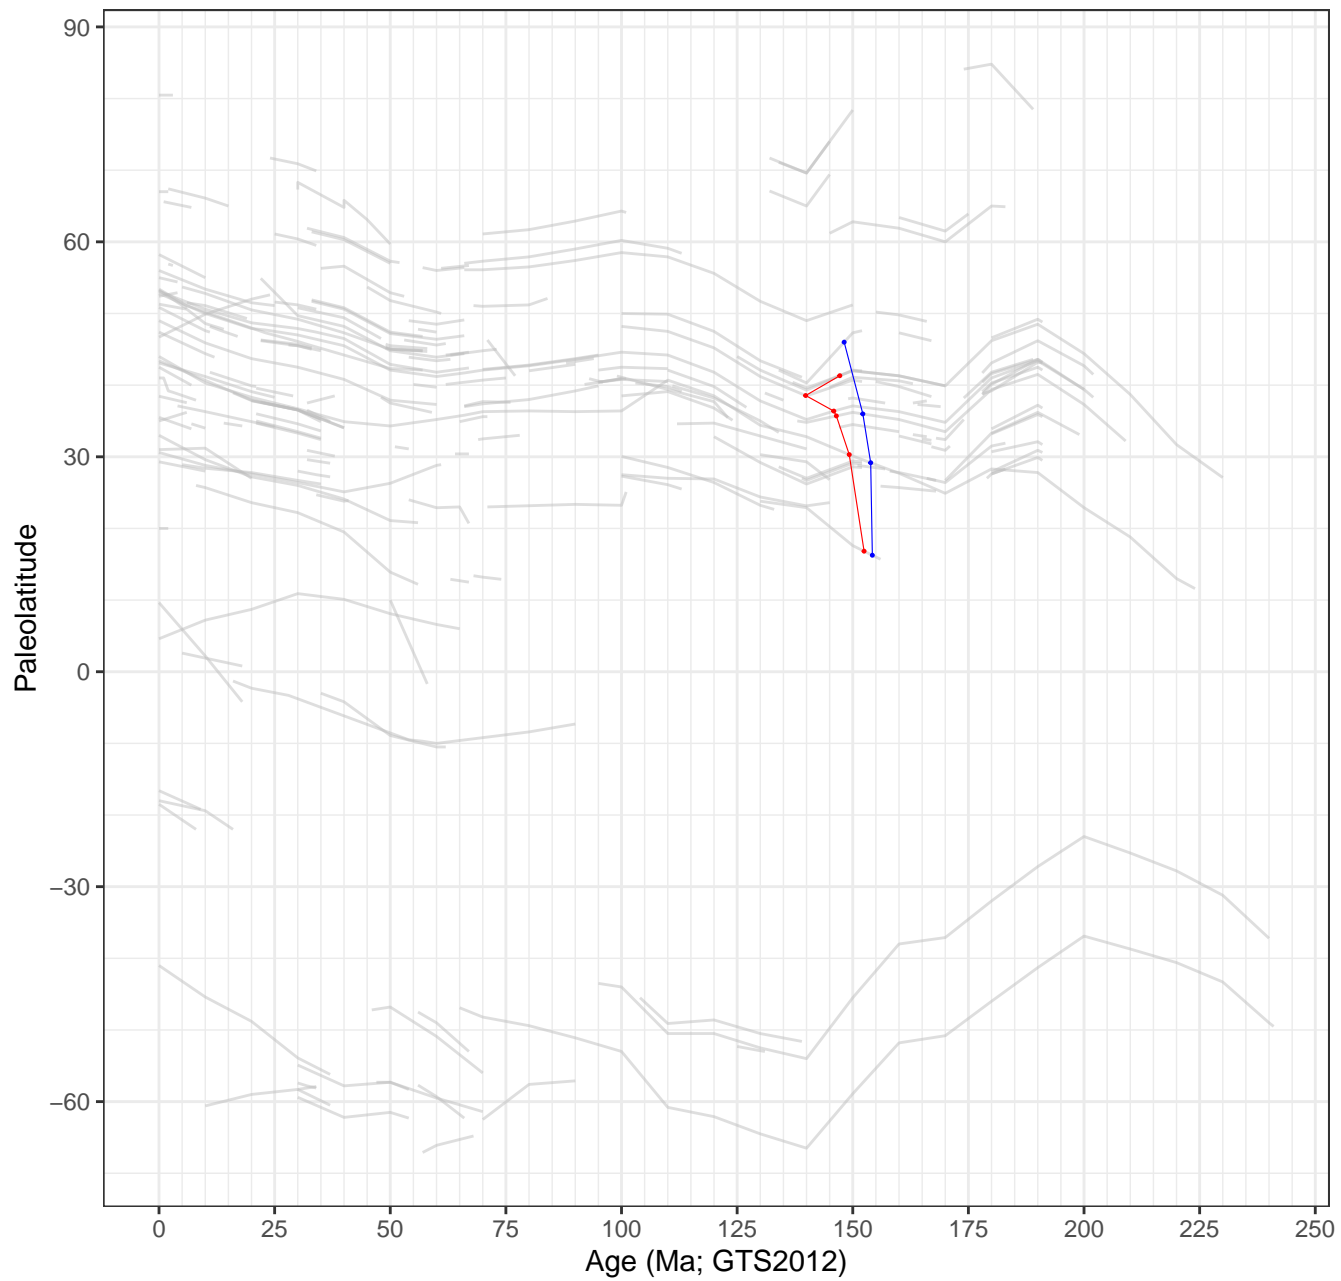

Supplement: Supplementary file 1347 [file Egmontodinium polyplacophorum.pdf › Supplement/Supplement 2/Species 1914 plots/Egmontodinium polyplacophorum.pdf]

# Species *Egmontodinium torynum*

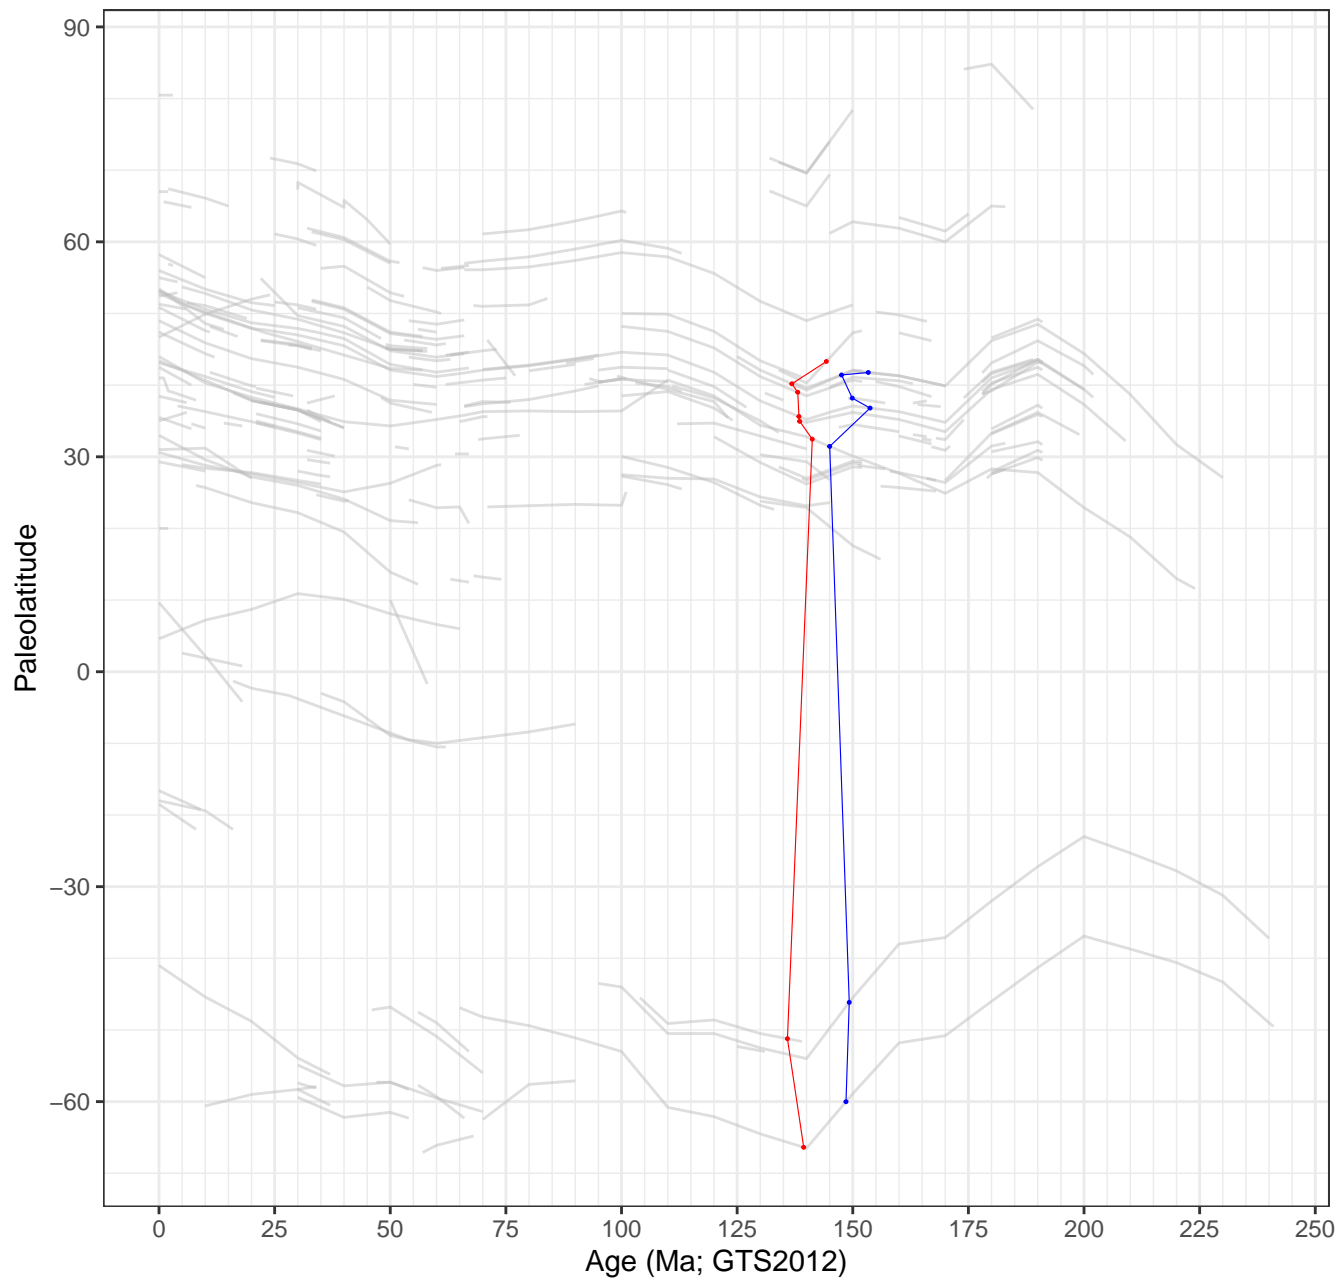

Supplement: Supplementary file 1348 [file Egmontodinium torynum.pdf › Supplement/Supplement 2/Species 1914 plots/Egmontodinium torynum.pdf]

# Species *Eisenackia crassitabulata*

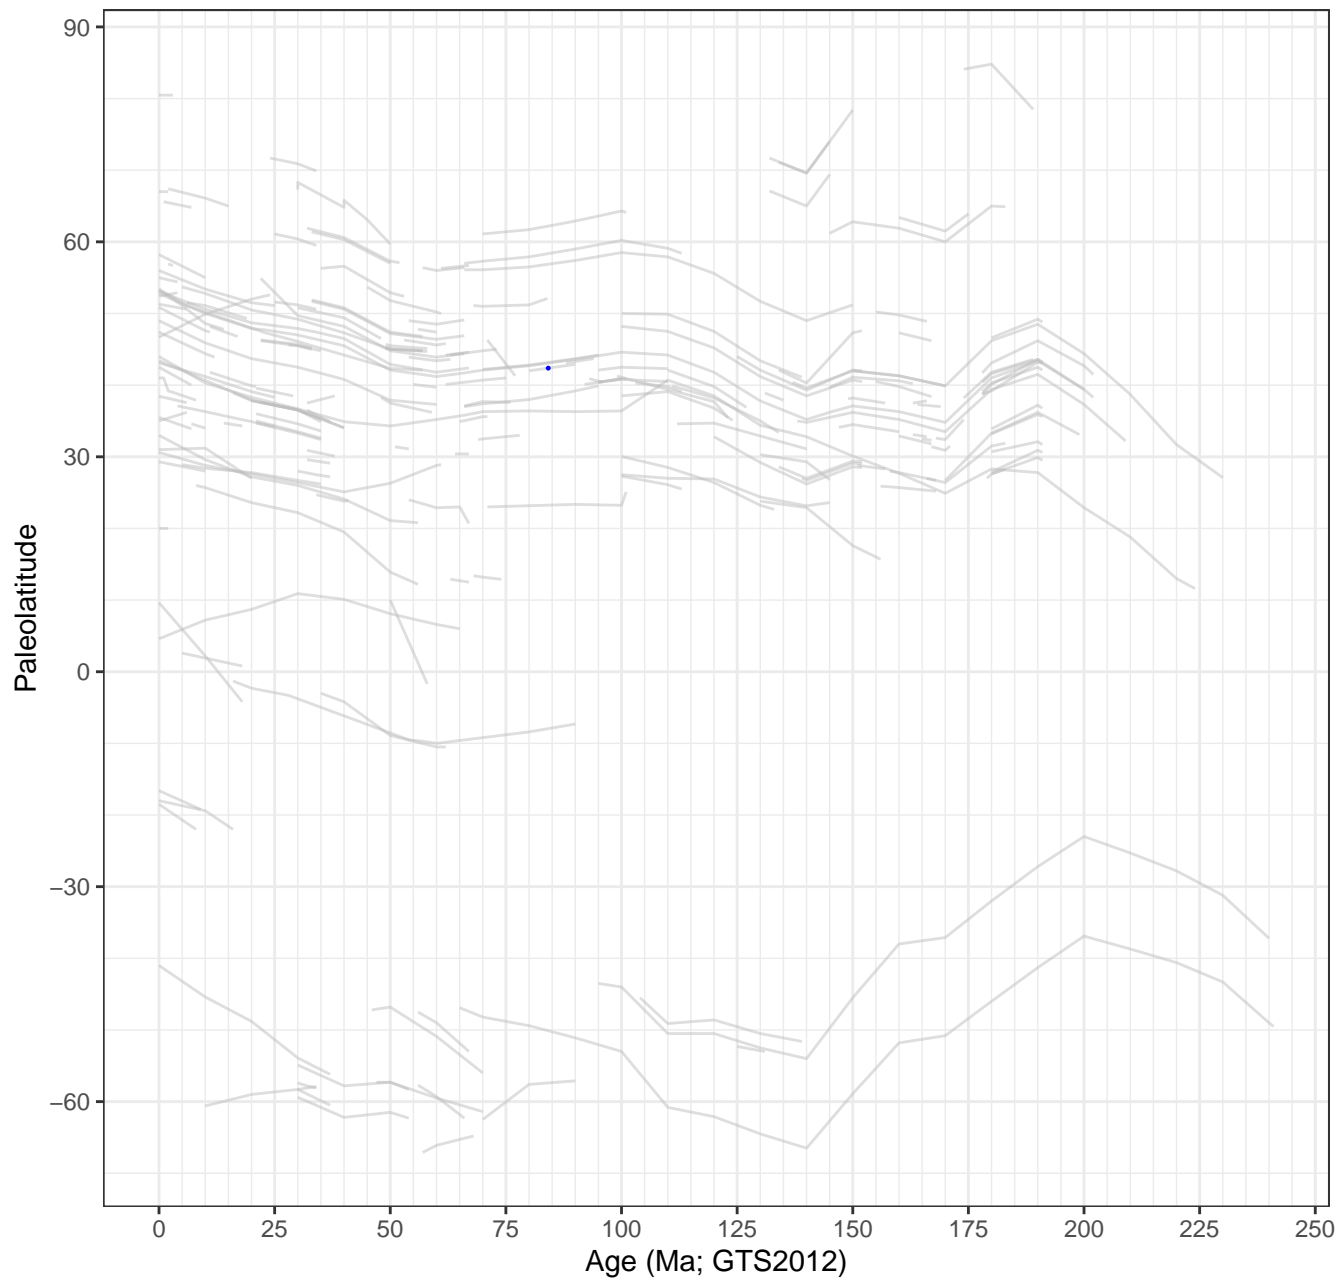

Supplement: Supplementary file 1349 [file Eisenackia crassitabulata.pdf › Supplement/Supplement 2/Species 1914 plots/Eisenackia crassitabulata.pdf]

# Species *Eisenackia reticulata*

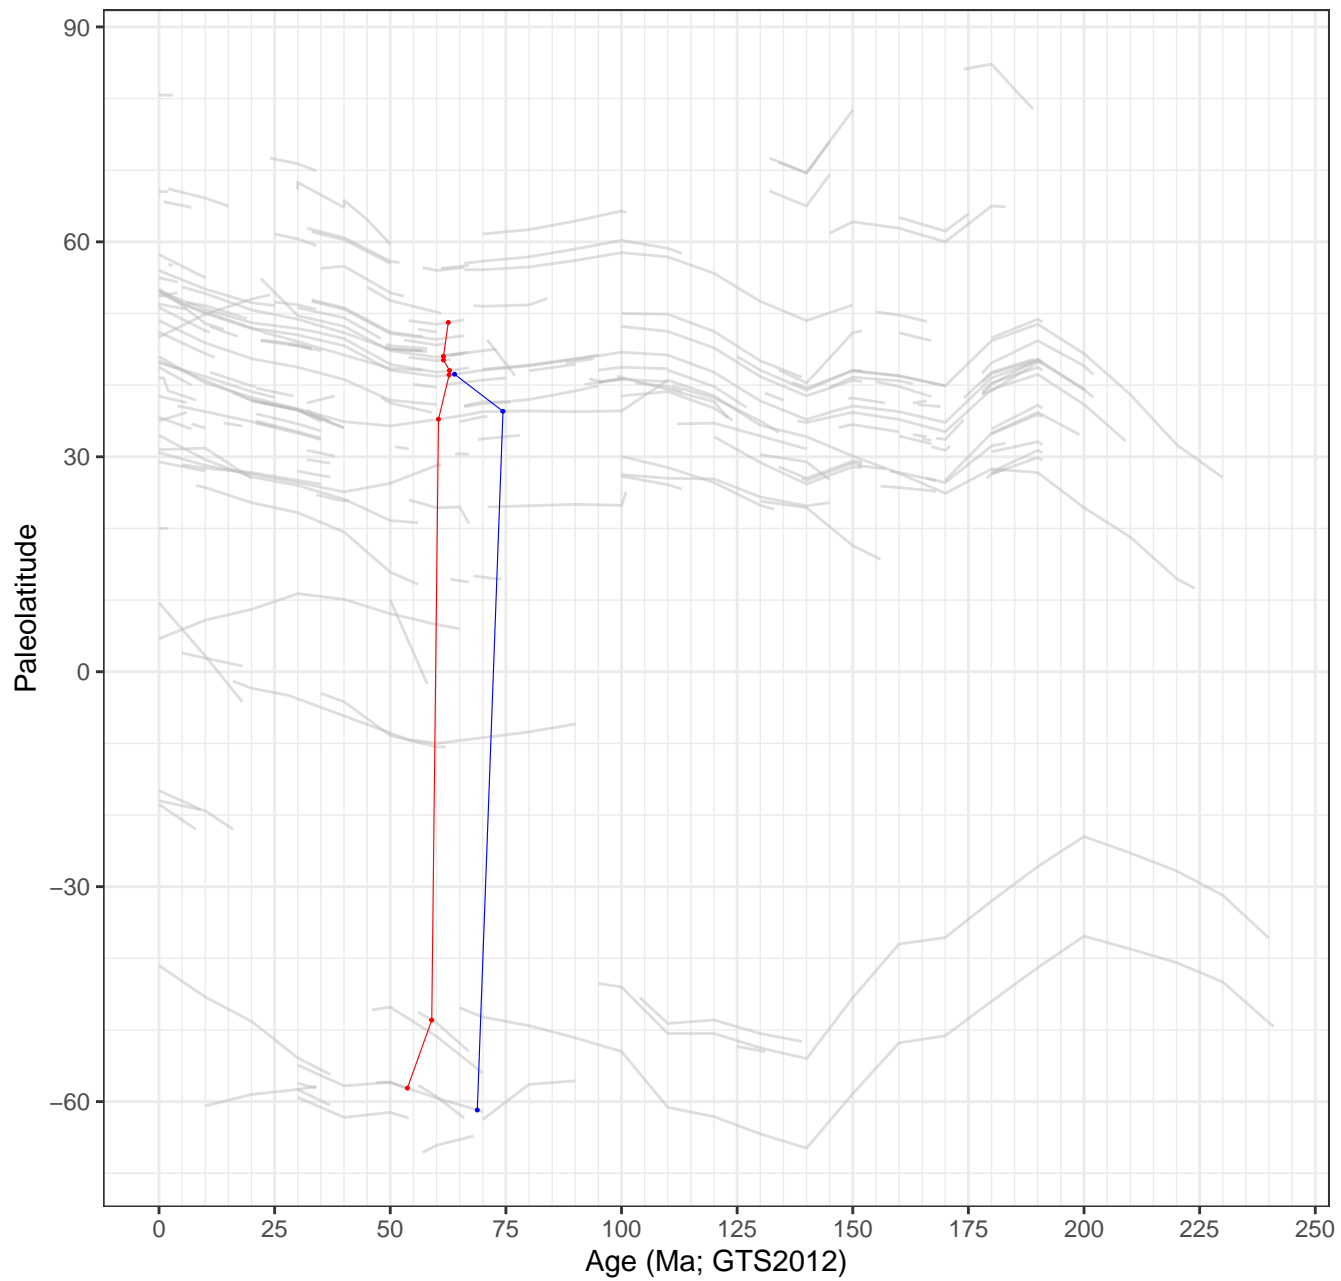

Supplement: Supplementary file 1350 [file Eisenackia reticulata.pdf › Supplement/Supplement 2/Species 1914 plots/Eisenackia reticulata.pdf]

# Species *Ellipsodinium membraniferum*

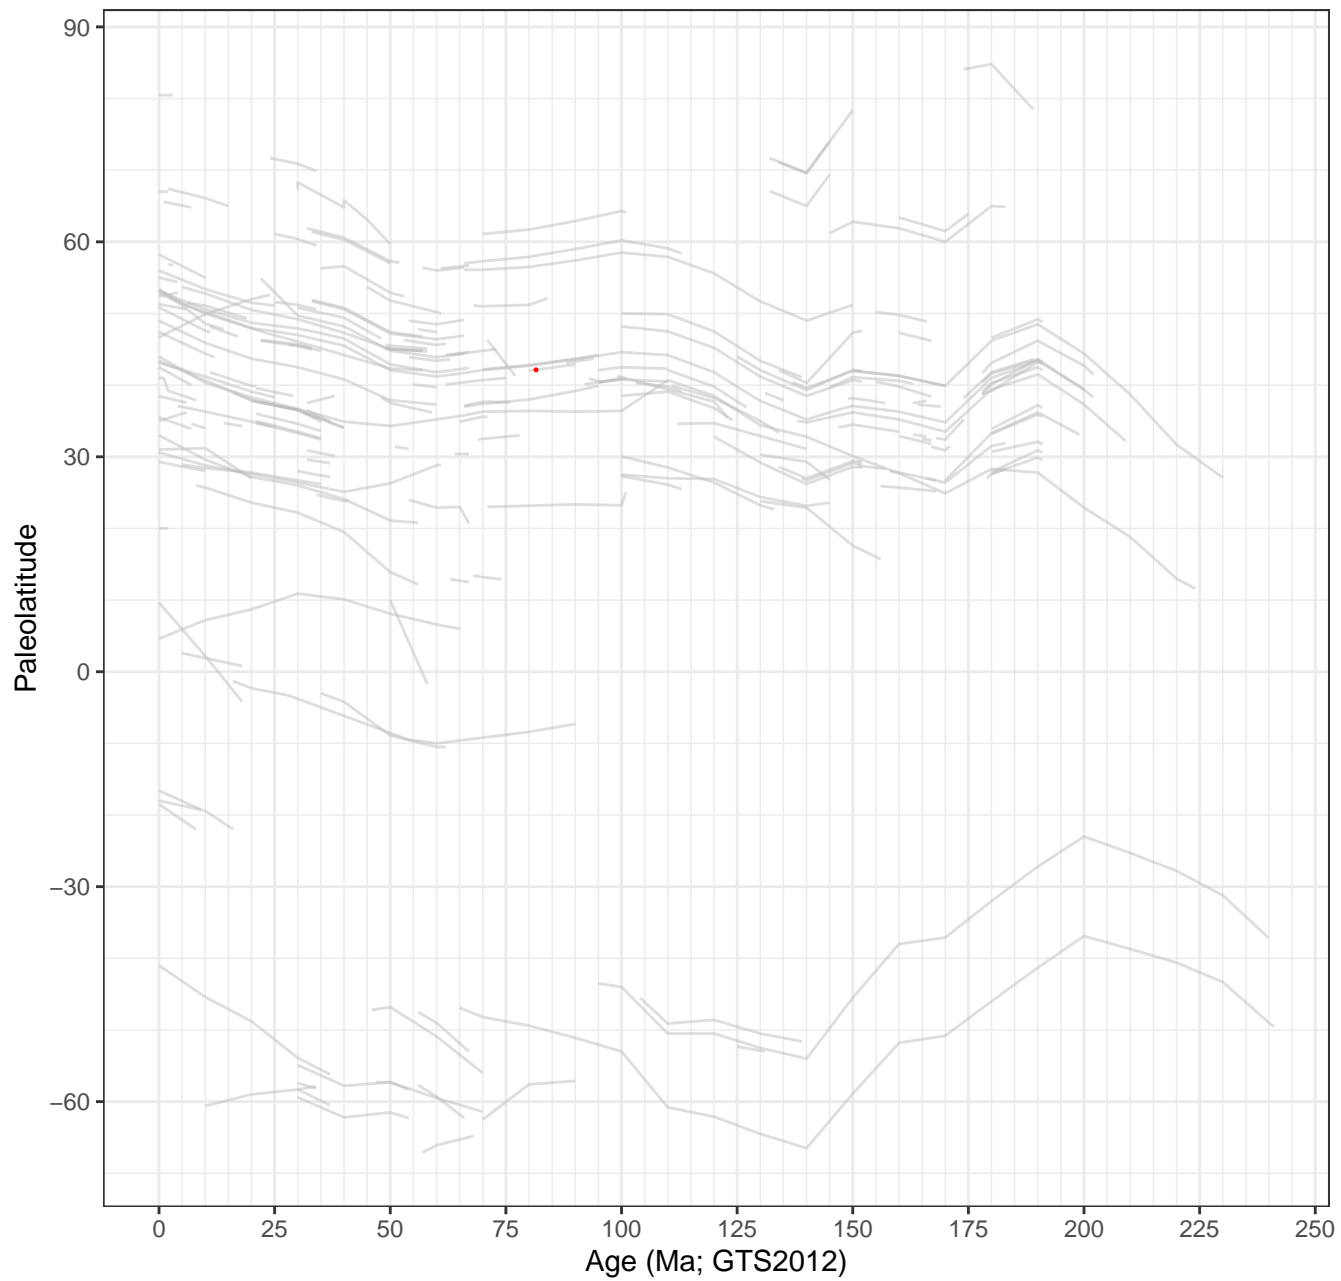

Supplement: Supplementary file 1351 [file Ellipsodinium membraniferum.pdf › Supplement/Supplement 2/Species 1914 plots/Ellipsodinium membraniferum.pdf]

# Species *Ellipsodinium reticulatum*

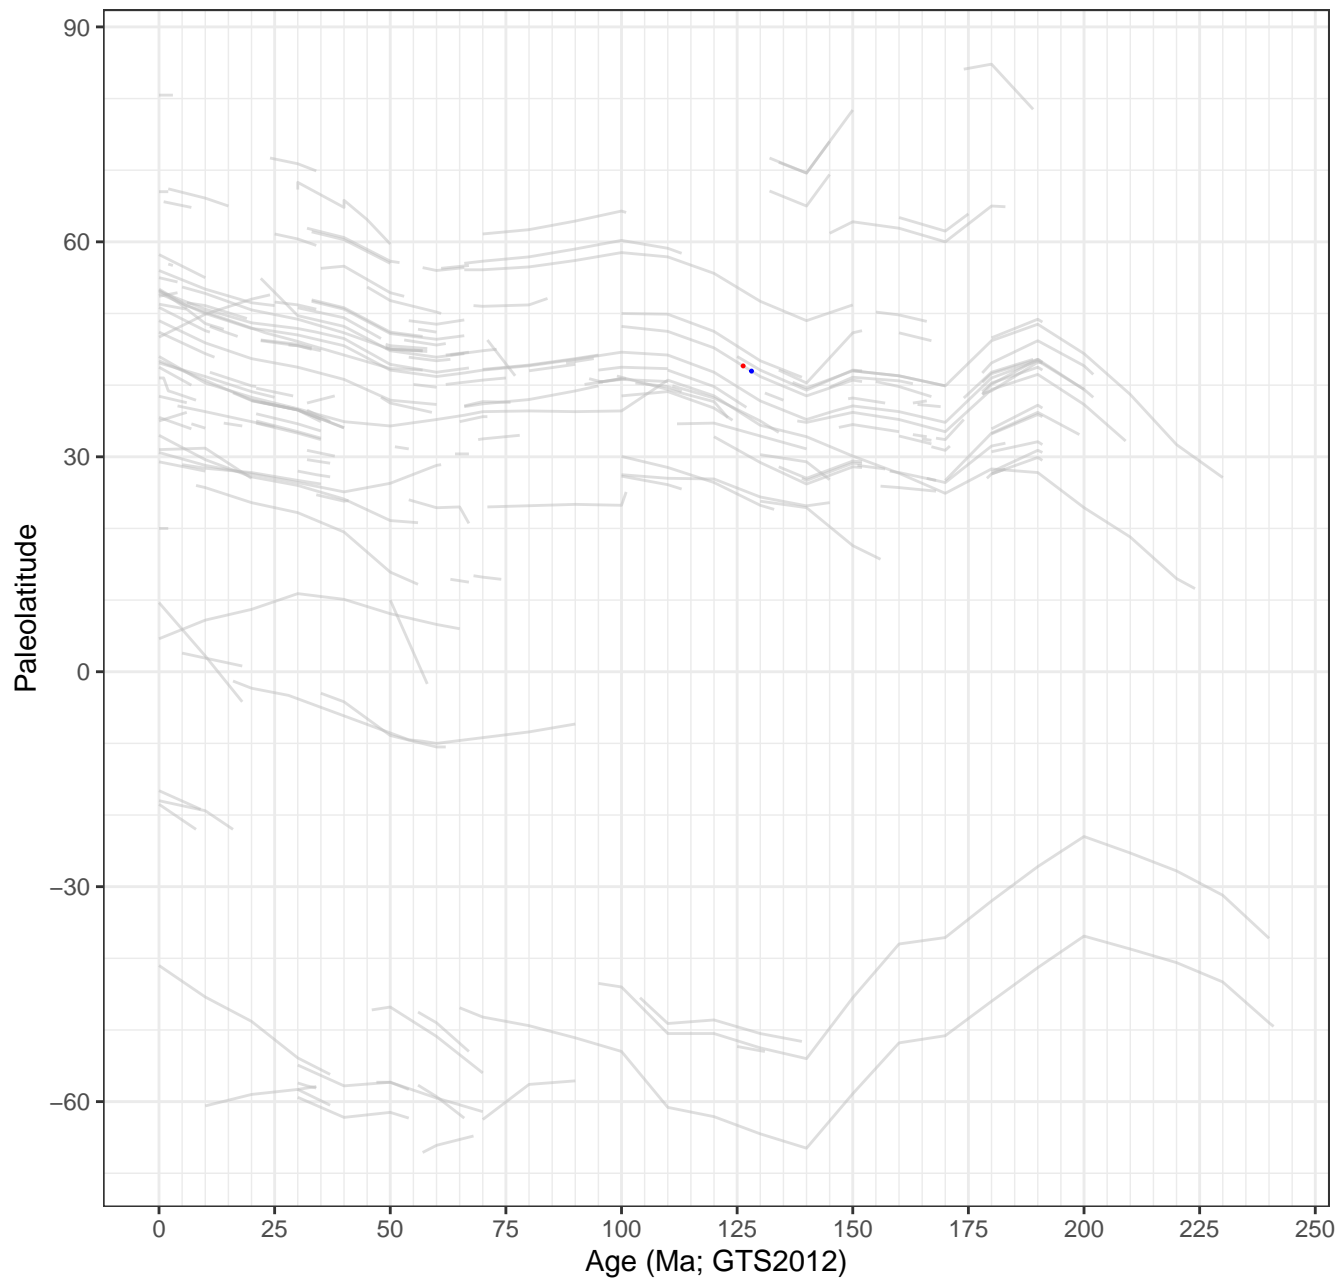

Supplement: Supplementary file 1352 [file Ellipsodinium reticulatum.pdf › Supplement/Supplement 2/Species 1914 plots/Ellipsodinium reticulatum.pdf]

# Species *Ellipsodinium rugulosum*

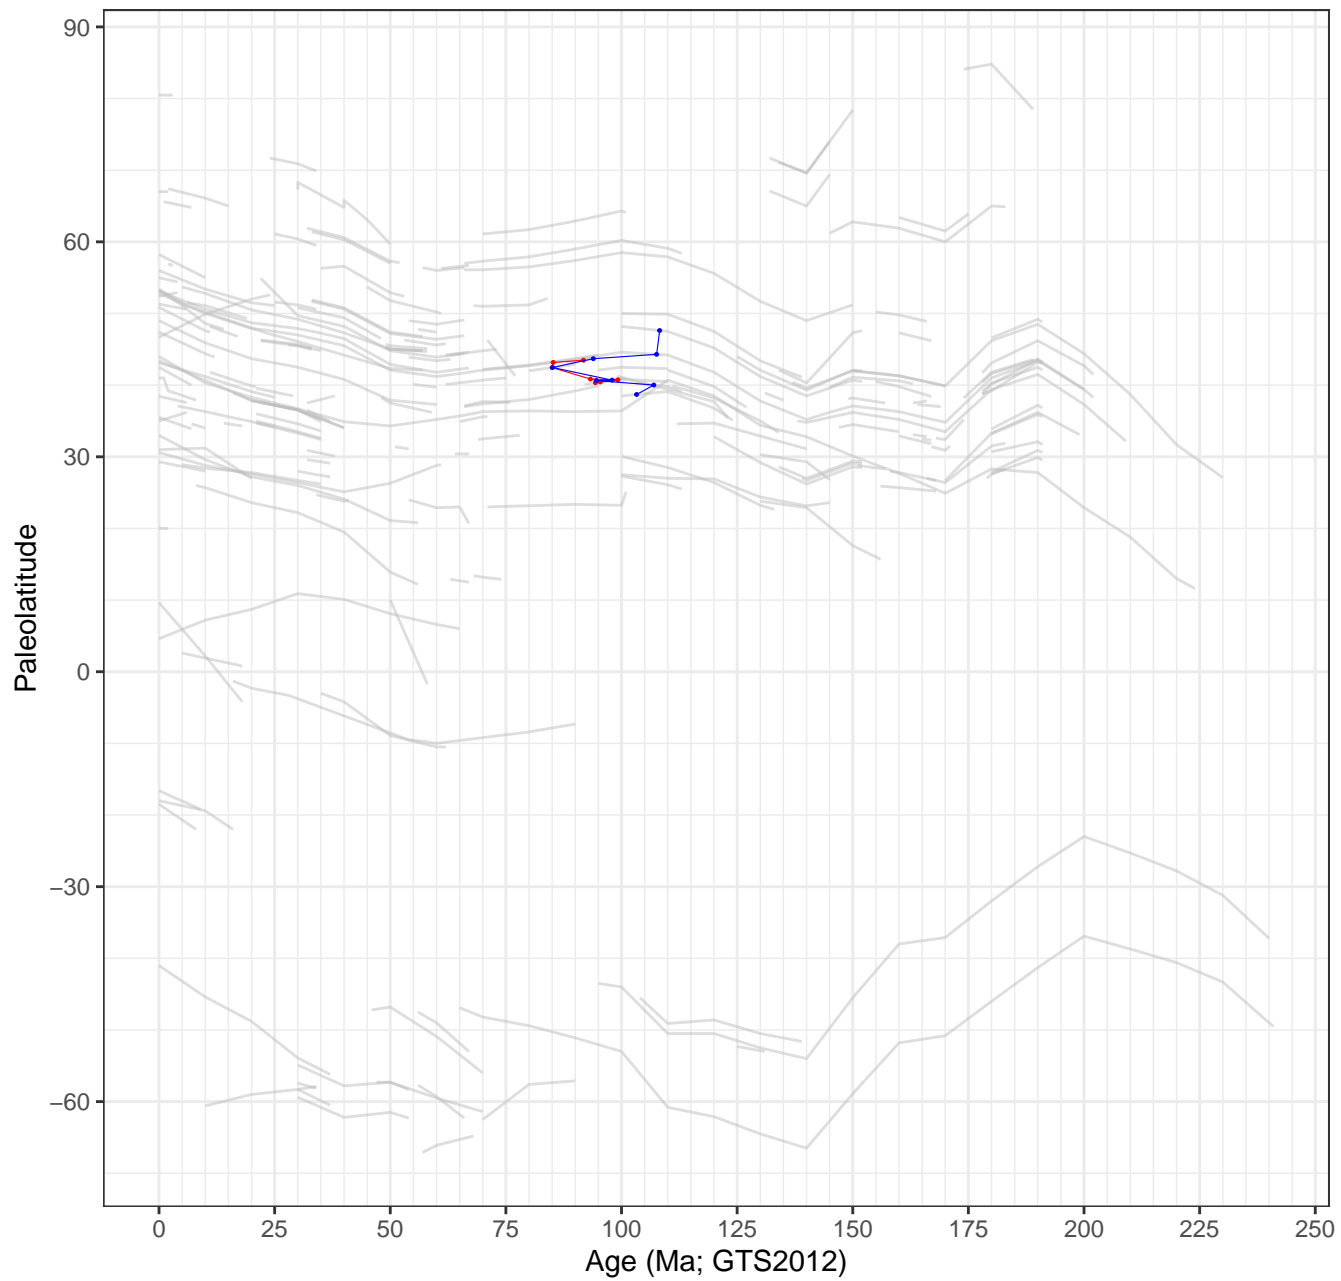

Supplement: Supplementary file 1353 [file Ellipsodinium rugulosum.pdf › Supplement/Supplement 2/Species 1914 plots/Ellipsodinium rugulosum.pdf]

# Species *Ellipsoidictyum cinctum*

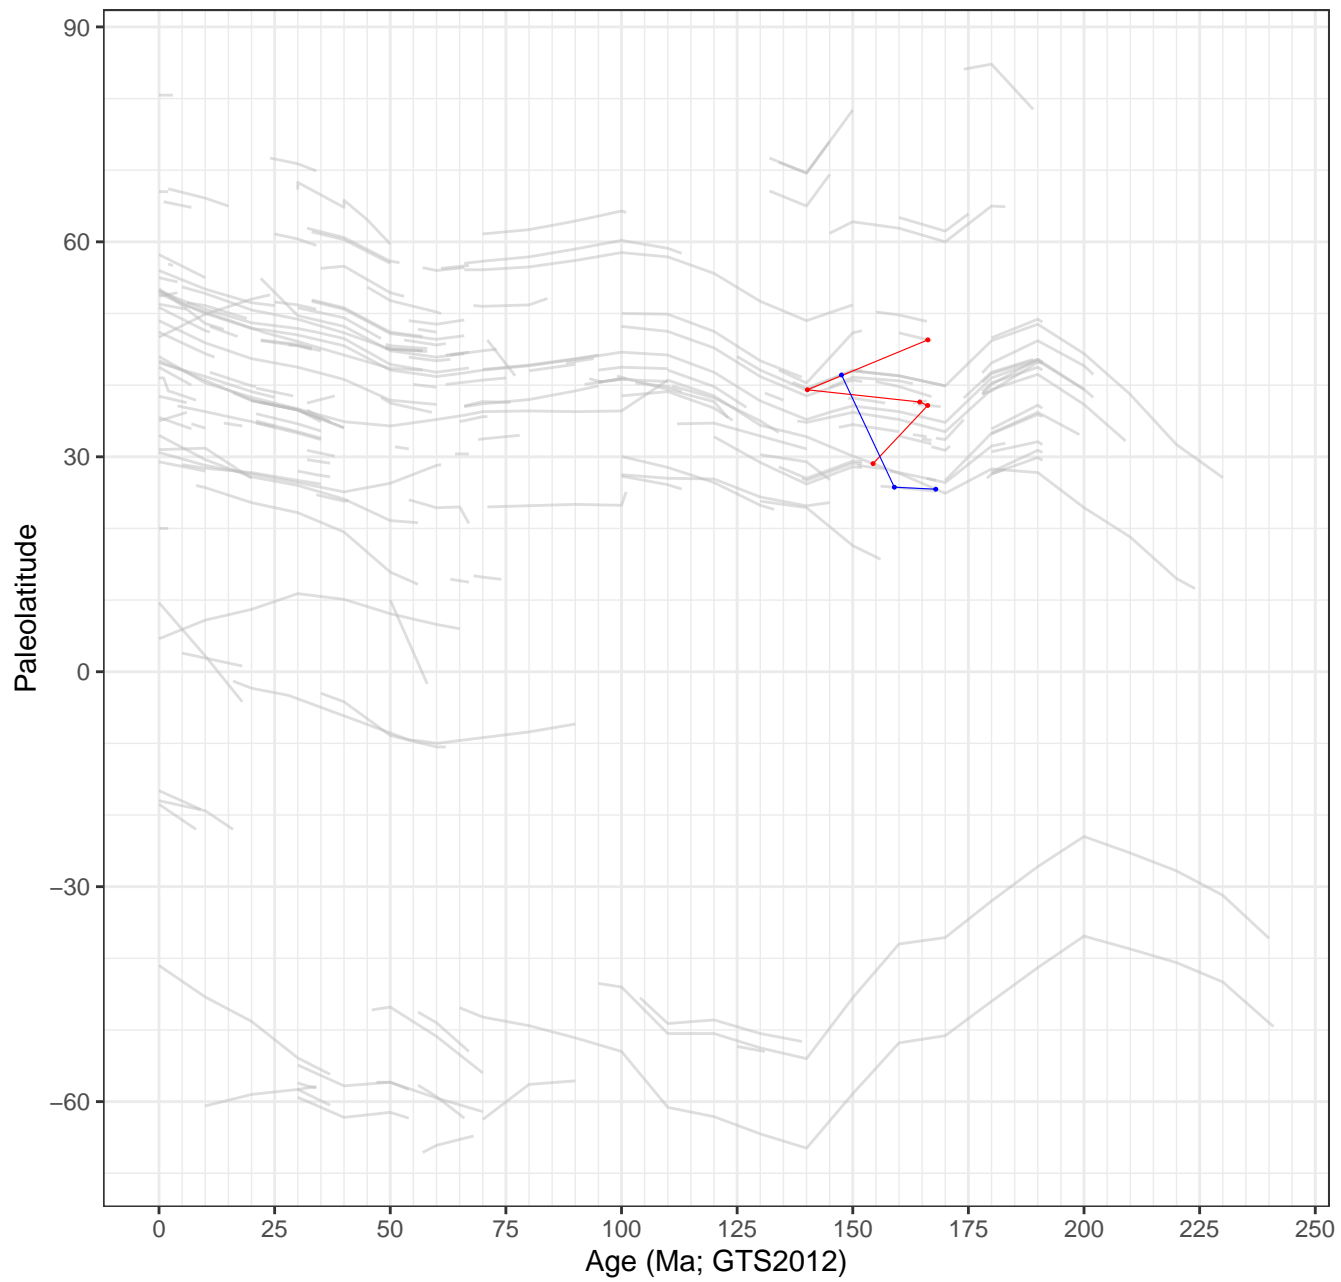

Supplement: Supplementary file 1354 [file Ellipsoidictyum cinctum.pdf › Supplement/Supplement 2/Species 1914 plots/Ellipsoidictyum cinctum.pdf]

# Species *Ellipsoidictyum cintum*

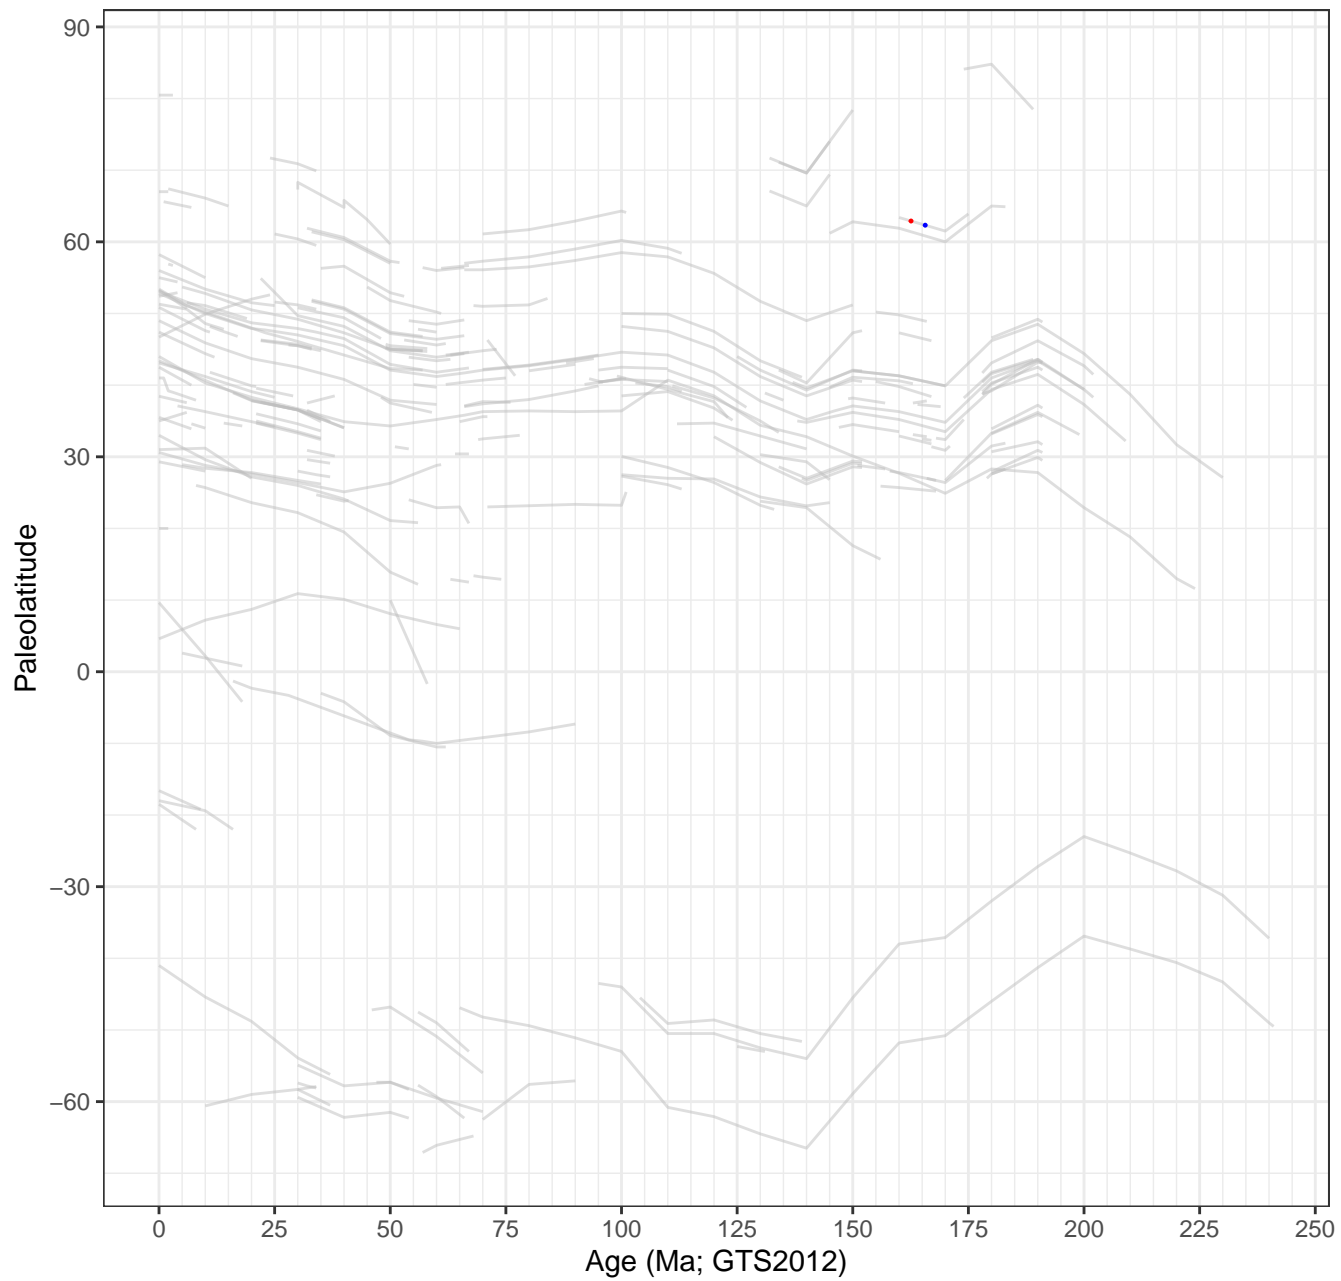

Supplement: Supplementary file 1355 [file Ellipsoidictyum cintum.pdf › Supplement/Supplement 2/Species 1914 plots/Ellipsoidictyum cintum.pdf]

# Species *Ellipsoidictyum imperfectum*

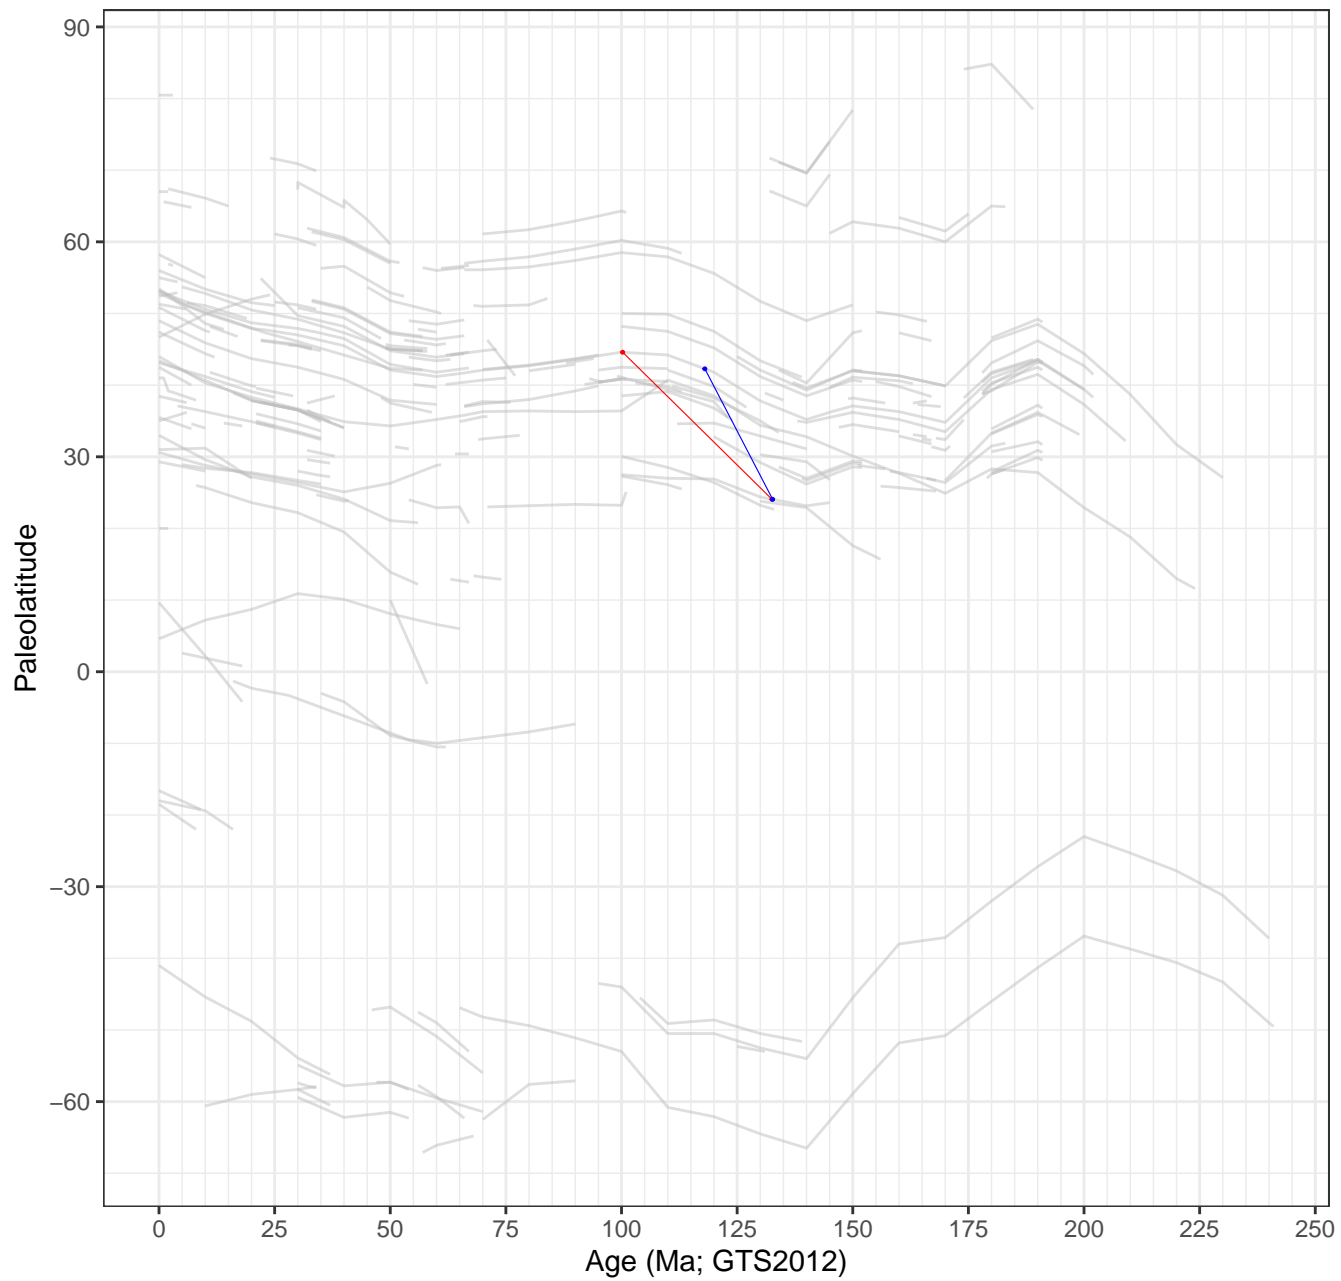

Supplement: Supplementary file 1356 [file Ellipsoidictyum imperfectum.pdf › Supplement/Supplement 2/Species 1914 plots/Ellipsoidictyum imperfectum.pdf]

# Species *Ellipsoidictyum* spp.

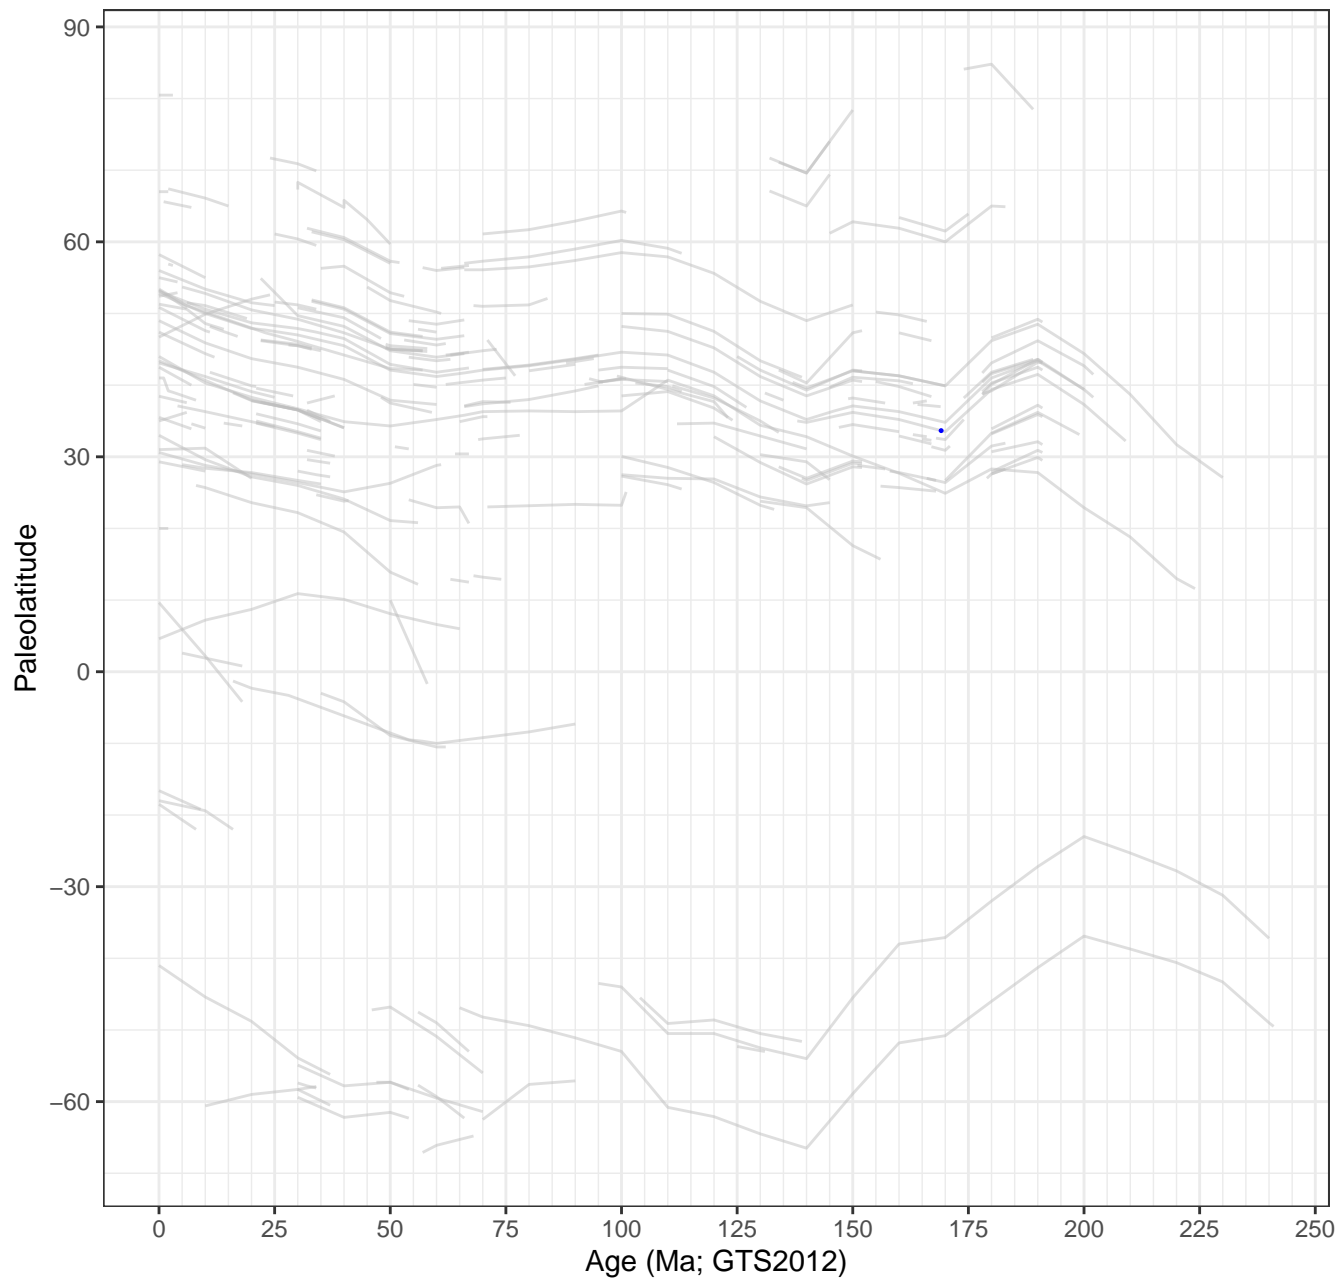

Supplement: Supplementary file 1357 [file Ellipsoidictyum spp..pdf › Supplement/Supplement 2/Species 1914 plots/Ellipsoidictyum spp..pdf]

# Species *Elytrocysta breva*

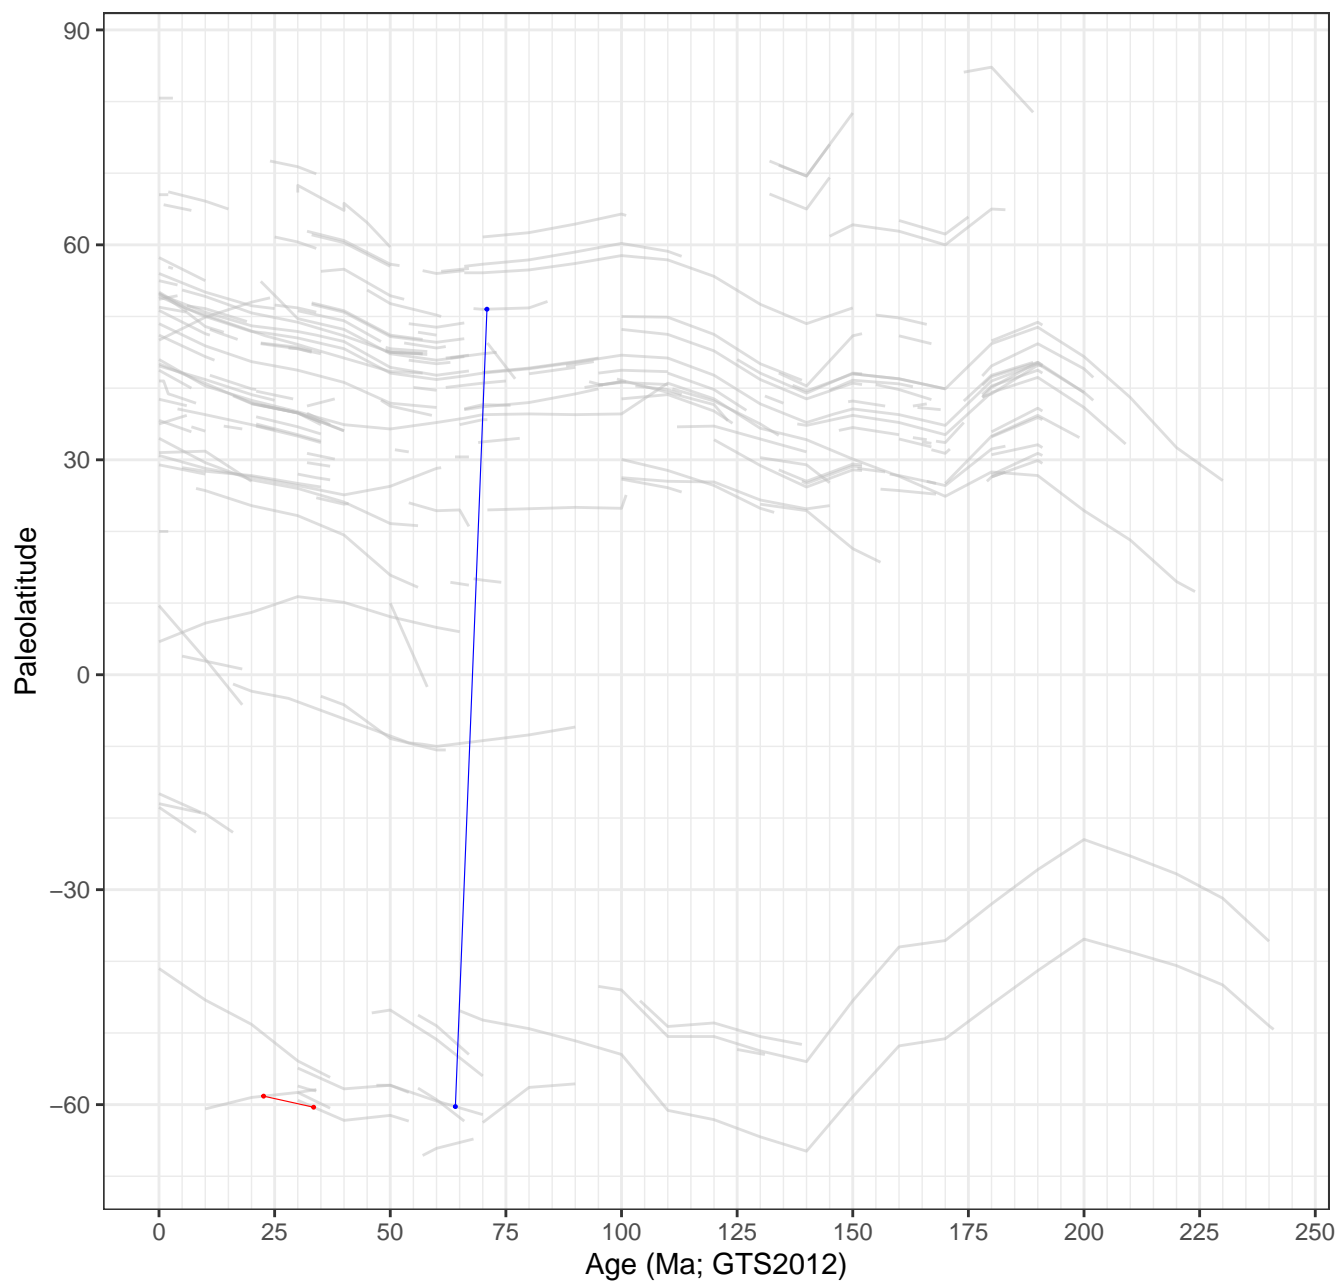

Supplement: Supplementary file 1358 [file Elytrocysta breva.pdf › Supplement/Supplement 2/Species 1914 plots/Elytrocysta breva.pdf]

# Species *Elytrocysta circulata*

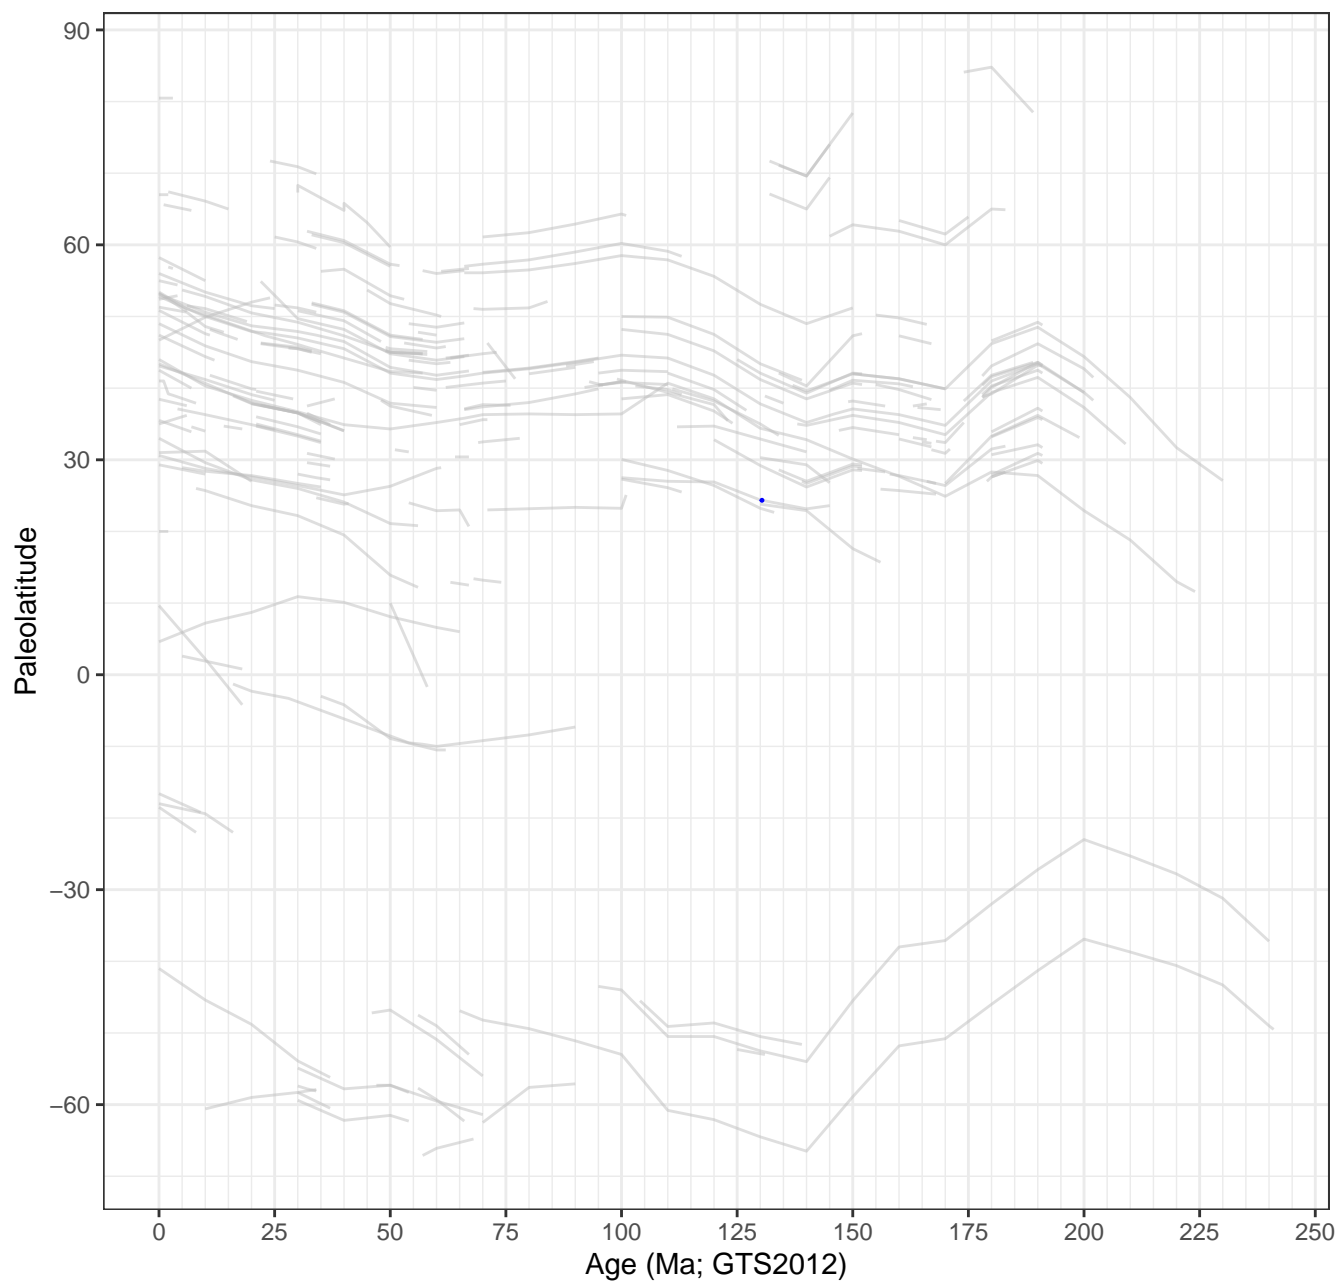

Supplement: Supplementary file 1359 [file Elytrocysta circulata.pdf › Supplement/Supplement 2/Species 1914 plots/Elytrocysta circulata.pdf]

# Species *Elytrocysta druggii*

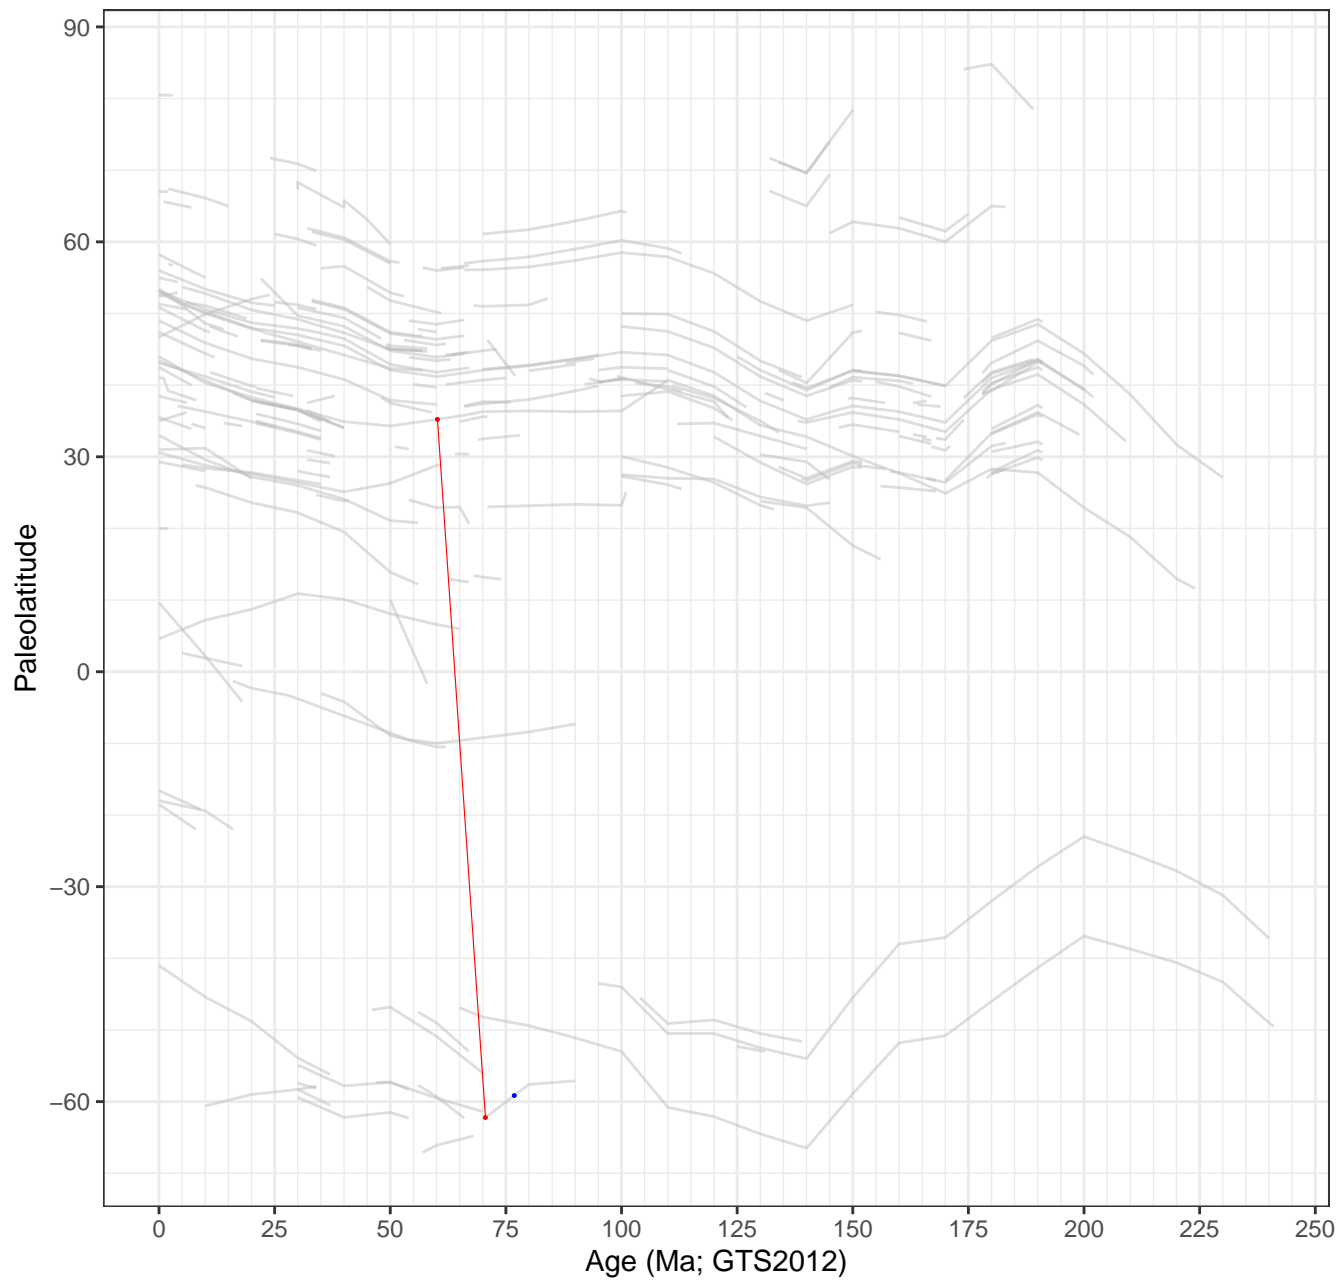

Supplement: Supplementary file 1360 [file Elytrocysta druggii.pdf › Supplement/Supplement 2/Species 1914 plots/Elytrocysta druggii.pdf]

# Species *Endoceratium dettmanniae*

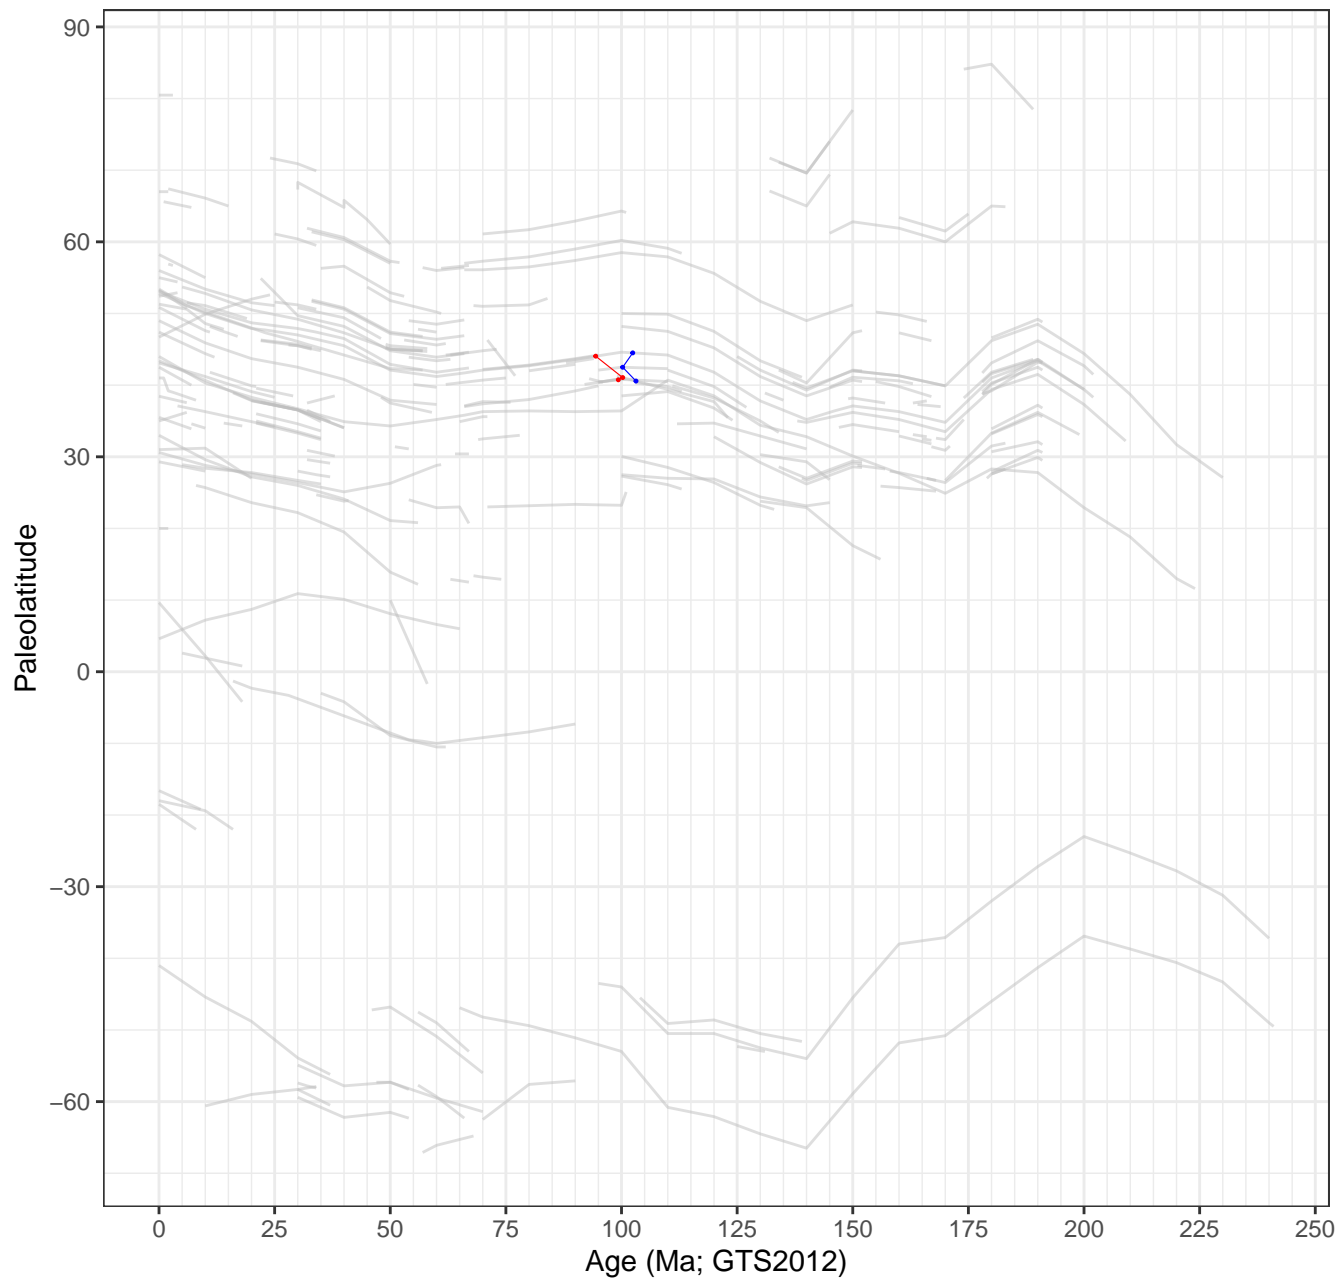

Supplement: Supplementary file 1361 [file Endoceratium dettmanniae.pdf › Supplement/Supplement 2/Species 1914 plots/Endoceratium dettmanniae.pdf]

# Species *Endoceratium exquisitum*

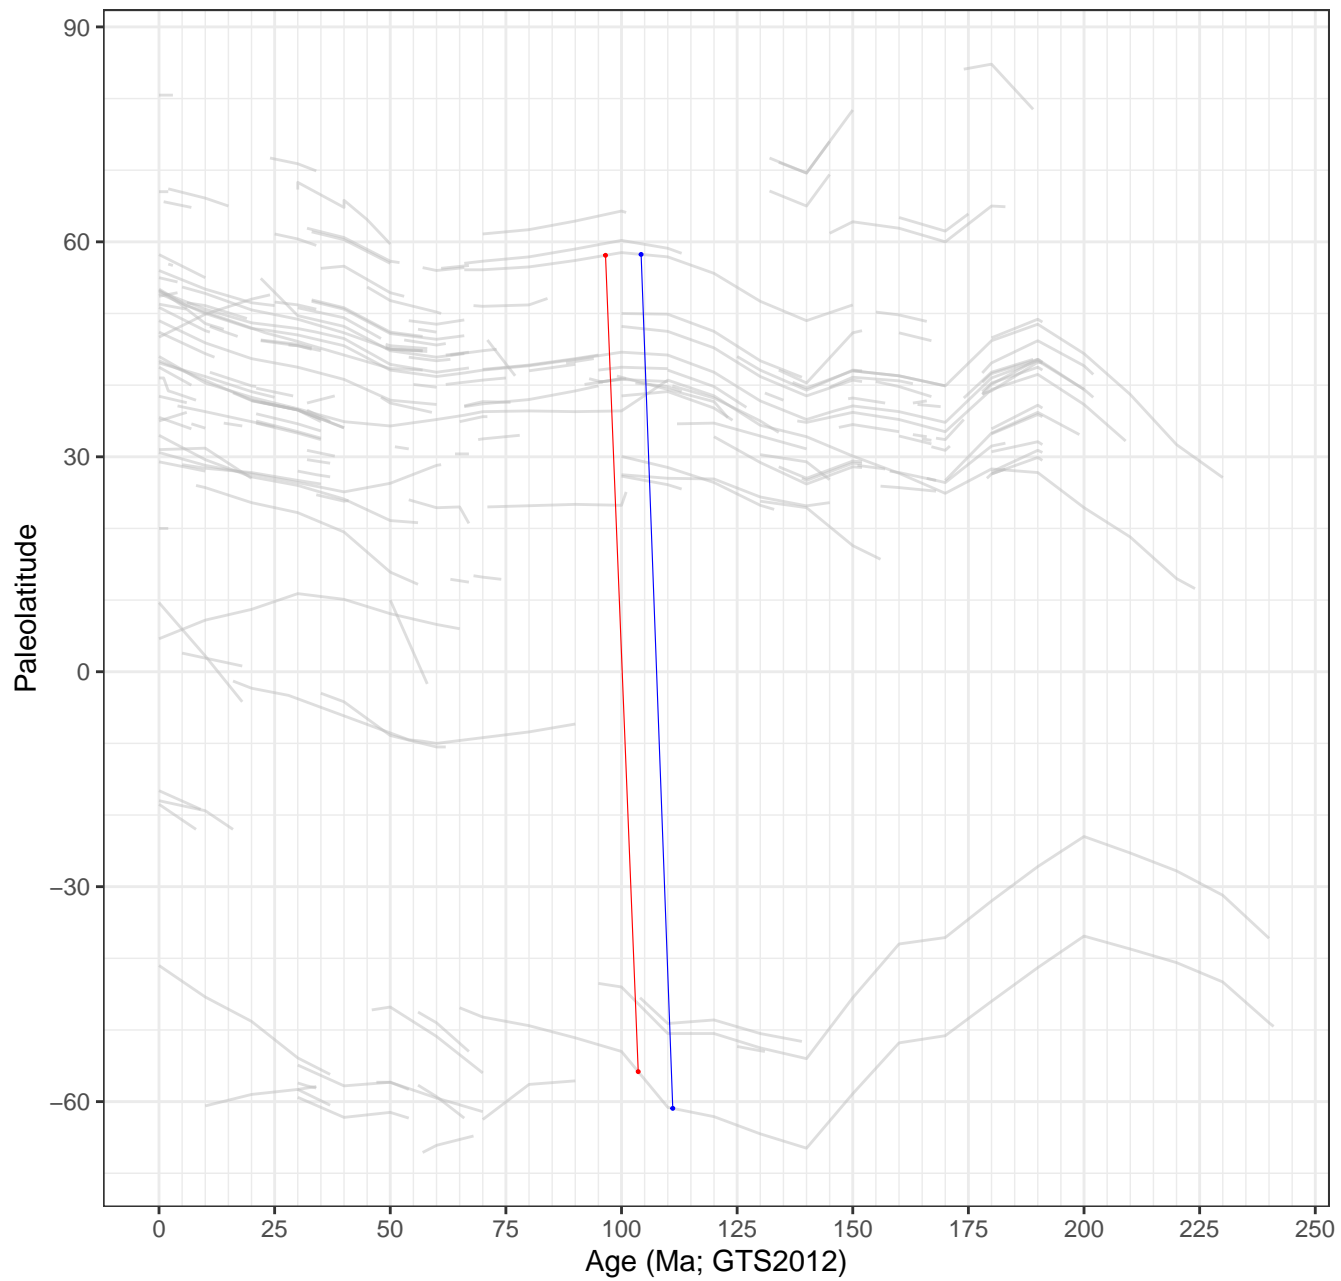

Supplement: Supplementary file 1362 [file Endoceratium exquisitum.pdf › Supplement/Supplement 2/Species 1914 plots/Endoceratium exquisitum.pdf]

# Species *Endoceratium ludbrookiae*

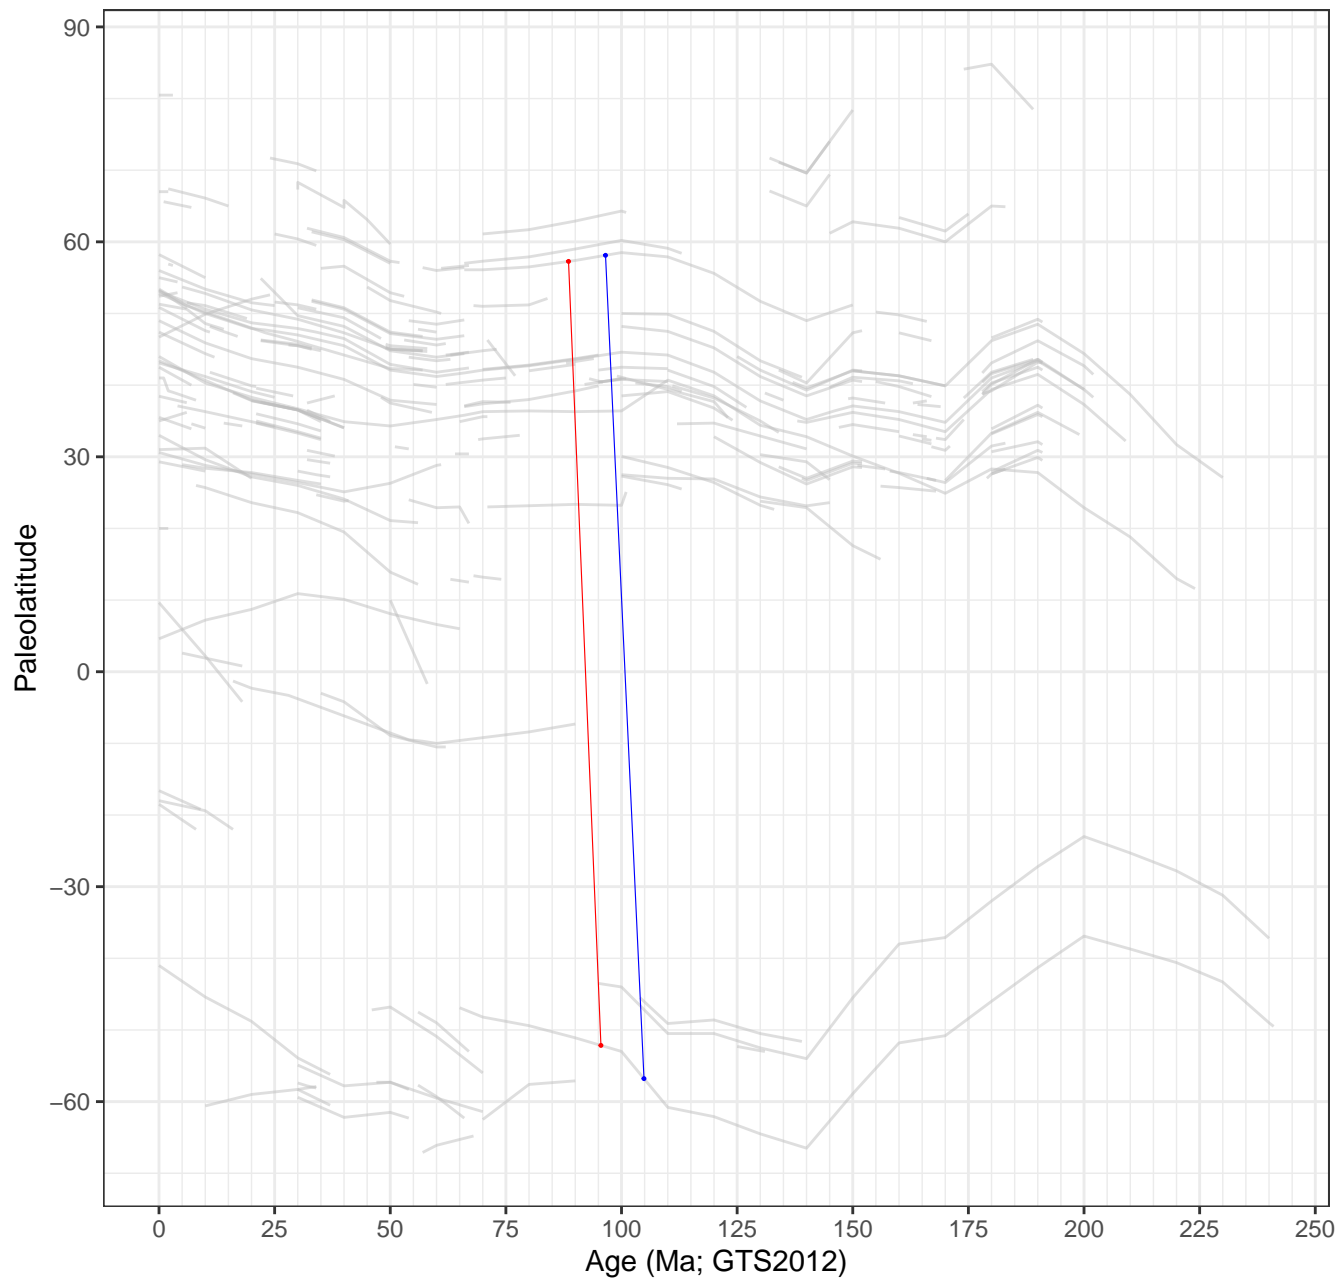

Supplement: Supplementary file 1363 [file Endoceratium ludbrookiae.pdf › Supplement/Supplement 2/Species 1914 plots/Endoceratium ludbrookiae.pdf]

# Species *Endoceratium pflugii*

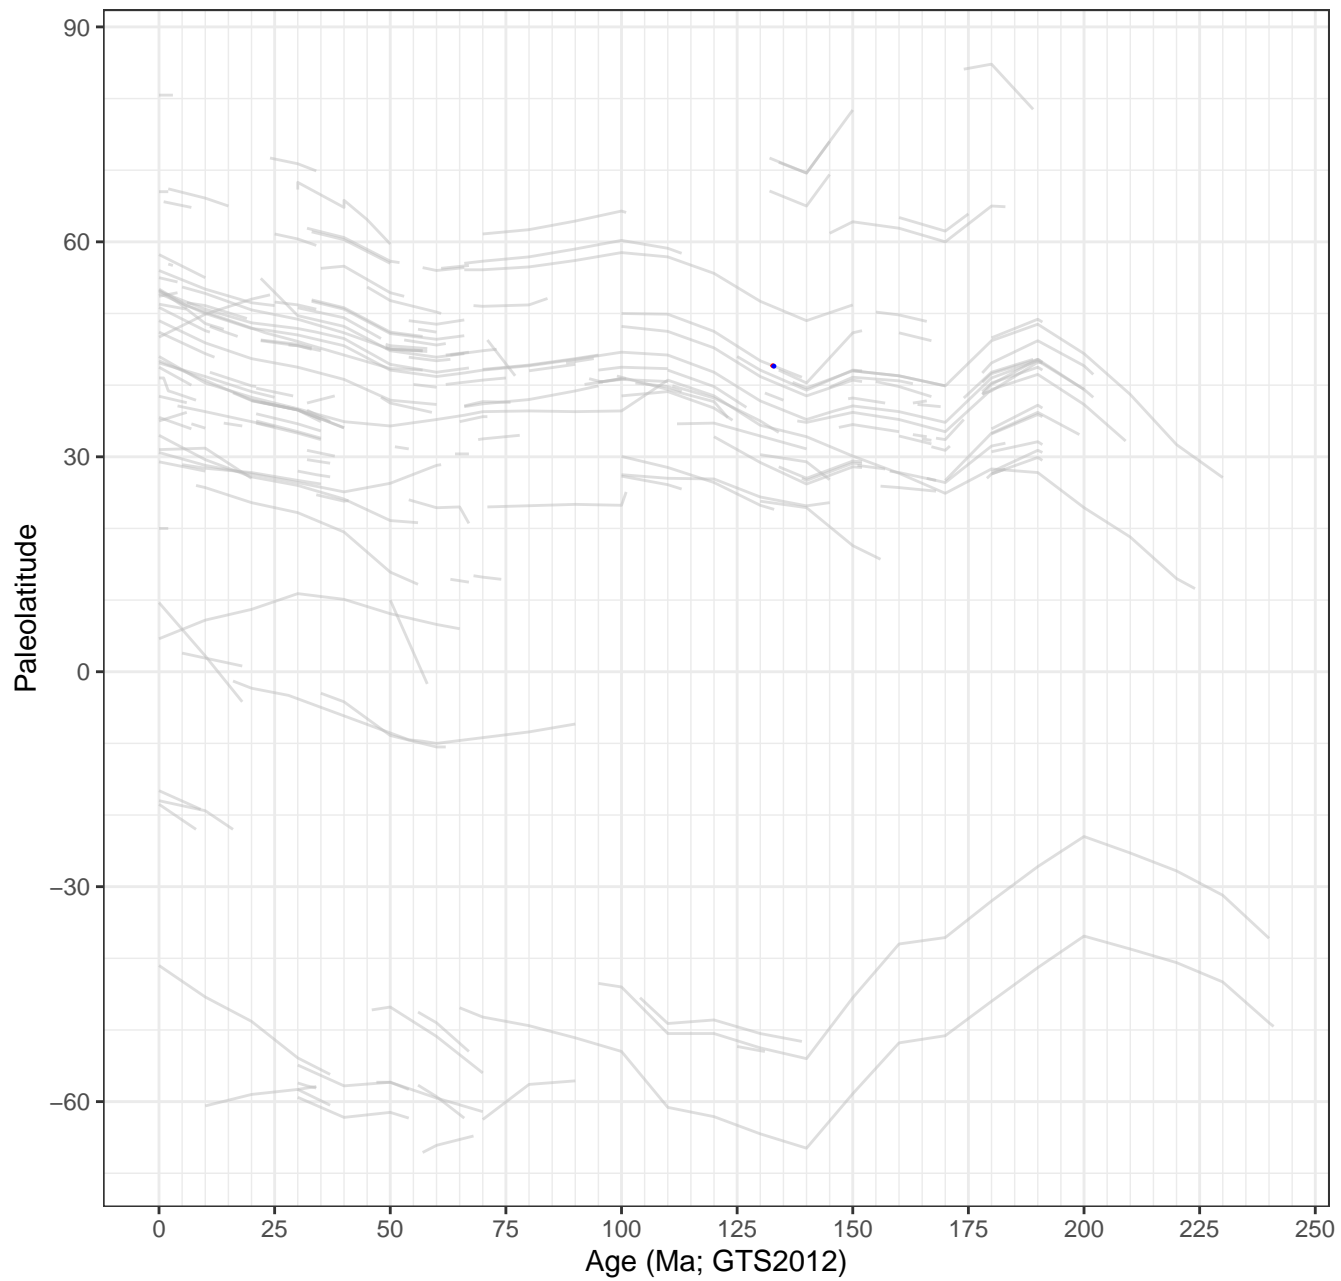

Supplement: Supplementary file 1364 [file Endoceratium pflugii.pdf › Supplement/Supplement 2/Species 1914 plots/Endoceratium pflugii.pdf]

# Species *Endoceratium turneri*

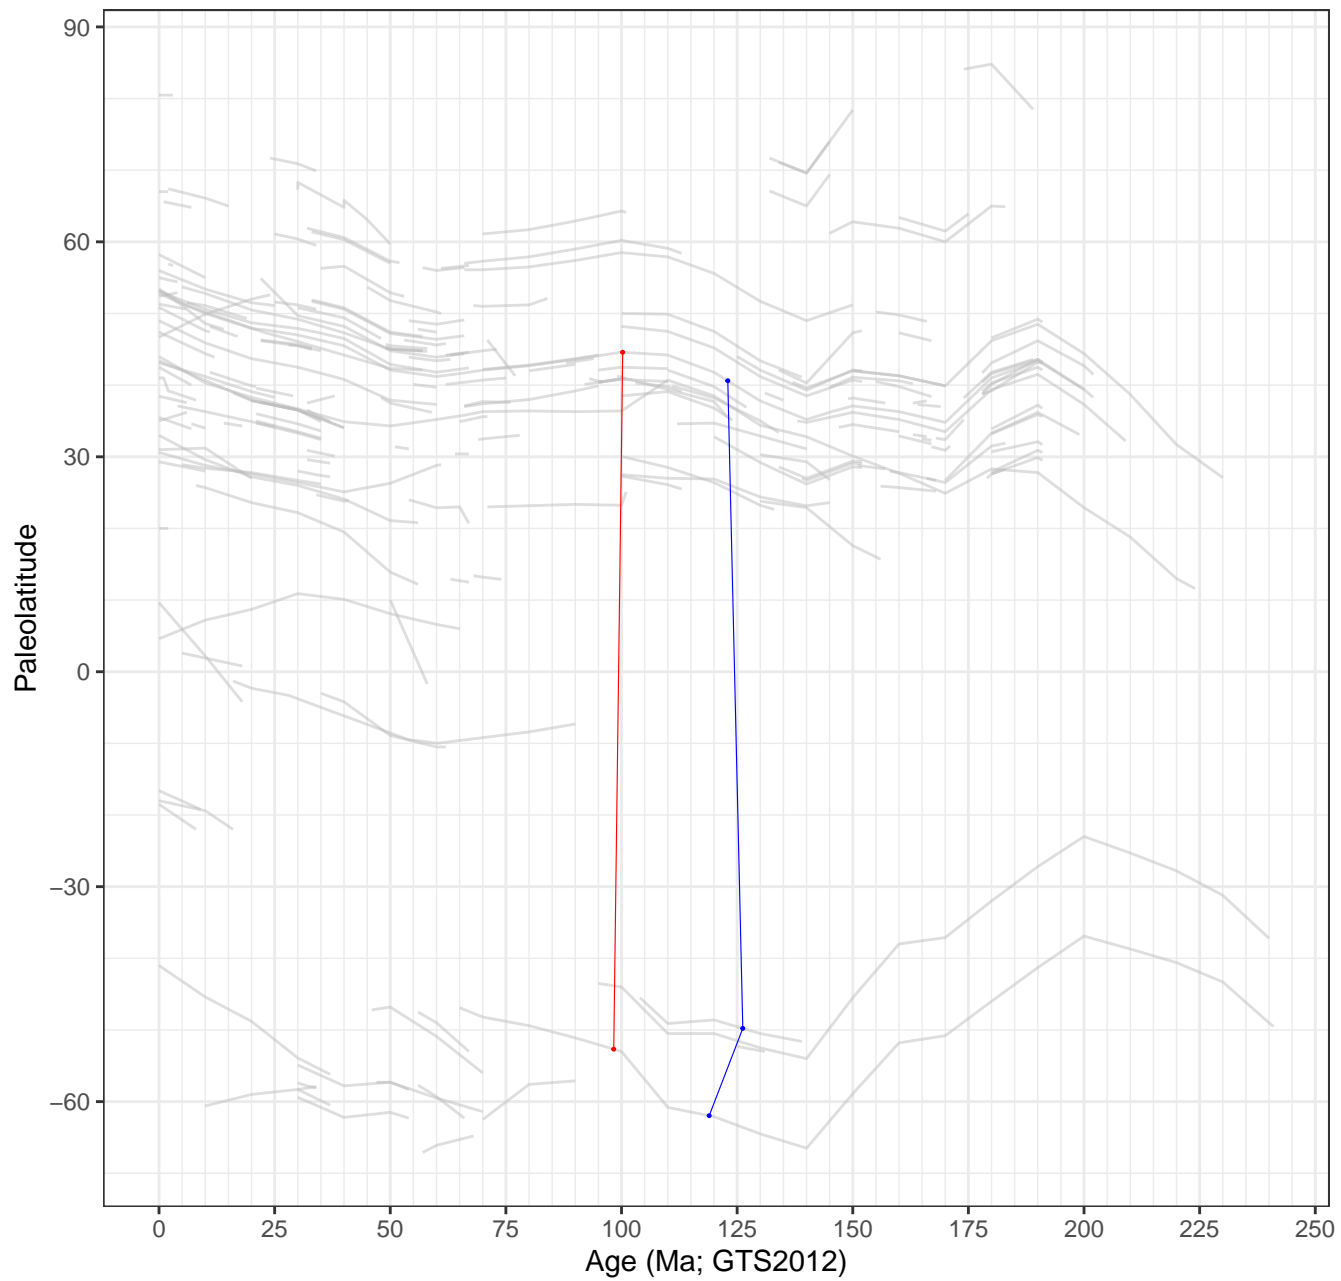

Supplement: Supplementary file 1365 [file Endoceratium turneri.pdf › Supplement/Supplement 2/Species 1914 plots/Endoceratium turneri.pdf]

# Species *Endoscrinium asymmetricum*

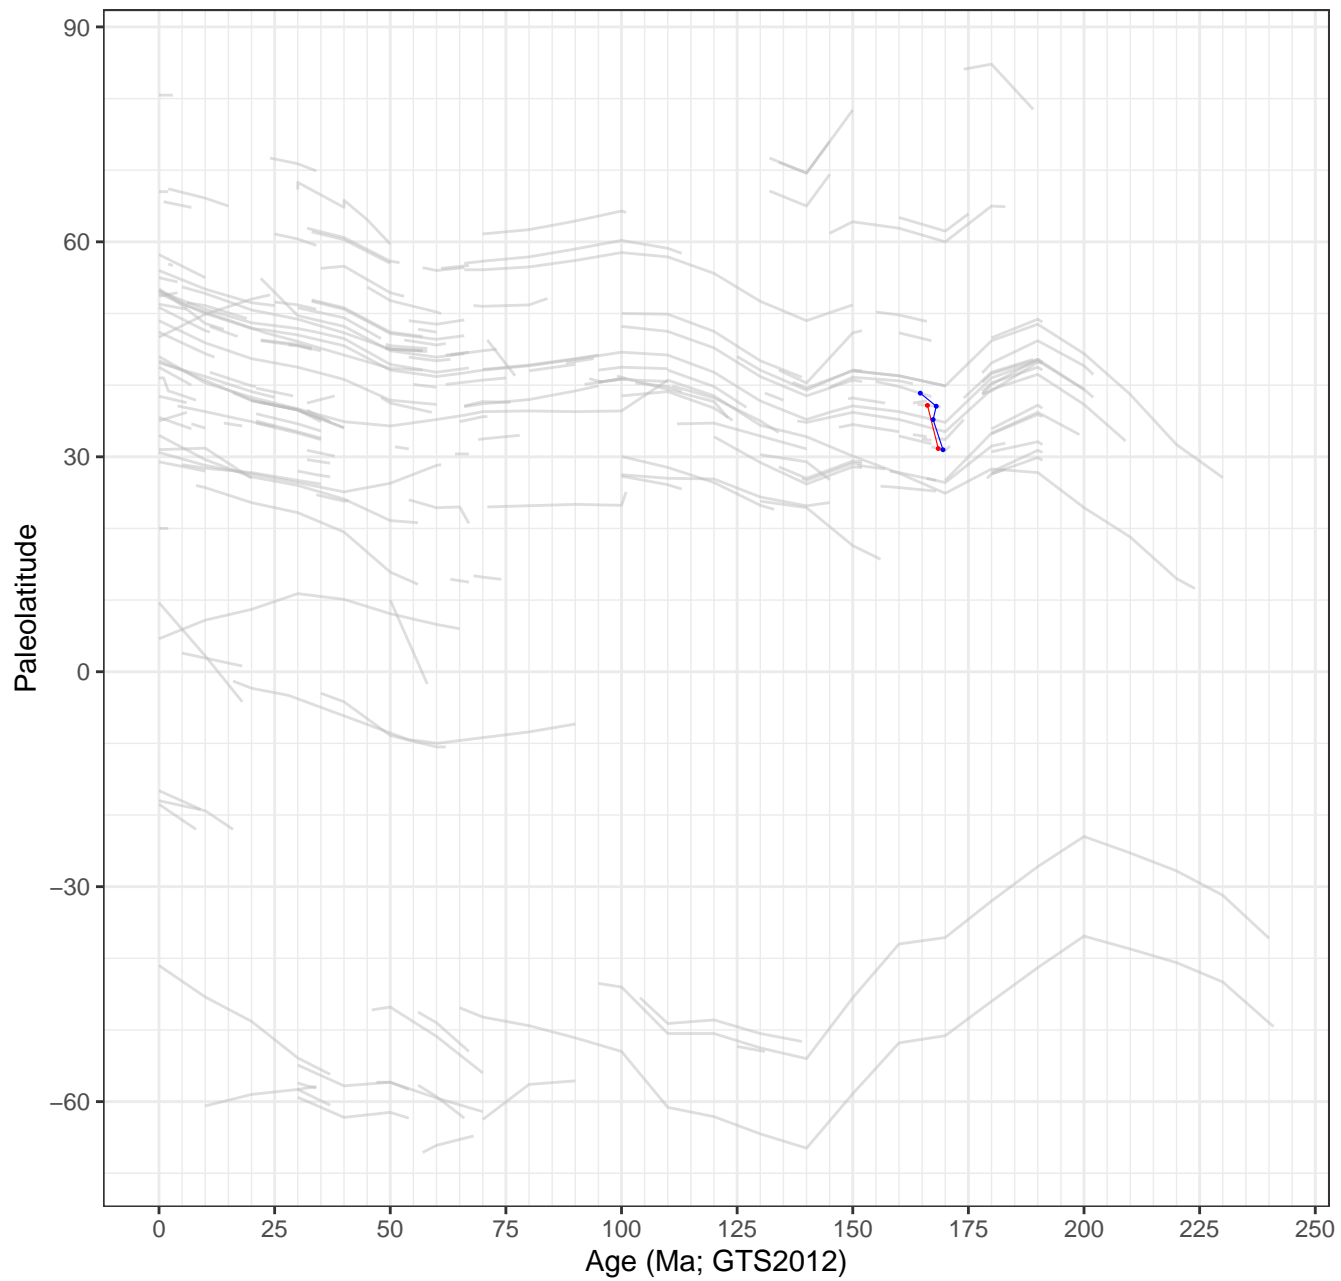

Supplement: Supplementary file 1366 [file Endoscrinium asymmetricum.pdf › Supplement/Supplement 2/Species 1914 plots/Endoscrinium asymmetricum.pdf]

# Species *Endoscrinium attadalense*

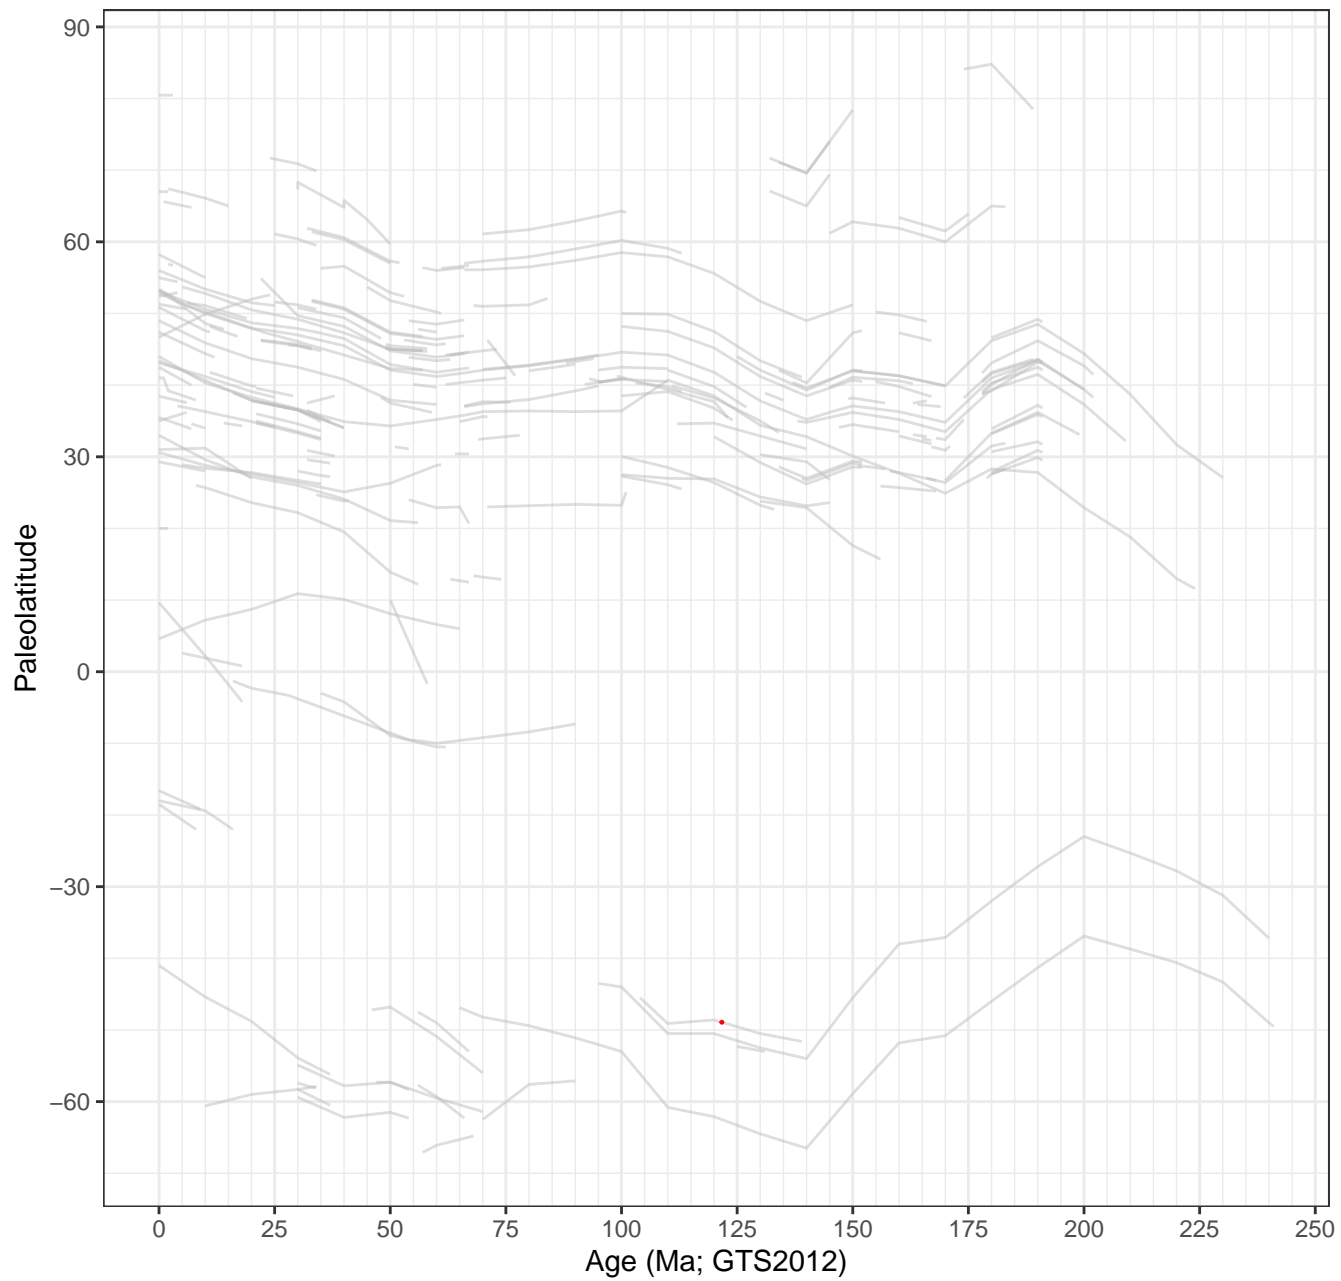

Supplement: Supplementary file 1367 [file Endoscrinium attadalense.pdf › Supplement/Supplement 2/Species 1914 plots/Endoscrinium attadalense.pdf]

# Species *Endoscrinium bessebae*

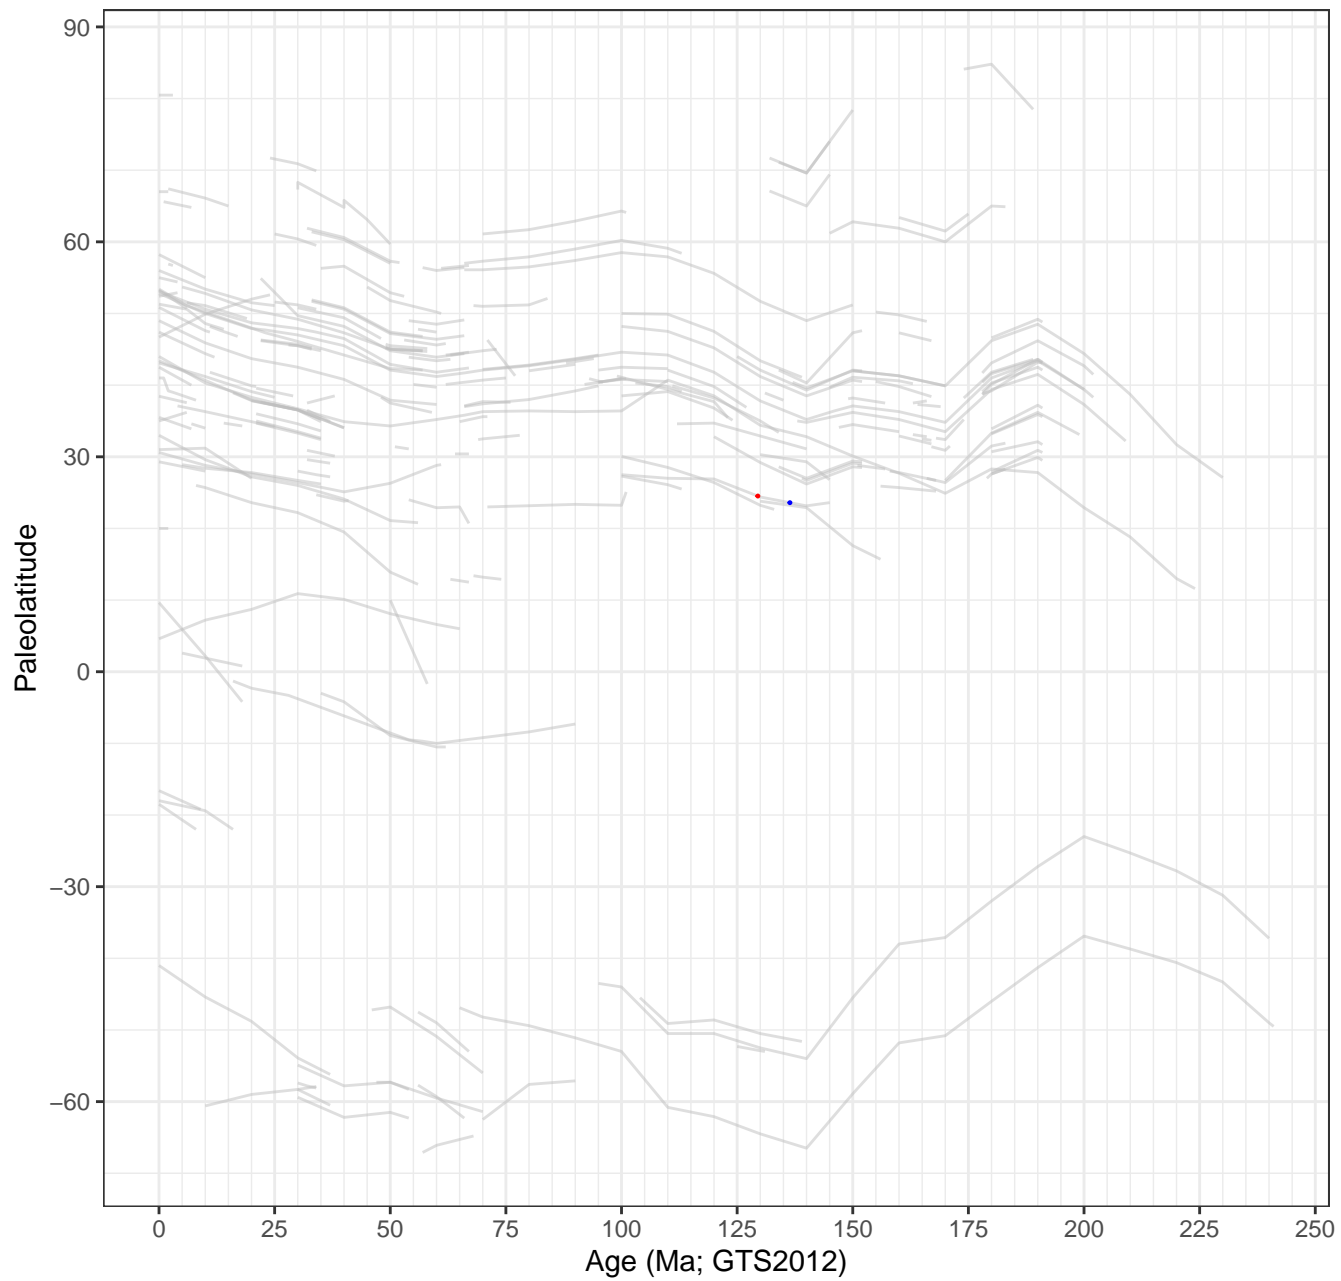

Supplement: Supplementary file 1368 [file Endoscrinium bessebae.pdf › Supplement/Supplement 2/Species 1914 plots/Endoscrinium bessebae.pdf]

# Species *Endoscrinium galeritum*

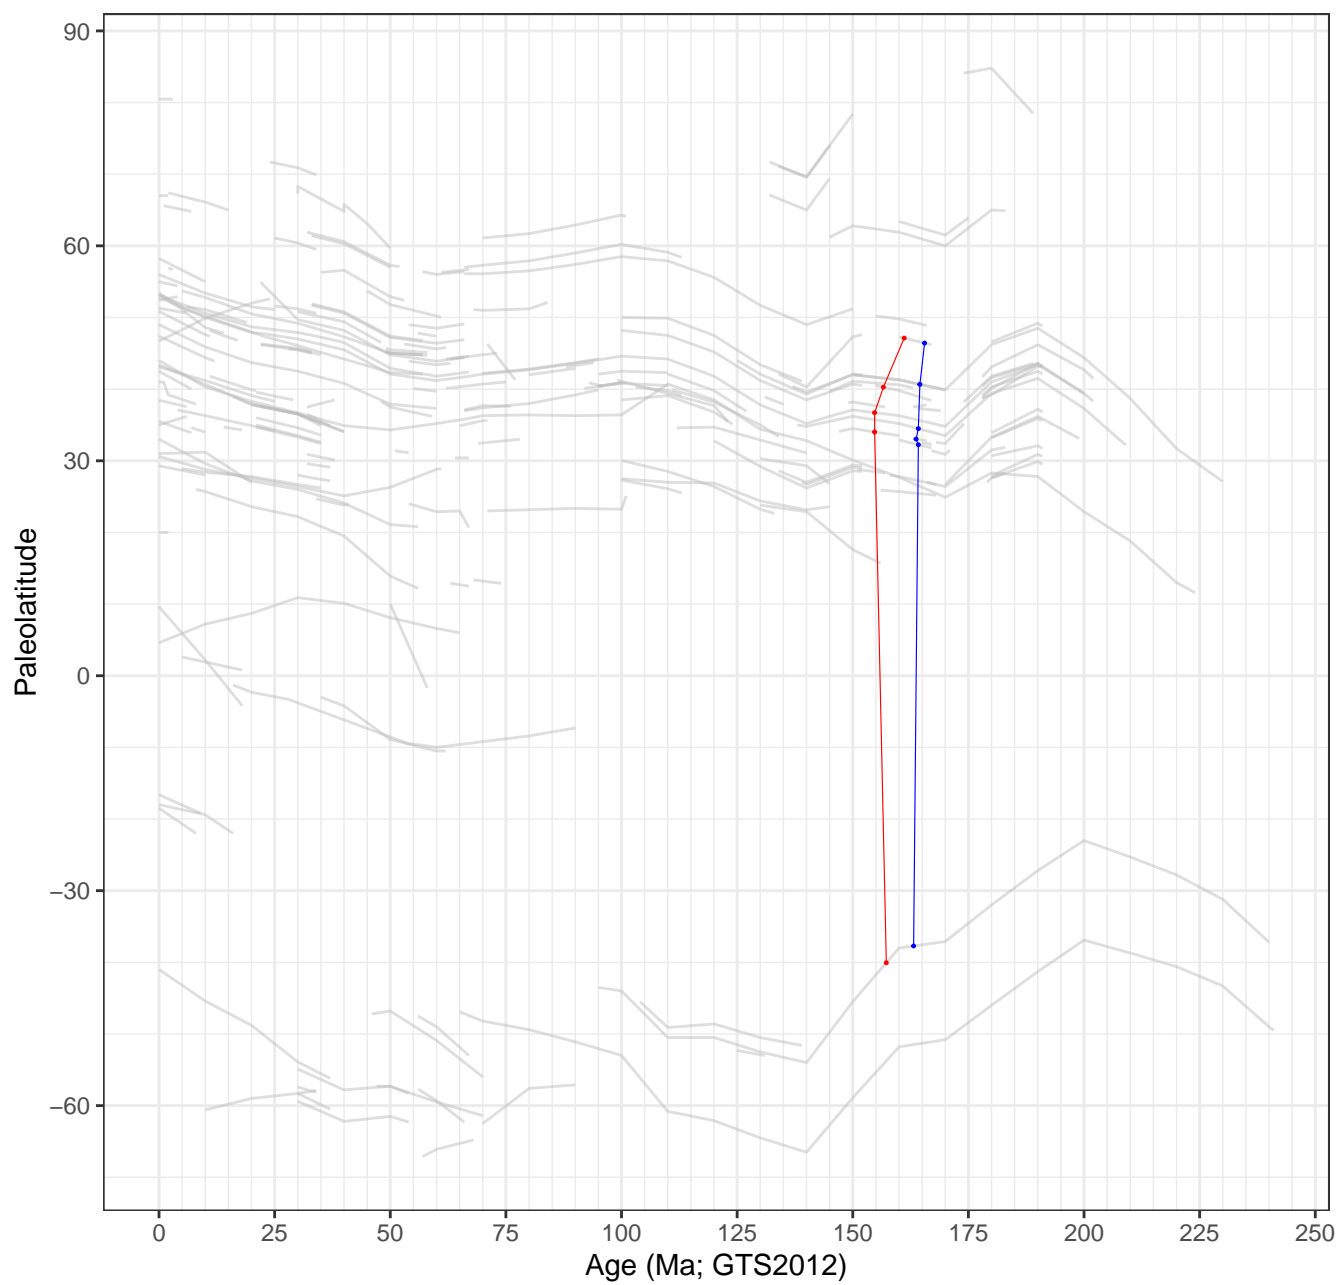

Supplement: Supplementary file 1369 [file Endoscrinium galeritum.pdf › Supplement/Supplement 2/Species 1914 plots/Endoscrinium galeritum.pdf]

# Species *Endoscrinium granulatum*

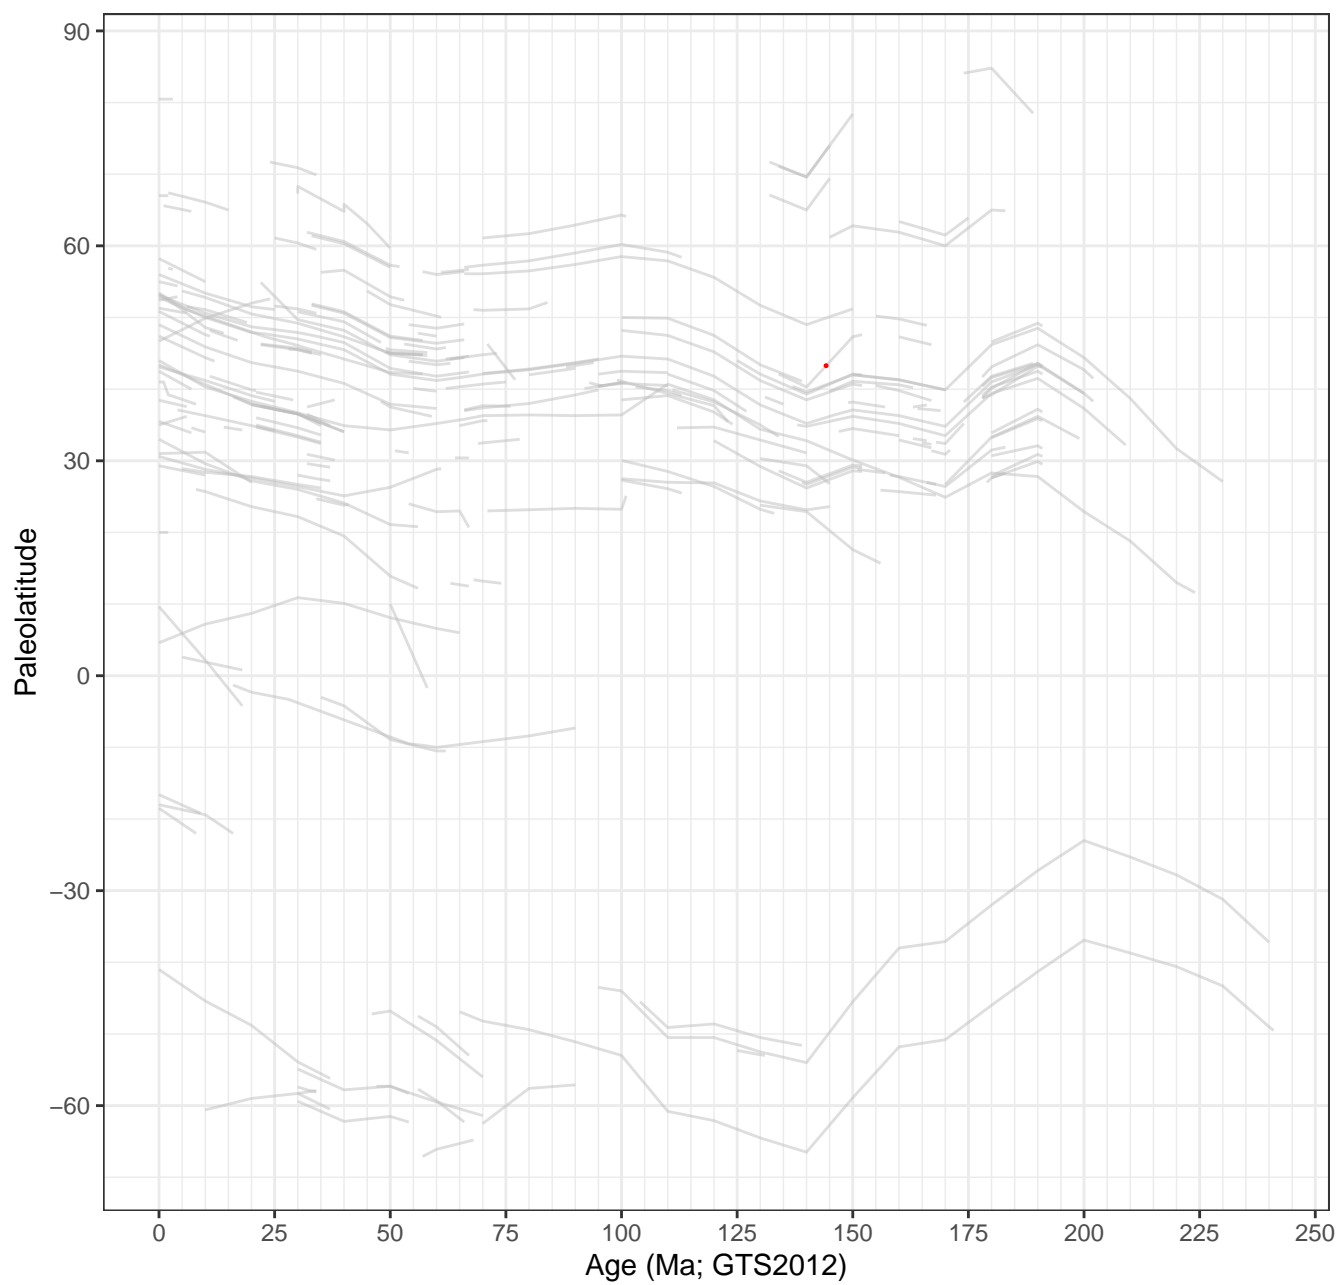

Supplement: Supplementary file 1370 [file Endoscrinium granulatum.pdf › Supplement/Supplement 2/Species 1914 plots/Endoscrinium granulatum.pdf]

# Species *Endoscrinium hauterivianum*

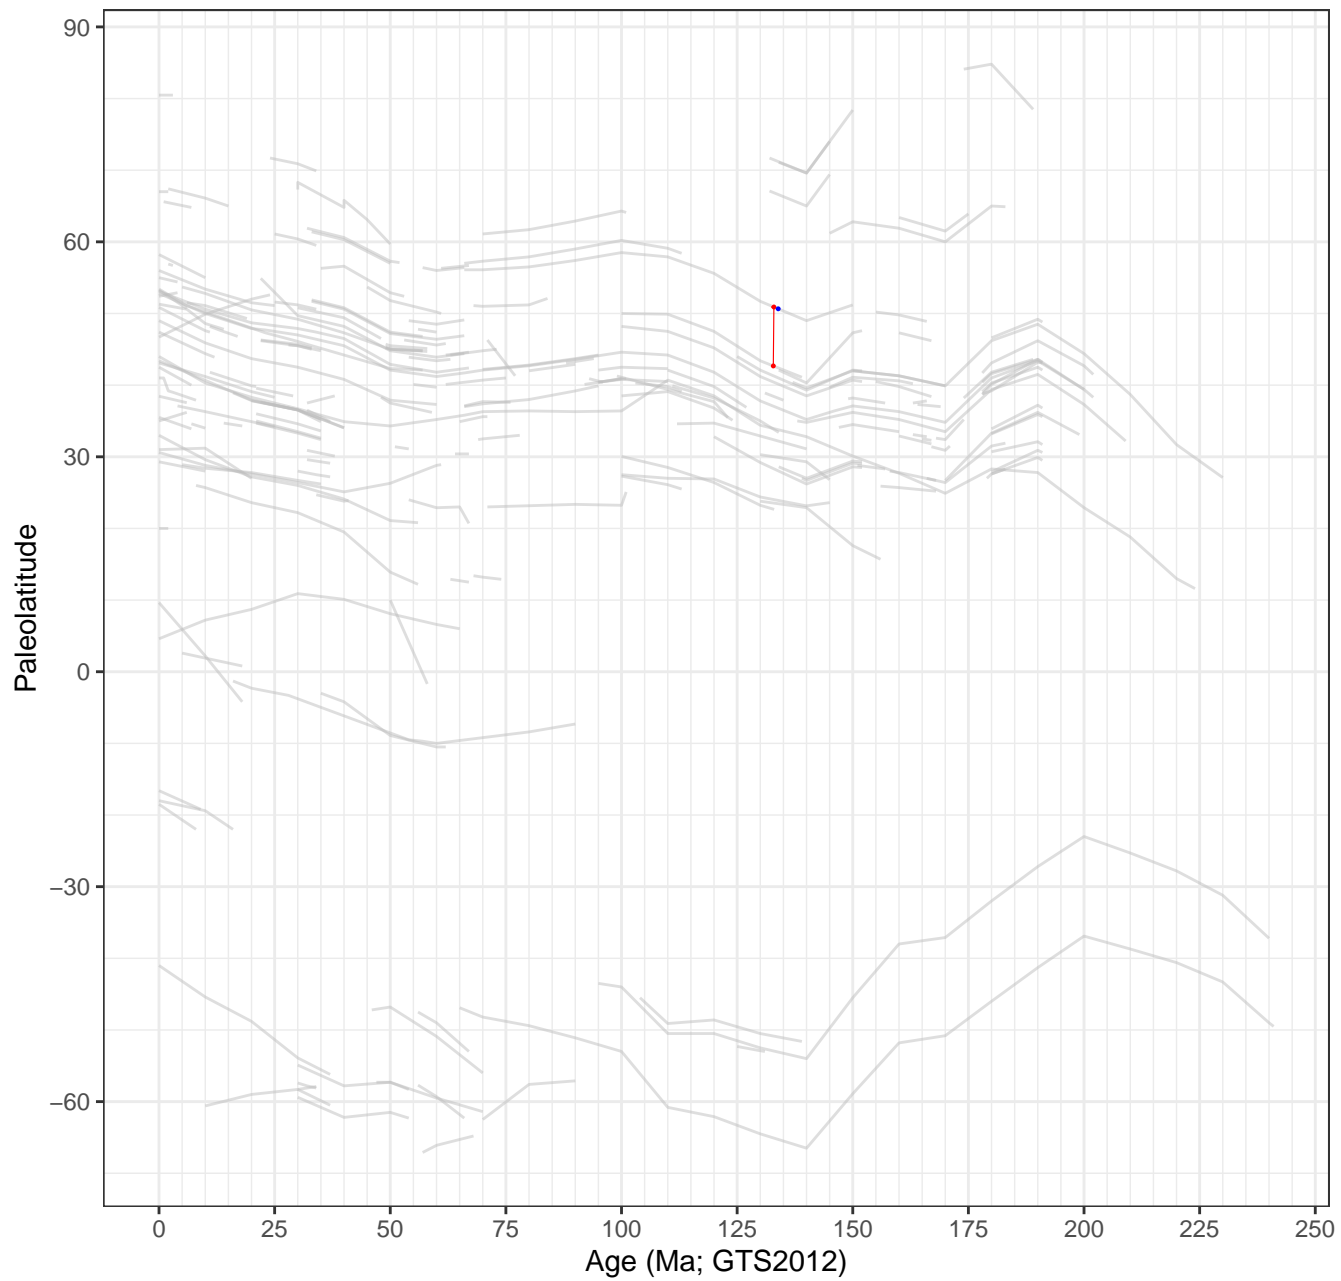

Supplement: Supplementary file 1371 [file Endoscrinium hauterivianum.pdf › Supplement/Supplement 2/Species 1914 plots/Endoscrinium hauterivianum.pdf]

# Species *Endoscrinium heikeae*

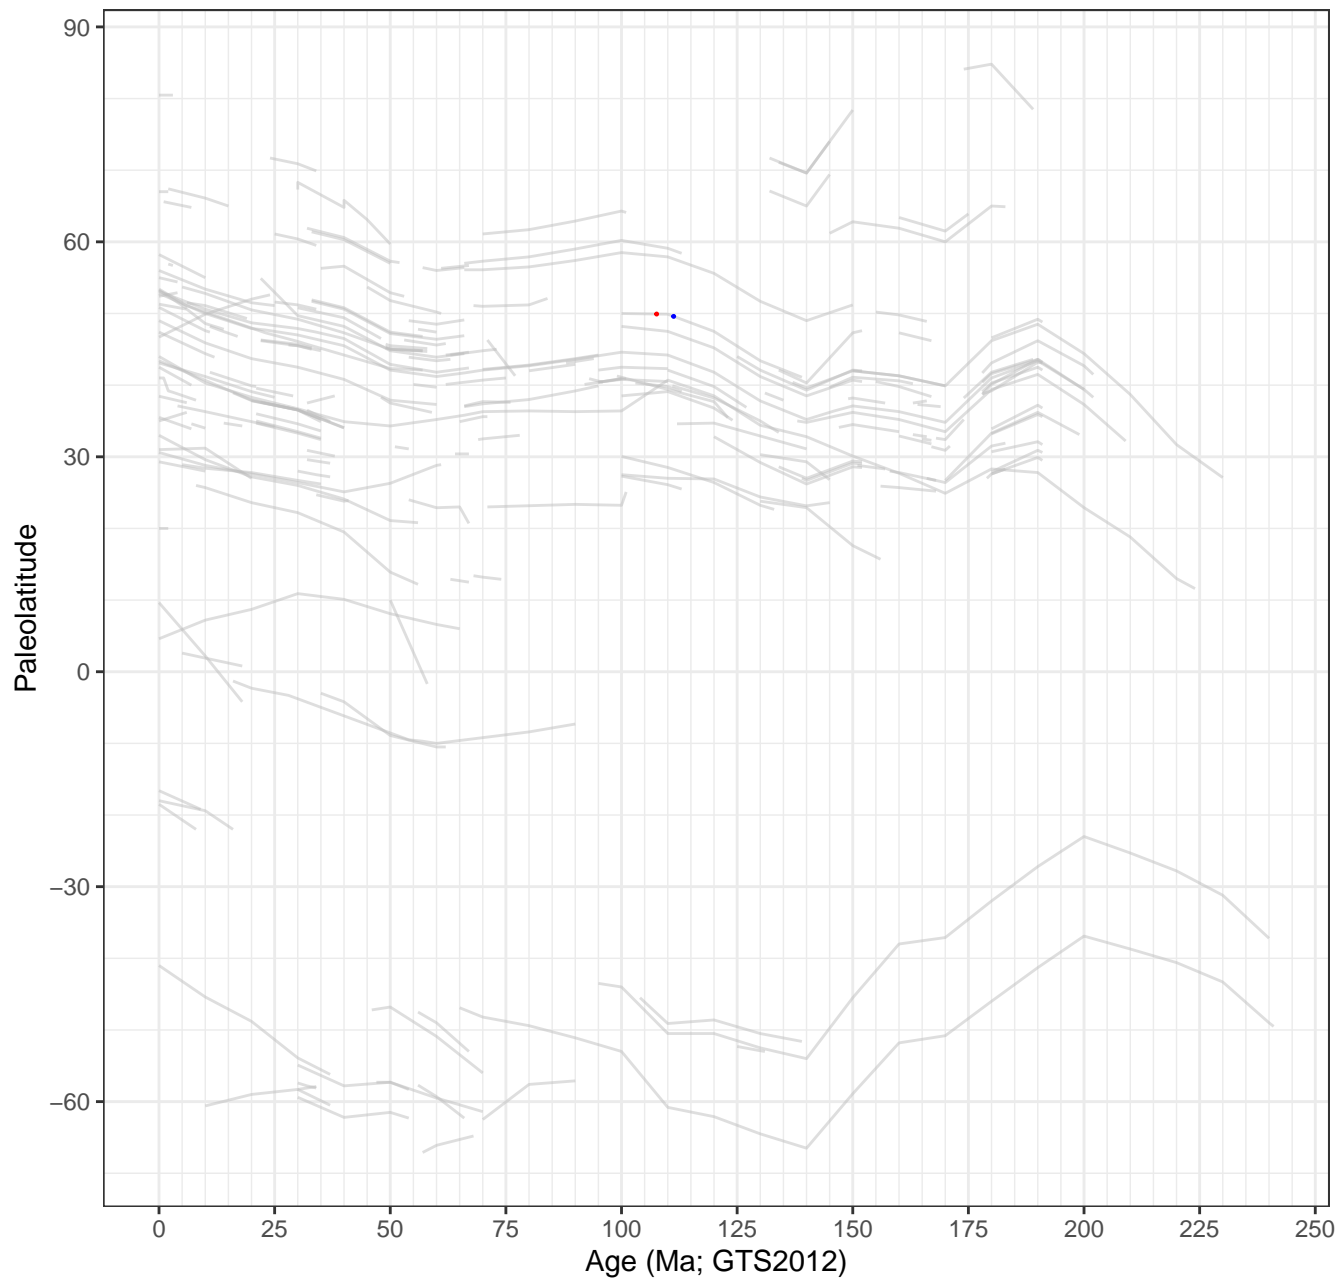

Supplement: Supplementary file 1372 [file Endoscrinium heikeae.pdf › Supplement/Supplement 2/Species 1914 plots/Endoscrinium heikeae.pdf]

# Species *Endoscrinium irregulare*

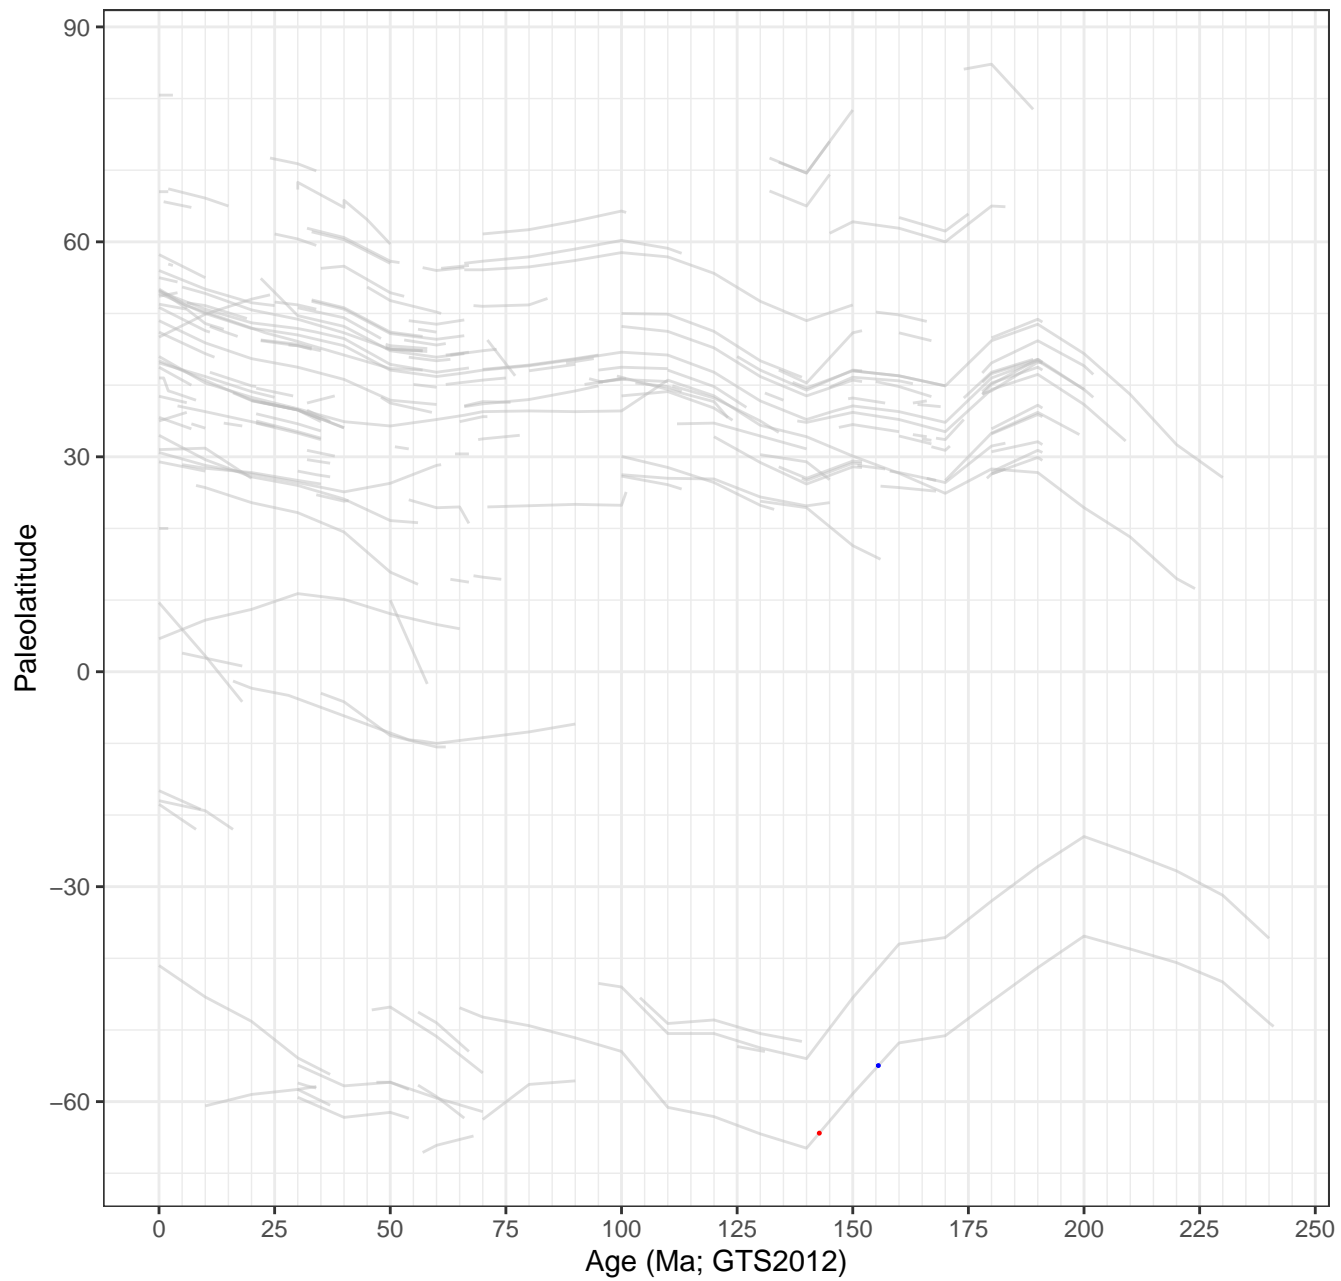

Supplement: Supplementary file 1373 [file Endoscrinium irregulare.pdf › Supplement/Supplement 2/Species 1914 plots/Endoscrinium irregulare.pdf]

# Species *Endoscrinium kempiae*

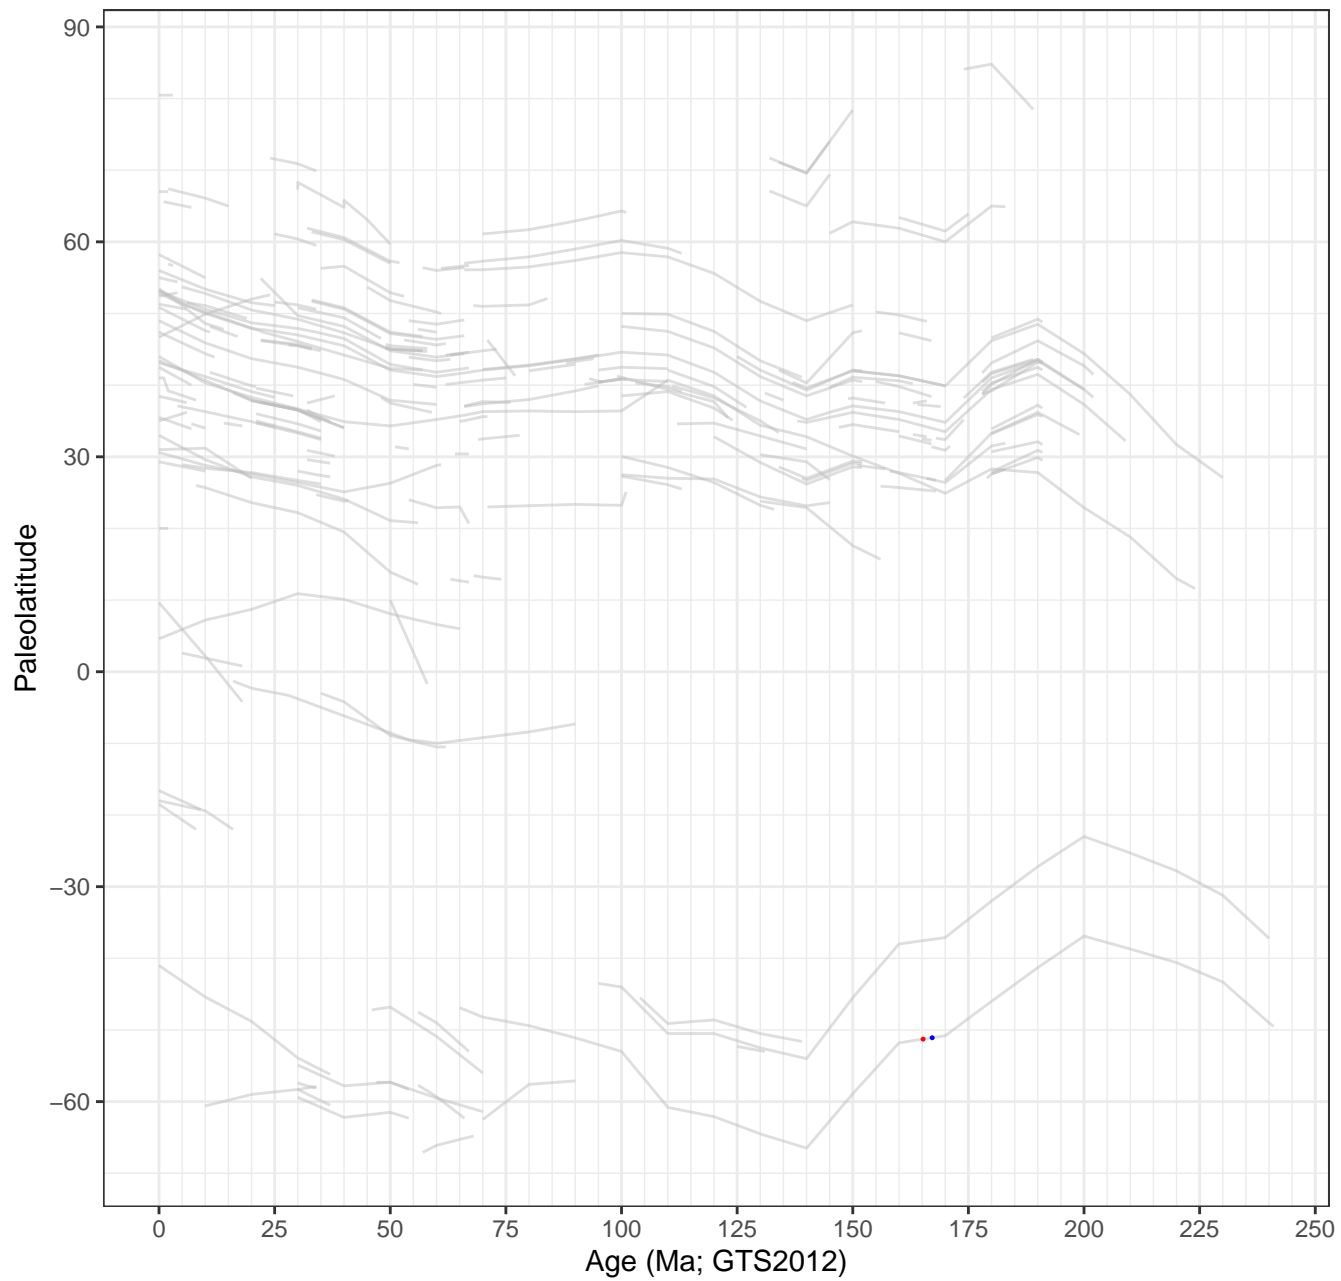

Supplement: Supplementary file 1374 [file Endoscrinium kempiae.pdf › Supplement/Supplement 2/Species 1914 plots/Endoscrinium kempiae.pdf]

# Species *Endoscrinium luridum*

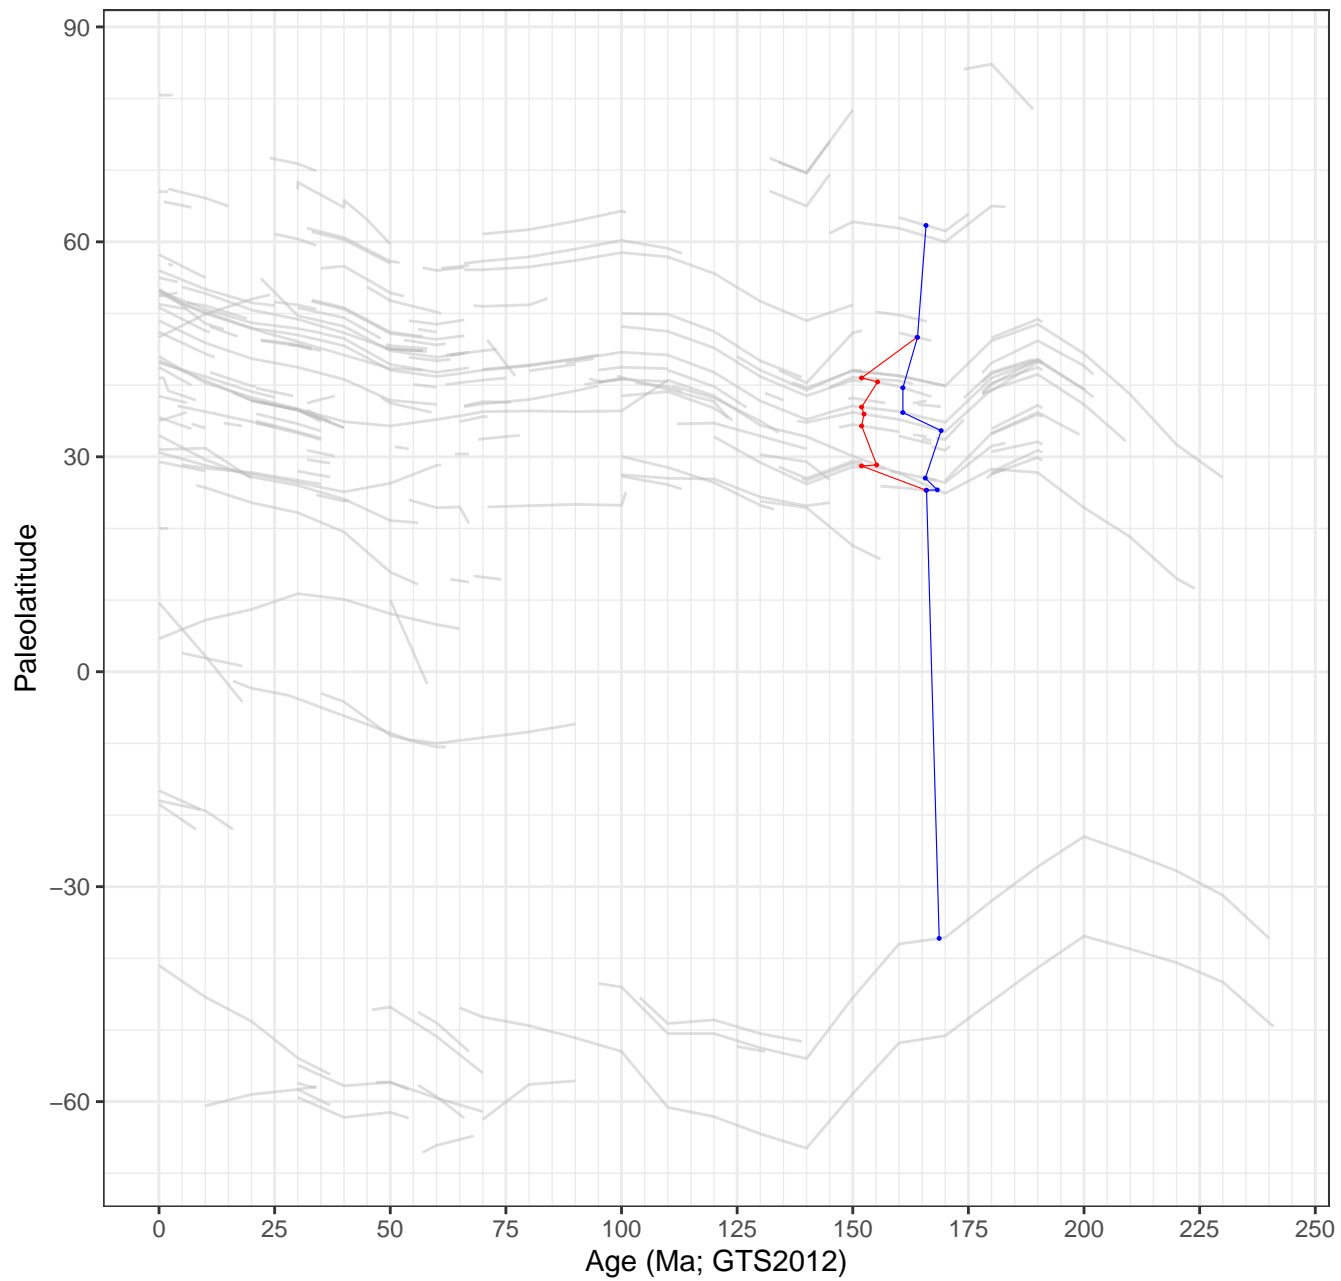

Supplement: Supplementary file 1375 [file Endoscrinium luridum.pdf › Supplement/Supplement 2/Species 1914 plots/Endoscrinium luridum.pdf]

# Species *Endoscrinium reticulatum*

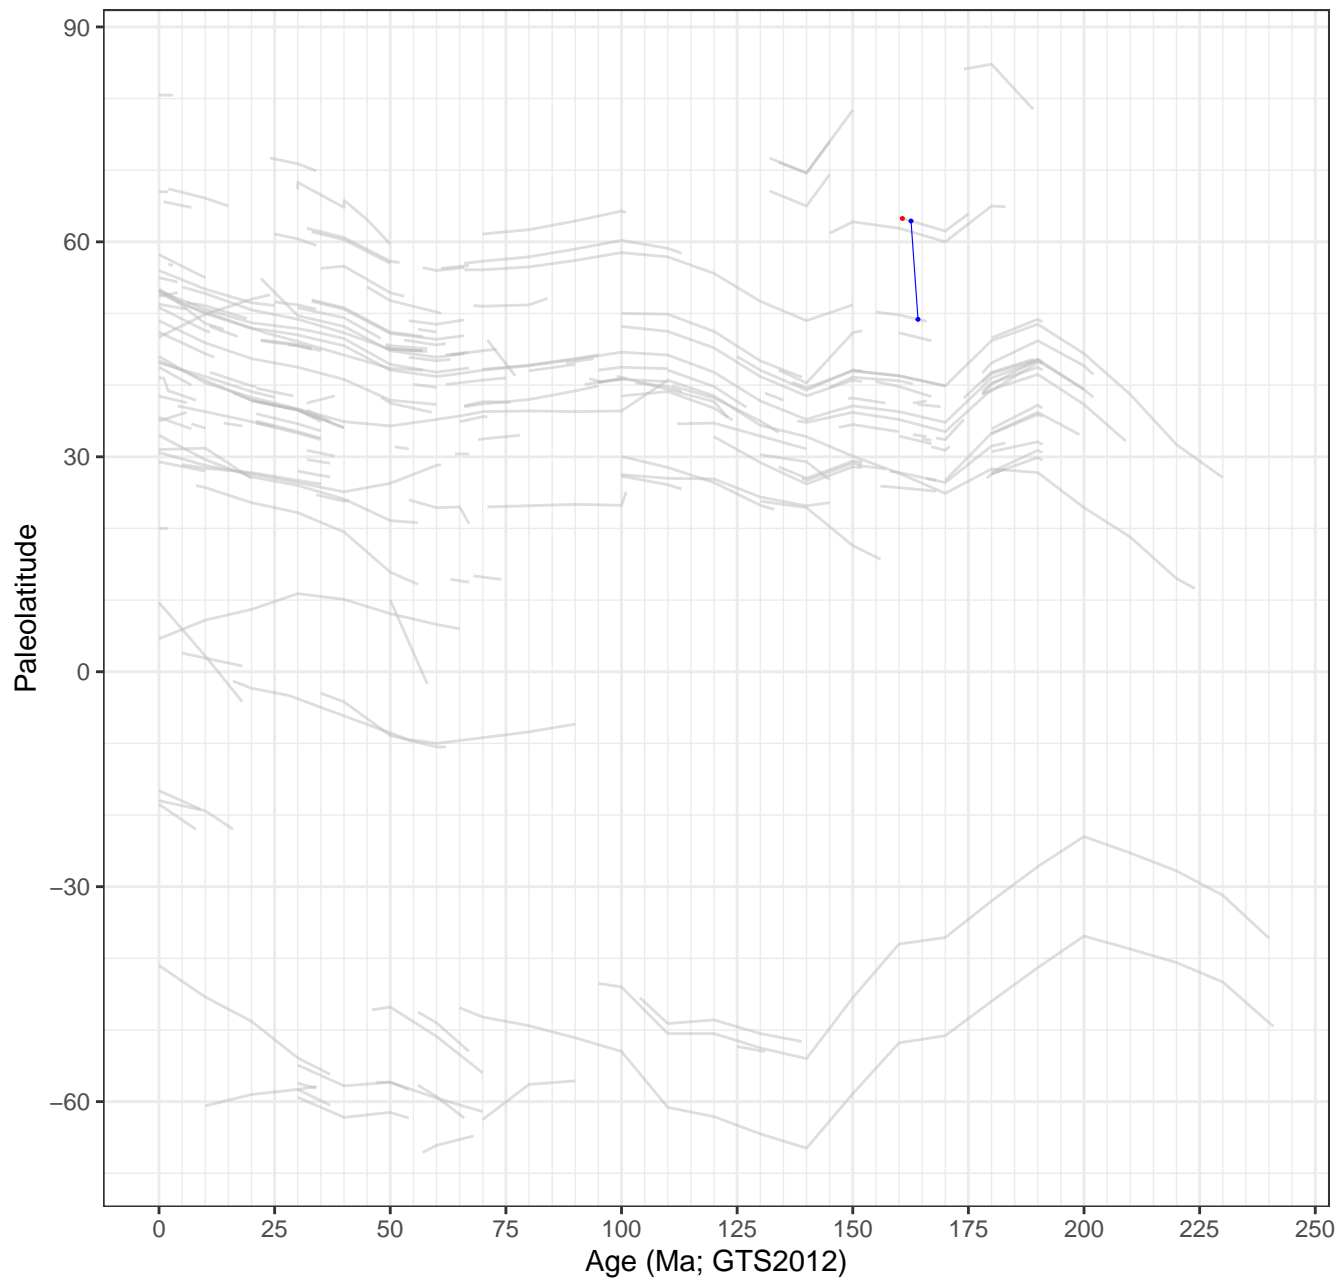

Supplement: Supplementary file 1376 [file Endoscrinium reticulatum.pdf › Supplement/Supplement 2/Species 1914 plots/Endoscrinium reticulatum.pdf]

# Species *Enneadocysta arcuata*

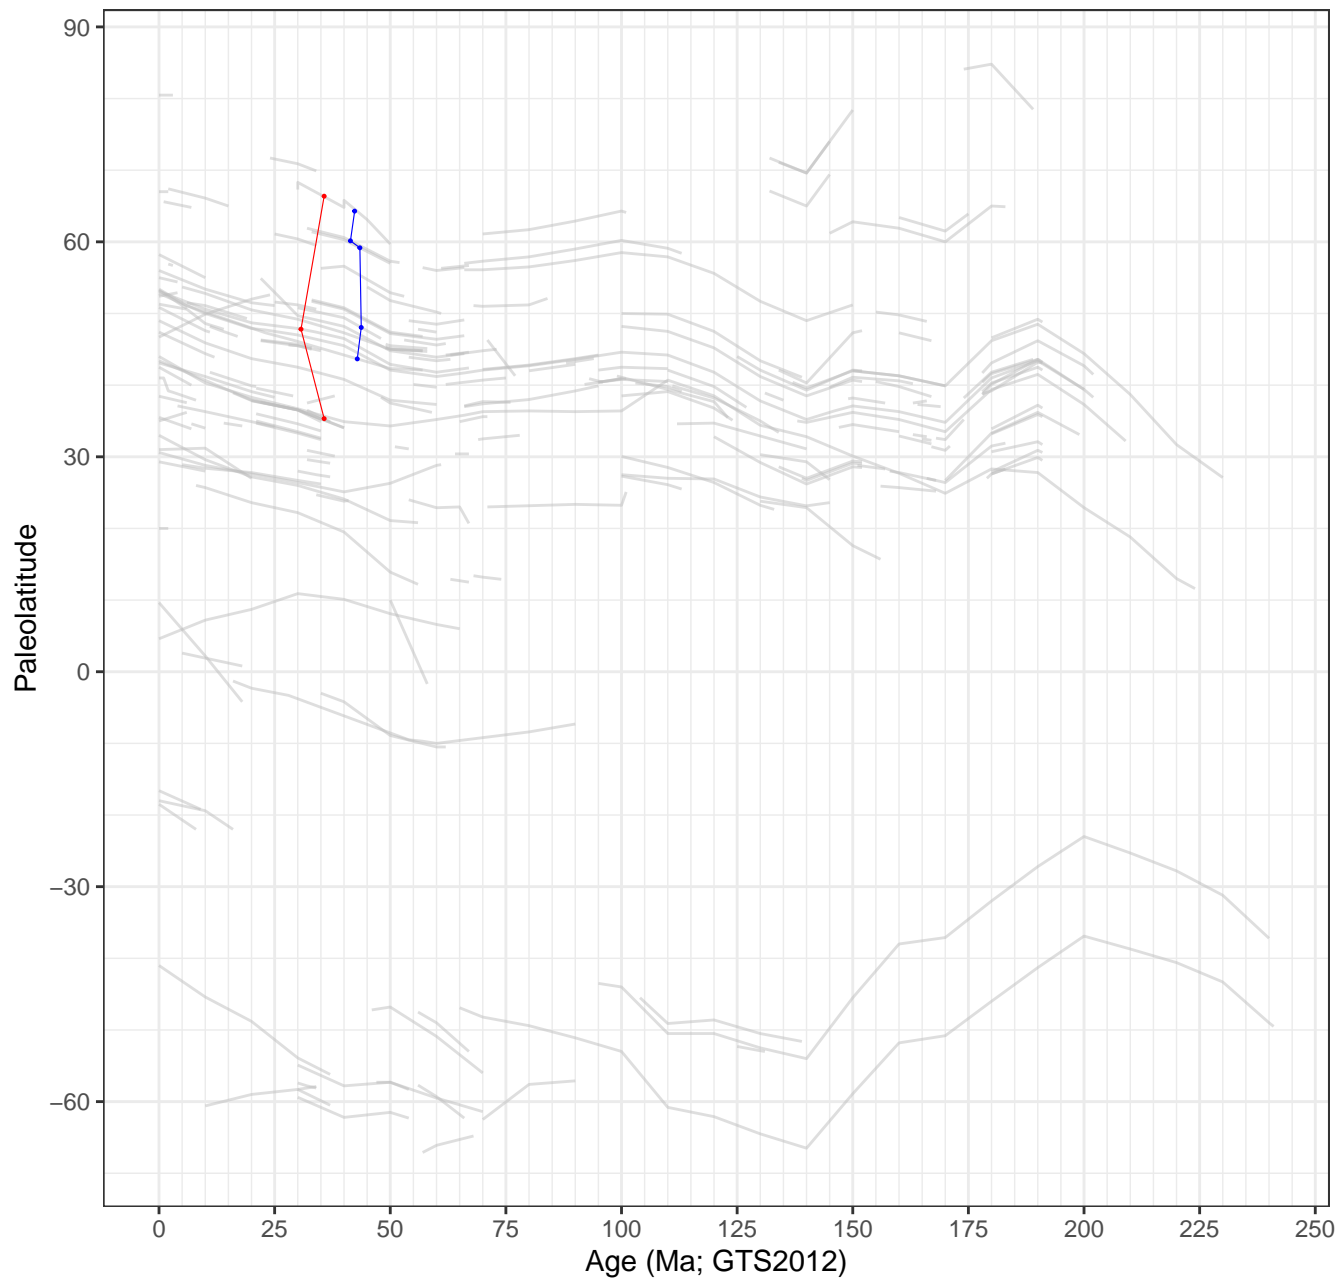

Supplement: Supplementary file 1377 [file Enneadocysta arcuata.pdf › Supplement/Supplement 2/Species 1914 plots/Enneadocysta arcuata.pdf]

# Species *Enneadocysta dictyostila*

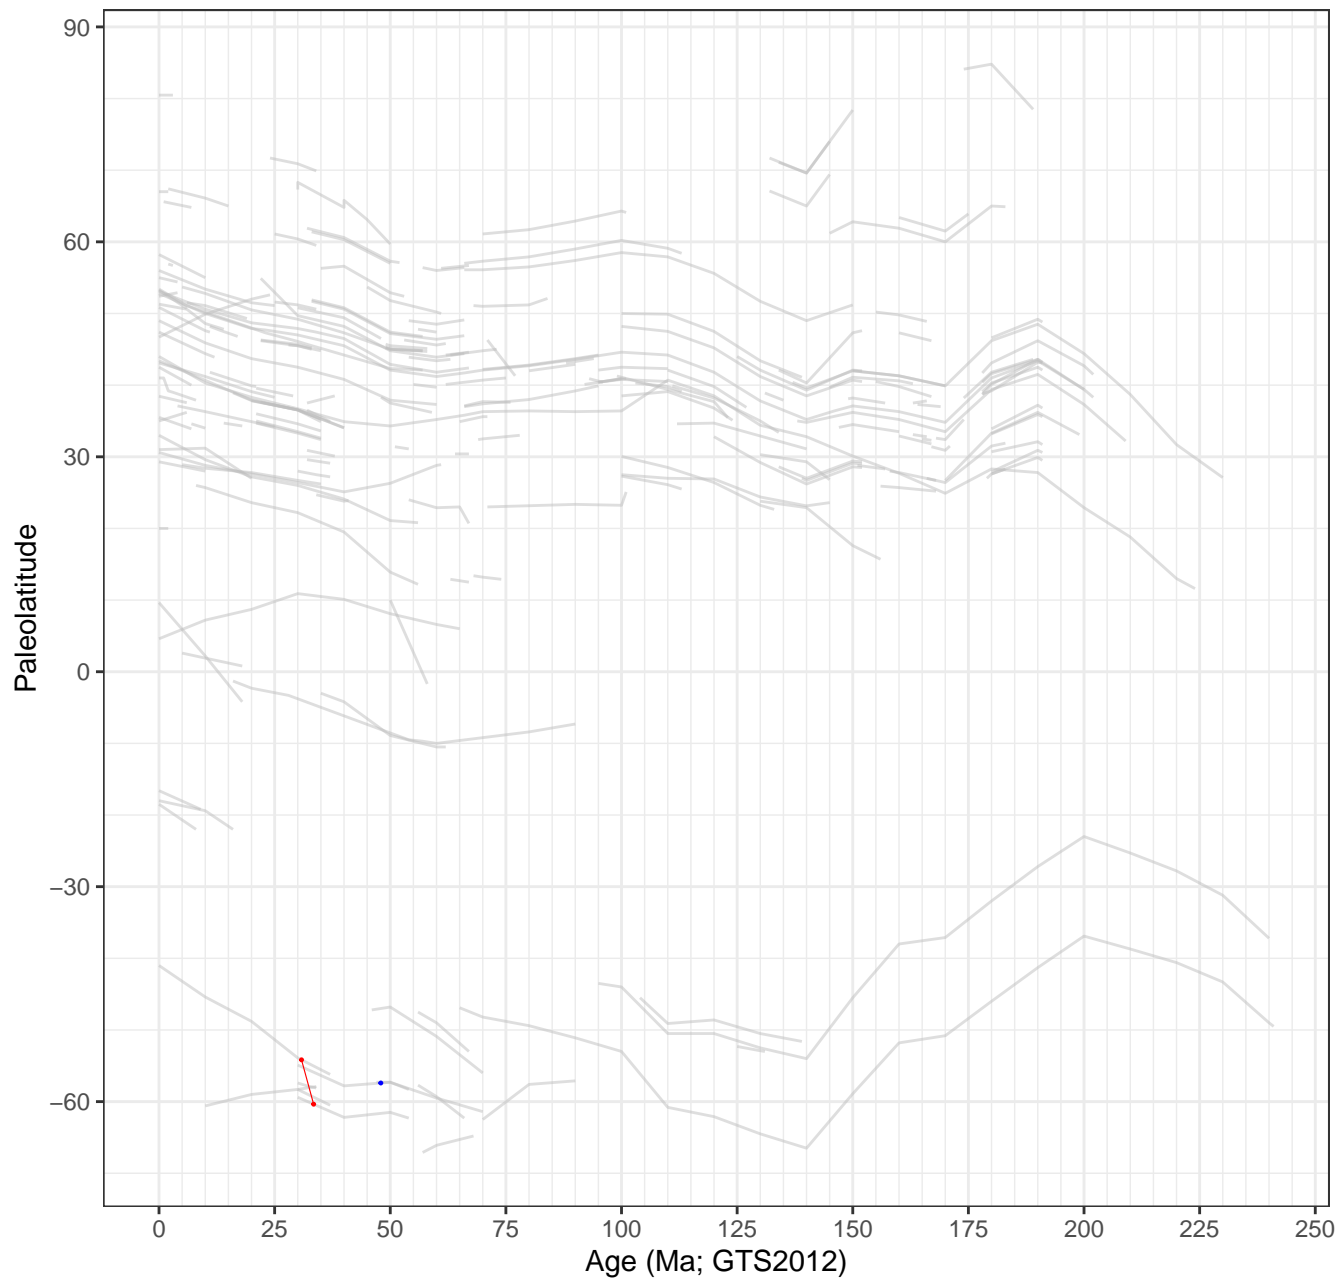

Supplement: Supplementary file 1378 [file Enneadocysta dictyostila.pdf › Supplement/Supplement 2/Species 1914 plots/Enneadocysta dictyostila.pdf]

# Species *Enneadocysta fenestrata*

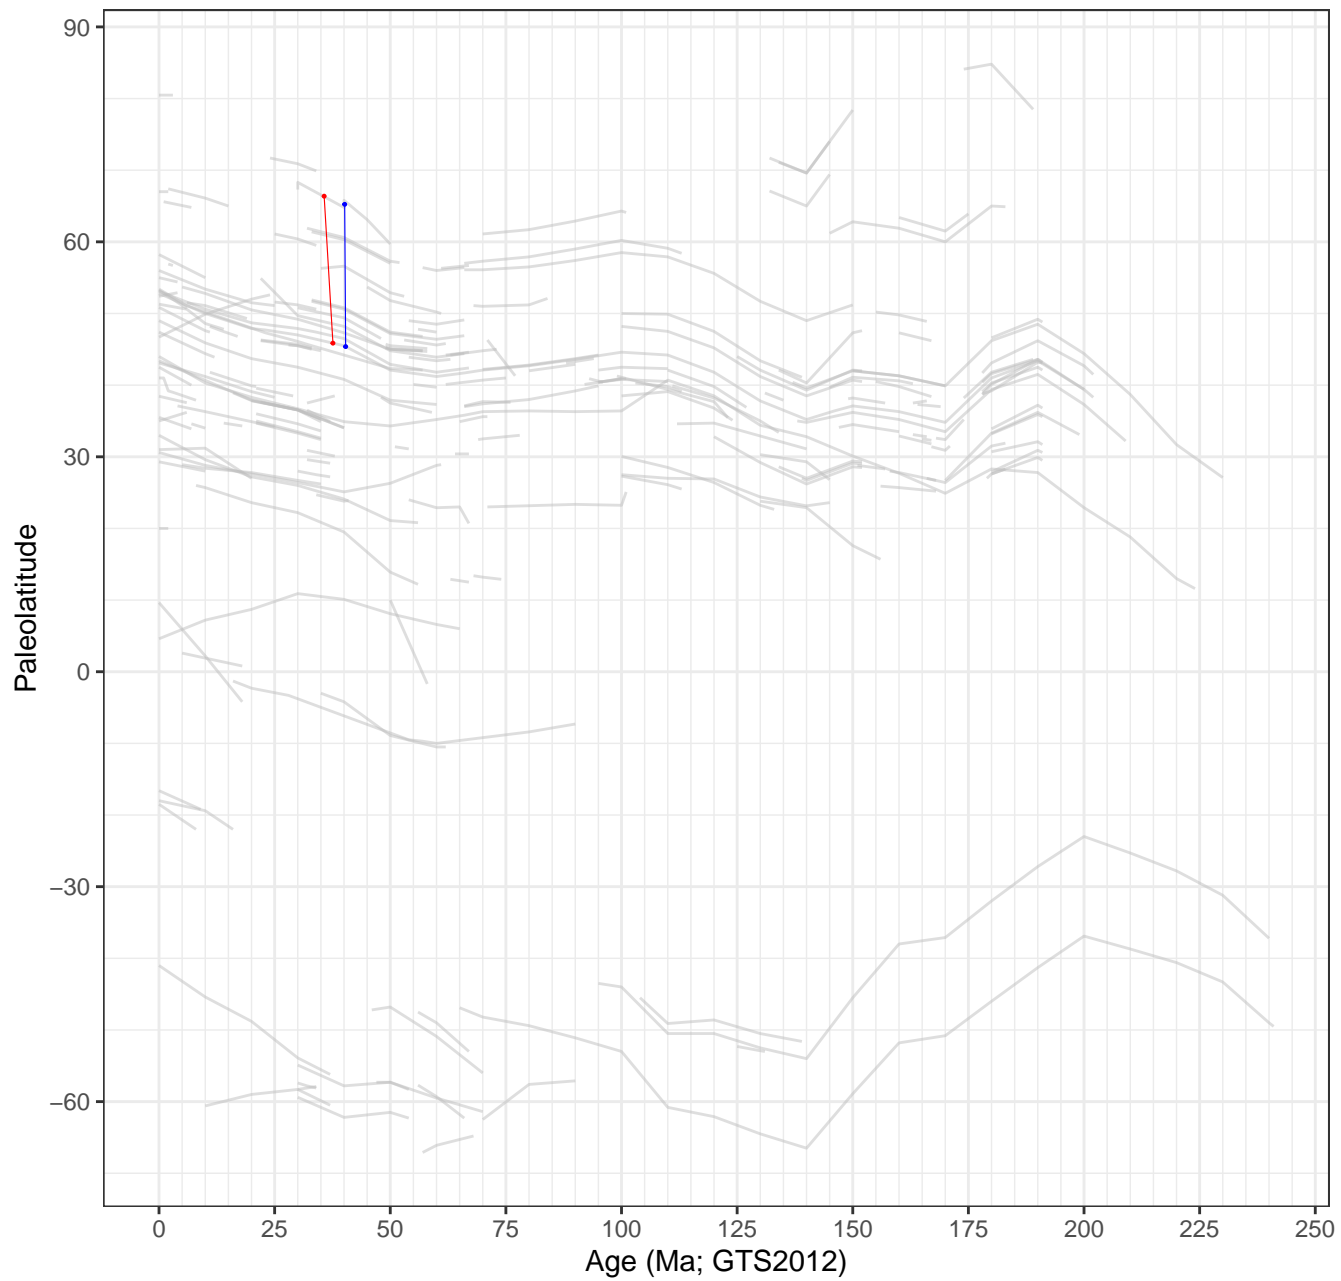

Supplement: Supplementary file 1379 [file Enneadocysta fenestrata.pdf › Supplement/Supplement 2/Species 1914 plots/Enneadocysta fenestrata.pdf]

# Species *Enneadocysta multicornuta*

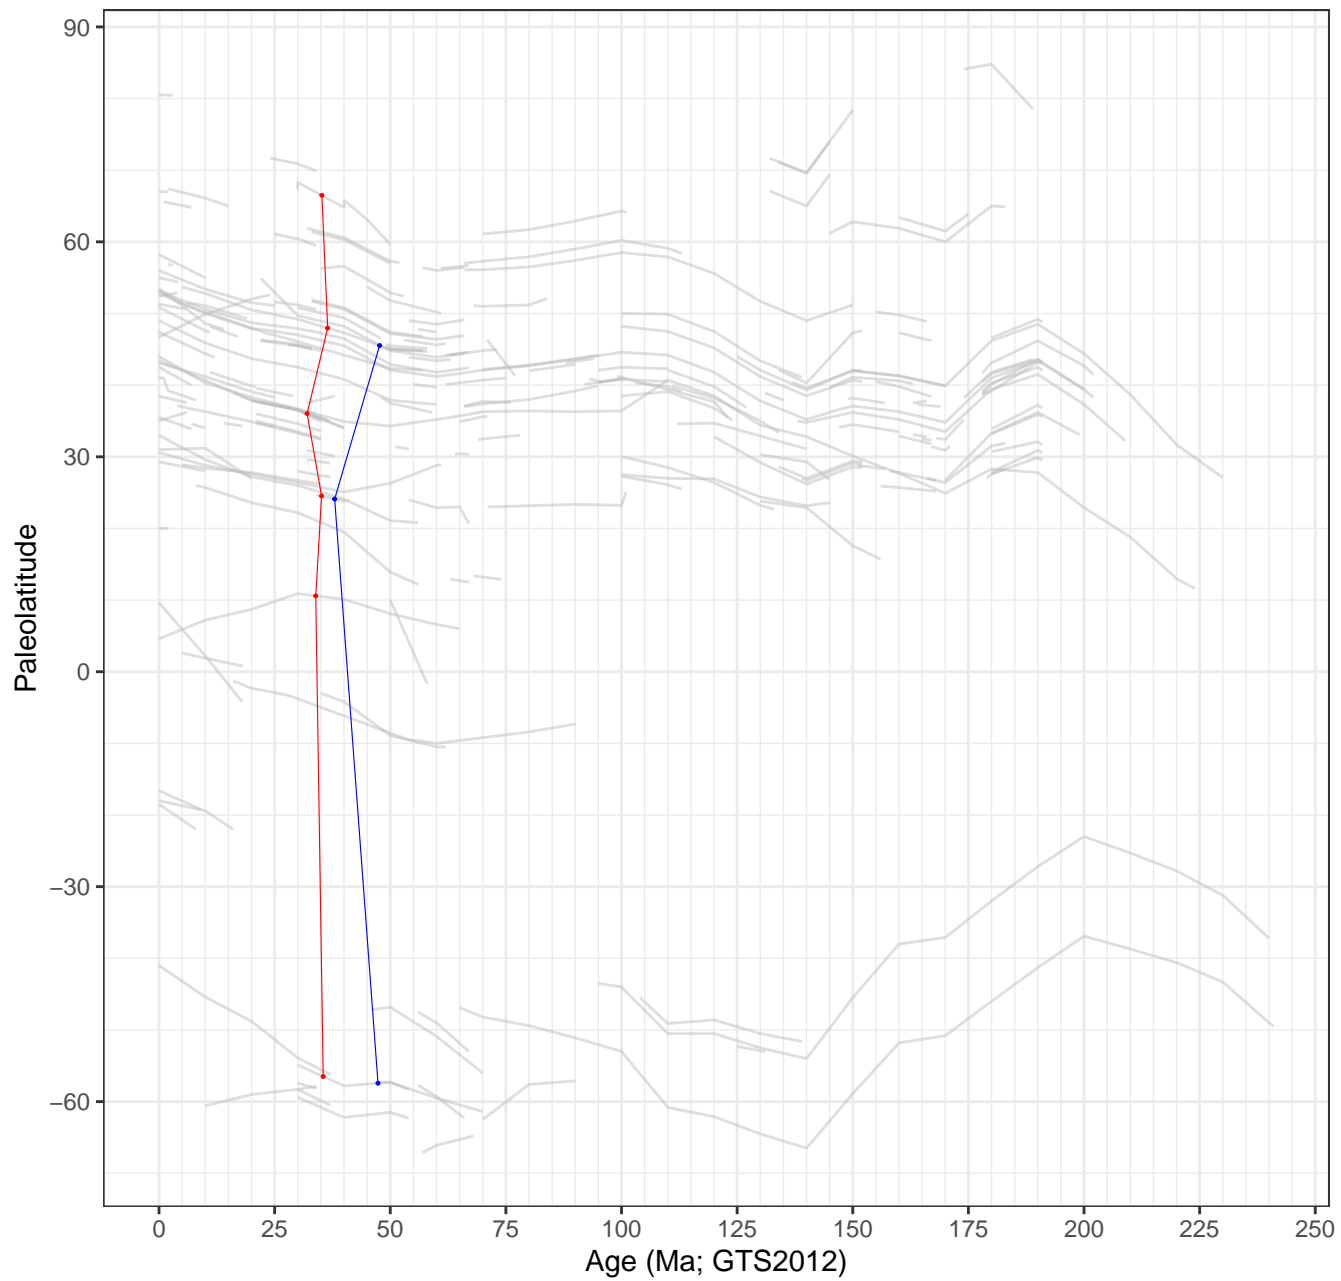

Supplement: Supplementary file 1380 [file Enneadocysta multicornuta.pdf › Supplement/Supplement 2/Species 1914 plots/Enneadocysta multicornuta.pdf]

# Species *Enneadocysta pectiniformis*

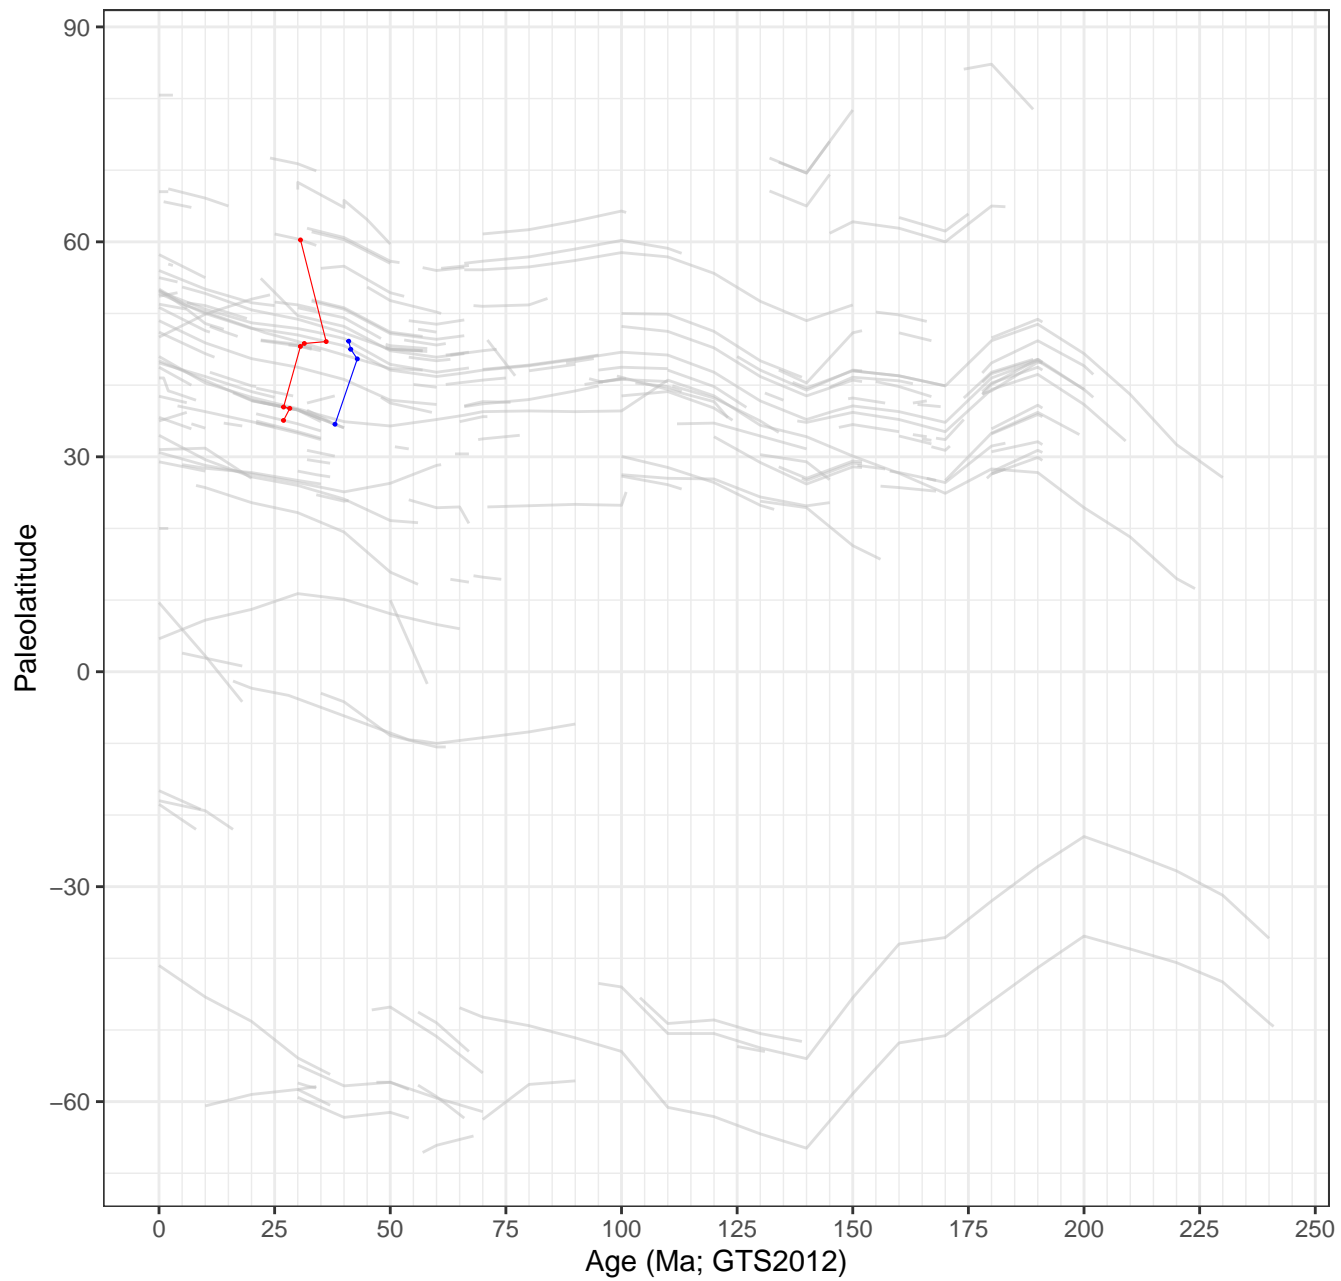

Supplement: Supplementary file 1381 [file Enneadocysta pectiniformis.pdf › Supplement/Supplement 2/Species 1914 plots/Enneadocysta pectiniformis.pdf]

# Species *Eocladopyxis furculum*

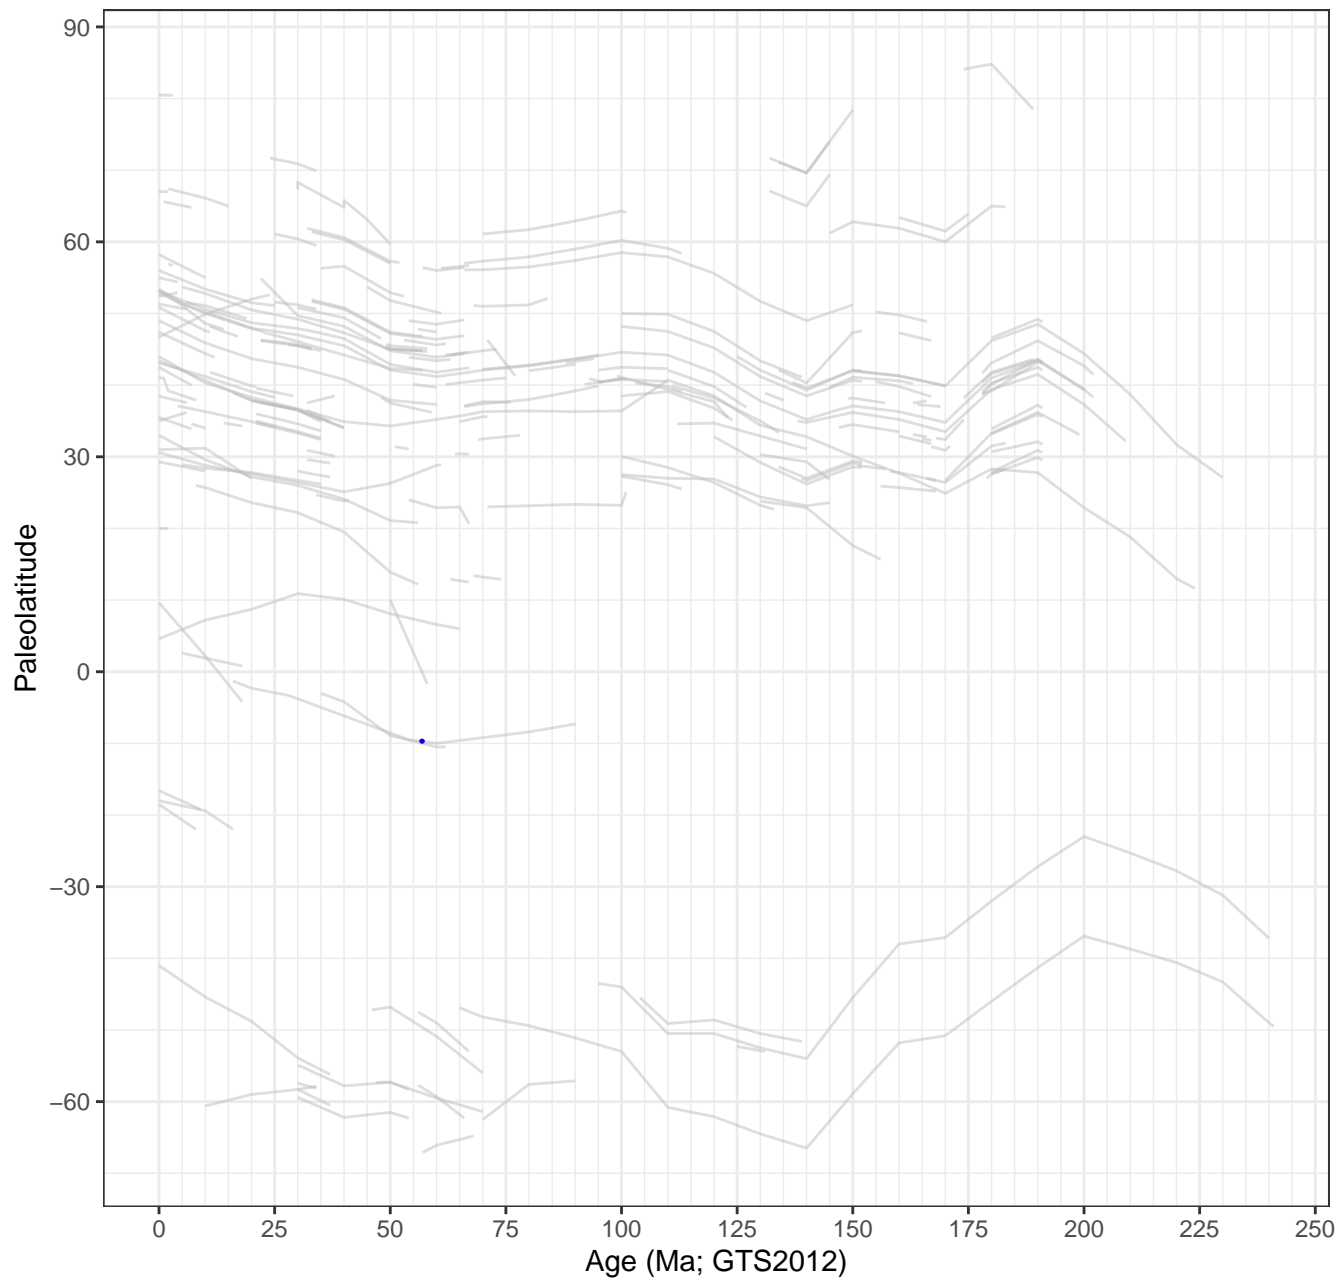

Supplement: Supplementary file 1382 [file Eocladopyxis furculum.pdf › Supplement/Supplement 2/Species 1914 plots/Eocladopyxis furculum.pdf]

# Species *Eocladopyxis peniculata*

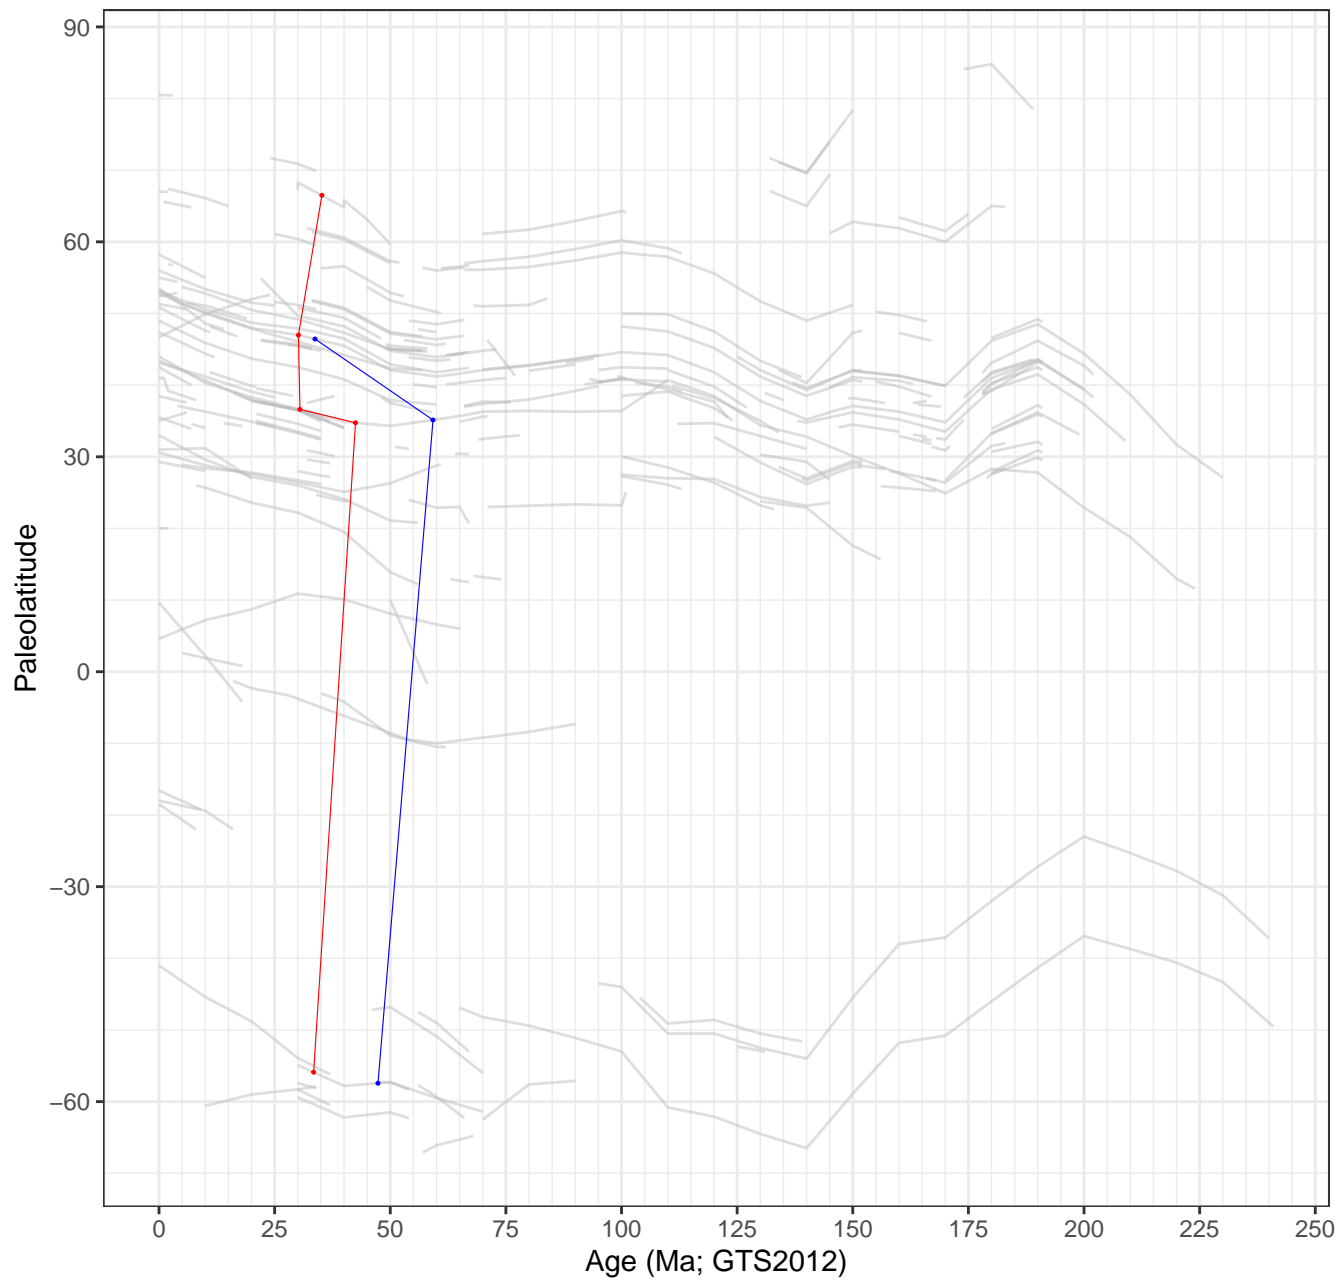

Supplement: Supplementary file 1383 [file Eocladopyxis peniculata.pdf › Supplement/Supplement 2/Species 1914 plots/Eocladopyxis peniculata.pdf]

# Species *Eocladopyxis tessellata*

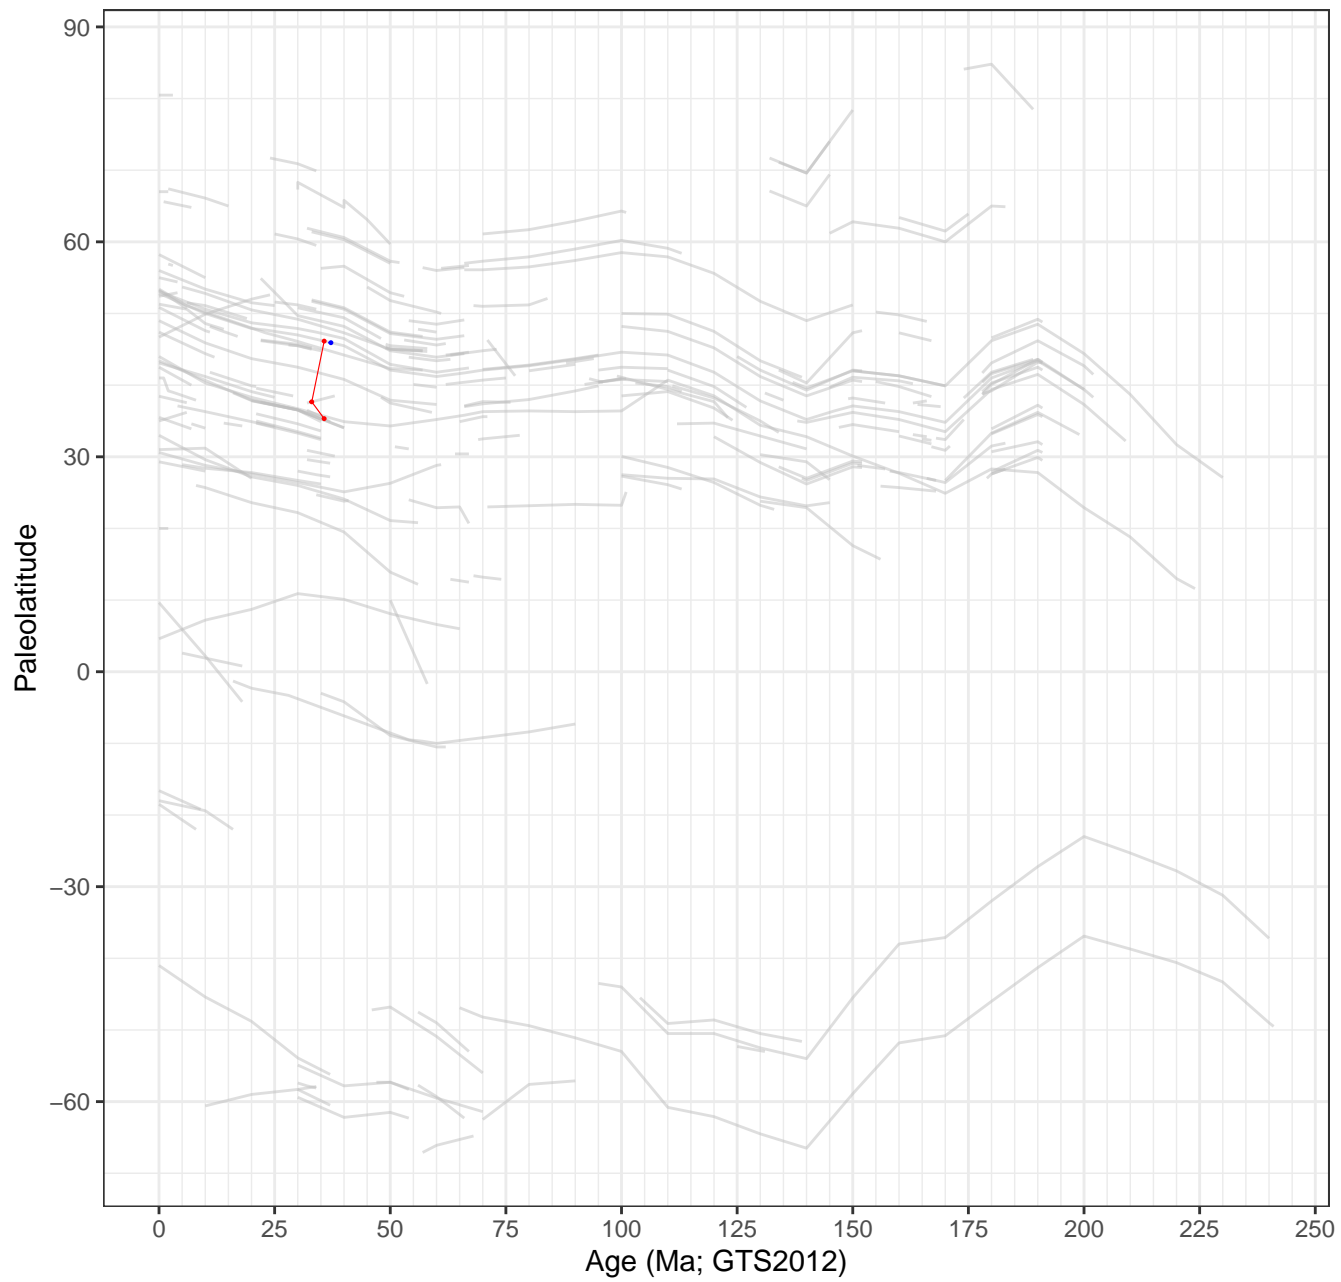

Supplement: Supplementary file 1384 [file Eocladopyxis tessellata.pdf › Supplement/Supplement 2/Species 1914 plots/Eocladopyxis tessellata.pdf]

# Species *Eodinia pachytheca*

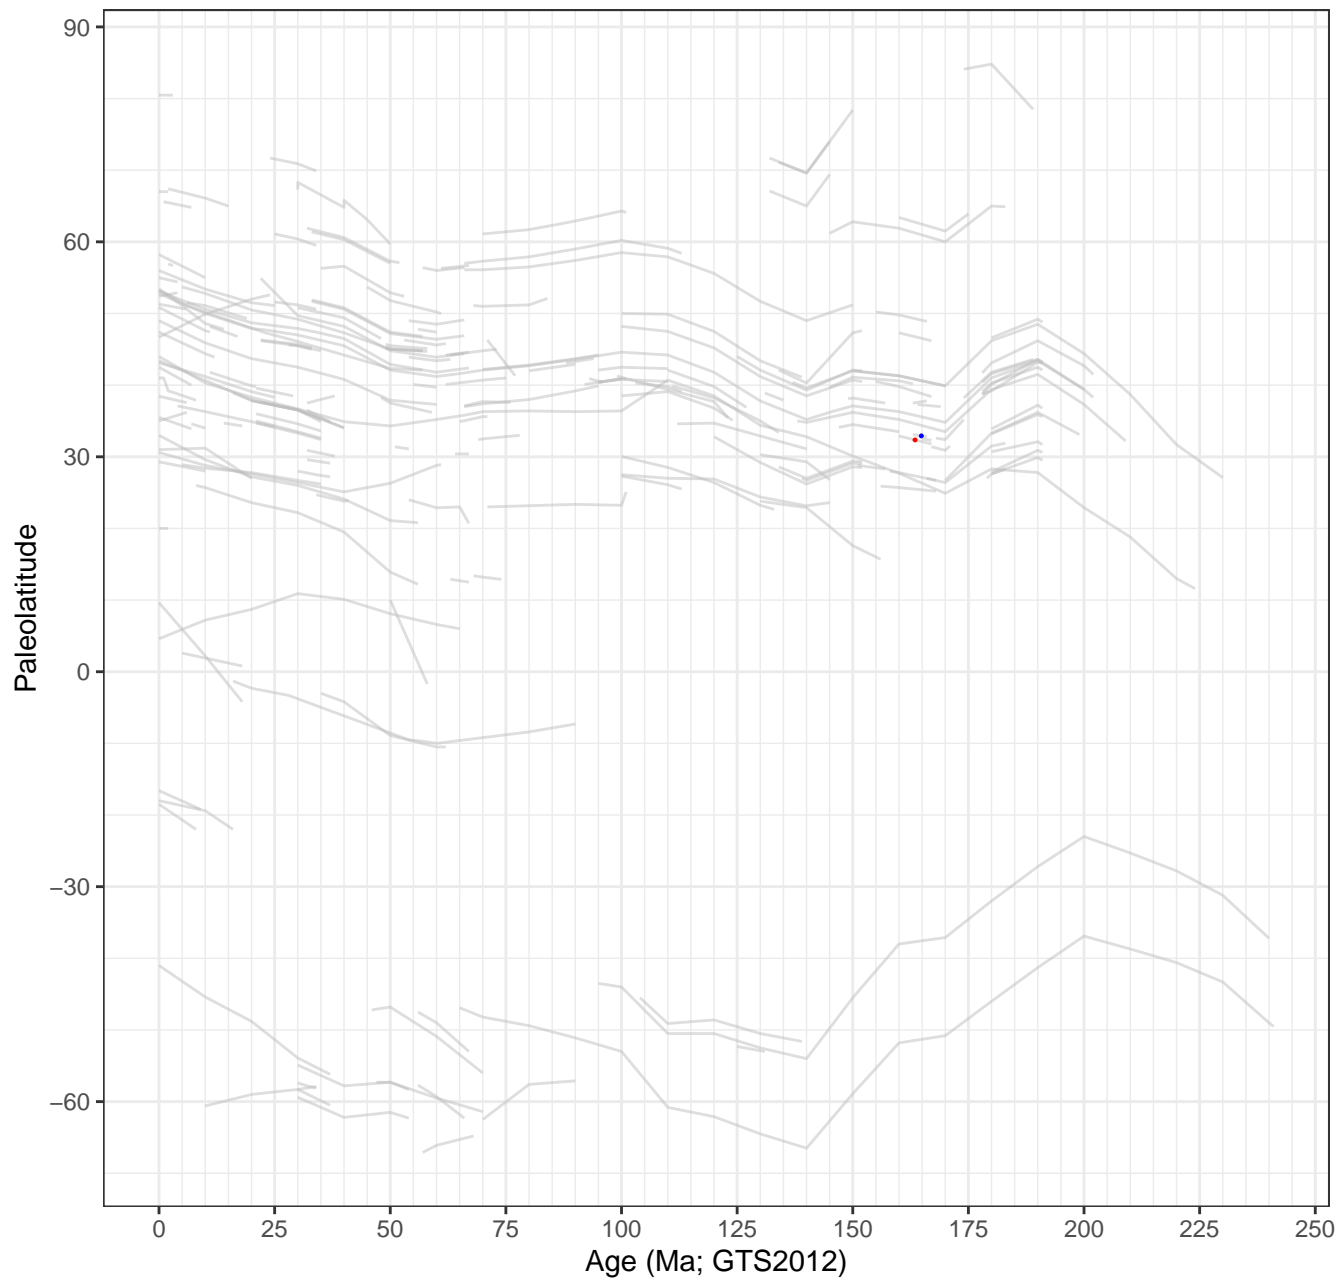

Supplement: Supplementary file 1385 [file Eodinia pachytheca.pdf › Supplement/Supplement 2/Species 1914 plots/Eodinia pachytheca.pdf]

# Species *Epelidinium translucidum*

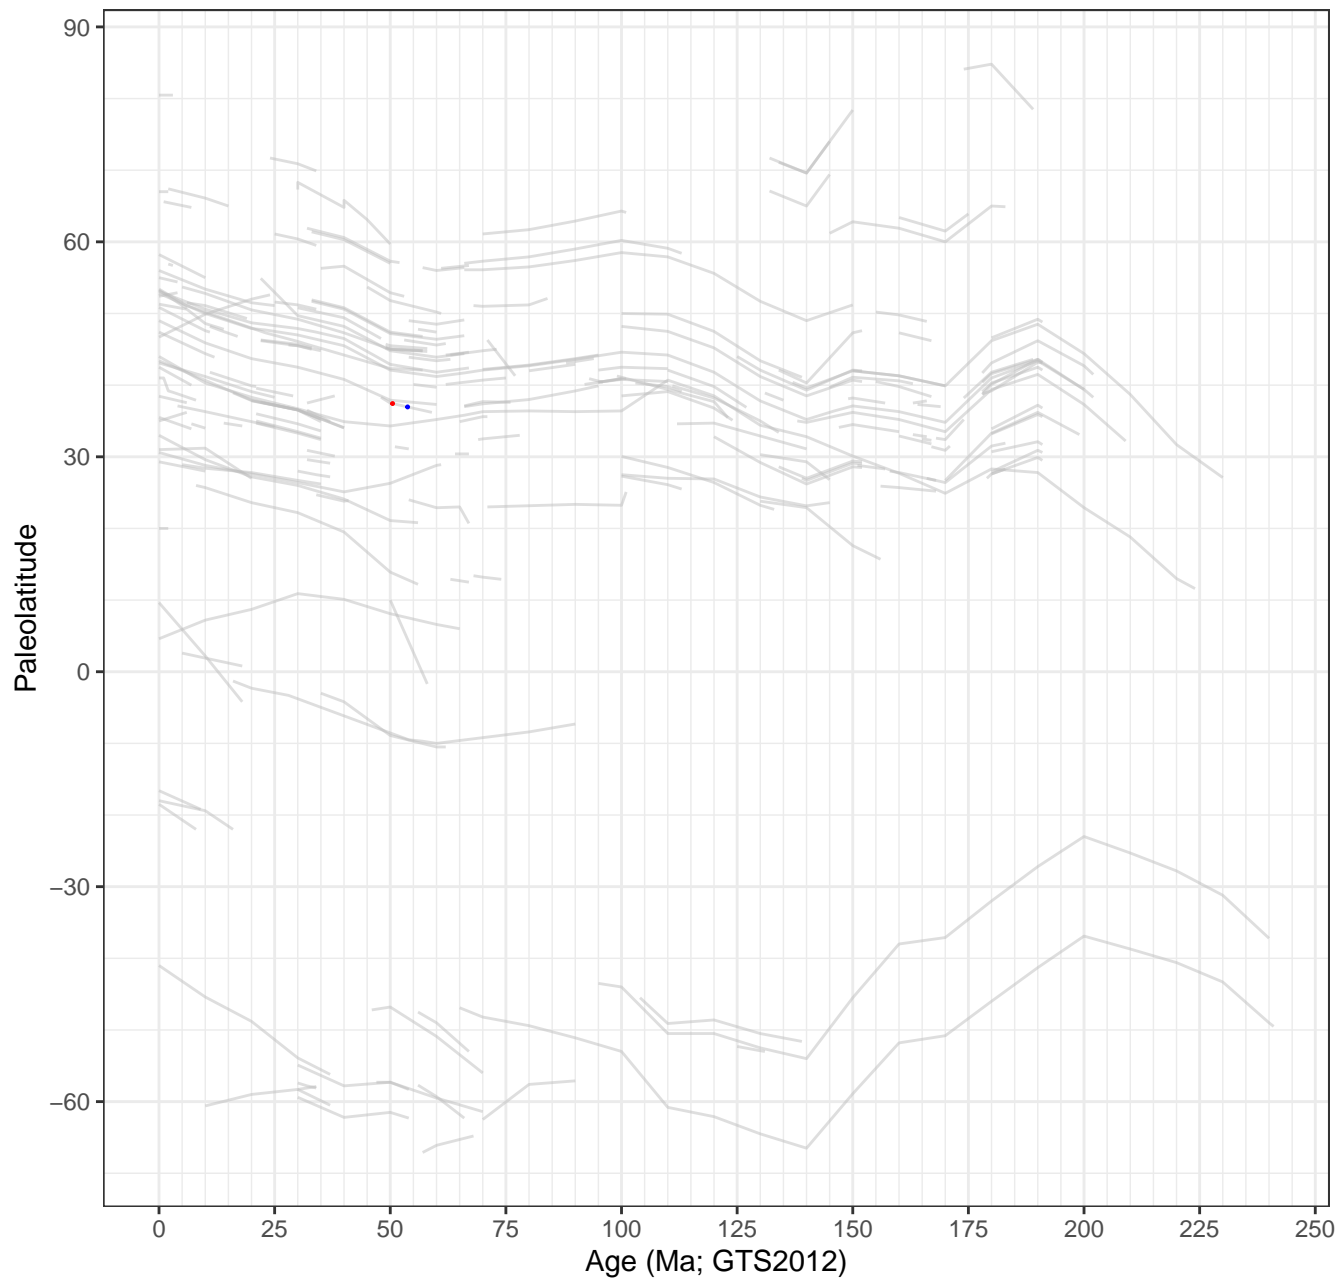

Supplement: Supplementary file 1386 [file Epelidinium translucidum.pdf › Supplement/Supplement 2/Species 1914 plots/Epelidinium translucidum.pdf]

# Species *Epelidodyctium imperfectum*

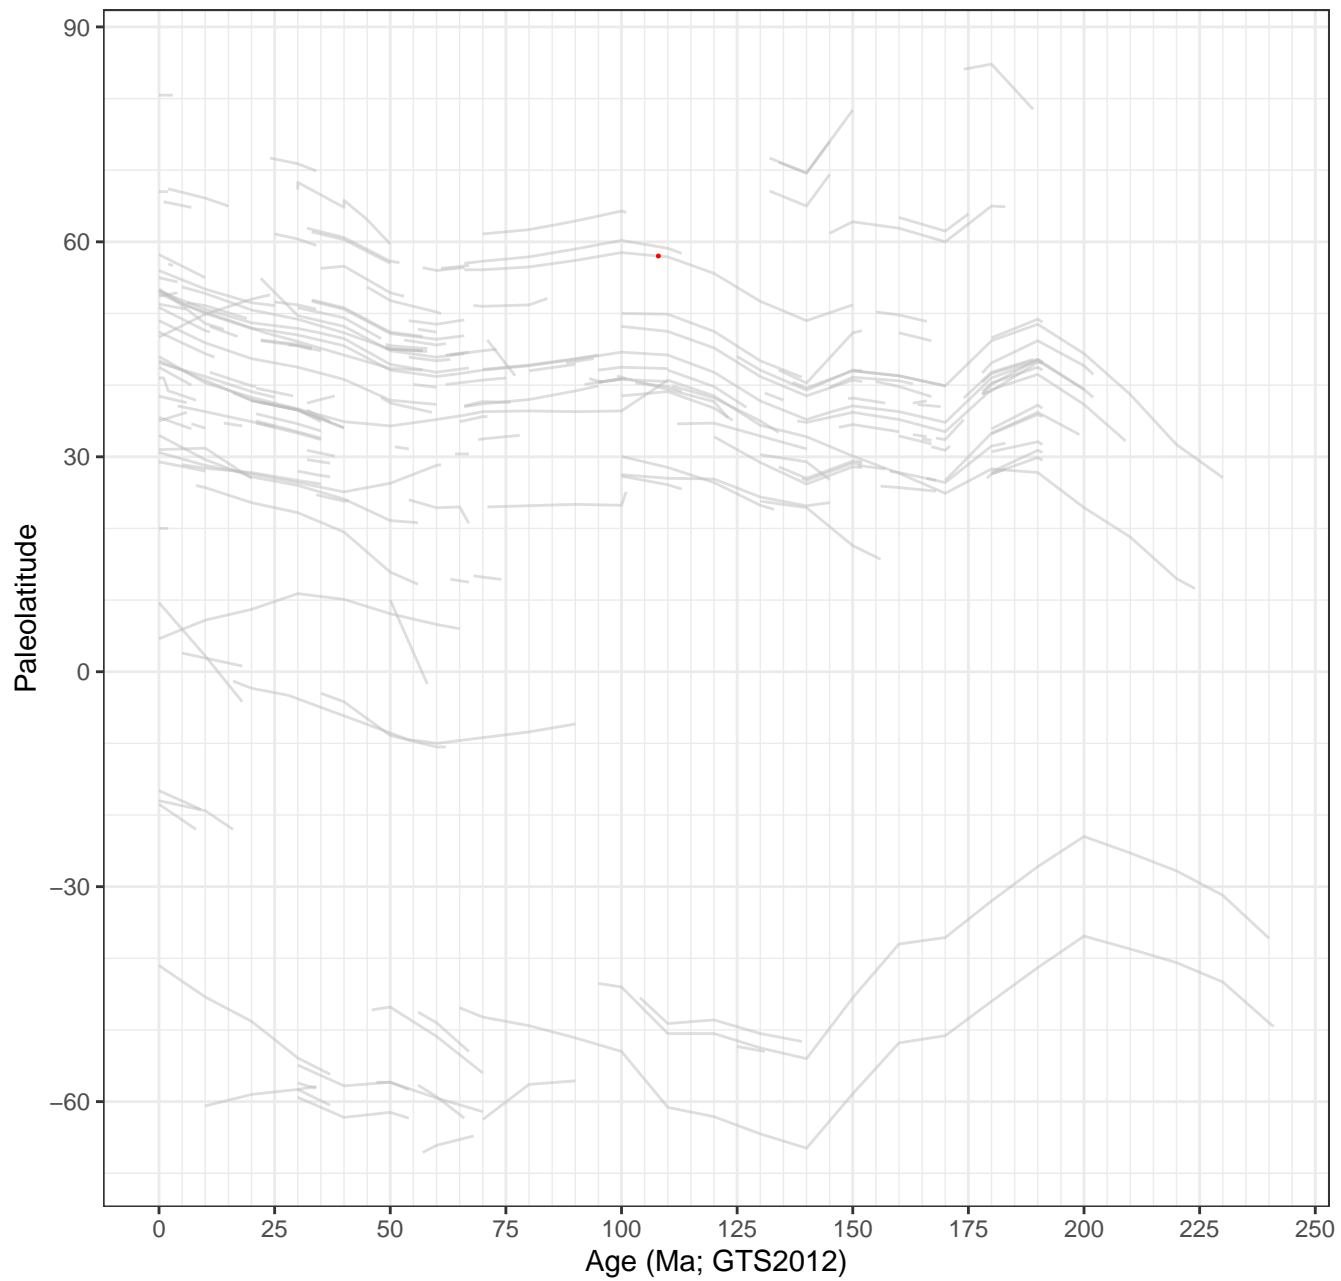

Supplement: Supplementary file 1387 [file Epelidodyctium imperfectum.pdf › Supplement/Supplement 2/Species 1914 plots/Epelidodyctium imperfectum.pdf]

# Species *Epelidosphaeridia manifesta*

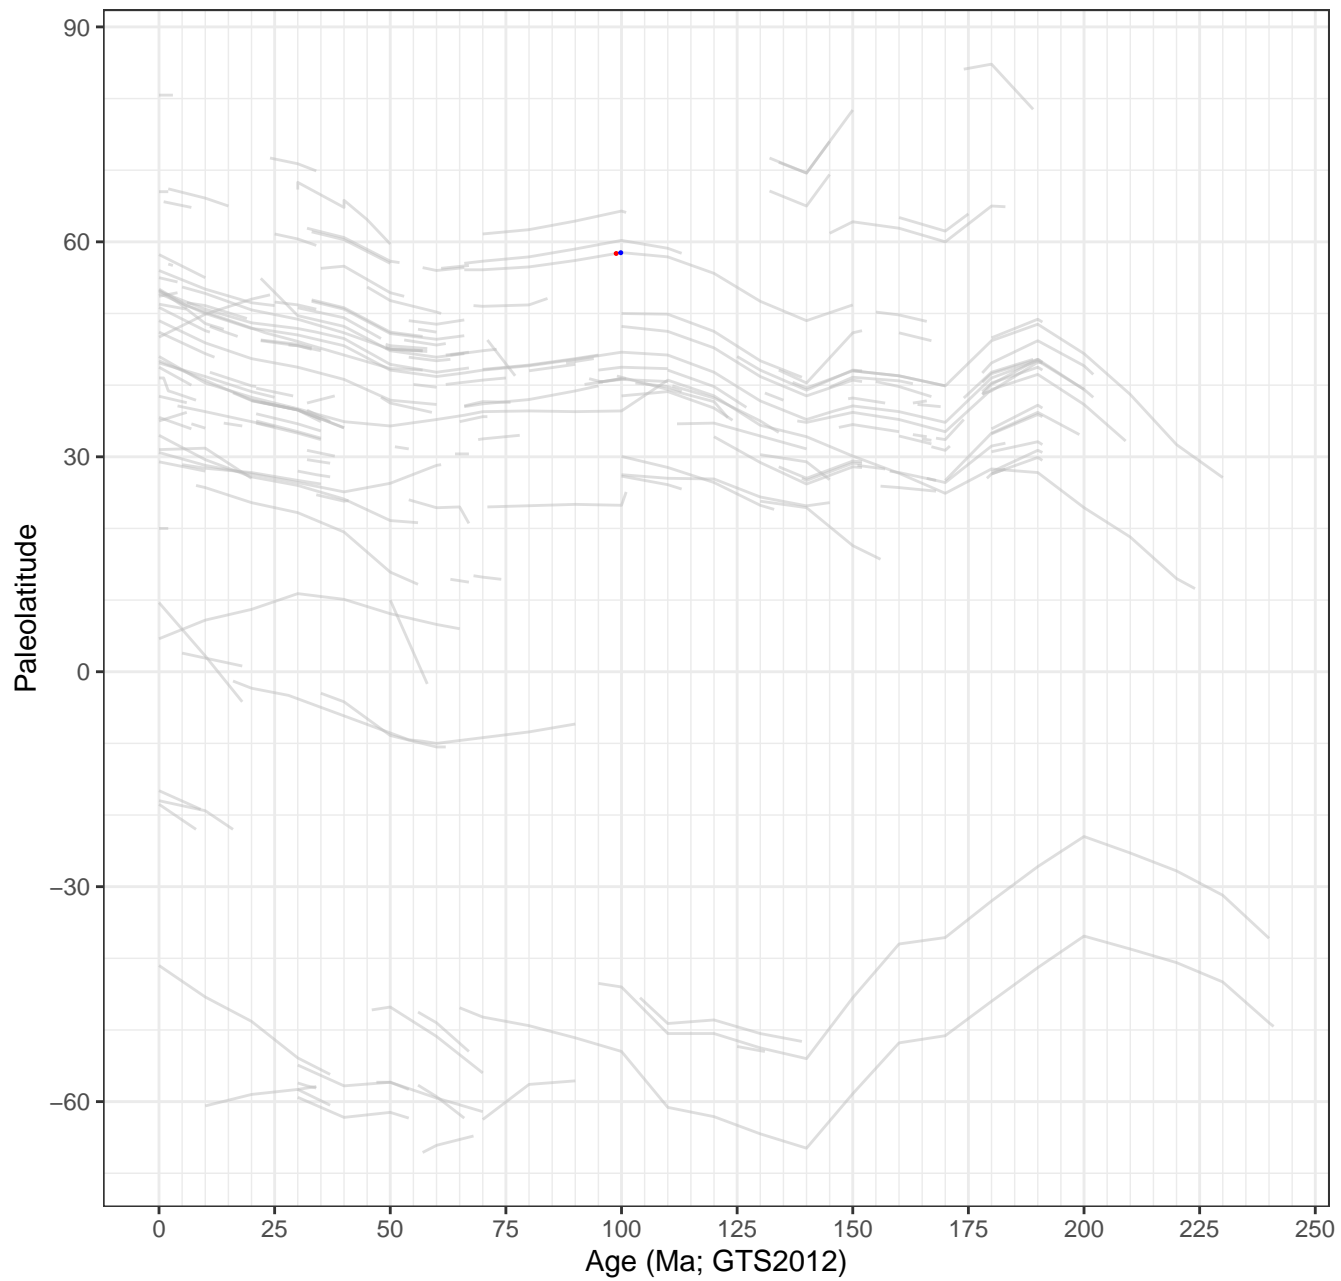

Supplement: Supplementary file 1388 [file Epelidosphaeridia manifesta.pdf › Supplement/Supplement 2/Species 1914 plots/Epelidosphaeridia manifesta.pdf]

# Species *Epelidosphaeridia pentagona*

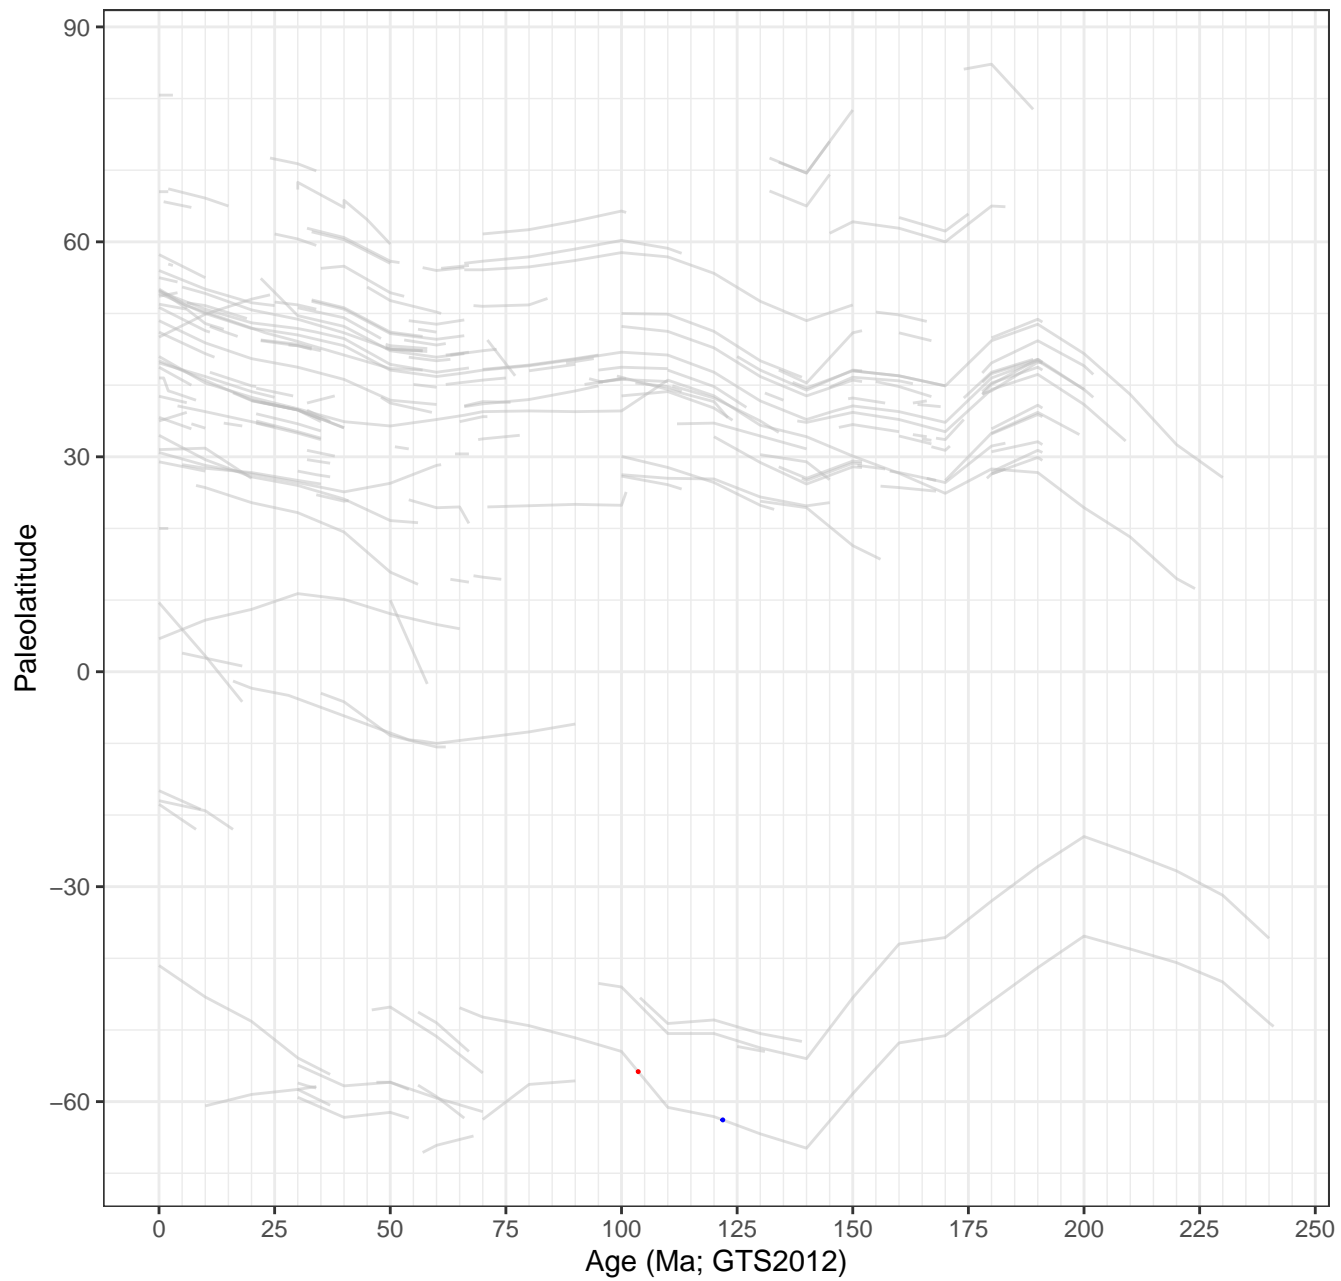

Supplement: Supplementary file 1389 [file Epelidosphaeridia pentagona.pdf › Supplement/Supplement 2/Species 1914 plots/Epelidosphaeridia pentagona.pdf]

# Species *Epelidosphaeridia spinosa*

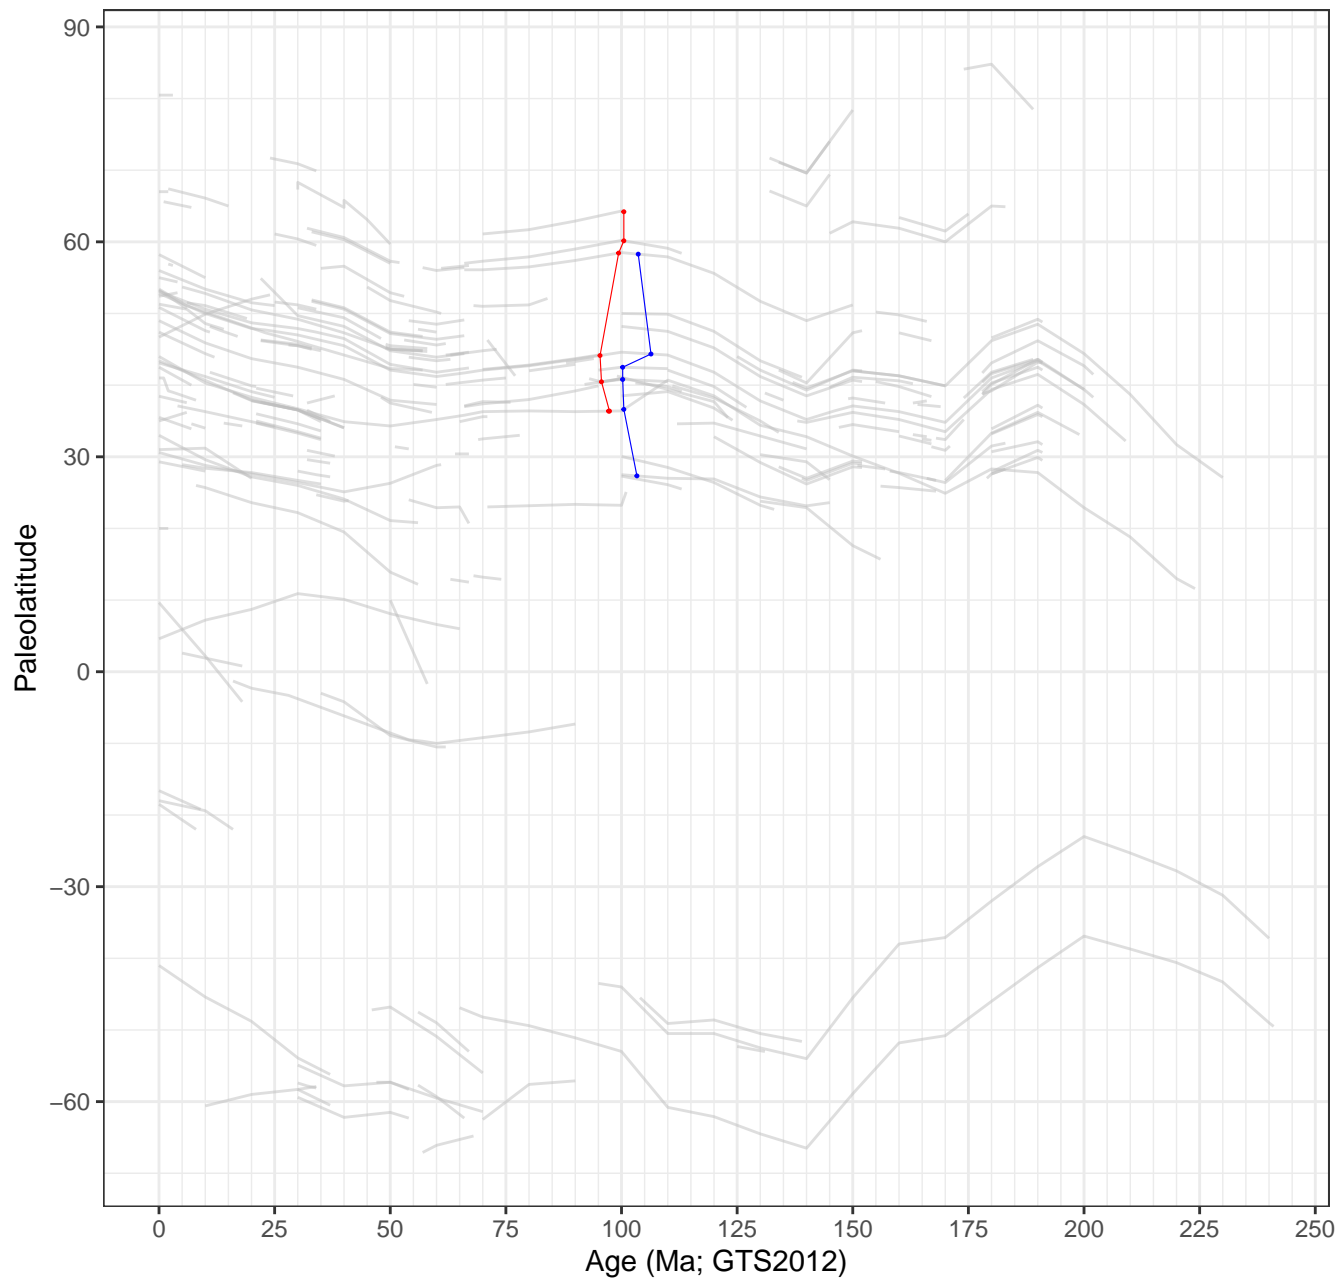

Supplement: Supplementary file 1390 [file Epelidosphaeridia spinosa.pdf › Supplement/Supplement 2/Species 1914 plots/Epelidosphaeridia spinosa.pdf]

# Species *Epiplosphaera areolata*

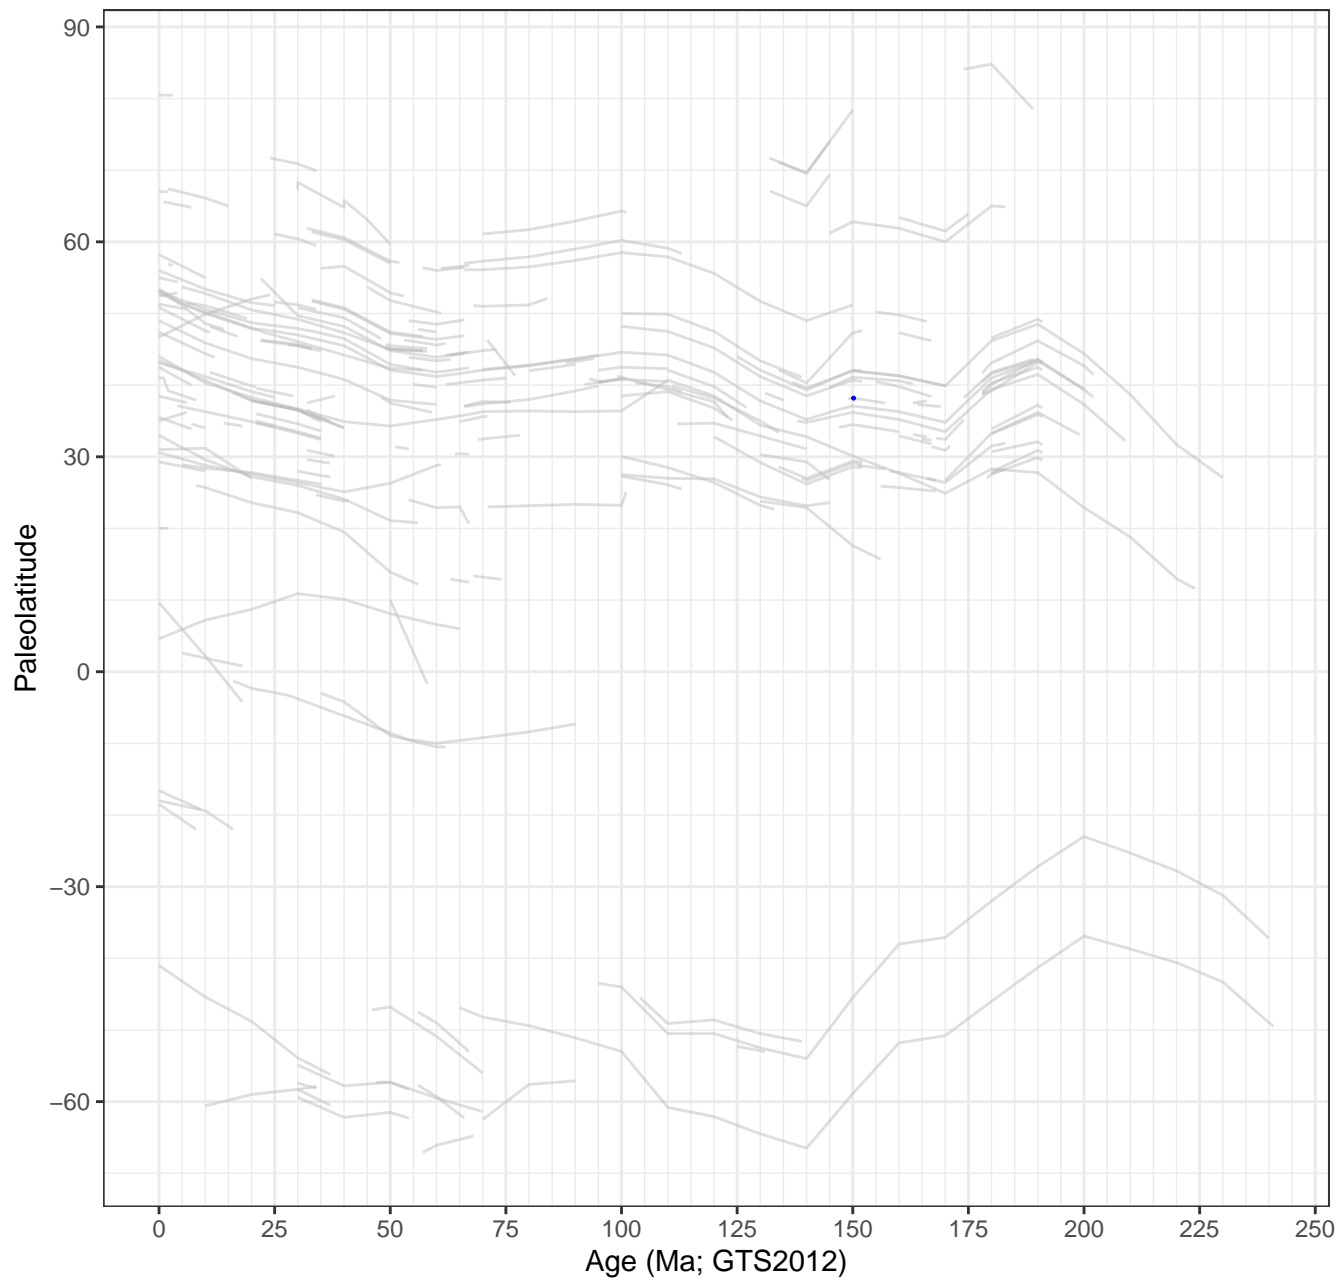

Supplement: Supplementary file 1391 [file Epiplosphaera areolata.pdf › Supplement/Supplement 2/Species 1914 plots/Epiplosphaera areolata.pdf]

# Species *Epiplosphaera gochtii*

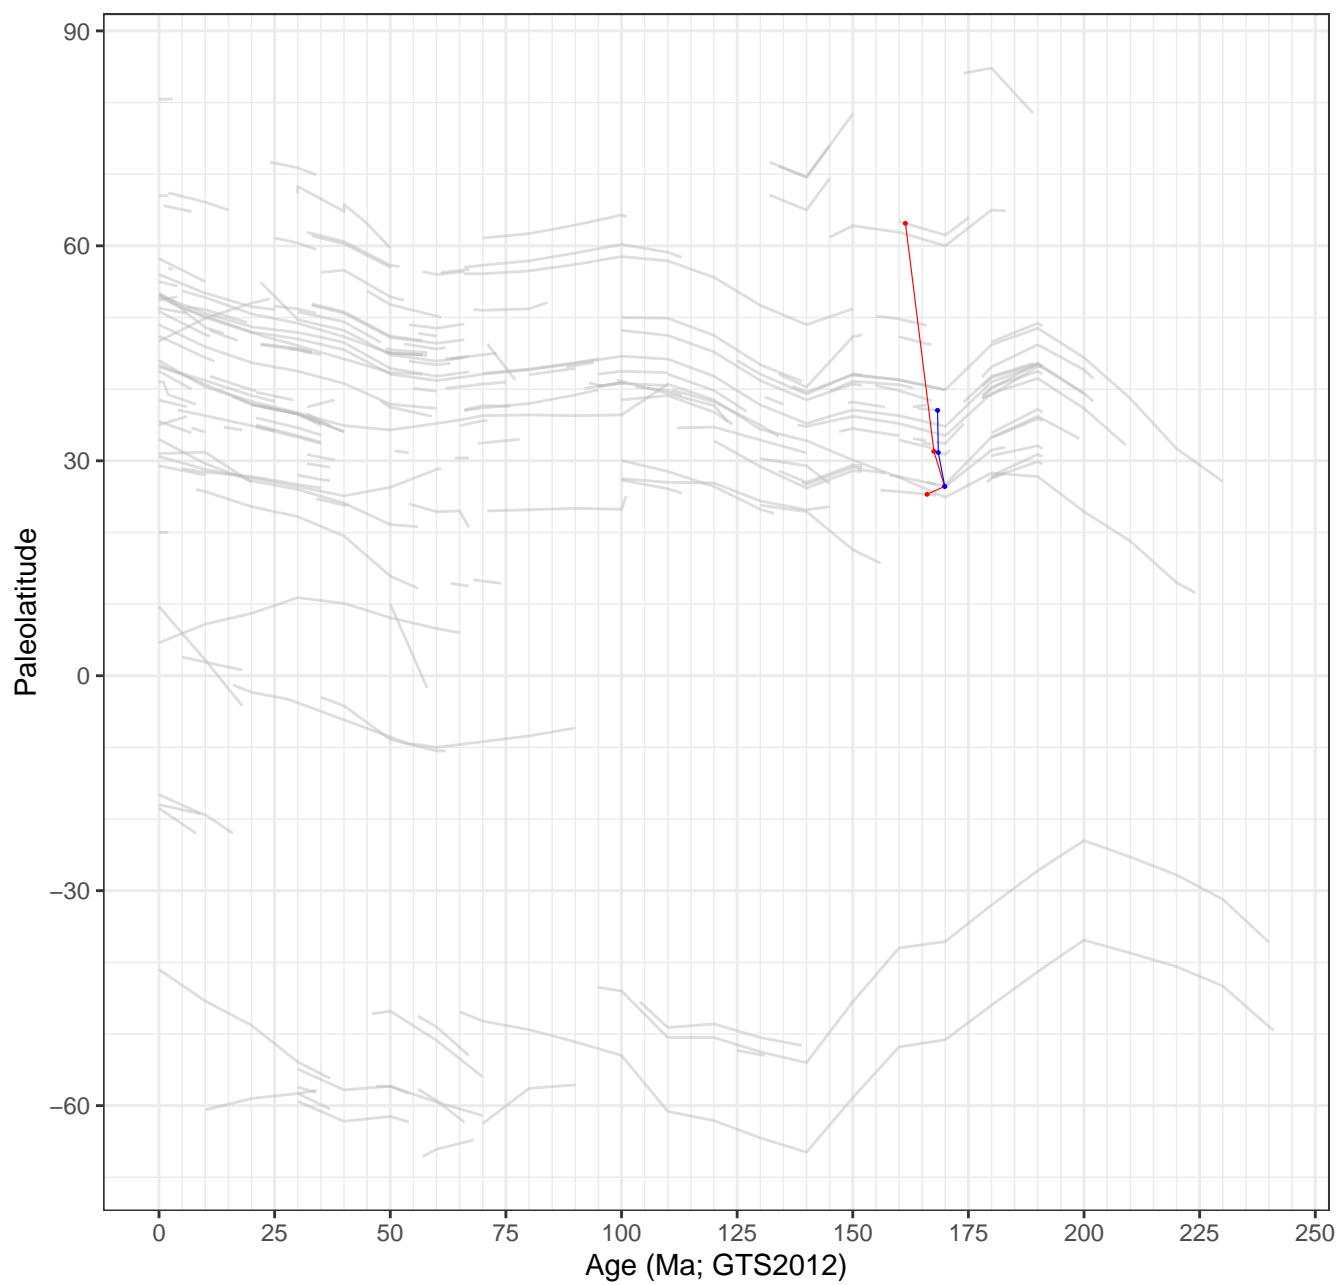

Supplement: Supplementary file 1392 [file Epiplosphaera gochtii.pdf › Supplement/Supplement 2/Species 1914 plots/Epiplosphaera gochtii.pdf]

# Species *Epiplosphaera reticulospinosa*

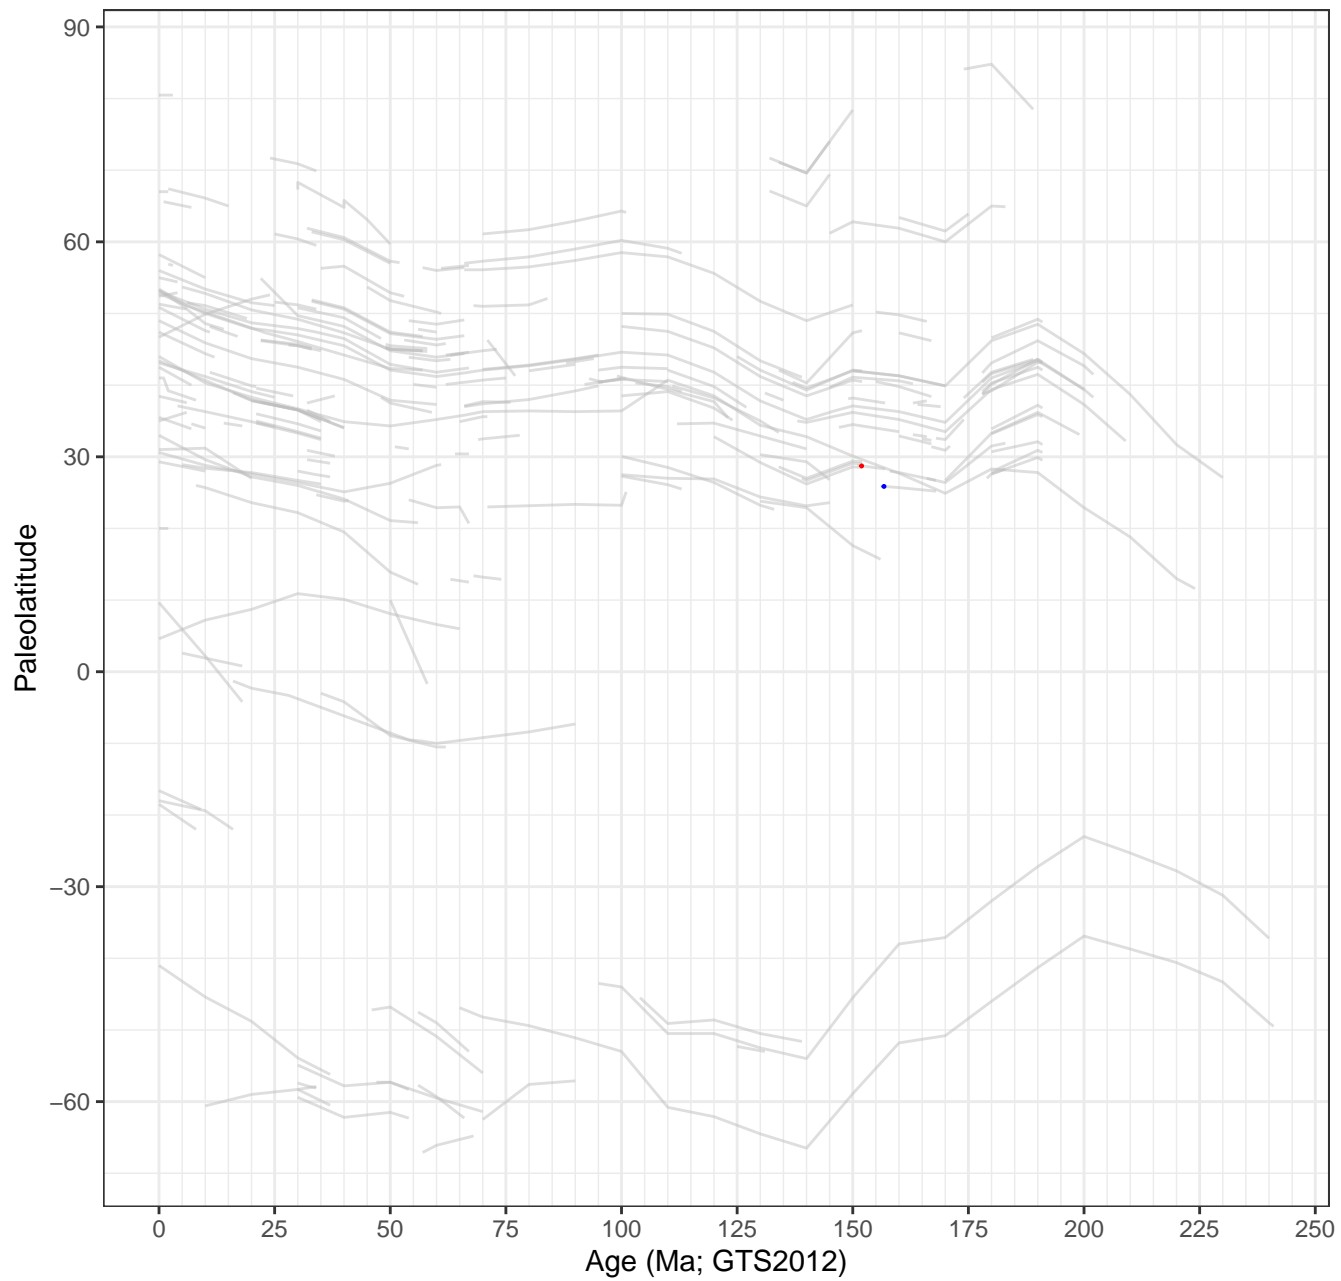

Supplement: Supplementary file 1393 [file Epiplosphaera reticulospinosa.pdf › Supplement/Supplement 2/Species 1914 plots/Epiplosphaera reticulospinosa.pdf]

# Species *Epitricysta vinckensis*

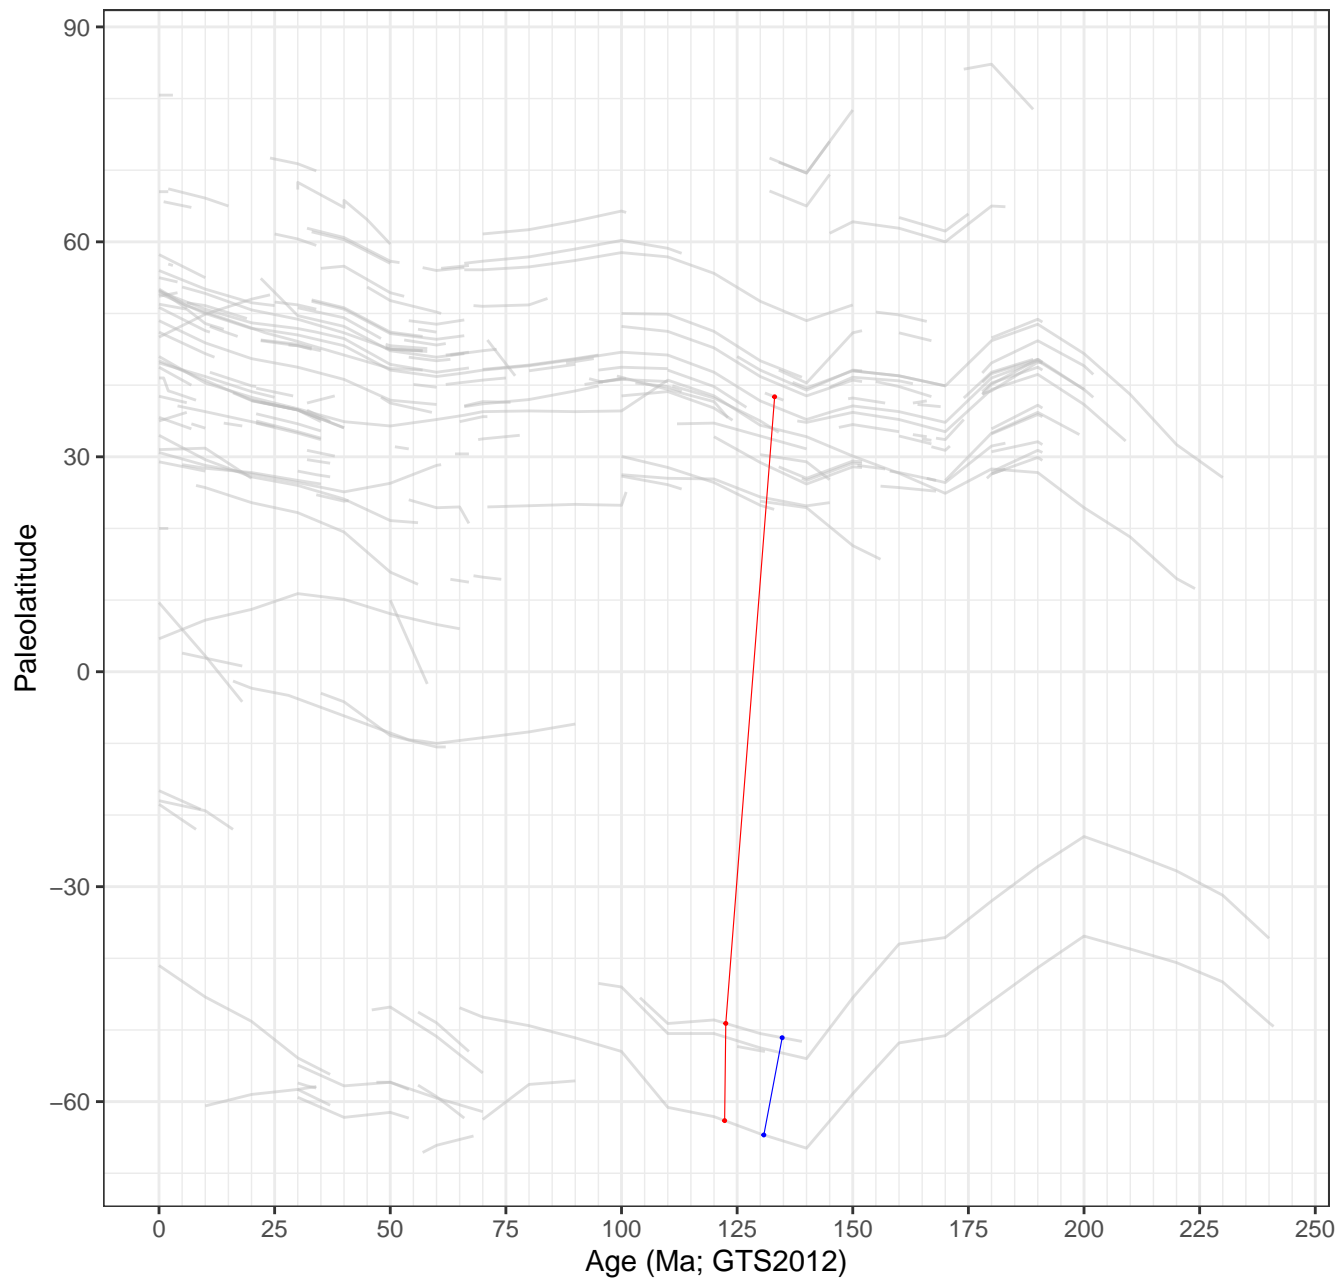

Supplement: Supplementary file 1394 [file Epitricysta vinckensis.pdf › Supplement/Supplement 2/Species 1914 plots/Epitricysta vinckensis.pdf]

# Species *Erymnodinium delectabile*

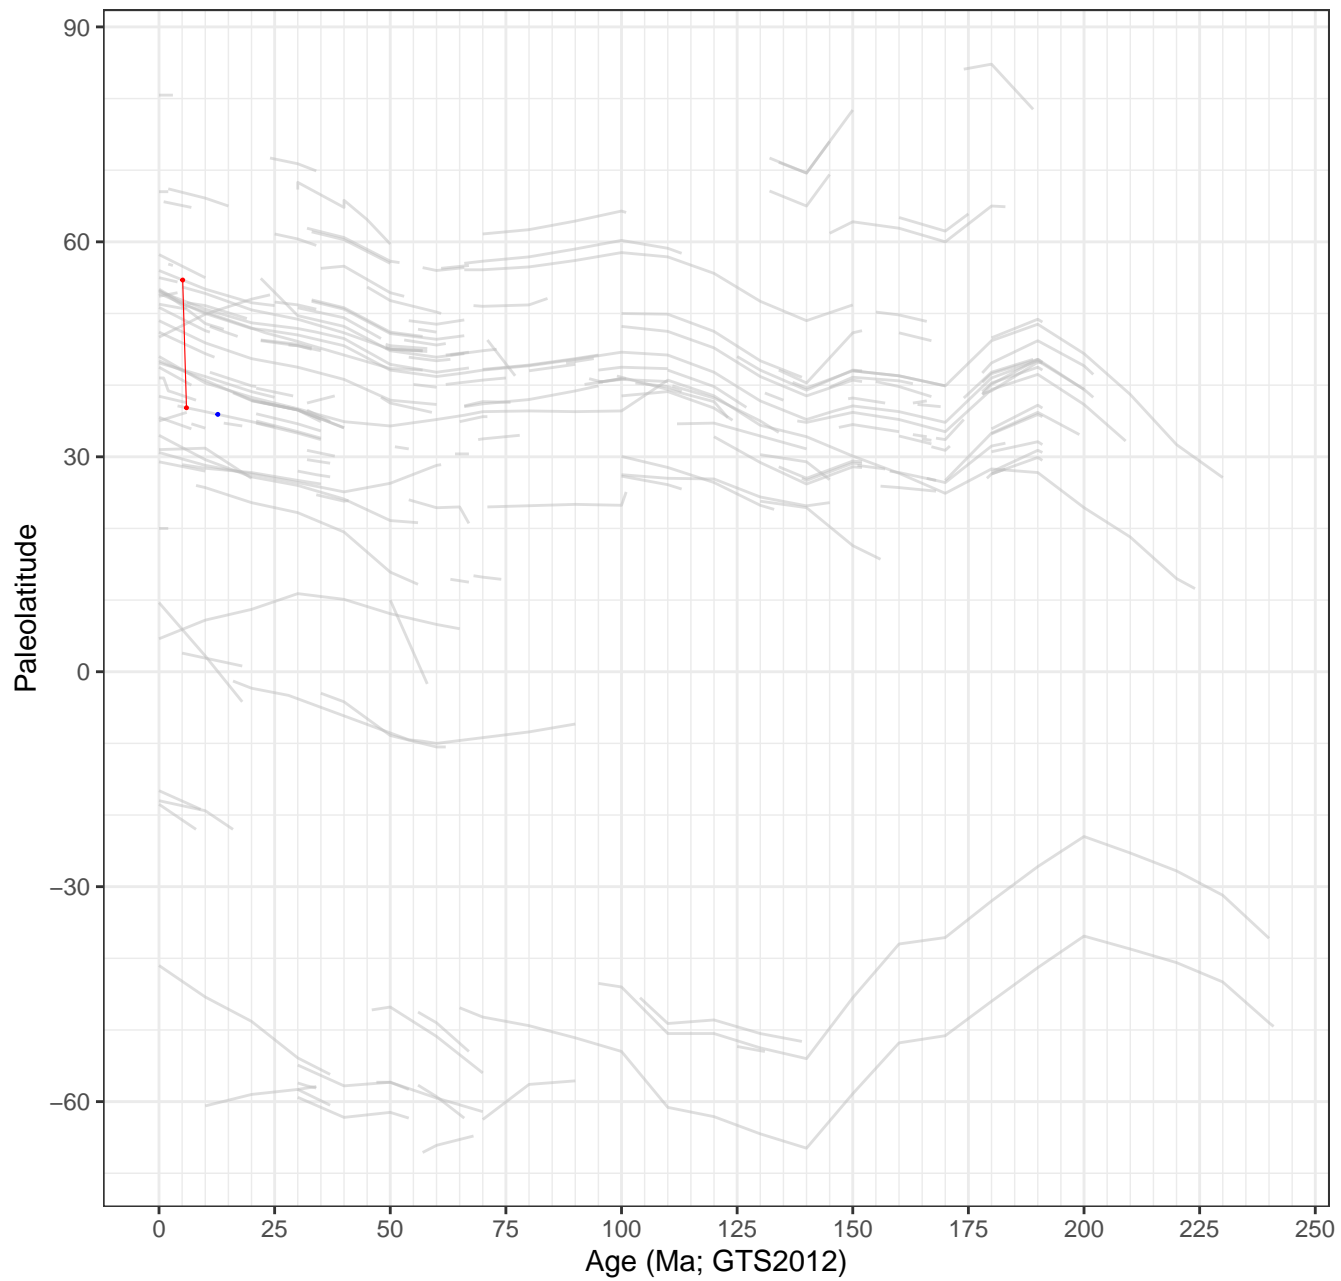

Supplement: Supplementary file 1395 [file Erymnodinium delectabile.pdf › Supplement/Supplement 2/Species 1914 plots/Erymnodinium delectabile.pdf]

# Species *Escharisphaeridia granulata*

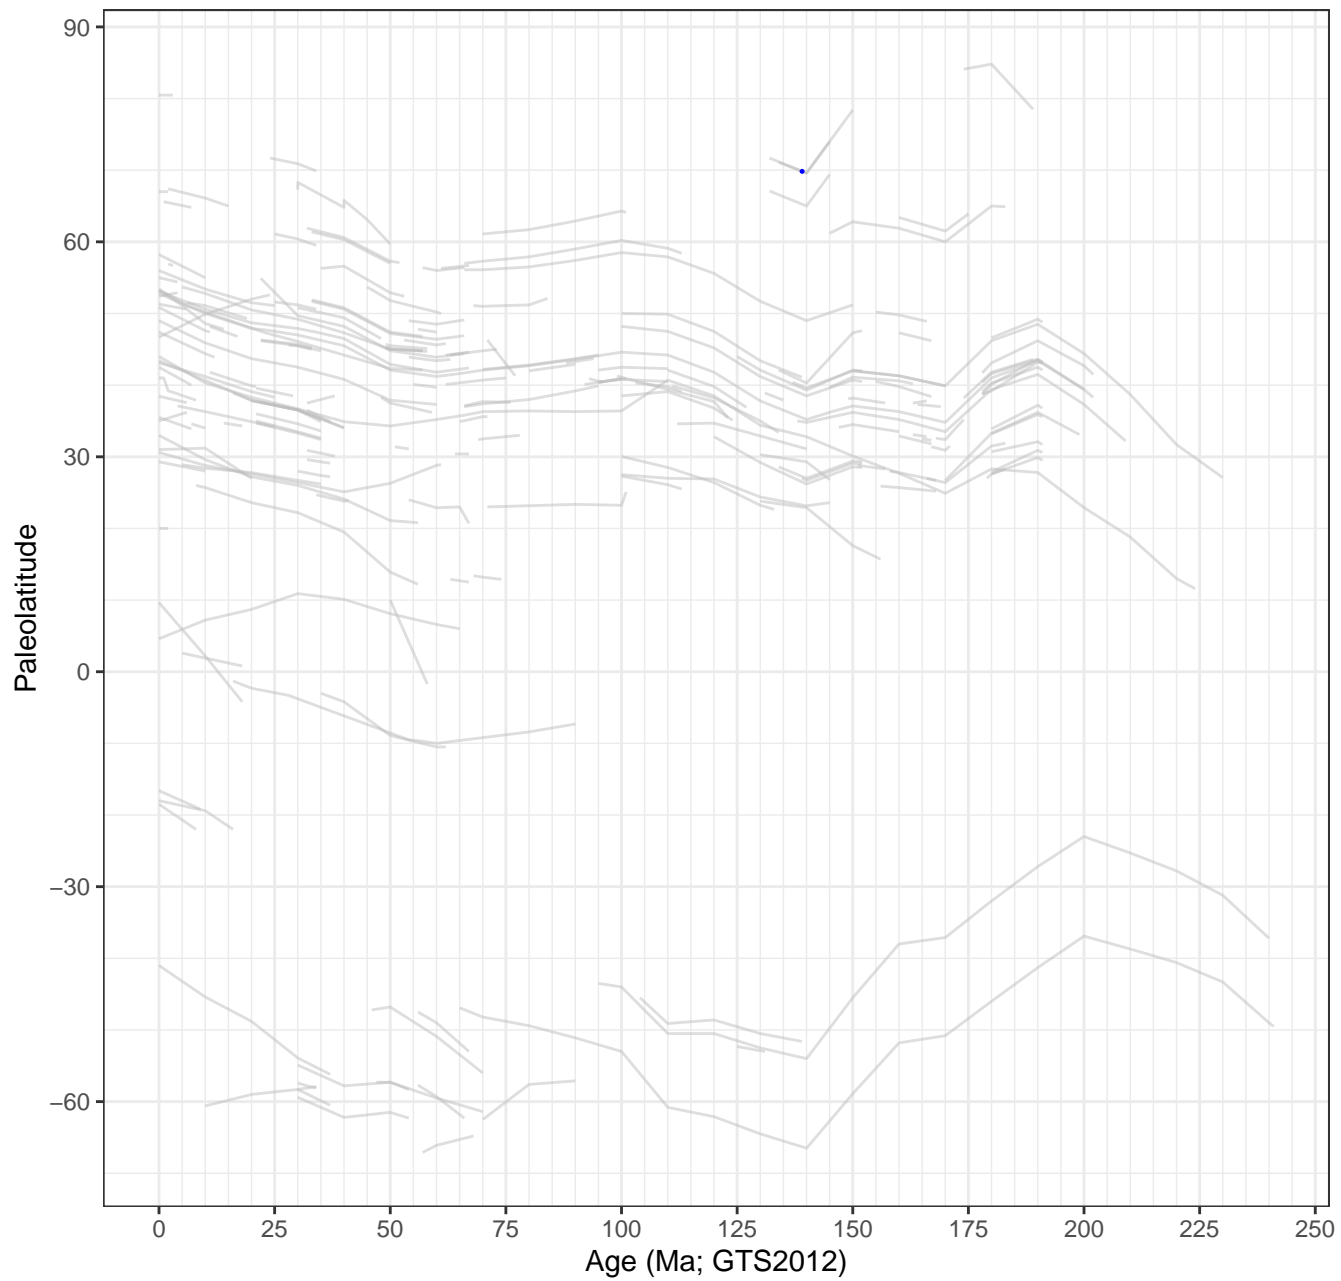

Supplement: Supplementary file 1396 [file Escharisphaeridia granulata.pdf › Supplement/Supplement 2/Species 1914 plots/Escharisphaeridia granulata.pdf]

# Species *Escharisphaeridia pelionensis*

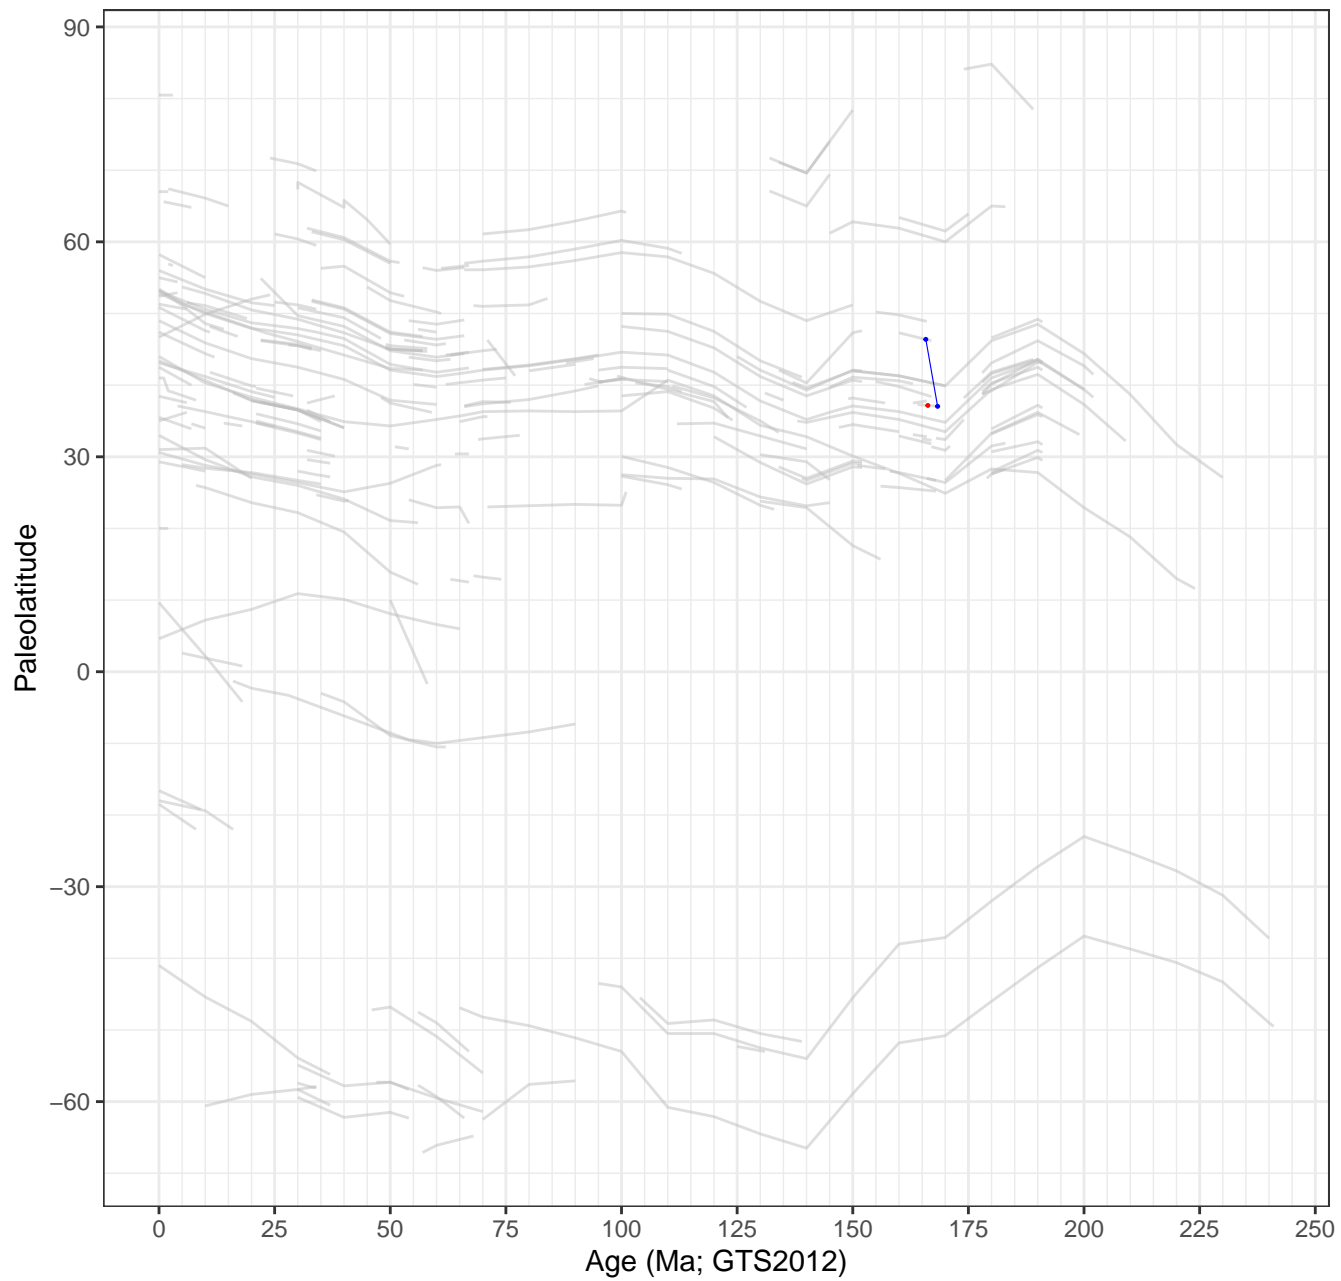

Supplement: Supplementary file 1397 [file Escharisphaeridia pelionensis.pdf › Supplement/Supplement 2/Species 1914 plots/Escharisphaeridia pelionensis.pdf]

# Species *Escharisphaeridia pococki*

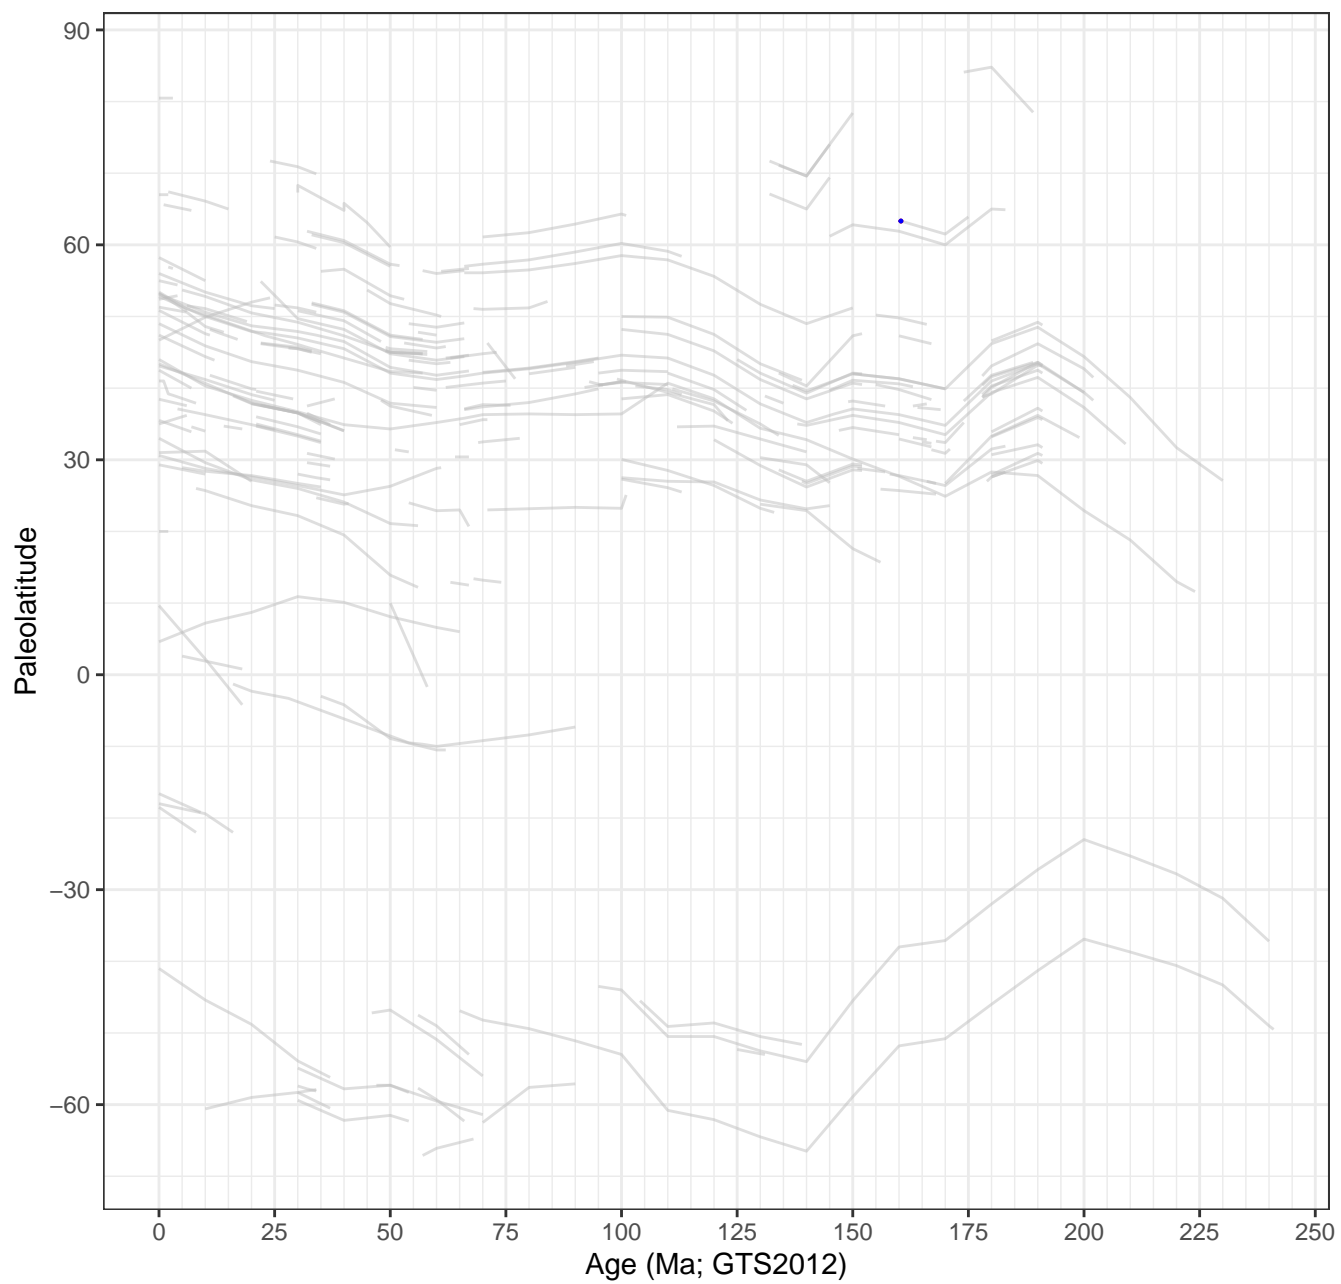

Supplement: Supplementary file 1398 [file Escharisphaeridia pococki.pdf › Supplement/Supplement 2/Species 1914 plots/Escharisphaeridia pococki.pdf]

# Species *Escharisphaeridia pocockii*

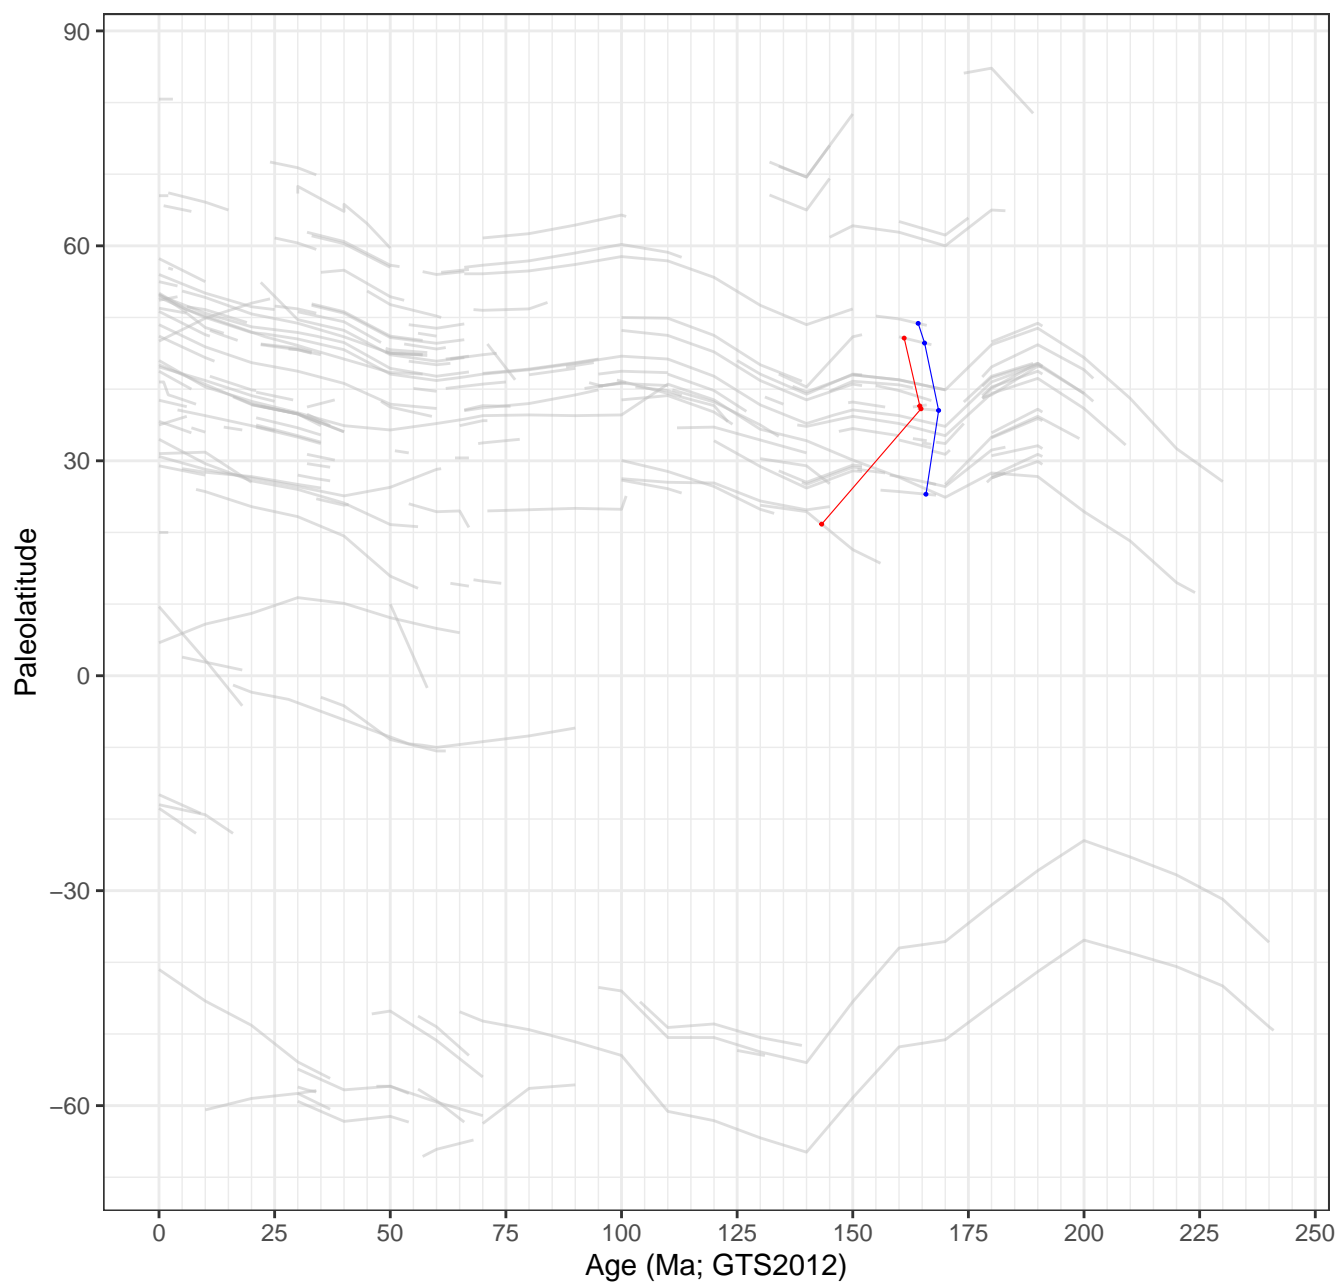

Supplement: Supplementary file 1399 [file Escharisphaeridia pocockii.pdf › Supplement/Supplement 2/Species 1914 plots/Escharisphaeridia pocockii.pdf]

# Species *Escharisphaeridia psilata*

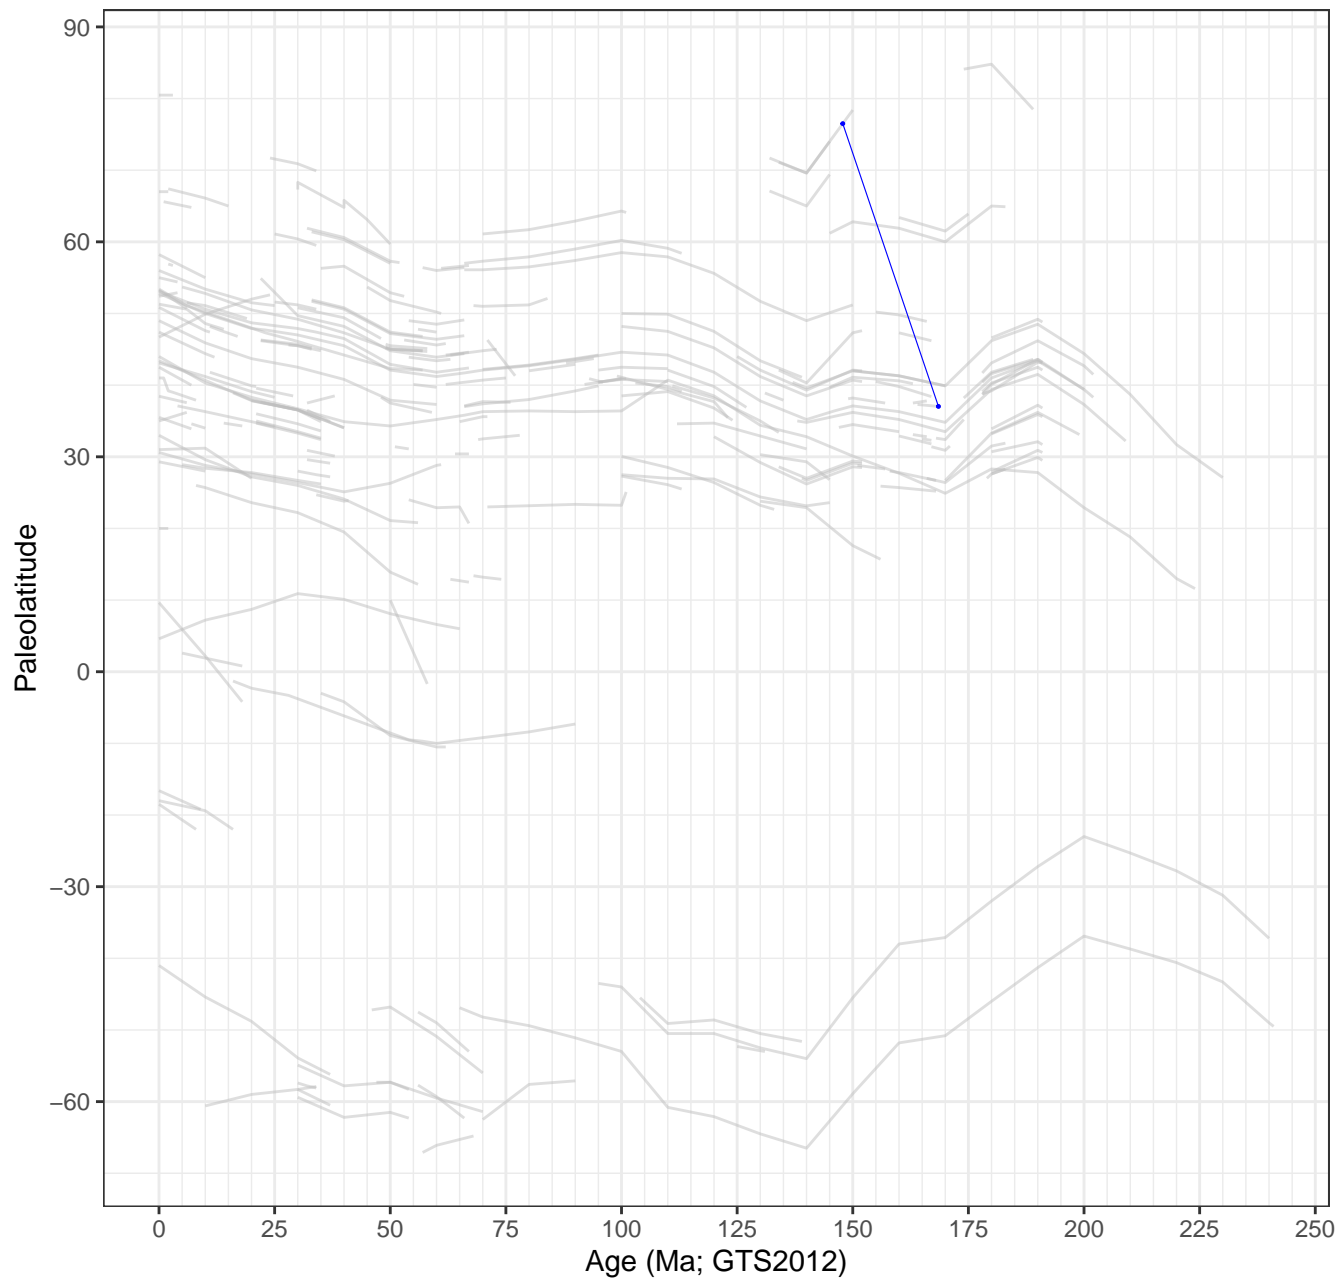

Supplement: Supplementary file 1400 [file Escharisphaeridia psilata.pdf › Supplement/Supplement 2/Species 1914 plots/Escharisphaeridia psilata.pdf]

# Species *Escharisphaeridia rudis*

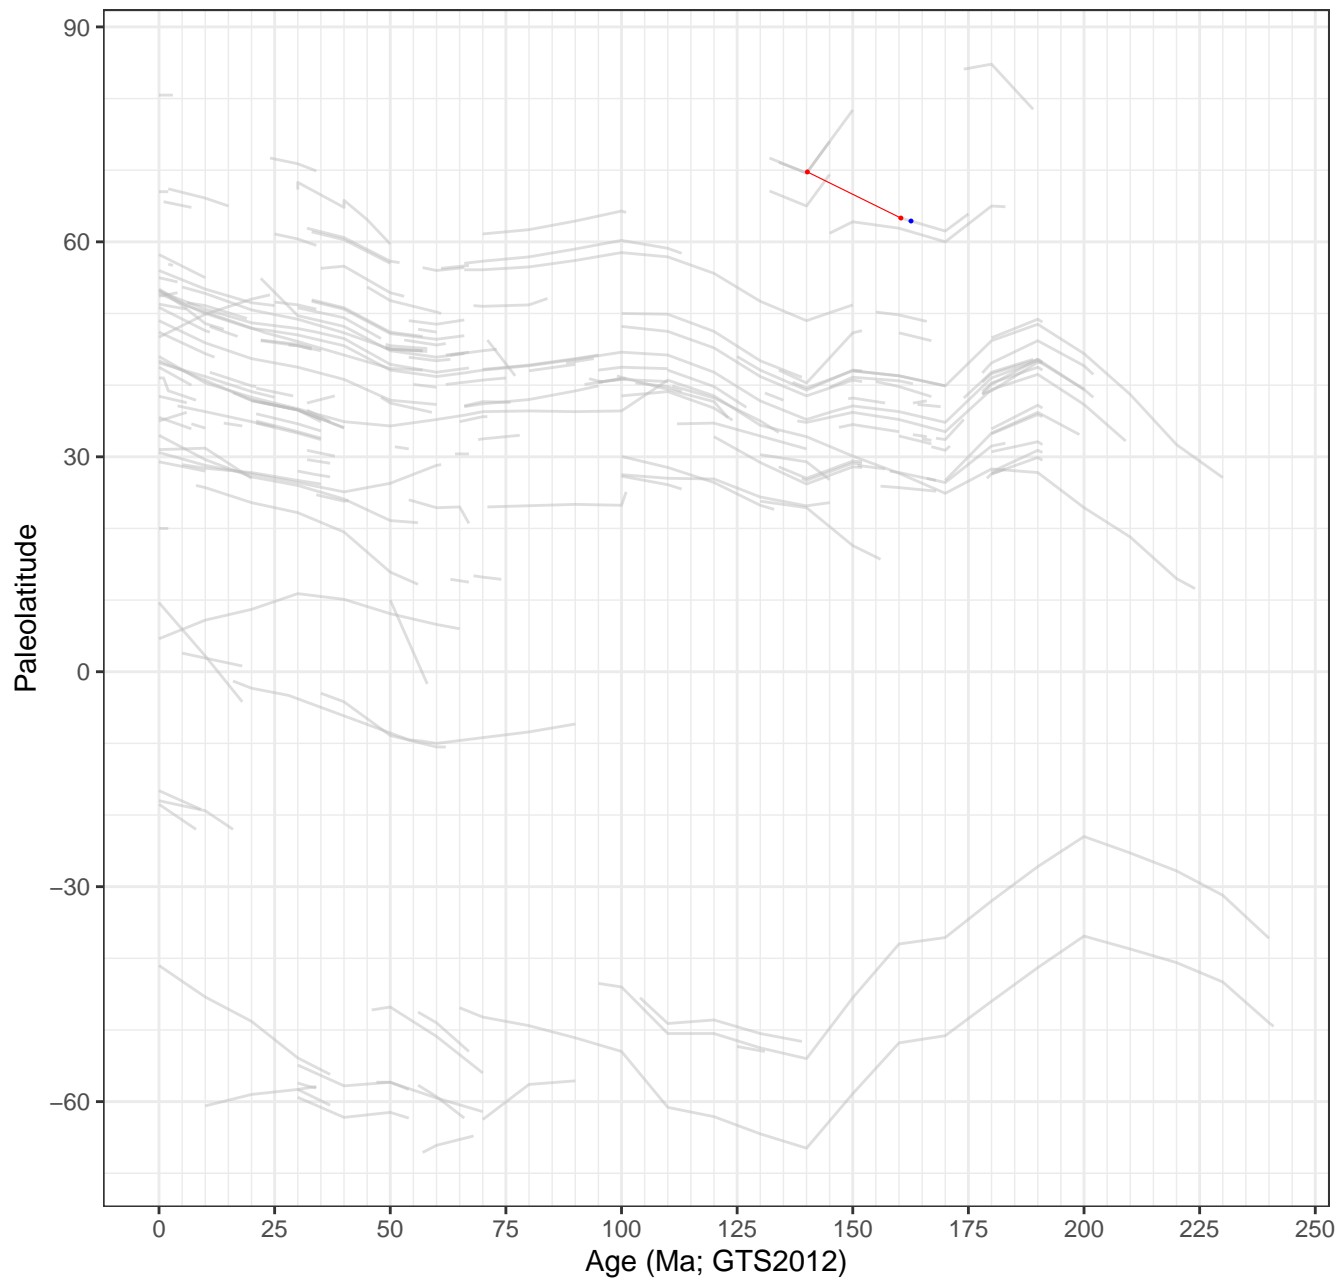

Supplement: Supplementary file 1401 [file Escharisphaeridia rudis.pdf › Supplement/Supplement 2/Species 1914 plots/Escharisphaeridia rudis.pdf]

# Species *Eucladinium gambangense*

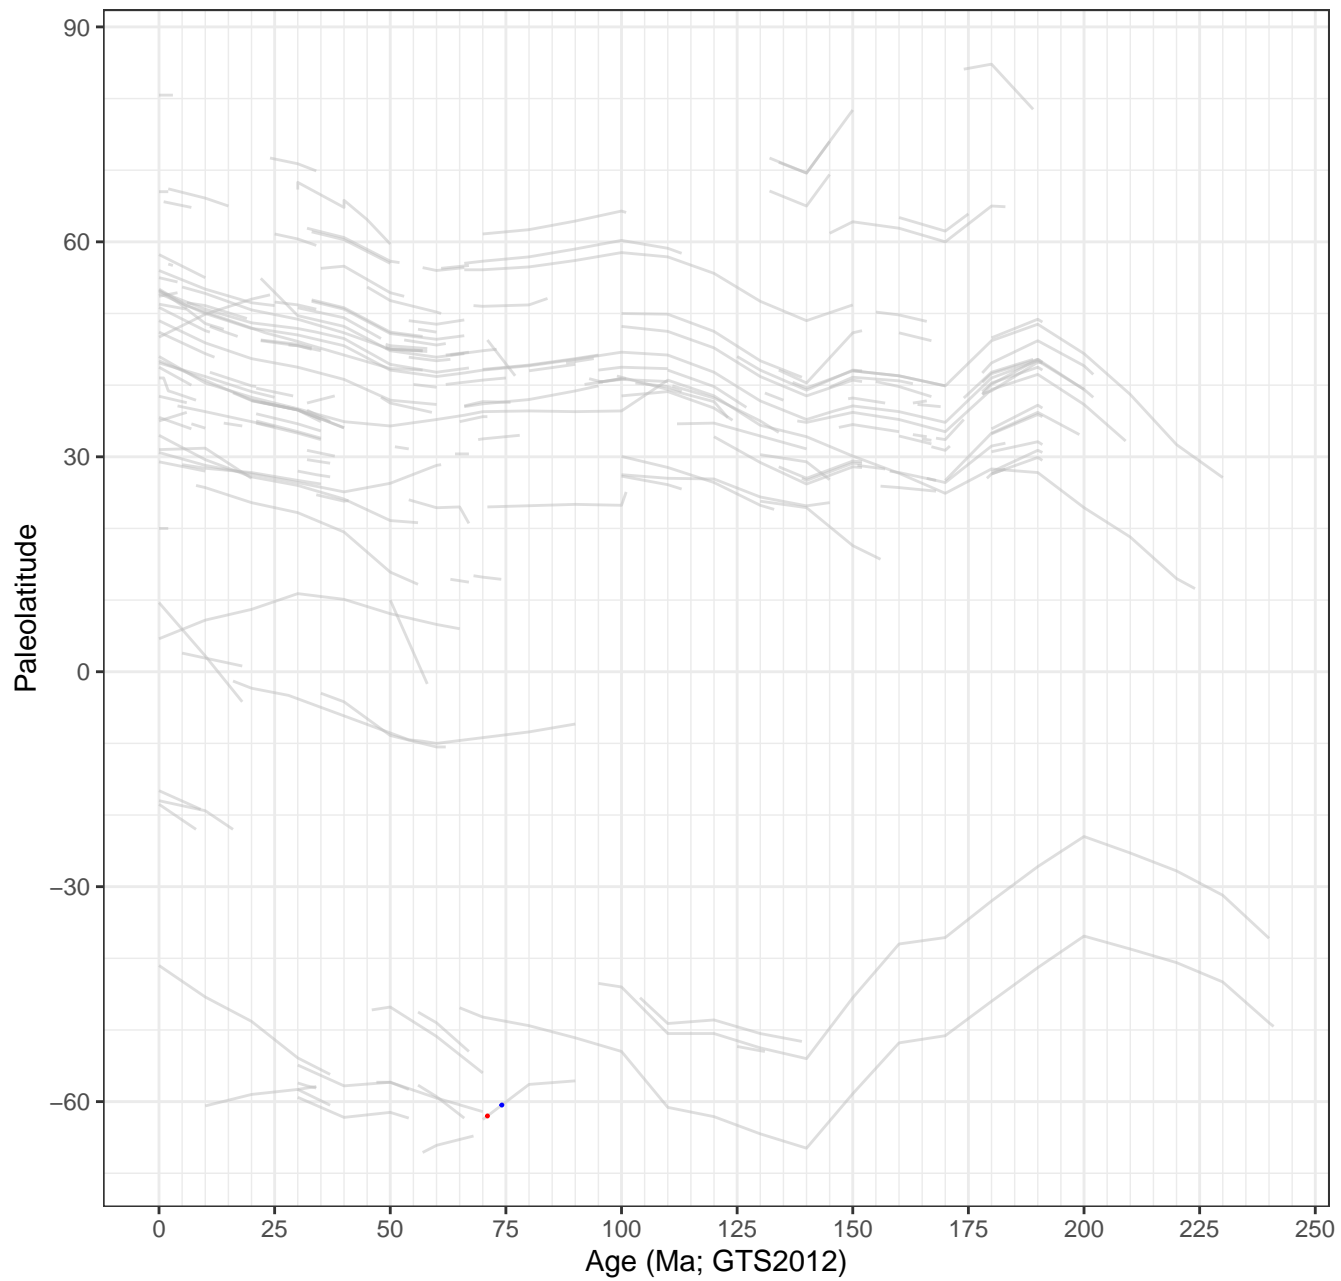

Supplement: Supplementary file 1402 [file Eucladinium gambangense.pdf › Supplement/Supplement 2/Species 1914 plots/Eucladinium gambangense.pdf]

# Species *Eucladinium madurense*

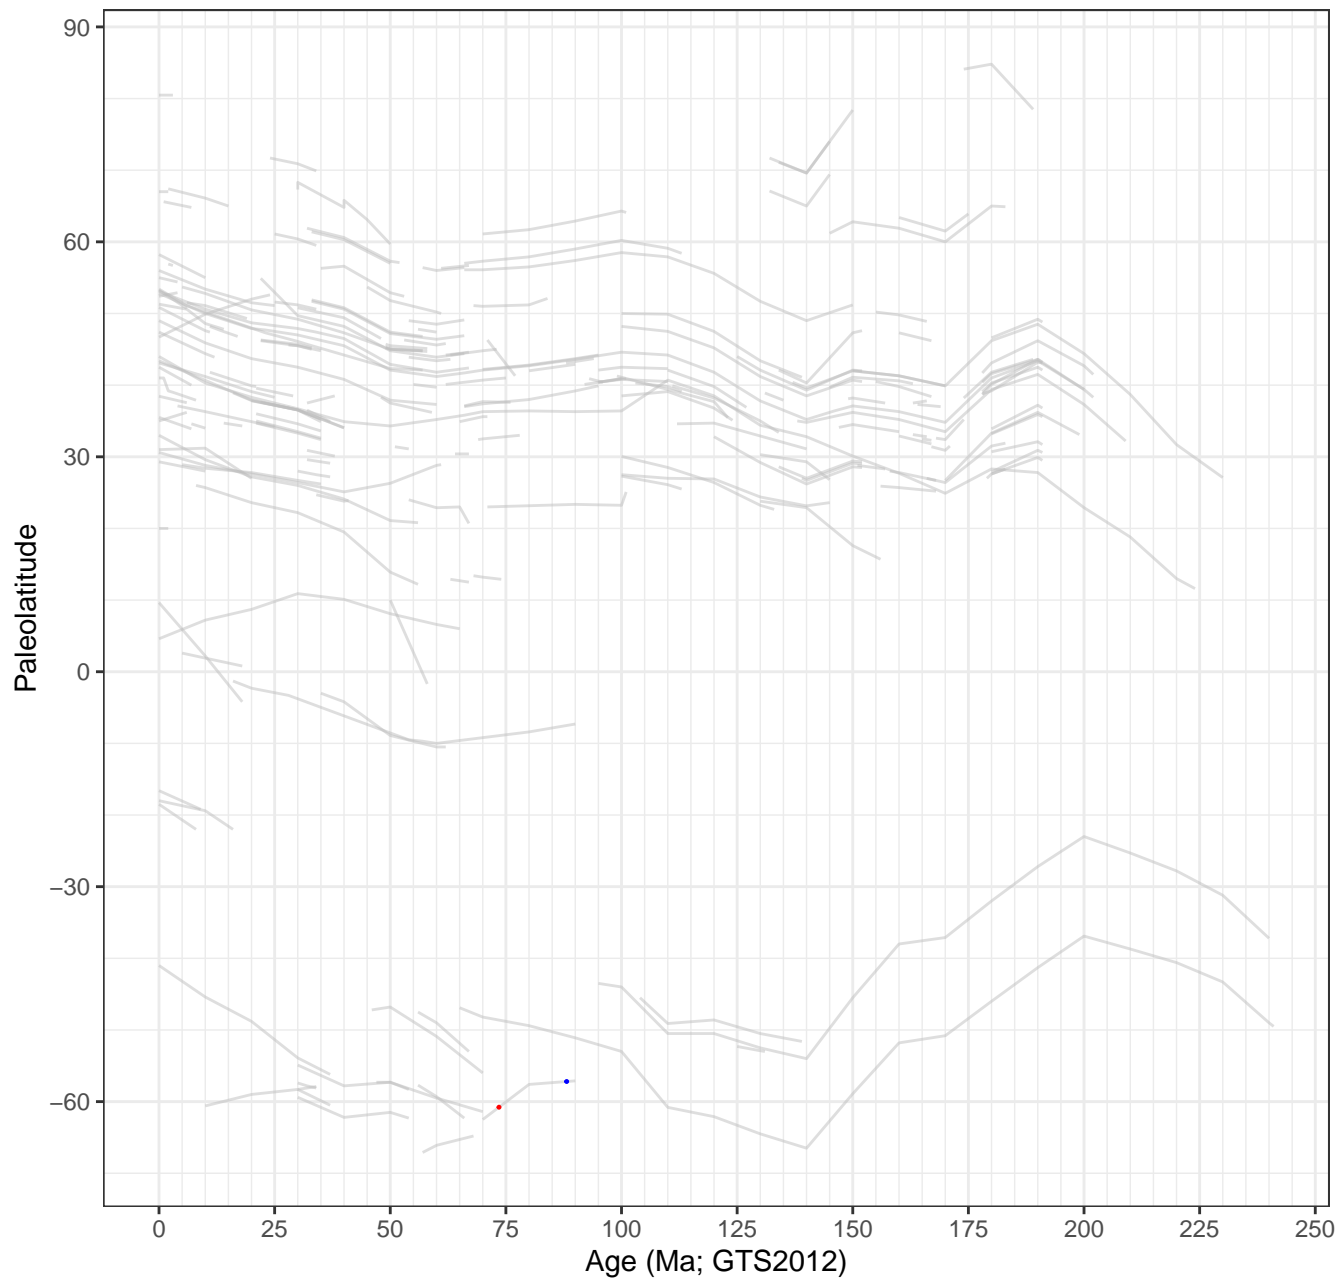

Supplement: Supplementary file 1403 [file Eucladinium madurense.pdf › Supplement/Supplement 2/Species 1914 plots/Eucladinium madurense.pdf]

# Species *Eucladinium spinosissimum*

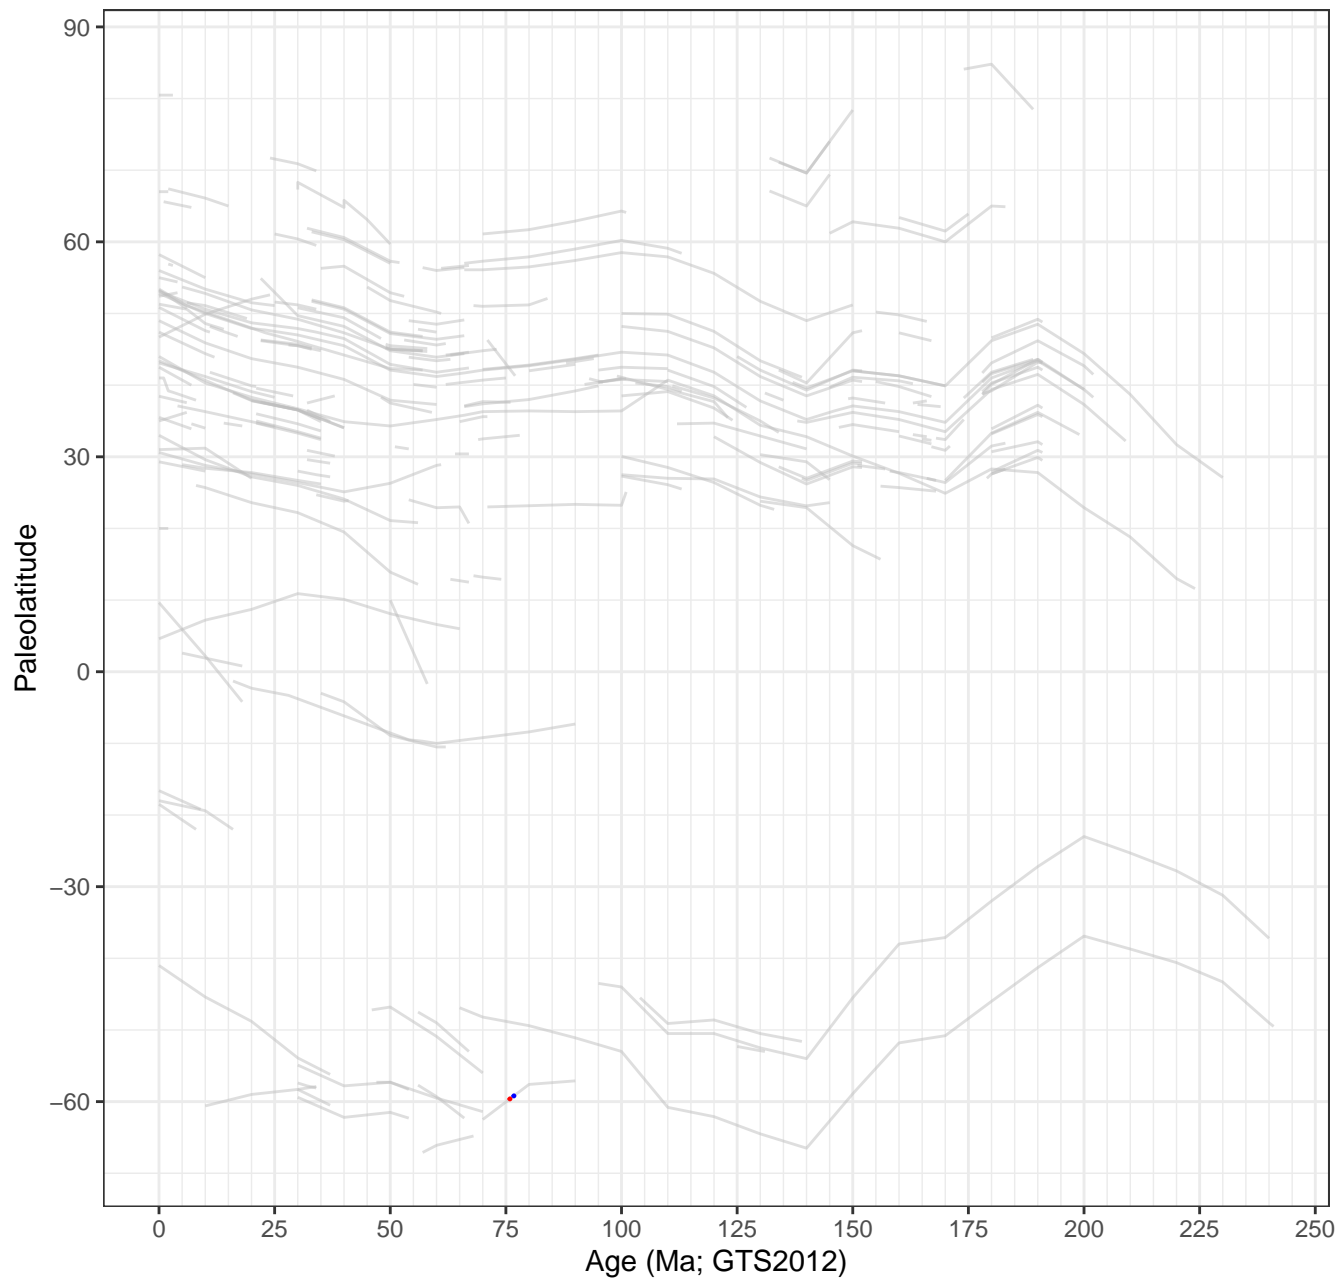

Supplement: Supplementary file 1404 [file Eucladinium spinossissum.pdf › Supplement/Supplement 2/Species 1914 plots/Eucladinium spinossissum.pdf]

# Species *Eurydinium ellipticum*

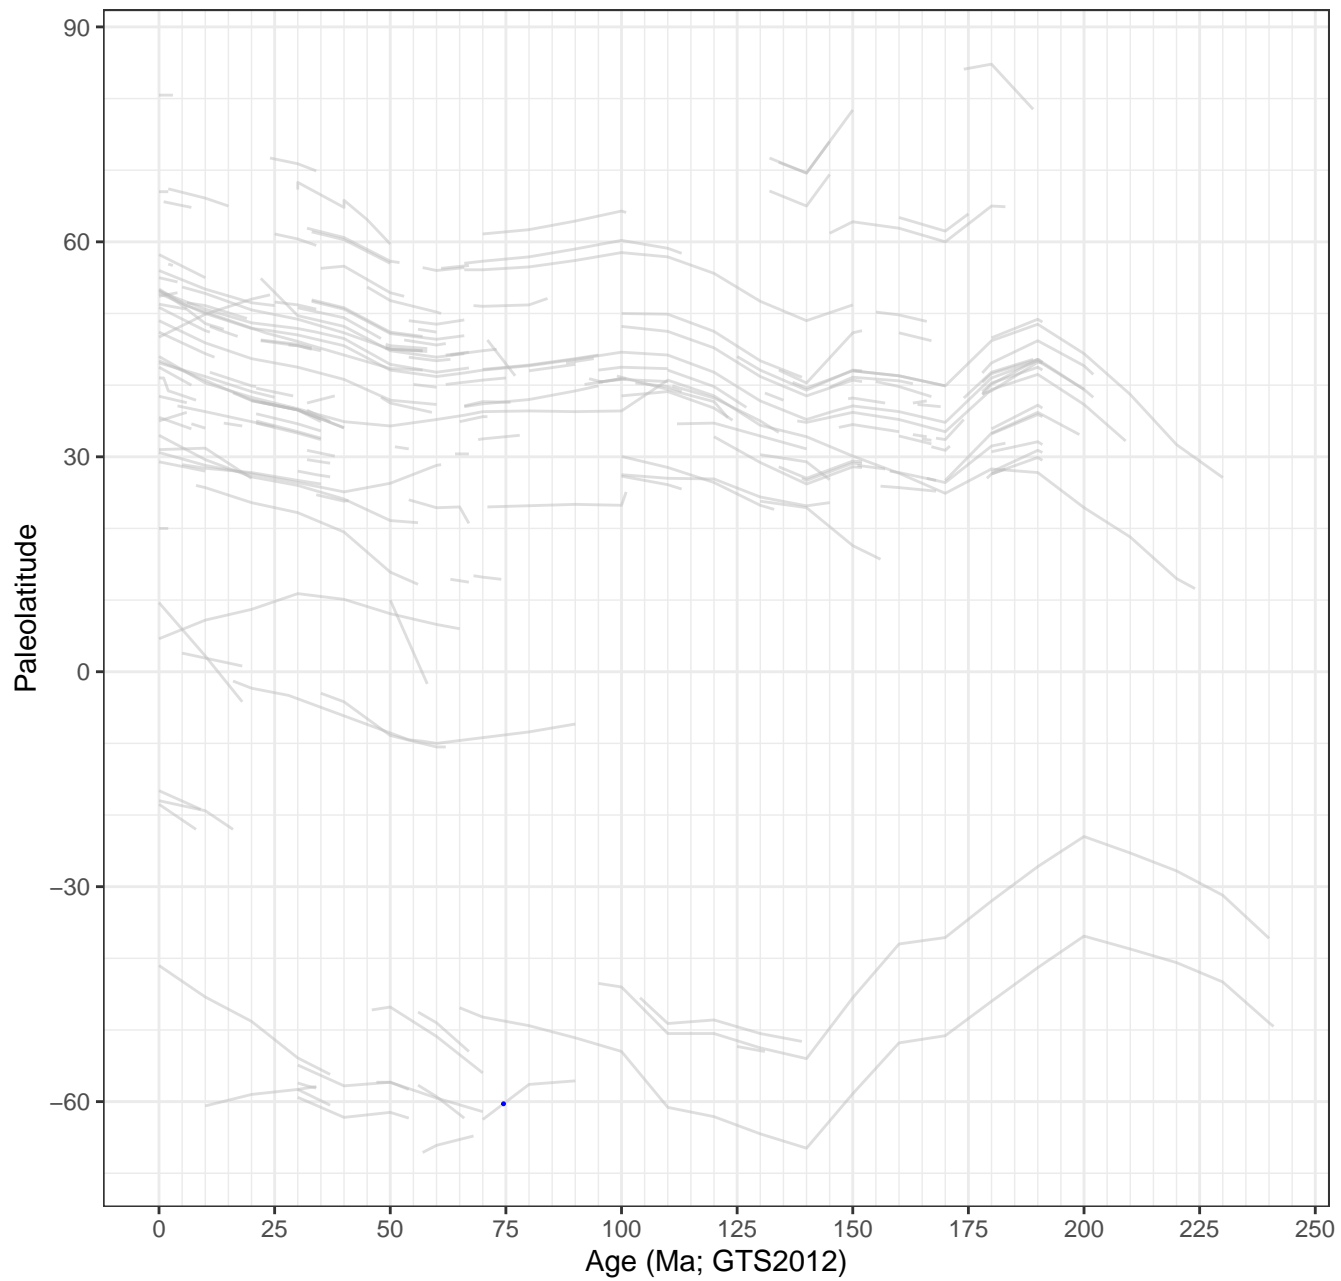

Supplement: Supplementary file 1405 [file Eurydinium ellipticum.pdf › Supplement/Supplement 2/Species 1914 plots/Eurydinium ellipticum.pdf]

# Species *Eurydinium euthemum*

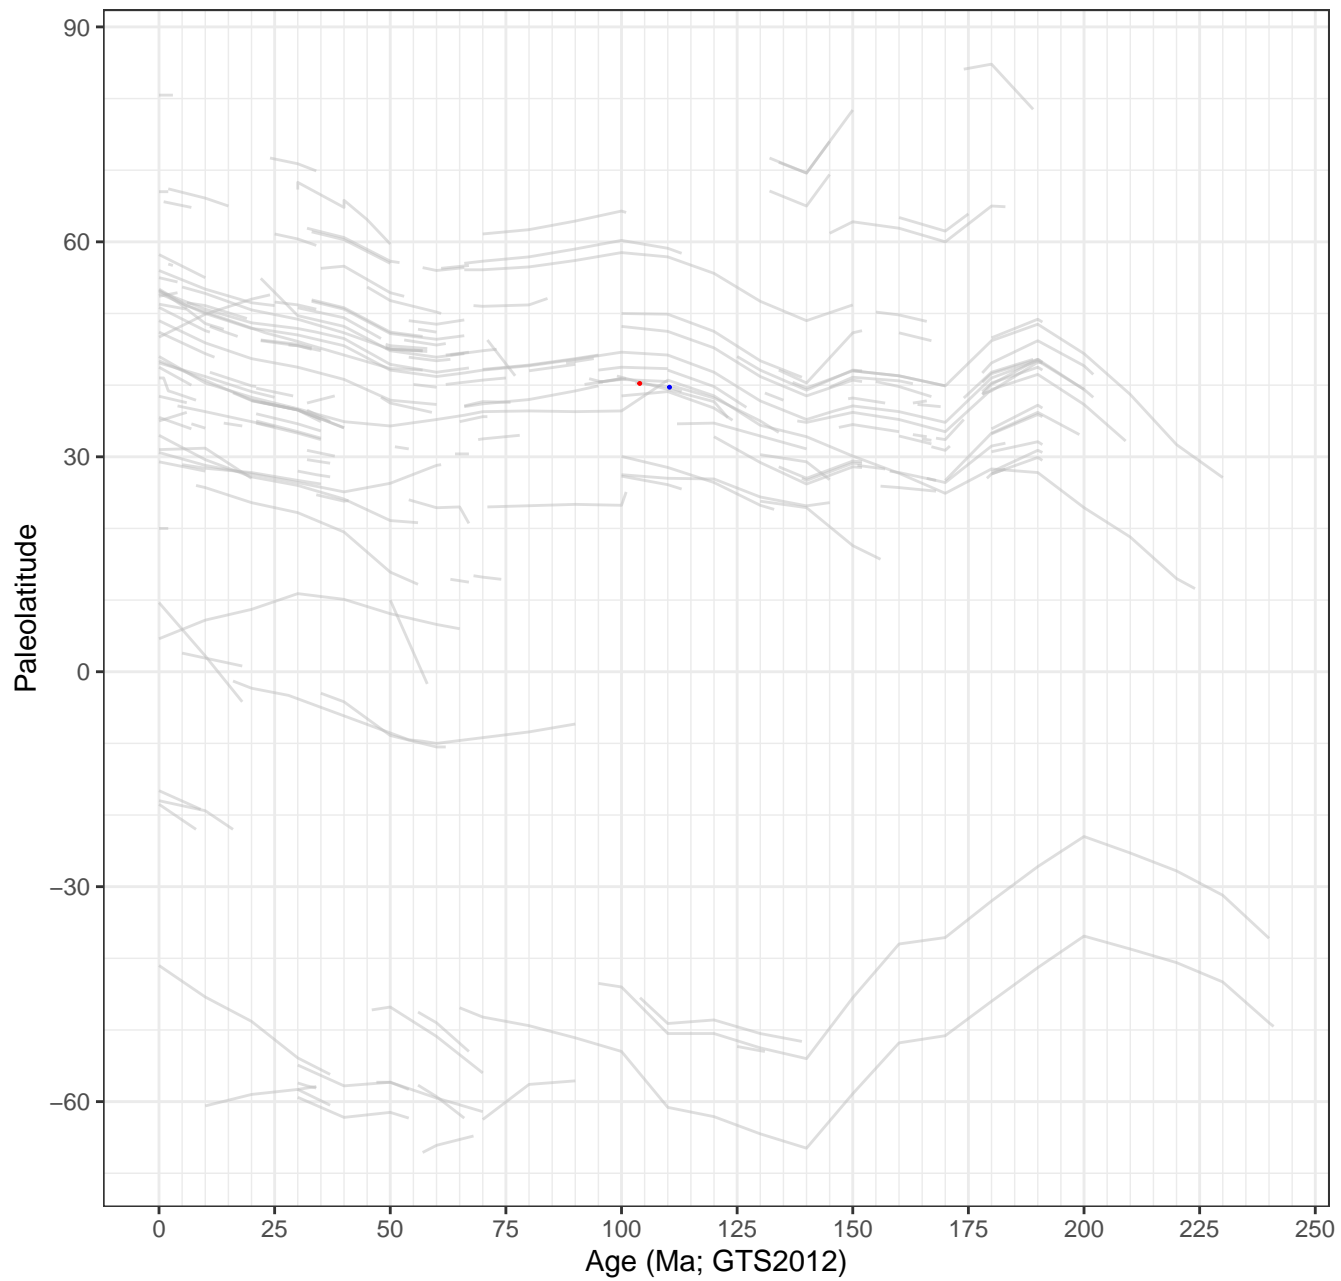

Supplement: Supplementary file 1406 [file Eurydinium euthemum.pdf › Supplement/Supplement 2/Species 1914 plots/Eurydinium euthemum.pdf]

# Species *Eurydinium eyrense*

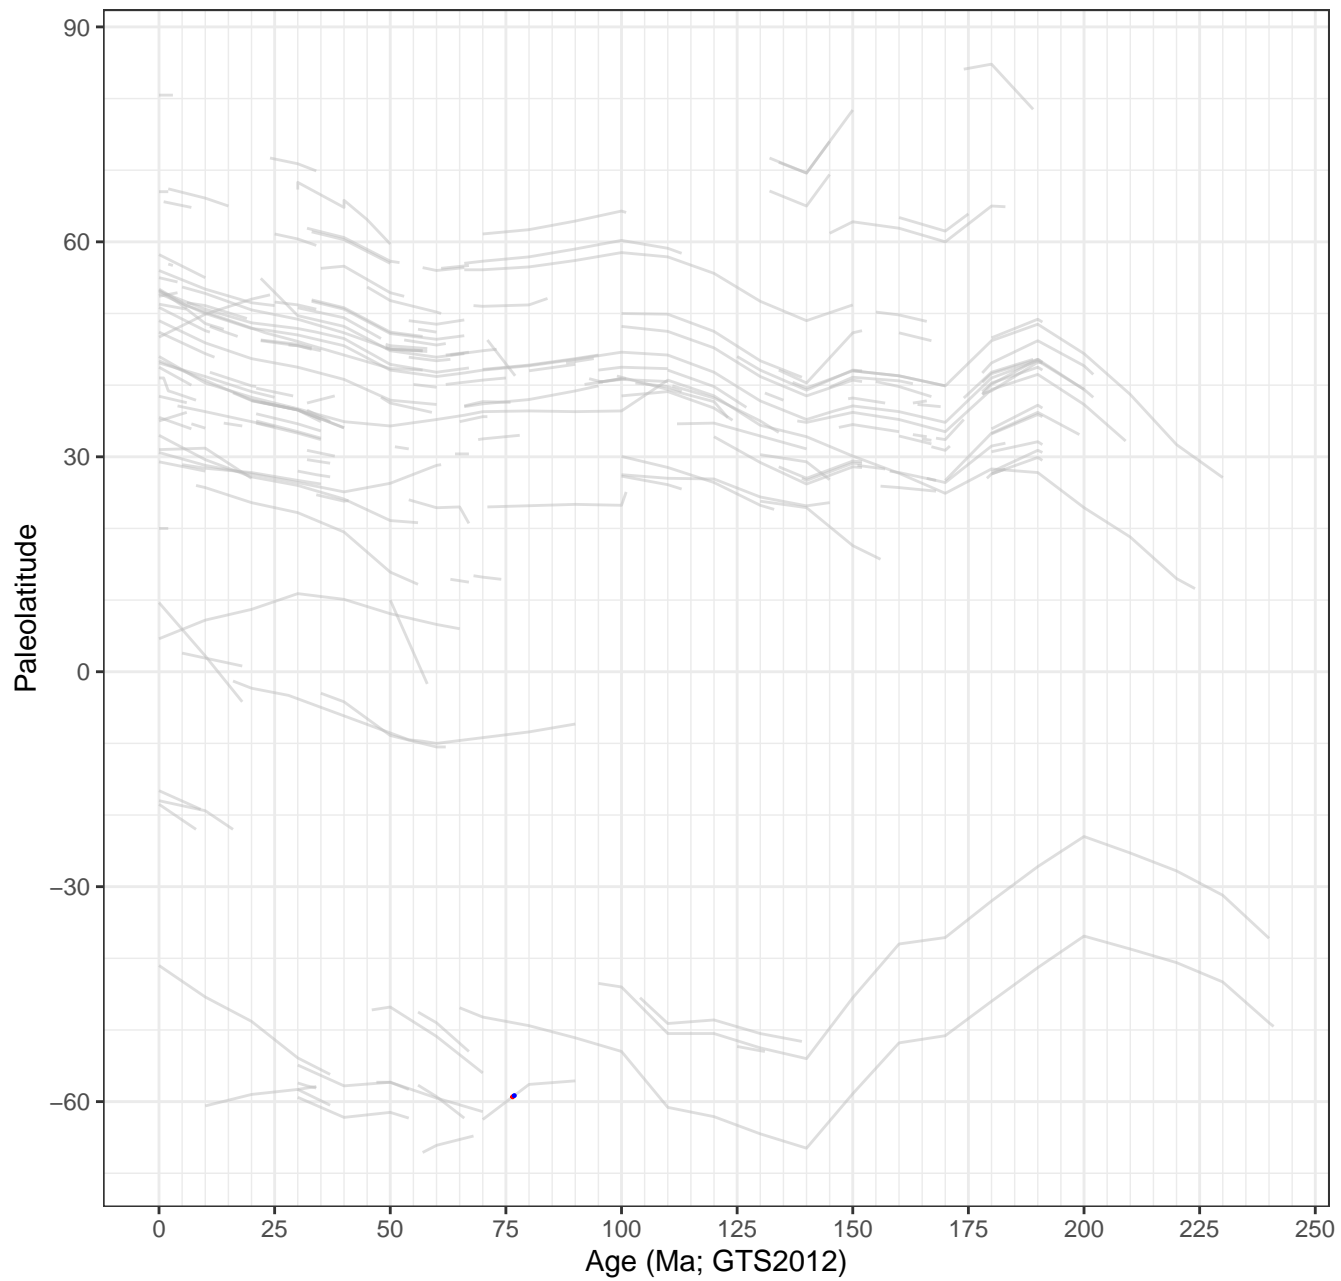

Supplement: Supplementary file 1407 [file Eurydinium eyrense.pdf › Supplement/Supplement 2/Species 1914 plots/Eurydinium eyrense.pdf]

# Species *Eurydinium ingramii*

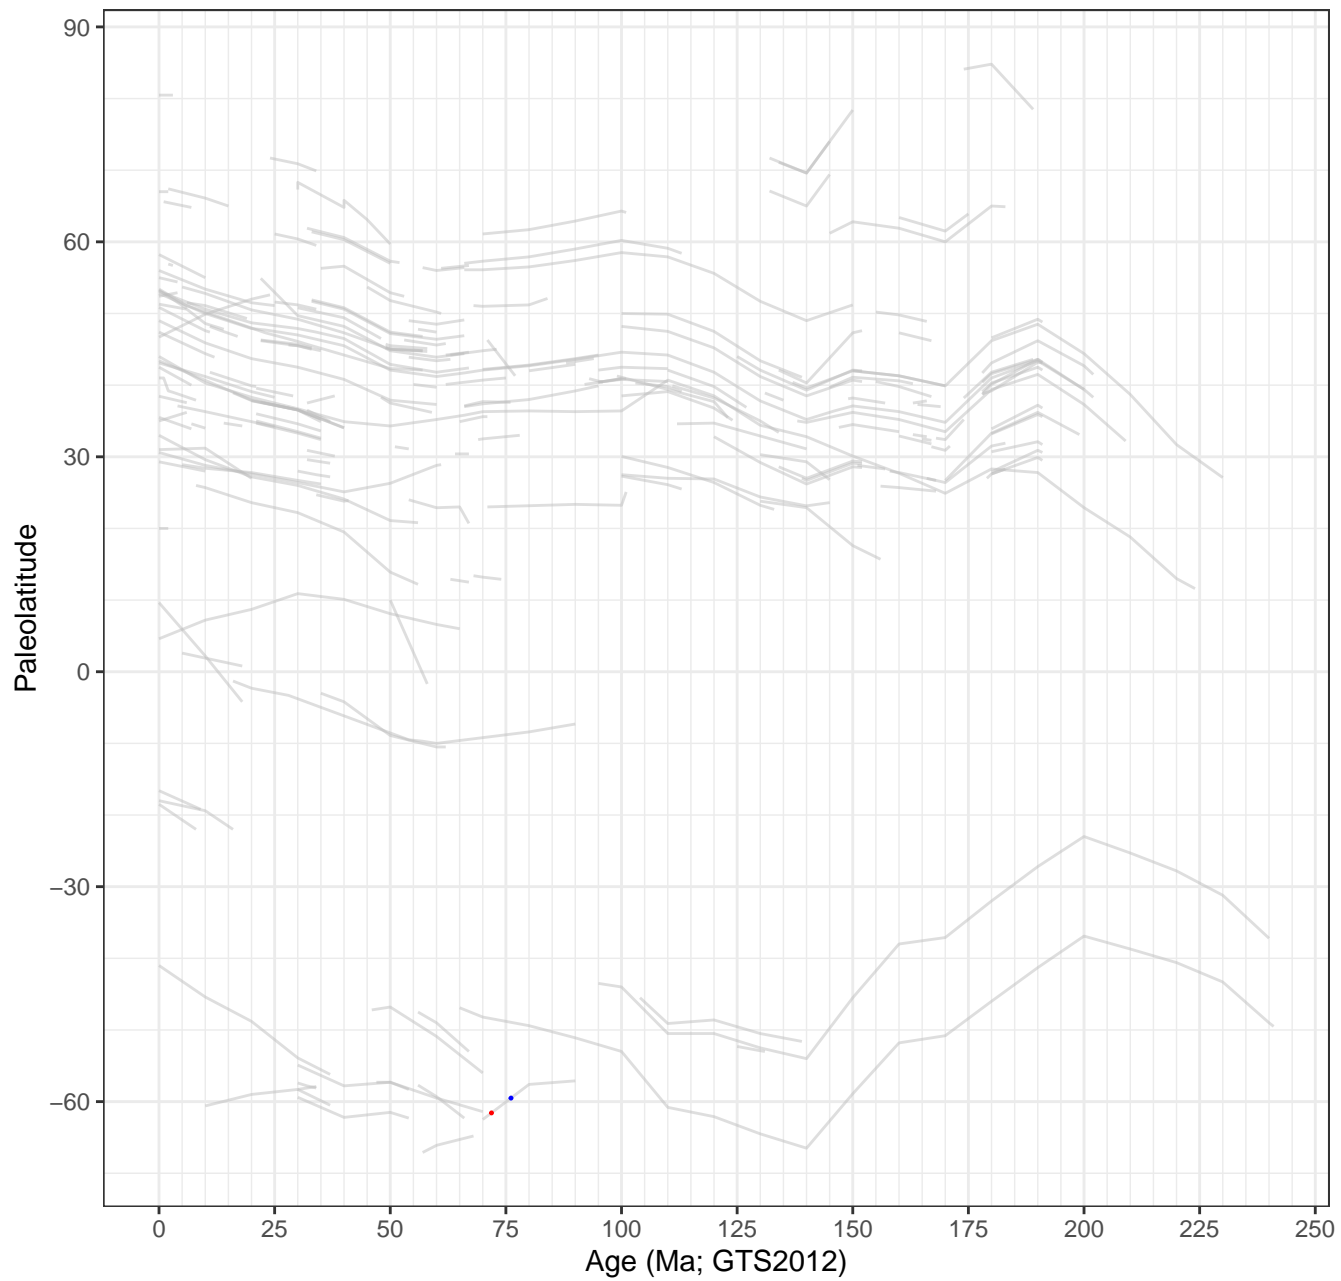

Supplement: Supplementary file 1408 [file Eurydinium ingramii.pdf › Supplement/Supplement 2/Species 1914 plots/Eurydinium ingramii.pdf]

# Species *Eurydinium tempestivum*

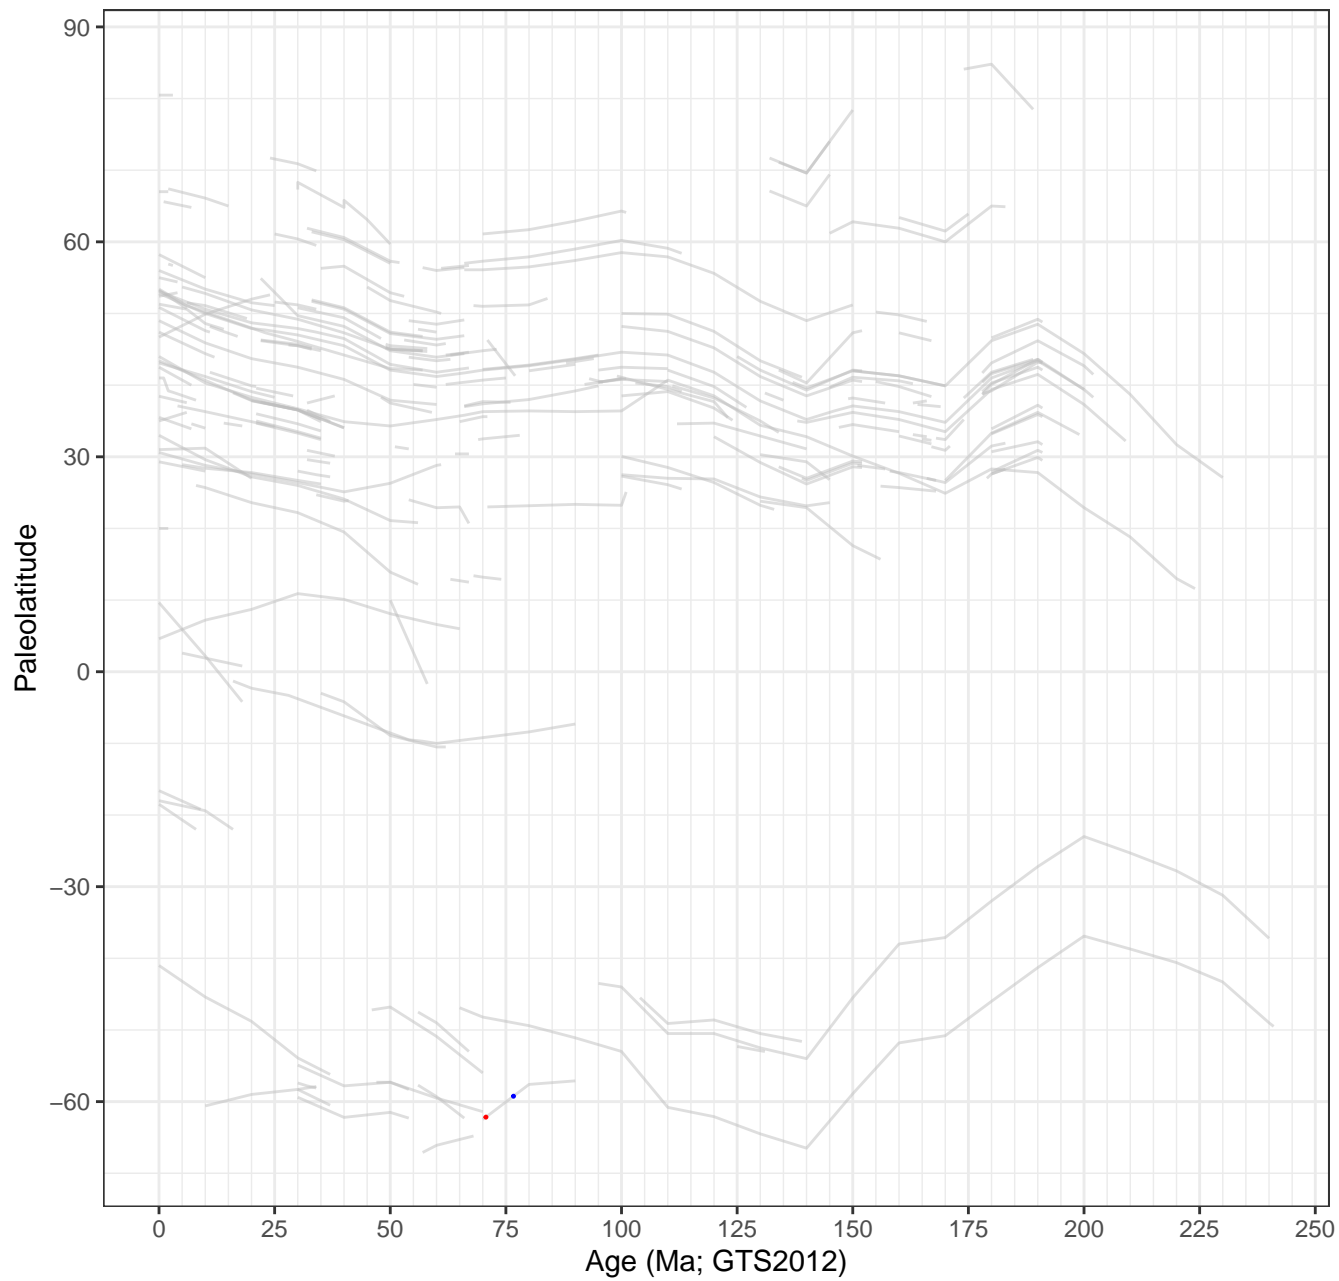

Supplement: Supplementary file 1409 [file Eurydinium tempestivum.pdf › Supplement/Supplement 2/Species 1914 plots/Eurydinium tempestivum.pdf]

# Species *Evansia alaskensis*

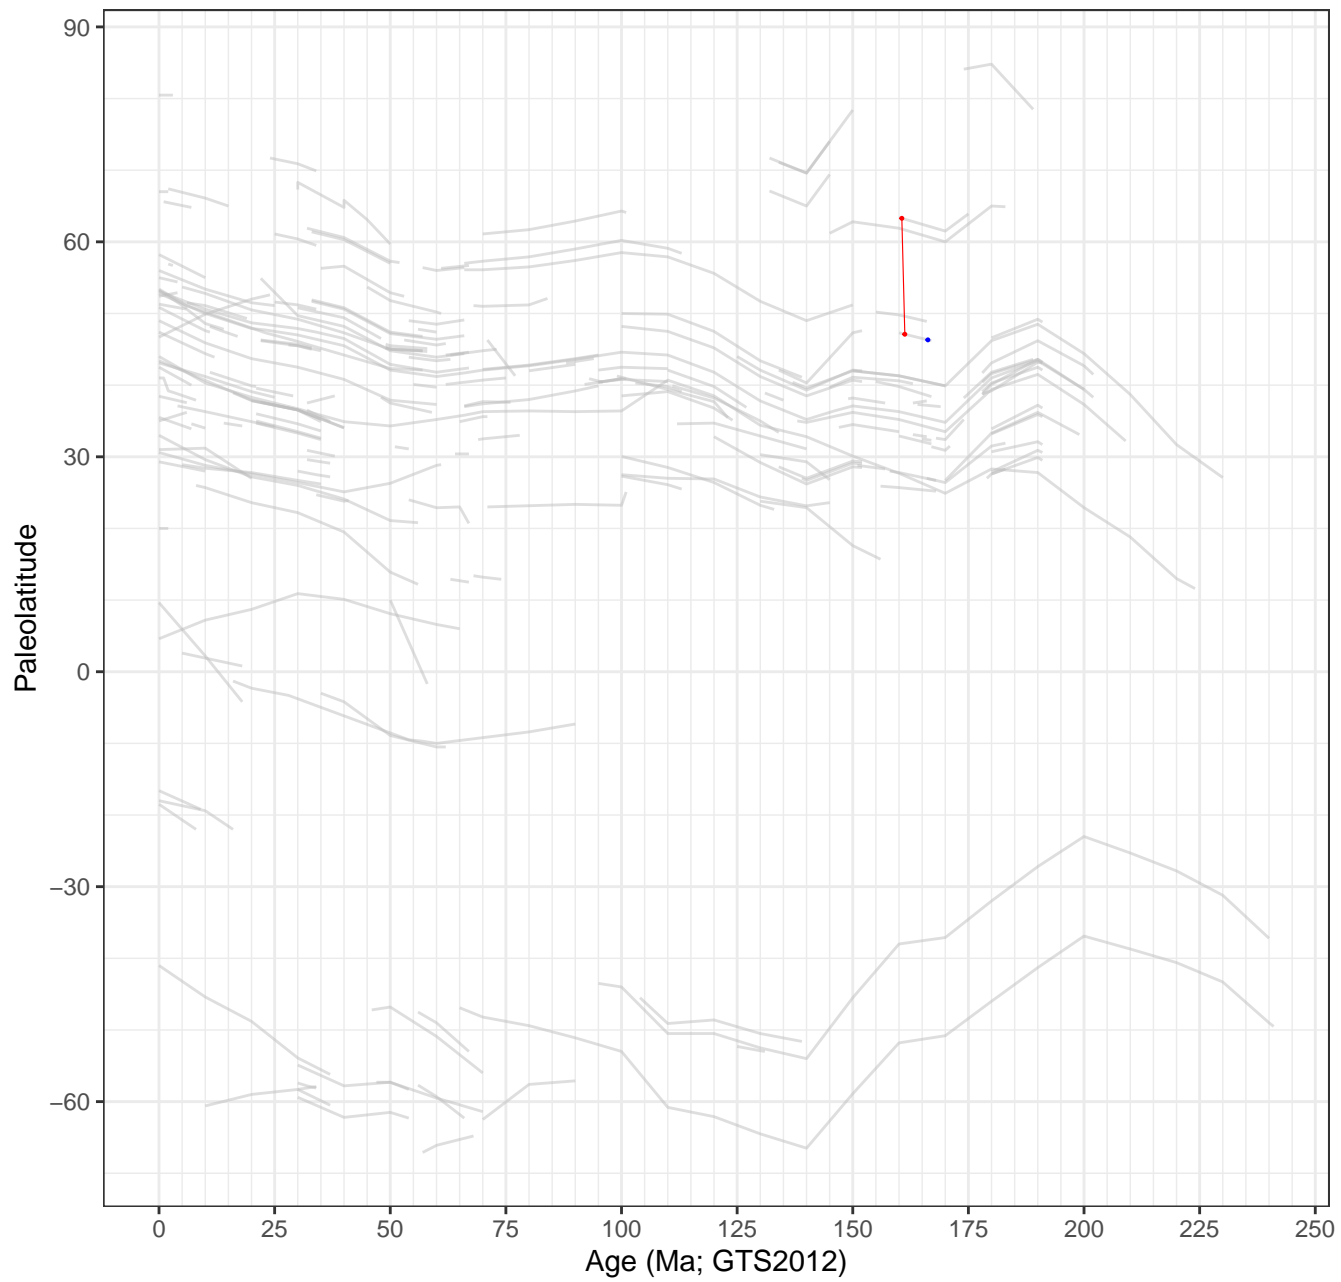

Supplement: Supplementary file 1410 [file Evansia alaskensis.pdf › Supplement/Supplement 2/Species 1914 plots/Evansia alaskensis.pdf]

# Species *Evansia barentsensis*

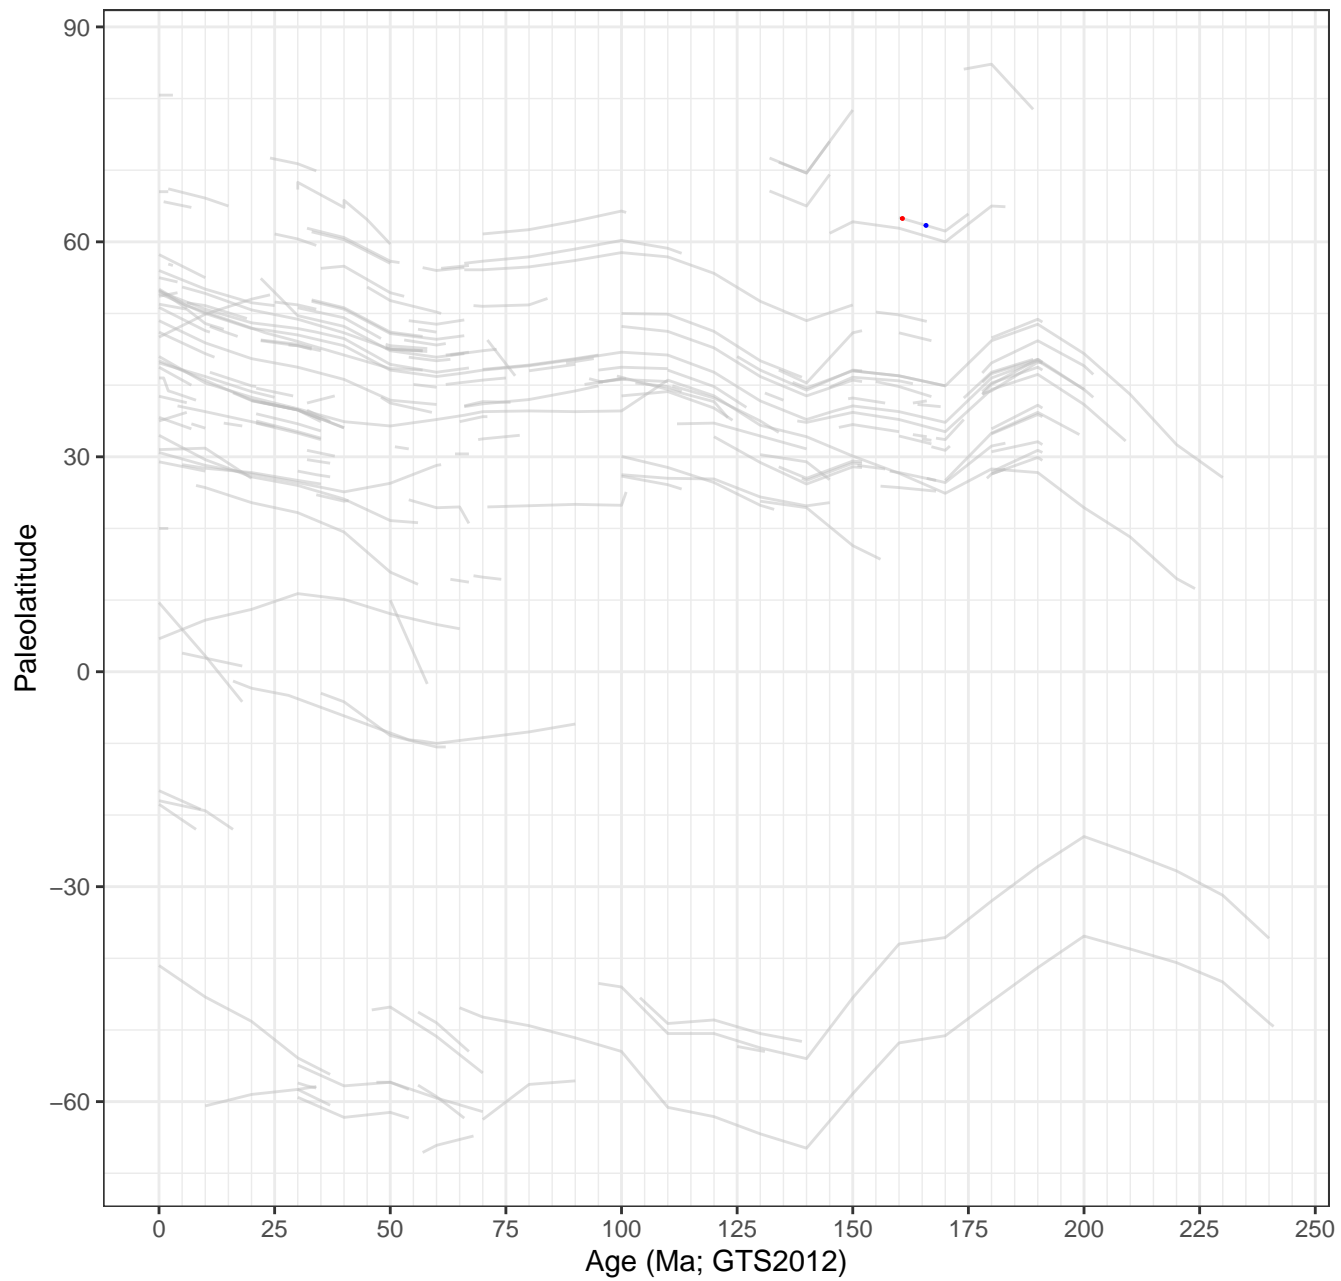

Supplement: Supplementary file 1411 [file Evansia barentsensis.pdf › Supplement/Supplement 2/Species 1914 plots/Evansia barentsensis.pdf]

# Species *Evansia cerebraloides*

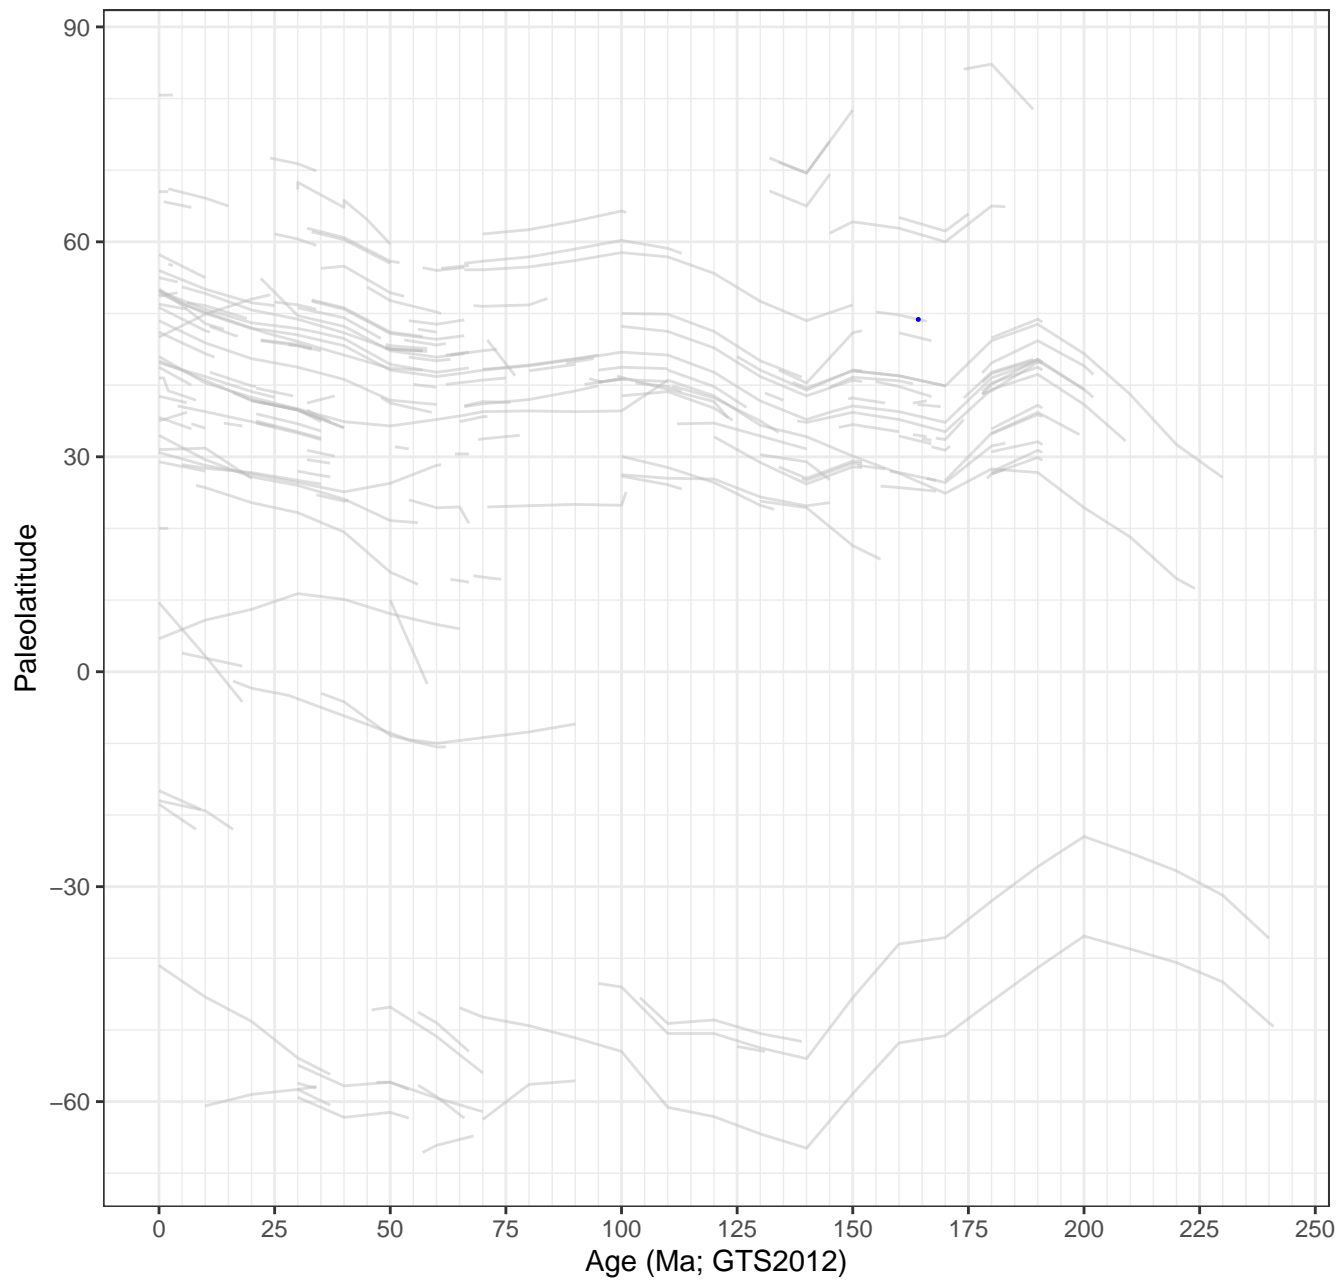

Supplement: Supplementary file 1412 [file Evansia cerebraloides.pdf › Supplement/Supplement 2/Species 1914 plots/Evansia cerebraloides.pdf]

# Species *Evansia deflandrei*

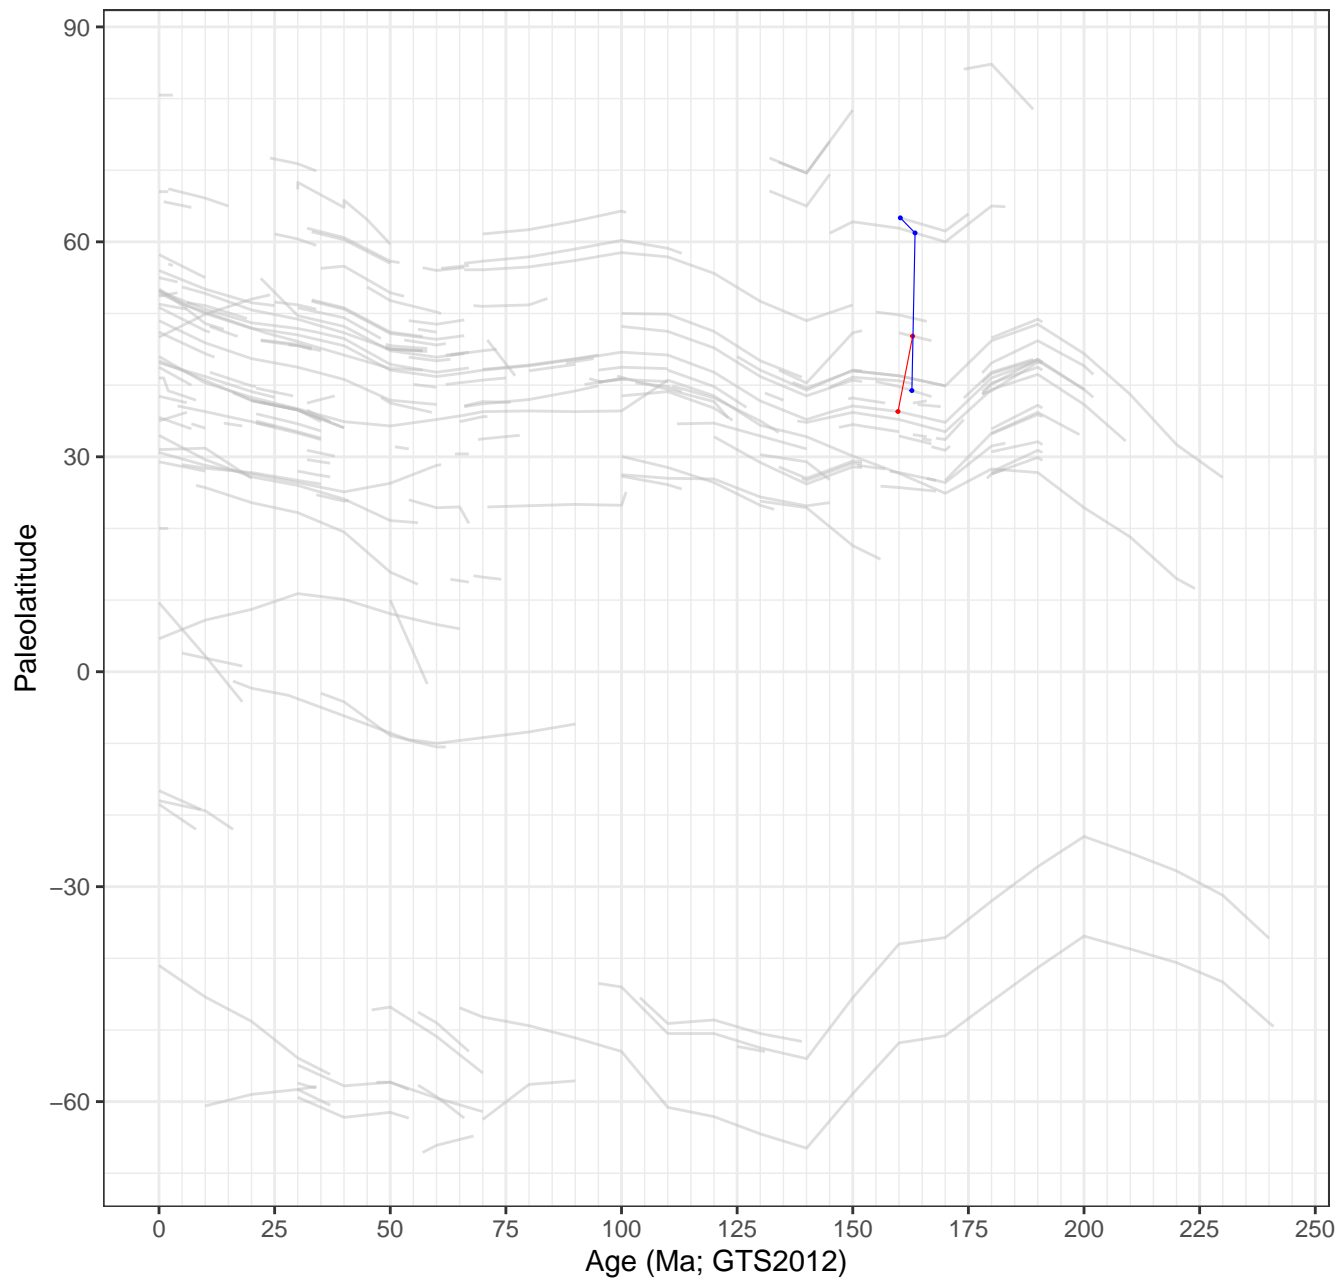

Supplement: Supplementary file 1413 [file Evansia deflandrei.pdf › Supplement/Supplement 2/Species 1914 plots/Evansia deflandrei.pdf]

# Species *Evansia wigginsii*

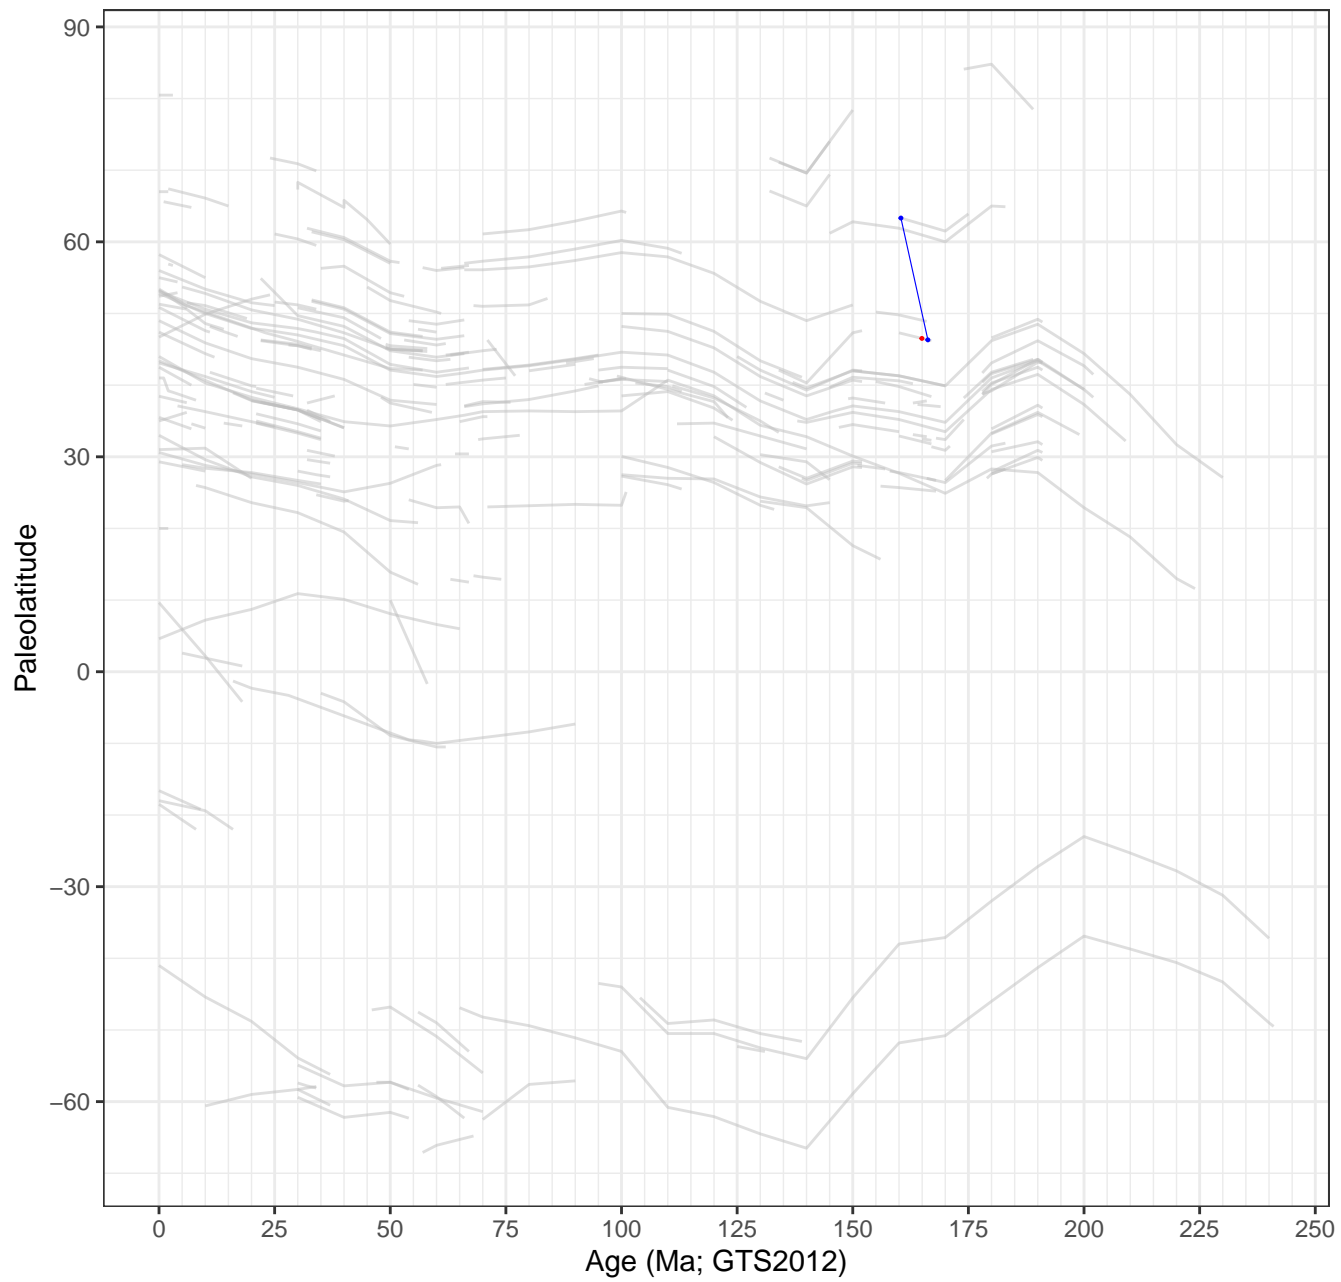

Supplement: Supplementary file 1414 [file Evansia wigginsii.pdf › Supplement/Supplement 2/Species 1914 plots/Evansia wigginsii.pdf]

# Species *Evittosphaerula paratabulata*

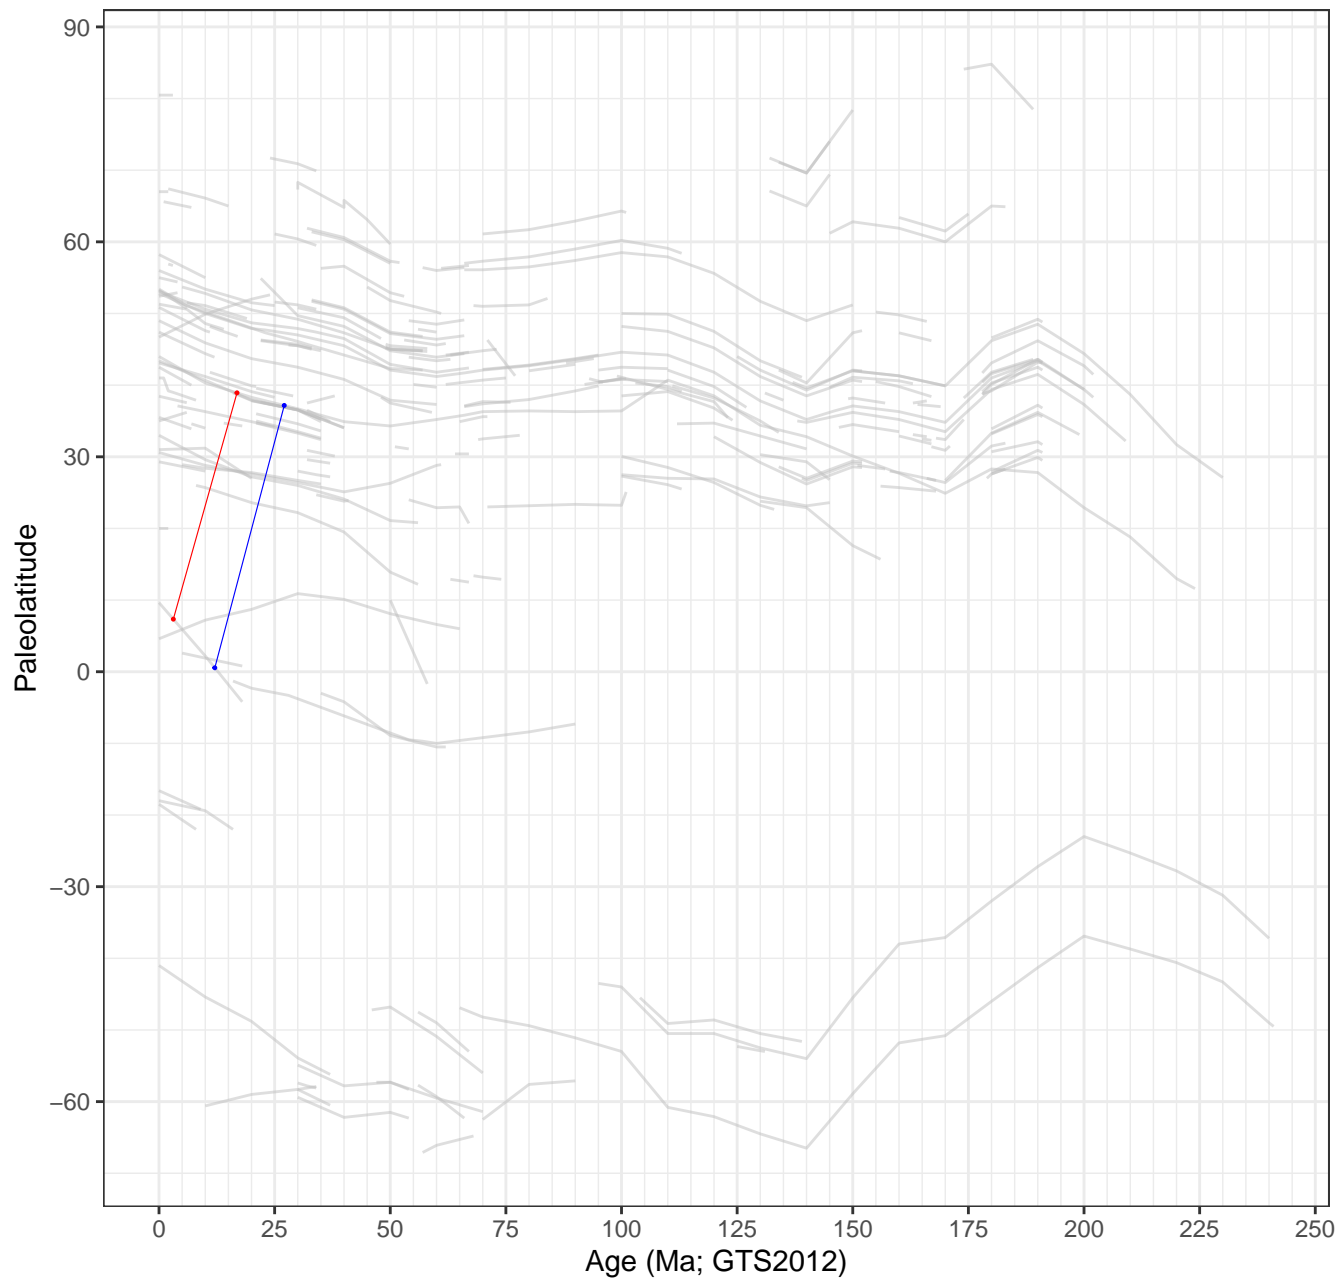

Supplement: Supplementary file 1415 [file Evittosphaerula paratabulata.pdf › Supplement/Supplement 2/Species 1914 plots/Evittosphaerula paratabulata.pdf]

# Species Exiguiphraera phragma

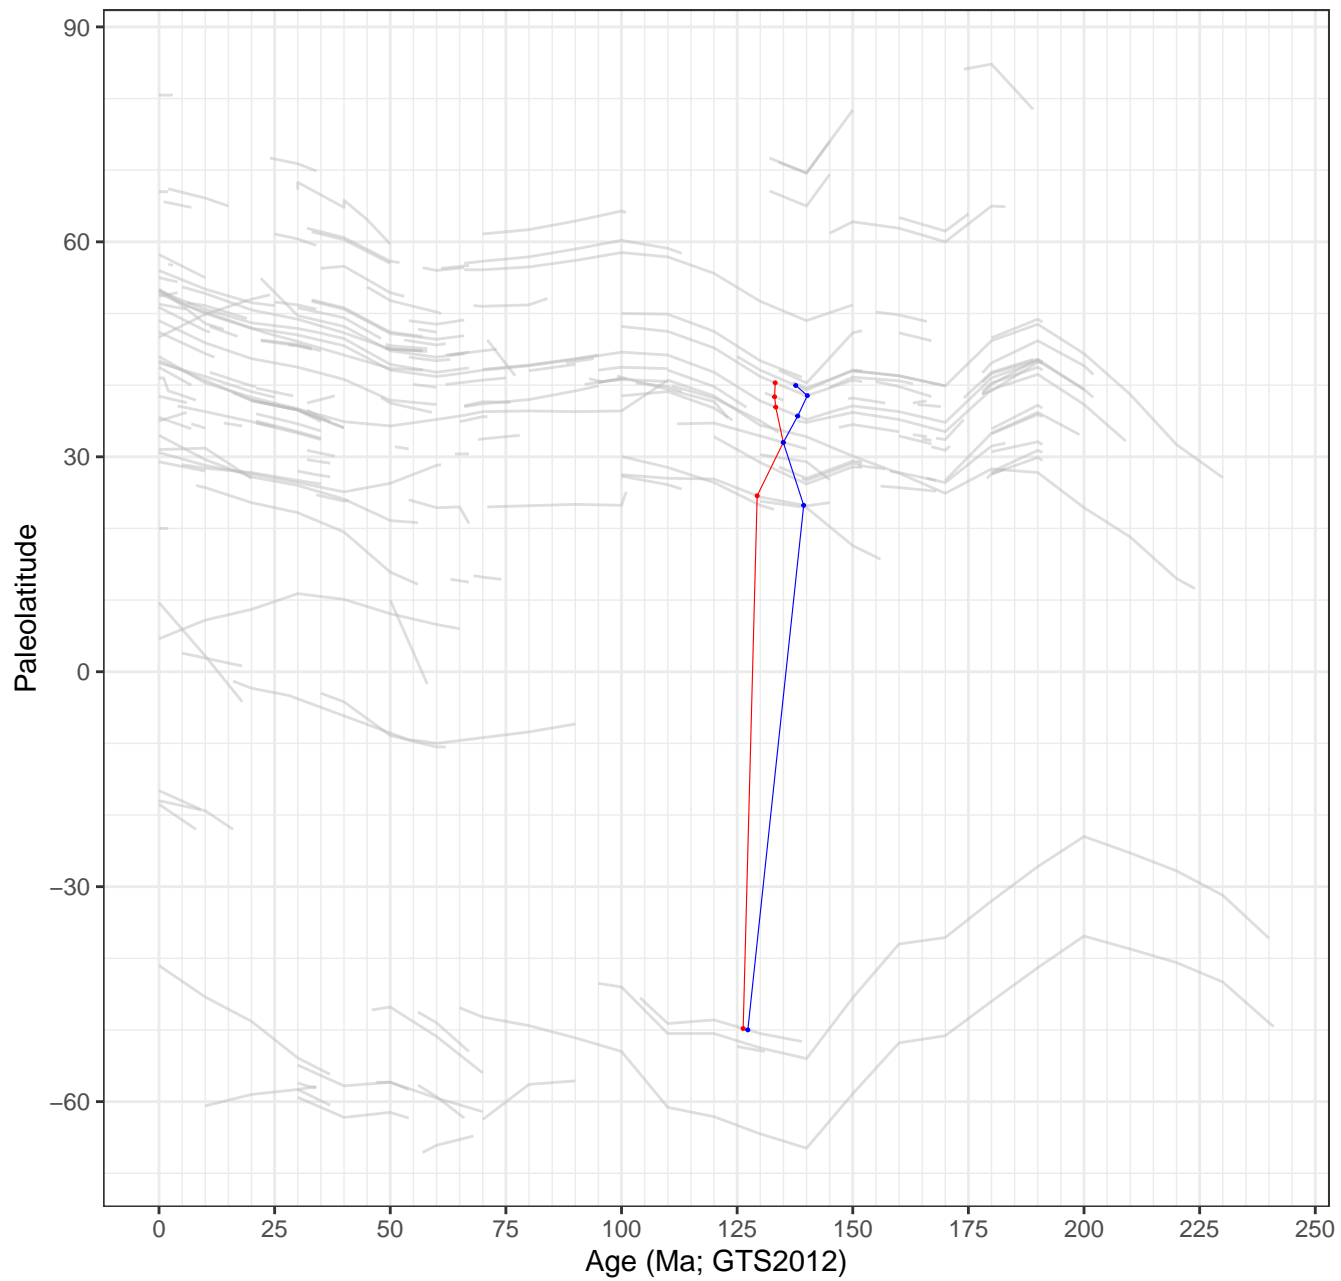

Supplement: Supplementary file 1416 [file Exiguisphaera phragma.pdf › Supplement/Supplement 2/Species 1914 plots/Exiguisphaera phragma.pdf]

# Species Exiguishphaera plectilis

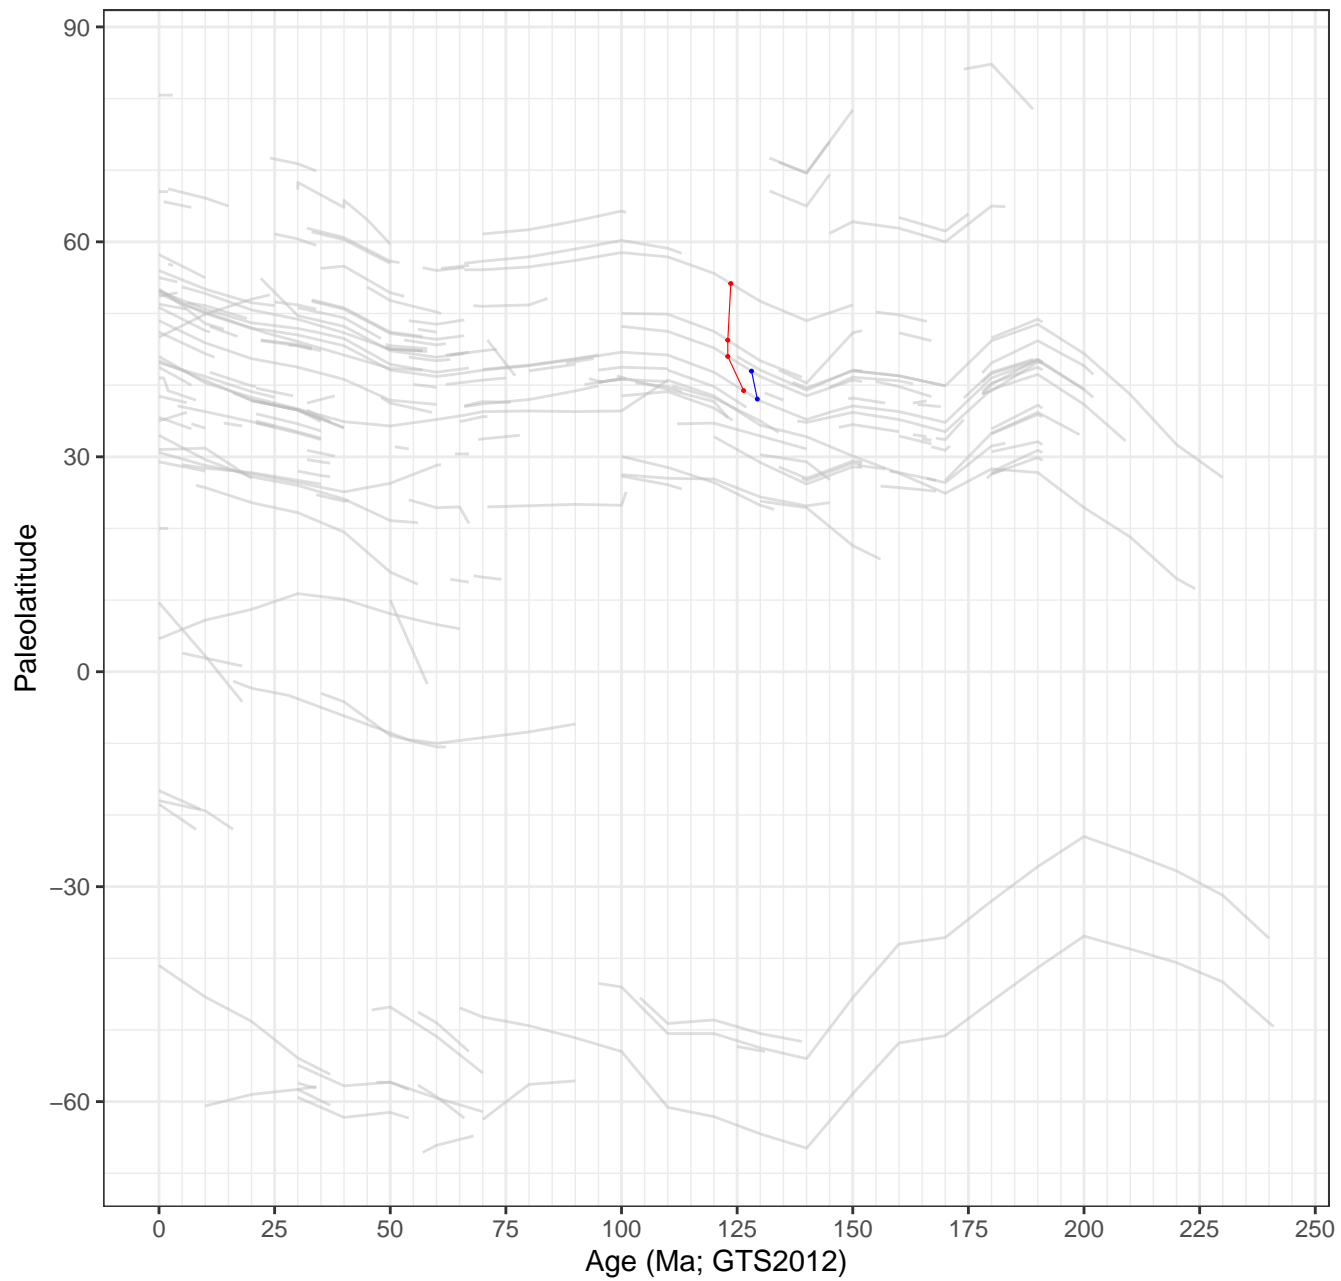

Supplement: Supplementary file 1417 [file Exiguisphaera plectilis.pdf › Supplement/Supplement 2/Species 1914 plots/Exiguisphaera plectilis.pdf]

# Species *Exochosphaeridium arnace*

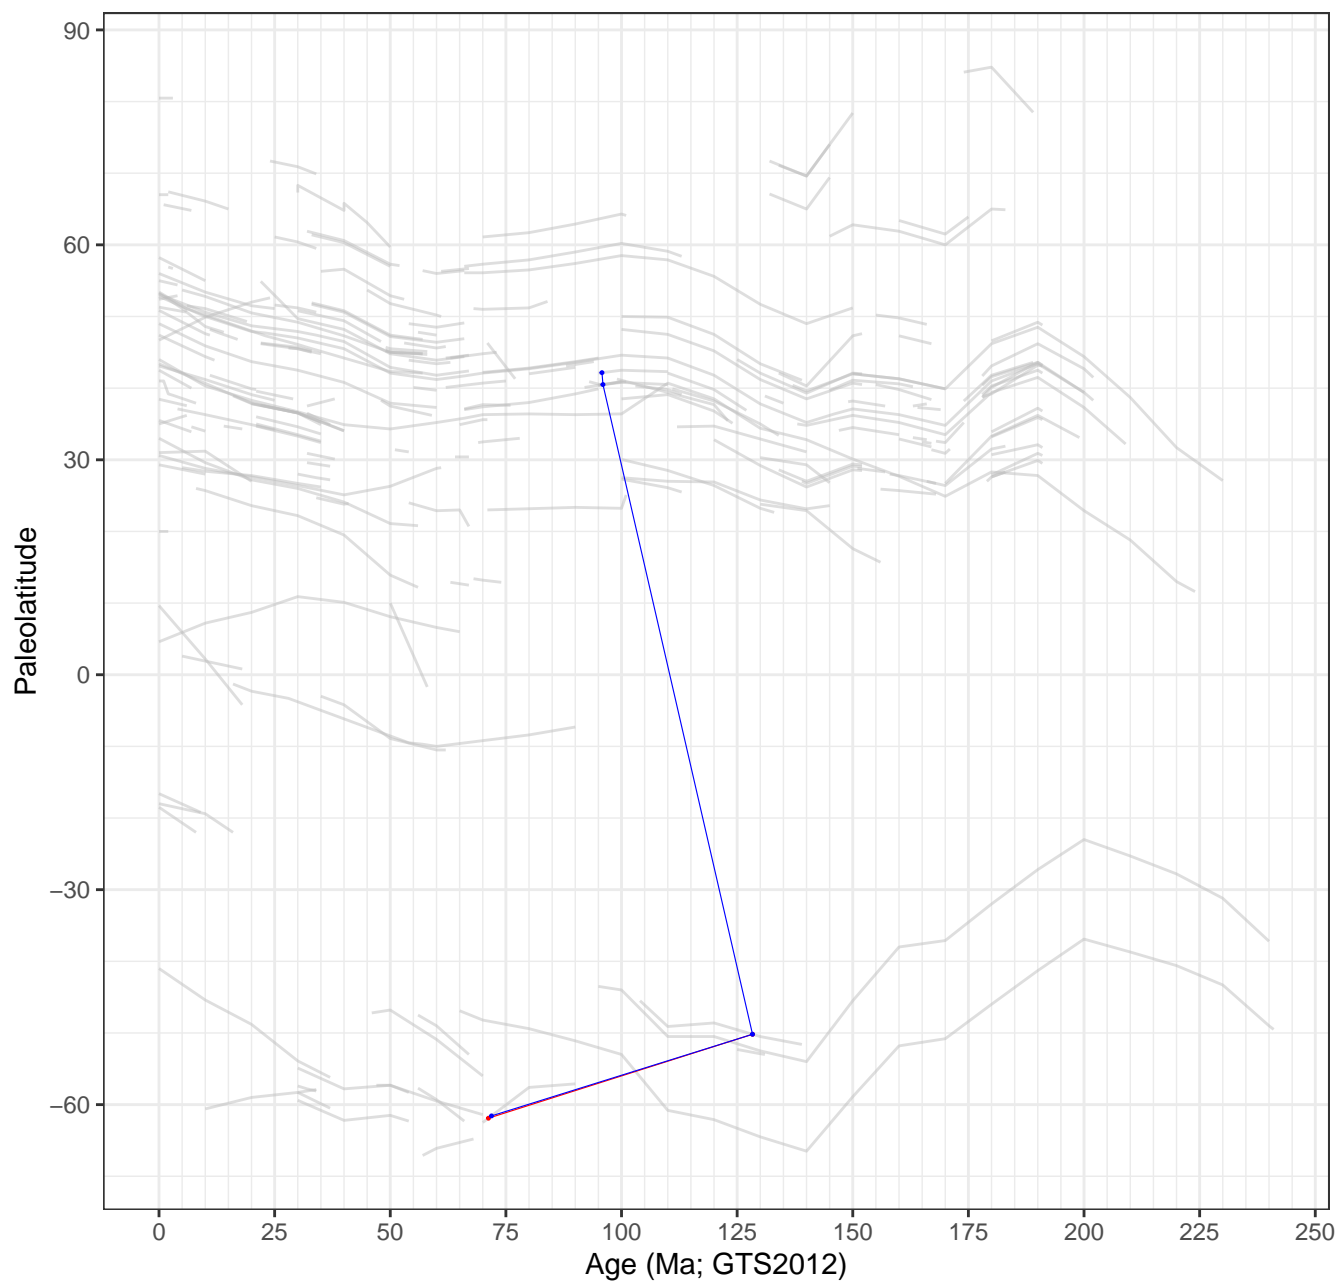

Supplement: Supplementary file 1418 [file Exochosphaeridium arnace.pdf › Supplement/Supplement 2/Species 1914 plots/Exochosphaeridium arnace.pdf]

# Species *Exochosphaeridium insigne*

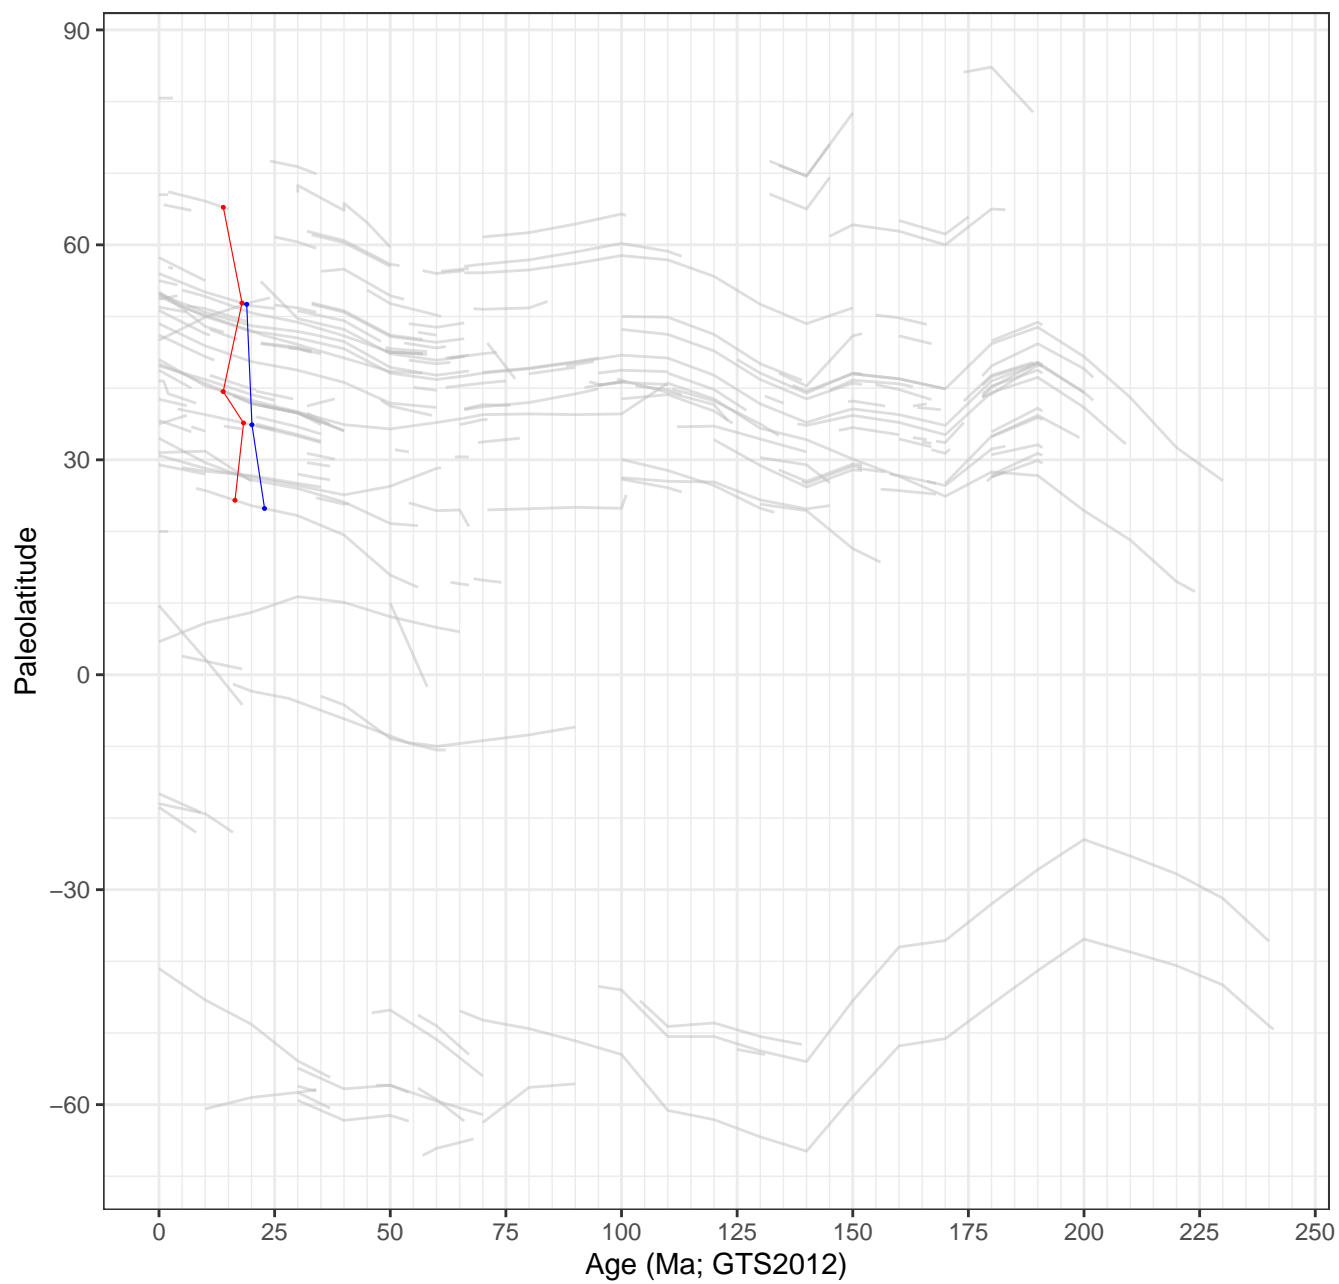

Supplement: Supplementary file 1419 [file Exochosphaeridium insigne.pdf › Supplement/Supplement 2/Species 1914 plots/Exochosphaeridium insigne.pdf]

# Species *Exochosphaeridium majus*

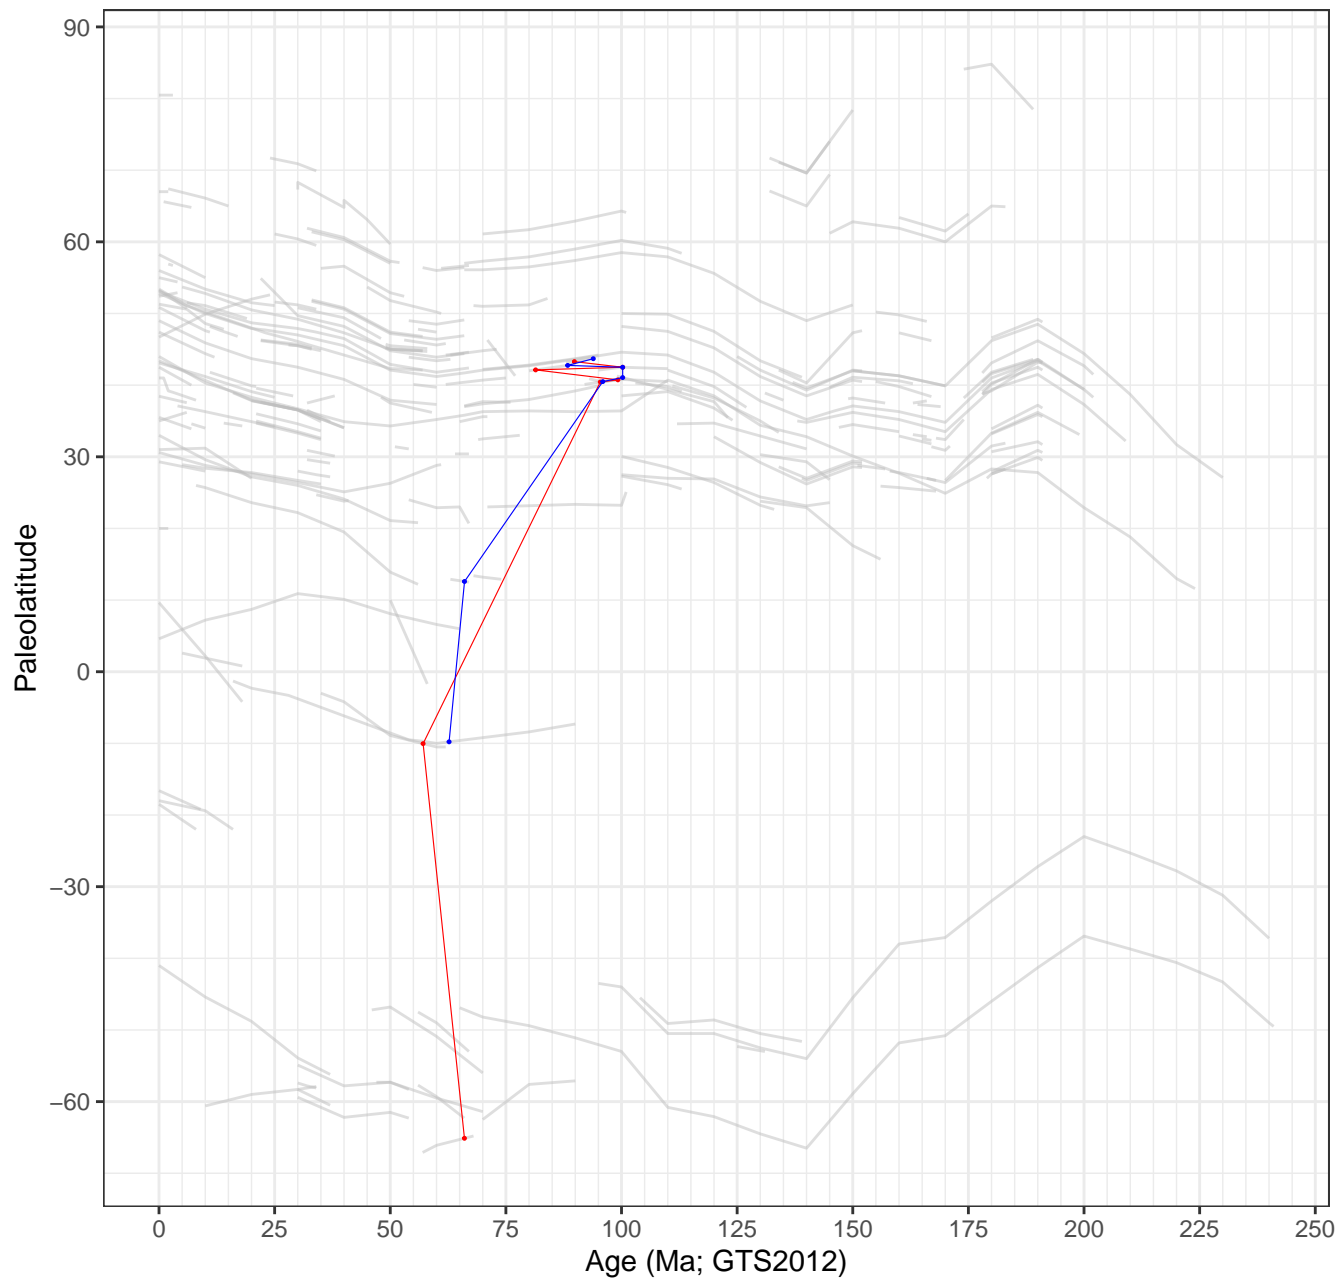

Supplement: Supplementary file 1420 [file Exochosphaeridium majus.pdf › Supplement/Supplement 2/Species 1914 plots/Exochosphaeridium majus.pdf]

# Species *Exochosphaeridium multifurcatum*

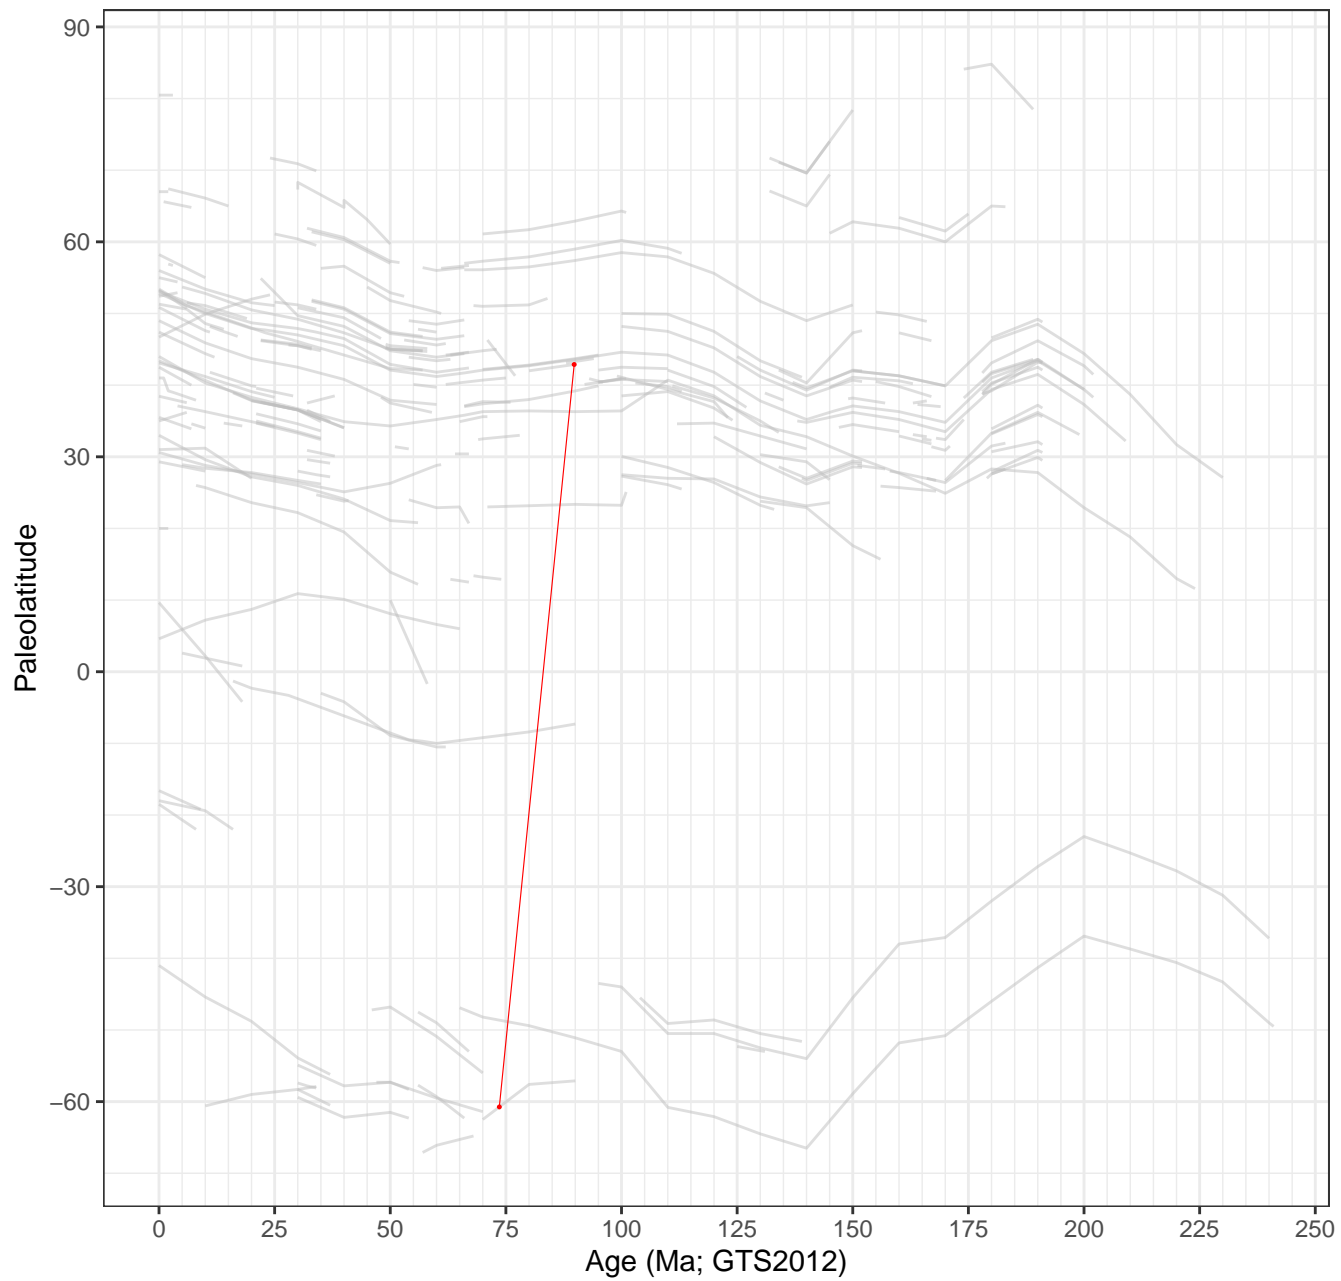

Supplement: Supplementary file 1421 [file Exochosphaeridium multifurcatum.pdf › Supplement/Supplement 2/Species 1914 plots/Exochosphaeridium multifurcatum.pdf]

# Species *Exochosphaeridium phragmites*

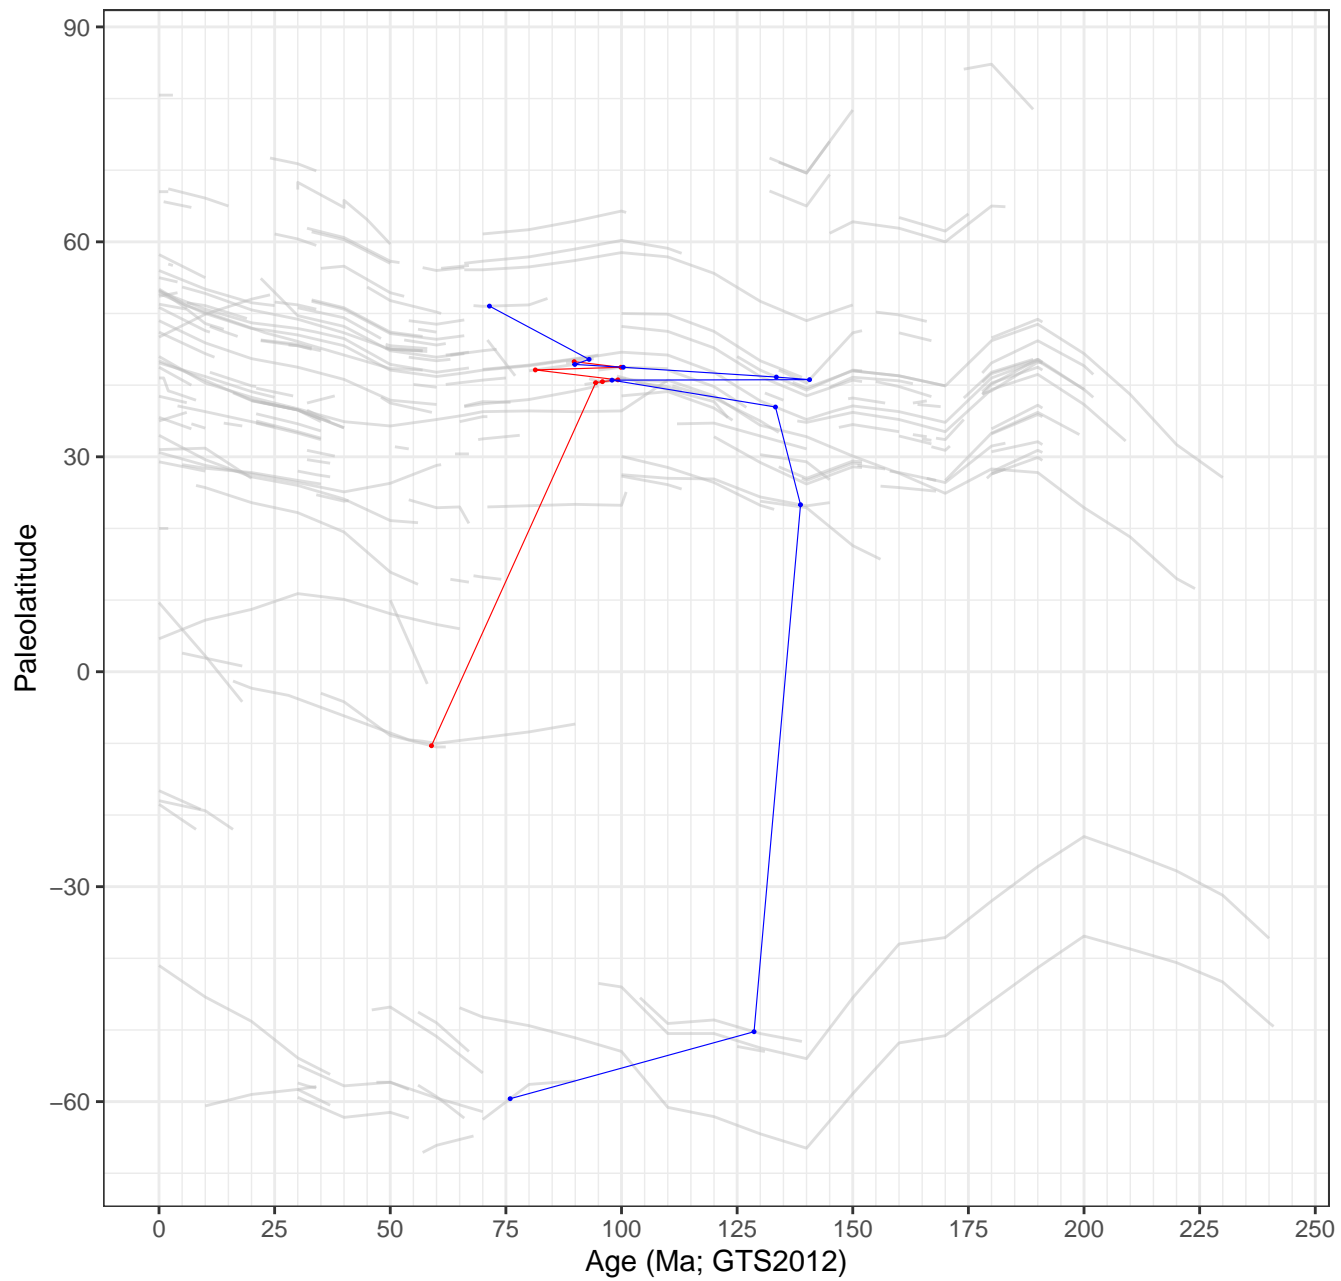

Supplement: Supplementary file 1422 [file Exochosphaeridium phragmites.pdf › Supplement/Supplement 2/Species 1914 plots/Exochosphaeridium phragmites.pdf]

# Species *Exochosphaeridium robustum*

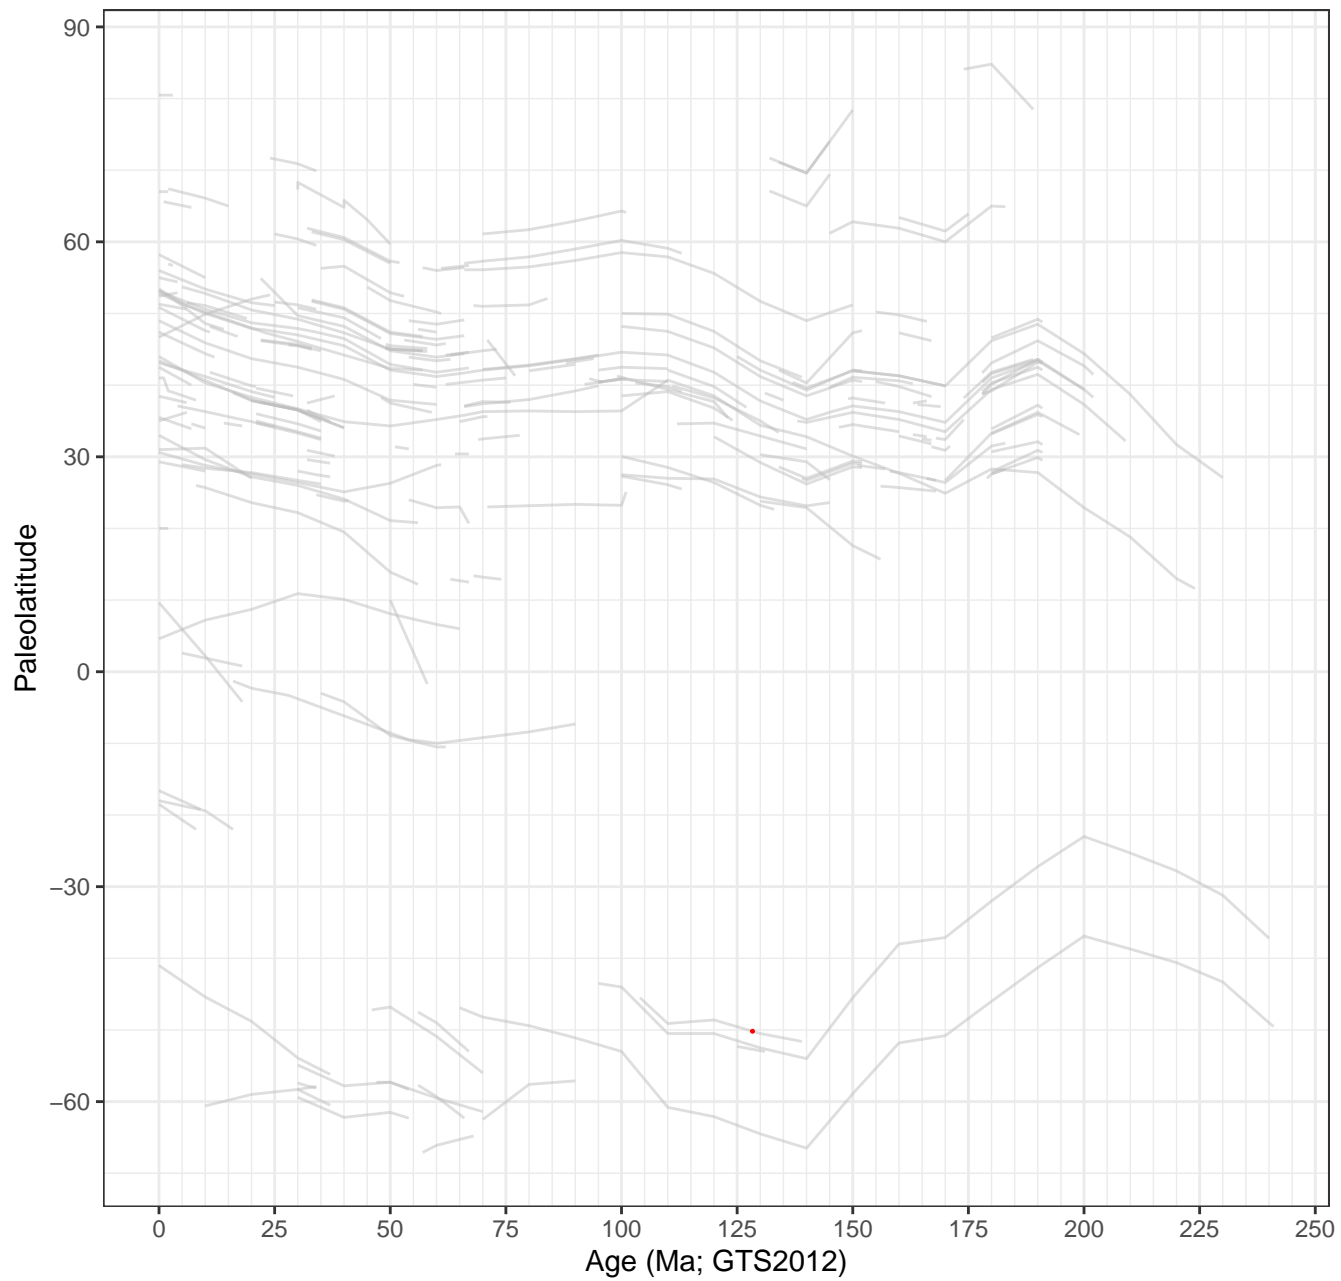

Supplement: Supplementary file 1423 [file Exochosphaeridium robustum.pdf › Supplement/Supplement 2/Species 1914 plots/Exochosphaeridium robustum.pdf]

# Species *Eyrea nebulosa*

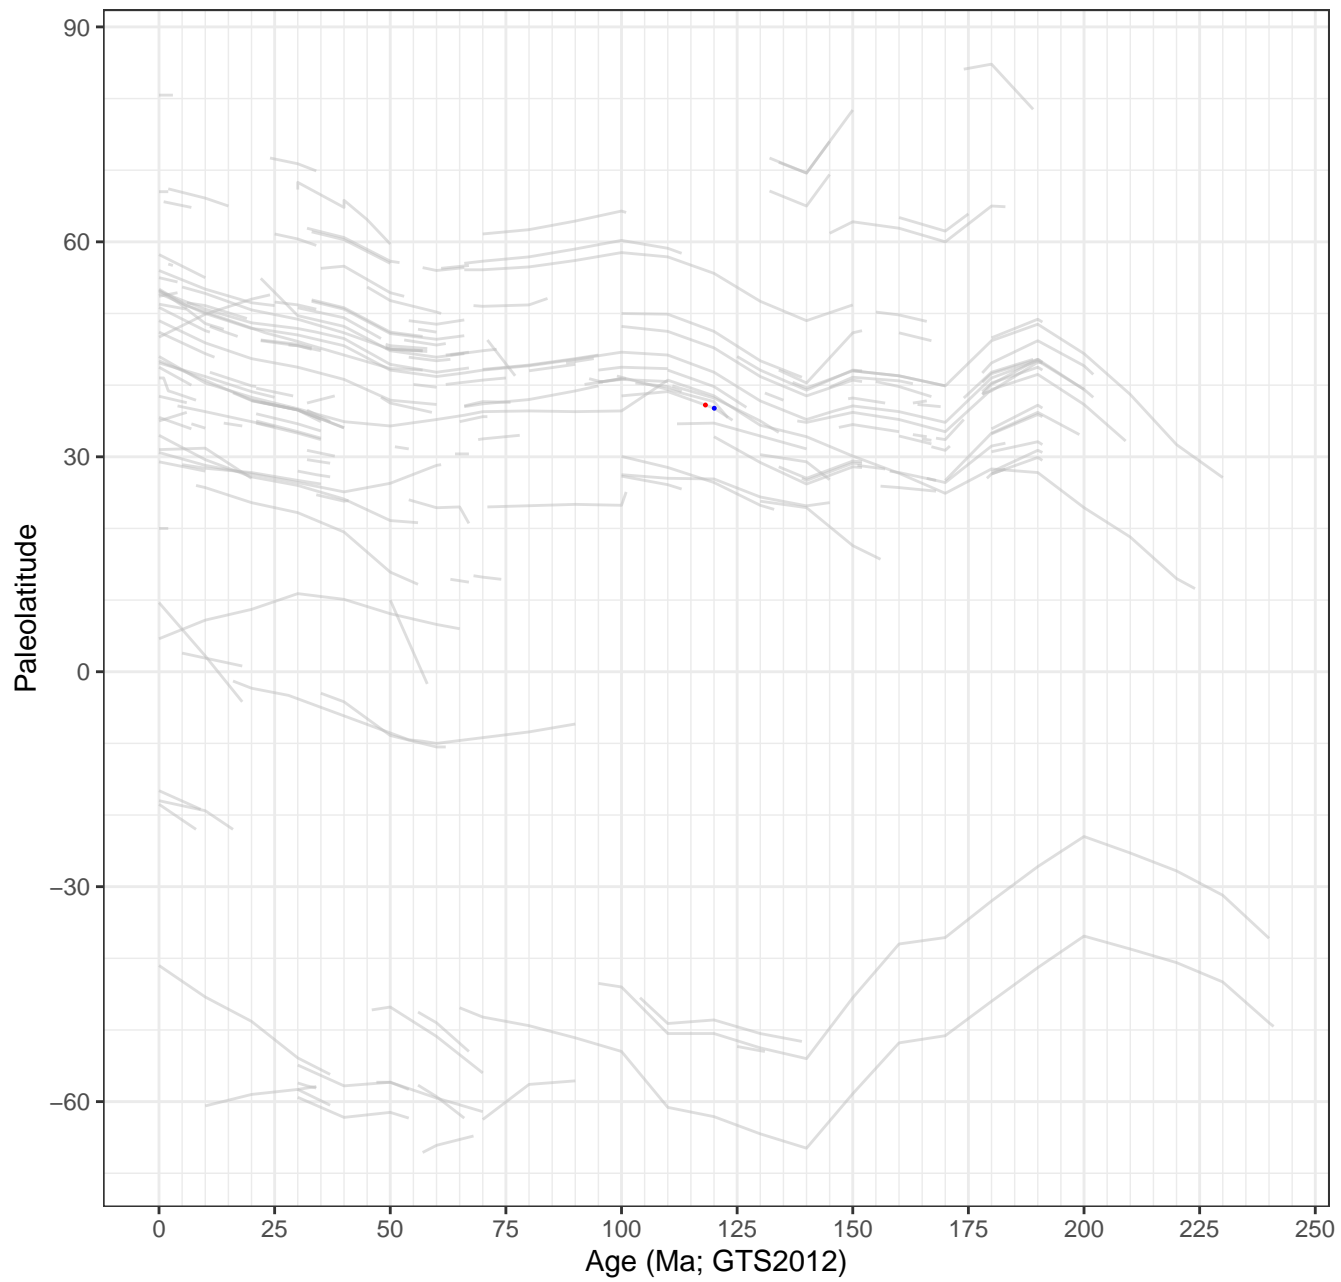

Supplement: Supplementary file 1424 [file Eyrea nebulosa.pdf › Supplement/Supplement 2/Species 1914 plots/Eyrea nebulosa.pdf]

# Species *Fibradinium annetorpense*

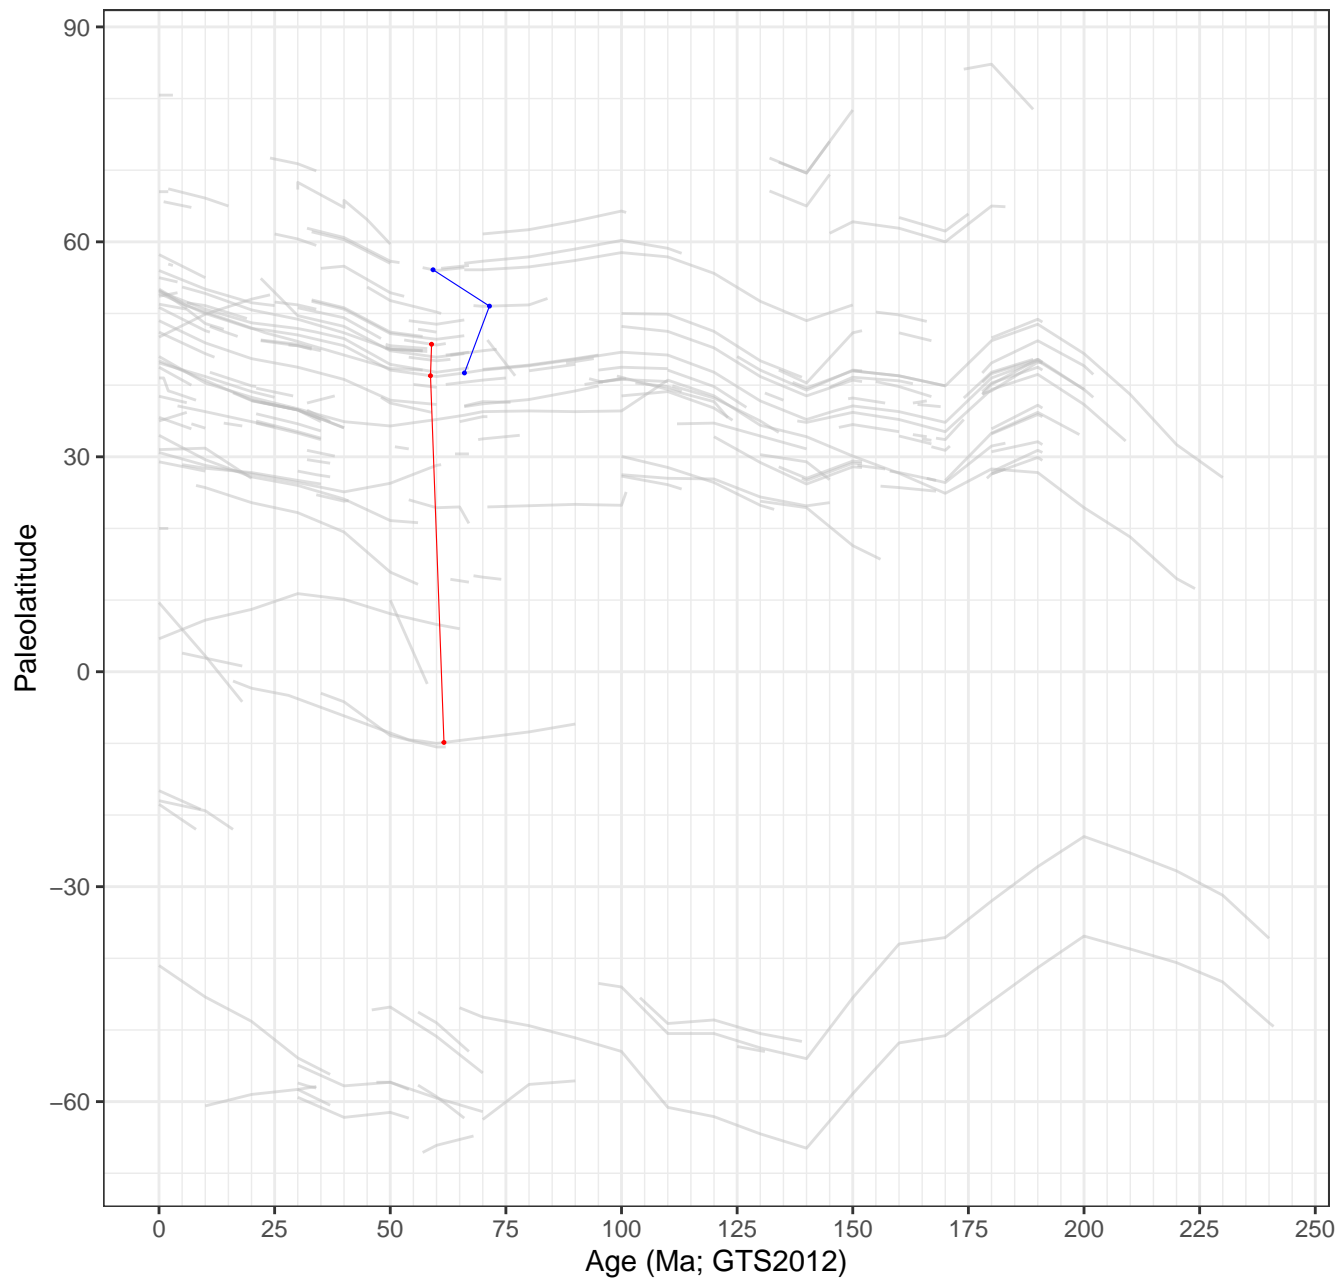

Supplement: Supplementary file 1425 [file Fibradinium annetorpense.pdf › Supplement/Supplement 2/Species 1914 plots/Fibradinium annetorpense.pdf]

# Species *Fibradinium squamosum*

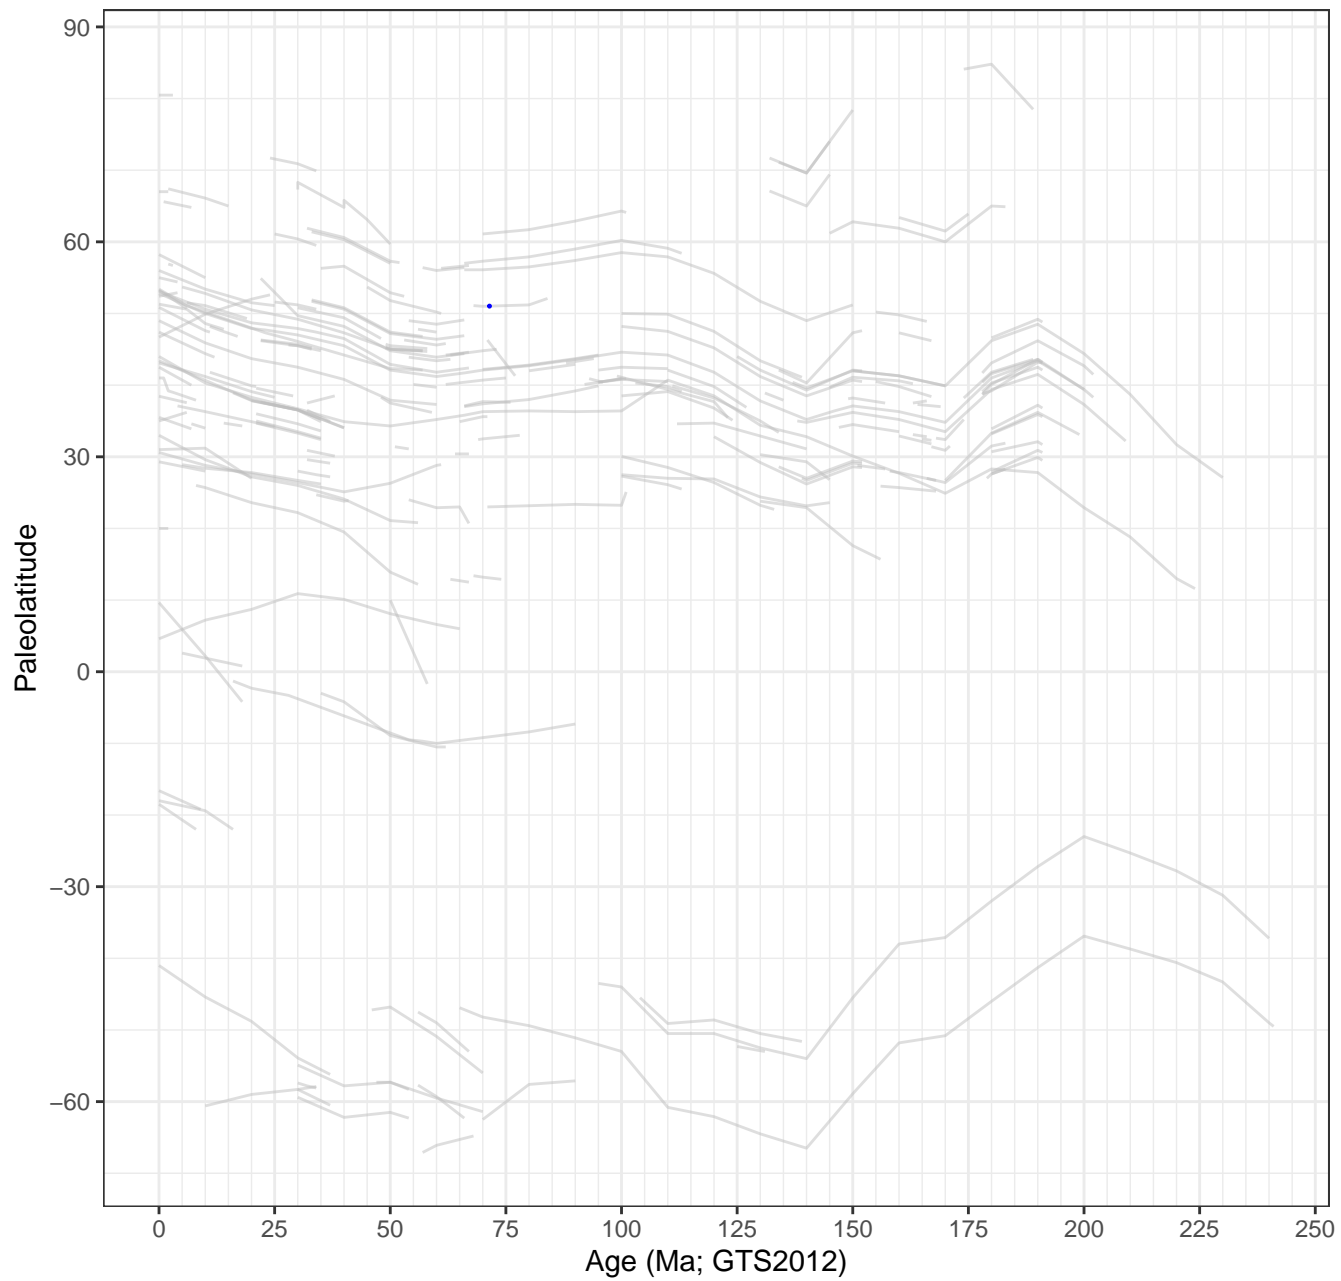

Supplement: Supplementary file 1426 [file Fibradinium squamosum.pdf › Supplement/Supplement 2/Species 1914 plots/Fibradinium squamosum.pdf]

# Species *Fibradinium variculum*

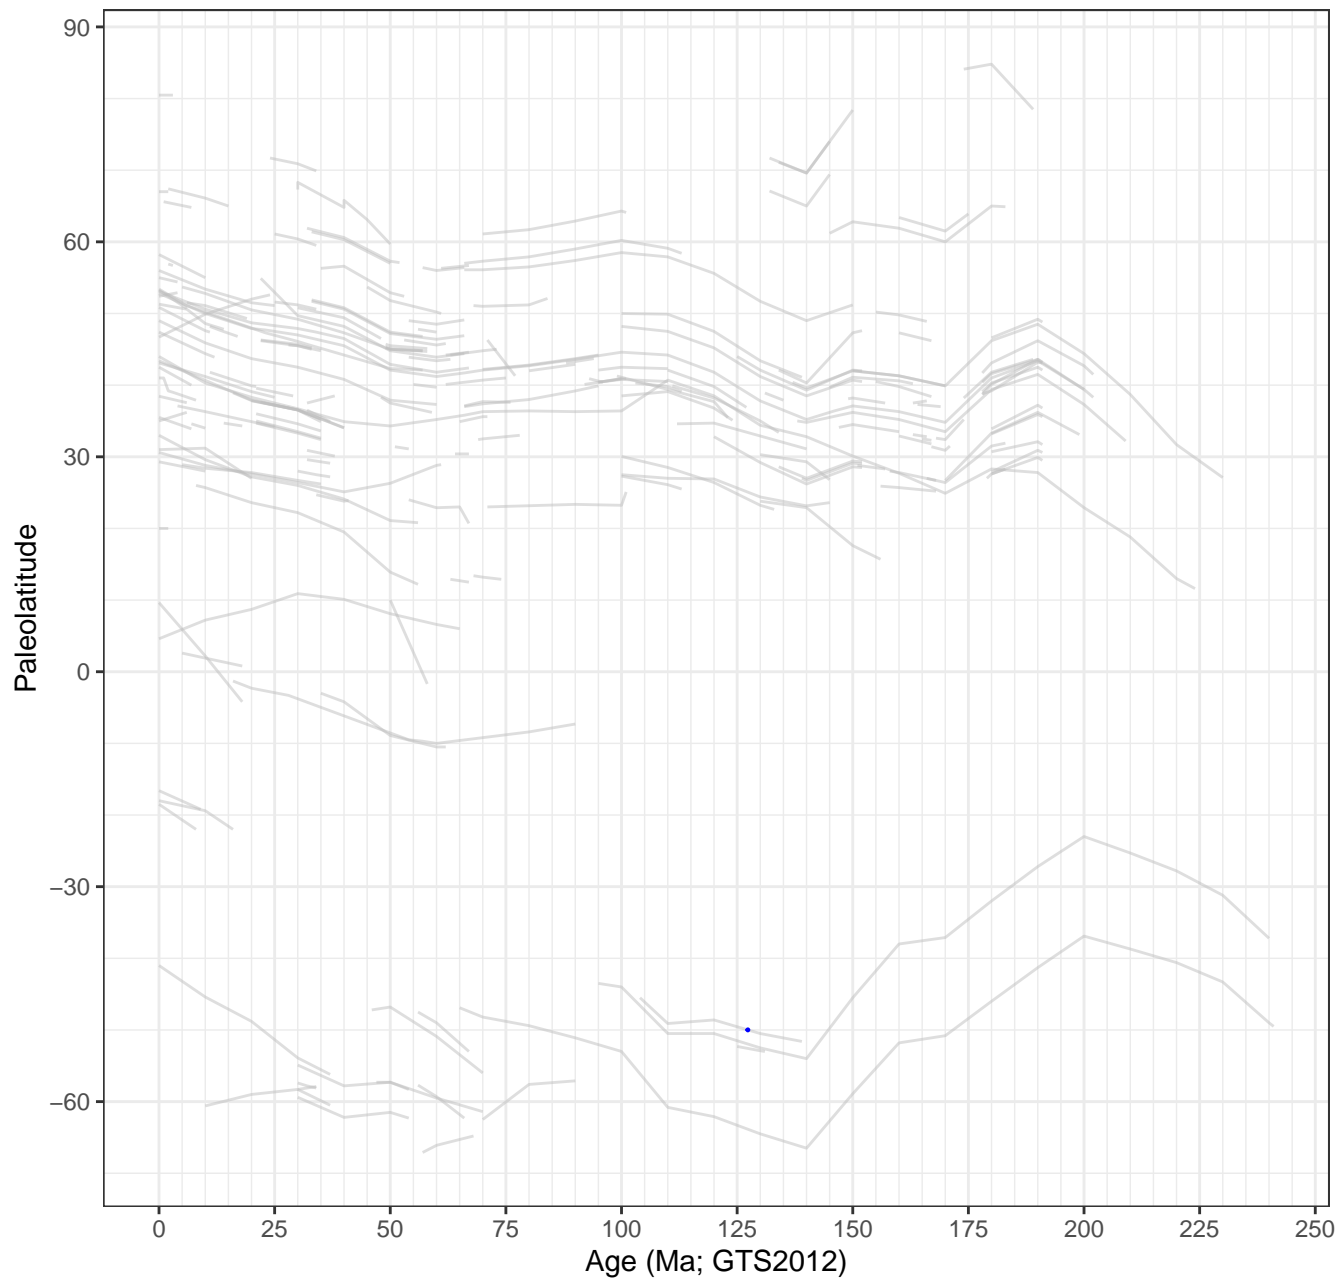

Supplement: Supplementary file 1427 [file Fibradinium variculum.pdf › Supplement/Supplement 2/Species 1914 plots/Fibradinium variculum.pdf]

# Species *Fibrocysta axialis*

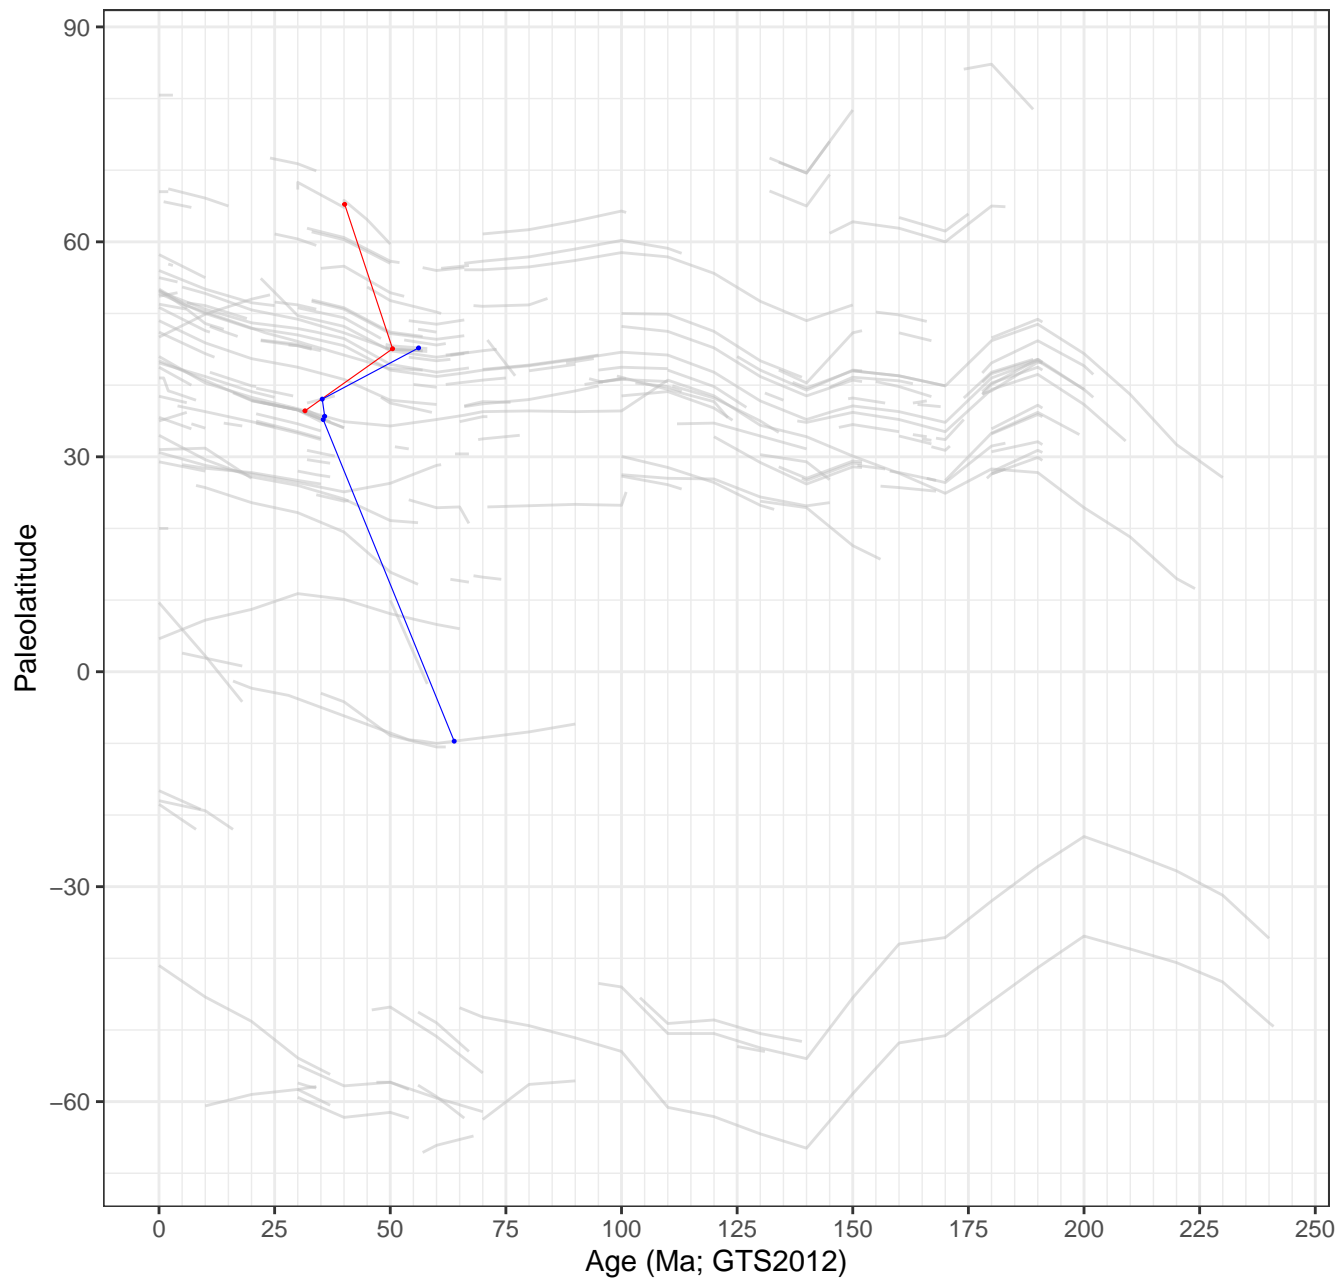

Supplement: Supplementary file 1428 [file Fibrocysta axialis.pdf › Supplement/Supplement 2/Species 1914 plots/Fibrocysta axialis.pdf]

# Species *Fibrocysta bipolaris*

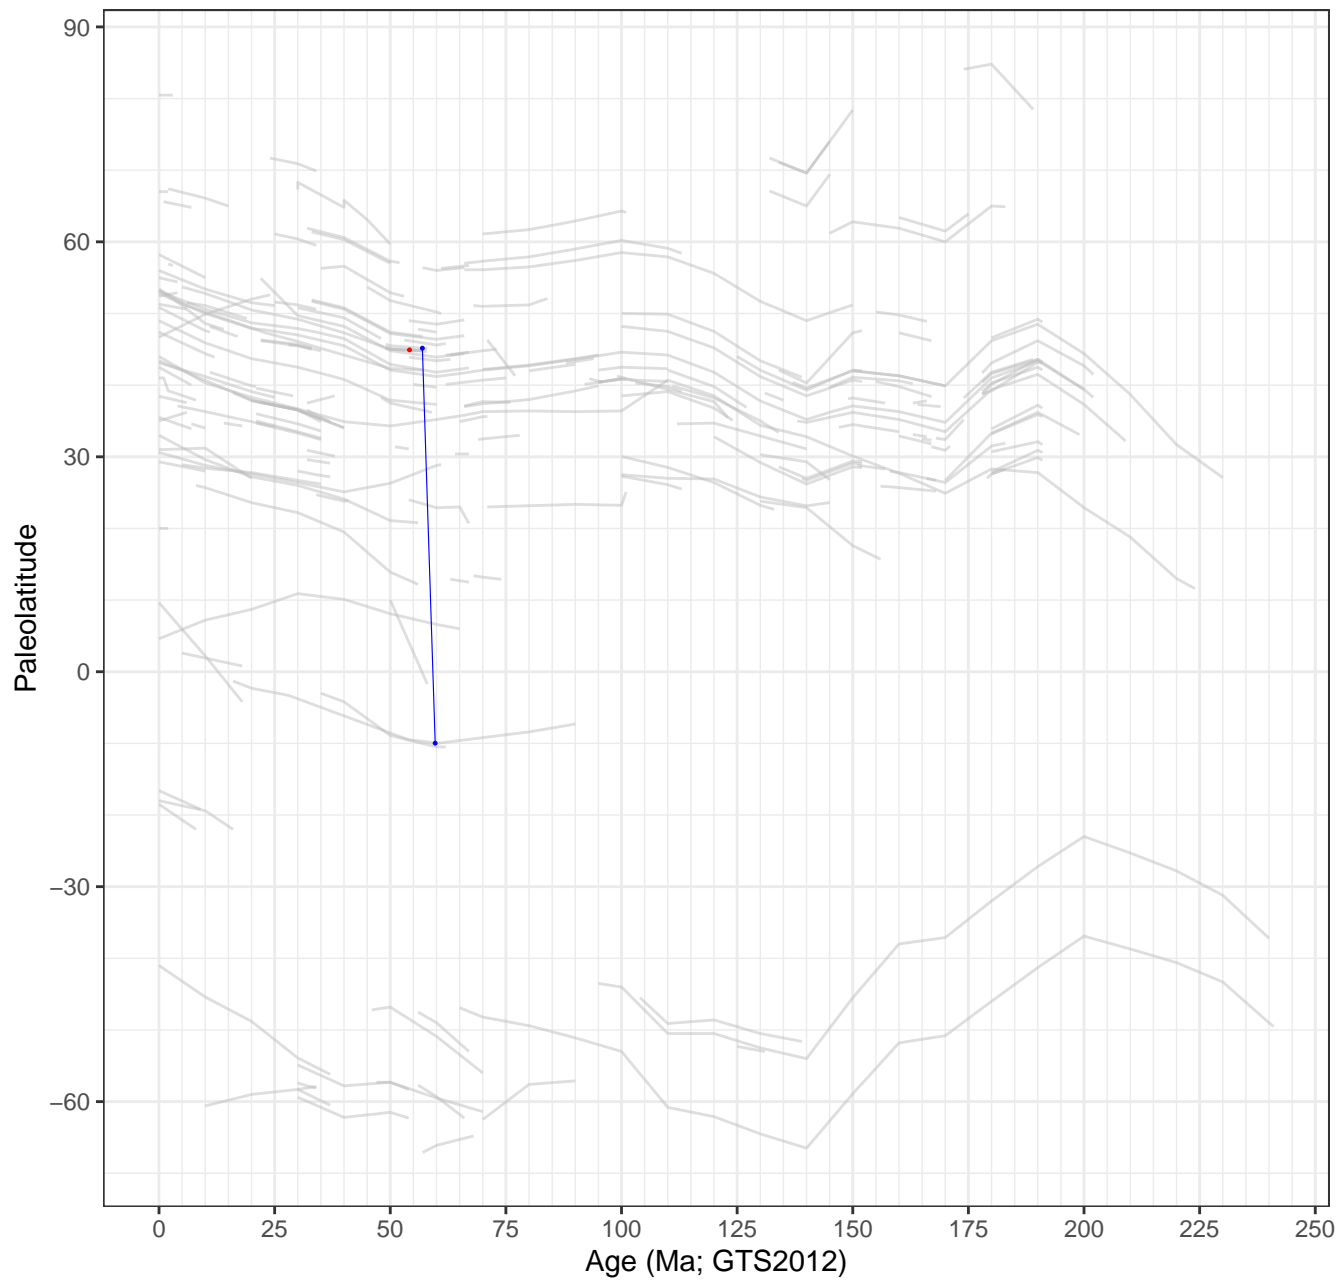

Supplement: Supplementary file 1429 [file Fibrocysta bipolaris.pdf › Supplement/Supplement 2/Species 1914 plots/Fibrocysta bipolaris.pdf]

# Species *Fibrocysta licia*

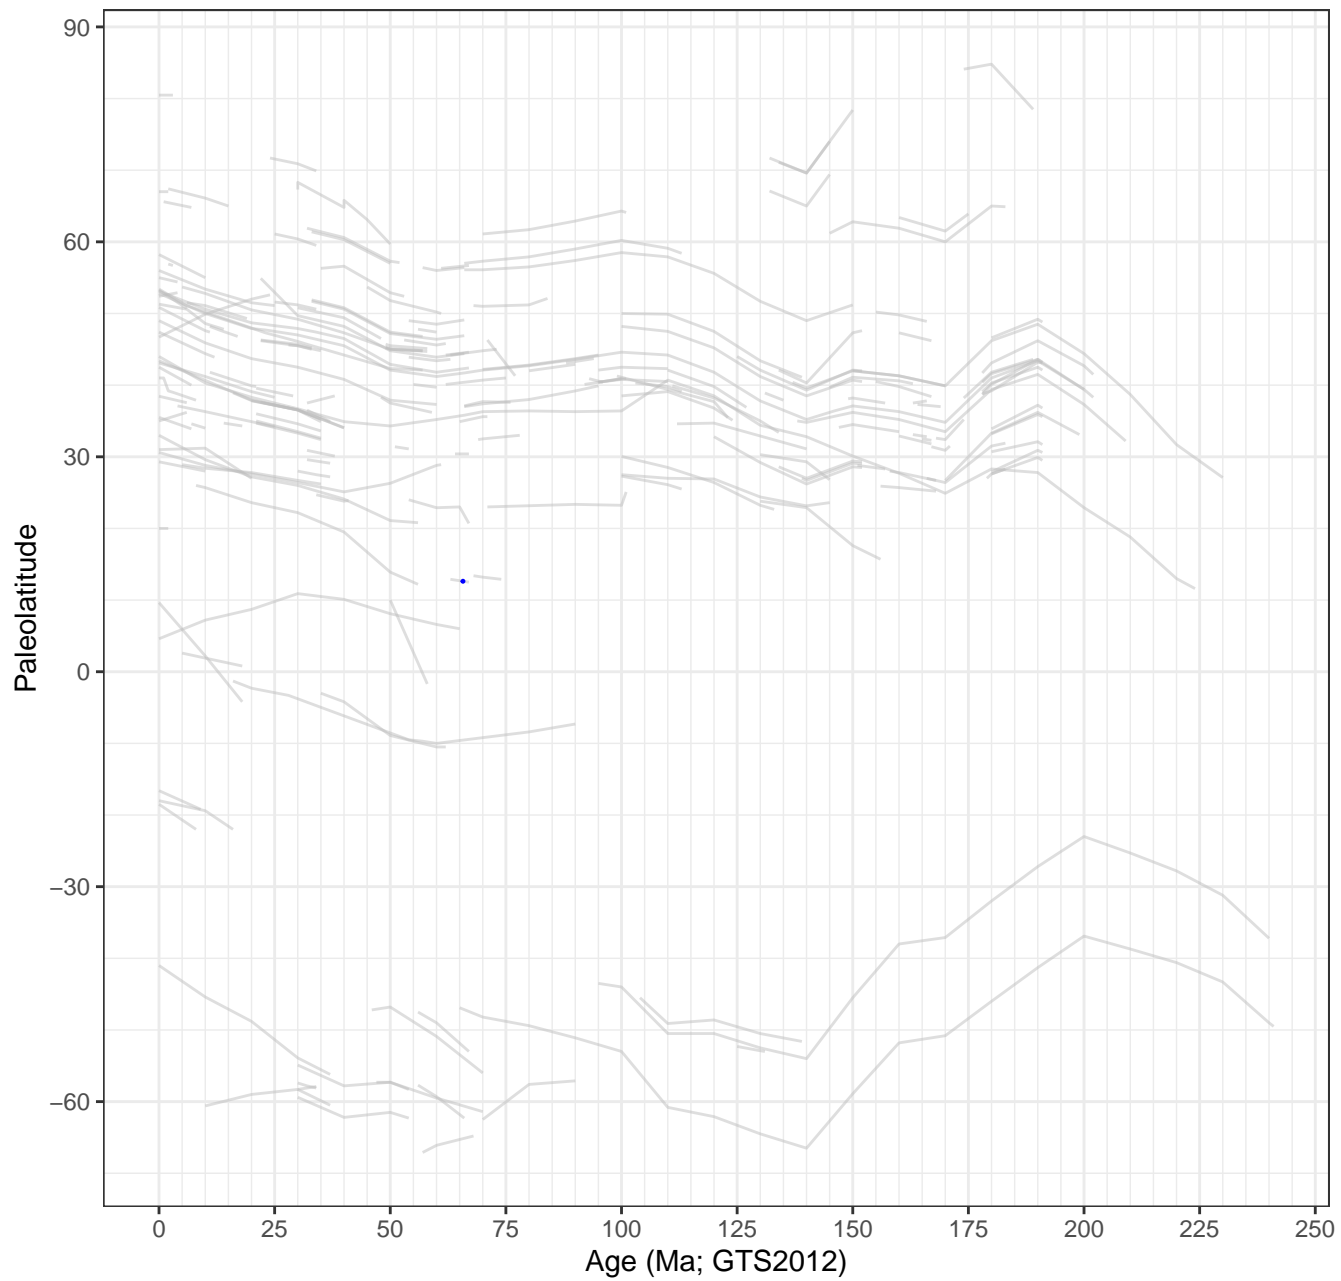

Supplement: Supplementary file 1430 [file Fibrocysta licia.pdf › Supplement/Supplement 2/Species 1914 plots/Fibrocysta licia.pdf]

# Species *Fibrocysta ovalis*

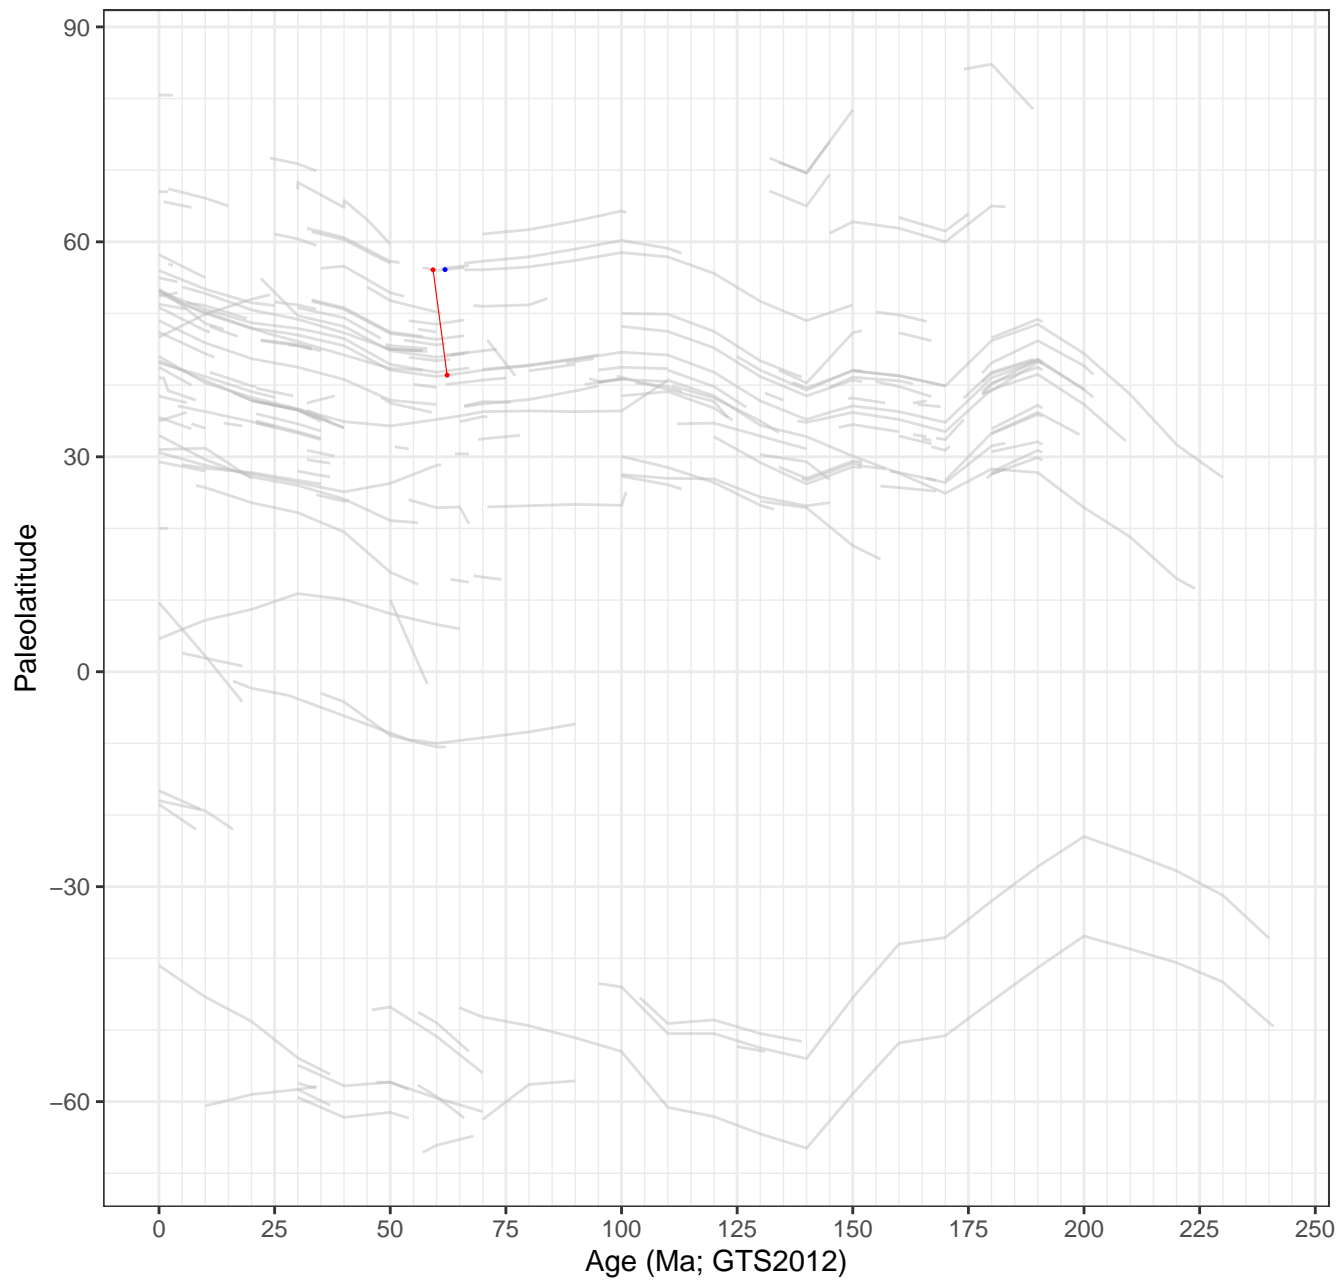

Supplement: Supplementary file 1431 [file Fibrocysta ovalis.pdf › Supplement/Supplement 2/Species 1914 plots/Fibrocysta ovalis.pdf]

# Species *Fibrocysta radiata*

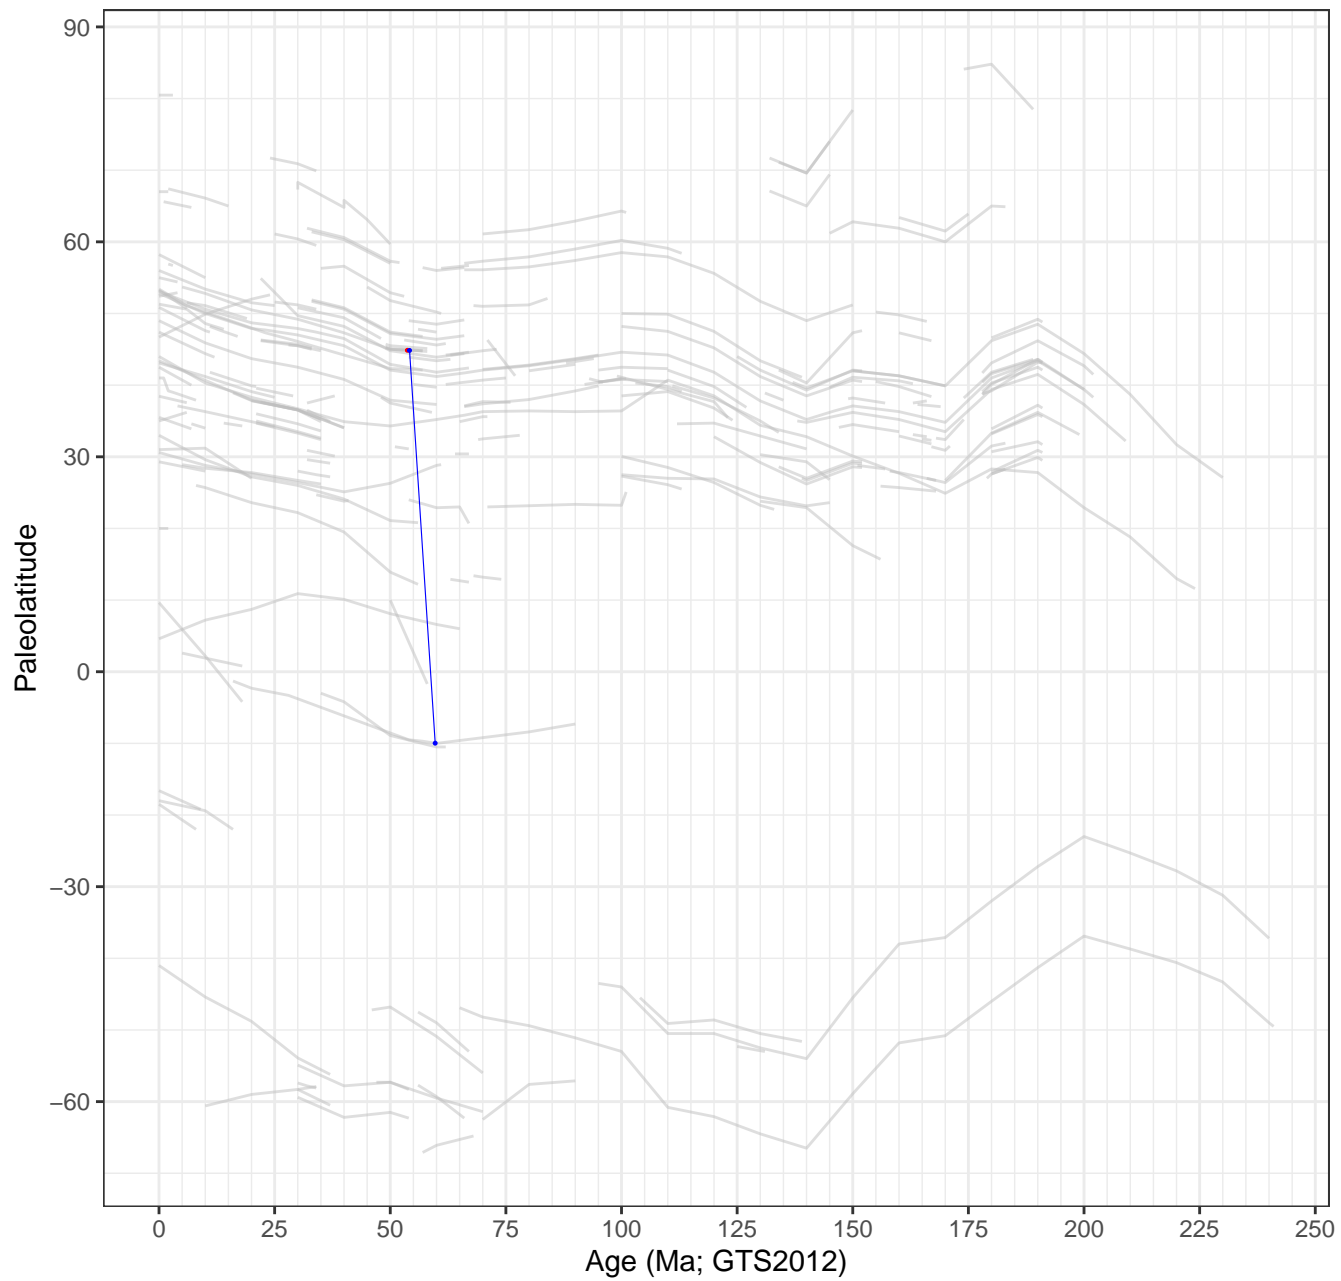

Supplement: Supplementary file 1432 [file Fibrocysta radiata.pdf › Supplement/Supplement 2/Species 1914 plots/Fibrocysta radiata.pdf]
