# Supplementary figures and images for: DINOSTRAT: a global database of the stratigraphic and paleolatitudinal distribution of Mesozoic–Cenozoic organic-walled dinoflagellate cysts (part 15 of 27)
Source: Copernicus journal article supplement (doi:10.5194/essd-14-579-2022), 2022-02-09

# Species *Fibrocysta vectensis*

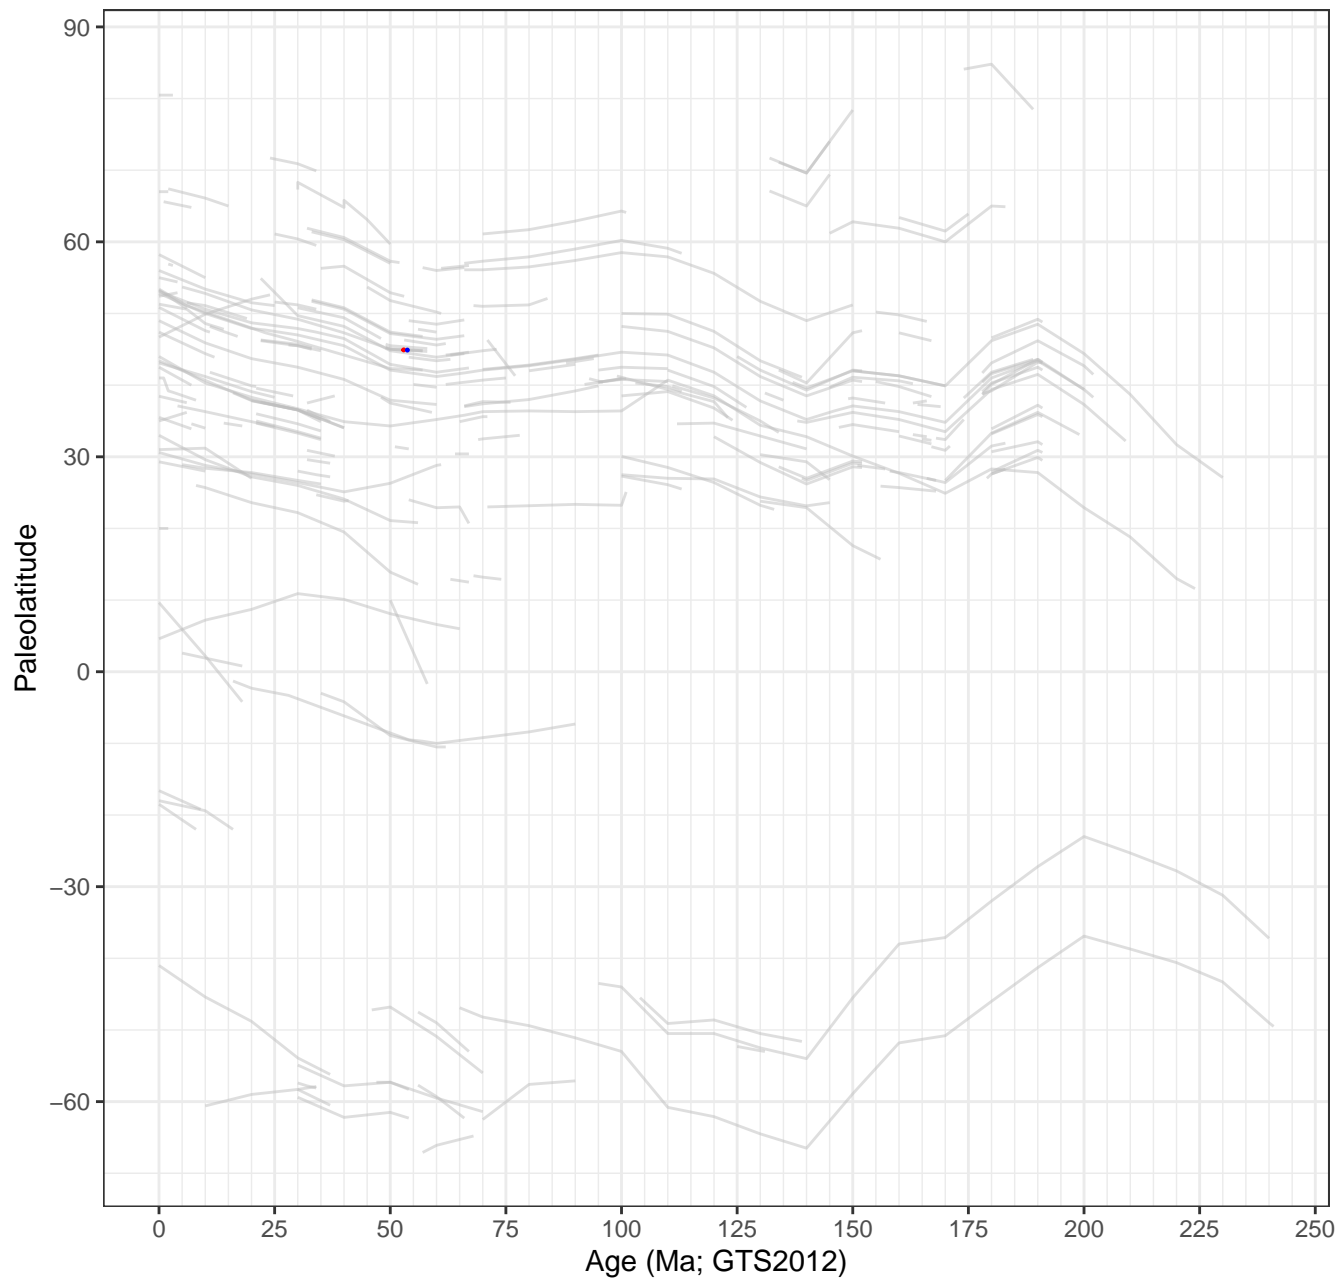

Supplement: Supplementary file 1433 [file Fibrocysta vectensis.pdf › Supplement/Supplement 2/Species 1914 plots/Fibrocysta vectensis.pdf]

# Species *Filisphaera filifera filifera*

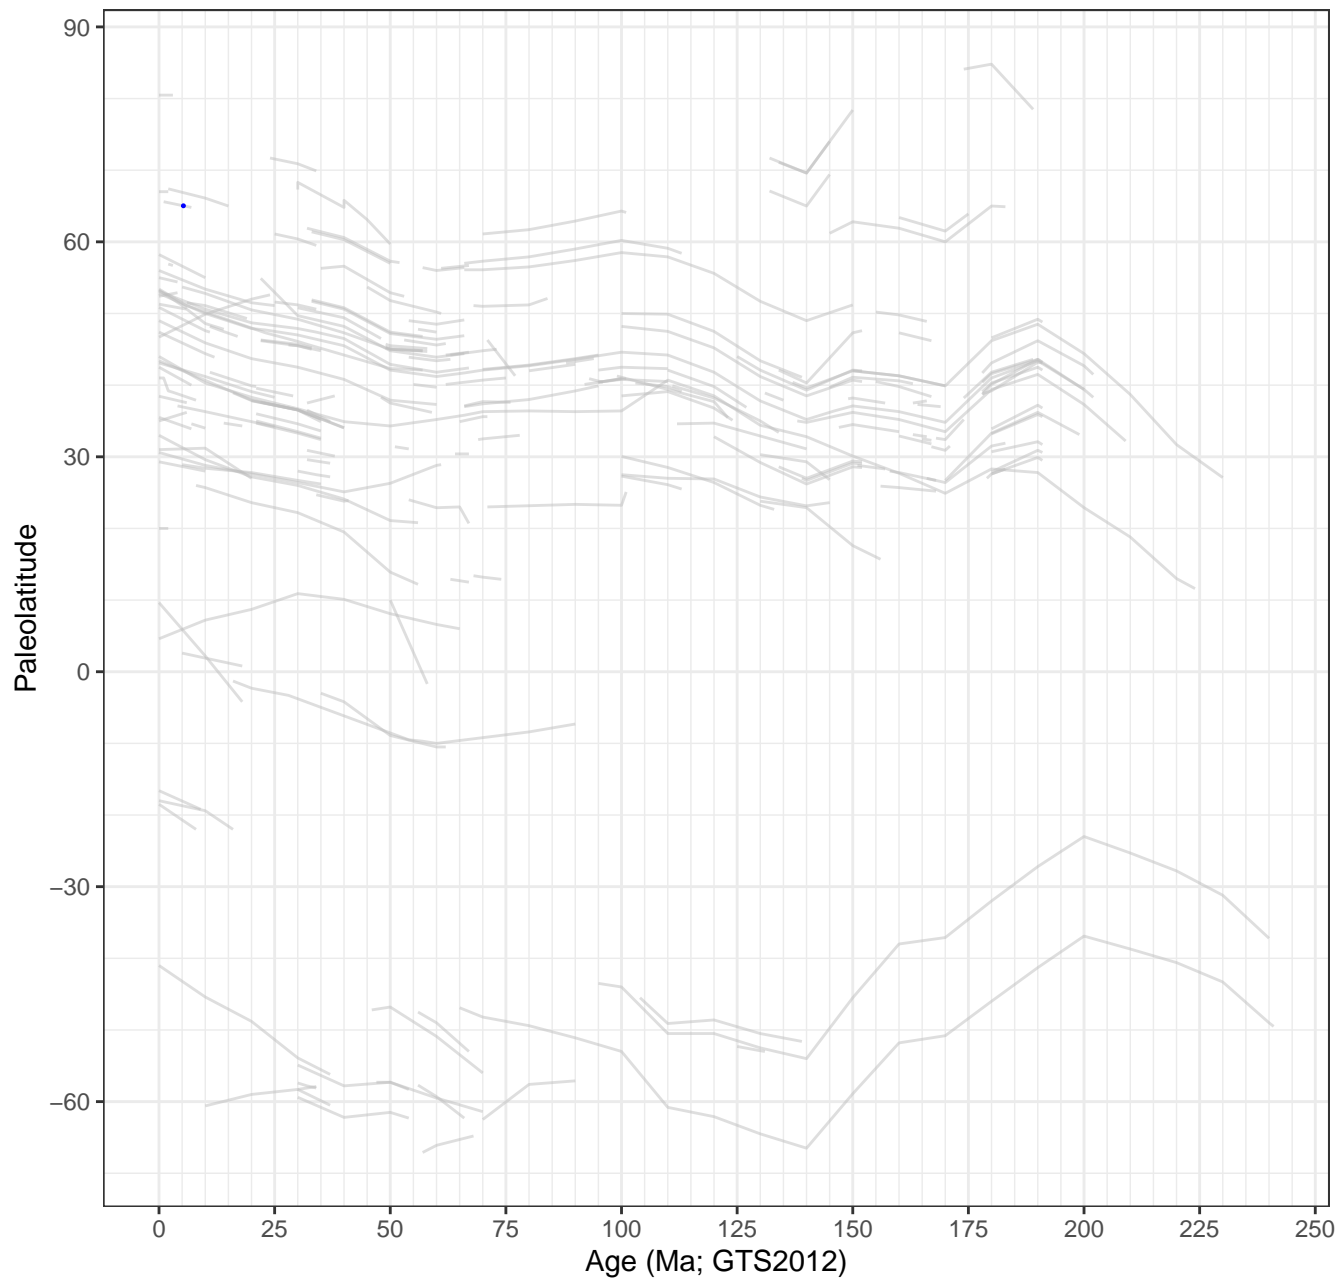

Supplement: Supplementary file 1434 [file Filisphaera filifera filifera.pdf › Supplement/Supplement 2/Species 1914 plots/Filisphaera filifera filifera.pdf]

# Species *Filisphaera filifera*

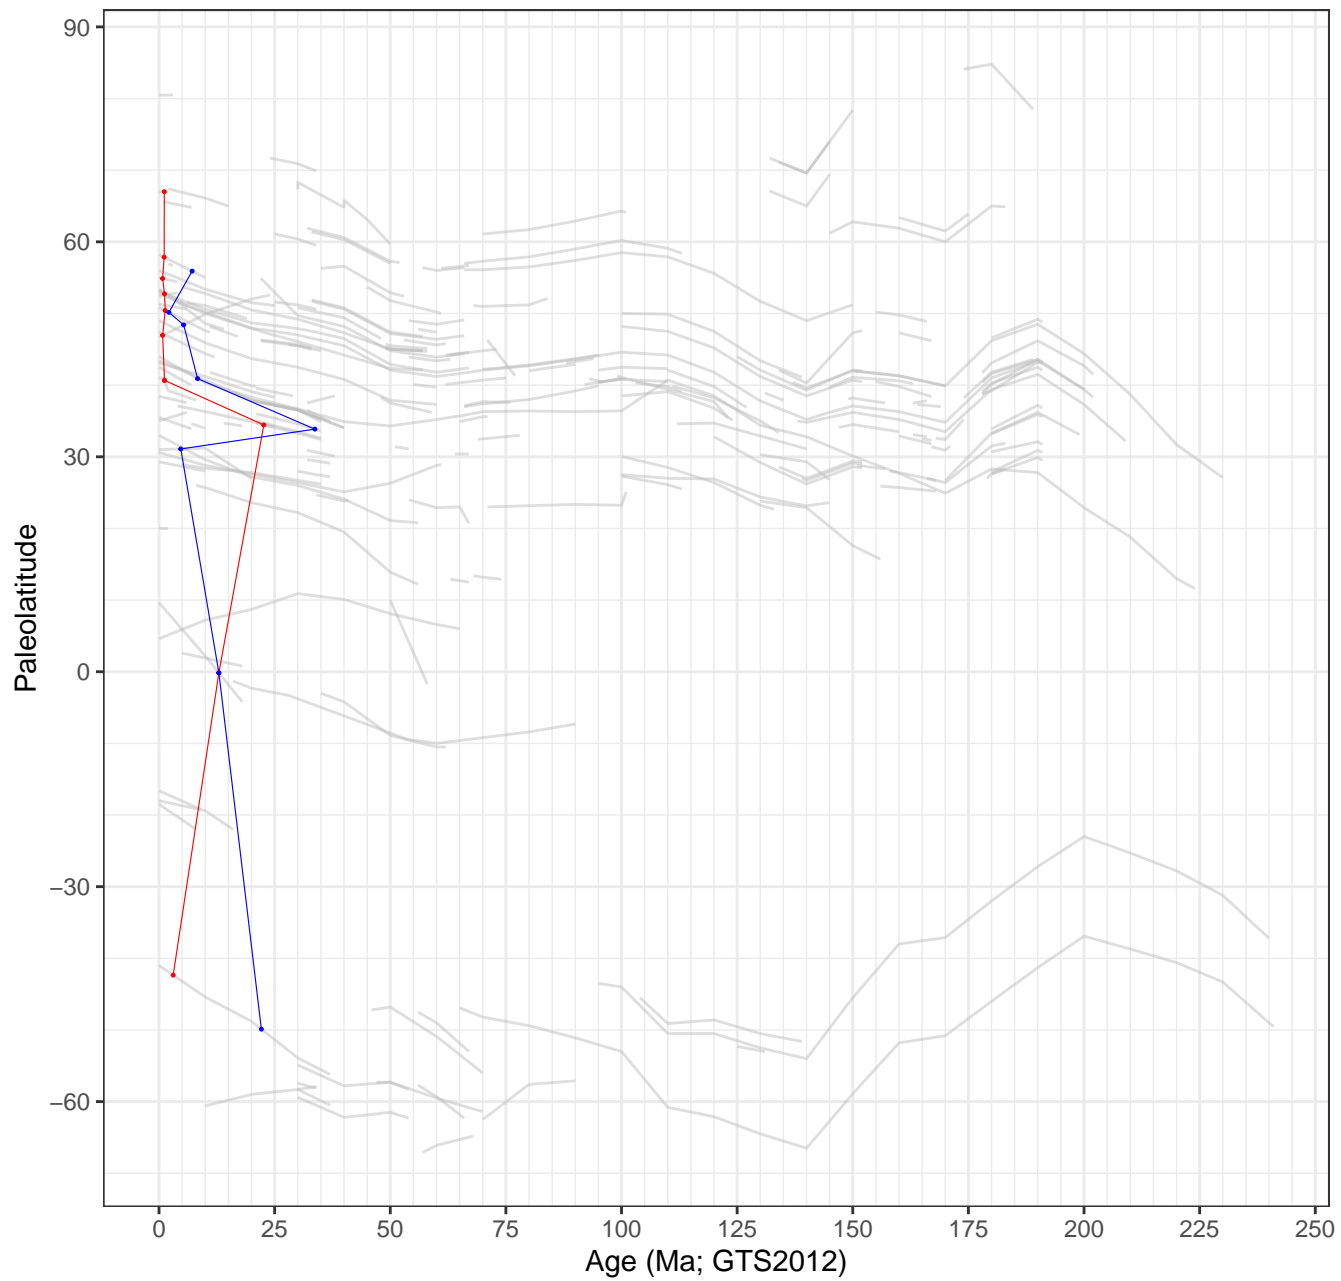

Supplement: Supplementary file 1435 [file Filisphaera filifera.pdf › Supplement/Supplement 2/Species 1914 plots/Filisphaera filifera.pdf]

# Species *Filisphaera microornata*

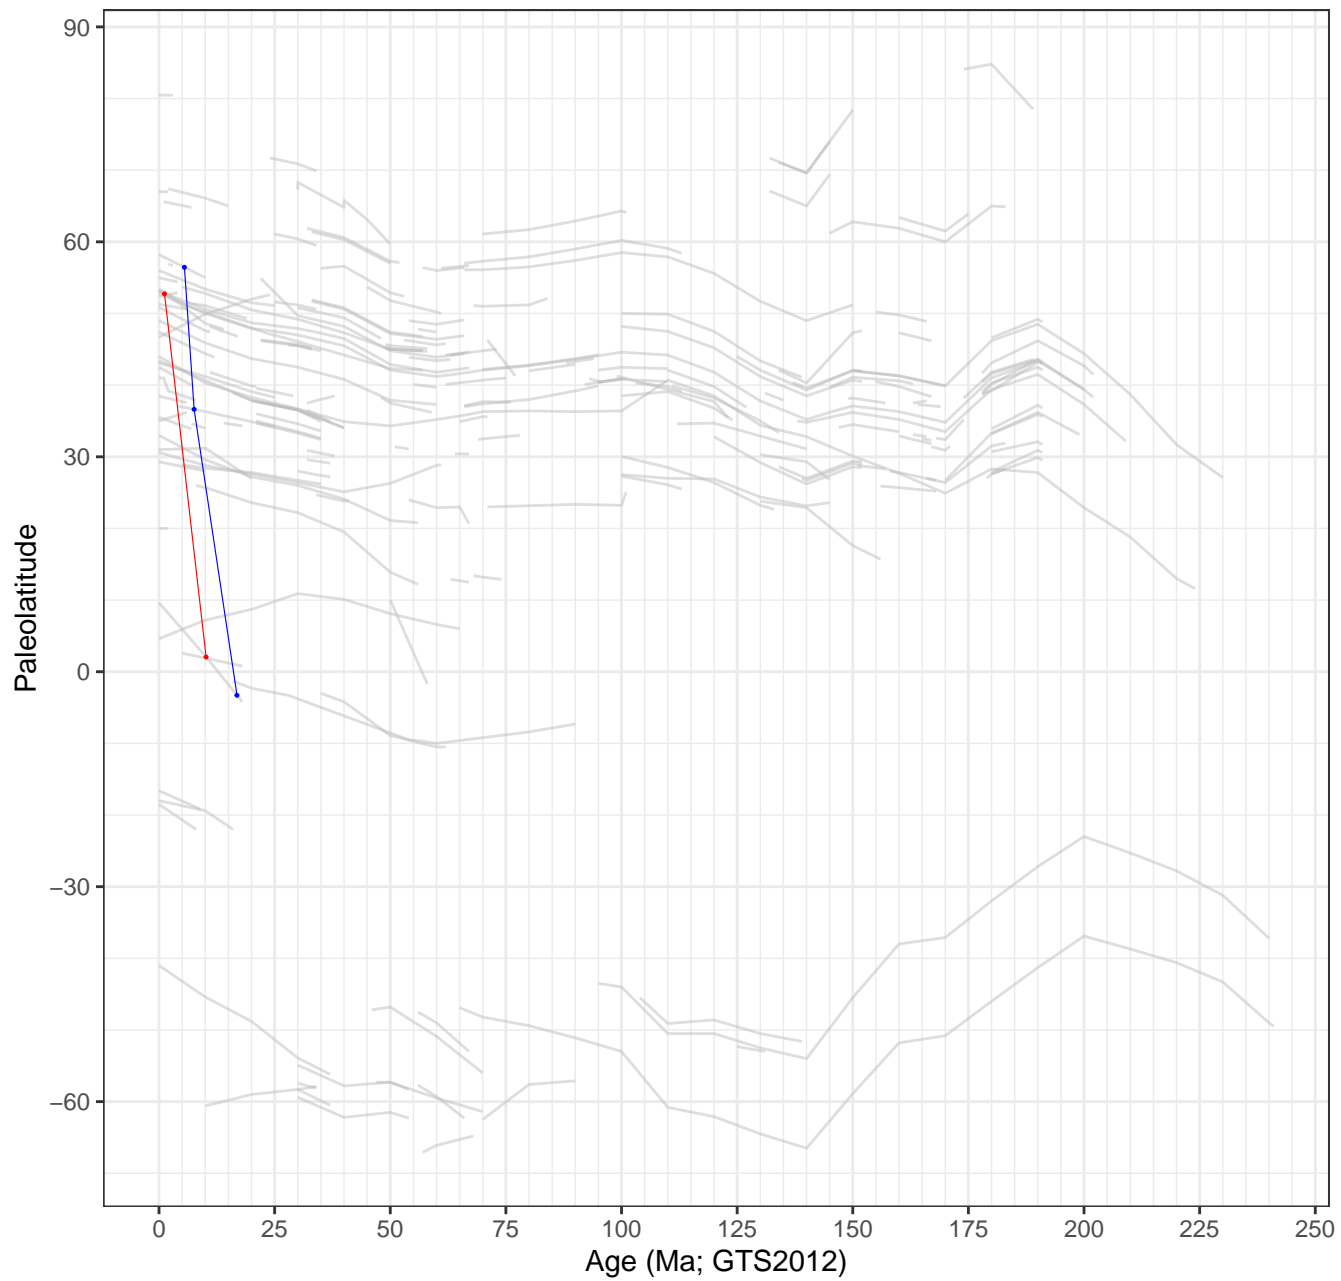

Supplement: Supplementary file 1436 [file Filisphaera microornata.pdf › Supplement/Supplement 2/Species 1914 plots/Filisphaera microornata.pdf]

# Species *Flamingoia cometa*

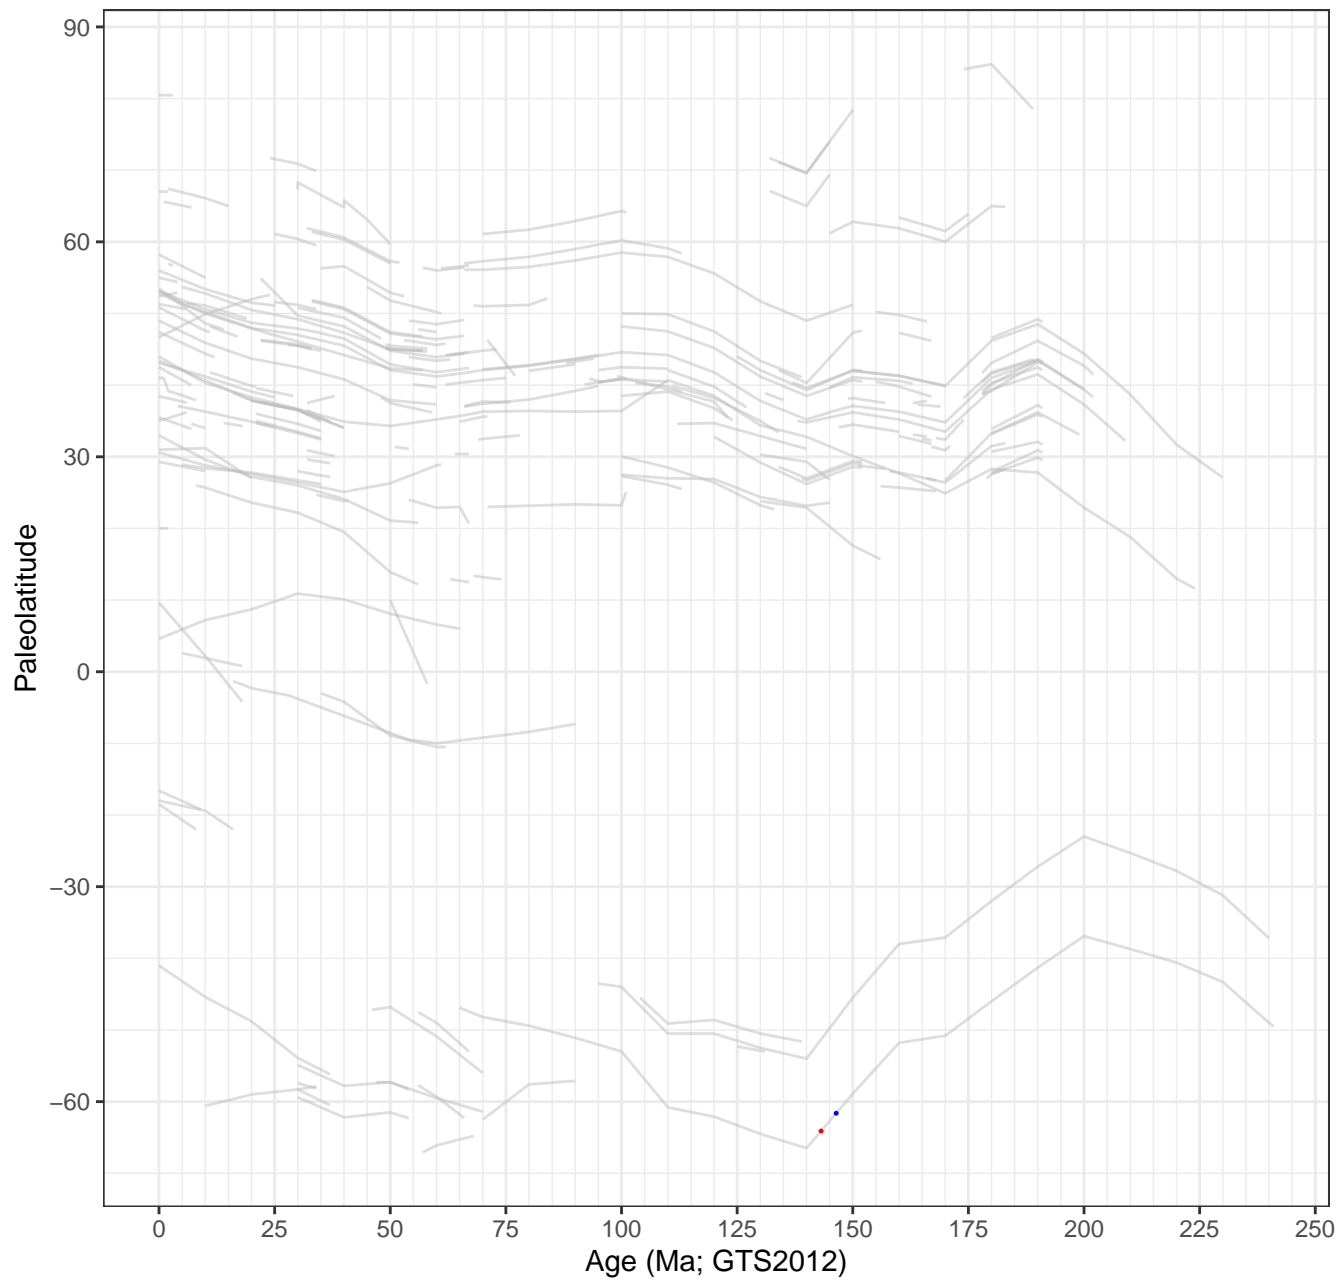

Supplement: Supplementary file 1437 [file Flamingoia cometa.pdf › Supplement/Supplement 2/Species 1914 plots/Flamingoia cometa.pdf]

# Species *Flandrecysta furcata*

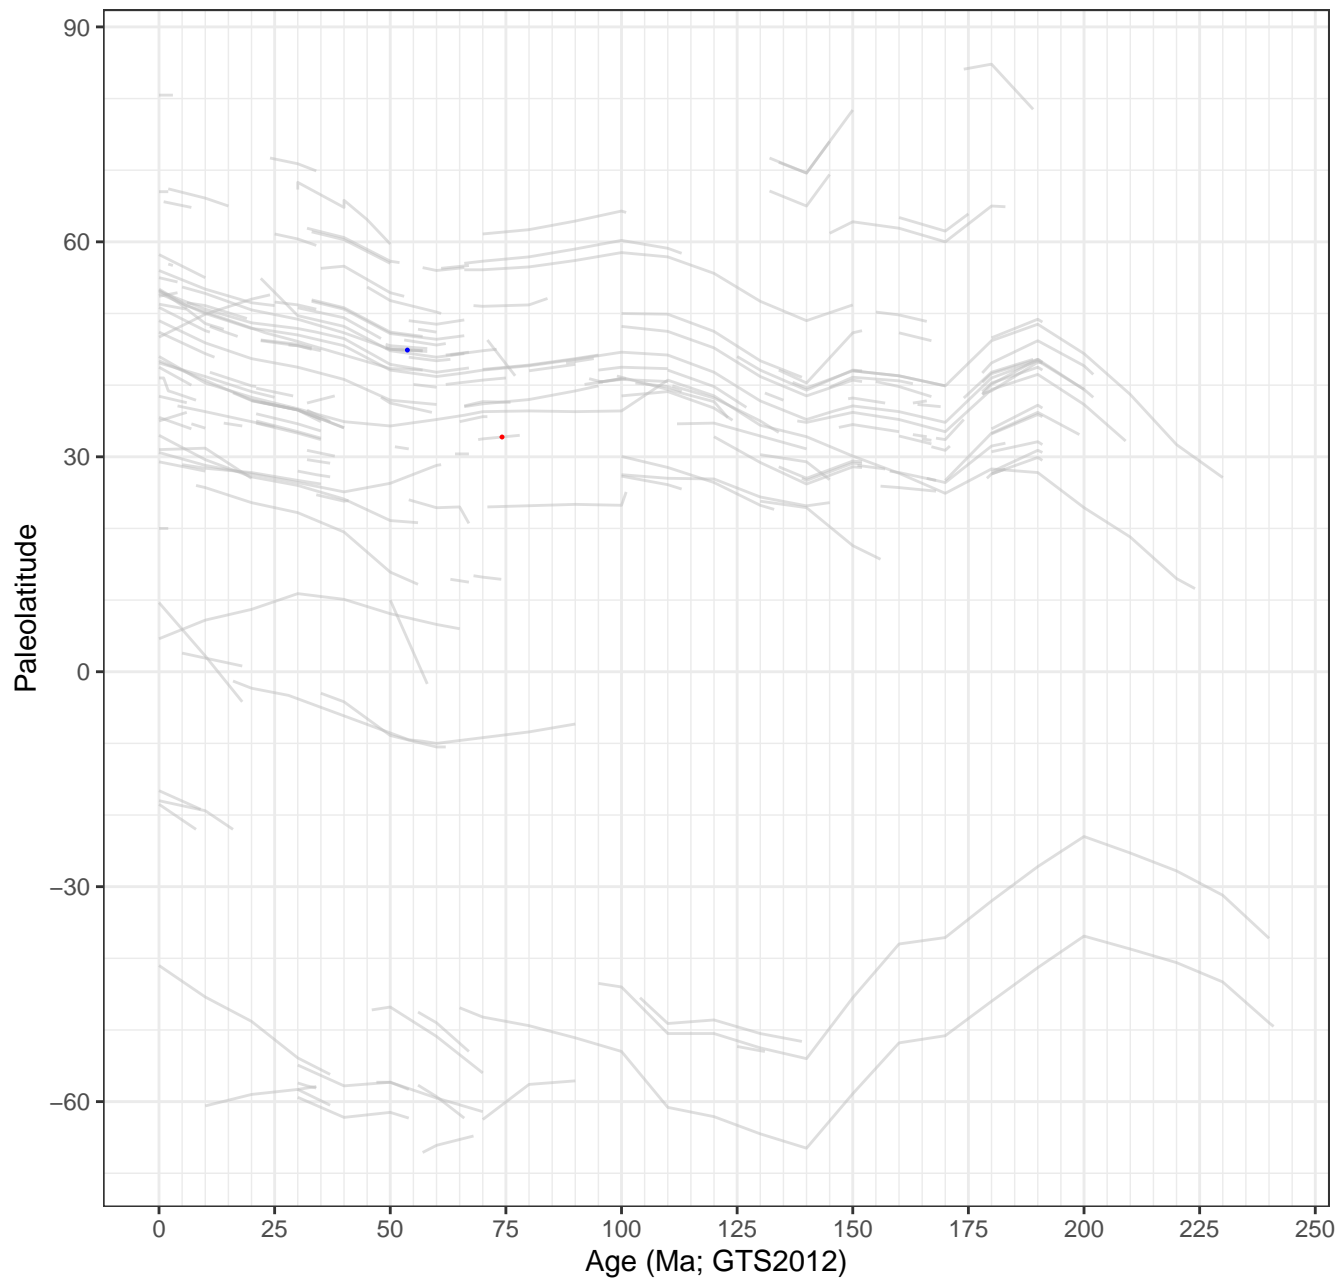

Supplement: Supplementary file 1438 [file Flandrecysta furcata.pdf › Supplement/Supplement 2/Species 1914 plots/Flandrecysta furcata.pdf]

# Species *Florentinia abjuncta*

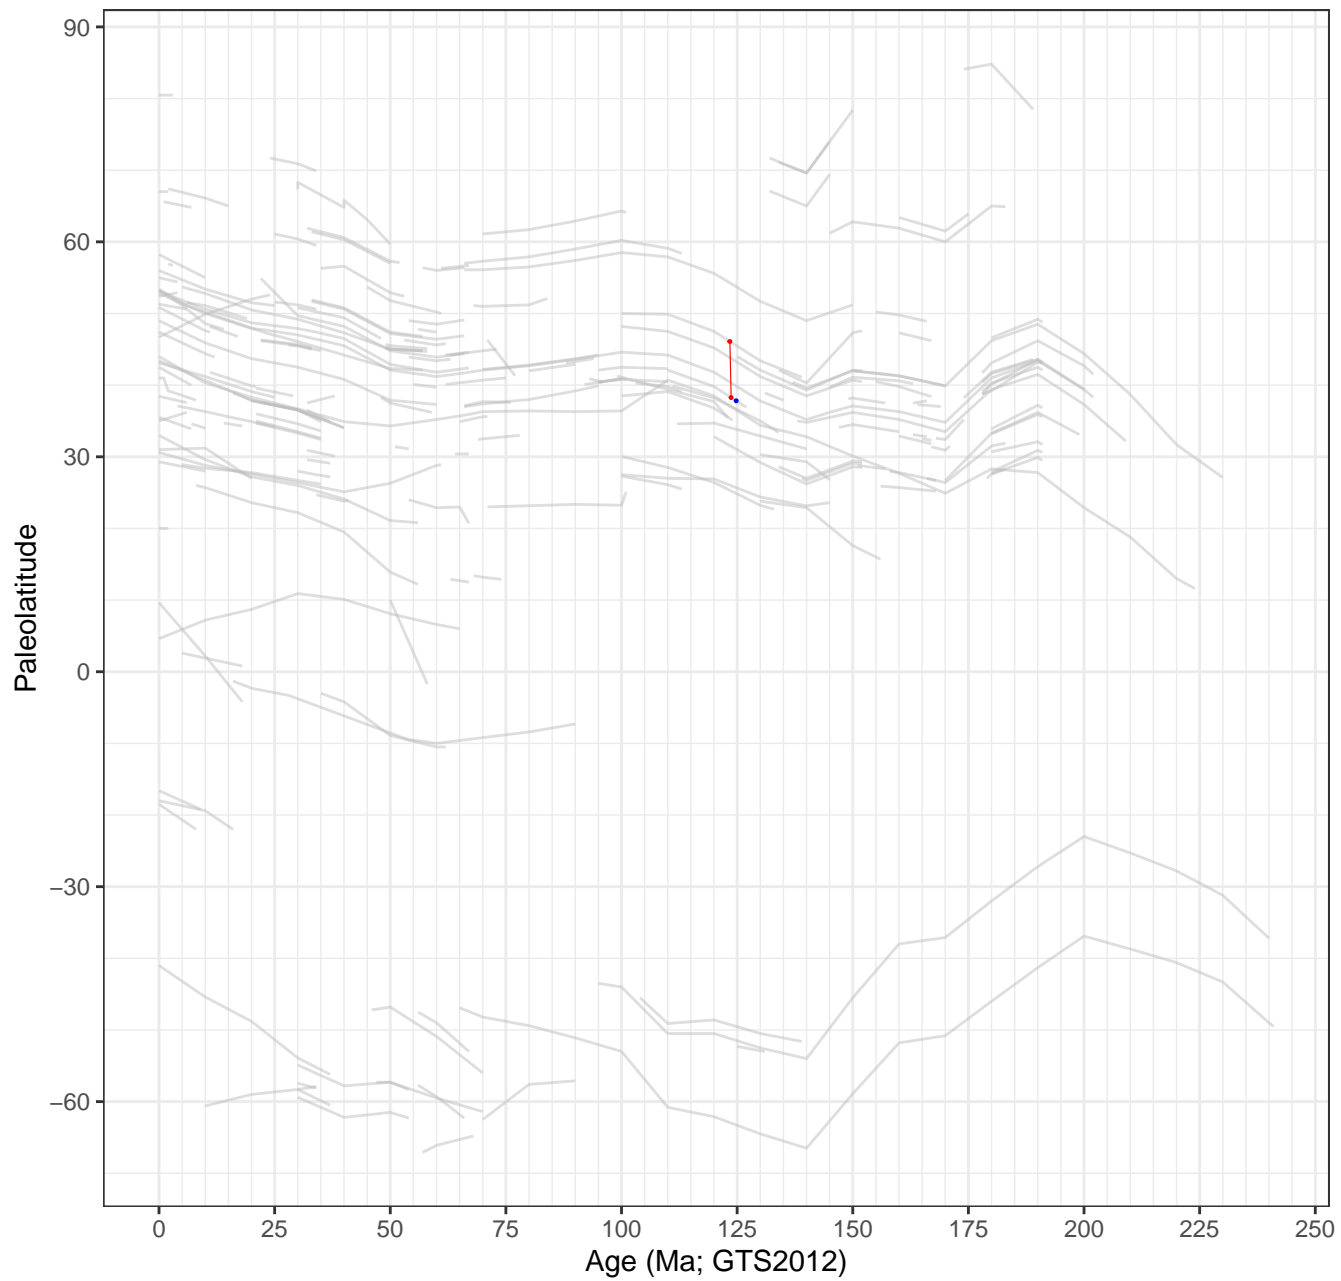

Supplement: Supplementary file 1439 [file Florentinia abjuncta.pdf › Supplement/Supplement 2/Species 1914 plots/Florentinia abjuncta.pdf]

# Species *Florentinia buspina*

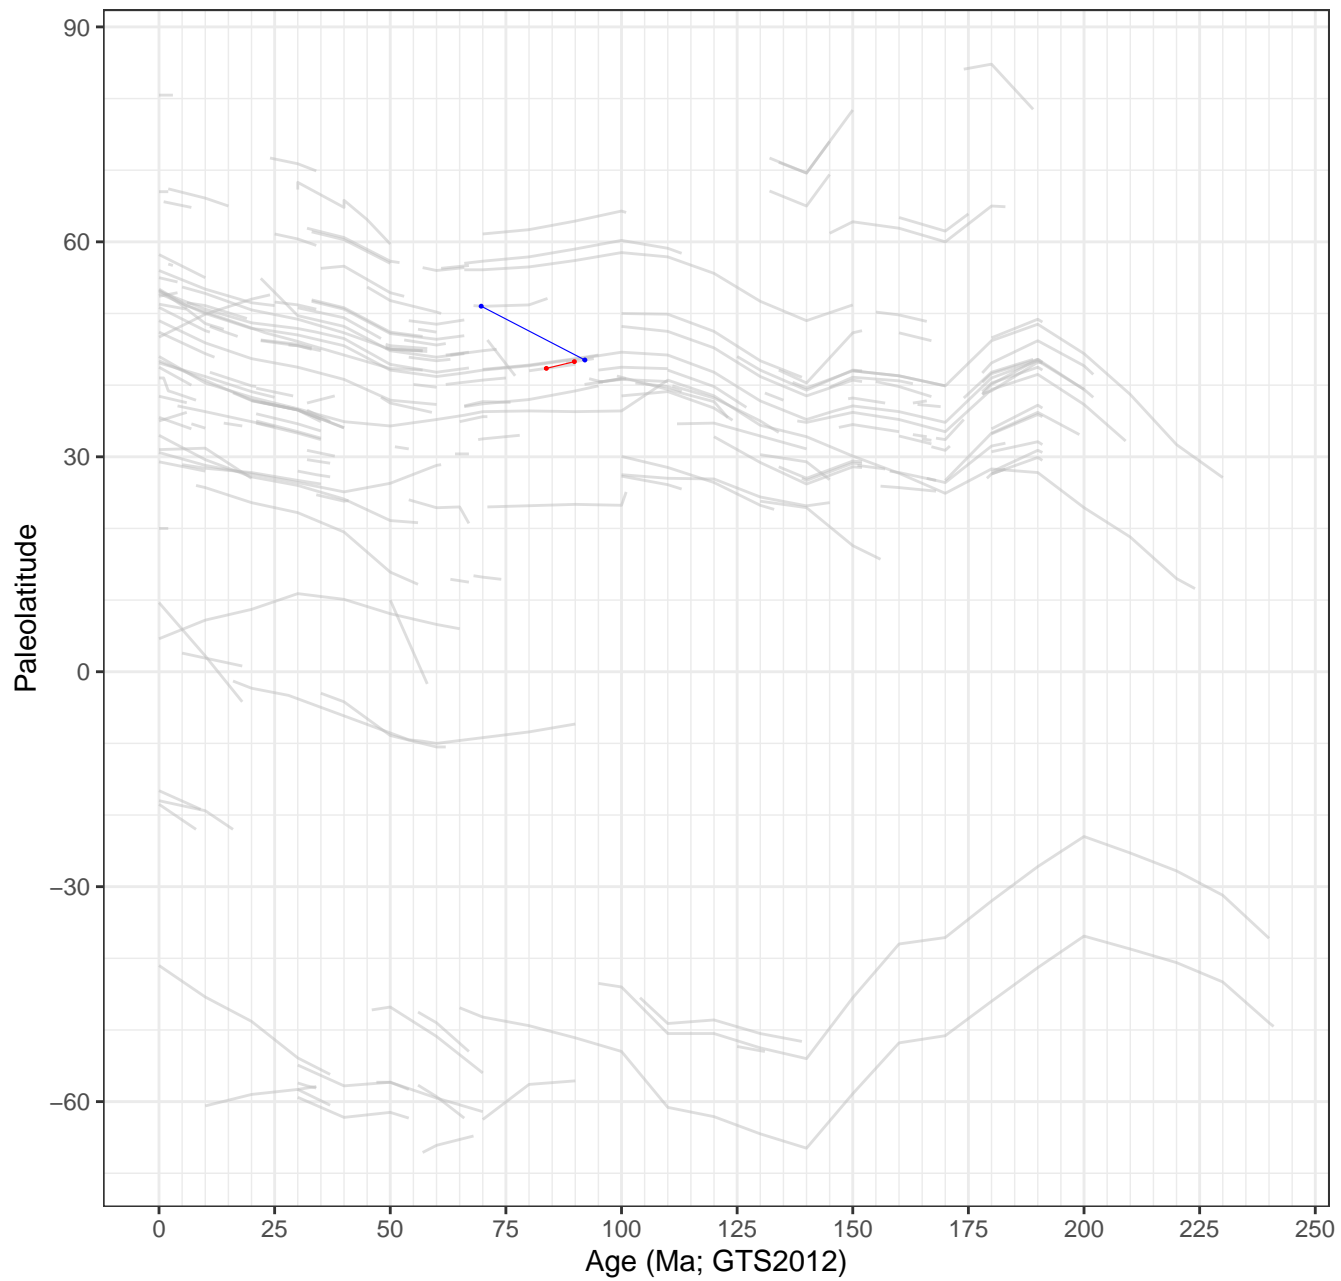

Supplement: Supplementary file 1440 [file Florentinia buspina.pdf › Supplement/Supplement 2/Species 1914 plots/Florentinia buspina.pdf]

# Species *Florentinia clavigera*

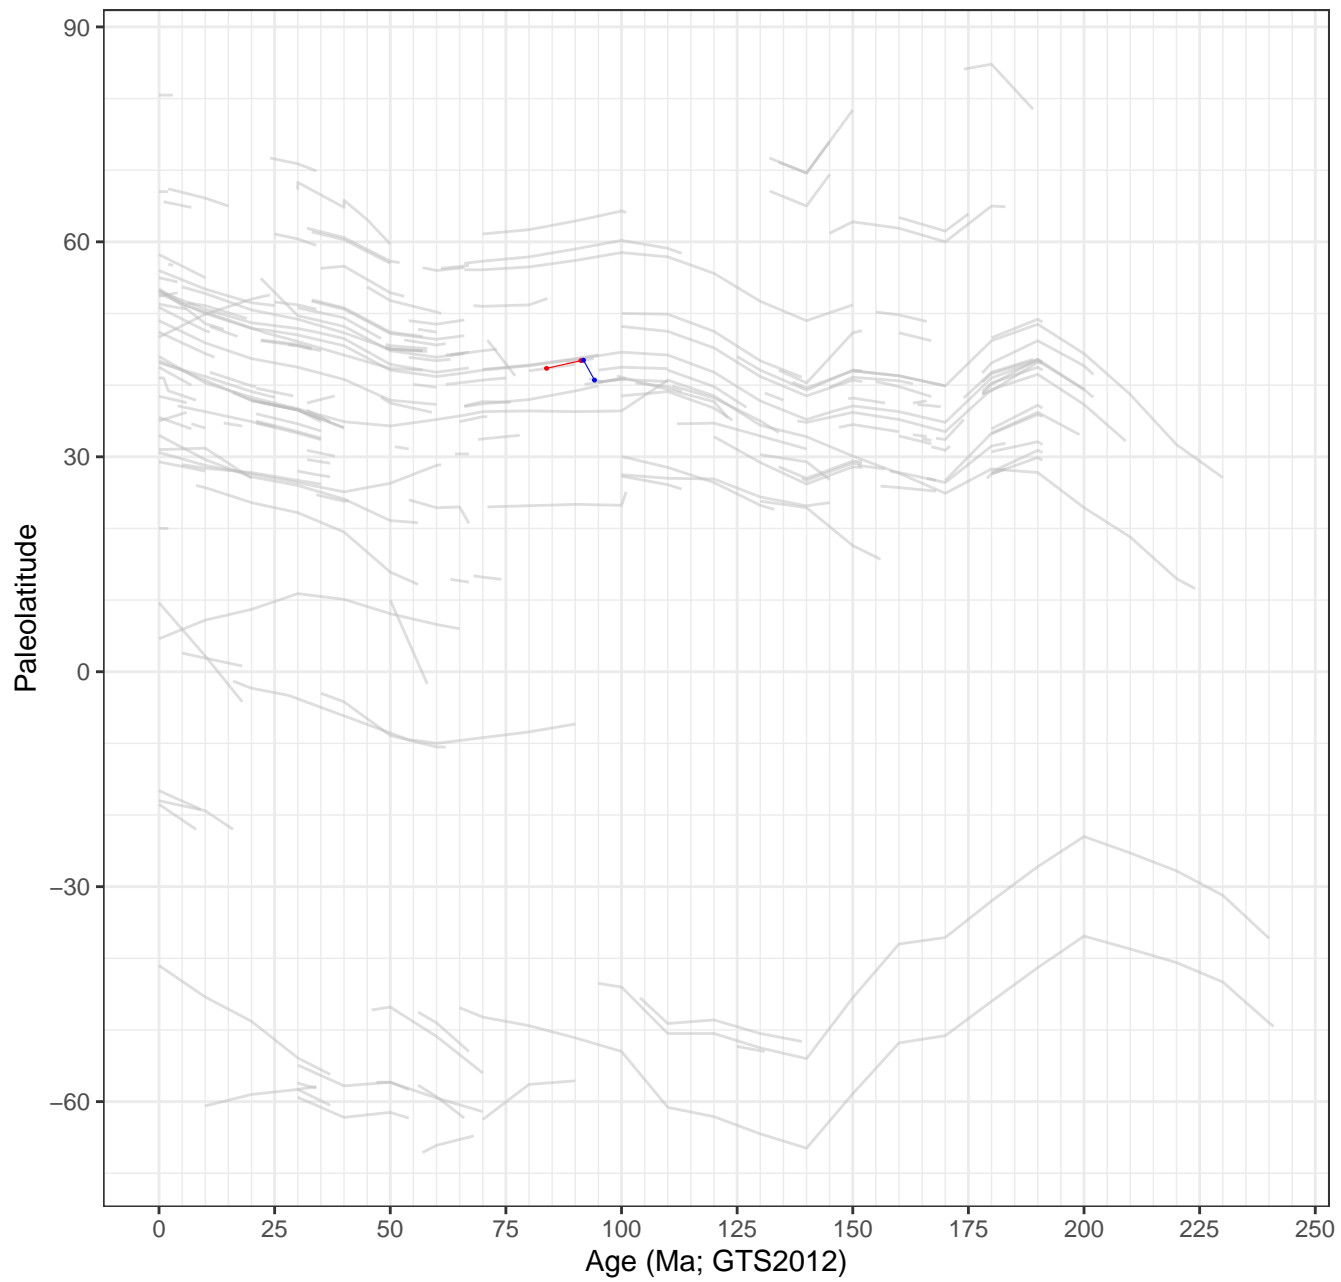

Supplement: Supplementary file 1441 [file Florentinia clavigera.pdf › Supplement/Supplement 2/Species 1914 plots/Florentinia clavigera.pdf]

# Species *Florentinia deanei*

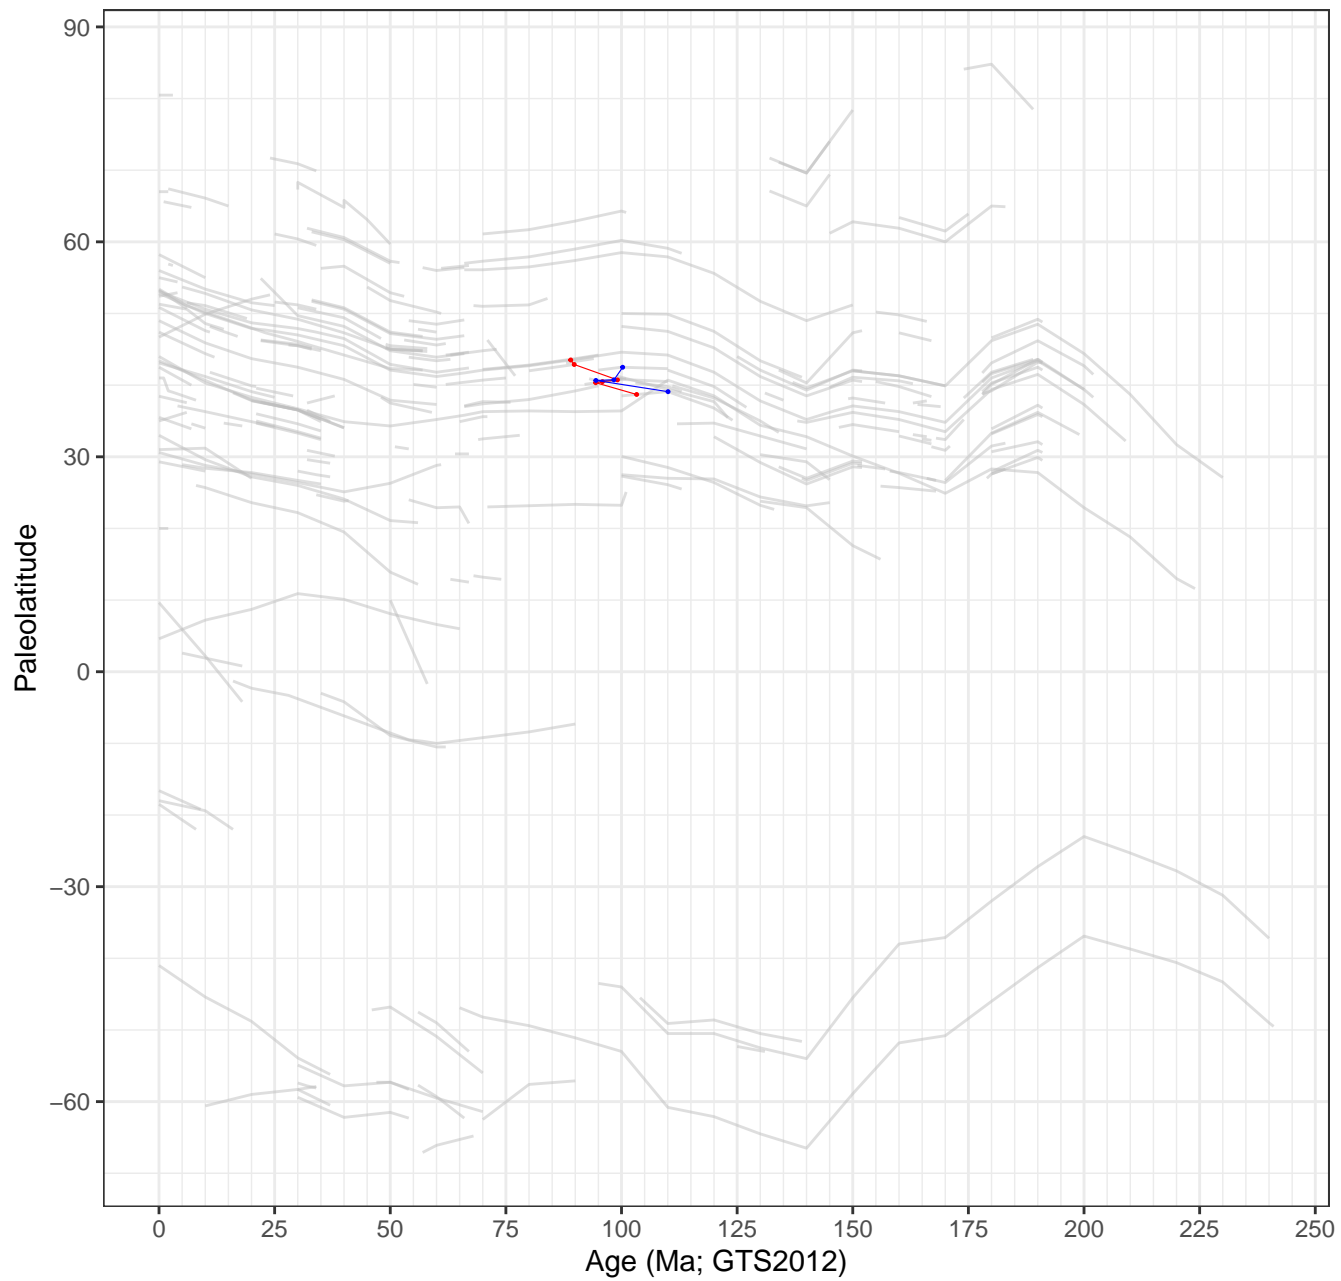

Supplement: Supplementary file 1442 [file Florentinia deanei.pdf › Supplement/Supplement 2/Species 1914 plots/Florentinia deanei.pdf]

# Species *Florentinia ferox*

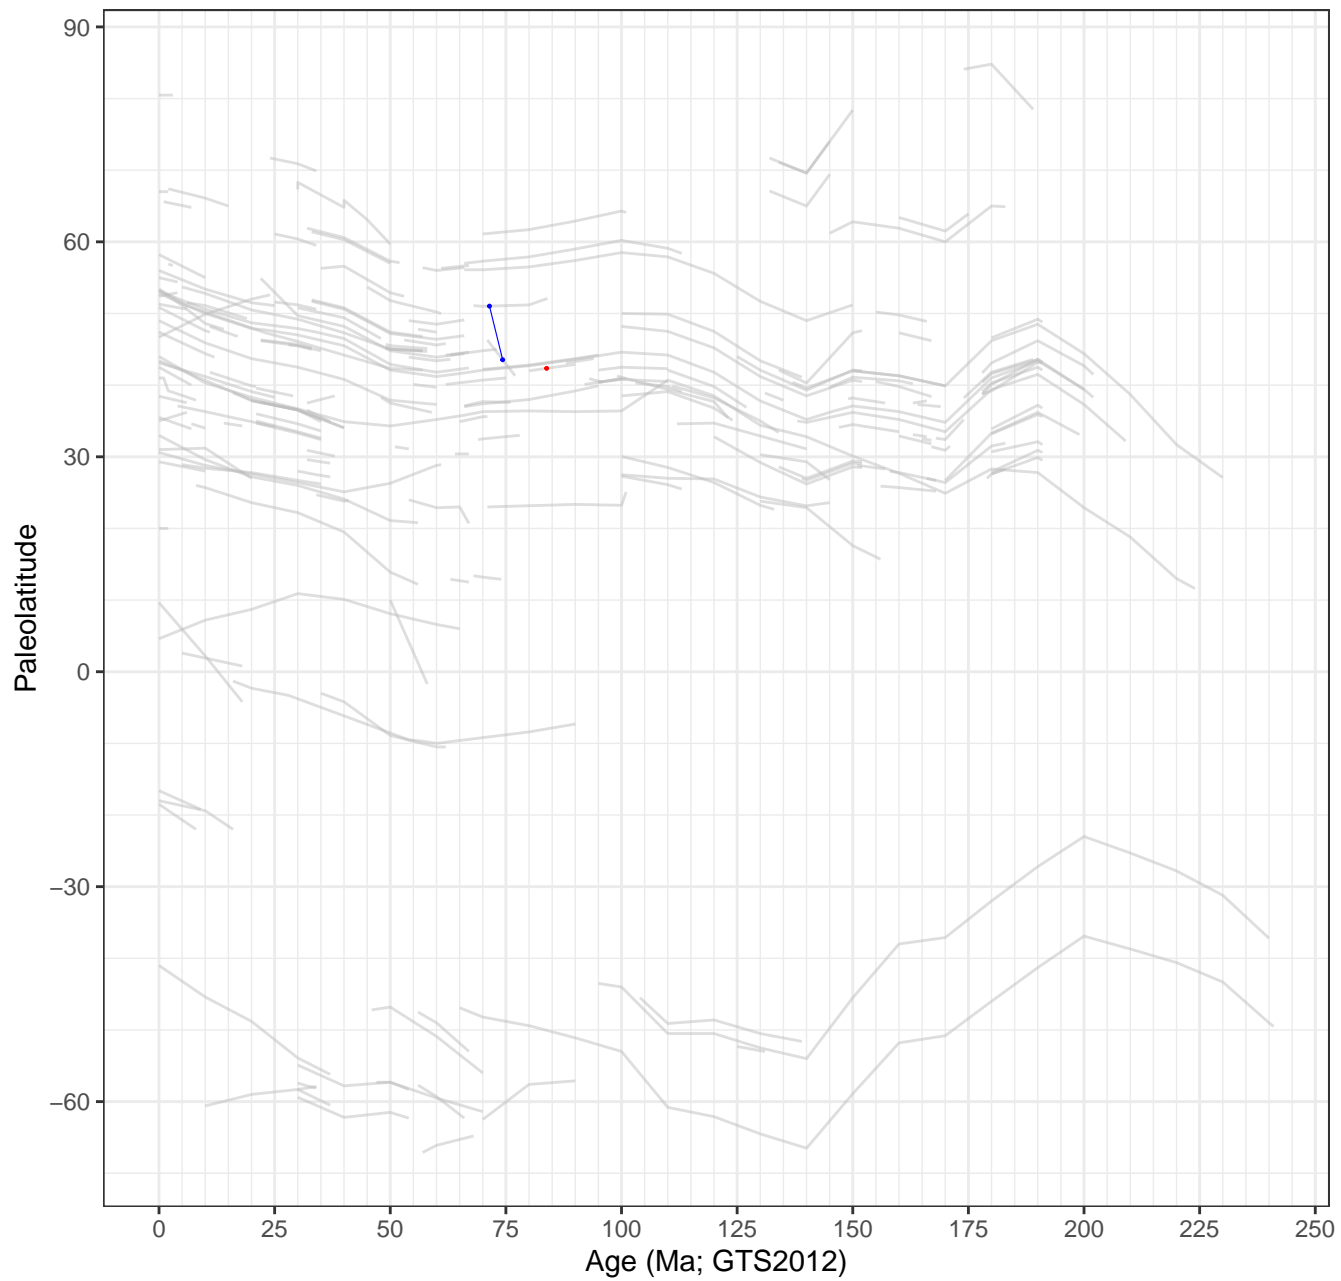

Supplement: Supplementary file 1443 [file Florentinia ferox.pdf › Supplement/Supplement 2/Species 1914 plots/Florentinia ferox.pdf]

# Species *Florentinia interrupta*

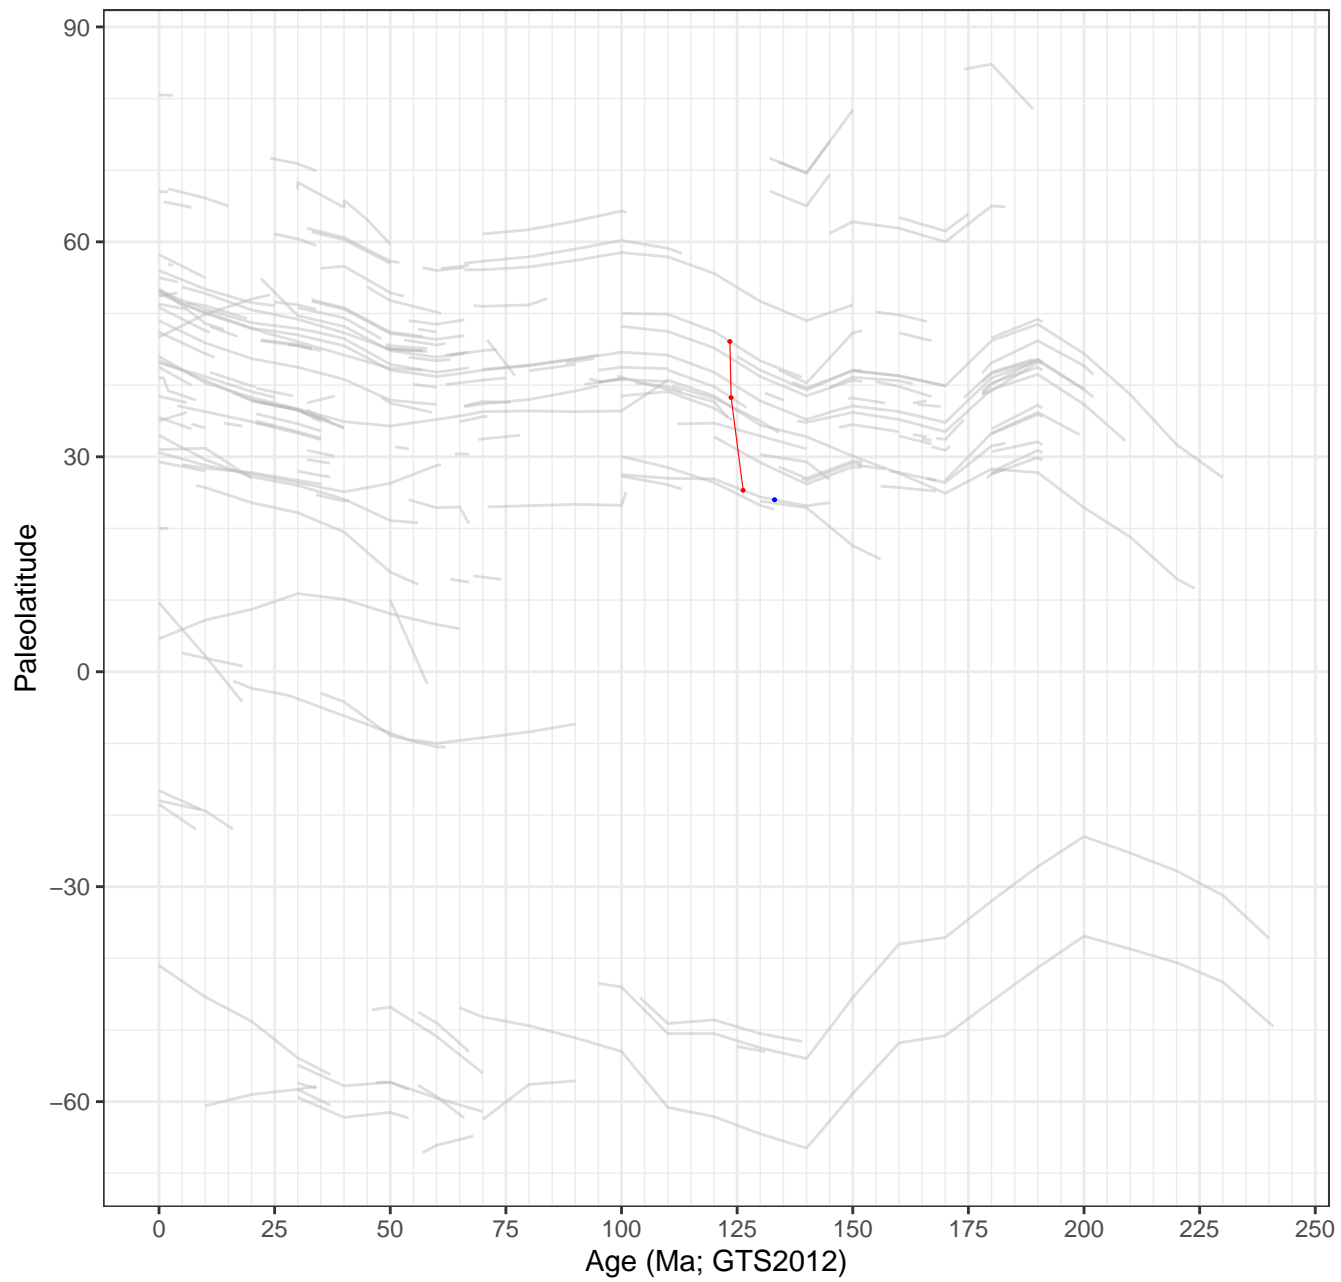

Supplement: Supplementary file 1444 [file Florentinia interrupta.pdf › Supplement/Supplement 2/Species 1914 plots/Florentinia interrupta.pdf]

# Species *Florentinia laciniata*

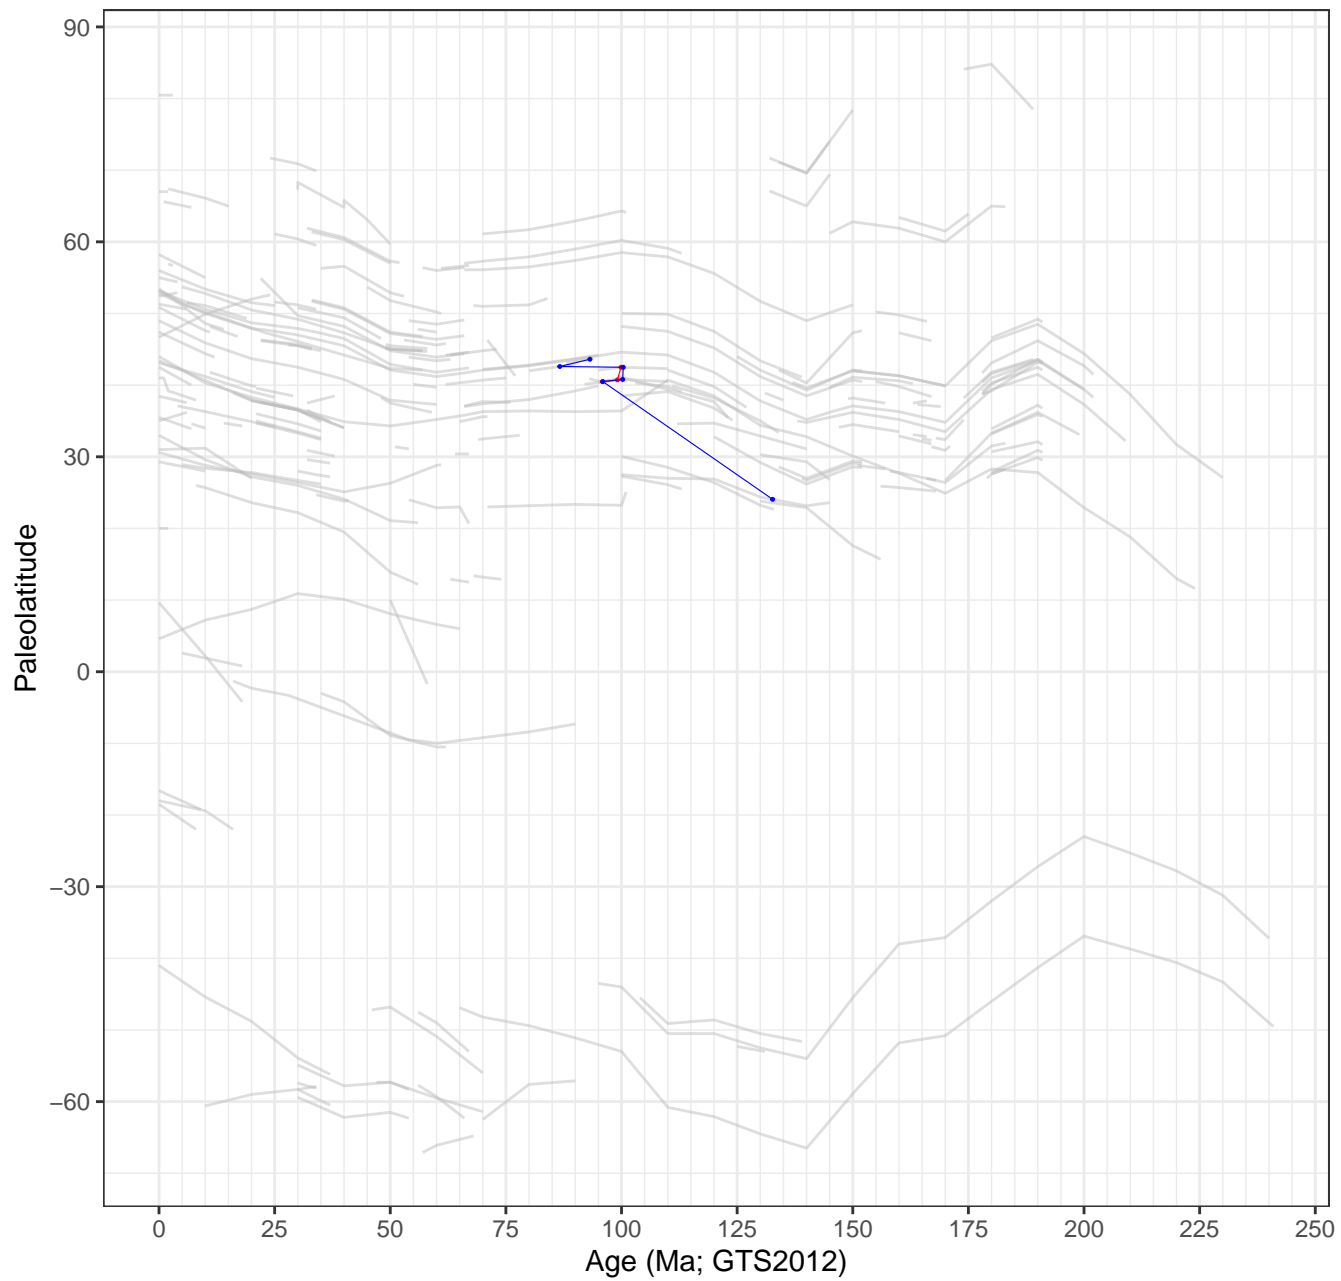

Supplement: Supplementary file 1445 [file Florentinia laciniata.pdf › Supplement/Supplement 2/Species 1914 plots/Florentinia laciniata.pdf]

# Species *Florentinia mantellii*

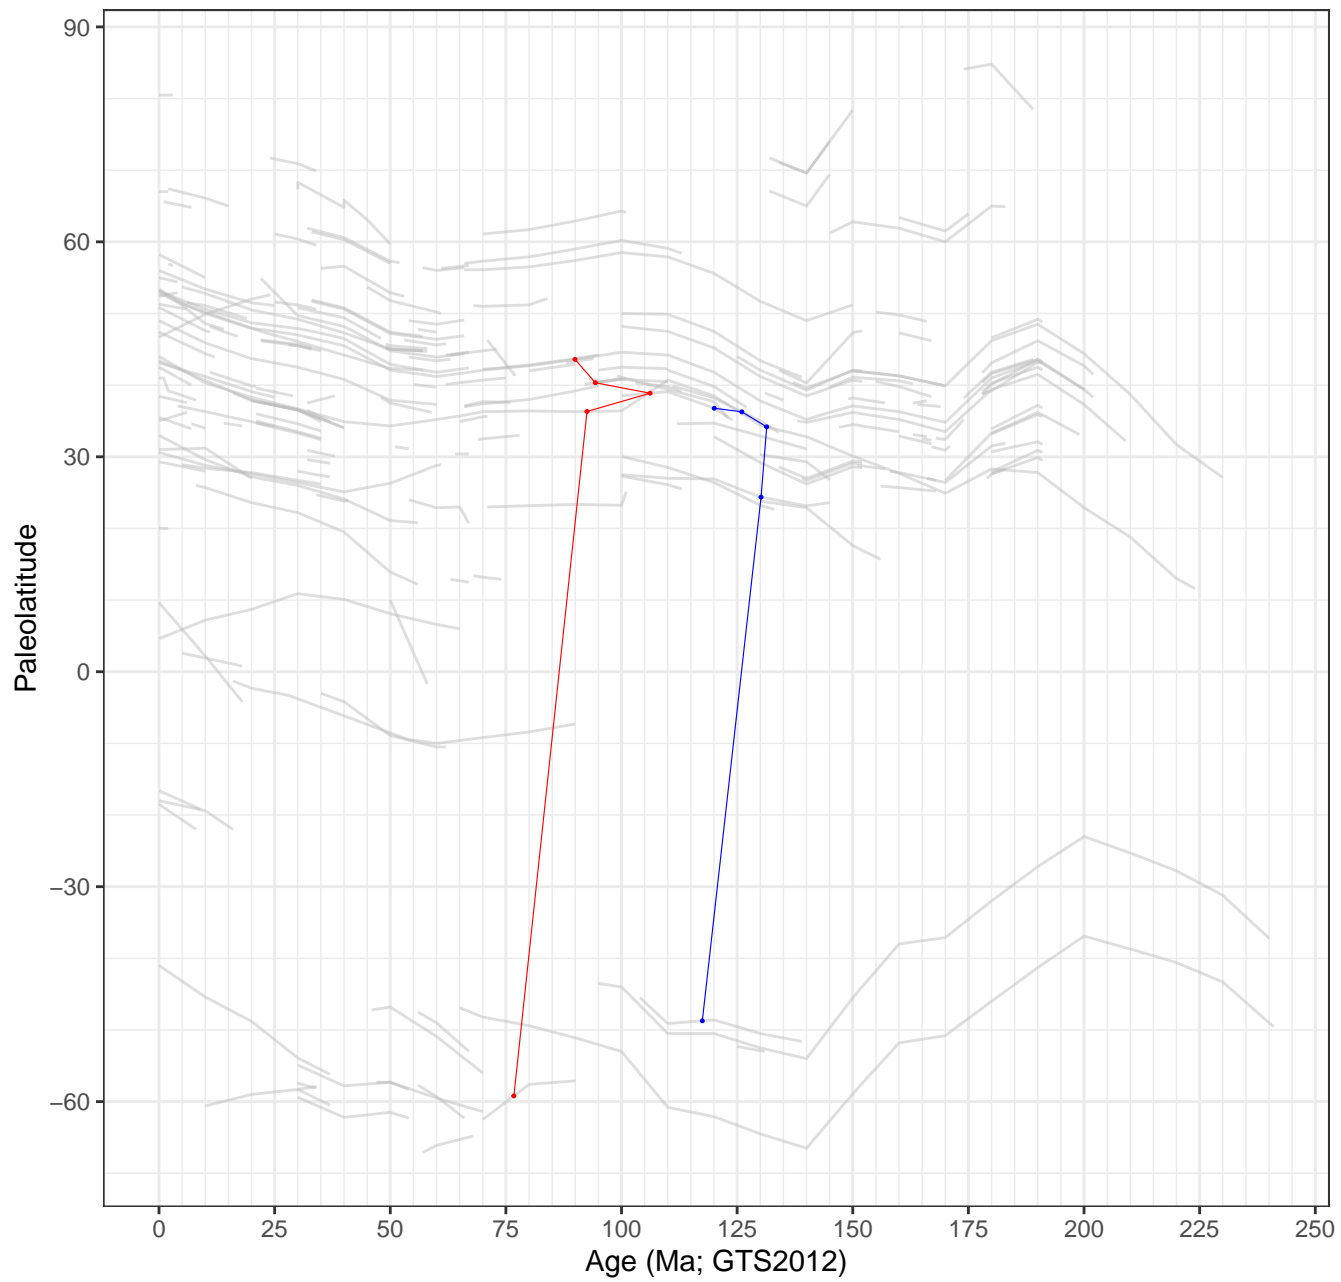

Supplement: Supplementary file 1446 [file Florentinia mantellii.pdf › Supplement/Supplement 2/Species 1914 plots/Florentinia mantellii.pdf]

# Species *Florentinia mayii*

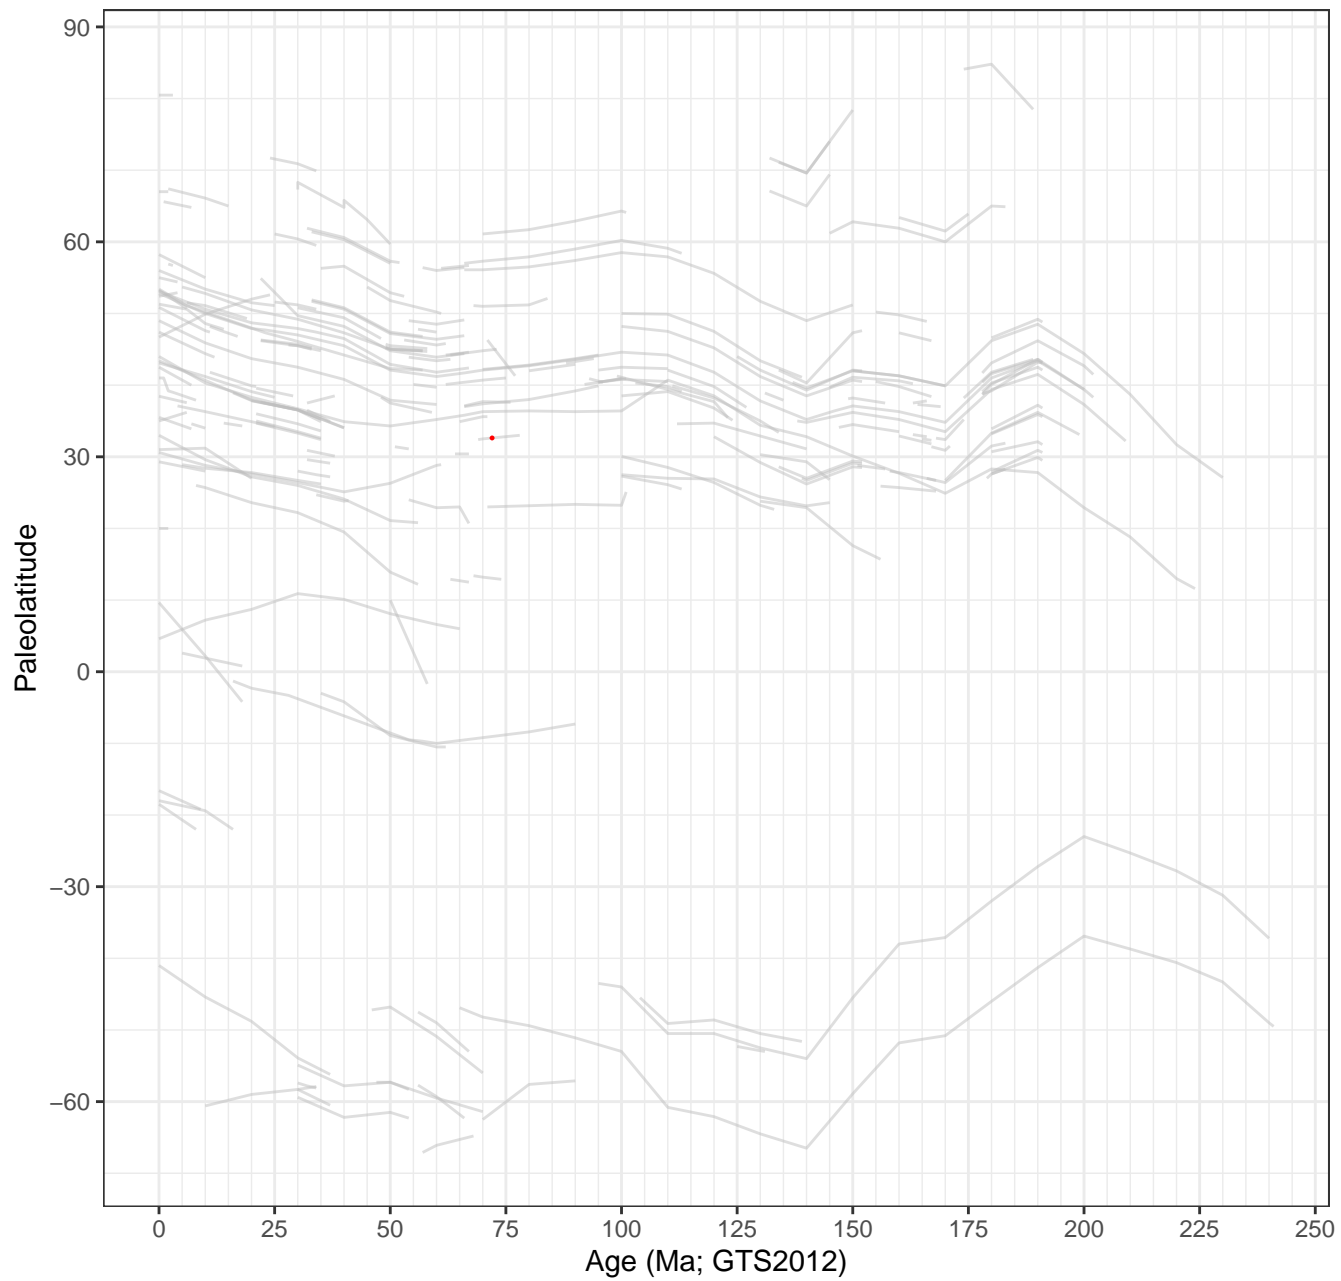

Supplement: Supplementary file 1447 [file Florentinia mayii.pdf › Supplement/Supplement 2/Species 1914 plots/Florentinia mayii.pdf]

# Species *Florentinia radiculata*

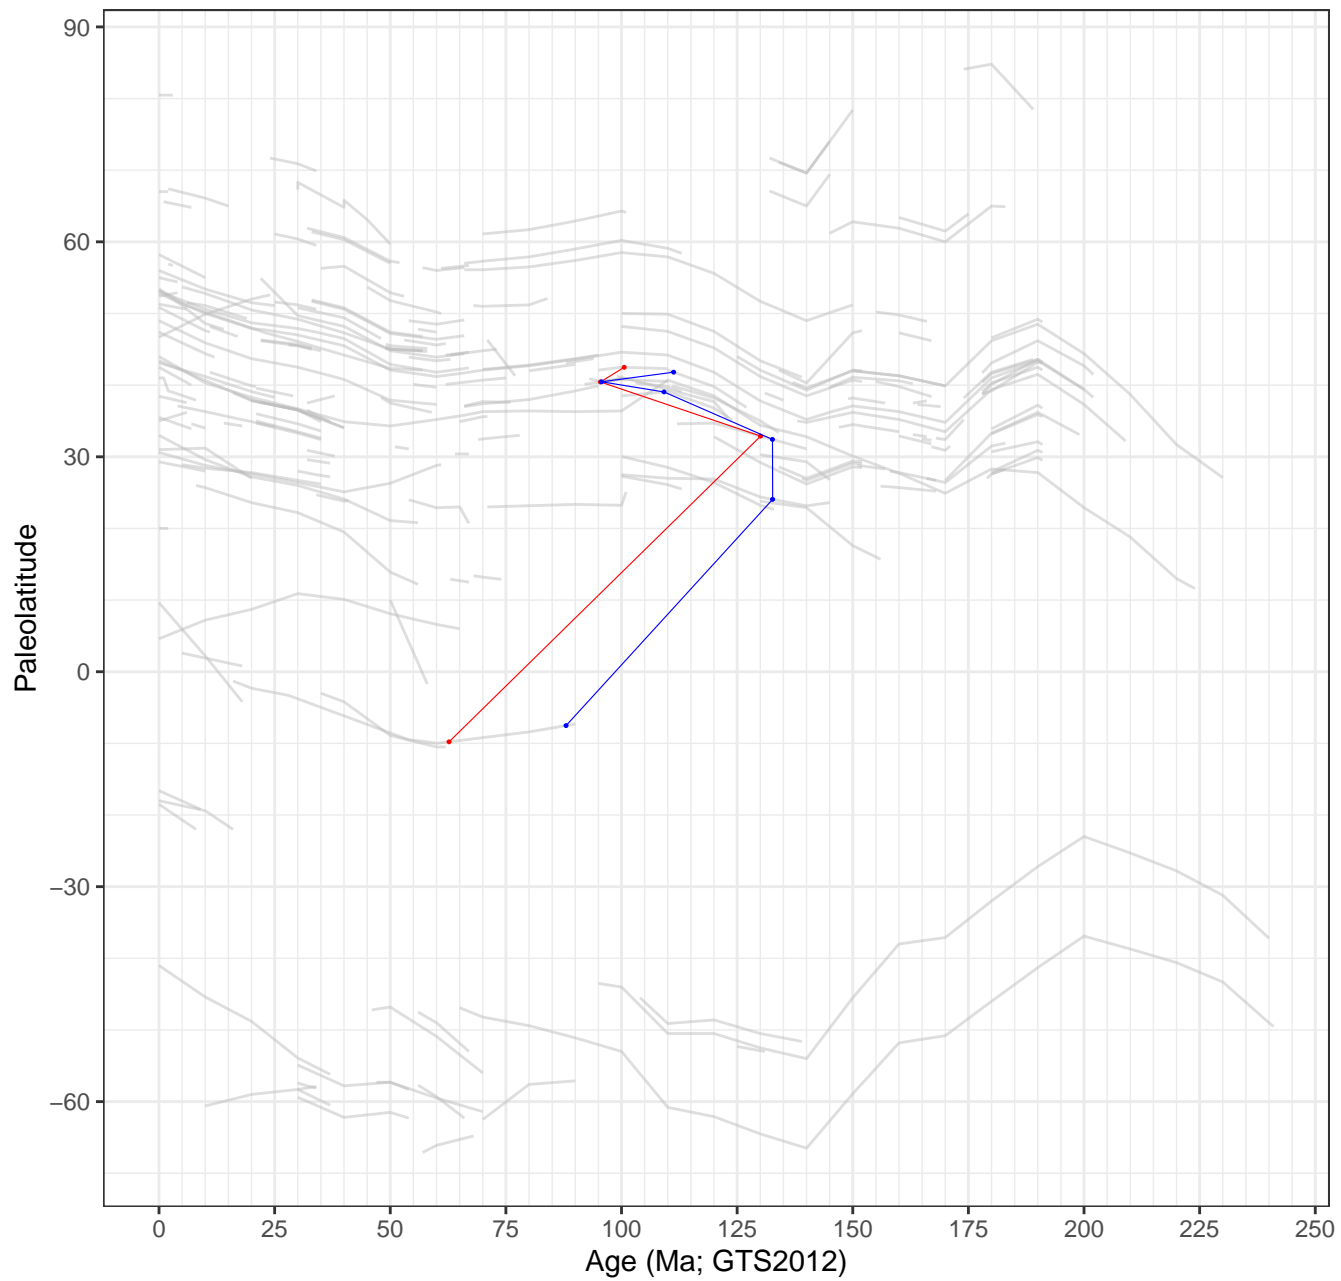

Supplement: Supplementary file 1448 [file Florentinia radiculata.pdf › Supplement/Supplement 2/Species 1914 plots/Florentinia radiculata.pdf]

# Species *Florentinia reichartii*

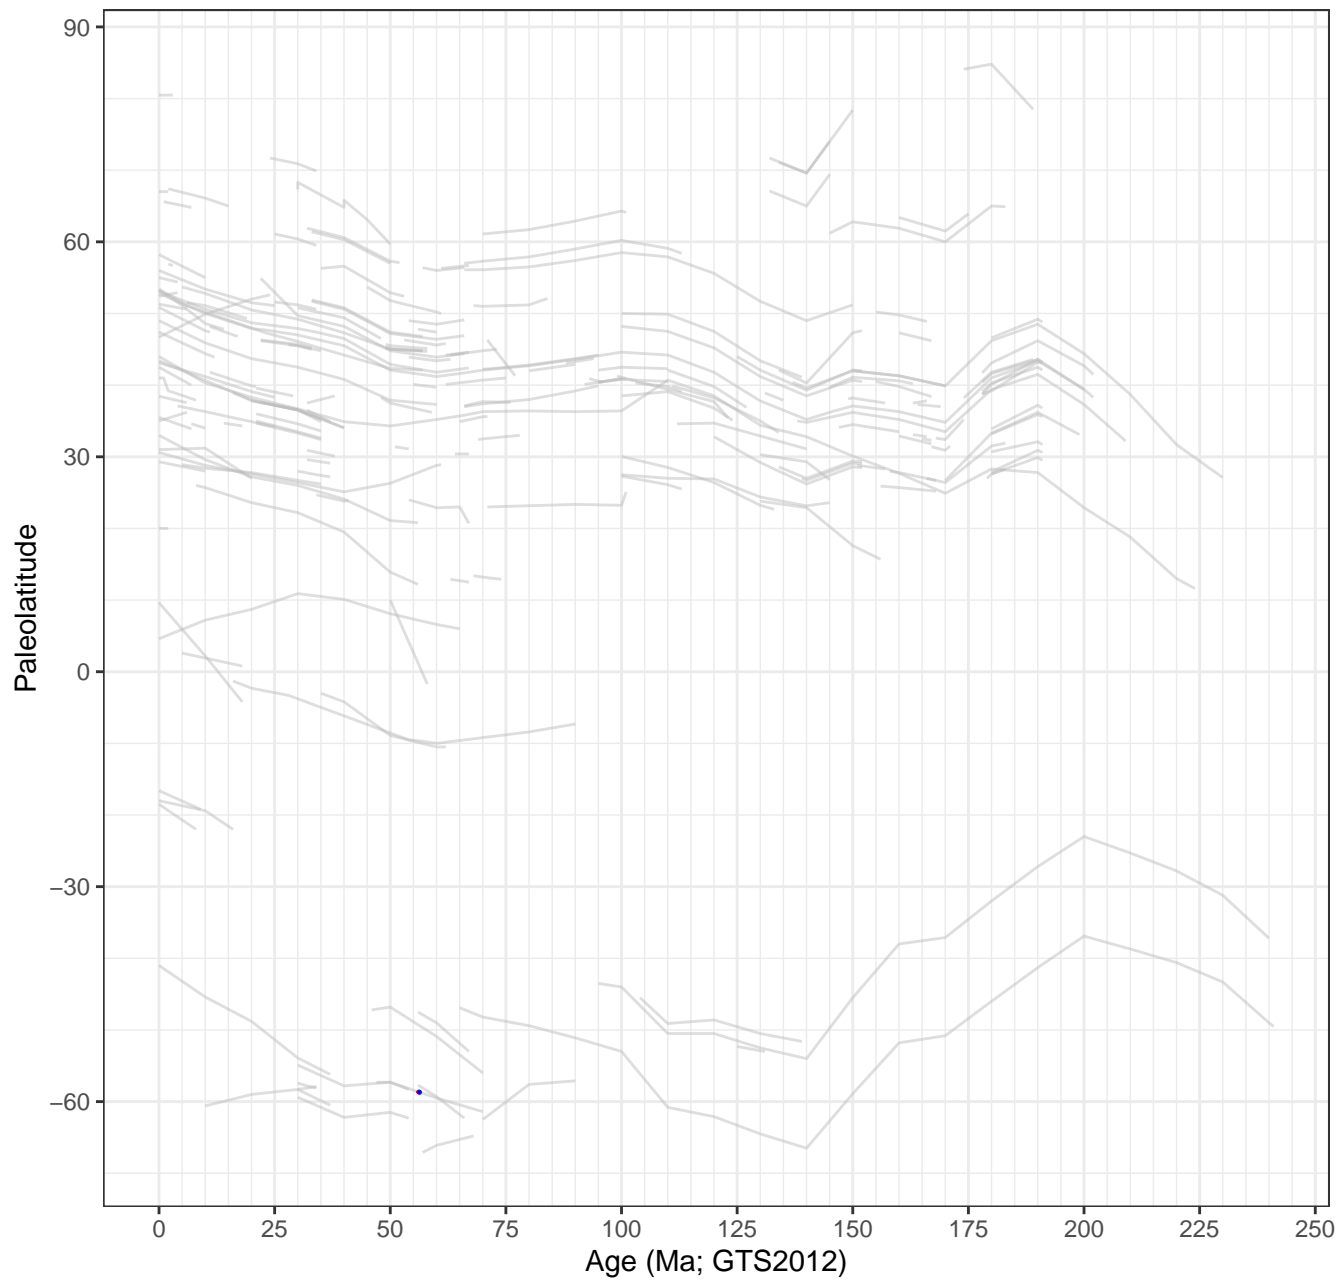

Supplement: Supplementary file 1449 [file Florentinia reichartii.pdf › Supplement/Supplement 2/Species 1914 plots/Florentinia reichartii.pdf]

# Species *Florentinia resex*

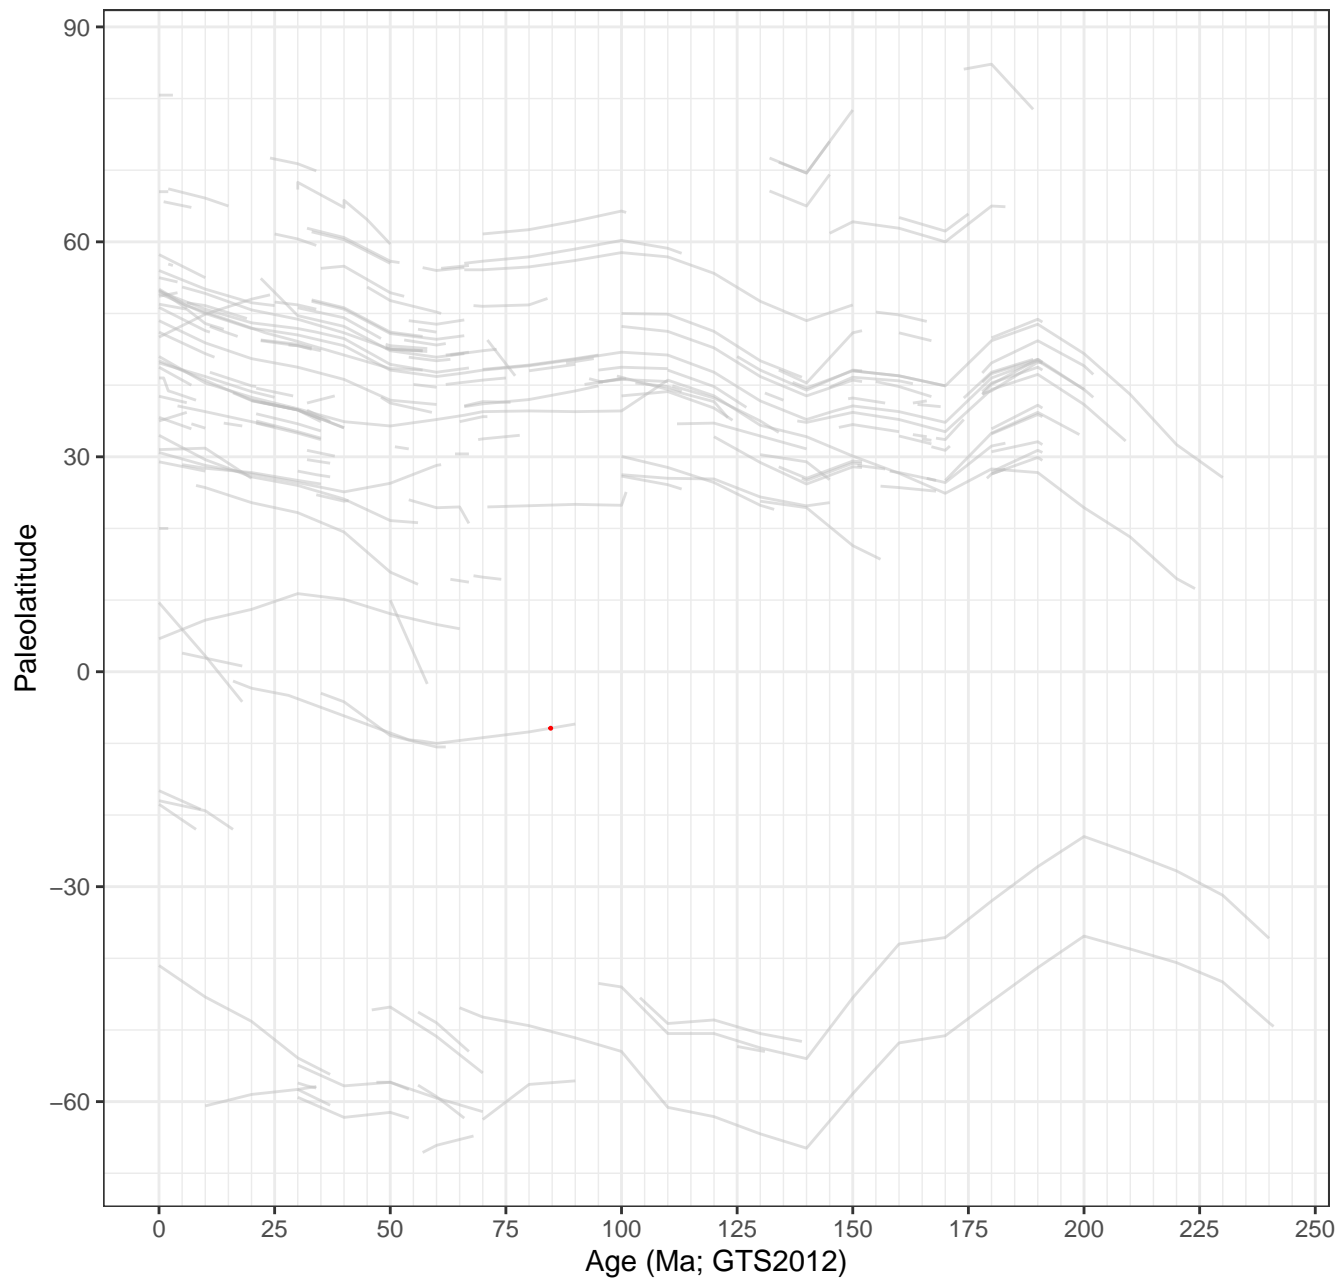

Supplement: Supplementary file 1450 [file Florentinia resex.pdf › Supplement/Supplement 2/Species 1914 plots/Florentinia resex.pdf]

# Species *Florentinia stellata*

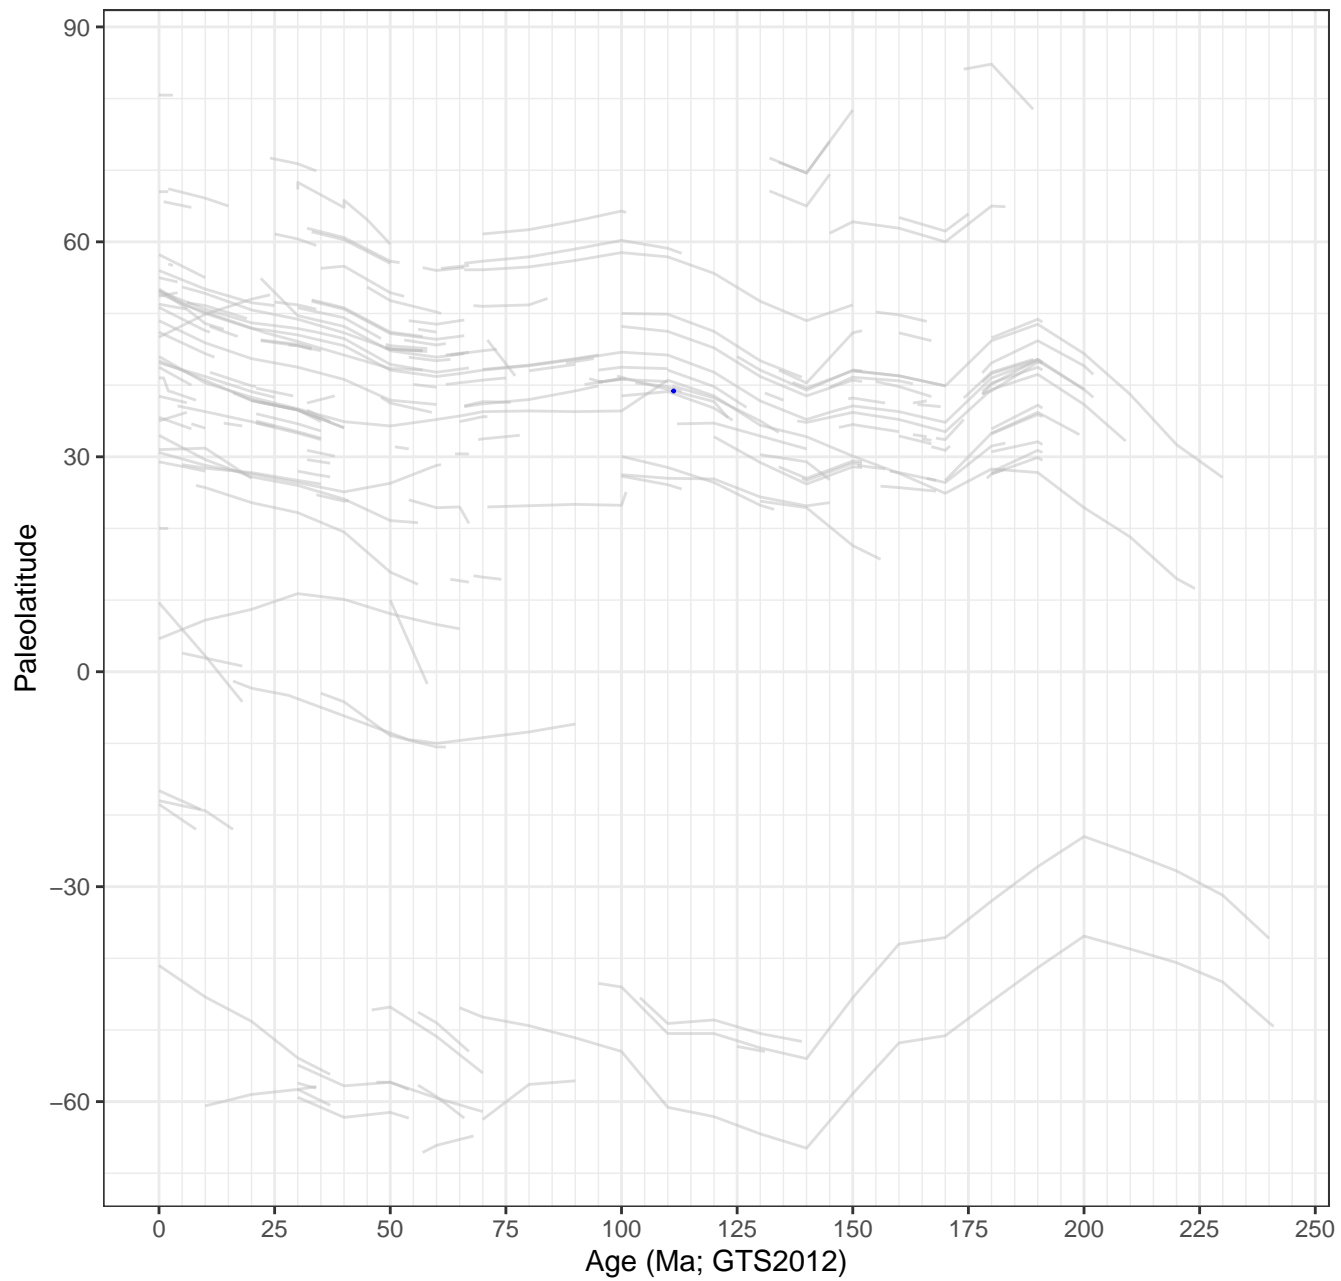

Supplement: Supplementary file 1451 [file Florentinia stellata.pdf › Supplement/Supplement 2/Species 1914 plots/Florentinia stellata.pdf]

# Species *Florentinia tenera*

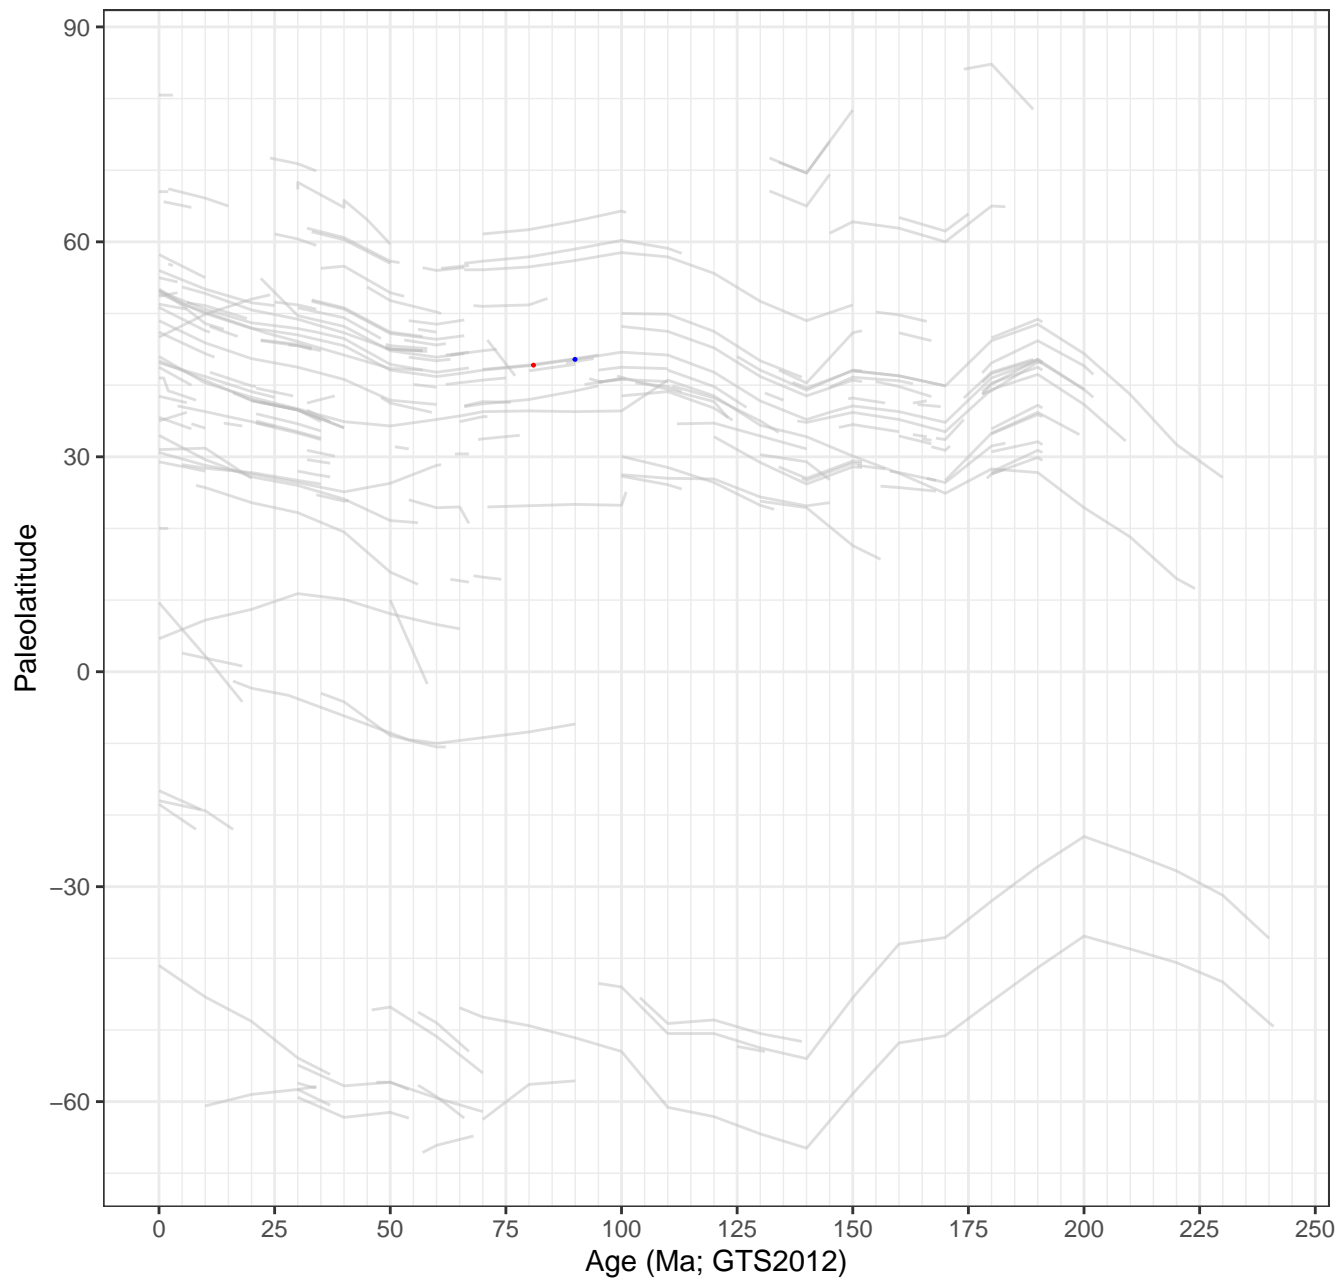

Supplement: Supplementary file 1452 [file Florentinia tenera.pdf › Supplement/Supplement 2/Species 1914 plots/Florentinia tenera.pdf]

# Species *Florentinia tridactylites*

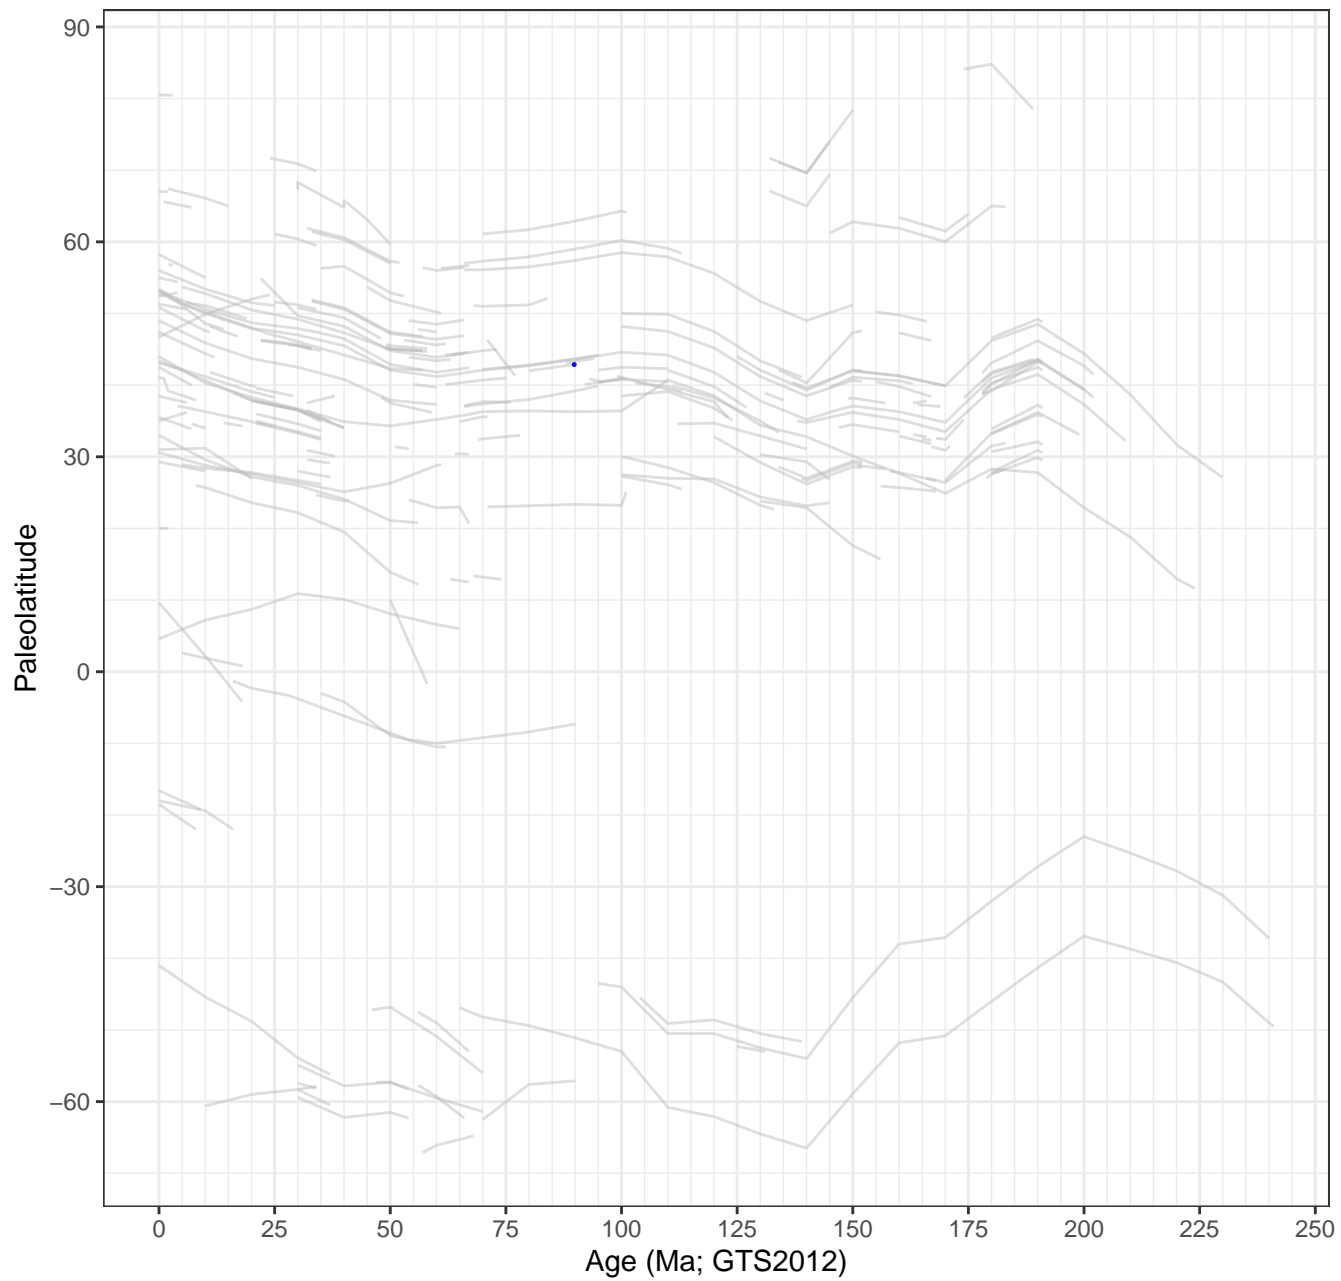

Supplement: Supplementary file 1453 [file Florentinia tridactylites.pdf › Supplement/Supplement 2/Species 1914 plots/Florentinia tridactylites.pdf]

# Species *Fostericysta eclipsiana*

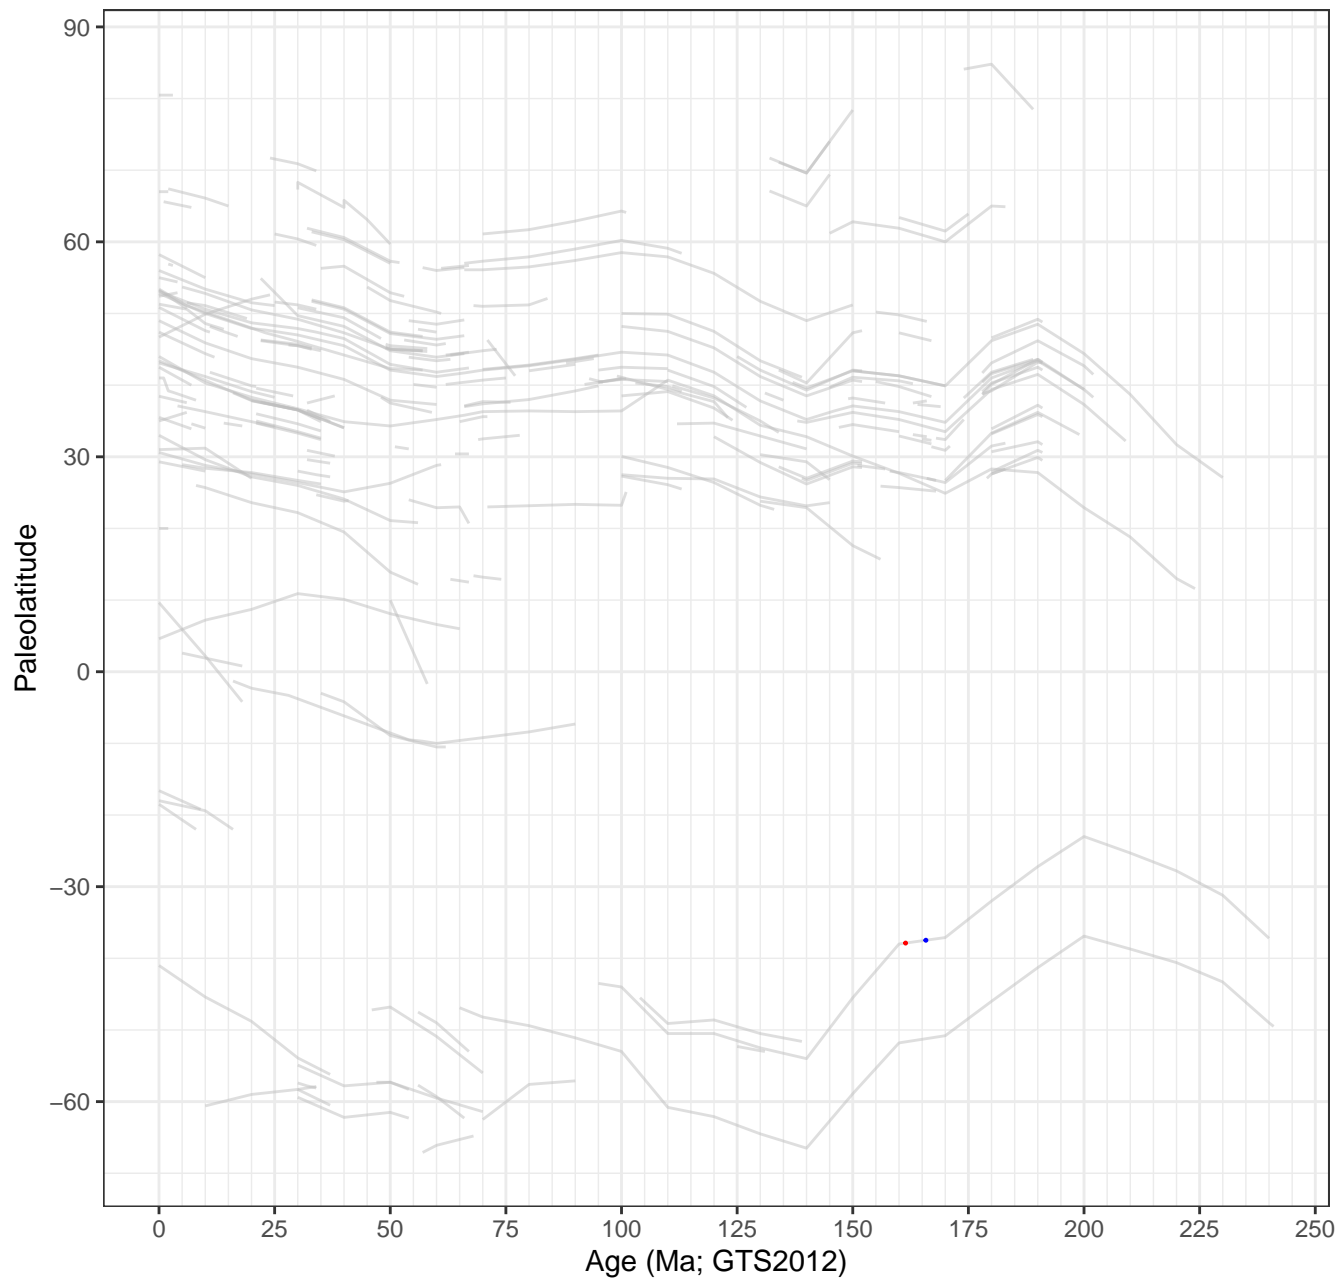

Supplement: Supplementary file 1454 [file Fostericysta eclipsiana.pdf › Supplement/Supplement 2/Species 1914 plots/Fostericysta eclipsiana.pdf]

# Species *Foucheria modesta*

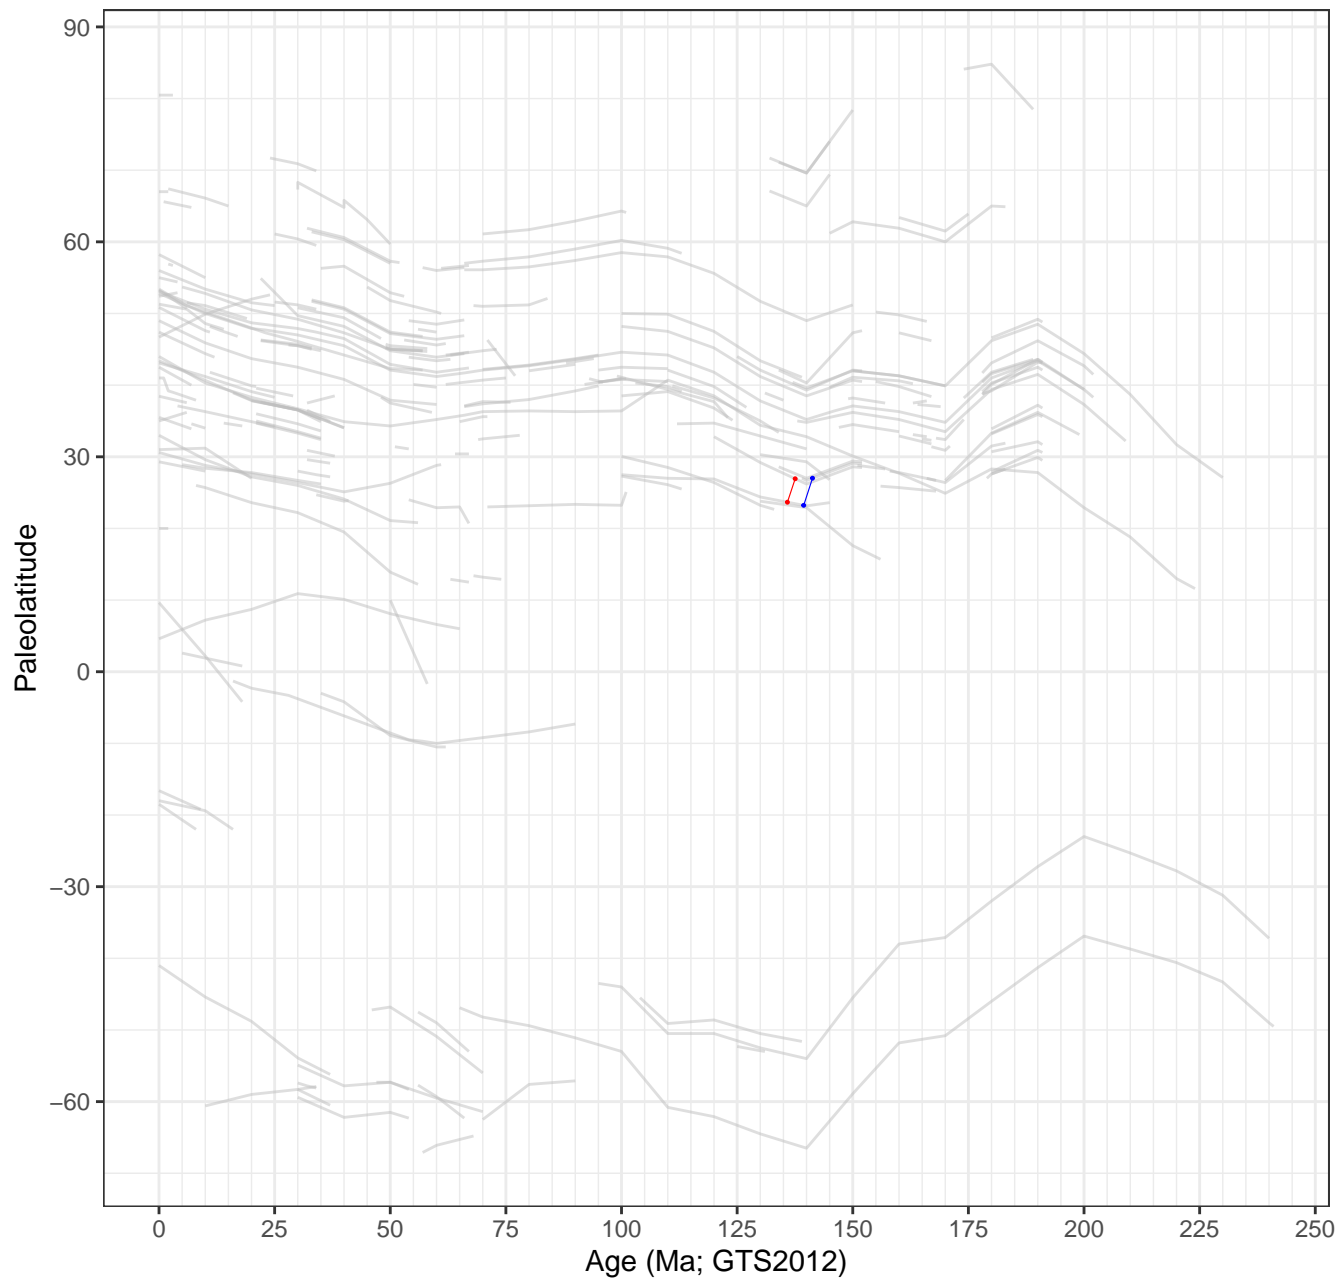

Supplement: Supplementary file 1455 [file Foucheria modesta.pdf › Supplement/Supplement 2/Species 1914 plots/Foucheria modesta.pdf]

# Species *Freboldinium regulum*

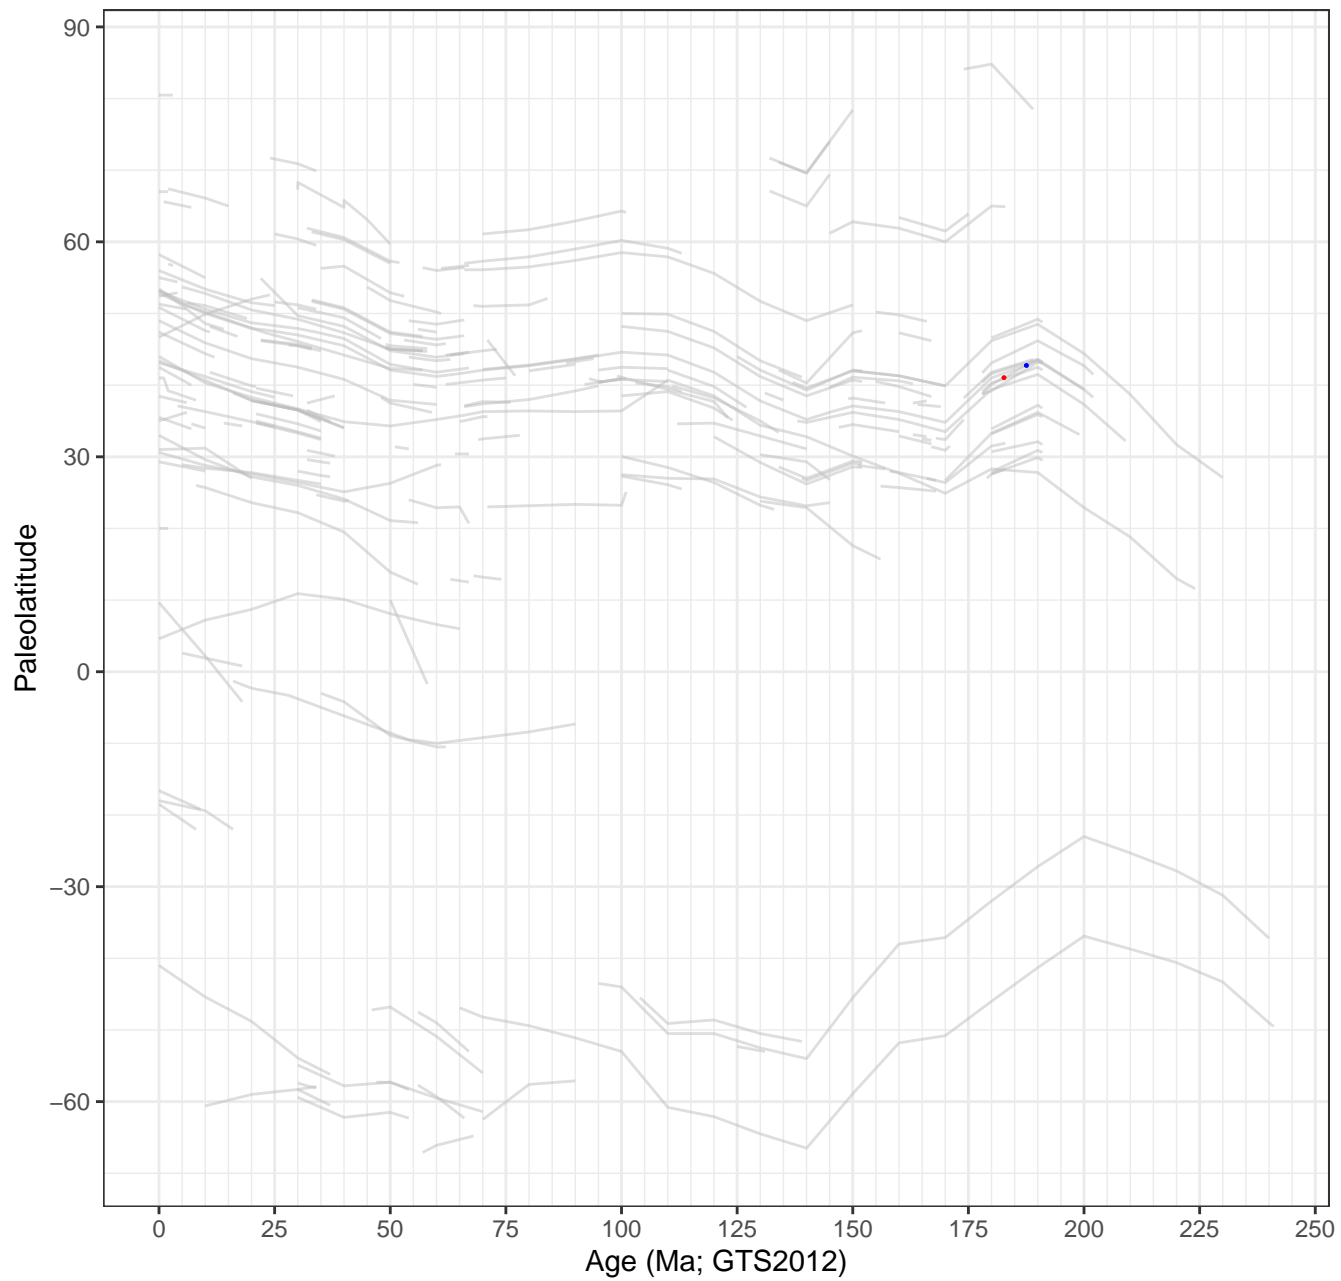

Supplement: Supplementary file 1456 [file Freboldinium regulum.pdf › Supplement/Supplement 2/Species 1914 plots/Freboldinium regulum.pdf]

# Species *Fromea amphora*

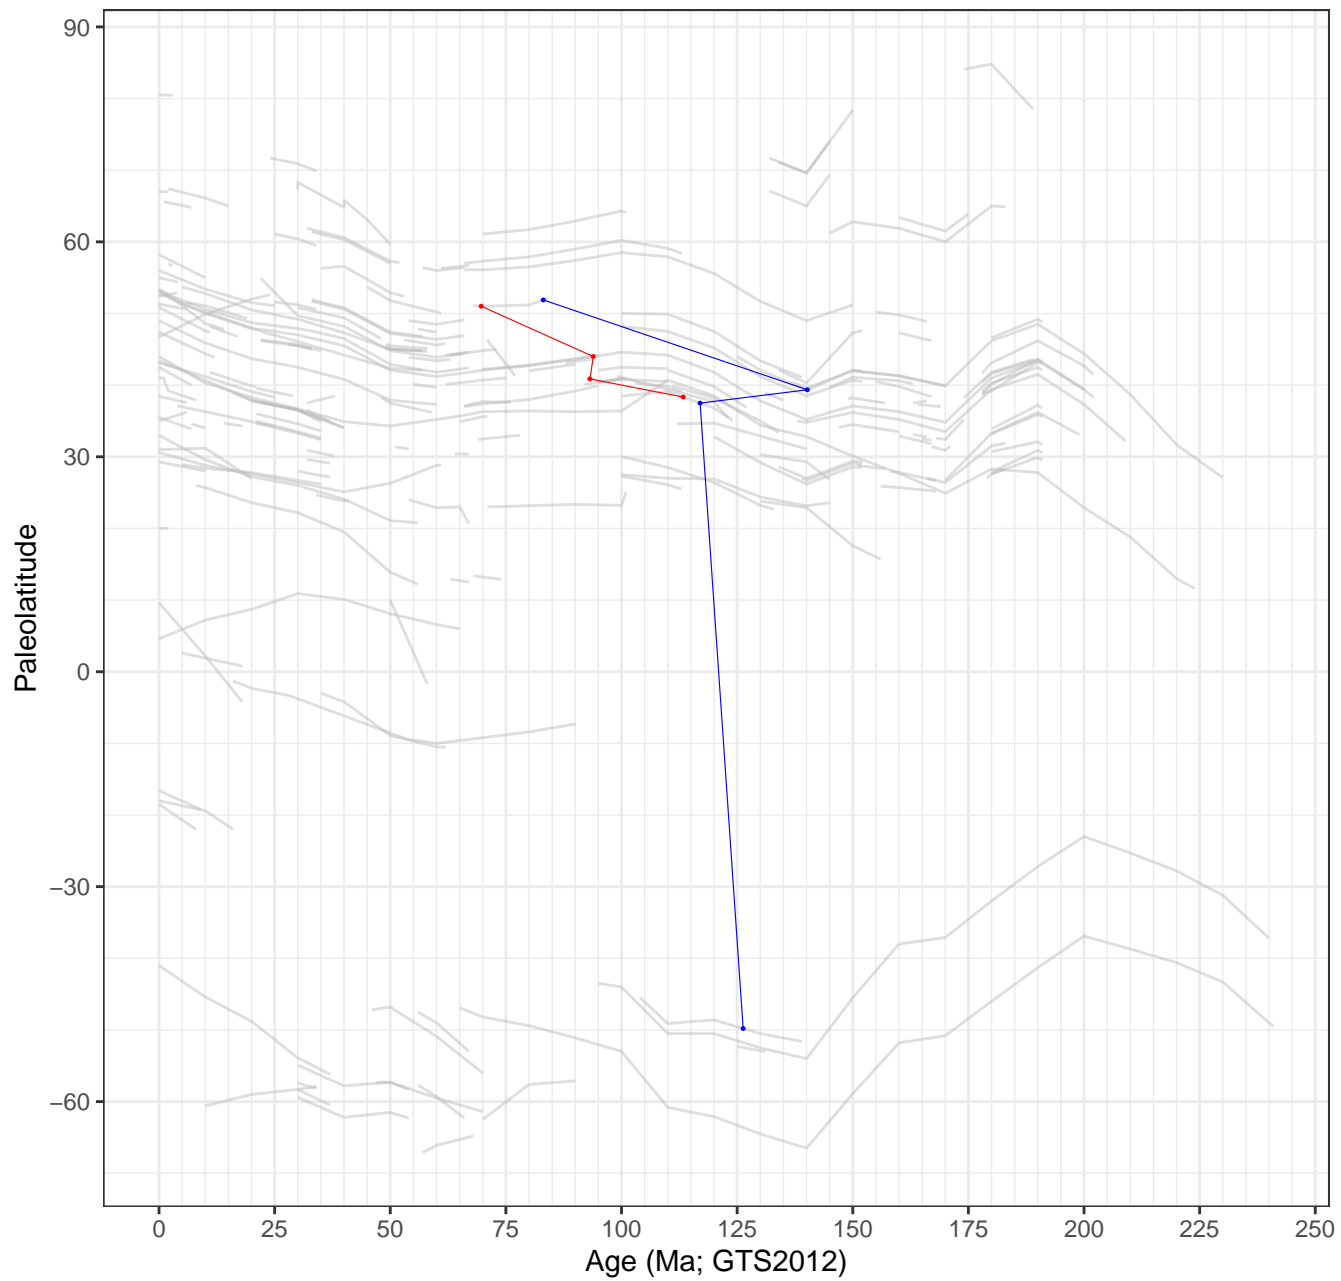

Supplement: Supplementary file 1457 [file Fromea amphora.pdf › Supplement/Supplement 2/Species 1914 plots/Fromea amphora.pdf]

# Species Fromea chytra

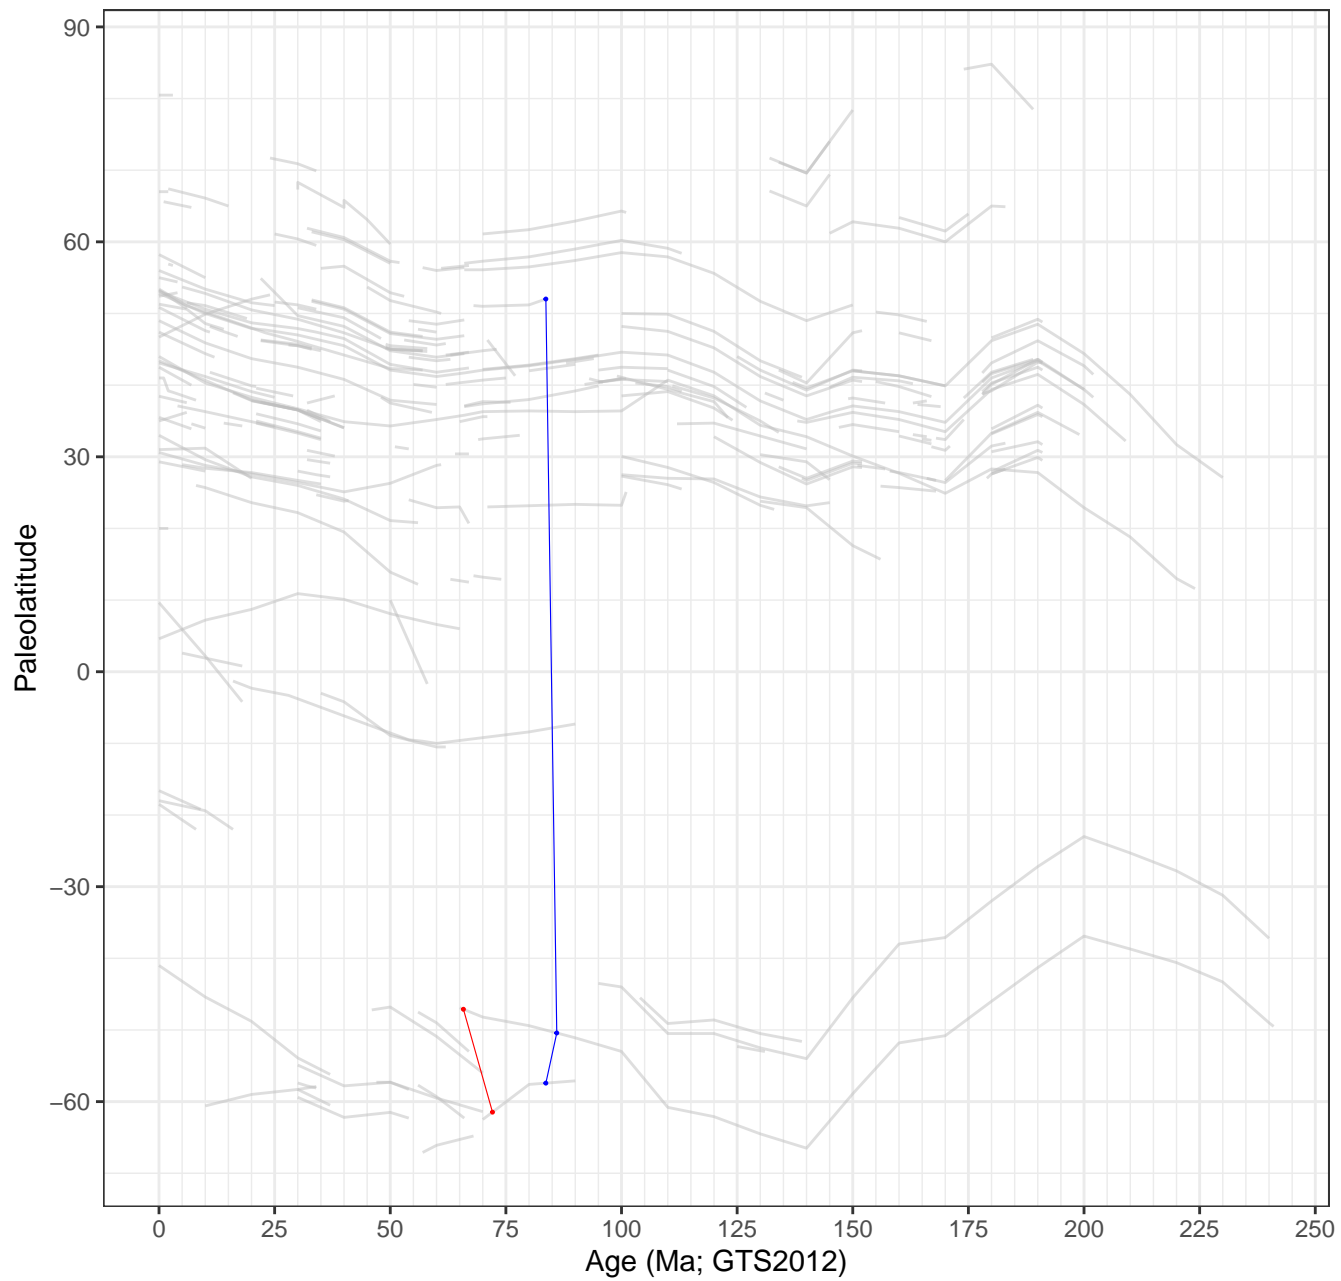

Supplement: Supplementary file 1458 [file Fromea chytra.pdf › Supplement/Supplement 2/Species 1914 plots/Fromea chytra.pdf]

# Species *Fromea cylindrica*

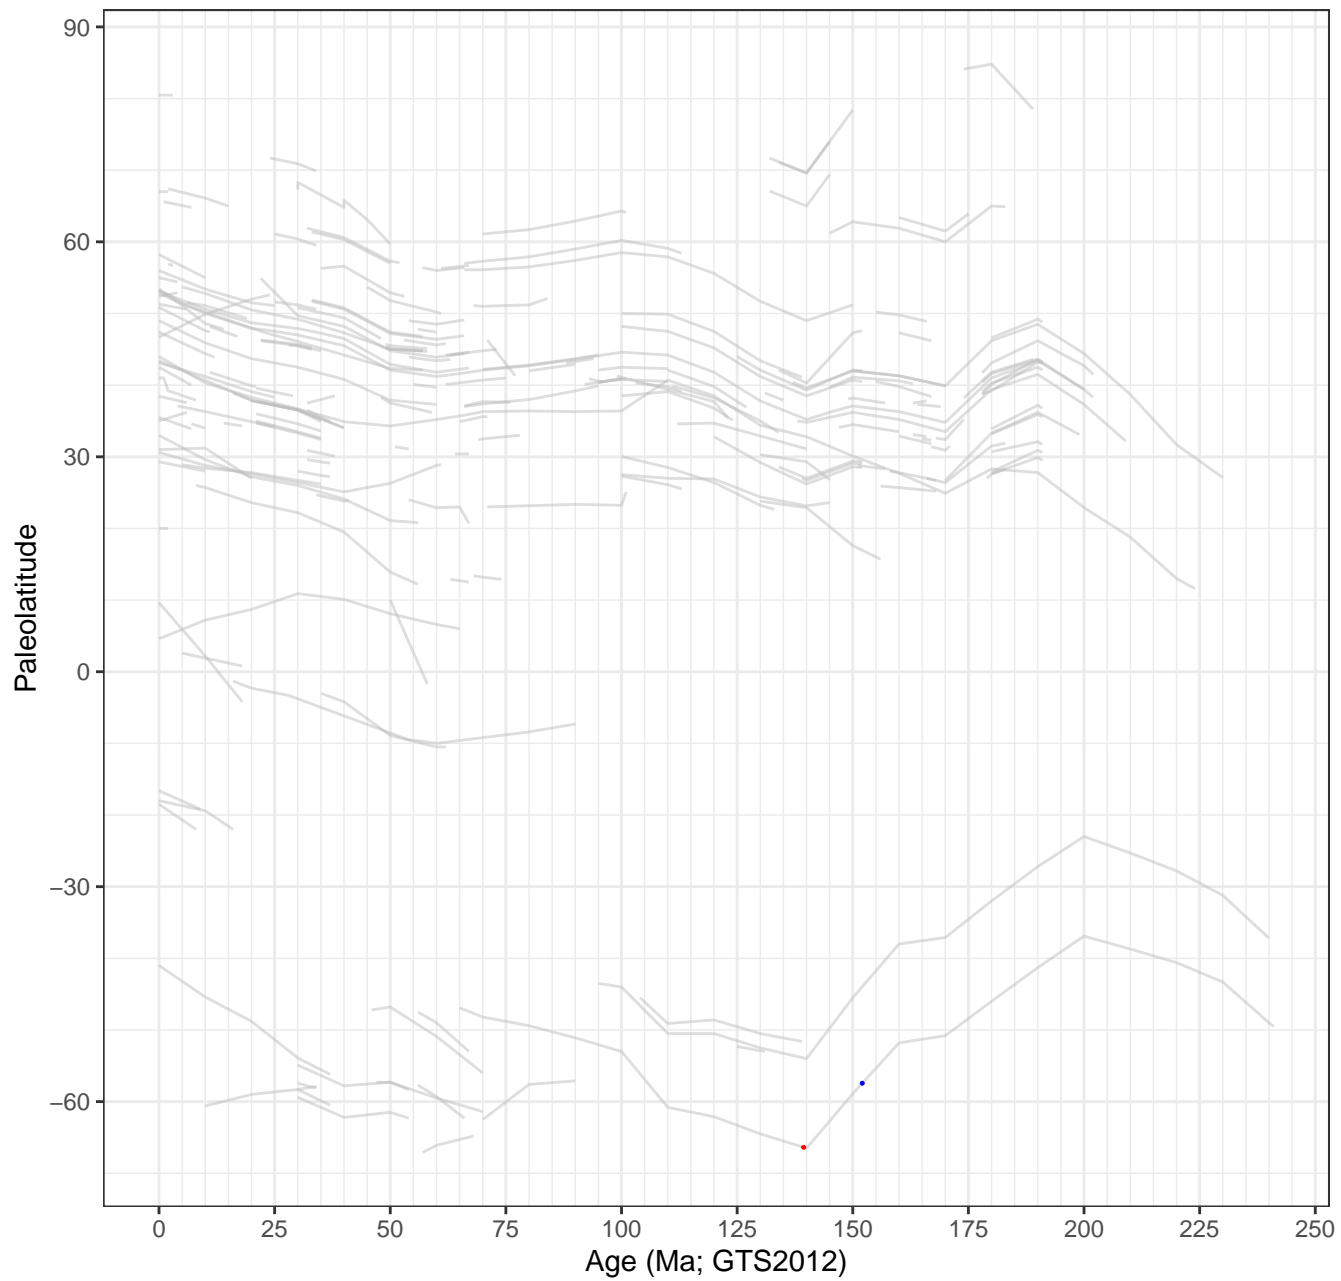

Supplement: Supplementary file 1459 [file Fromea cylindrica.pdf › Supplement/Supplement 2/Species 1914 plots/Fromea cylindrica.pdf]

# Species *Fromea laevigata*

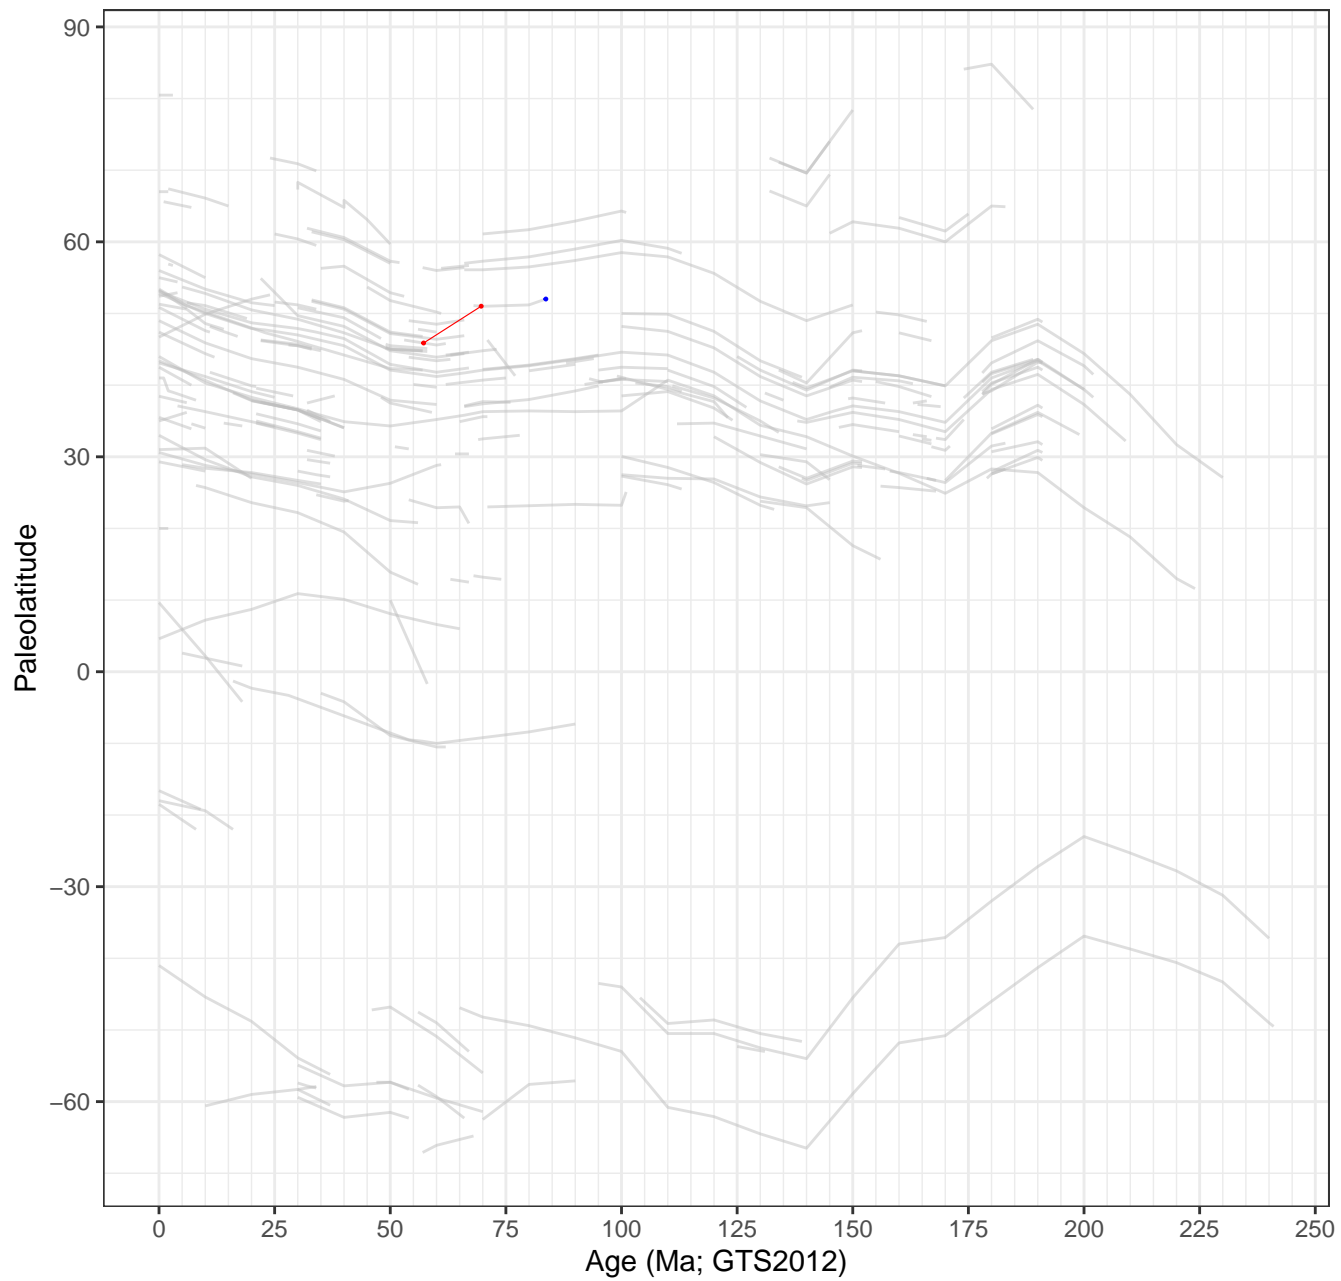

Supplement: Supplementary file 1460 [file Fromea laevigata.pdf › Supplement/Supplement 2/Species 1914 plots/Fromea laevigata.pdf]

# Species *Fromea monilifera*

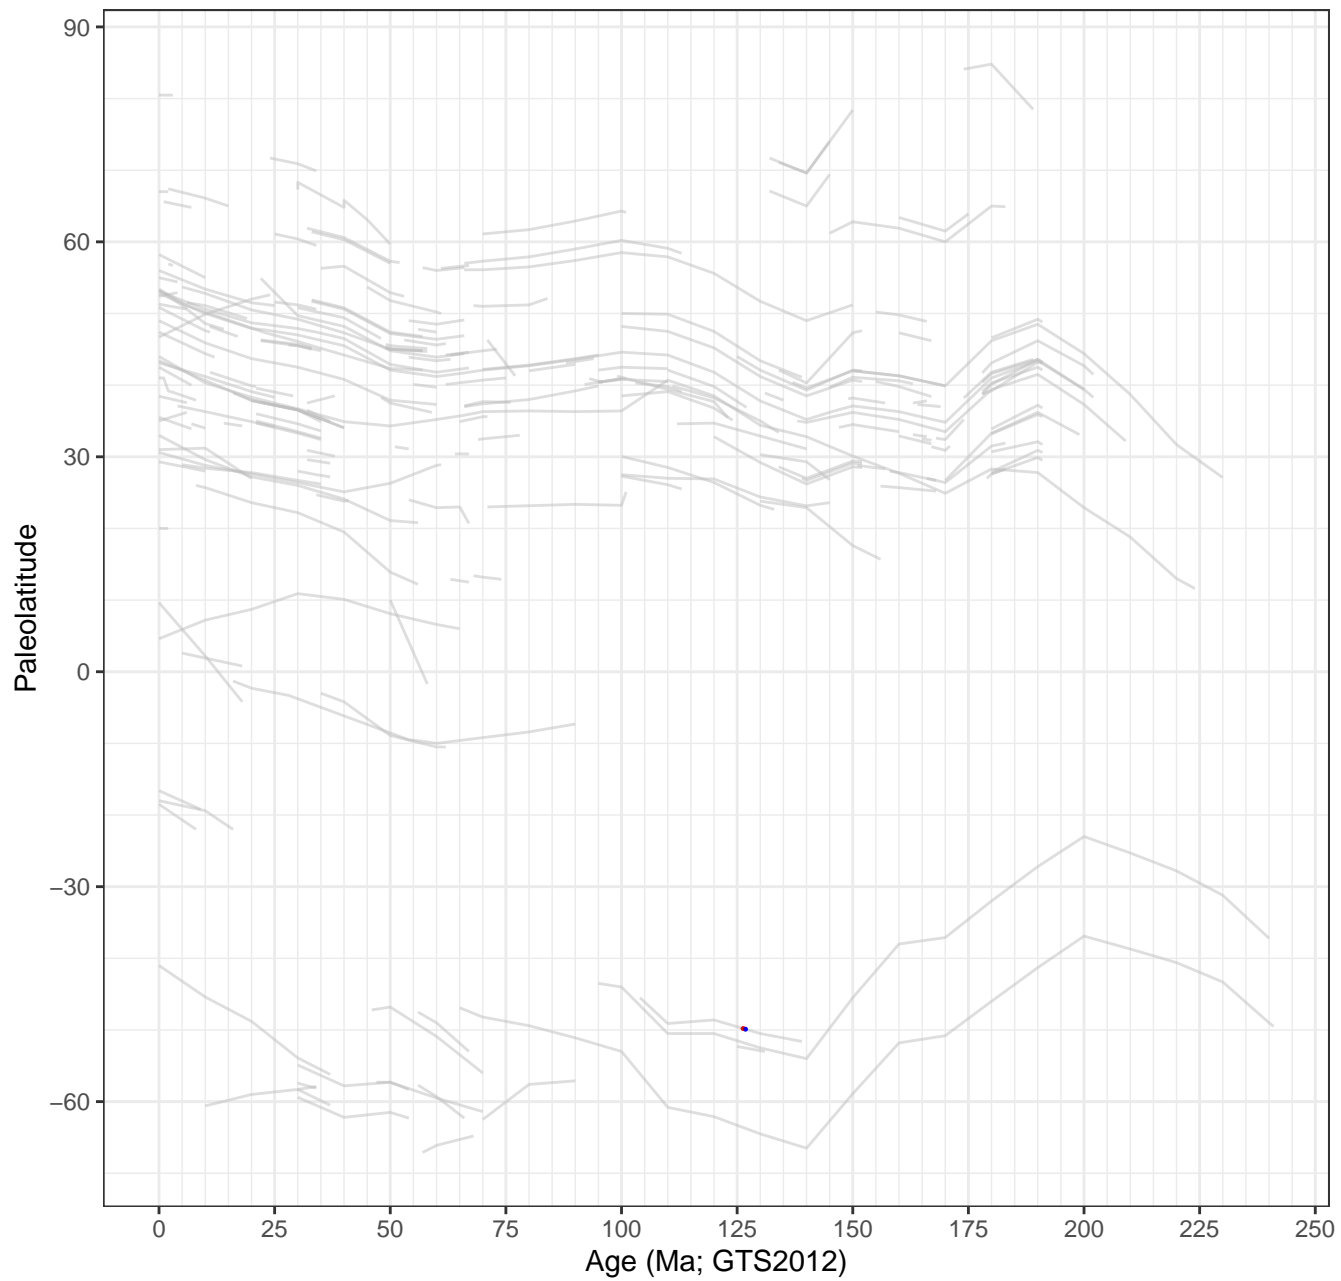

Supplement: Supplementary file 1461 [file Fromea monilifera.pdf › Supplement/Supplement 2/Species 1914 plots/Fromea monilifera.pdf]

# Species *Fromea quadrugata*

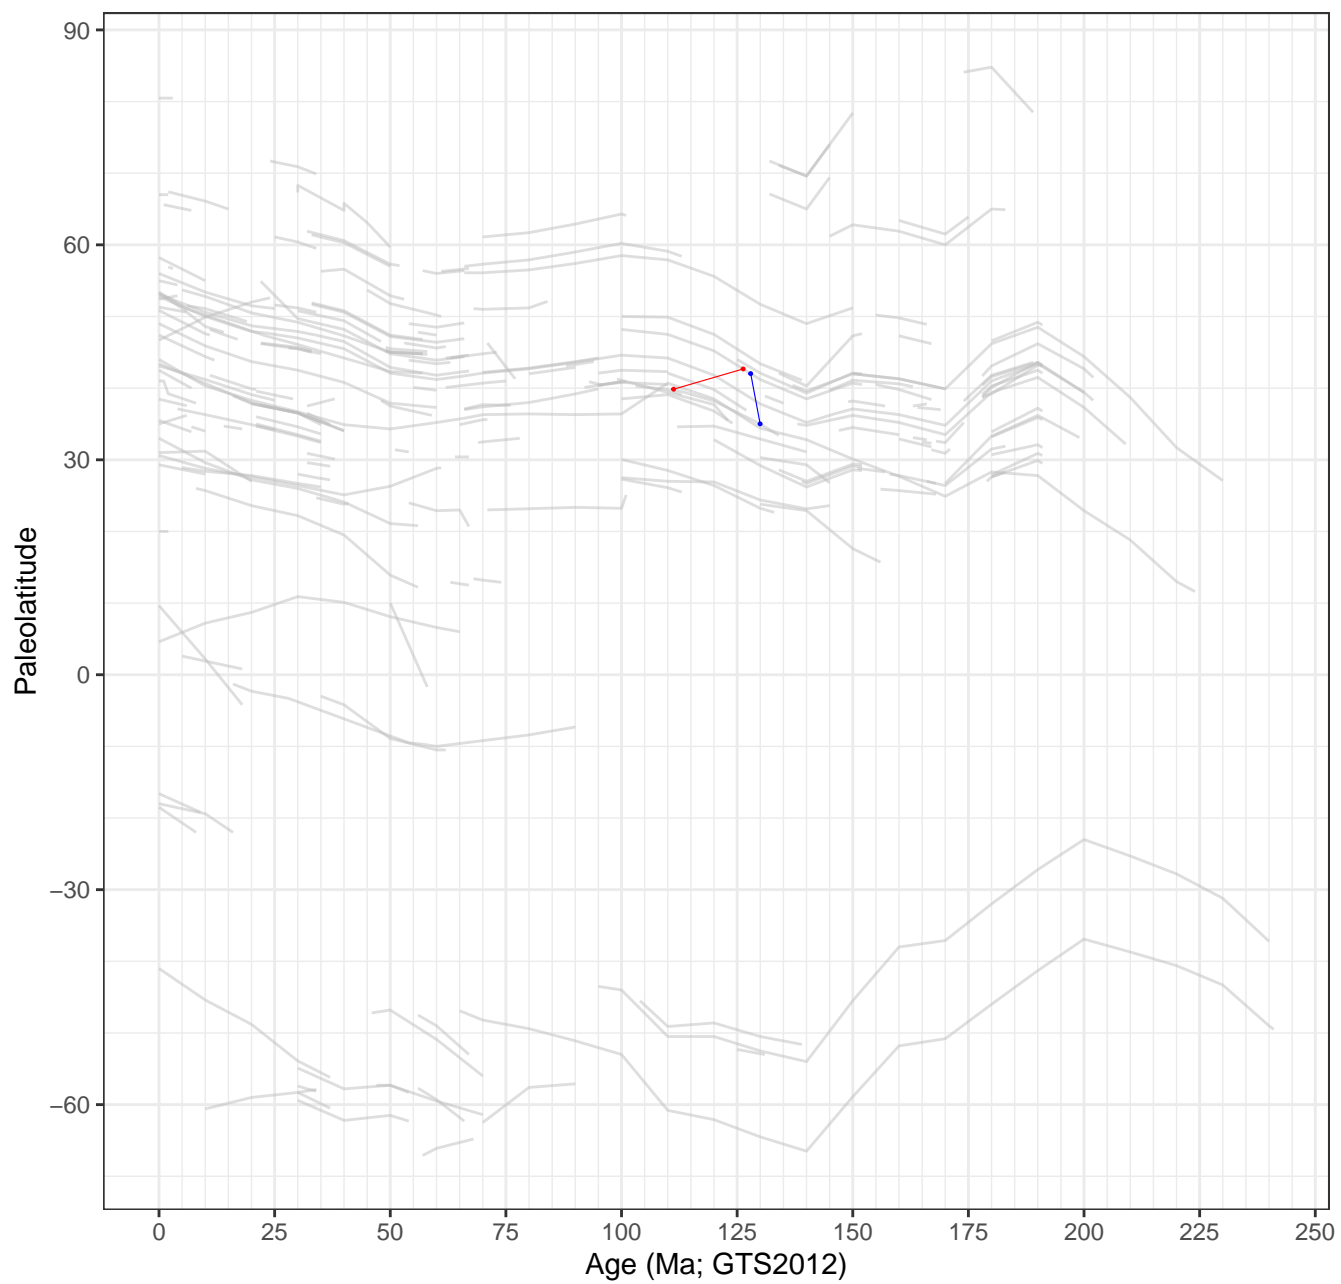

Supplement: Supplementary file 1462 [file Fromea quadrugata.pdf › Supplement/Supplement 2/Species 1914 plots/Fromea quadrugata.pdf]

# Species *Fromea tornatilis*

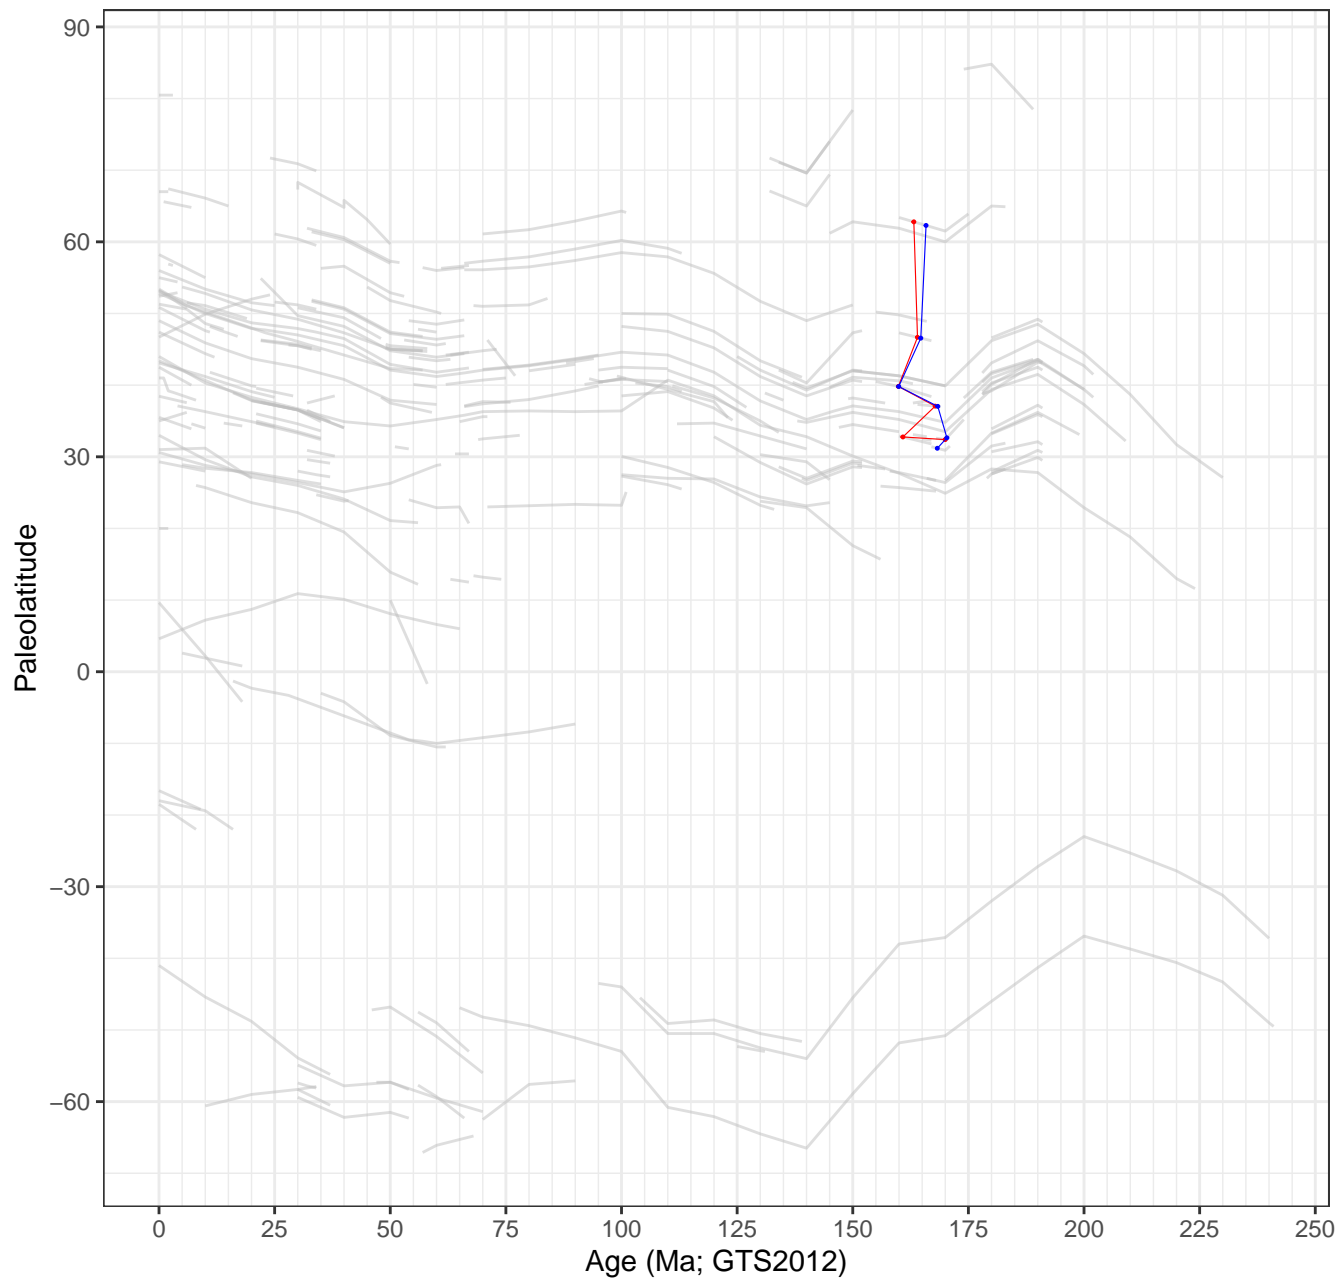

Supplement: Supplementary file 1463 [file Fromea tornatilis.pdf › Supplement/Supplement 2/Species 1914 plots/Fromea tornatilis.pdf]

# Species *Fusiformacysta challisiana*

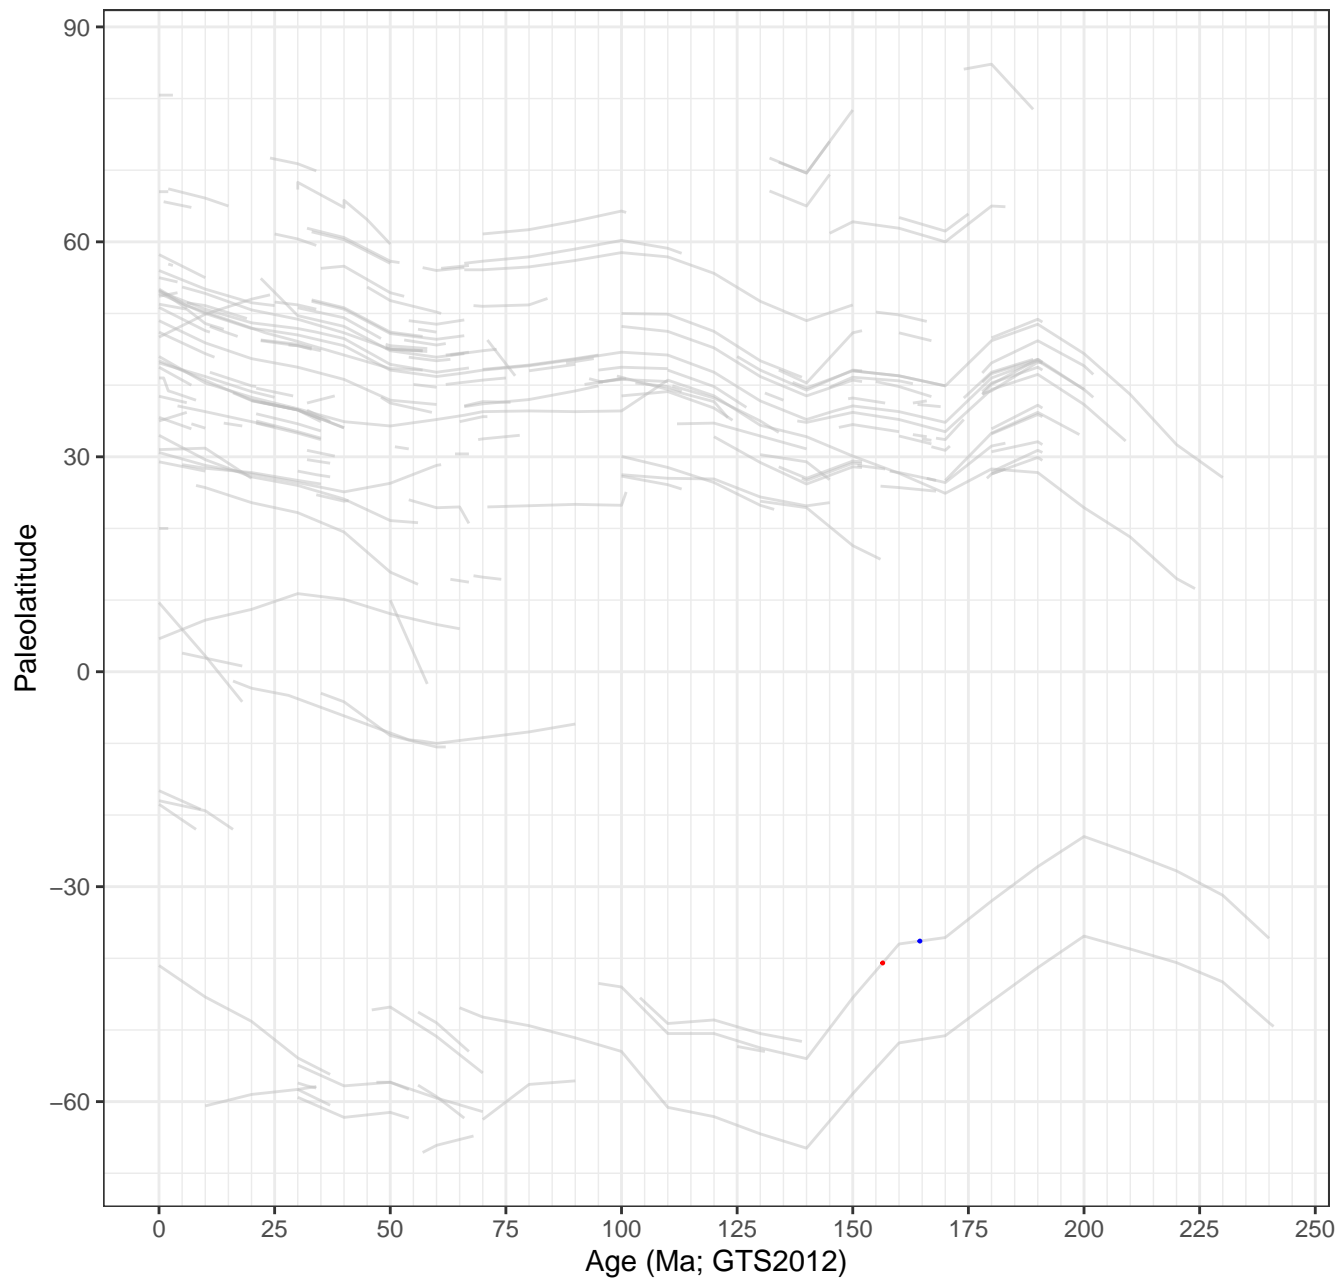

Supplement: Supplementary file 1464 [file Fusiformacysta challisiana.pdf › Supplement/Supplement 2/Species 1914 plots/Fusiformacysta challisiana.pdf]

# Species *Fusiformacysta terniana*

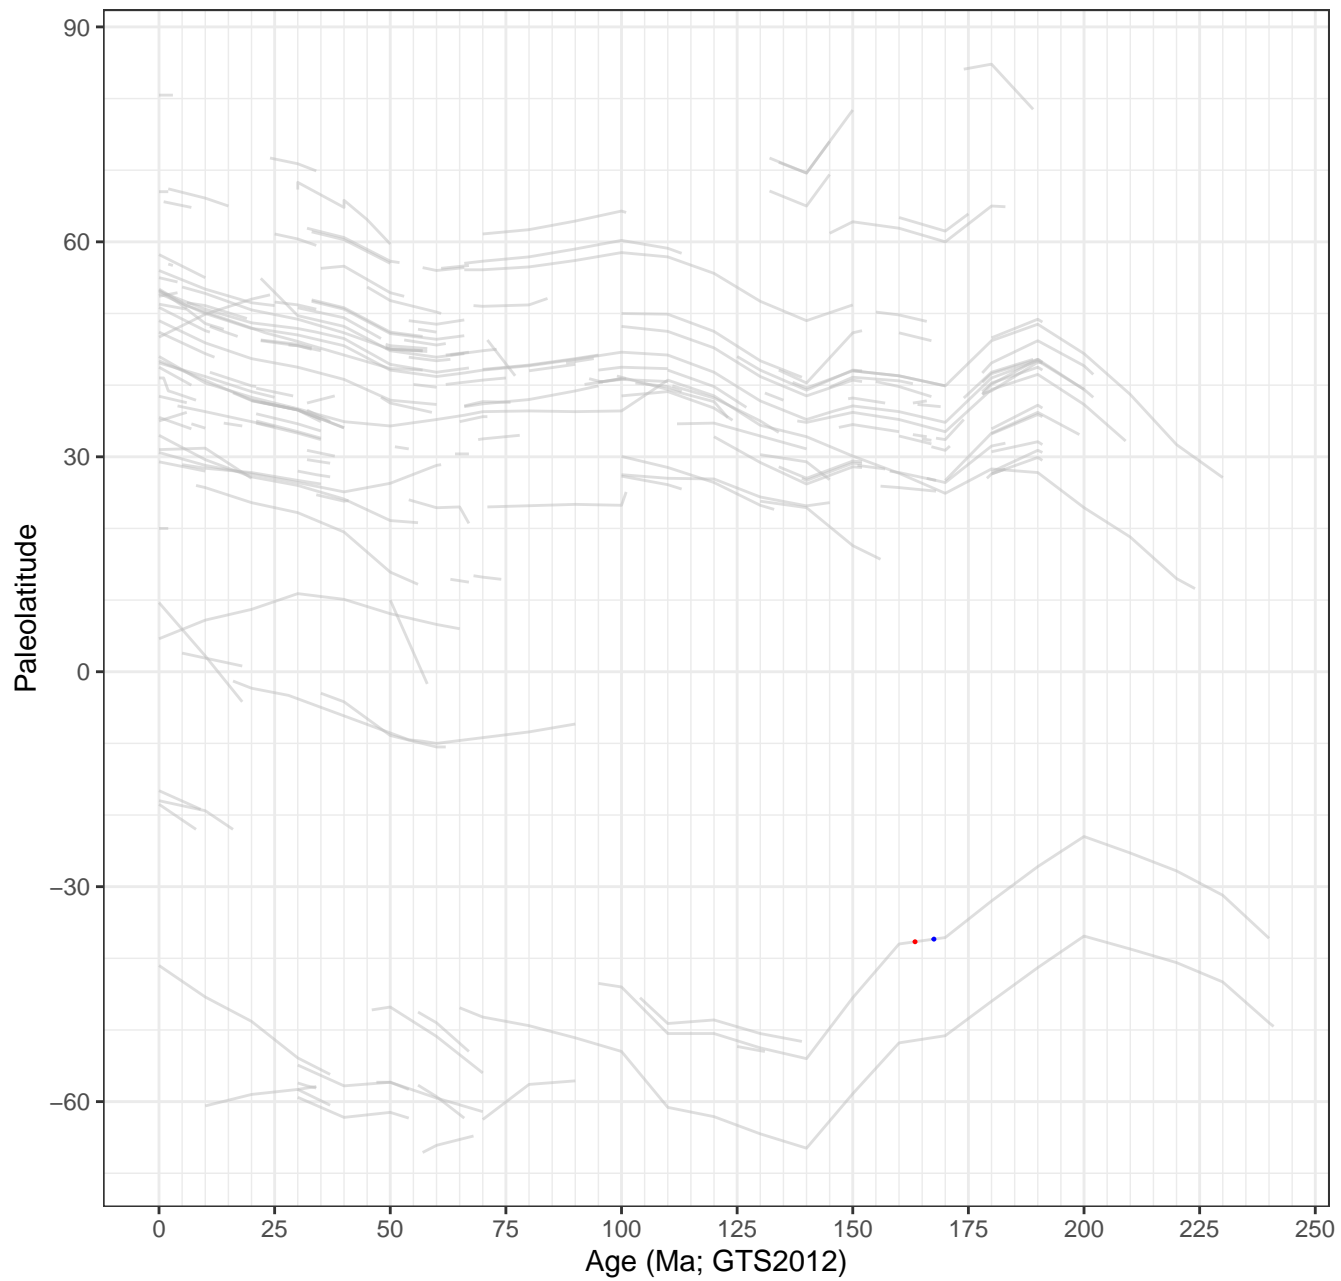

Supplement: Supplementary file 1465 [file Fusiformacysta terniana.pdf › Supplement/Supplement 2/Species 1914 plots/Fusiformacysta terniana.pdf]

# Species *Galeacysta etrusca*

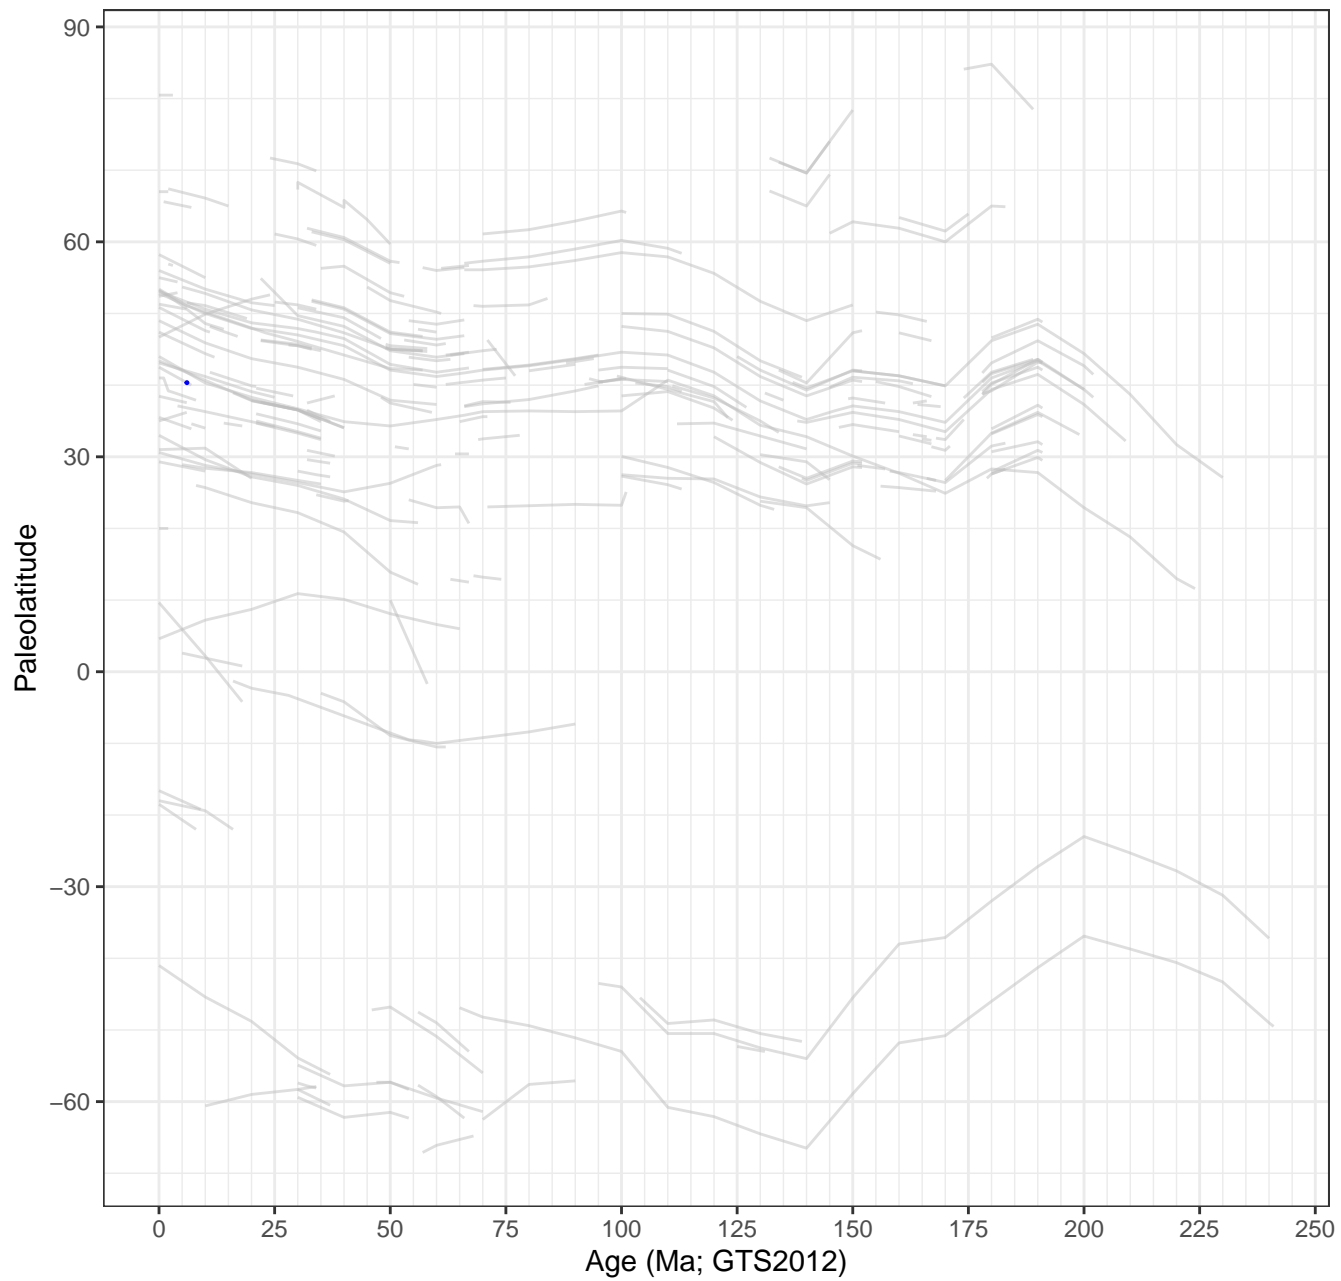

Supplement: Supplementary file 1466 [file Galeacysta etrusca.pdf › Supplement/Supplement 2/Species 1914 plots/Galeacysta etrusca.pdf]

# Species *Gardodinium angustum*

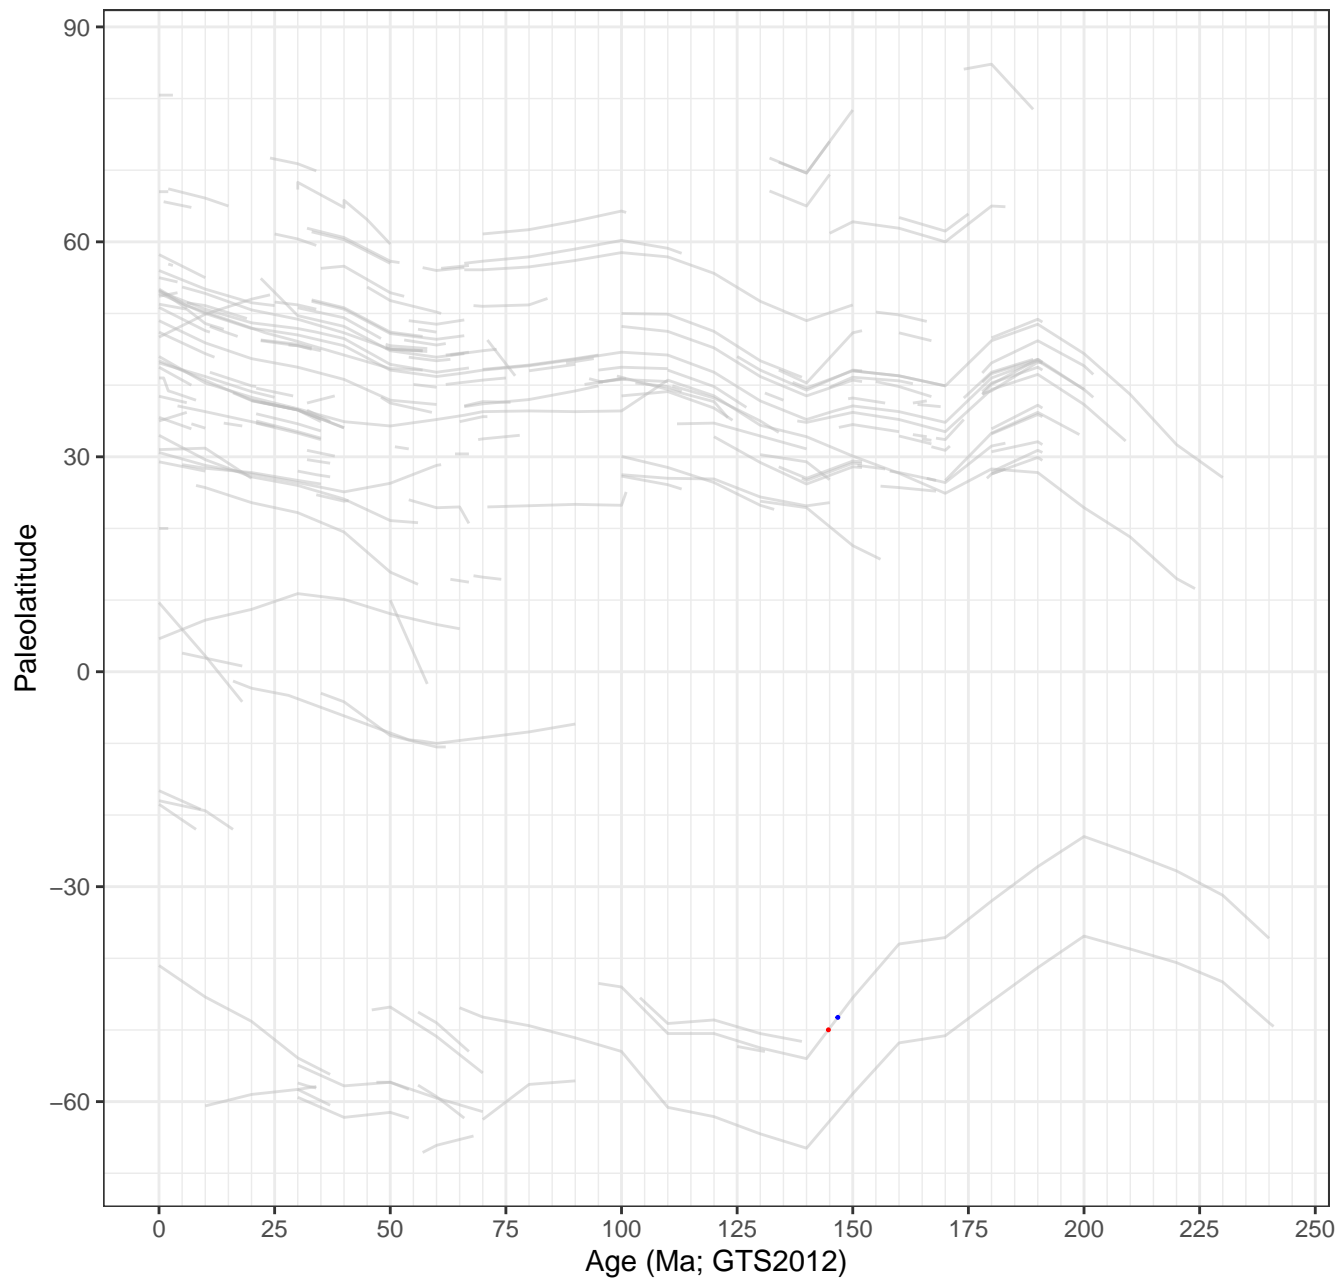

Supplement: Supplementary file 1467 [file Gardodinium angustum.pdf › Supplement/Supplement 2/Species 1914 plots/Gardodinium angustum.pdf]

# Species *Gardodinium attenuatum*

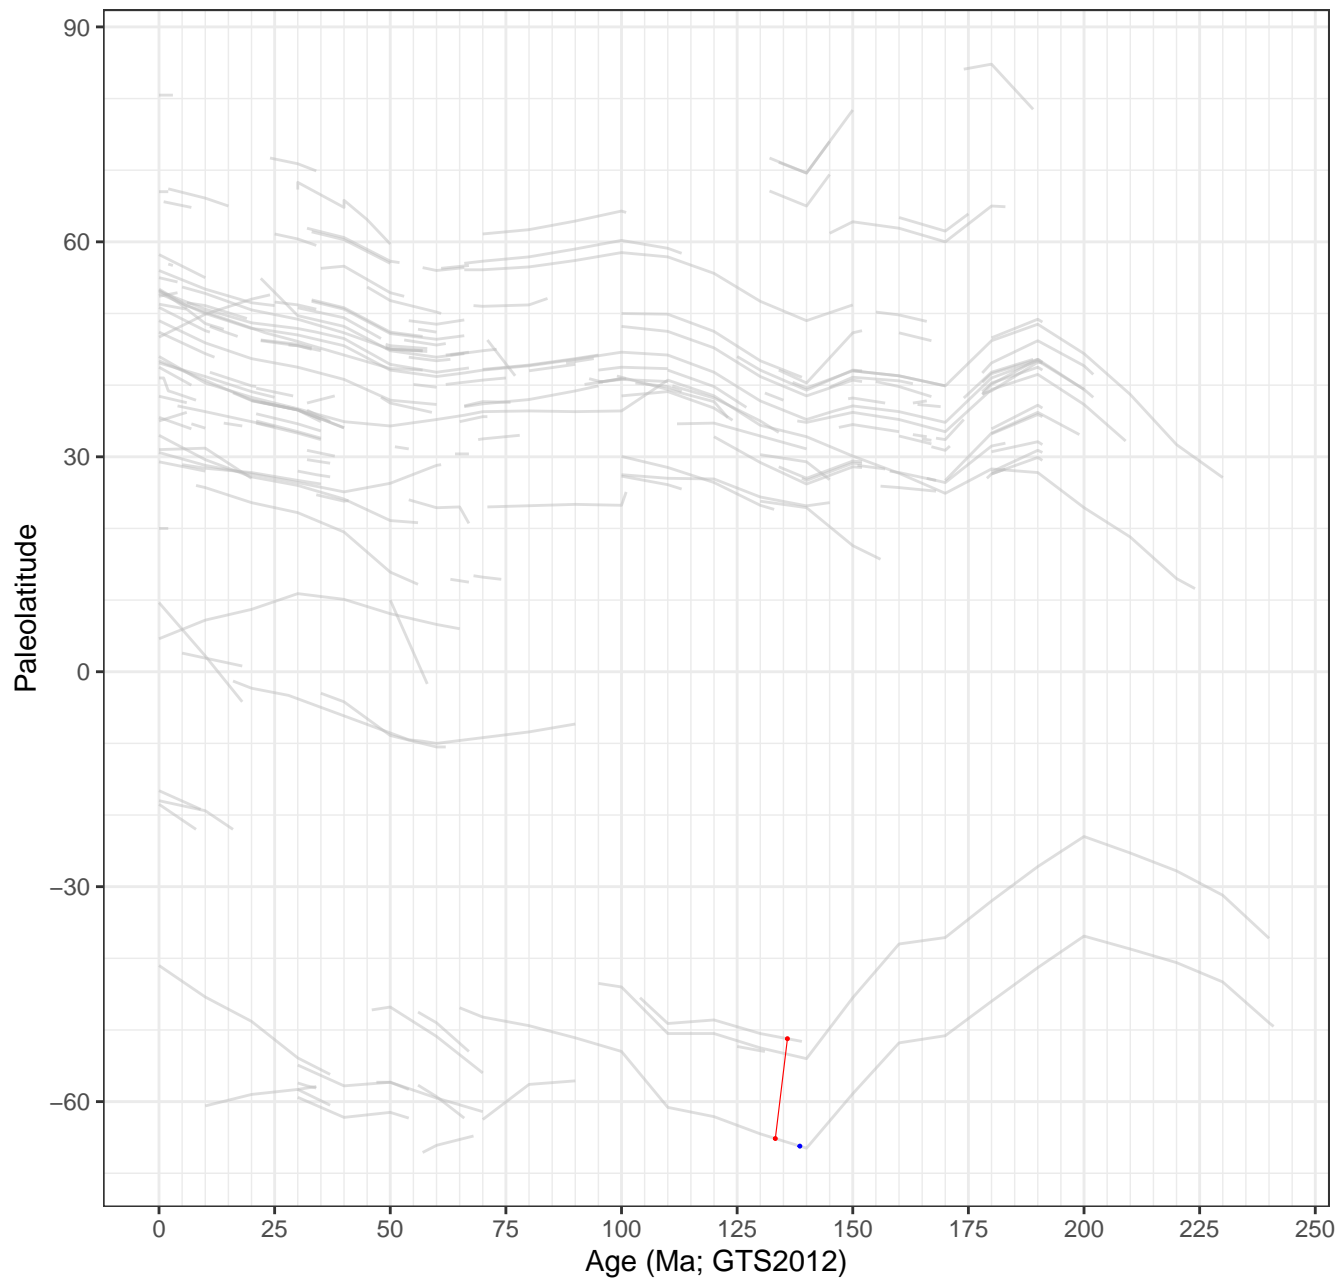

Supplement: Supplementary file 1468 [file Gardodinium attenuatum.pdf › Supplement/Supplement 2/Species 1914 plots/Gardodinium attenuatum.pdf]

# Species *Gardodinium lowii*

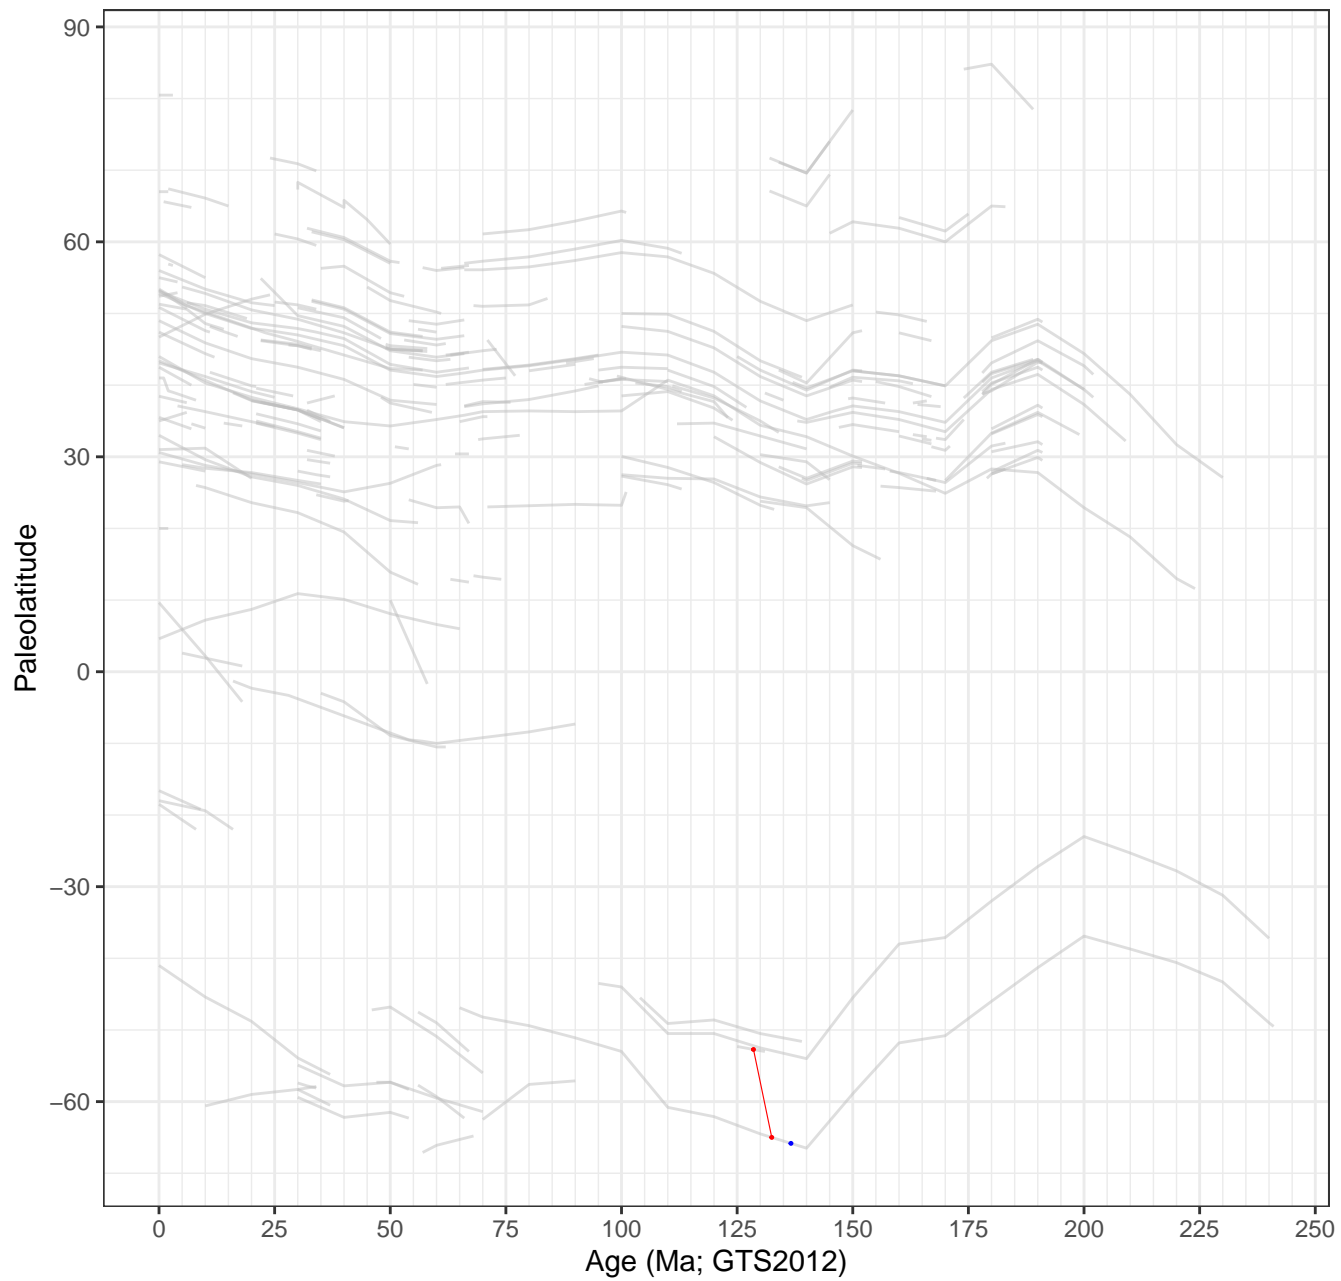

Supplement: Supplementary file 1469 [file Gardodinium lowii.pdf › Supplement/Supplement 2/Species 1914 plots/Gardodinium lowii.pdf]

# Species *Gardodinium ordinale*

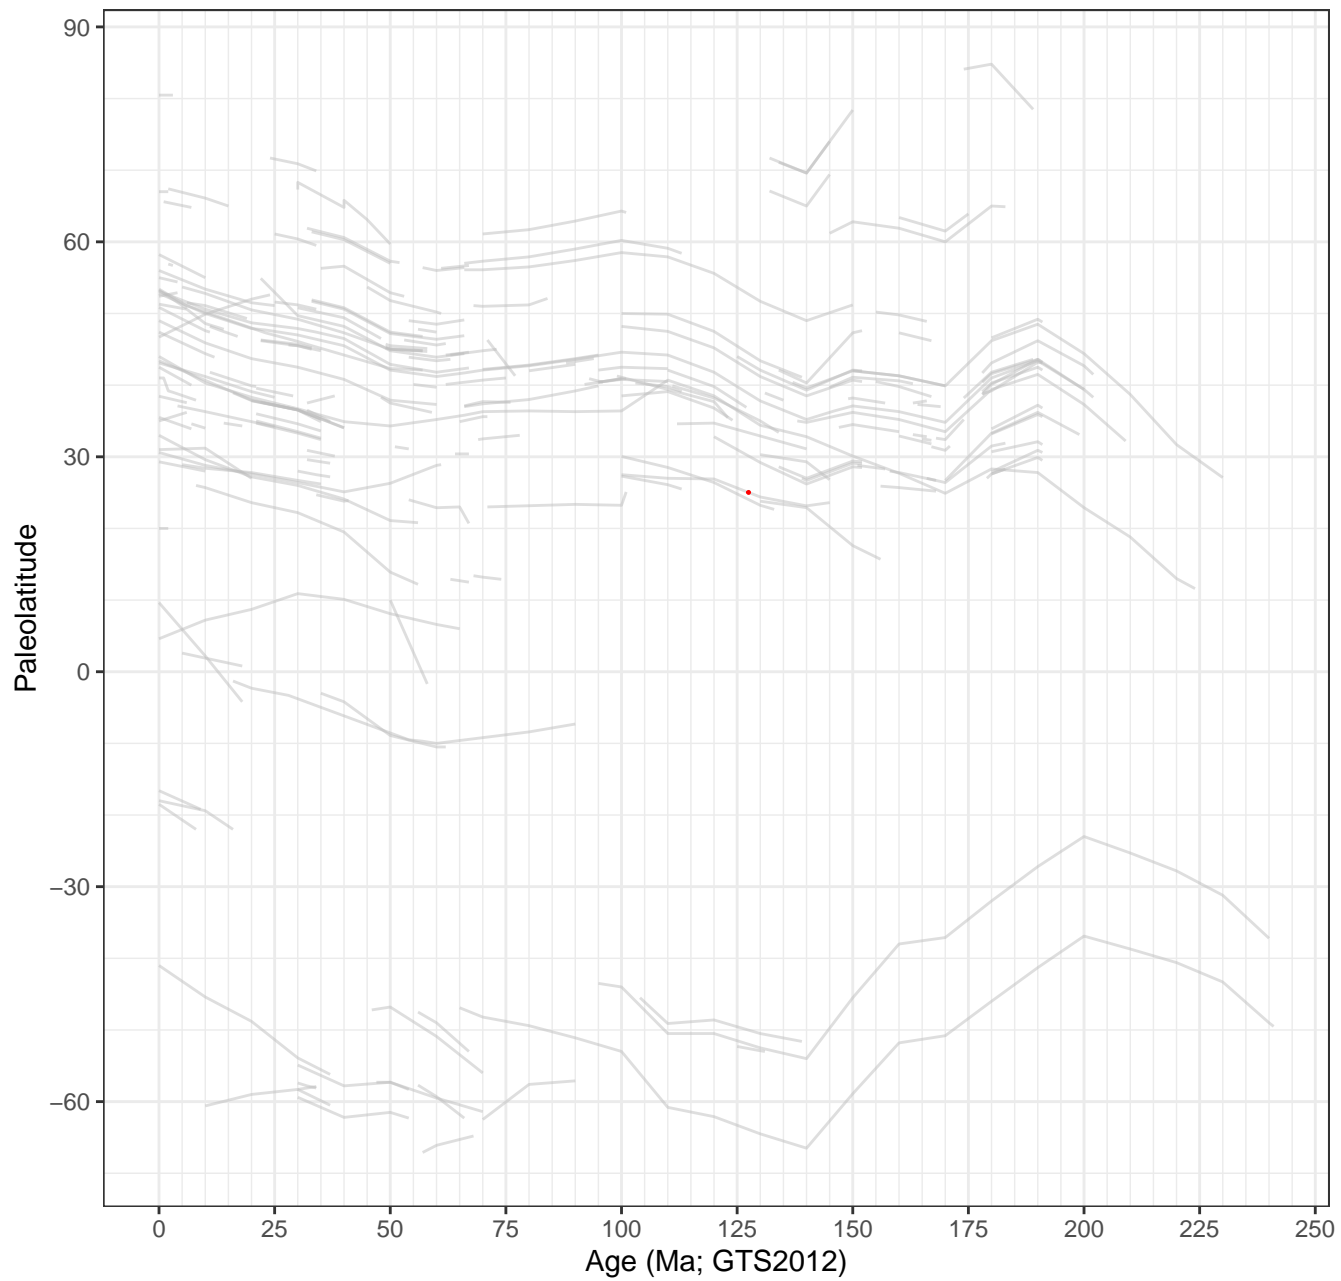

Supplement: Supplementary file 1470 [file Gardodinium ordinale.pdf › Supplement/Supplement 2/Species 1914 plots/Gardodinium ordinale.pdf]

# Species *Gardodinium trabeculosum*

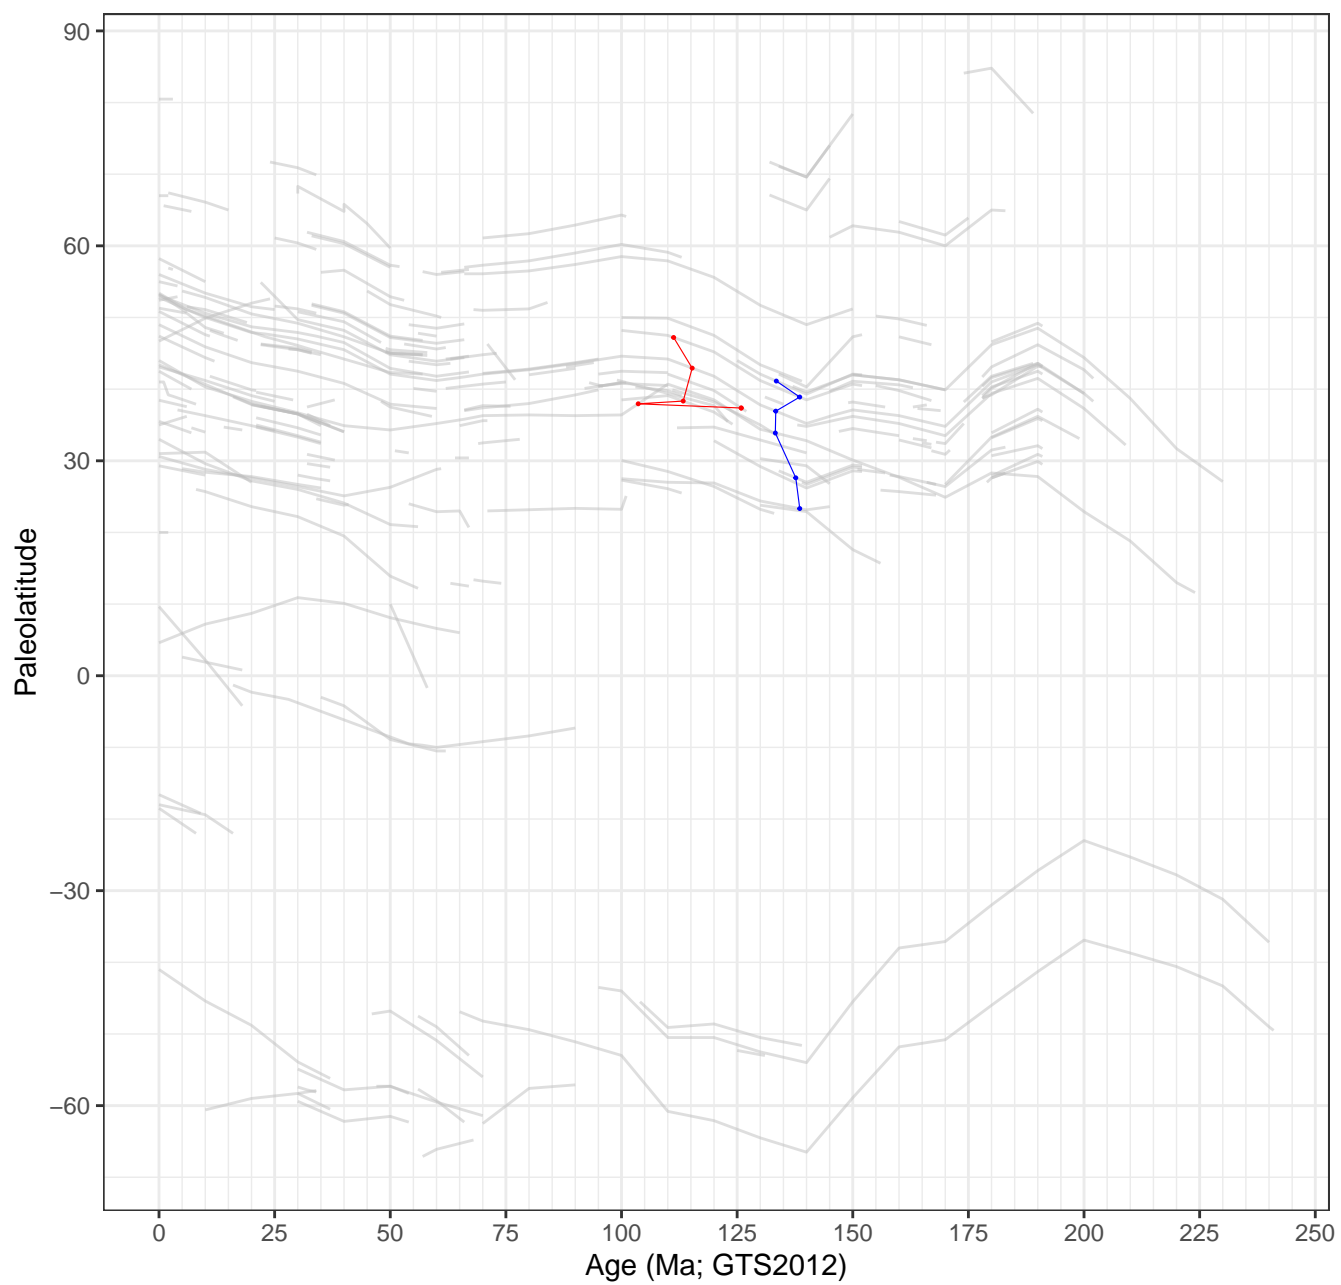

Supplement: Supplementary file 1471 [file Gardodinium trabeculosum.pdf › Supplement/Supplement 2/Species 1914 plots/Gardodinium trabeculosum.pdf]

# Species *Geiselodinium tenerum*

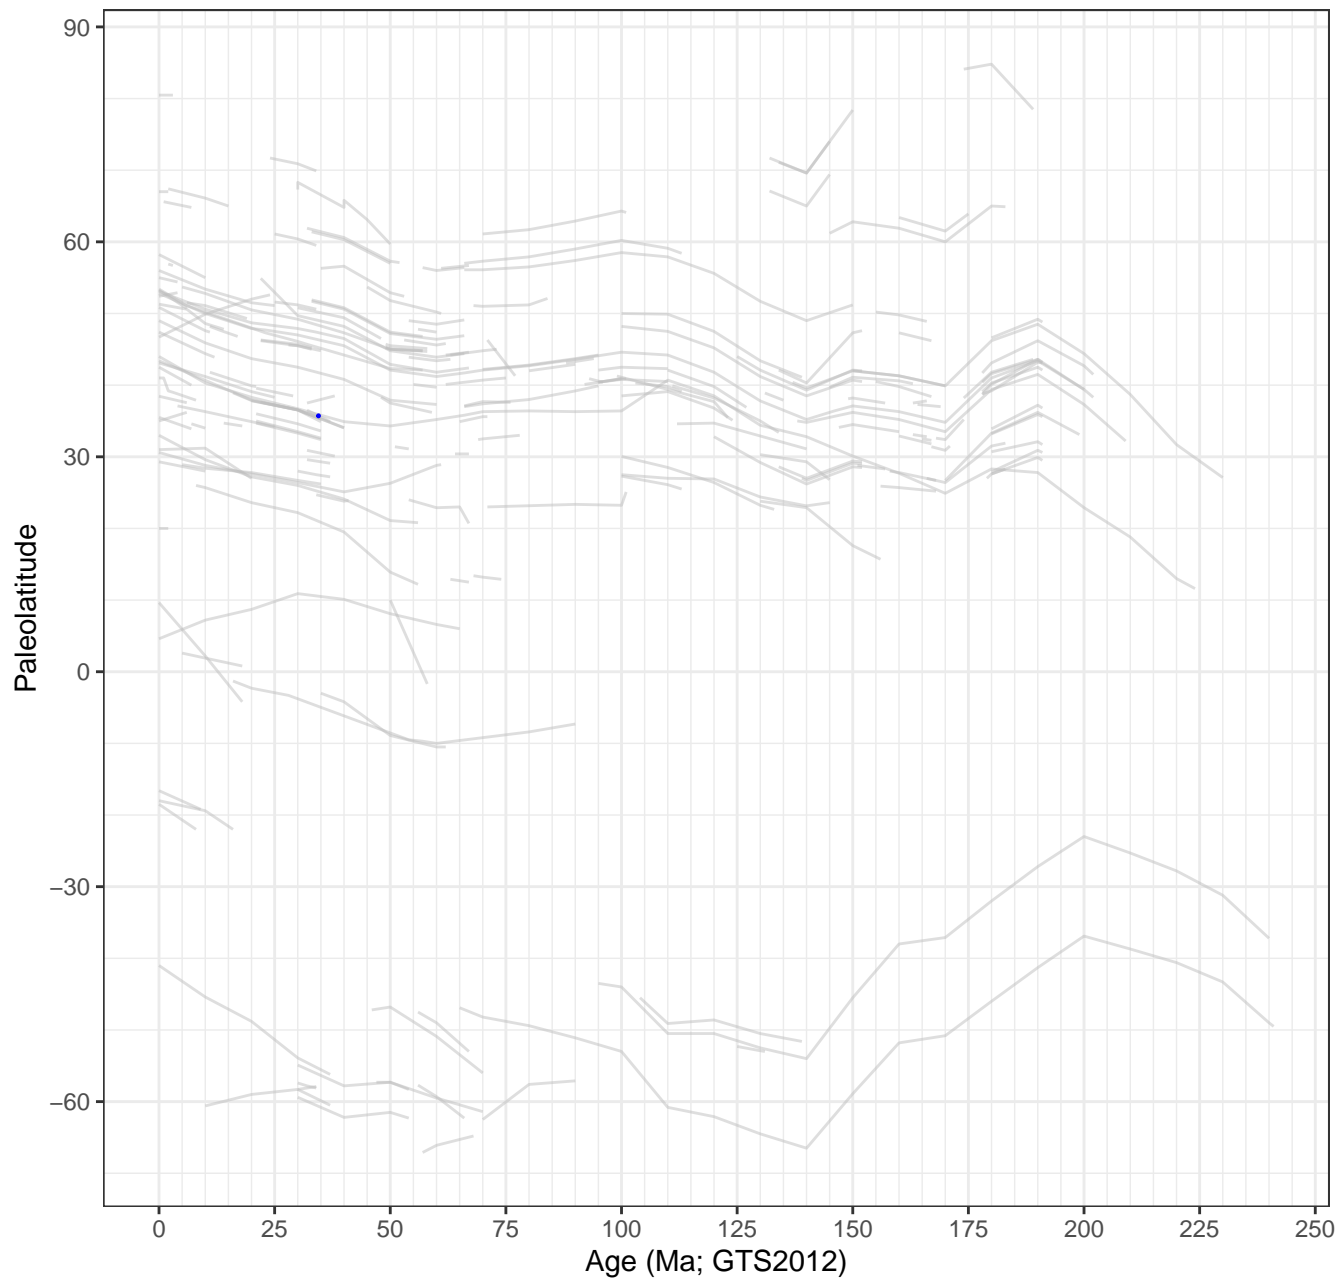

Supplement: Supplementary file 1472 [file Geiselodinium tenerum.pdf › Supplement/Supplement 2/Species 1914 plots/Geiselodinium tenerum.pdf]

# Species *Gelatia inflata*

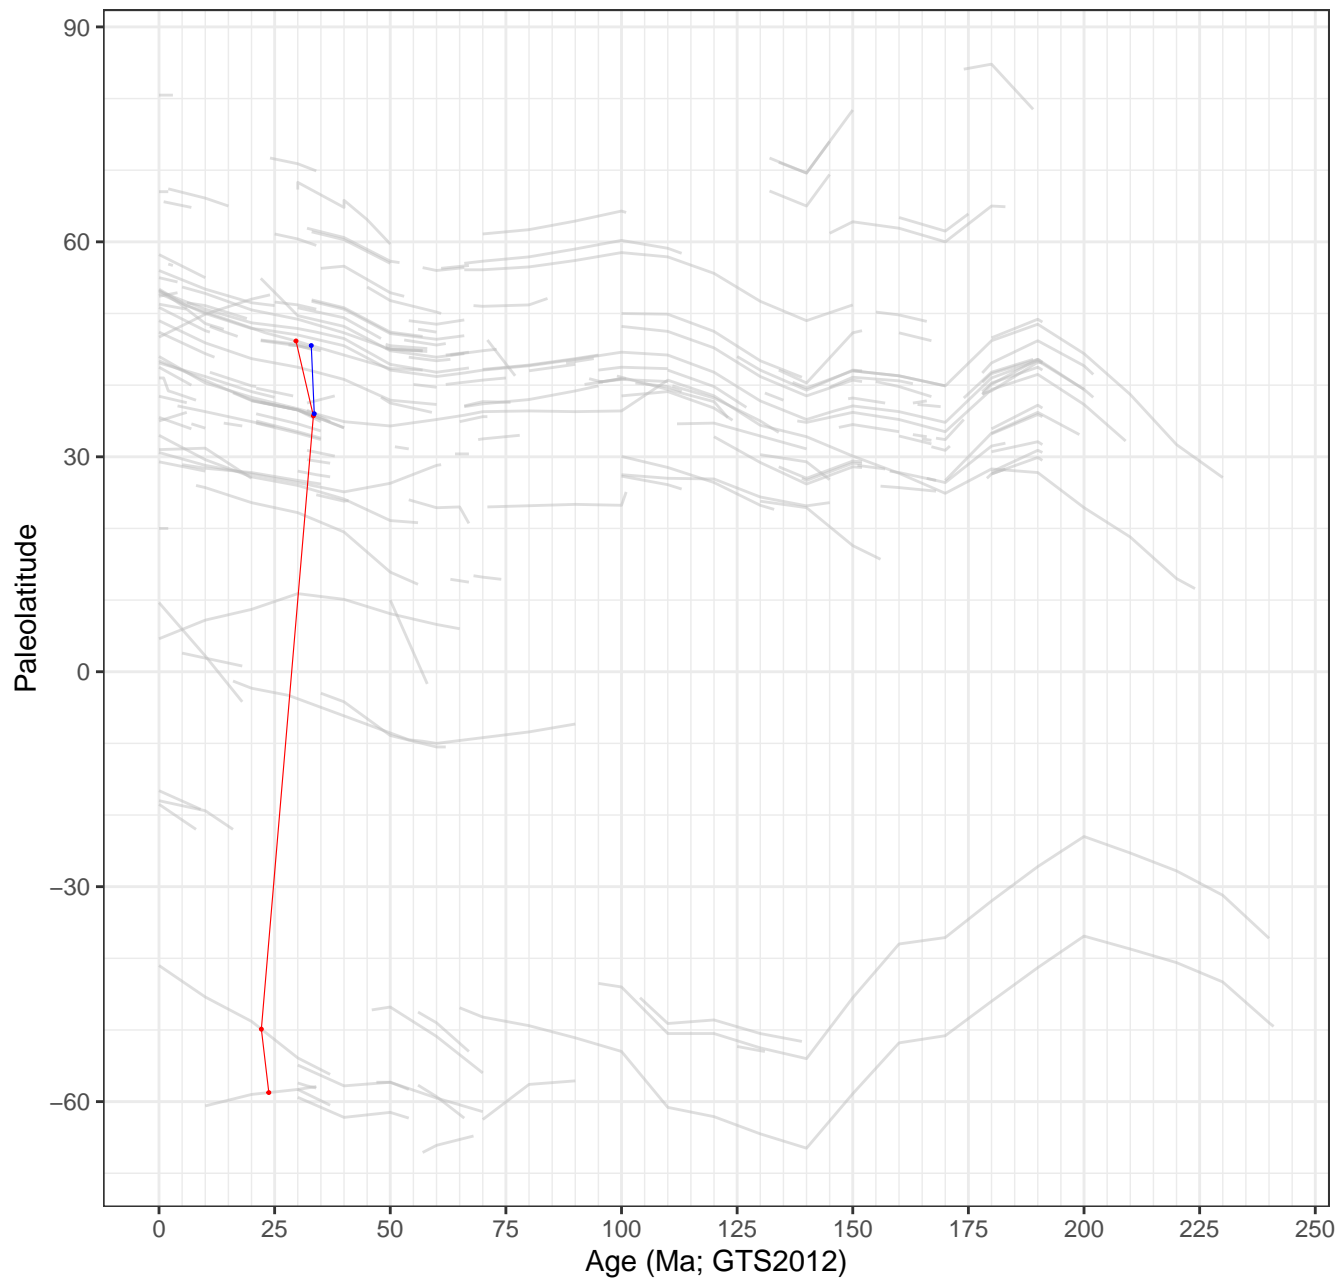

Supplement: Supplementary file 1473 [file Gelatia inflata.pdf › Supplement/Supplement 2/Species 1914 plots/Gelatia inflata.pdf]

# Species *Gerdiocysta conopeum*

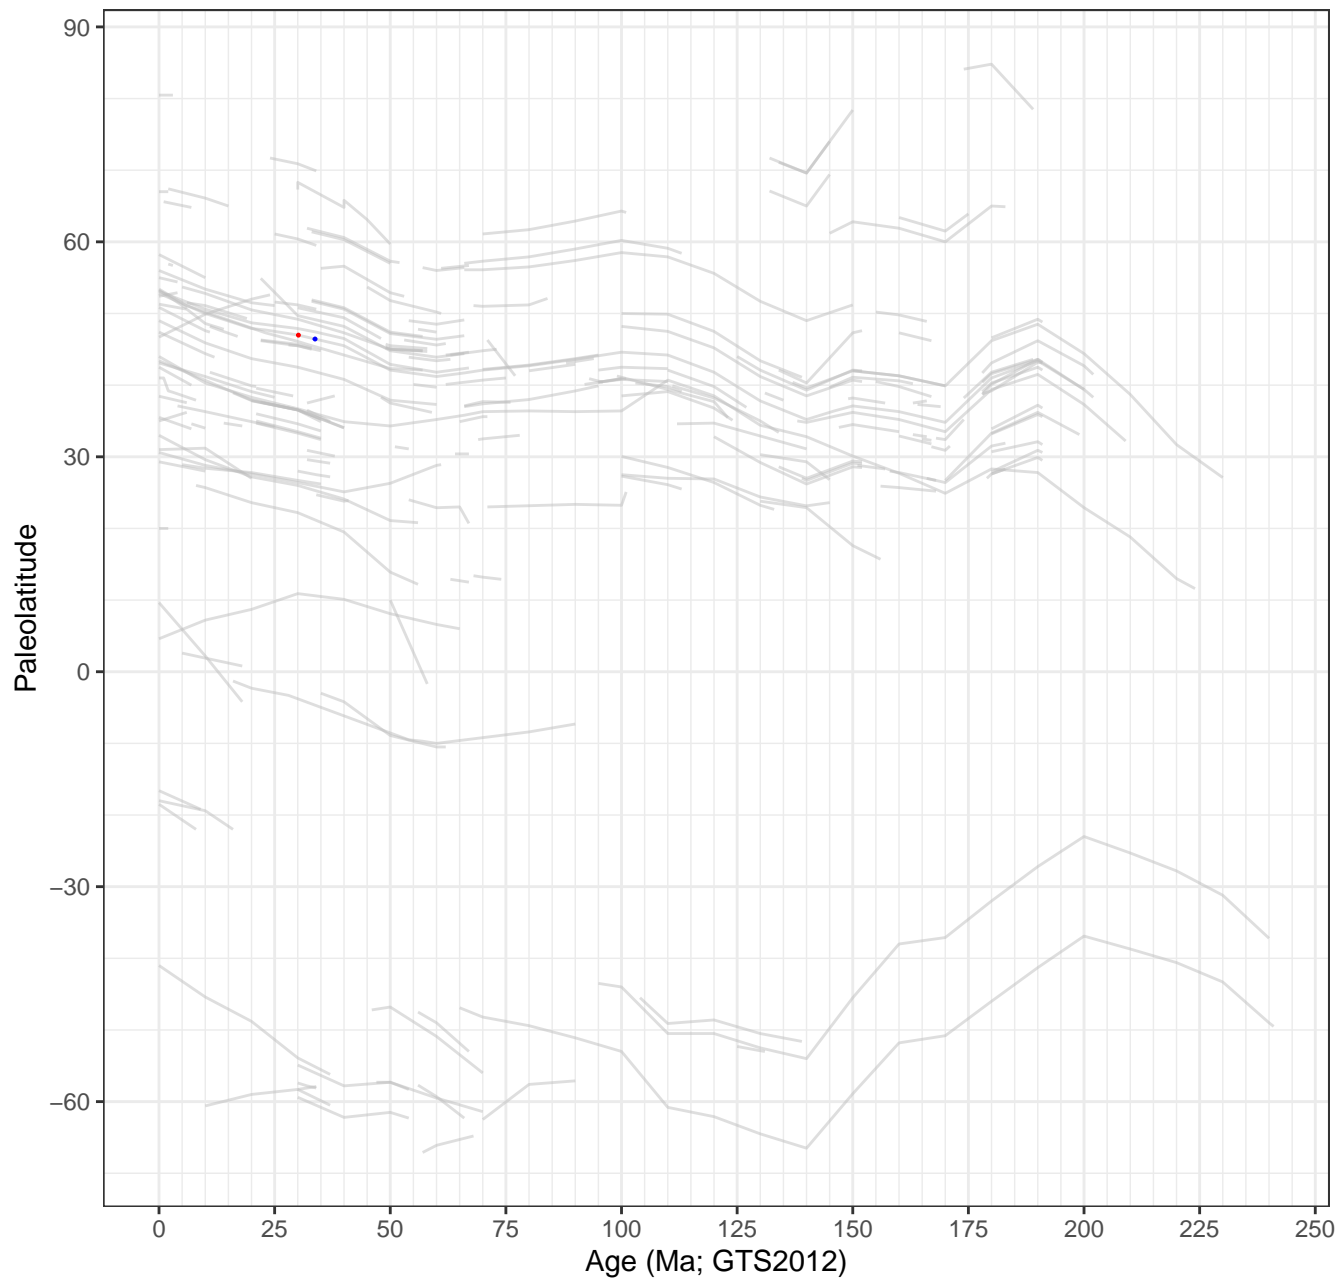

Supplement: Supplementary file 1474 [file Gerdiocysta conopeum.pdf › Supplement/Supplement 2/Species 1914 plots/Gerdiocysta conopeum.pdf]

# Species *Gerlachidium aechomorphum*

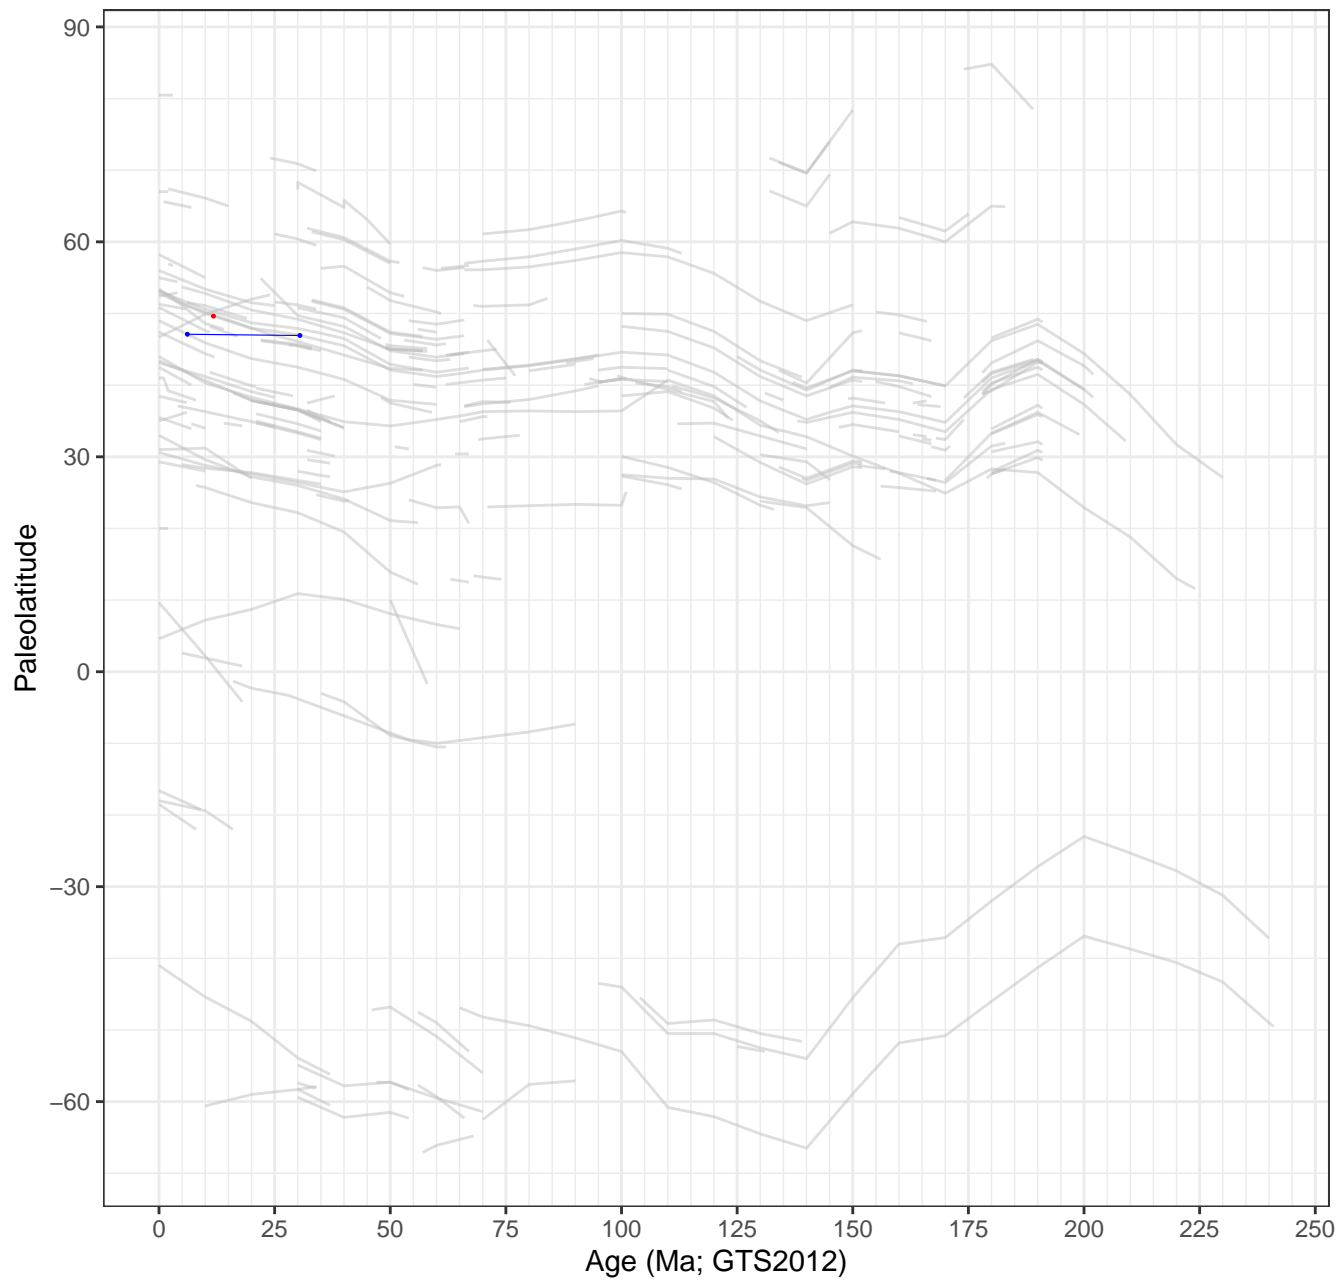

Supplement: Supplementary file 1475 [file Gerlachidium aechomorphum.pdf › Supplement/Supplement 2/Species 1914 plots/Gerlachidium aechomorphum.pdf]

# Species *Gillinia denticulata*

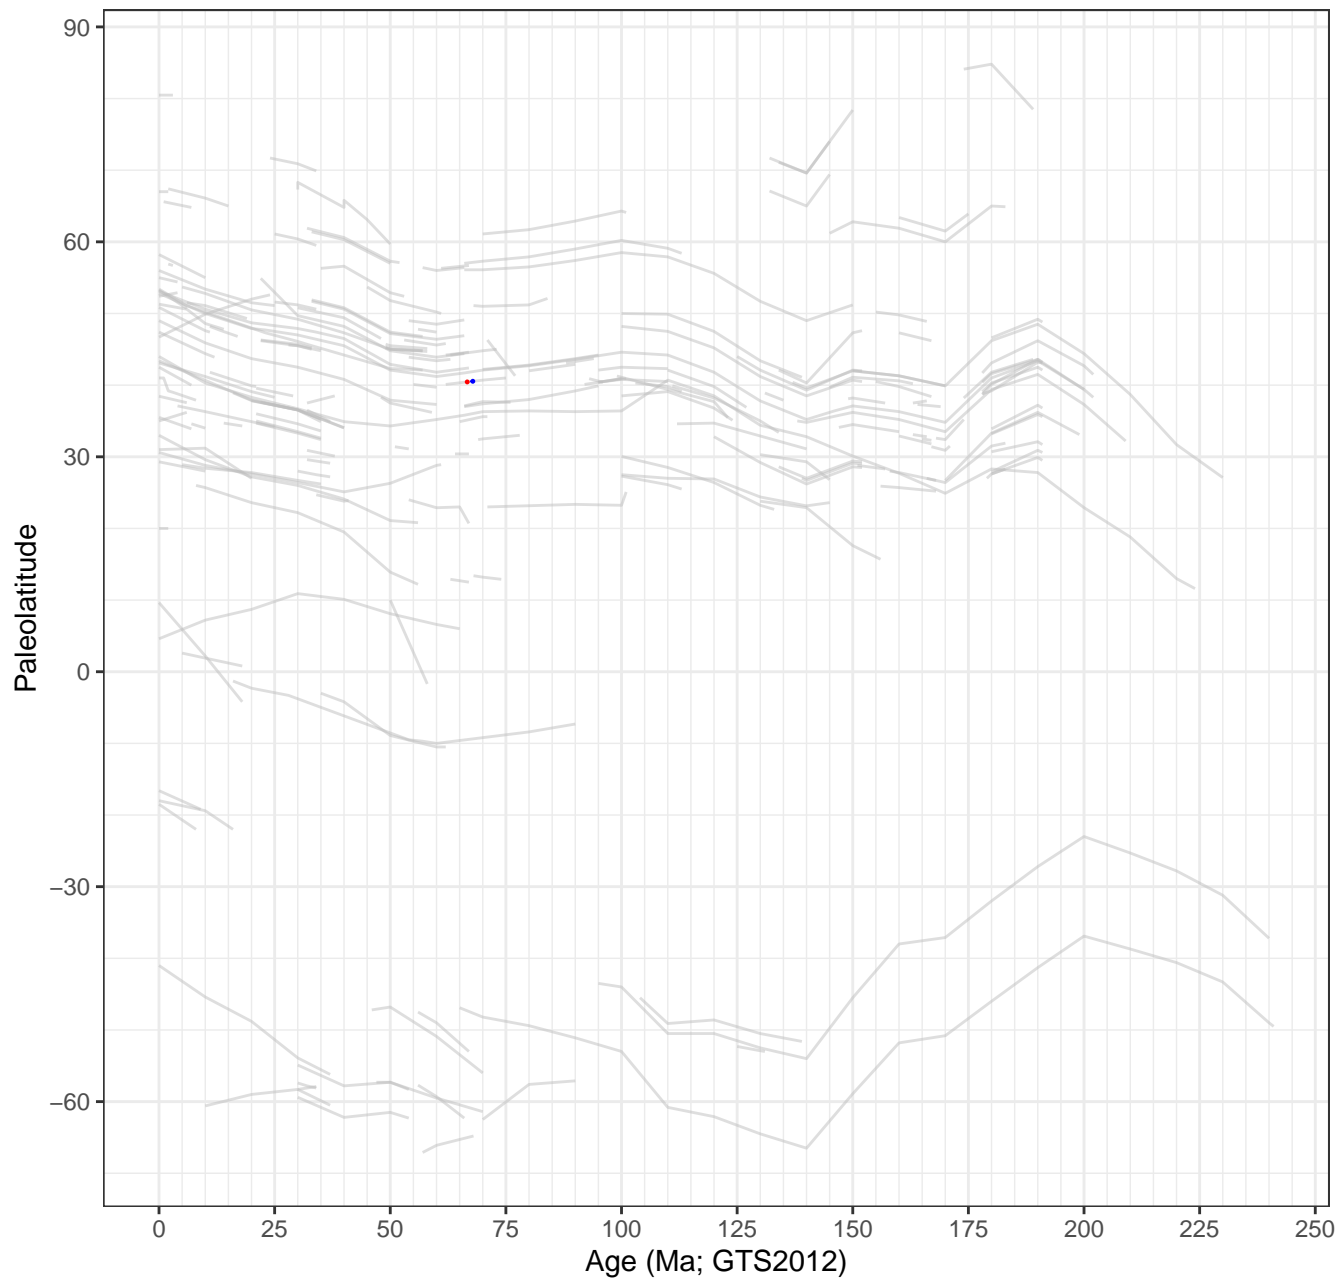

Supplement: Supplementary file 1476 [file Gillinia denticulata.pdf › Supplement/Supplement 2/Species 1914 plots/Gillinia denticulata.pdf]

# Species *Gillinia hymenophora*

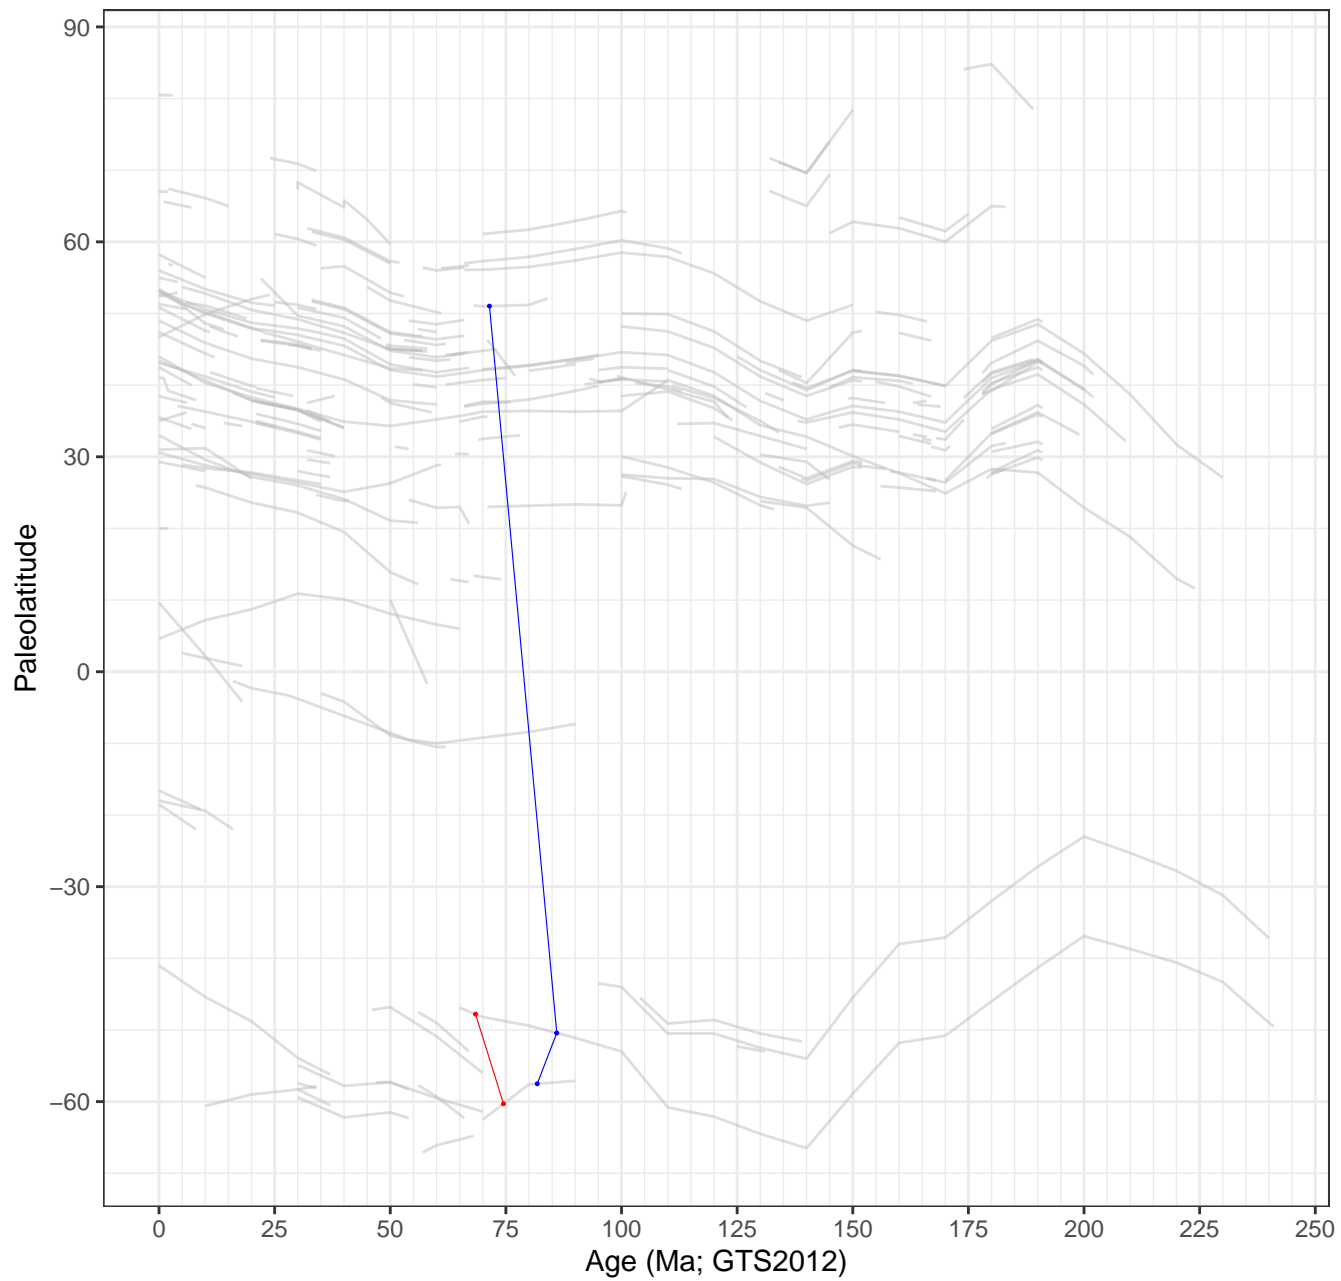

Supplement: Supplementary file 1477 [file Gillinia hymenophora.pdf › Supplement/Supplement 2/Species 1914 plots/Gillinia hymenophora.pdf]

# Species *Gingiodinium evittii*

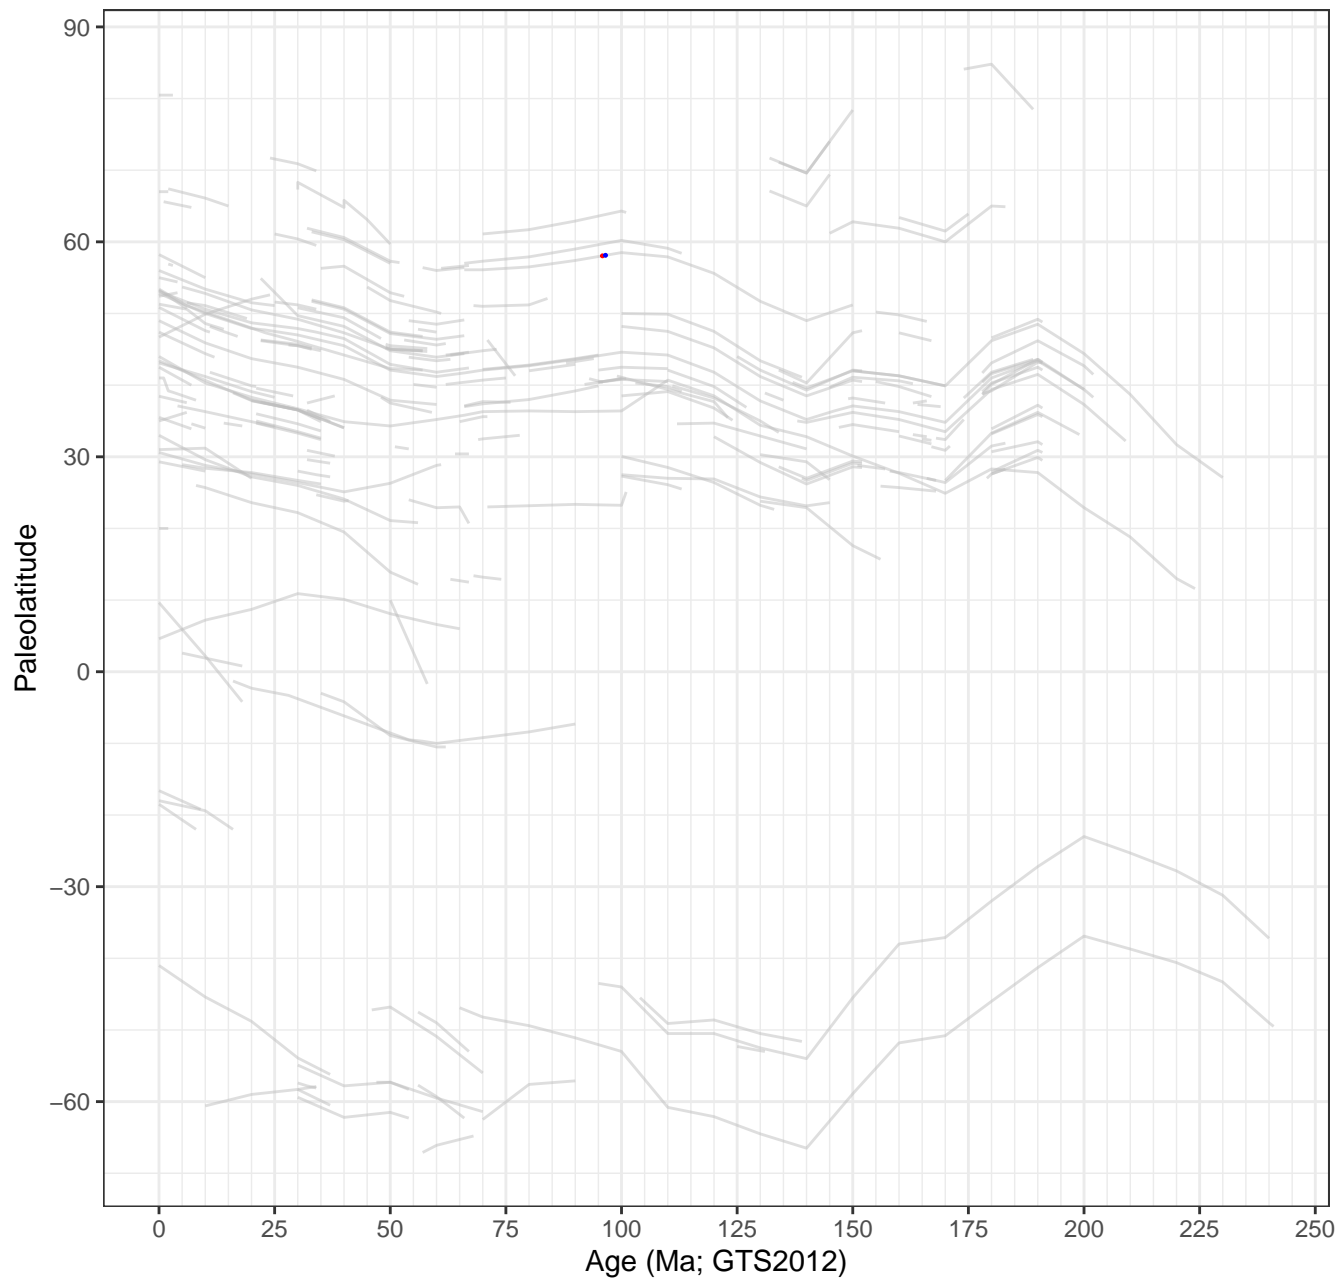

Supplement: Supplementary file 1478 [file Ginginodinium evittii.pdf › Supplement/Supplement 2/Species 1914 plots/Ginginodinium evittii.pdf]

# Species *Glaphyrocysta castelcasiensis*

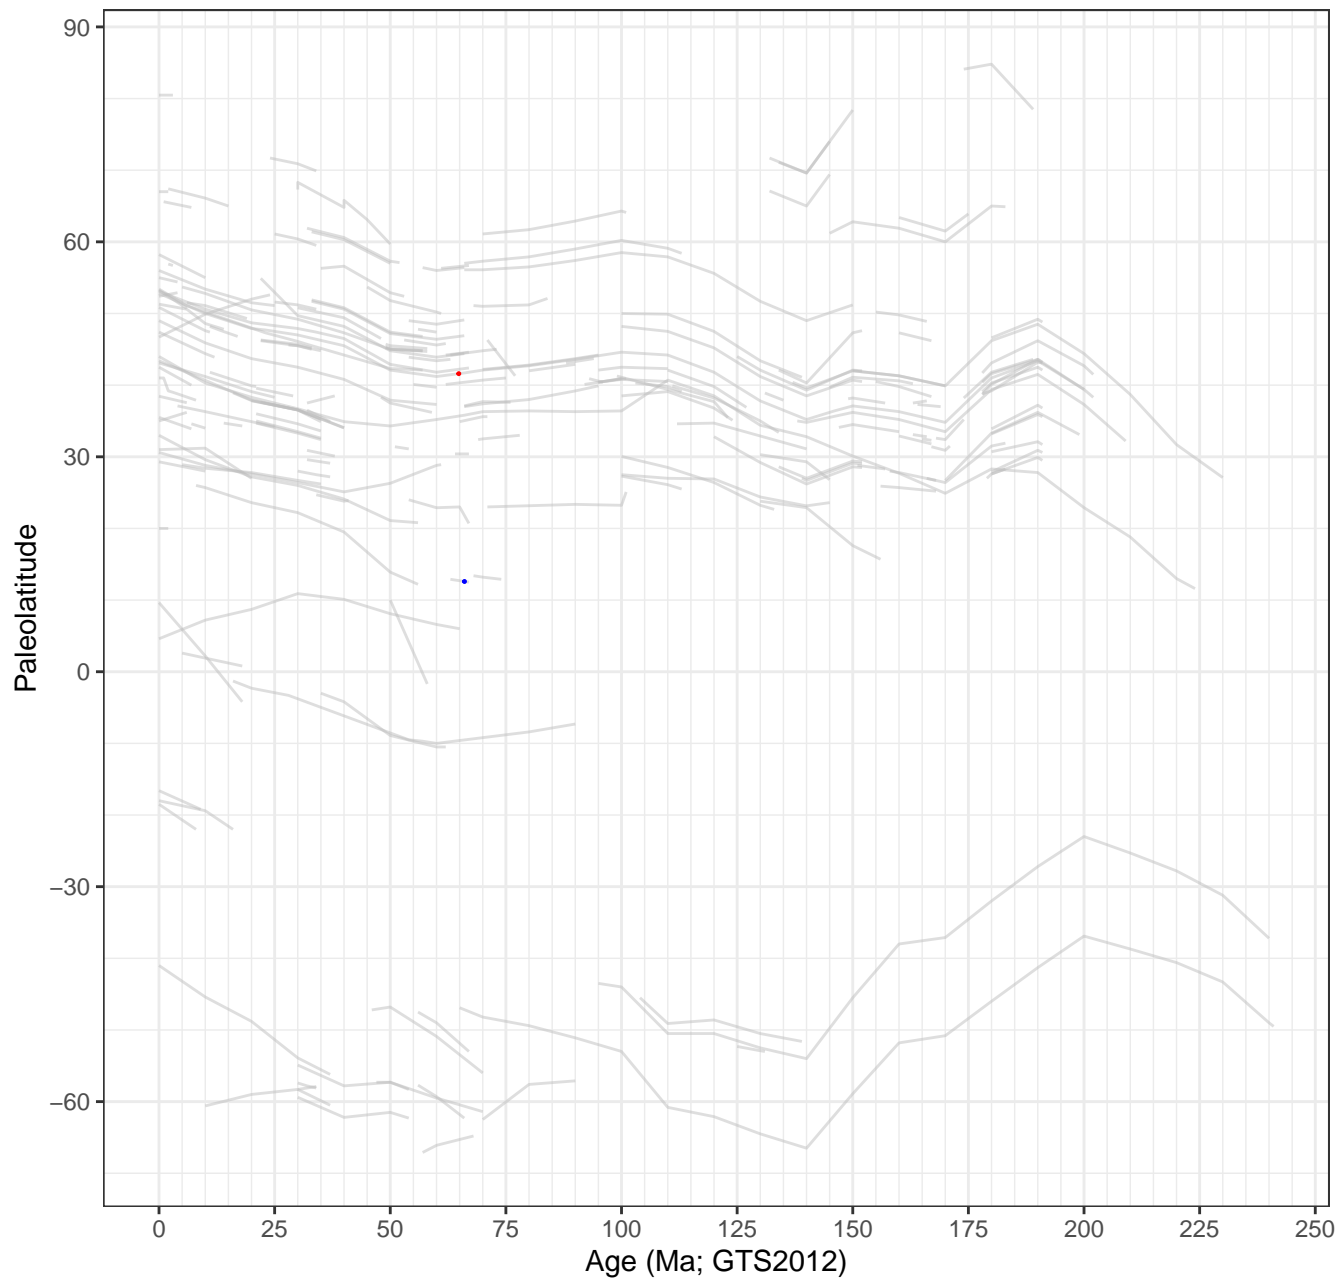

Supplement: Supplementary file 1479 [file Glaphyrocysta castelcasiensis.pdf › Supplement/Supplement 2/Species 1914 plots/Glaphyrocysta castelcasiensis.pdf]

# Species *Glaphyrocysta delicata*

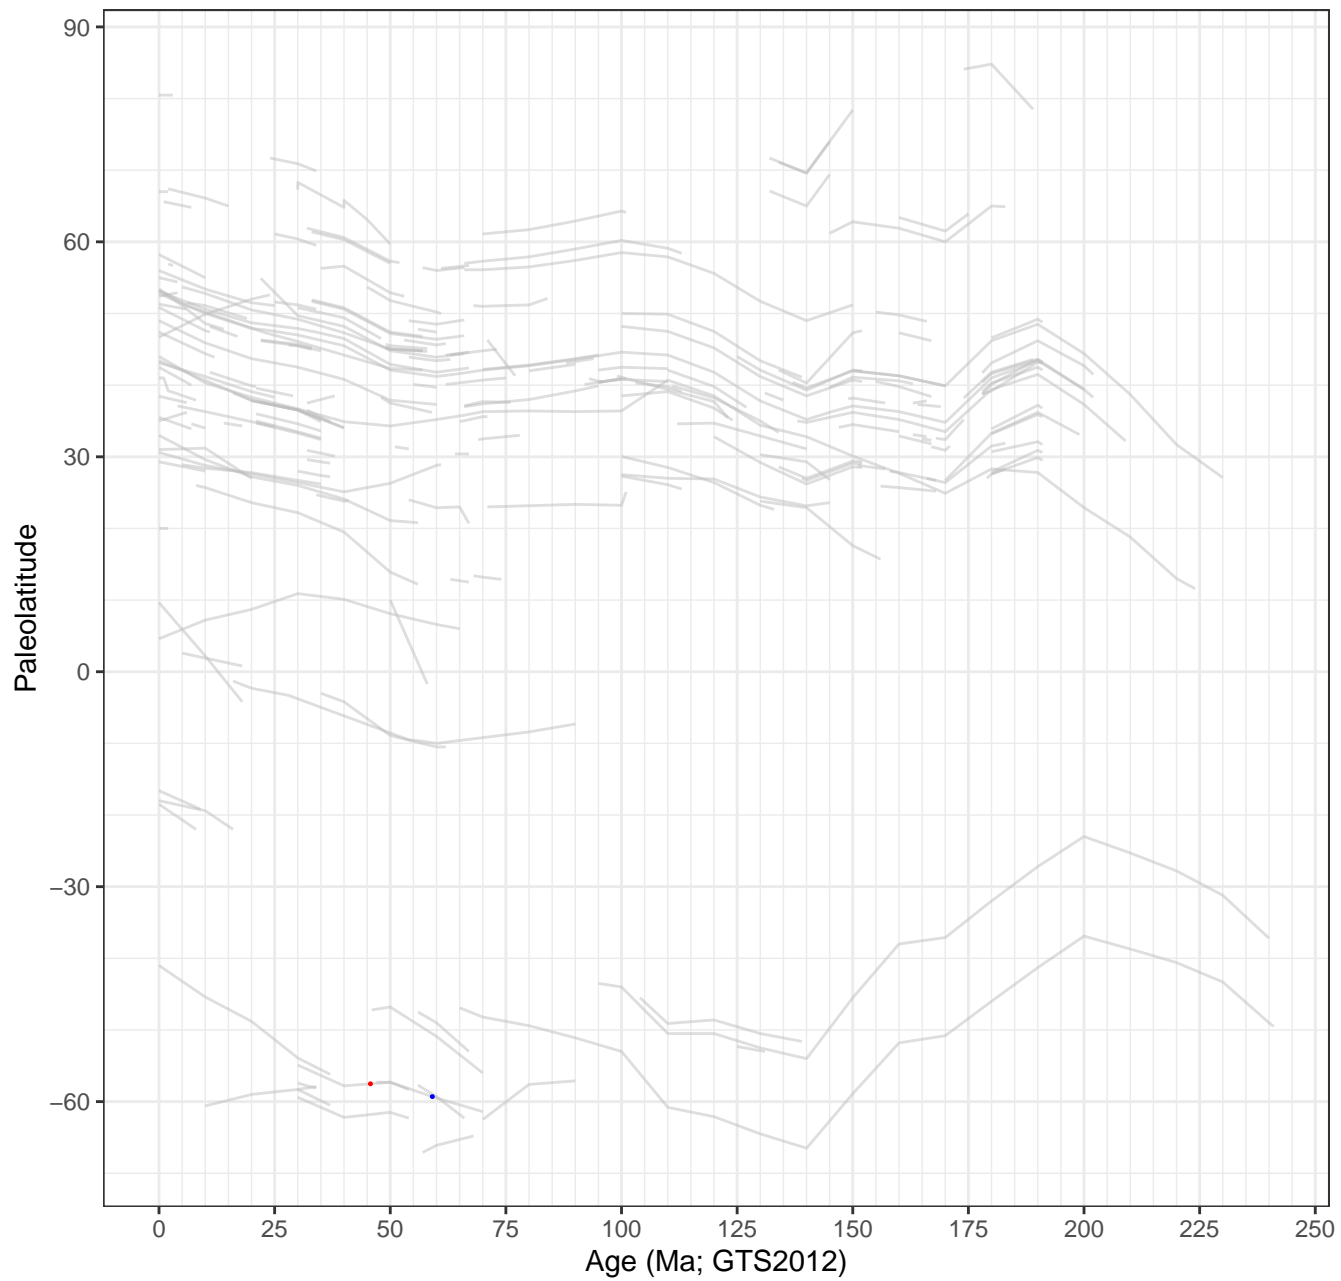

Supplement: Supplementary file 1480 [file Glaphyrocysta delicata.pdf › Supplement/Supplement 2/Species 1914 plots/Glaphyrocysta delicata.pdf]

# Species *Glaphyrocysta divaricata*

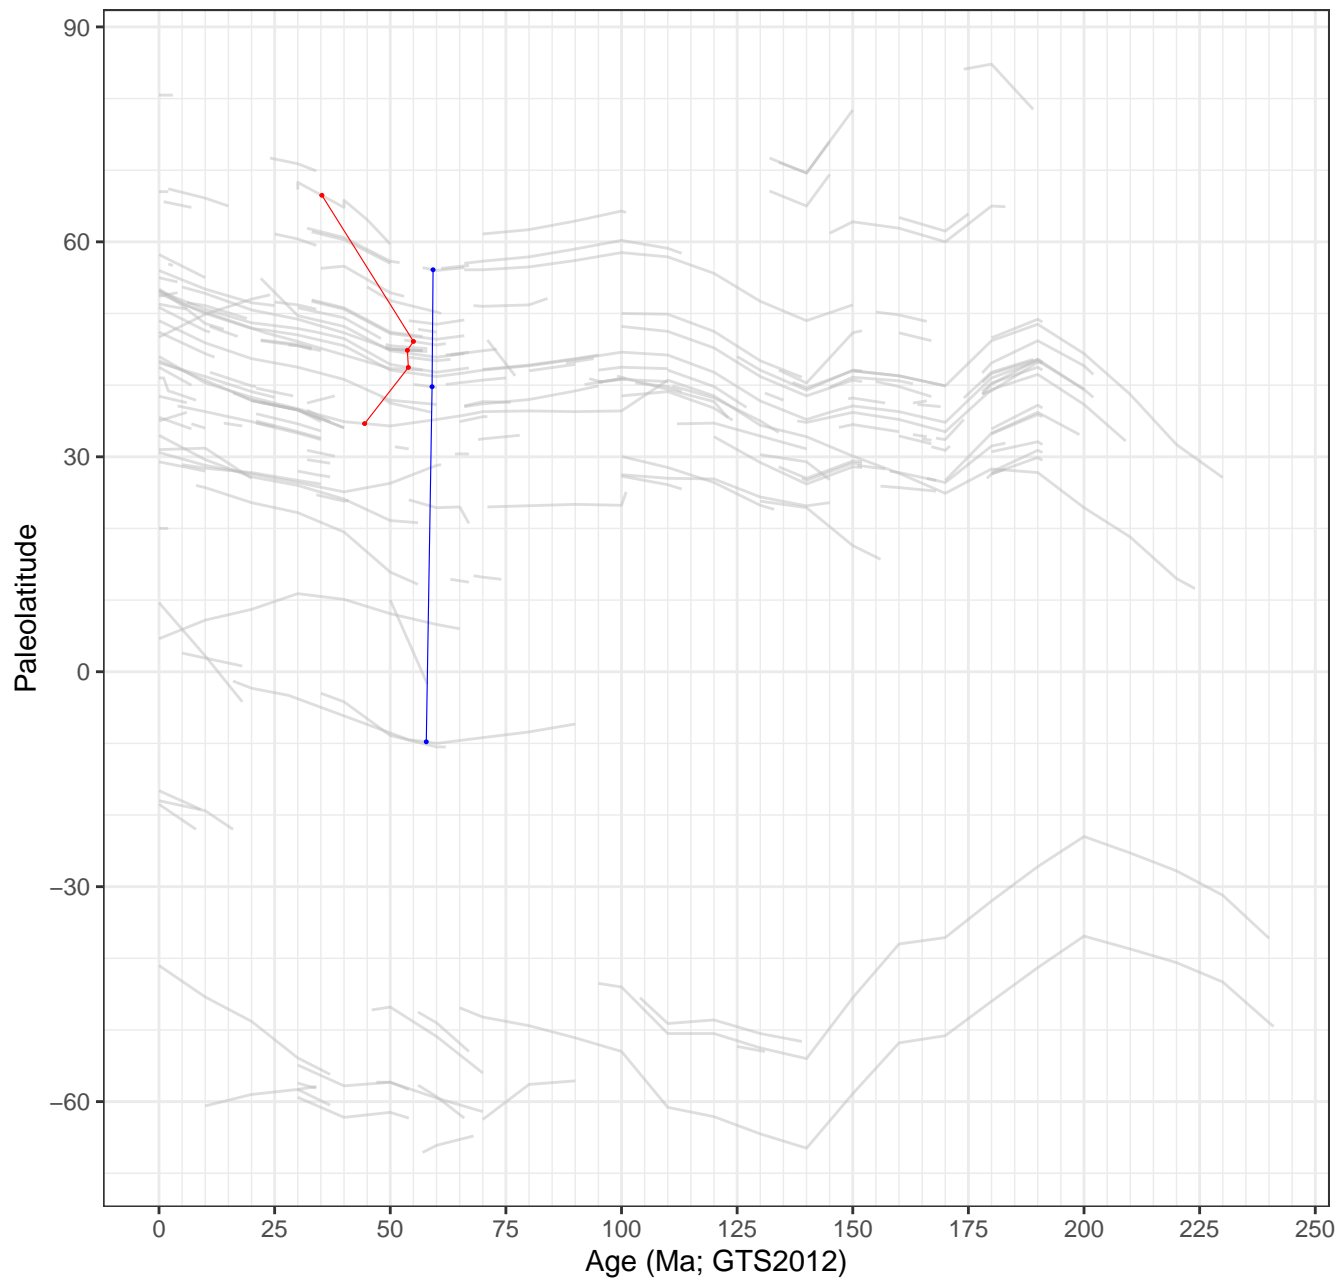

Supplement: Supplementary file 1481 [file Glaphyrocysta divaricata.pdf › Supplement/Supplement 2/Species 1914 plots/Glaphyrocysta divaricata.pdf]

# Species *Glaphyrocysta extensa*

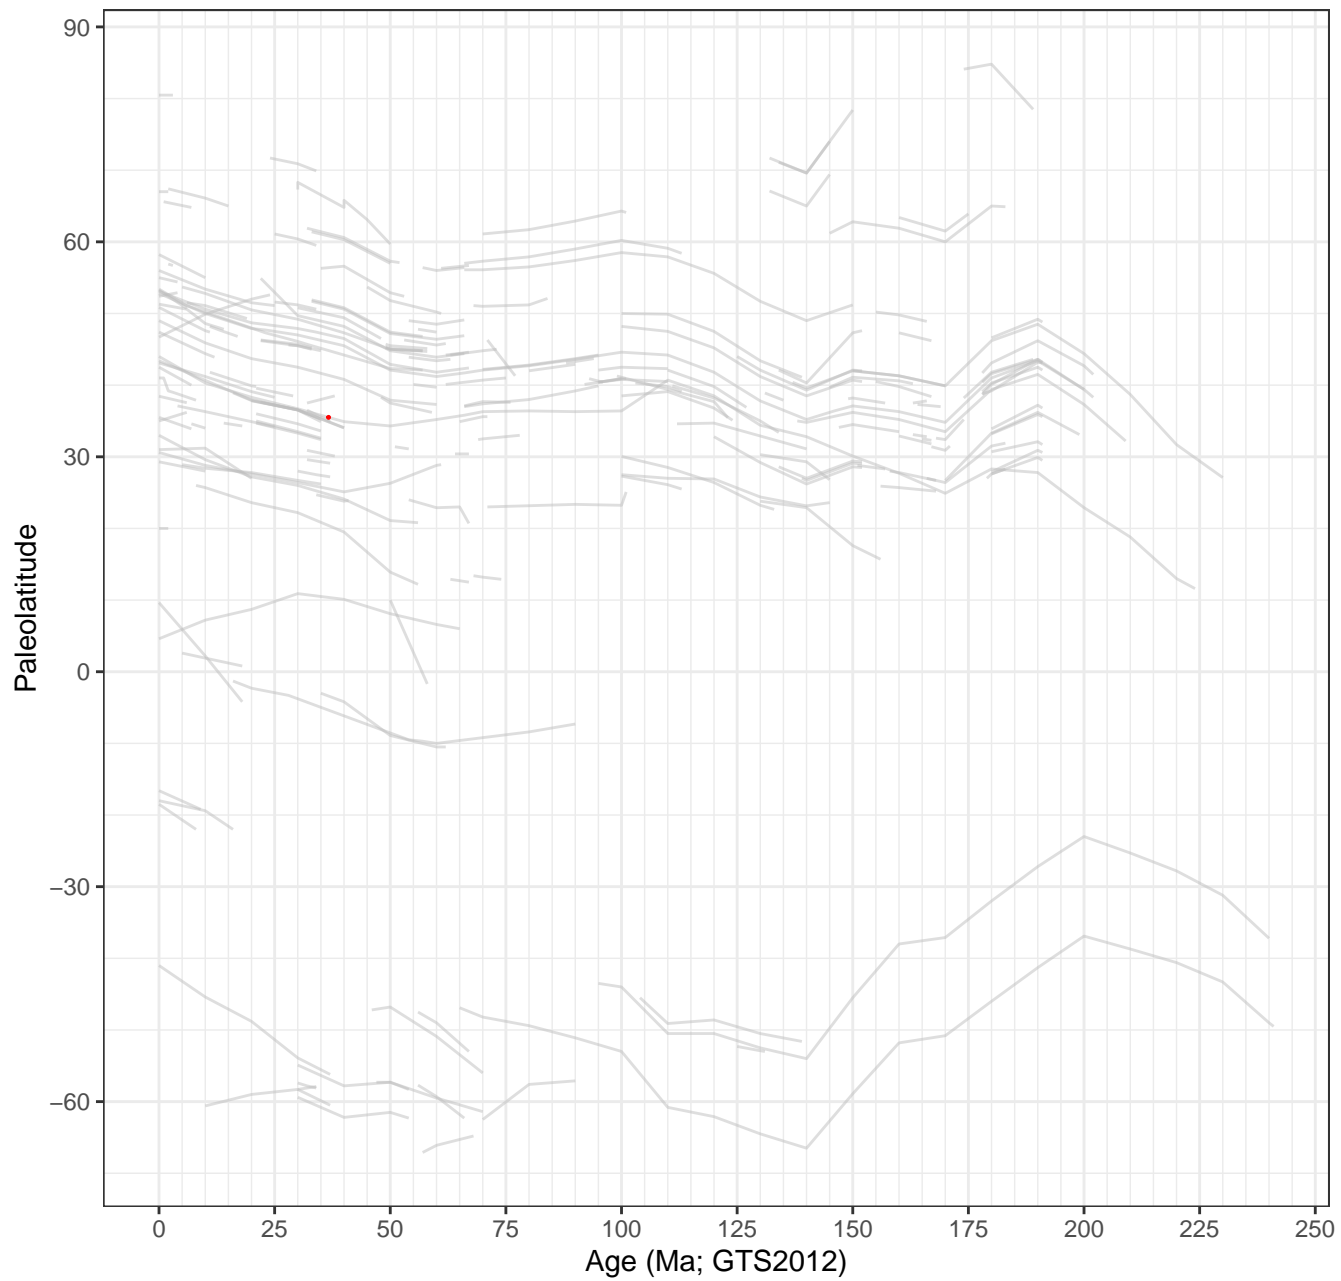

Supplement: Supplementary file 1482 [file Glaphyrocysta extensa.pdf › Supplement/Supplement 2/Species 1914 plots/Glaphyrocysta extensa.pdf]

# Species *Glaphyrocysta exuberans*

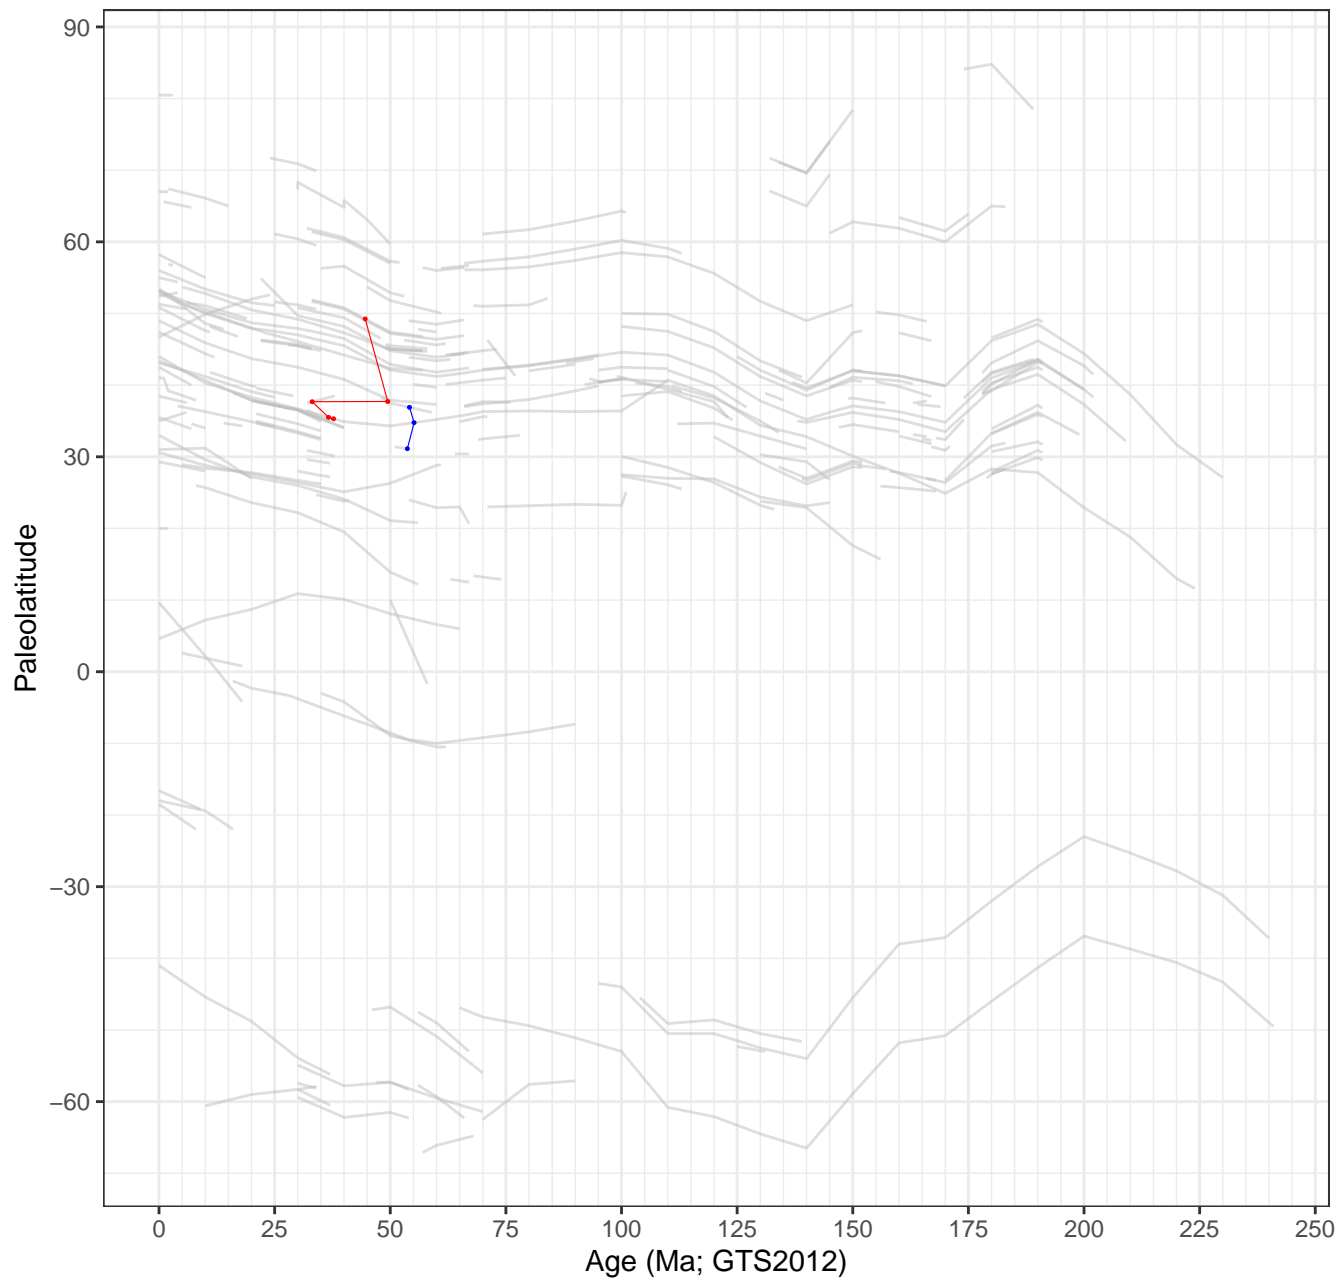

Supplement: Supplementary file 1483 [file Glaphyrocysta exuberans.pdf › Supplement/Supplement 2/Species 1914 plots/Glaphyrocysta exuberans.pdf]

# Species *Glaphyrocysta intricata*

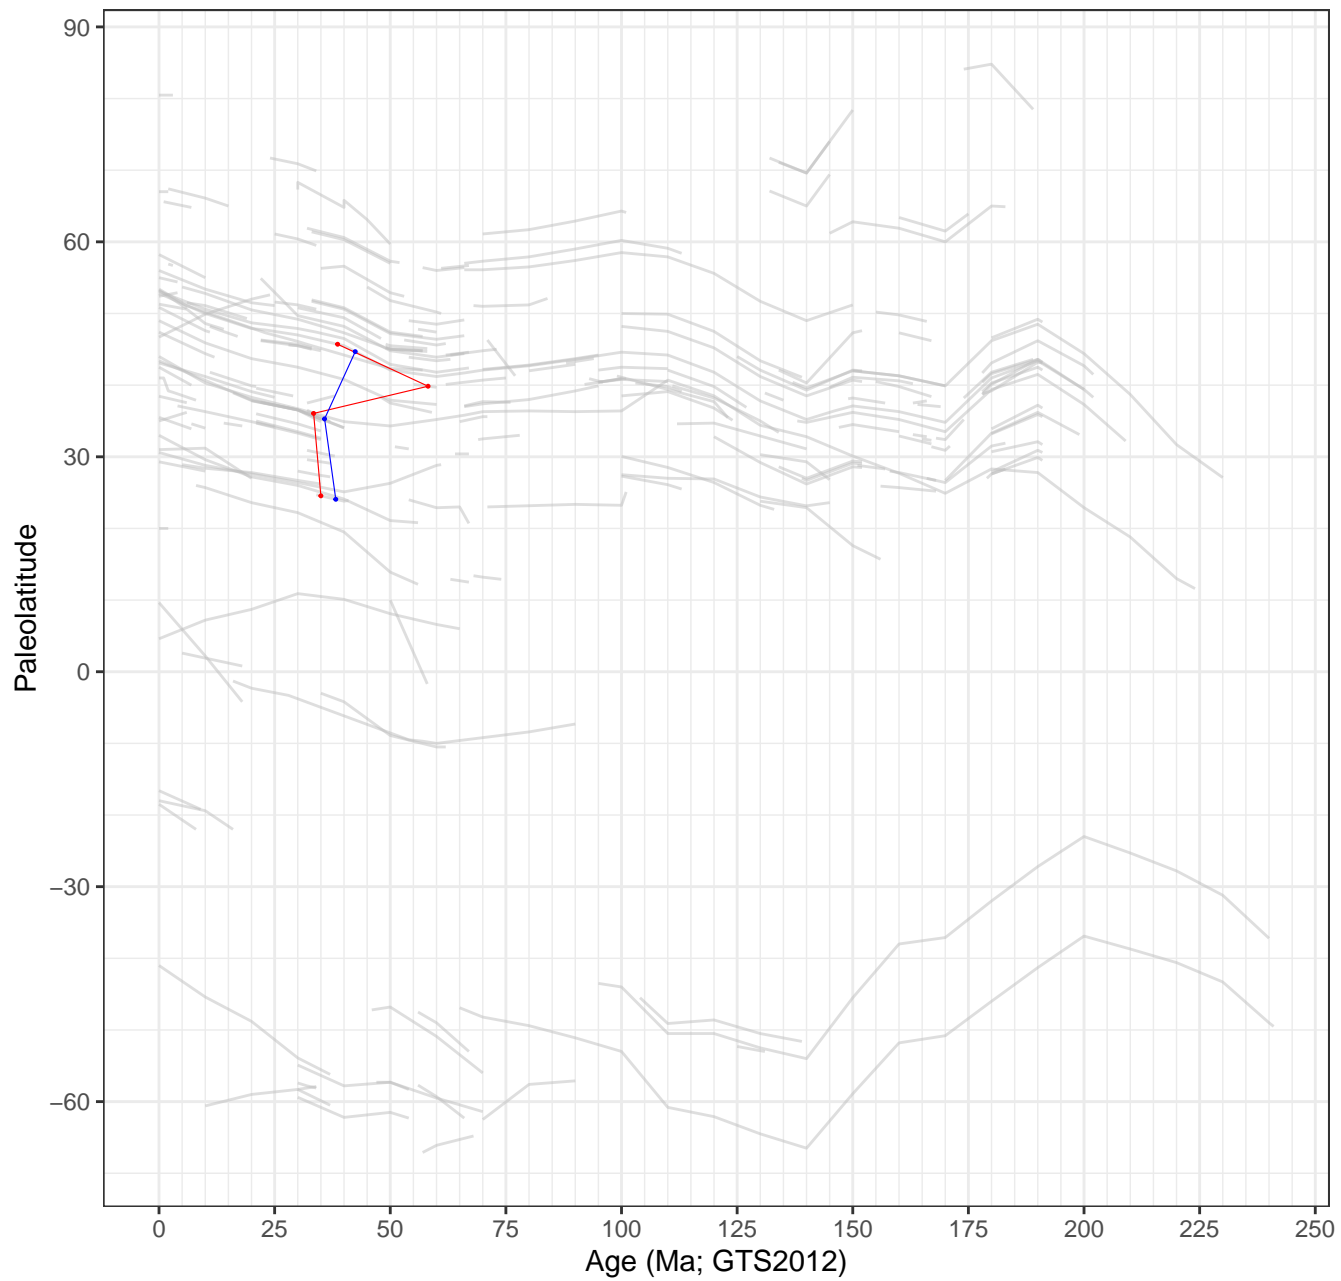

Supplement: Supplementary file 1484 [file Glaphyrocysta intricata.pdf › Supplement/Supplement 2/Species 1914 plots/Glaphyrocysta intricata.pdf]

# Species *Glaphyrocysta laciniformis*

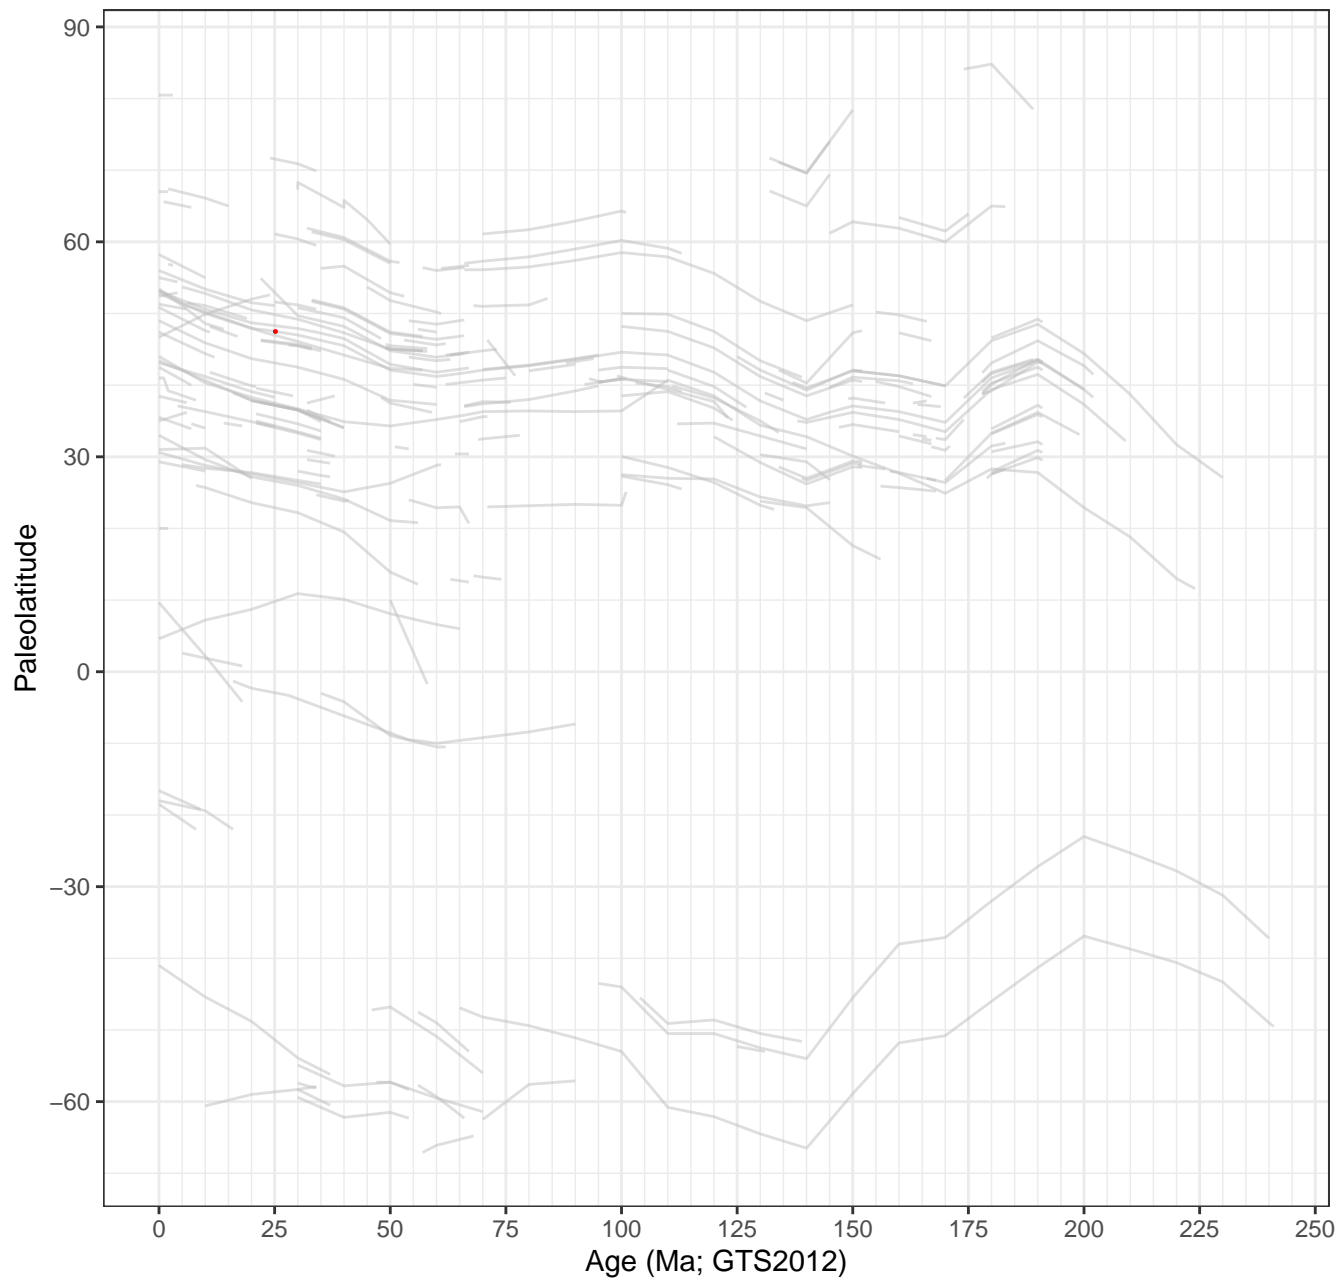

Supplement: Supplementary file 1485 [file Glaphyrocysta laciiniformis.pdf › Supplement/Supplement 2/Species 1914 plots/Glaphyrocysta laciiniformis.pdf]

# Species *Glaphyrocysta microfenestrata*

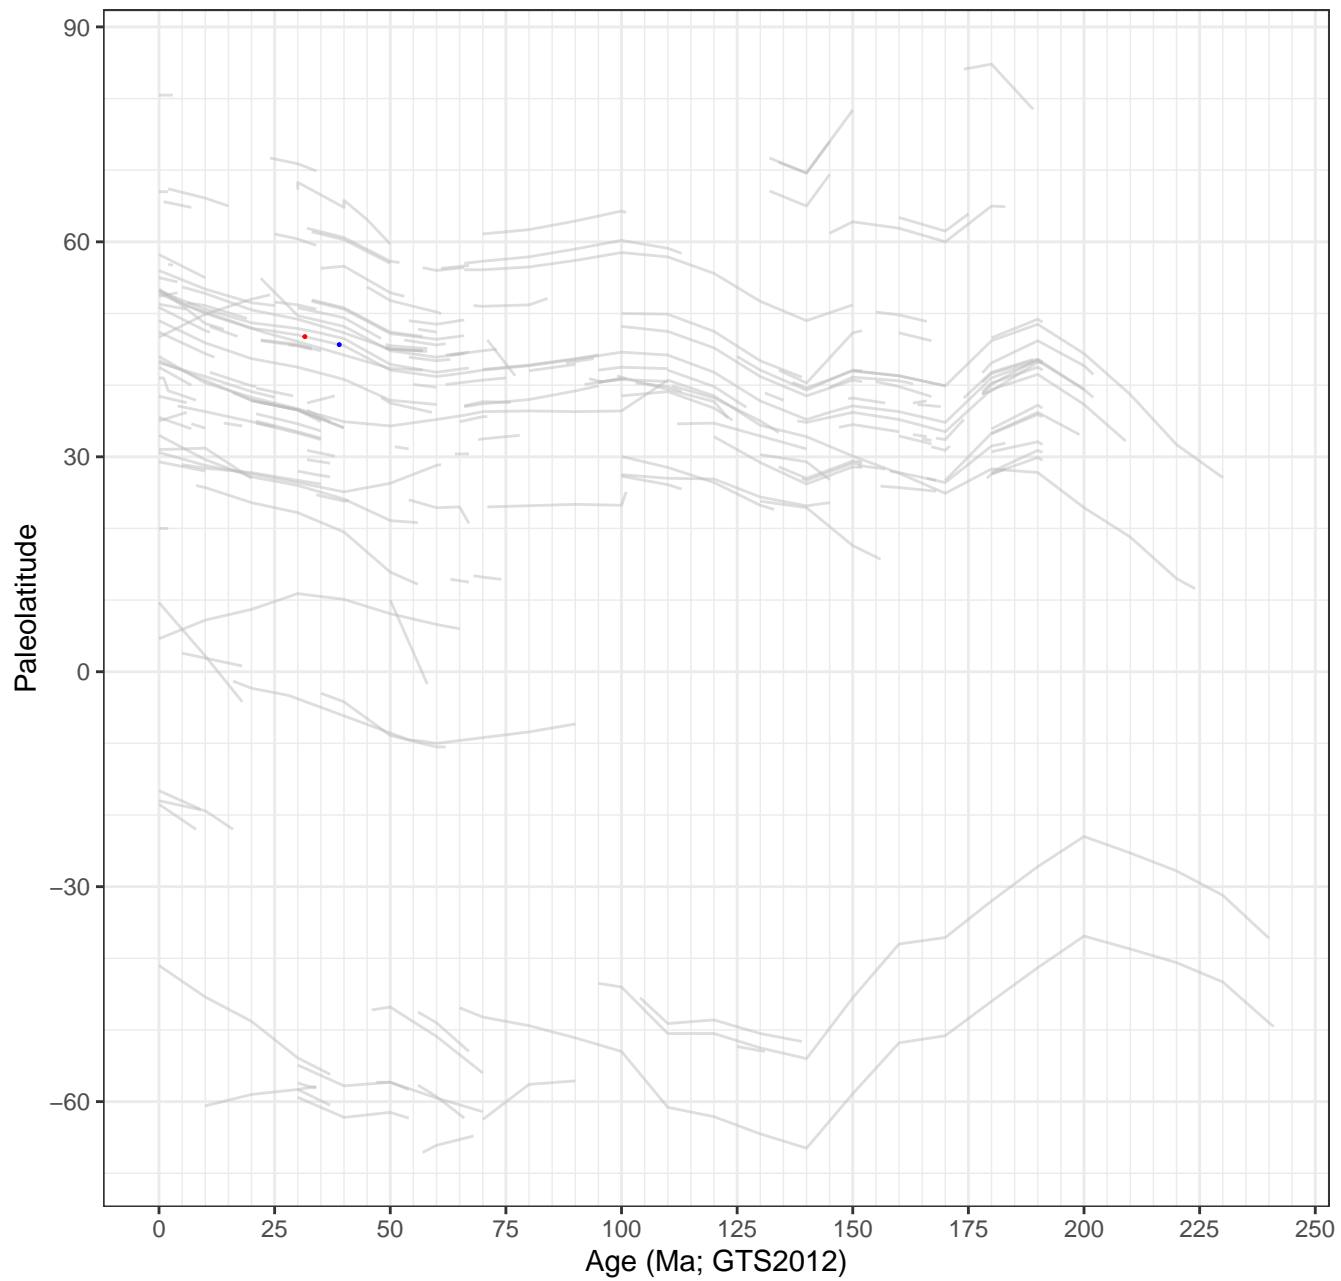

Supplement: Supplementary file 1486 [file Glaphyrocysta microfenestrata.pdf › Supplement/Supplement 2/Species 1914 plots/Glaphyrocysta microfenestrata.pdf]

# Species *Glaphyrocysta ordinata*

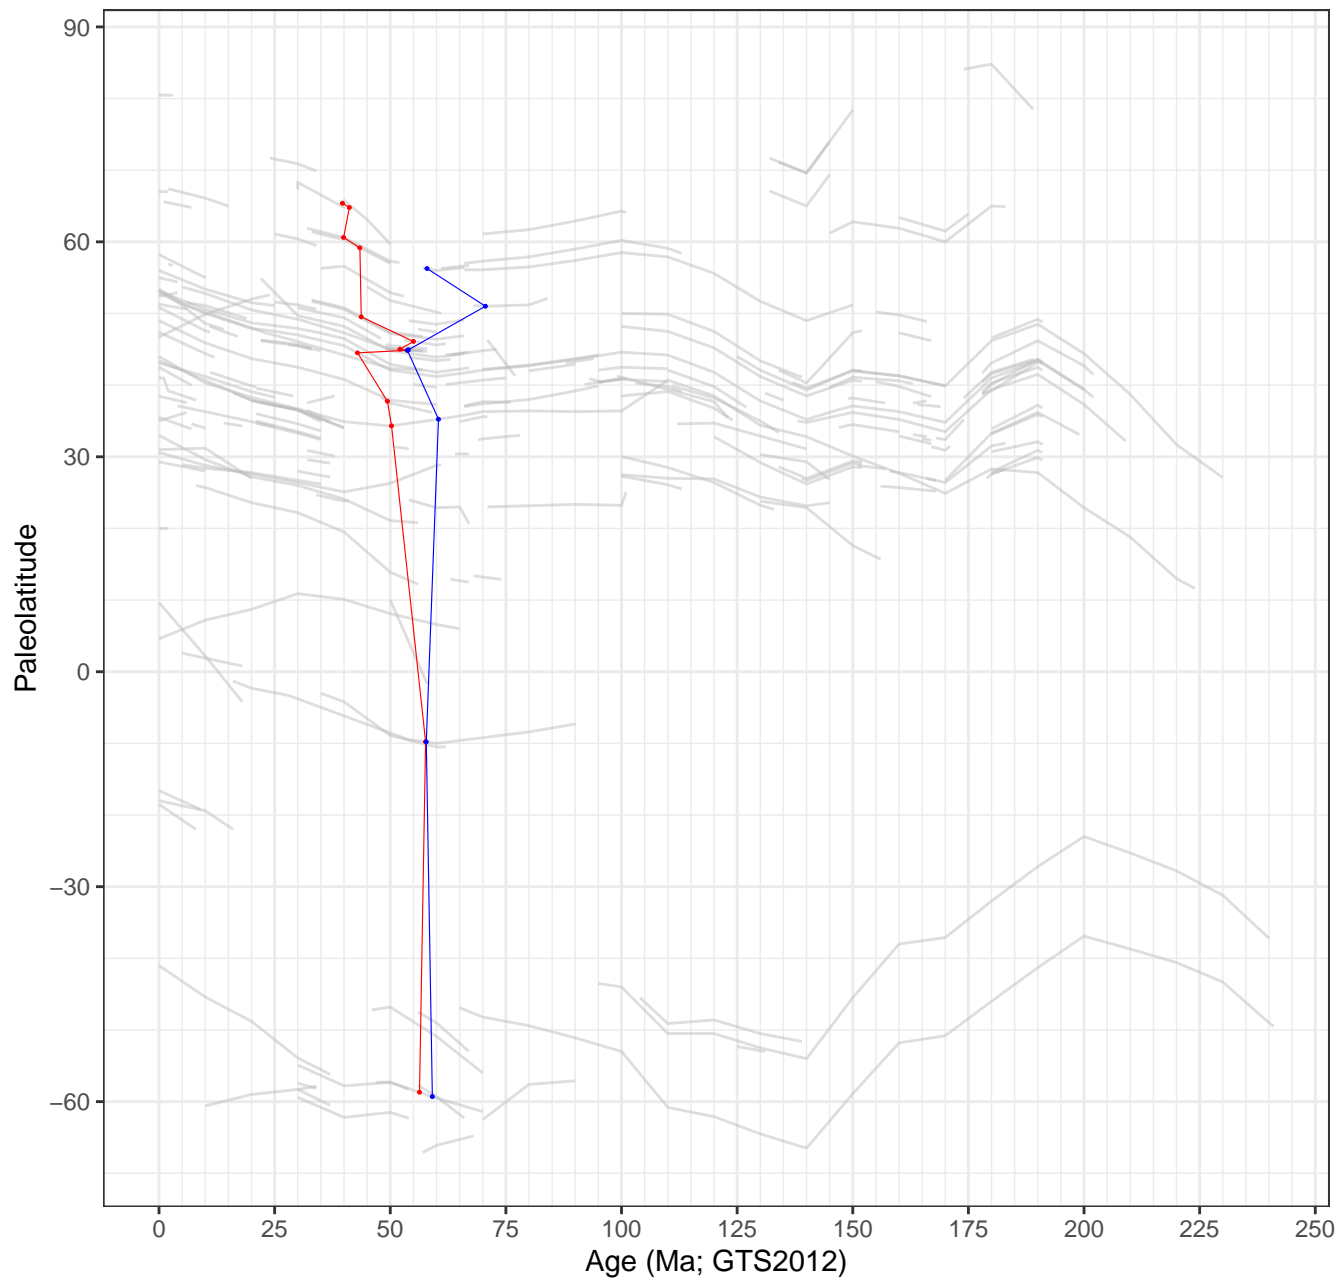

Supplement: Supplementary file 1487 [file Glaphyrocysta ordinata.pdf › Supplement/Supplement 2/Species 1914 plots/Glaphyrocysta ordinata.pdf]

# Species *Glaphyrocysta pastielsii*

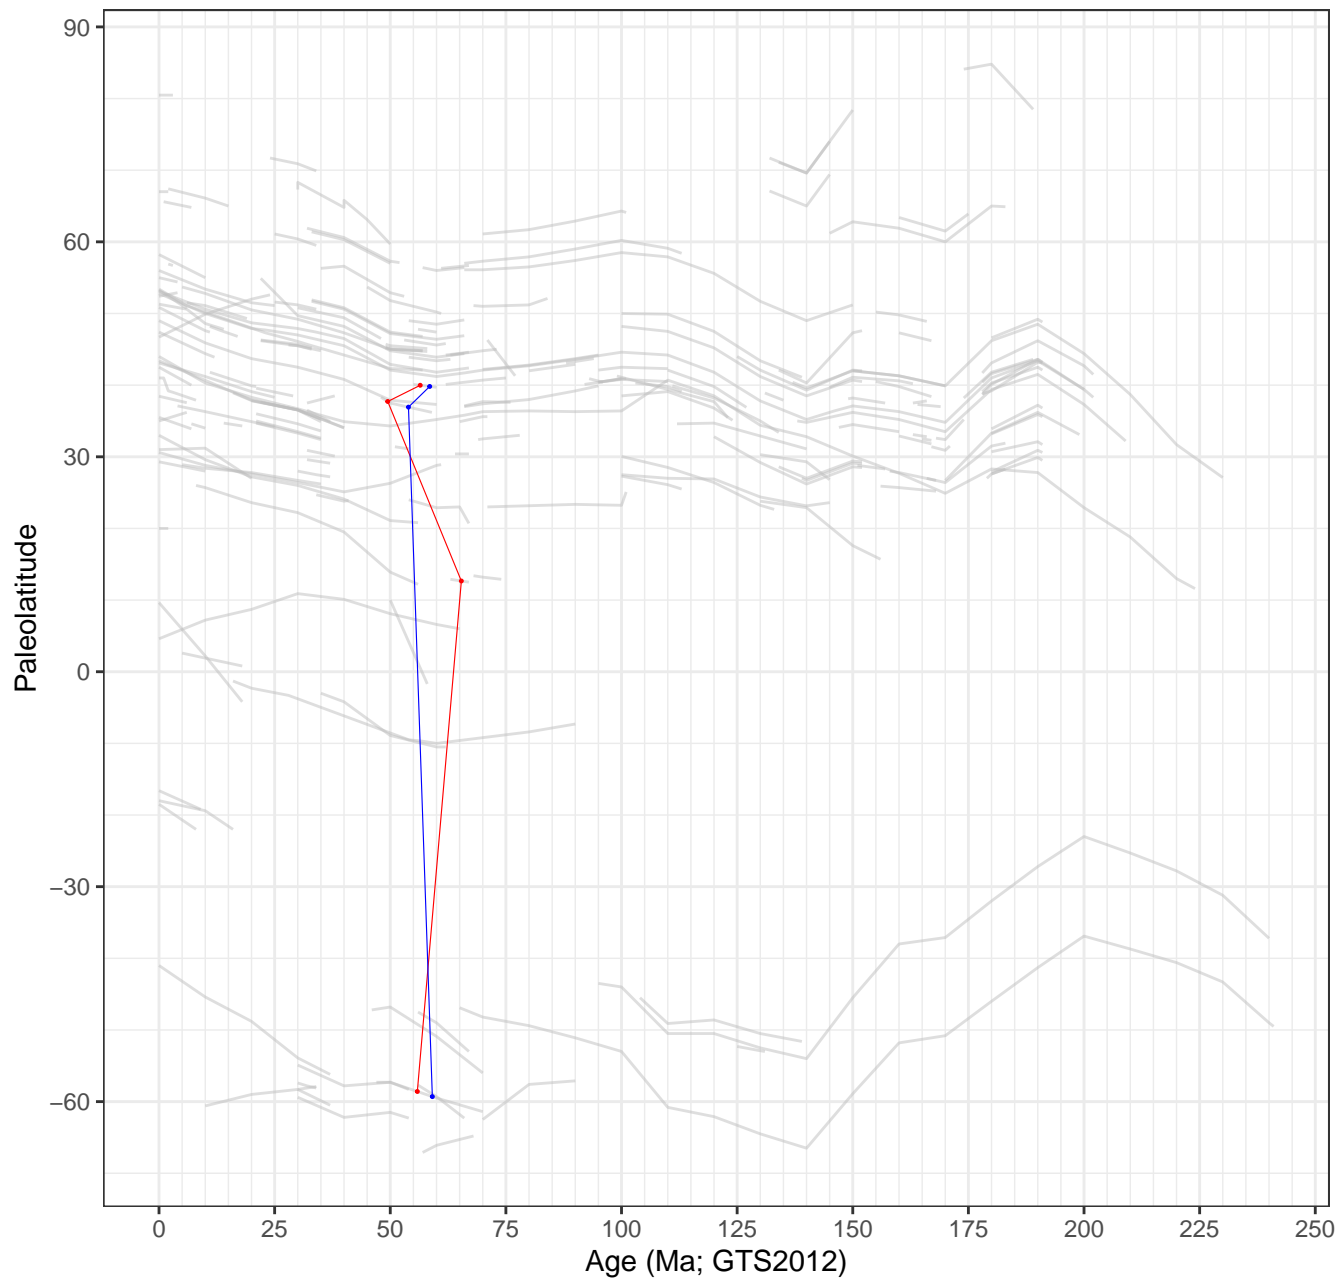

Supplement: Supplementary file 1488 [file Glaphyrocysta pastielsii.pdf › Supplement/Supplement 2/Species 1914 plots/Glaphyrocysta pastielsii.pdf]

# Species *Glaphyrocysta paupercula*

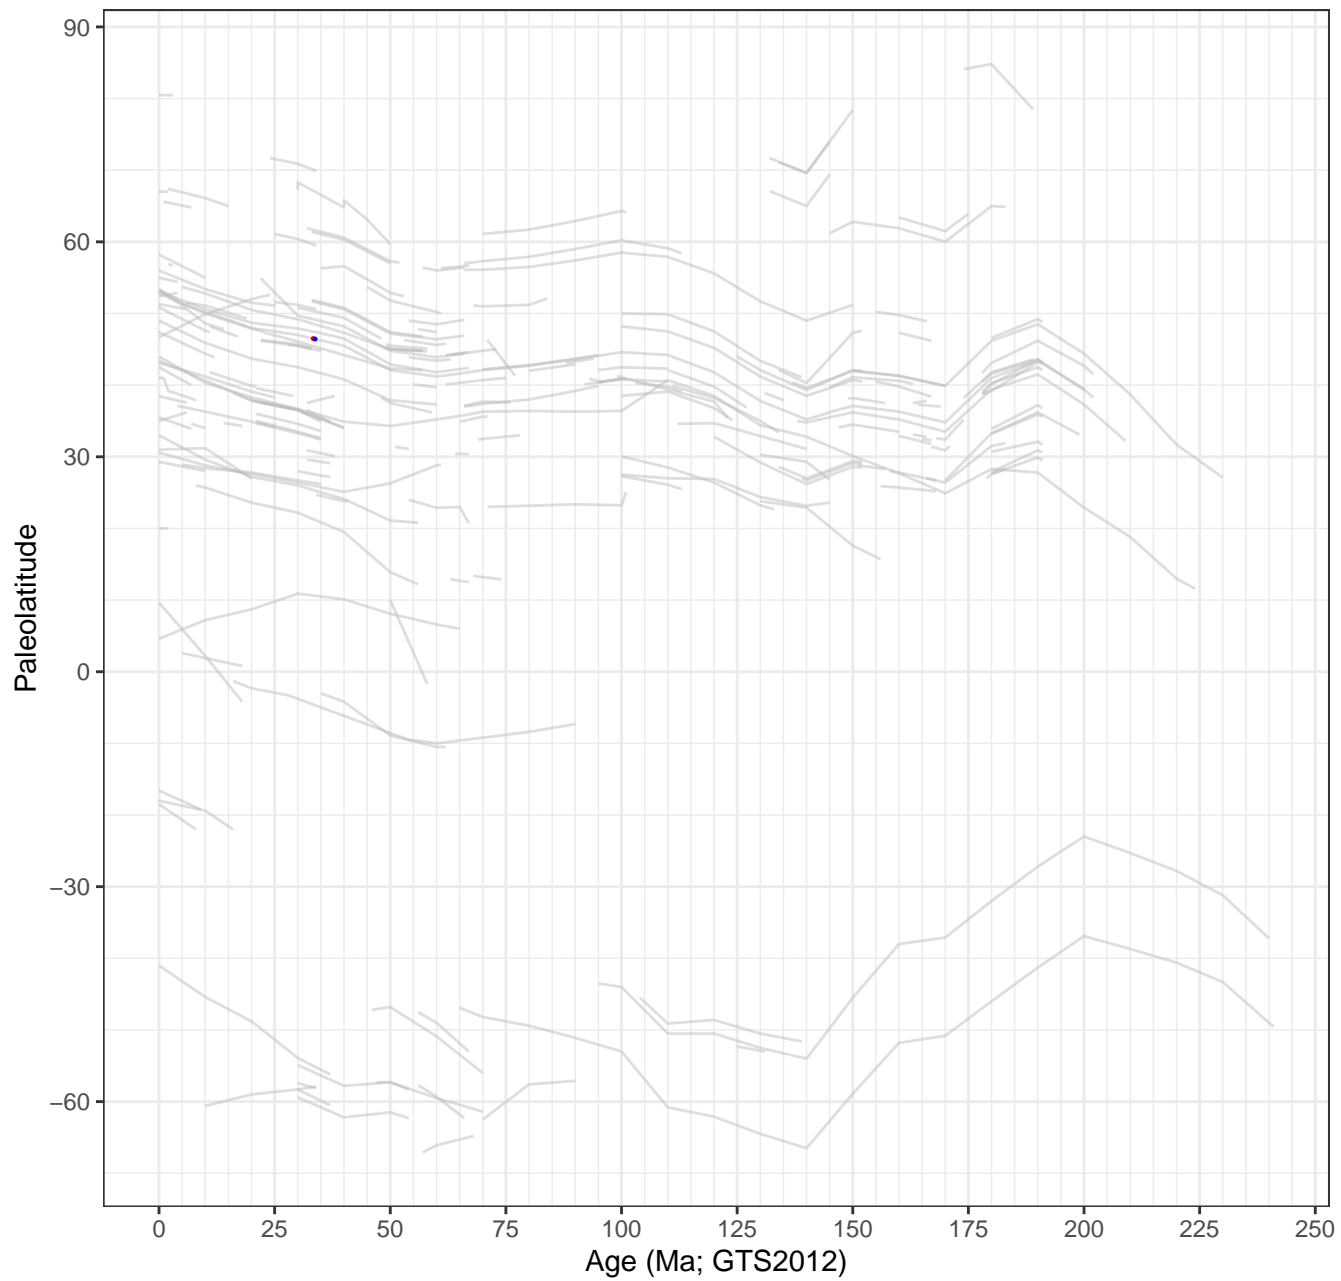

Supplement: Supplementary file 1489 [file Glaphyrocysta paupercula.pdf › Supplement/Supplement 2/Species 1914 plots/Glaphyrocysta paupercula.pdf]

# Species *Glaphyrocysta perforata*

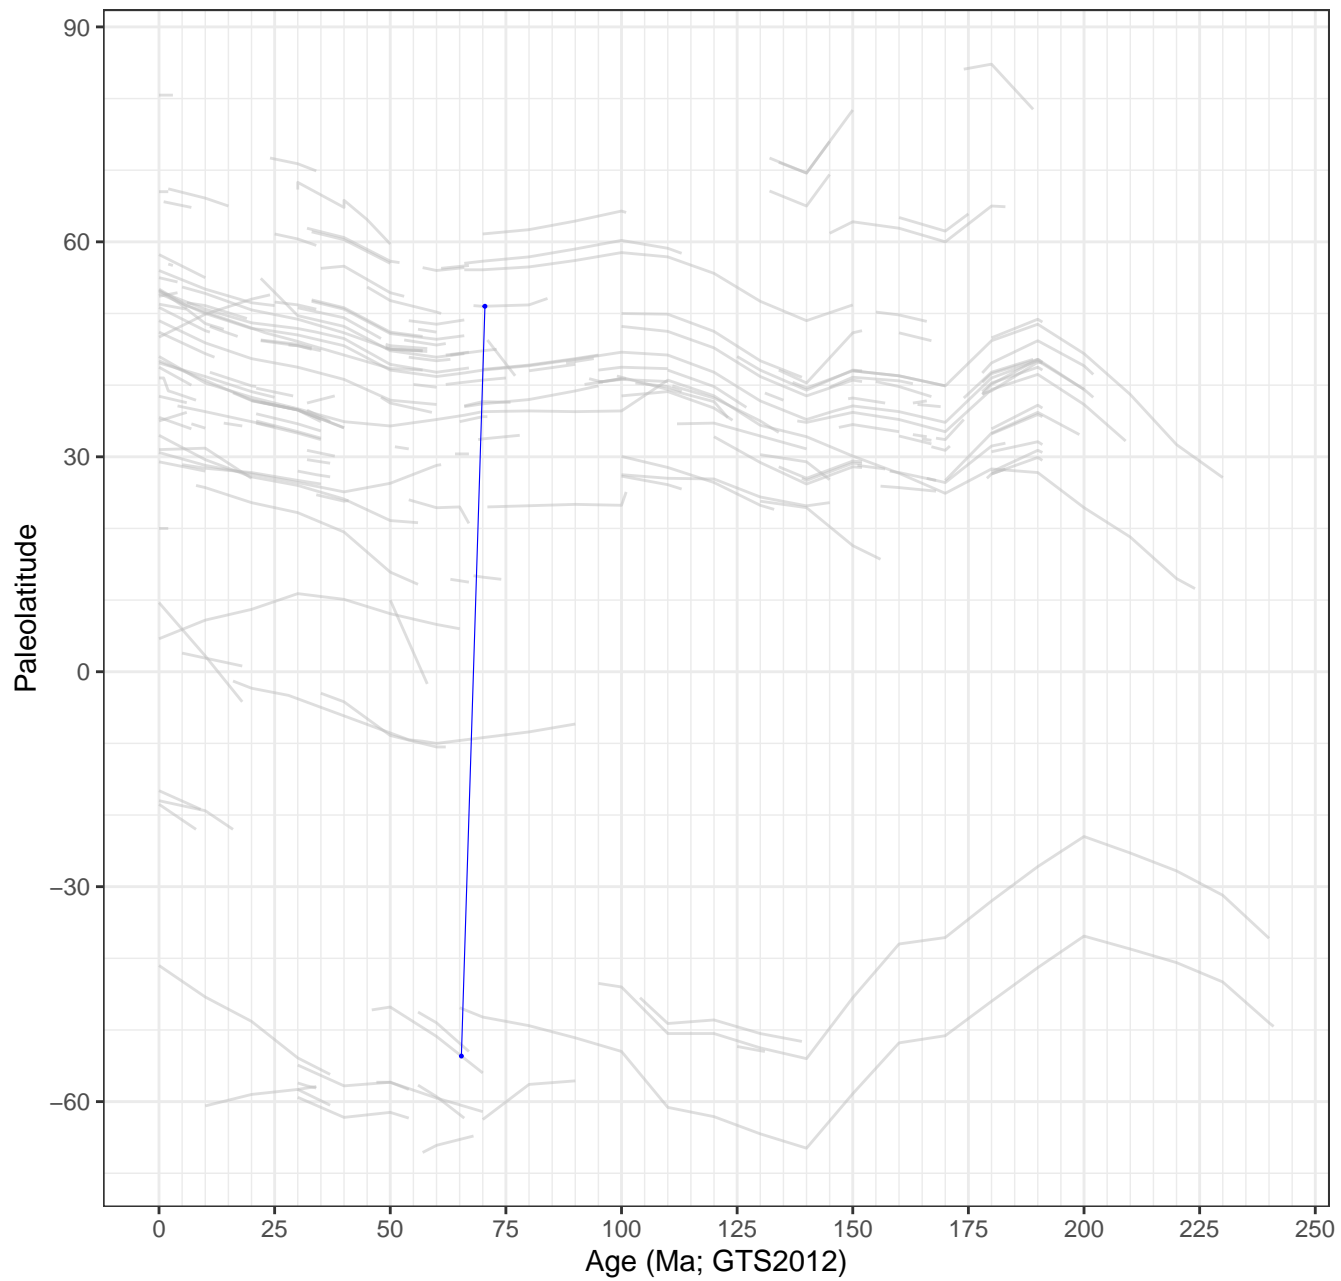

Supplement: Supplementary file 1490 [file Glaphyrocysta perforata.pdf › Supplement/Supplement 2/Species 1914 plots/Glaphyrocysta perforata.pdf]

# Species *Glaphyrocysta priabonensis*

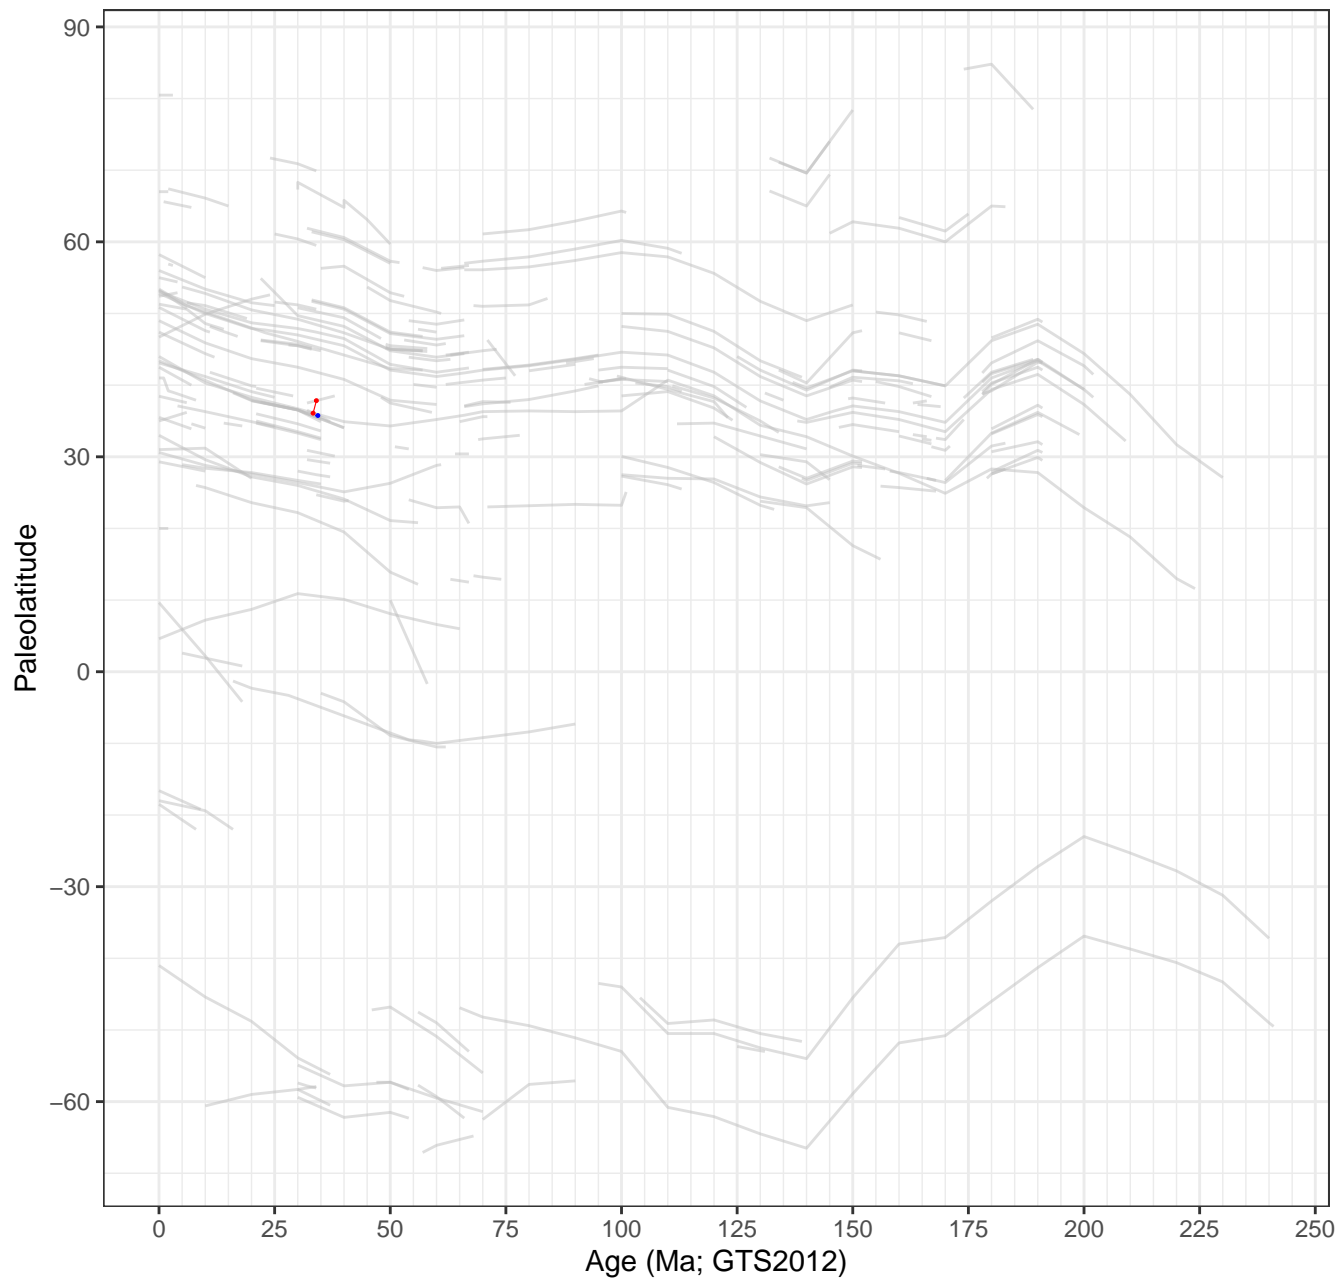

Supplement: Supplementary file 1491 [file Glaphyrocysta priabonensis.pdf › Supplement/Supplement 2/Species 1914 plots/Glaphyrocysta priabonensis.pdf]

# Species *Glaphyrocysta reticulosa*

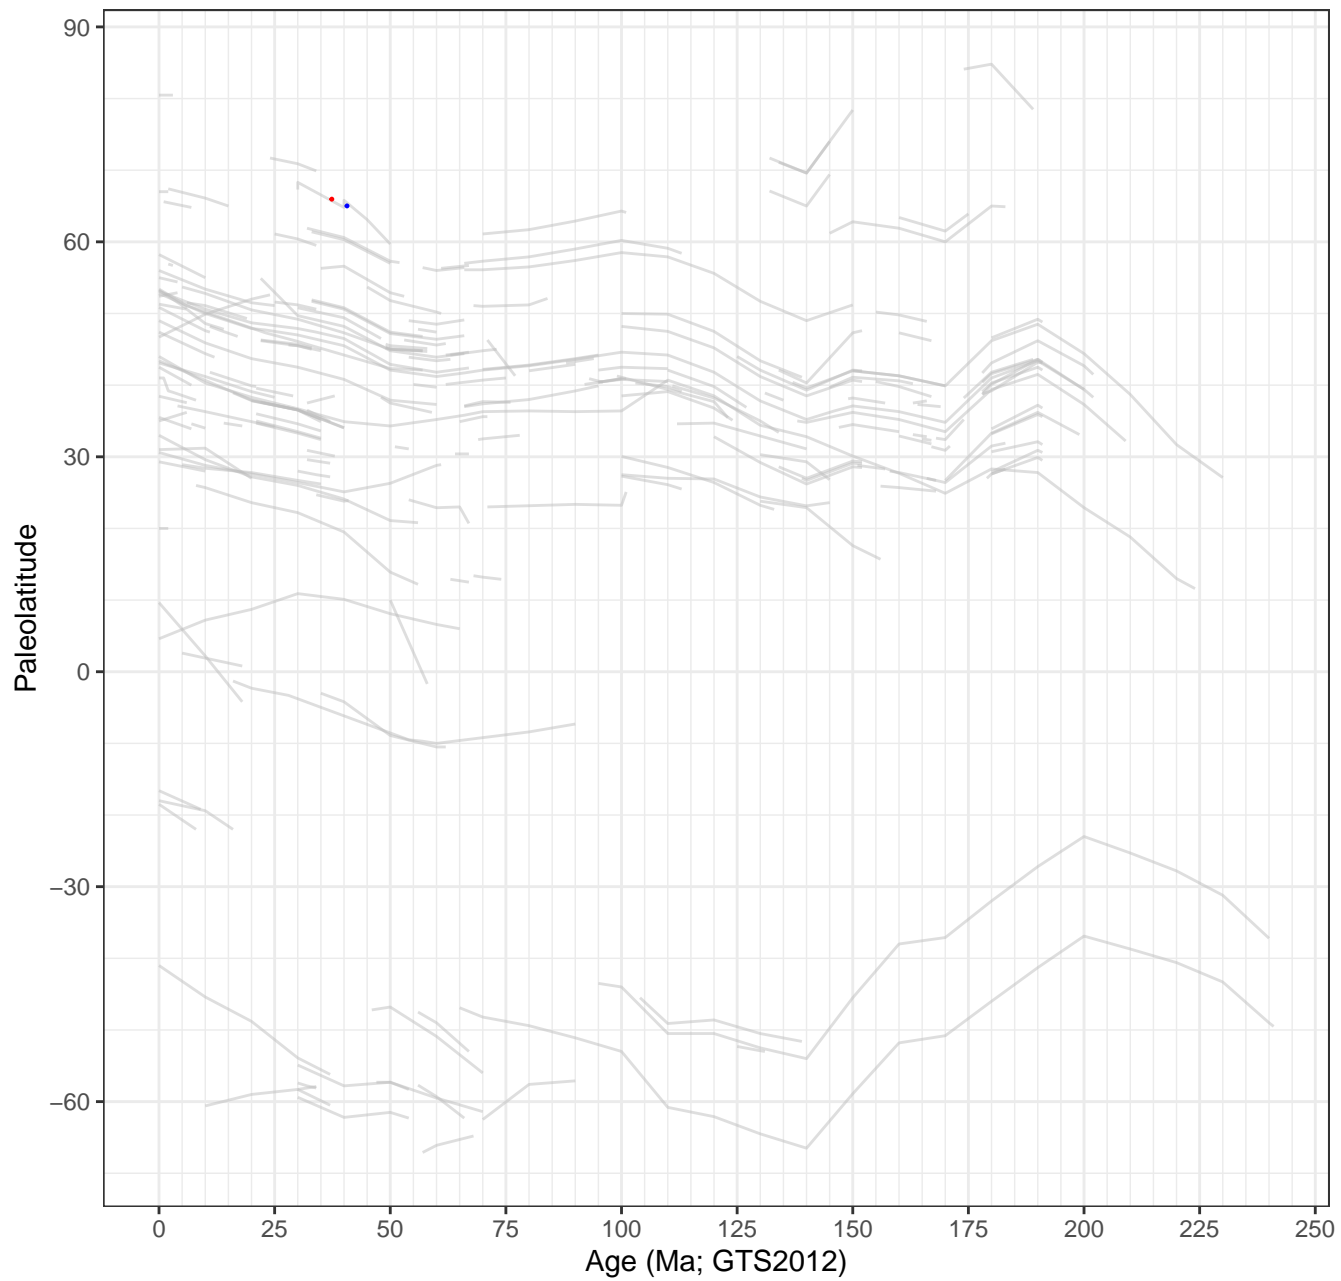

Supplement: Supplementary file 1492 [file Glaphyrocysta reticulosa.pdf › Supplement/Supplement 2/Species 1914 plots/Glaphyrocysta reticulosa.pdf]

# Species *Glaphyrocysta retiintexta*

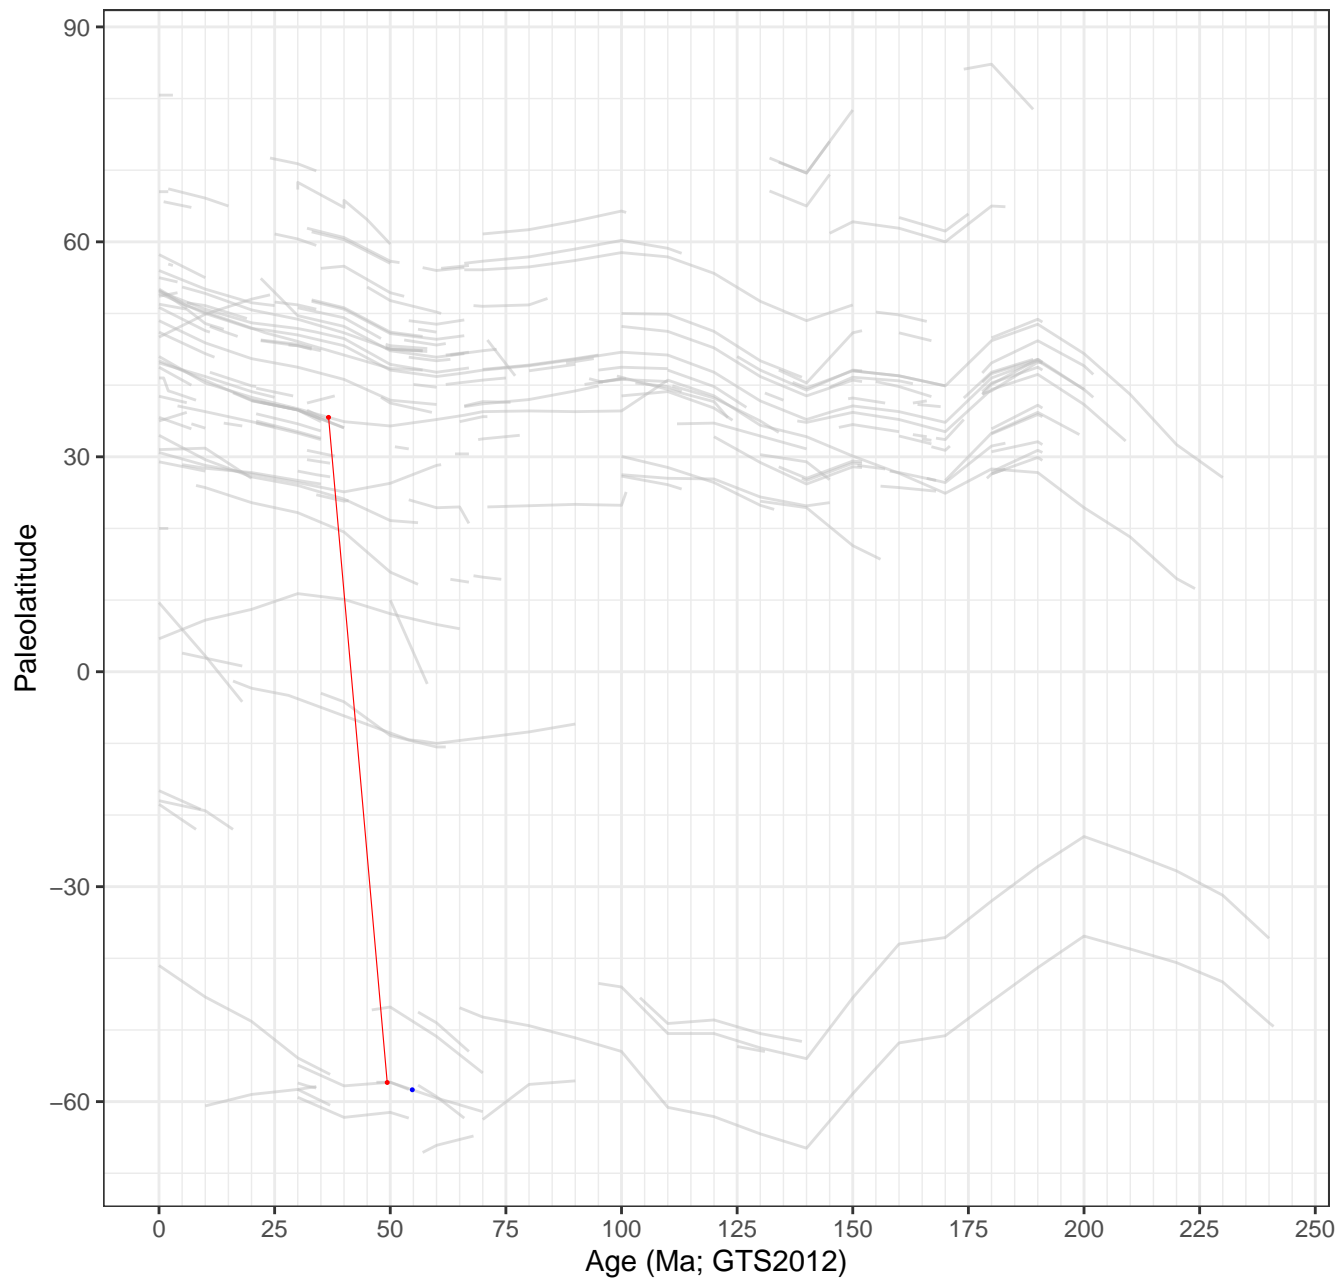

Supplement: Supplementary file 1493 [file Glaphyrocysta retiintexta.pdf › Supplement/Supplement 2/Species 1914 plots/Glaphyrocysta retiintexta.pdf]

# Species *Glaphyrocysta semicirculata*

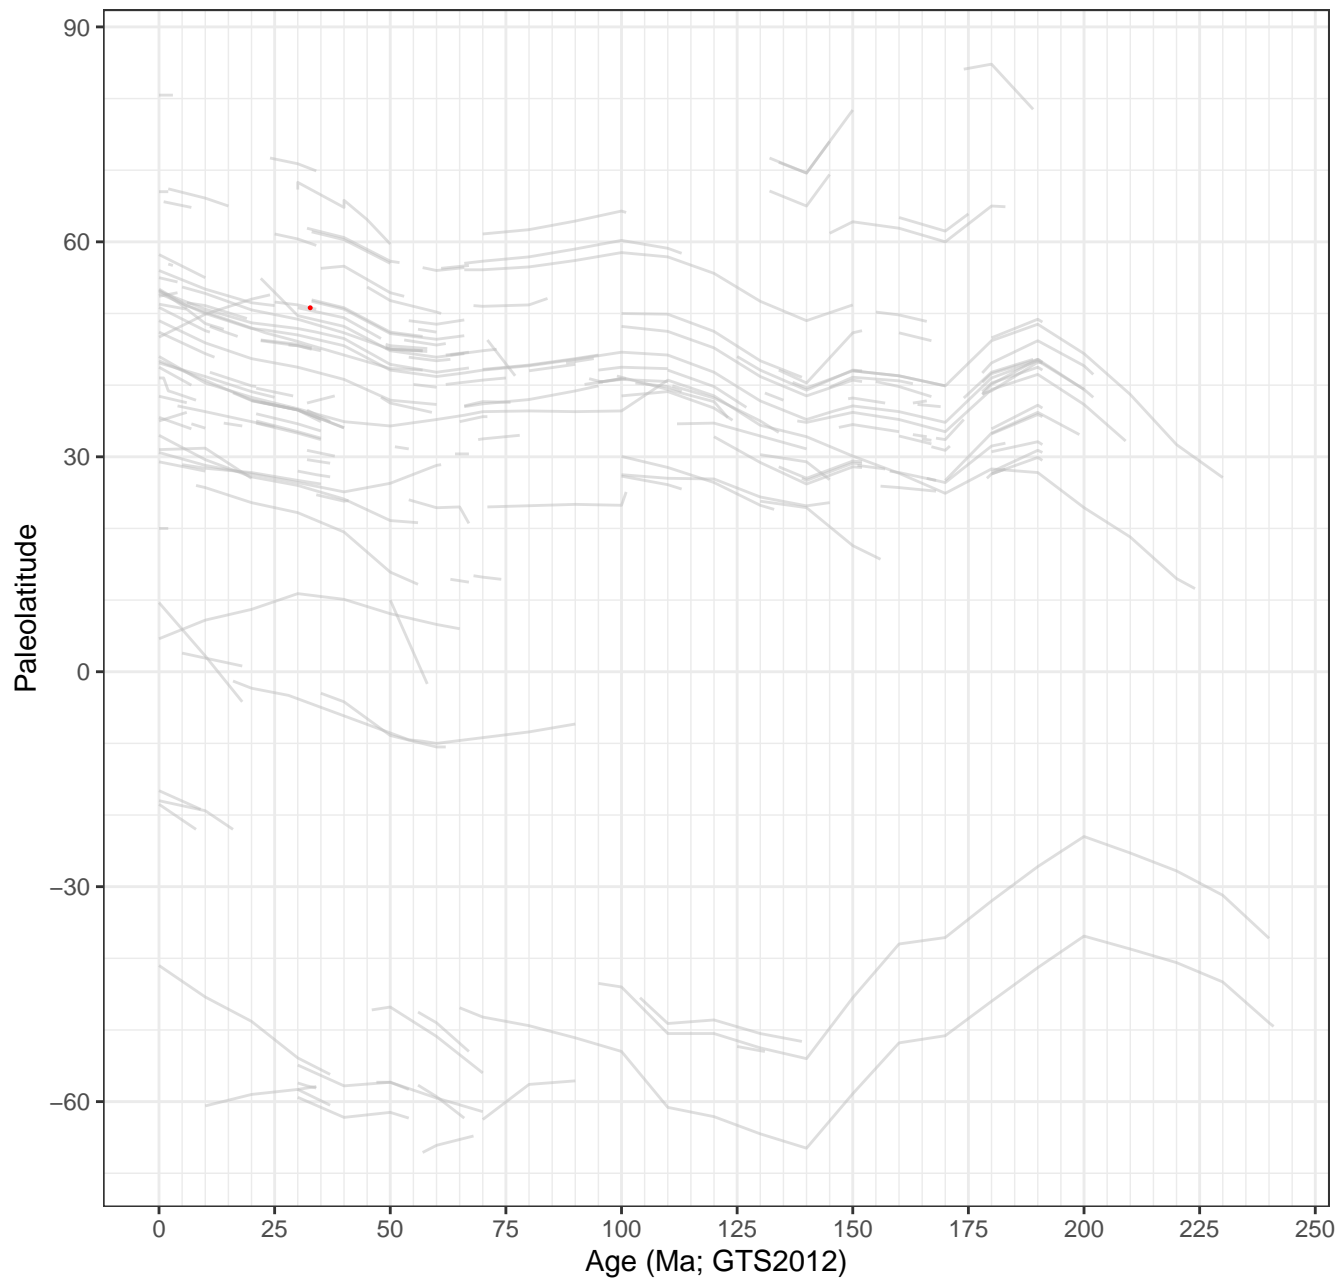

Supplement: Supplementary file 1494 [file Glaphyrocysta semicirculata.pdf › Supplement/Supplement 2/Species 1914 plots/Glaphyrocysta semicirculata.pdf]

# Species *Glaphyrocysta semitecta*

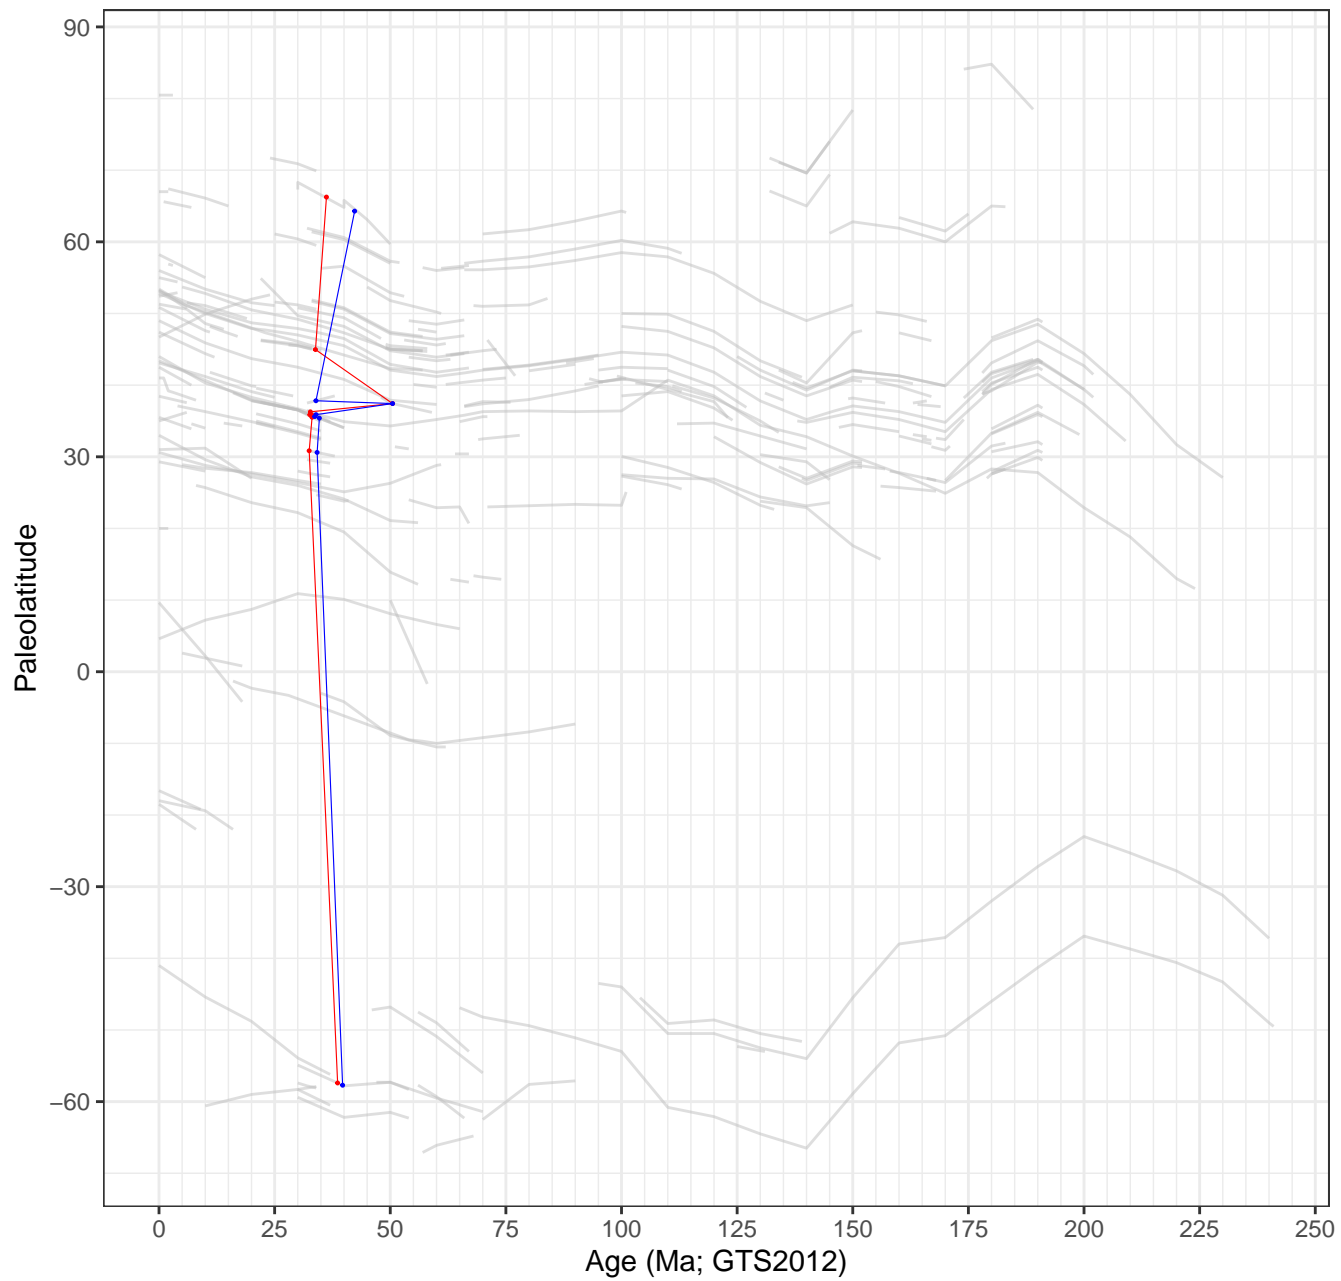

Supplement: Supplementary file 1495 [file Glaphyrocysta semitecta.pdf › Supplement/Supplement 2/Species 1914 plots/Glaphyrocysta semitecta.pdf]

# Species *Glaphyrocysta texta*

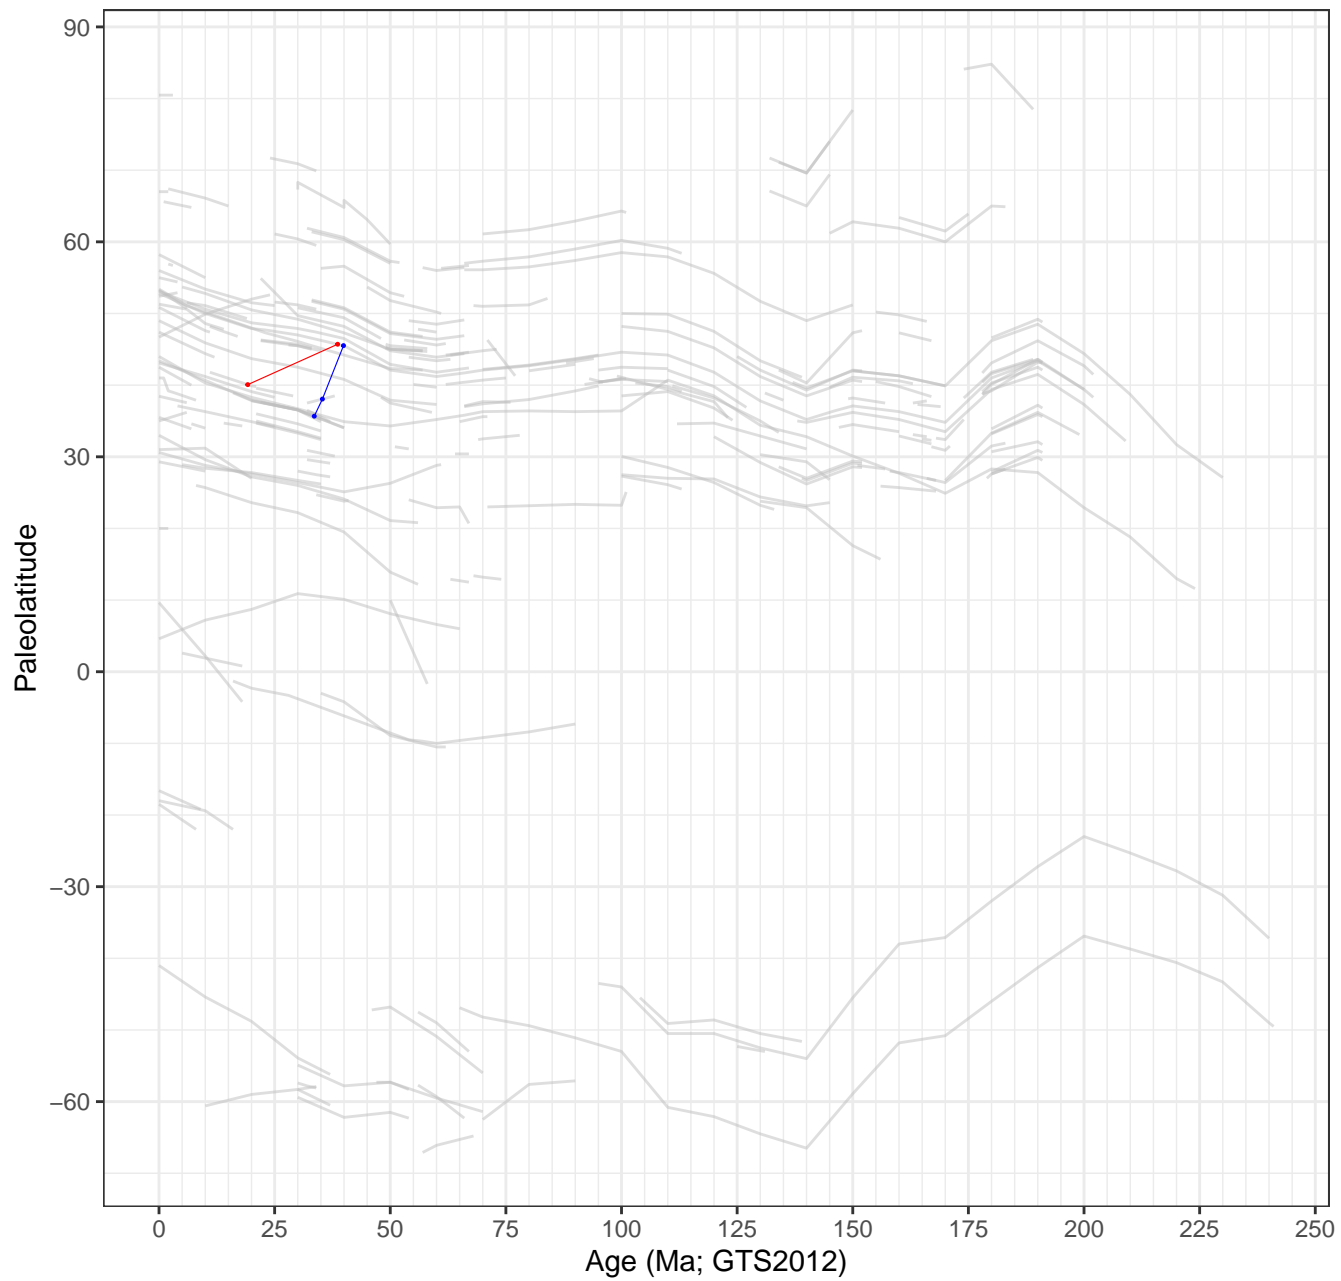

Supplement: Supplementary file 1496 [file Glaphyrocysta texta.pdf › Supplement/Supplement 2/Species 1914 plots/Glaphyrocysta texta.pdf]

# Species *Glaphyrocysta vicina*

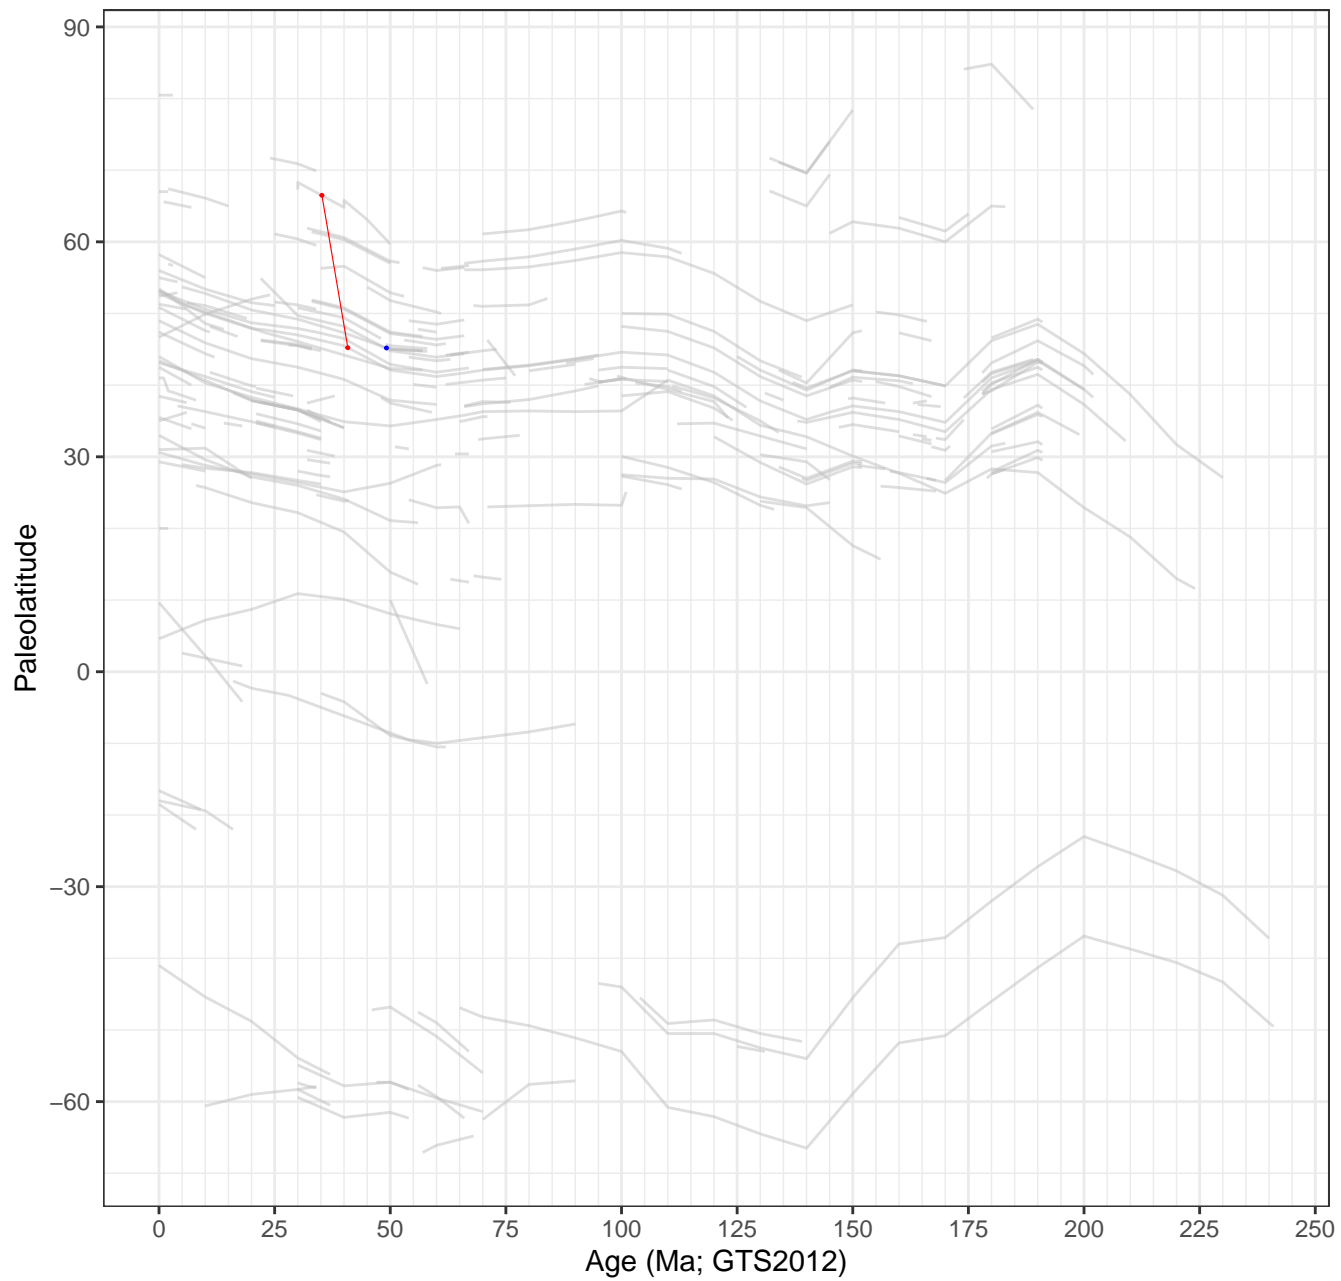

Supplement: Supplementary file 1497 [file Glaphyrocysta vicina.pdf › Supplement/Supplement 2/Species 1914 plots/Glaphyrocysta vicina.pdf]

# Species *Glaphyrocysta wilsonii*

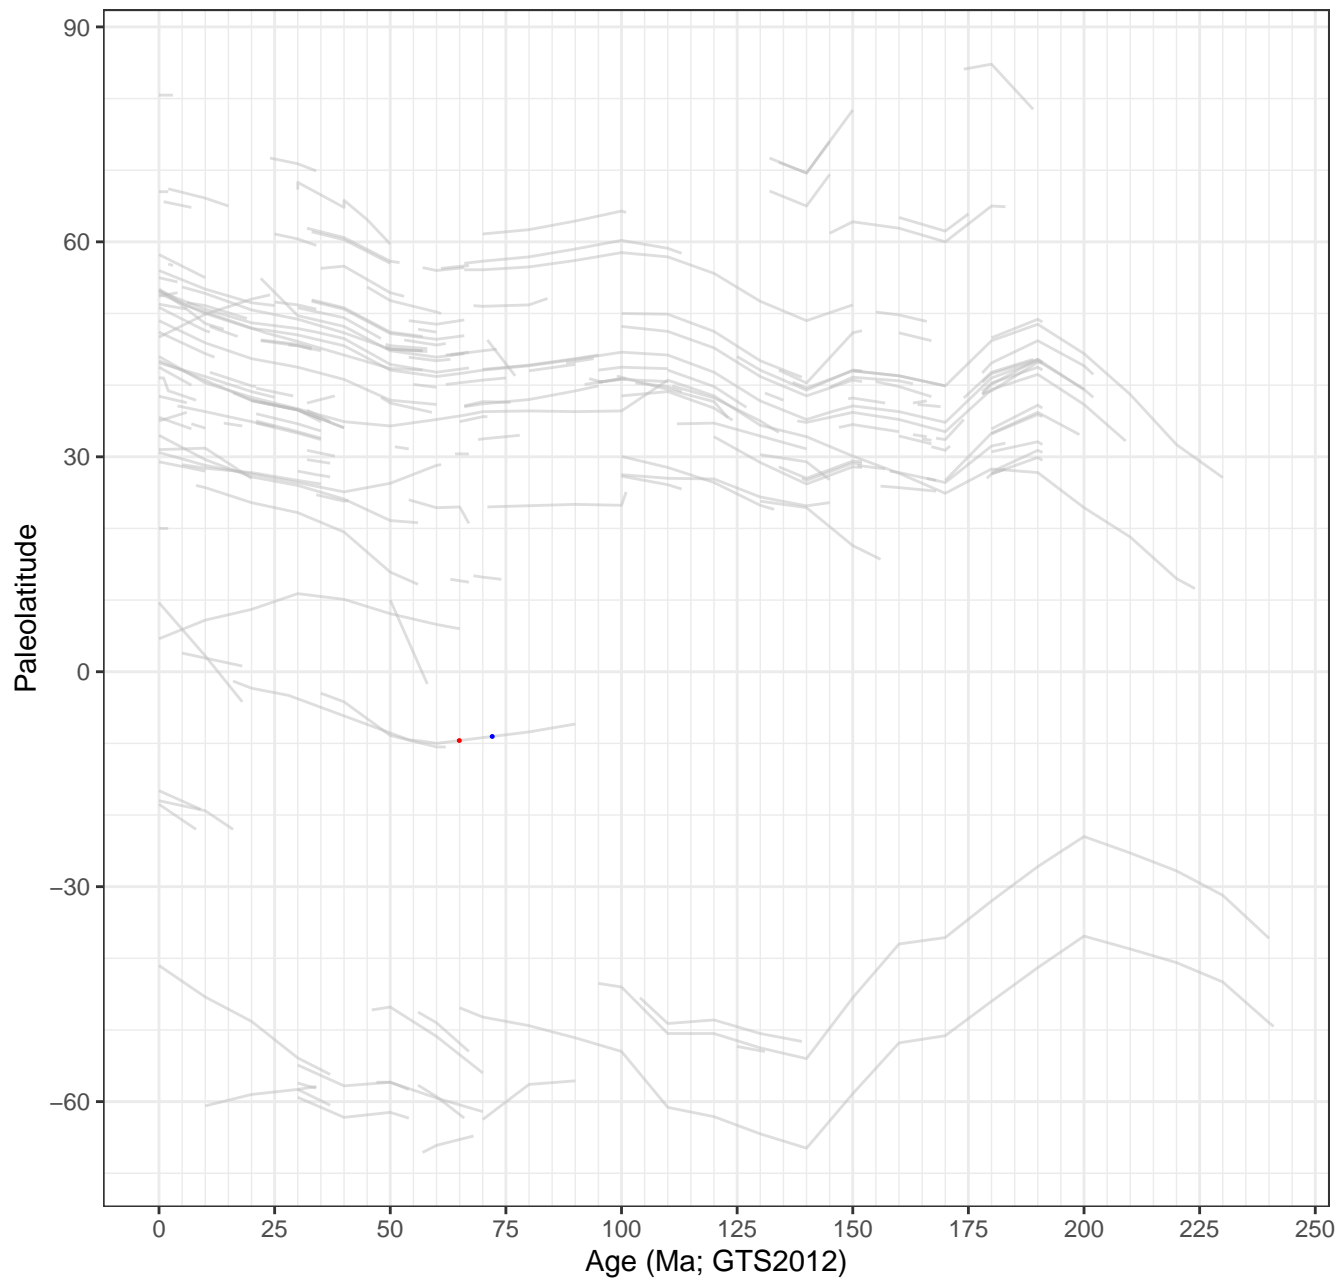

Supplement: Supplementary file 1498 [file Glaphyrocysta wilsonii.pdf › Supplement/Supplement 2/Species 1914 plots/Glaphyrocysta wilsonii.pdf]

# Species *Glossodinium dimorphum*

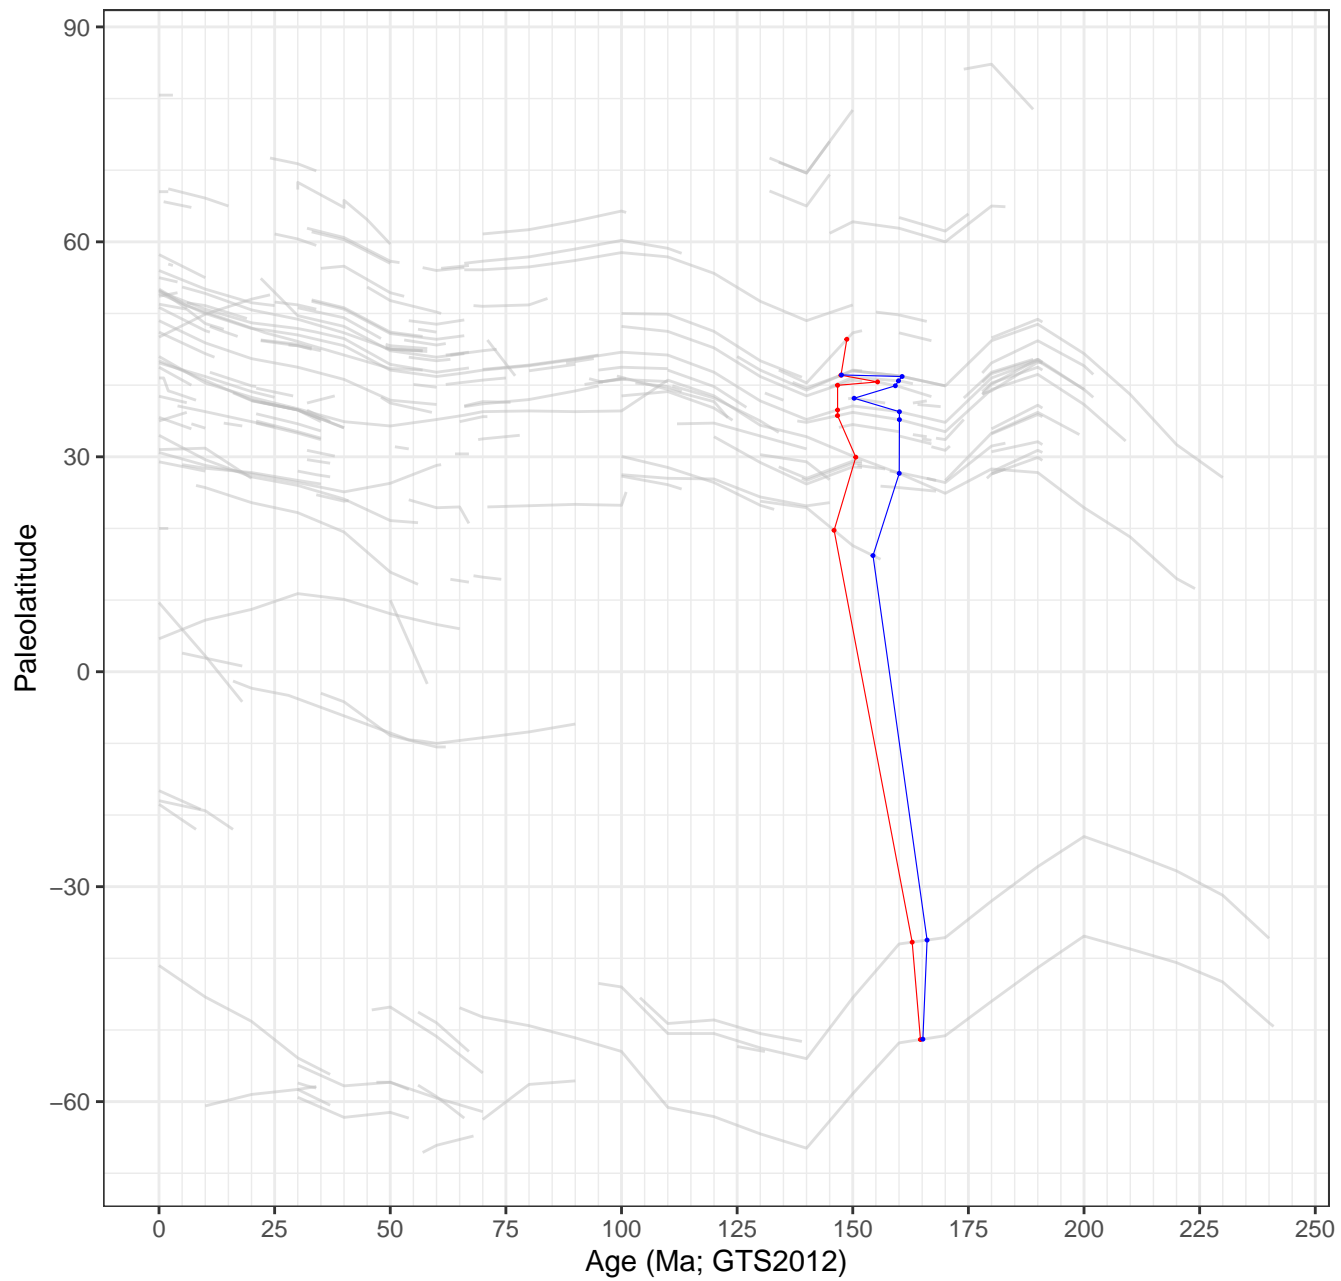

Supplement: Supplementary file 1499 [file Glossodinium dimorphum.pdf › Supplement/Supplement 2/Species 1914 plots/Glossodinium dimorphum.pdf]

# Species *Gochteodinia mutabilis*

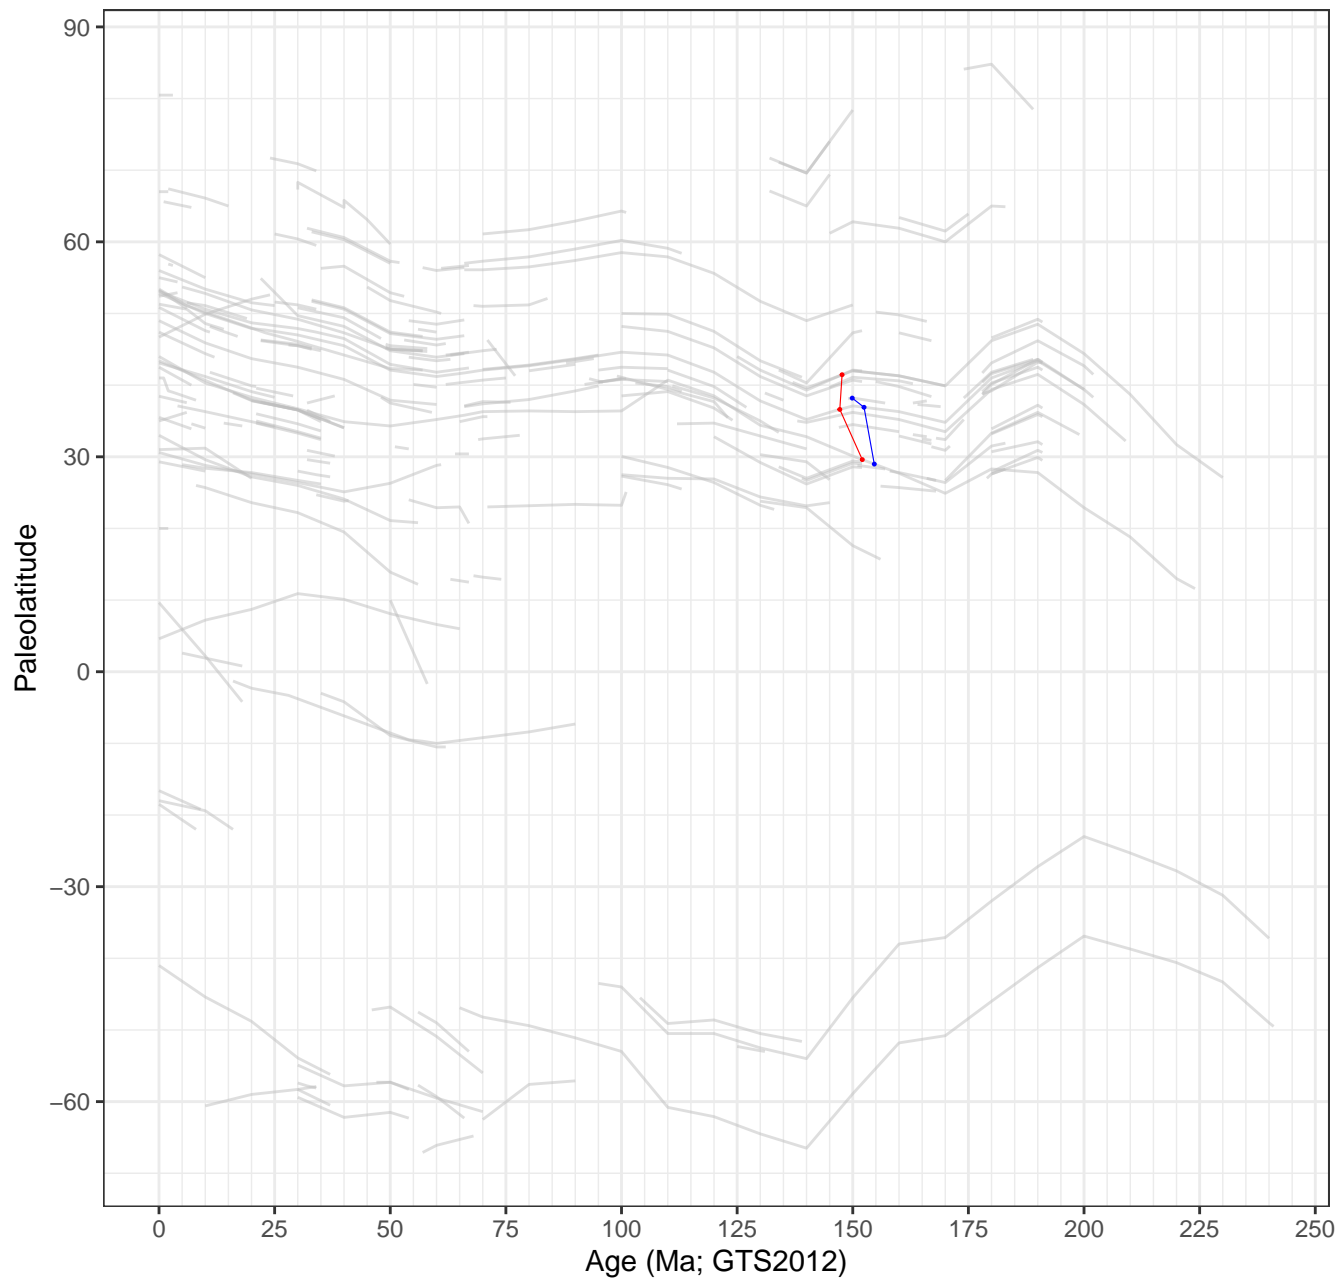

Supplement: Supplementary file 1500 [file Gochteodinia mutabilis.pdf › Supplement/Supplement 2/Species 1914 plots/Gochteodinia mutabilis.pdf]

# Species *Gochteodinia tuberculata*

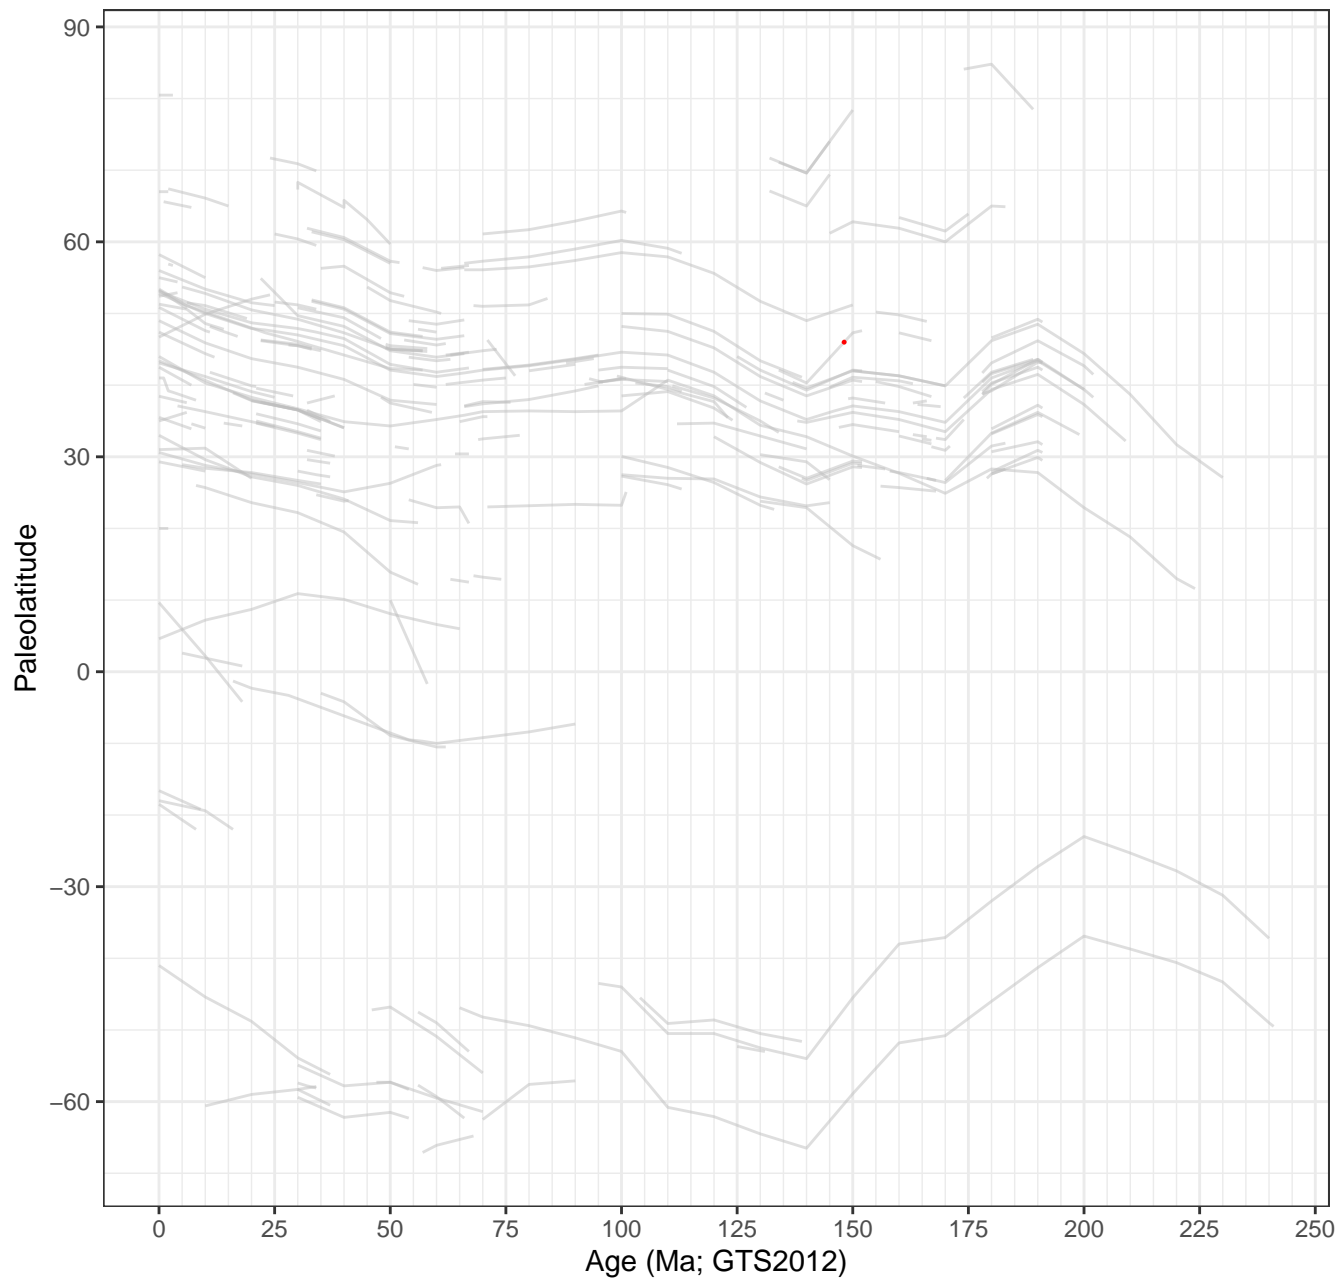

Supplement: Supplementary file 1501 [file Gochteodinia tuberculata.pdf › Supplement/Supplement 2/Species 1914 plots/Gochteodinia tuberculata.pdf]

# Species *Gochteodinia villosa multifurcata*

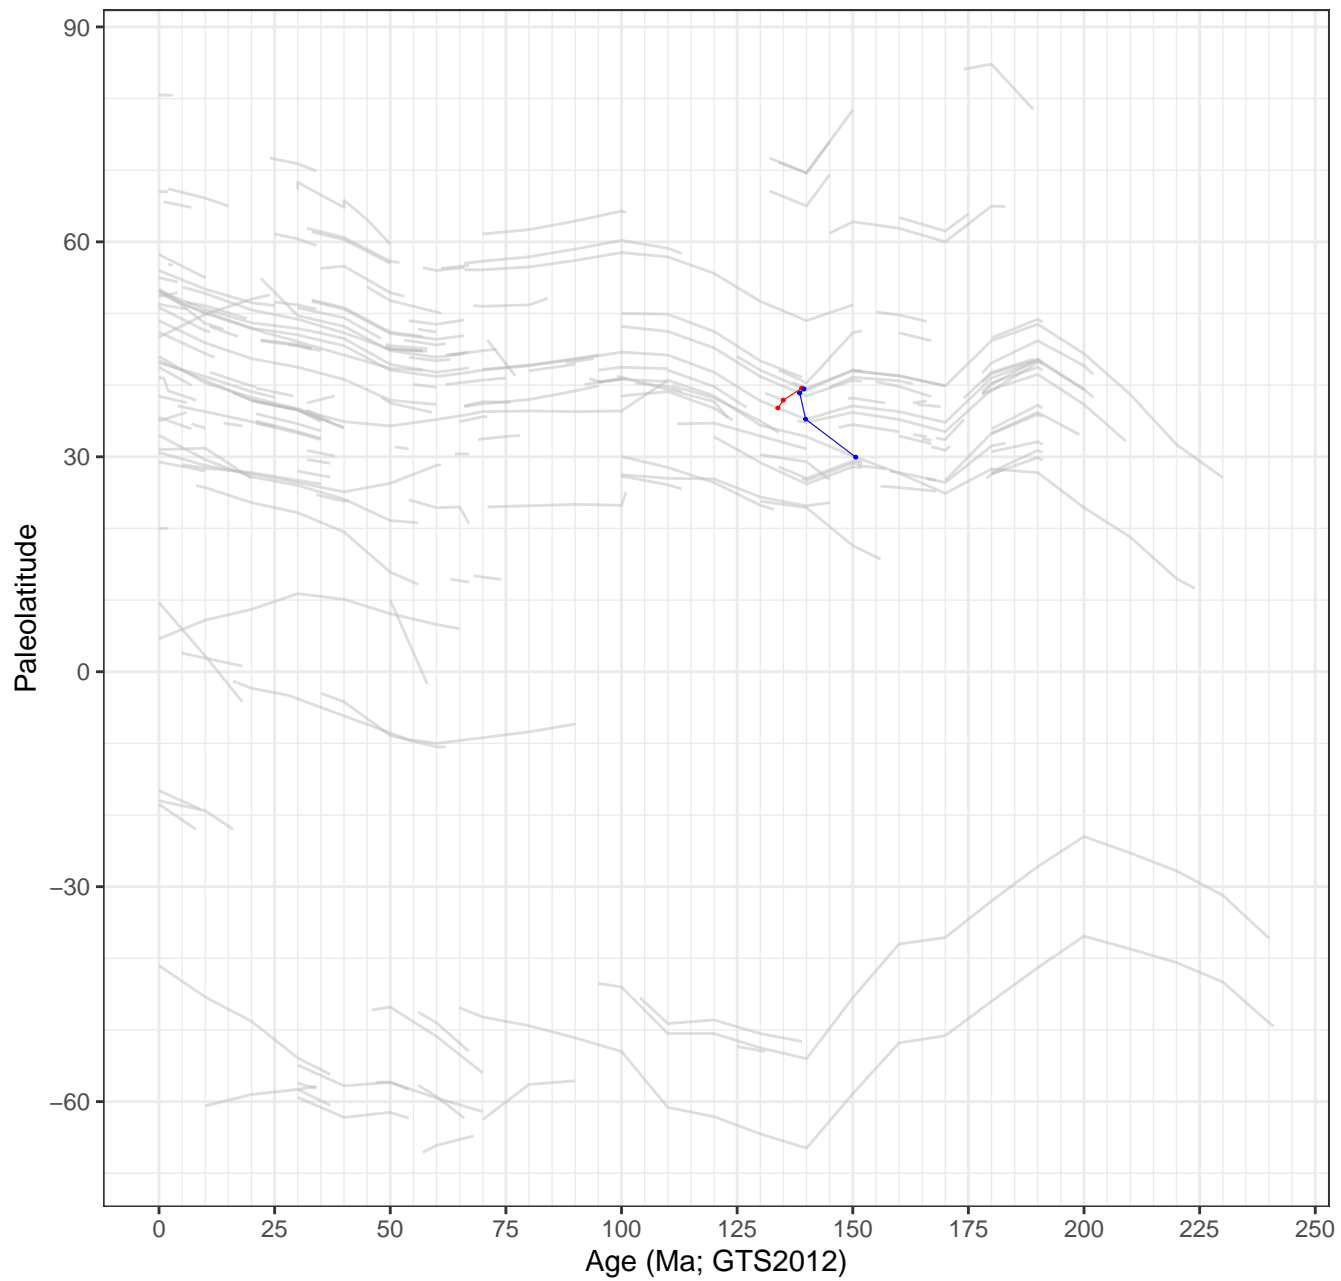

Supplement: Supplementary file 1502 [file Gochteodinia villosa multifurcata.pdf › Supplement/Supplement 2/Species 1914 plots/Gochteodinia villosa multifurcata.pdf]

# Species *Gochteodinia villosa villosa*

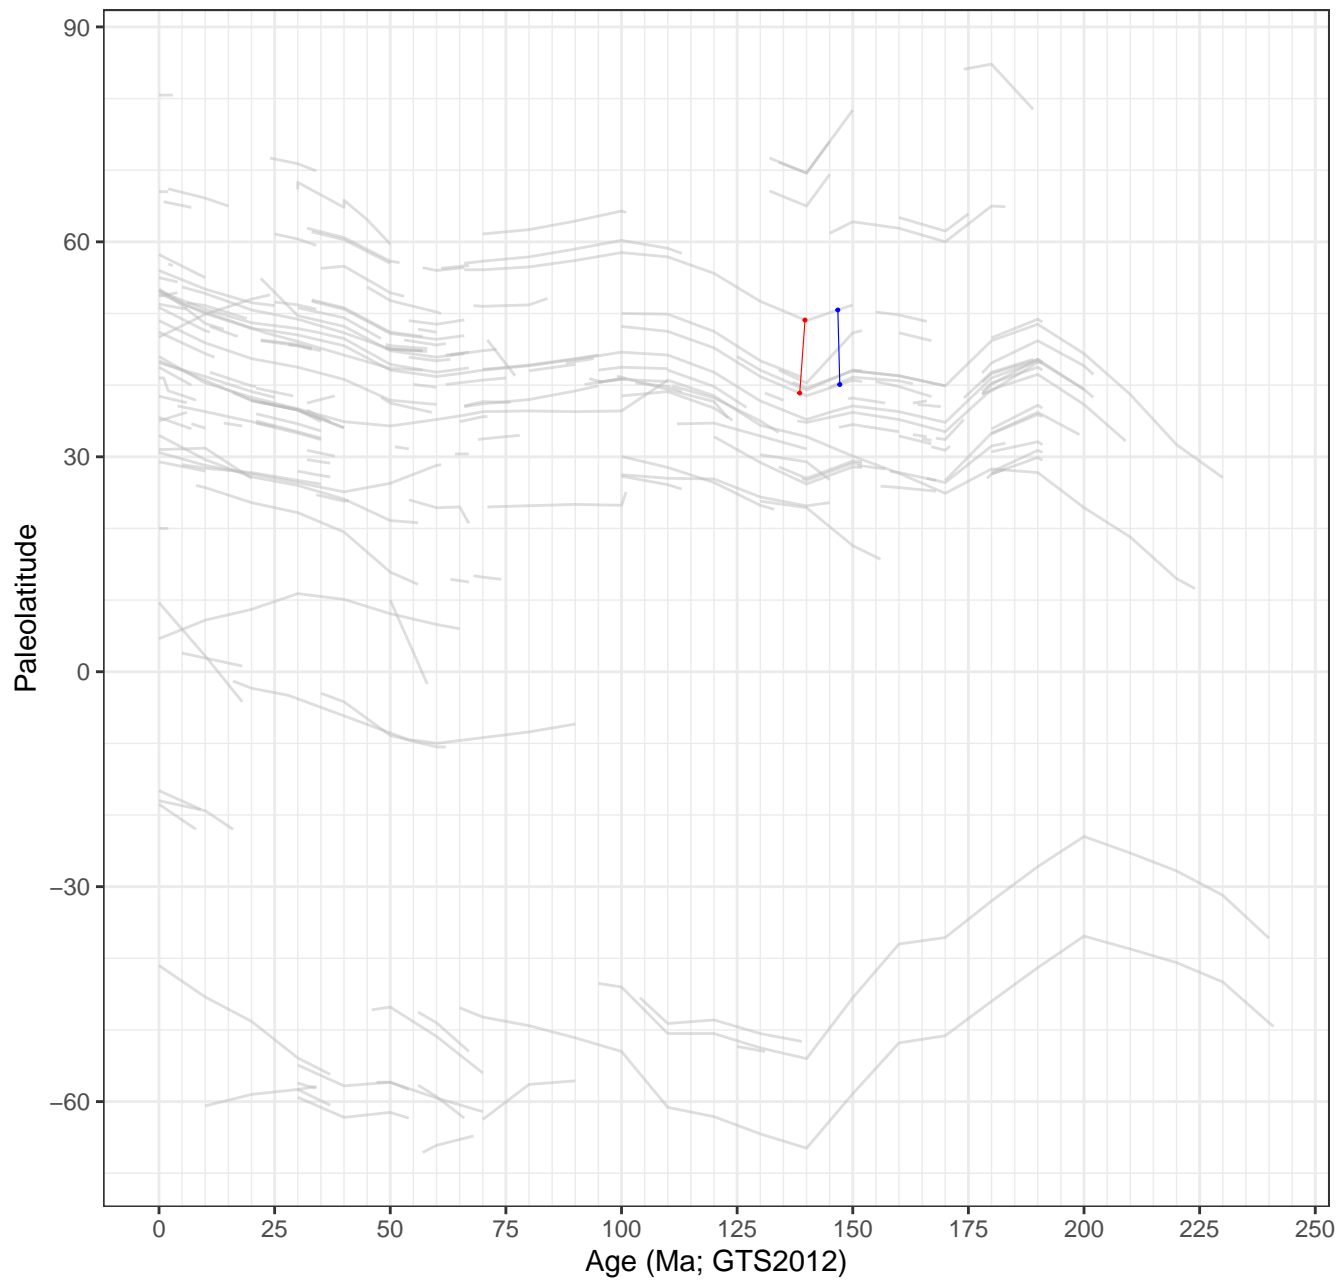

Supplement: Supplementary file 1503 [file Gochteodinia villosa villosa.pdf › Supplement/Supplement 2/Species 1914 plots/Gochteodinia villosa villosa.pdf]

# Species *Gochteodinia villosa*

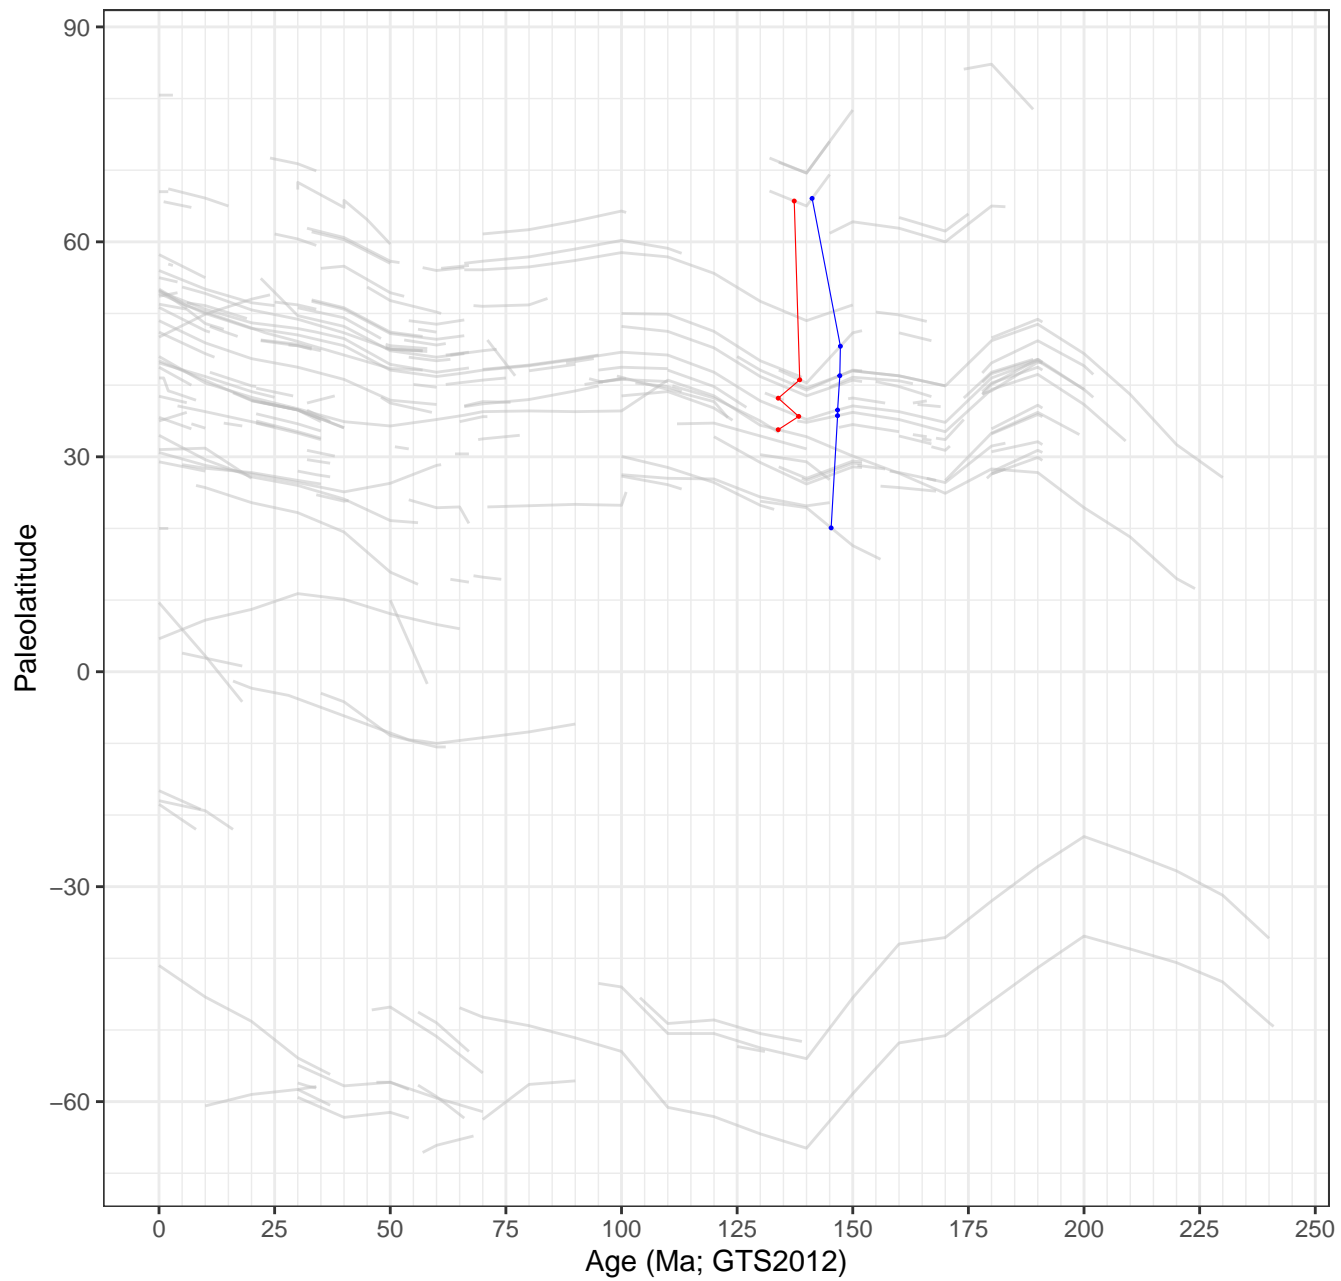

Supplement: Supplementary file 1504 [file Gochteodinia villosa.pdf › Supplement/Supplement 2/Species 1914 plots/Gochteodinia villosa.pdf]

# Species *Gochteodinia virgula*

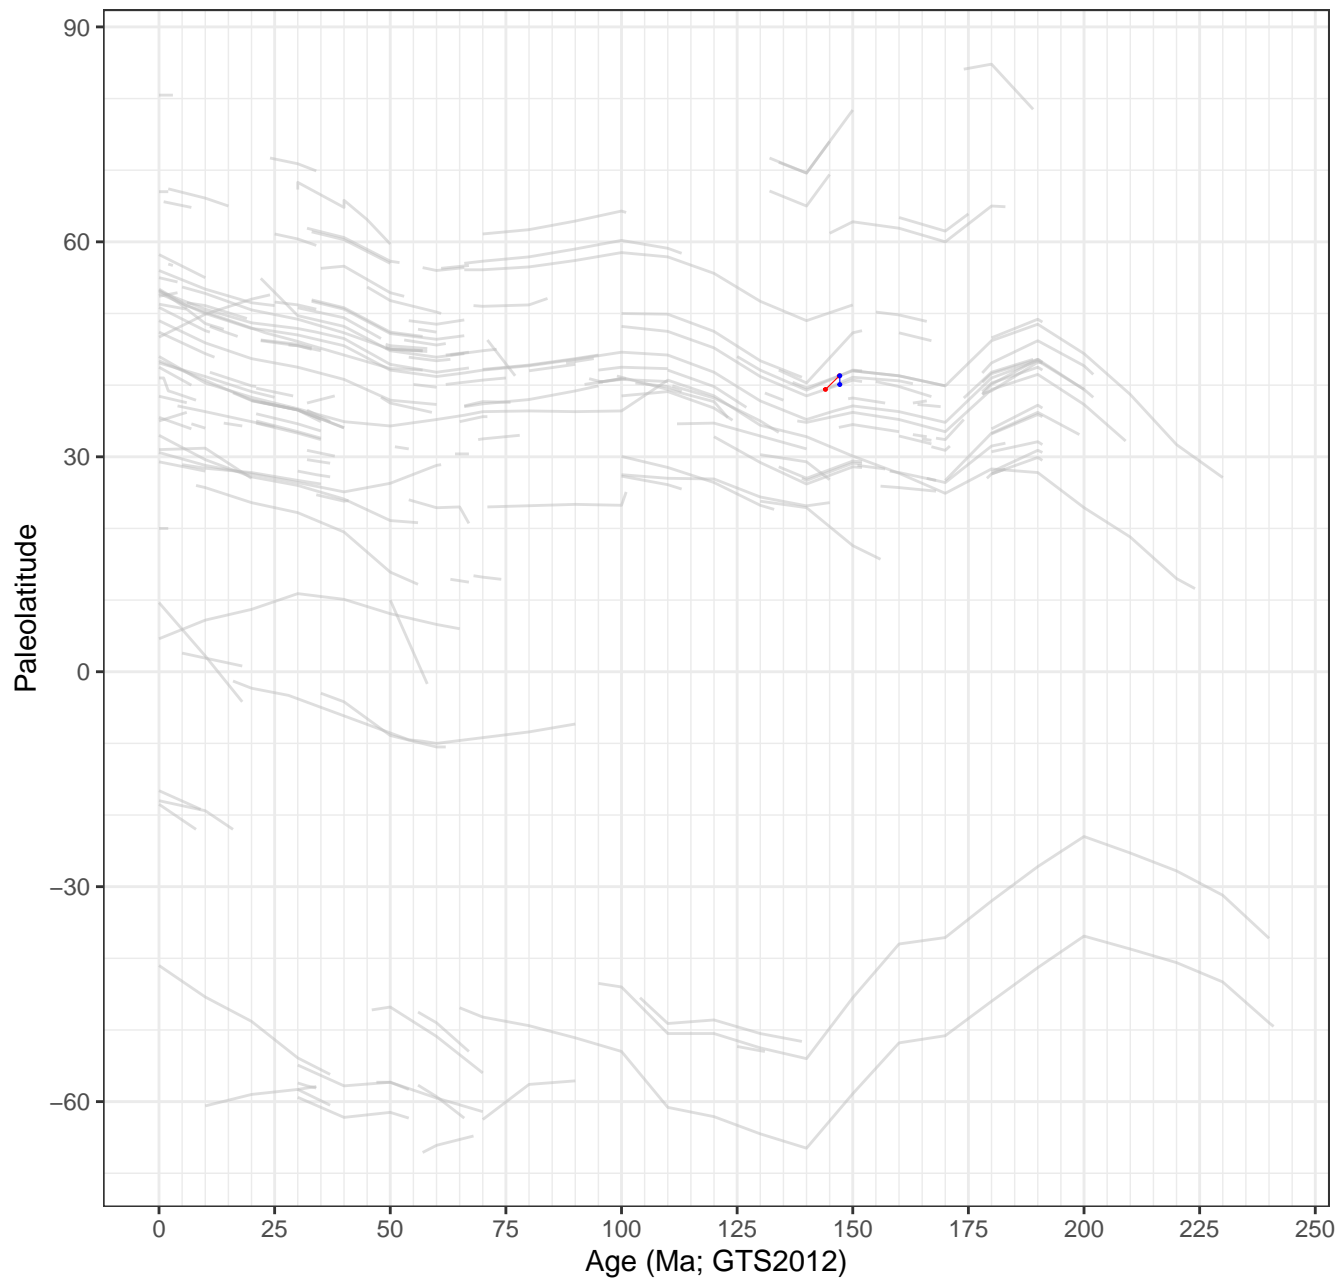

Supplement: Supplementary file 1505 [file Gochteodinia virgula.pdf › Supplement/Supplement 2/Species 1914 plots/Gochteodinia virgula.pdf]

# Species *Gongylodinium erymnoteichon*

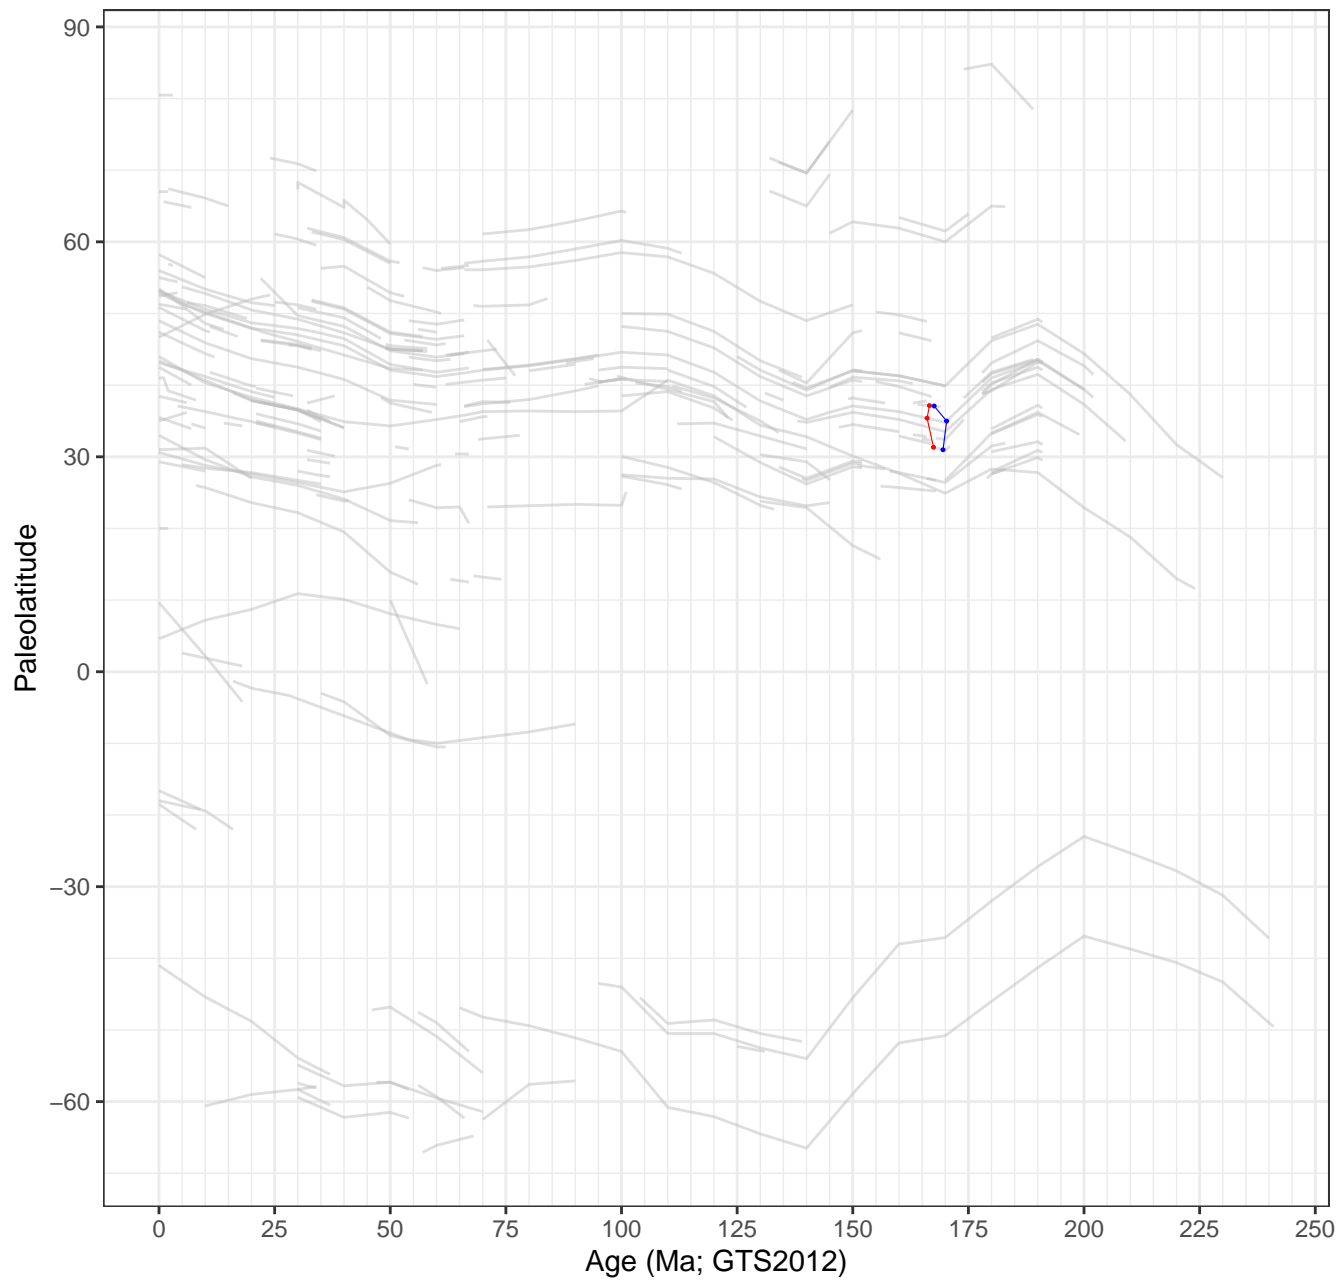

Supplement: Supplementary file 1506 [file Gongylodinium erymnoteichon.pdf › Supplement/Supplement 2/Species 1914 plots/Gongylodinium erymnoteichon.pdf]

# Species *Gongylodinium spinoreticulatum*

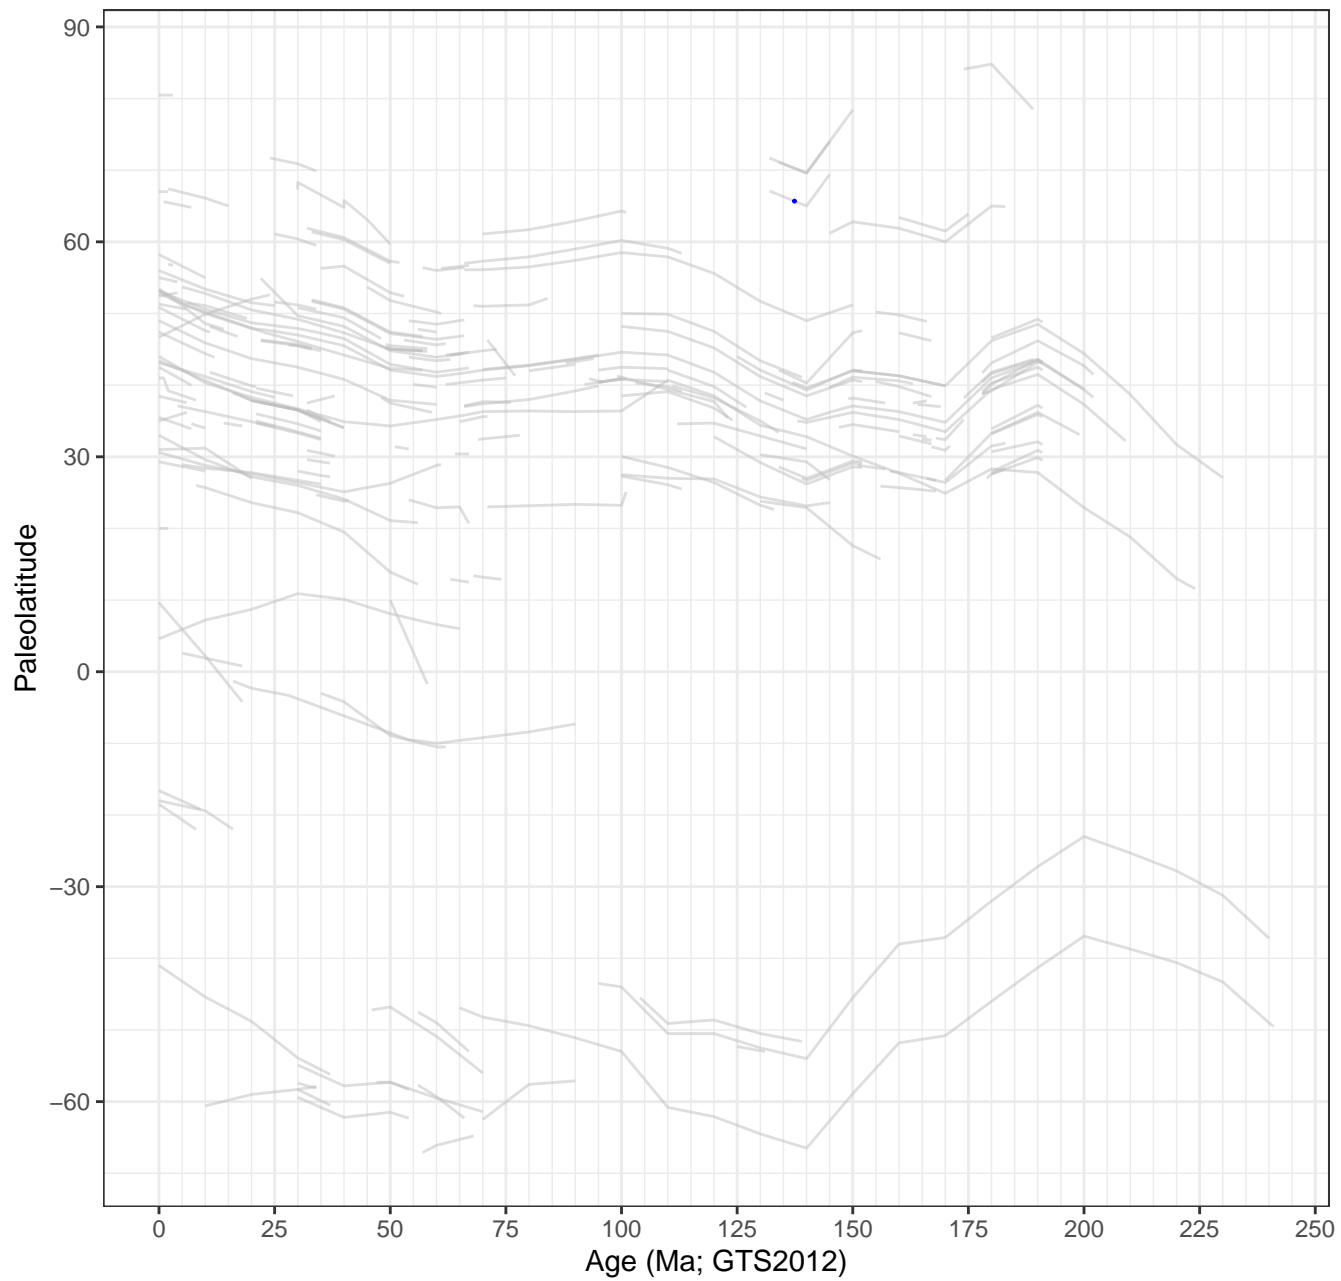

Supplement: Supplementary file 1507 [file Gongylodinium spinoreticulatum.pdf › Supplement/Supplement 2/Species 1914 plots/Gongylodinium spinoreticulatum.pdf]

# Species *Gonyaulacysta adecta longicornis*

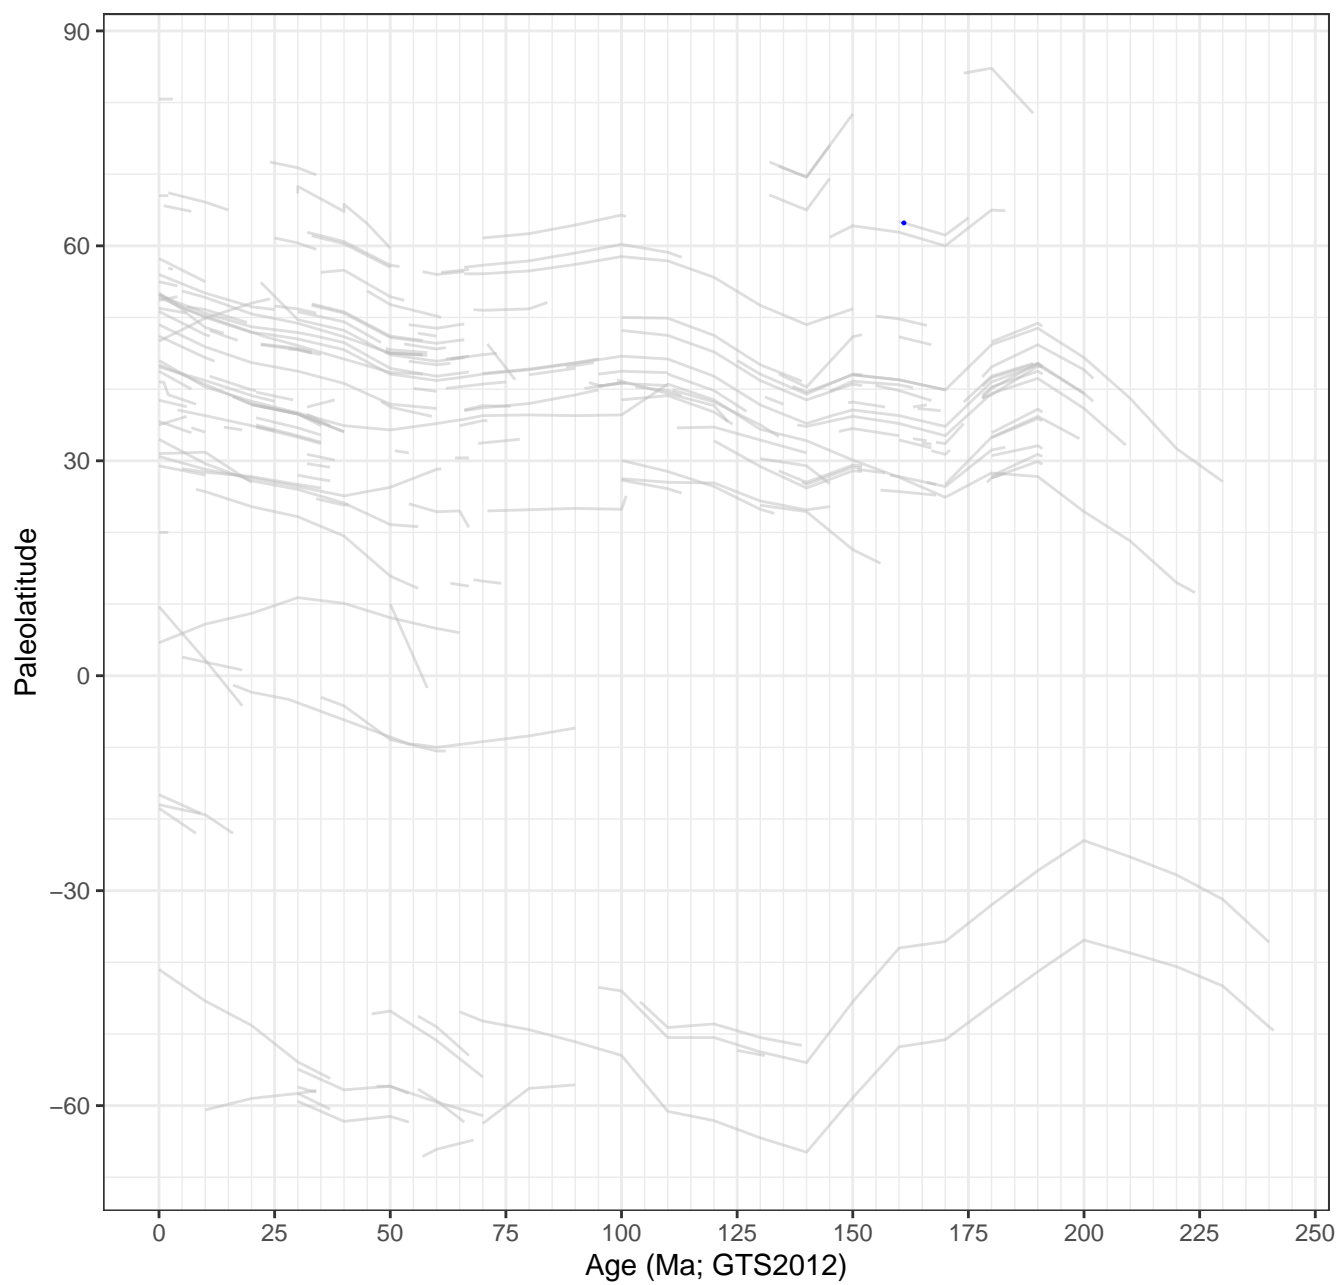

Supplement: Supplementary file 1508 [file Gonyaulacysta adecta longicornis.pdf › Supplement/Supplement 2/Species 1914 plots/Gonyaulacysta adecta longicornis.pdf]

# Species *Gonyaulacysta centriconnata*

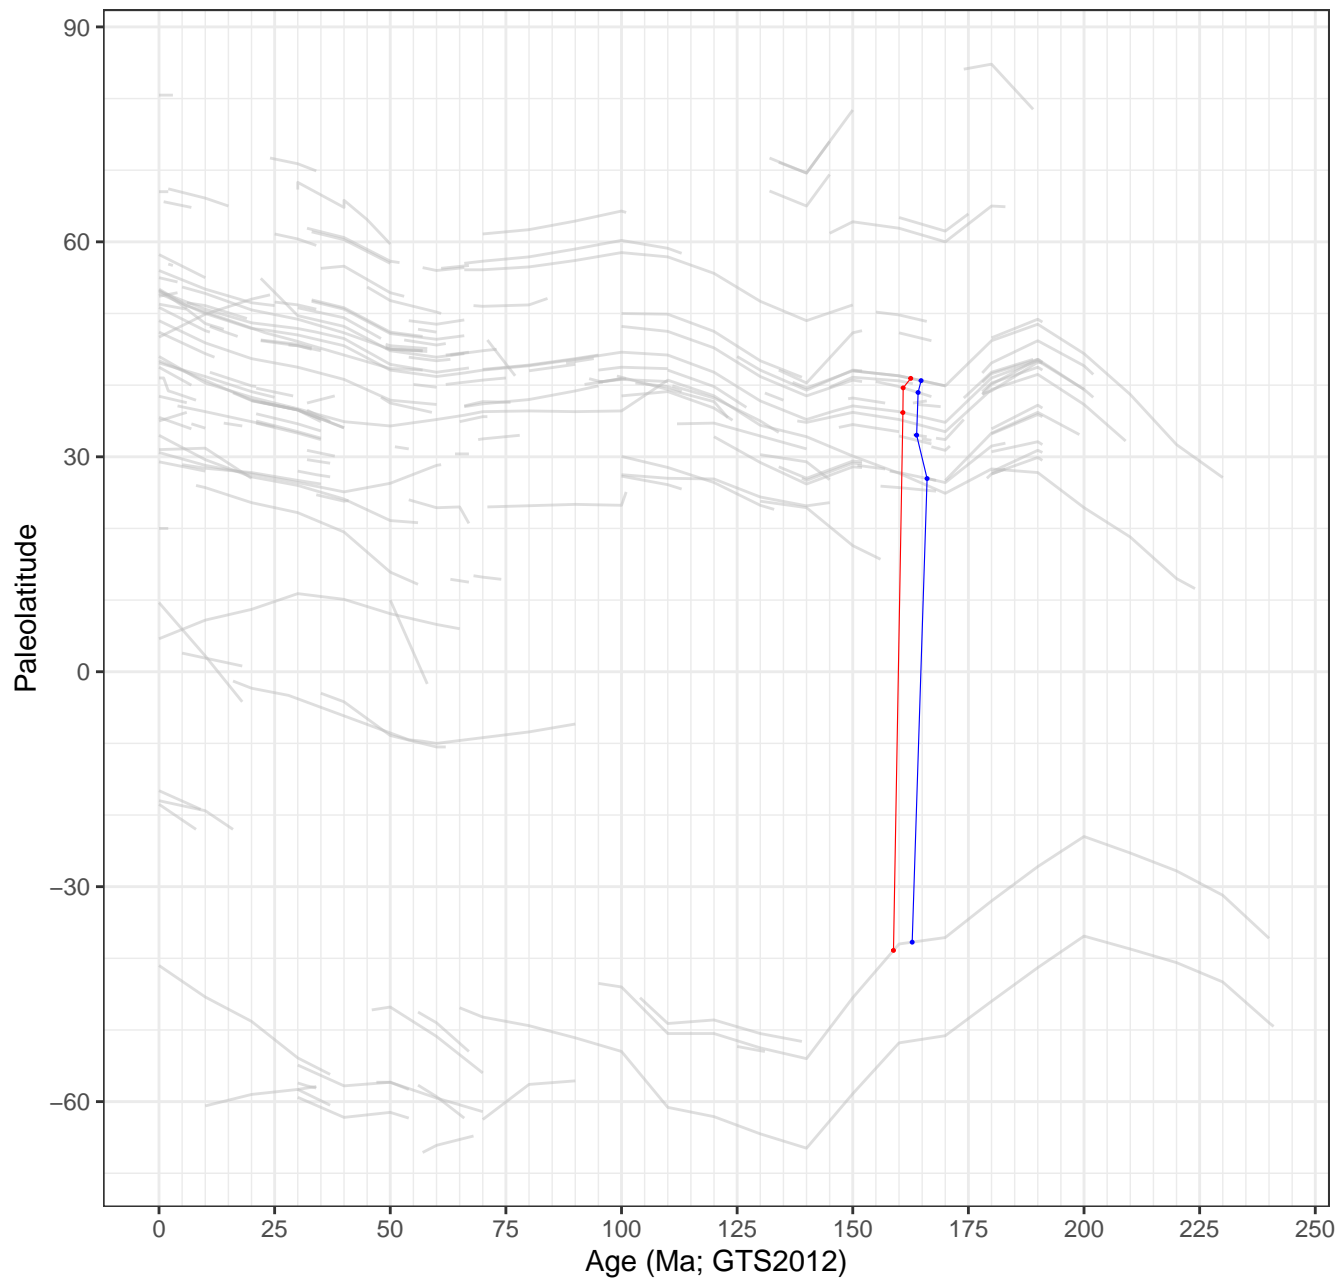

Supplement: Supplementary file 1509 [file Gonyaulacysta centriconnata.pdf › Supplement/Supplement 2/Species 1914 plots/Gonyaulacysta centriconnata.pdf]

# Species *Gonyaulacysta ceratophora*

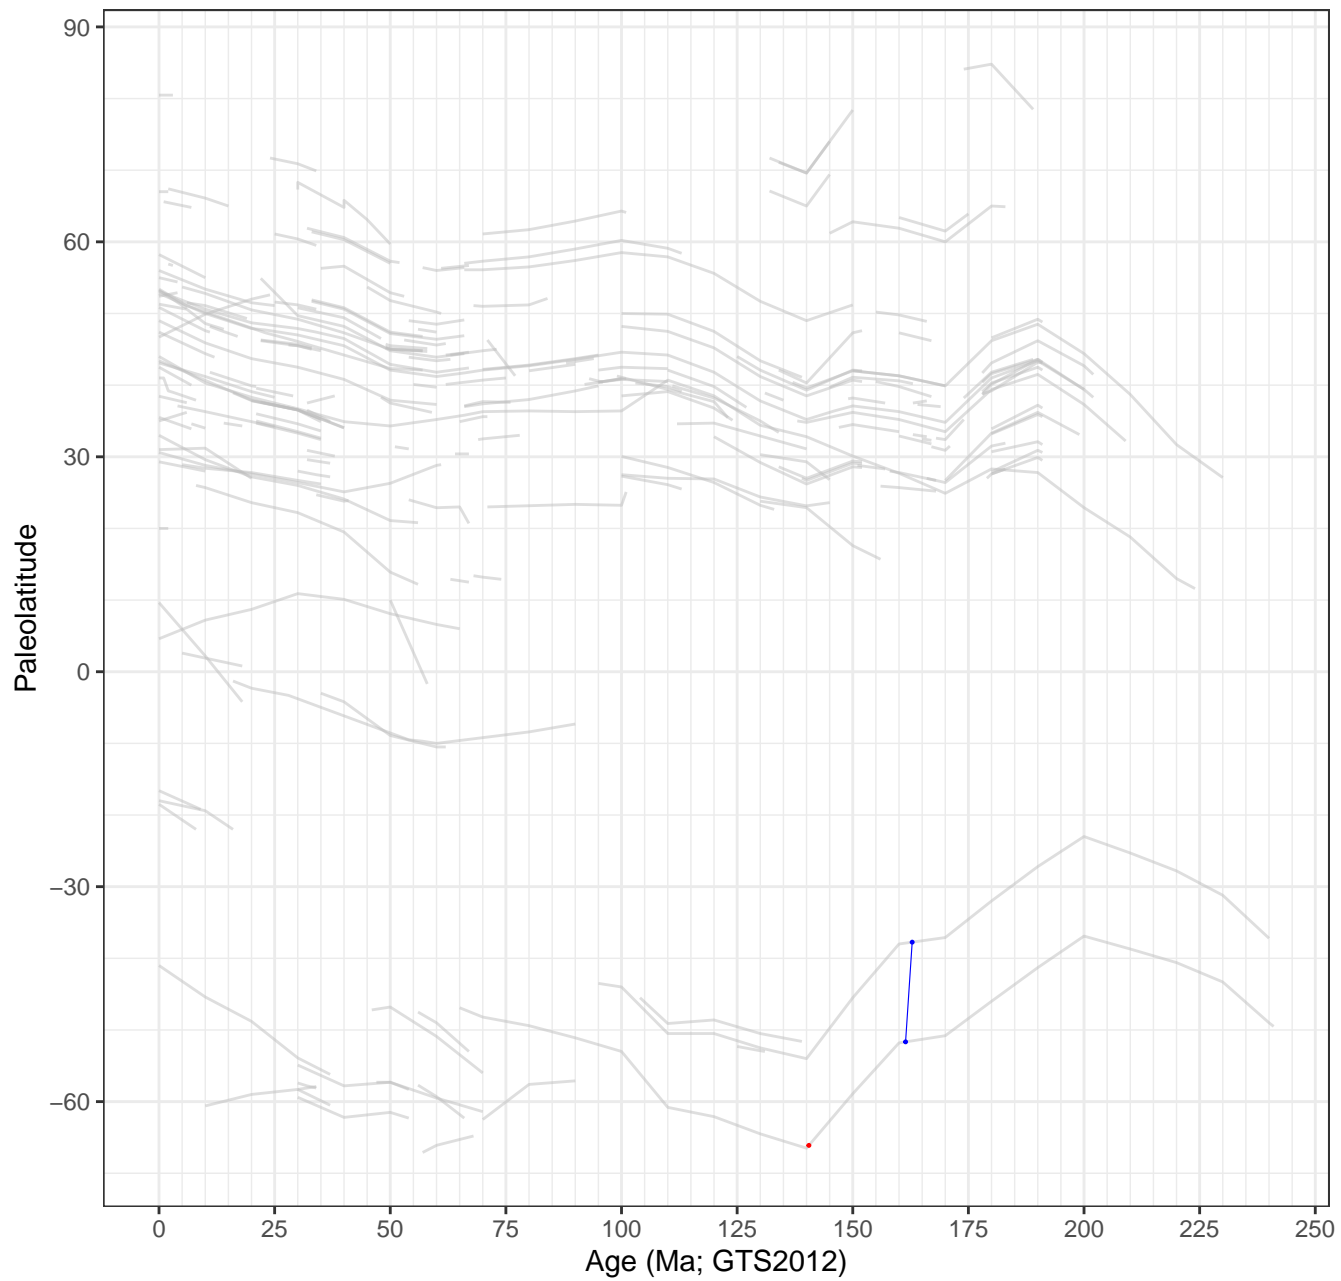

Supplement: Supplementary file 1510 [file Gonyaulacysta ceratophora.pdf › Supplement/Supplement 2/Species 1914 plots/Gonyaulacysta ceratophora.pdf]

# Species *Gonyaulacysta dentata*

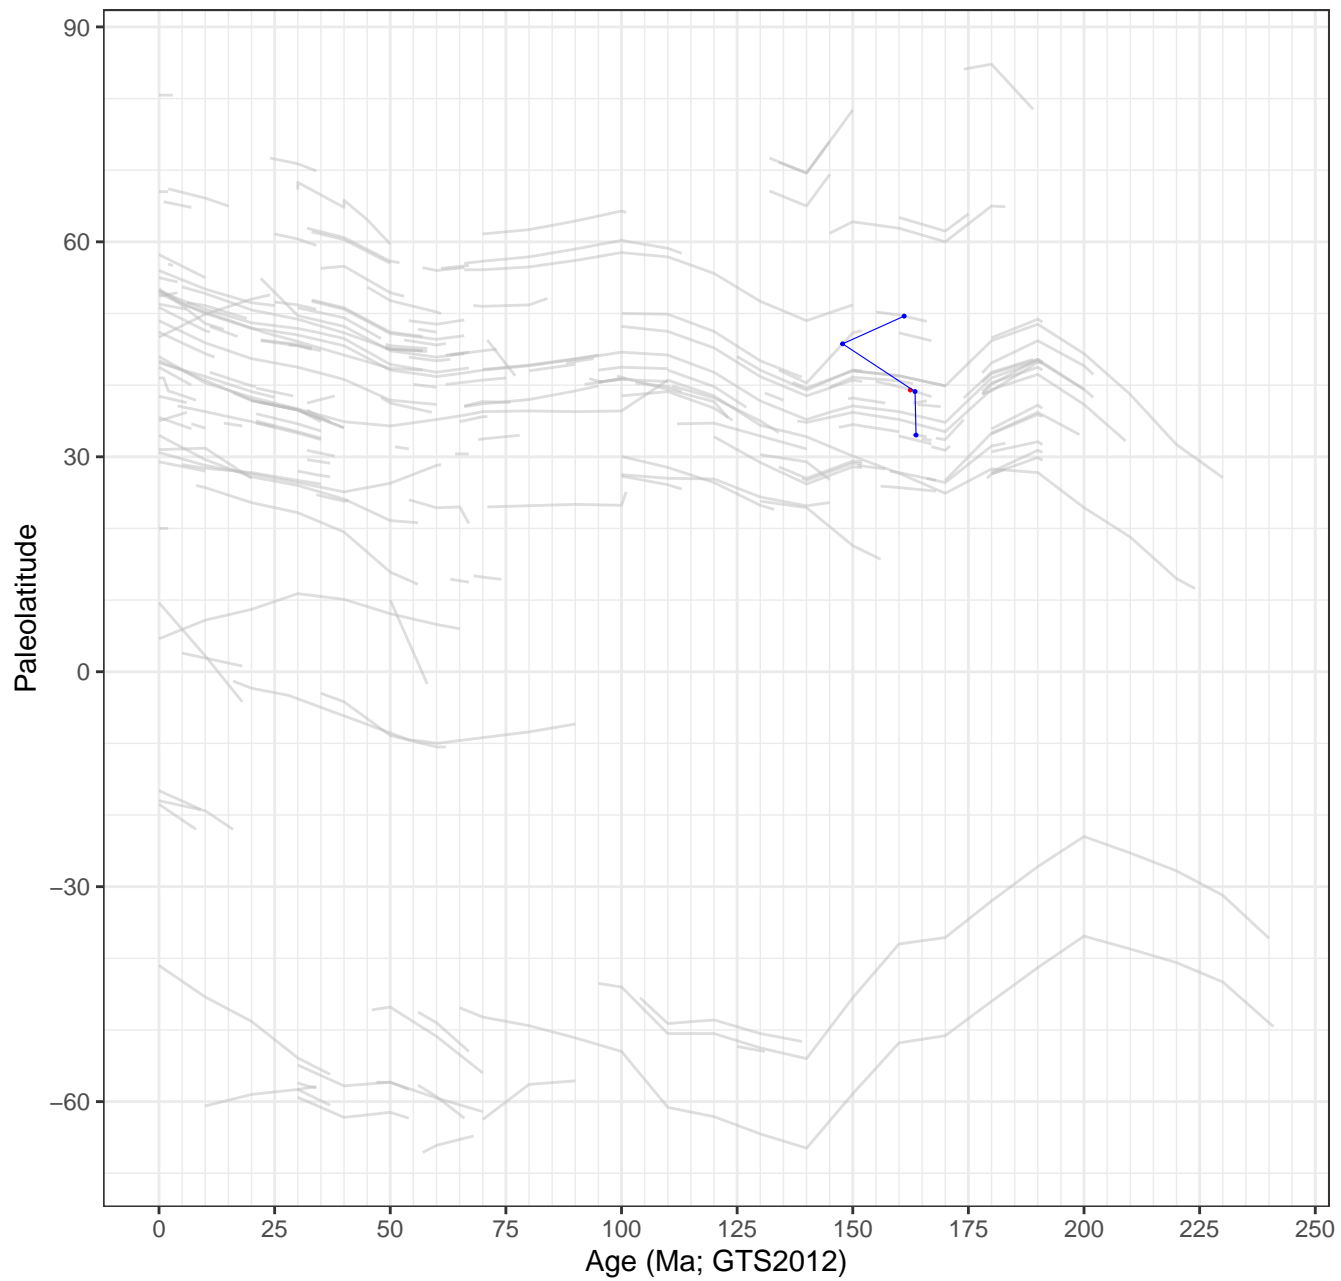

Supplement: Supplementary file 1511 [file Gonyaulacysta dentata.pdf › Supplement/Supplement 2/Species 1914 plots/Gonyaulacysta dentata.pdf]

# Species *Gonyaulacysta dualis*

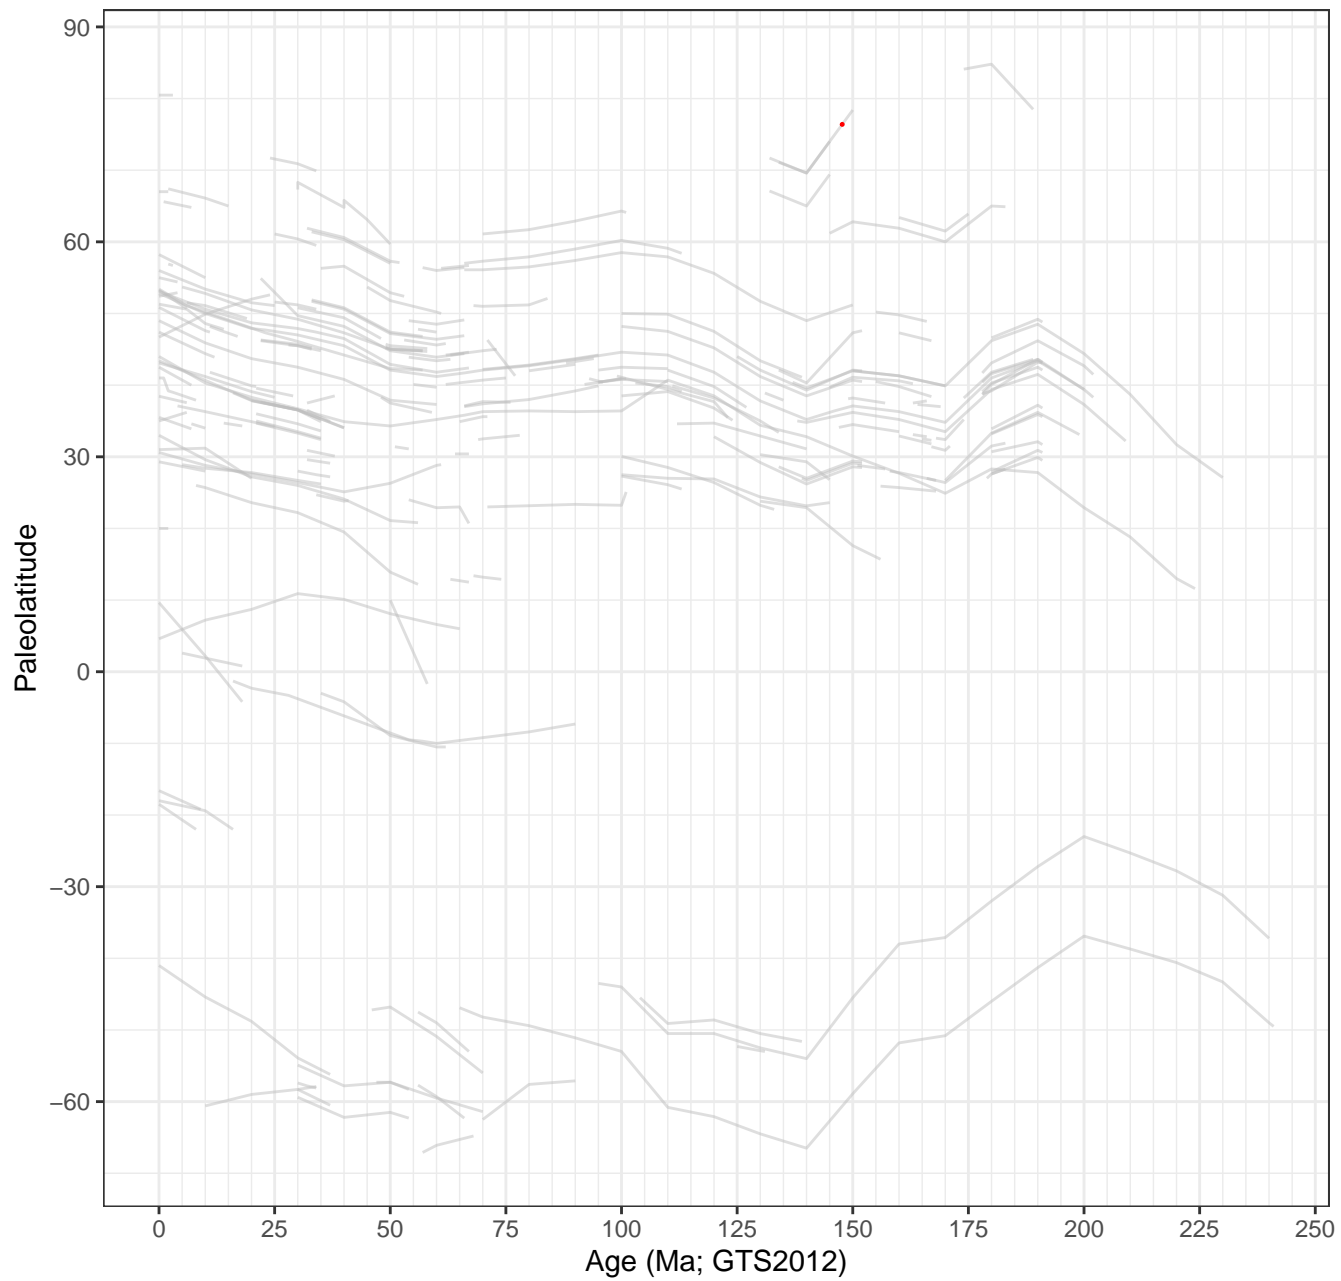

Supplement: Supplementary file 1512 [file Gonyaulacysta dualis.pdf › Supplement/Supplement 2/Species 1914 plots/Gonyaulacysta dualis.pdf]

# Species *Gonyaulacysta eisenackii*

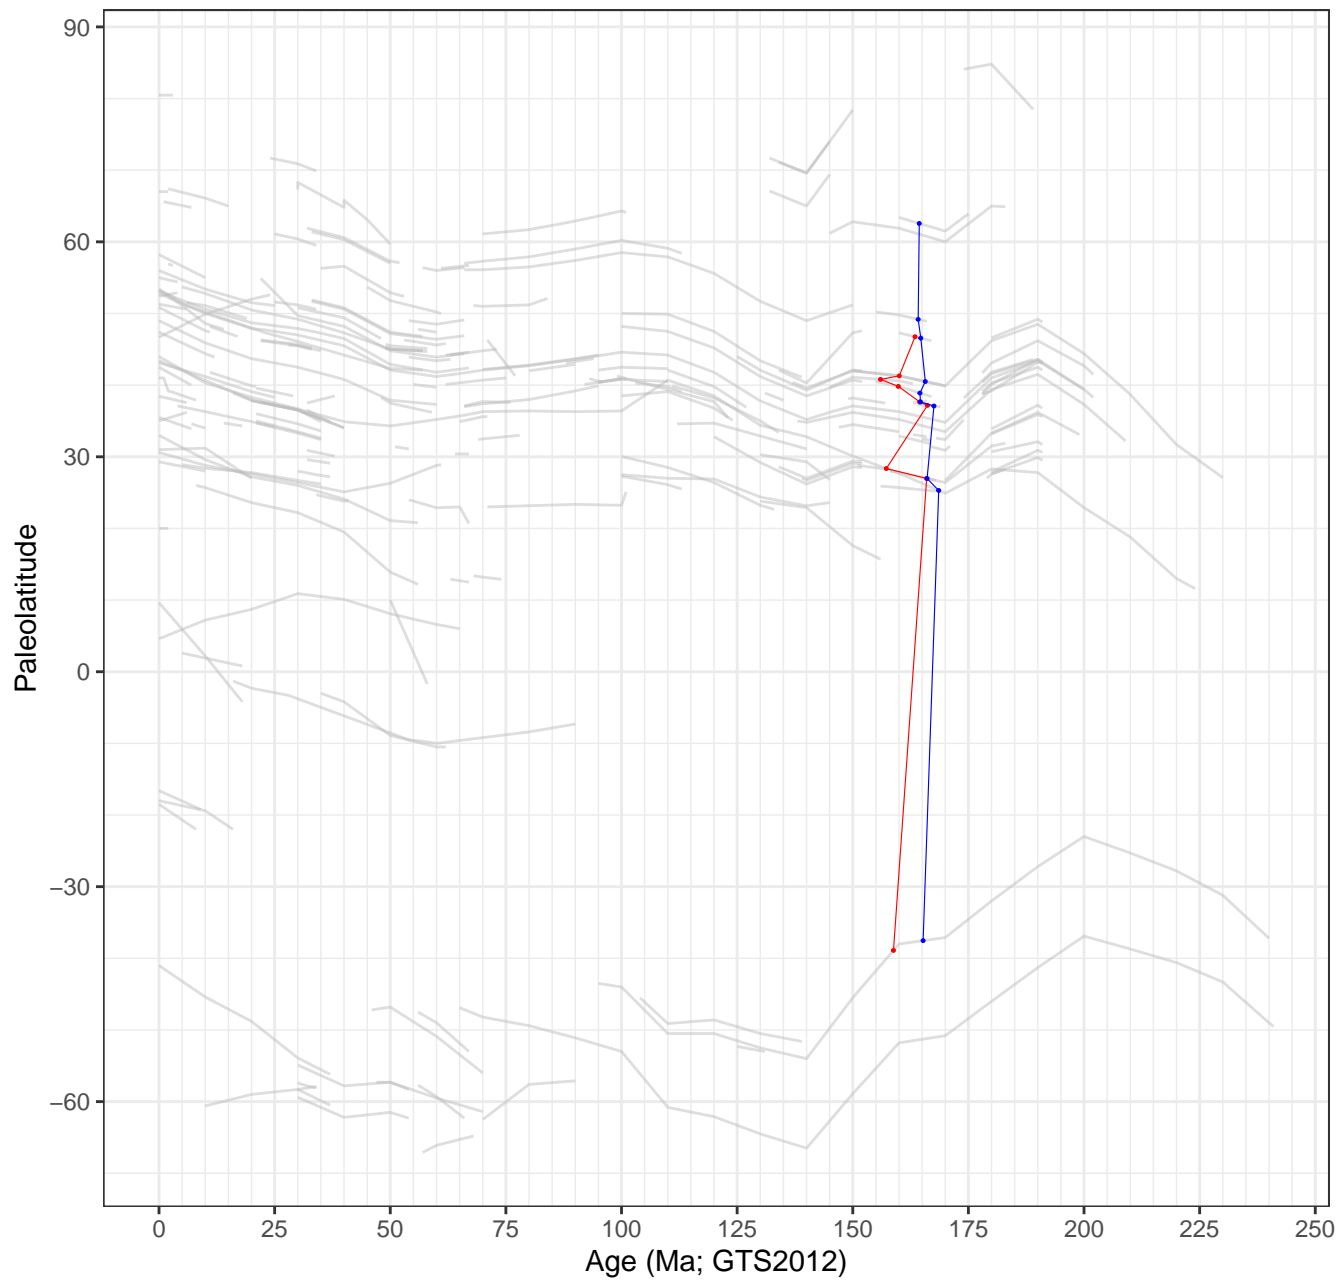

Supplement: Supplementary file 1513 [file Gonyaulacysta eisenackii.pdf › Supplement/Supplement 2/Species 1914 plots/Gonyaulacysta eisenackii.pdf]

# Species *Gonyaulacysta fenestrata*

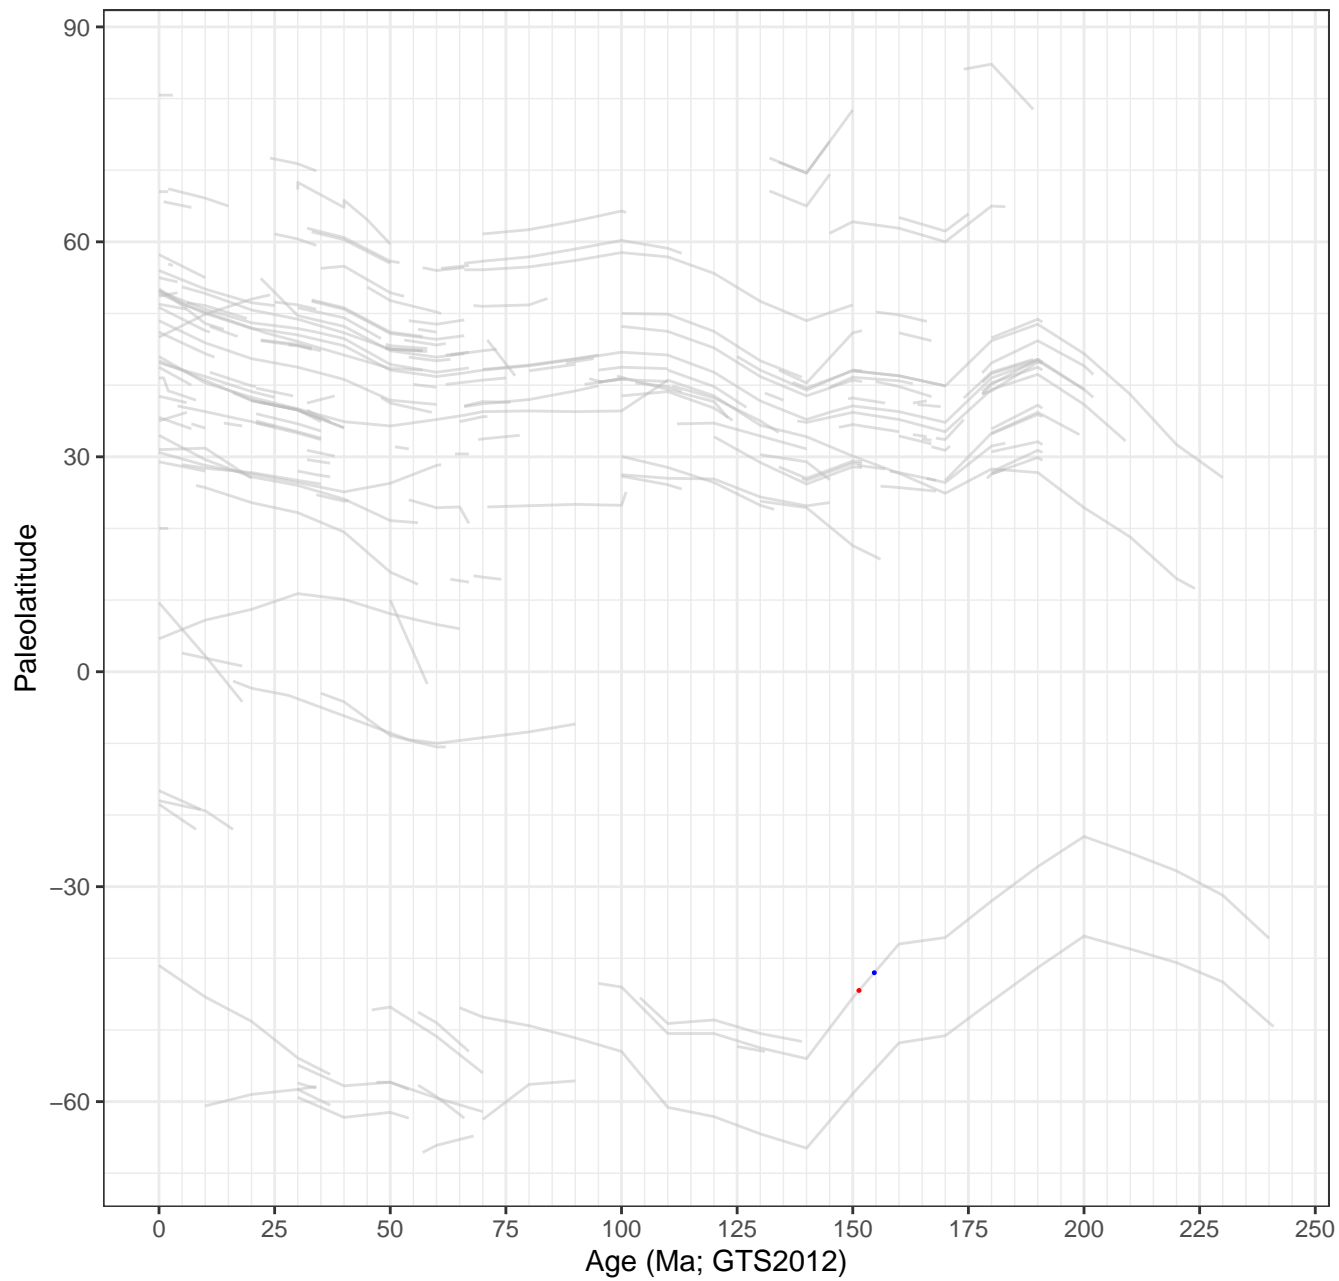

Supplement: Supplementary file 1514 [file Gonyaulacysta fenestrata.pdf › Supplement/Supplement 2/Species 1914 plots/Gonyaulacysta fenestrata.pdf]

# Species *Gonyaulacysta jurassica adecta adecta*

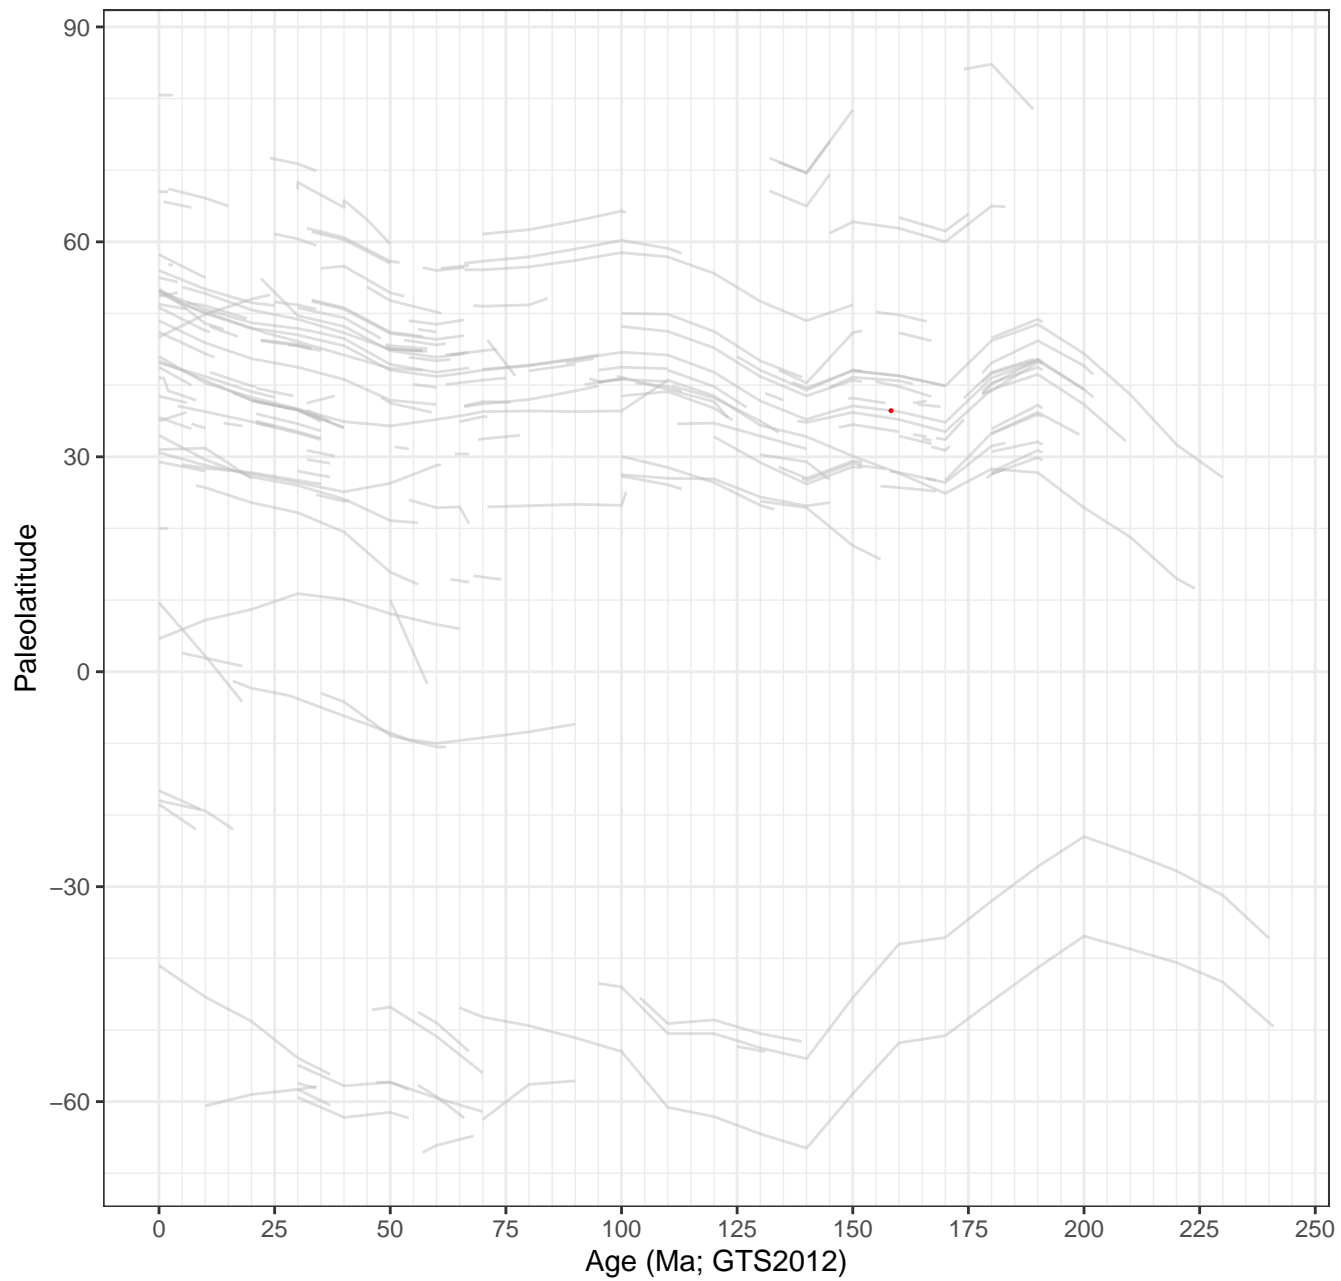

Supplement: Supplementary file 1515 [file Gonyaulacysta jurassica adecta adecta.pdf › Supplement/Supplement 2/Species 1914 plots/Gonyaulacysta jurassica adecta adecta.pdf]

# Species *Gonyaulacysta jurassica* *adecta longicornis*

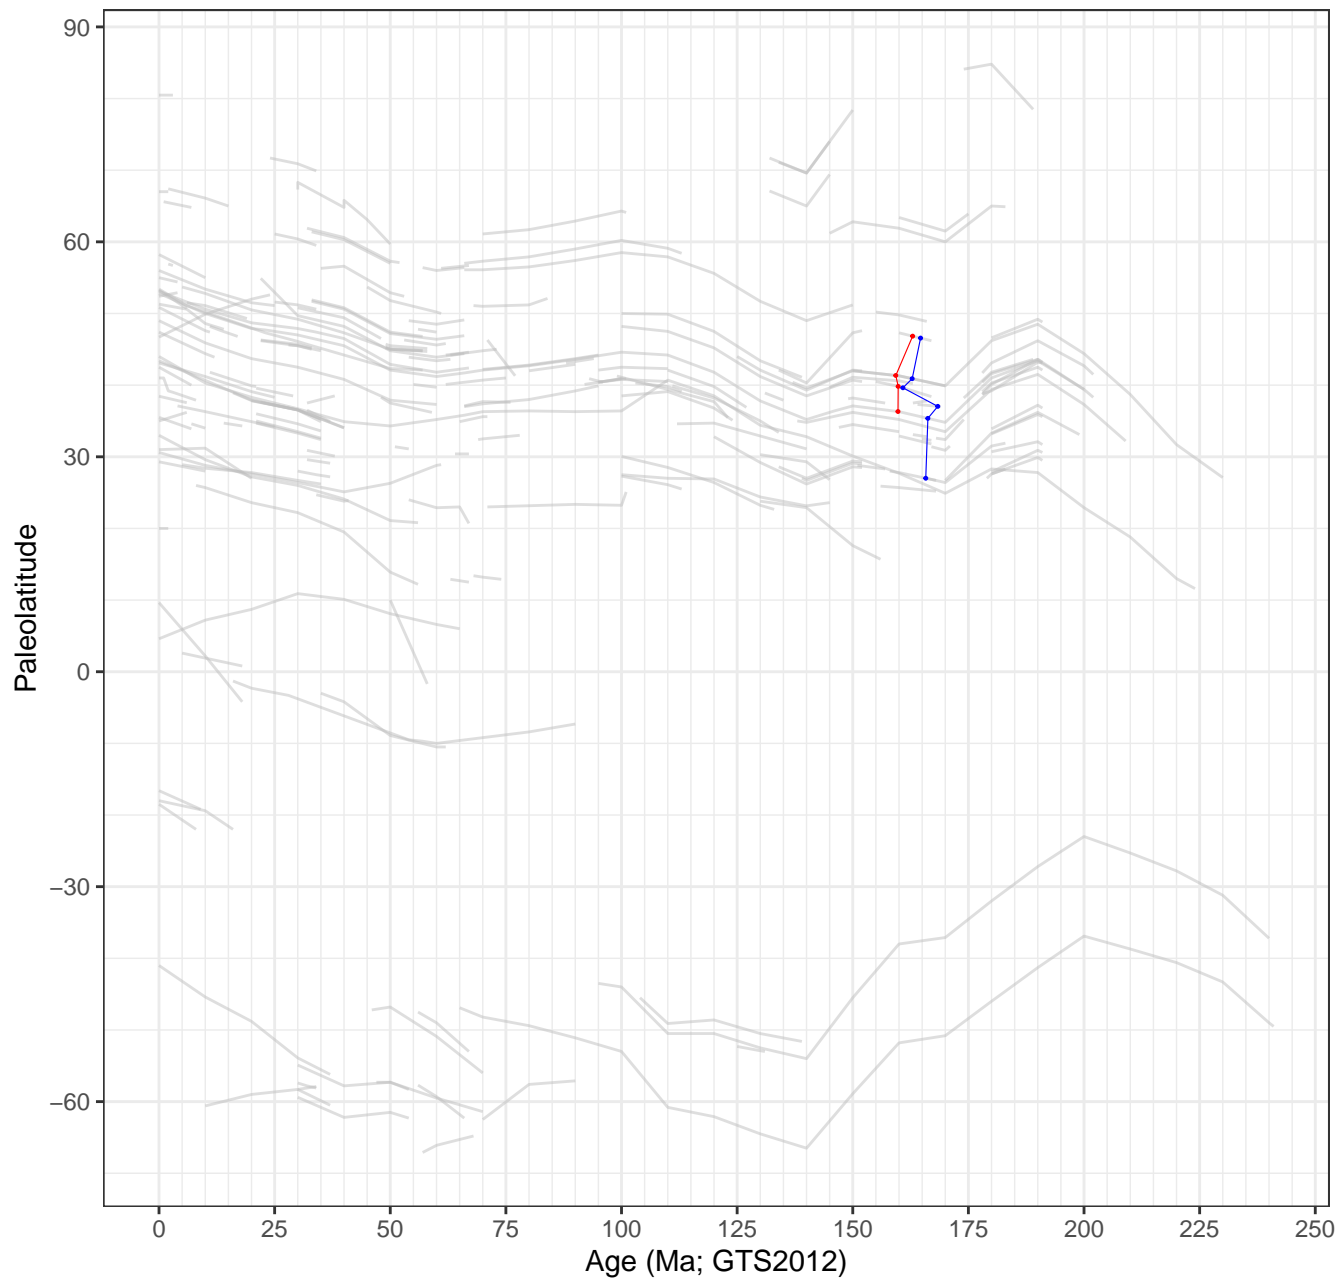

Supplement: Supplementary file 1516 [file Gonyaulacysta jurassica adecta longicornis.pdf › Supplement/Supplement 2/Species 1914 plots/Gonyaulacysta jurassica adecta longicornis.pdf]

# Species *Gonyaulacysta jurassica adecta*

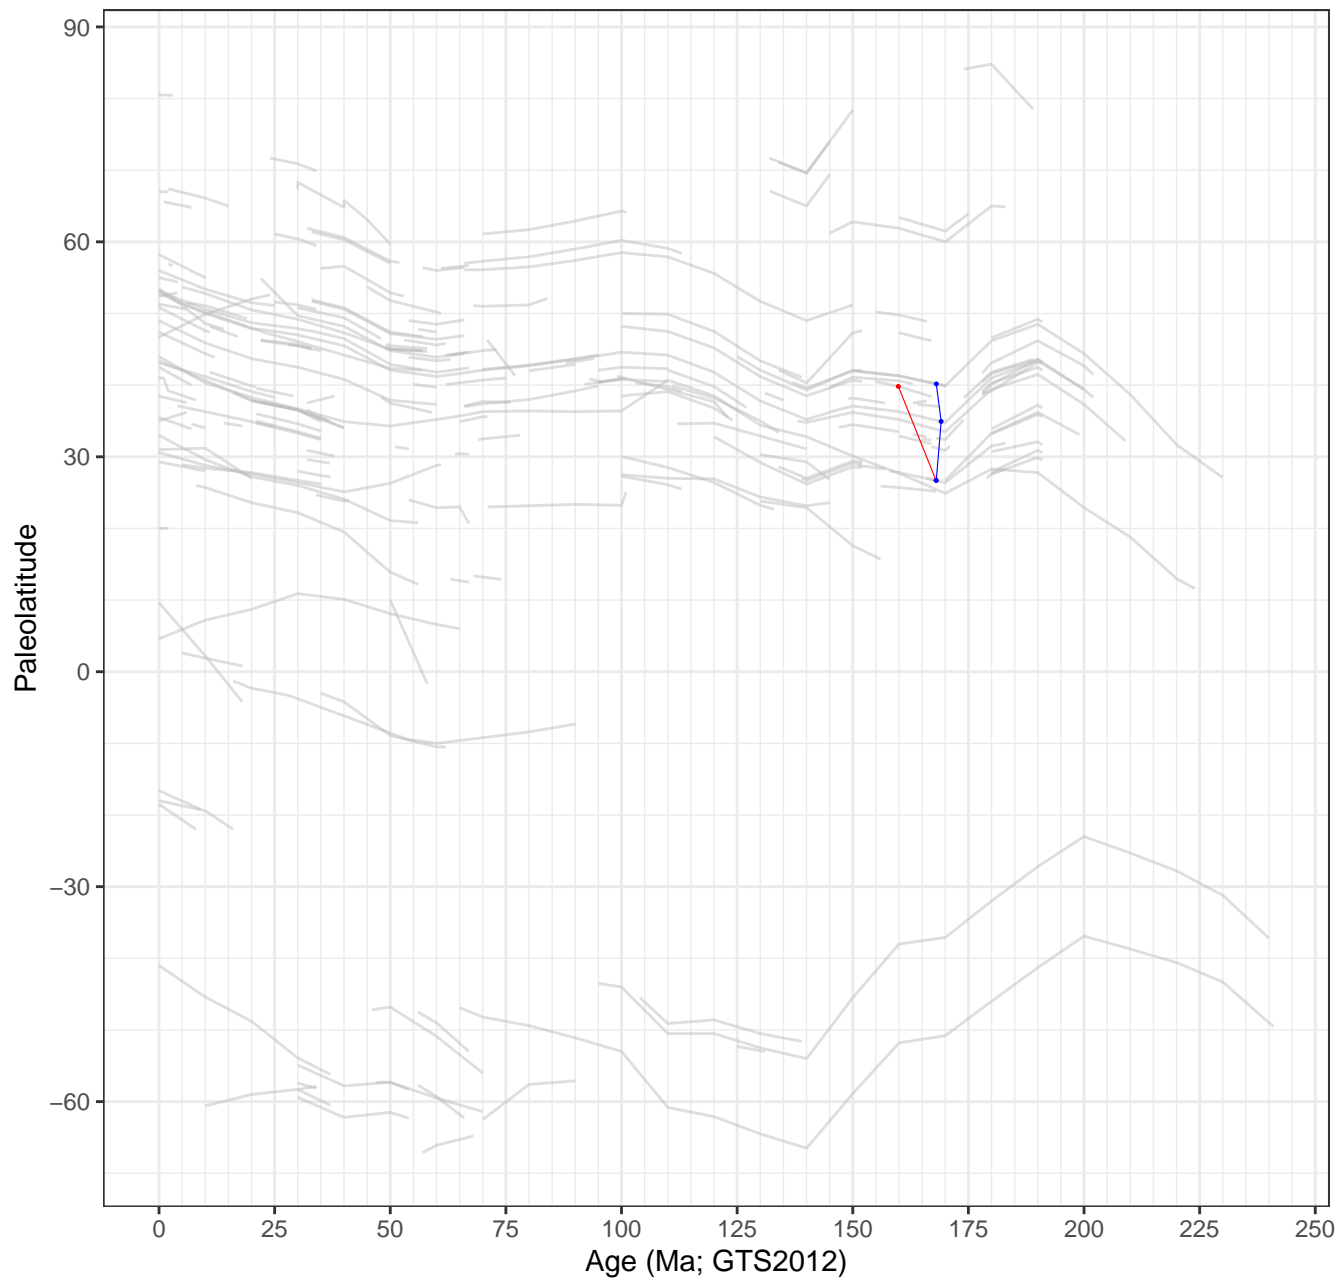

Supplement: Supplementary file 1517 [file Gonyaulacysta jurassica adecta.pdf › Supplement/Supplement 2/Species 1914 plots/Gonyaulacysta jurassica adecta.pdf]

# Species *Gonyaulacysta jurassica jurassica*

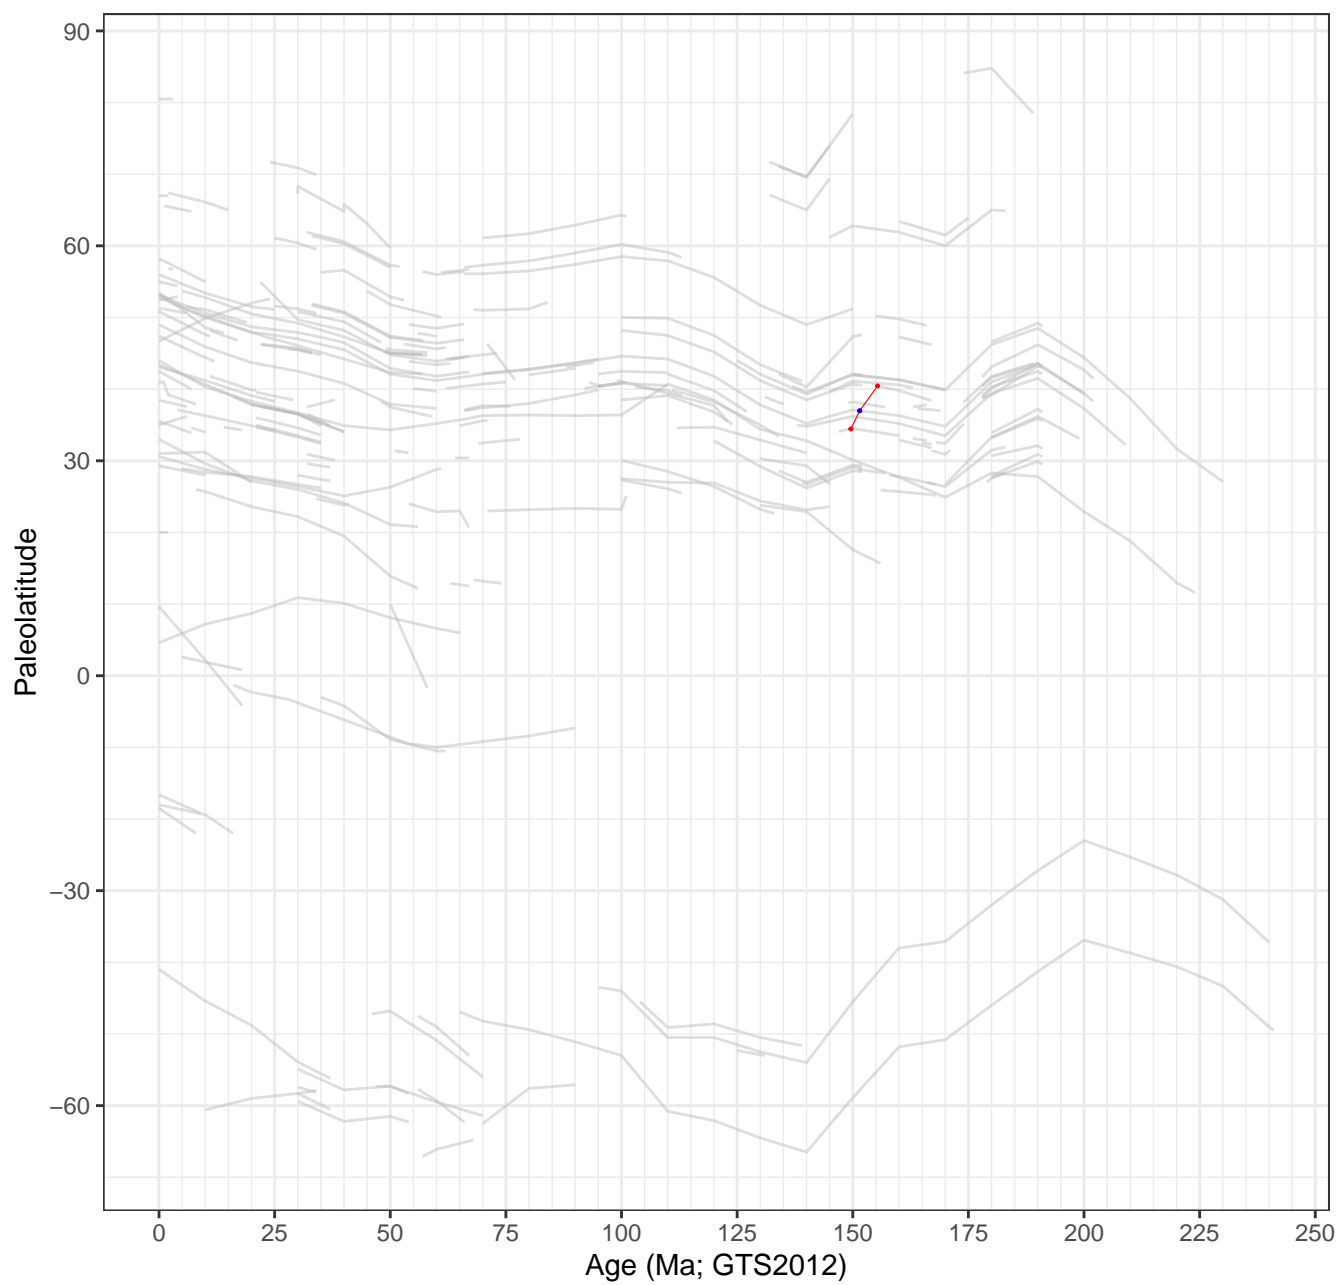

Supplement: Supplementary file 1518 [file Gonyaulacysta jurassica jurassica.pdf › Supplement/Supplement 2/Species 1914 plots/Gonyaulacysta jurassica jurassica.pdf]

# Species *Gonyaulacysta jurassica longicornis*

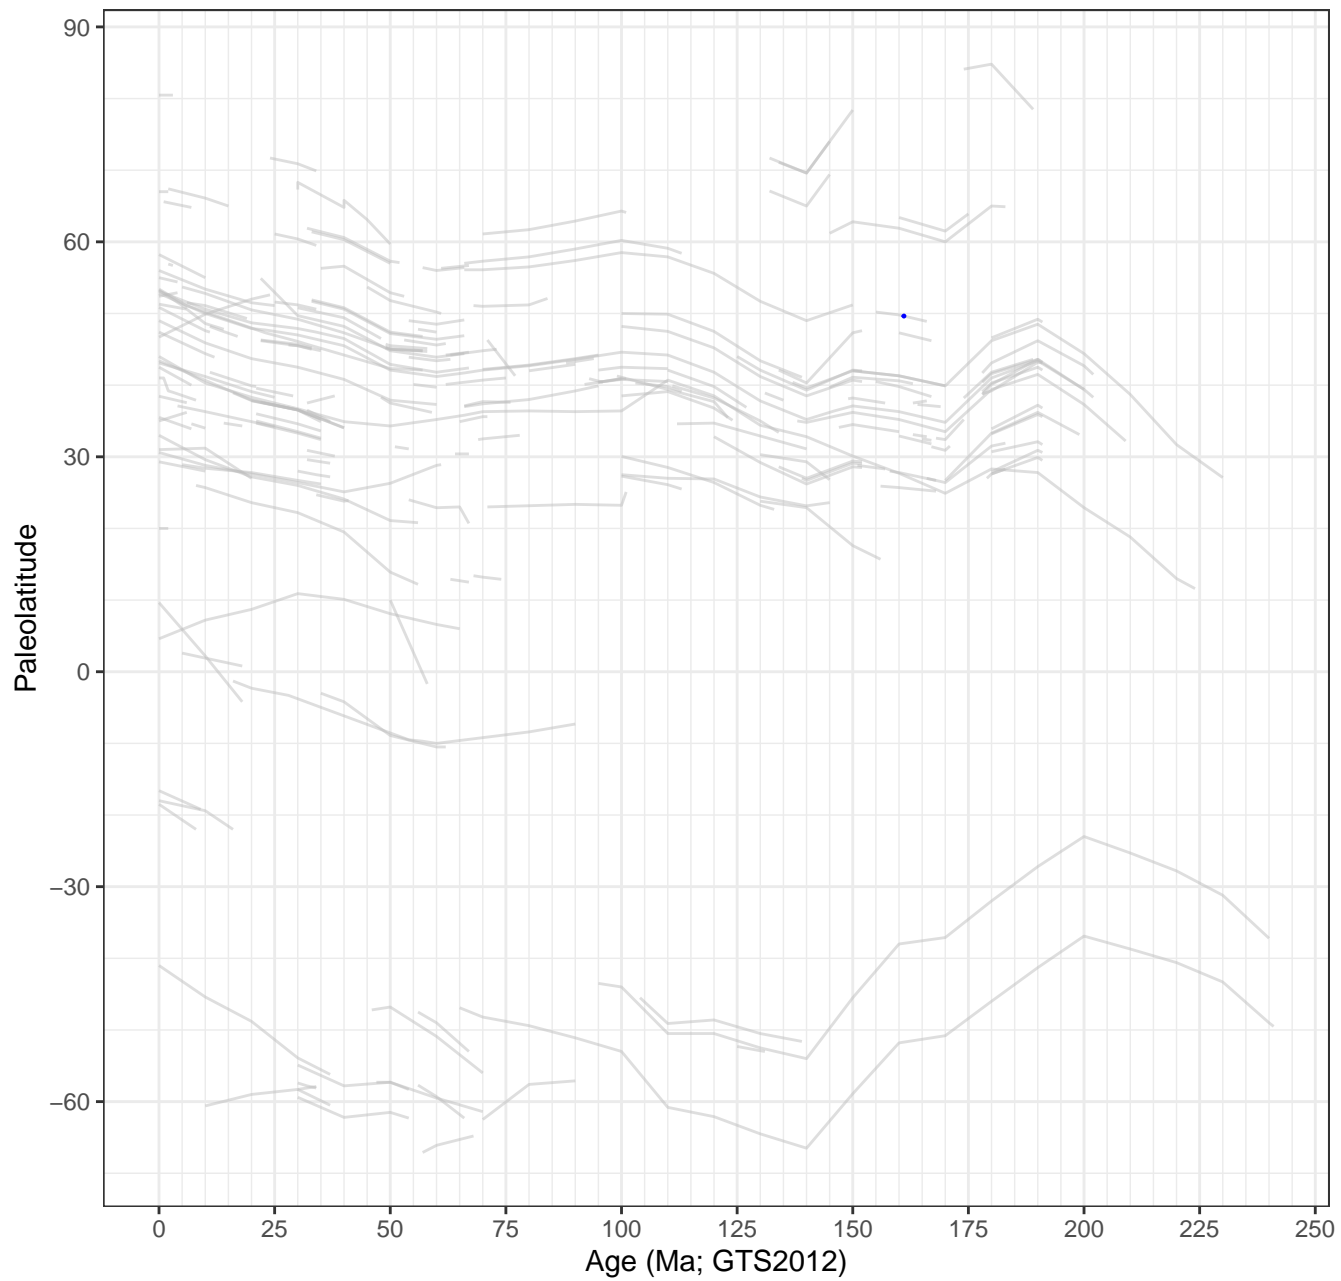

Supplement: Supplementary file 1519 [file Gonyaulacysta jurassica longicornis.pdf › Supplement/Supplement 2/Species 1914 plots/Gonyaulacysta jurassica longicornis.pdf]

# Species *Gonyaulacysta jurassica*

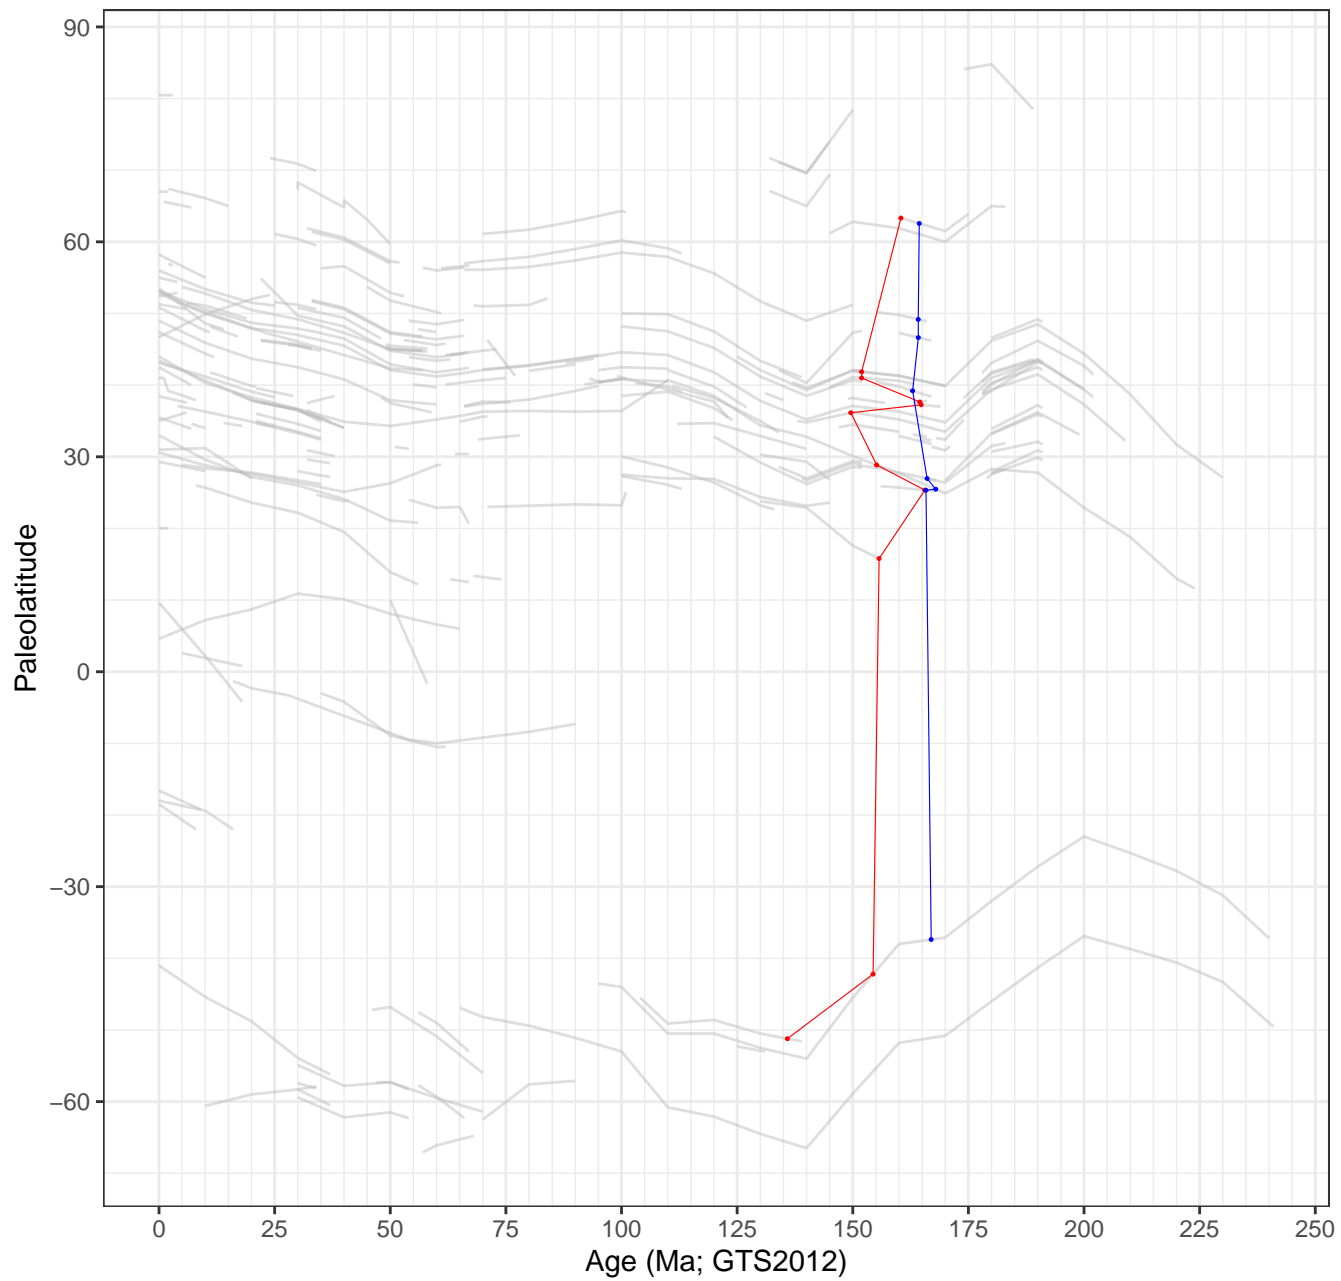

Supplement: Supplementary file 1520 [file Gonyaulacysta jurassica.pdf › Supplement/Supplement 2/Species 1914 plots/Gonyaulacysta jurassica.pdf]

# Species *Gonyaulacysta kleithria*

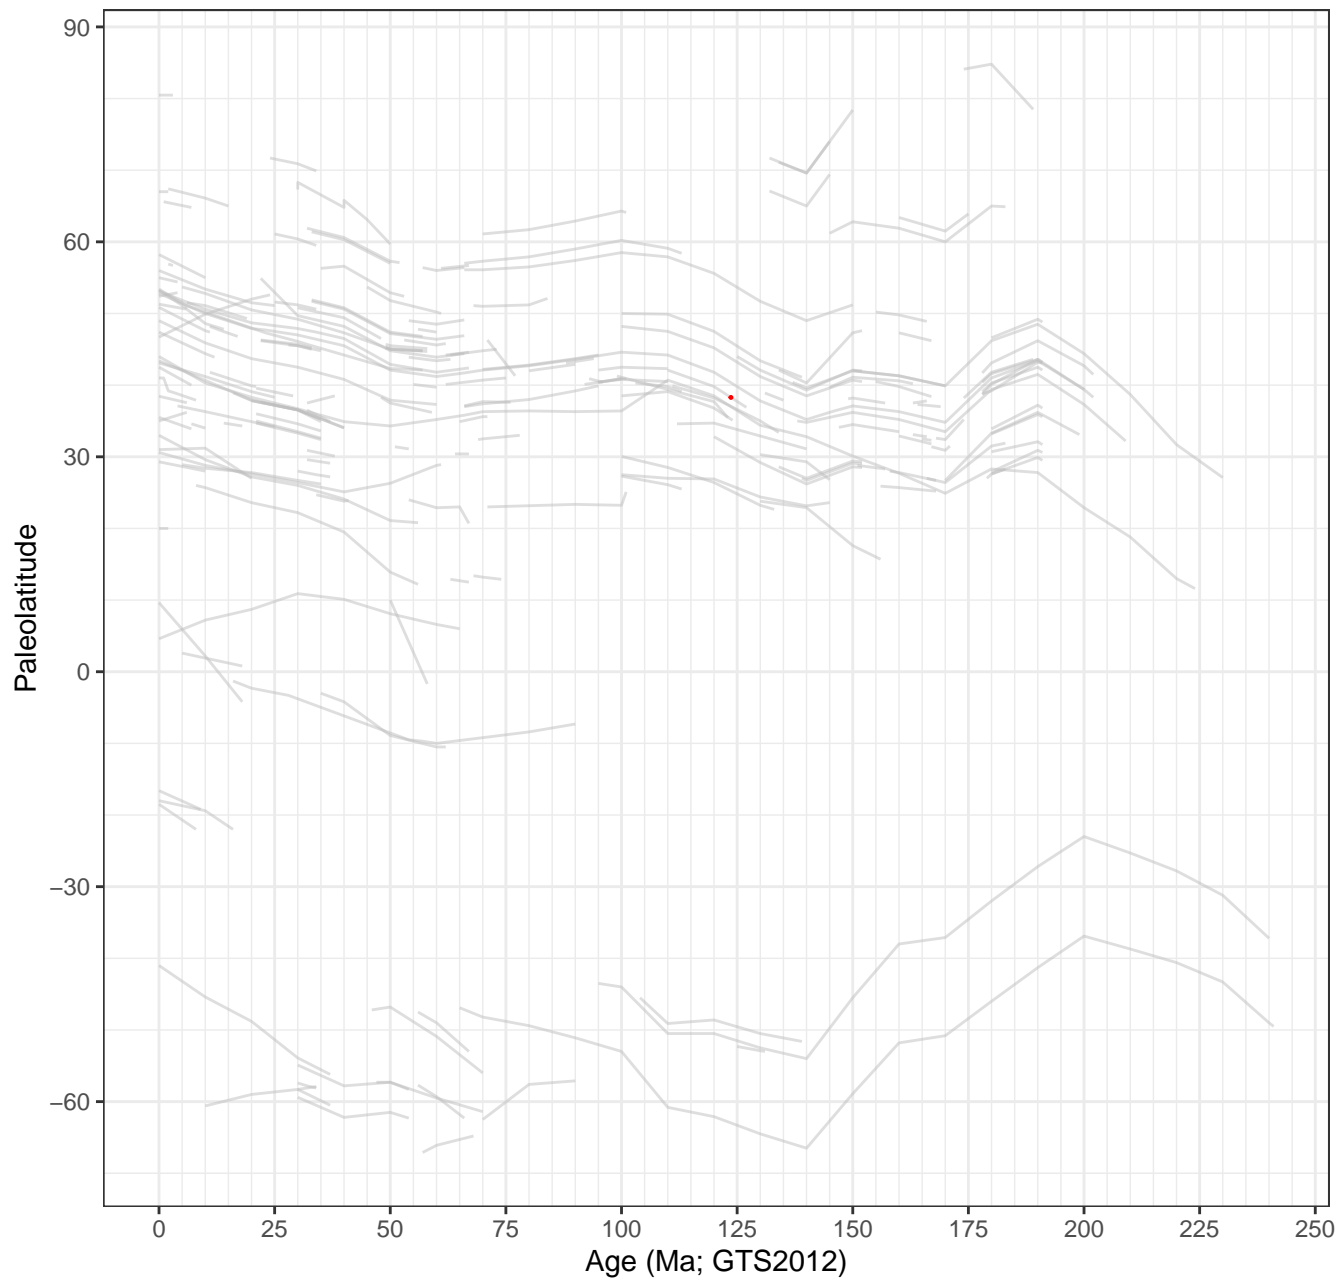

Supplement: Supplementary file 1521 [file Gonyaulacysta kleithria.pdf › Supplement/Supplement 2/Species 1914 plots/Gonyaulacysta kleithria.pdf]

# Species *Gonyaulacysta pectinigera*

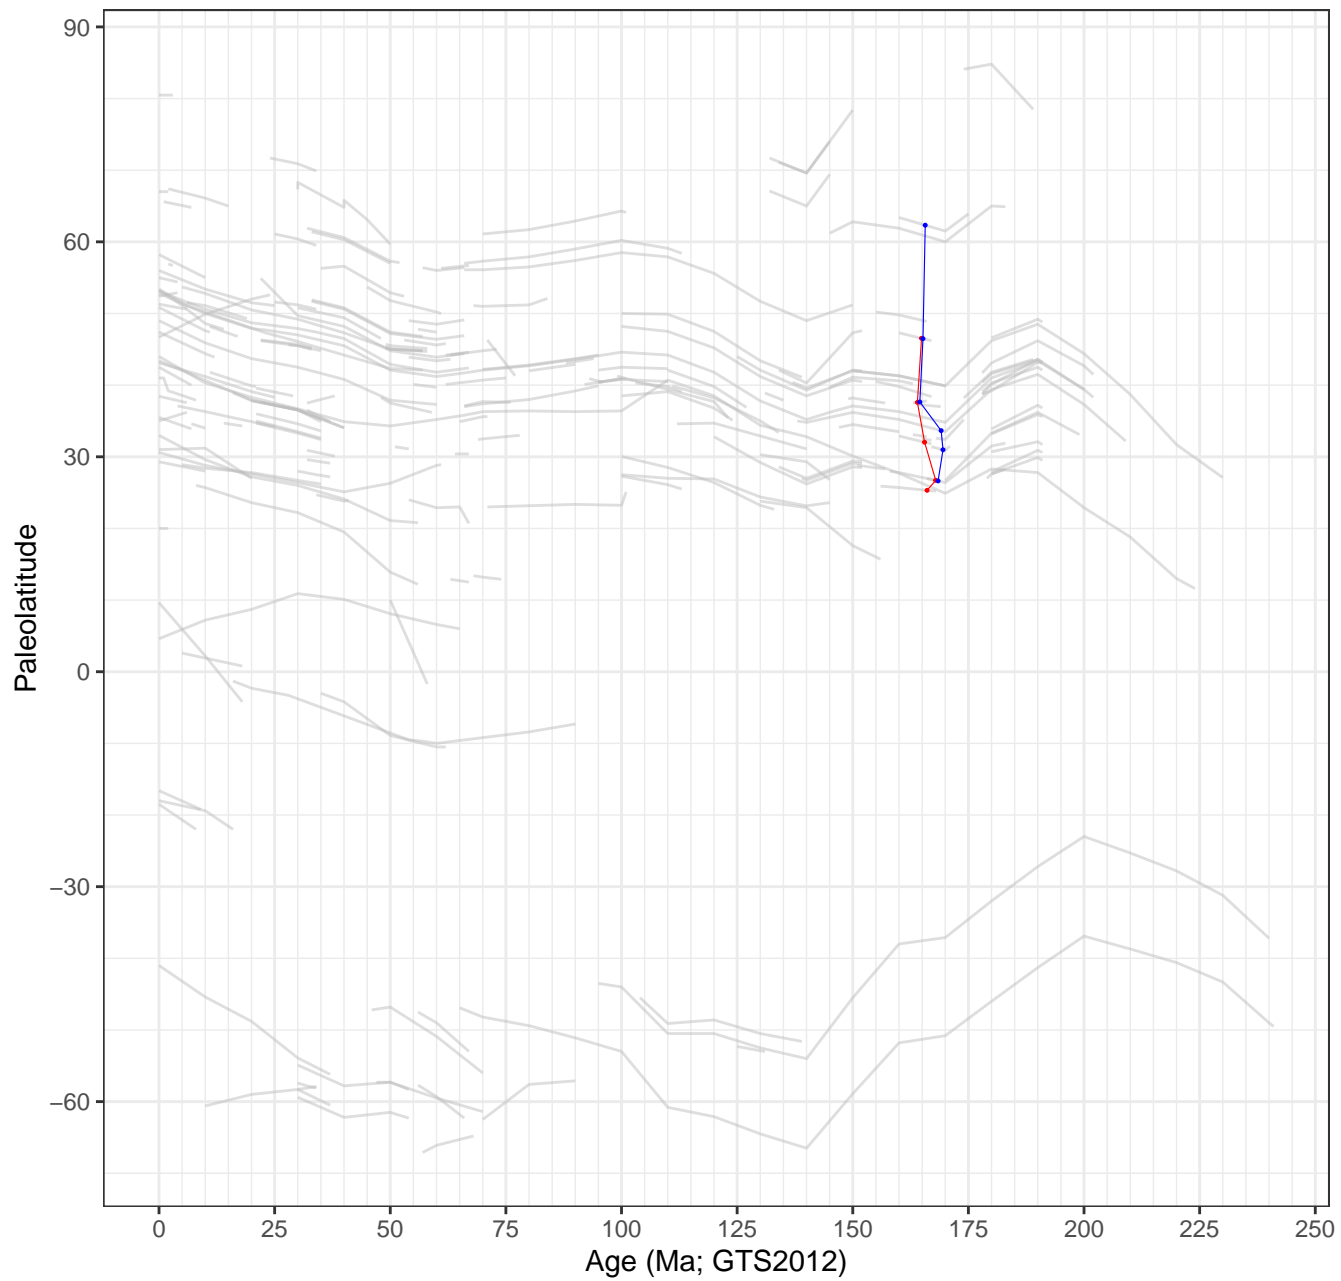

Supplement: Supplementary file 1522 [file Gonyaulacysta pectinigera.pdf › Supplement/Supplement 2/Species 1914 plots/Gonyaulacysta pectinigera.pdf]

# Species *Gonyaulacysta polythris*

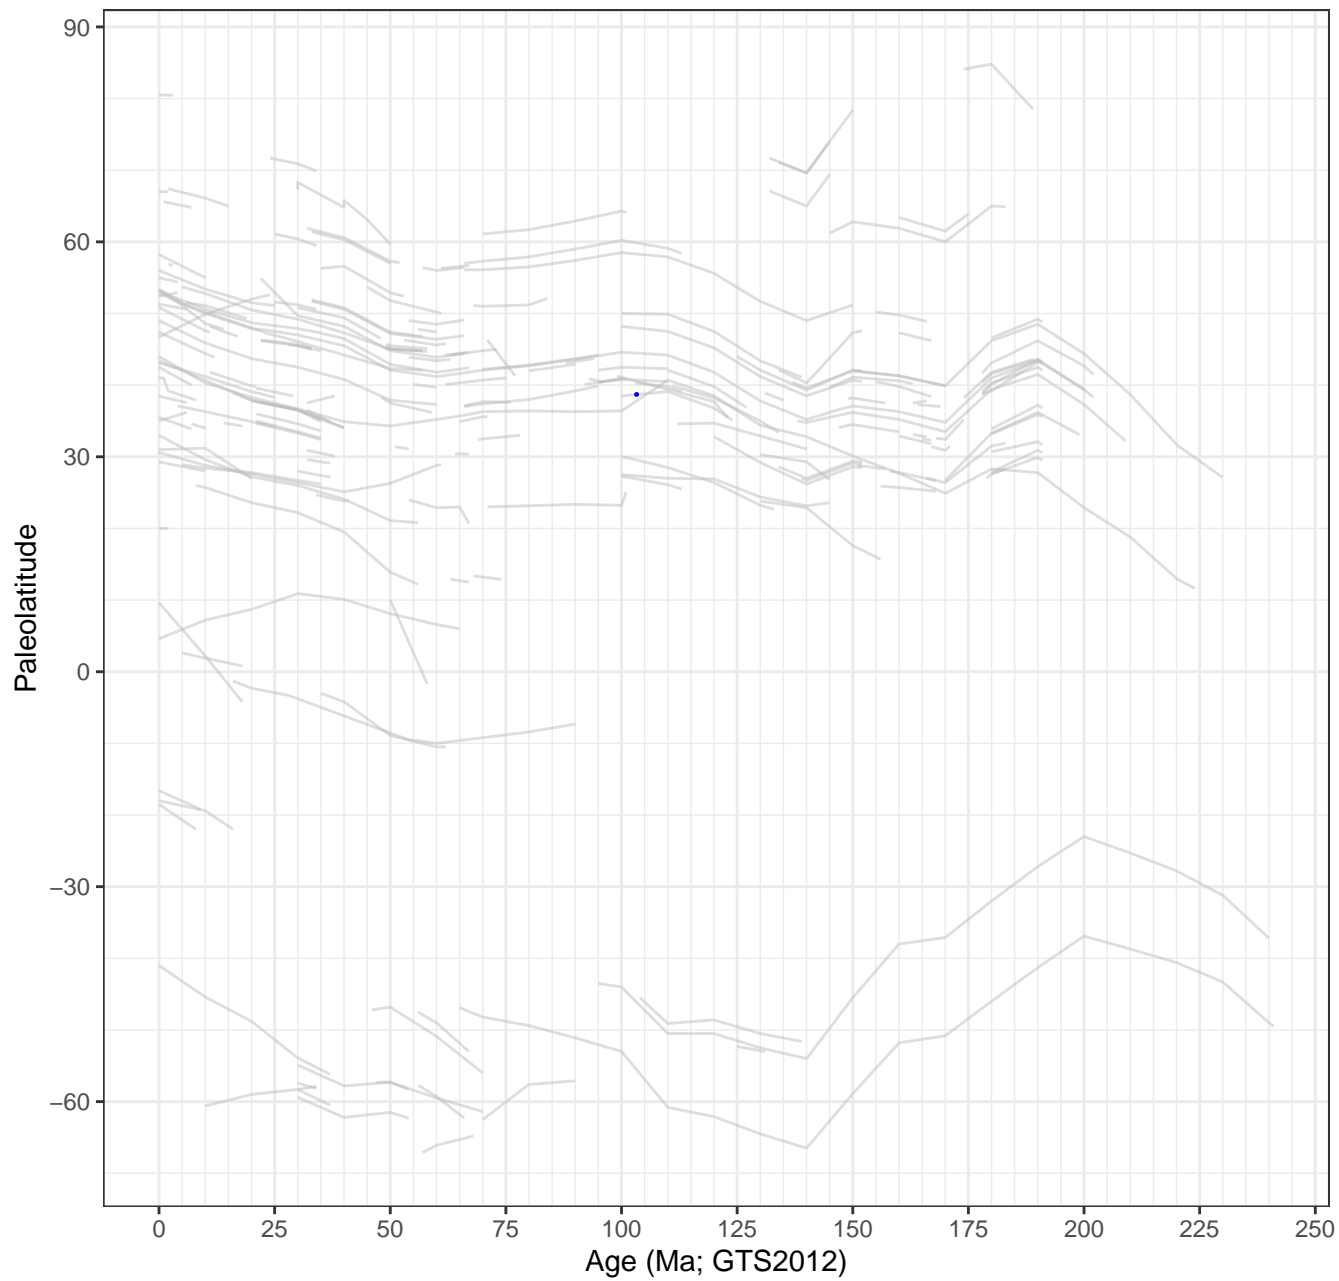

Supplement: Supplementary file 1523 [file Gonyaulacysta polythris.pdf › Supplement/Supplement 2/Species 1914 plots/Gonyaulacysta polythris.pdf]

# Species *Gonyaulacysta teicha*

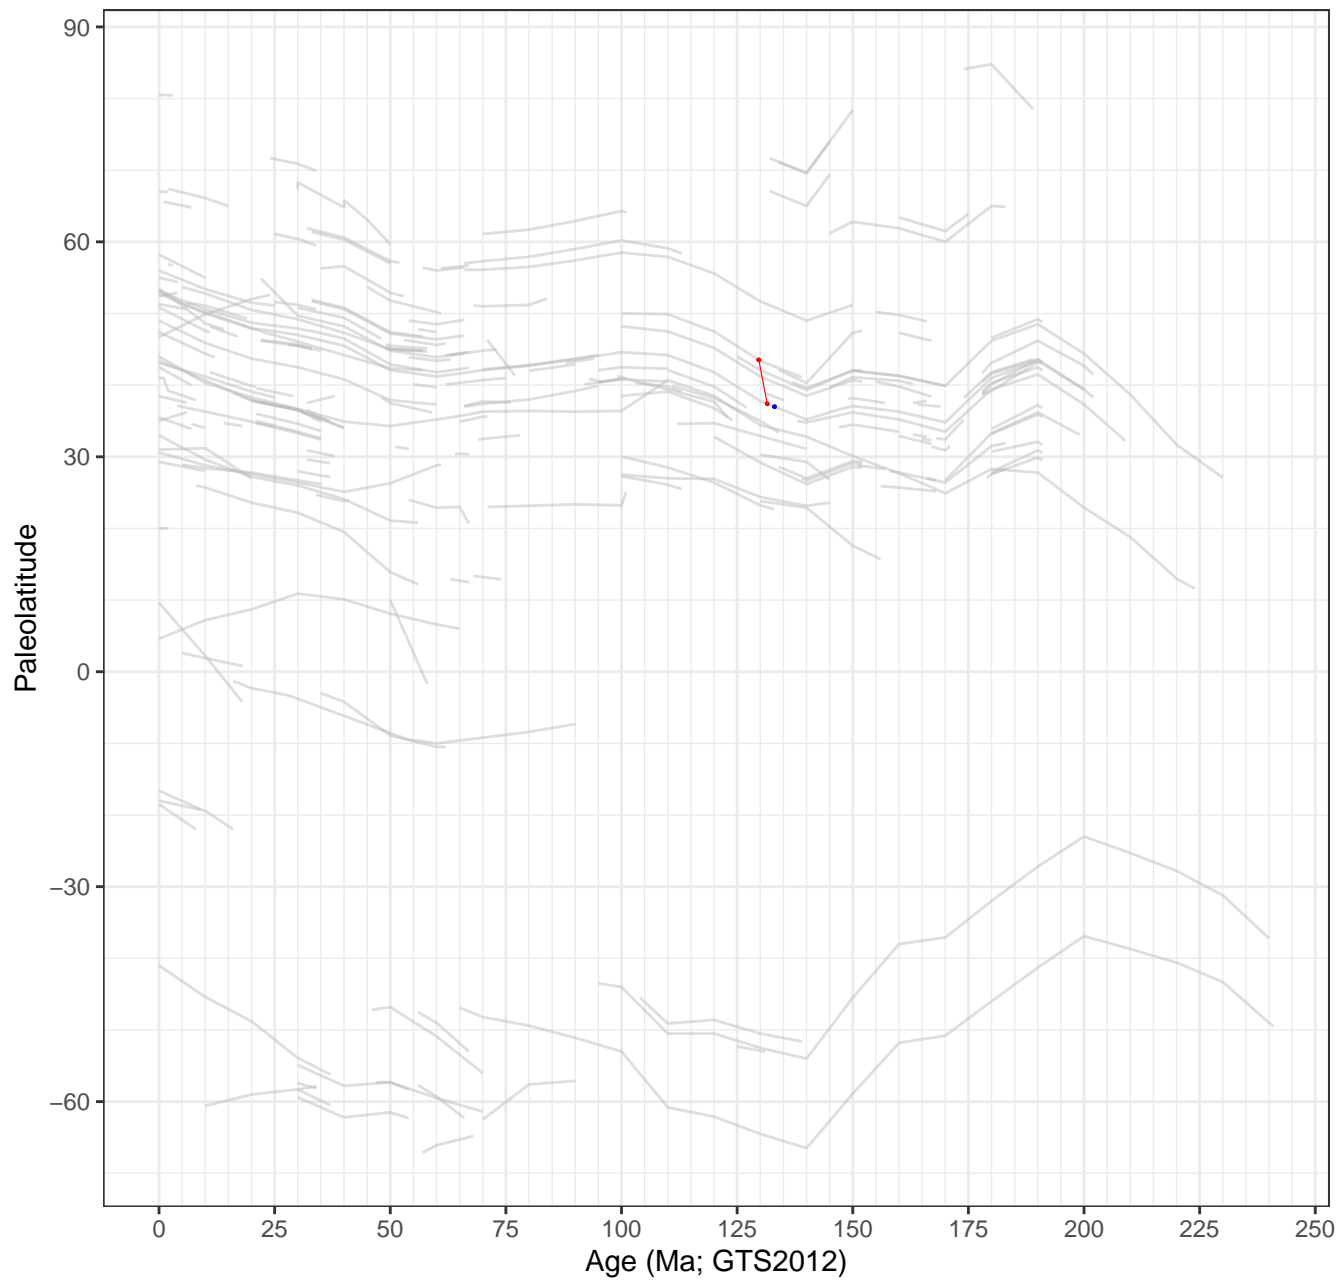

Supplement: Supplementary file 1524 [file Gonyaulacysta teicha.pdf › Supplement/Supplement 2/Species 1914 plots/Gonyaulacysta teicha.pdf]

# Species *Gonyaulacysta wetzelii*

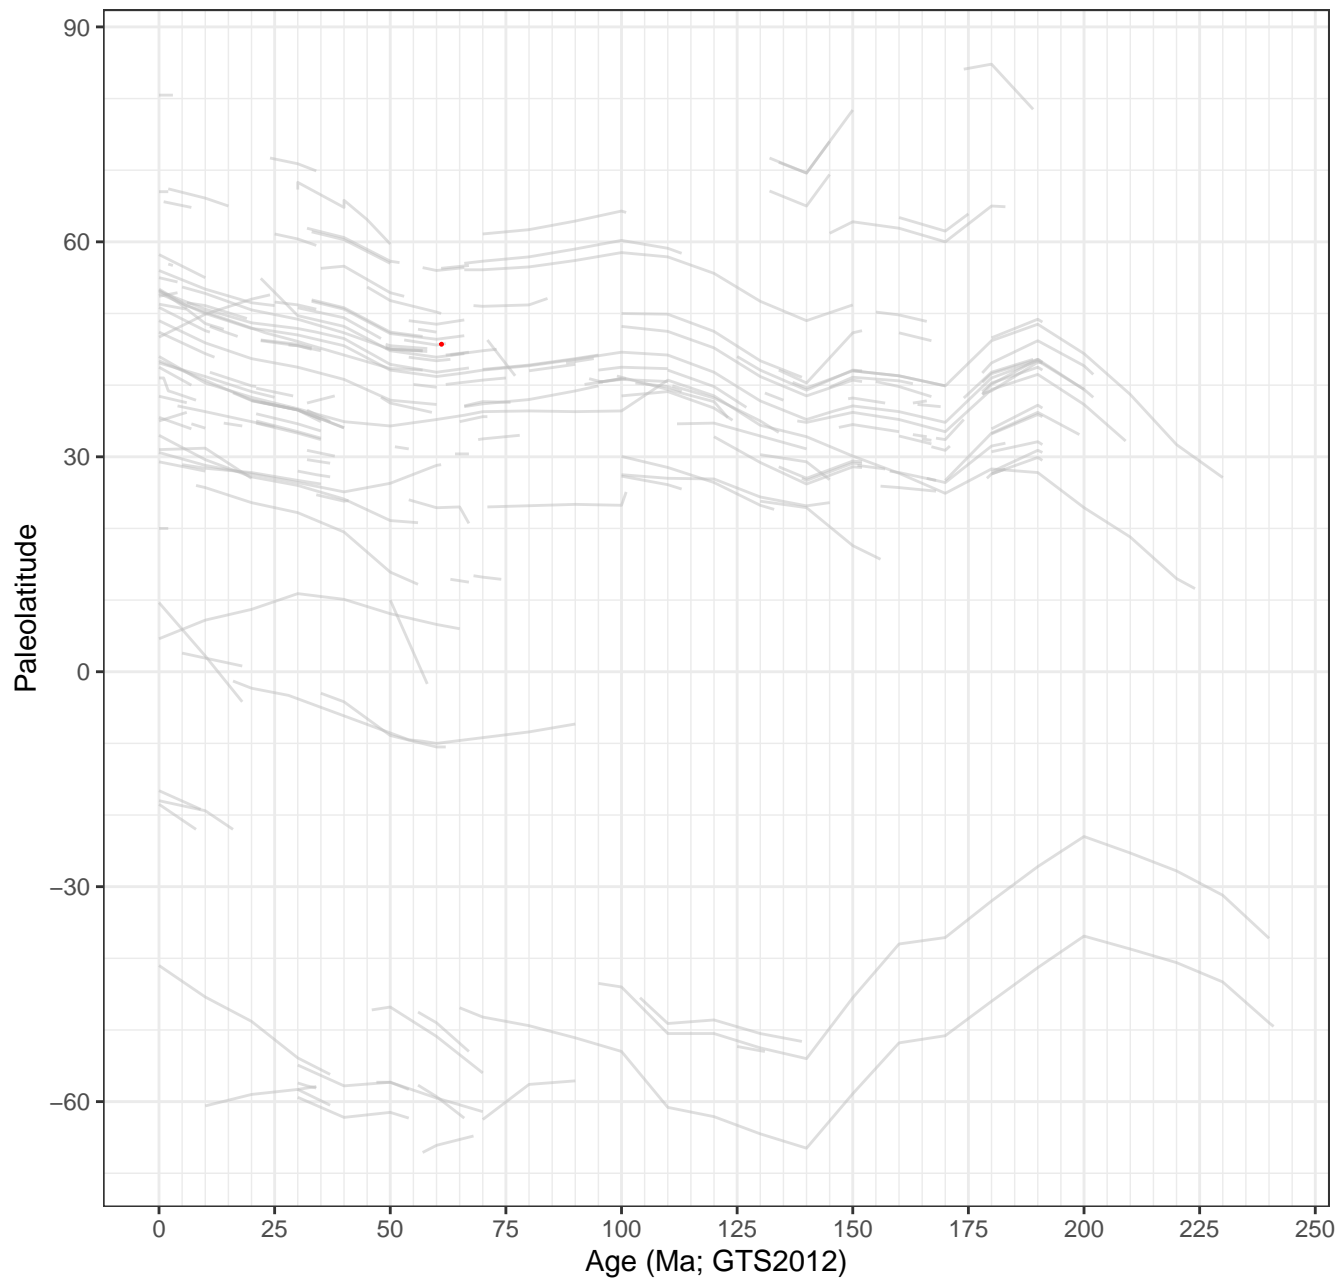

Supplement: Supplementary file 1525 [file Gonyaulacysta wetzelii.pdf › Supplement/Supplement 2/Species 1914 plots/Gonyaulacysta wetzelii.pdf]

# Species *Gramocysta verricula*

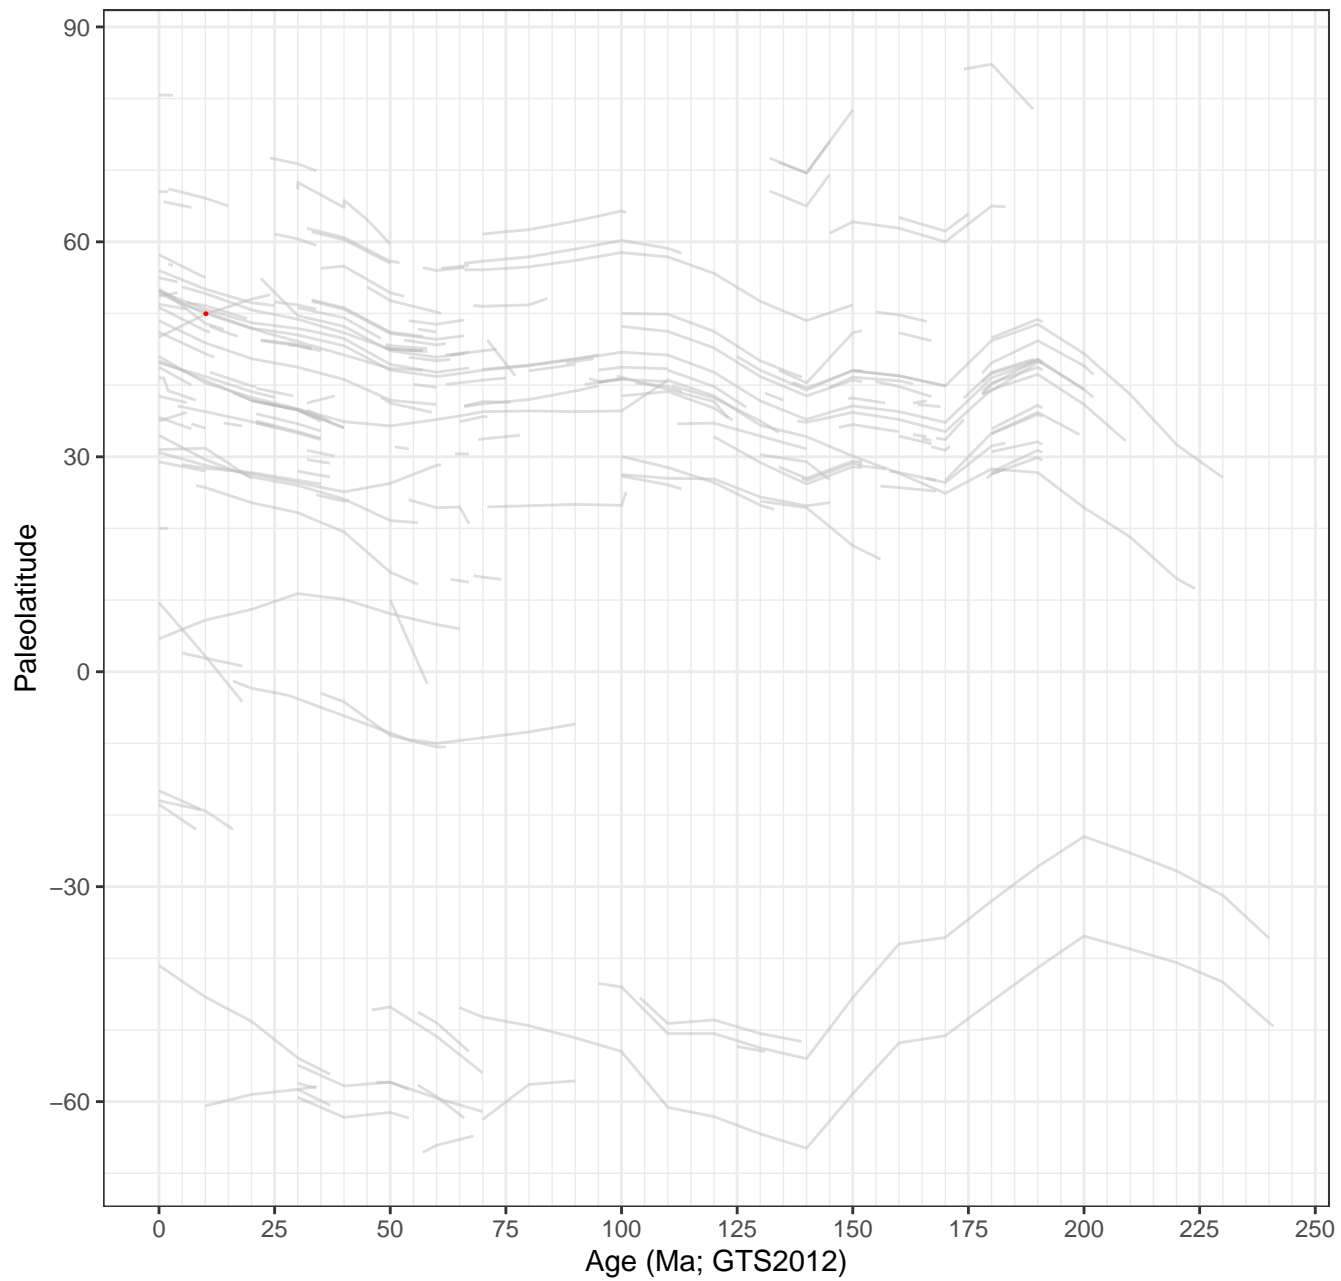

Supplement: Supplementary file 1526 [file Gramocysta verricula.pdf › Supplement/Supplement 2/Species 1914 plots/Gramocysta verricula.pdf]

# Species *Gramocysta vesicula*

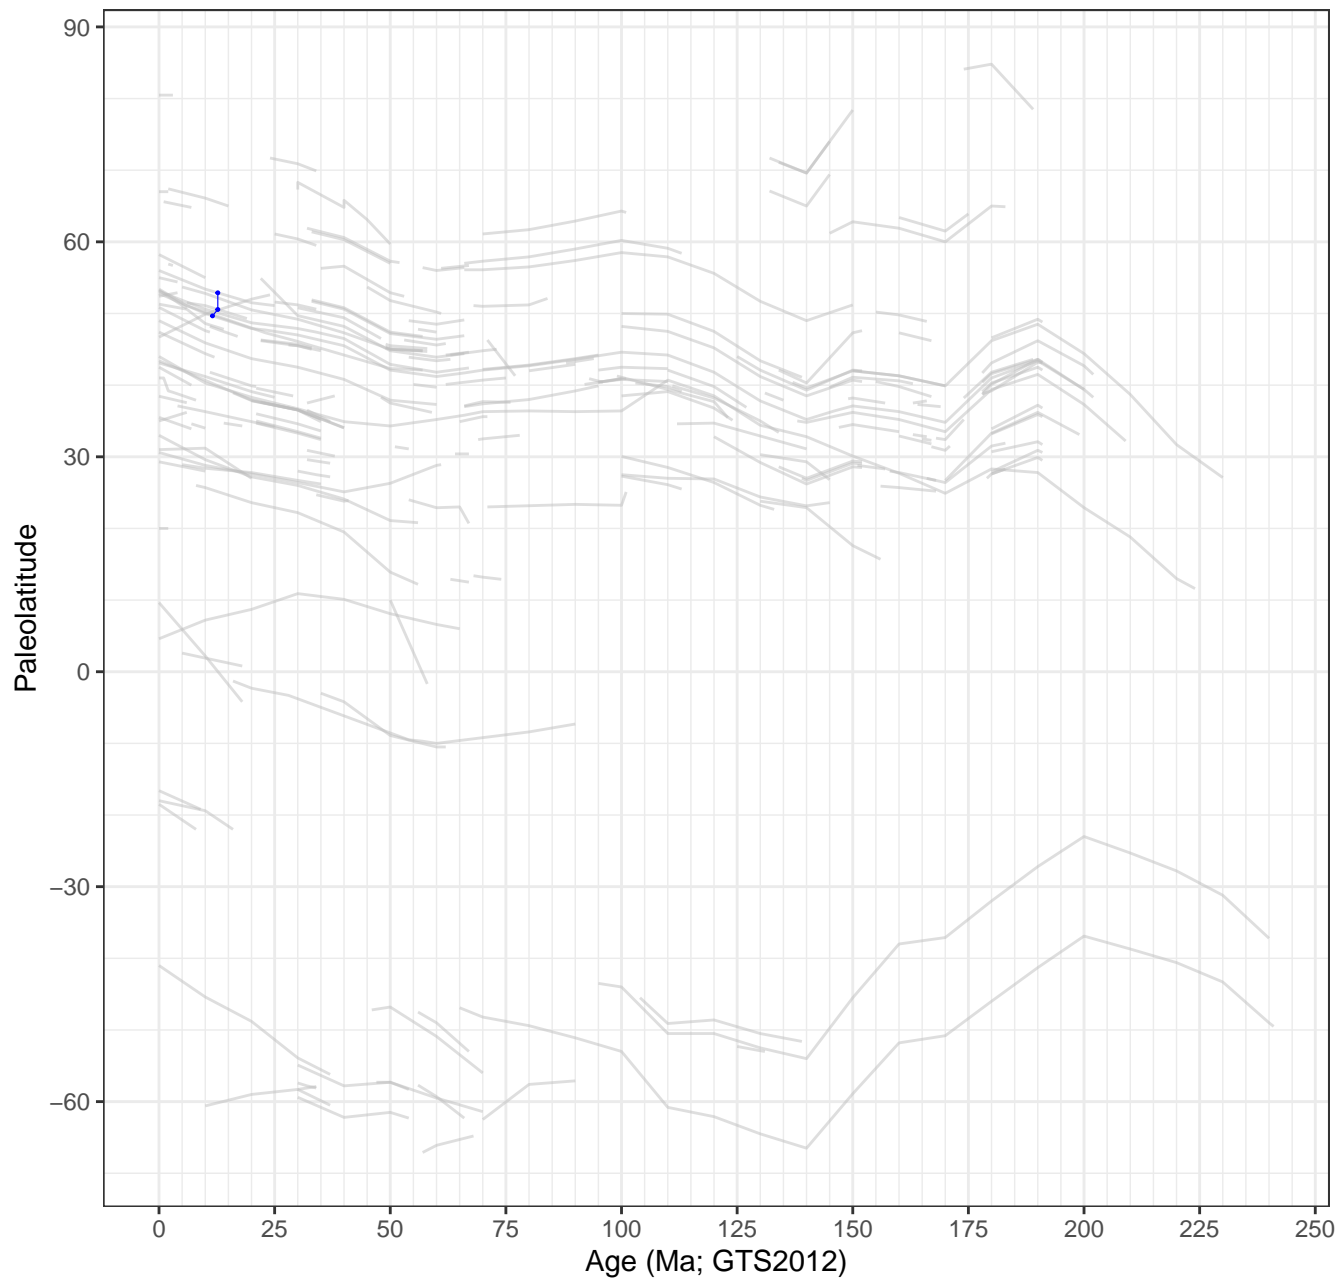

Supplement: Supplementary file 1527 [file Gramocysta vesicula.pdf › Supplement/Supplement 2/Species 1914 plots/Gramocysta vesicula.pdf]

# Species *Gymnodinium longicorne*

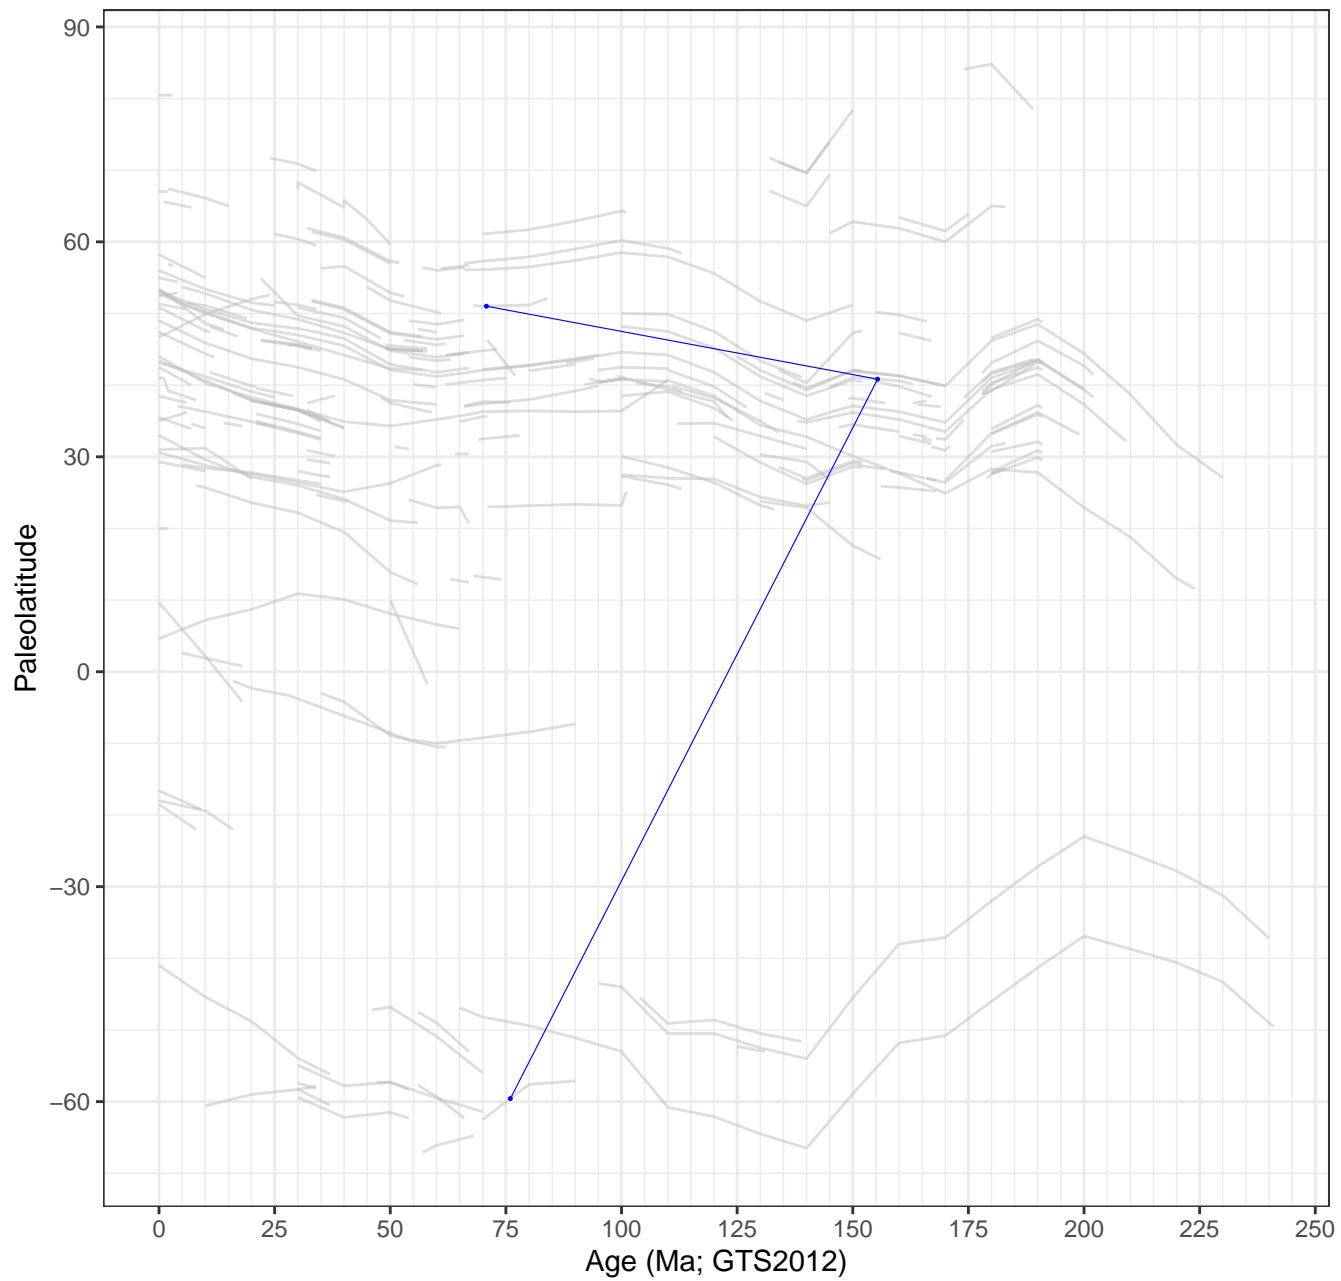

Supplement: Supplementary file 1528 [file Gymnodinium longicorne.pdf › Supplement/Supplement 2/Species 1914 plots/Gymnodinium longicorne.pdf]

# Species *Habibacysta tectata*

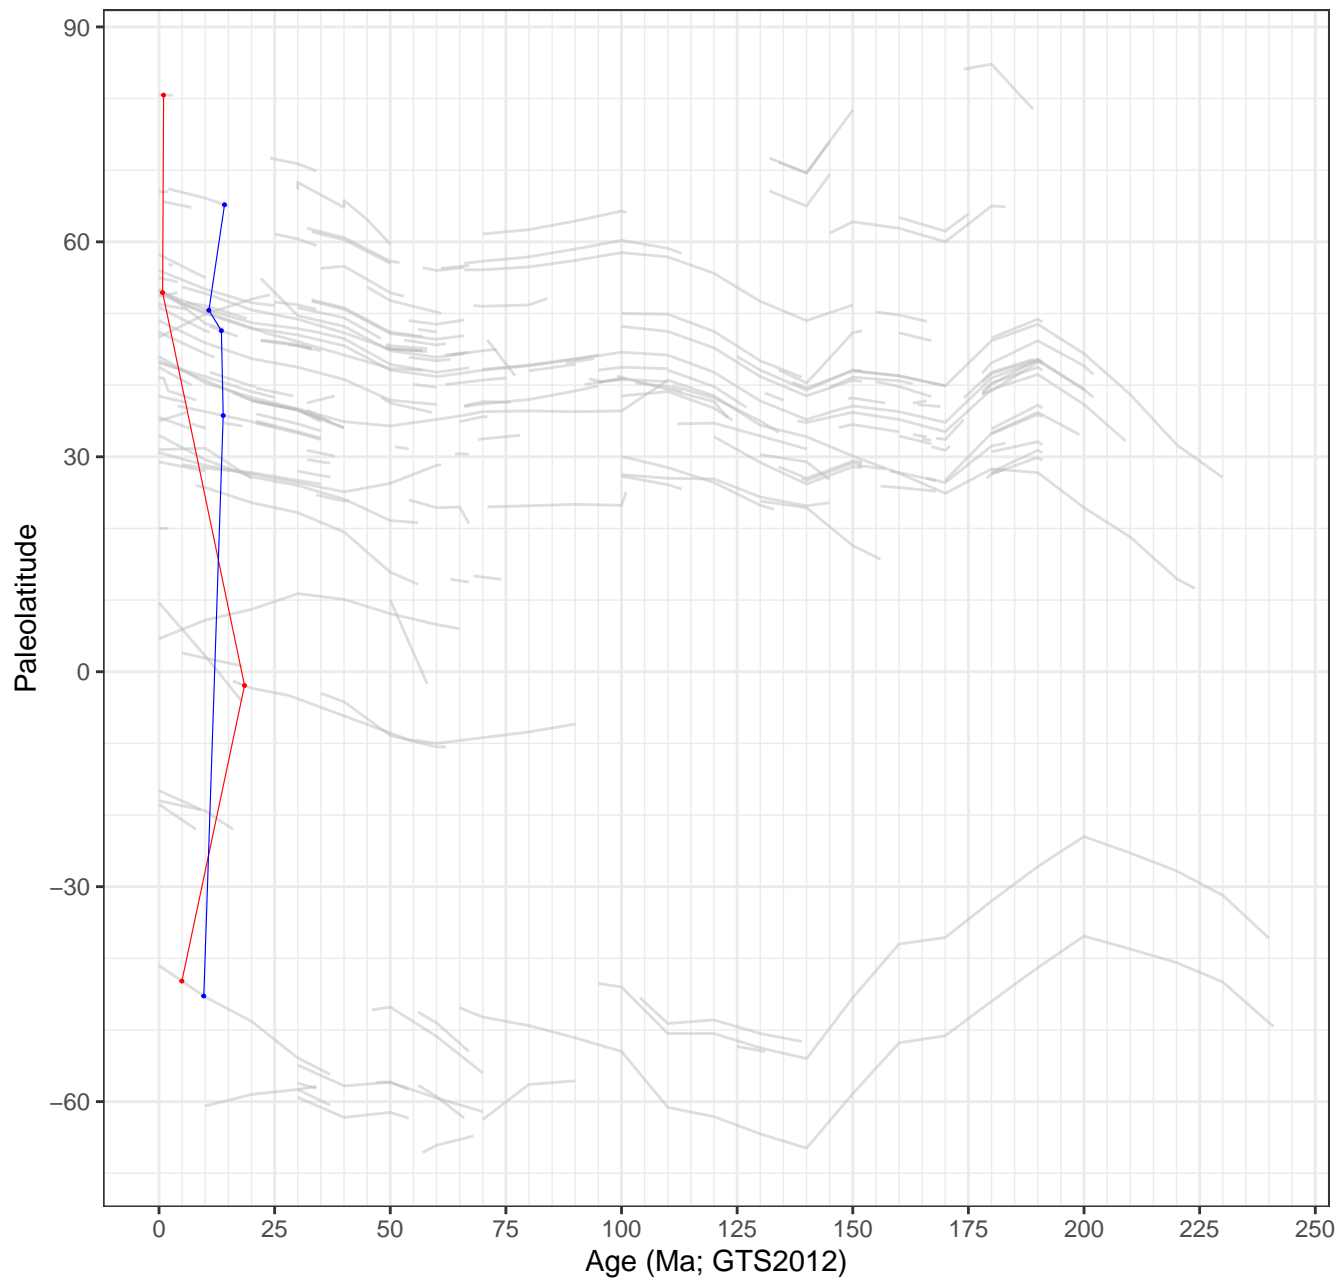

Supplement: Supplementary file 1529 [file Habibacysta tectata.pdf › Supplement/Supplement 2/Species 1914 plots/Habibacysta tectata.pdf]

# Species *Hadriana cinctum*

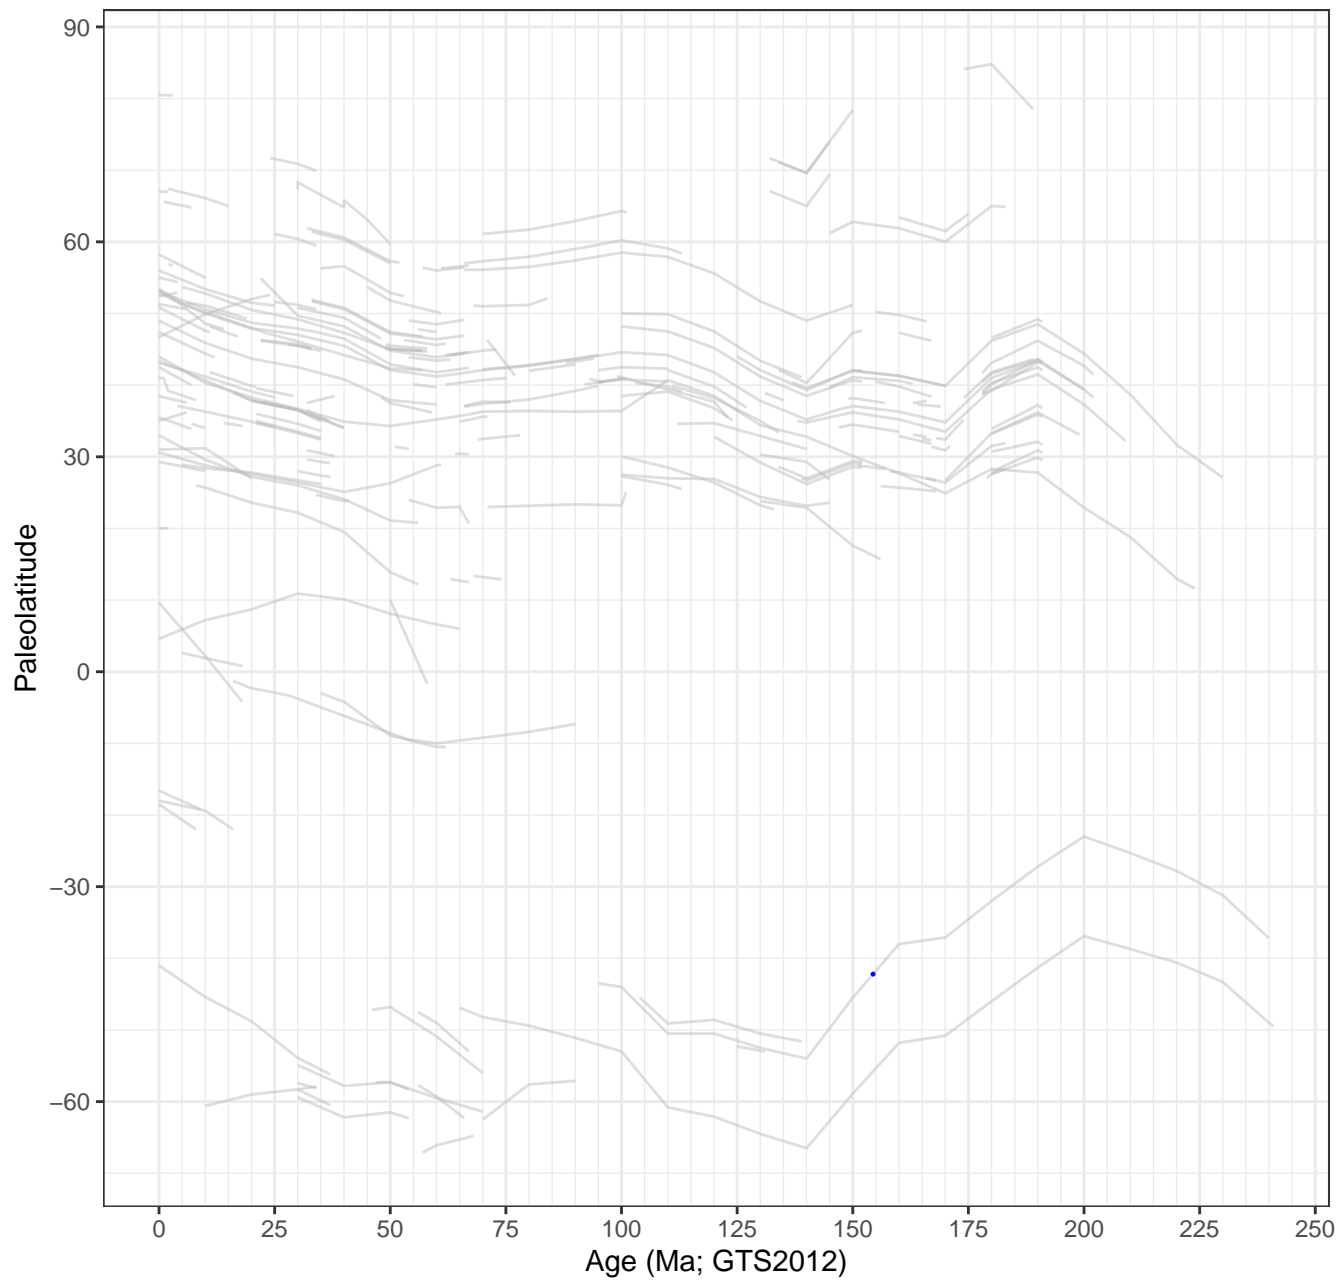

Supplement: Supplementary file 1530 [file Hadriana cinctum.pdf › Supplement/Supplement 2/Species 1914 plots/Hadriana cinctum.pdf]

# Species *Hafniasphaera cryptovesiculatus*

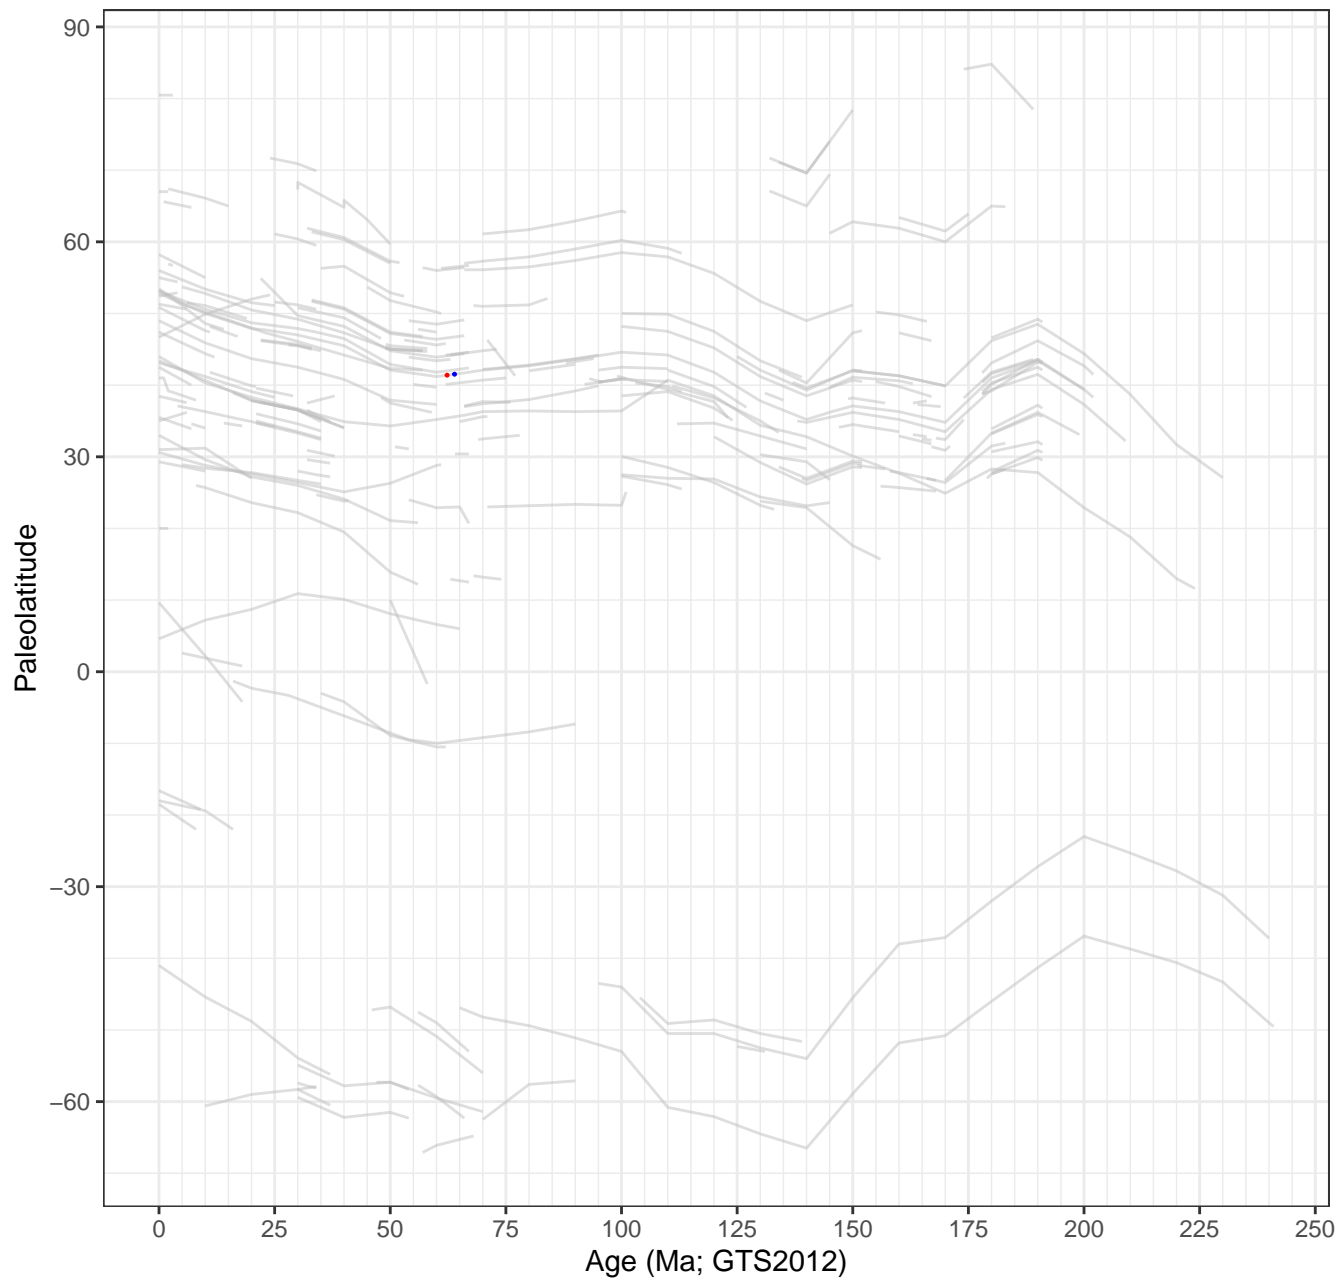

Supplement: Supplementary file 1531 [file Hafniasphaera cryptovesiculatus.pdf › Supplement/Supplement 2/Species 1914 plots/Hafniasphaera cryptovesiculatus.pdf]

# Species *Hafniasphaera delicata*

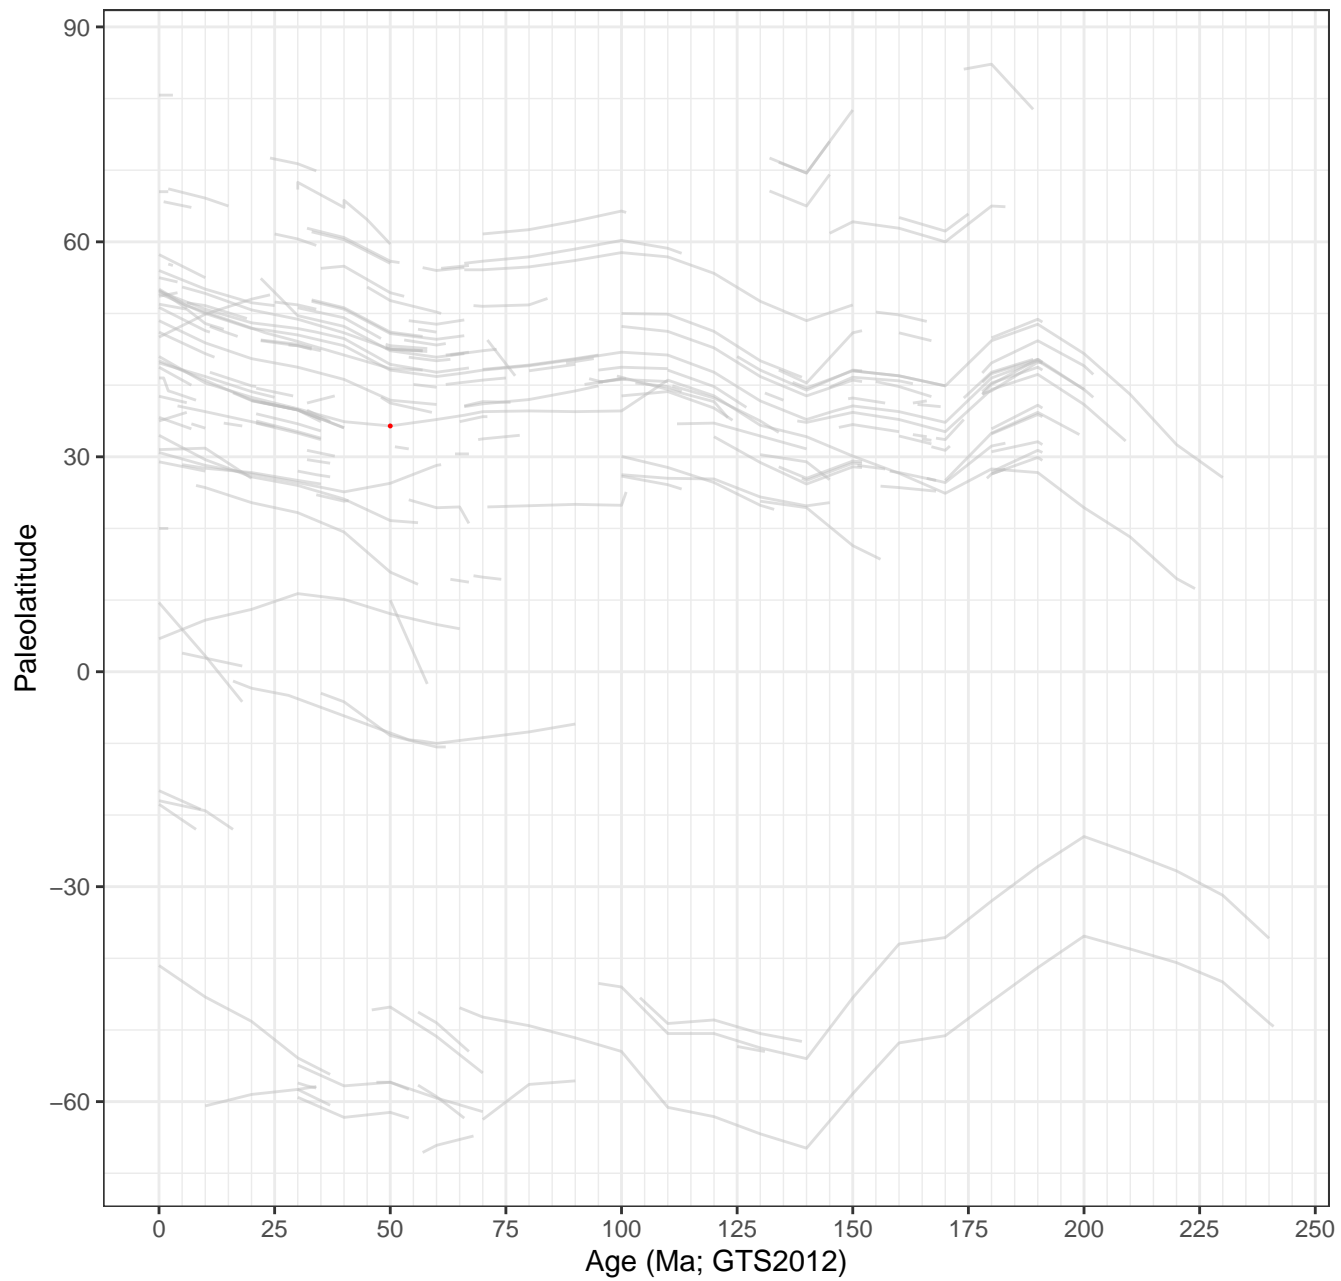

Supplement: Supplementary file 1532 [file Hafniasphaera delicata.pdf › Supplement/Supplement 2/Species 1914 plots/Hafniasphaera delicata.pdf]
