# Supplementary figures and images for: DINOSTRAT: a global database of the stratigraphic and paleolatitudinal distribution of Mesozoic–Cenozoic organic-walled dinoflagellate cysts (part 16 of 27)
Source: Copernicus journal article supplement (doi:10.5194/essd-14-579-2022), 2022-02-09

# Species *Hafniasphaera fluens*

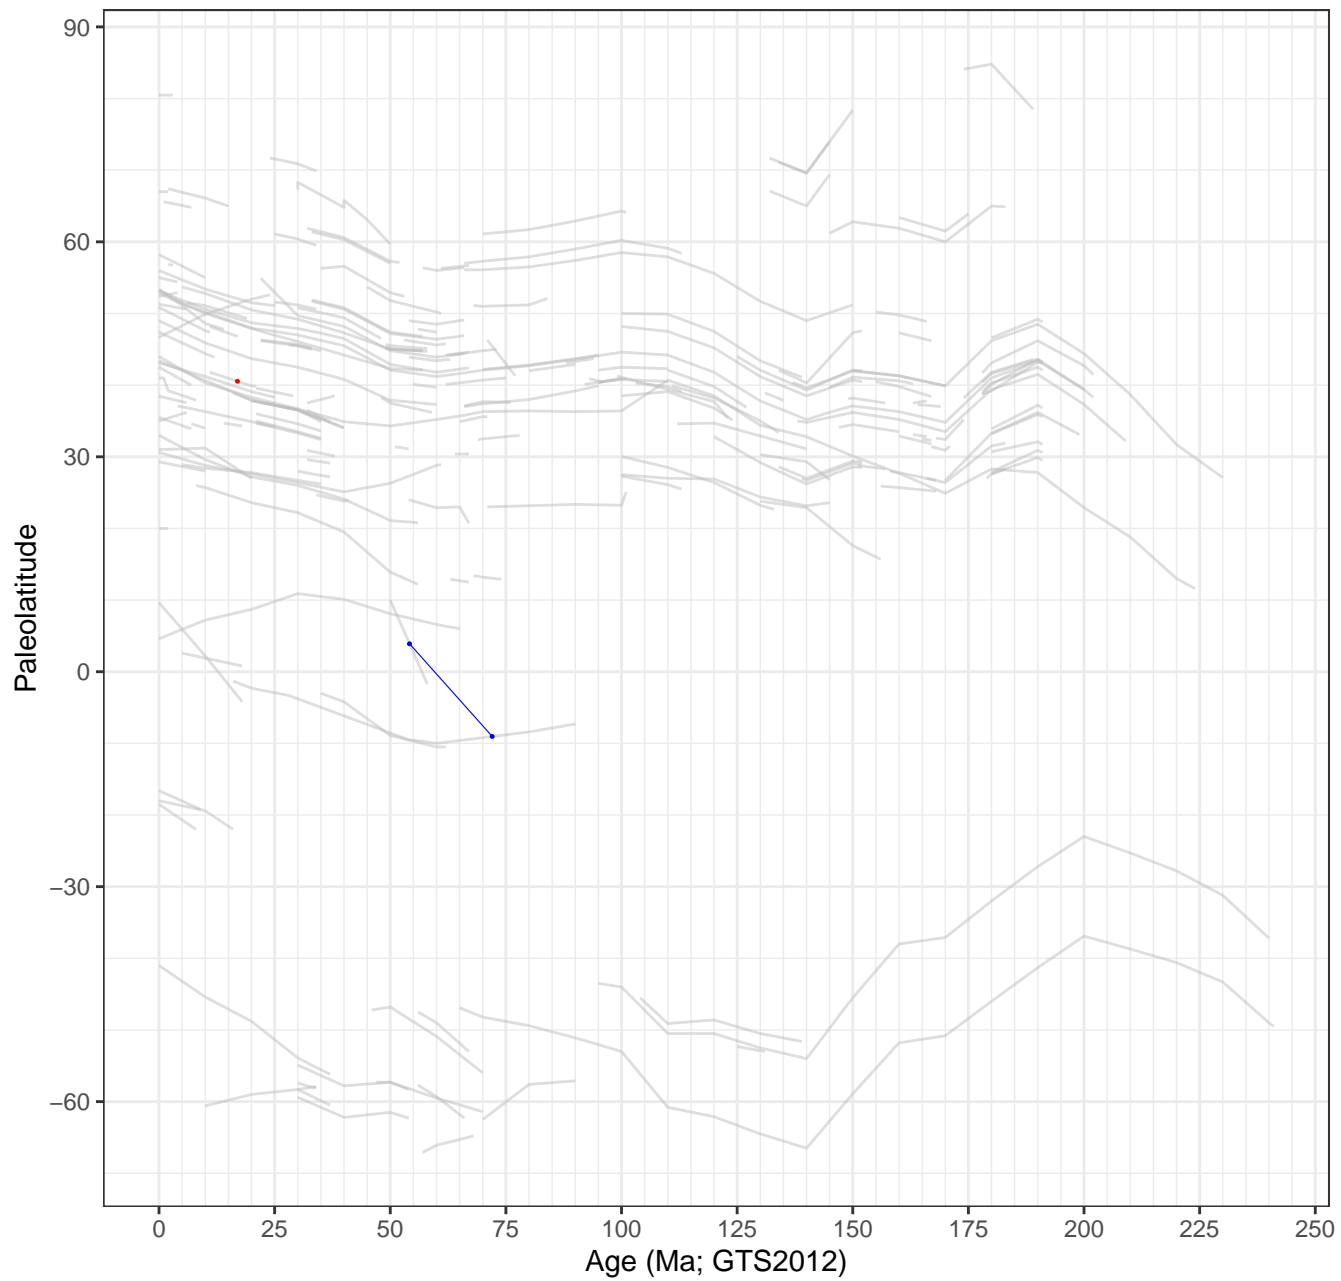

Supplement: Supplementary file 1533 [file Hafniasphaera fluens.pdf › Supplement/Supplement 2/Species 1914 plots/Hafniasphaera fluens.pdf]

# Species *Hafniasphaera graciosa*

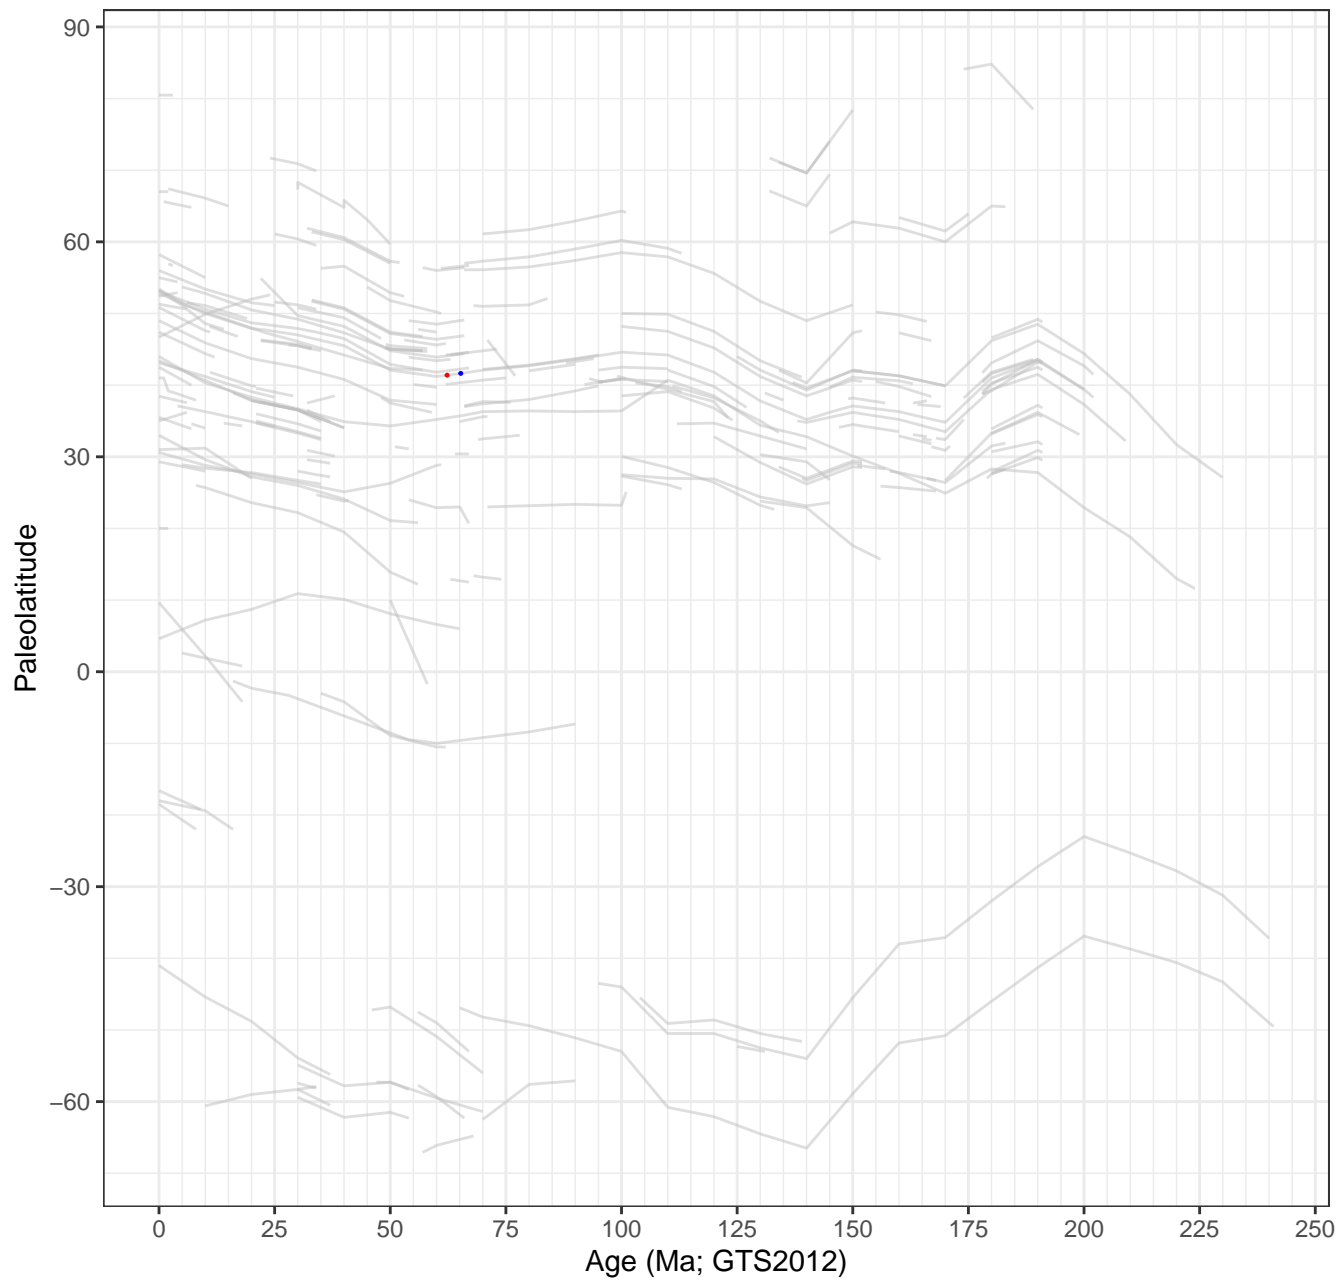

Supplement: Supplementary file 1534 [file Hafniasphaera graciosa.pdf › Supplement/Supplement 2/Species 1914 plots/Hafniasphaera graciosa.pdf]

# Species *Hafniasphaera hyalospinosa*

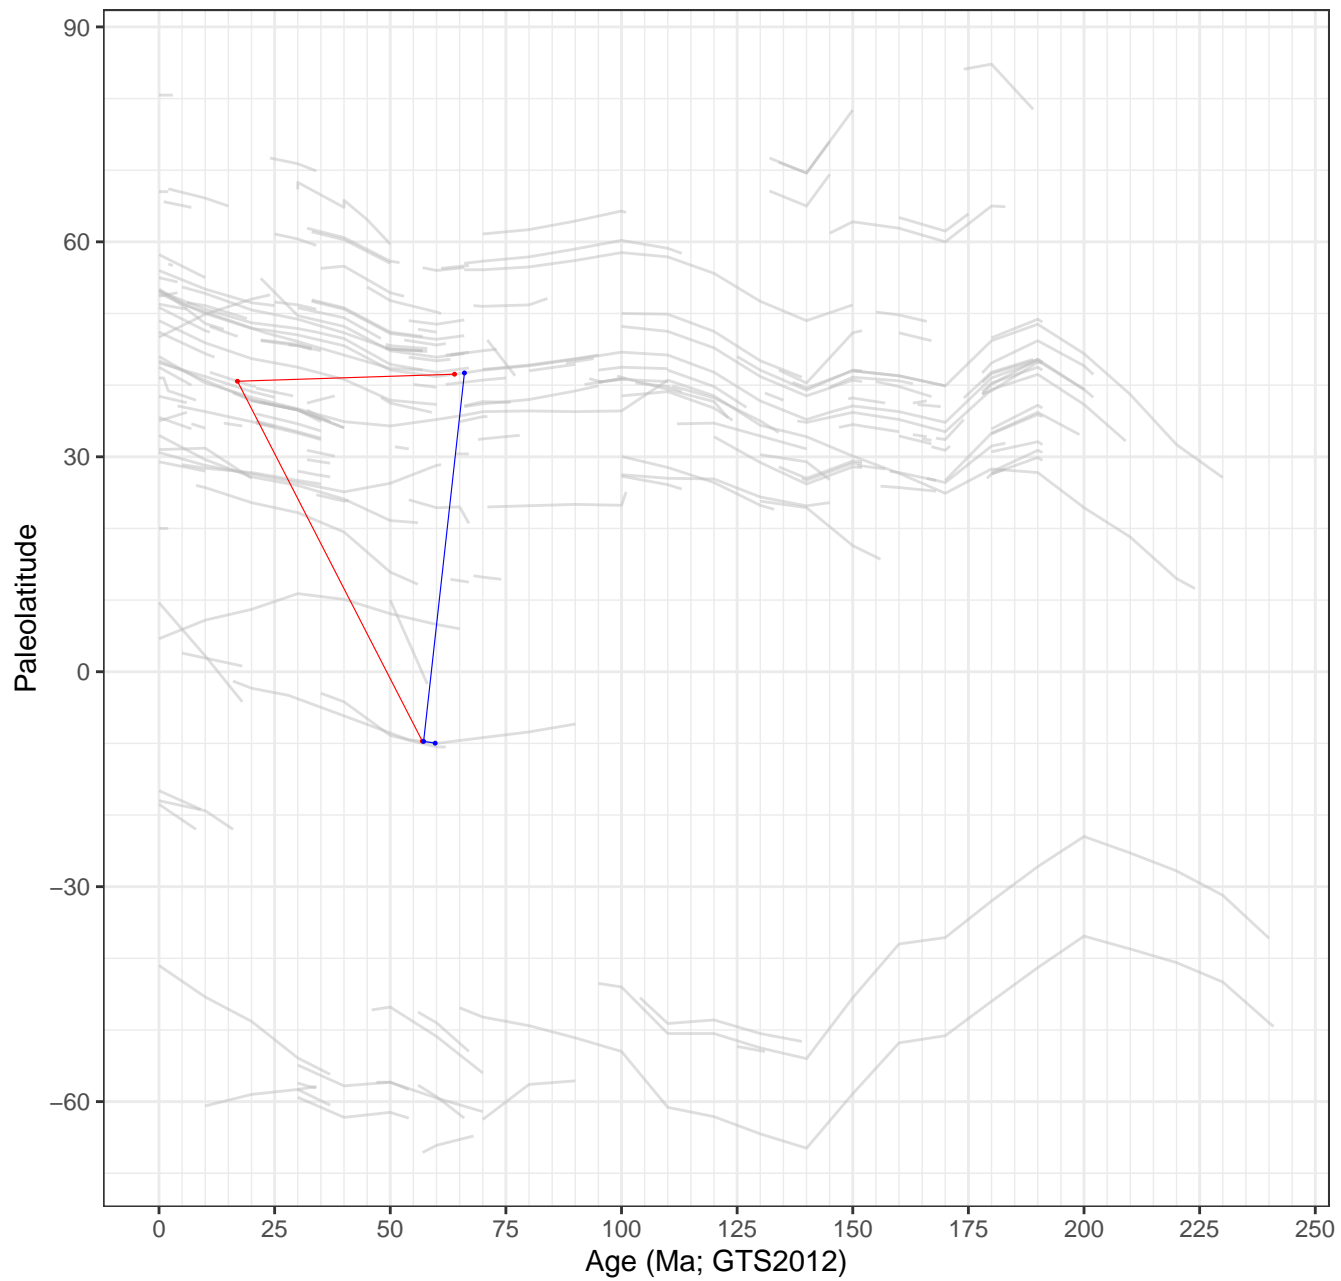

Supplement: Supplementary file 1535 [file Hafniasphaera hyalospinosa.pdf › Supplement/Supplement 2/Species 1914 plots/Hafniasphaera hyalospinosa.pdf]

# Species *Hafniasphaera septata*

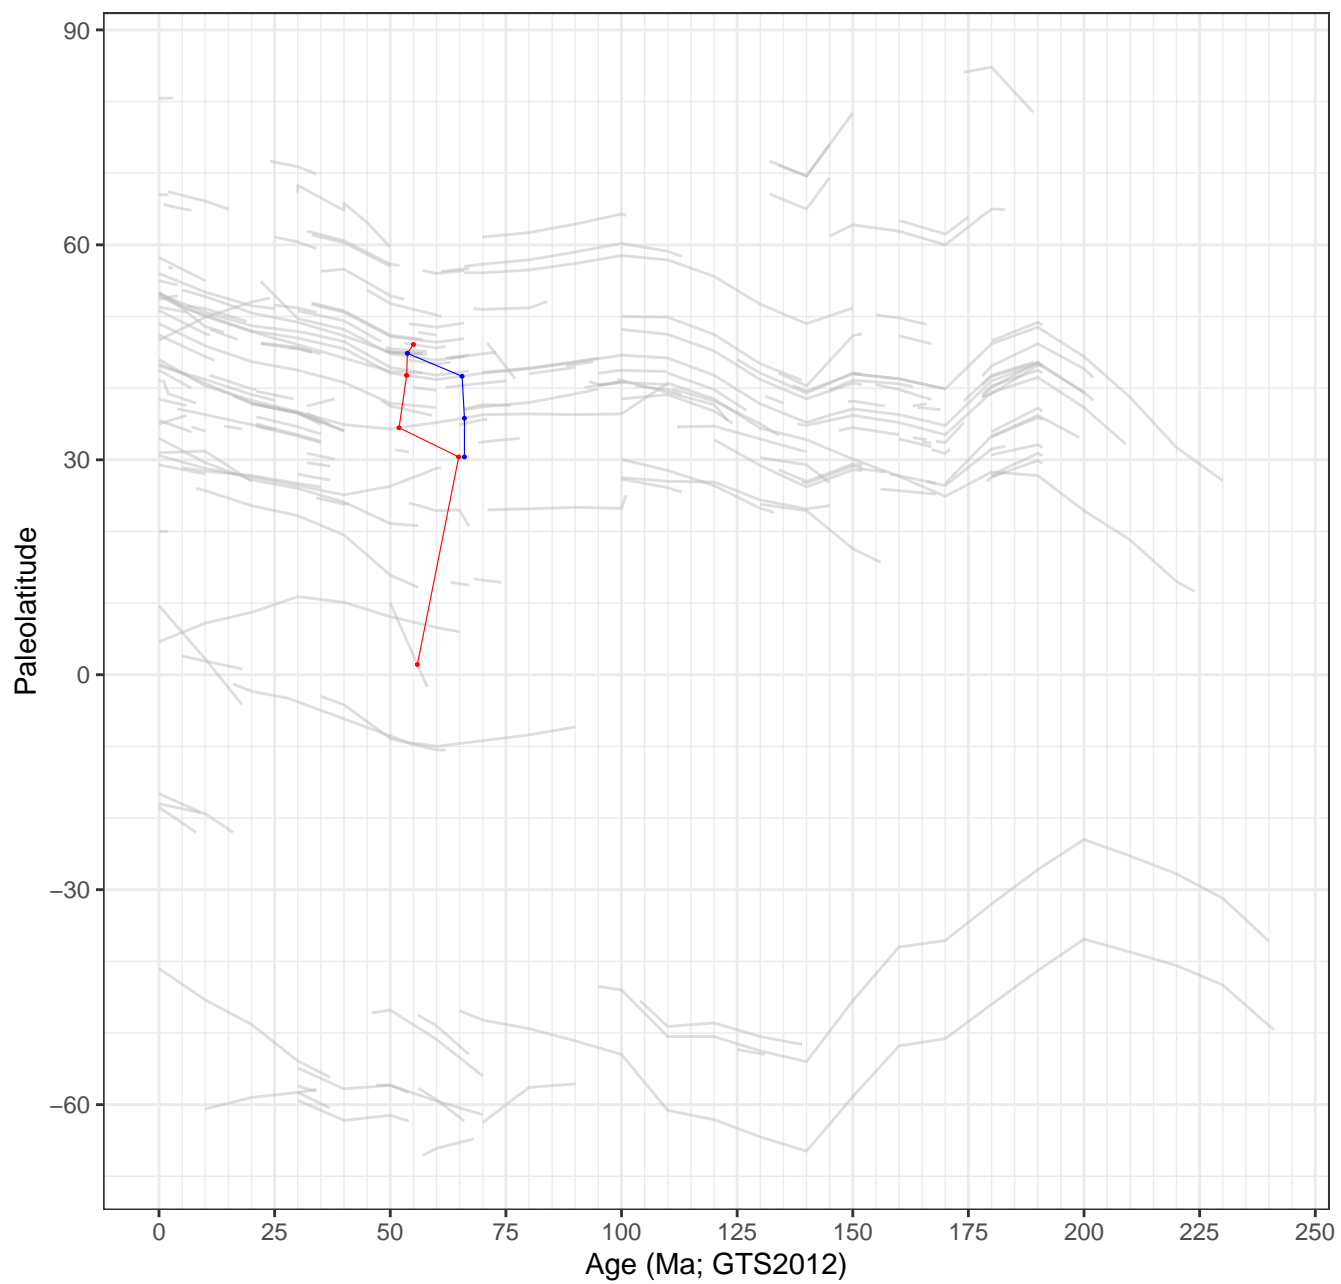

Supplement: Supplementary file 1536 [file Hafniasphaera septata.pdf › Supplement/Supplement 2/Species 1914 plots/Hafniasphaera septata.pdf]

# Species *Hapsidaulax margarethae*

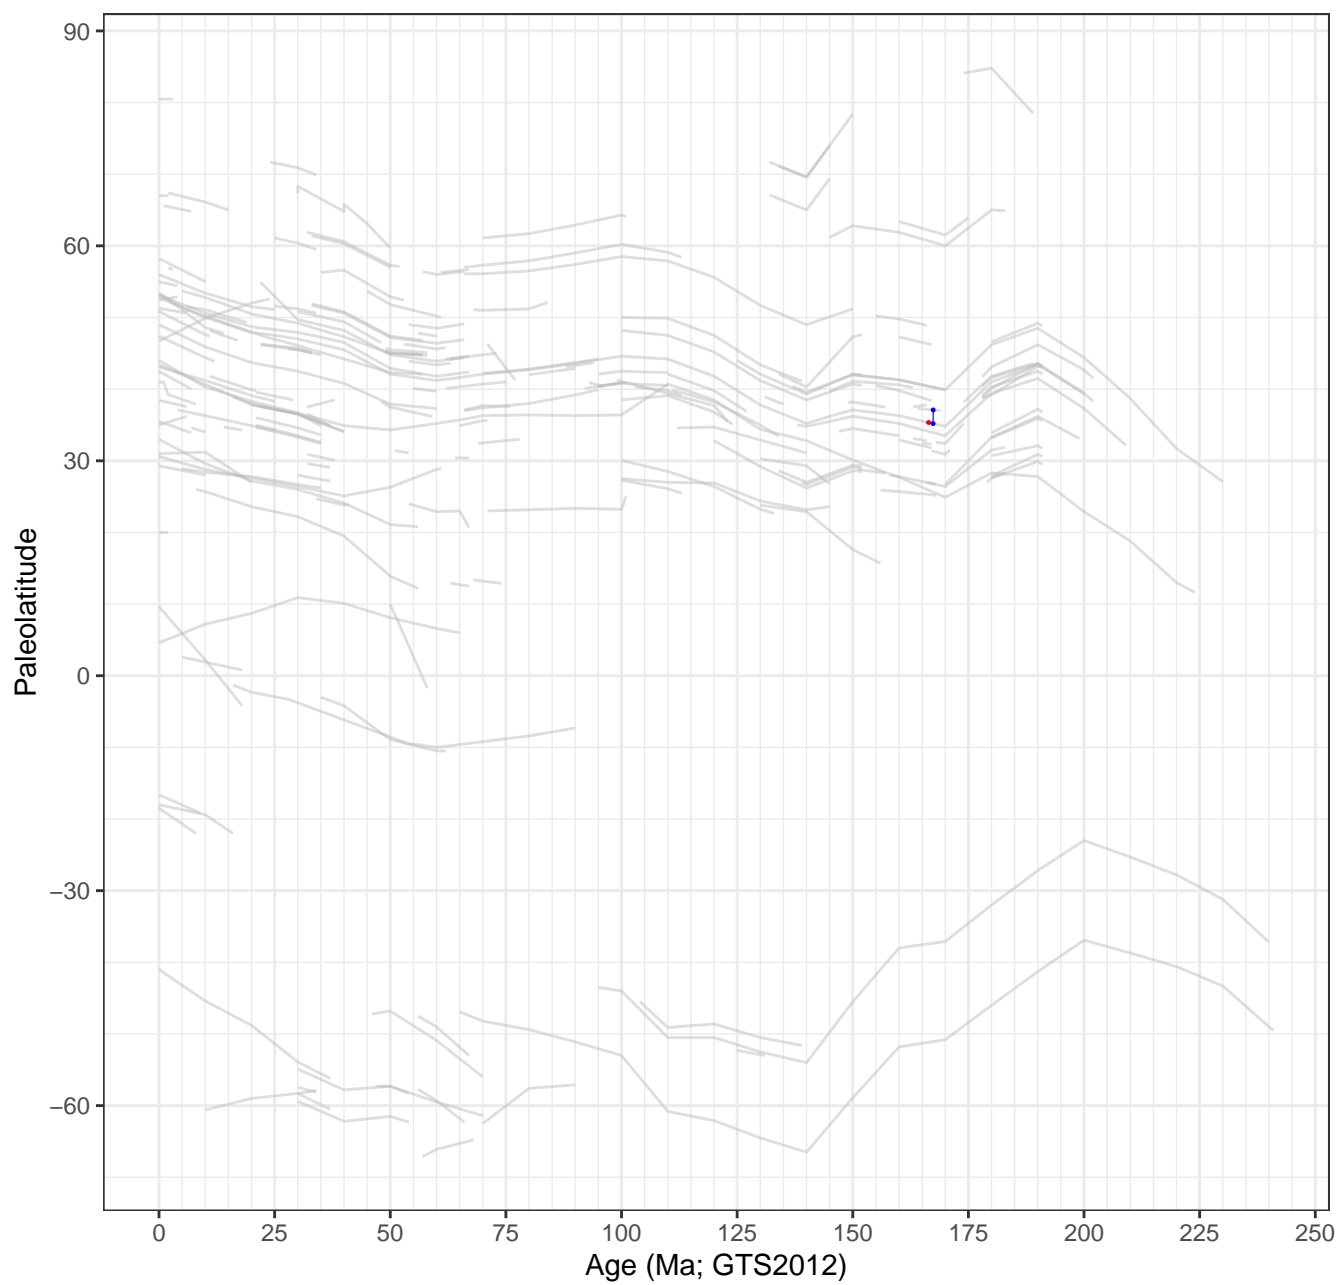

Supplement: Supplementary file 1537 [file Hapsidaulax margarethae.pdf › Supplement/Supplement 2/Species 1914 plots/Hapsidaulax margarethae.pdf]

# Species *Hapsocysta bentae*

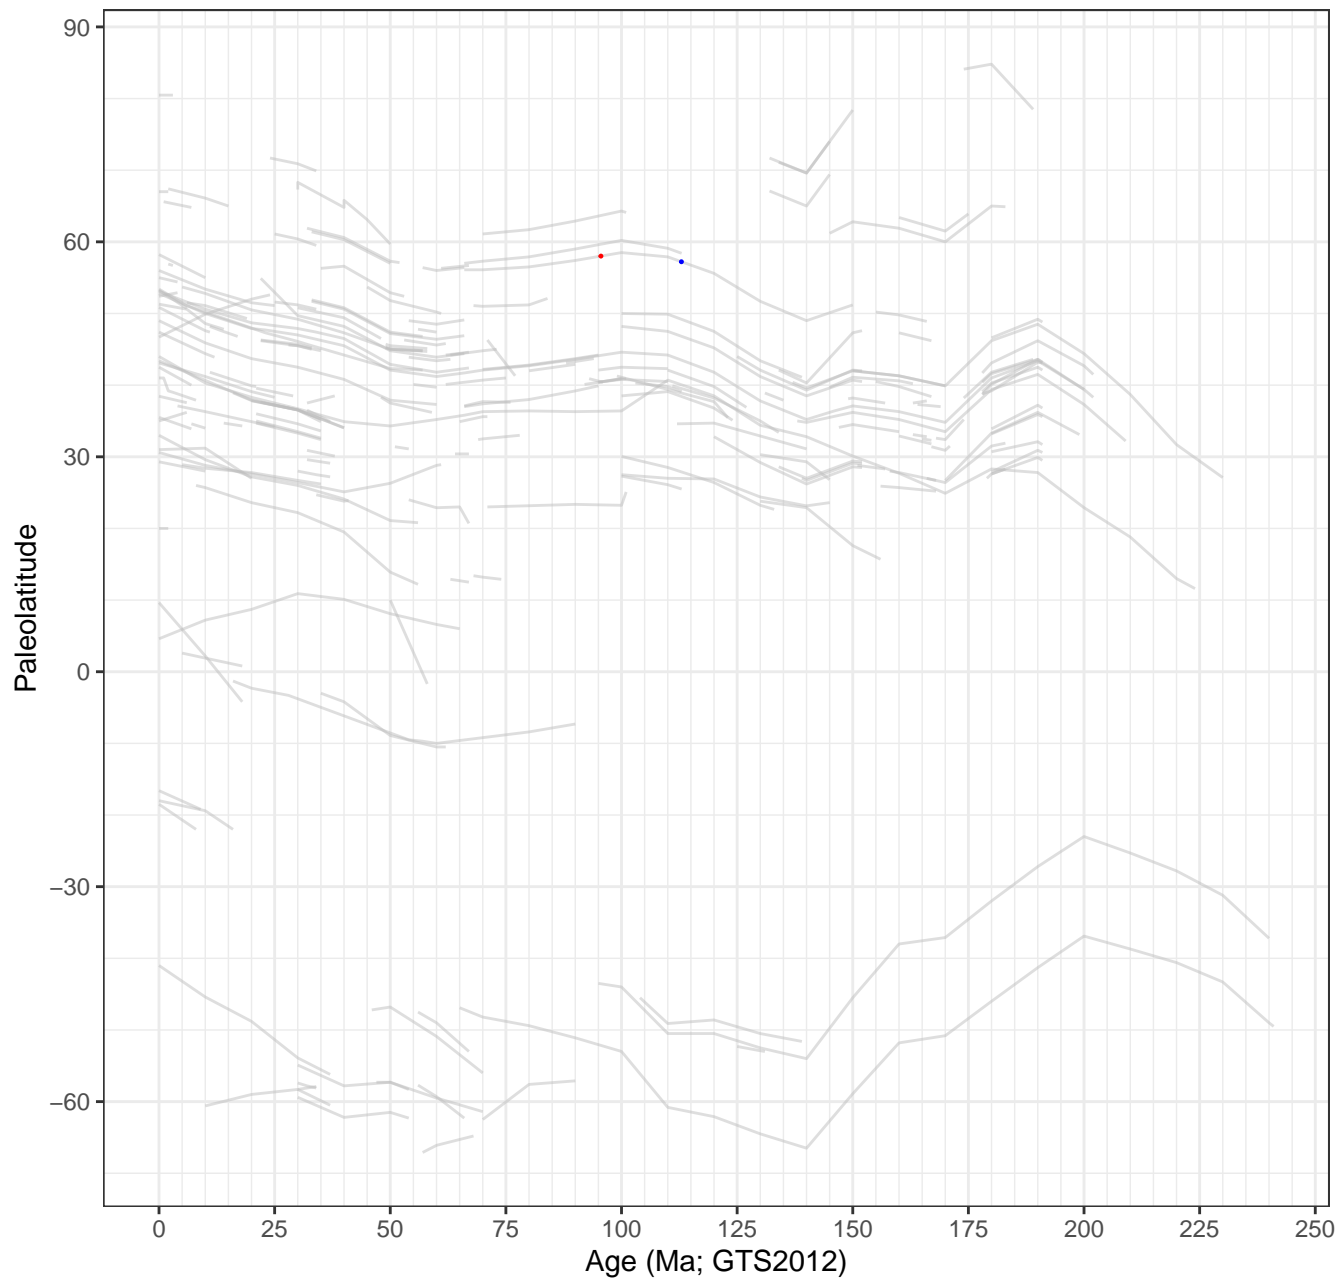

Supplement: Supplementary file 1538 [file Hapsocysta bentae.pdf › Supplement/Supplement 2/Species 1914 plots/Hapsocysta bentae.pdf]

# Species *Hapsocysta dictyota*

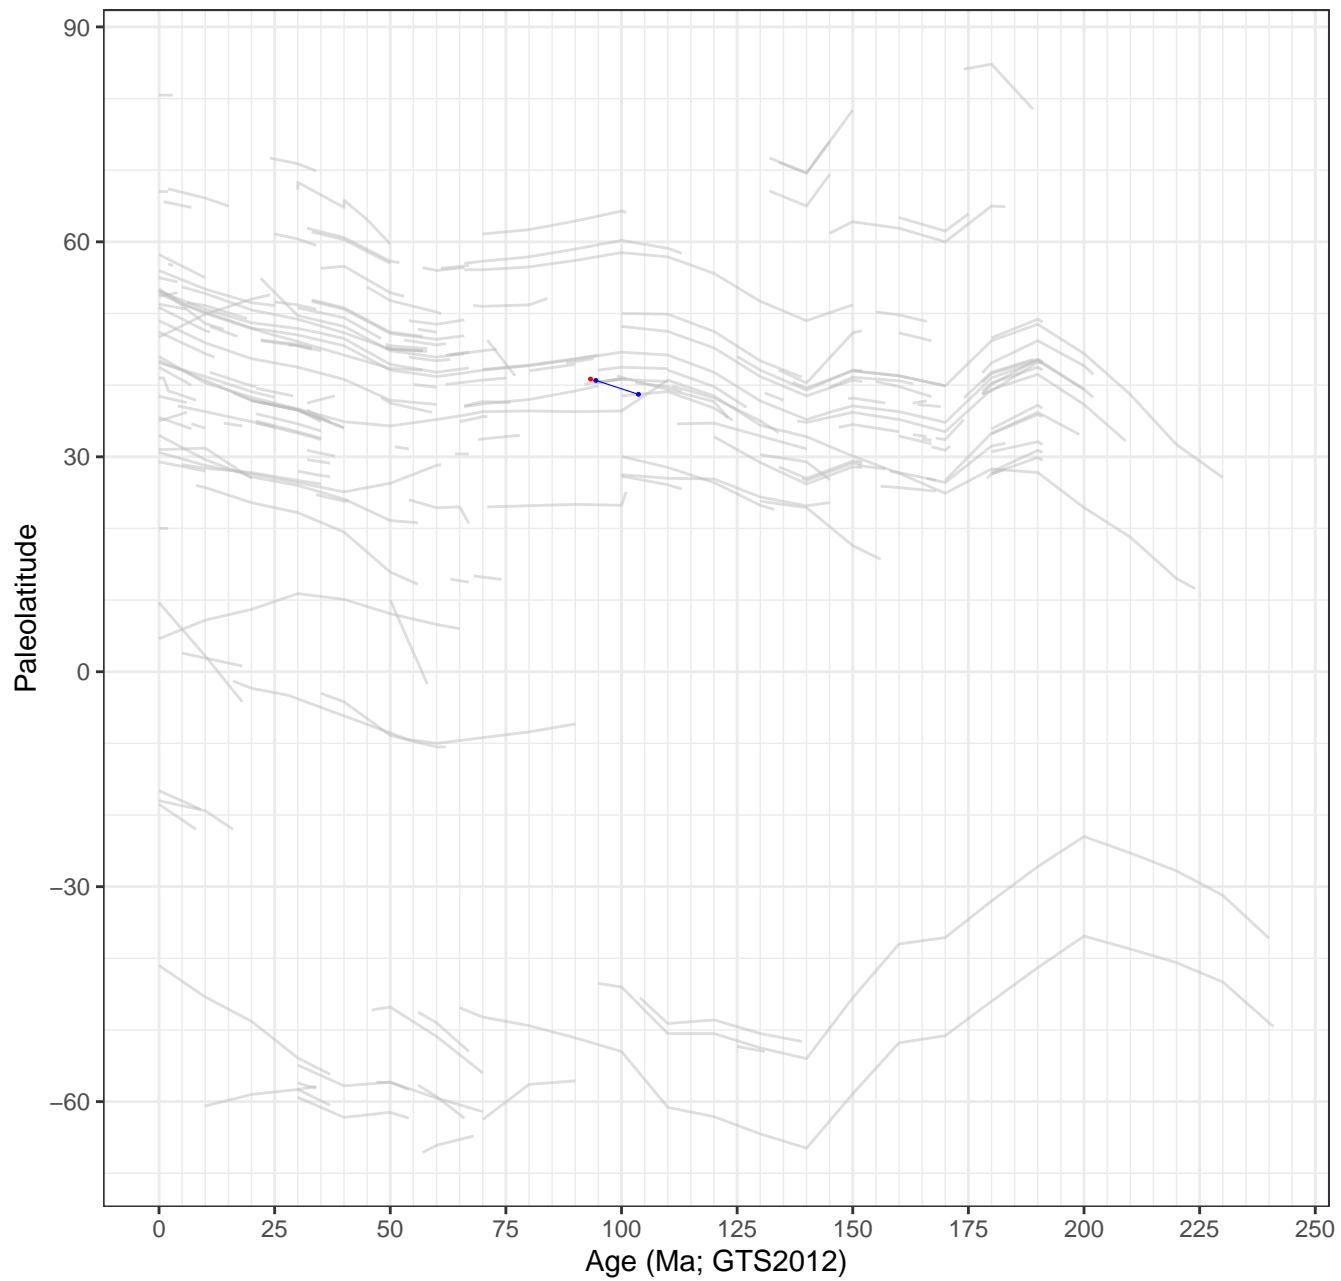

Supplement: Supplementary file 1539 [file Hapsocysta dictyota.pdf › Supplement/Supplement 2/Species 1914 plots/Hapsocysta dictyota.pdf]

# Species *Hapsocysta fenestrata*

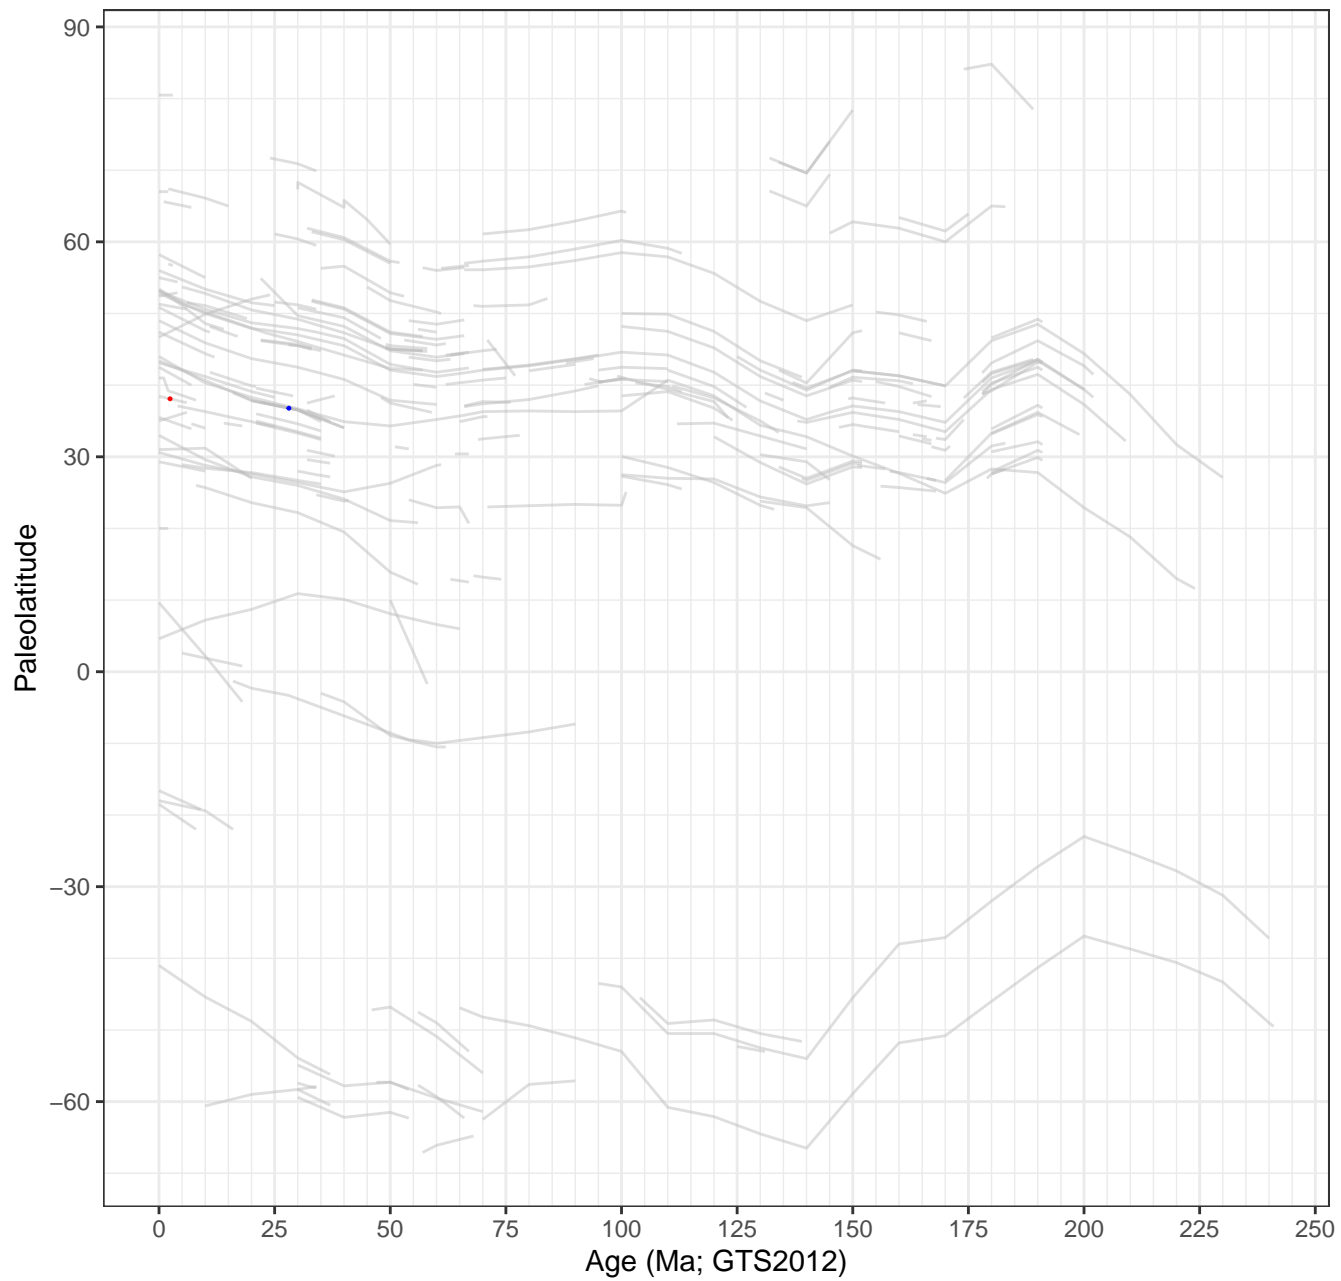

Supplement: Supplementary file 1540 [file Hapsocysta fenestrata.pdf › Supplement/Supplement 2/Species 1914 plots/Hapsocysta fenestrata.pdf]

# Species *Hapsocysta peridictya*

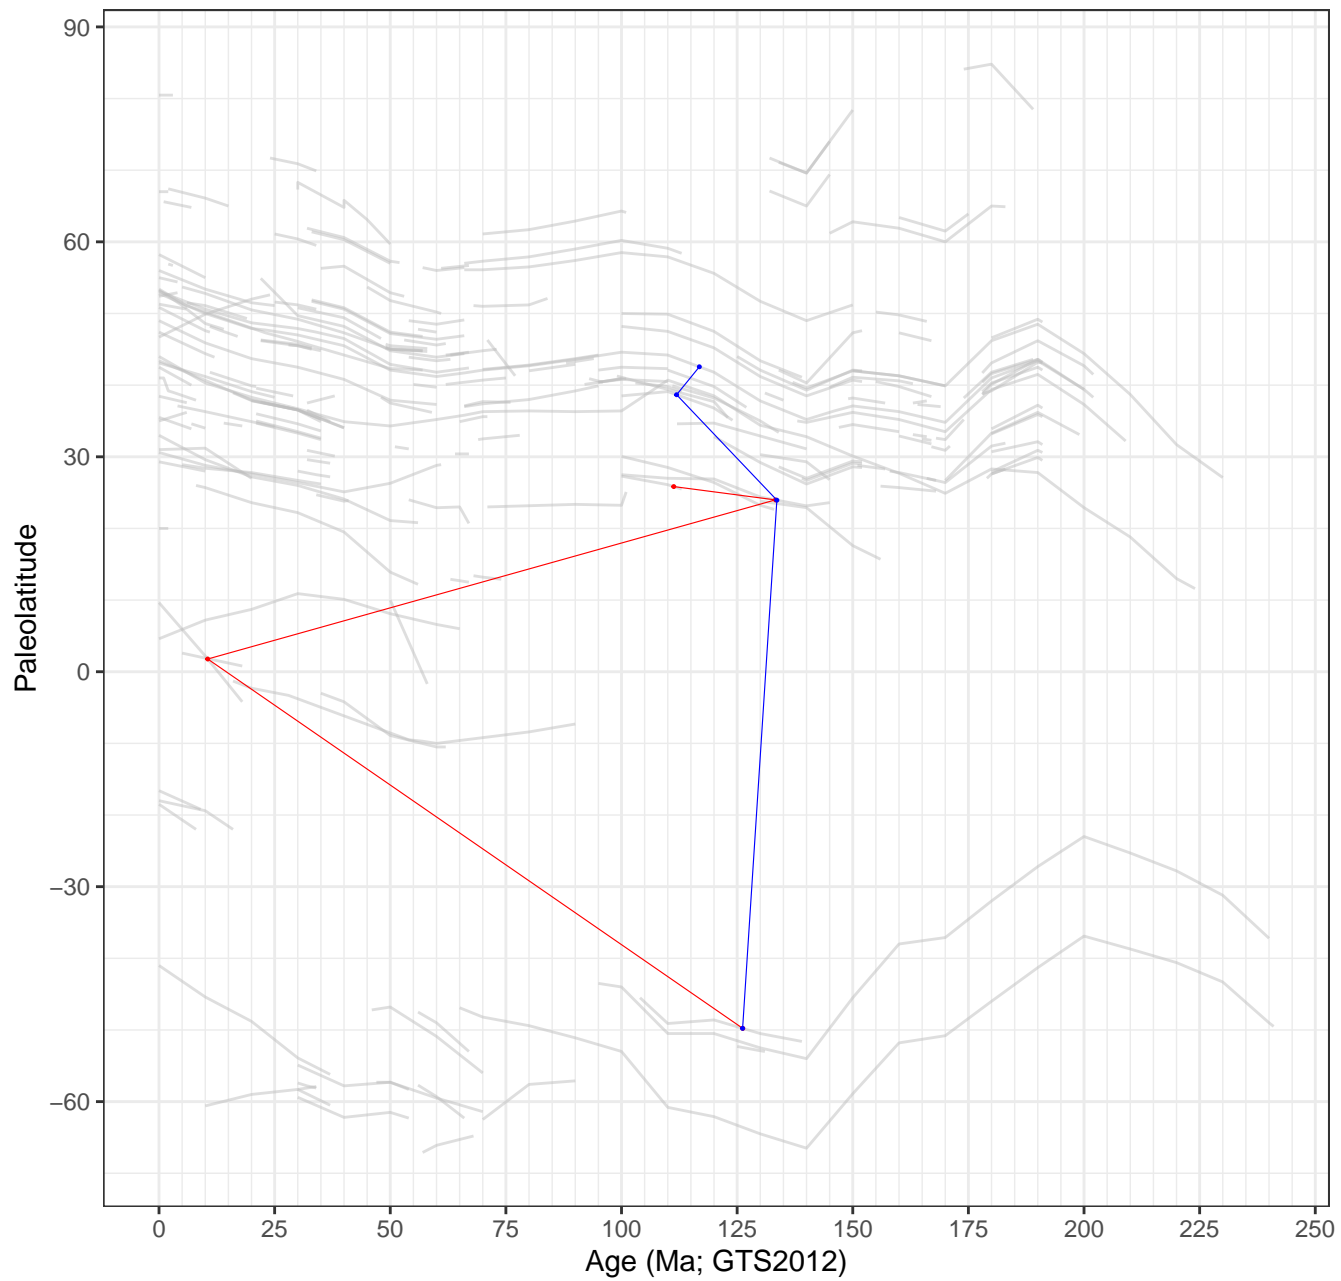

Supplement: Supplementary file 1541 [file Hapsocysta peridictya.pdf › Supplement/Supplement 2/Species 1914 plots/Hapsocysta peridictya.pdf]

# Species *Hebecysta balmei*

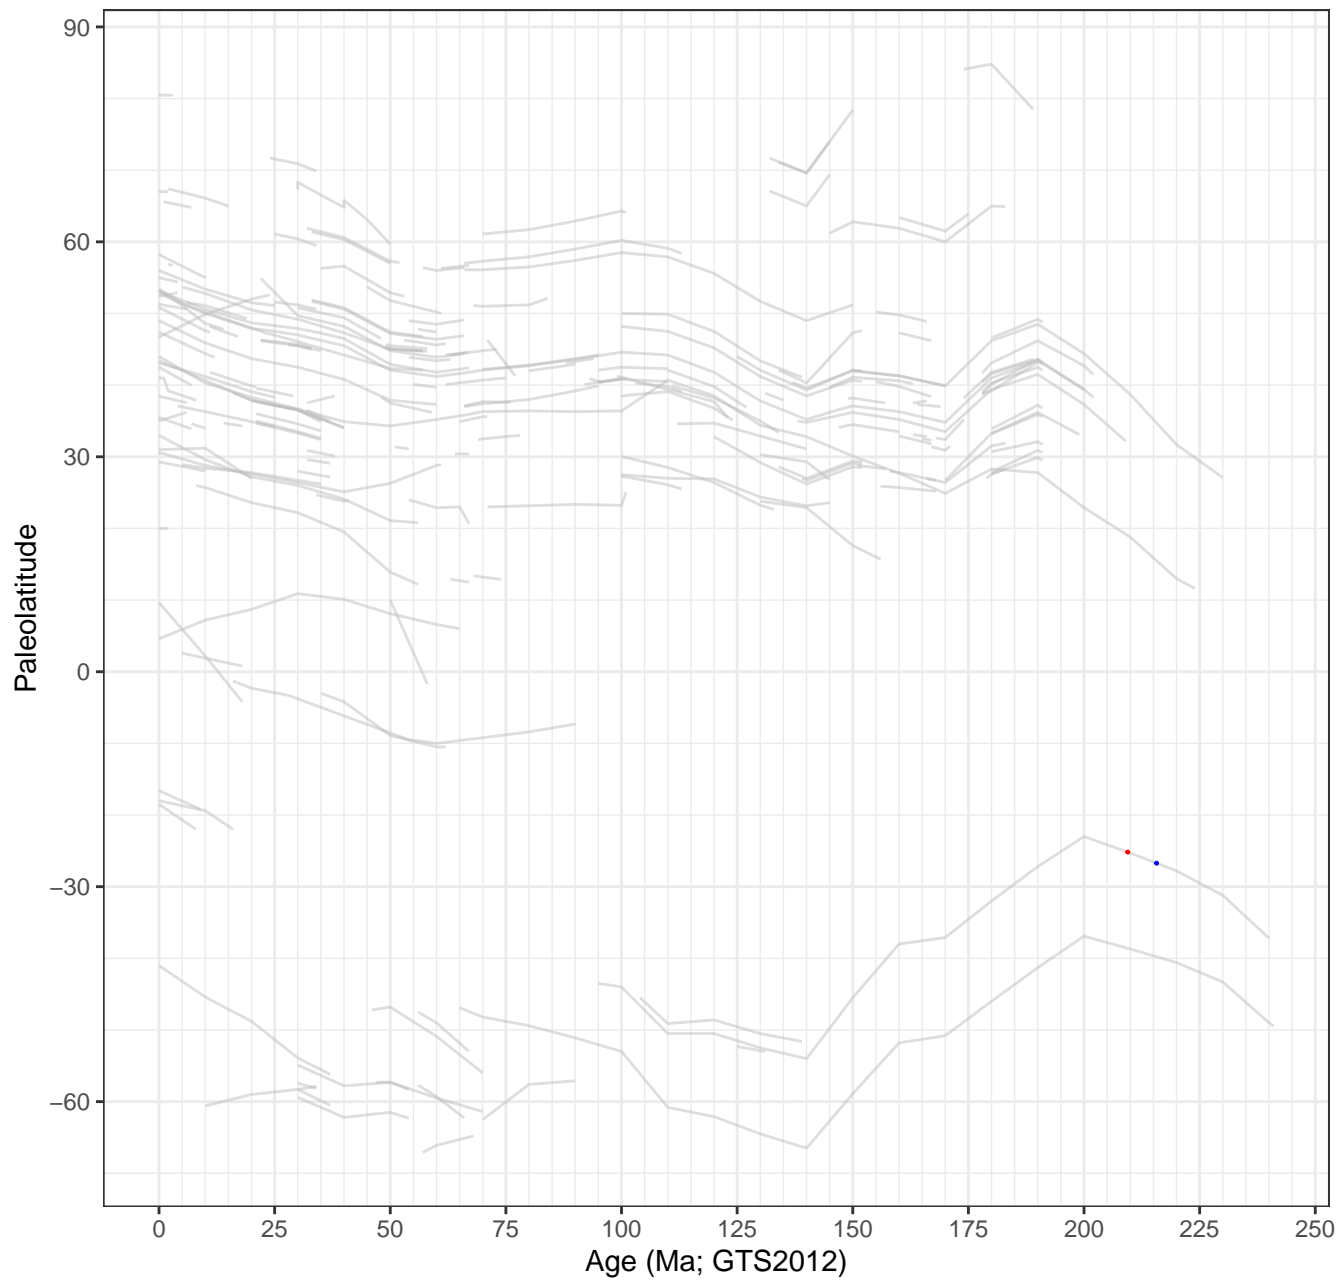

Supplement: Supplementary file 1542 [file Hebecysta balmei.pdf › Supplement/Supplement 2/Species 1914 plots/Hebecysta balmei.pdf]

# Species *Hebecysta brevicornuta*

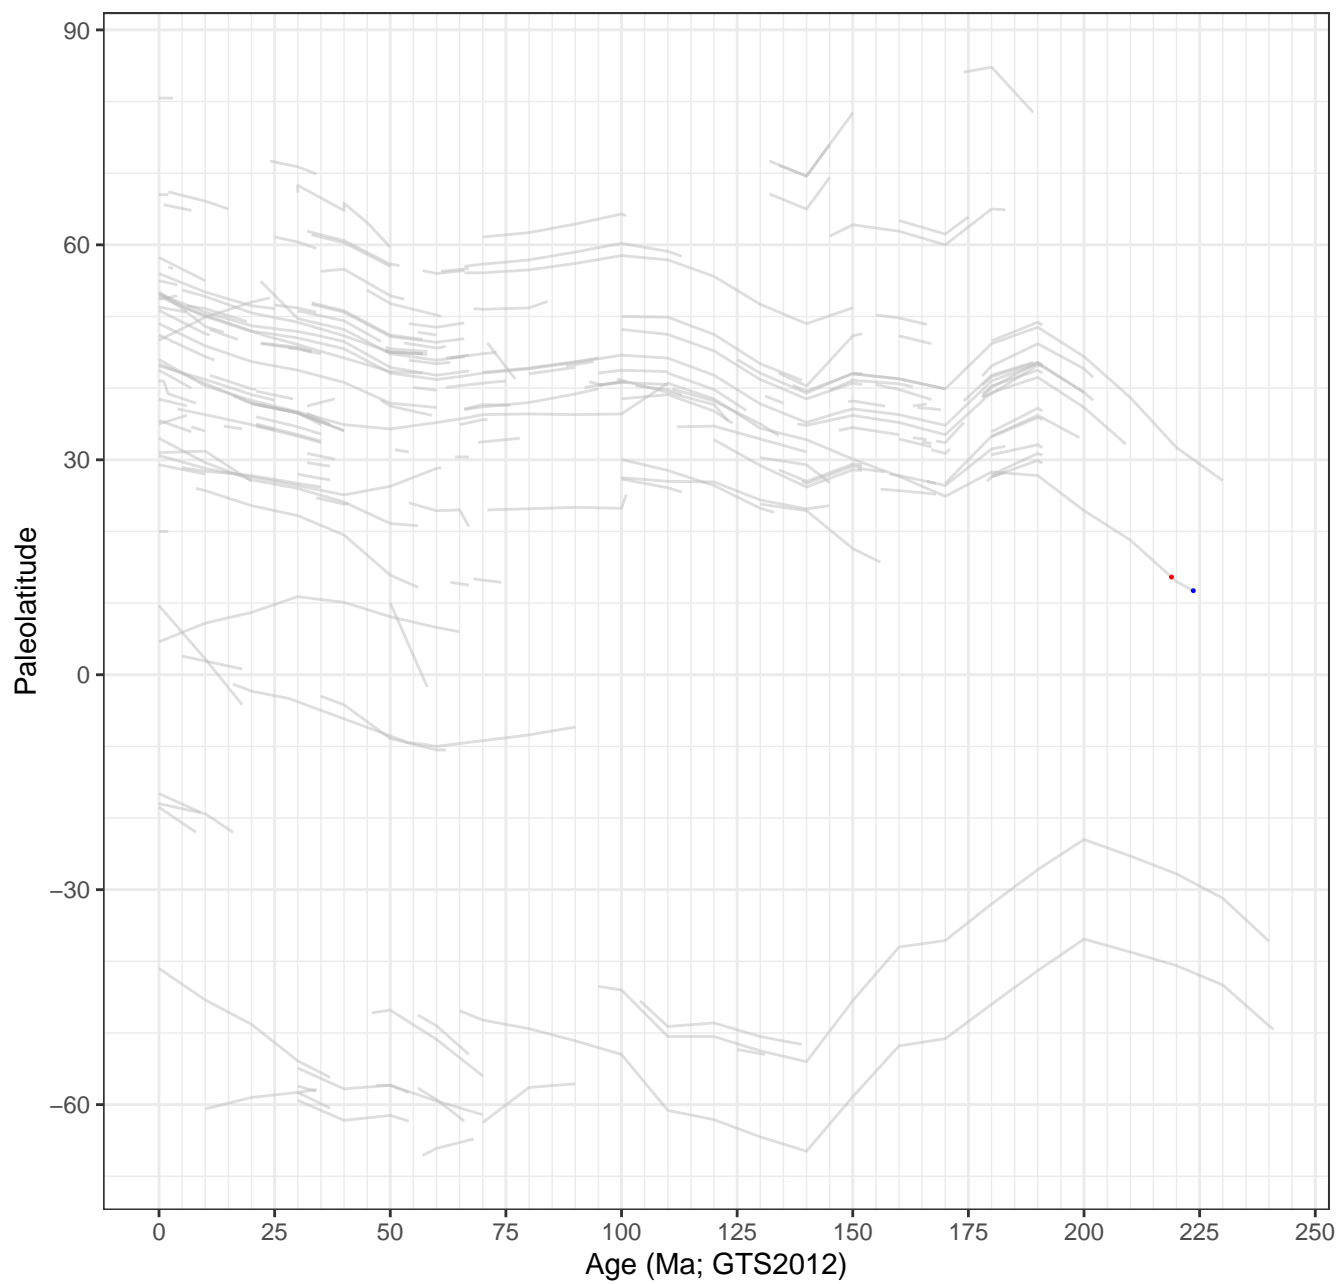

Supplement: Supplementary file 1543 [file Hebecysta brevicornuta.pdf › Supplement/Supplement 2/Species 1914 plots/Hebecysta brevicornuta.pdf]

# Species *Heibergella kendelbachia*

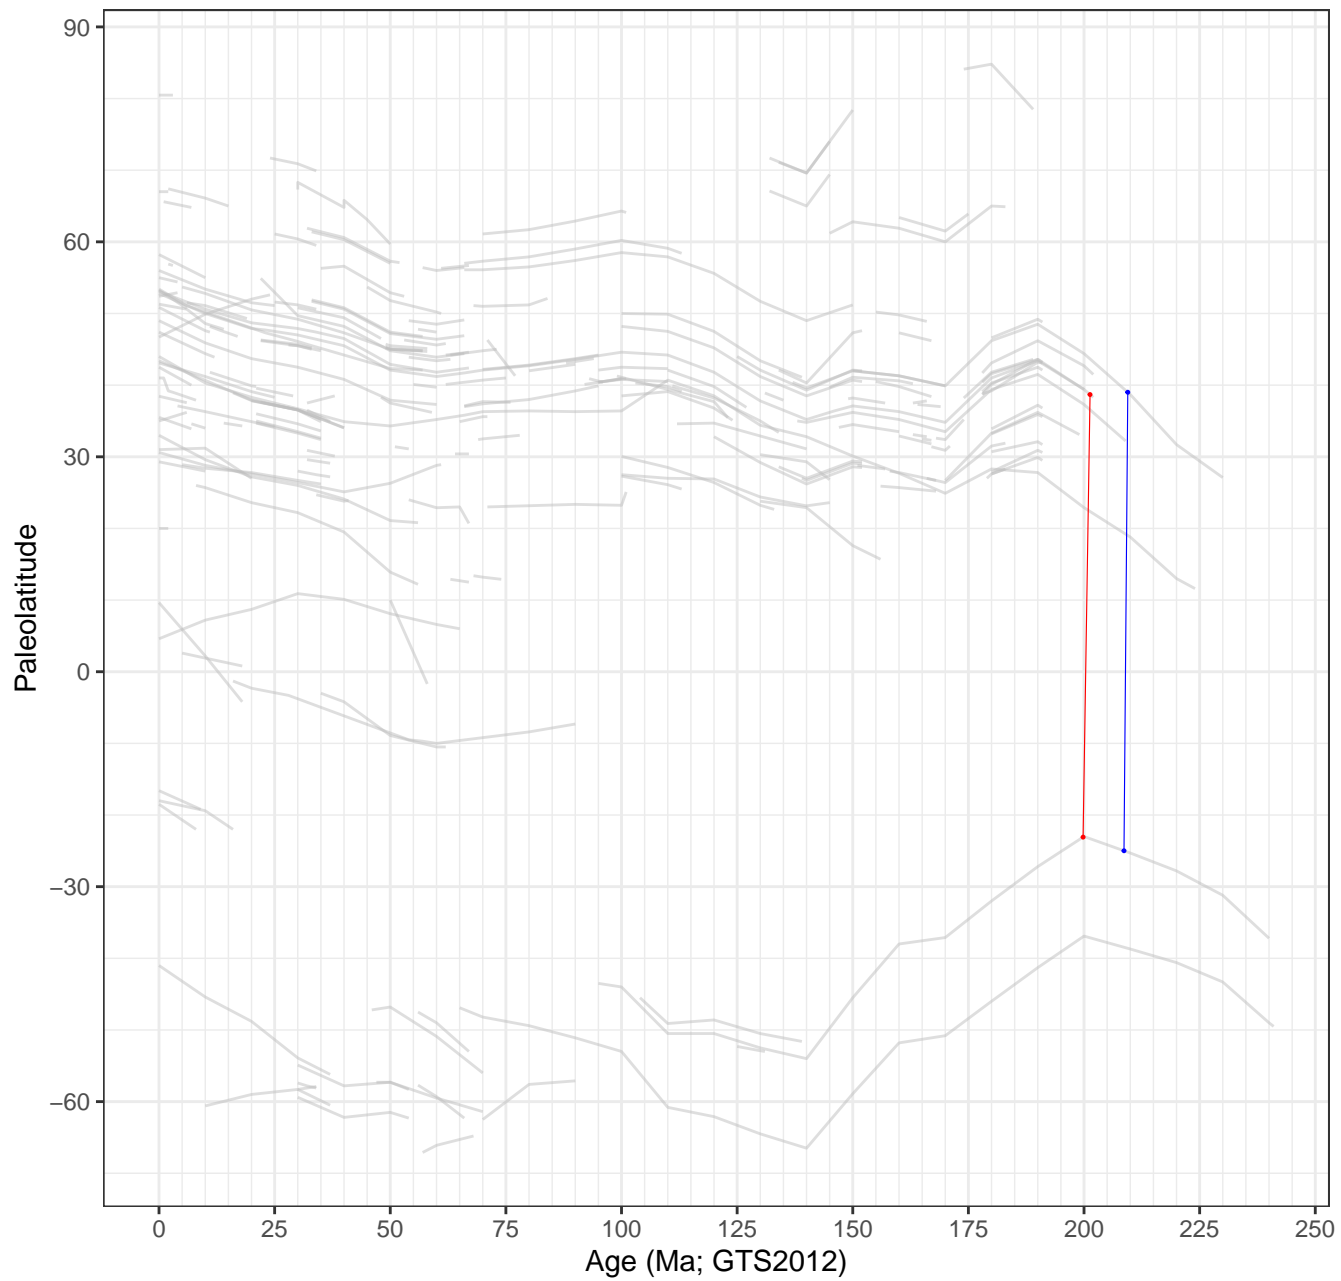

Supplement: Supplementary file 1544 [file Heibergella kendelbachia.pdf › Supplement/Supplement 2/Species 1914 plots/Heibergella kendelbachia.pdf]

# Species *Hemiplacophora semilunifera*

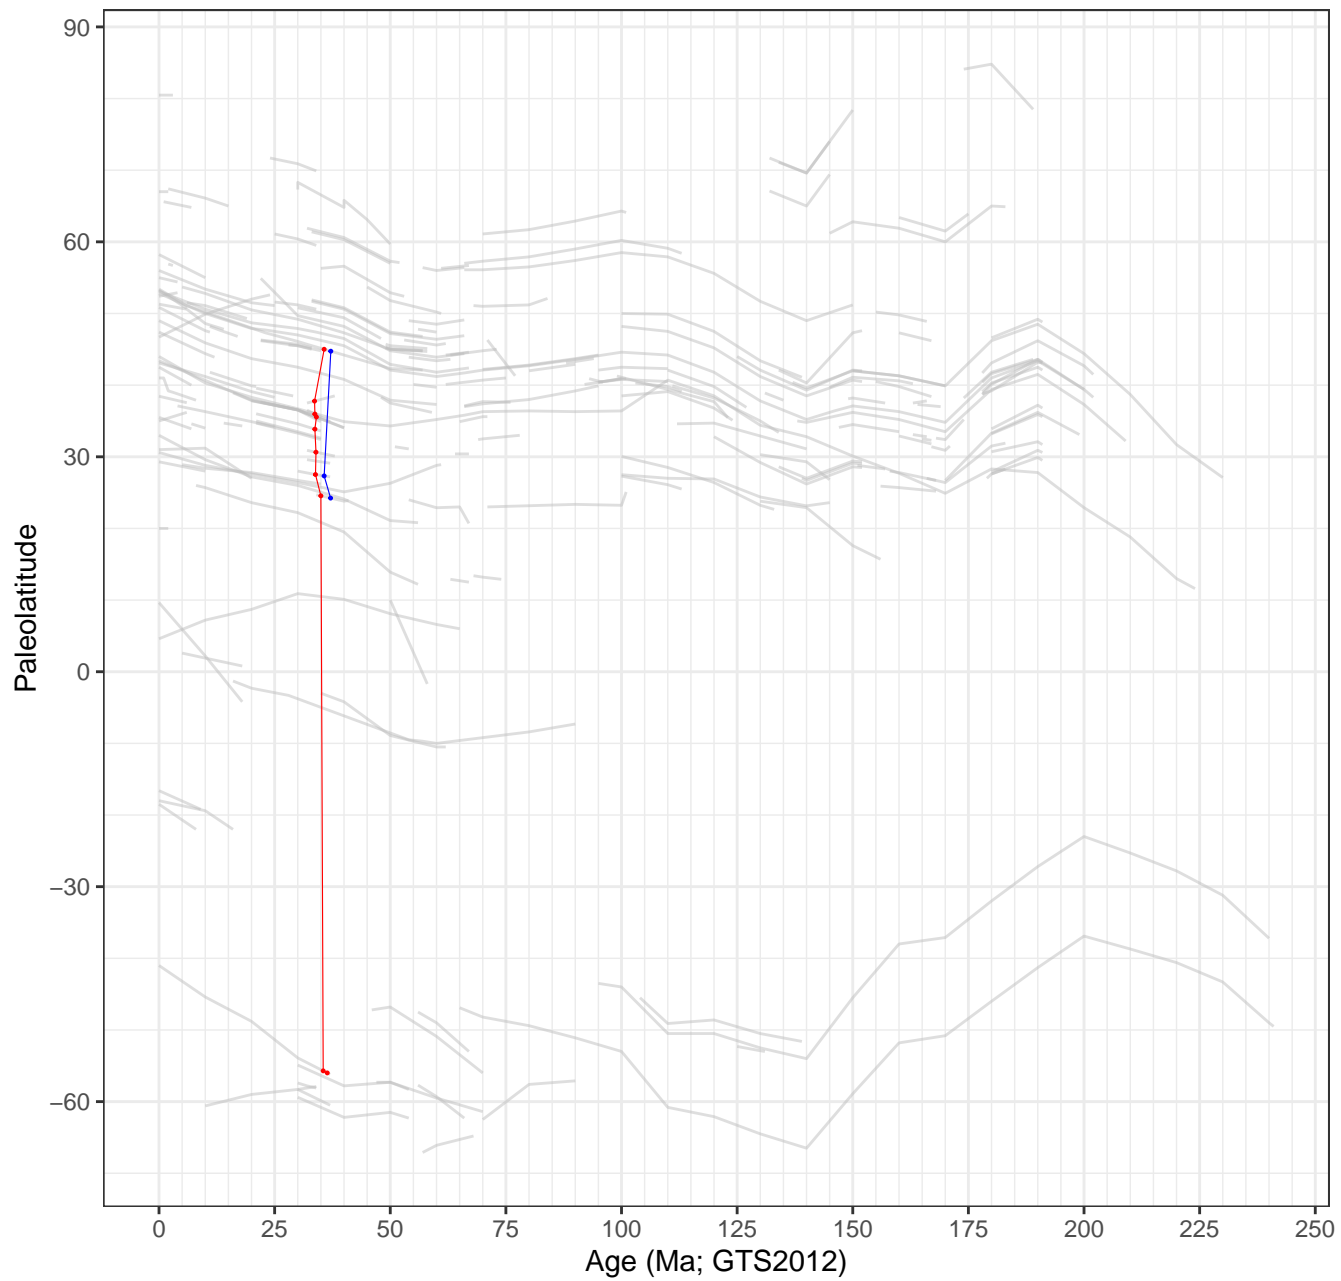

Supplement: Supplementary file 1545 [file Hemiplacophora semilunifera.pdf › Supplement/Supplement 2/Species 1914 plots/Hemiplacophora semilunifera.pdf]

# Species *Herendeenia pisciformis*

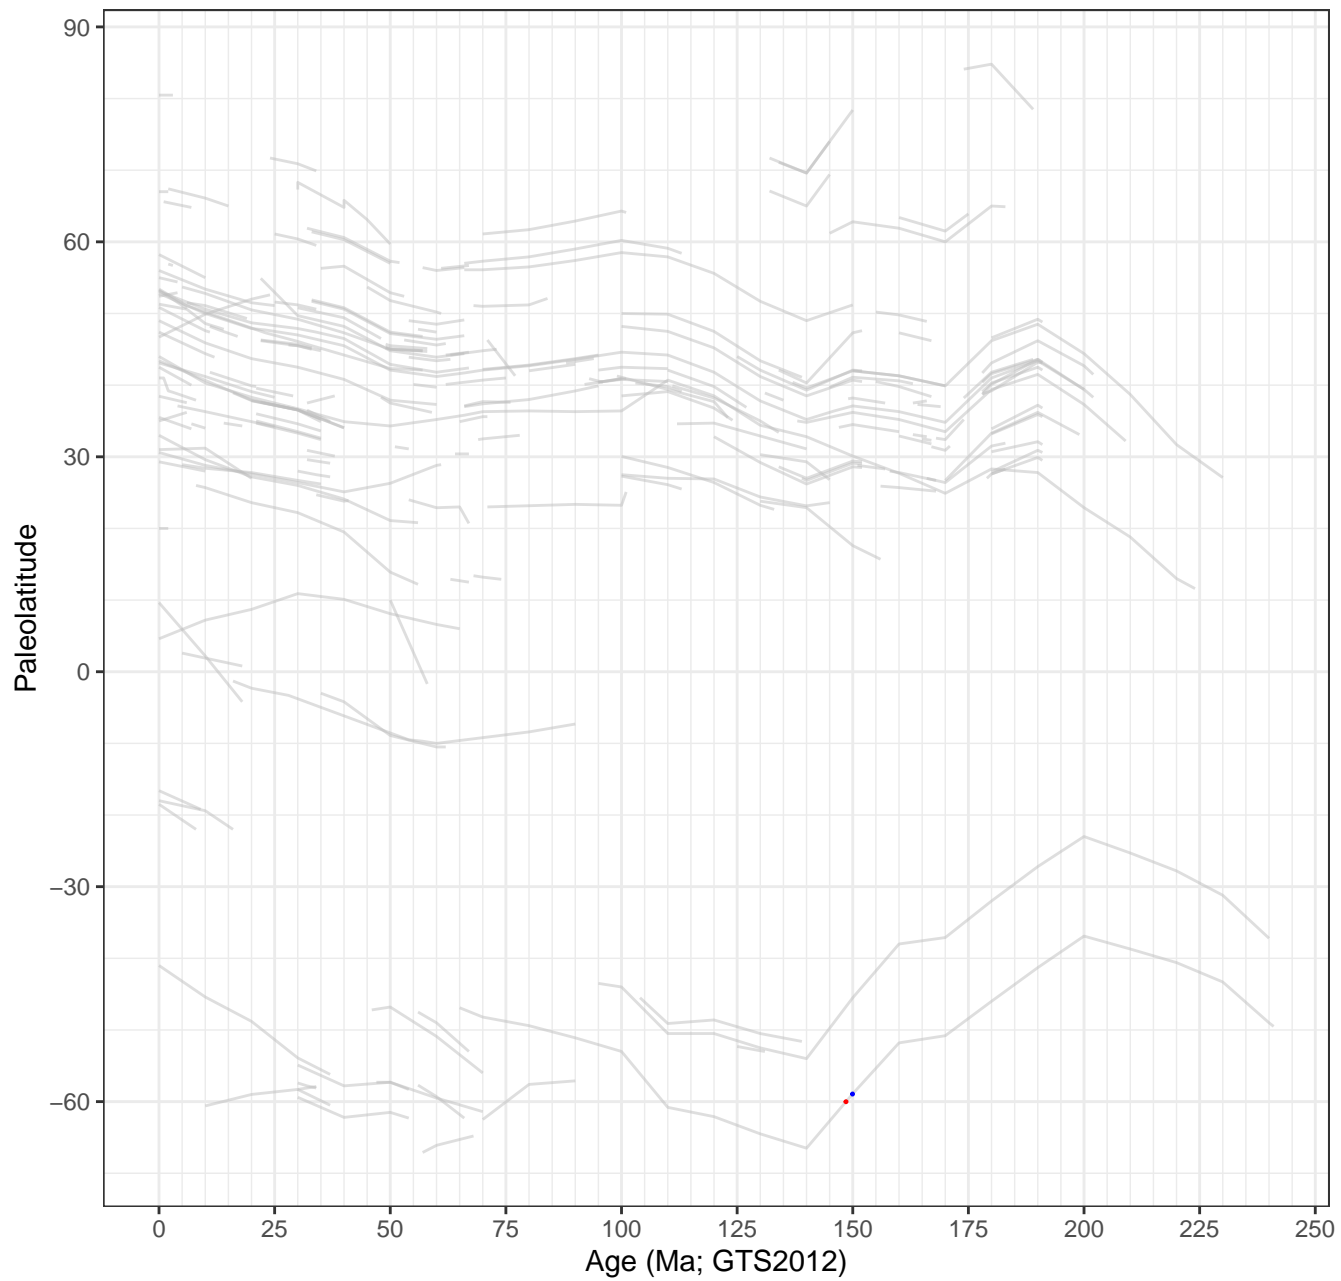

Supplement: Supplementary file 1546 [file Herendeenia pisciformis.pdf › Supplement/Supplement 2/Species 1914 plots/Herendeenia pisciformis.pdf]

# Species *Herendeenia postprojecta*

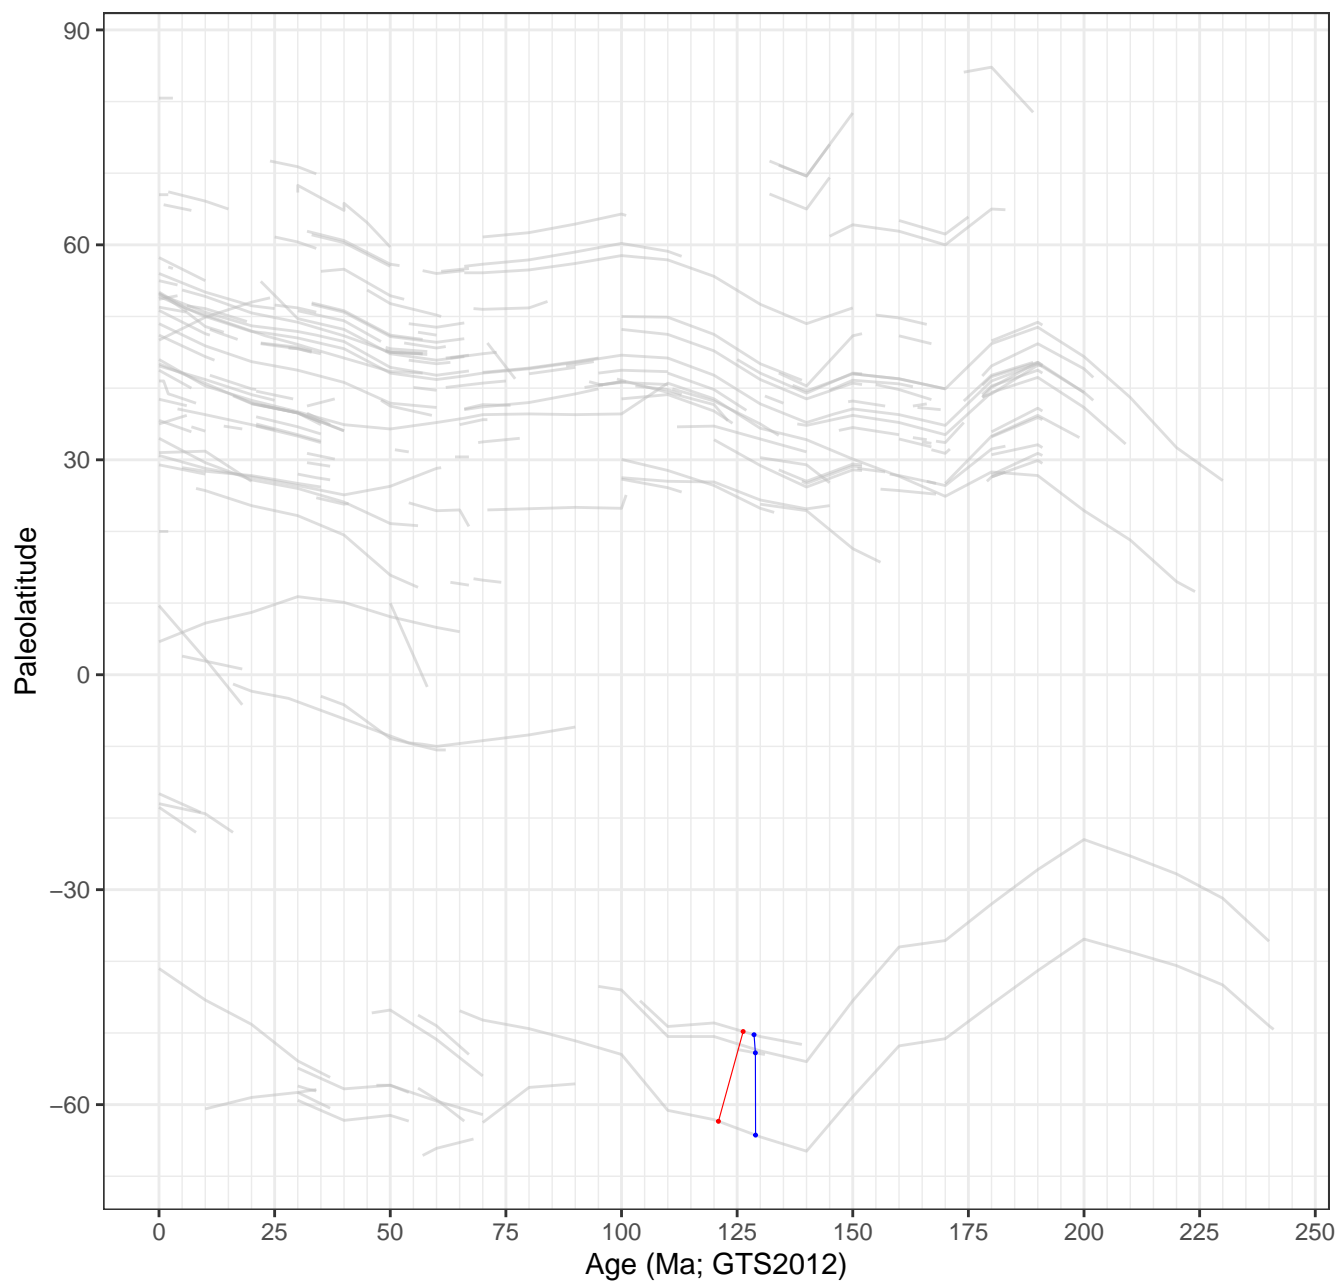

Supplement: Supplementary file 1547 [file Herendeenia postprojecta.pdf › Supplement/Supplement 2/Species 1914 plots/Herendeenia postprojecta.pdf]

# Species *Heslertonia heslertonensis*

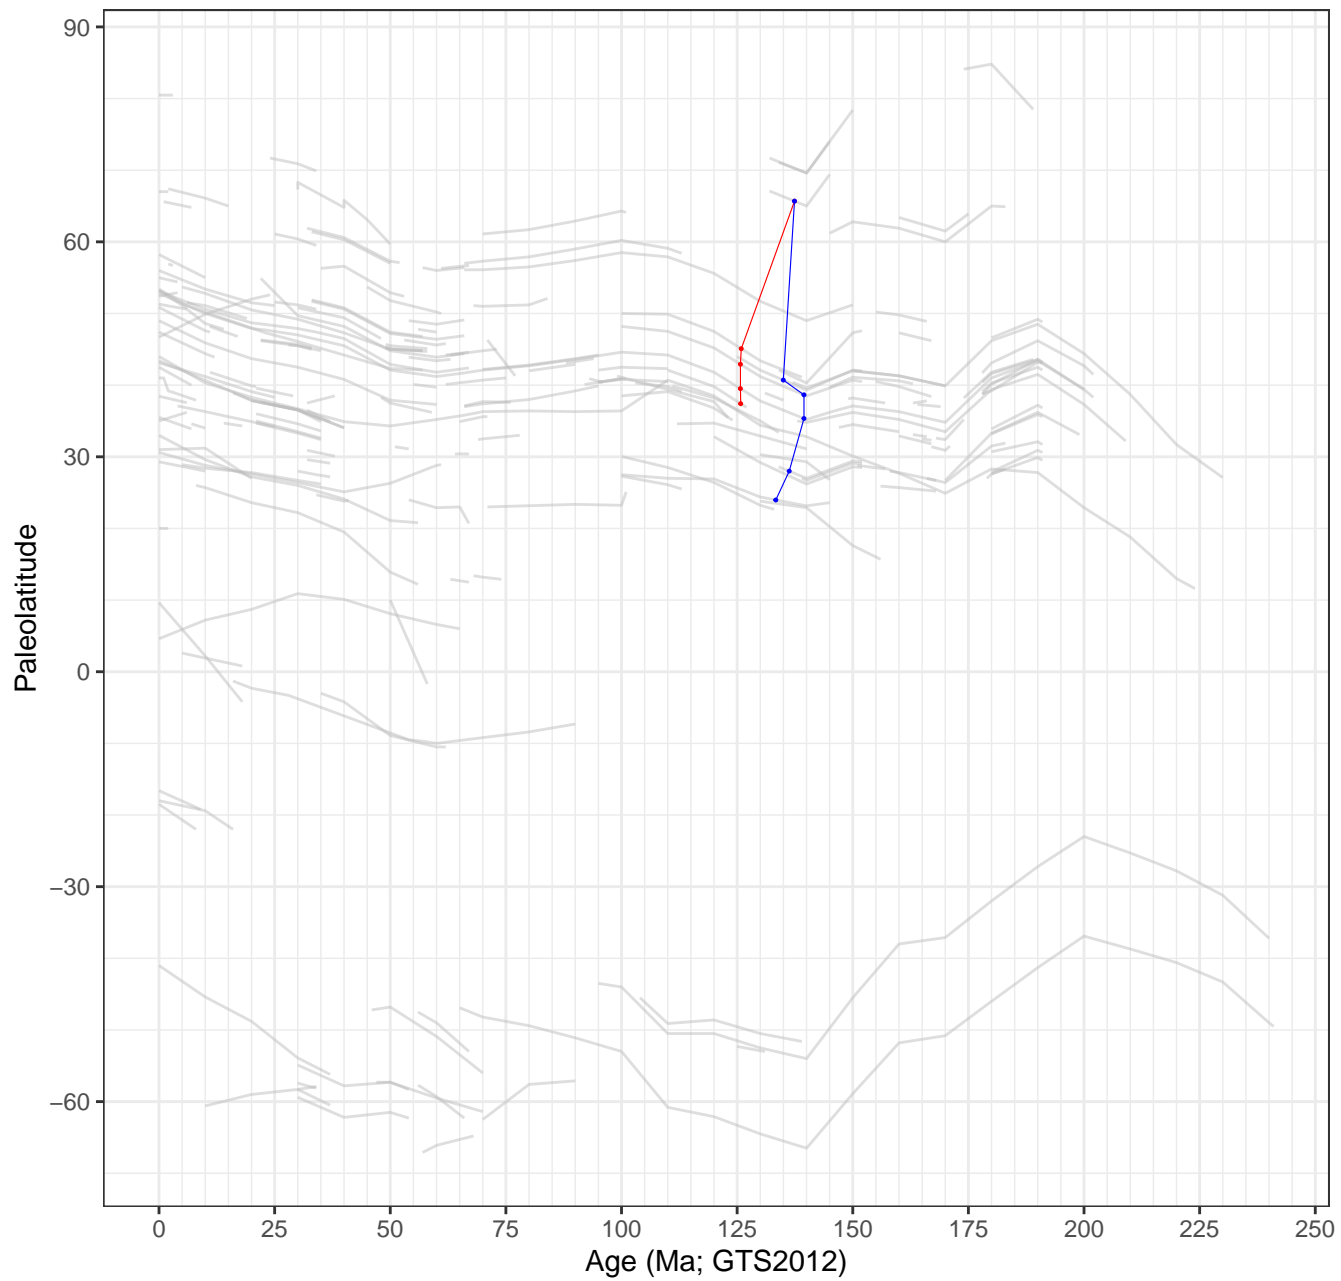

Supplement: Supplementary file 1548 [file Heslertonia heslertonensis.pdf › Supplement/Supplement 2/Species 1914 plots/Heslertonia heslertonensis.pdf]

# Species *Heslertonia pellucida*

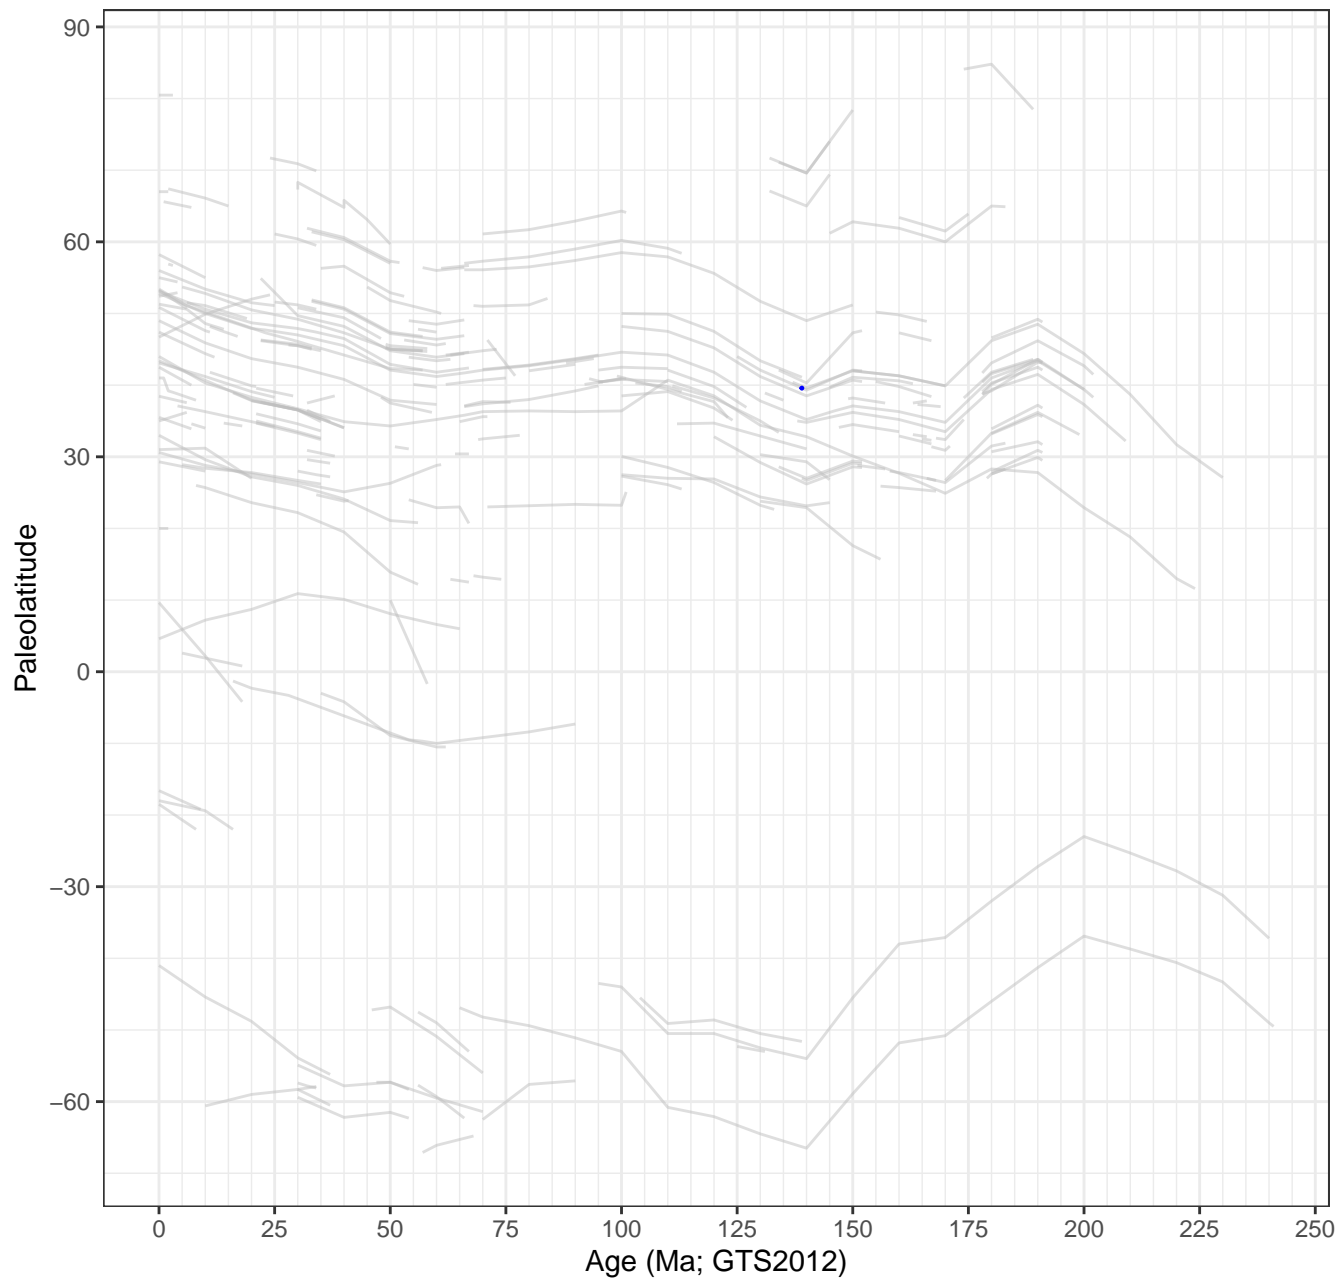

Supplement: Supplementary file 1549 [file Heslertonia pellucida.pdf › Supplement/Supplement 2/Species 1914 plots/Heslertonia pellucida.pdf]

# Species *Heslertonia striata*

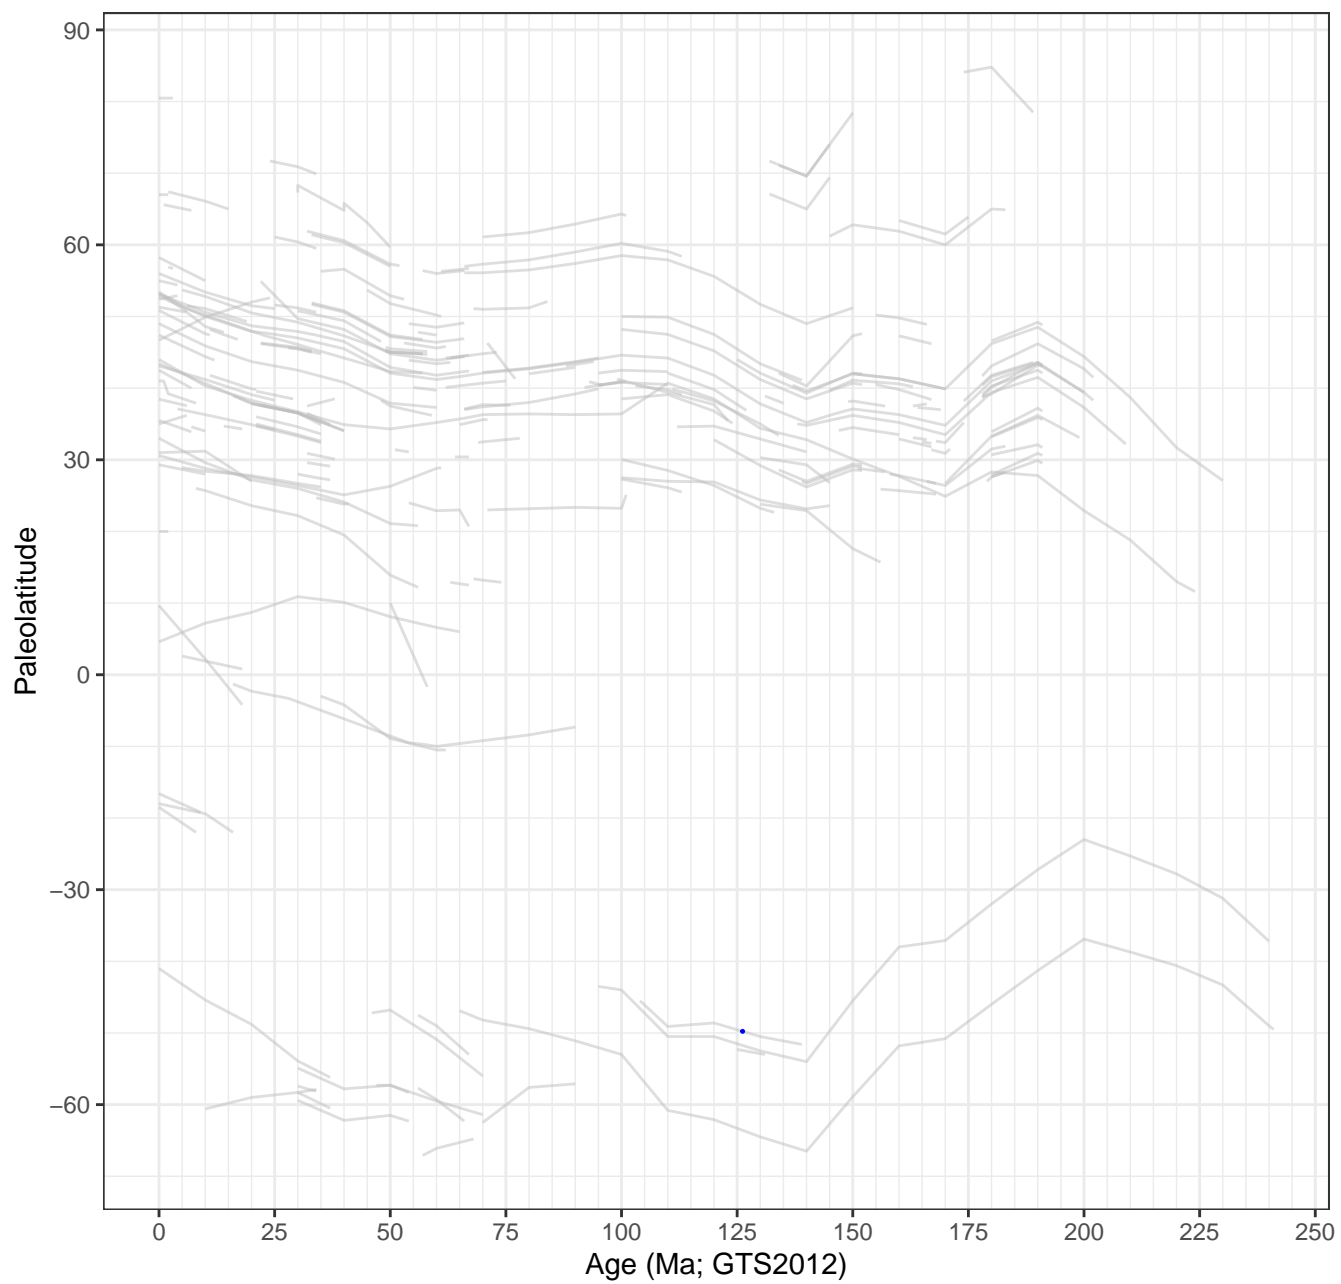

Supplement: Supplementary file 1550 [file Heslertonia striata.pdf › Supplement/Supplement 2/Species 1914 plots/Heslertonia striata.pdf]

# Species *Heteraulacacysta campanula*

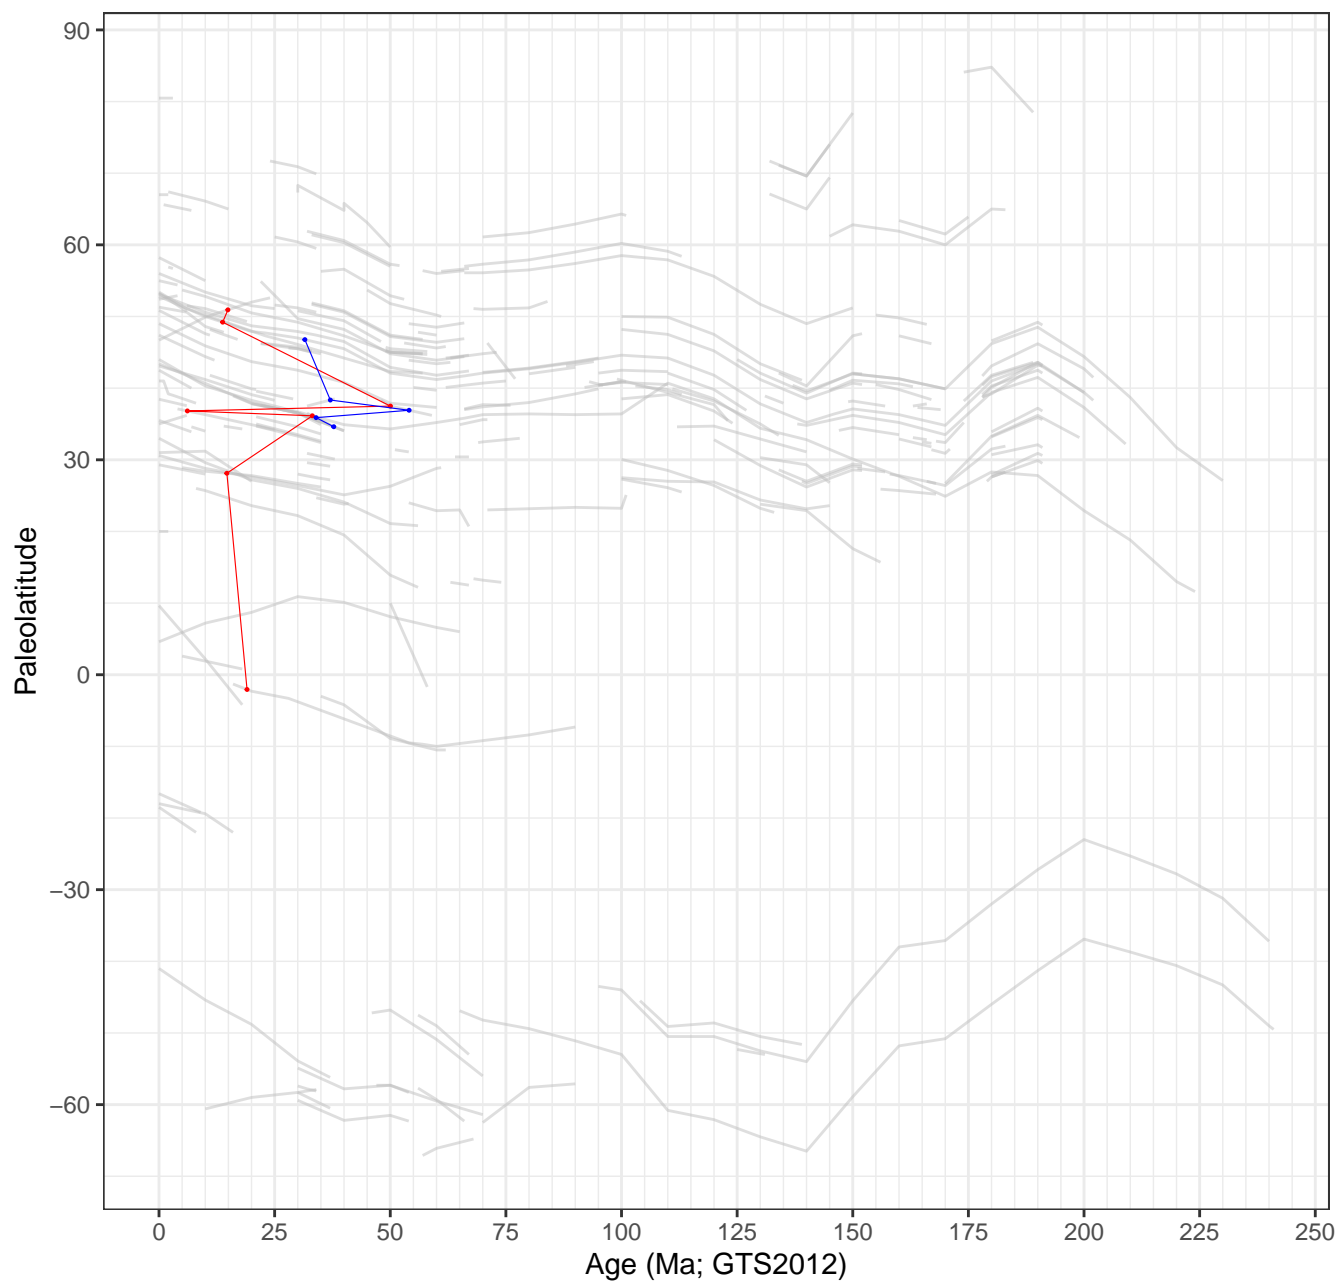

Supplement: Supplementary file 1551 [file Heteraulacacysta campanula.pdf › Supplement/Supplement 2/Species 1914 plots/Heteraulacacysta campanula.pdf]

# Species *Heteraulacacysta everriculata*

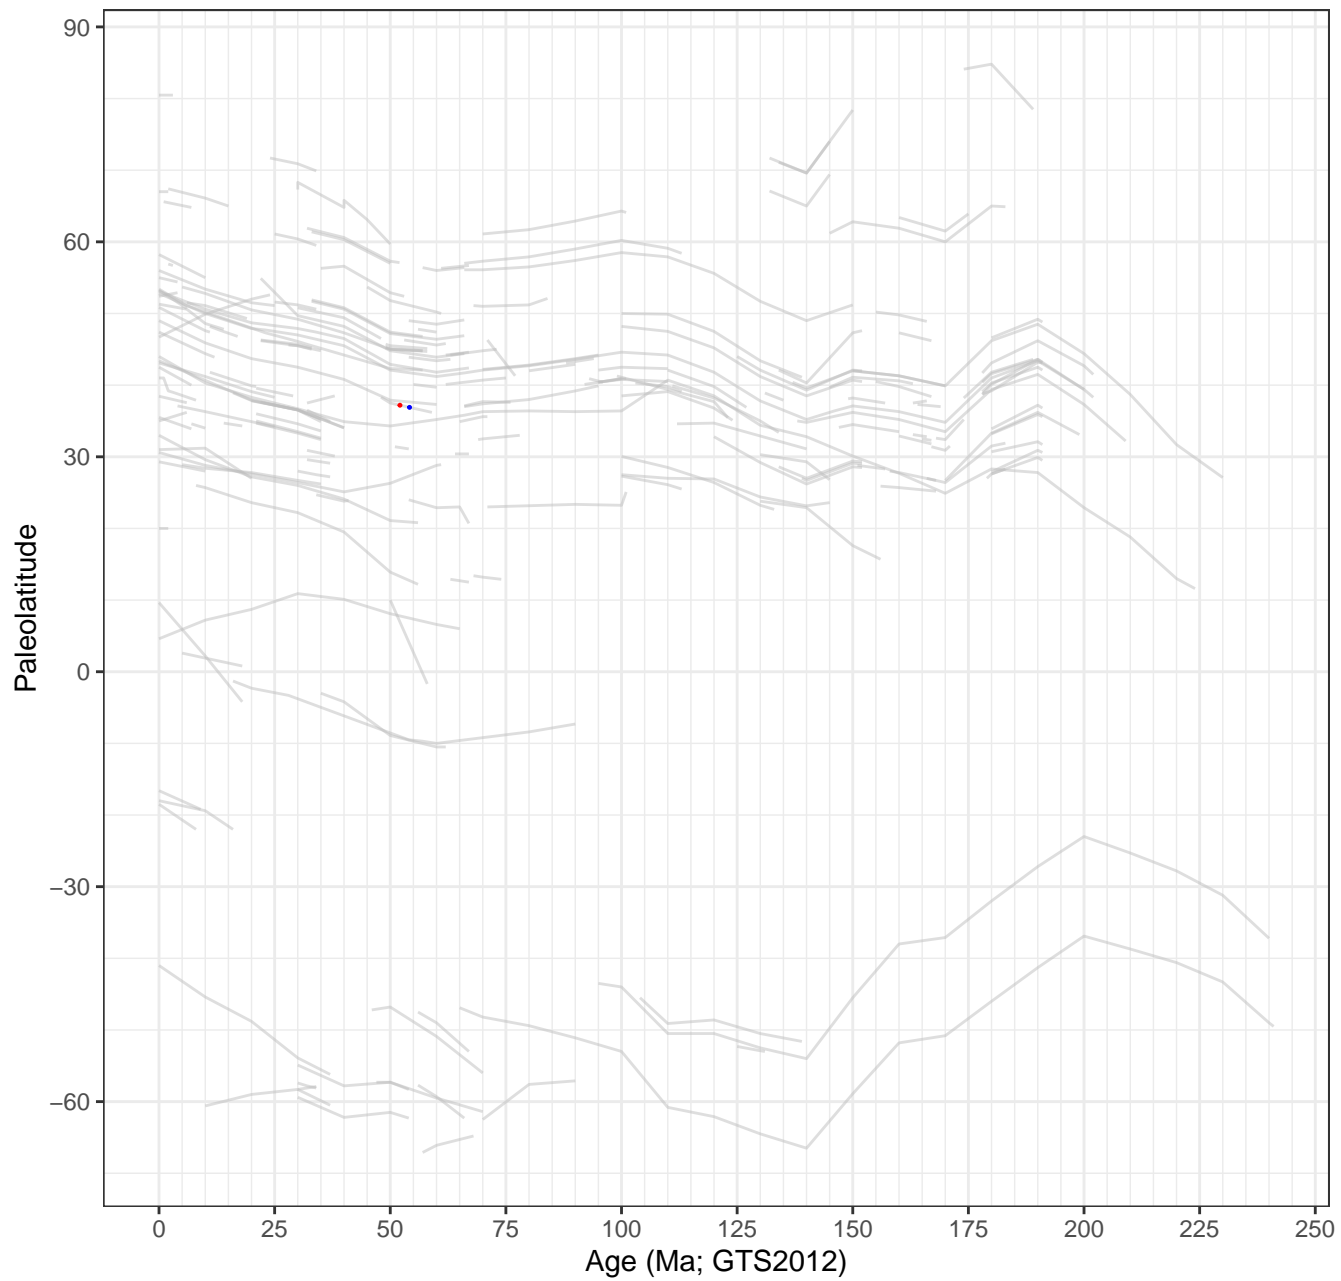

Supplement: Supplementary file 1552 [file Heteraulacacysta everriculata.pdf › Supplement/Supplement 2/Species 1914 plots/Heteraulacacysta everriculata.pdf]

# Species *Heteraulacacysta leptalea*

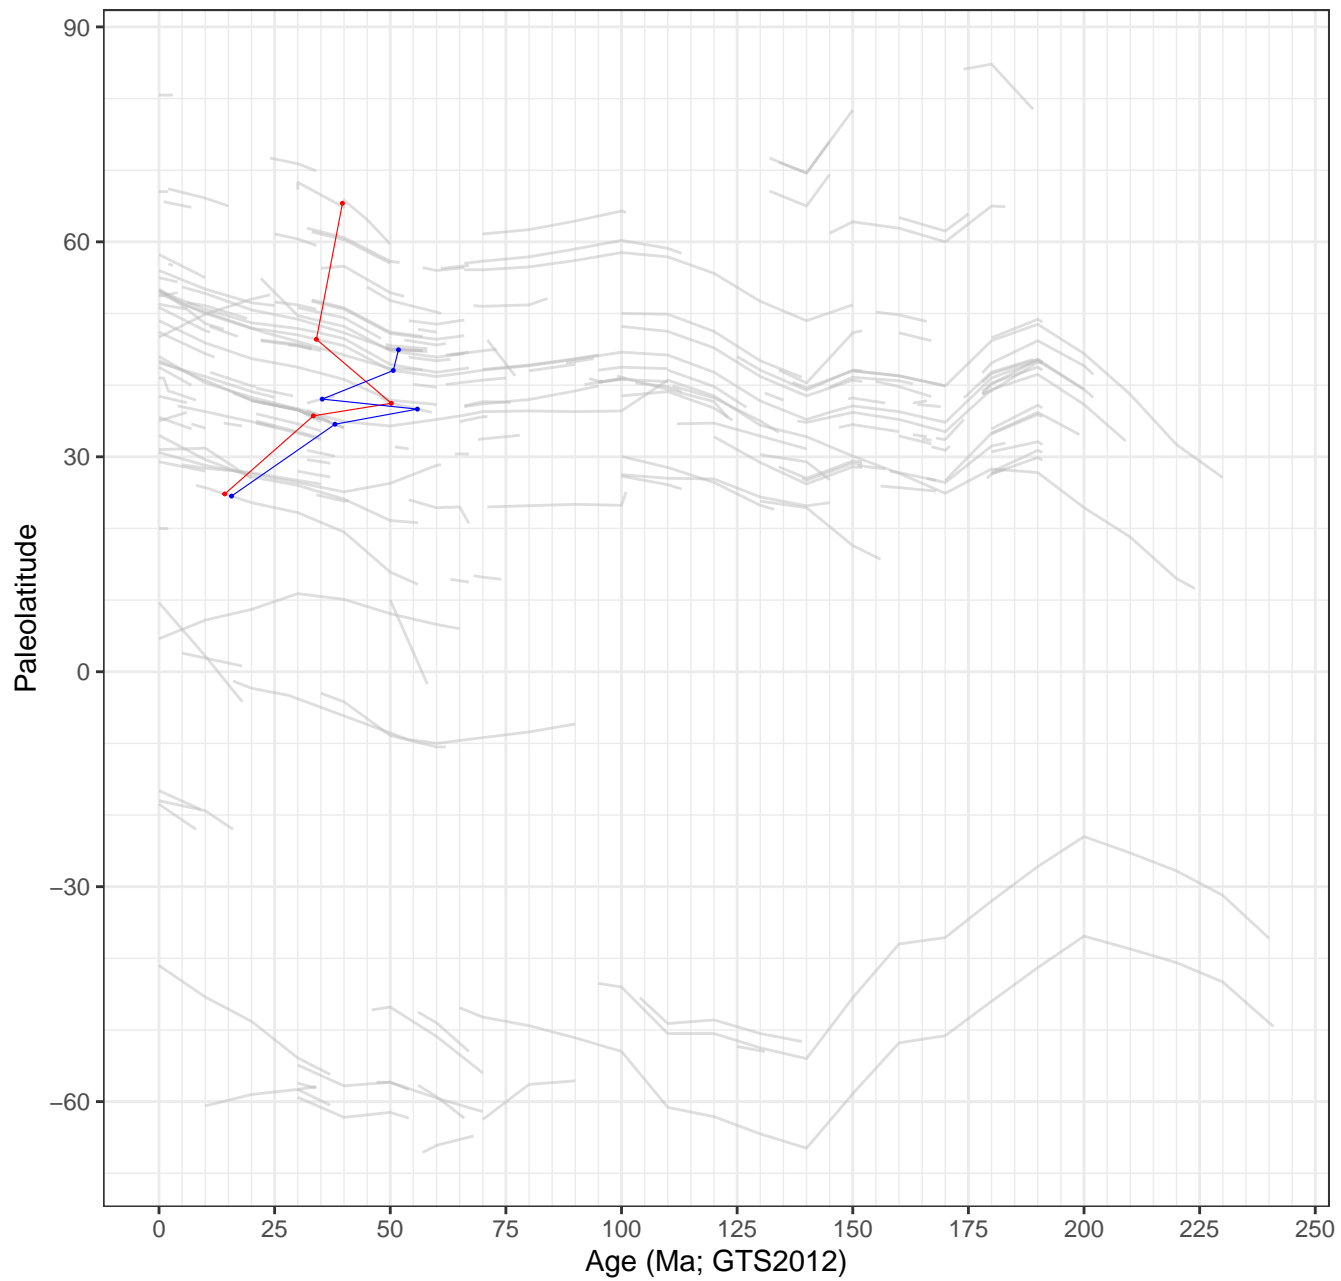

Supplement: Supplementary file 1553 [file Heteraulacacysta leptalea.pdf › Supplement/Supplement 2/Species 1914 plots/Heteraulacacysta leptalea.pdf]

# Species *Heteraulacacysta porosa*

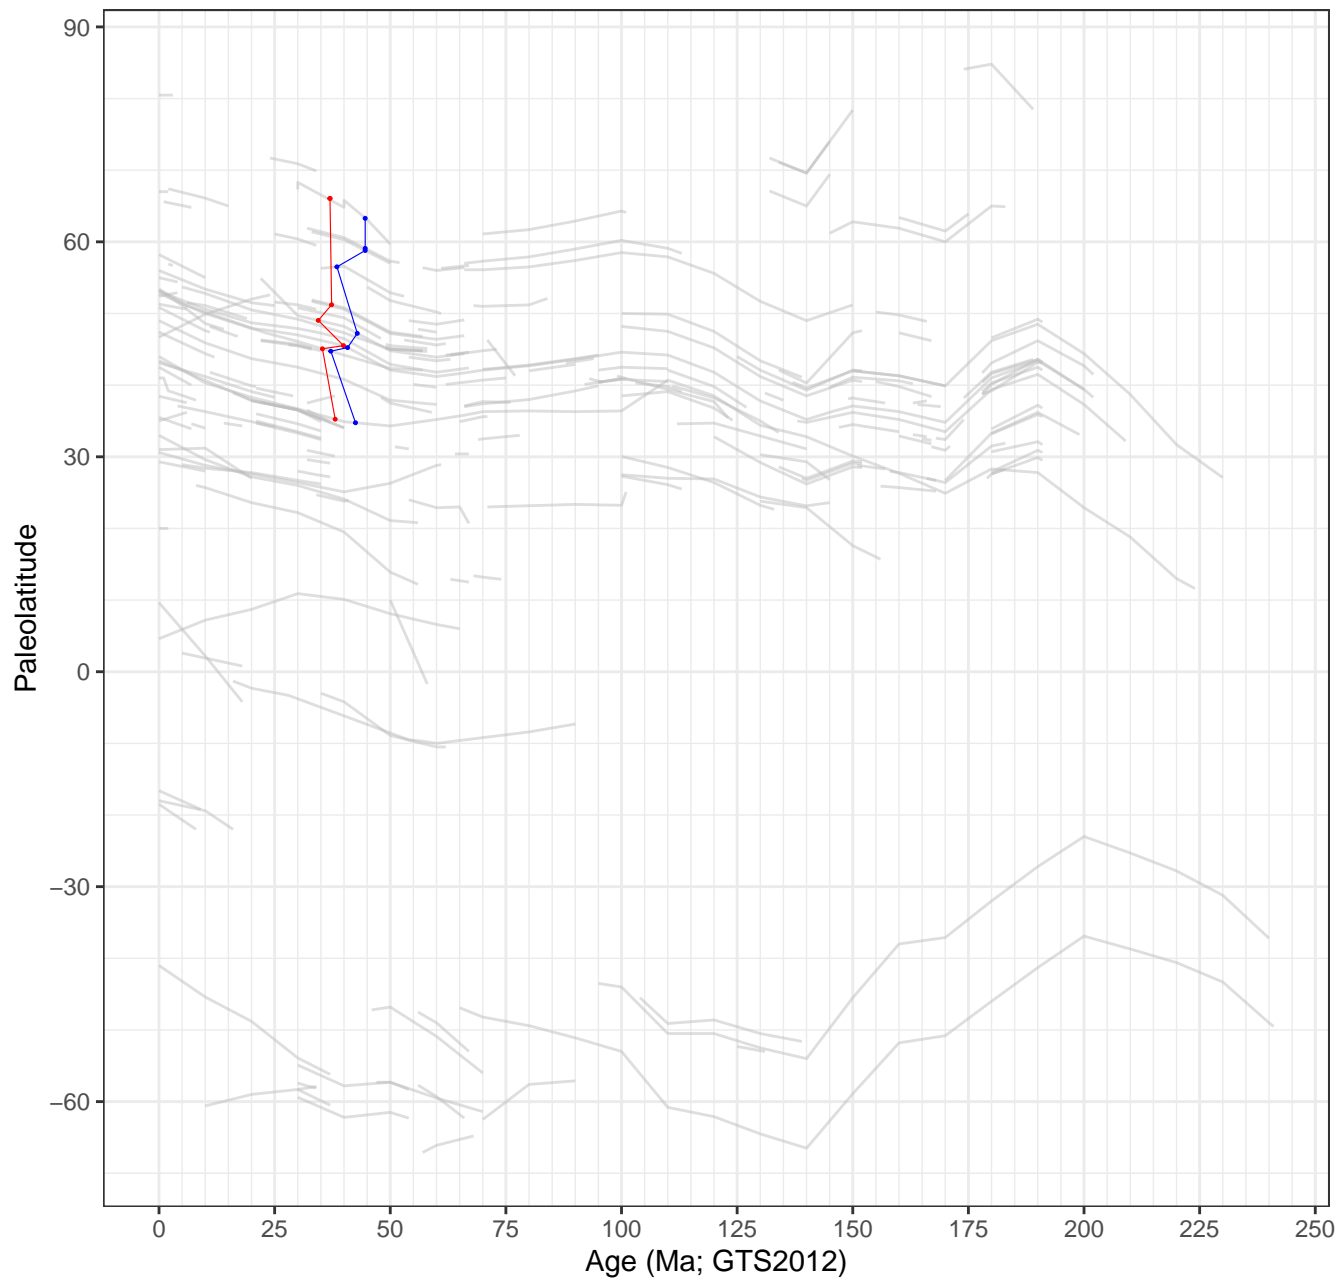

Supplement: Supplementary file 1554 [file Heteraulacacysta porosa.pdf › Supplement/Supplement 2/Species 1914 plots/Heteraulacacysta porosa.pdf]

# Species *Heteraulacacysta pustulata*

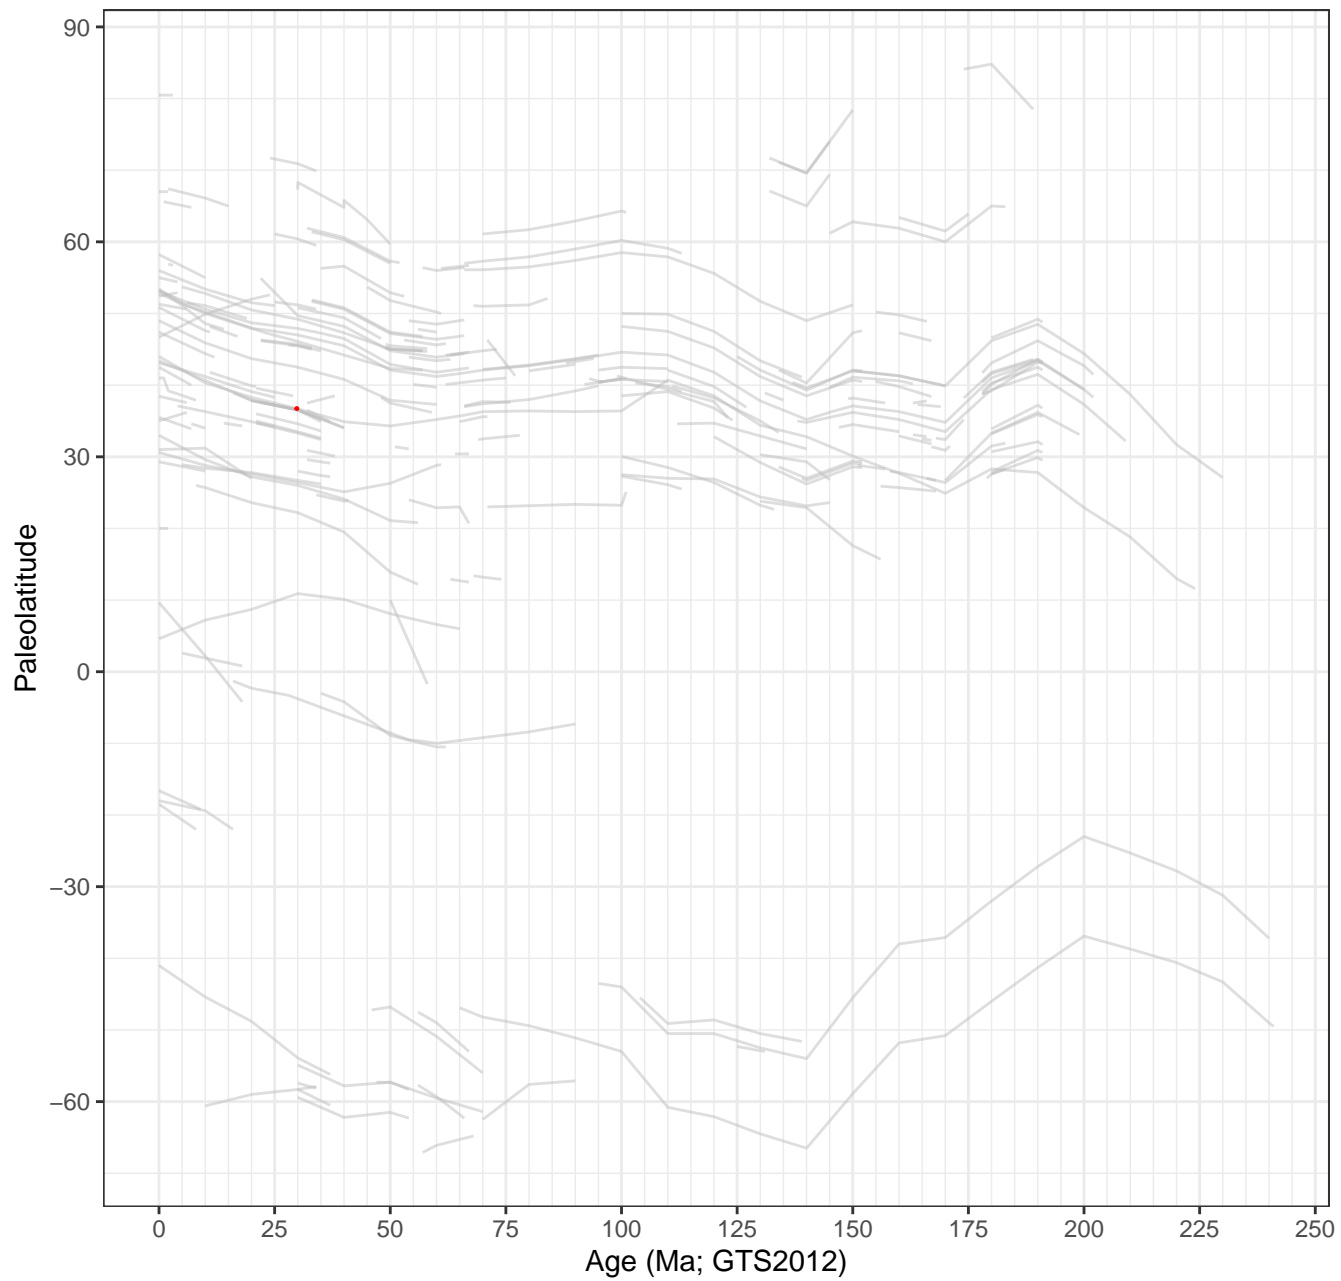

Supplement: Supplementary file 1555 [file Heteraulacacysta pustulata.pdf › Supplement/Supplement 2/Species 1914 plots/Heteraulacacysta pustulata.pdf]

# Species *Heterosphaeridium conjunctum*

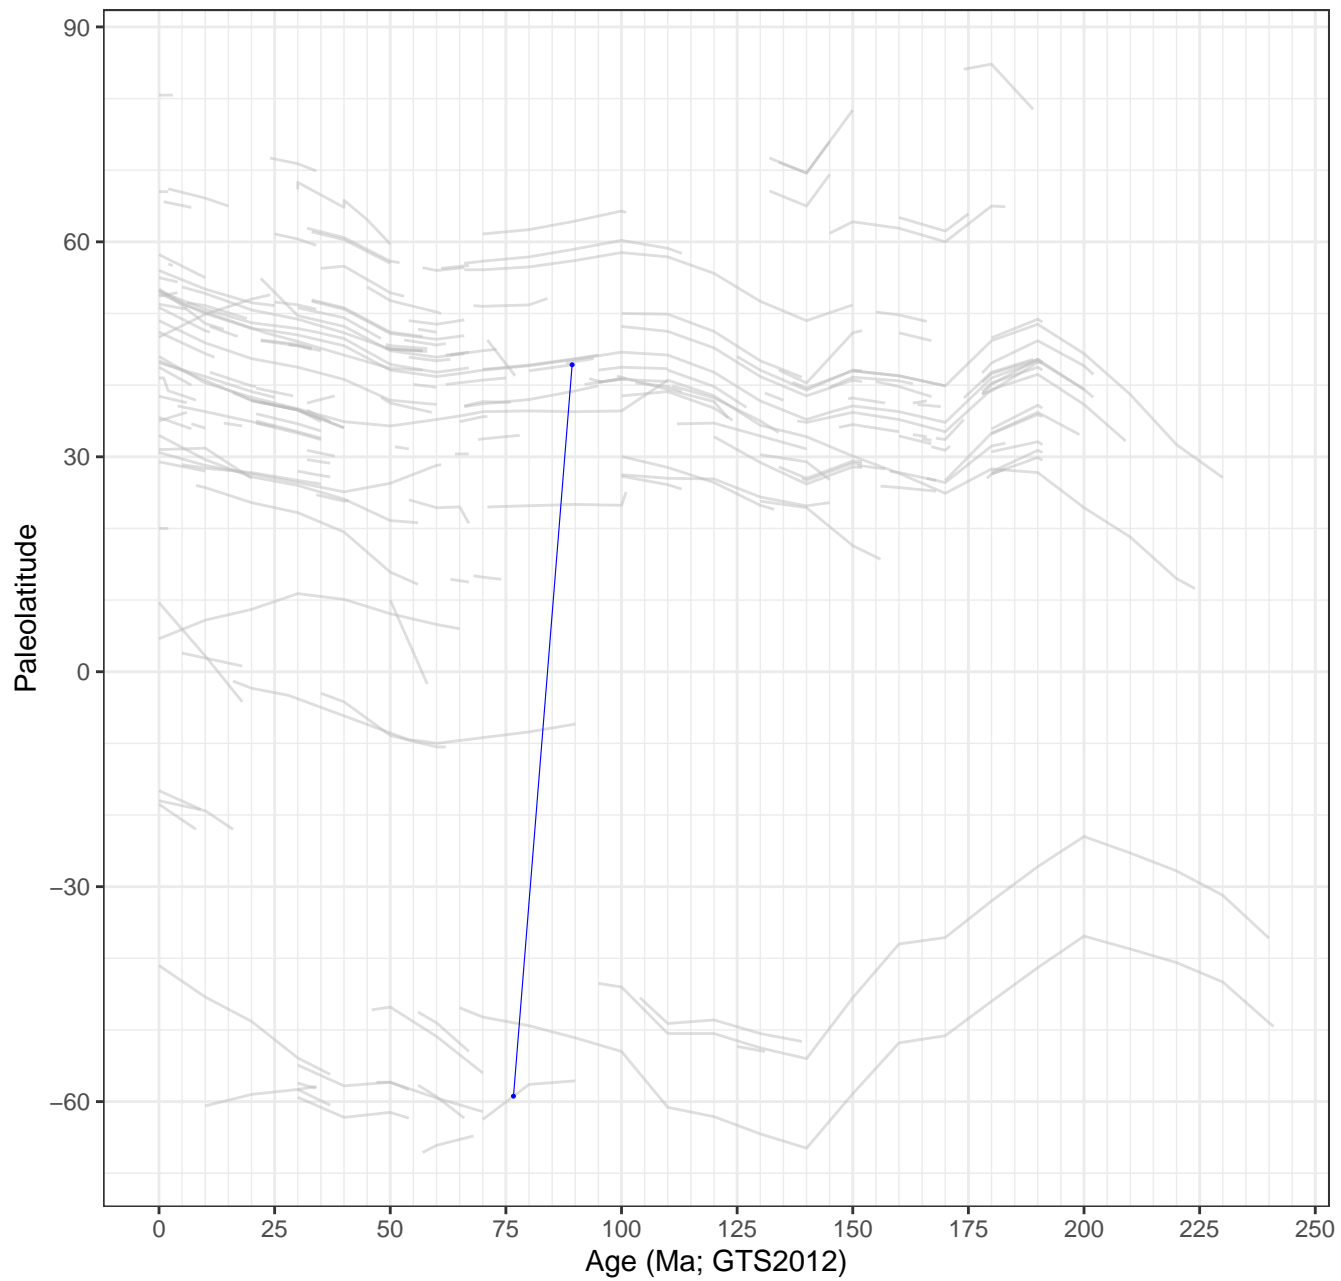

Supplement: Supplementary file 1556 [file Heterosphaeridium conjunctum.pdf › Supplement/Supplement 2/Species 1914 plots/Heterosphaeridium conjunctum.pdf]

# Species *Heterosphaeridium cordiforme*

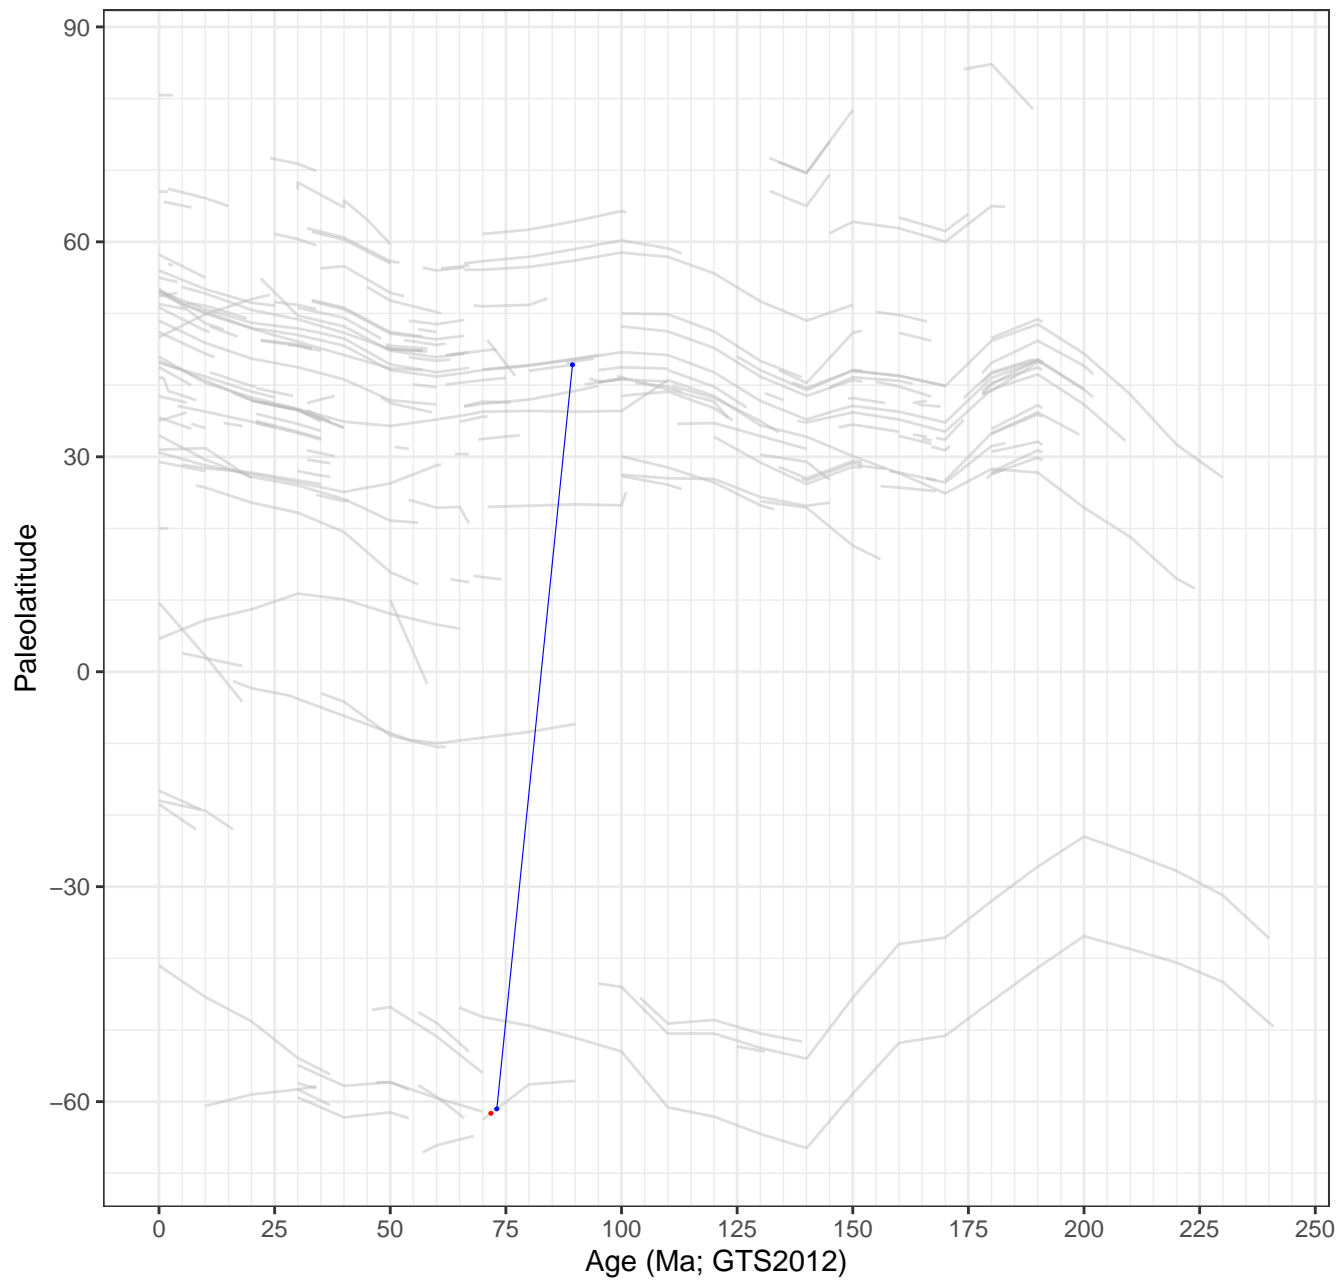

Supplement: Supplementary file 1557 [file Heterosphaeridium cordiforme.pdf › Supplement/Supplement 2/Species 1914 plots/Heterosphaeridium cordiforme.pdf]

# Species *Heterosphaeridium difficile*

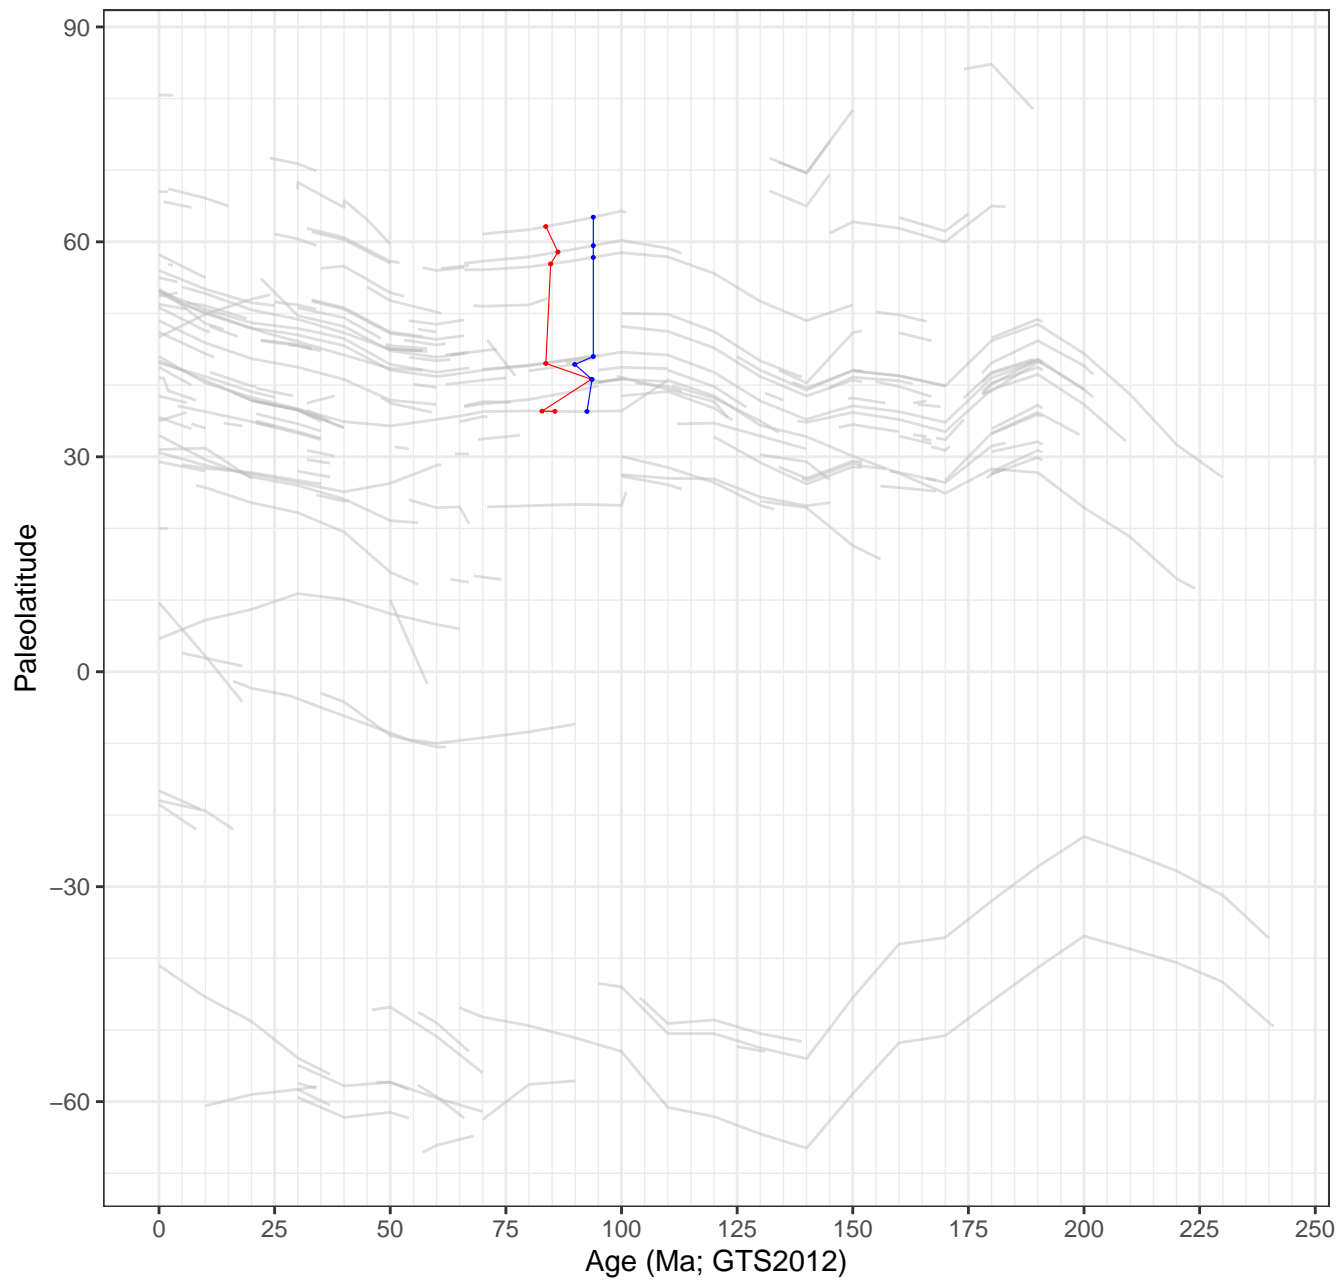

Supplement: Supplementary file 1558 [file Heterosphaeridium difficile.pdf › Supplement/Supplement 2/Species 1914 plots/Heterosphaeridium difficile.pdf]

# Species *Heterosphaeridium galiciae*

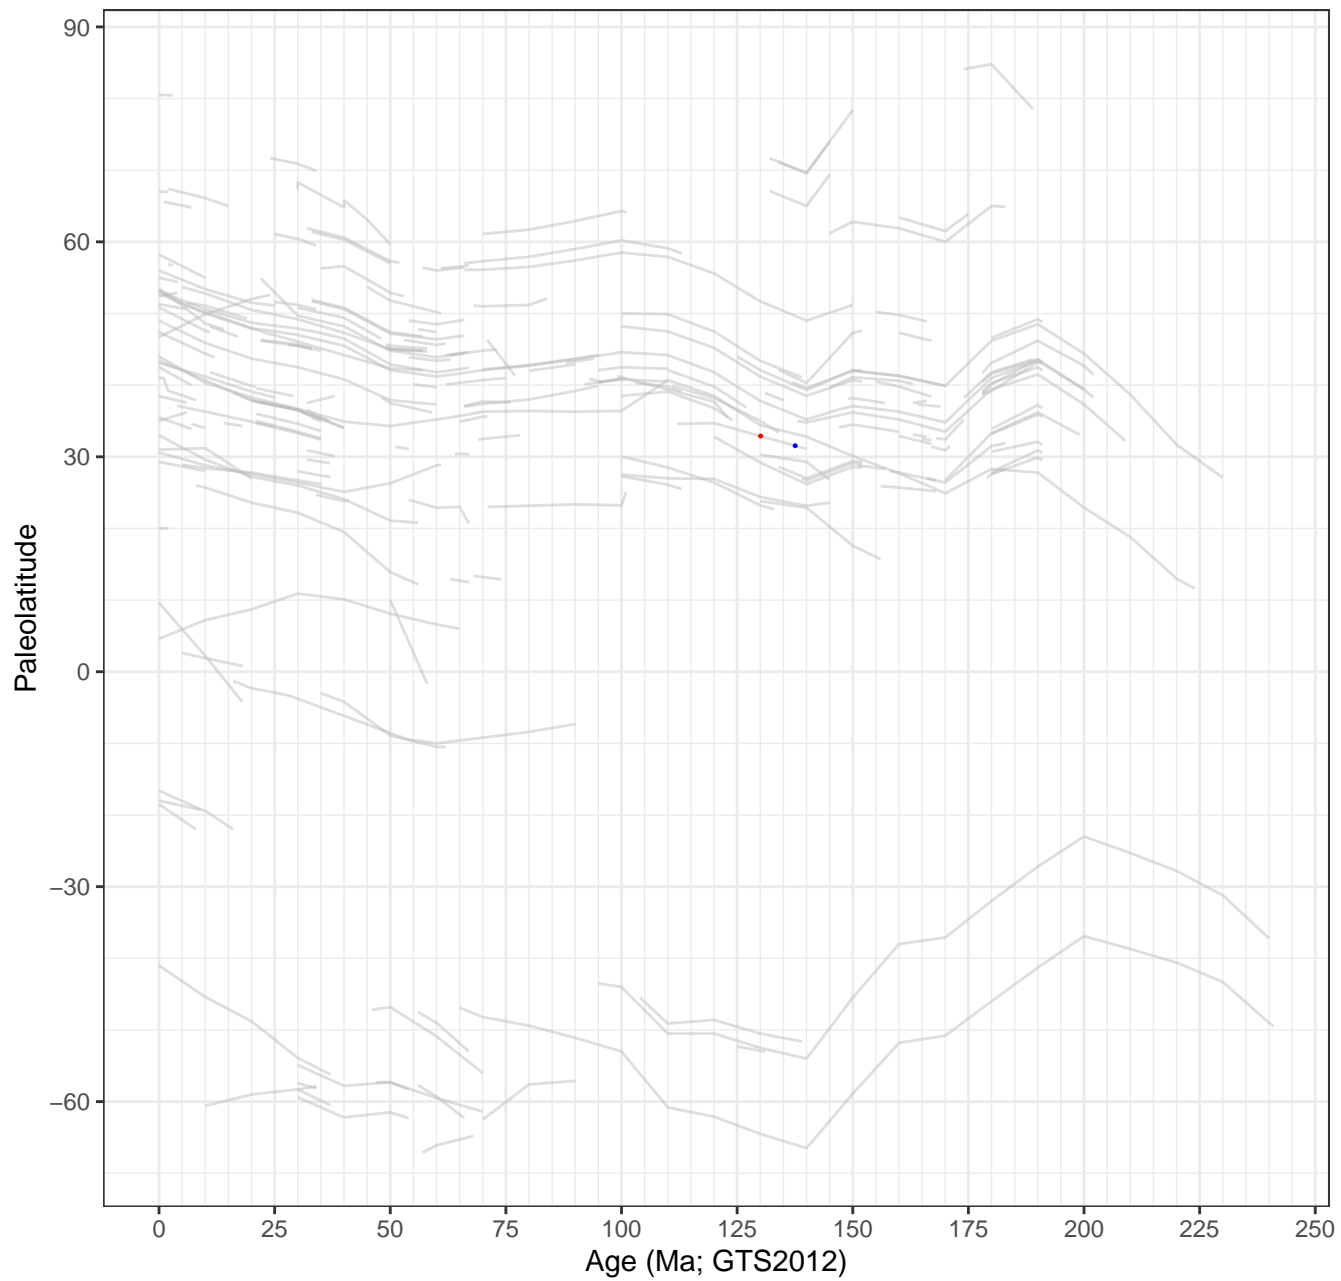

Supplement: Supplementary file 1559 [file Heterosphaeridium galiciae.pdf › Supplement/Supplement 2/Species 1914 plots/Heterosphaeridium galiciae.pdf]

# Species *Heterosphaeridium heteracanthum*

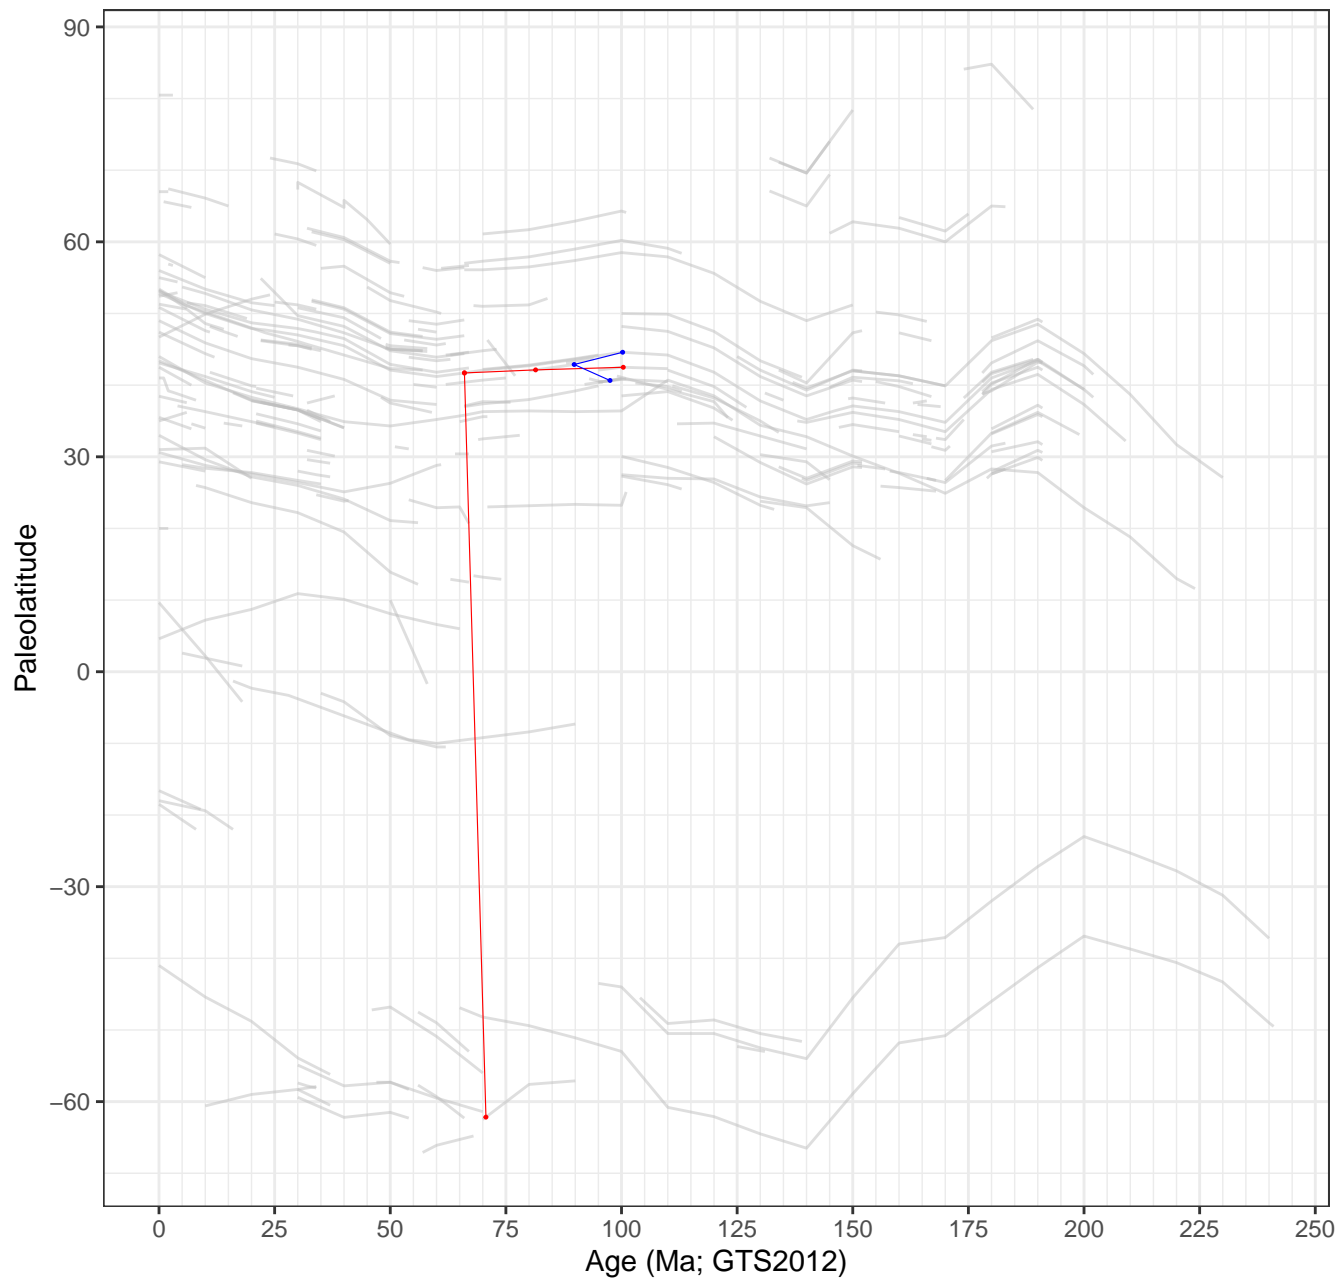

Supplement: Supplementary file 1560 [file Heterosphaeridium heteracanthum.pdf › Supplement/Supplement 2/Species 1914 plots/Heterosphaeridium heteracanthum.pdf]

# Species *Heterosphaeridium spinaconjunctum*

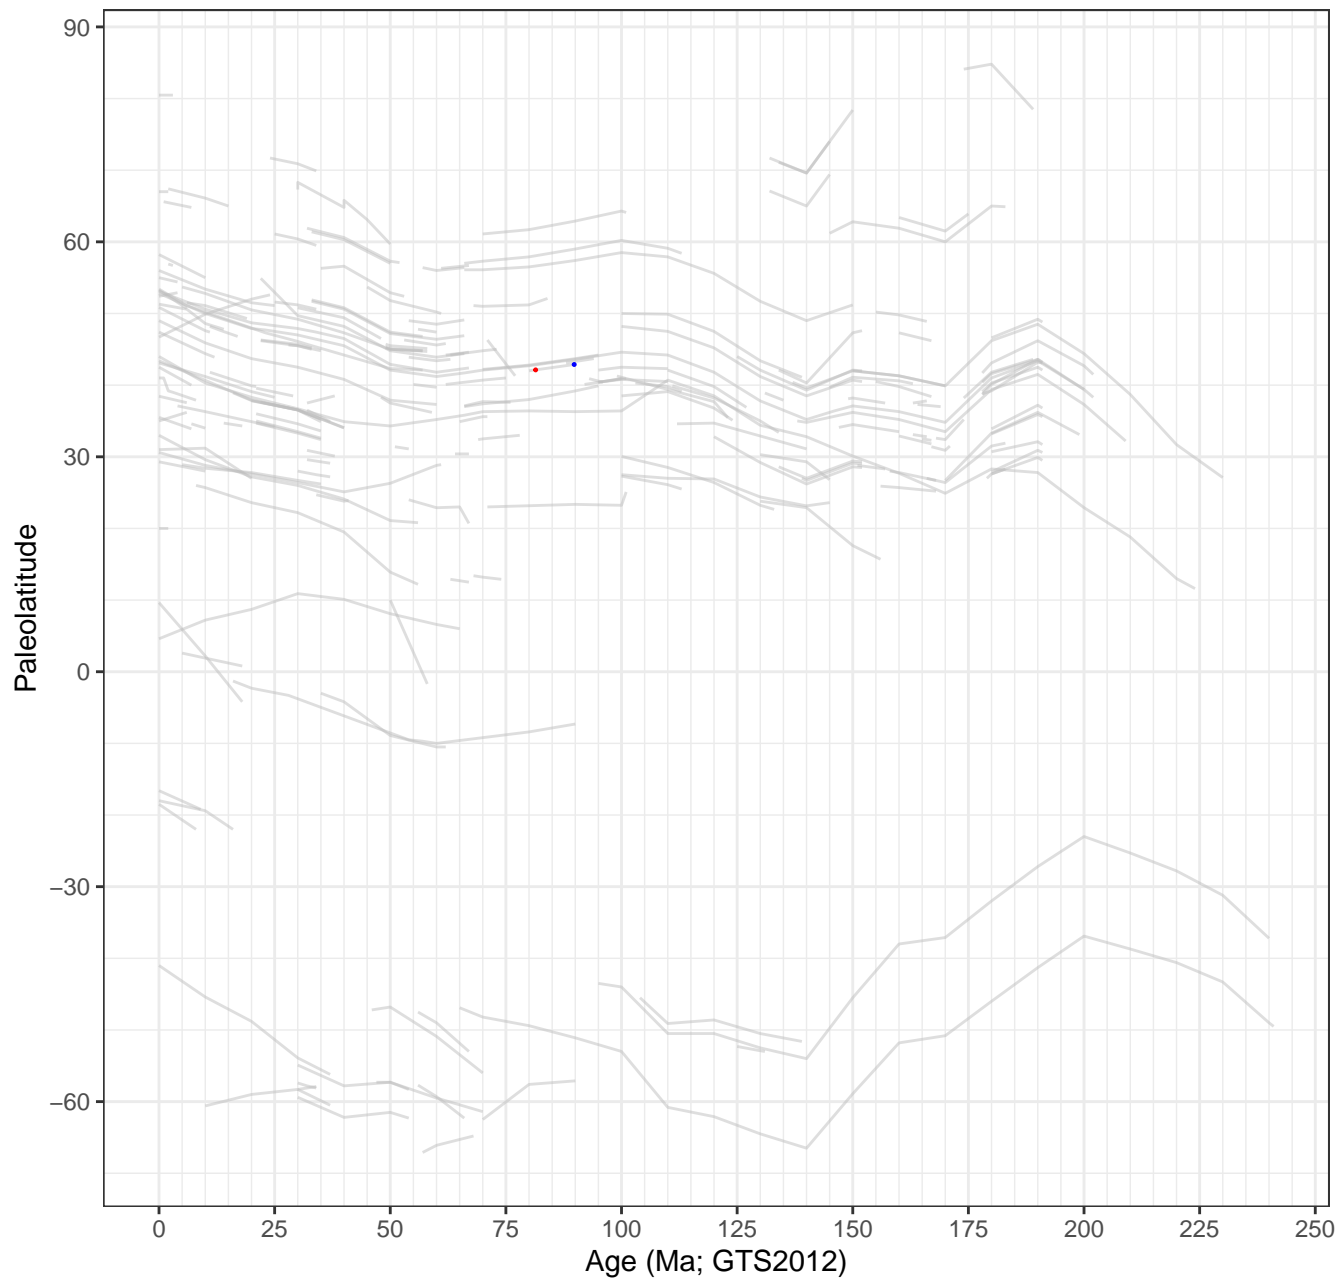

Supplement: Supplementary file 1561 [file Heterosphaeridium spinaconjunctum.pdf › Supplement/Supplement 2/Species 1914 plots/Heterosphaeridium spinaconjunctum.pdf]

# Species *Heterosphaeridium verdieri*

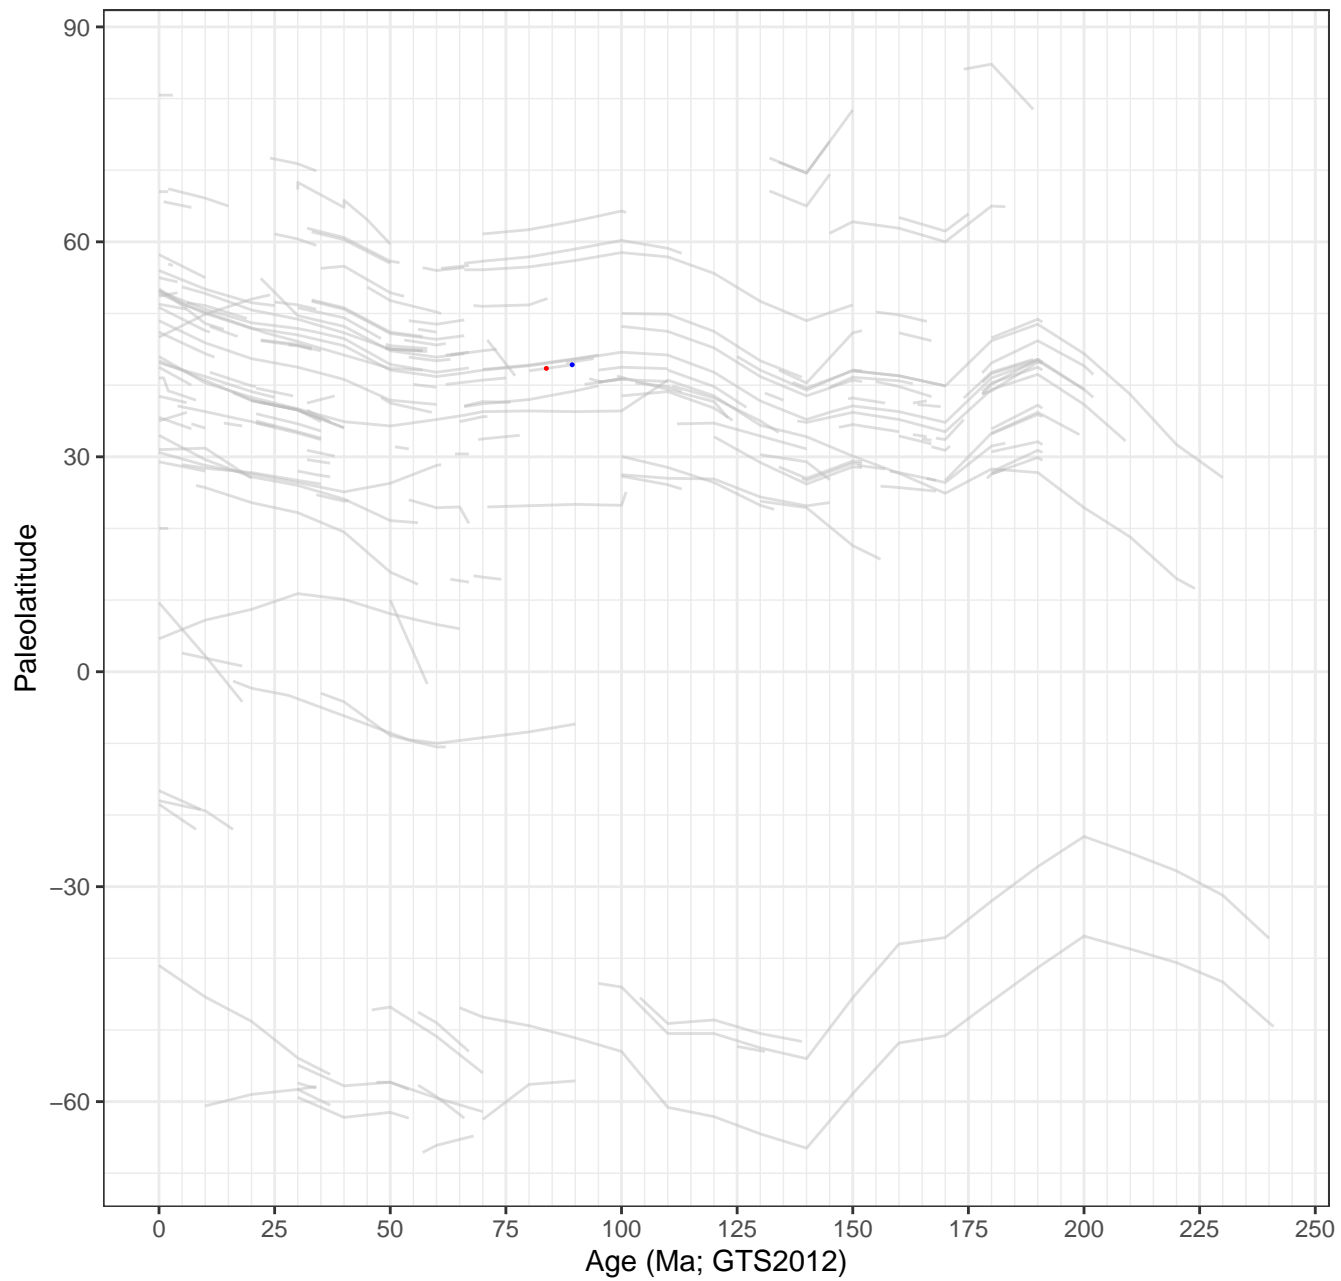

Supplement: Supplementary file 1562 [file Heterosphaeridium verdieri.pdf › Supplement/Supplement 2/Species 1914 plots/Heterosphaeridium verdieri.pdf]

# Species *Histiocysta outananensis*

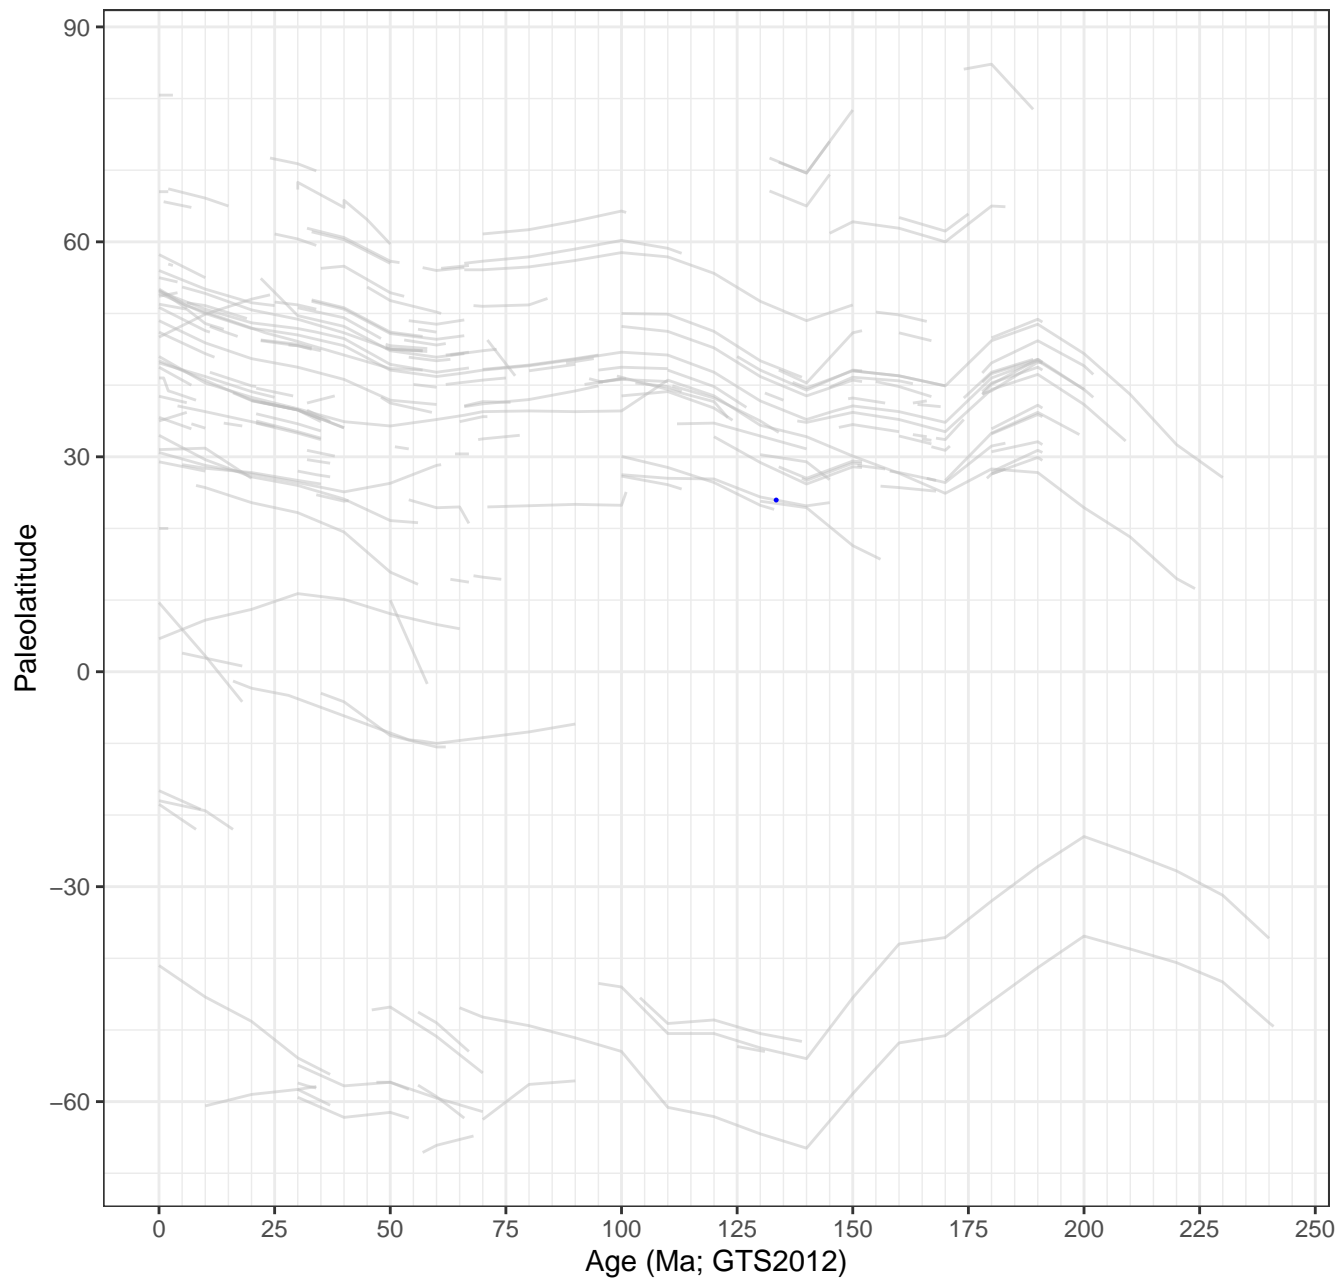

Supplement: Supplementary file 1563 [file Histiocysta outananensis.pdf › Supplement/Supplement 2/Species 1914 plots/Histiocysta outananensis.pdf]

# Species *Histiocysta palla*

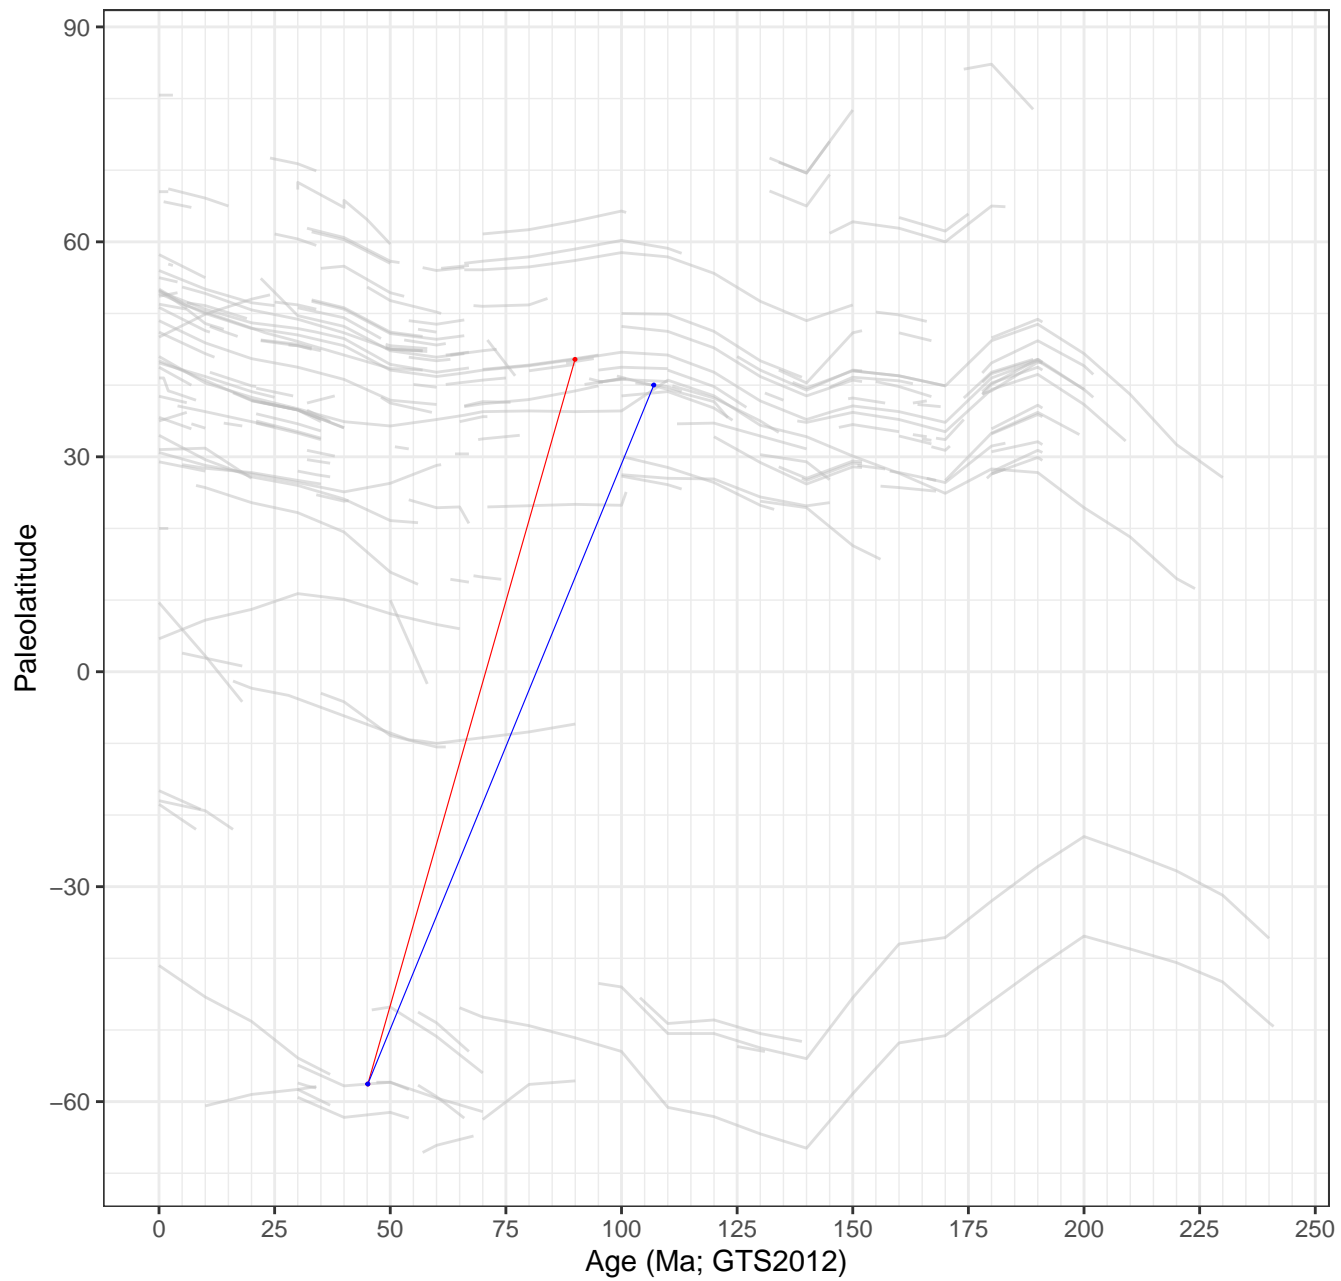

Supplement: Supplementary file 1564 [file Histiocysta palla.pdf › Supplement/Supplement 2/Species 1914 plots/Histiocysta palla.pdf]

# Species *Histiophora ornata*

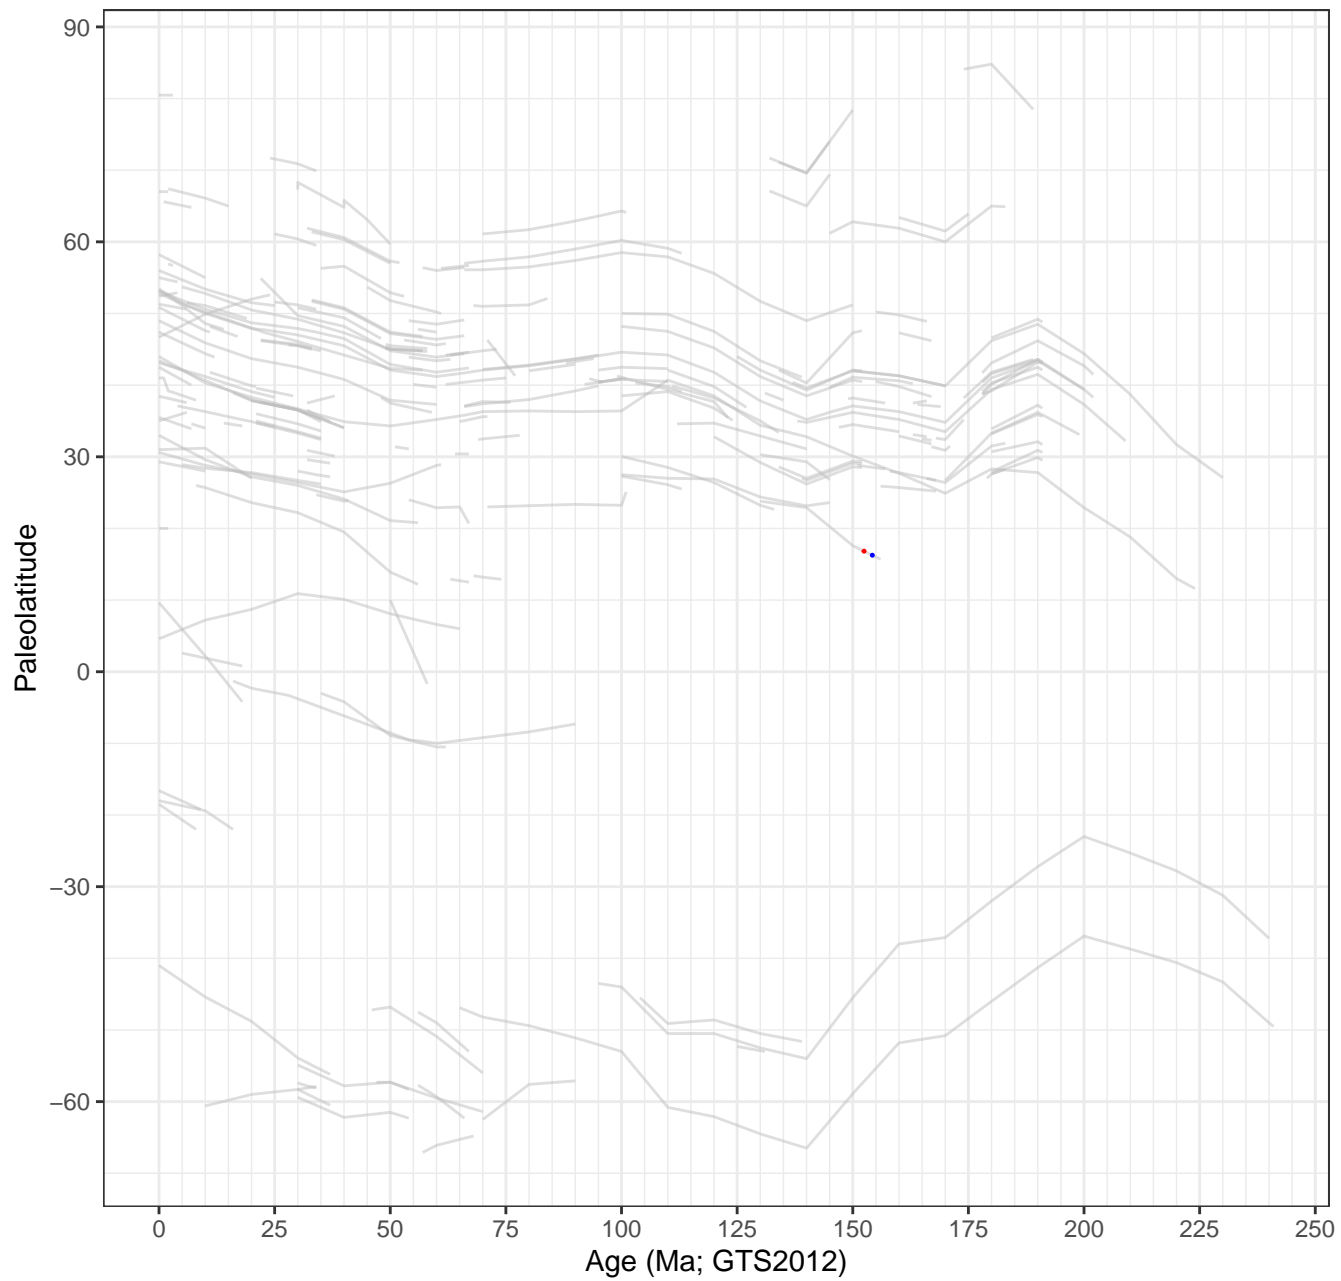

Supplement: Supplementary file 1565 [file Histiophora ornata.pdf › Supplement/Supplement 2/Species 1914 plots/Histiophora ornata.pdf]

# Species Homotryblum abbreviatum

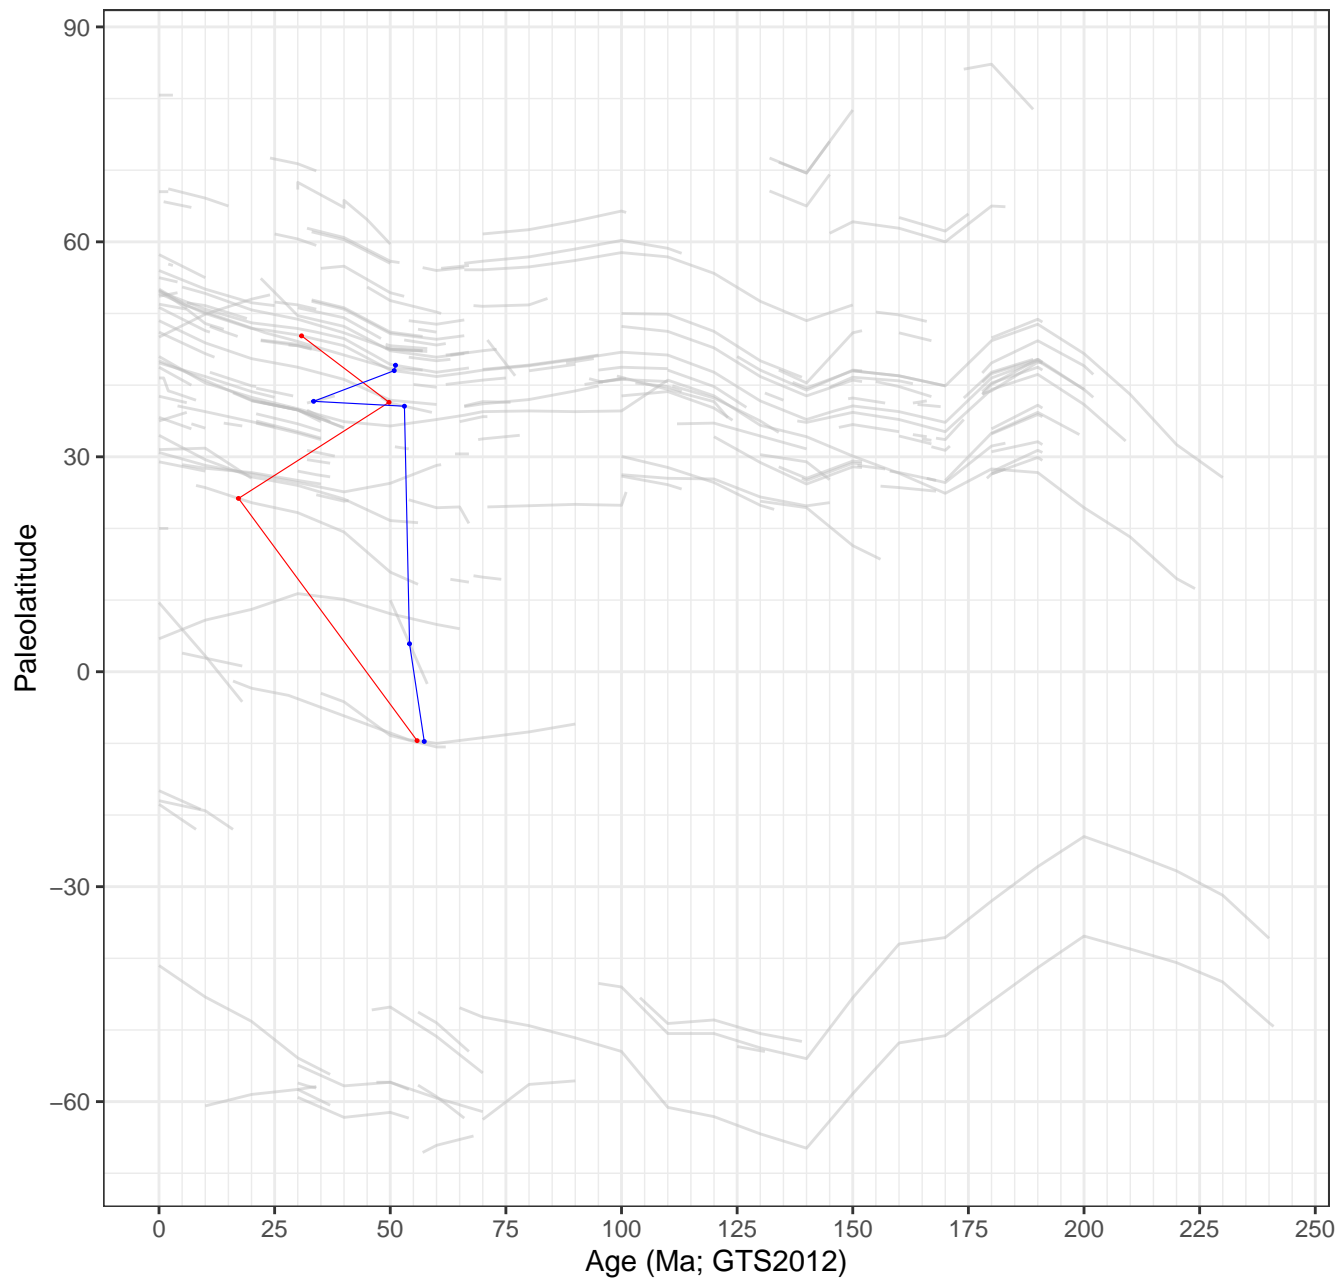

Supplement: Supplementary file 1566 [file Homotryblium abbreviatum.pdf › Supplement/Supplement 2/Species 1914 plots/Homotryblium abbreviatum.pdf]

# Species *Homotryblum aculeatum*

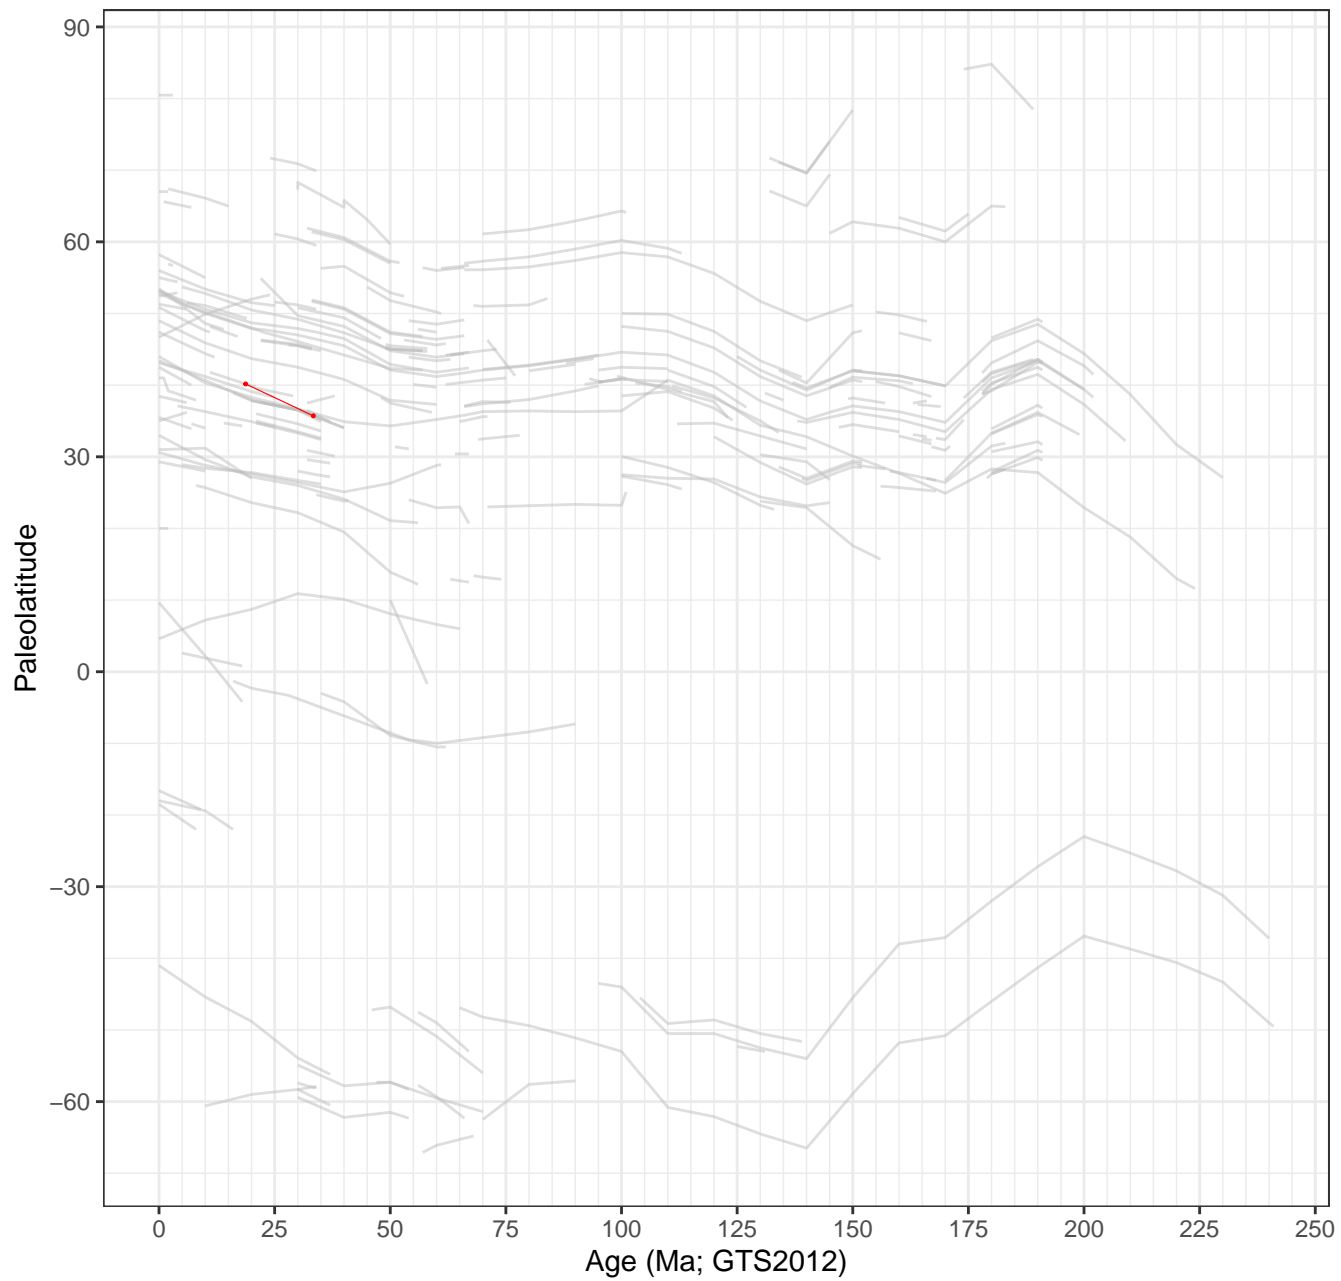

Supplement: Supplementary file 1567 [file Homotryblium aculeatum.pdf › Supplement/Supplement 2/Species 1914 plots/Homotryblium aculeatum.pdf]

# Species *Homotryblum caliculum*

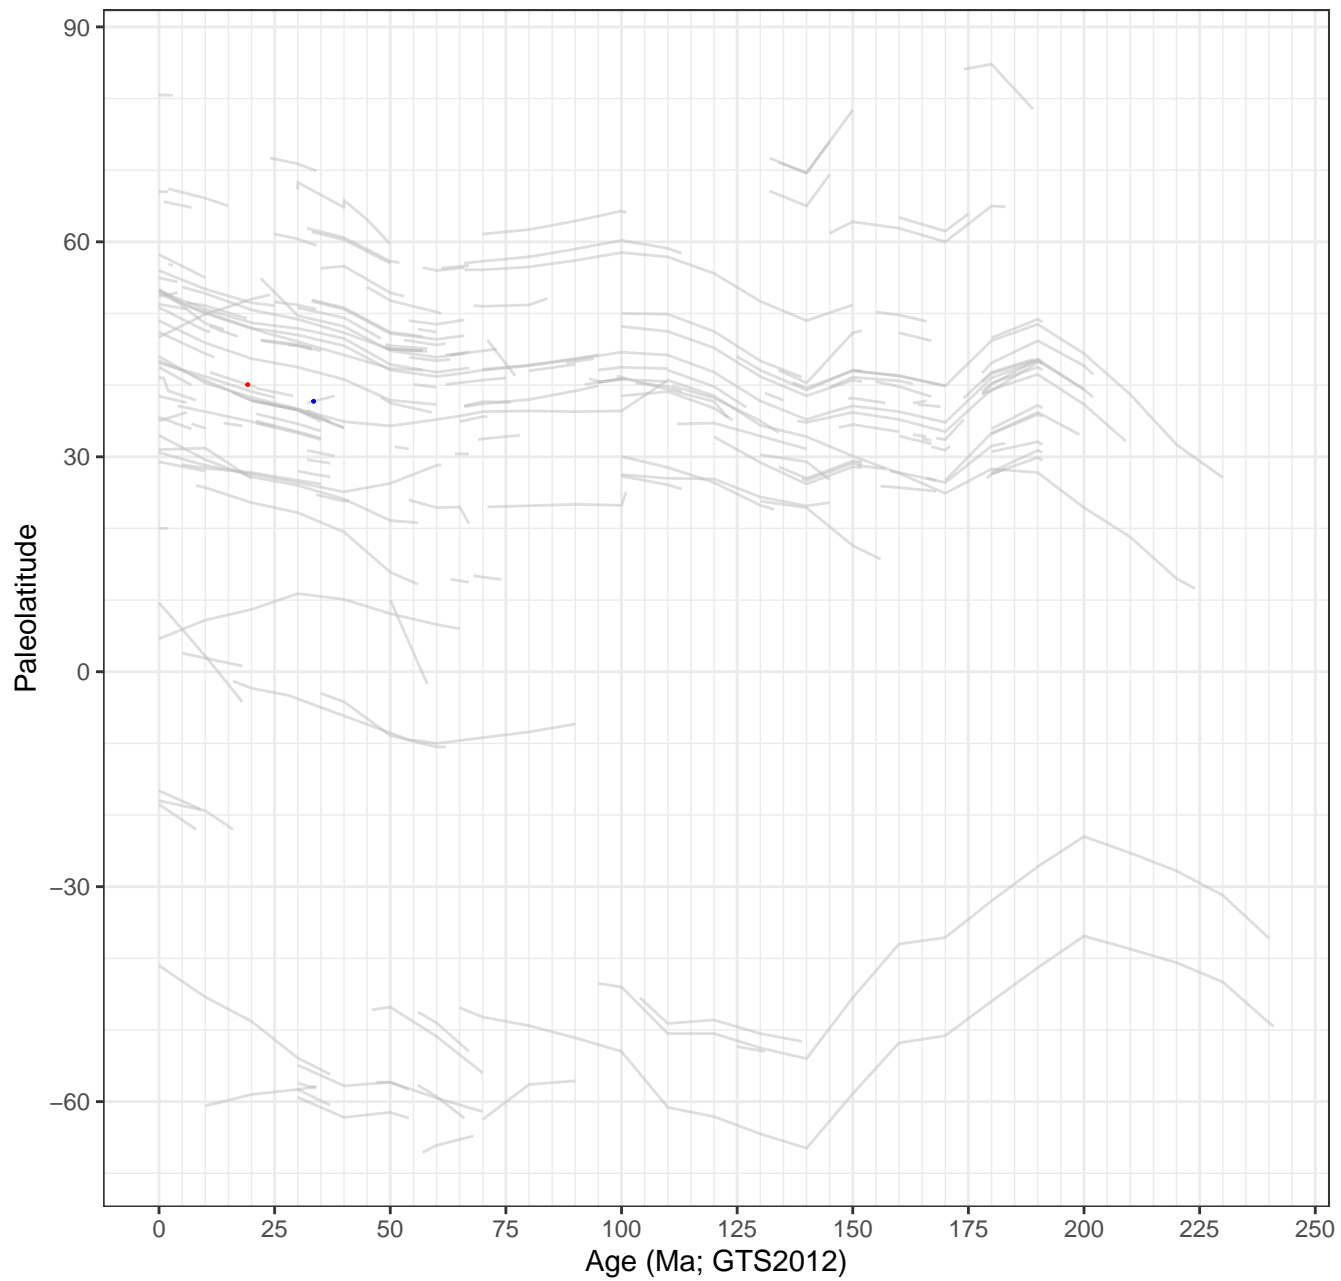

Supplement: Supplementary file 1568 [file Homotryblium caliculum.pdf › Supplement/Supplement 2/Species 1914 plots/Homotryblium caliculum.pdf]

# Species *Homotryblum floripes breviradiatum*

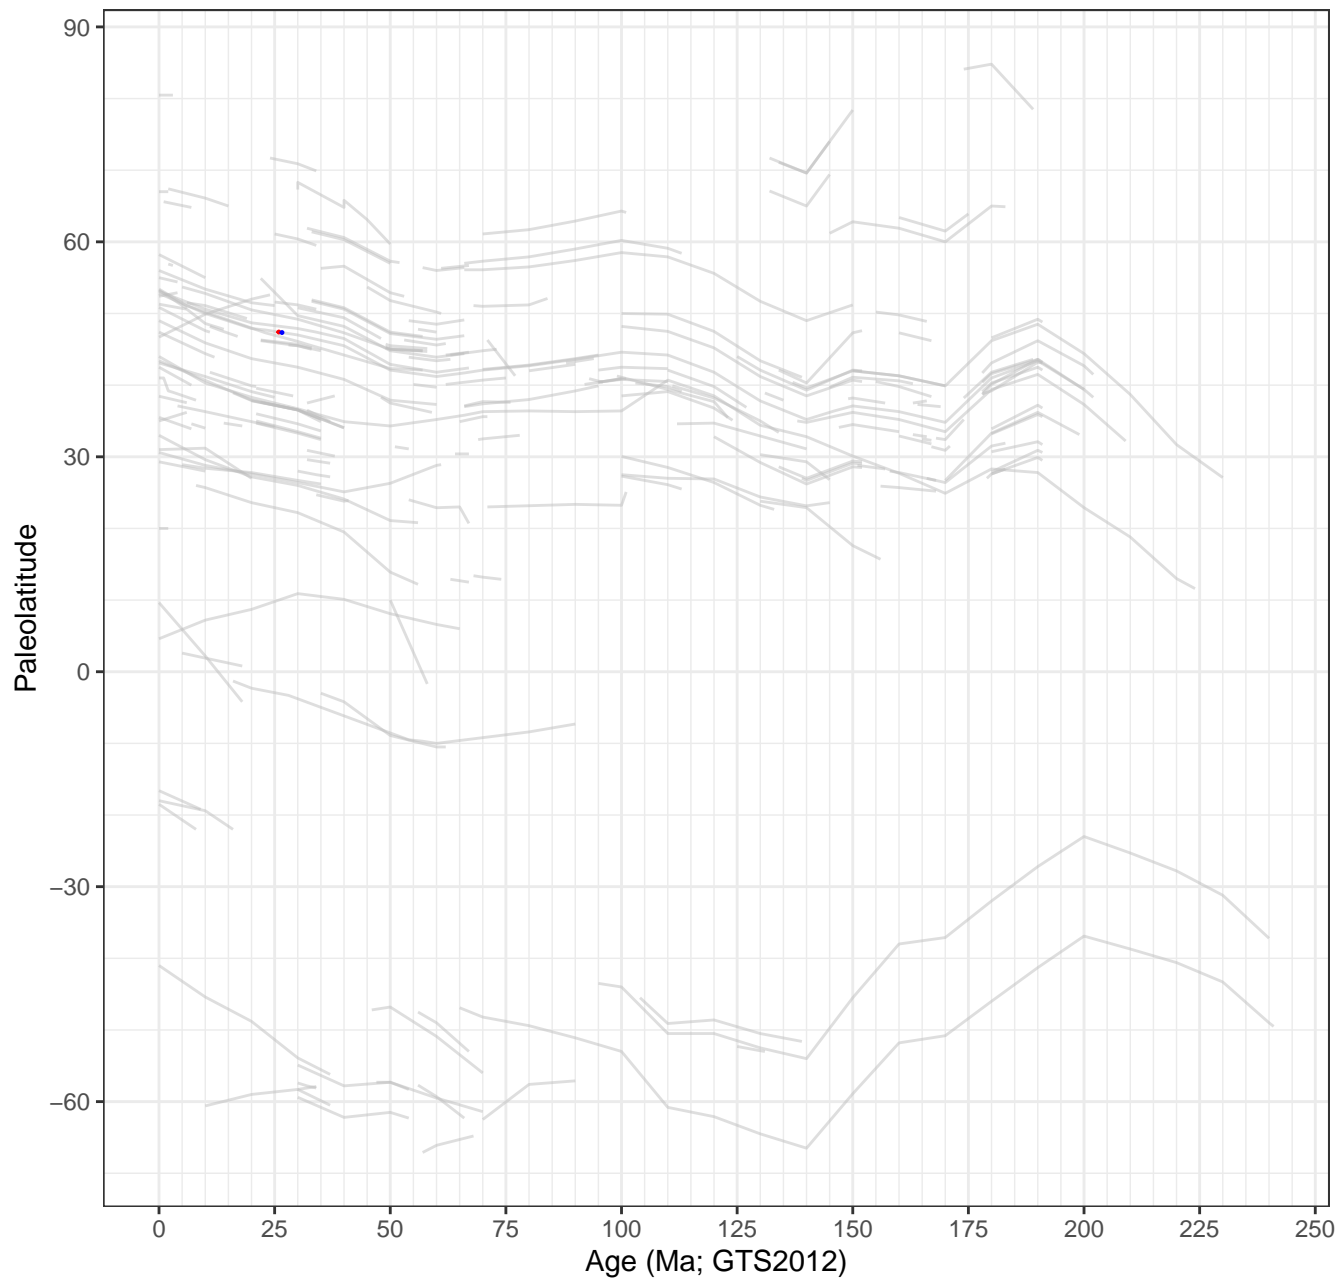

Supplement: Supplementary file 1569 [file Homotryblium floripes breviradiatum.pdf › Supplement/Supplement 2/Species 1914 plots/Homotryblium floripes breviradiatum.pdf]

# Species *Homotryblum floripes*

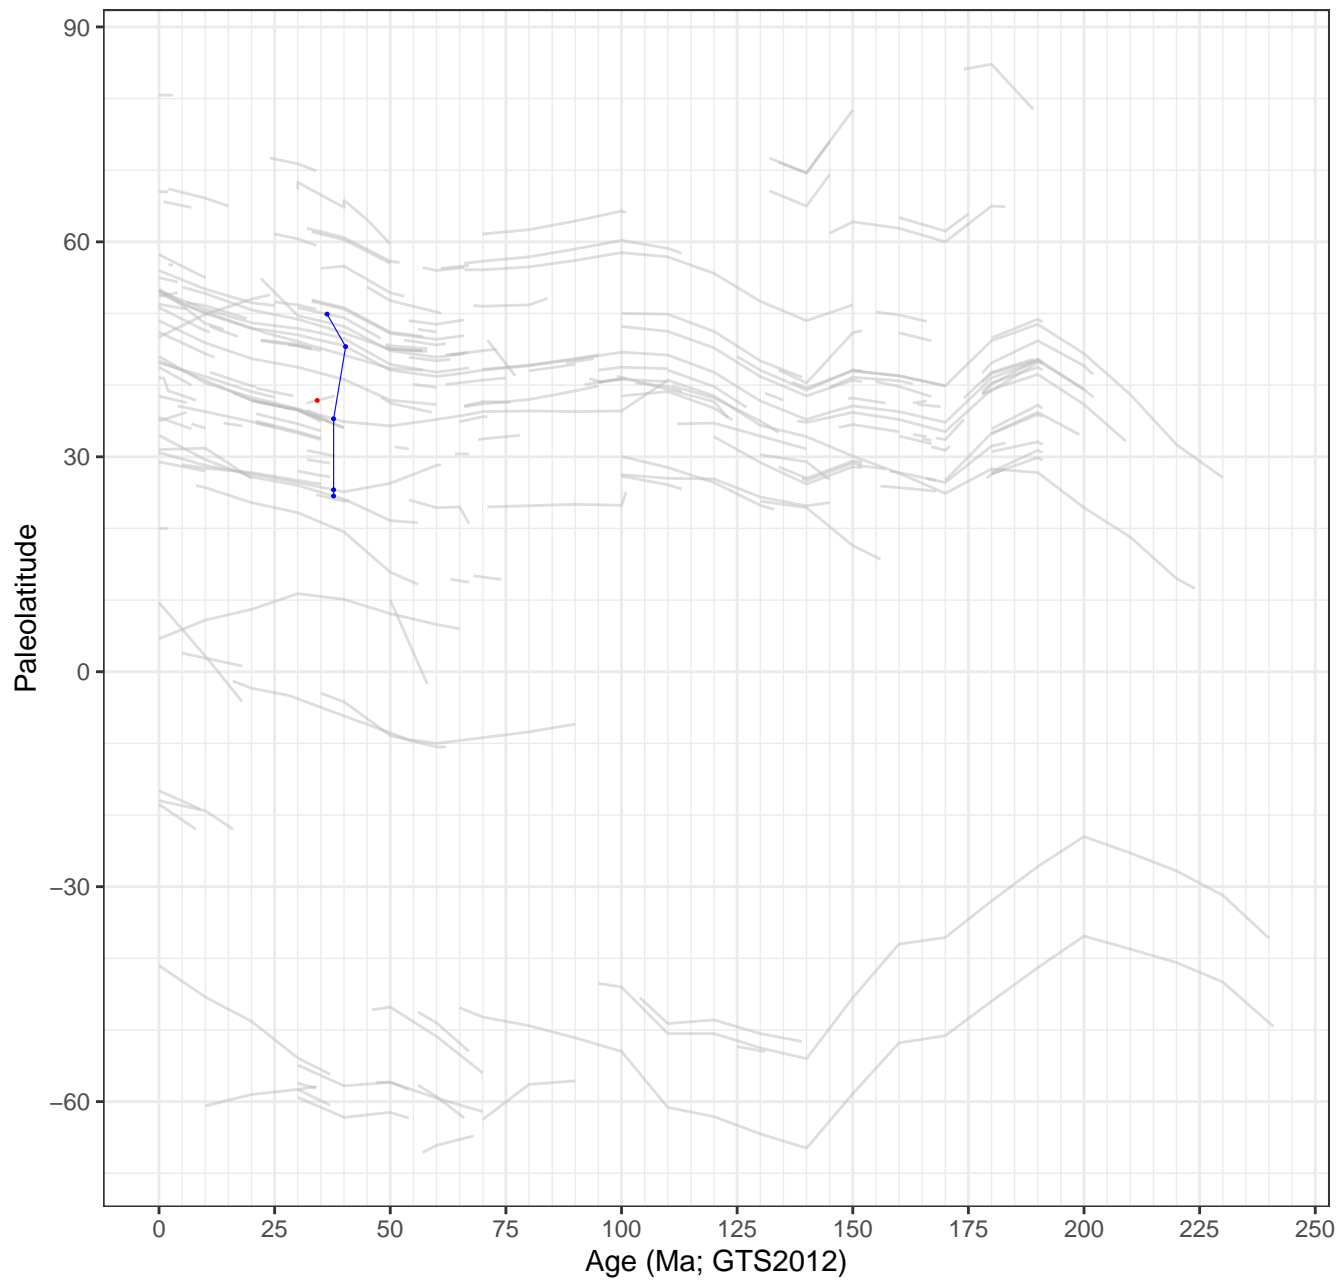

Supplement: Supplementary file 1570 [file Homotryblium floripes.pdf › Supplement/Supplement 2/Species 1914 plots/Homotryblium floripes.pdf]

# Species *Homotryblum oceanicum*

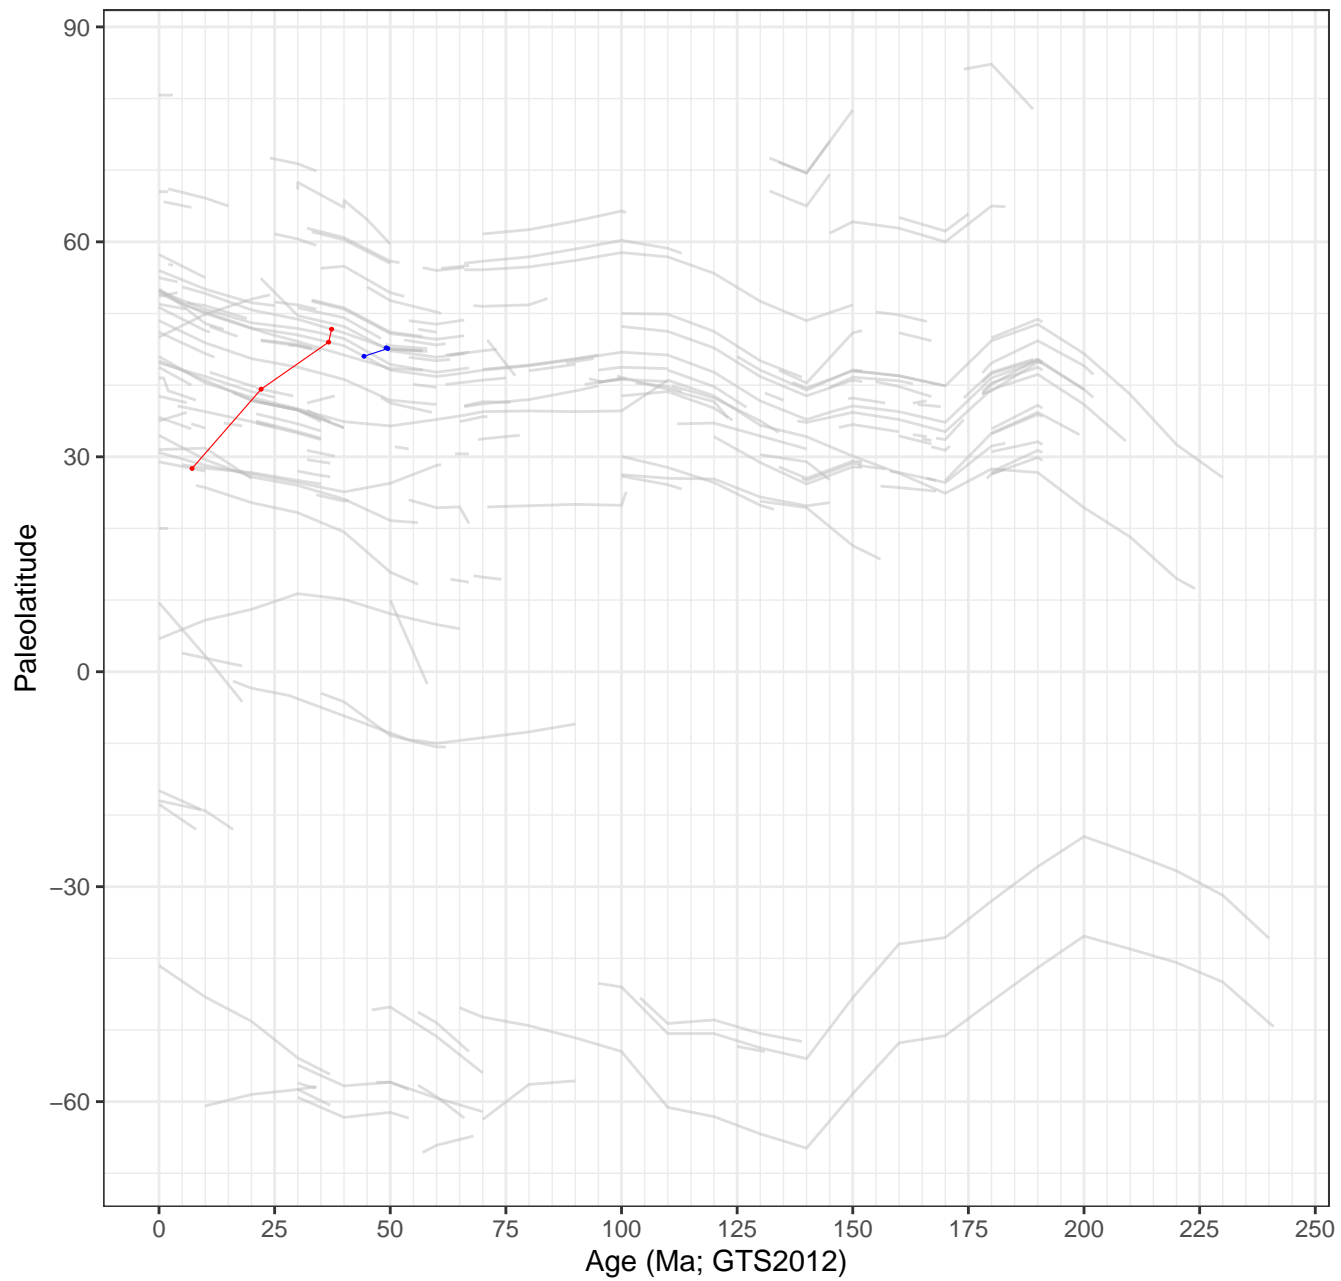

Supplement: Supplementary file 1571 [file Homotryblium oceanicum.pdf › Supplement/Supplement 2/Species 1914 plots/Homotryblium oceanicum.pdf]

# Species *Homotryblum pallidum*

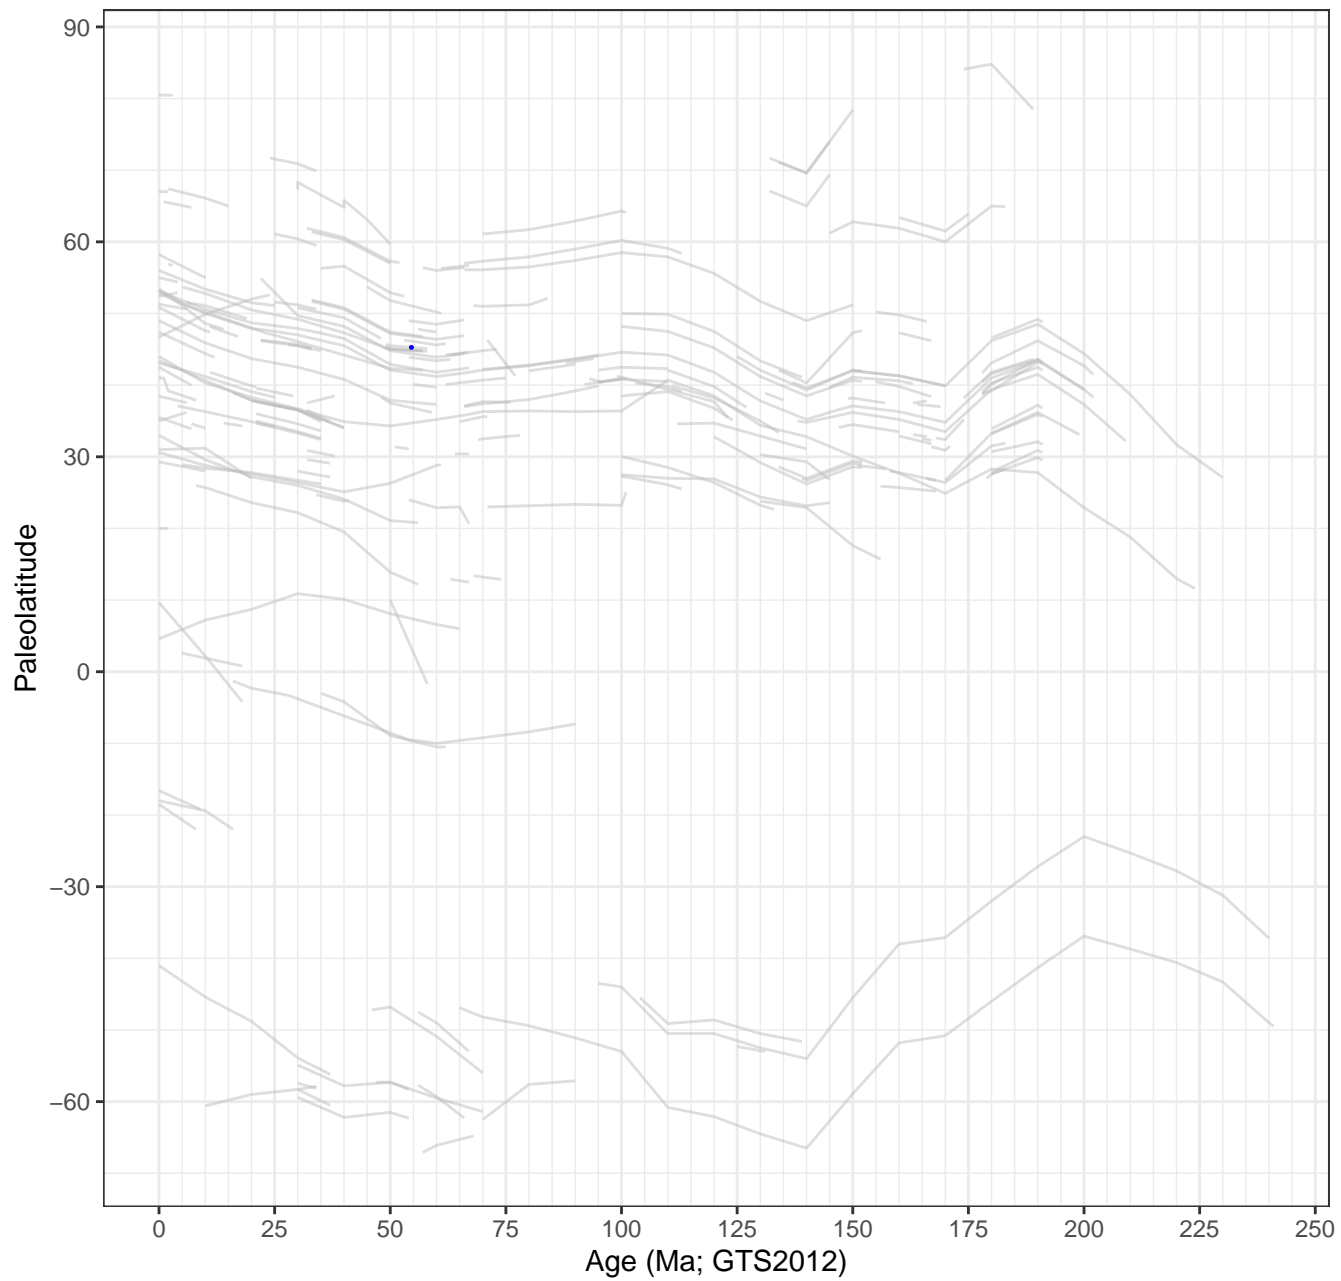

Supplement: Supplementary file 1572 [file Homotryblium pallidum.pdf › Supplement/Supplement 2/Species 1914 plots/Homotryblium pallidum.pdf]

# Species *Homotryblum plectilum*

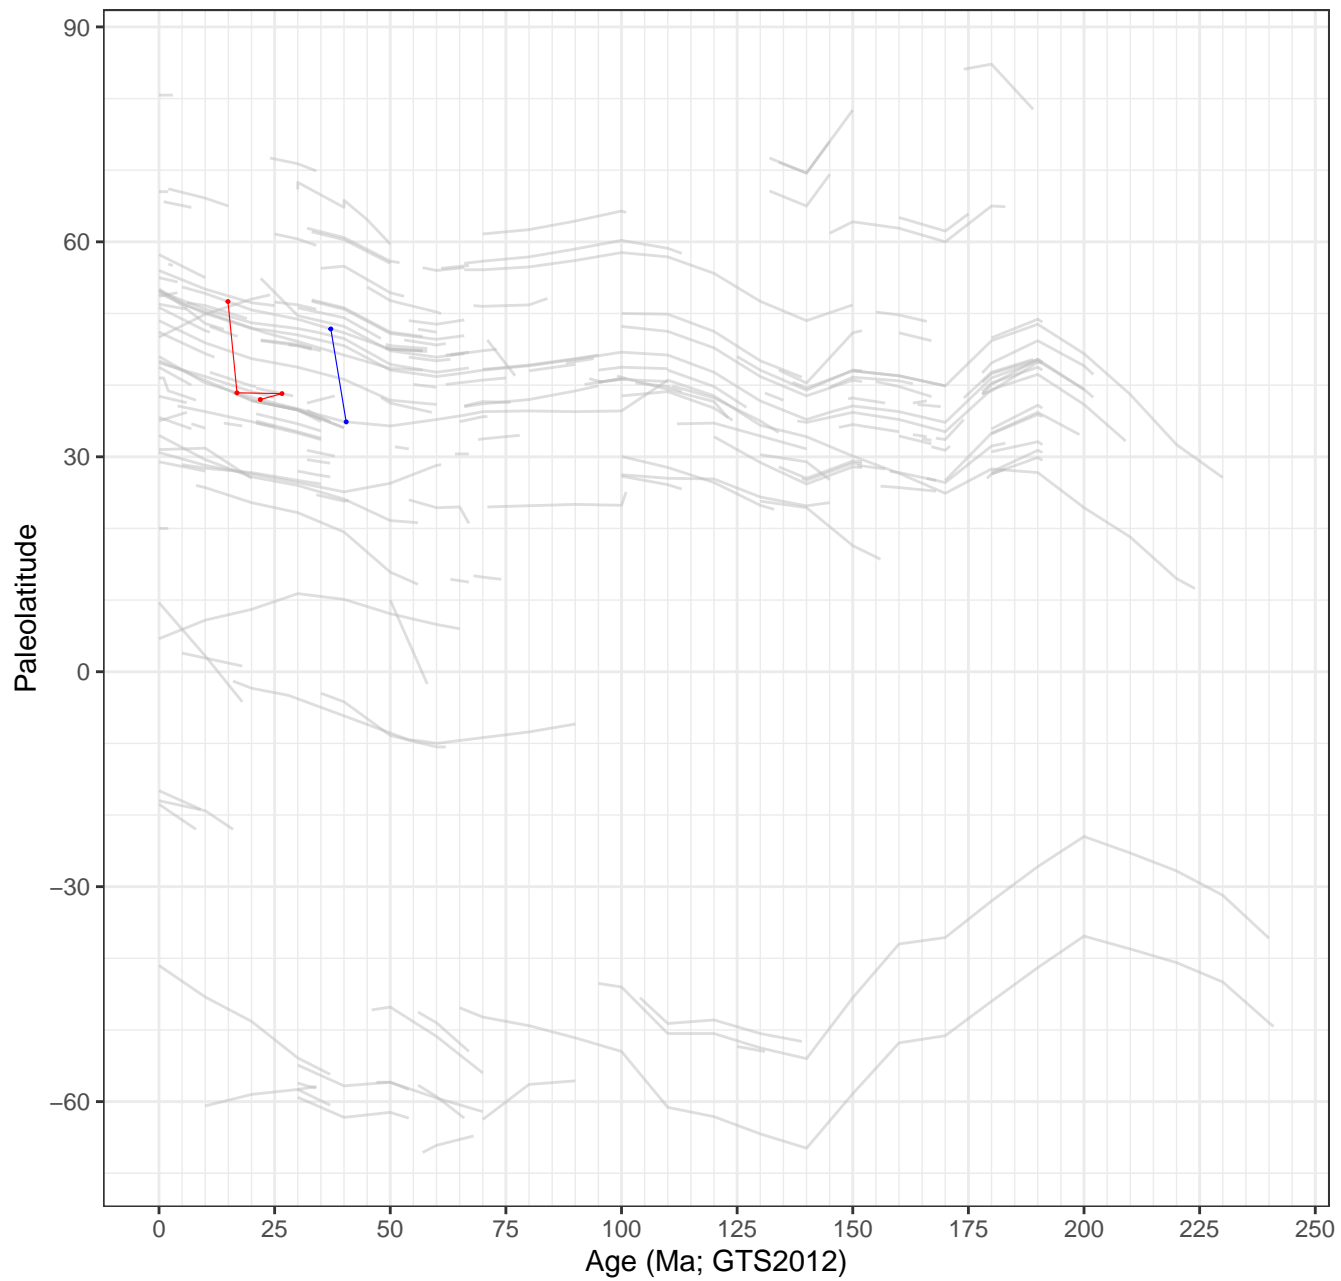

Supplement: Supplementary file 1573 [file Homotryblium plectilum.pdf › Supplement/Supplement 2/Species 1914 plots/Homotryblium plectilum.pdf]

# Species *Homotryblum tasmaniense*

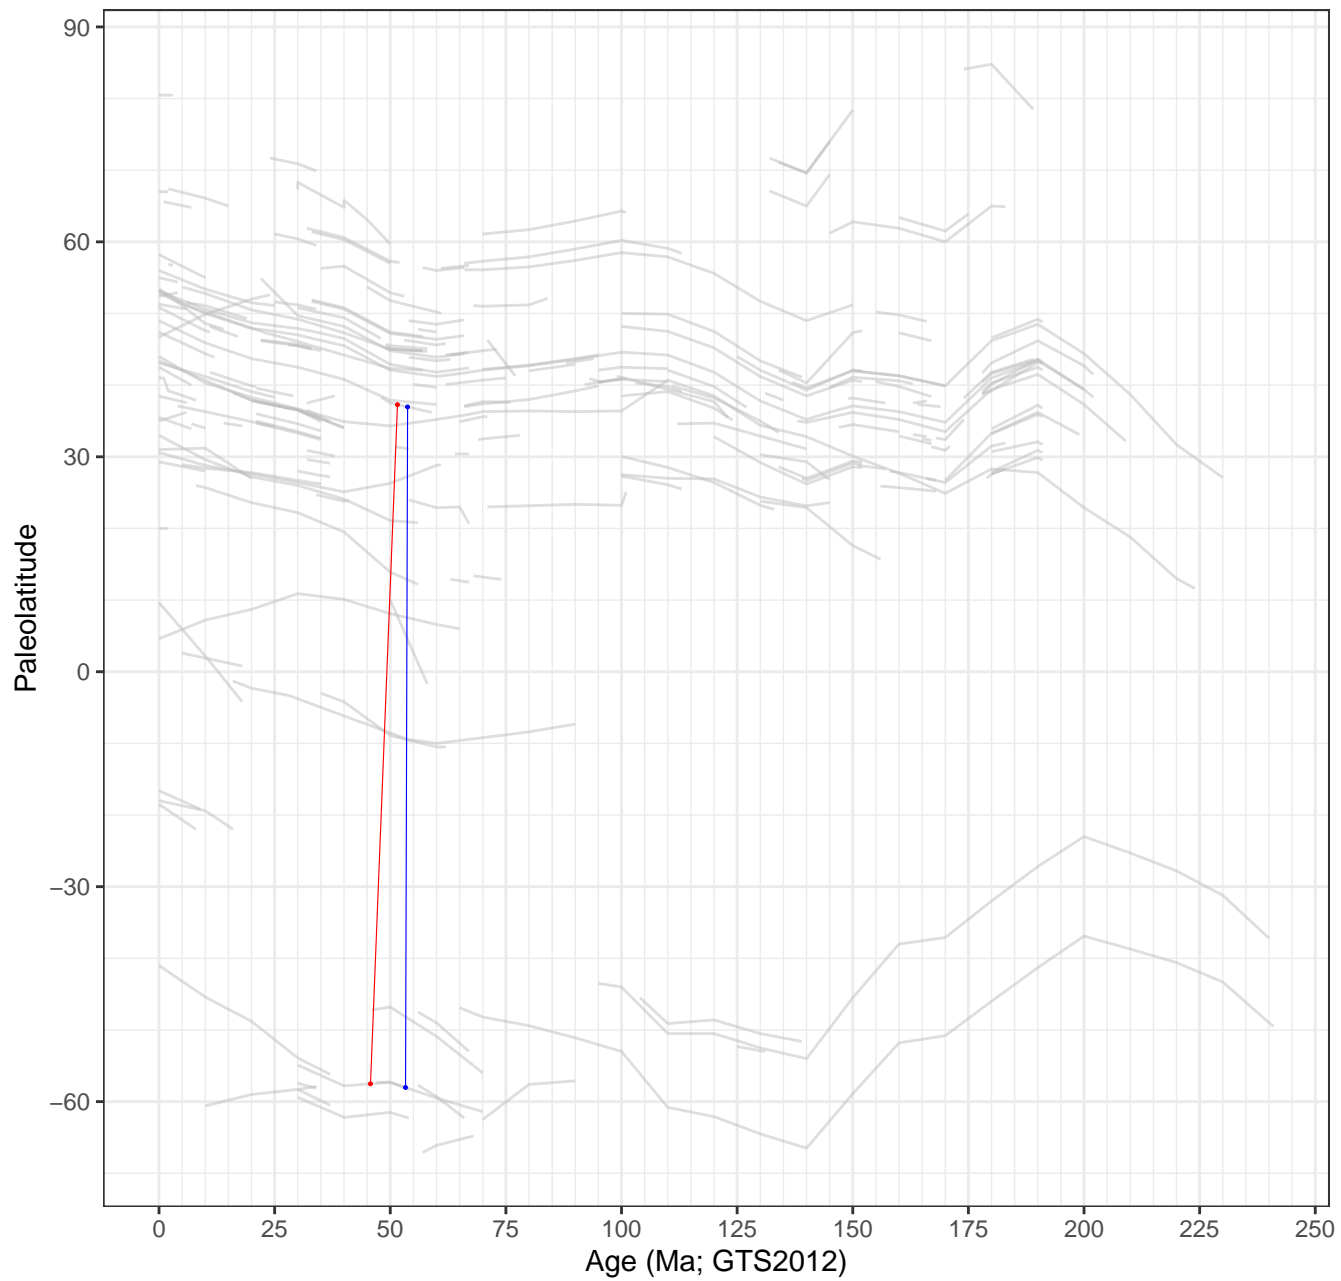

Supplement: Supplementary file 1574 [file Homotryblium tasmaniense.pdf › Supplement/Supplement 2/Species 1914 plots/Homotryblium tasmaniense.pdf]

# Species *Homotryblum tenuispinosum*

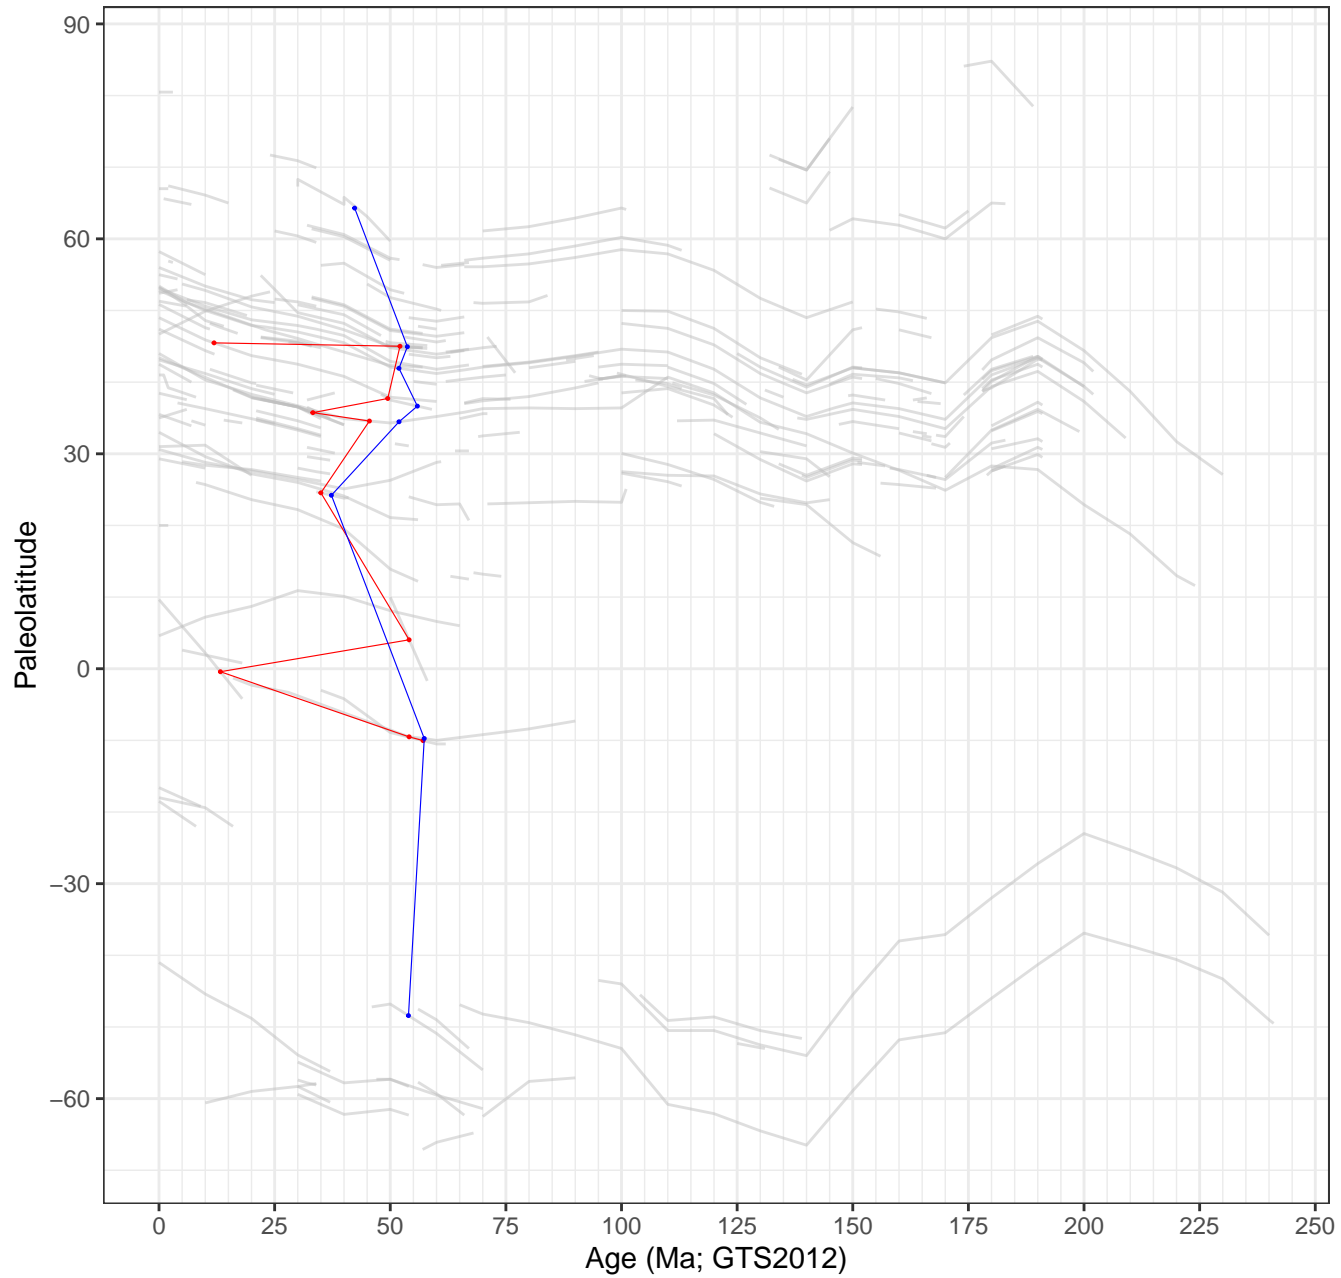

Supplement: Supplementary file 1575 [file Homotryblium tenuispinosum.pdf › Supplement/Supplement 2/Species 1914 plots/Homotryblium tenuispinosum.pdf]

# Species *Homotryblum vallum*

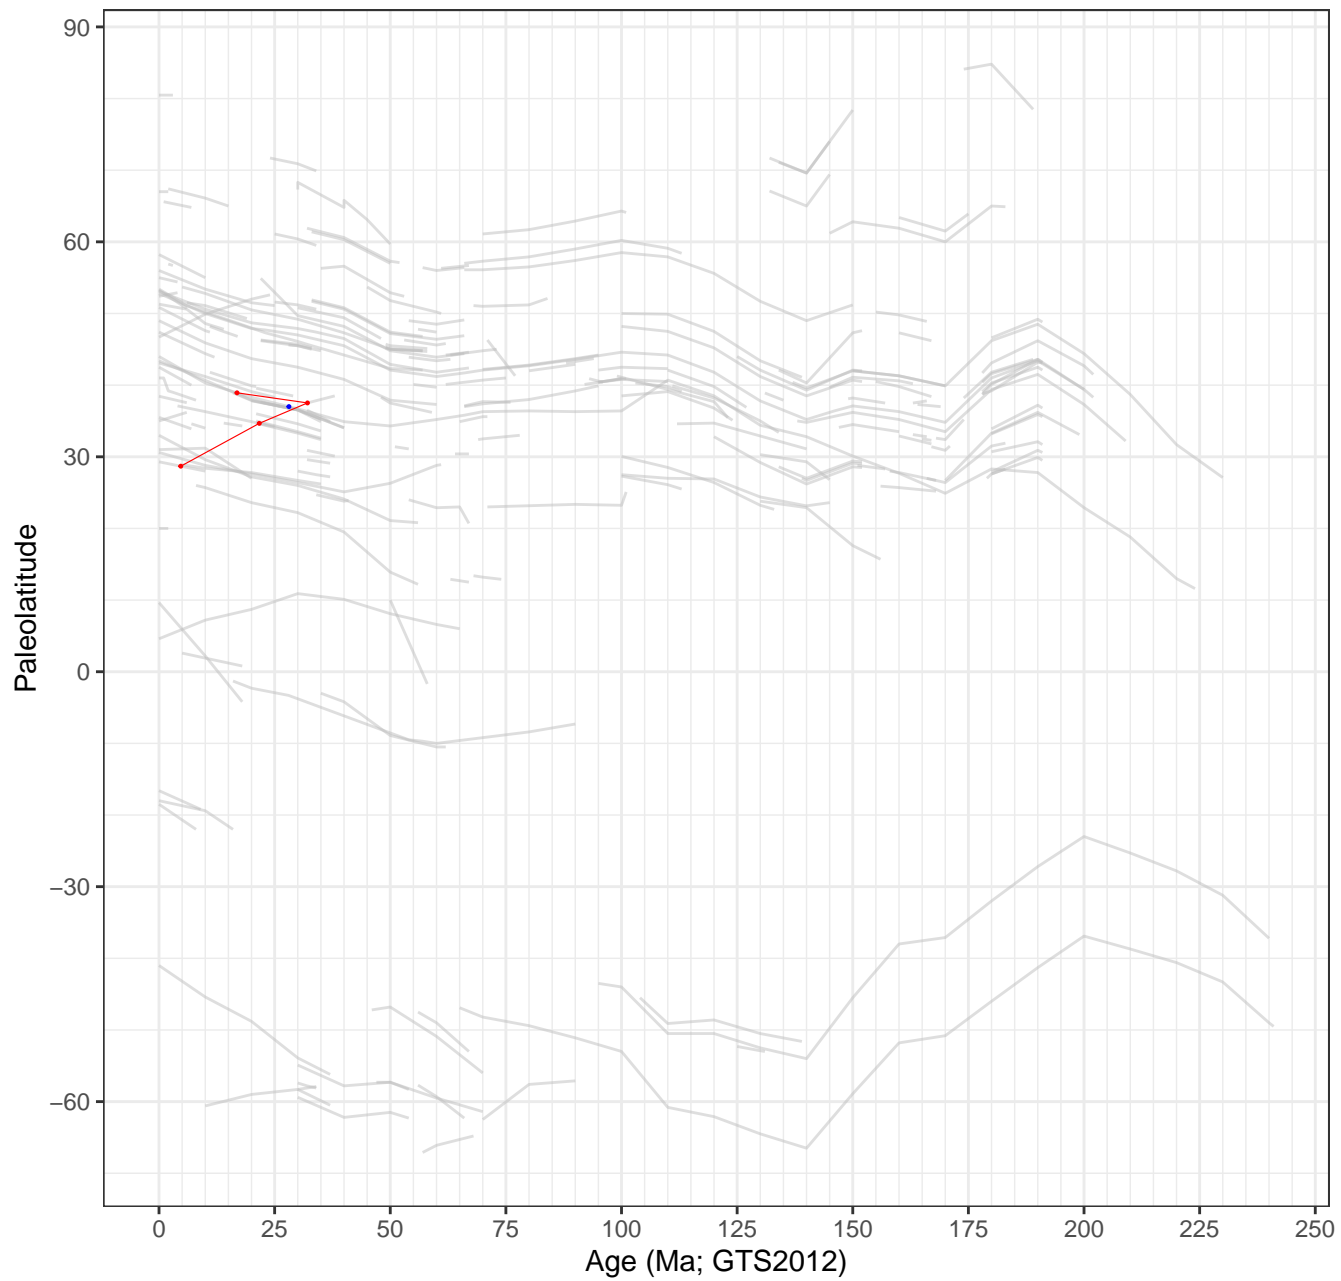

Supplement: Supplementary file 1576 [file Homotryblium vallum.pdf › Supplement/Supplement 2/Species 1914 plots/Homotryblium vallum.pdf]

# Species Homotryblum variabile

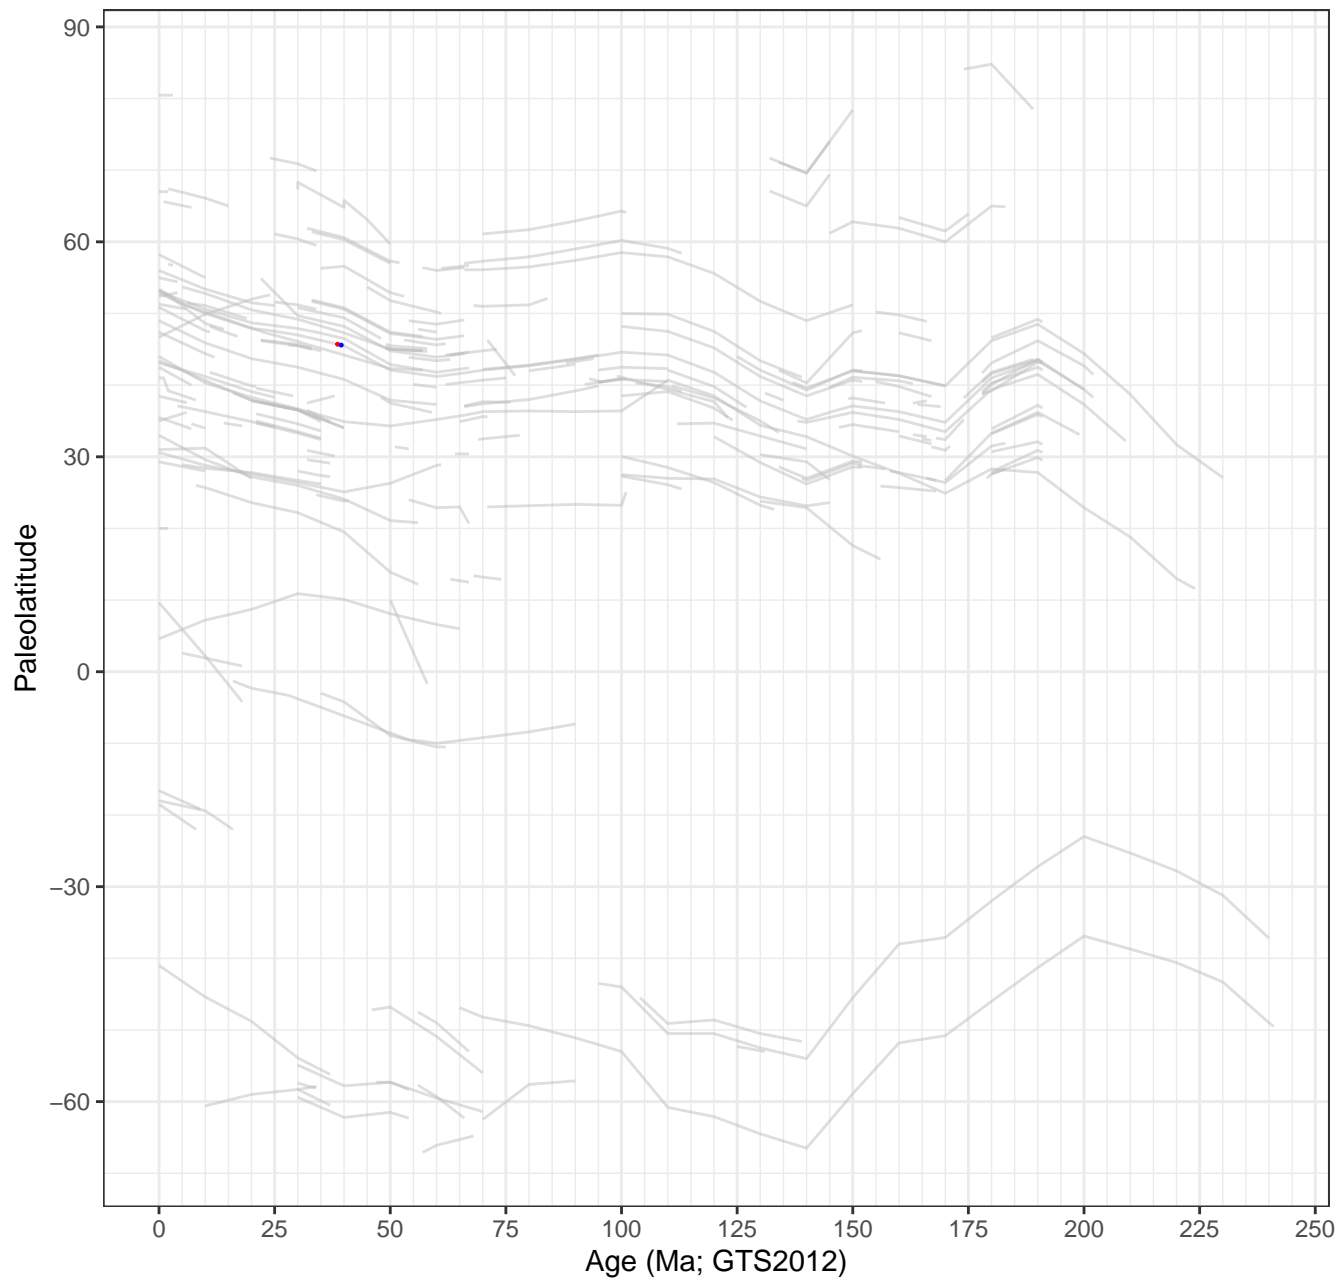

Supplement: Supplementary file 1577 [file Homotryblium variabile.pdf › Supplement/Supplement 2/Species 1914 plots/Homotryblium variabile.pdf]

# Species *Hystriochodinium furcatum*

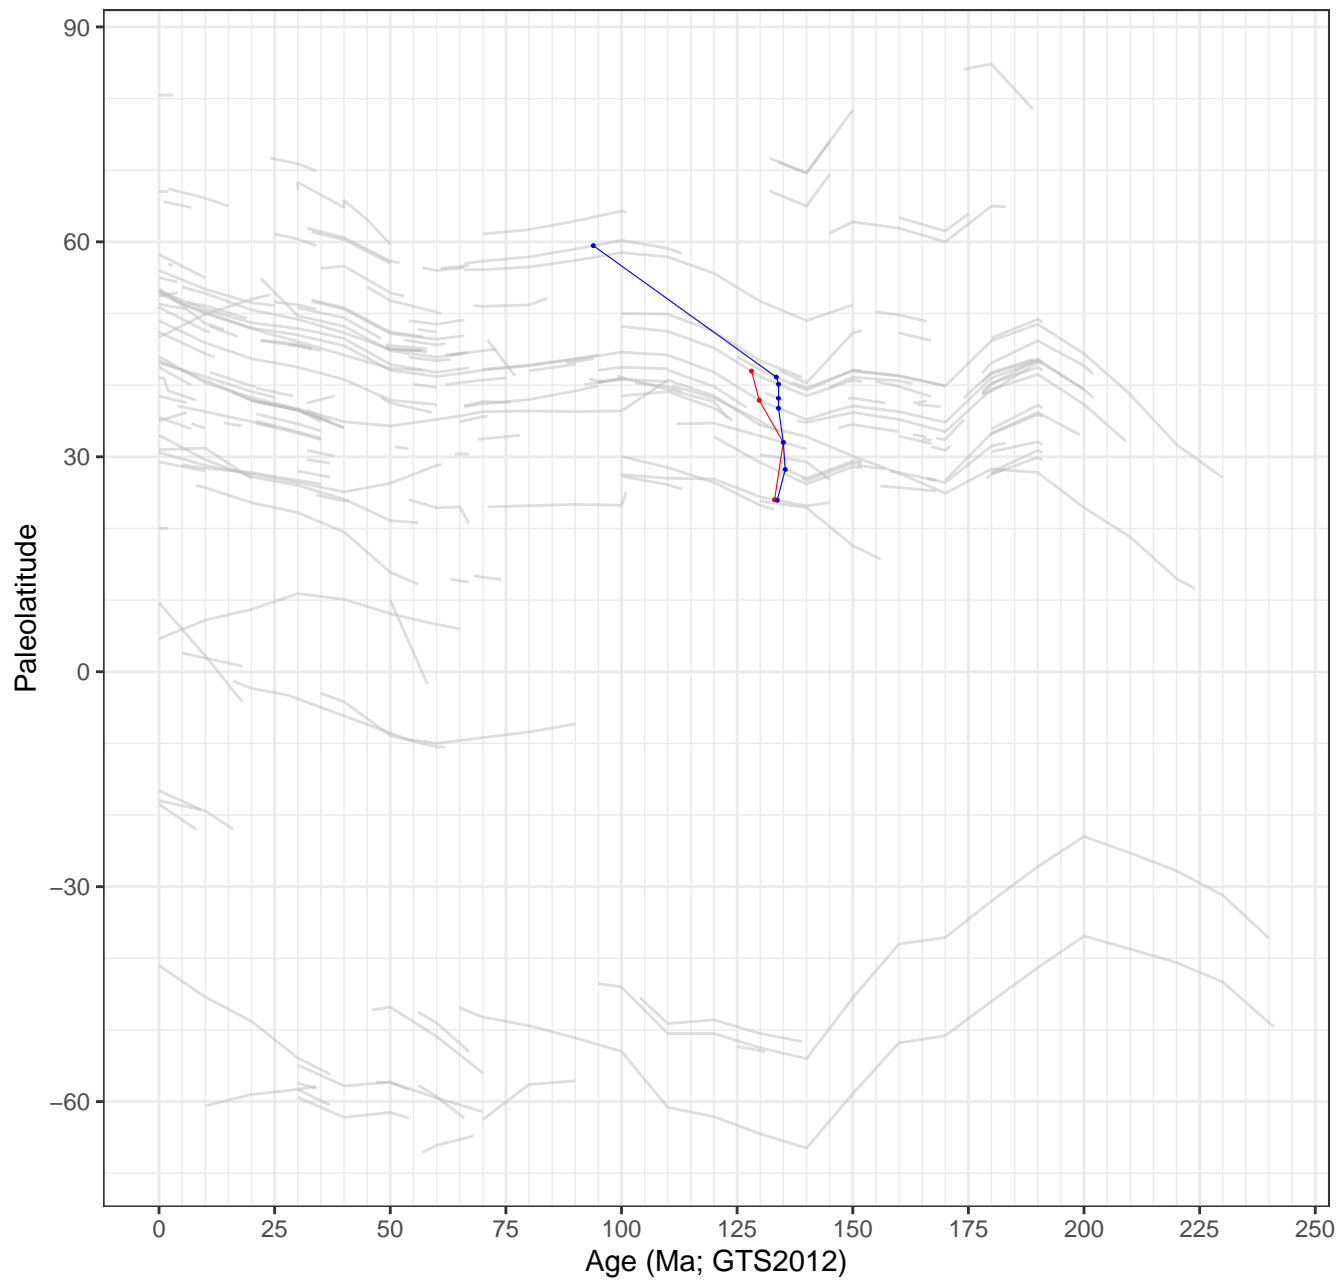

Supplement: Supplementary file 1578 [file Hystrichodinium furcatum.pdf › Supplement/Supplement 2/Species 1914 plots/Hystrichodinium furcatum.pdf]

# Species *Hystrichodinium lanceatum*

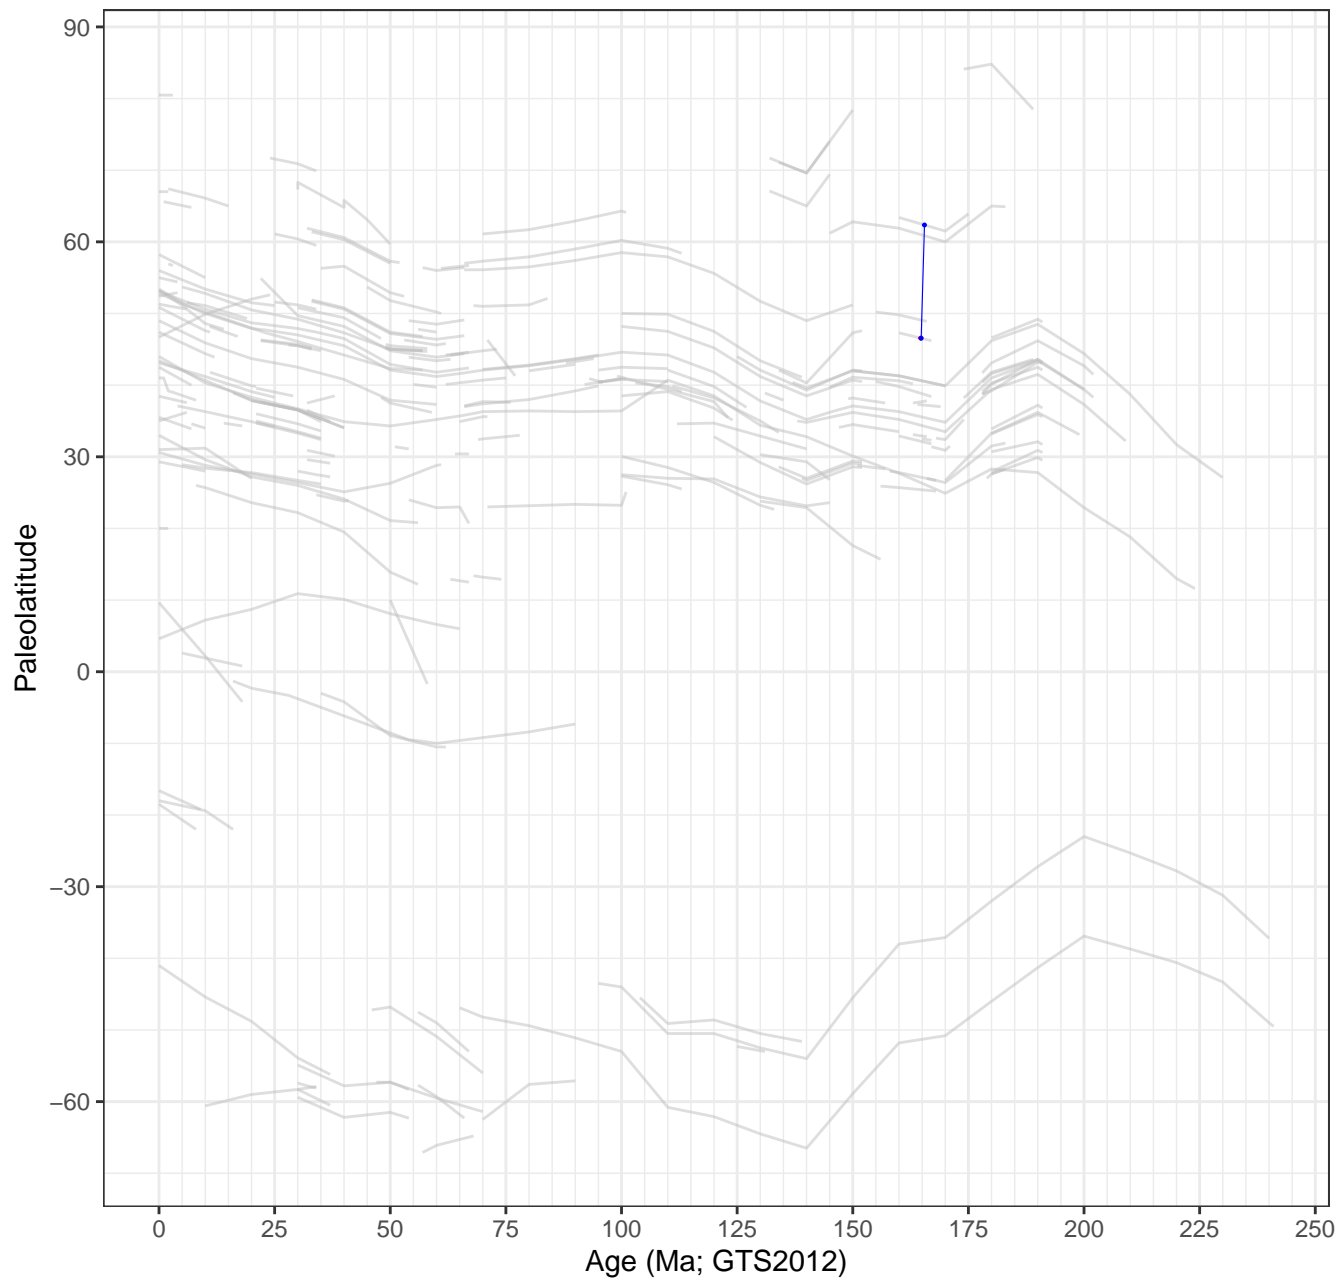

Supplement: Supplementary file 1579 [file Hystrichodinium lanceatum.pdf › Supplement/Supplement 2/Species 1914 plots/Hystrichodinium lanceatum.pdf]

# Species *Hystrichodinium pulchrum*

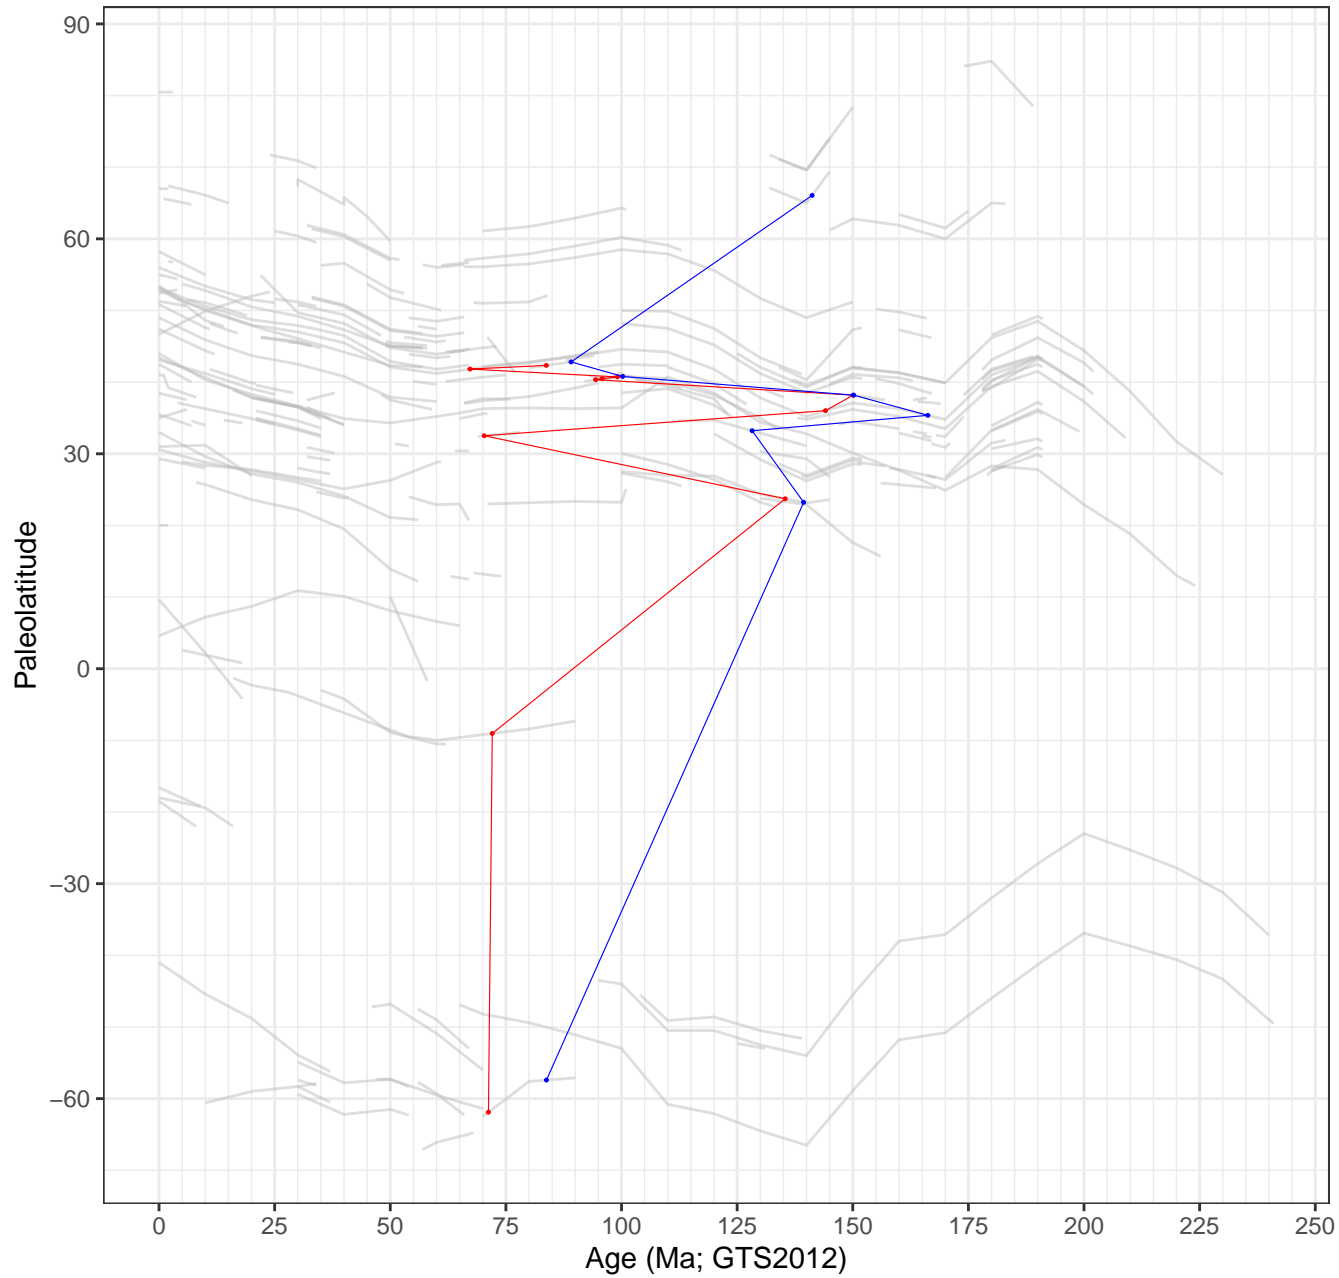

Supplement: Supplementary file 1580 [file Hystrichodinium pulchrum.pdf › Supplement/Supplement 2/Species 1914 plots/Hystrichodinium pulchrum.pdf]

# Species *Hystrichodinium ramoides*

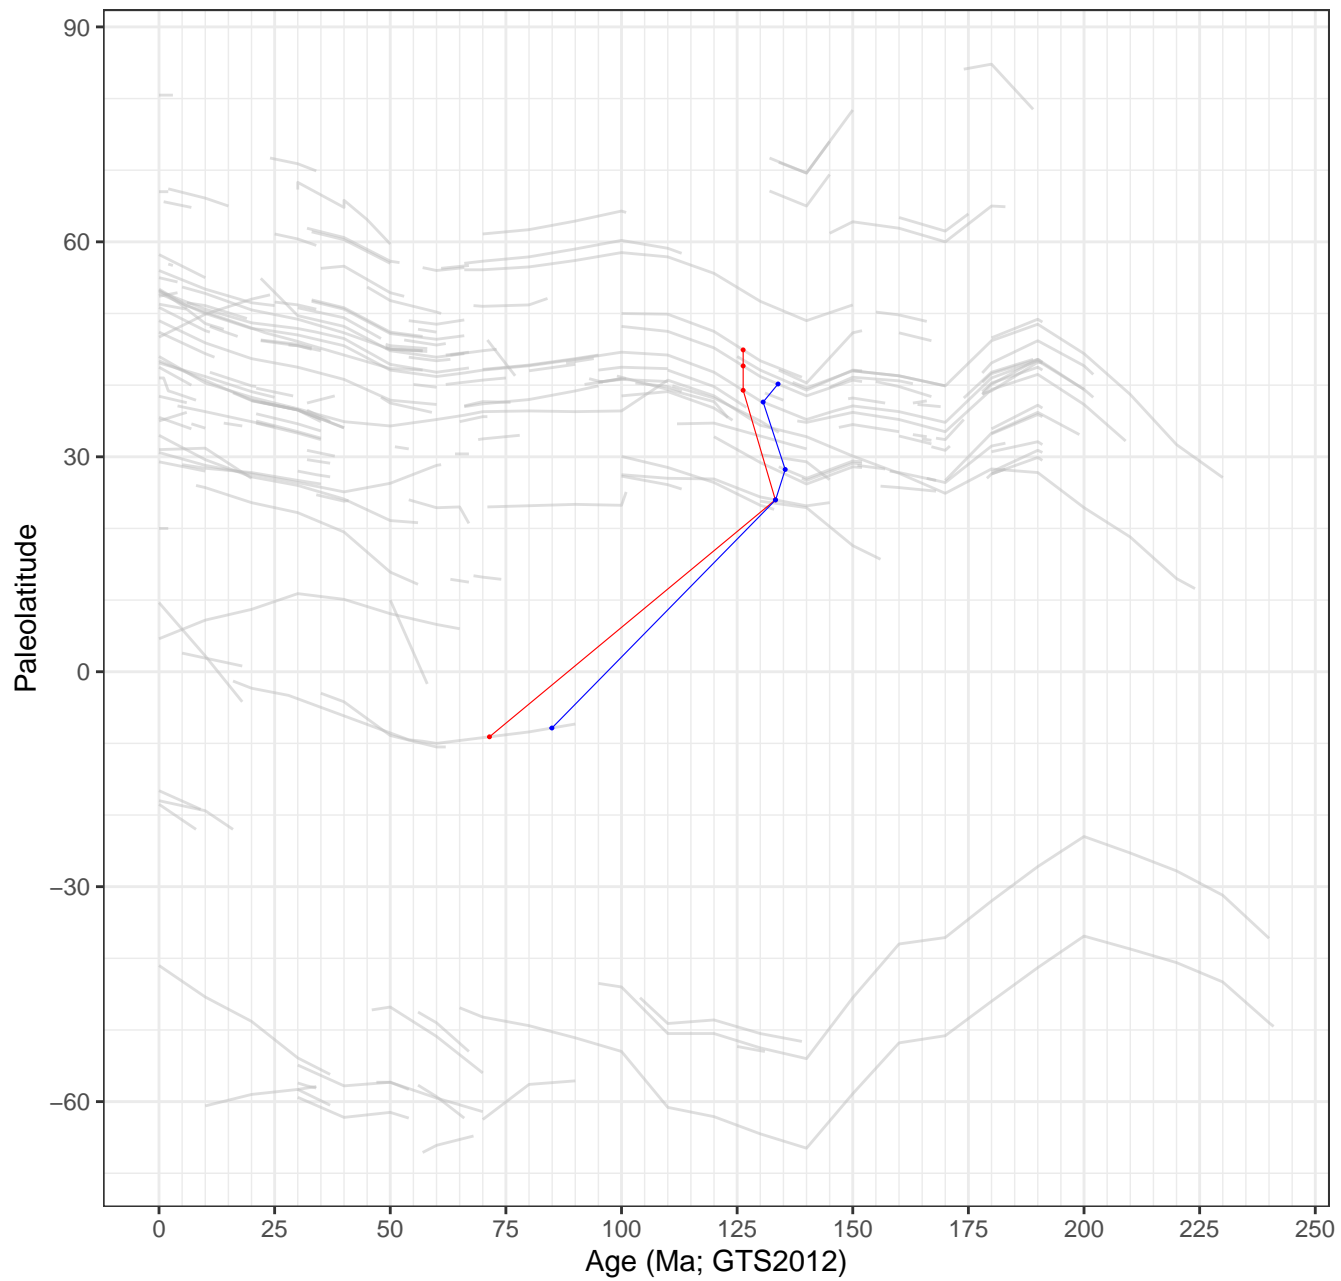

Supplement: Supplementary file 1581 [file Hystrichodinium ramoides.pdf › Supplement/Supplement 2/Species 1914 plots/Hystrichodinium ramoides.pdf]

# Species *Hystrichodinium voigtii*

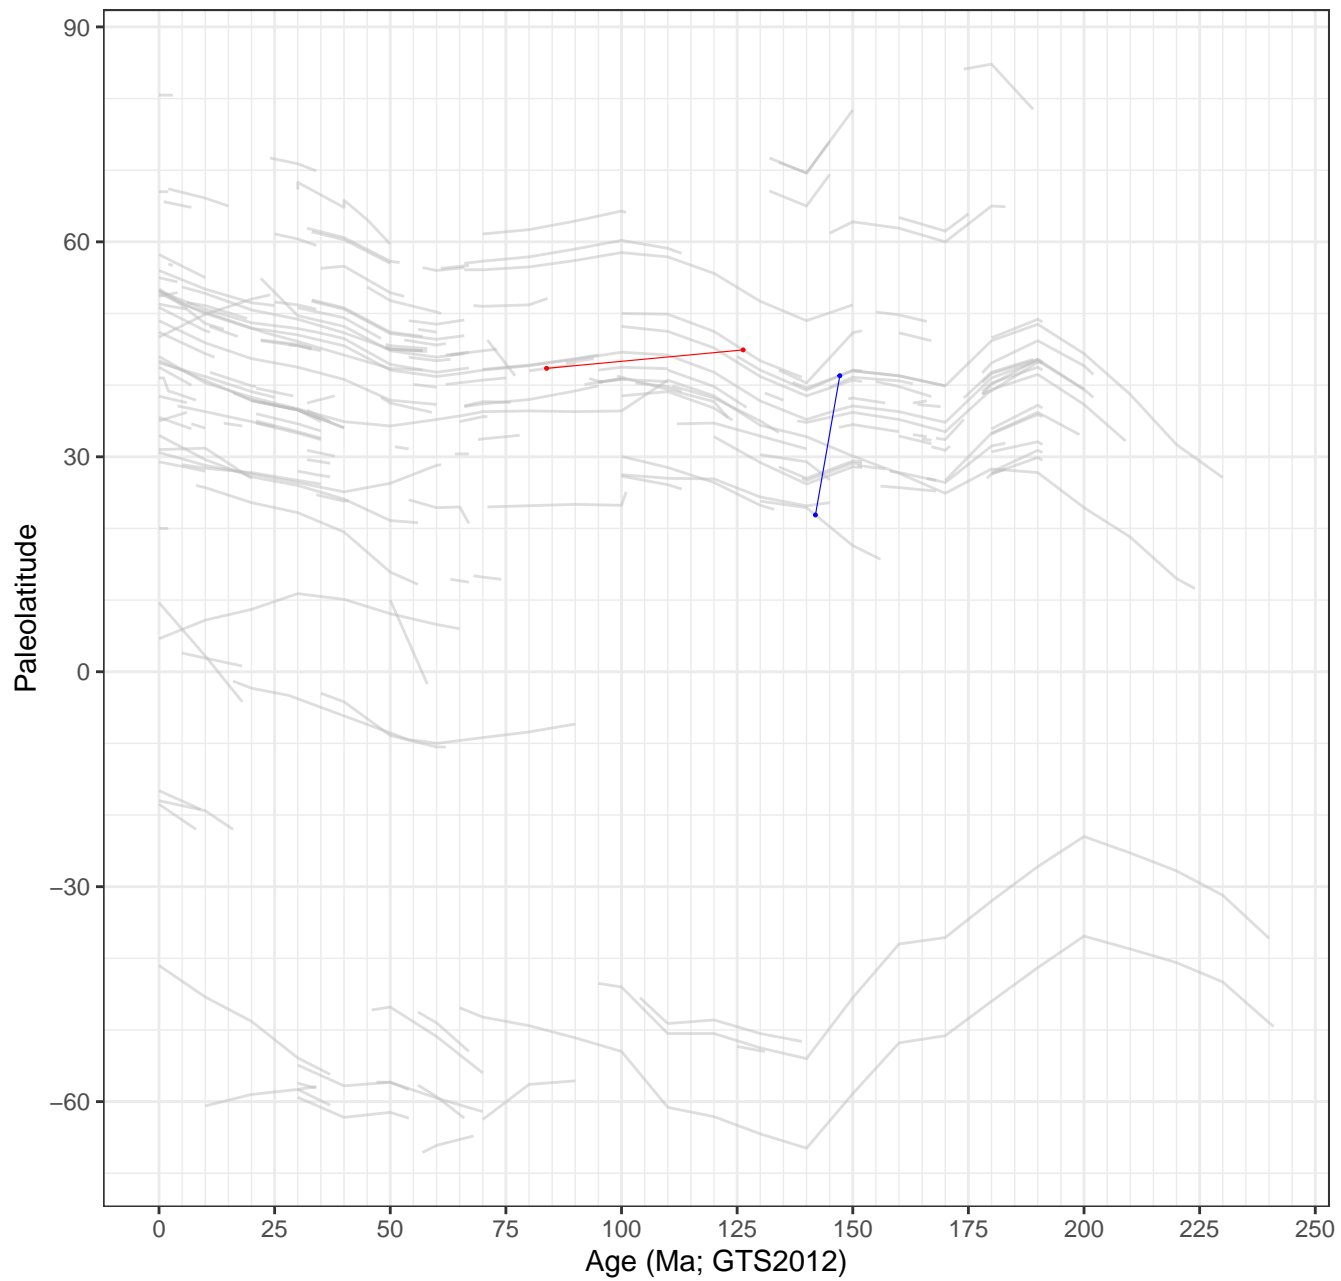

Supplement: Supplementary file 1582 [file Hystrichodinium voigtii.pdf › Supplement/Supplement 2/Species 1914 plots/Hystrichodinium voigtii.pdf]

# Species *Hystrichokolpoma bullatum*

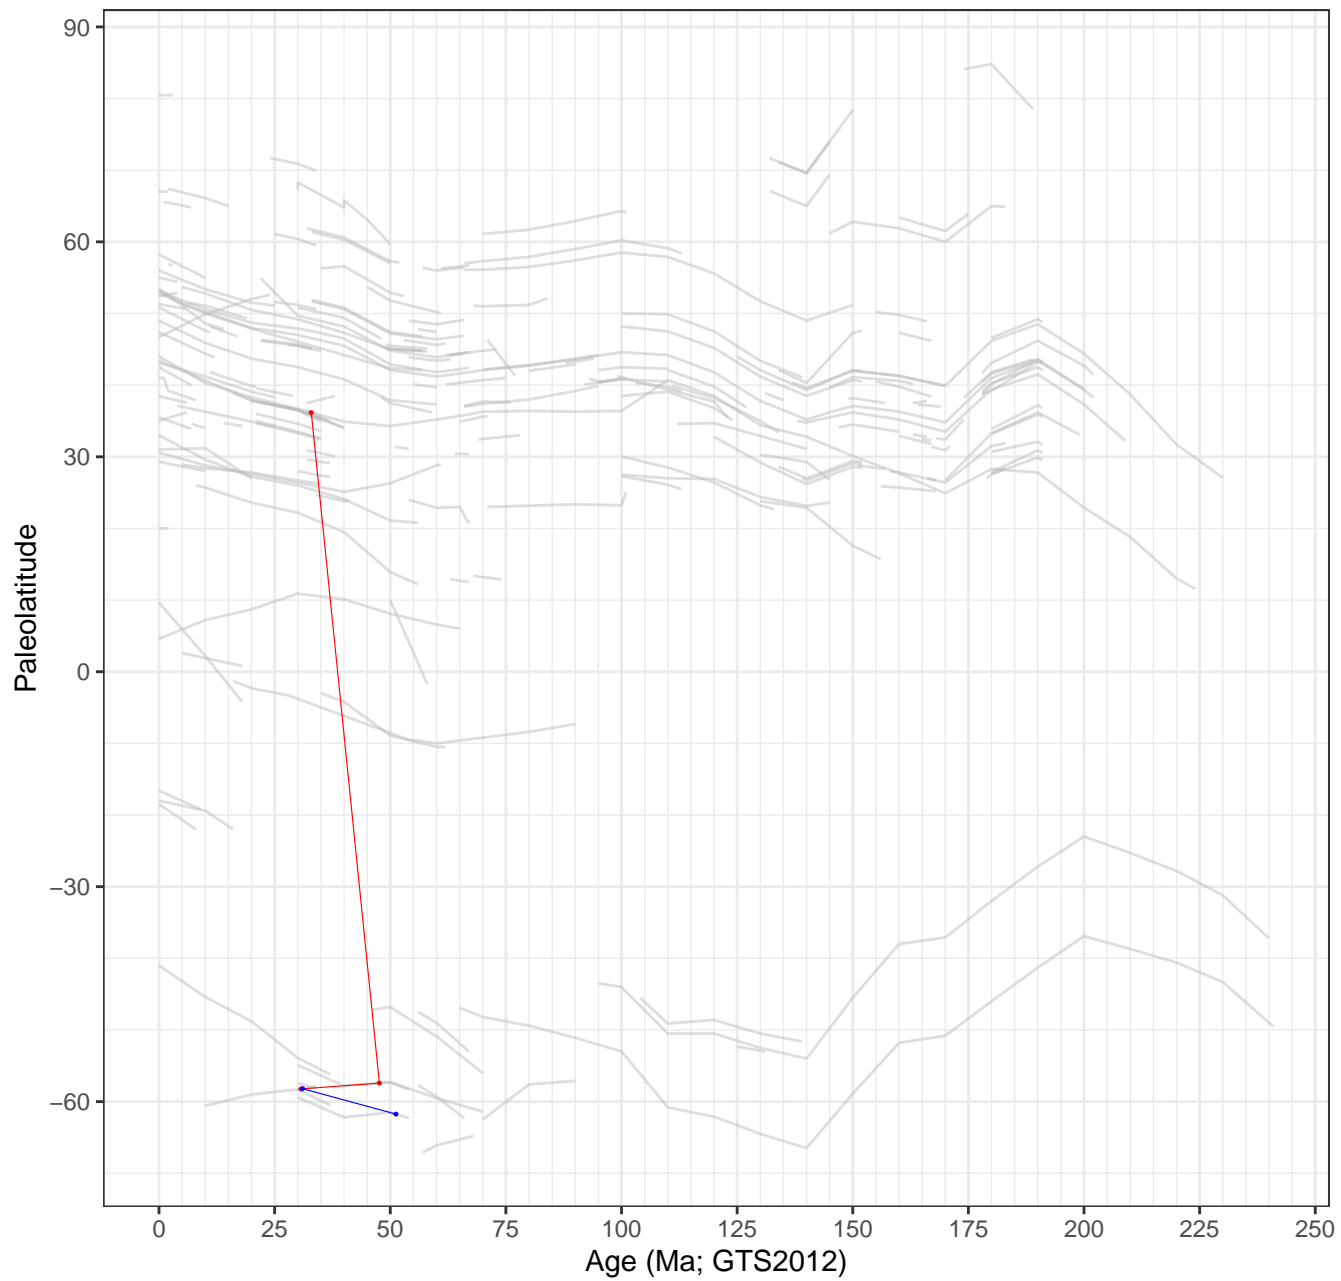

Supplement: Supplementary file 1584 [file Hystrichokolpoma bullatum.pdf › Supplement/Supplement 2/Species 1914 plots/Hystrichokolpoma bullatum.pdf]

# Species *Hystrichokolpoma cinctum*

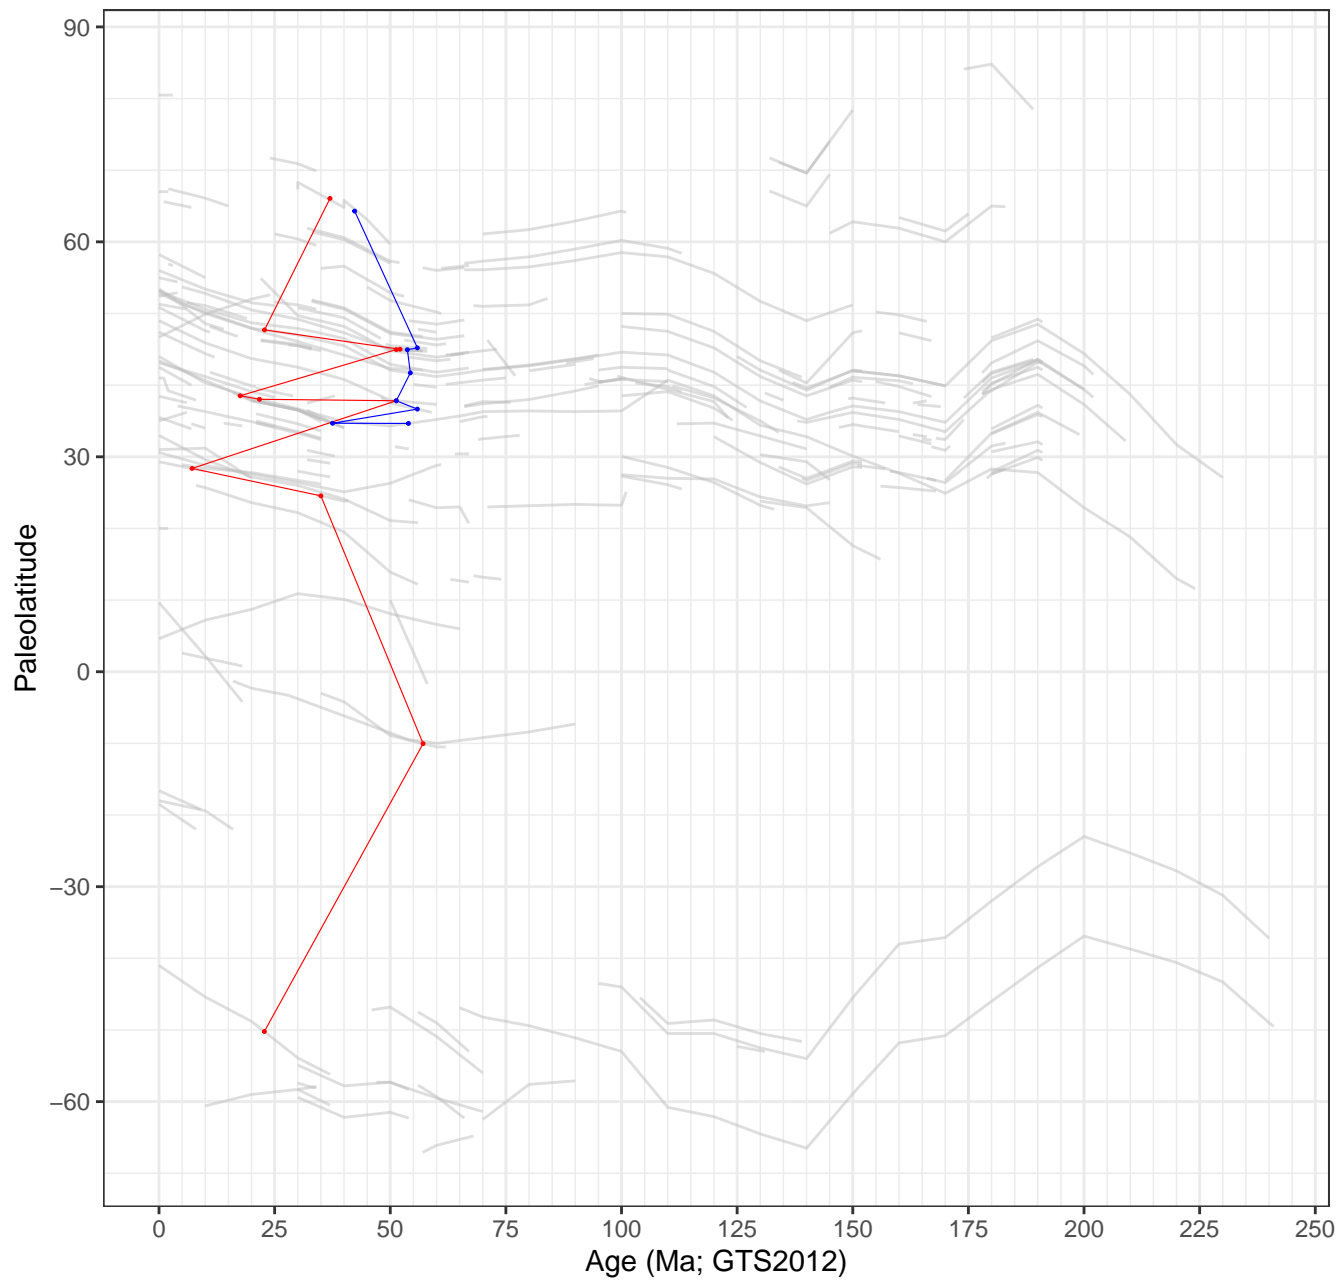

Supplement: Supplementary file 1585 [file Hystrichokolpoma cinctum.pdf › Supplement/Supplement 2/Species 1914 plots/Hystrichokolpoma cinctum.pdf]

# Species *Hystrichokolpoma denticulatum*

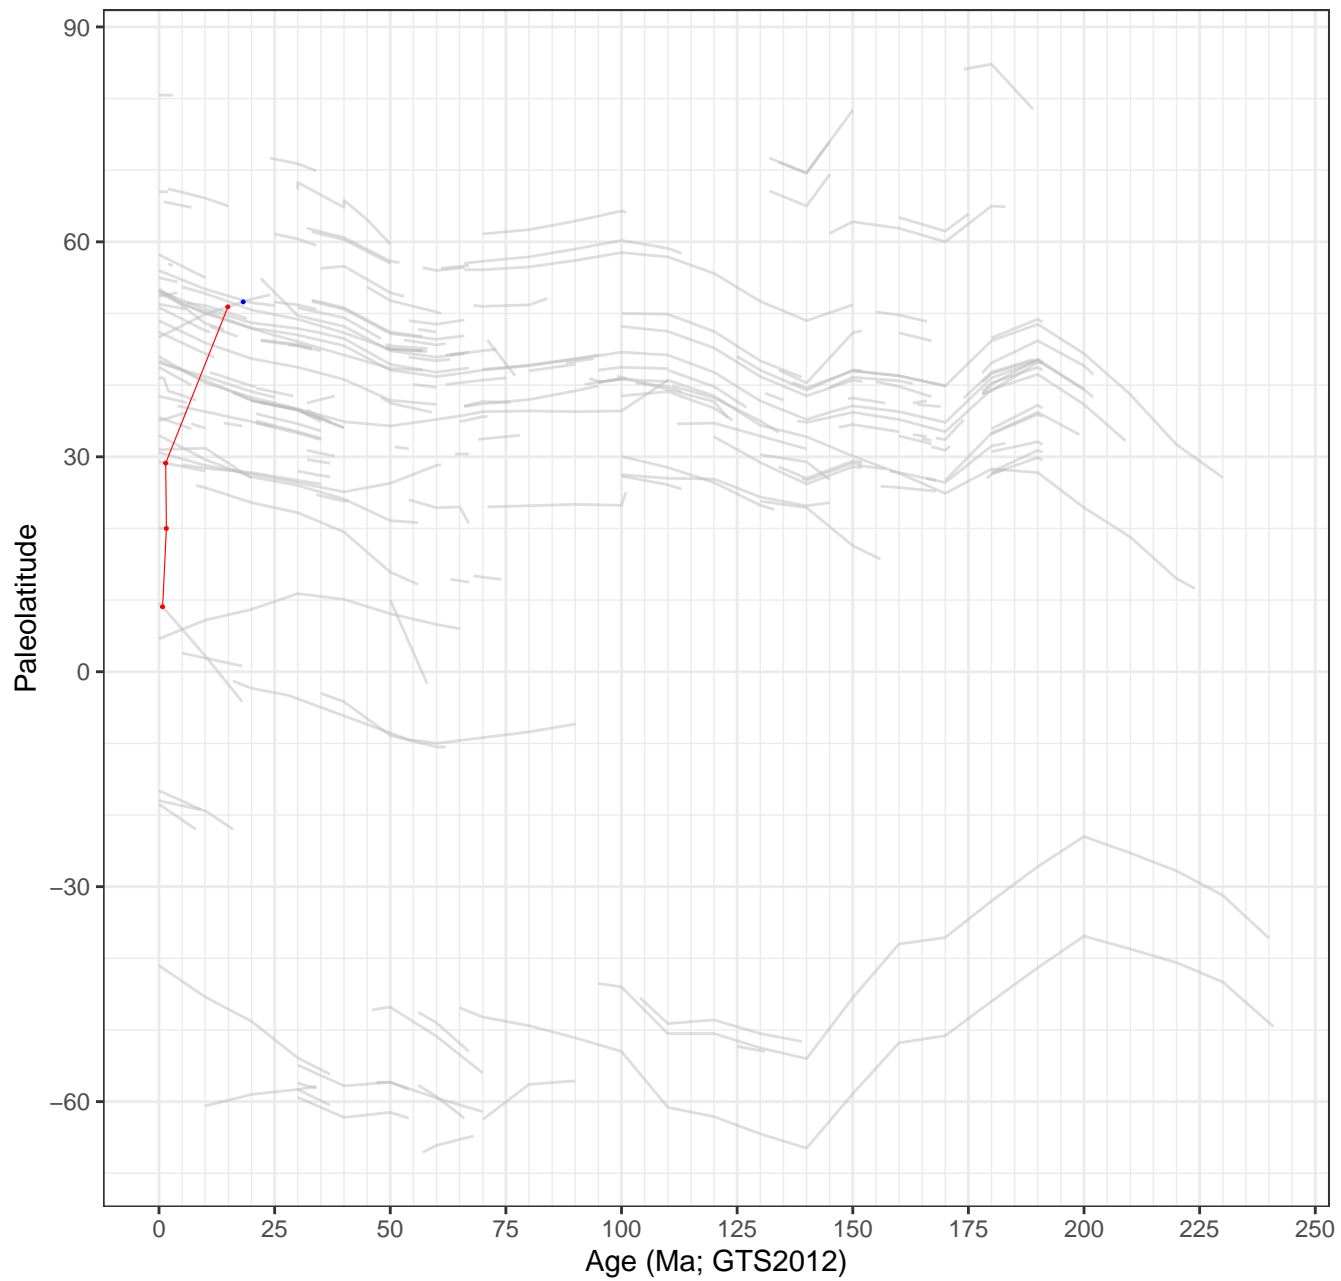

Supplement: Supplementary file 1586 [file Hystrichokolpoma denticulatum.pdf › Supplement/Supplement 2/Species 1914 plots/Hystrichokolpoma denticulatum.pdf]

# Species *Hystrichokolpoma ellipticum*

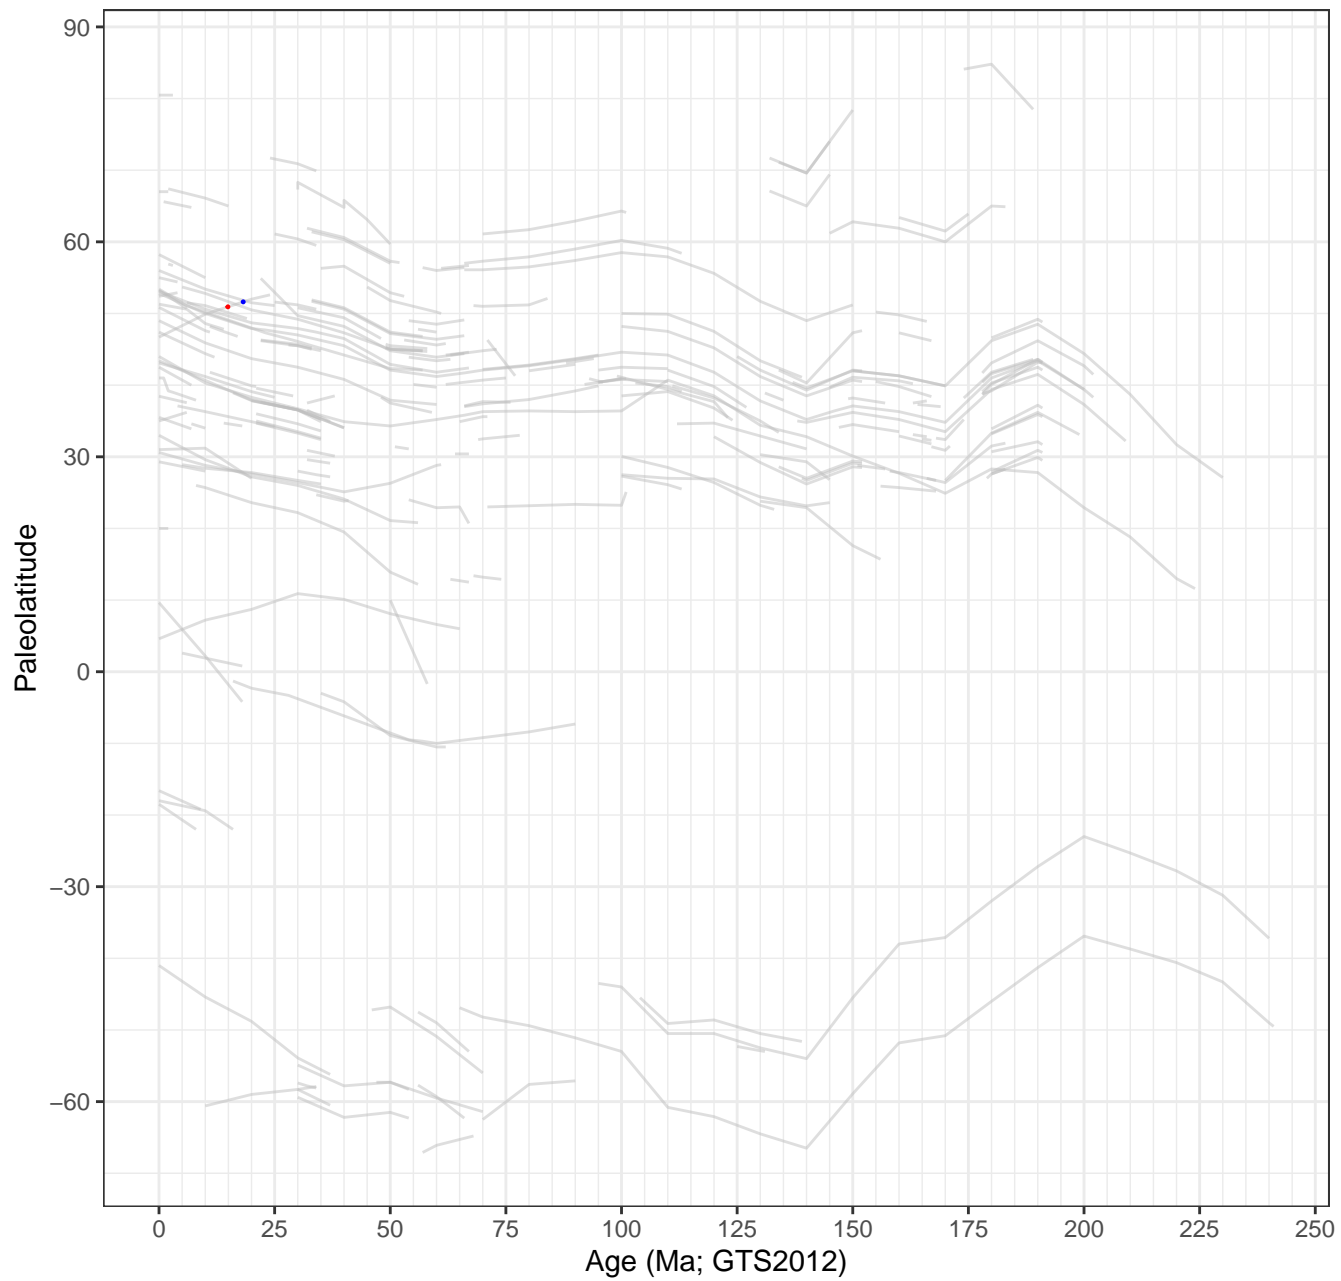

Supplement: Supplementary file 1587 [file Hystrichokolpoma ellipticum.pdf › Supplement/Supplement 2/Species 1914 plots/Hystrichokolpoma ellipticum.pdf]

# Species *Hystrichokolpoma globulus*

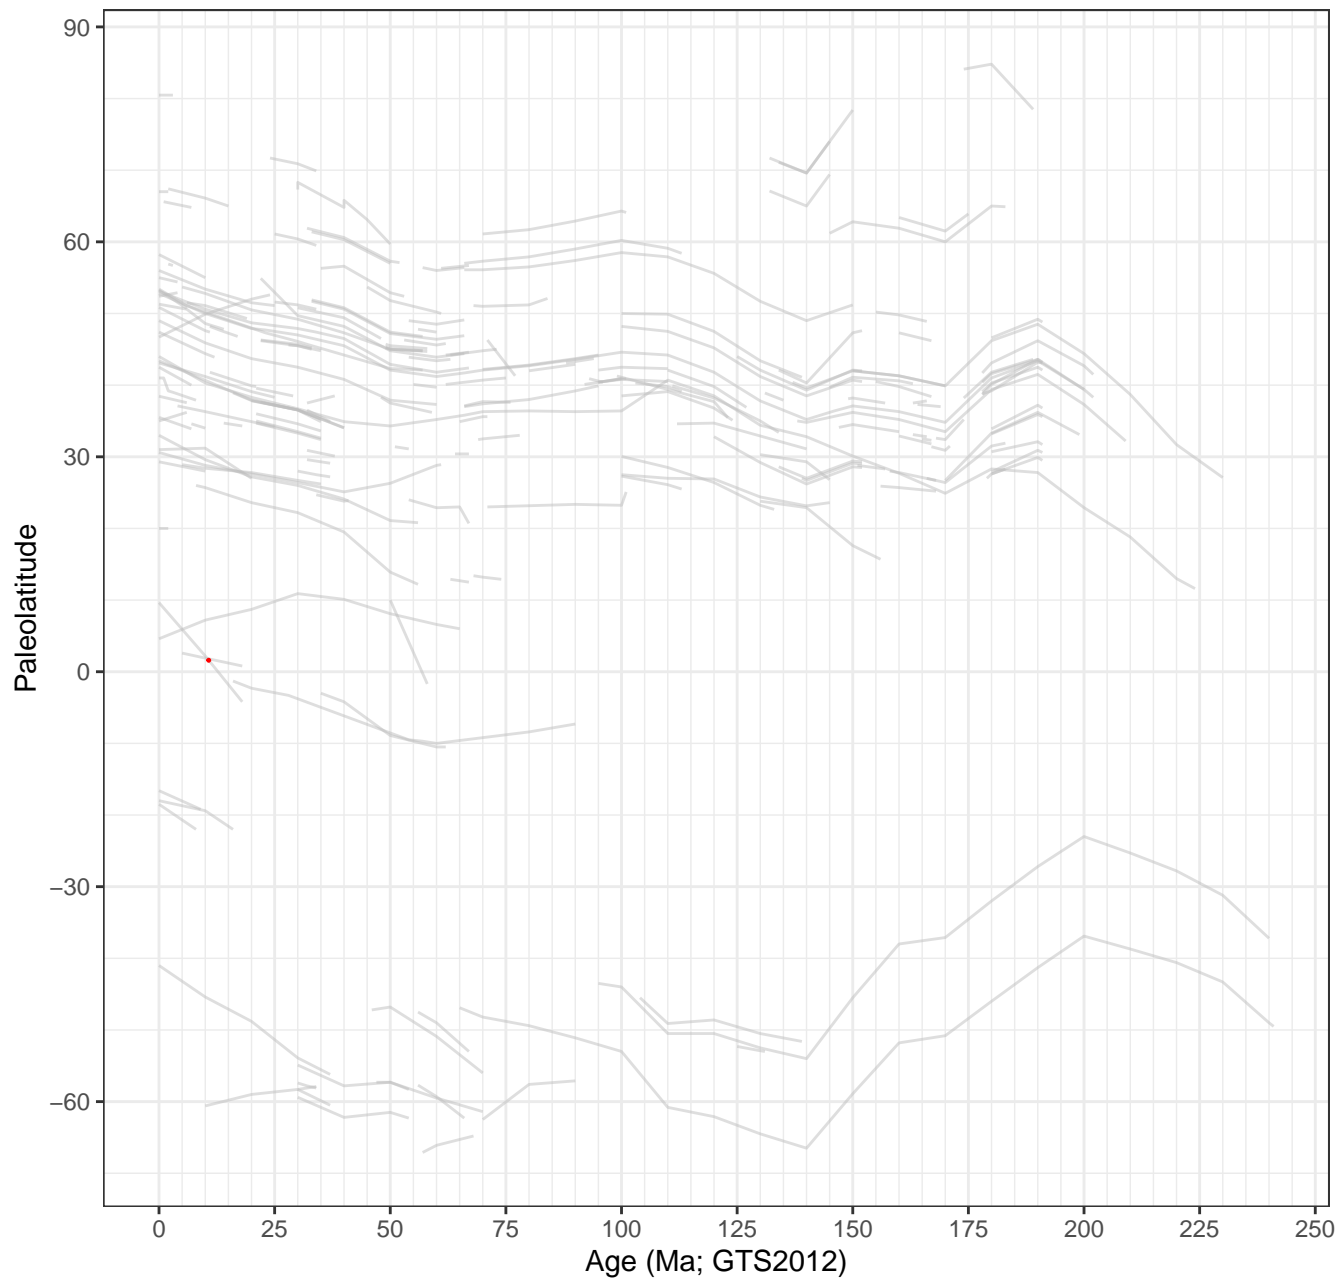

Supplement: Supplementary file 1588 [file Hystrichokolpoma globulus.pdf › Supplement/Supplement 2/Species 1914 plots/Hystrichokolpoma globulus.pdf]

# Species *Hystrichokolpoma granulatum*

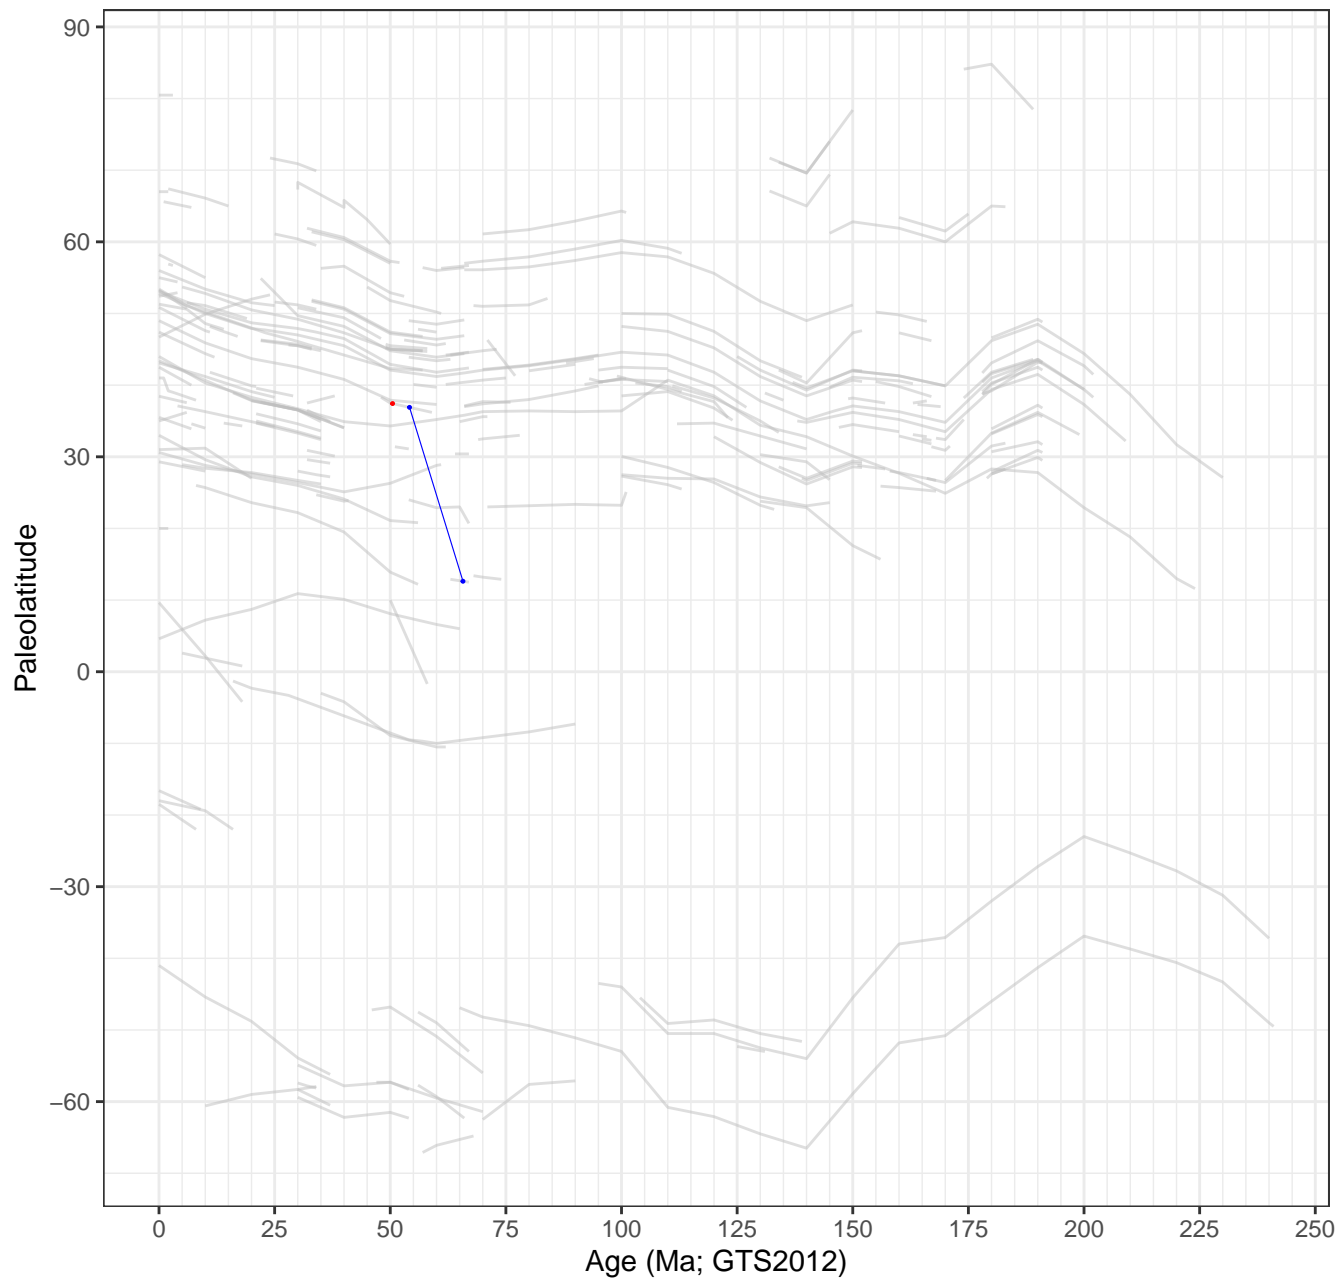

Supplement: Supplementary file 1589 [file Hystrichokolpoma granulatum.pdf › Supplement/Supplement 2/Species 1914 plots/Hystrichokolpoma granulatum.pdf]

# Species *Hystrichokolpoma okinawainum*

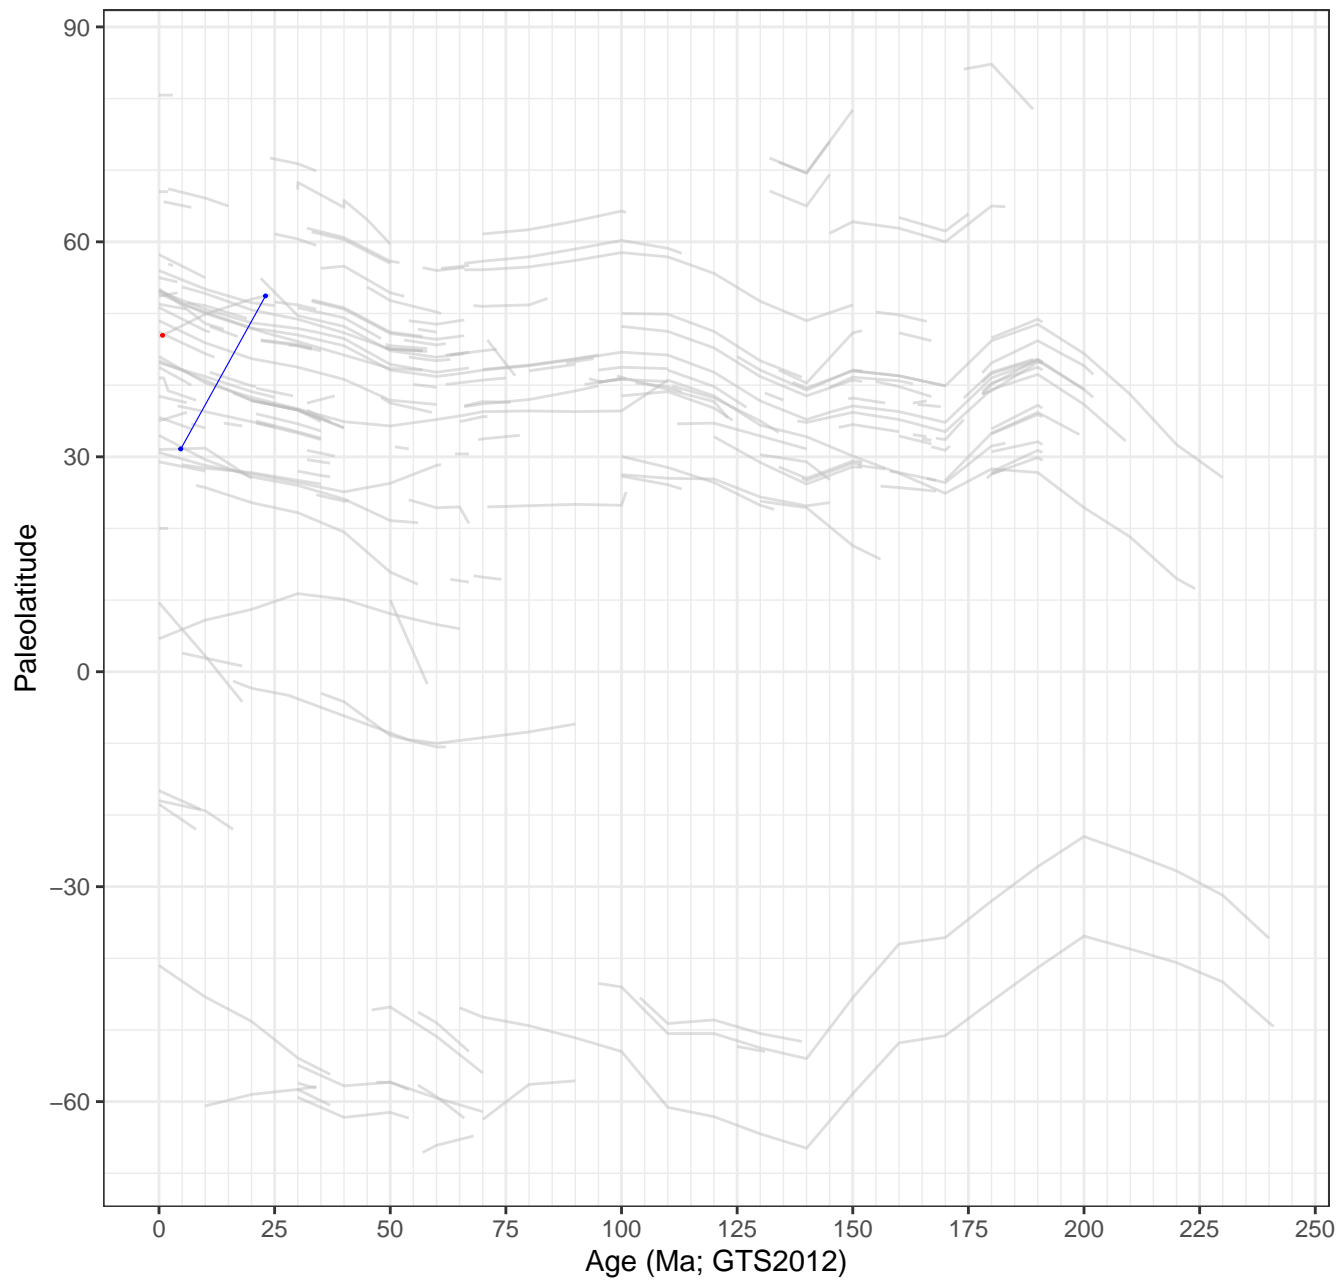

Supplement: Supplementary file 1590 [file Hystrichokolpoma okinawainum.pdf › Supplement/Supplement 2/Species 1914 plots/Hystrichokolpoma okinawainum.pdf]

# Species *Hystriocholpoma pacificum*

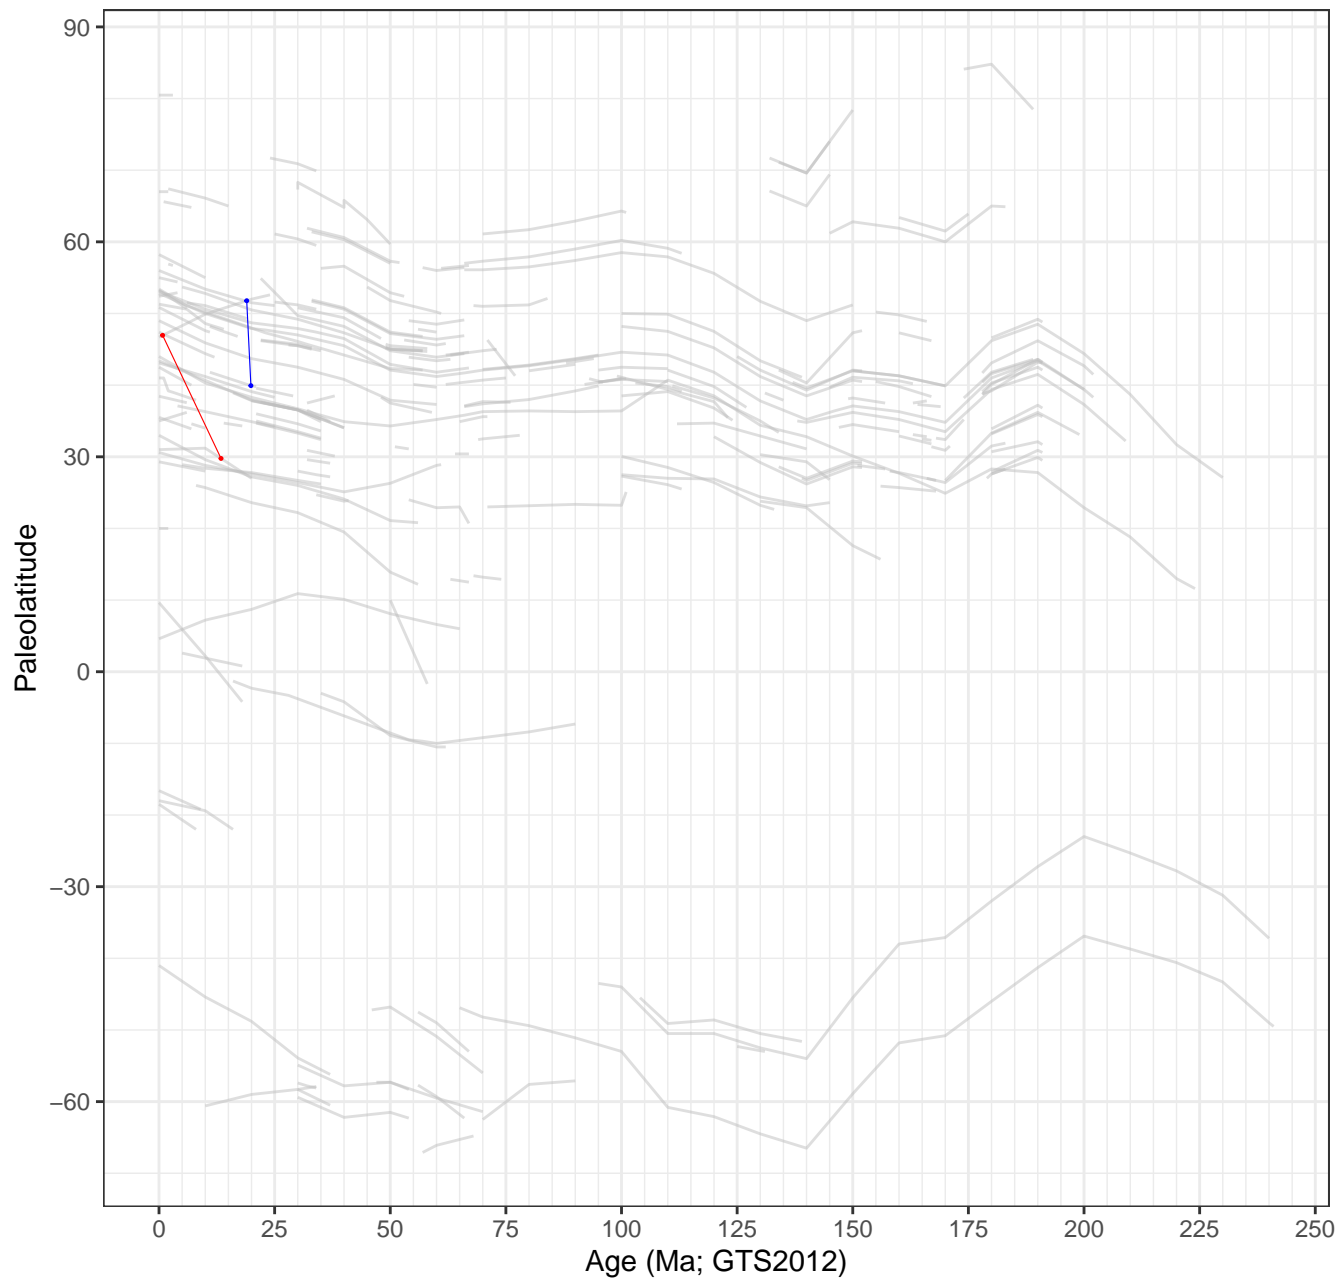

Supplement: Supplementary file 1591 [file Hystrichokolpoma pacificum.pdf › Supplement/Supplement 2/Species 1914 plots/Hystrichokolpoma pacificum.pdf]

# Species *Hystriocholpoma poculum*

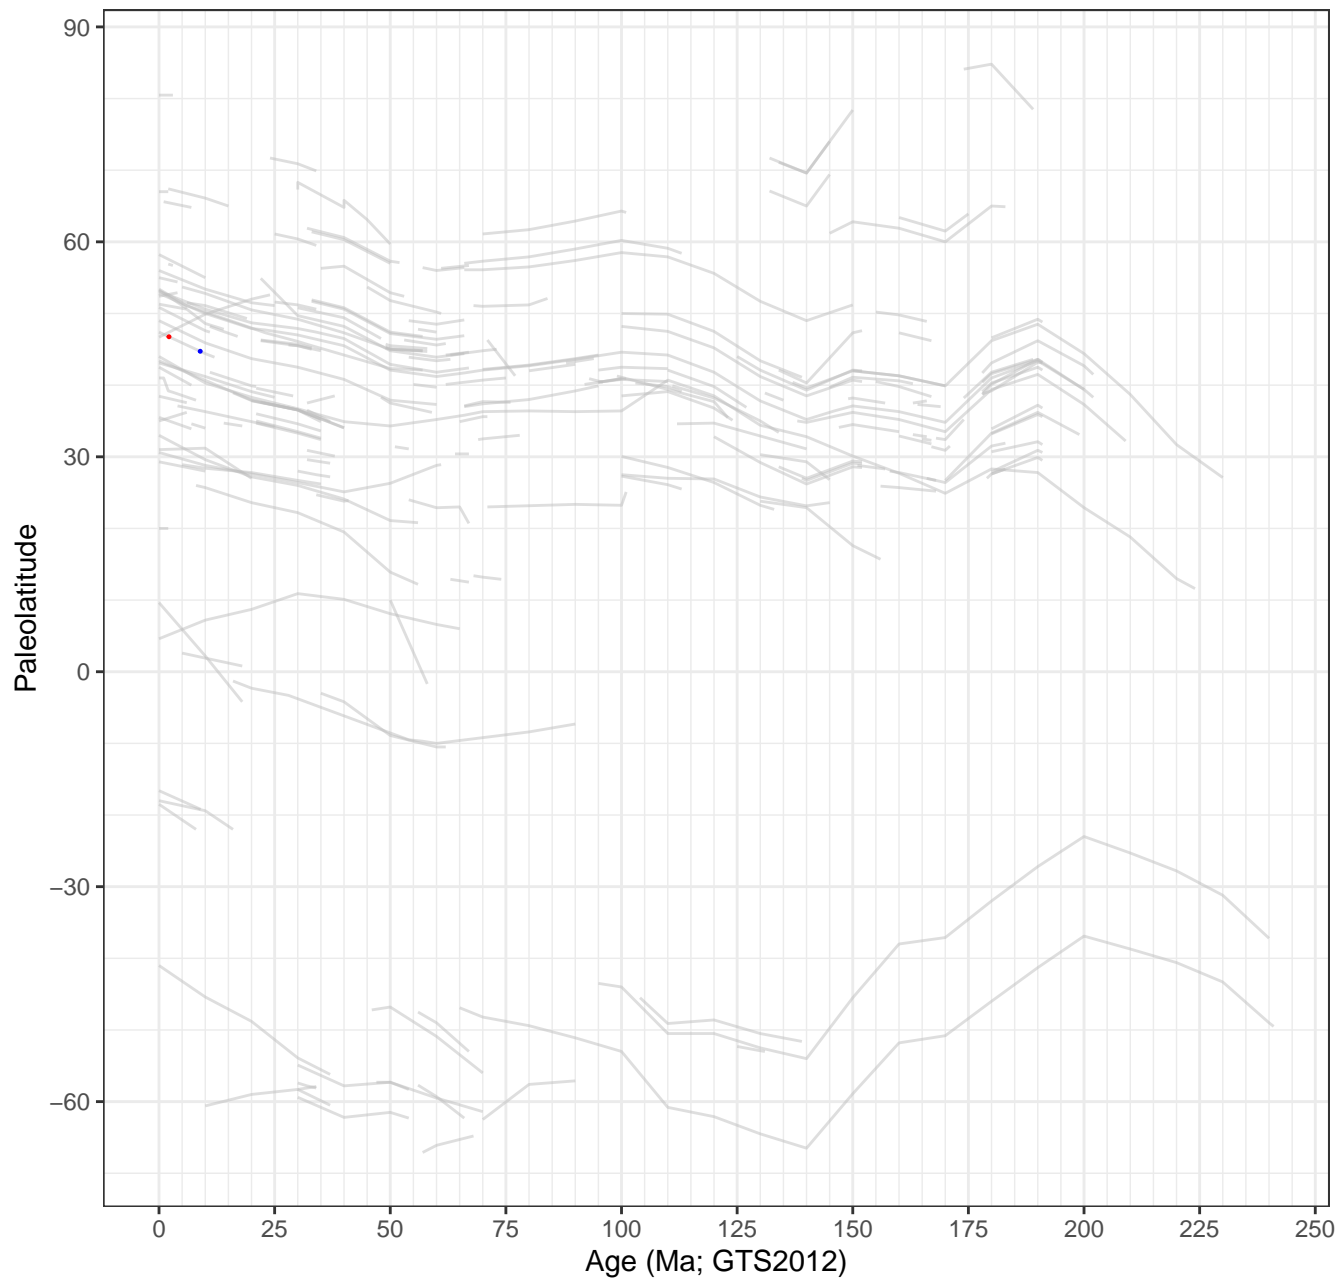

Supplement: Supplementary file 1592 [file Hystrichokolpoma poculum.pdf › Supplement/Supplement 2/Species 1914 plots/Hystrichokolpoma poculum.pdf]

# Species *Hystrichokolpoma proprium*

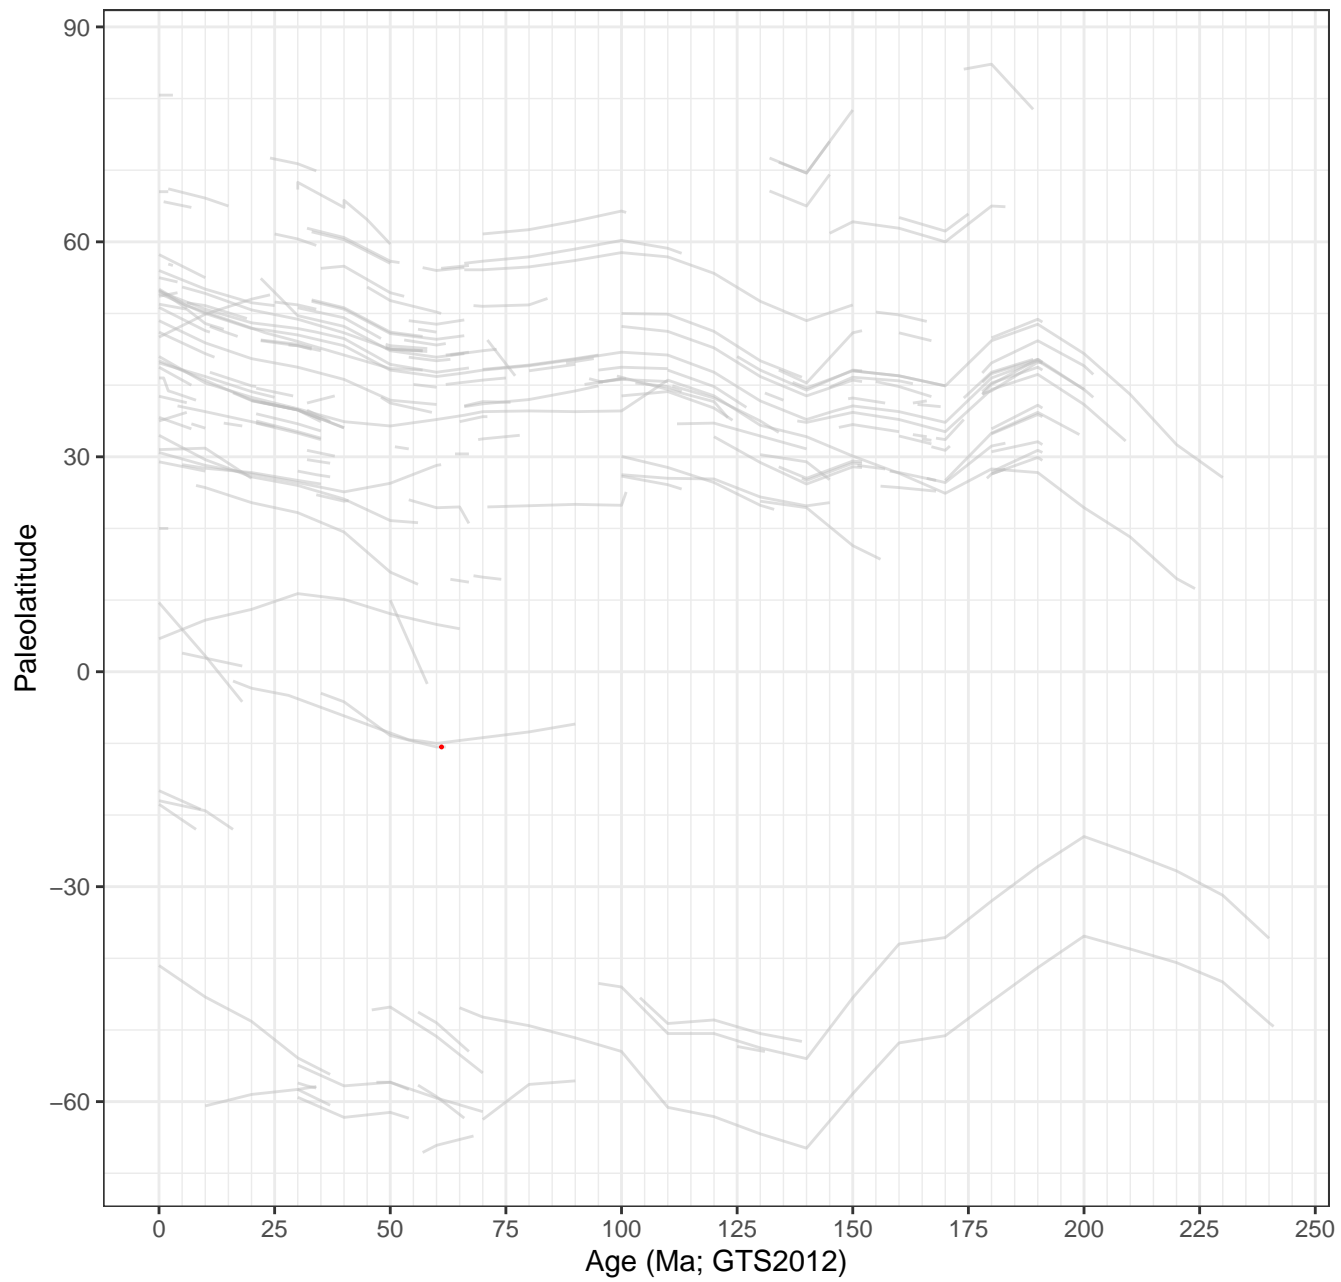

Supplement: Supplementary file 1593 [file Hystrichokolpoma proprium.pdf › Supplement/Supplement 2/Species 1914 plots/Hystrichokolpoma proprium.pdf]

# Species *Hystriocholpoma pseudooceanica*

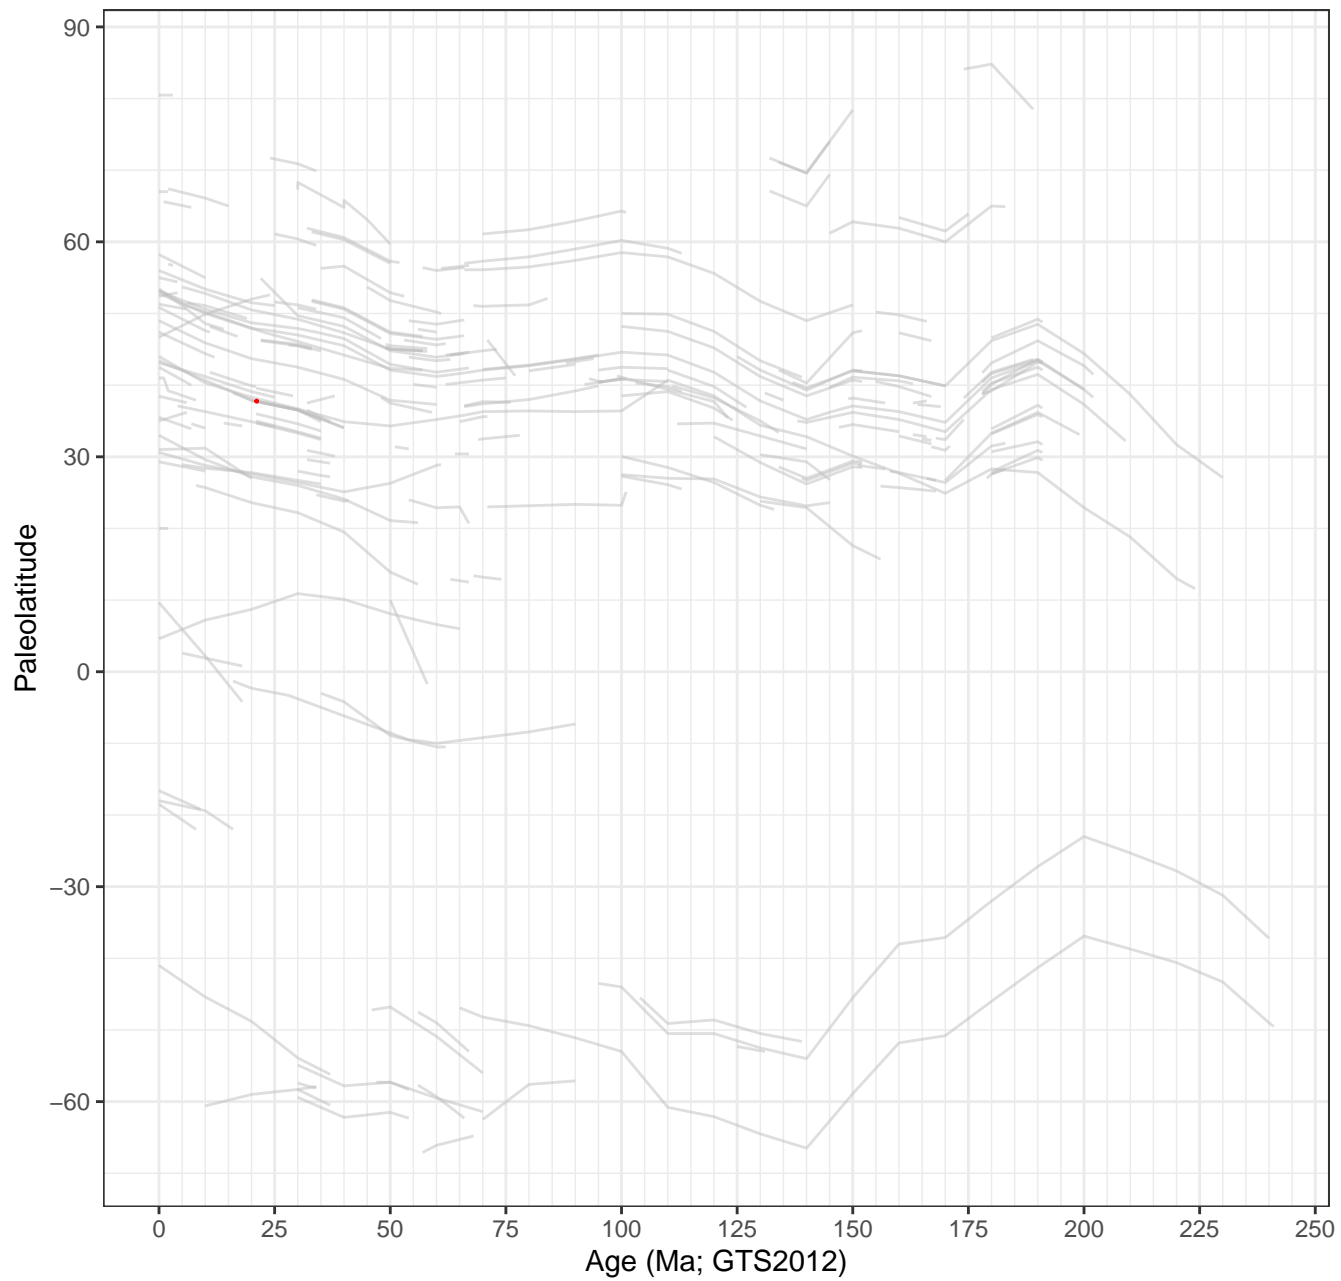

Supplement: Supplementary file 1594 [file Hystrichokolpoma pseudooceanica.pdf › Supplement/Supplement 2/Species 1914 plots/Hystrichokolpoma pseudooceanica.pdf]

# Species *Hystriocholpoma pusillum*

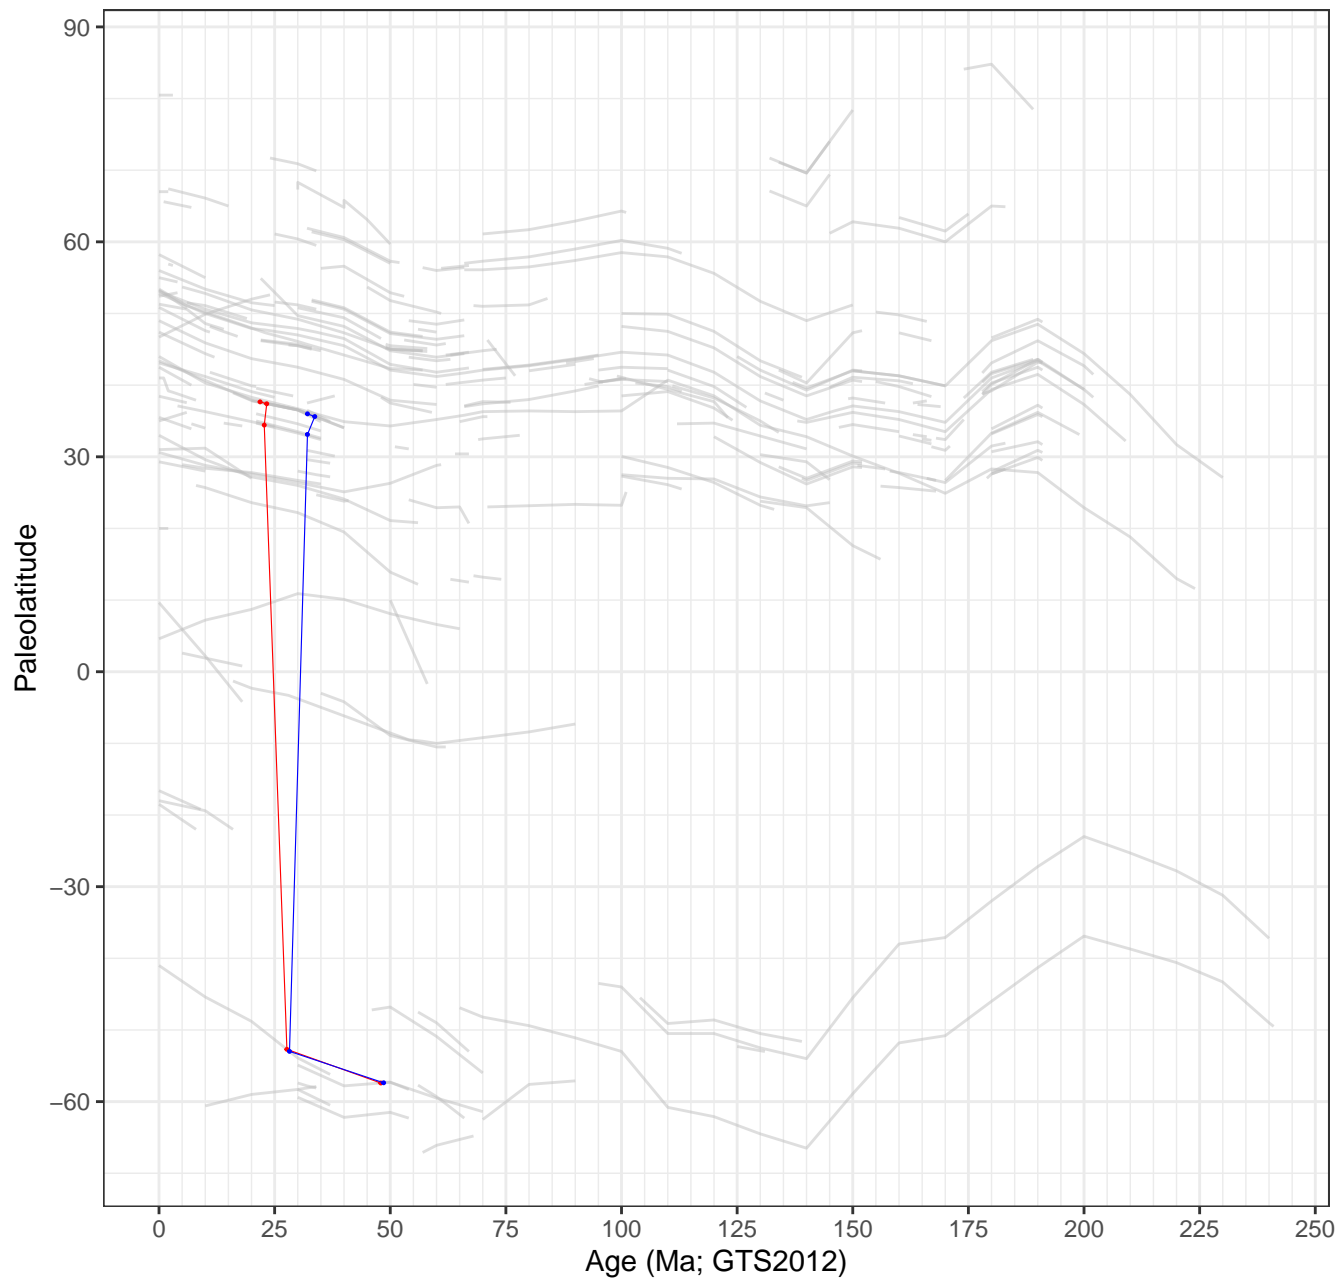

Supplement: Supplementary file 1595 [file Hystrichokolpoma pusillum.pdf › Supplement/Supplement 2/Species 1914 plots/Hystrichokolpoma pusillum.pdf]

# Species *Hystriachokolpoma reducta*

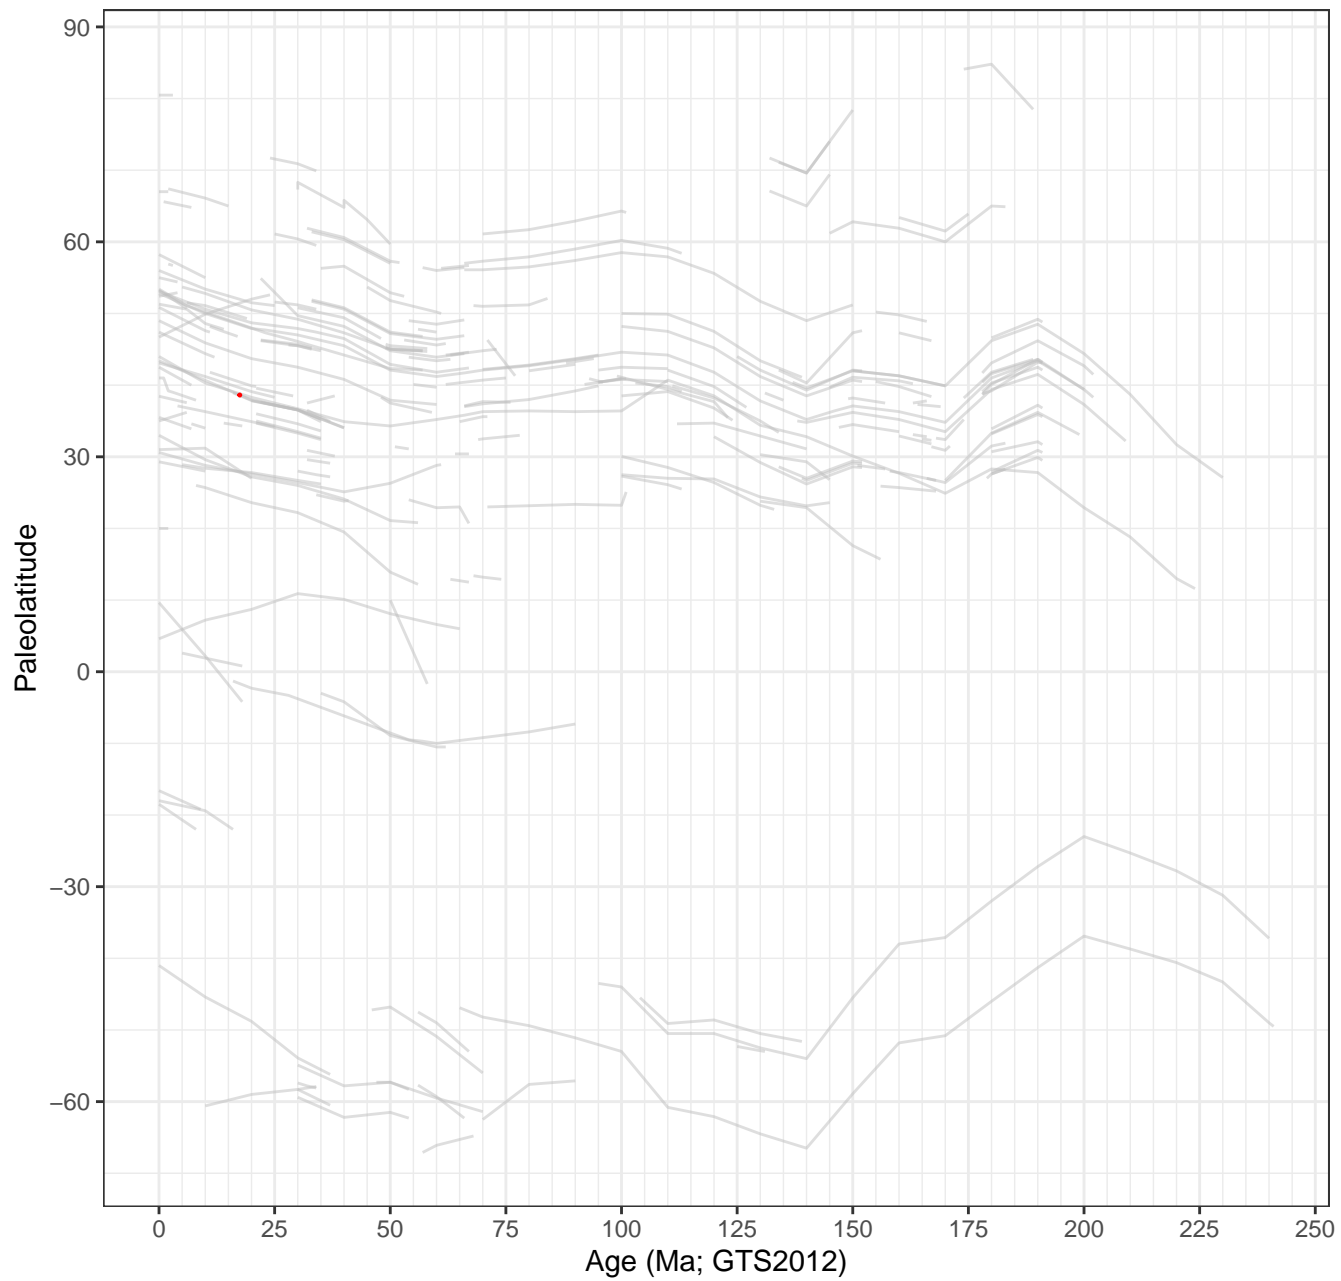

Supplement: Supplementary file 1596 [file Hystrichokolpoma reducta.pdf › Supplement/Supplement 2/Species 1914 plots/Hystrichokolpoma reducta.pdf]

# Species *Hystrichokolpoma rigaudiae*

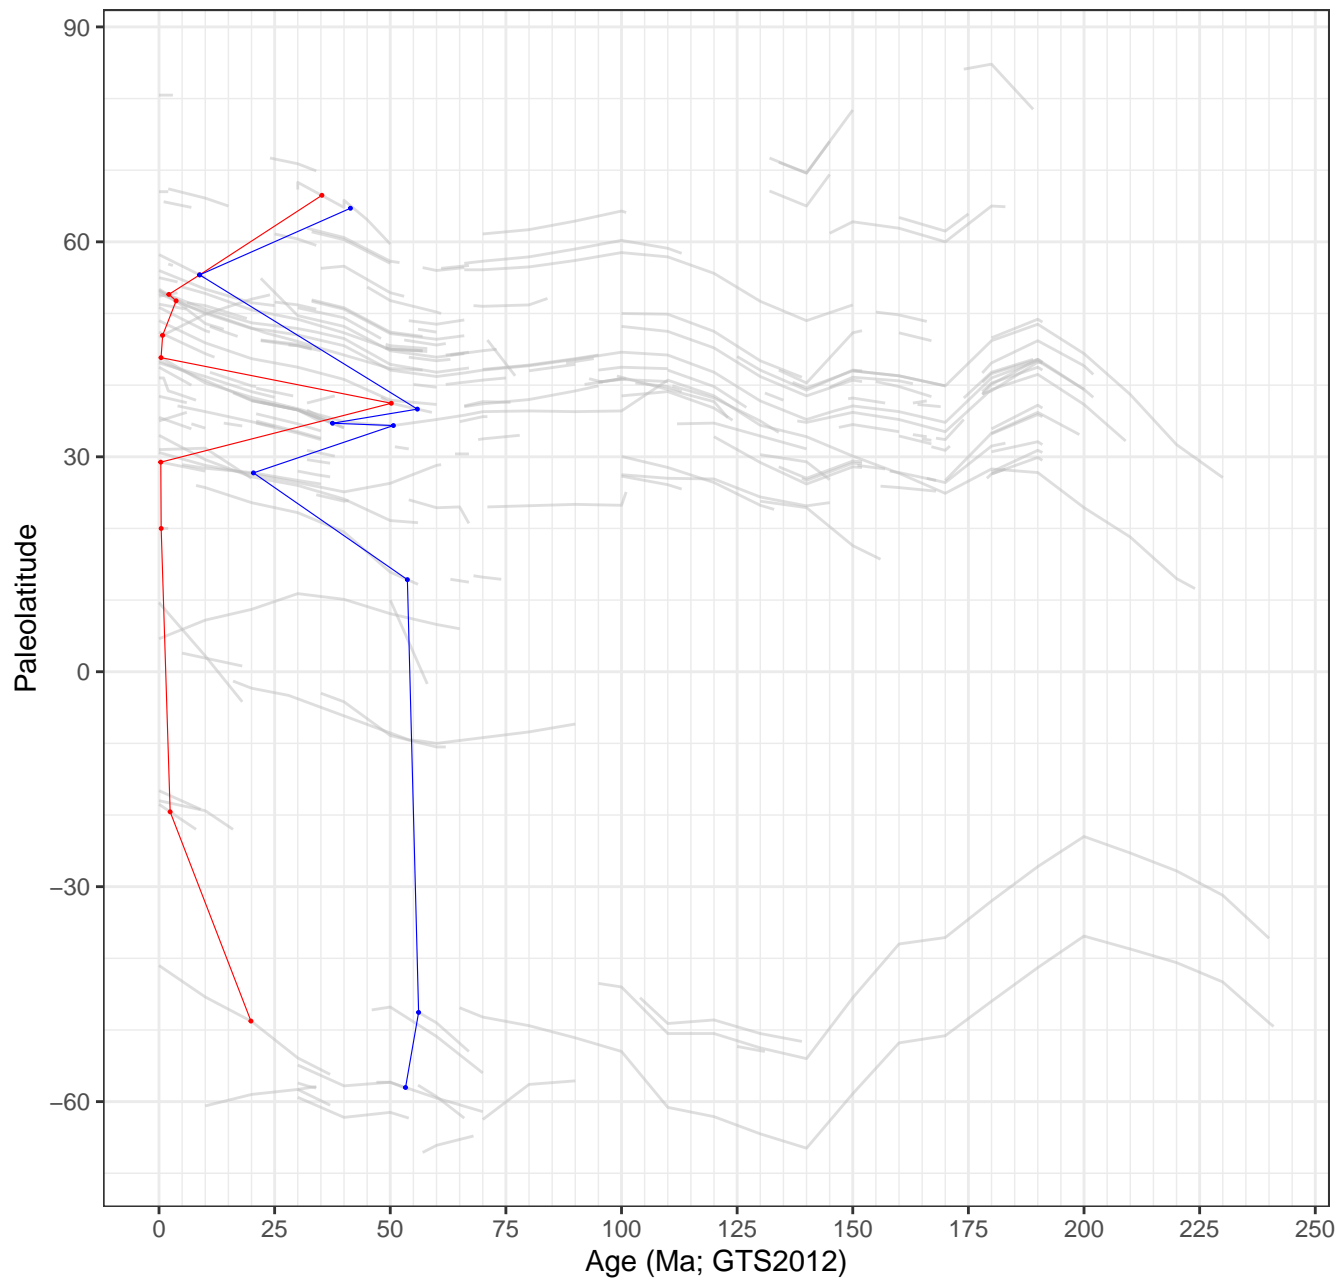

Supplement: Supplementary file 1597 [file Hystrichokolpoma rigaudiae.pdf › Supplement/Supplement 2/Species 1914 plots/Hystrichokolpoma rigaudiae.pdf]

# Species *Hystrichokolpoma salacia*

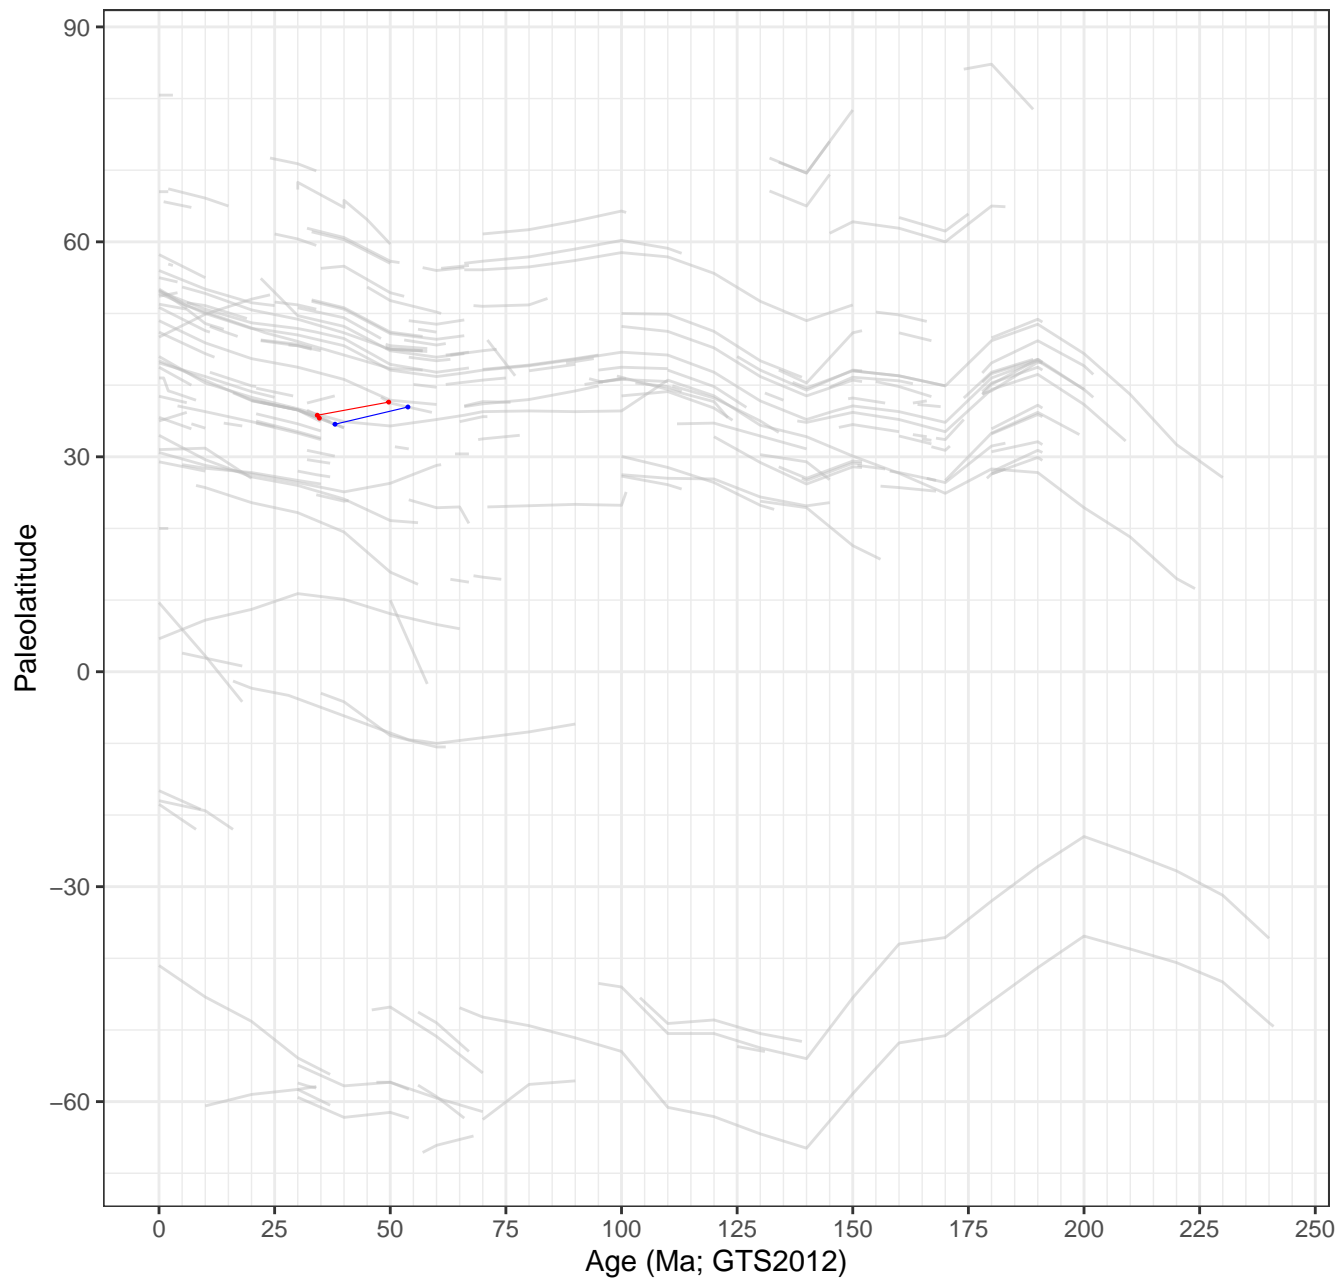

Supplement: Supplementary file 1598 [file Hystrichokolpoma salacia.pdf › Supplement/Supplement 2/Species 1914 plots/Hystrichokolpoma salacia.pdf]

# Species *Hystrichokolpoma spinosum*

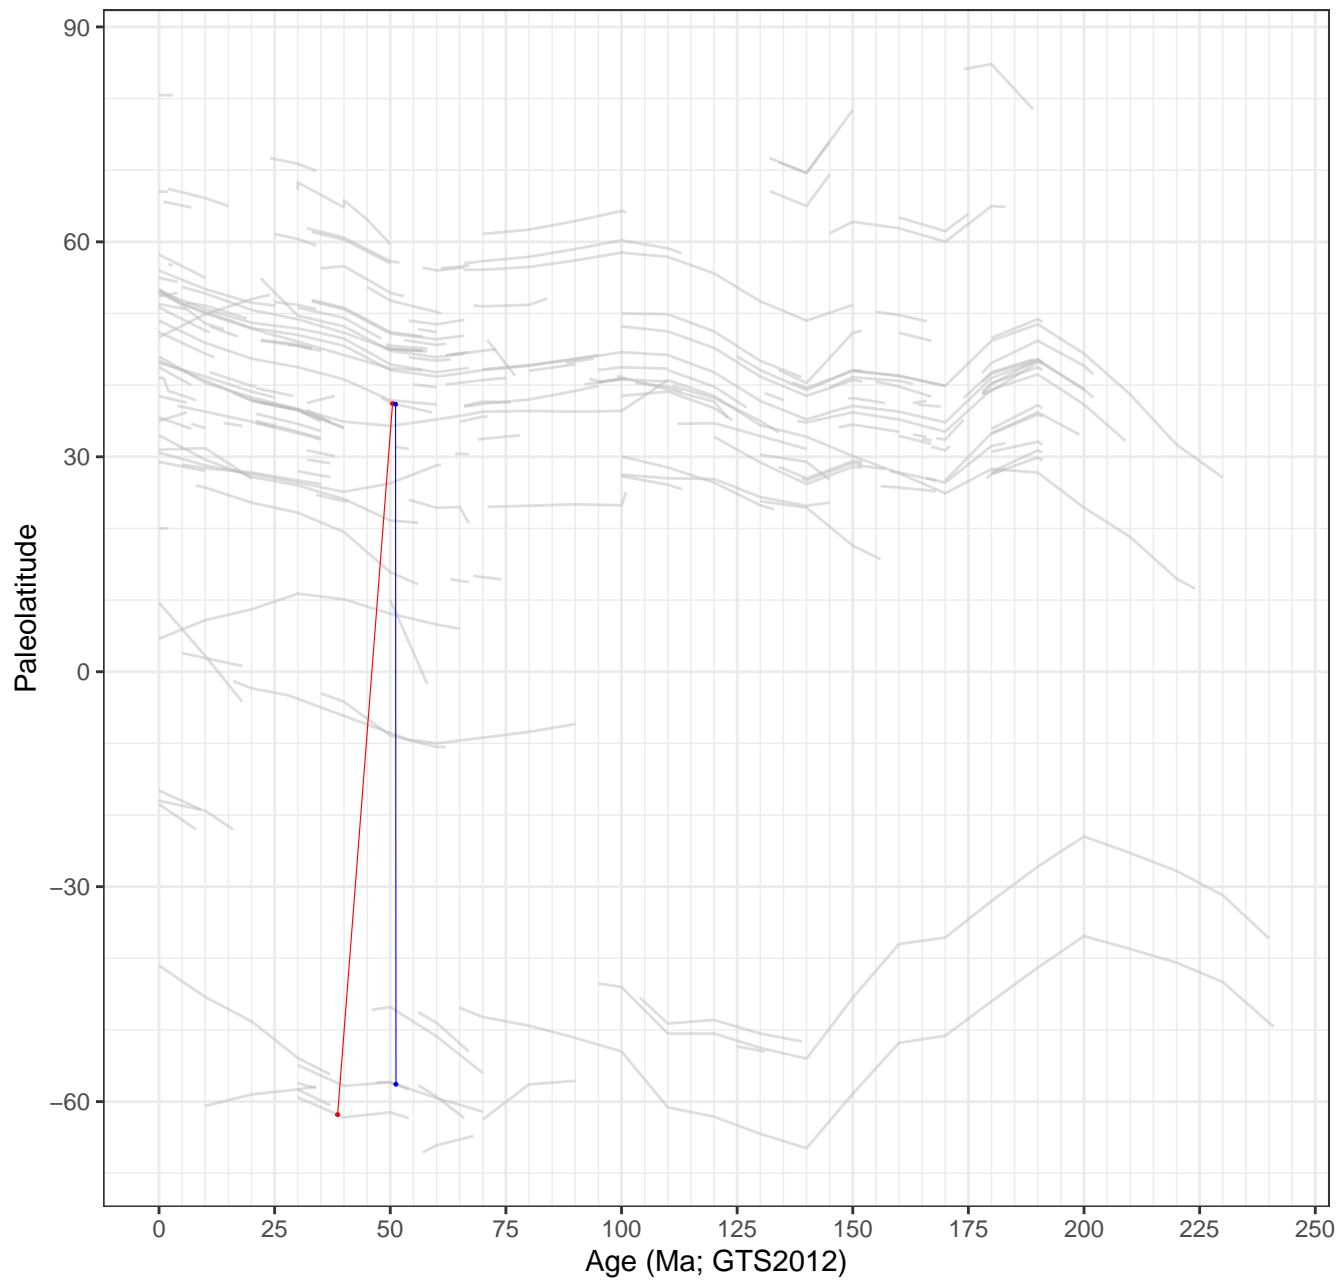

Supplement: Supplementary file 1599 [file Hystrichokolpoma spinosum.pdf › Supplement/Supplement 2/Species 1914 plots/Hystrichokolpoma spinosum.pdf]

# Species *Hystrichokolpoma truncatum*

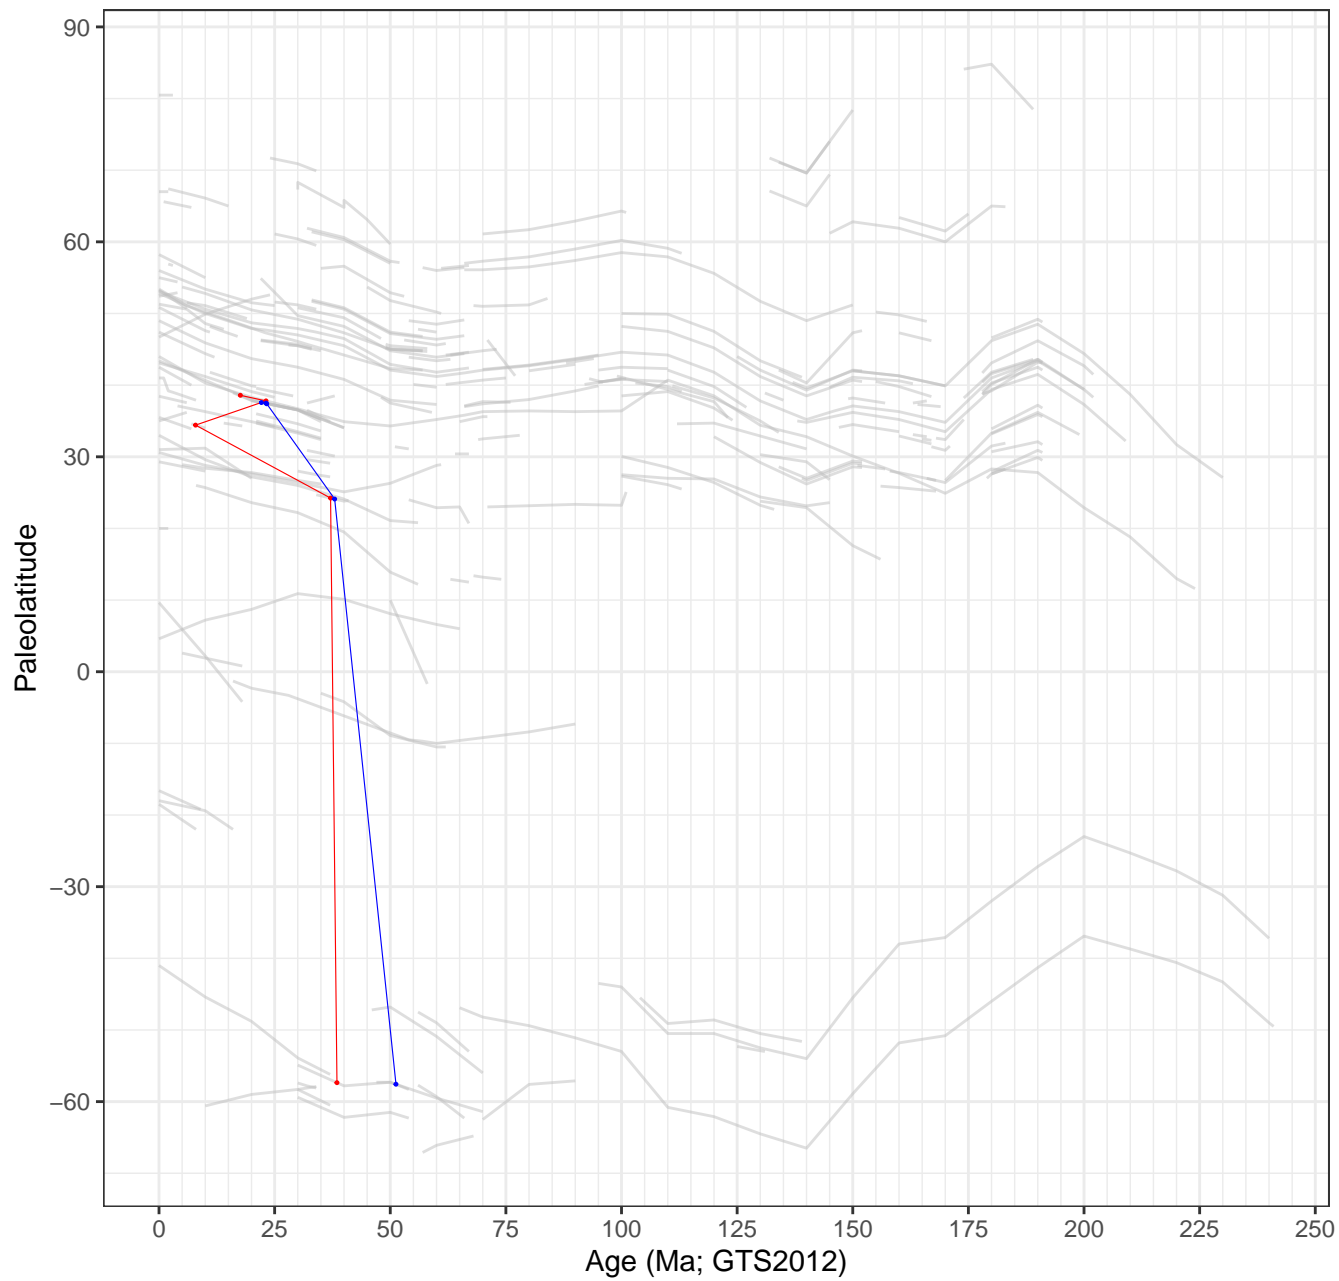

Supplement: Supplementary file 1600 [file Hystrichokolpoma truncatum.pdf › Supplement/Supplement 2/Species 1914 plots/Hystrichokolpoma truncatum.pdf]

# Species *Hystriocholpoma unispinum*

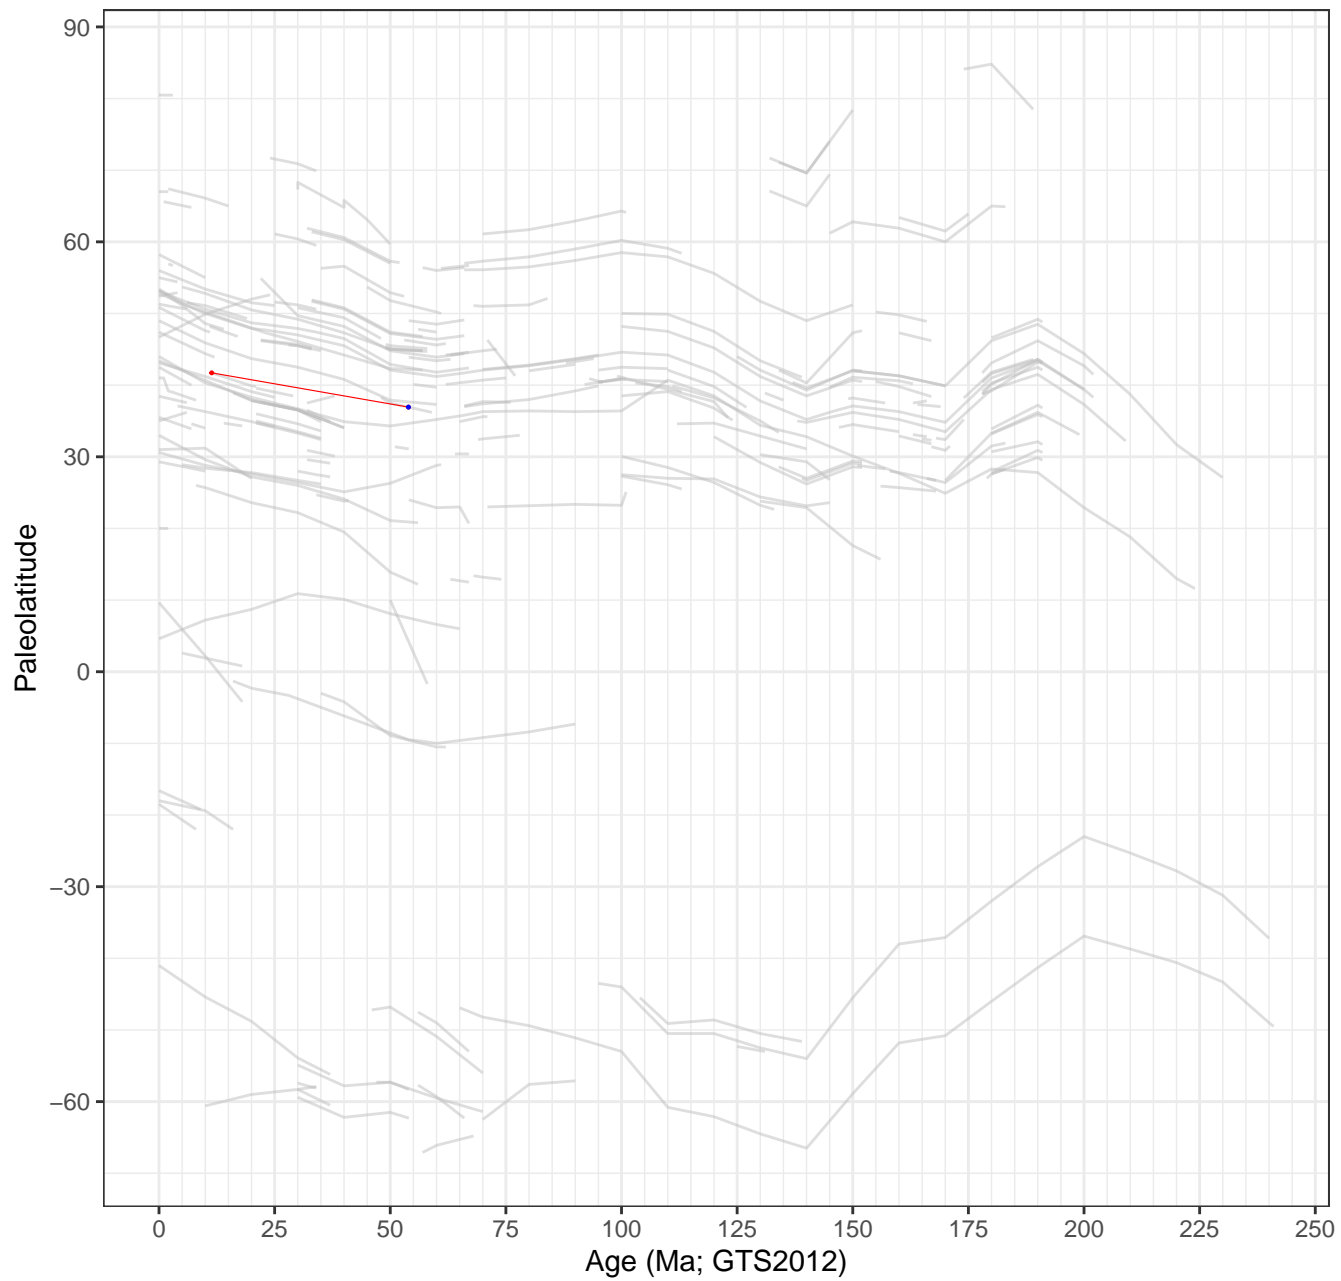

Supplement: Supplementary file 1601 [file Hystrichokolpoma unispinum.pdf › Supplement/Supplement 2/Species 1914 plots/Hystrichokolpoma unispinum.pdf]

# Species *Hystrichosphaeridium arborispinum*

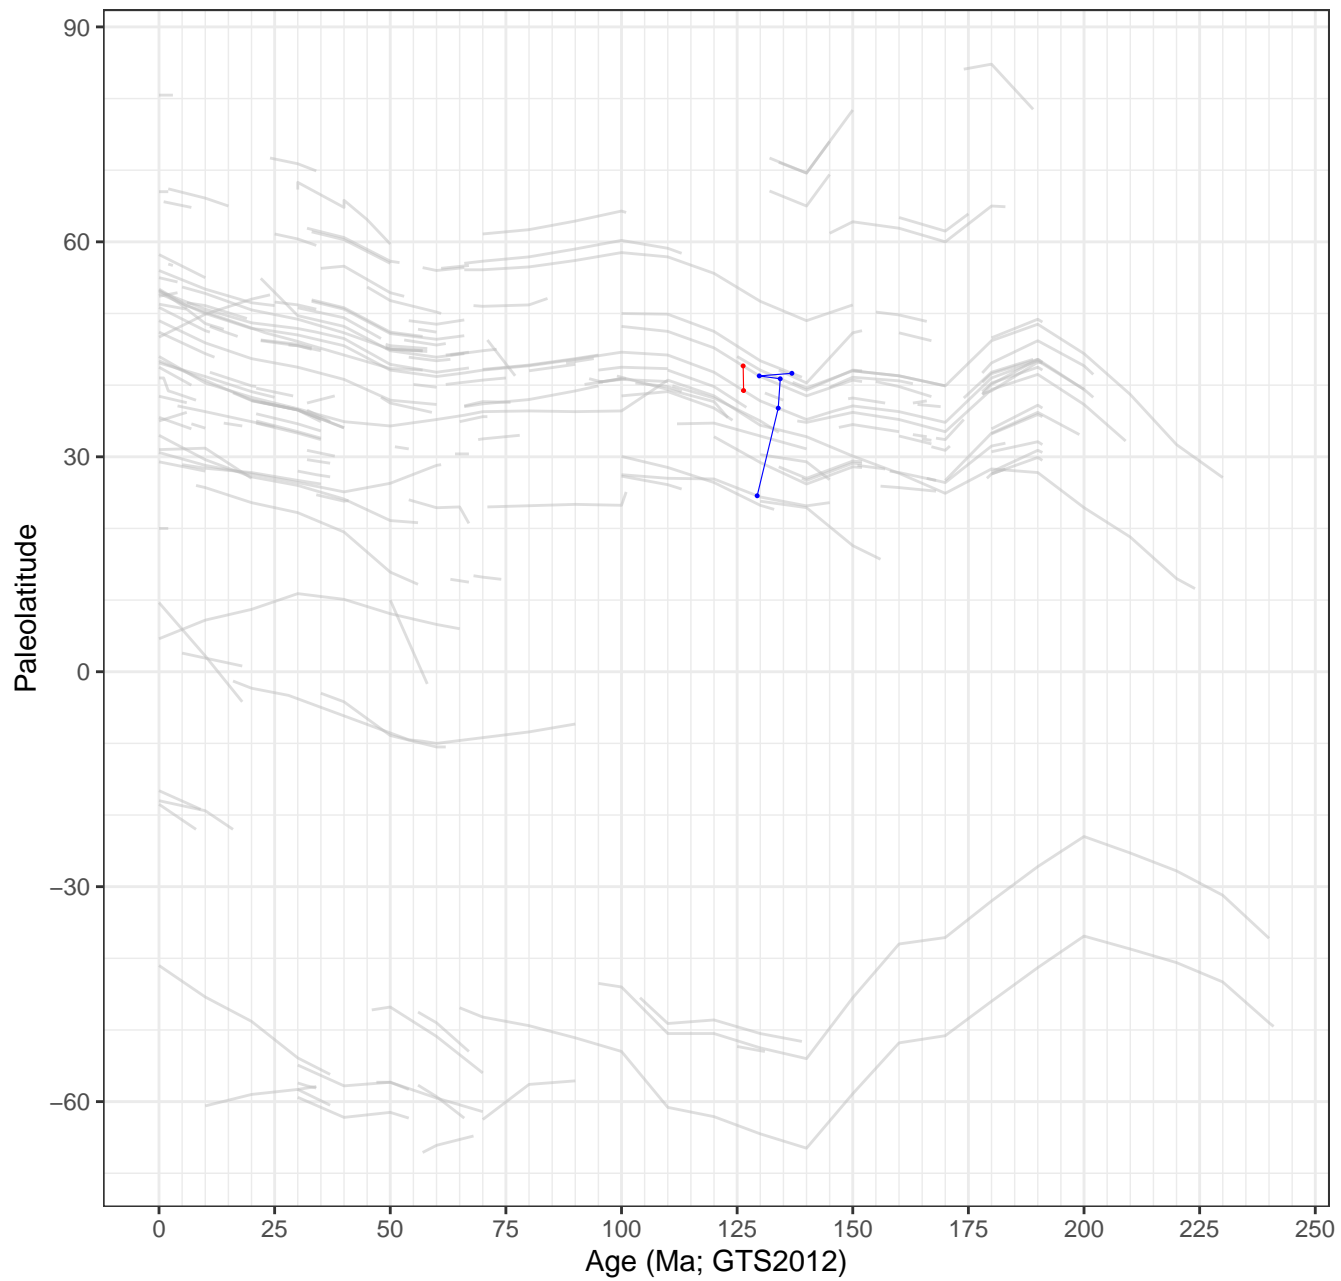

Supplement: Supplementary file 1602 [file Hystrichosphaeridium arborispinum.pdf › Supplement/Supplement 2/Species 1914 plots/Hystrichosphaeridium arborispinum.pdf]

# Species *Hystrichosphaeridium bowerbankii*

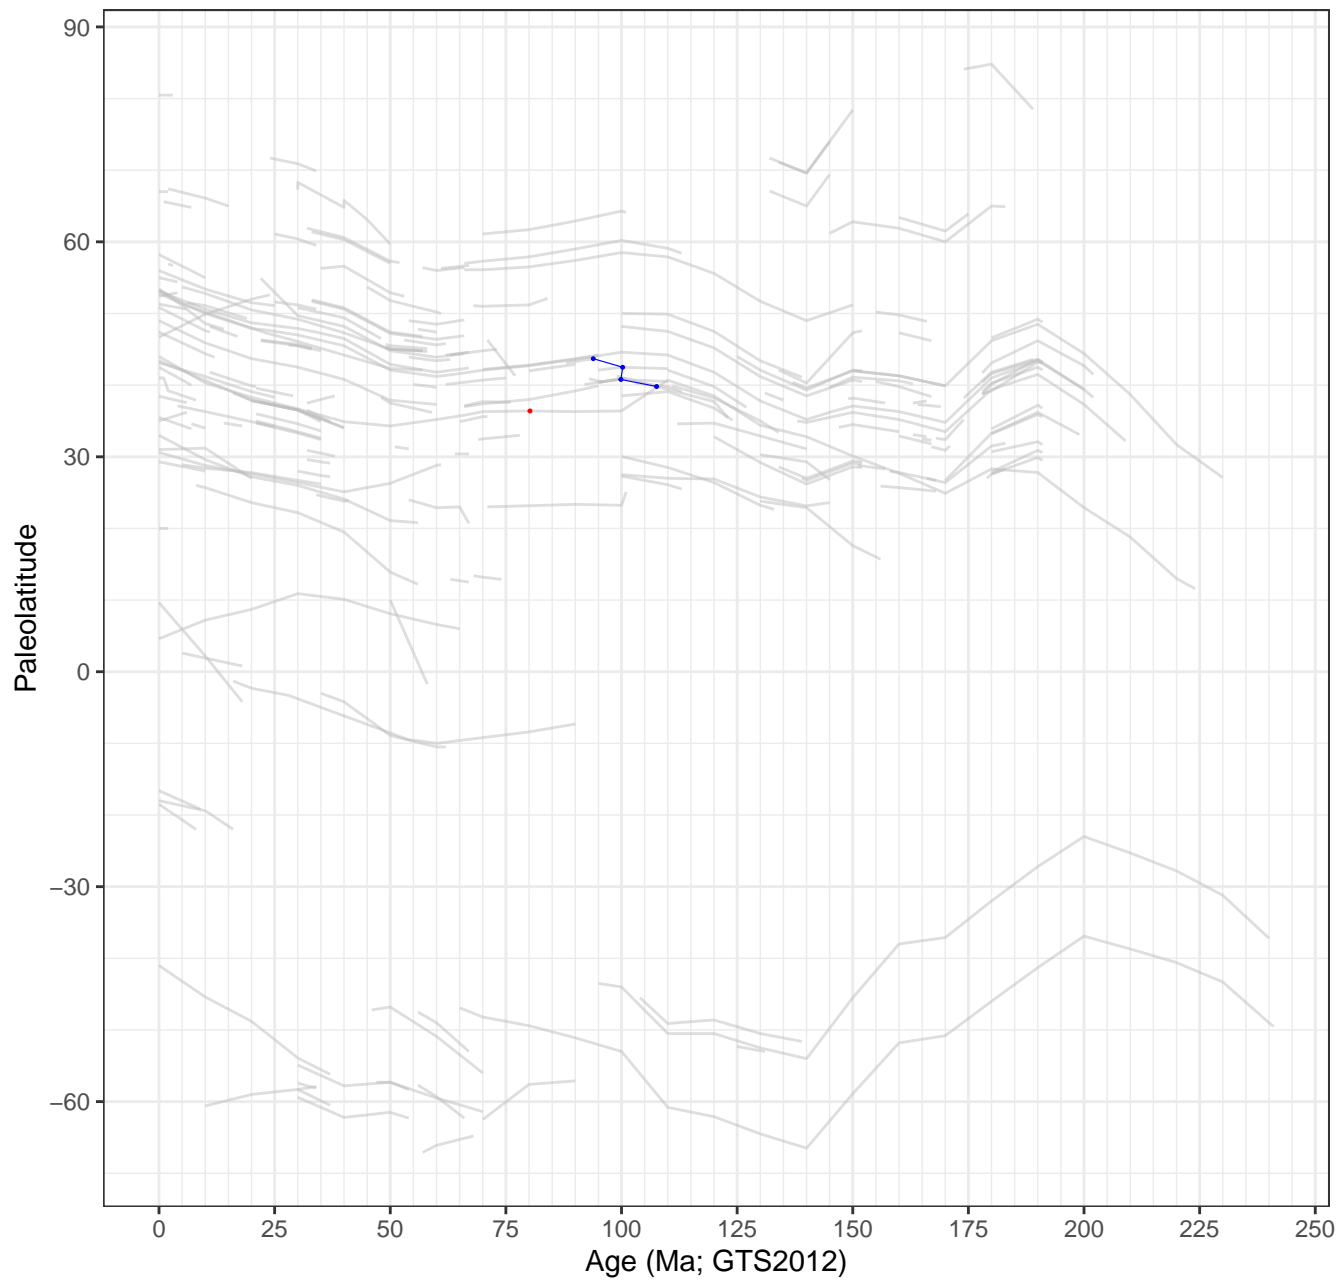

Supplement: Supplementary file 1603 [file Hystrichosphaeridium bowerbankii.pdf › Supplement/Supplement 2/Species 1914 plots/Hystrichosphaeridium bowerbankii.pdf]

# Species *Hystrichosphaeridium conispiniferum*

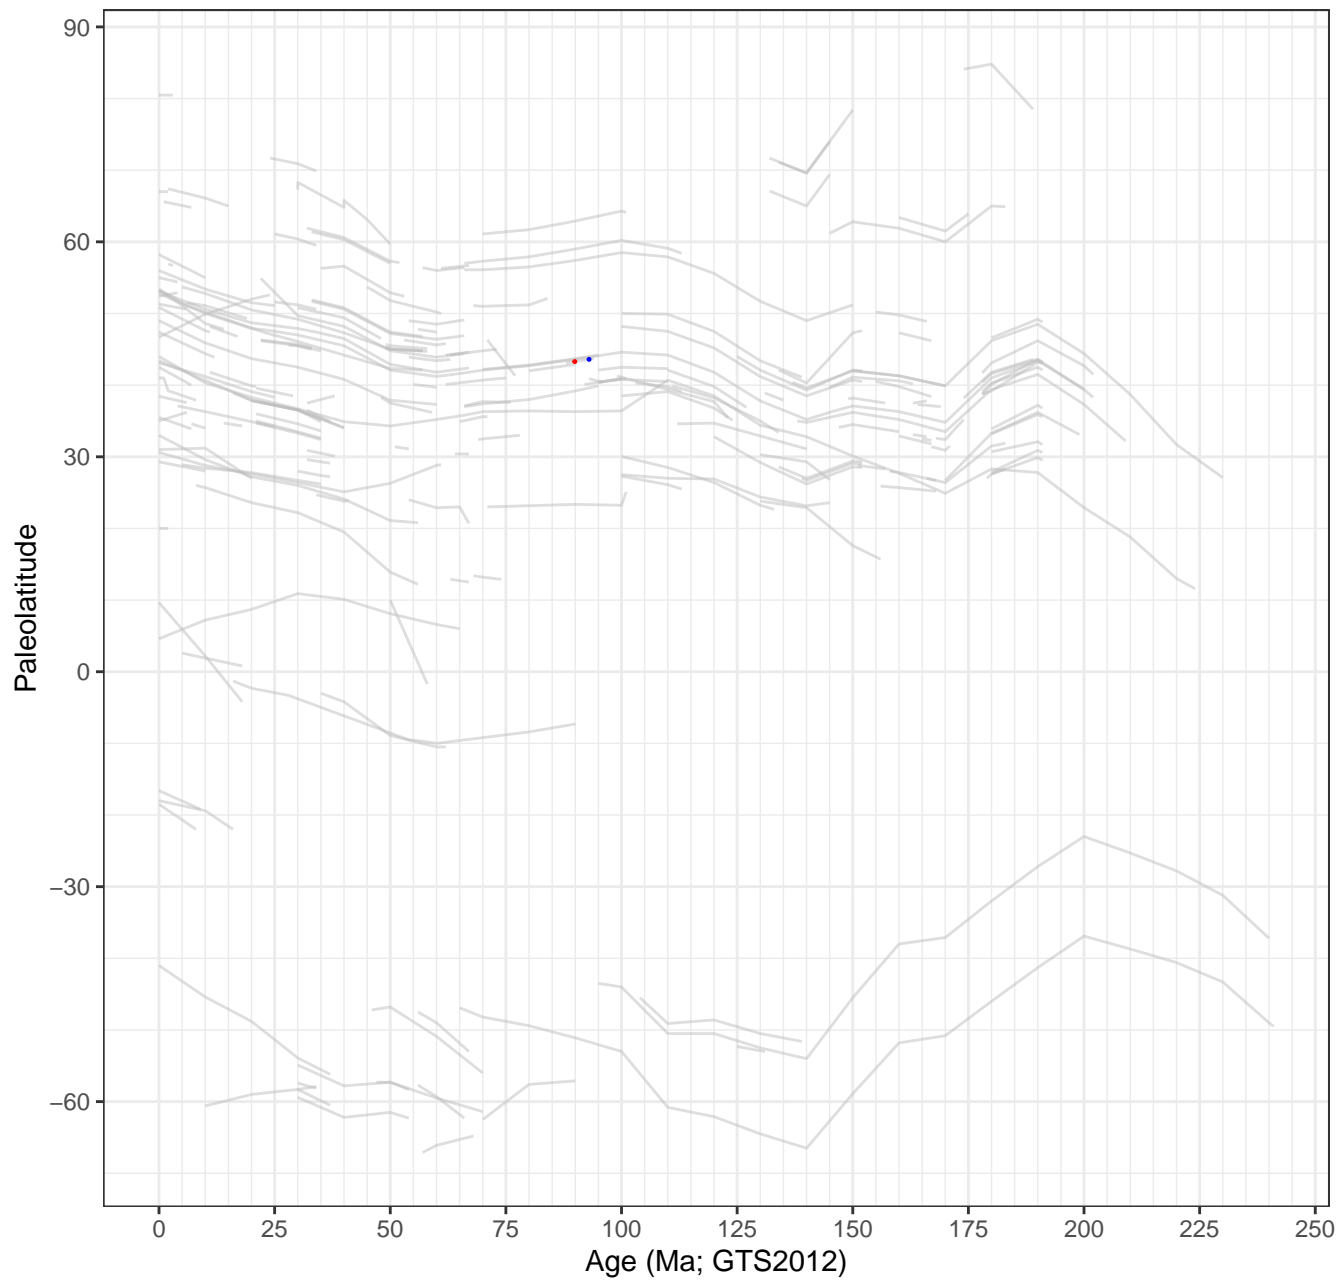

Supplement: Supplementary file 1604 [file Hystrichosphaeridium conispiniferum.pdf › Supplement/Supplement 2/Species 1914 plots/Hystrichosphaeridium conispiniferum.pdf]

# Species *Hystrichosphaeridium dowlingii*

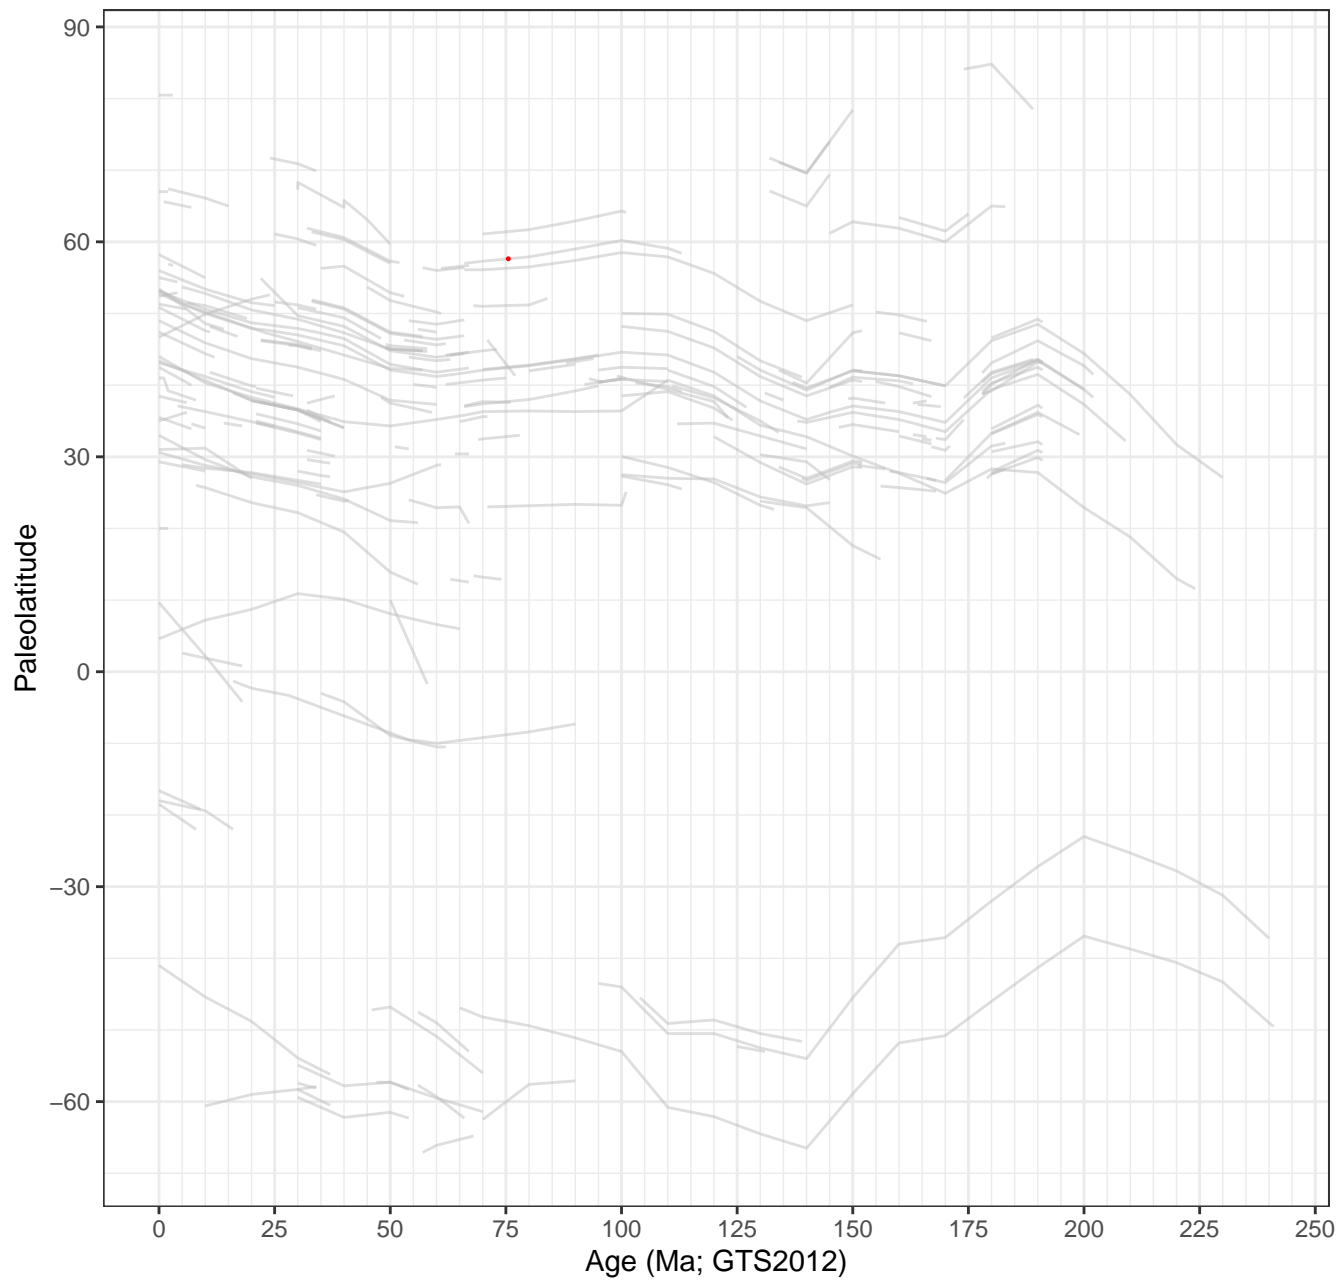

Supplement: Supplementary file 1605 [file Hystrichosphaeridium dowlingii.pdf › Supplement/Supplement 2/Species 1914 plots/Hystrichosphaeridium dowlingii.pdf]

# Species *Hystrichosphaeridium palmatum*

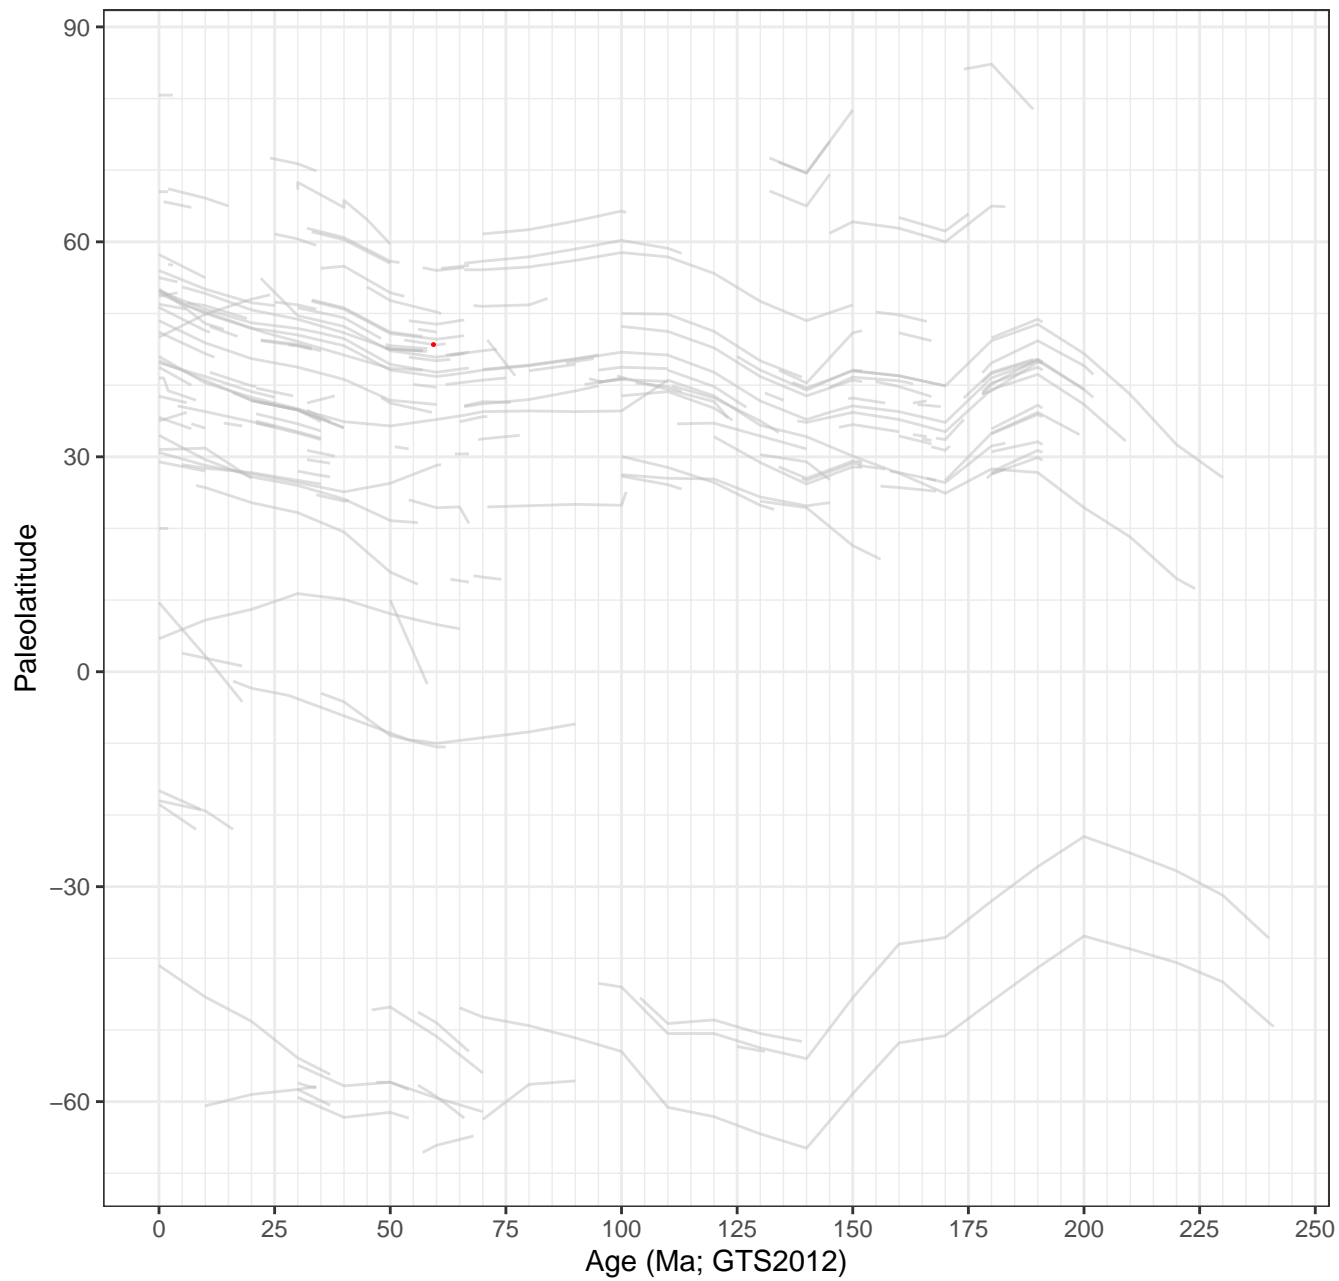

Supplement: Supplementary file 1606 [file Hystrichosphaeridium palmatum.pdf › Supplement/Supplement 2/Species 1914 plots/Hystrichosphaeridium palmatum.pdf]

# Species *Hystrichosphaeridium petilum*

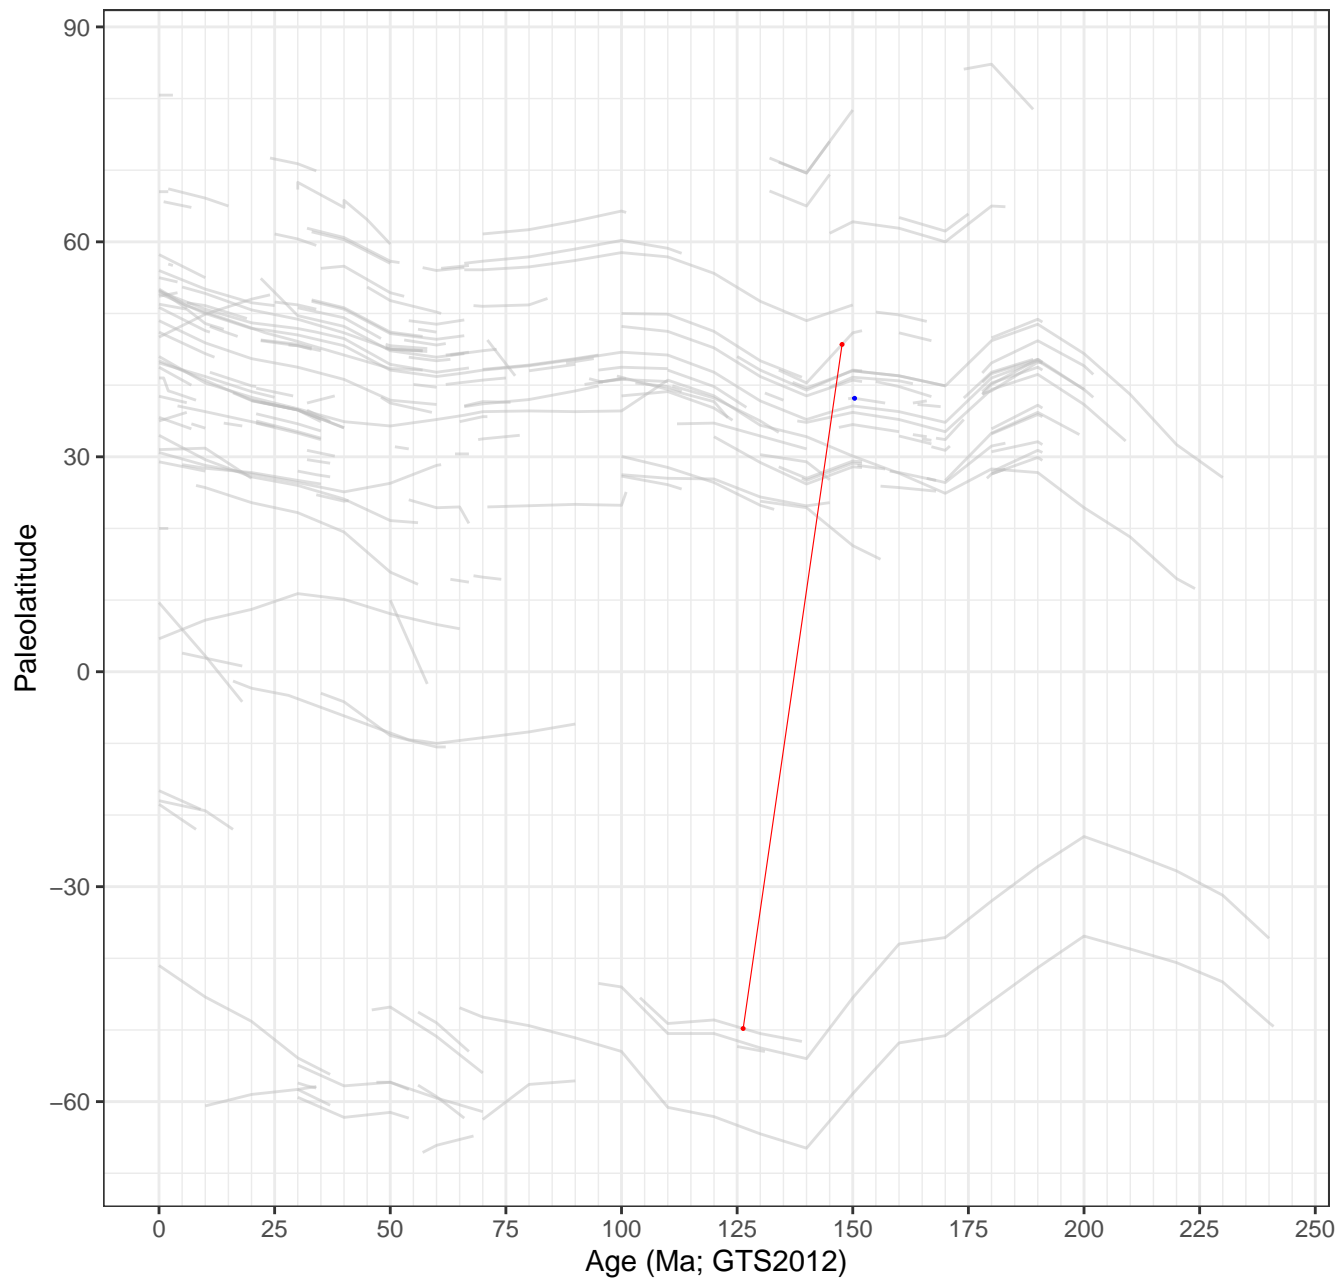

Supplement: Supplementary file 1607 [file Hystrichosphaeridium petilum.pdf › Supplement/Supplement 2/Species 1914 plots/Hystrichosphaeridium petilum.pdf]

# Species *Hystrichosphaeridium recurvatum*

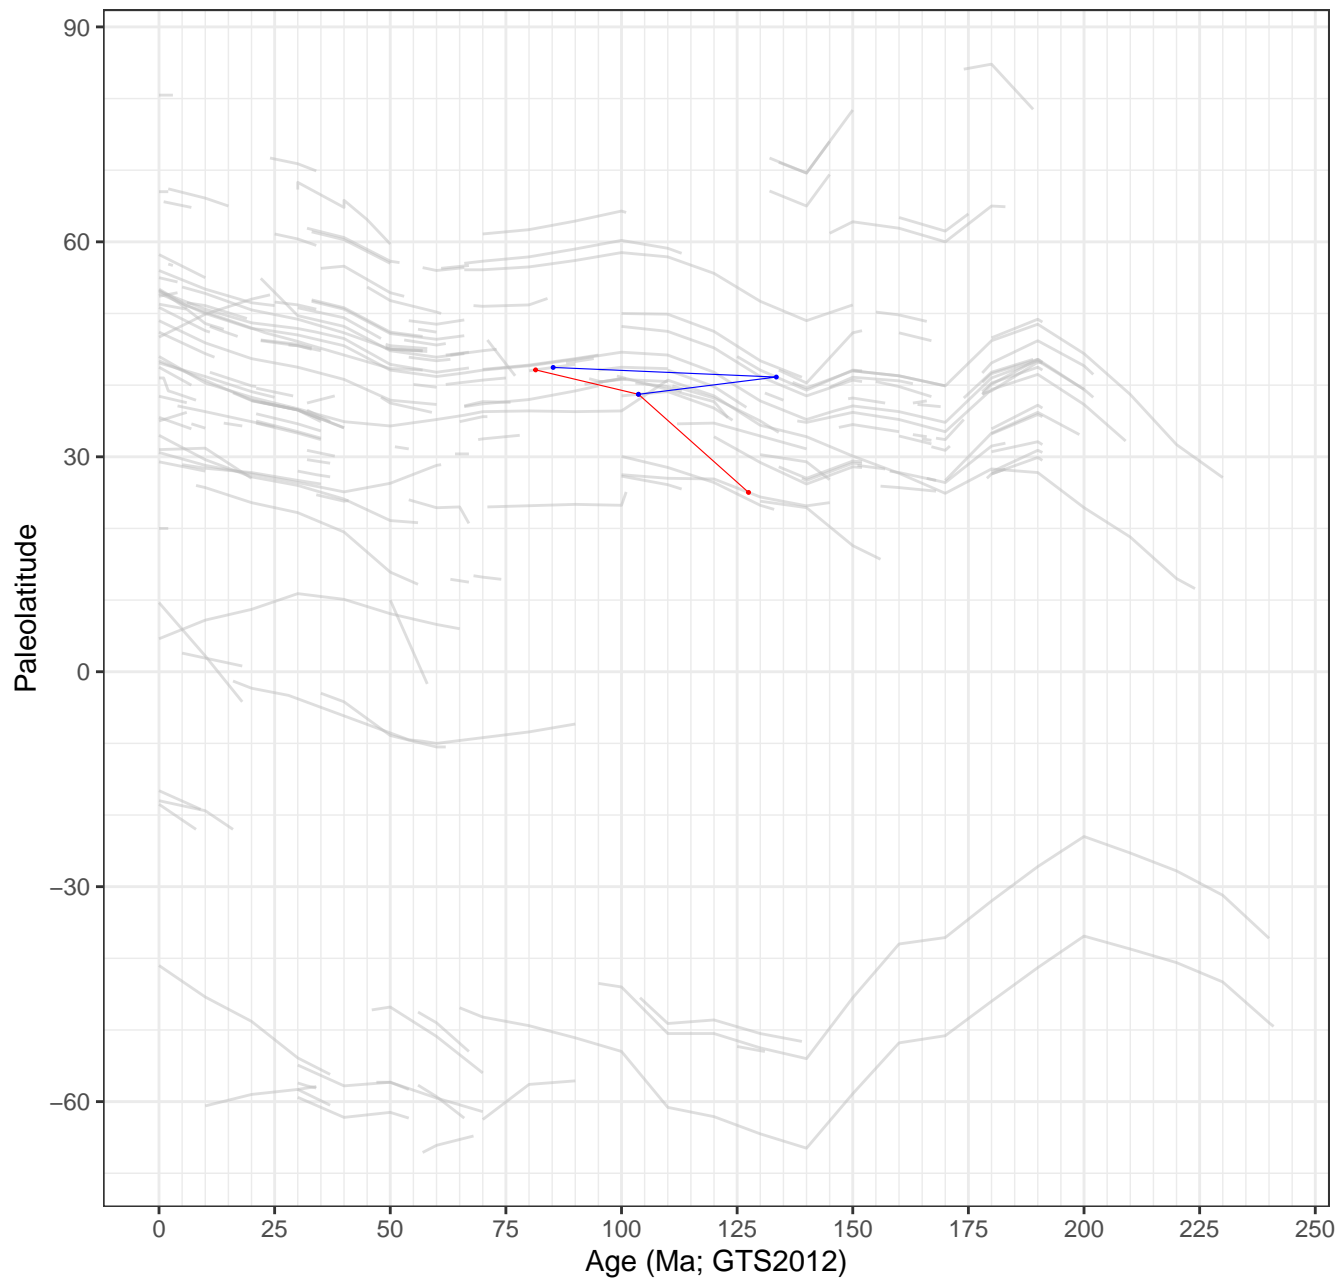

Supplement: Supplementary file 1608 [file Hystrichosphaeridium recurvatum.pdf › Supplement/Supplement 2/Species 1914 plots/Hystrichosphaeridium recurvatum.pdf]

# Species *Hystrichosphaeridium salpingophorum*

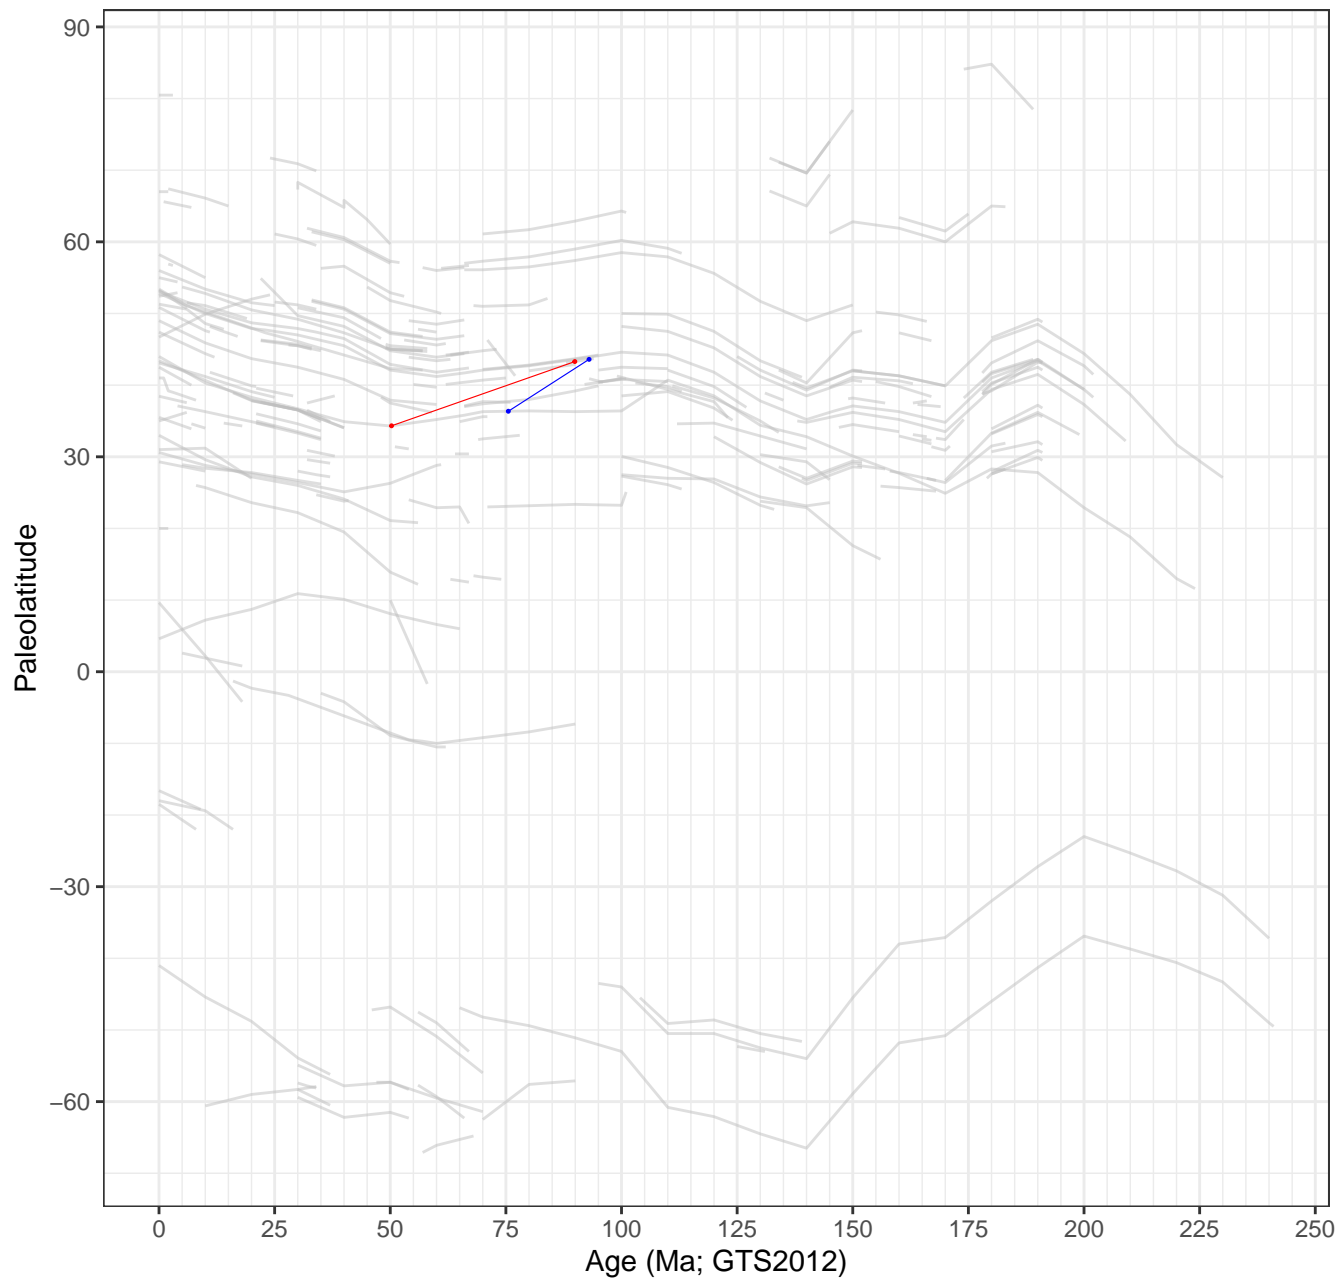

Supplement: Supplementary file 1609 [file Hystrichosphaeridium salpingophorum.pdf › Supplement/Supplement 2/Species 1914 plots/Hystrichosphaeridium salpingophorum.pdf]

# Species *Hystrichosphaeridium truswelliae*

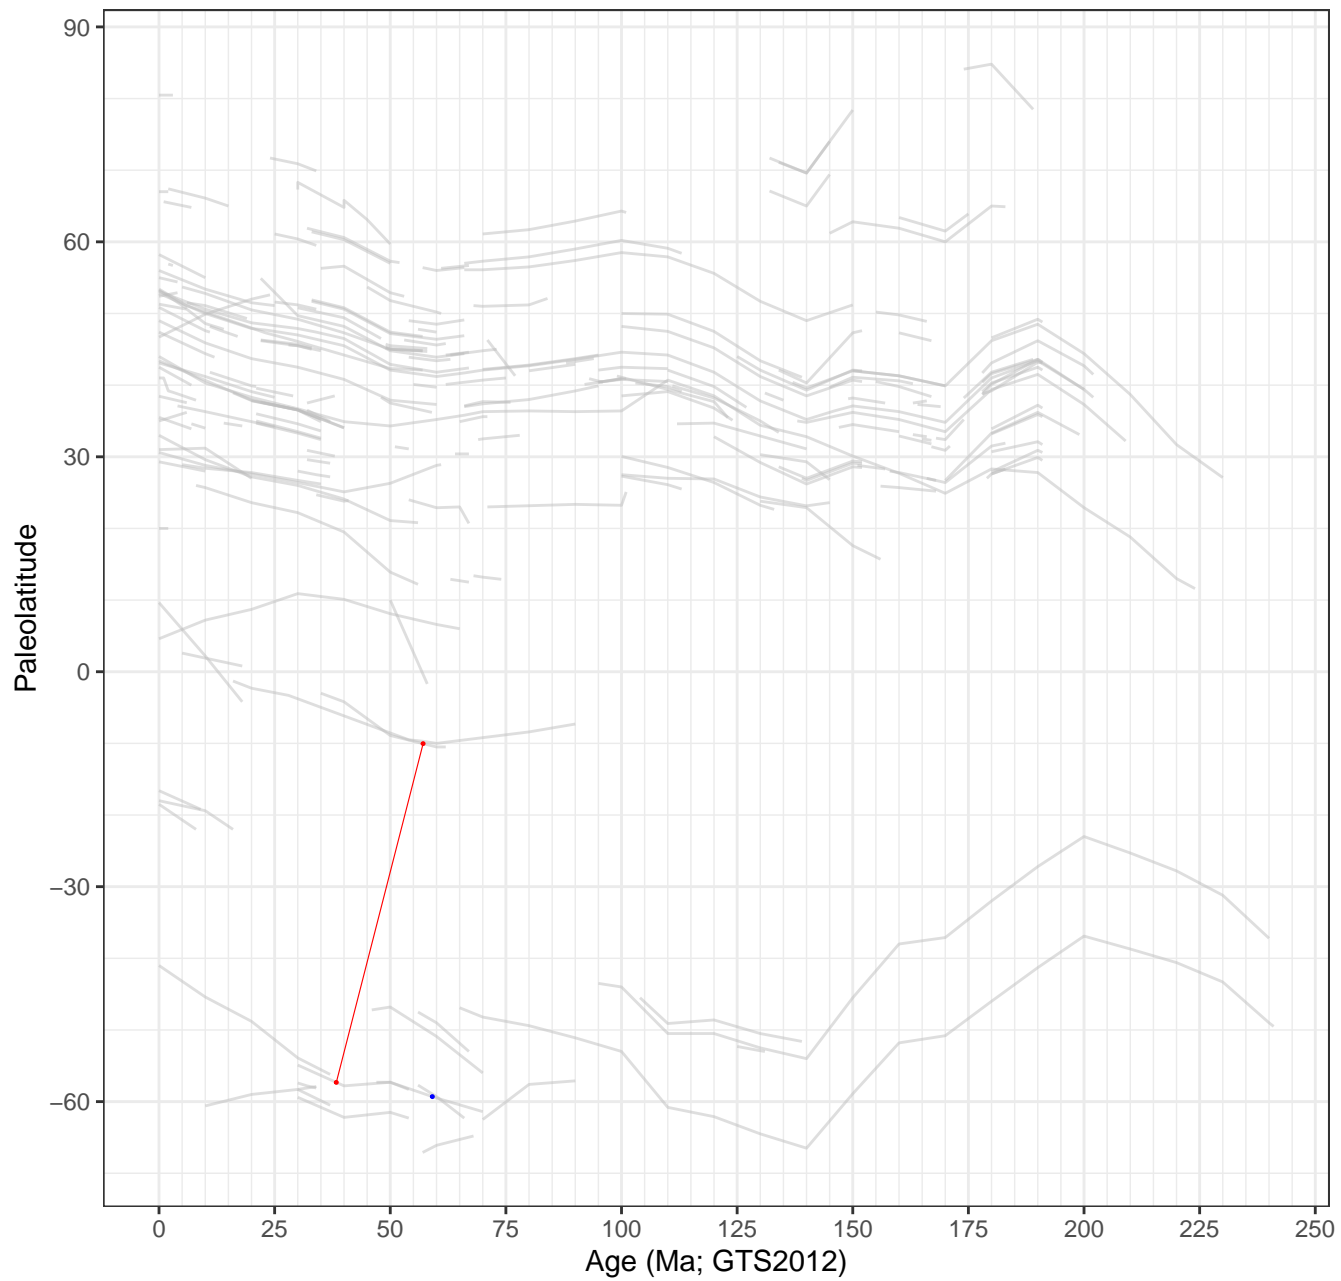

Supplement: Supplementary file 1610 [file Hystrichosphaeridium truswelliae.pdf › Supplement/Supplement 2/Species 1914 plots/Hystrichosphaeridium truswelliae.pdf]

# Species *Hystrichosphaeridium tubiferum*

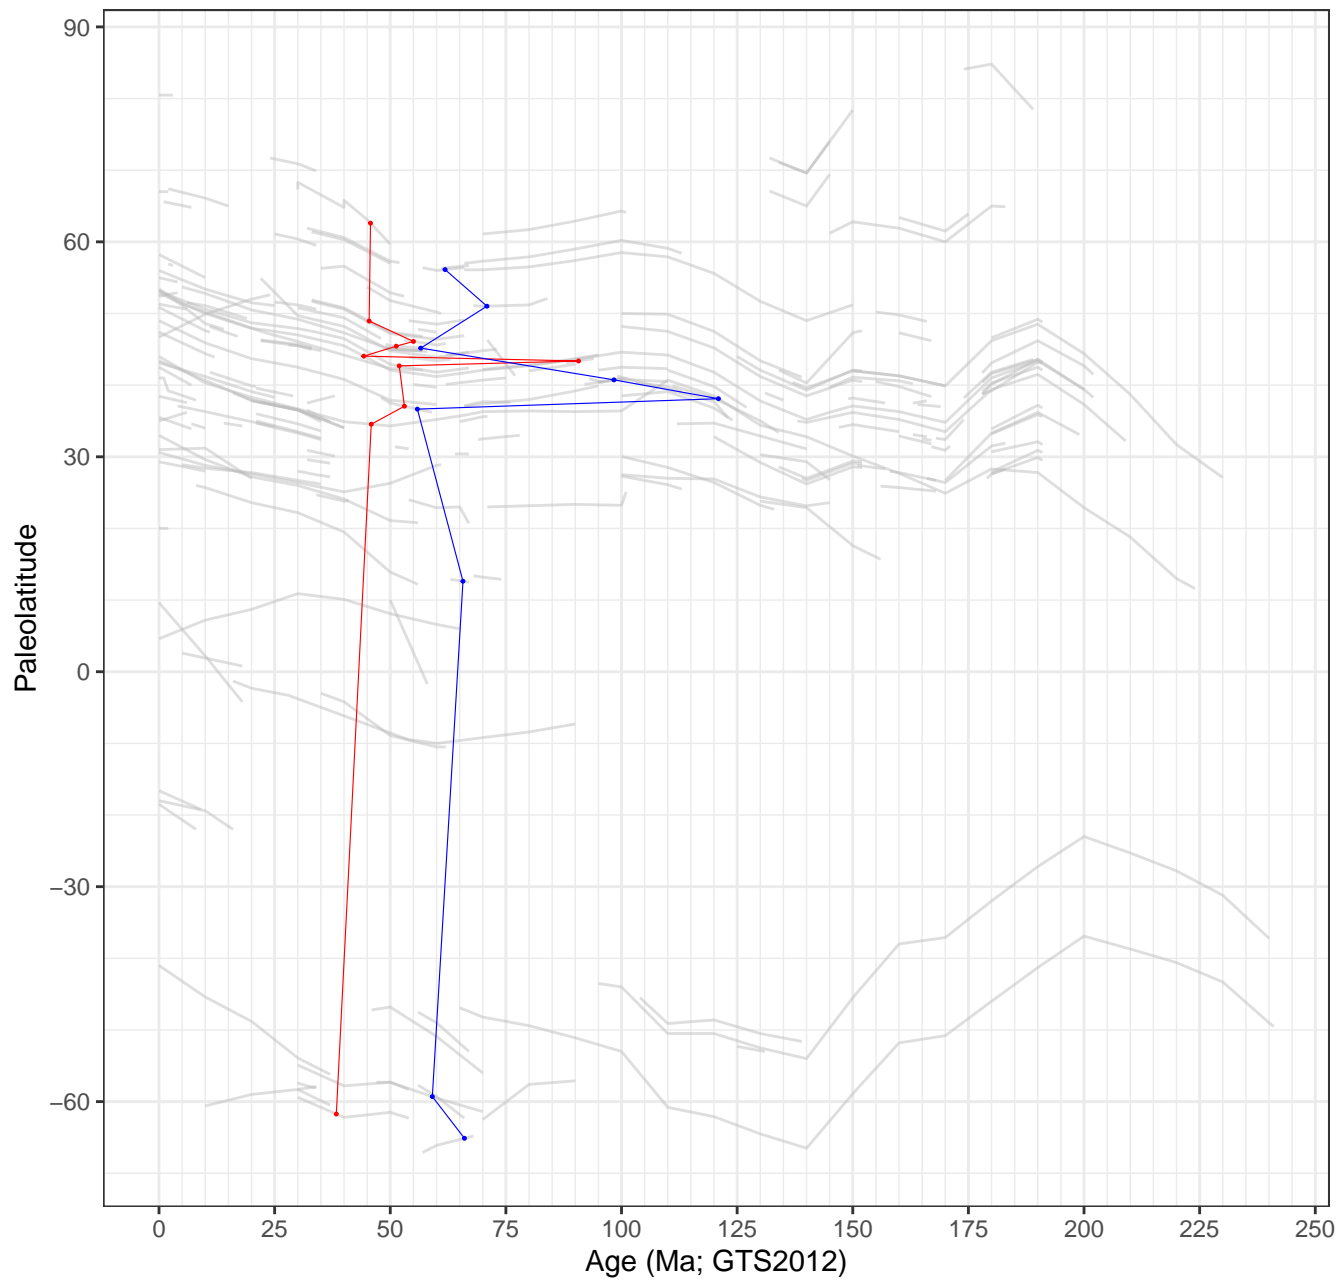

Supplement: Supplementary file 1611 [file Hystrichosphaeridium tubiferum.pdf › Supplement/Supplement 2/Species 1914 plots/Hystrichosphaeridium tubiferum.pdf]

# Species *Hystrichosphaerina orbifera*

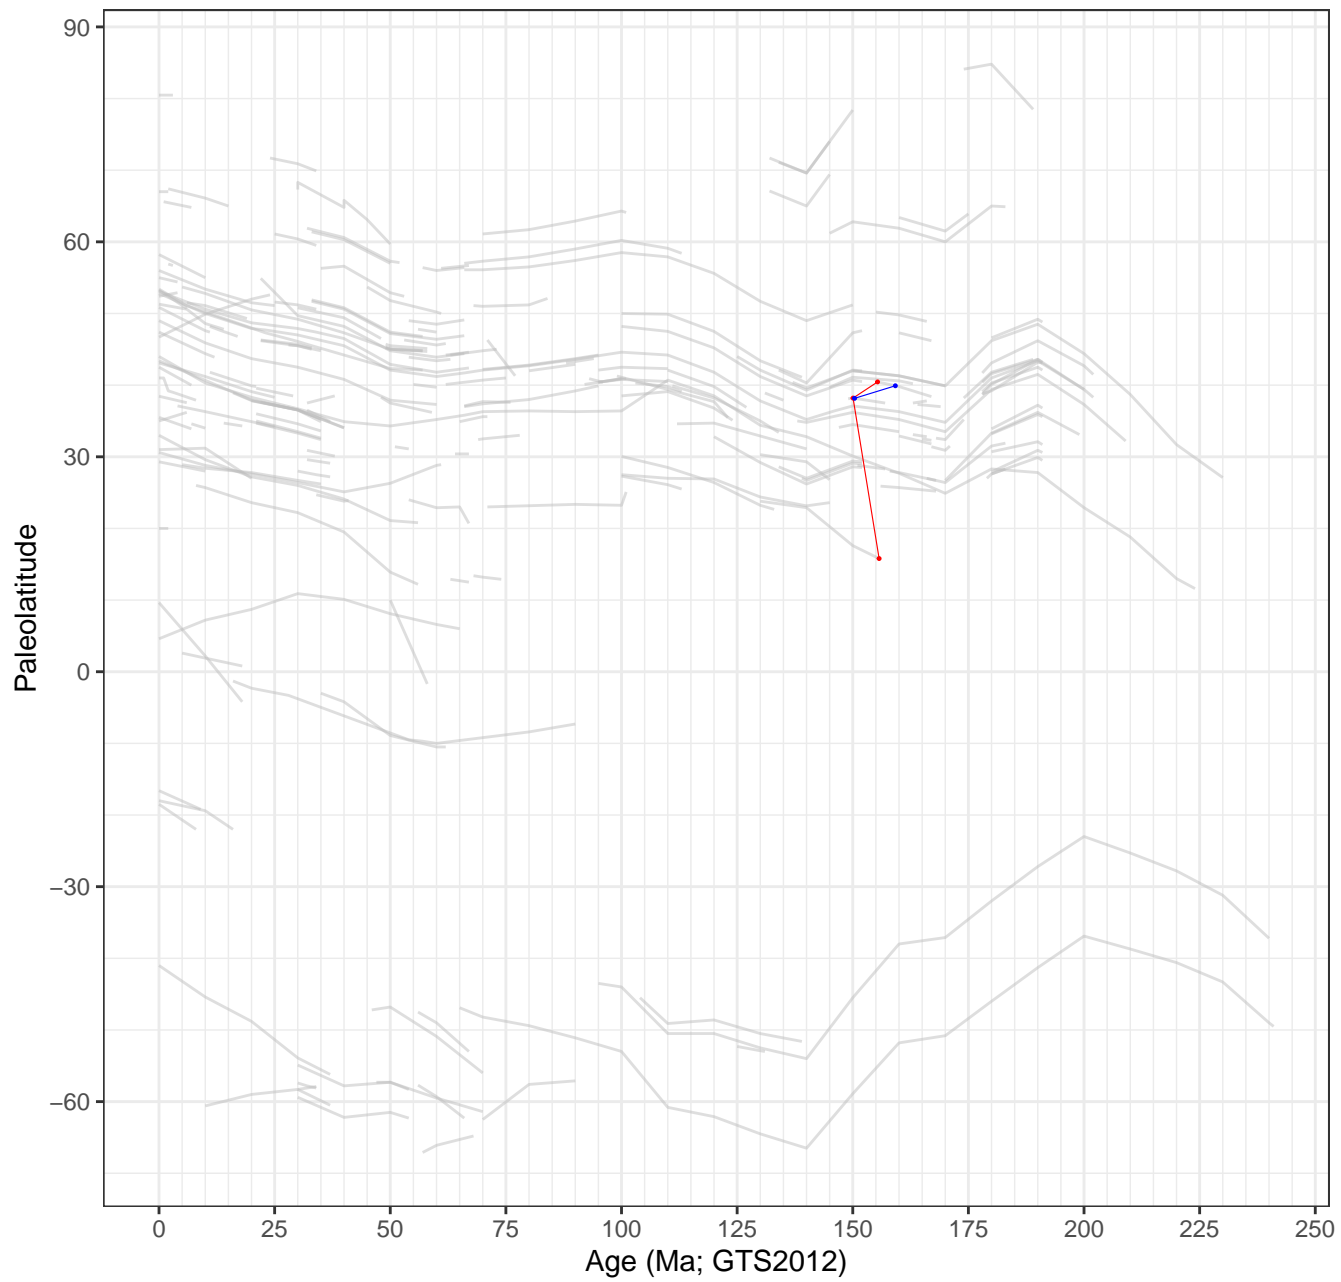

Supplement: Supplementary file 1612 [file Hystrichosphaerina orbifera.pdf › Supplement/Supplement 2/Species 1914 plots/Hystrichosphaerina orbifera.pdf]

# Species *Hystrichosphaerina schindewolfii*

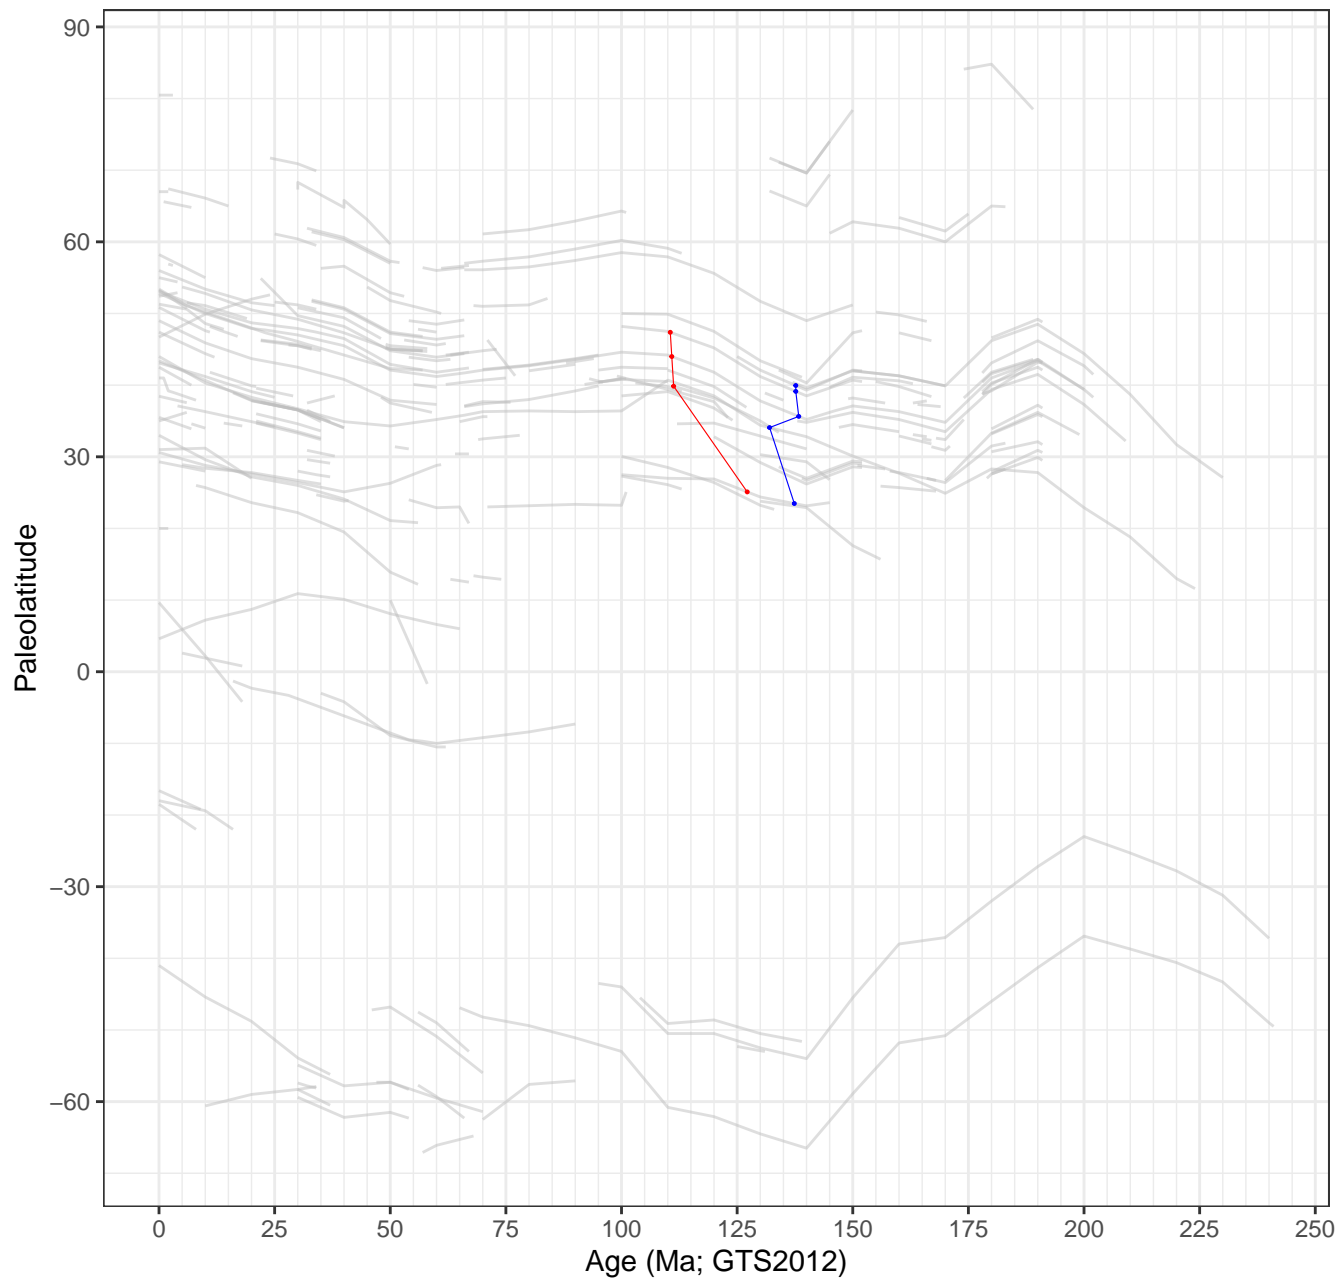

Supplement: Supplementary file 1613 [file Hystrichosphaerina schindewolfii.pdf › Supplement/Supplement 2/Species 1914 plots/Hystrichosphaerina schindewolfii.pdf]

# Species *Hystriosphraeropsis complanata*

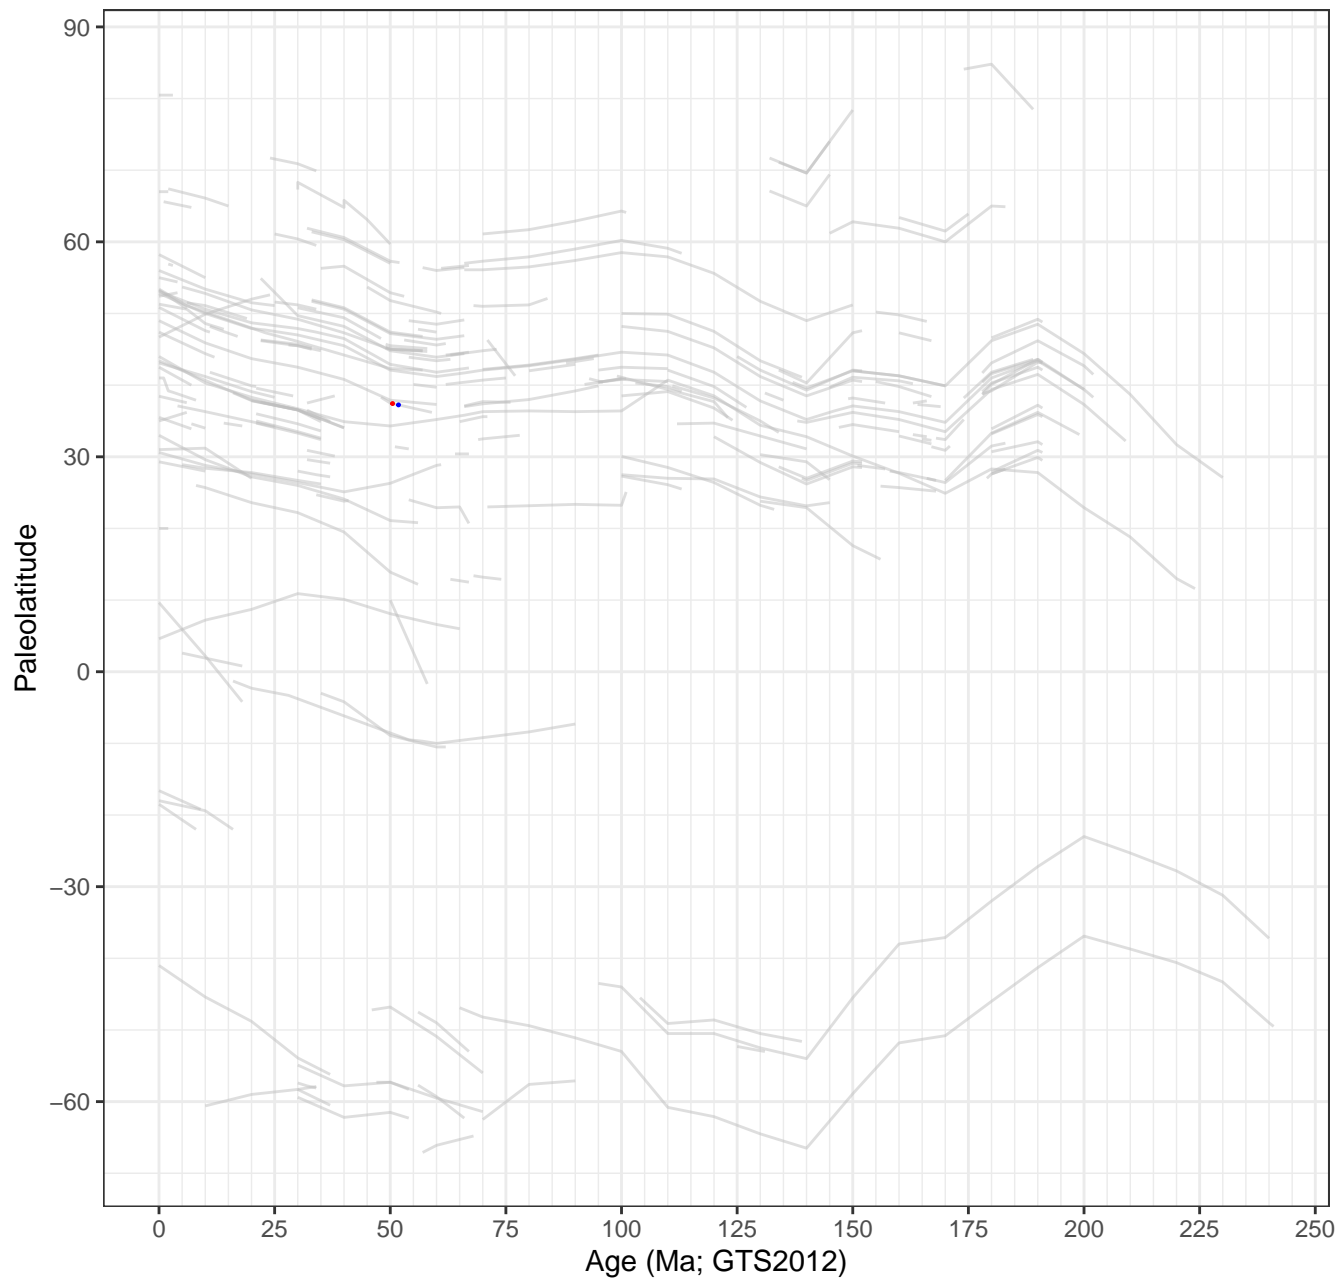

Supplement: Supplementary file 1614 [file Hystrichosphaeropsis complanata.pdf › Supplement/Supplement 2/Species 1914 plots/Hystrichosphaeropsis complanata.pdf]

# Species *Hystrichosphaeropsis costae*

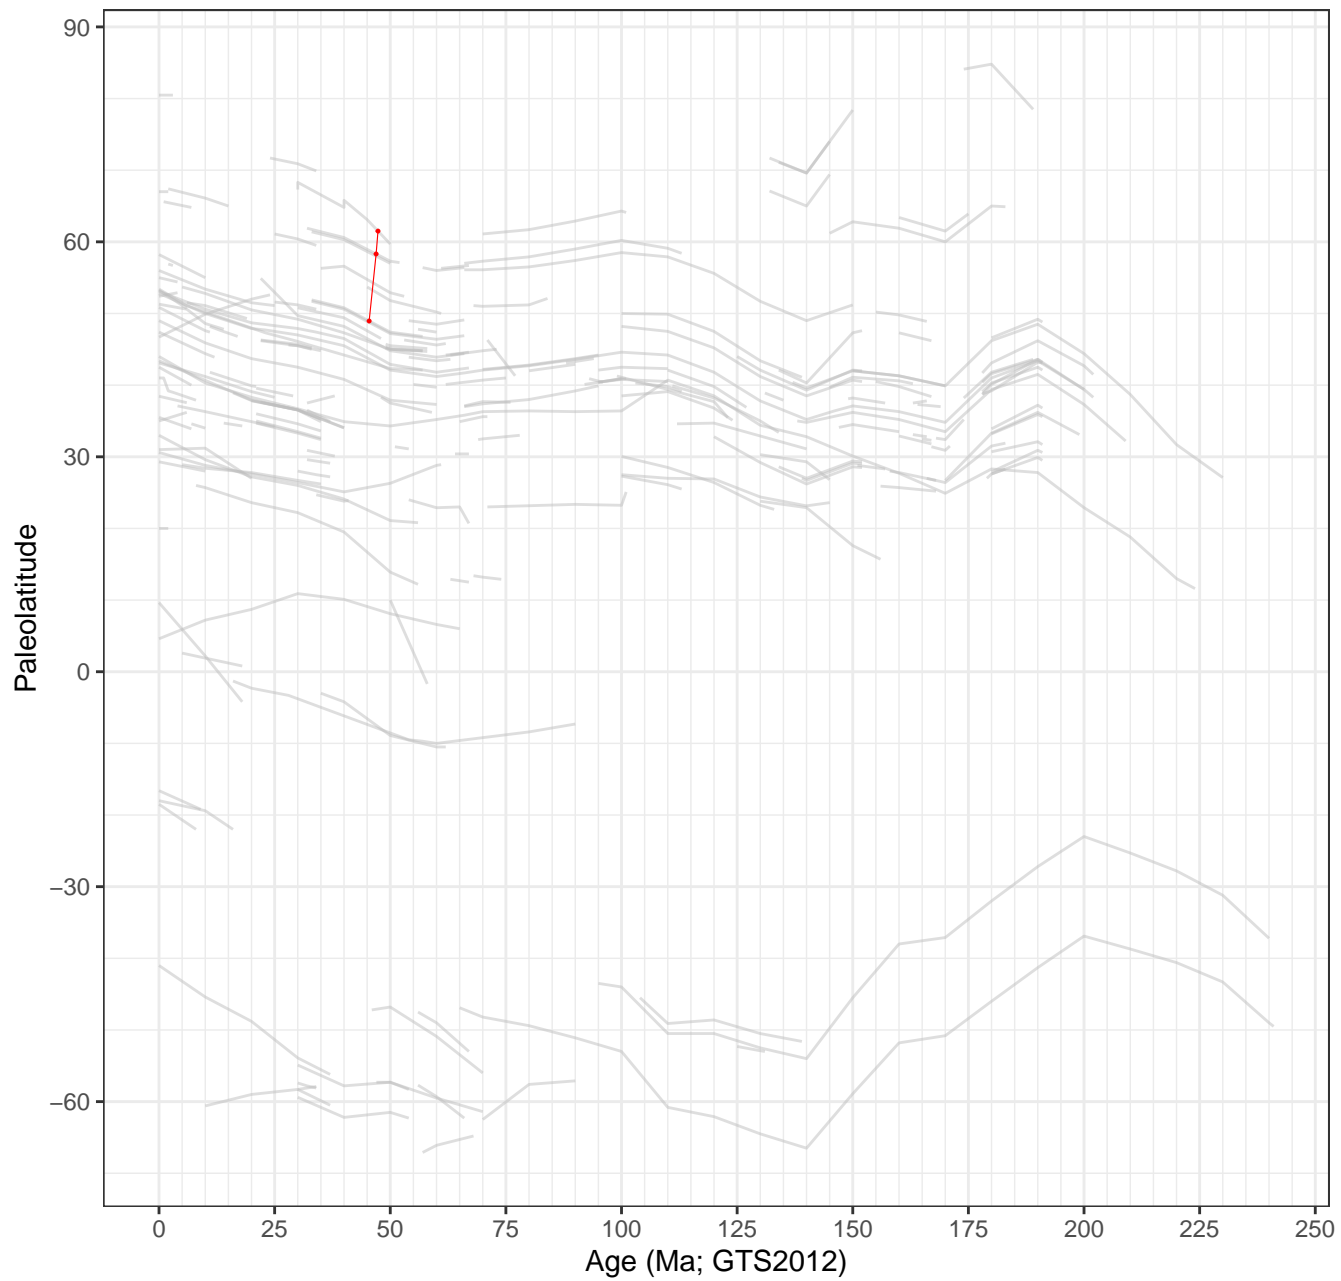

Supplement: Supplementary file 1615 [file Hystrichosphaeropsis costae.pdf › Supplement/Supplement 2/Species 1914 plots/Hystrichosphaeropsis costae.pdf]

# Species *Hystrichosphaeropsis galeata*

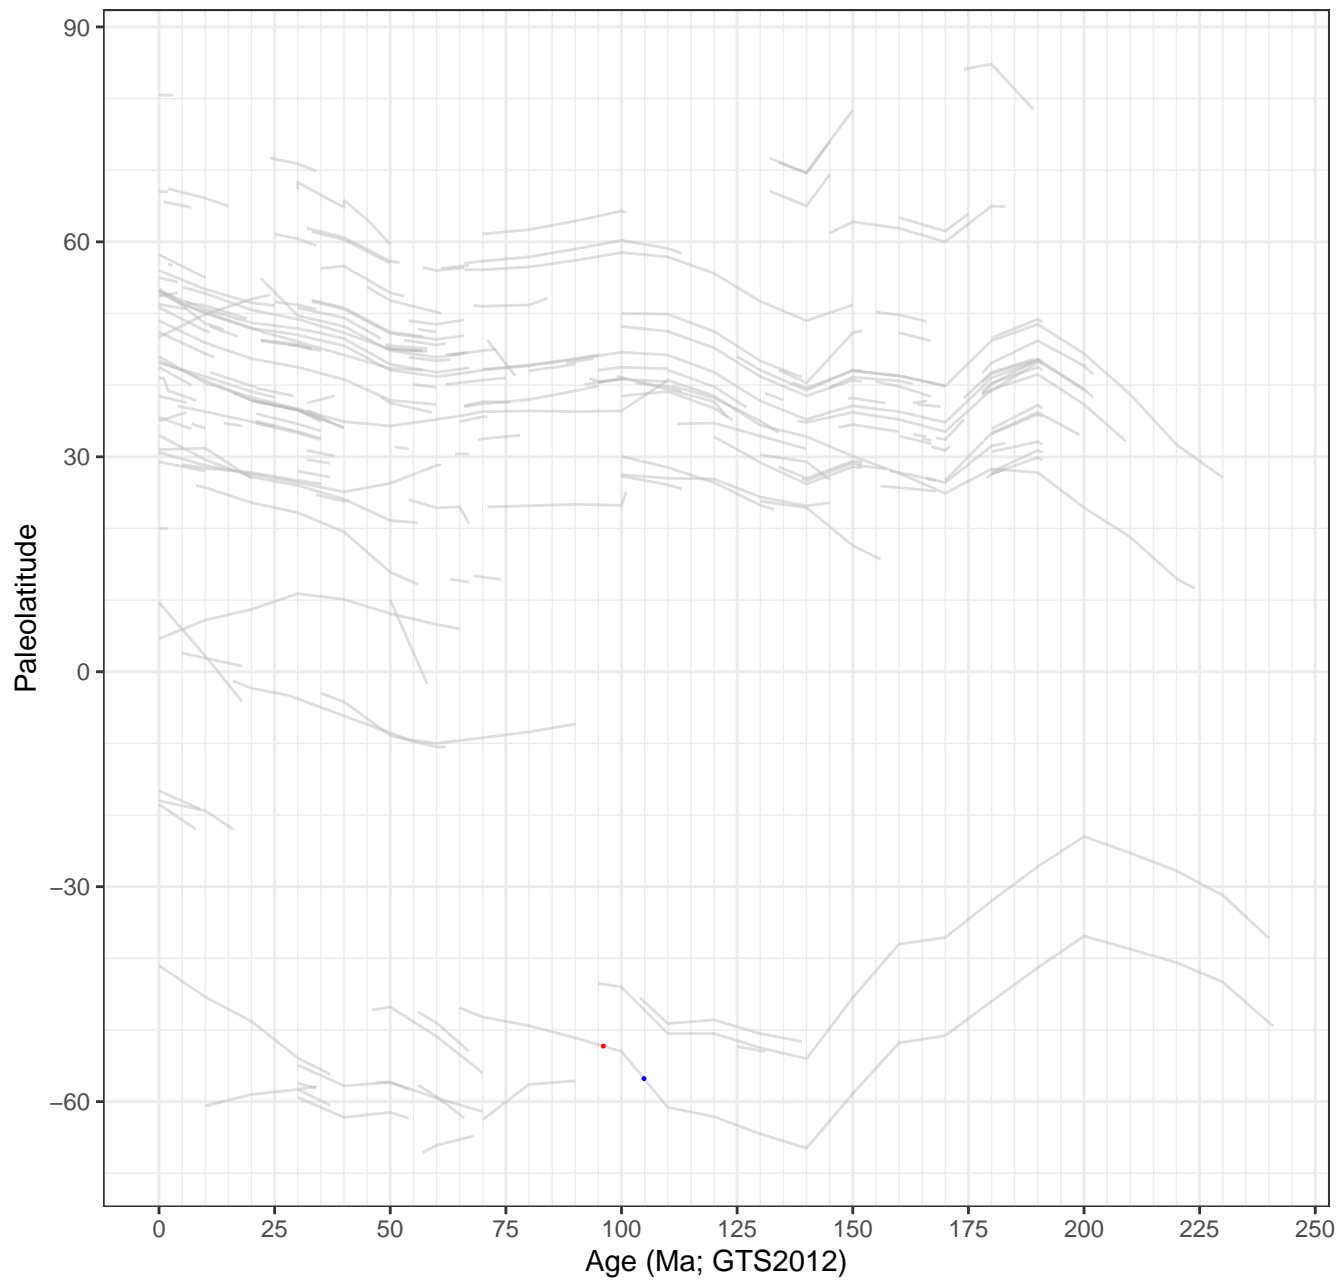

Supplement: Supplementary file 1616 [file Hystrichosphaeropsis galeata.pdf › Supplement/Supplement 2/Species 1914 plots/Hystrichosphaeropsis galeata.pdf]

# Species *Hystrichosphaeropsis minimum*

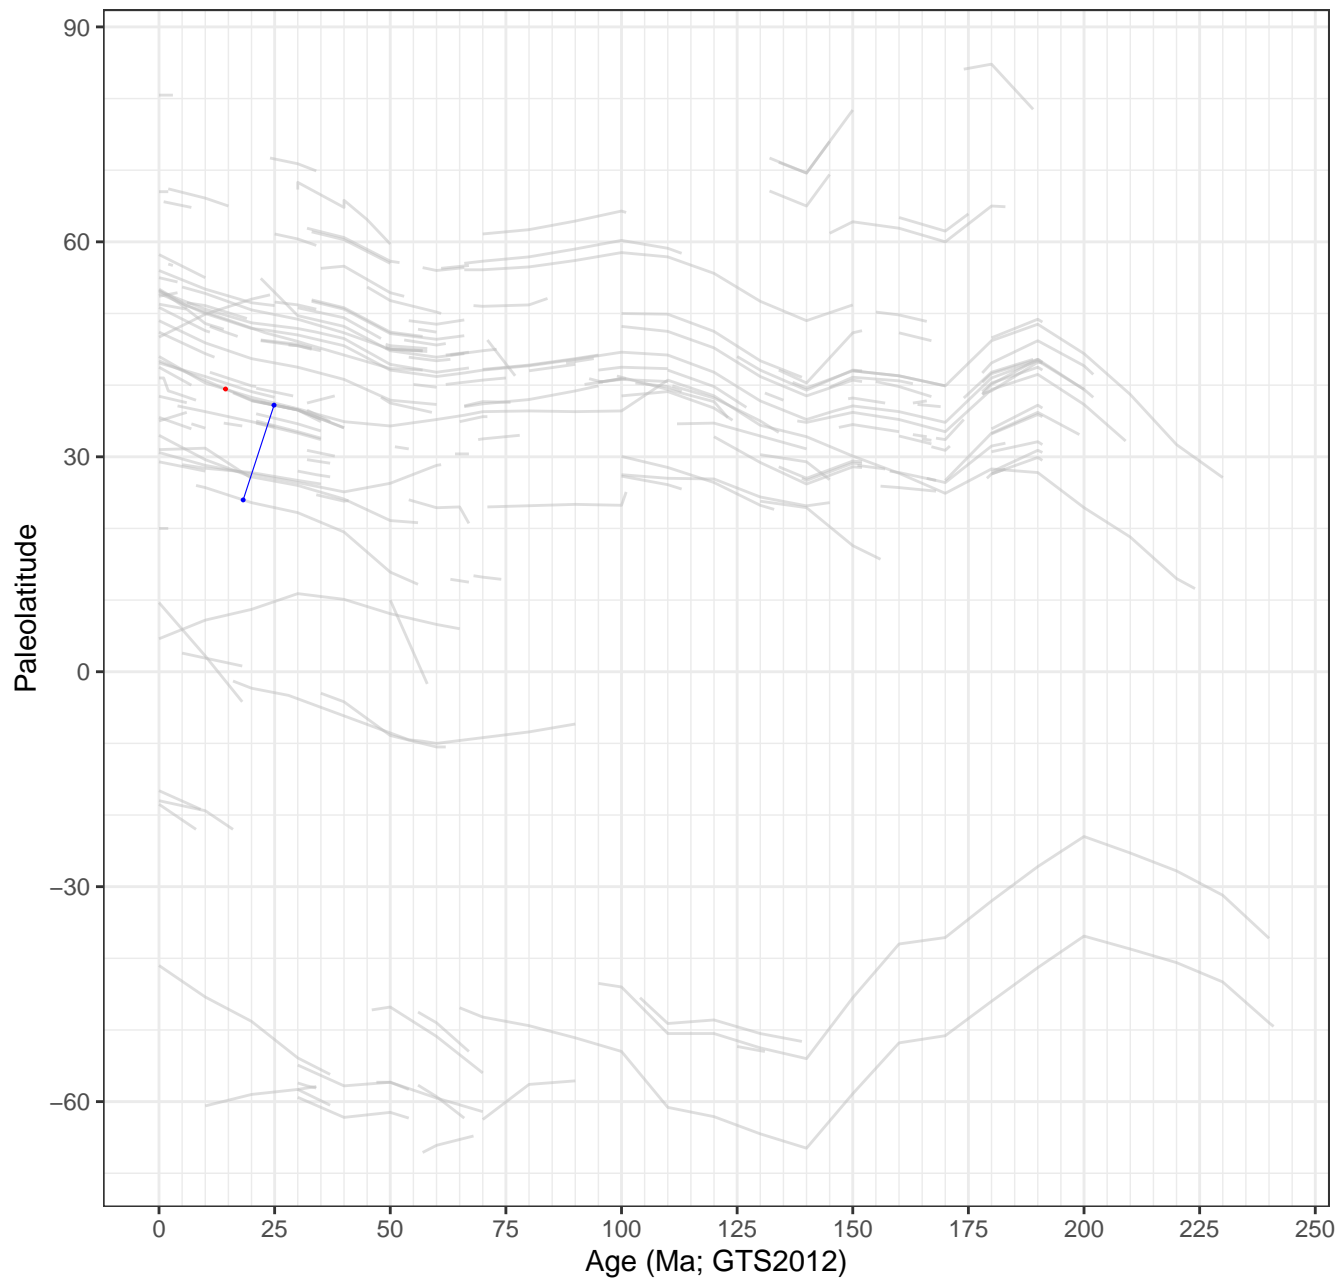

Supplement: Supplementary file 1617 [file Hystrichosphaeropsis minimum.pdf › Supplement/Supplement 2/Species 1914 plots/Hystrichosphaeropsis minimum.pdf]

# Species *Hystrichosphaeropsis obscura*

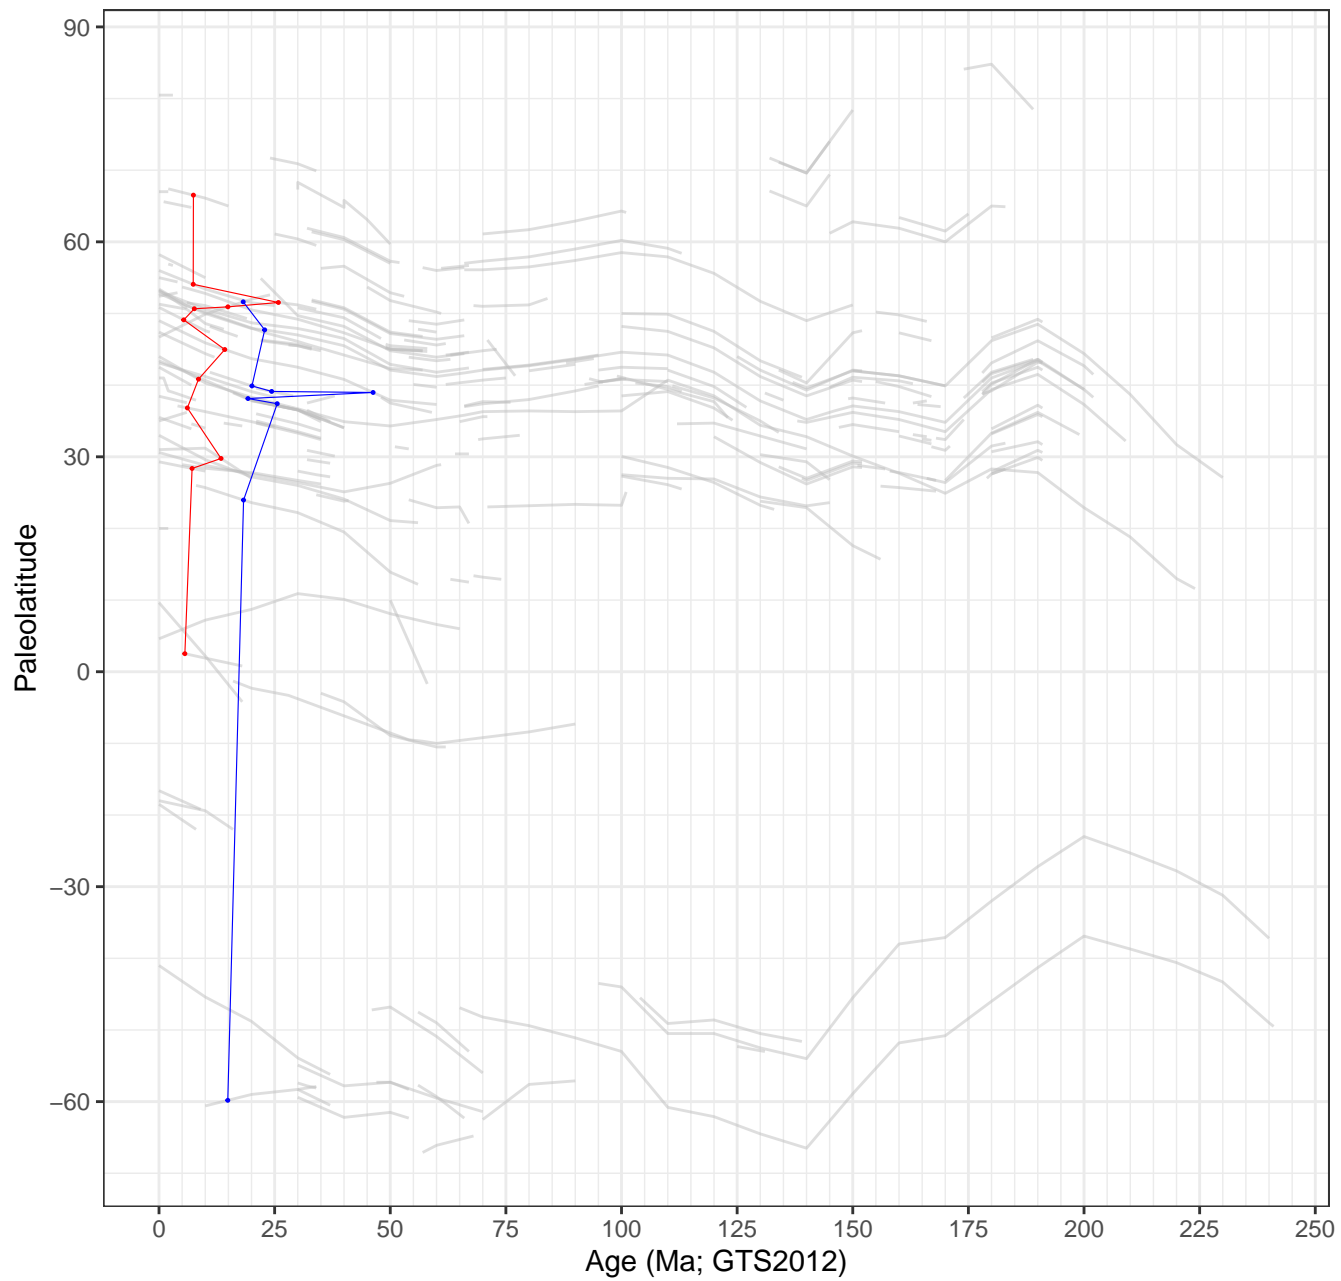

Supplement: Supplementary file 1618 [file Hystrichosphaeropsis obscura.pdf › Supplement/Supplement 2/Species 1914 plots/Hystrichosphaeropsis obscura.pdf]

# Species *Hystrichosphaeropsis ovum*

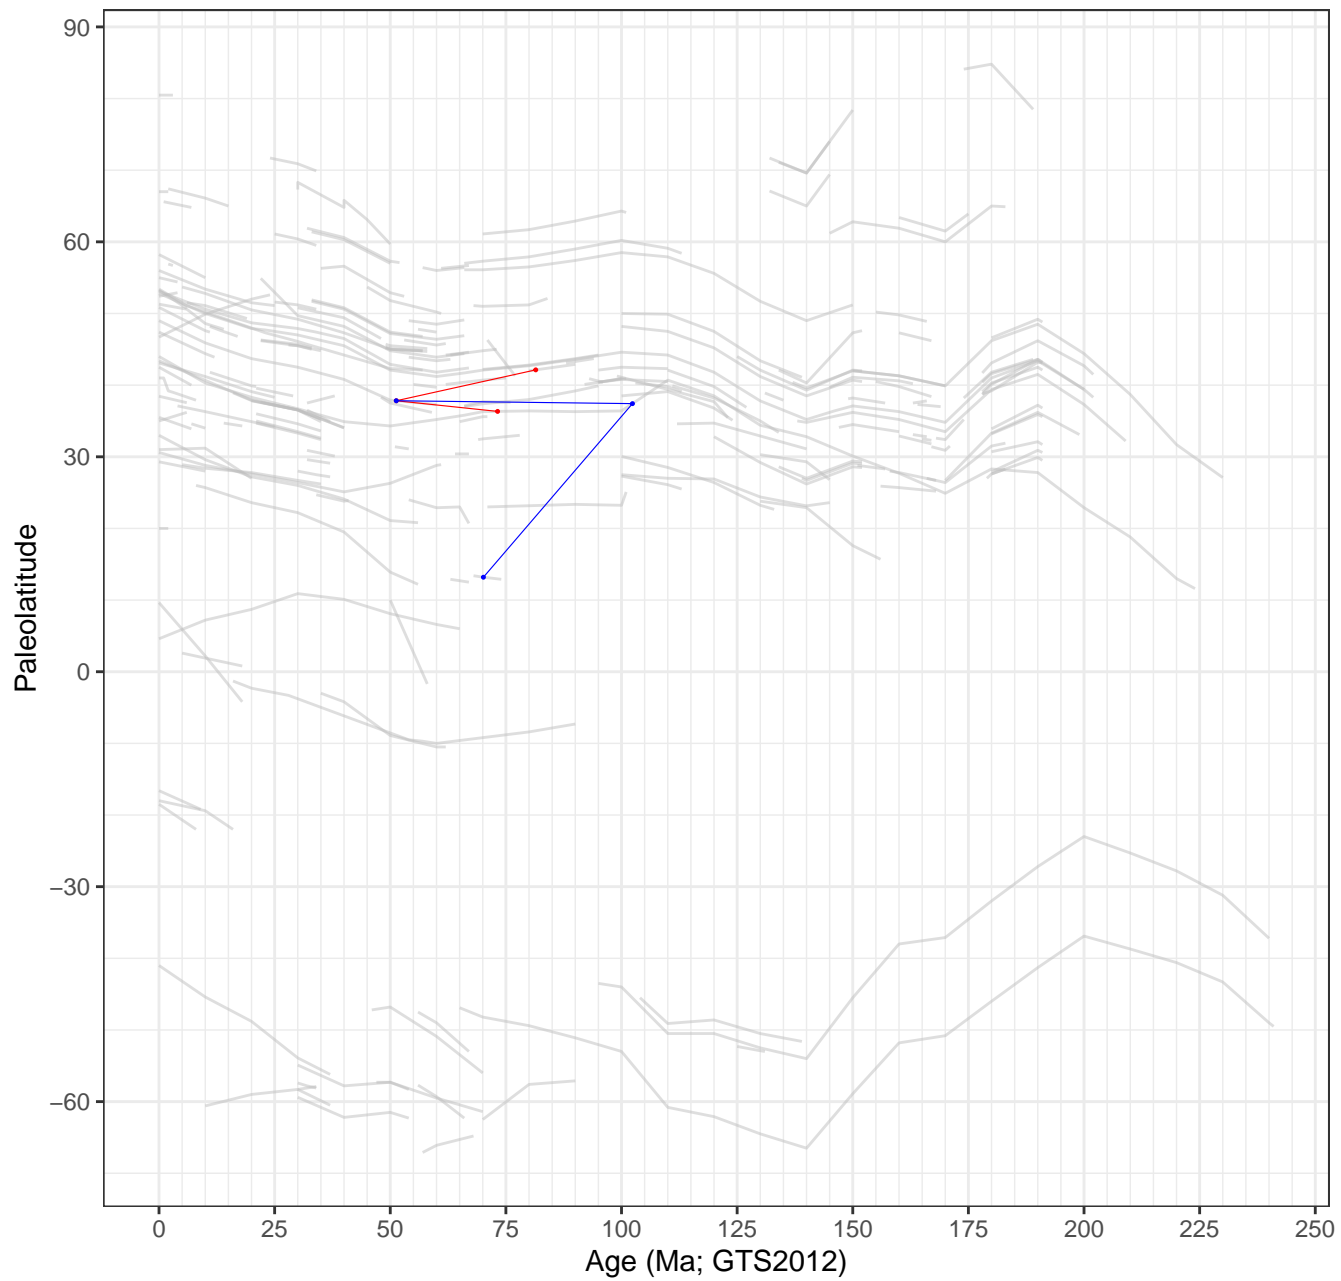

Supplement: Supplementary file 1619 [file Hystrichosphaeropsis ovum.pdf › Supplement/Supplement 2/Species 1914 plots/Hystrichosphaeropsis ovum.pdf]

# Species *Hystrichosphaeropsis perforata*

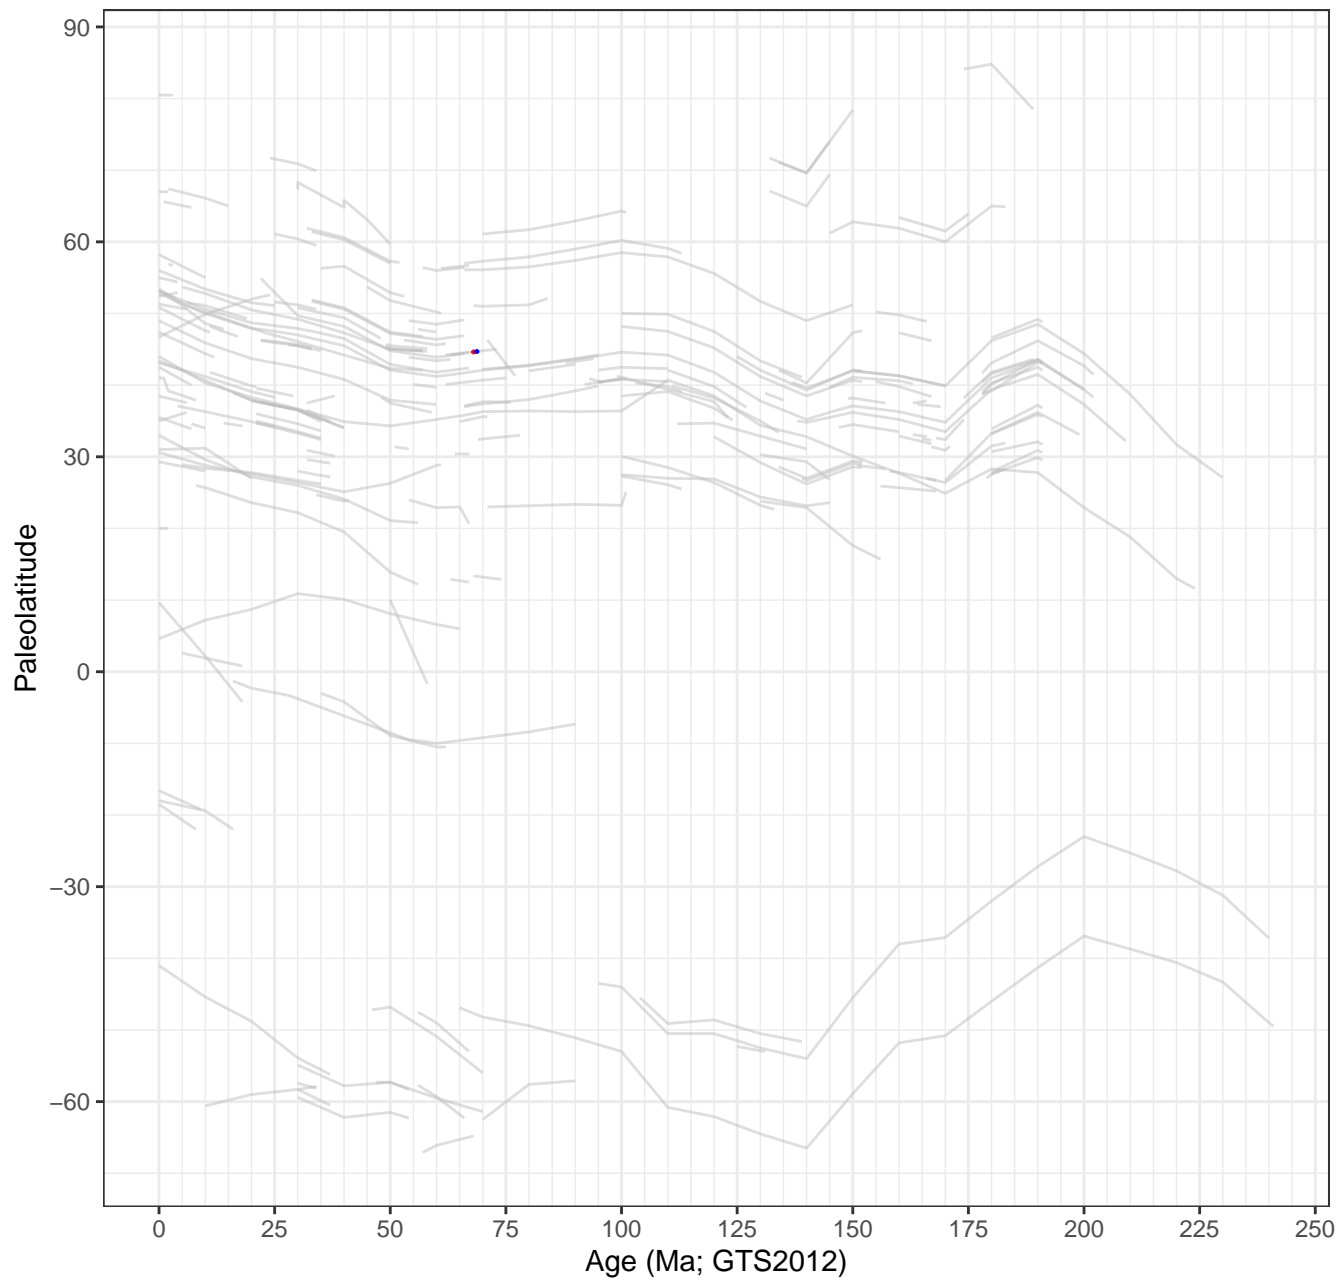

Supplement: Supplementary file 1620 [file Hystrichosphaeropsis perforata.pdf › Supplement/Supplement 2/Species 1914 plots/Hystrichosphaeropsis perforata.pdf]

# Species *Hystrichosphaeropsis quasicribrata*

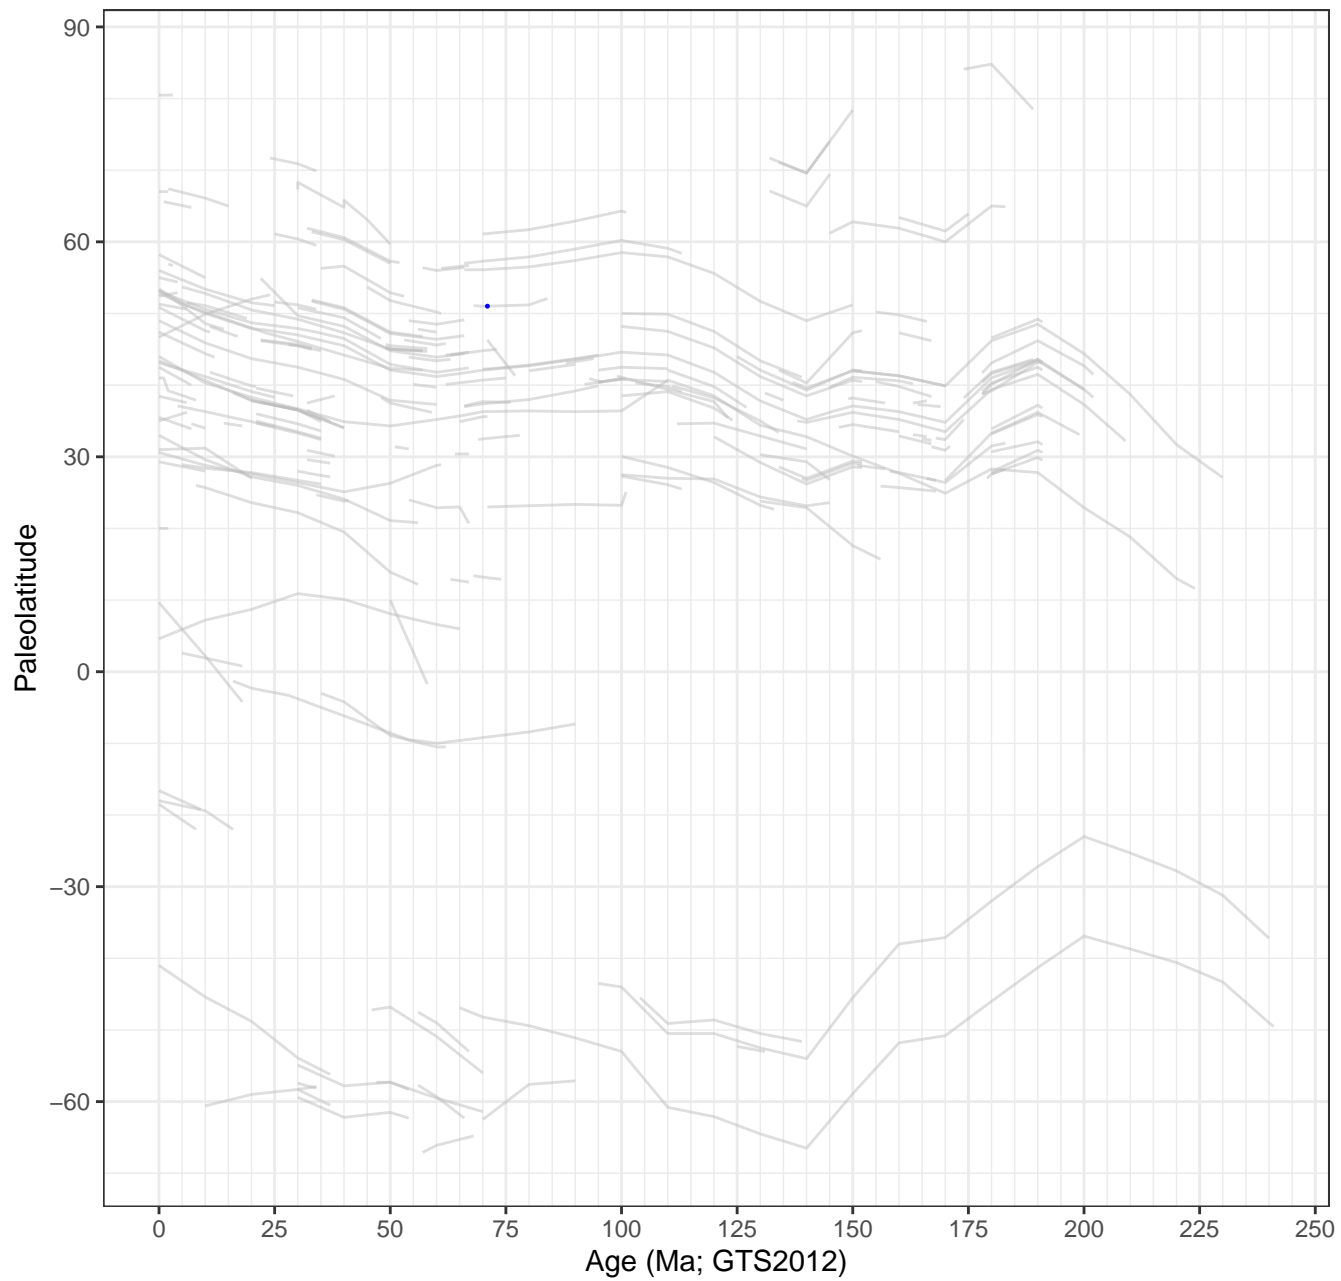

Supplement: Supplementary file 1621 [file Hystrichosphaeropsis quasicribrata.pdf › Supplement/Supplement 2/Species 1914 plots/Hystrichosphaeropsis quasicribrata.pdf]

# Species *Hystriosphaeopsis rectangularis*

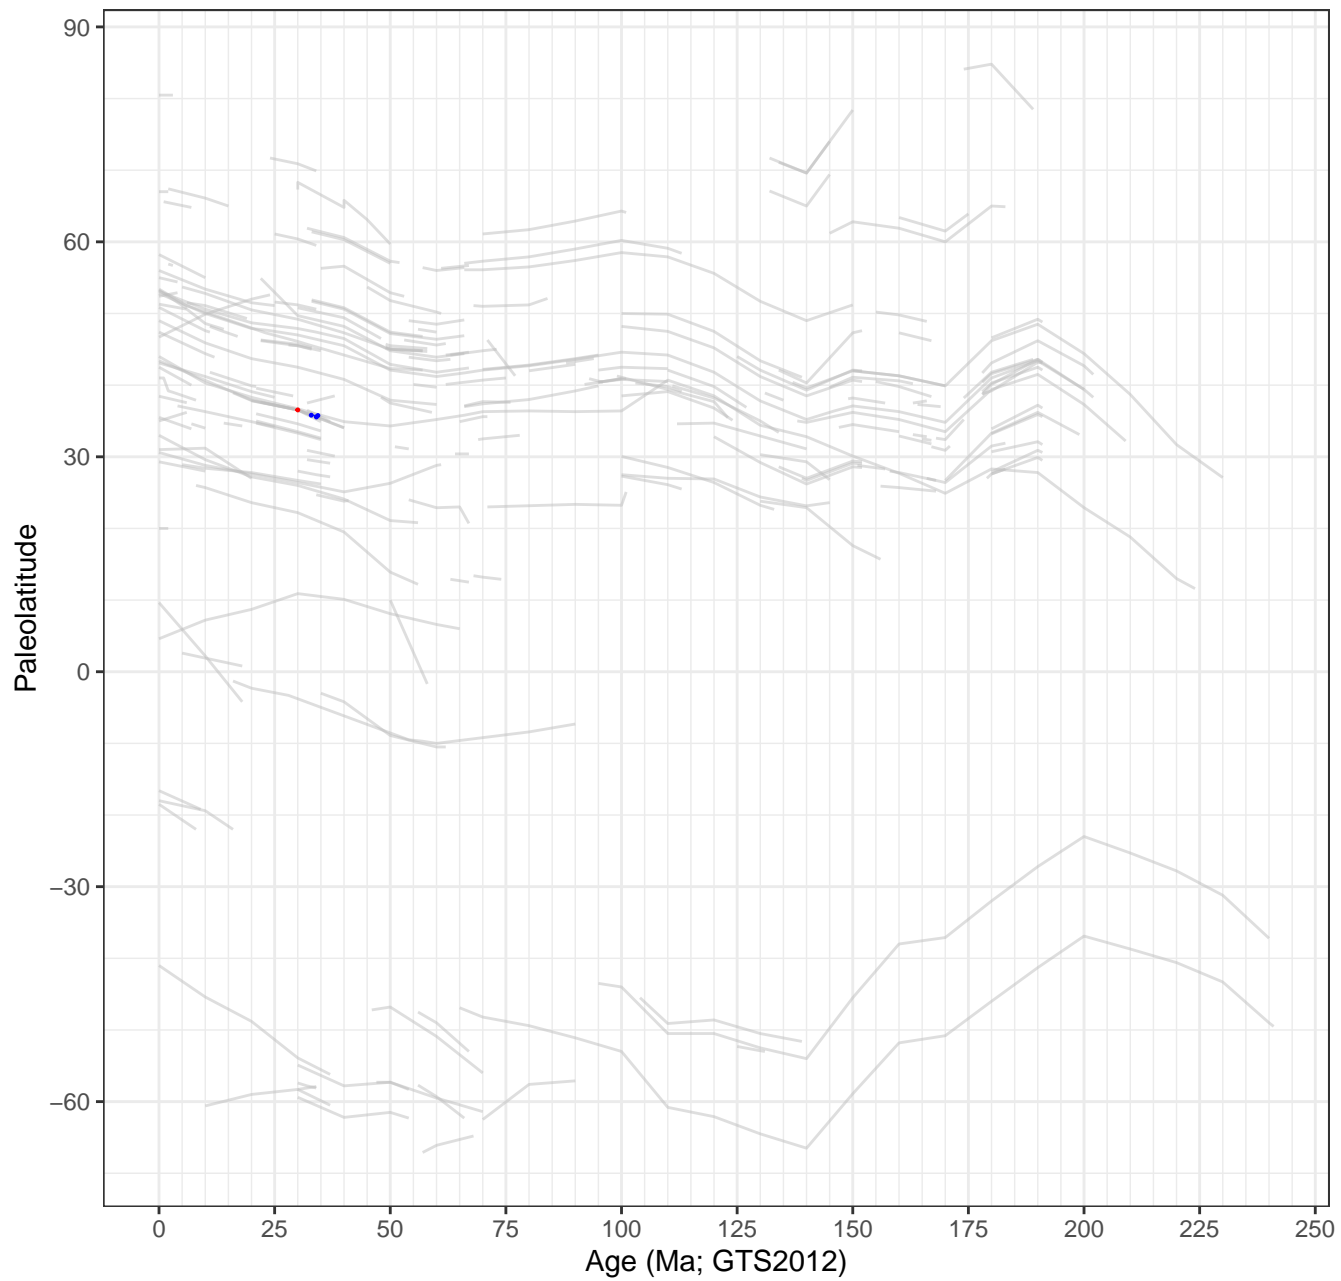

Supplement: Supplementary file 1622 [file Hystrichosphaeropsis rectangularis.pdf › Supplement/Supplement 2/Species 1914 plots/Hystrichosphaeropsis rectangularis.pdf]

# Species *Hystrihostrogylon borisii*

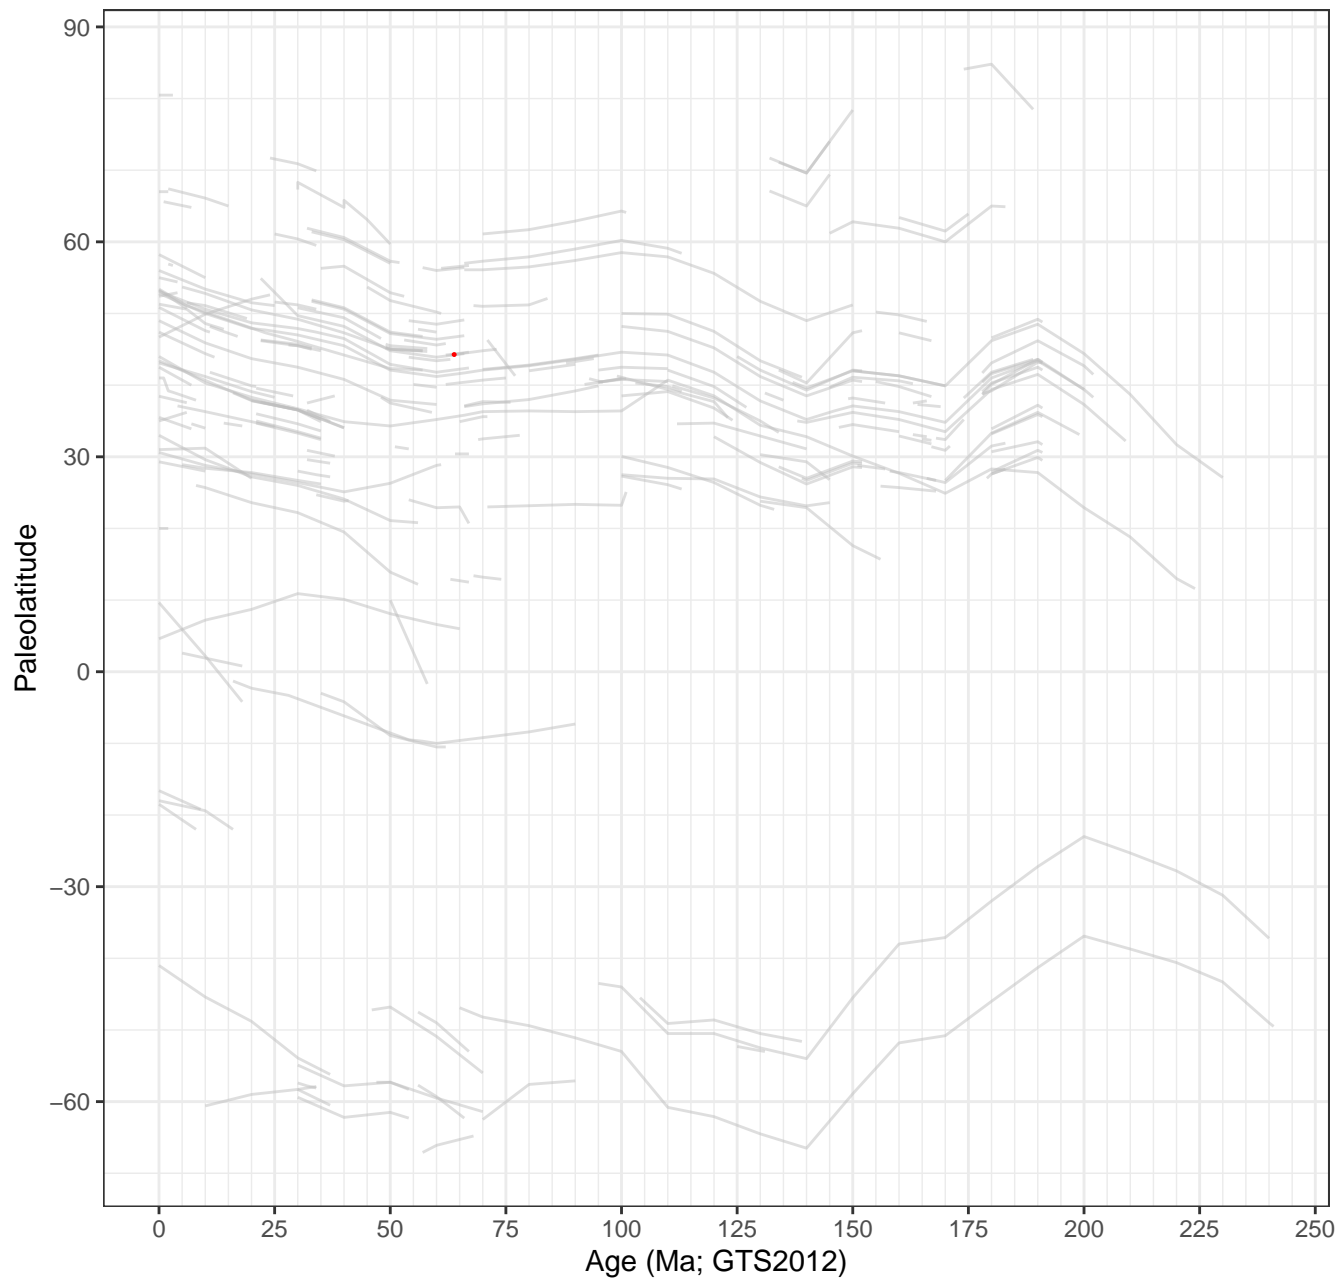

Supplement: Supplementary file 1623 [file Hystrichostrogylon borisii.pdf › Supplement/Supplement 2/Species 1914 plots/Hystrichostrogylon borisii.pdf]

# Species *Hystriostrogydon clausenii*

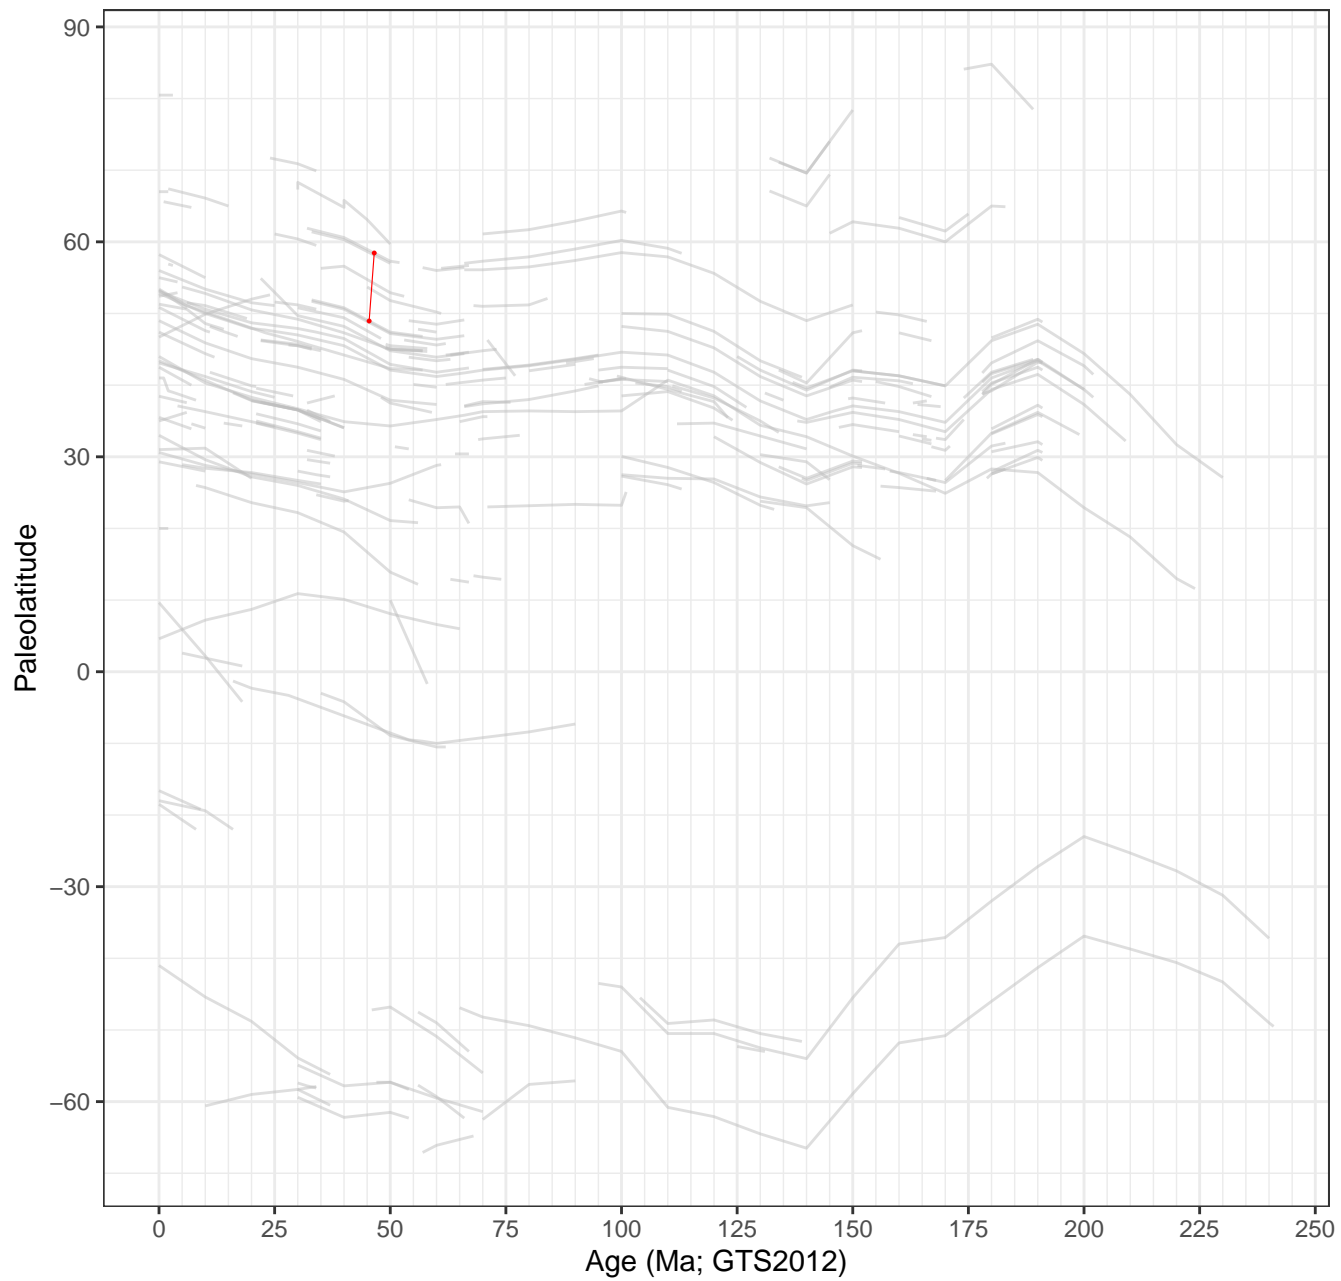

Supplement: Supplementary file 1624 [file Hystrichostrogylon clausenii.pdf › Supplement/Supplement 2/Species 1914 plots/Hystrichostrogylon clausenii.pdf]

# Species *Hystriostrogydon conincki*

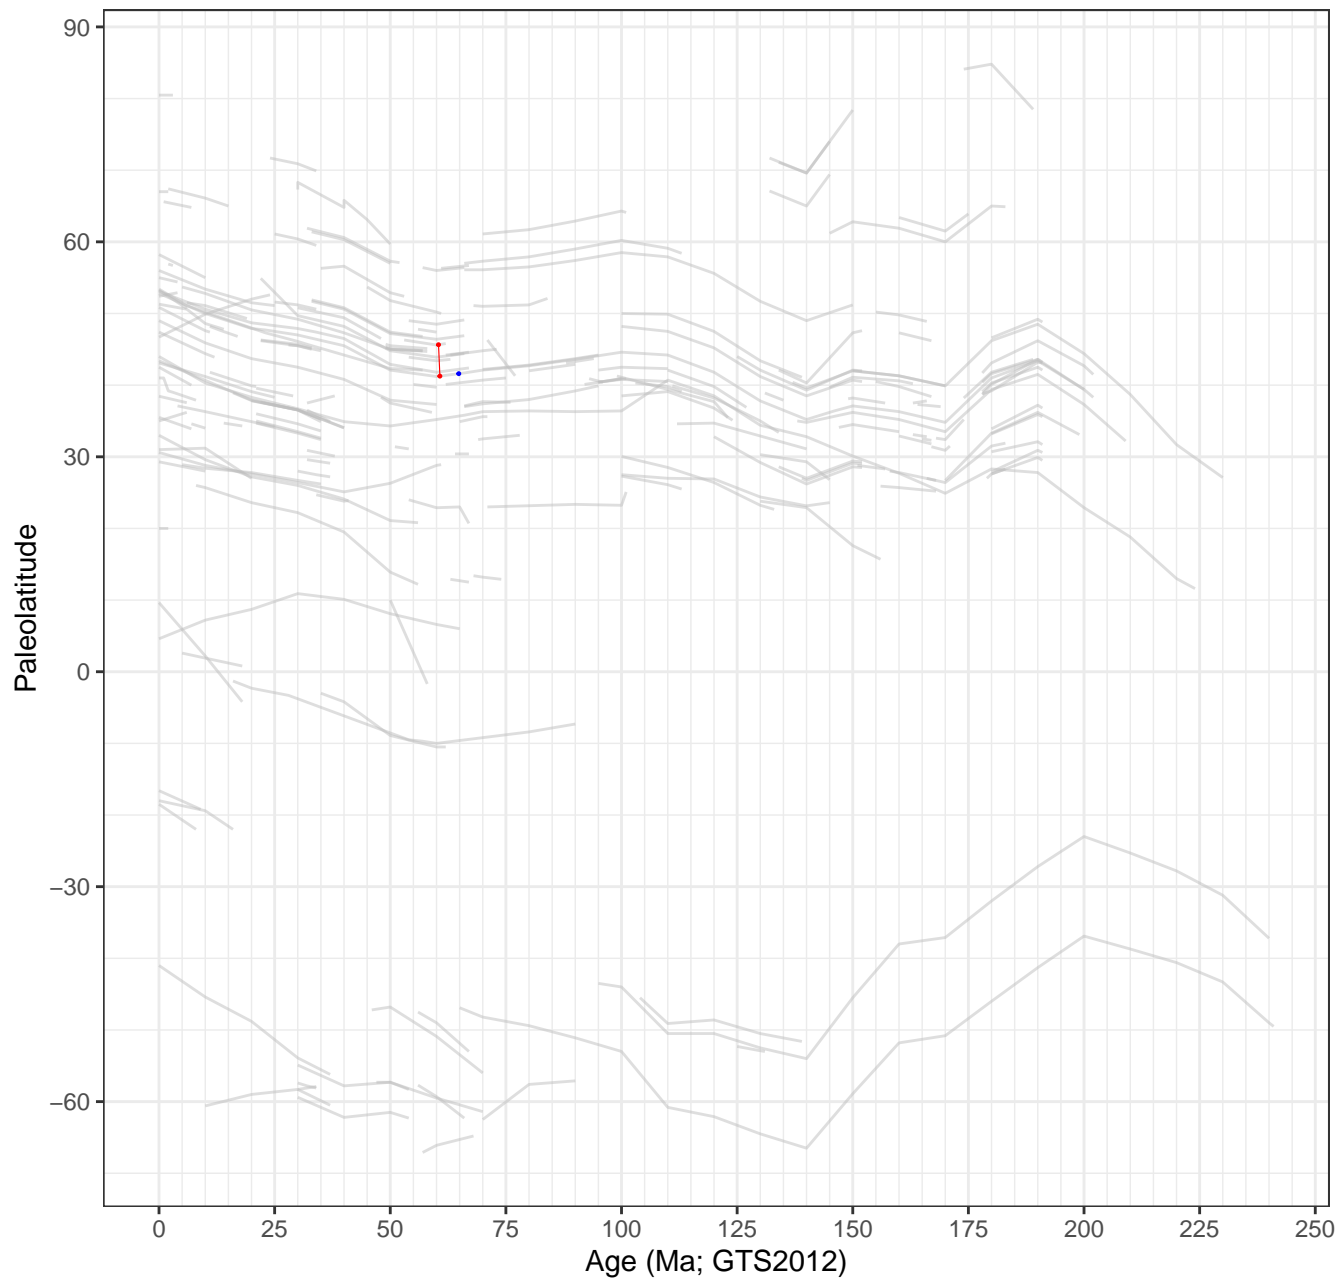

Supplement: Supplementary file 1625 [file Hystrichostrogylon conincki.pdf › Supplement/Supplement 2/Species 1914 plots/Hystrichostrogylon conincki.pdf]

# Species *Hystriostrogylon holohymenium*

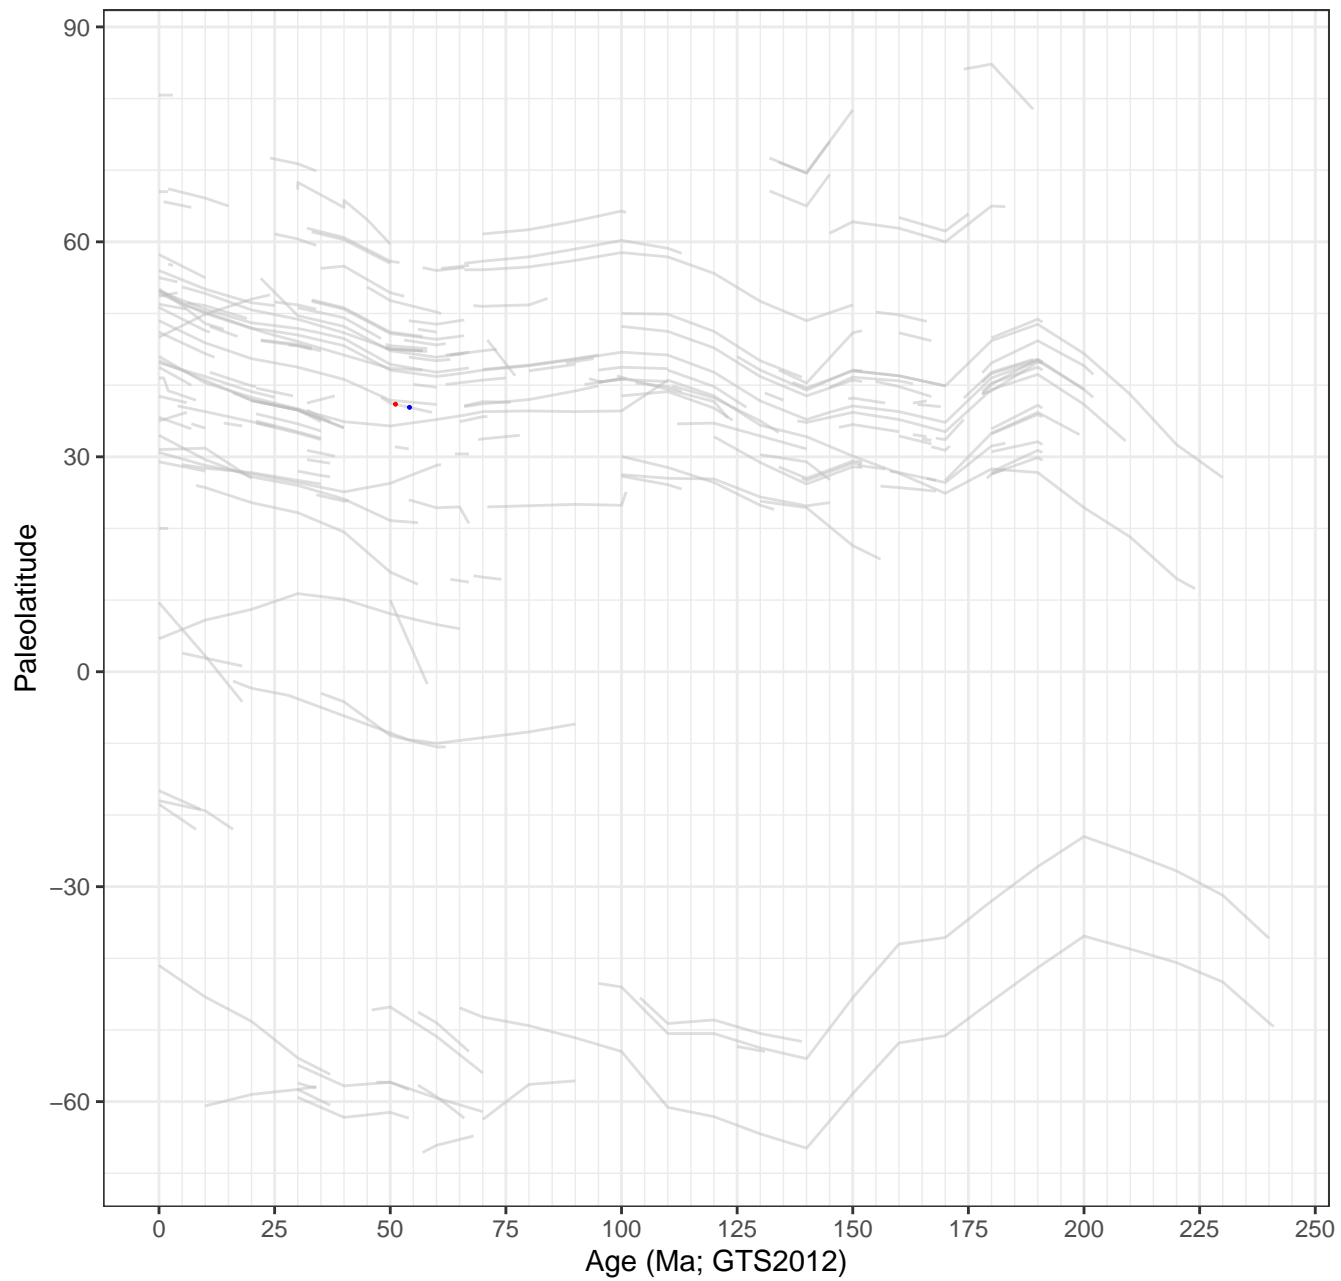

Supplement: Supplementary file 1626 [file Hystrichostrogylon holohymenium.pdf › Supplement/Supplement 2/Species 1914 plots/Hystrichostrogylon holohymenium.pdf]

# Species *Hystriostrogydon membraniphorum*

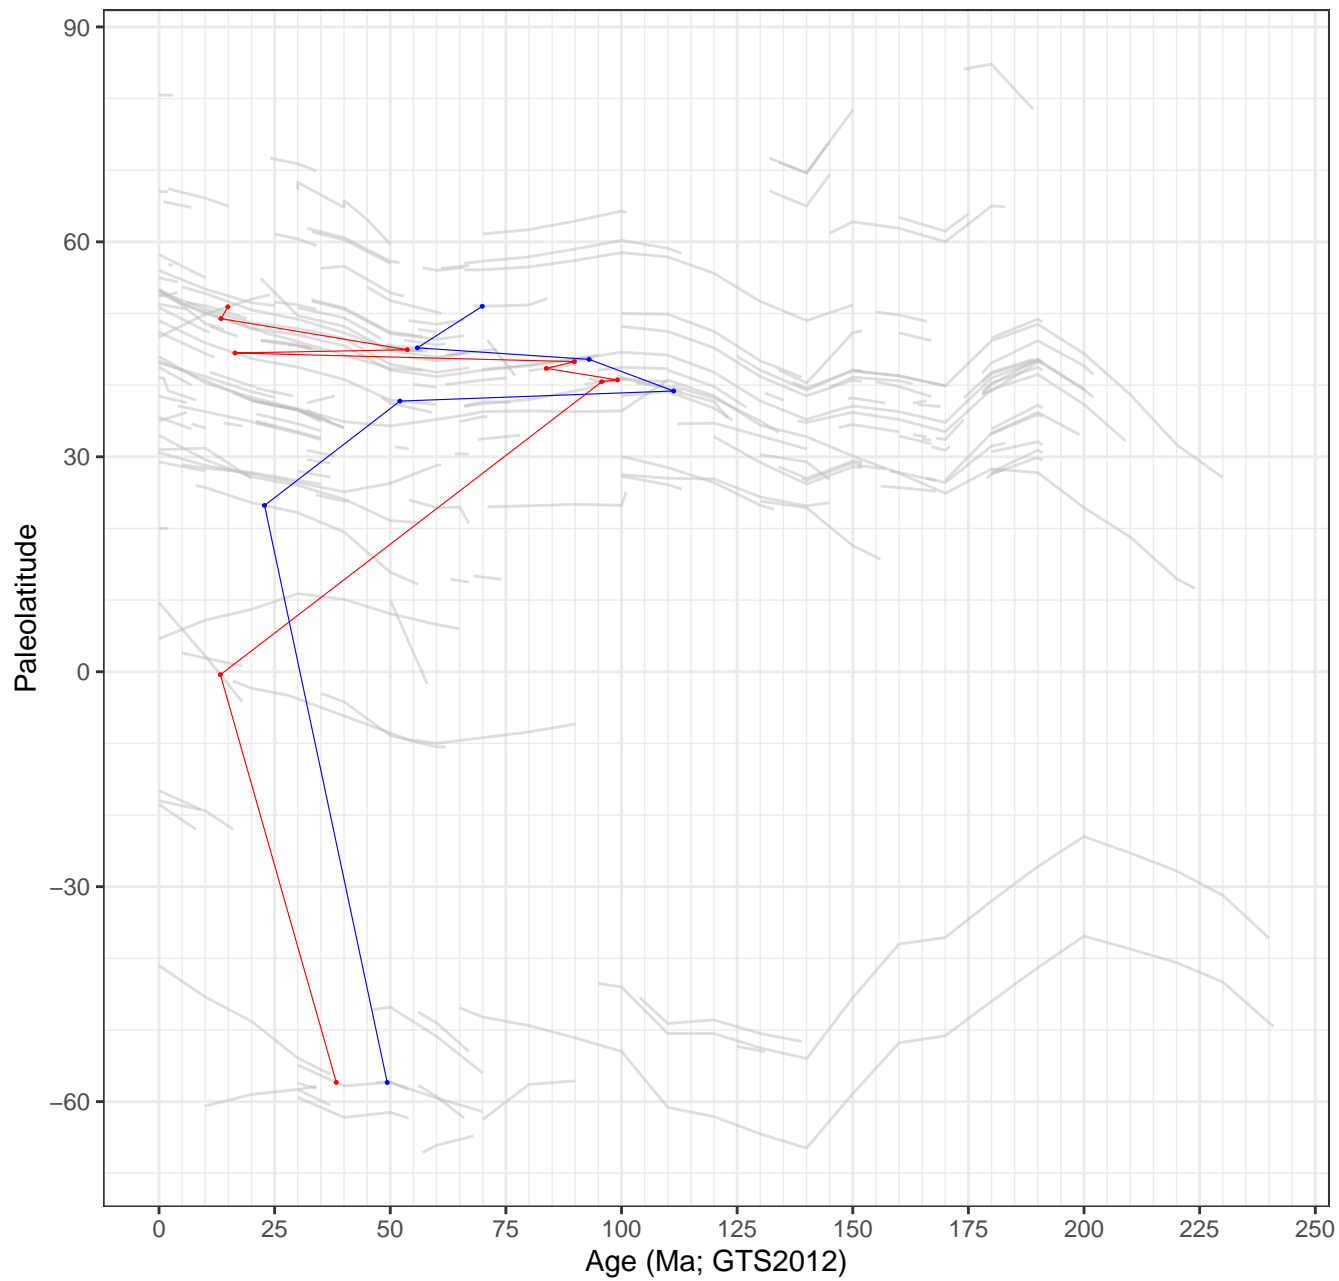

Supplement: Supplementary file 1627 [file Hystrichostrogylon membraniphorum.pdf › Supplement/Supplement 2/Species 1914 plots/Hystrichostrogylon membraniphorum.pdf]

# Species *Hystrihostrogylon stolidotum*

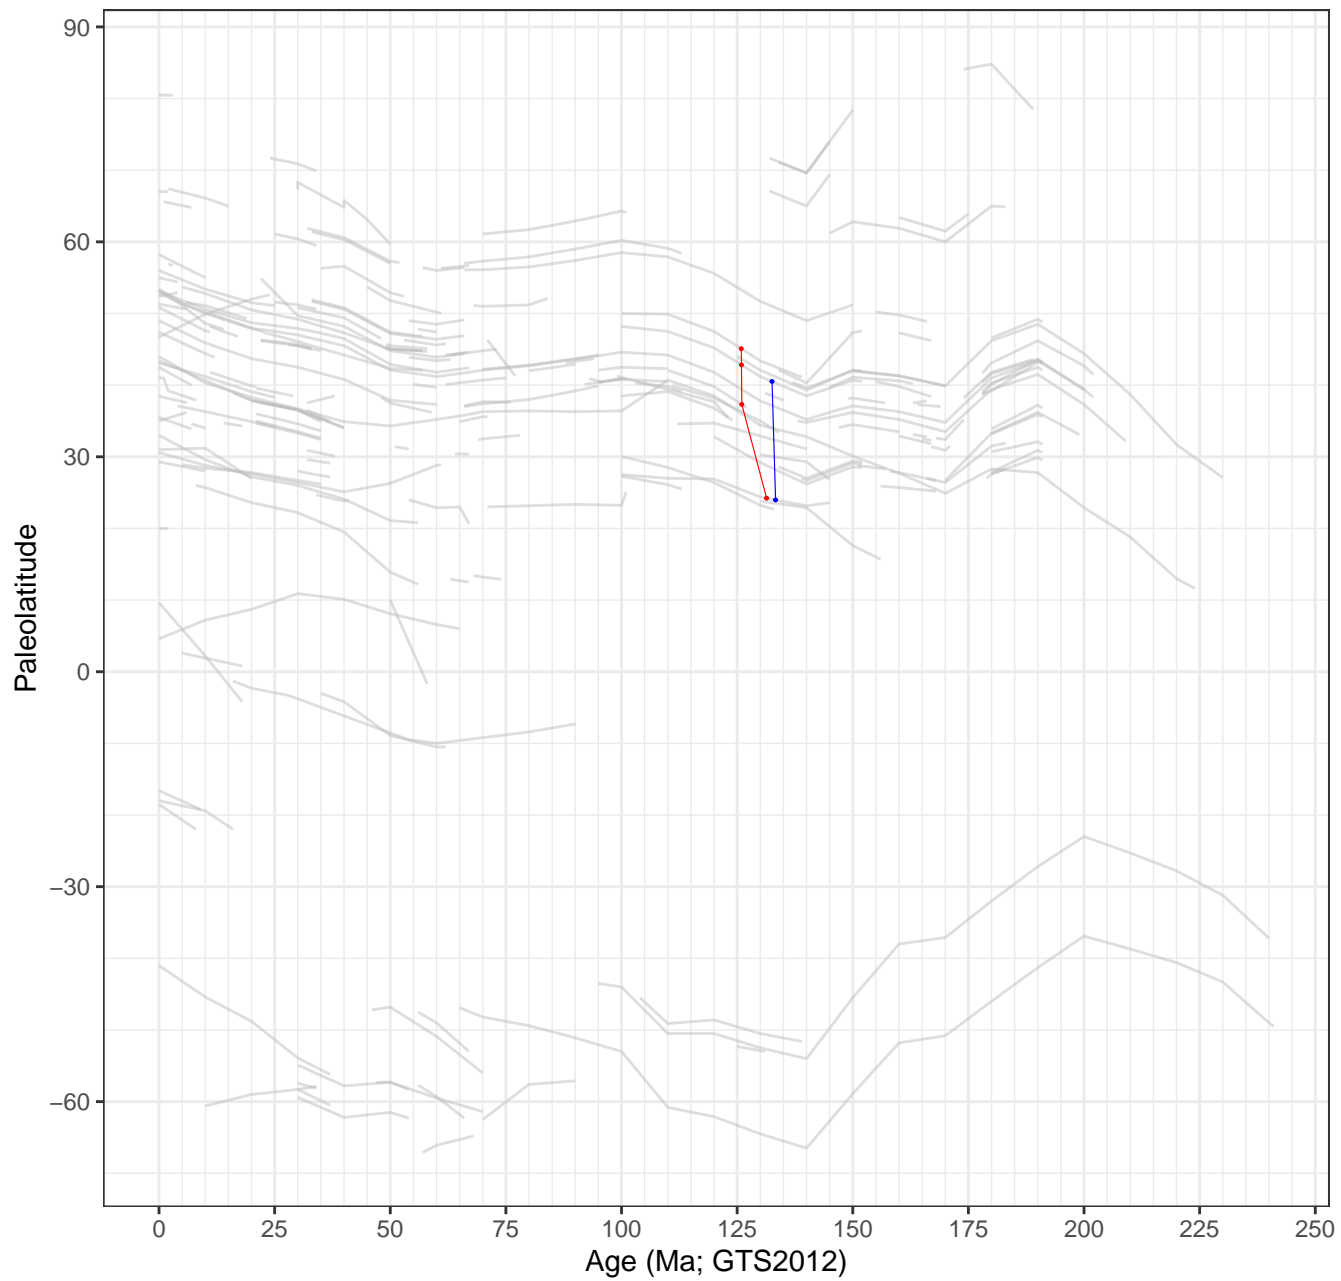

Supplement: Supplementary file 1628 [file Hystrichostrogylon stolidotum.pdf › Supplement/Supplement 2/Species 1914 plots/Hystrichostrogylon stolidotum.pdf]

# Species *Ifecysta fusiforma*

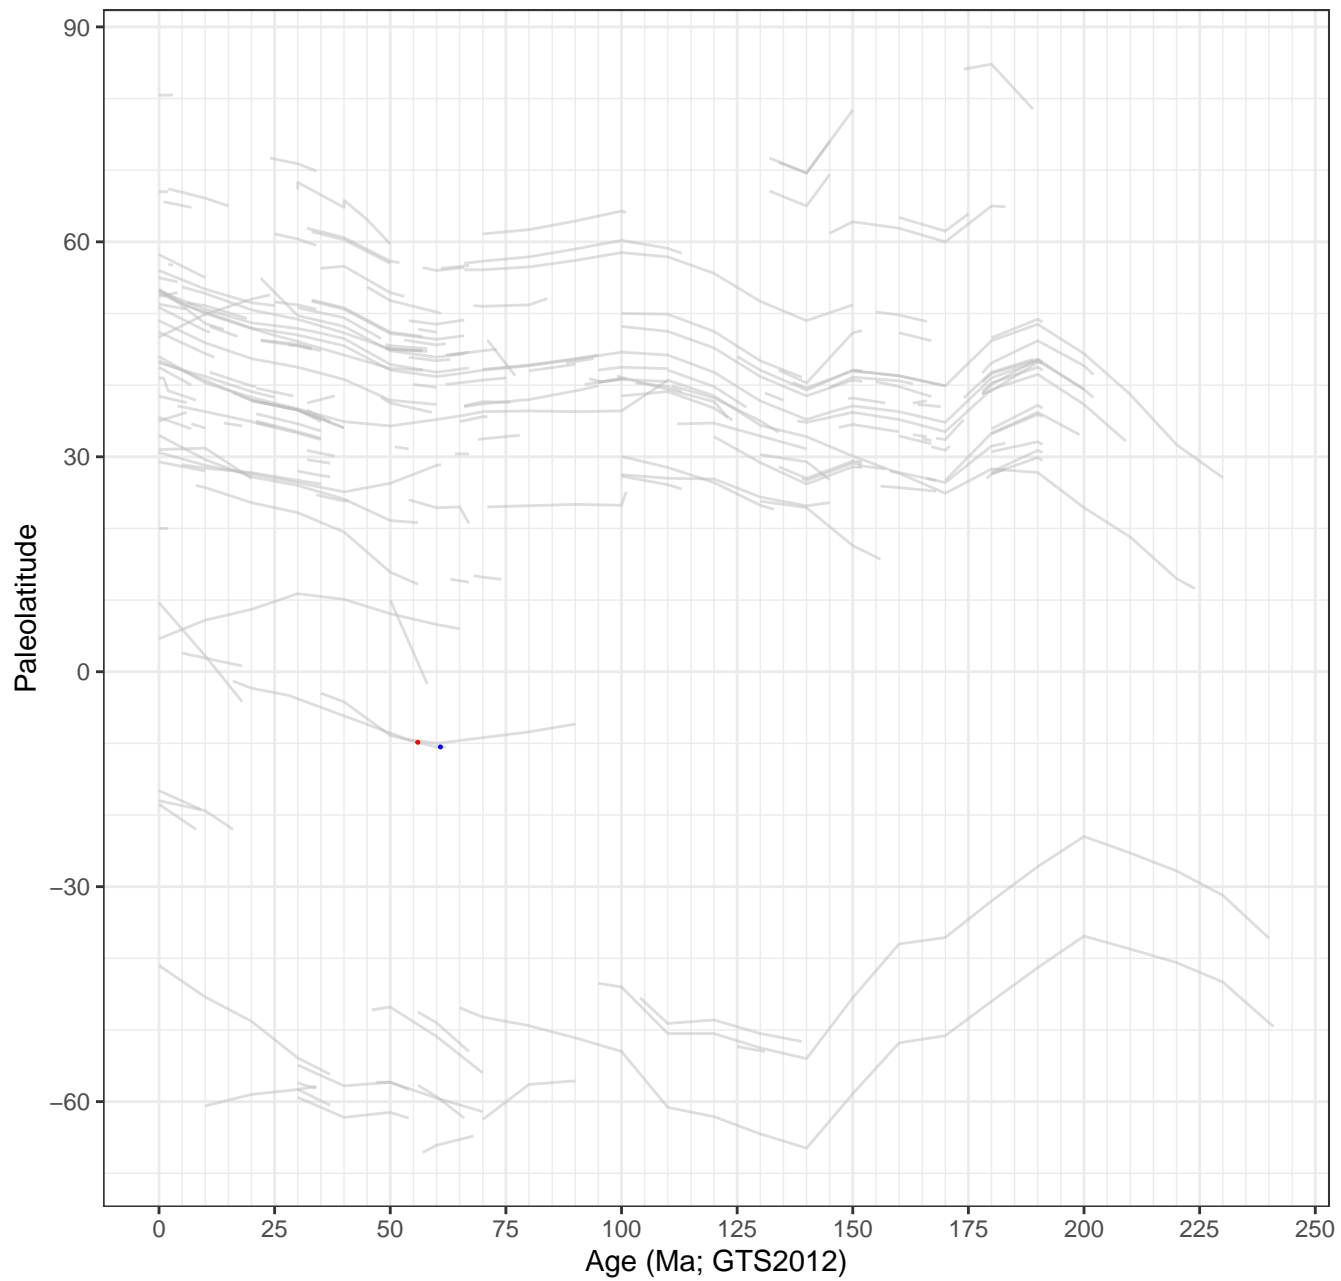

Supplement: Supplementary file 1629 [file Ifecysta fusiforma.pdf › Supplement/Supplement 2/Species 1914 plots/Ifecysta fusiforma.pdf]

# Species Ifecysta lappacea

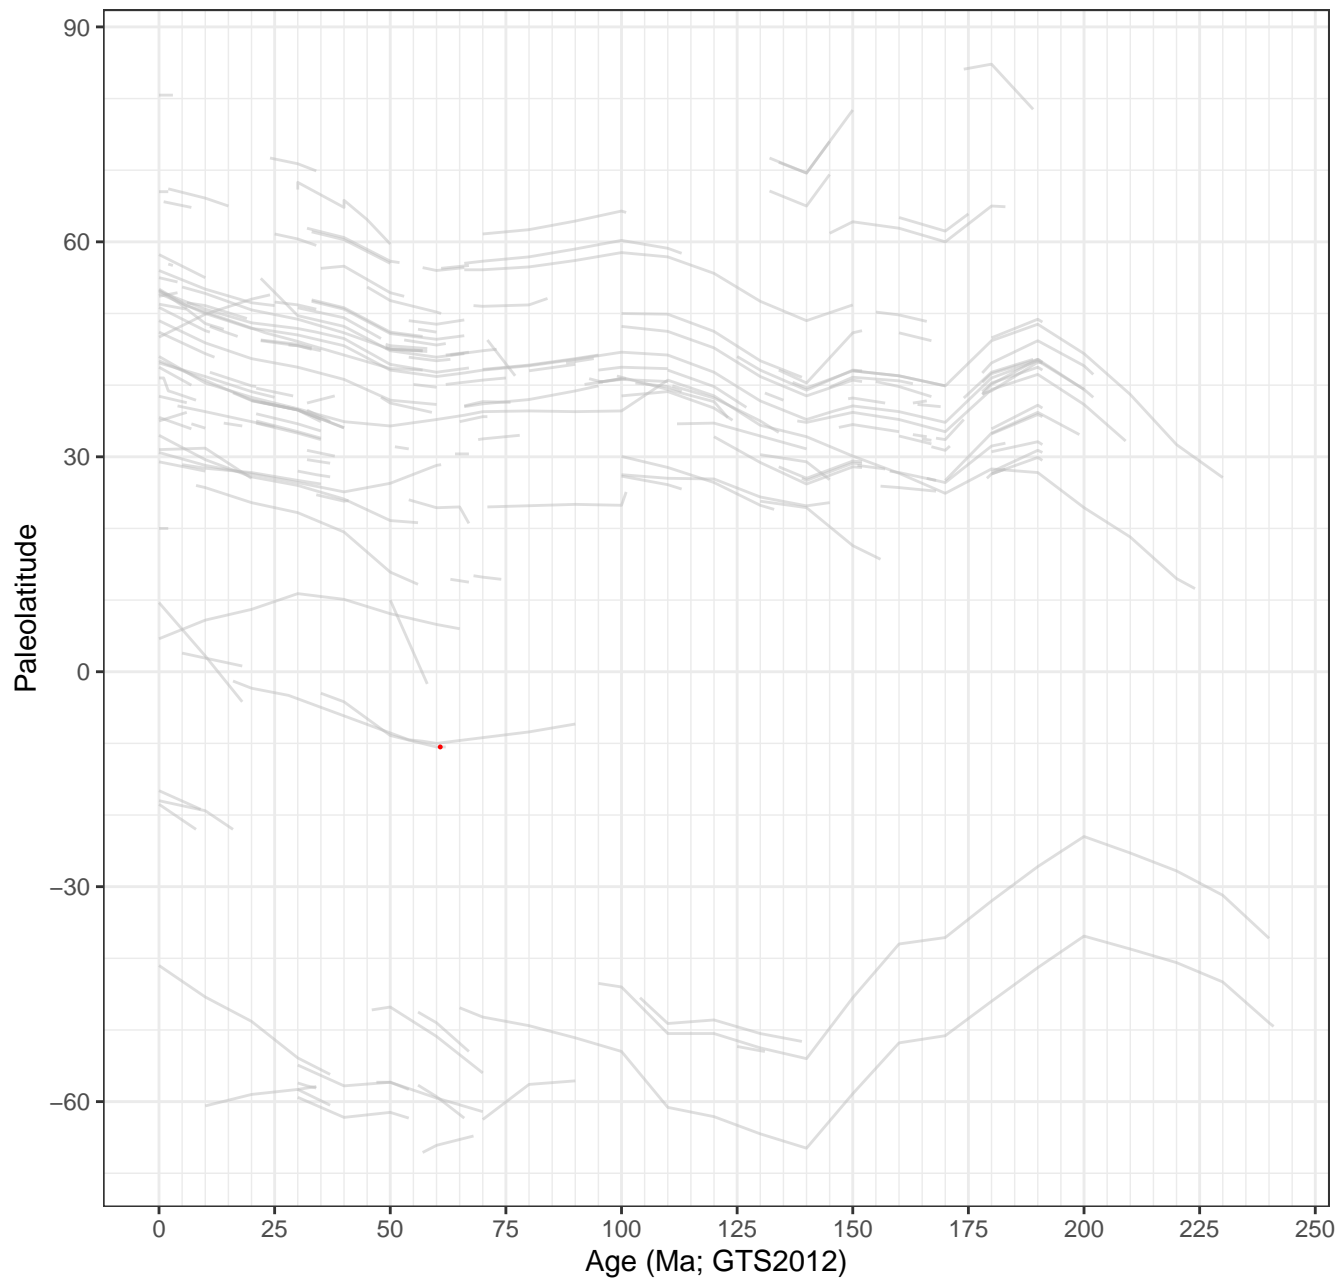

Supplement: Supplementary file 1630 [file Ifecysta lappacea.pdf › Supplement/Supplement 2/Species 1914 plots/Ifecysta lappacea.pdf]

# Species *Imbatodinium kondratjevii*

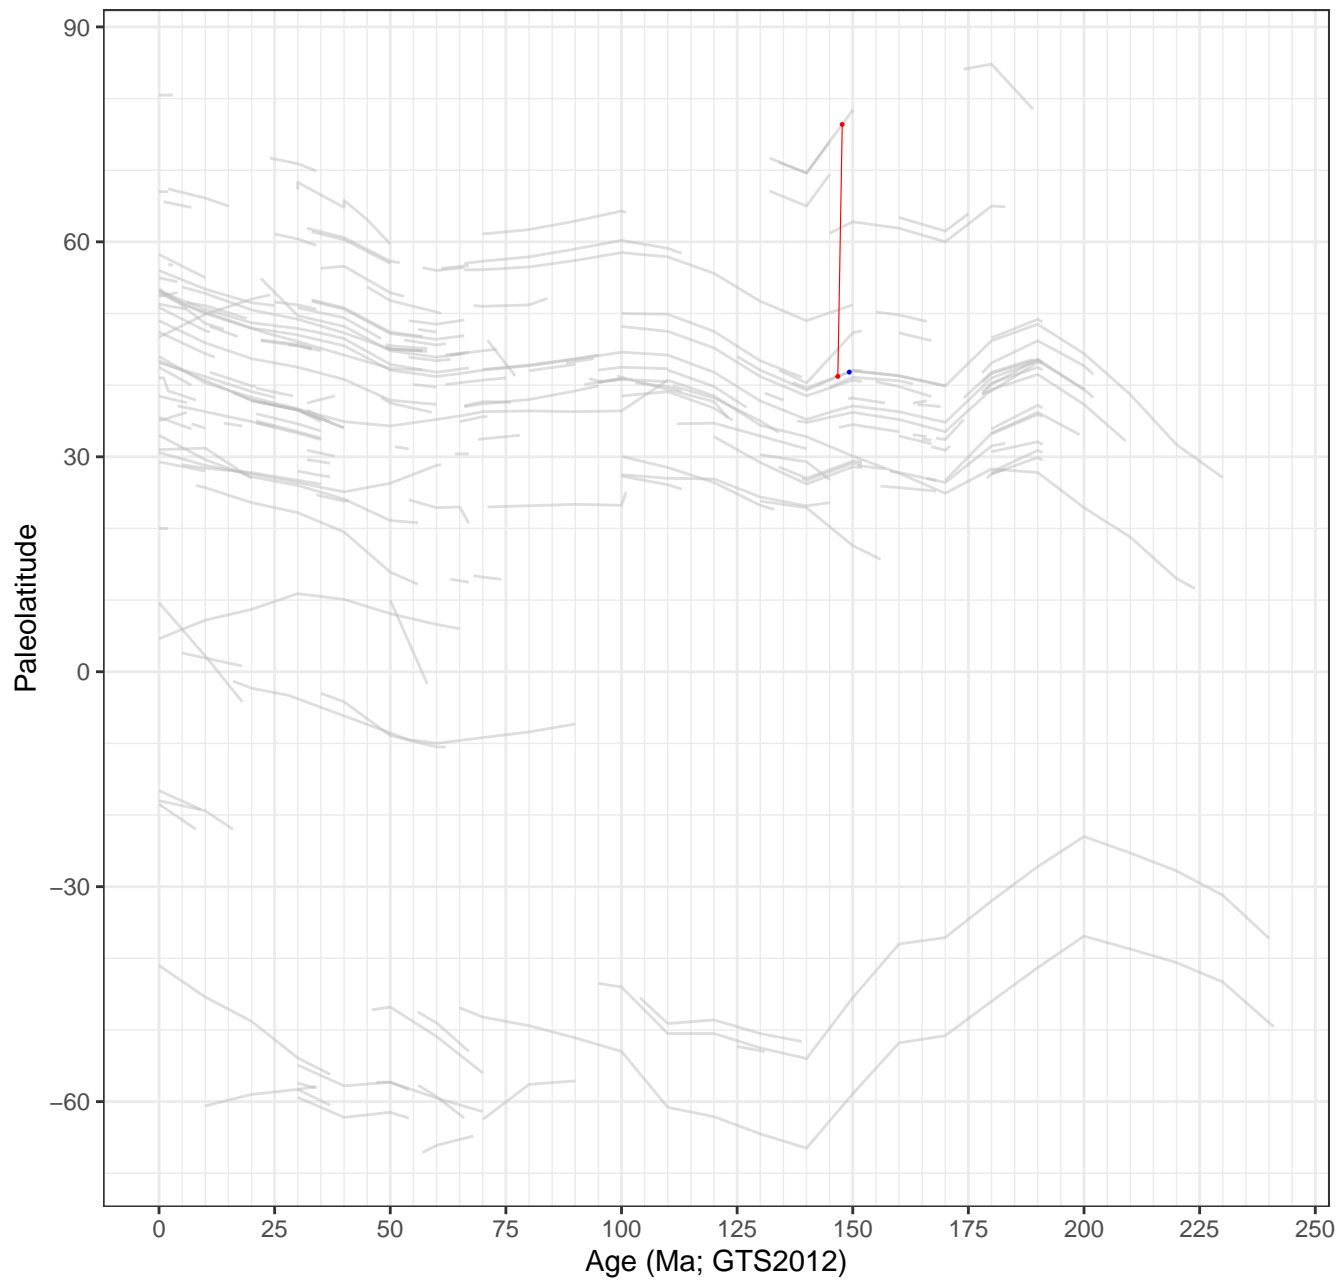

Supplement: Supplementary file 1631 [file Imbatodinium kondratjevii.pdf › Supplement/Supplement 2/Species 1914 plots/Imbatodinium kondratjevii.pdf]

# Species *Impagidinium aculeatum*

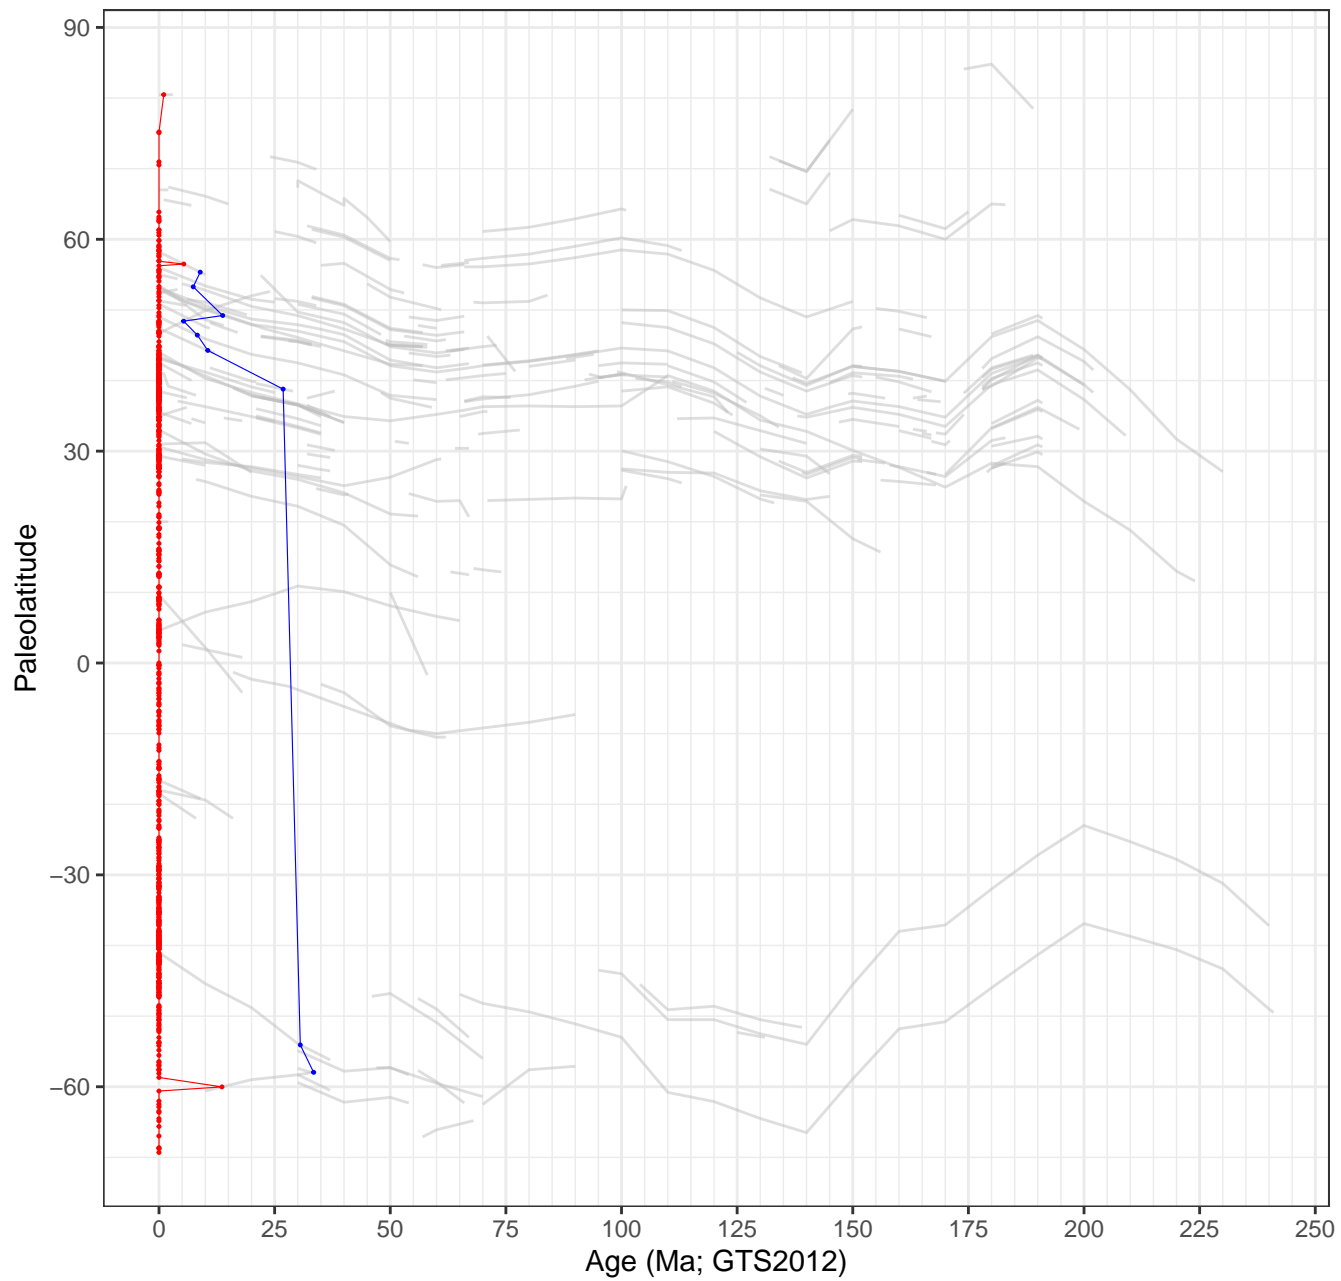

Supplement: Supplementary file 1632 [file Impagidinium aculeatum.pdf › Supplement/Supplement 2/Species 1914 plots/Impagidinium aculeatum.pdf]

# Species *Impagidinium alectrolophum*

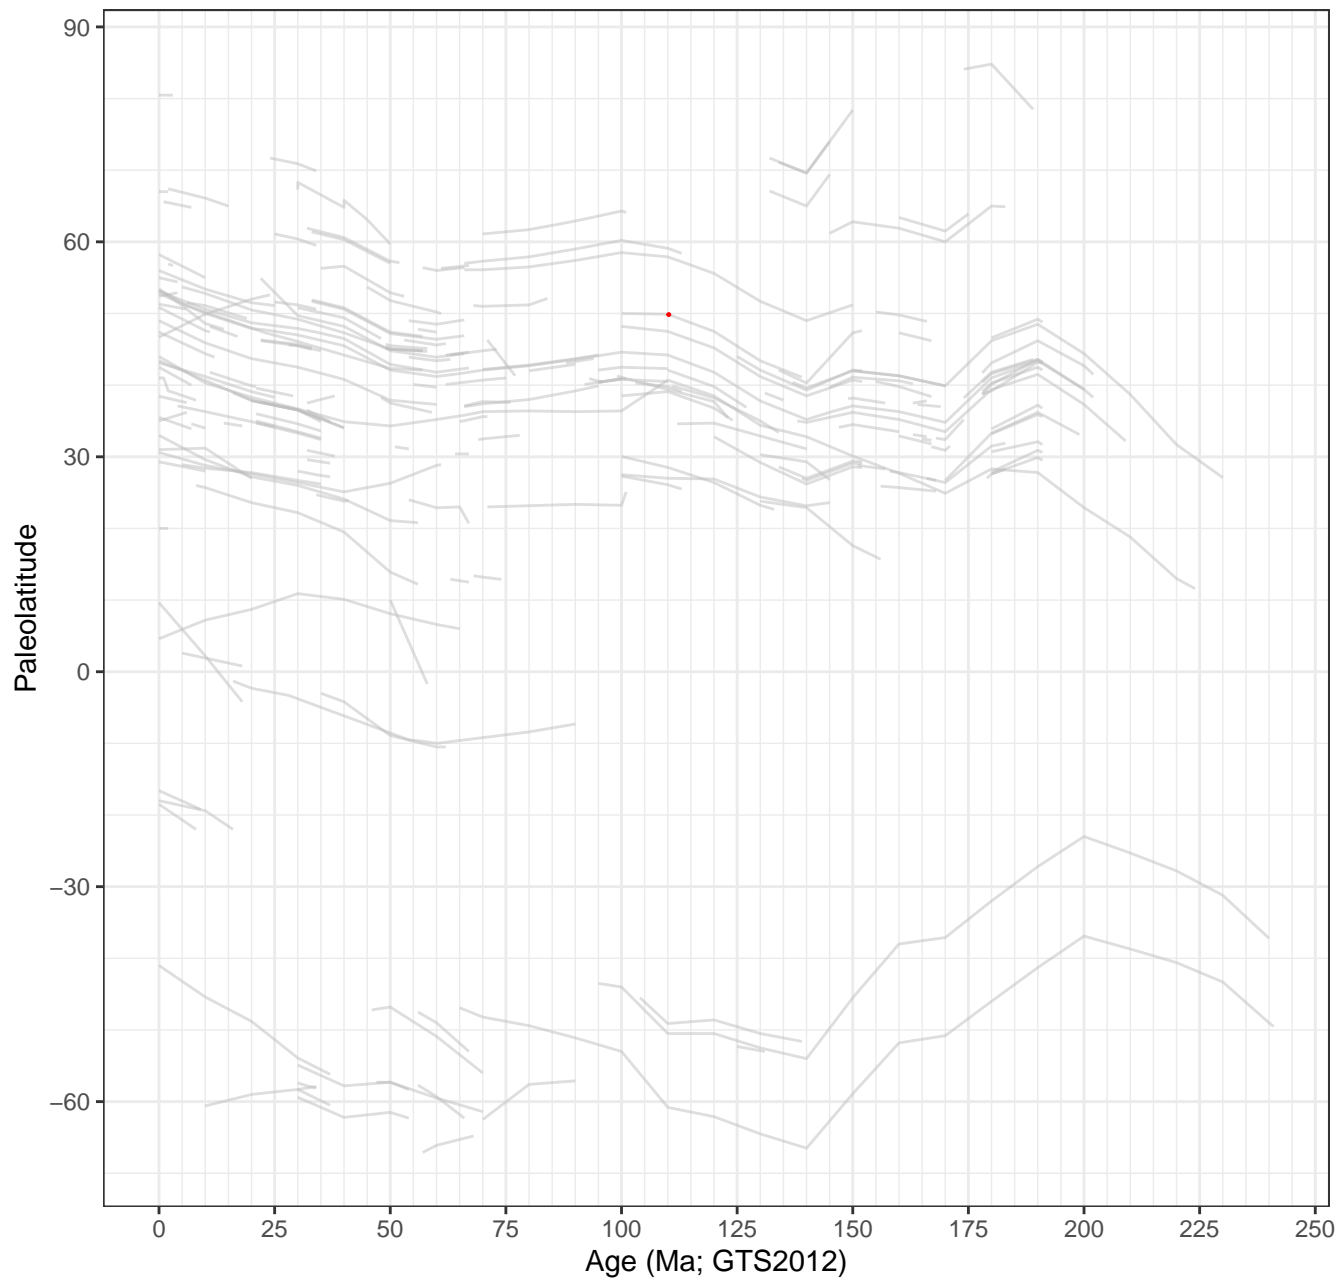

Supplement: Supplementary file 1633 [file Impagidinium alectrolophum.pdf › Supplement/Supplement 2/Species 1914 plots/Impagidinium alectrolophum.pdf]
