# Supplementary figures and images for: DINOSTRAT: a global database of the stratigraphic and paleolatitudinal distribution of Mesozoic–Cenozoic organic-walled dinoflagellate cysts (part 17 of 27)
Source: Copernicus journal article supplement (doi:10.5194/essd-14-579-2022), 2022-02-09

# Species *Impagidinium aliferum*

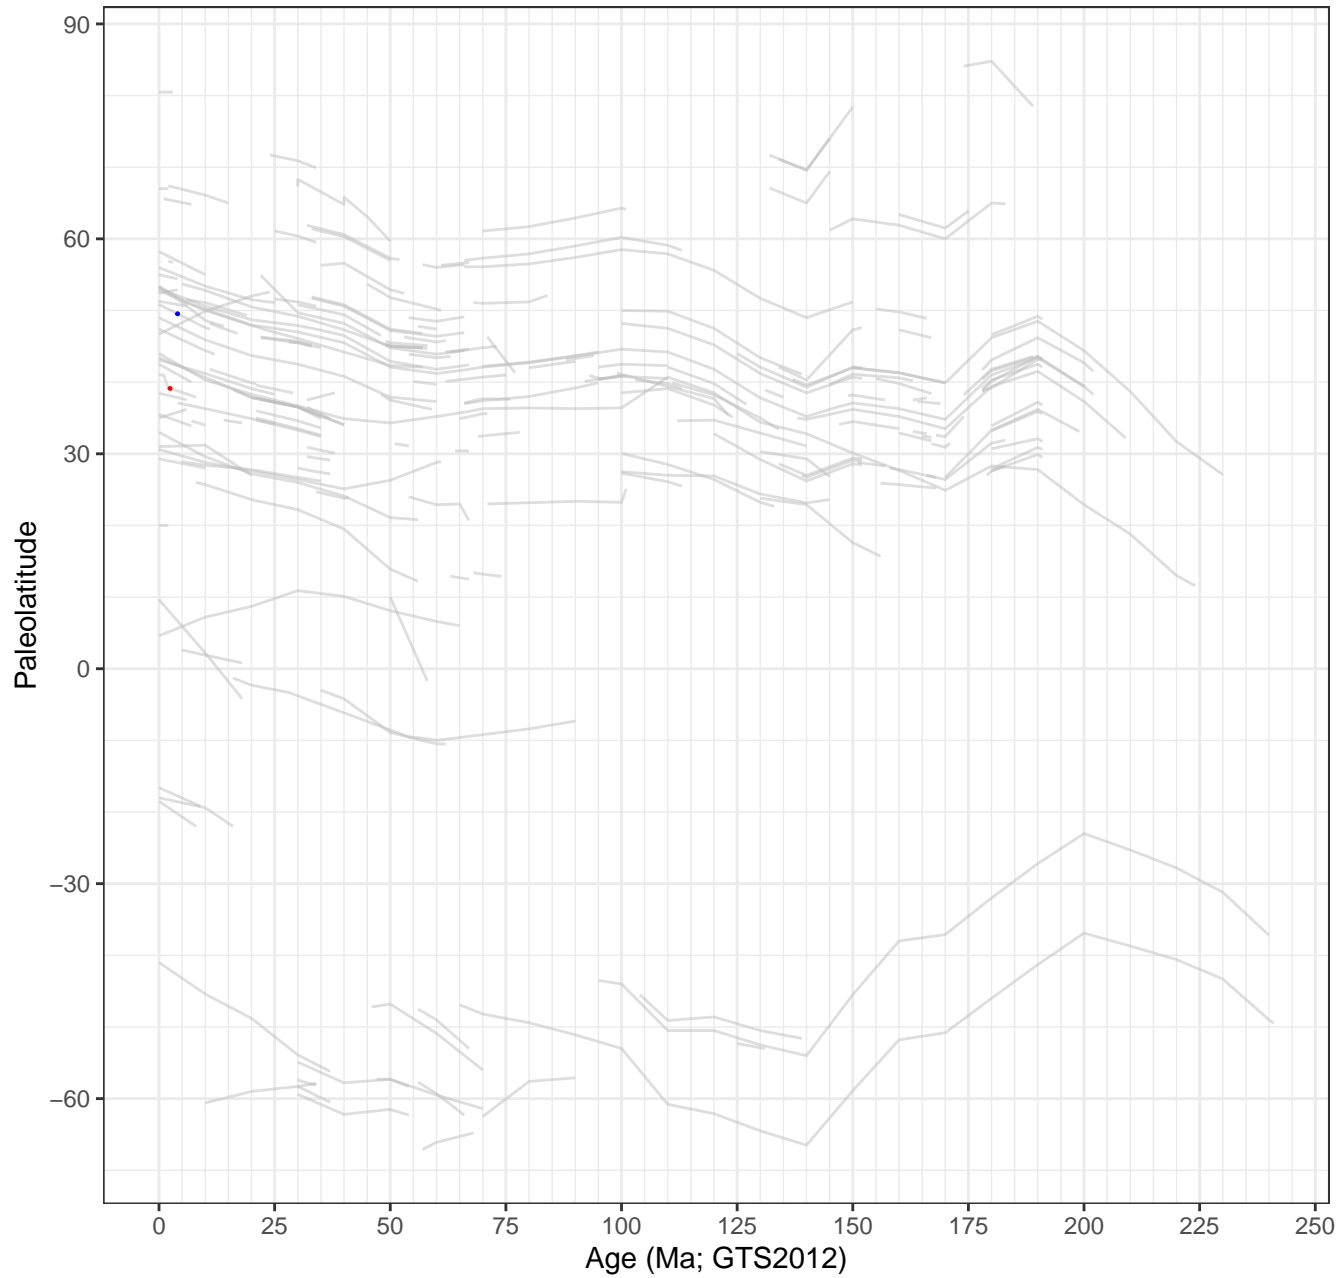

Supplement: Supplementary file 1634 [file Impagidinium aliferum.pdf › Supplement/Supplement 2/Species 1914 plots/Impagidinium aliferum.pdf]

# Species Impagidinium argemon

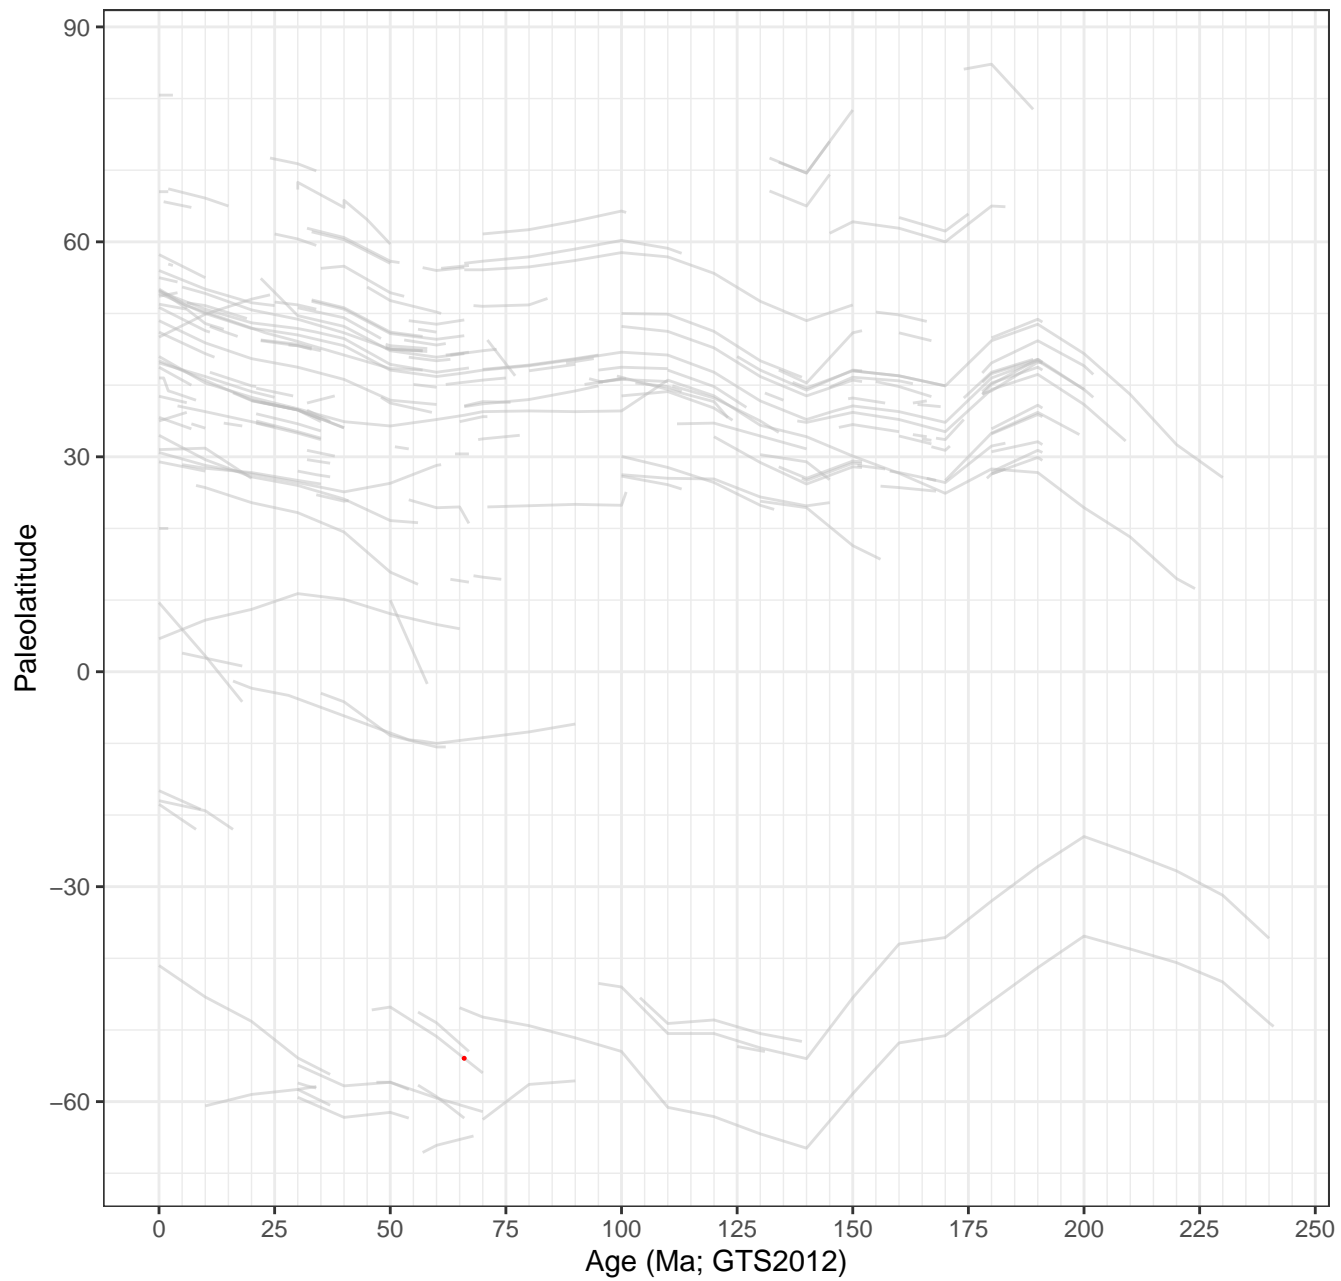

Supplement: Supplementary file 1635 [file Impagidinium argemon.pdf › Supplement/Supplement 2/Species 1914 plots/Impagidinium argemon.pdf]

# Species *Impagidinium cantabrigiense*

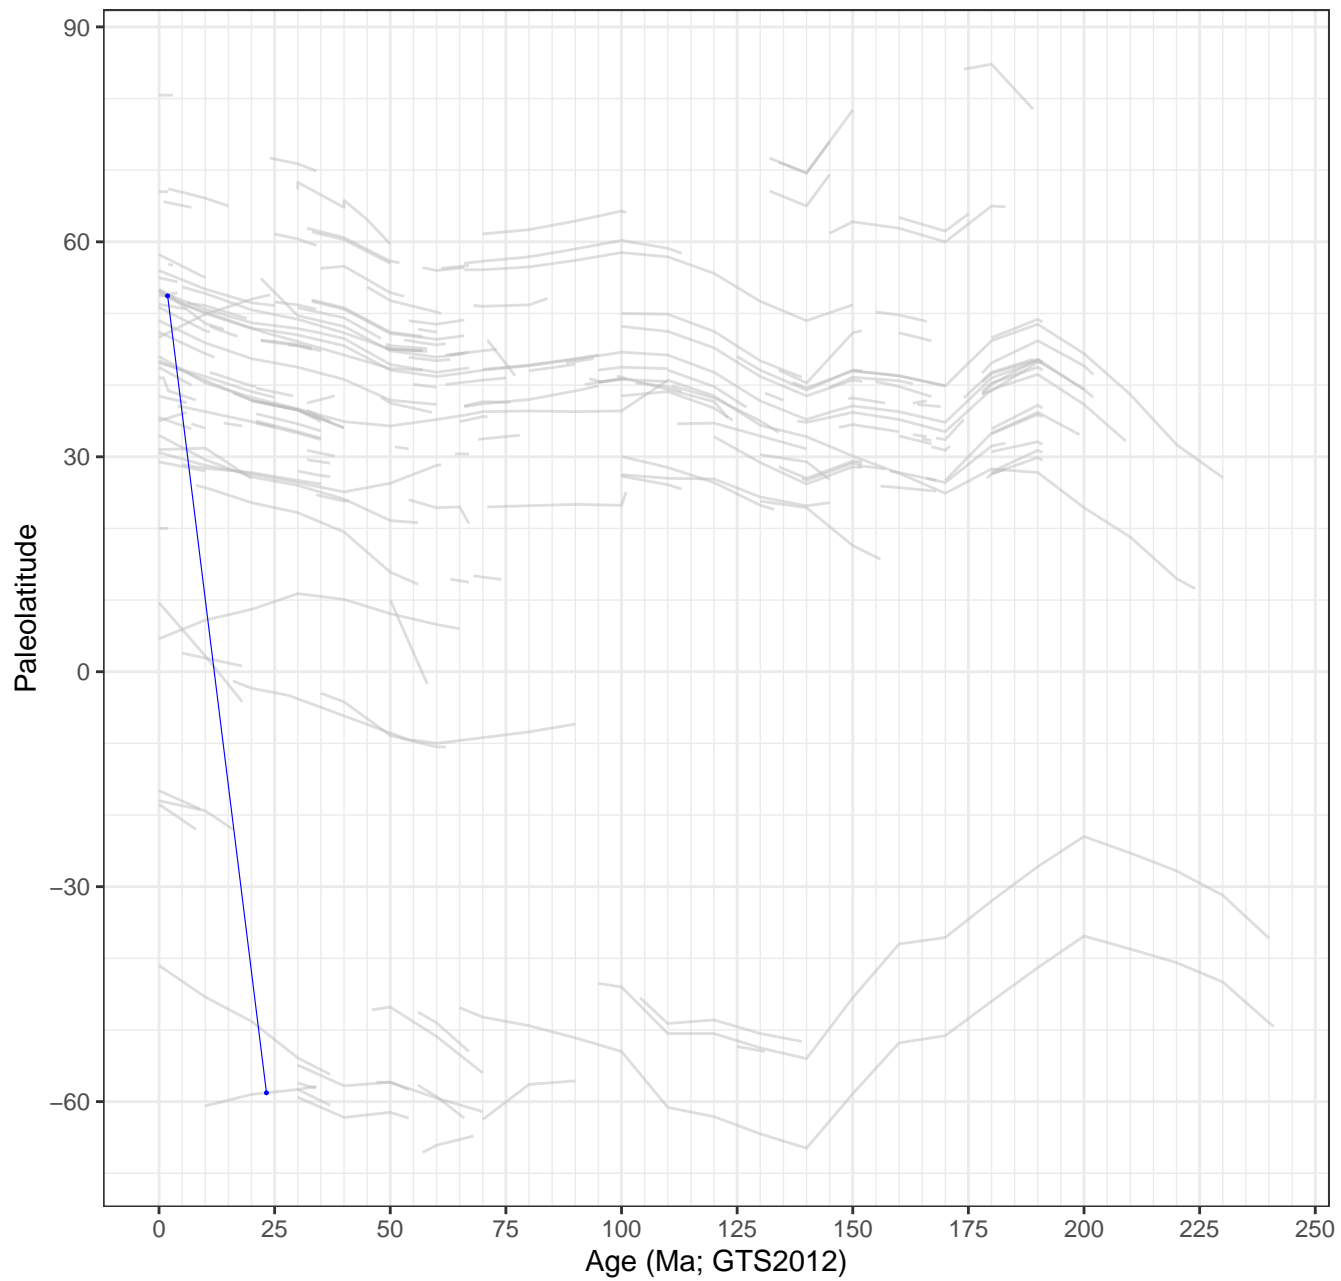

Supplement: Supplementary file 1636 [file Impagidinium cantabrigiense.pdf › Supplement/Supplement 2/Species 1914 plots/Impagidinium cantabrigiense.pdf]

# Species *Impagidinium caspiense*

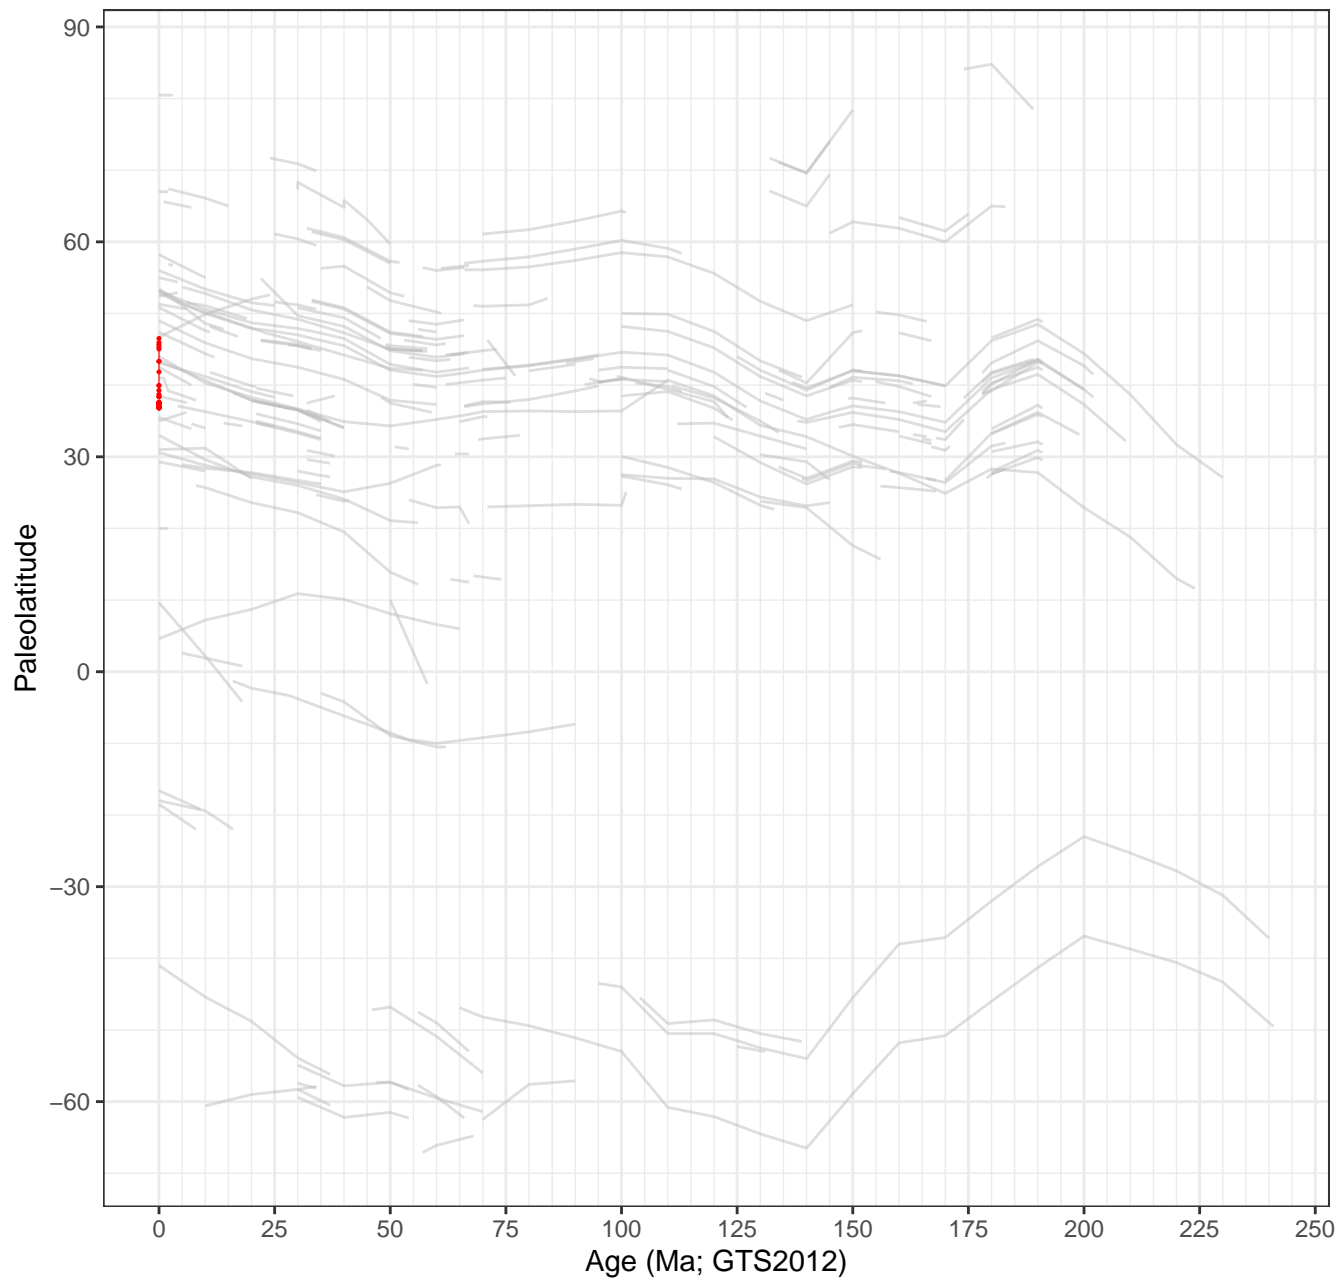

Supplement: Supplementary file 1637 [file Impagidinium caspienense.pdf › Supplement/Supplement 2/Species 1914 plots/Impagidinium caspienense.pdf]

# Species *Impagidinium cassicus*

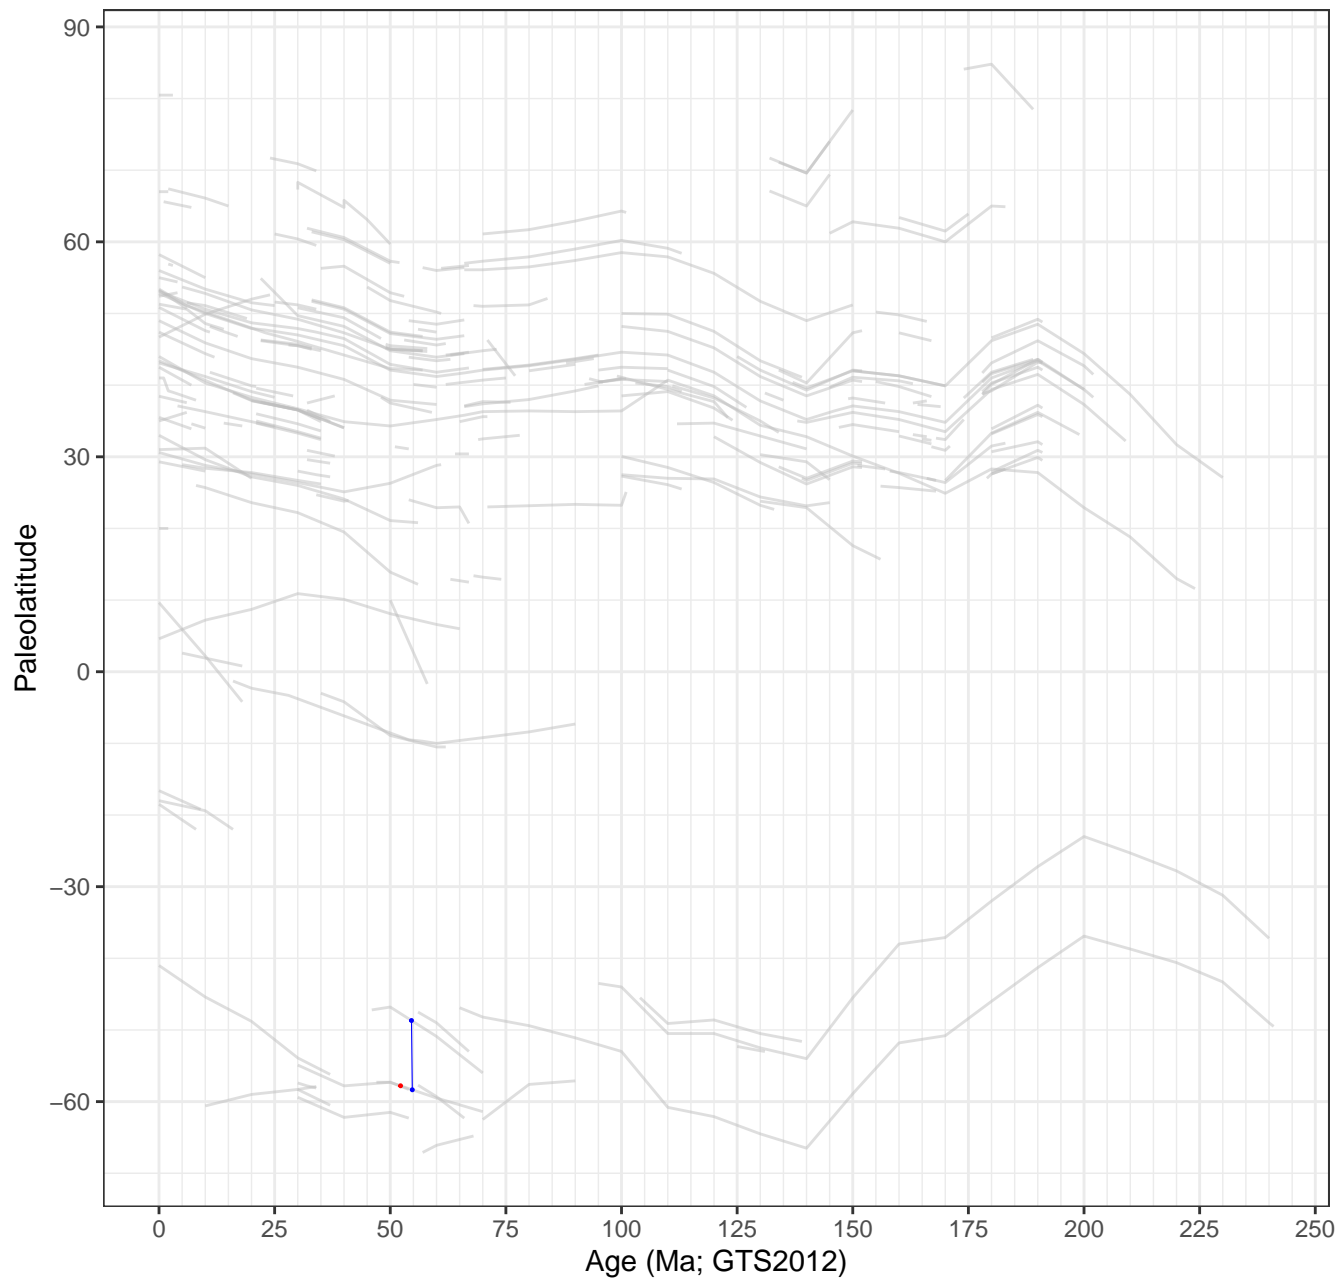

Supplement: Supplementary file 1638 [file Impagidinium cassiculus.pdf › Supplement/Supplement 2/Species 1914 plots/Impagidinium cassiculus.pdf]

# Species Impagidinium cavea



Supplement: Supplementary file 1639 [file Impagidinium cavea.pdf › Supplement/Supplement 2/Species 1914 plots/Impagidinium cavea.pdf]

# Species *Impagidinium celinae*

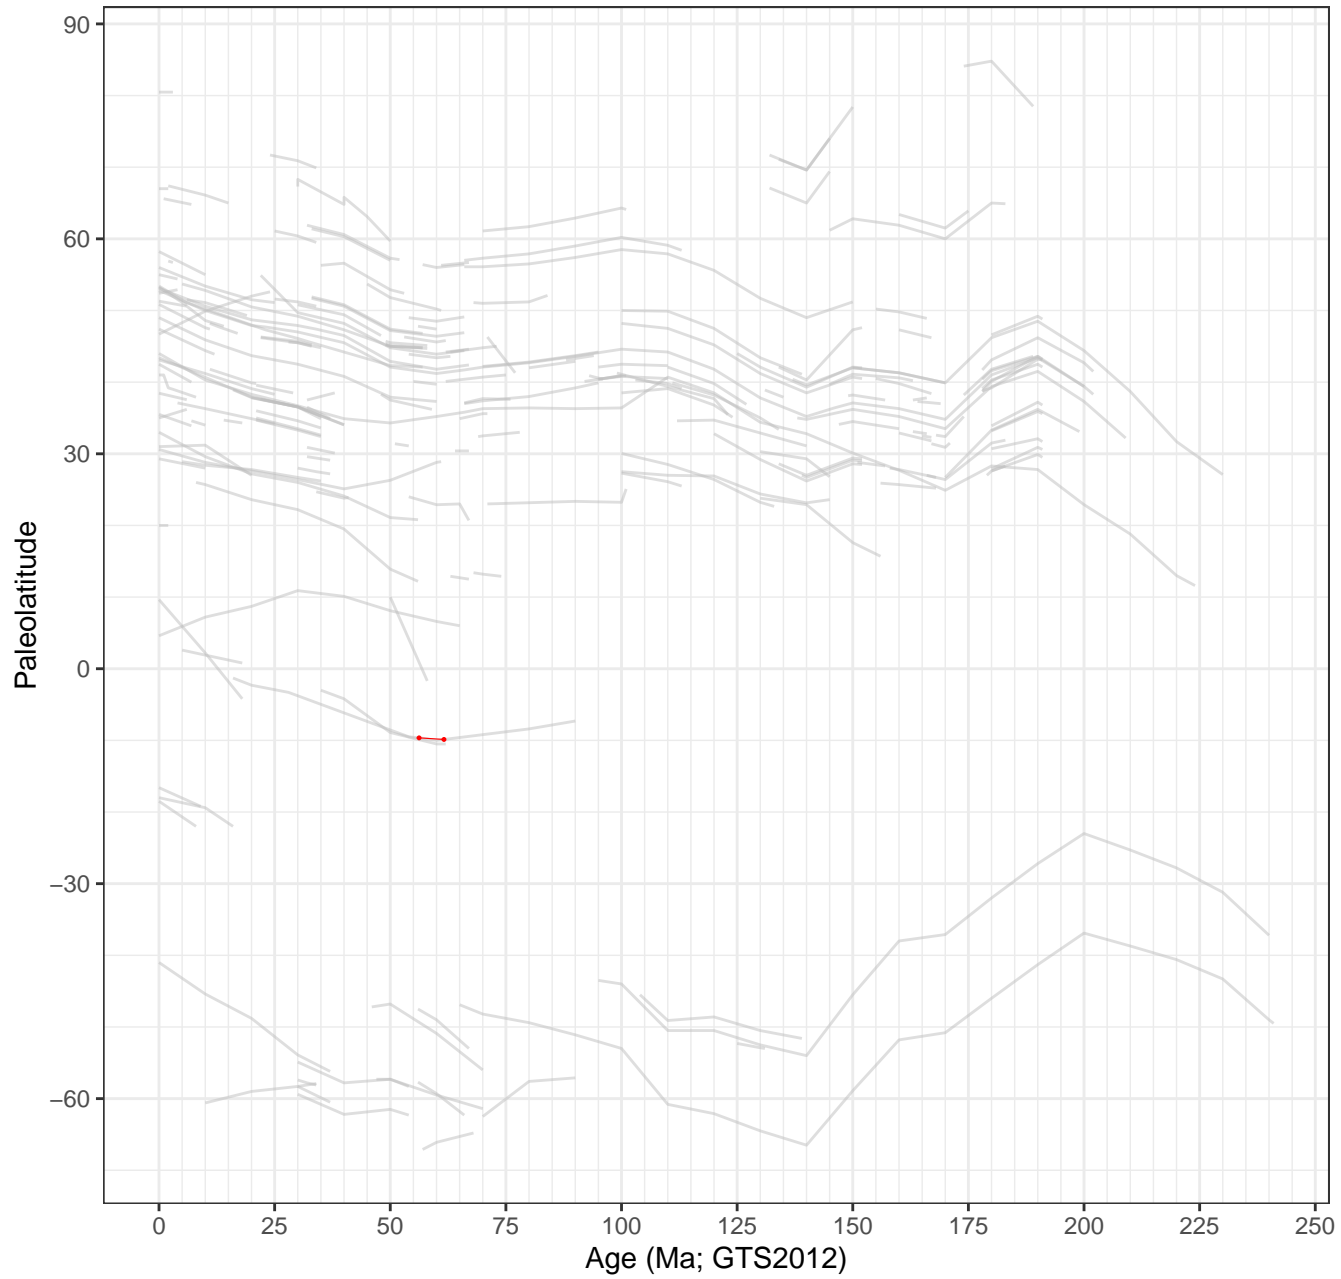

Supplement: Supplementary file 1640 [file Impagidinium celinae.pdf › Supplement/Supplement 2/Species 1914 plots/Impagidinium celinae.pdf]

# Species *Impagidinium crassimuratum*

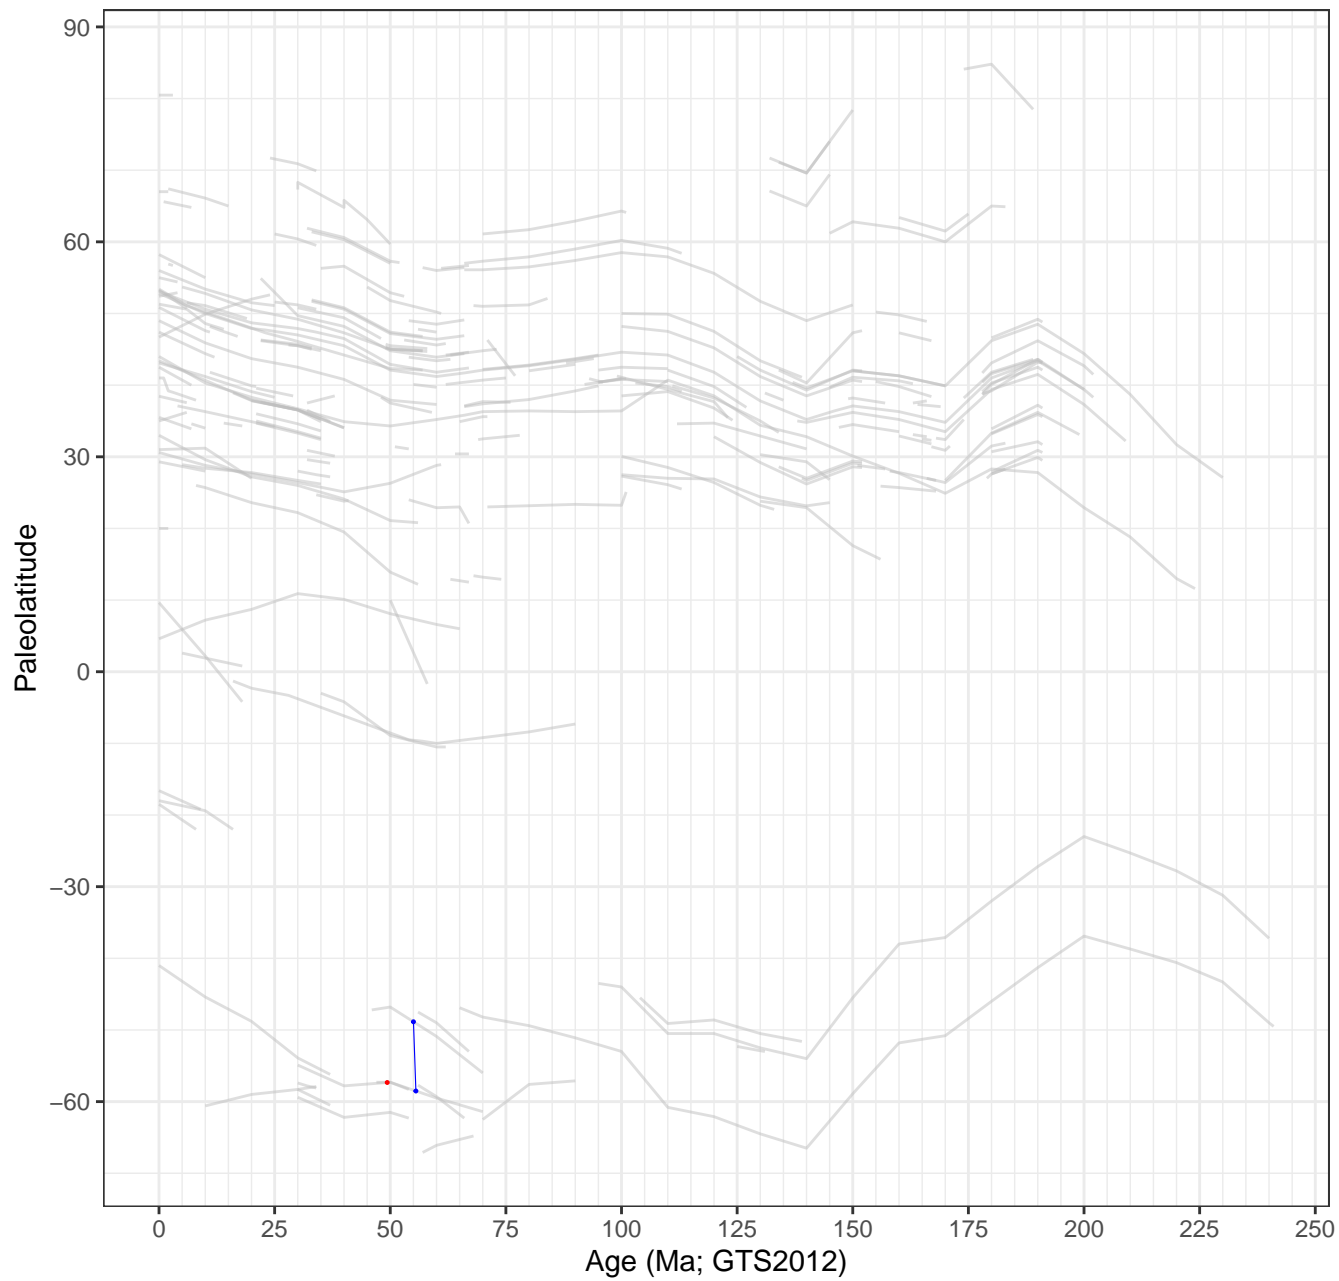

Supplement: Supplementary file 1641 [file Impagidinium crassimuratum.pdf › Supplement/Supplement 2/Species 1914 plots/Impagidinium crassimuratum.pdf]

# Species *Impagidinium cristatum*

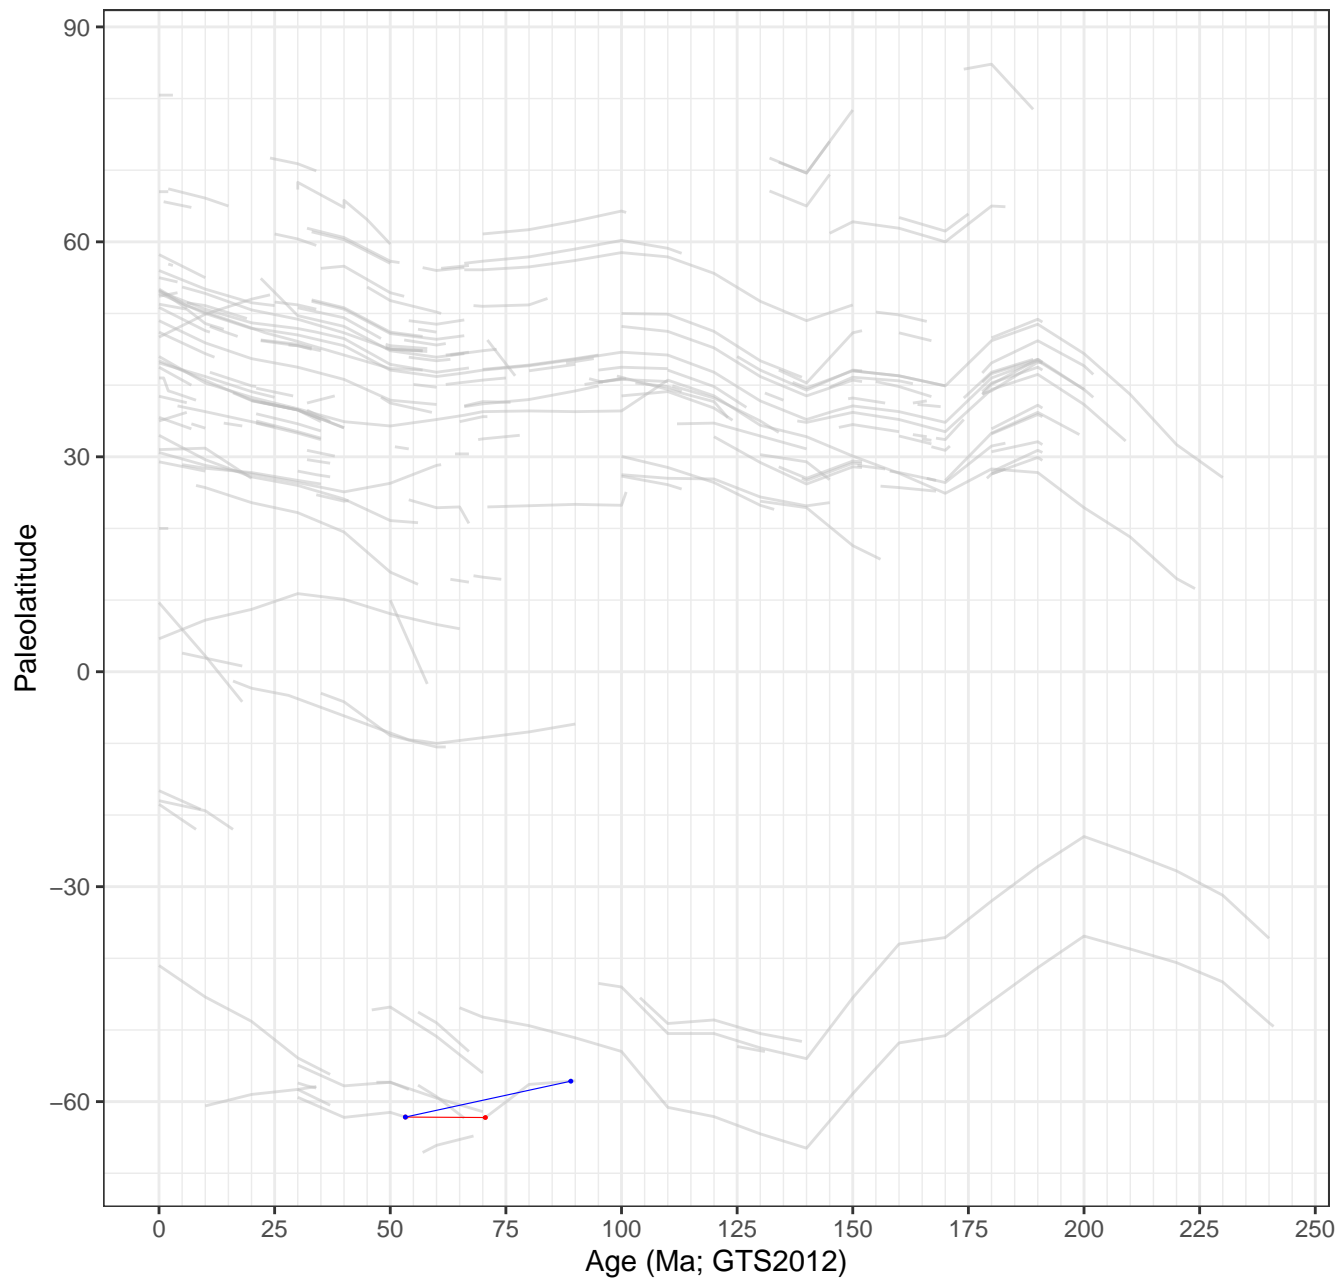

Supplement: Supplementary file 1642 [file Impagidinium cristatum.pdf › Supplement/Supplement 2/Species 1914 plots/Impagidinium cristatum.pdf]

# Species *Impagidinium crouchiaie*

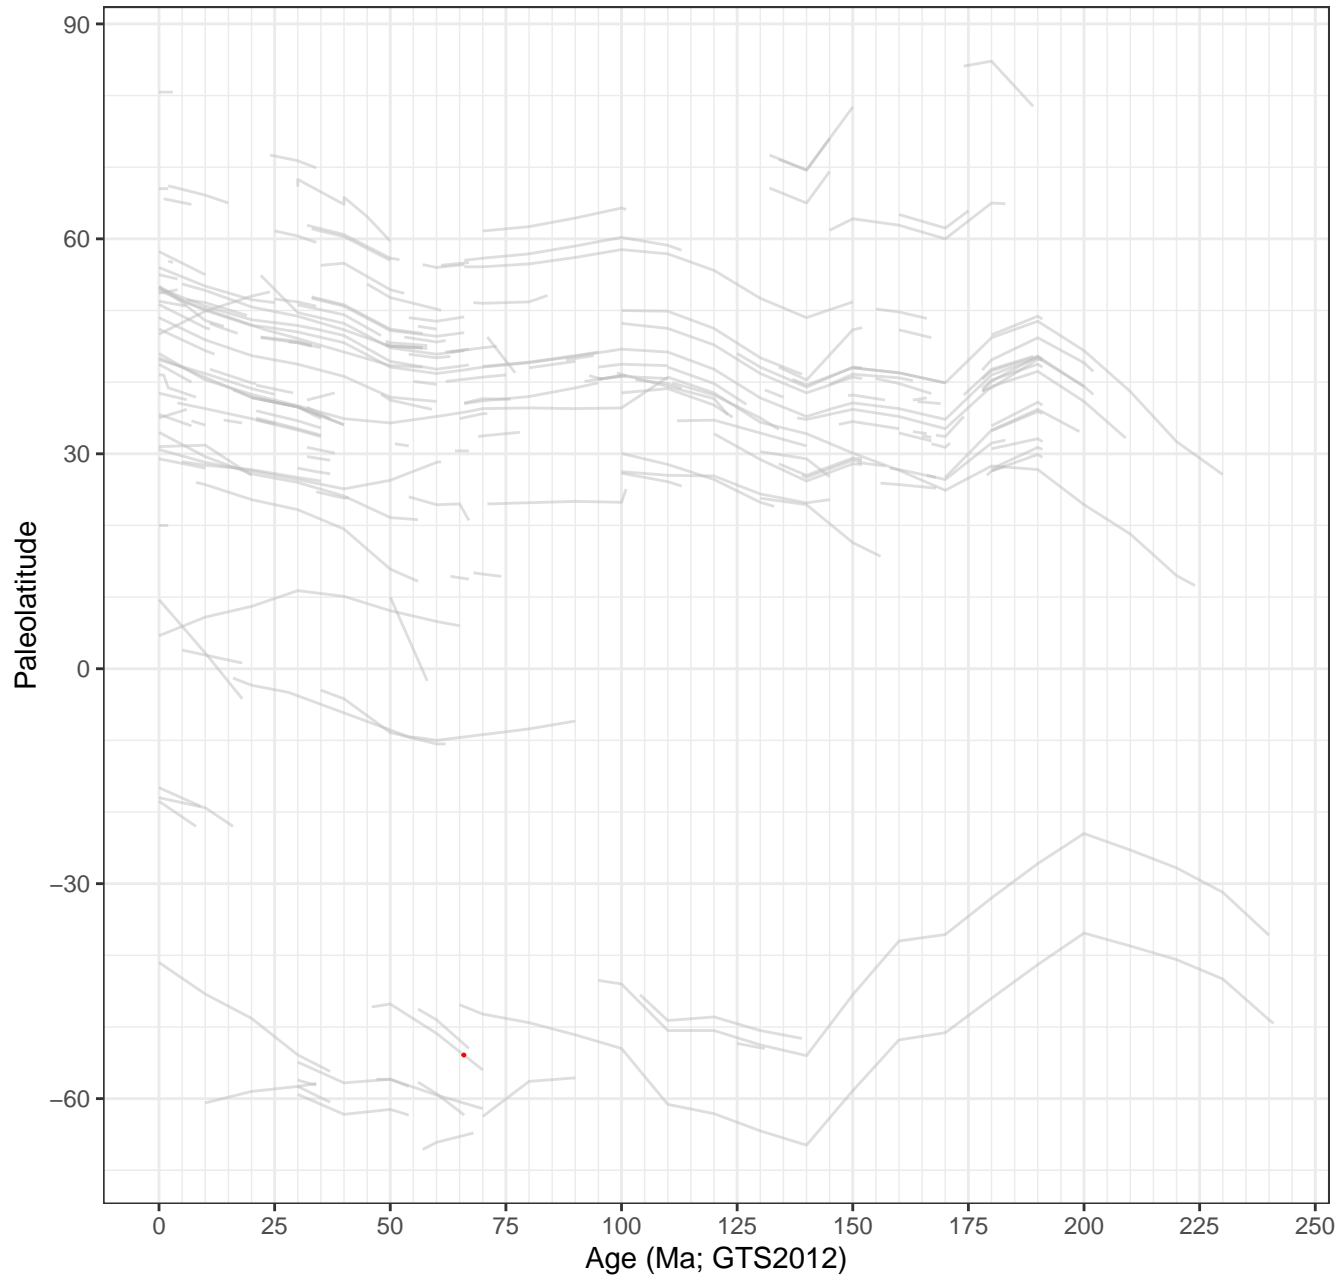

Supplement: Supplementary file 1643 [file Impagidinium crouchiae.pdf › Supplement/Supplement 2/Species 1914 plots/Impagidinium crouchiae.pdf]

# Species *Impagidinium densiverrucosum*

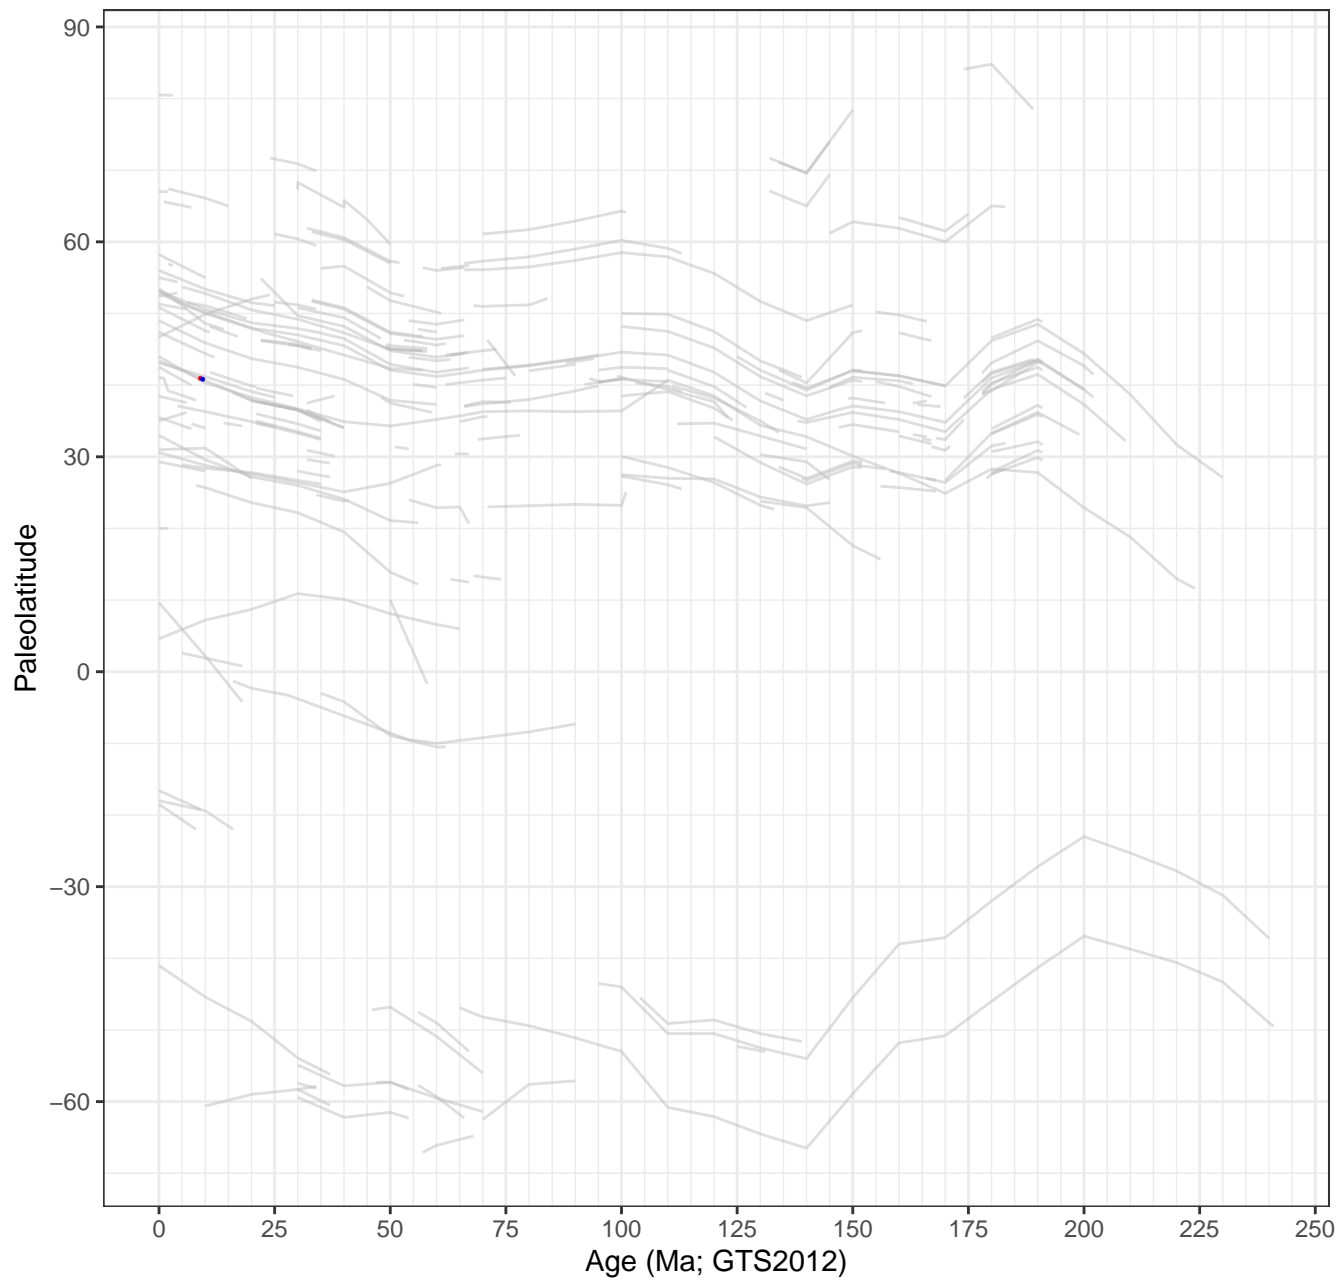

Supplement: Supplementary file 1644 [file Impagidinium densiverrucosum.pdf › Supplement/Supplement 2/Species 1914 plots/Impagidinium densiverrucosum.pdf]

# Species Impagidinium dispersitum

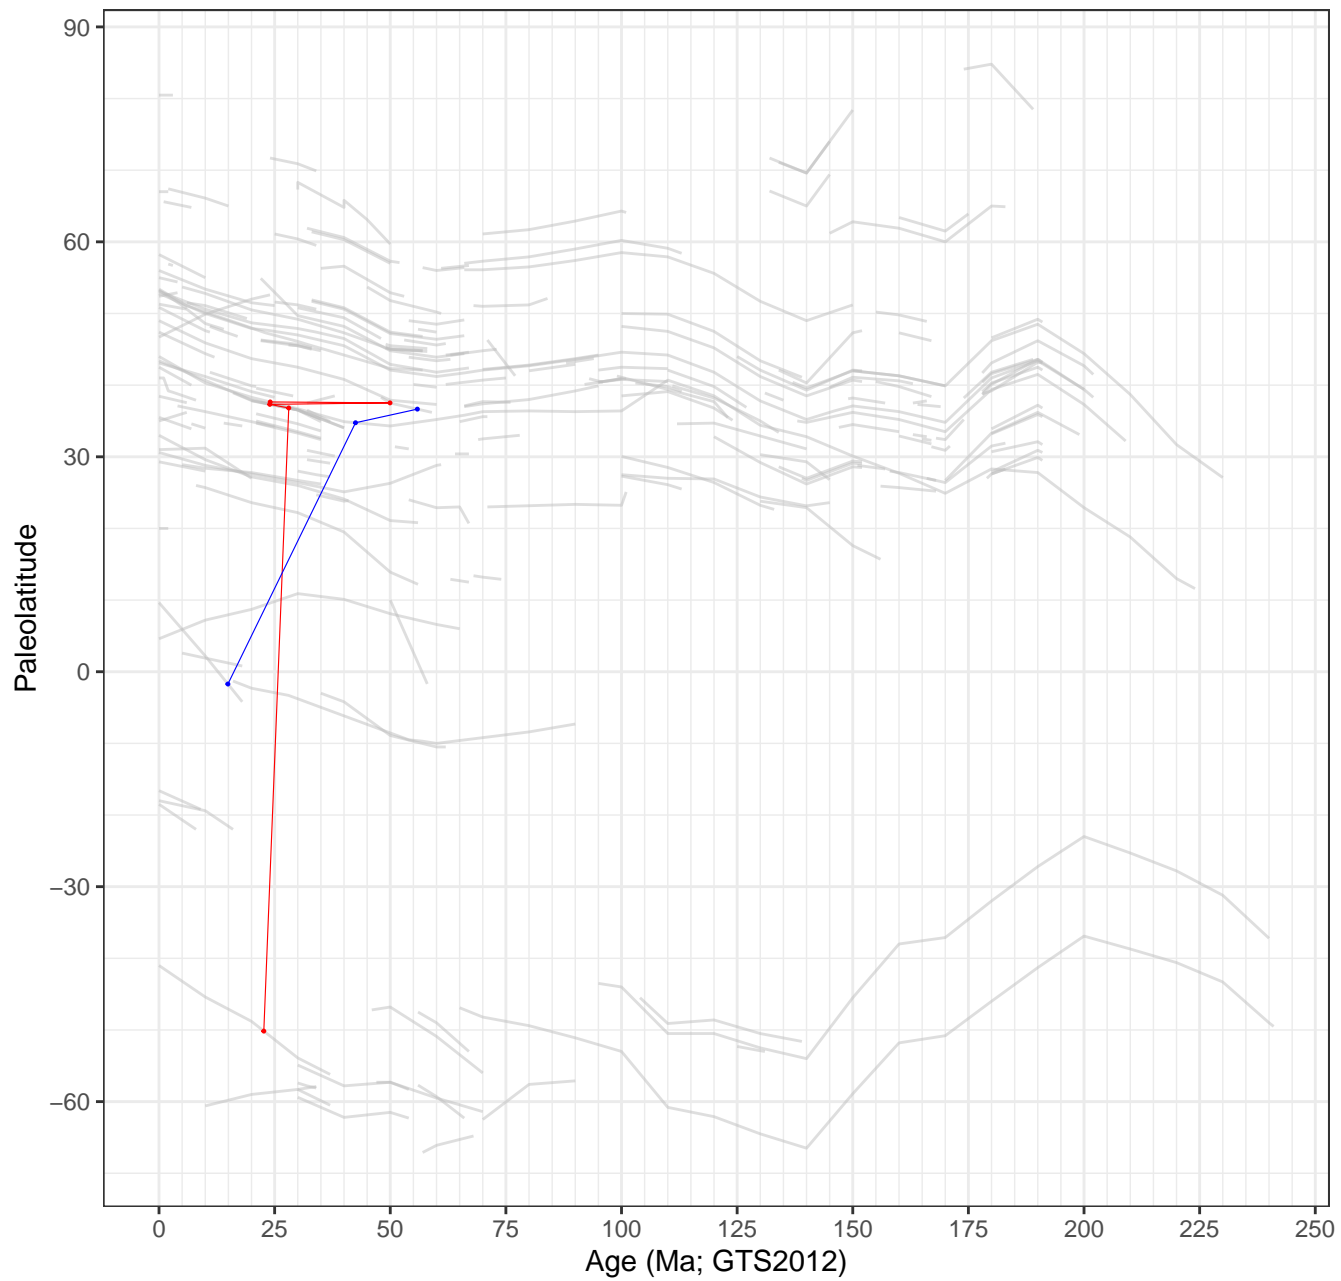

Supplement: Supplementary file 1645 [file Impagidinium dispertitum.pdf › Supplement/Supplement 2/Species 1914 plots/Impagidinium dispertitum.pdf]

# Species Impagidinium diversum

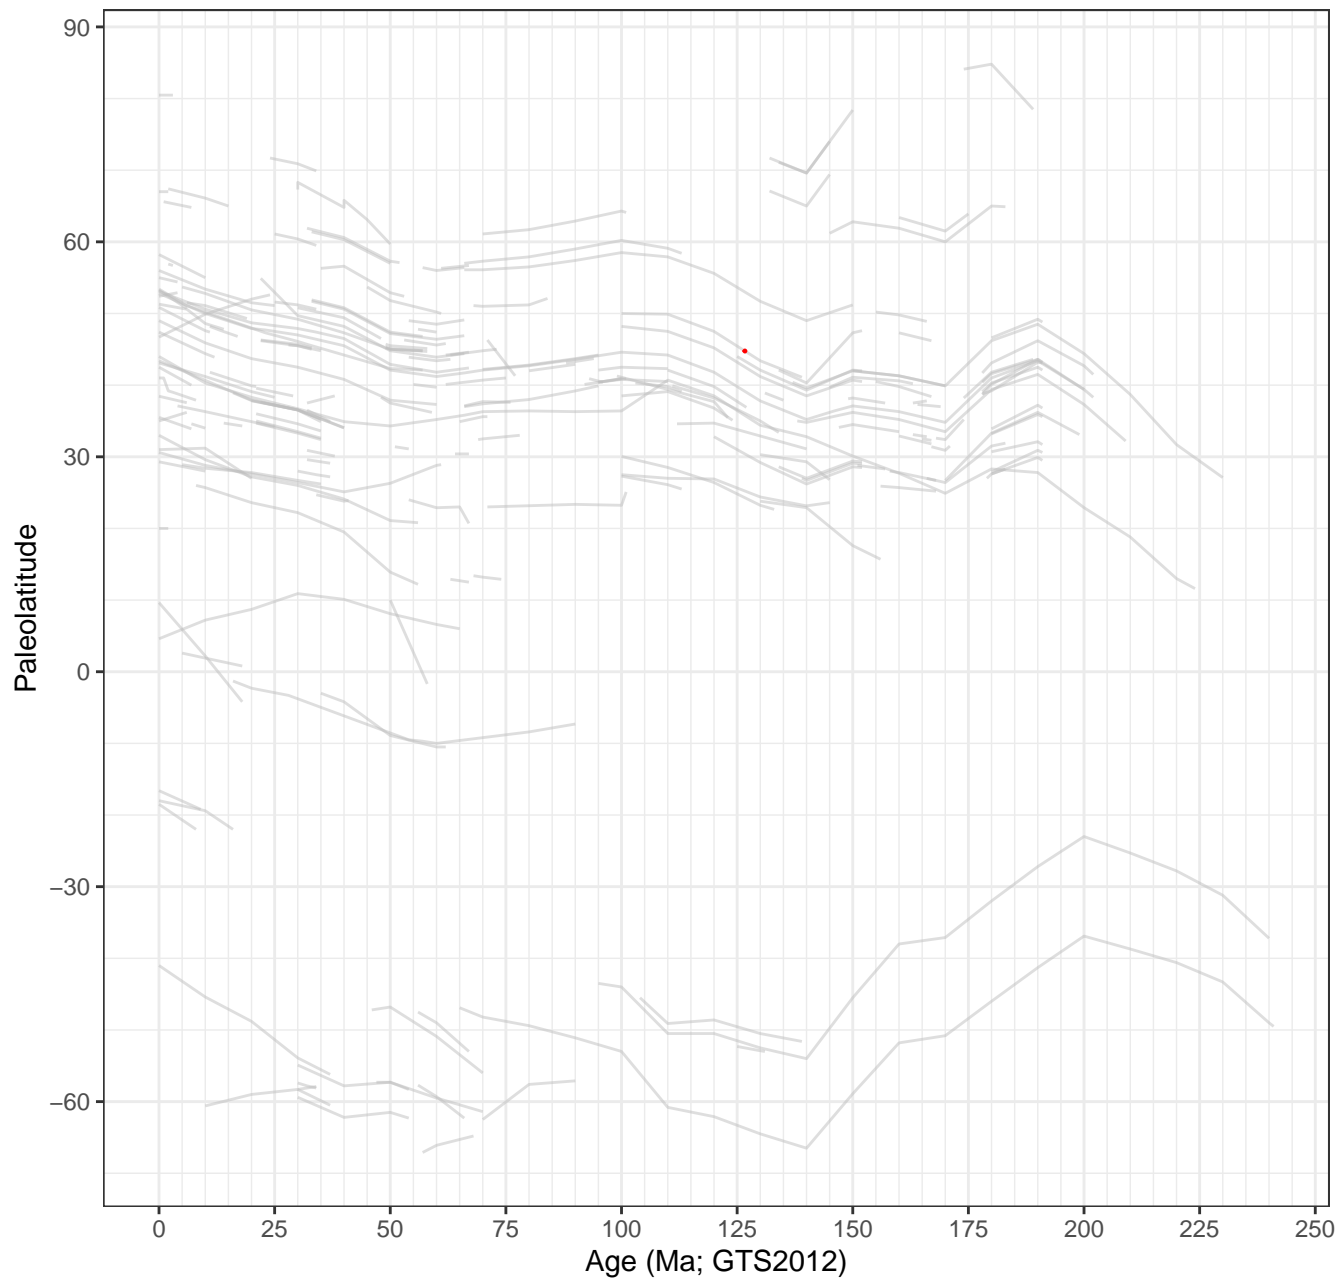

Supplement: Supplementary file 1646 [file Impagidinium diversum.pdf › Supplement/Supplement 2/Species 1914 plots/Impagidinium diversum.pdf]

# Species *Impagidinium elegans*

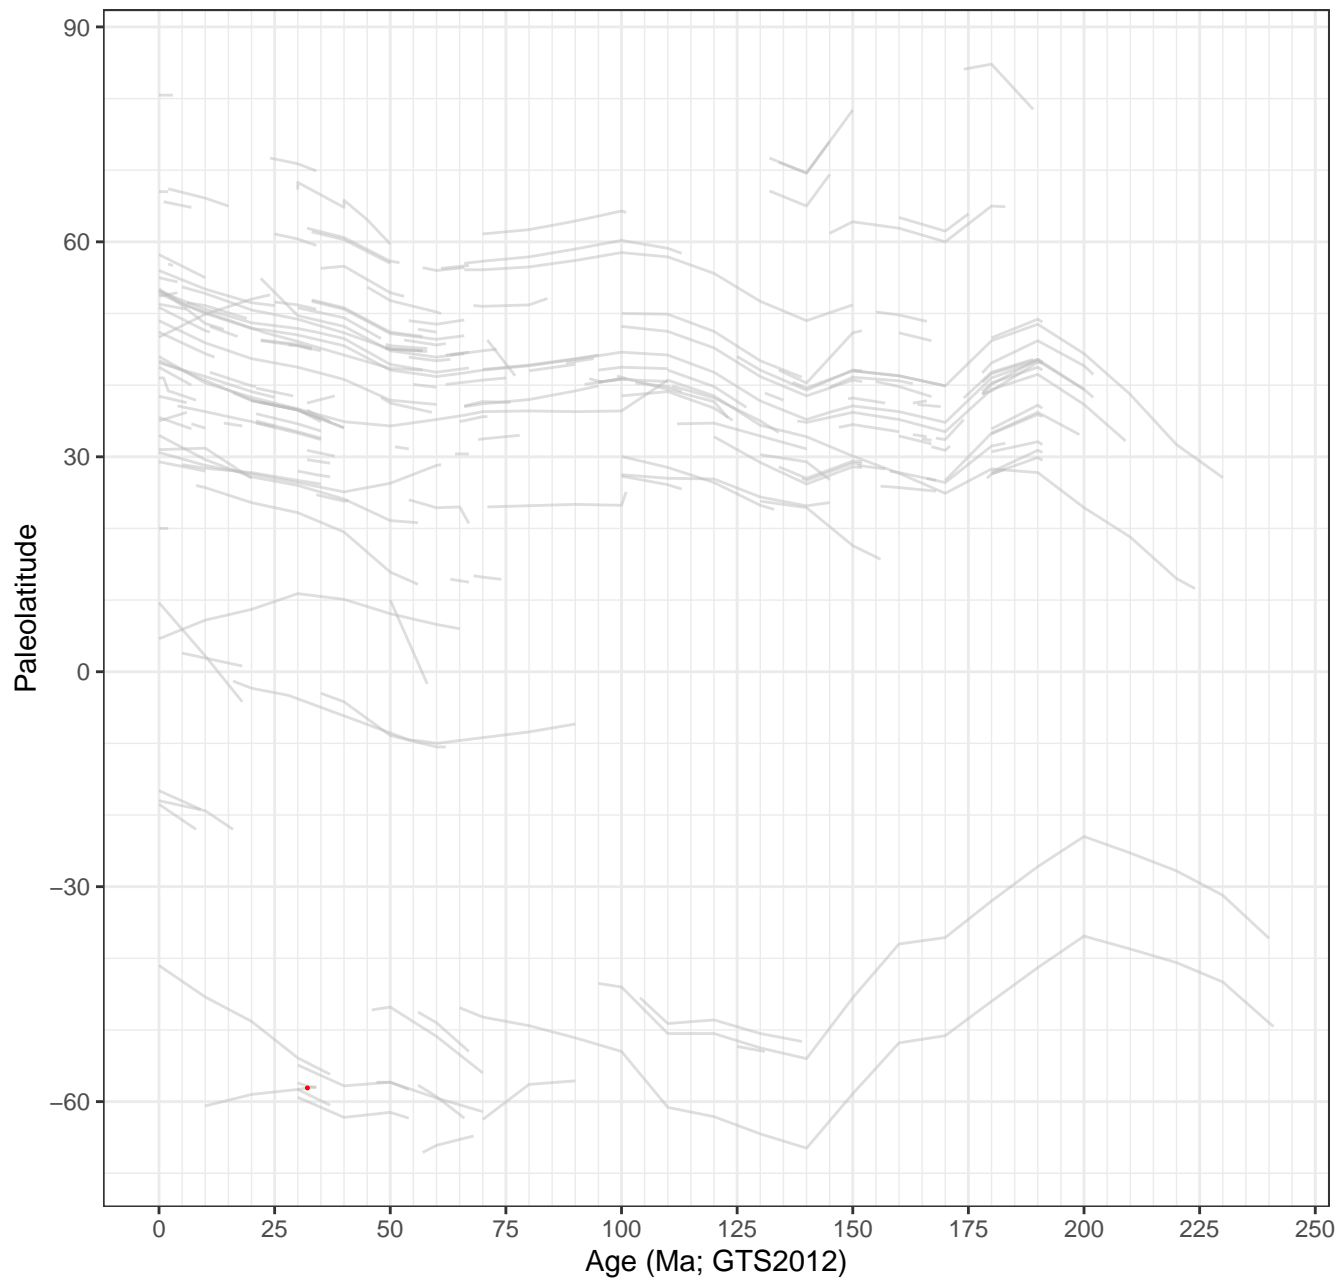

Supplement: Supplementary file 1647 [file Impagidinium elegans.pdf › Supplement/Supplement 2/Species 1914 plots/Impagidinium elegans.pdf]

# Species *Impagidinium elongatum*

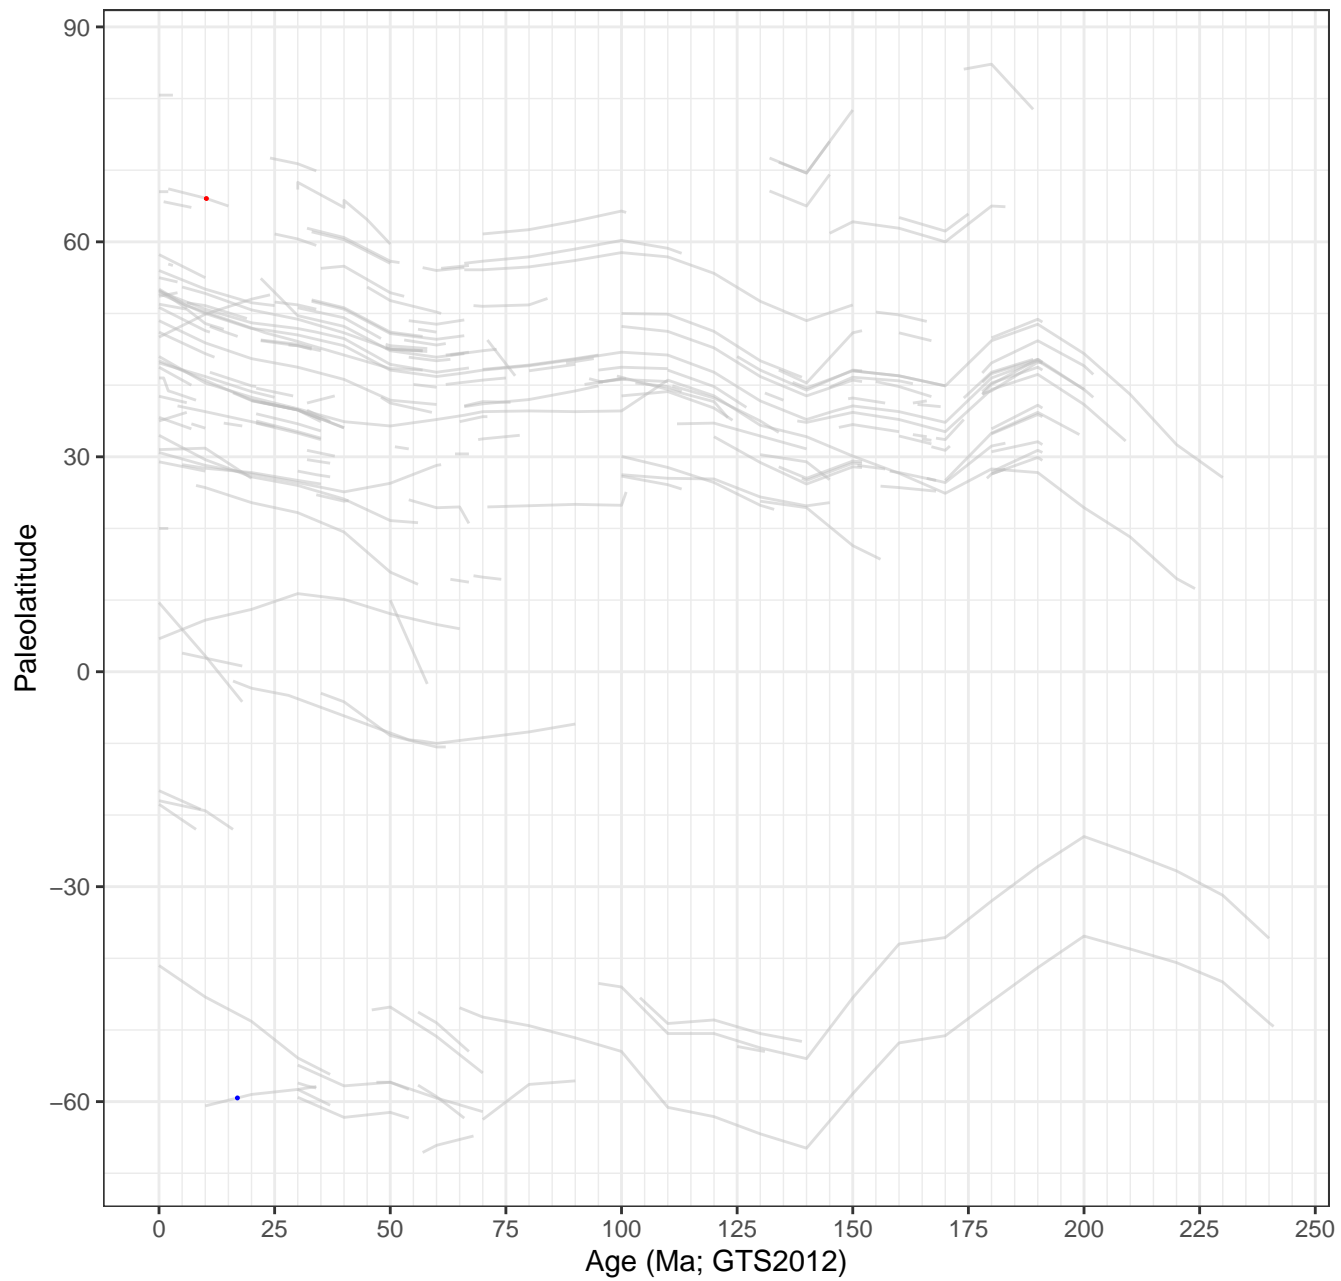

Supplement: Supplementary file 1648 [file Impagidinium elongatum.pdf › Supplement/Supplement 2/Species 1914 plots/Impagidinium elongatum.pdf]

# Species Impagidinium eugubinum

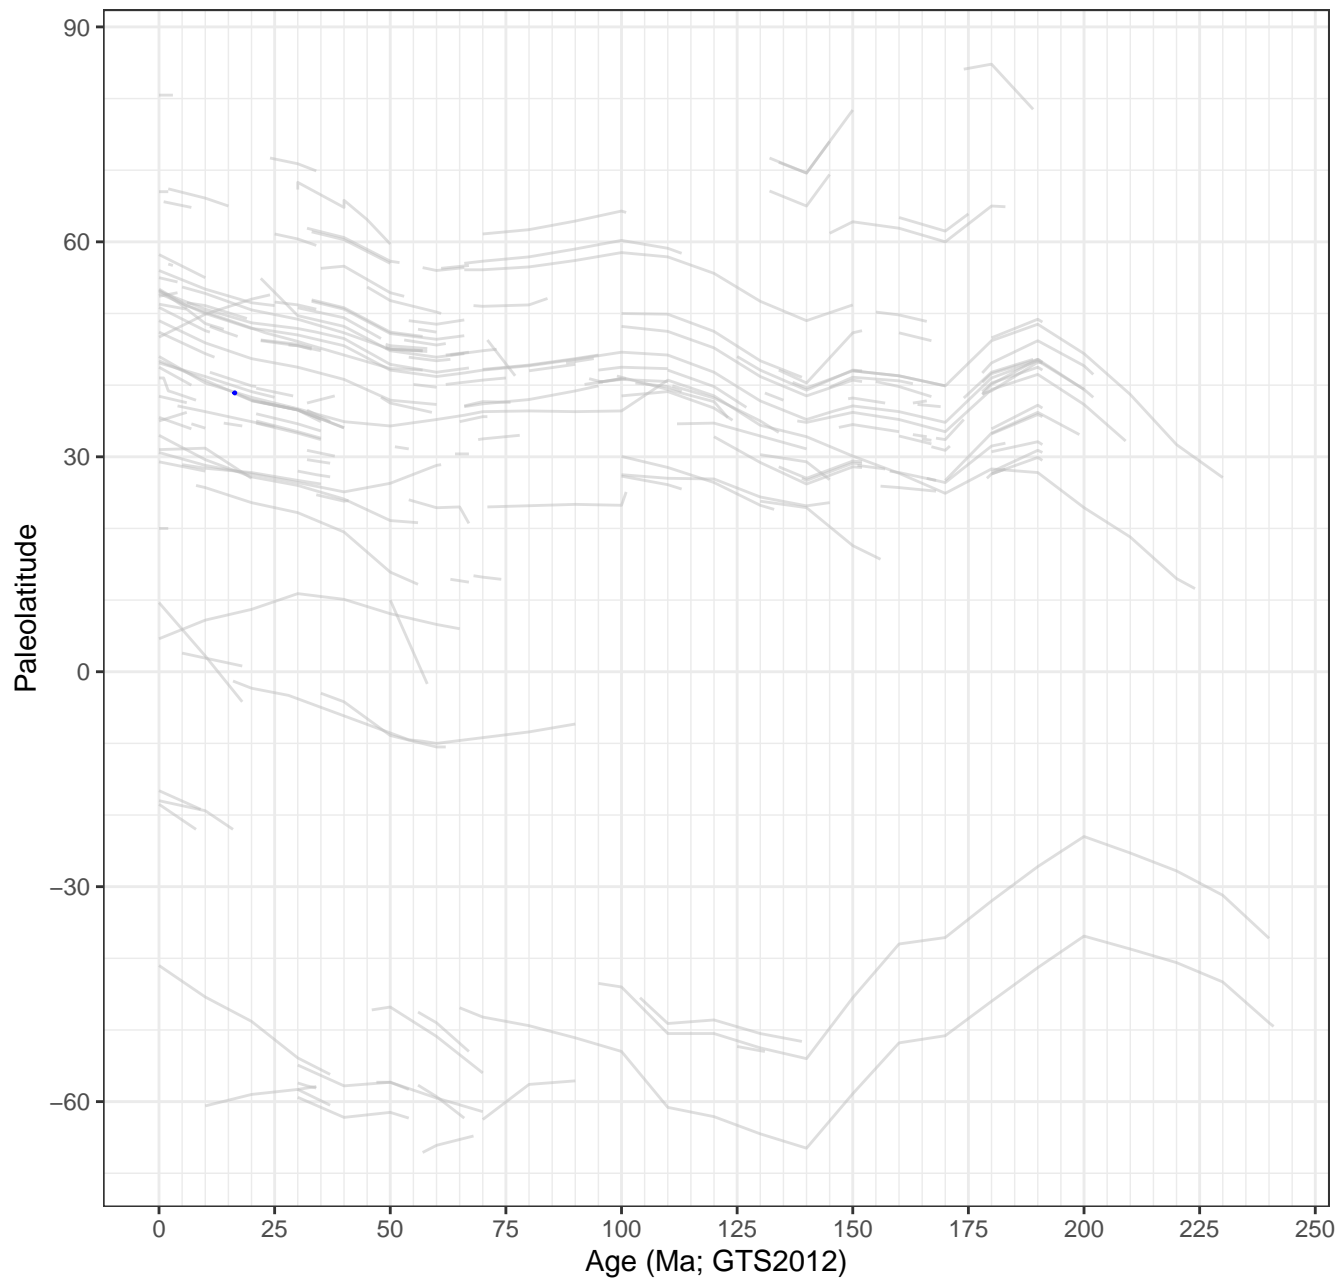

Supplement: Supplementary file 1649 [file Impagidinium eugubinum.pdf › Supplement/Supplement 2/Species 1914 plots/Impagidinium eugubinum.pdf]

# Species *Impagidinium fenestroseptatum*

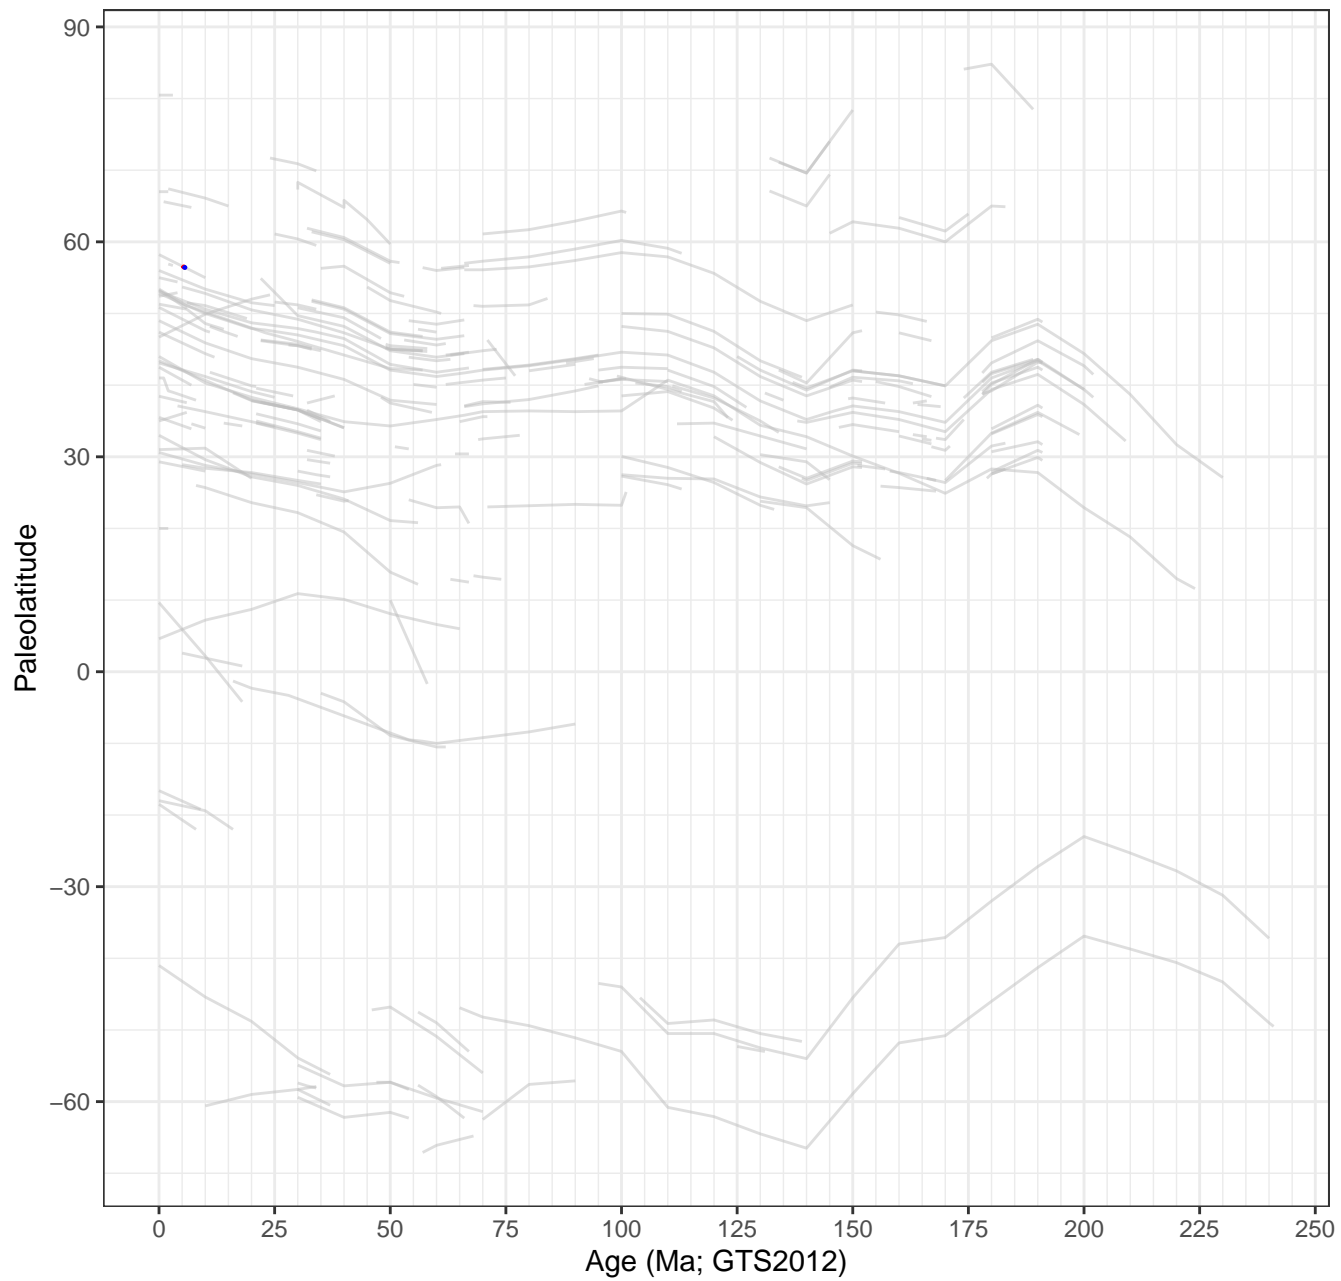

Supplement: Supplementary file 1650 [file Impagidinium fenestroseptatum.pdf › Supplement/Supplement 2/Species 1914 plots/Impagidinium fenestroseptatum.pdf]

# Species *Impagidinium hannahii*

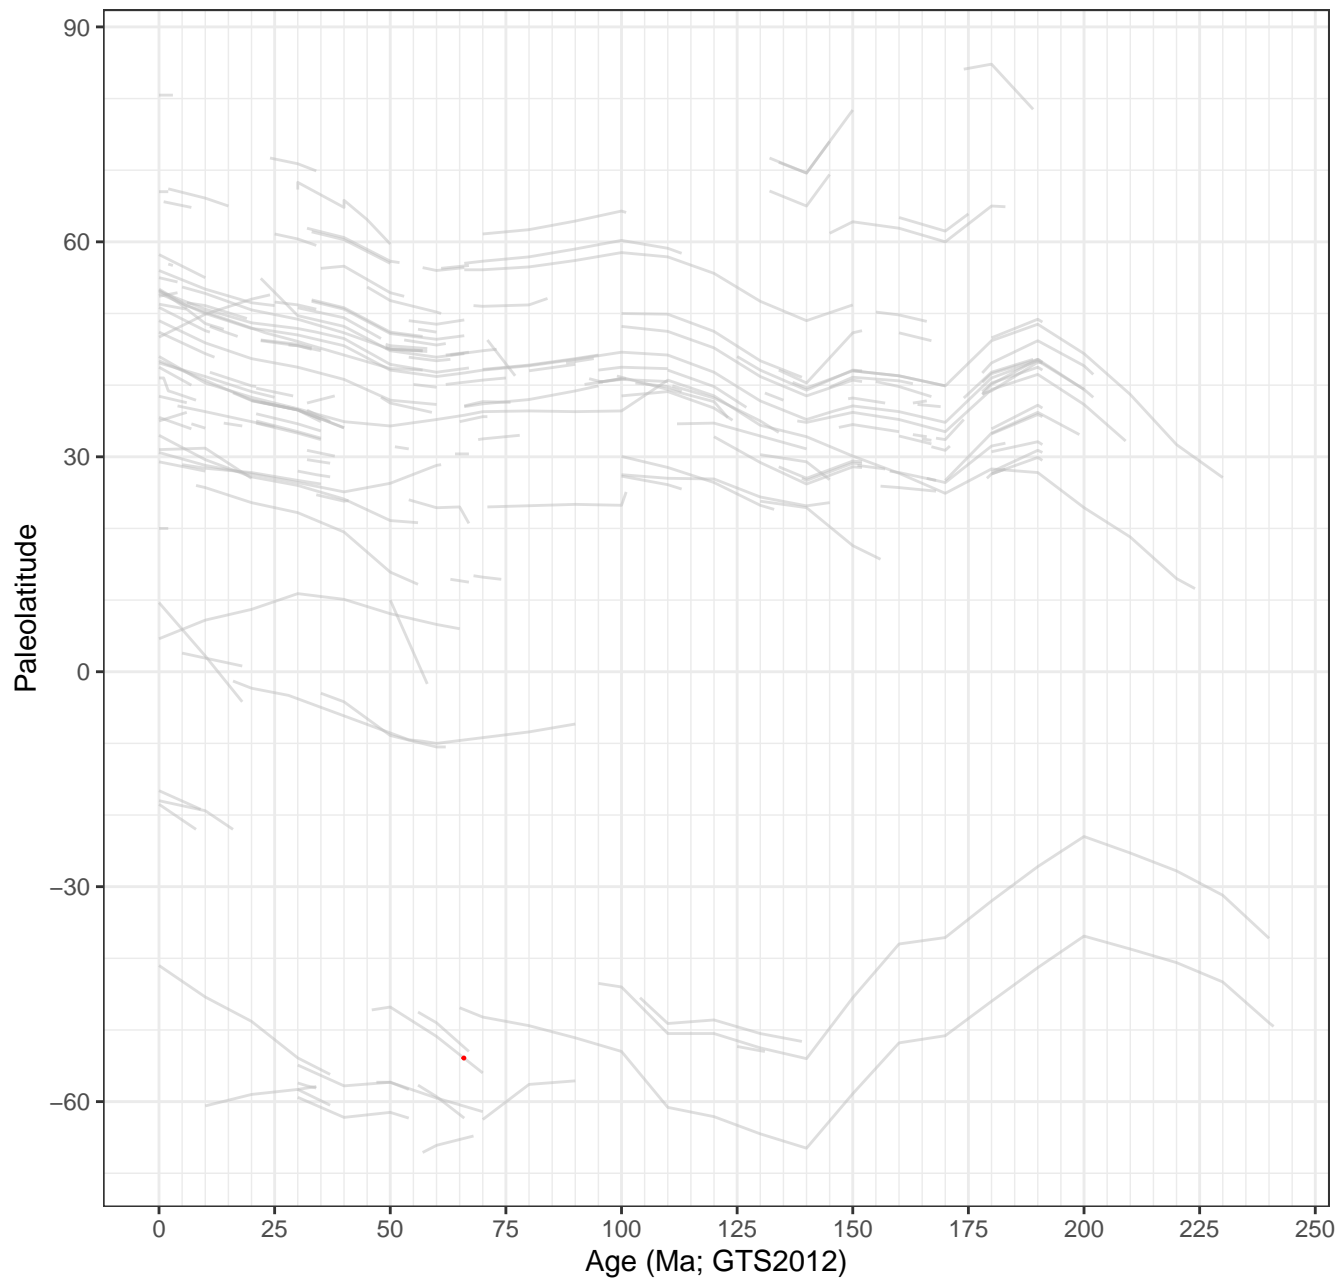

Supplement: Supplementary file 1651 [file Impagidinium hannahii.pdf › Supplement/Supplement 2/Species 1914 plots/Impagidinium hannahii.pdf]

# Species *Impagidinium japonicum*

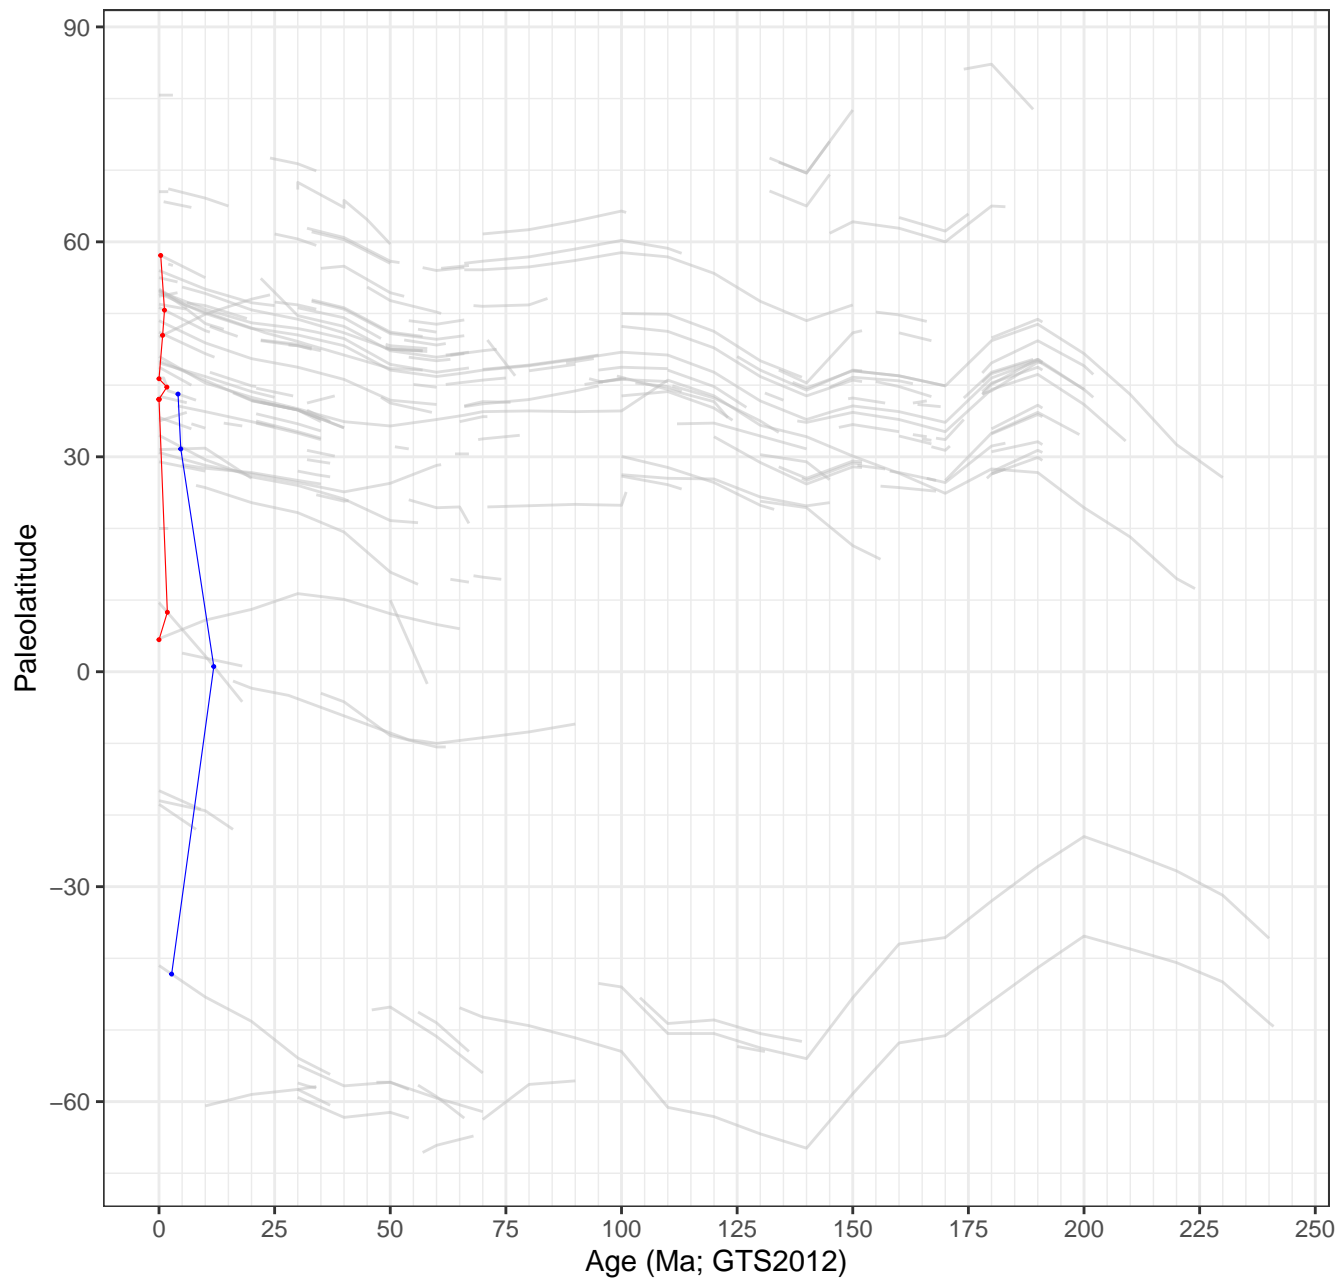

Supplement: Supplementary file 1652 [file Impagidinium japonicum.pdf › Supplement/Supplement 2/Species 1914 plots/Impagidinium japonicum.pdf]

# Species *Impagidinium maculatum*

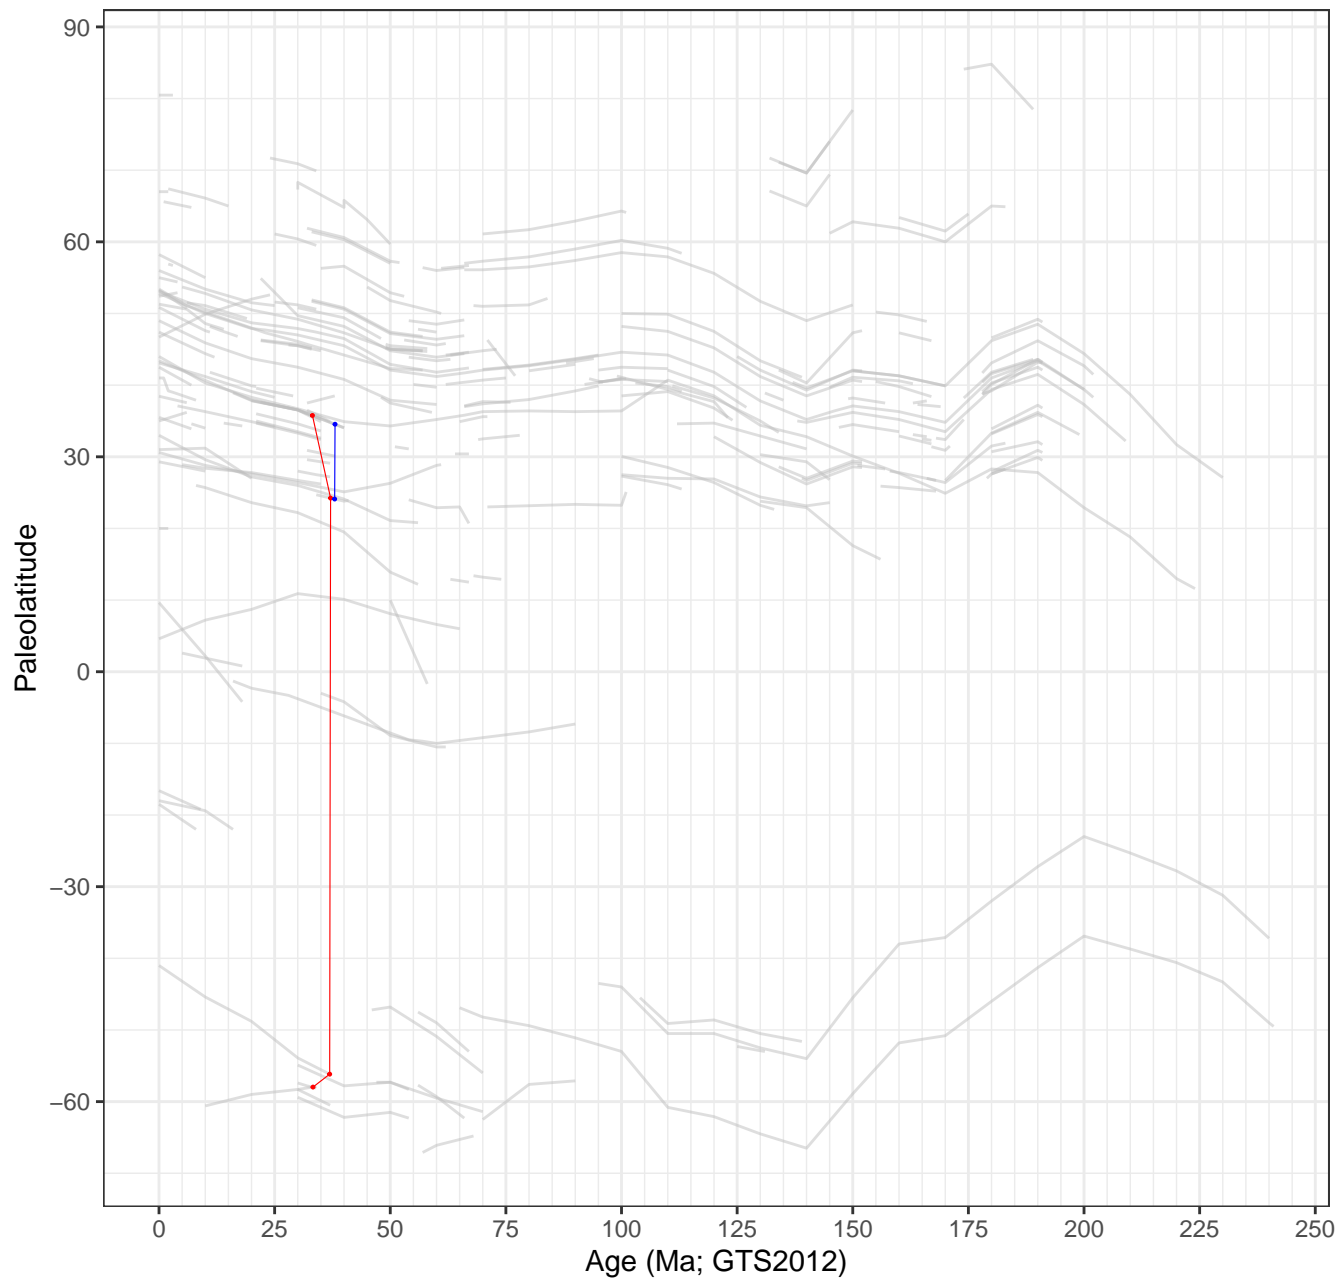

Supplement: Supplementary file 1653 [file Impagidinium maculatum.pdf › Supplement/Supplement 2/Species 1914 plots/Impagidinium maculatum.pdf]

# Species Impagidinium minus

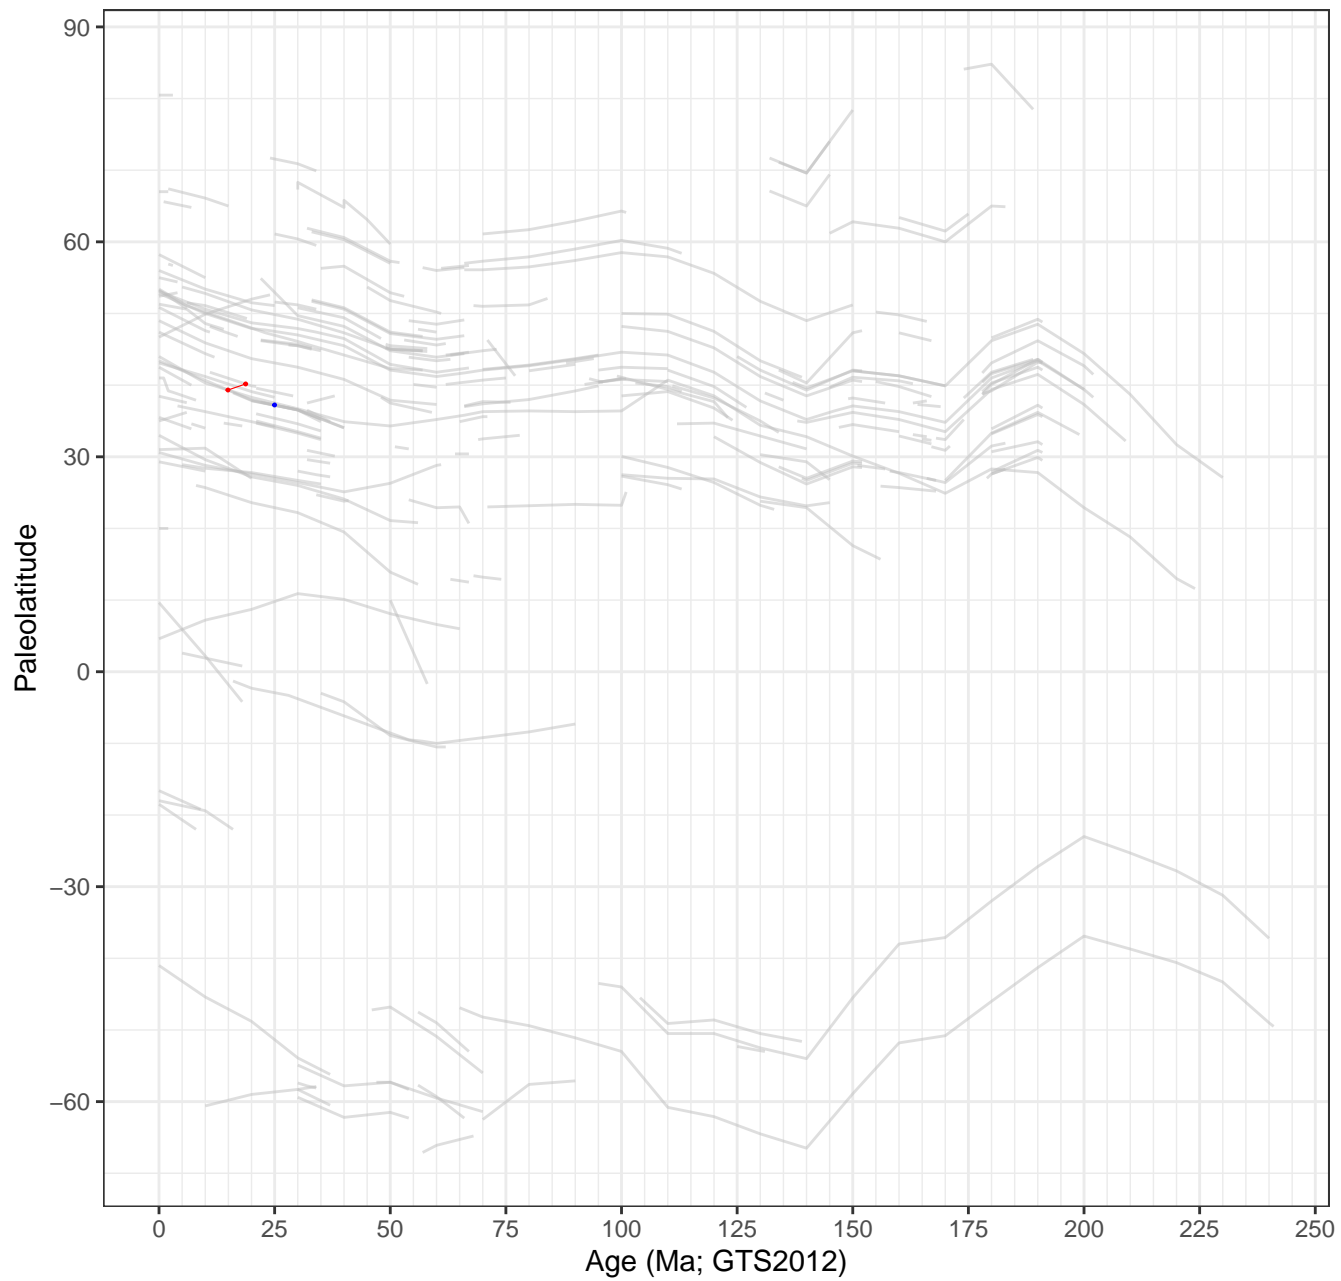

Supplement: Supplementary file 1654 [file Impagidinium minus.pdf › Supplement/Supplement 2/Species 1914 plots/Impagidinium minus.pdf]

# Species Impagidinium multiplex

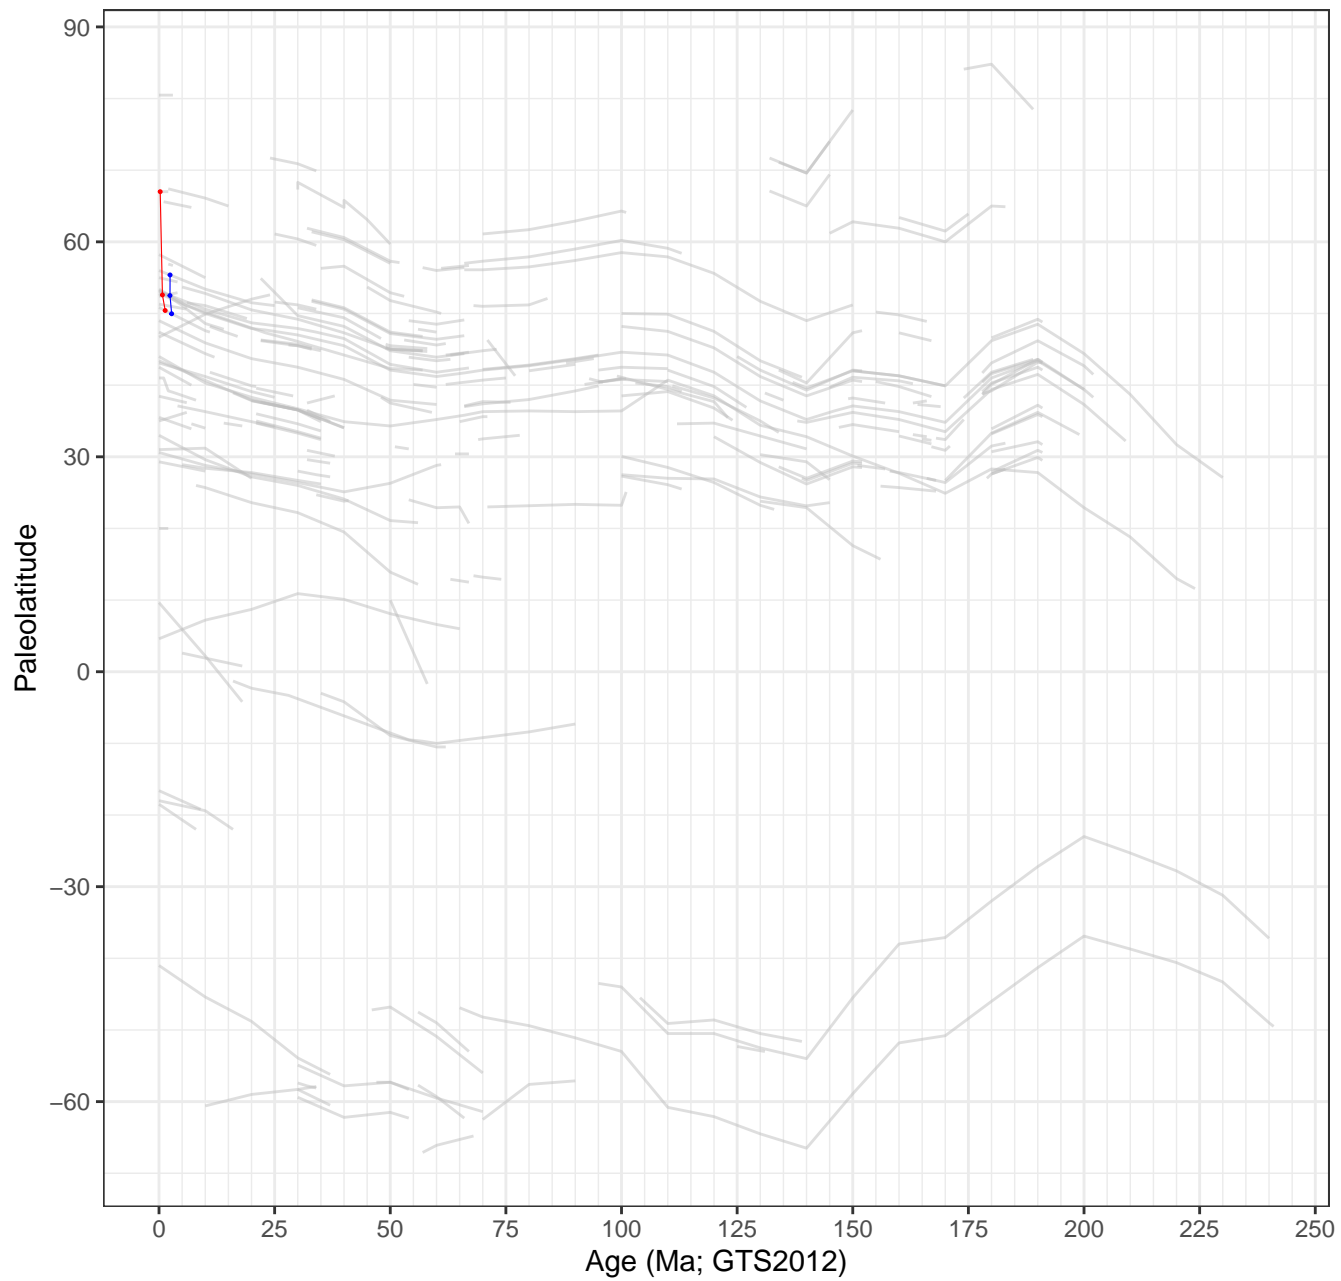

Supplement: Supplementary file 1655 [file Impagidinium multiplex.pdf › Supplement/Supplement 2/Species 1914 plots/Impagidinium multiplex.pdf]

# Species *Impagidinium obscurum*

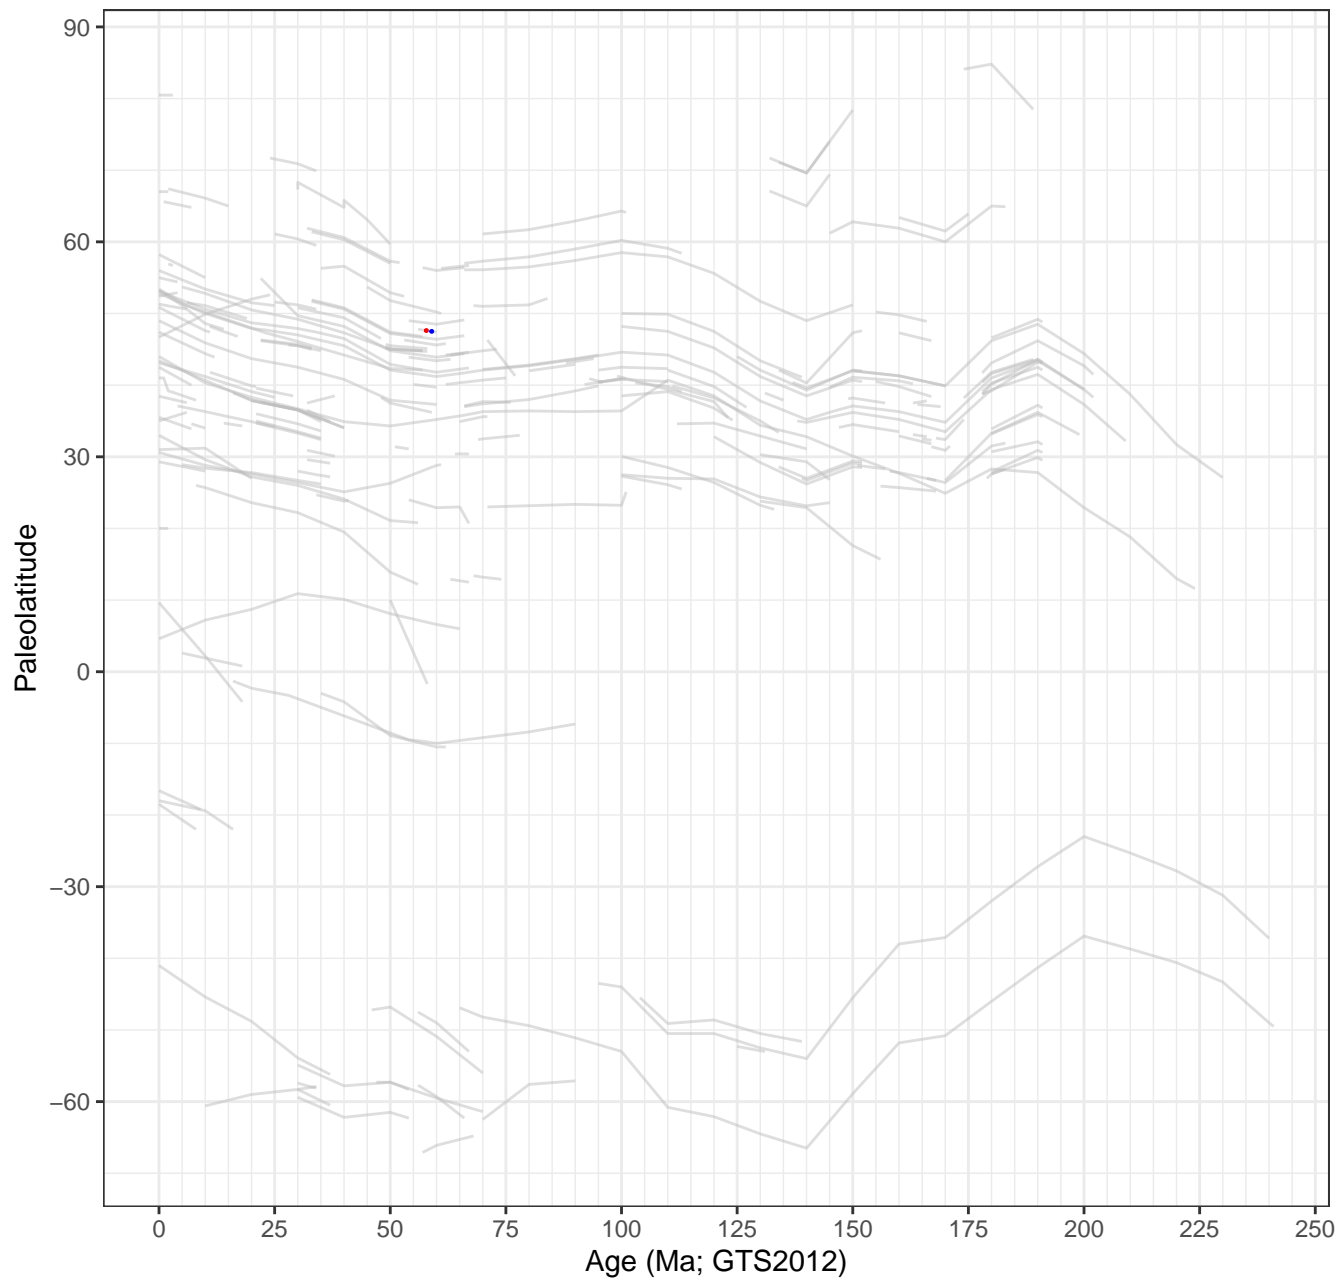

Supplement: Supplementary file 1656 [file Impagidinium obscurum.pdf › Supplement/Supplement 2/Species 1914 plots/Impagidinium obscurum.pdf]

# Species *Impagidinium pallidum*

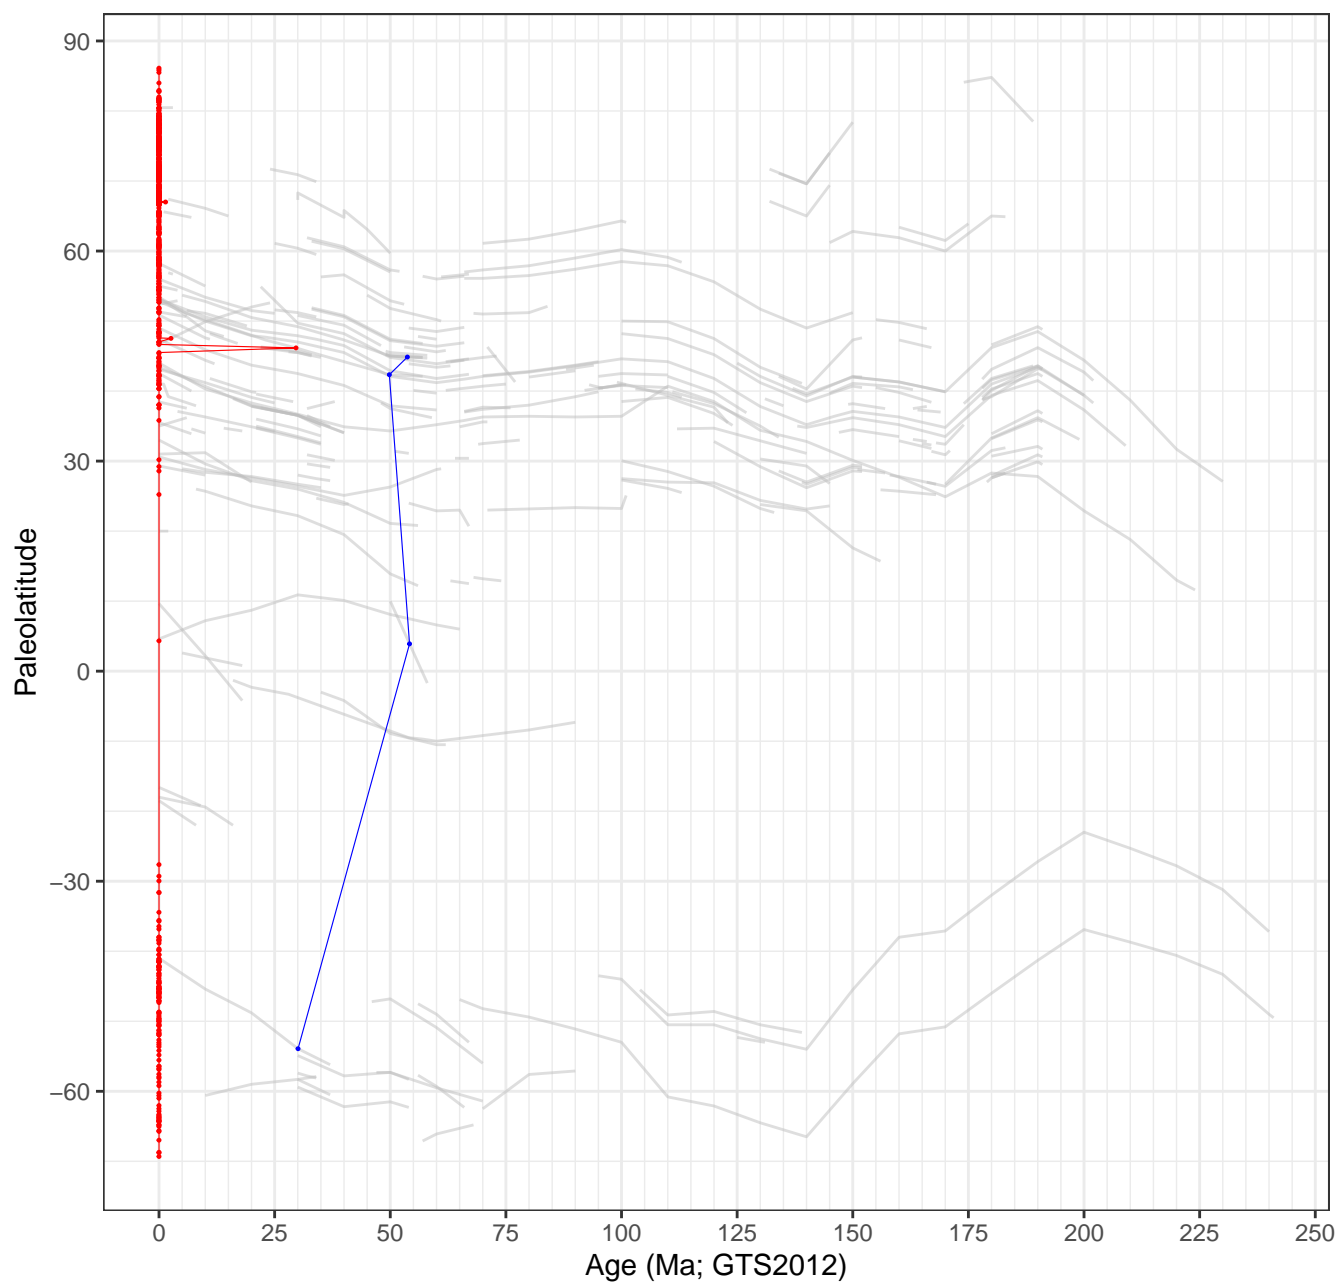

Supplement: Supplementary file 1657 [file Impagidinium pallidum.pdf › Supplement/Supplement 2/Species 1914 plots/Impagidinium pallidum.pdf]

# Species *Impagidinium paradoxum*

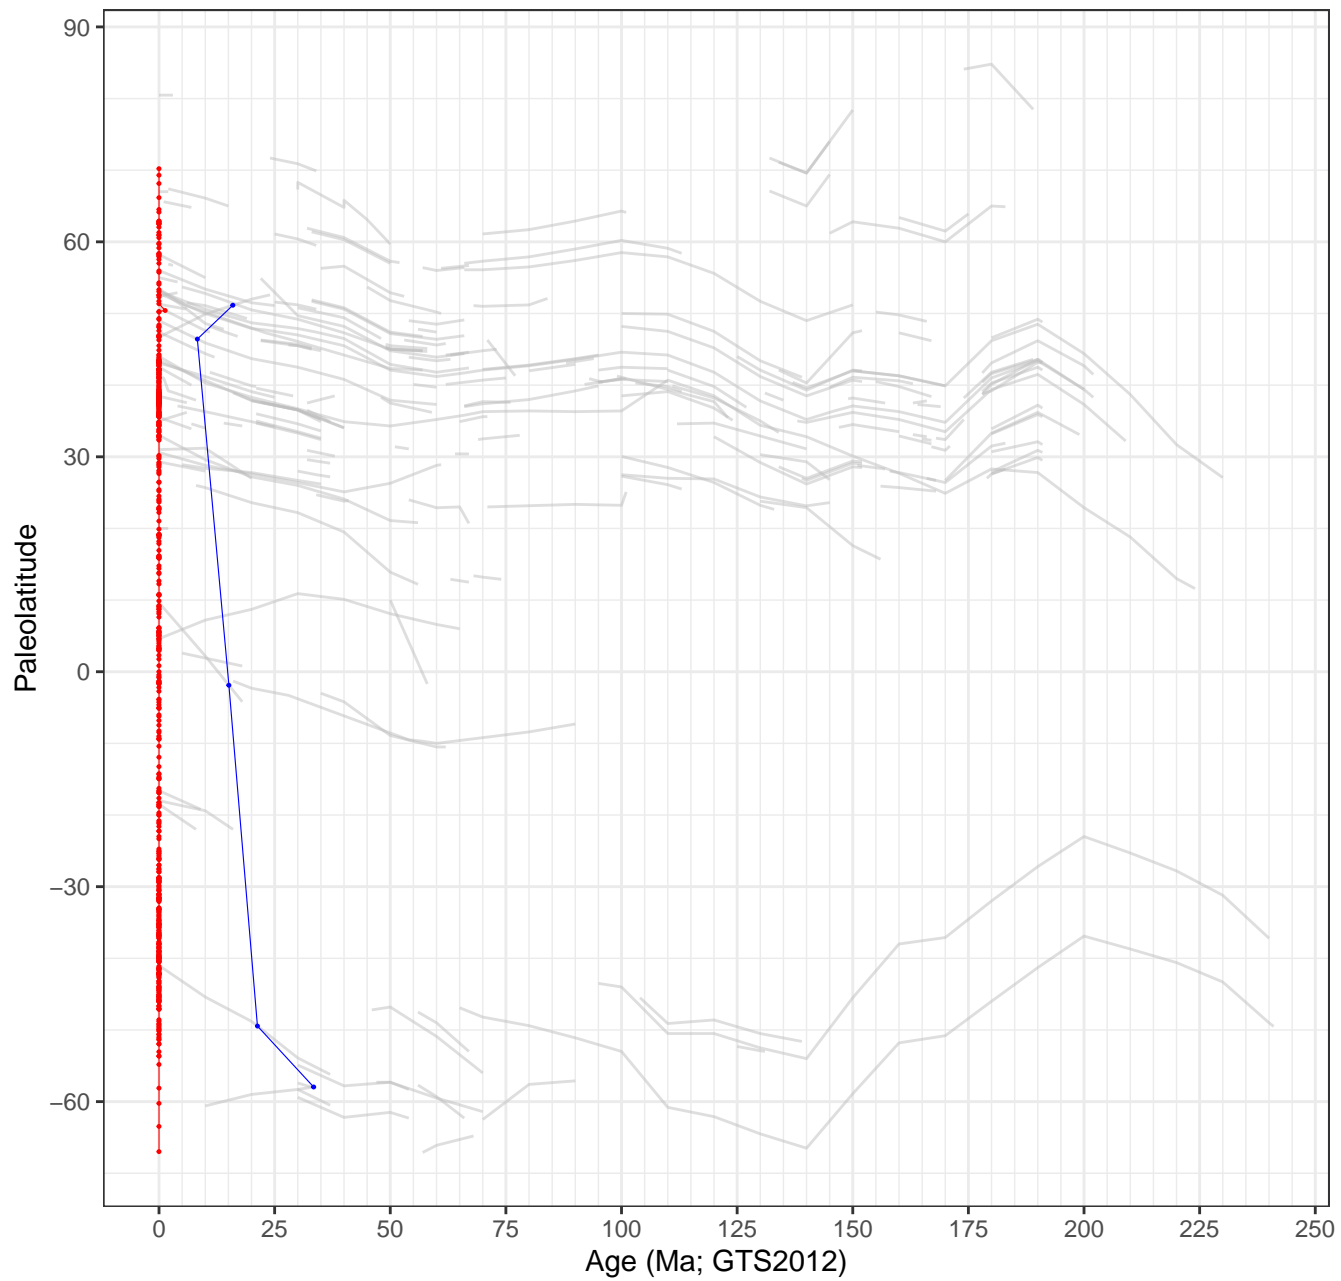

Supplement: Supplementary file 1658 [file Impagidinium paradoxum.pdf › Supplement/Supplement 2/Species 1914 plots/Impagidinium paradoxum.pdf]

# Species *Impagidinium parvireticulatum*

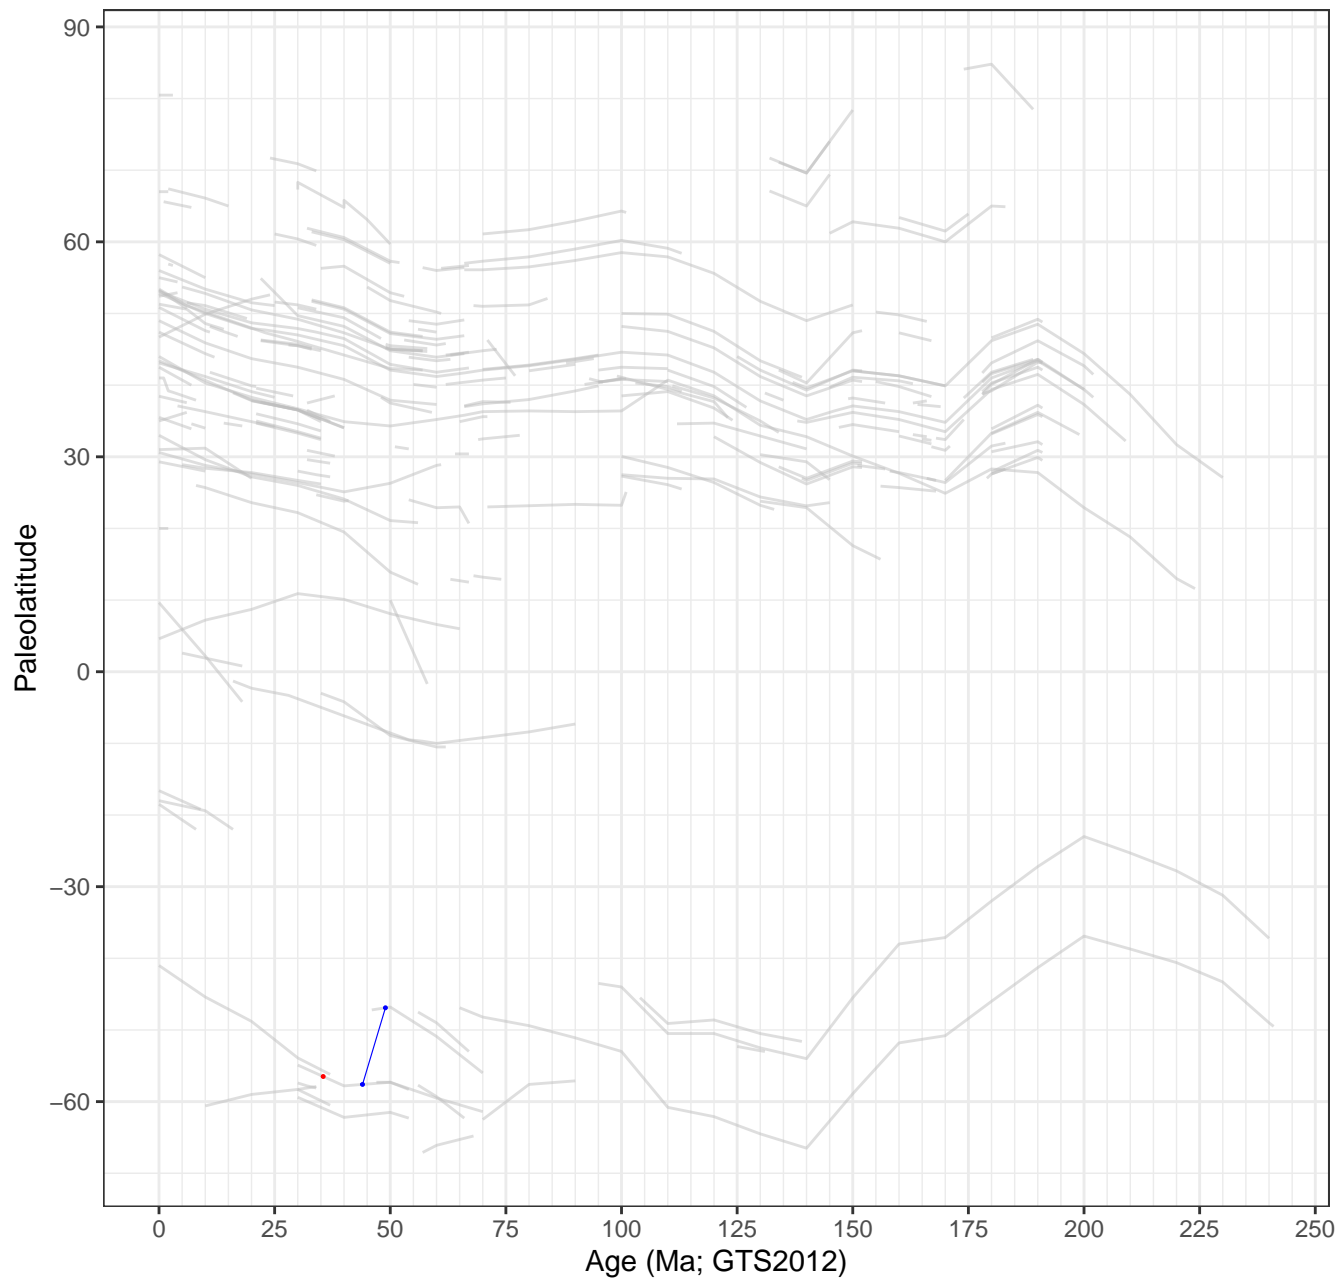

Supplement: Supplementary file 1659 [file Impagidinium parvireticulatum.pdf › Supplement/Supplement 2/Species 1914 plots/Impagidinium parvireticulatum.pdf]

# Species *Impagidinium patulum*

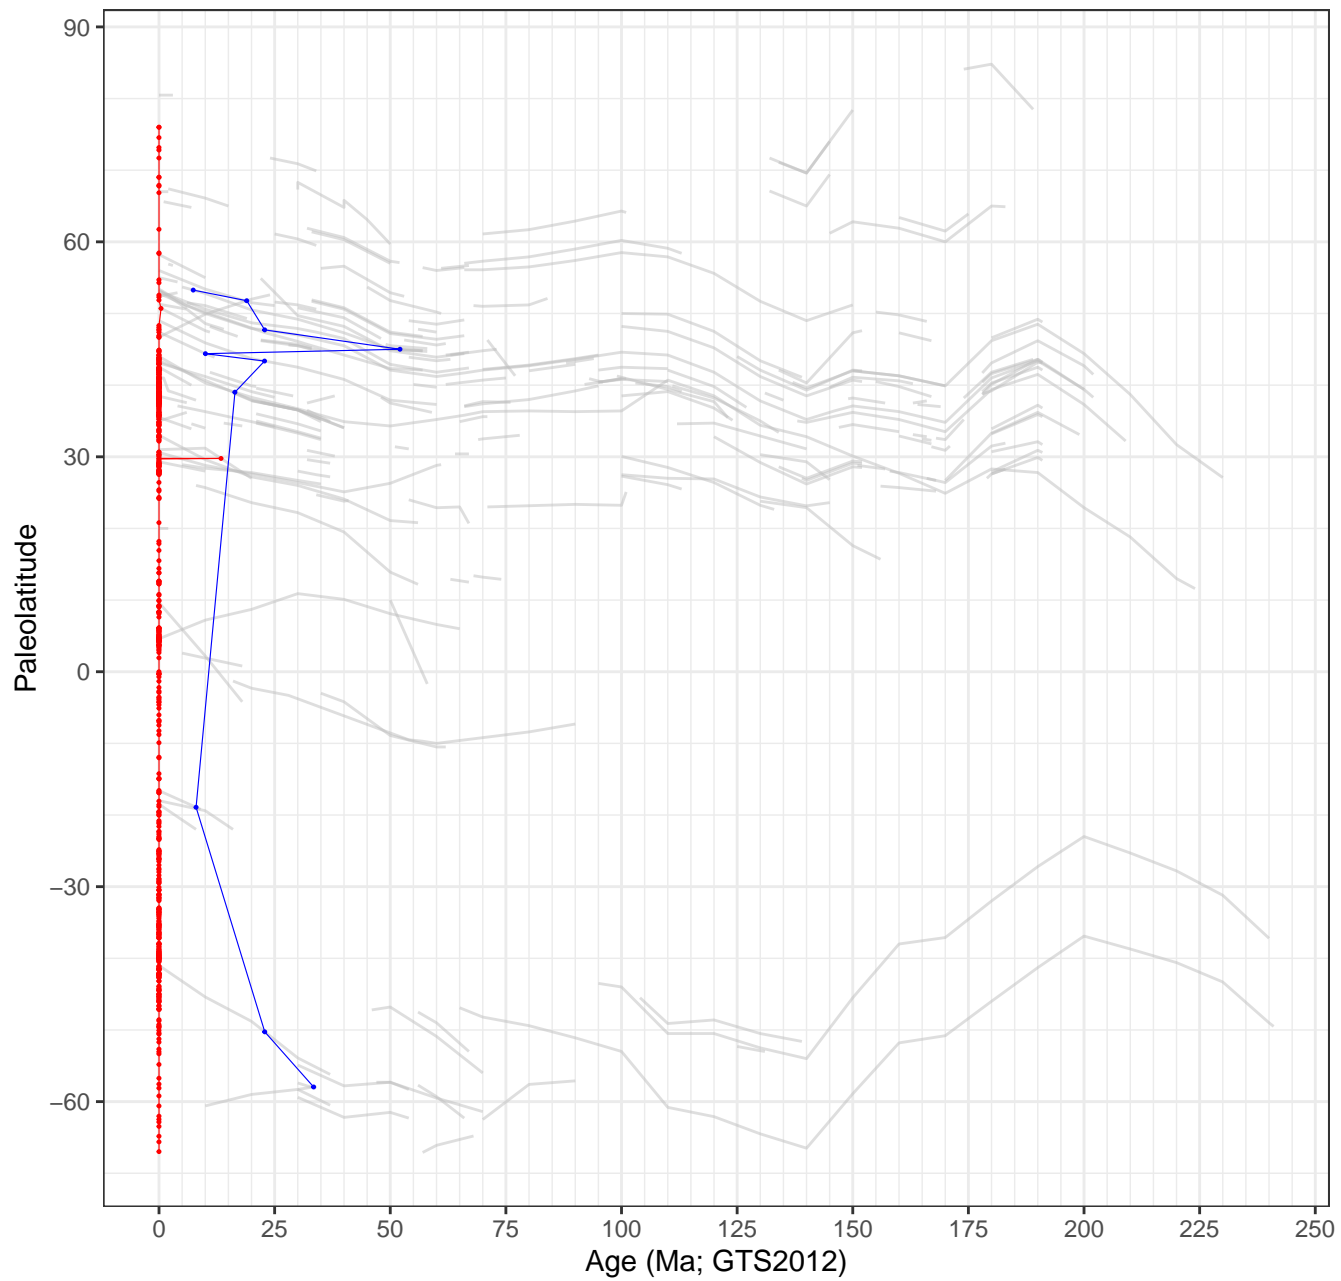

Supplement: Supplementary file 1660 [file Impagidinium patulum.pdf › Supplement/Supplement 2/Species 1914 plots/Impagidinium patulum.pdf]

# Species *Impagidinium phlyctaena*

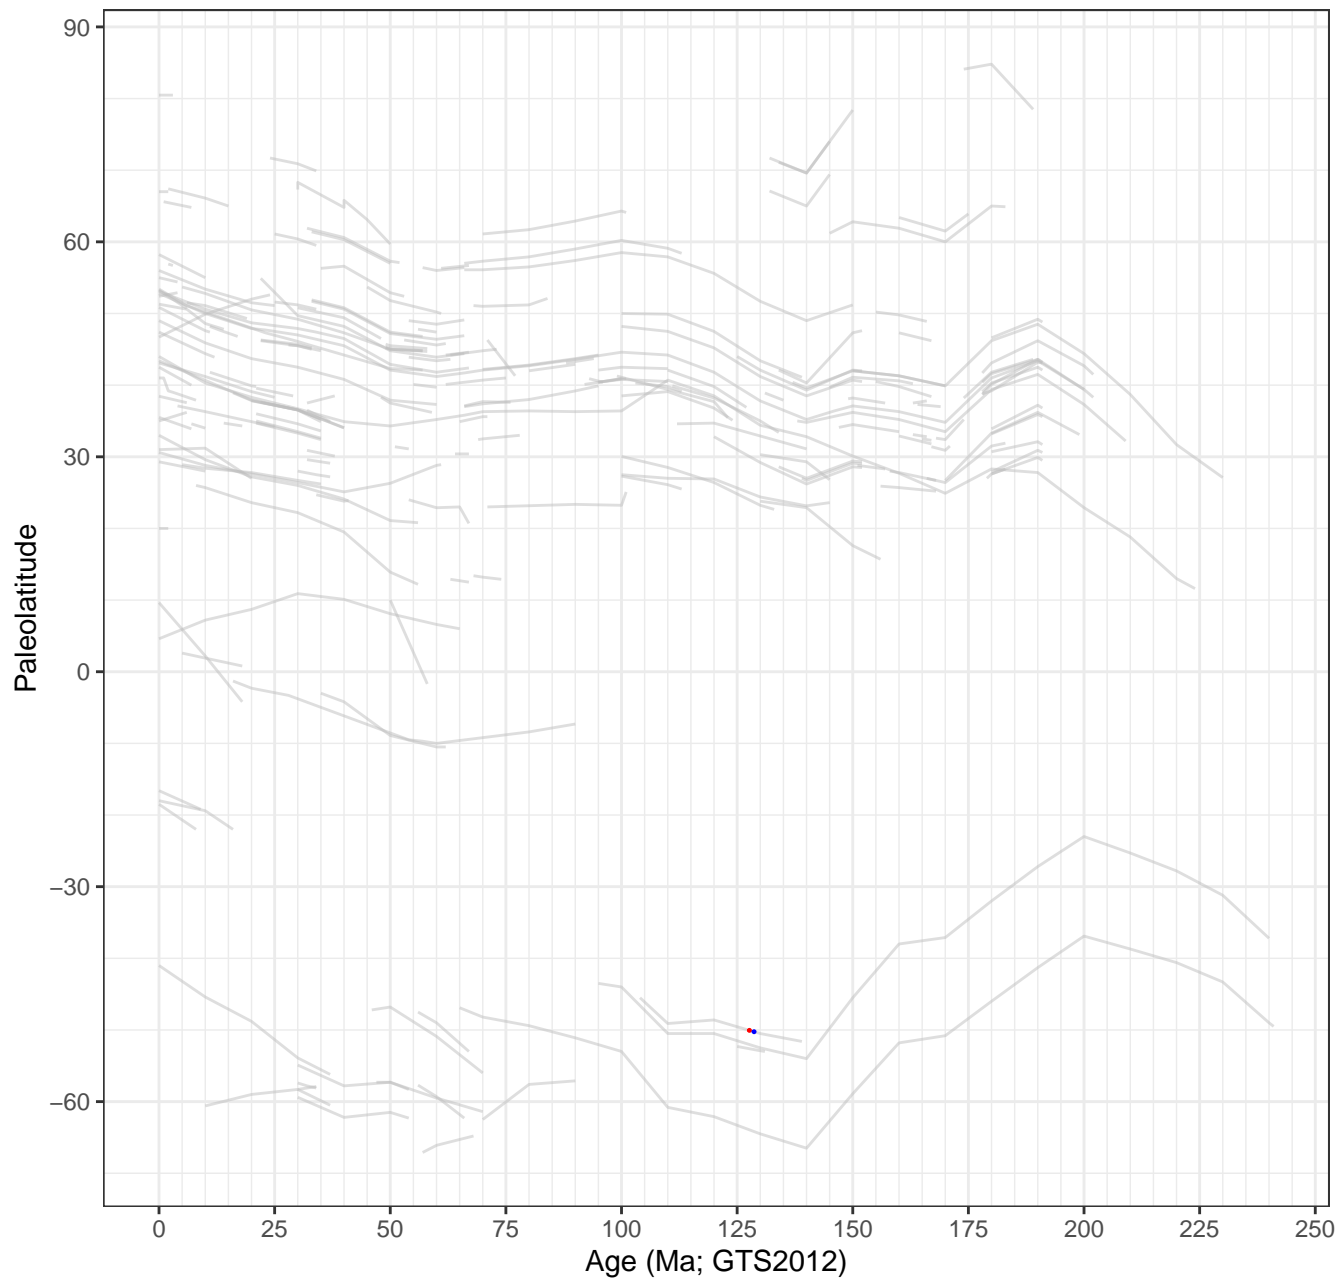

Supplement: Supplementary file 1661 [file Impagidinium phlyctaena.pdf › Supplement/Supplement 2/Species 1914 plots/Impagidinium phlyctaena.pdf]

# Species *Impagidinium plicatum*

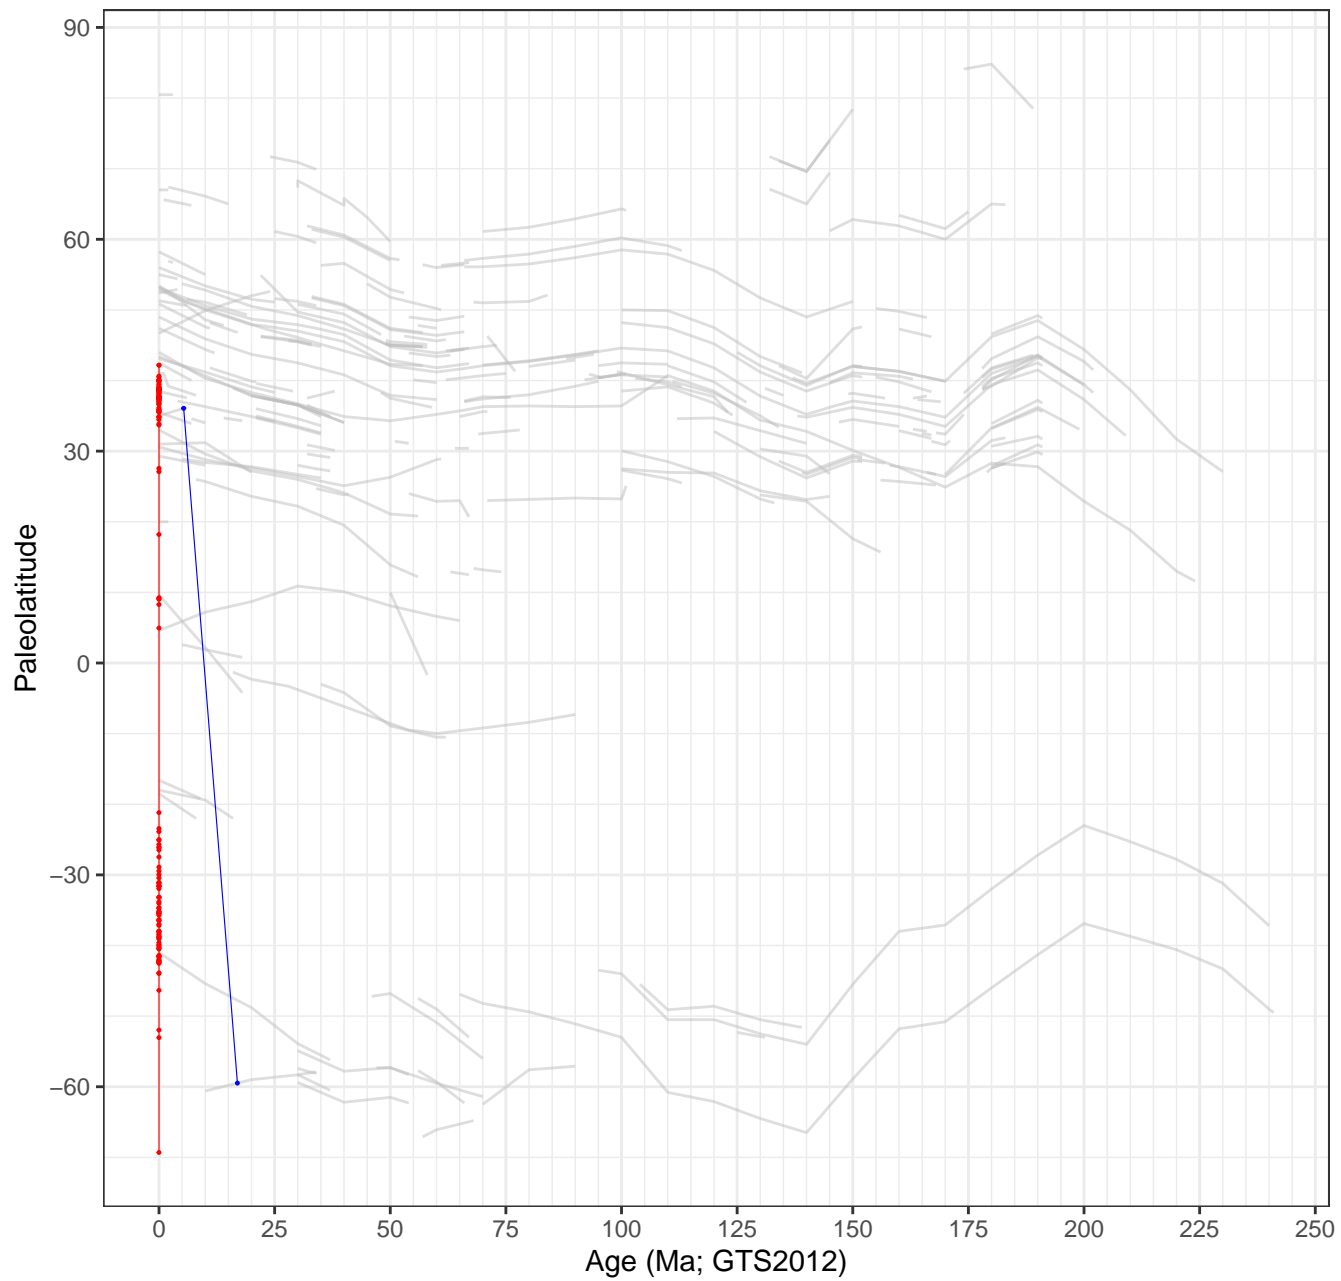

Supplement: Supplementary file 1662 [file Impagidinium plicatum.pdf › Supplement/Supplement 2/Species 1914 plots/Impagidinium plicatum.pdf]

# Species *Impagidinium rigidaseptatum*

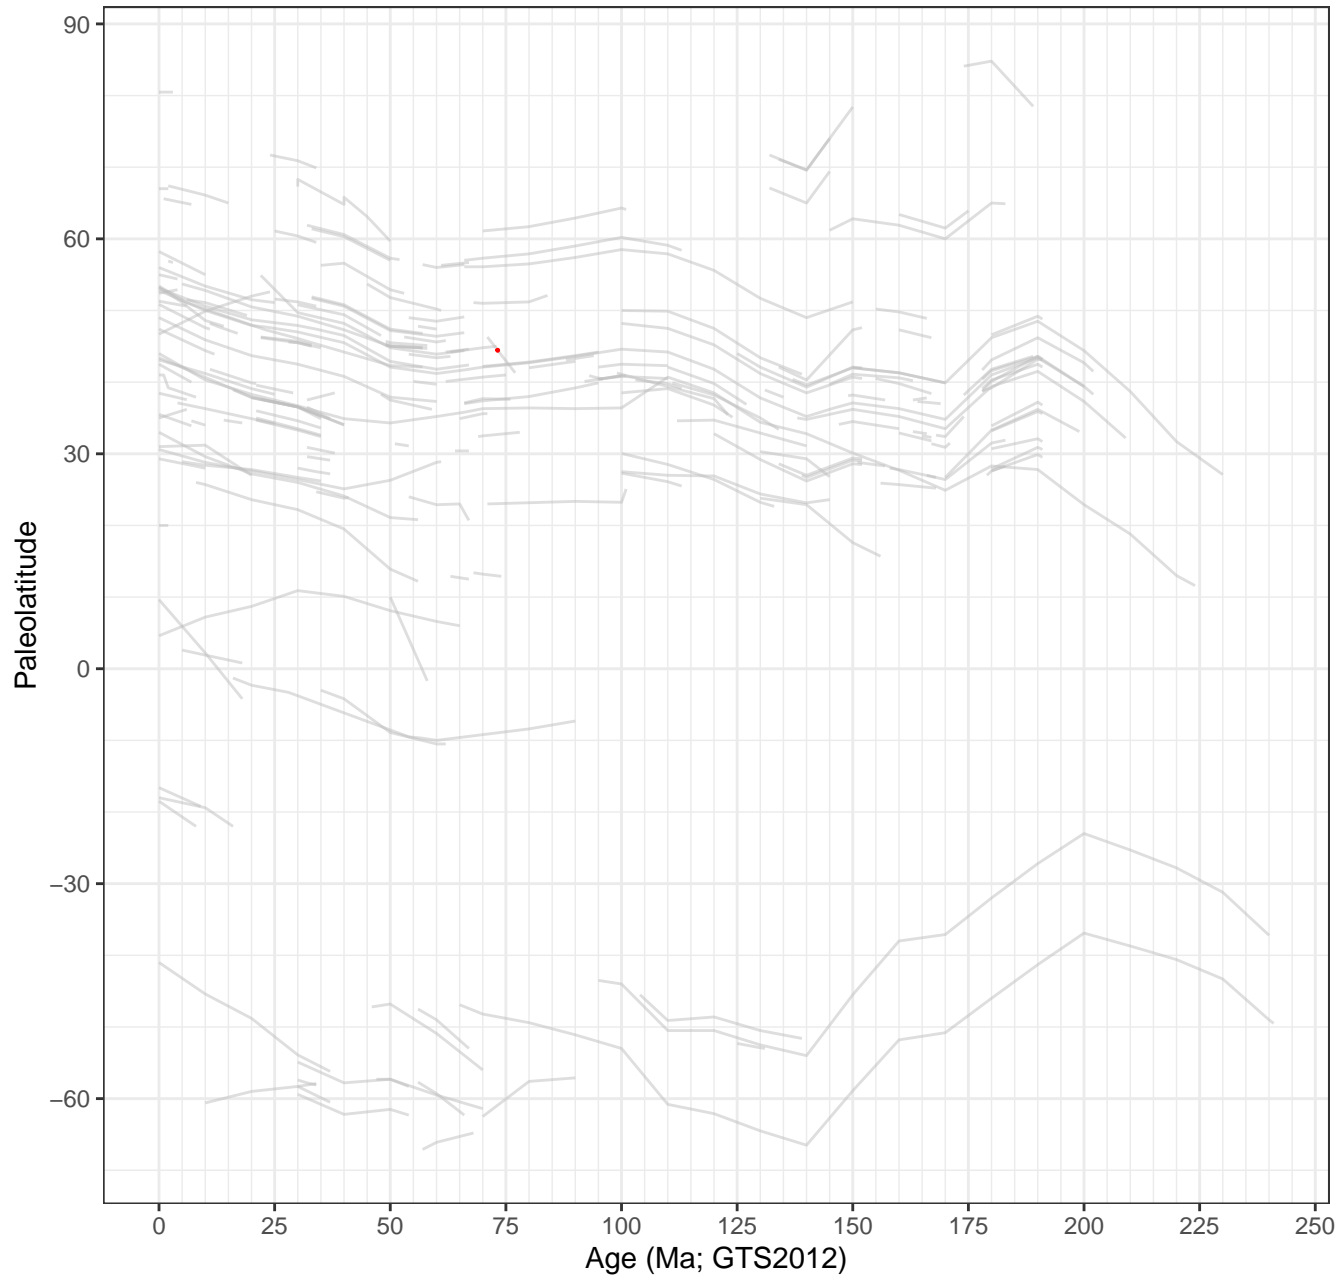

Supplement: Supplementary file 1663 [file Impagidinium rigidaseptatum.pdf › Supplement/Supplement 2/Species 1914 plots/Impagidinium rigidaseptatum.pdf]

# Species Impagidinium siciliense

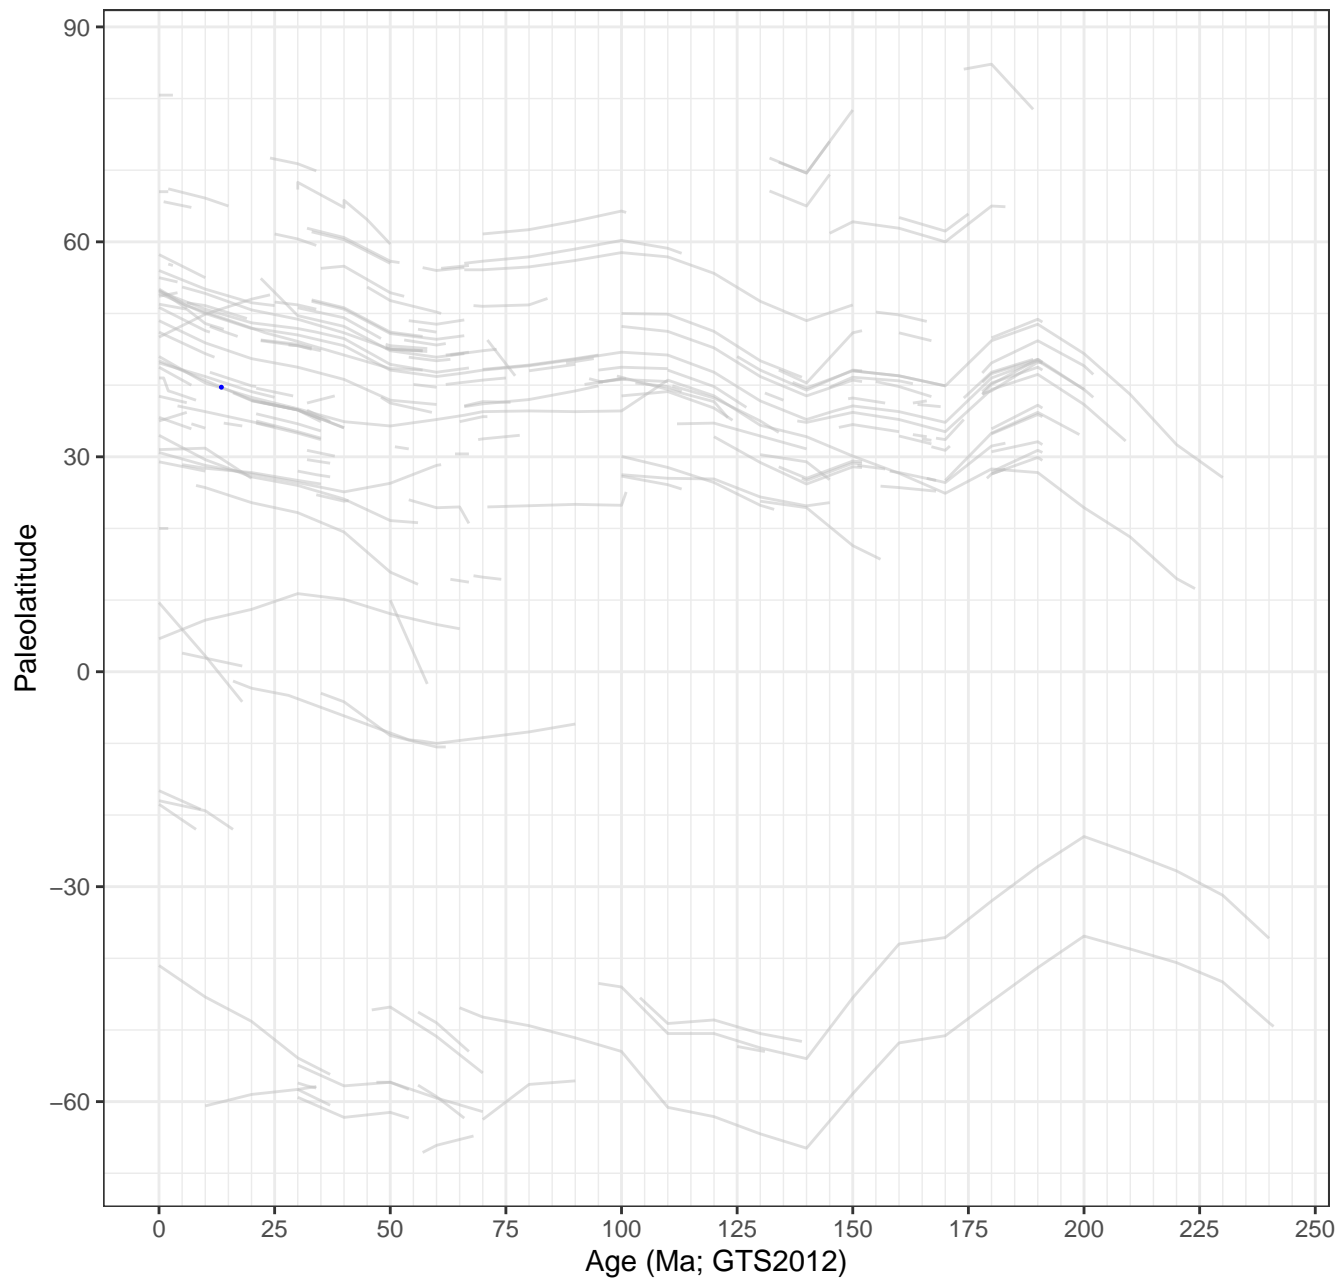

Supplement: Supplementary file 1664 [file Impagidinium siciliense.pdf › Supplement/Supplement 2/Species 1914 plots/Impagidinium siciliense.pdf]

# Species Impagidinium solidum

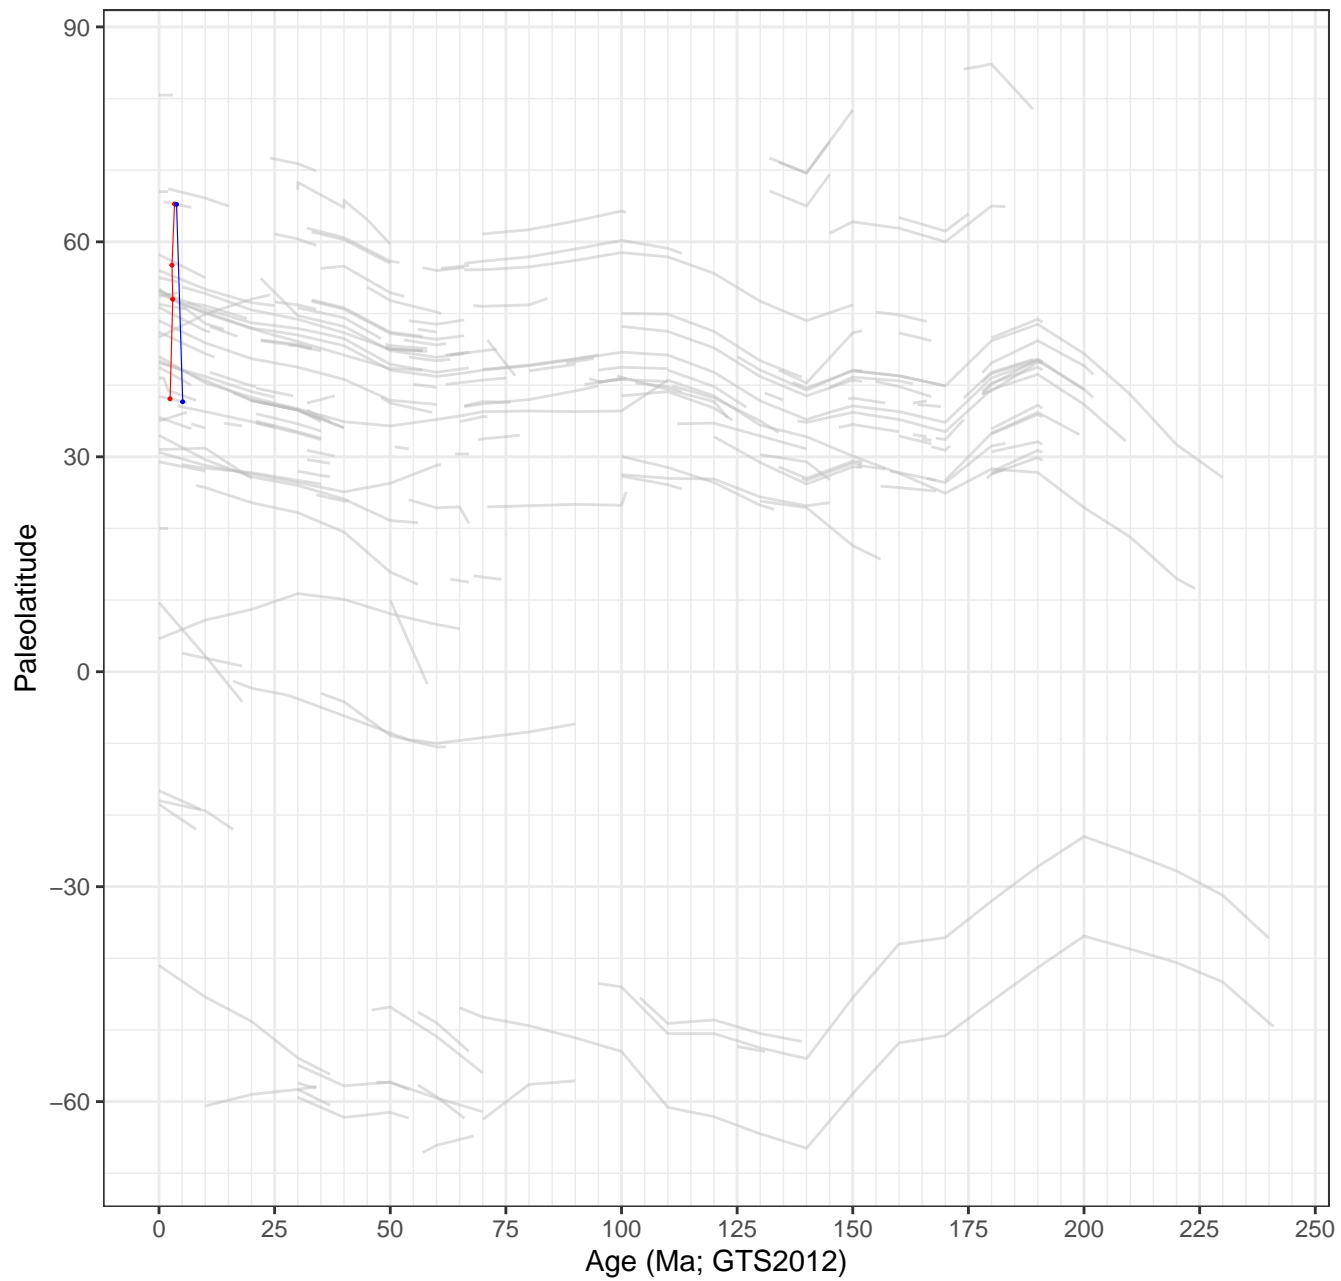

Supplement: Supplementary file 1665 [file Impagidinium solidum.pdf › Supplement/Supplement 2/Species 1914 plots/Impagidinium solidum.pdf]

# Species *Impagidinium sphaericum*

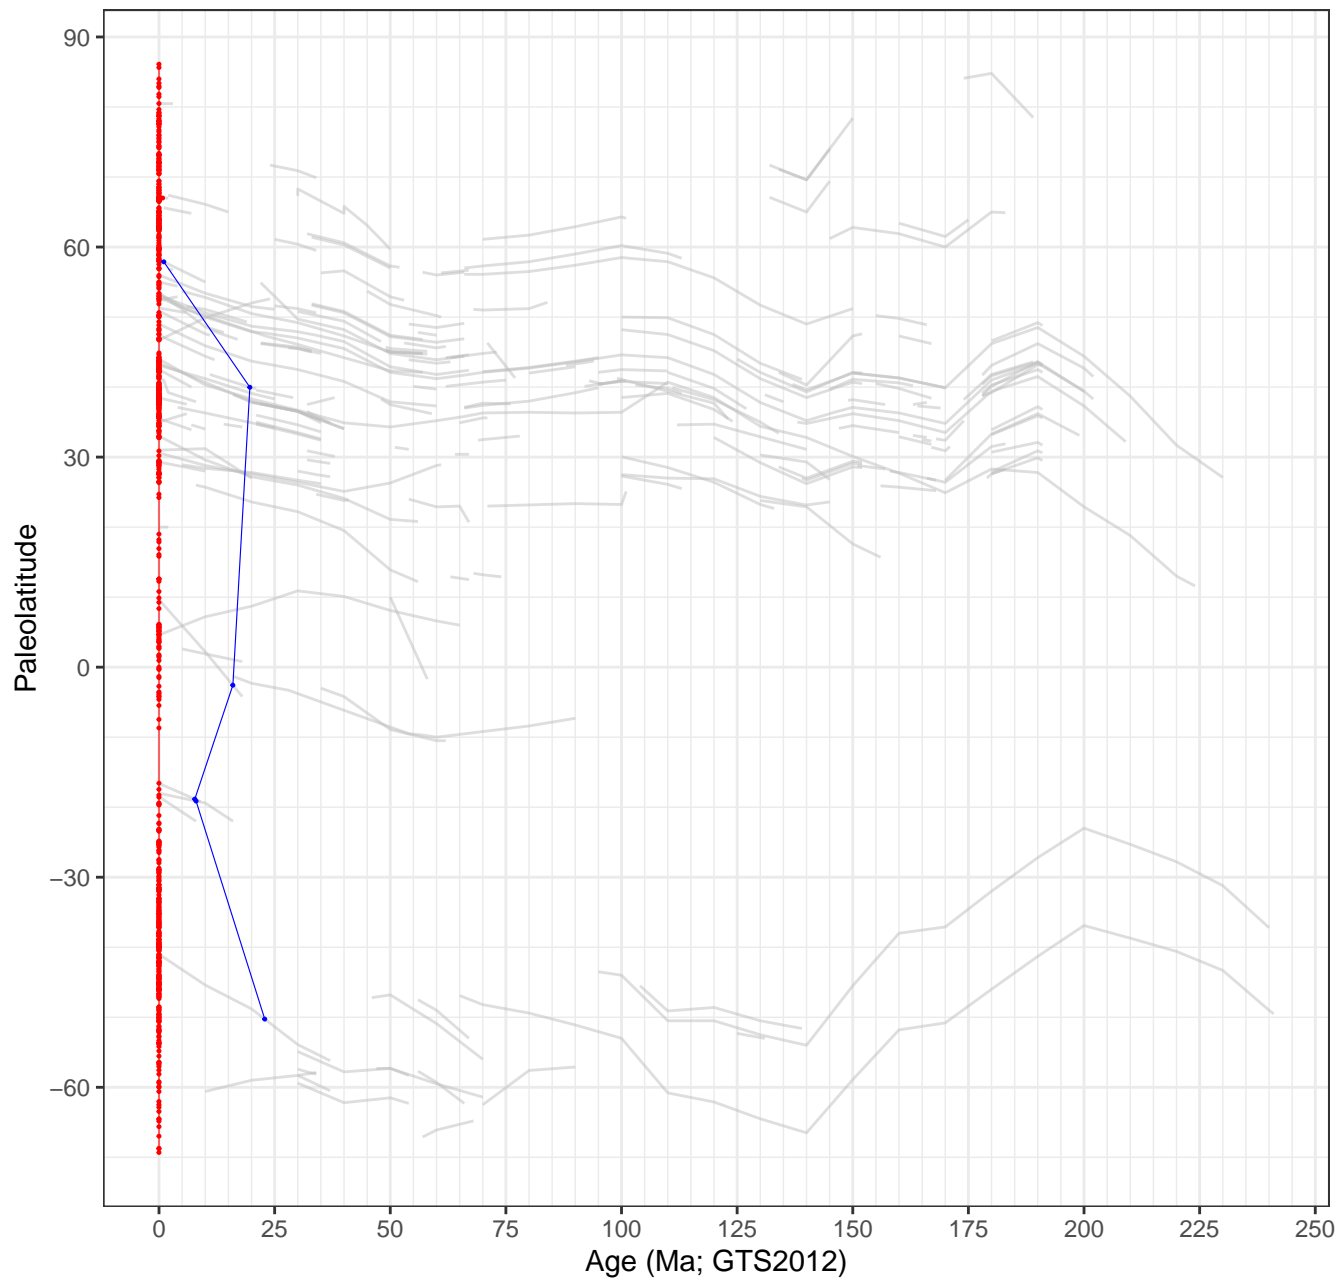

Supplement: Supplementary file 1666 [file Impagidinium sphaericum.pdf › Supplement/Supplement 2/Species 1914 plots/Impagidinium sphaericum.pdf]

# Species *Impagidinium striatum*

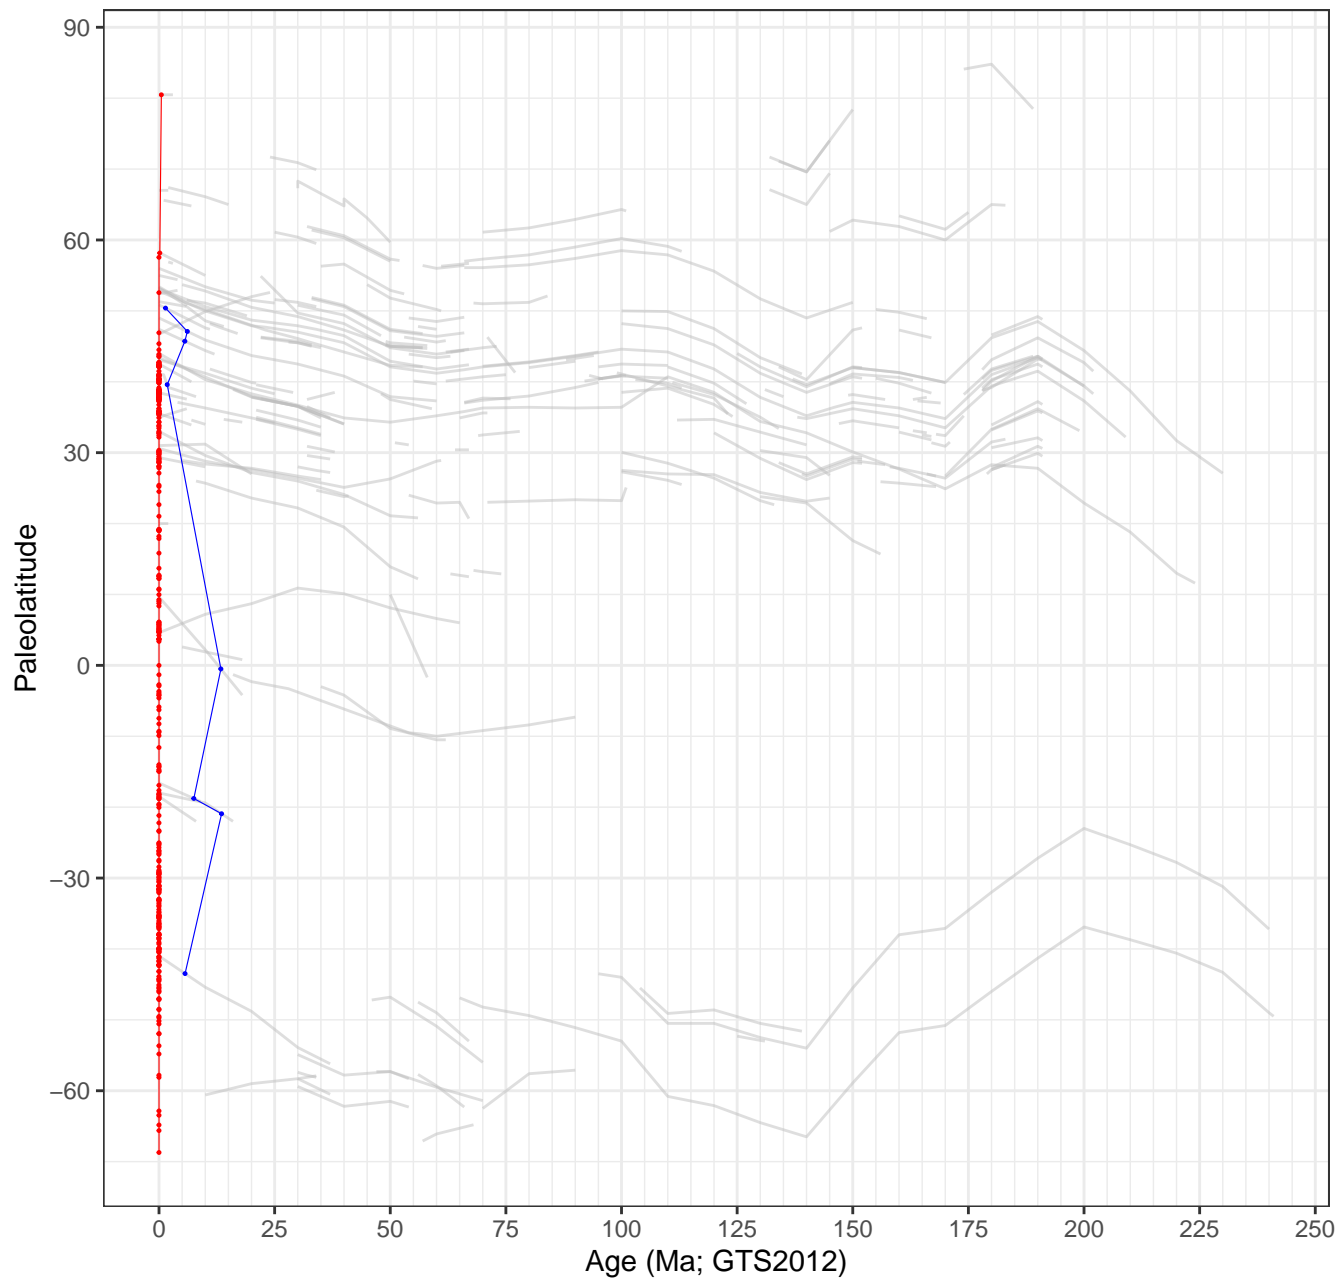

Supplement: Supplementary file 1667 [file Impagidinium strialatum.pdf › Supplement/Supplement 2/Species 1914 plots/Impagidinium strialatum.pdf]

# Species *Impagidinium tectum*

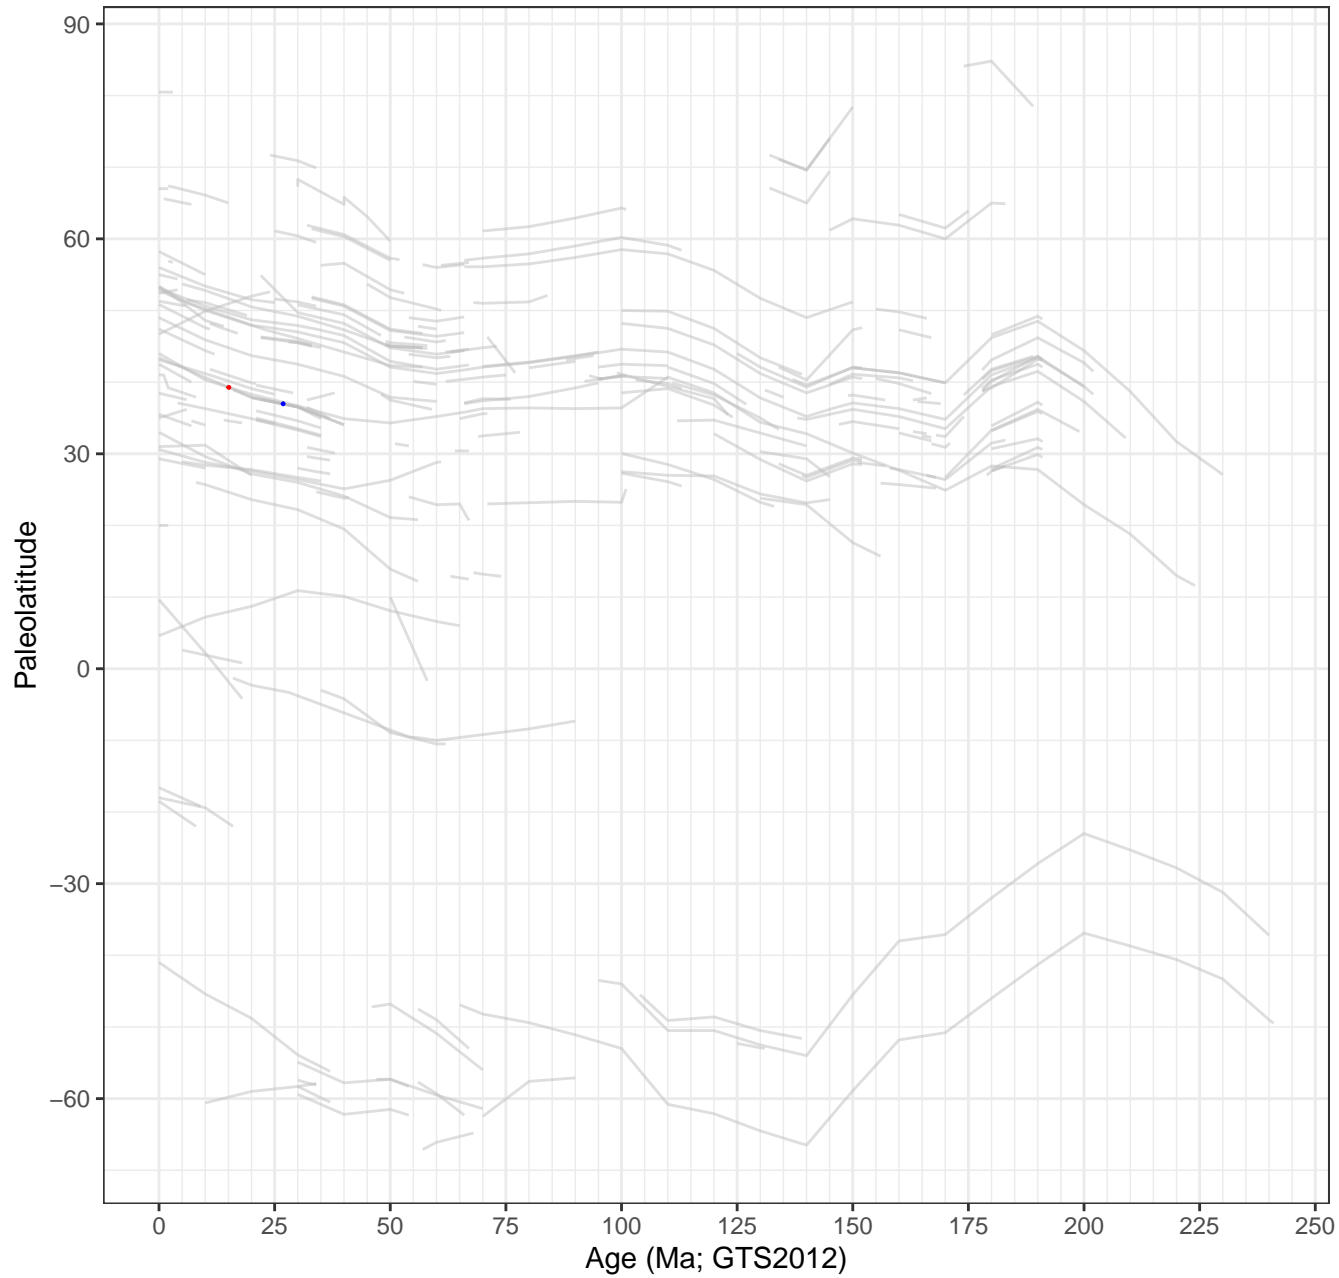

Supplement: Supplementary file 1668 [file Impagidinium tectum.pdf › Supplement/Supplement 2/Species 1914 plots/Impagidinium tectum.pdf]

# Species *Impagidinium torsium*

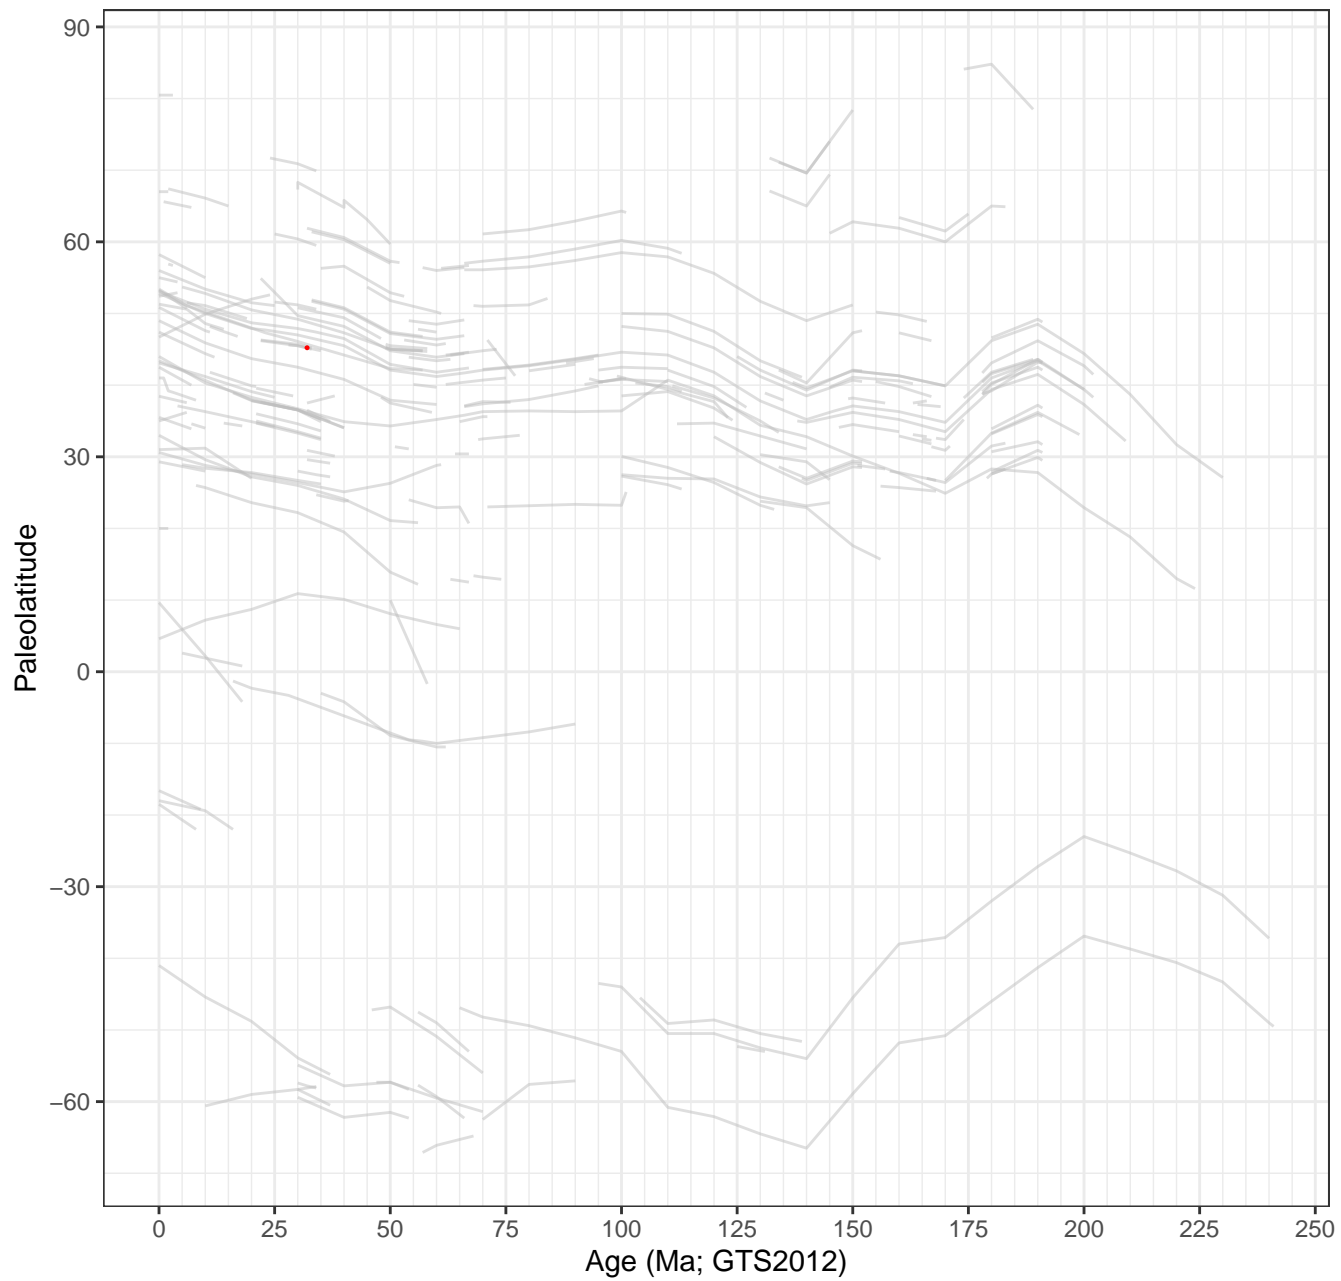

Supplement: Supplementary file 1669 [file Impagidinium torsium.pdf › Supplement/Supplement 2/Species 1914 plots/Impagidinium torsium.pdf]

# Species *Impagidinium variaseptum*

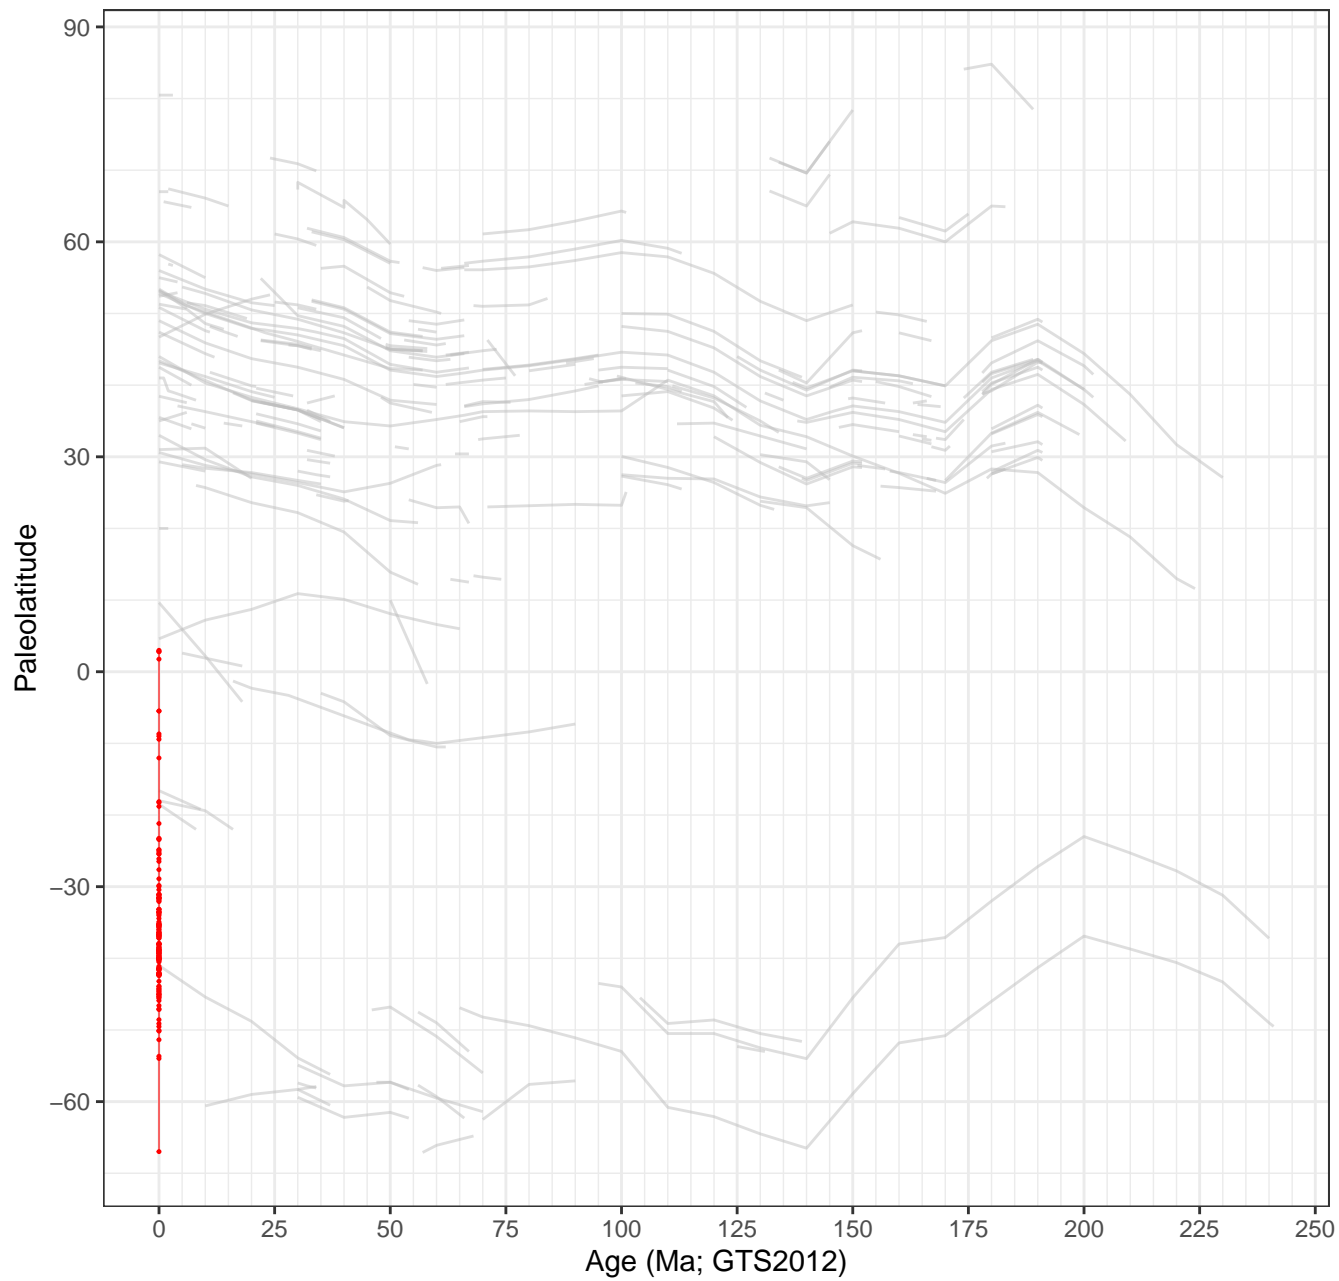

Supplement: Supplementary file 1670 [file Impagidinium variaseptum.pdf › Supplement/Supplement 2/Species 1914 plots/Impagidinium variaseptum.pdf]

# Species *Impagidinium velorum*

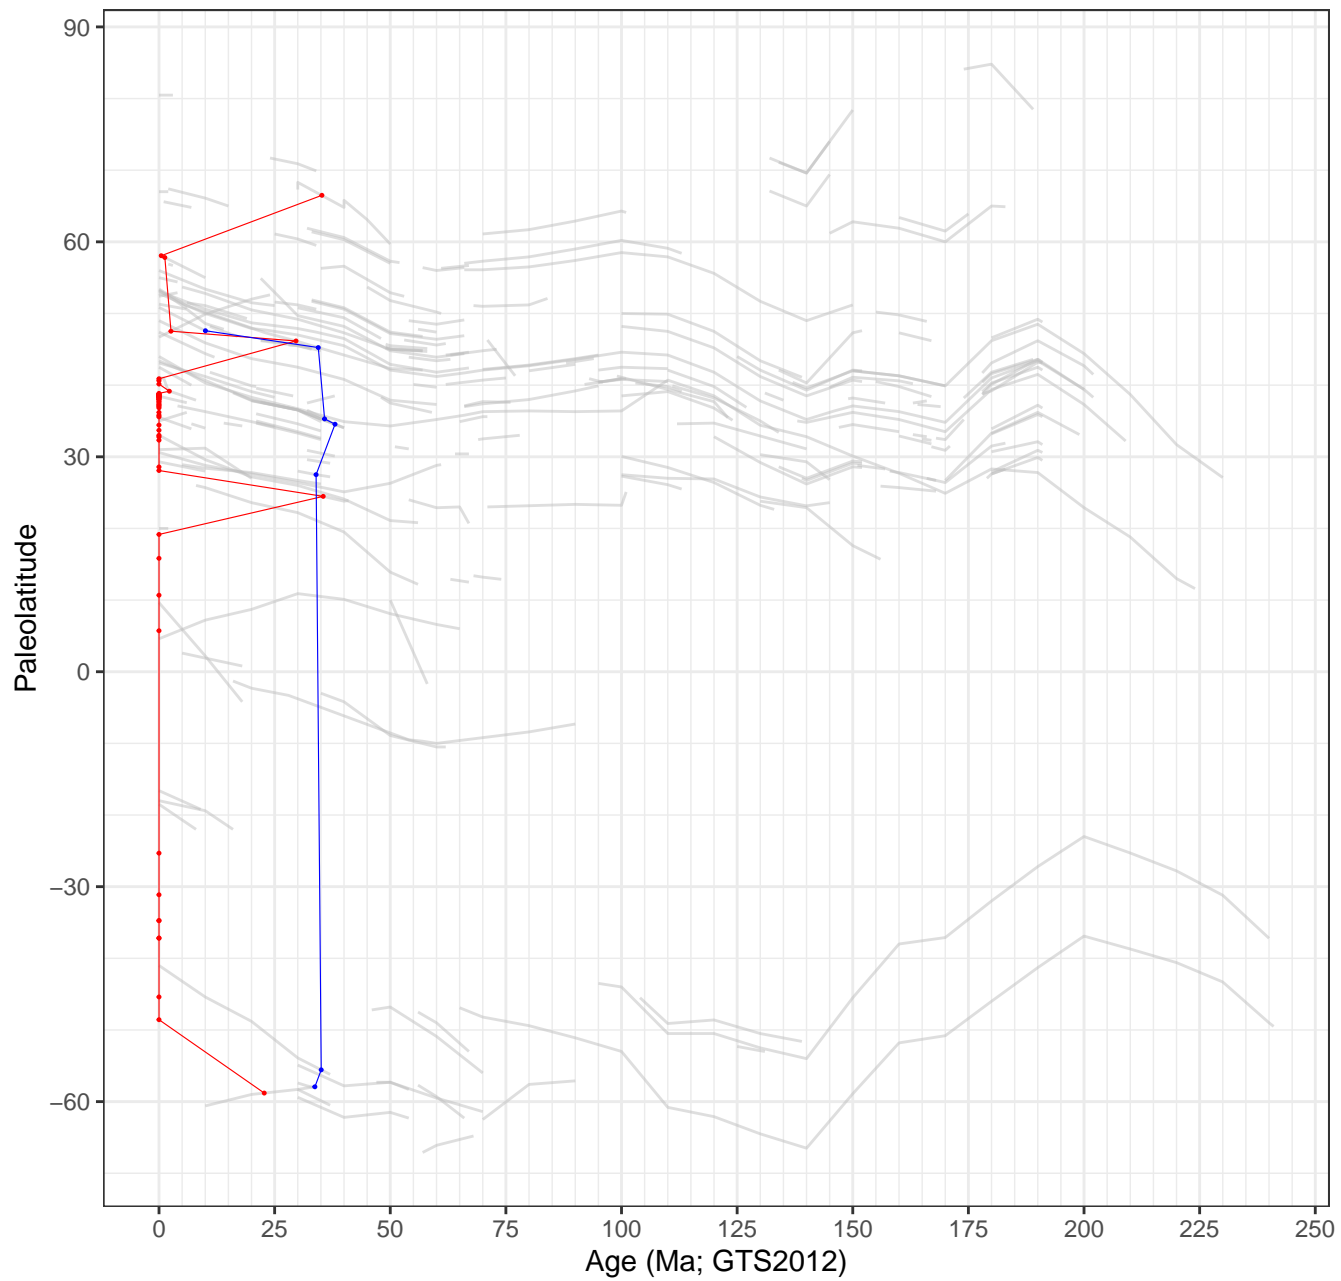

Supplement: Supplementary file 1671 [file Impagidinium velorum.pdf › Supplement/Supplement 2/Species 1914 plots/Impagidinium velorum.pdf]

# Species *Impagidinium verrucosum*

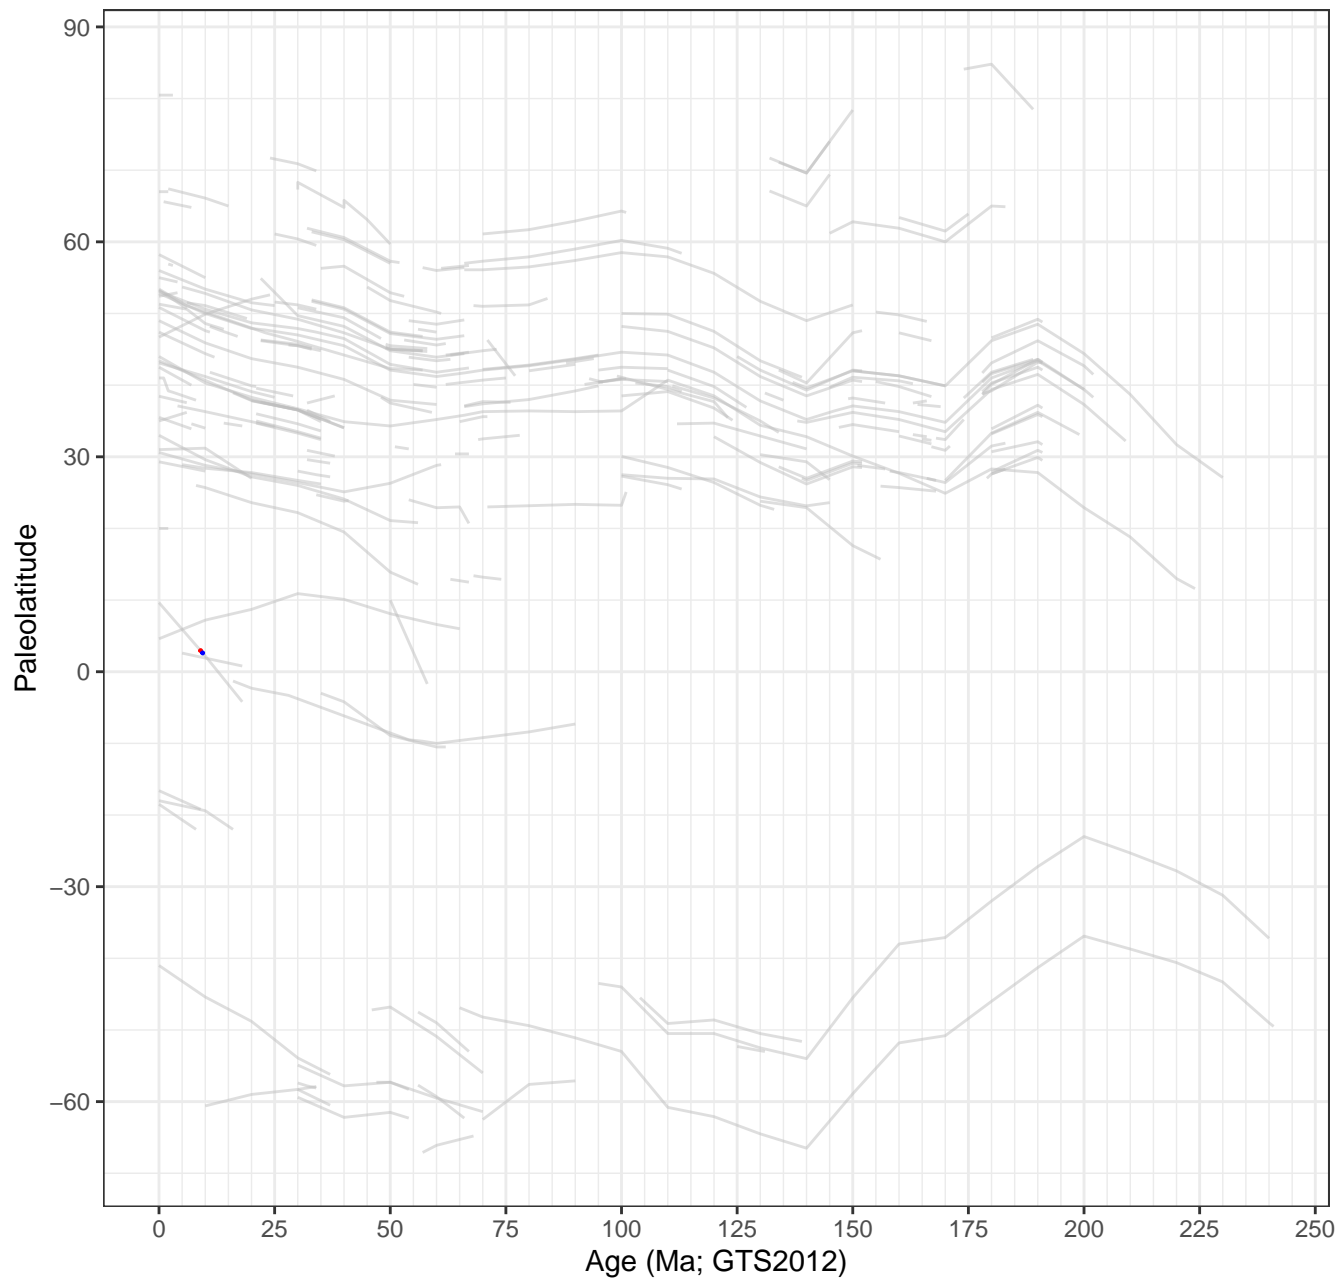

Supplement: Supplementary file 1672 [file Impagidinium verrucosum.pdf › Supplement/Supplement 2/Species 1914 plots/Impagidinium verrucosum.pdf]

# Species *Impagidinium victorianum*

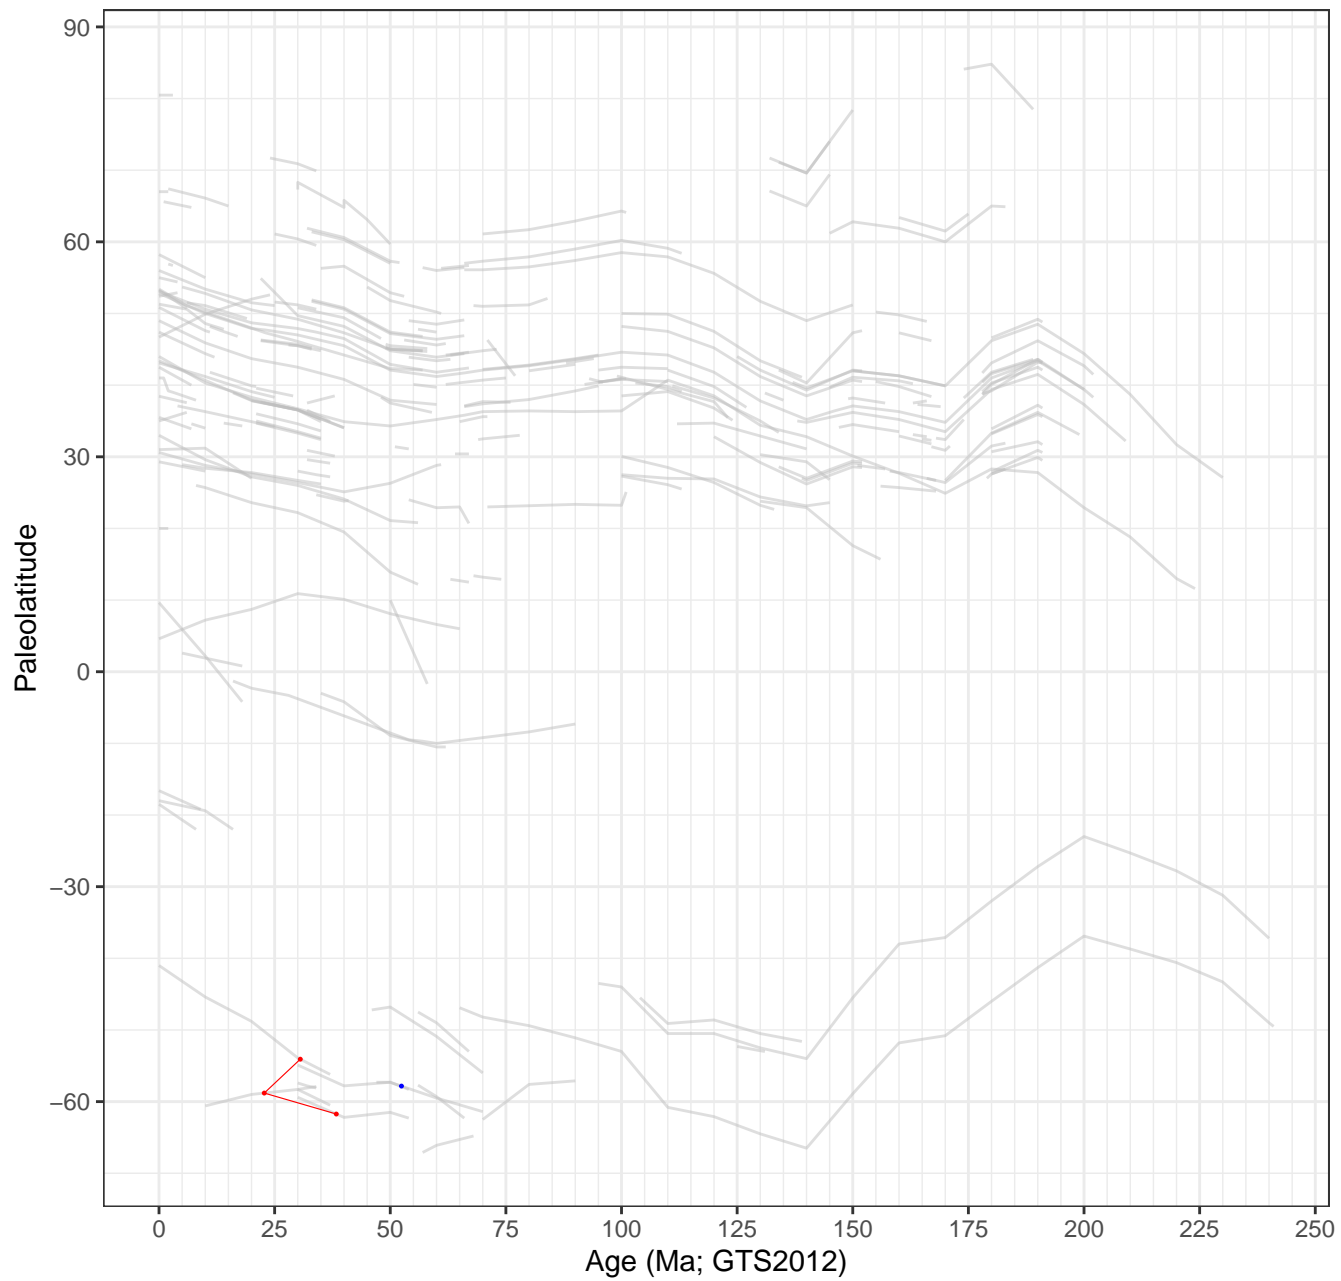

Supplement: Supplementary file 1673 [file Impagidinium victorianum.pdf › Supplement/Supplement 2/Species 1914 plots/Impagidinium victorianum.pdf]

# Species Imperfectodinium bulbosum

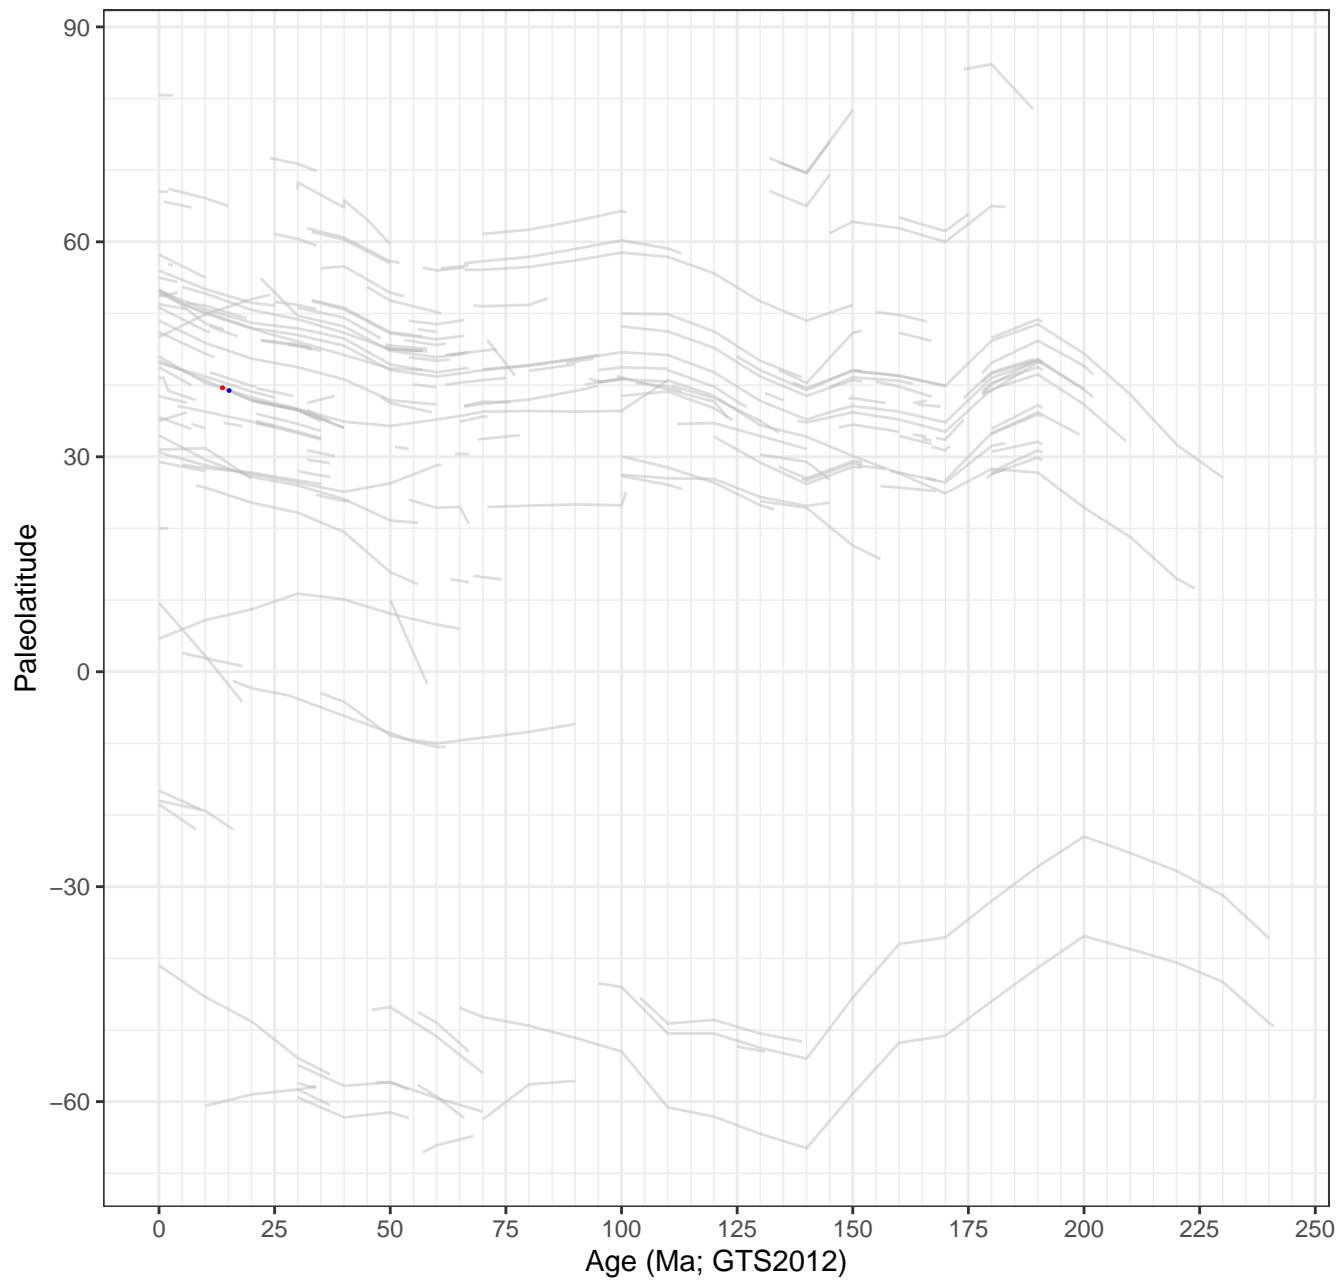

Supplement: Supplementary file 1674 [file Imperfectodinium bulbosum.pdf › Supplement/Supplement 2/Species 1914 plots/Imperfectodinium bulbosum.pdf]

# Species Imperfectodinium septatum

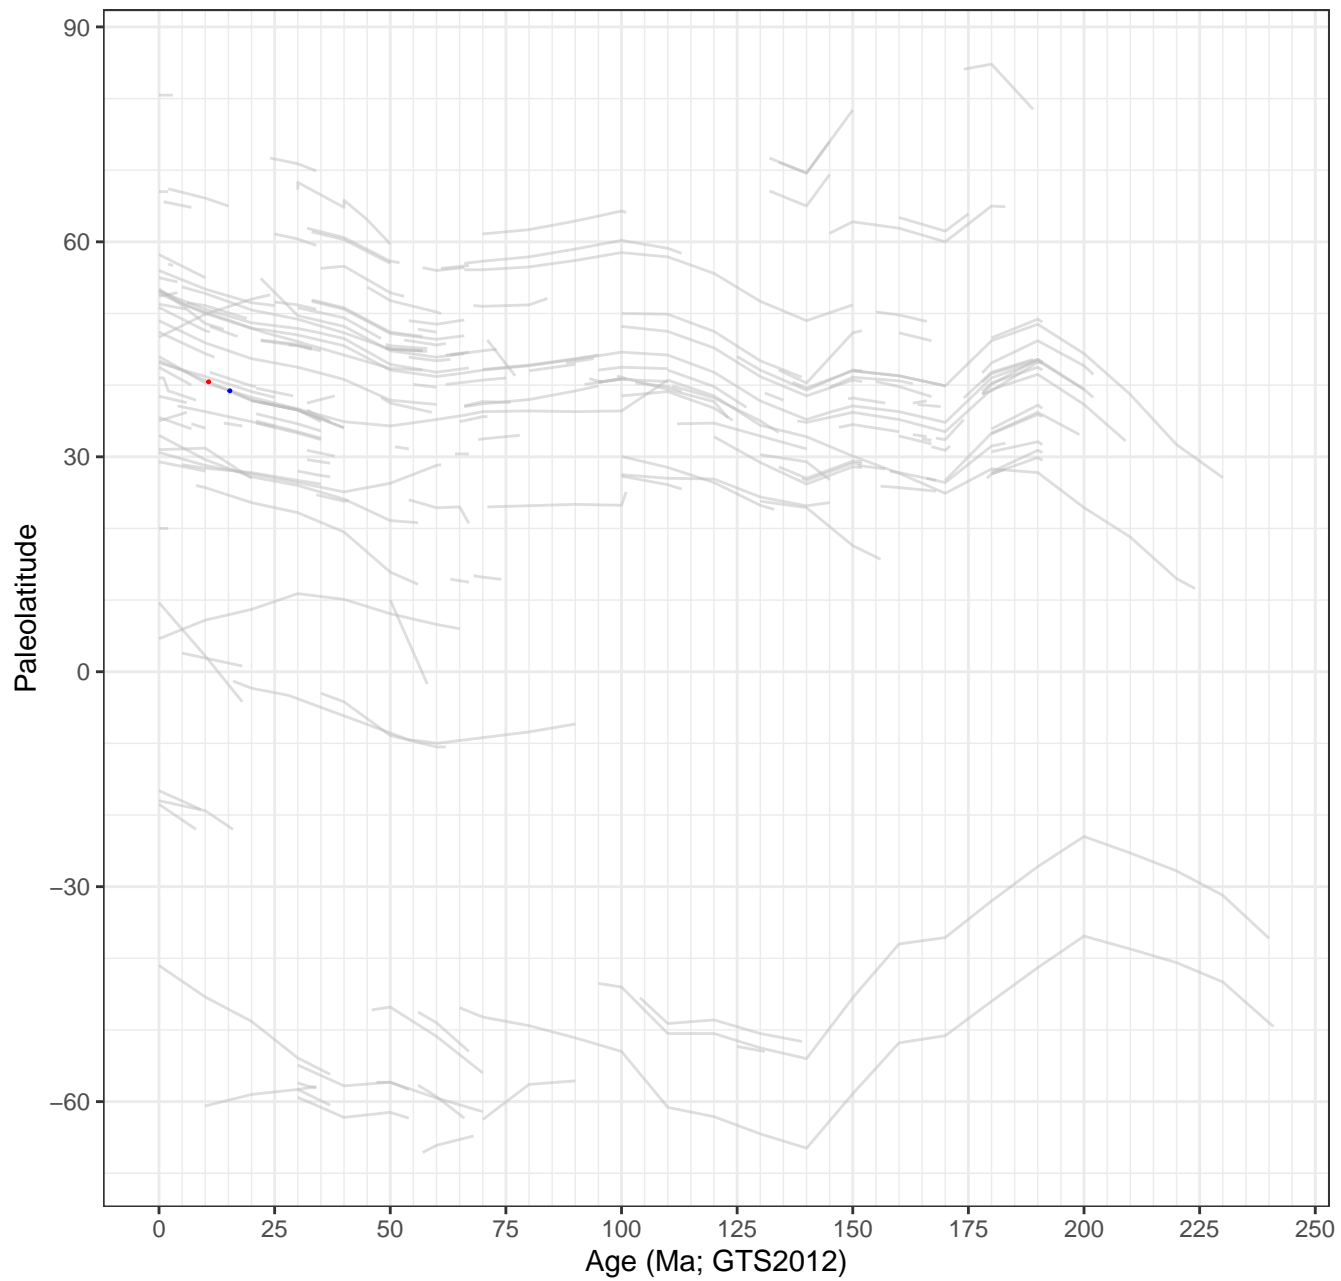

Supplement: Supplementary file 1675 [file Imperfectodinium septatum.pdf › Supplement/Supplement 2/Species 1914 plots/Imperfectodinium septatum.pdf]

# Species Impletosphaeridium capitatum

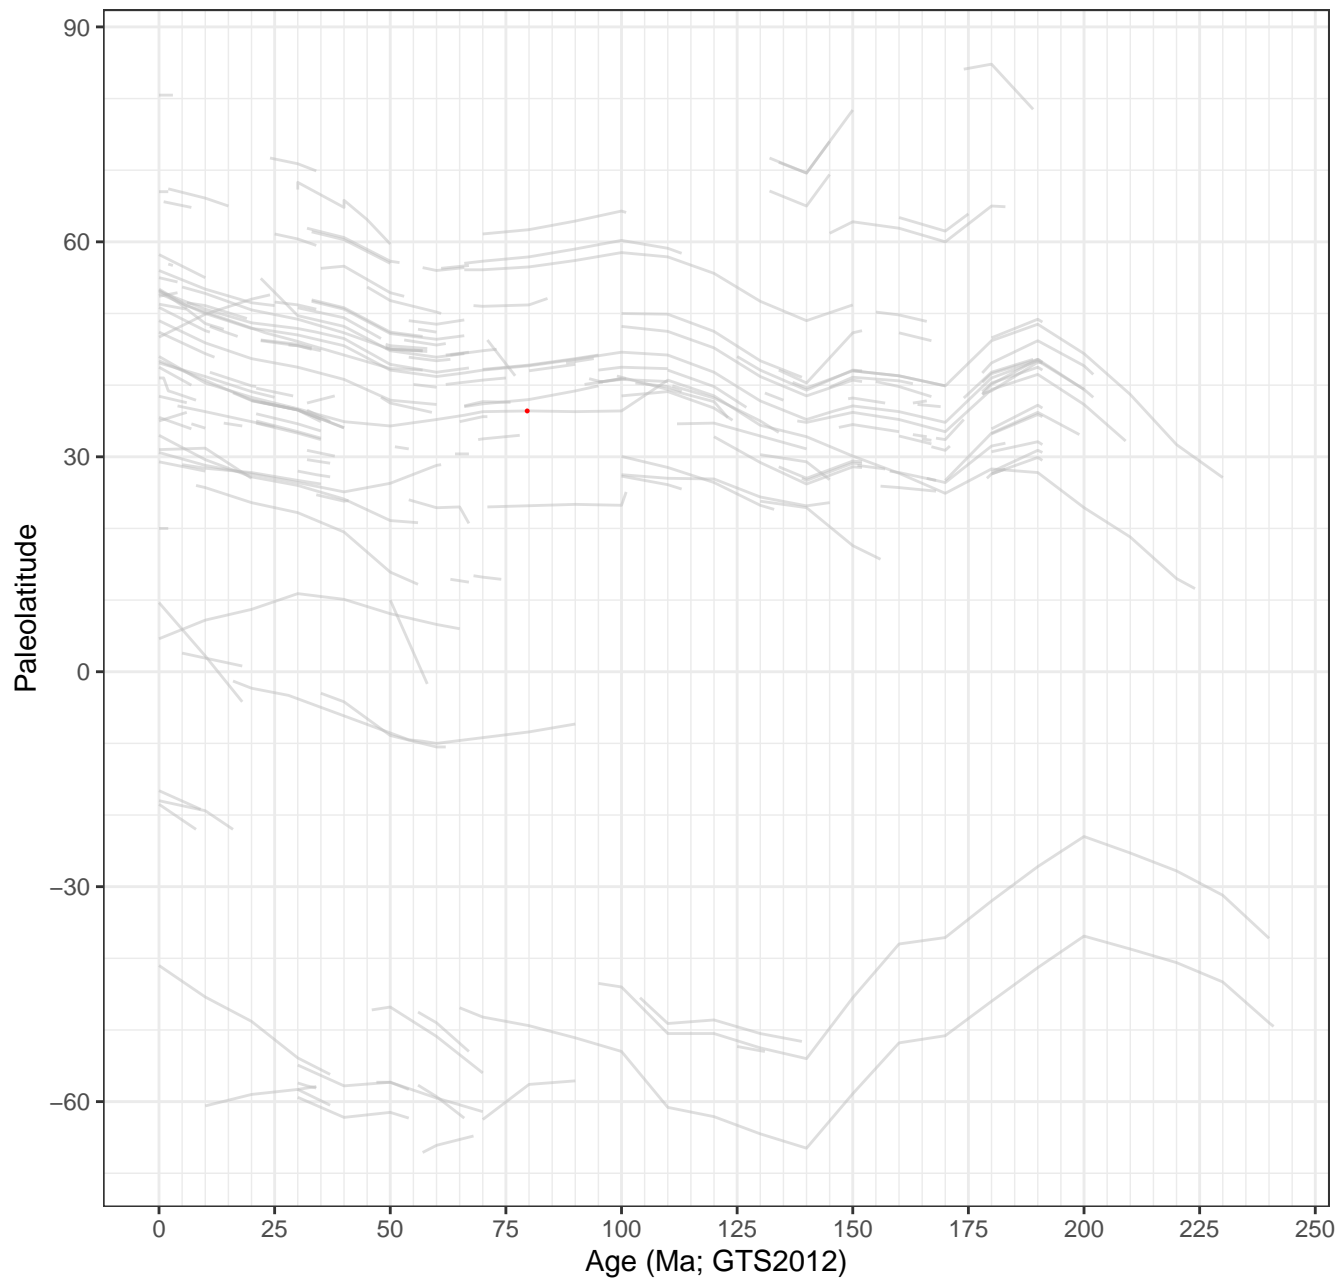

Supplement: Supplementary file 1676 [file Impletosphaeridium capitatum.pdf › Supplement/Supplement 2/Species 1914 plots/Impletosphaeridium capitatum.pdf]

# Species Impletosphaeridium clavulum

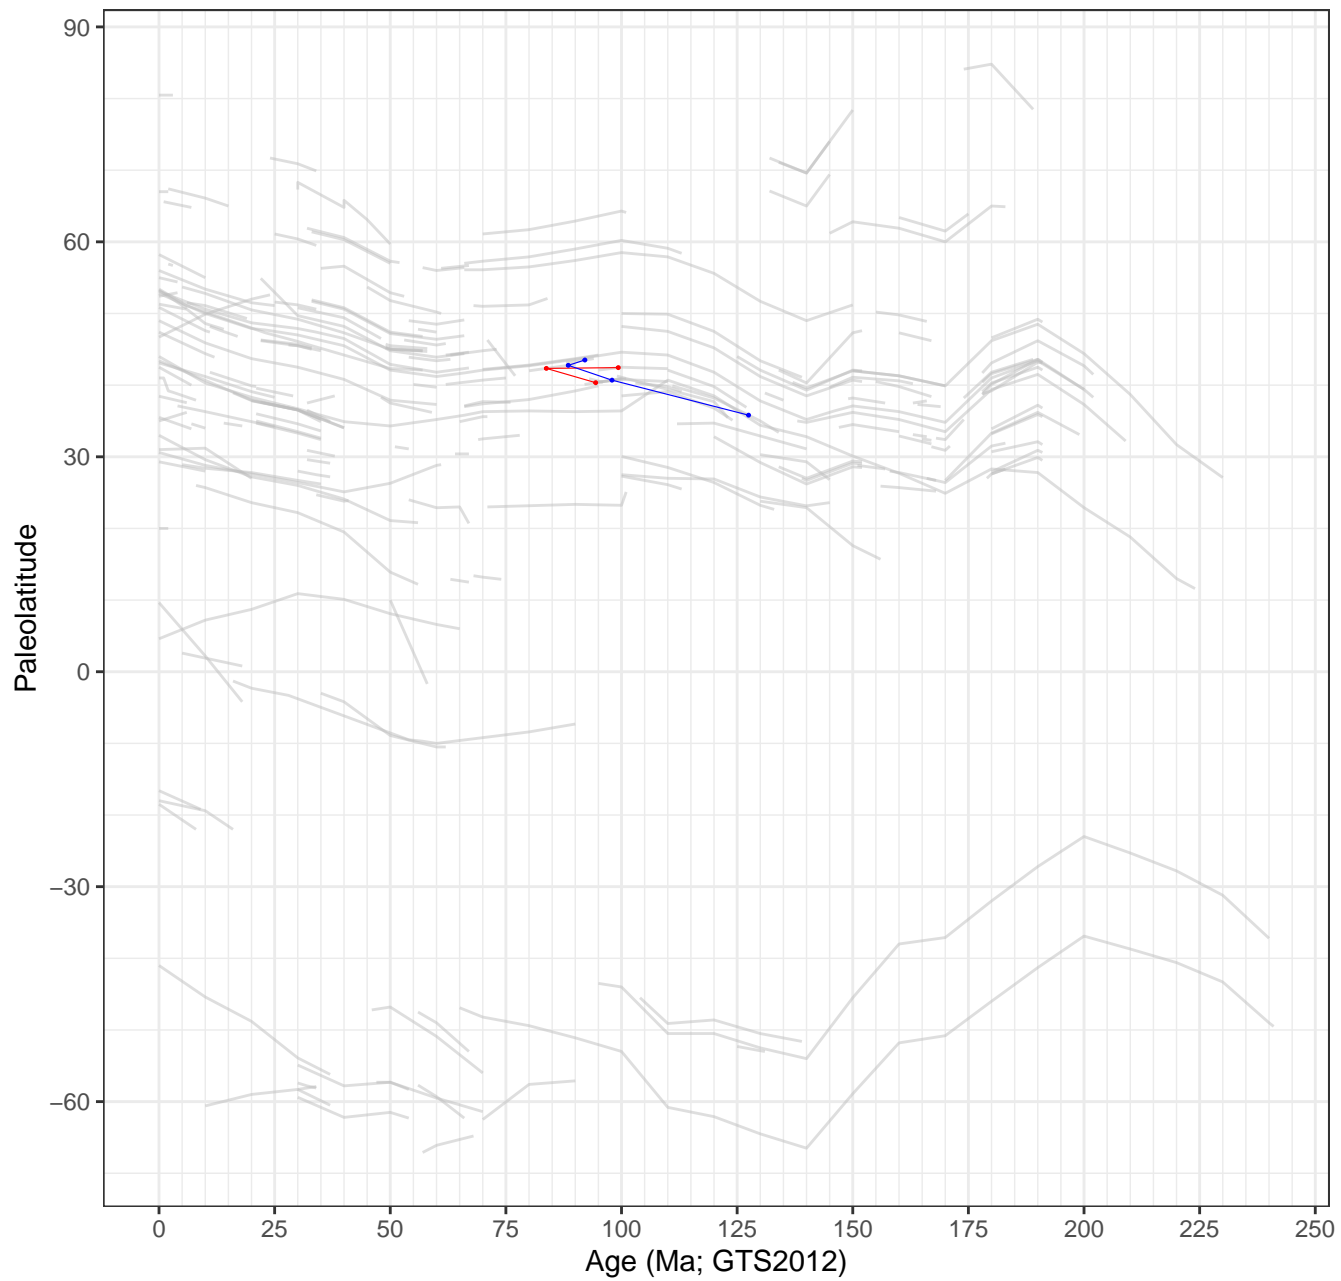

Supplement: Supplementary file 1677 [file Impletosphaeridium clavulum.pdf › Supplement/Supplement 2/Species 1914 plots/Impletosphaeridium clavulum.pdf]

# Species Impletosphaeridium cracens

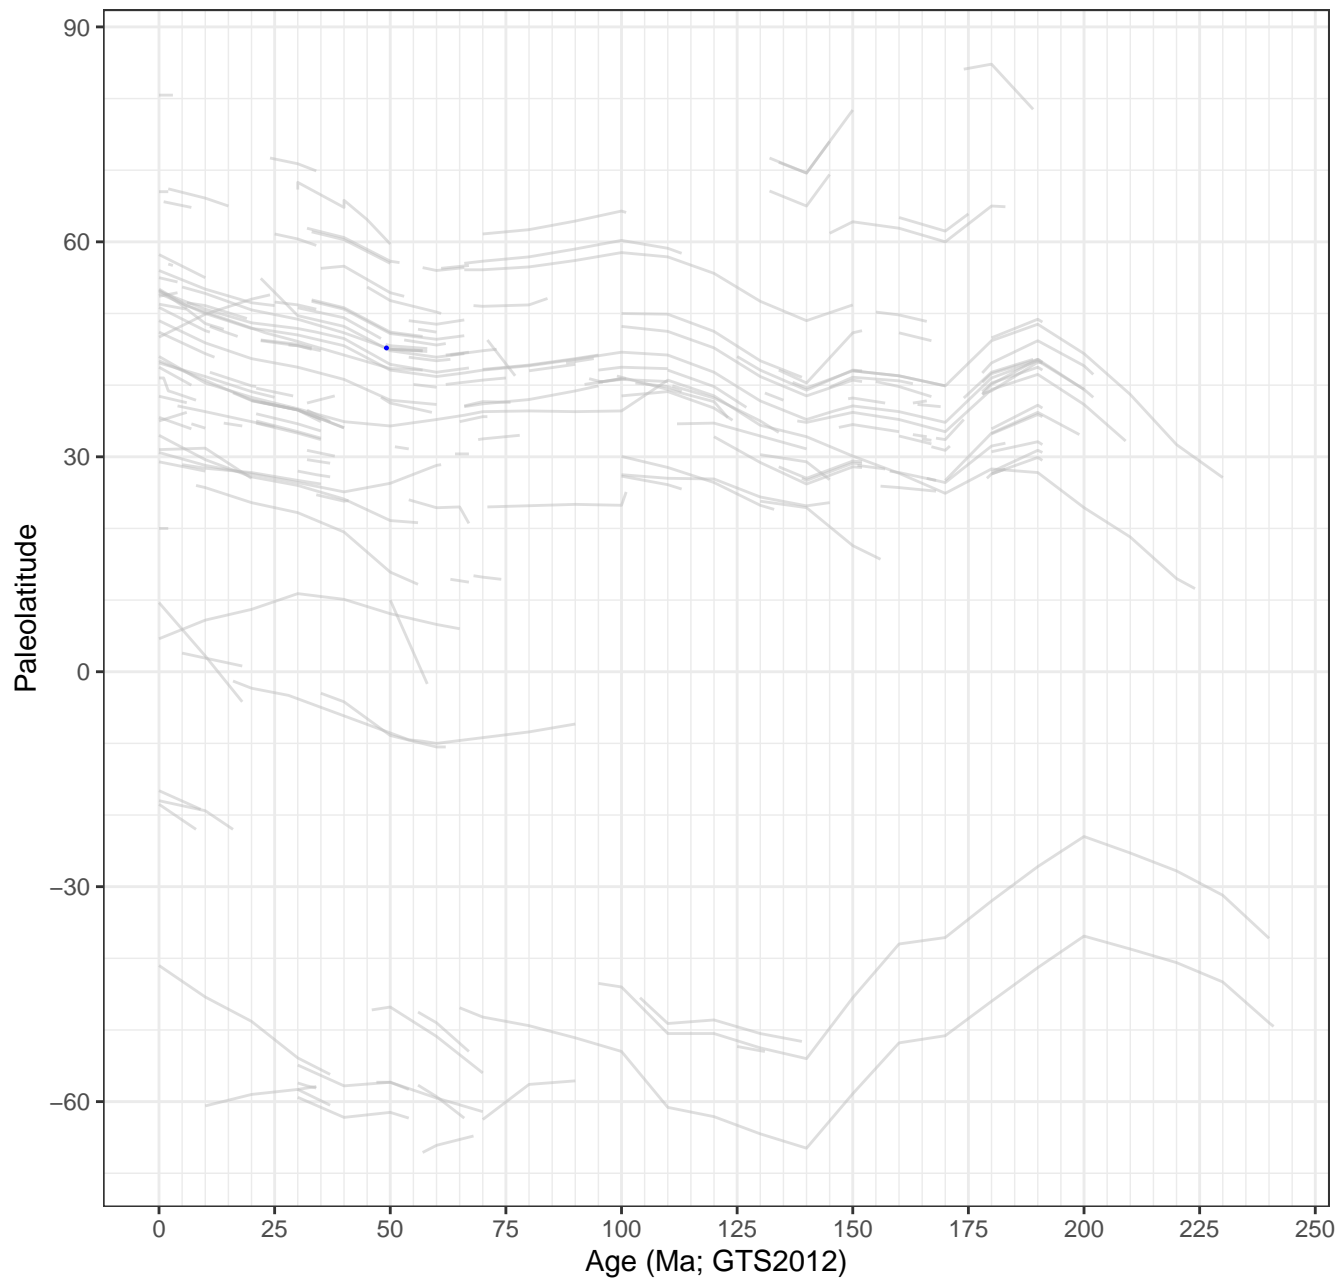

Supplement: Supplementary file 1678 [file Impletosphaeridium cracens.pdf › Supplement/Supplement 2/Species 1914 plots/Impletosphaeridium cracens.pdf]

# Species Impletosphaeridium ehrenbergii

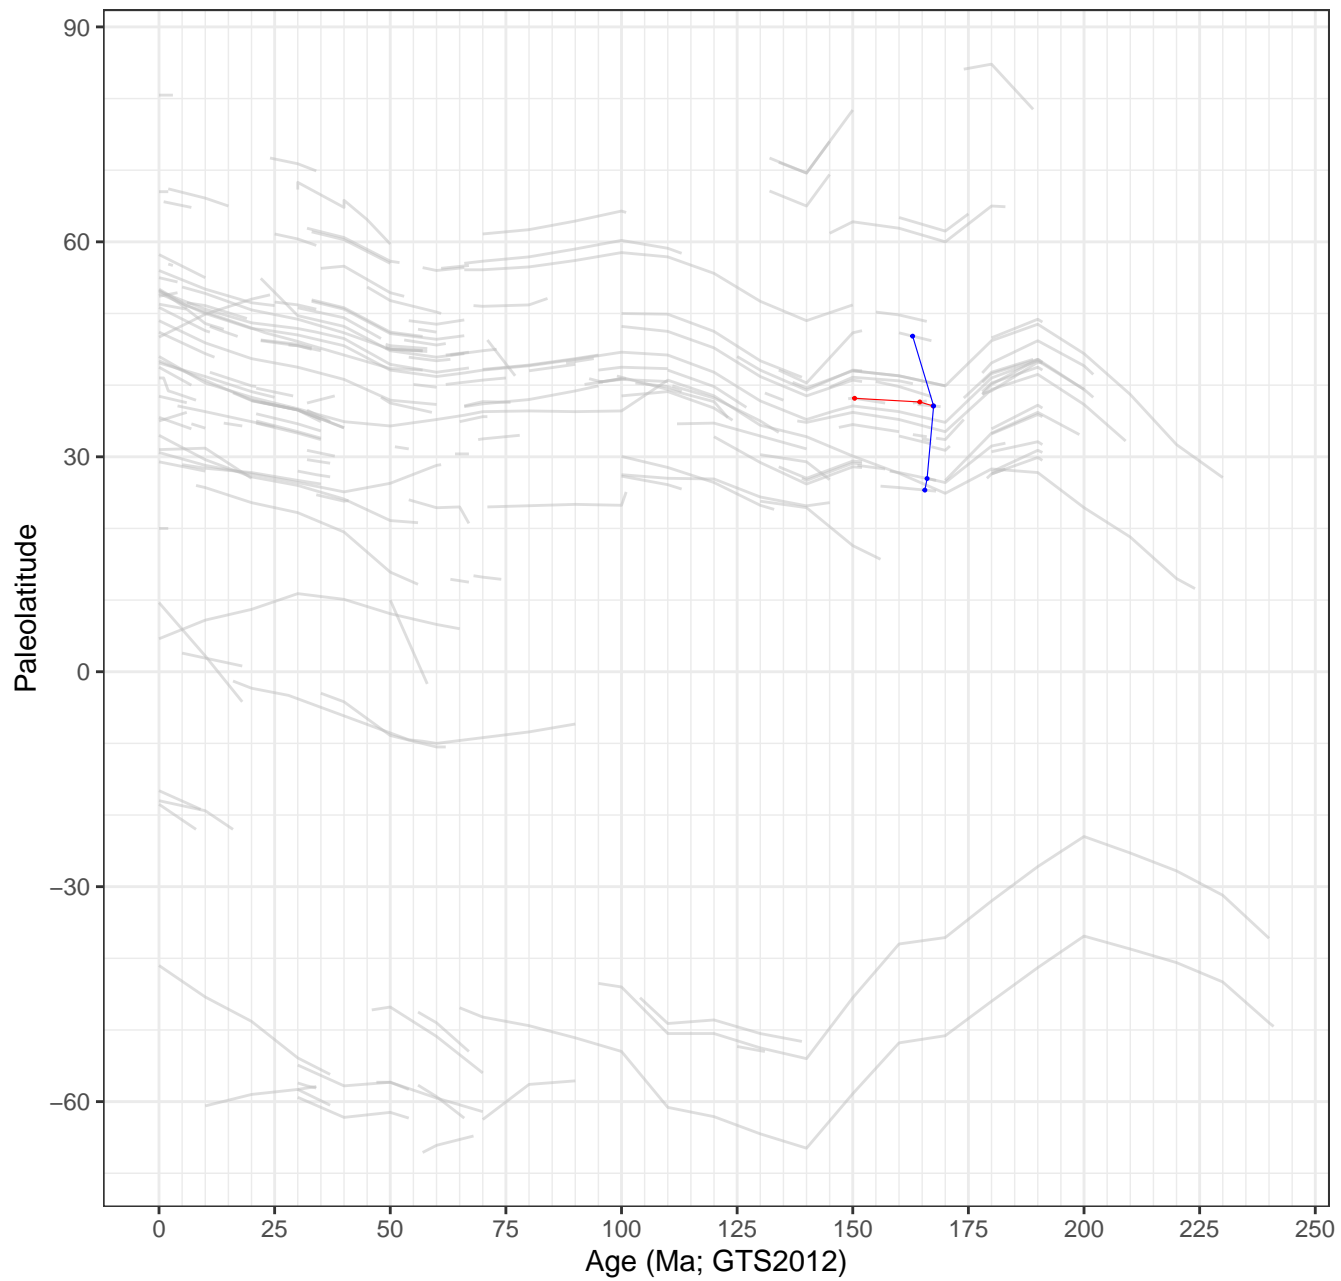

Supplement: Supplementary file 1679 [file Impletosphaeridium ehrenbergii.pdf › Supplement/Supplement 2/Species 1914 plots/Impletosphaeridium ehrenbergii.pdf]

# Species Impletosphaeridium lumectum

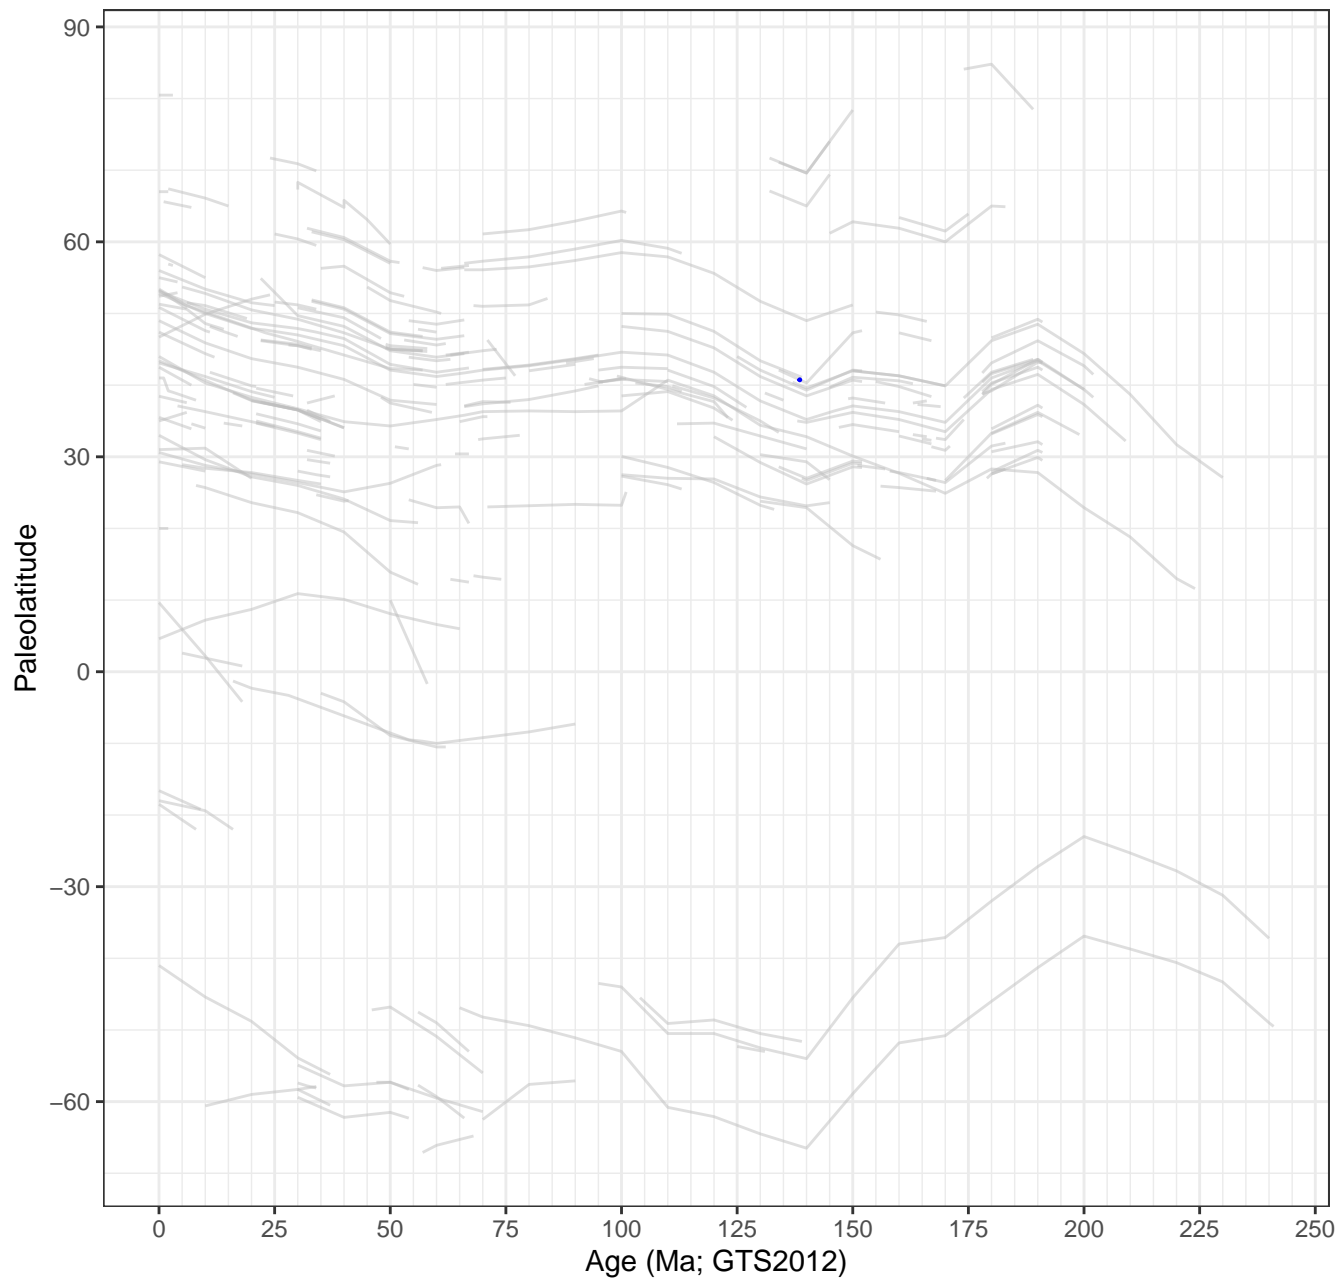

Supplement: Supplementary file 1680 [file Impletosphaeridium lumectum.pdf › Supplement/Supplement 2/Species 1914 plots/Impletosphaeridium lumectum.pdf]

# Species Impletosphaeridium pachydermum

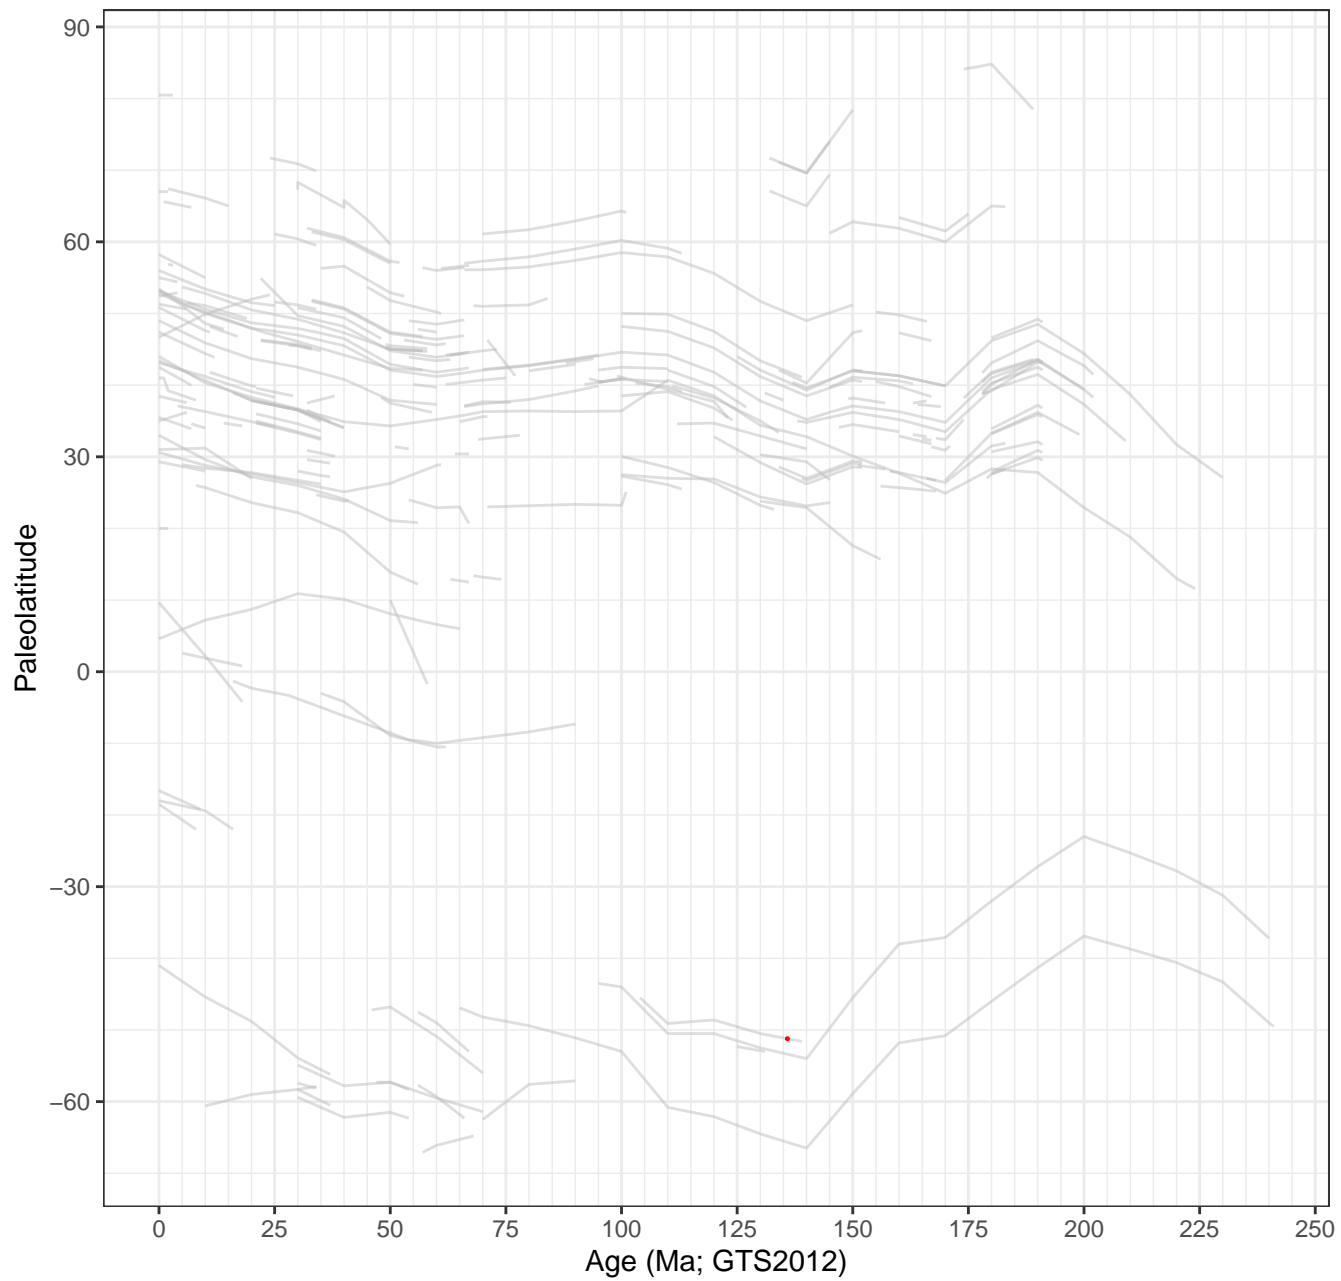

Supplement: Supplementary file 1681 [file Impletosphaeridium pachydermum.pdf › Supplement/Supplement 2/Species 1914 plots/Impletosphaeridium pachydermum.pdf]

# Species Impletosphaeridium polytrichum

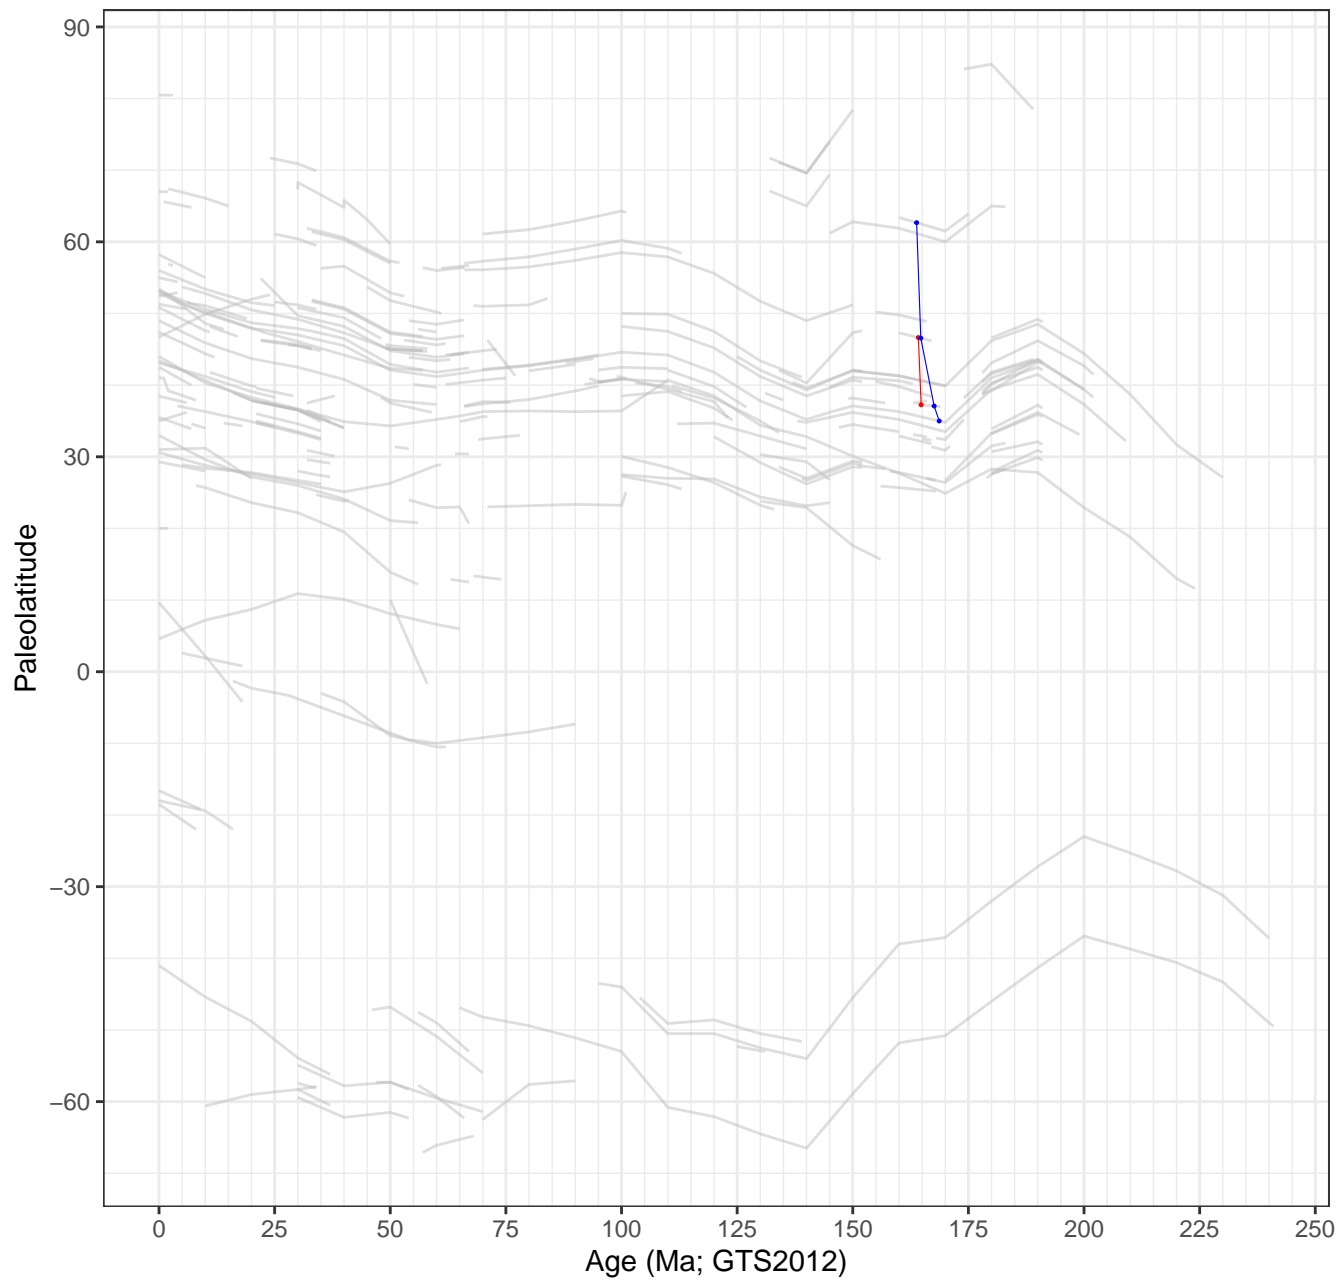

Supplement: Supplementary file 1682 [file Impletosphaeridium polytrichum.pdf › Supplement/Supplement 2/Species 1914 plots/Impletosphaeridium polytrichum.pdf]

# Species Impletosphaeridium prolatum

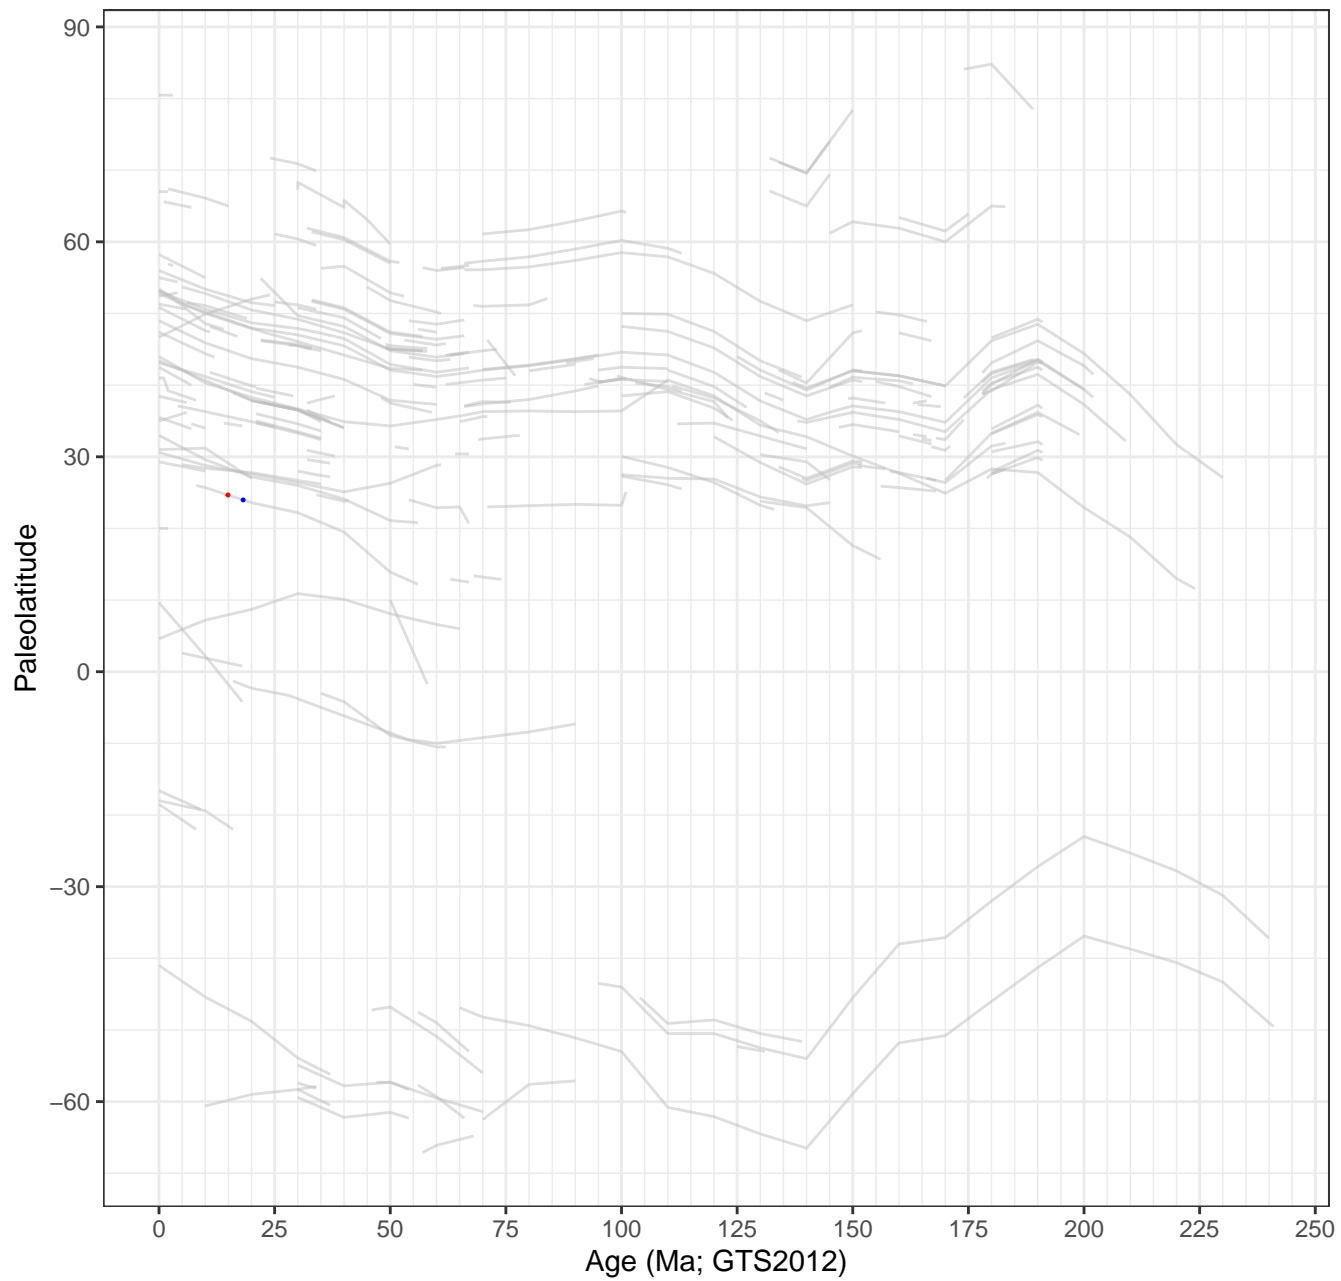

Supplement: Supplementary file 1683 [file Impletosphaeridium prolatum.pdf › Supplement/Supplement 2/Species 1914 plots/Impletosphaeridium prolatum.pdf]

# Species Impletosphaeridium tribuliferum

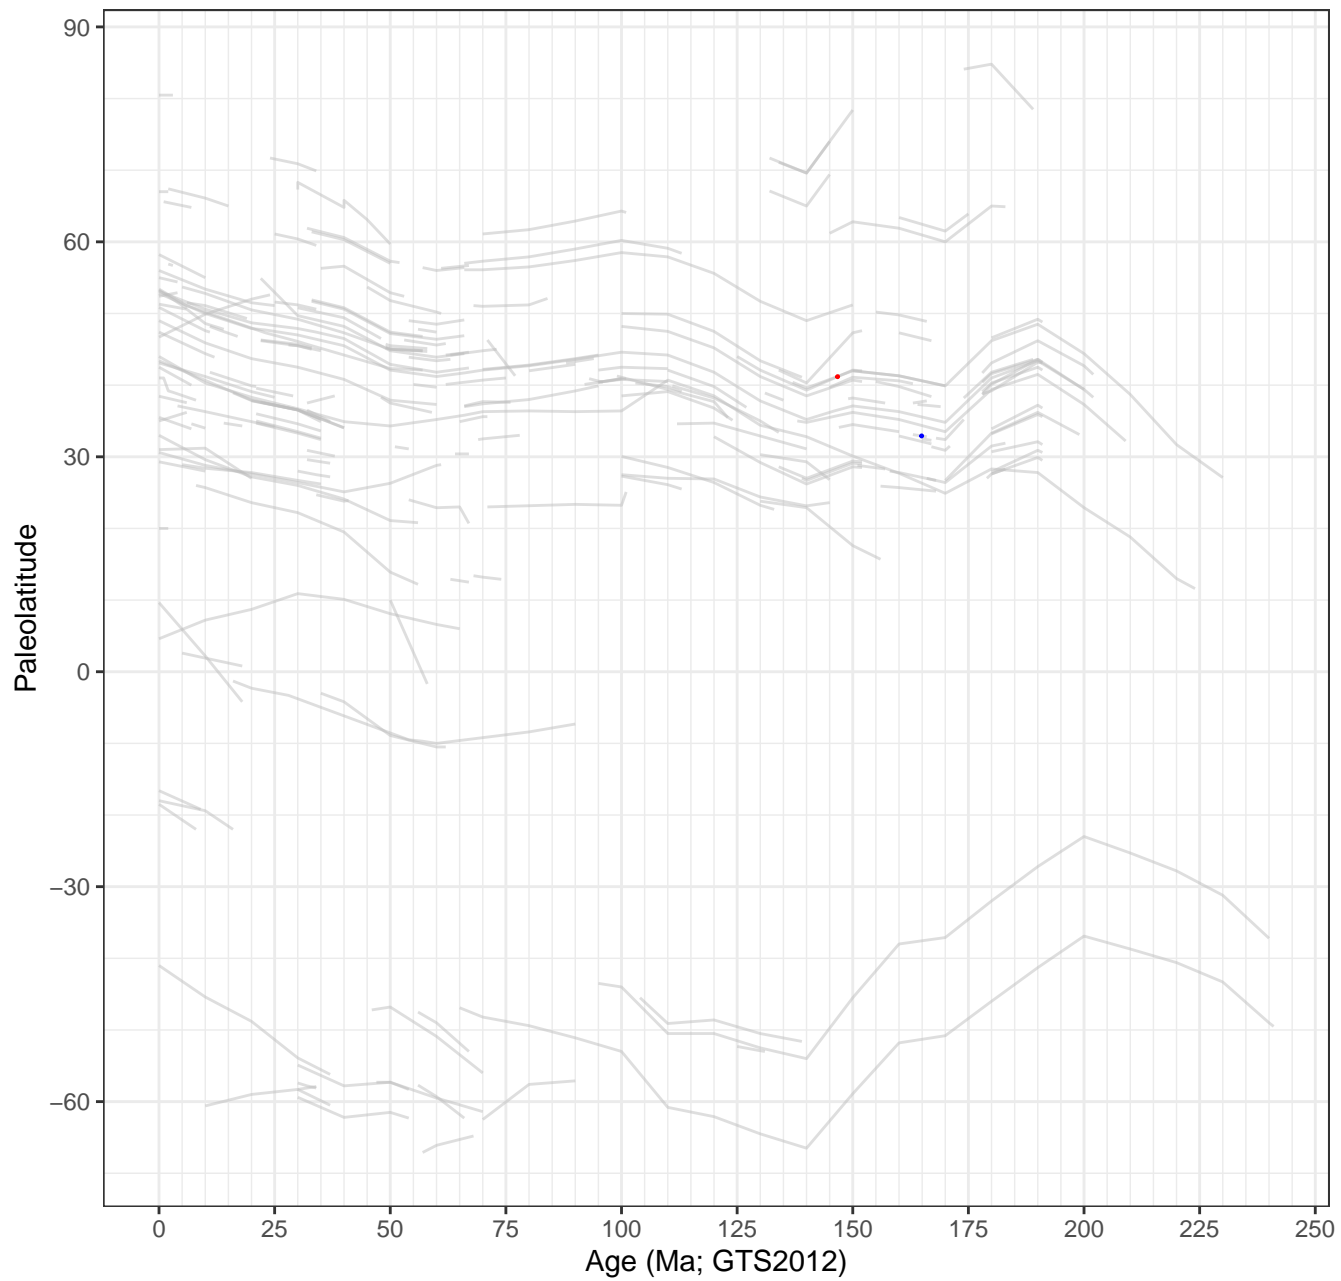

Supplement: Supplementary file 1684 [file Impletosphaeridium tribuliferum.pdf › Supplement/Supplement 2/Species 1914 plots/Impletosphaeridium tribuliferum.pdf]

# Species Impletosphaeridium varispinosum

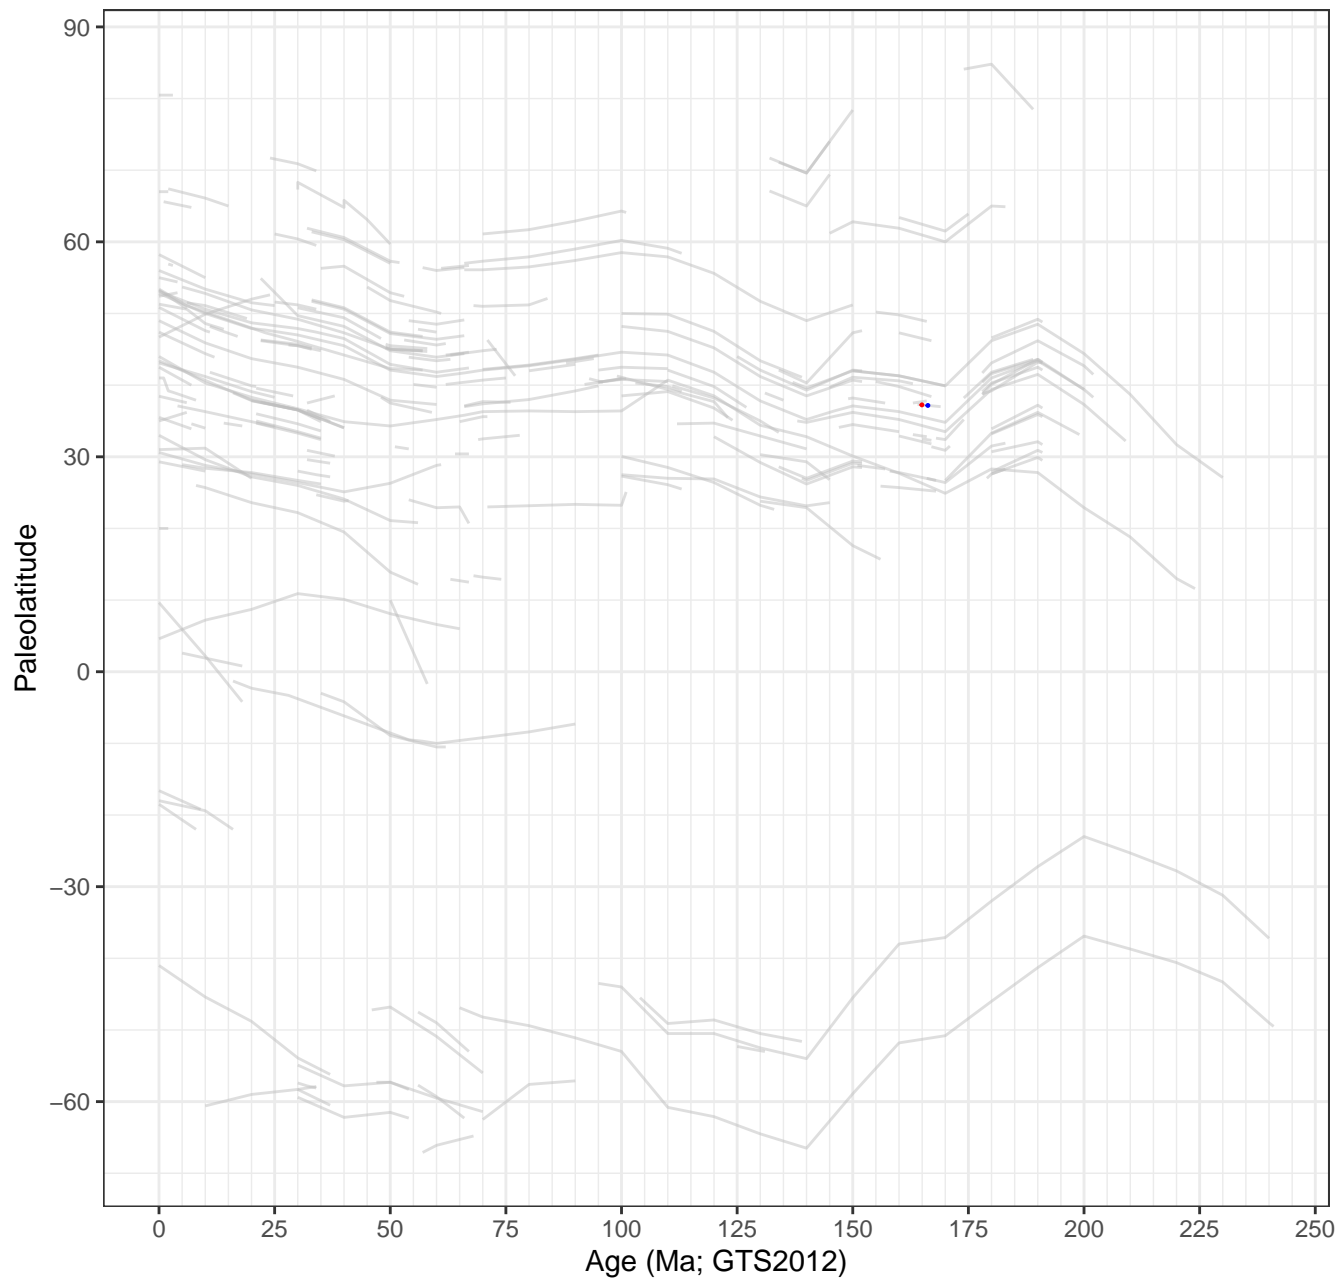

Supplement: Supplementary file 1685 [file Impletosphaeridium varispinosum.pdf › Supplement/Supplement 2/Species 1914 plots/Impletosphaeridium varispinosum.pdf]

# Species *Indodinium khariense*

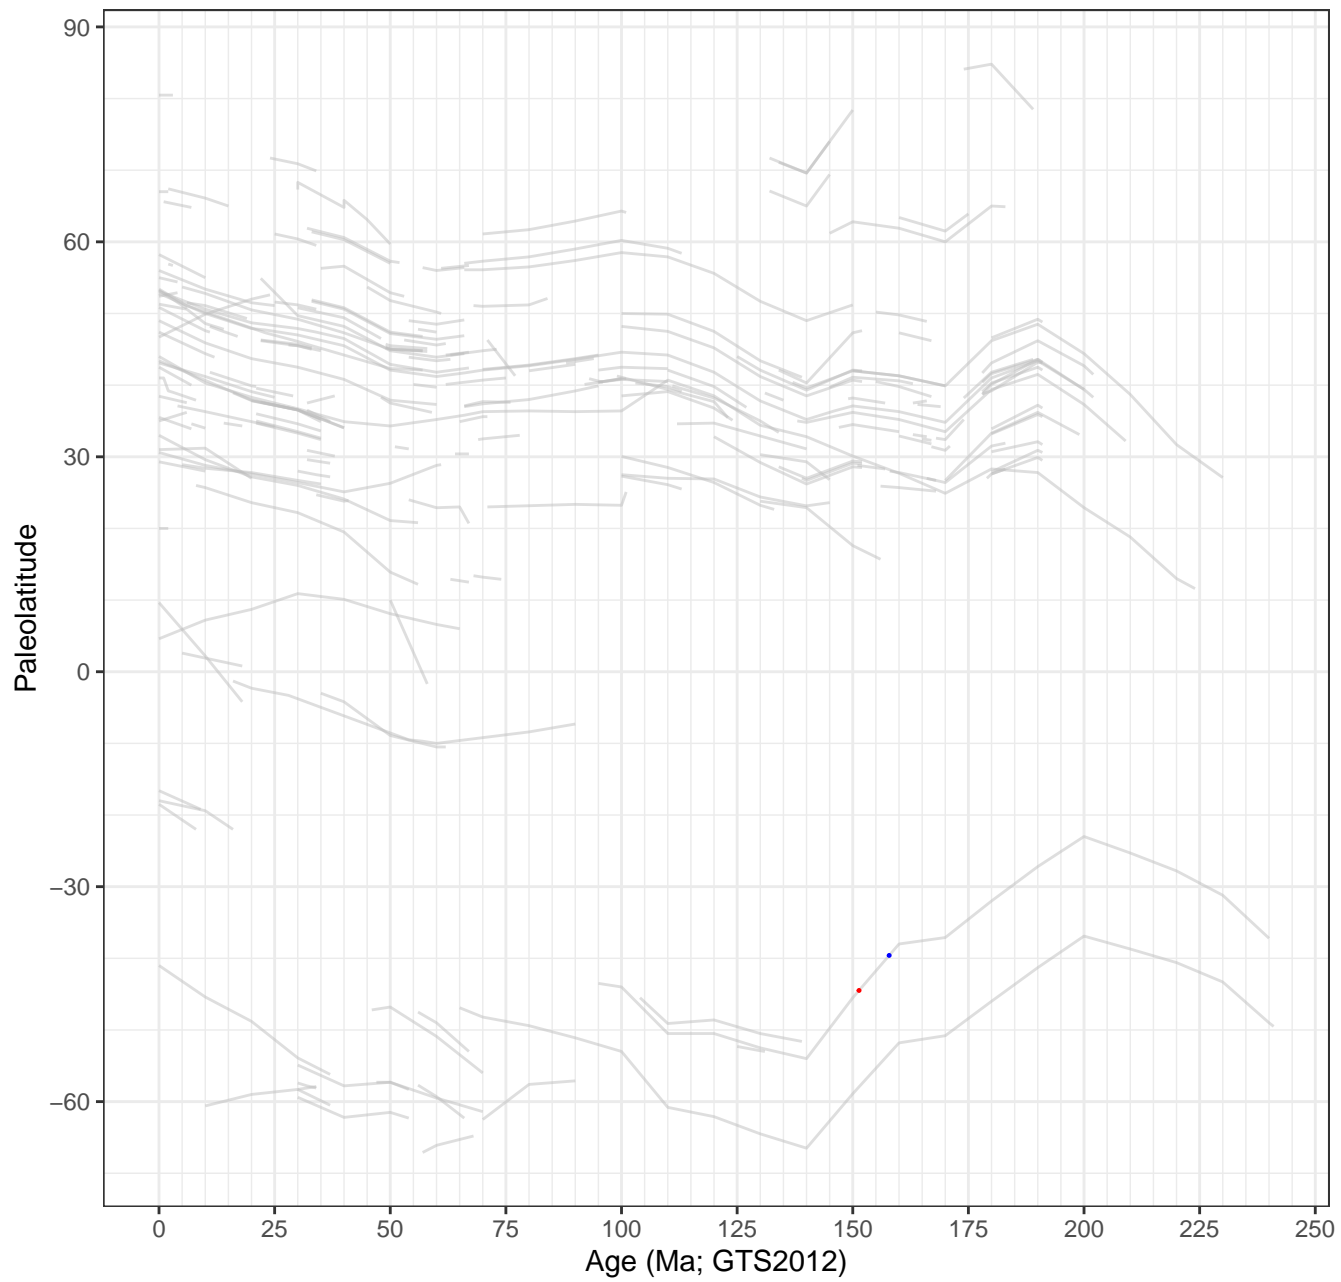

Supplement: Supplementary file 1686 [file Indodinium khariense.pdf › Supplement/Supplement 2/Species 1914 plots/Indodinium khariense.pdf]

# Species *Invertocysta lacrymosa*

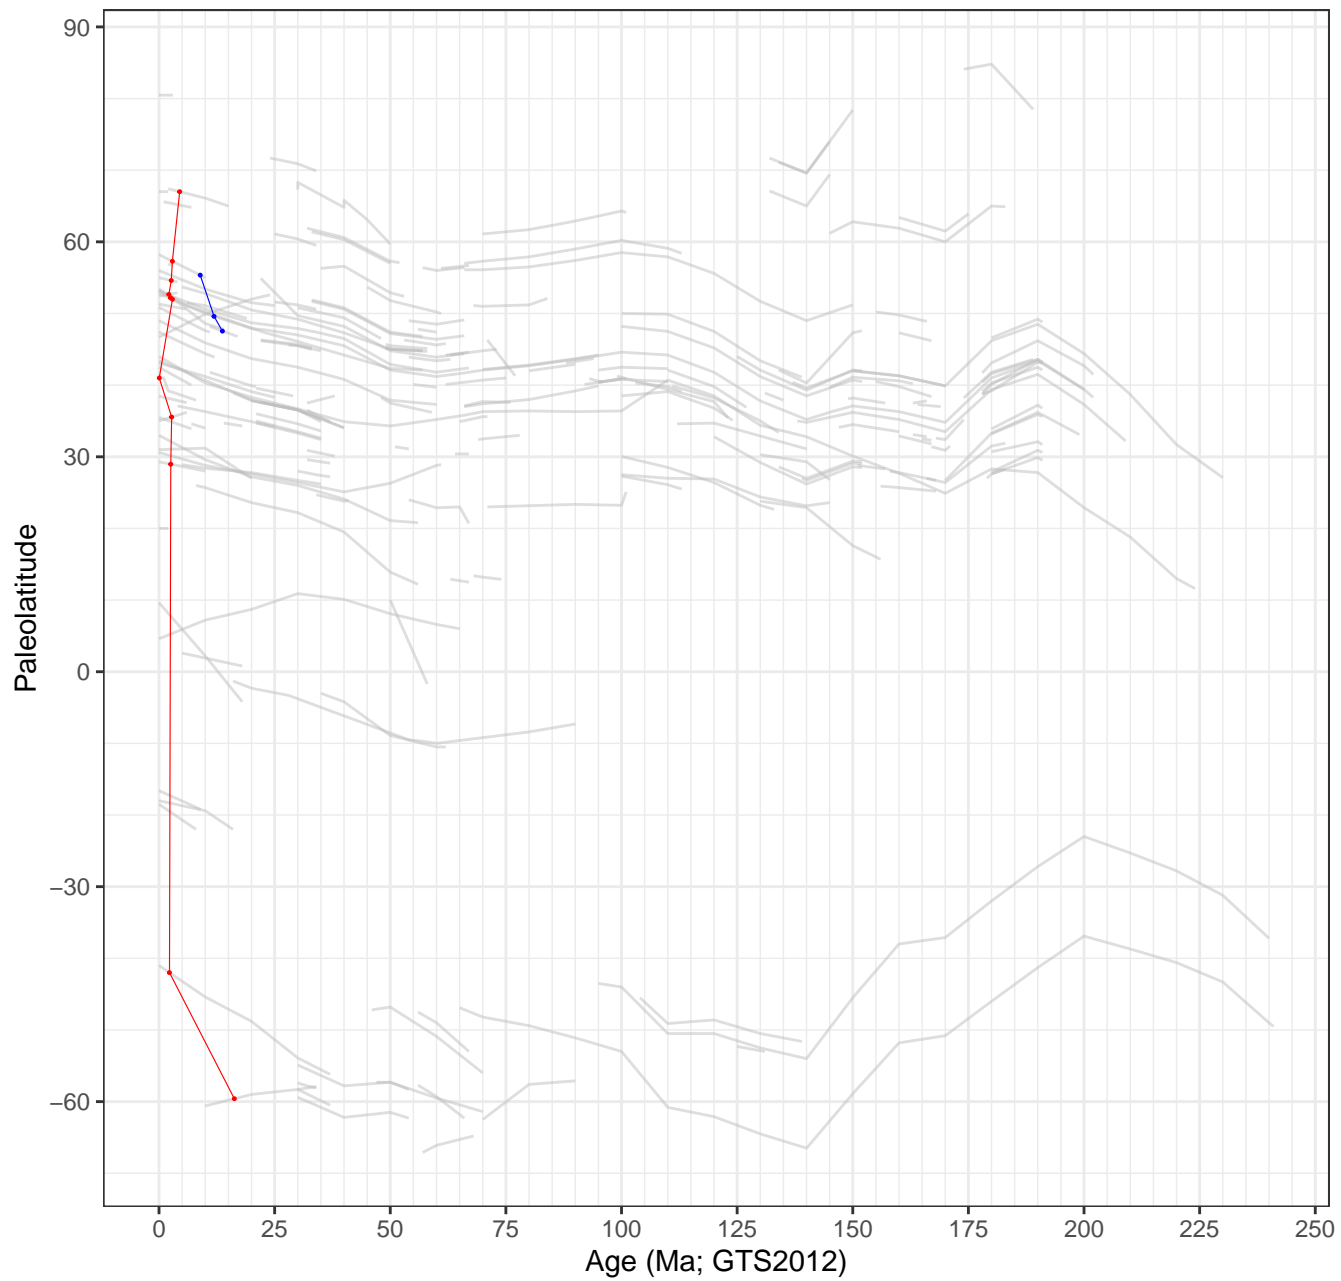

Supplement: Supplementary file 1687 [file Invertocysta lacrymosa.pdf › Supplement/Supplement 2/Species 1914 plots/Invertocysta lacrymosa.pdf]

# Species *Invertocysta tabulata*

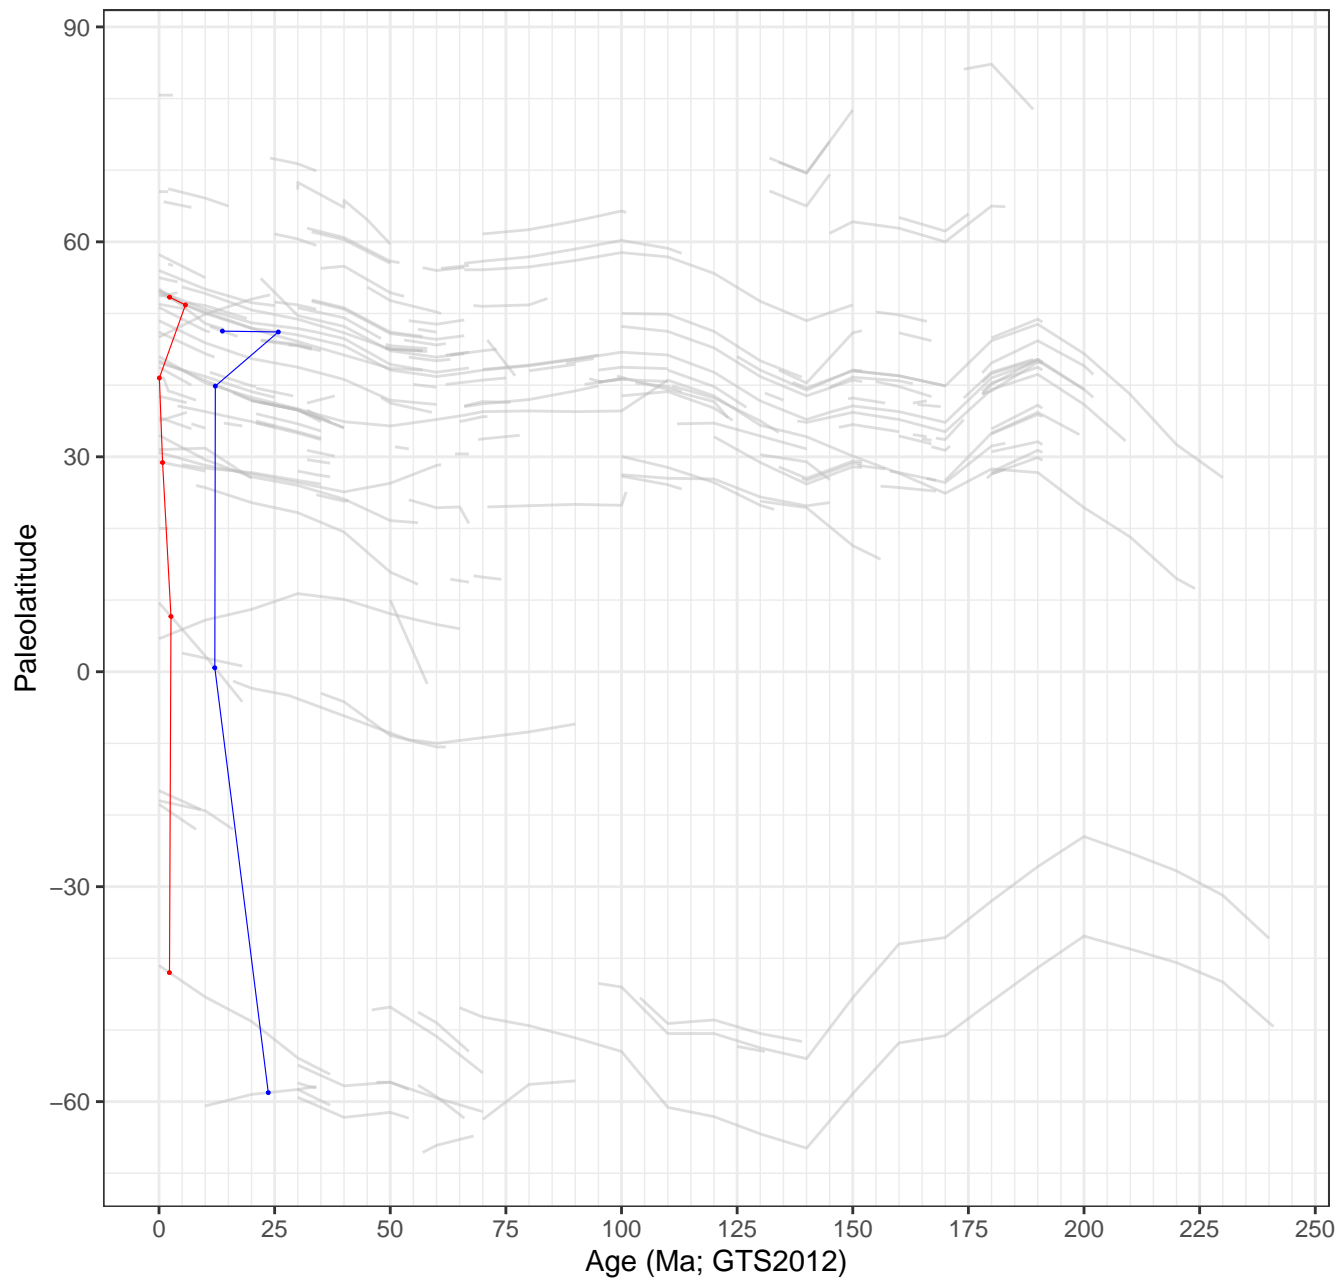

Supplement: Supplementary file 1688 [file Invertocysta tabulata.pdf › Supplement/Supplement 2/Species 1914 plots/Invertocysta tabulata.pdf]

# Species *Isabelidinium acuminatum*

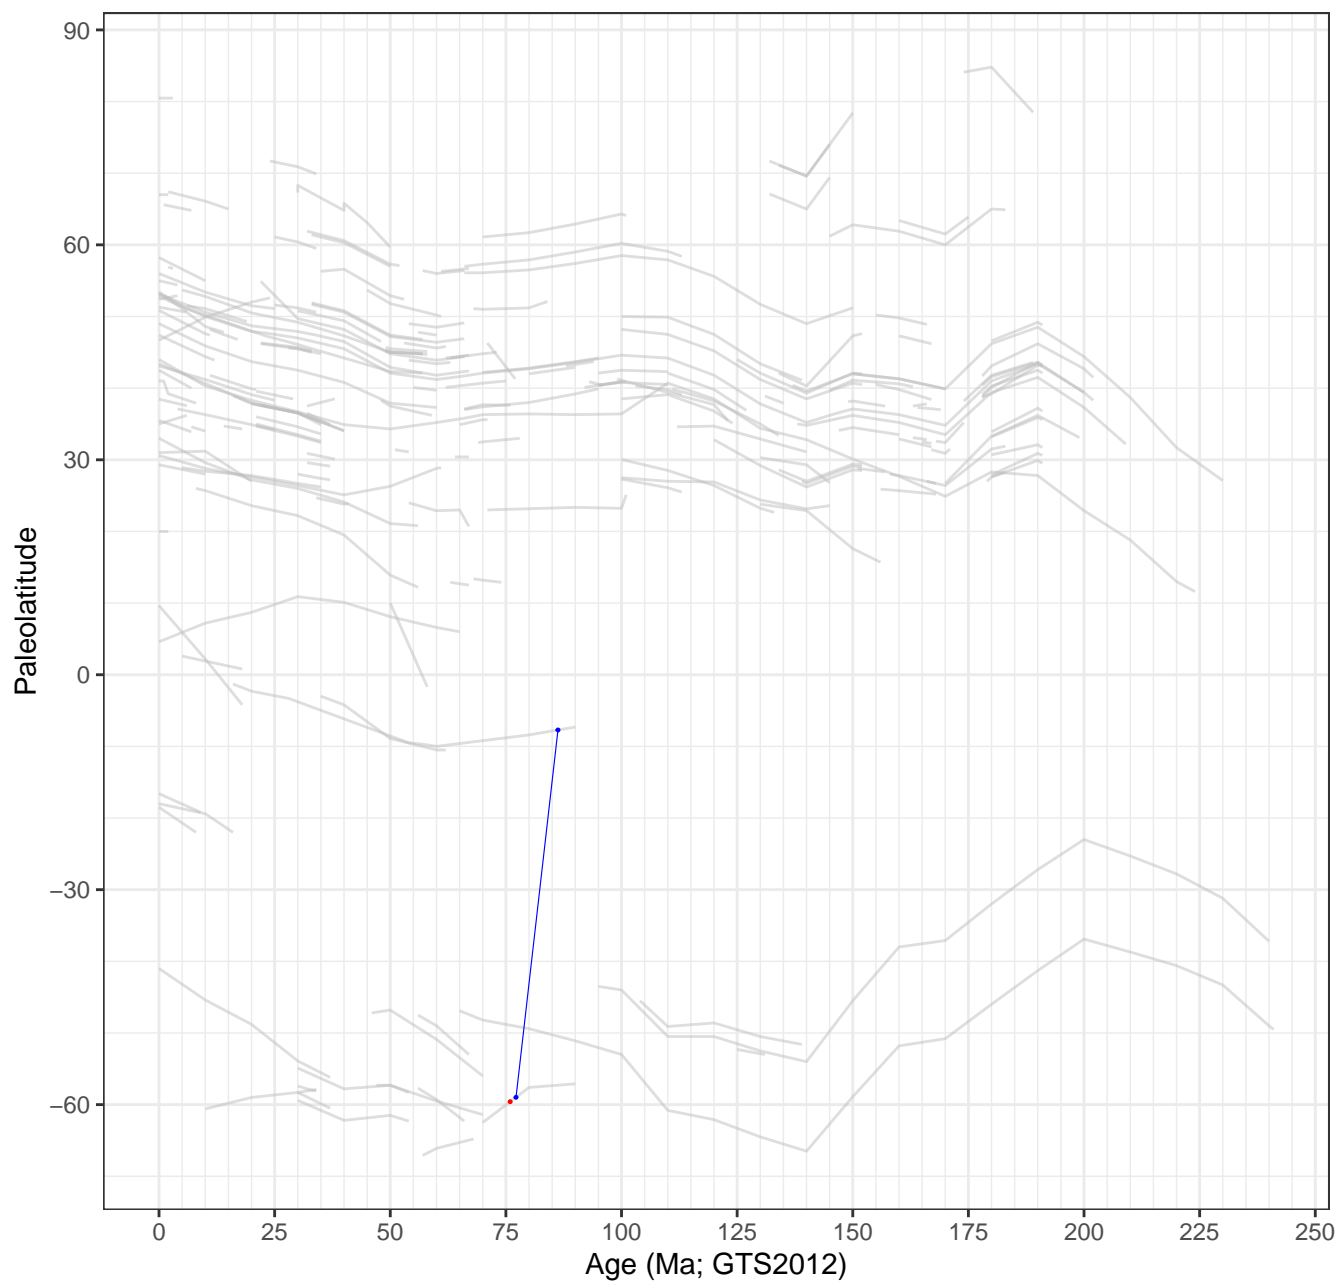

Supplement: Supplementary file 1689 [file Isabelidinium acuminatum.pdf › Supplement/Supplement 2/Species 1914 plots/Isabelidinium acuminatum.pdf]

# Species *Isabelidinium amphiatum*

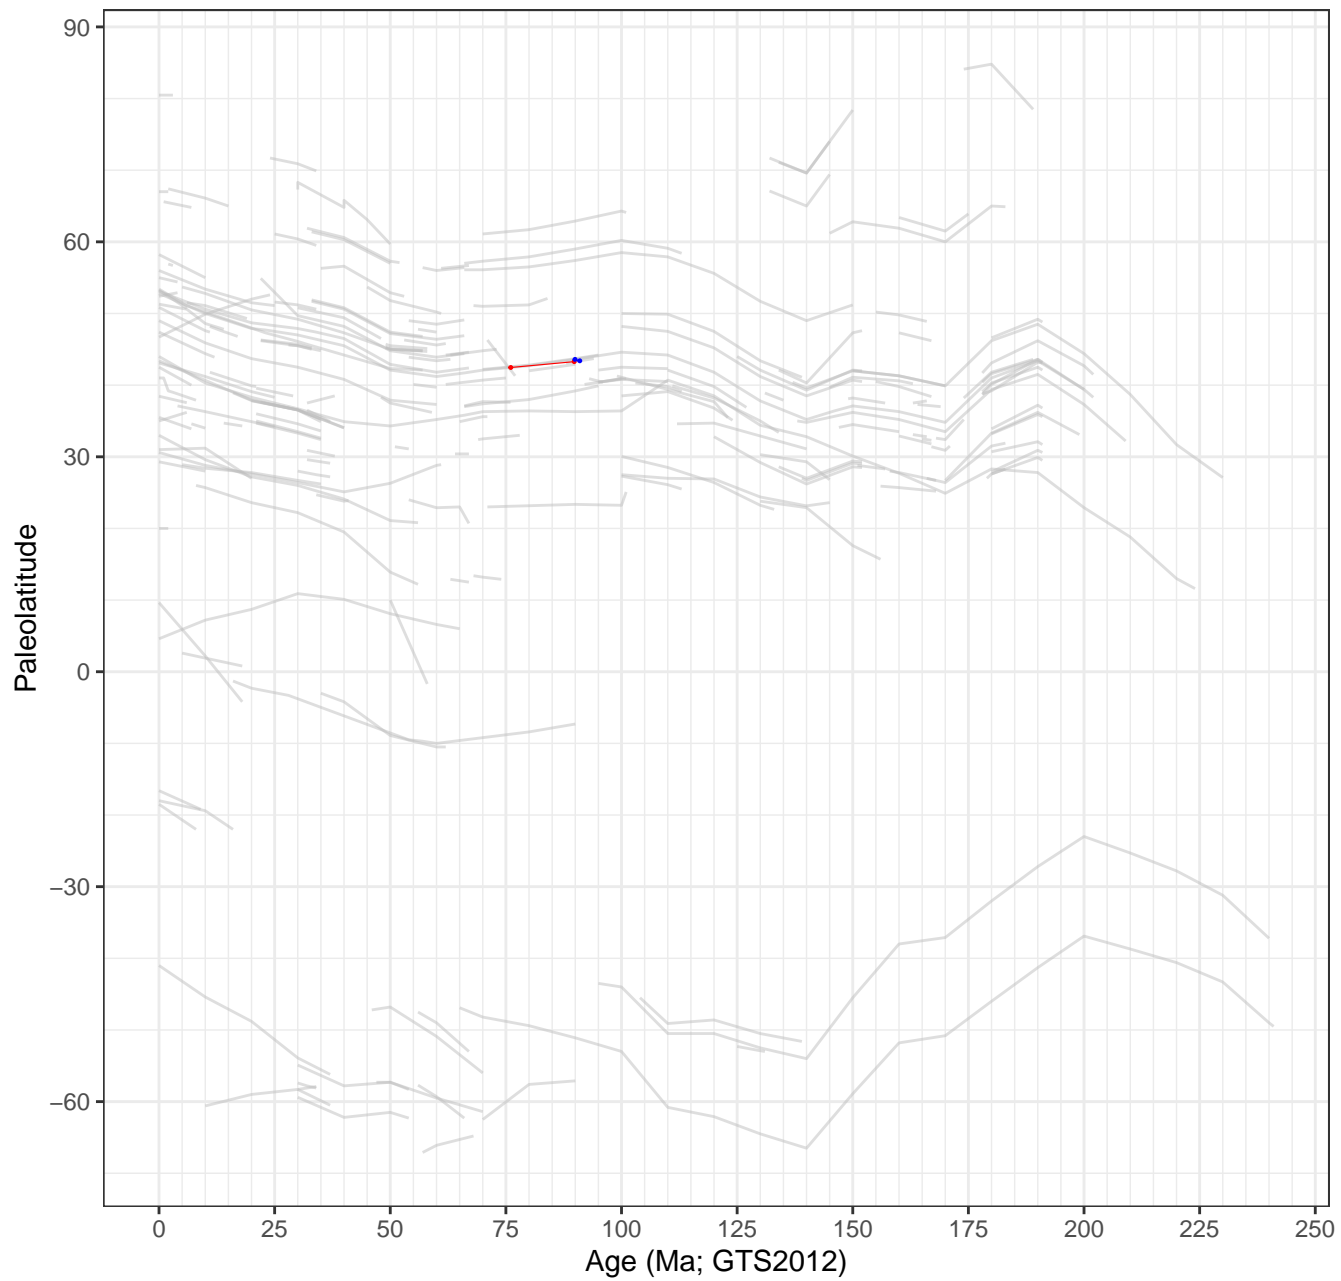

Supplement: Supplementary file 1690 [file Isabelidinium amphiatum.pdf › Supplement/Supplement 2/Species 1914 plots/Isabelidinium amphiatum.pdf]

# Species *Isabelidinium bakeri*

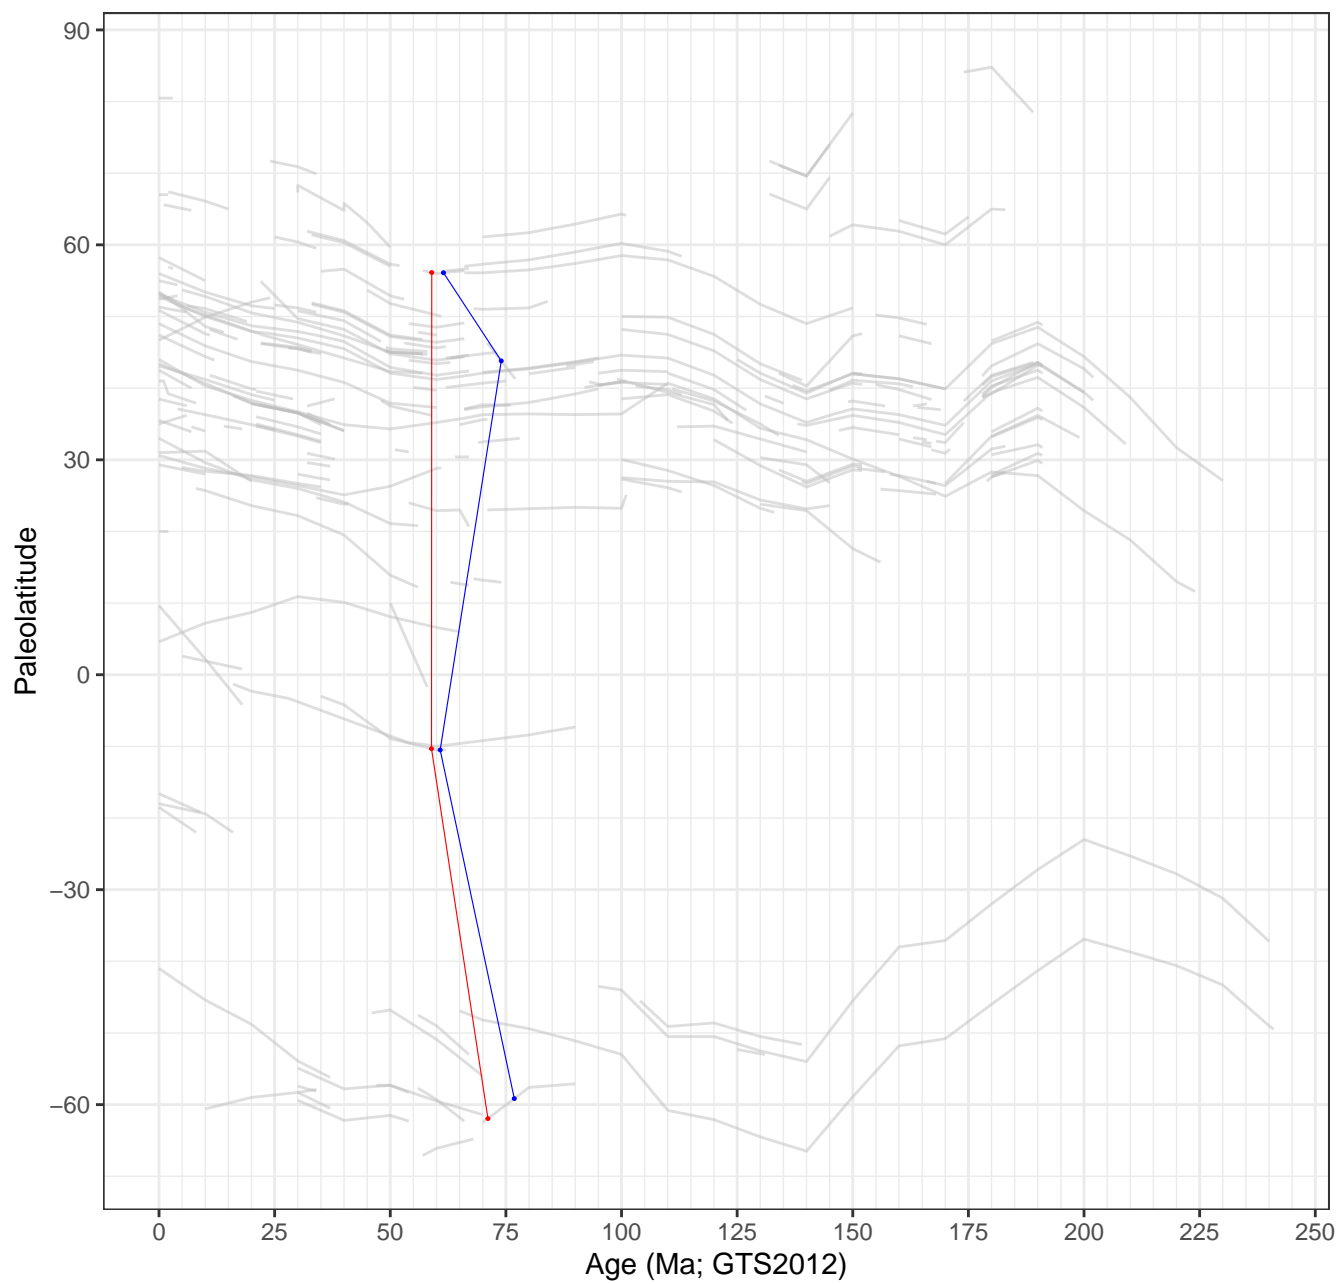

Supplement: Supplementary file 1691 [file Isabelidinium bakeri.pdf › Supplement/Supplement 2/Species 1914 plots/Isabelidinium bakeri.pdf]

# Species *Isabelidinium cingulatum*

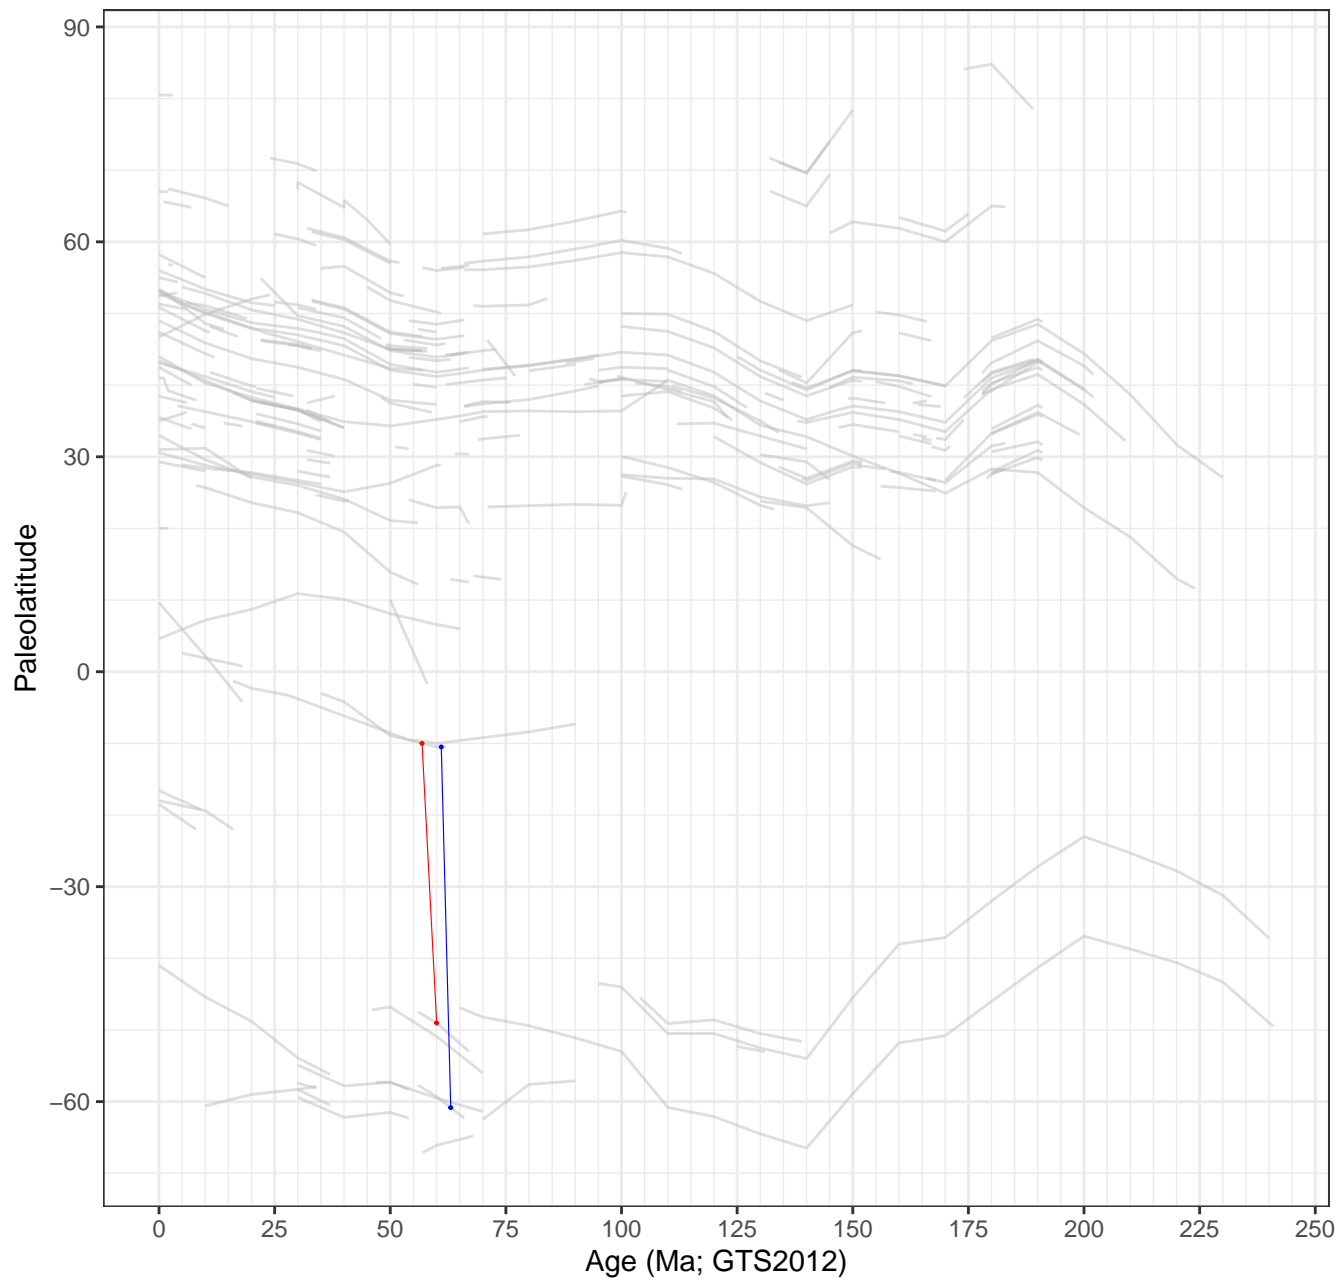

Supplement: Supplementary file 1692 [file Isabelidinium cingulatum.pdf › Supplement/Supplement 2/Species 1914 plots/Isabelidinium cingulatum.pdf]

# Species *Isabelidinium cooksoniae*

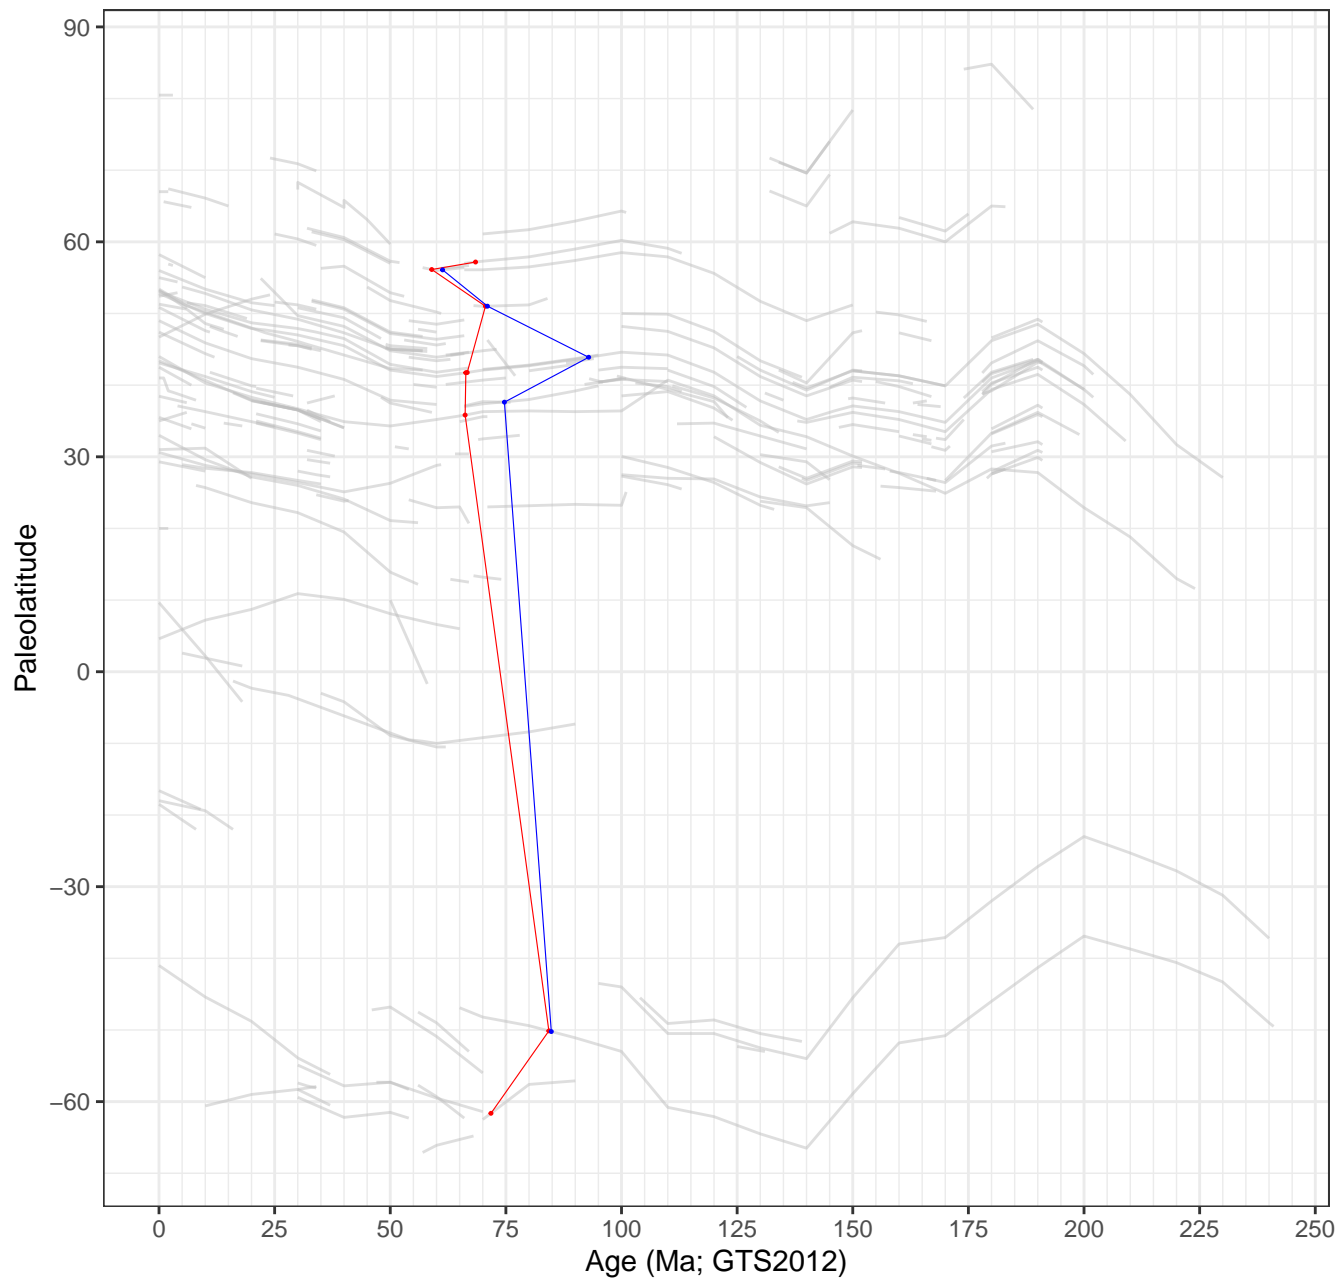

Supplement: Supplementary file 1693 [file Isabelidinium cooksoniae.pdf › Supplement/Supplement 2/Species 1914 plots/Isabelidinium cooksoniae.pdf]

# Species *Isabelidinium cretaceum*

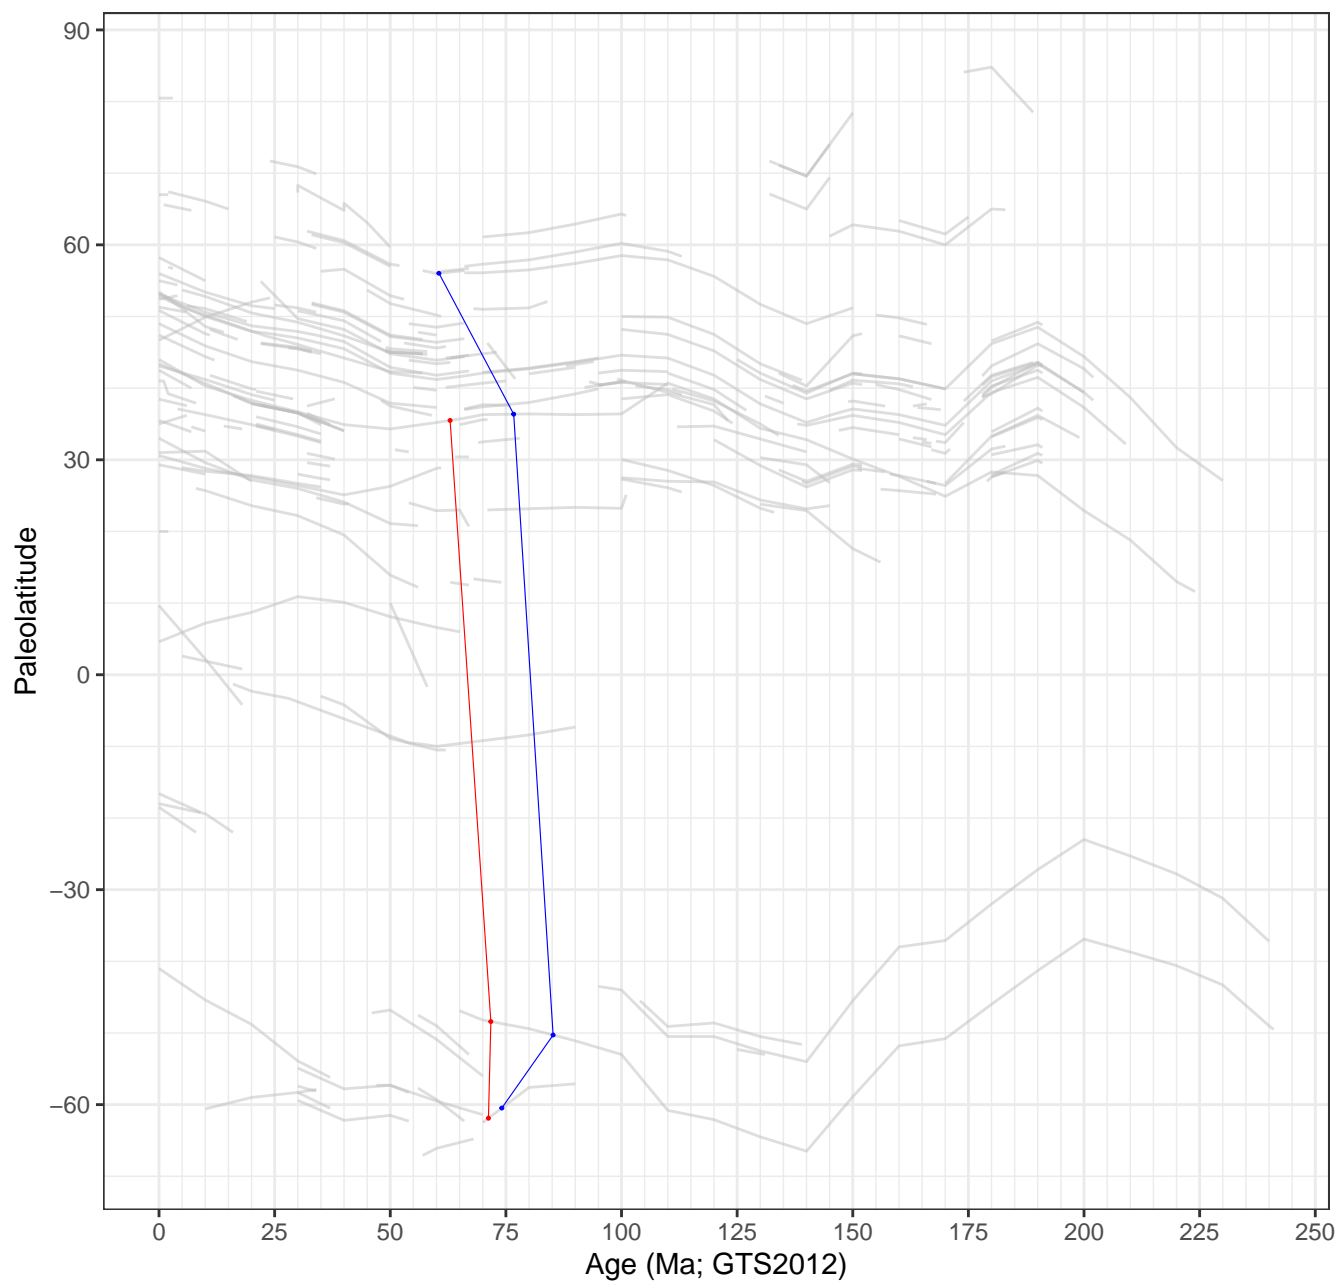

Supplement: Supplementary file 1694 [file Isabelidinium cretaceum.pdf › Supplement/Supplement 2/Species 1914 plots/Isabelidinium cretaceum.pdf]

# Species Isabelidinium gallium

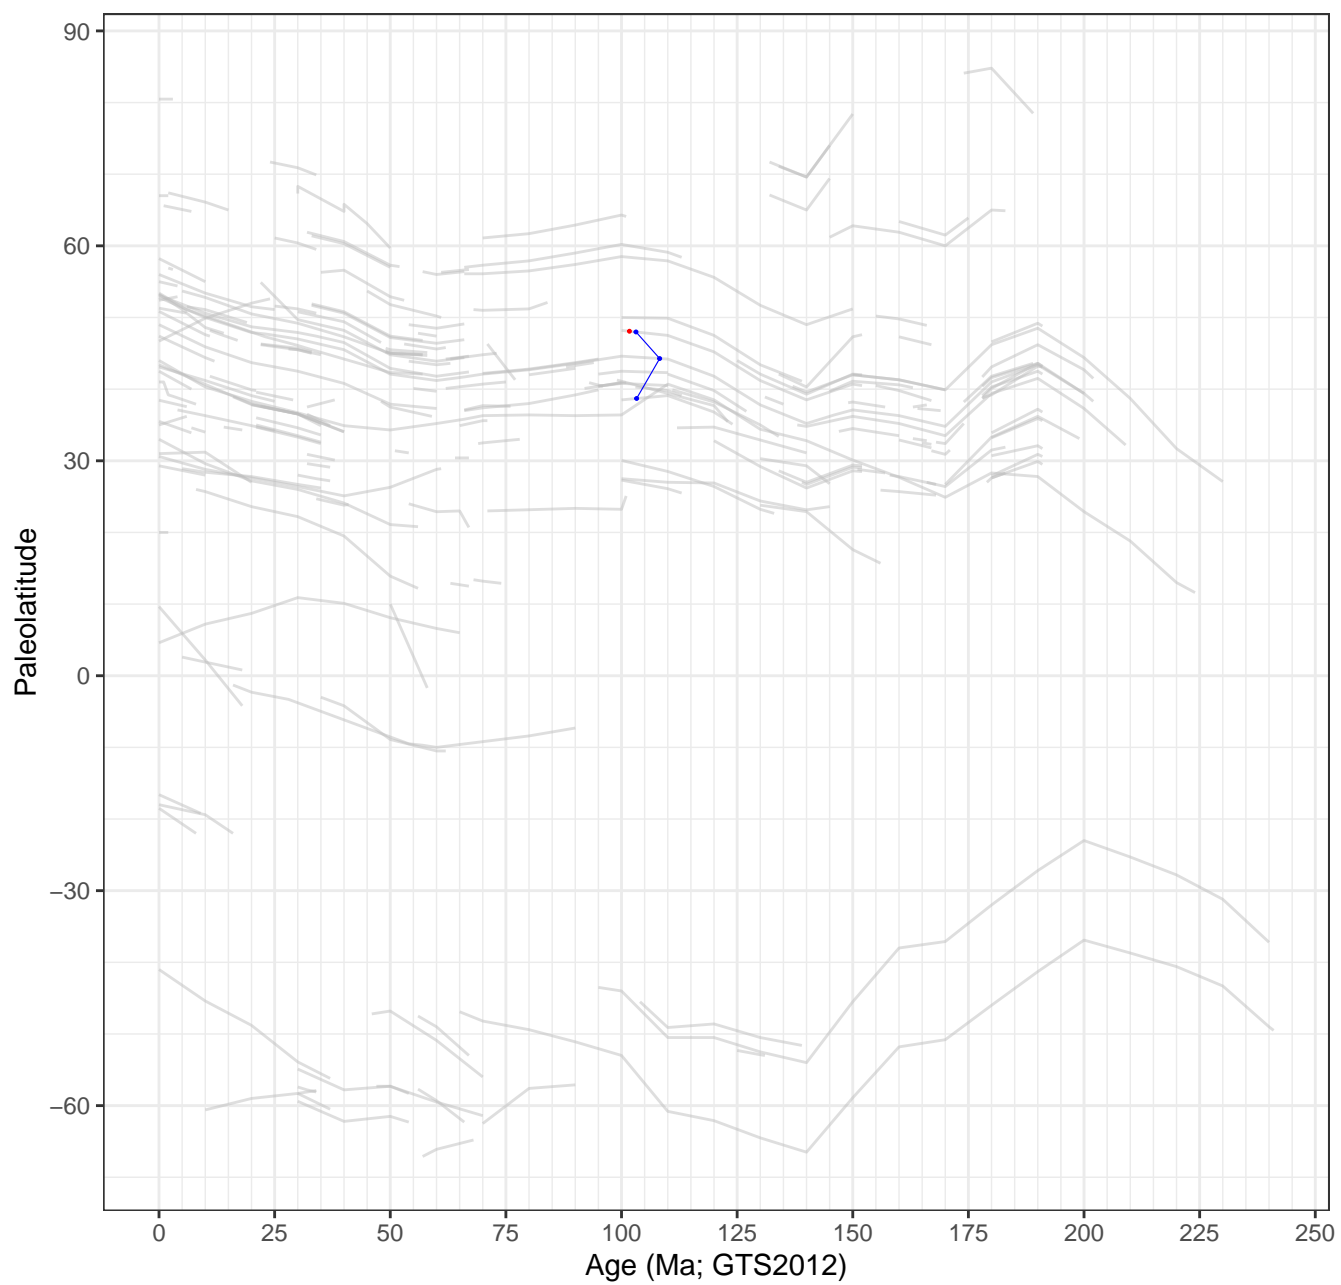

Supplement: Supplementary file 1695 [file Isabelidinium gallium.pdf › Supplement/Supplement 2/Species 1914 plots/Isabelidinium gallium.pdf]

# Species *Isabelidinium glabrum*

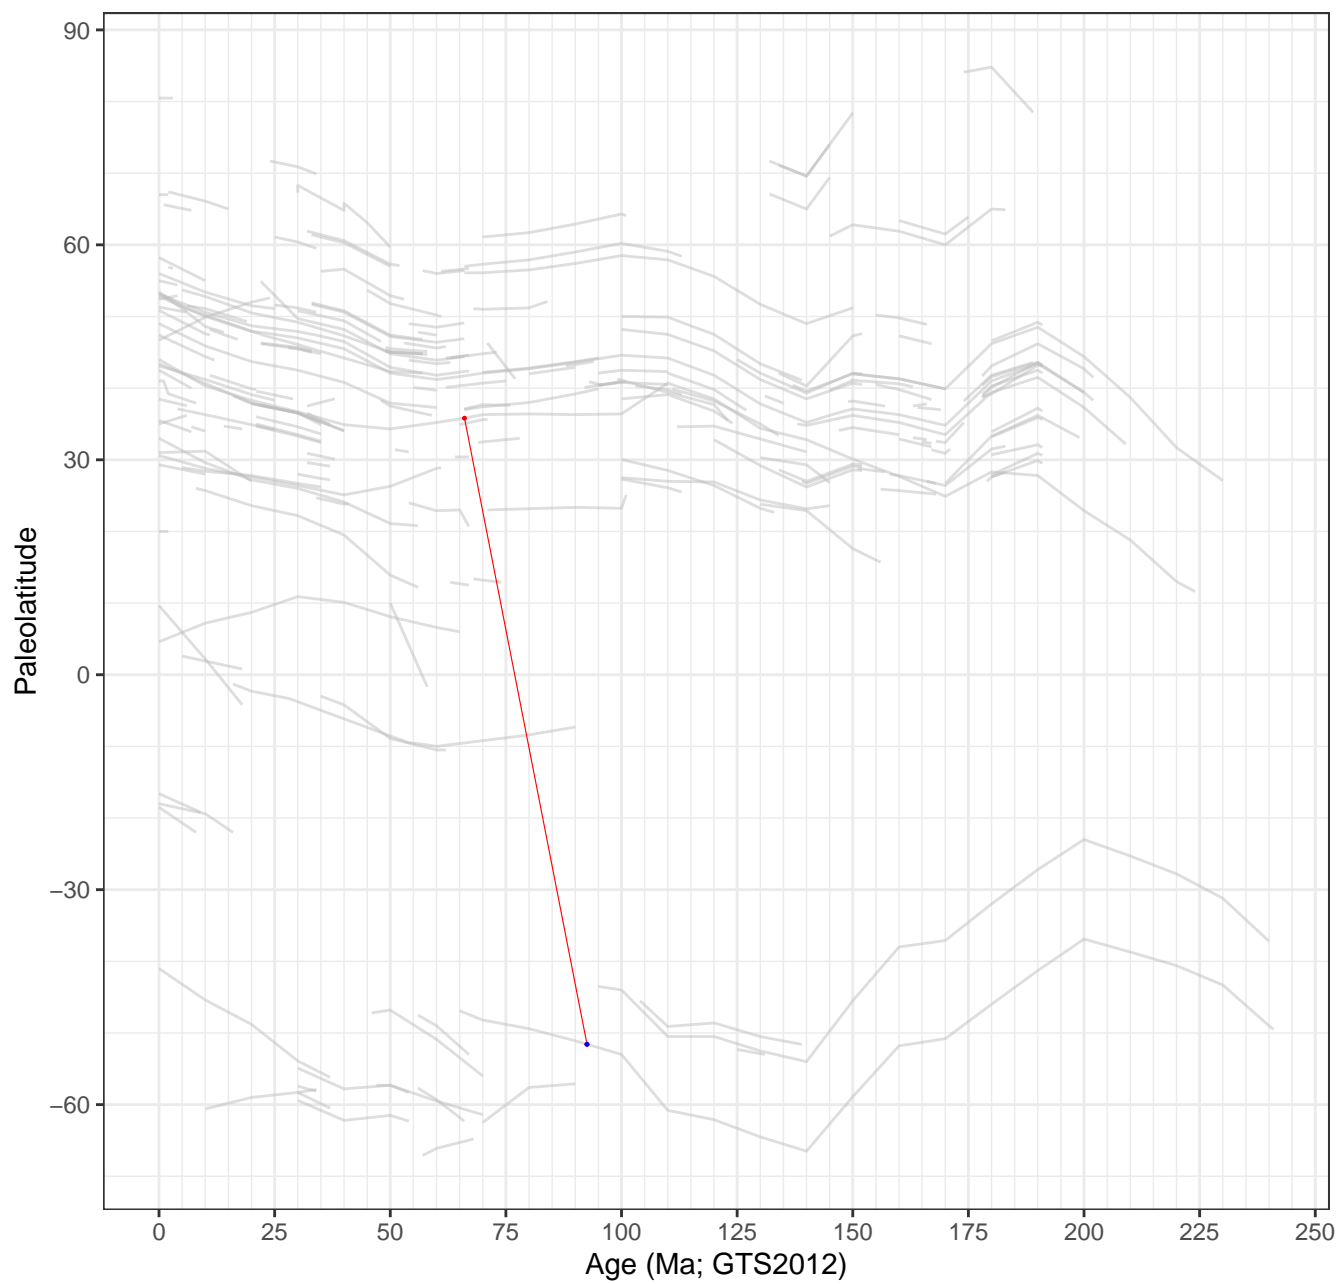

Supplement: Supplementary file 1696 [file Isabelidinium glabrum.pdf › Supplement/Supplement 2/Species 1914 plots/Isabelidinium glabrum.pdf]

# Species *Isabelidinium korojonense*

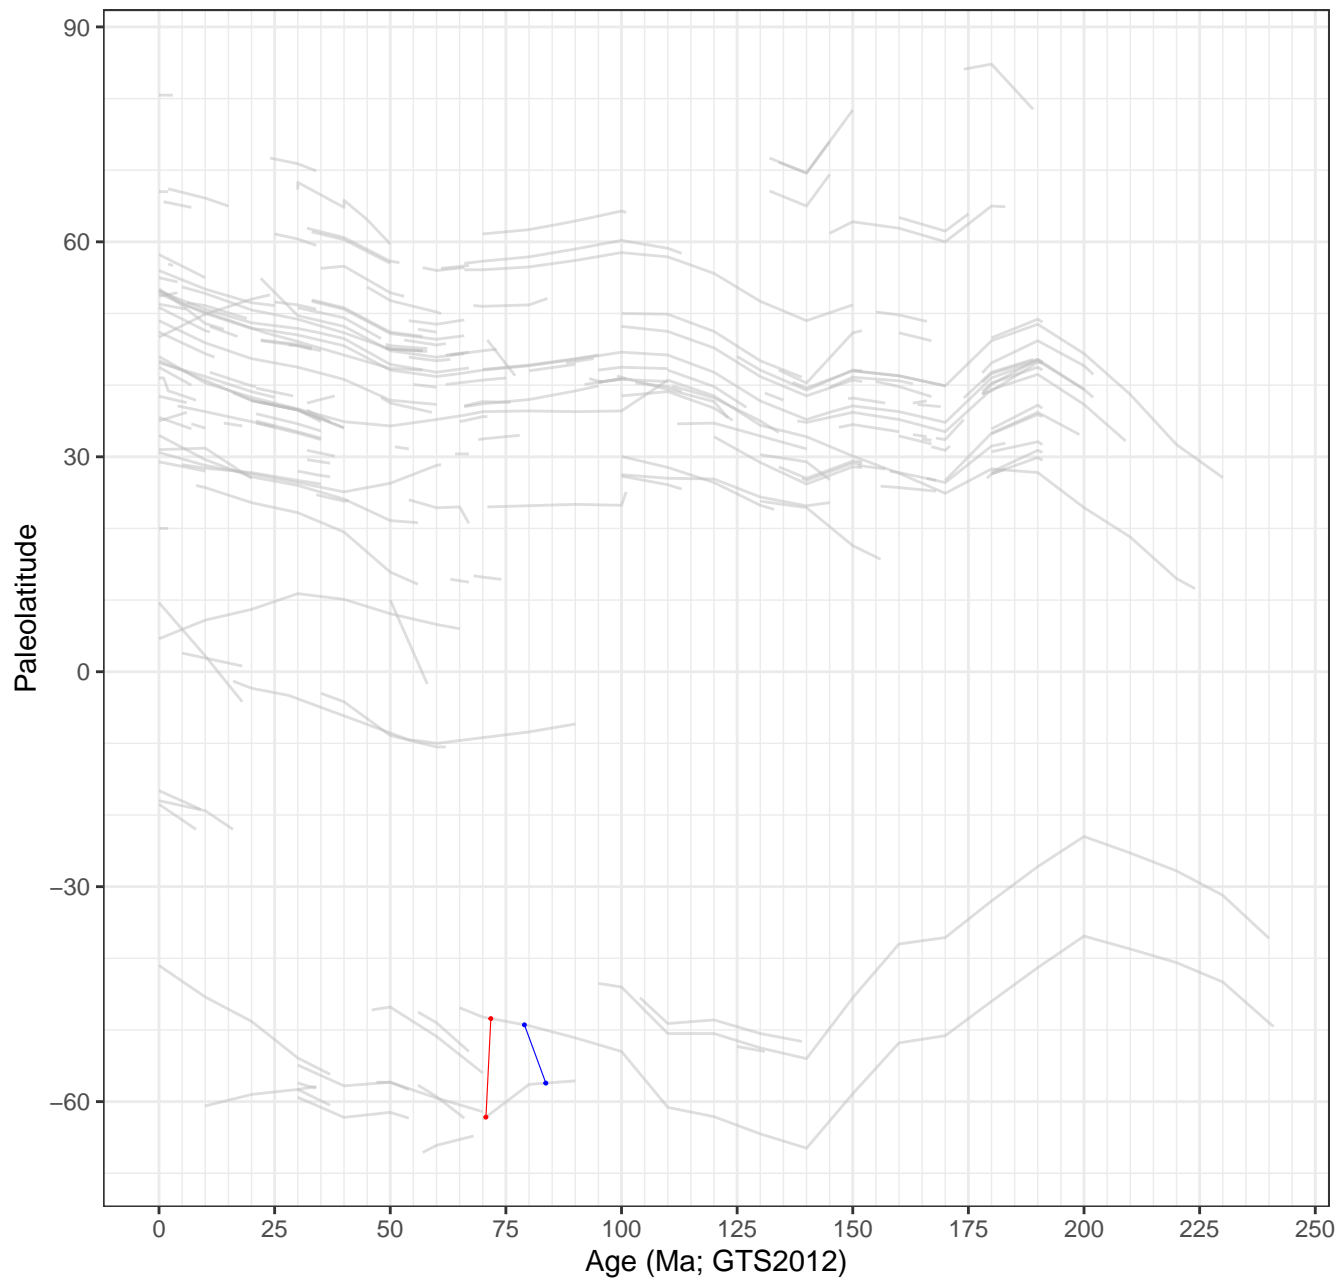

Supplement: Supplementary file 1697 [file Isabelidinium korojonense.pdf › Supplement/Supplement 2/Species 1914 plots/Isabelidinium korojonense.pdf]

# Species *Isabelidinium magnum*

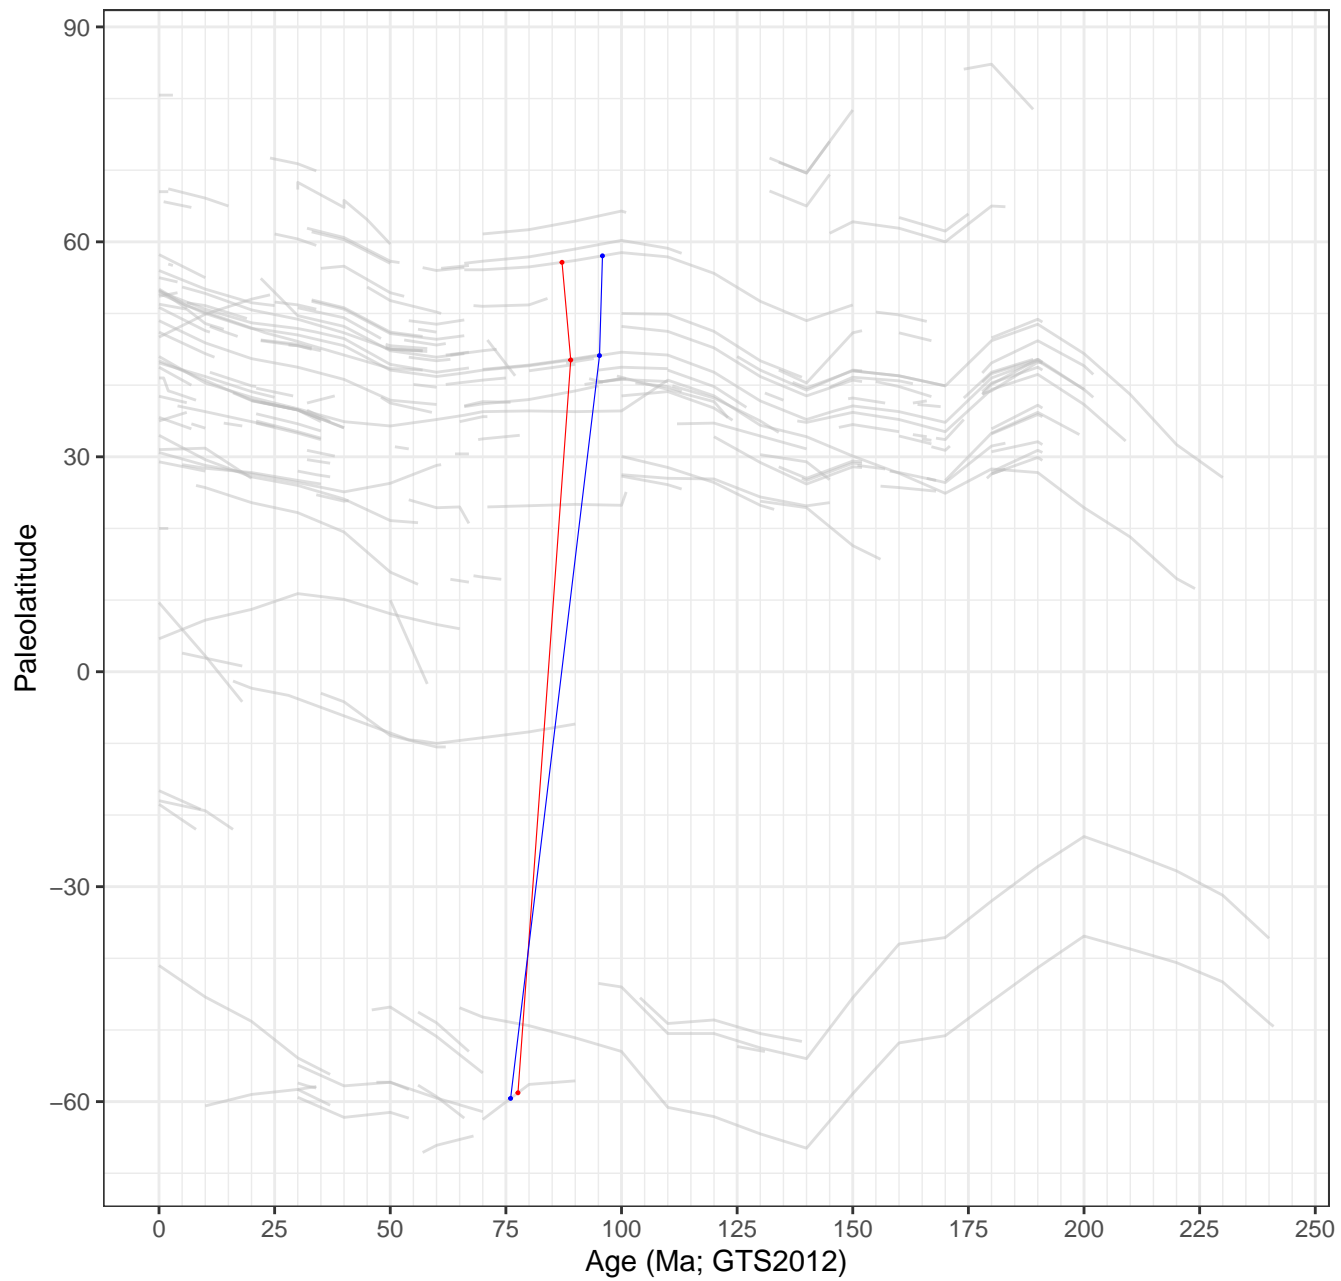

Supplement: Supplementary file 1698 [file Isabelidinium magnum.pdf › Supplement/Supplement 2/Species 1914 plots/Isabelidinium magnum.pdf]

# Species *Isabelidinium majae*

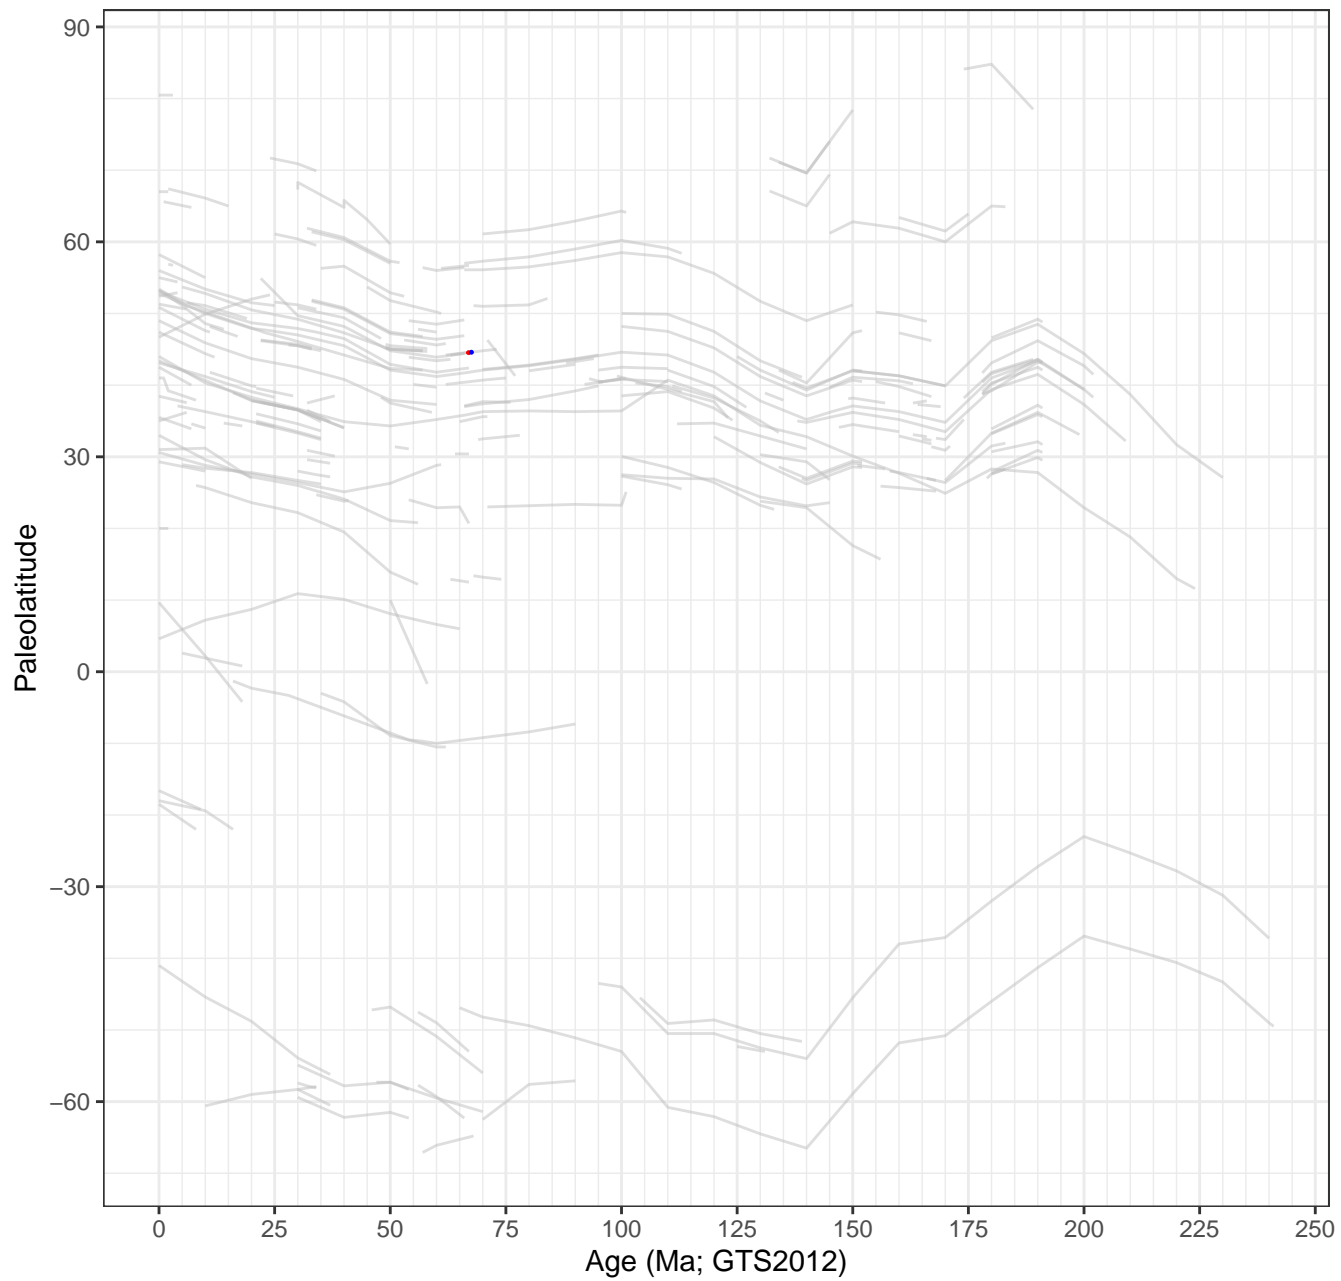

Supplement: Supplementary file 1699 [file Isabelidinium majae.pdf › Supplement/Supplement 2/Species 1914 plots/Isabelidinium majae.pdf]

# Species *Isabelidinium microarmum*

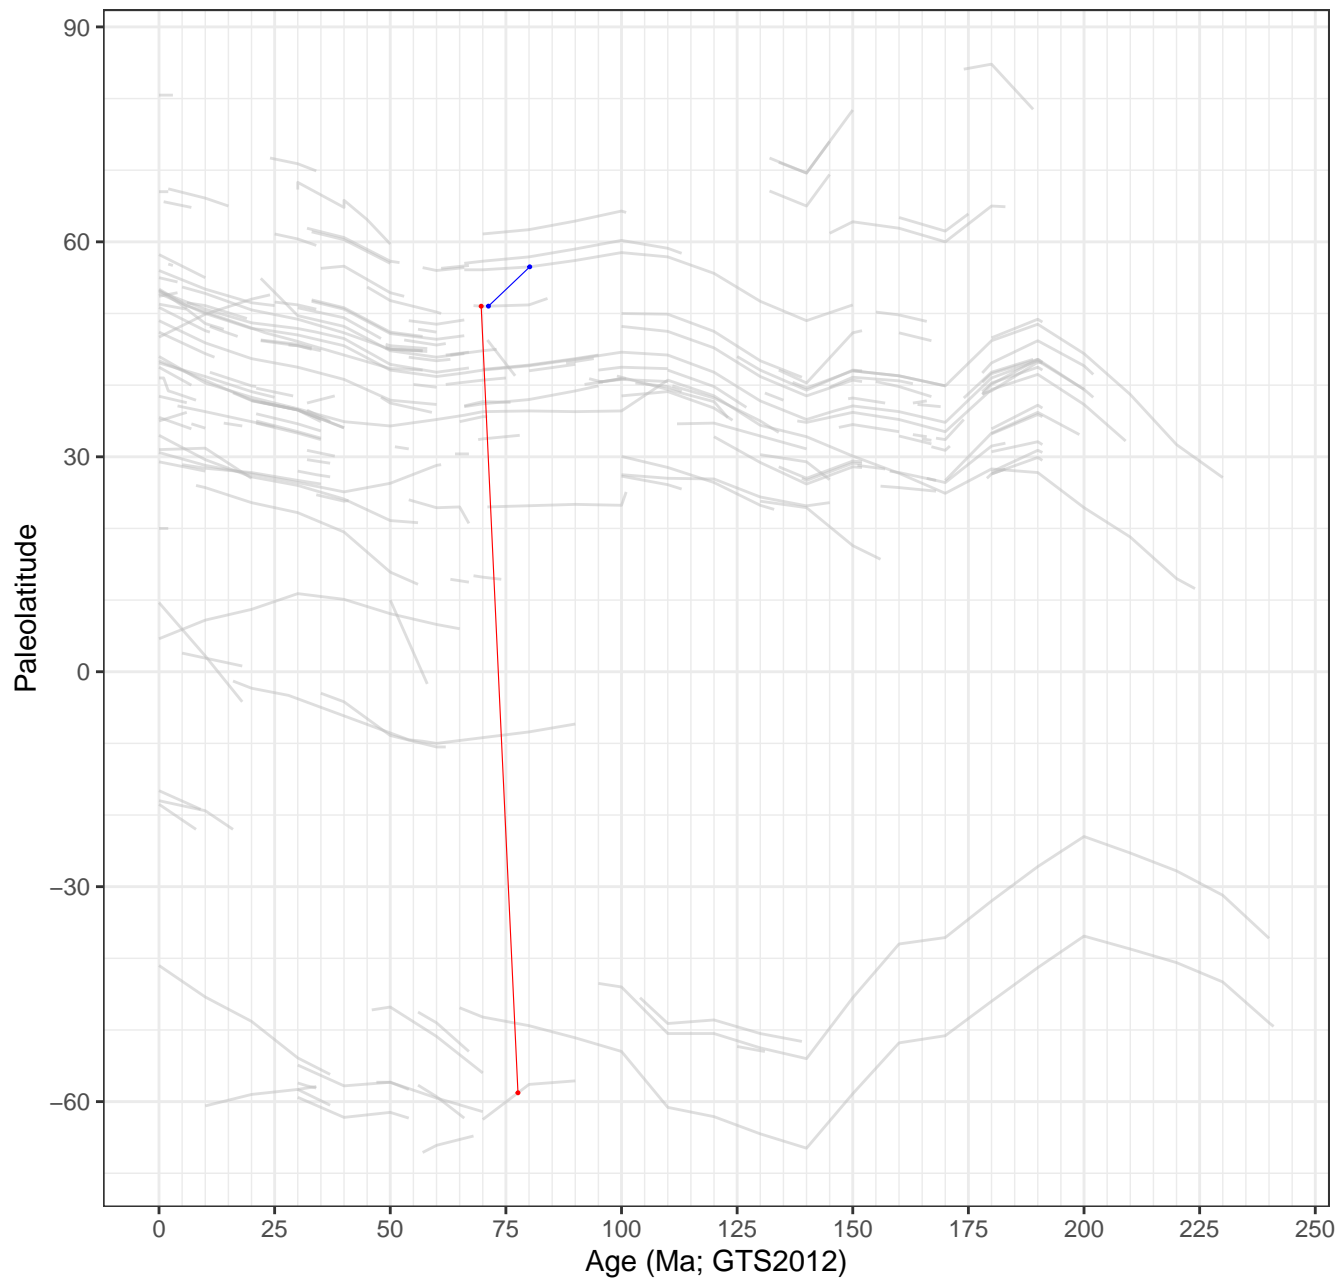

Supplement: Supplementary file 1700 [file Isabelidinium microarmum.pdf › Supplement/Supplement 2/Species 1914 plots/Isabelidinium microarmum.pdf]

# Species *Isabelidinium pellucidum*

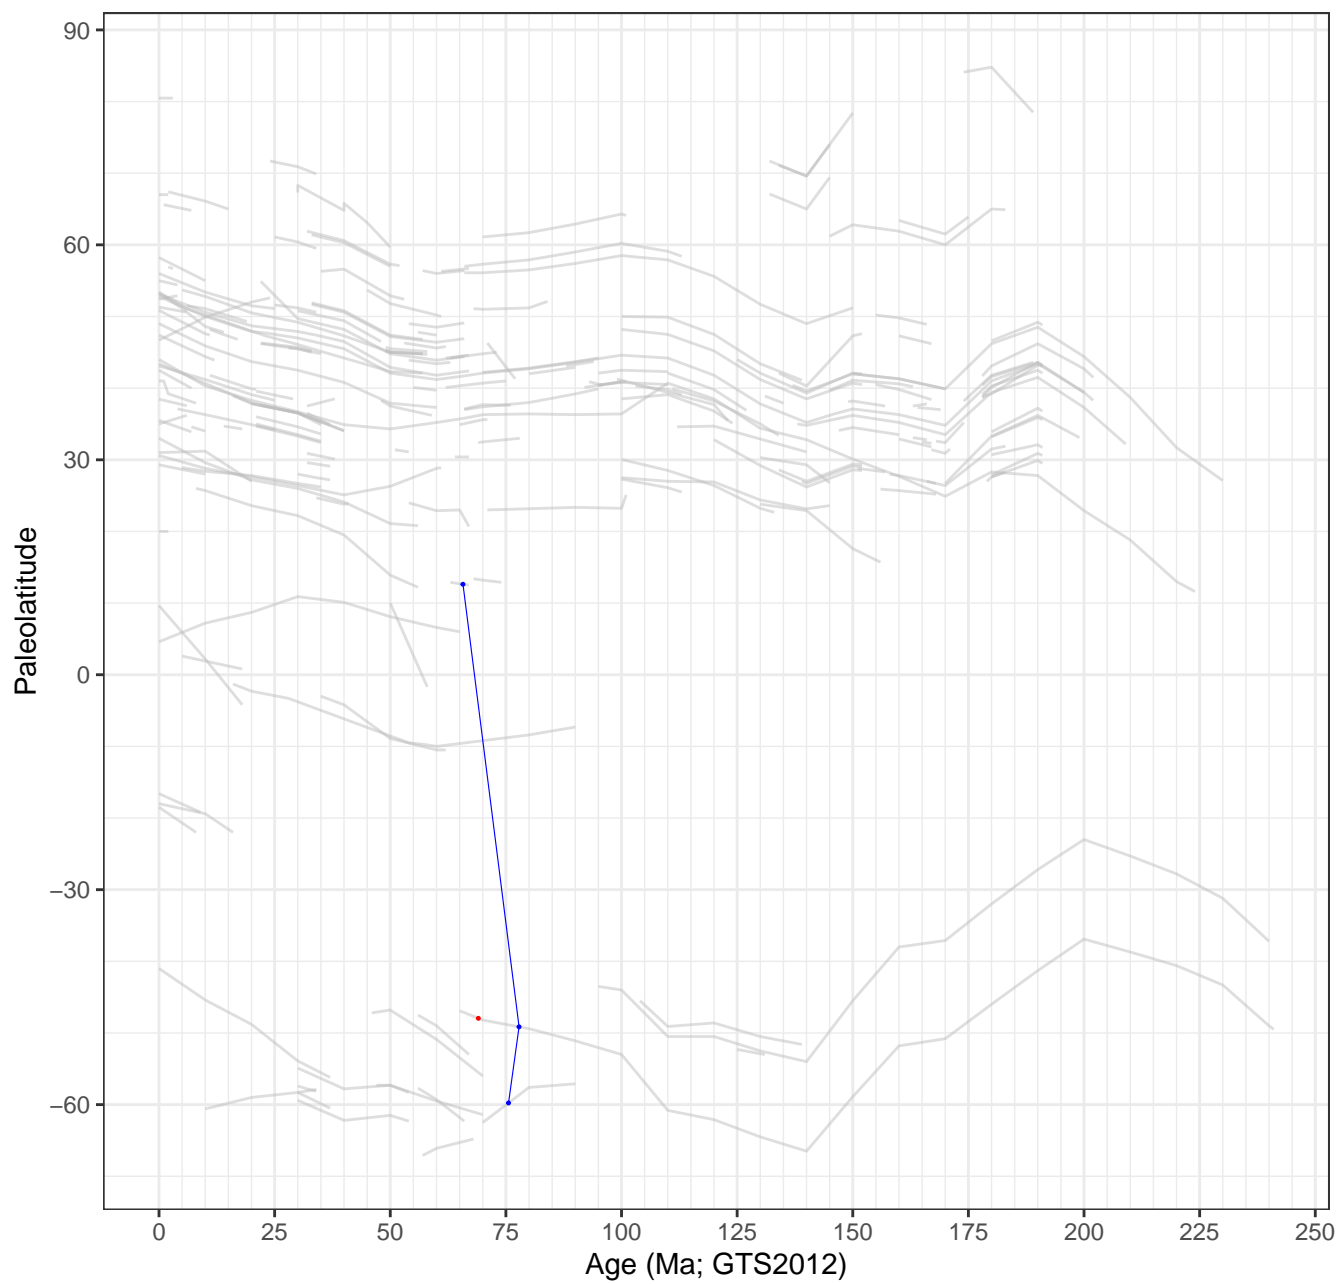

Supplement: Supplementary file 1701 [file Isabelidinium pellucidum.pdf › Supplement/Supplement 2/Species 1914 plots/Isabelidinium pellucidum.pdf]

# Species *Isabelidinium rectangularum*

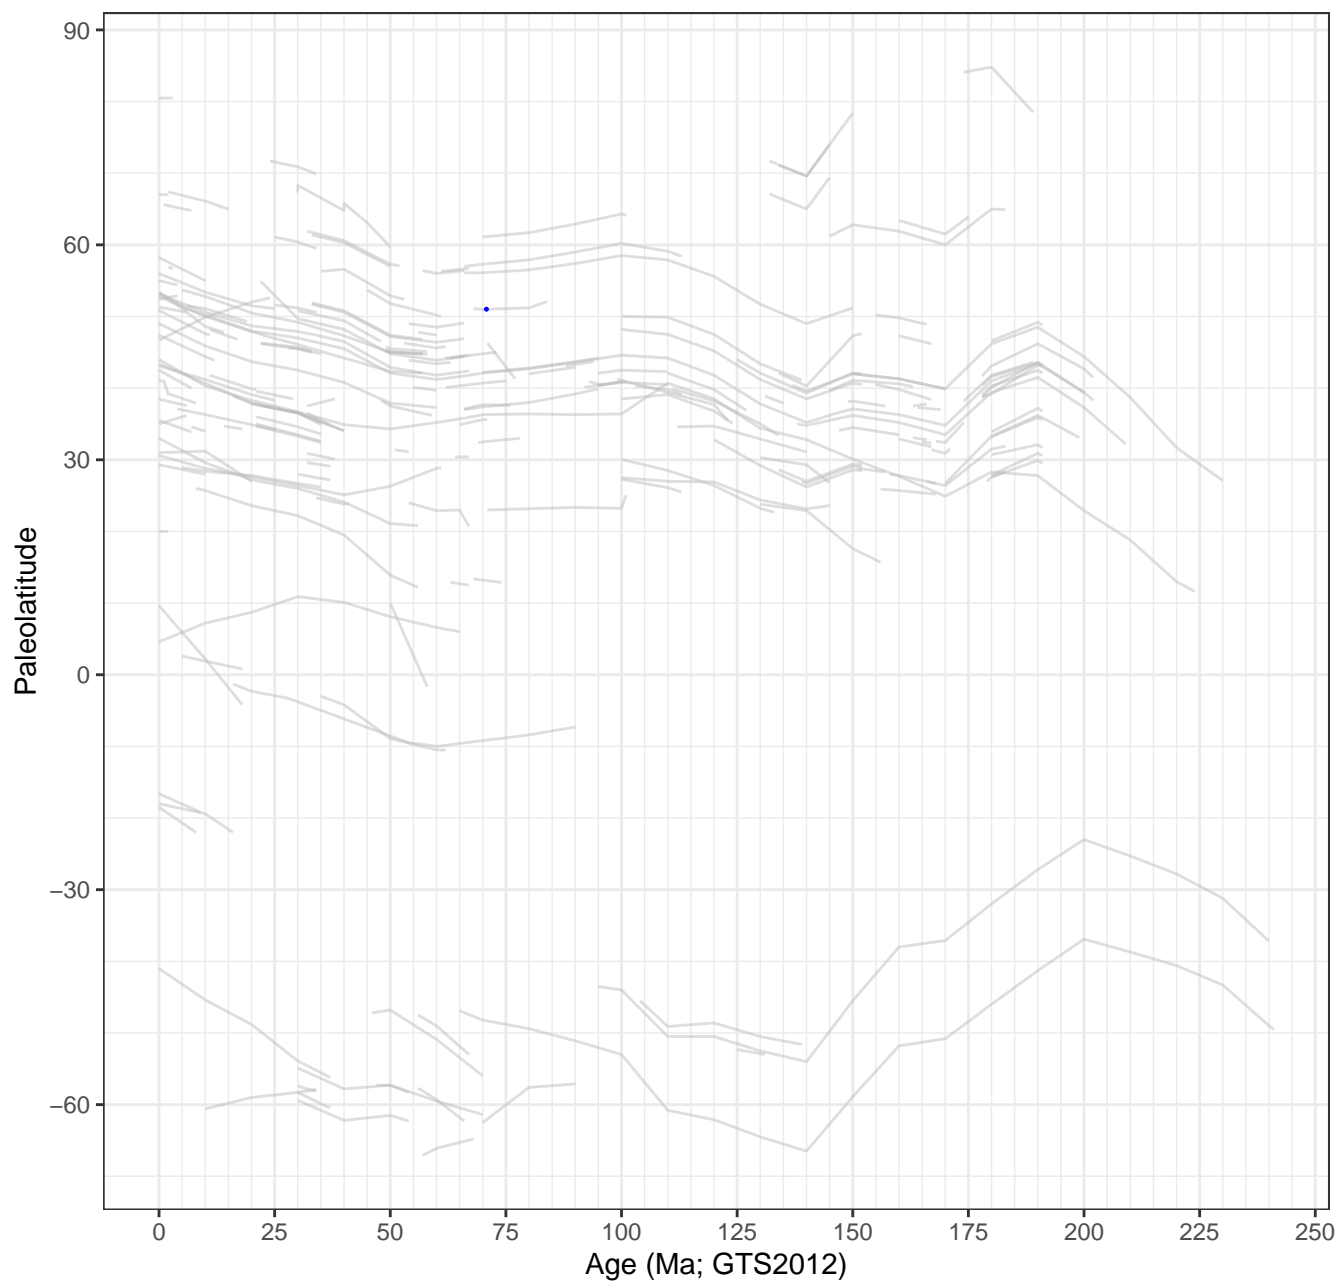

Supplement: Supplementary file 1702 [file Isabelidinium rectangulatum.pdf › Supplement/Supplement 2/Species 1914 plots/Isabelidinium rectangulatum.pdf]

# Species *Isabelidinium thomasii*

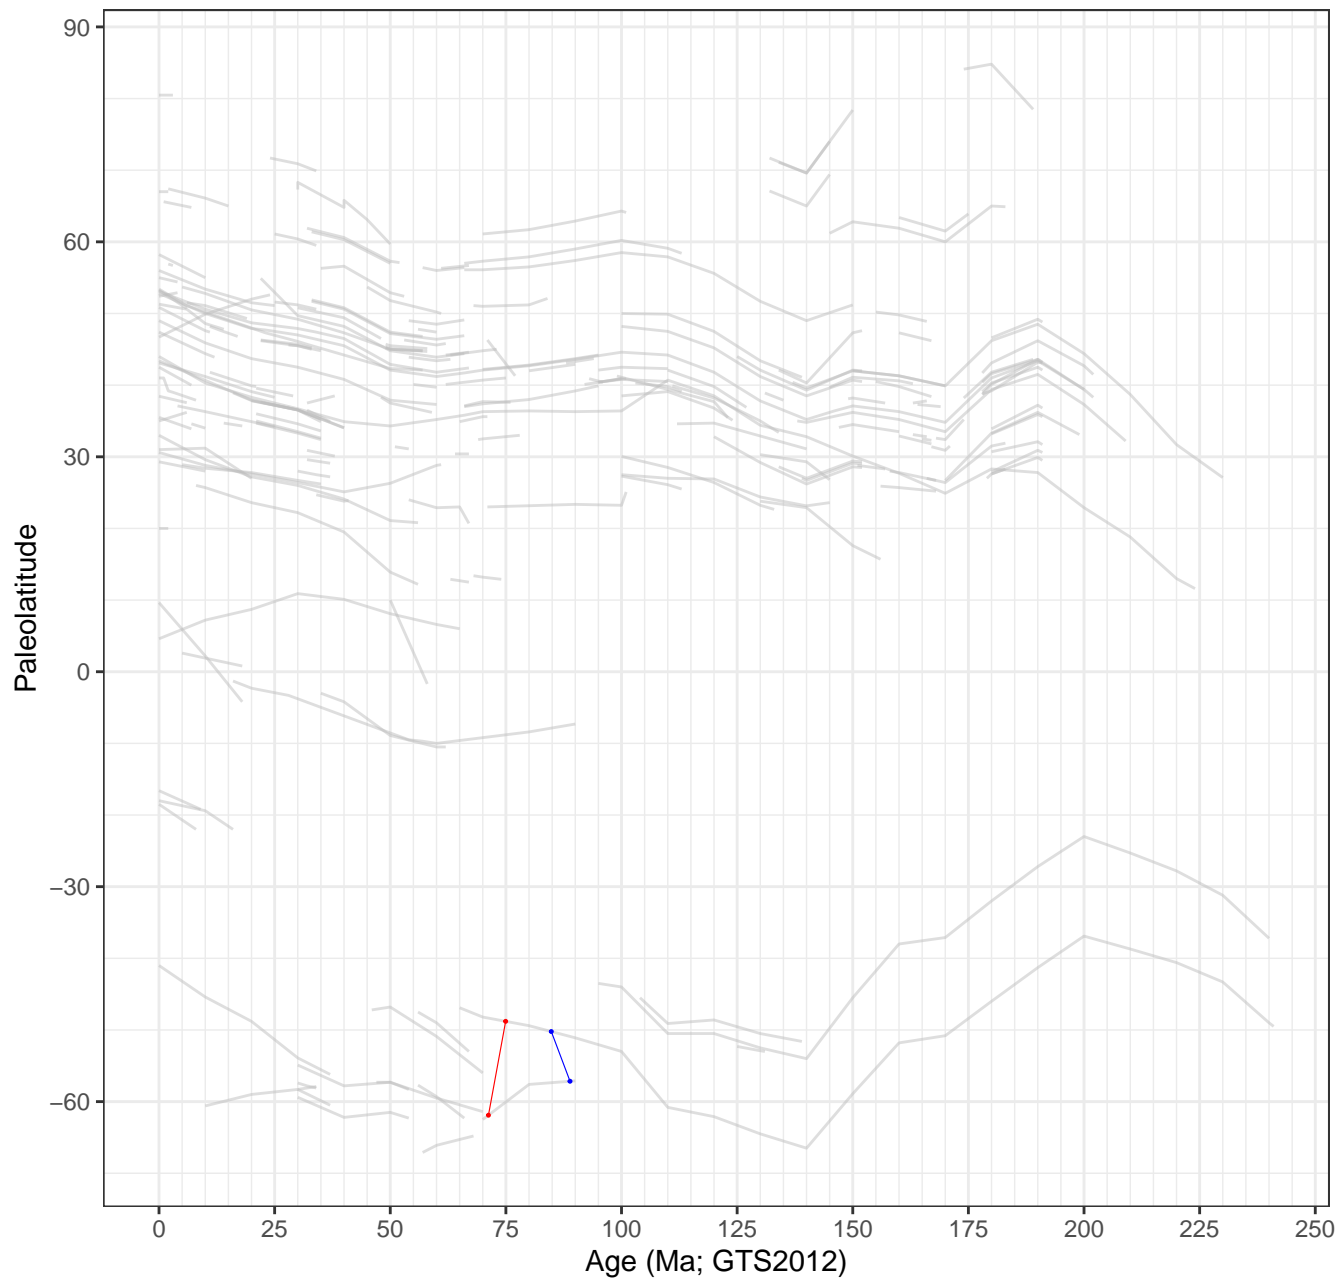

Supplement: Supplementary file 1703 [file Isabelidinium thomasii.pdf › Supplement/Supplement 2/Species 1914 plots/Isabelidinium thomasii.pdf]

# Species *Isabelidinium viborgense*

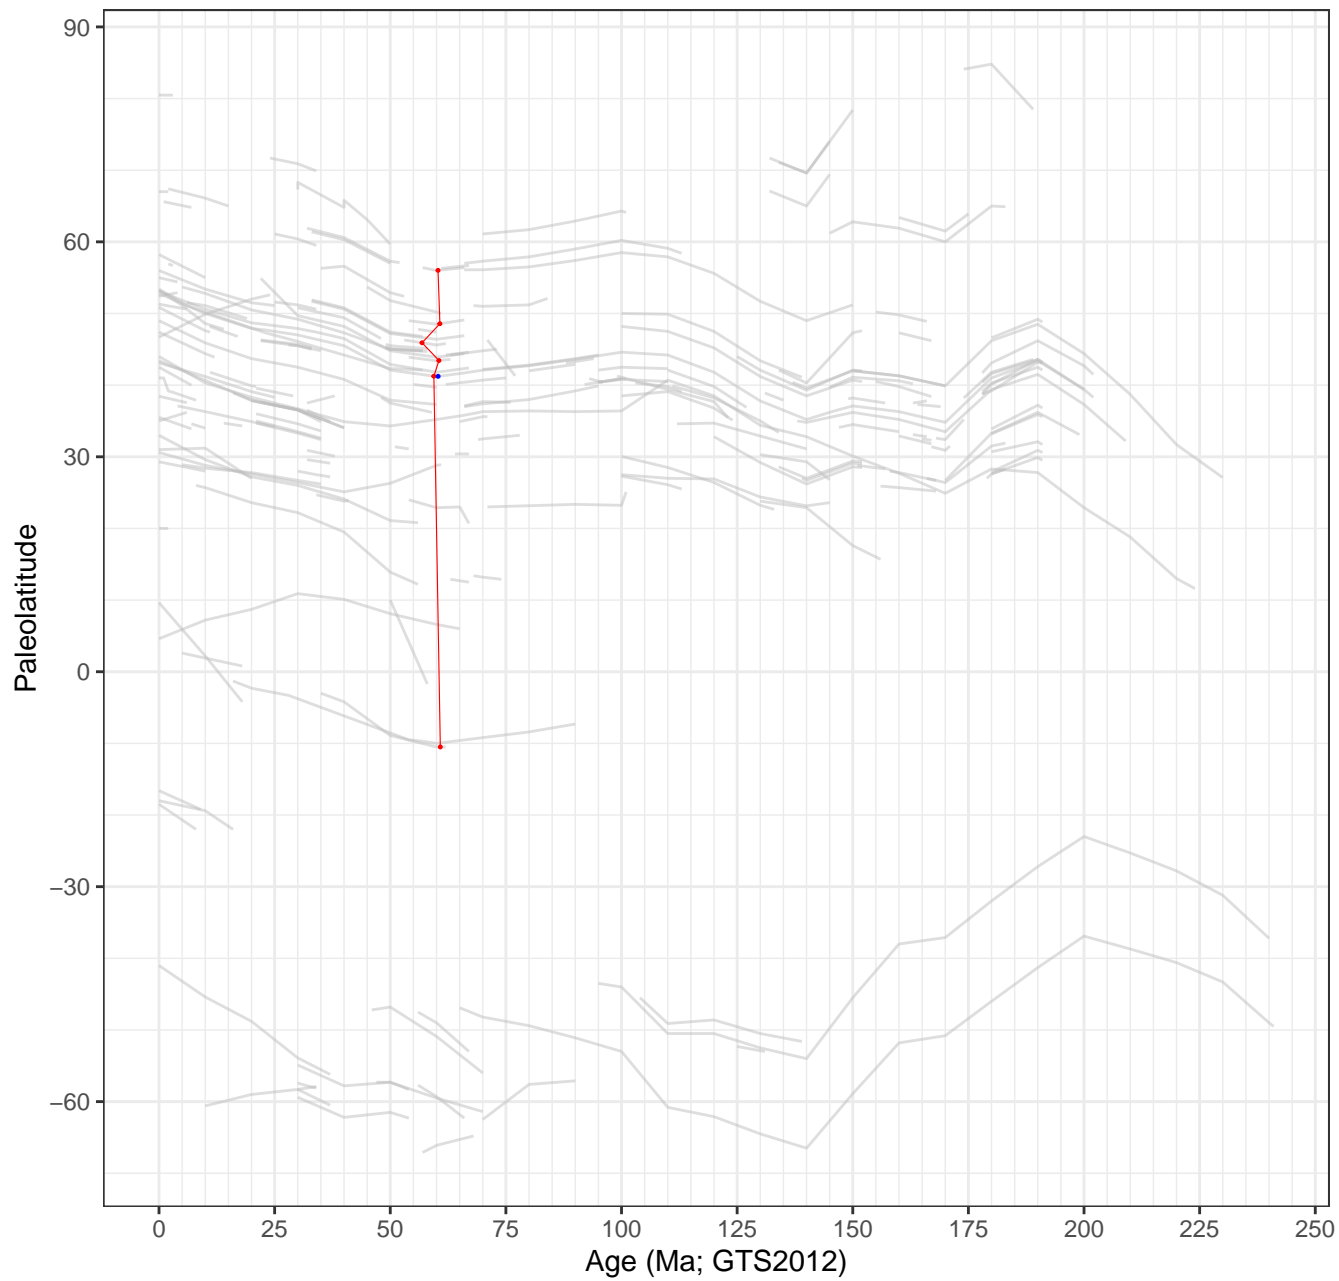

Supplement: Supplementary file 1704 [file Isabelidinium viborgense.pdf › Supplement/Supplement 2/Species 1914 plots/Isabelidinium viborgense.pdf]

# Species *Islandinium brevispinosum*

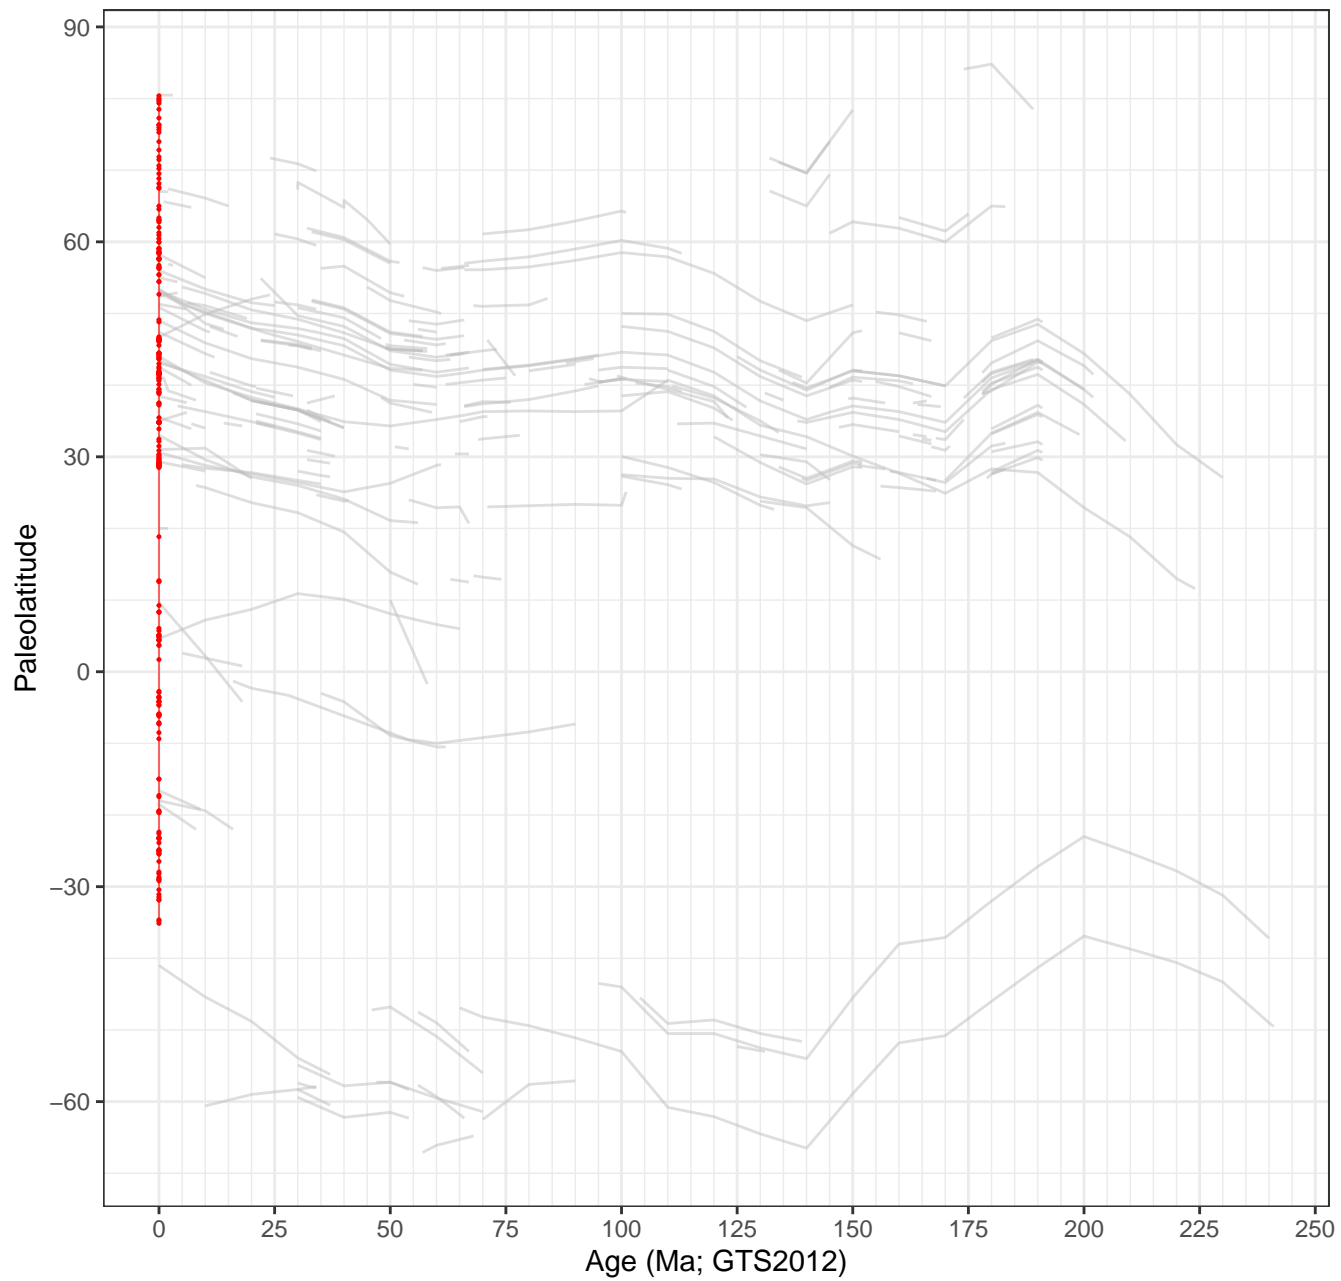

Supplement: Supplementary file 1705 [file Islandinium brevispinosum.pdf › Supplement/Supplement 2/Species 1914 plots/Islandinium brevispinosum.pdf]

# Species *Islandinium cesare*

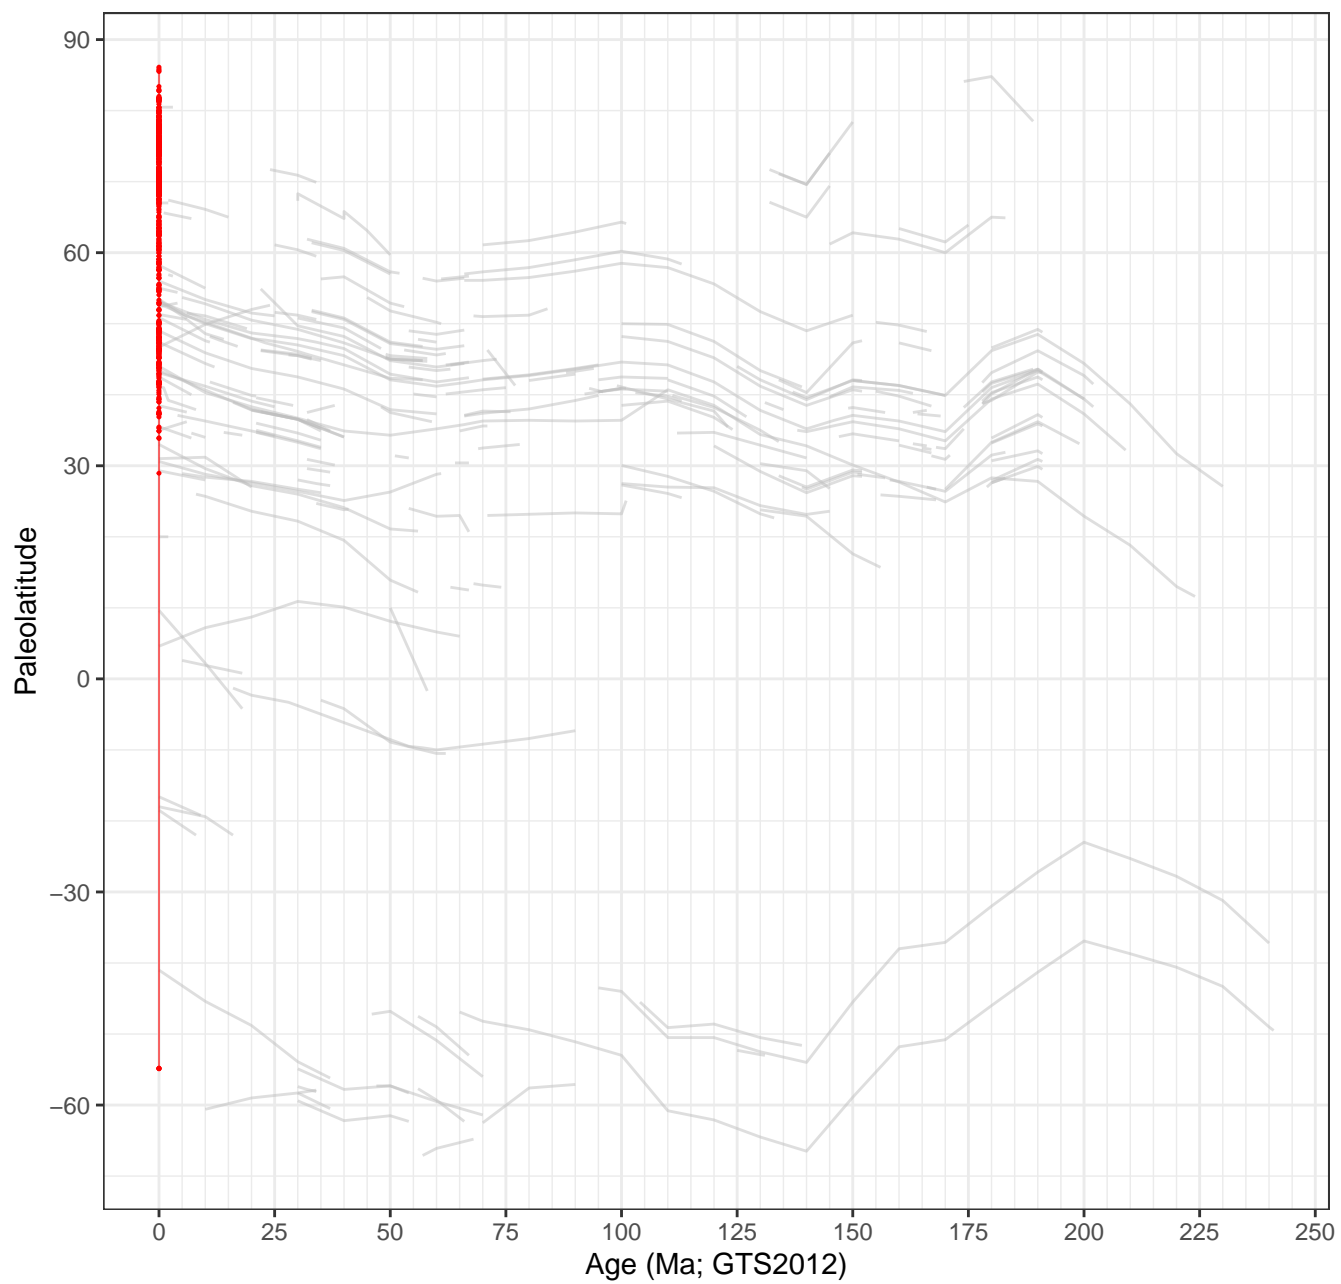

Supplement: Supplementary file 1706 [file Islandinium cesare.pdf › Supplement/Supplement 2/Species 1914 plots/Islandinium cesare.pdf]

# Species *Islandinium minutum*

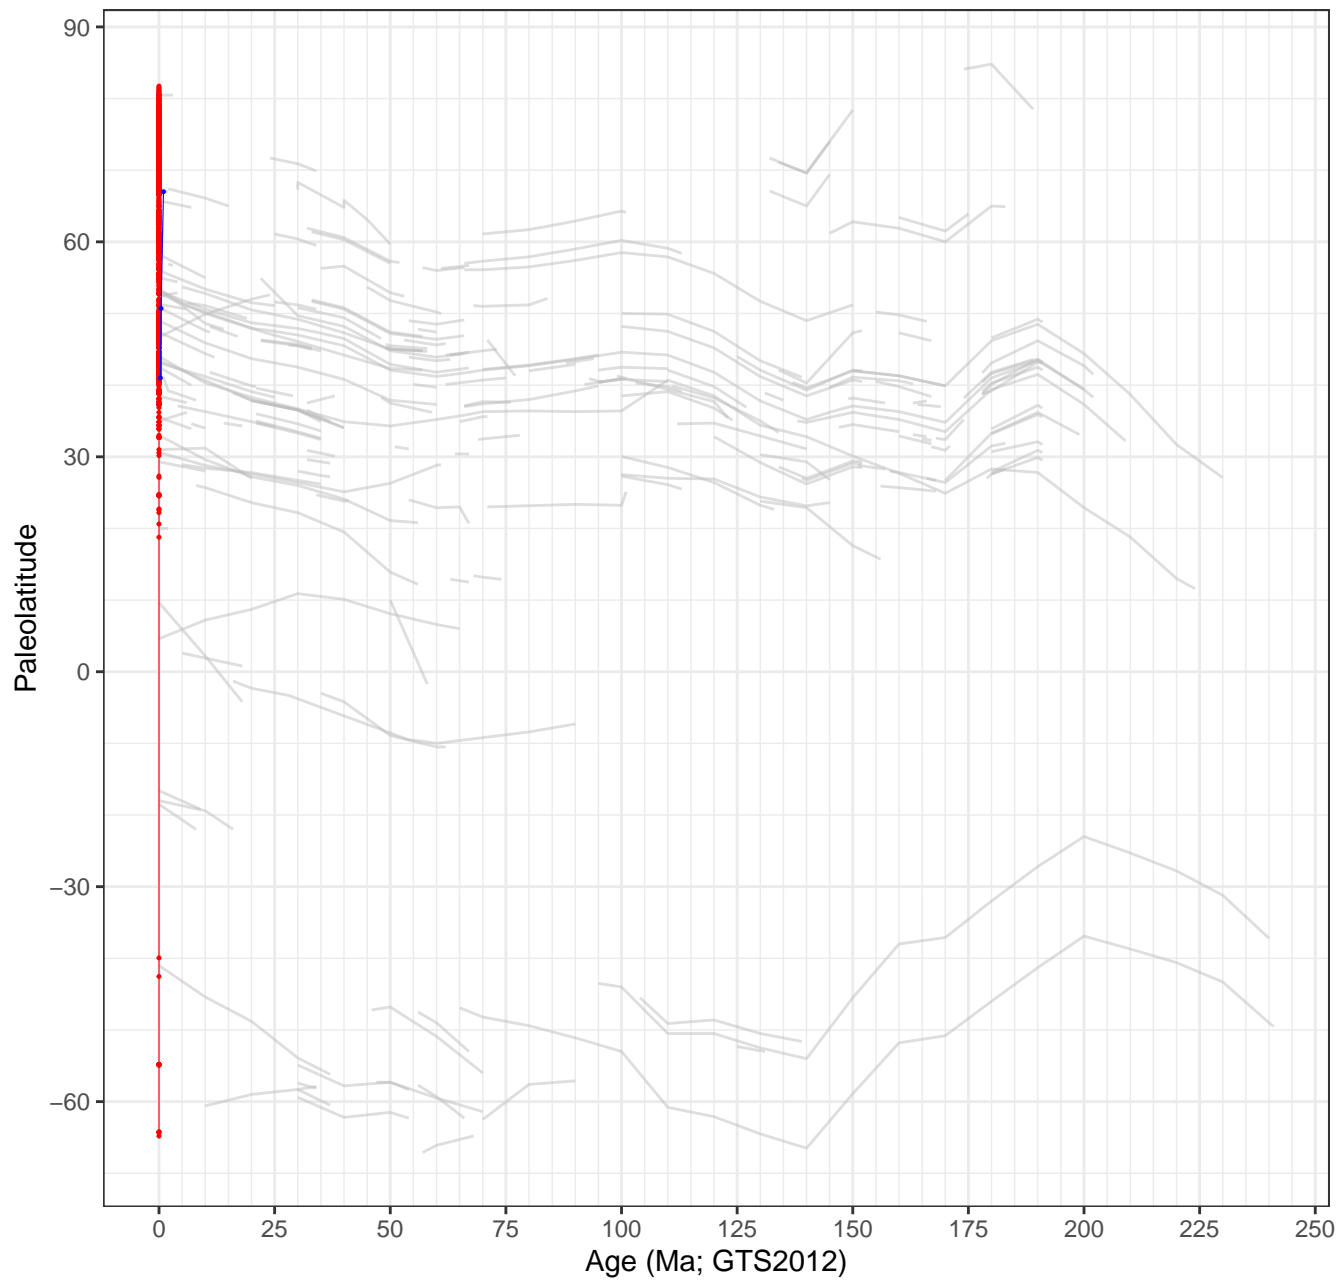

Supplement: Supplementary file 1707 [file Islandinium minutum.pdf › Supplement/Supplement 2/Species 1914 plots/Islandinium minutum.pdf]

# Species *Isthmocystis distincta*

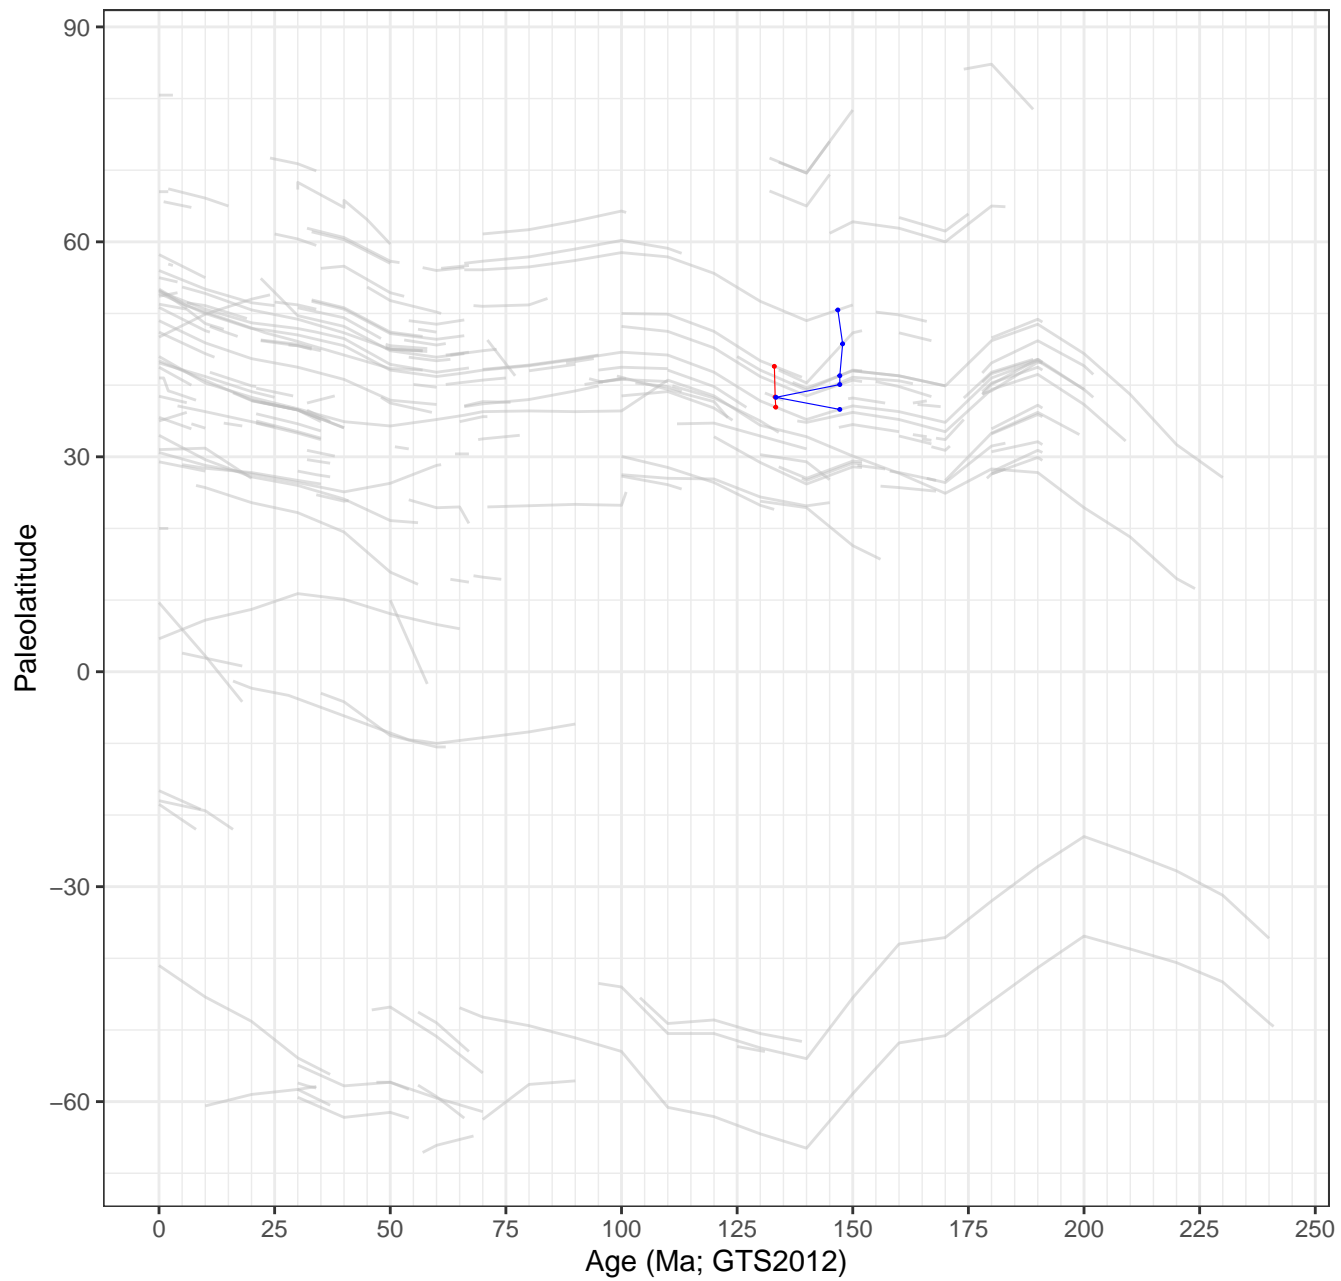

Supplement: Supplementary file 1708 [file Isthmocystis distincta.pdf › Supplement/Supplement 2/Species 1914 plots/Isthmocystis distincta.pdf]

# Species *Jansonias* spp.

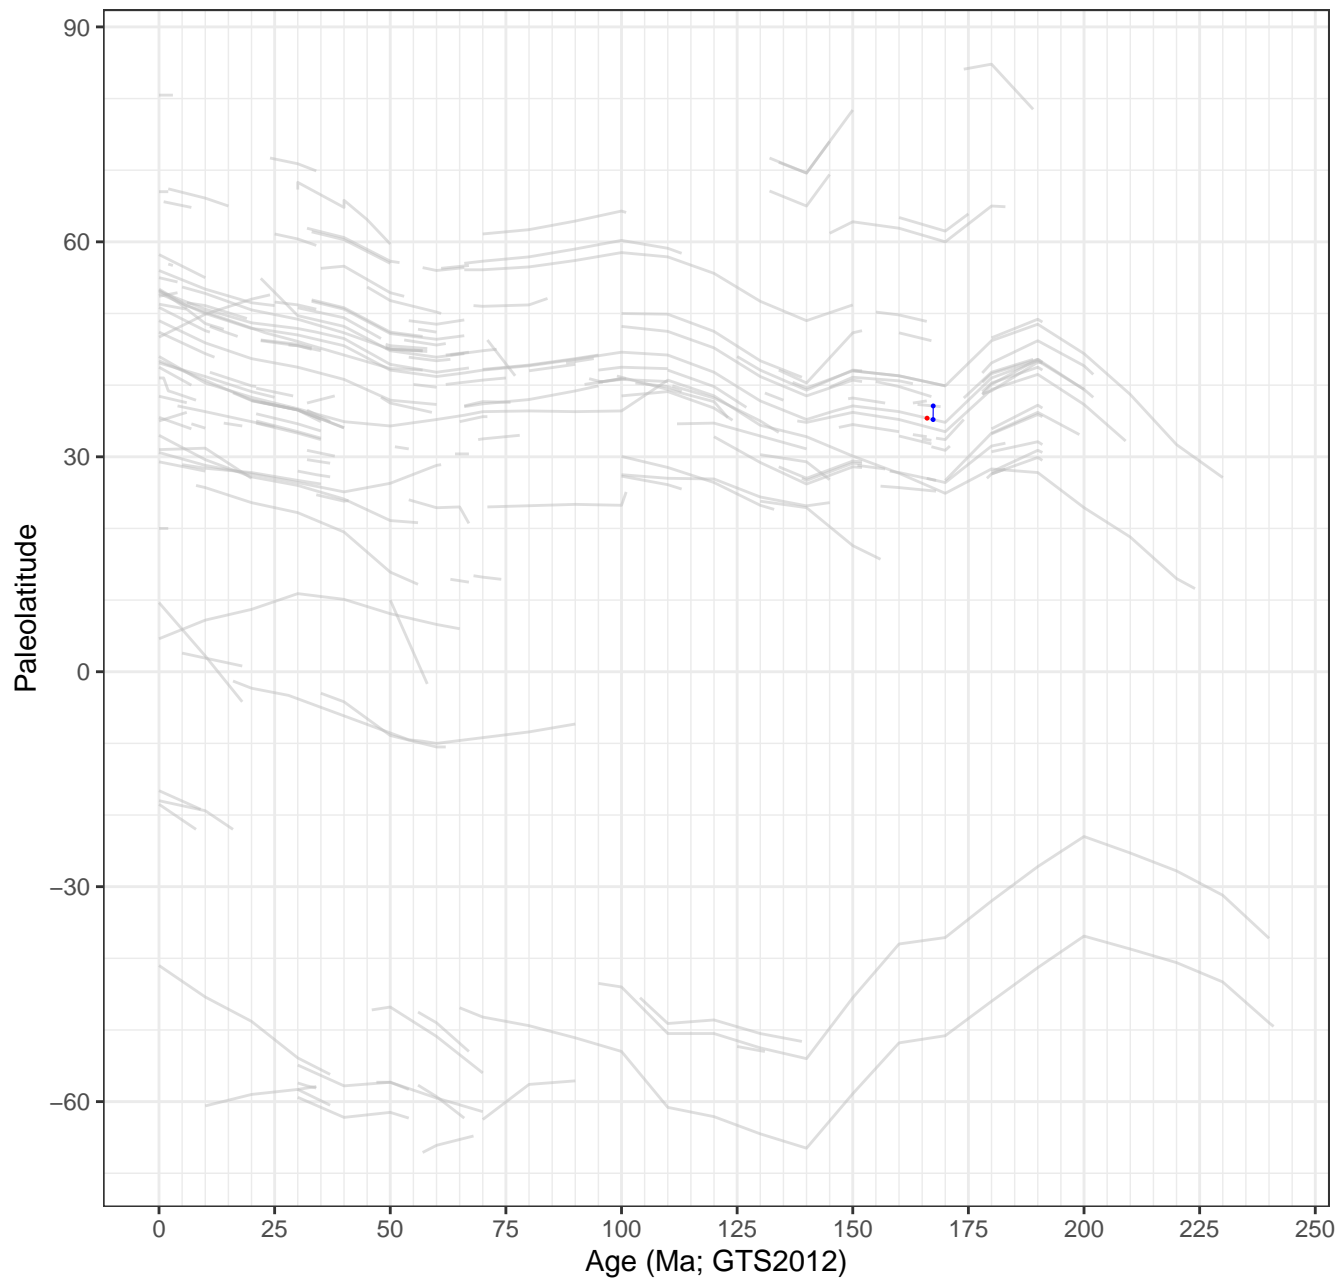

Supplement: Supplementary file 1709 [file Jansonia spp..pdf › Supplement/Supplement 2/Species 1914 plots/Jansonia spp..pdf]

# Species *Kaiwaradinium scrutillinium*

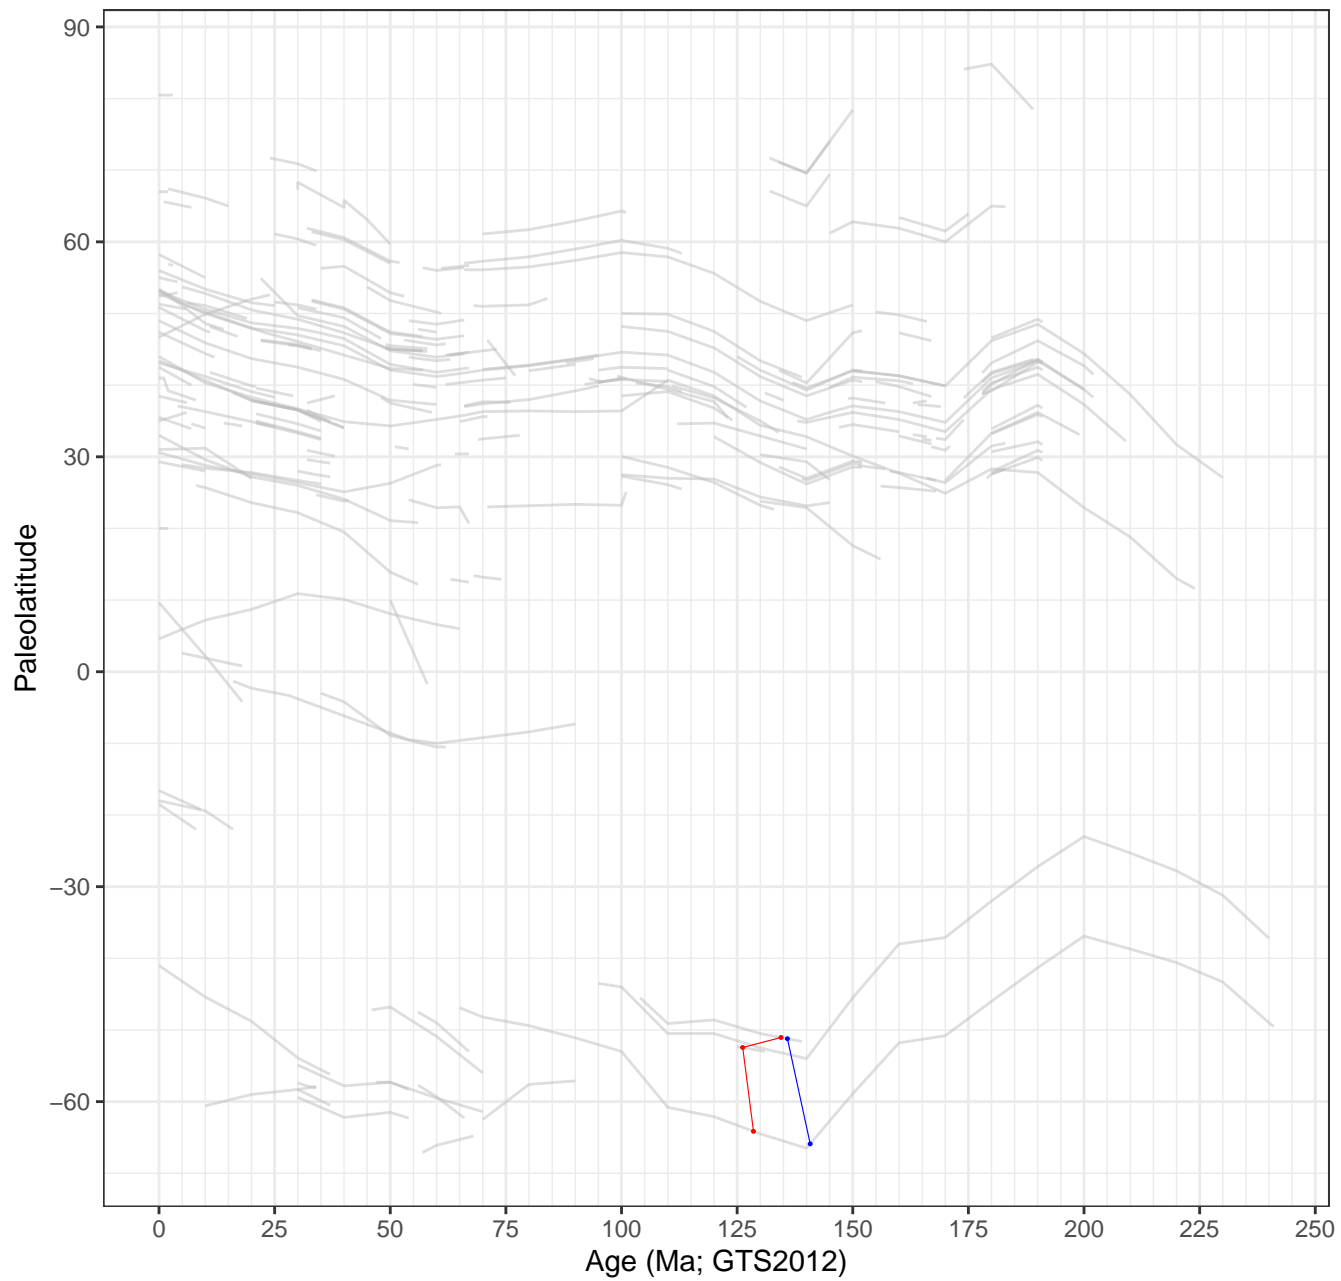

Supplement: Supplementary file 1710 [file Kaiwaradinium scrutillinium.pdf › Supplement/Supplement 2/Species 1914 plots/Kaiwaradinium scrutillinium.pdf]

# Species *Kallosphaeridium biornatum*

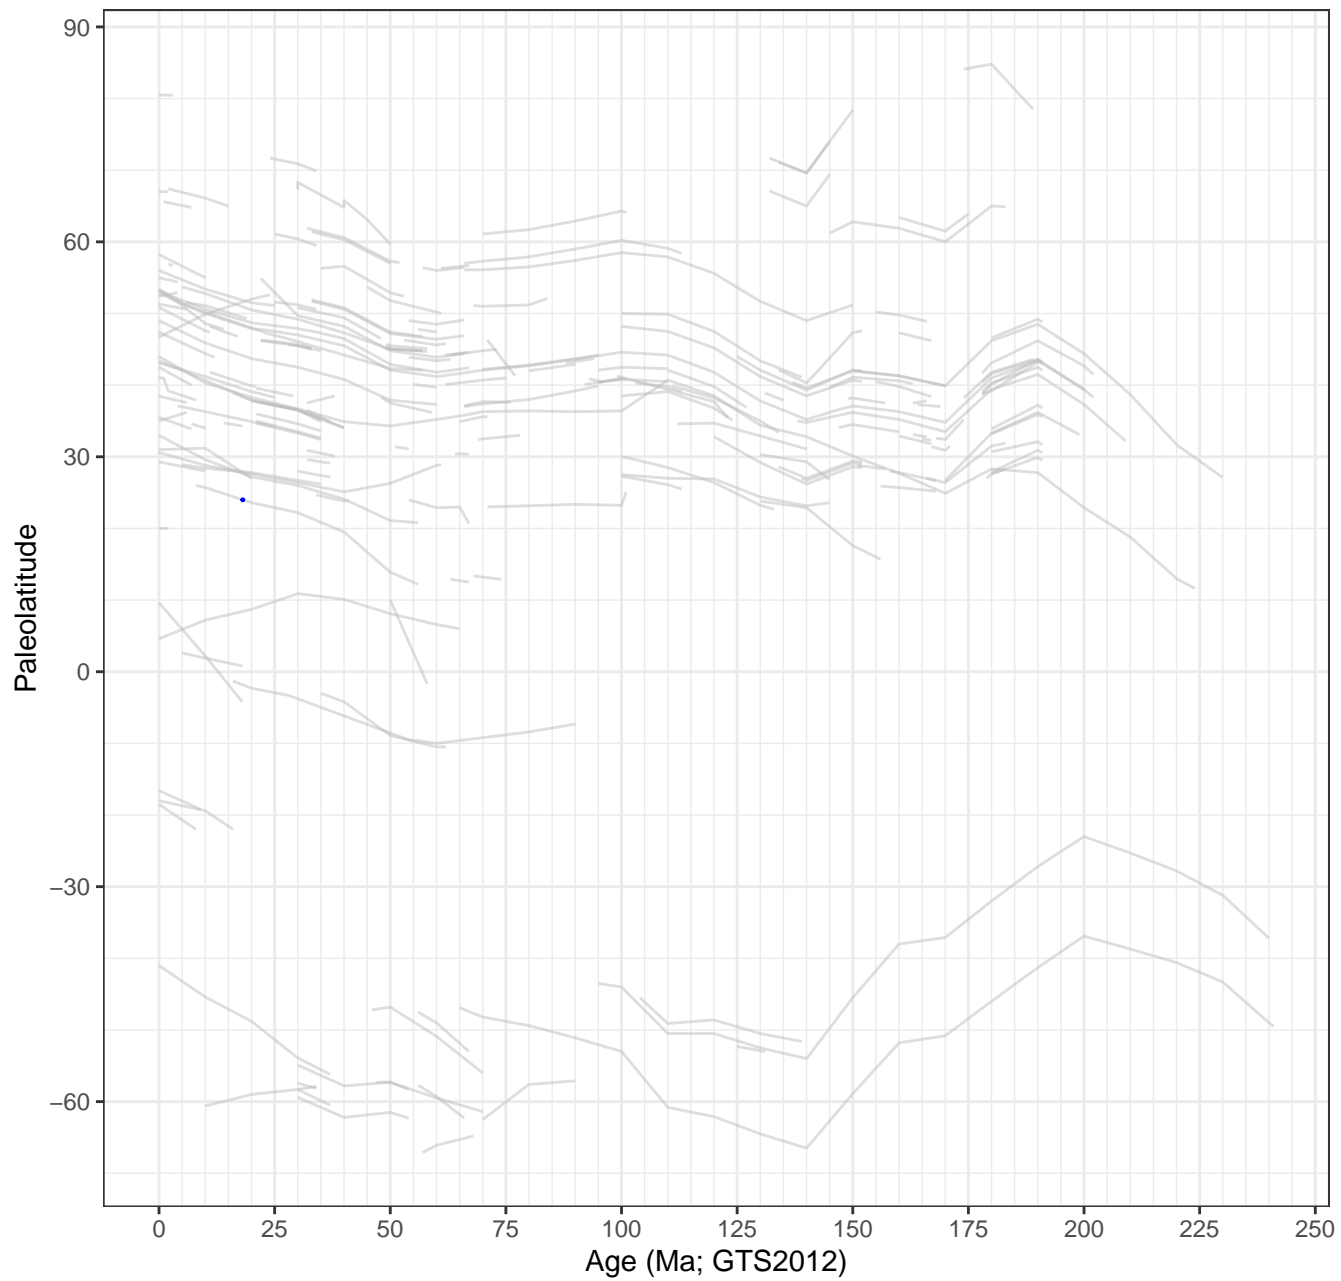

Supplement: Supplementary file 1711 [file Kallosphaeridium biornatum.pdf › Supplement/Supplement 2/Species 1914 plots/Kallosphaeridium biornatum.pdf]

# Species *Kallosphaeridium breviparbatum*

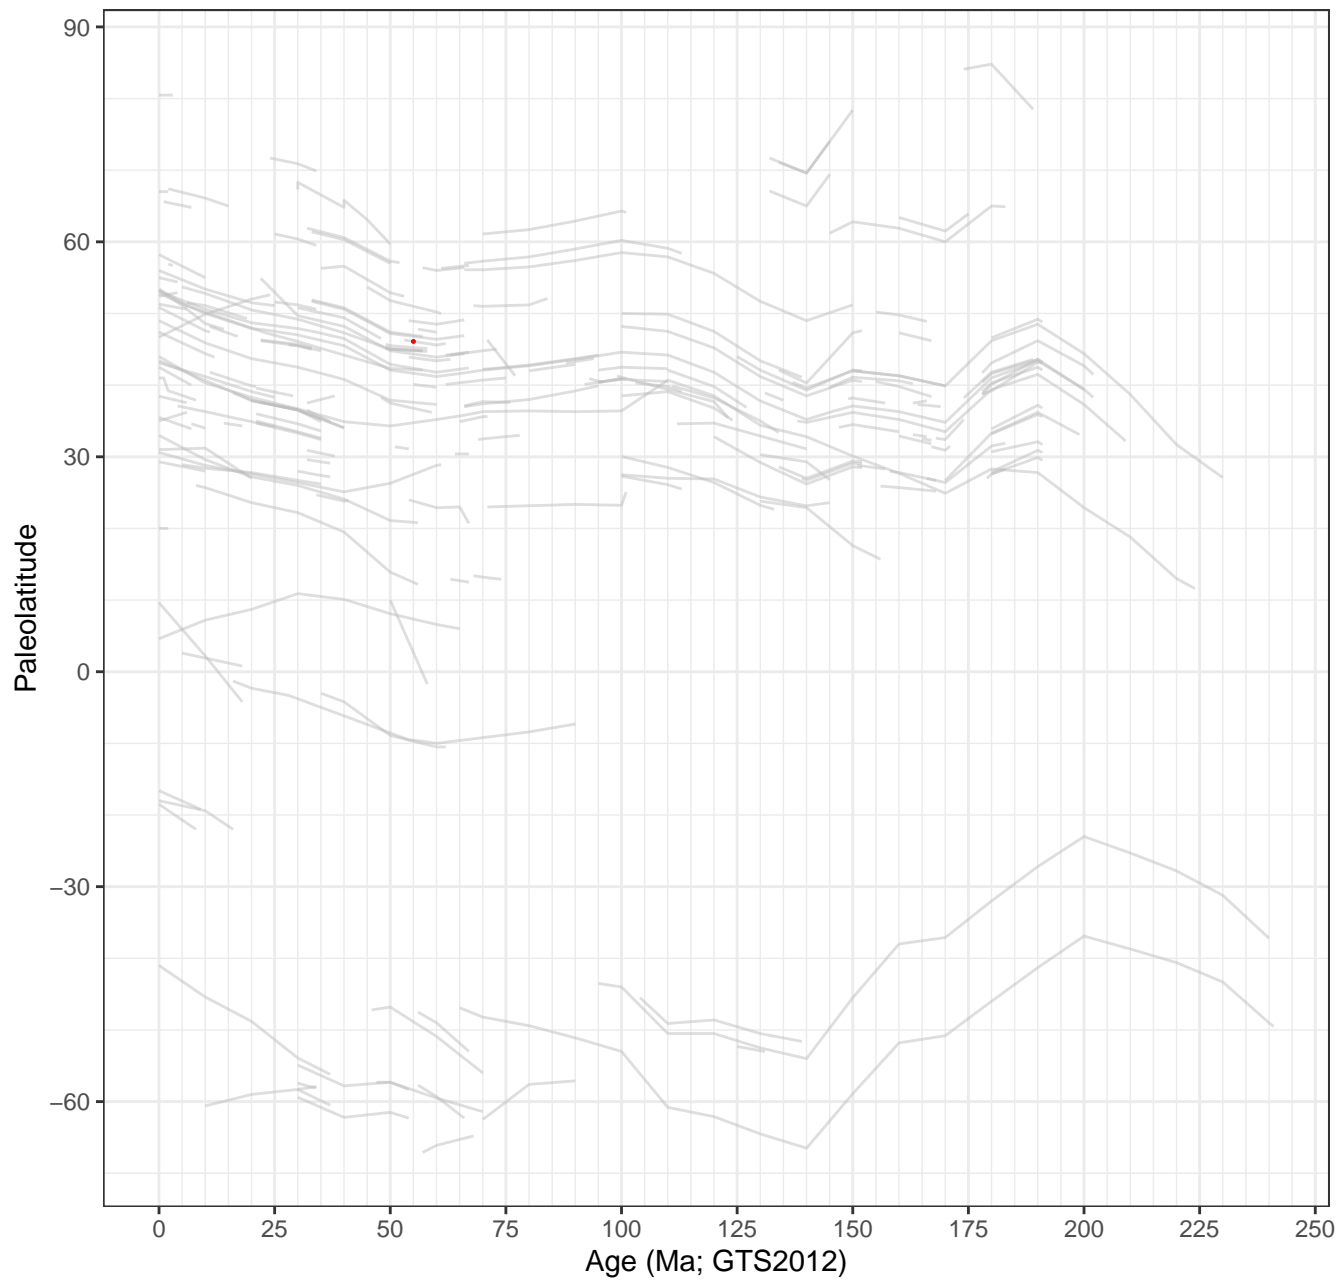

Supplement: Supplementary file 1712 [file Kallosphaeridium brevibarbatum.pdf › Supplement/Supplement 2/Species 1914 plots/Kallosphaeridium brevibarbatum.pdf]

# Species *Kallosphaeridium capulatum*

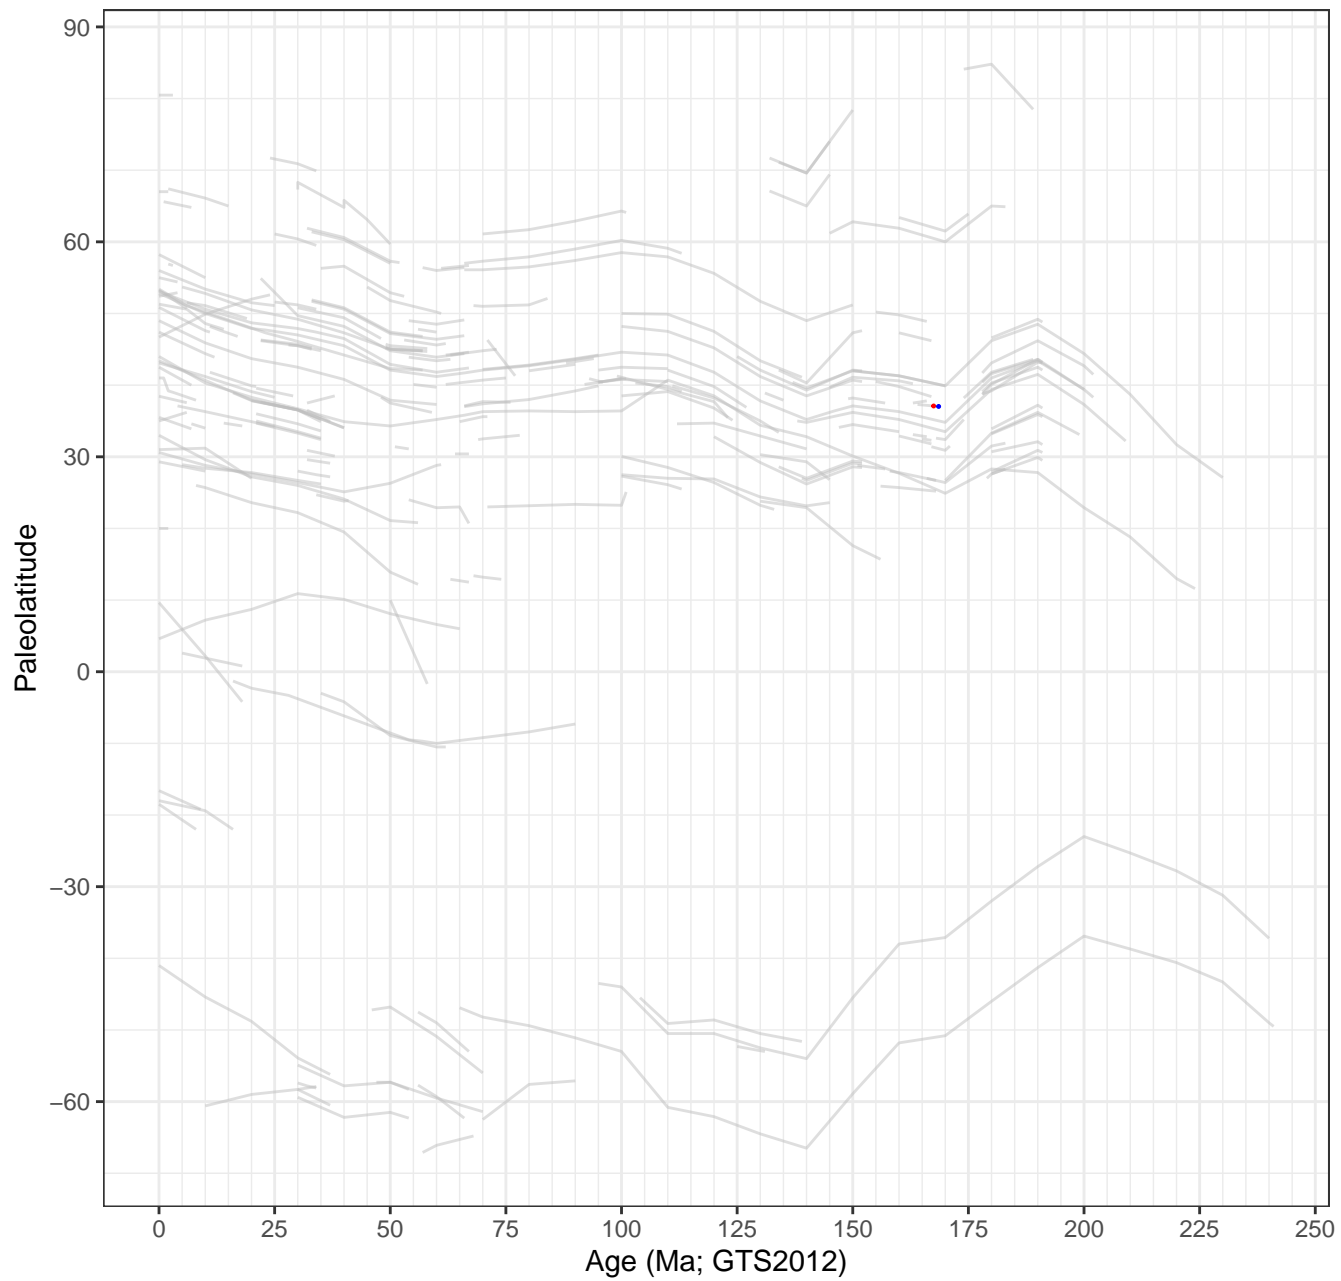

Supplement: Supplementary file 1713 [file Kallosphaeridium capulatum.pdf › Supplement/Supplement 2/Species 1914 plots/Kallosphaeridium capulatum.pdf]

# Species *Kallosphaeridium granulatum*

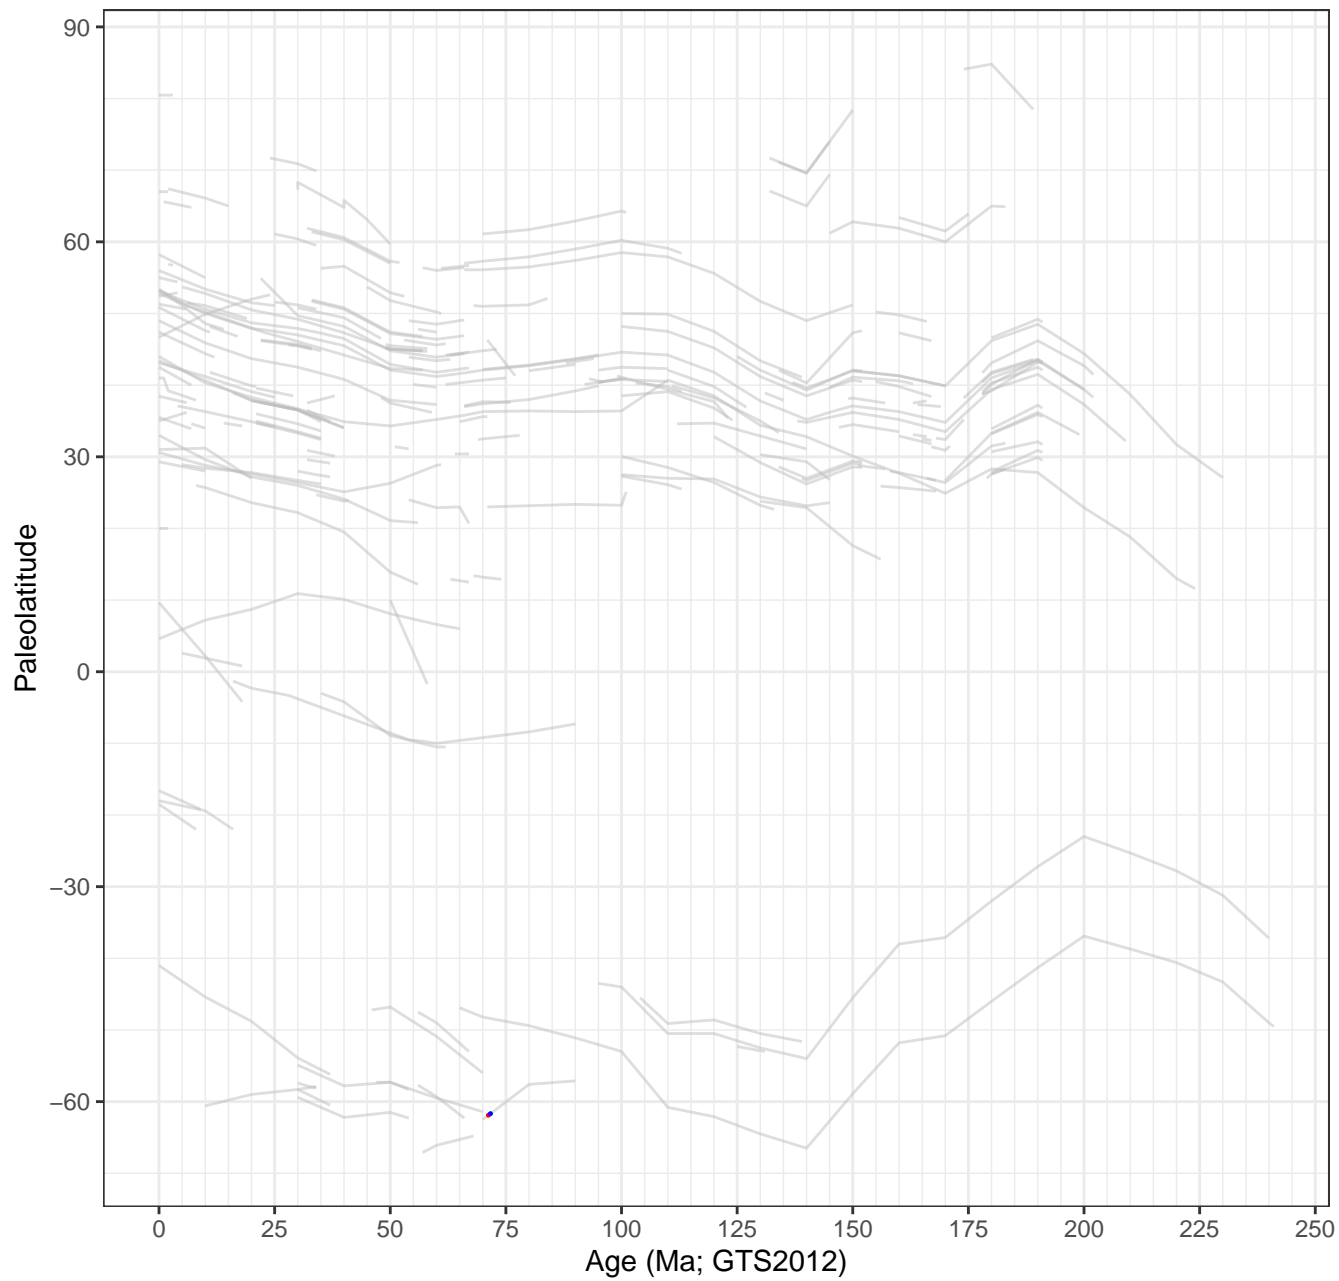

Supplement: Supplementary file 1714 [file Kallosphaeridium granulatum.pdf › Supplement/Supplement 2/Species 1914 plots/Kallosphaeridium granulatum.pdf]

# Species *Kallosphaeridium helbyi*

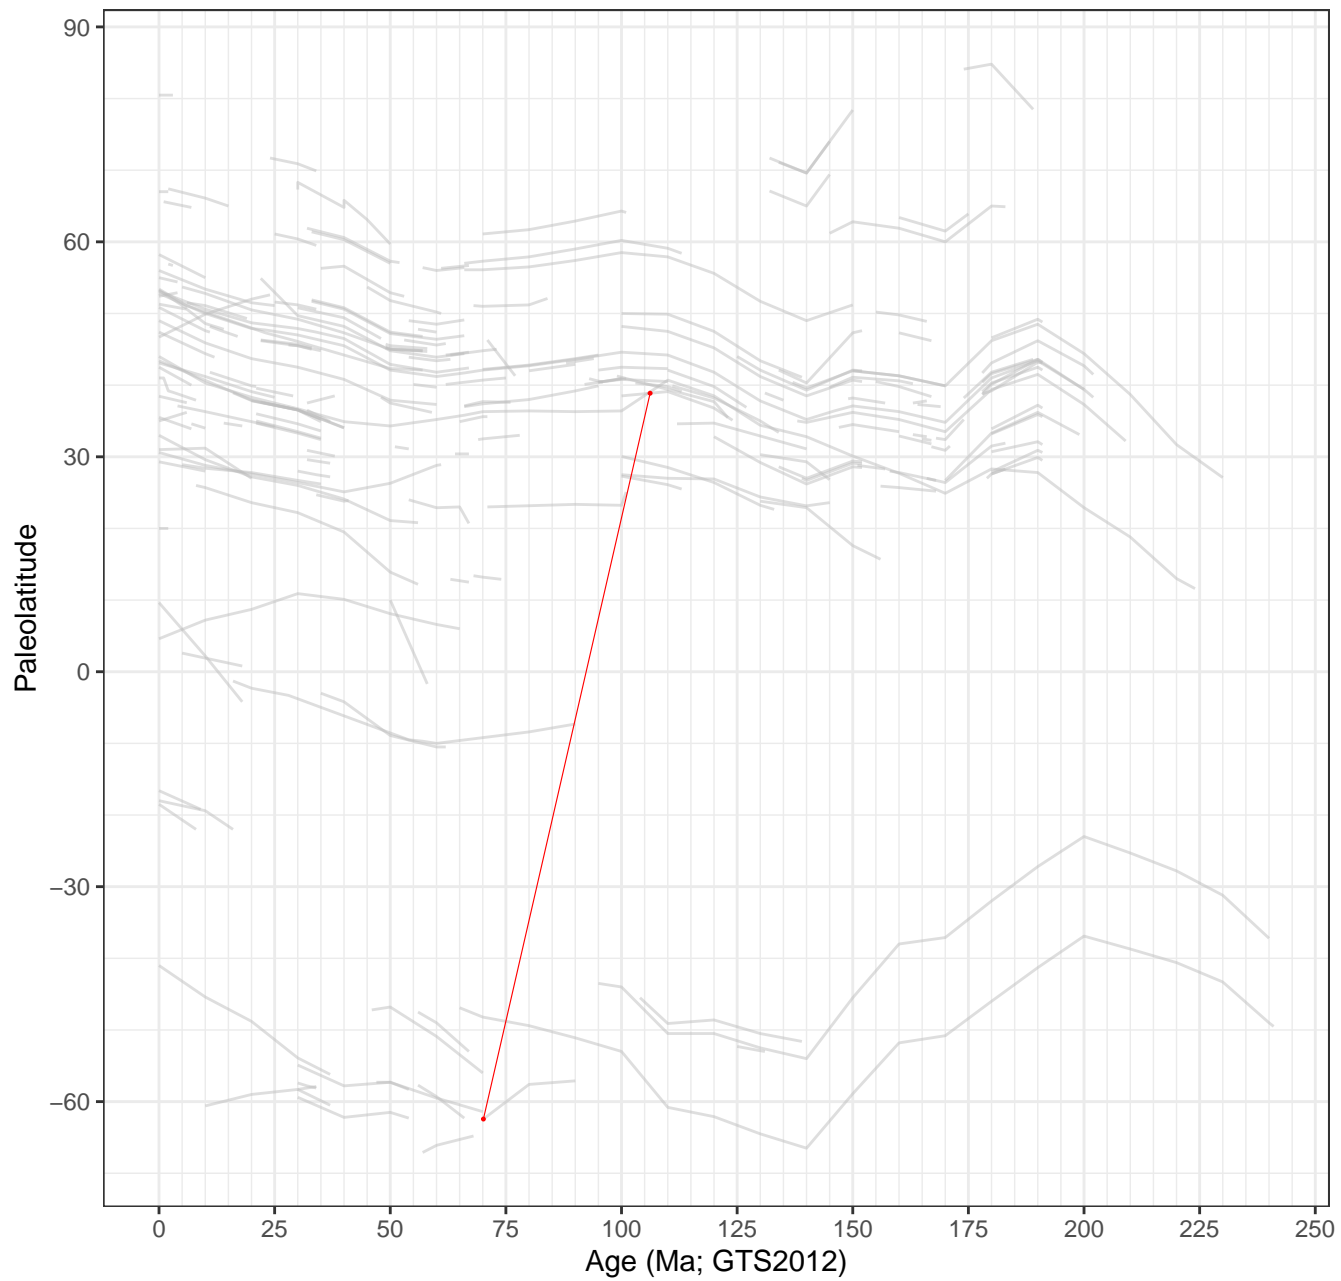

Supplement: Supplementary file 1715 [file Kallosphaeridium helbyi.pdf › Supplement/Supplement 2/Species 1914 plots/Kallosphaeridium helbyi.pdf]

# Species *Kallosphaeridium hypornatum*

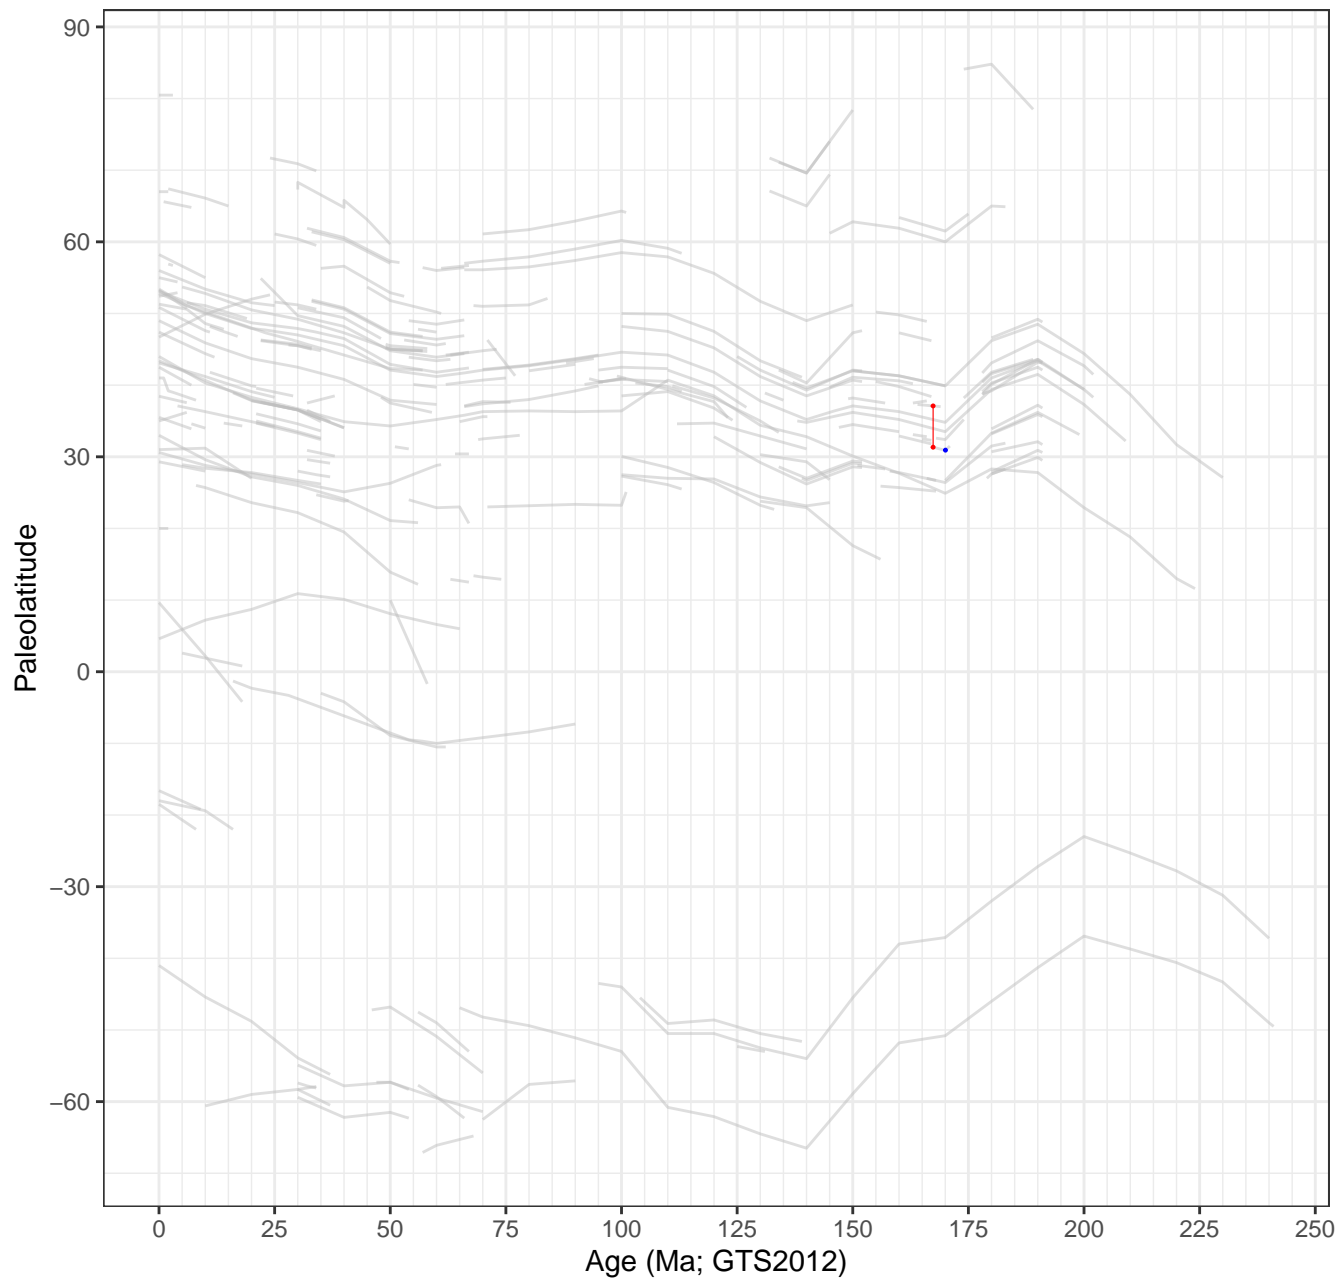

Supplement: Supplementary file 1716 [file Kallosphaeridium hypornatum.pdf › Supplement/Supplement 2/Species 1914 plots/Kallosphaeridium hypornatum.pdf]

# Species *Kallosphaeridium orchiesense*

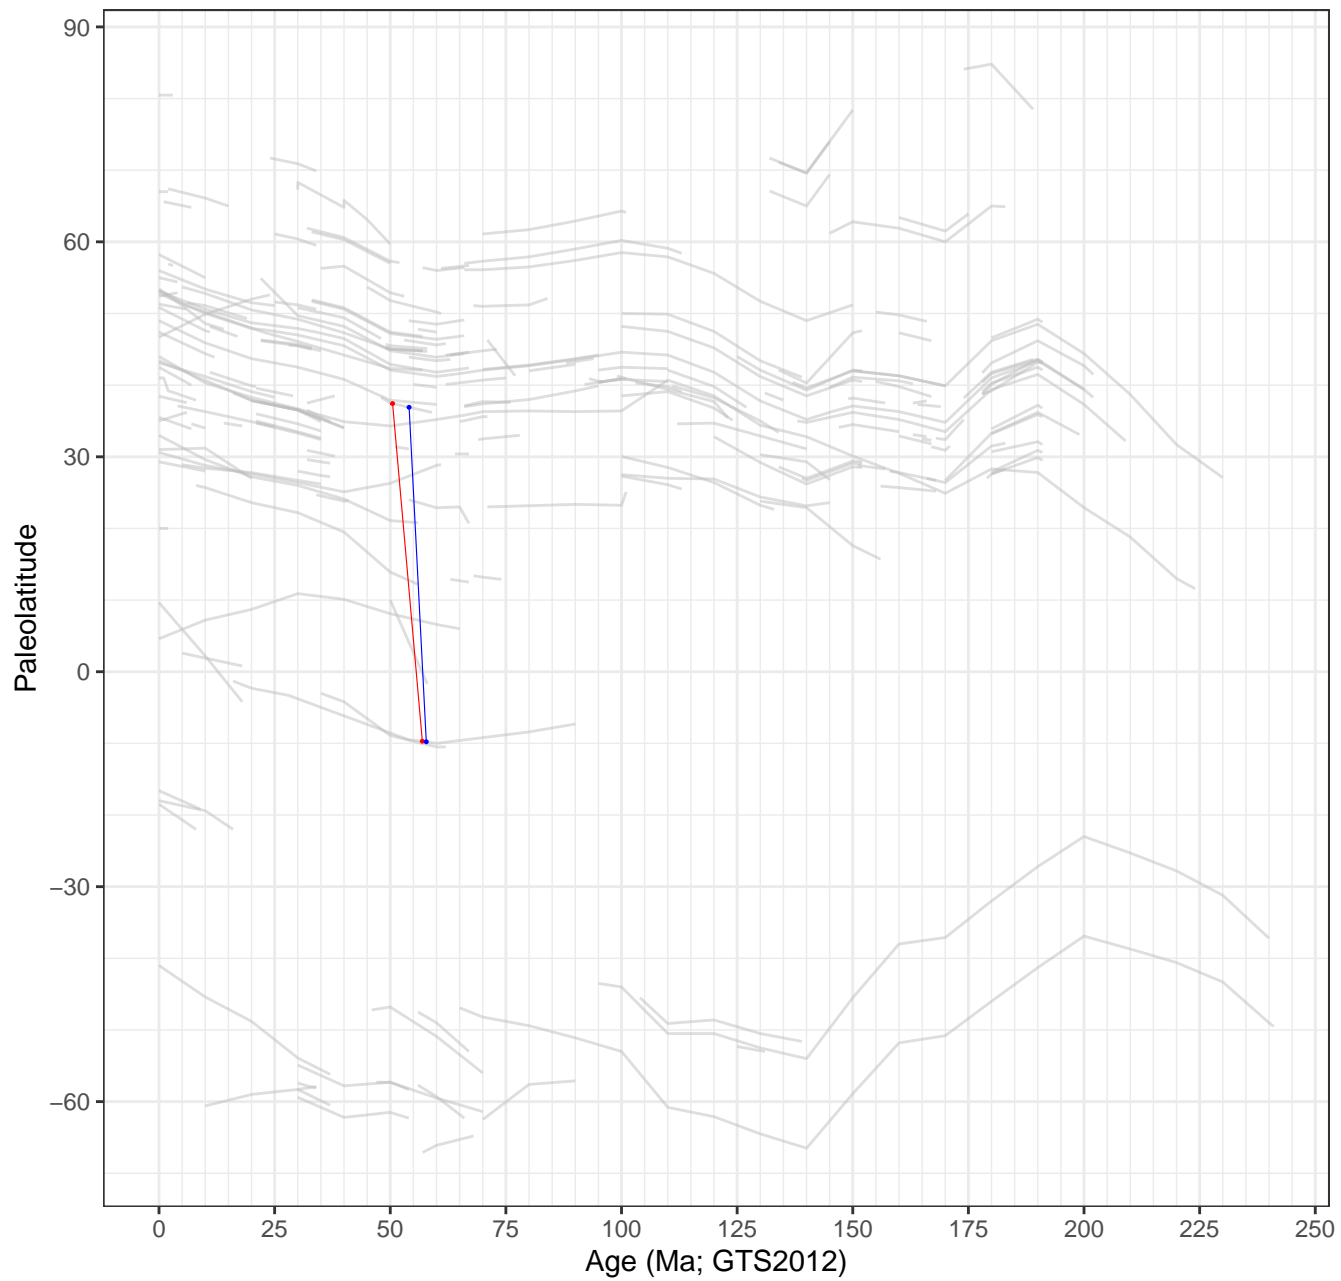

Supplement: Supplementary file 1717 [file Kallosphaeridium orchiesense.pdf › Supplement/Supplement 2/Species 1914 plots/Kallosphaeridium orchiesense.pdf]

# Species *Kallosphaeridium parvum*

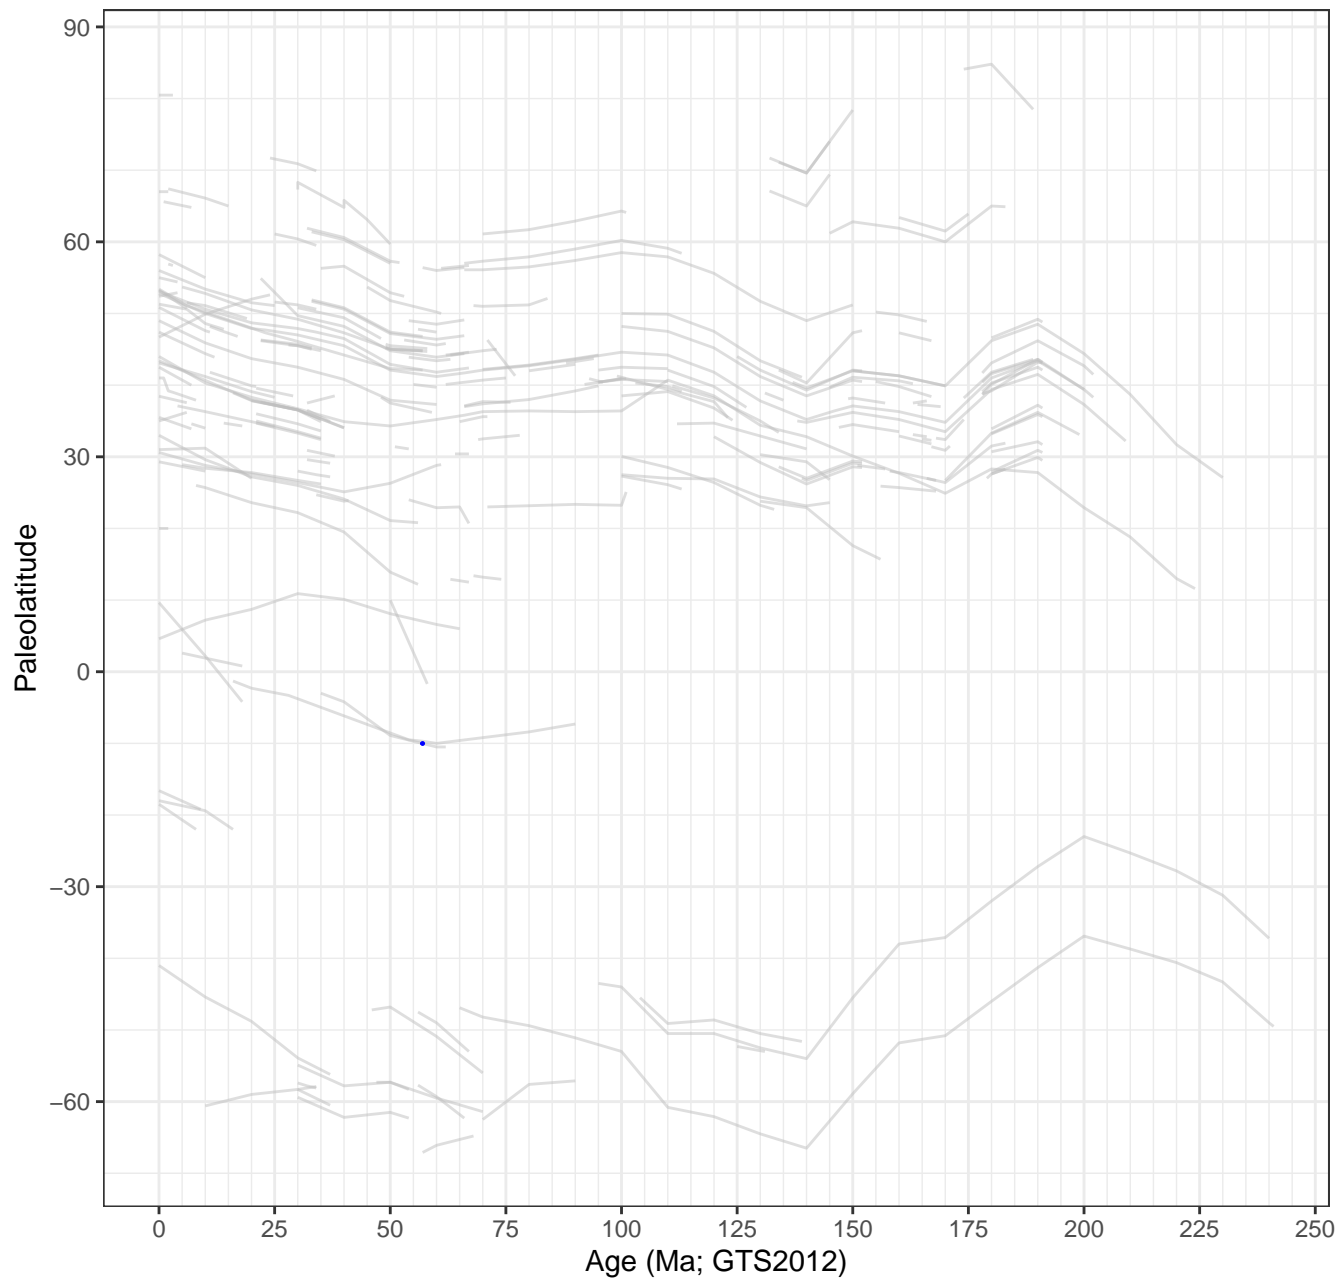

Supplement: Supplementary file 1718 [file Kallosphaeridium parvum.pdf › Supplement/Supplement 2/Species 1914 plots/Kallosphaeridium parvum.pdf]

# Species *Kallosphaeridium praussii*

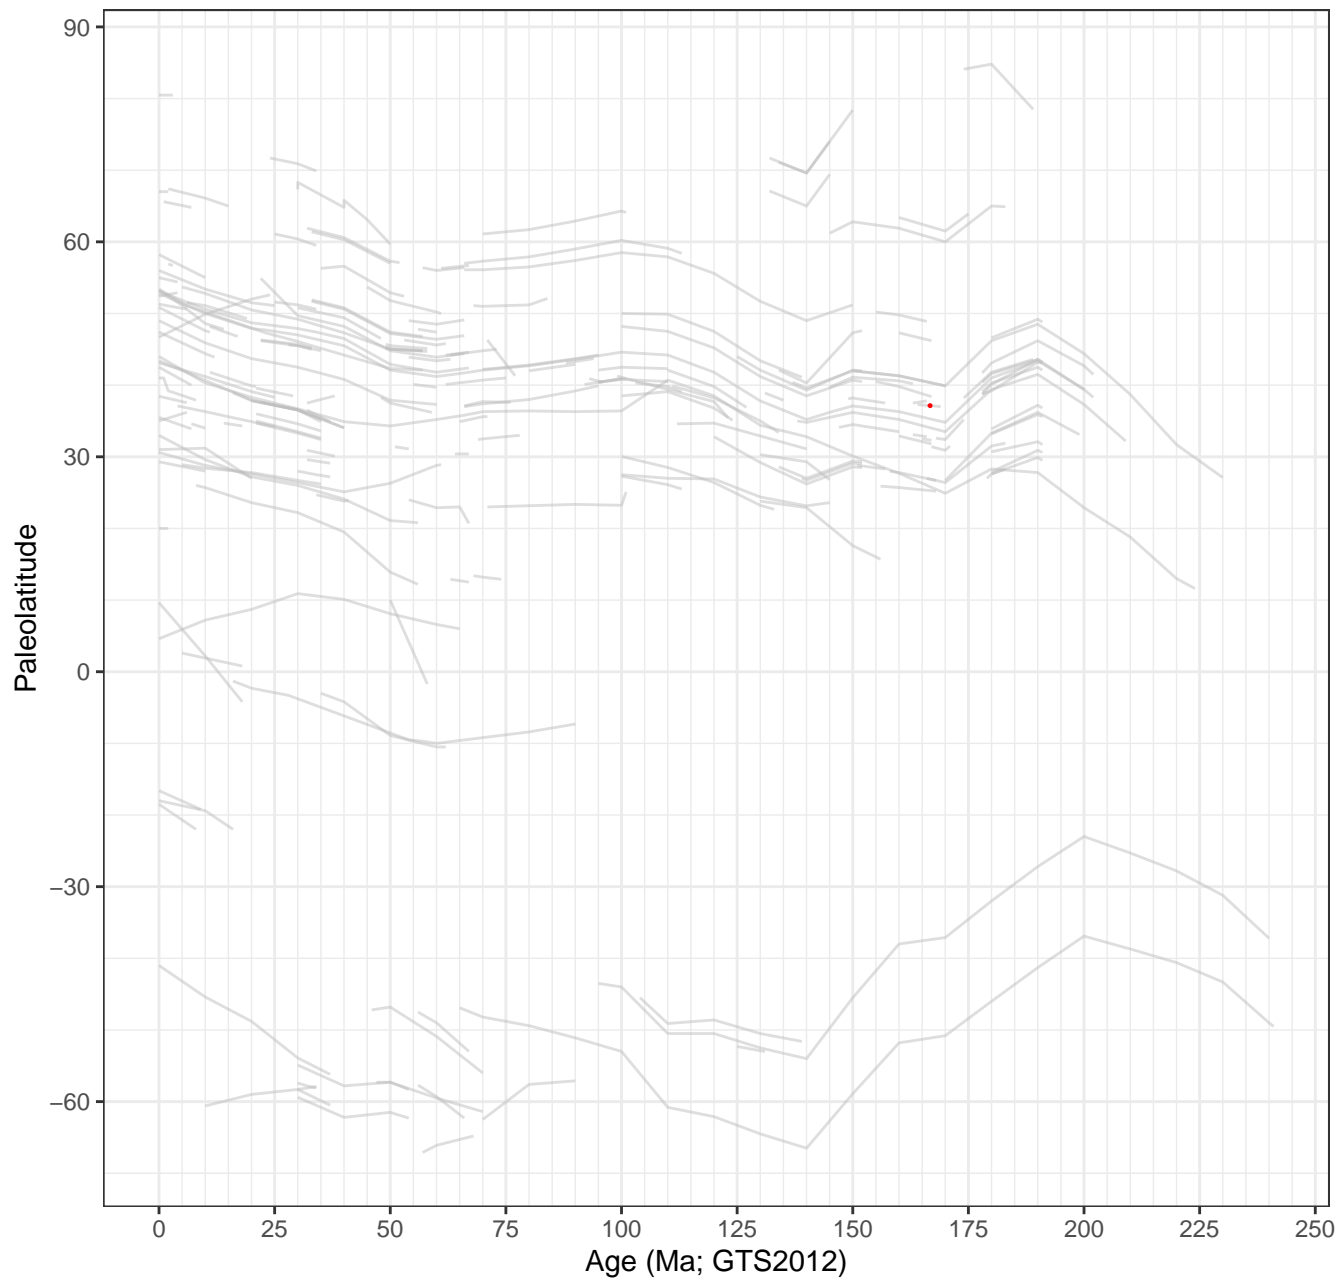

Supplement: Supplementary file 1719 [file Kallosphaeridium praussii.pdf › Supplement/Supplement 2/Species 1914 plots/Kallosphaeridium praussii.pdf]

# Species *Kallosphaeridium ringnesiorum*

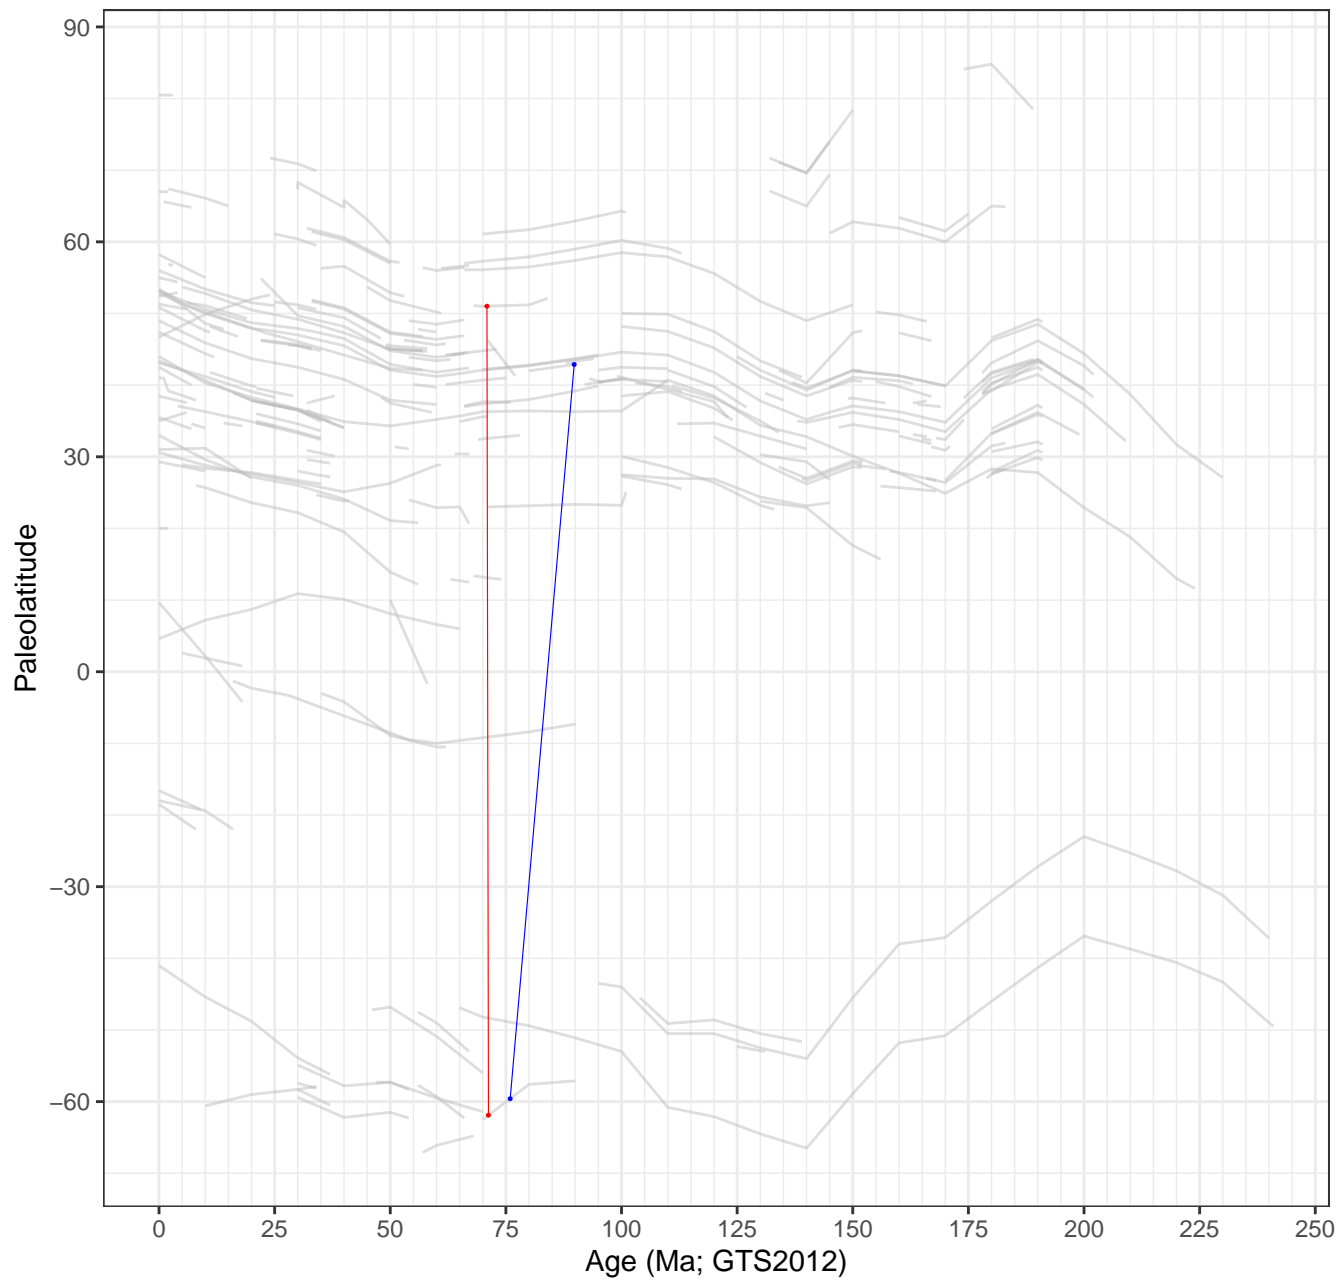

Supplement: Supplementary file 1720 [file Kallosphaeridium ringnesiorum.pdf › Supplement/Supplement 2/Species 1914 plots/Kallosphaeridium ringnesiorum.pdf]

# Species *Kallosphaeridium* spp.

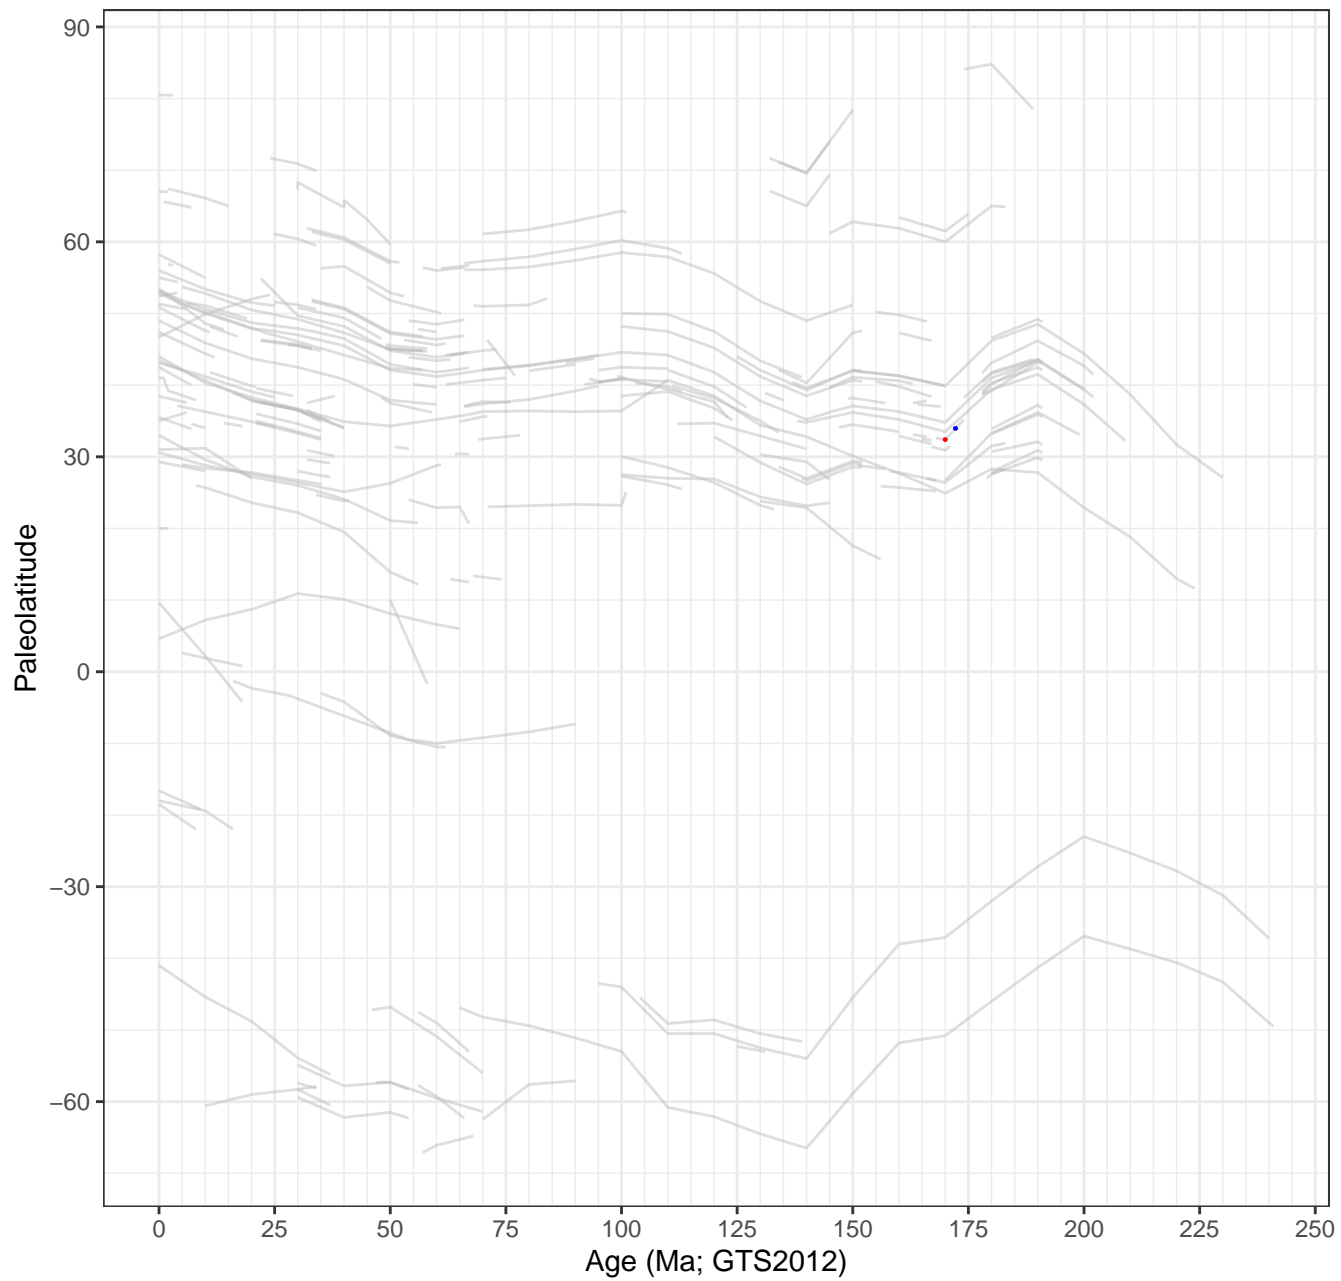

Supplement: Supplementary file 1721 [file Kallosphaeridium spp..pdf › Supplement/Supplement 2/Species 1914 plots/Kallosphaeridium spp..pdf]

# Species *Kallosphaeridium yorubaense*

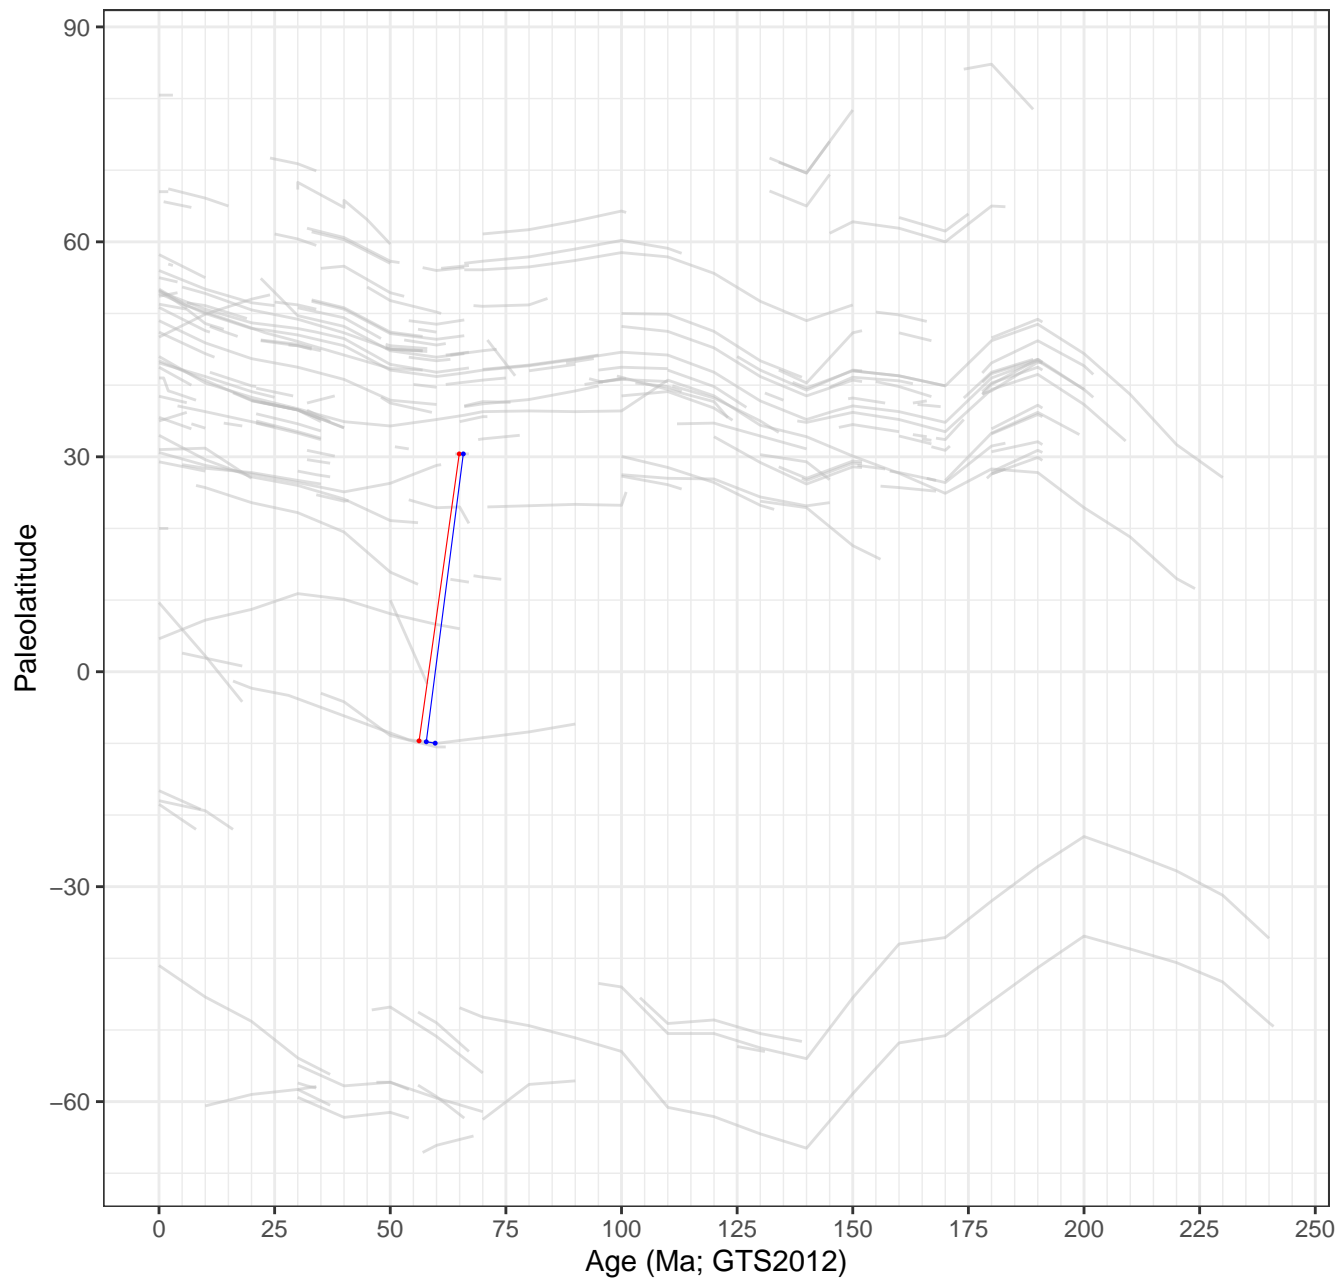

Supplement: Supplementary file 1722 [file Kallosphaeridium yorubaense.pdf › Supplement/Supplement 2/Species 1914 plots/Kallosphaeridium yorubaense.pdf]

# Species *Kalypstea diceras*

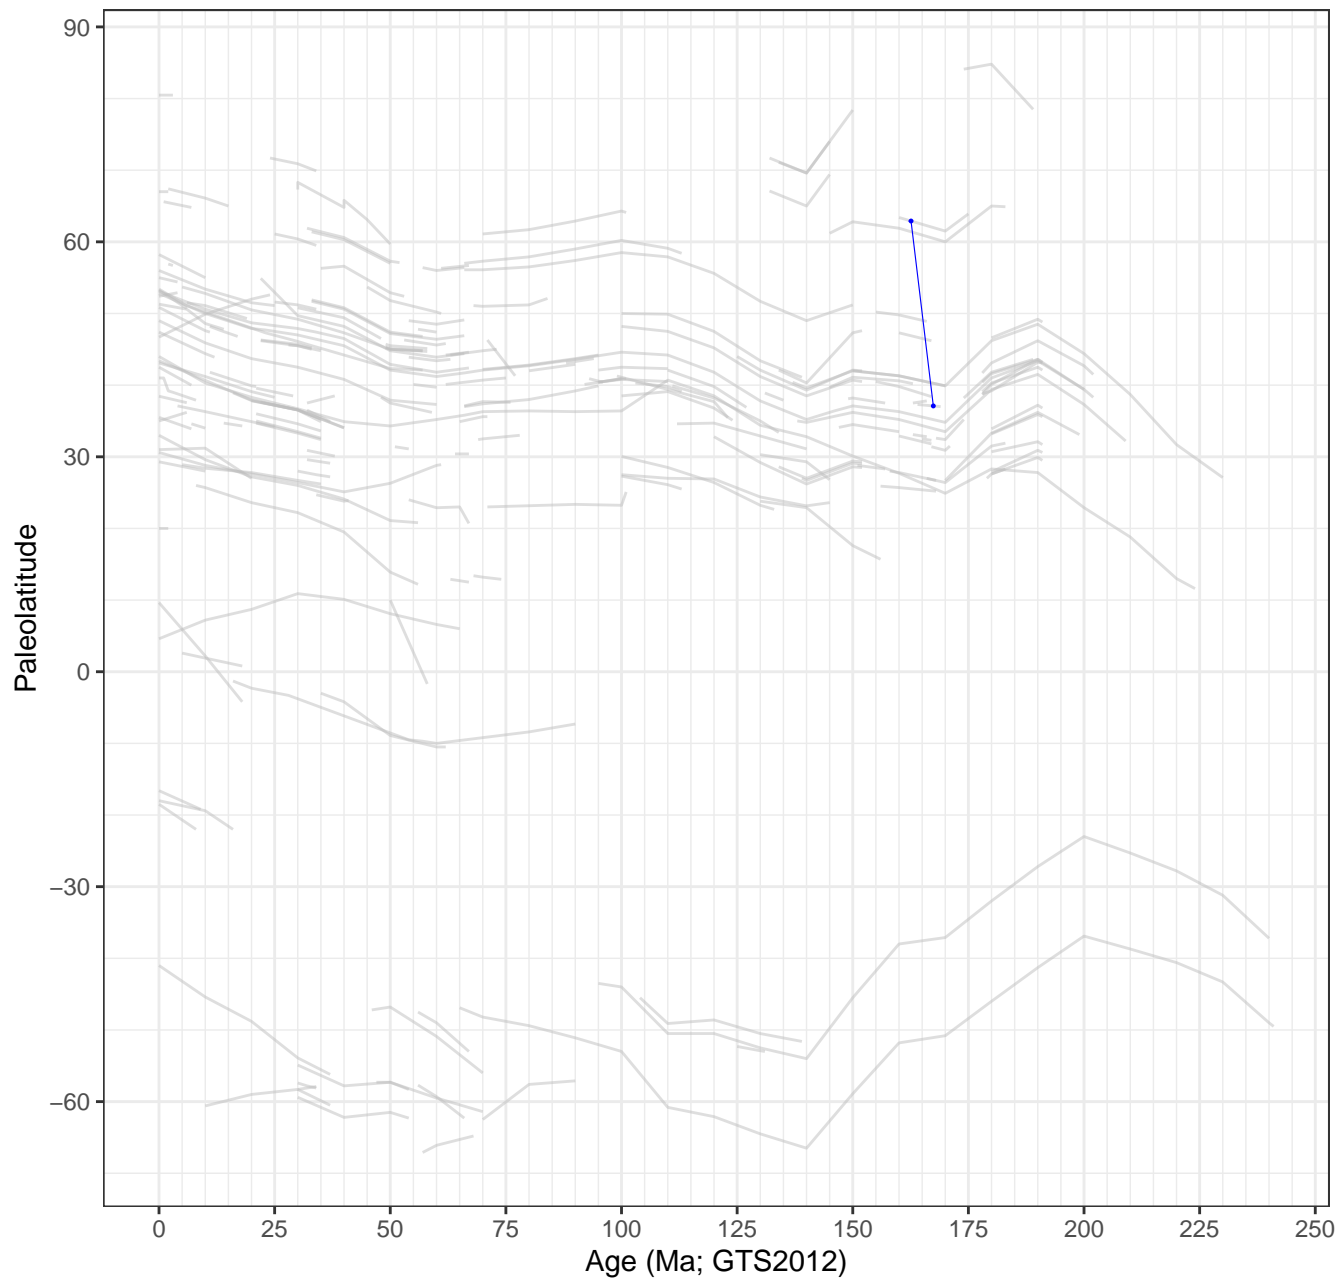

Supplement: Supplementary file 1723 [file Kalyptea diceras.pdf › Supplement/Supplement 2/Species 1914 plots/Kalyptea diceras.pdf]

# Species *Kalyptea stegasta*

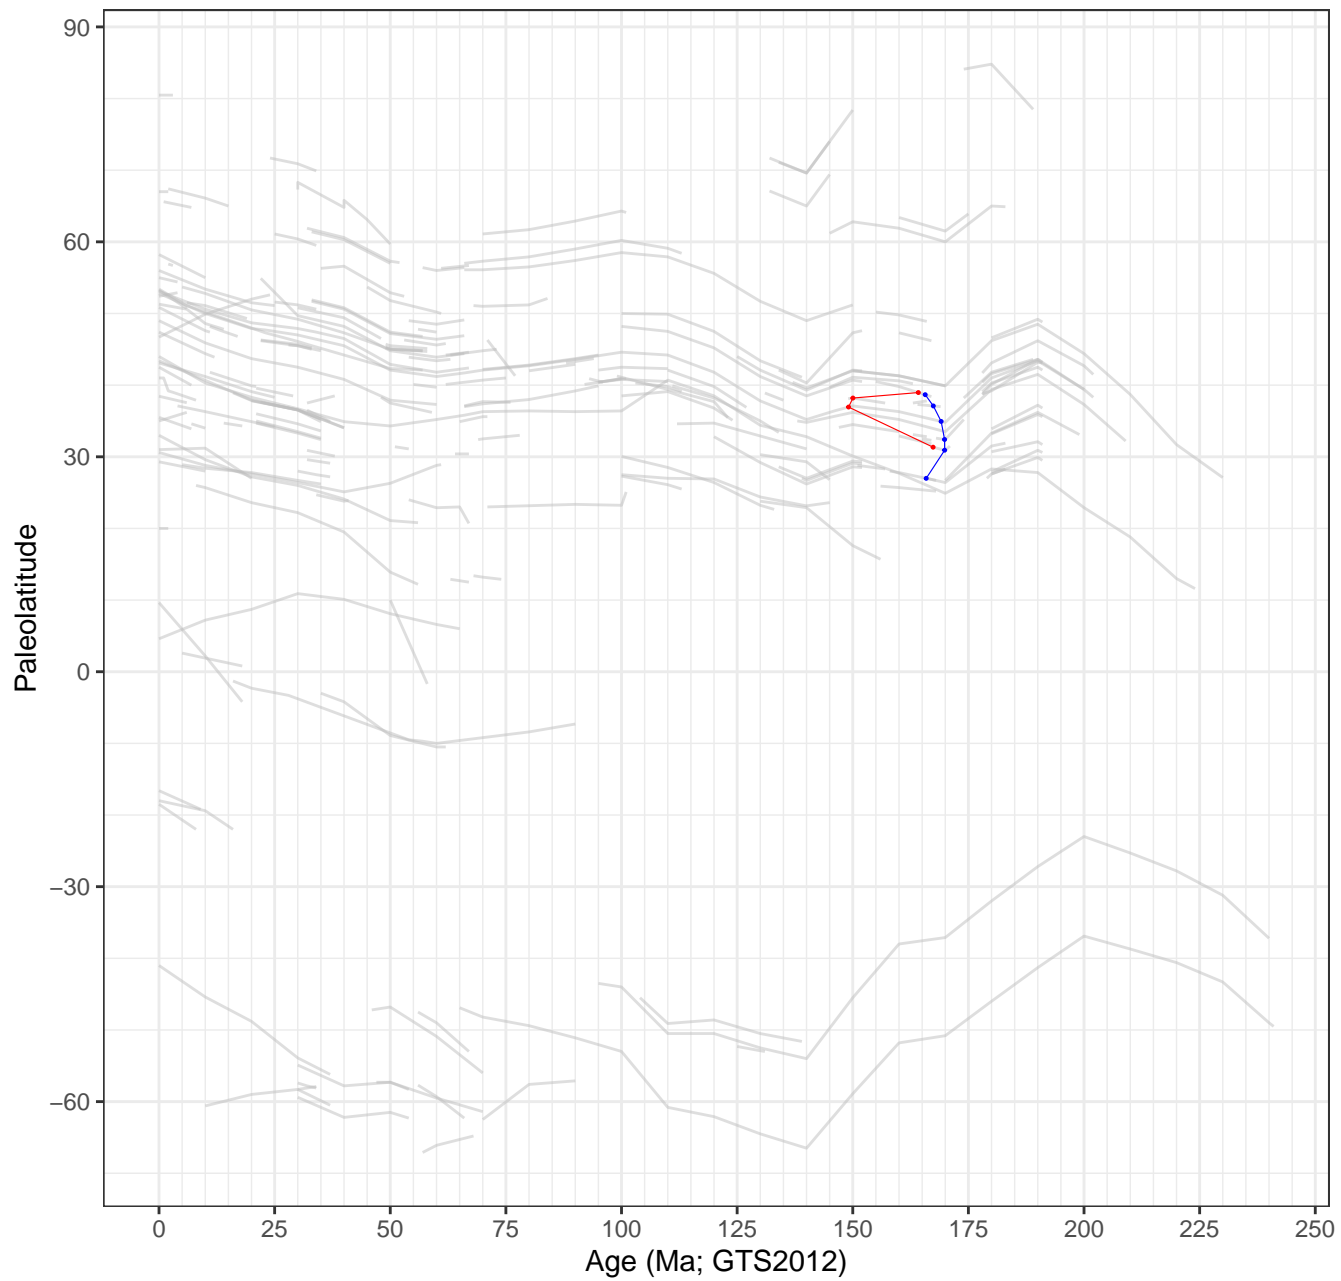

Supplement: Supplementary file 1724 [file Kalyptea stegasta.pdf › Supplement/Supplement 2/Species 1914 plots/Kalyptea stegasta.pdf]

# Species *Kalypstea wisemaniae*

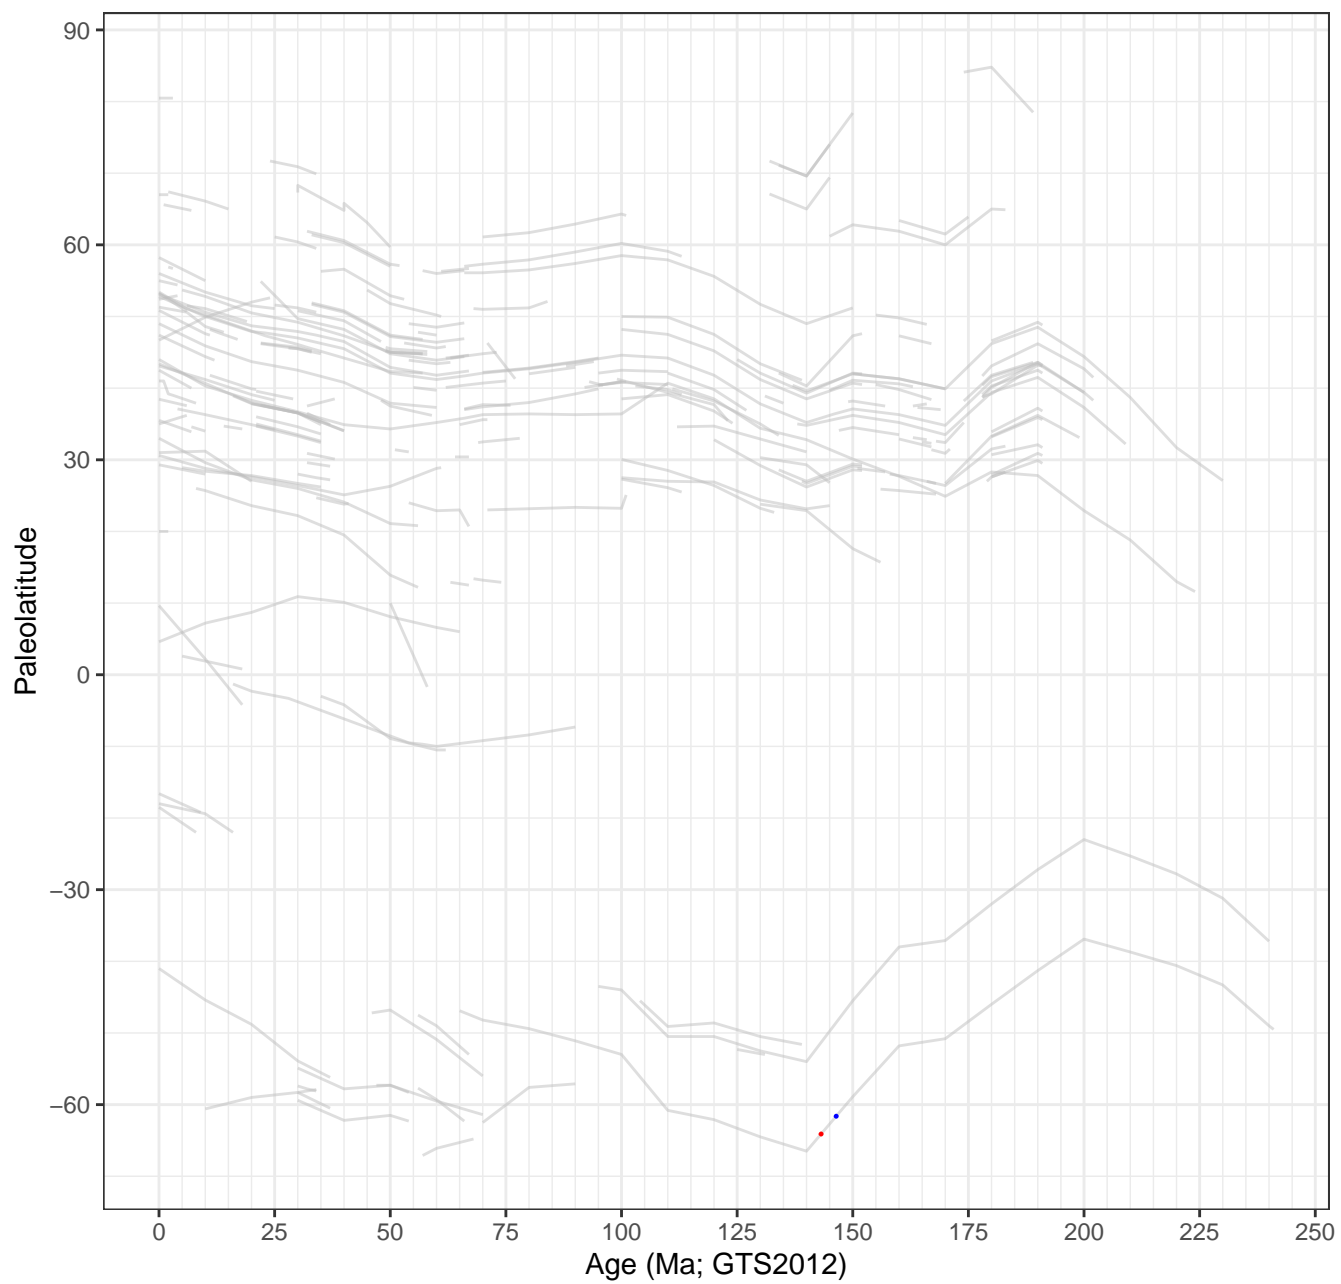

Supplement: Supplementary file 1725 [file Kalyptea wisemaniae.pdf › Supplement/Supplement 2/Species 1914 plots/Kalyptea wisemaniae.pdf]

# Species *Kenleyia leptocerata*

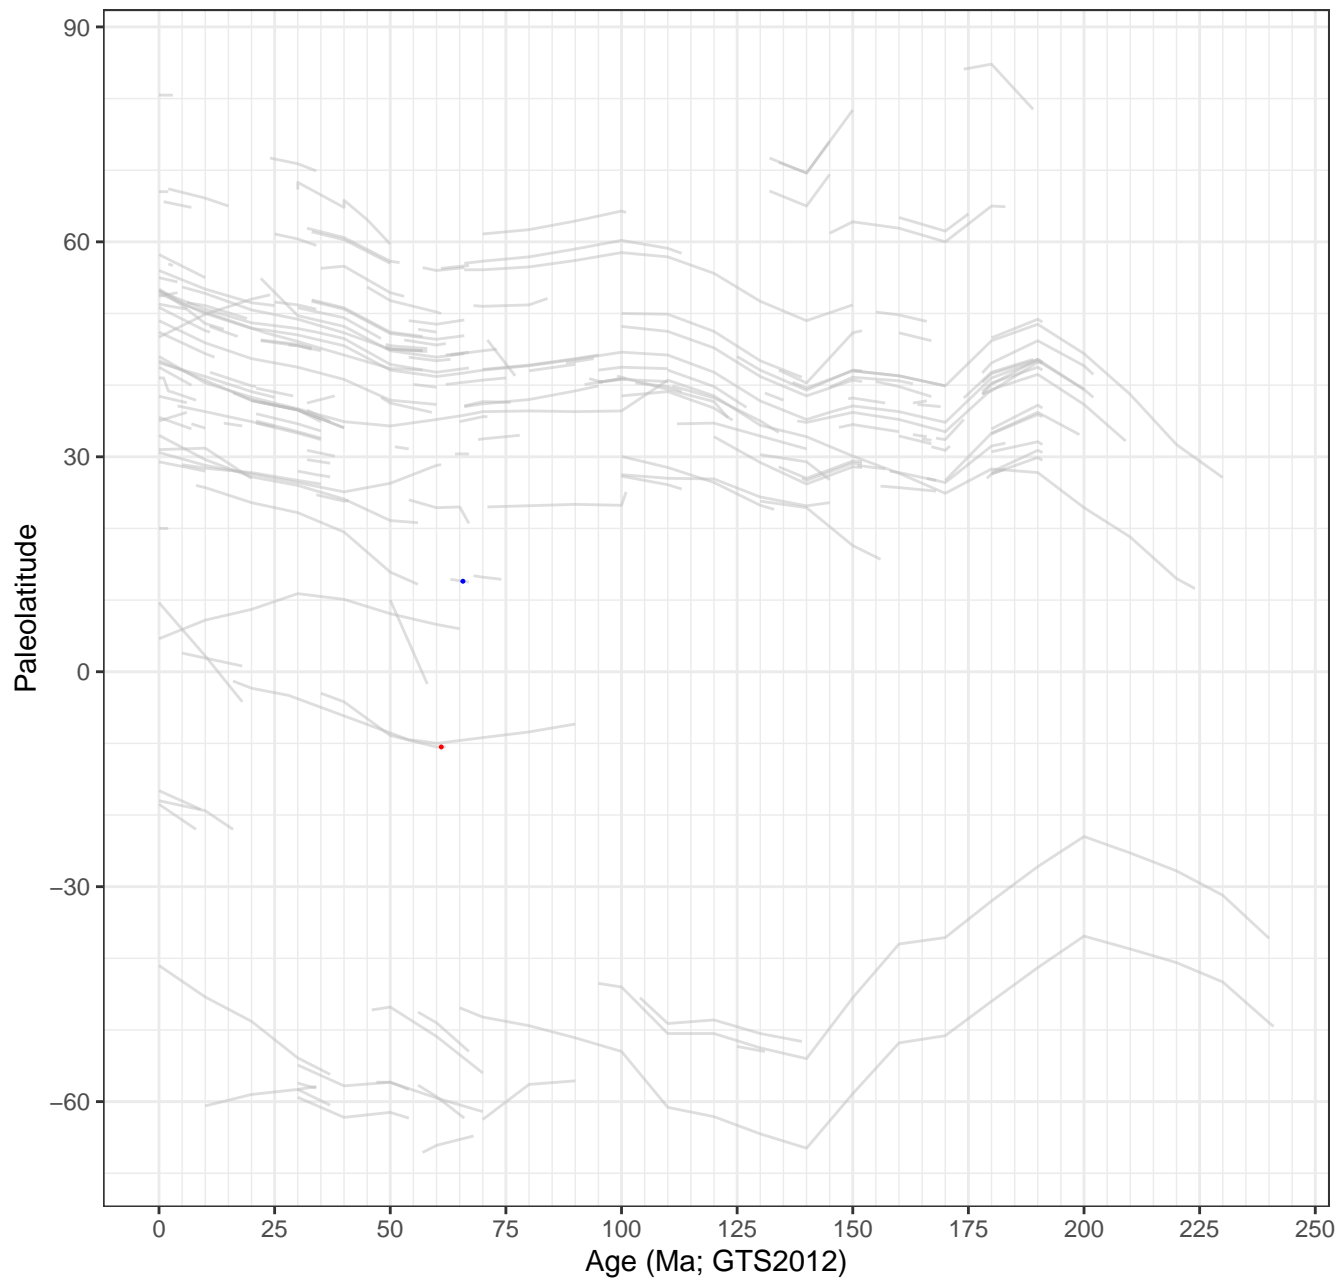

Supplement: Supplementary file 1726 [file Kenleyia leptocerata.pdf › Supplement/Supplement 2/Species 1914 plots/Kenleyia leptocerata.pdf]

# Species *Kenleyia lophophora*

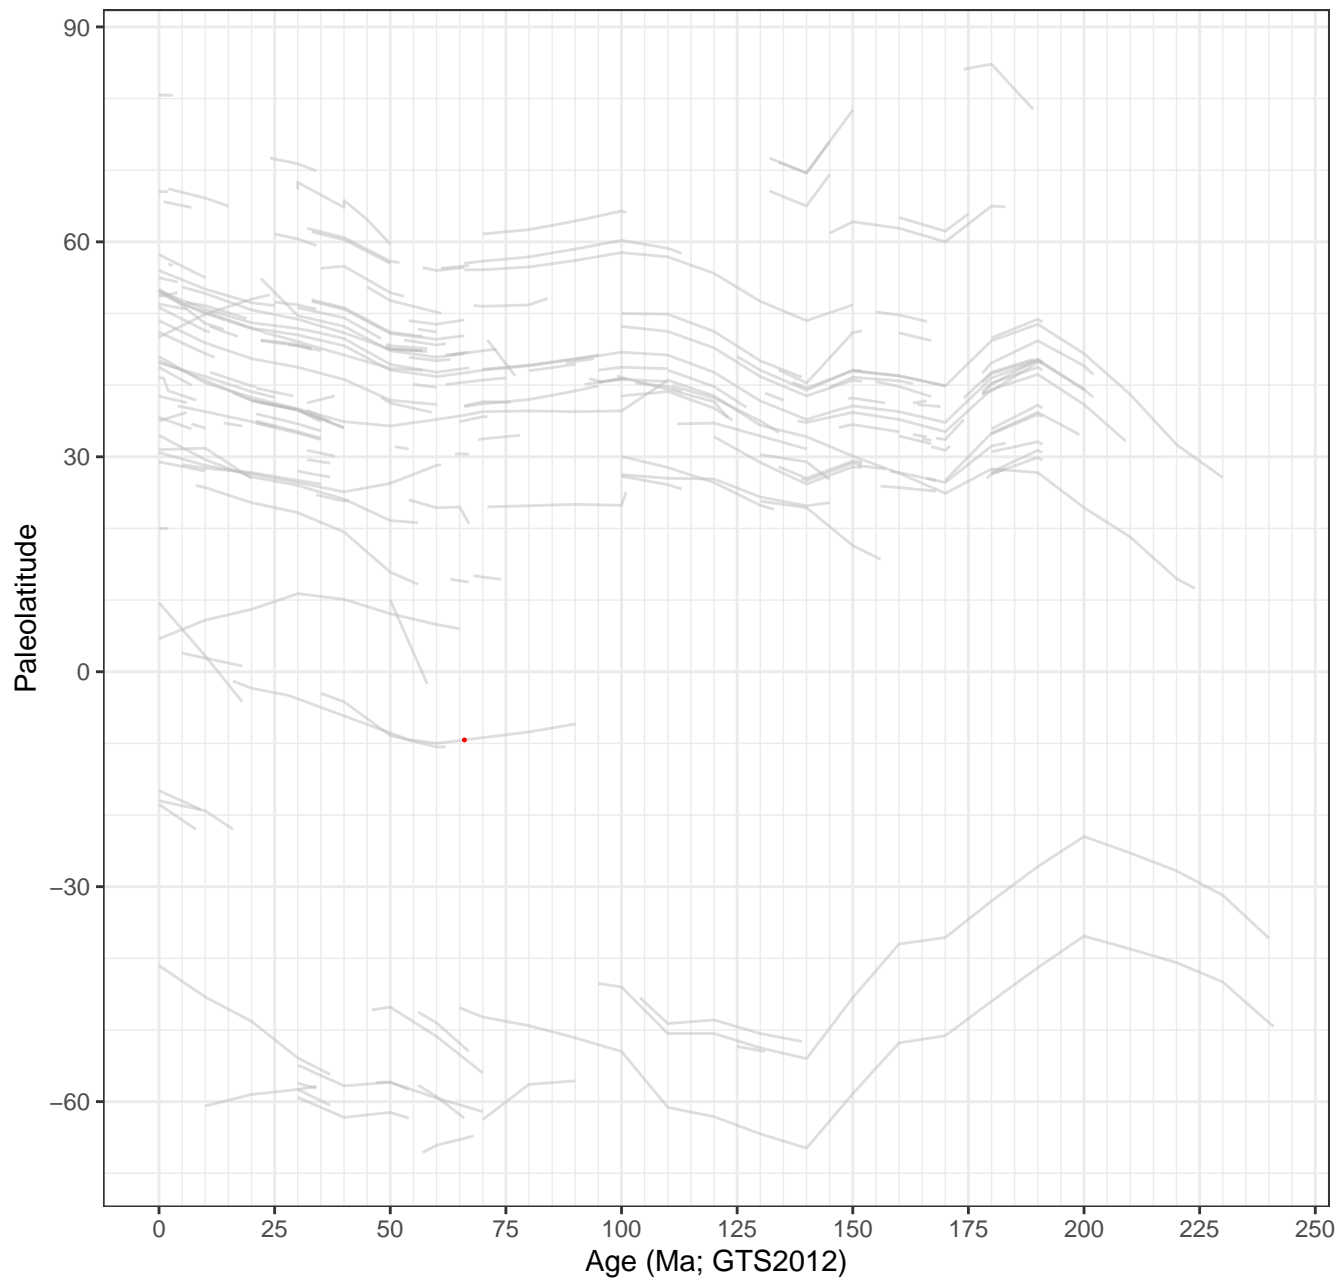

Supplement: Supplementary file 1727 [file Kenleyia lophophora.pdf › Supplement/Supplement 2/Species 1914 plots/Kenleyia lophophora.pdf]

# Species *Kenleyia nuda*

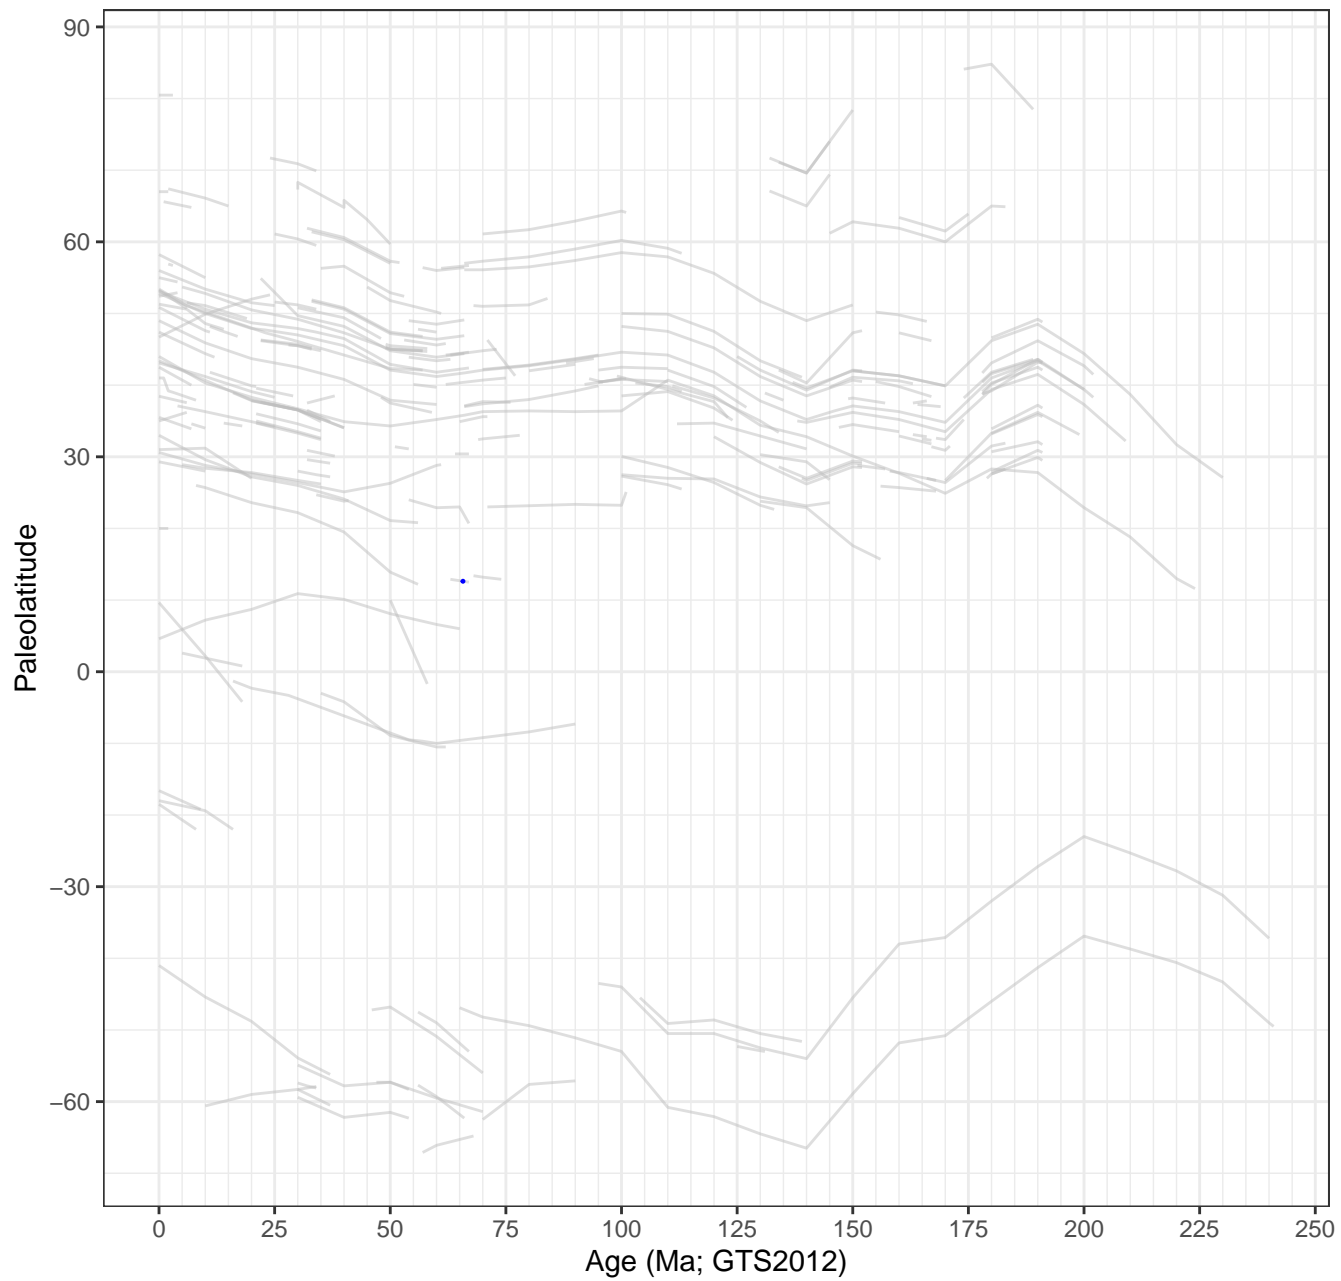

Supplement: Supplementary file 1728 [file Kenleyia nuda.pdf › Supplement/Supplement 2/Species 1914 plots/Kenleyia nuda.pdf]

# Species *Kenleyia pachycerata*

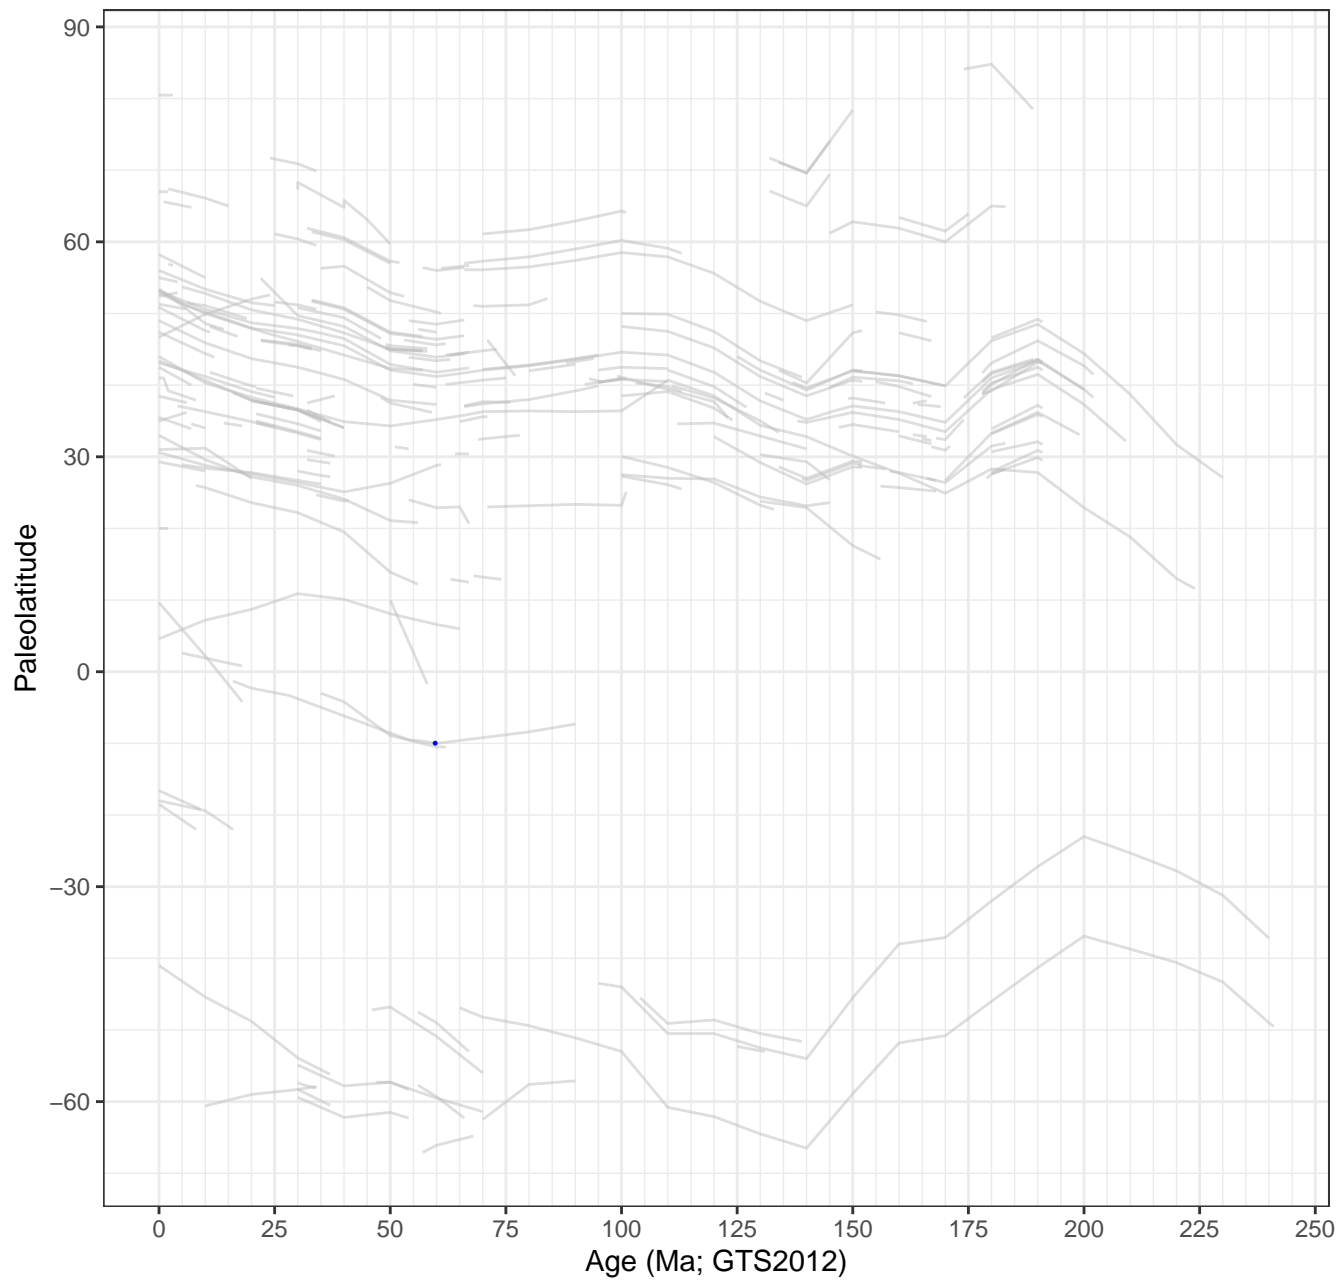

Supplement: Supplementary file 1729 [file Kenleyia pachycerata.pdf › Supplement/Supplement 2/Species 1914 plots/Kenleyia pachycerata.pdf]

# Species *Kiokansium prolatum*

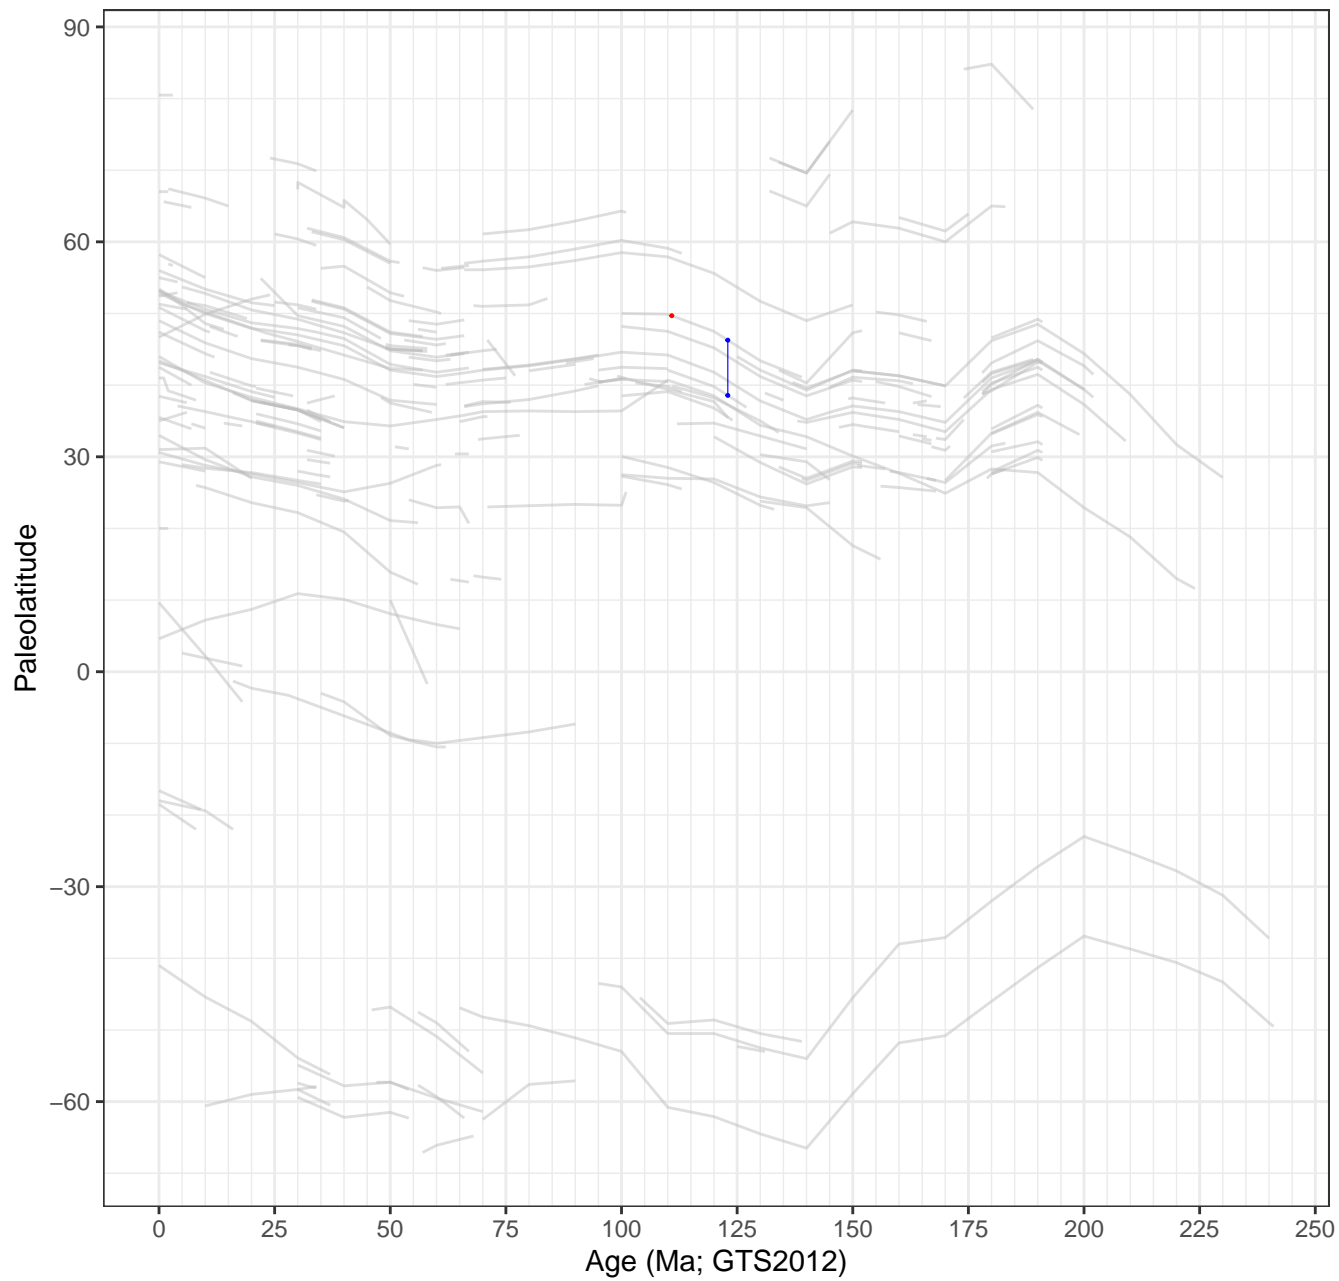

Supplement: Supplementary file 1730 [file Kiokansium prolatum.pdf › Supplement/Supplement 2/Species 1914 plots/Kiokansium prolatum.pdf]

# Species *Kiokansium unituberculatum*

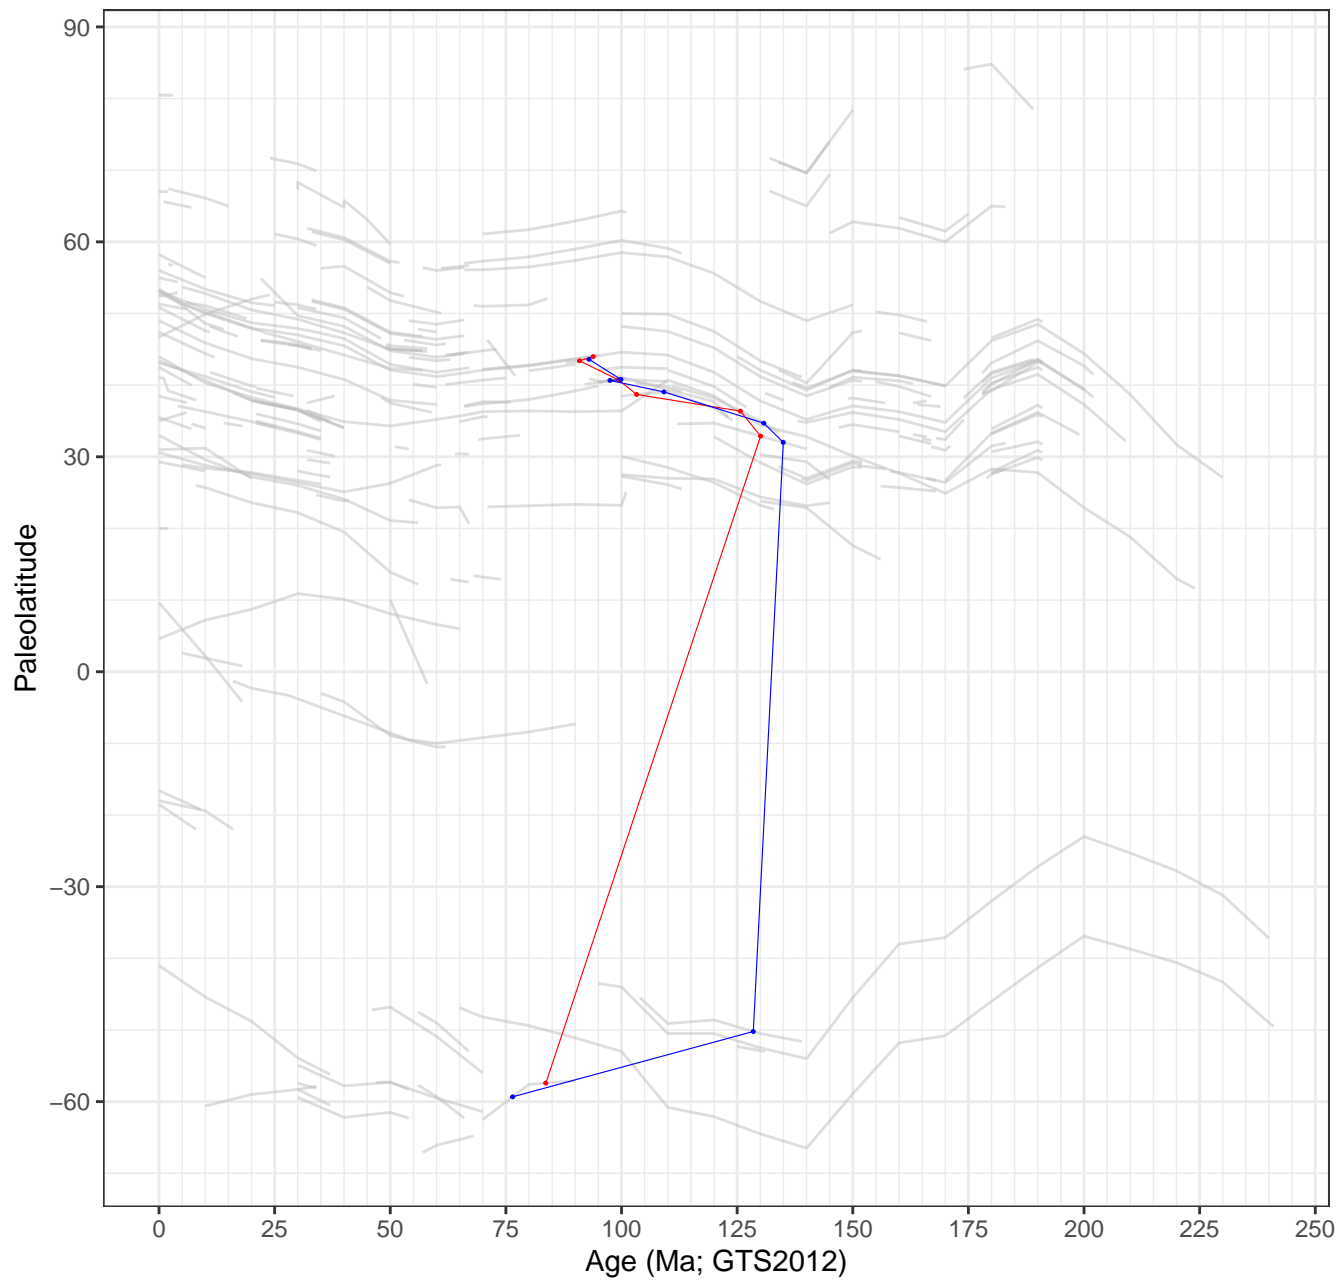

Supplement: Supplementary file 1731 [file Kiokansium unituberculatum.pdf › Supplement/Supplement 2/Species 1914 plots/Kiokansium unituberculatum.pdf]

# Species *Kiokansium williamsii*

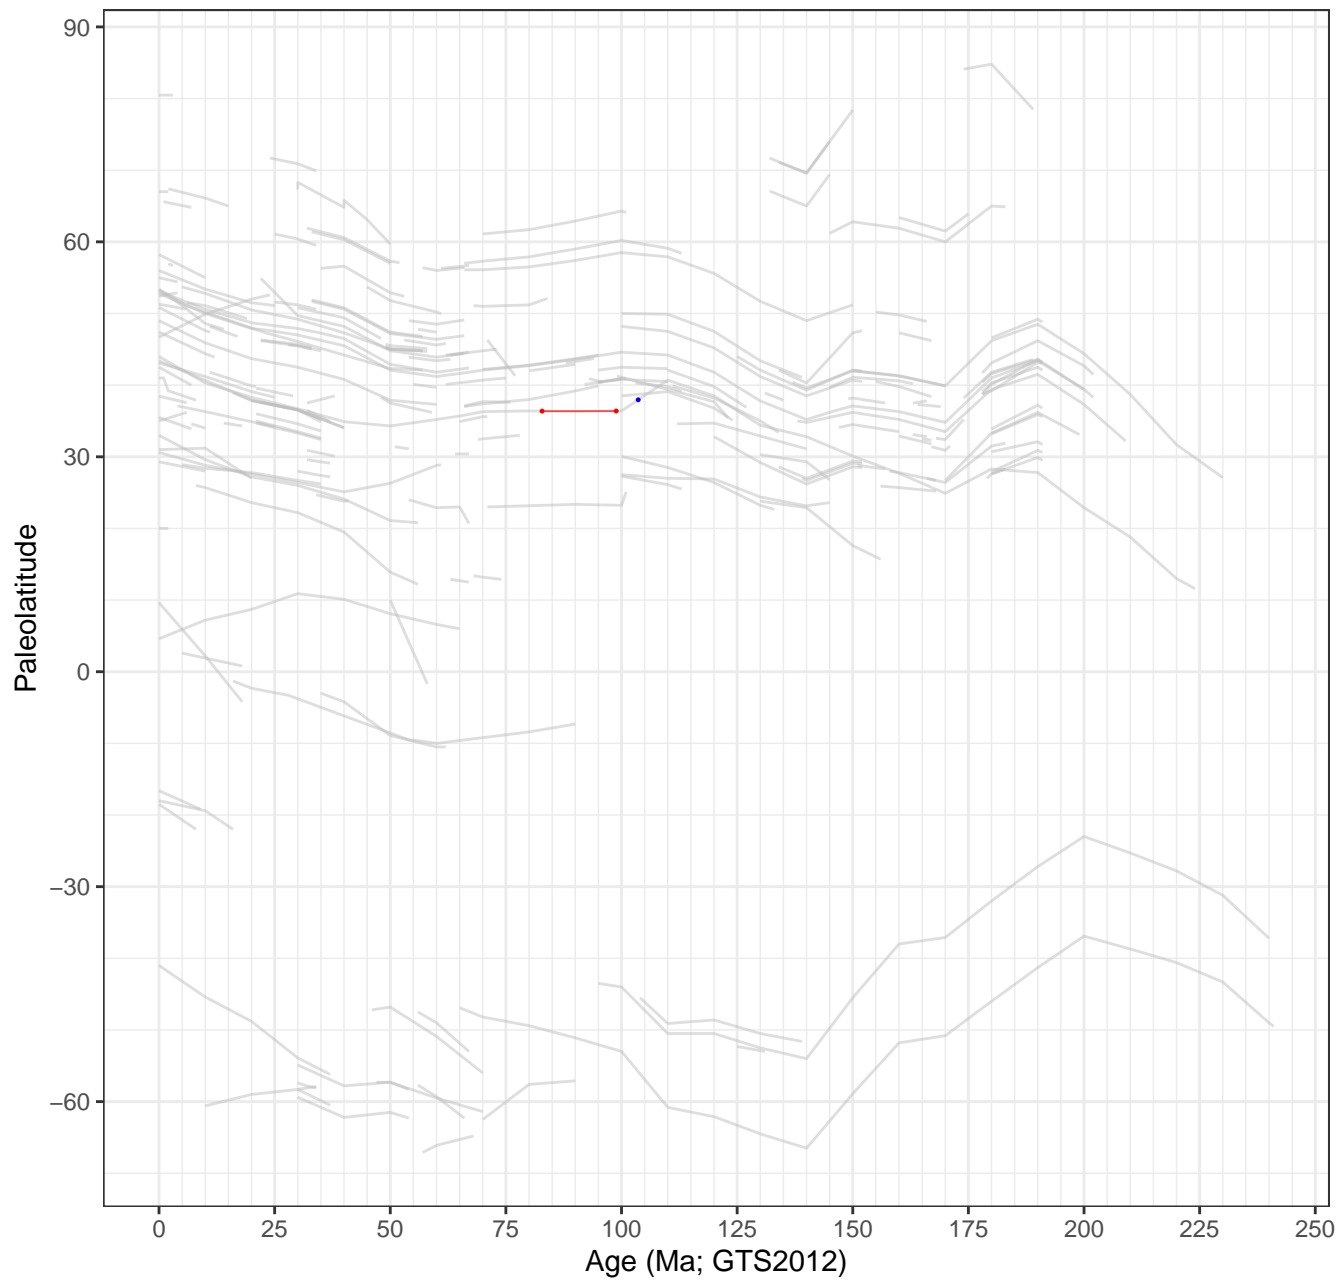

Supplement: Supplementary file 1732 [file Kiokansium williamsii.pdf › Supplement/Supplement 2/Species 1914 plots/Kiokansium williamsii.pdf]

# Species *Kisselevia insolens*

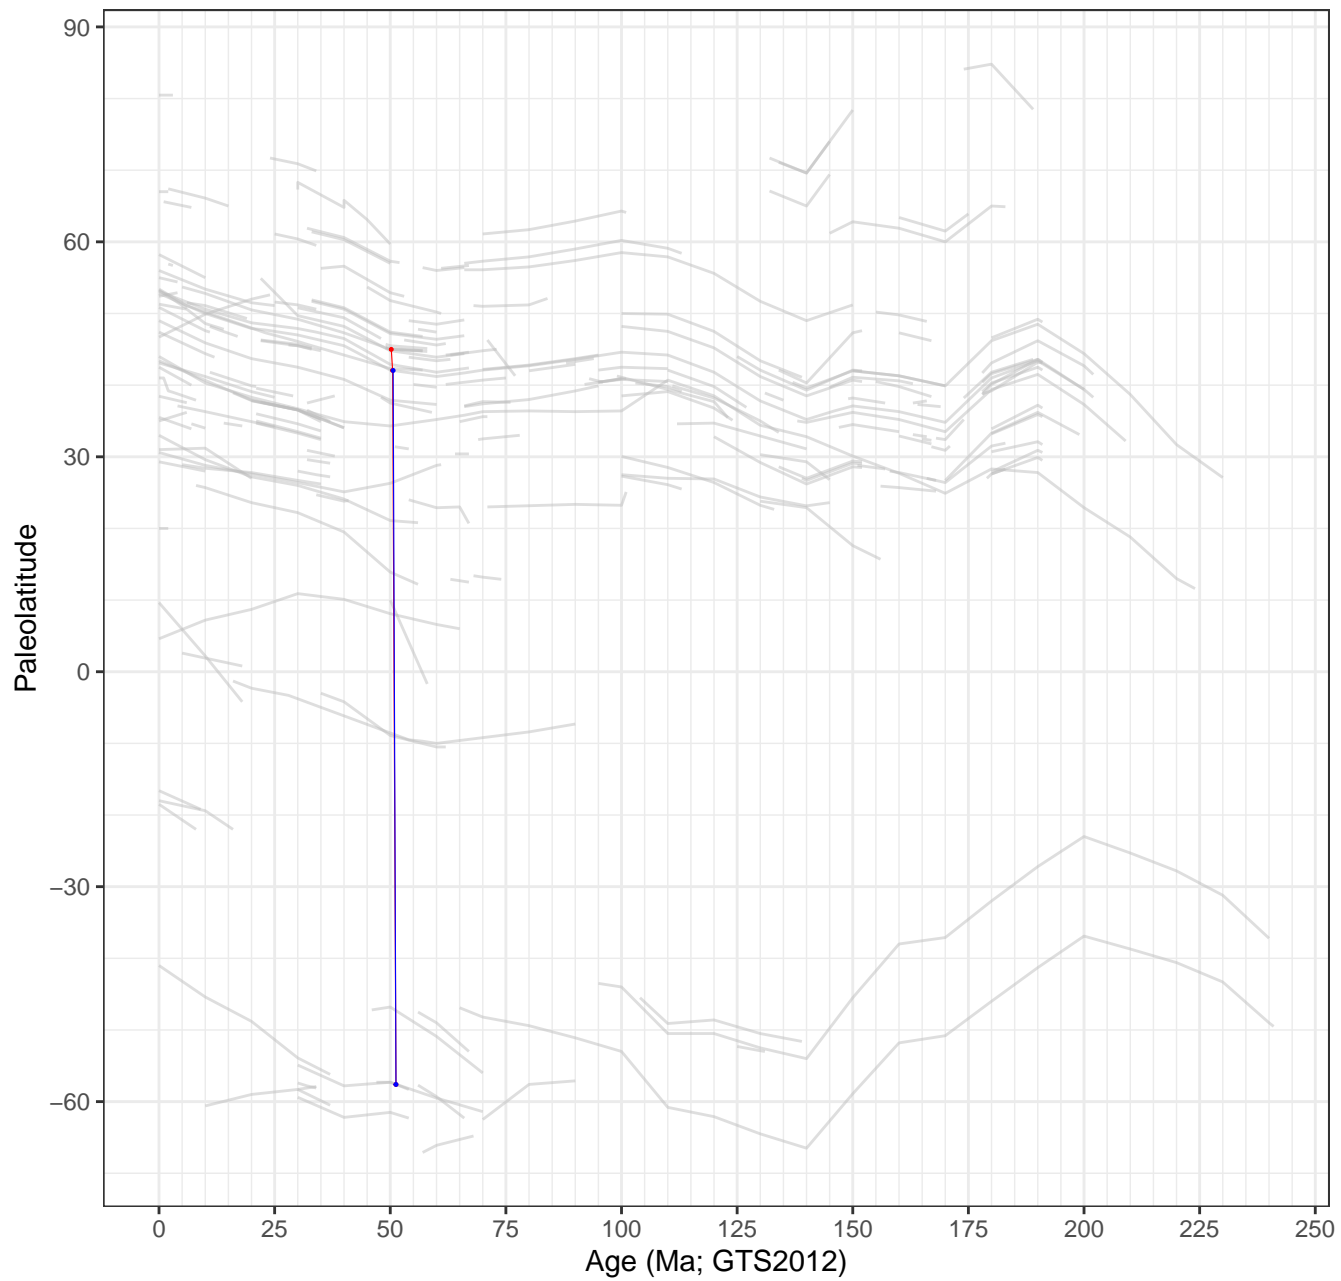

Supplement: Supplementary file 1733 [file Kisselevia insolens.pdf › Supplement/Supplement 2/Species 1914 plots/Kisselevia insolens.pdf]
