# Supplementary figures and images for: DINOSTRAT: a global database of the stratigraphic and paleolatitudinal distribution of Mesozoic–Cenozoic organic-walled dinoflagellate cysts (part 18 of 27)
Source: Copernicus journal article supplement (doi:10.5194/essd-14-579-2022), 2022-02-09

# Species *Kisselevia ornata*

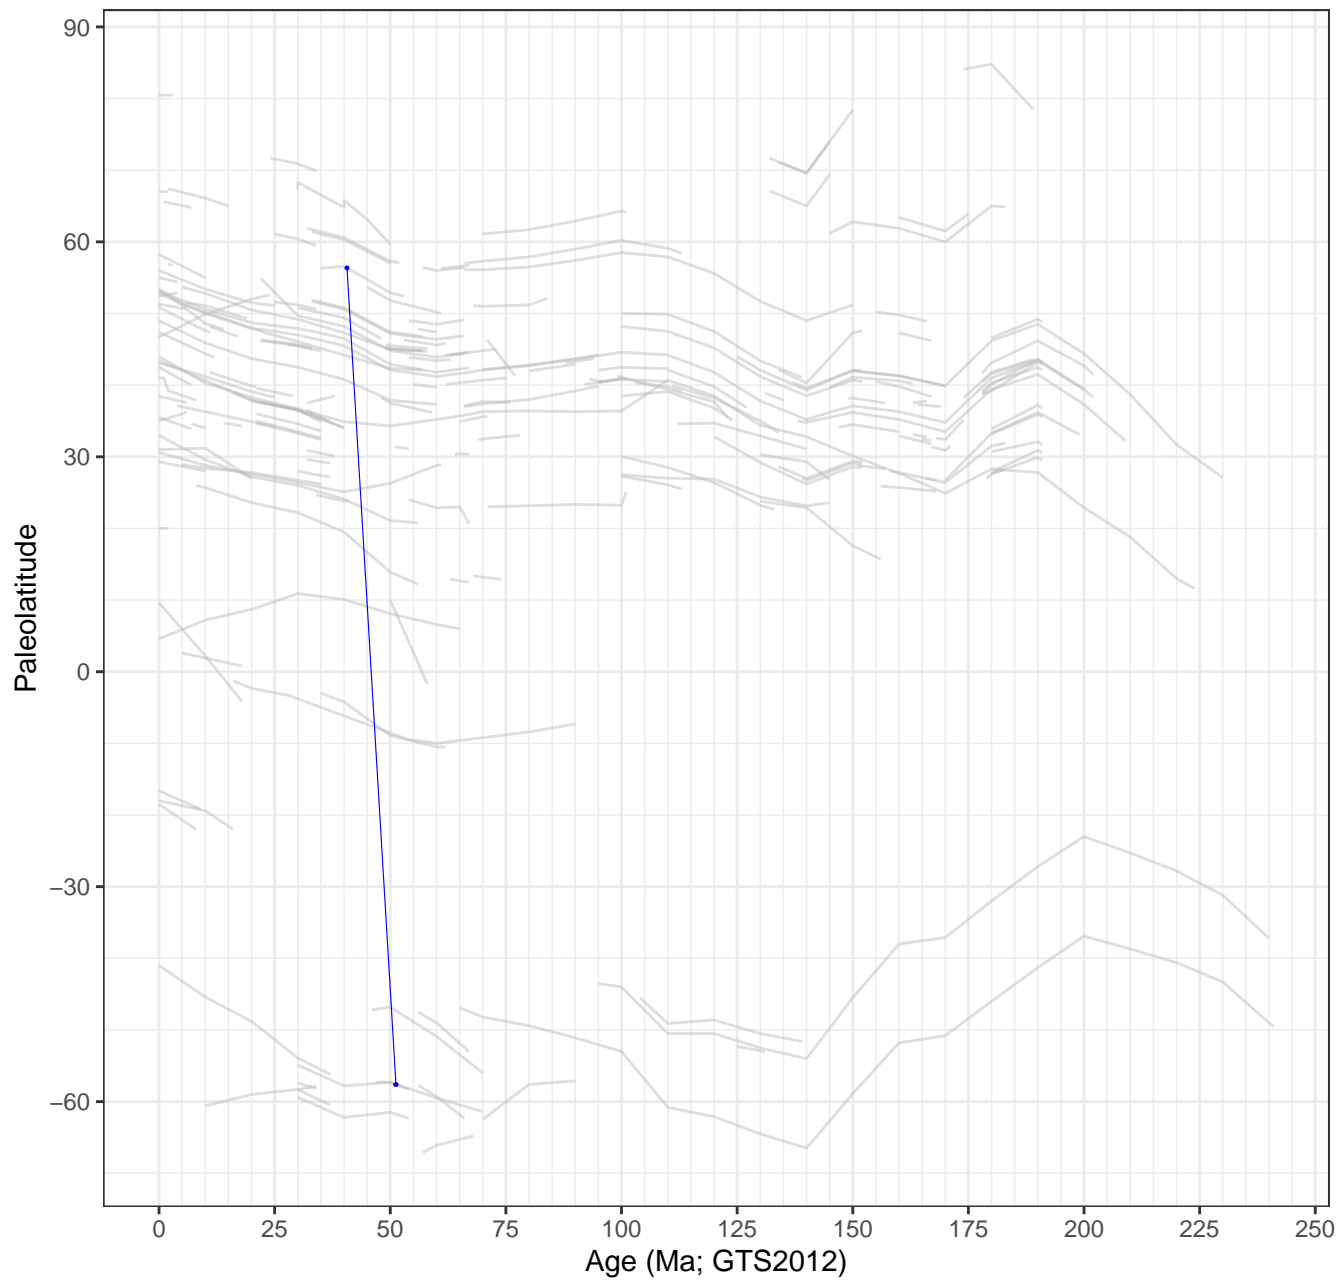

Supplement: Supplementary file 1734 [file Kisselevia ornata.pdf › Supplement/Supplement 2/Species 1914 plots/Kisselevia ornata.pdf]

# Species *Kleithriasphaeridium atlatense*

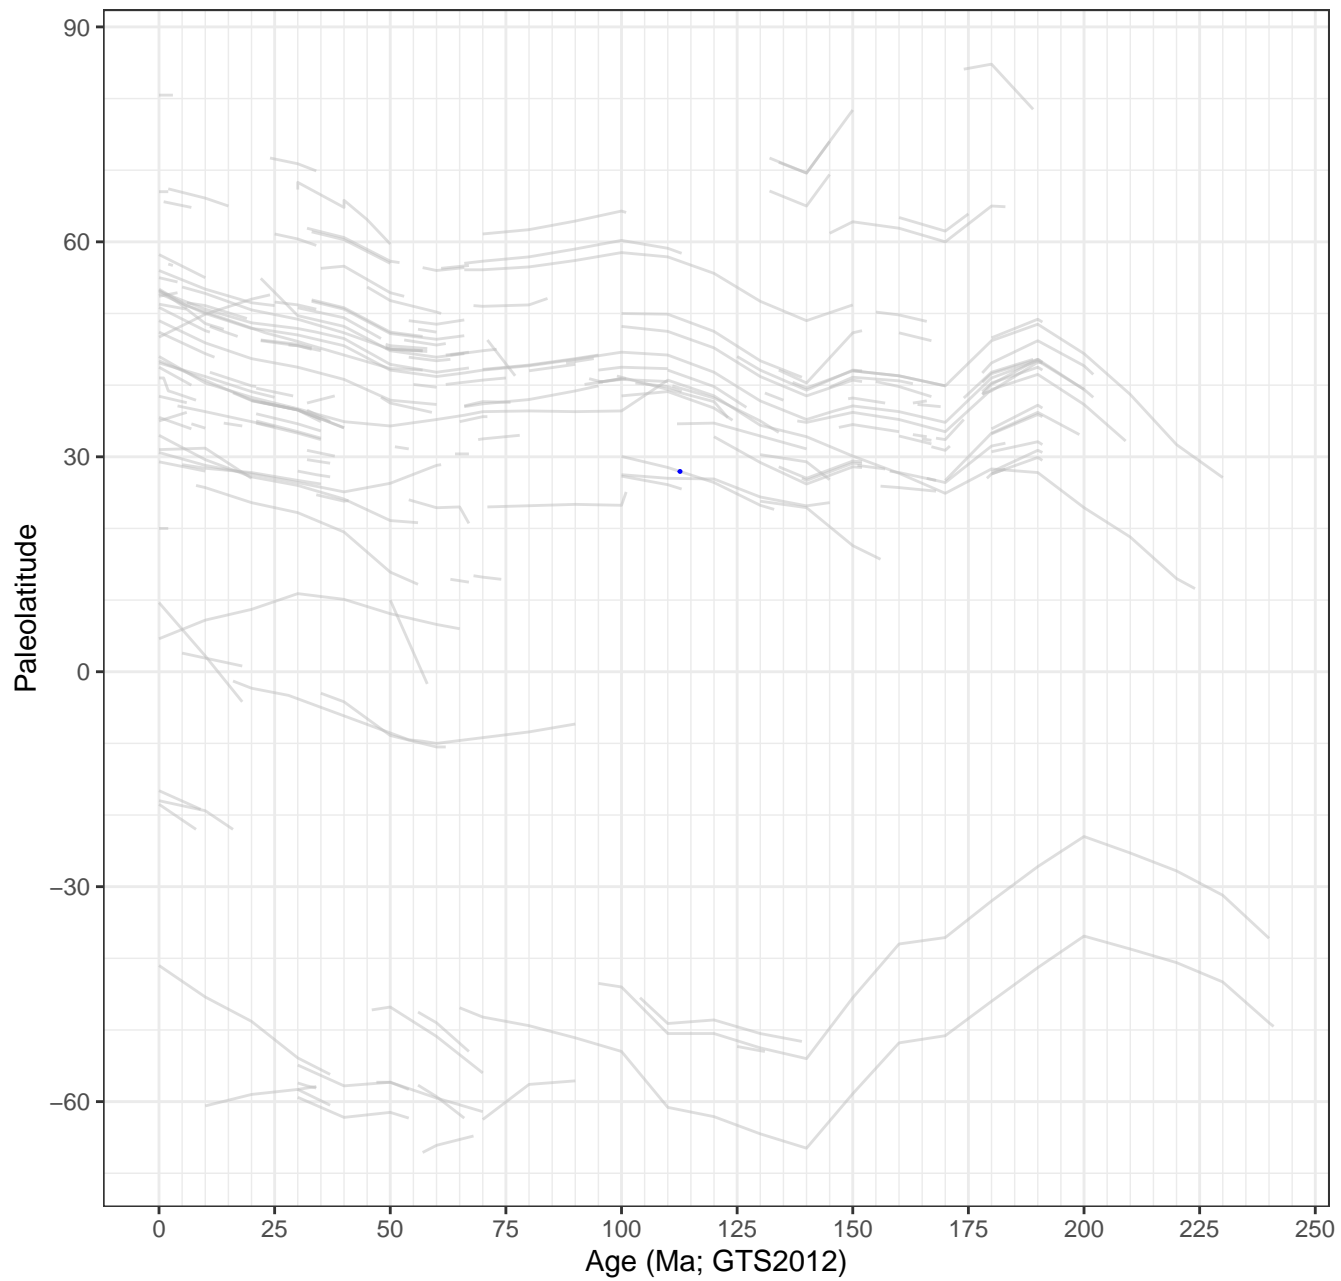

Supplement: Supplementary file 1735 [file Kleithriasphaeridium atlasiense.pdf › Supplement/Supplement 2/Species 1914 plots/Kleithriasphaeridium atlasiense.pdf]

# Species *Kleithriasphaeridium cooksoniae*

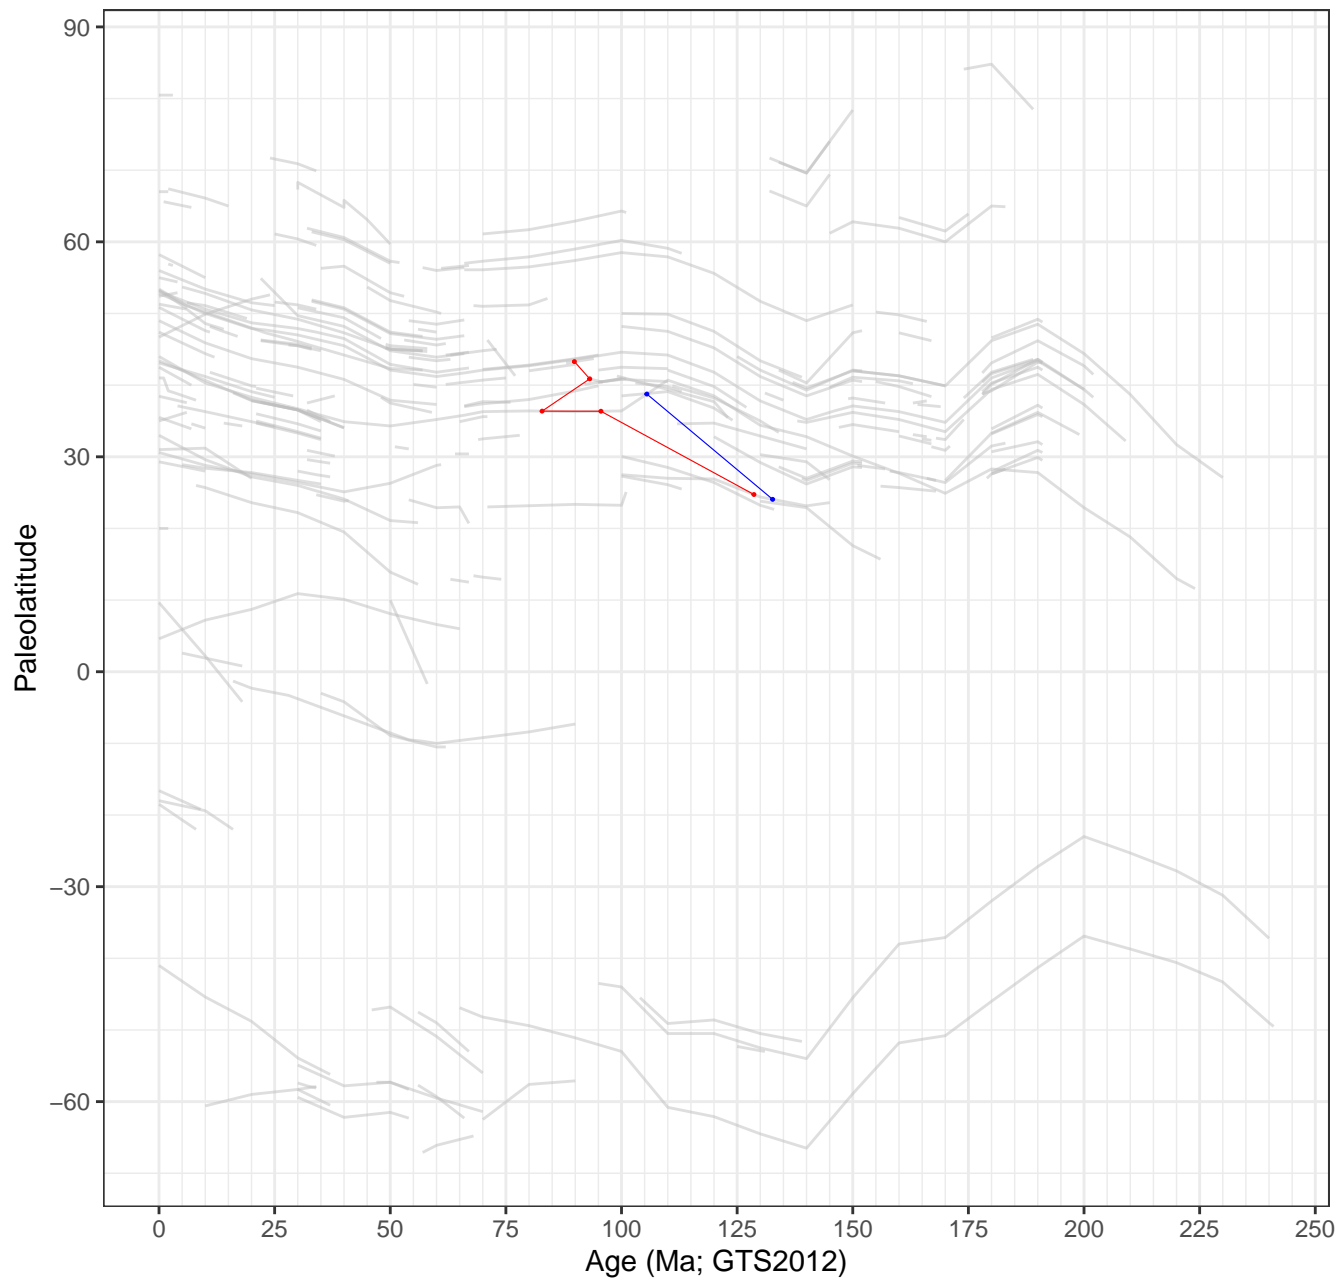

Supplement: Supplementary file 1736 [file Kleithriasphaeridium cooksoniae.pdf › Supplement/Supplement 2/Species 1914 plots/Kleithriasphaeridium cooksoniae.pdf]

# Species *Kleithriasphaeridium corrugatum*

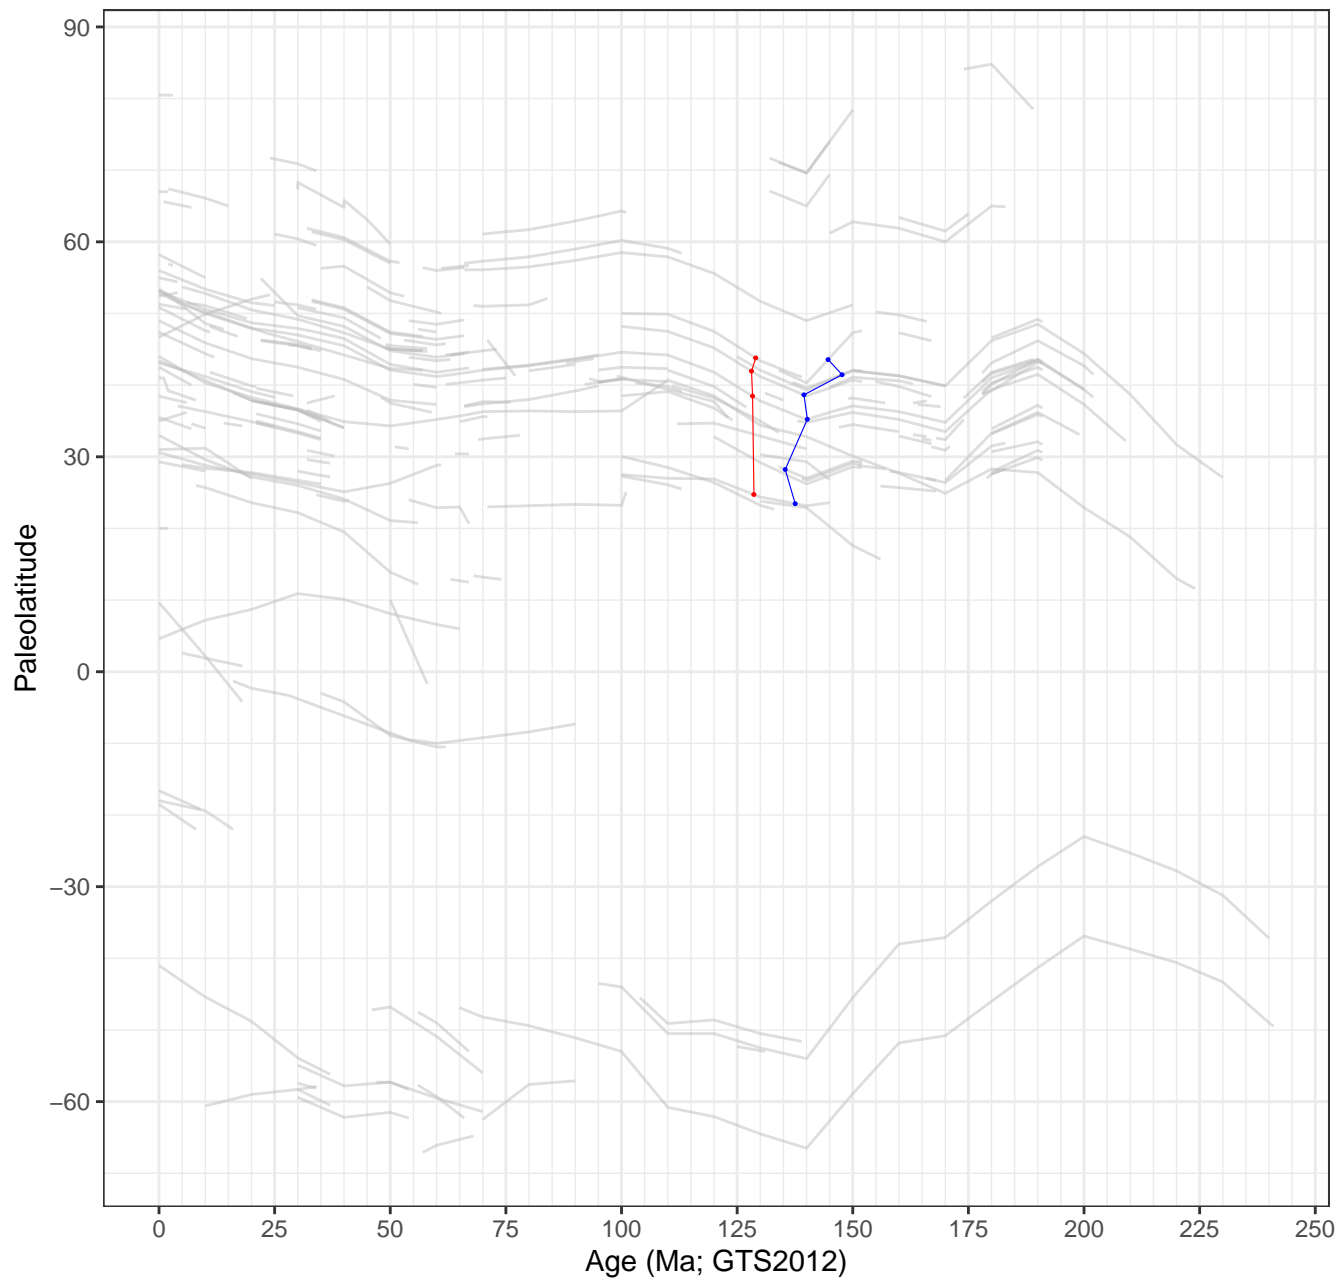

Supplement: Supplementary file 1737 [file Kleithriasphaeridium corrugatum.pdf › Supplement/Supplement 2/Species 1914 plots/Kleithriasphaeridium corrugatum.pdf]

# Species *Kleithriasphaeridium eoinodes*

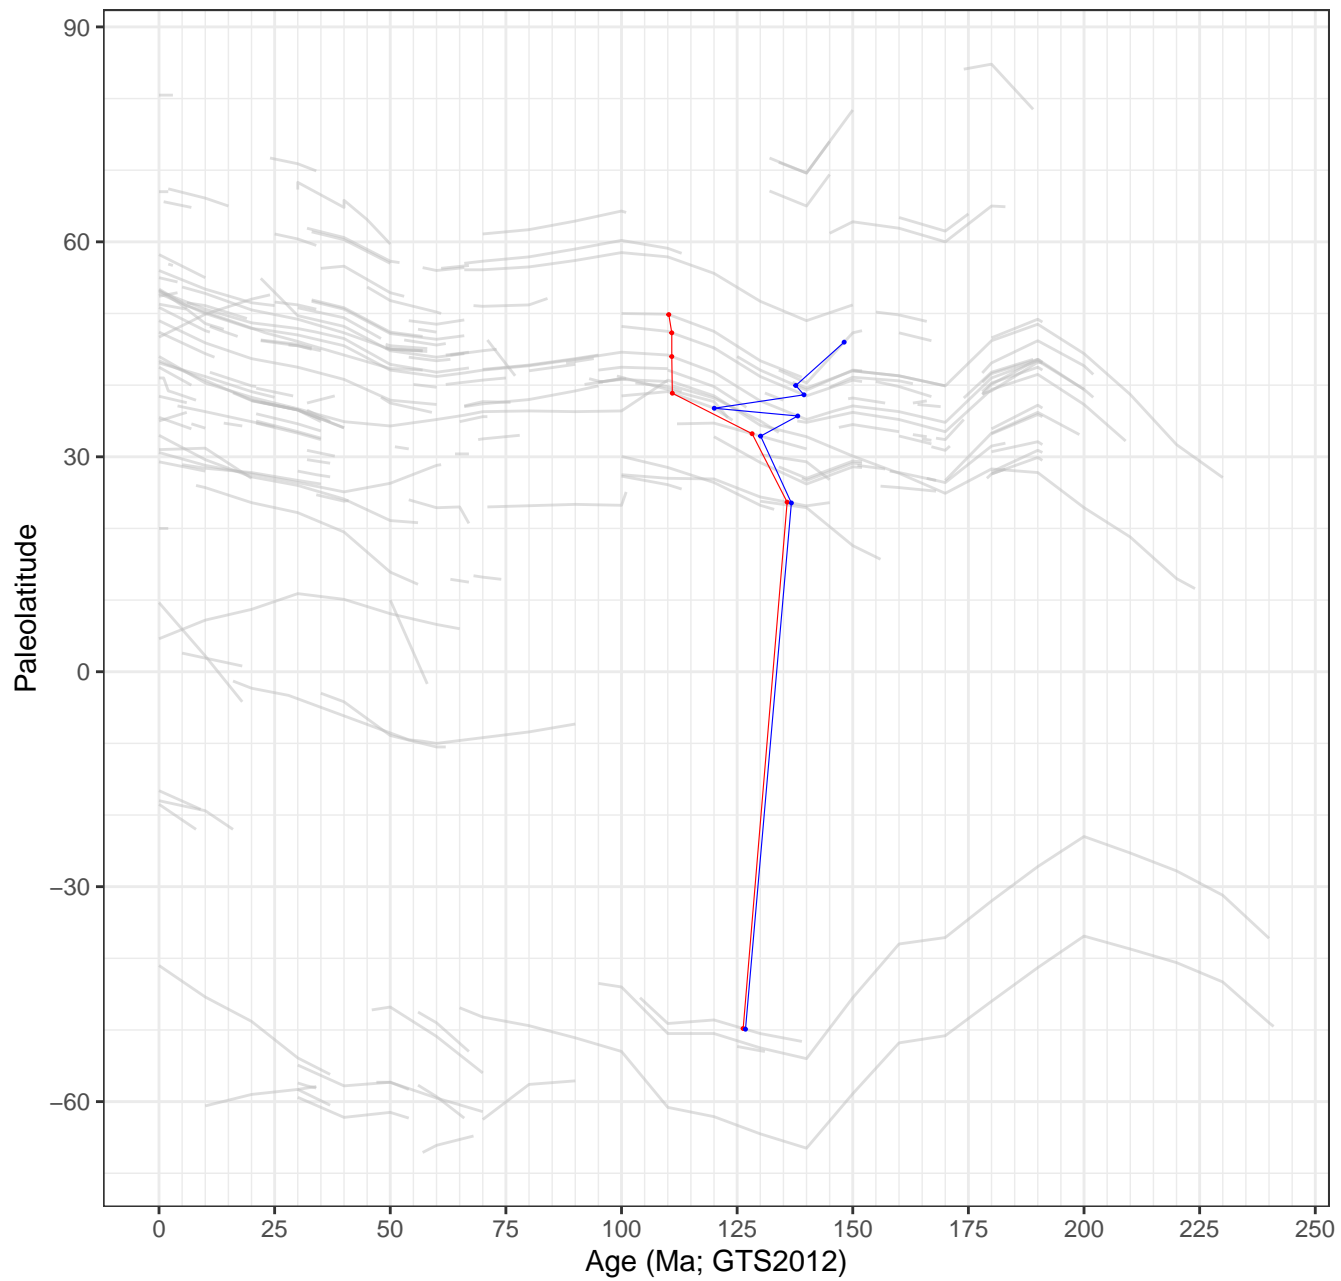

Supplement: Supplementary file 1738 [file Kleithriasphaeridium eoinodes.pdf › Supplement/Supplement 2/Species 1914 plots/Kleithriasphaeridium eoinodes.pdf]

# Species *Kleithriasphaeridium fasciatum*

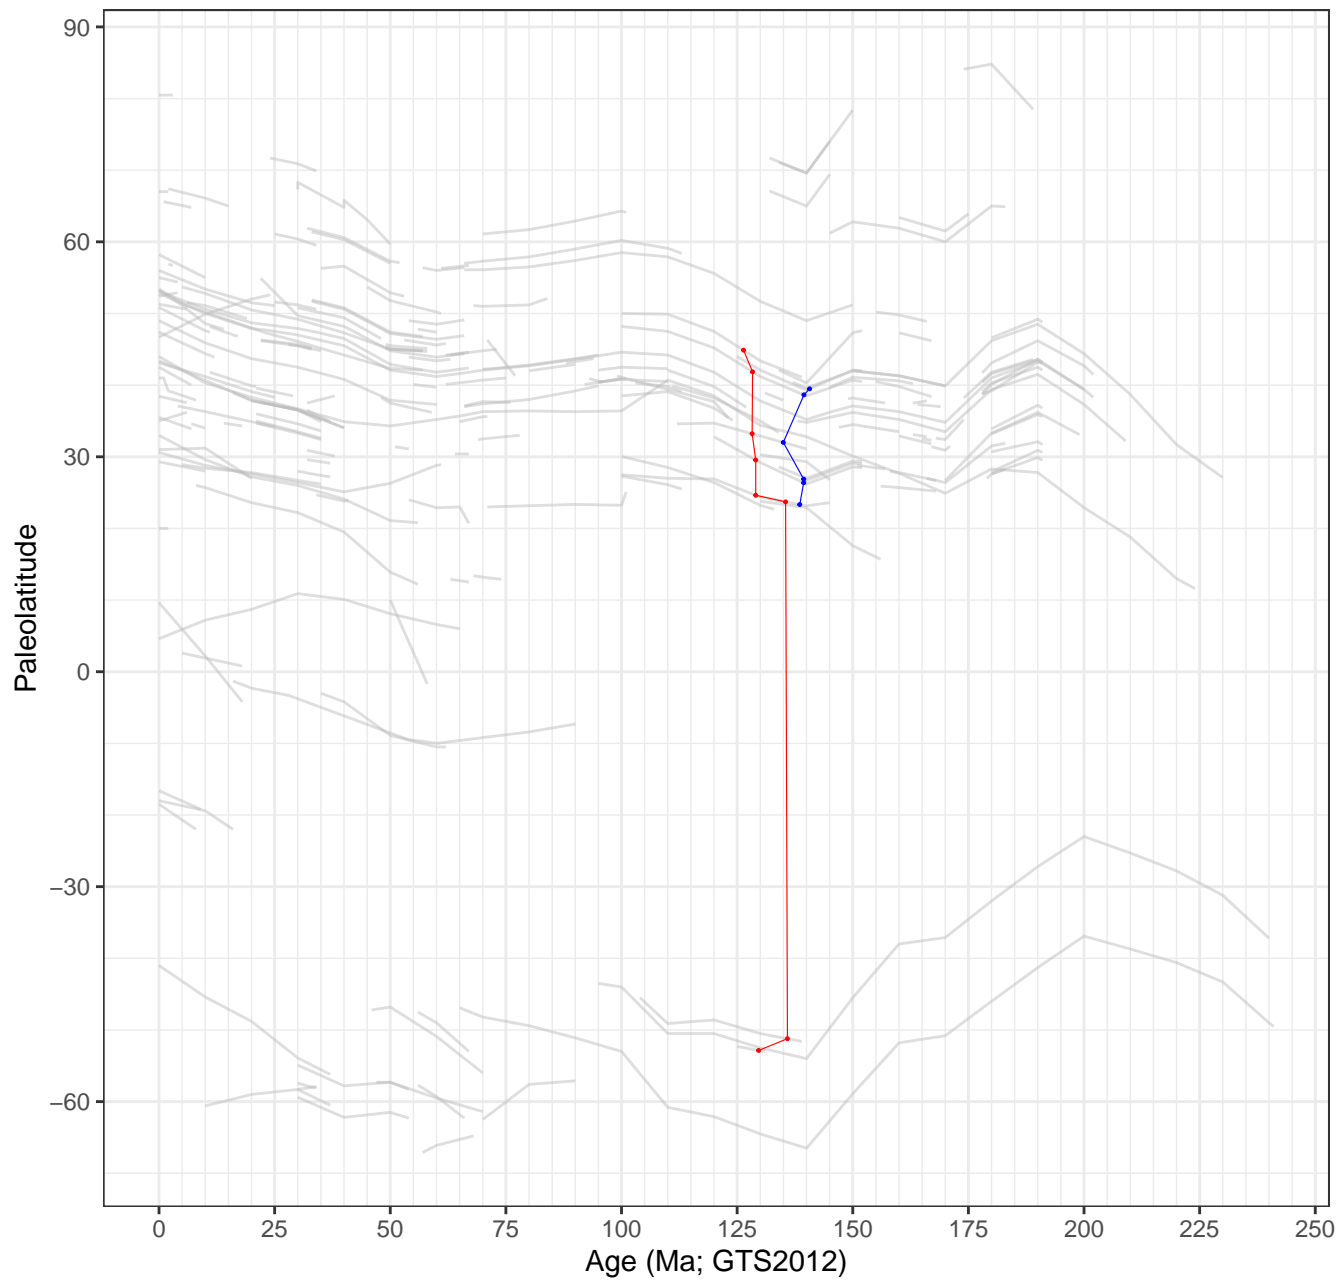

Supplement: Supplementary file 1739 [file Kleithriasphaeridium fasciatum.pdf › Supplement/Supplement 2/Species 1914 plots/Kleithriasphaeridium fasciatum.pdf]

# Species *Kleithriasphaeridium loffrense*

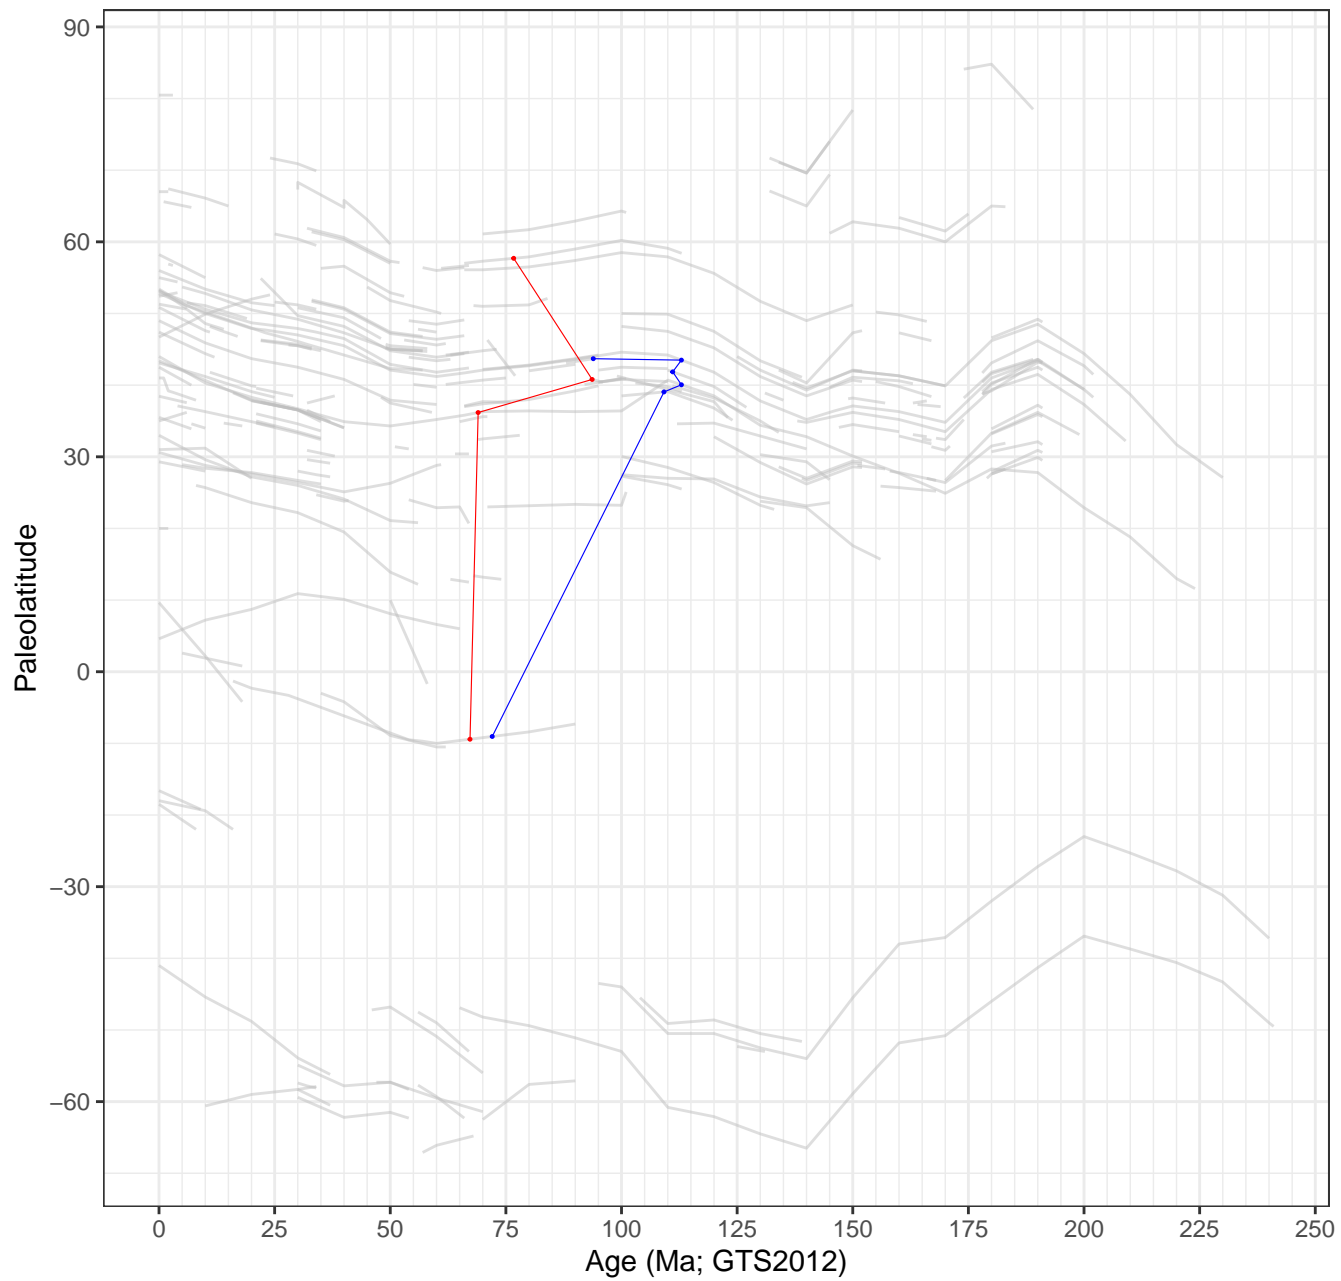

Supplement: Supplementary file 1740 [file Kleithriasphaeridium loffrense.pdf › Supplement/Supplement 2/Species 1914 plots/Kleithriasphaeridium loffrense.pdf]

# Species *Kleithriasphaeridium perforatum*

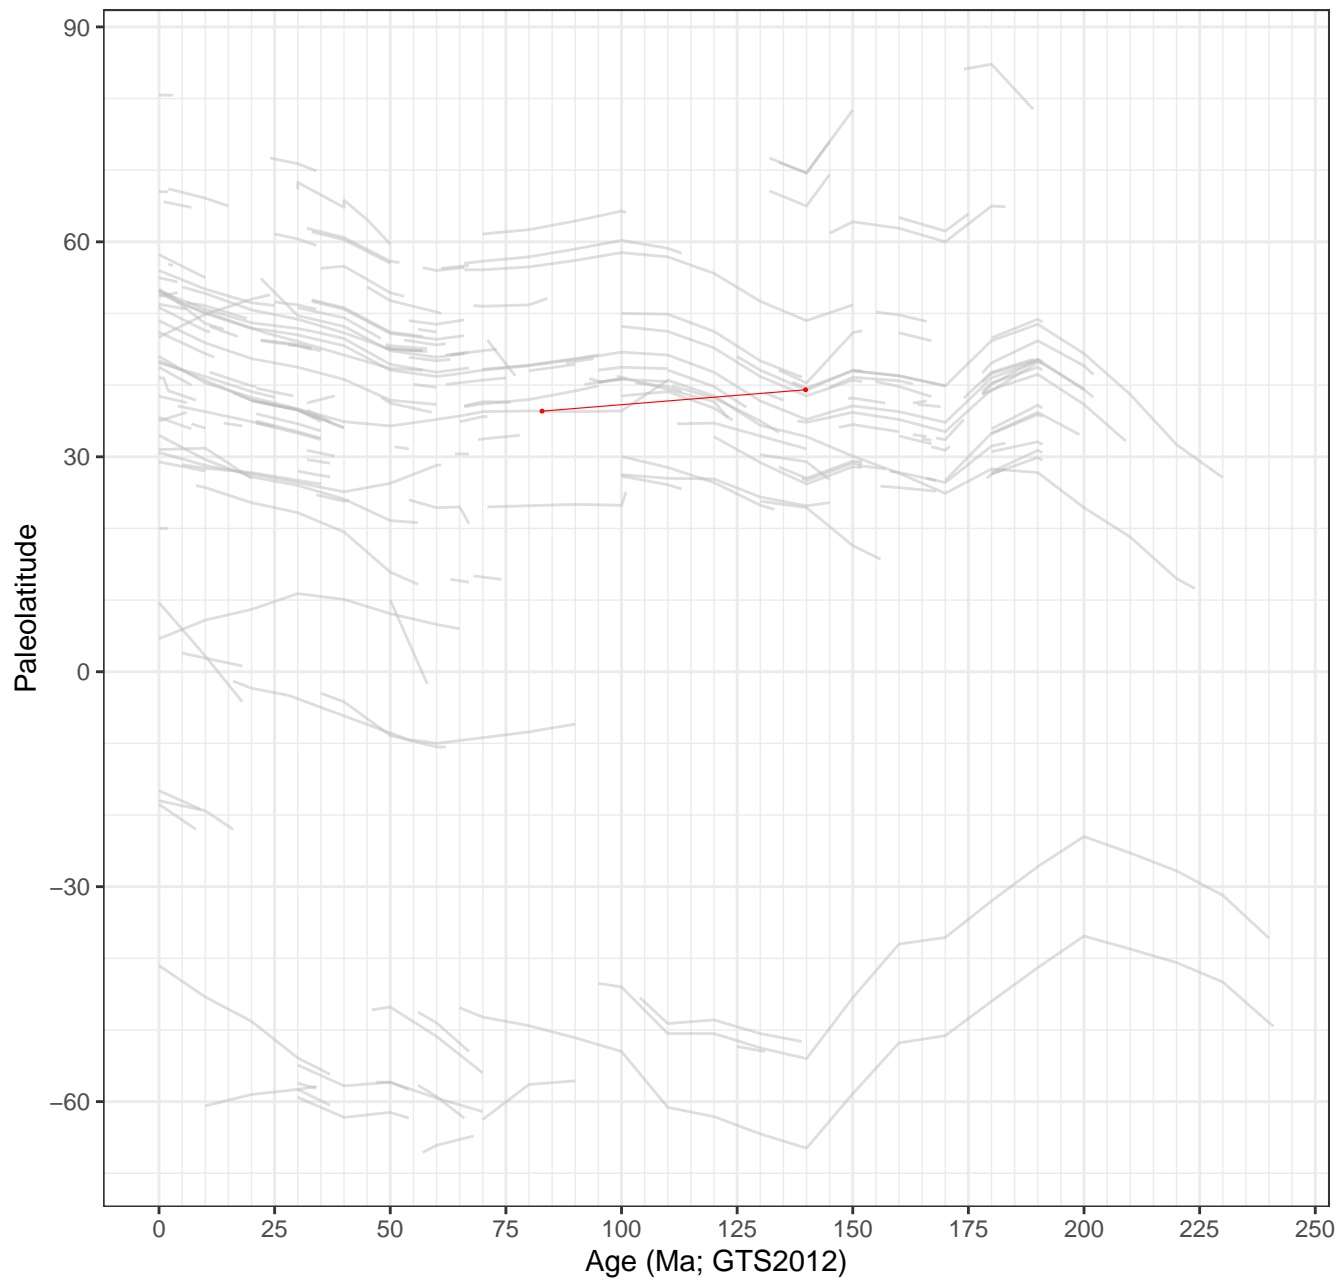

Supplement: Supplementary file 1741 [file Kleithriasphaeridium perforatum.pdf › Supplement/Supplement 2/Species 1914 plots/Kleithriasphaeridium perforatum.pdf]

# Species *Kleithrasphaeridium porosispinum*

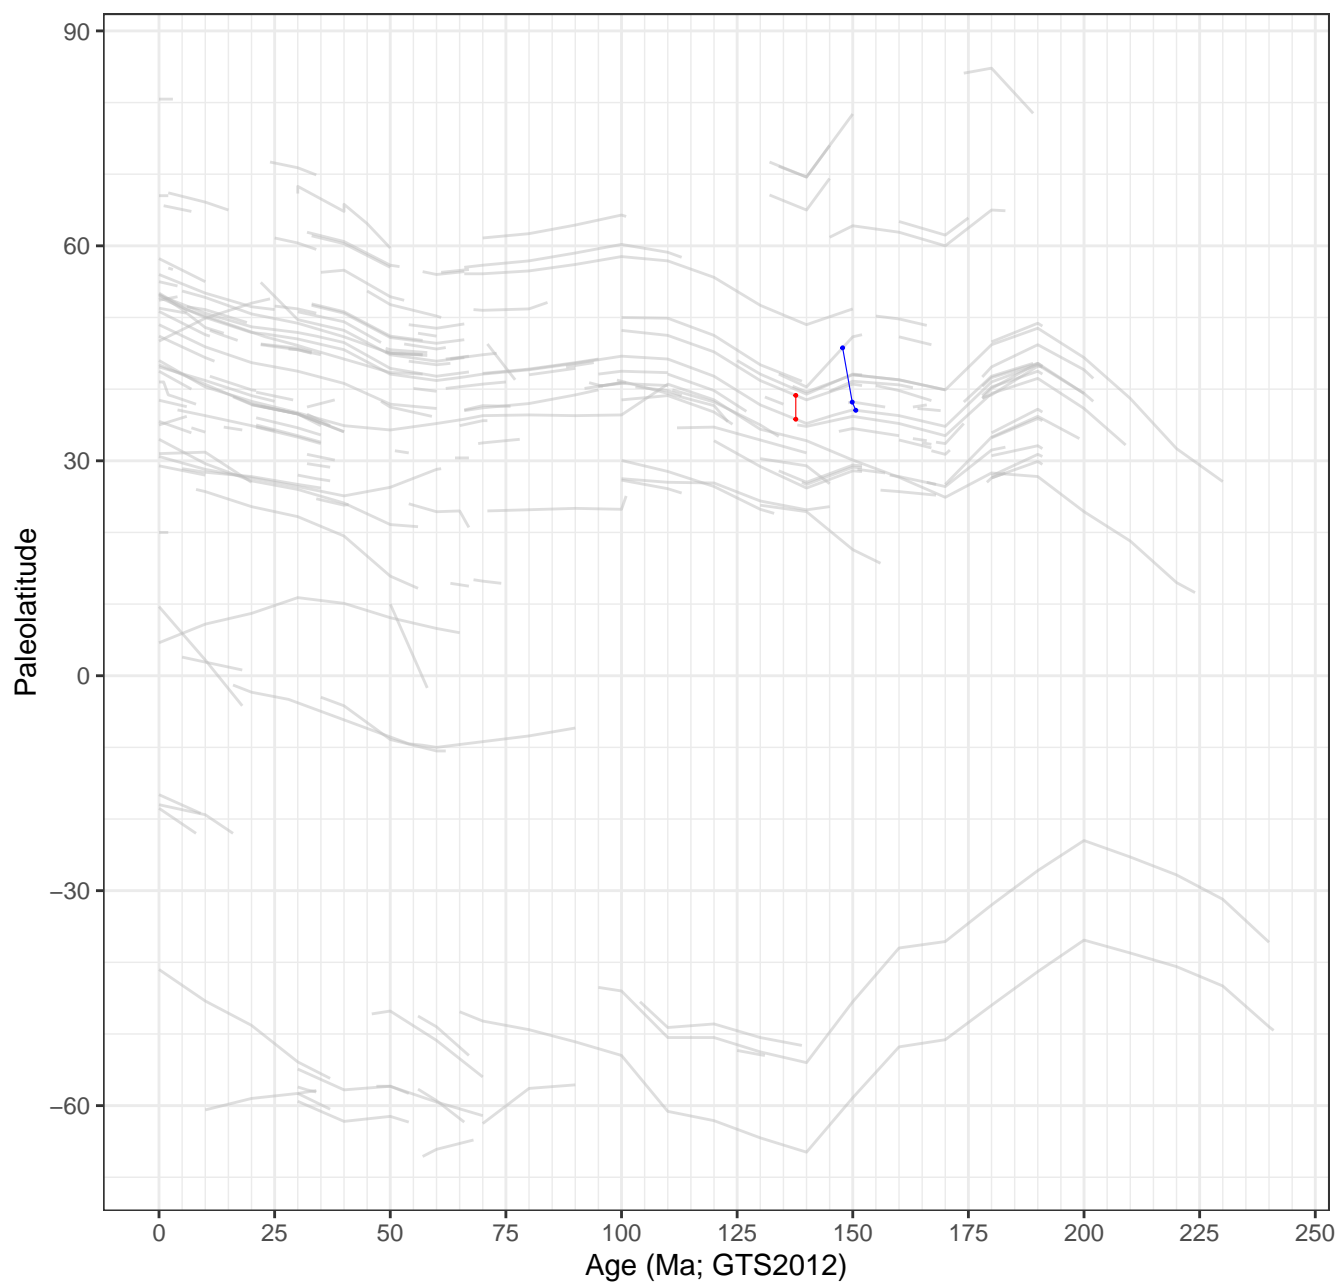

Supplement: Supplementary file 1742 [file Kleithriasphaeridium porosispinum.pdf › Supplement/Supplement 2/Species 1914 plots/Kleithriasphaeridium porosispinum.pdf]

# Species *Kleithriasphaeridium readei*

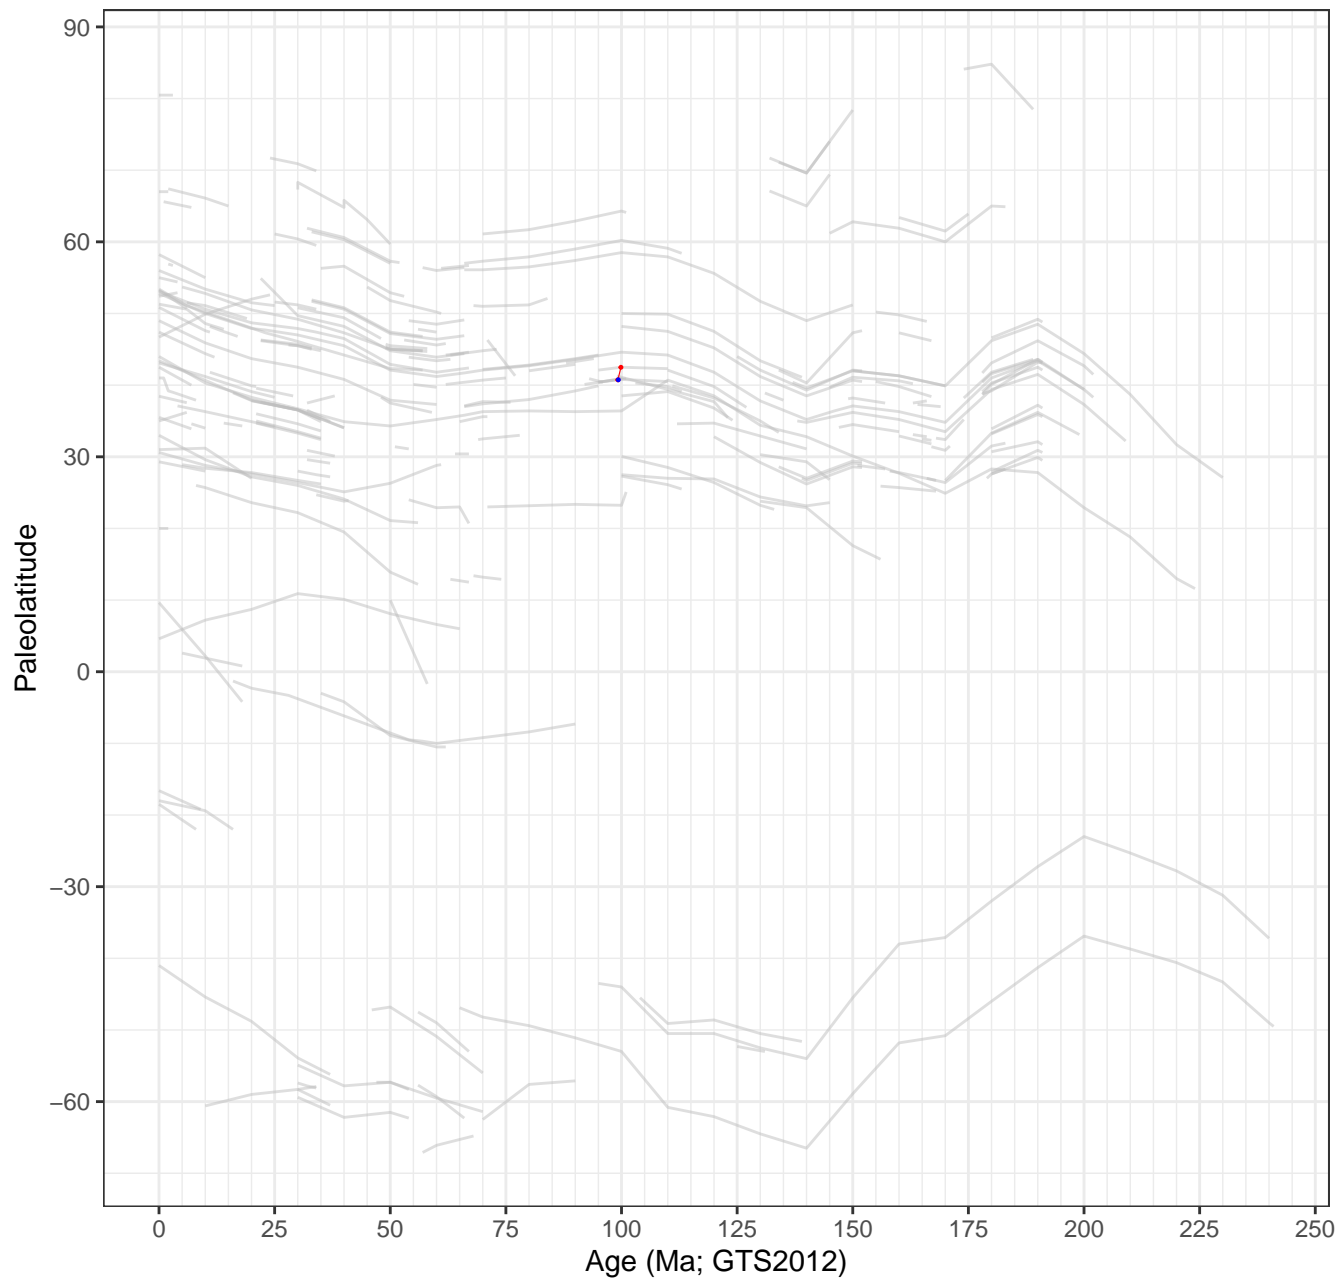

Supplement: Supplementary file 1743 [file Kleithriasphaeridium readei.pdf › Supplement/Supplement 2/Species 1914 plots/Kleithriasphaeridium readei.pdf]

# Species *Kleithriasphaeridium sarmentum*

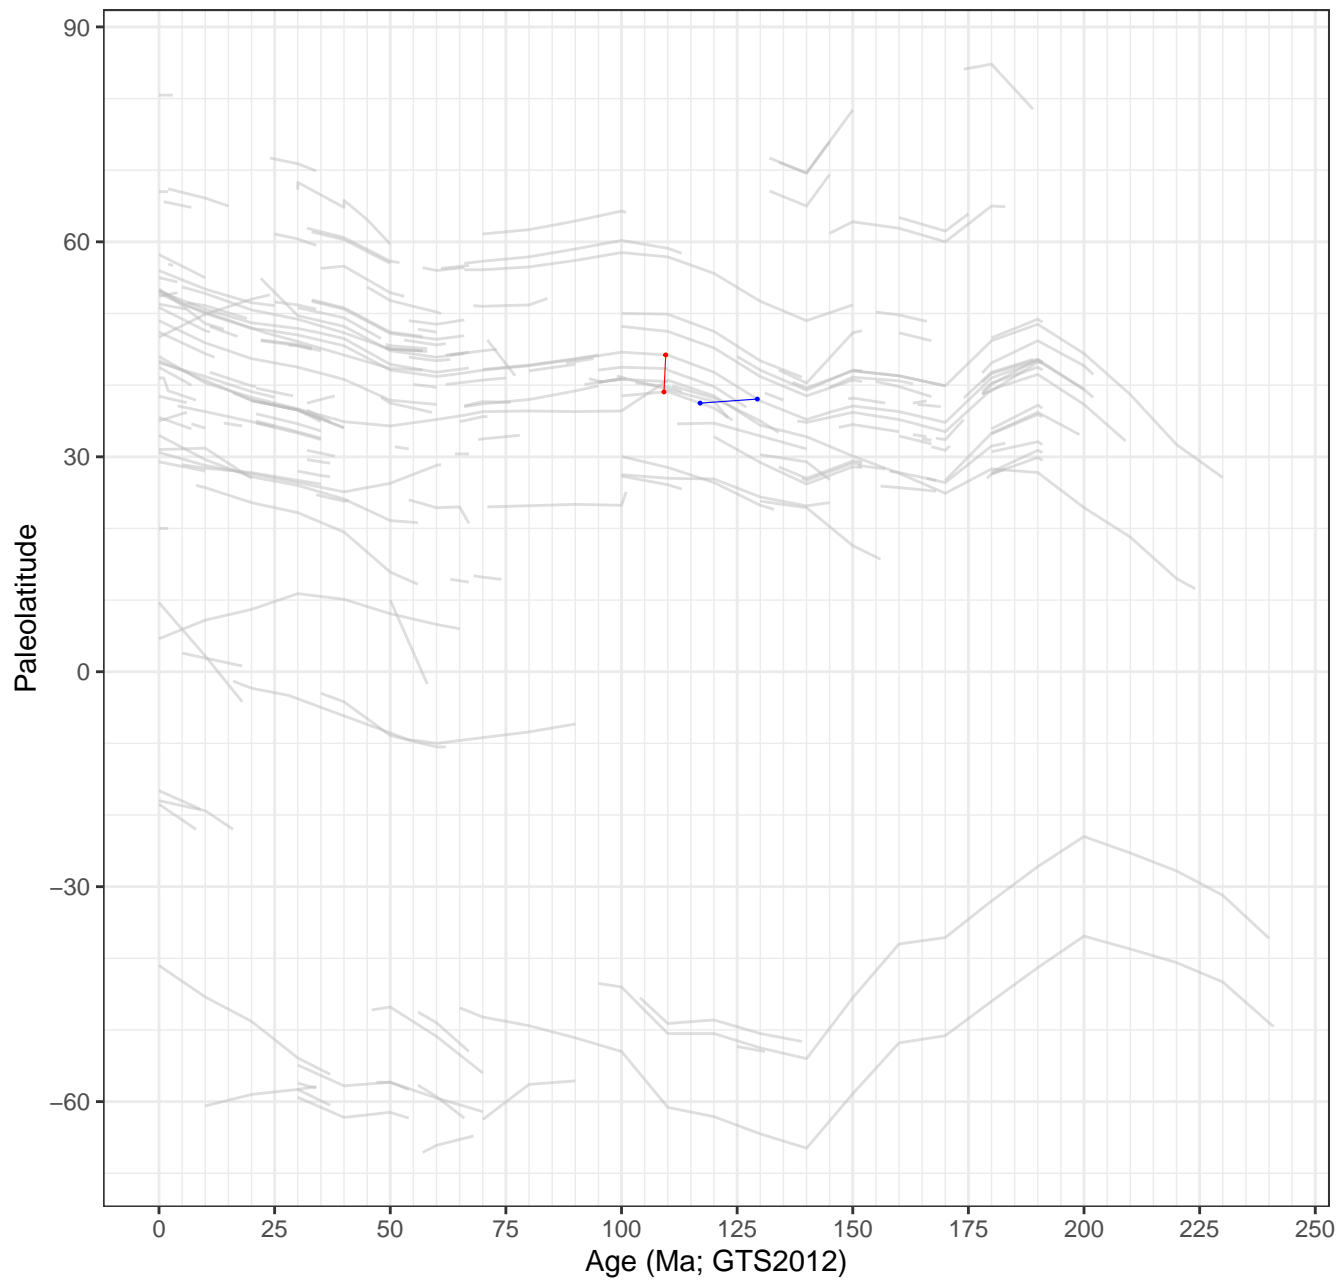

Supplement: Supplementary file 1744 [file Kleithriasphaeridium sarmentum.pdf › Supplement/Supplement 2/Species 1914 plots/Kleithriasphaeridium sarmentum.pdf]

# Species *Kleithriasphaeridium telpinosum*

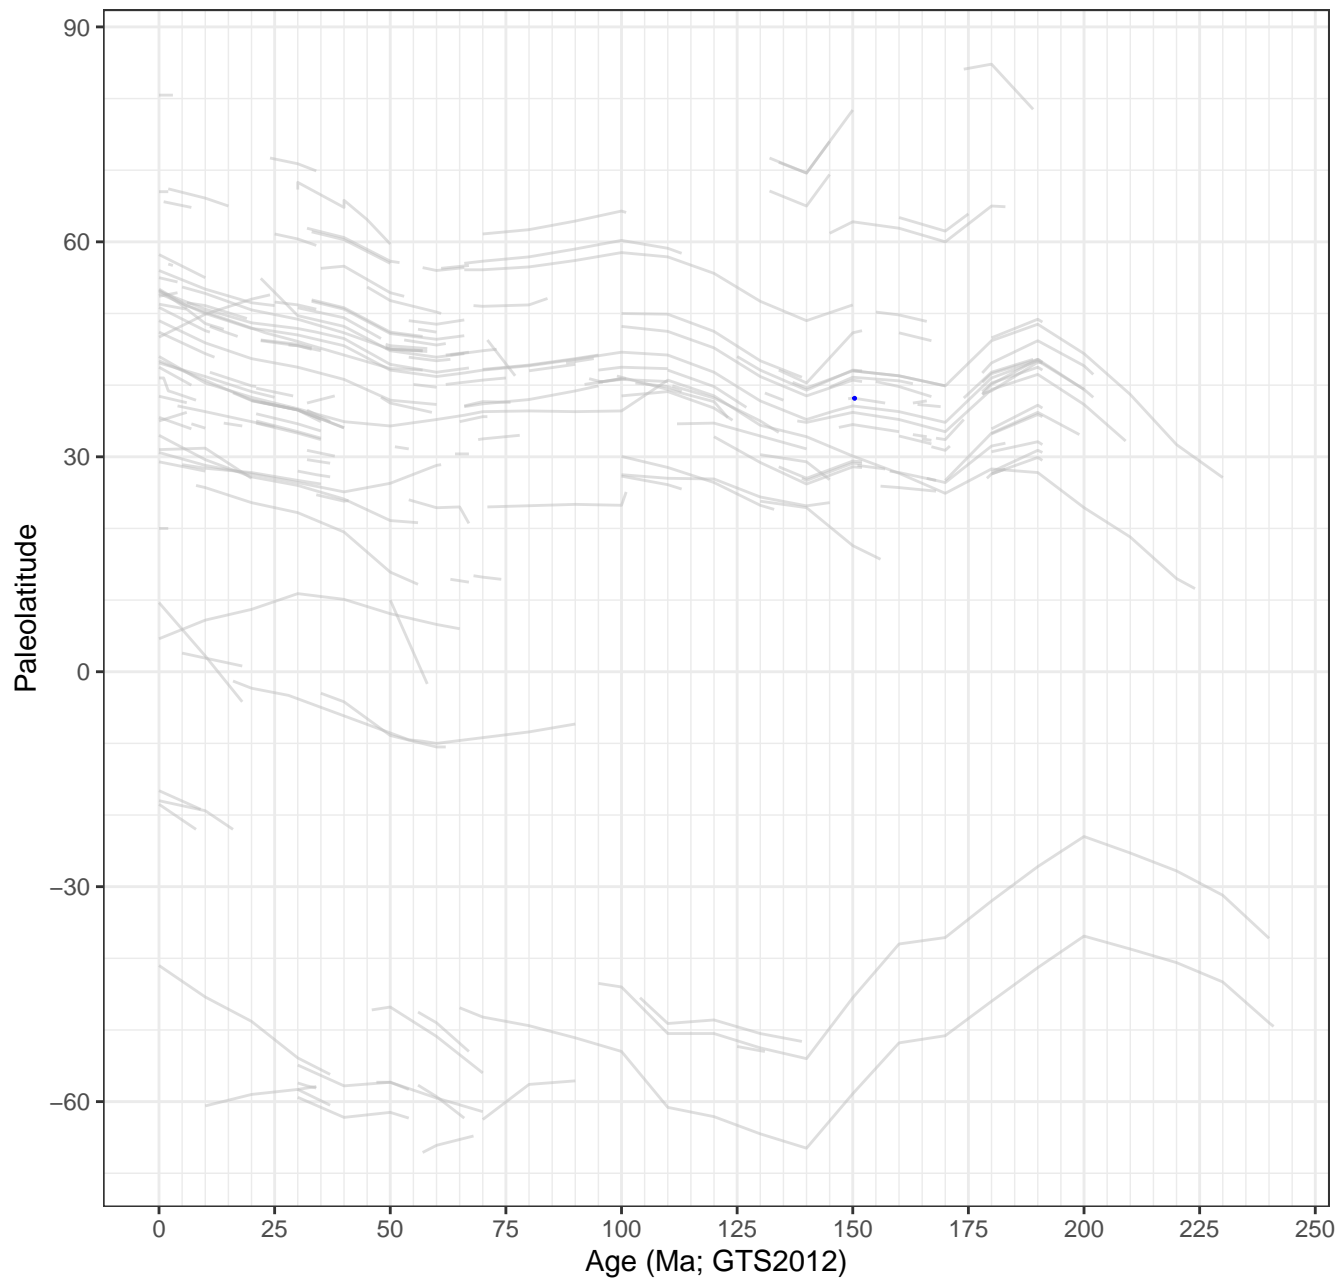

Supplement: Supplementary file 1745 [file Kleithriasphaeridium telaspinosum.pdf › Supplement/Supplement 2/Species 1914 plots/Kleithriasphaeridium telaspinosum.pdf]

# Species *Kleithriasphaeridium tubulosum*

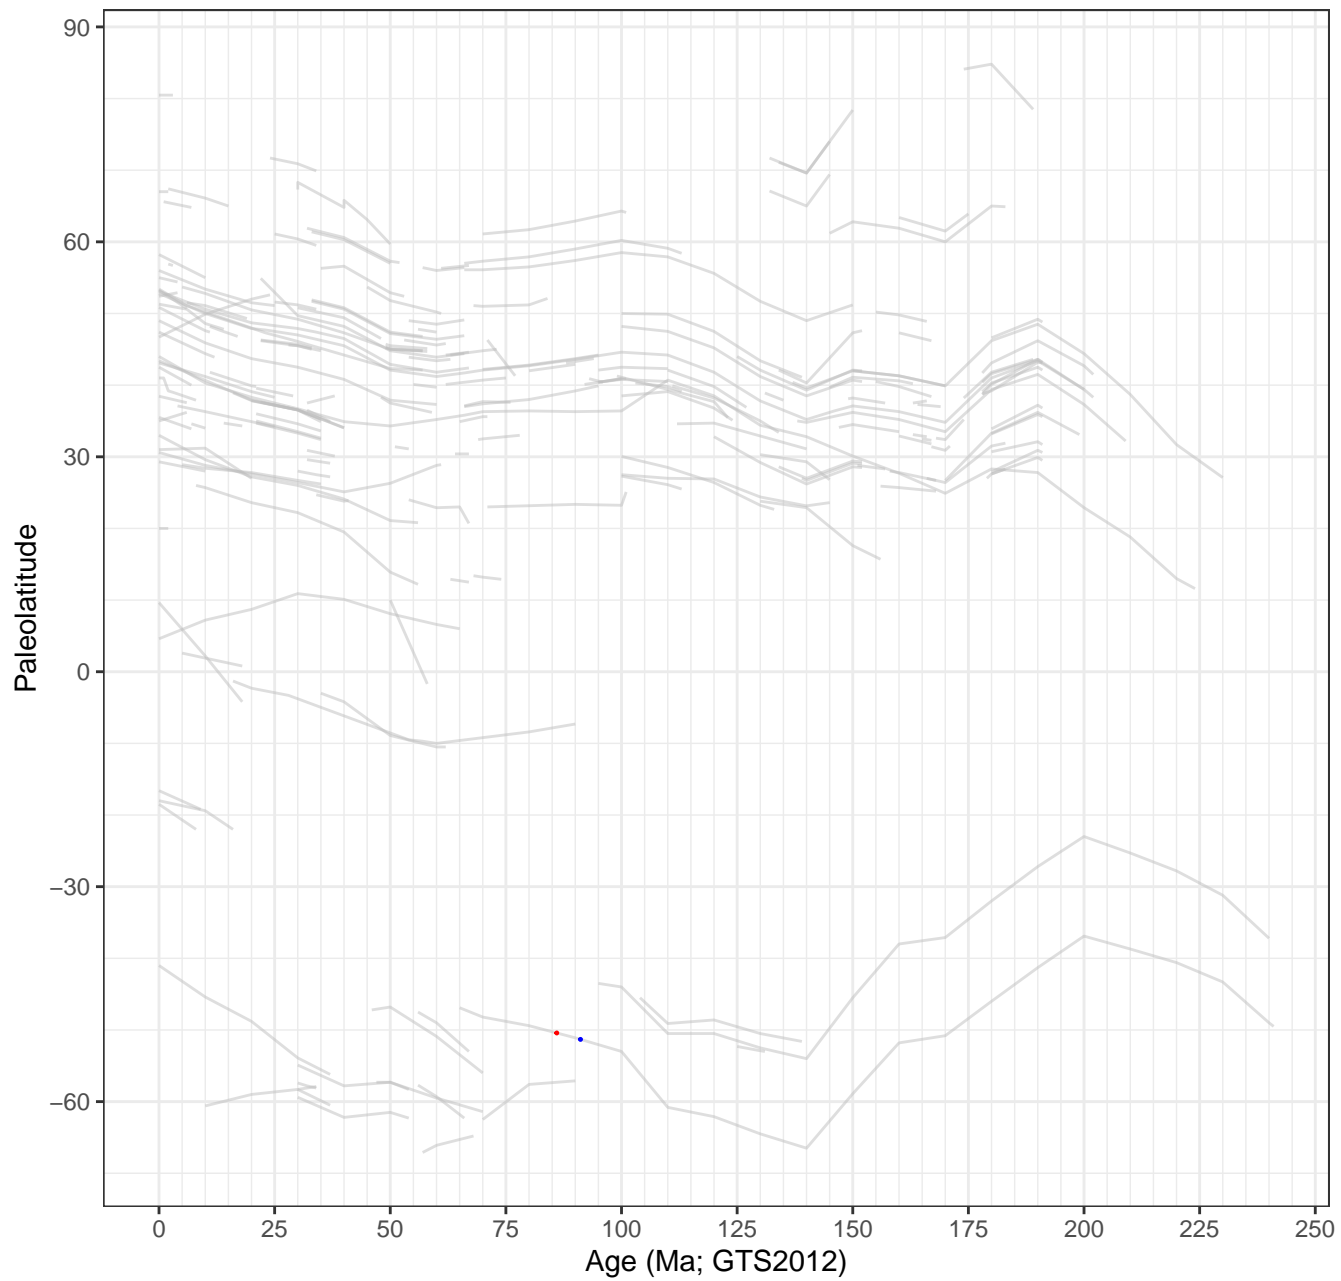

Supplement: Supplementary file 1746 [file Kleithriasphaeridium tubulosum.pdf › Supplement/Supplement 2/Species 1914 plots/Kleithriasphaeridium tubulosum.pdf]

# Species *Komewuia glabra*

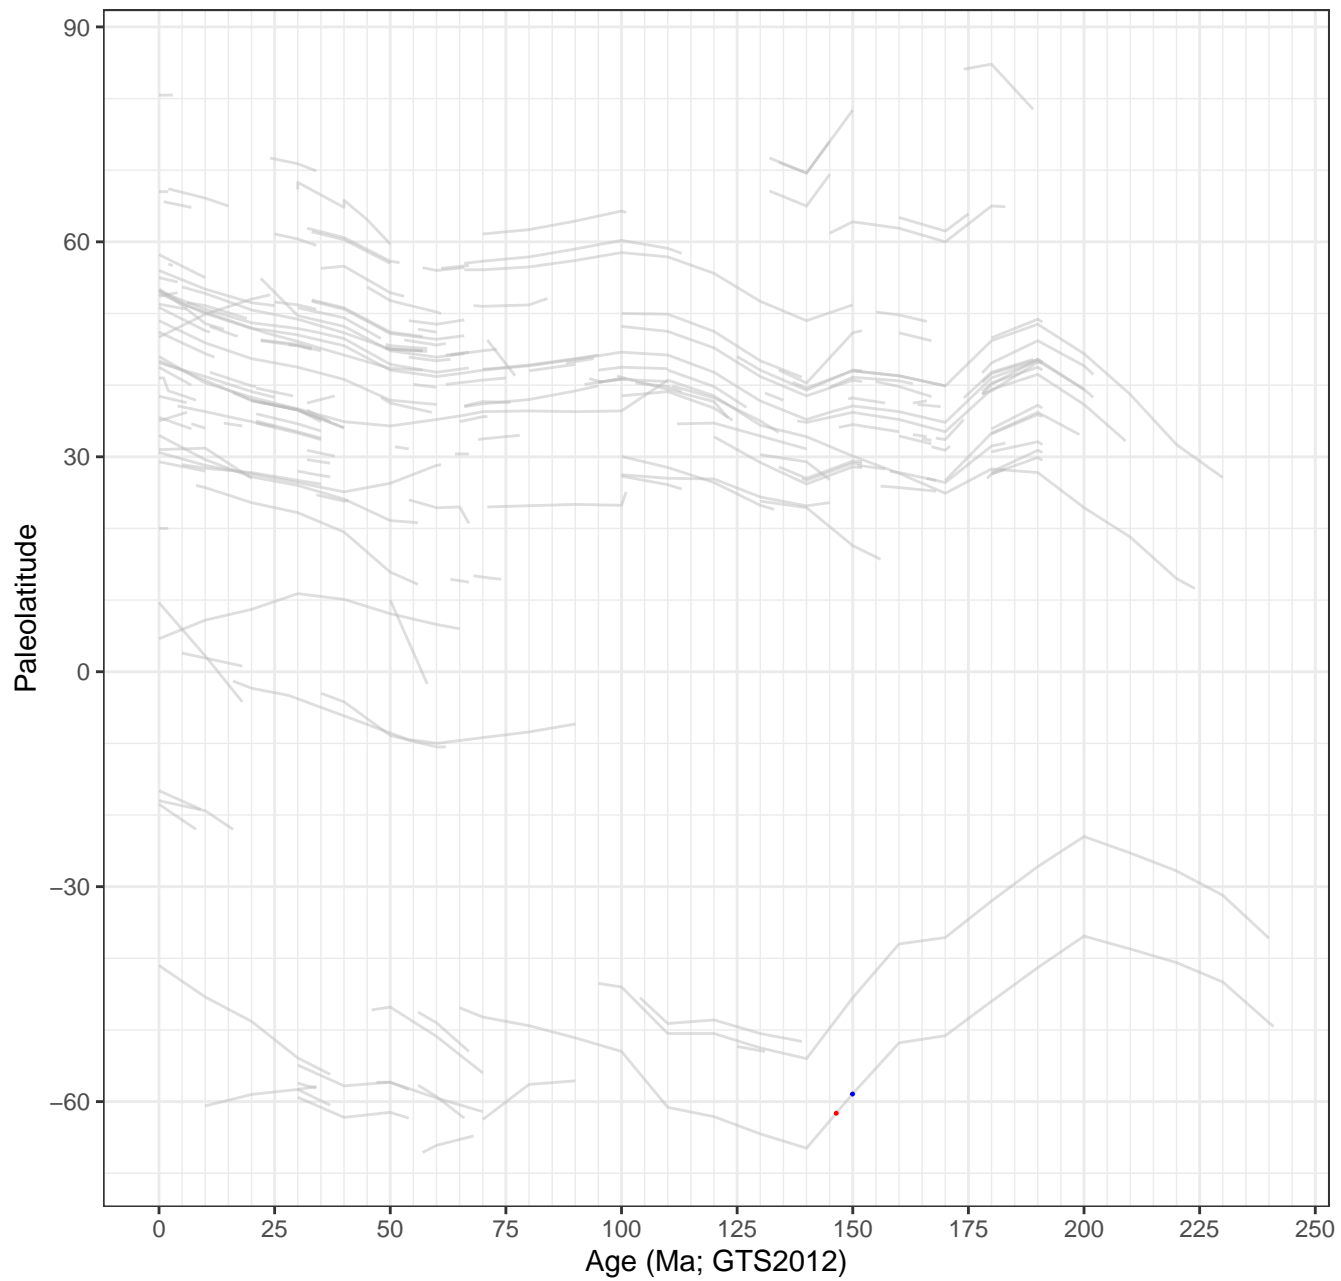

Supplement: Supplementary file 1747 [file Komewuia glabra.pdf › Supplement/Supplement 2/Species 1914 plots/Komewuia glabra.pdf]

# Species *Korystocysta aldridgei*

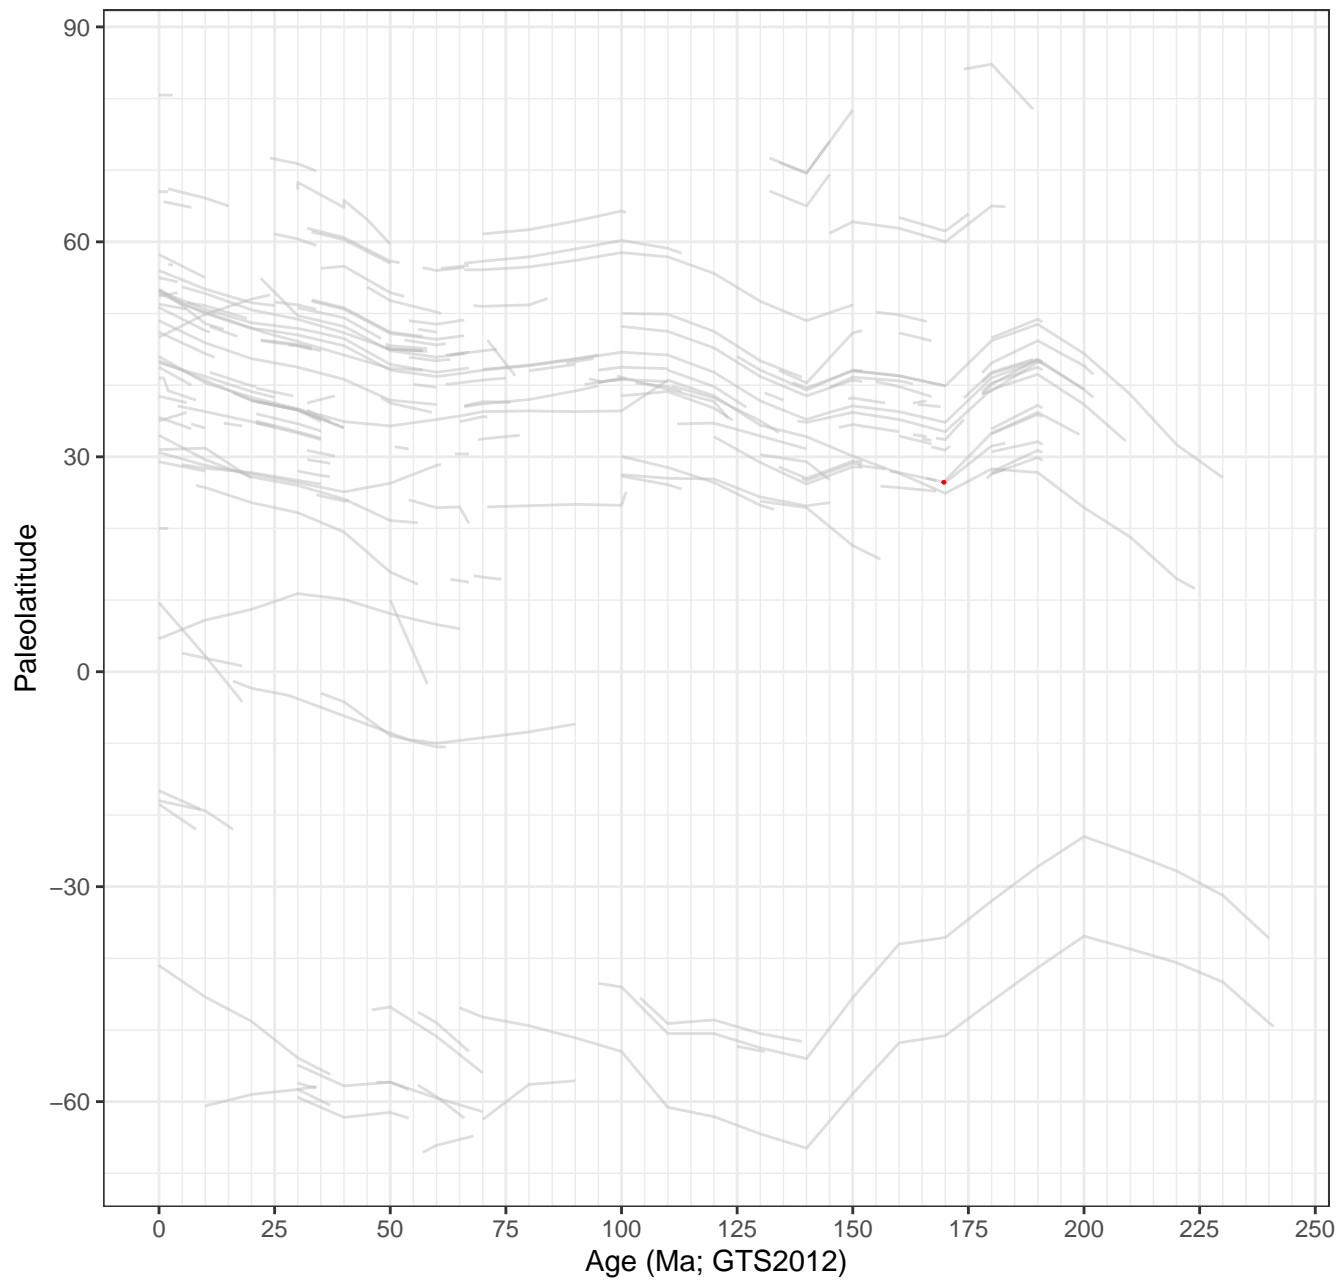

Supplement: Supplementary file 1748 [file Korystocysta aldridgeii.pdf › Supplement/Supplement 2/Species 1914 plots/Korystocysta aldridgeii.pdf]

# Species *Korystocysta gochtii*

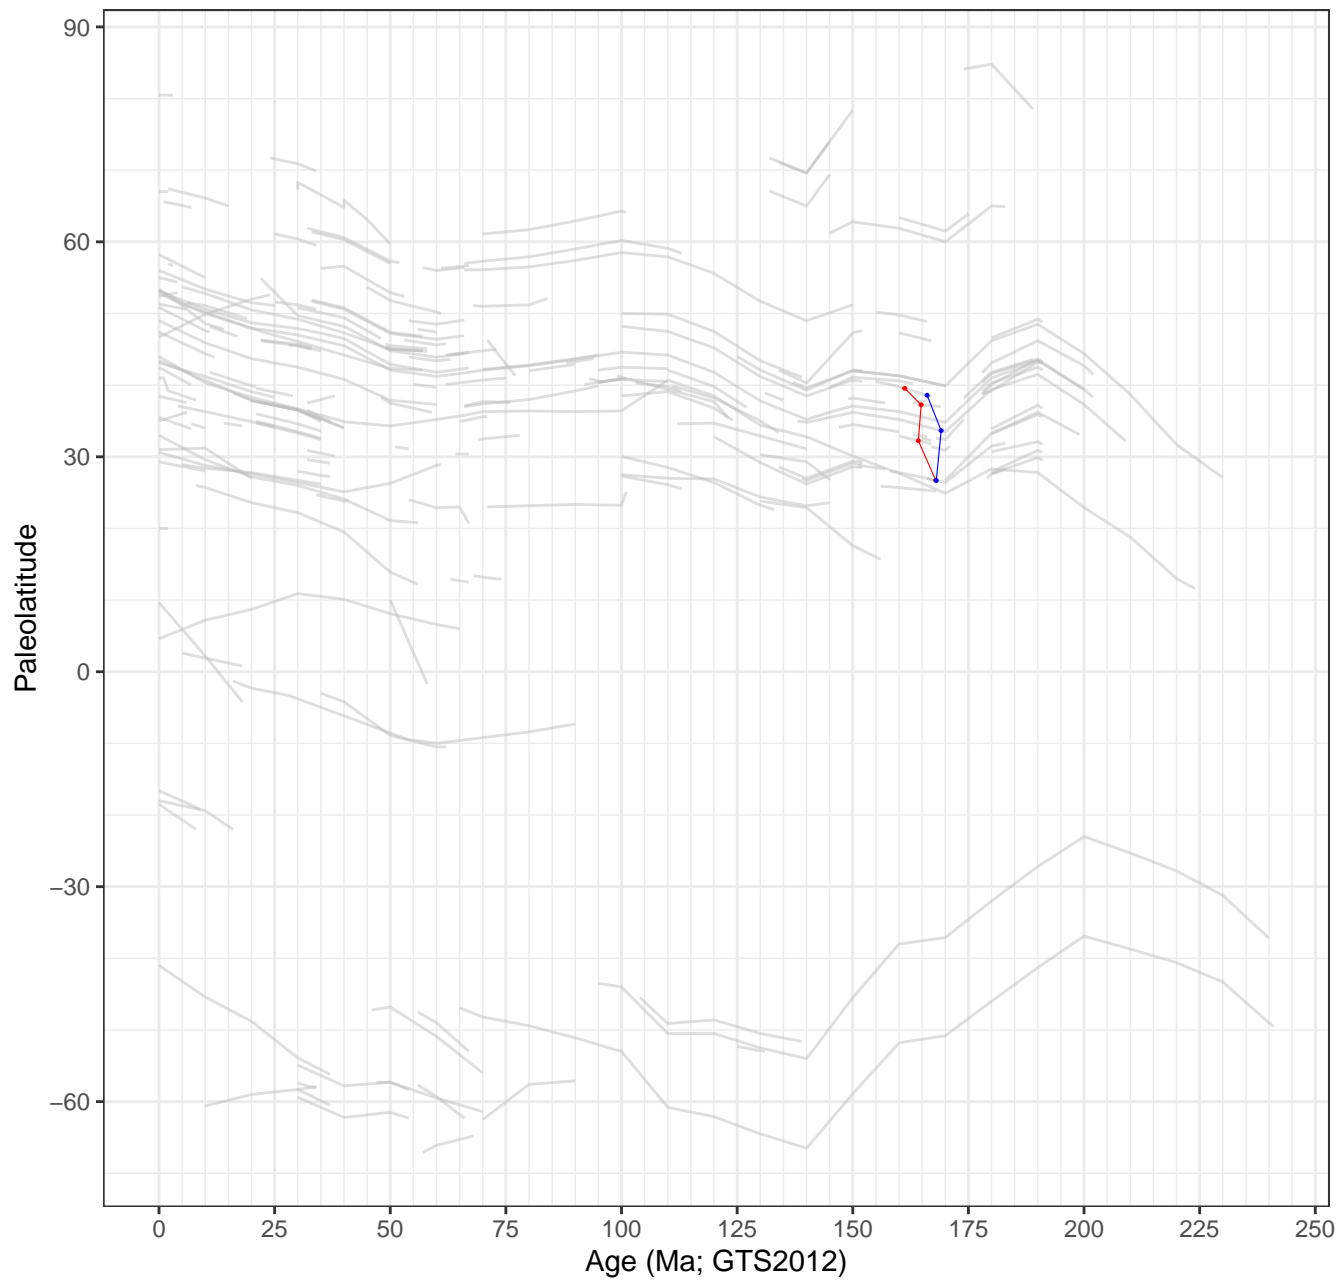

Supplement: Supplementary file 1749 [file Korystocysta gochtii.pdf › Supplement/Supplement 2/Species 1914 plots/Korystocysta gochtii.pdf]

# Species *Korystocysta kettonensis*

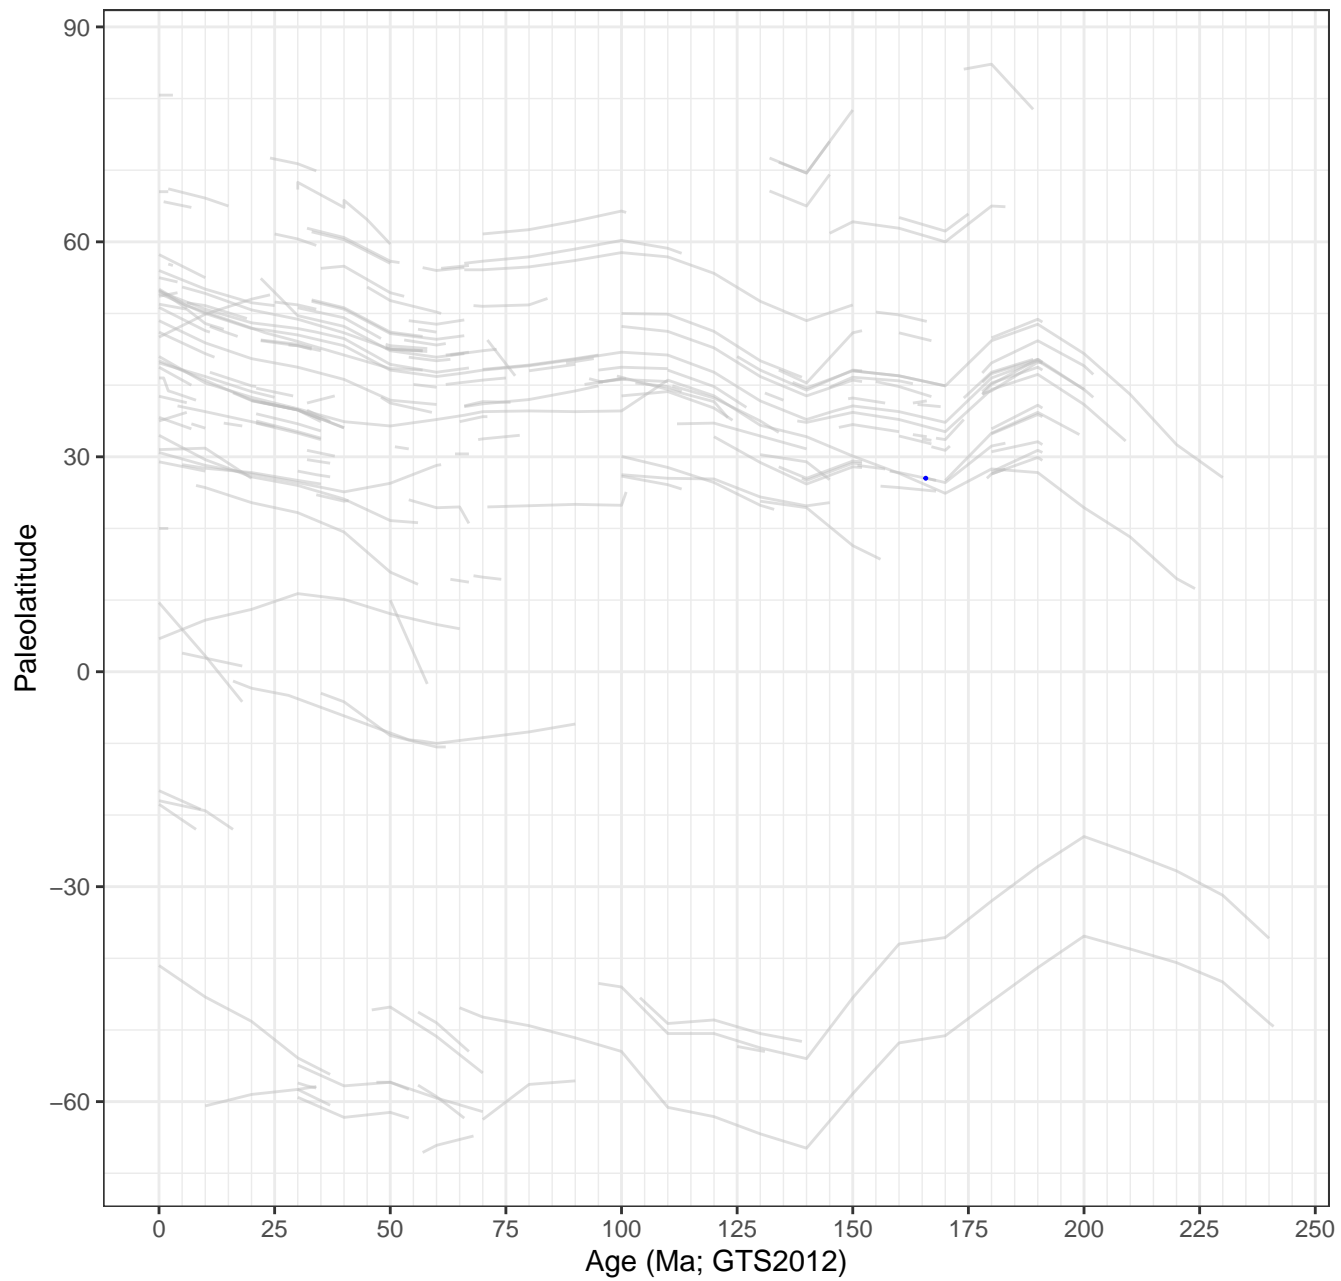

Supplement: Supplementary file 1750 [file Korystocysta kettonensis.pdf › Supplement/Supplement 2/Species 1914 plots/Korystocysta kettonensis.pdf]

# Species *Korystocysta pachyderma*

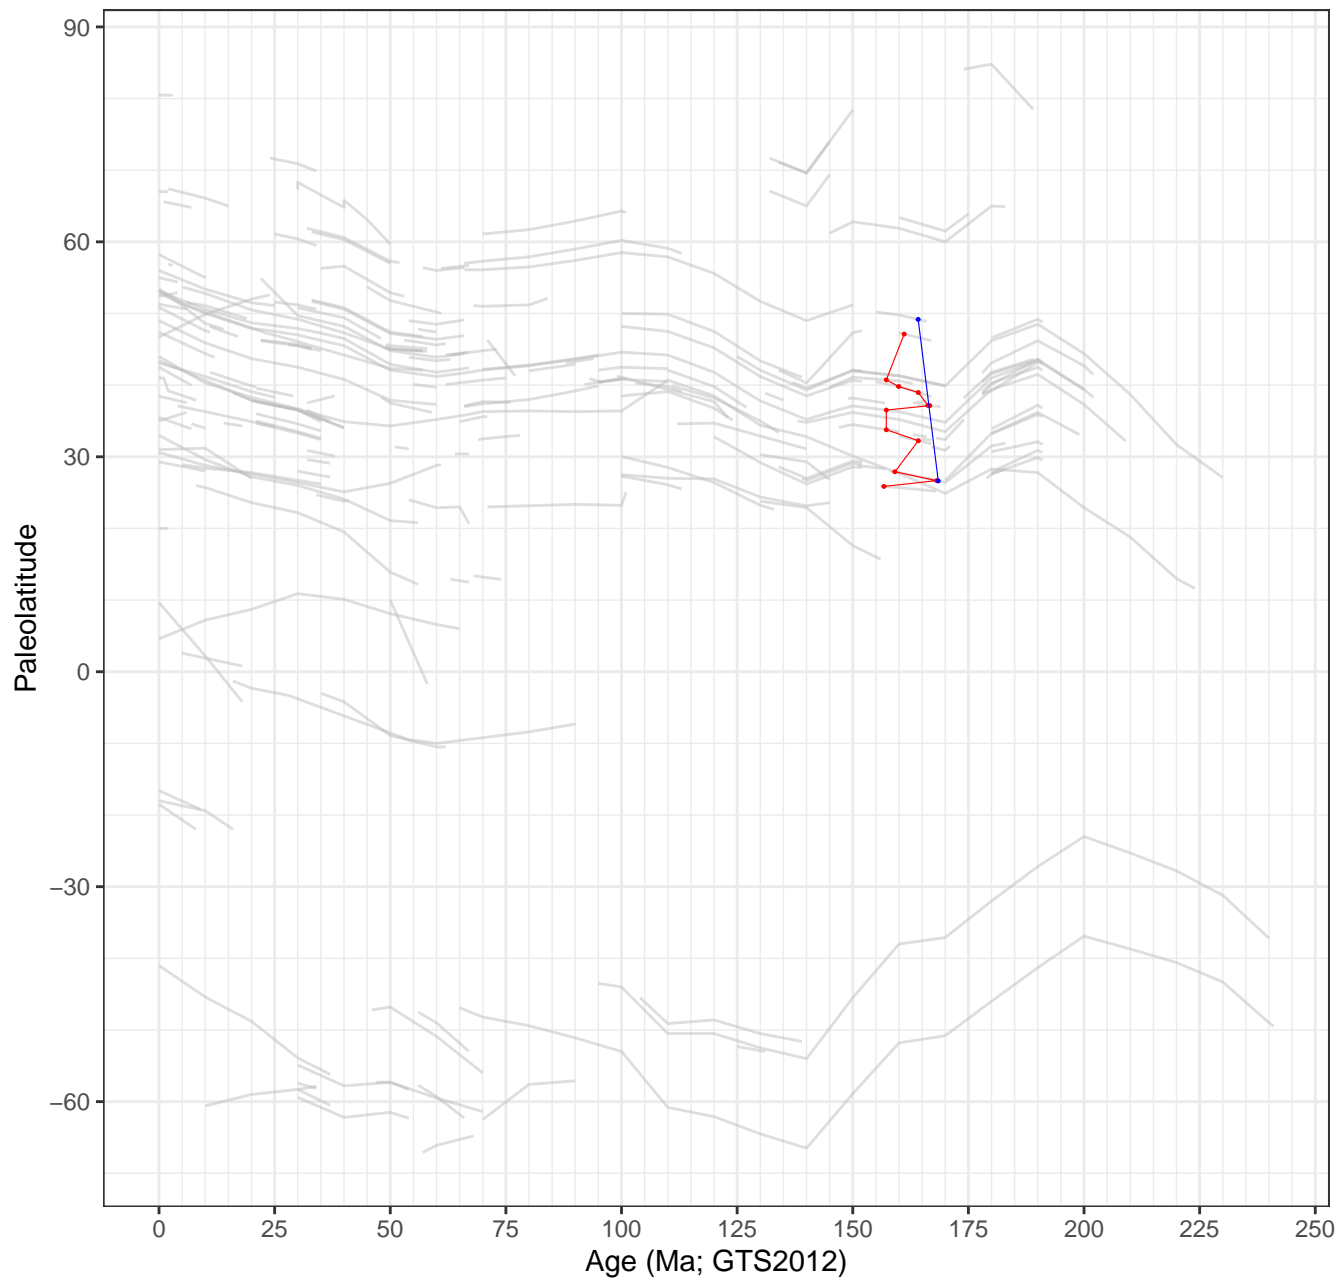

Supplement: Supplementary file 1751 [file Korystocysta pachyderma.pdf › Supplement/Supplement 2/Species 1914 plots/Korystocysta pachyderma.pdf]

# Species *Labyrinthodinium truncatum modicum*

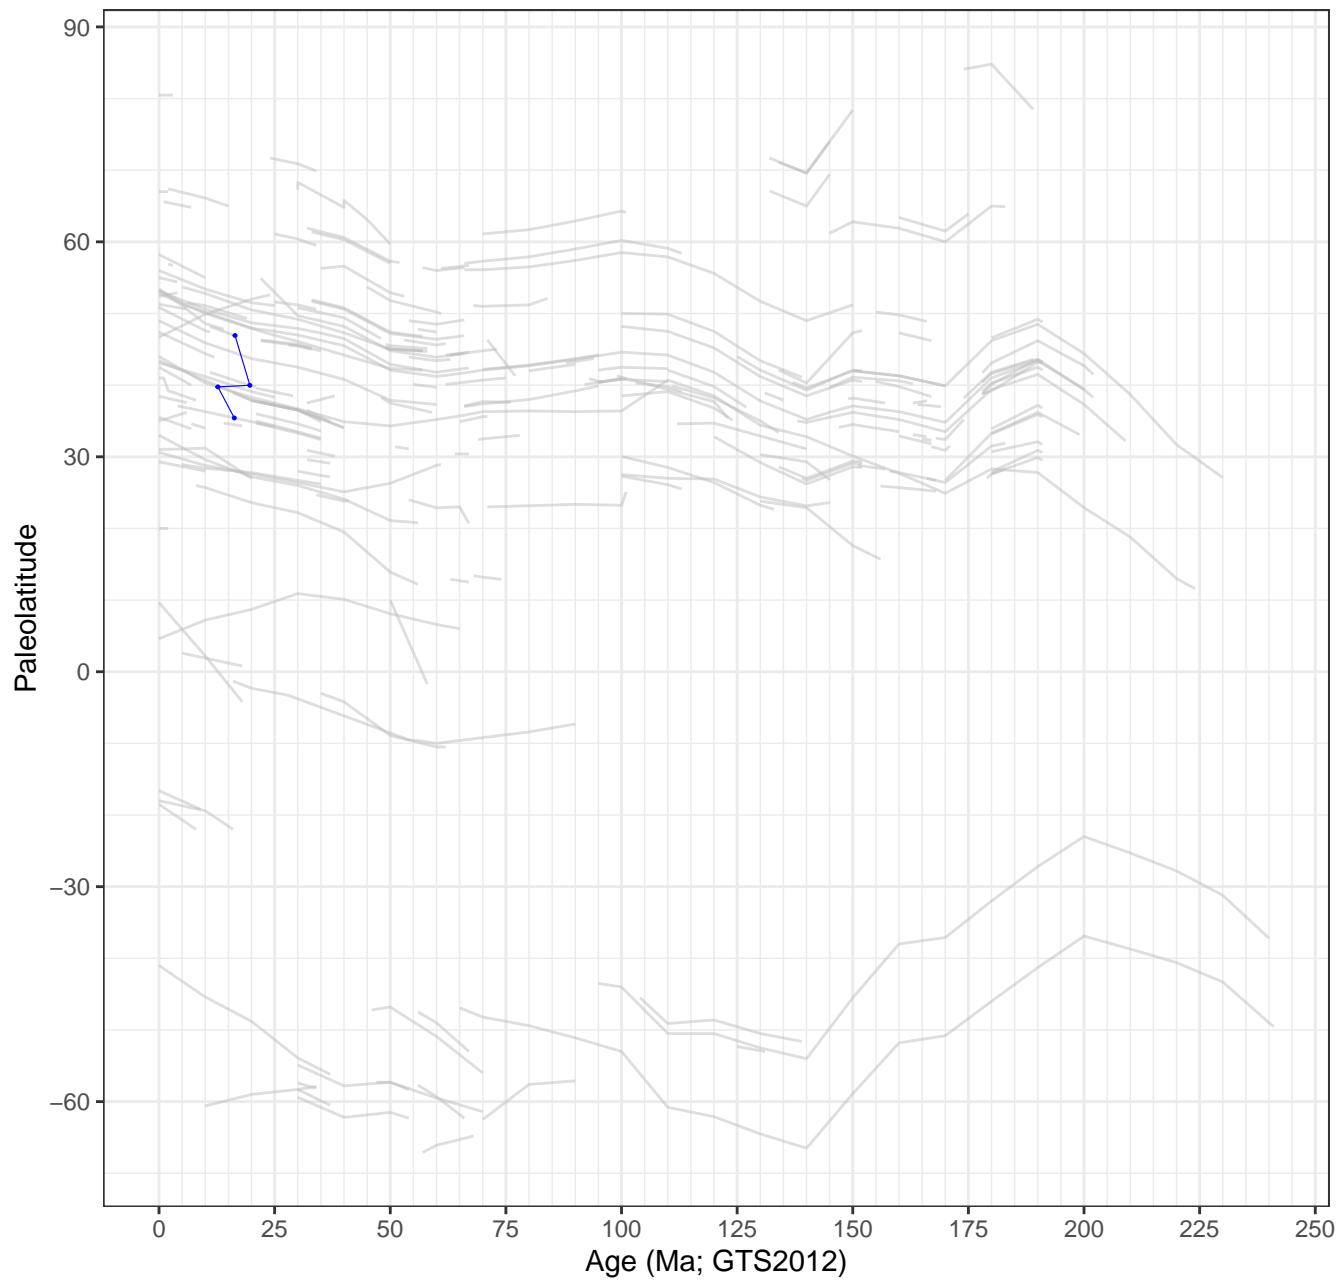

Supplement: Supplementary file 1752 [file Labyrinthodinium truncatum modicum.pdf › Supplement/Supplement 2/Species 1914 plots/Labyrinthodinium truncatum modicum.pdf]

# Species *Labyrinthodinium truncatum reductum*

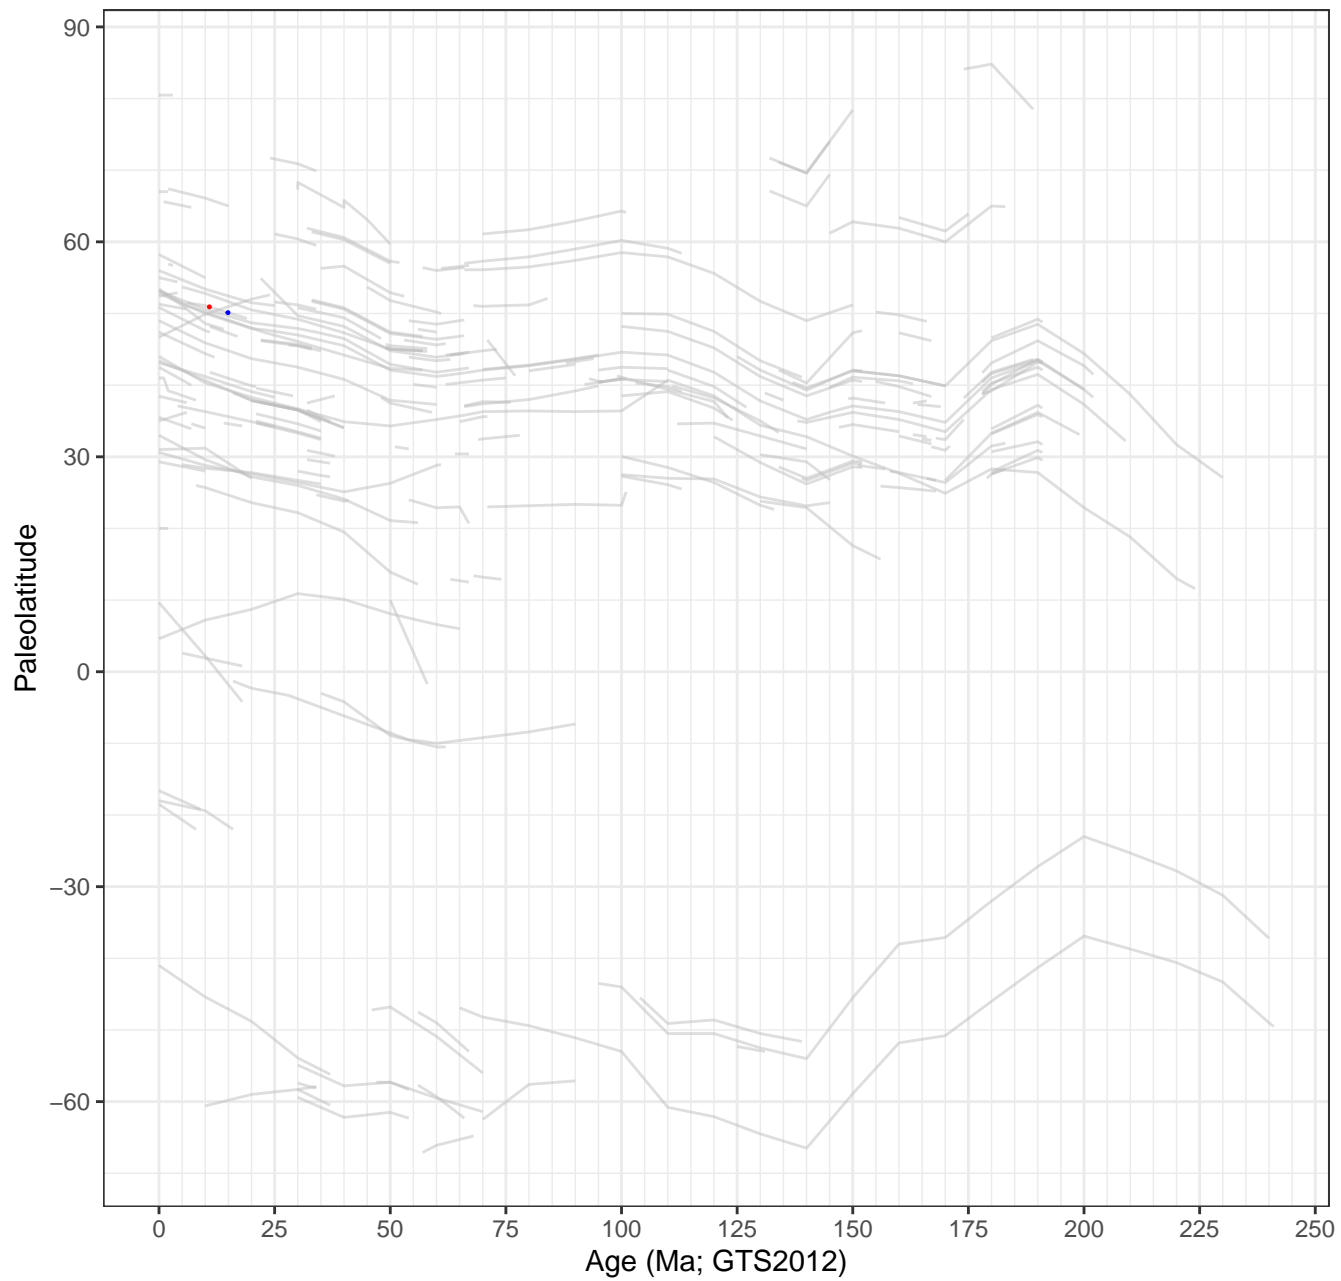

Supplement: Supplementary file 1753 [file Labyrinthodinium truncatum reductum.pdf › Supplement/Supplement 2/Species 1914 plots/Labyrinthodinium truncatum reductum.pdf]

# Species *Labyrinthodinium truncatum truncatum*

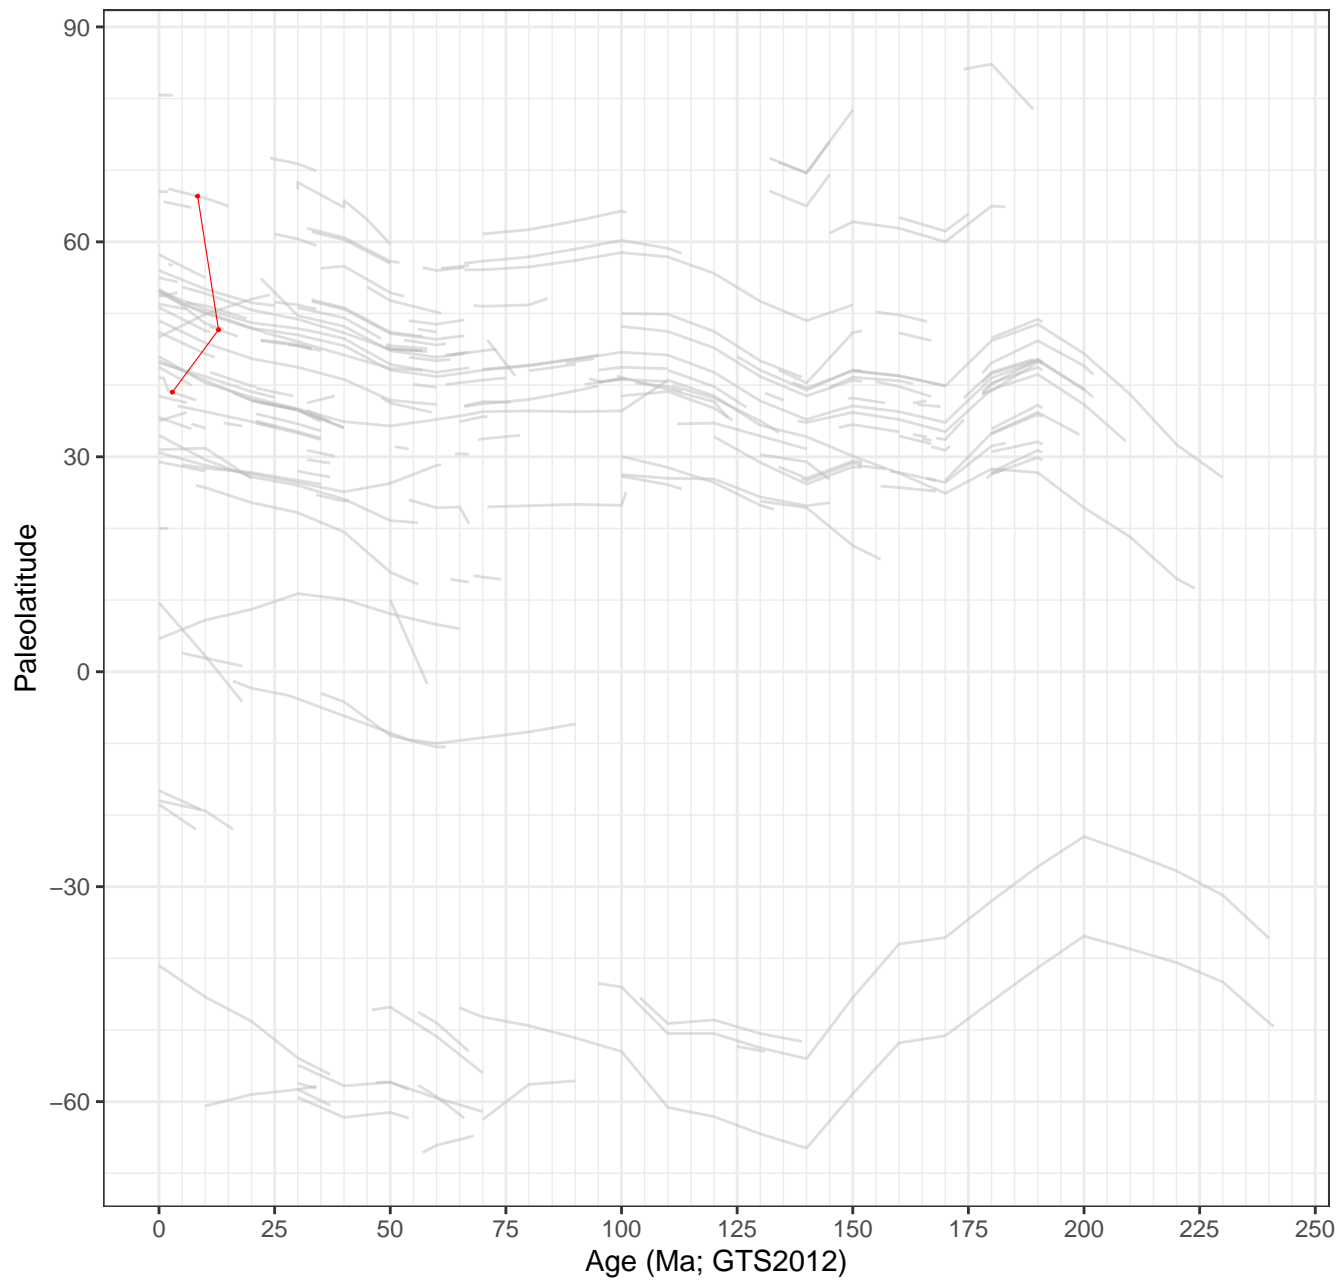

Supplement: Supplementary file 1754 [file Labyrinthodinium truncatum truncatum.pdf › Supplement/Supplement 2/Species 1914 plots/Labyrinthodinium truncatum truncatum.pdf]

# Species *Labyrinthodinium truncatum*

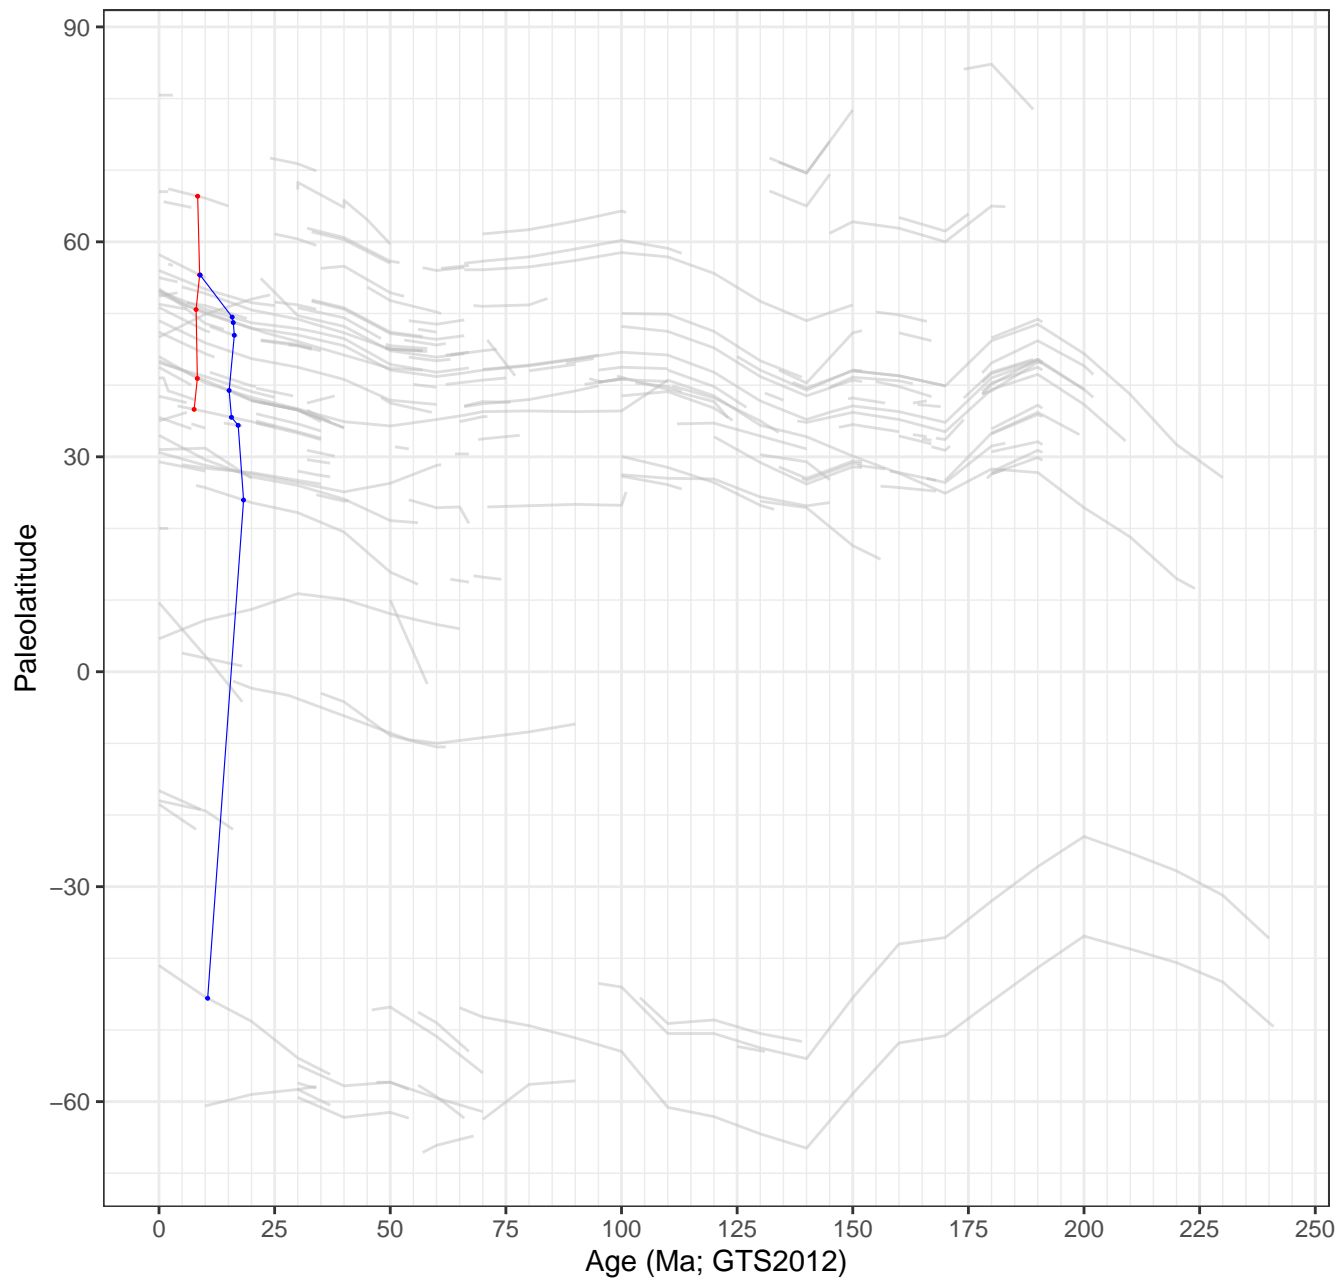

Supplement: Supplementary file 1755 [file Labyrinthodinium truncatum.pdf › Supplement/Supplement 2/Species 1914 plots/Labyrinthodinium truncatum.pdf]

# Species *Laciniadinium arcticum*

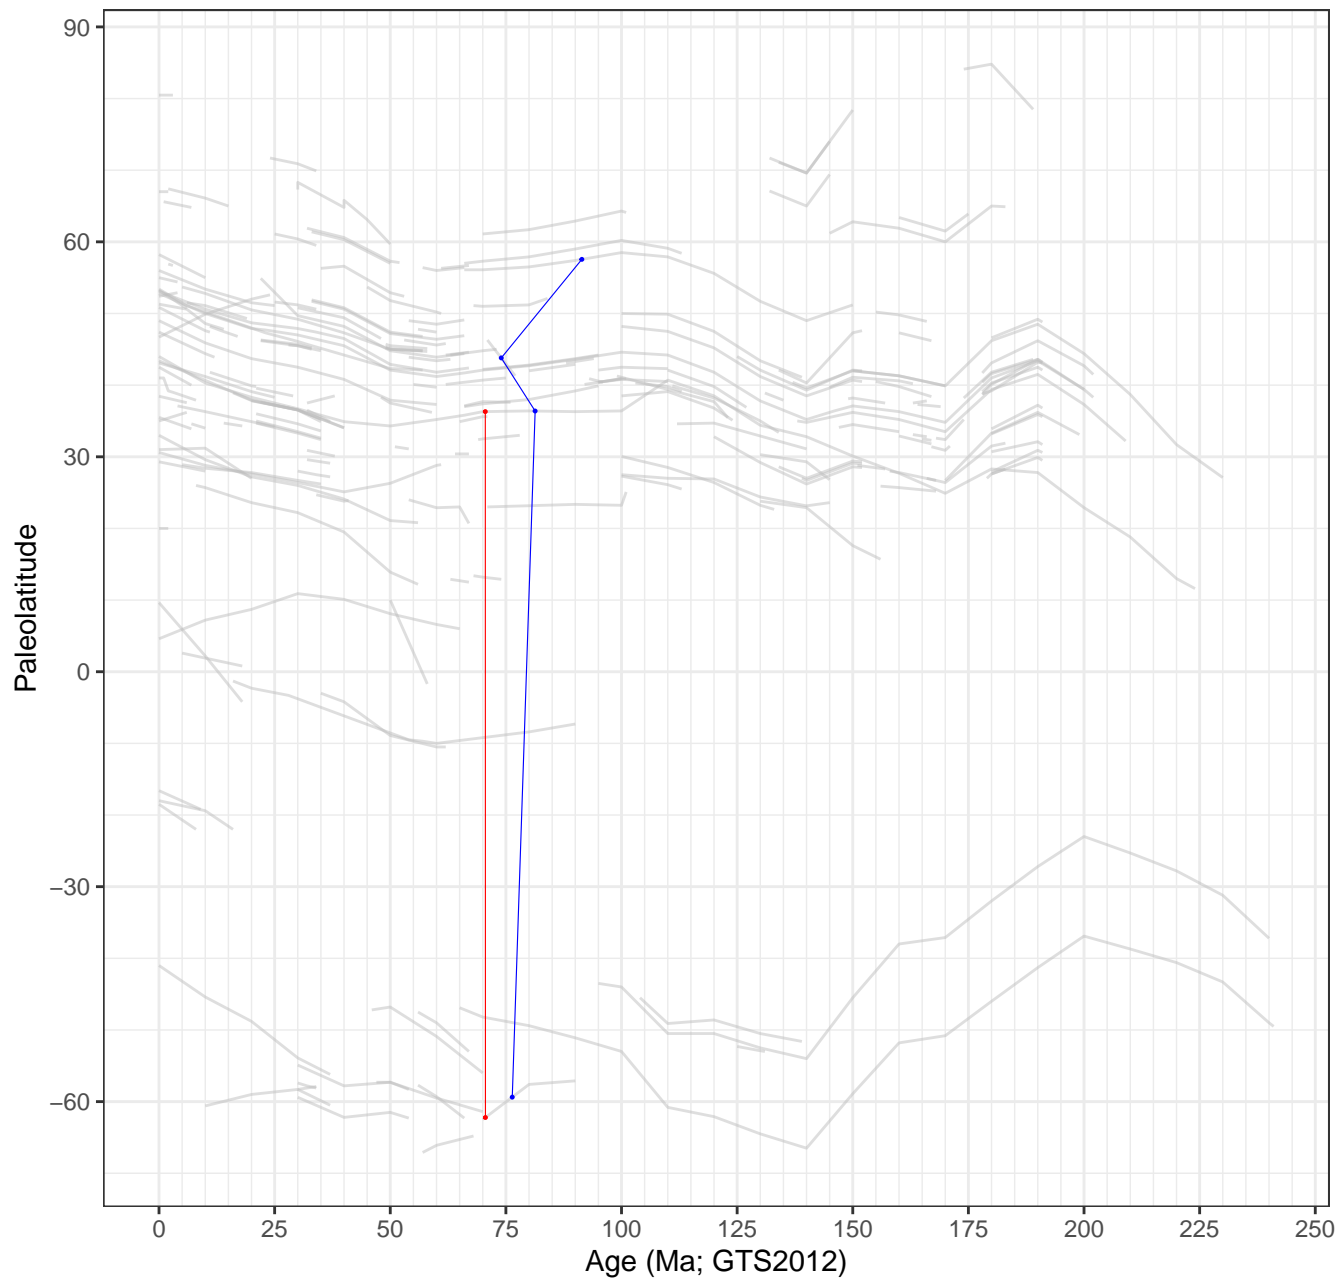

Supplement: Supplementary file 1756 [file Laciniadinium arcticum.pdf › Supplement/Supplement 2/Species 1914 plots/Laciniadinium arcticum.pdf]

# Species *Laciniadinium firmum*

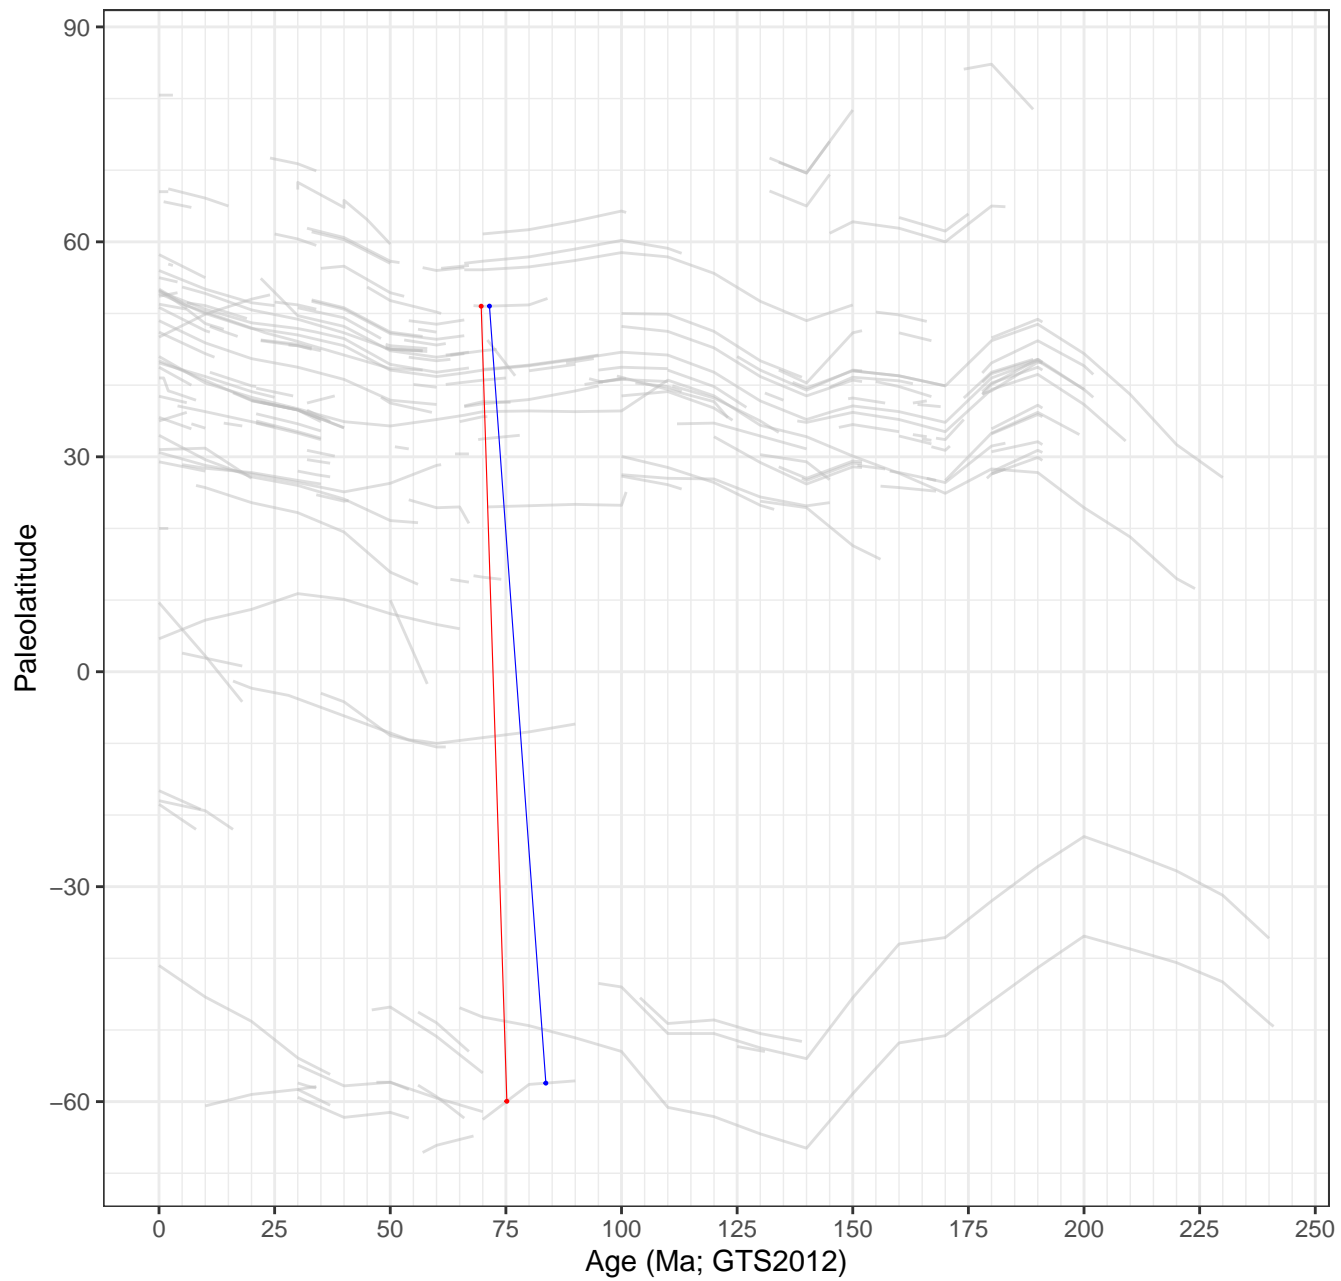

Supplement: Supplementary file 1757 [file Laciniadinium firmum.pdf › Supplement/Supplement 2/Species 1914 plots/Laciniadinium firmum.pdf]

# Species *Laciniadinium rhombiforme*

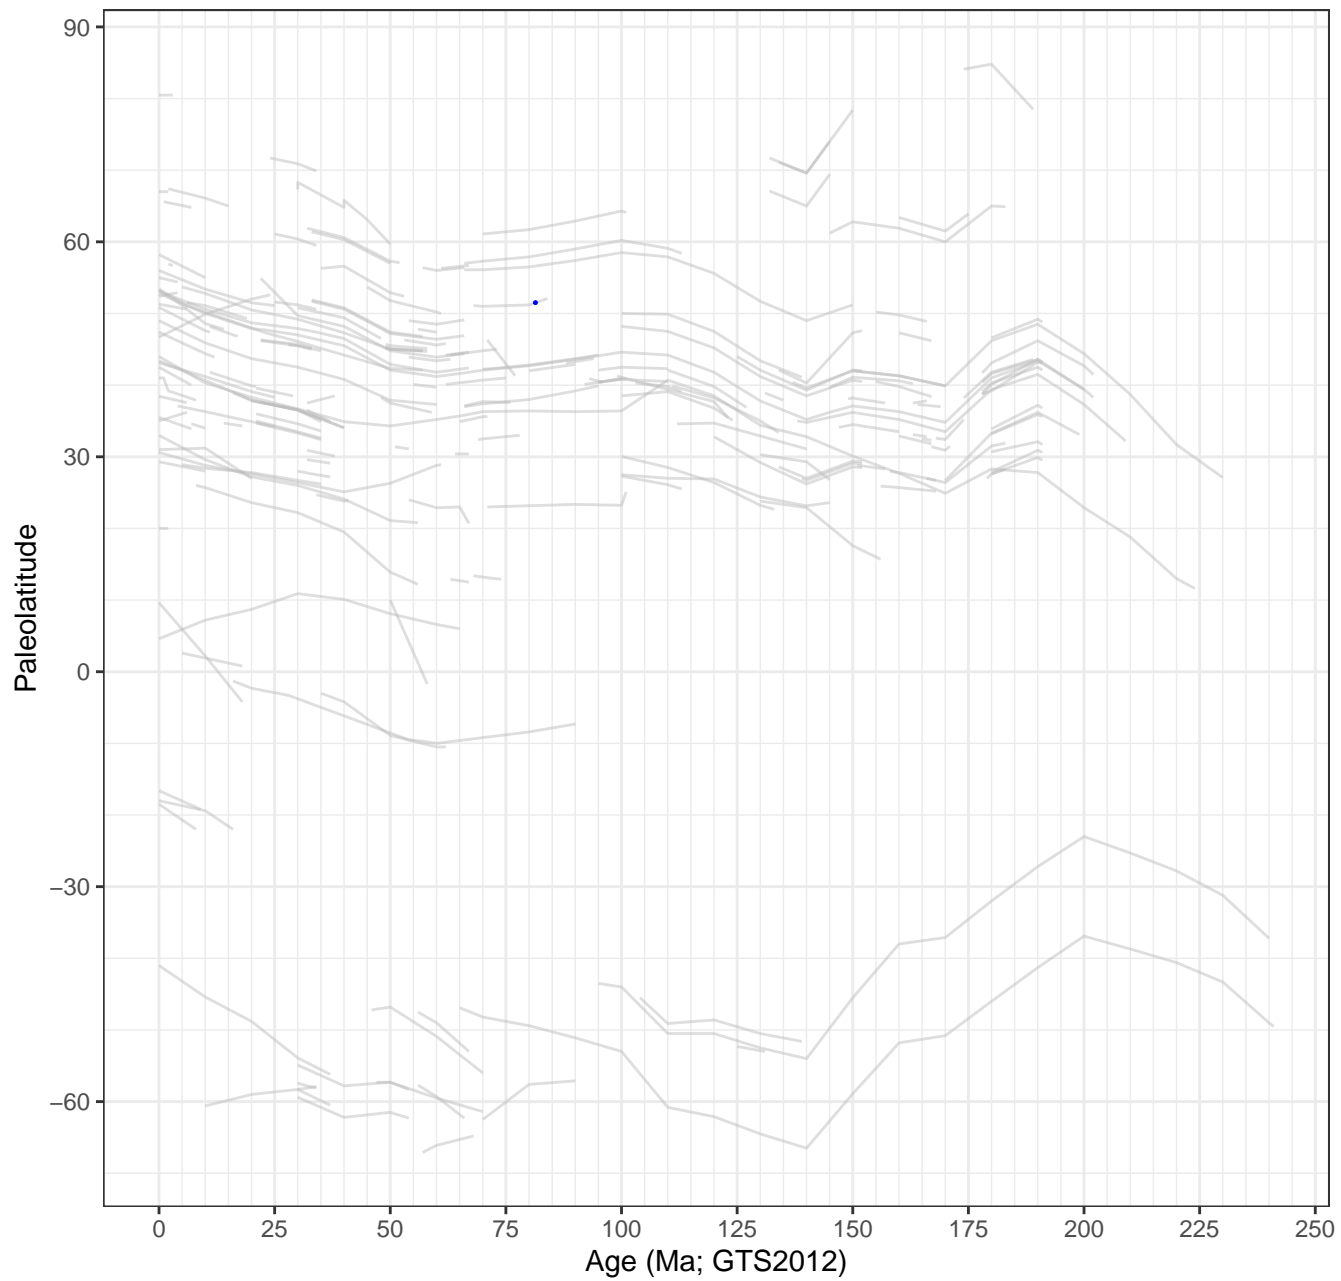

Supplement: Supplementary file 1758 [file Laciniadinium rhombiforme.pdf › Supplement/Supplement 2/Species 1914 plots/Laciniadinium rhombiforme.pdf]

# Species *Laciniadinium williamsii*

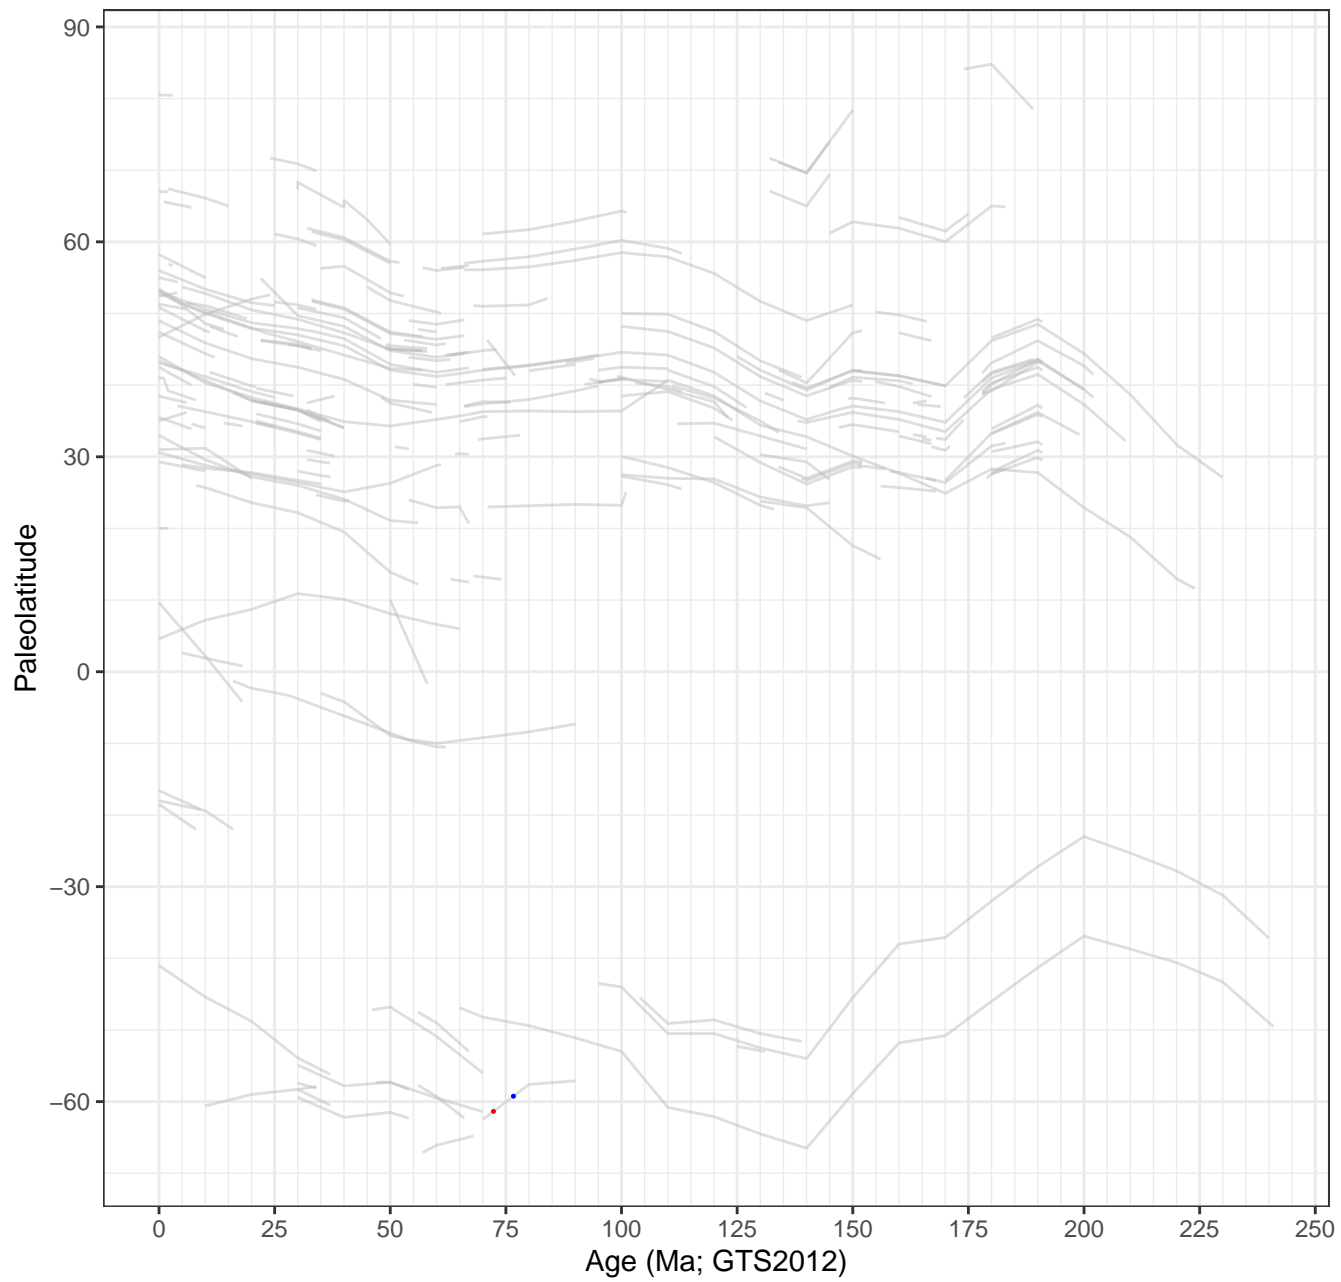

Supplement: Supplementary file 1759 [file Laciniadinium williamsii.pdf › Supplement/Supplement 2/Species 1914 plots/Laciniadinium williamsii.pdf]

# Species *Lacrymodinium warrenii*

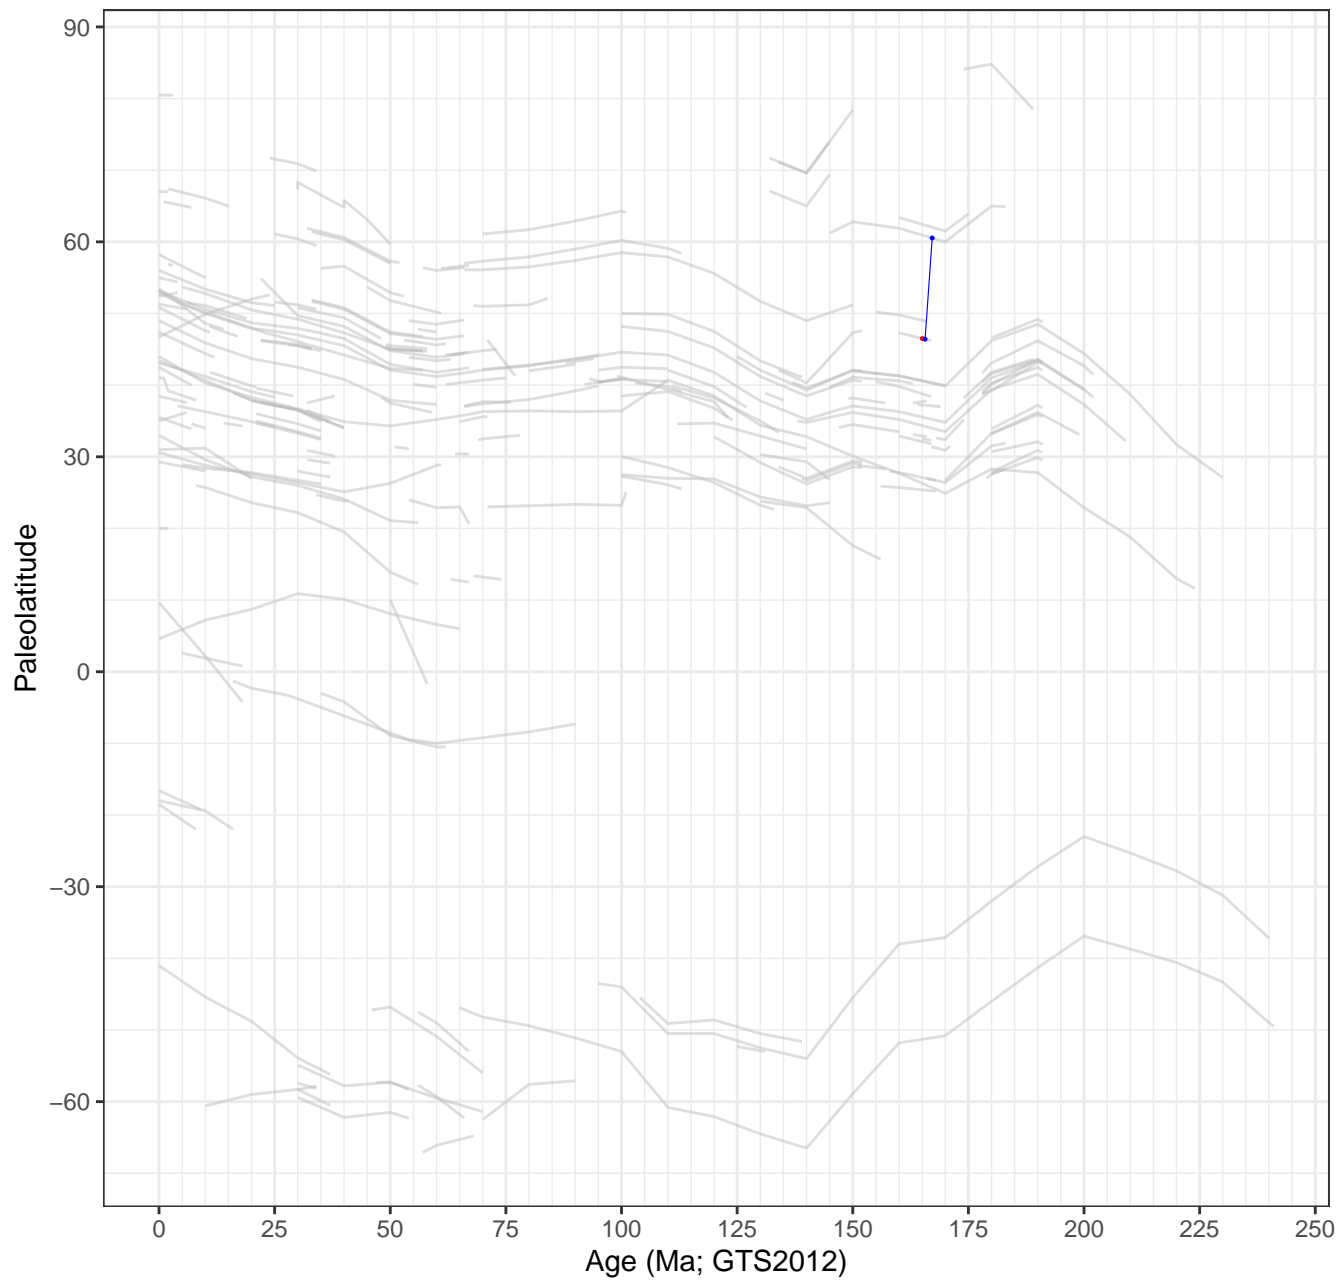

Supplement: Supplementary file 1760 [file Lacrymodinium warrenii.pdf › Supplement/Supplement 2/Species 1914 plots/Lacrymodinium warrenii.pdf]

# Species *Lagenorhynchus delicatula*

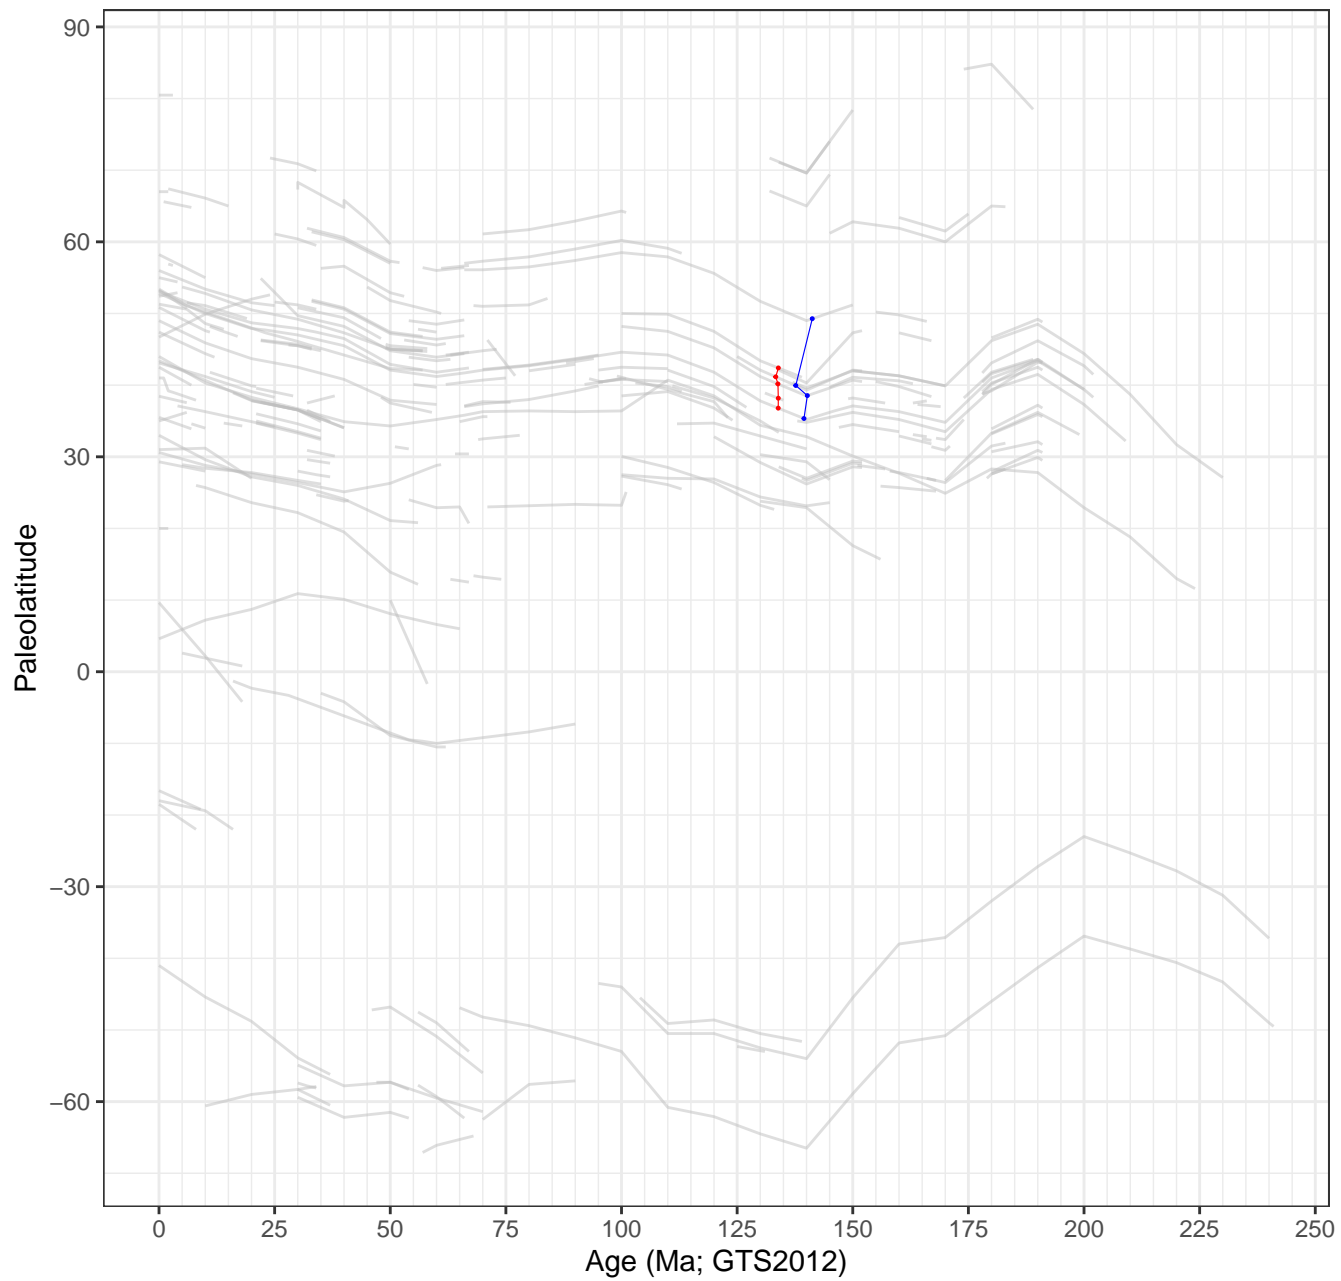

Supplement: Supplementary file 1761 [file Lagenorhytis delicatula.pdf › Supplement/Supplement 2/Species 1914 plots/Lagenorhytis delicatula.pdf]

# Species *Lanterna bulgarica*

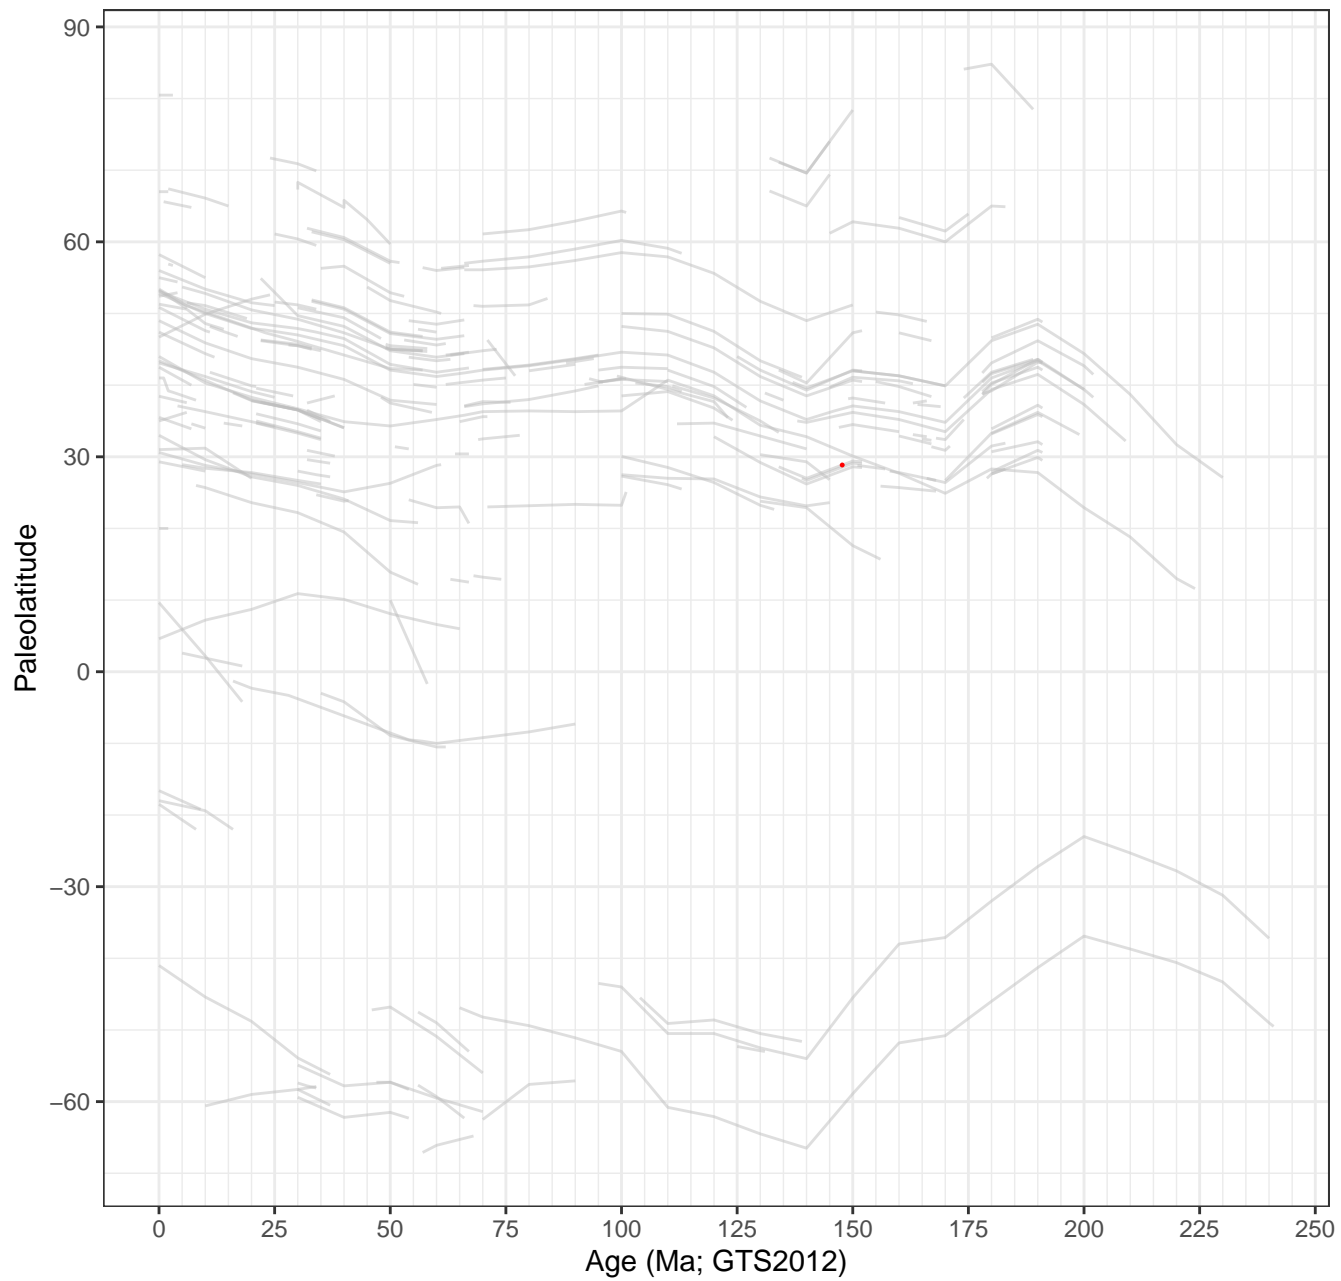

Supplement: Supplementary file 1762 [file Lanterna bulgarica.pdf › Supplement/Supplement 2/Species 1914 plots/Lanterna bulgarica.pdf]

# Species *Lanterna* spp.

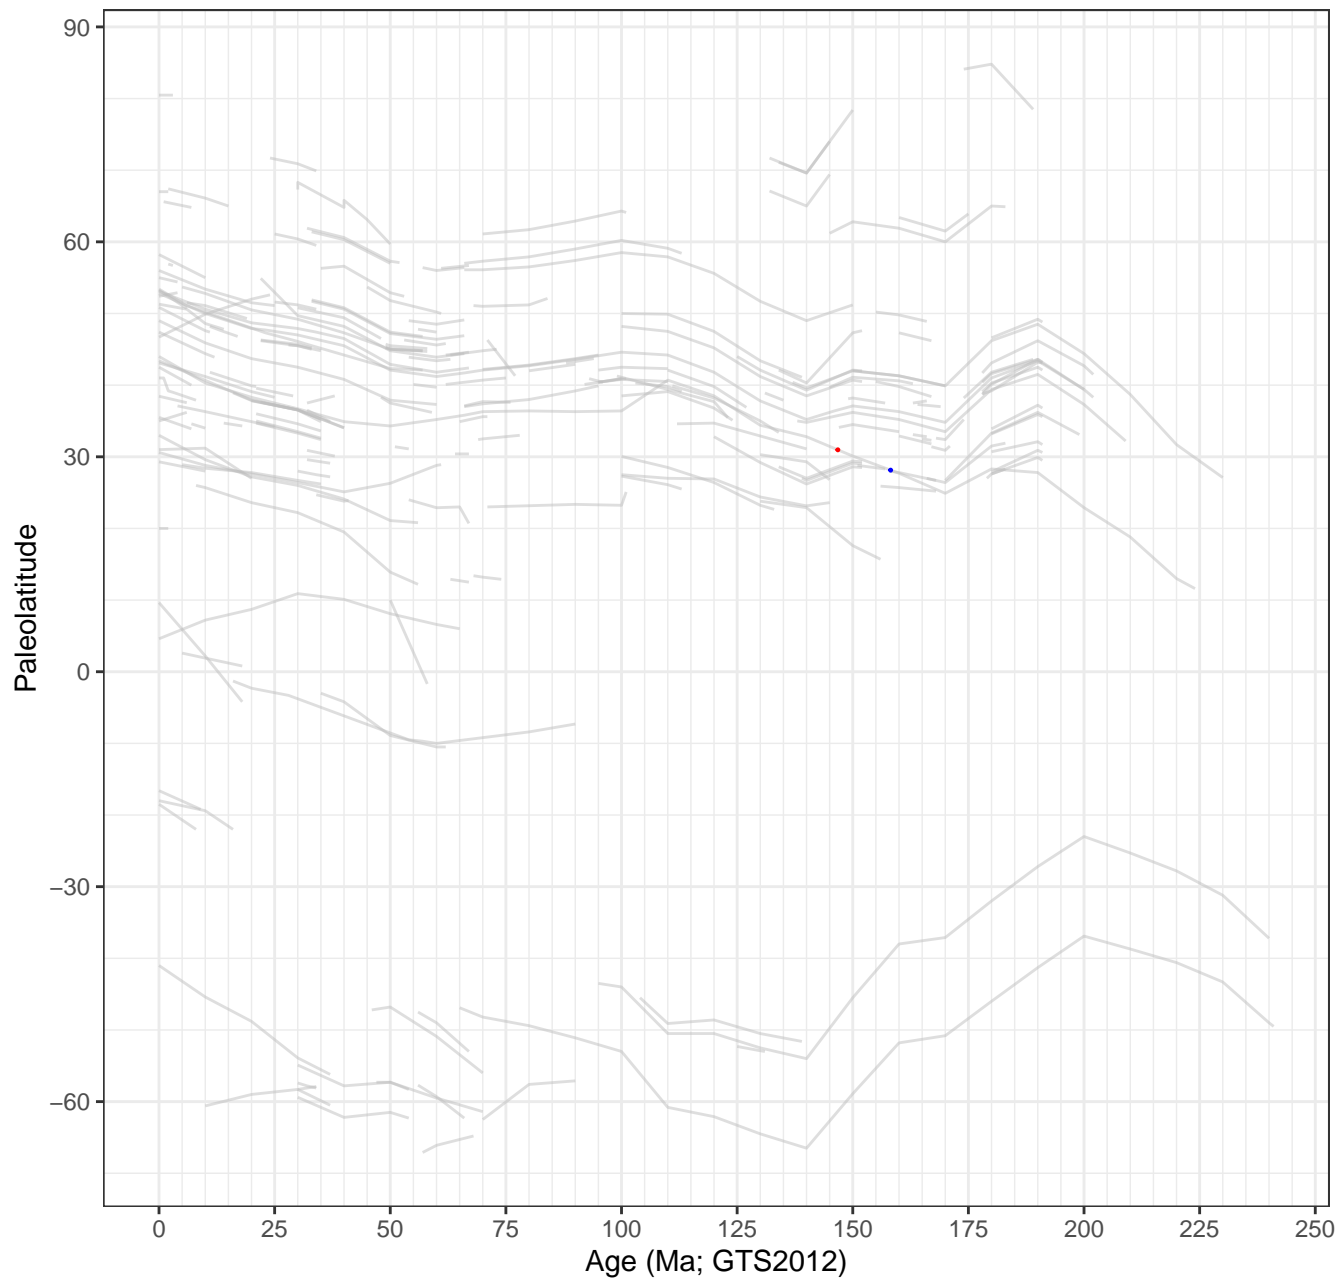

Supplement: Supplementary file 1763 [file Lanterna spp..pdf › Supplement/Supplement 2/Species 1914 plots/Lanterna spp..pdf]

# Species *Lanternosphaeridium reinhardtii*

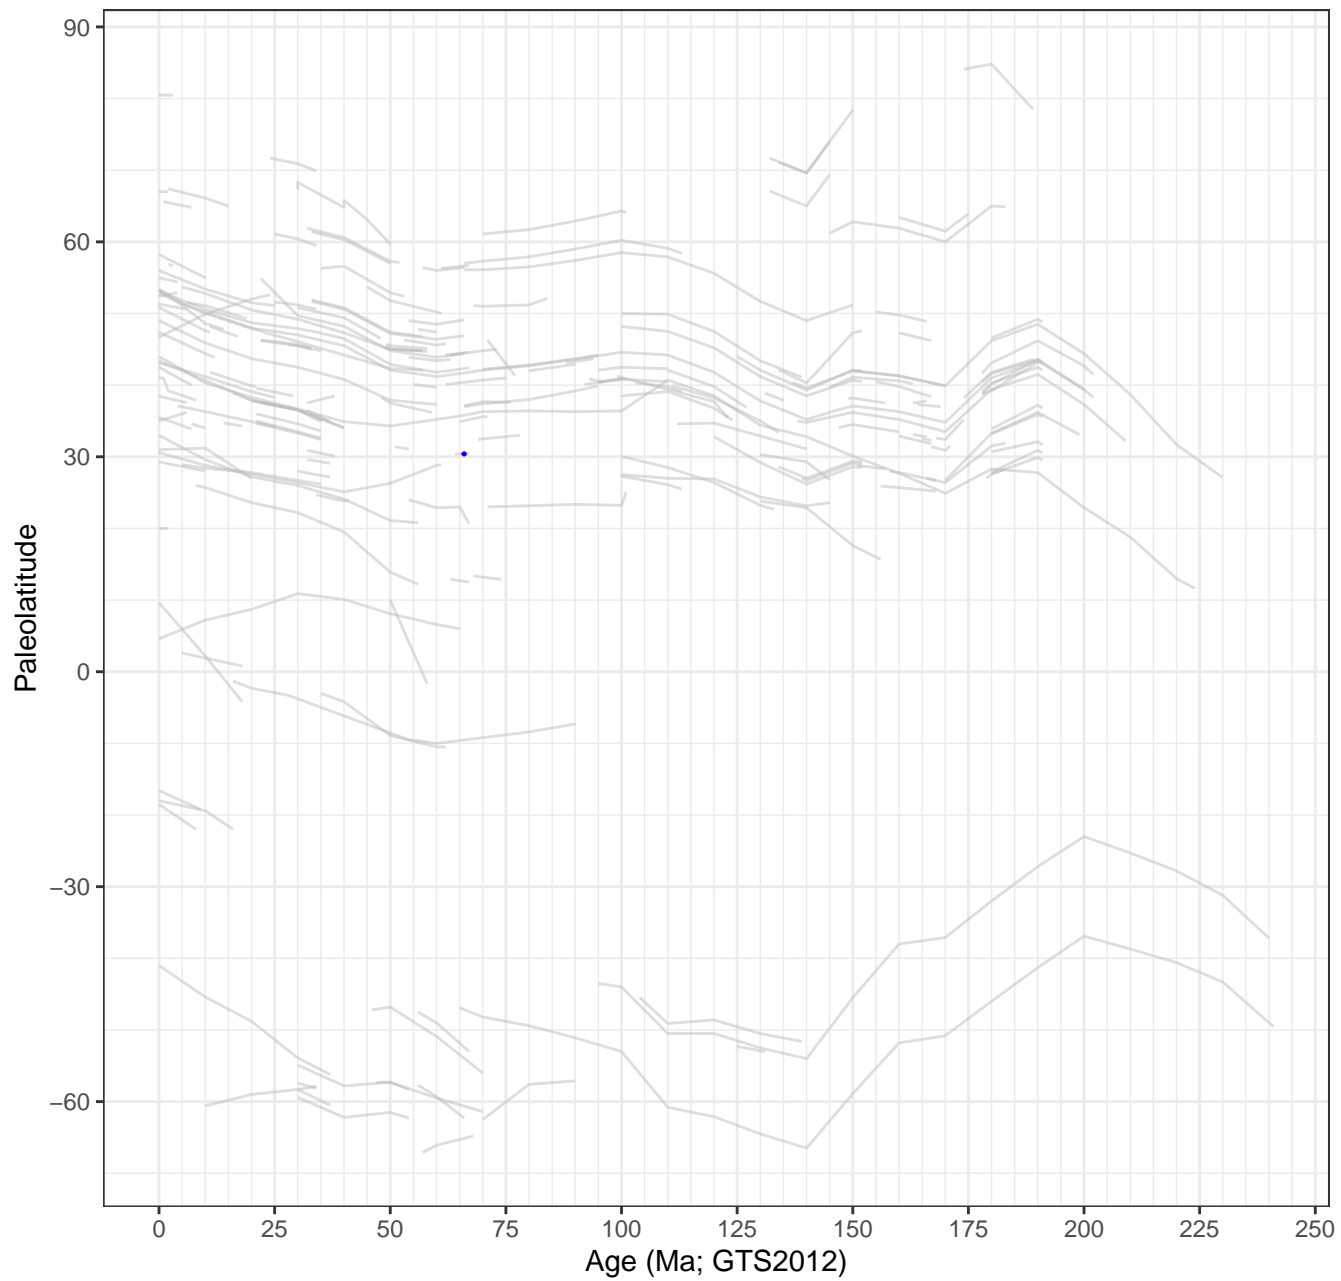

Supplement: Supplementary file 1764 [file Lanternosphaeridium reinhardtii.pdf › Supplement/Supplement 2/Species 1914 plots/Lanternosphaeridium reinhardtii.pdf]

# Species *Lanternosphaeridium* spp.

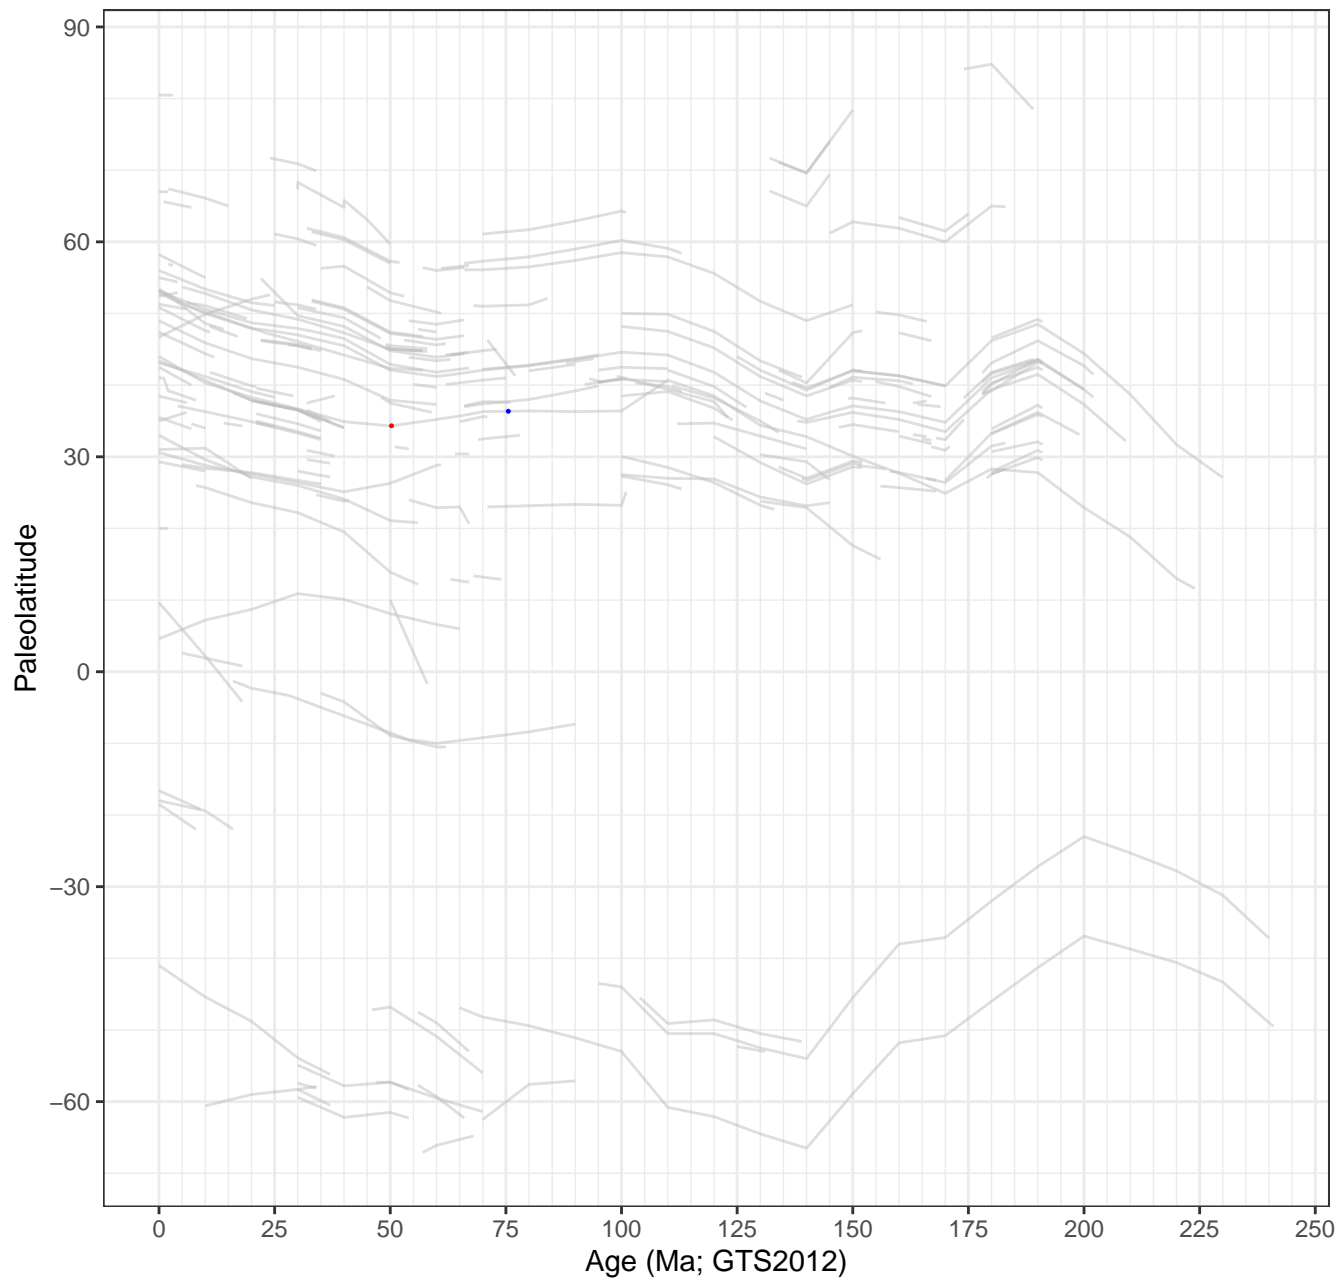

Supplement: Supplementary file 1765 [file Lanternosphaeridium spp..pdf › Supplement/Supplement 2/Species 1914 plots/Lanternosphaeridium spp..pdf]

# Species *Leberidocysta chlamydata*

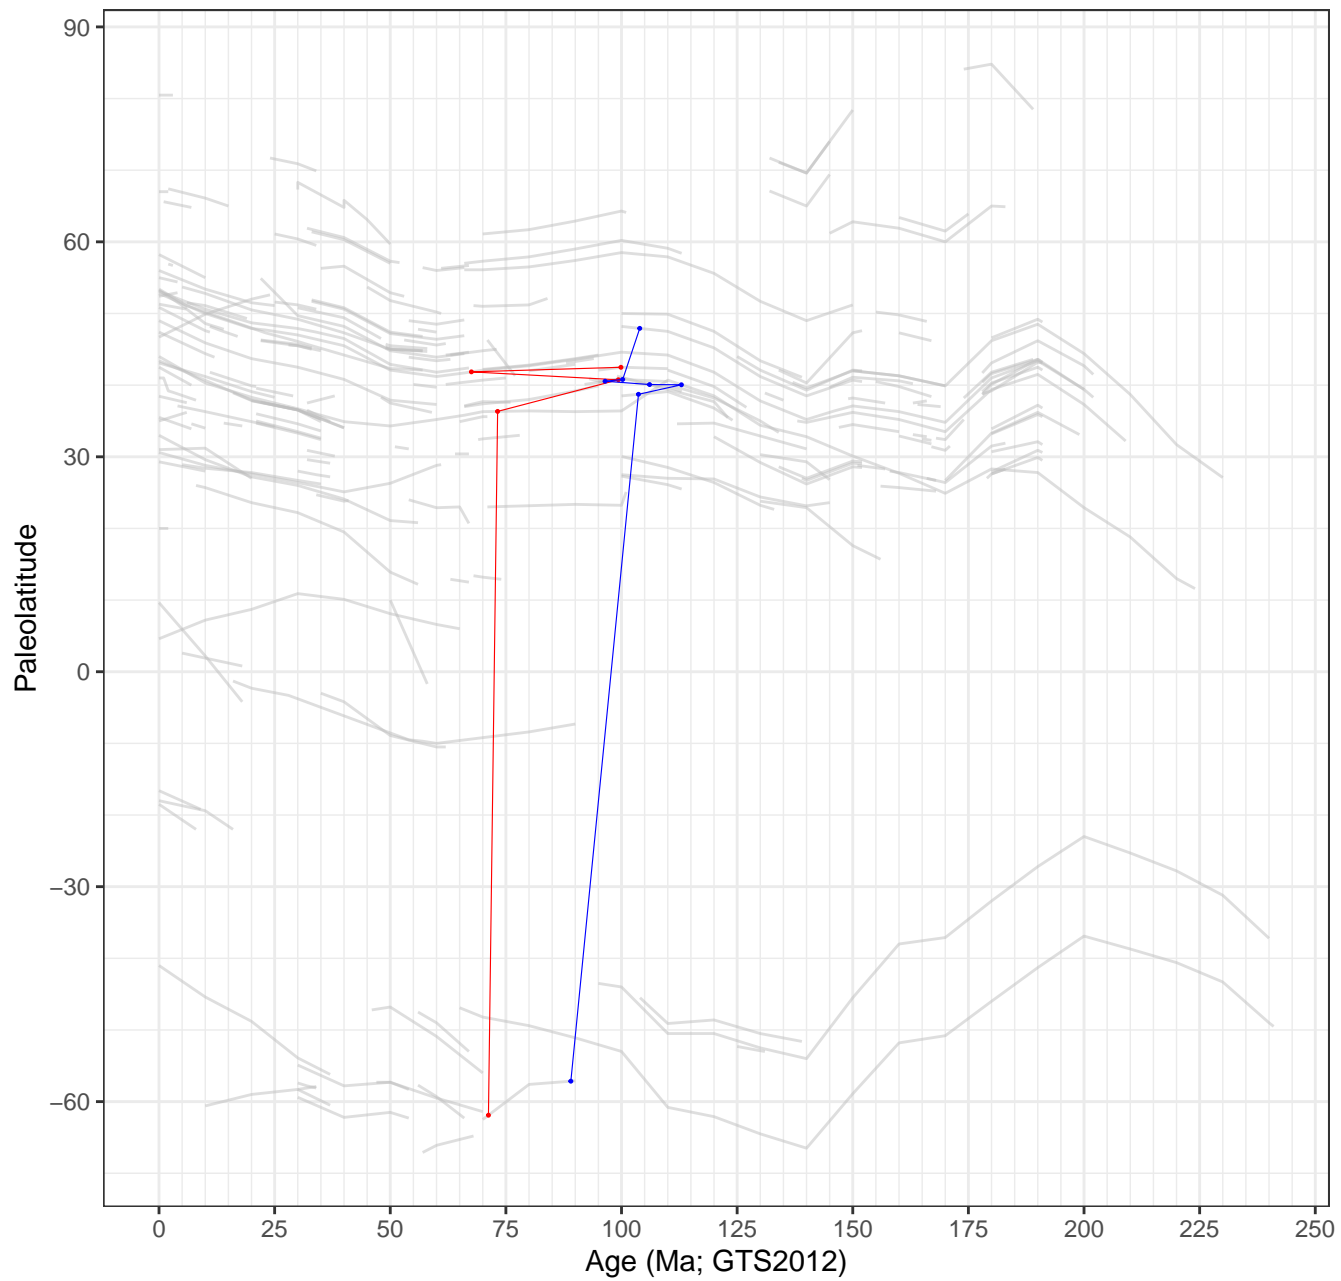

Supplement: Supplementary file 1766 [file Leberidocysta chlamydata.pdf › Supplement/Supplement 2/Species 1914 plots/Leberidocysta chlamydata.pdf]

# Species *Leberidocysta defloccata*

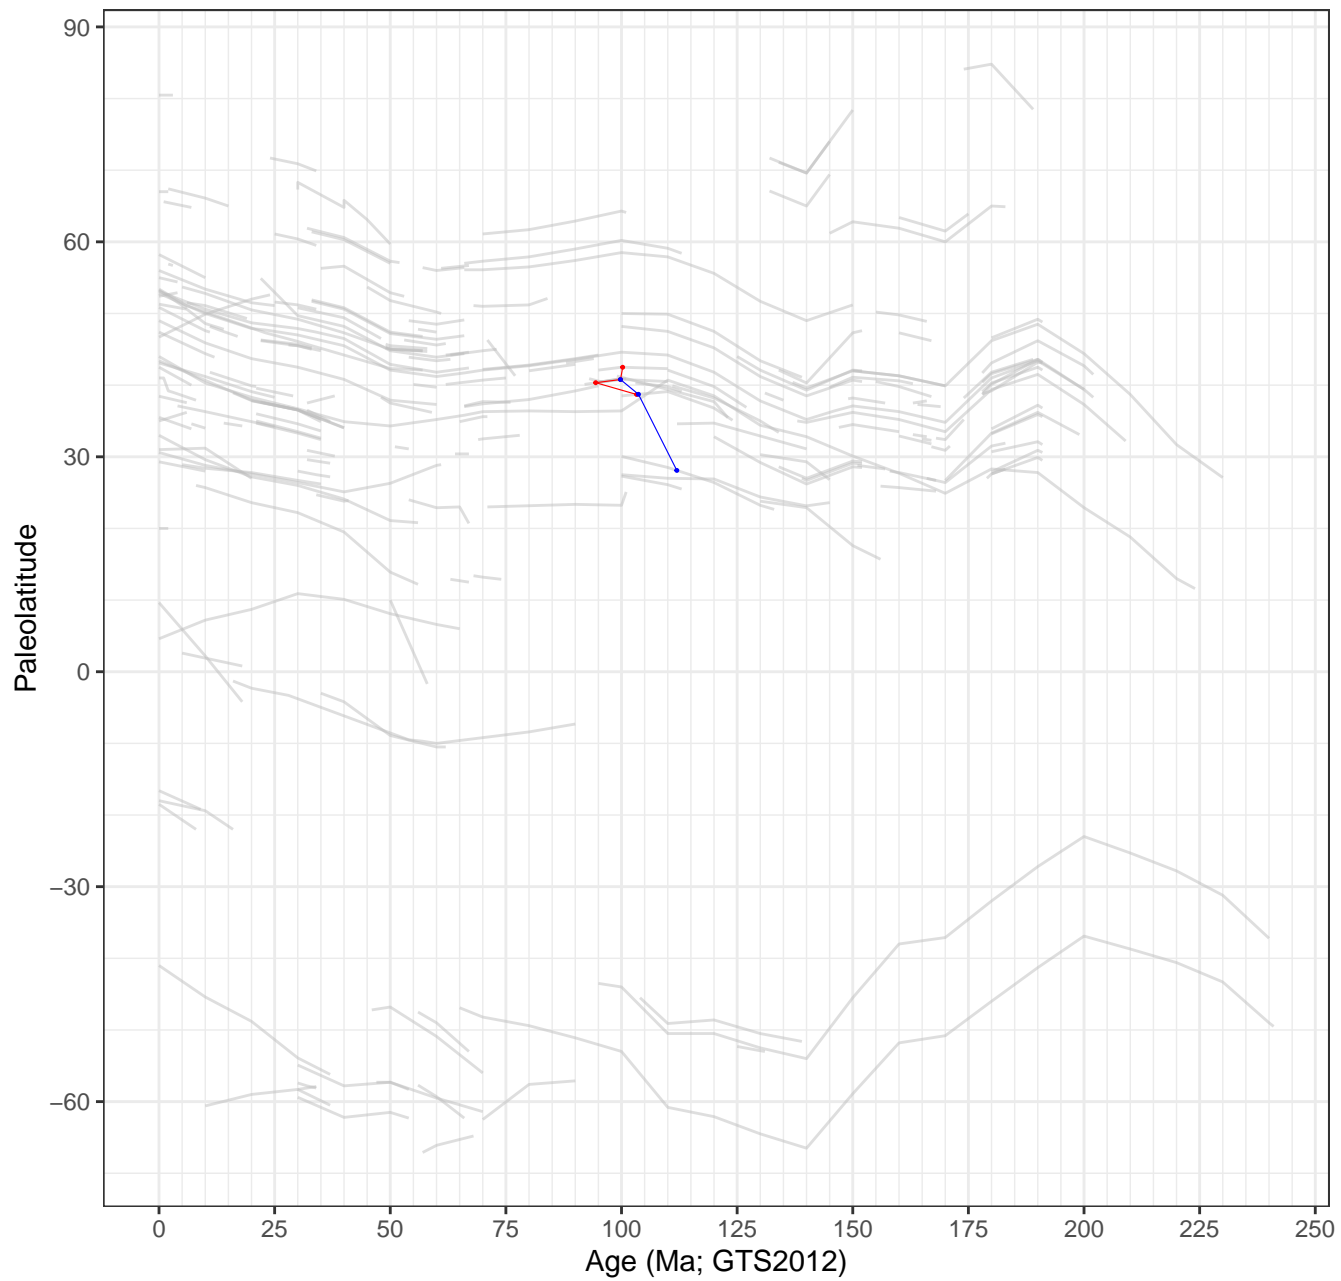

Supplement: Supplementary file 1767 [file Leberidocysta defloccata.pdf › Supplement/Supplement 2/Species 1914 plots/Leberidocysta defloccata.pdf]

# Species *Leberidocysta flagellichnia*

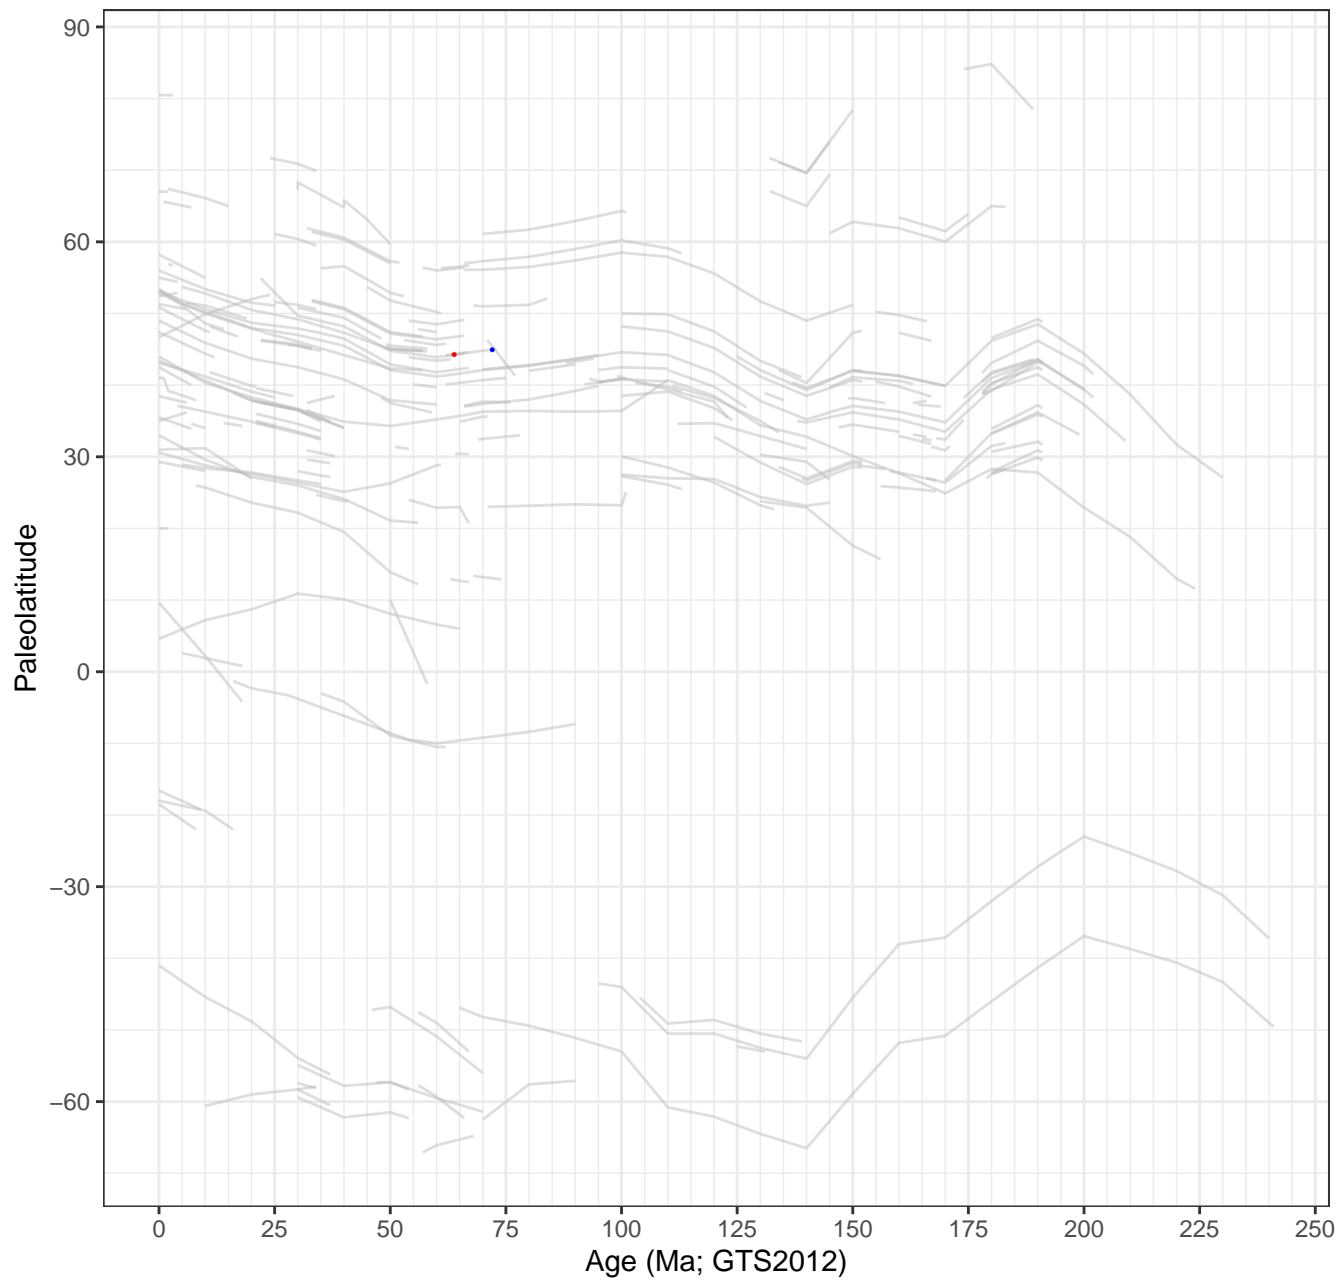

Supplement: Supplementary file 1768 [file Leberidocysta flagellichnia.pdf › Supplement/Supplement 2/Species 1914 plots/Leberidocysta flagellichnia.pdf]

# Species *Leberidocysta microverrucosa*

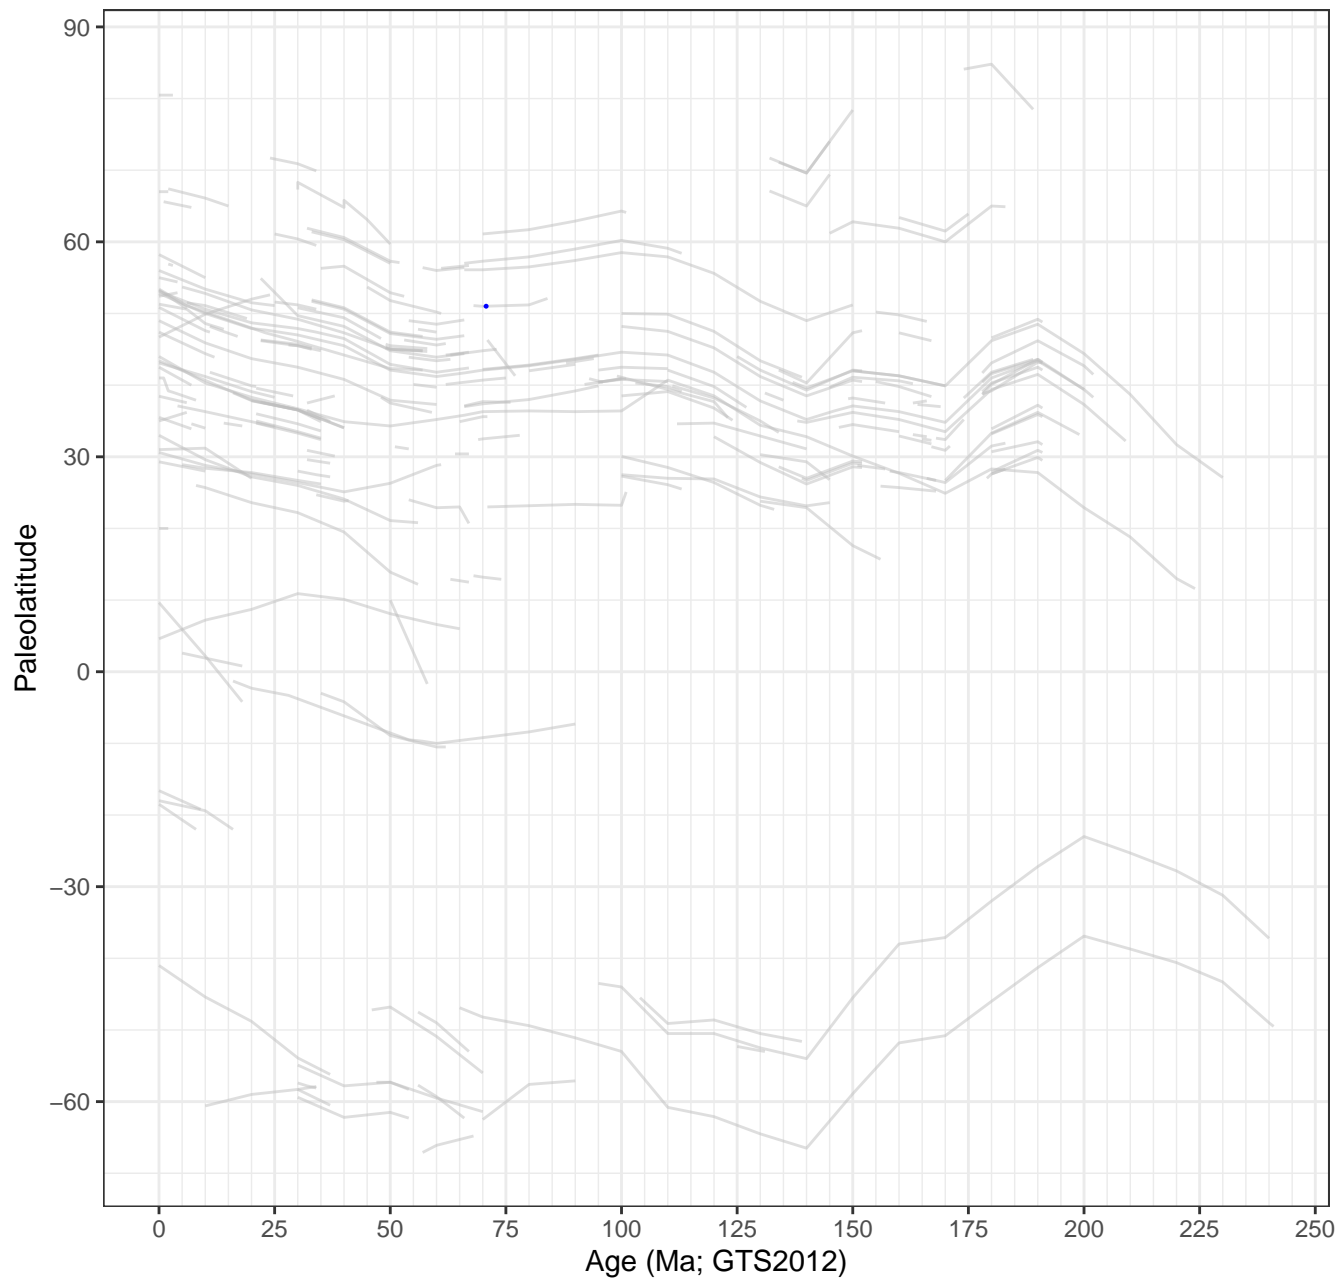

Supplement: Supplementary file 1769 [file Leberidocysta microverrucosa.pdf › Supplement/Supplement 2/Species 1914 plots/Leberidocysta microverrucosa.pdf]

# Species *Lejeunecysta acuminata*

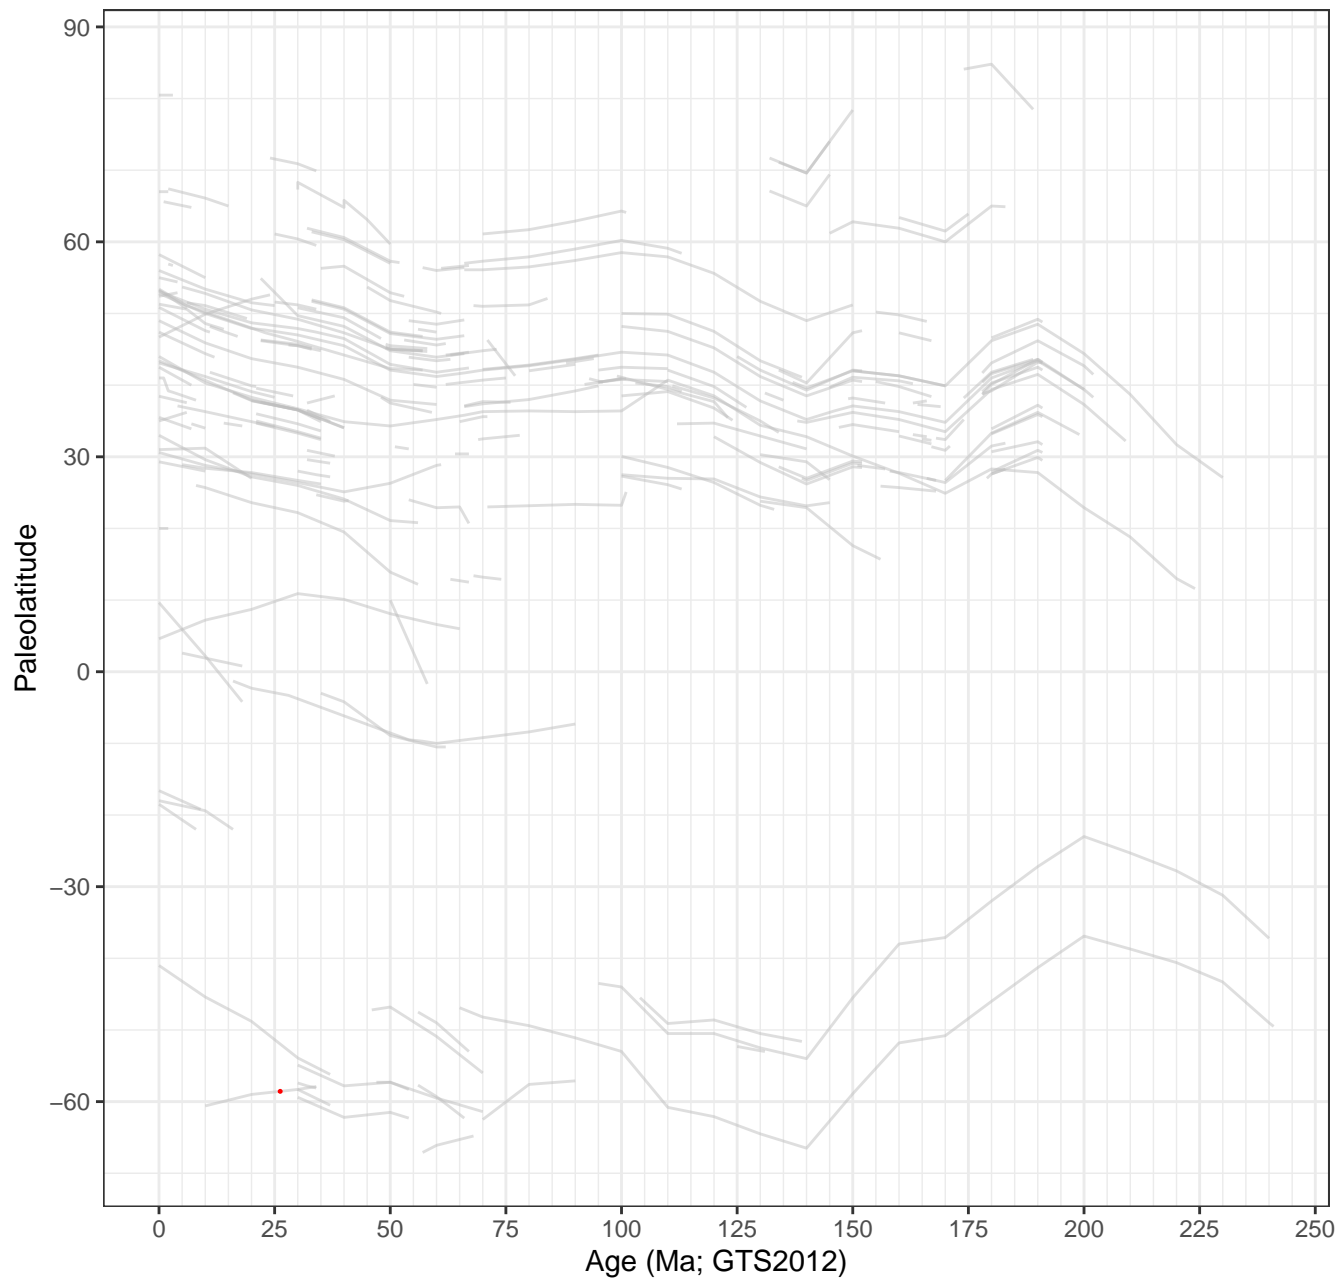

Supplement: Supplementary file 1770 [file Lejeunecysta acuminata.pdf › Supplement/Supplement 2/Species 1914 plots/Lejeunecysta acuminata.pdf]

# Species *Lejeunecysta adeliense*

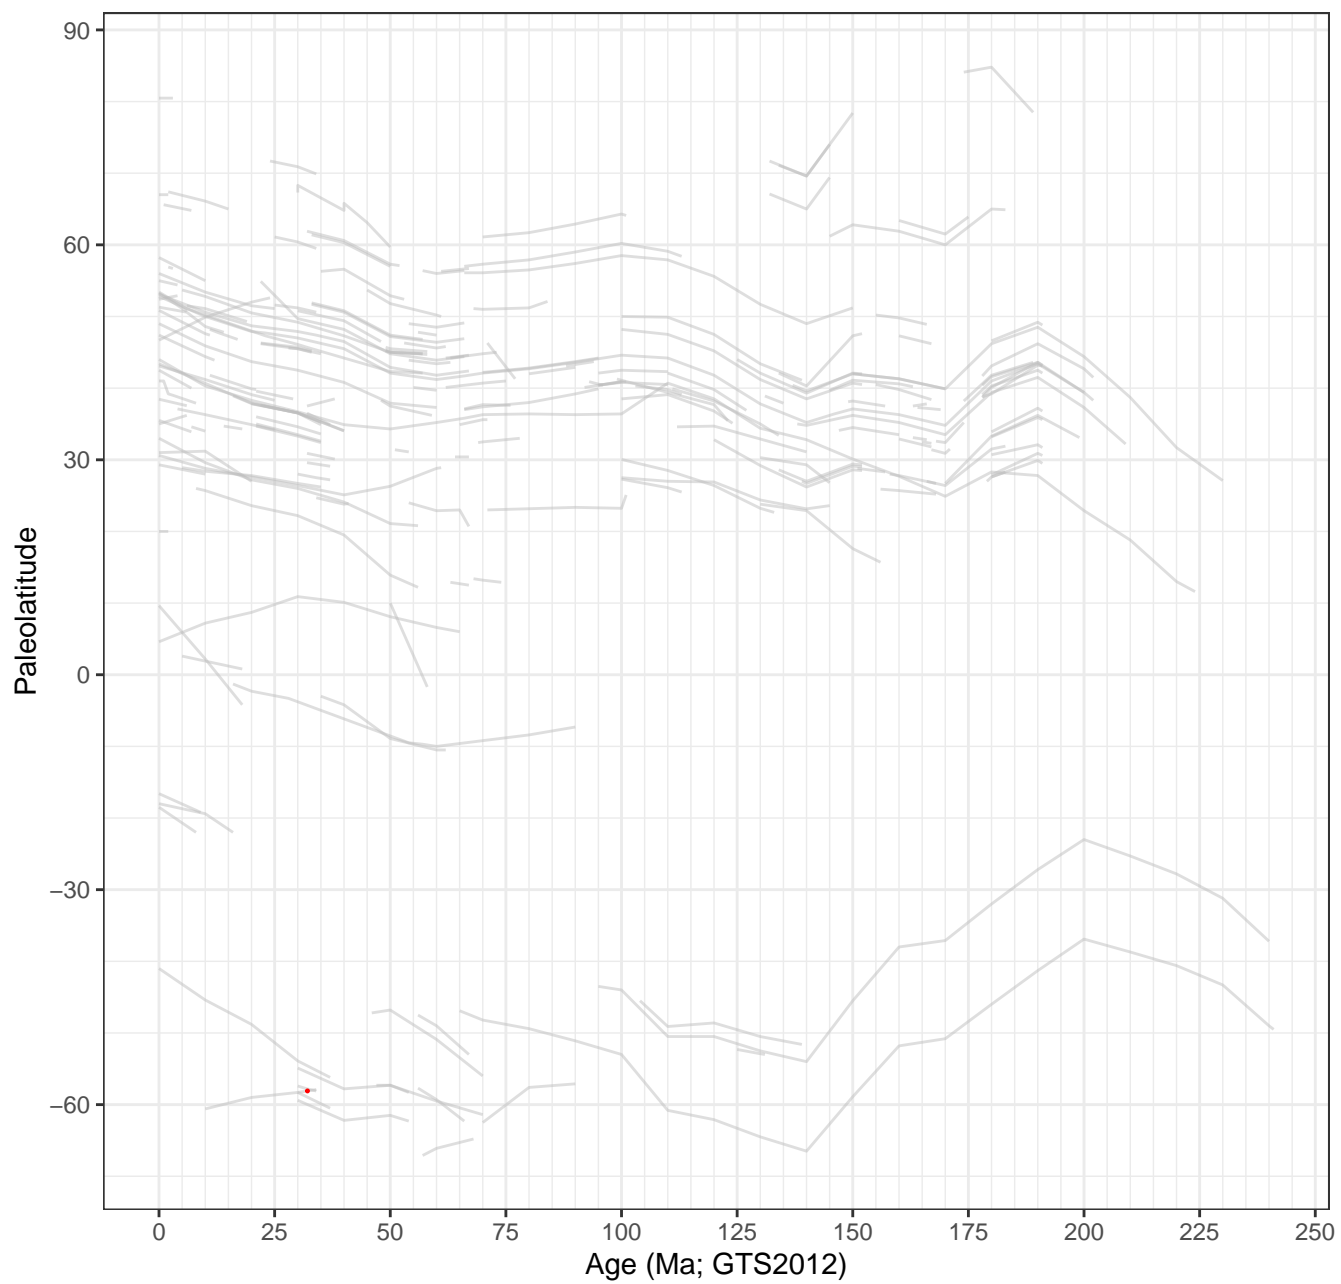

Supplement: Supplementary file 1771 [file Lejeunecysta adeliense.pdf › Supplement/Supplement 2/Species 1914 plots/Lejeunecysta adeliense.pdf]

# Species *Lejeunecysta attenuata*

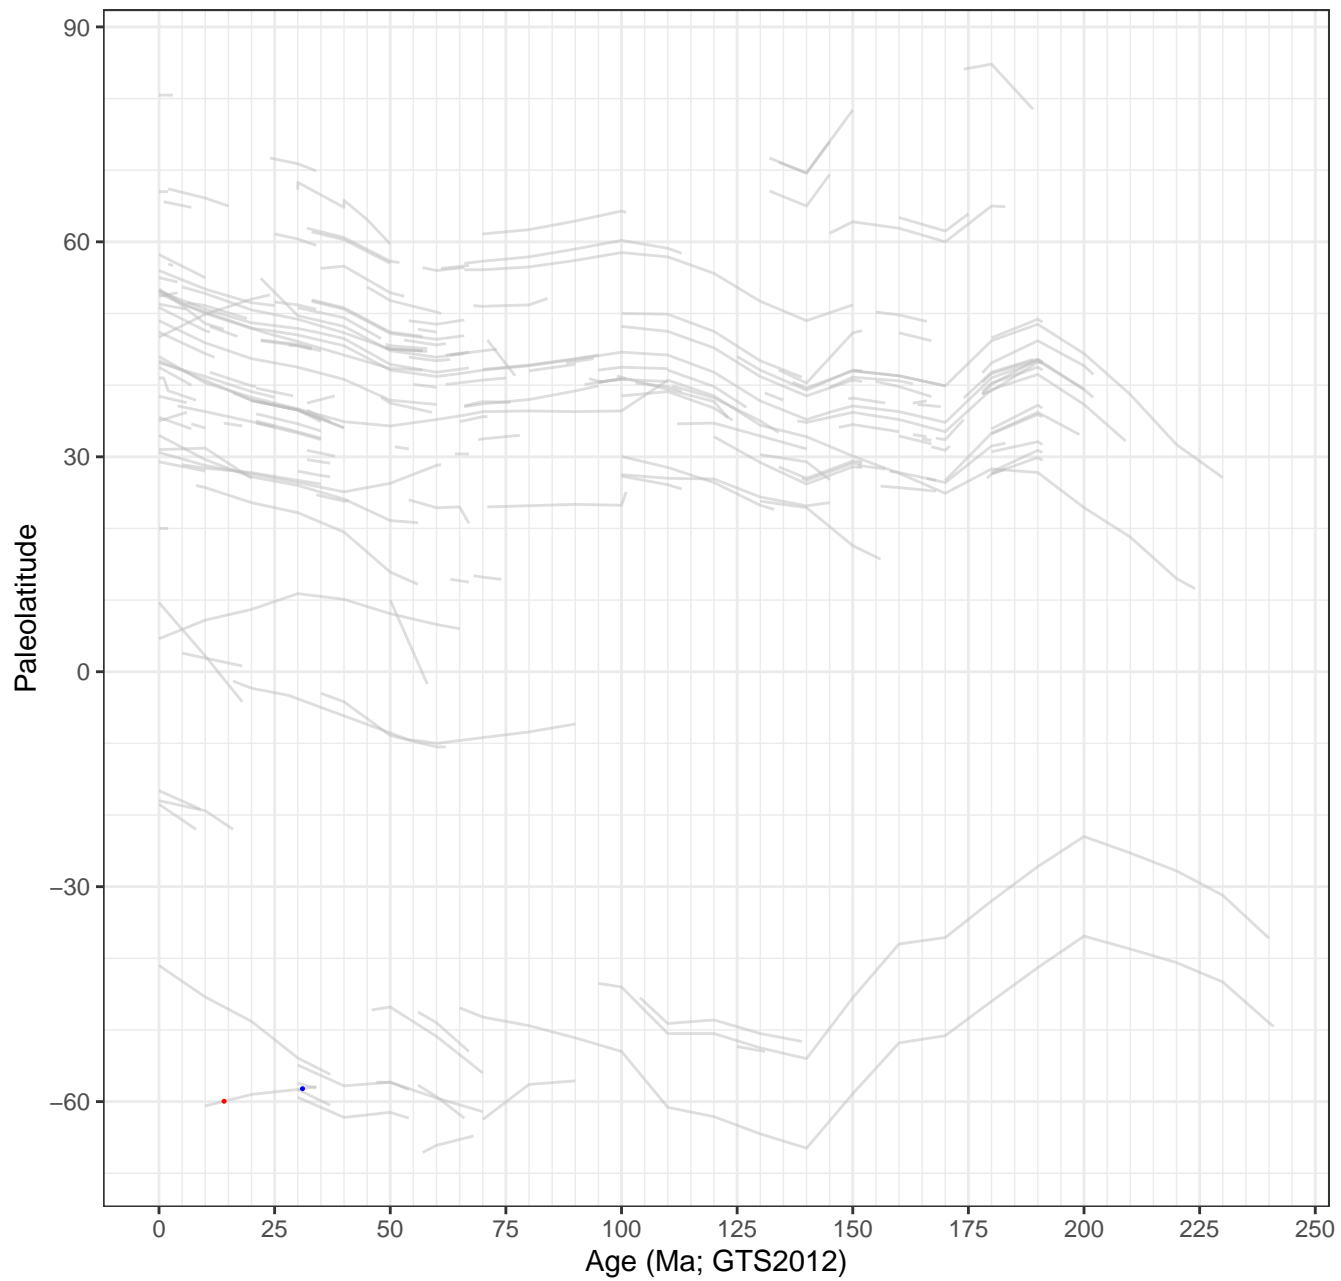

Supplement: Supplementary file 1772 [file Lejeunecysta attenuata.pdf › Supplement/Supplement 2/Species 1914 plots/Lejeunecysta attenuata.pdf]

# Species *Lejeunecysta beninensis*

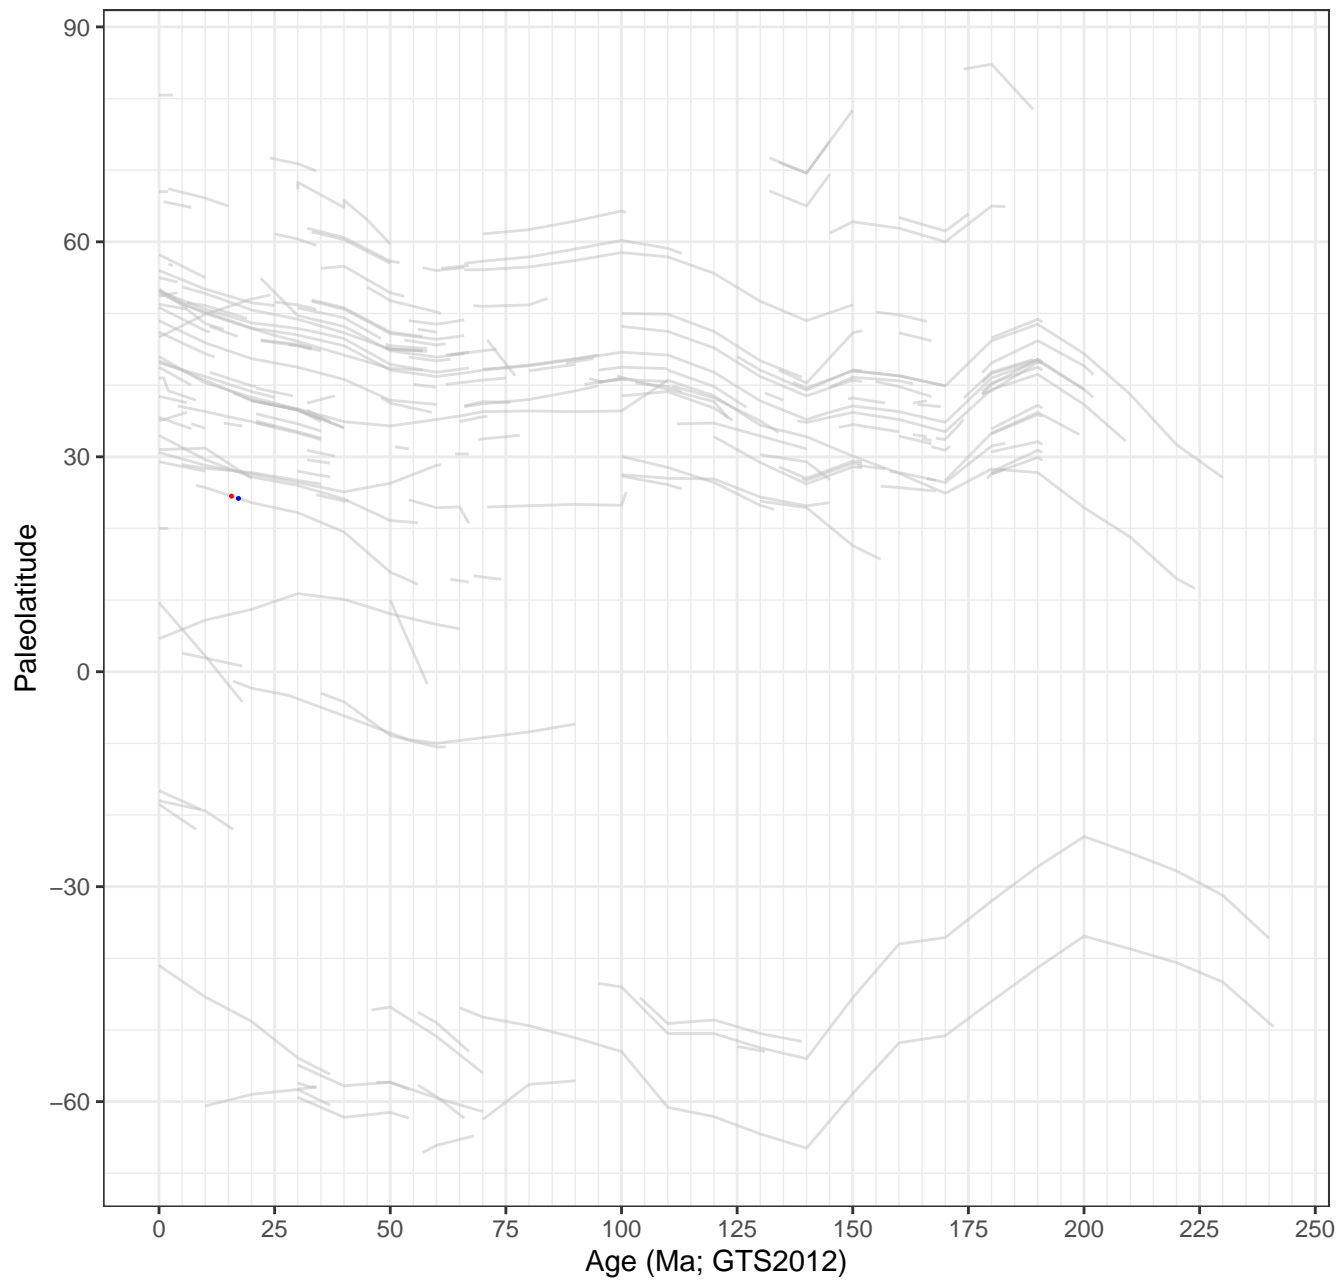

Supplement: Supplementary file 1773 [file Lejeunecysta beninensis.pdf › Supplement/Supplement 2/Species 1914 plots/Lejeunecysta beninensis.pdf]

# Species *Lejeunecysta catoma*

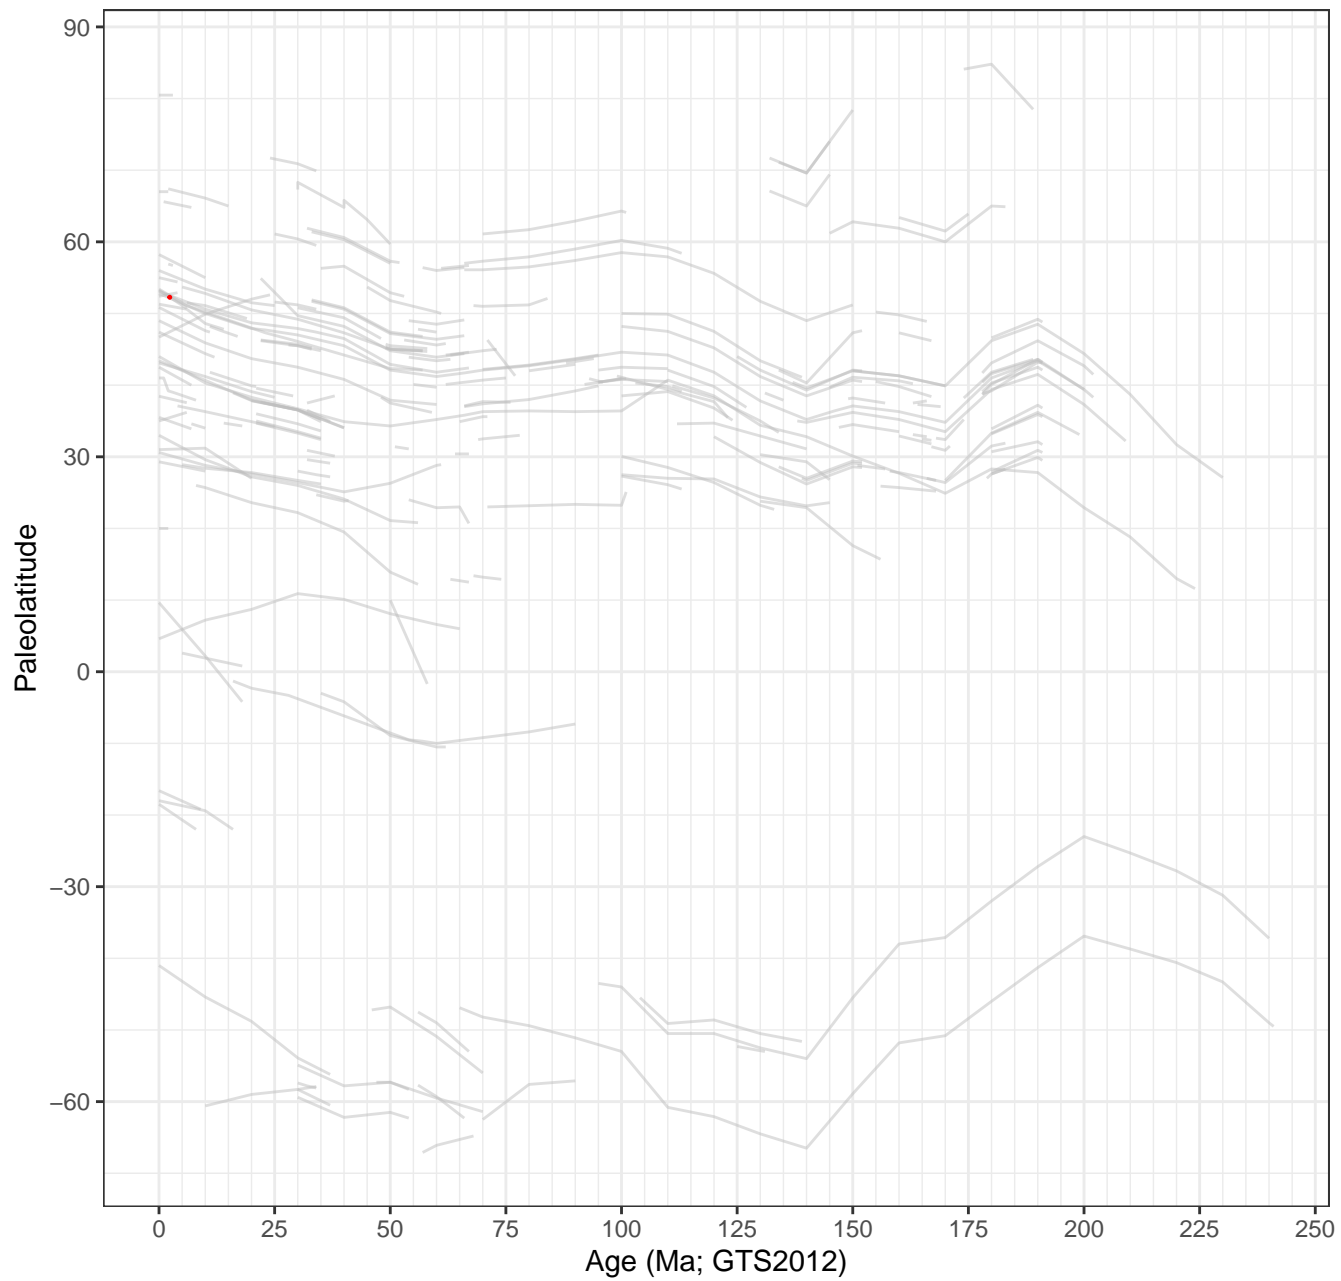

Supplement: Supplementary file 1774 [file Lejeunecysta catoma.pdf › Supplement/Supplement 2/Species 1914 plots/Lejeunecysta catoma.pdf]

# Species *Lejeunecysta cinctoria*

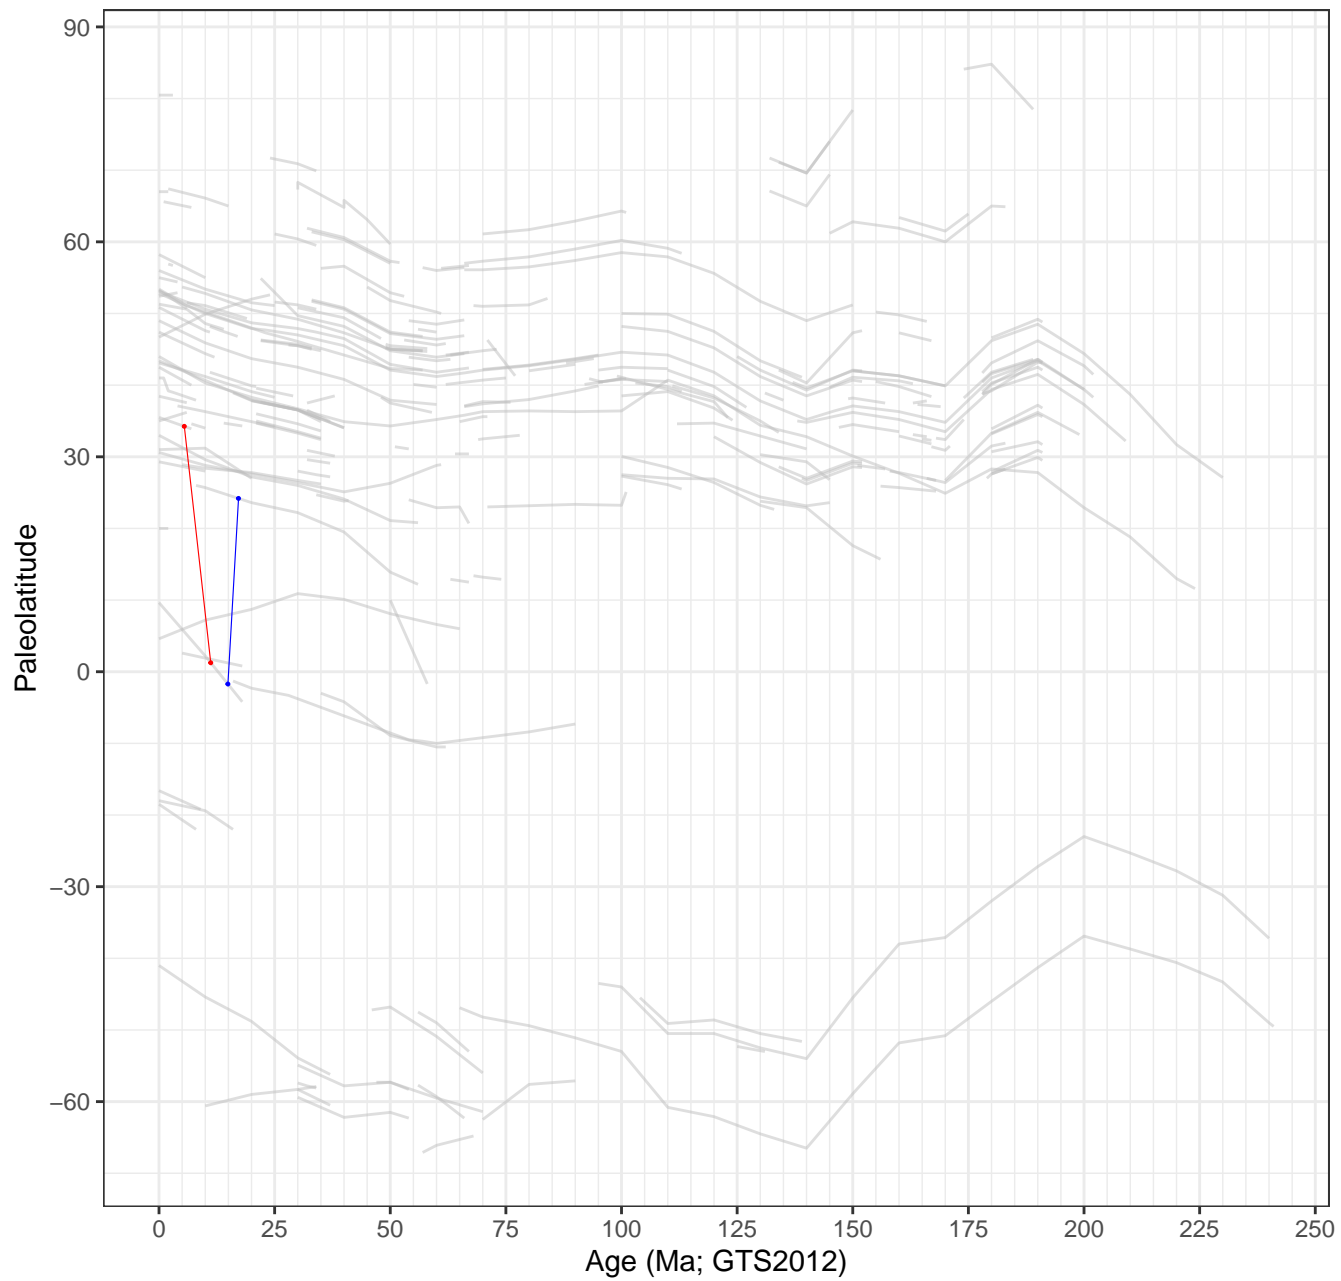

Supplement: Supplementary file 1775 [file Lejeunecysta cinctoria.pdf › Supplement/Supplement 2/Species 1914 plots/Lejeunecysta cinctoria.pdf]

# Species *Lejeunecysta communis*

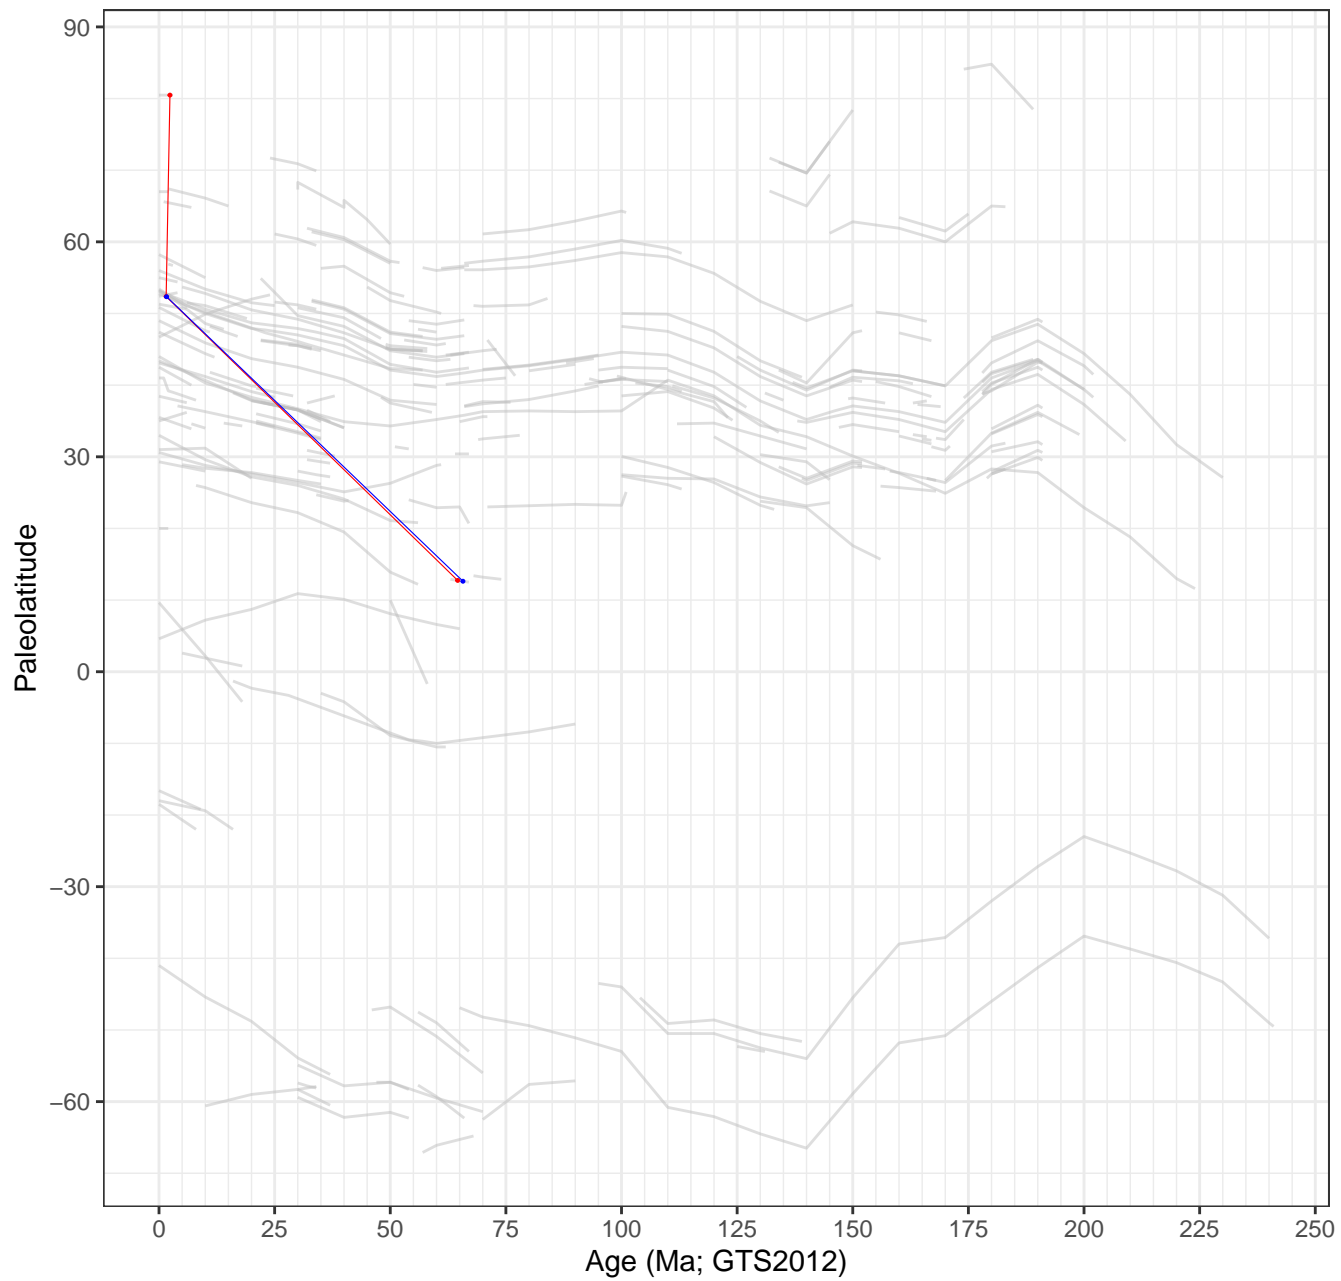

Supplement: Supplementary file 1776 [file Lejeunecysta communis.pdf › Supplement/Supplement 2/Species 1914 plots/Lejeunecysta communis.pdf]

# Species *Lejeunecysta convexa*

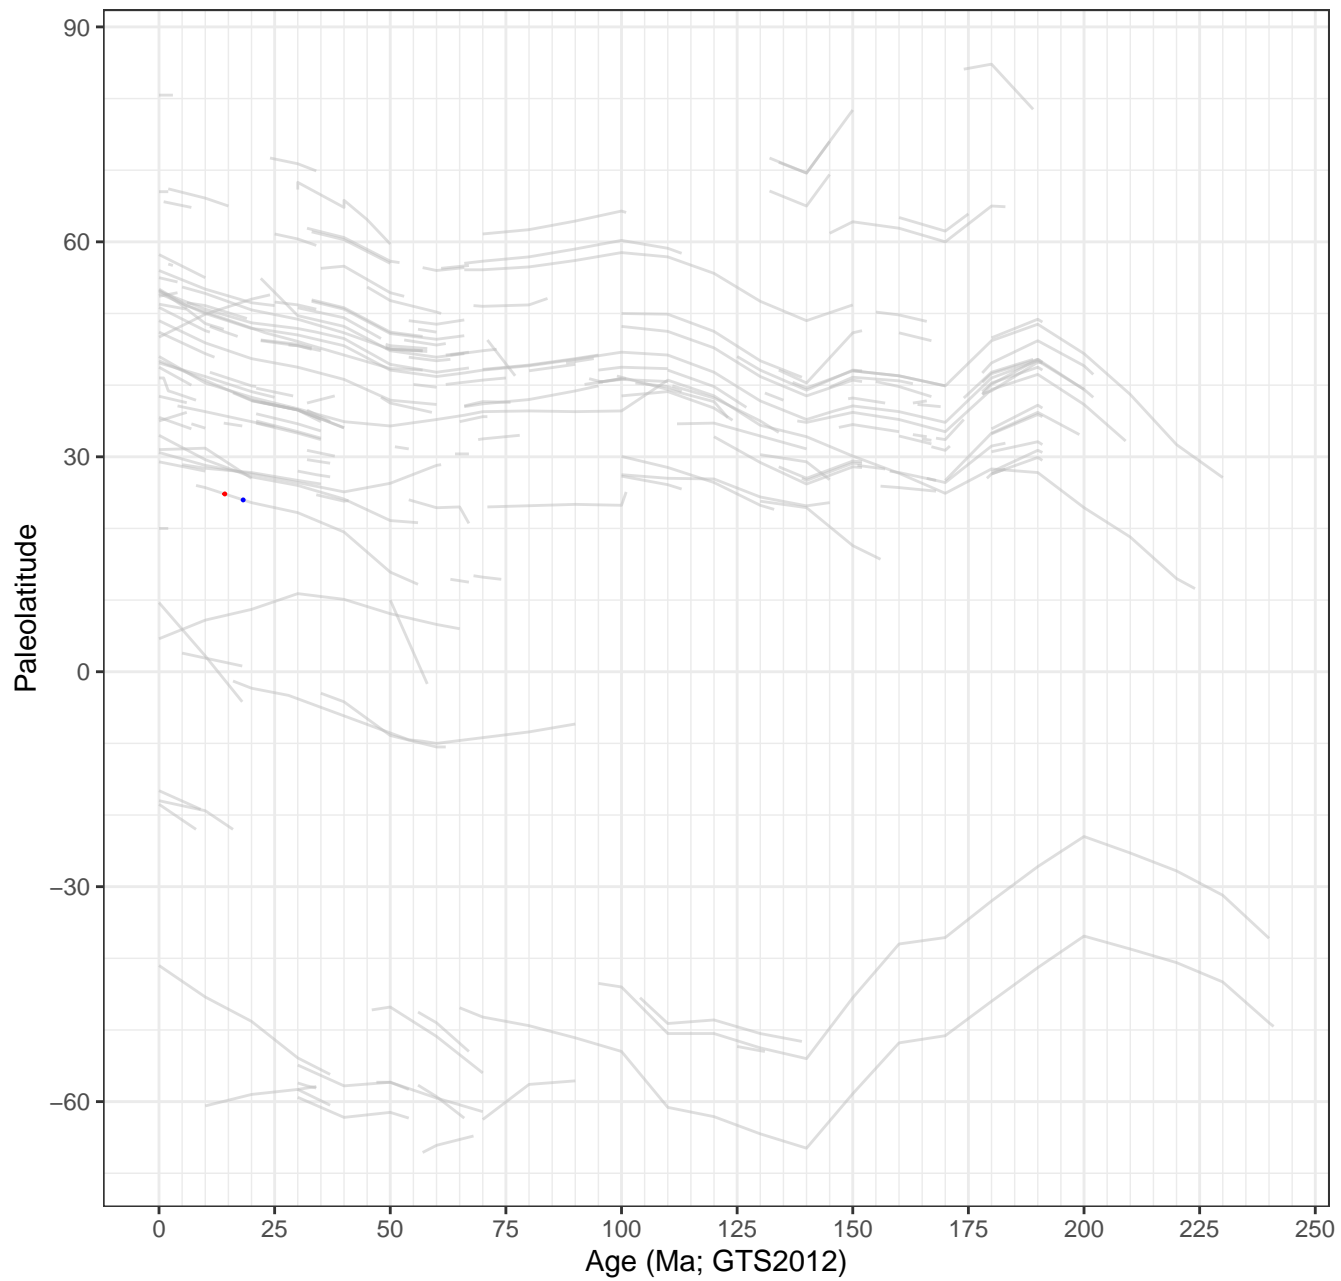

Supplement: Supplementary file 1777 [file Lejeunecysta convexa.pdf › Supplement/Supplement 2/Species 1914 plots/Lejeunecysta convexa.pdf]

# Species *Lejeunecysta cowiae*

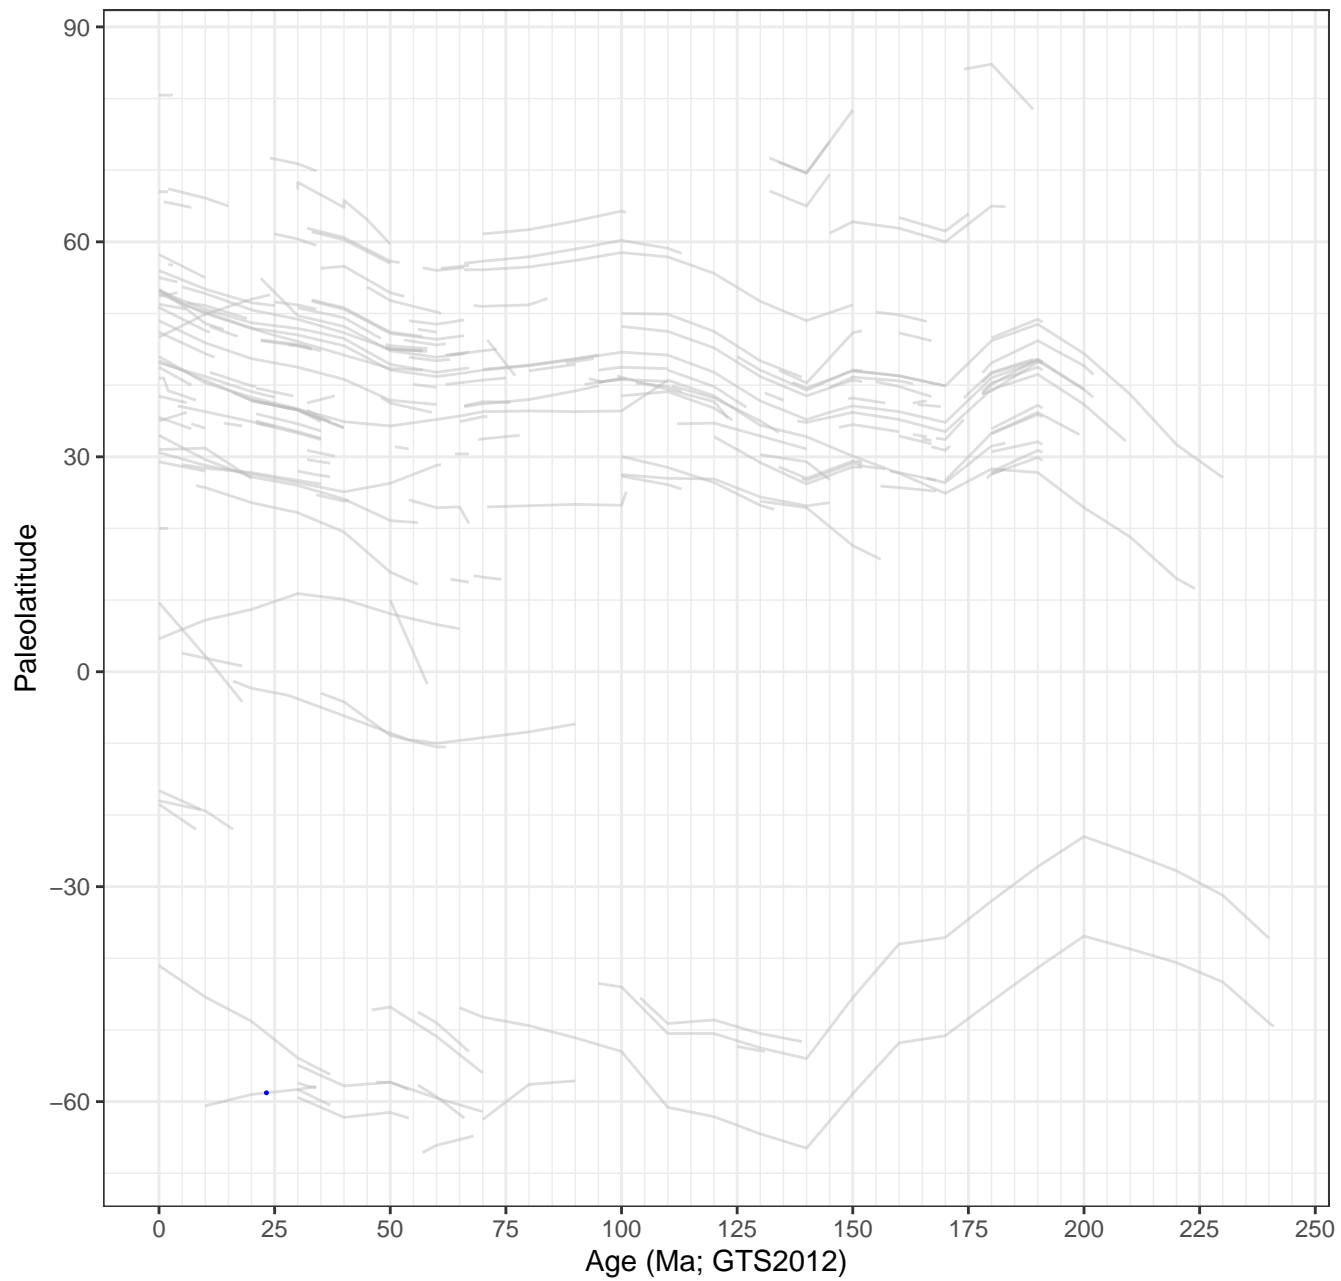

Supplement: Supplementary file 1778 [file Lejeunecysta cowiae.pdf › Supplement/Supplement 2/Species 1914 plots/Lejeunecysta cowiae.pdf]

# Species *Lejeunecysta diversiforma*

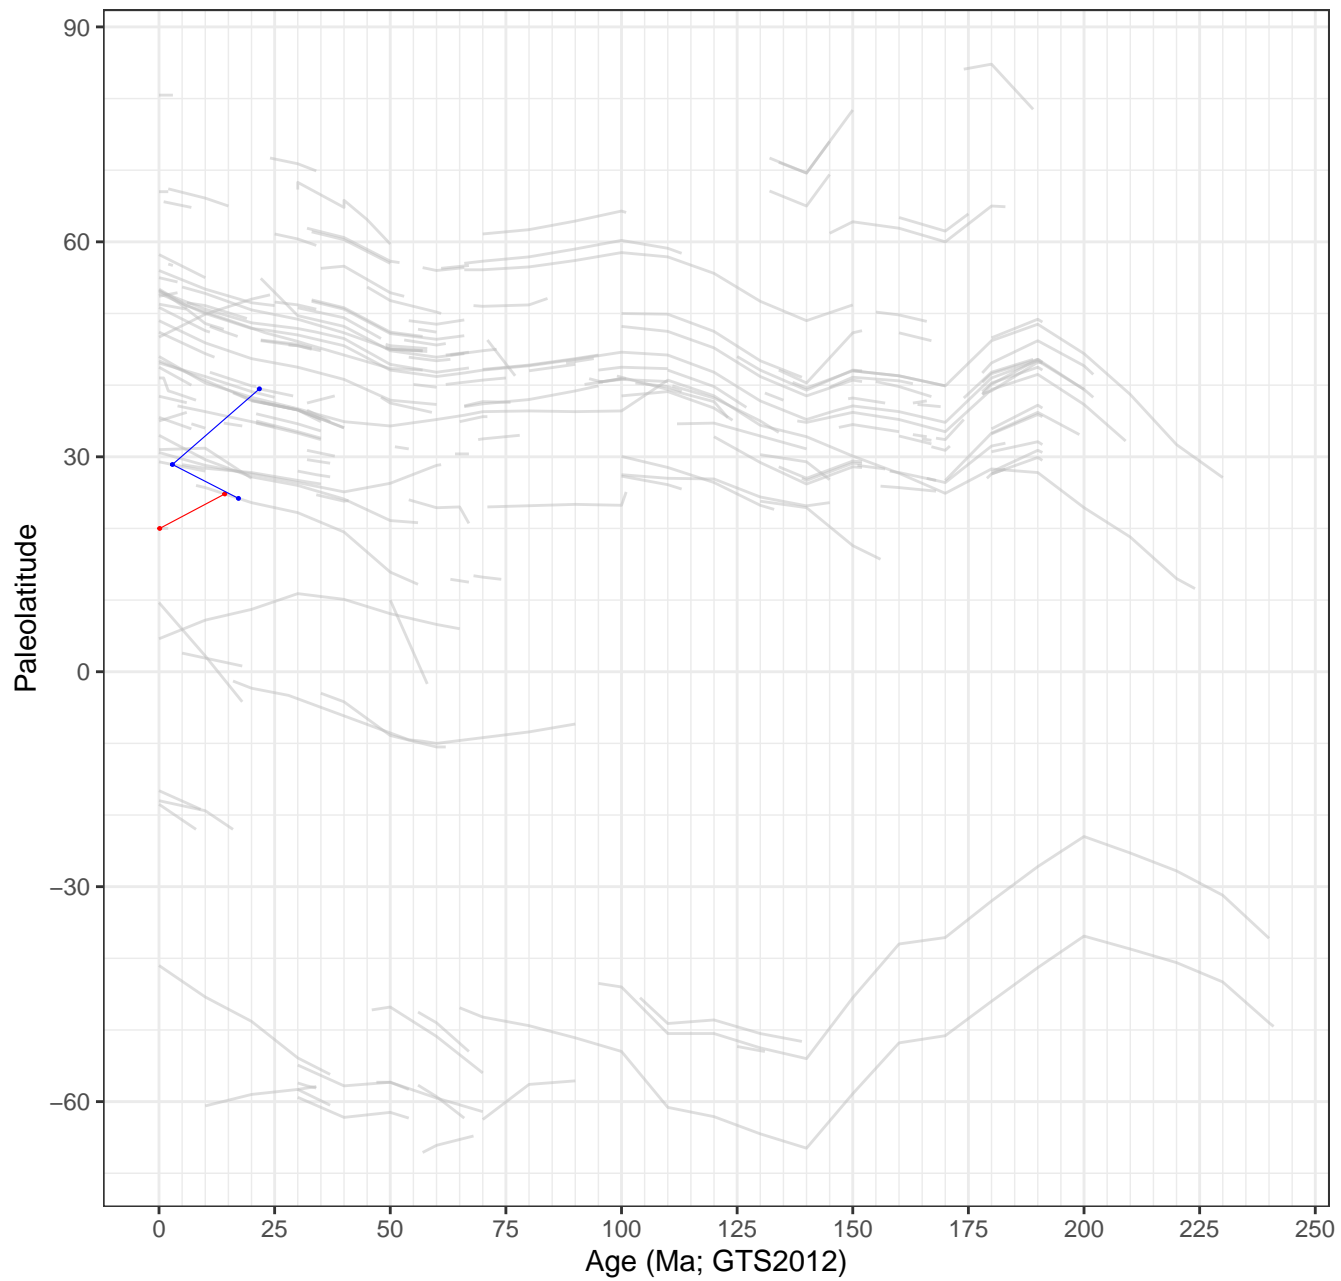

Supplement: Supplementary file 1779 [file Lejeunecysta diversiforma.pdf › Supplement/Supplement 2/Species 1914 plots/Lejeunecysta diversiforma.pdf]

# Species *Lejeunecysta fallax*

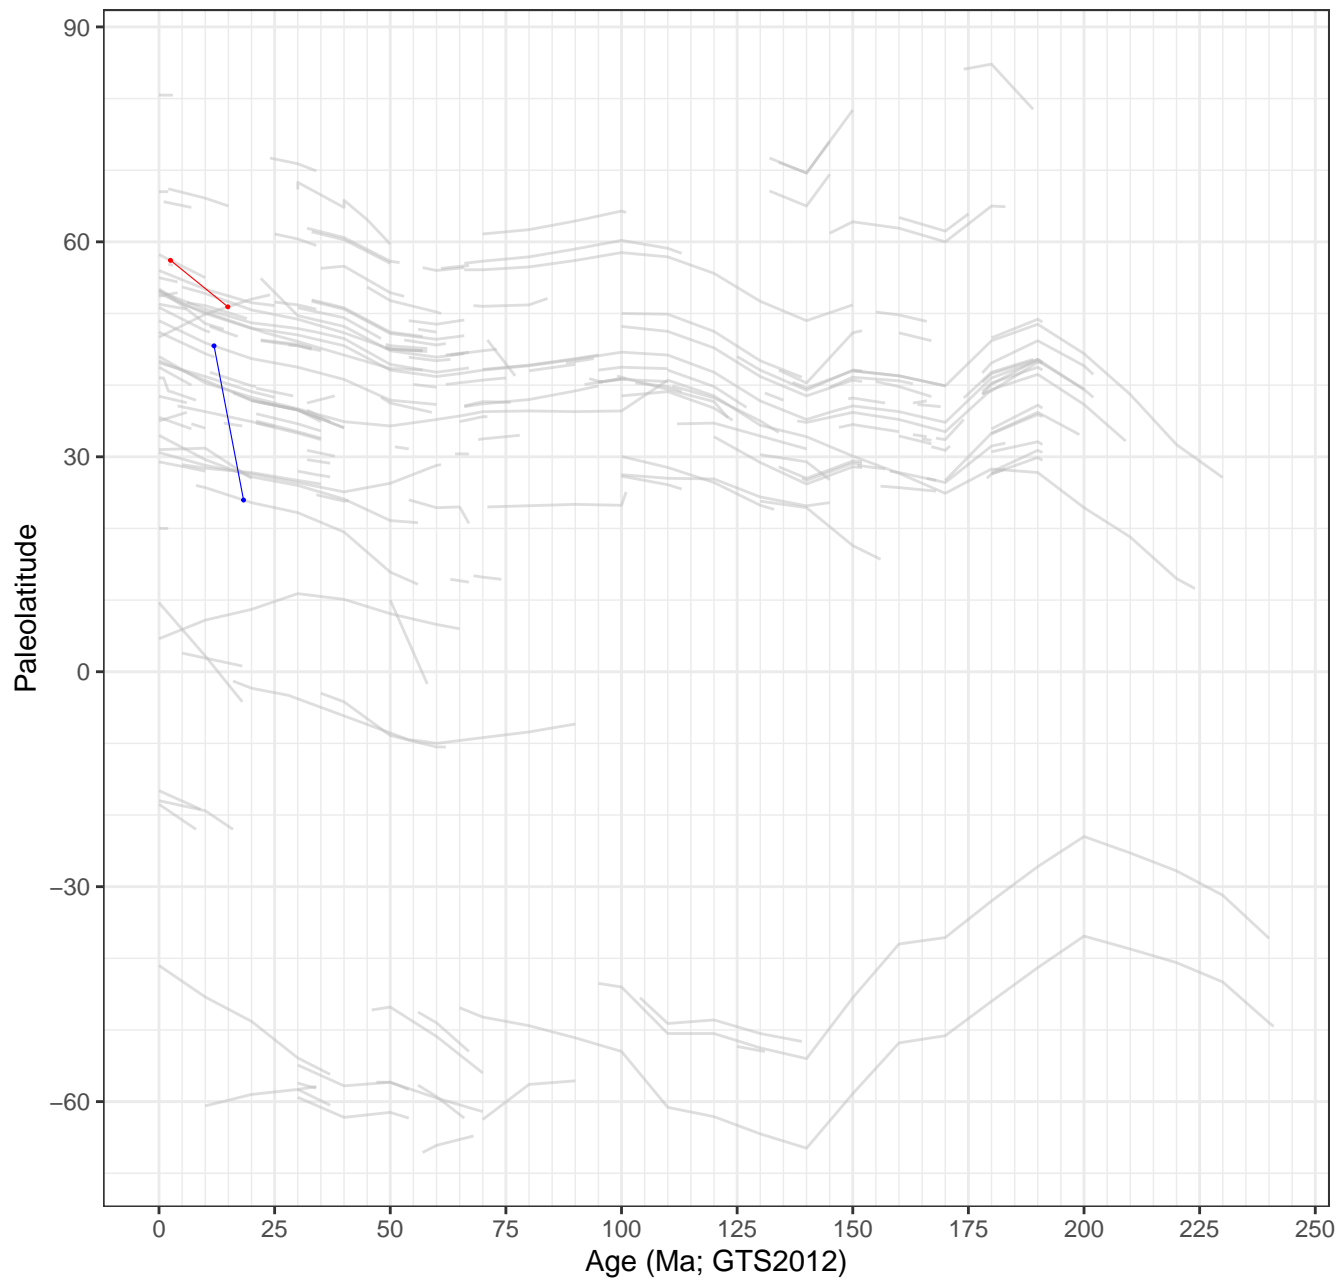

Supplement: Supplementary file 1780 [file Lejeunecysta fallax.pdf › Supplement/Supplement 2/Species 1914 plots/Lejeunecysta fallax.pdf]

# Species *Lejeunecysta globosa*

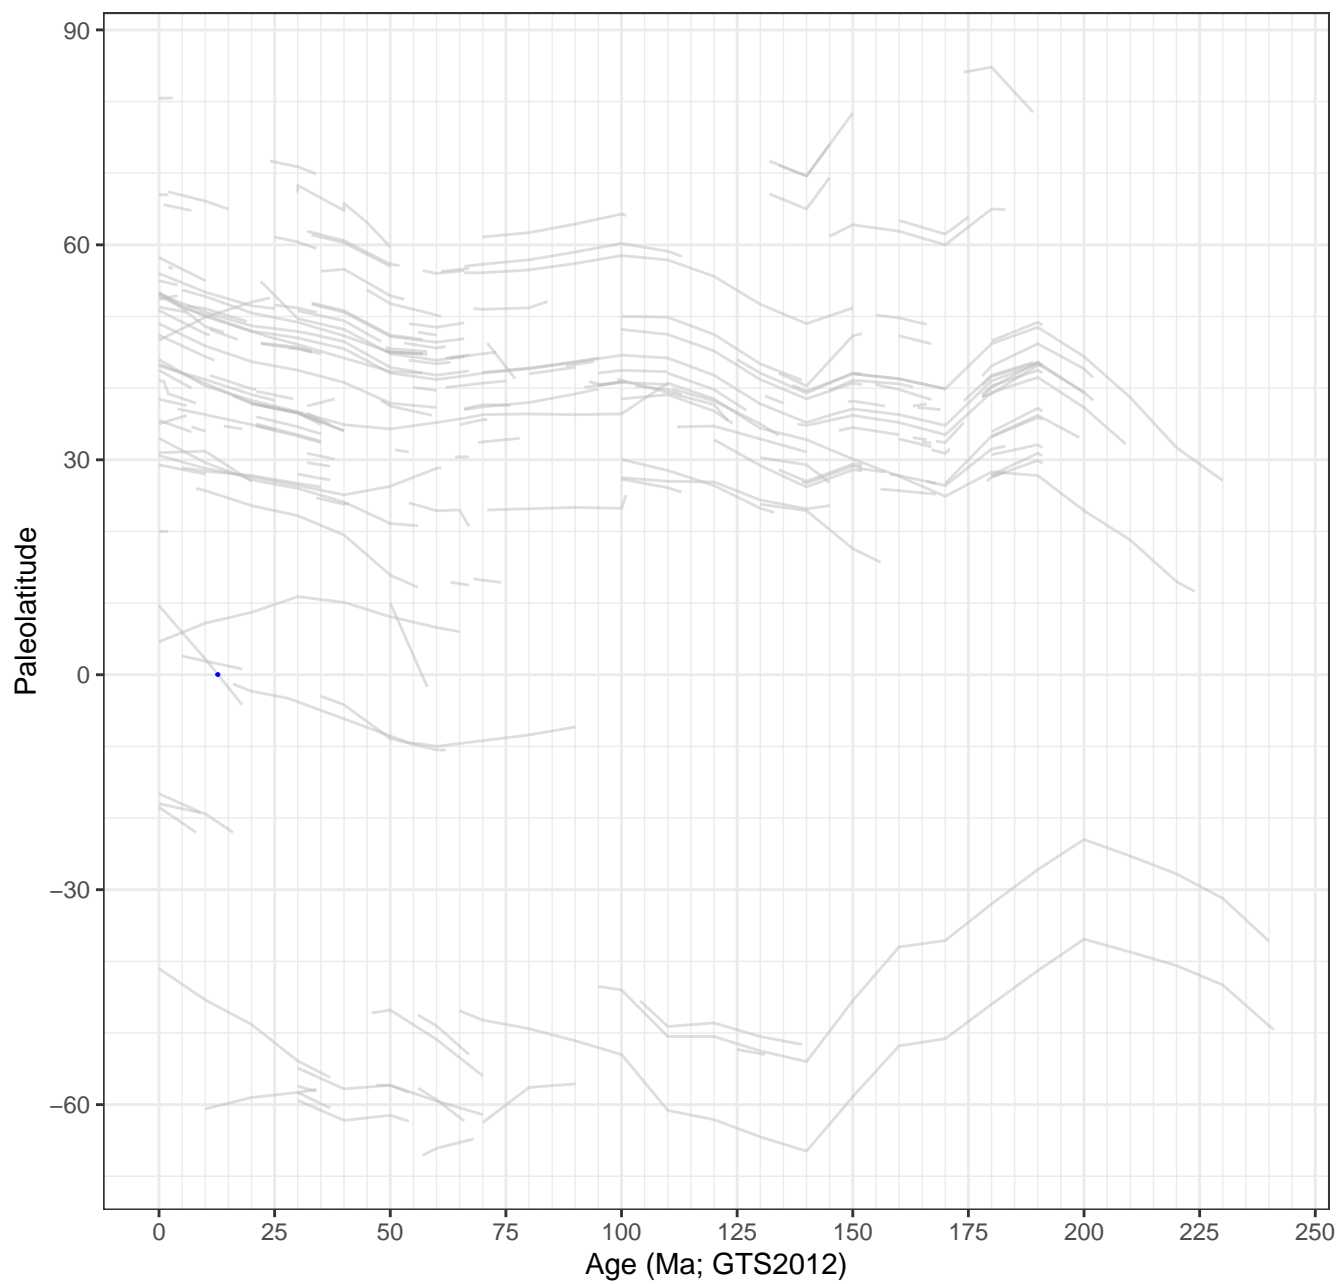

Supplement: Supplementary file 1781 [file Lejeunecysta globosa.pdf › Supplement/Supplement 2/Species 1914 plots/Lejeunecysta globosa.pdf]

# Species *Lejeunecysta granosa*

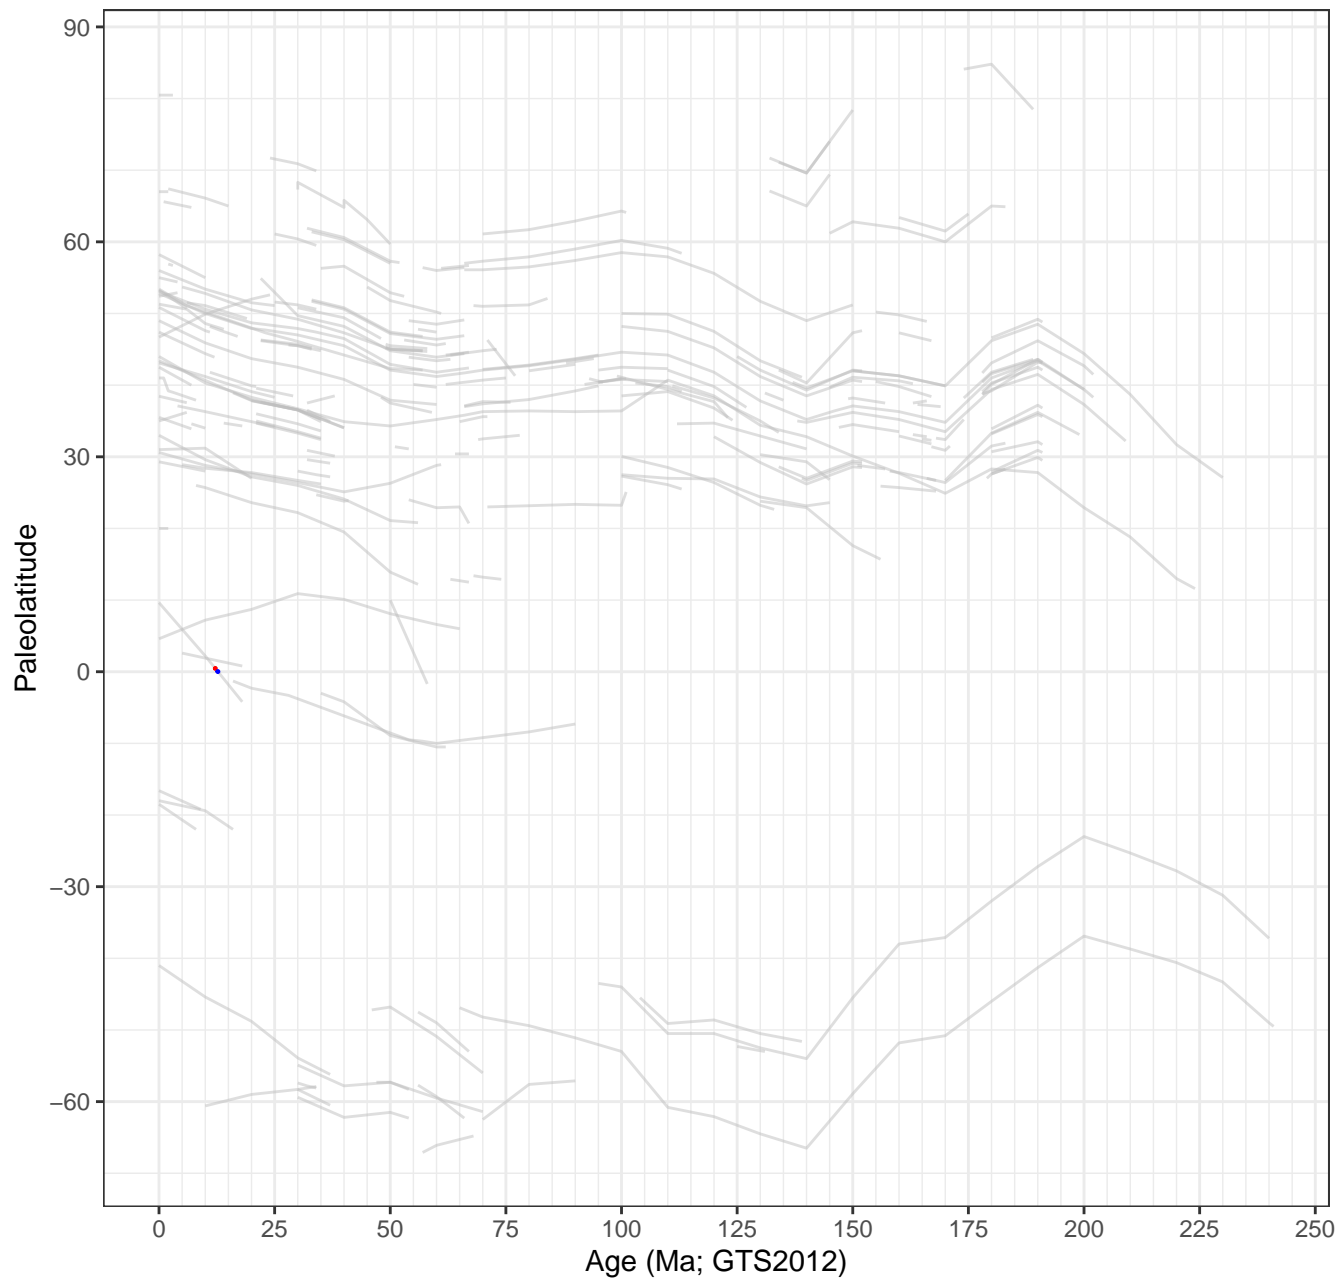

Supplement: Supplementary file 1782 [file Lejeunecysta granosa.pdf › Supplement/Supplement 2/Species 1914 plots/Lejeunecysta granosa.pdf]

# Species *Lejeunecysta hatterasensis*

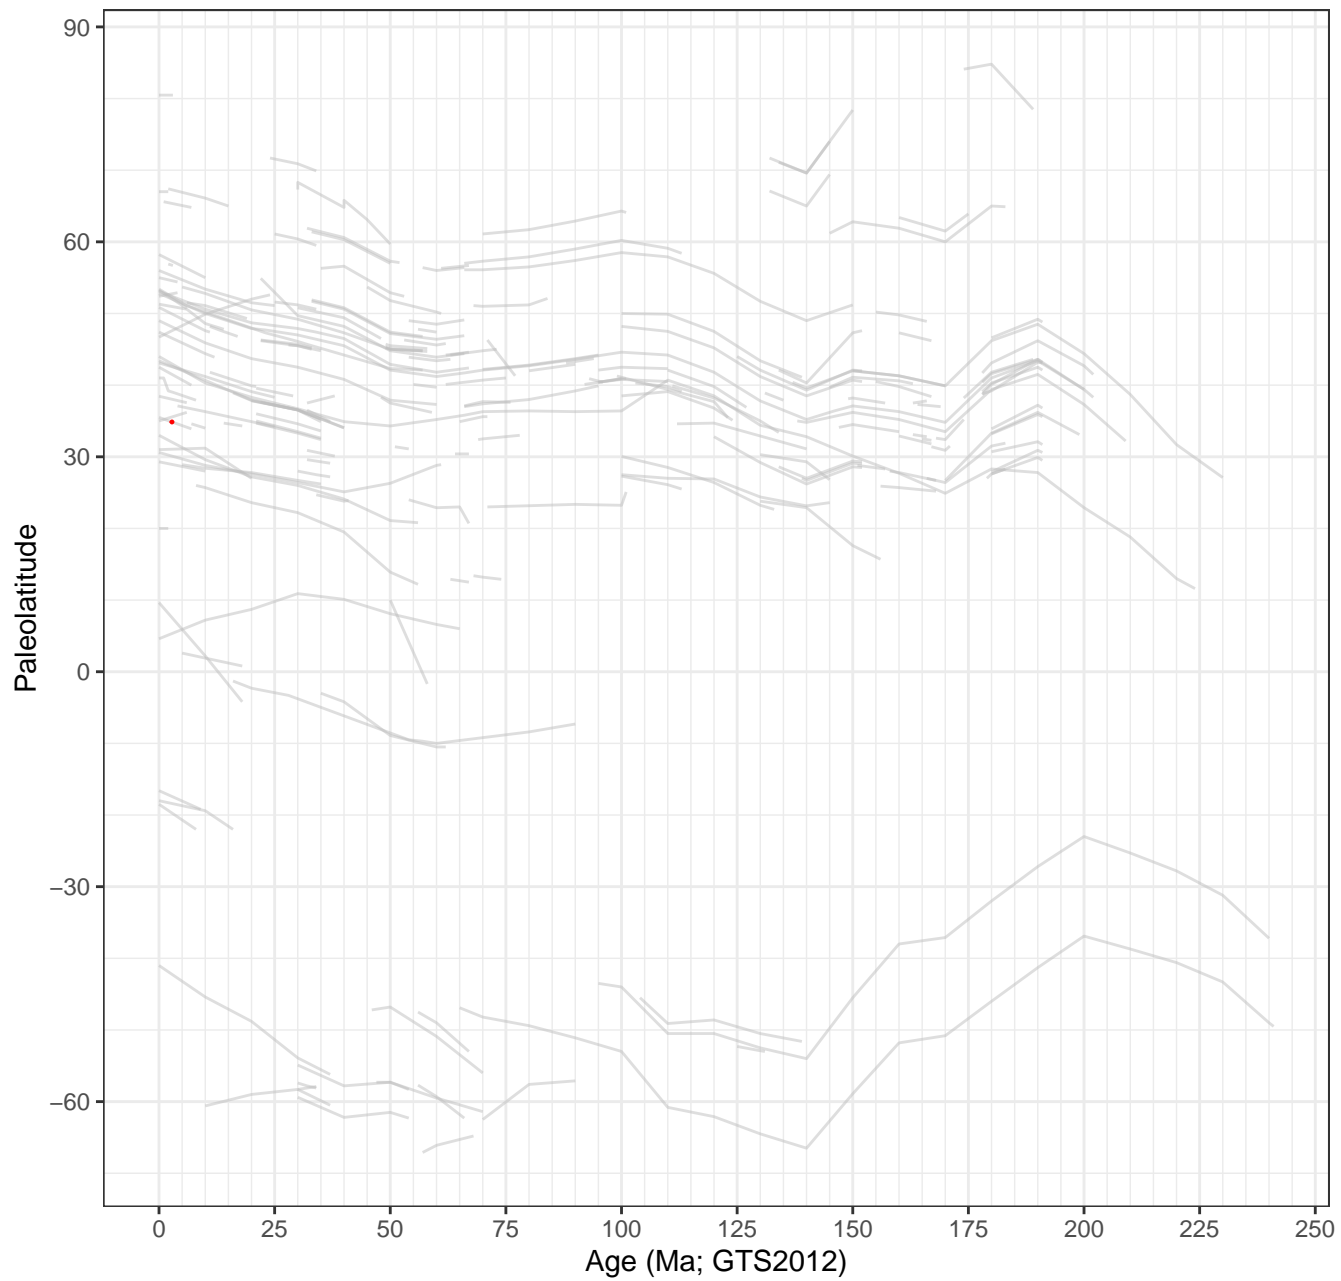

Supplement: Supplementary file 1783 [file Lejeunecysta hatterasensis.pdf › Supplement/Supplement 2/Species 1914 plots/Lejeunecysta hatterasensis.pdf]

# Species *Lejeunecysta hyalina*

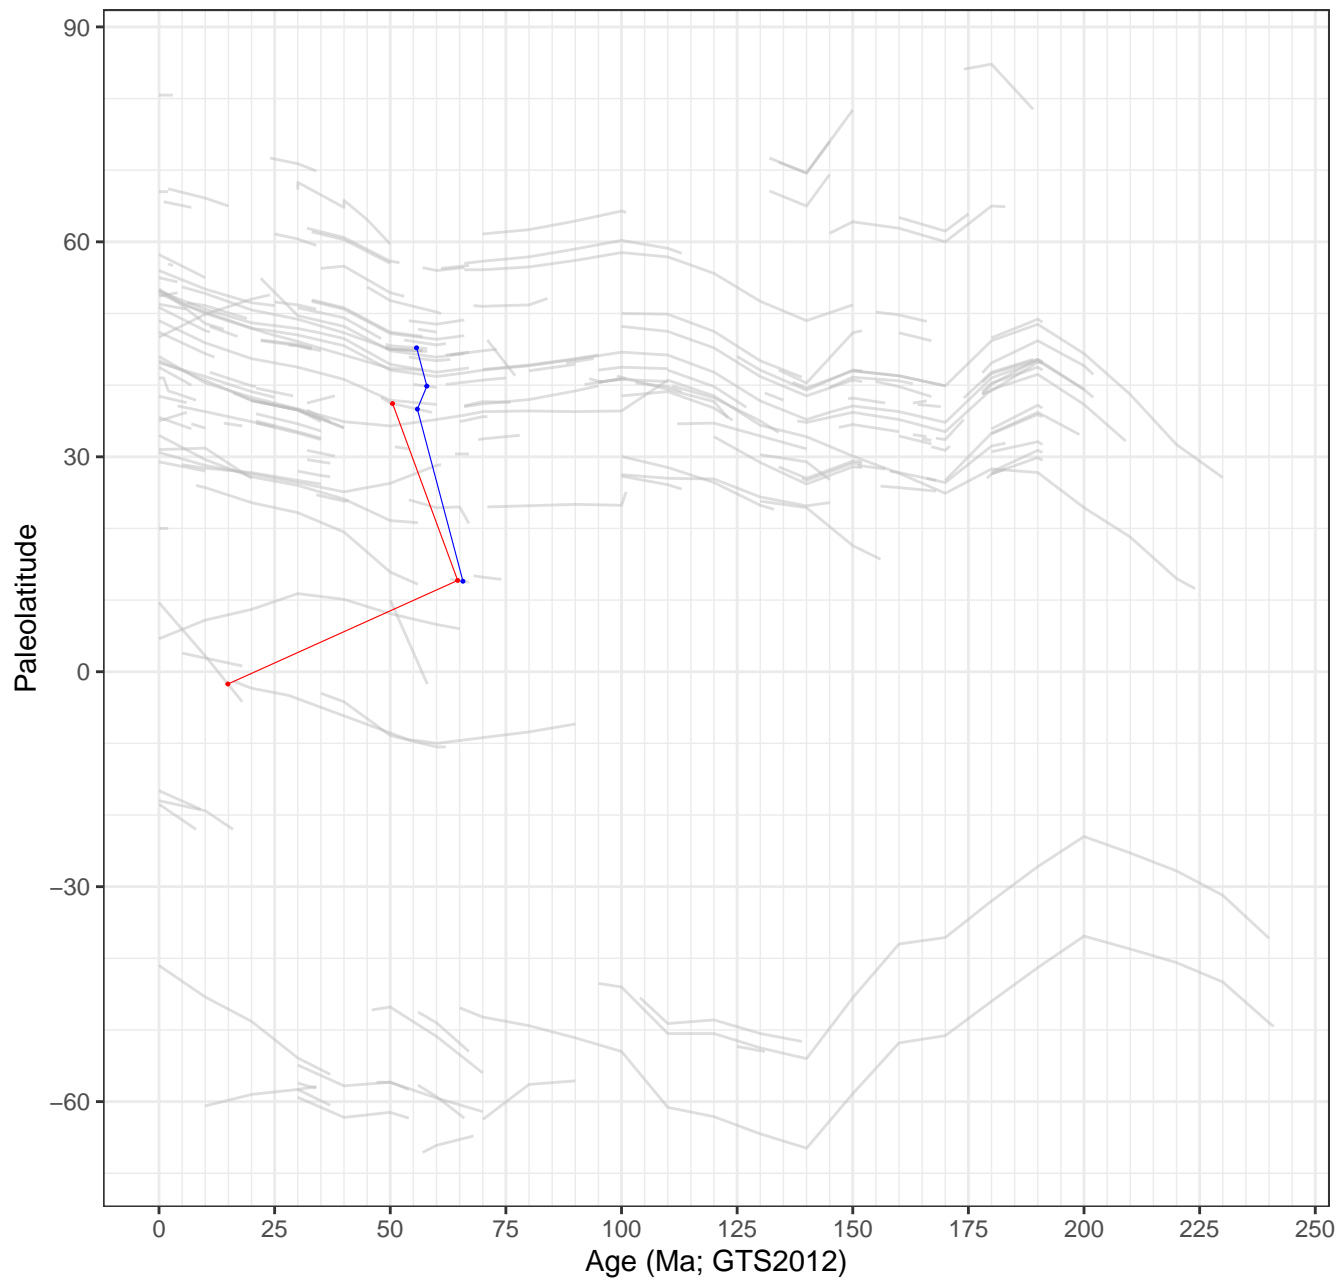

Supplement: Supplementary file 1784 [file Lejeunecysta hyalina.pdf › Supplement/Supplement 2/Species 1914 plots/Lejeunecysta hyalina.pdf]

# Species *Lejeunecysta interrupta*

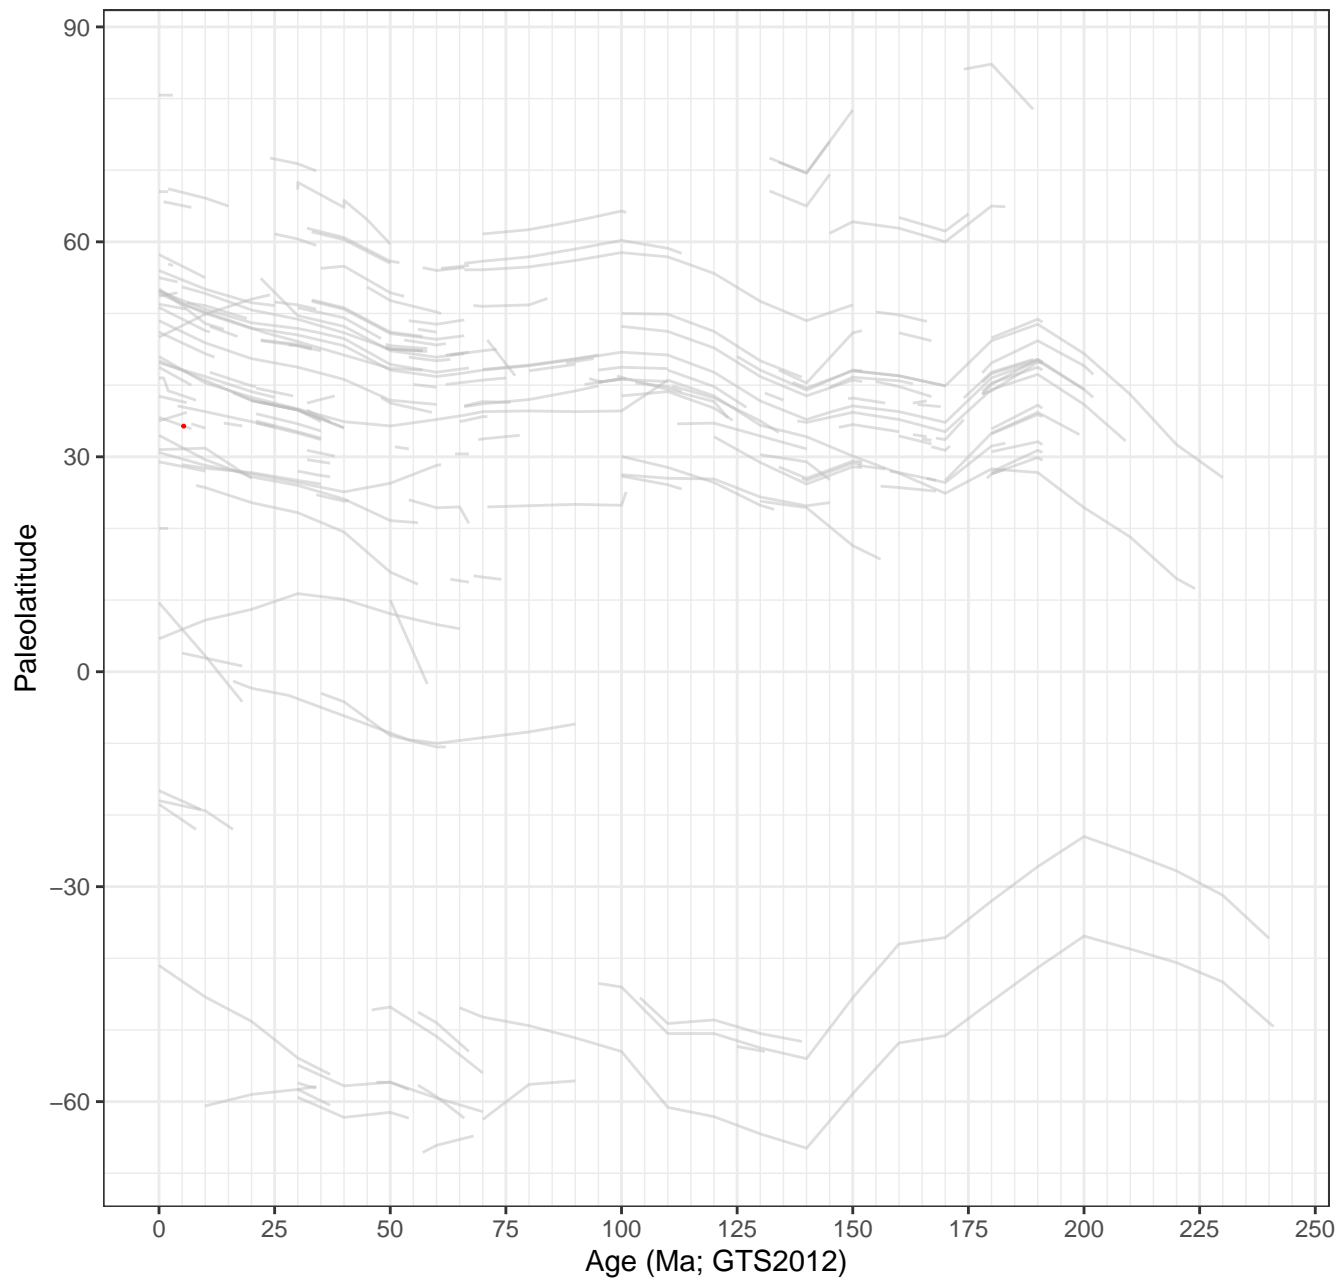

Supplement: Supplementary file 1785 [file Lejeunecysta interrupta.pdf › Supplement/Supplement 2/Species 1914 plots/Lejeunecysta interrupta.pdf]

# Species *Lejeunecysta izerzenensis*

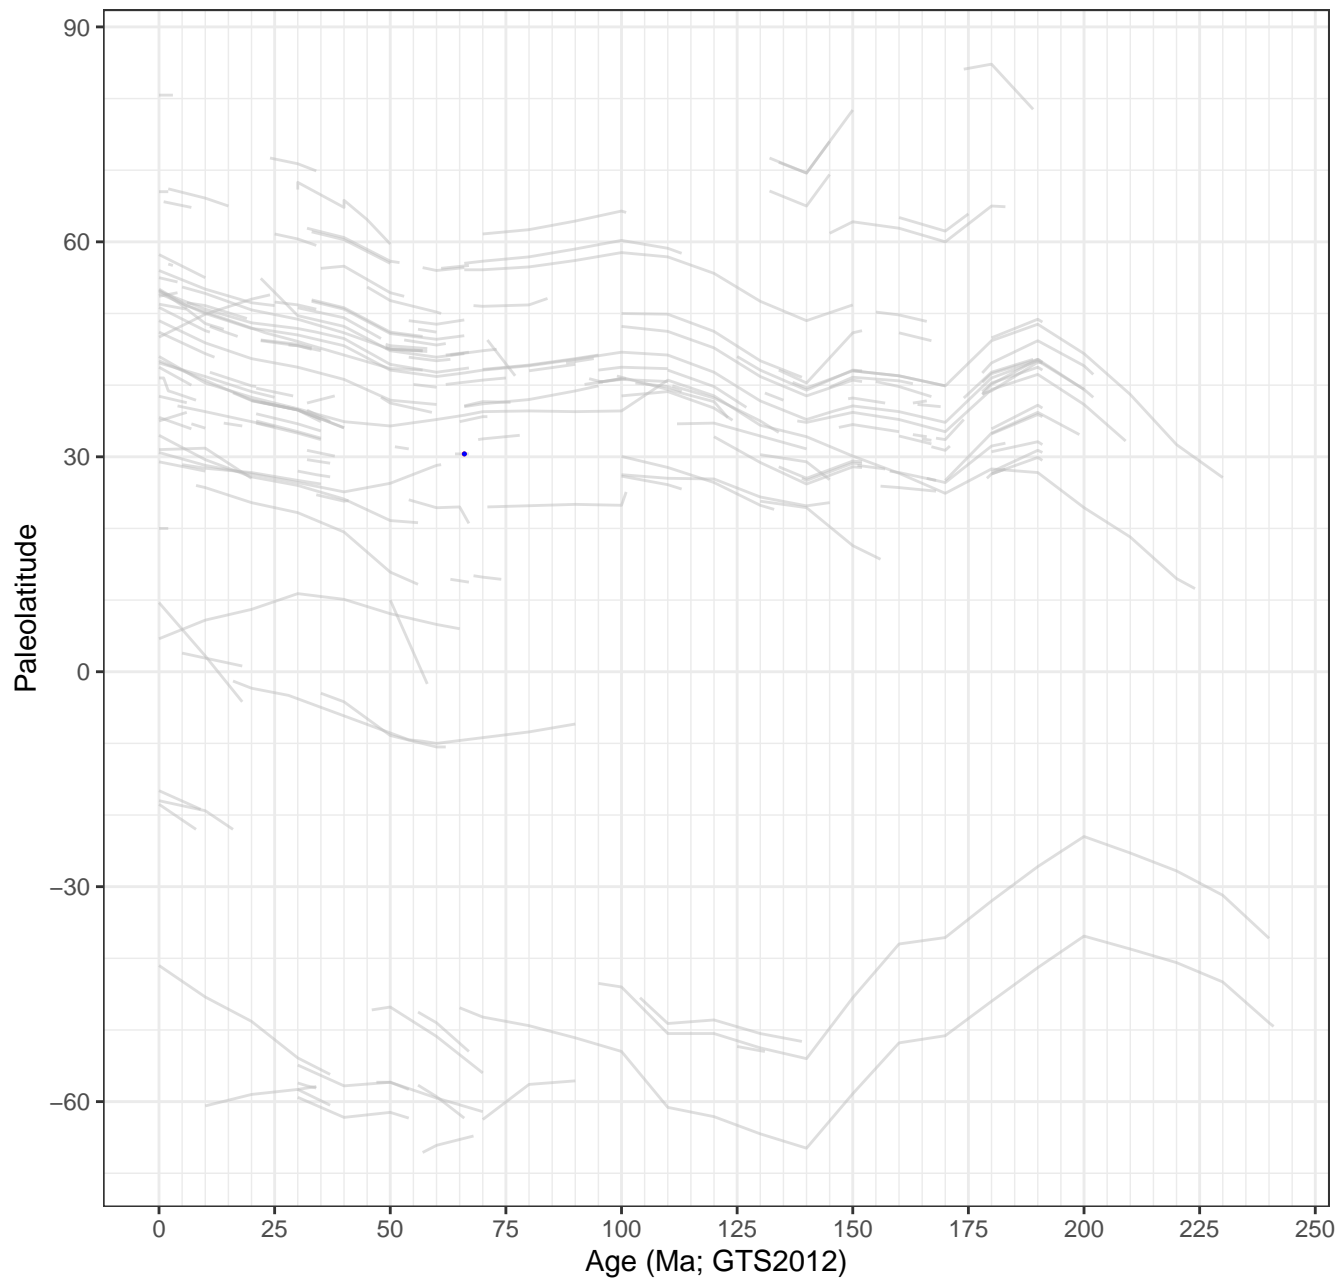

Supplement: Supplementary file 1786 [file Lejeunecysta izerzenensis.pdf › Supplement/Supplement 2/Species 1914 plots/Lejeunecysta izerzenensis.pdf]

# Species *Lejeunecysta katatonos*

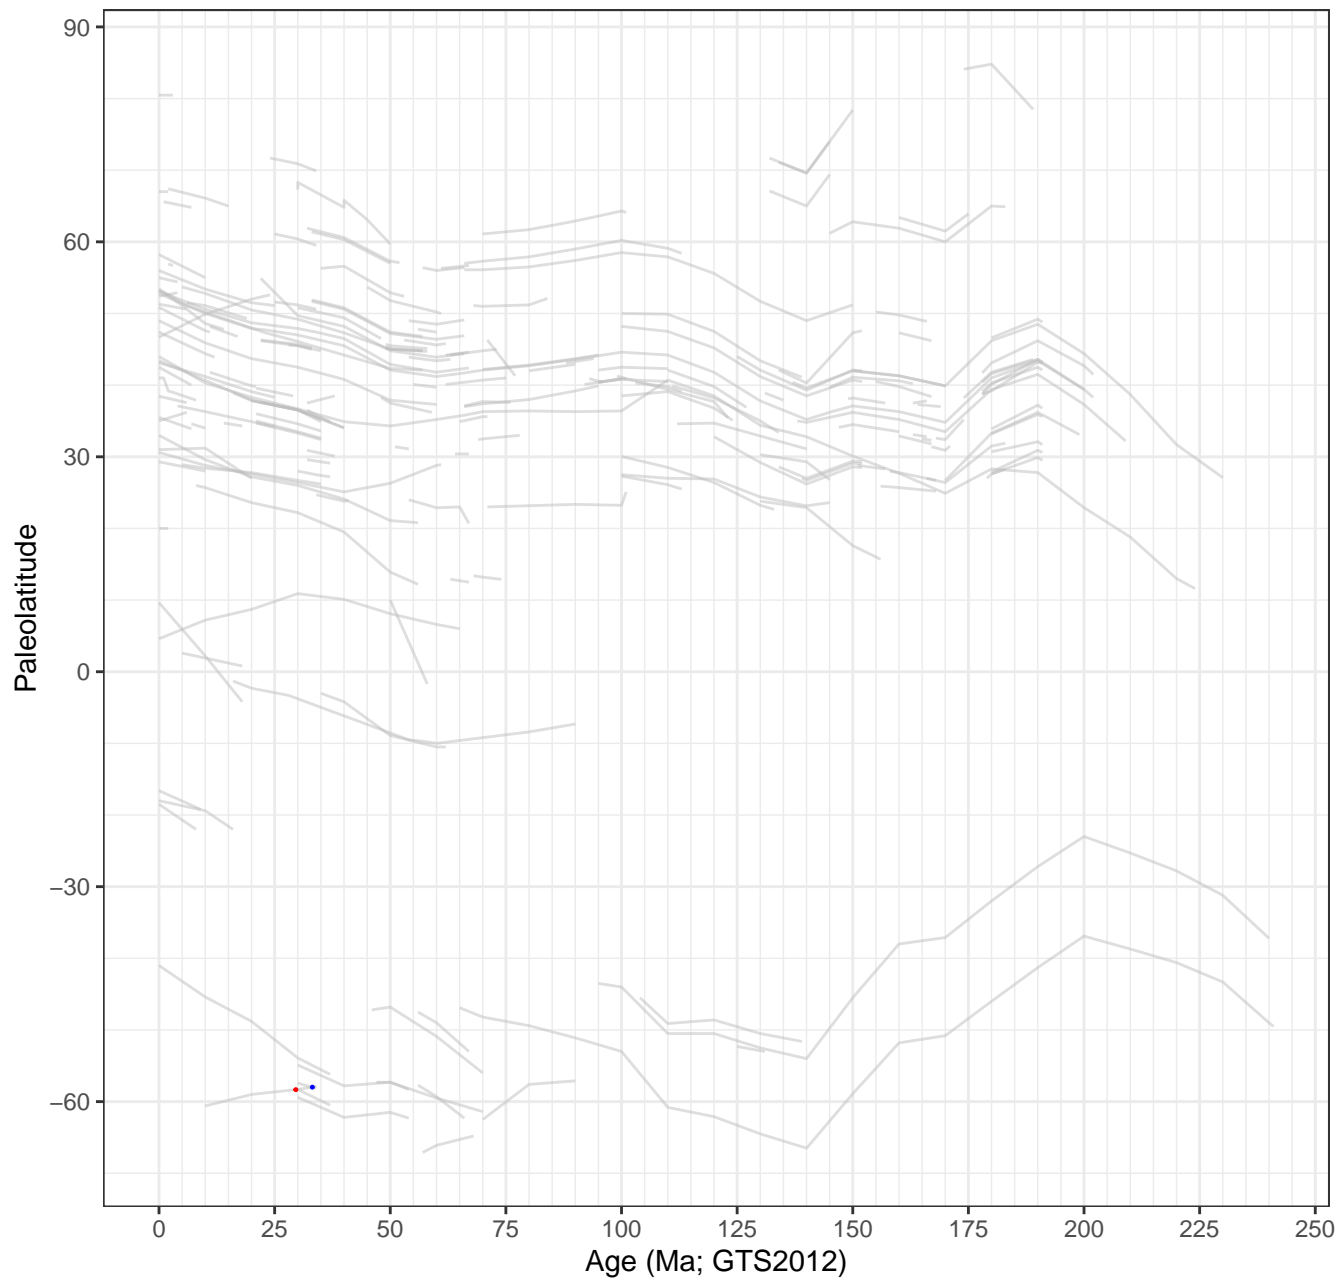

Supplement: Supplementary file 1787 [file Lejeunecysta katatonos.pdf › Supplement/Supplement 2/Species 1914 plots/Lejeunecysta katatonos.pdf]

# Species *Lejeunecysta mariae*

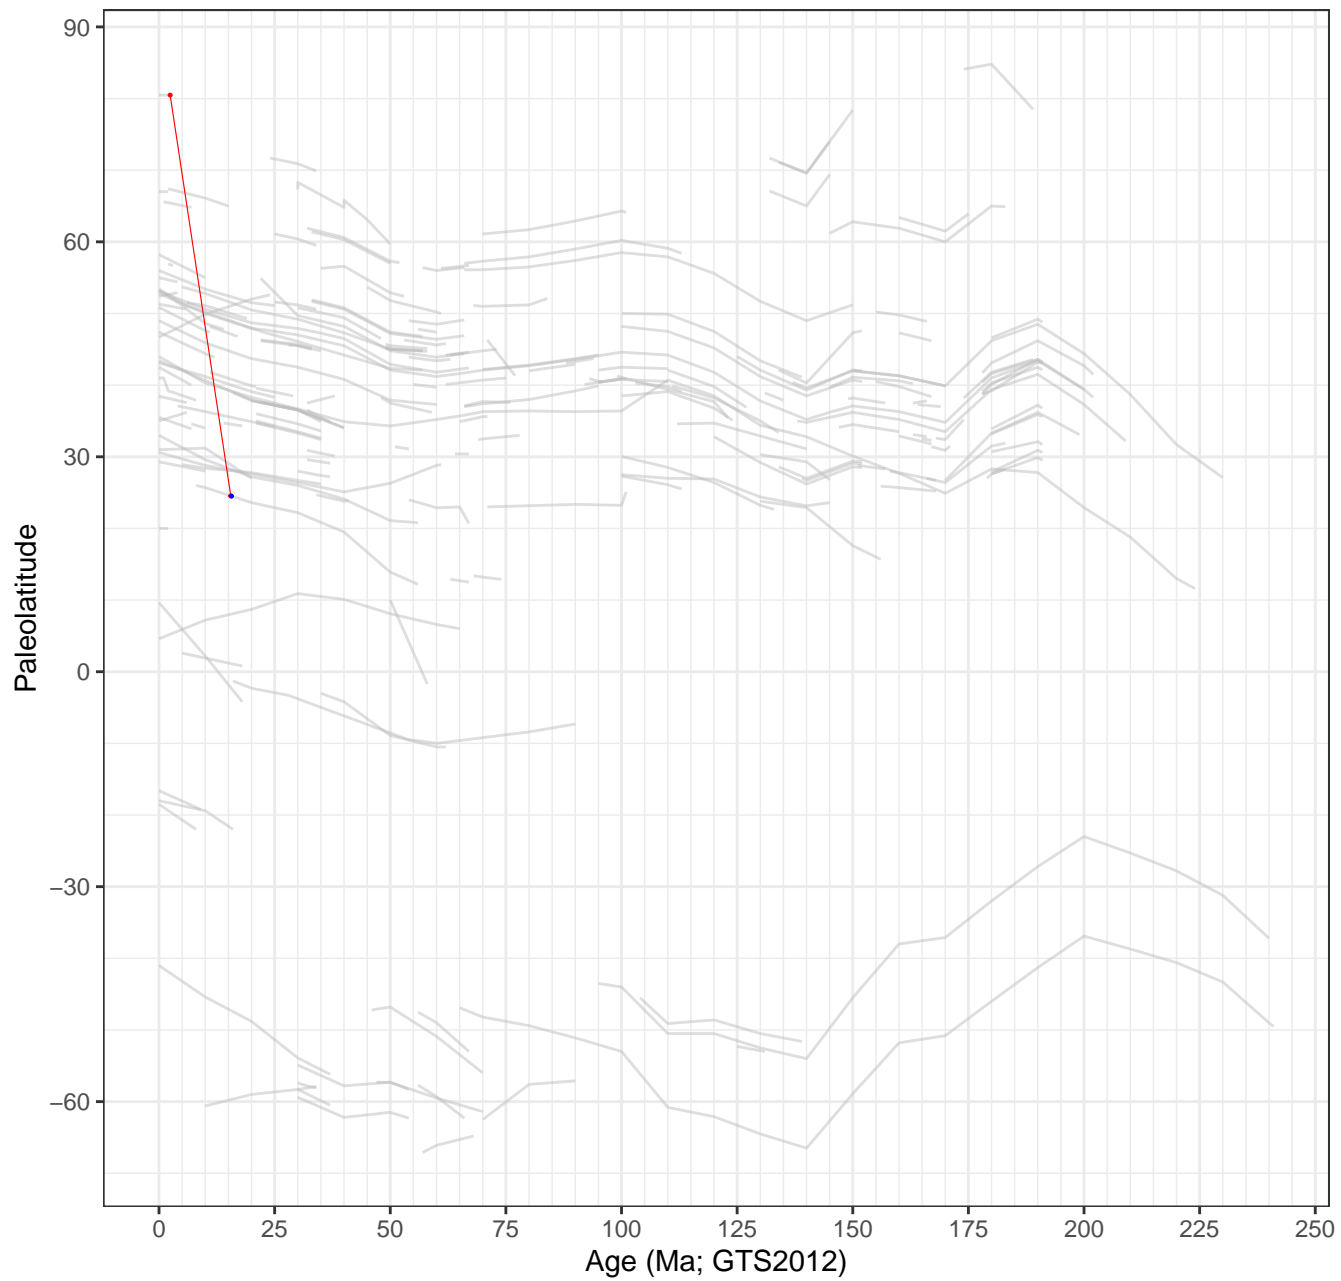

Supplement: Supplementary file 1788 [file Lejeunecysta mariae.pdf › Supplement/Supplement 2/Species 1914 plots/Lejeunecysta mariae.pdf]

# Species *Lejeunecysta pulchra*

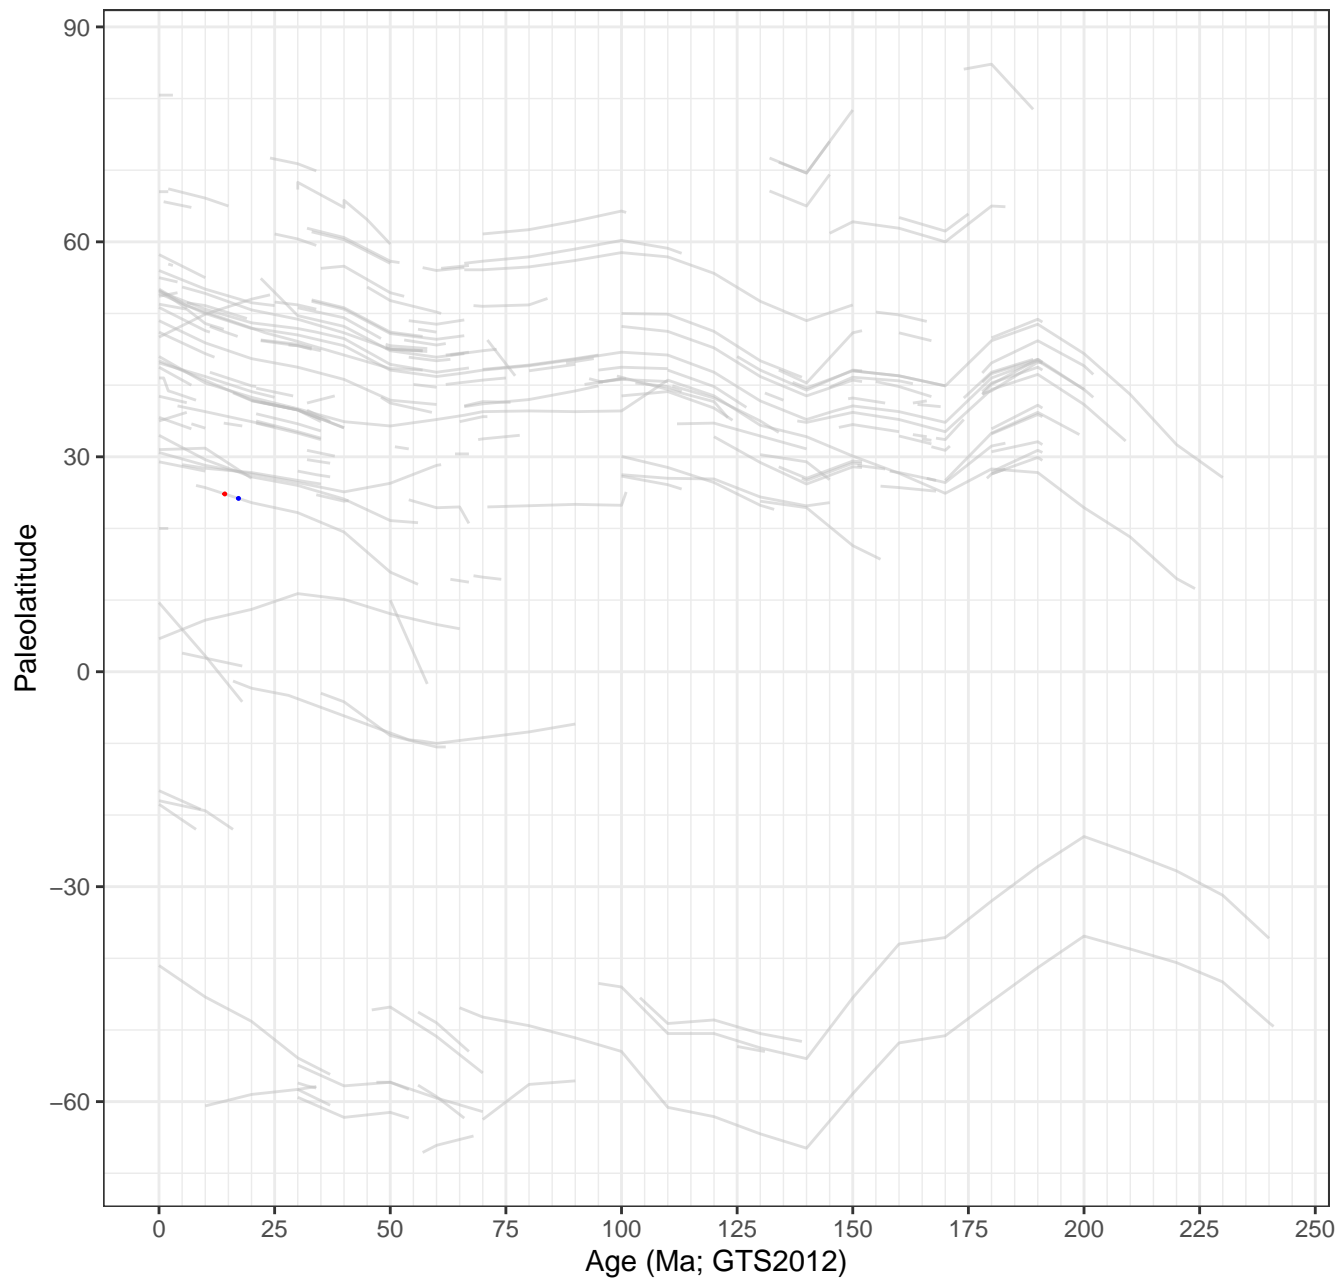

Supplement: Supplementary file 1789 [file Lejeunecysta pulchra.pdf › Supplement/Supplement 2/Species 1914 plots/Lejeunecysta pulchra.pdf]

# Species *Lejeunecysta rotunda*

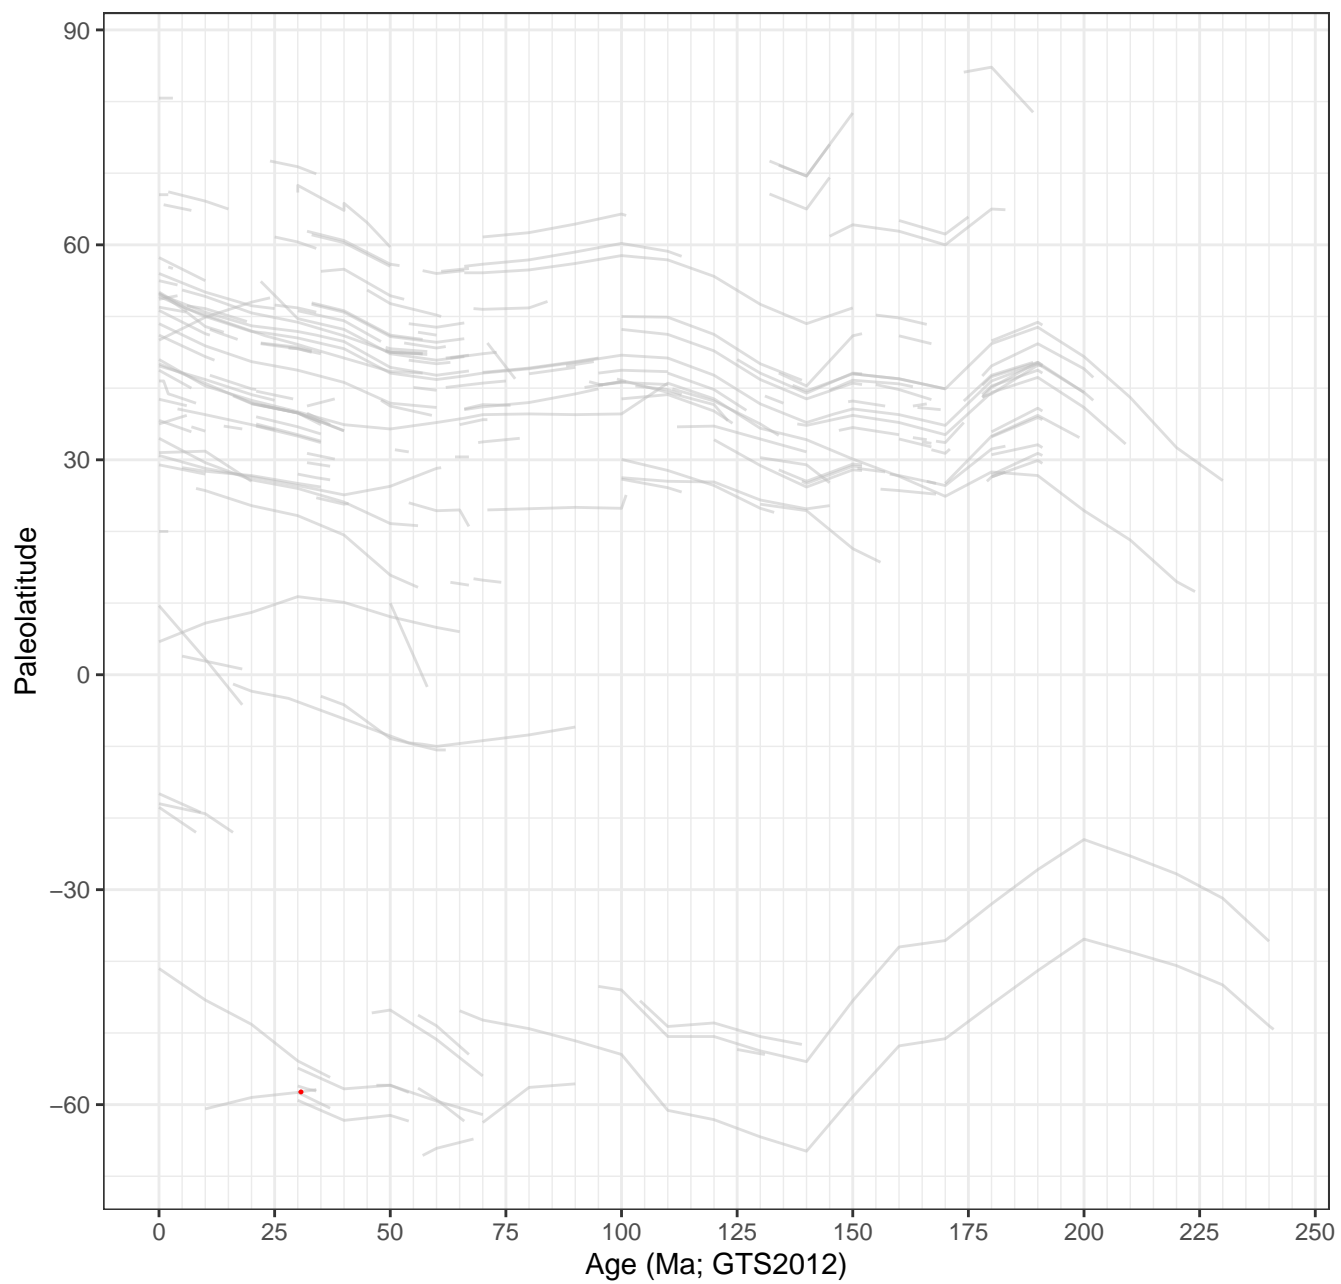

Supplement: Supplementary file 1790 [file Lejeunecysta rotunda.pdf › Supplement/Supplement 2/Species 1914 plots/Lejeunecysta rotunda.pdf]

# Species *Lejeunecysta spatiosa*

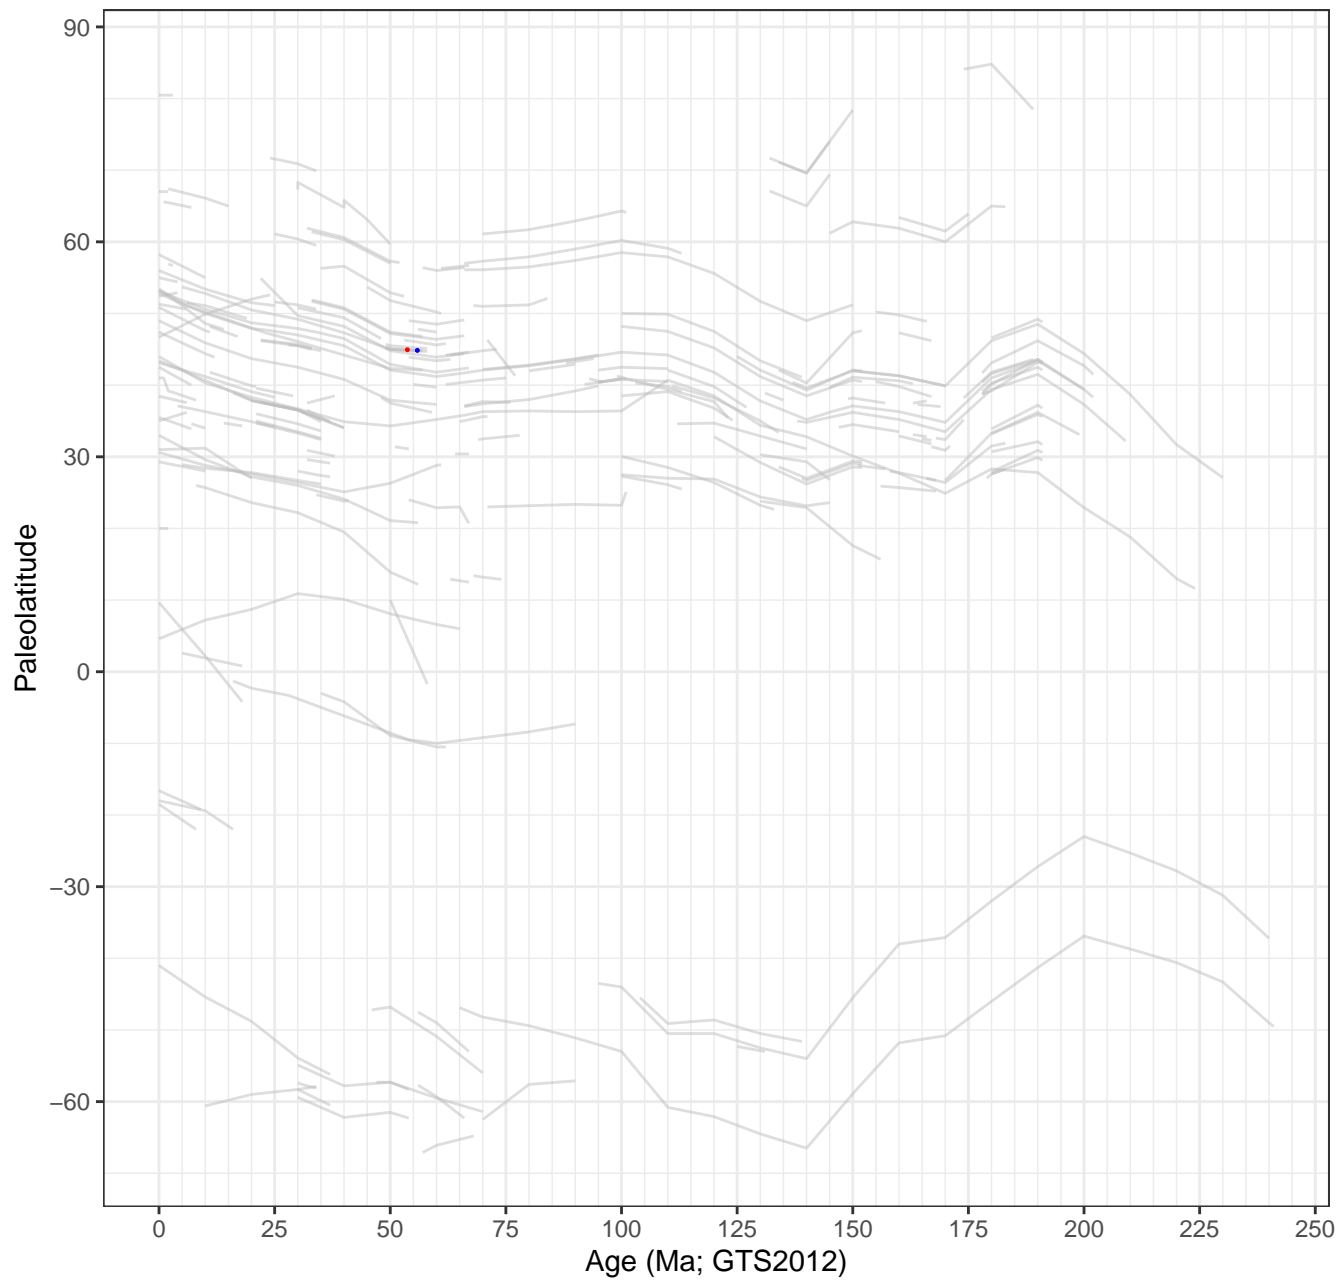

Supplement: Supplementary file 1791 [file Lejeunecysta spatiosa.pdf › Supplement/Supplement 2/Species 1914 plots/Lejeunecysta spatiosa.pdf]

# Species *Lejeunecysta* spp.

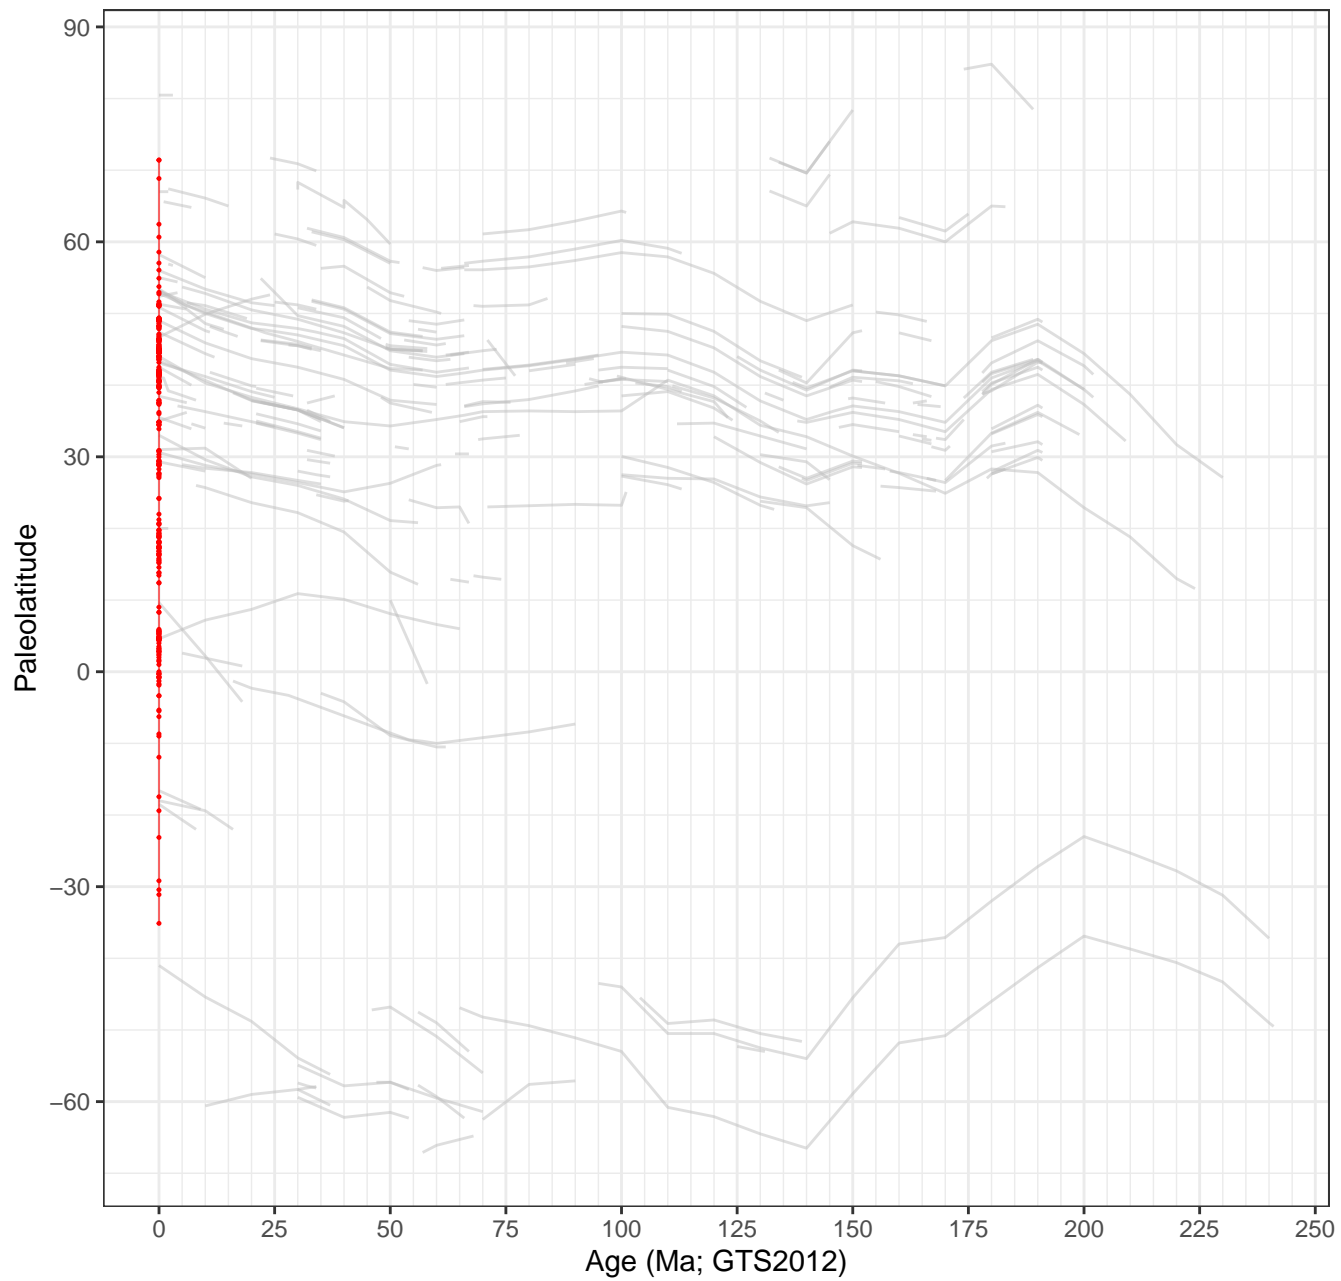

Supplement: Supplementary file 1792 [file Lejeunecysta spp..pdf › Supplement/Supplement 2/Species 1914 plots/Lejeunecysta spp..pdf]

# Species *Lejeunecysta tenella*

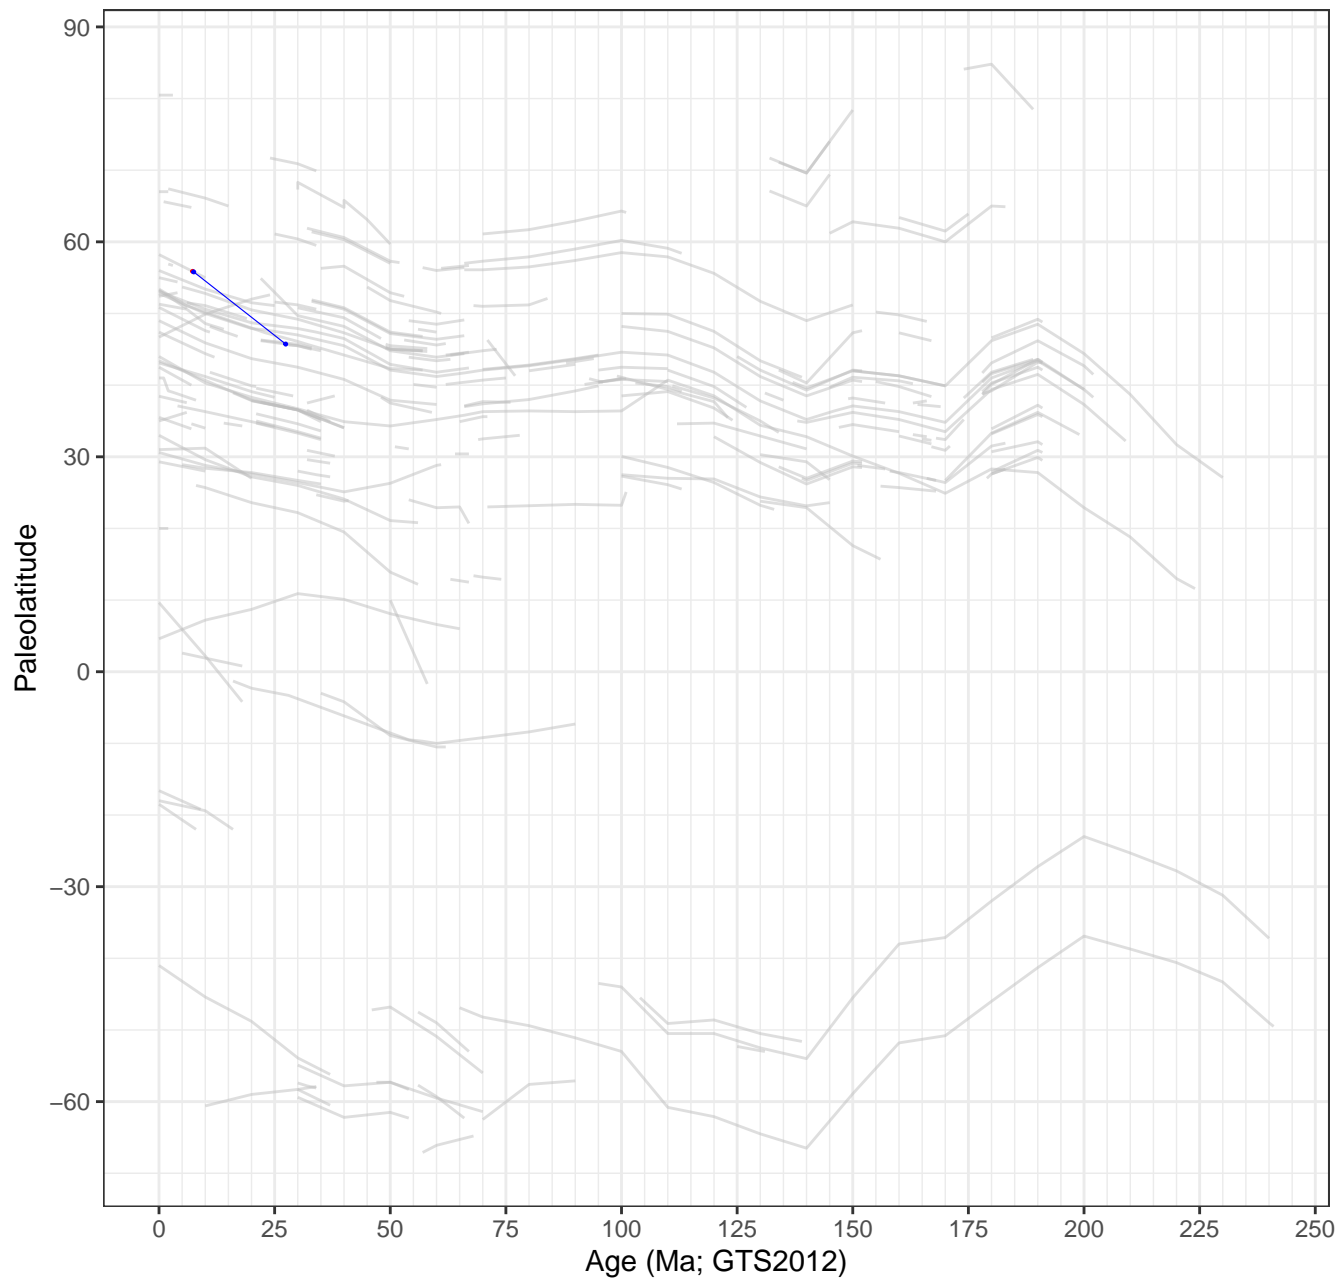

Supplement: Supplementary file 1793 [file Lejeunecysta tenella.pdf › Supplement/Supplement 2/Species 1914 plots/Lejeunecysta tenella.pdf]

# Species *Lentinia serrata*

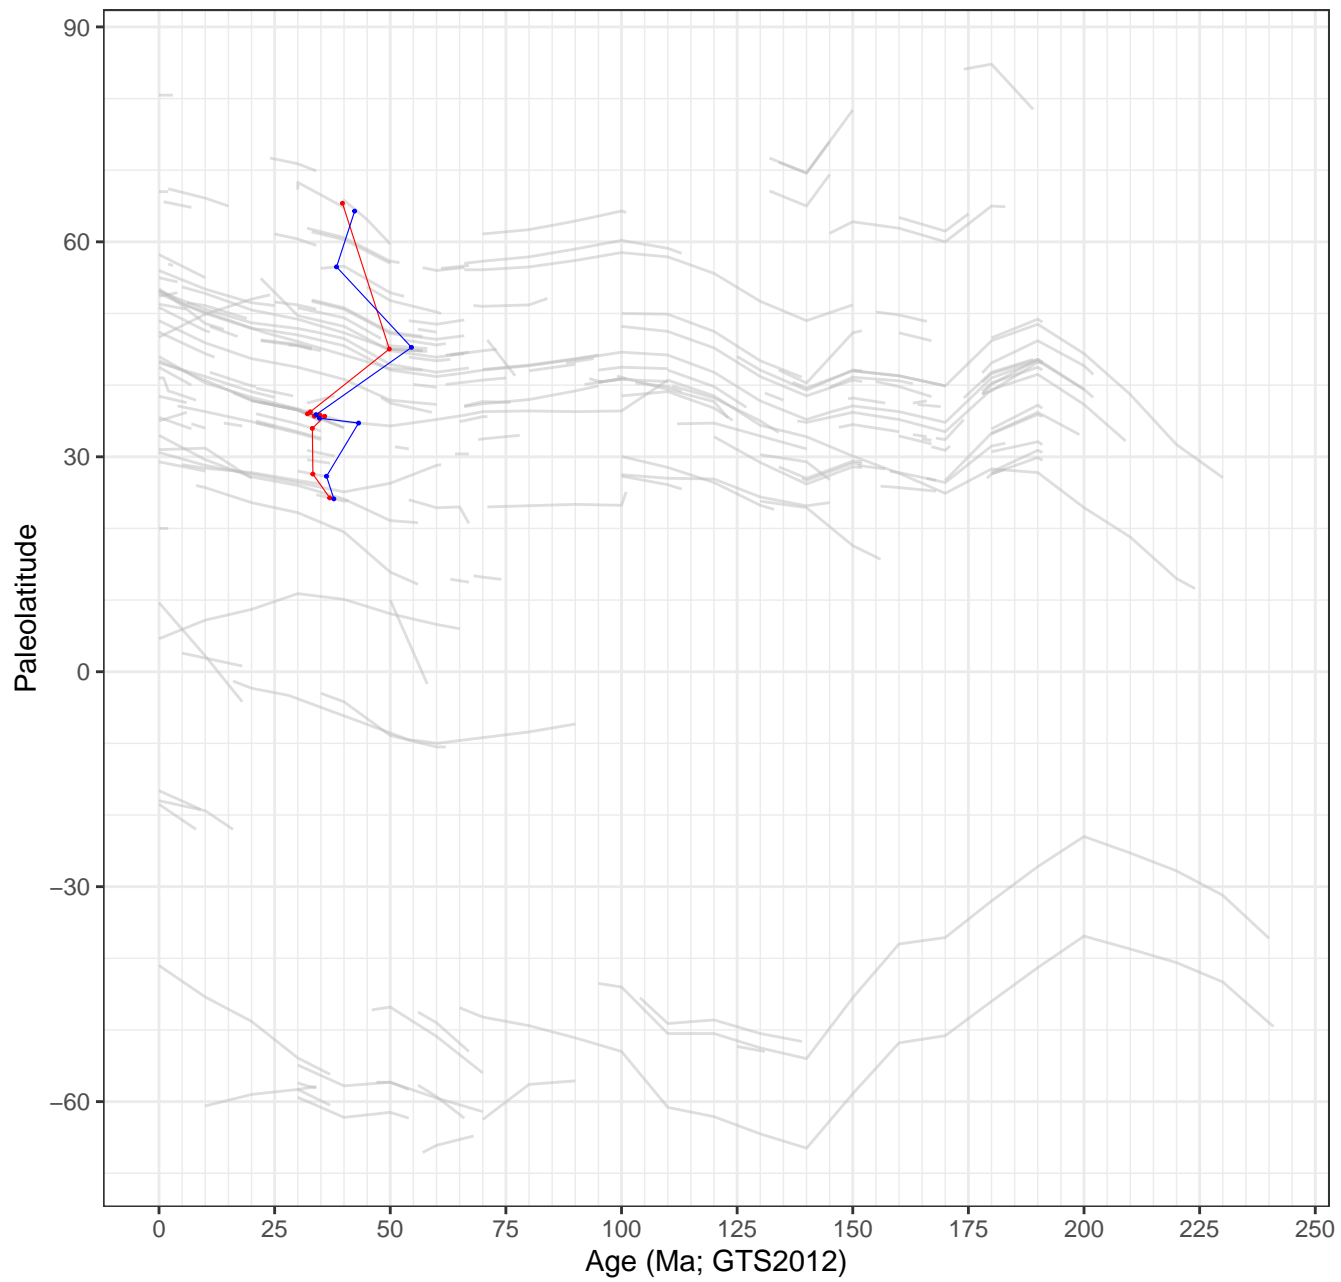

Supplement: Supplementary file 1794 [file Lentinia serrata.pdf › Supplement/Supplement 2/Species 1914 plots/Lentinia serrata.pdf]

# Species *Lentinia wetzellii*

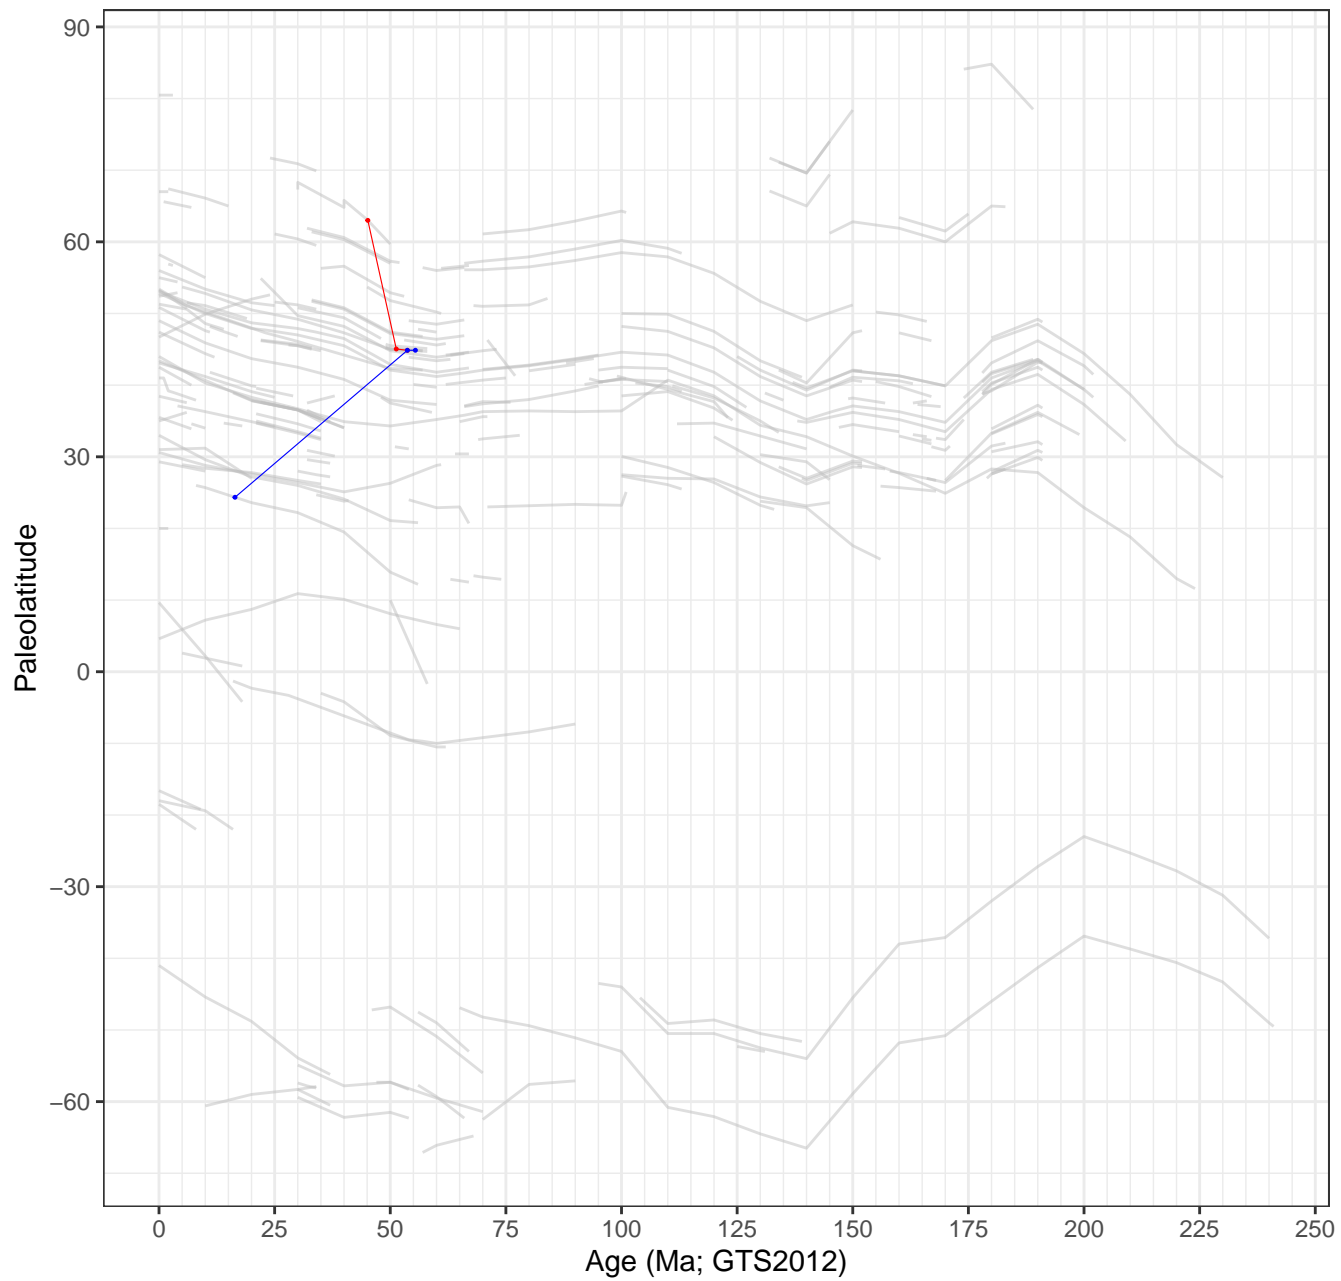

Supplement: Supplementary file 1795 [file Lentinia wetzelii.pdf › Supplement/Supplement 2/Species 1914 plots/Lentinia wetzelii.pdf]

# Species *Leptodinium ambiguum*

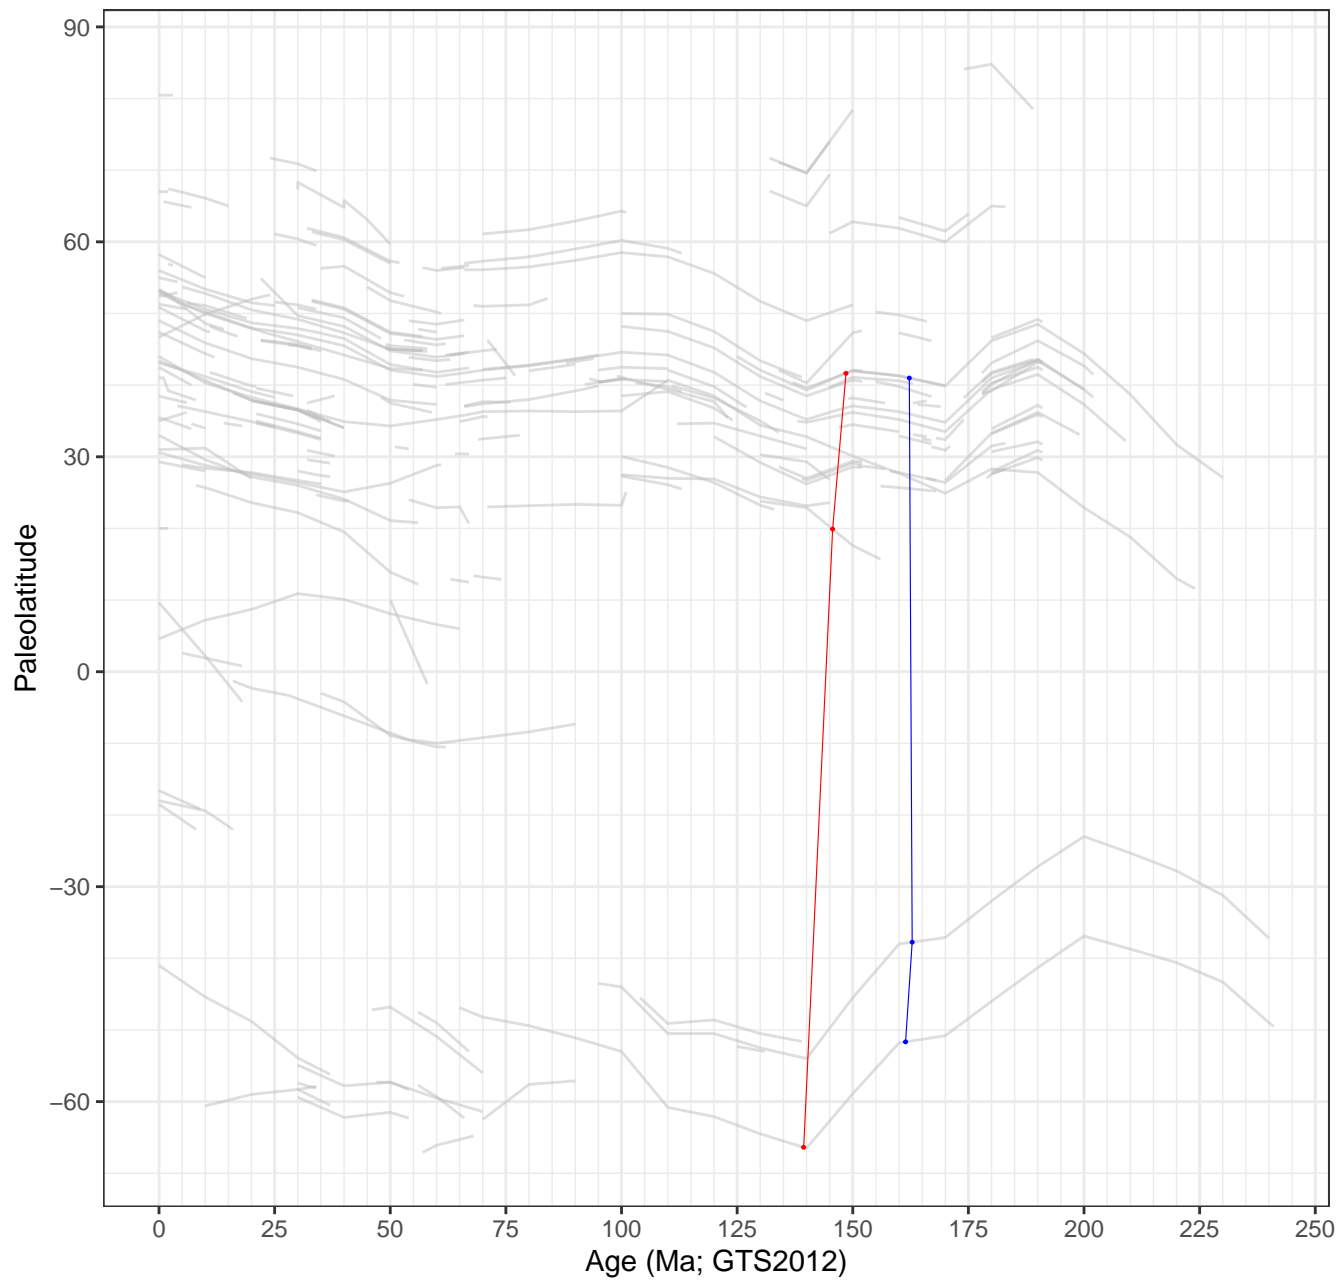

Supplement: Supplementary file 1796 [file Leptodinium ambiguum.pdf › Supplement/Supplement 2/Species 1914 plots/Leptodinium ambiguum.pdf]

# Species *Leptodinium antigonium*

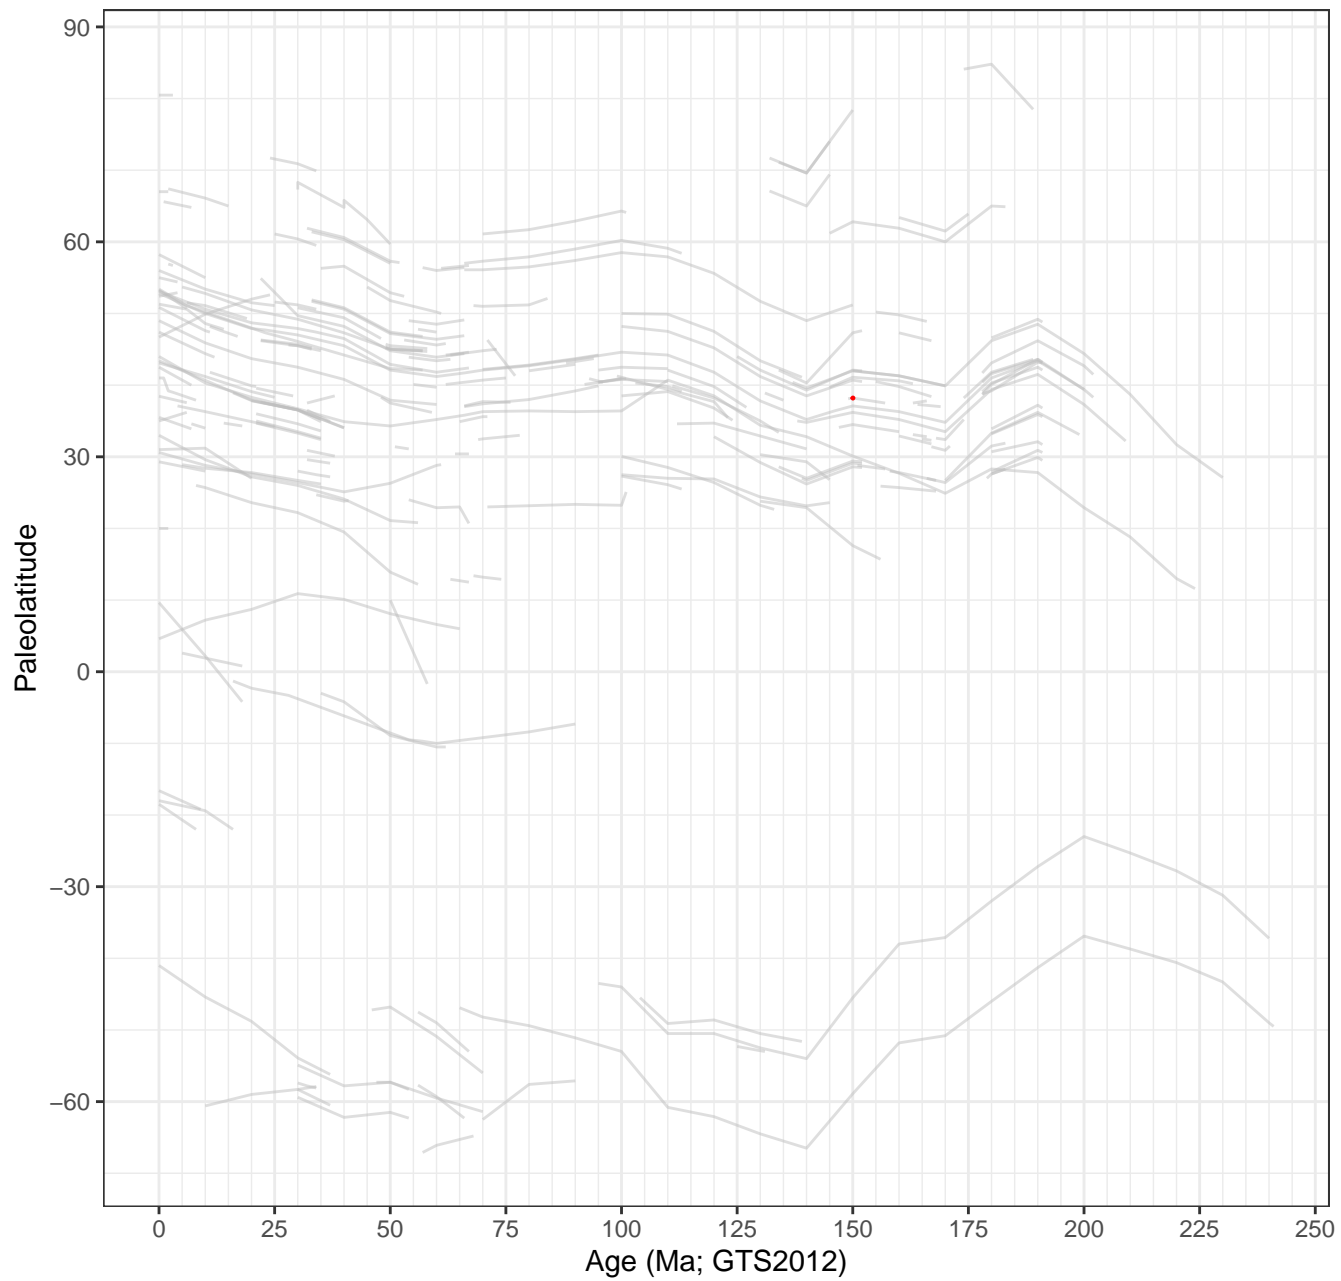

Supplement: Supplementary file 1797 [file Leptodinium antigonium.pdf › Supplement/Supplement 2/Species 1914 plots/Leptodinium antigonium.pdf]

# Species *Leptodinium arcuatum*

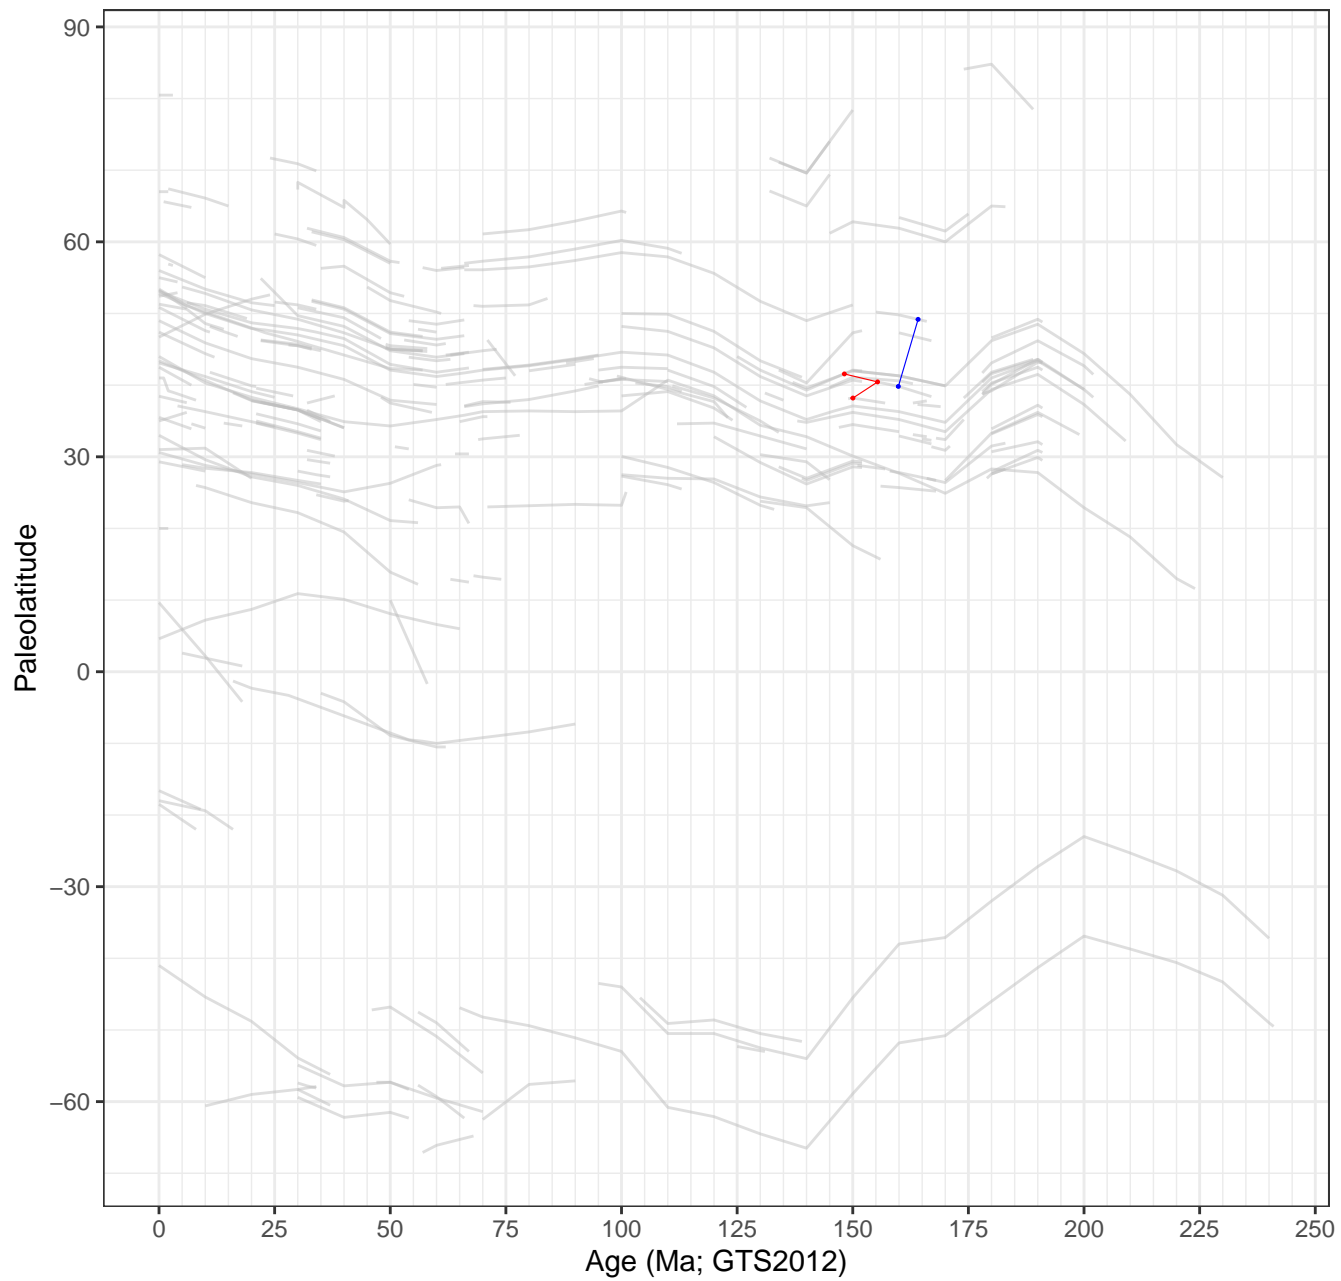

Supplement: Supplementary file 1798 [file Leptodinium arcuatum.pdf › Supplement/Supplement 2/Species 1914 plots/Leptodinium arcuatum.pdf]

# Species *Leptodinium asymmetricum*

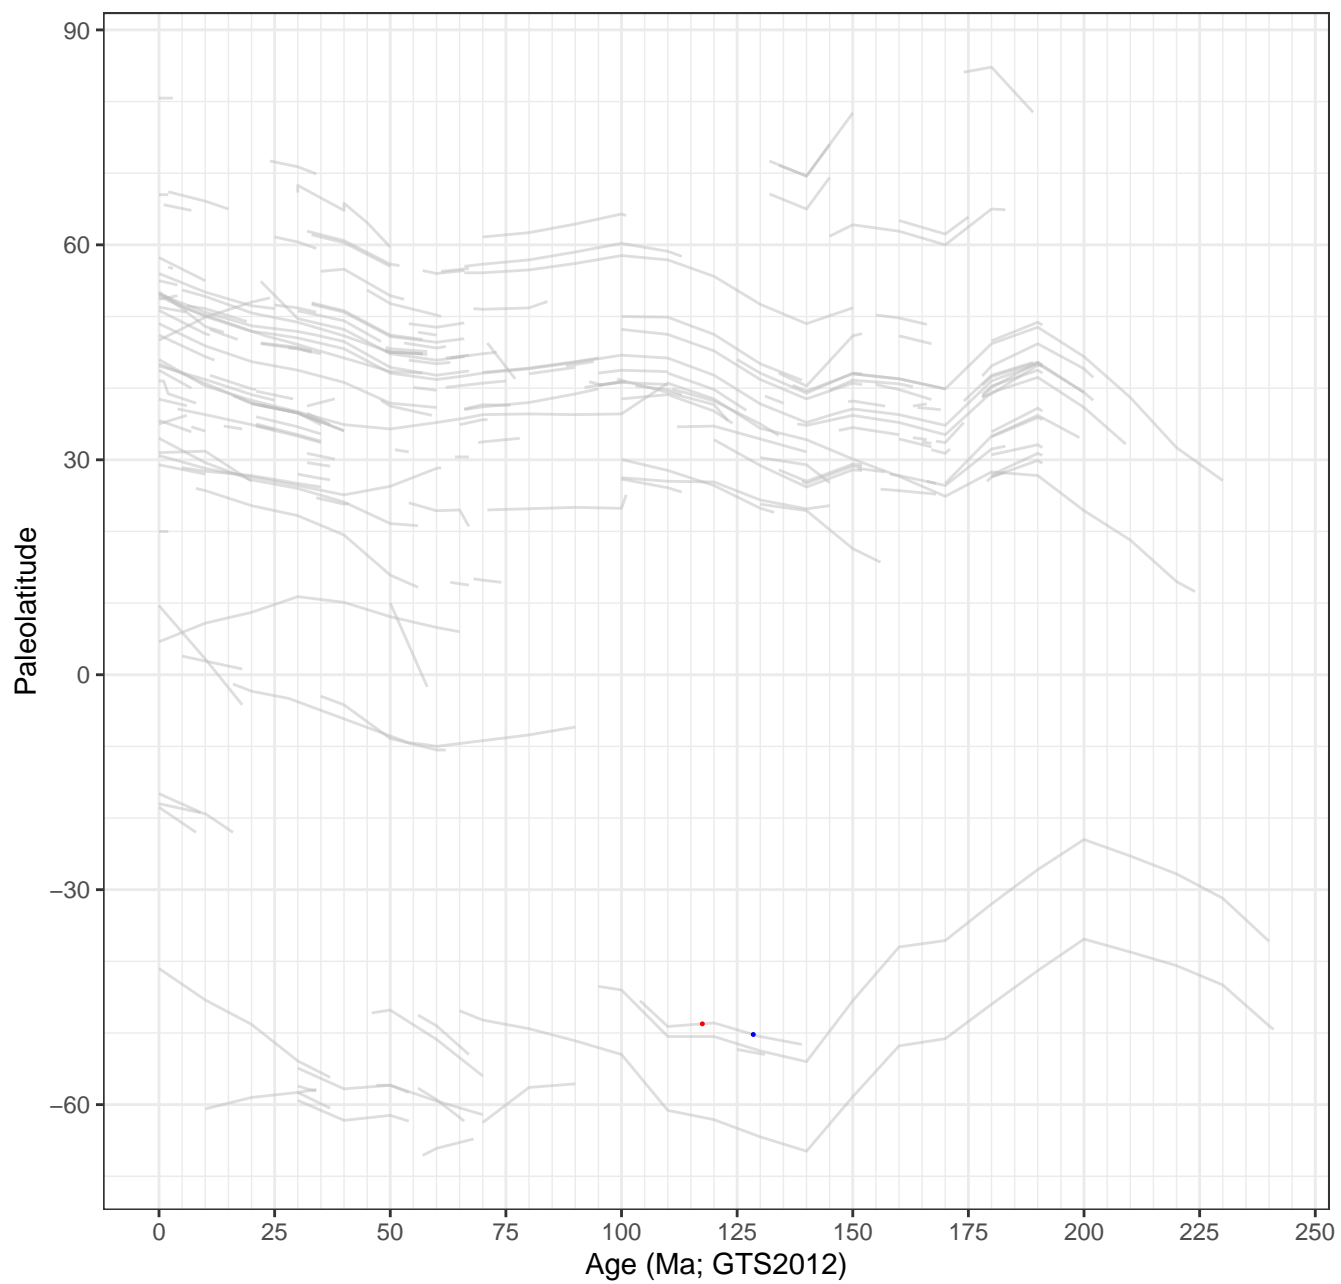

Supplement: Supplementary file 1799 [file Leptodinium asymmetricum.pdf › Supplement/Supplement 2/Species 1914 plots/Leptodinium asymmetricum.pdf]

# Species *Leptodinium cancellatum*

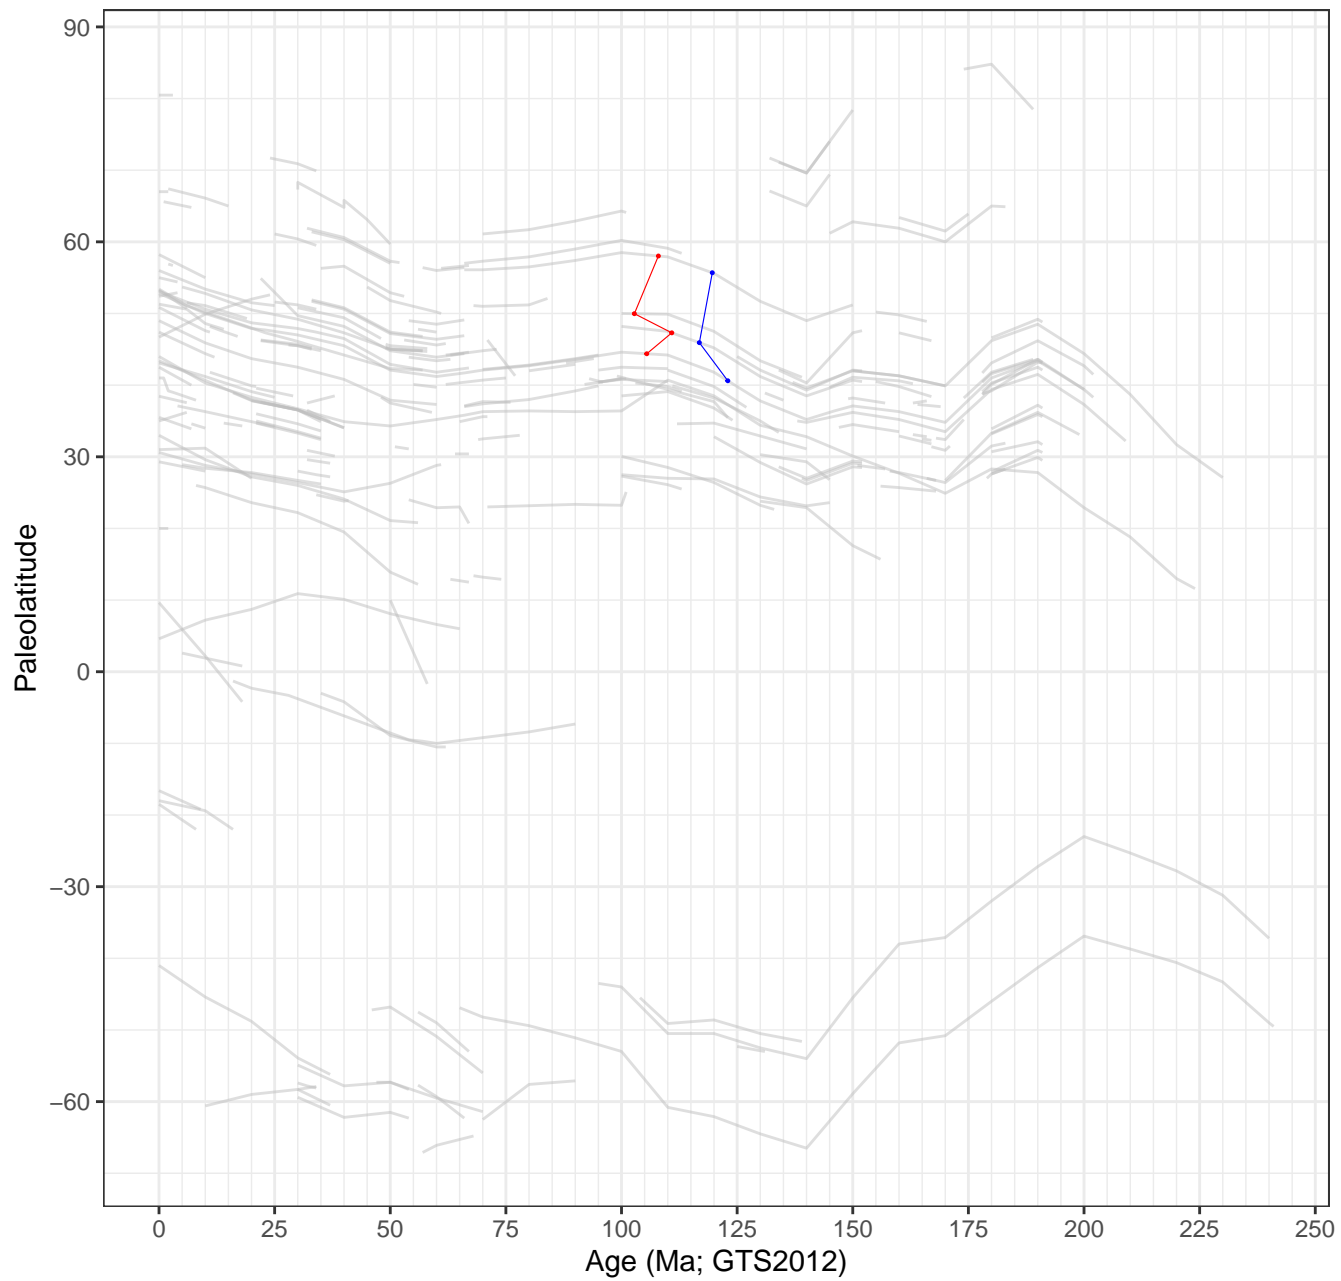

Supplement: Supplementary file 1800 [file Leptodinium cancellatum.pdf › Supplement/Supplement 2/Species 1914 plots/Leptodinium cancellatum.pdf]

# Species *Leptodinium deflandrei*

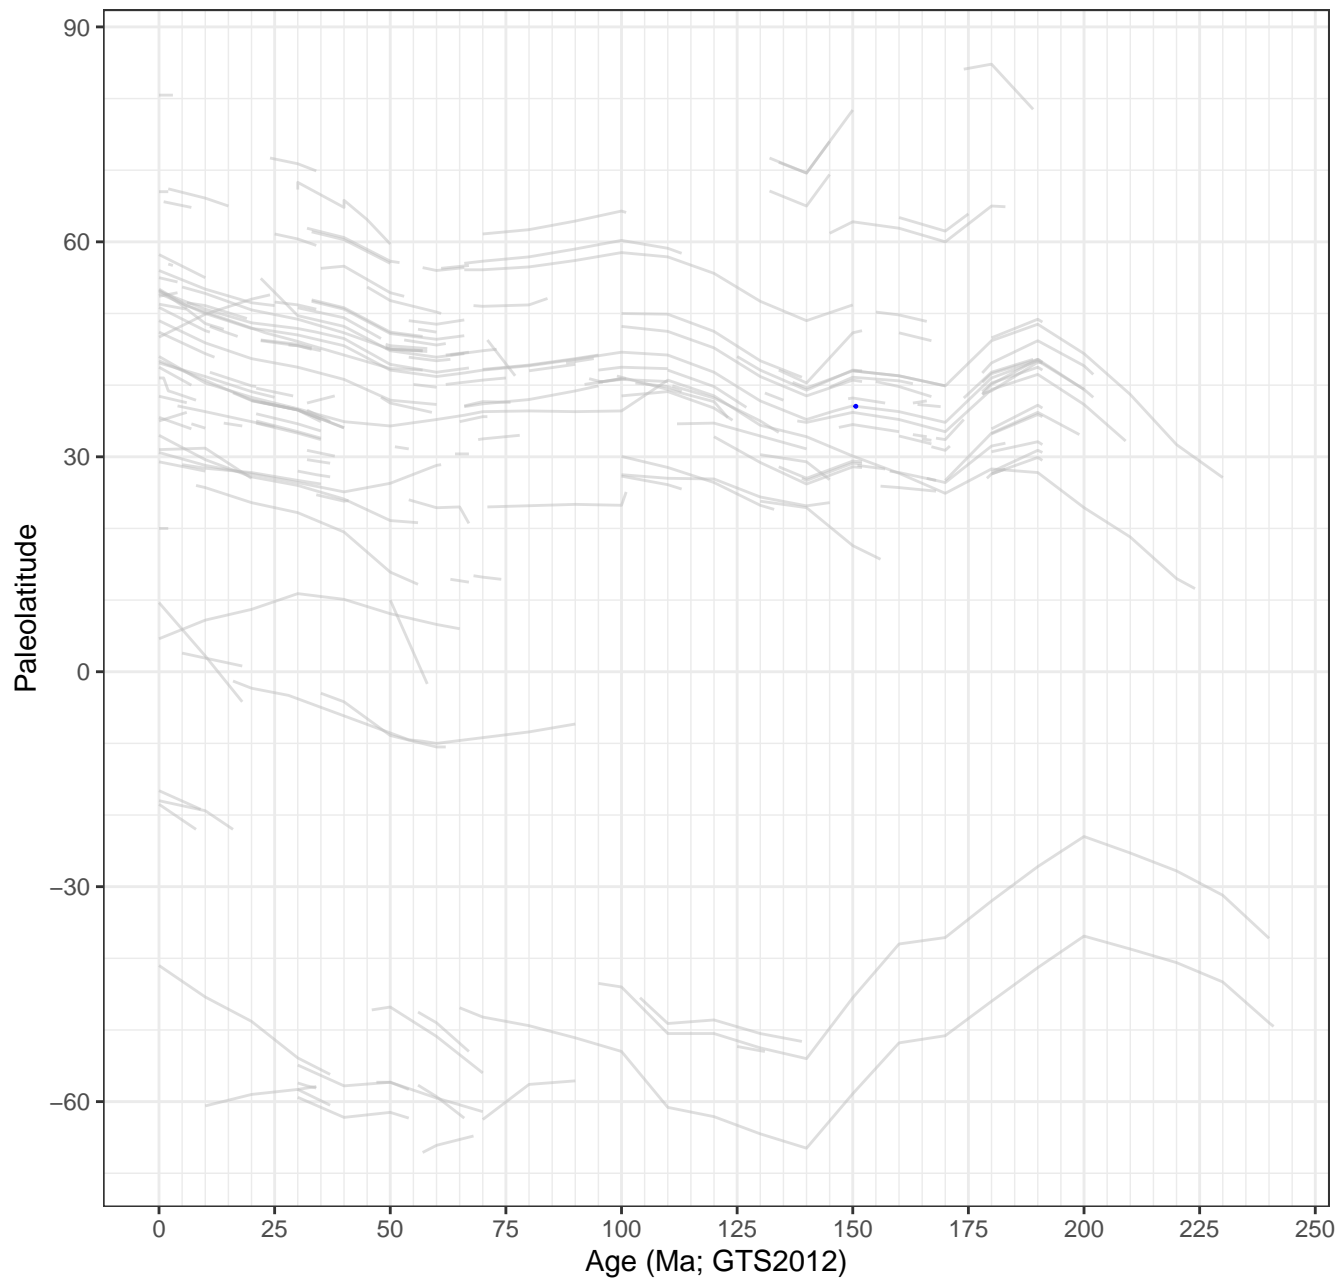

Supplement: Supplementary file 1801 [file Leptodinium deflandrei.pdf › Supplement/Supplement 2/Species 1914 plots/Leptodinium deflandrei.pdf]

# Species *Leptodinium eumorphum*

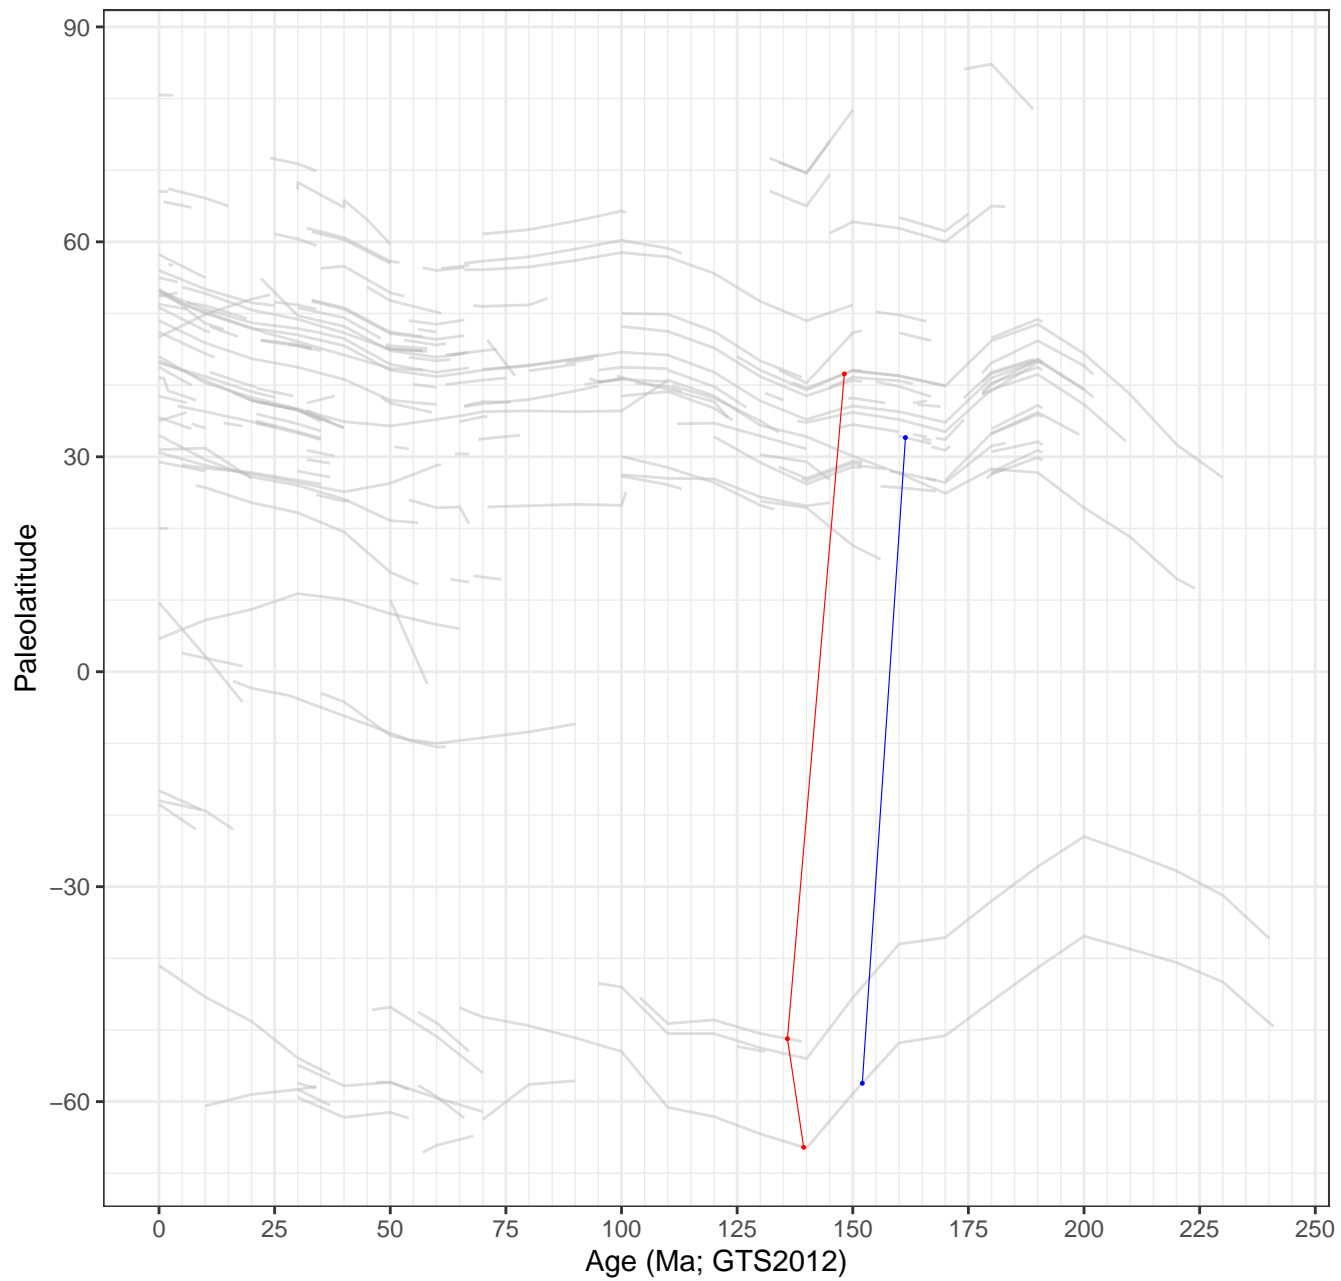

Supplement: Supplementary file 1802 [file Leptodinium eumorphum.pdf › Supplement/Supplement 2/Species 1914 plots/Leptodinium eumorphum.pdf]

# Species *Leptodinium hyalodermopse*

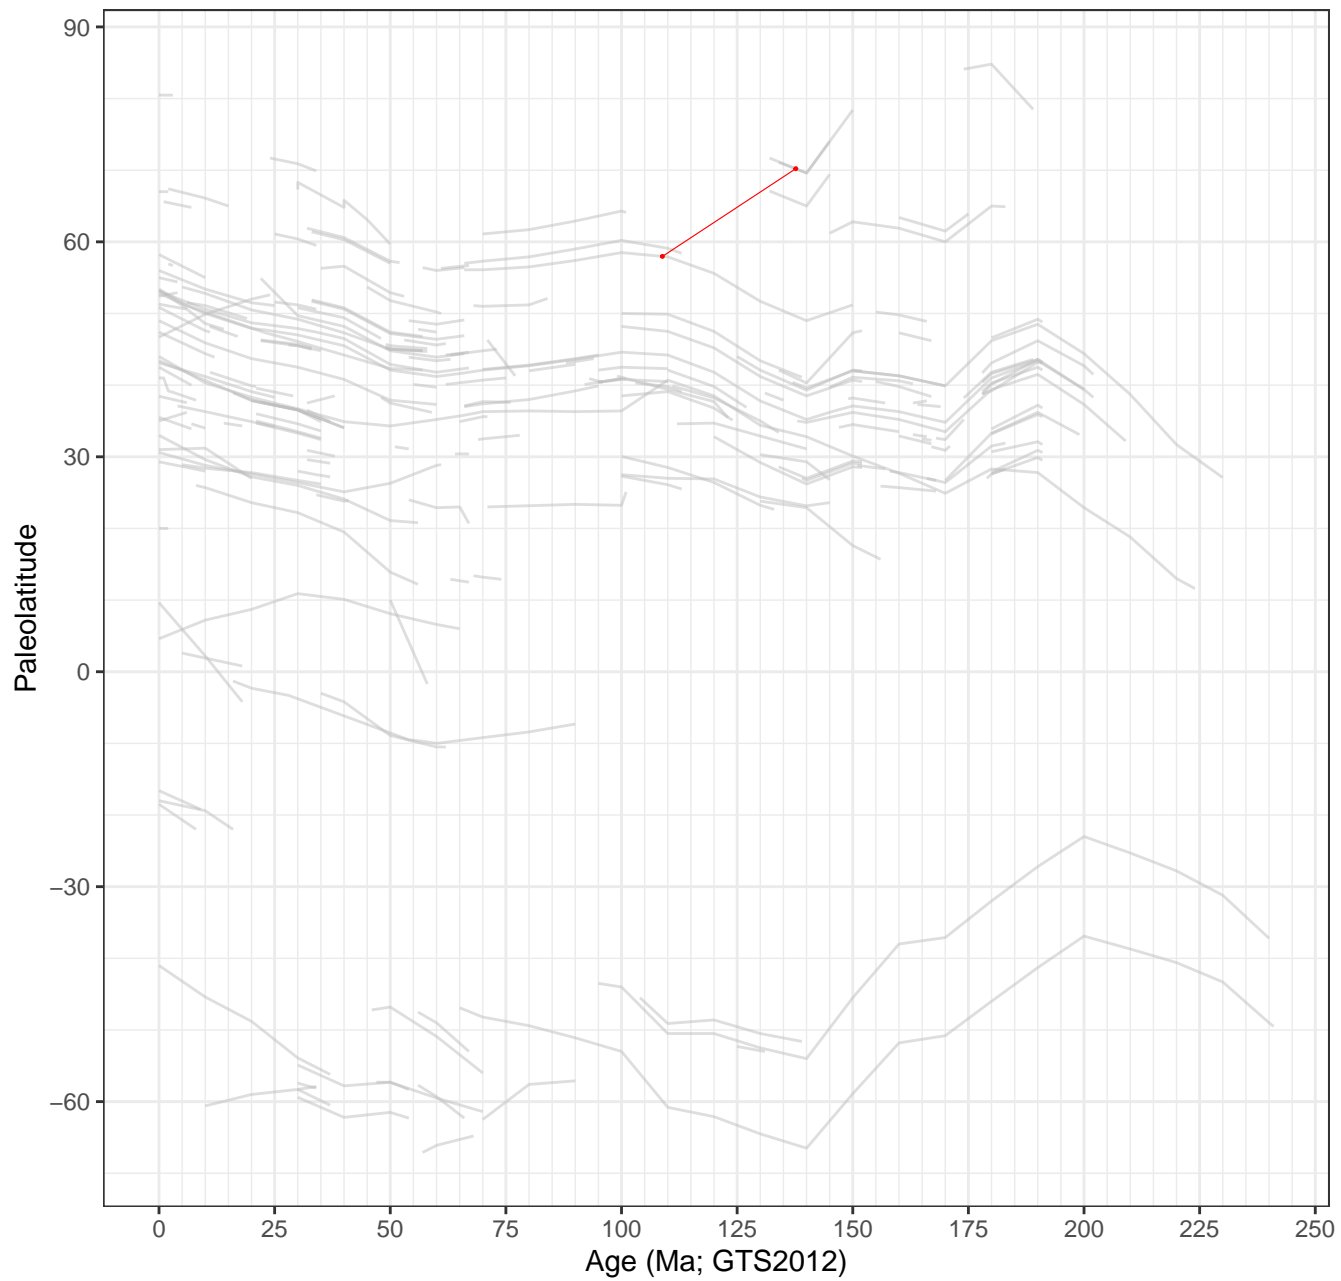

Supplement: Supplementary file 1803 [file Leptodinium hyalodermopse.pdf › Supplement/Supplement 2/Species 1914 plots/Leptodinium hyalodermopse.pdf]

# Species *Leptodinium italicum*

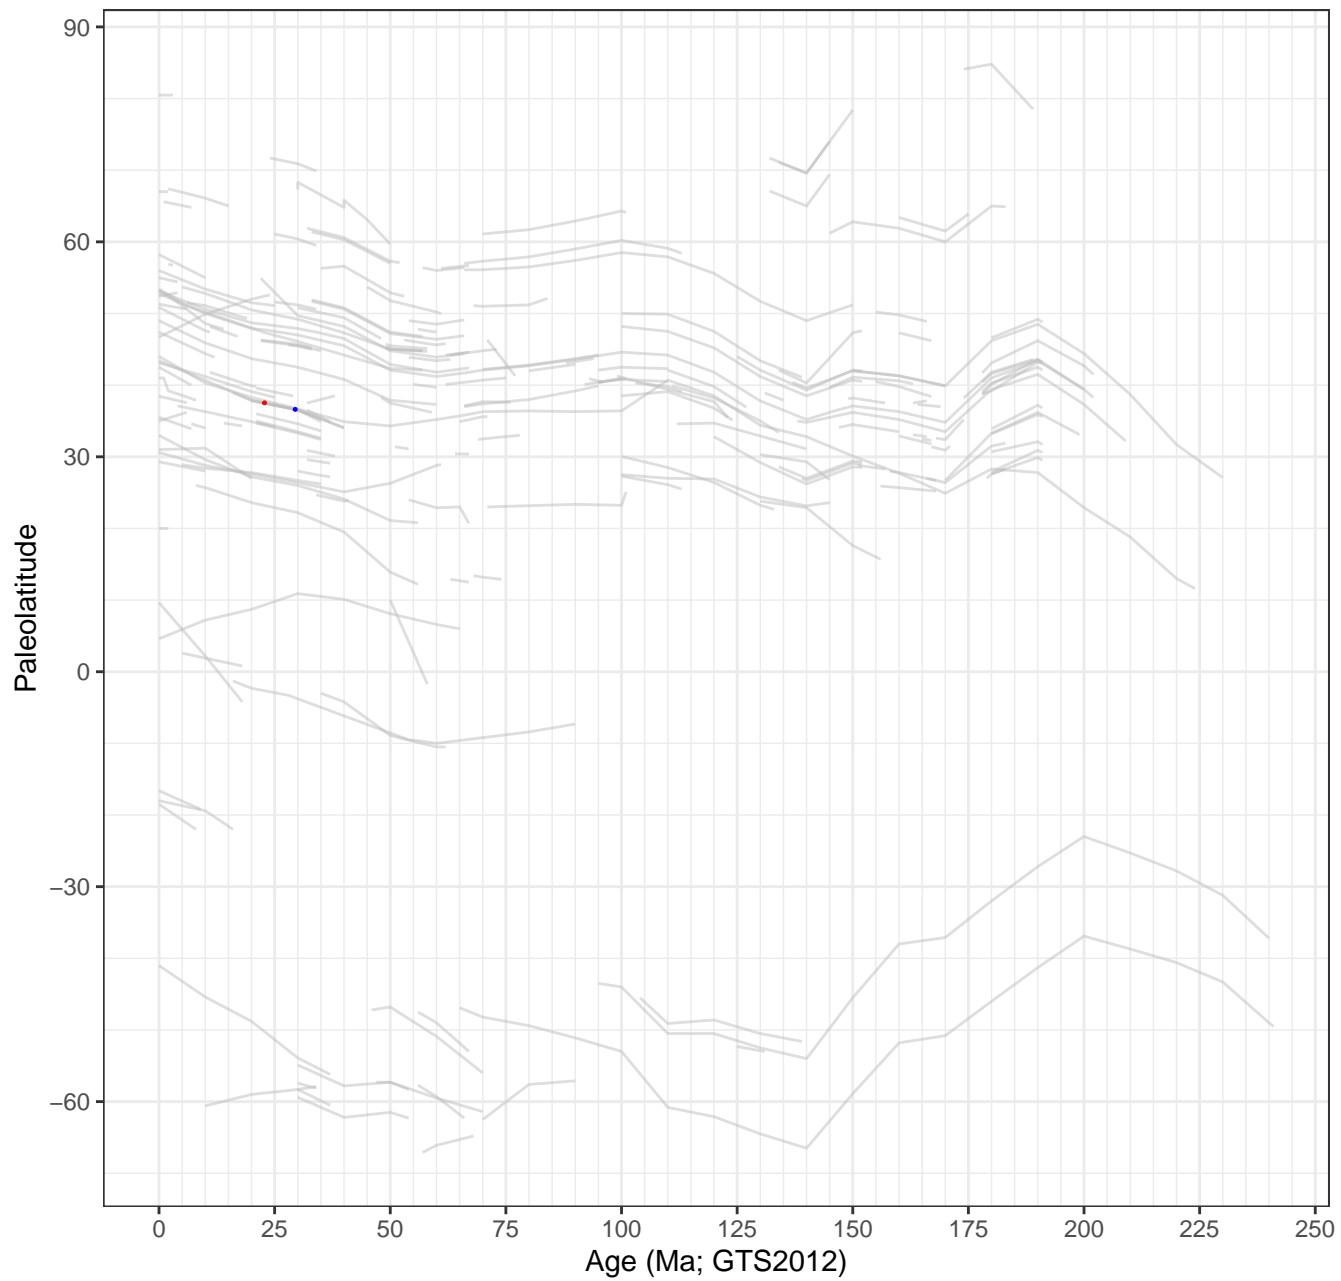

Supplement: Supplementary file 1804 [file Leptodinium italicum.pdf › Supplement/Supplement 2/Species 1914 plots/Leptodinium italicum.pdf]

# Species *Leptodinium mirabile*

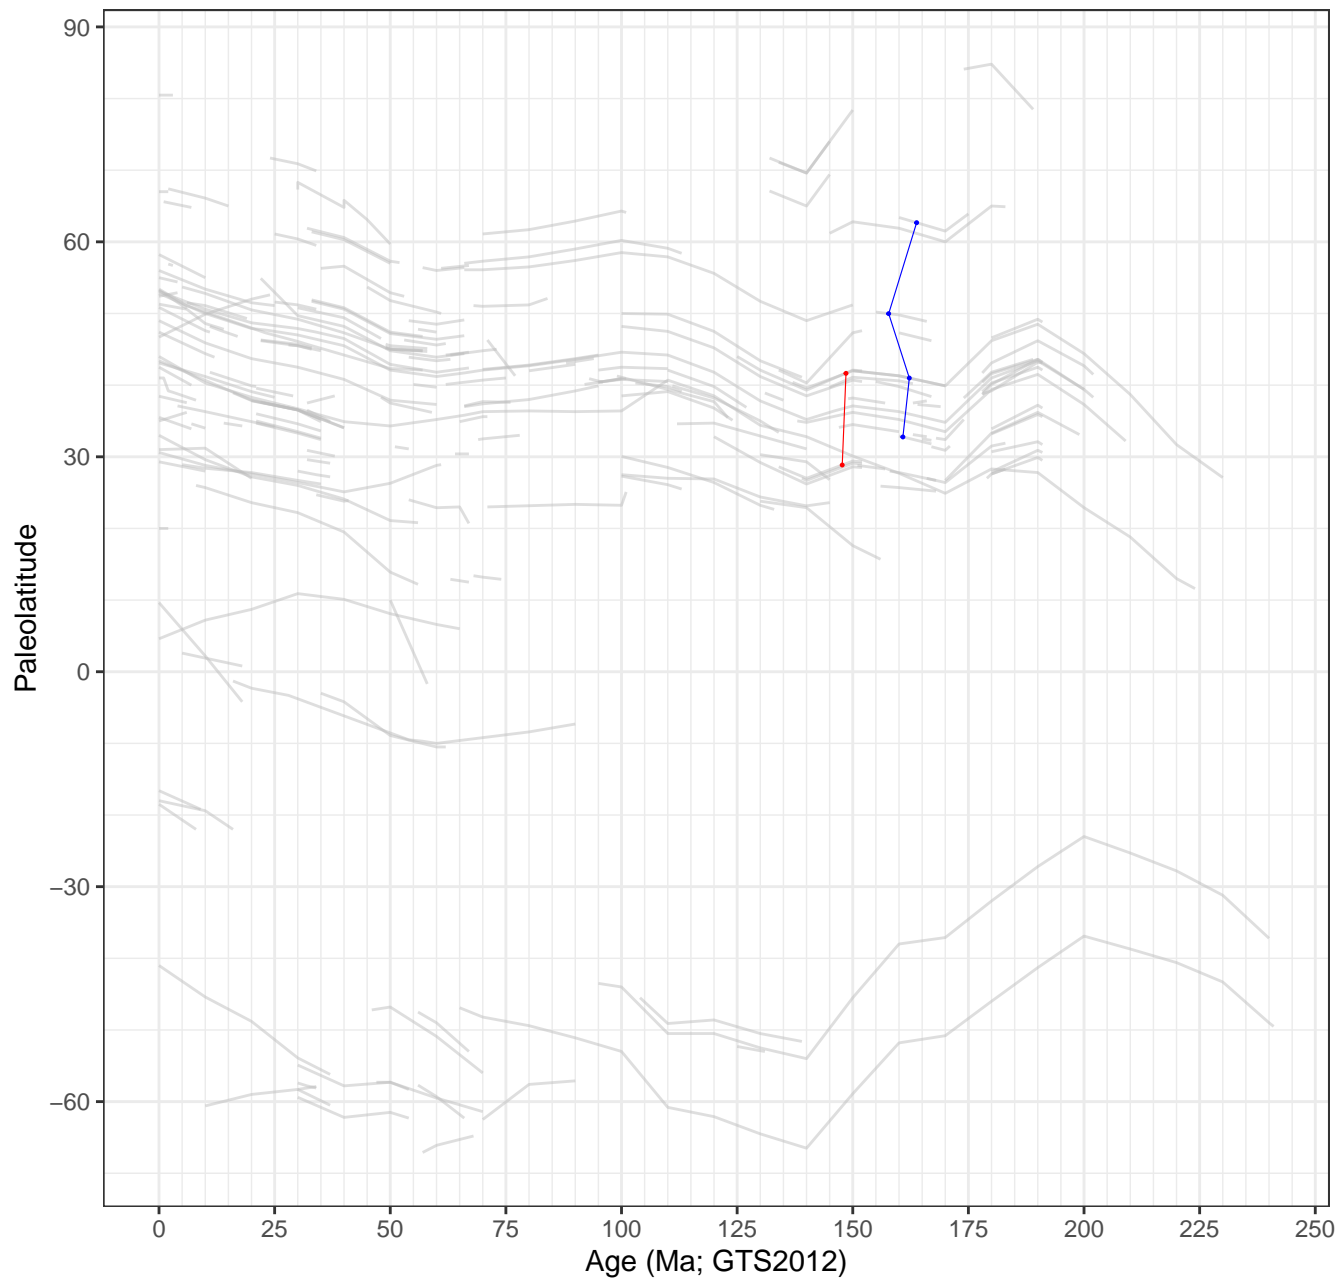

Supplement: Supplementary file 1805 [file Leptodinium mirabile.pdf › Supplement/Supplement 2/Species 1914 plots/Leptodinium mirabile.pdf]

# Species *Leptodinium pinnosum*

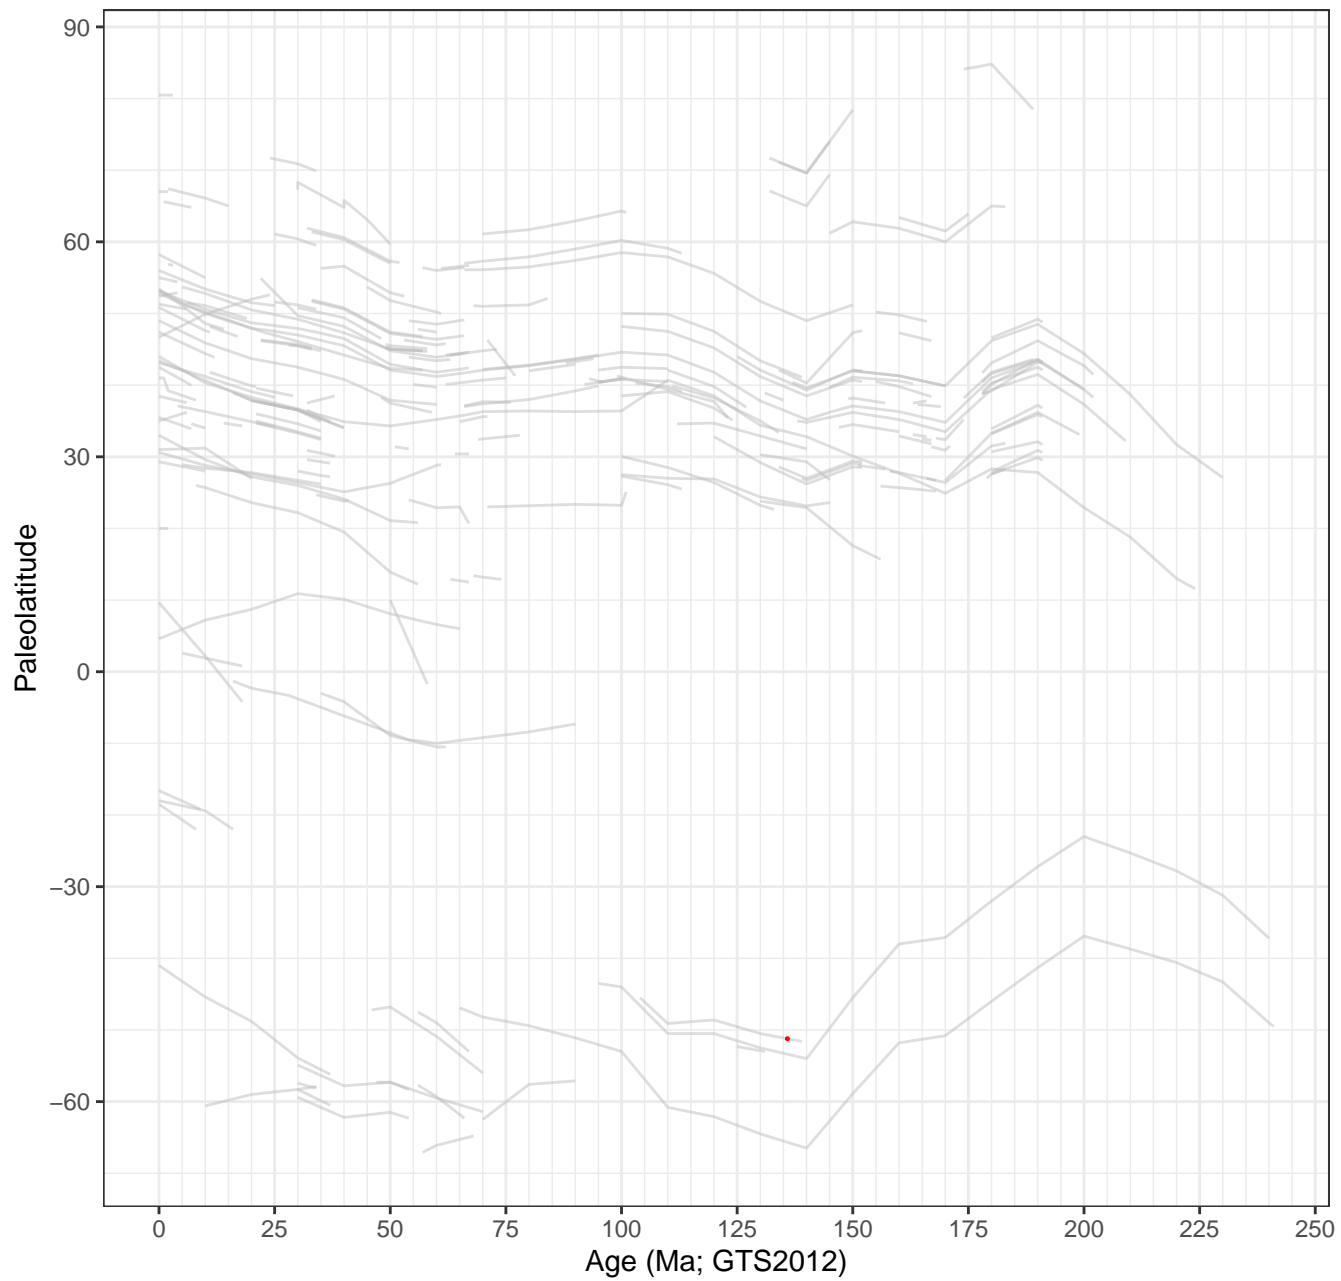

Supplement: Supplementary file 1806 [file Leptodinium pinnosum.pdf › Supplement/Supplement 2/Species 1914 plots/Leptodinium pinnosum.pdf]

# Species *Leptodinium pustulatum*

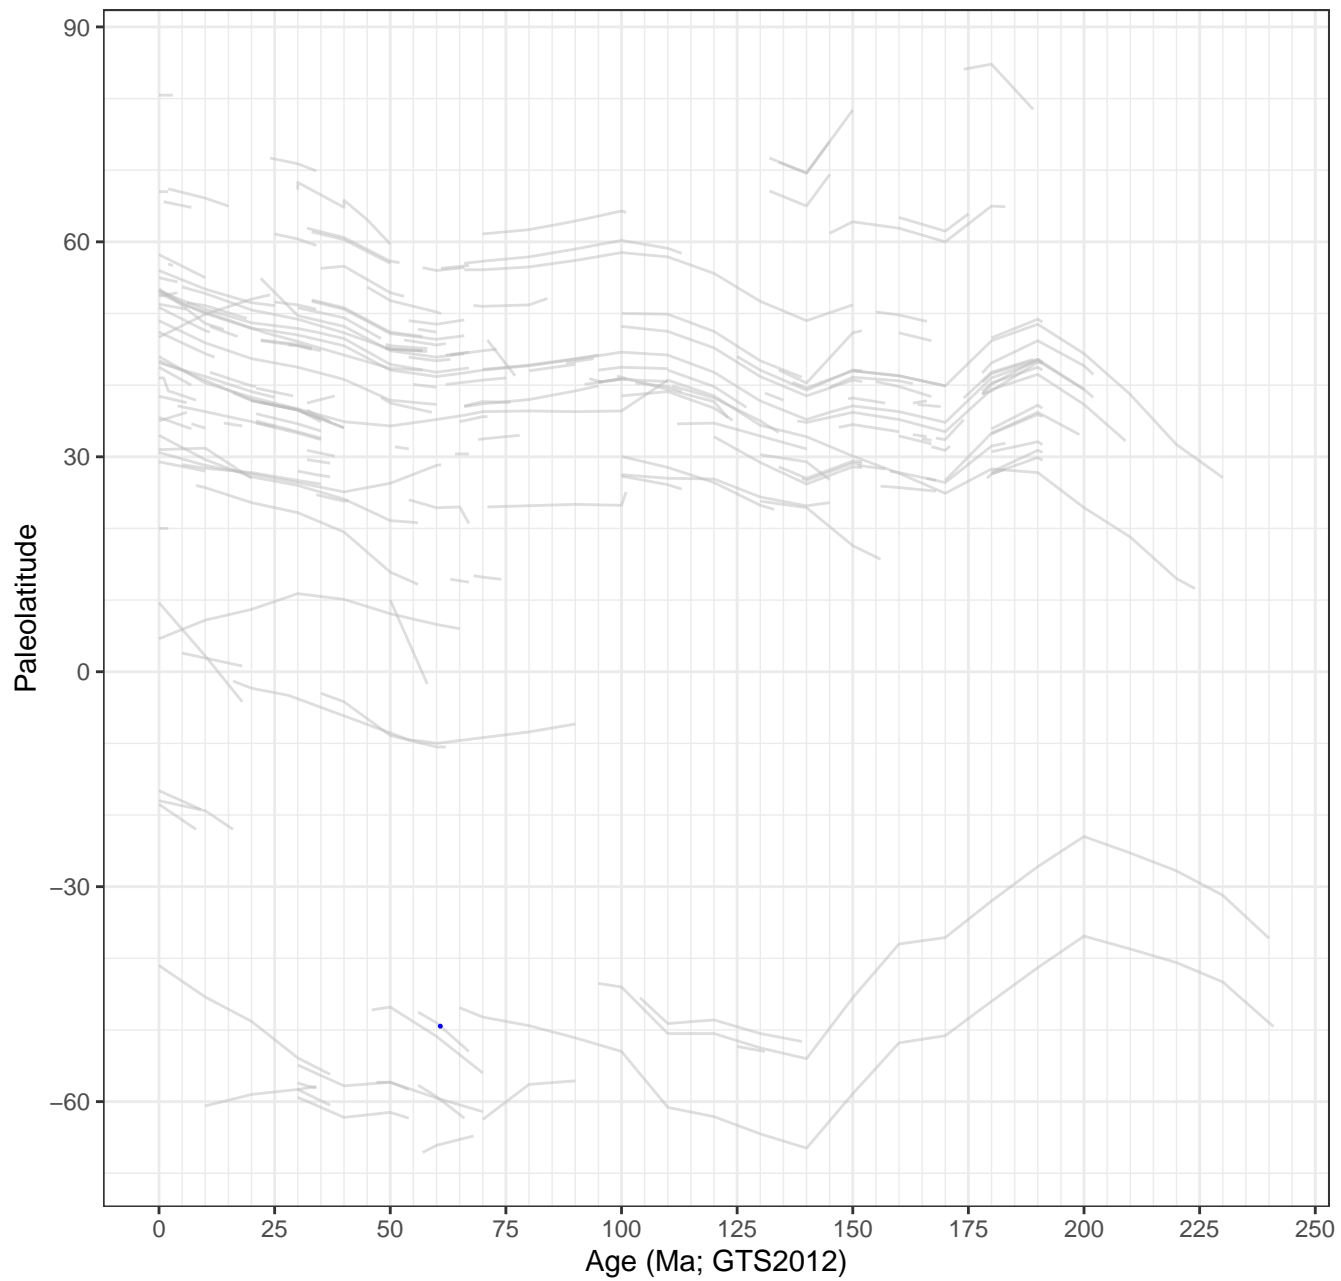

Supplement: Supplementary file 1807 [file Leptodinium pustulatum.pdf › Supplement/Supplement 2/Species 1914 plots/Leptodinium pustulatum.pdf]

# Species *Leptodinium simplex*

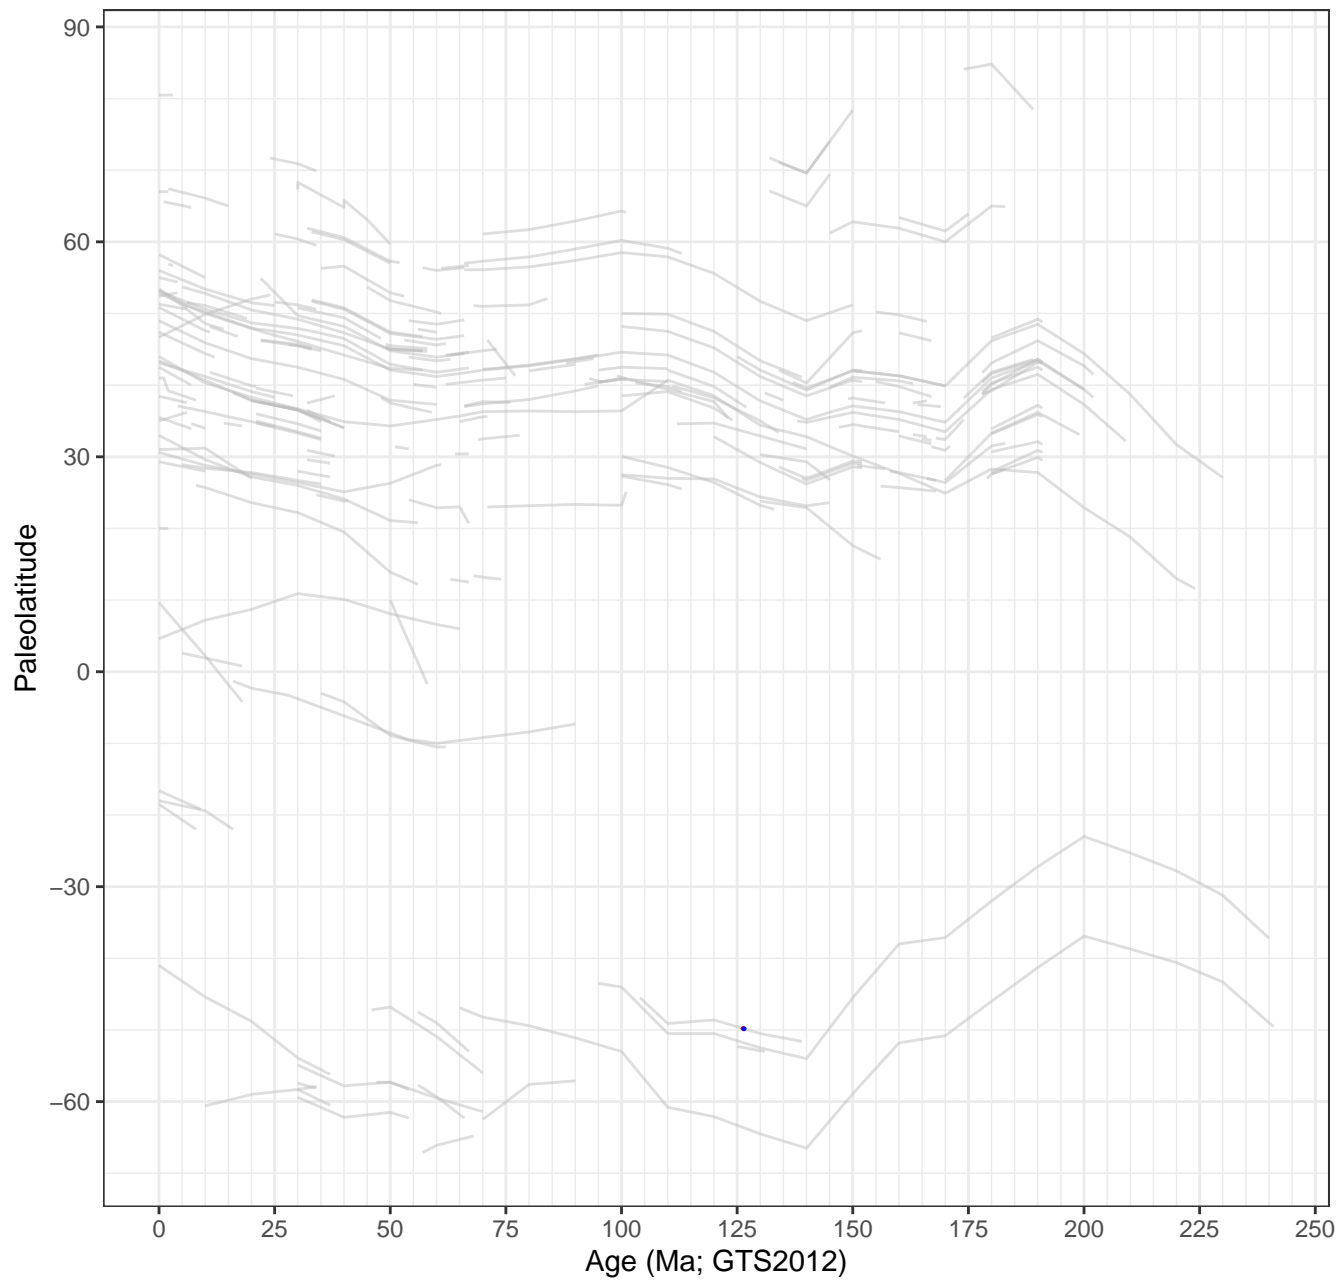

Supplement: Supplementary file 1808 [file Leptodinium simplex.pdf › Supplement/Supplement 2/Species 1914 plots/Leptodinium simplex.pdf]

# Species *Leptodinium subtile*

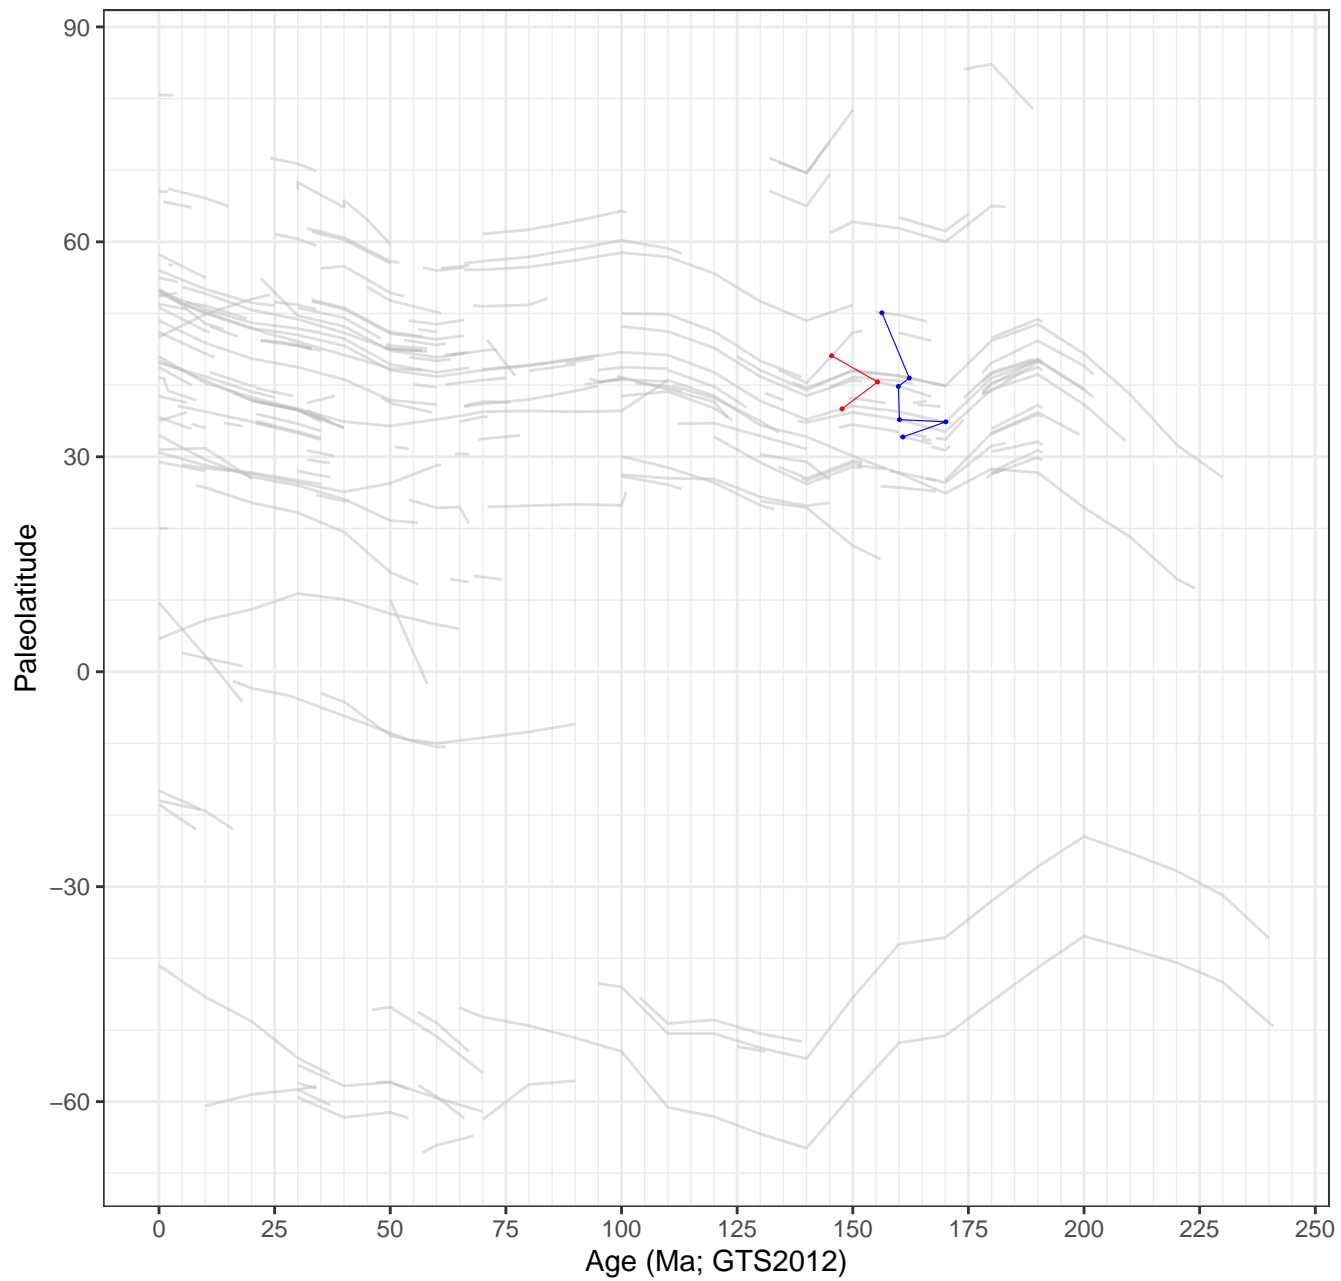

Supplement: Supplementary file 1809 [file Leptodinium subtile.pdf › Supplement/Supplement 2/Species 1914 plots/Leptodinium subtile.pdf]

# Species *Leptodinium tunellum*

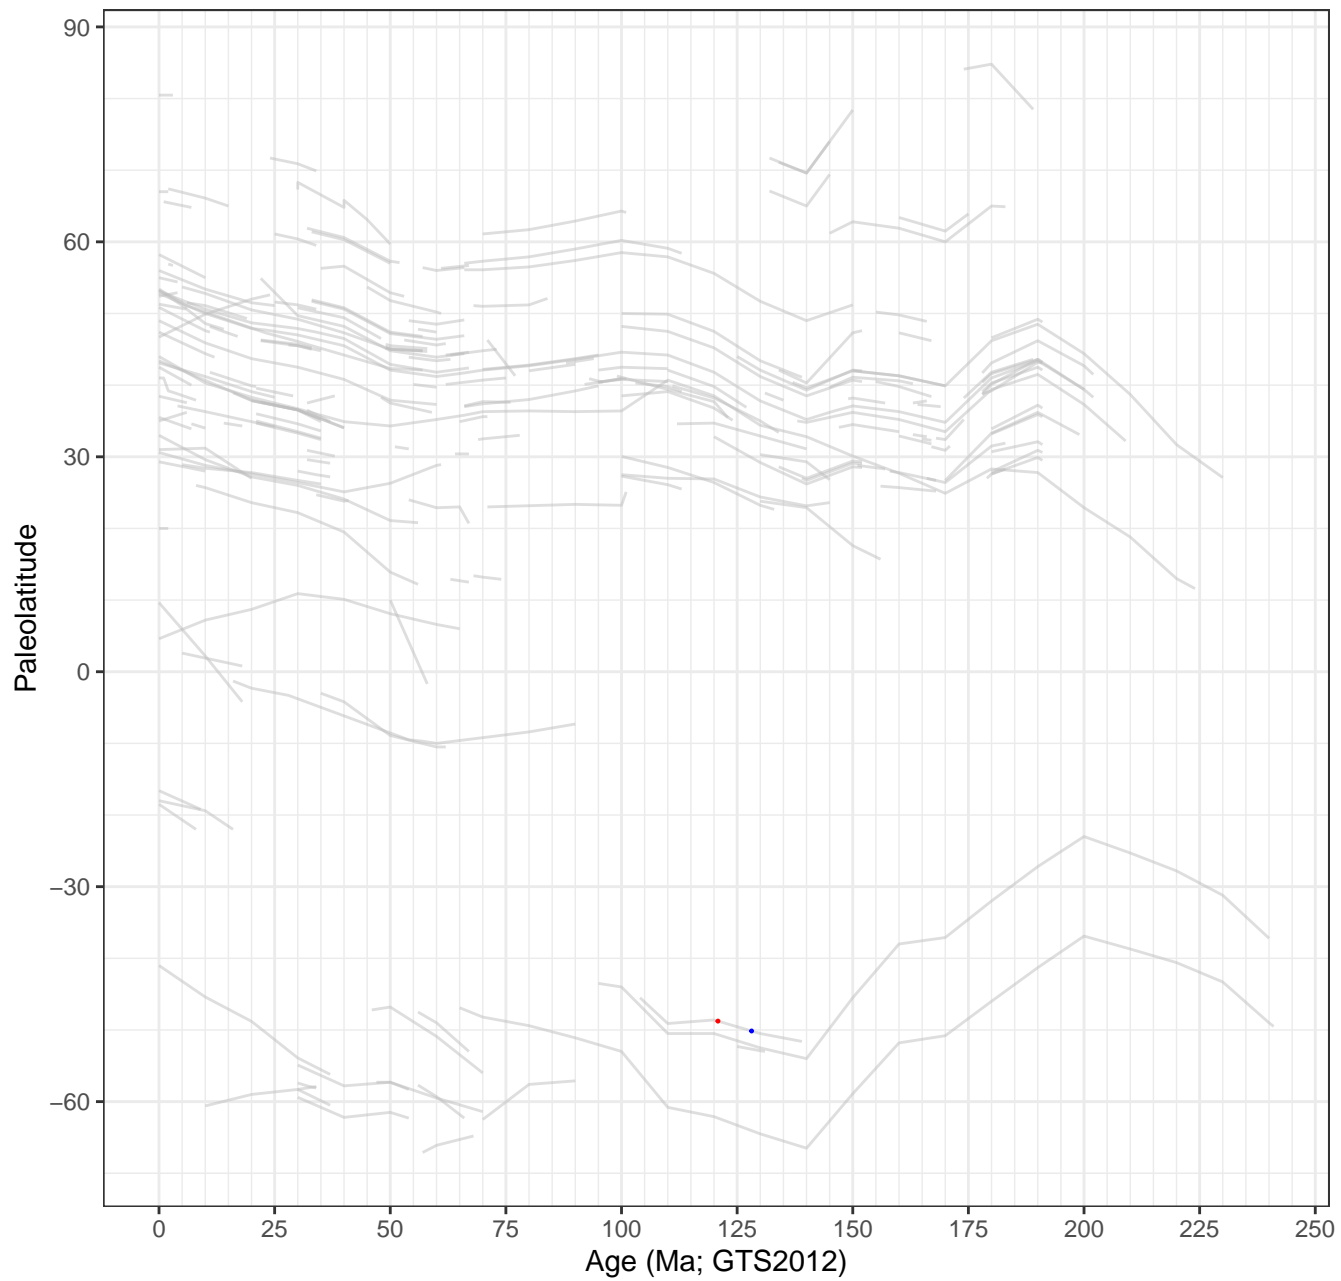

Supplement: Supplementary file 1810 [file Leptodinium tunellum.pdf › Supplement/Supplement 2/Species 1914 plots/Leptodinium tunellum.pdf]

# Species *Liasidium variabile*

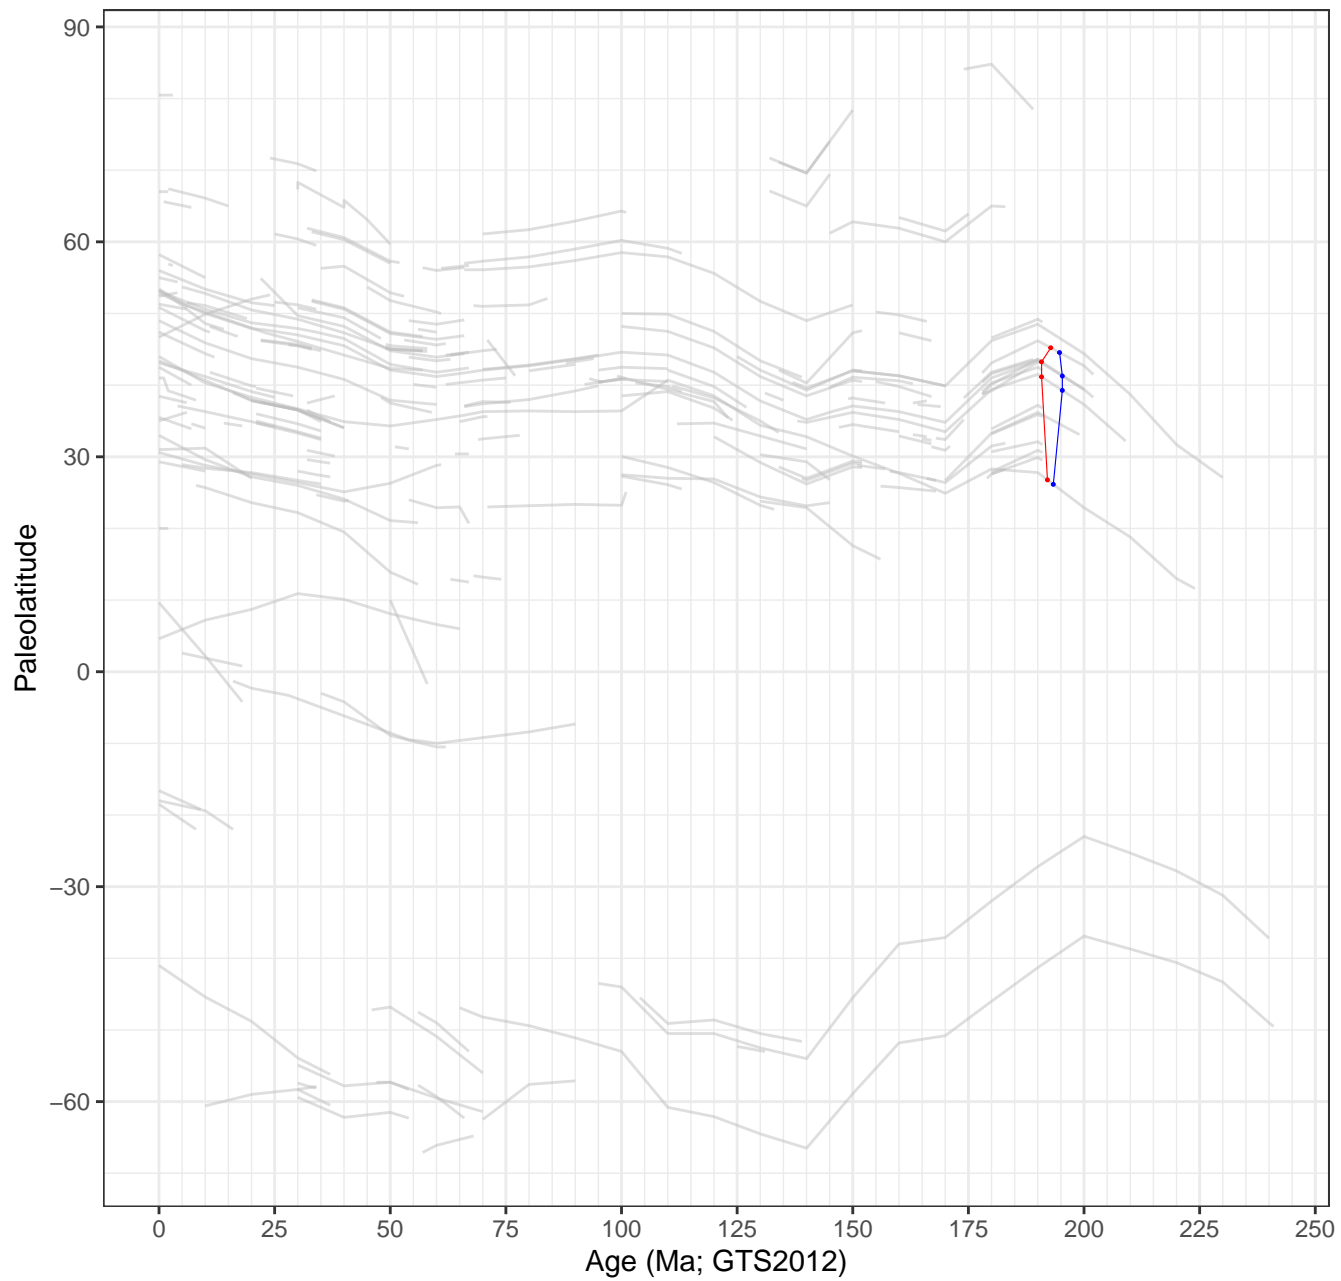

Supplement: Supplementary file 1811 [file Liasidium variabile.pdf › Supplement/Supplement 2/Species 1914 plots/Liasidium variabile.pdf]

# Species *Licracysta corymbus*

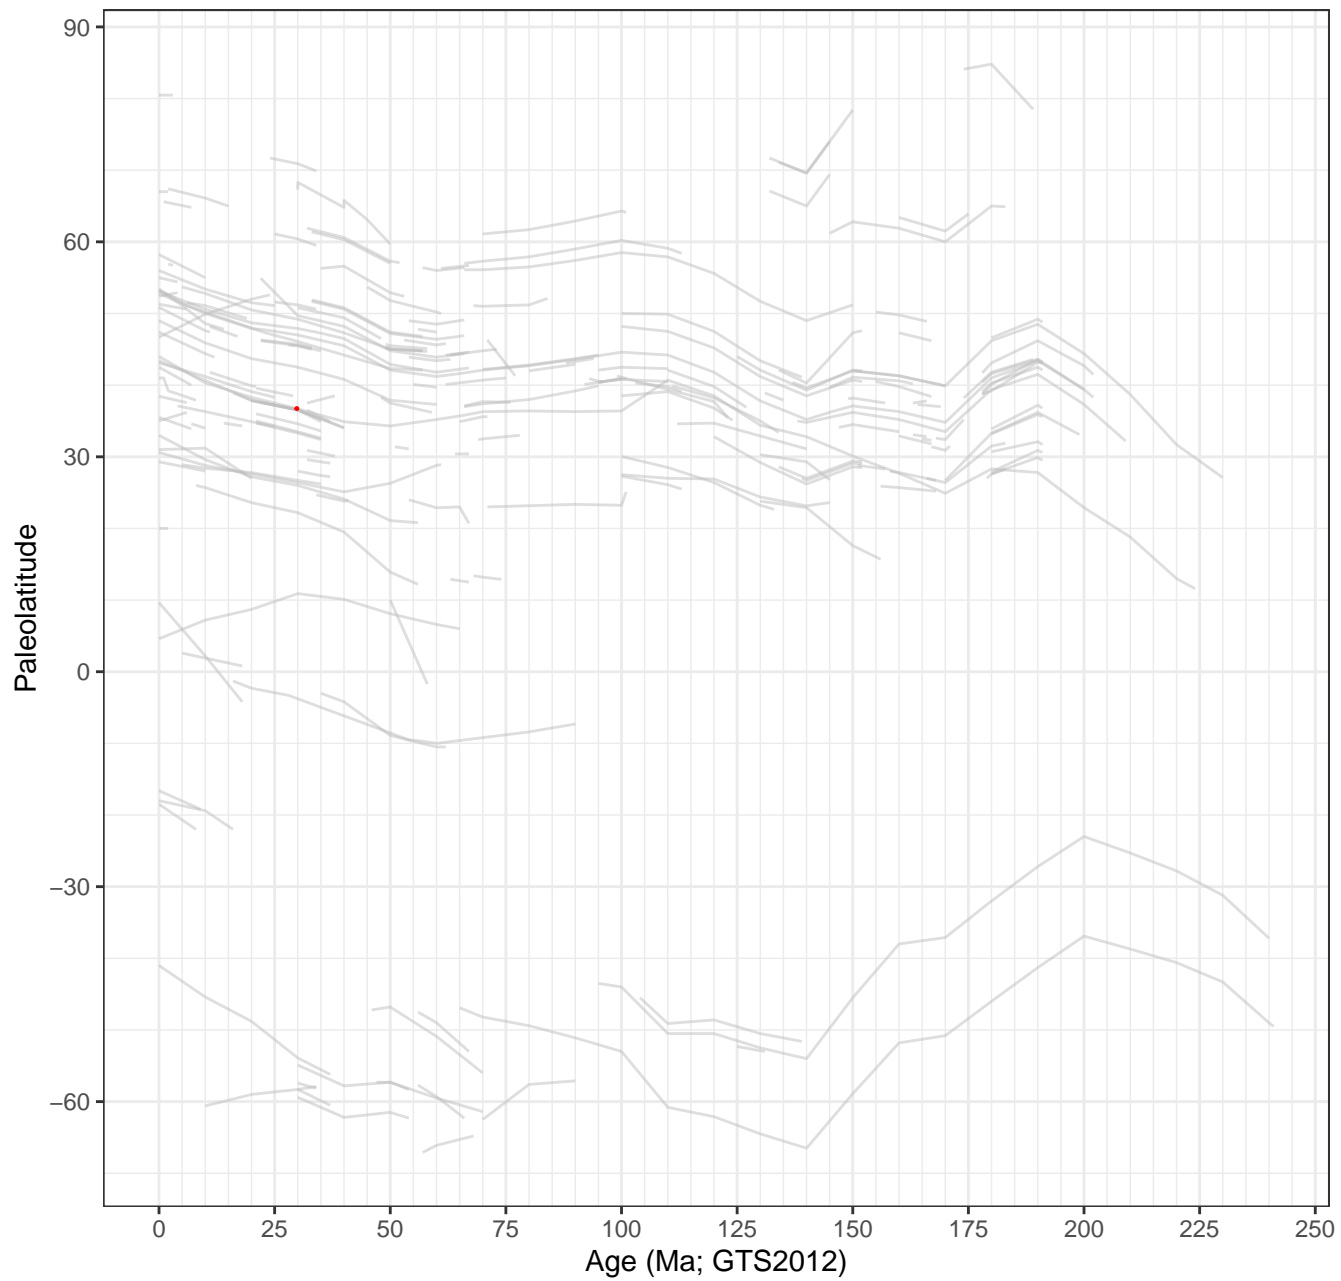

Supplement: Supplementary file 1812 [file Licracysta corymbus.pdf › Supplement/Supplement 2/Species 1914 plots/Licracysta corymbus.pdf]

# Species *Licracysta semicirculata*

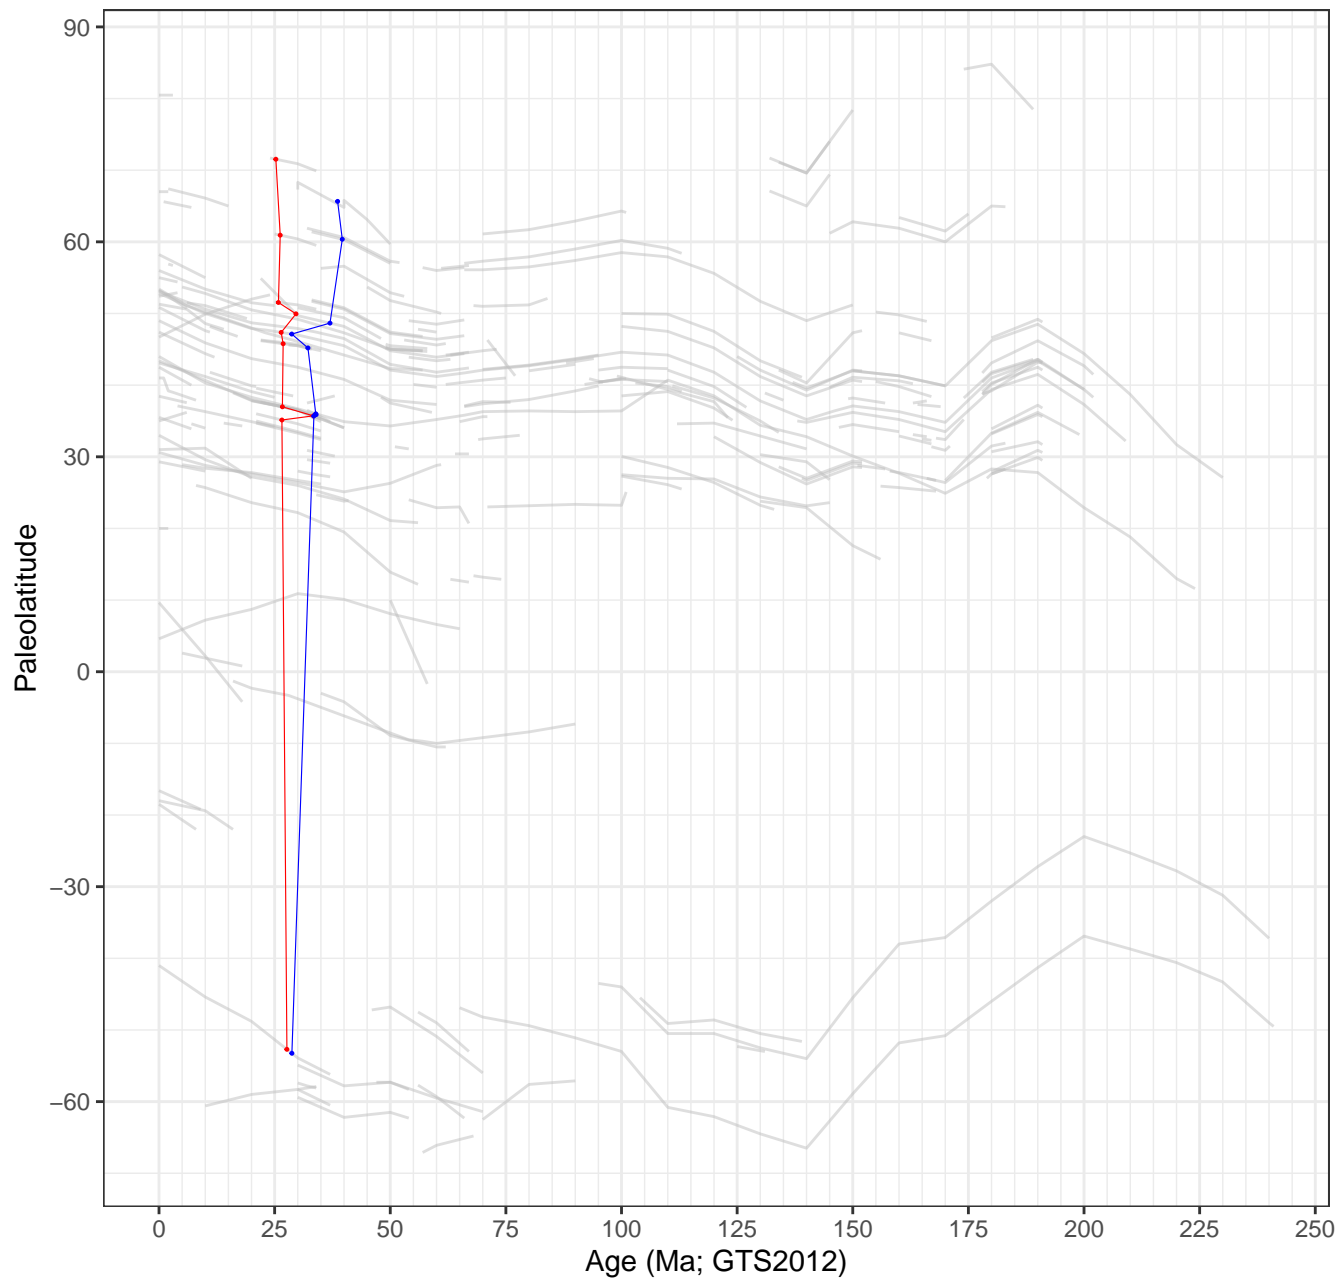

Supplement: Supplementary file 1813 [file Licracysta semicirculata.pdf › Supplement/Supplement 2/Species 1914 plots/Licracysta semicirculata.pdf]

# Species *Liesbergia abdounensis*

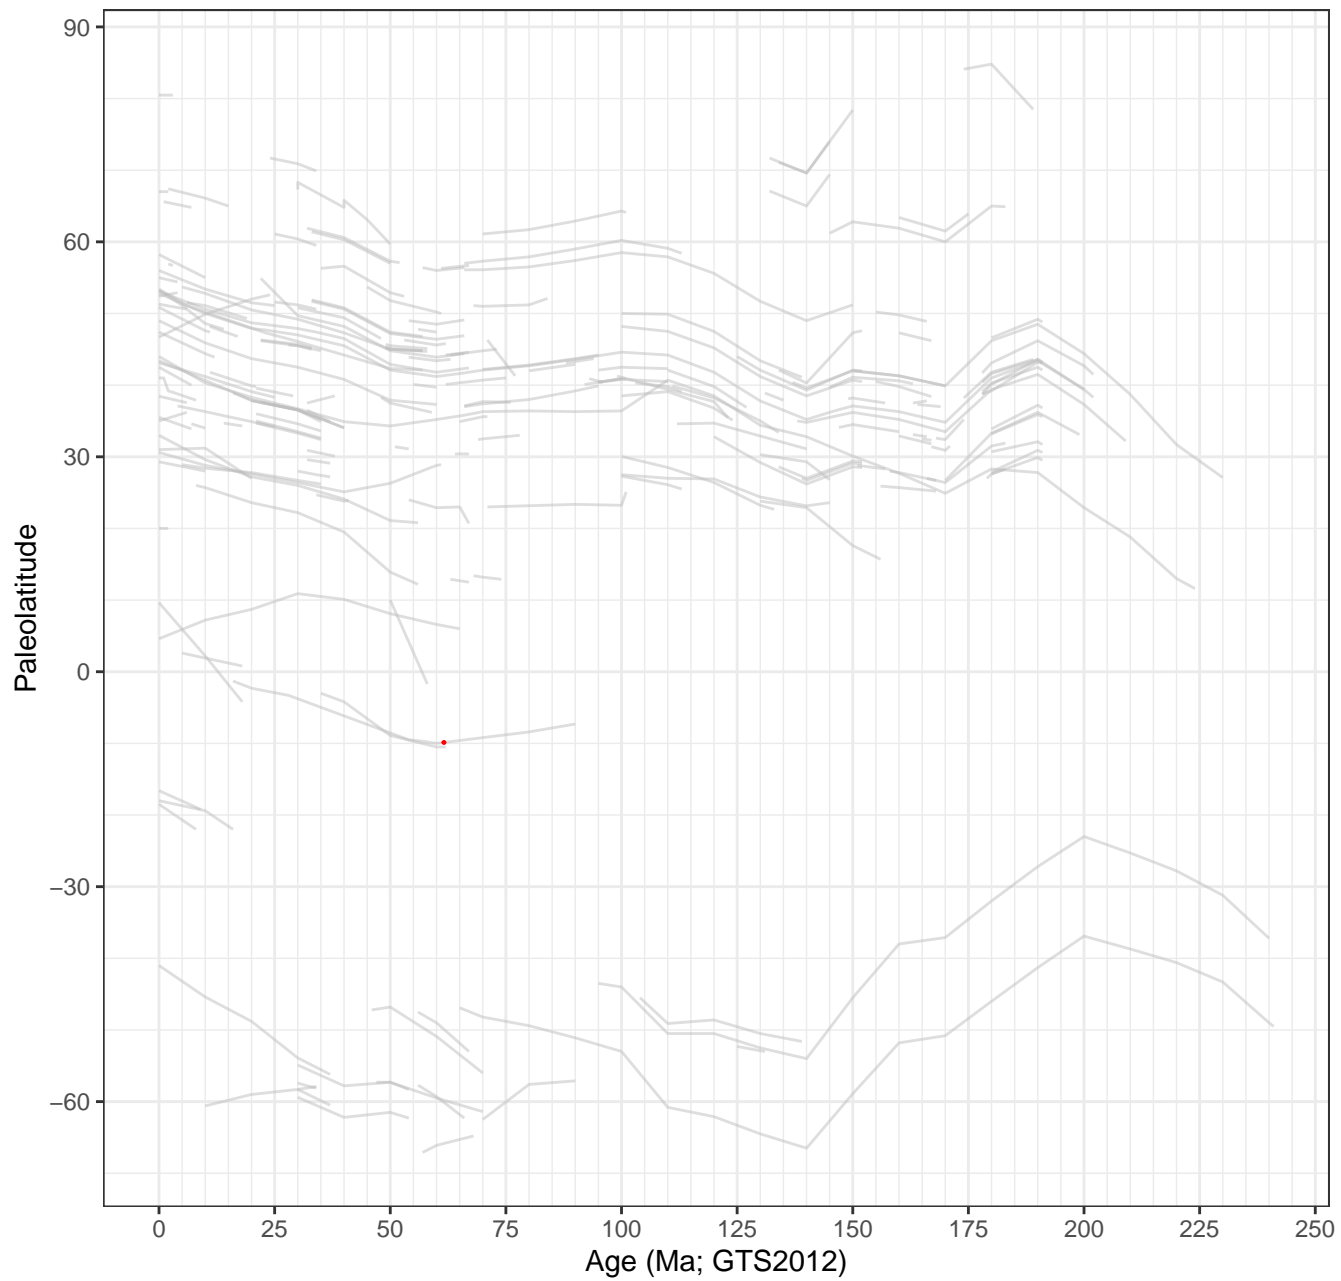

Supplement: Supplementary file 1814 [file Liesbergia abdounensis.pdf › Supplement/Supplement 2/Species 1914 plots/Liesbergia abdounensis.pdf]

# Species *Liesbergia liesbergensis*

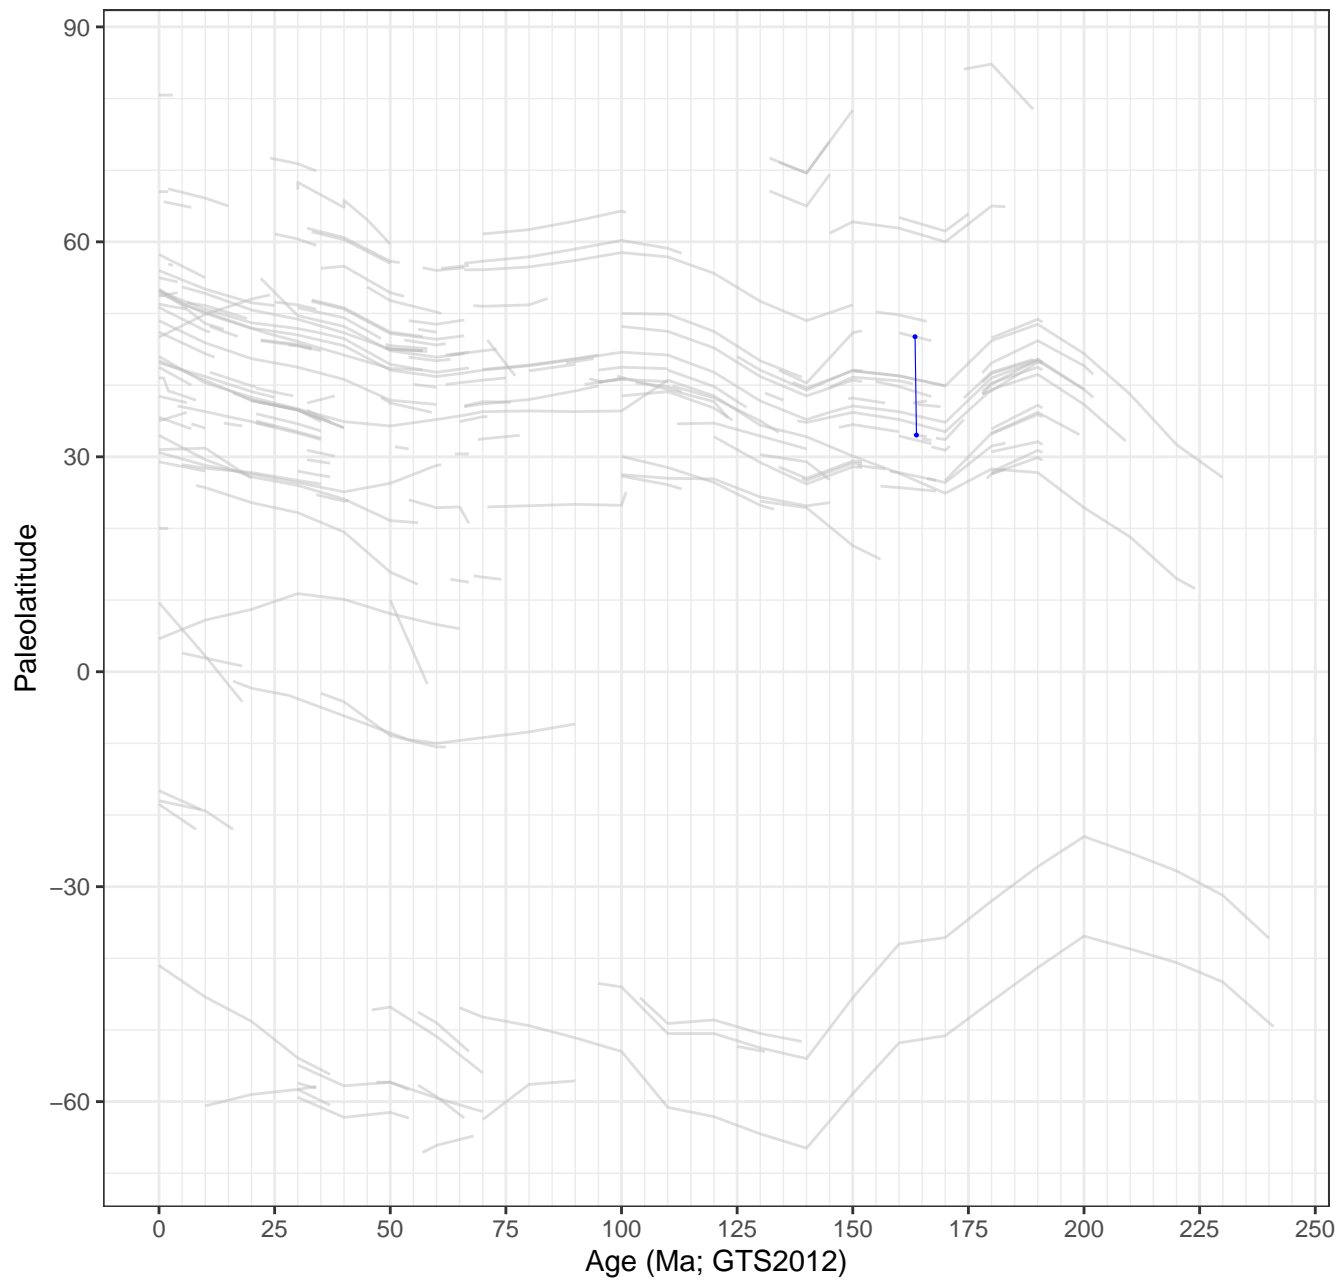

Supplement: Supplementary file 1815 [file Liesbergia liesbergensis.pdf › Supplement/Supplement 2/Species 1914 plots/Liesbergia liesbergensis.pdf]

# Species *Limbicysta bjaerkei*

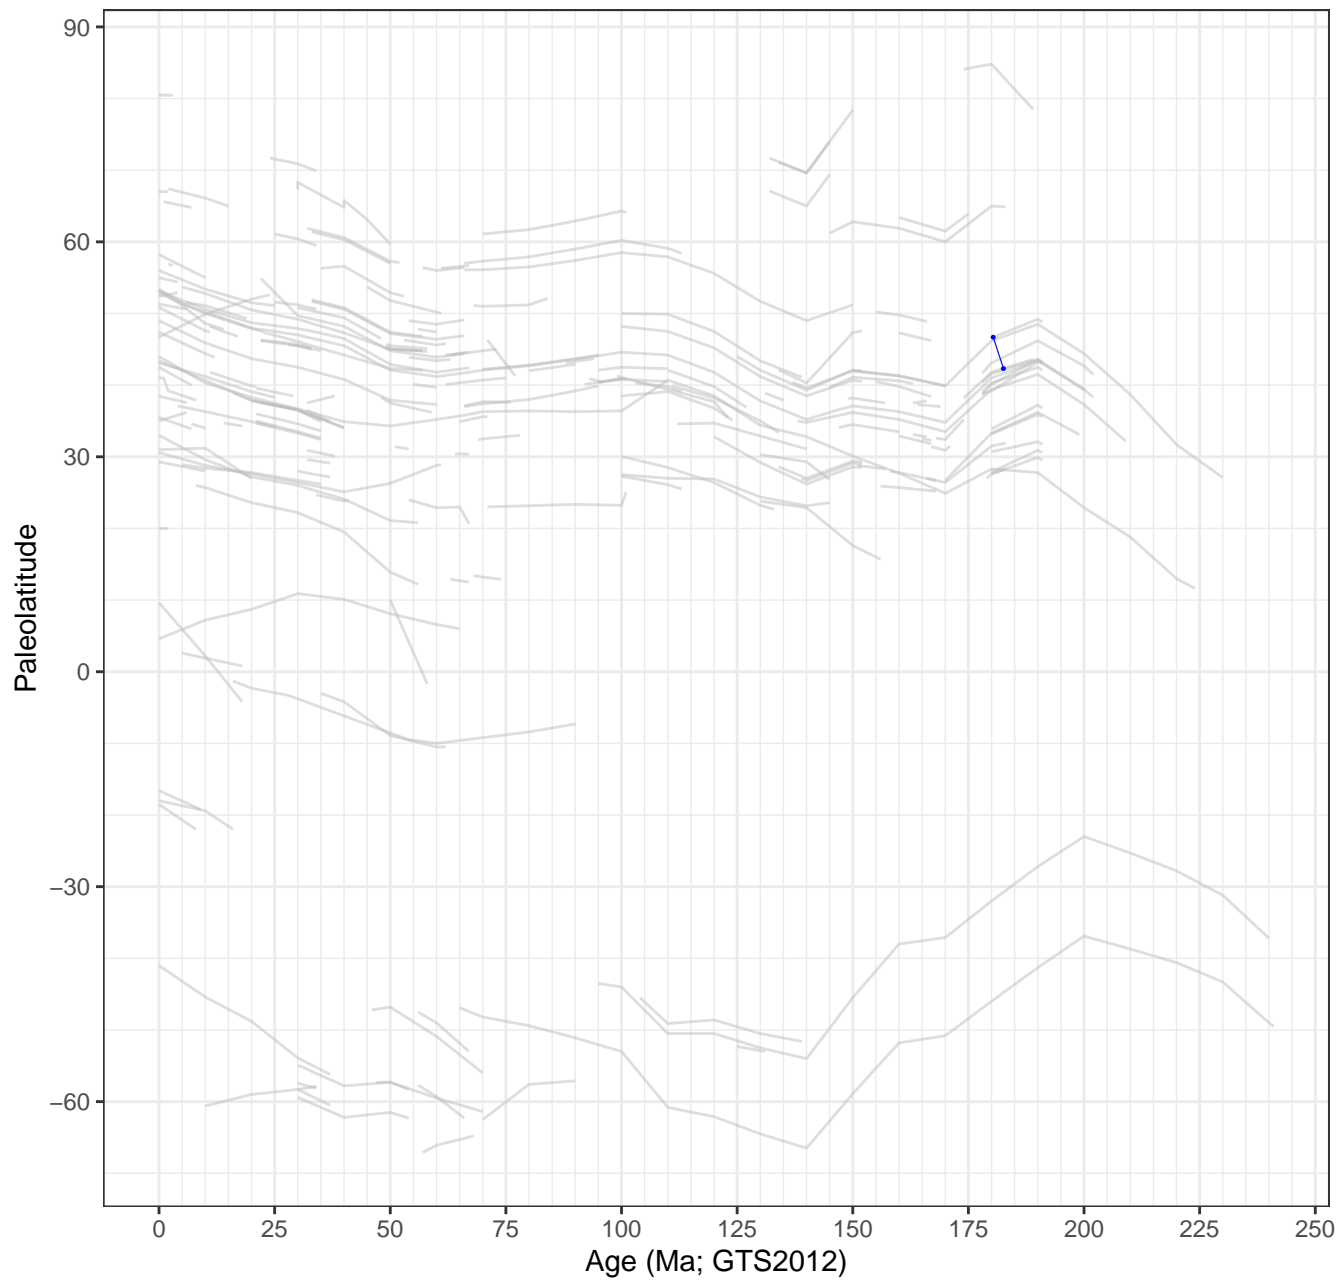

Supplement: Supplementary file 1816 [file Limbicysta bjaerkei.pdf › Supplement/Supplement 2/Species 1914 plots/Limbicysta bjaerkei.pdf]

# Species *Limbodinium absidatum*

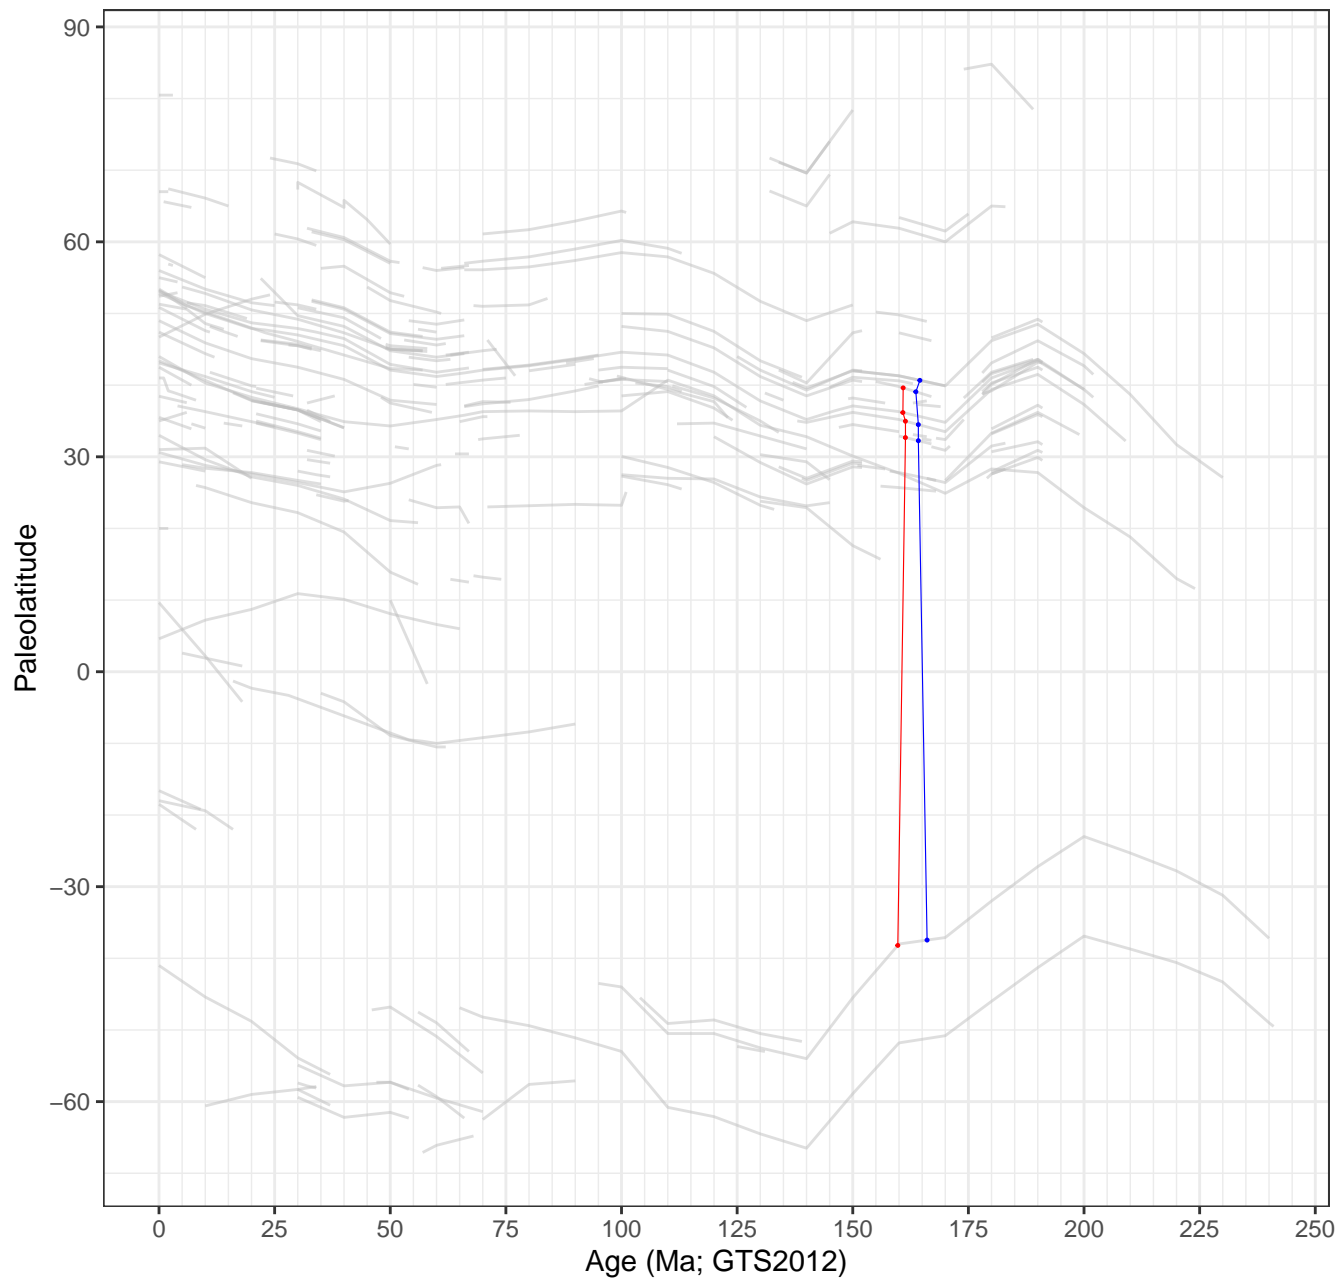

Supplement: Supplementary file 1817 [file Limbodinium absidatum.pdf › Supplement/Supplement 2/Species 1914 plots/Limbodinium absidatum.pdf]

# Species *Lingulodinium bergmanii*

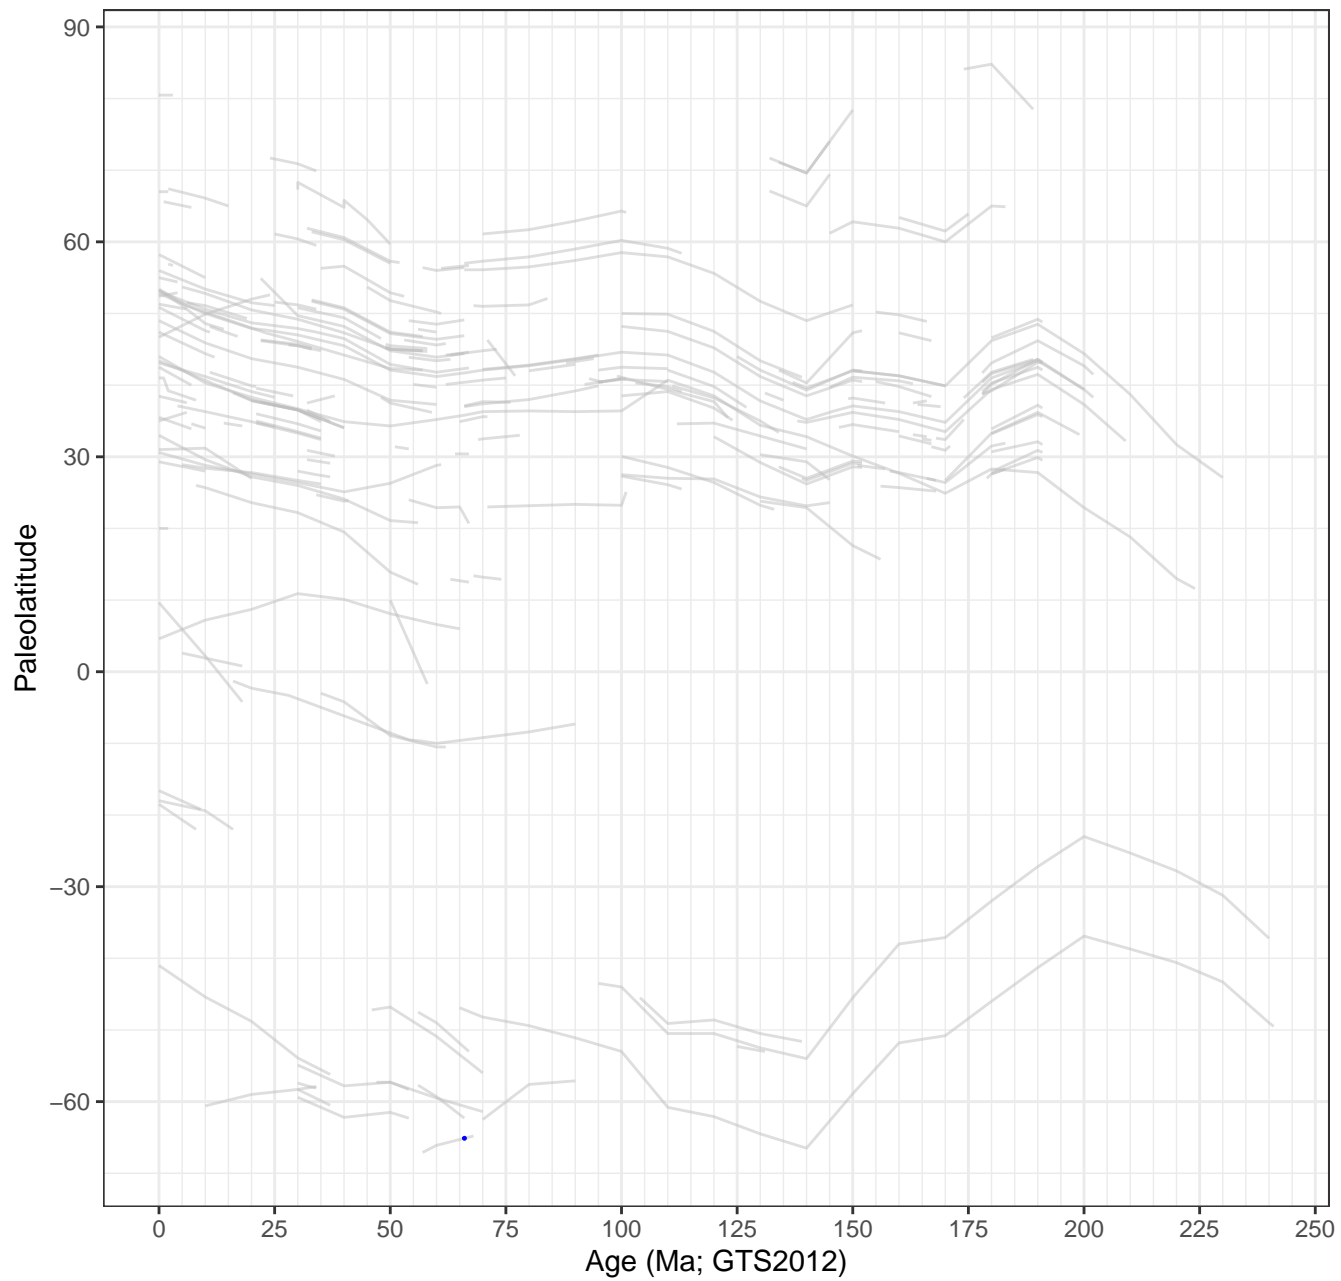

Supplement: Supplementary file 1818 [file Lingulodinium bergmanii.pdf › Supplement/Supplement 2/Species 1914 plots/Lingulodinium bergmanii.pdf]

# Species *Lingulodinium hemicystum*

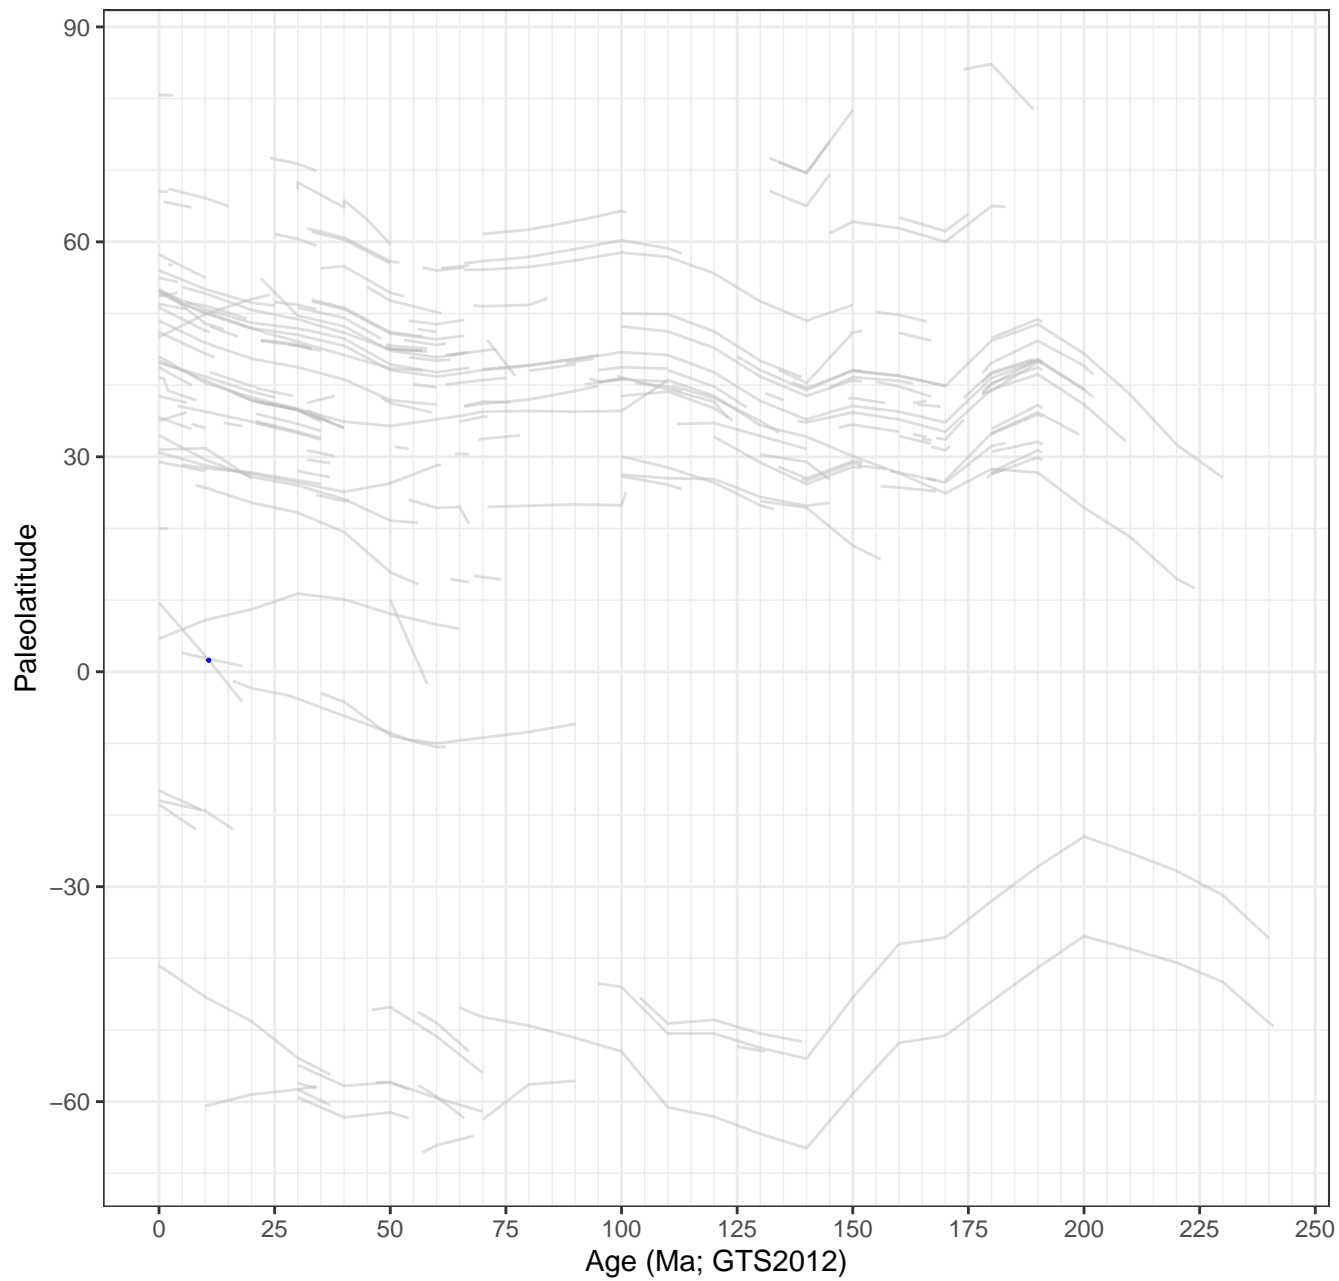

Supplement: Supplementary file 1819 [file Lingulodinium hemicystum.pdf › Supplement/Supplement 2/Species 1914 plots/Lingulodinium hemicystum.pdf]

# Species *Lingulodinium machaerophorum*

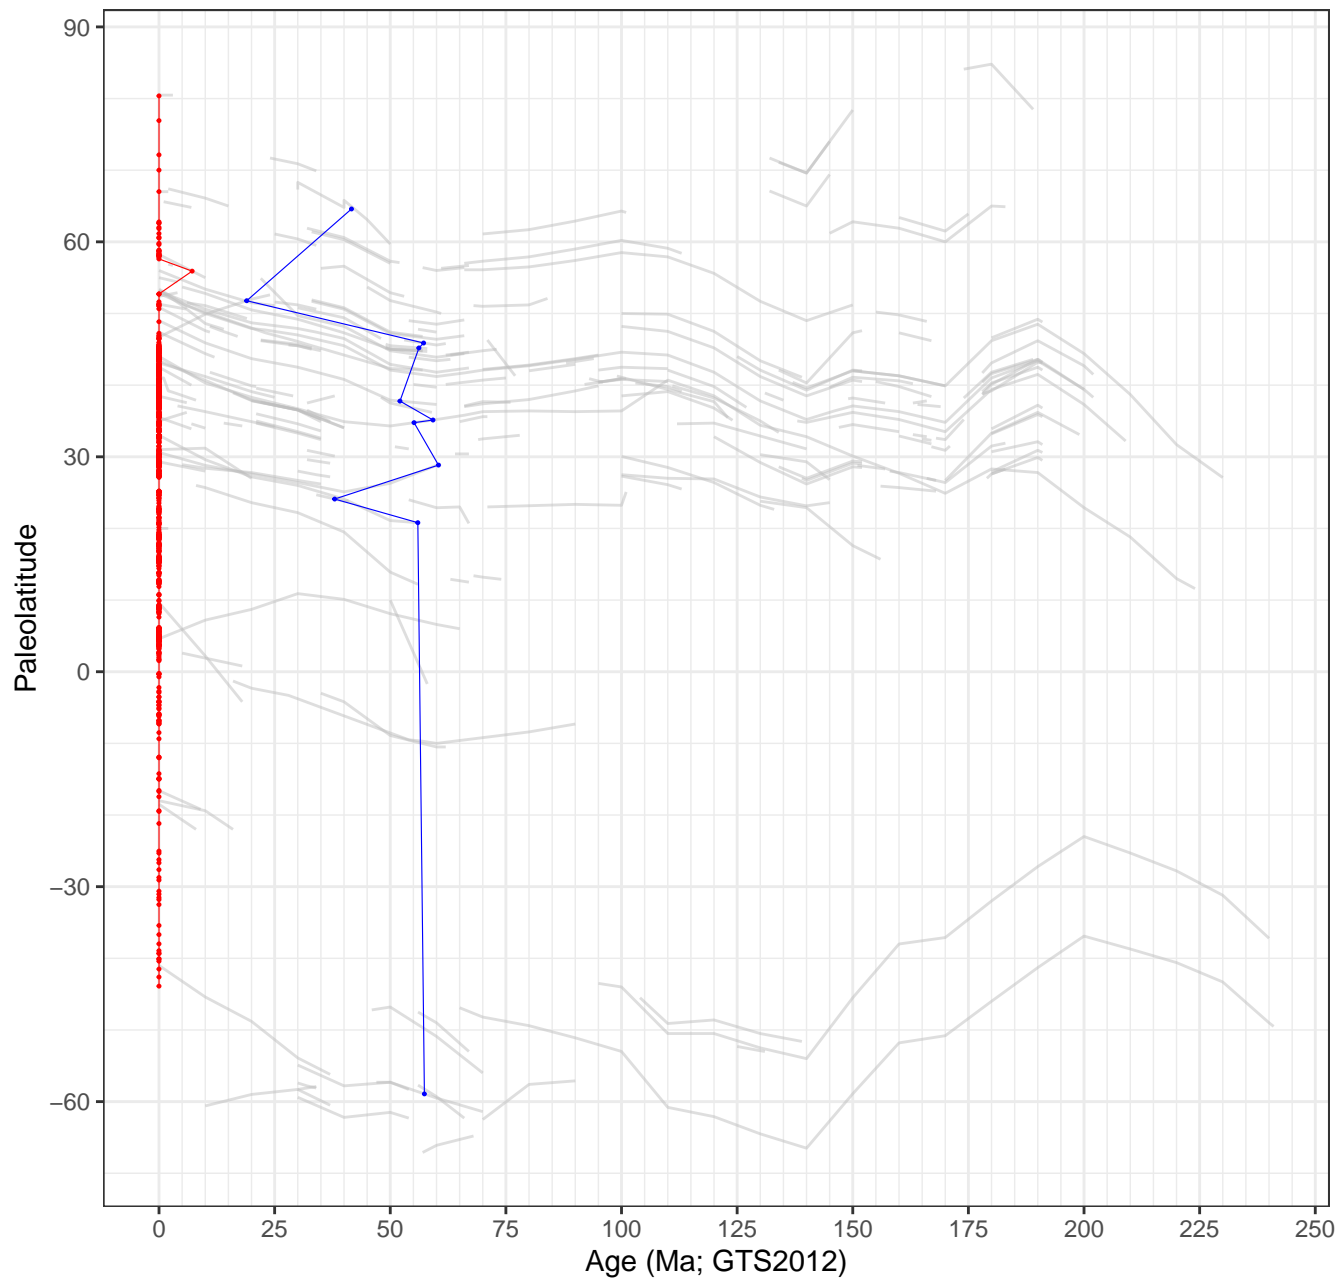

Supplement: Supplementary file 1820 [file Lingulodinium machaerophorum.pdf › Supplement/Supplement 2/Species 1914 plots/Lingulodinium machaerophorum.pdf]

# Species *Lingulodinium multivirgatum*

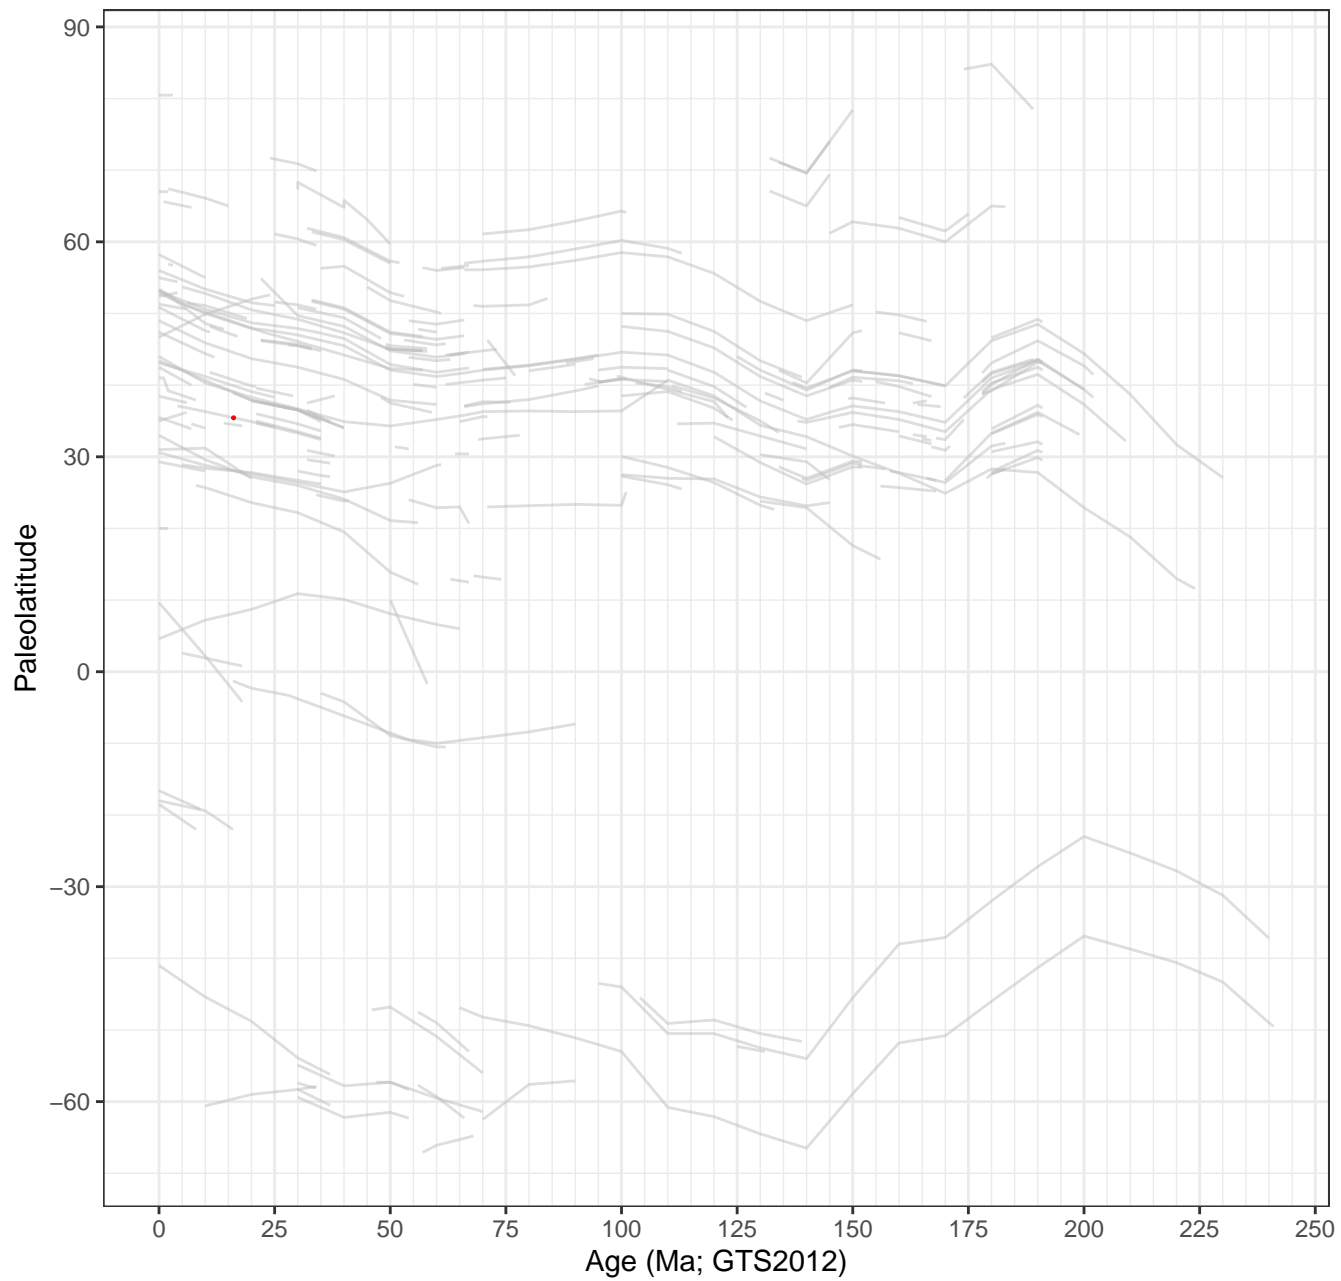

Supplement: Supplementary file 1821 [file Lingulodinium multivirgatum.pdf › Supplement/Supplement 2/Species 1914 plots/Lingulodinium multivirgatum.pdf]

# Species *Lithodinia arcanitabulata*

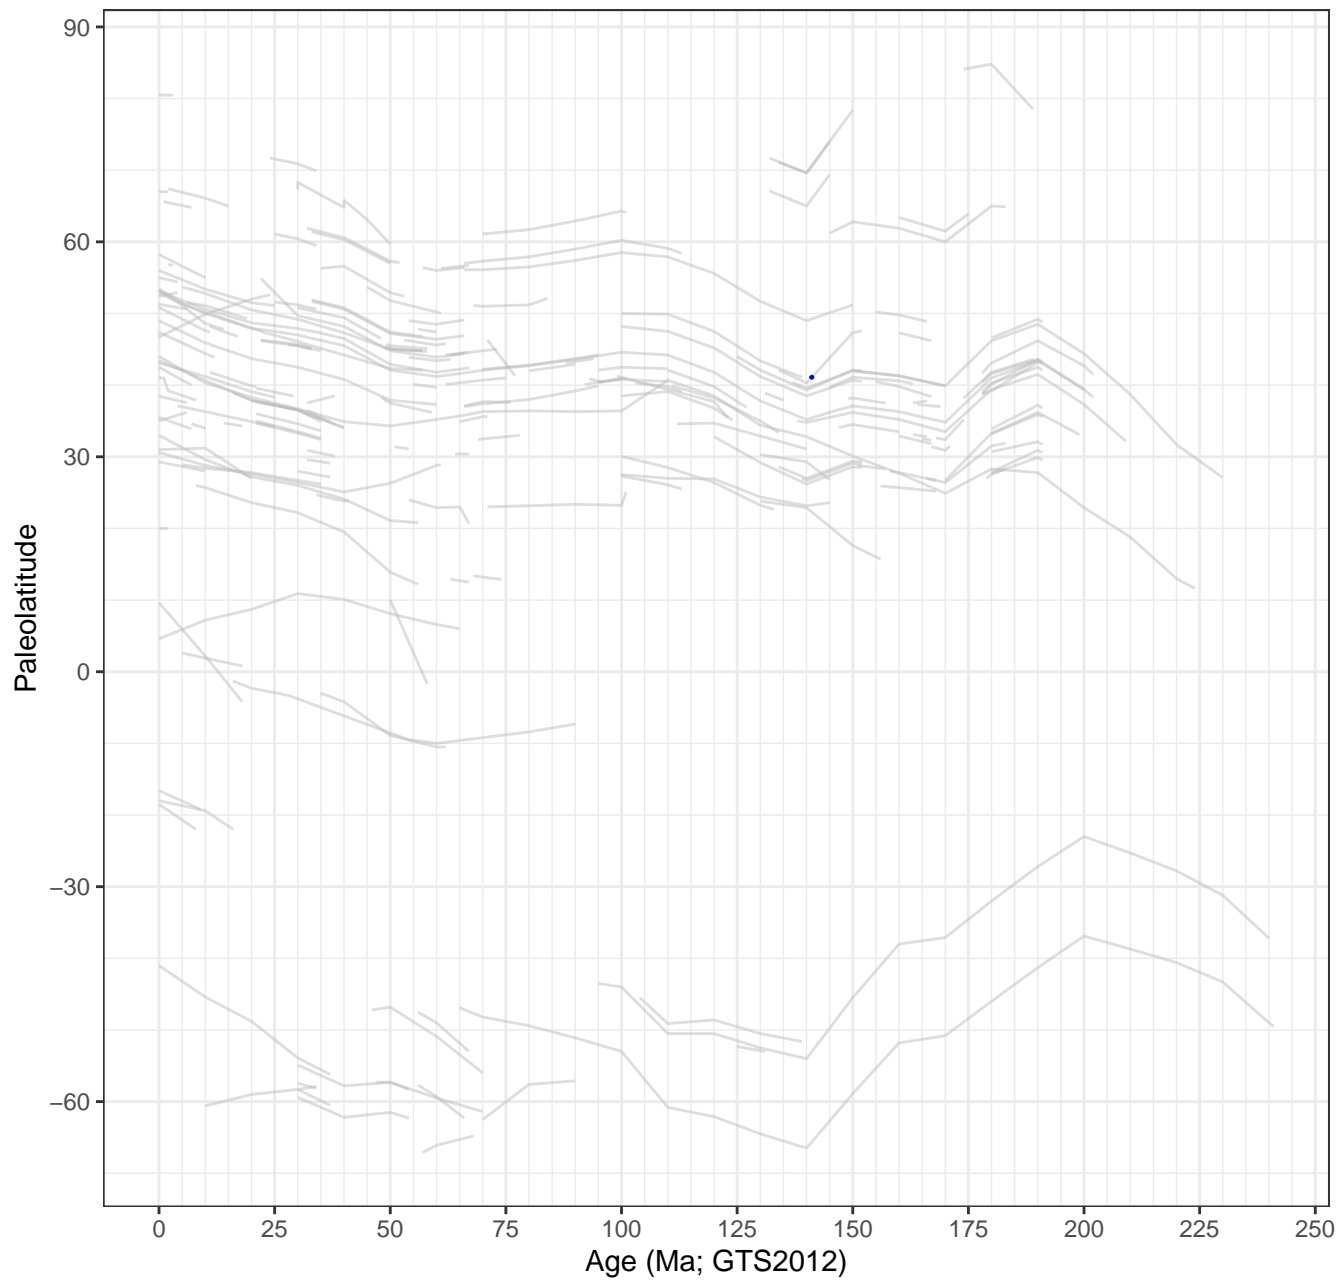

Supplement: Supplementary file 1822 [file Lithodinia arcanitabulata.pdf › Supplement/Supplement 2/Species 1914 plots/Lithodinia arcanitabulata.pdf]

# Species *Lithodinia jurassica*

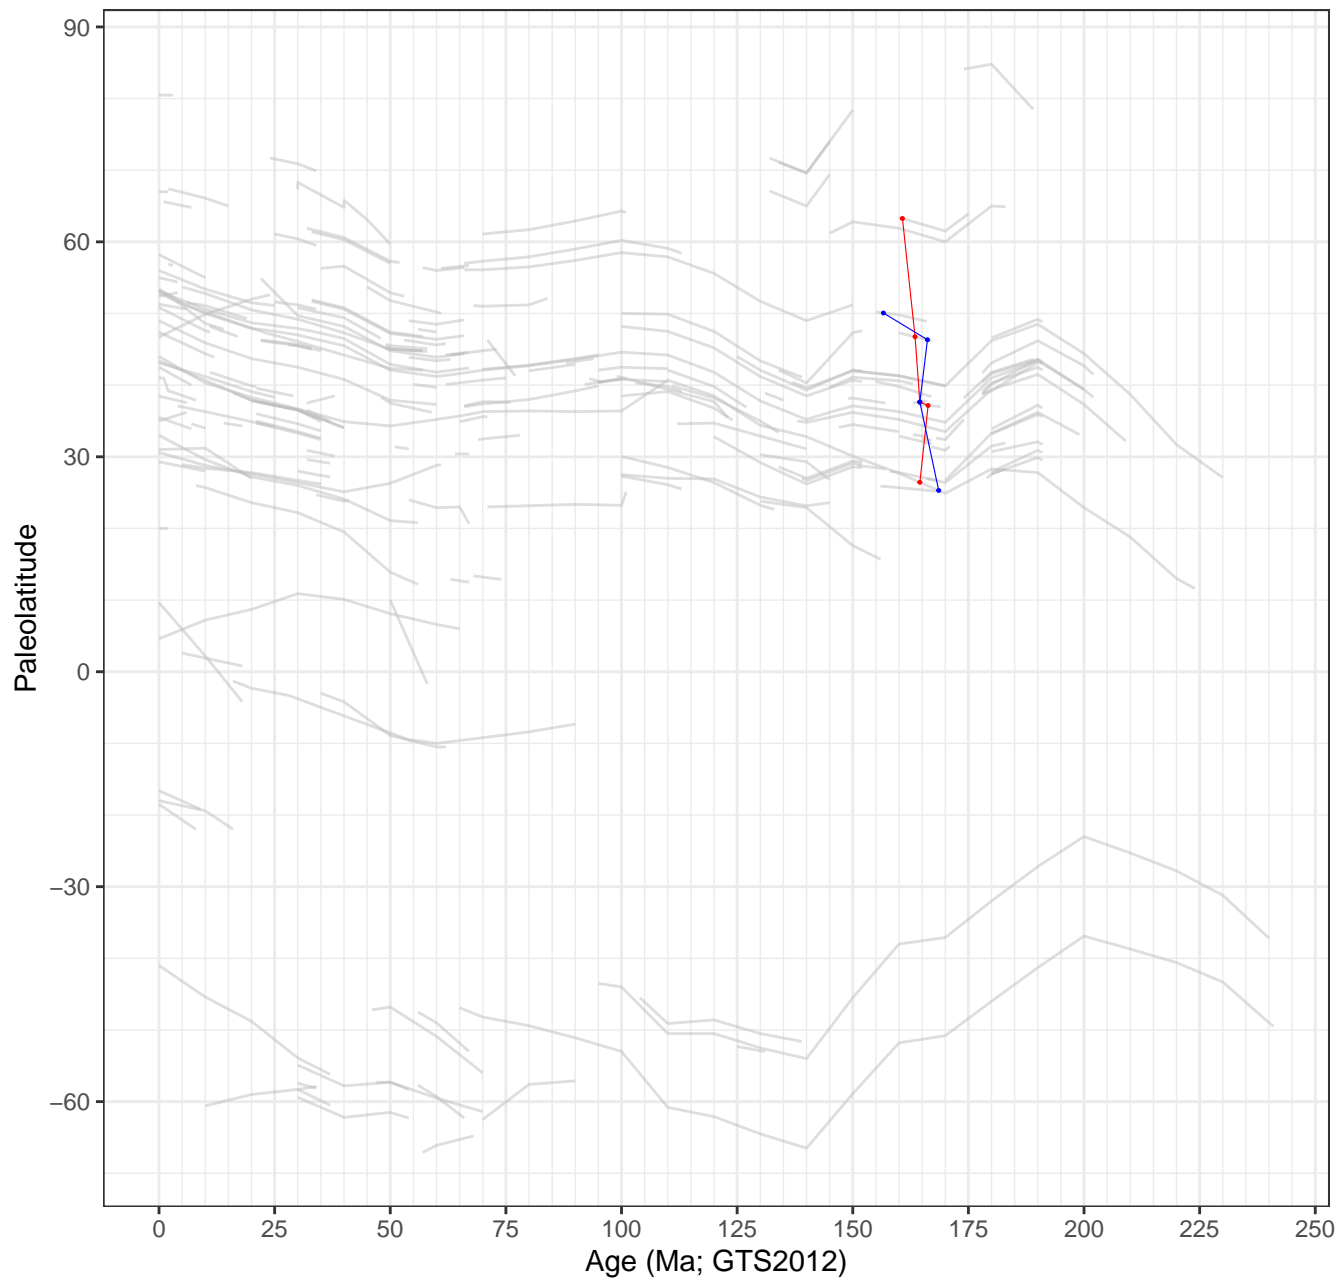

Supplement: Supplementary file 1823 [file Lithodinia jurassica.pdf › Supplement/Supplement 2/Species 1914 plots/Lithodinia jurassica.pdf]

# Species *Lithodinia protothymosa*

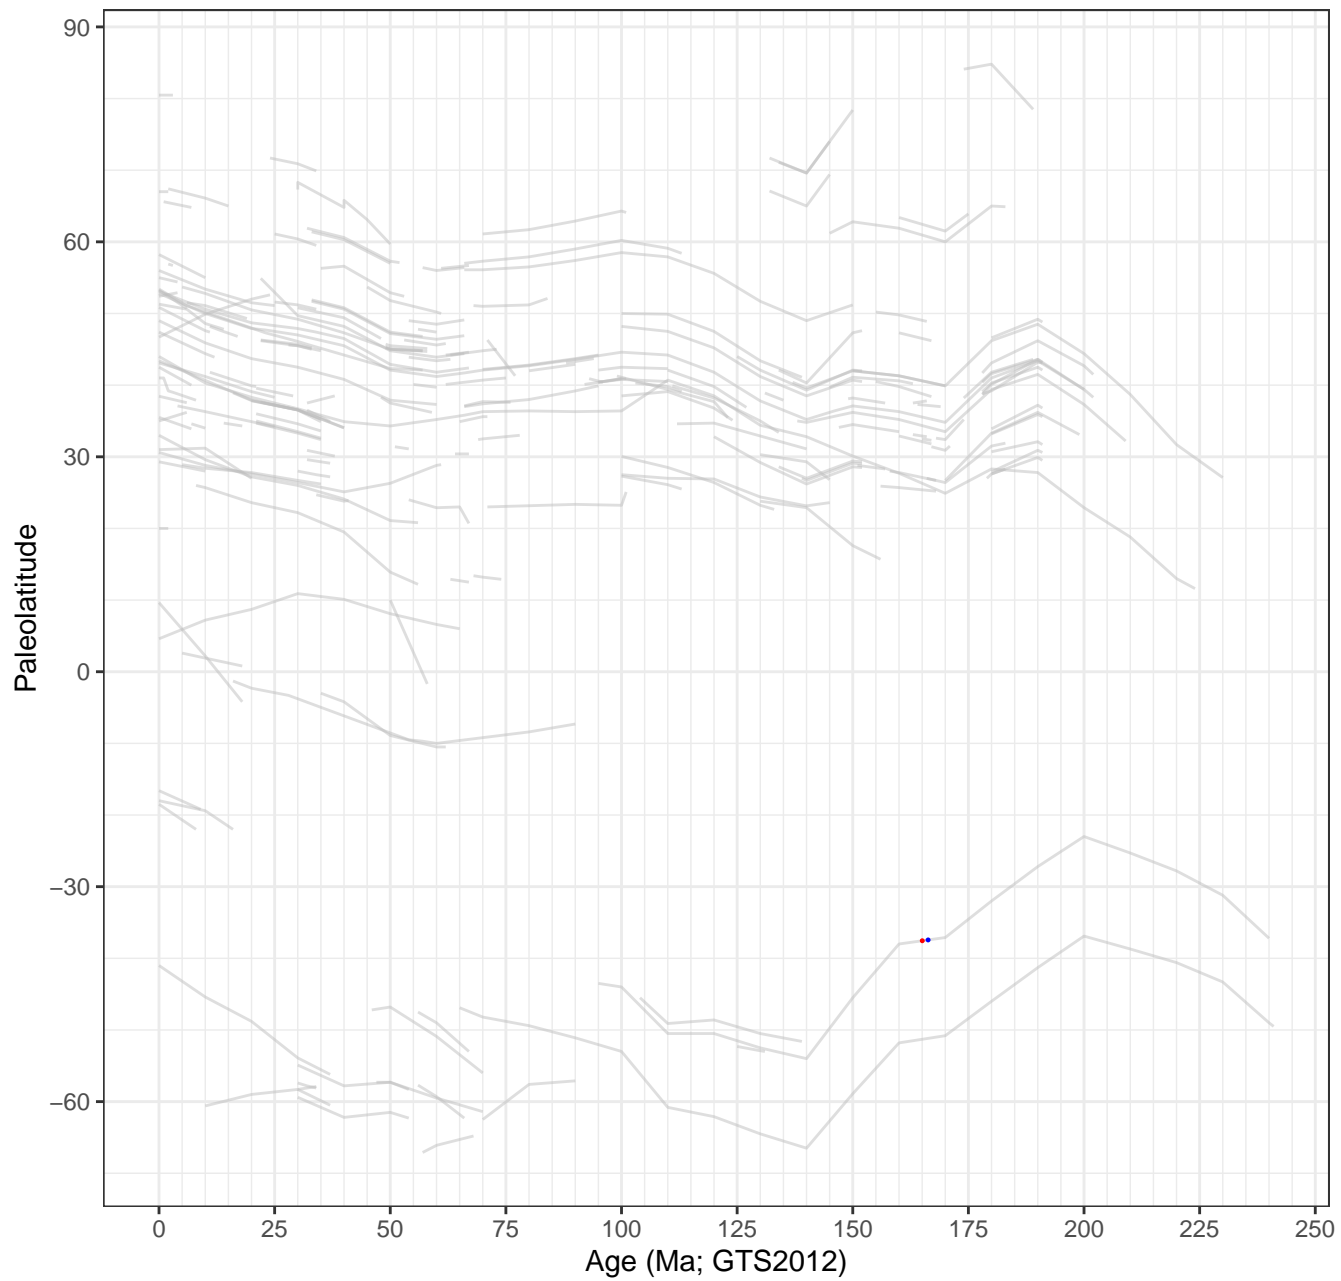

Supplement: Supplementary file 1824 [file Lithodinia protothymosa.pdf › Supplement/Supplement 2/Species 1914 plots/Lithodinia protothymosa.pdf]

# Species *Litosphaeridium arundum*

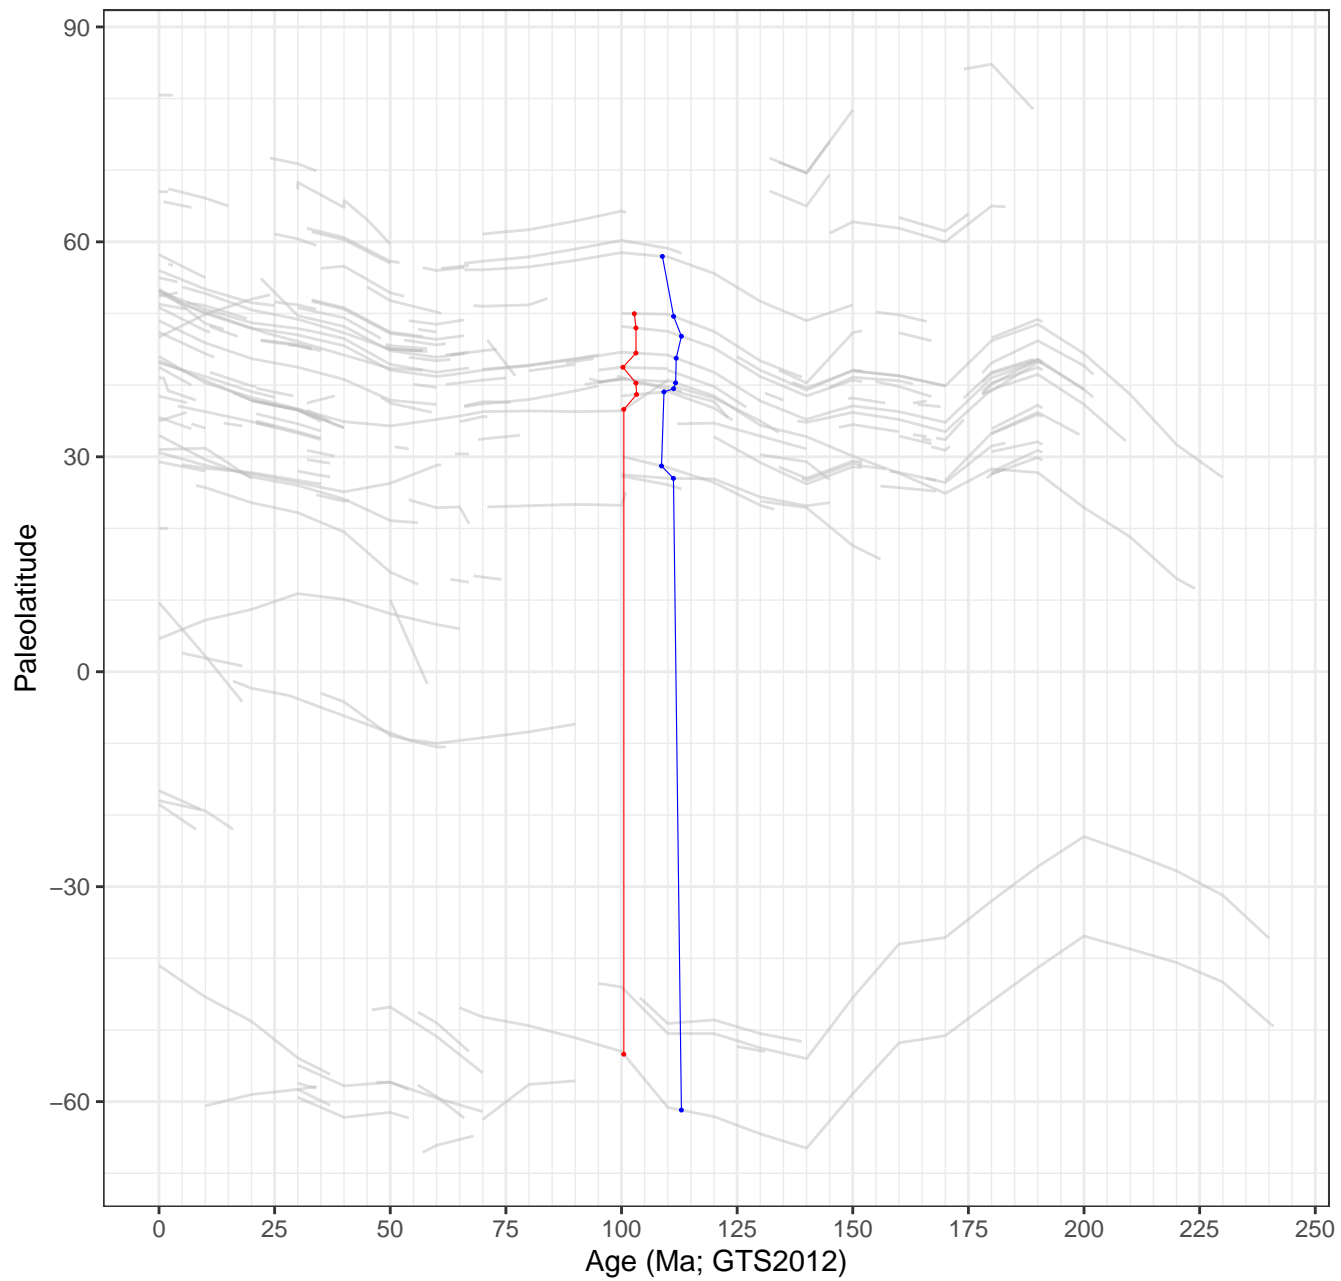

Supplement: Supplementary file 1825 [file Litosphaeridium arundum.pdf › Supplement/Supplement 2/Species 1914 plots/Litosphaeridium arundum.pdf]

# Species *Litosphaeridium conispinum*

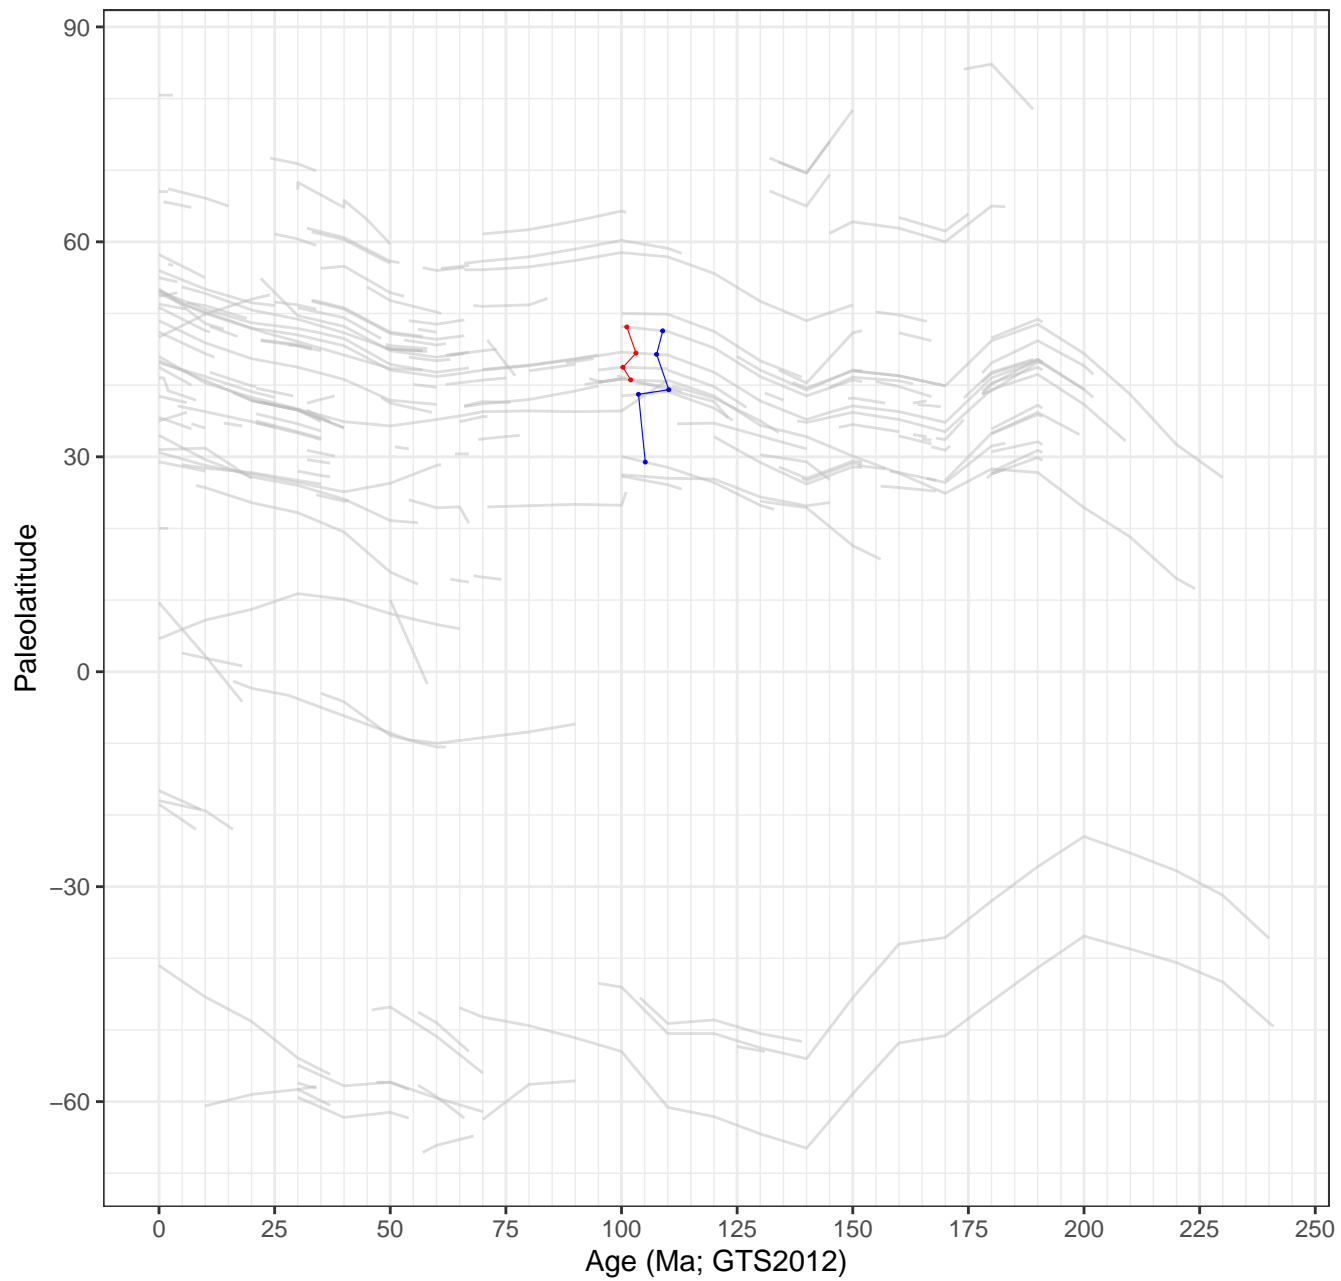

Supplement: Supplementary file 1826 [file Litosphaeridium conispinum.pdf › Supplement/Supplement 2/Species 1914 plots/Litosphaeridium conispinum.pdf]

# Species *Litosphaeridium siphoniphorum*

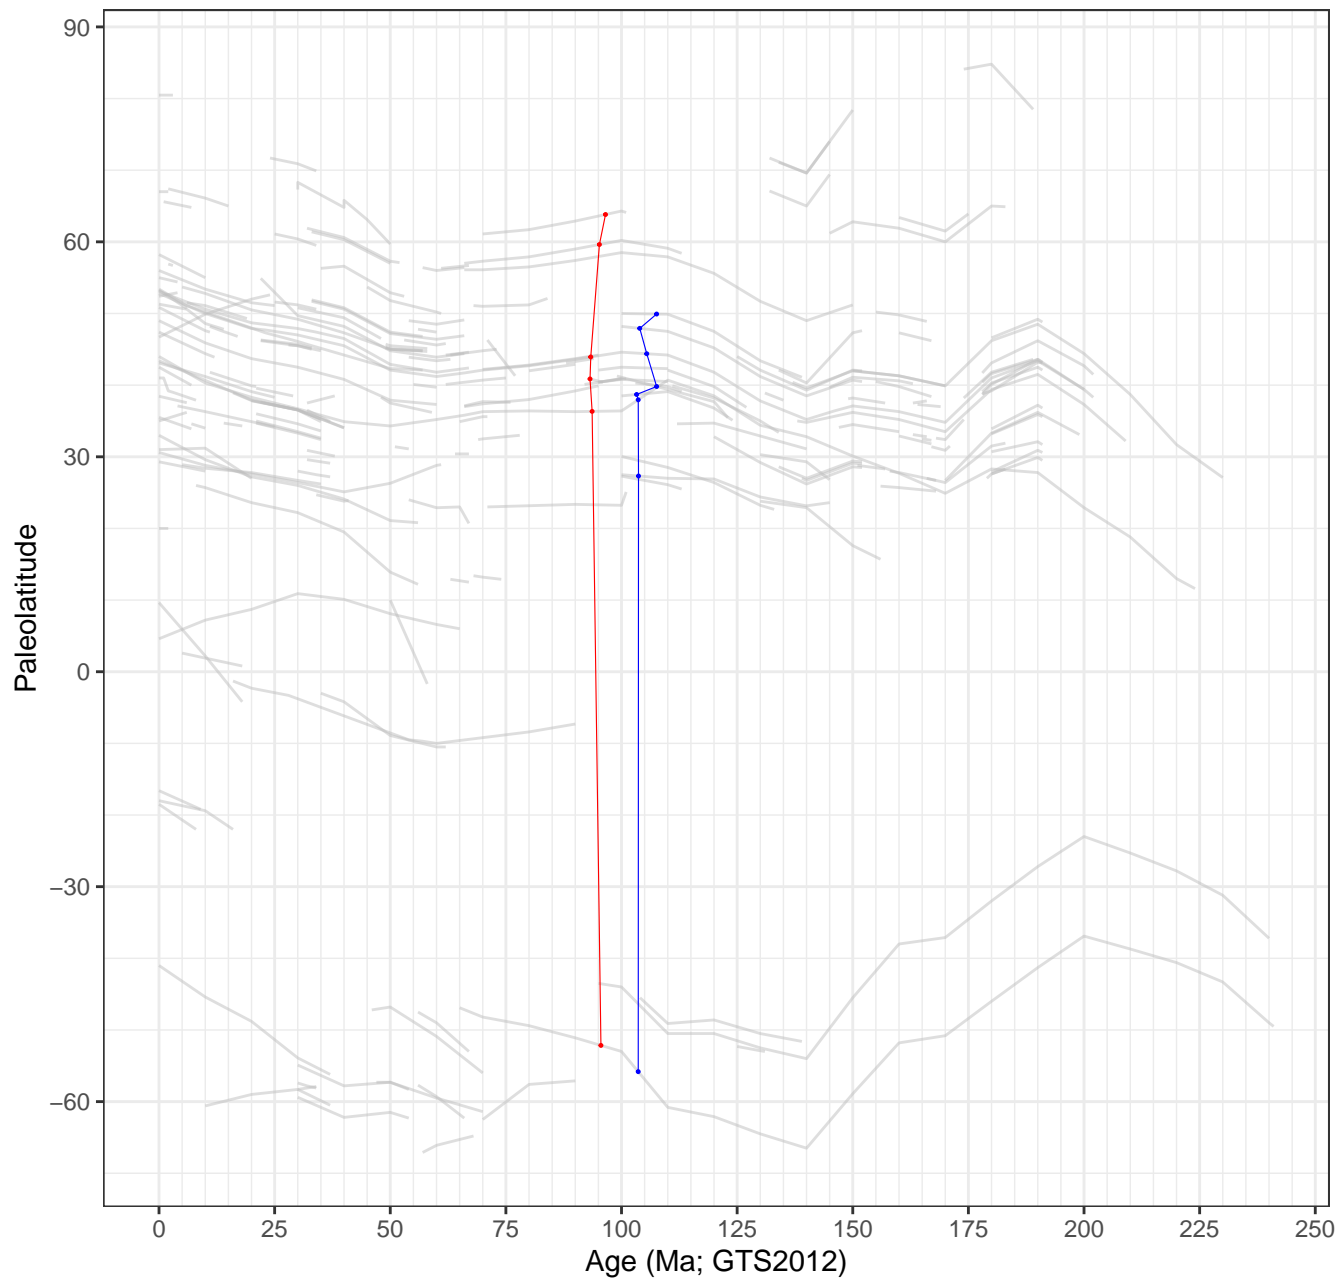

Supplement: Supplementary file 1827 [file Litosphaeridium siphoniphorum.pdf › Supplement/Supplement 2/Species 1914 plots/Litosphaeridium siphoniphorum.pdf]

# Species *Lophocysta* spp.

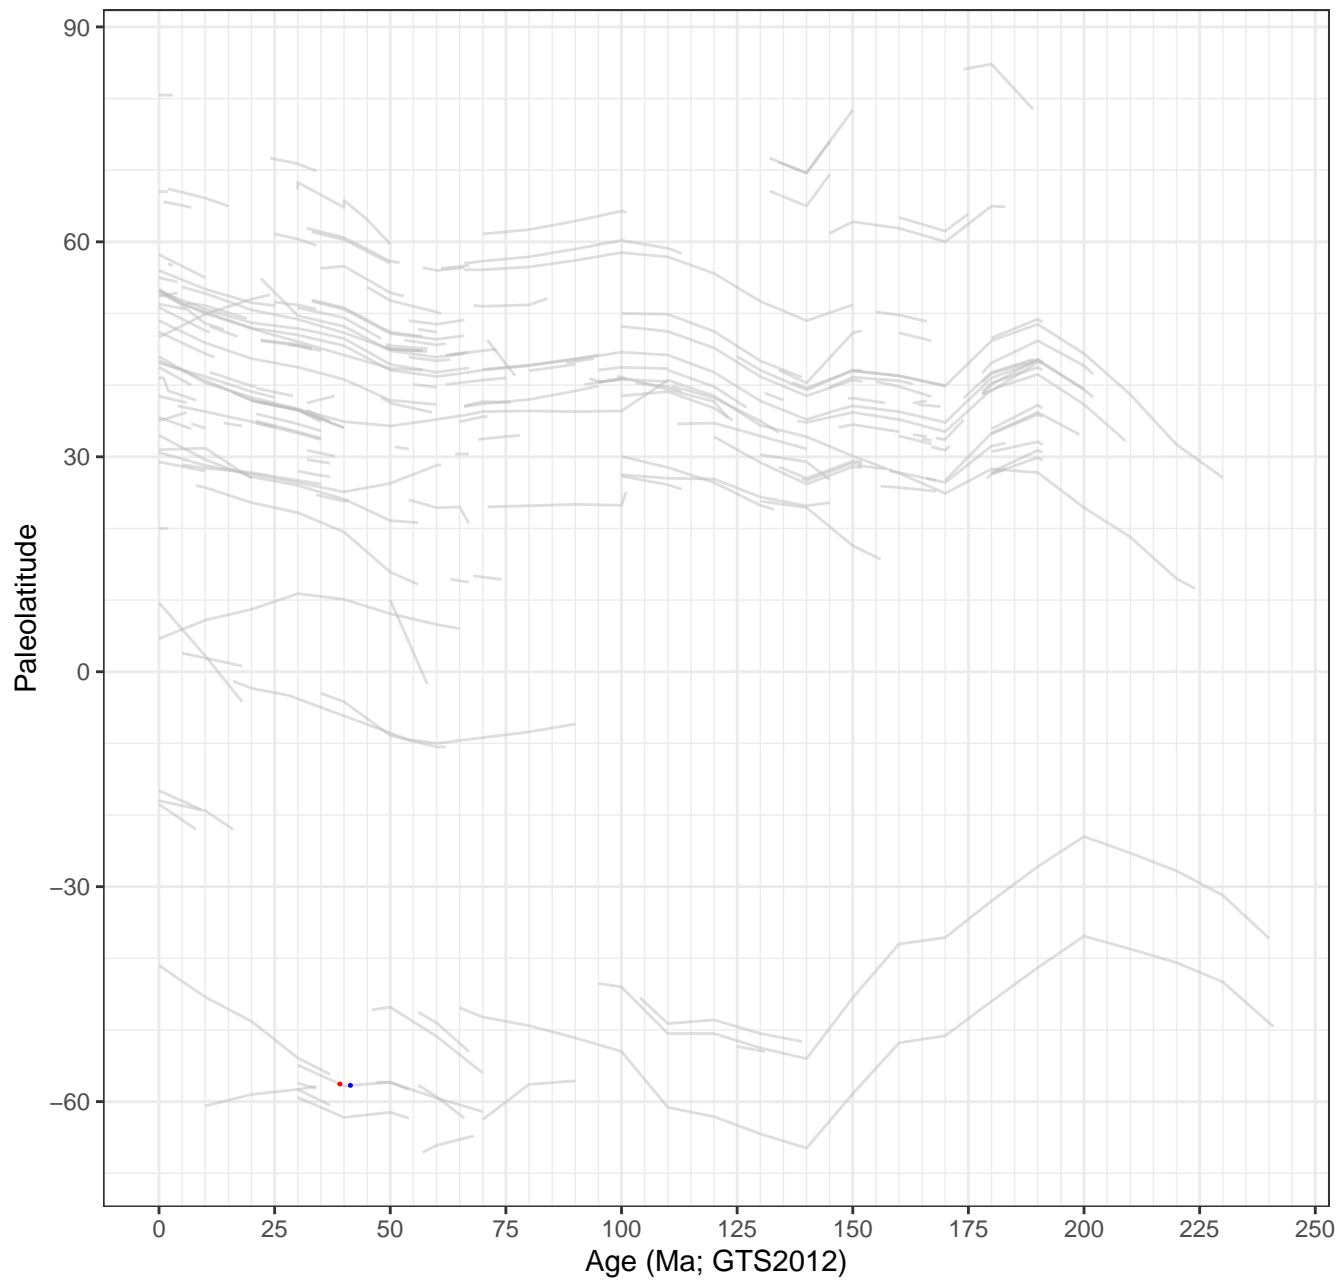

Supplement: Supplementary file 1828 [file Lophocysta spp..pdf › Supplement/Supplement 2/Species 1914 plots/Lophocysta spp..pdf]

# Species *Lophocysta sulcolimbata*

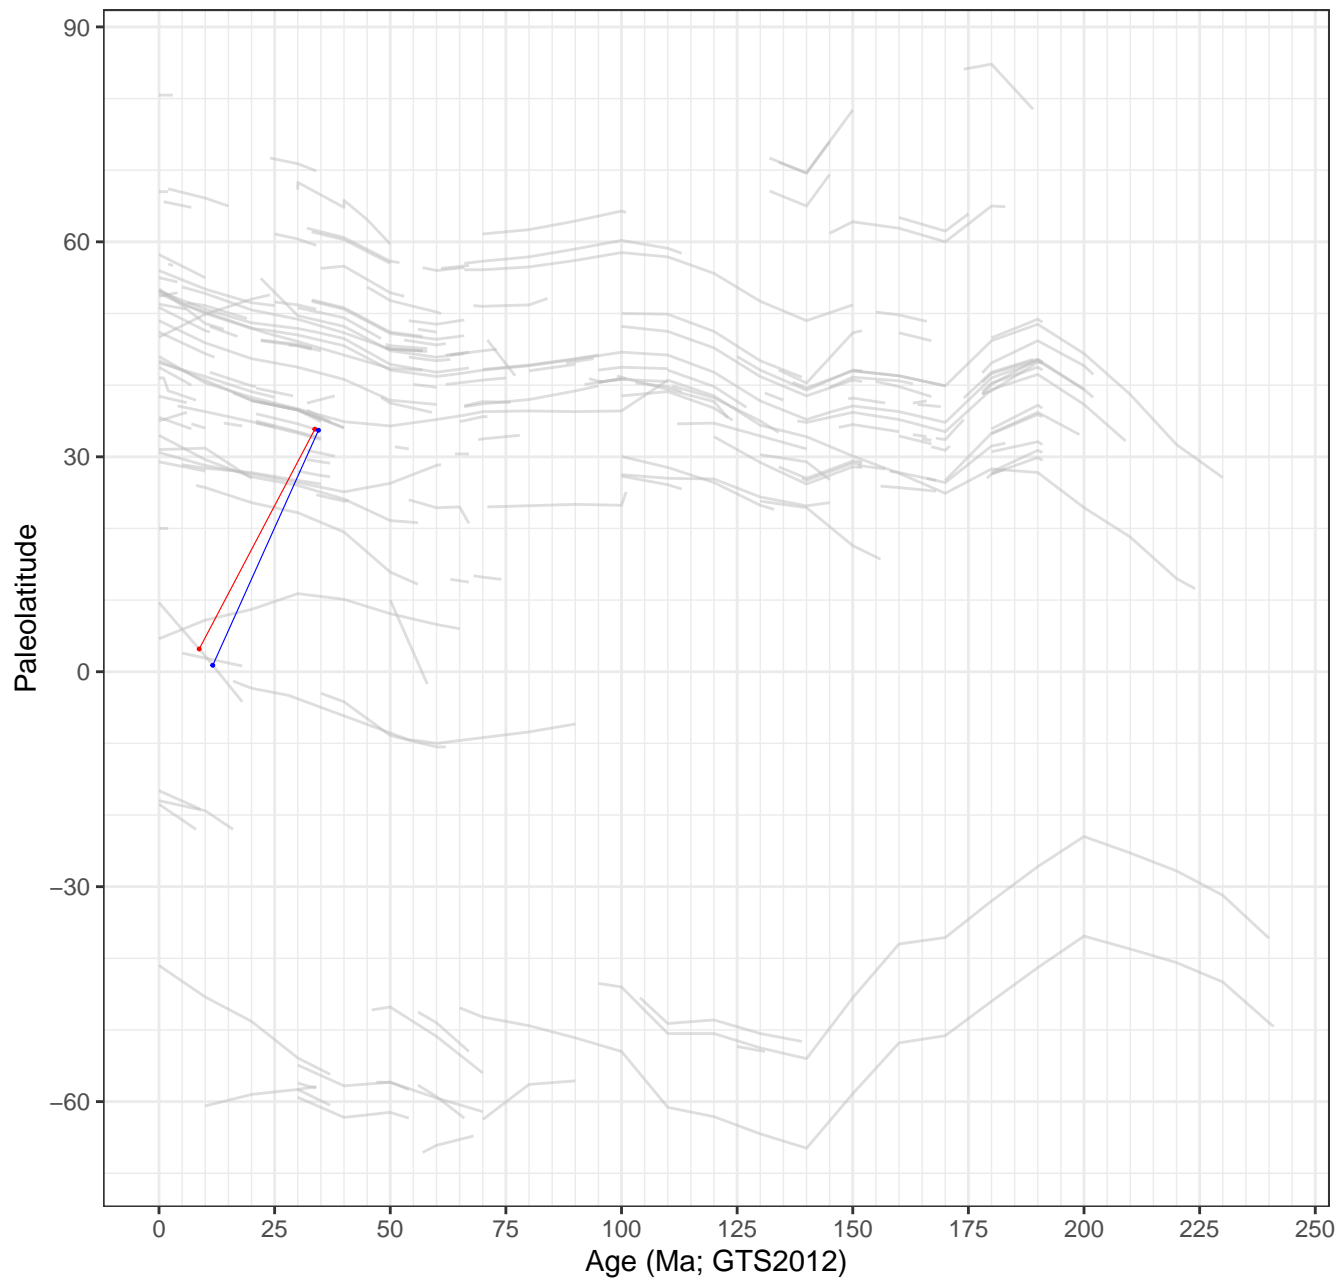

Supplement: Supplementary file 1829 [file Lophocysta sulcolimbata.pdf › Supplement/Supplement 2/Species 1914 plots/Lophocysta sulcolimbata.pdf]

# Species *Luehndea cirilliae*

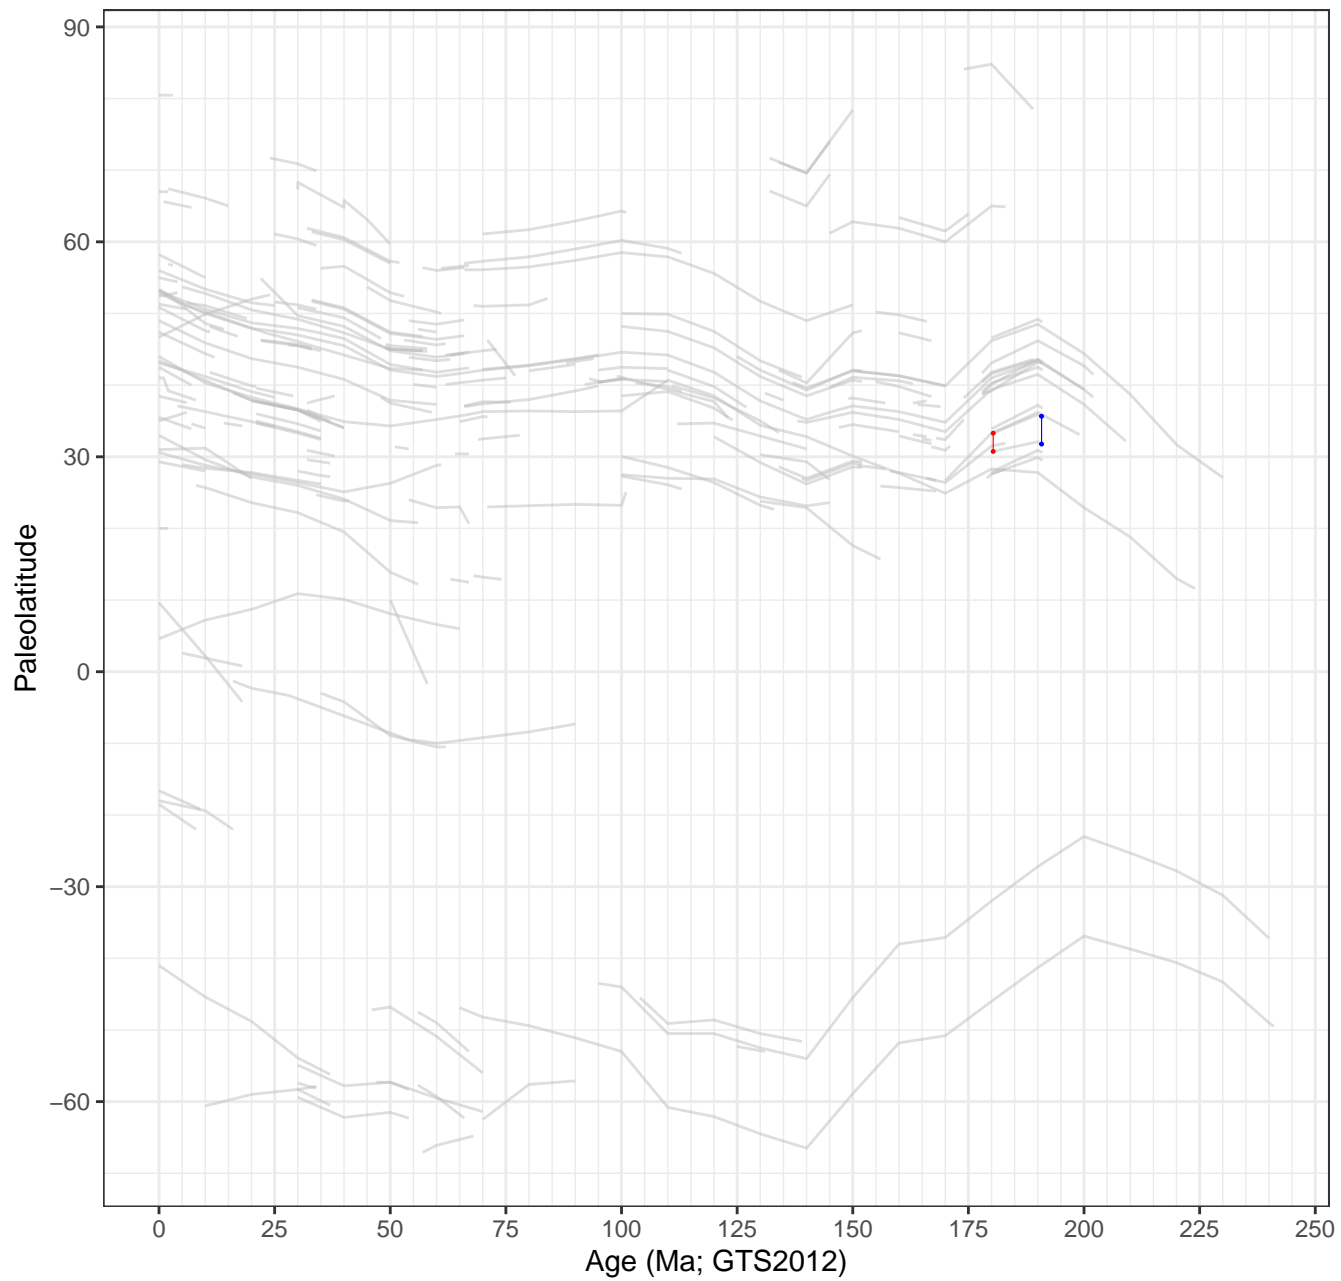

Supplement: Supplementary file 1830 [file Luehndea cirilliae.pdf › Supplement/Supplement 2/Species 1914 plots/Luehndea cirilliae.pdf]

# Species *Luehndea septata*

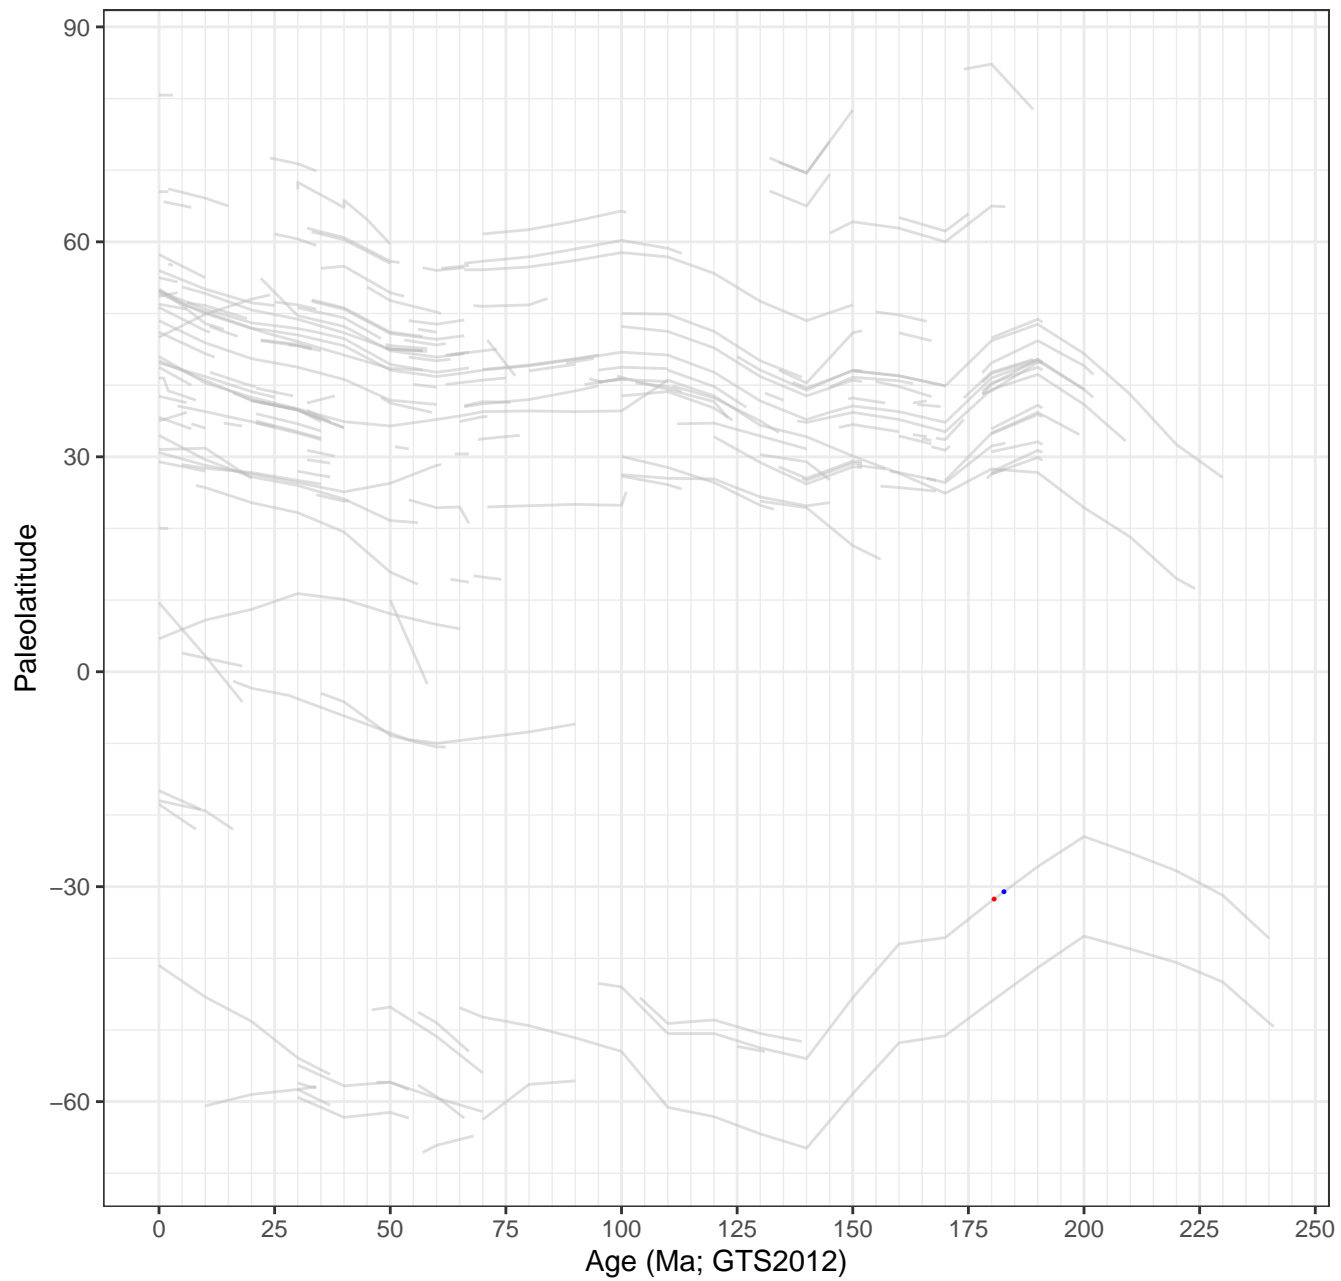

Supplement: Supplementary file 1831 [file Luehndea septata.pdf › Supplement/Supplement 2/Species 1914 plots/Luehndea septata.pdf]

# Species *Luehndea spinosa*

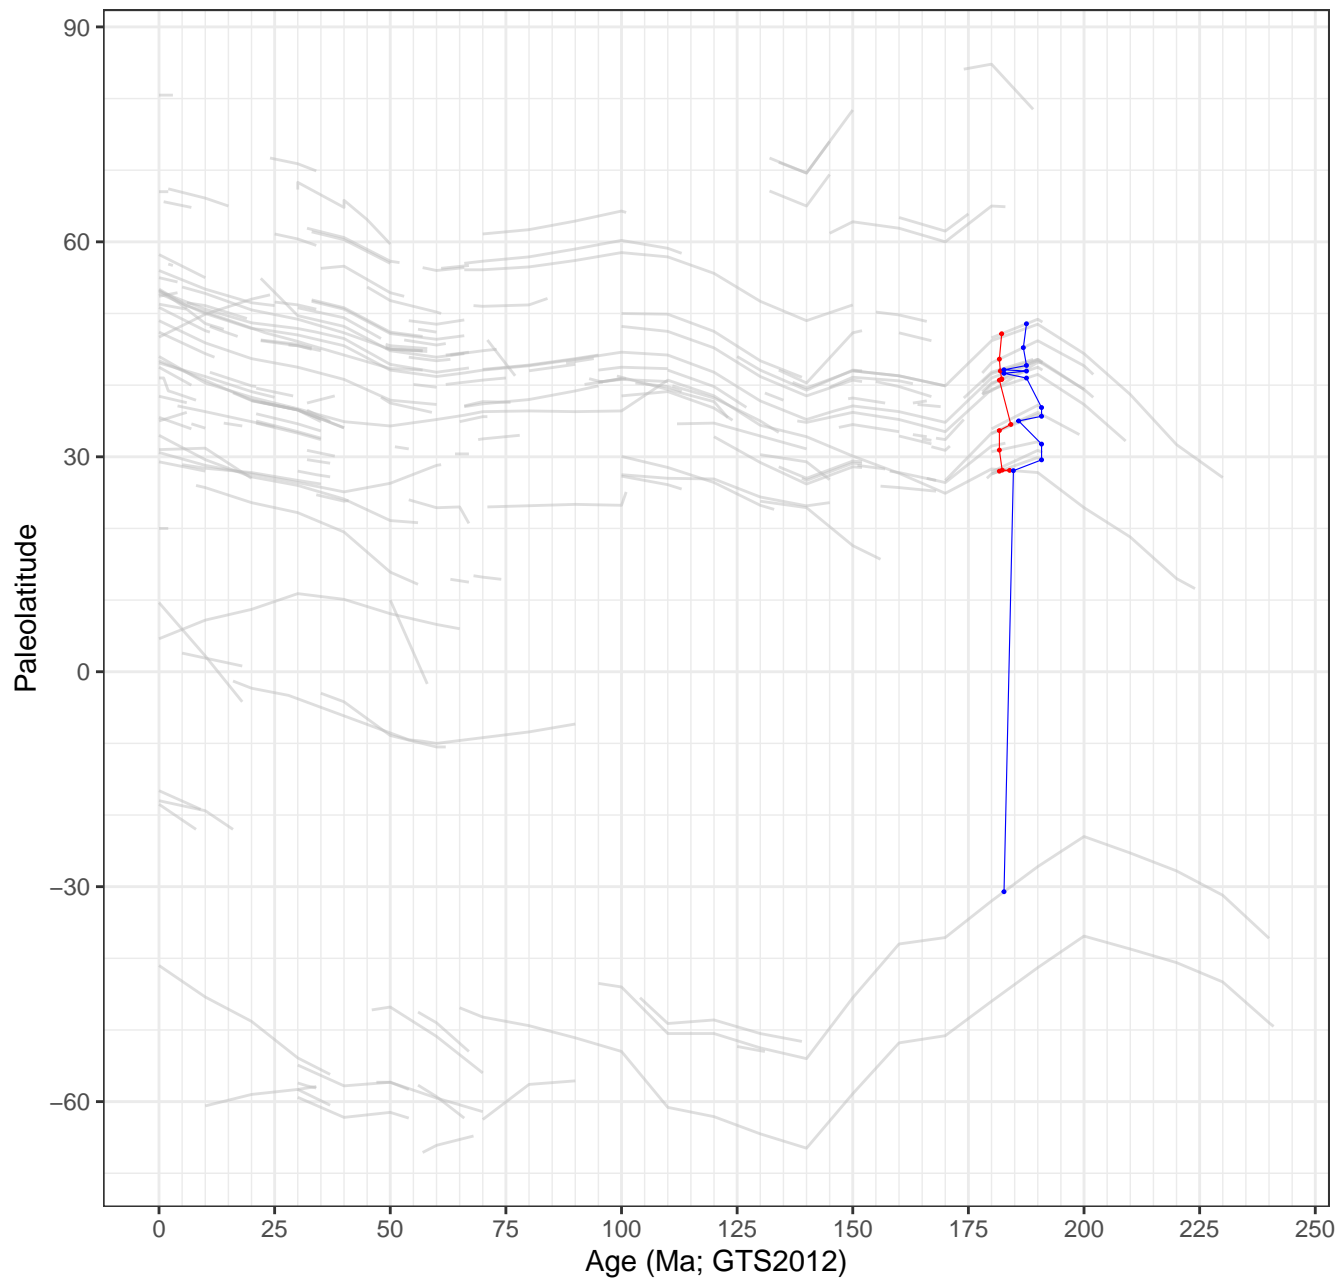

Supplement: Supplementary file 1832 [file Luehndea spinosa.pdf › Supplement/Supplement 2/Species 1914 plots/Luehndea spinosa.pdf]

# Species *Luxadinium primum*

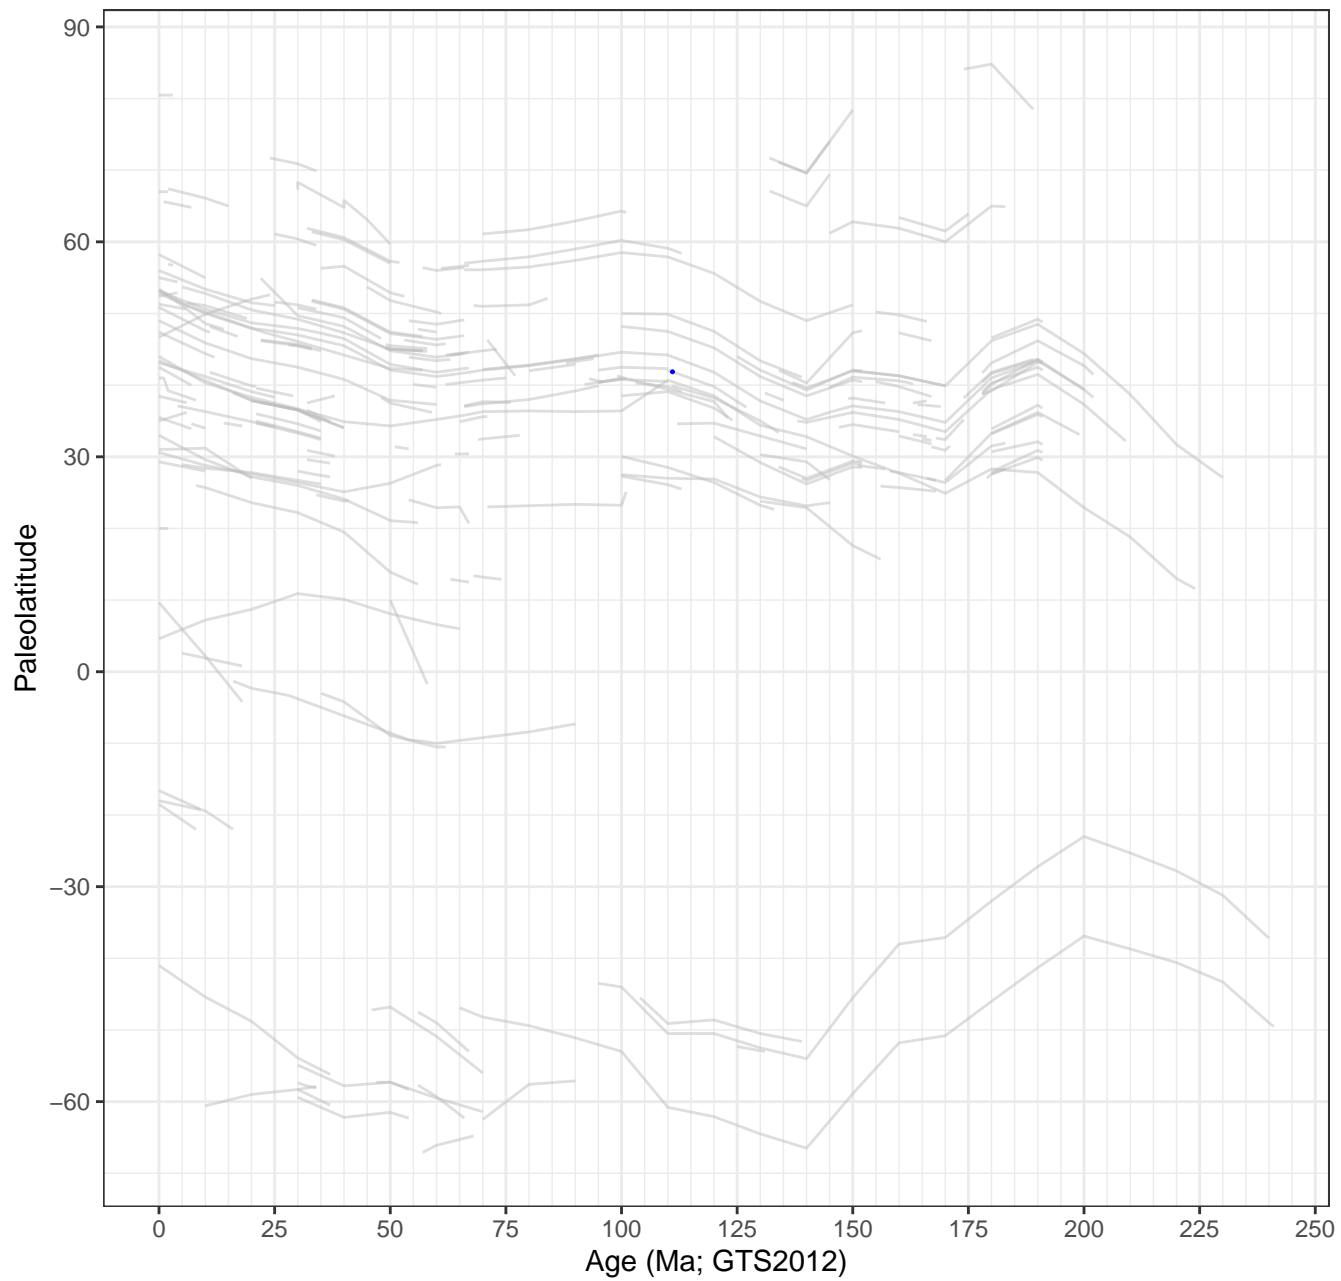

Supplement: Supplementary file 1833 [file Luxadinium primulum.pdf › Supplement/Supplement 2/Species 1914 plots/Luxadinium primulum.pdf]
