# Supplementary figures and images for: DINOSTRAT: a global database of the stratigraphic and paleolatitudinal distribution of Mesozoic–Cenozoic organic-walled dinoflagellate cysts (part 19 of 27)
Source: Copernicus journal article supplement (doi:10.5194/essd-14-579-2022), 2022-02-09

# Species *Luxadinium propatulum*

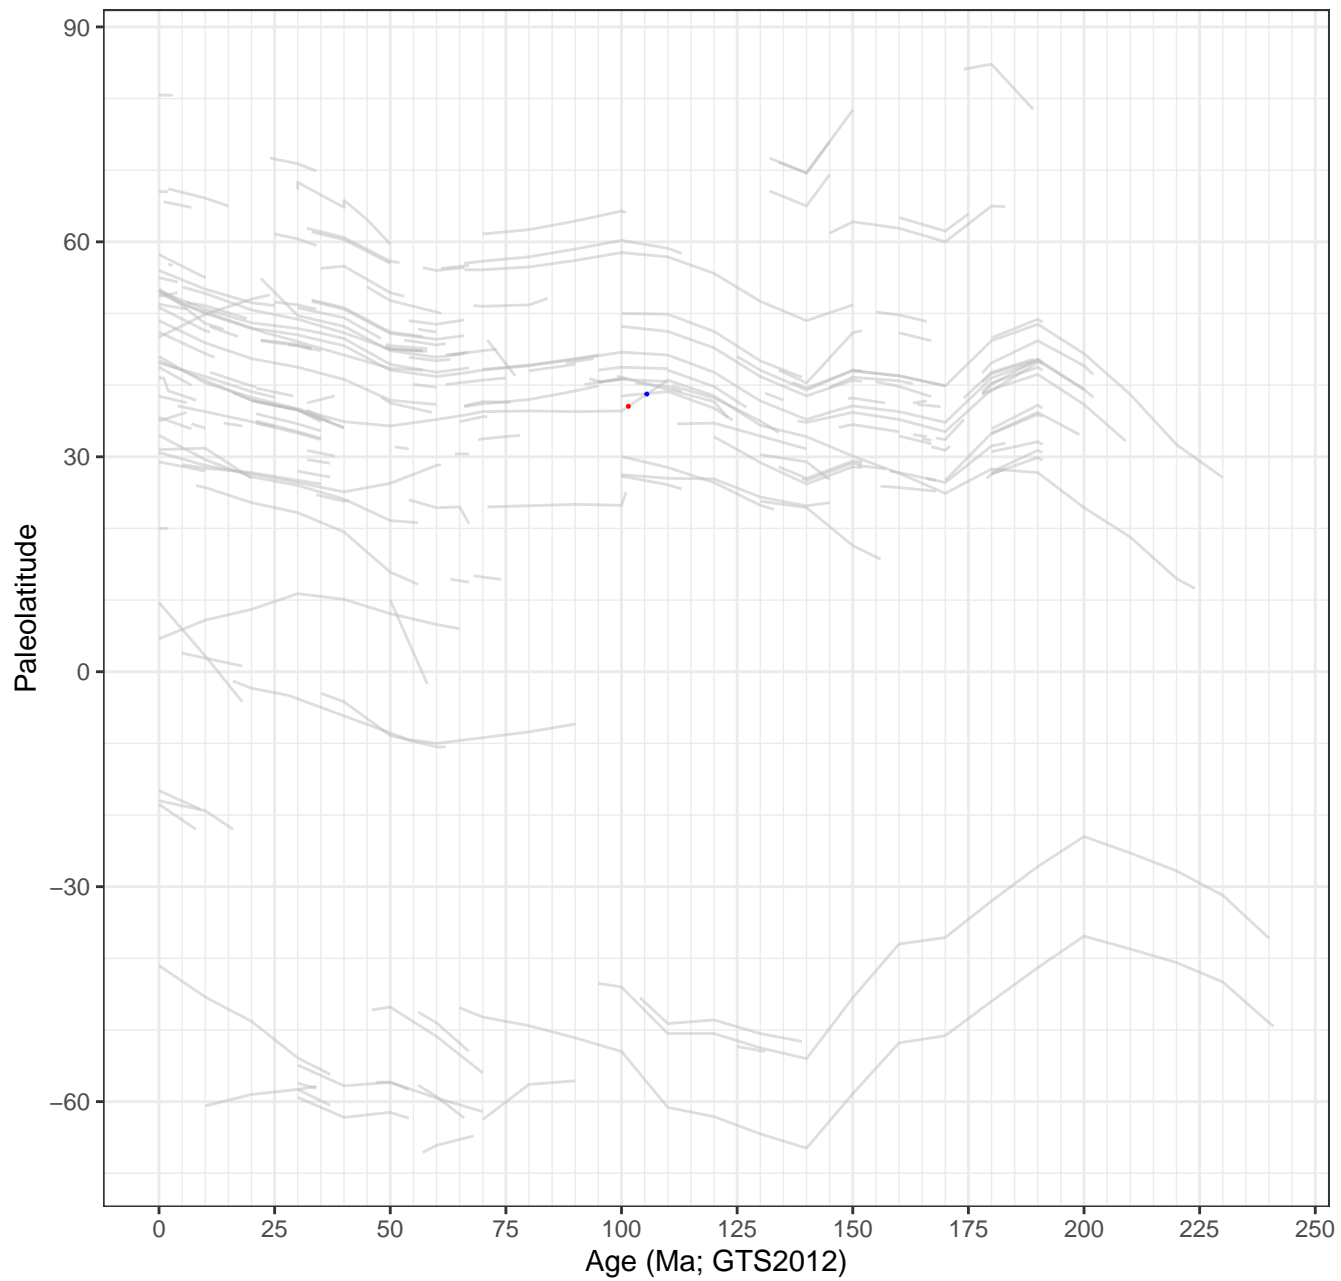

Supplement: Supplementary file 1834 [file Luxadinium propatulum.pdf › Supplement/Supplement 2/Species 1914 plots/Luxadinium propatulum.pdf]

# Species *Maduradinium pentagonum*

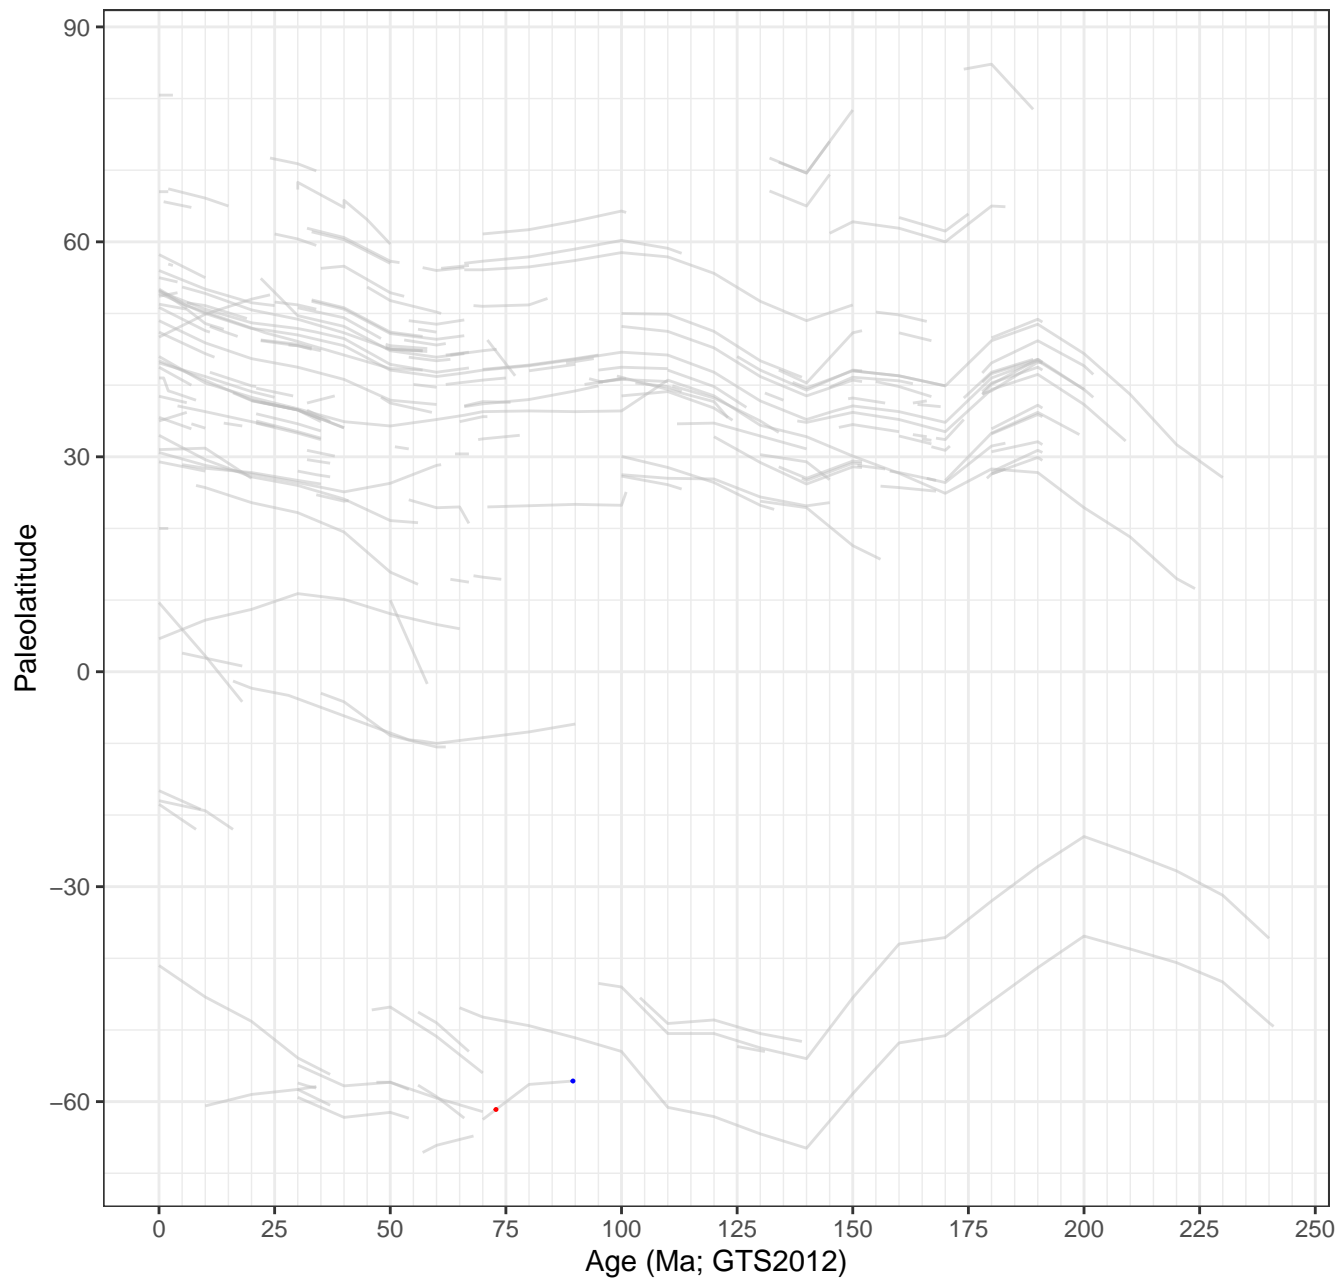

Supplement: Supplementary file 1835 [file Maduradinium pentagonum.pdf › Supplement/Supplement 2/Species 1914 plots/Maduradinium pentagonum.pdf]

# Species *Malvinia escutiana*

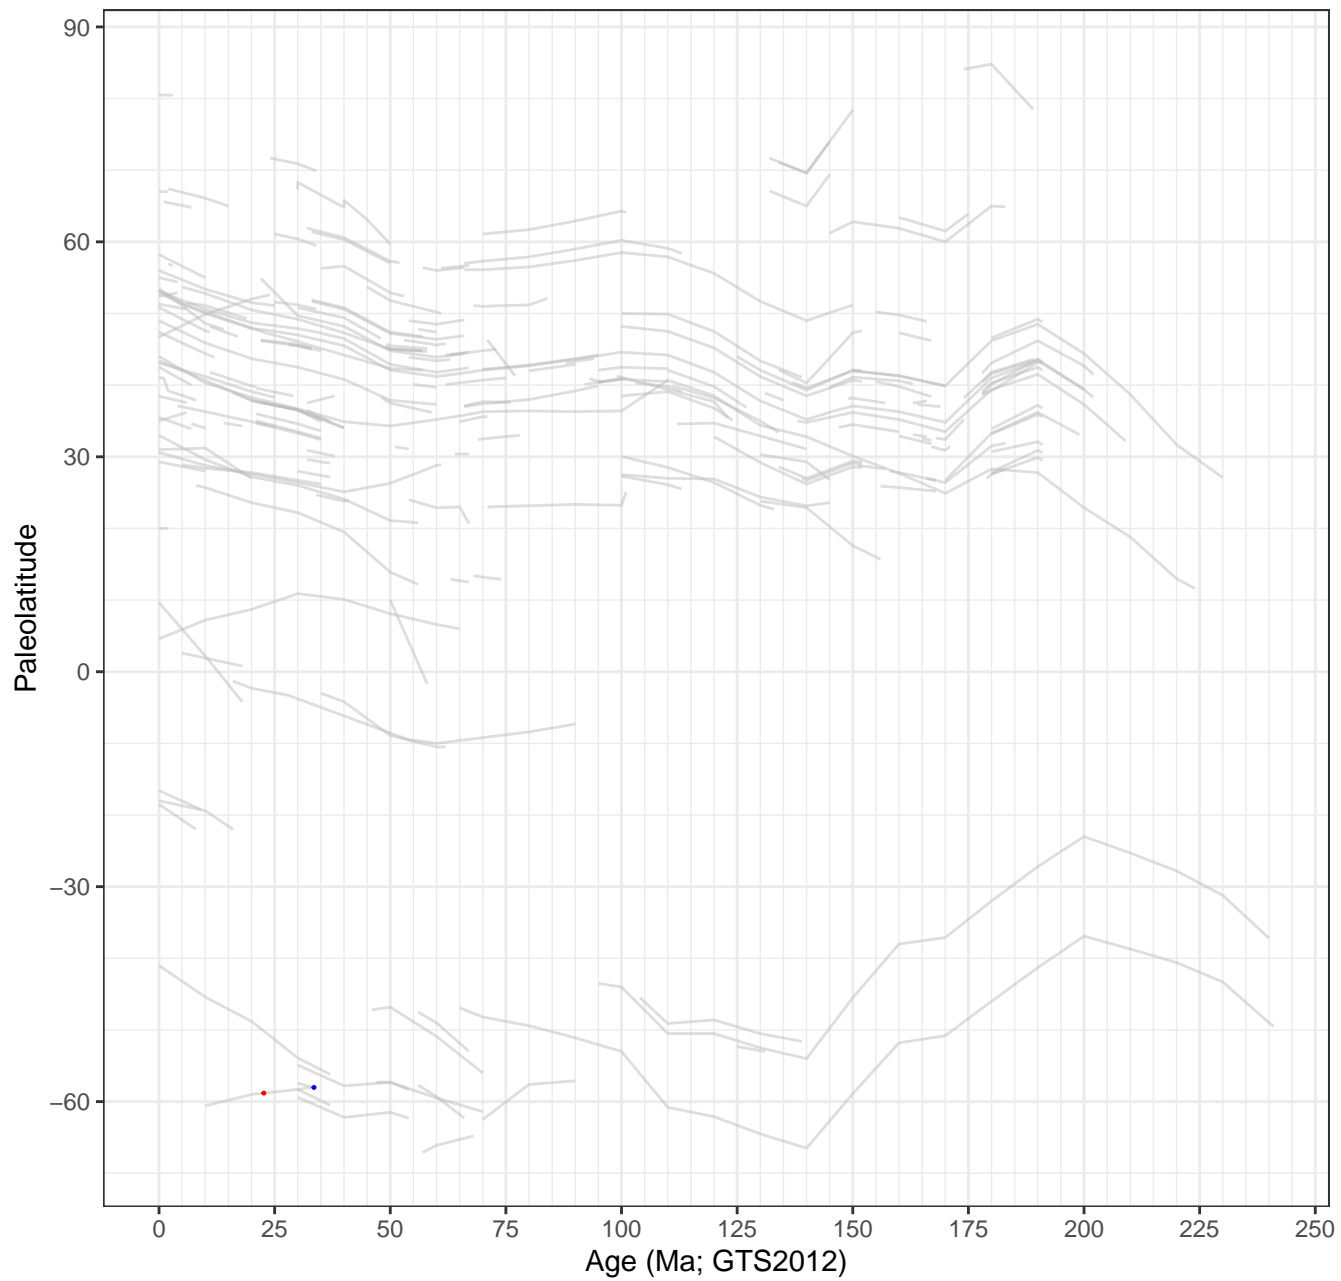

Supplement: Supplementary file 1836 [file Malvinia escutiana.pdf › Supplement/Supplement 2/Species 1914 plots/Malvinia escutiana.pdf]

# Species *Mancodinium coalitum*

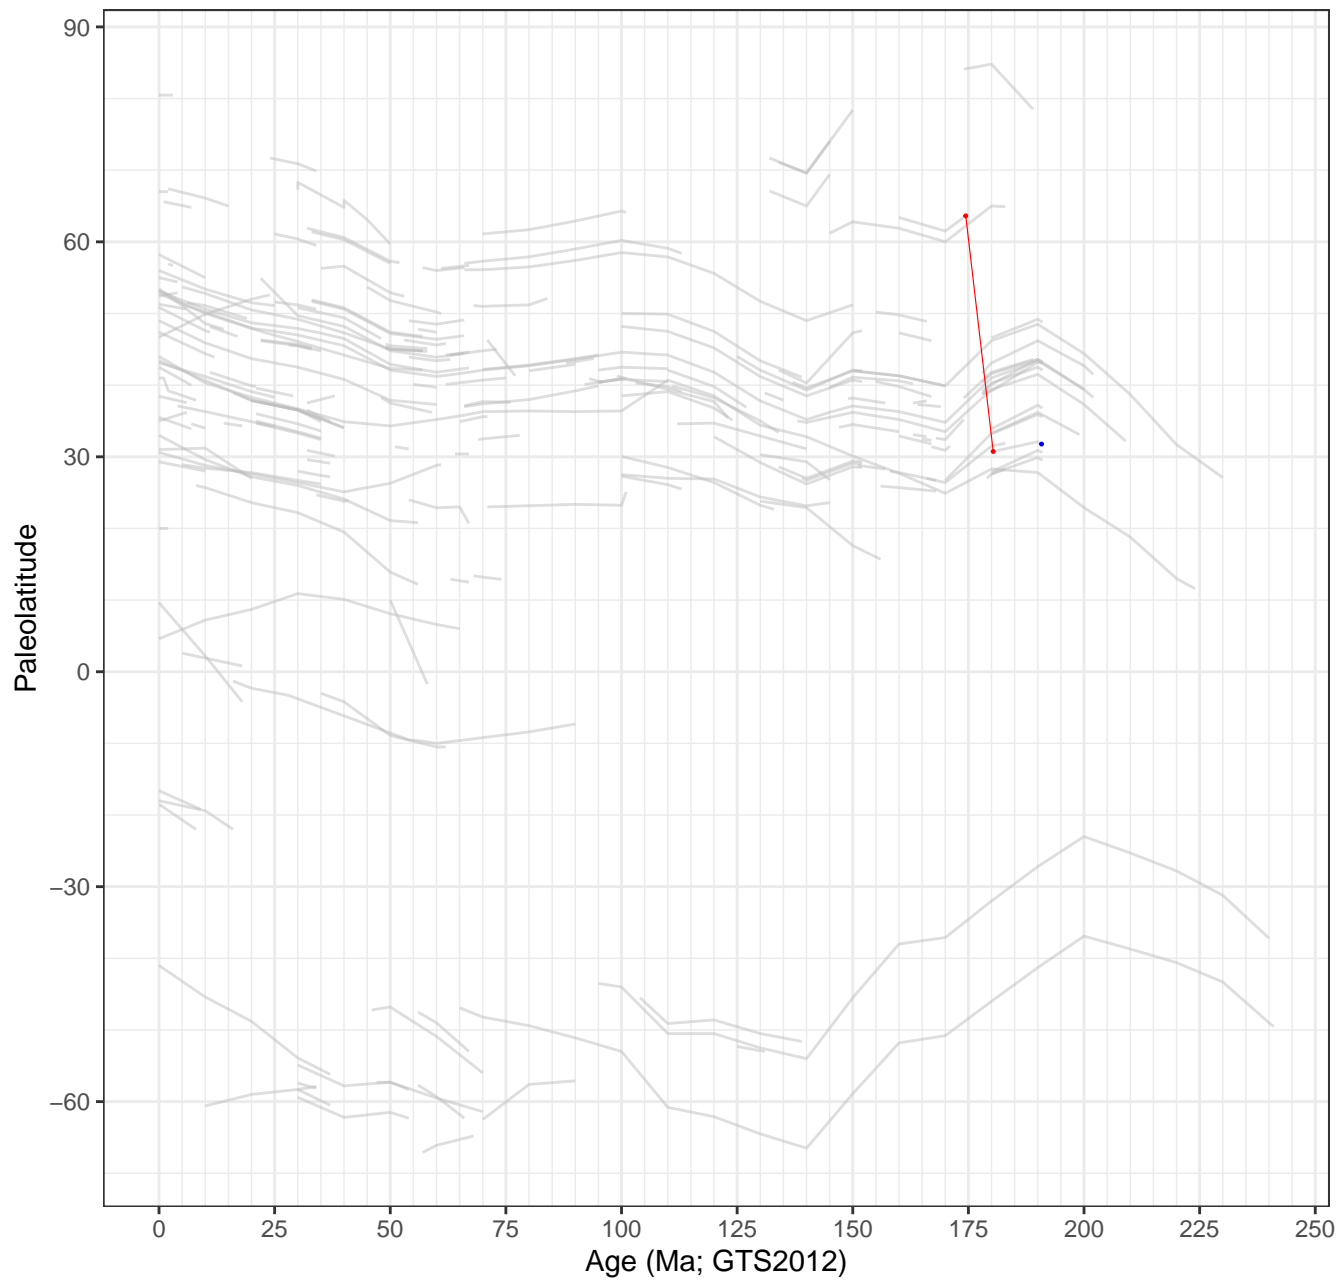

Supplement: Supplementary file 1837 [file Mancodinium coalitum.pdf › Supplement/Supplement 2/Species 1914 plots/Mancodinium coalitum.pdf]

# Species *Mancodinium semitabulatum*

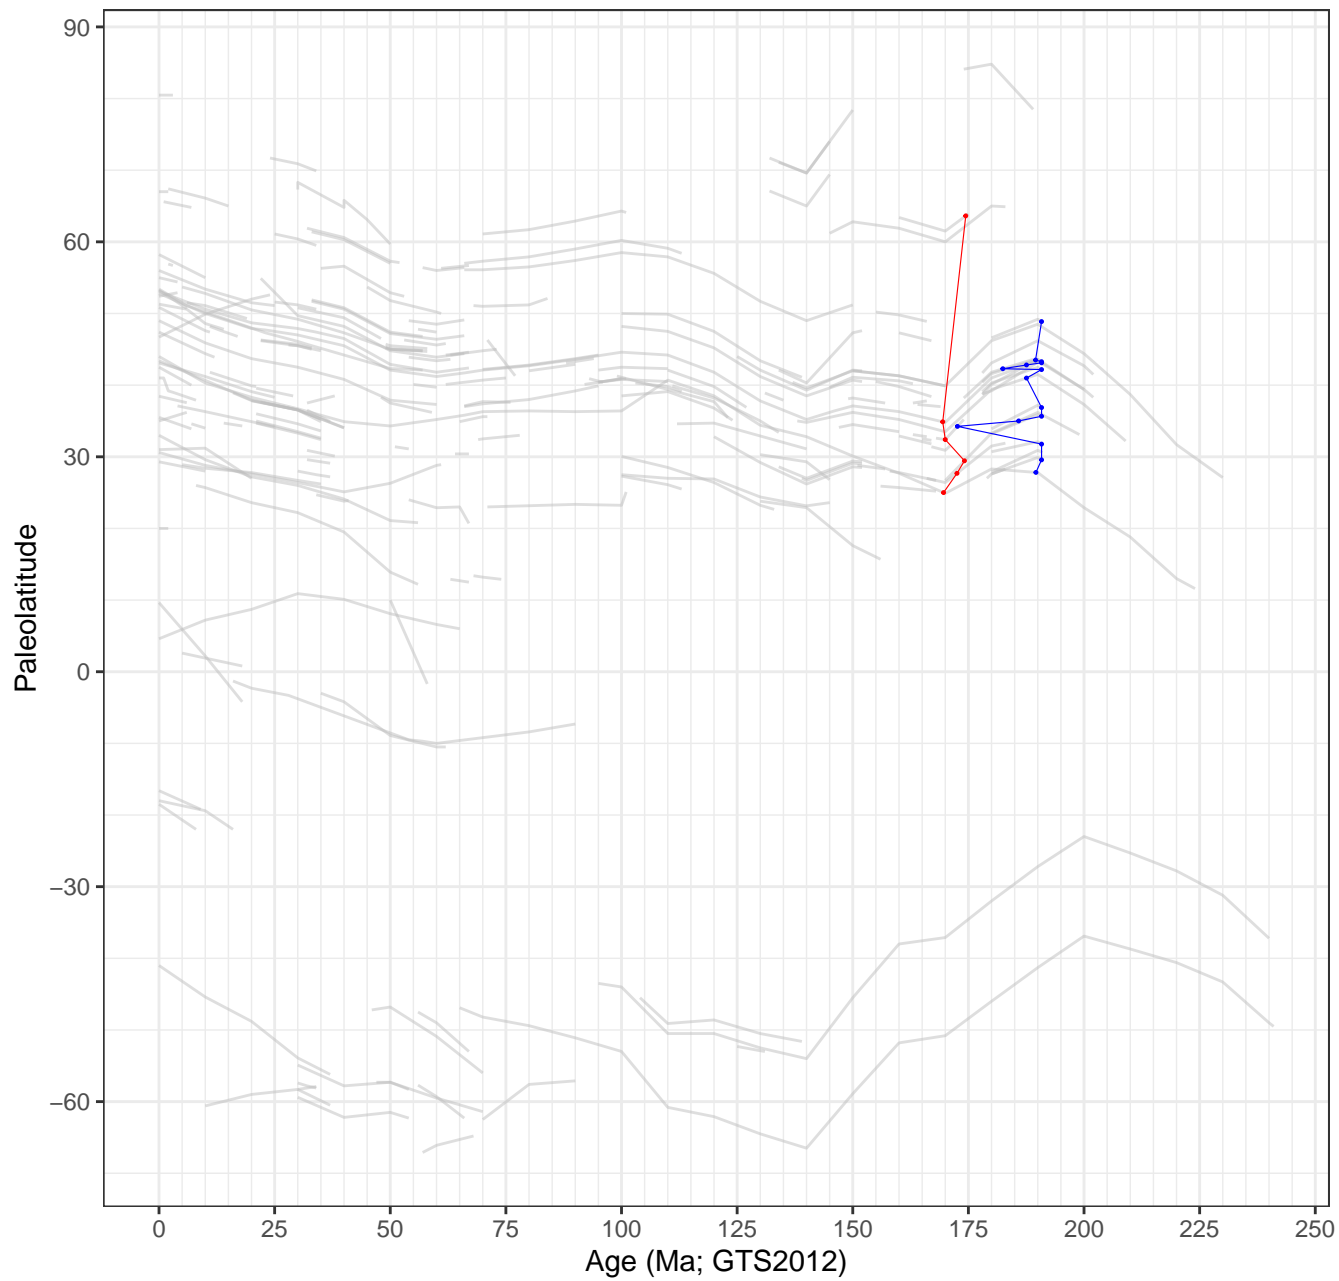

Supplement: Supplementary file 1838 [file Mancodinium semitabulatum.pdf › Supplement/Supplement 2/Species 1914 plots/Mancodinium semitabulatum.pdf]

# Species *Manumiella bertodado*

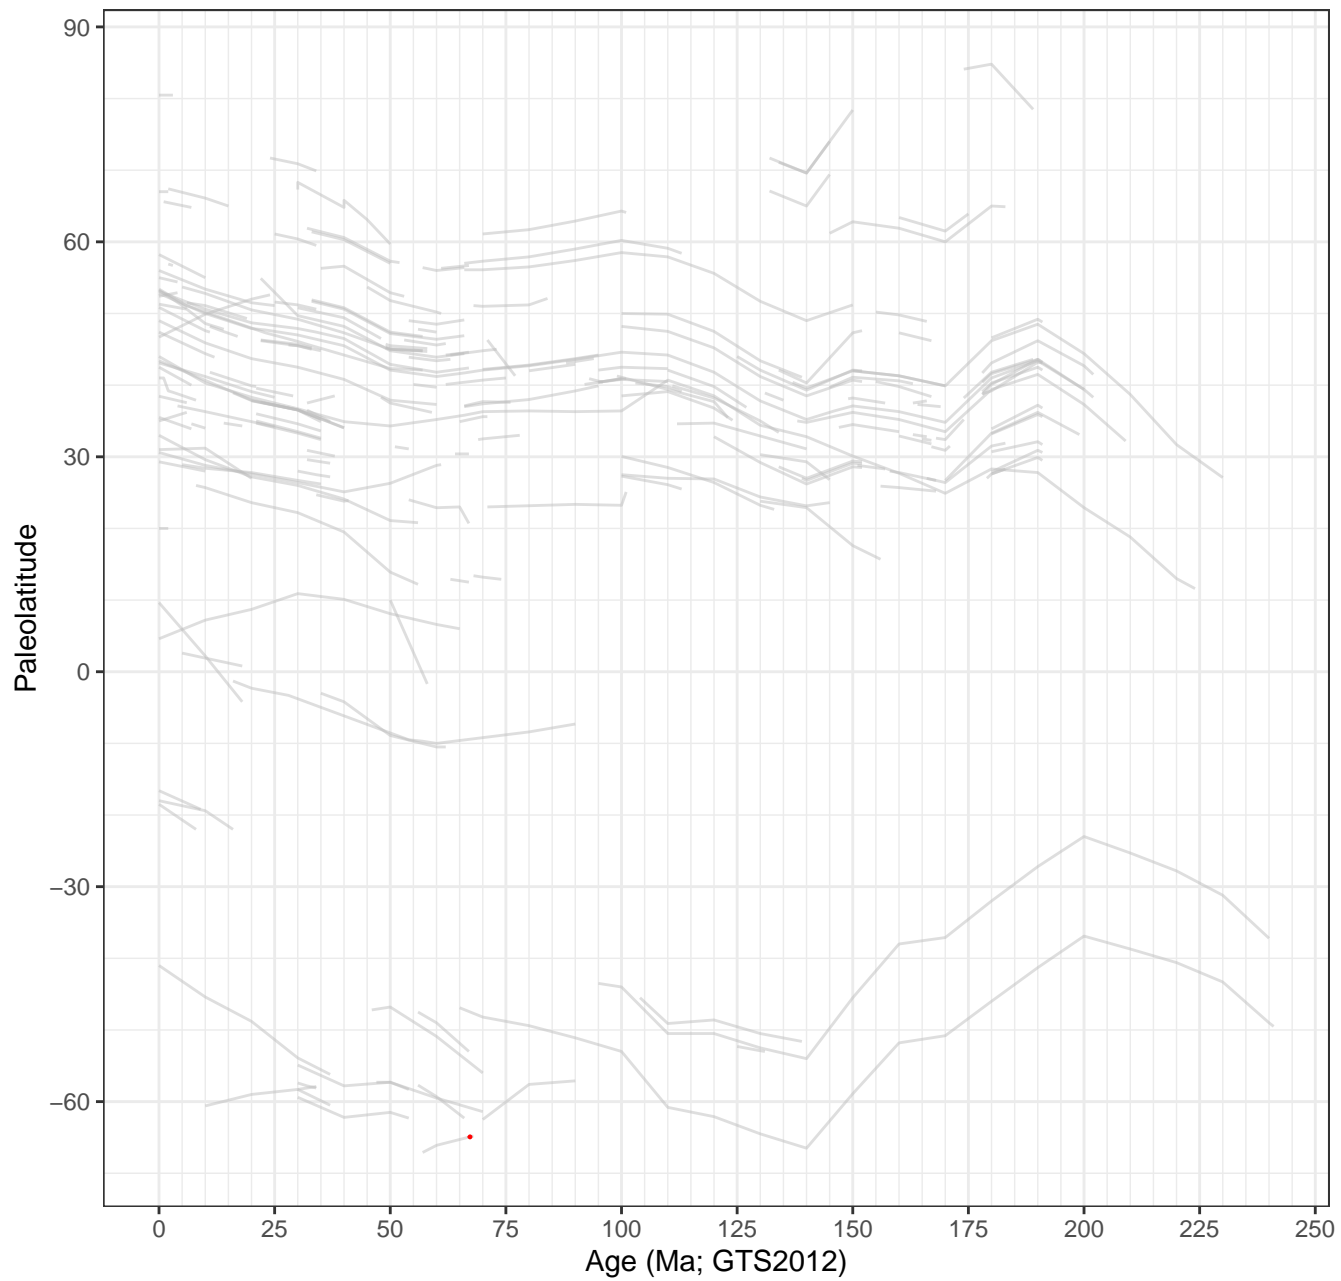

Supplement: Supplementary file 1839 [file Manumiella bertodado.pdf › Supplement/Supplement 2/Species 1914 plots/Manumiella bertodado.pdf]

# Species *Manumiella coronata*

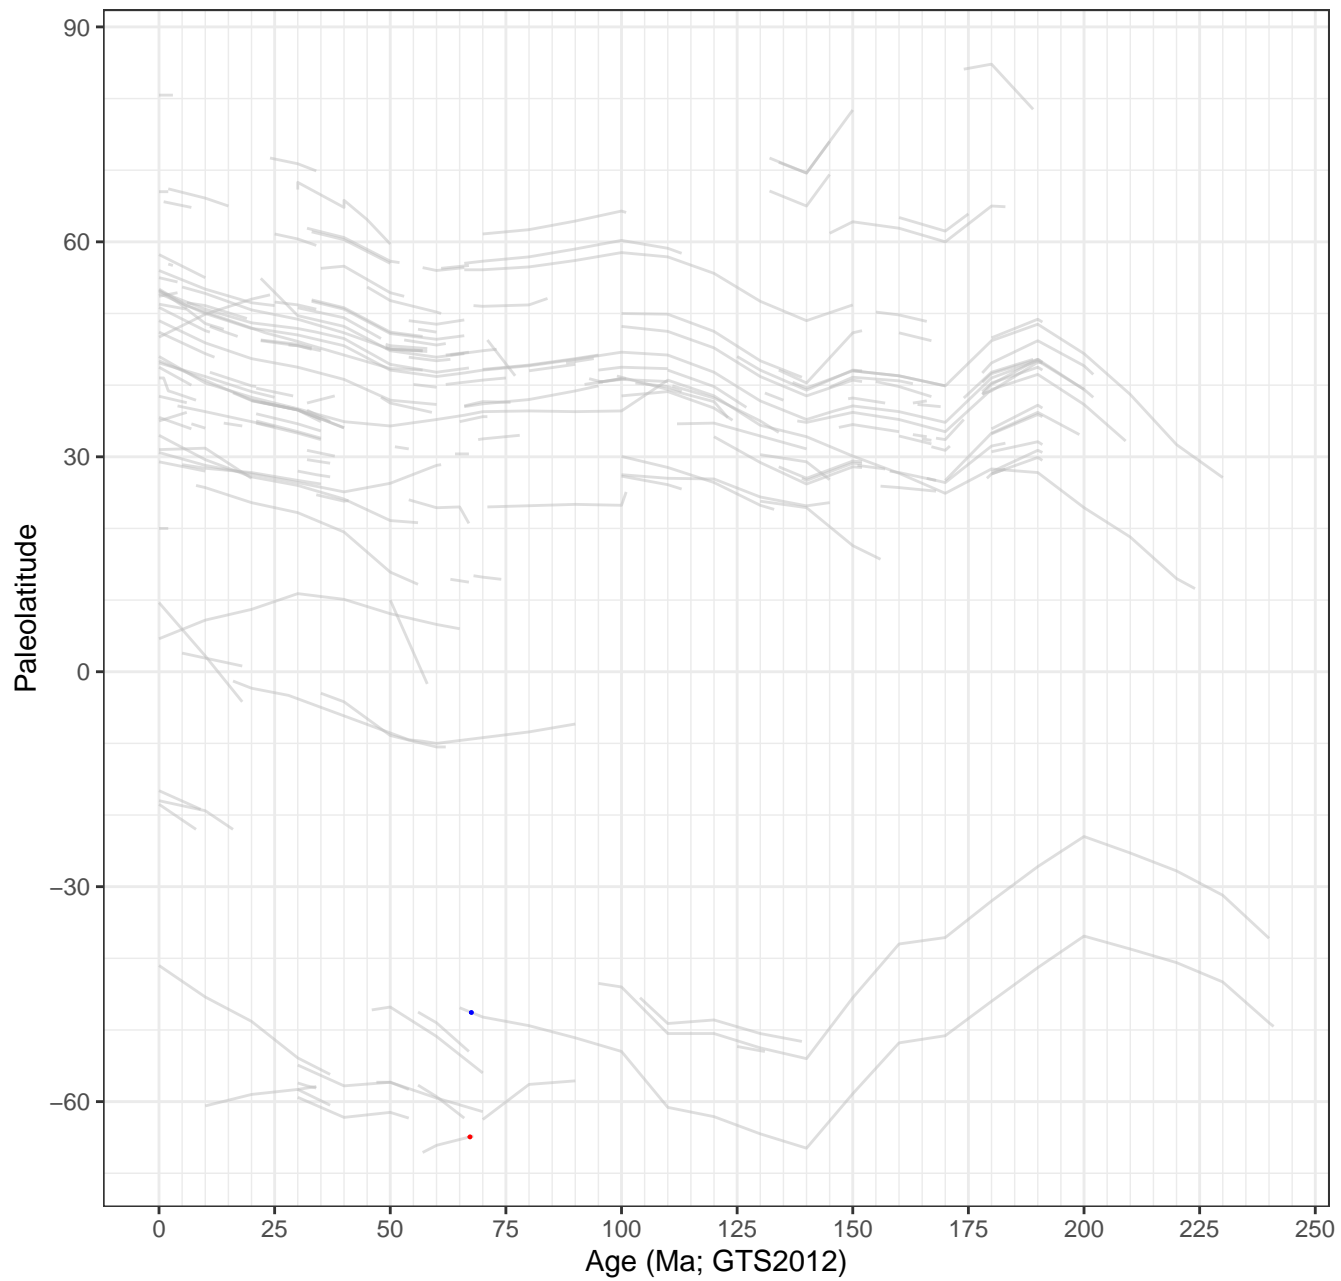

Supplement: Supplementary file 1840 [file Manumiella coronata.pdf › Supplement/Supplement 2/Species 1914 plots/Manumiella coronata.pdf]

# Species *Manumiella cretacea oviformis*

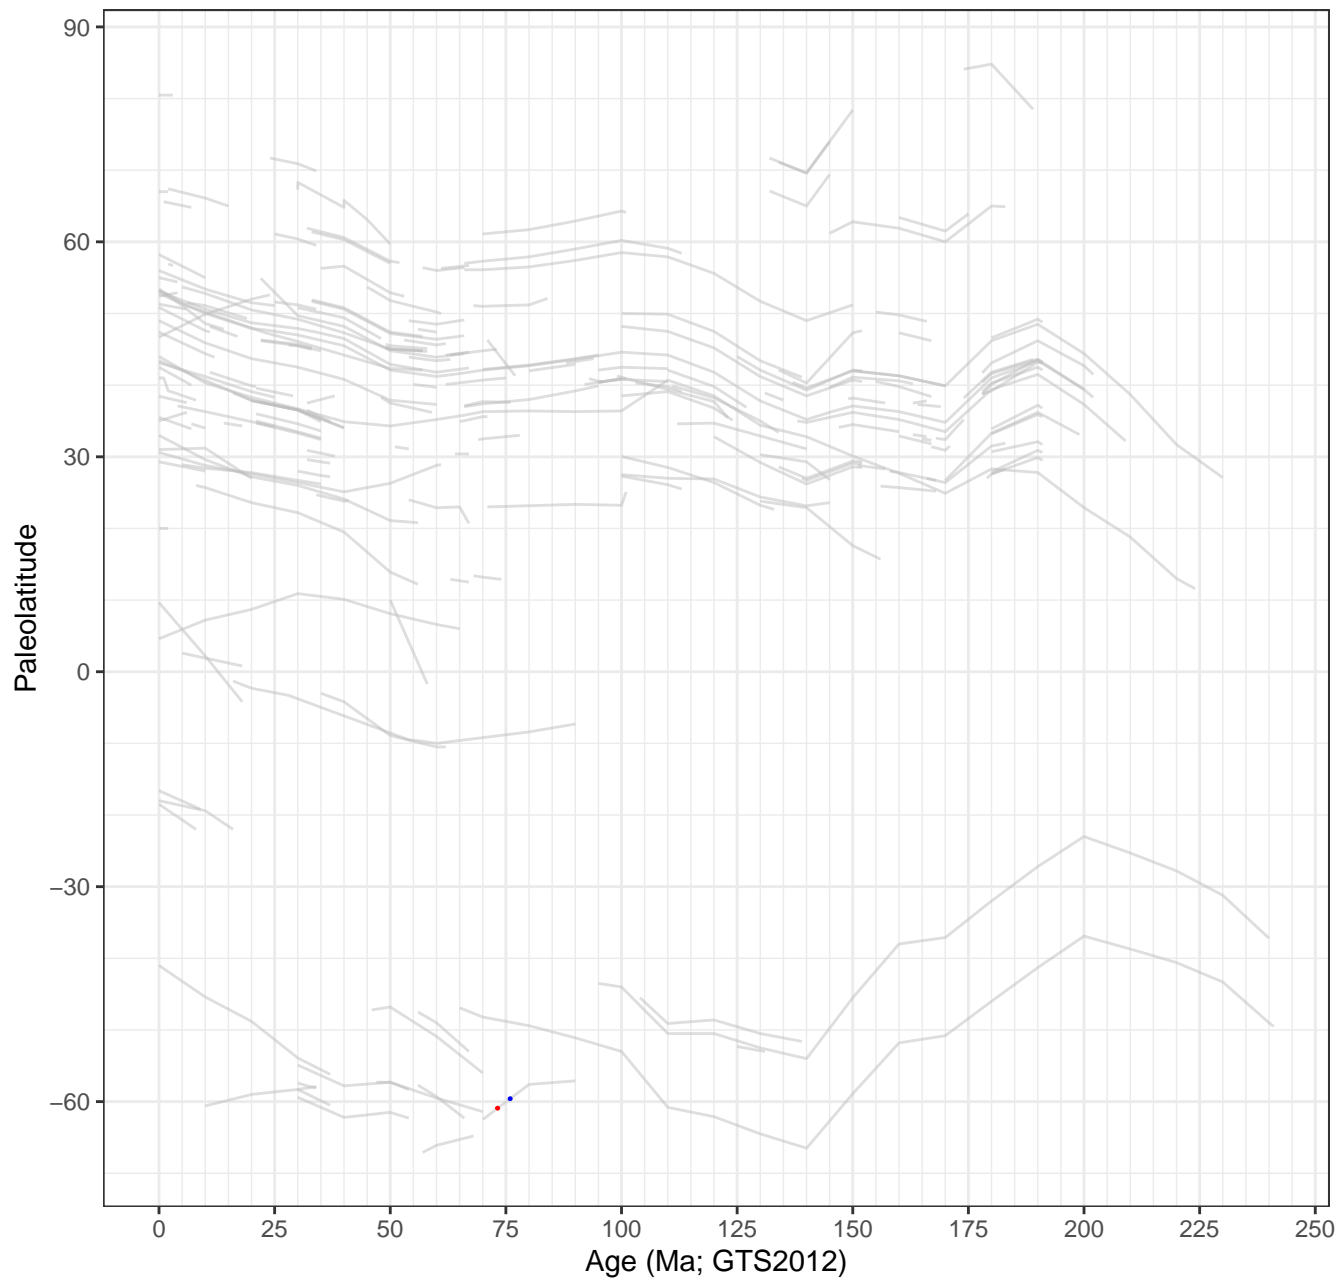

Supplement: Supplementary file 1841 [file Manumiella cretacea oviformis.pdf › Supplement/Supplement 2/Species 1914 plots/Manumiella cretacea oviformis.pdf]

# Species *Manumiella druggii*

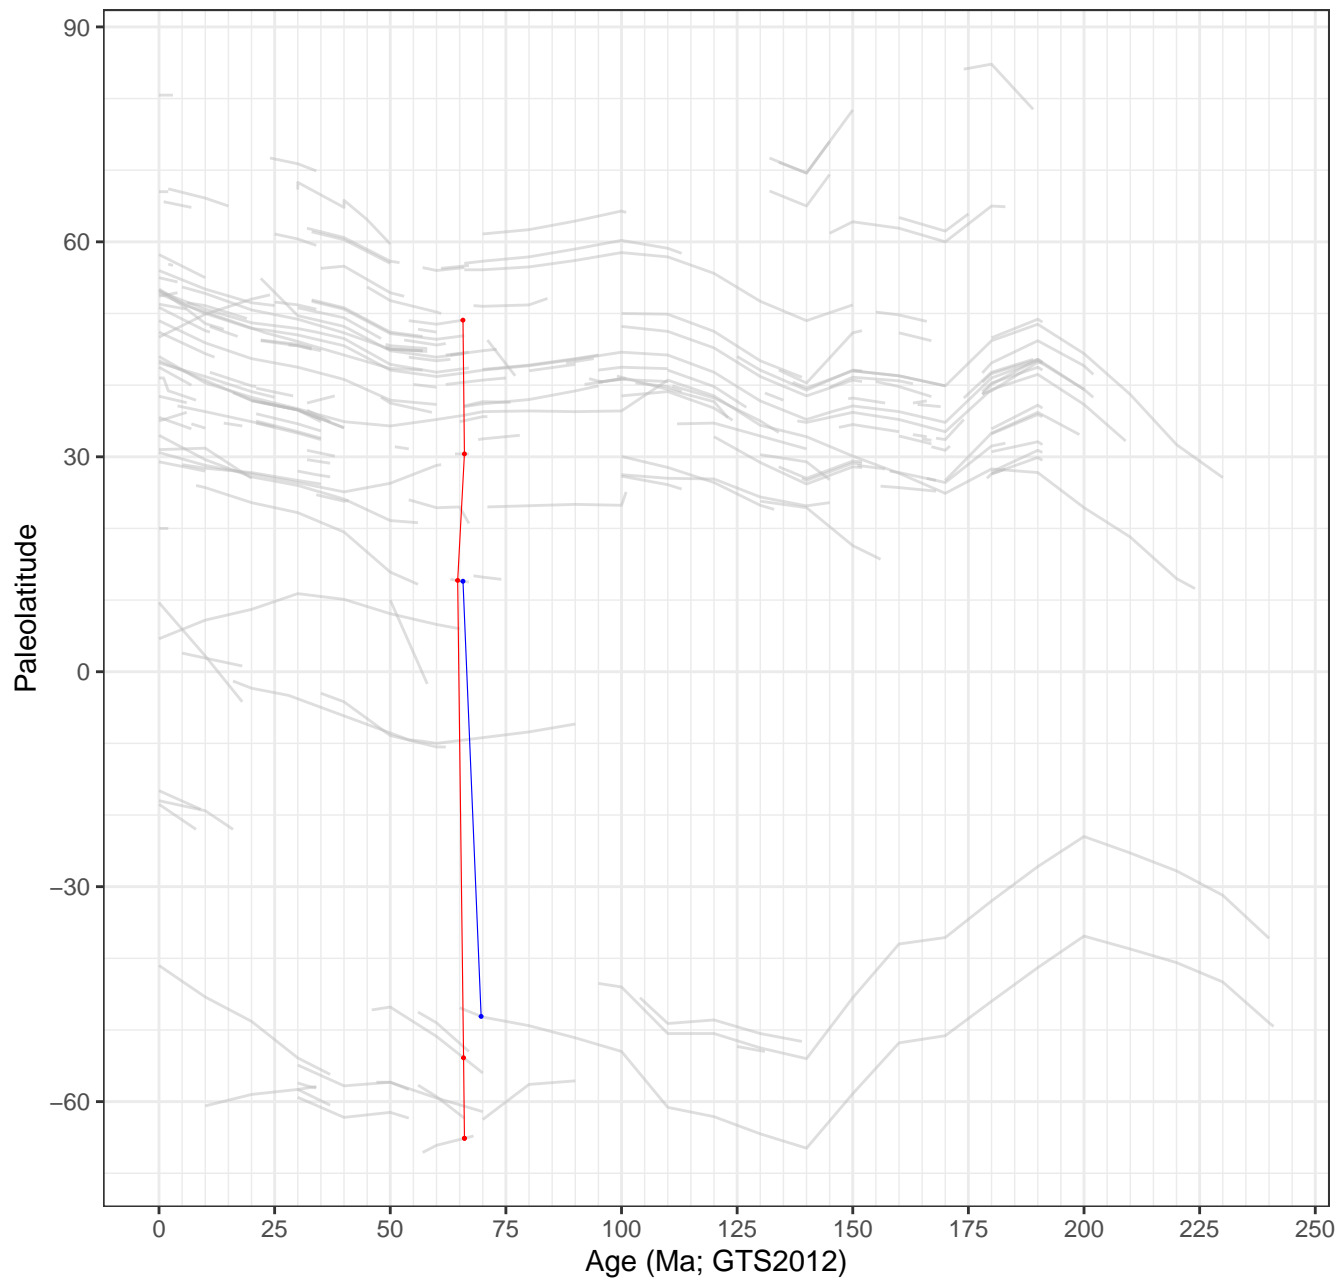

Supplement: Supplementary file 1842 [file Manumiella druggii.pdf › Supplement/Supplement 2/Species 1914 plots/Manumiella druggii.pdf]

# Species *Manumiella rotunda*

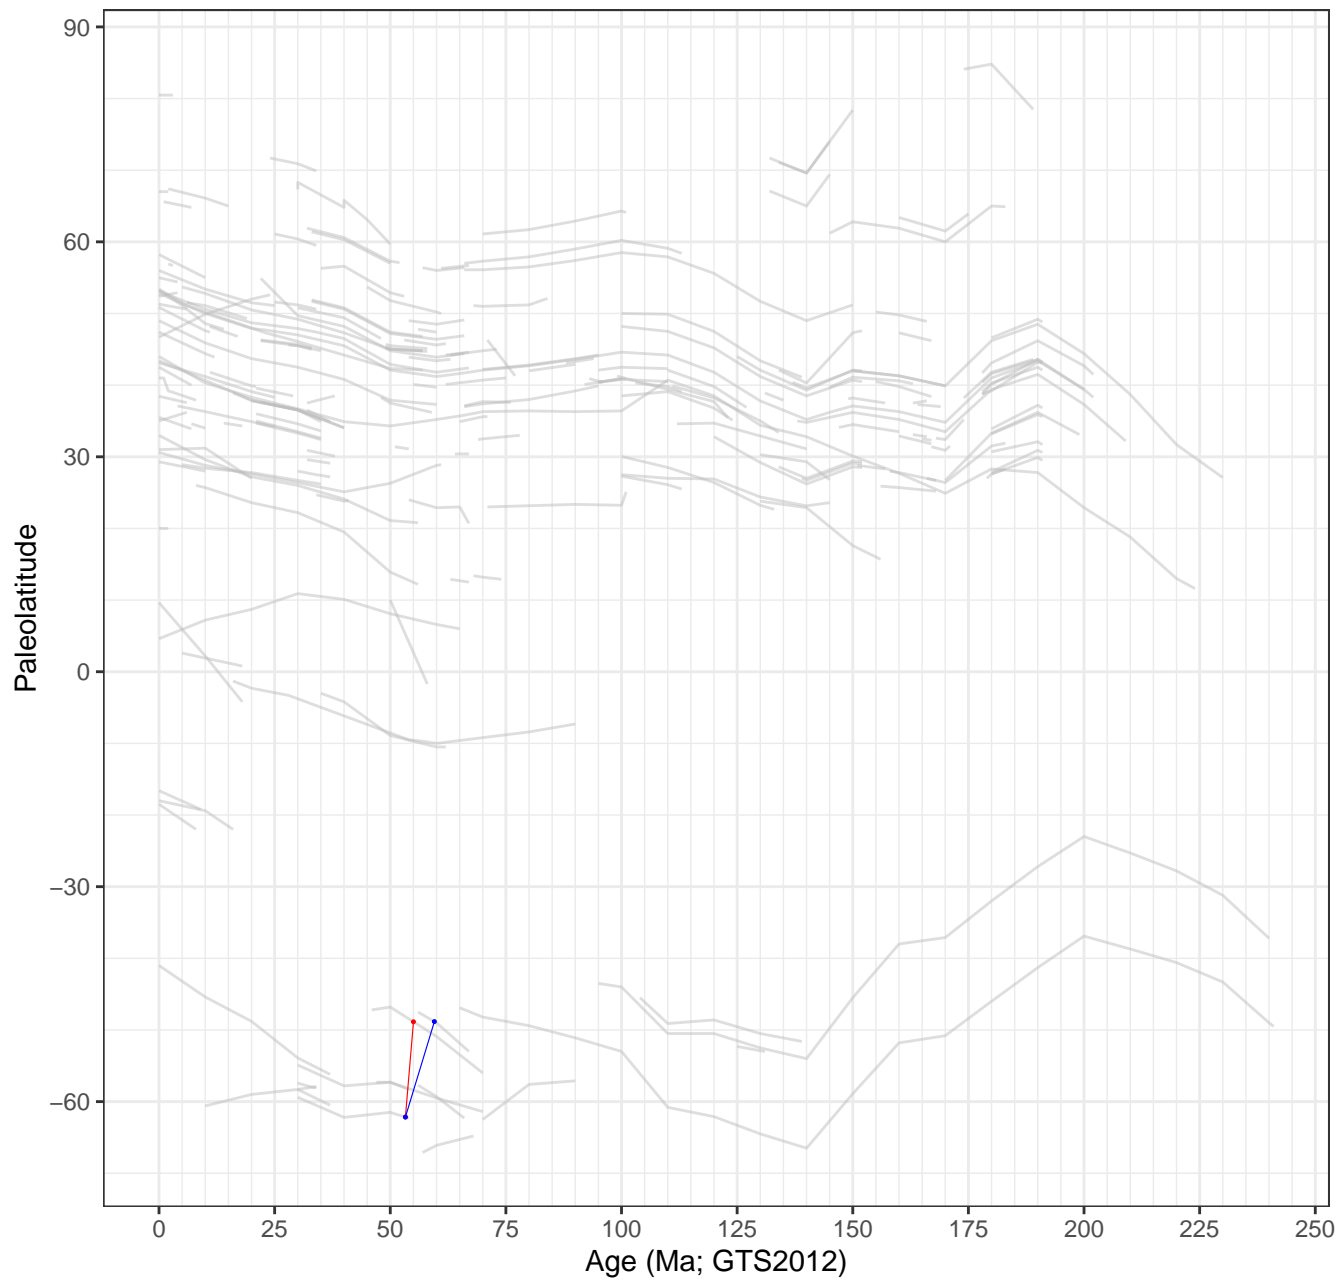

Supplement: Supplementary file 1843 [file Manumiella rotunda.pdf › Supplement/Supplement 2/Species 1914 plots/Manumiella rotunda.pdf]

# Species *Manumiella seelandica*

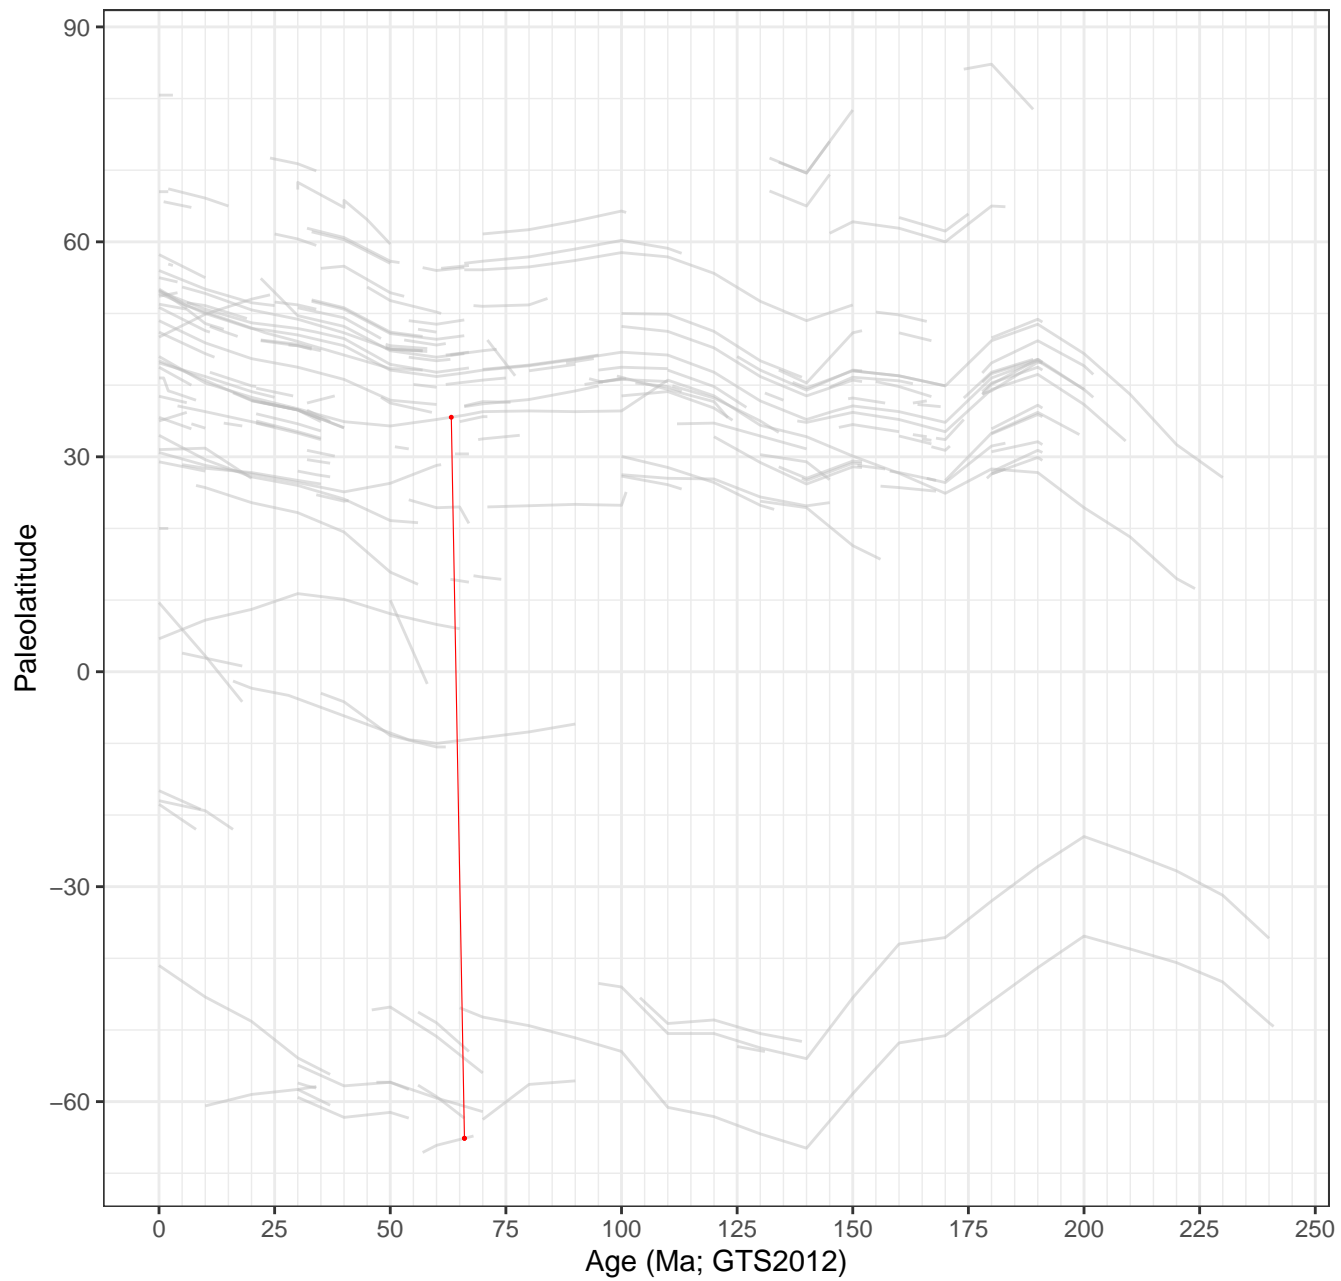

Supplement: Supplementary file 1844 [file Manumiella seelandica.pdf › Supplement/Supplement 2/Species 1914 plots/Manumiella seelandica.pdf]

# Species *Maturodinium inornatum*

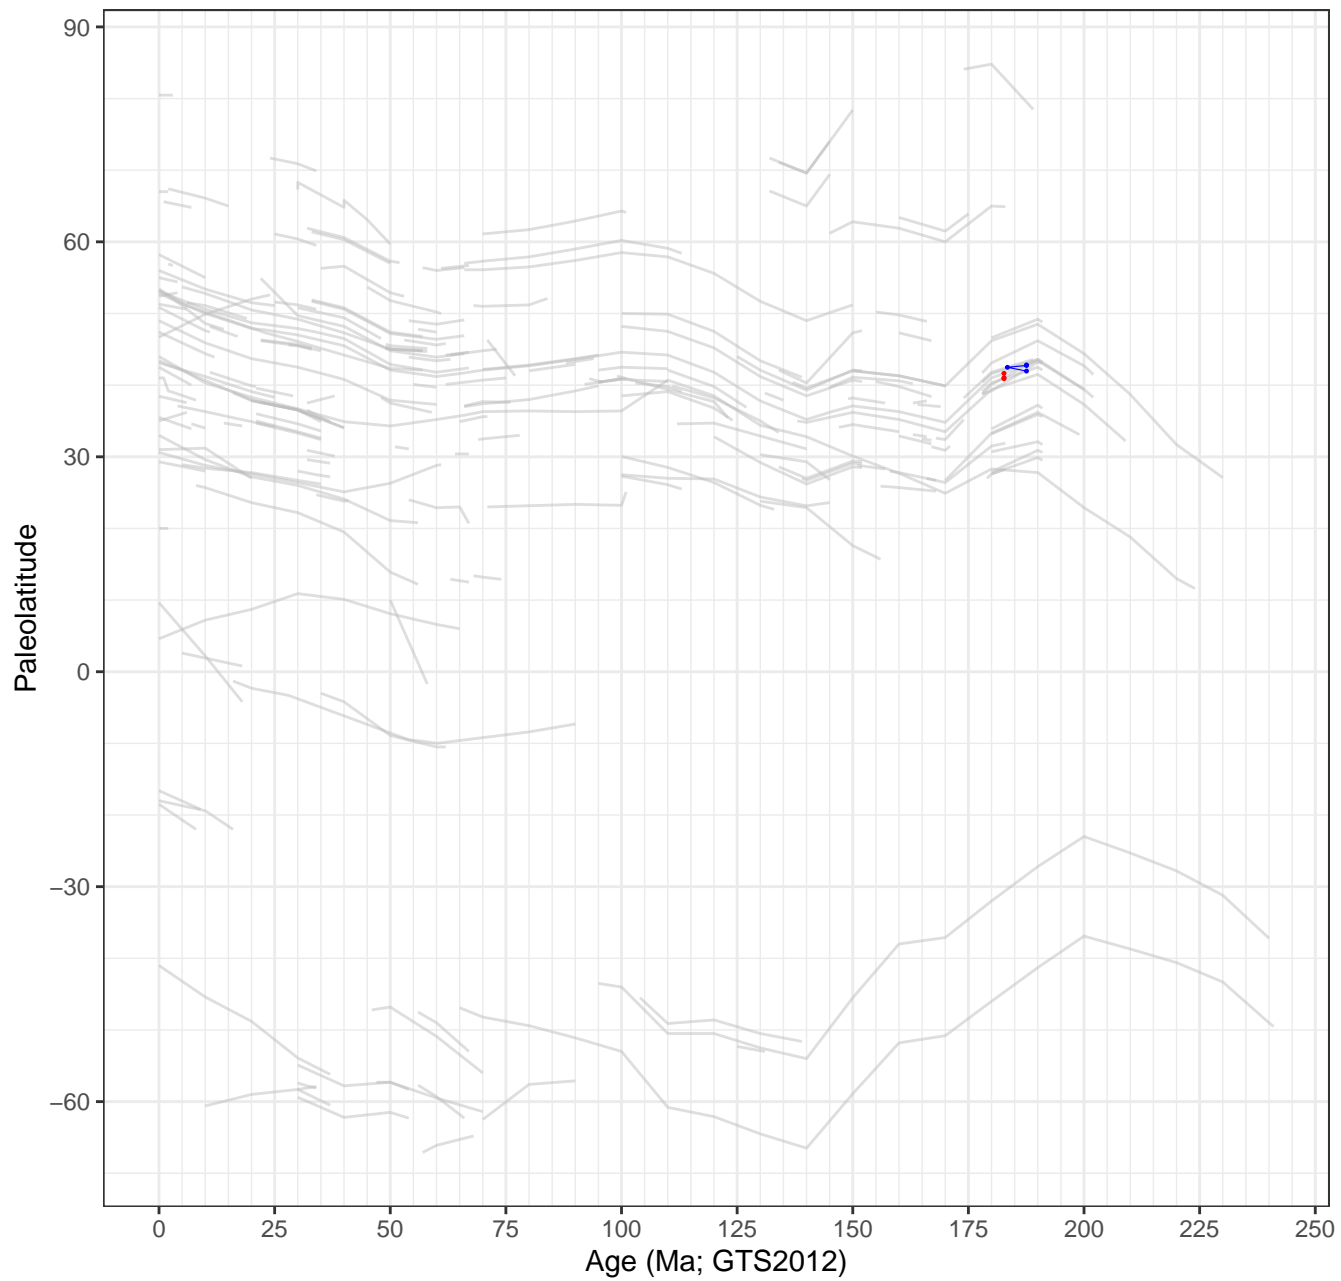

Supplement: Supplementary file 1845 [file Maturodinium inornatum.pdf › Supplement/Supplement 2/Species 1914 plots/Maturodinium inornatum.pdf]

# Species *Meiourodinium spongiosum*

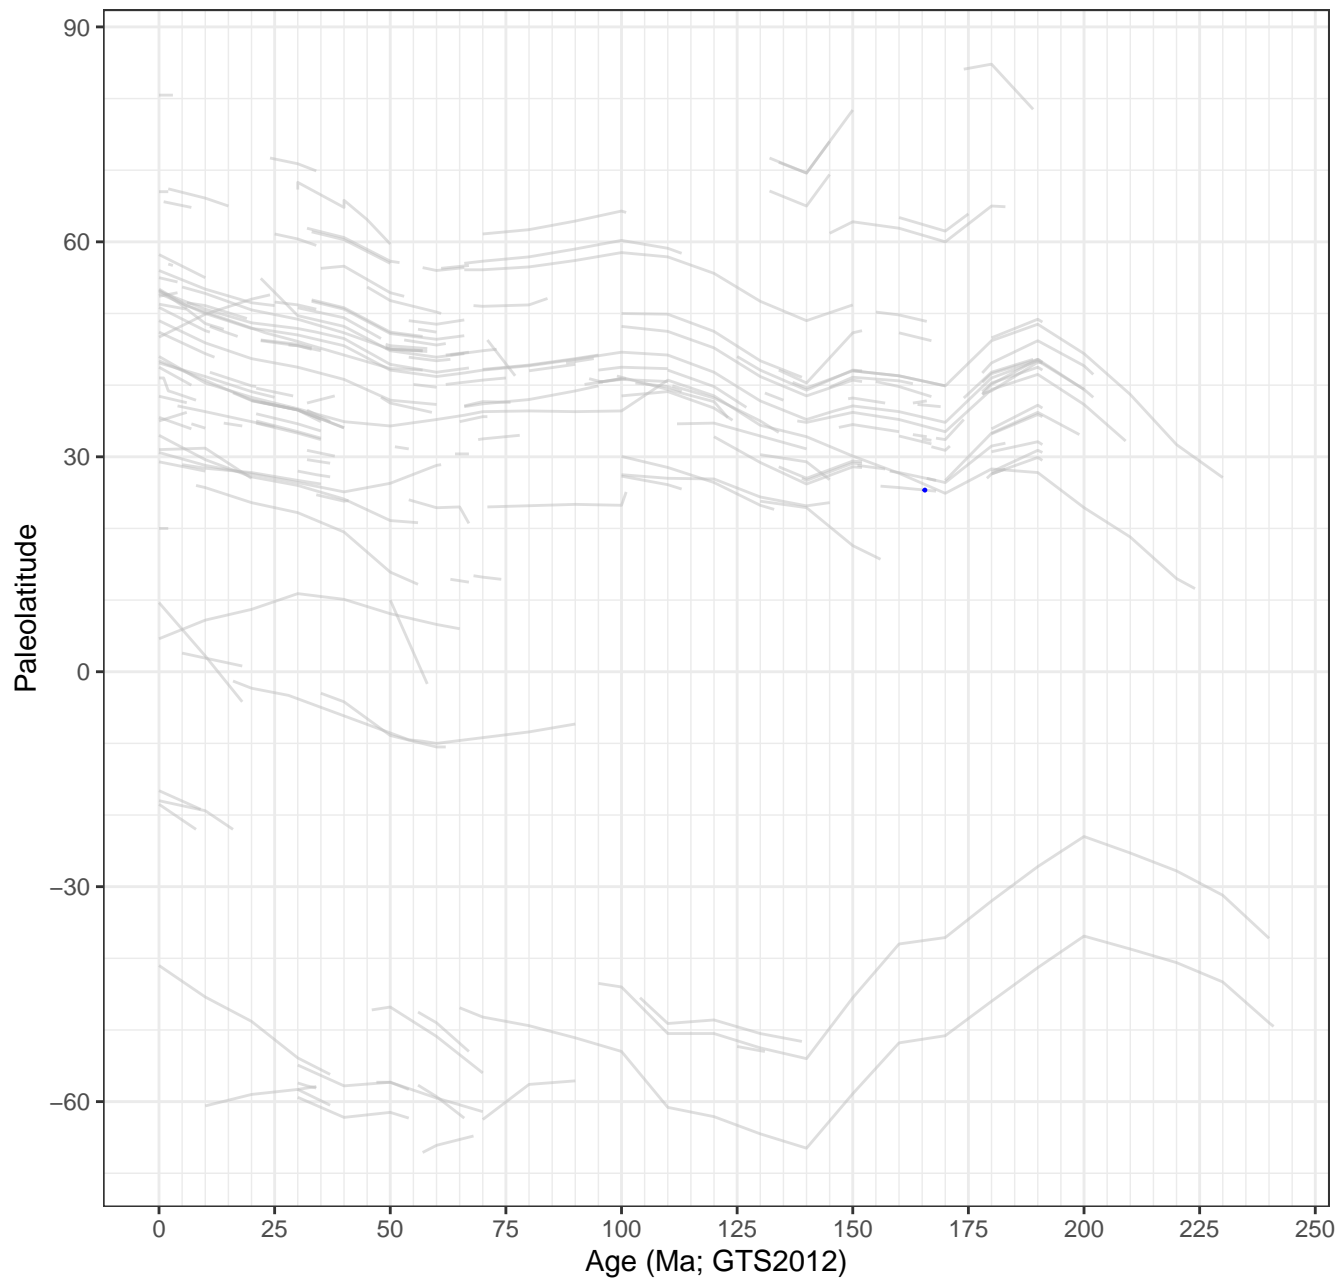

Supplement: Supplementary file 1846 [file Meiourodinium spongiosum.pdf › Supplement/Supplement 2/Species 1914 plots/Meiourodinium spongiosum.pdf]

# Species *Meiourogonyaulax amlasis*

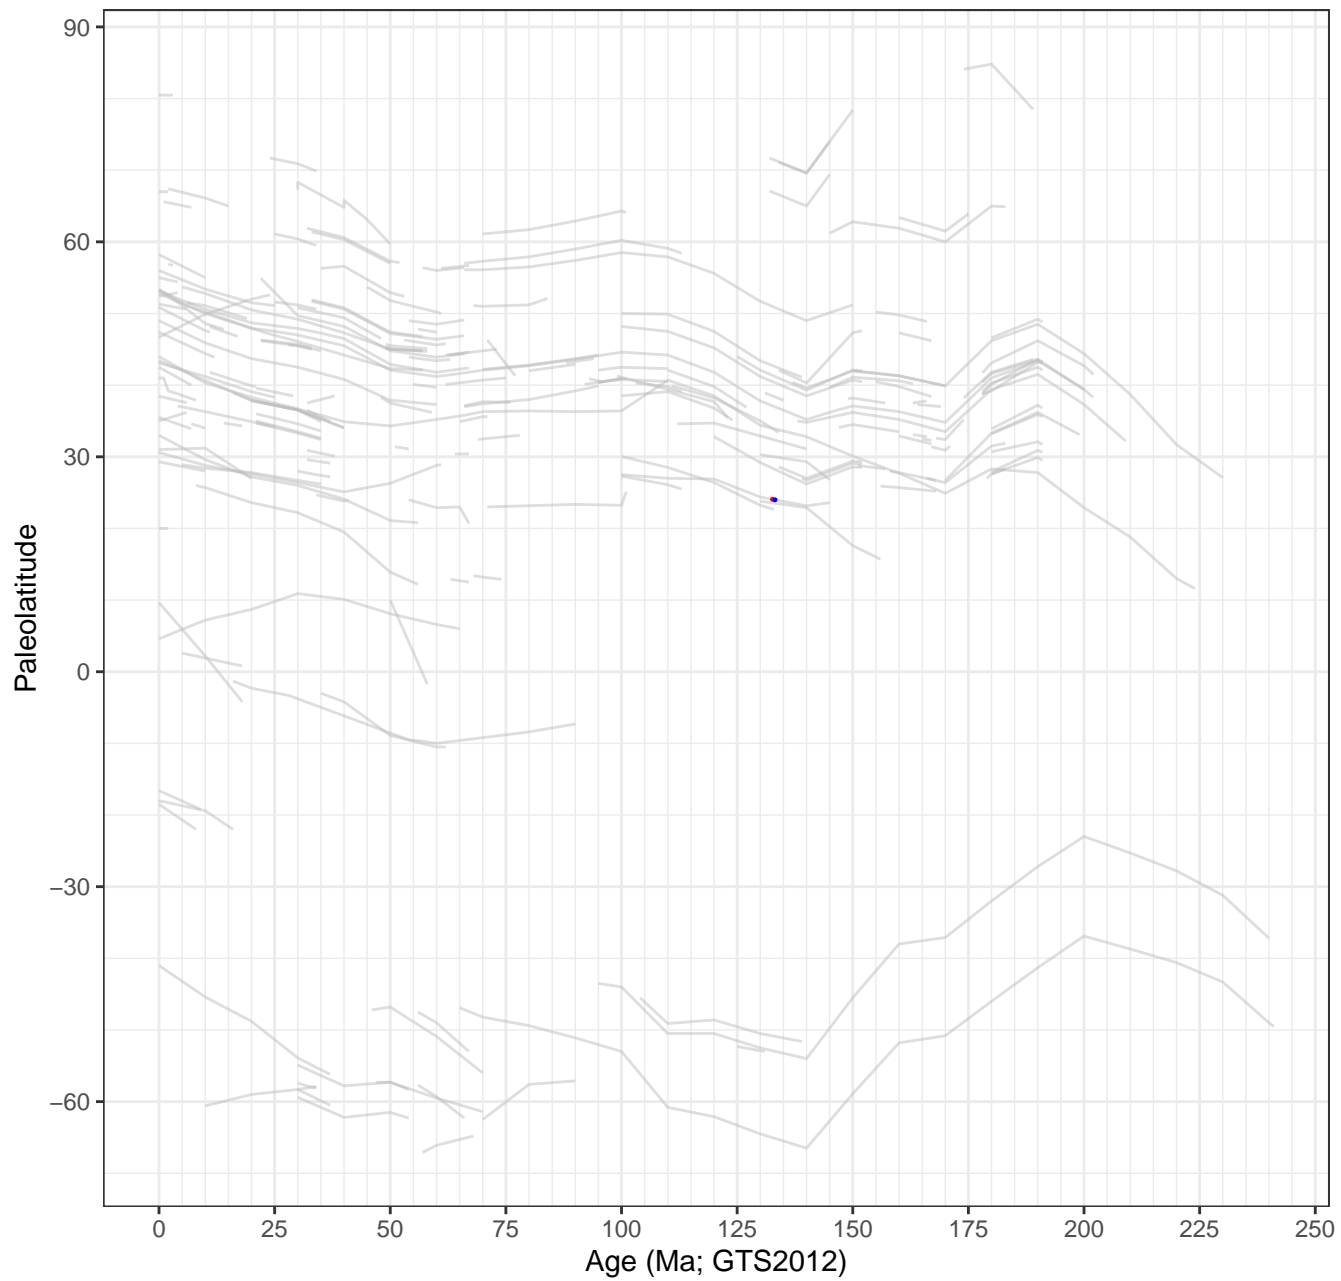

Supplement: Supplementary file 1847 [file Meiourogonyaulax amlasis.pdf › Supplement/Supplement 2/Species 1914 plots/Meiourogonyaulax amlasis.pdf]

# Species *Meiourogonyaulax bathonica*

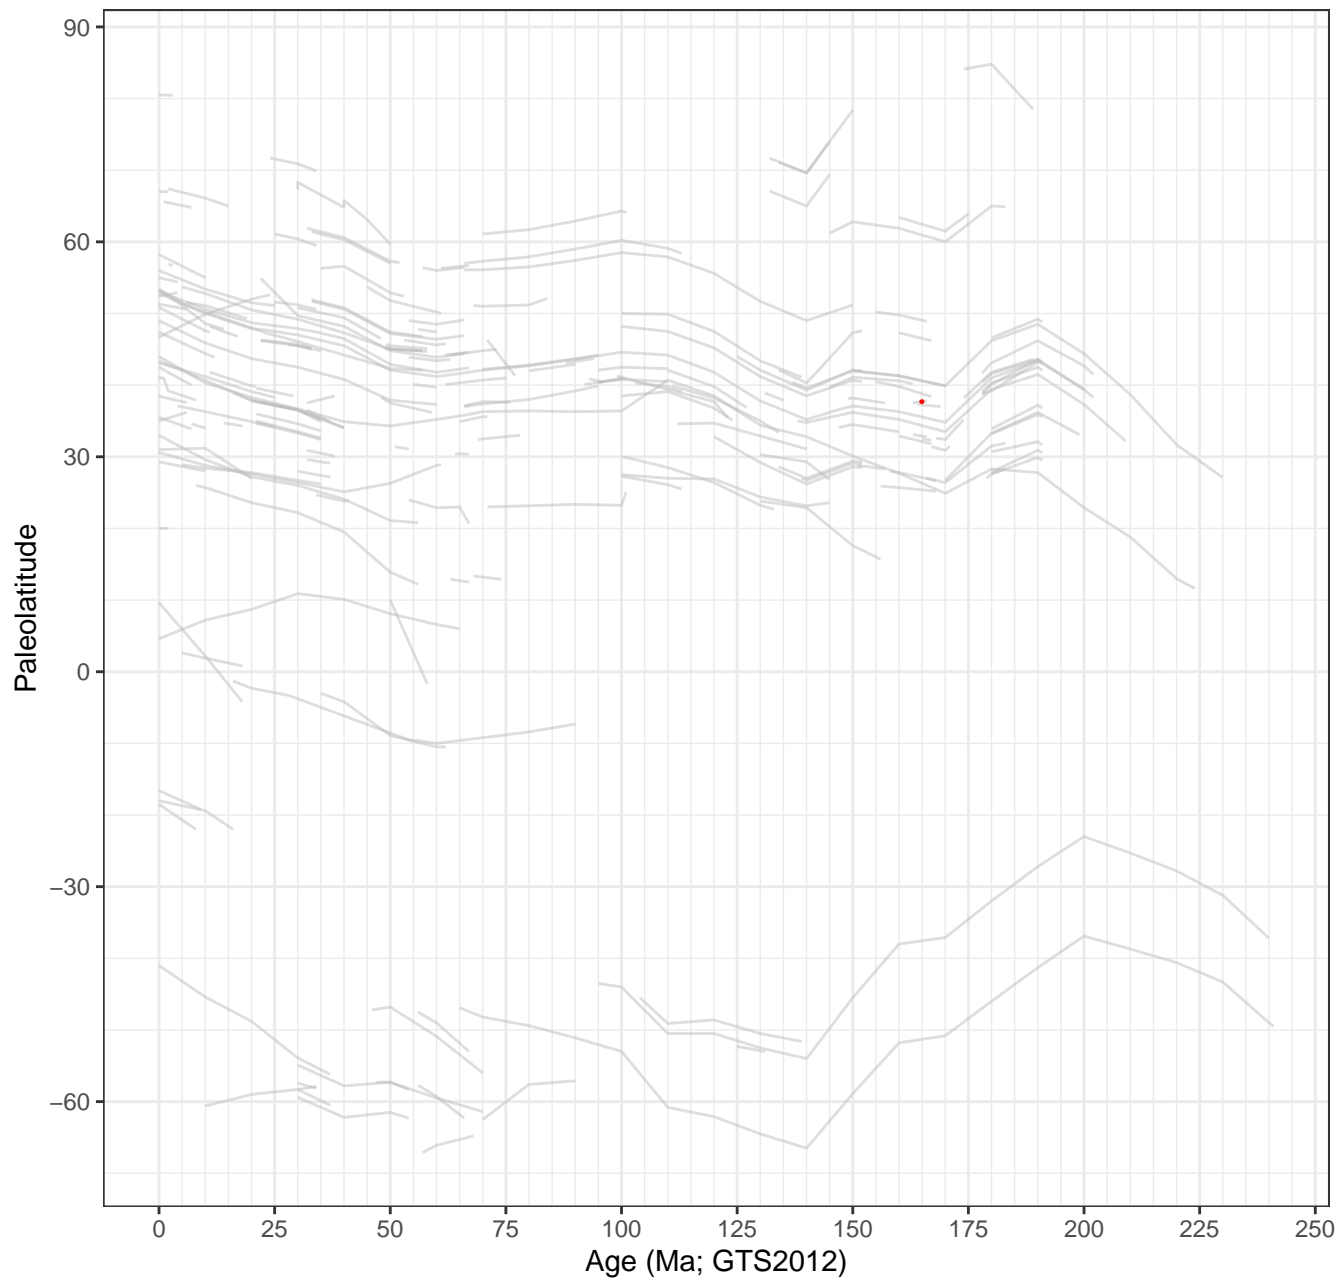

Supplement: Supplementary file 1848 [file Meiourogonyaulax bathonica.pdf › Supplement/Supplement 2/Species 1914 plots/Meiourogonyaulax bathonica.pdf]

# Species *Meiourogonyaulax borealis*

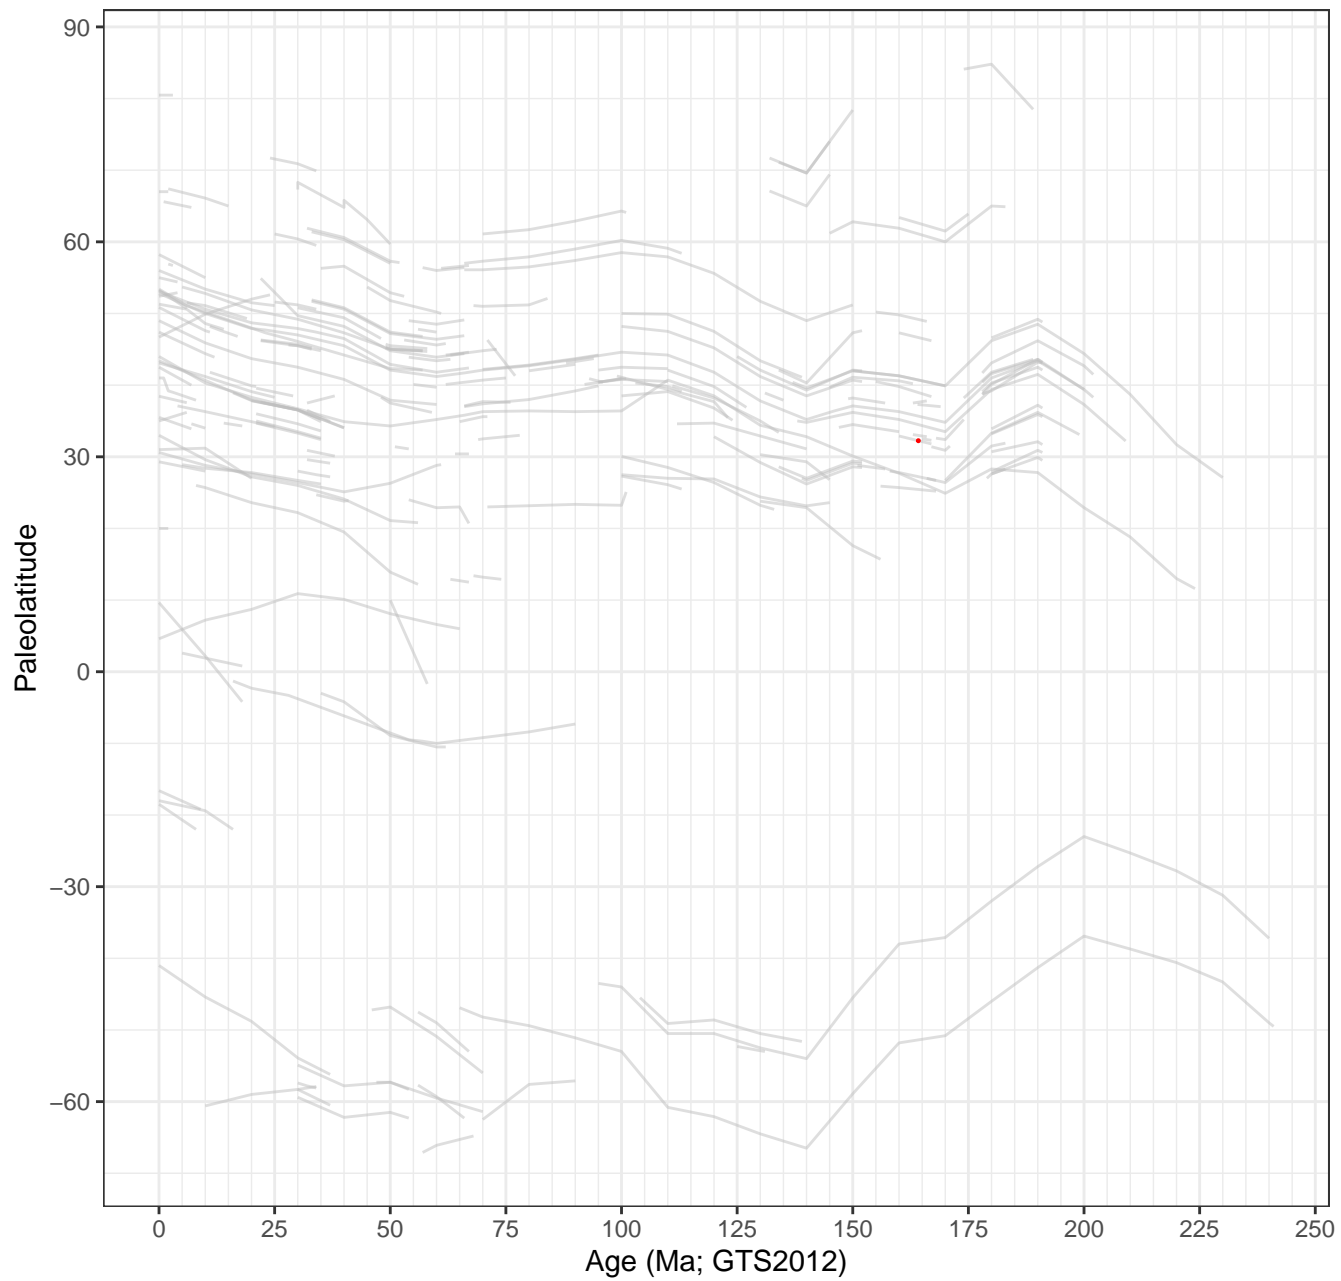

Supplement: Supplementary file 1849 [file Meiourogonyaulax borealis.pdf › Supplement/Supplement 2/Species 1914 plots/Meiourogonyaulax borealis.pdf]

# Species *Meiourogonyaulax bulloidea*

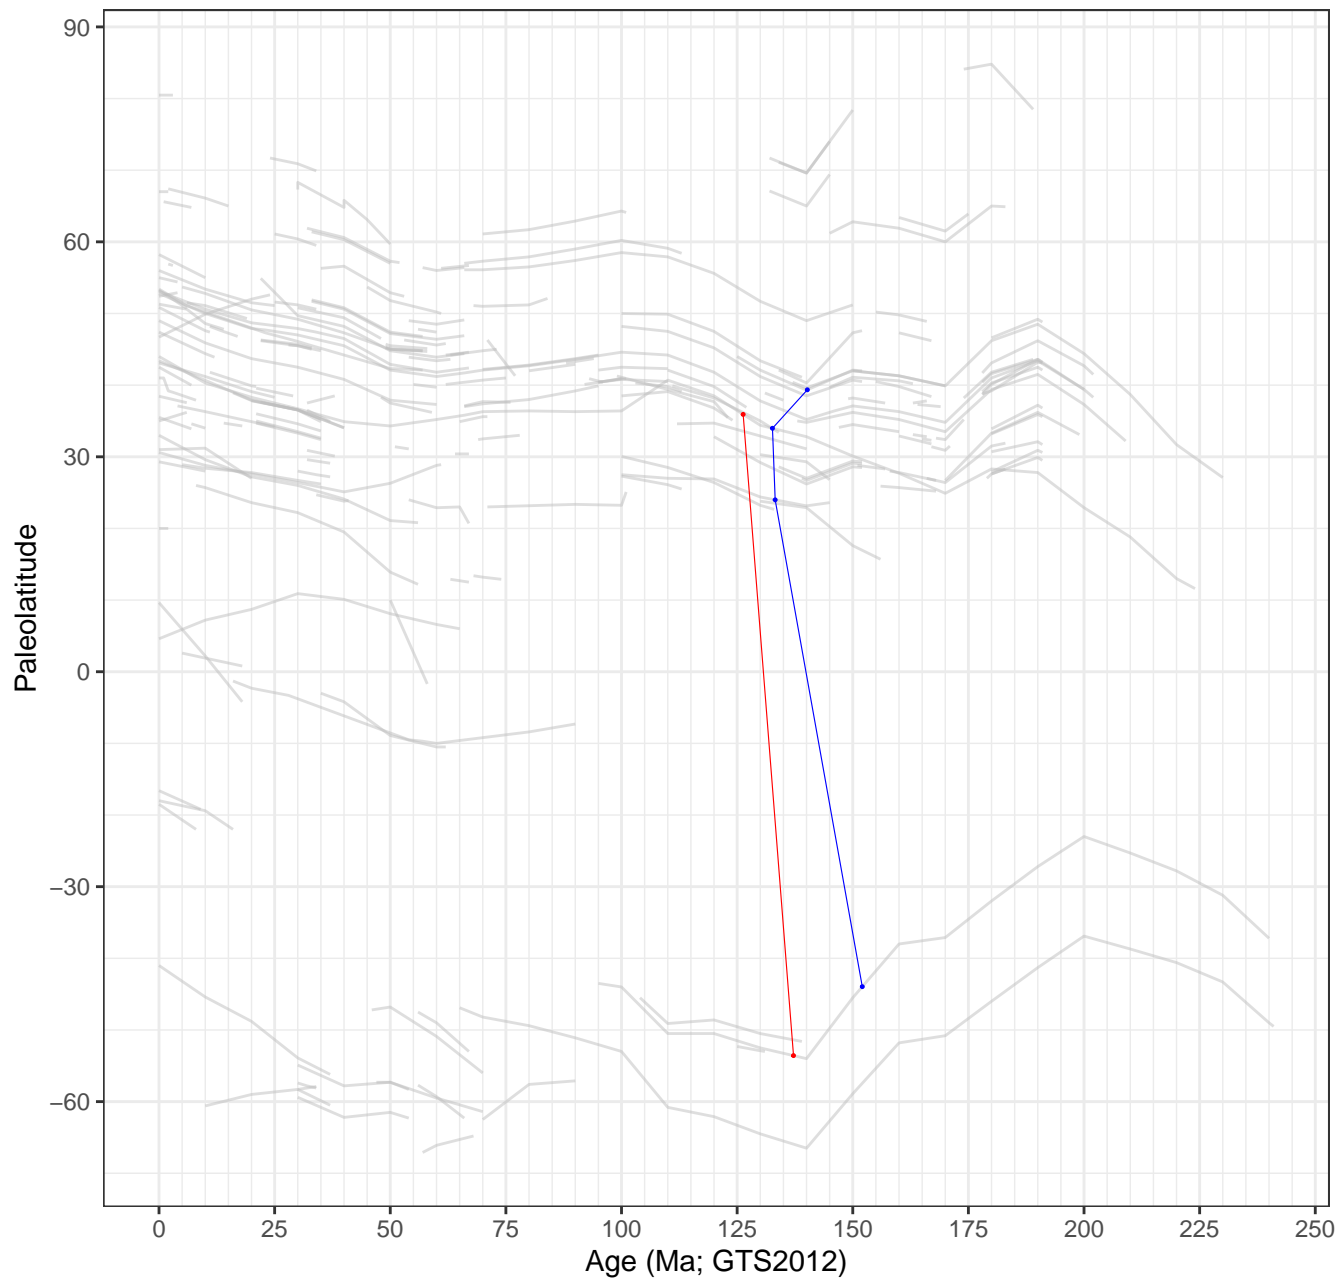

Supplement: Supplementary file 1850 [file Meiourogonyaulax bulloidea.pdf › Supplement/Supplement 2/Species 1914 plots/Meiourogonyaulax bulloidea.pdf]

# Species *Meiourogonyaulax callomonii*

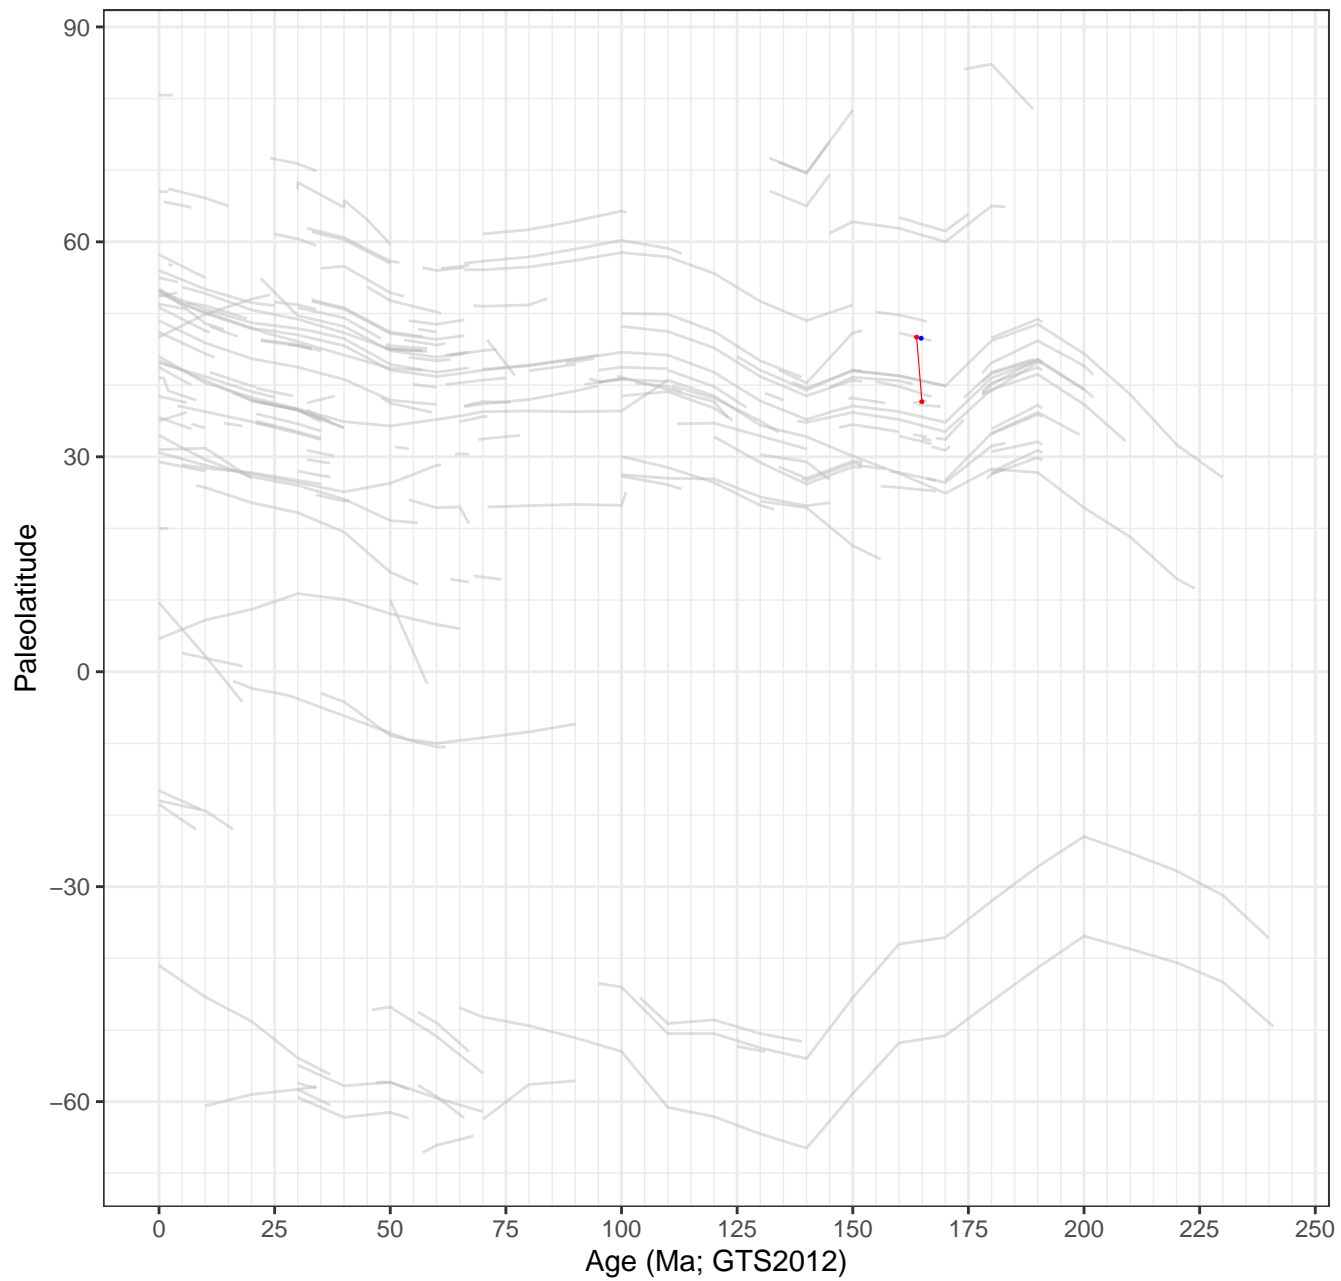

Supplement: Supplementary file 1851 [file Meiourogonyaulax callomonii.pdf › Supplement/Supplement 2/Species 1914 plots/Meiourogonyaulax callomonii.pdf]

# Species *Meiourogonyaulax caytonensis*

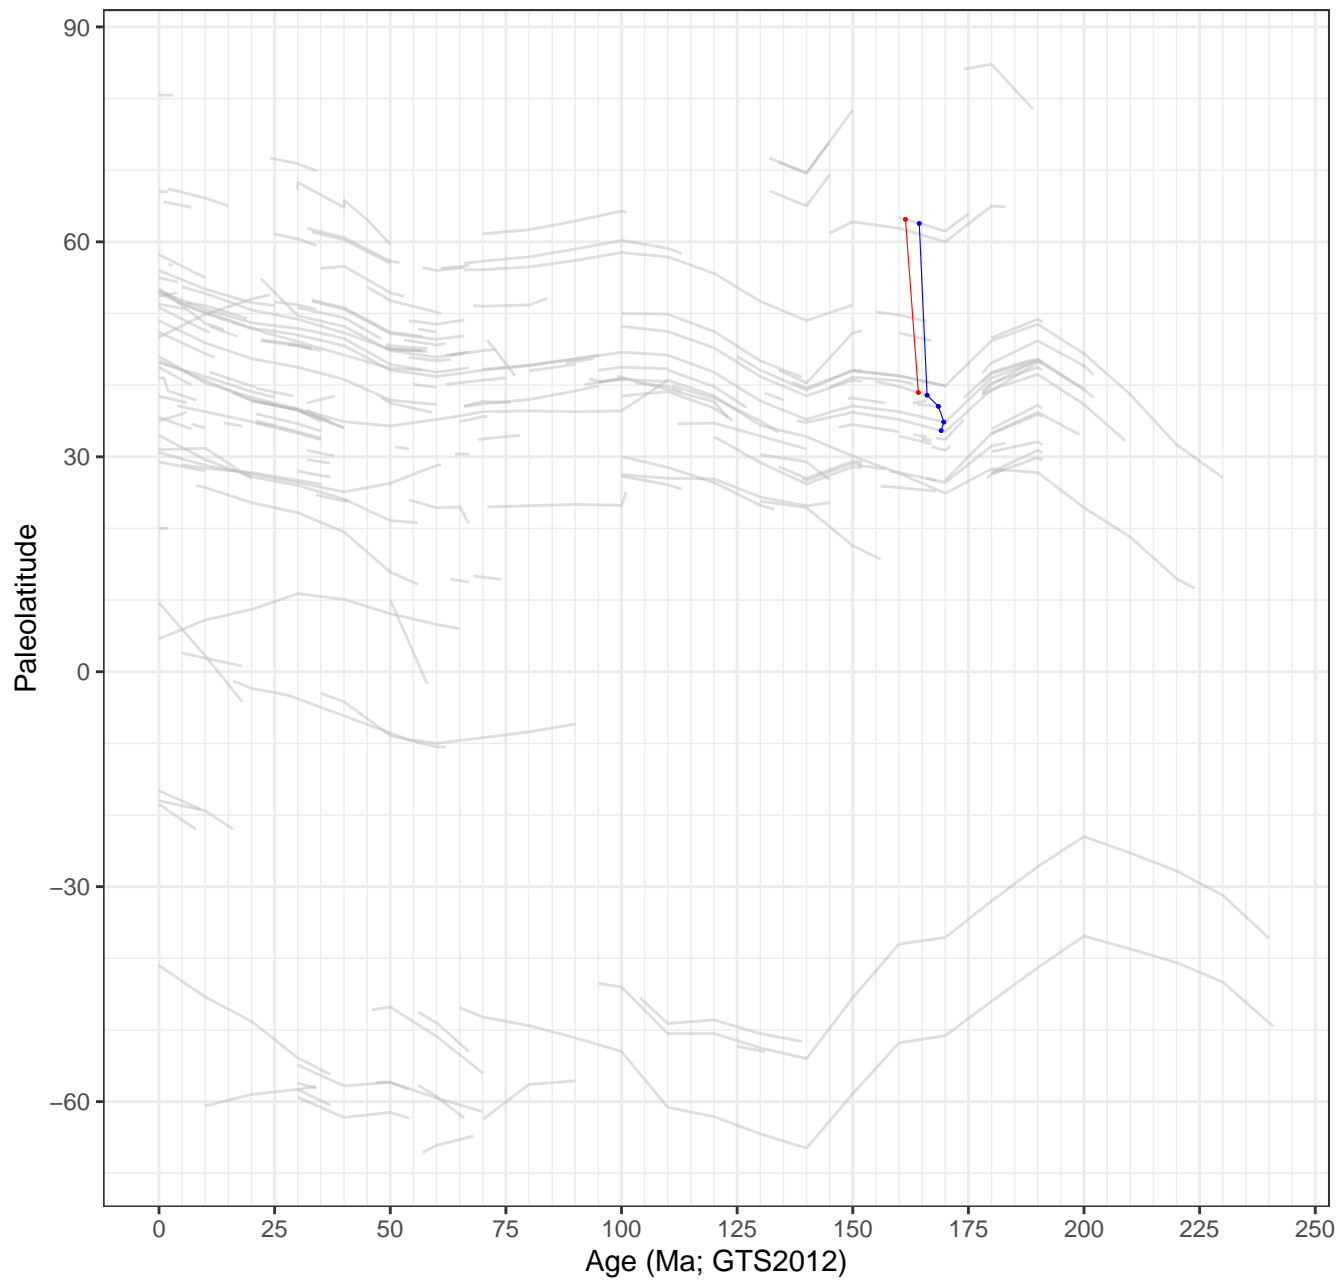

Supplement: Supplementary file 1852 [file Meiourogonyaulax caytonensis.pdf › Supplement/Supplement 2/Species 1914 plots/Meiourogonyaulax caytonensis.pdf]

# Species *Meiourogonyaulax cristulata*



Supplement: Supplementary file 1853 [file Meiourogonyaulax cristulata.pdf › Supplement/Supplement 2/Species 1914 plots/Meiourogonyaulax cristulata.pdf]

# Species *Meiourogonyaulax deflandrei*

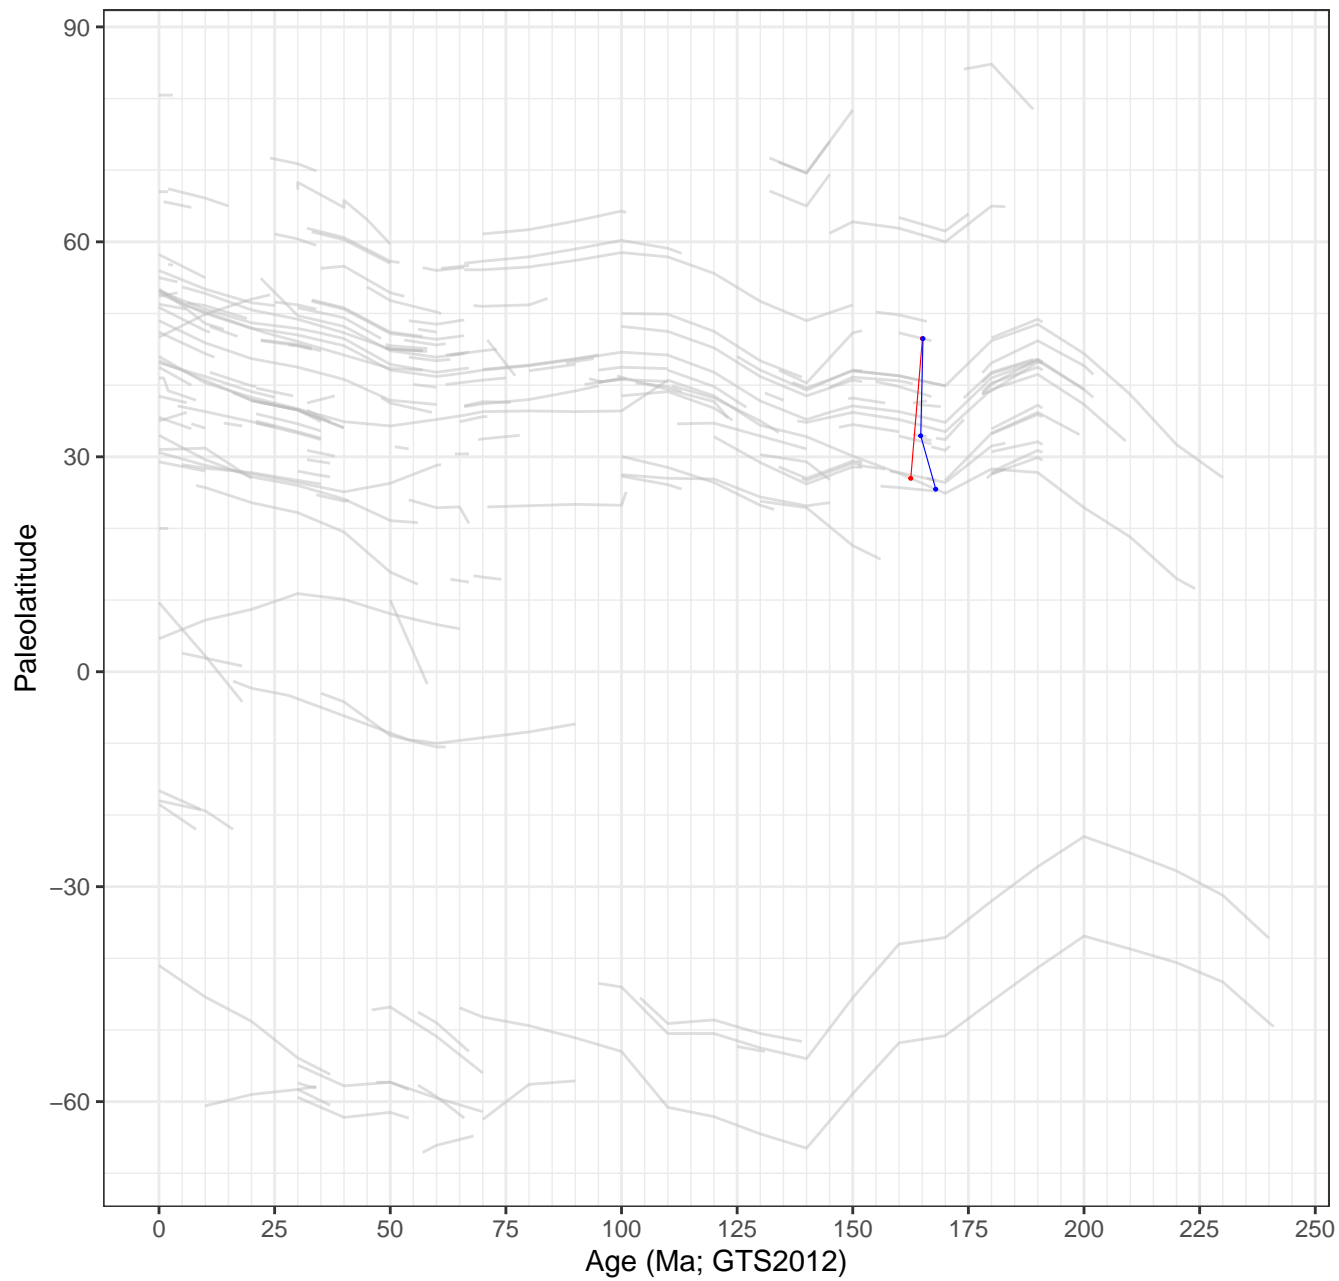

Supplement: Supplementary file 1854 [file Meiourogonyaulax deflandrei.pdf › Supplement/Supplement 2/Species 1914 plots/Meiourogonyaulax deflandrei.pdf]

# Species *Meiourogonyaulax diaphana*

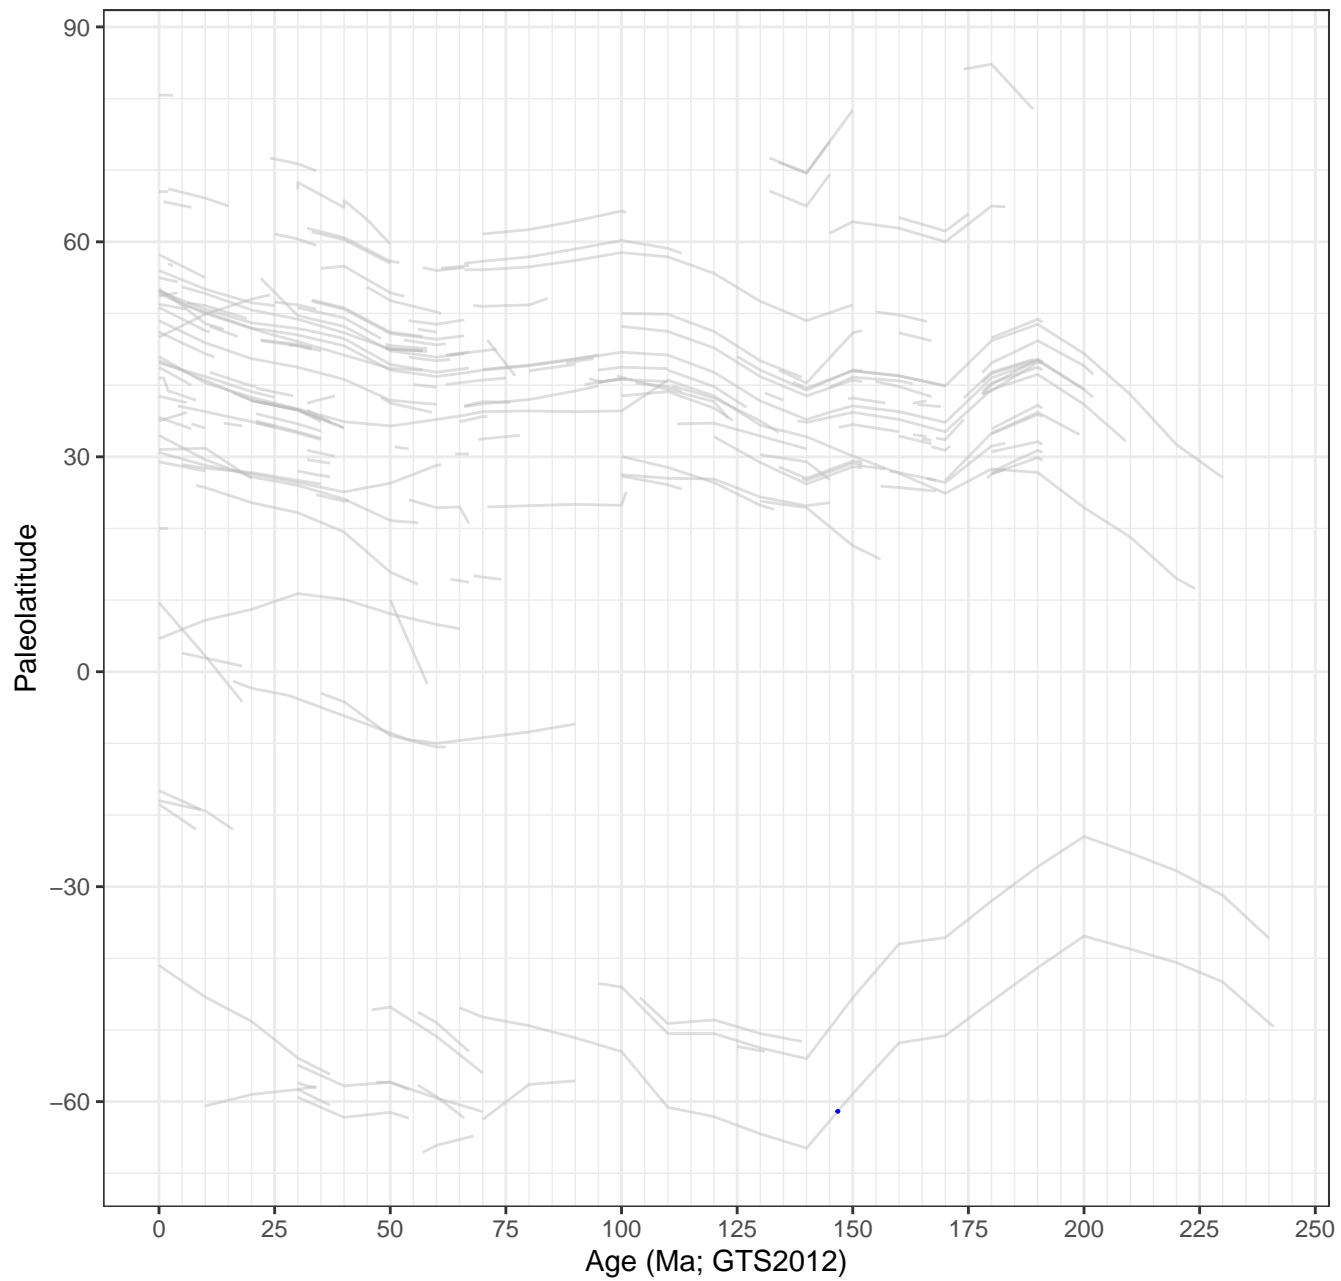

Supplement: Supplementary file 1855 [file Meiourogonyaulax diaphana.pdf › Supplement/Supplement 2/Species 1914 plots/Meiourogonyaulax diaphana.pdf]

# Species *Meiourogonyaulax maculata*

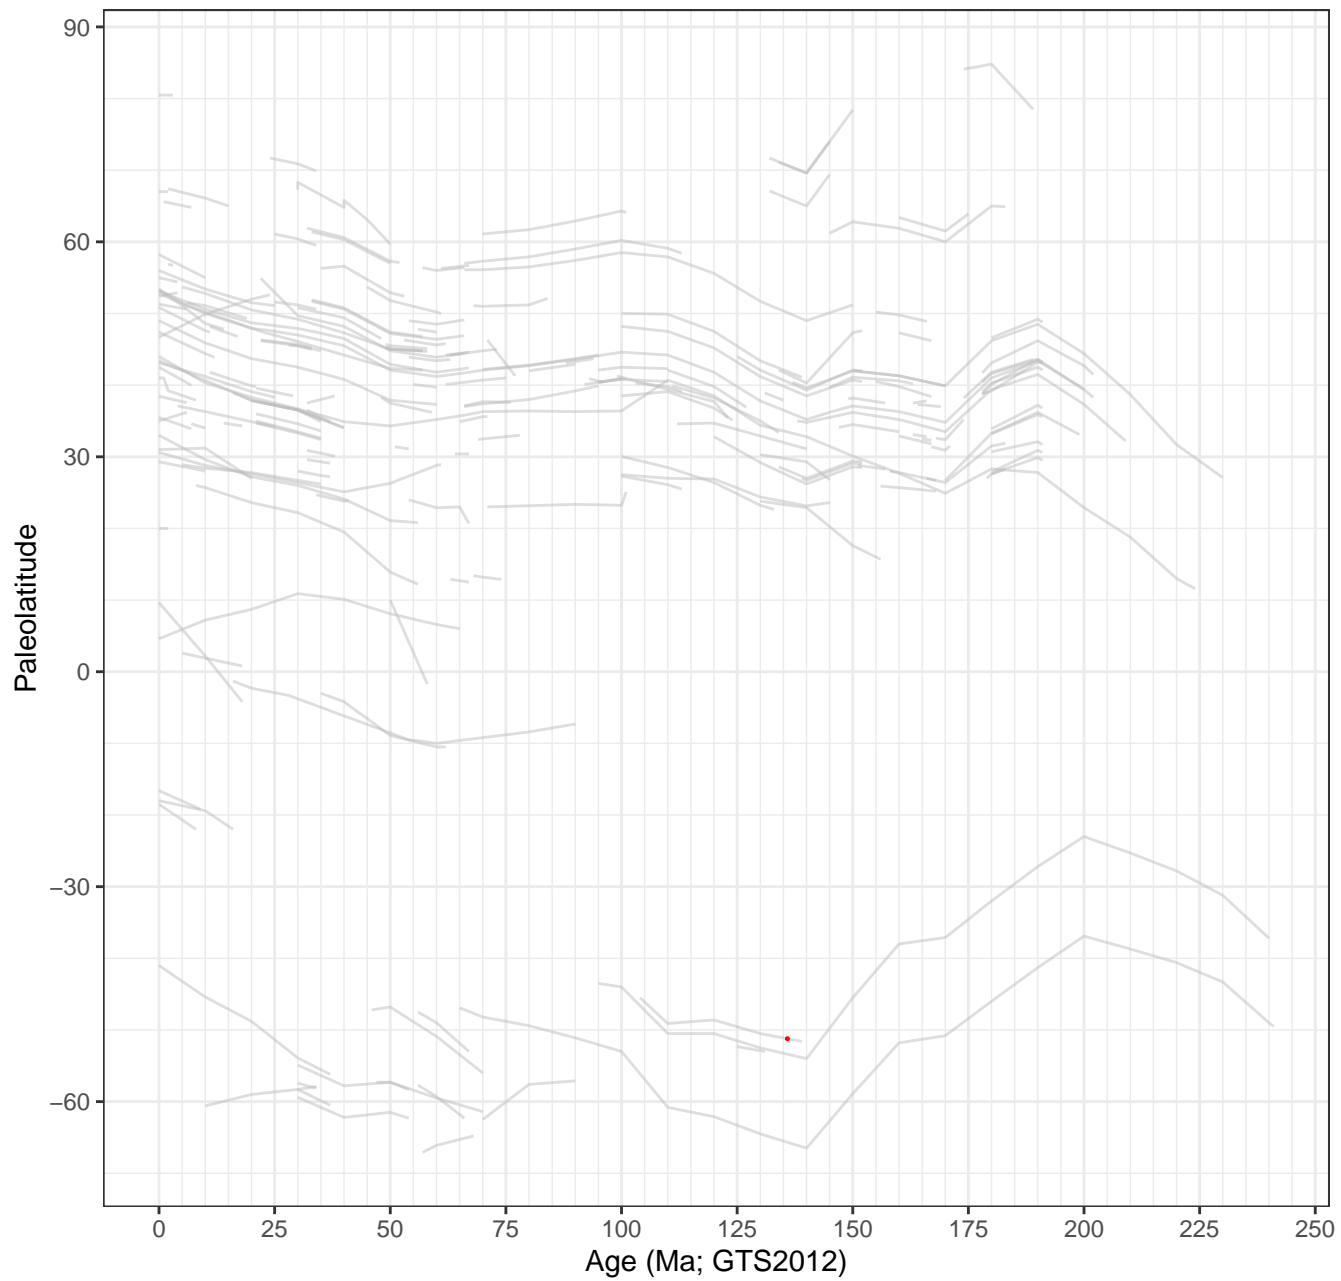

Supplement: Supplementary file 1856 [file Meiourogonyaulax maculata.pdf › Supplement/Supplement 2/Species 1914 plots/Meiourogonyaulax maculata.pdf]

# Species *Meiourogonyaulax penitabulata*

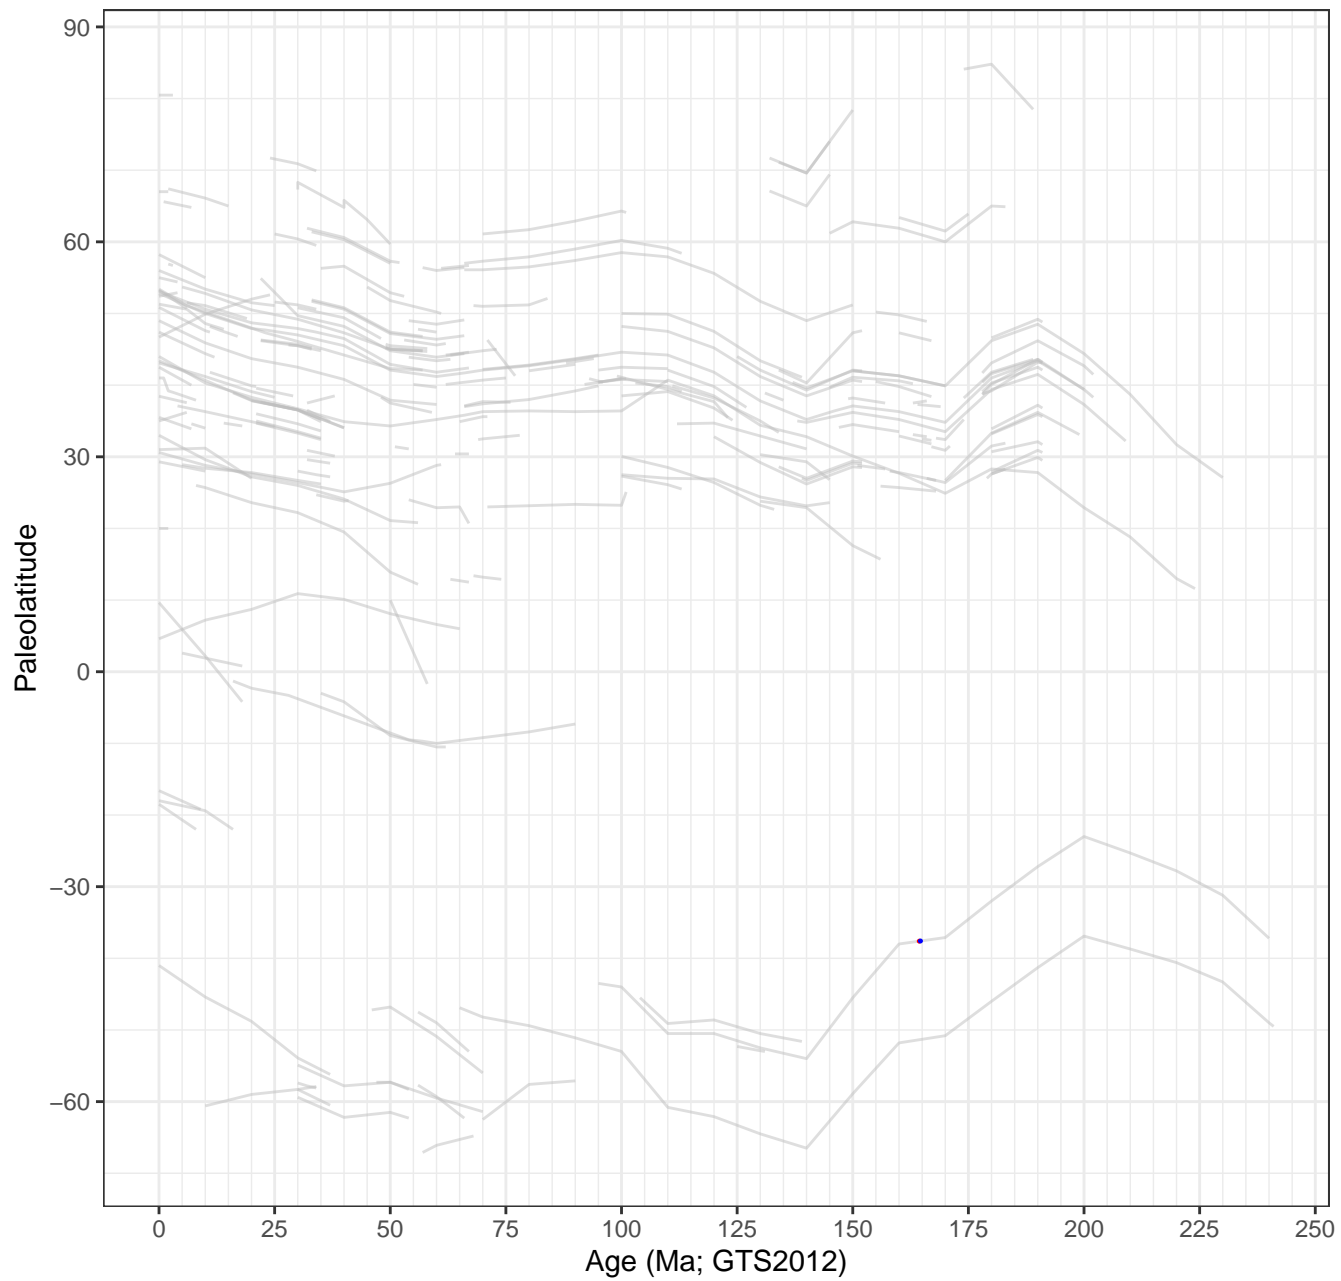

Supplement: Supplementary file 1857 [file Meiourogonyaulax penitabulata.pdf › Supplement/Supplement 2/Species 1914 plots/Meiourogonyaulax penitabulata.pdf]

# Species *Meiouruguayaulax pertusa*

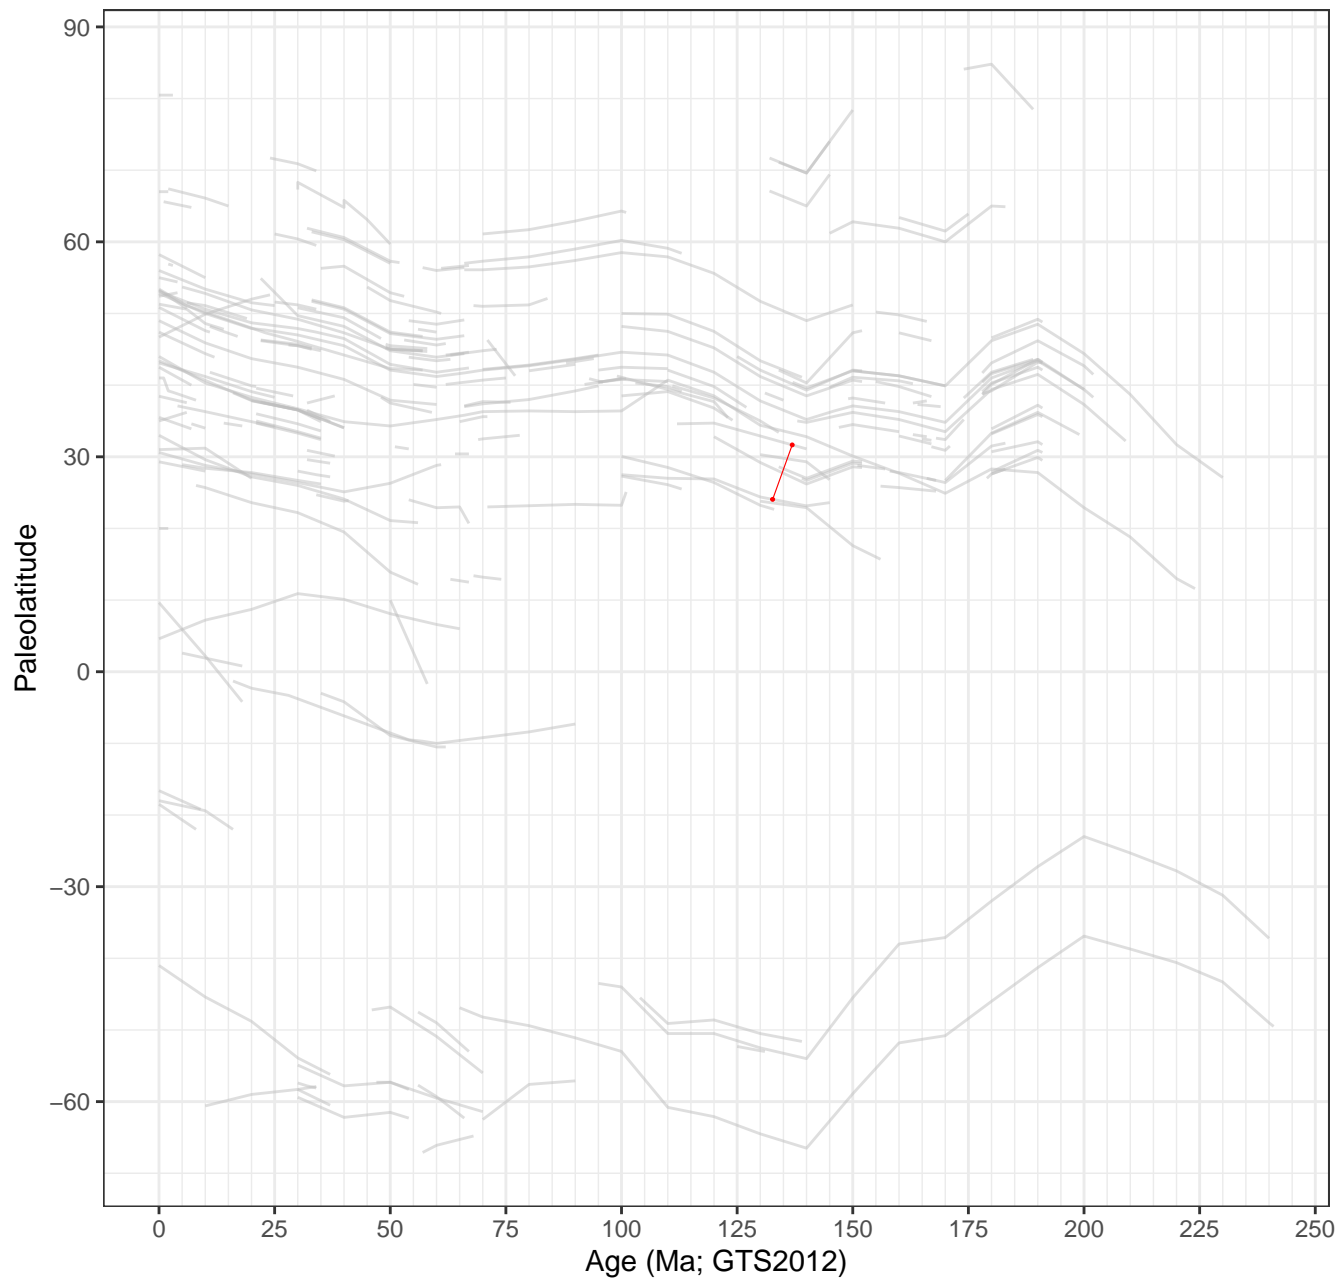

Supplement: Supplementary file 1858 [file Meiourogonyaulax pertusa.pdf › Supplement/Supplement 2/Species 1914 plots/Meiourogonyaulax pertusa.pdf]

# Species *Meiourogonyaulax planoseptata*

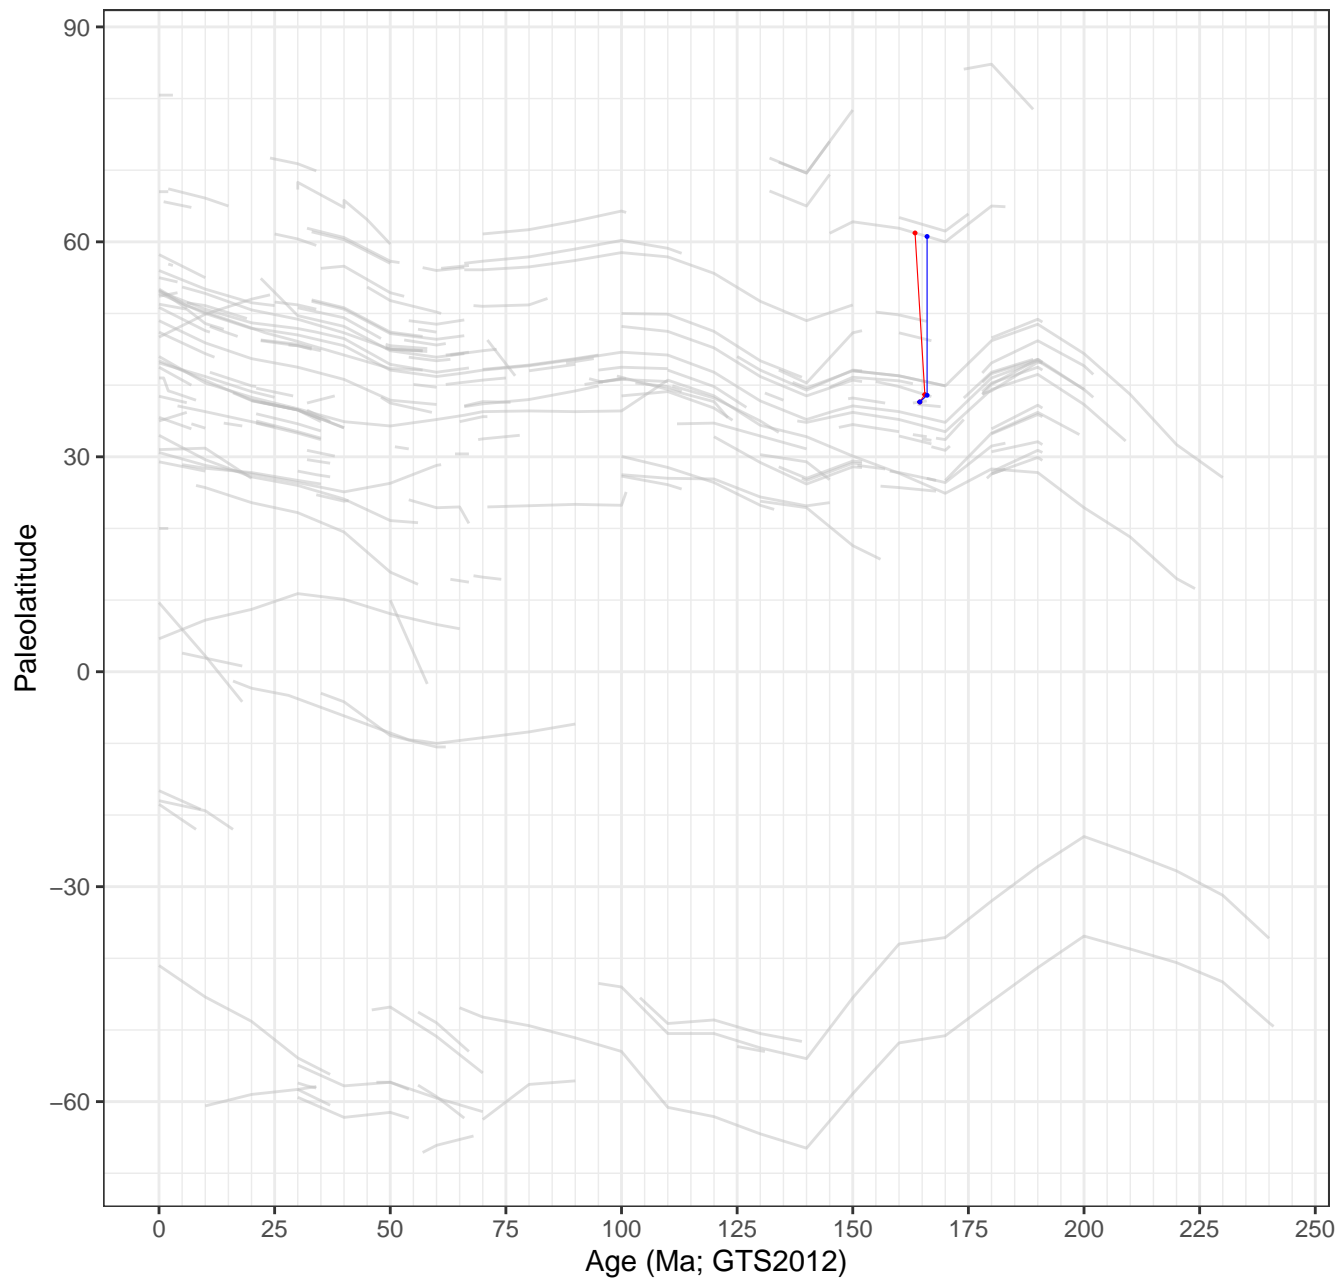

Supplement: Supplementary file 1859 [file Meiourogonyaulax planoseptata.pdf › Supplement/Supplement 2/Species 1914 plots/Meiourogonyaulax planoseptata.pdf]

# Species *Meiourogonyaulax psora*

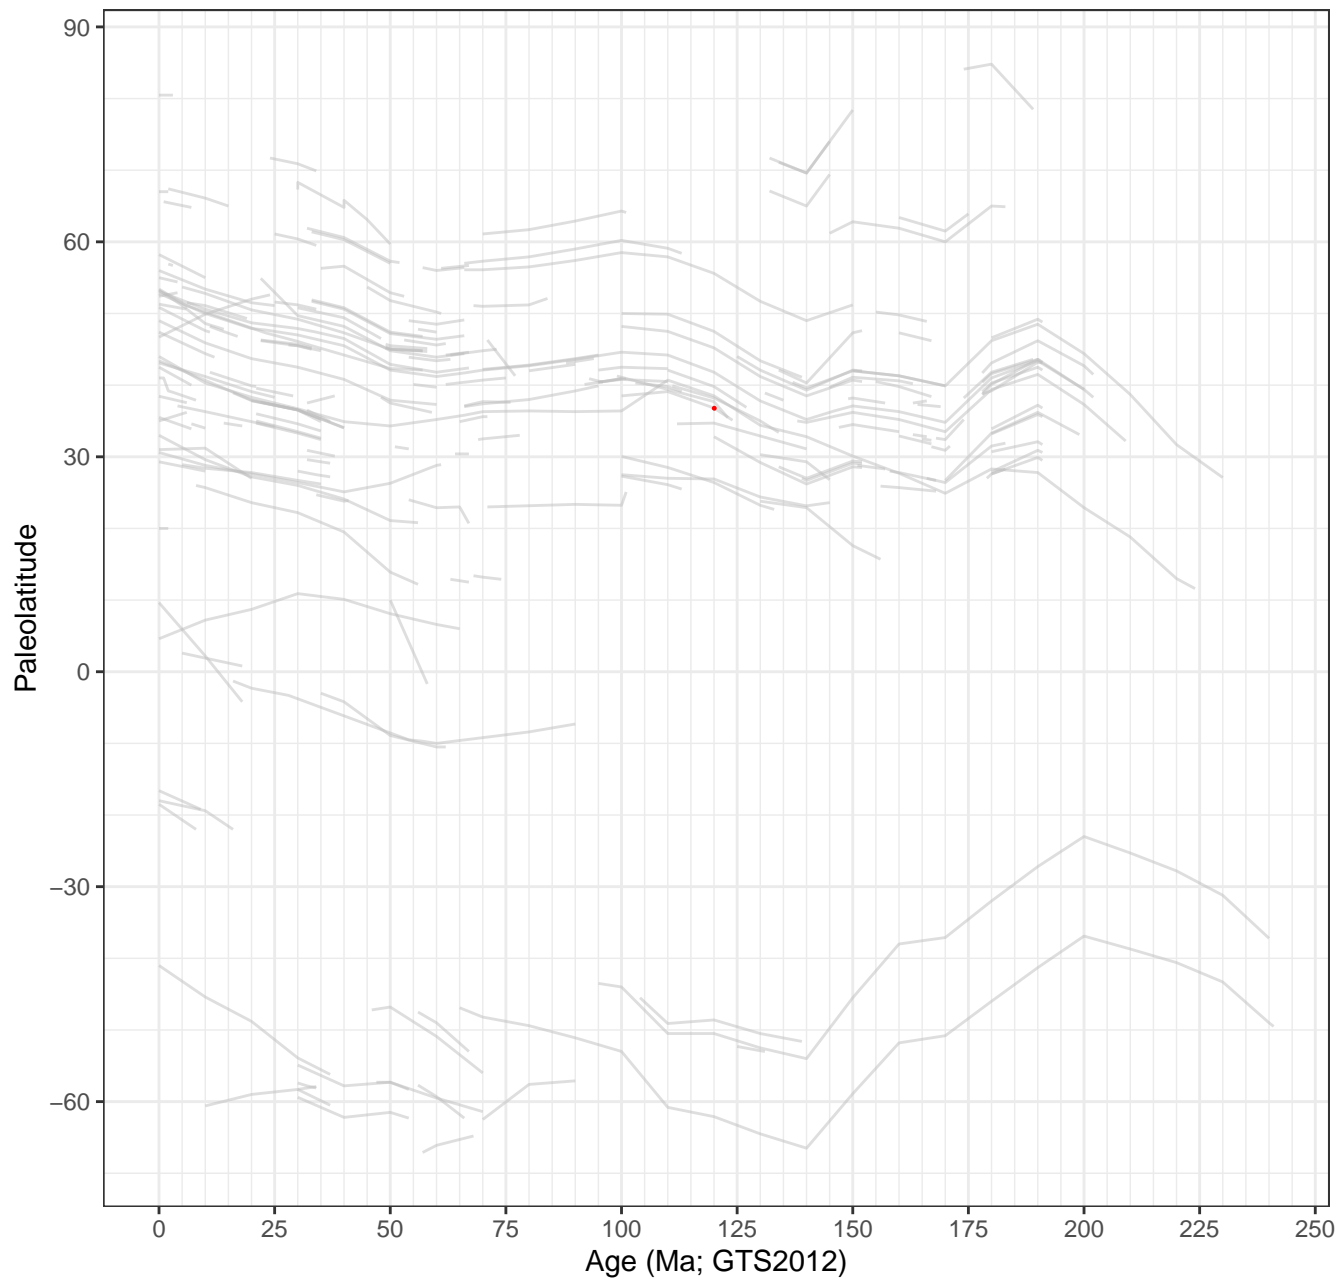

Supplement: Supplementary file 1860 [file Meiourogonyaulax psora.pdf › Supplement/Supplement 2/Species 1914 plots/Meiourogonyaulax psora.pdf]

# Species *Meiourogonyaulax reticulata*

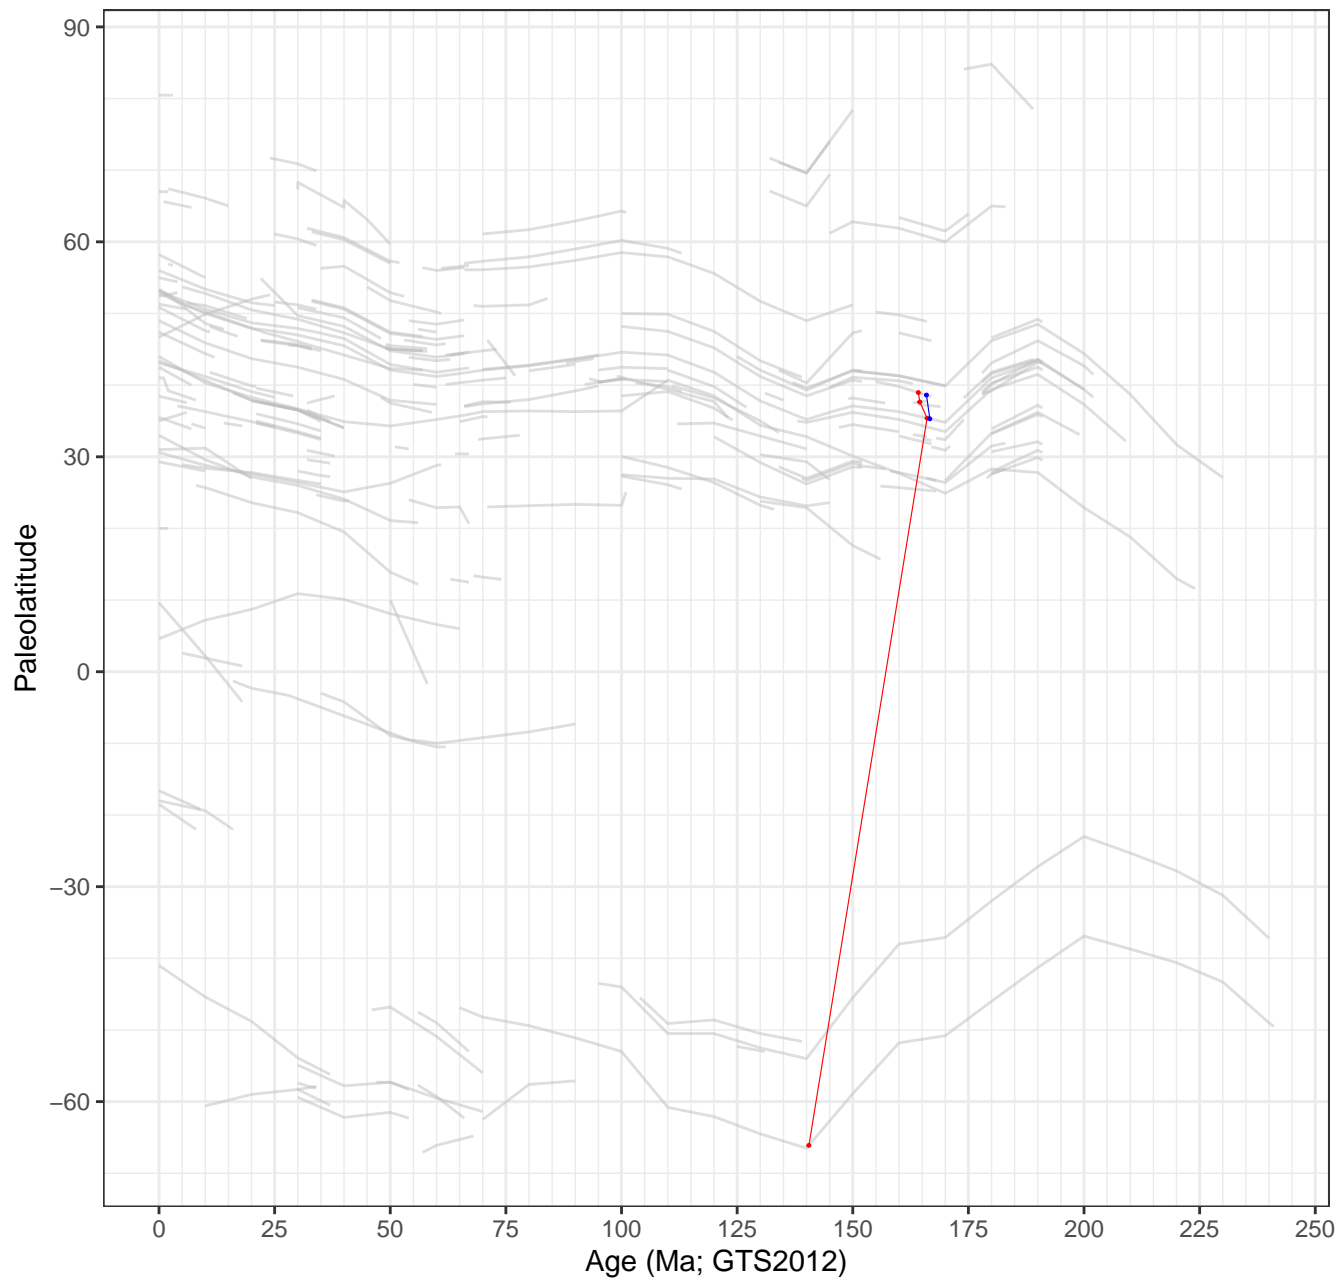

Supplement: Supplementary file 1861 [file Meiourogonyaulax reticulata.pdf › Supplement/Supplement 2/Species 1914 plots/Meiourogonyaulax reticulata.pdf]

# Species *Meiourogonyaulax spongiosa*

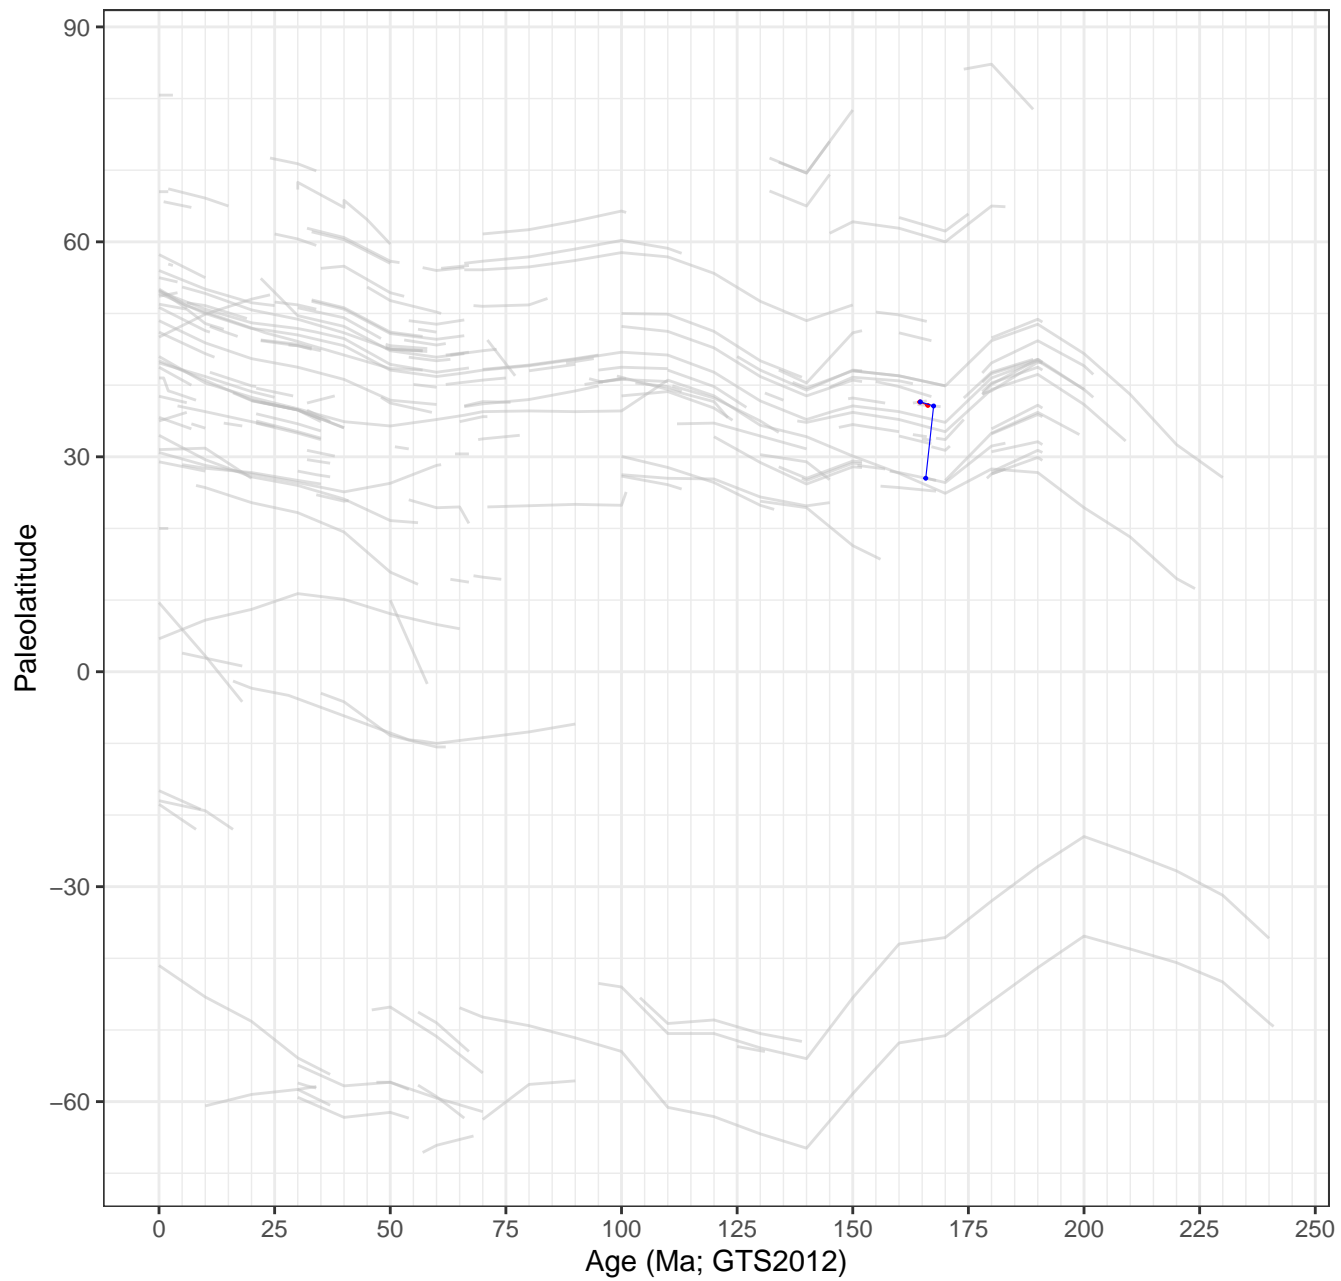

Supplement: Supplementary file 1862 [file Meiourogonyaulax spongiosa.pdf › Supplement/Supplement 2/Species 1914 plots/Meiourogonyaulax spongiosa.pdf]

# Species *Meiouruguayaulax stoveri*

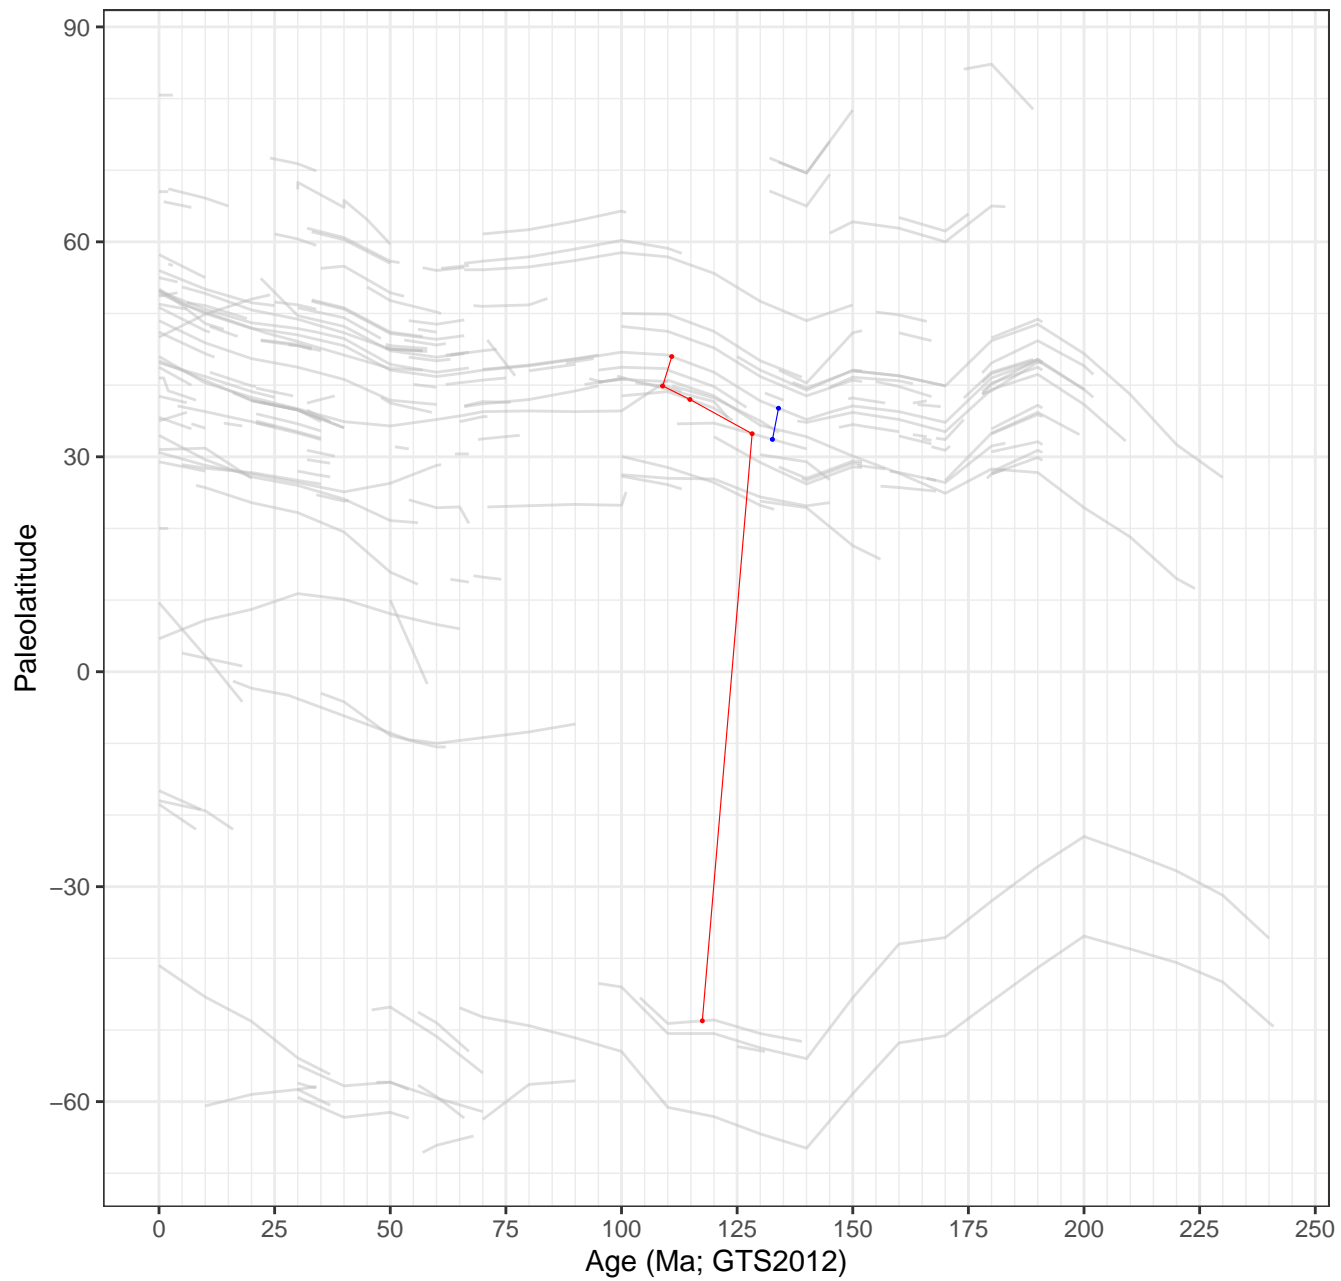

Supplement: Supplementary file 1863 [file Meiourogonyaulax stoveri.pdf › Supplement/Supplement 2/Species 1914 plots/Meiourogonyaulax stoveri.pdf]

# Species *Meiourogonyaulax strongyla*

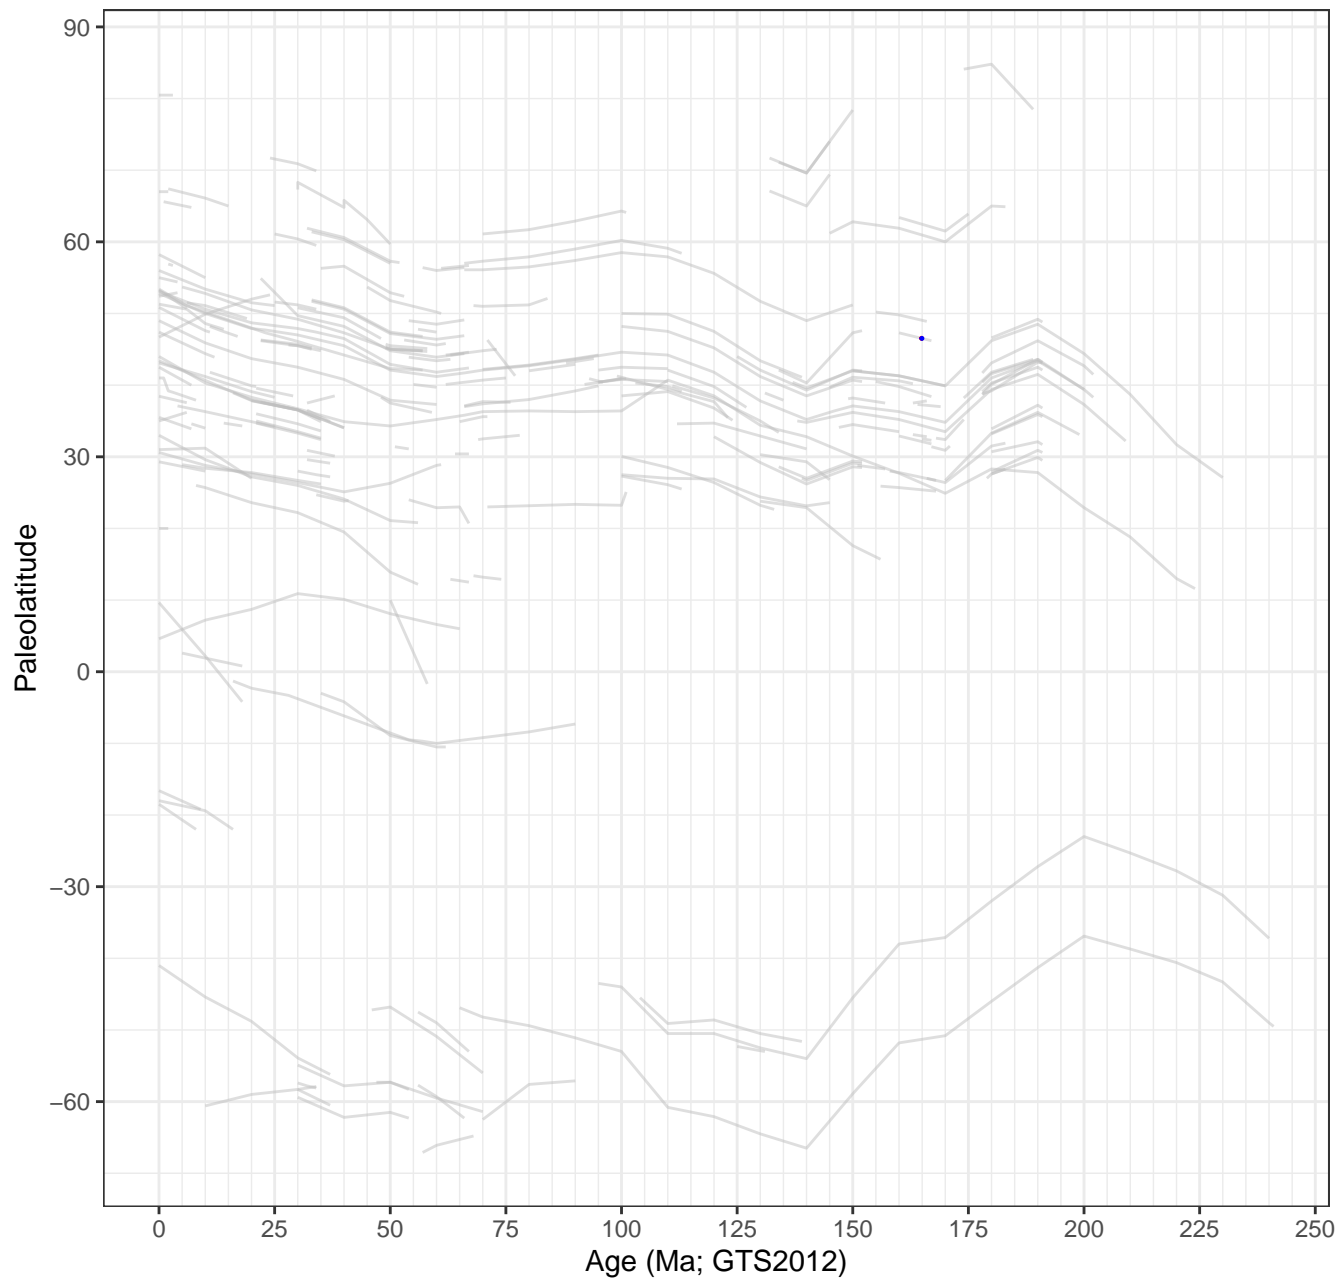

Supplement: Supplementary file 1864 [file Meiourogonyaulax strongyla.pdf › Supplement/Supplement 2/Species 1914 plots/Meiourogonyaulax strongyla.pdf]

# Species *Meiouruguayaulax valensii*

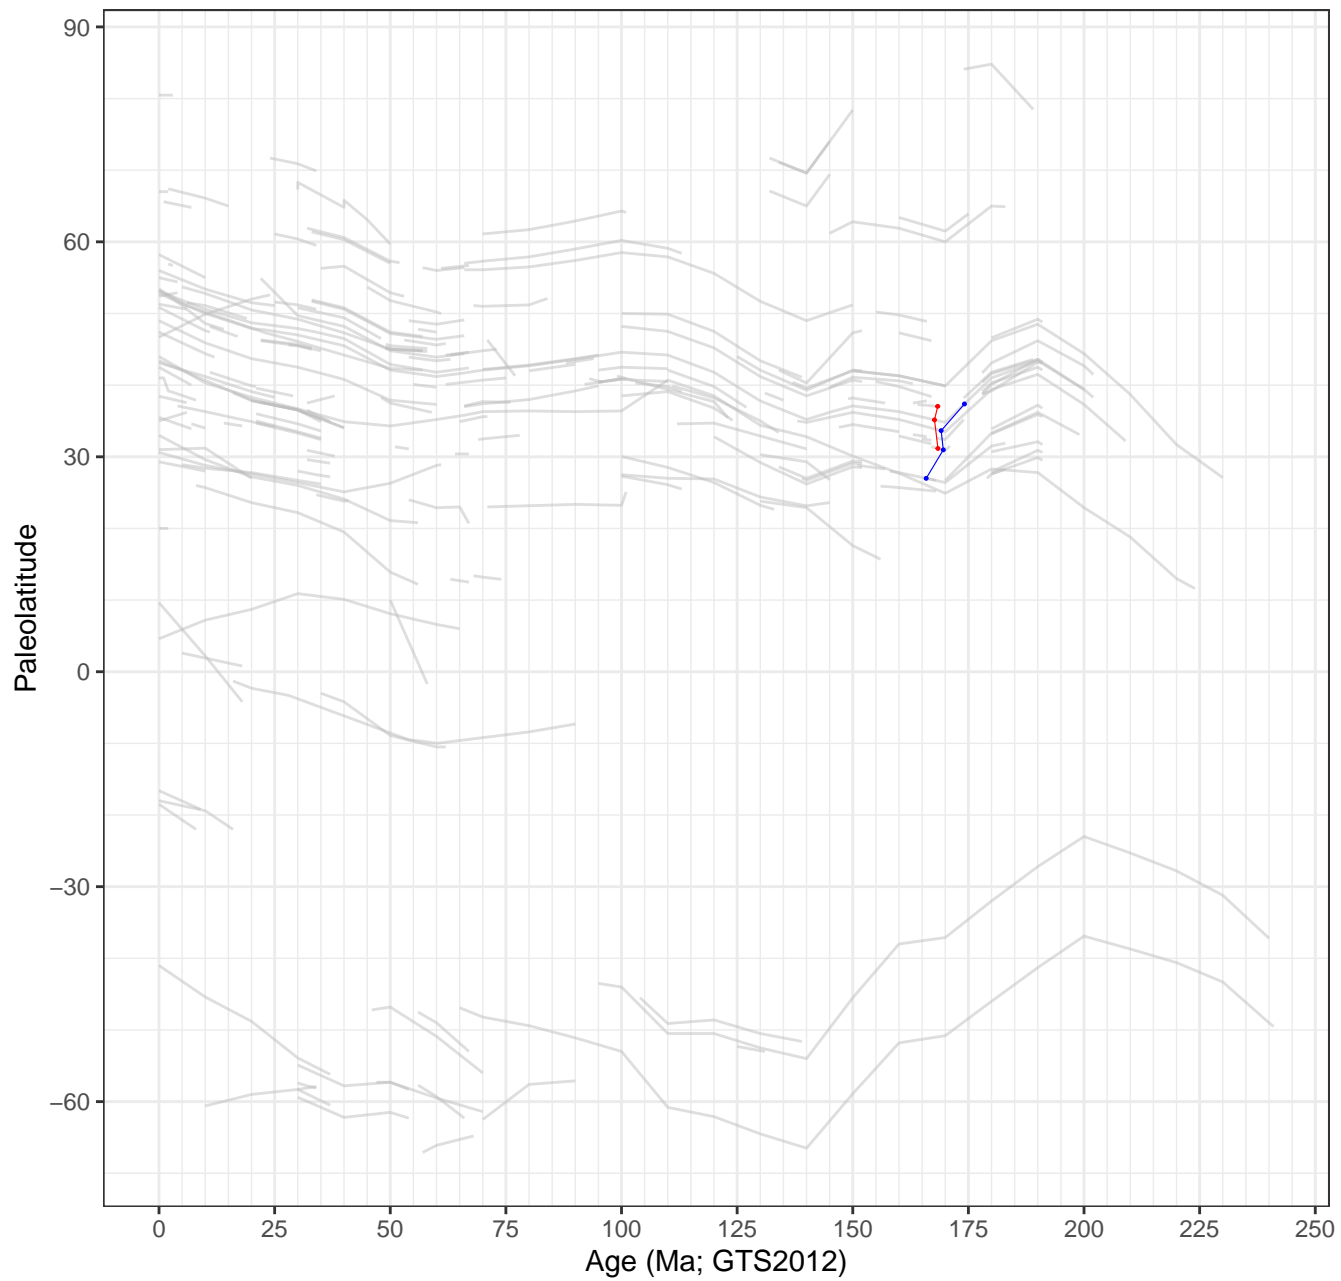

Supplement: Supplementary file 1865 [file Meiourogonyaulax valensii.pdf › Supplement/Supplement 2/Species 1914 plots/Meiourogonyaulax valensii.pdf]

# Species *Melittasphaeridium angustum*

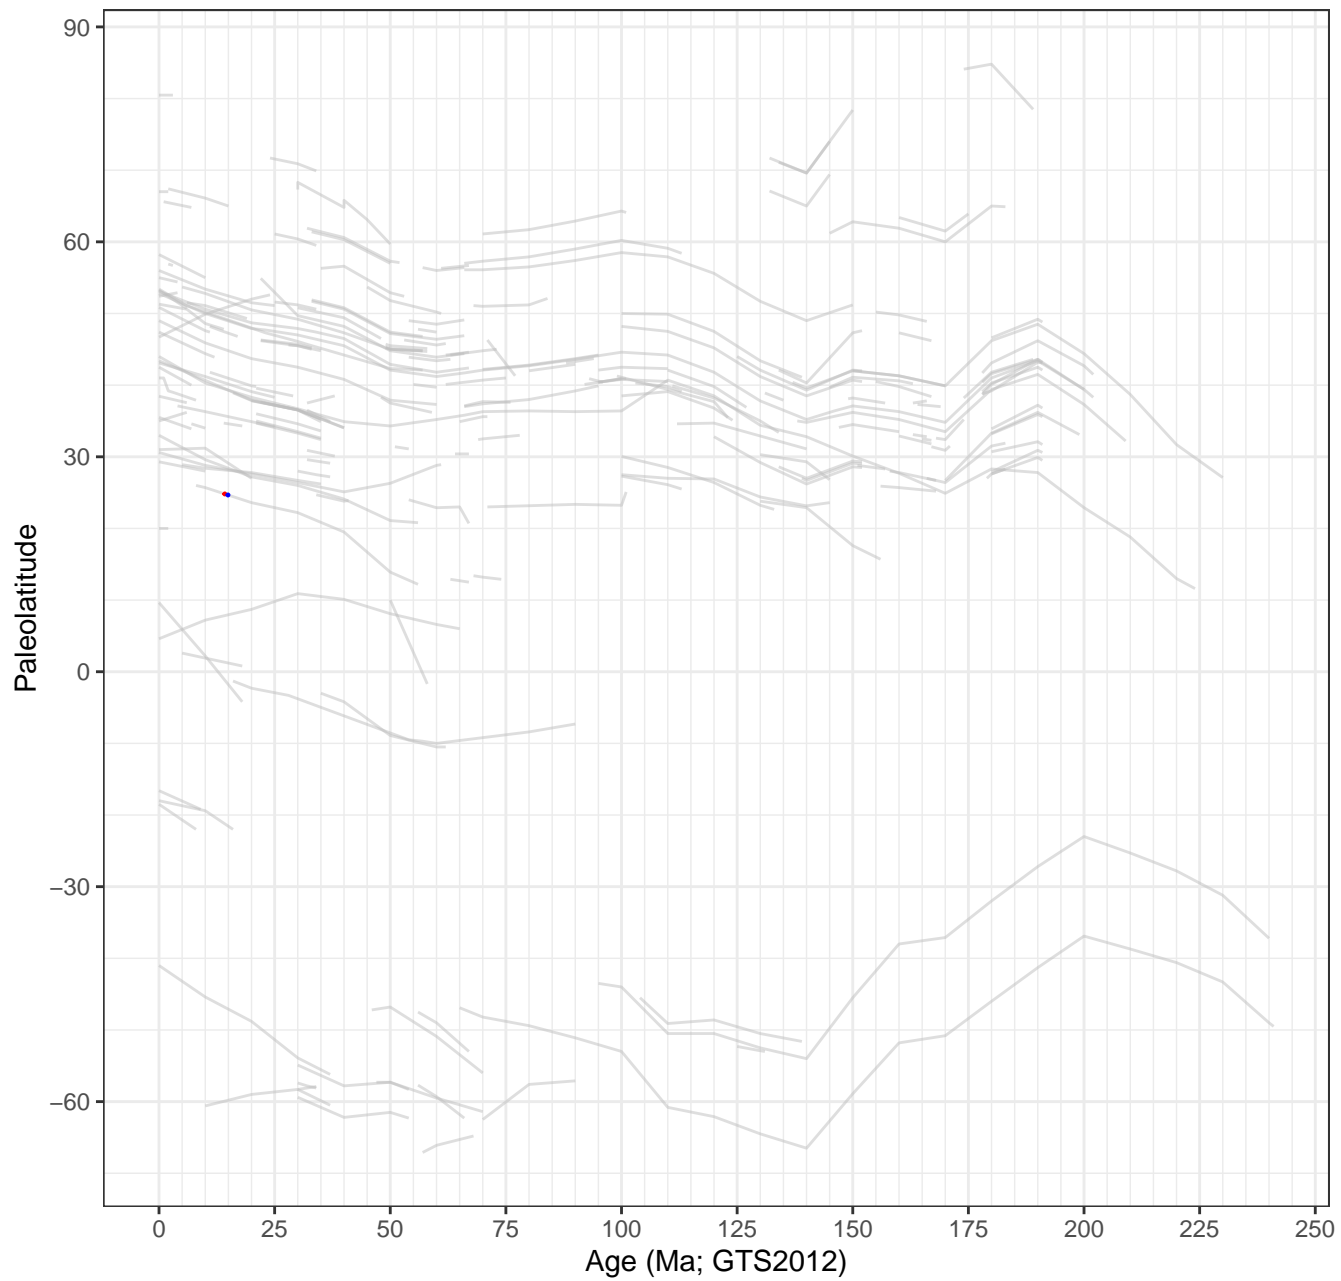

Supplement: Supplementary file 1866 [file Melitasphaeridium angustum.pdf › Supplement/Supplement 2/Species 1914 plots/Melitasphaeridium angustum.pdf]

# Species *Melitasphaeridium asterium*

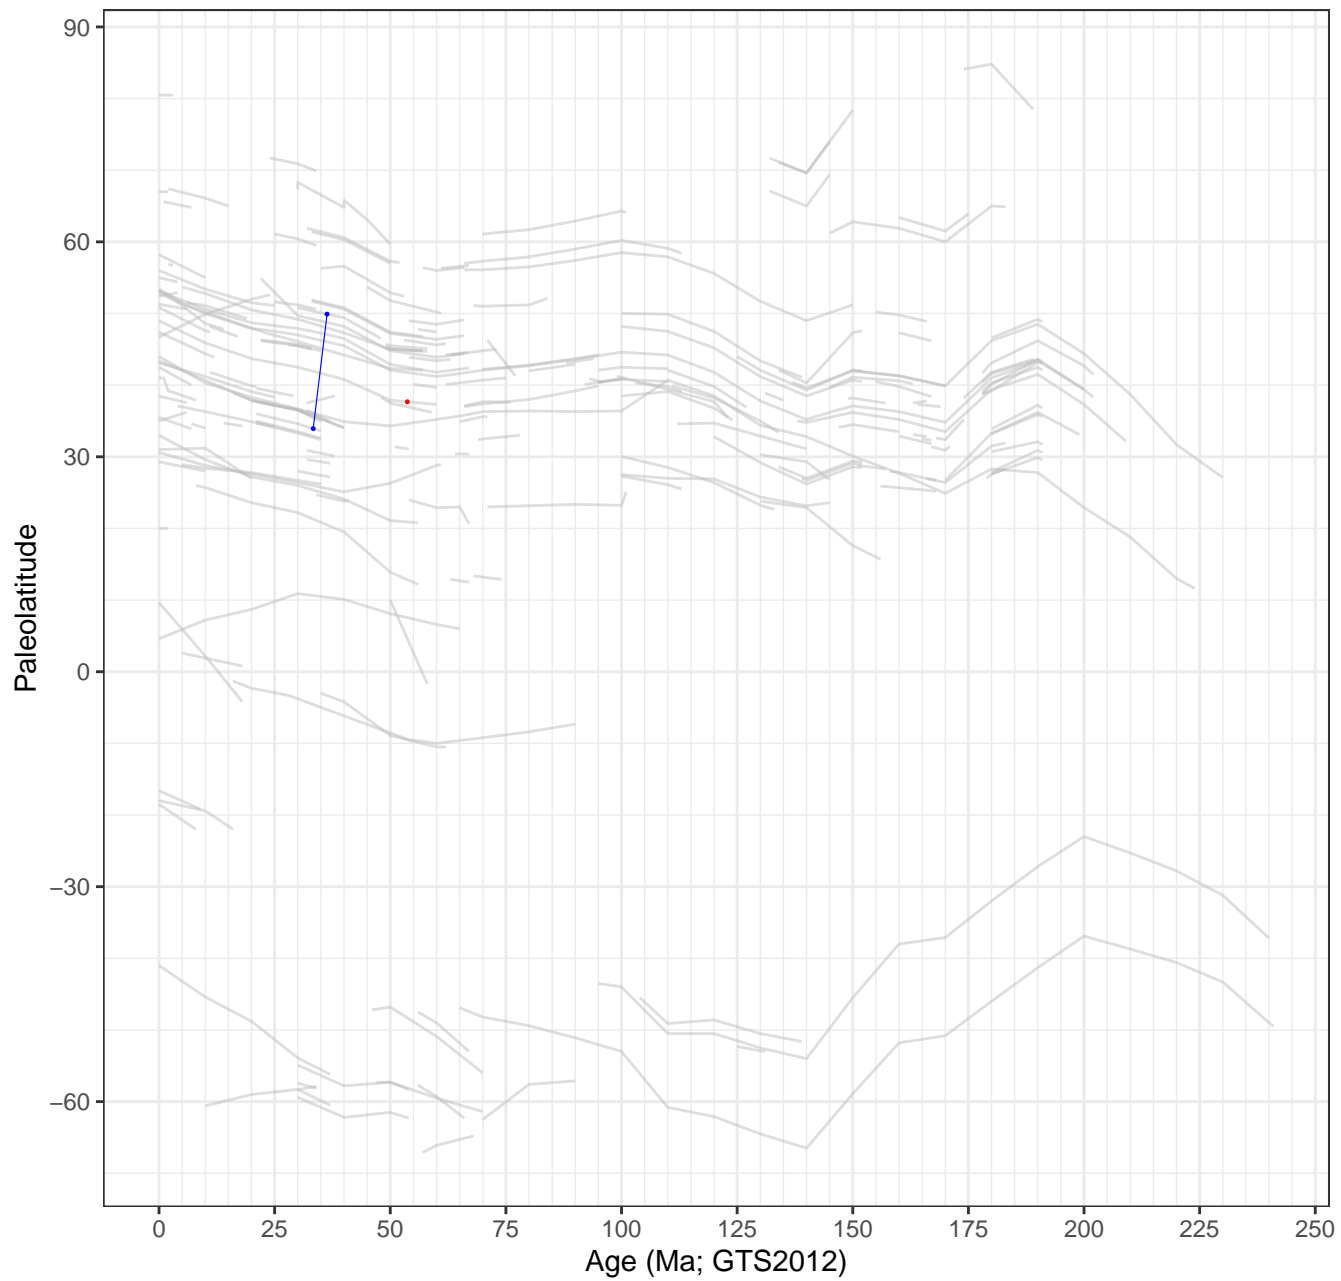

Supplement: Supplementary file 1867 [file Melitasphaeridium asterium.pdf › Supplement/Supplement 2/Species 1914 plots/Melitasphaeridium asterium.pdf]

# Species *Melittasphaeridium choanophorum reductum*

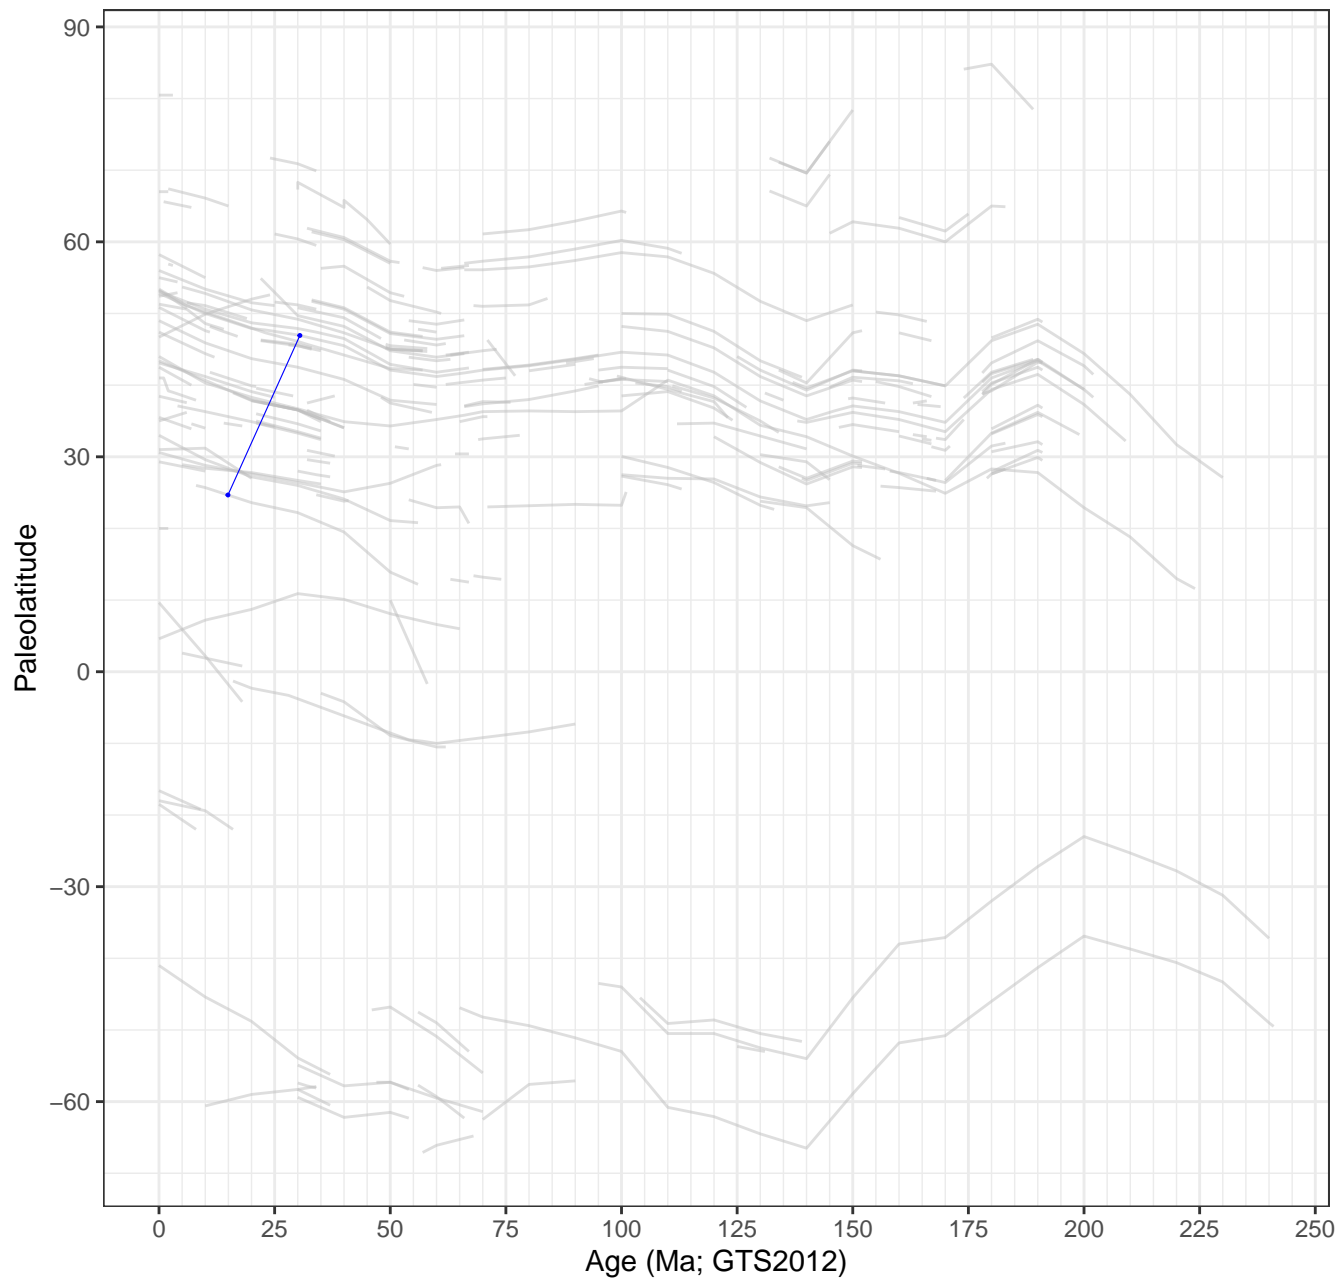

Supplement: Supplementary file 1868 [file Melitasphaeridium choanophorum reductum.pdf › Supplement/Supplement 2/Species 1914 plots/Melitasphaeridium choanophorum reductum.pdf]

# Species *Melittasphaeridium choanophorum*

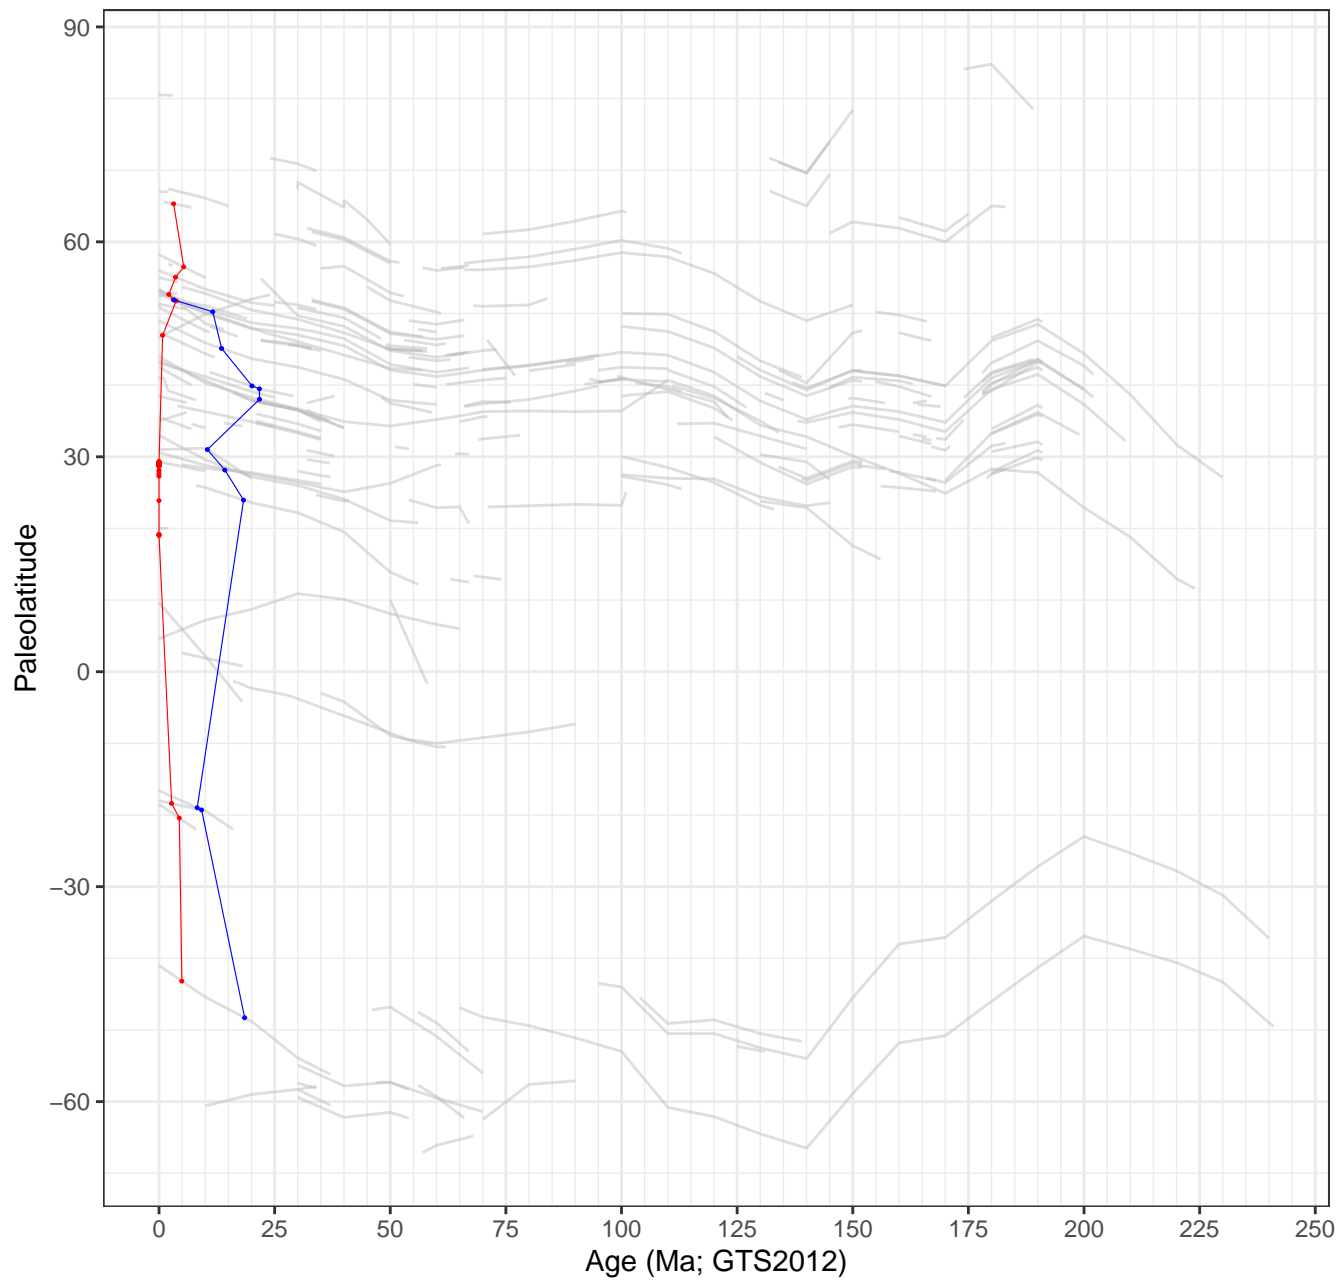

Supplement: Supplementary file 1869 [file Melitasphaeridium choanophorum.pdf › Supplement/Supplement 2/Species 1914 plots/Melitasphaeridium choanophorum.pdf]

# Species *Melitasphaeridium pseudorecurvatum*

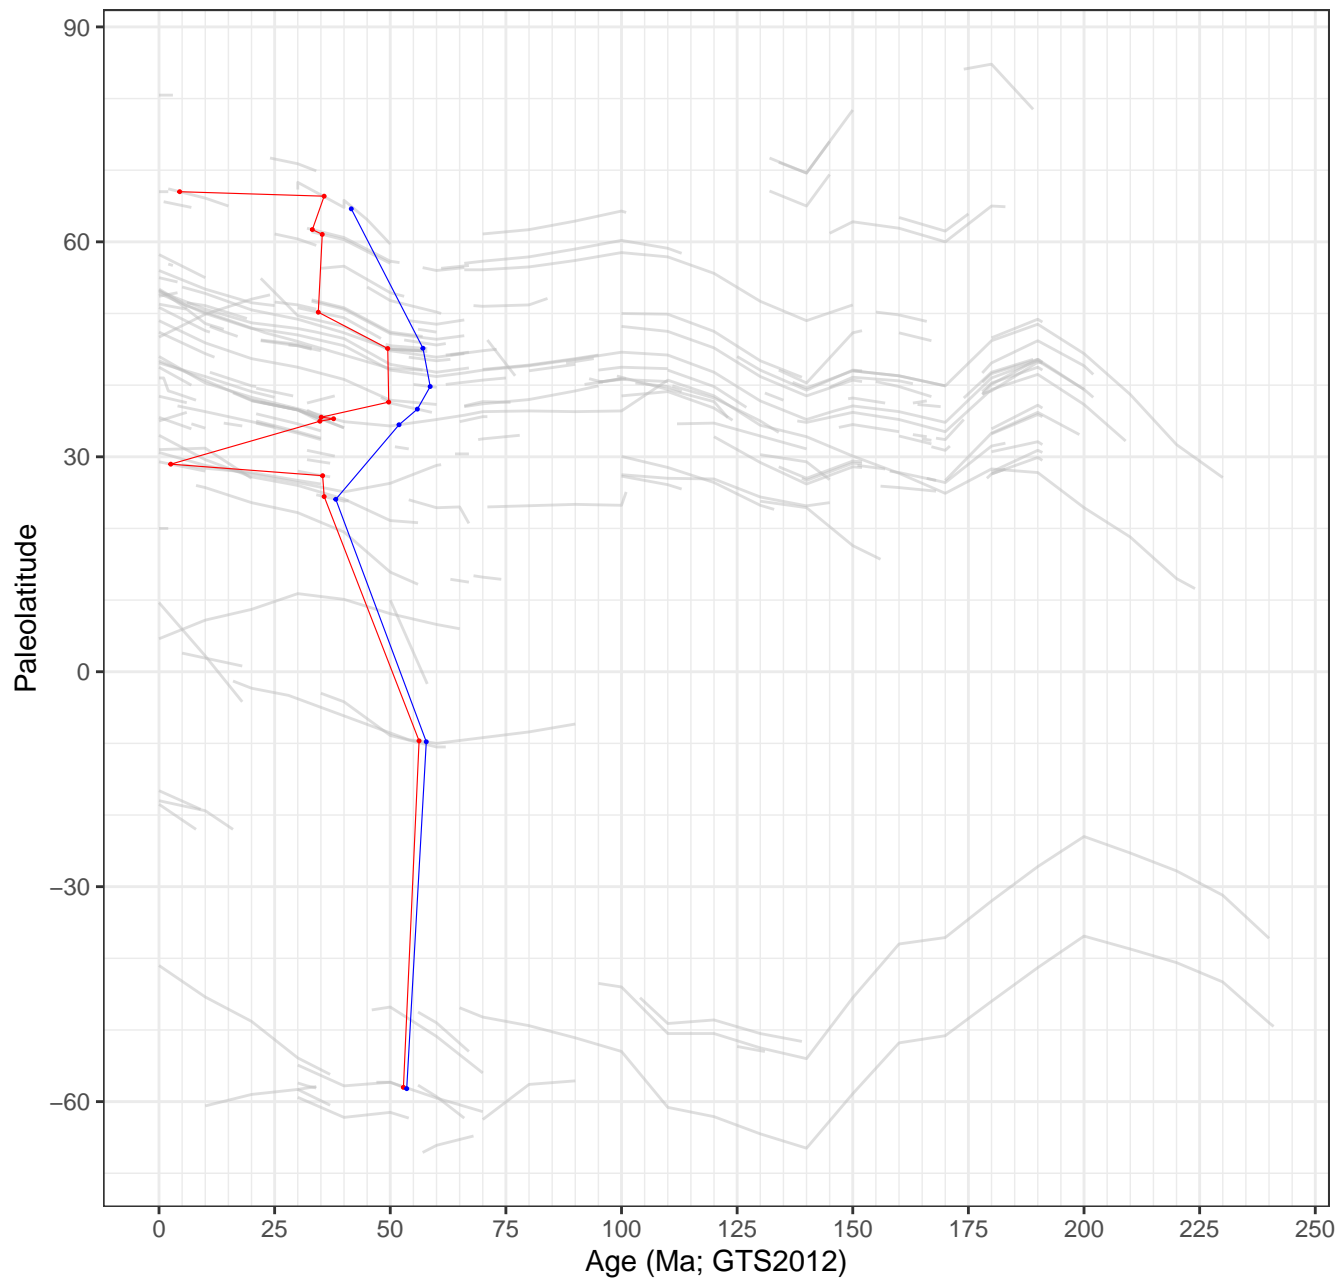

Supplement: Supplementary file 1870 [file Melitasphaeridium pseudorecurvatum.pdf › Supplement/Supplement 2/Species 1914 plots/Melitasphaeridium pseudorecurvatum.pdf]

# Species *Membranilarnacia compressa*

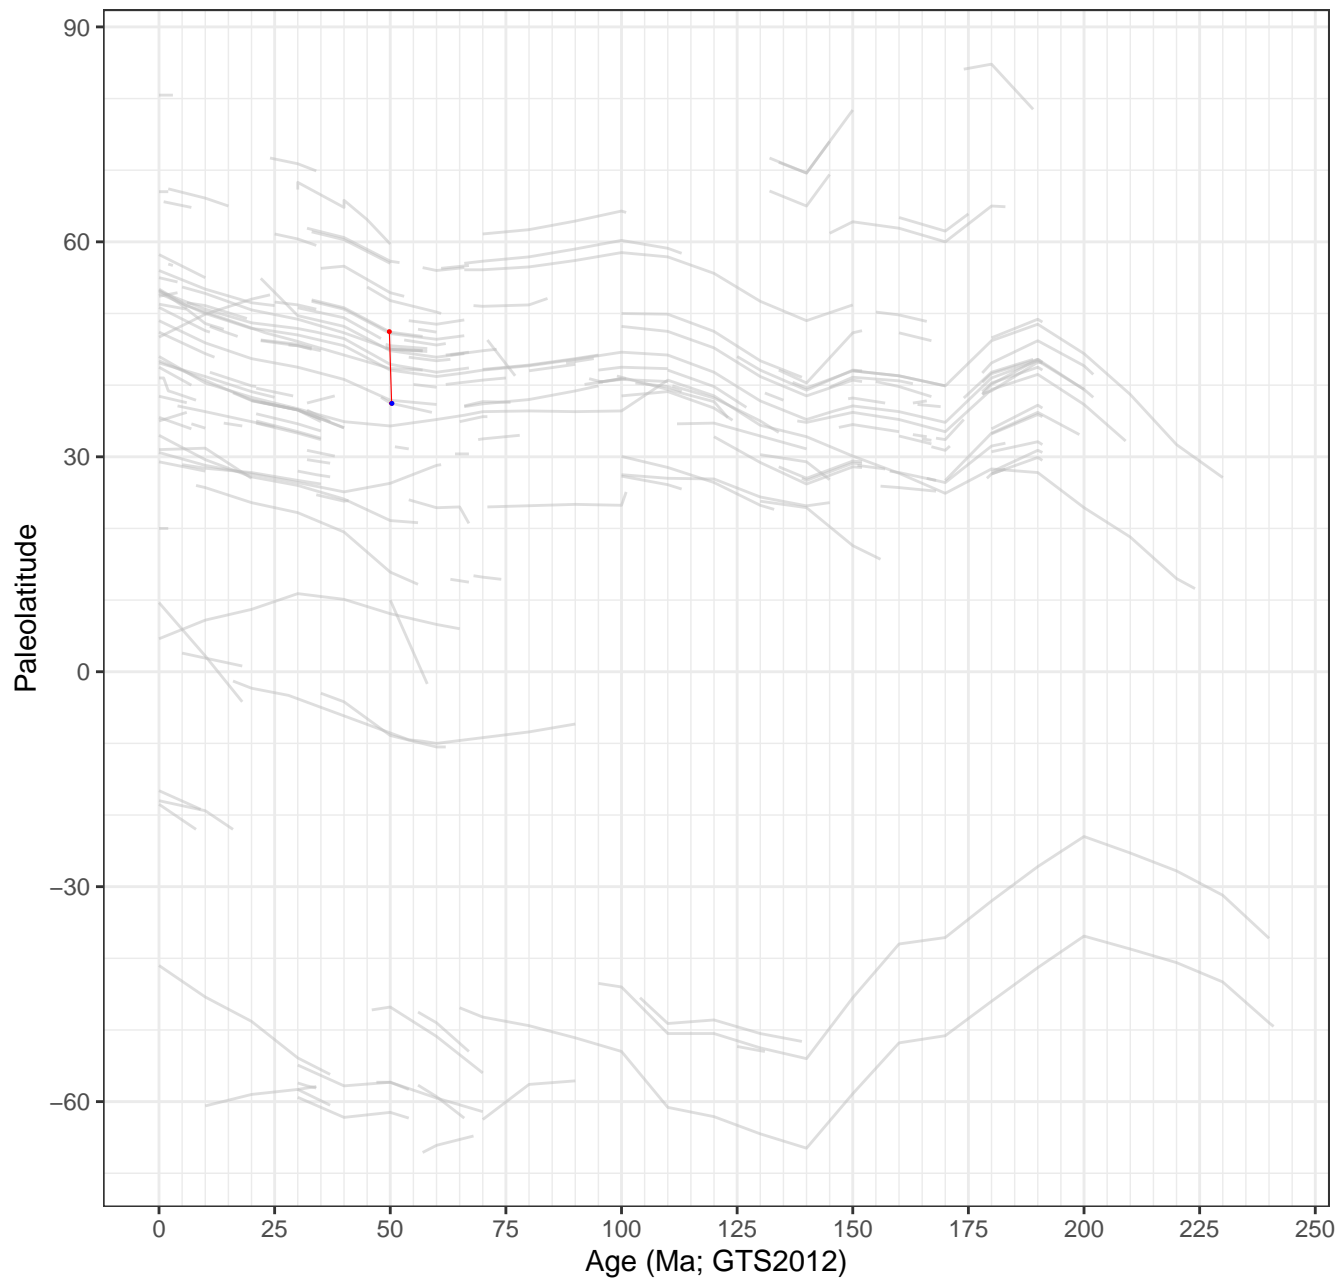

Supplement: Supplementary file 1871 [file Membranilarnacia compressa.pdf › Supplement/Supplement 2/Species 1914 plots/Membranilarnacia compressa.pdf]

# Species *Membranilarnacia glabra*

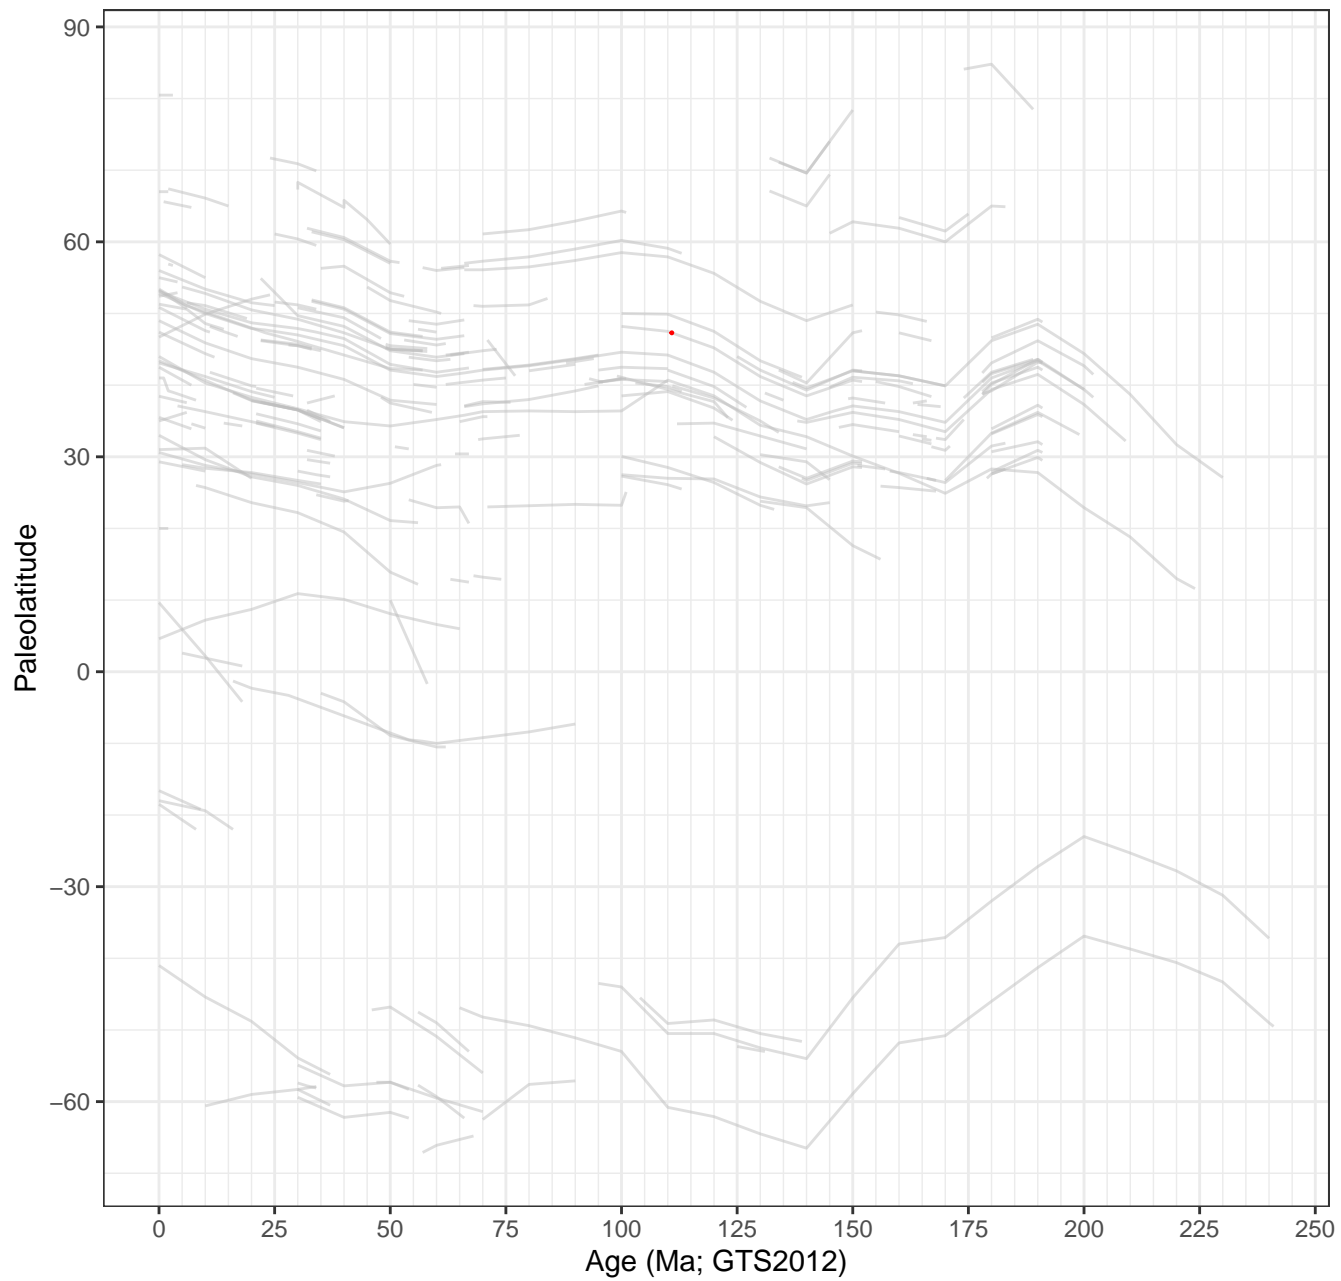

Supplement: Supplementary file 1872 [file Membranilarnacia glabra.pdf › Supplement/Supplement 2/Species 1914 plots/Membranilarnacia glabra.pdf]

# Species Membranilarnacia hapala

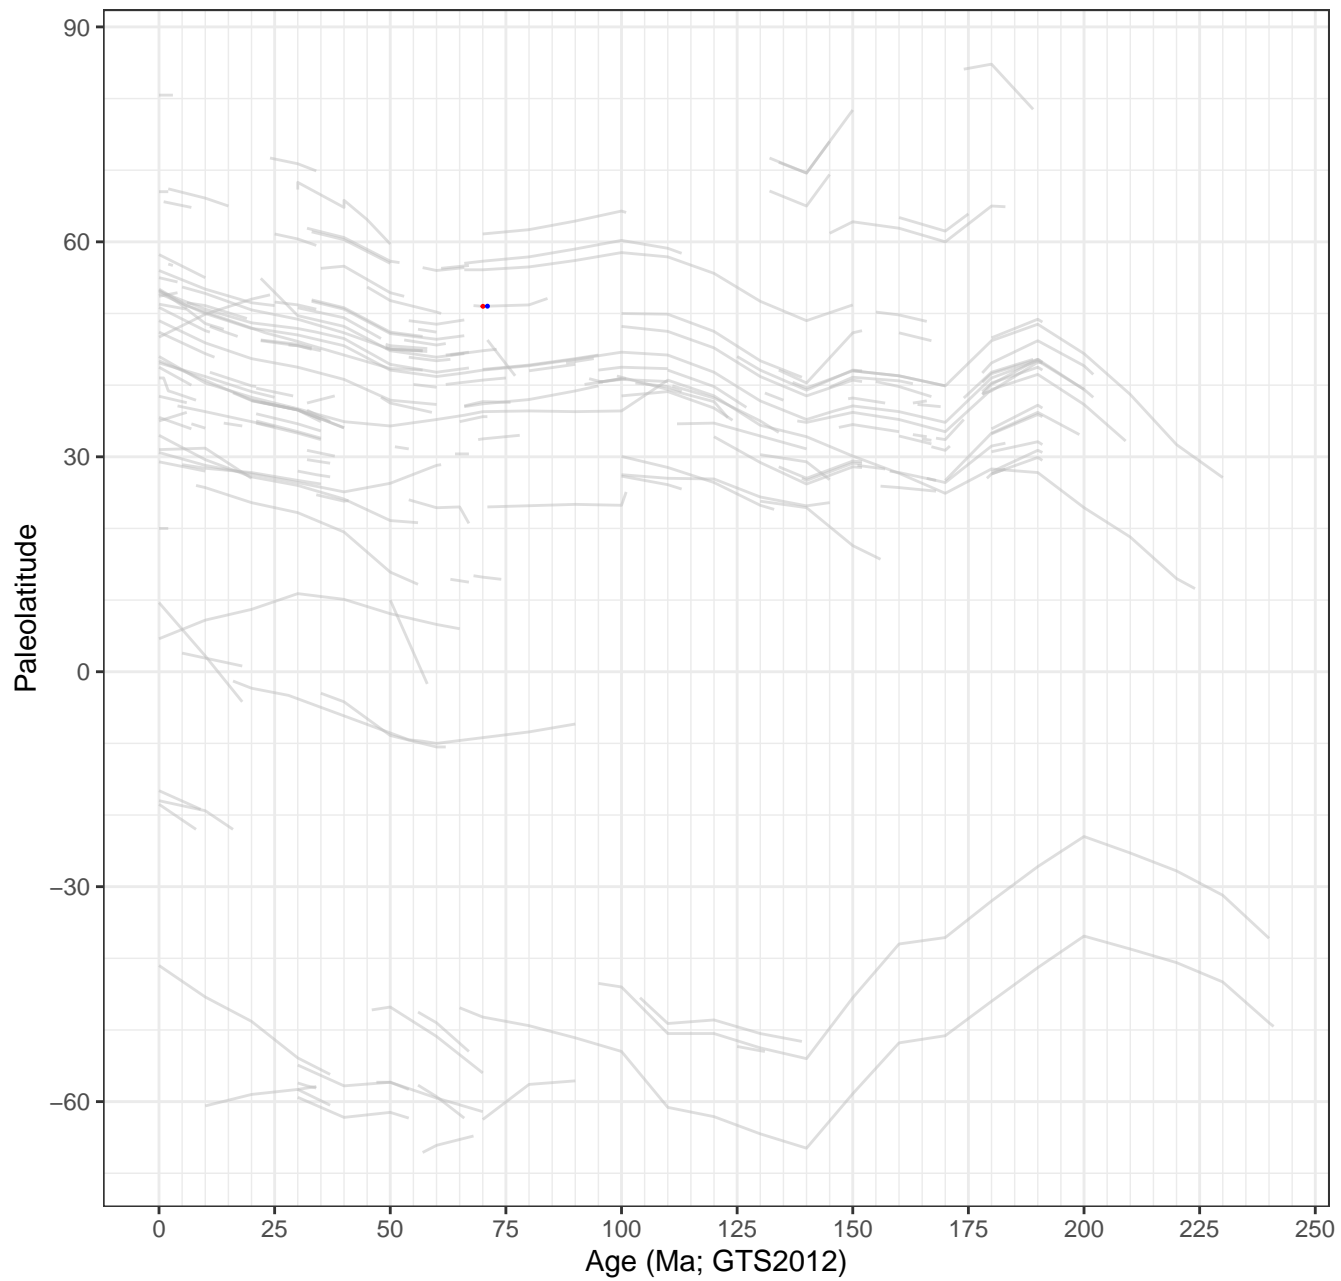

Supplement: Supplementary file 1873 [file Membranilarnacia hapala.pdf › Supplement/Supplement 2/Species 1914 plots/Membranilarnacia hapala.pdf]

# Species Membranilarnacia picensa

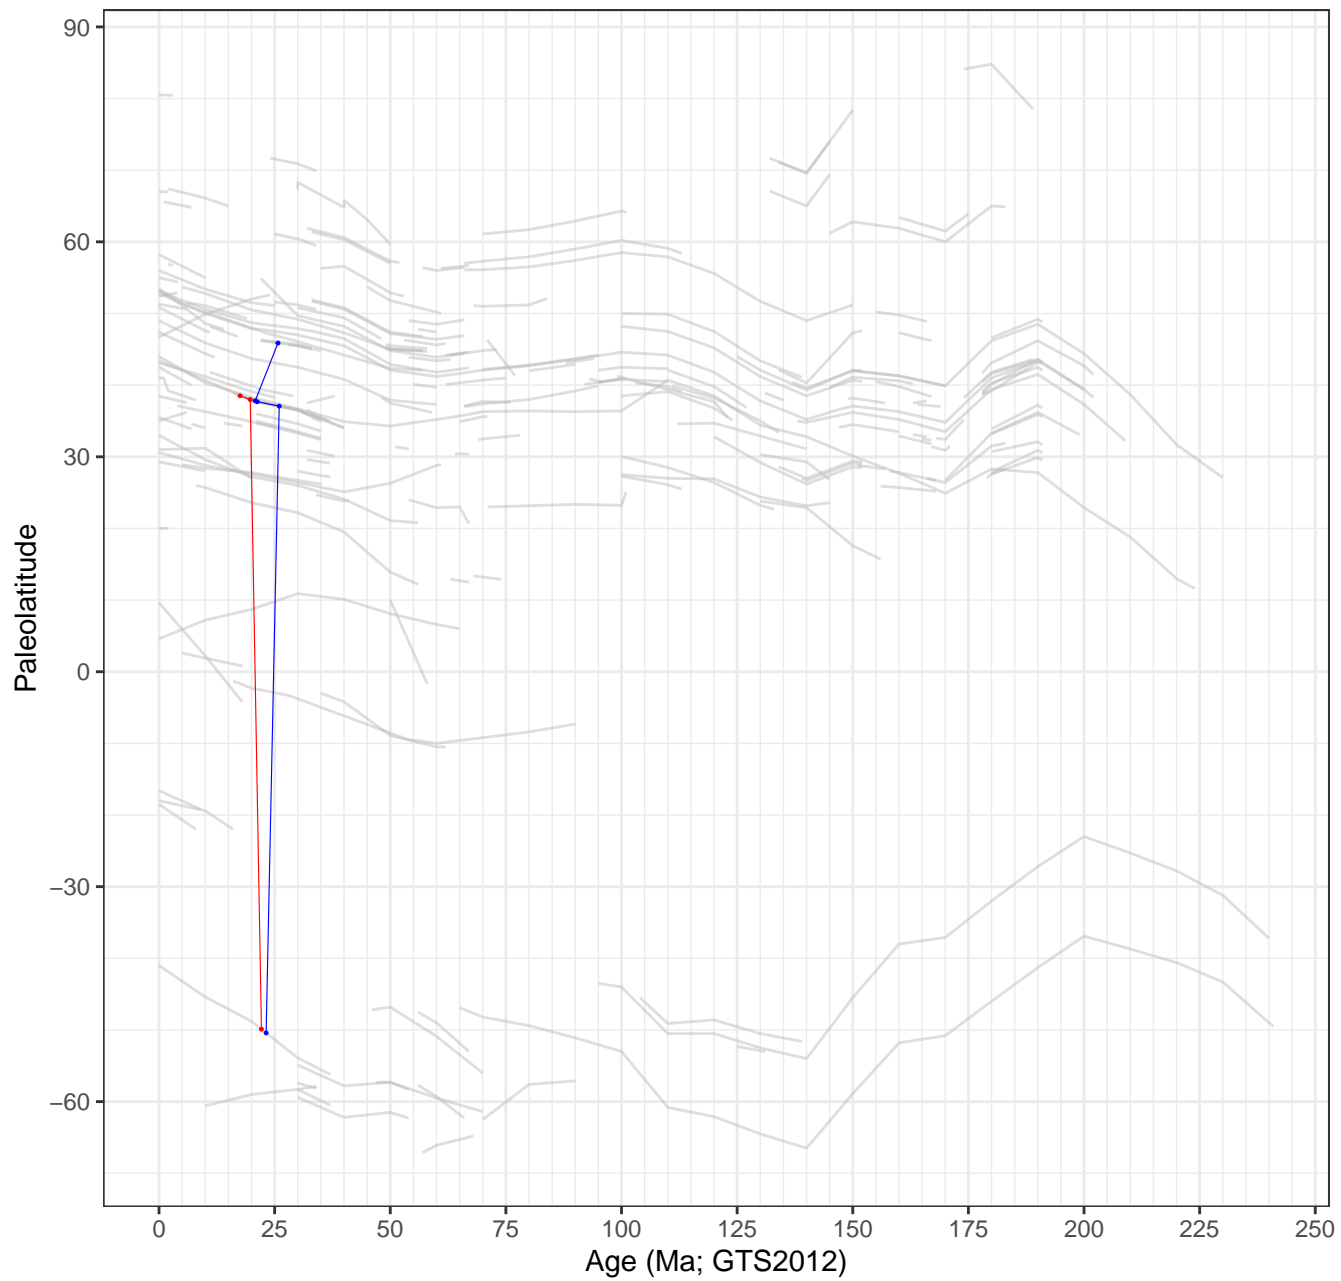

Supplement: Supplementary file 1874 [file Membranilarnacia picena.pdf › Supplement/Supplement 2/Species 1914 plots/Membranilarnacia picena.pdf]

# Species *Membranilarnacia polycladiata*

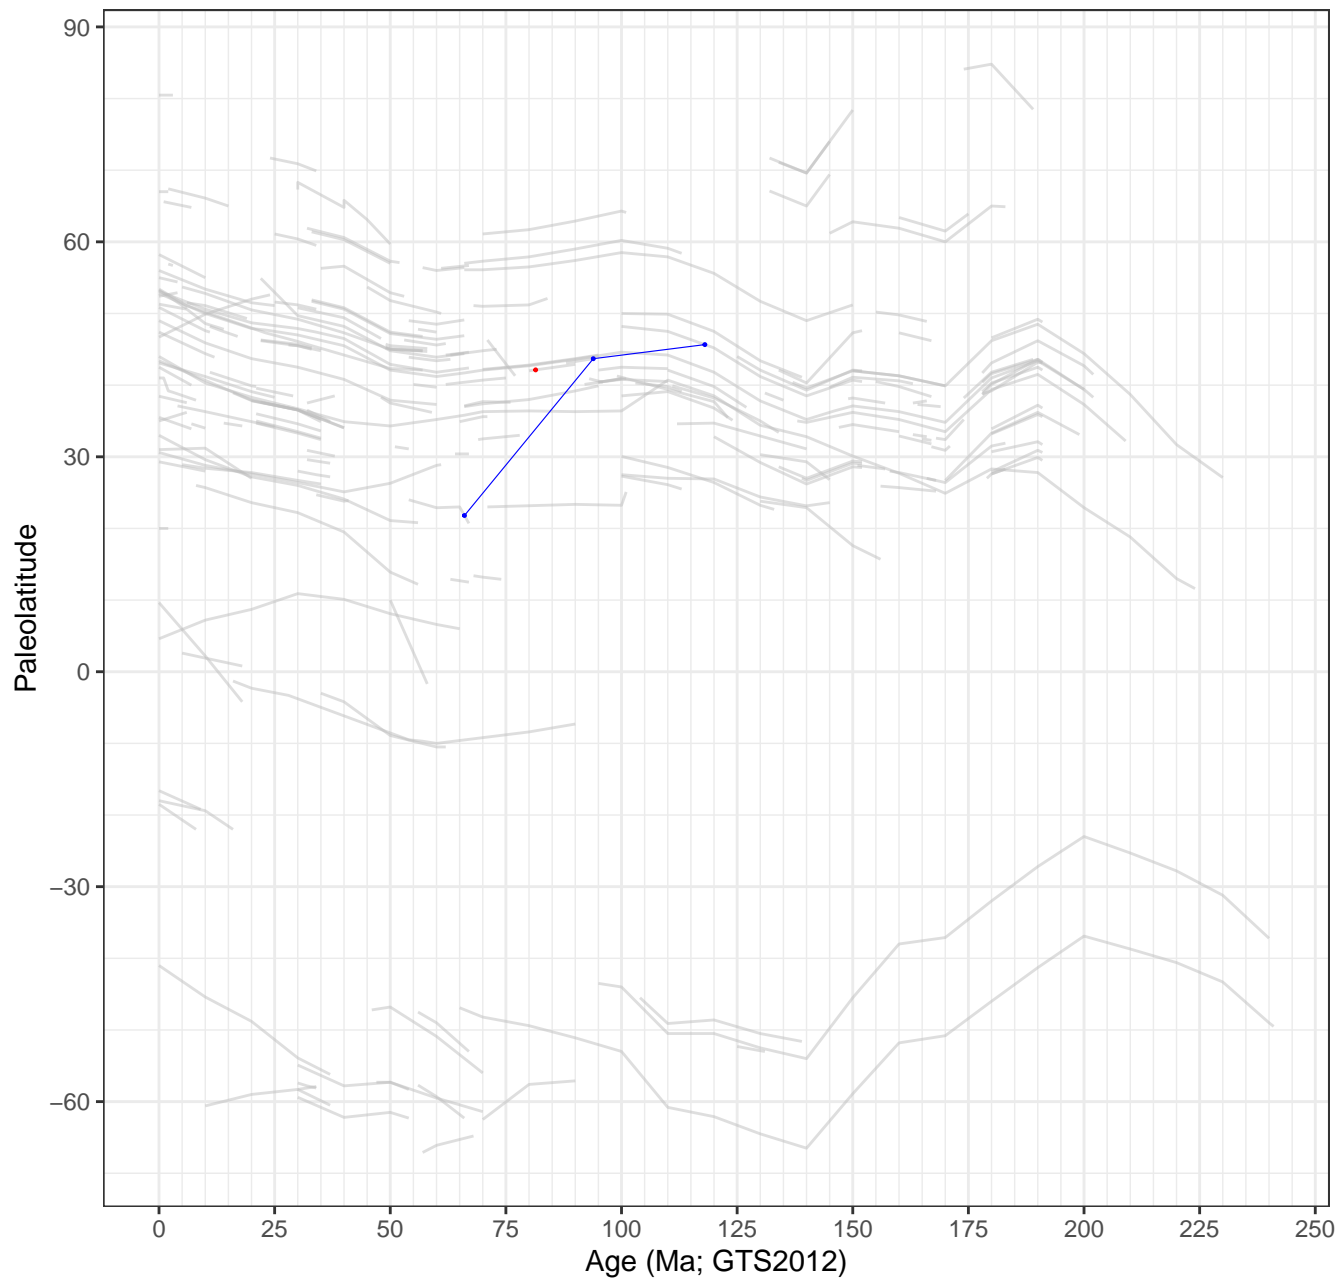

Supplement: Supplementary file 1875 [file Membranilarnacia polycladiata.pdf › Supplement/Supplement 2/Species 1914 plots/Membranilarnacia polycladiata.pdf]

# Species *Membranilarnacia tenella*

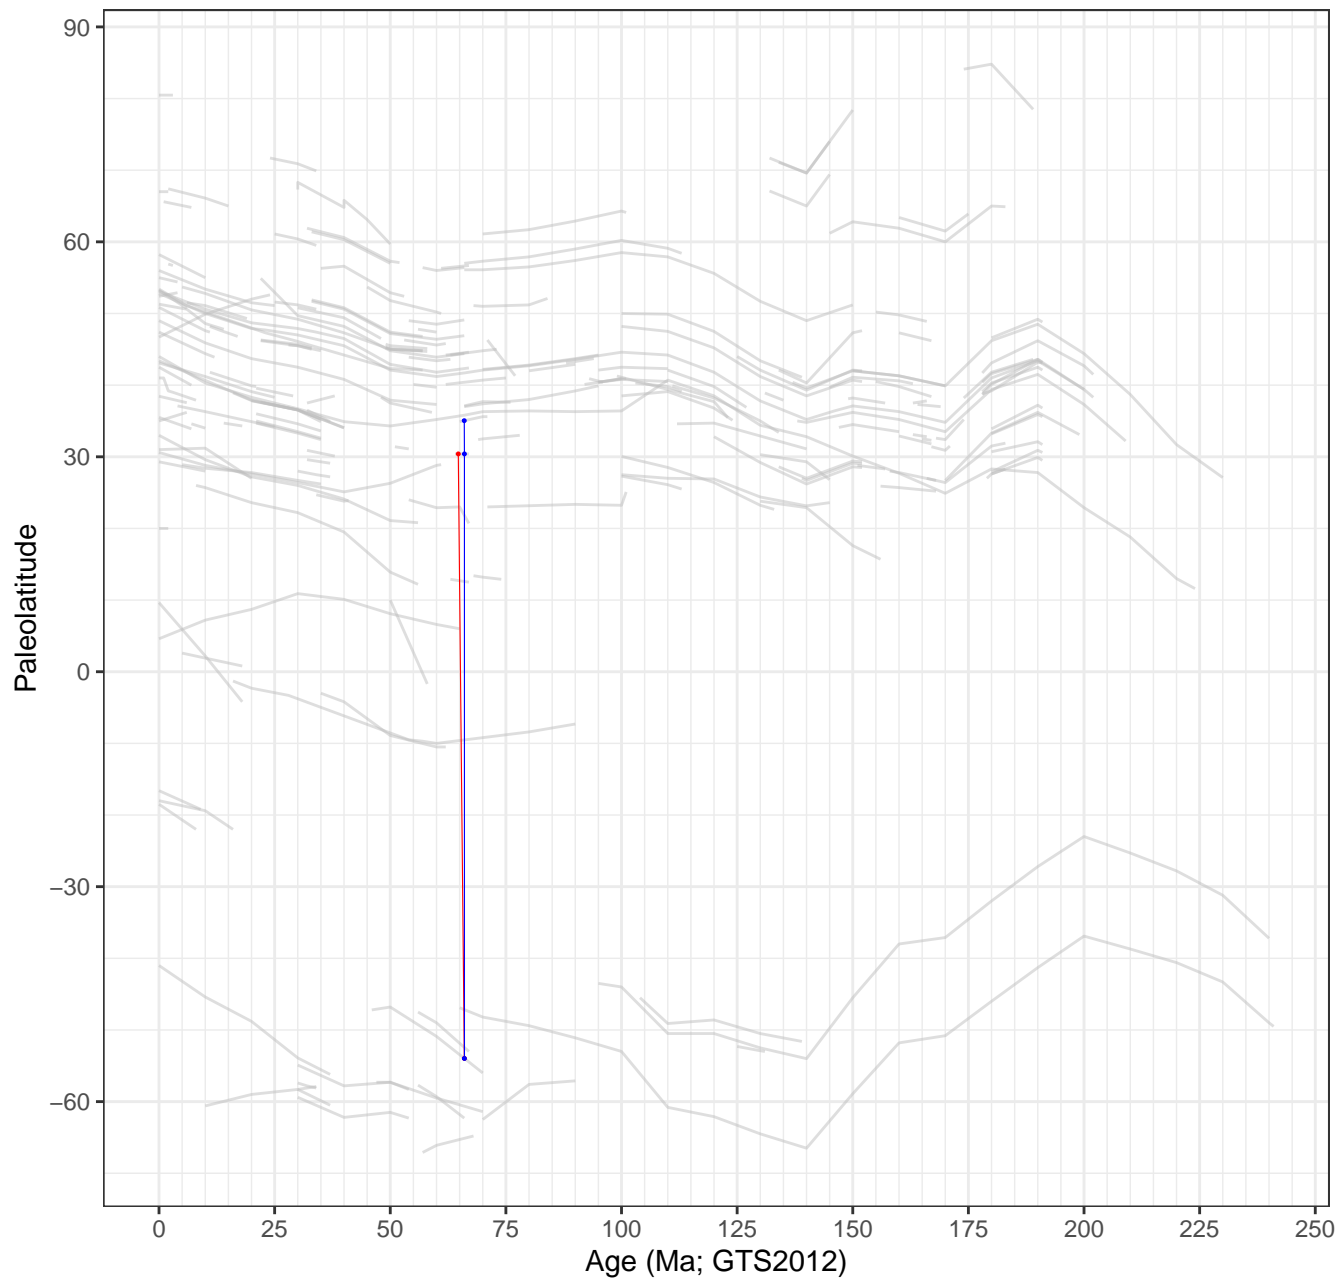

Supplement: Supplementary file 1876 [file Membranilarnacia tenella.pdf › Supplement/Supplement 2/Species 1914 plots/Membranilarnacia tenella.pdf]

# Species *Membranilarnacia wilsonii*

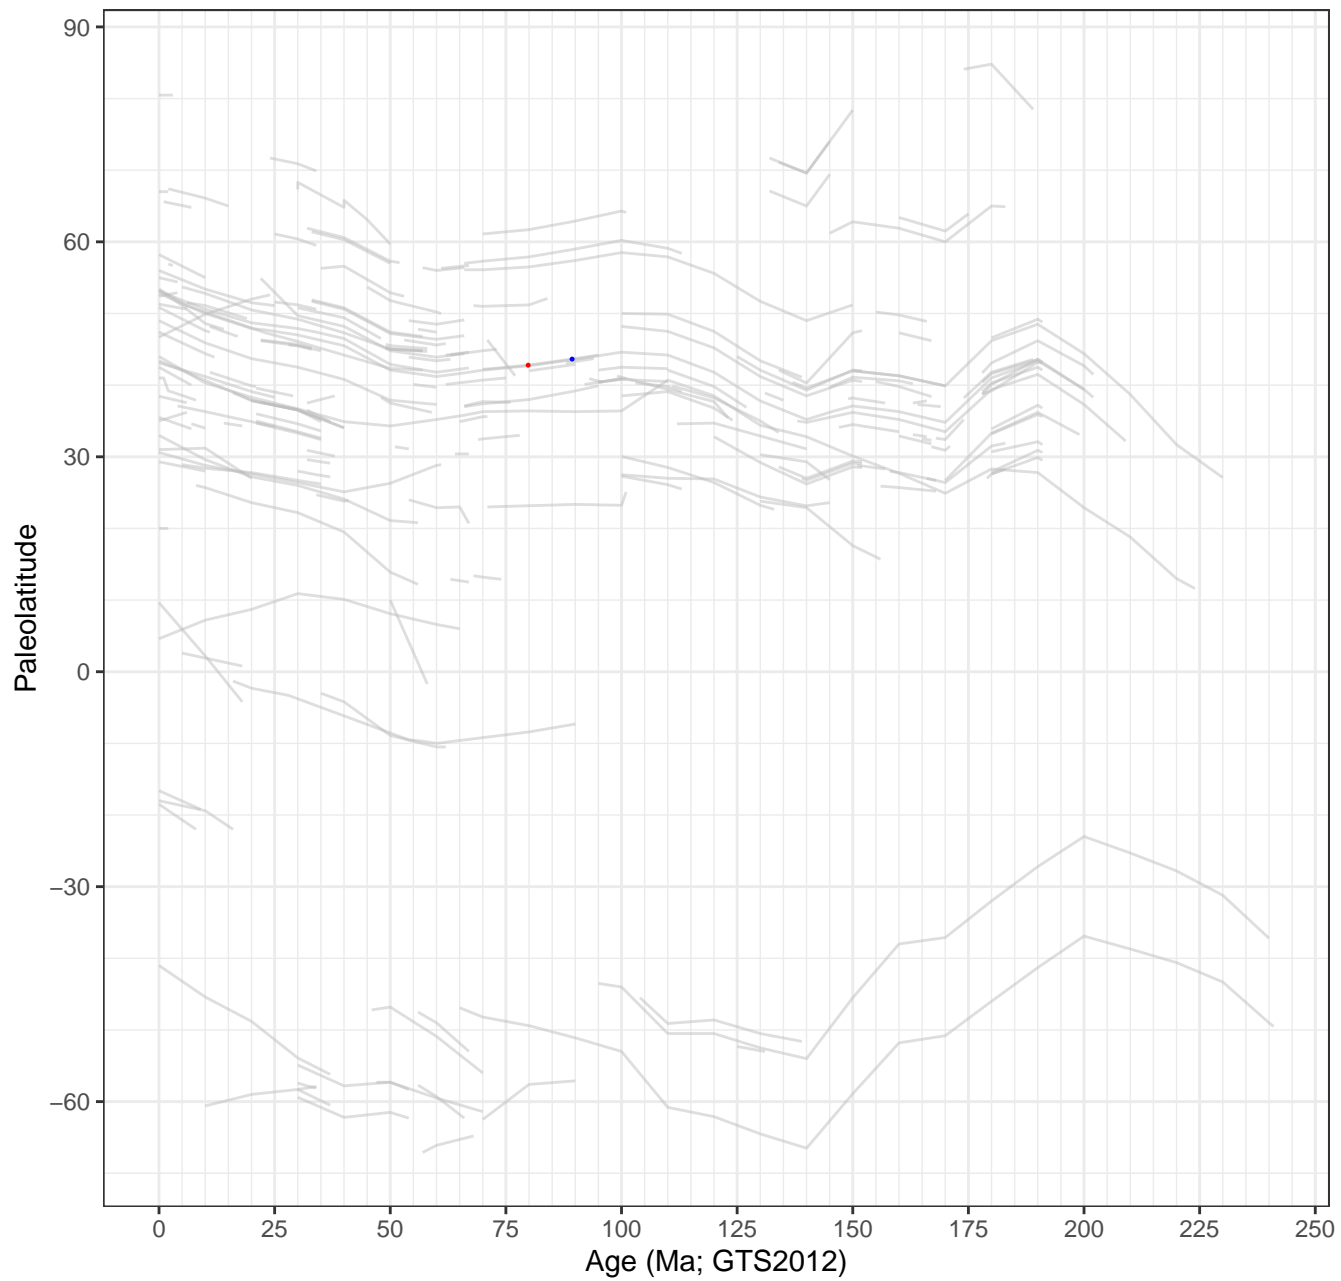

Supplement: Supplementary file 1877 [file Membranilarnacia wilsonii.pdf › Supplement/Supplement 2/Species 1914 plots/Membranilarnacia wilsonii.pdf]

# Species Membranilarnax liradiscoides

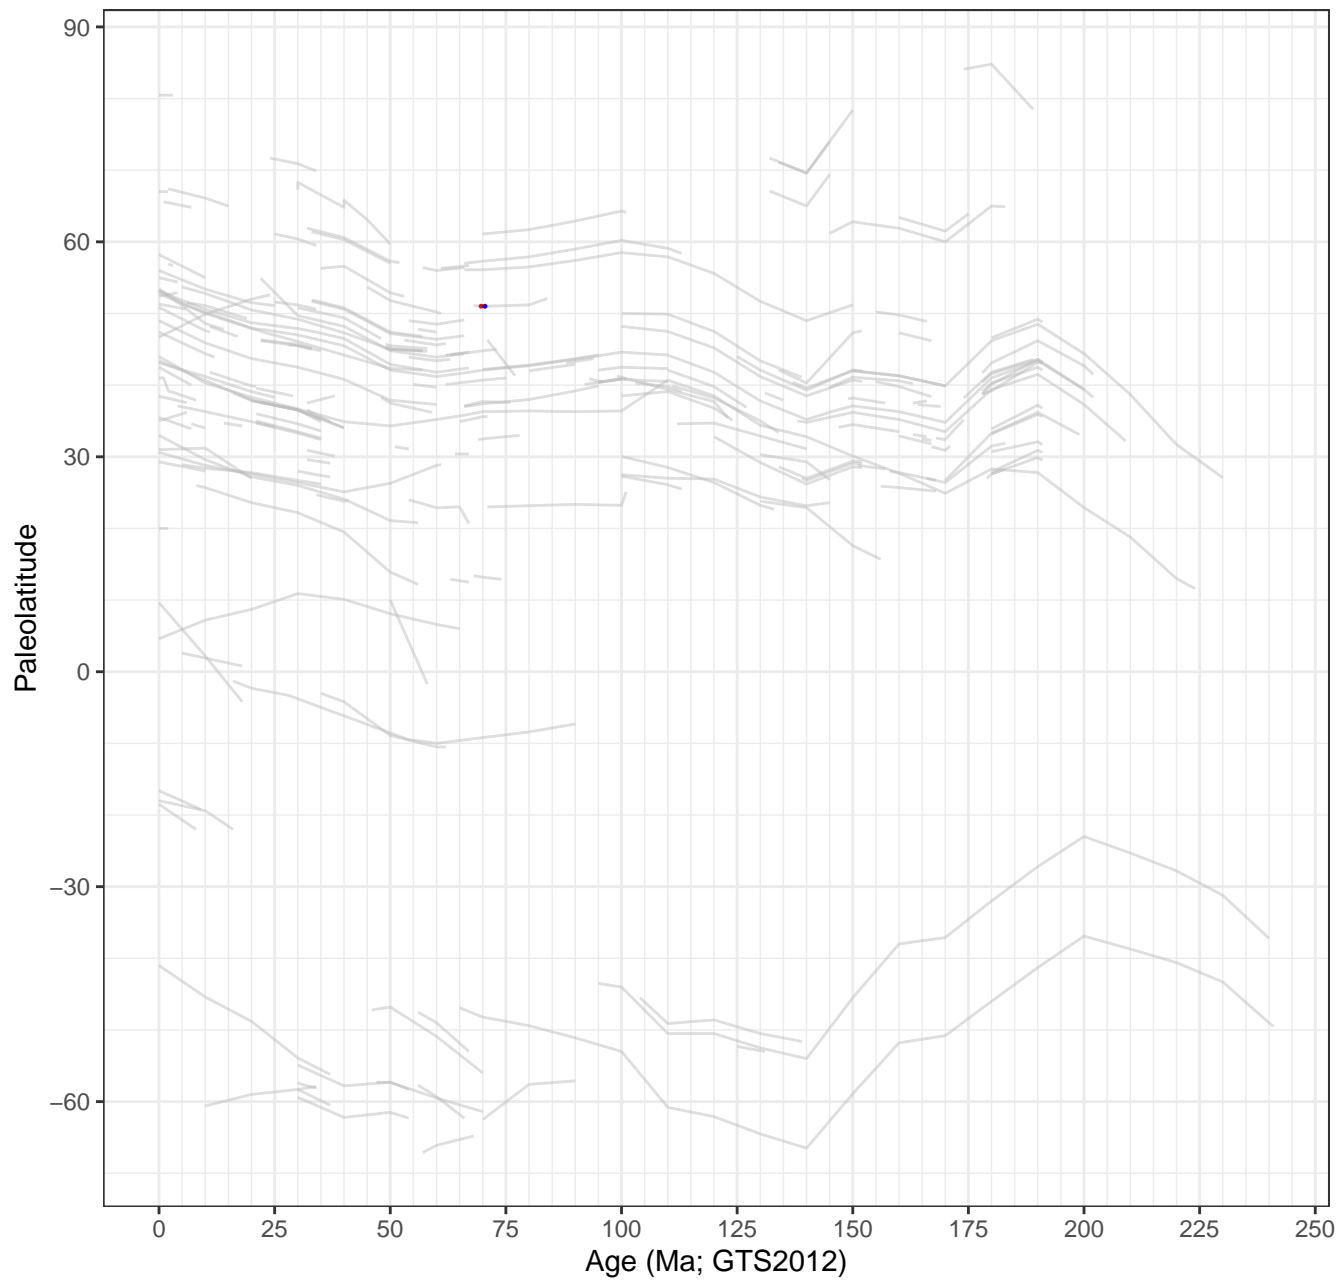

Supplement: Supplementary file 1878 [file Membranilarnax liradiscoides.pdf › Supplement/Supplement 2/Species 1914 plots/Membranilarnax liradiscoides.pdf]

# Species *Membranophoridium aspinatum*

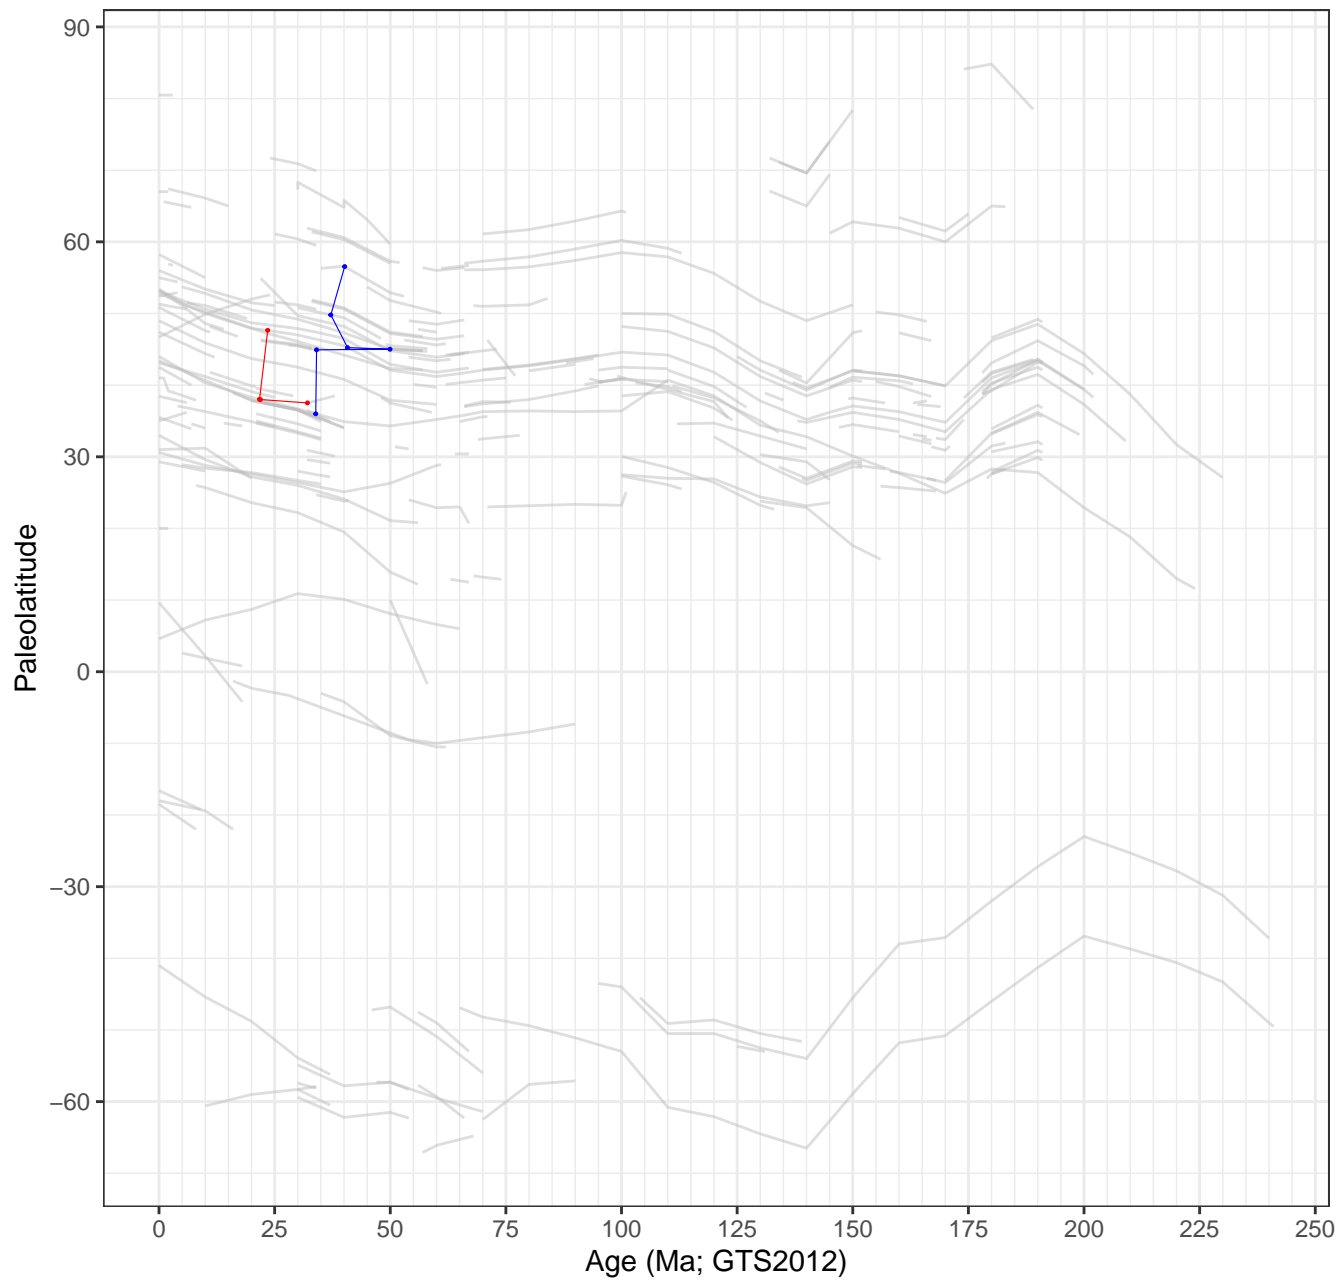

Supplement: Supplementary file 1879 [file Membranophoridium aspinatum.pdf › Supplement/Supplement 2/Species 1914 plots/Membranophoridium aspinatum.pdf]

# Species Membranophoridium perforatum

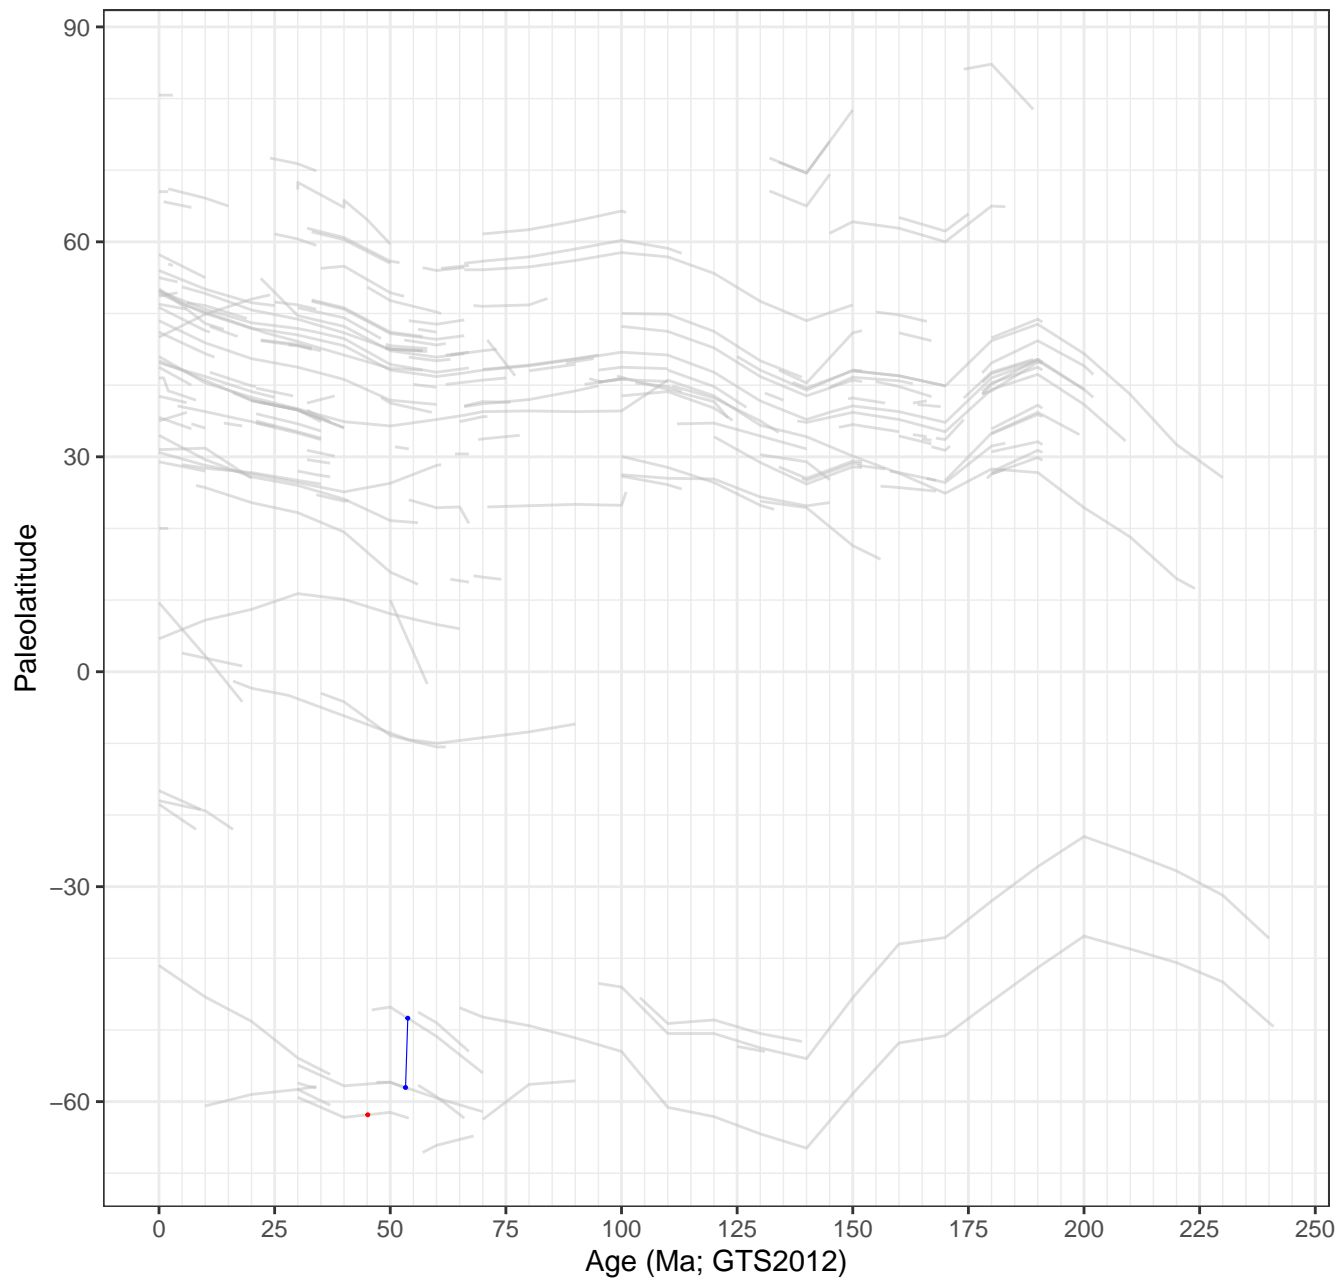

Supplement: Supplementary file 1880 [file Membranophoridium perforatum.pdf › Supplement/Supplement 2/Species 1914 plots/Membranophoridium perforatum.pdf]

# Species *Membranosphaera maastrichtica*

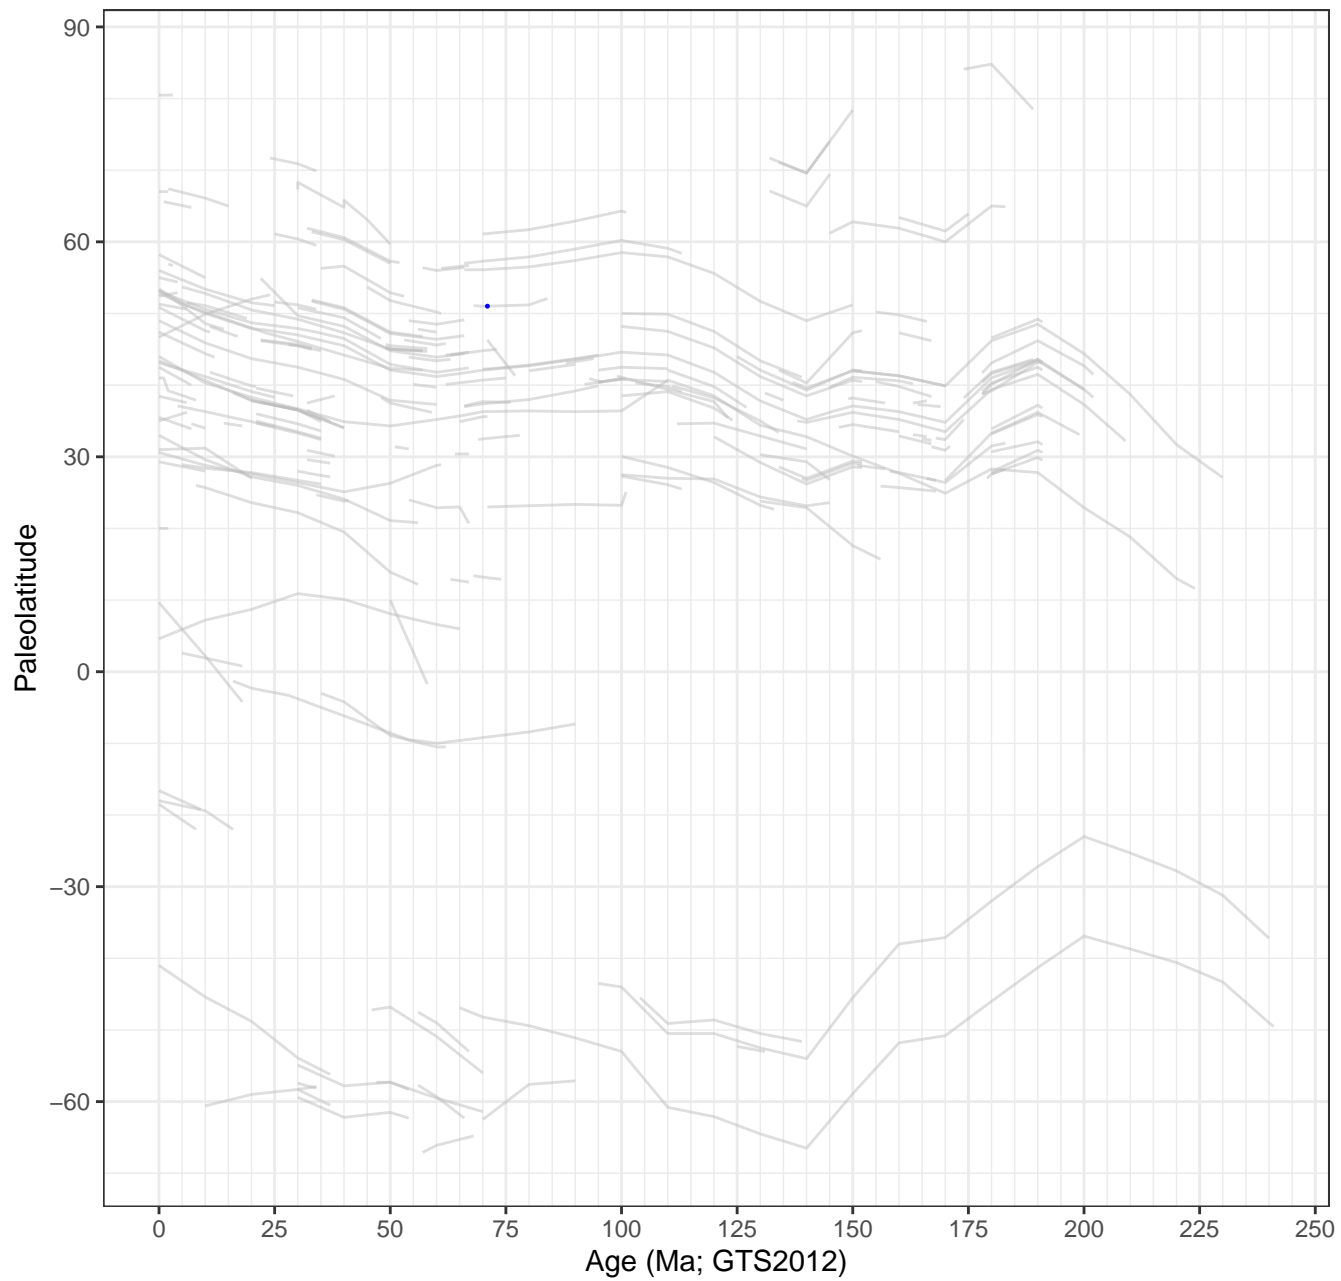

Supplement: Supplementary file 1881 [file Membranosphaera maastrichtica.pdf › Supplement/Supplement 2/Species 1914 plots/Membranosphaera maastrichtica.pdf]

# Species *Mendicodinium brunneum*

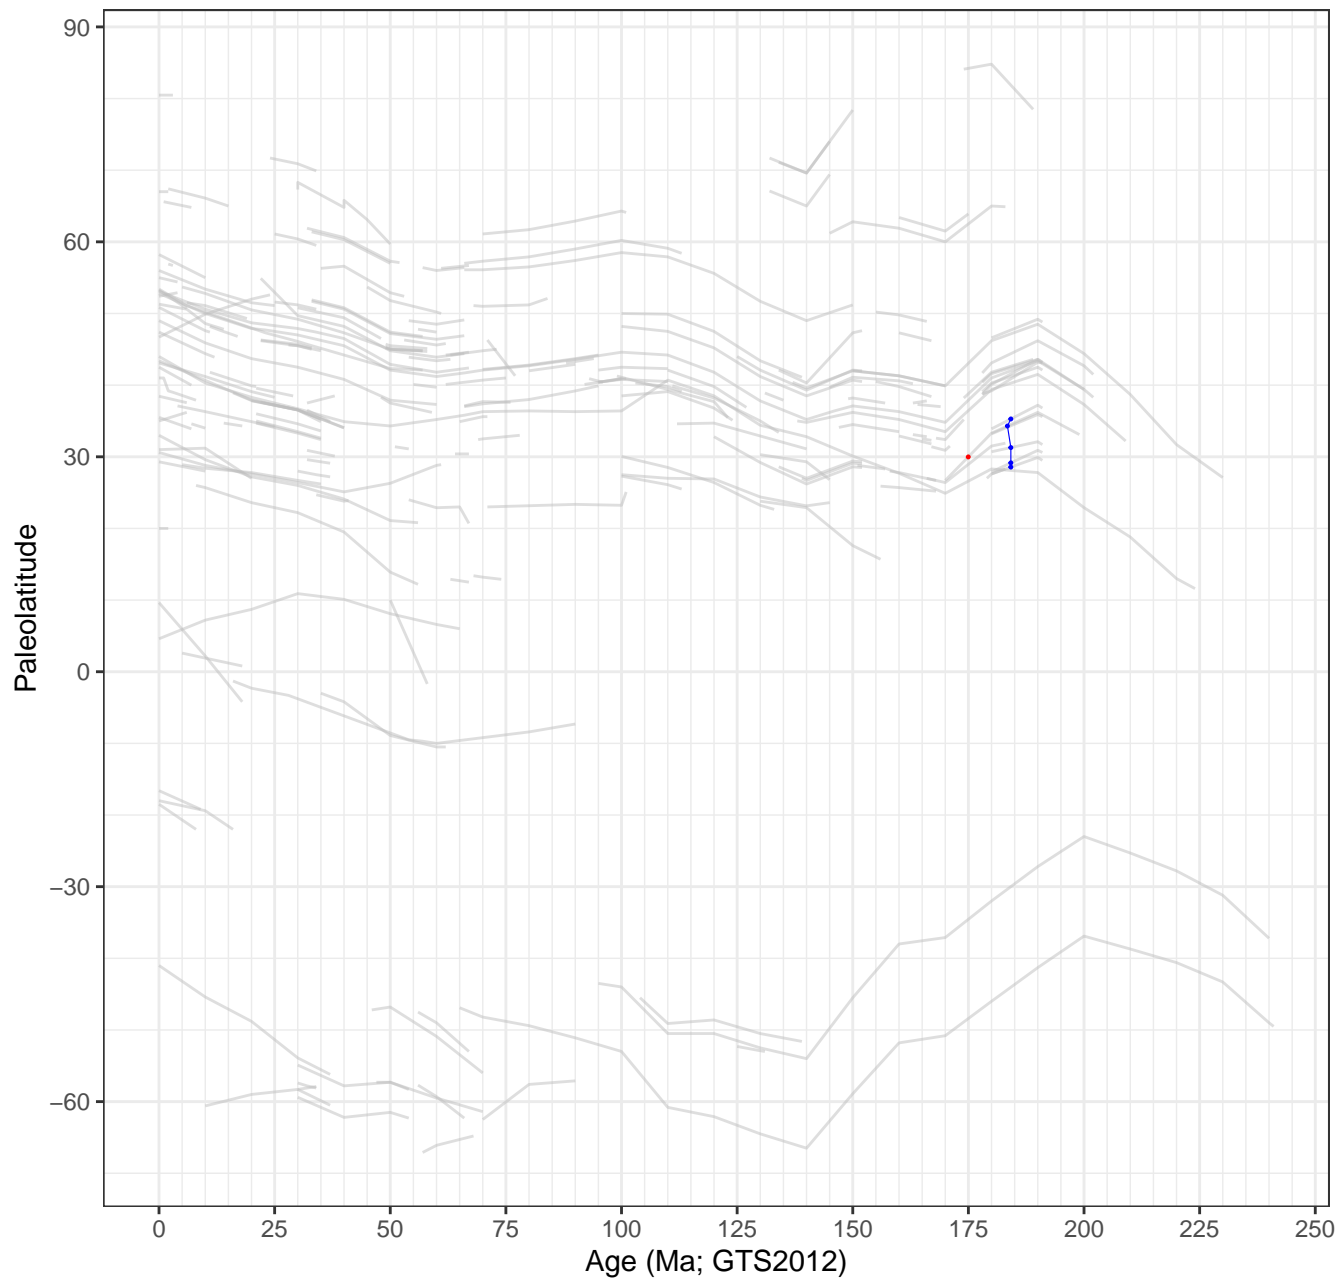

Supplement: Supplementary file 1882 [file Mendicodinium brunneum.pdf › Supplement/Supplement 2/Species 1914 plots/Mendicodinium brunneum.pdf]

# Species *Mendicodinium echinatum*

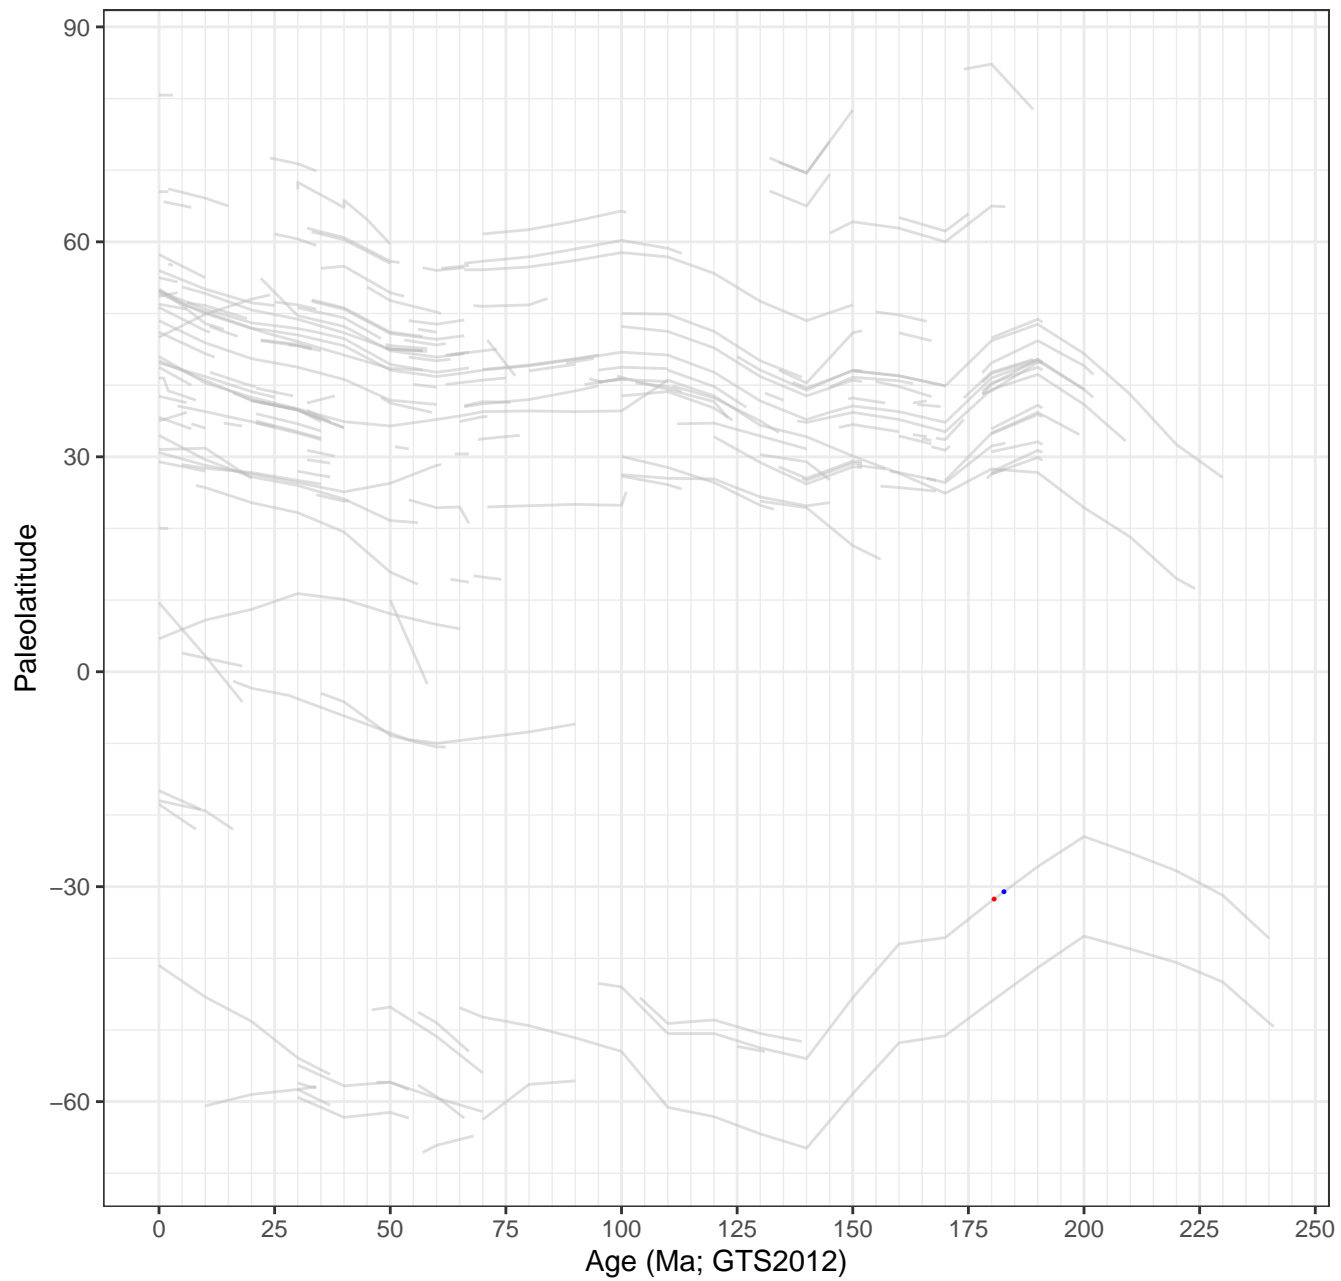

Supplement: Supplementary file 1883 [file Mendicodinium echinatum.pdf › Supplement/Supplement 2/Species 1914 plots/Mendicodinium echinatum.pdf]

# Species *Mendicodinium groenlandicum*

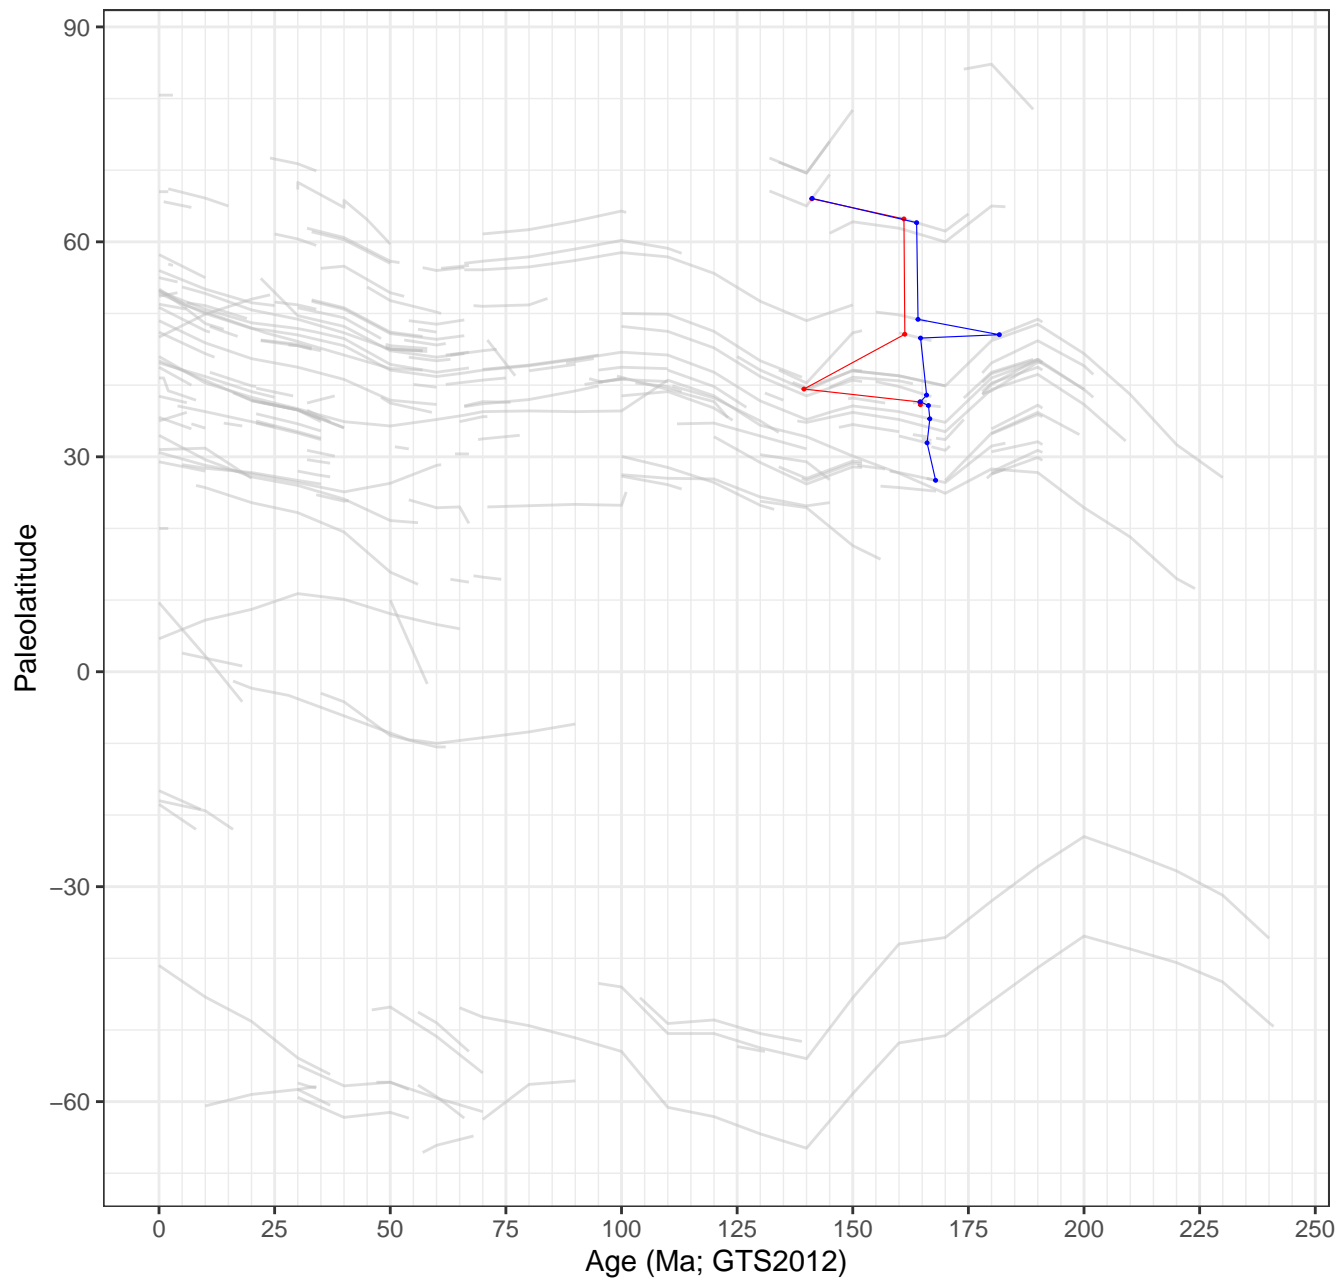

Supplement: Supplementary file 1884 [file Mendicodinium groenlandicum.pdf › Supplement/Supplement 2/Species 1914 plots/Mendicodinium groenlandicum.pdf]

# Species *Mendicodinium microscabratum*

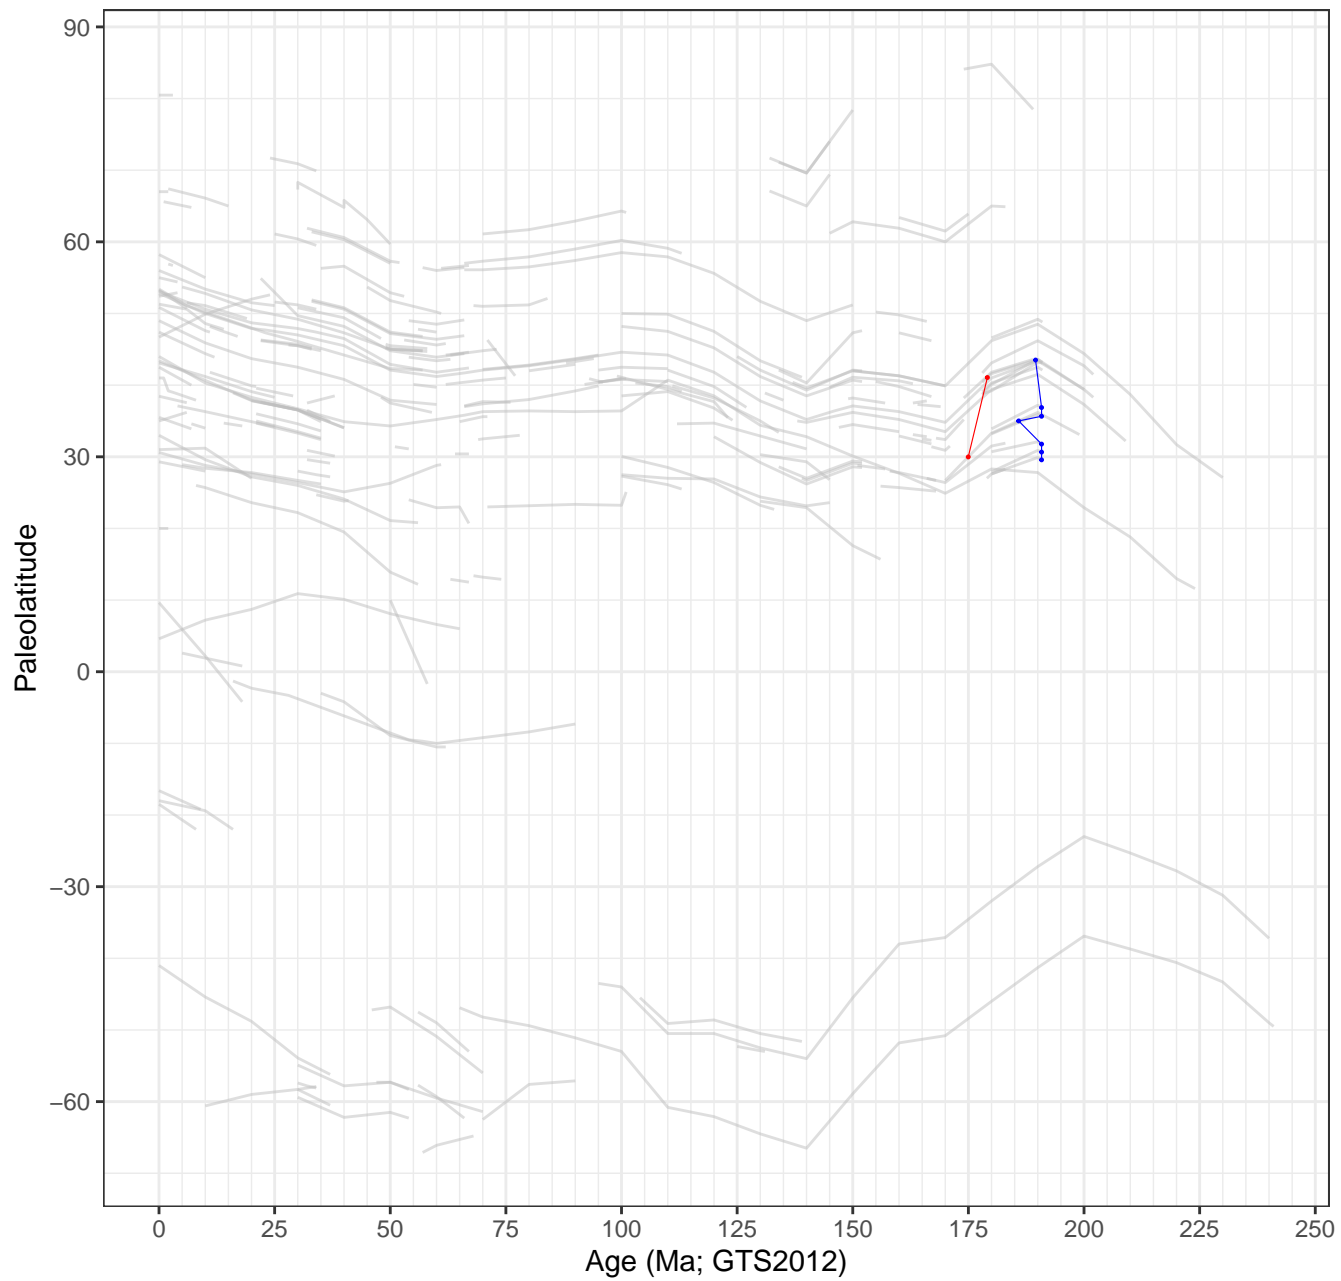

Supplement: Supplementary file 1885 [file Mendicodinium microscabratum.pdf › Supplement/Supplement 2/Species 1914 plots/Mendicodinium microscabratum.pdf]

# Species *Mendicodinium reticulatum*

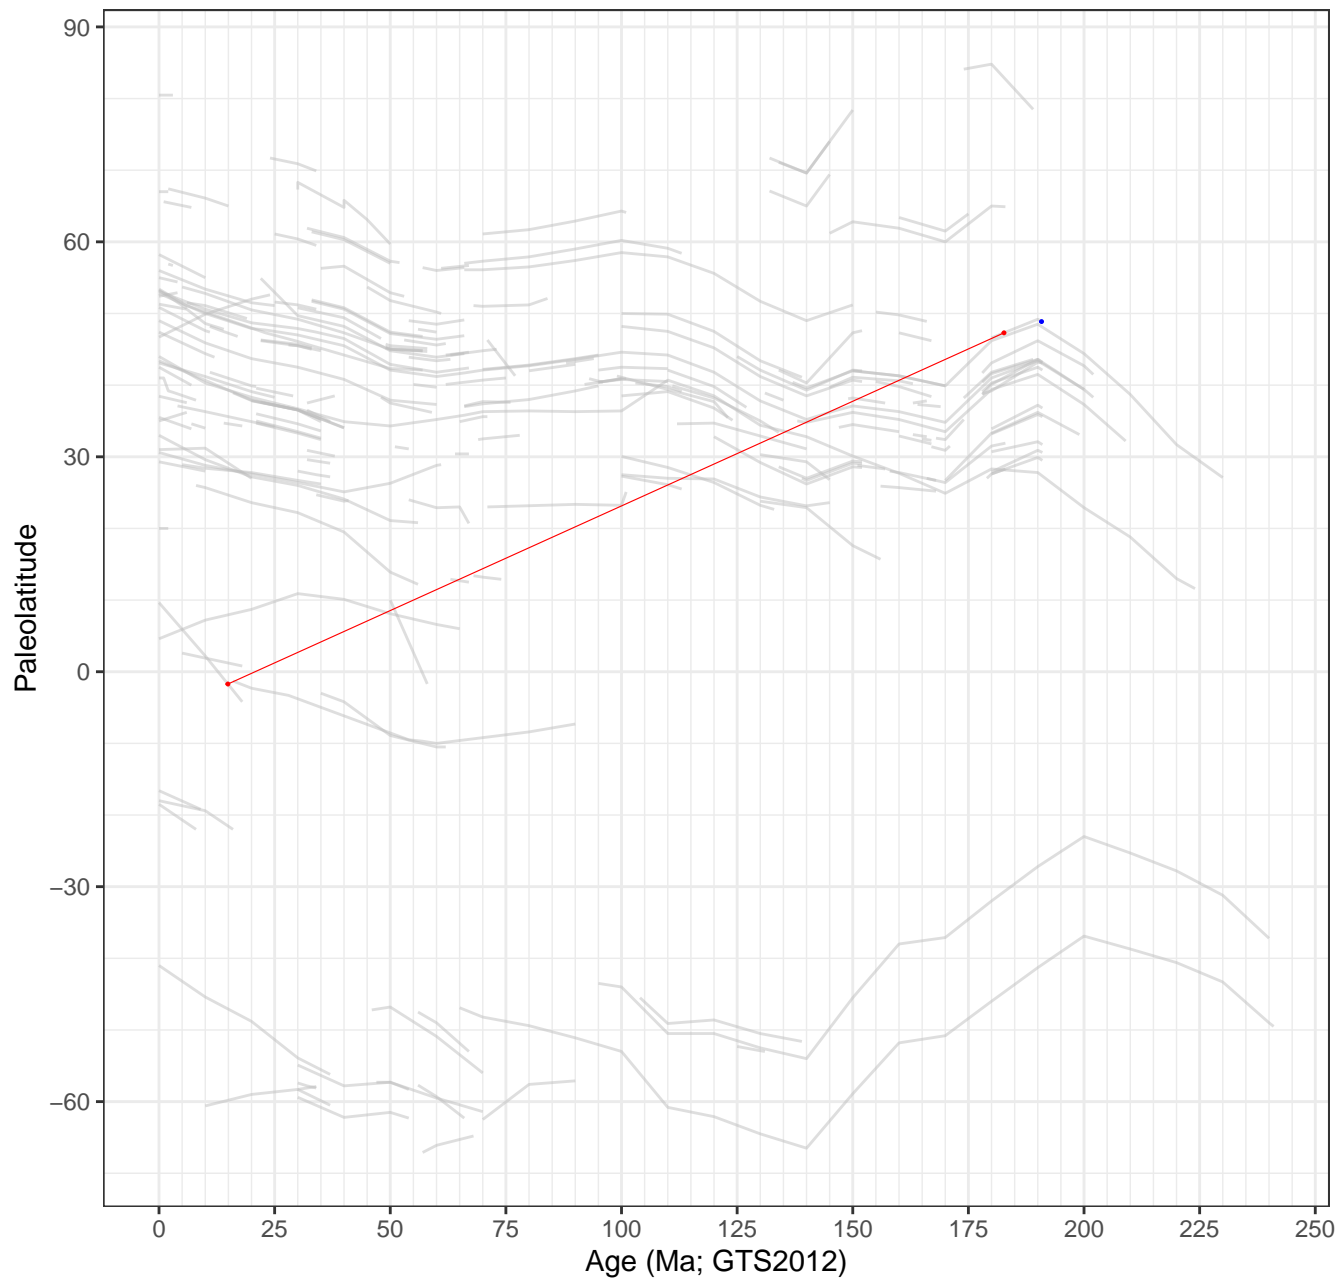

Supplement: Supplementary file 1886 [file Mendicodinium reticulatum.pdf › Supplement/Supplement 2/Species 1914 plots/Mendicodinium reticulatum.pdf]

# Species *Mendicodinium robustum*

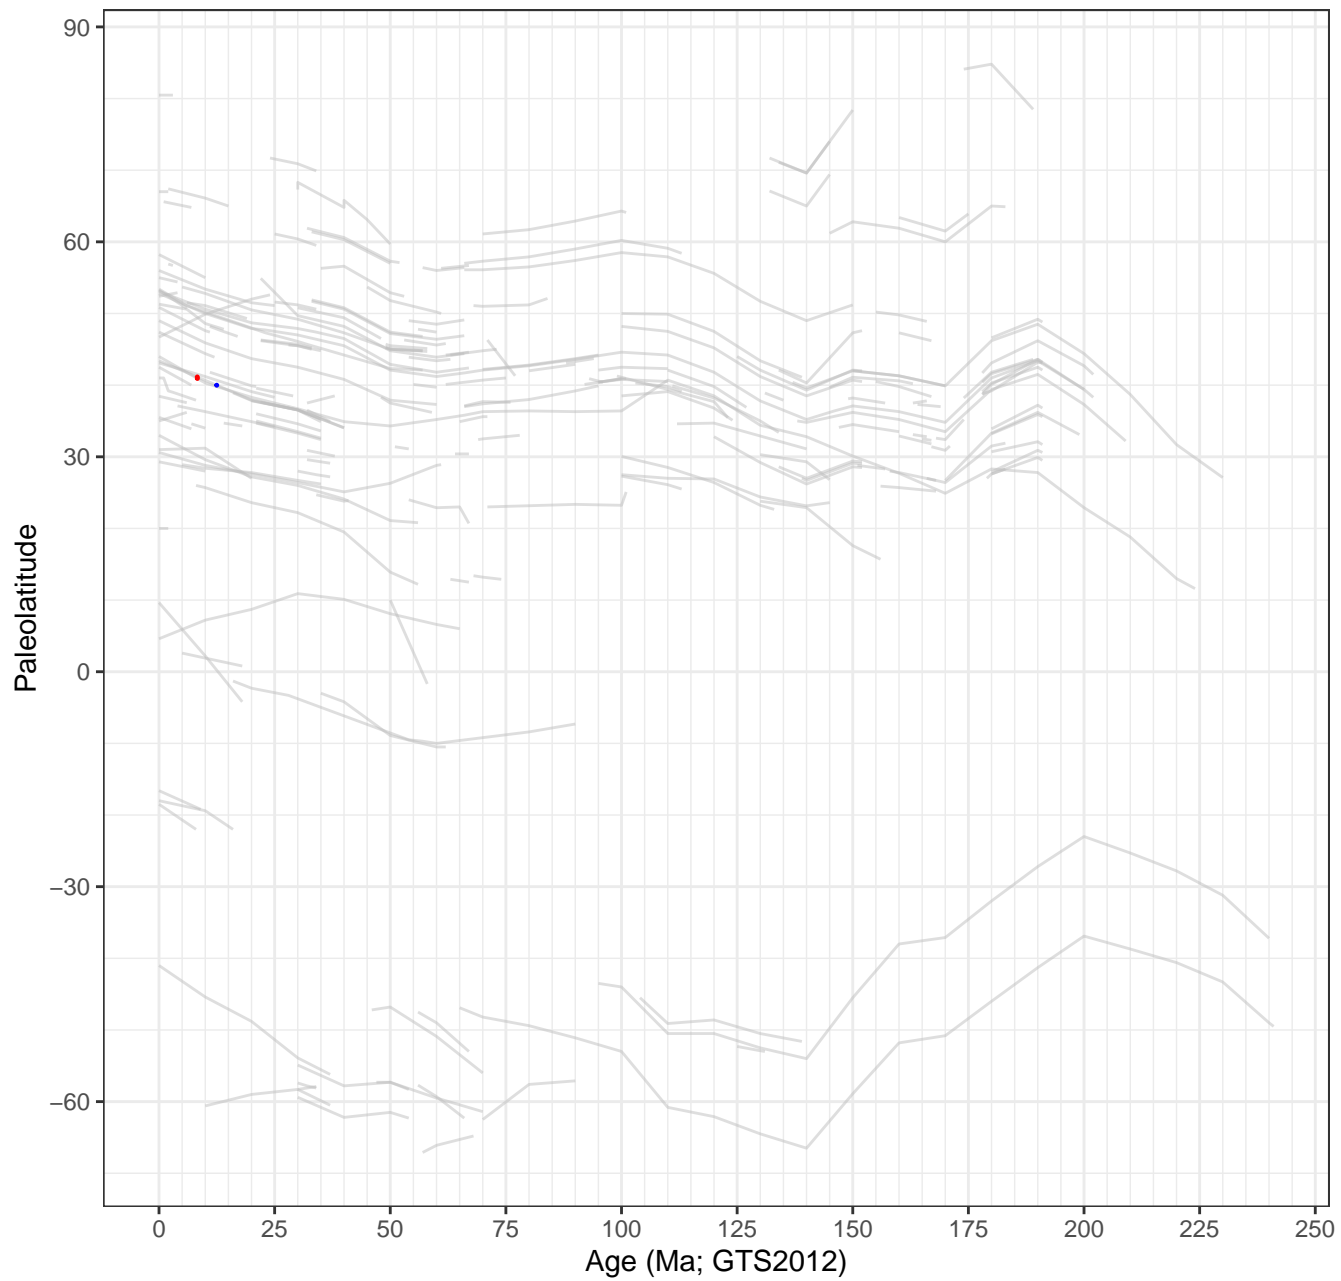

Supplement: Supplementary file 1887 [file Mendicodinium robustum.pdf › Supplement/Supplement 2/Species 1914 plots/Mendicodinium robustum.pdf]

# Species *Mendicodinium scabratum*

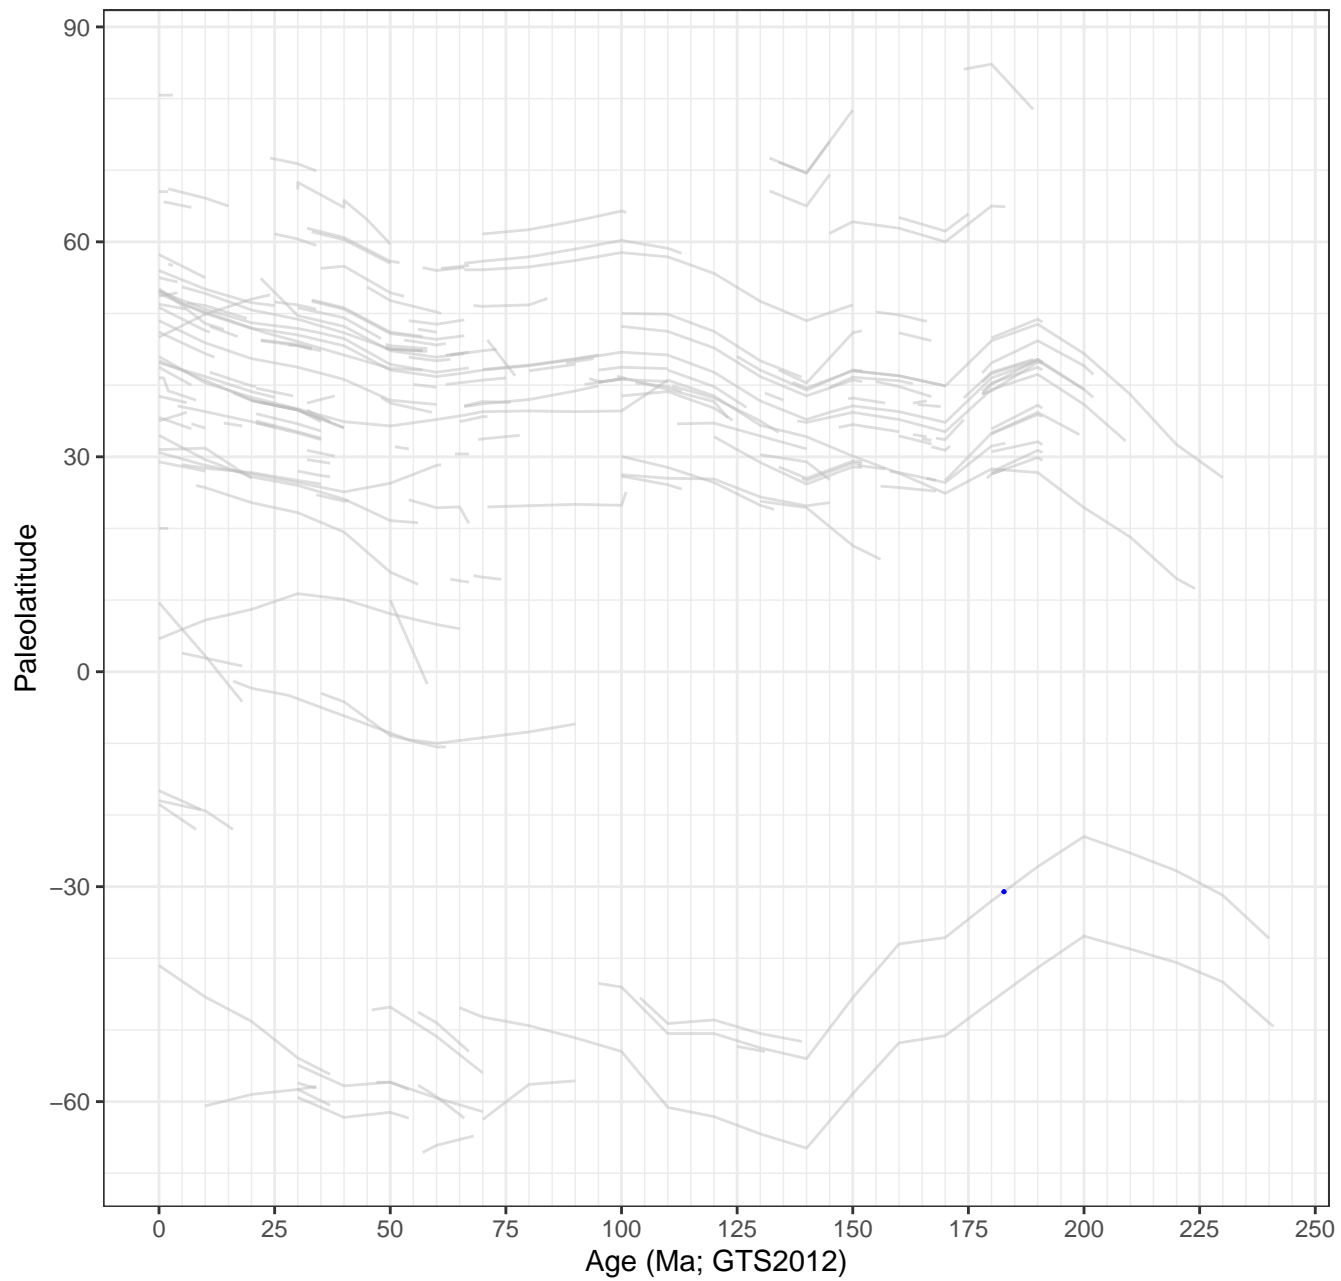

Supplement: Supplementary file 1888 [file Mendicodinium scabratum.pdf › Supplement/Supplement 2/Species 1914 plots/Mendicodinium scabratum.pdf]

# Species *Mendicodinium spinosum*

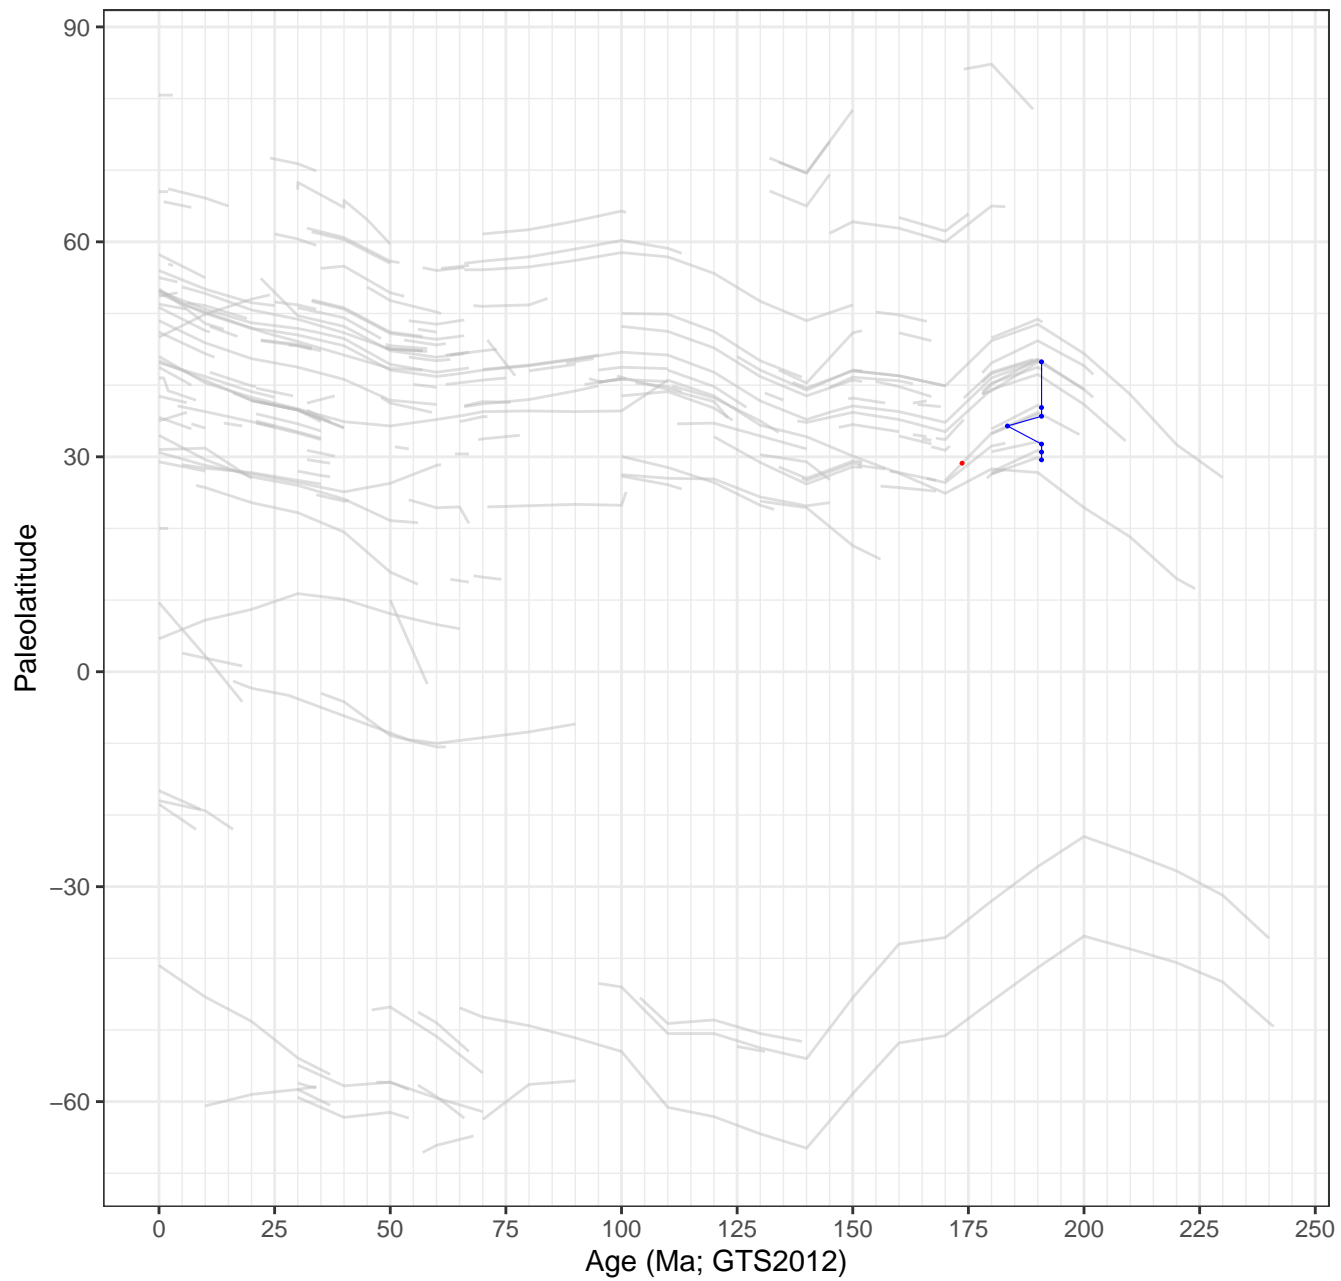

Supplement: Supplementary file 1889 [file Mendicodinium spinosum.pdf › Supplement/Supplement 2/Species 1914 plots/Mendicodinium spinosum.pdf]

# Species *Mendicodinium umbriense*

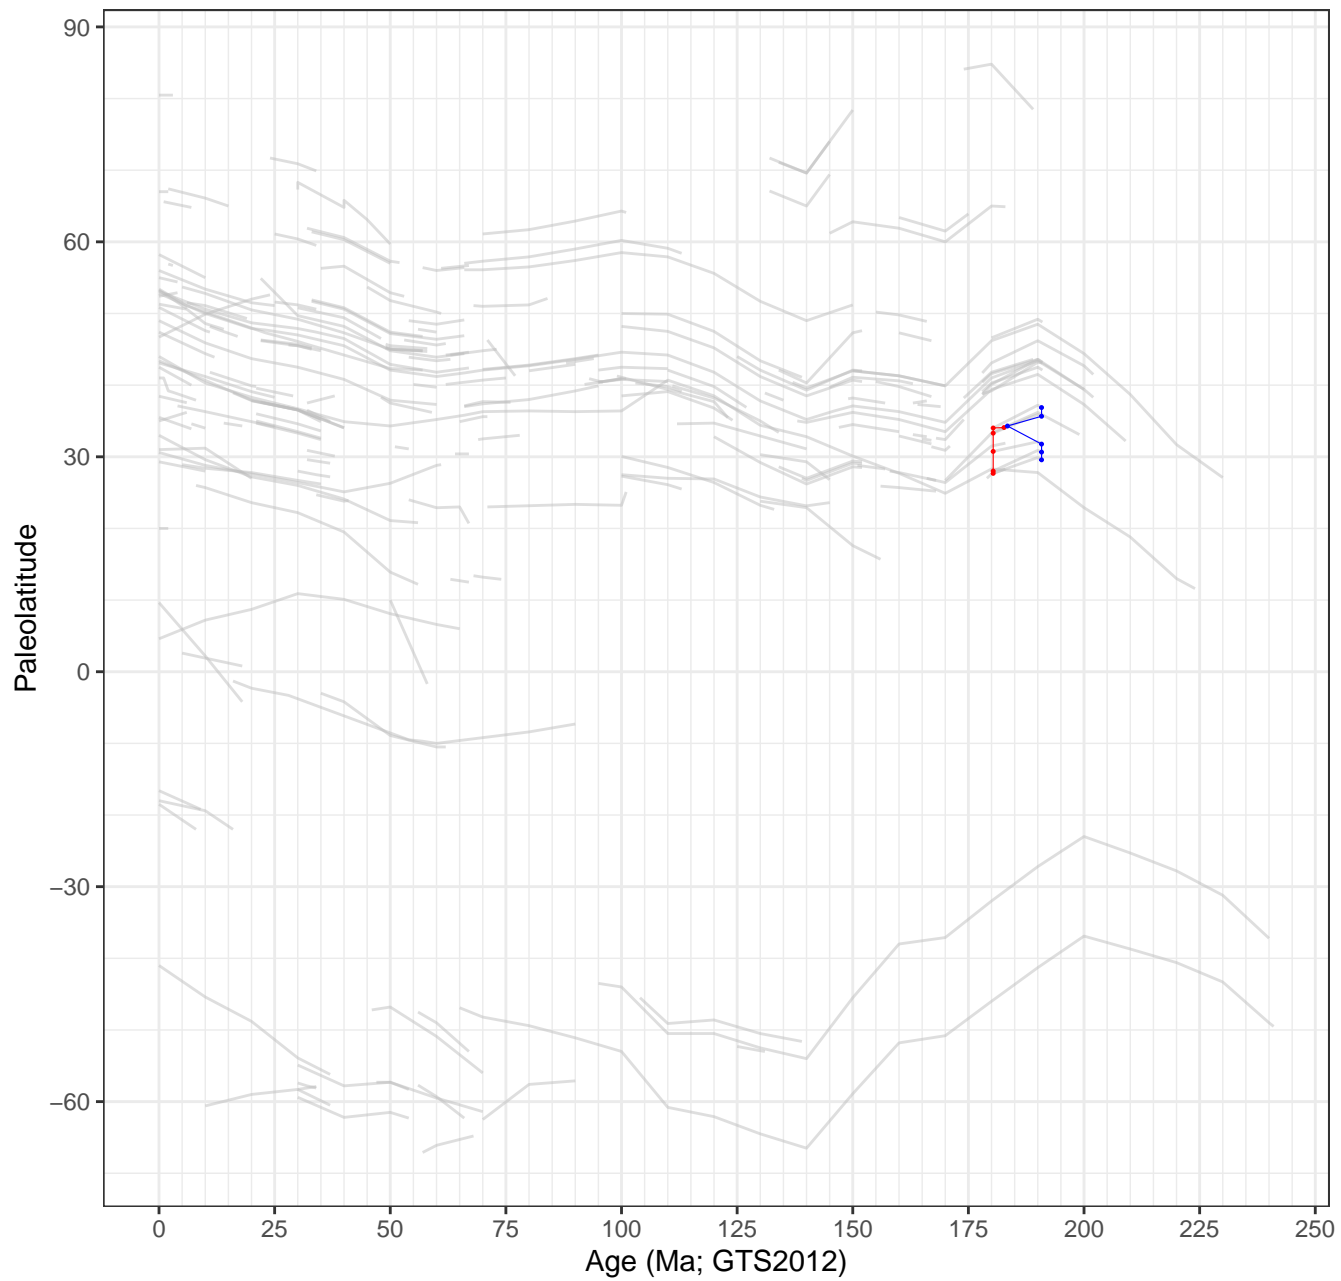

Supplement: Supplementary file 1890 [file Mendicodinium umbriense.pdf › Supplement/Supplement 2/Species 1914 plots/Mendicodinium umbriense.pdf]

# Species *Microdinium bensonii*

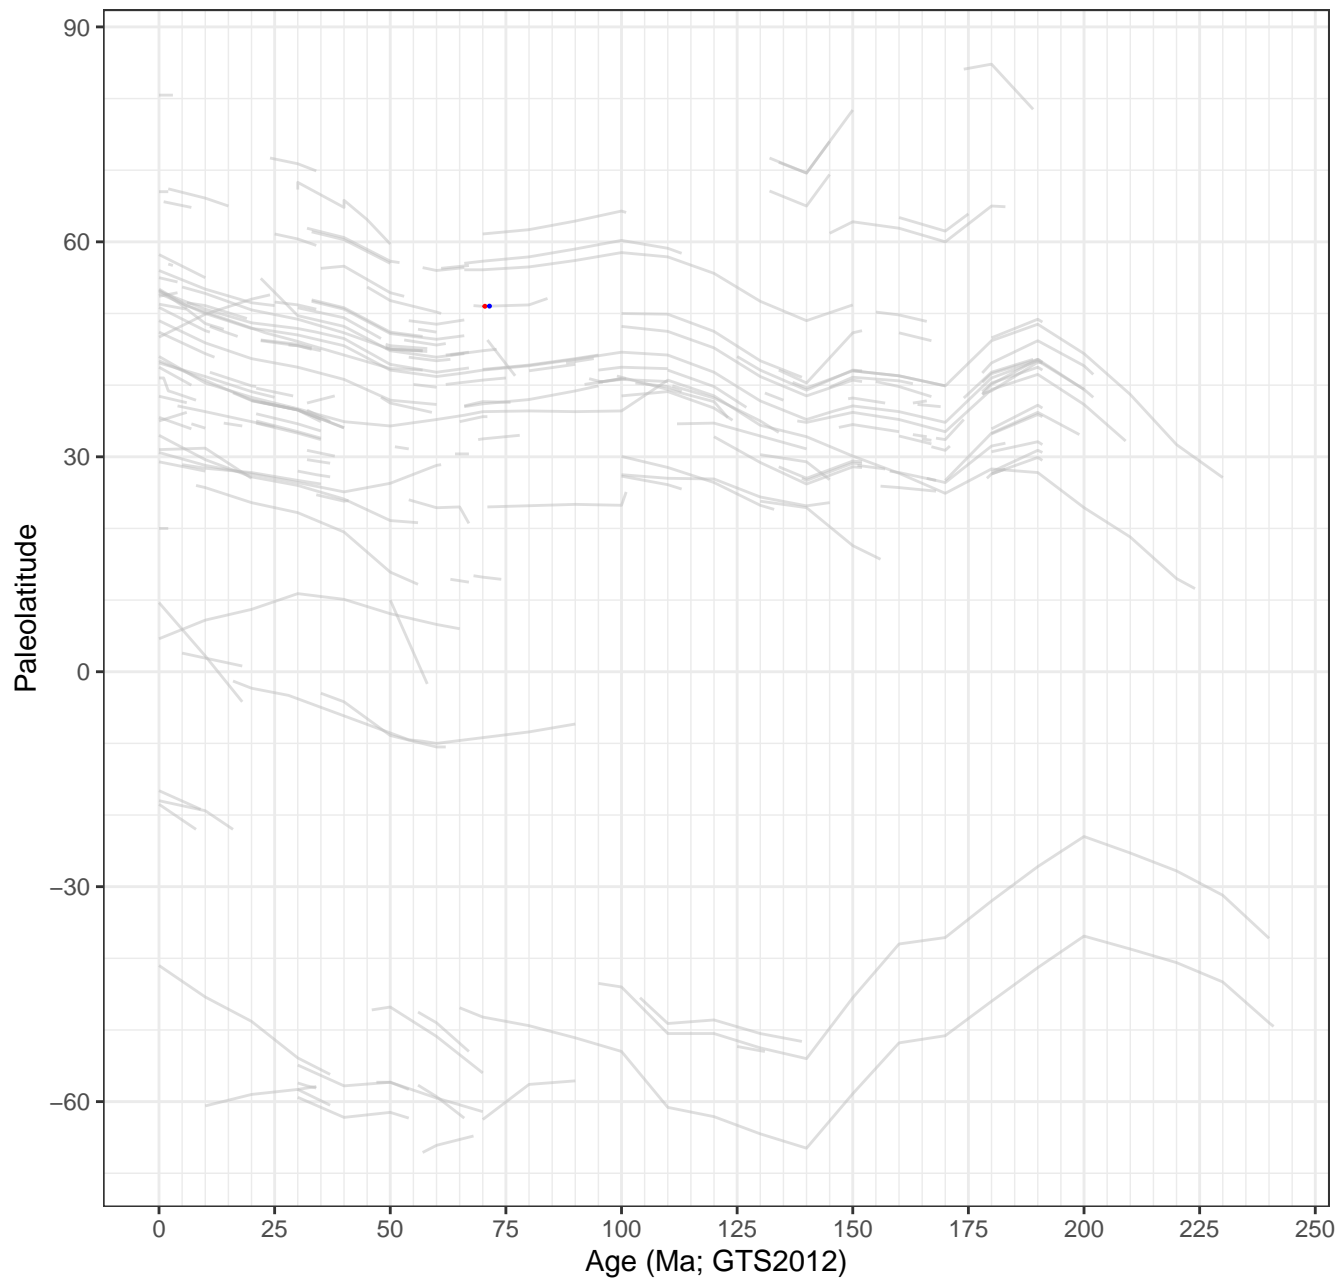

Supplement: Supplementary file 1891 [file Microdinium bensonii.pdf › Supplement/Supplement 2/Species 1914 plots/Microdinium bensonii.pdf]

# Species *Microdinium cassiculus*

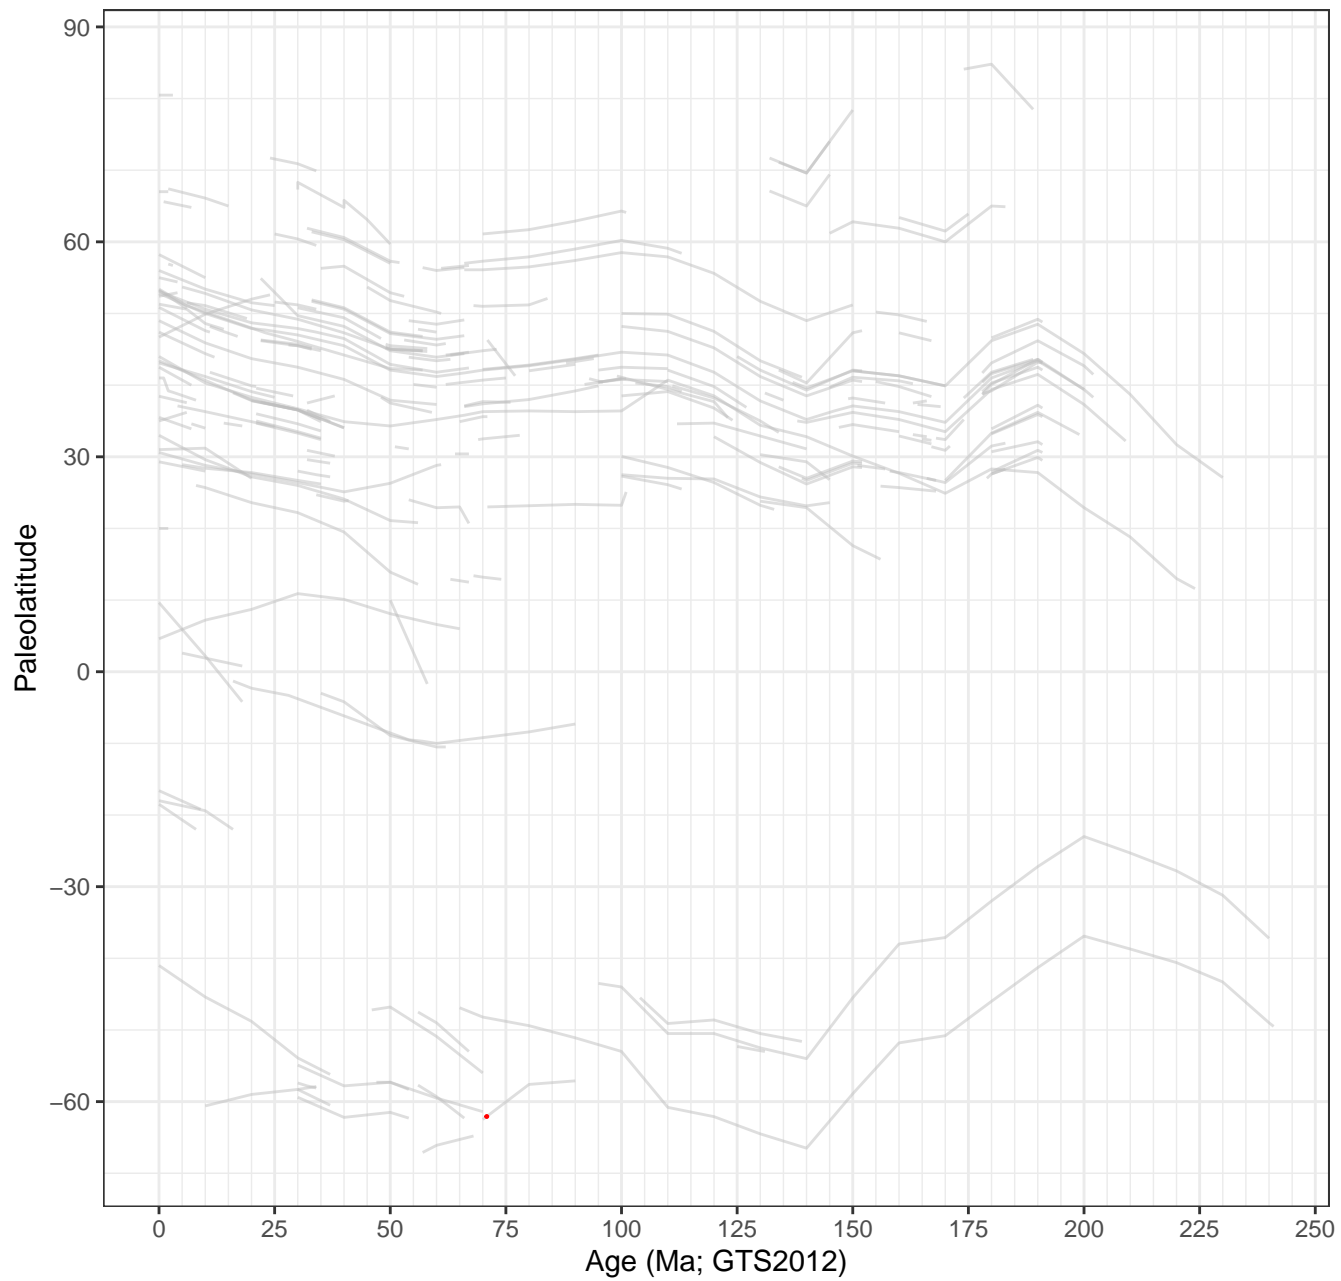

Supplement: Supplementary file 1892 [file Microdinium cassiculus.pdf › Supplement/Supplement 2/Species 1914 plots/Microdinium cassiculus.pdf]

# Species *Microdinium crinitum*

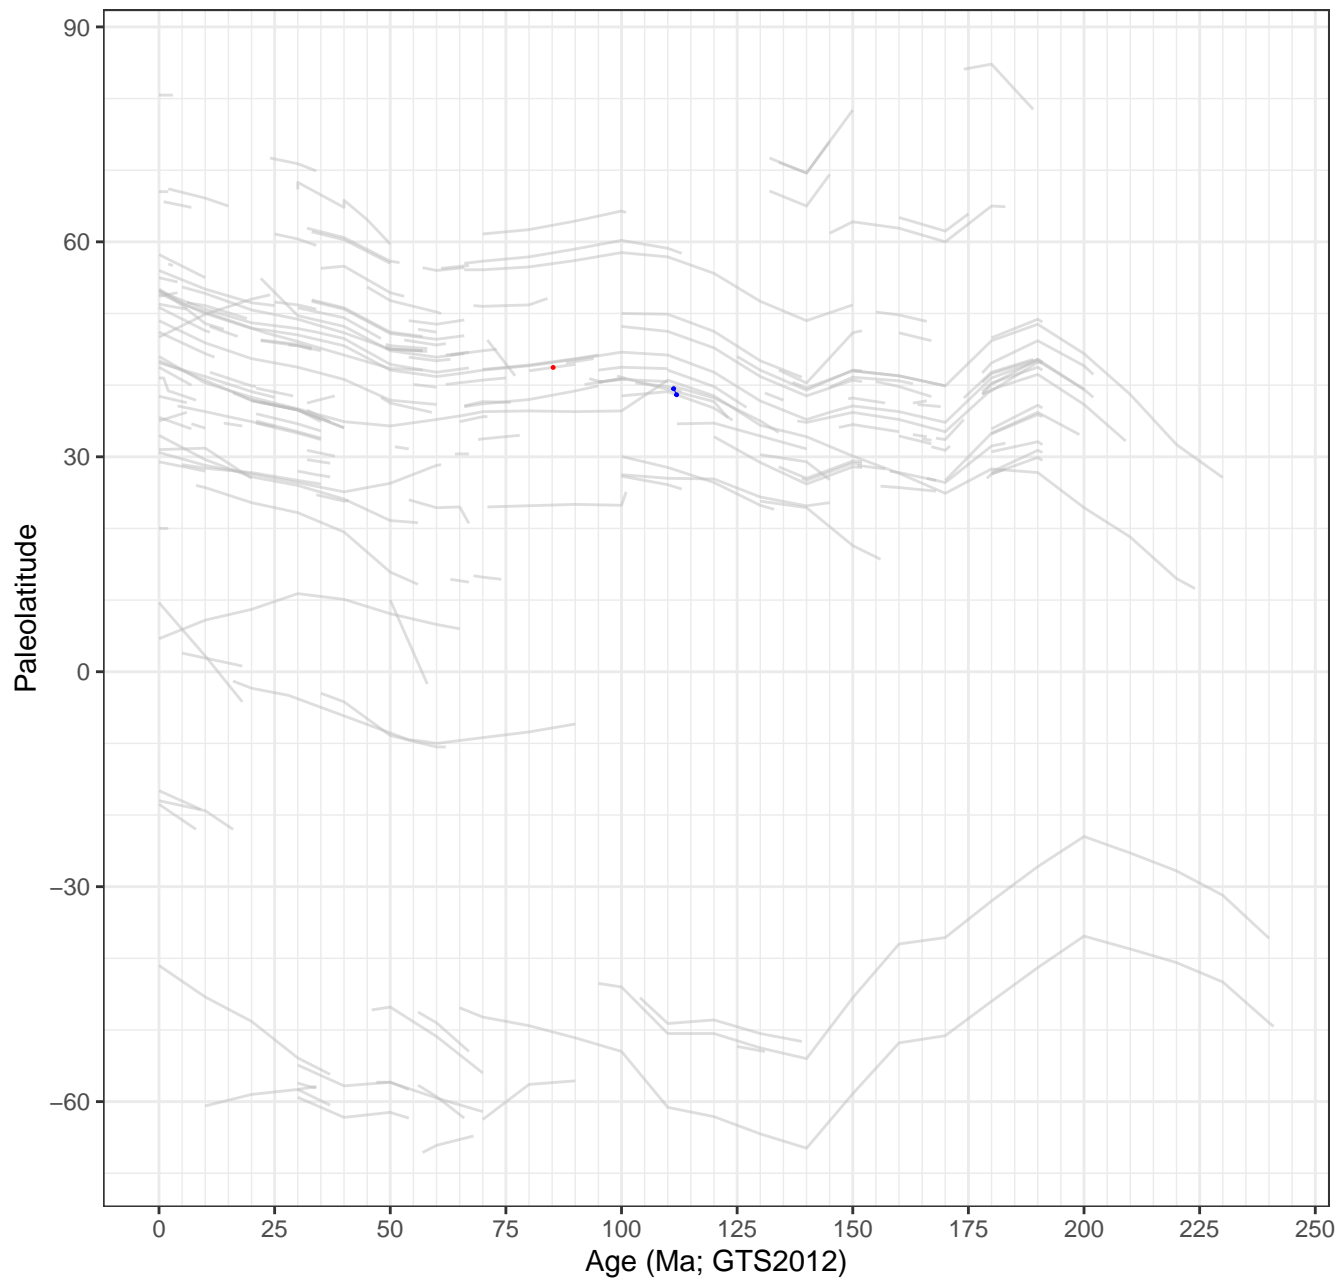

Supplement: Supplementary file 1893 [file Microdinium crinitum.pdf › Supplement/Supplement 2/Species 1914 plots/Microdinium crinitum.pdf]

# Species *Microdinium densigranulosum*

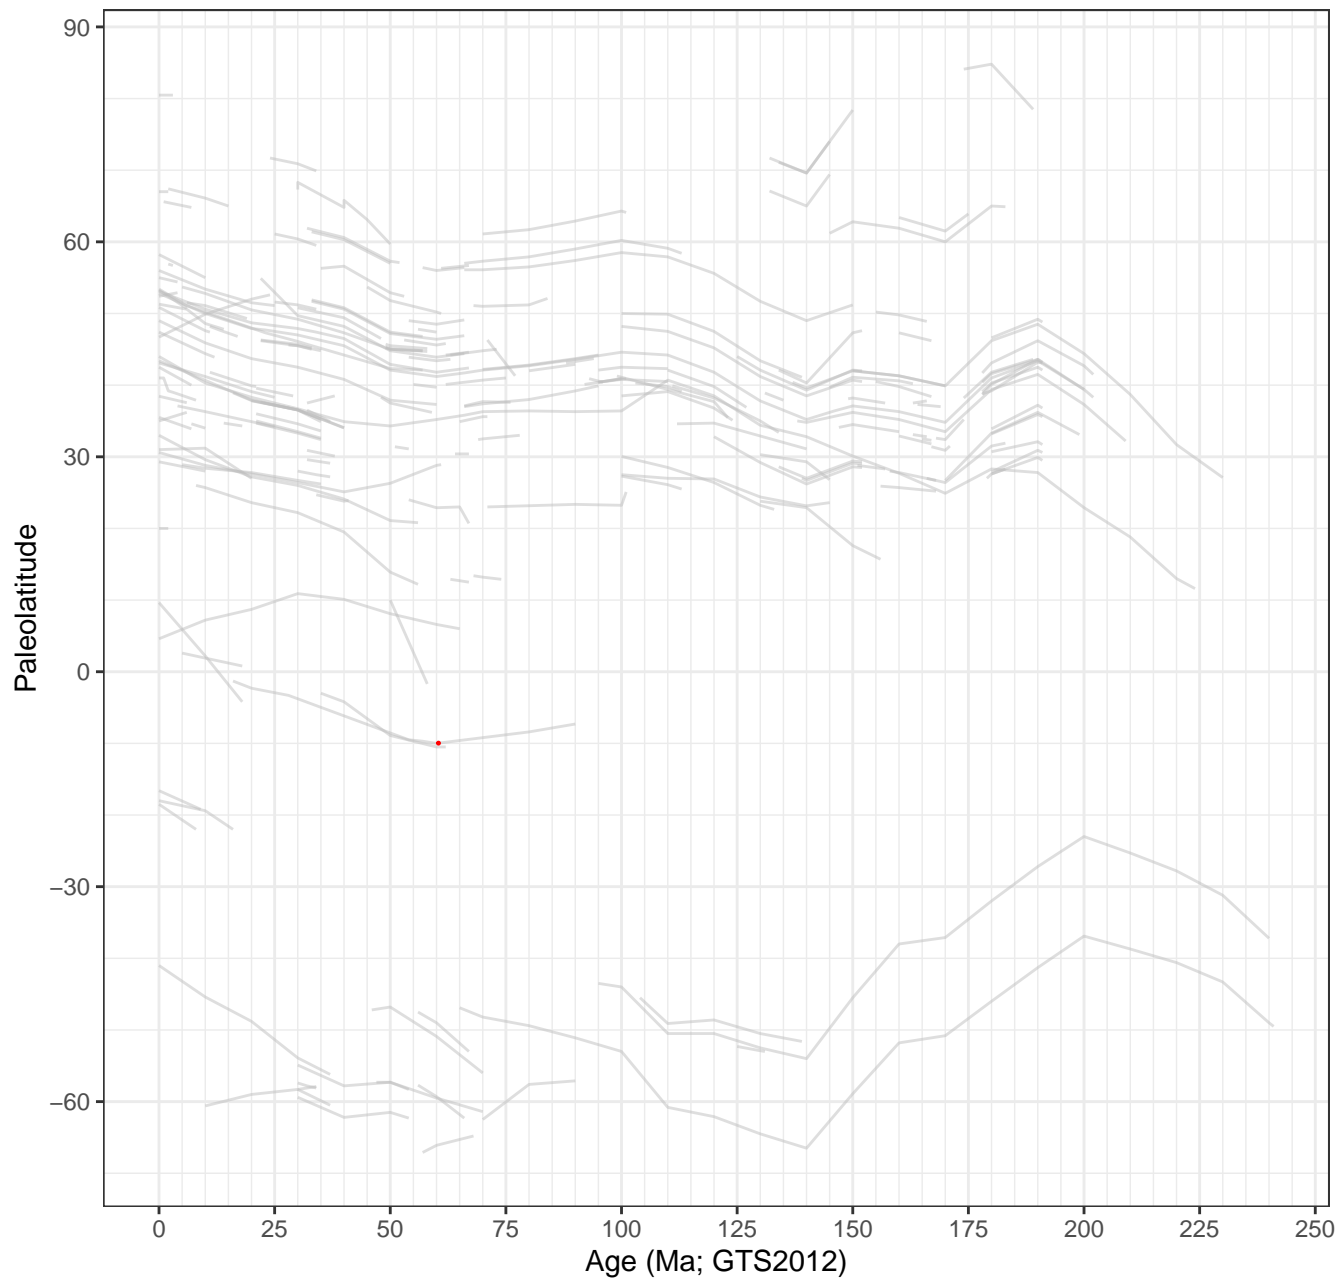

Supplement: Supplementary file 1894 [file Microdinium densigranulosum.pdf › Supplement/Supplement 2/Species 1914 plots/Microdinium densigranulosum.pdf]

# Species *Microdinium distinctum*

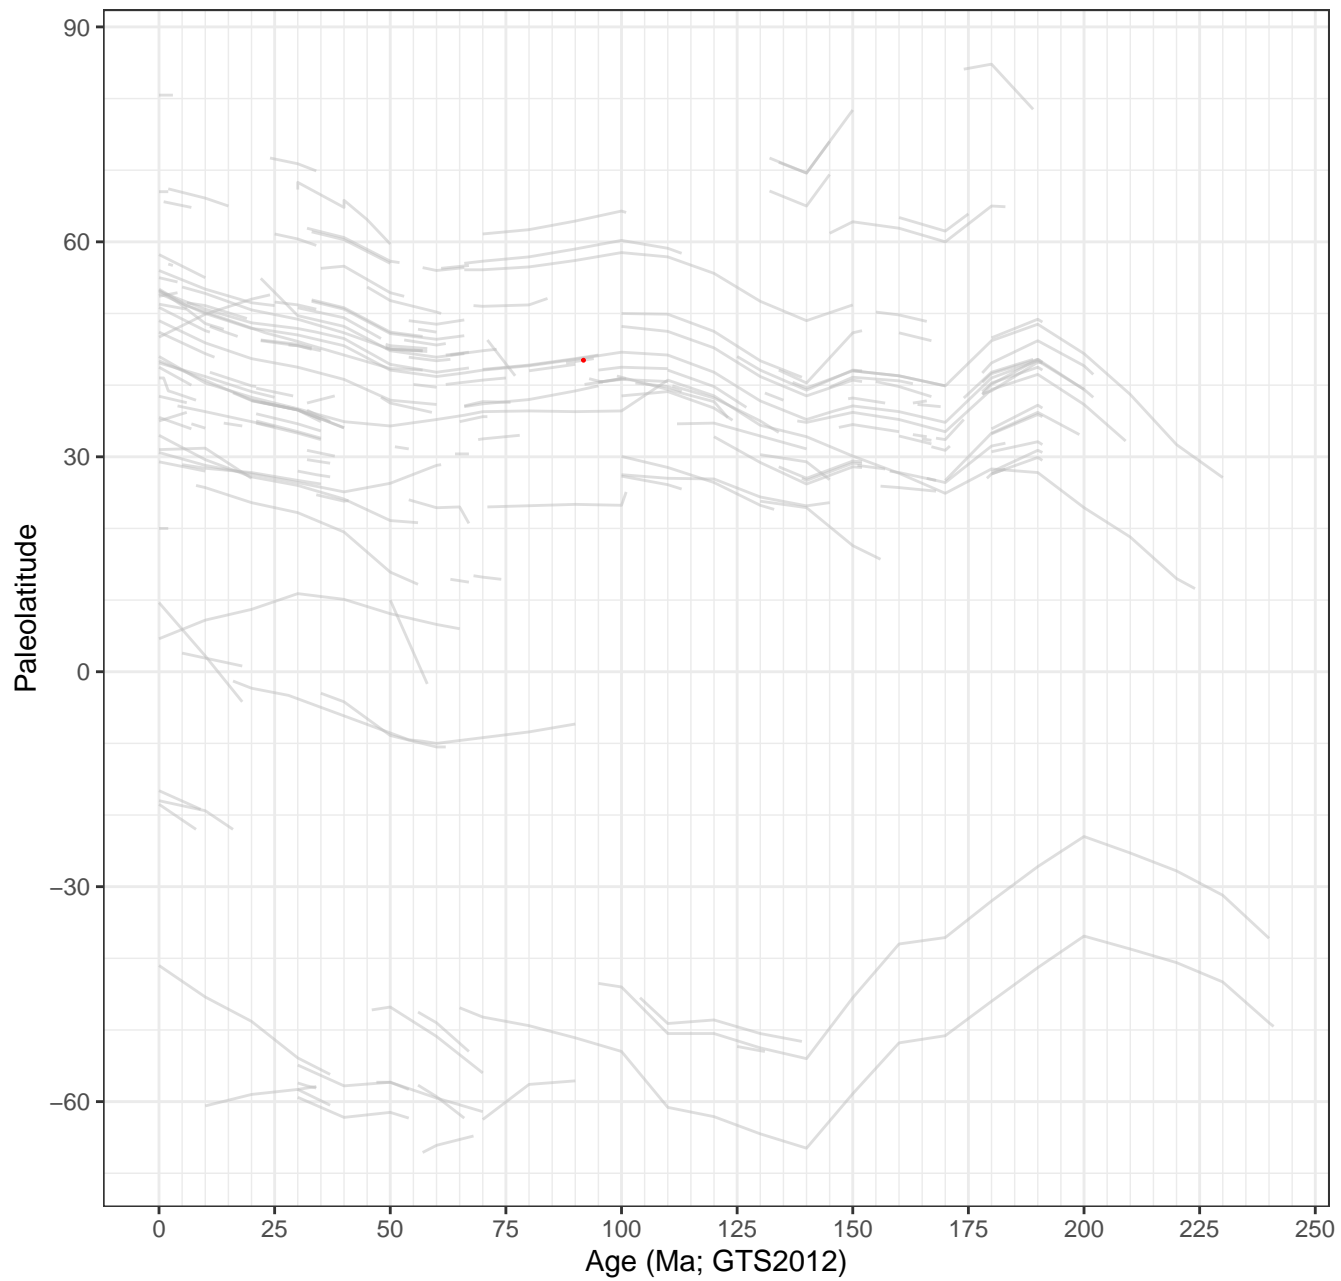

Supplement: Supplementary file 1895 [file Microdinium distinctum.pdf › Supplement/Supplement 2/Species 1914 plots/Microdinium distinctum.pdf]

# Species *Microdinium jurassicum*

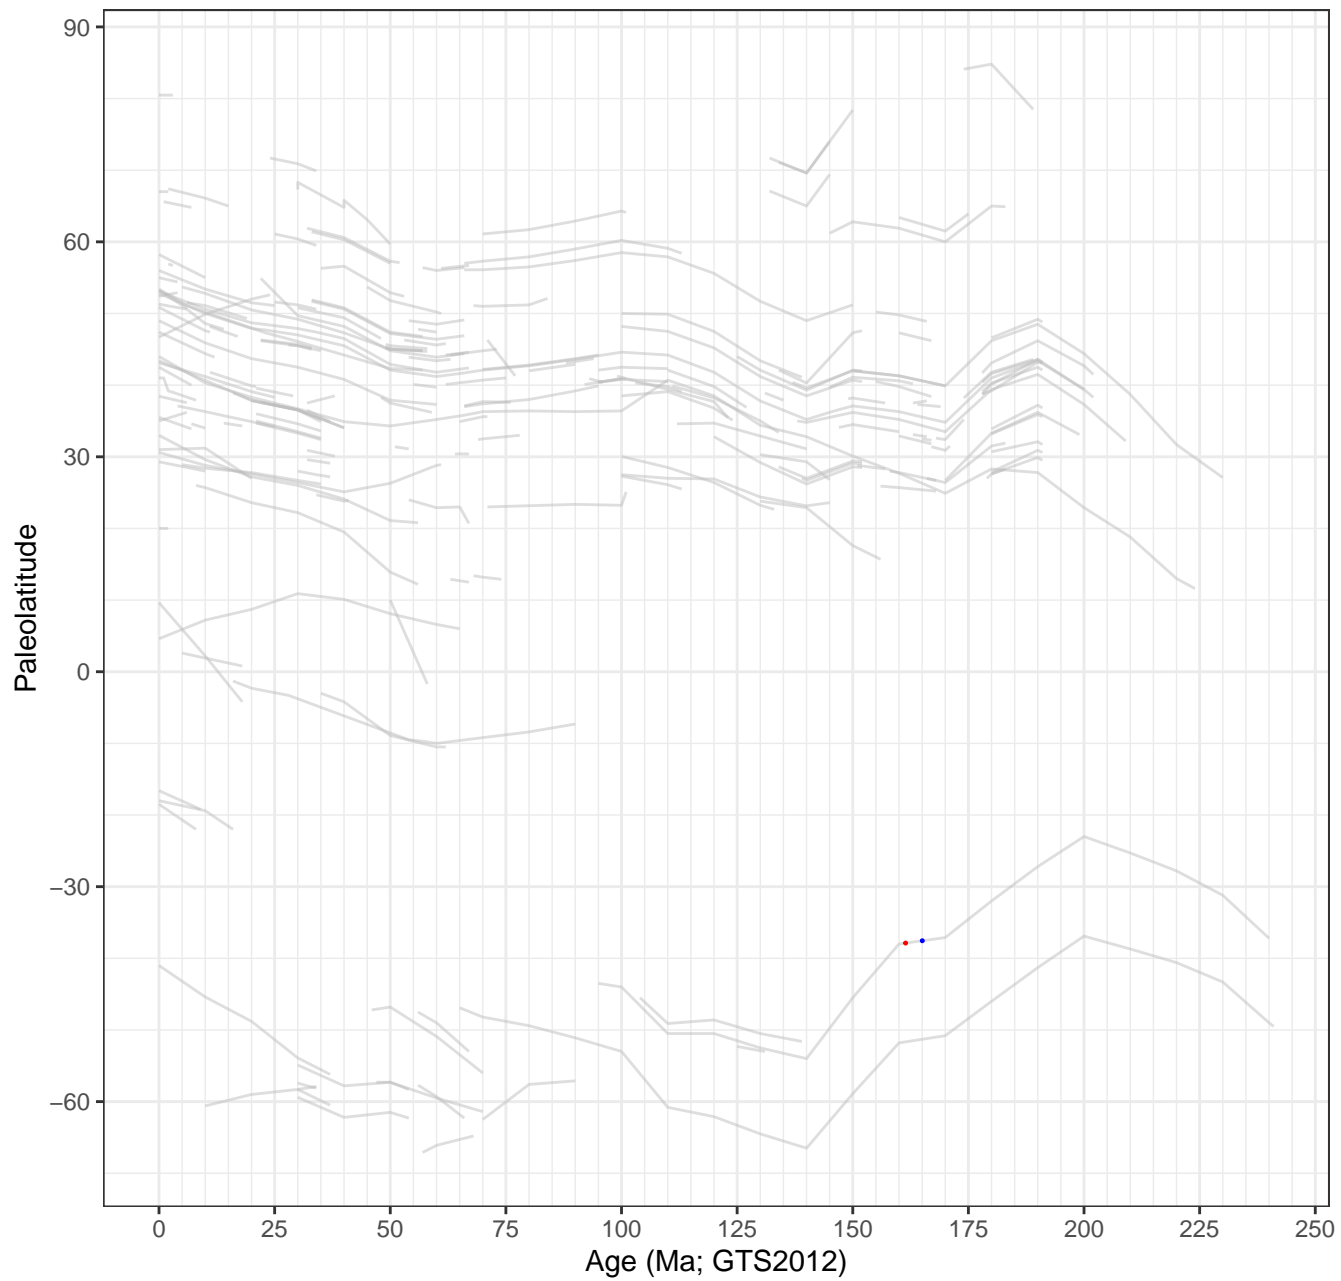

Supplement: Supplementary file 1896 [file Microdinium jurassicum.pdf › Supplement/Supplement 2/Species 1914 plots/Microdinium jurassicum.pdf]

# Species *Microdinium kustanaicum*

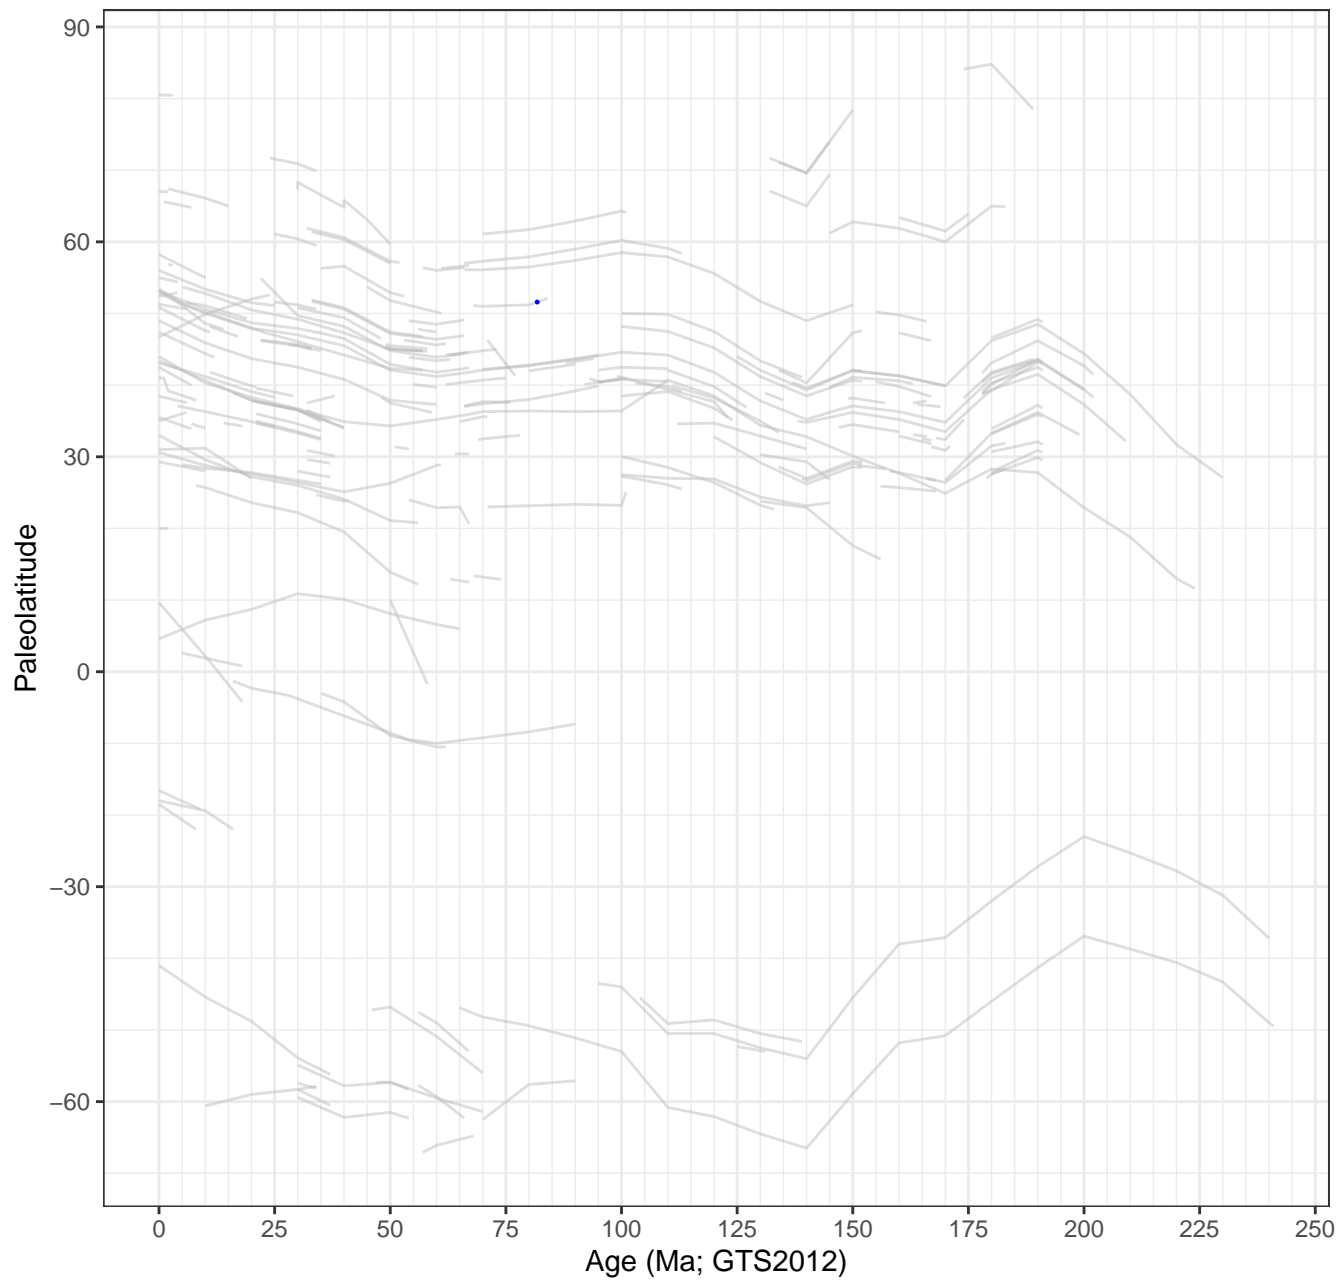

Supplement: Supplementary file 1897 [file Microdinium kustanaicum.pdf › Supplement/Supplement 2/Species 1914 plots/Microdinium kustanaicum.pdf]

# Species *Microdinium ornatum*

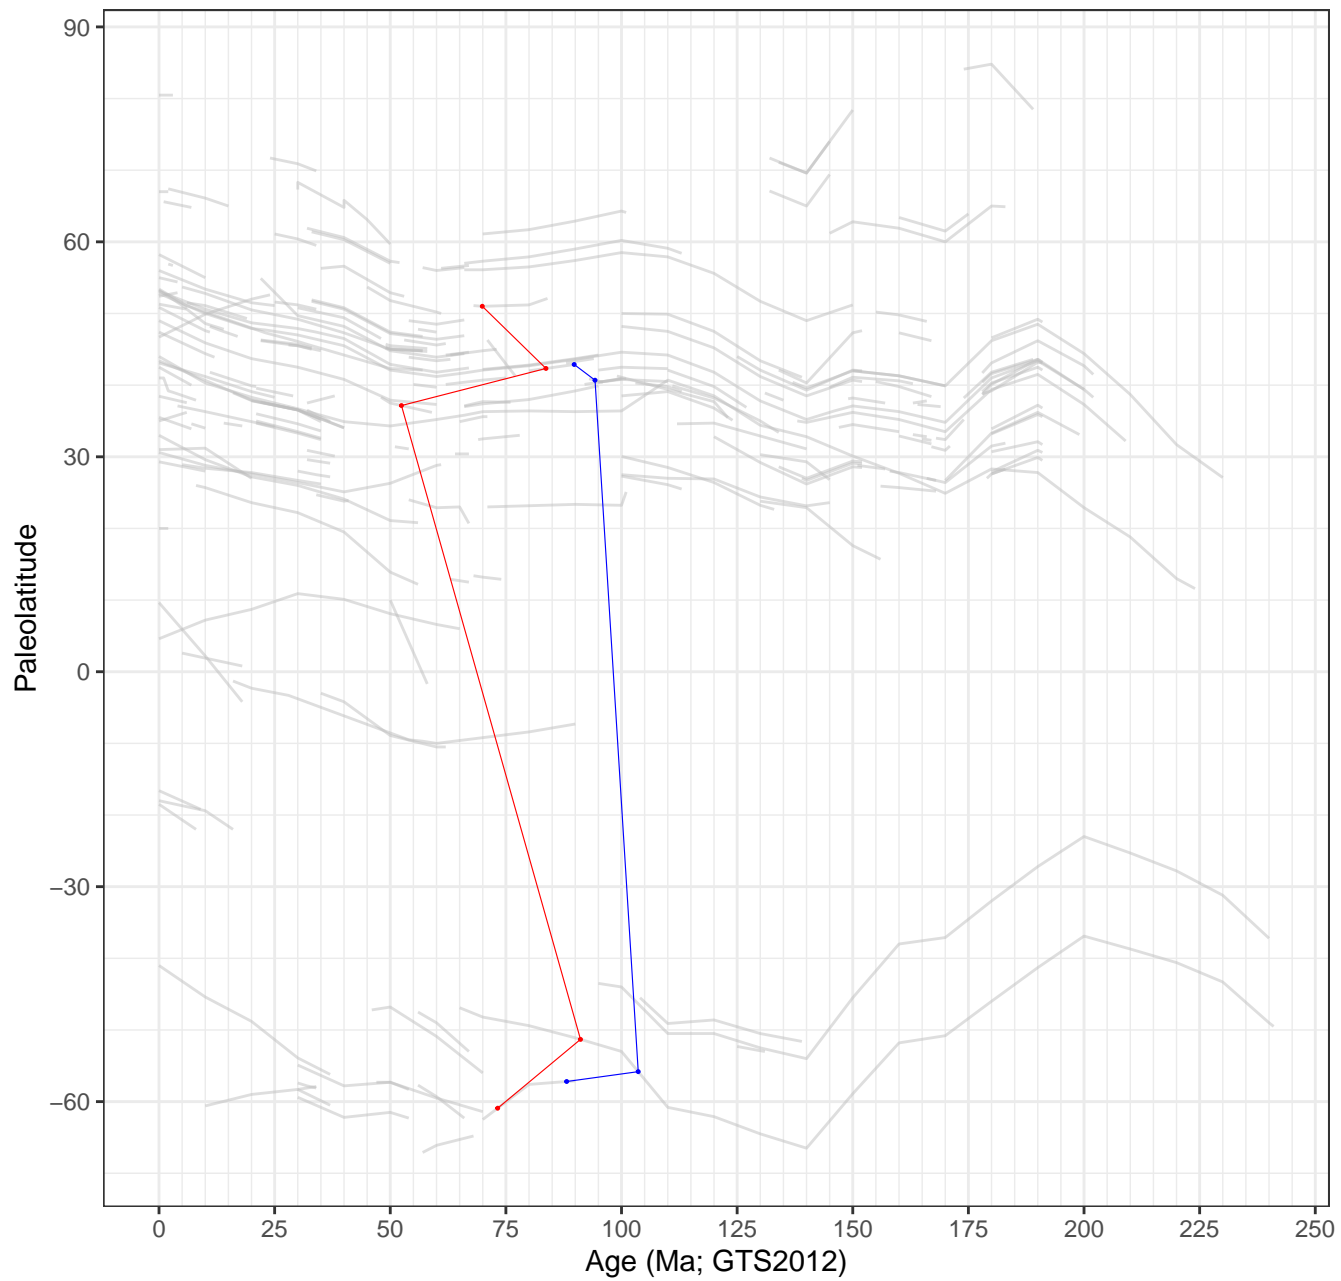

Supplement: Supplementary file 1898 [file Microdinium ornatum.pdf › Supplement/Supplement 2/Species 1914 plots/Microdinium ornatum.pdf]

# Species *Microdinium reticulatum*

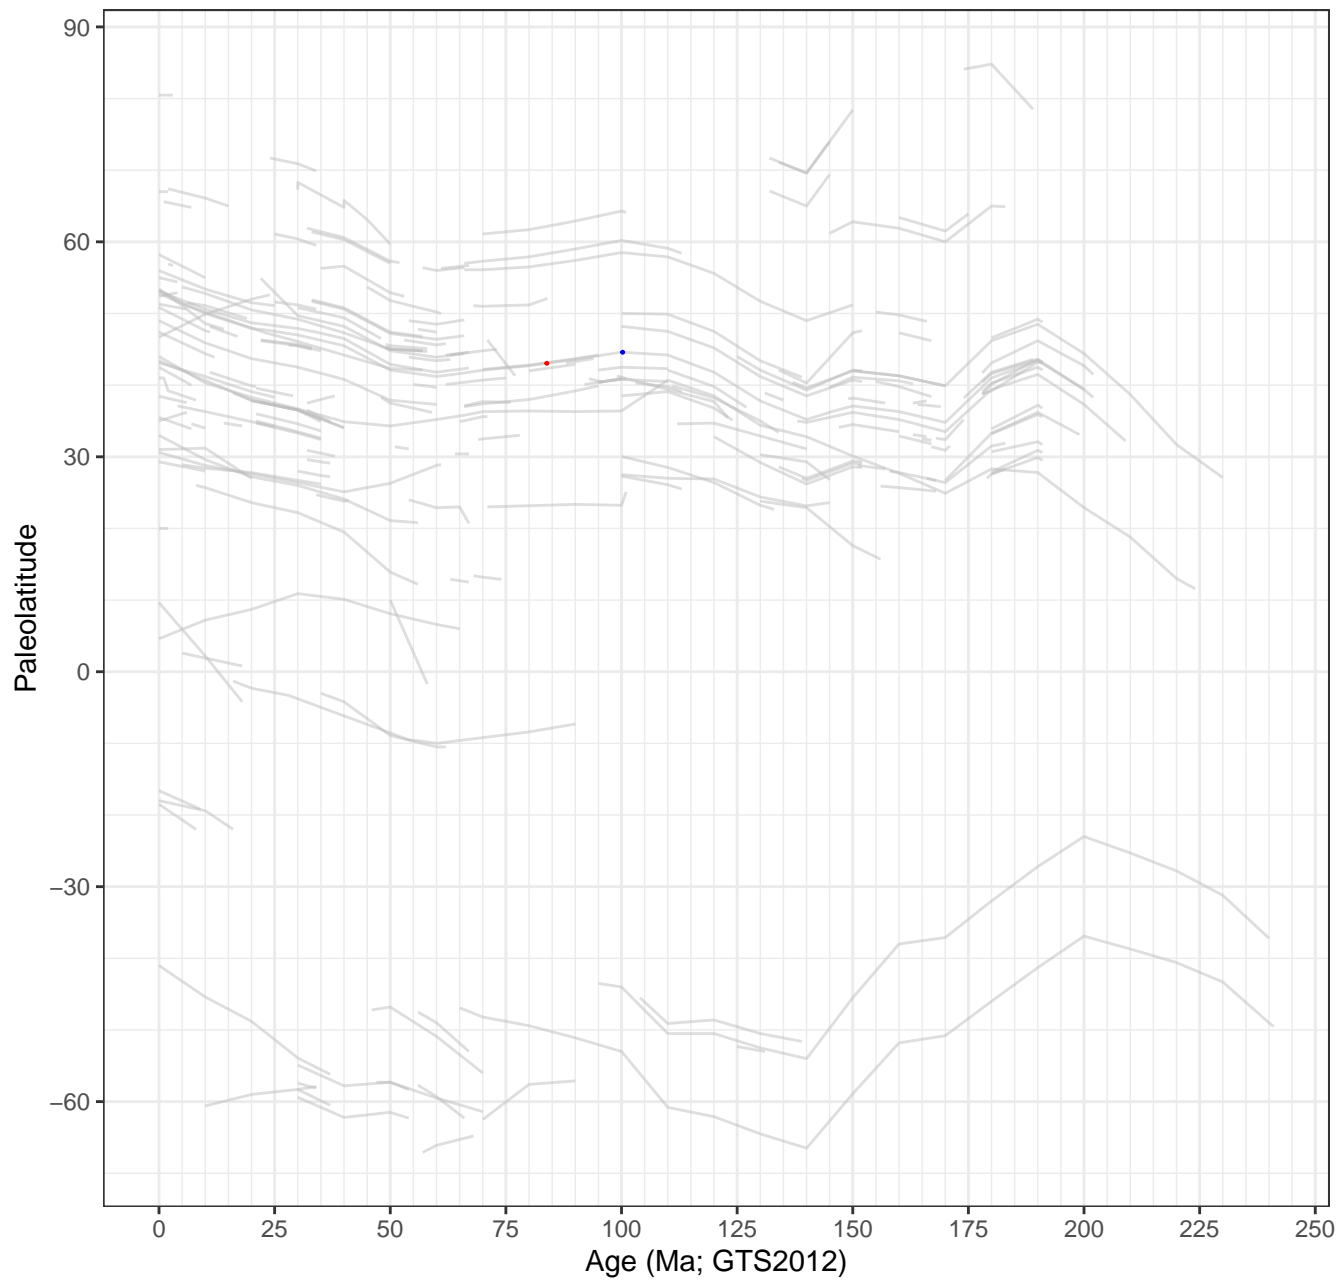

Supplement: Supplementary file 1899 [file Microdinium reticulatum.pdf › Supplement/Supplement 2/Species 1914 plots/Microdinium reticulatum.pdf]

# Species *Microdinium setosum*

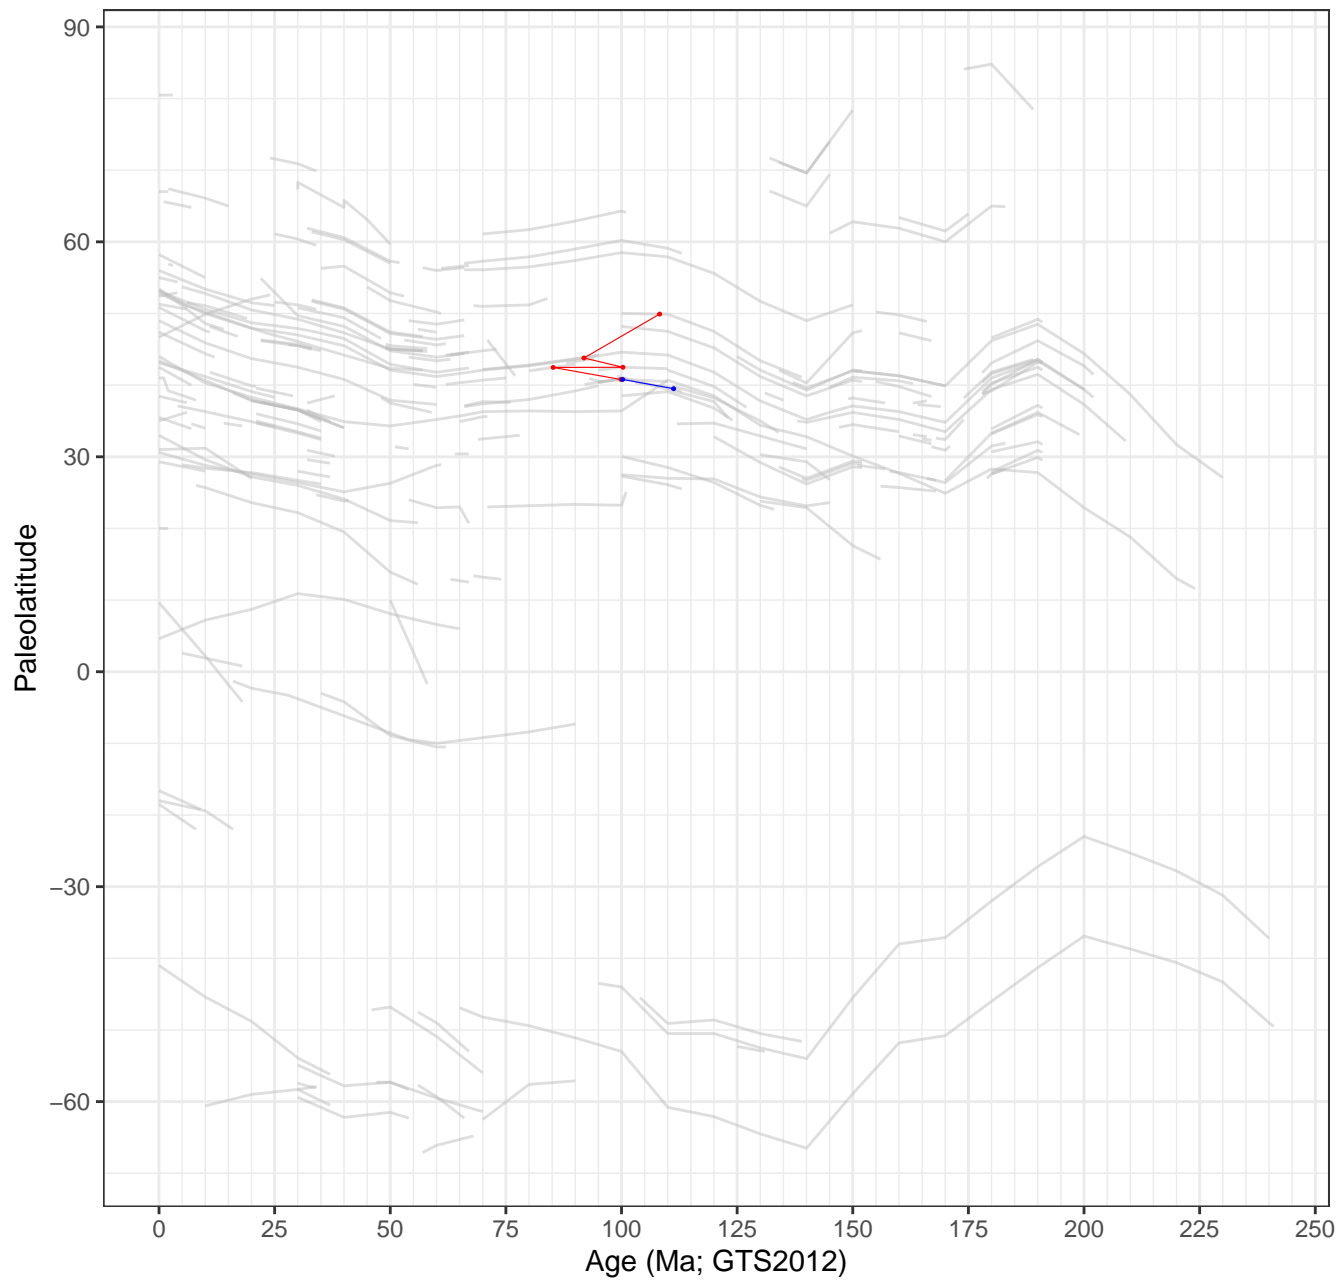

Supplement: Supplementary file 1900 [file Microdinium setosum.pdf › Supplement/Supplement 2/Species 1914 plots/Microdinium setosum.pdf]

# Species *Microdinium sonciniae*

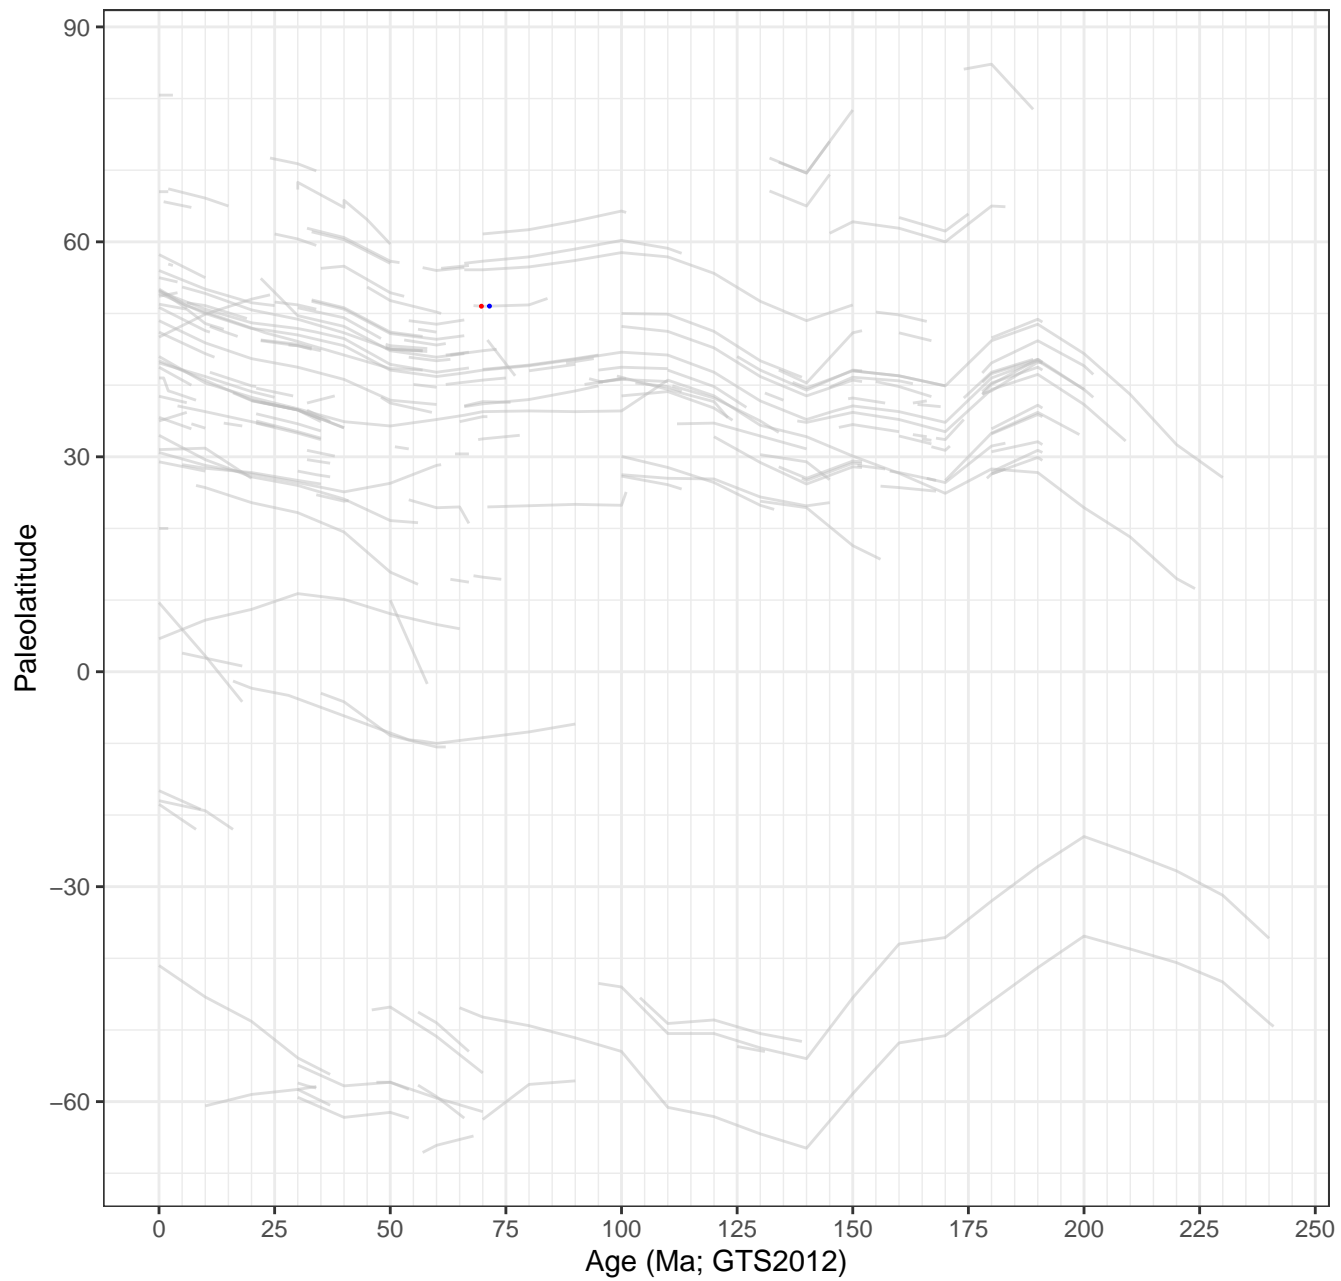

Supplement: Supplementary file 1901 [file Microdinium sonciniae.pdf › Supplement/Supplement 2/Species 1914 plots/Microdinium sonciniae.pdf]

# Species *Microsphaeridium ancistroides*

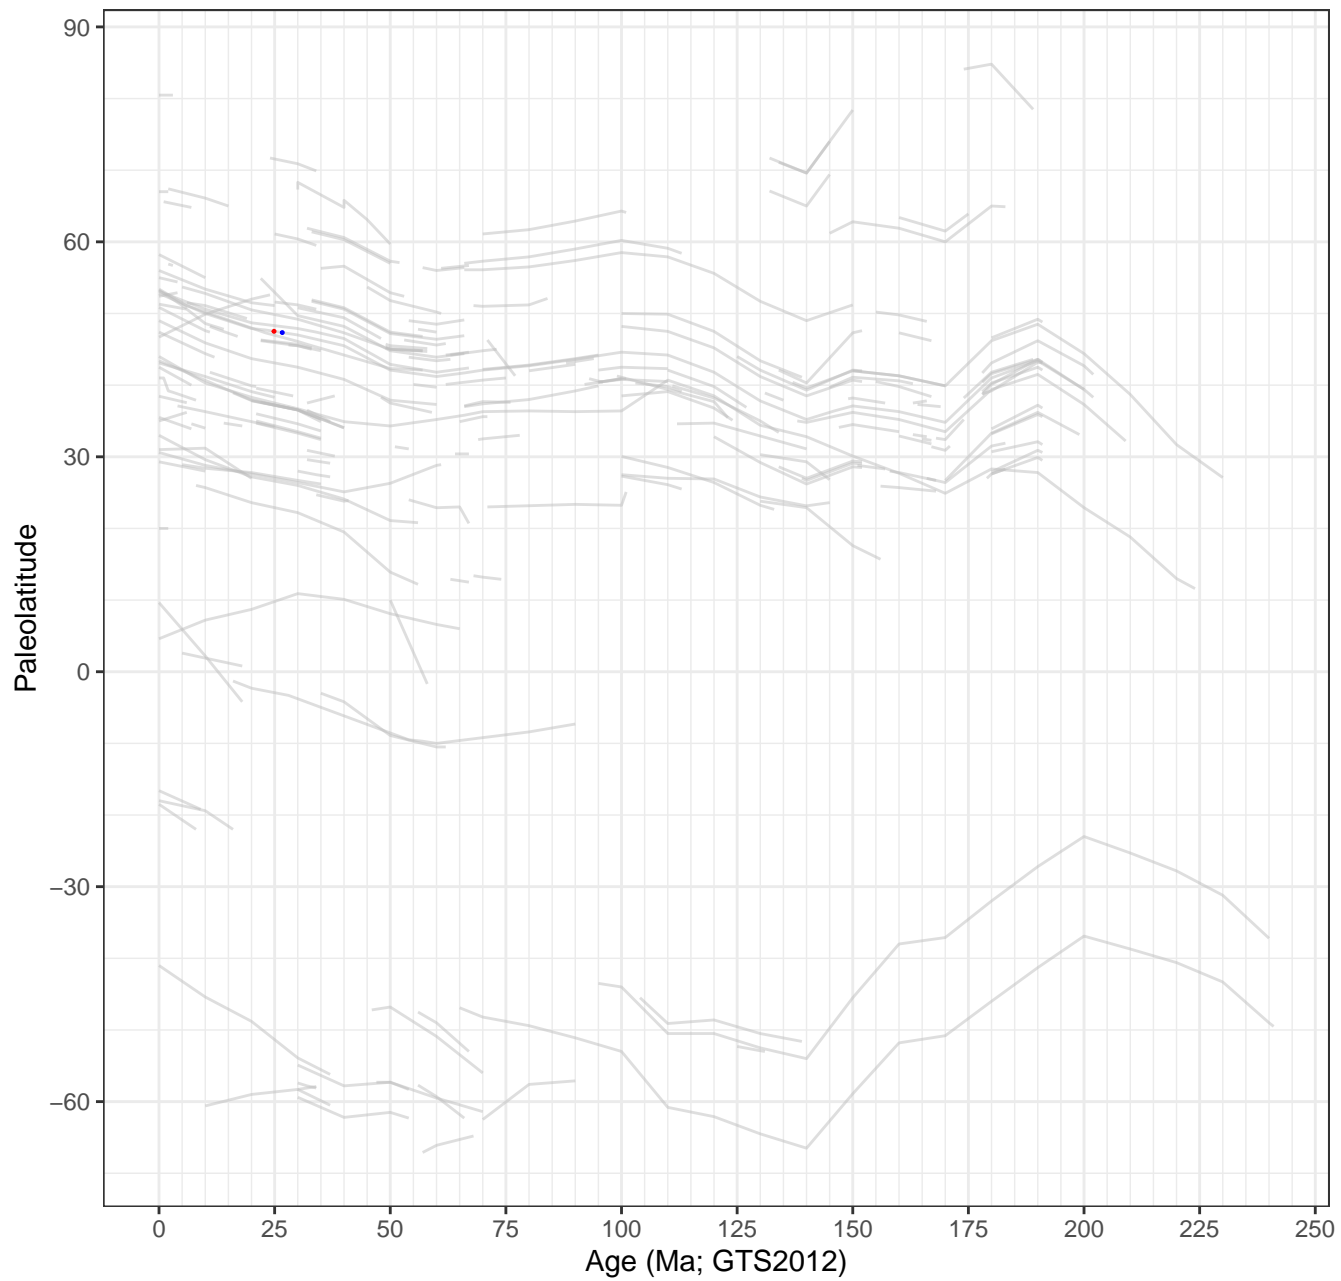

Supplement: Supplementary file 1902 [file Microsphaeridium ancistroides.pdf › Supplement/Supplement 2/Species 1914 plots/Microsphaeridium ancistroides.pdf]

# Species *Mikrocysta erugata*

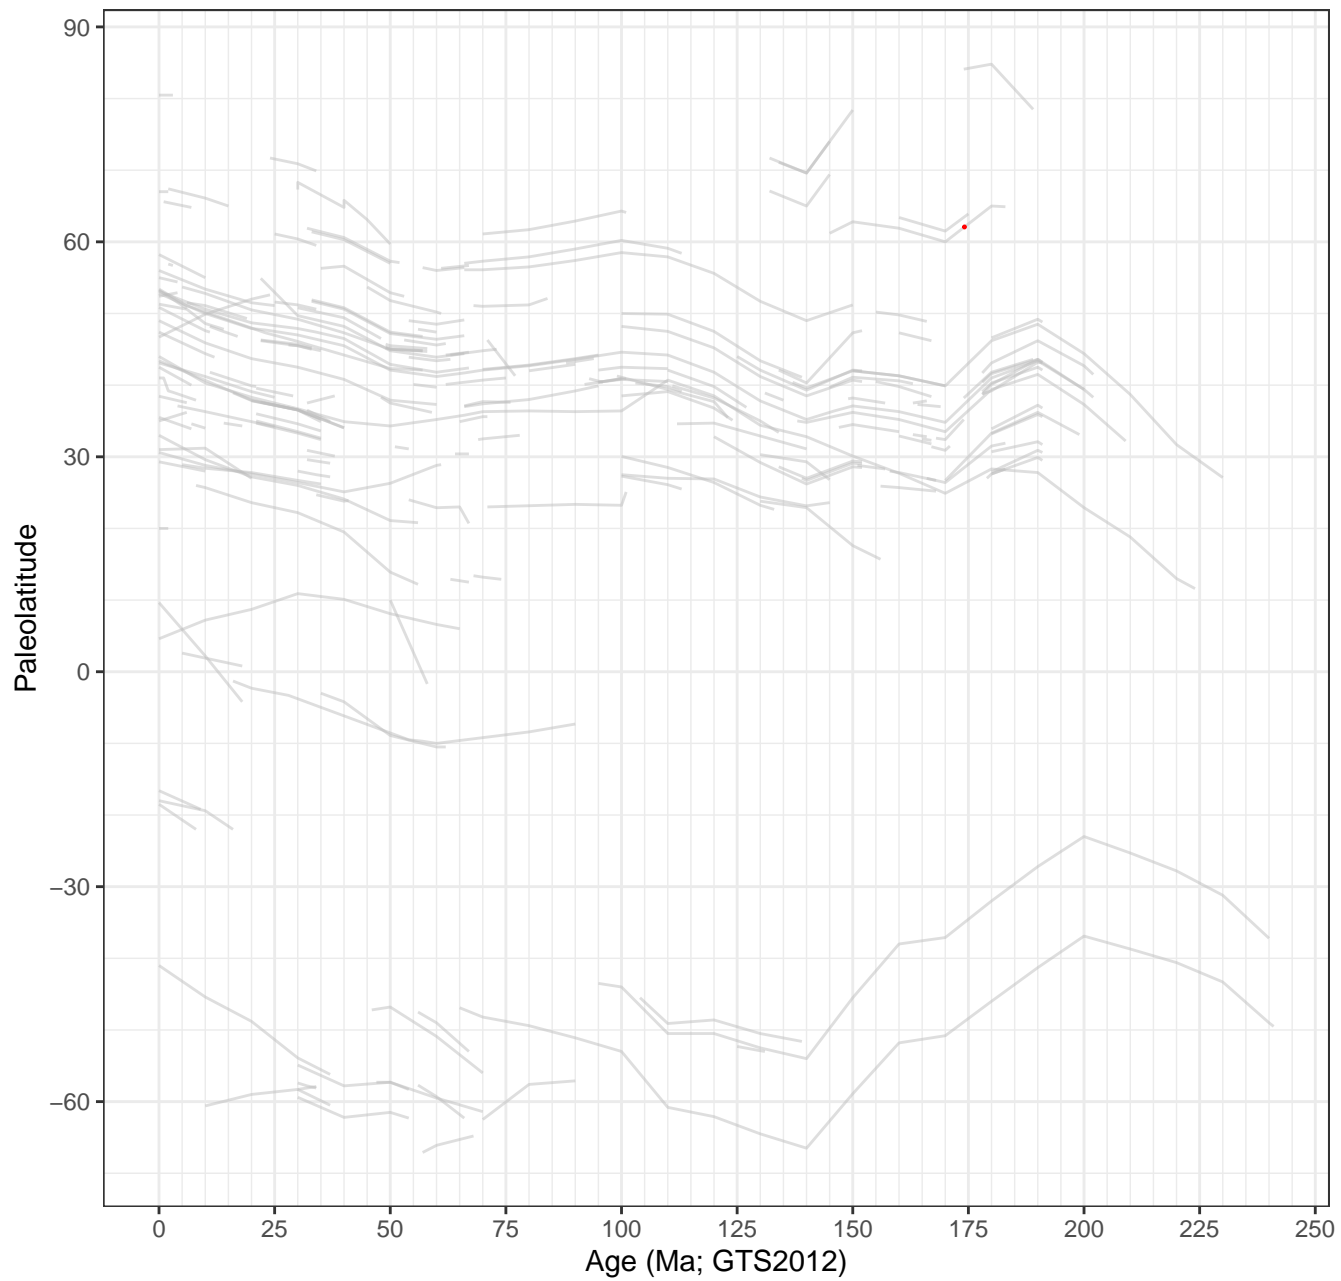

Supplement: Supplementary file 1903 [file Mikrocysta erugata.pdf › Supplement/Supplement 2/Species 1914 plots/Mikrocysta erugata.pdf]

# Species *Minisphaeridium latirictum*

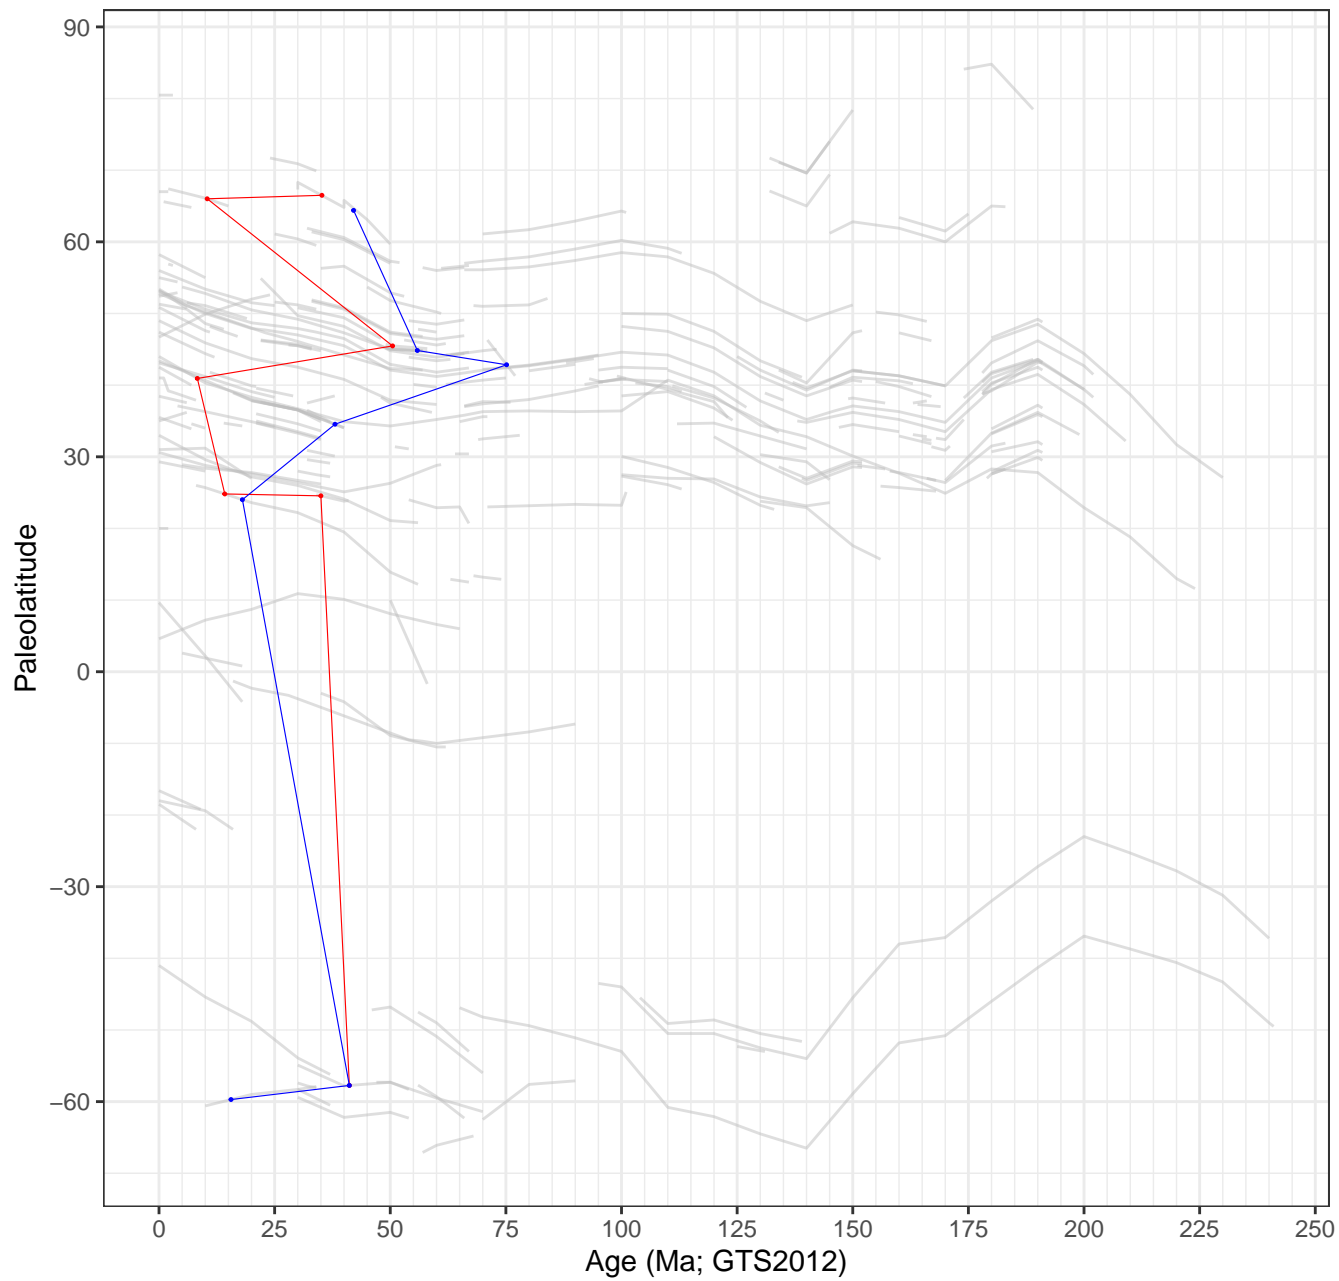

Supplement: Supplementary file 1904 [file Minisphaeridium latirictum.pdf › Supplement/Supplement 2/Species 1914 plots/Minisphaeridium latirictum.pdf]

# Species *Moesiodinium raileanui*

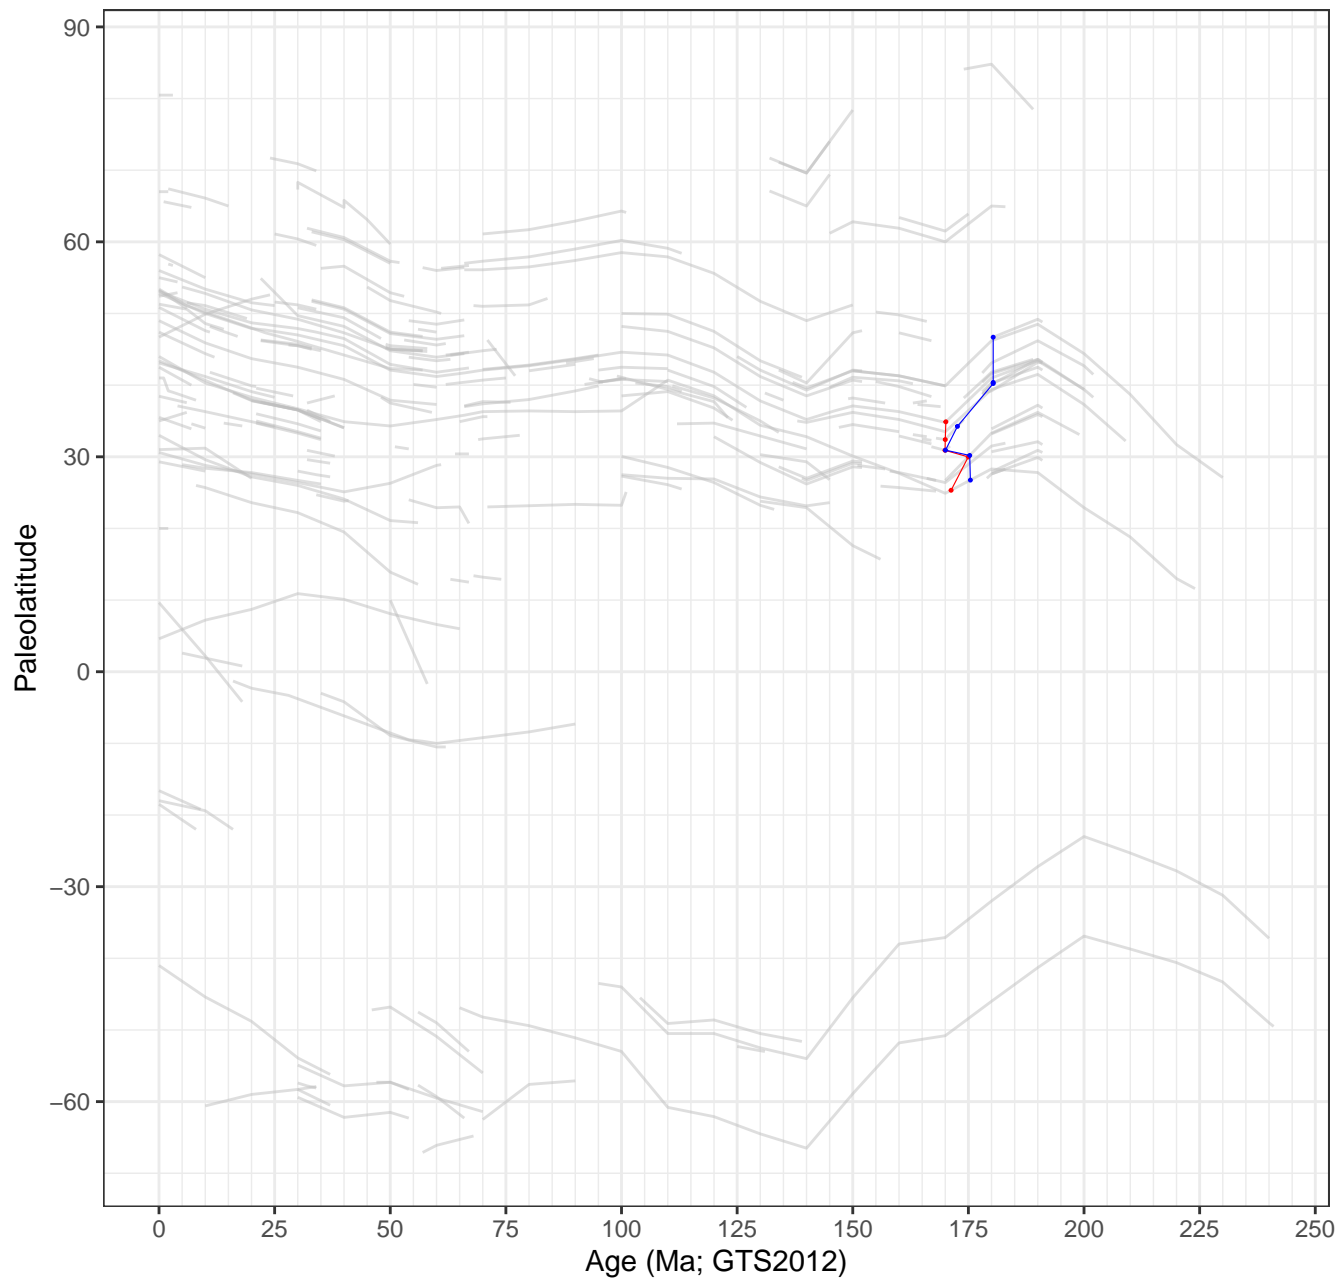

Supplement: Supplementary file 1905 [file Moesiodinium raileanui.pdf › Supplement/Supplement 2/Species 1914 plots/Moesiodinium raileanui.pdf]

# Species *Mombasadinium parvelatum*

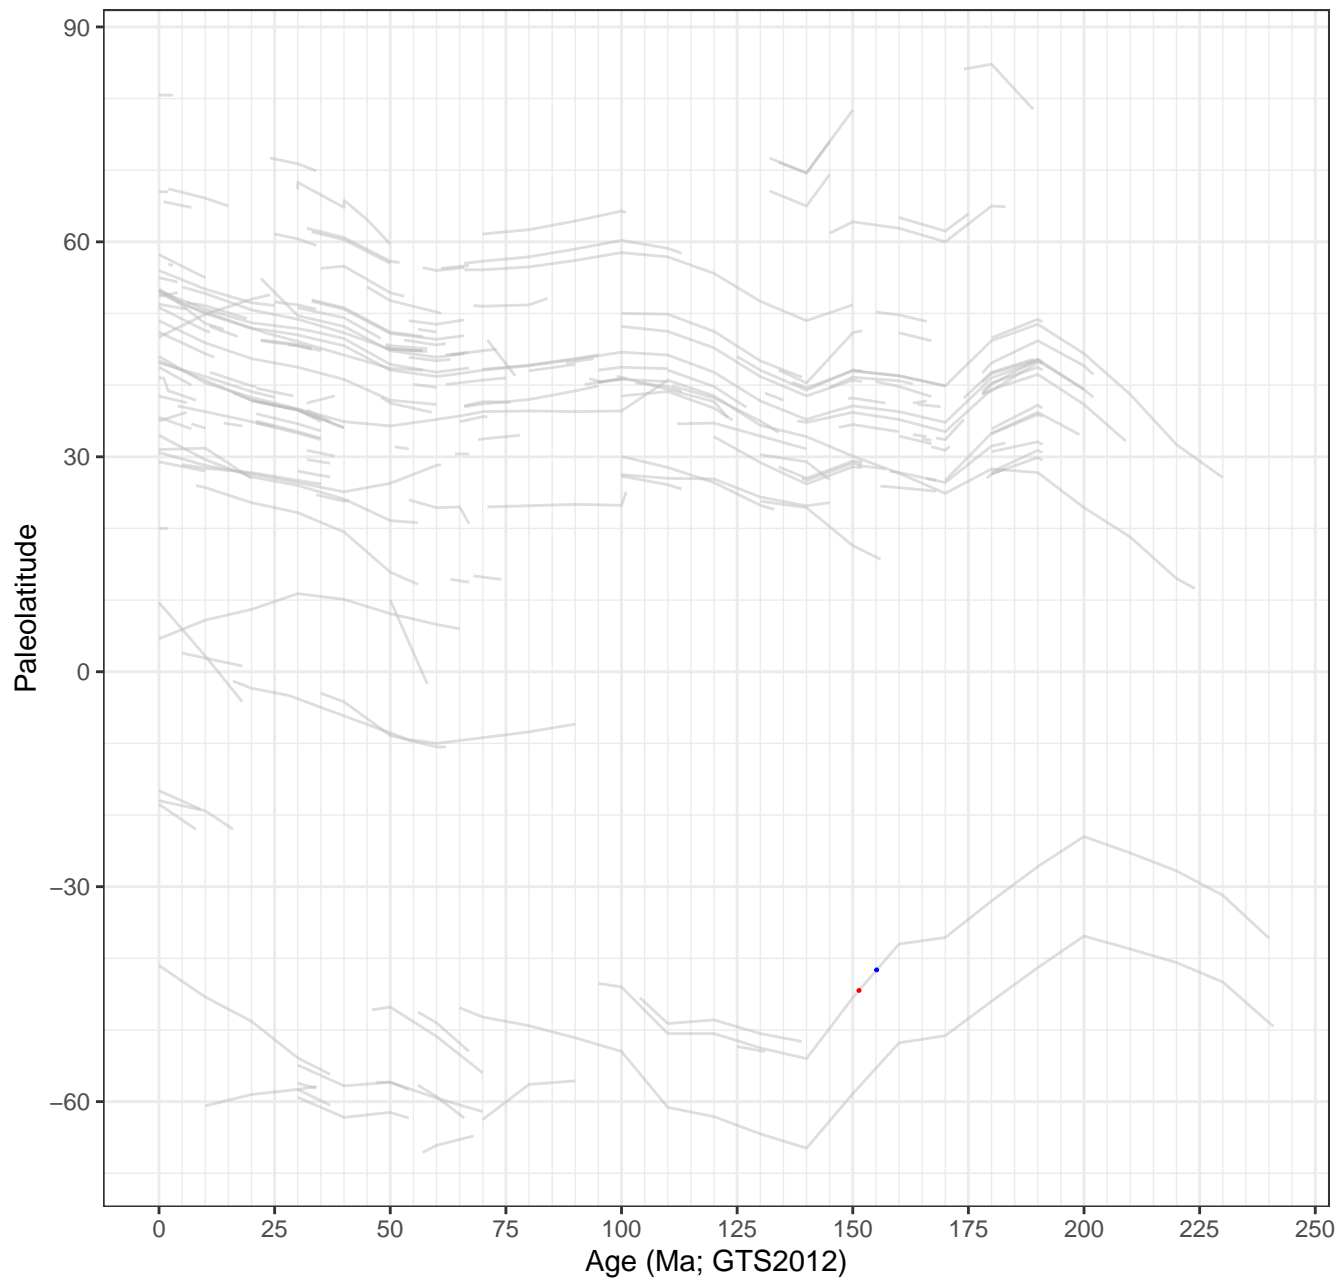

Supplement: Supplementary file 1906 [file Mombasadinium parvelatum.pdf › Supplement/Supplement 2/Species 1914 plots/Mombasadinium parvelatum.pdf]

# Species *Moorodinium tessellatum*

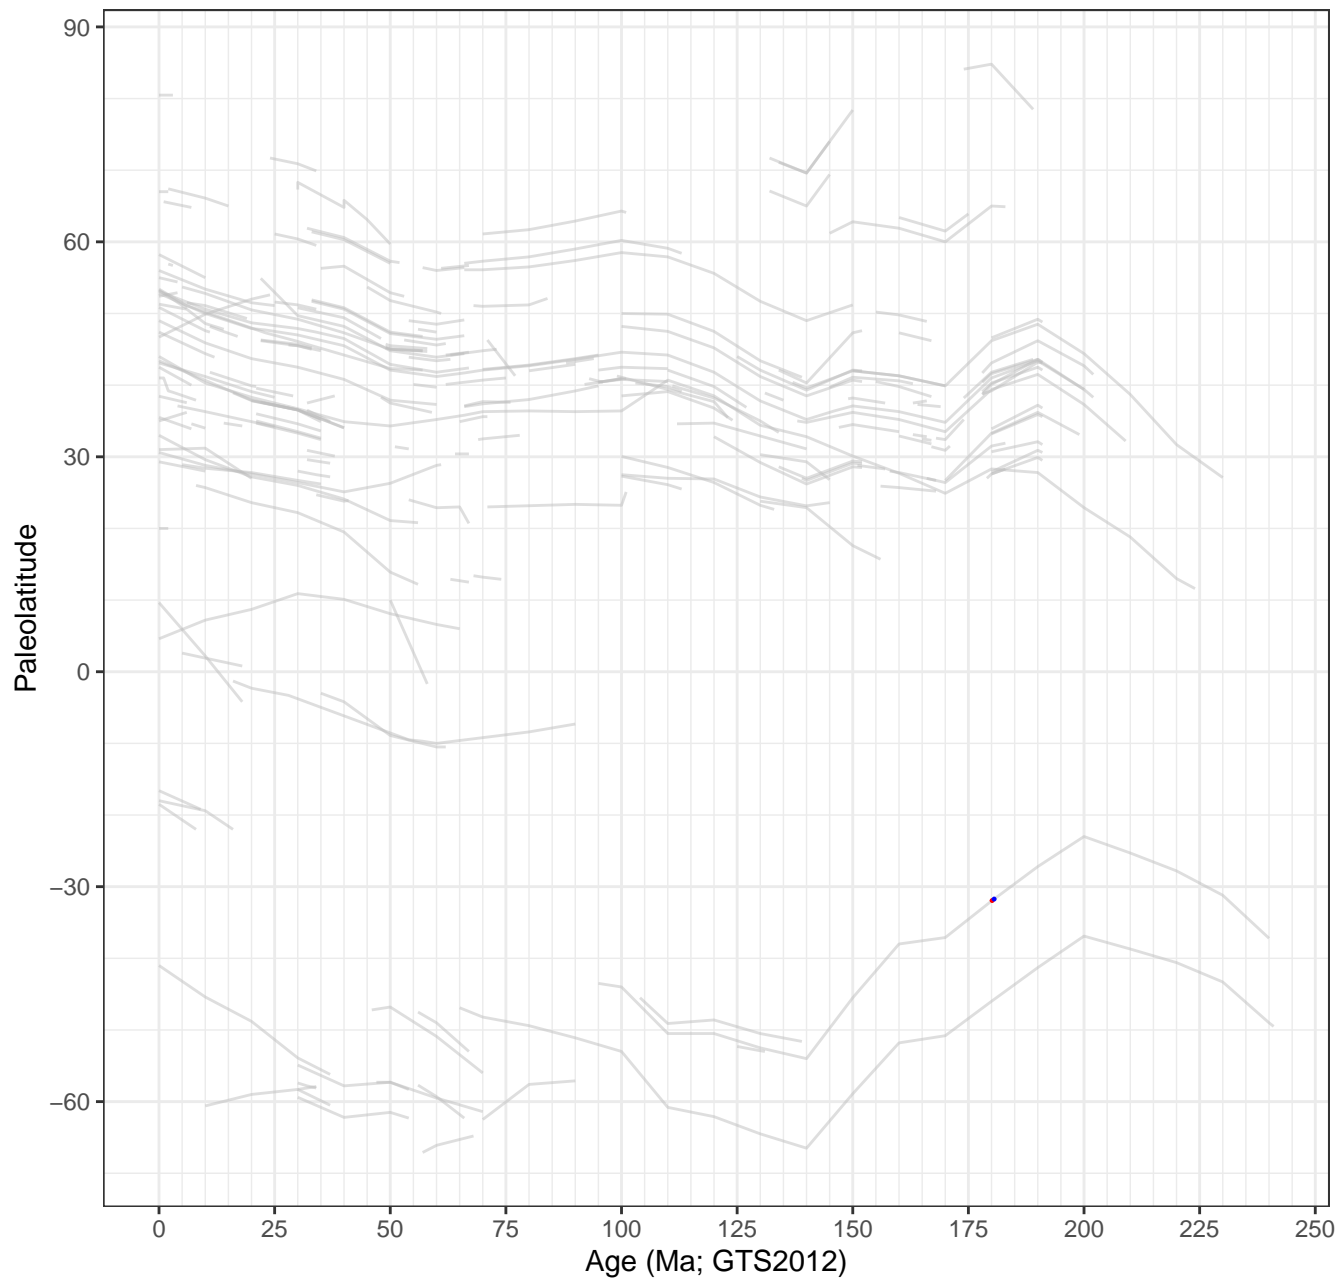

Supplement: Supplementary file 1907 [file Moorodinium tessellatum.pdf › Supplement/Supplement 2/Species 1914 plots/Moorodinium tessellatum.pdf]

# Species Mosaic *codinium mosaicum*

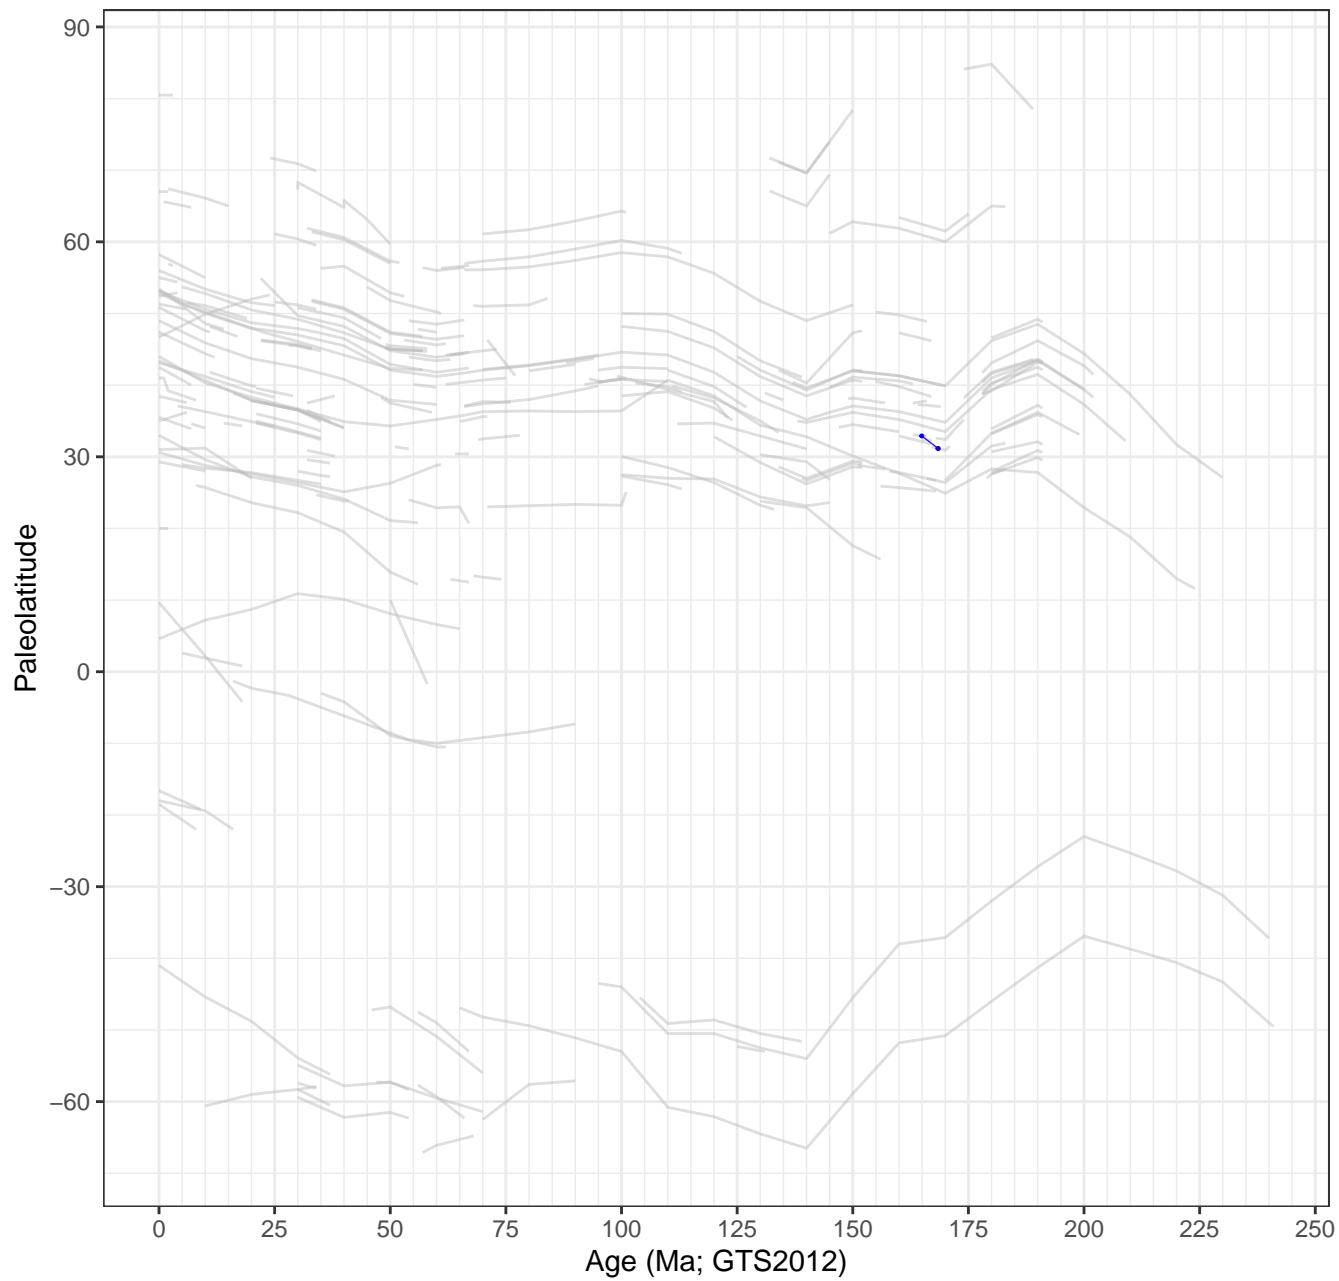

Supplement: Supplementary file 1908 [file Mosaicodinium mosaicum.pdf › Supplement/Supplement 2/Species 1914 plots/Mosaicodinium mosaicum.pdf]

# Species *Muderongia asymmetrica*

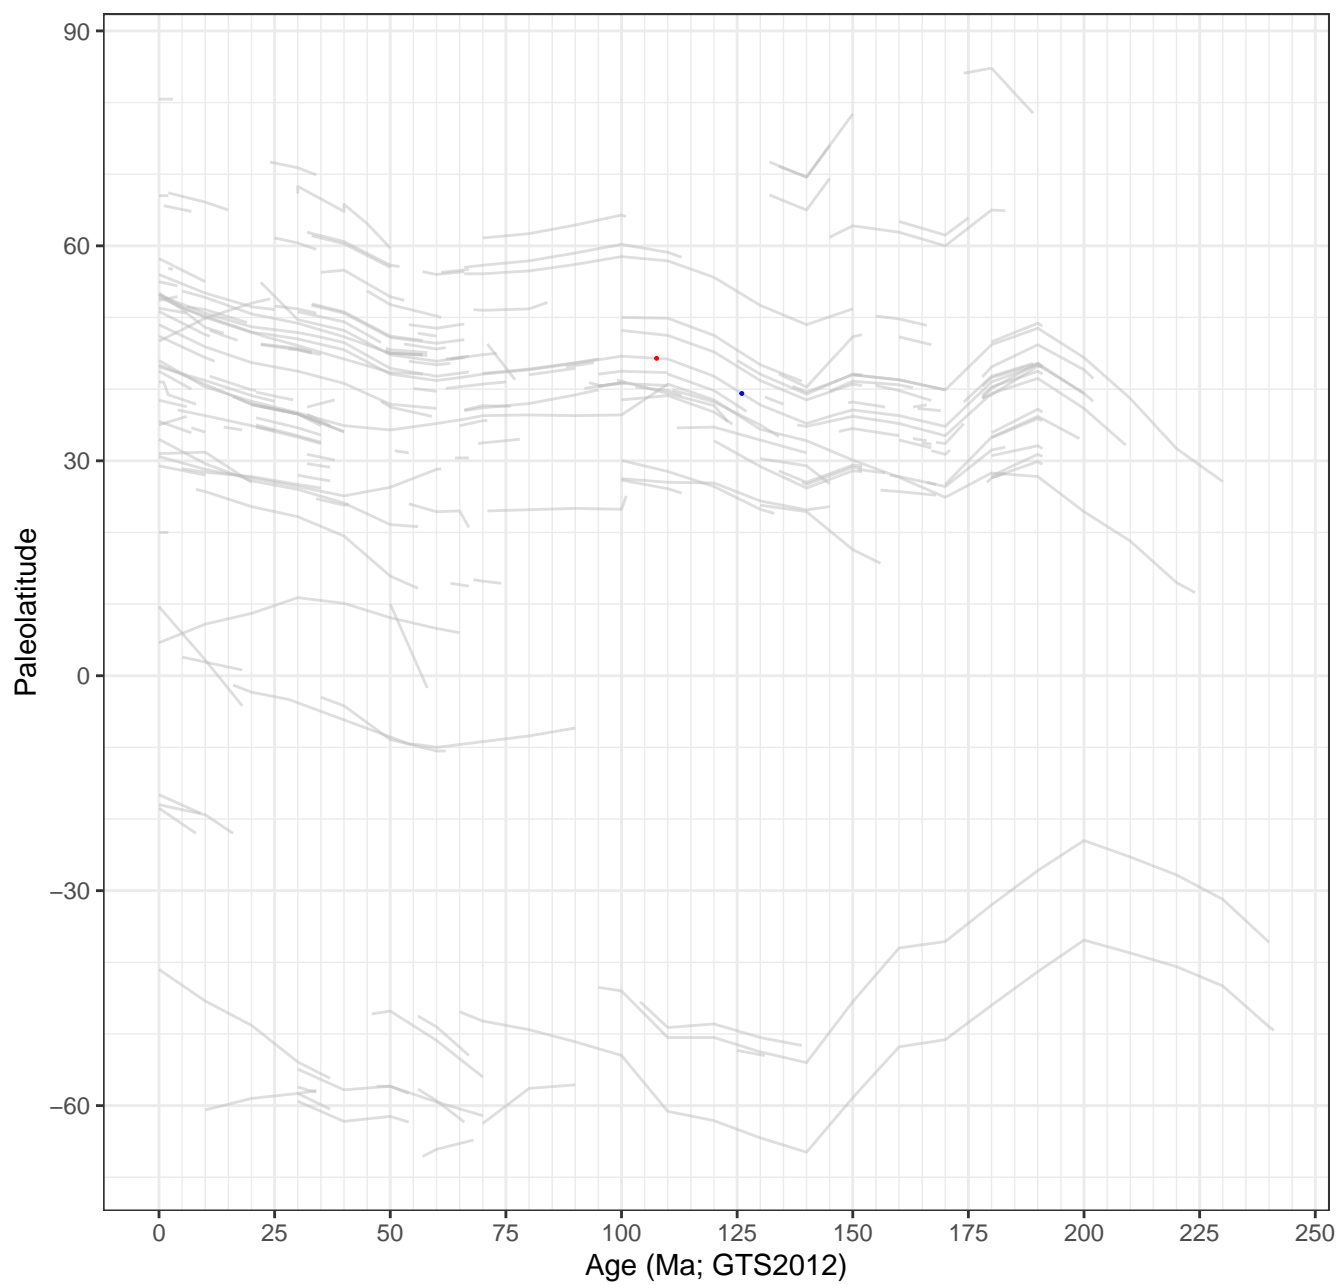

Supplement: Supplementary file 1909 [file Muderongia asymmetrica.pdf › Supplement/Supplement 2/Species 1914 plots/Muderongia asymmetrica.pdf]

# Species *Muderongia australis*

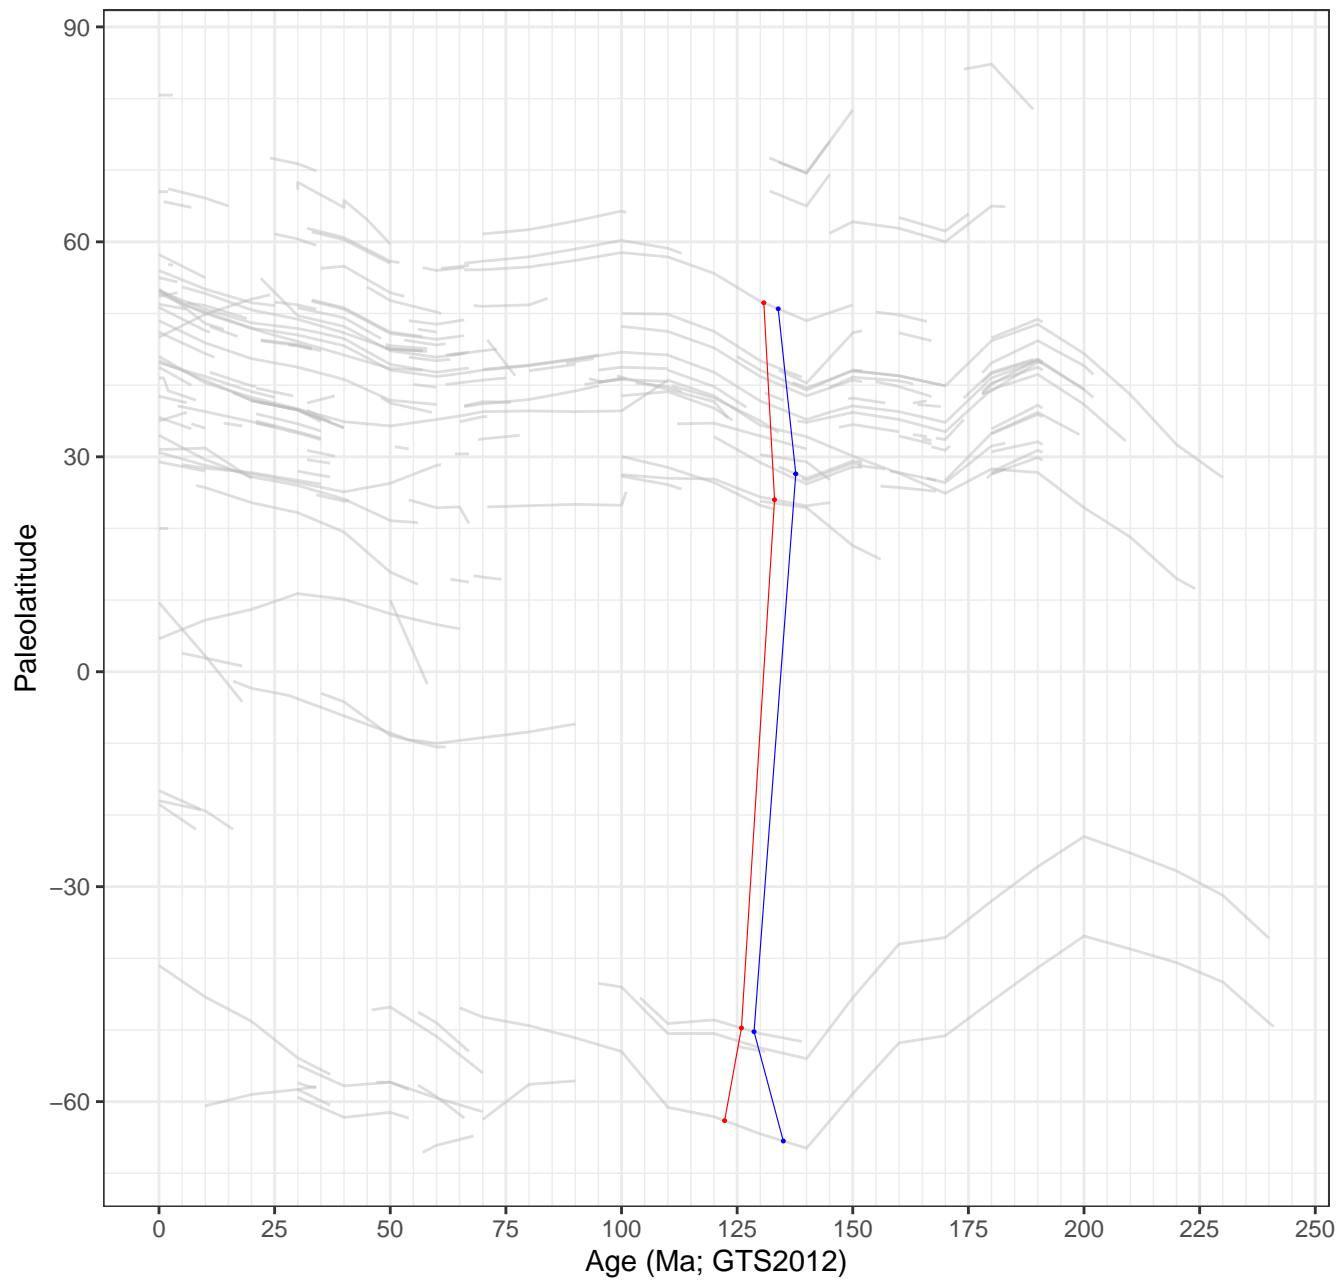

Supplement: Supplementary file 1910 [file Muderongia australis.pdf › Supplement/Supplement 2/Species 1914 plots/Muderongia australis.pdf]

# Species *Muderongia crucis*

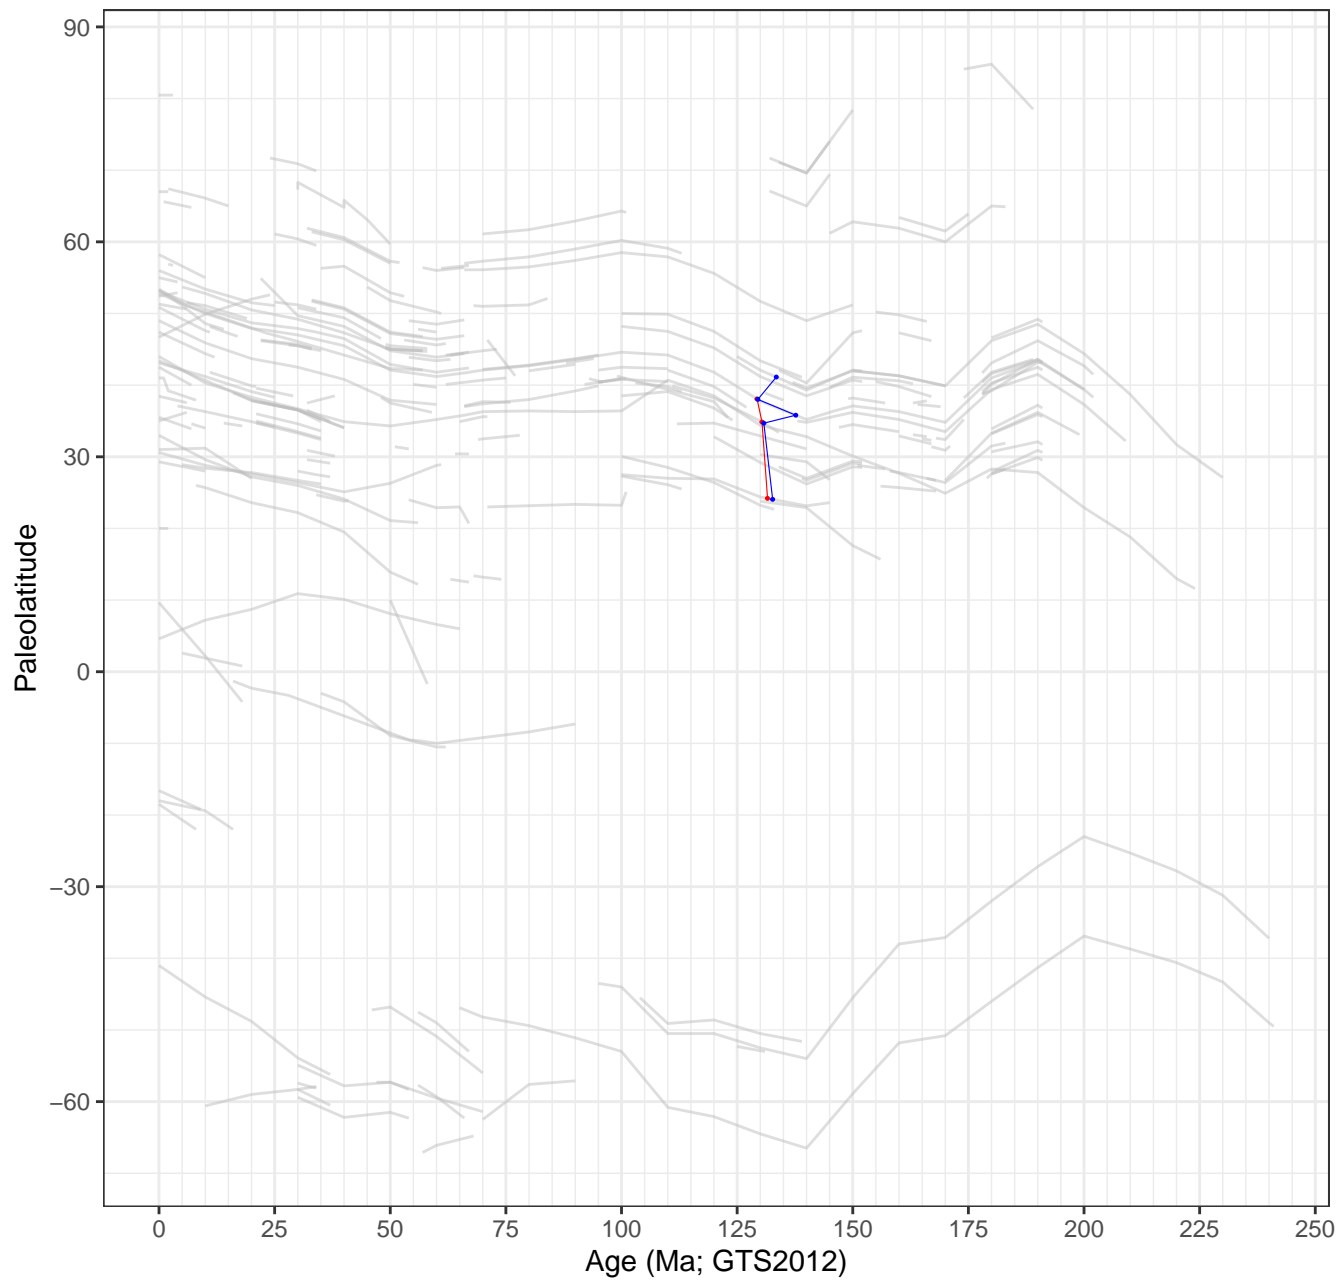

Supplement: Supplementary file 1911 [file Muderongia crucis.pdf › Supplement/Supplement 2/Species 1914 plots/Muderongia crucis.pdf]

# Species *Muderongia extensiva*

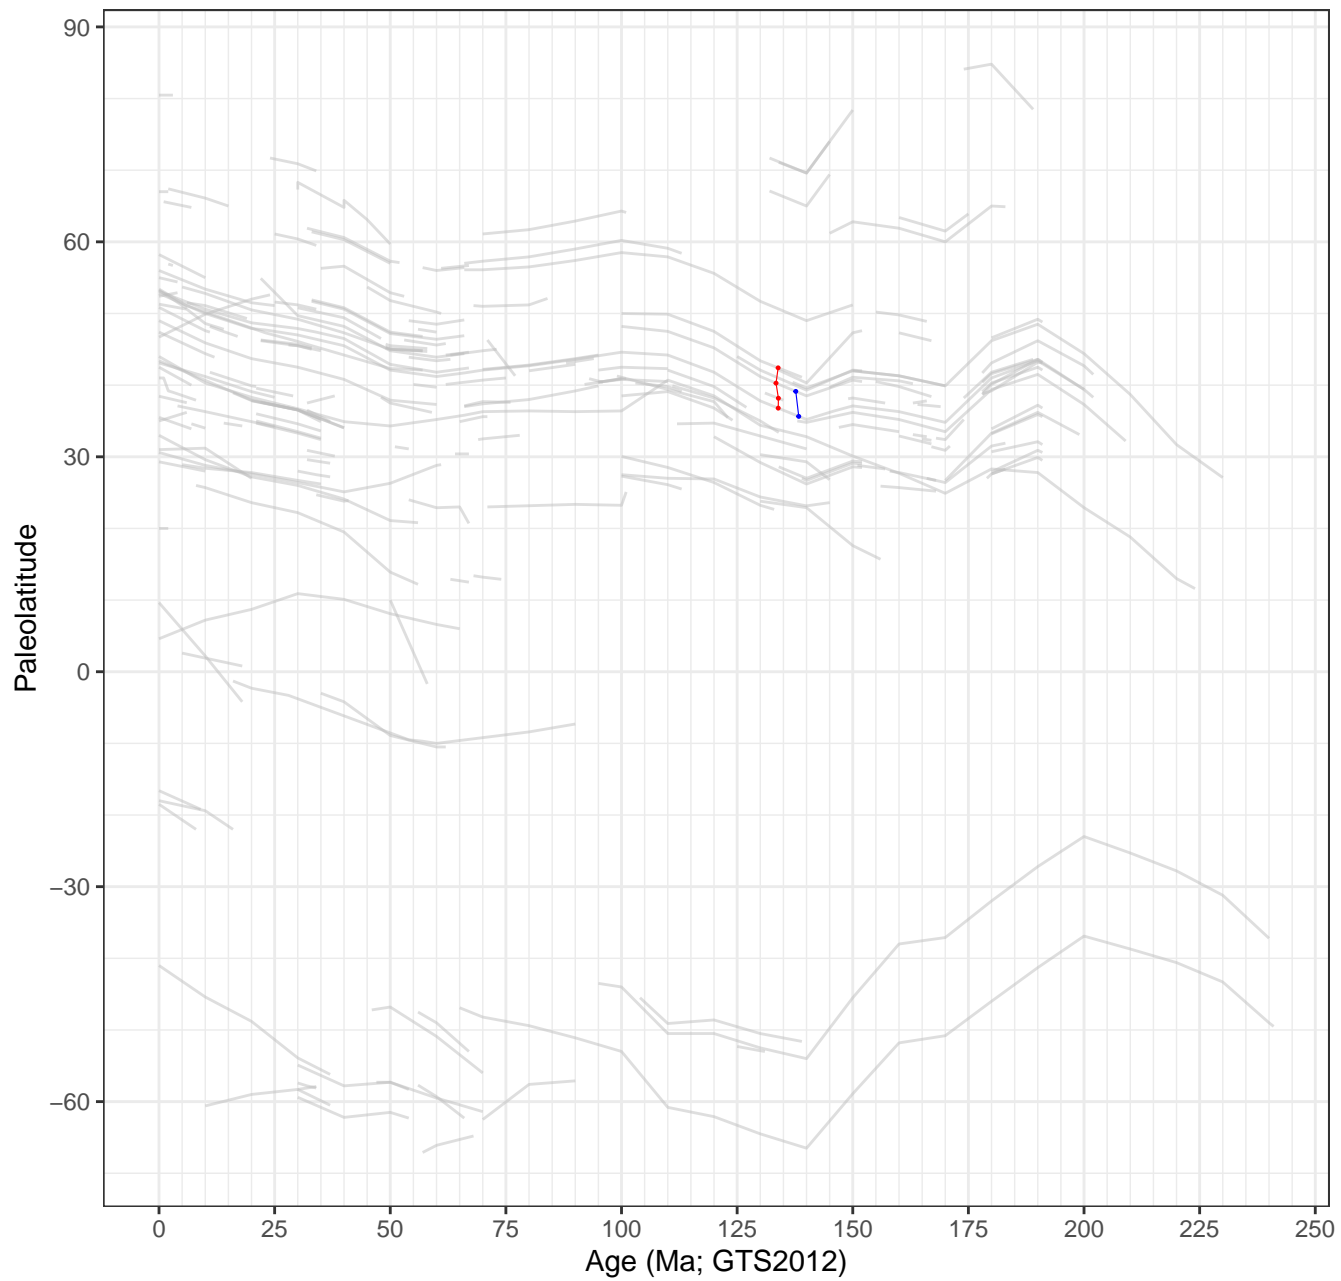

Supplement: Supplementary file 1912 [file Muderongia extensiva.pdf › Supplement/Supplement 2/Species 1914 plots/Muderongia extensiva.pdf]

# Species *Muderongia longicornis*

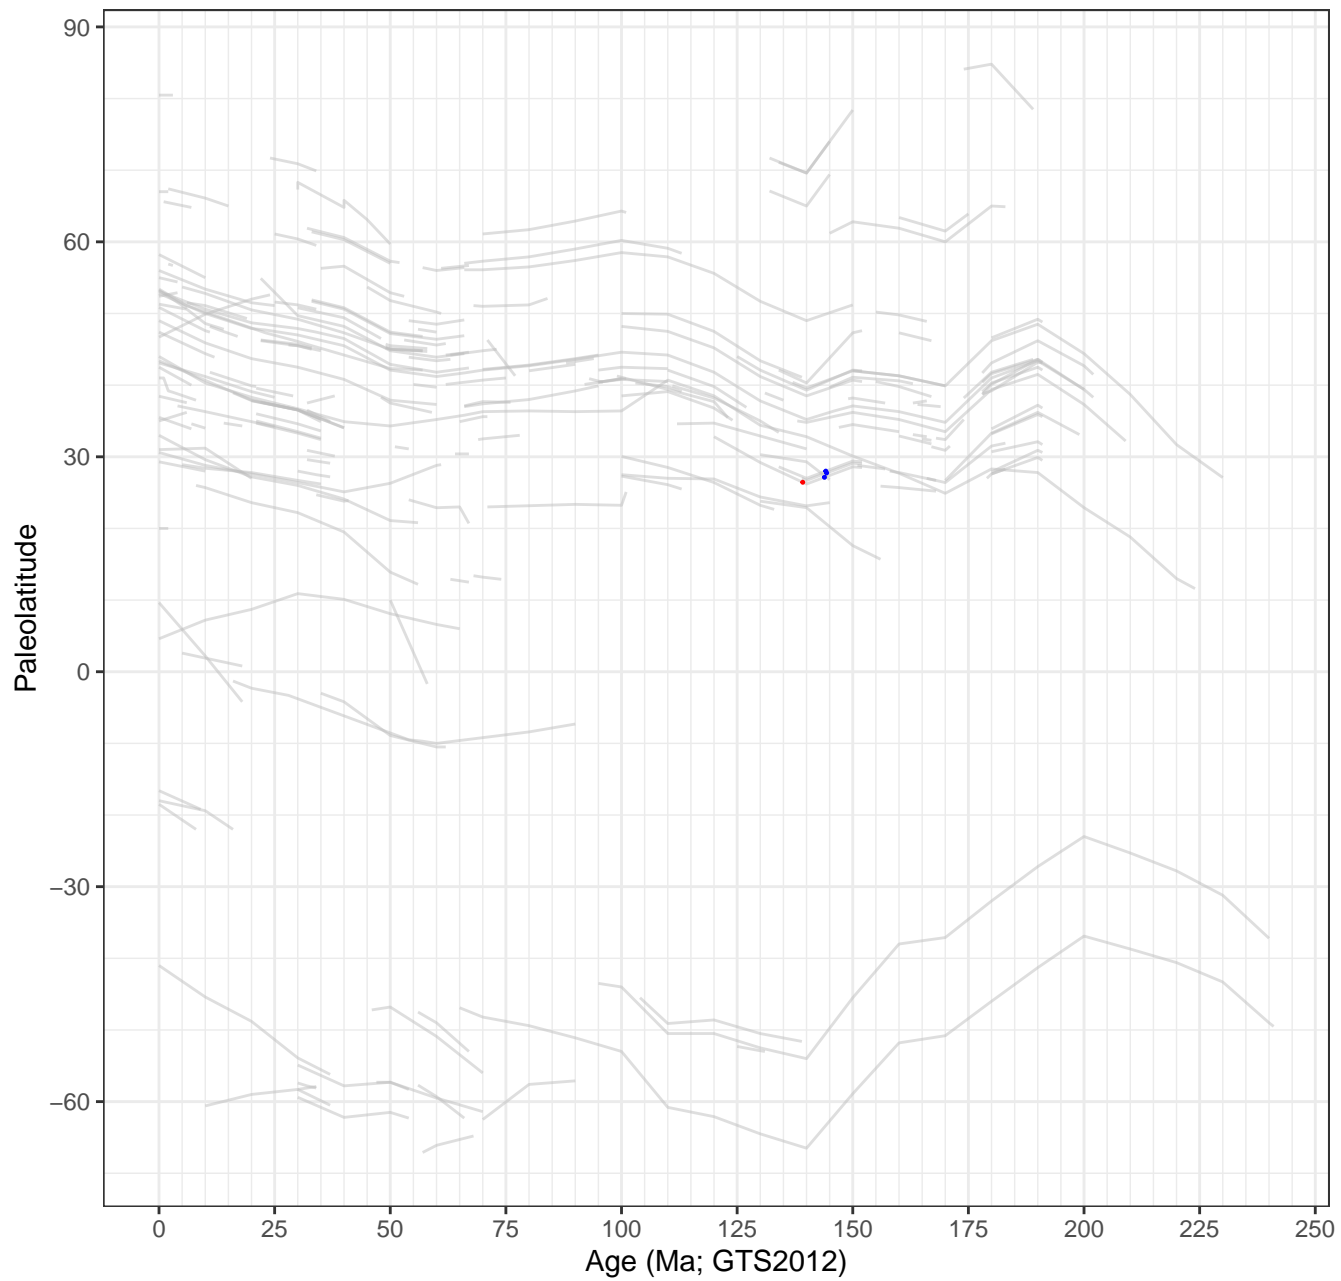

Supplement: Supplementary file 1913 [file Muderongia longicorna.pdf › Supplement/Supplement 2/Species 1914 plots/Muderongia longicorna.pdf]

# Species *Muderongia macwhaei*

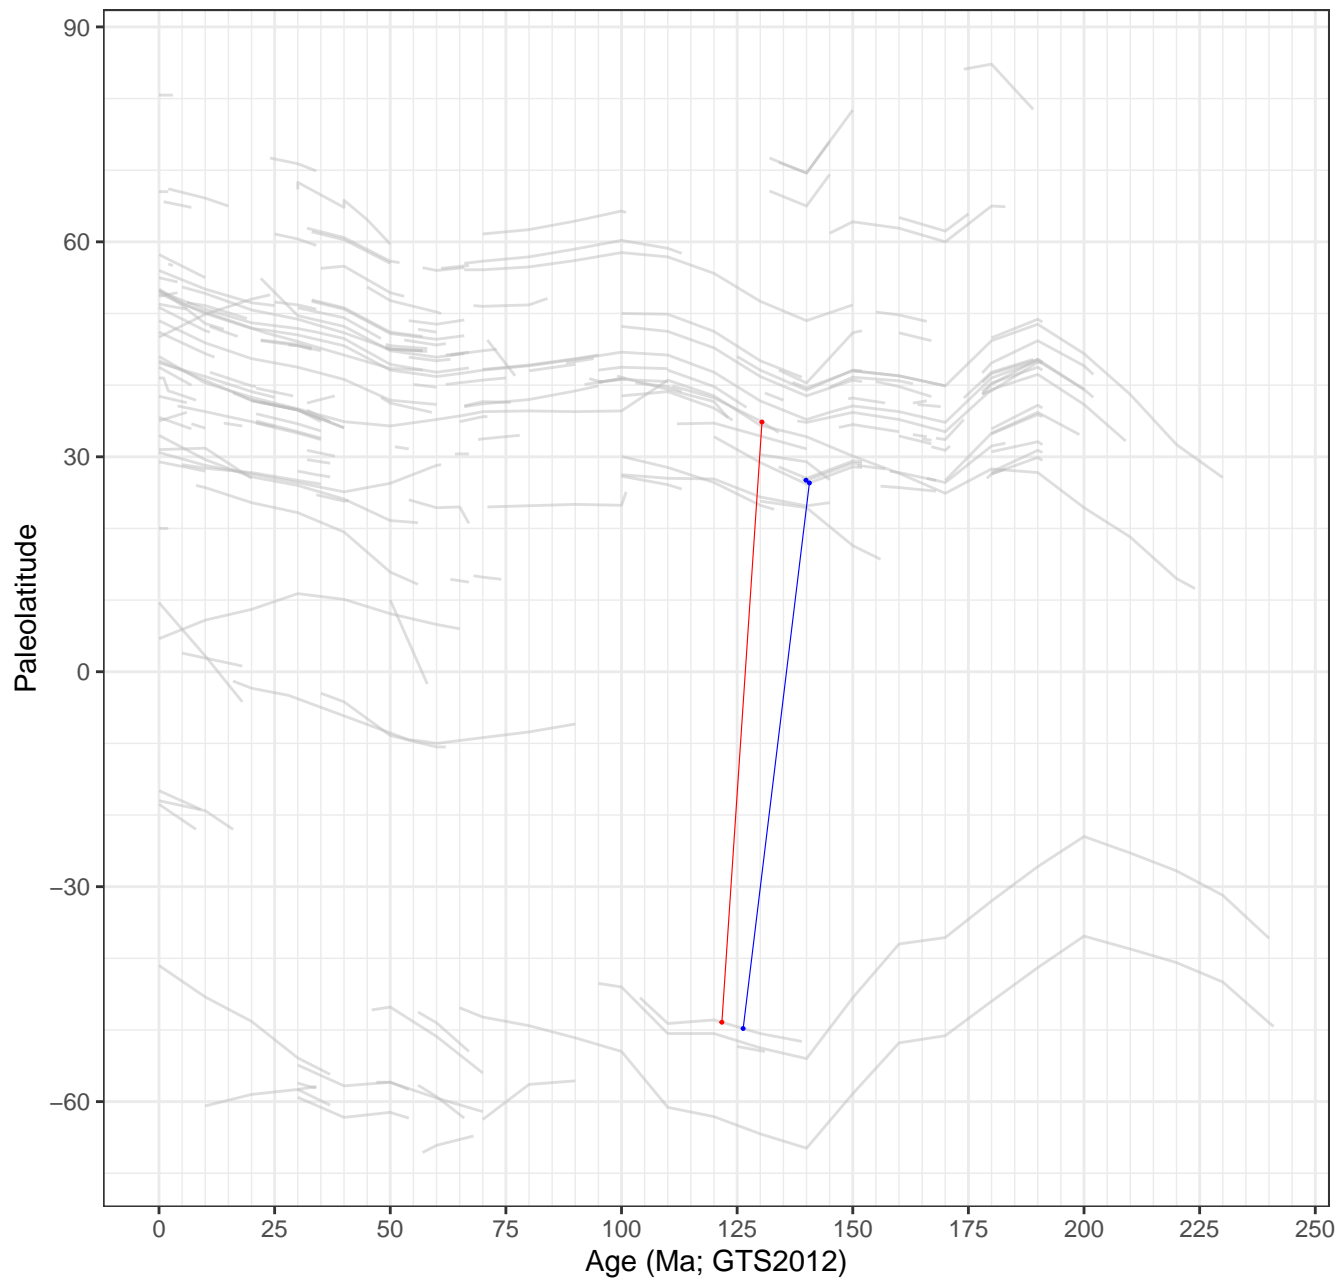

Supplement: Supplementary file 1914 [file Muderongia macwhaei.pdf › Supplement/Supplement 2/Species 1914 plots/Muderongia macwhaei.pdf]

# Species *Muderongia parjata*

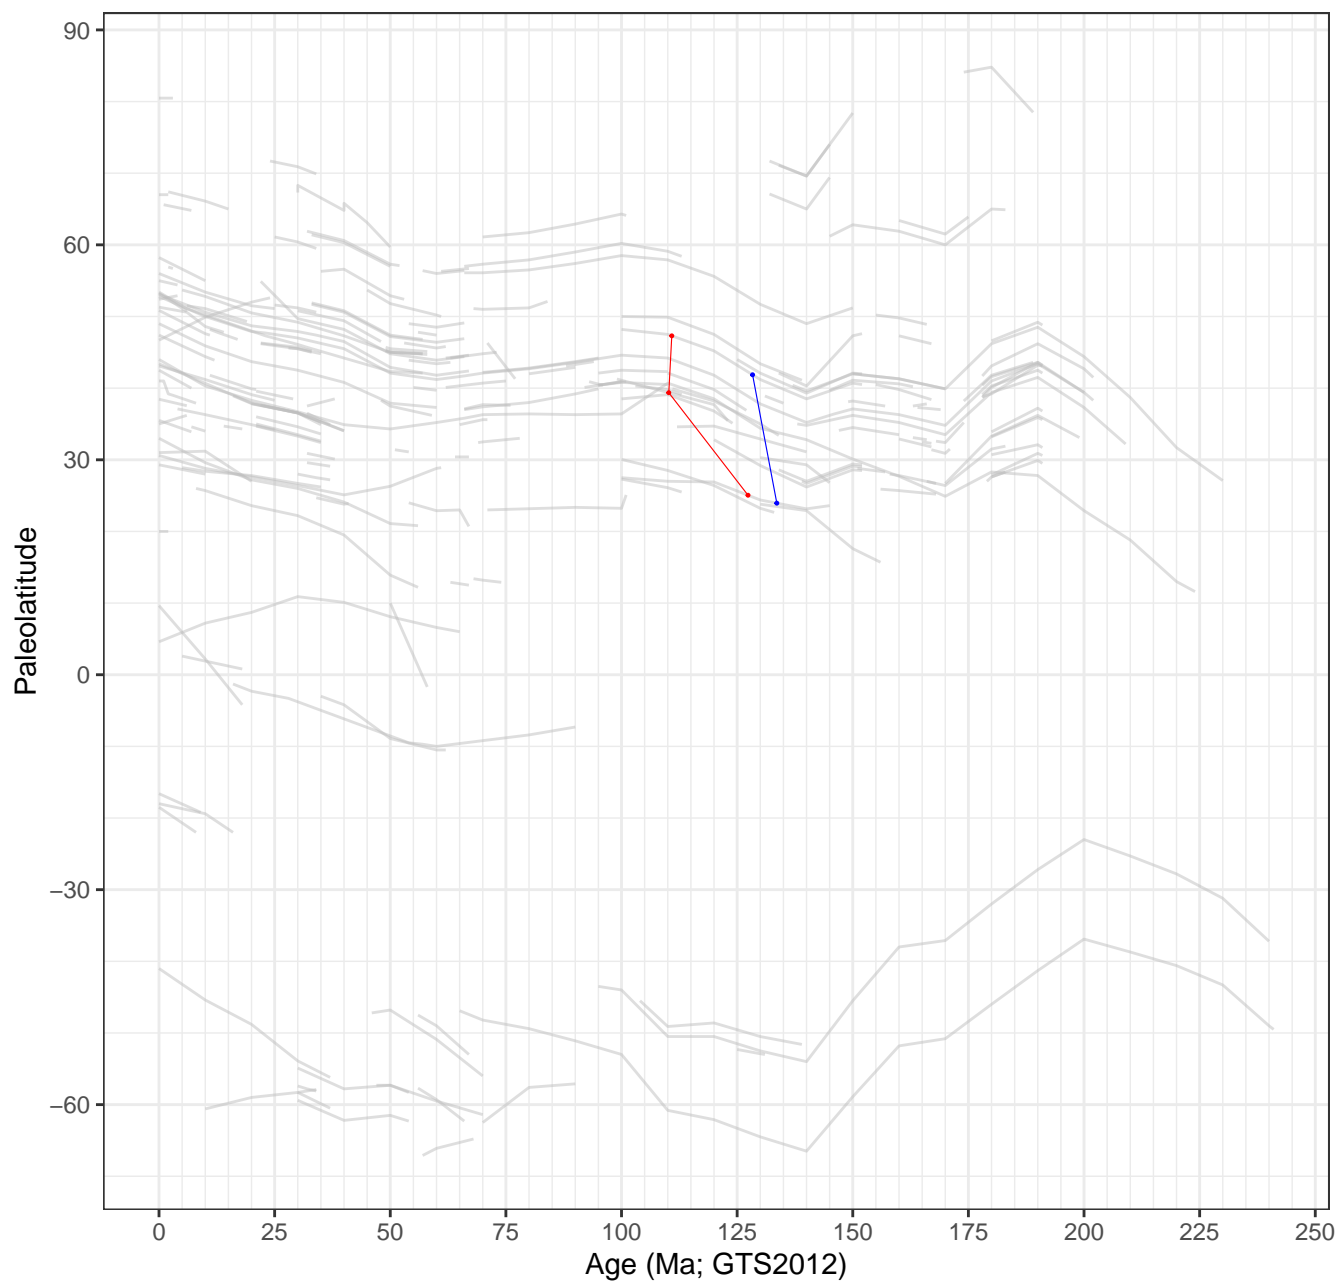

Supplement: Supplementary file 1915 [file Muderongia pariata.pdf › Supplement/Supplement 2/Species 1914 plots/Muderongia pariata.pdf]

# Species *Muderongia perforata*

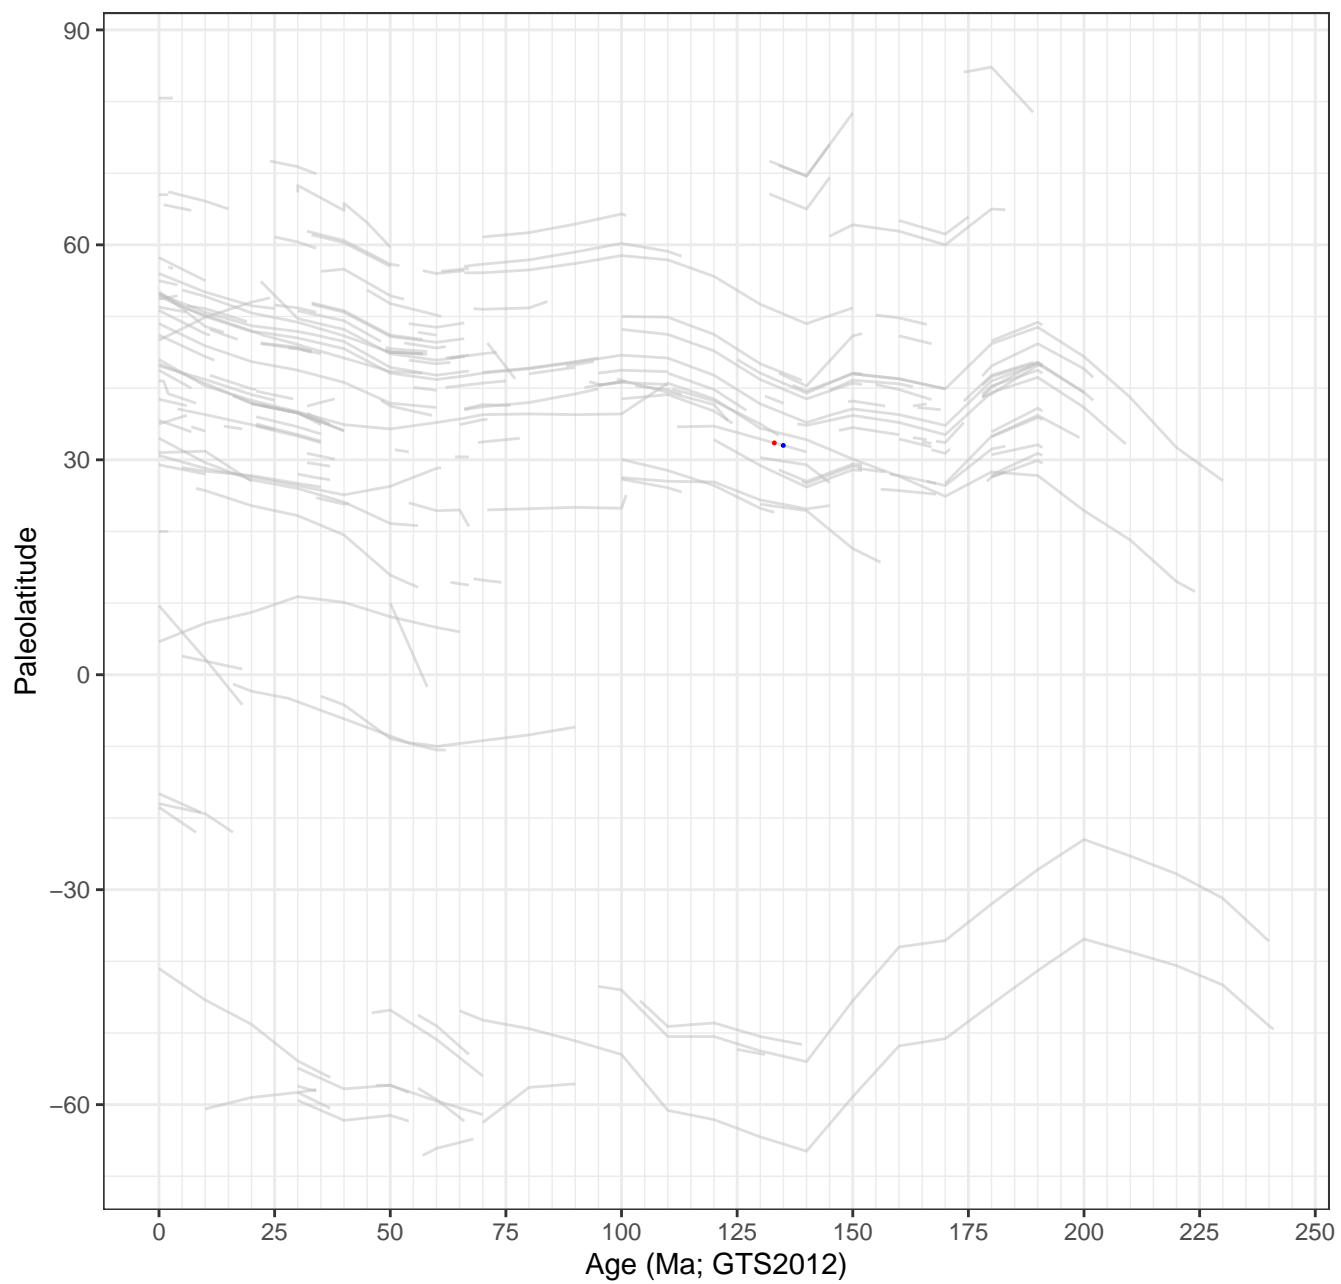

Supplement: Supplementary file 1916 [file Muderongia perforata.pdf › Supplement/Supplement 2/Species 1914 plots/Muderongia perforata.pdf]

# Species *Muderongia simplex microperforata*

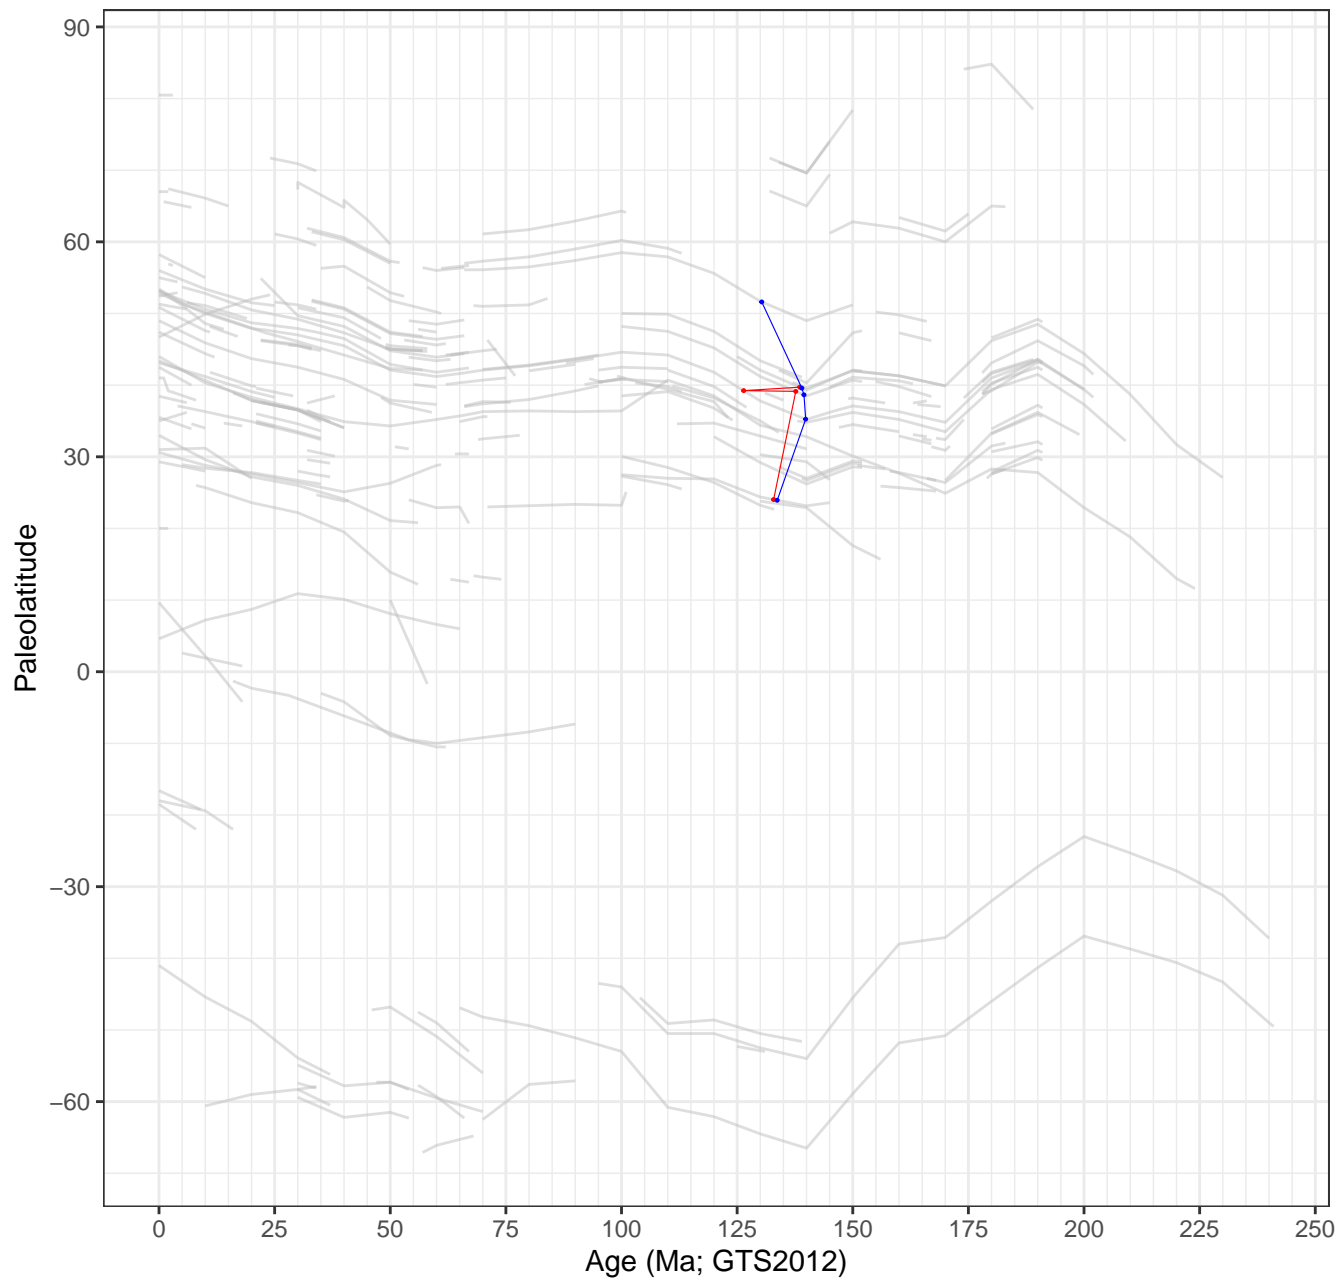

Supplement: Supplementary file 1917 [file Muderongia simplex microperforata.pdf › Supplement/Supplement 2/Species 1914 plots/Muderongia simplex microperforata.pdf]

# Species *Muderongia simplex*

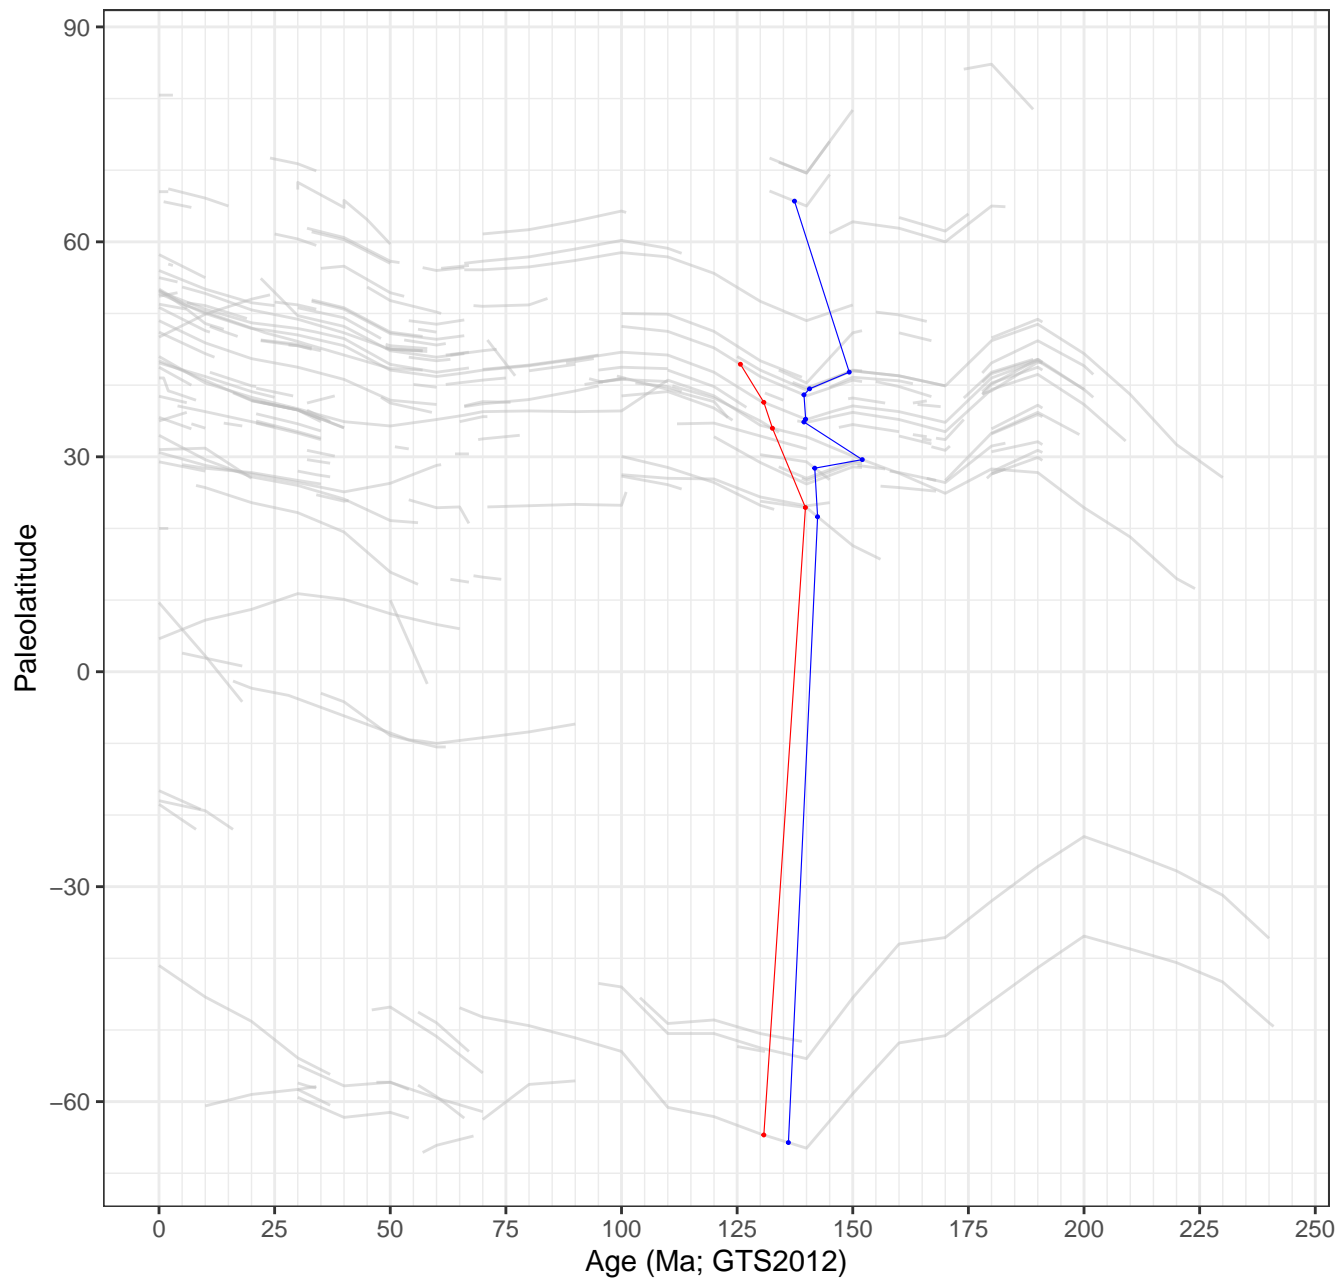

Supplement: Supplementary file 1918 [file Muderongia simplex.pdf › Supplement/Supplement 2/Species 1914 plots/Muderongia simplex.pdf]

# Species *Muderongia* sp. A

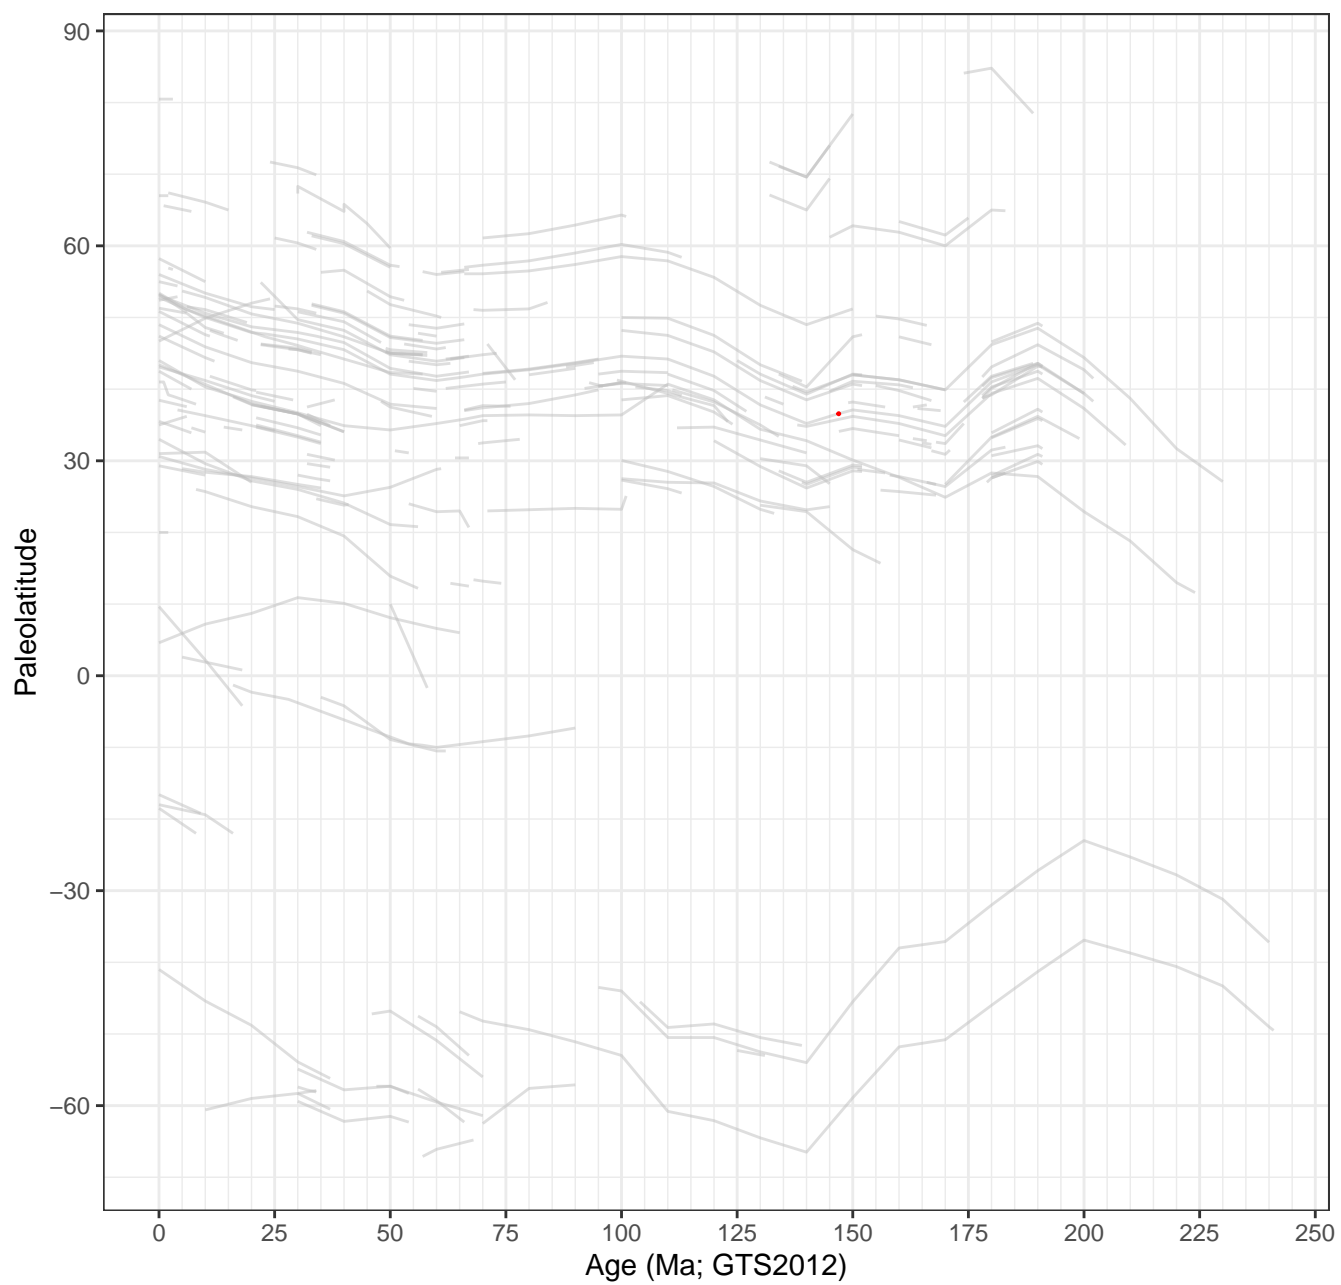

Supplement: Supplementary file 1919 [file Muderongia sp. A.pdf › Supplement/Supplement 2/Species 1914 plots/Muderongia sp. A.pdf]

# Species *Muderongia staurota*

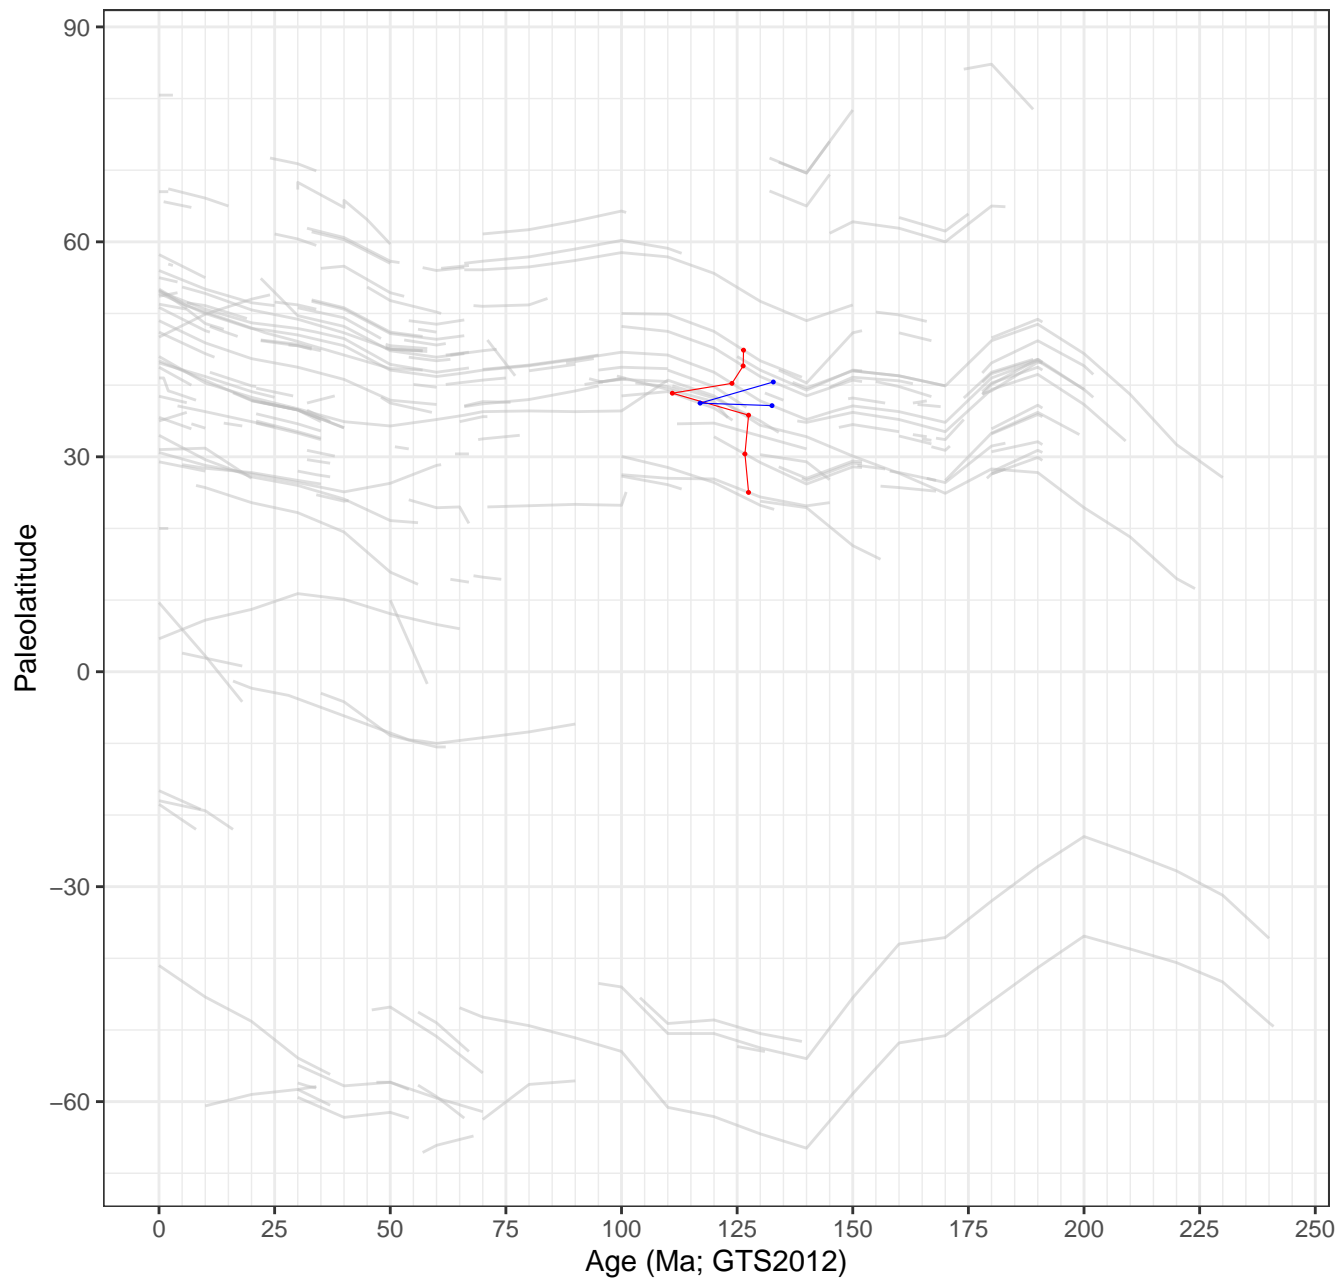

Supplement: Supplementary file 1920 [file Muderongia staurota.pdf › Supplement/Supplement 2/Species 1914 plots/Muderongia staurota.pdf]

# Species *Muderongia testudinaria*

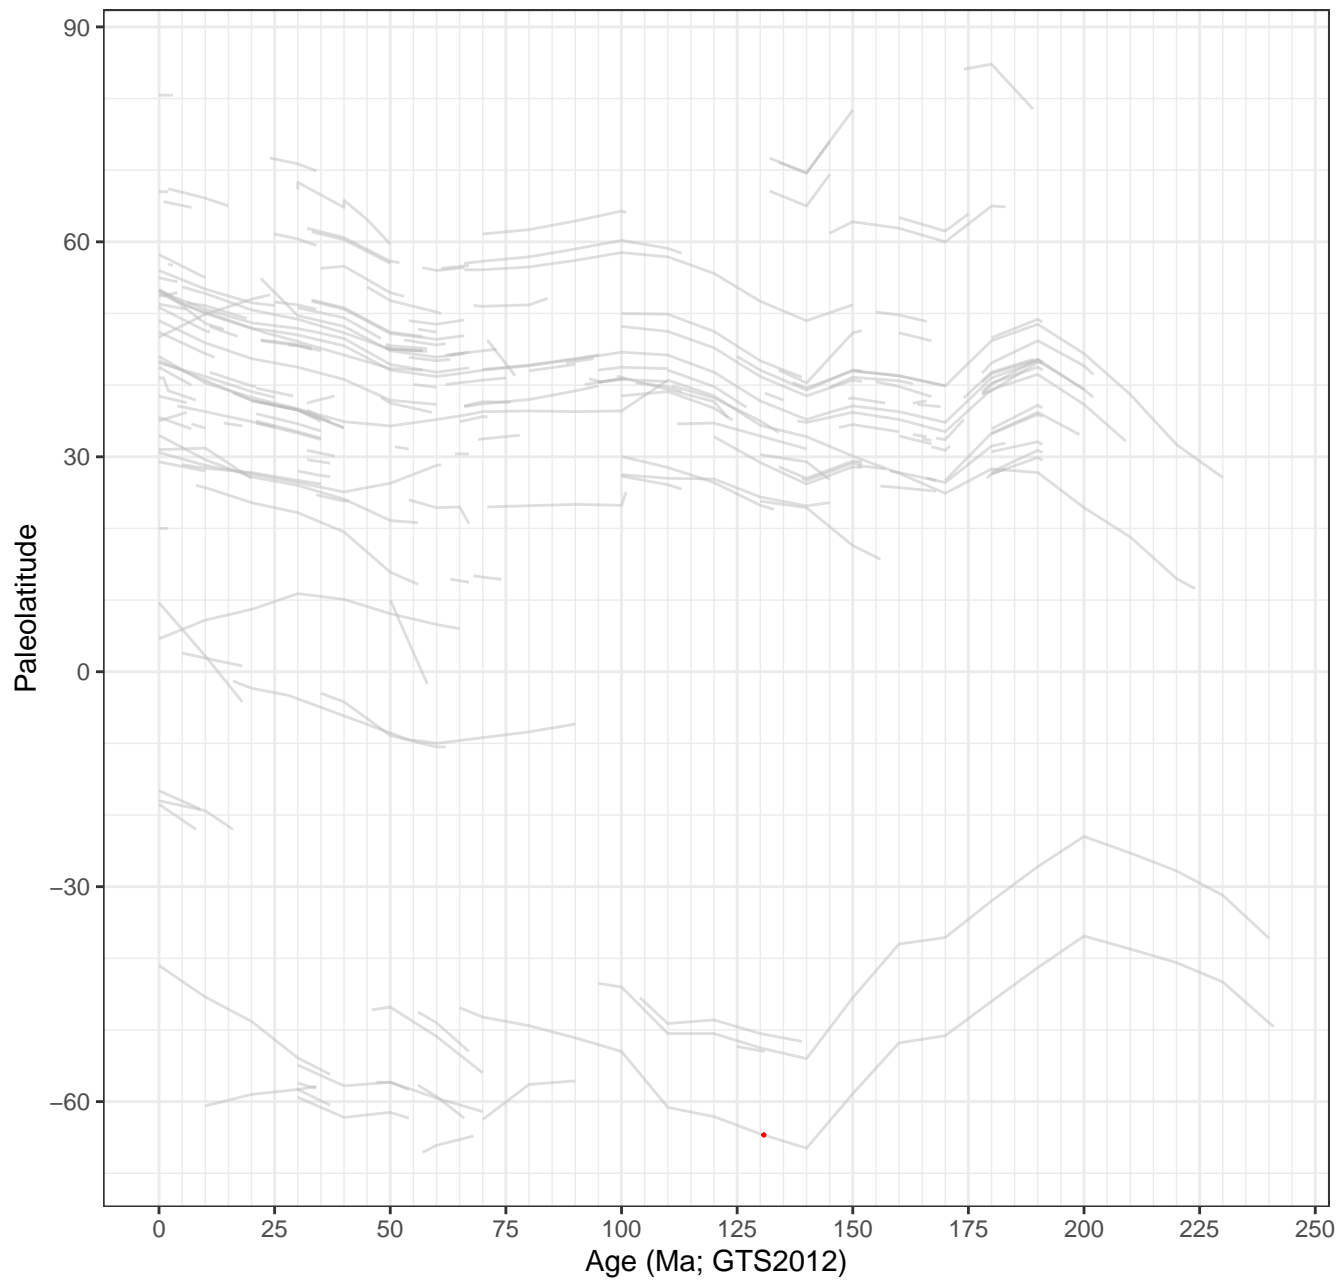

Supplement: Supplementary file 1921 [file Muderongia testudinaria.pdf › Supplement/Supplement 2/Species 1914 plots/Muderongia testudinaria.pdf]

# Species *Muderongia tetracantha*

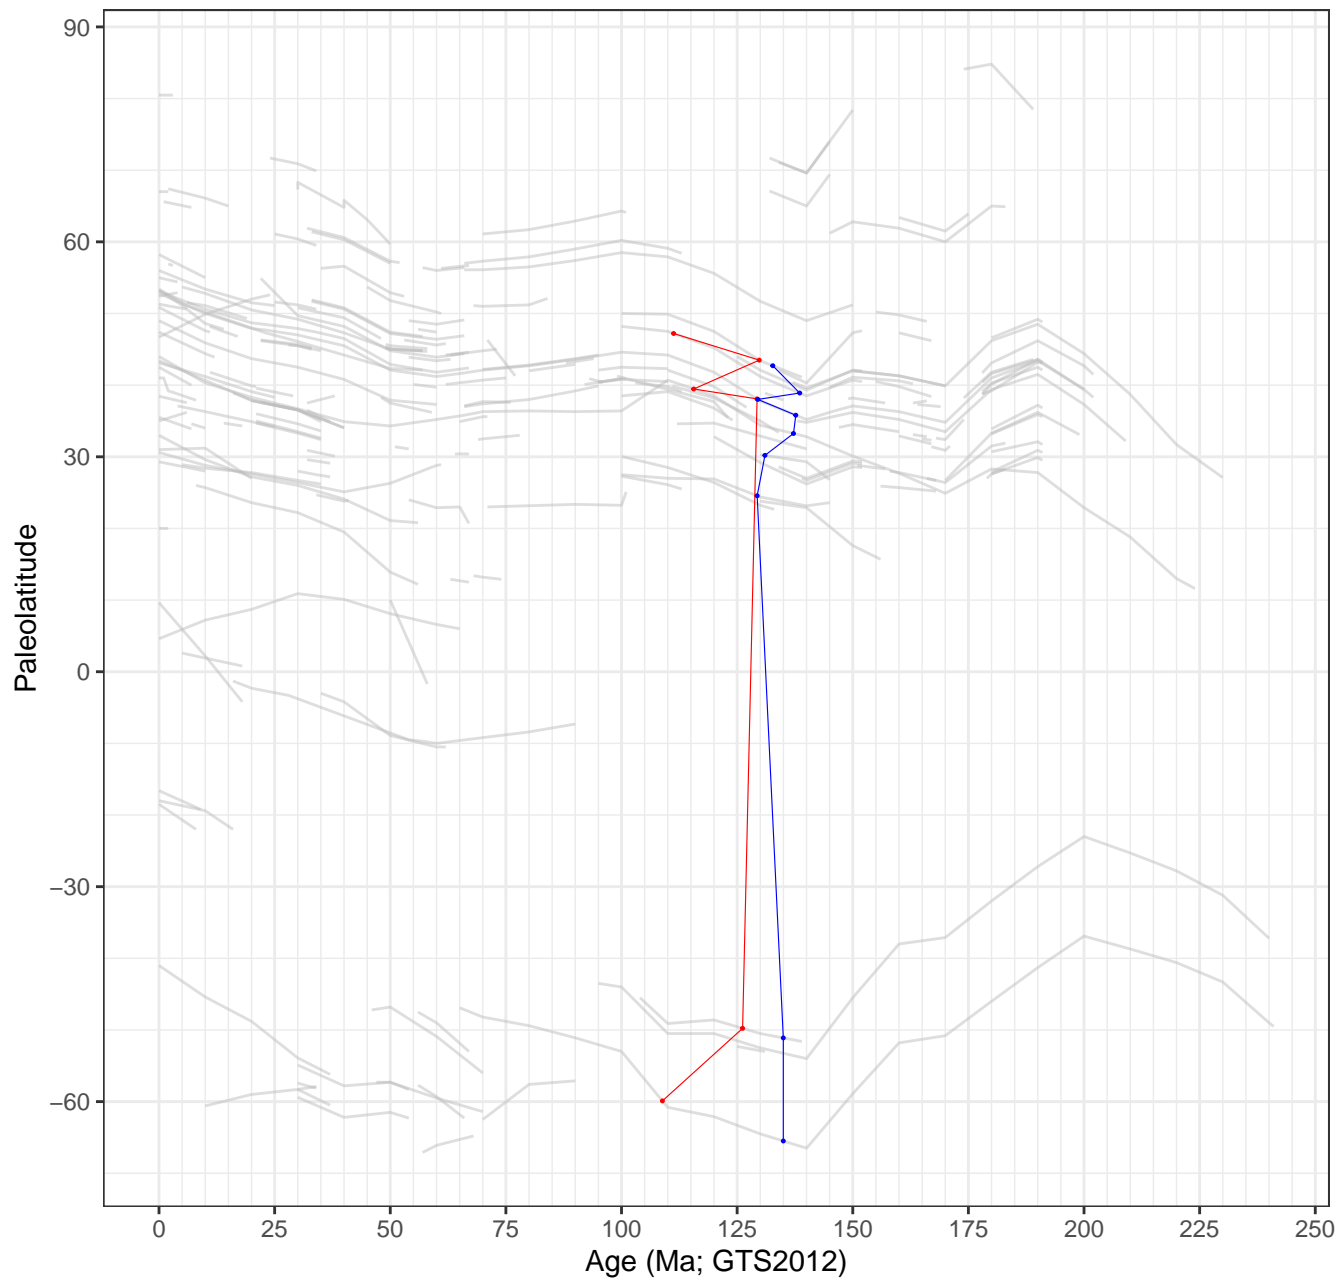

Supplement: Supplementary file 1922 [file Muderongia tetracantha.pdf › Supplement/Supplement 2/Species 1914 plots/Muderongia tetracantha.pdf]

# Species *Muratodinium fimbriatum*

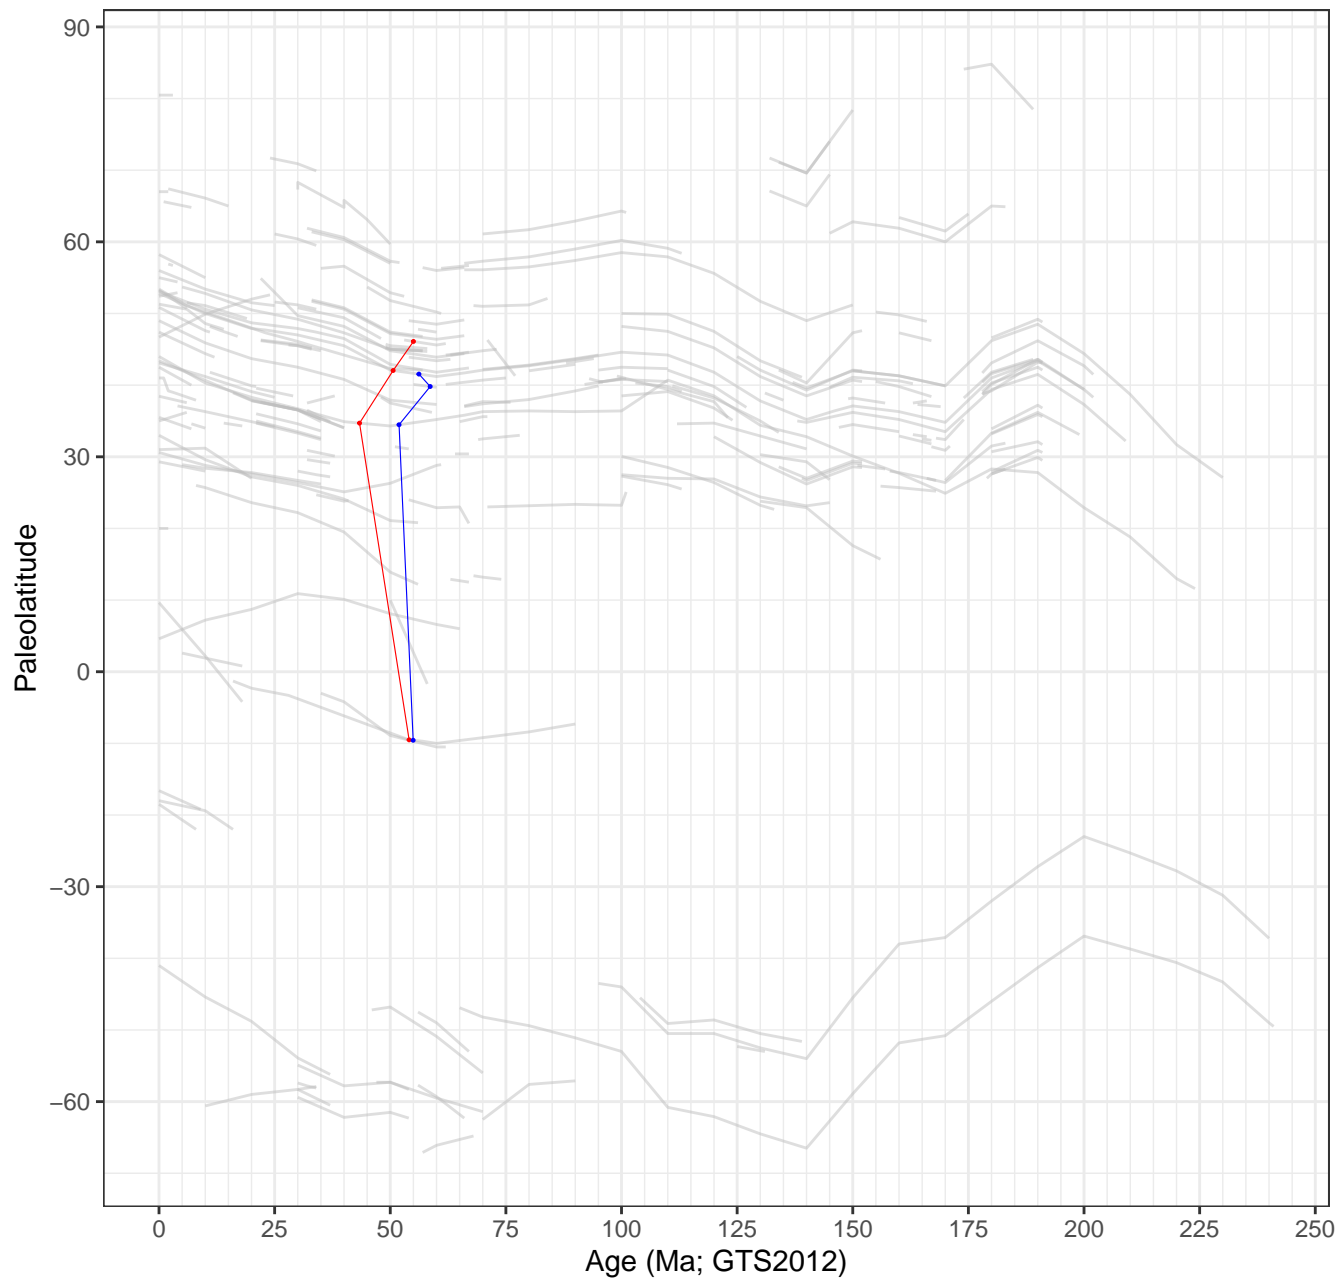

Supplement: Supplementary file 1923 [file Muratodinium fimbriatum.pdf › Supplement/Supplement 2/Species 1914 plots/Muratodinium fimbriatum.pdf]

# Species *Nannoceratopsis ambonis*

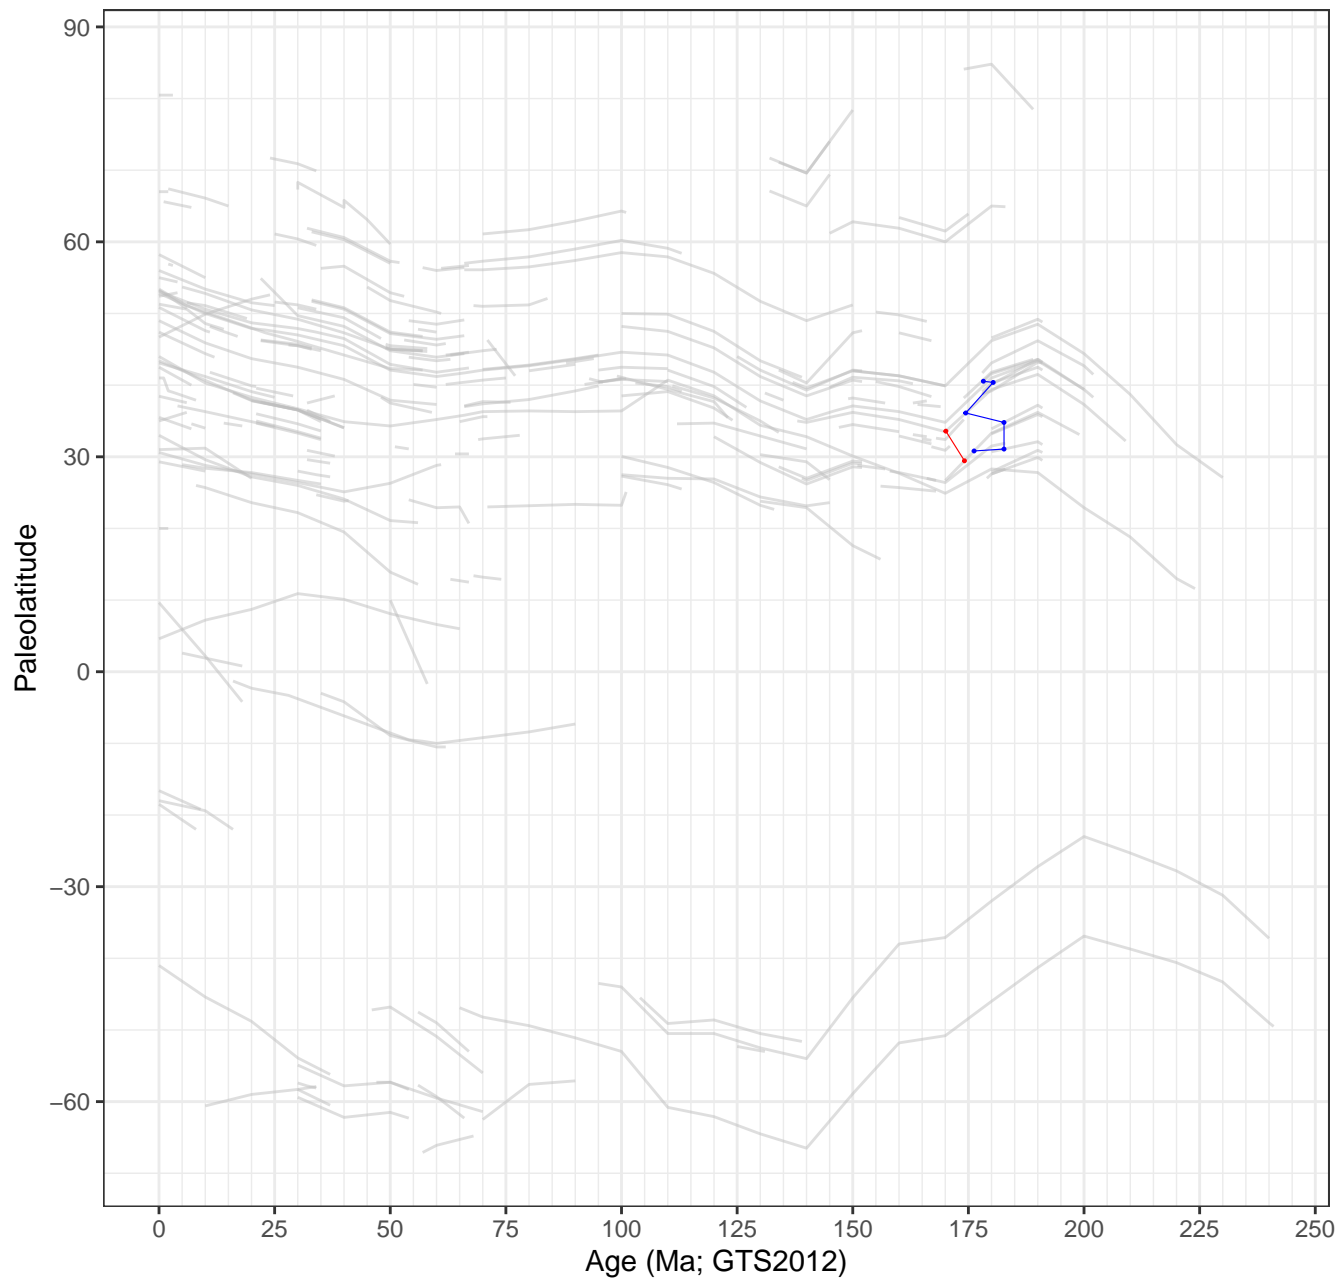

Supplement: Supplementary file 1924 [file Nannoceratopsis ambonis.pdf › Supplement/Supplement 2/Species 1914 plots/Nannoceratopsis ambonis.pdf]

# Species *Nannoceratopsis deflandrei* senex

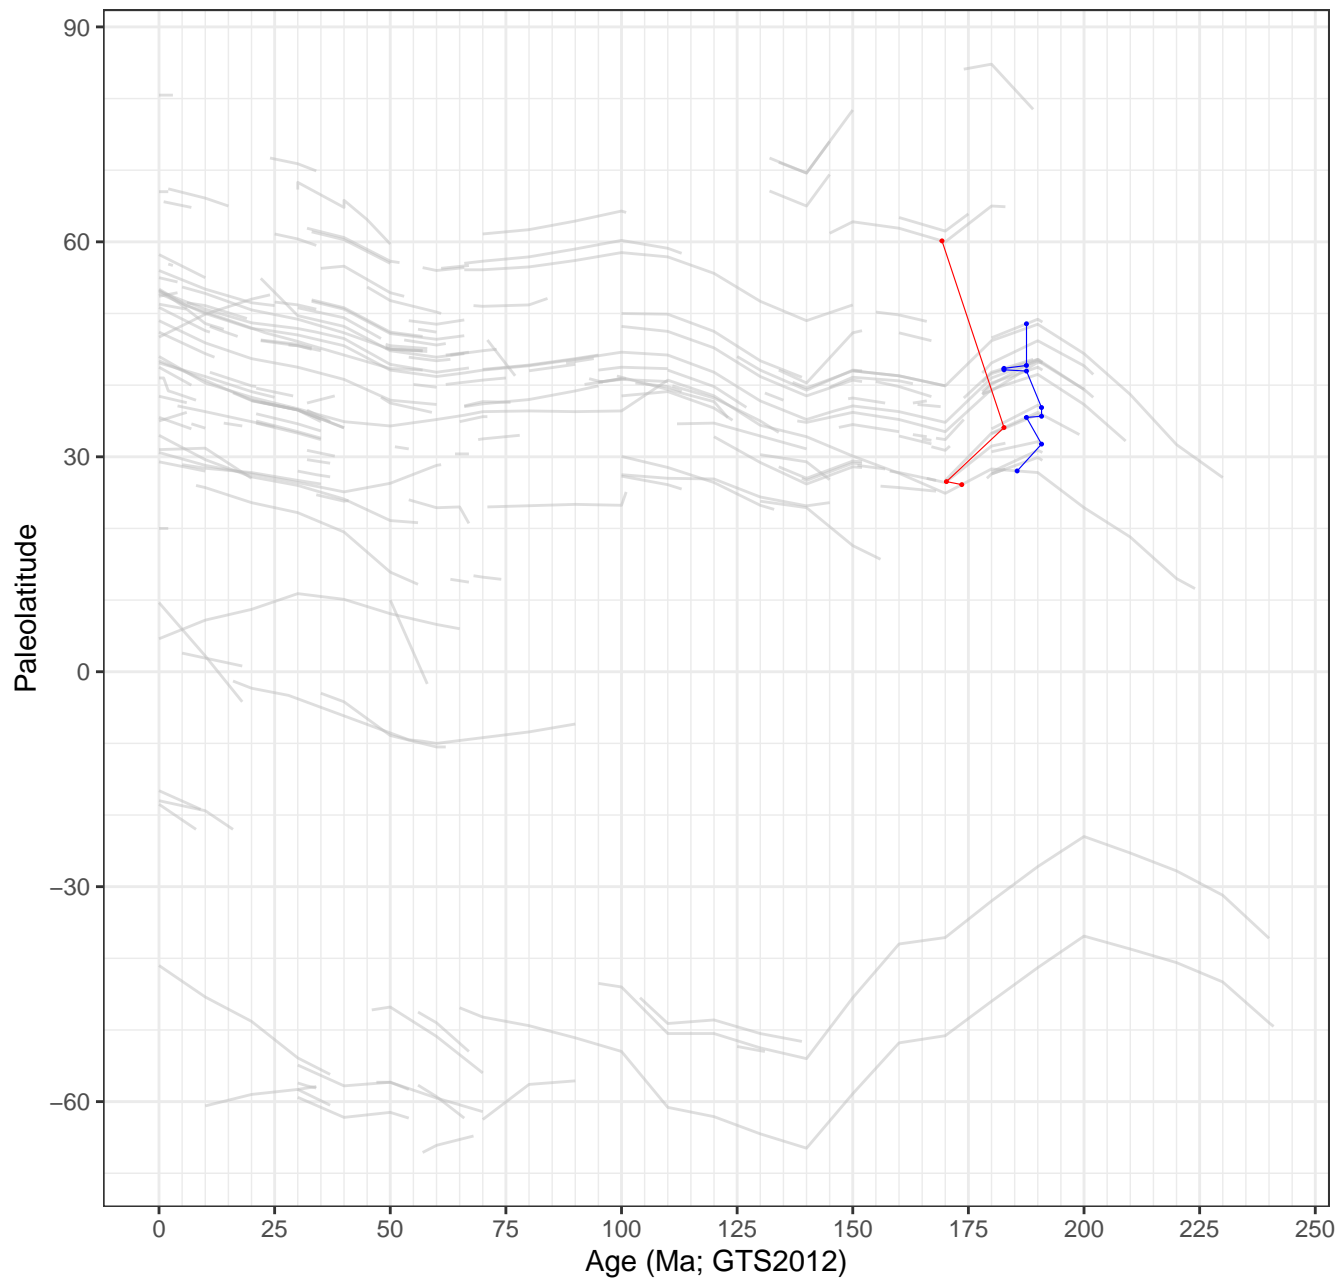

Supplement: Supplementary file 1925 [file Nannoceratopsis deflandrei senex.pdf › Supplement/Supplement 2/Species 1914 plots/Nannoceratopsis deflandrei senex.pdf]

# Species *Nannoceratopsis deflandrei*

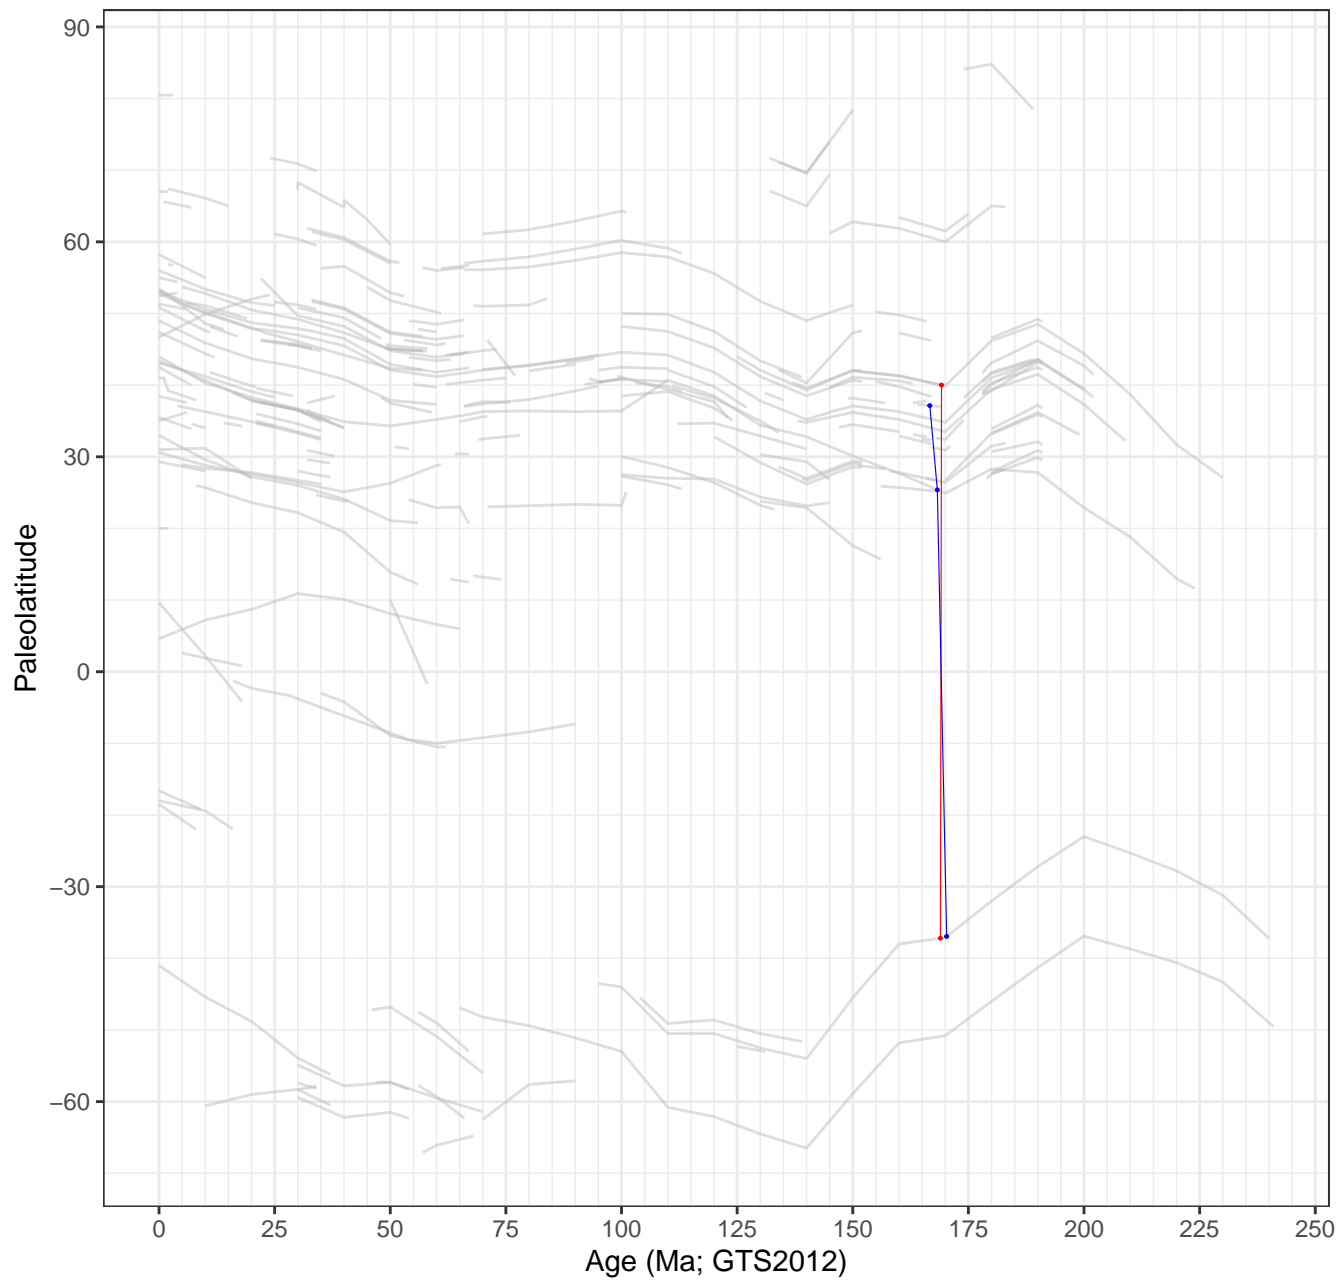

Supplement: Supplementary file 1926 [file Nannoceratopsis deflandrei.pdf › Supplement/Supplement 2/Species 1914 plots/Nannoceratopsis deflandrei.pdf]

# Species *Nannoceratopsis dictyambonis*

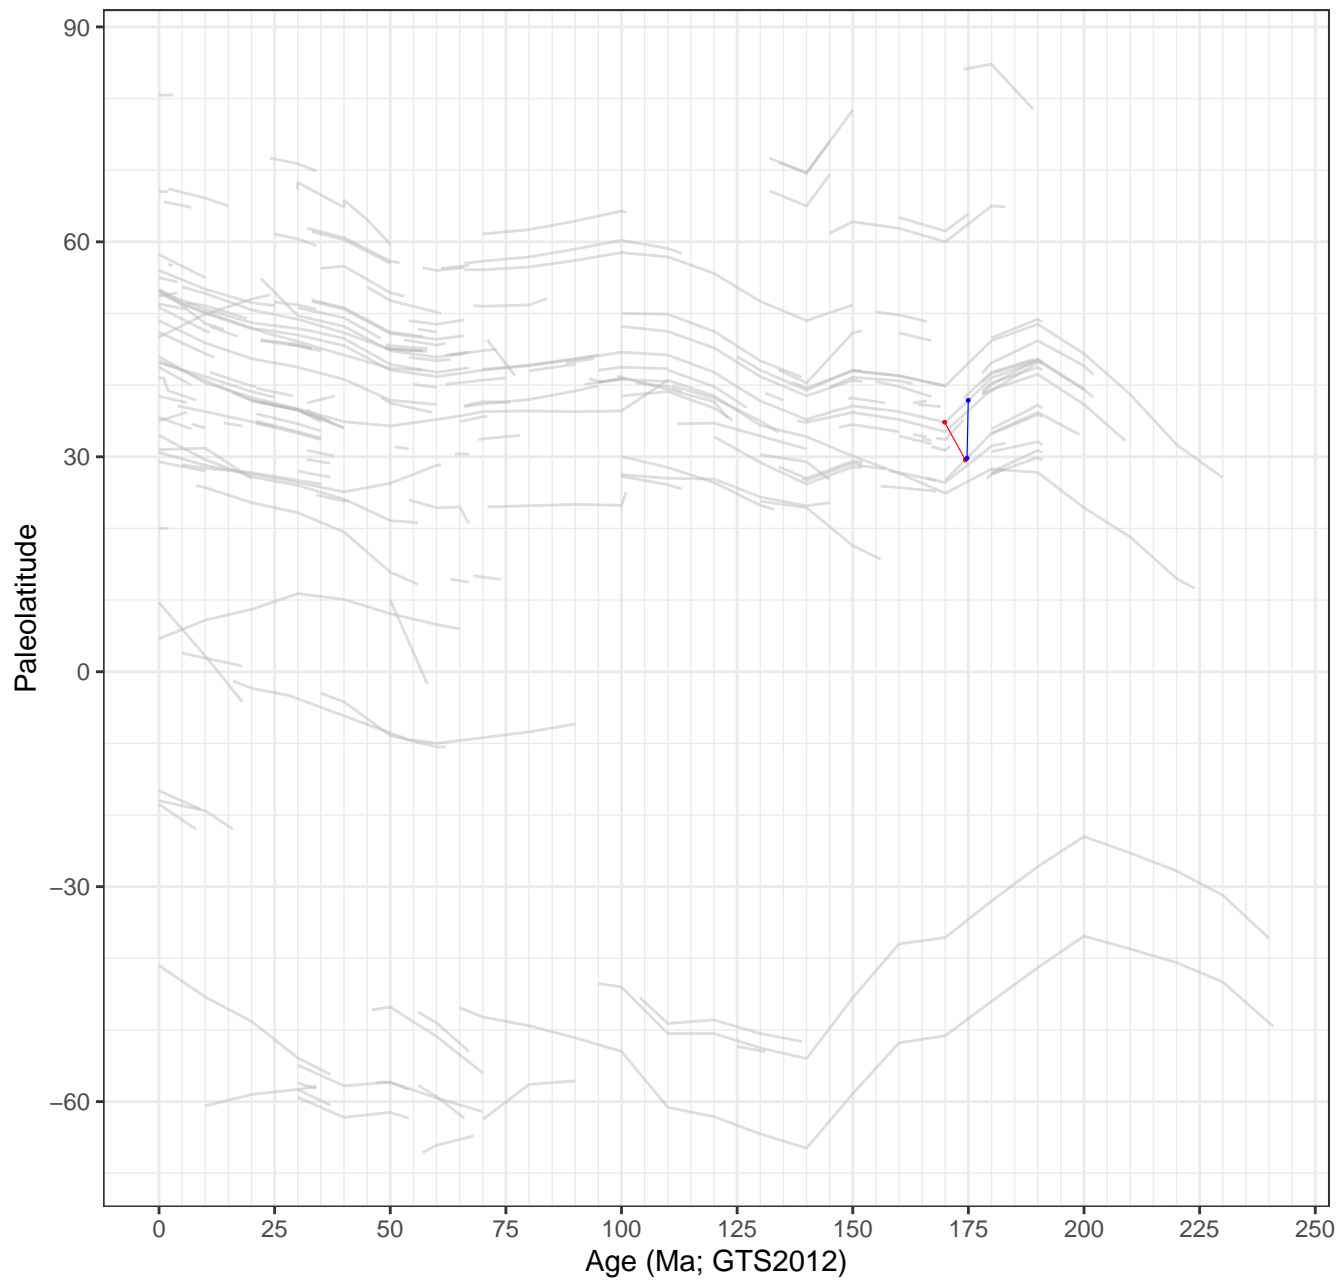

Supplement: Supplementary file 1927 [file Nannoceratopsis dictyambonis.pdf › Supplement/Supplement 2/Species 1914 plots/Nannoceratopsis dictyambonis.pdf]

# Species *Nannoceratopsis globiformis*

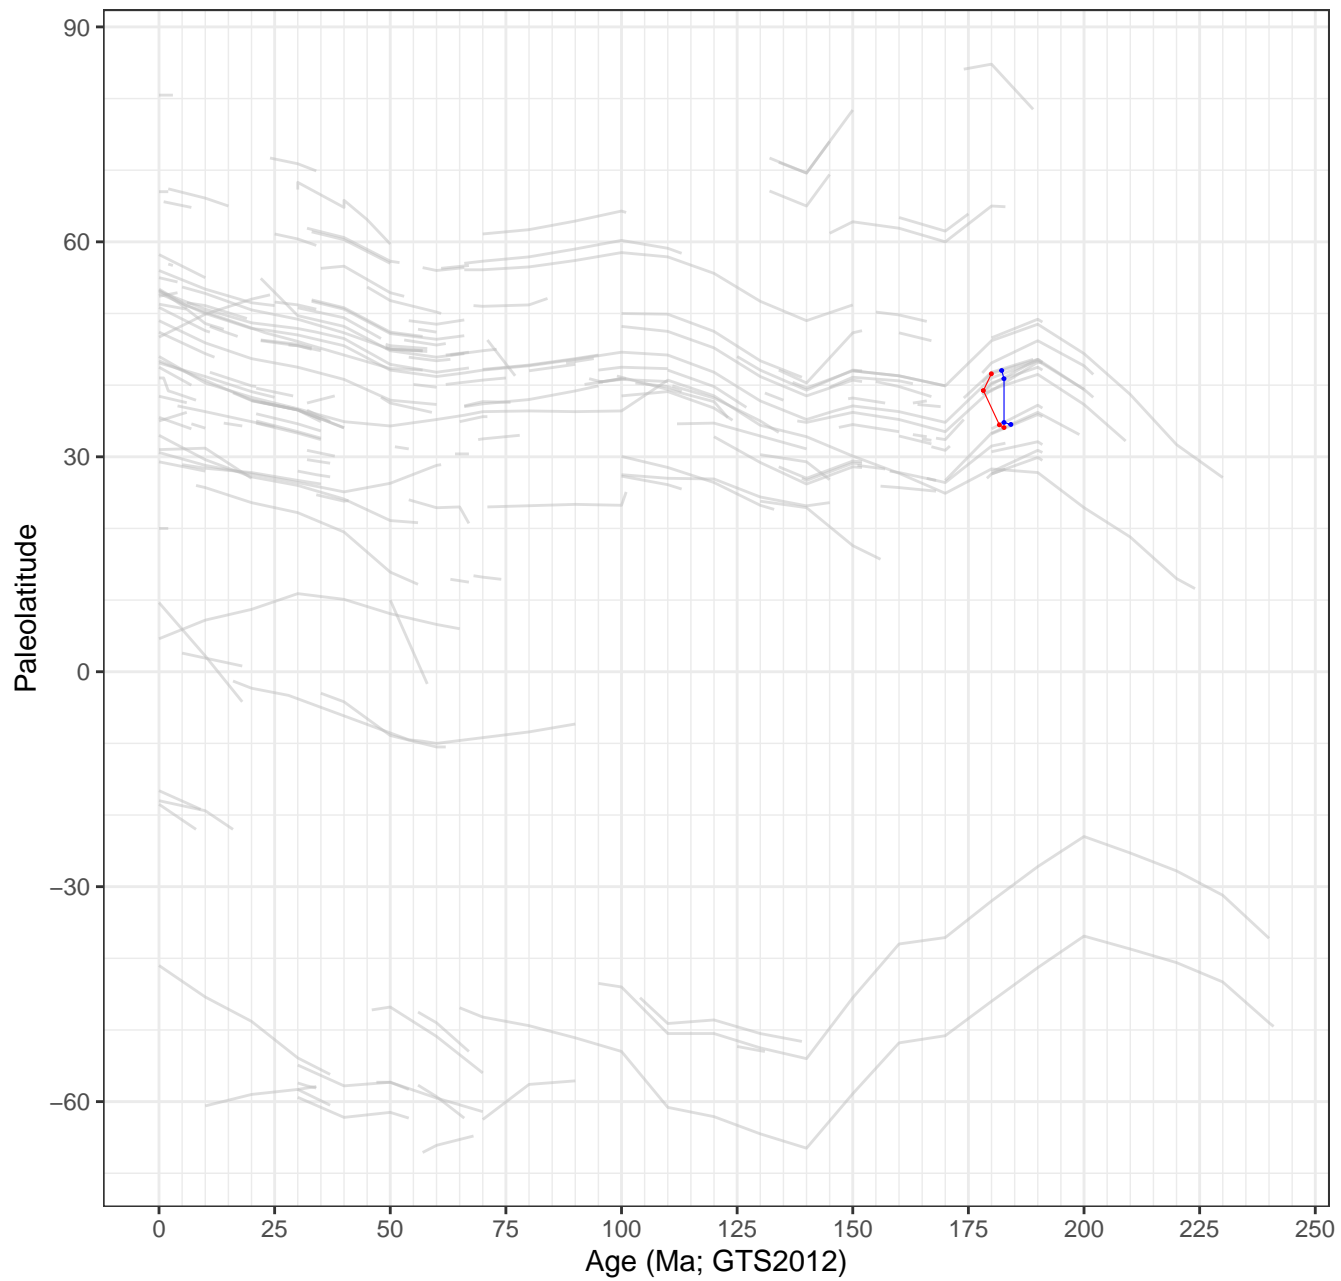

Supplement: Supplementary file 1928 [file Nannoceratopsis globiformis.pdf › Supplement/Supplement 2/Species 1914 plots/Nannoceratopsis globiformis.pdf]

# Species *Nannoceratopsis gracilis*

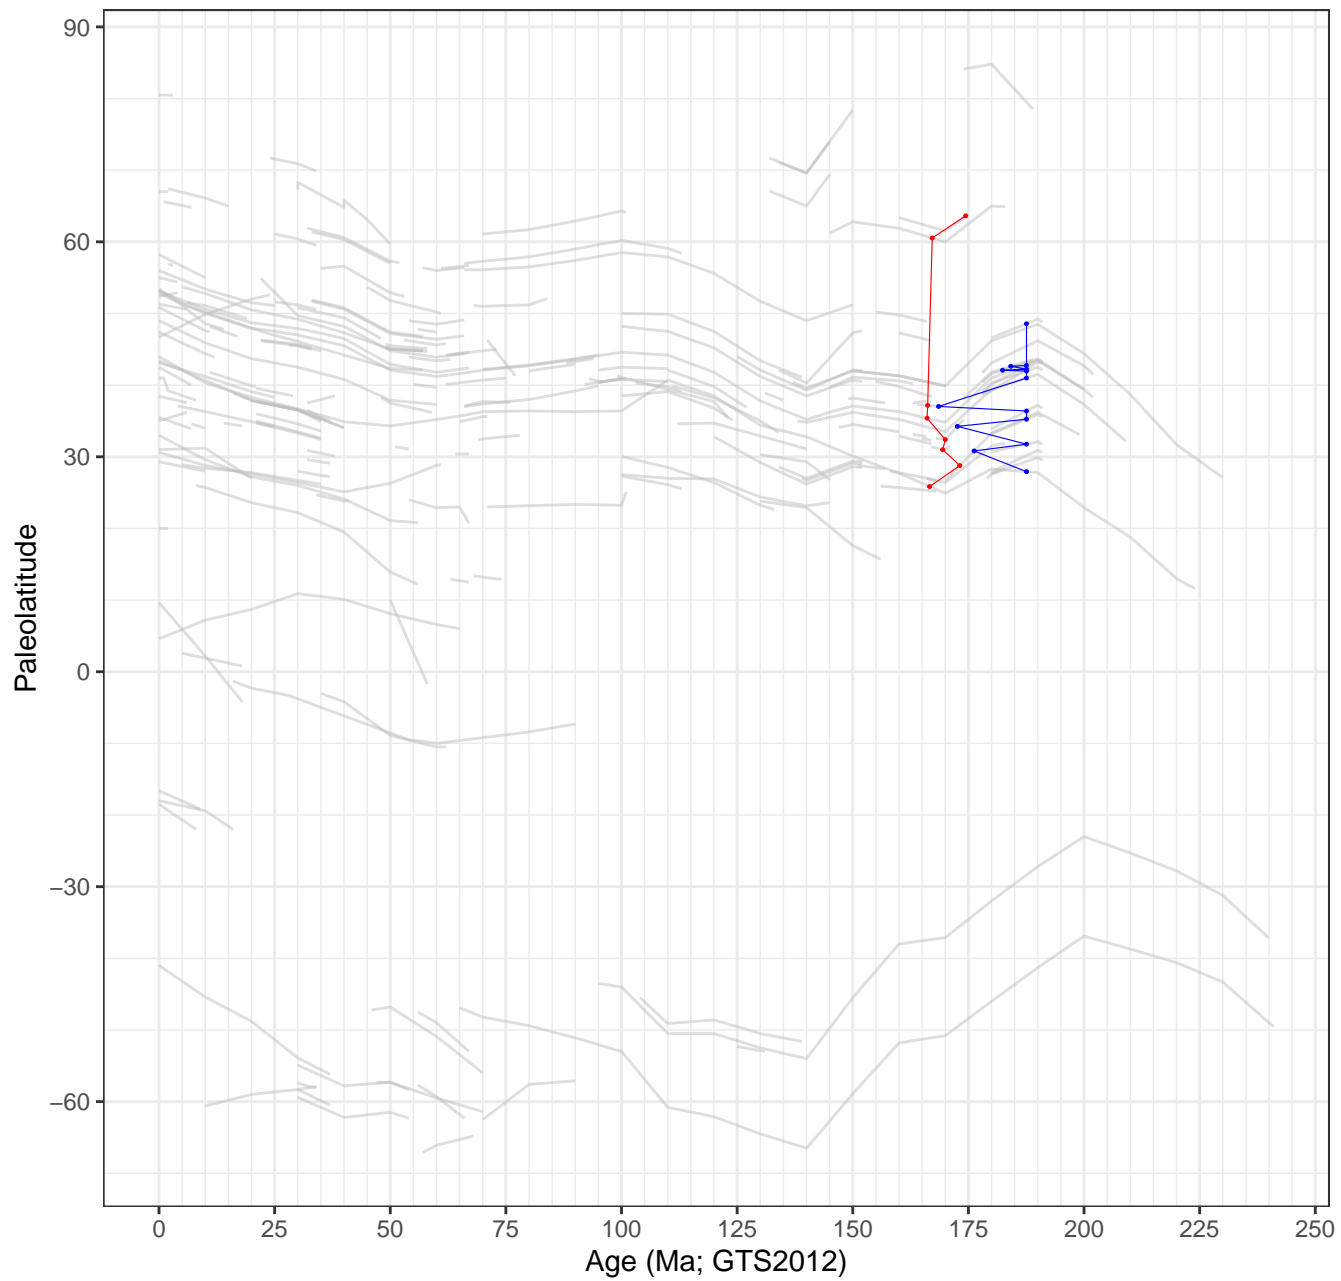

Supplement: Supplementary file 1929 [file Nannoceratopsis gracilis.pdf › Supplement/Supplement 2/Species 1914 plots/Nannoceratopsis gracilis.pdf]

# Species *Nannoceratopsis magnicornis*

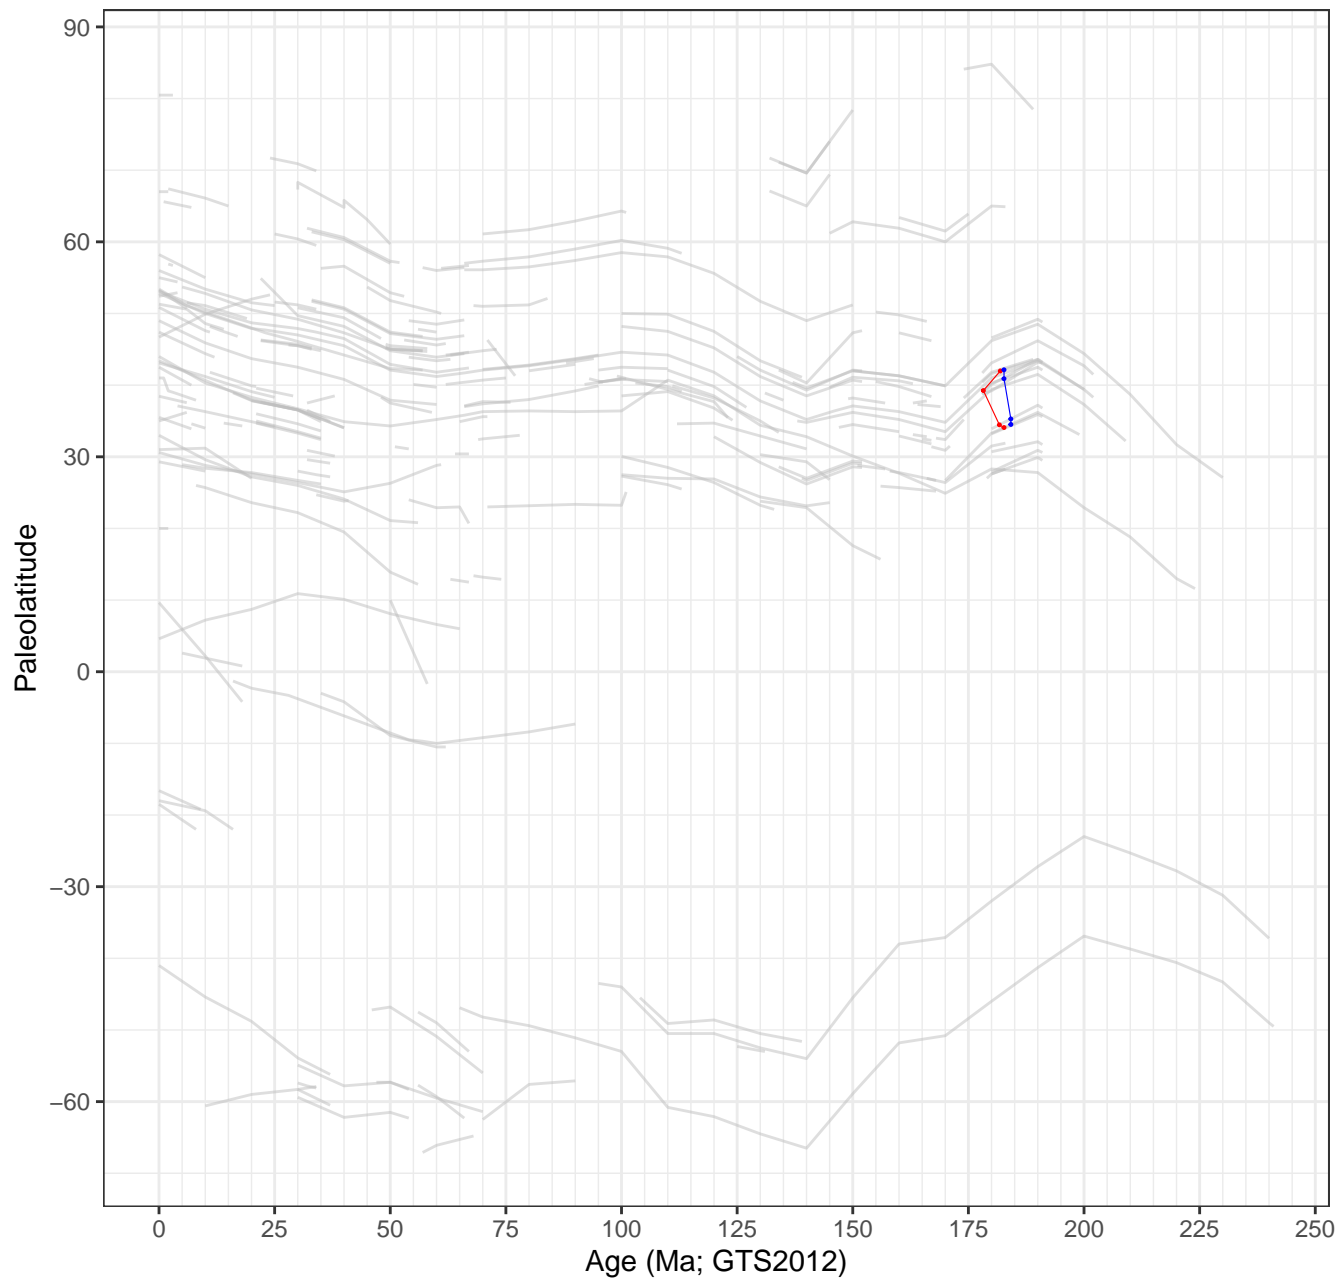

Supplement: Supplementary file 1930 [file Nannoceratopsis magnicornis.pdf › Supplement/Supplement 2/Species 1914 plots/Nannoceratopsis magnicornis.pdf]

# Species *Nannoceratopsis pellucida*

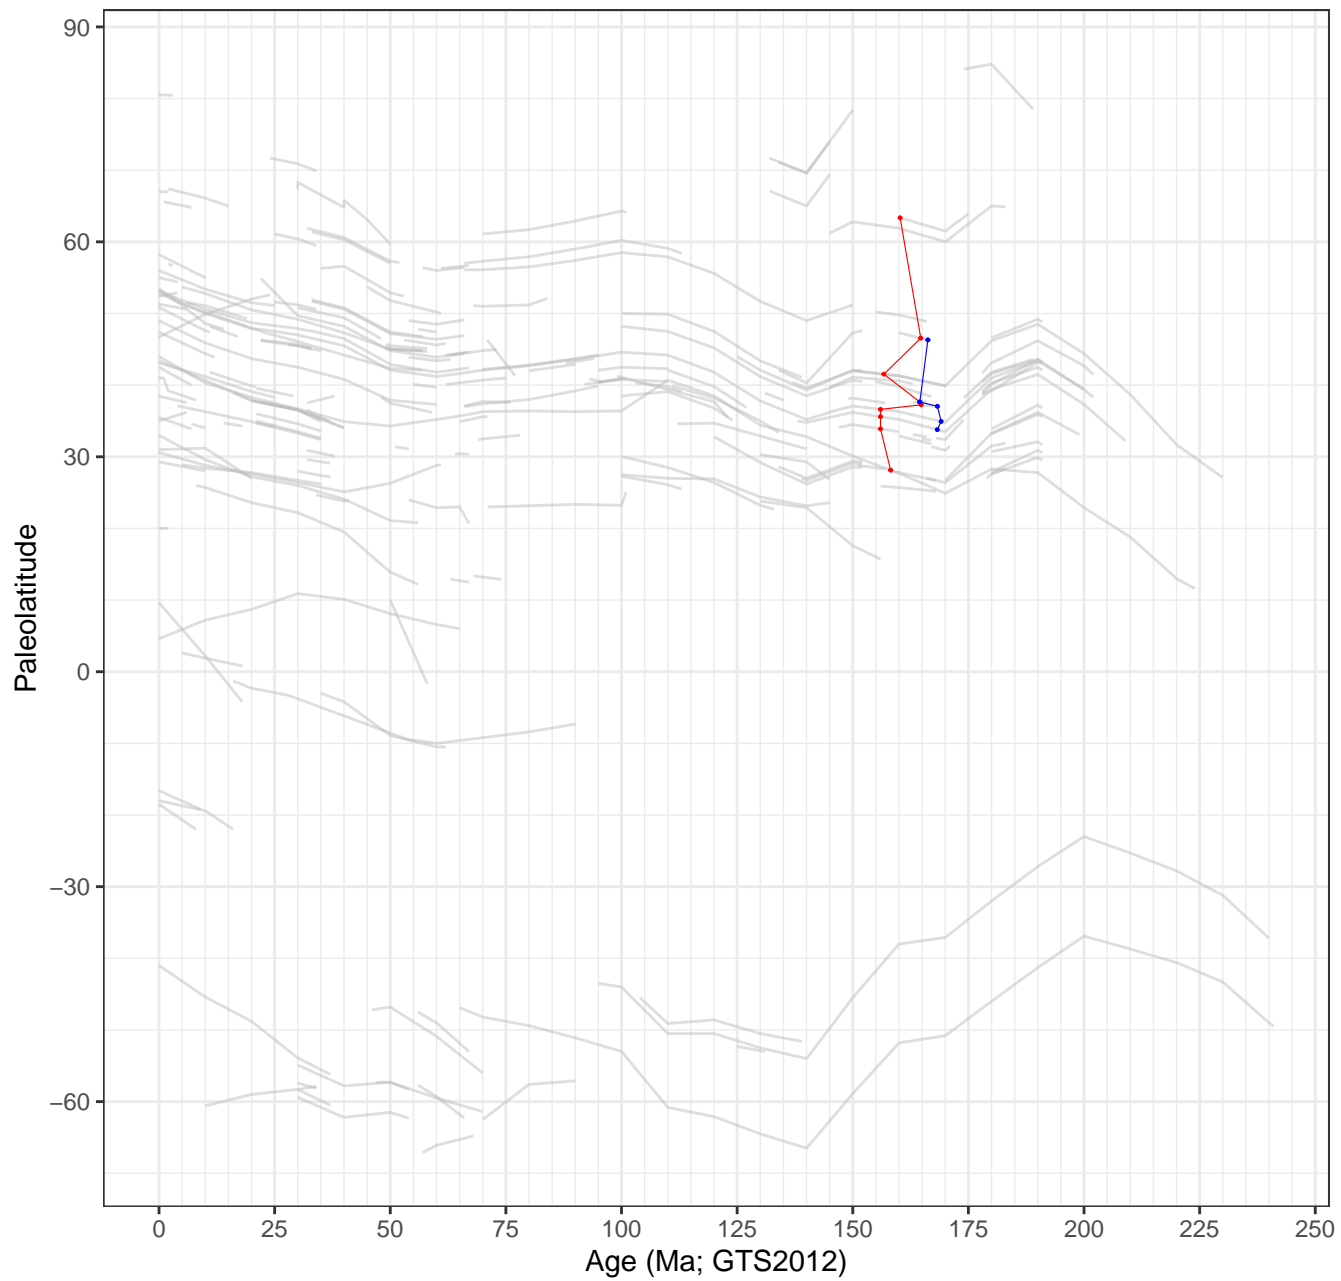

Supplement: Supplementary file 1931 [file Nannoceratopsis pellucida.pdf › Supplement/Supplement 2/Species 1914 plots/Nannoceratopsis pellucida.pdf]

# Species *Nannoceratopsis plegas*

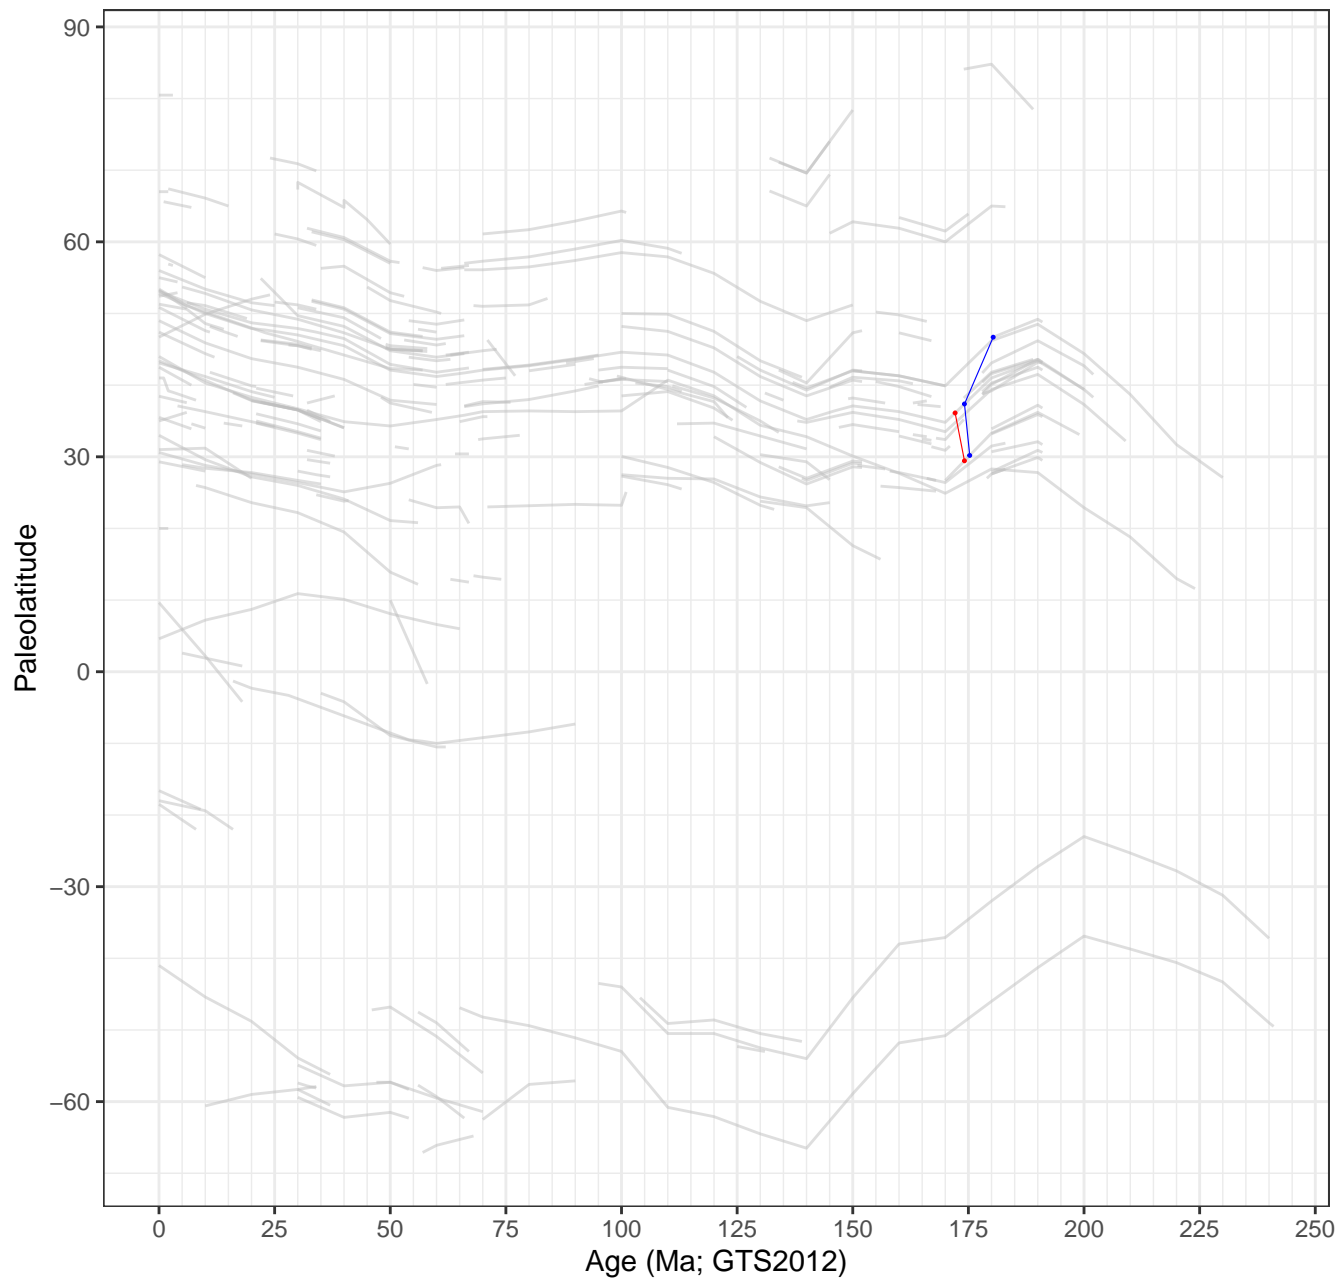

Supplement: Supplementary file 1932 [file Nannoceratopsis plegas.pdf › Supplement/Supplement 2/Species 1914 plots/Nannoceratopsis plegas.pdf]

# Species *Nannoceratopsis raunsgaardii*

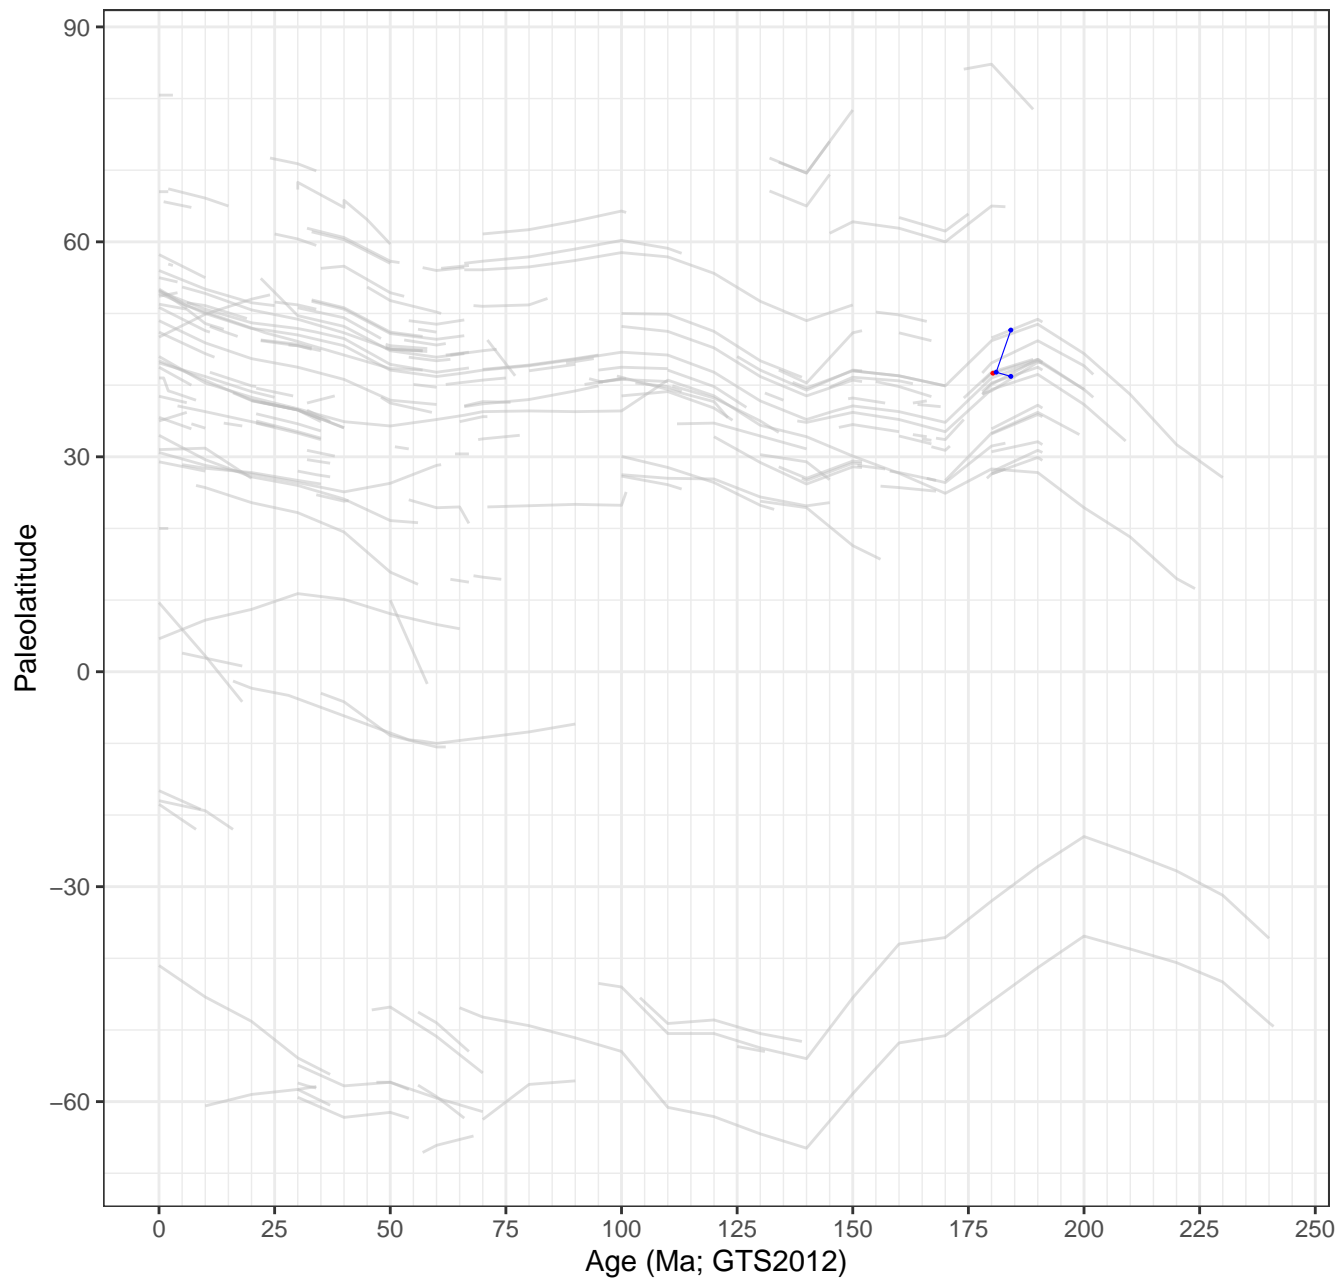

Supplement: Supplementary file 1933 [file Nannoceratopsis raunsgaardii.pdf › Supplement/Supplement 2/Species 1914 plots/Nannoceratopsis raunsgaardii.pdf]
