# Supplementary figures and images for: DINOSTRAT: a global database of the stratigraphic and paleolatitudinal distribution of Mesozoic–Cenozoic organic-walled dinoflagellate cysts (part 20 of 27)
Source: Copernicus journal article supplement (doi:10.5194/essd-14-579-2022), 2022-02-09

# Species *Nannoceratopsis ridingii*

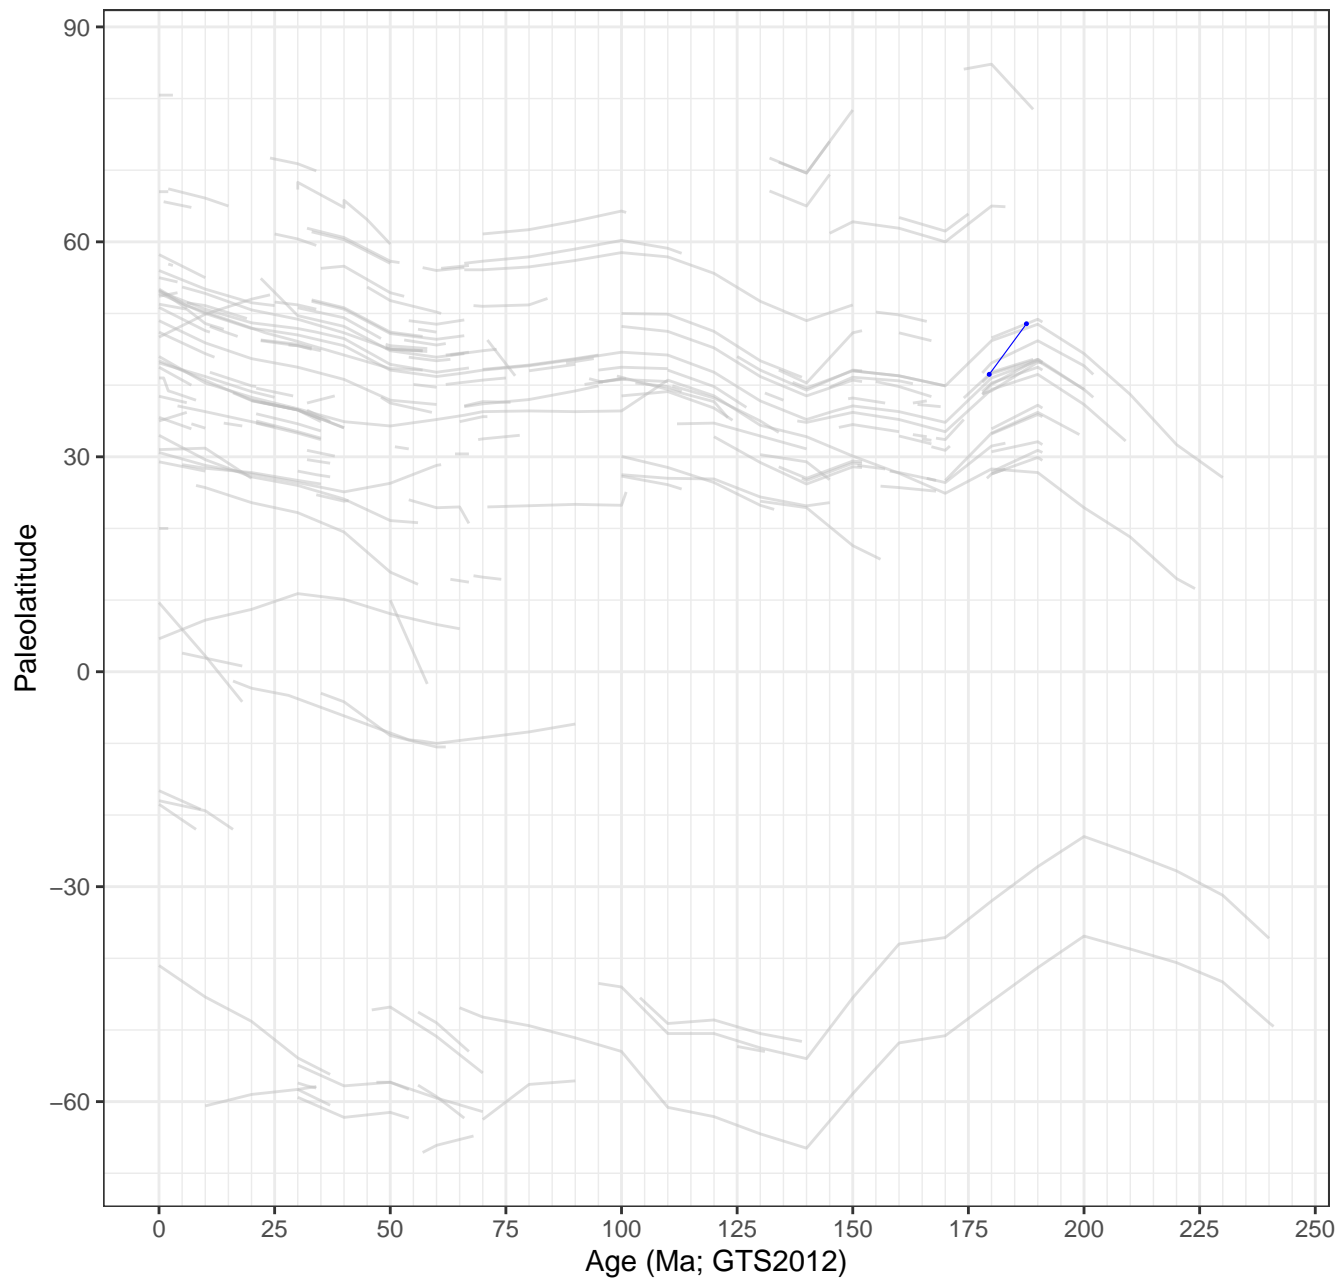

Supplement: Supplementary file 1934 [file Nannoceratopsis ridingii.pdf › Supplement/Supplement 2/Species 1914 plots/Nannoceratopsis ridingii.pdf]

# Species *Nannoceratopsis spiculata*

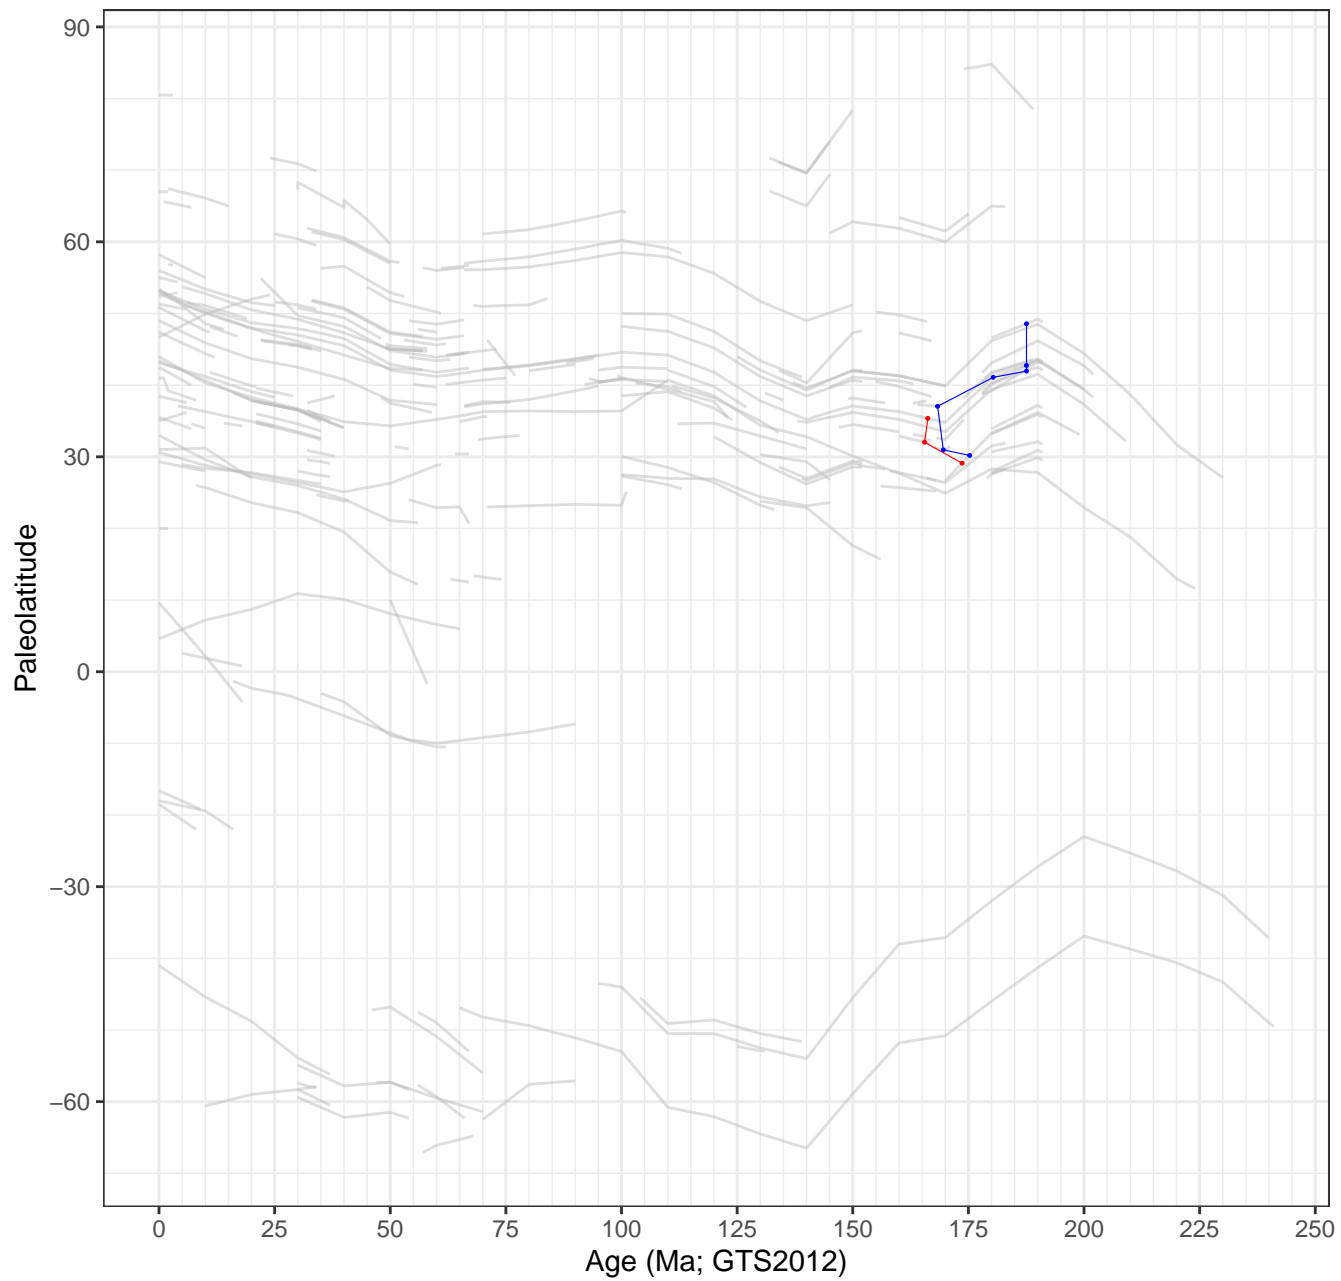

Supplement: Supplementary file 1935 [file Nannoceratopsis spiculata.pdf › Supplement/Supplement 2/Species 1914 plots/Nannoceratopsis spiculata.pdf]

# Species *Nannoceratopsis spinosa*

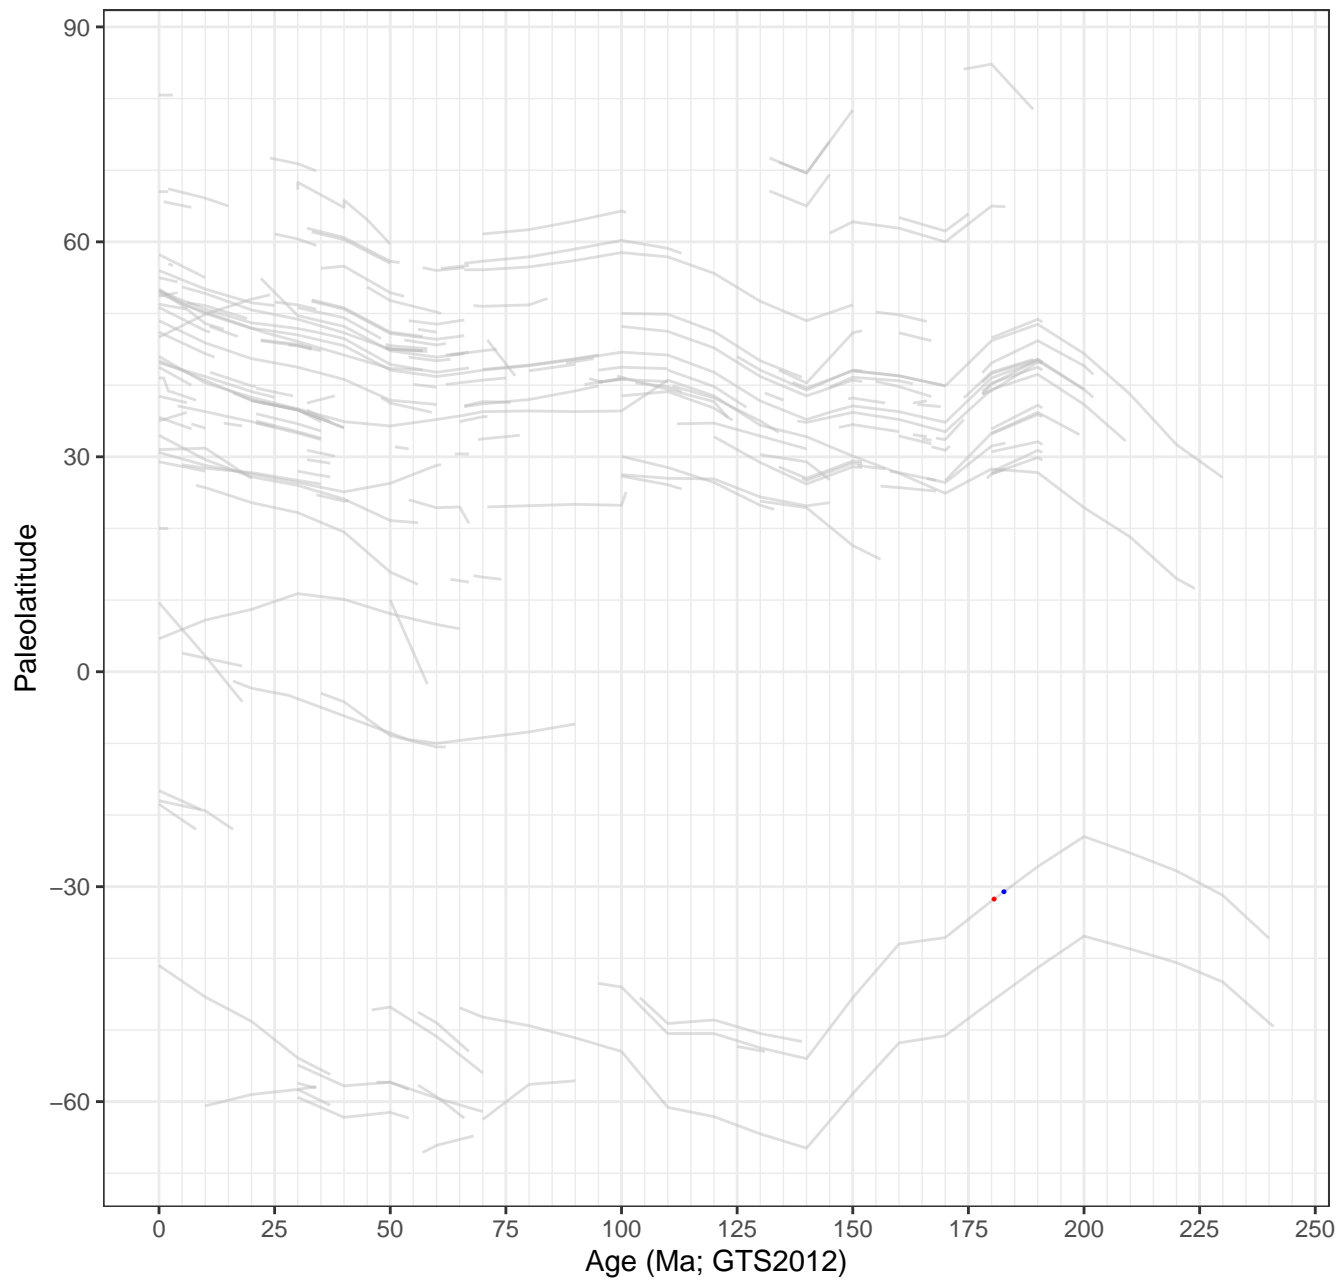

Supplement: Supplementary file 1936 [file Nannoceratopsis spinosa.pdf › Supplement/Supplement 2/Species 1914 plots/Nannoceratopsis spinosa.pdf]

# Species *Nannoceratopsis symmetrica*

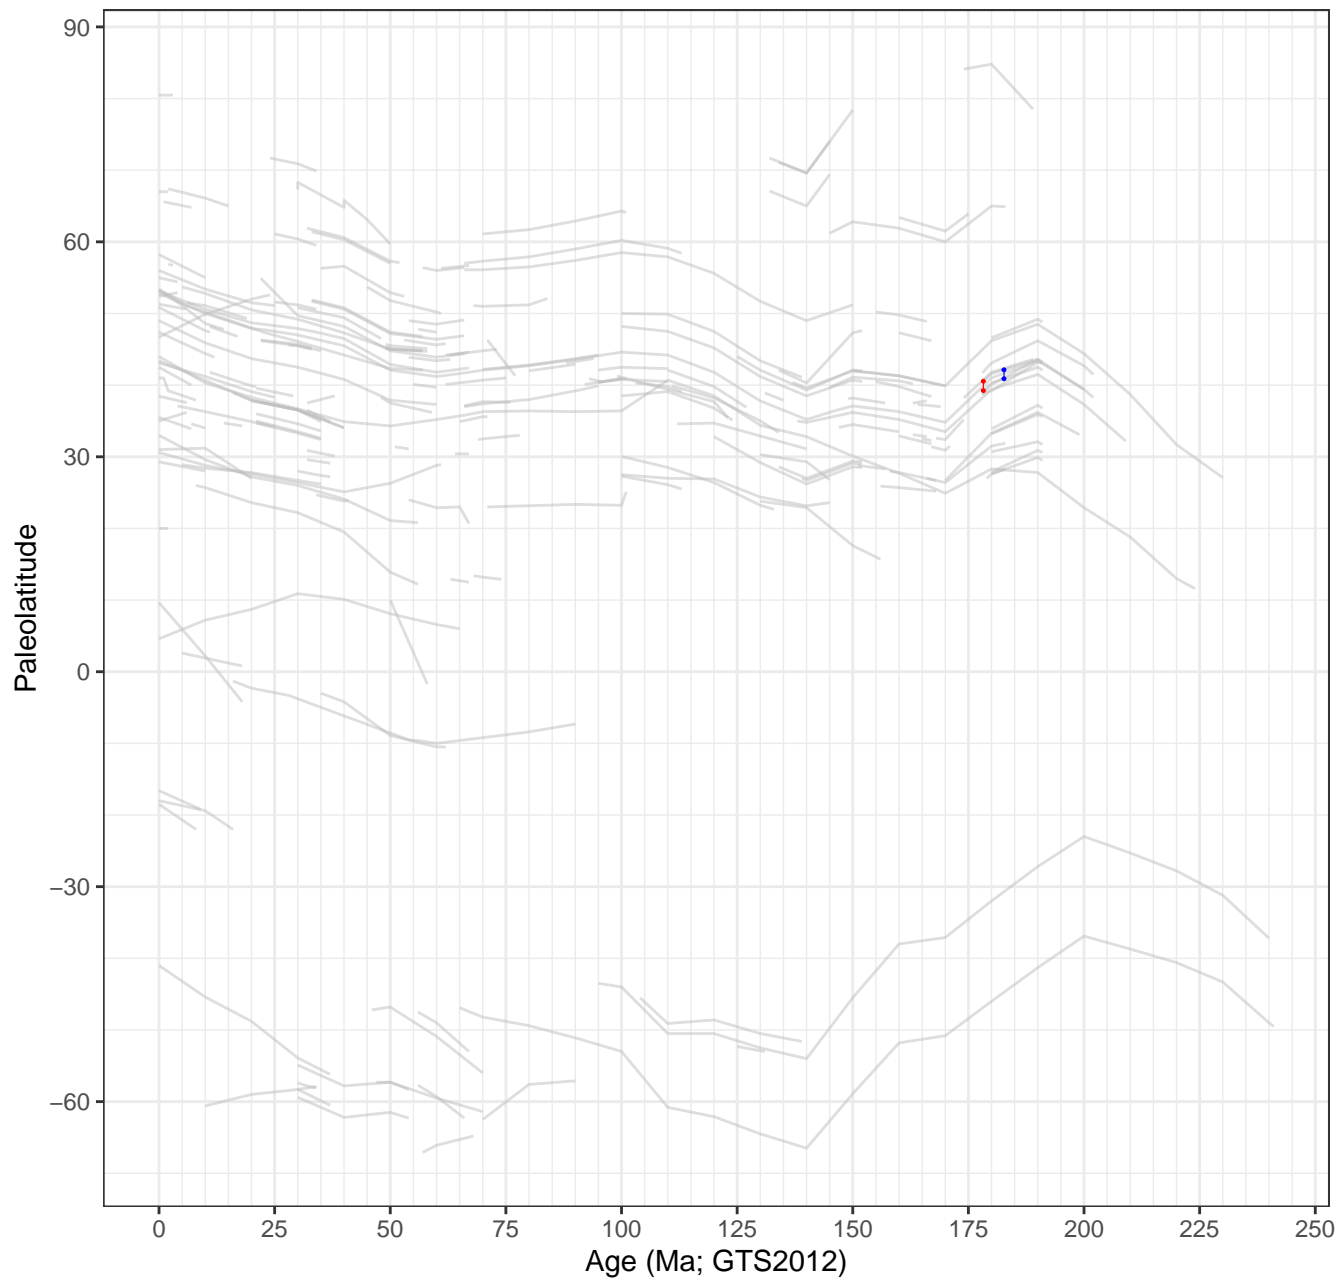

Supplement: Supplementary file 1937 [file Nannoceratopsis symmetrica.pdf › Supplement/Supplement 2/Species 1914 plots/Nannoceratopsis symmetrica.pdf]

# Species *Nannoceratopsis triangulata*

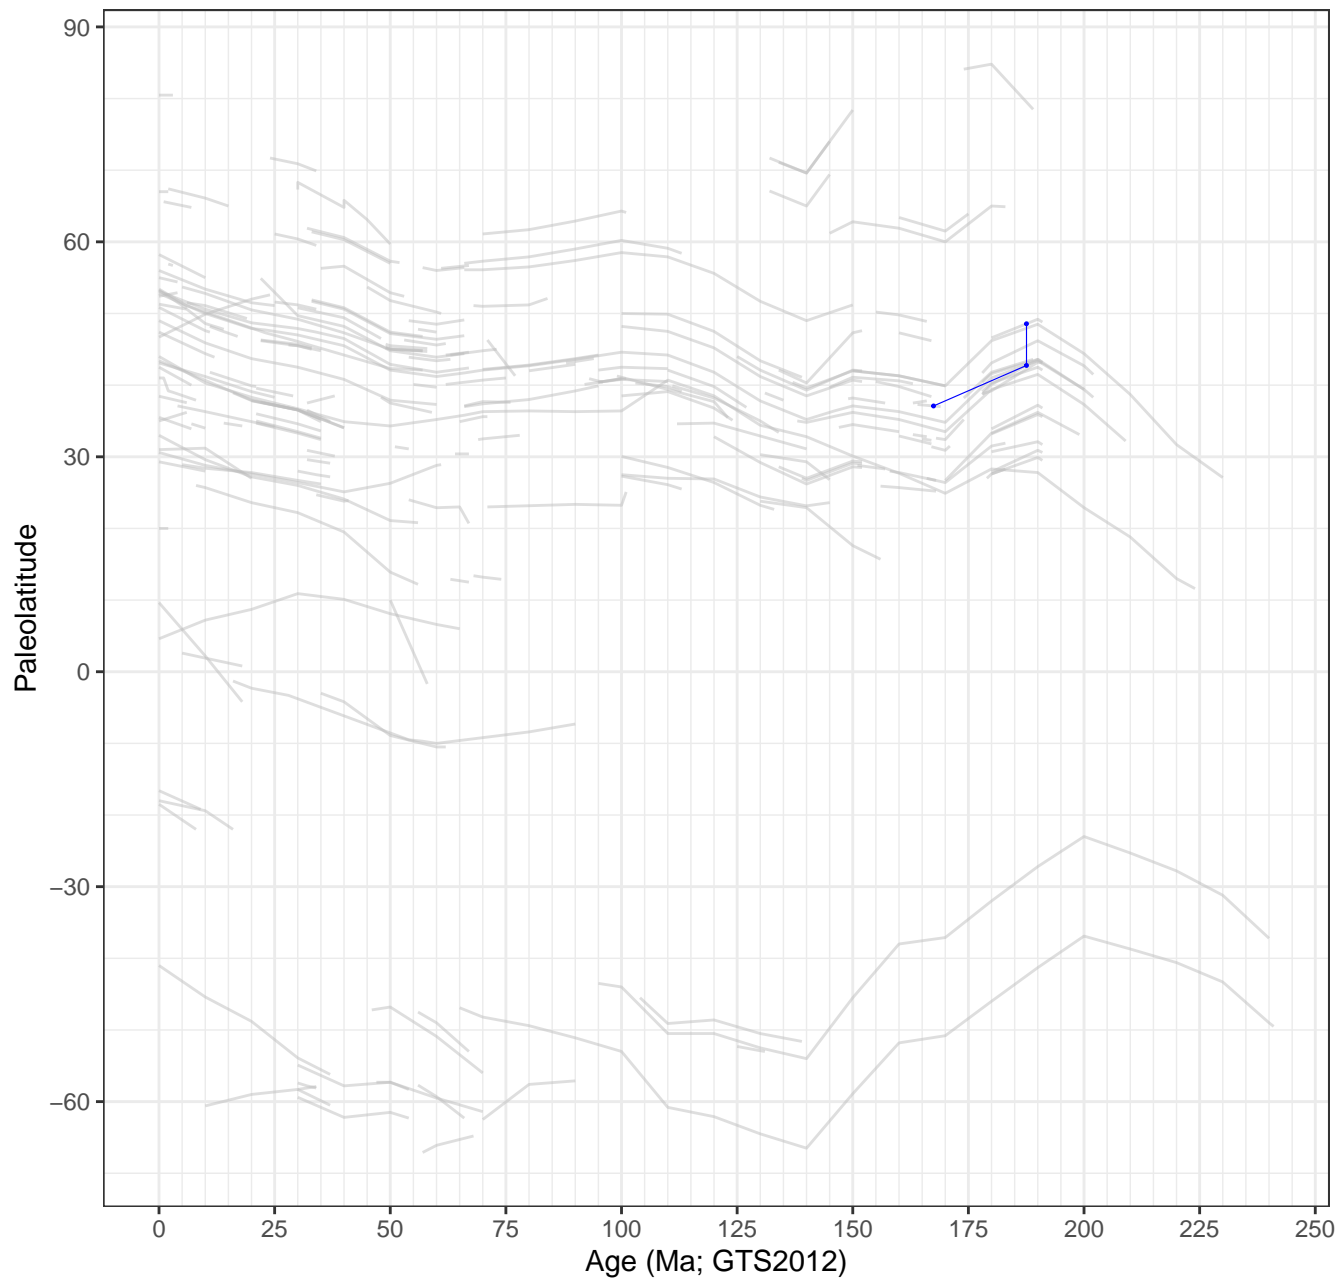

Supplement: Supplementary file 1938 [file Nannoceratopsis triangulata.pdf › Supplement/Supplement 2/Species 1914 plots/Nannoceratopsis triangulata.pdf]

# Species *Nannoceratopsis tricerias*

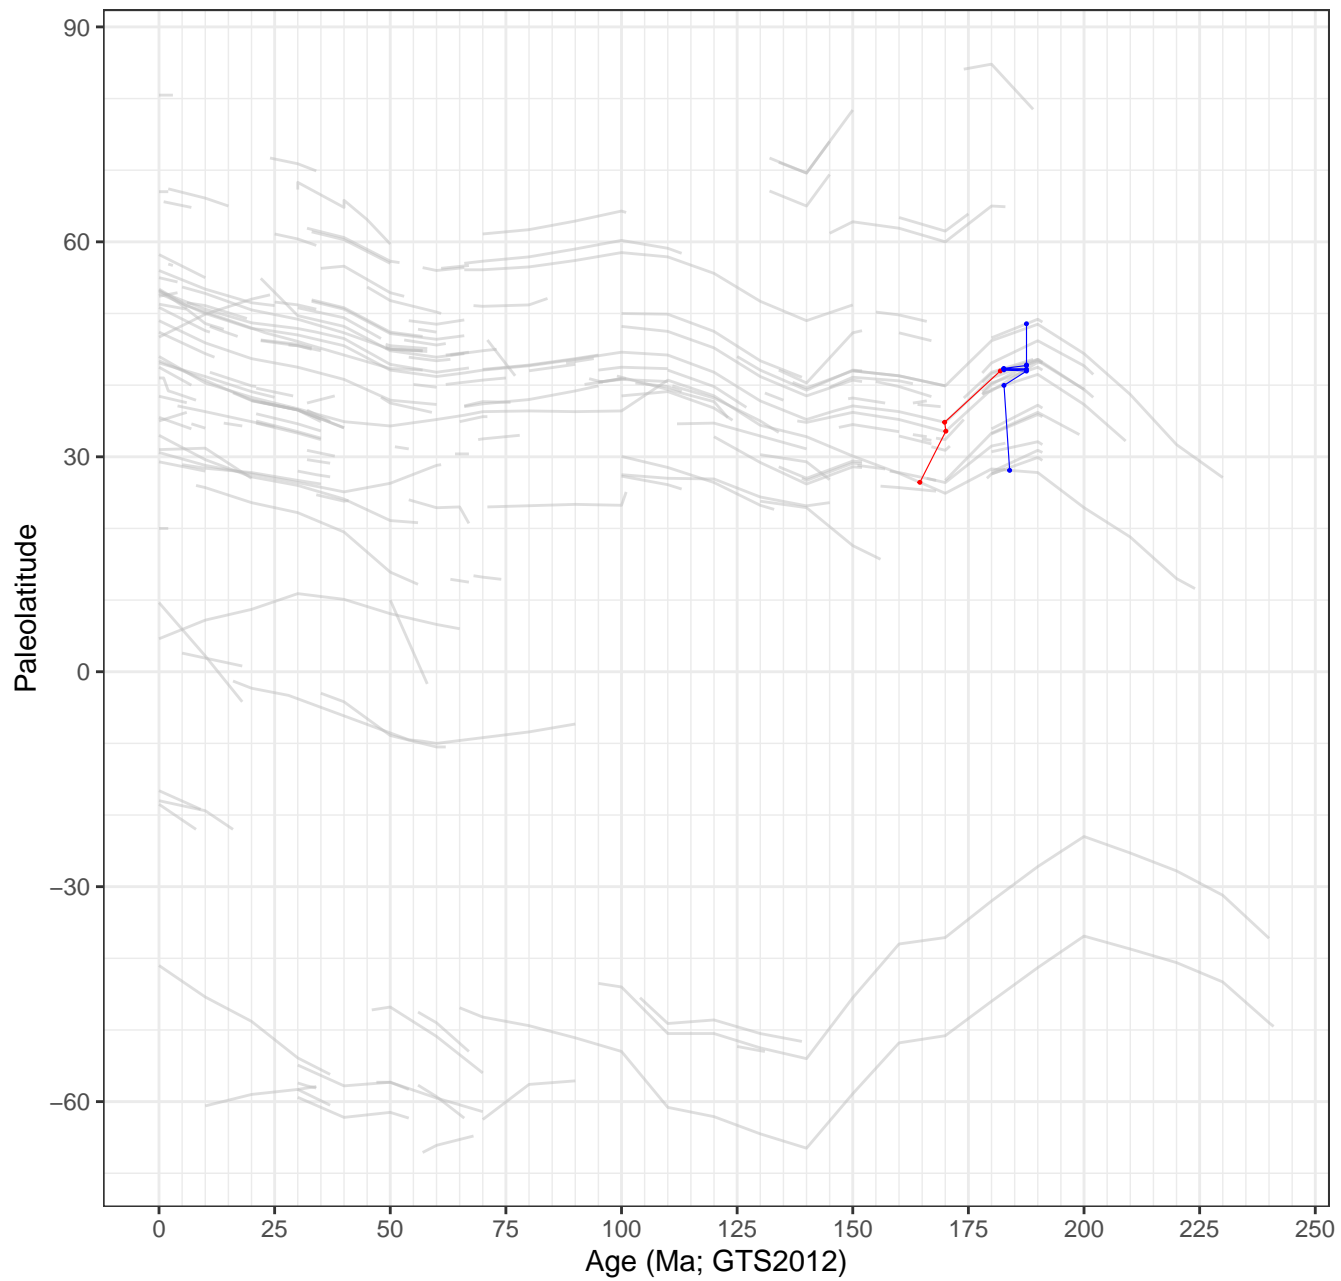

Supplement: Supplementary file 1939 [file Nannoceratopsis triceras.pdf › Supplement/Supplement 2/Species 1914 plots/Nannoceratopsis triceras.pdf]

# Species *Nelchinopsis kostromiensis*

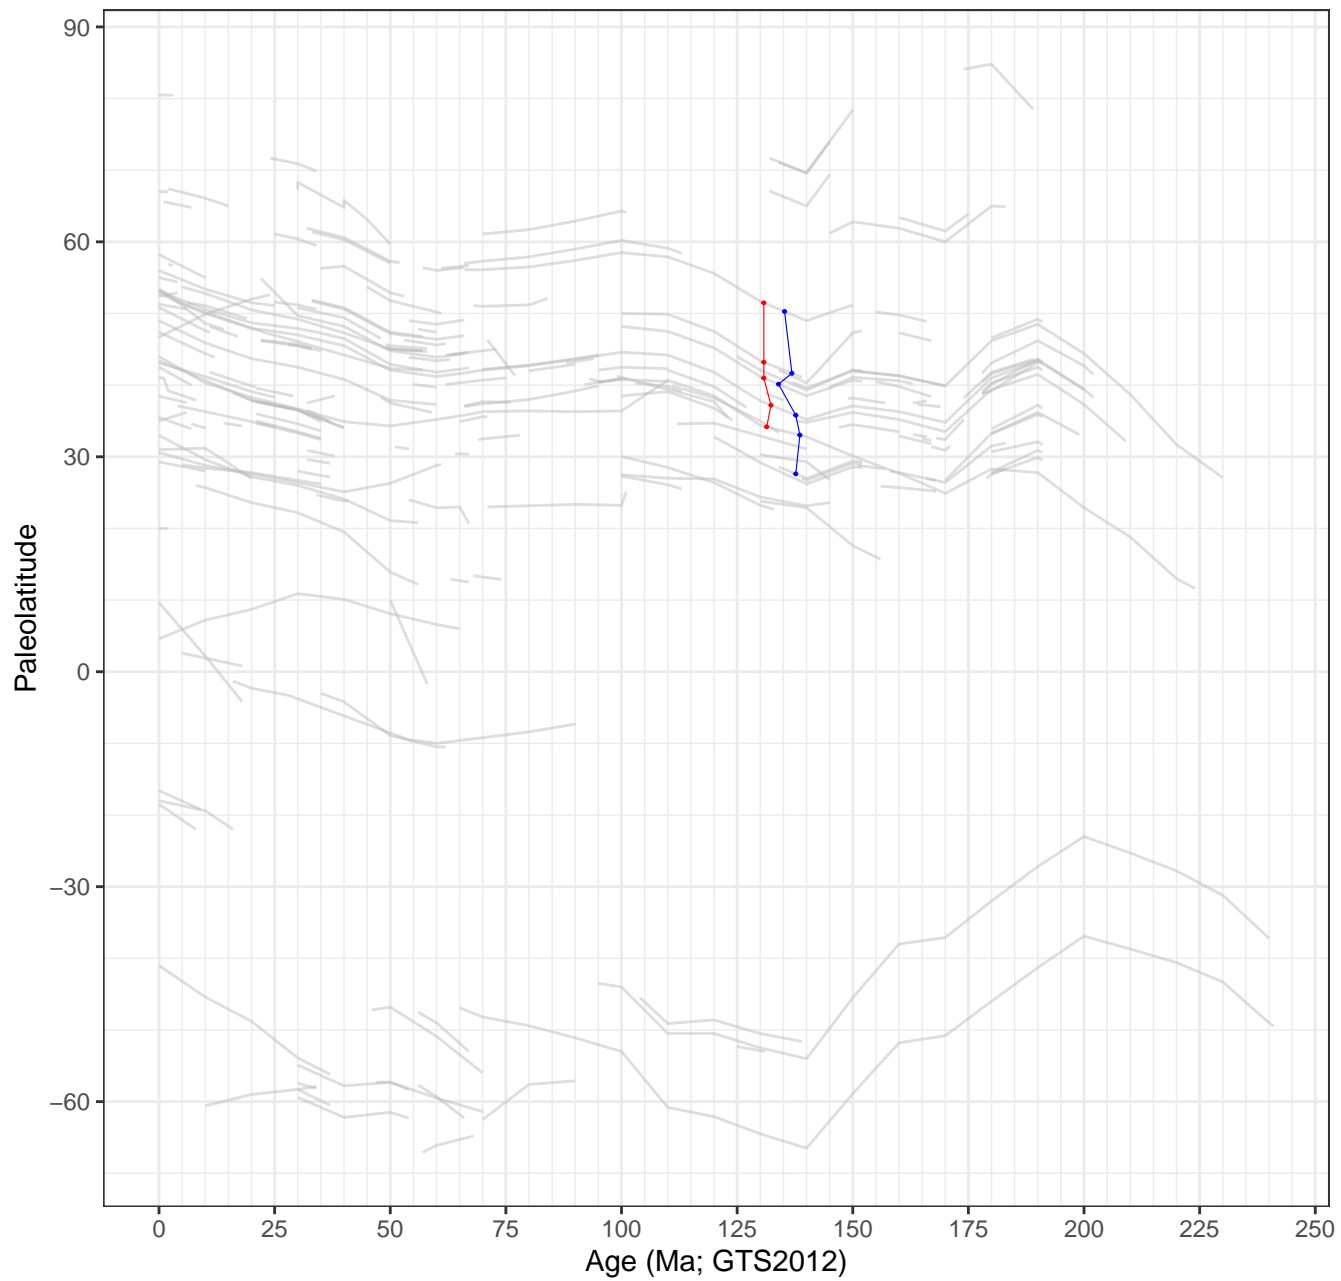

Supplement: Supplementary file 1940 [file Nelchinopsis kostromiensis.pdf › Supplement/Supplement 2/Species 1914 plots/Nelchinopsis kostromiensis.pdf]

# Species *Nelsoniella aceras*

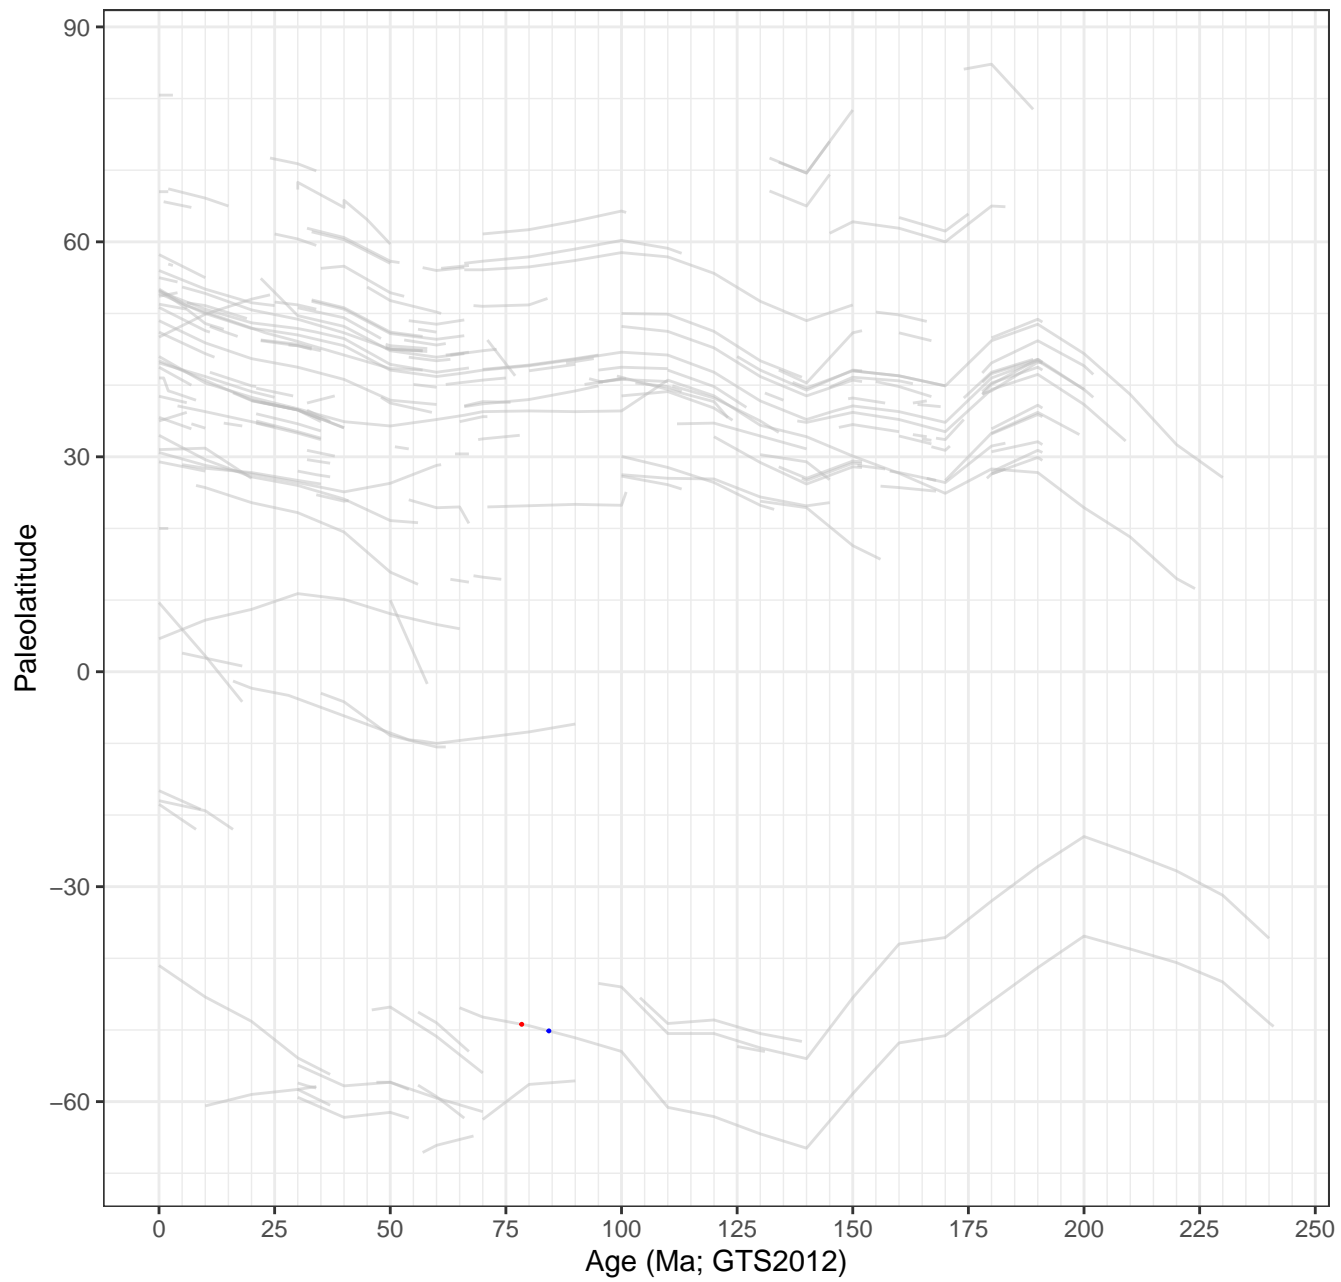

Supplement: Supplementary file 1941 [file Nelsoniella aceras.pdf › Supplement/Supplement 2/Species 1914 plots/Nelsoniella aceras.pdf]

# Species *Nelsoniella incomposita*

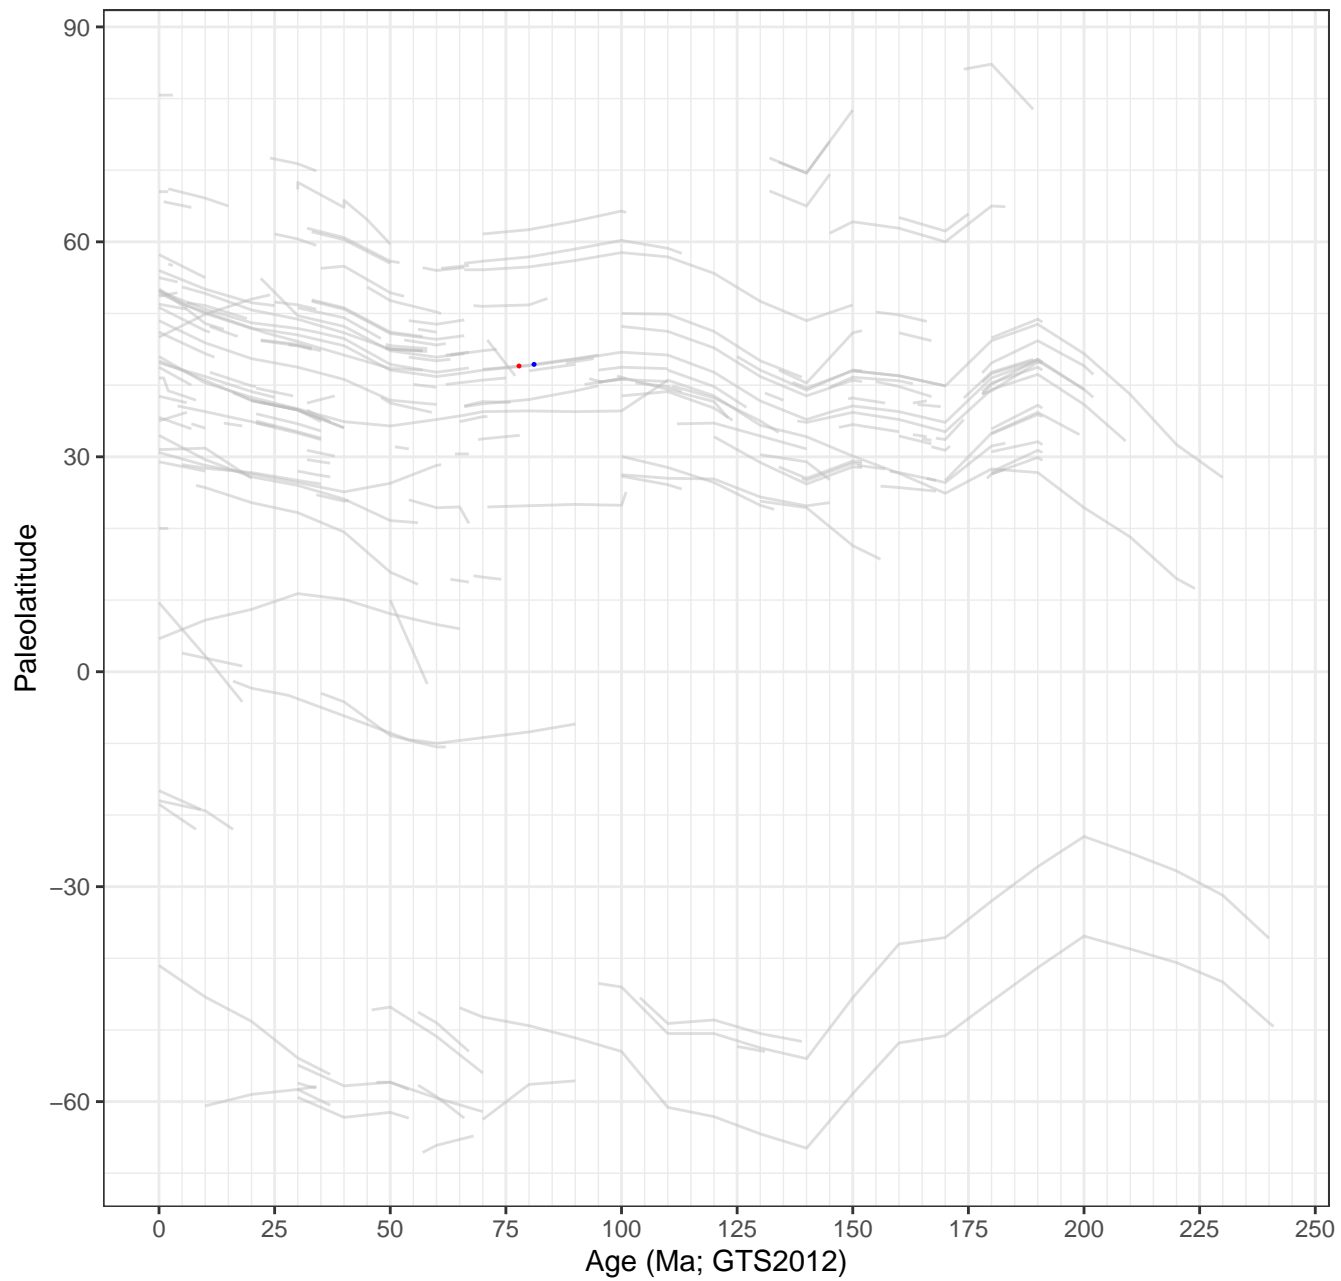

Supplement: Supplementary file 1942 [file Nelsoniella incomposita.pdf › Supplement/Supplement 2/Species 1914 plots/Nelsoniella incomposita.pdf]

# Species *Nelsoniella semireticulata*

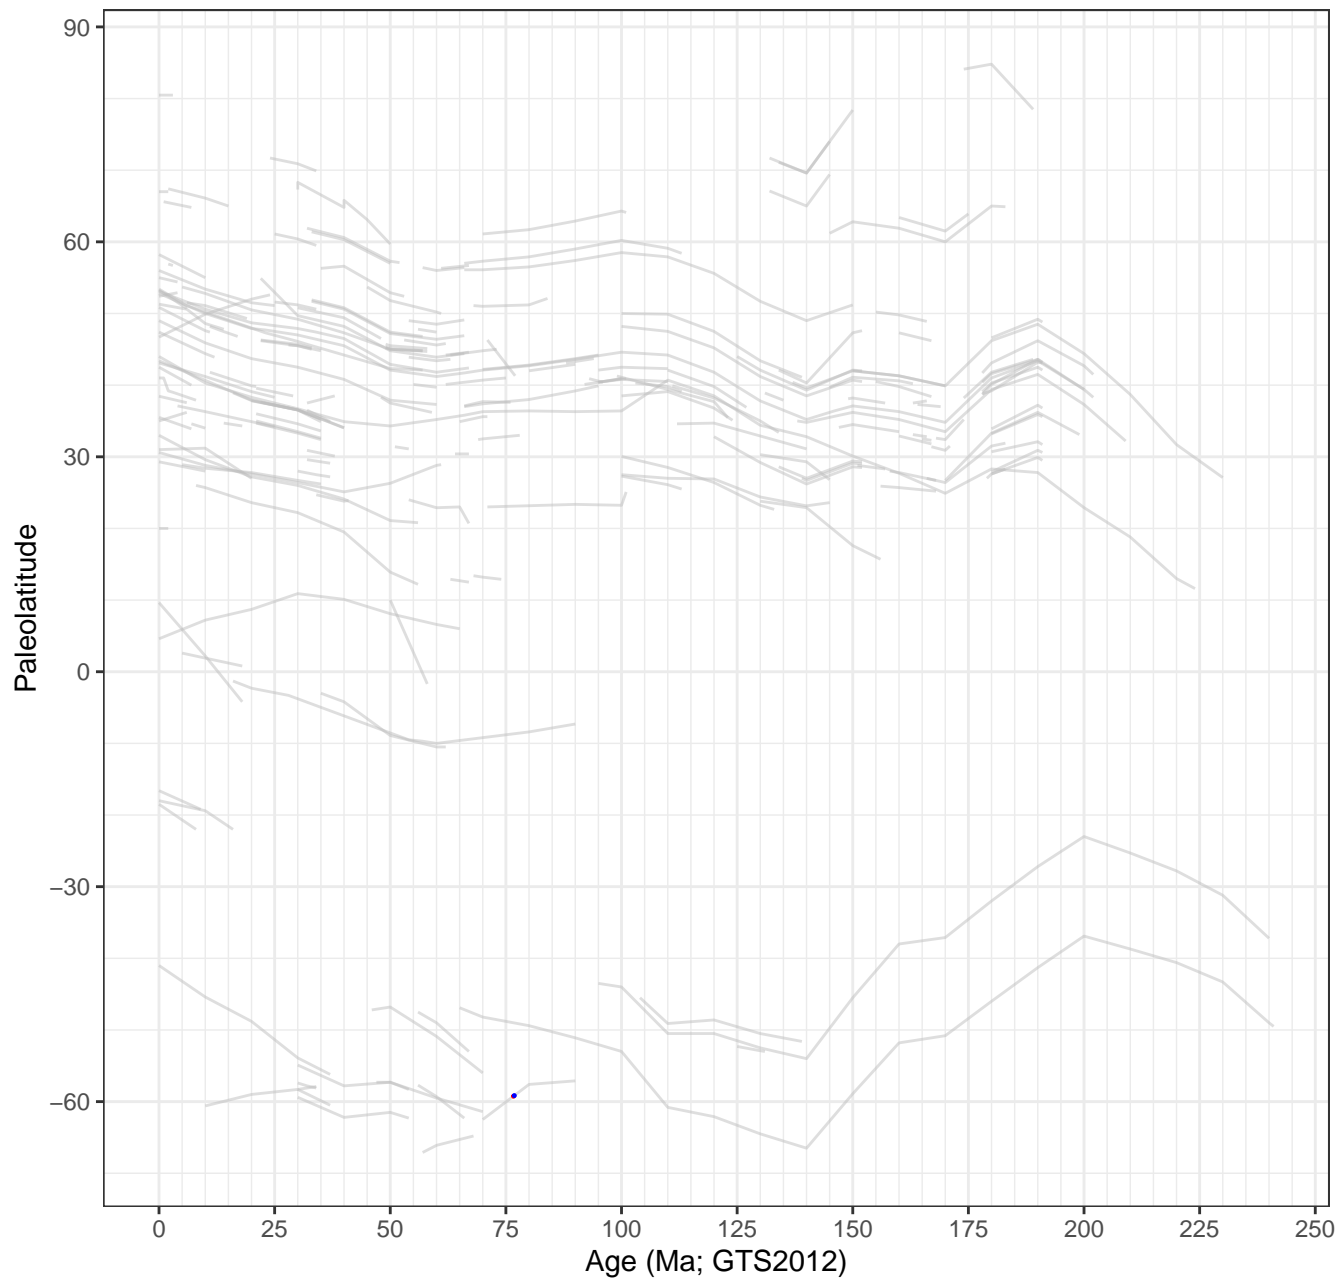

Supplement: Supplementary file 1943 [file Nelsoniella semireticulata.pdf › Supplement/Supplement 2/Species 1914 plots/Nelsoniella semireticulata.pdf]

# Species *Nelsoniella tuberculata*

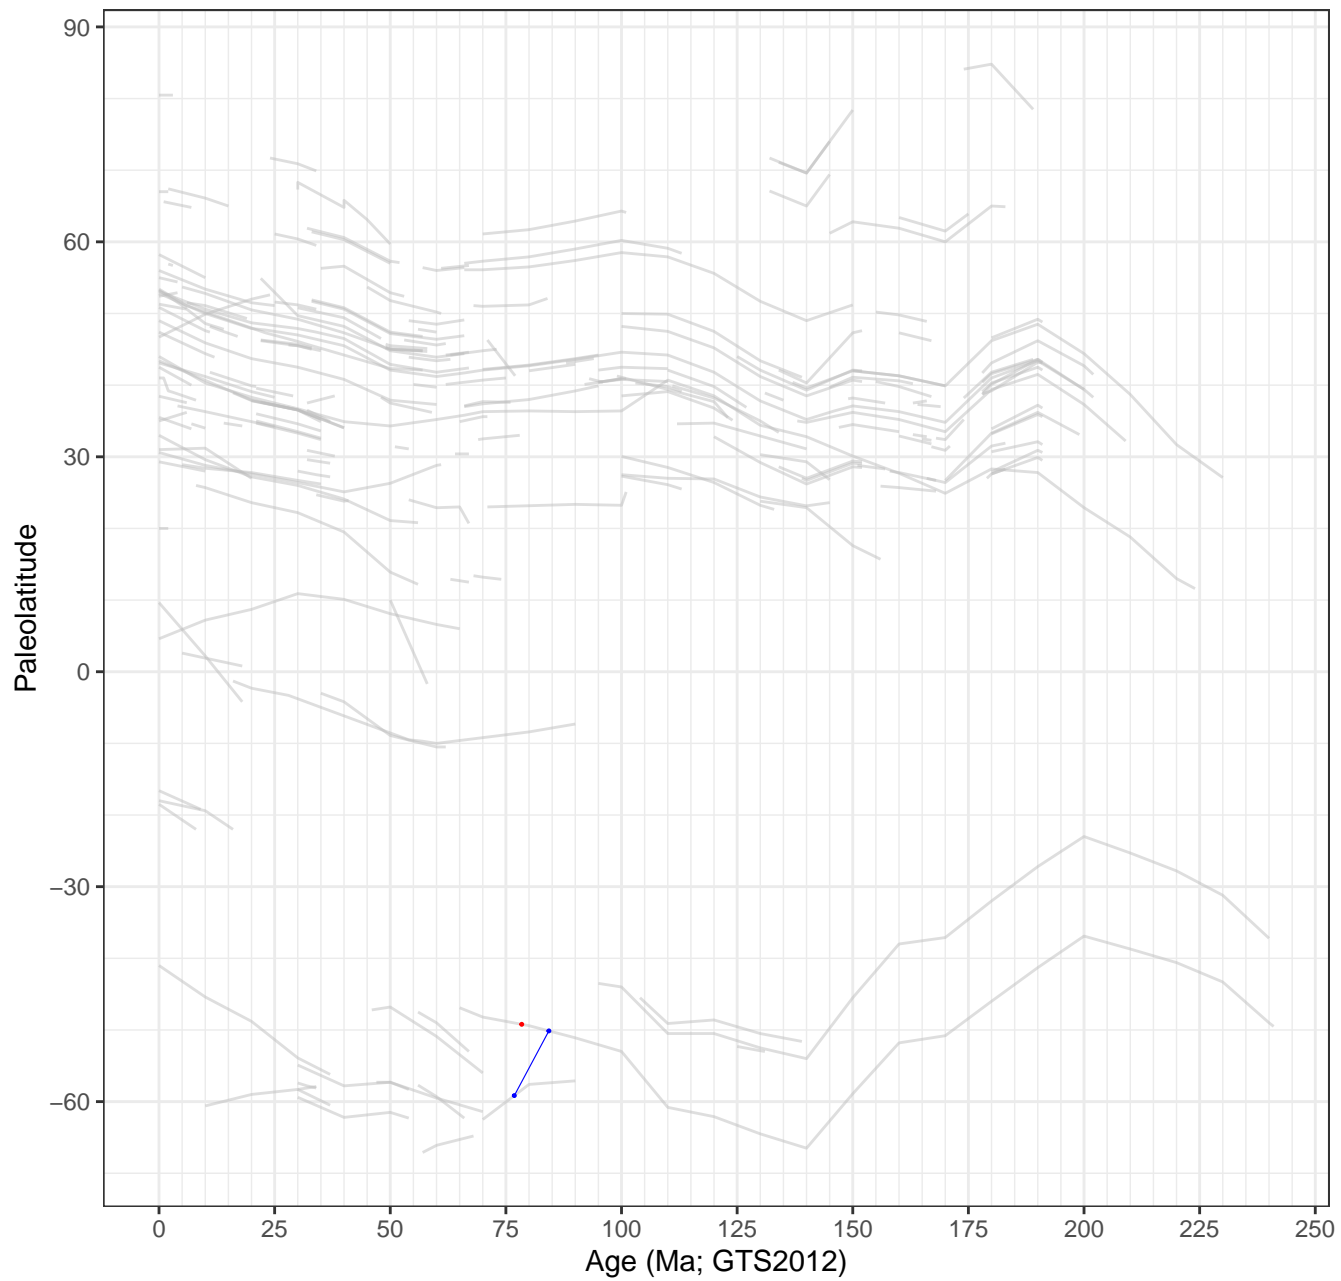

Supplement: Supplementary file 1944 [file Nelsoniella tuberculata.pdf › Supplement/Supplement 2/Species 1914 plots/Nelsoniella tuberculata.pdf]

# Species *Nematosphaeropsis densiradiata*

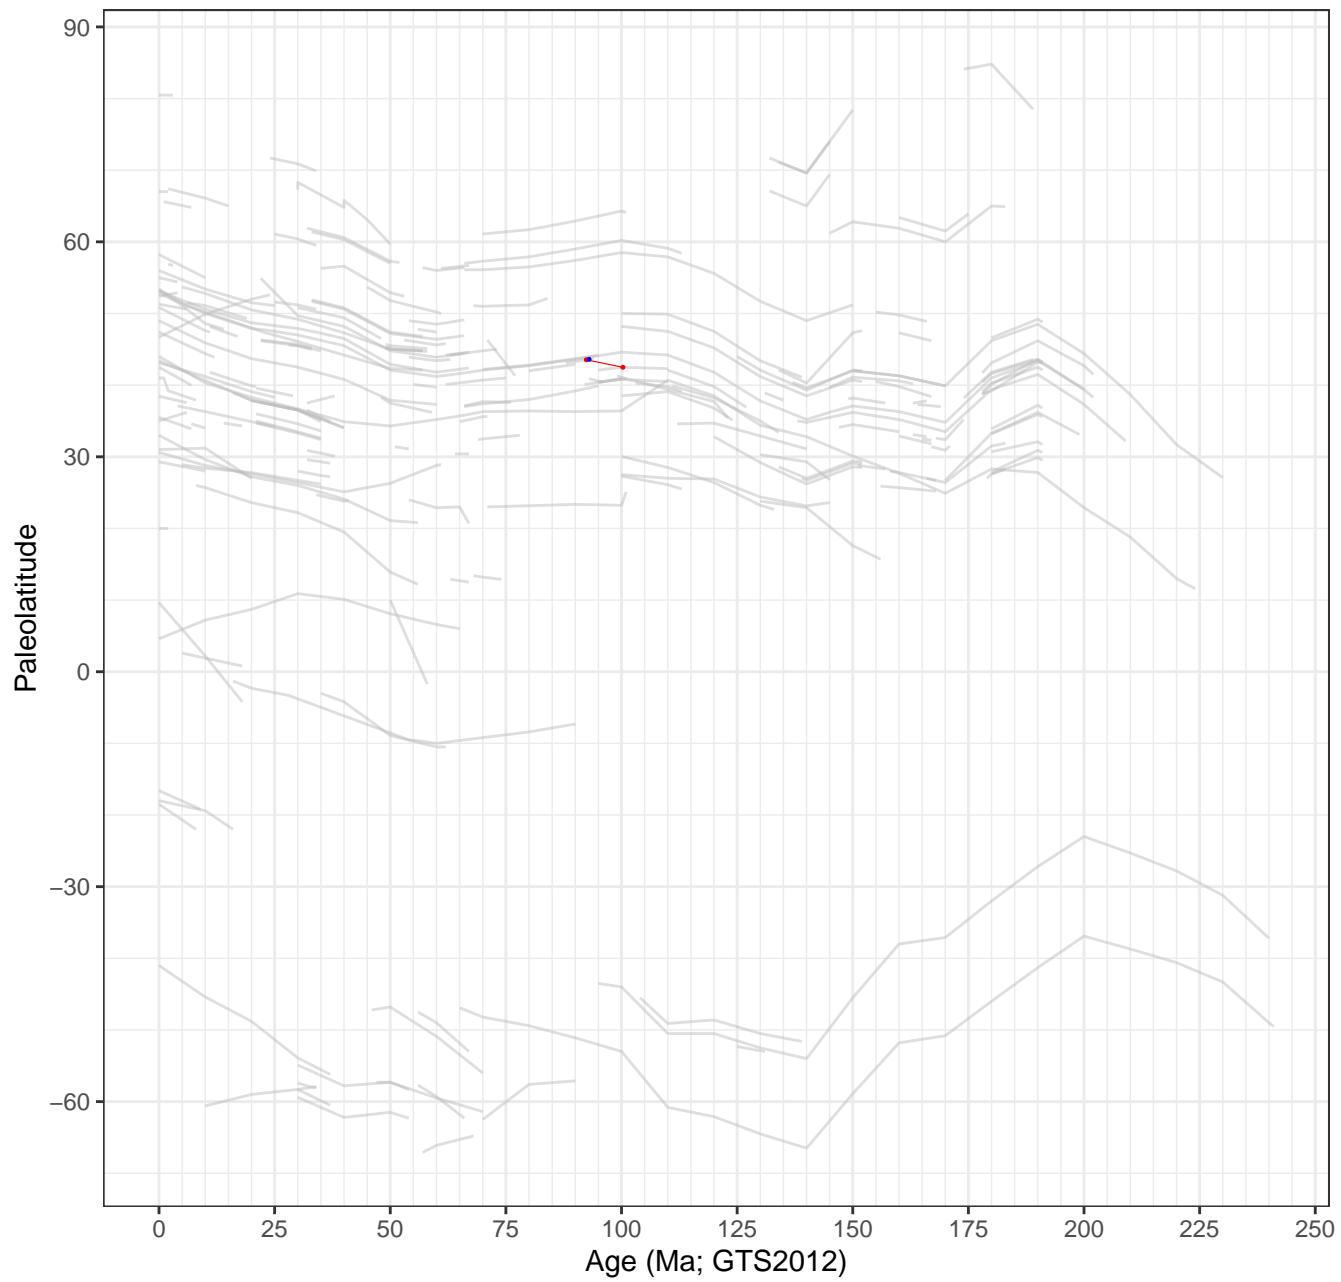

Supplement: Supplementary file 1945 [file Nematosphaeropsis densiradiata.pdf › Supplement/Supplement 2/Species 1914 plots/Nematosphaeropsis densiradiata.pdf]

# Species *Nematosphaeropsis downiei*

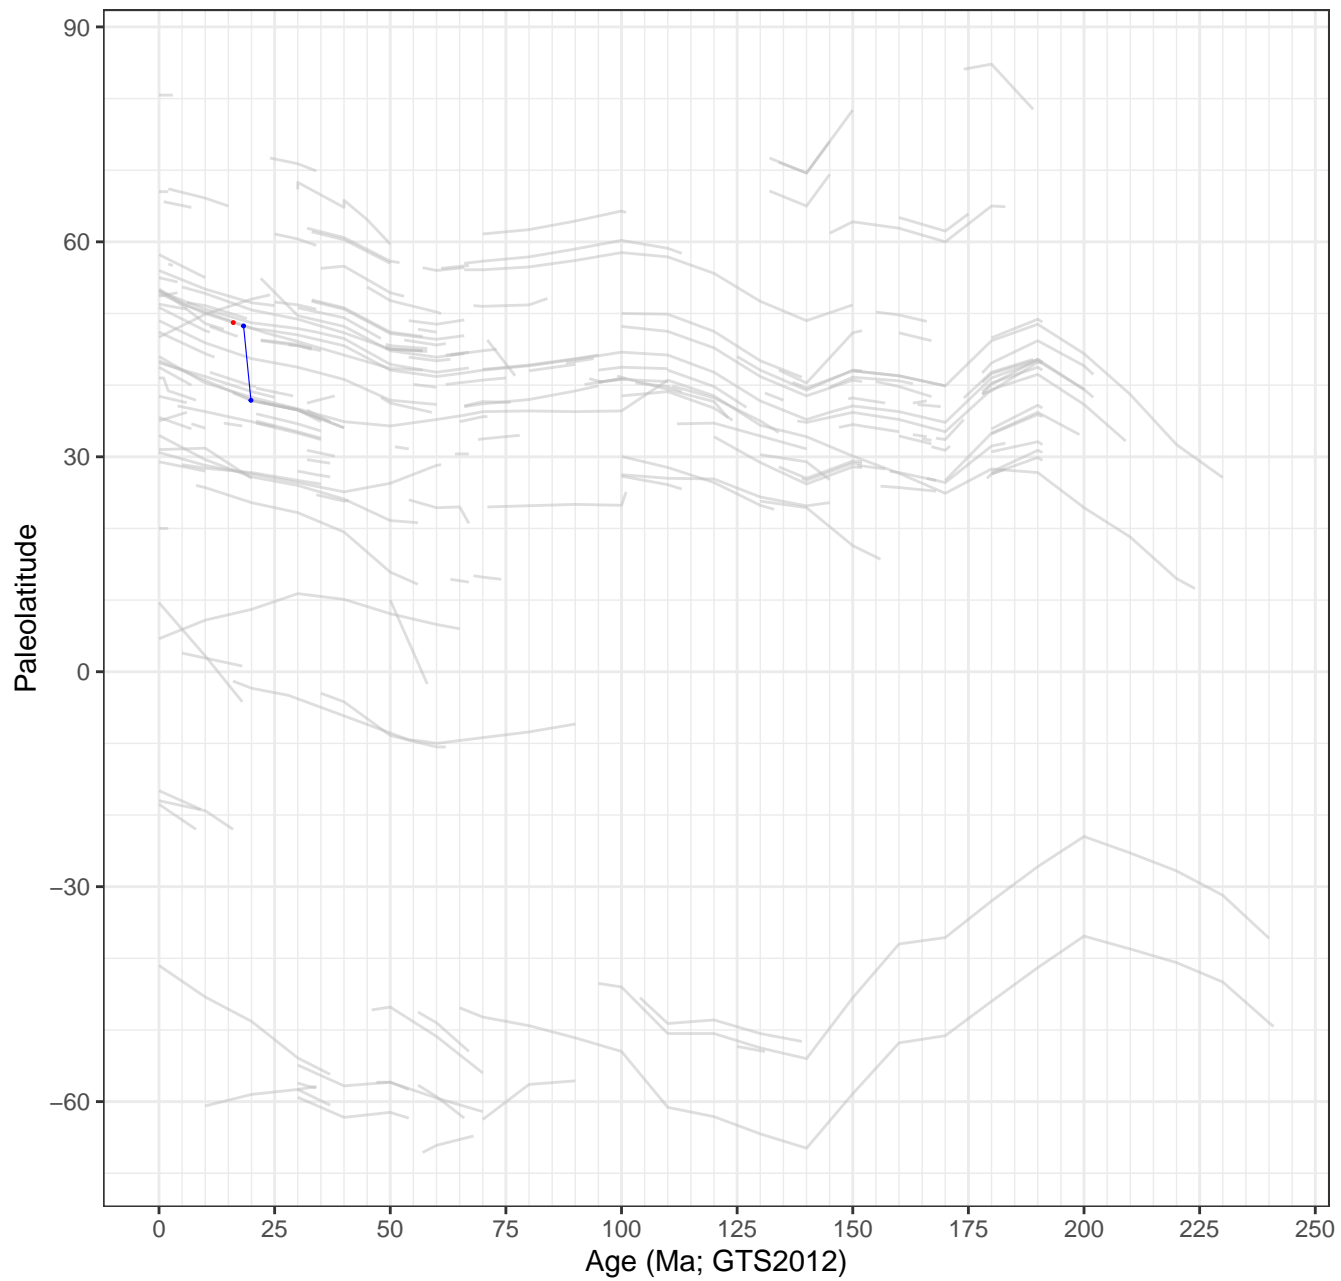

Supplement: Supplementary file 1946 [file Nematosphaeropsis downiei.pdf › Supplement/Supplement 2/Species 1914 plots/Nematosphaeropsis downiei.pdf]

# Species *Nematosphaeropsis labyrinthus*

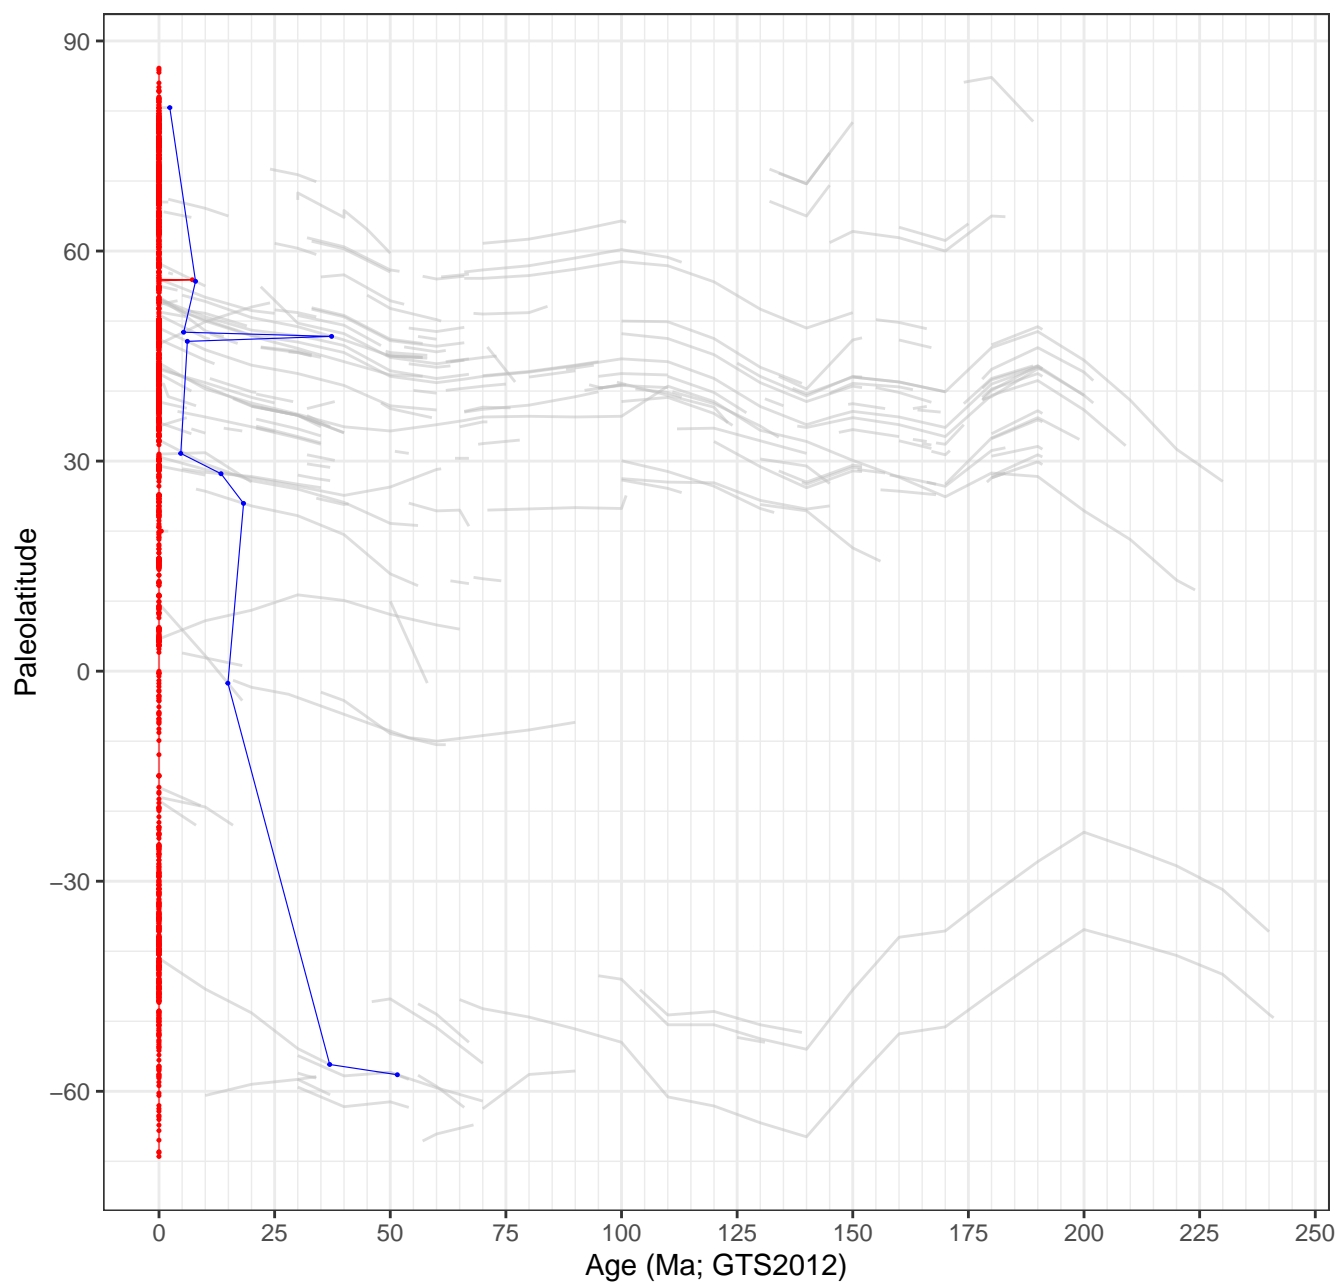

Supplement: Supplementary file 1947 [file Nematosphaeropsis labyrinthus.pdf › Supplement/Supplement 2/Species 1914 plots/Nematosphaeropsis labyrinthus.pdf]

# Species *Nematosphaeropsis lativittatus*

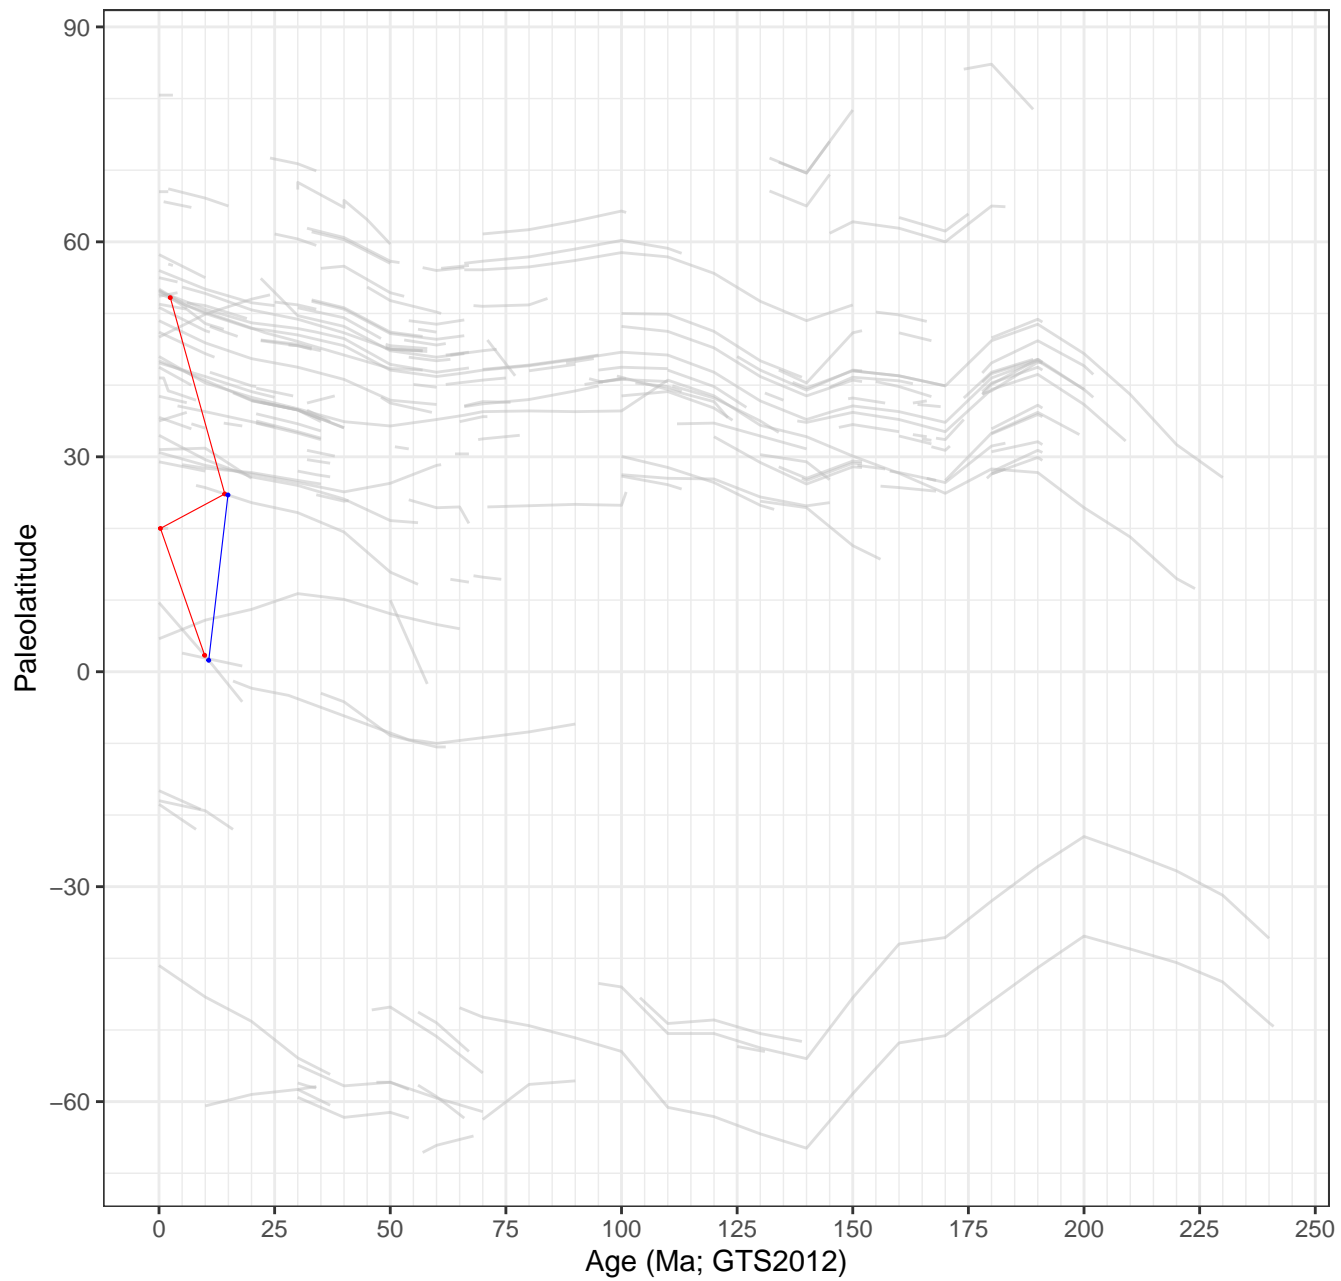

Supplement: Supplementary file 1948 [file Nematosphaeropsis lativittatus.pdf › Supplement/Supplement 2/Species 1914 plots/Nematosphaeropsis lativittatus.pdf]

# Species *Nematosphaeropsis lemniscata*

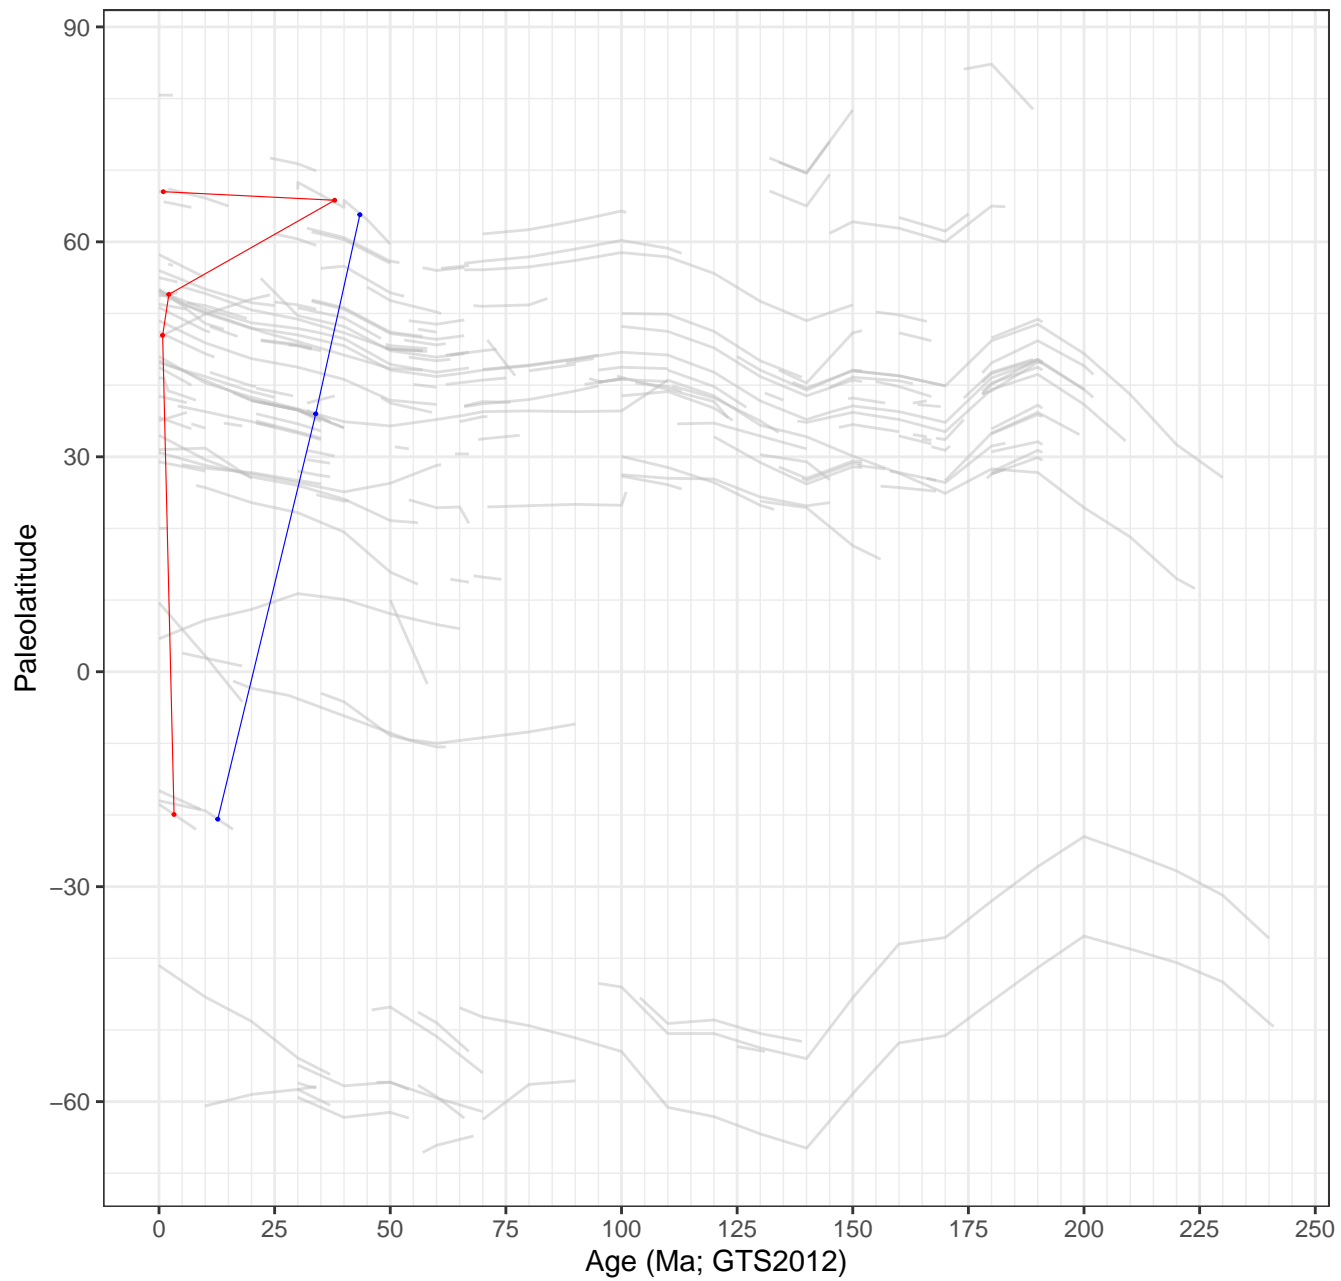

Supplement: Supplementary file 1949 [file Nematosphaeropsis lemniscata.pdf › Supplement/Supplement 2/Species 1914 plots/Nematosphaeropsis lemniscata.pdf]

# Species *Nematosphaeropsis major*

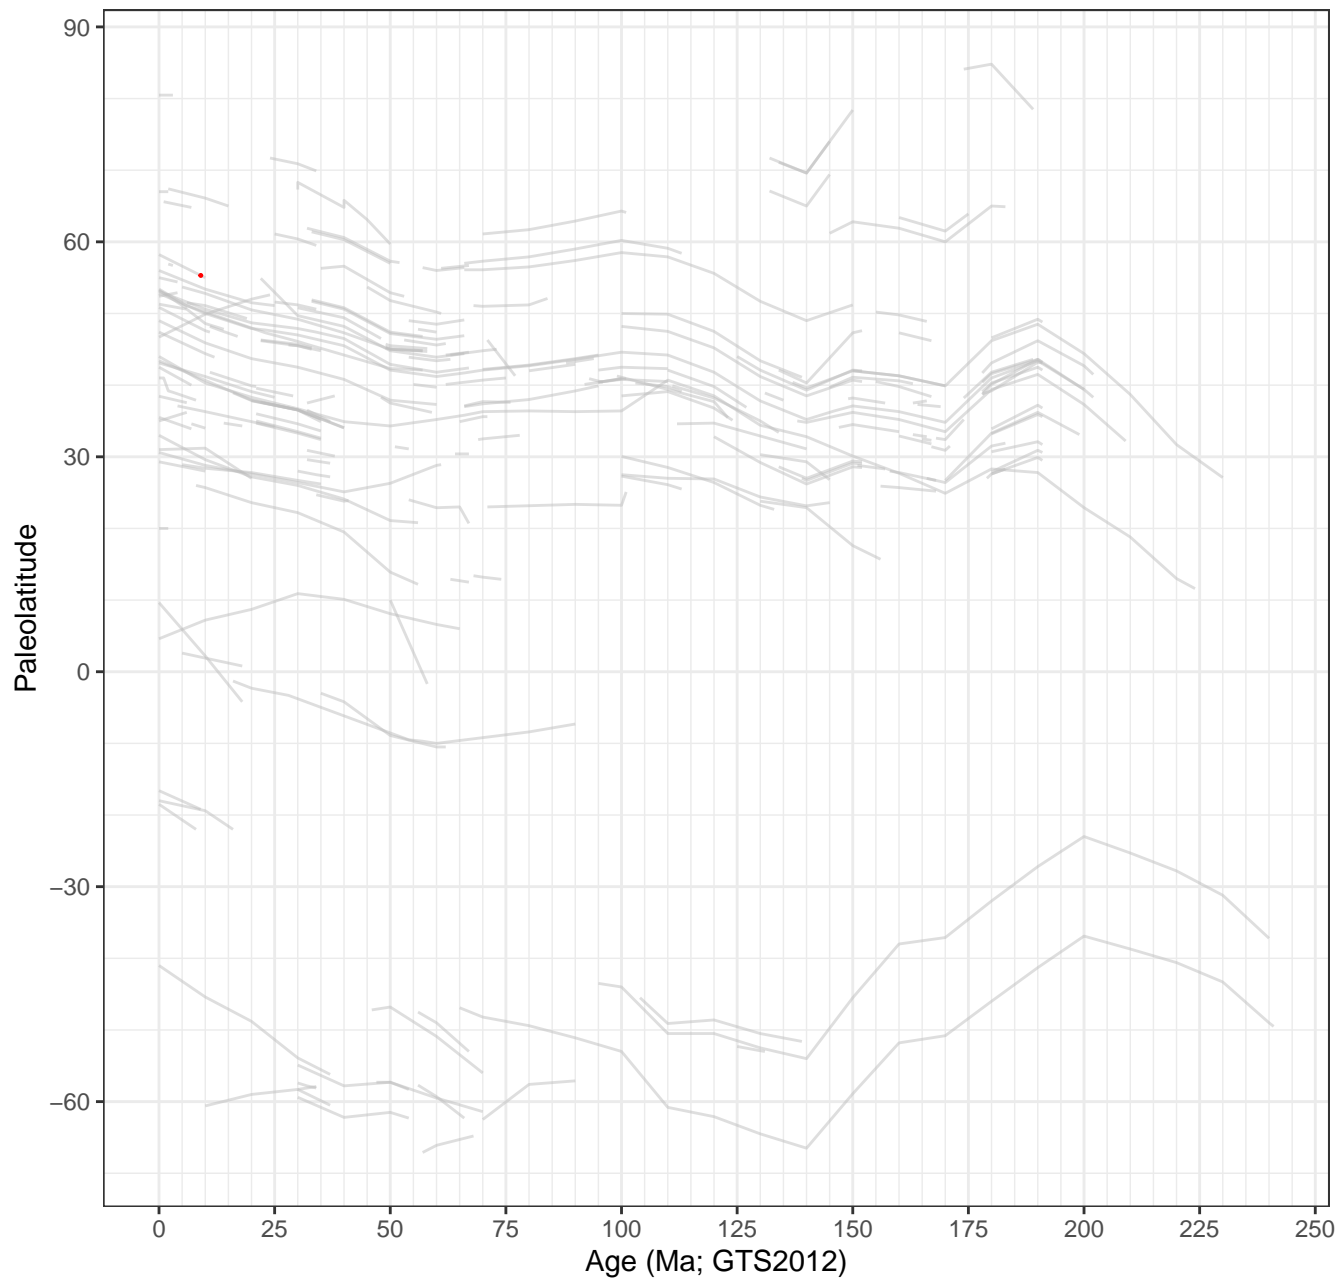

Supplement: Supplementary file 1950 [file Nematosphaeropsis major.pdf › Supplement/Supplement 2/Species 1914 plots/Nematosphaeropsis major.pdf]

# Species *Nematosphaeropsis oblonga*

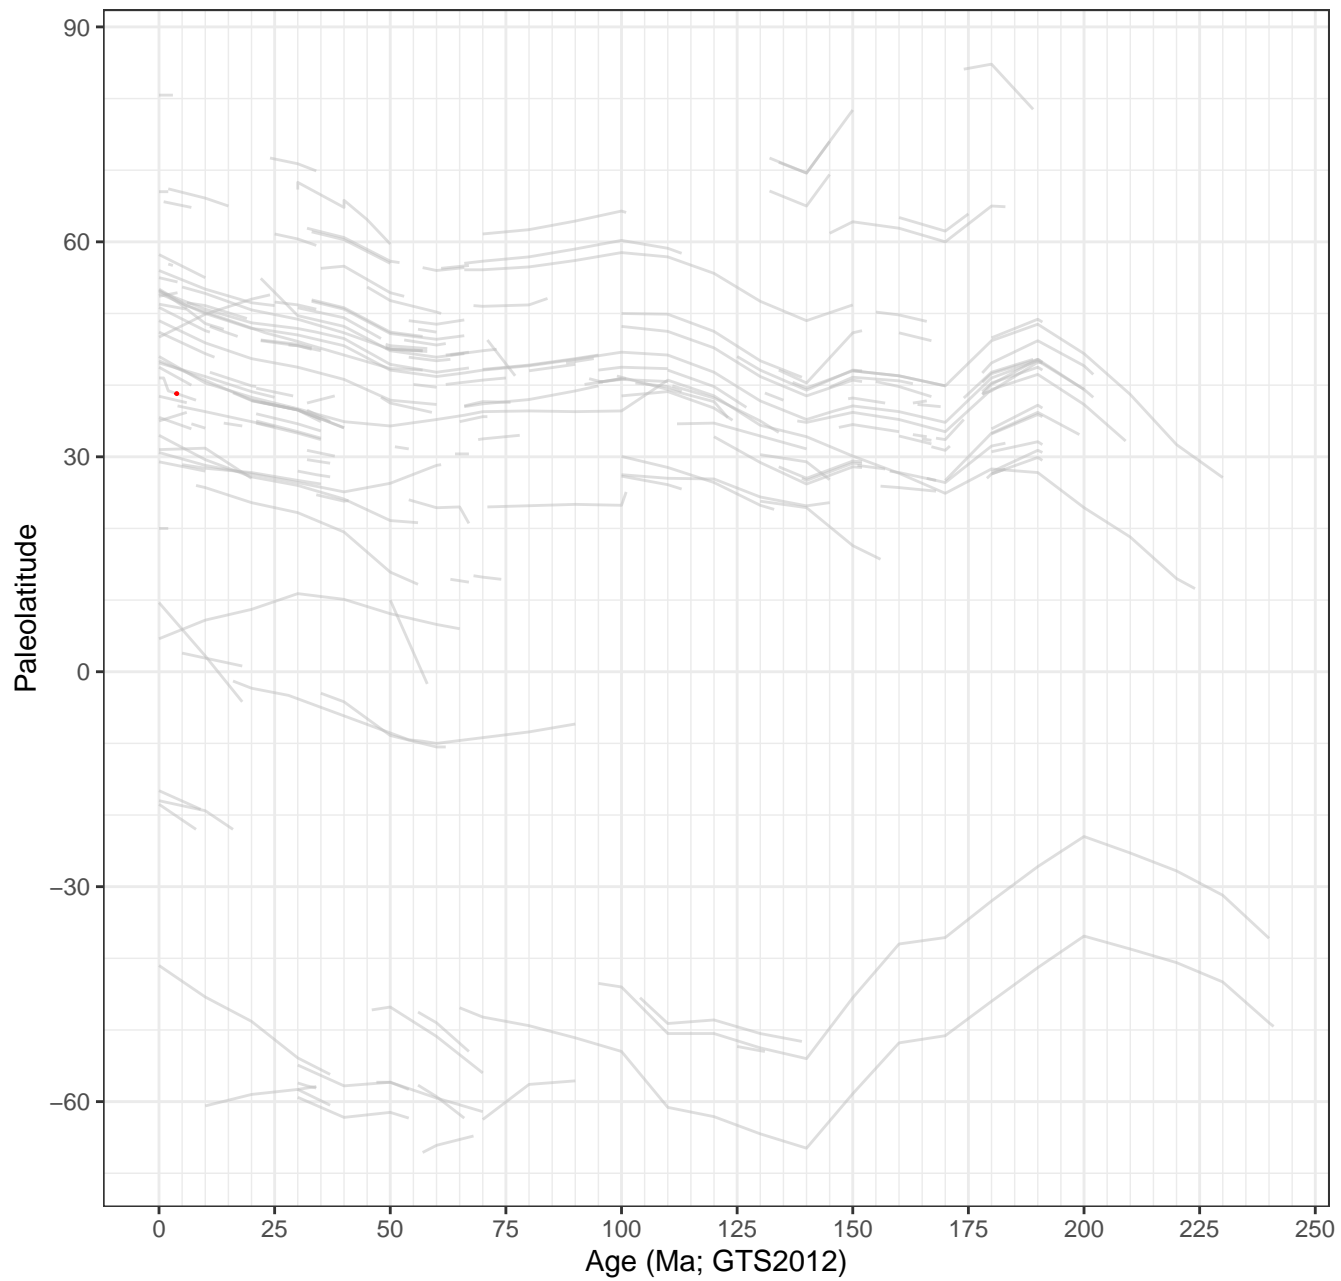

Supplement: Supplementary file 1951 [file Nematosphaeropsis oblonga.pdf › Supplement/Supplement 2/Species 1914 plots/Nematosphaeropsis oblonga.pdf]

# Species *Nematosphaeropsis philippotii*

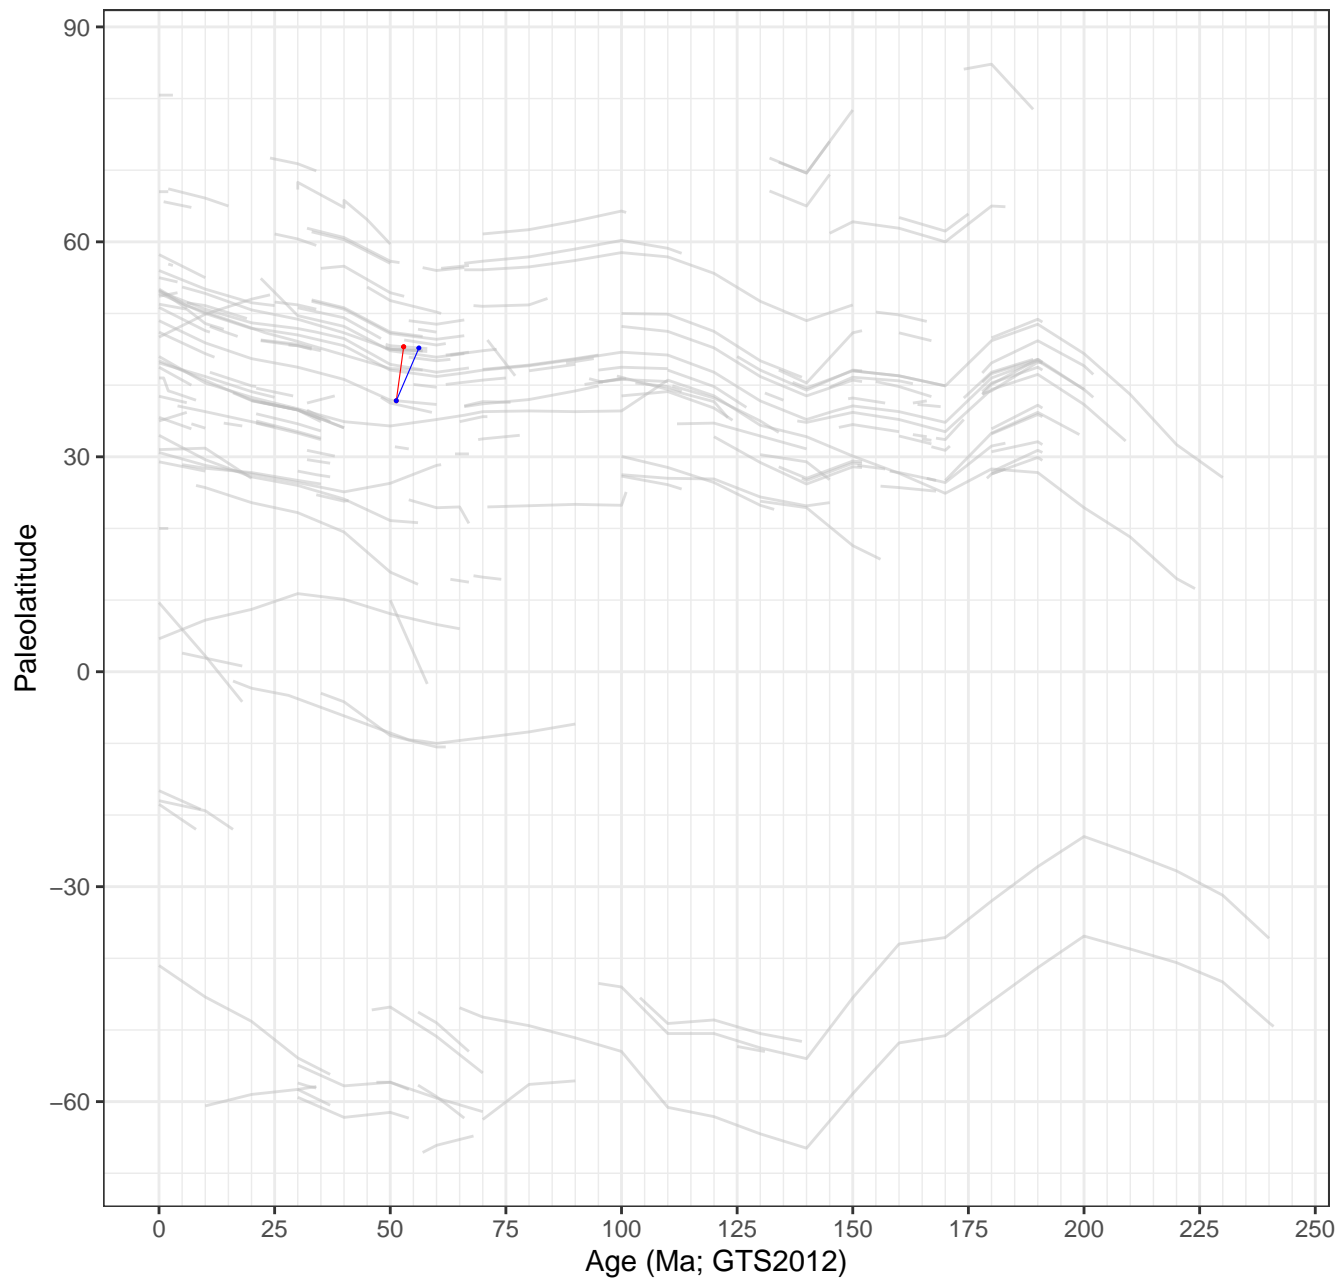

Supplement: Supplementary file 1952 [file Nematosphaeropsis philippotii.pdf › Supplement/Supplement 2/Species 1914 plots/Nematosphaeropsis philippotii.pdf]

# Species *Nematosphaeropsis reticulensis*

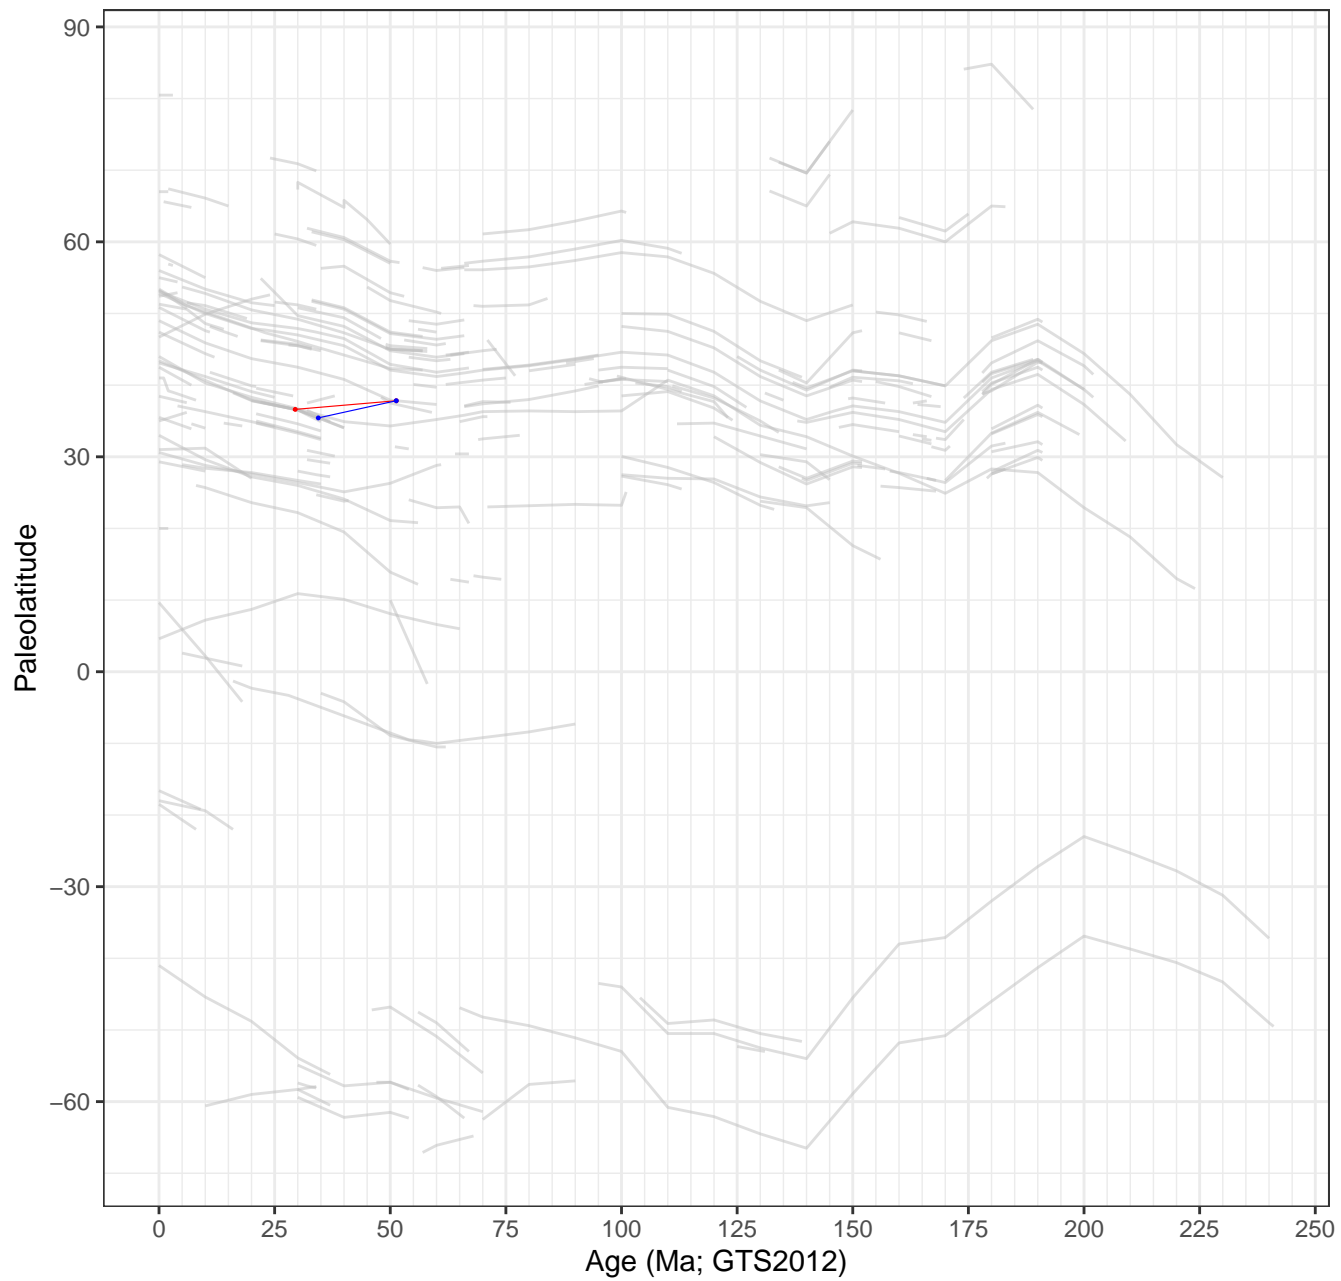

Supplement: Supplementary file 1953 [file Nematosphaeropsis reticulensis.pdf › Supplement/Supplement 2/Species 1914 plots/Nematosphaeropsis reticulensis.pdf]

# Species *Nematosphaeropsis rigida*

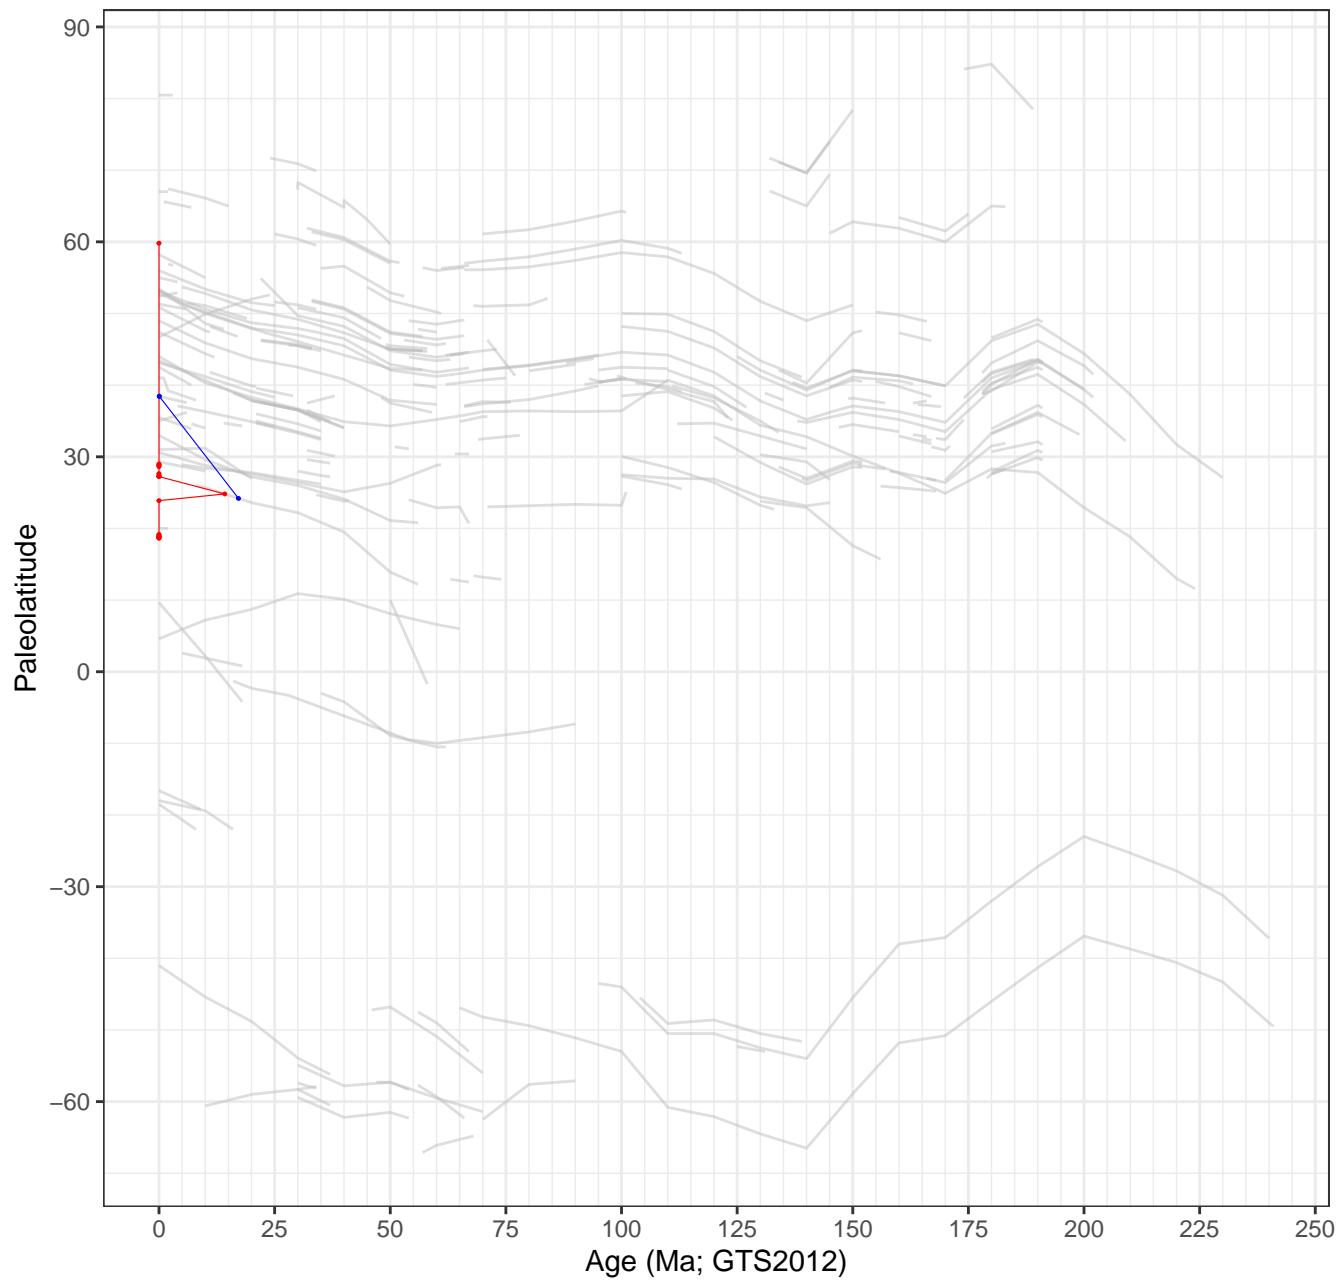

Supplement: Supplementary file 1954 [file Nematosphaeropsis rigida.pdf › Supplement/Supplement 2/Species 1914 plots/Nematosphaeropsis rigida.pdf]

# Species *Nematosphaeropsis scala*

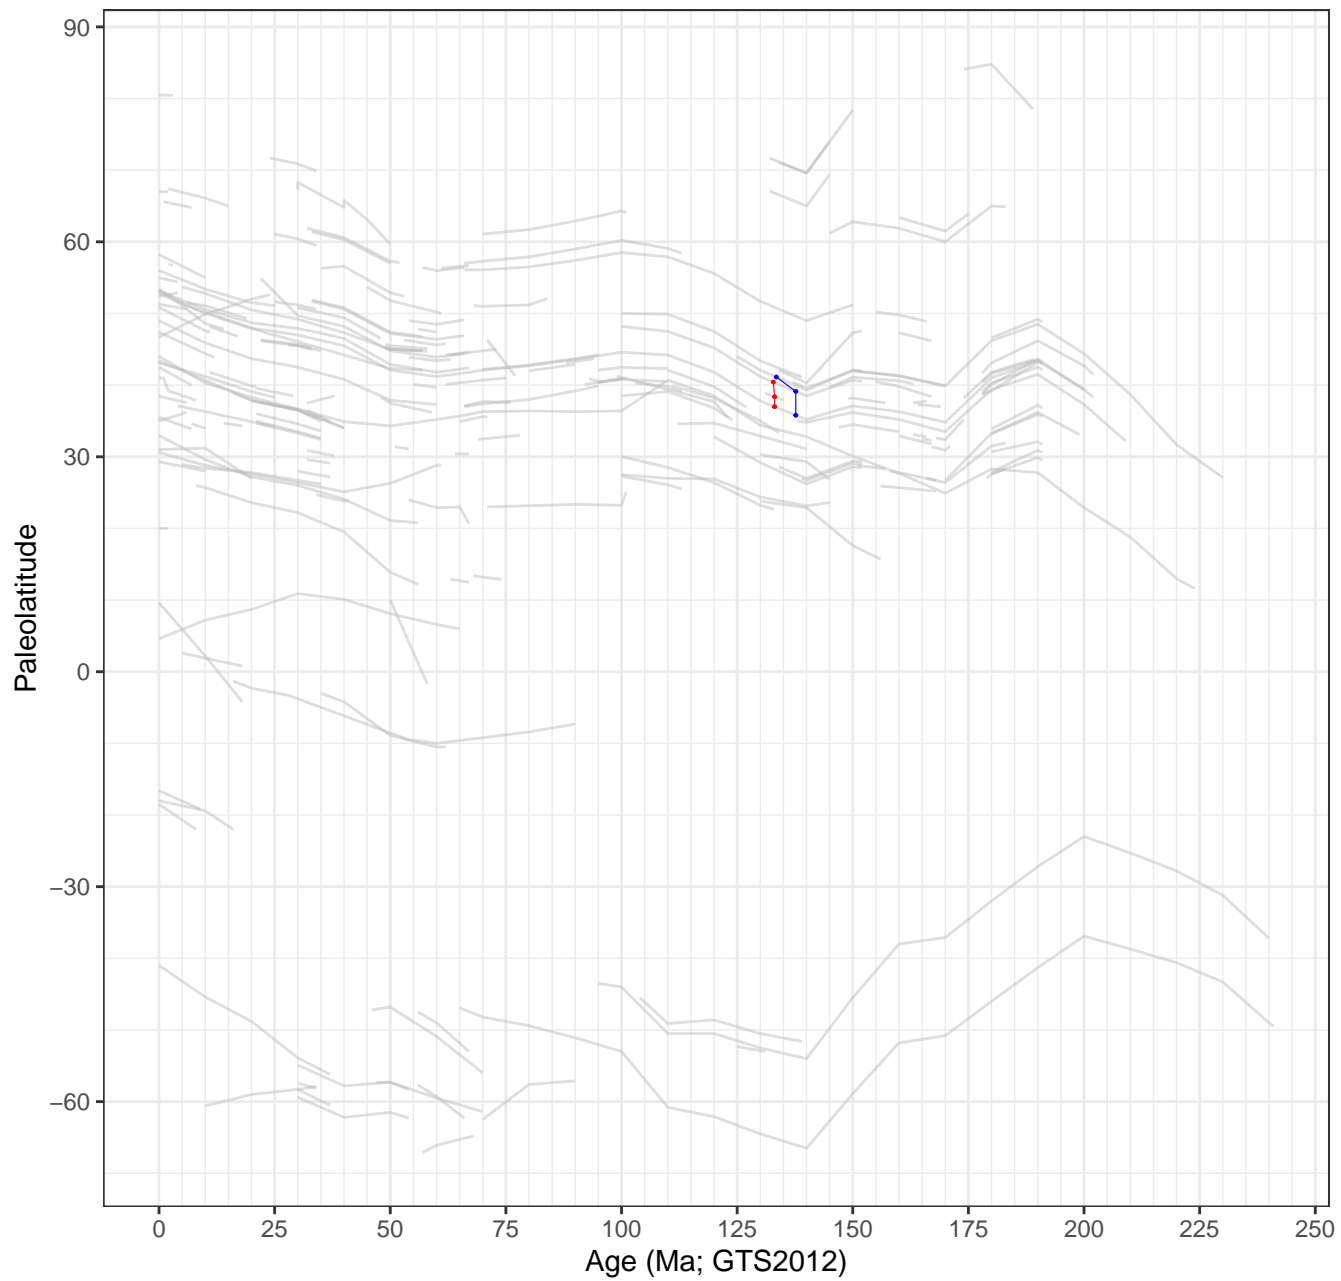

Supplement: Supplementary file 1955 [file Nematosphaeropsis scala.pdf › Supplement/Supplement 2/Species 1914 plots/Nematosphaeropsis scala.pdf]

# Species *Nematosphaeropsis singularis*

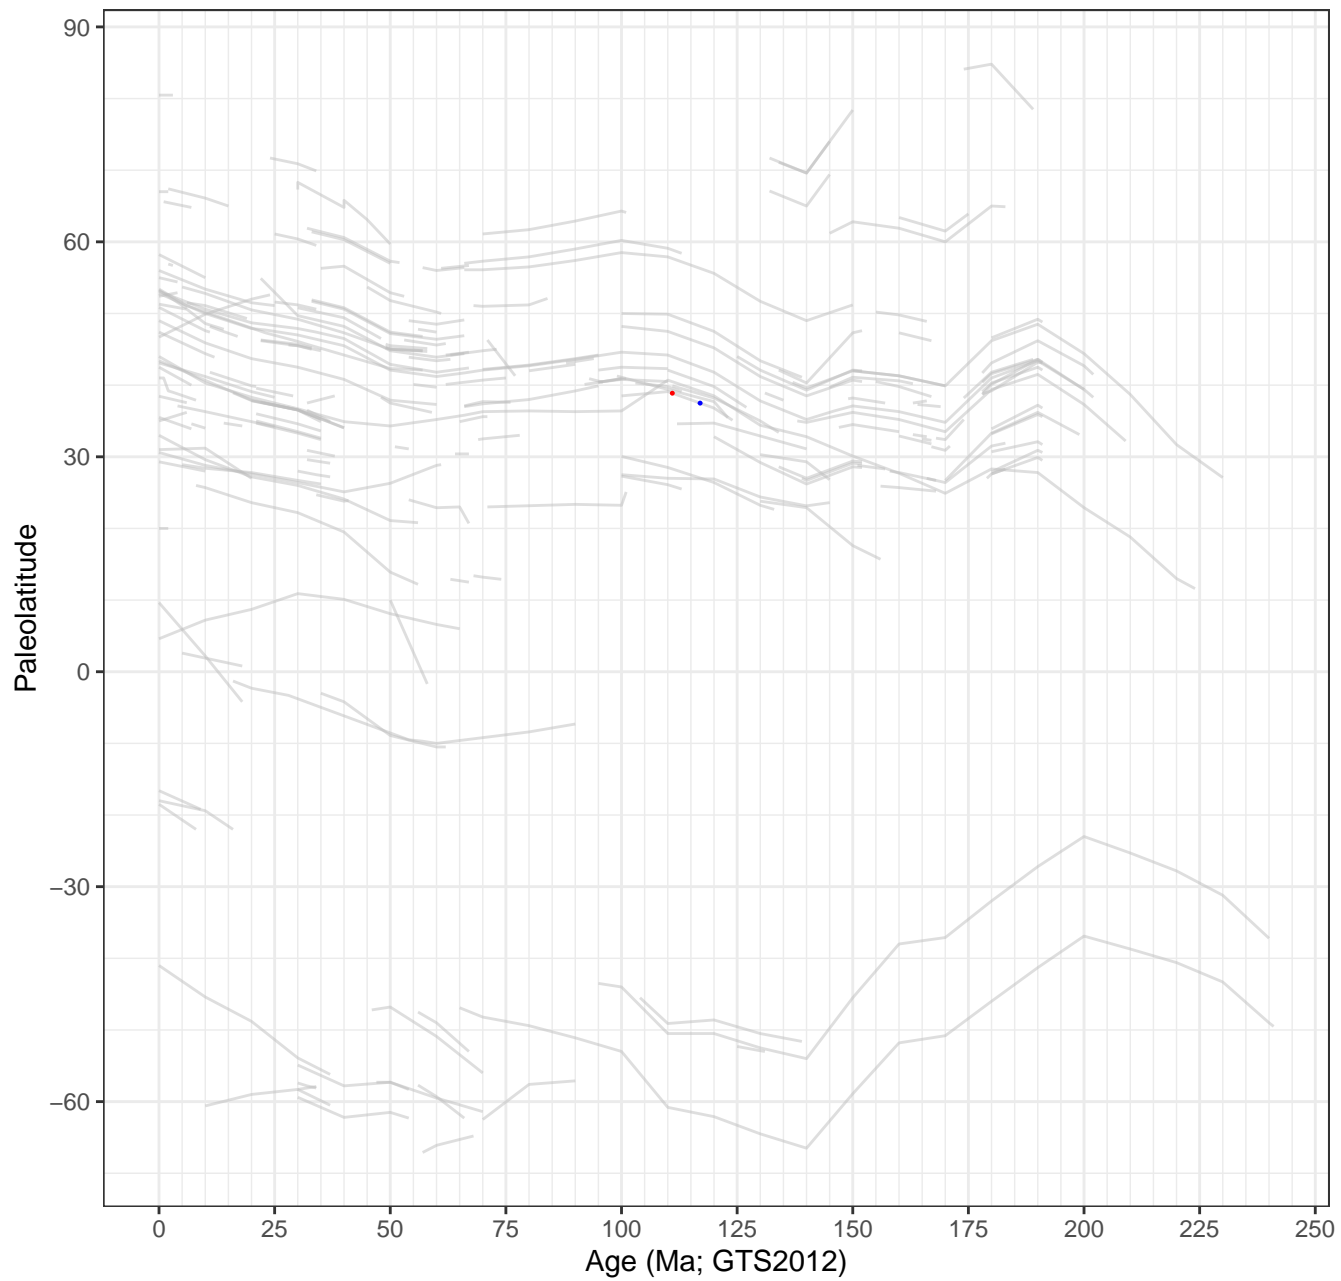

Supplement: Supplementary file 1956 [file Nematosphaeropsis singularis.pdf › Supplement/Supplement 2/Species 1914 plots/Nematosphaeropsis singularis.pdf]

# Species *Nexosispinum hesperum*

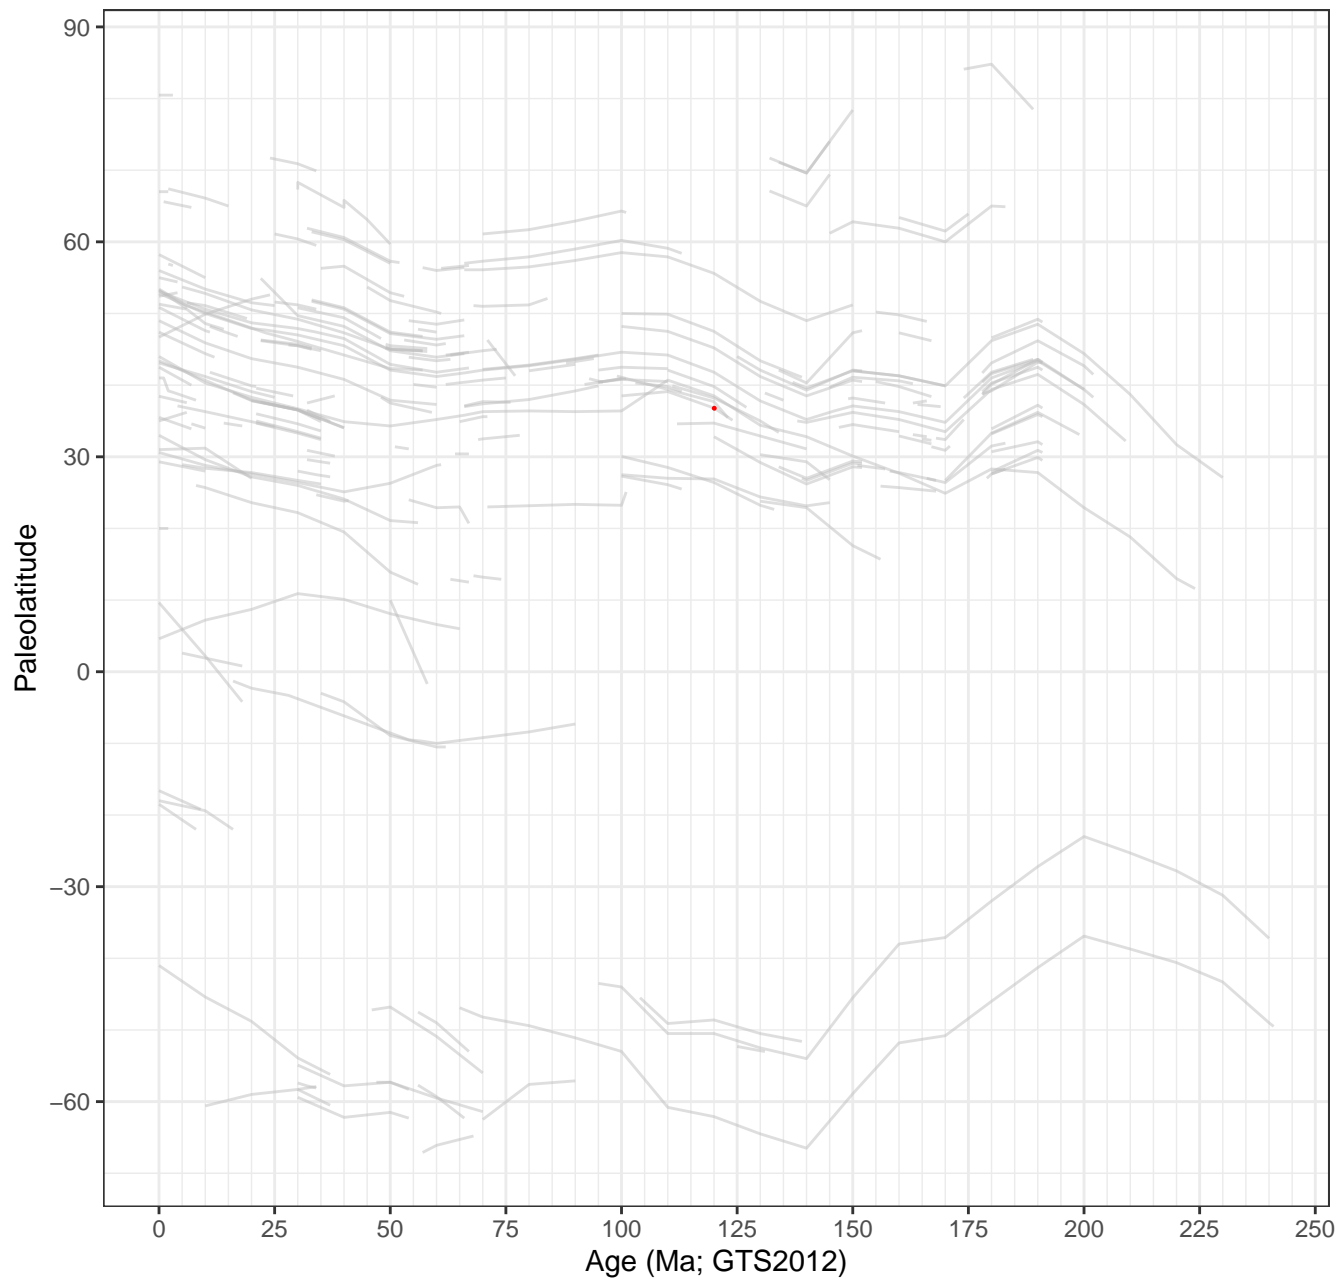

Supplement: Supplementary file 1957 [file Nexosispinum hesperum.pdf › Supplement/Supplement 2/Species 1914 plots/Nexosispinum hesperum.pdf]

# Species Nexosispinum minimum

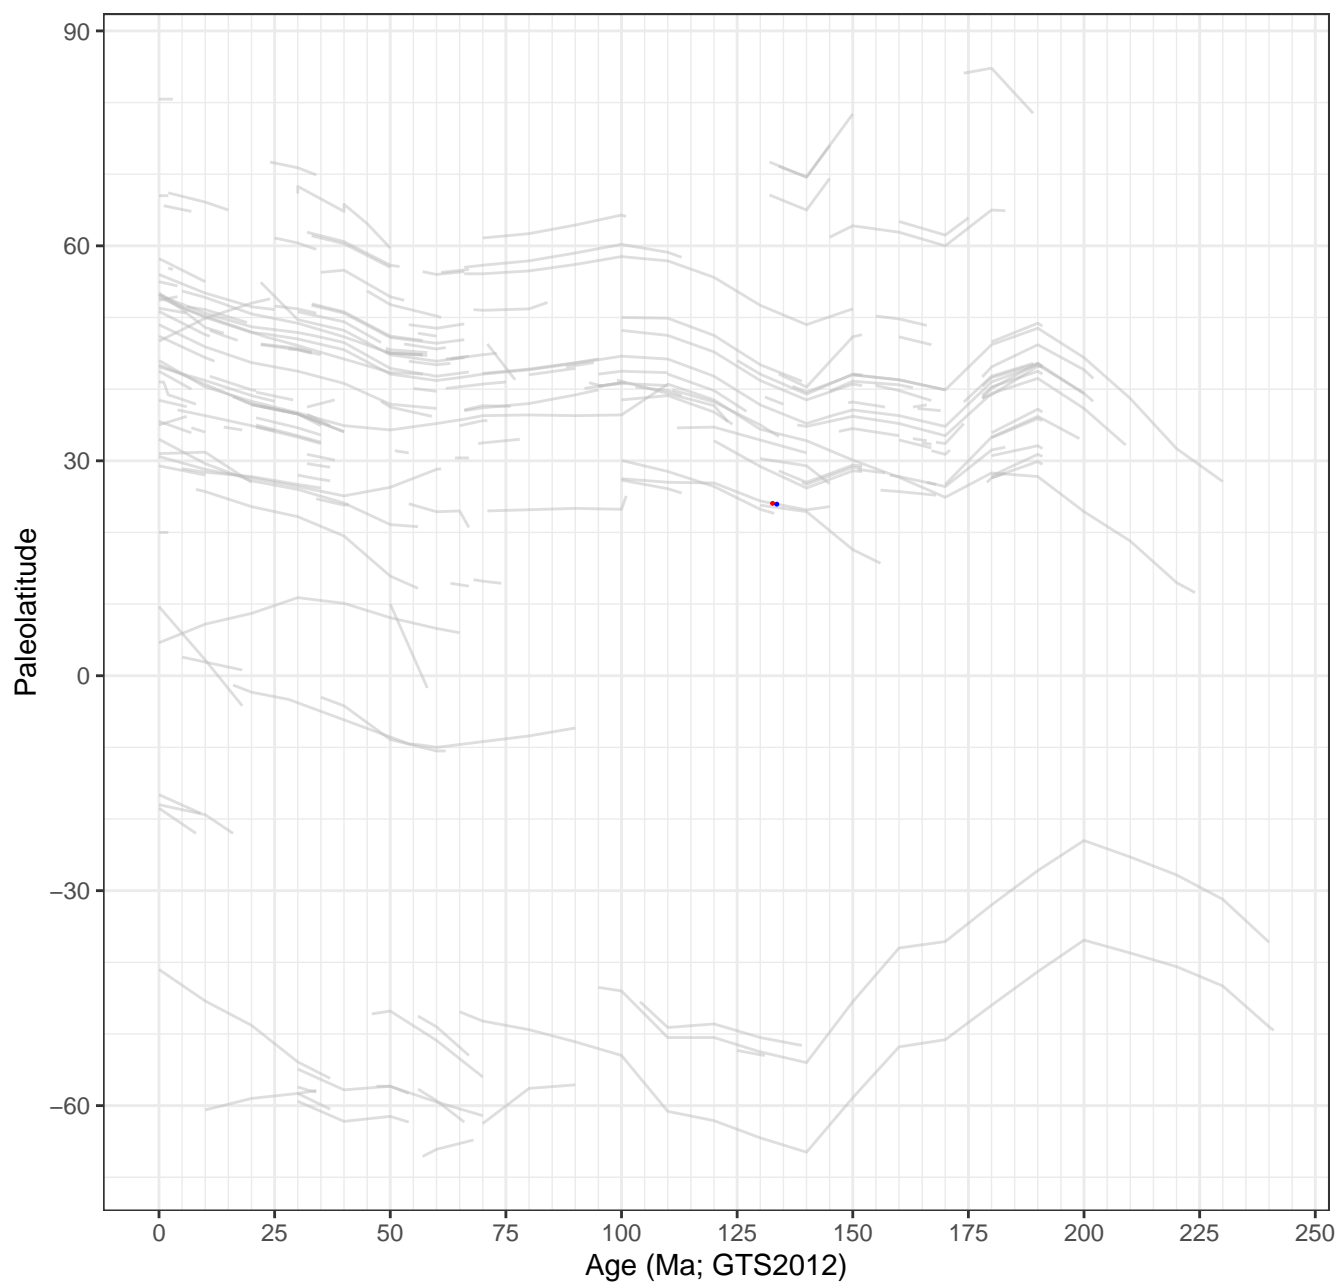

Supplement: Supplementary file 1958 [file Nexosispinum minimum.pdf › Supplement/Supplement 2/Species 1914 plots/Nexosispinum minimum.pdf]

# Species *Nexosispinum vetusculum*

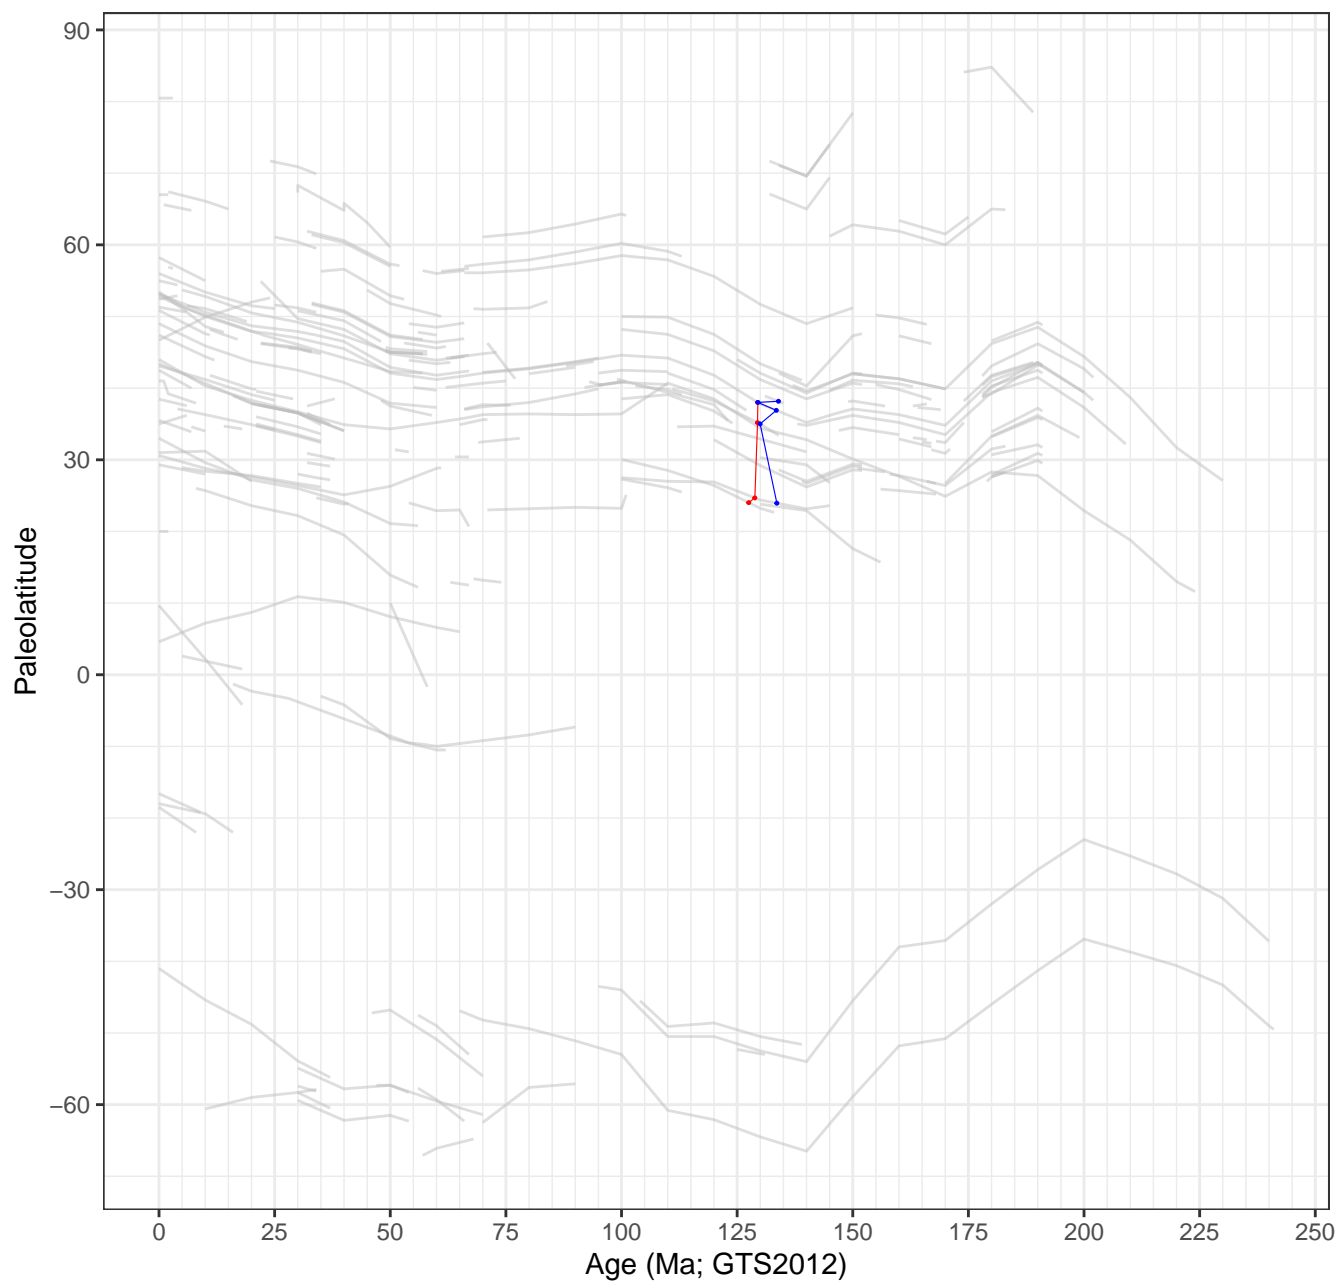

Supplement: Supplementary file 1959 [file Nexosispinum vetusculum.pdf › Supplement/Supplement 2/Species 1914 plots/Nexosispinum vetusculum.pdf]

# Species *Noricysta* spp.

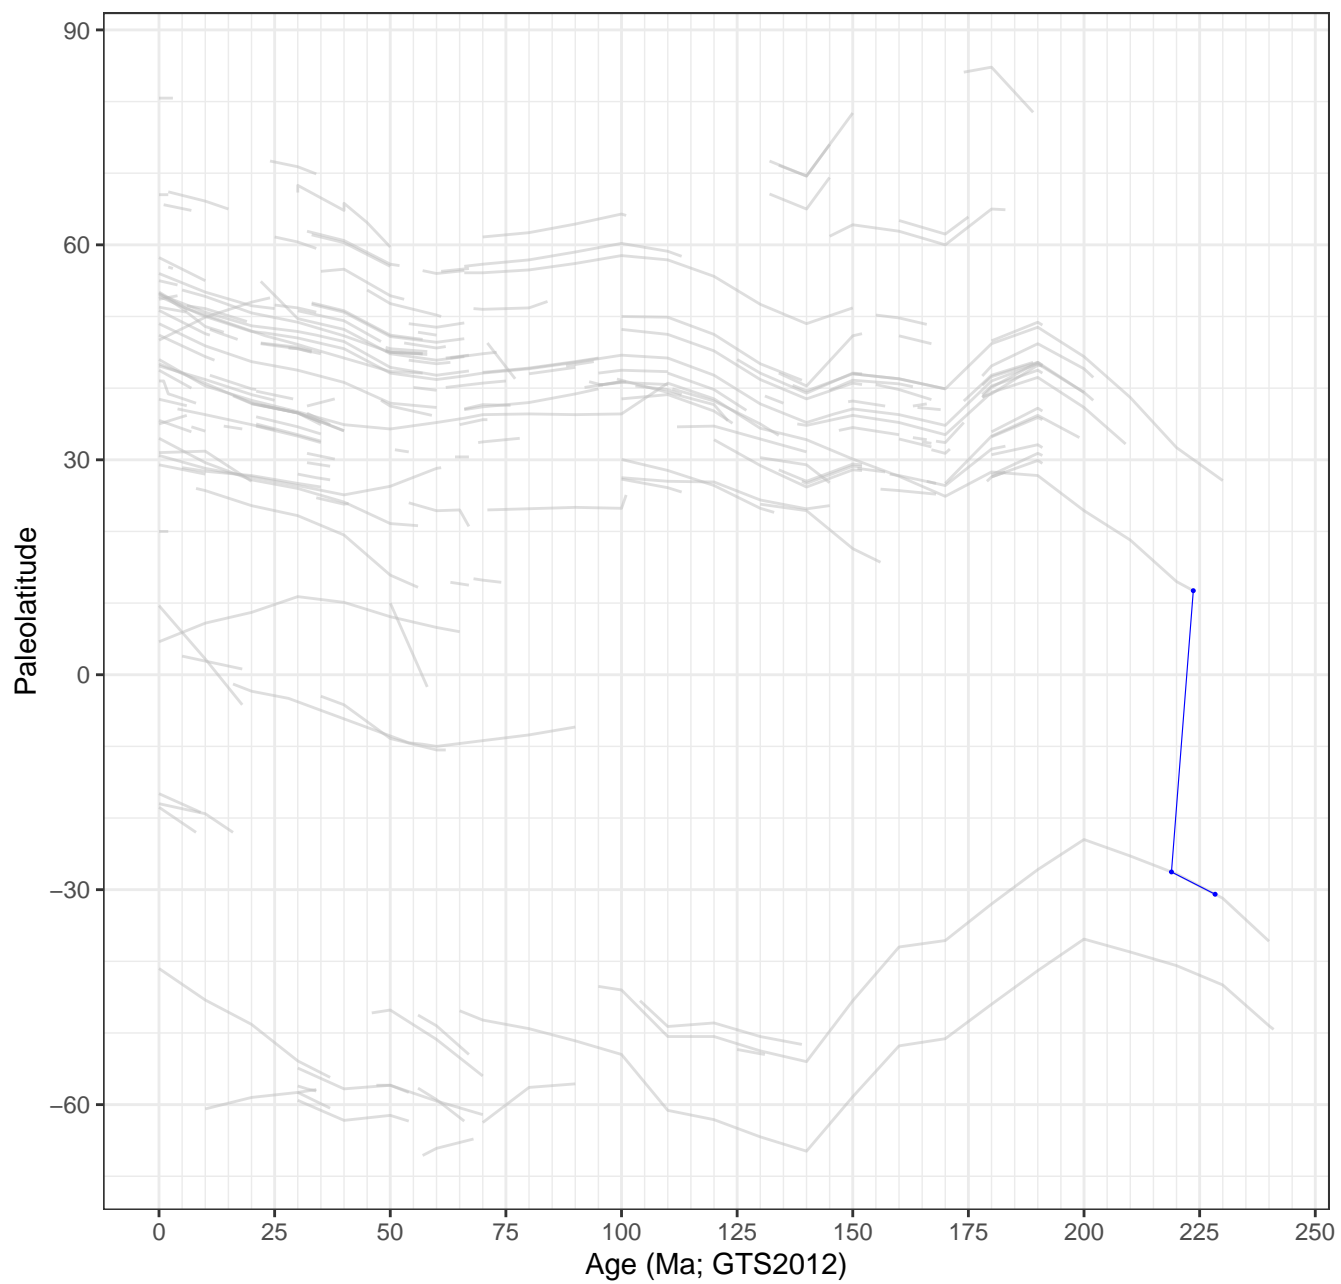

Supplement: Supplementary file 1960 [file Noricysta spp..pdf › Supplement/Supplement 2/Species 1914 plots/Noricysta spp..pdf]

# Species Nummus monoculatus

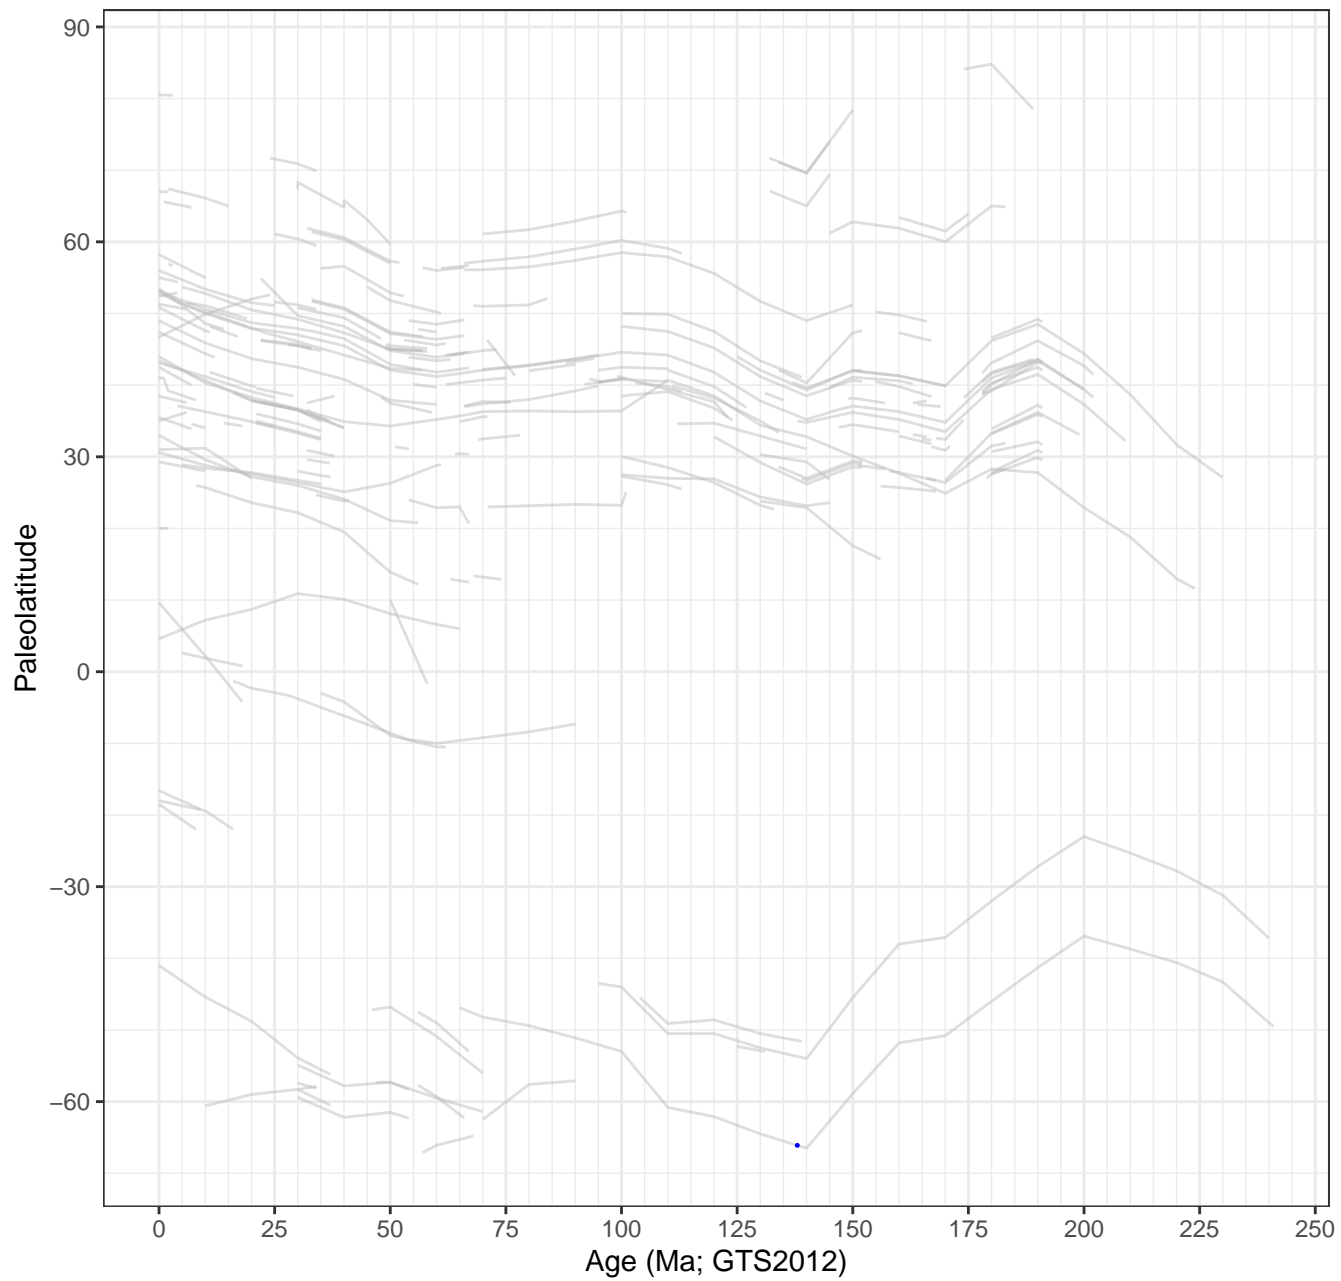

Supplement: Supplementary file 1961 [file Nummus monoculatus.pdf › Supplement/Supplement 2/Species 1914 plots/Nummus monoculatus.pdf]

# Species Nummus similis

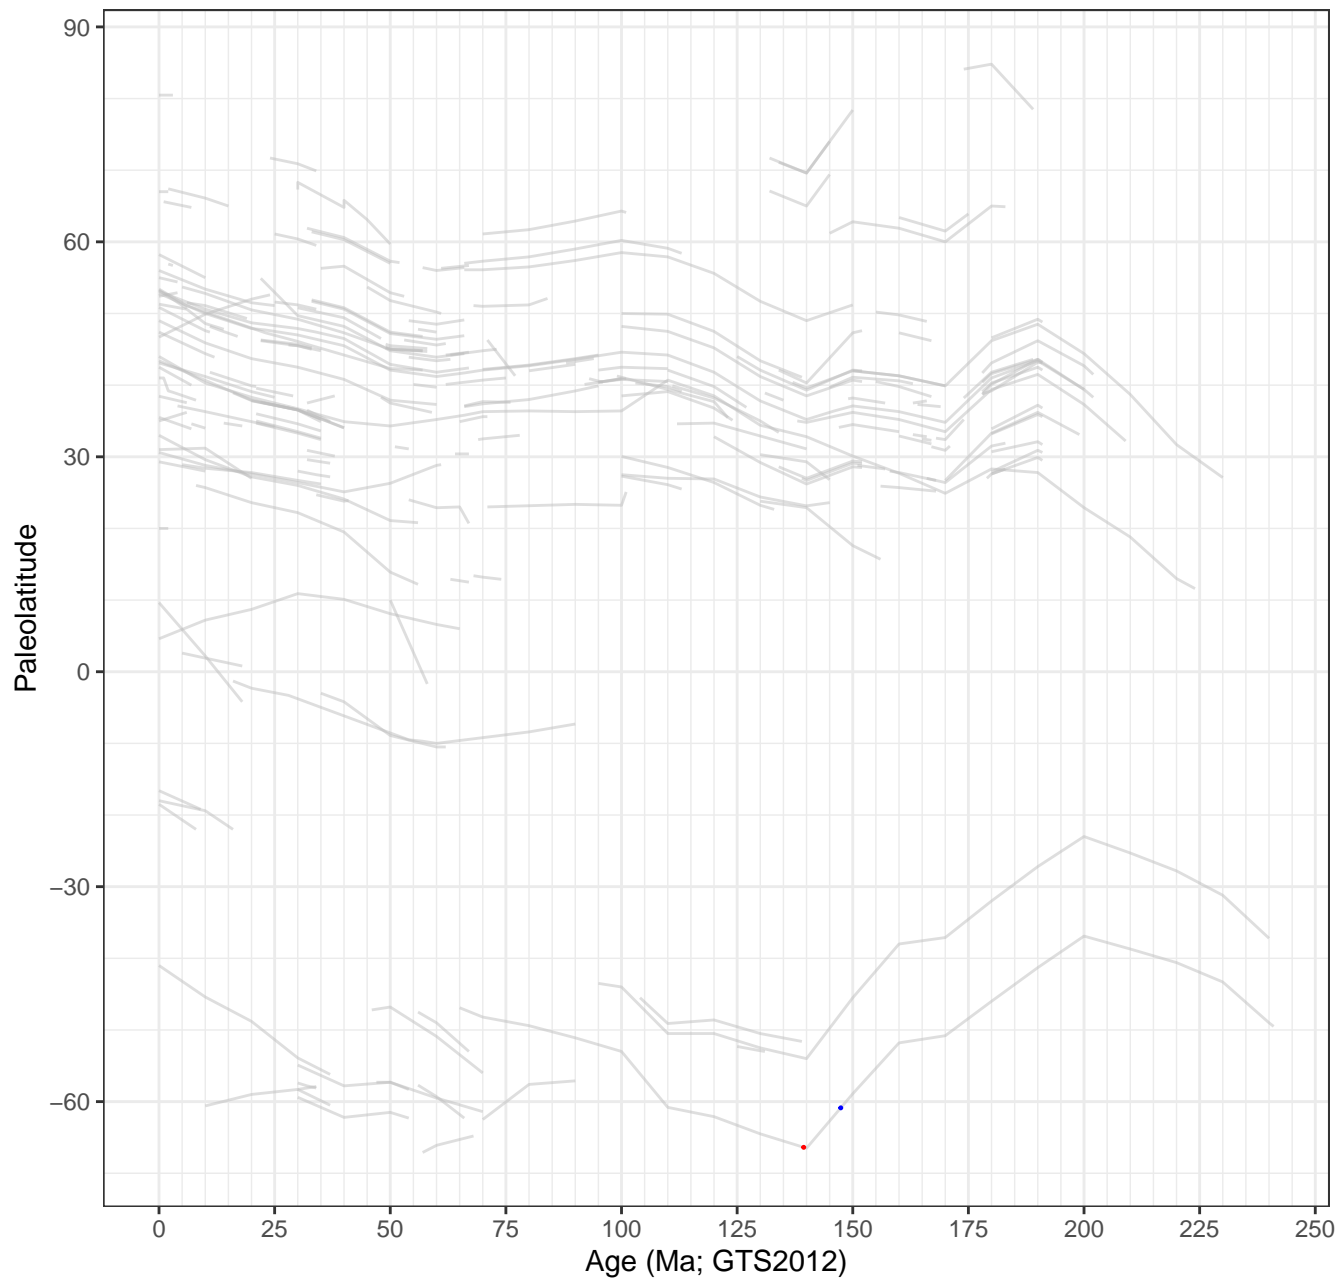

Supplement: Supplementary file 1962 [file Nummus similis.pdf › Supplement/Supplement 2/Species 1914 plots/Nummus similis.pdf]

# Species *Nyktericysta tripenta*

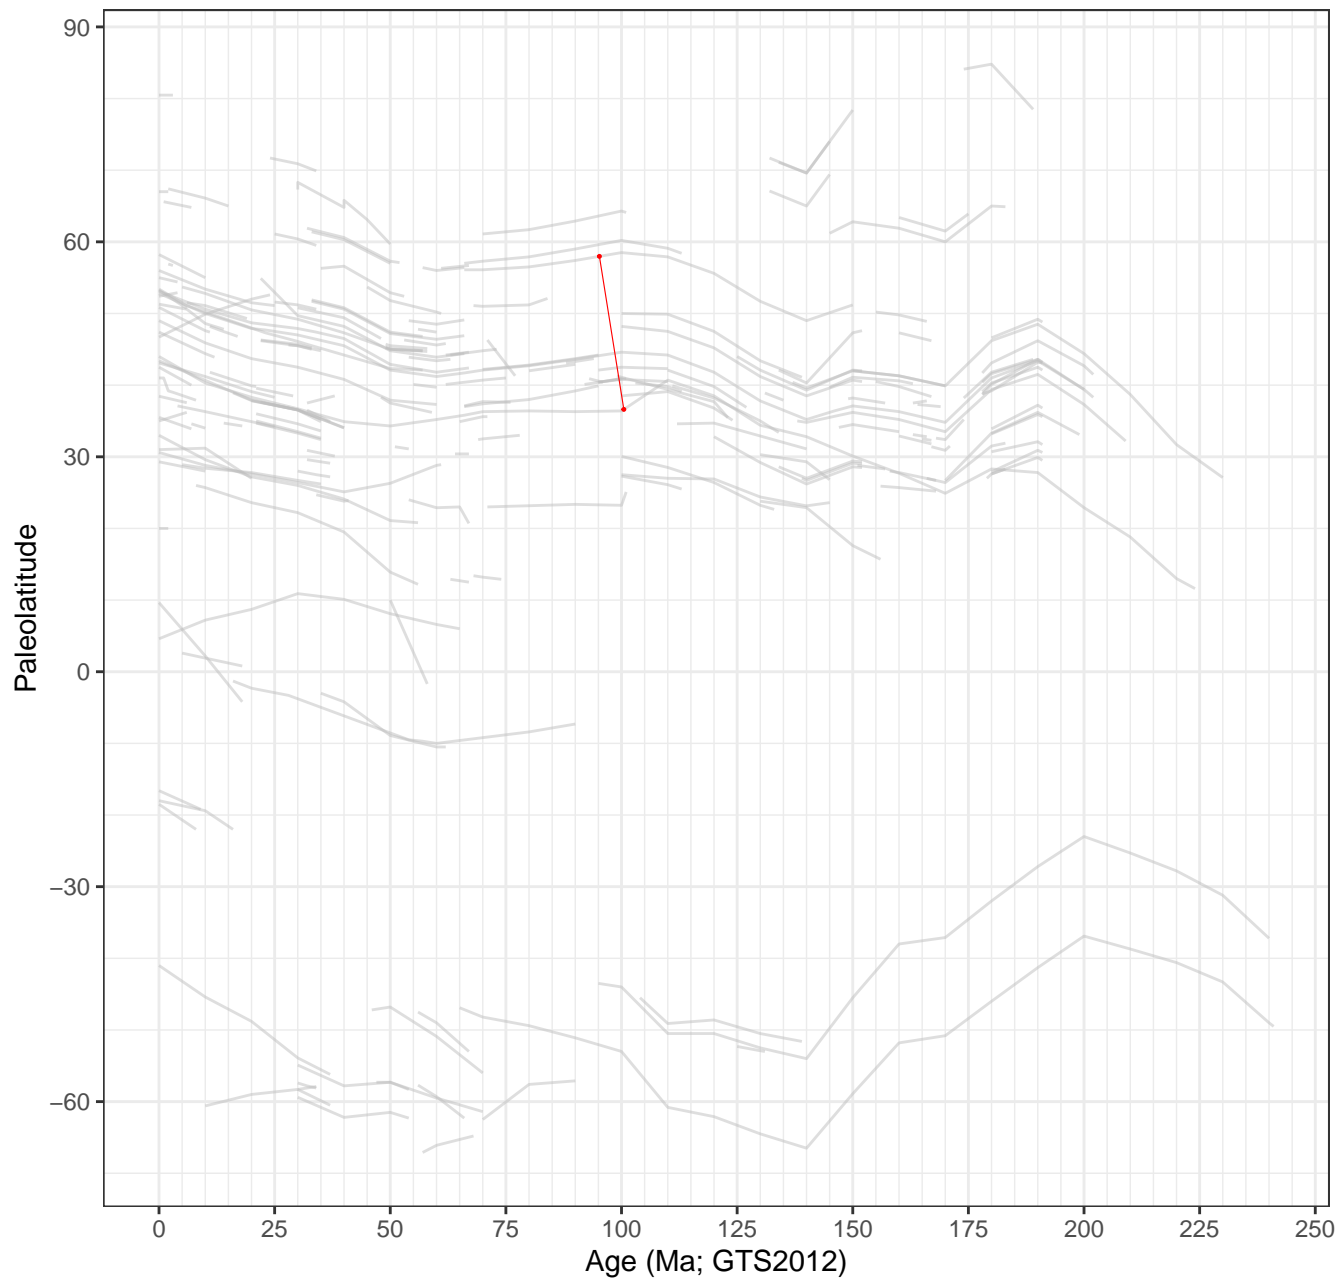

Supplement: Supplementary file 1963 [file Nyktericysta tripenta.pdf › Supplement/Supplement 2/Species 1914 plots/Nyktericysta tripenta.pdf]

# Species *Nyktericysta vitrea*

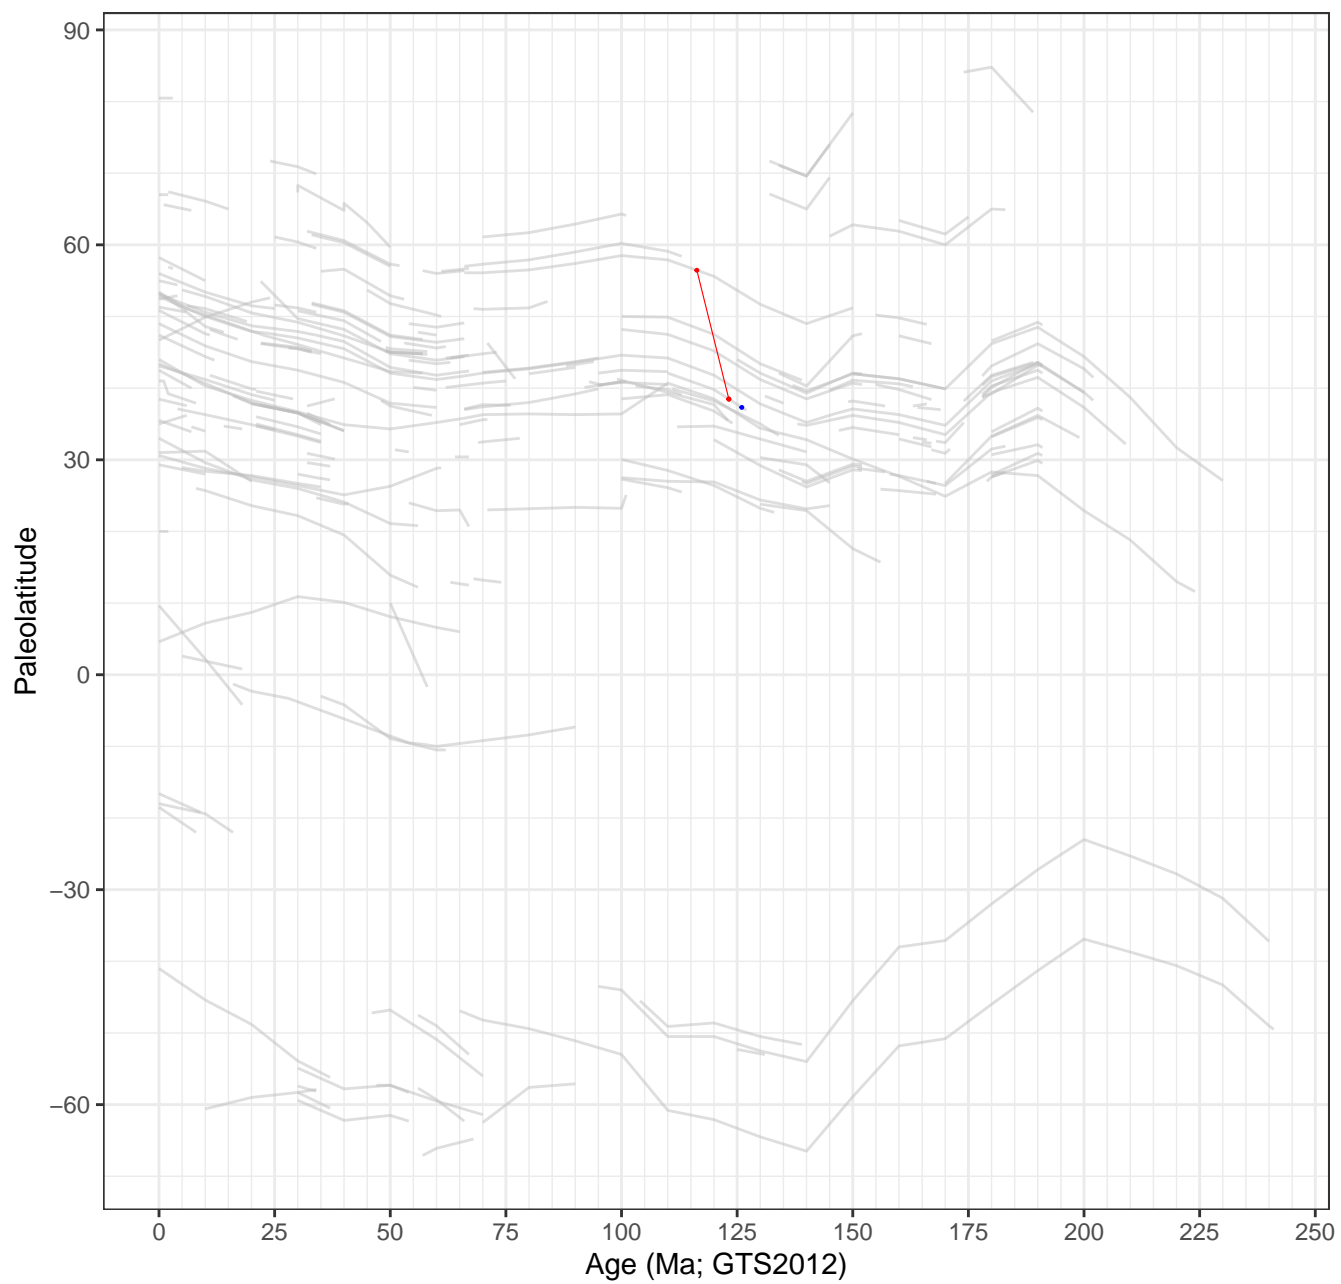

Supplement: Supplementary file 1964 [file Nyktericysta vitrea.pdf › Supplement/Supplement 2/Species 1914 plots/Nyktericysta vitrea.pdf]

# Species *Occisucysta balios*

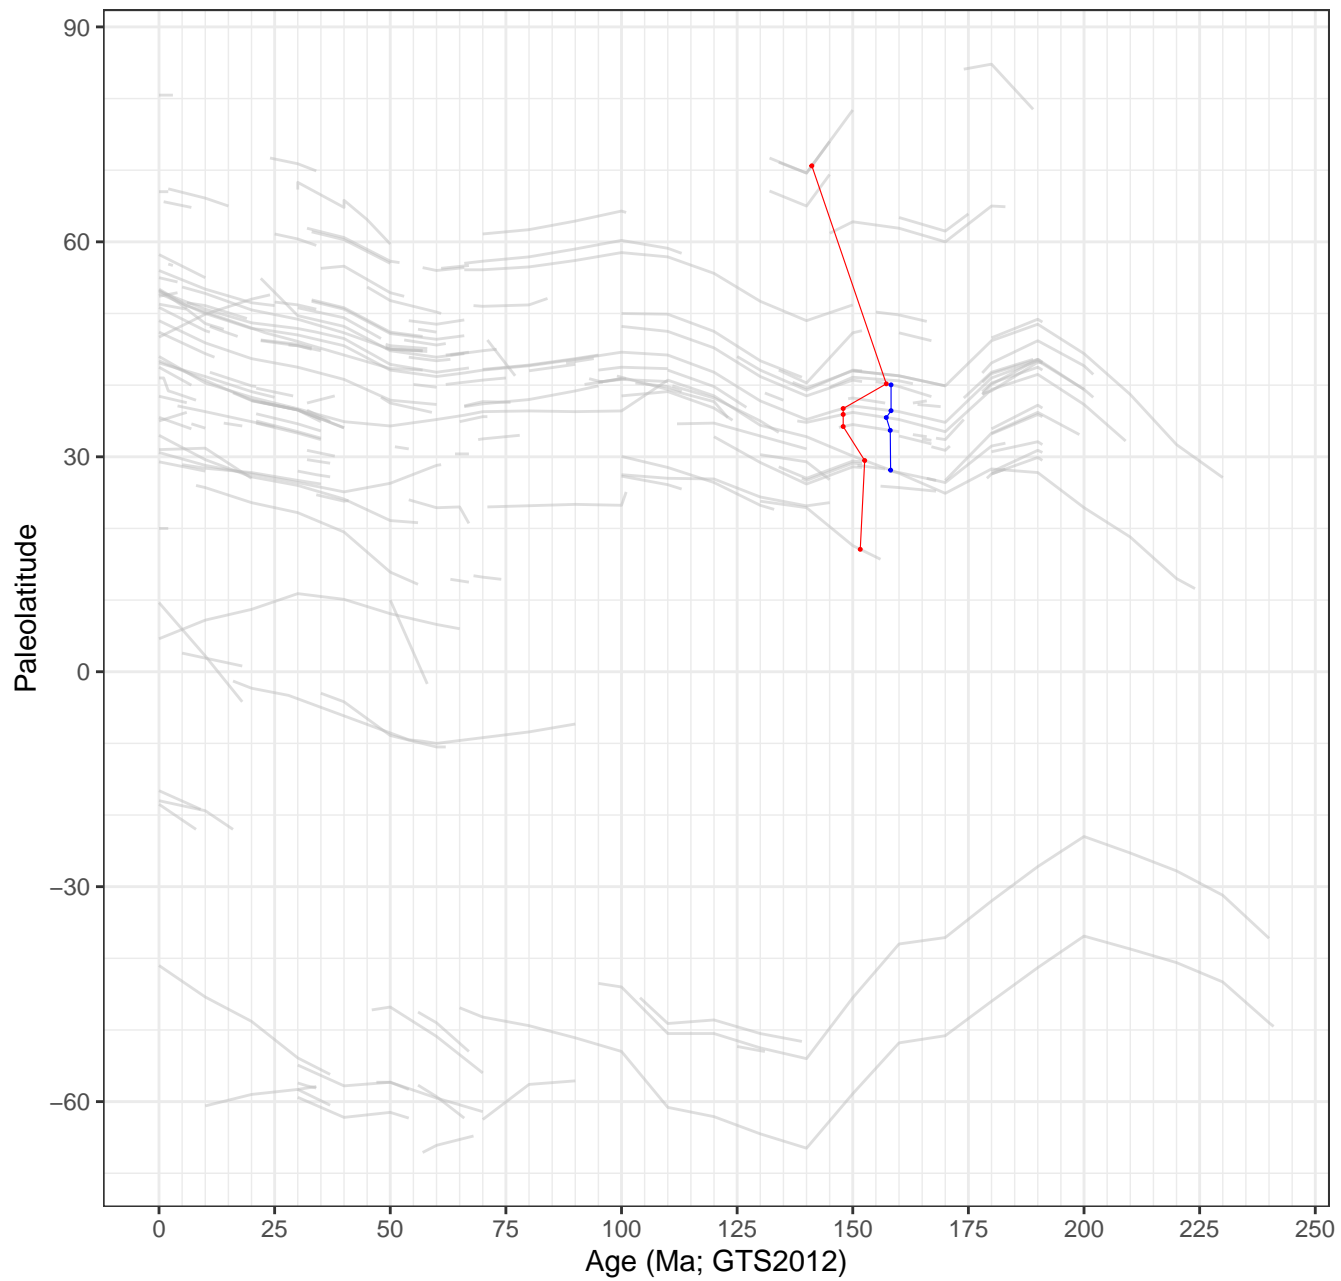

Supplement: Supplementary file 1965 [file Occisucysta balios.pdf › Supplement/Supplement 2/Species 1914 plots/Occisucysta balios.pdf]

# Species *Occisucysta duxburyi*

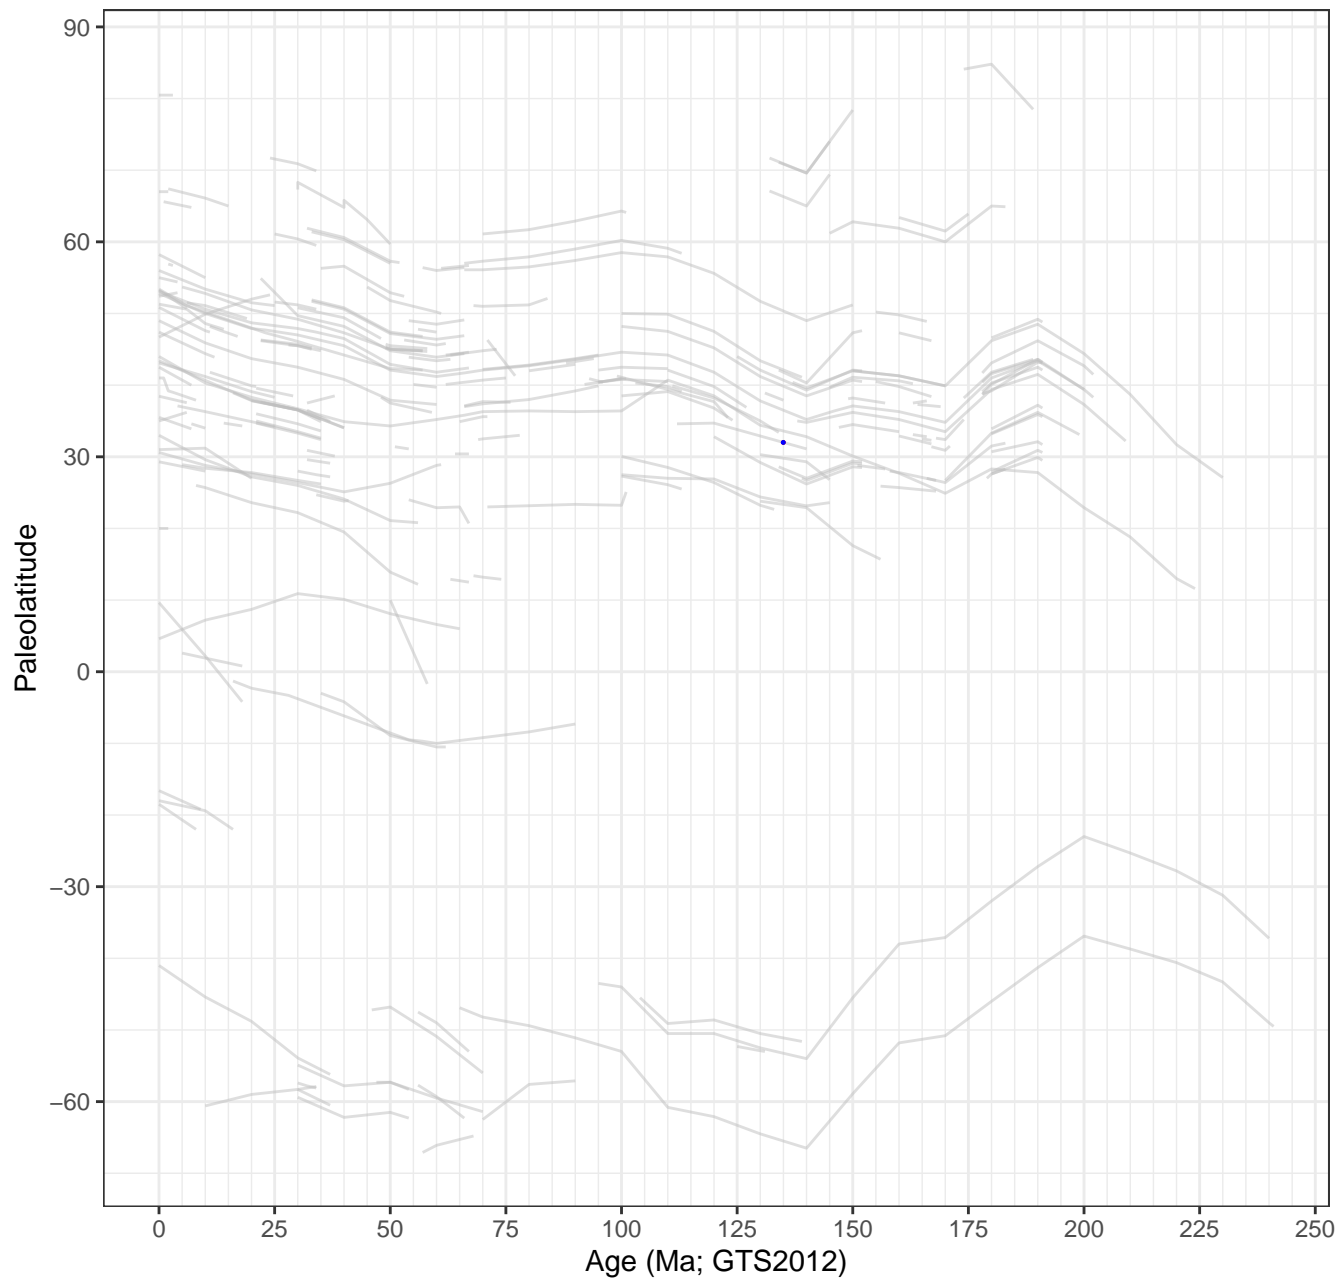

Supplement: Supplementary file 1966 [file Occisucysta duxburyi.pdf › Supplement/Supplement 2/Species 1914 plots/Occisucysta duxburyi.pdf]

# Species *Occisucysta echinata*

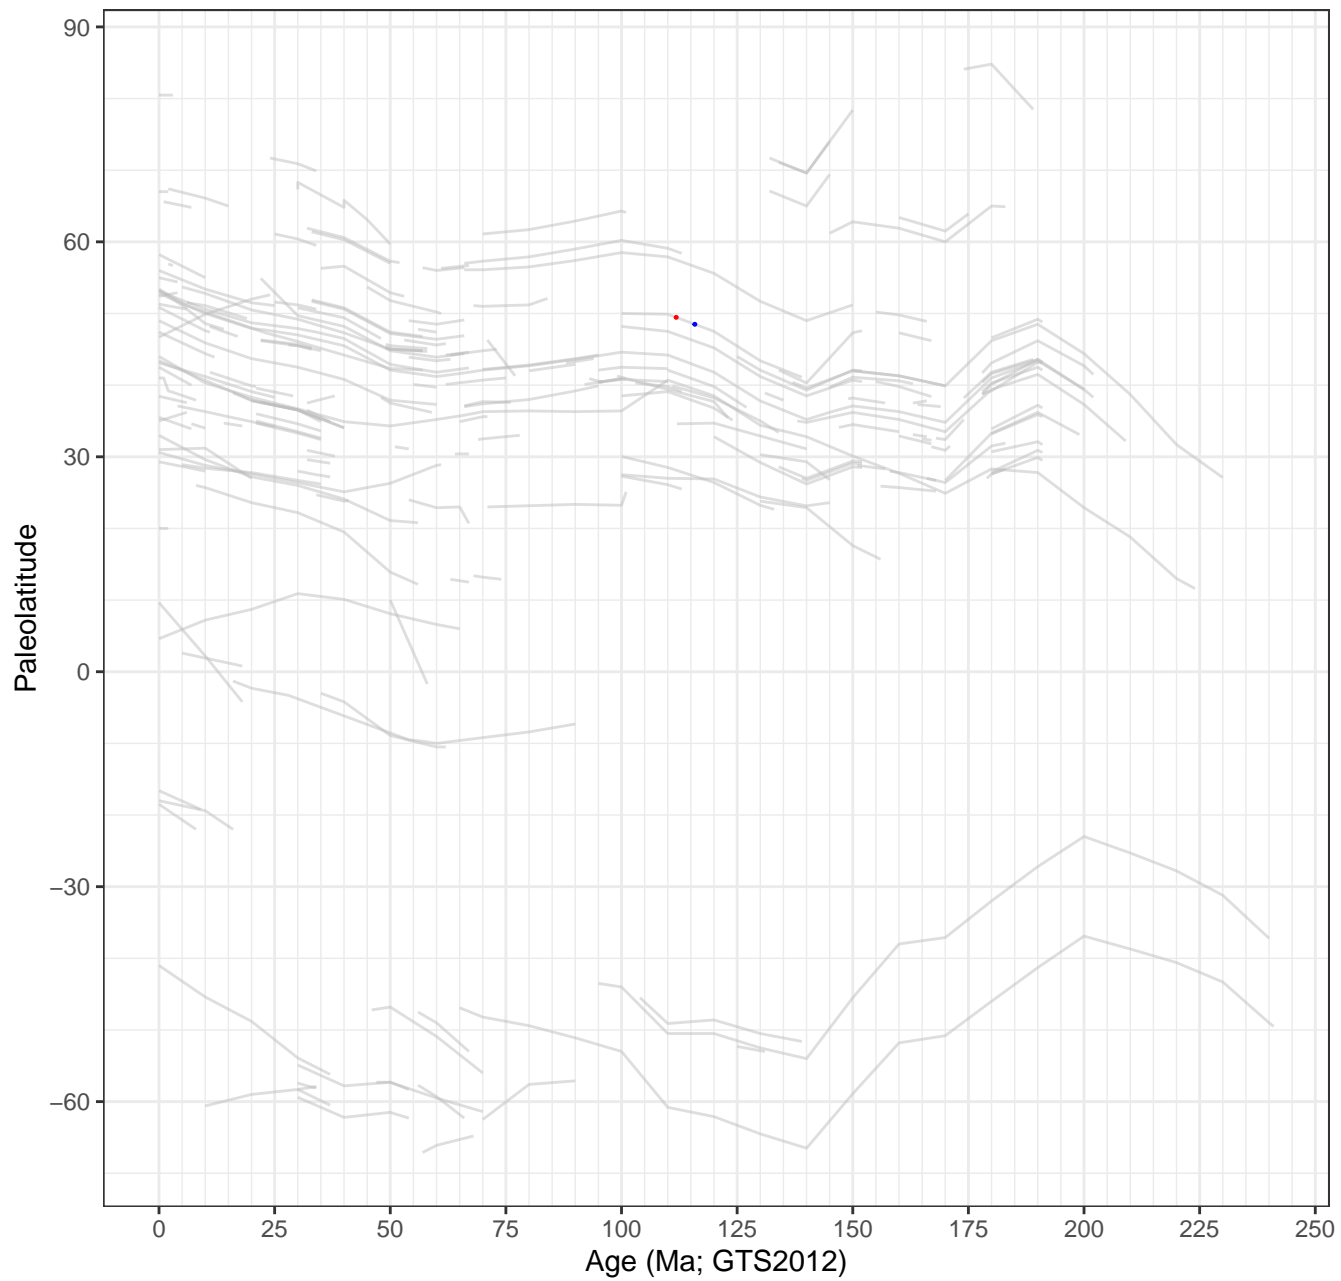

Supplement: Supplementary file 1967 [file Occisucysta echinata.pdf › Supplement/Supplement 2/Species 1914 plots/Occisucysta echinata.pdf]

# Species *Occisucysta tentorium*

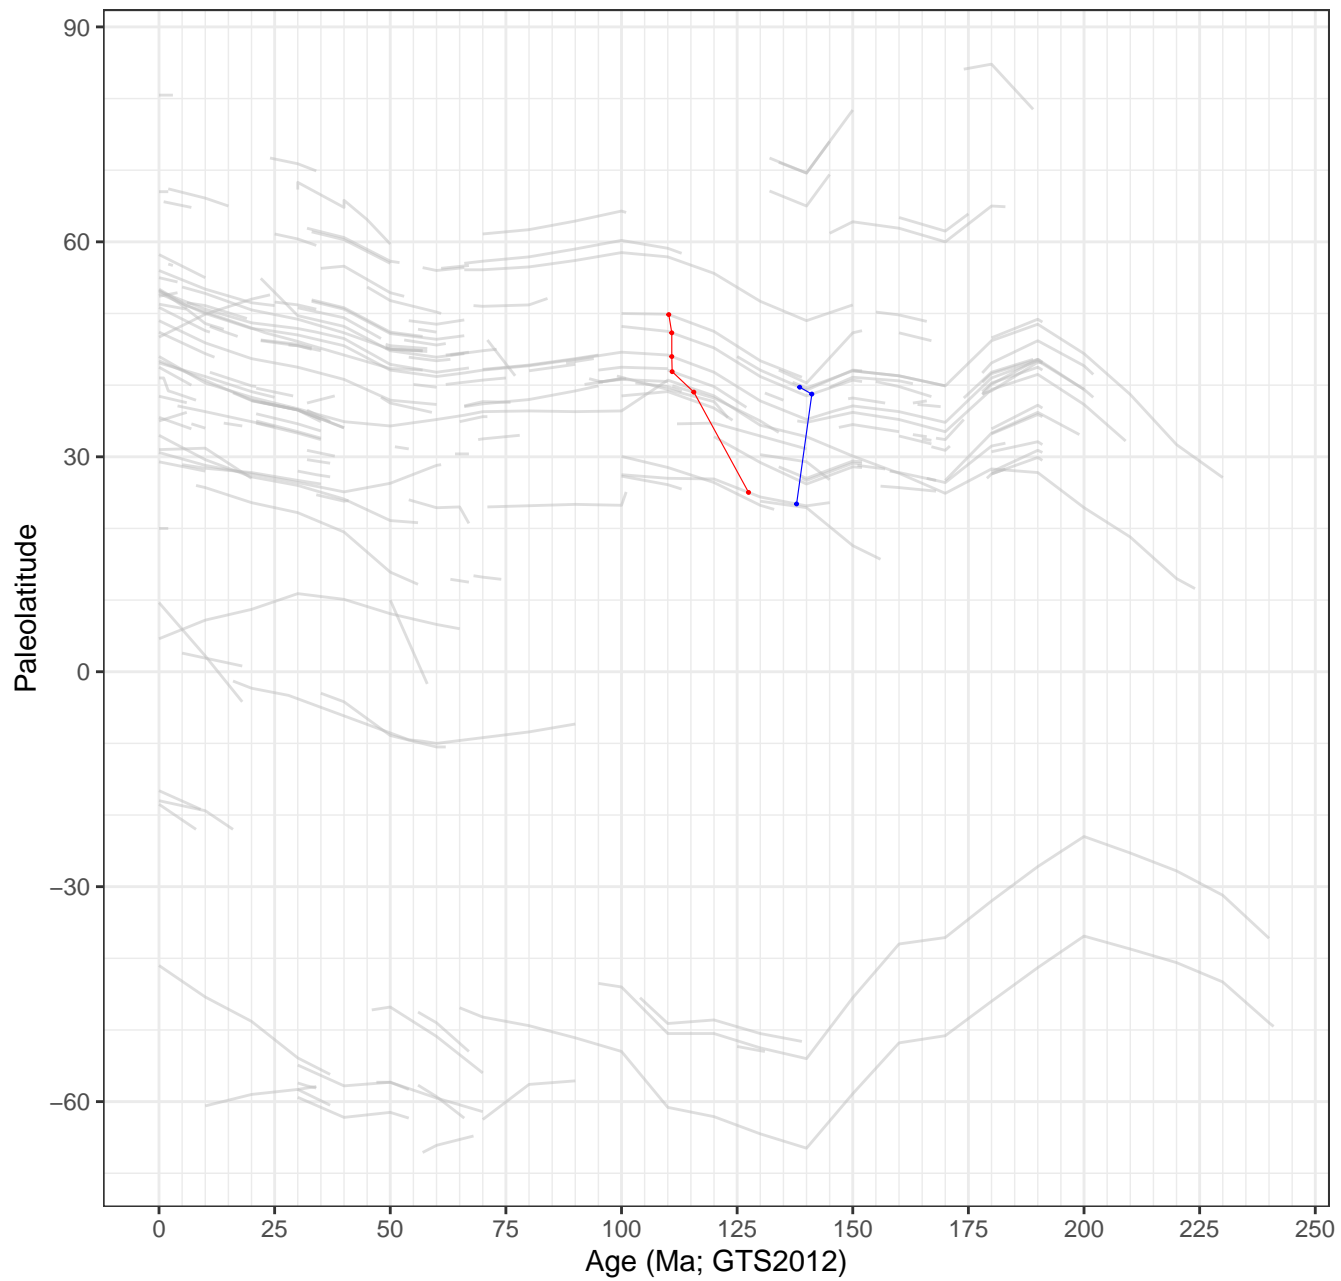

Supplement: Supplementary file 1968 [file Occisucysta tentorium.pdf › Supplement/Supplement 2/Species 1914 plots/Occisucysta tentorium.pdf]

# Species *Ochetodinium romanum*

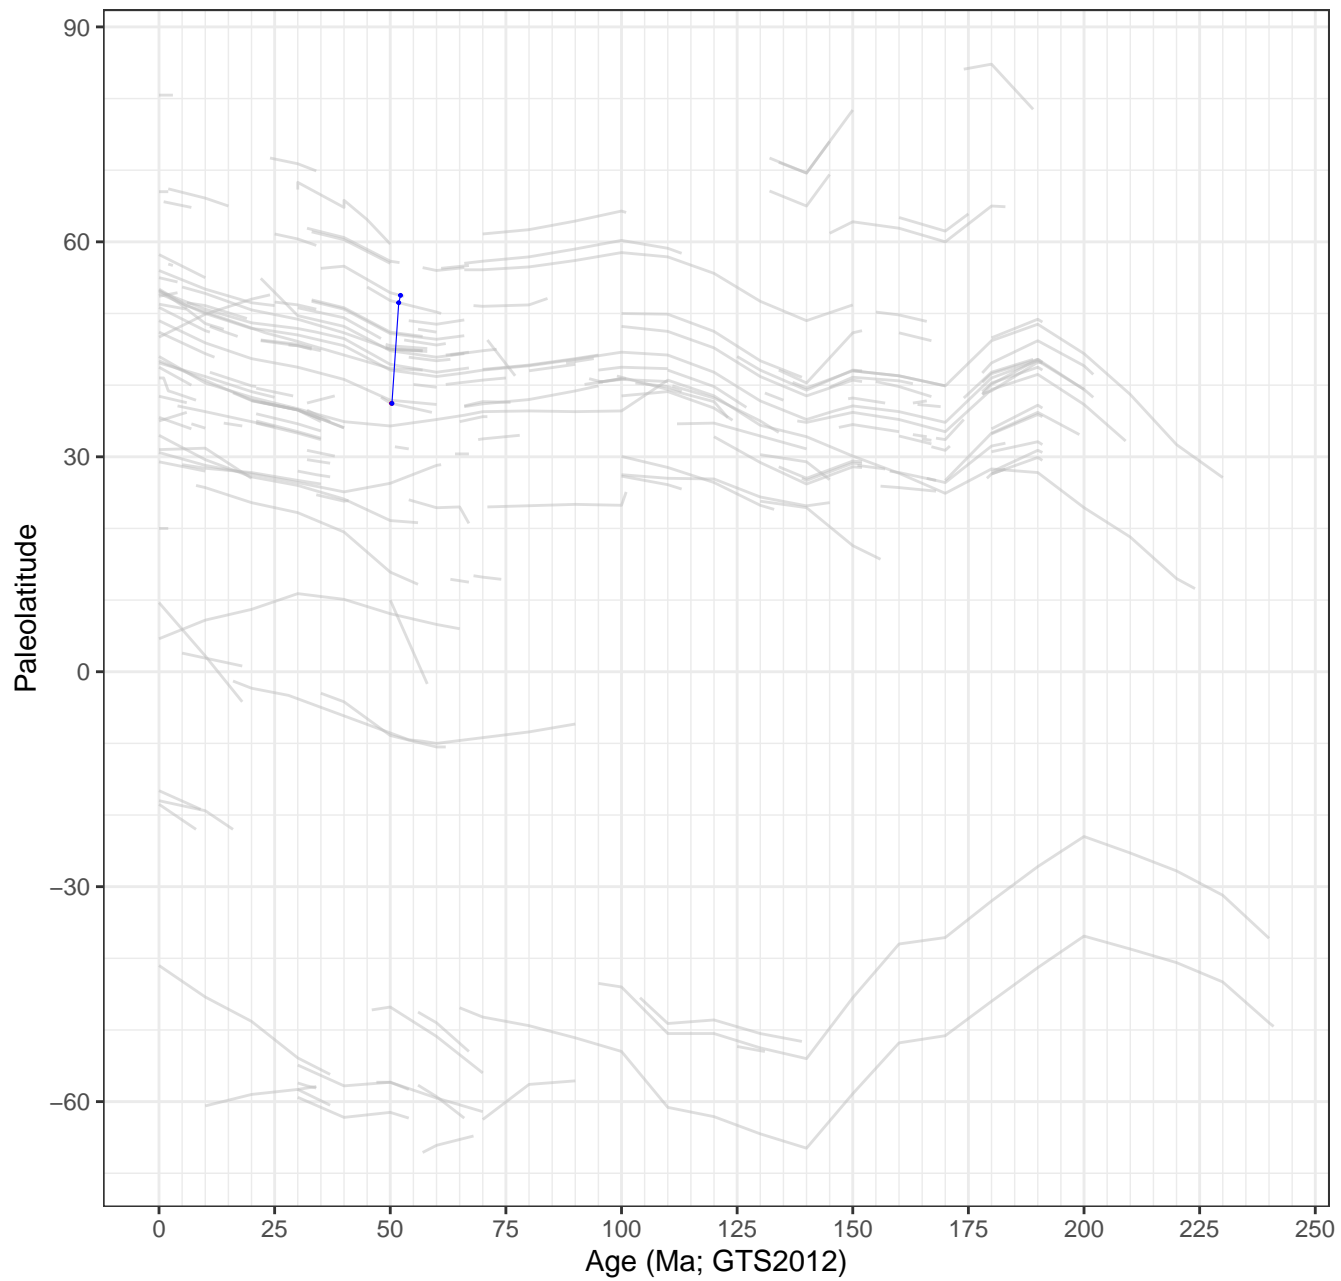

Supplement: Supplementary file 1969 [file Ochetodinium romanum.pdf › Supplement/Supplement 2/Species 1914 plots/Ochetodinium romanum.pdf]

# Species *Octodinium askiniae*

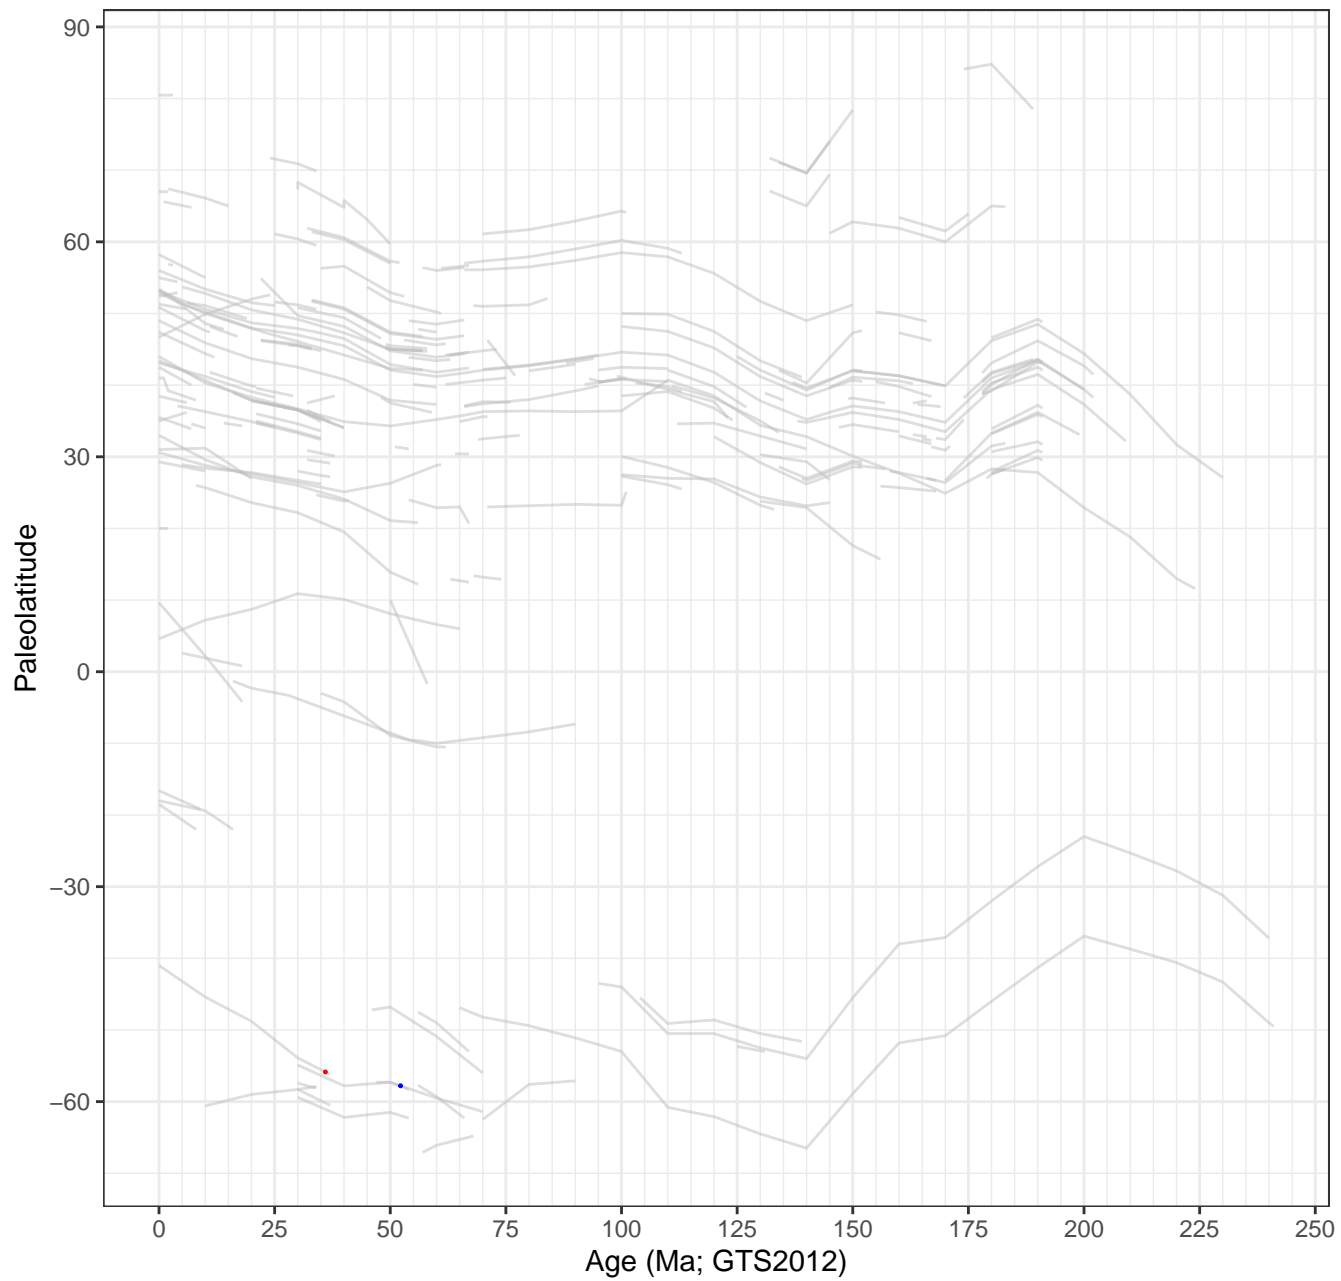

Supplement: Supplementary file 1970 [file Octodinium askiniae.pdf › Supplement/Supplement 2/Species 1914 plots/Octodinium askiniae.pdf]

# Species *Odontochitina ancala*

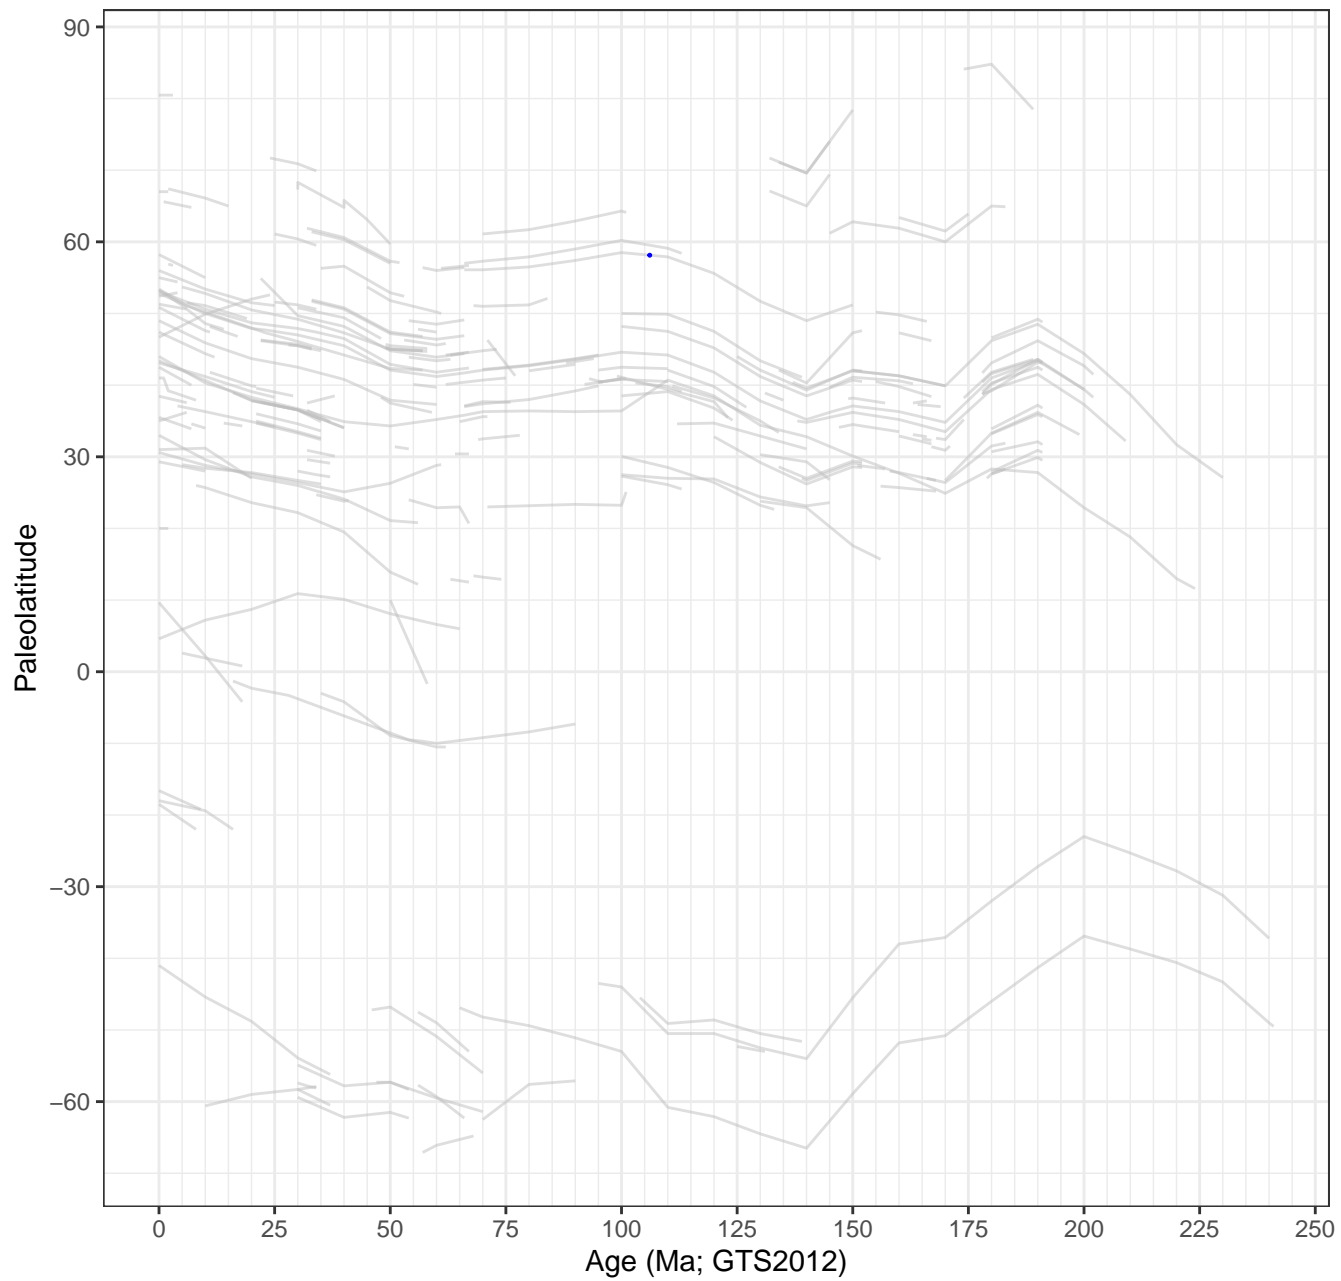

Supplement: Supplementary file 1971 [file Odontochitina ancala.pdf › Supplement/Supplement 2/Species 1914 plots/Odontochitina ancala.pdf]

# Species *Odontochitina costata*

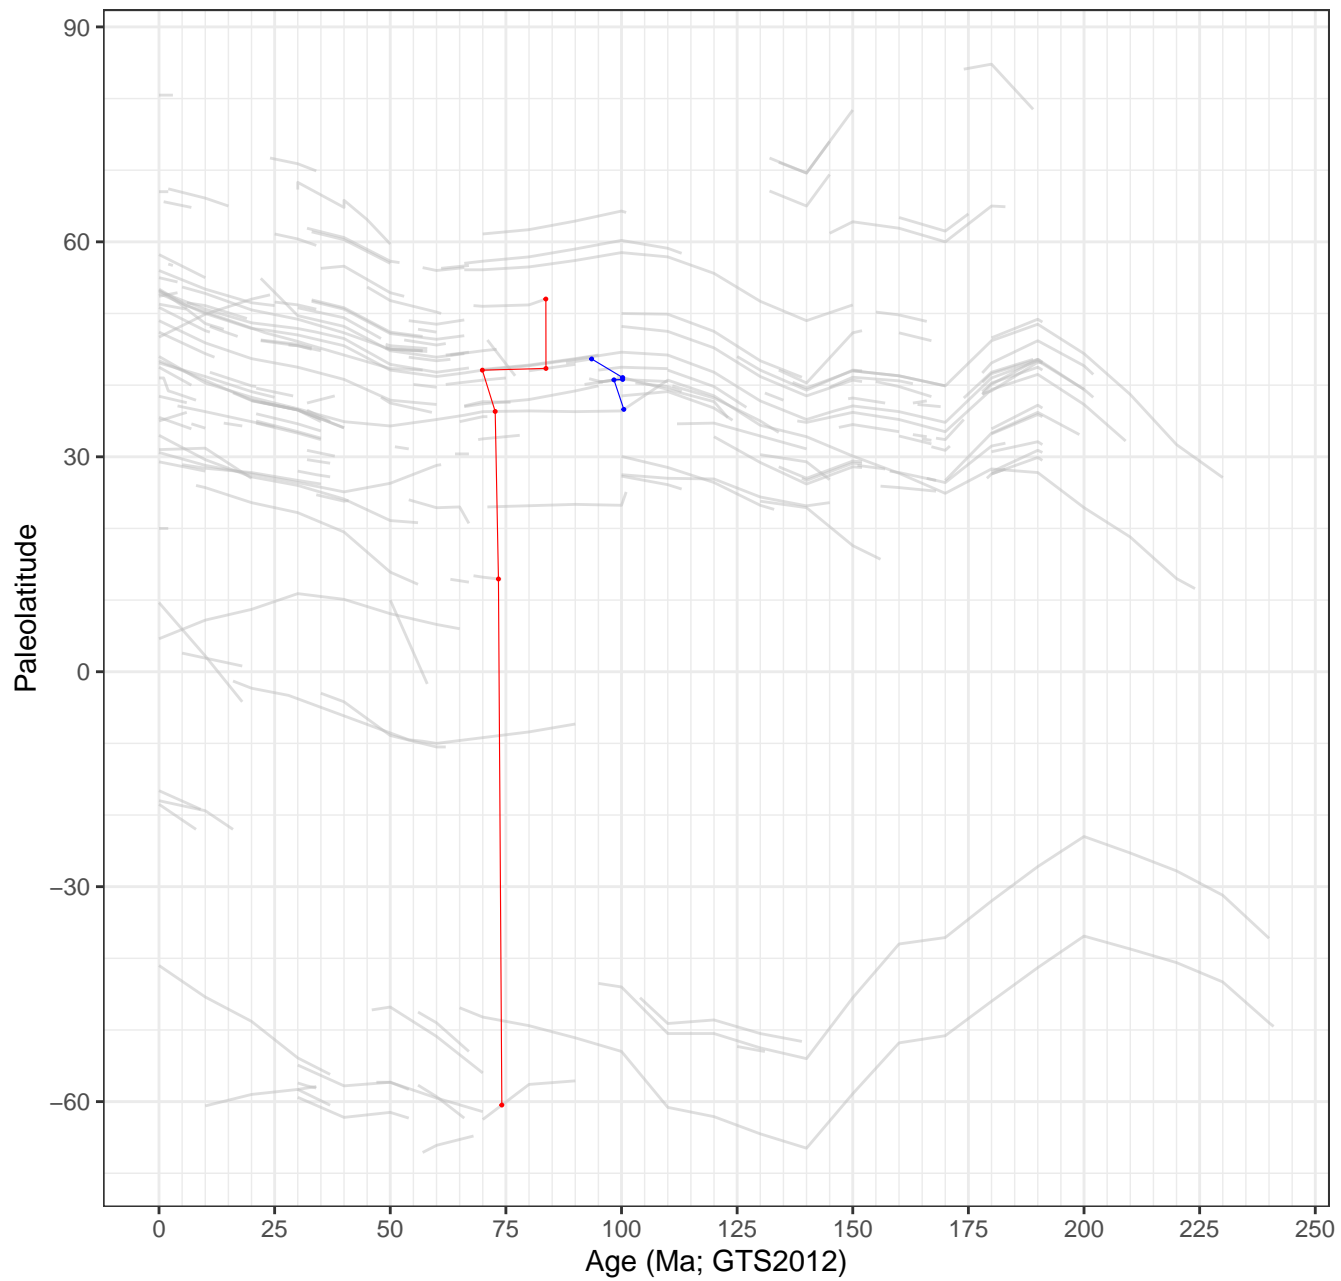

Supplement: Supplementary file 1972 [file Odontochitina costata.pdf › Supplement/Supplement 2/Species 1914 plots/Odontochitina costata.pdf]

# Species *Odontochitina cribripoda*

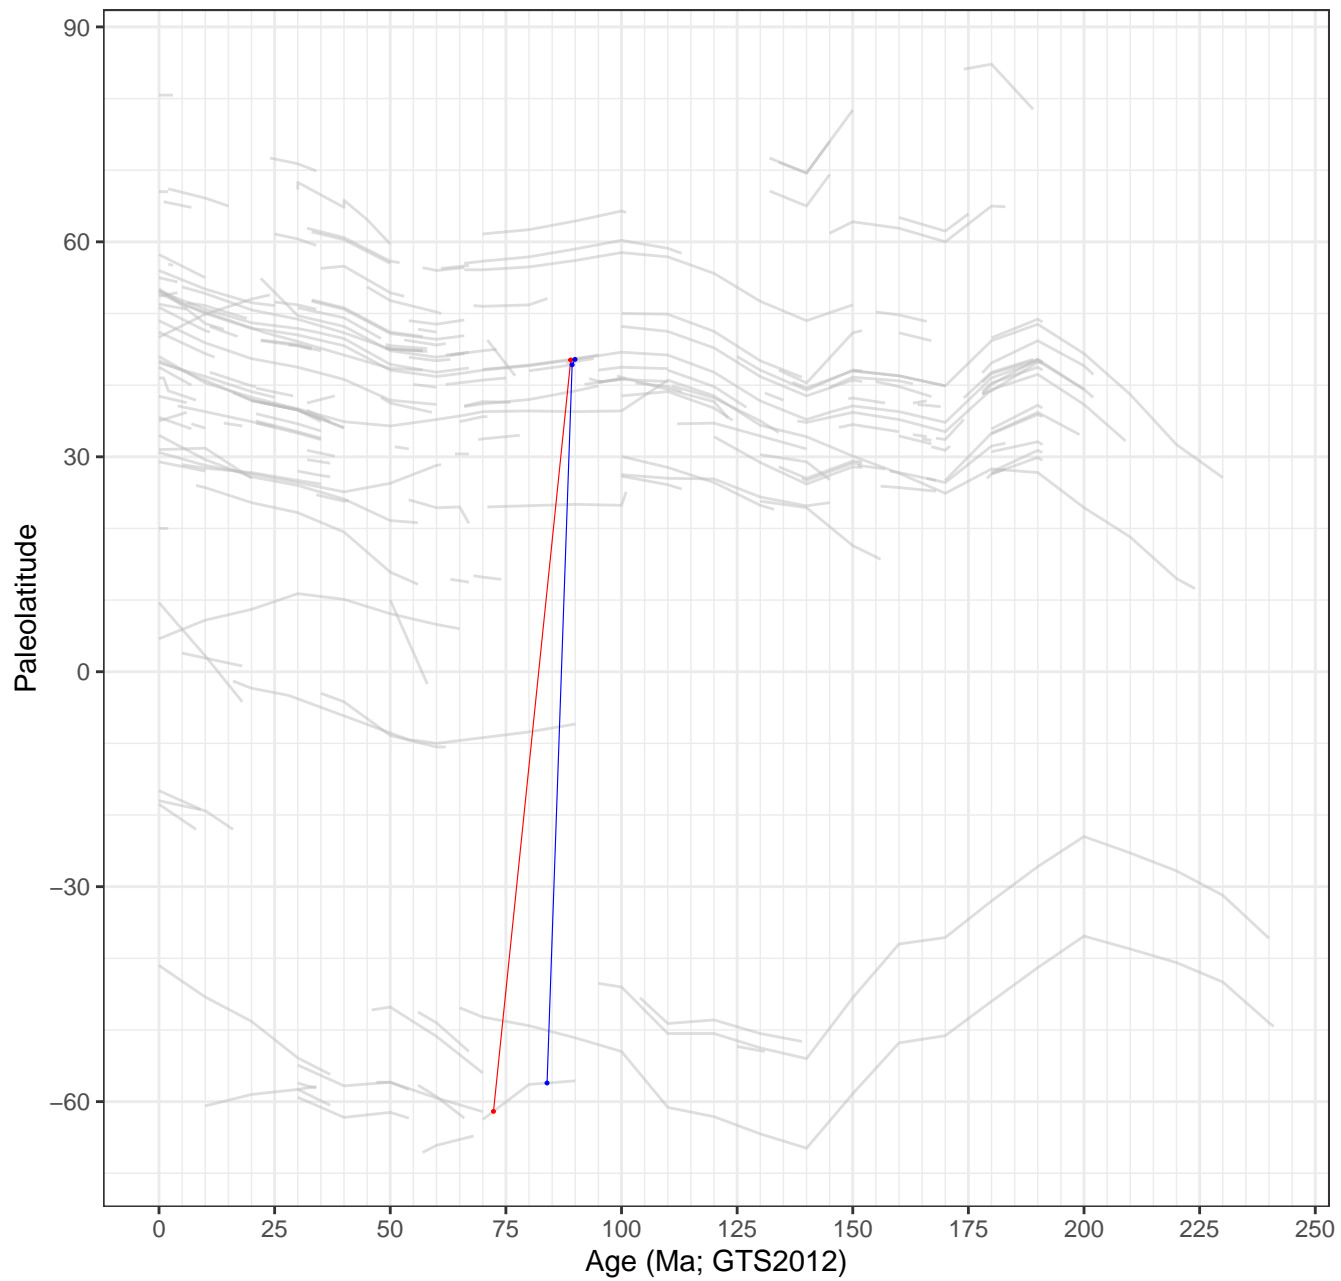

Supplement: Supplementary file 1973 [file Odontochitina cribropoda.pdf › Supplement/Supplement 2/Species 1914 plots/Odontochitina cribropoda.pdf]

# Species *Odontochitina diducta*

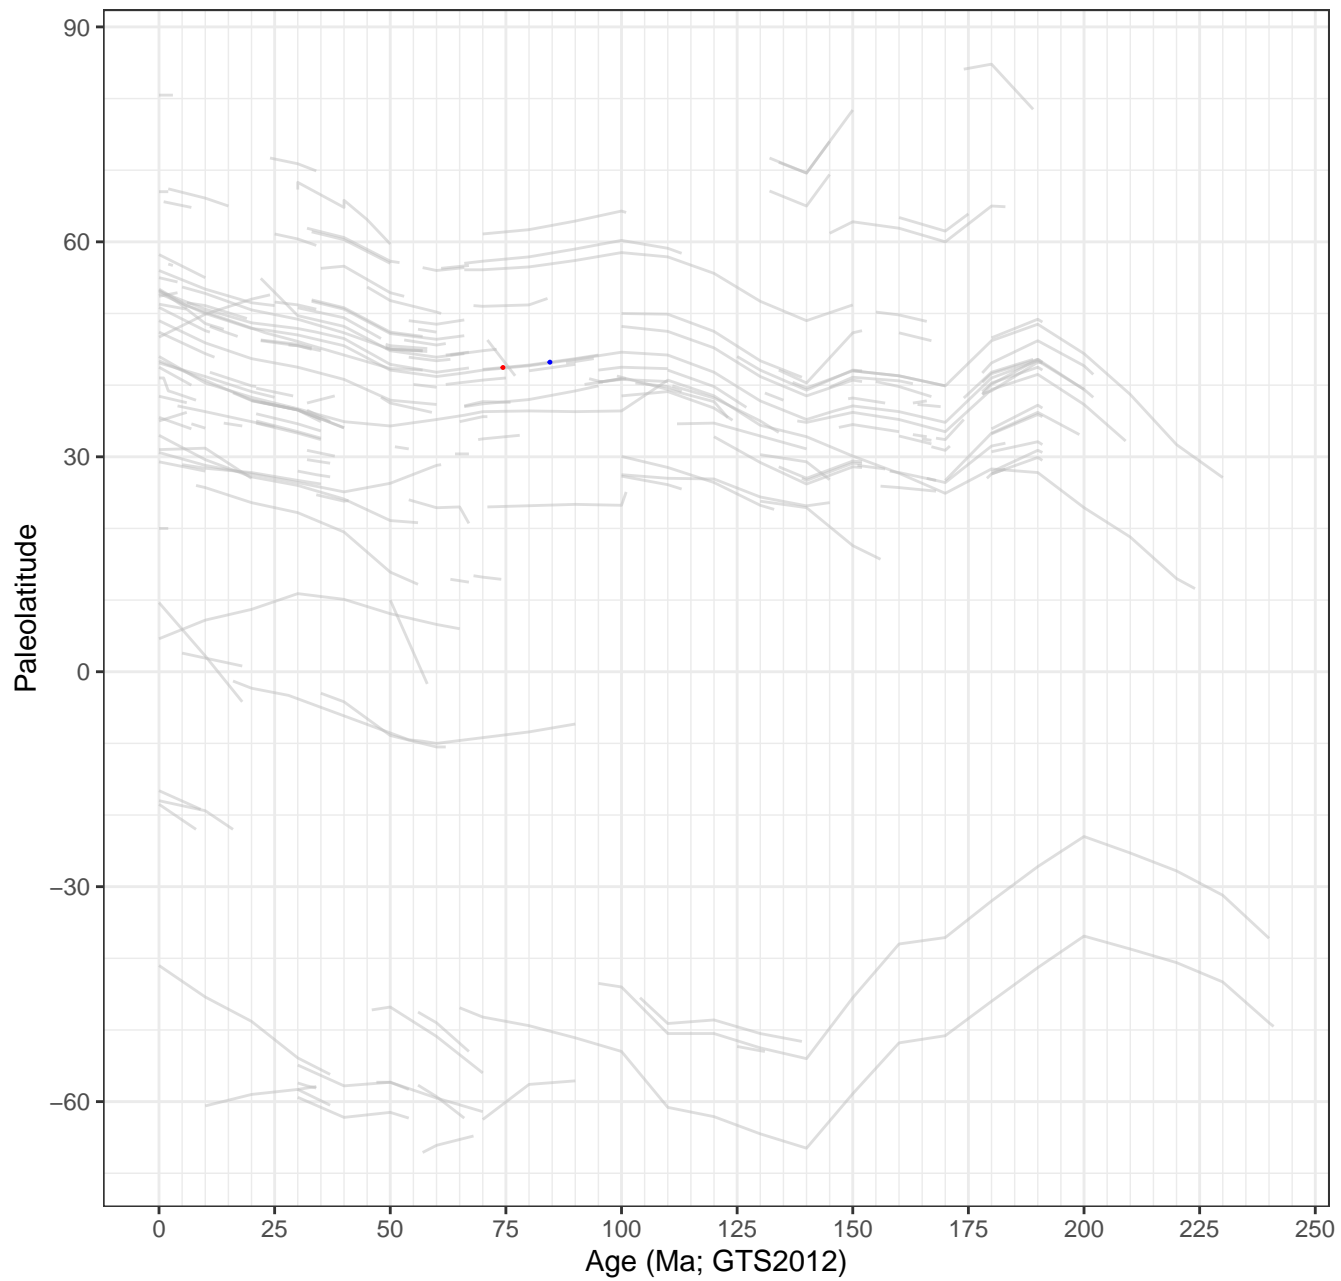

Supplement: Supplementary file 1974 [file Odontochitina diducta.pdf › Supplement/Supplement 2/Species 1914 plots/Odontochitina diducta.pdf]

# Species *Odontochitina imparilis*

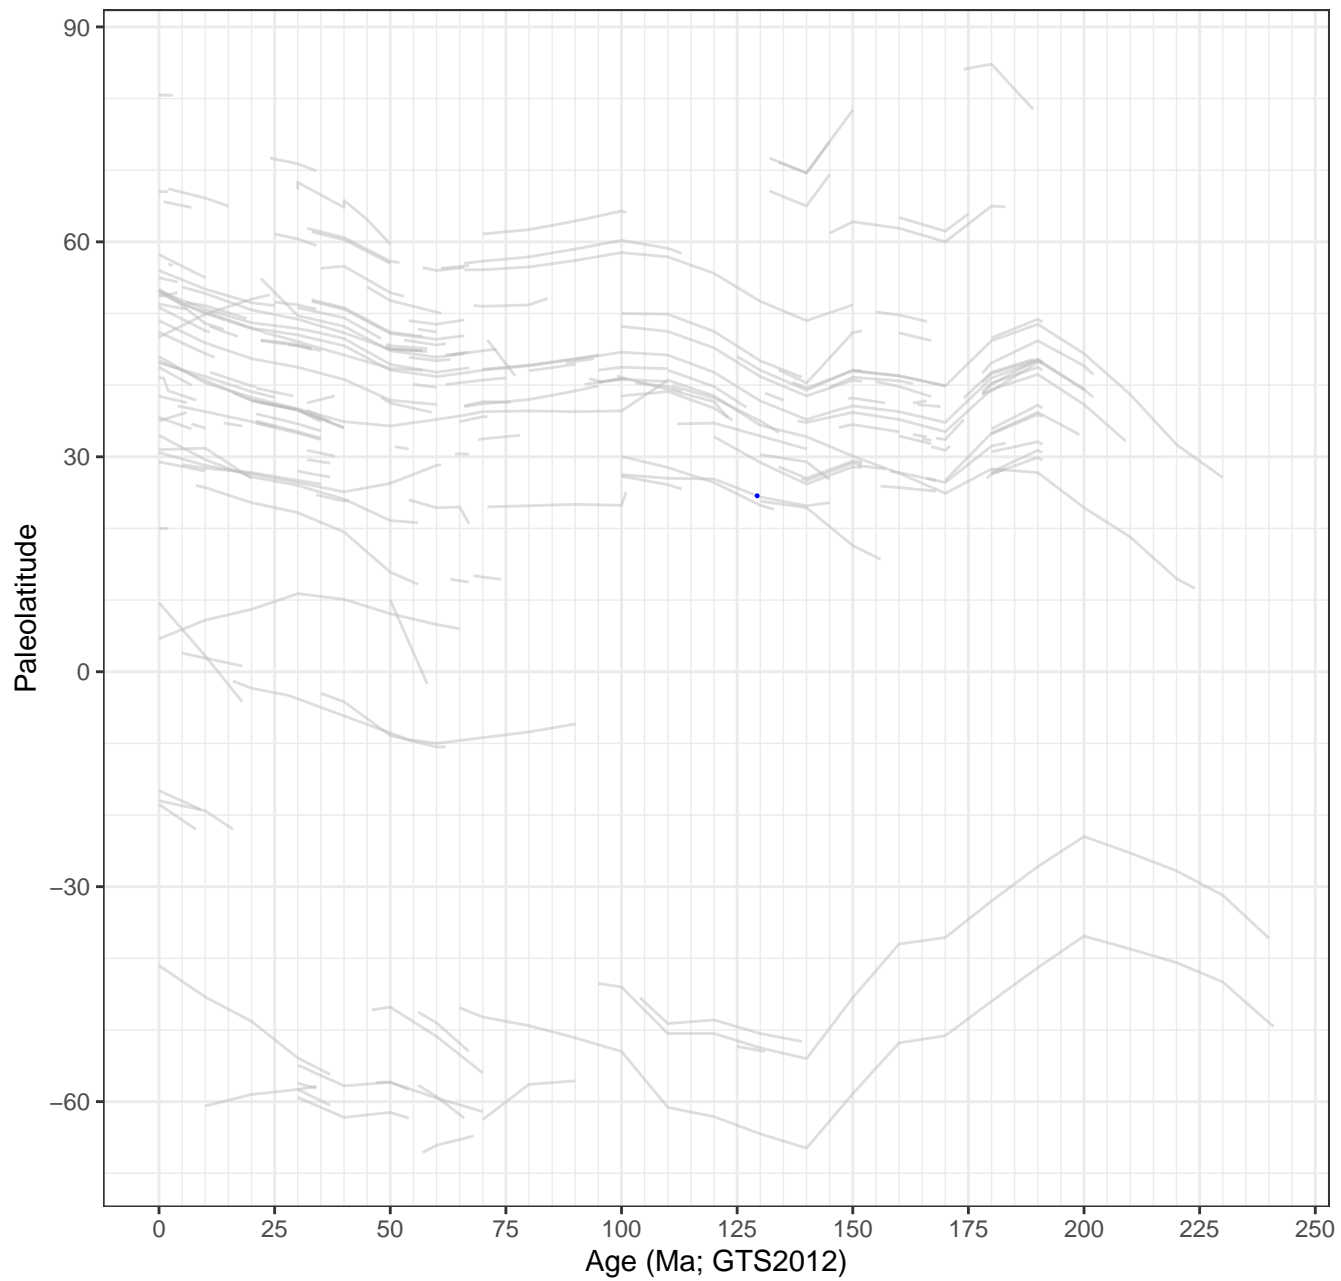

Supplement: Supplementary file 1975 [file Odontochitina imparilis.pdf › Supplement/Supplement 2/Species 1914 plots/Odontochitina imparilis.pdf]

# Species *Odontochitina nuda*

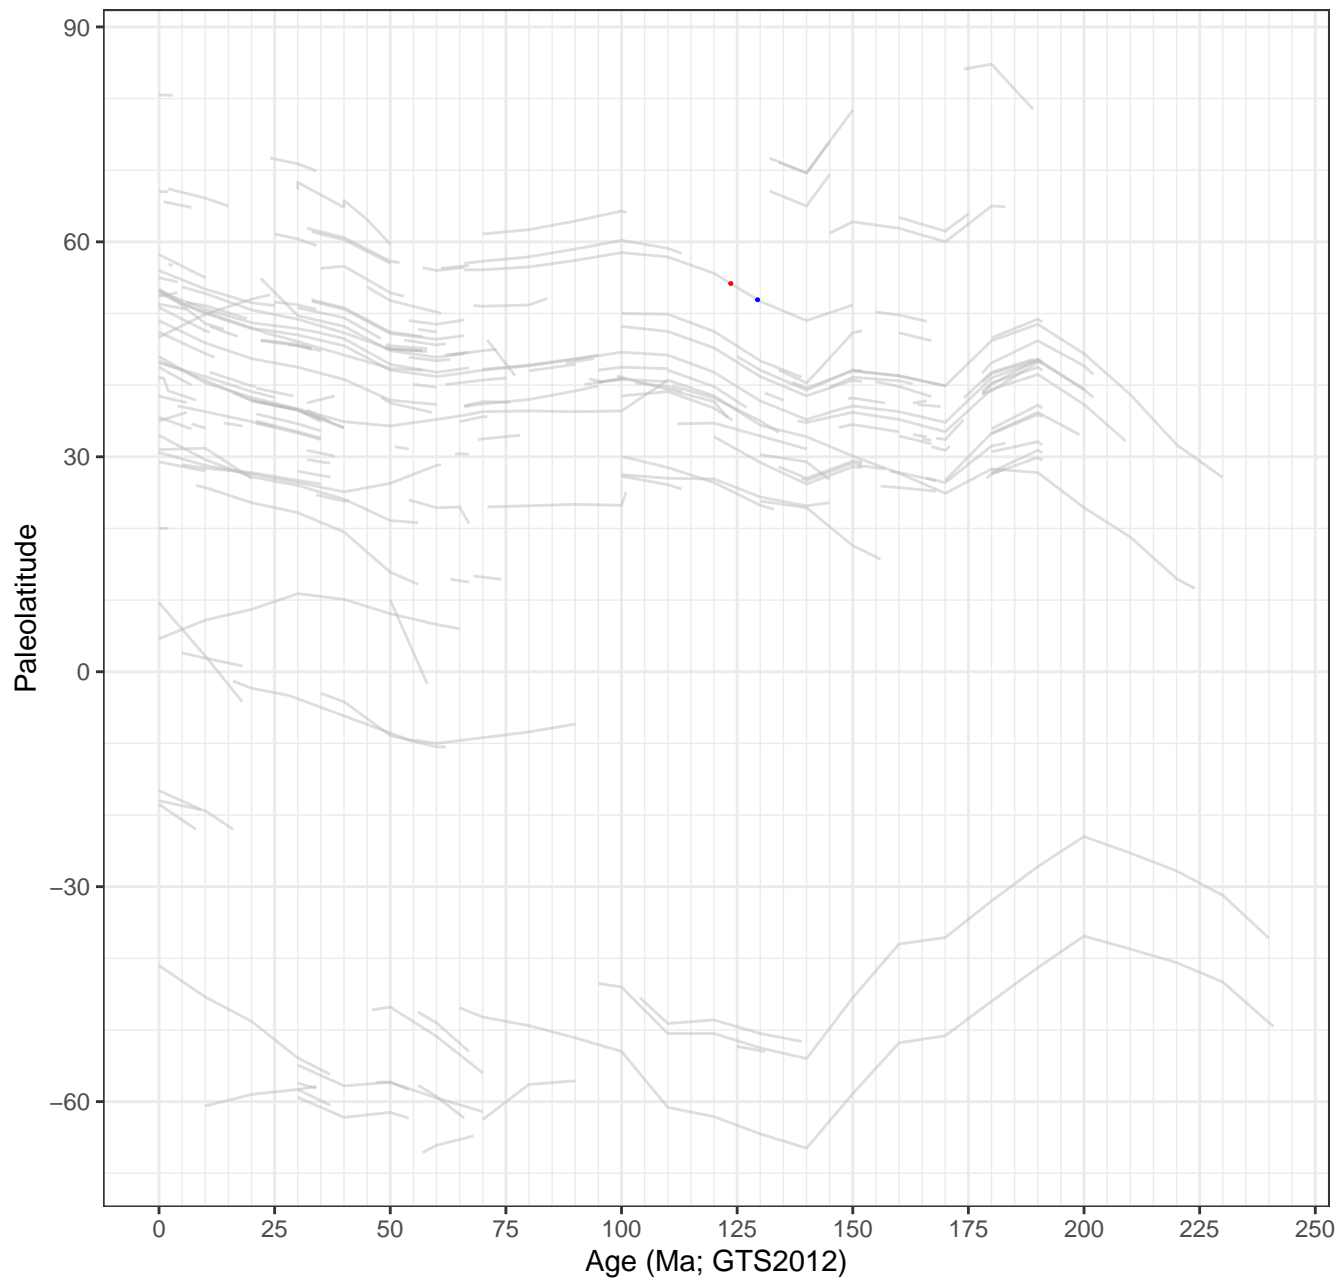

Supplement: Supplementary file 1976 [file Odontochitina nuda.pdf › Supplement/Supplement 2/Species 1914 plots/Odontochitina nuda.pdf]

# Species *Odontochitina operculata*

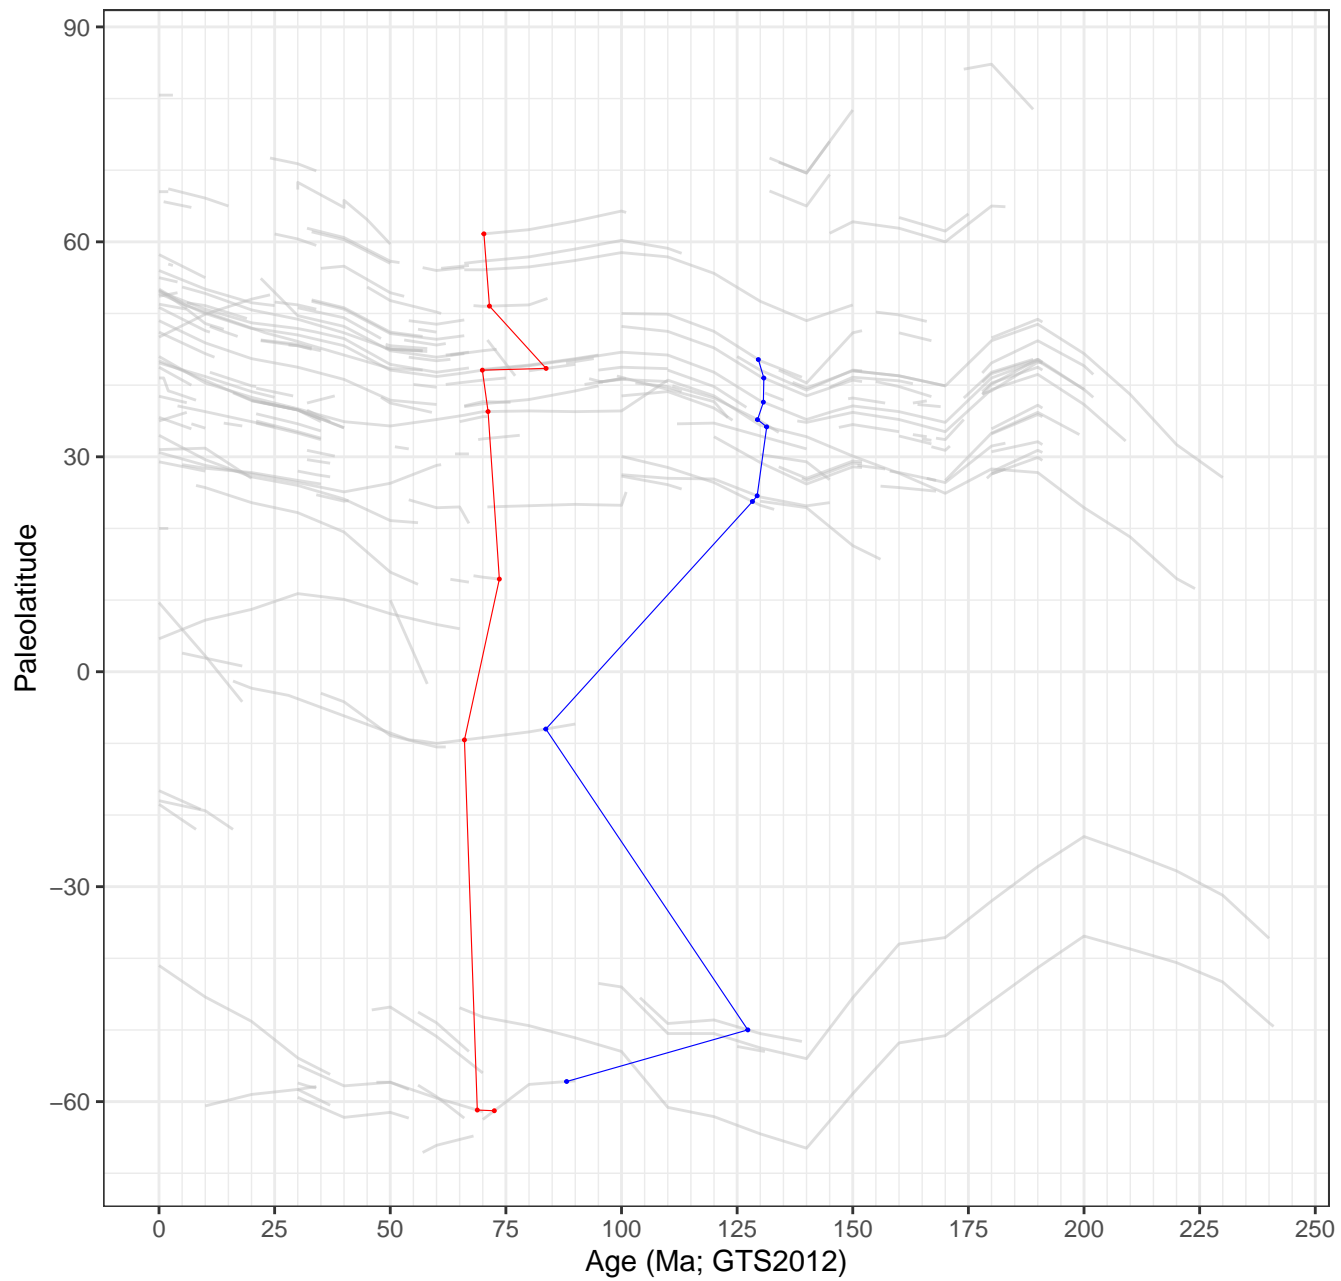

Supplement: Supplementary file 1977 [file Odontochitina operculata.pdf › Supplement/Supplement 2/Species 1914 plots/Odontochitina operculata.pdf]

# Species *Odontochitina porifera*

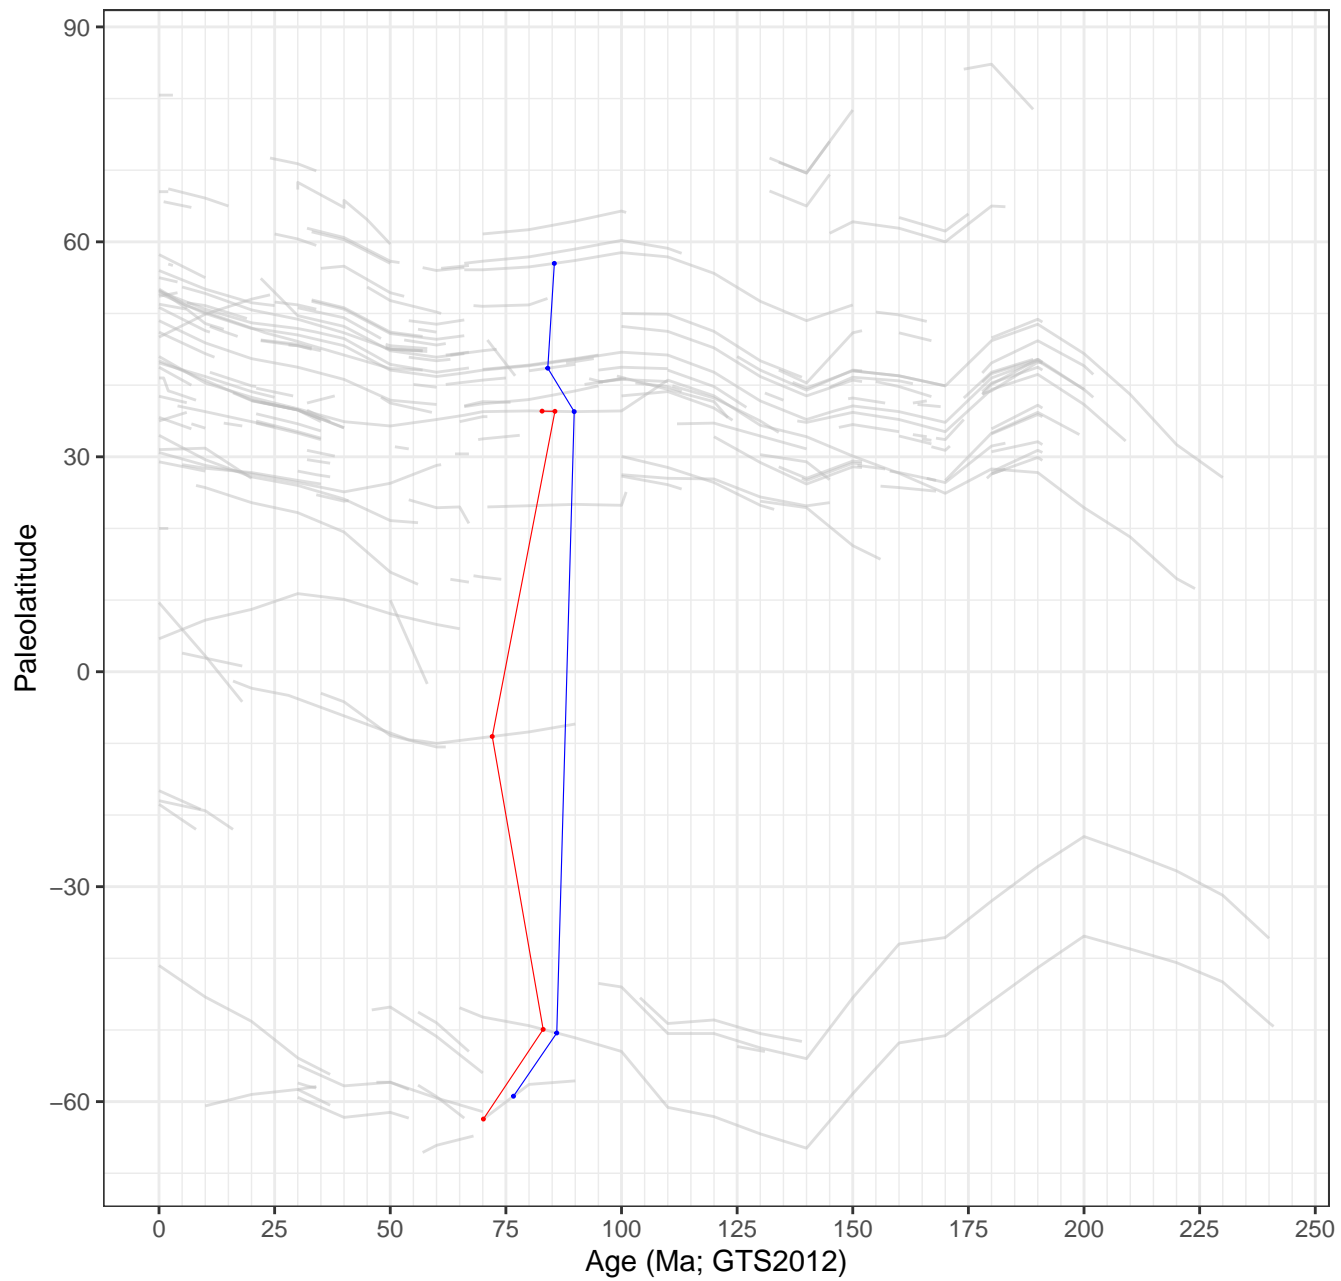

Supplement: Supplementary file 1978 [file Odontochitina porifera.pdf › Supplement/Supplement 2/Species 1914 plots/Odontochitina porifera.pdf]

# Species *Odontochitina rhakodes*

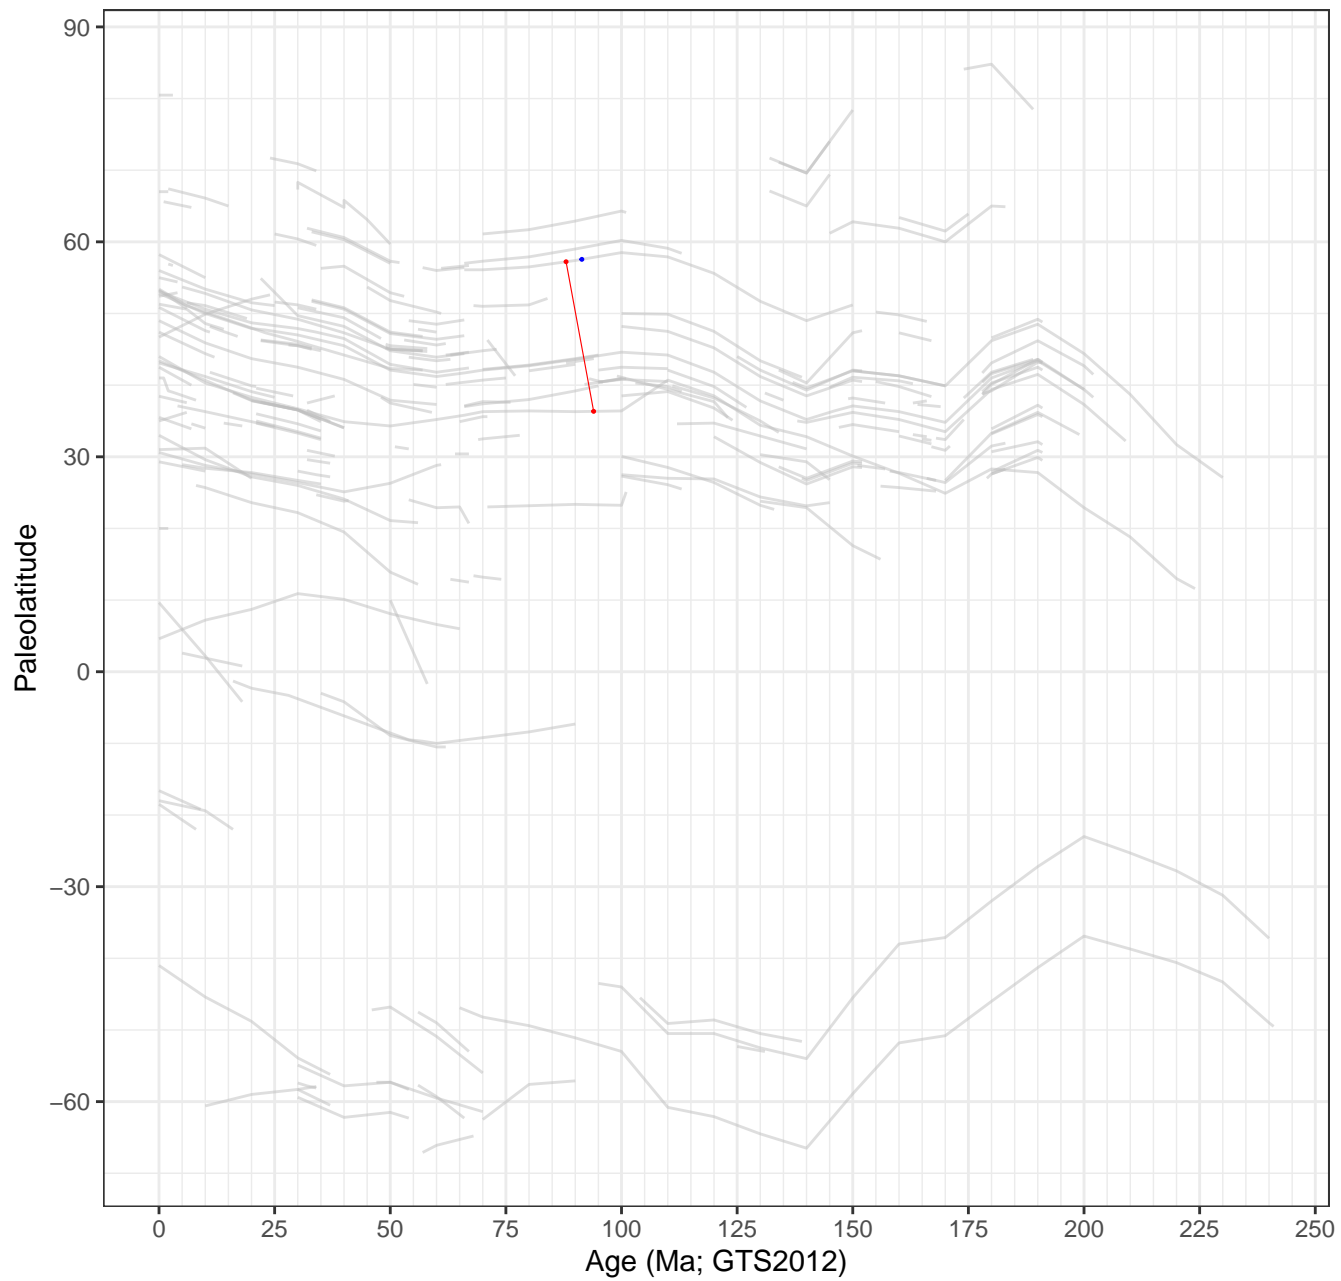

Supplement: Supplementary file 1979 [file Odontochitina rhakodes.pdf › Supplement/Supplement 2/Species 1914 plots/Odontochitina rhakodes.pdf]

# Species *Odontochitina singhii*

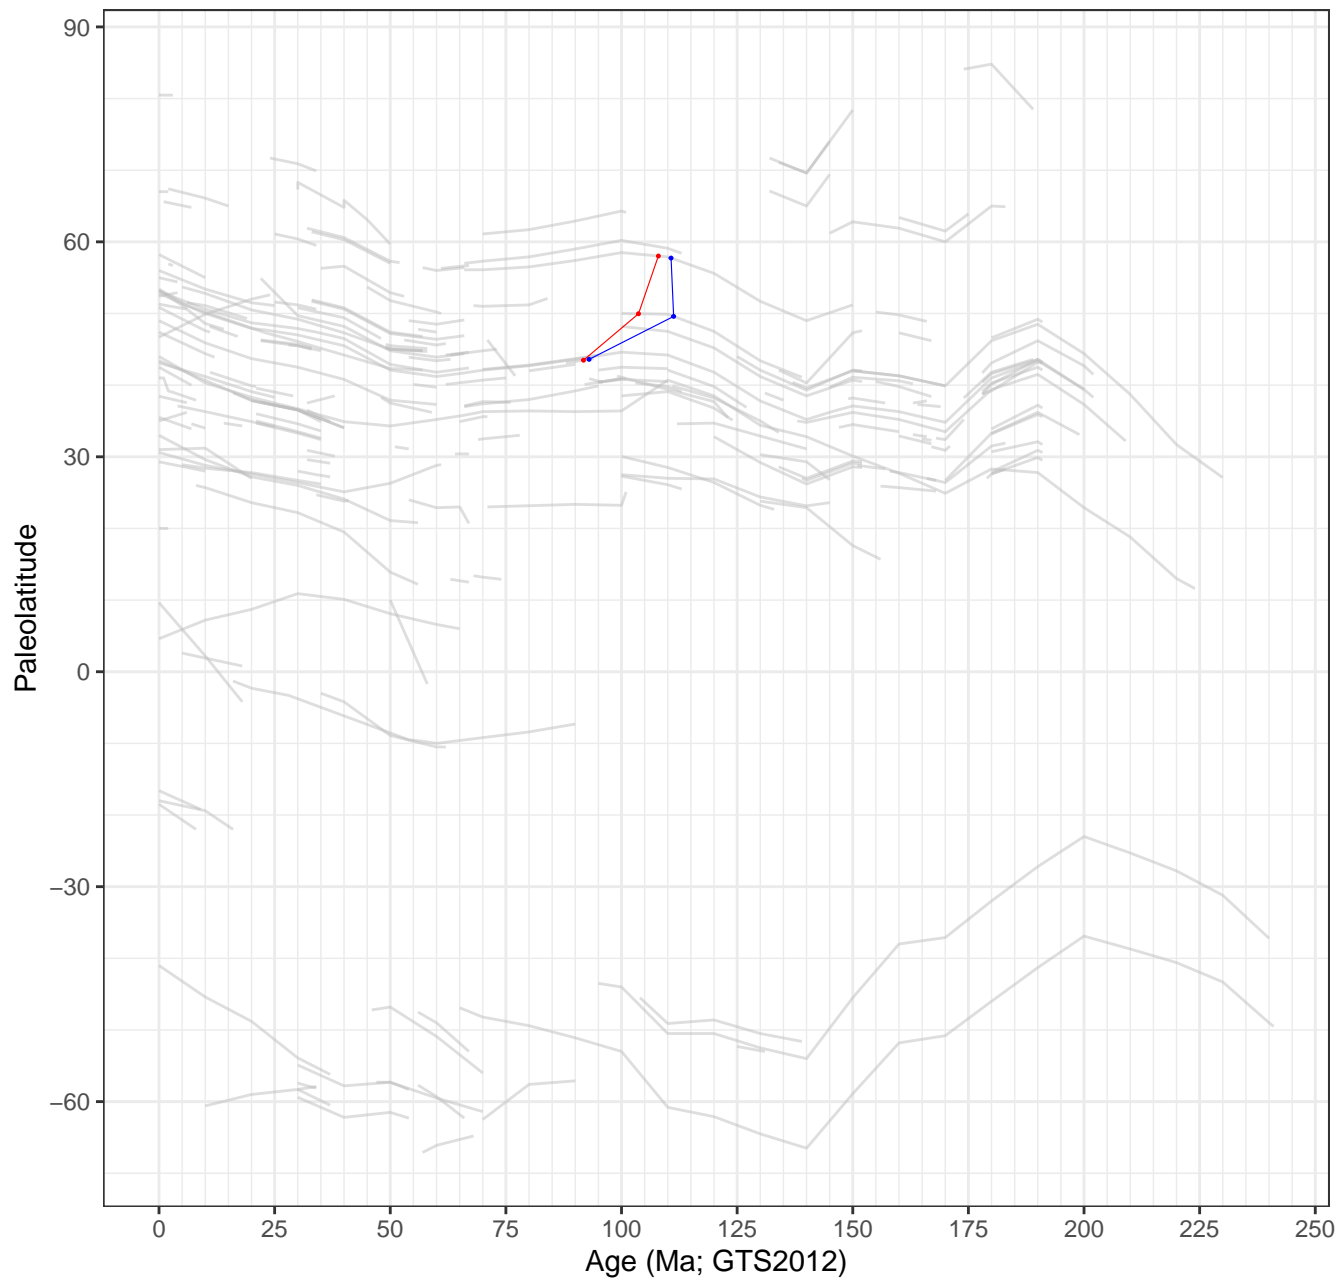

Supplement: Supplementary file 1980 [file Odontochitina singhii.pdf › Supplement/Supplement 2/Species 1914 plots/Odontochitina singhii.pdf]

# Species *Odontochitina spinosa*

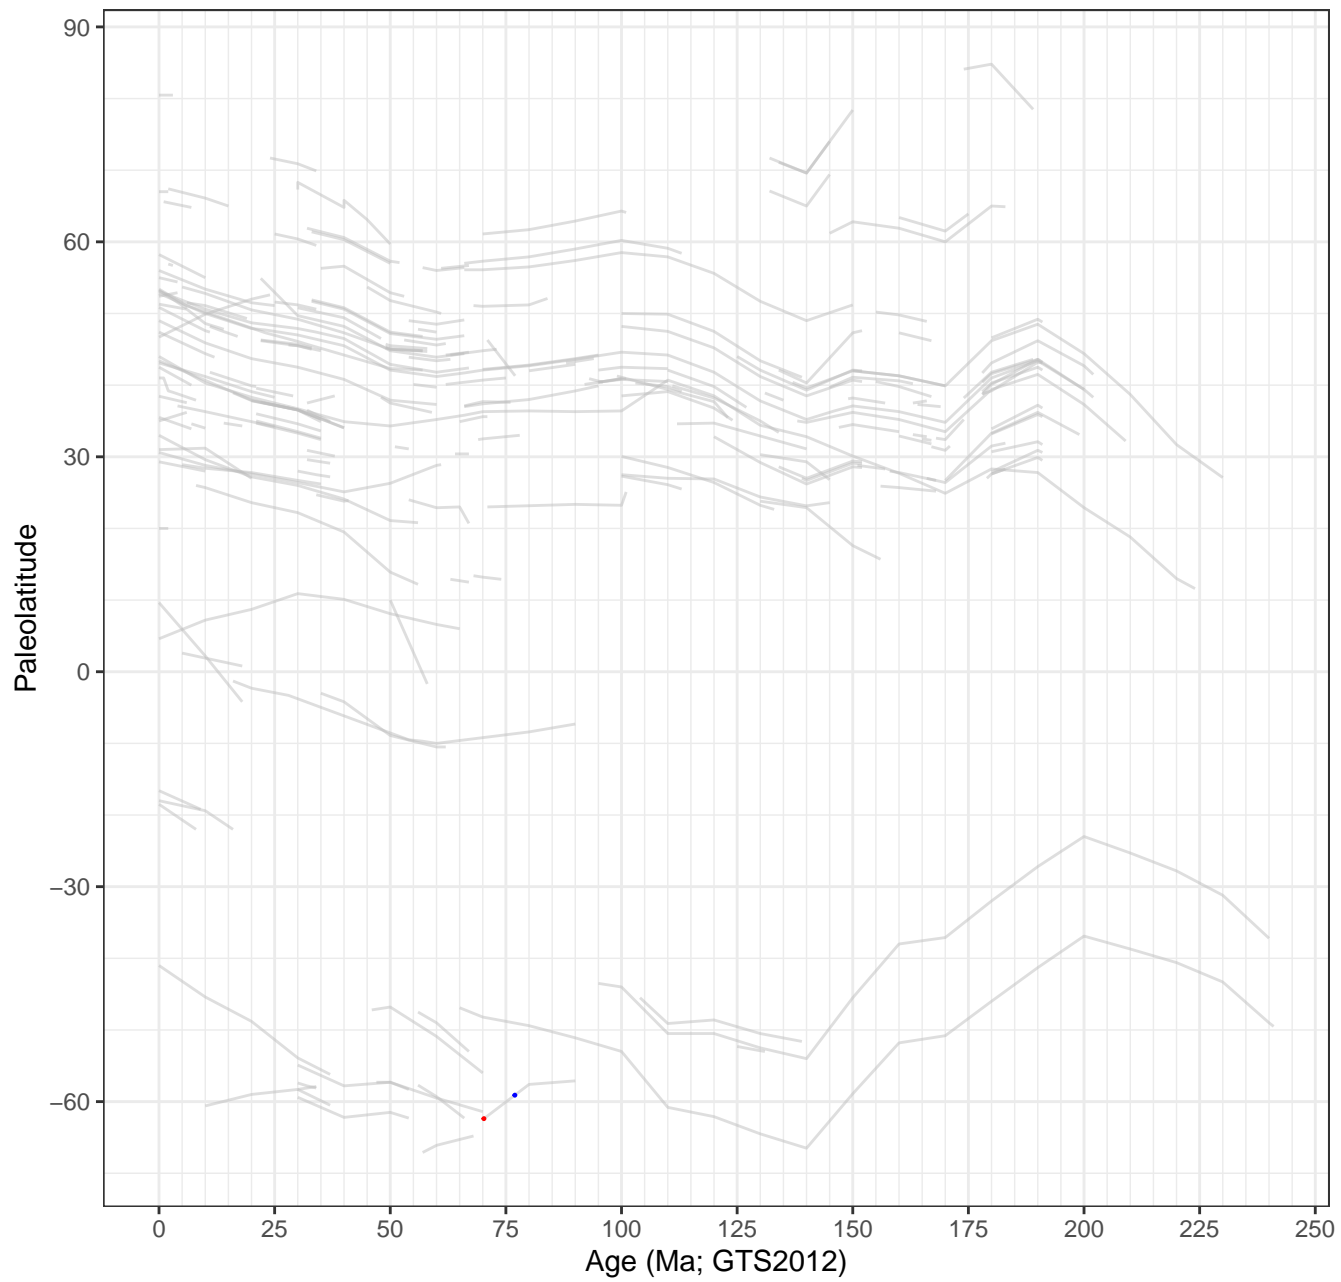

Supplement: Supplementary file 1981 [file Odontochitina spinosa.pdf › Supplement/Supplement 2/Species 1914 plots/Odontochitina spinosa.pdf]

# Species *Odontochitina* spp.

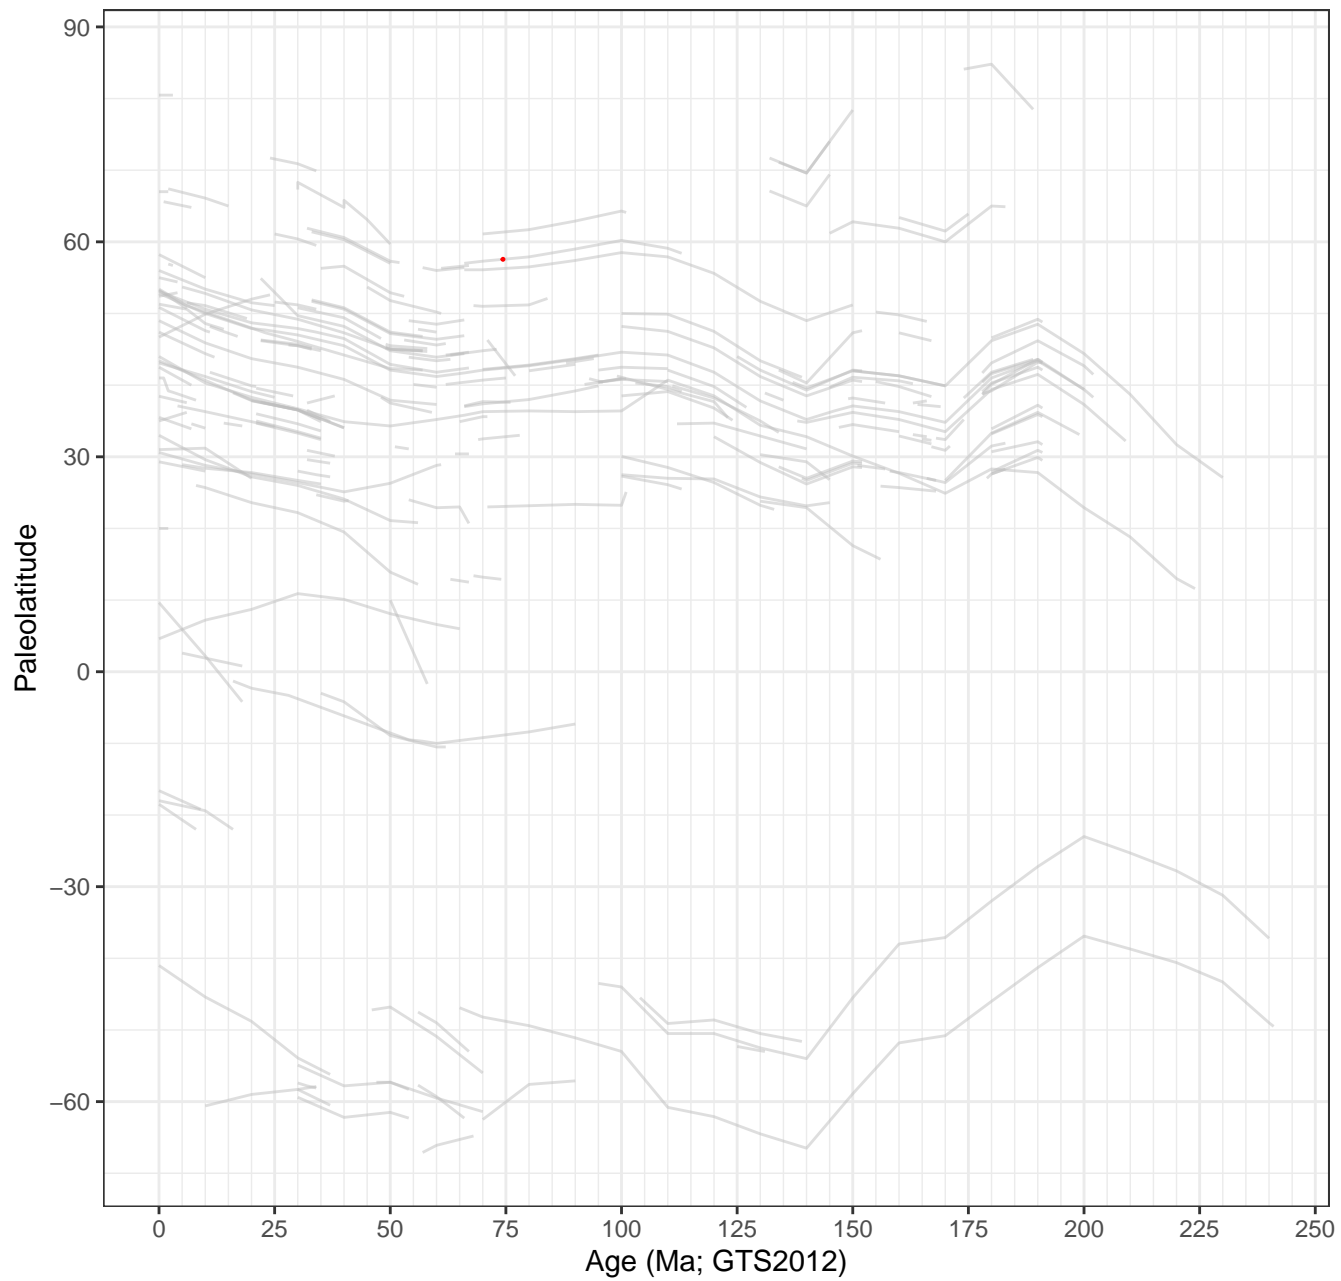

Supplement: Supplementary file 1982 [file Odontochitina spp..pdf › Supplement/Supplement 2/Species 1914 plots/Odontochitina spp..pdf]

# Species *Oligokolpoma galeottii*

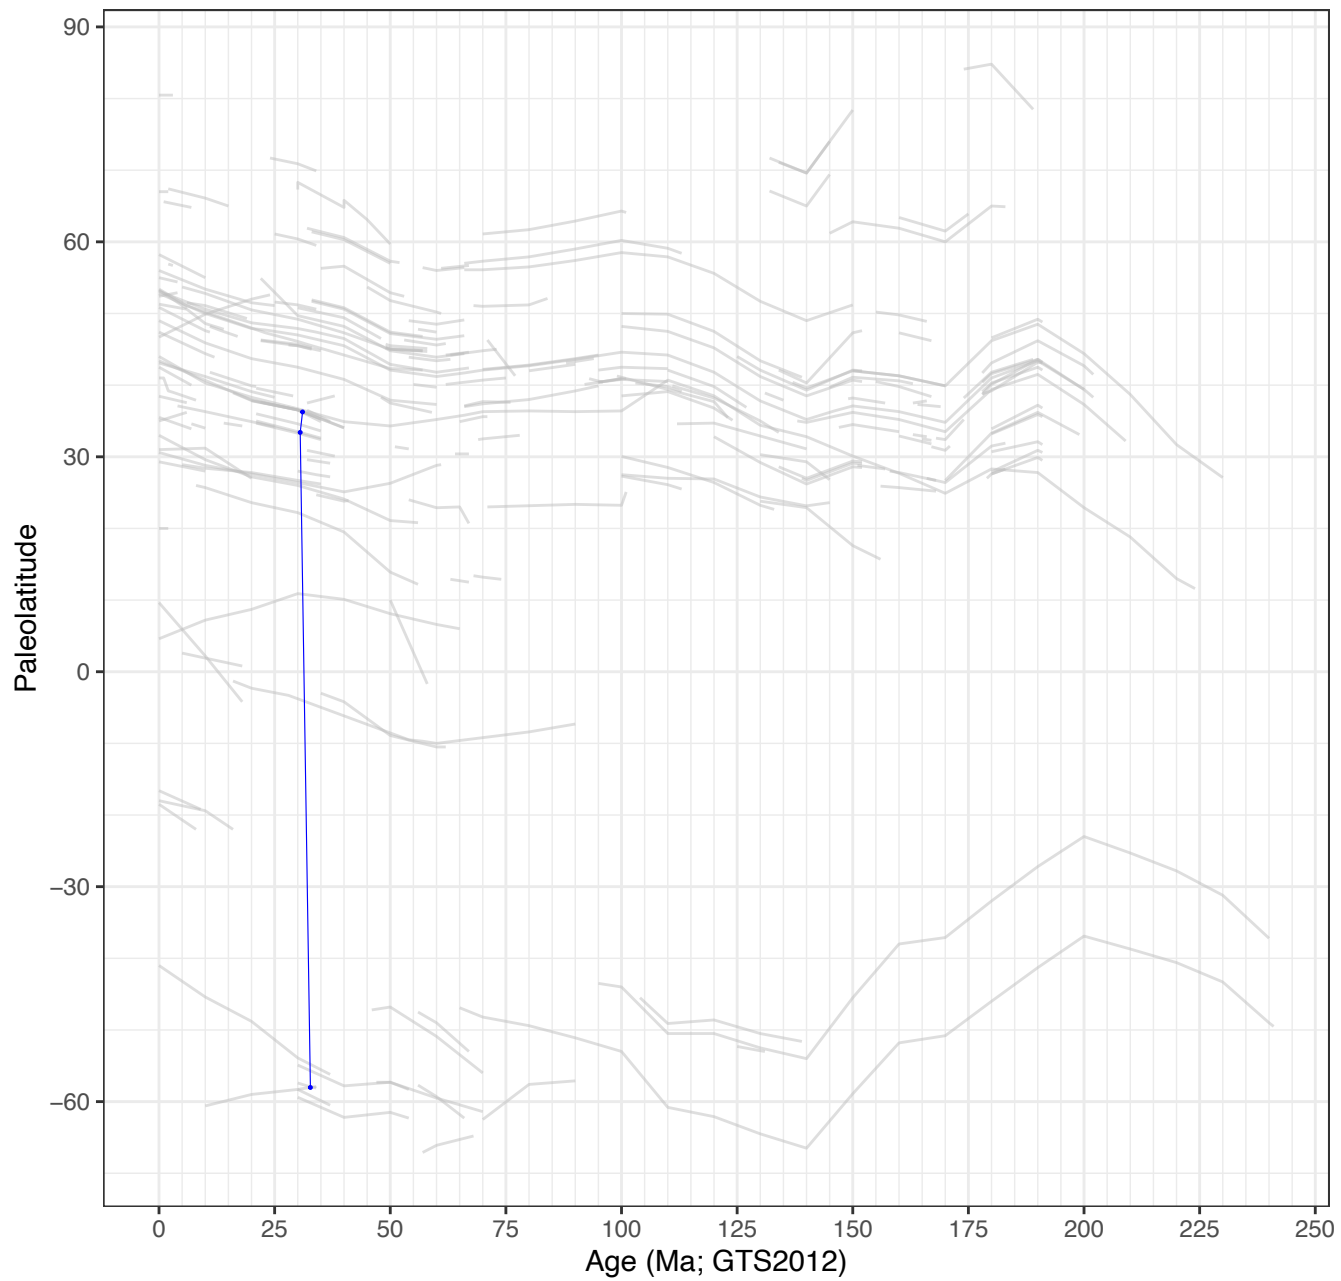

Supplement: Supplementary file 1983 [file Oligokolpoma galeottii.pdf › Supplement/Supplement 2/Species 1914 plots/Oligokolpoma galeottii.pdf]

# Species *Oligokolpoma tubulus*

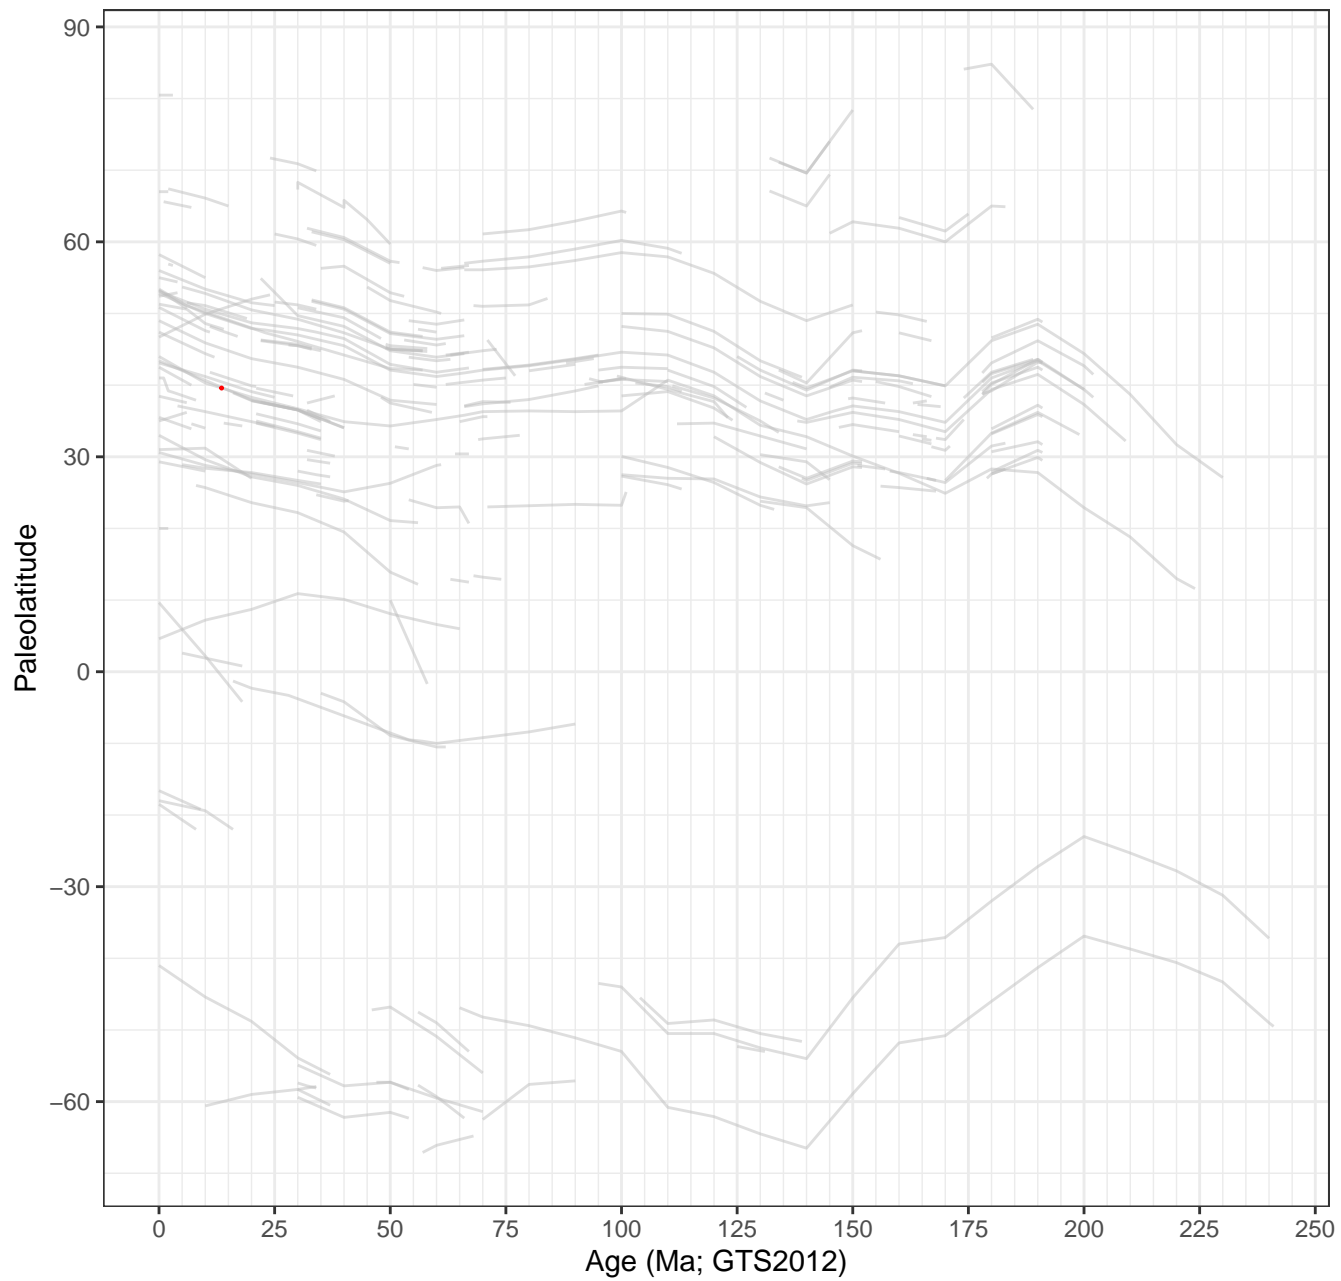

Supplement: Supplementary file 1984 [file Oligokolpoma tubulus.pdf › Supplement/Supplement 2/Species 1914 plots/Oligokolpoma tubulus.pdf]

# Species *Oligosphaeridium abaculum*

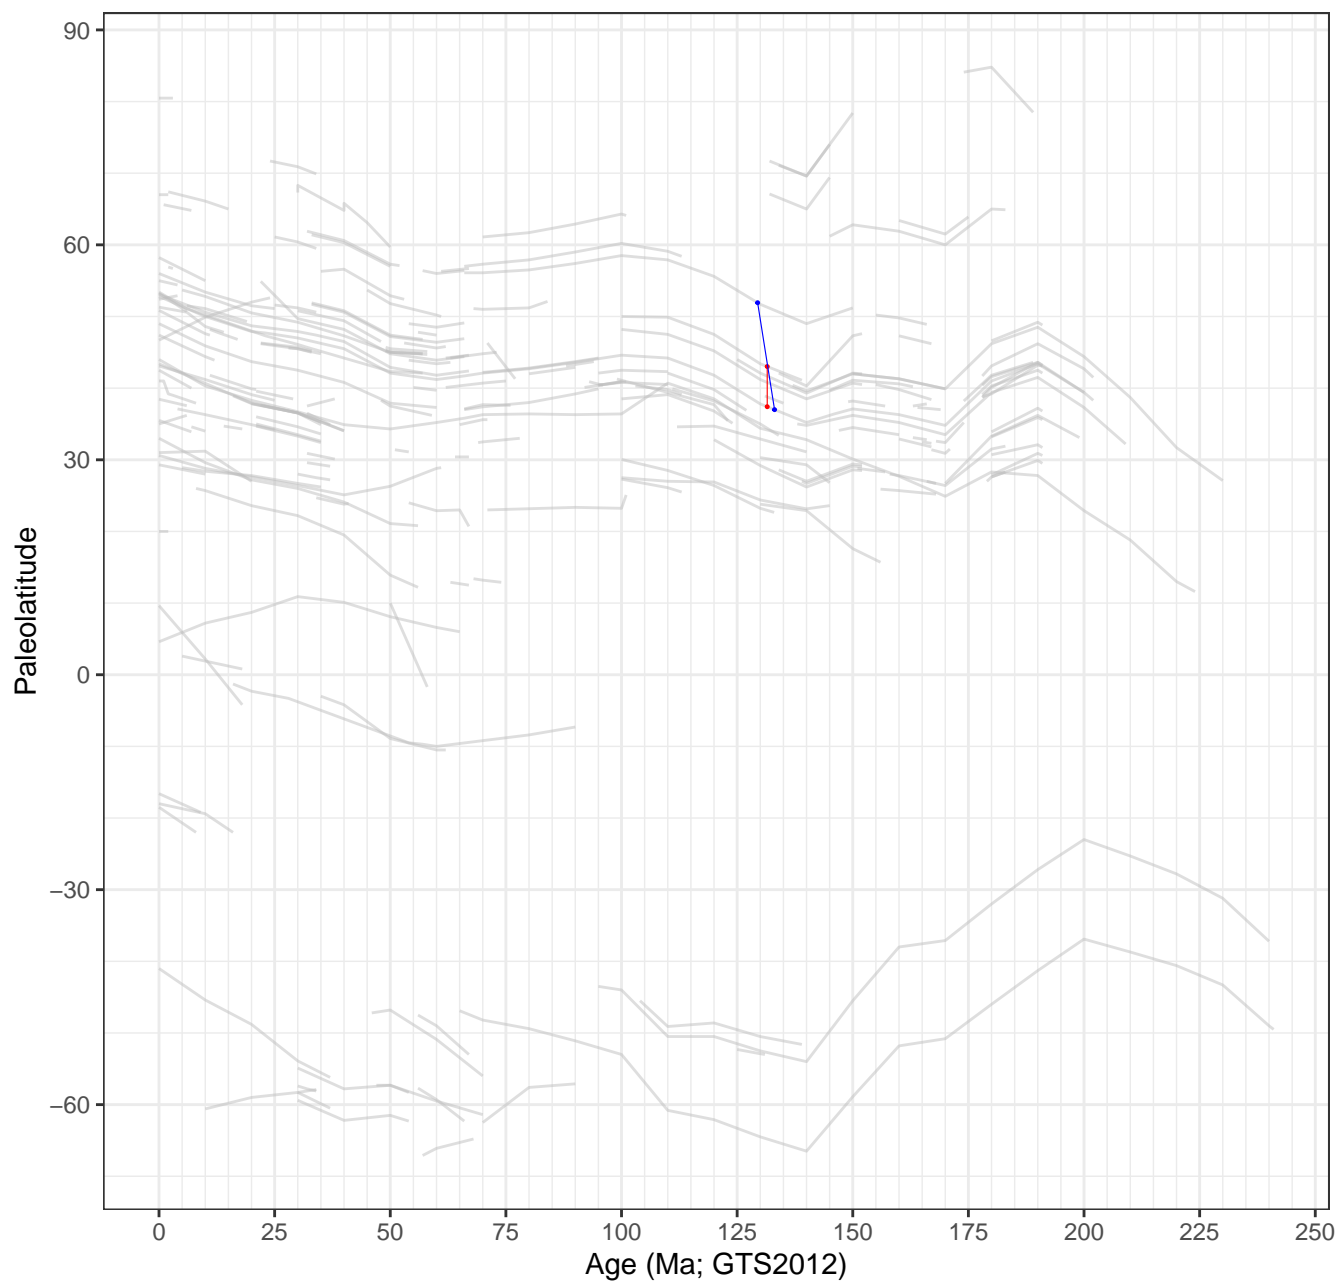

Supplement: Supplementary file 1985 [file Oligosphaeridium abaculum.pdf › Supplement/Supplement 2/Species 1914 plots/Oligosphaeridium abaculum.pdf]

# Species *Oligosphaeridium albertense*

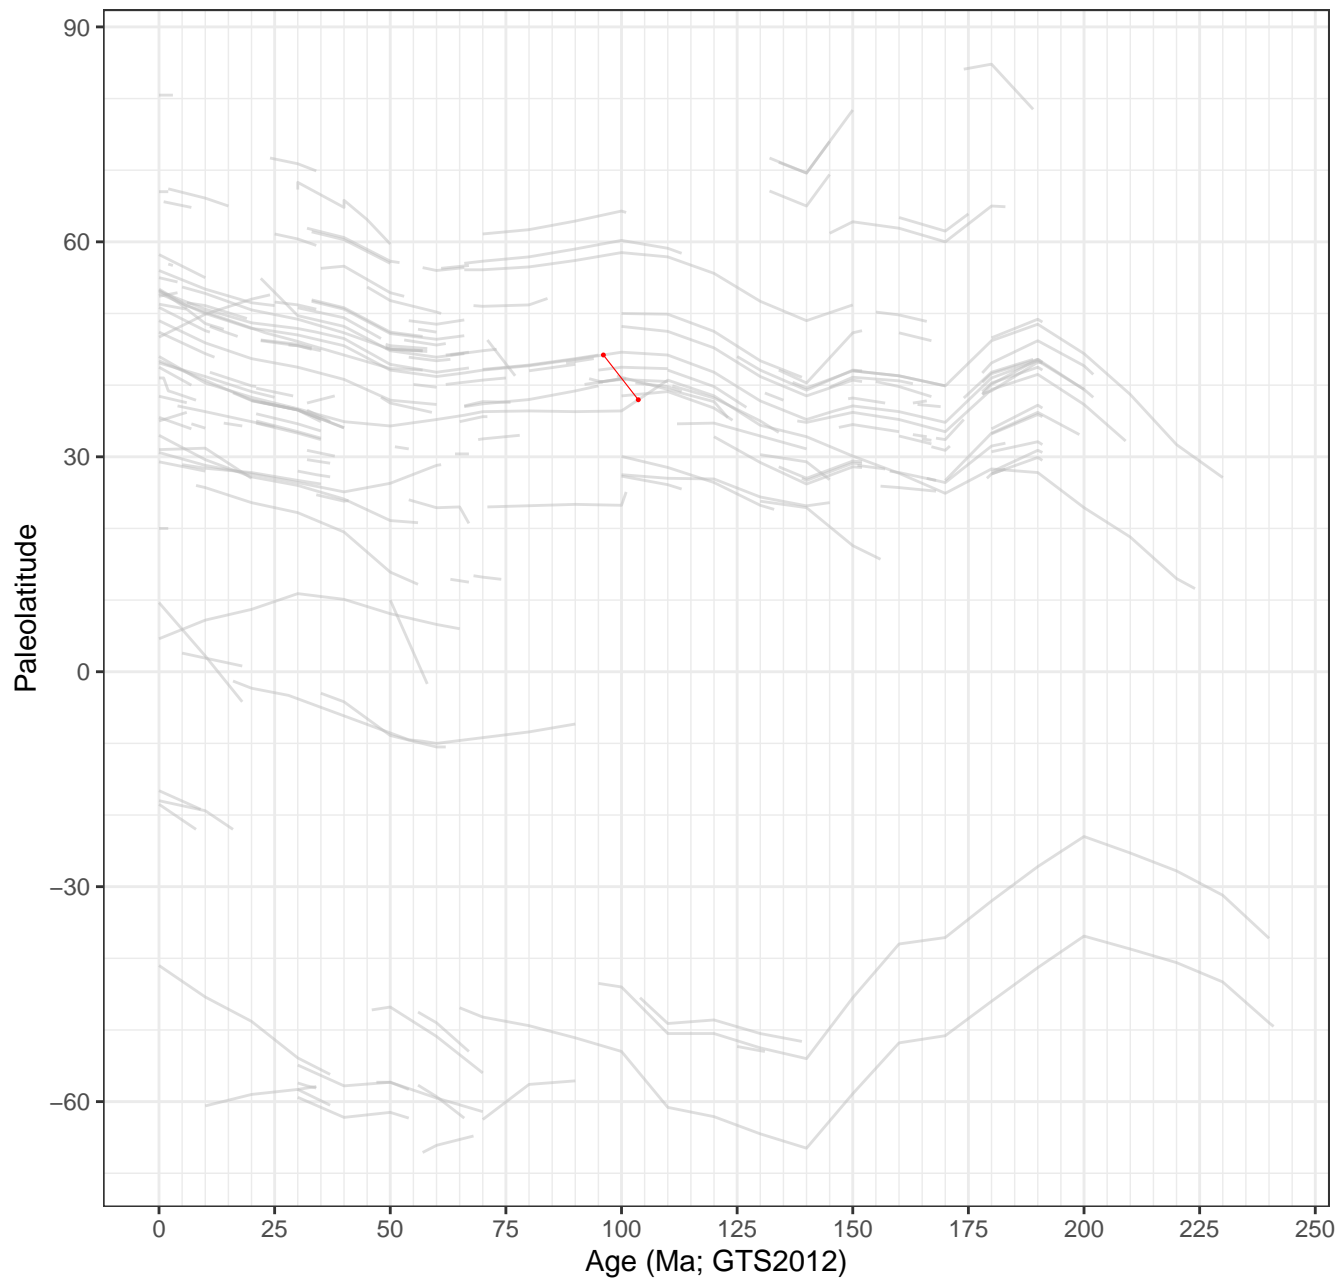

Supplement: Supplementary file 1986 [file Oligosphaeridium albertense.pdf › Supplement/Supplement 2/Species 1914 plots/Oligosphaeridium albertense.pdf]

# Species *Oligosphaeridium anapetum*

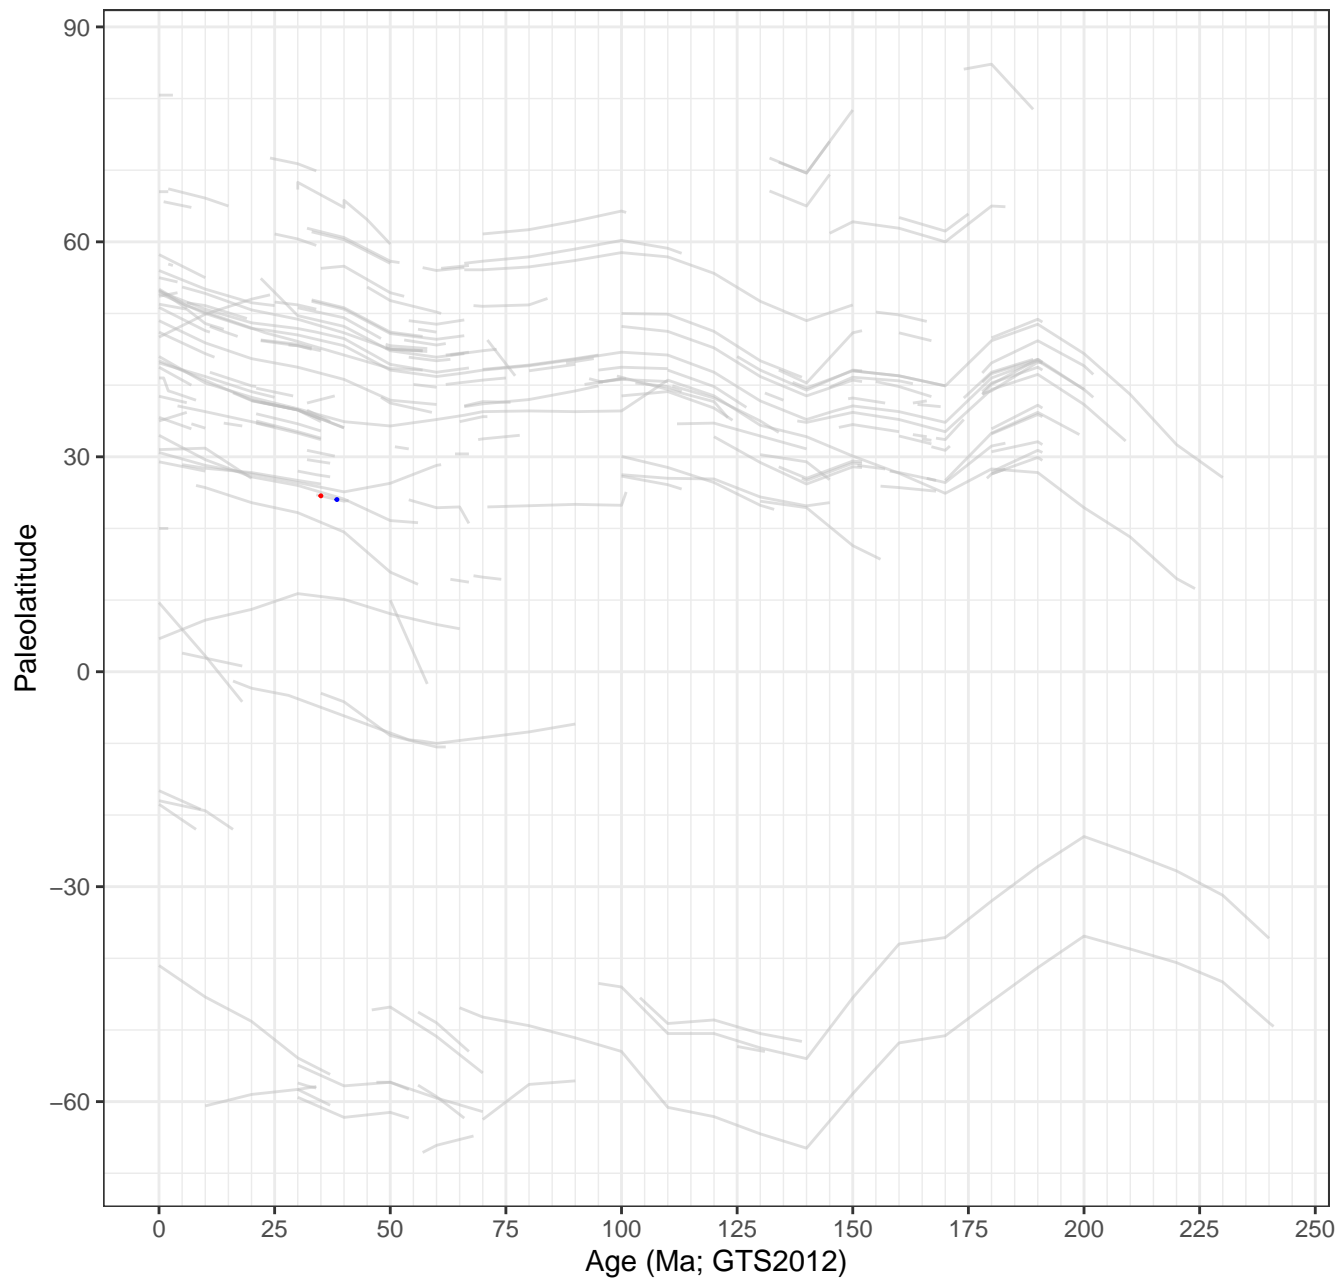

Supplement: Supplementary file 1987 [file Oligosphaeridium anapetum.pdf › Supplement/Supplement 2/Species 1914 plots/Oligosphaeridium anapetum.pdf]

# Species *Oligosphaeridium asterigerum*

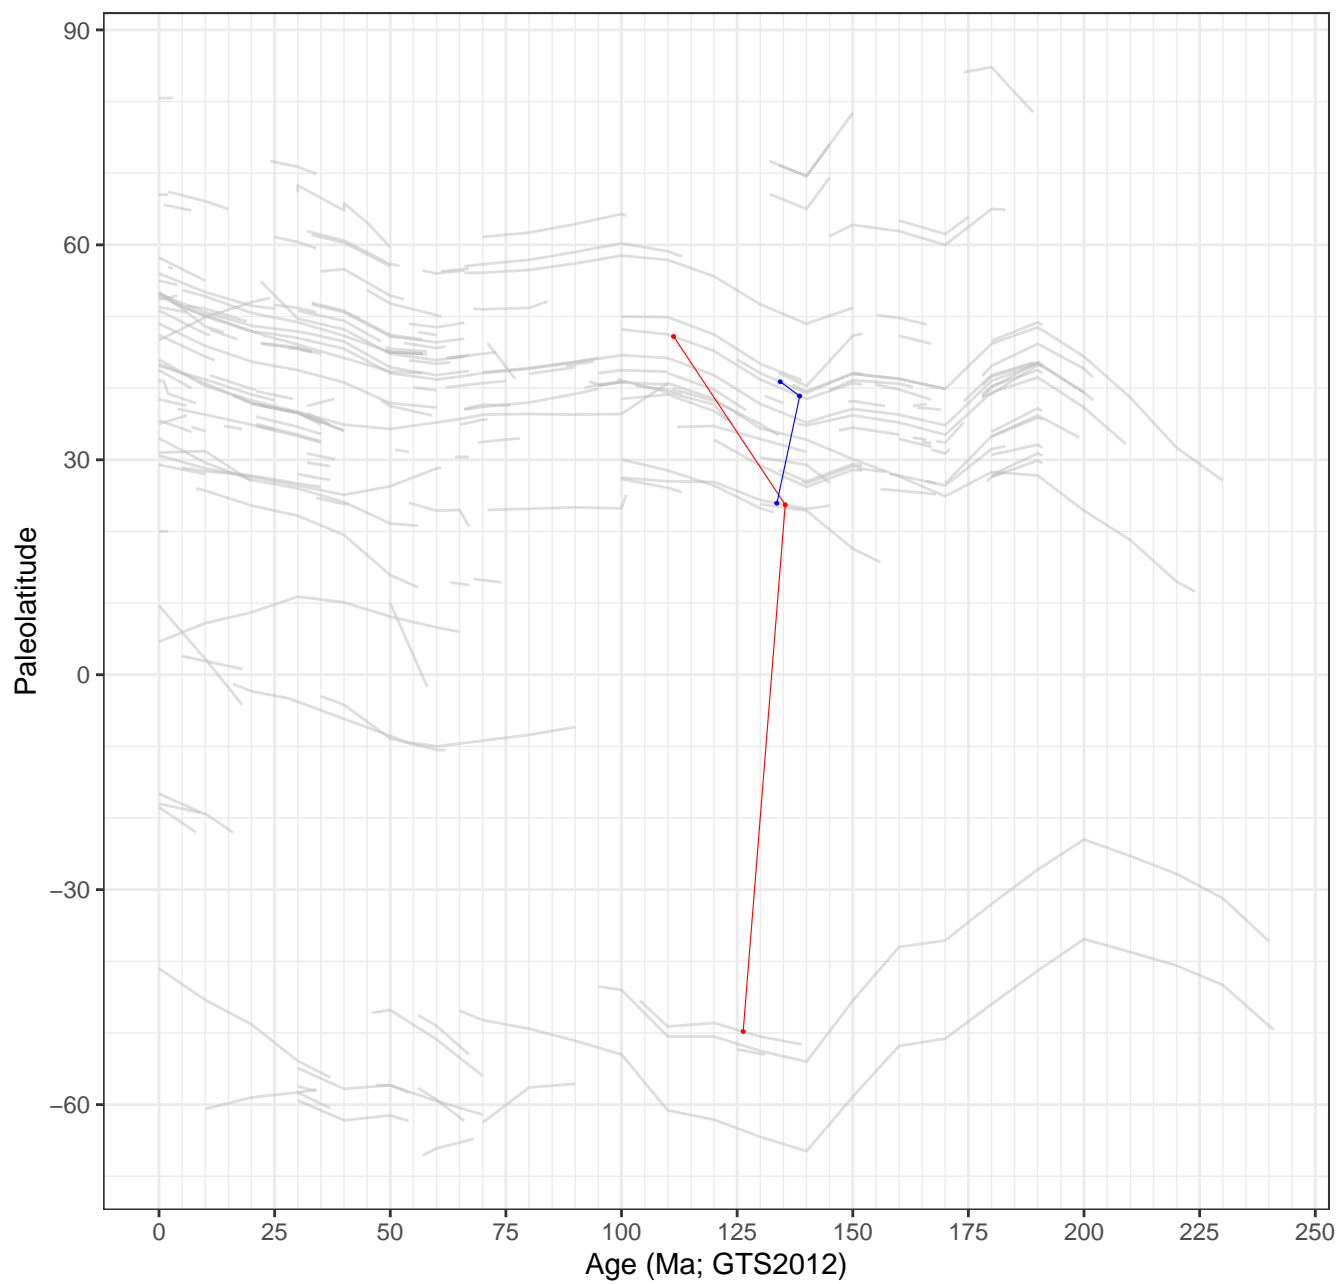

Supplement: Supplementary file 1988 [file Oligosphaeridium asterigerum.pdf › Supplement/Supplement 2/Species 1914 plots/Oligosphaeridium asterigerum.pdf]

# Species *Oligosphaeridium* complex

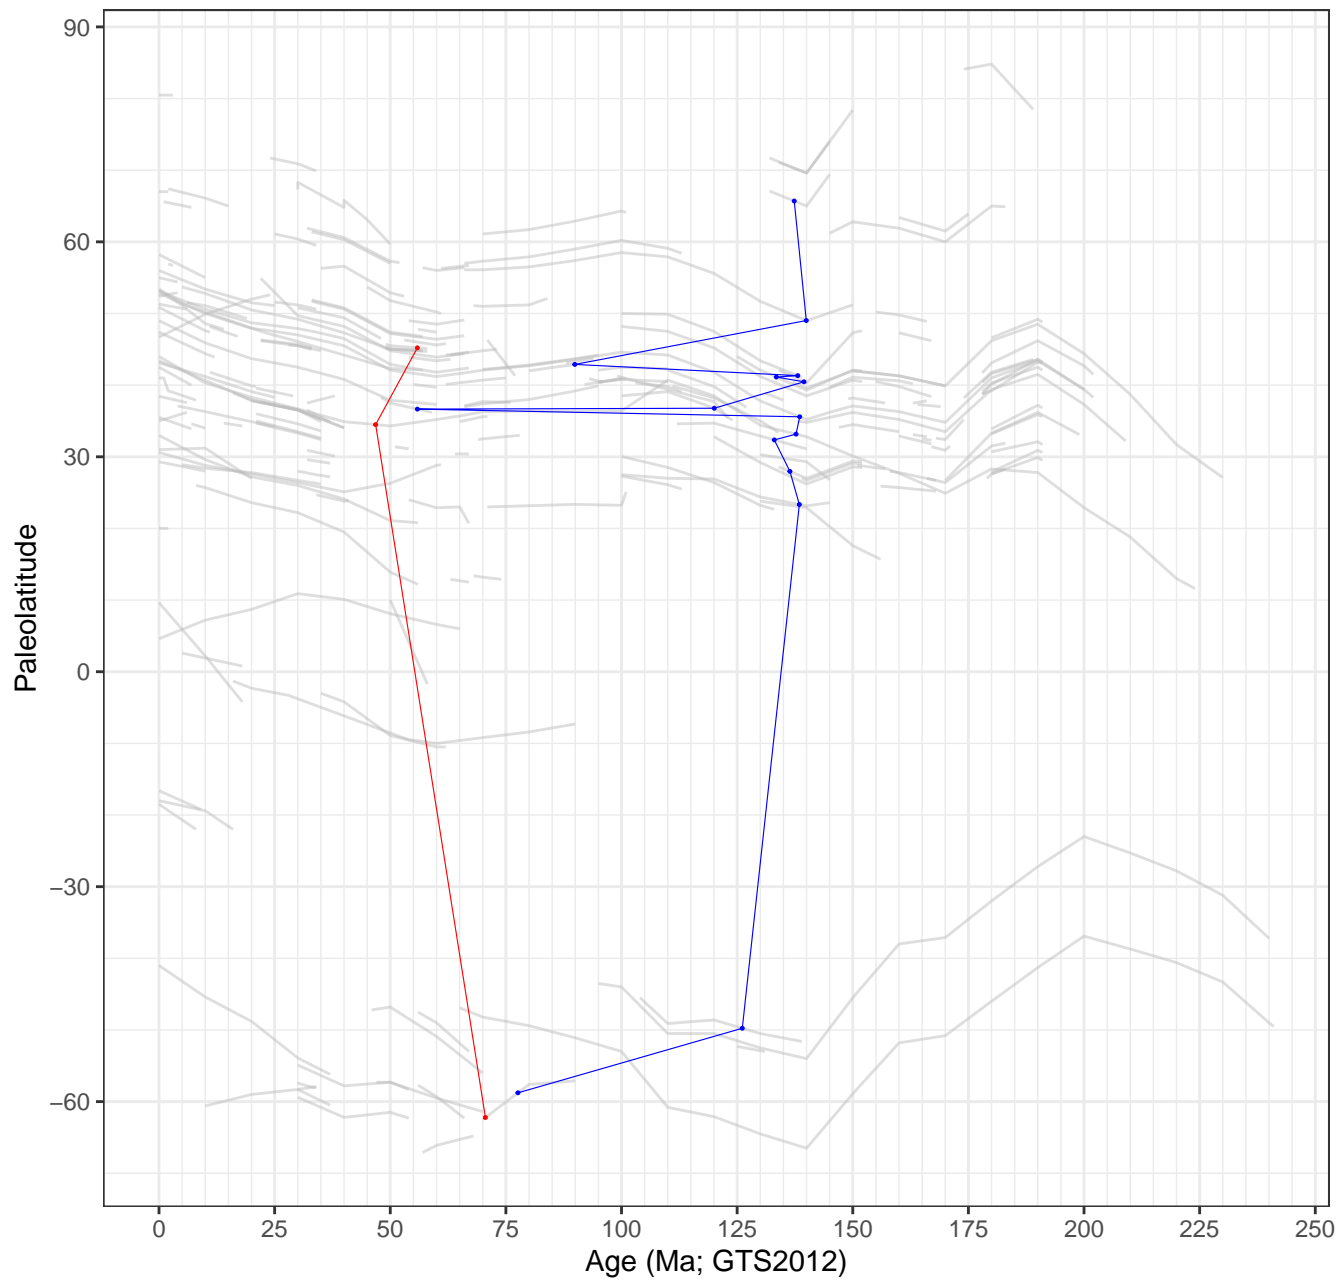

Supplement: Supplementary file 1989 [file Oligosphaeridium complex.pdf › Supplement/Supplement 2/Species 1914 plots/Oligosphaeridium complex.pdf]

# Species *Oligosphaeridium diluculum*

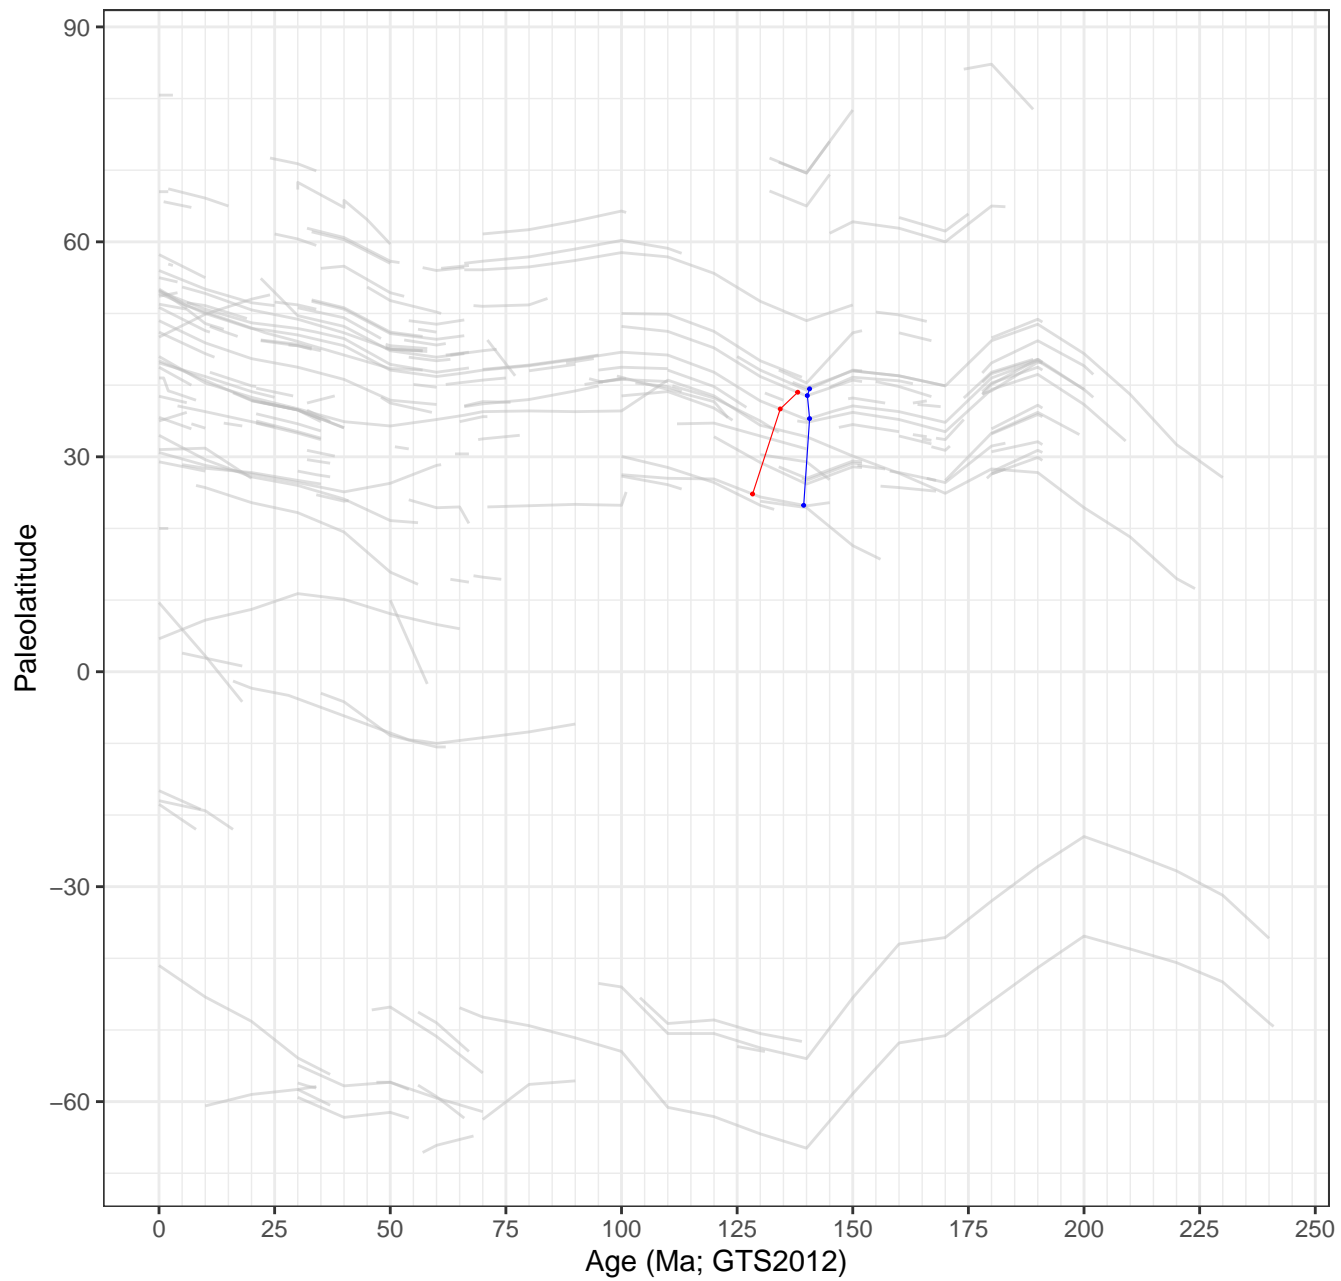

Supplement: Supplementary file 1990 [file Oligosphaeridium diluculum.pdf › Supplement/Supplement 2/Species 1914 plots/Oligosphaeridium diluculum.pdf]

# Species *Oligosphaeridium dividuum*

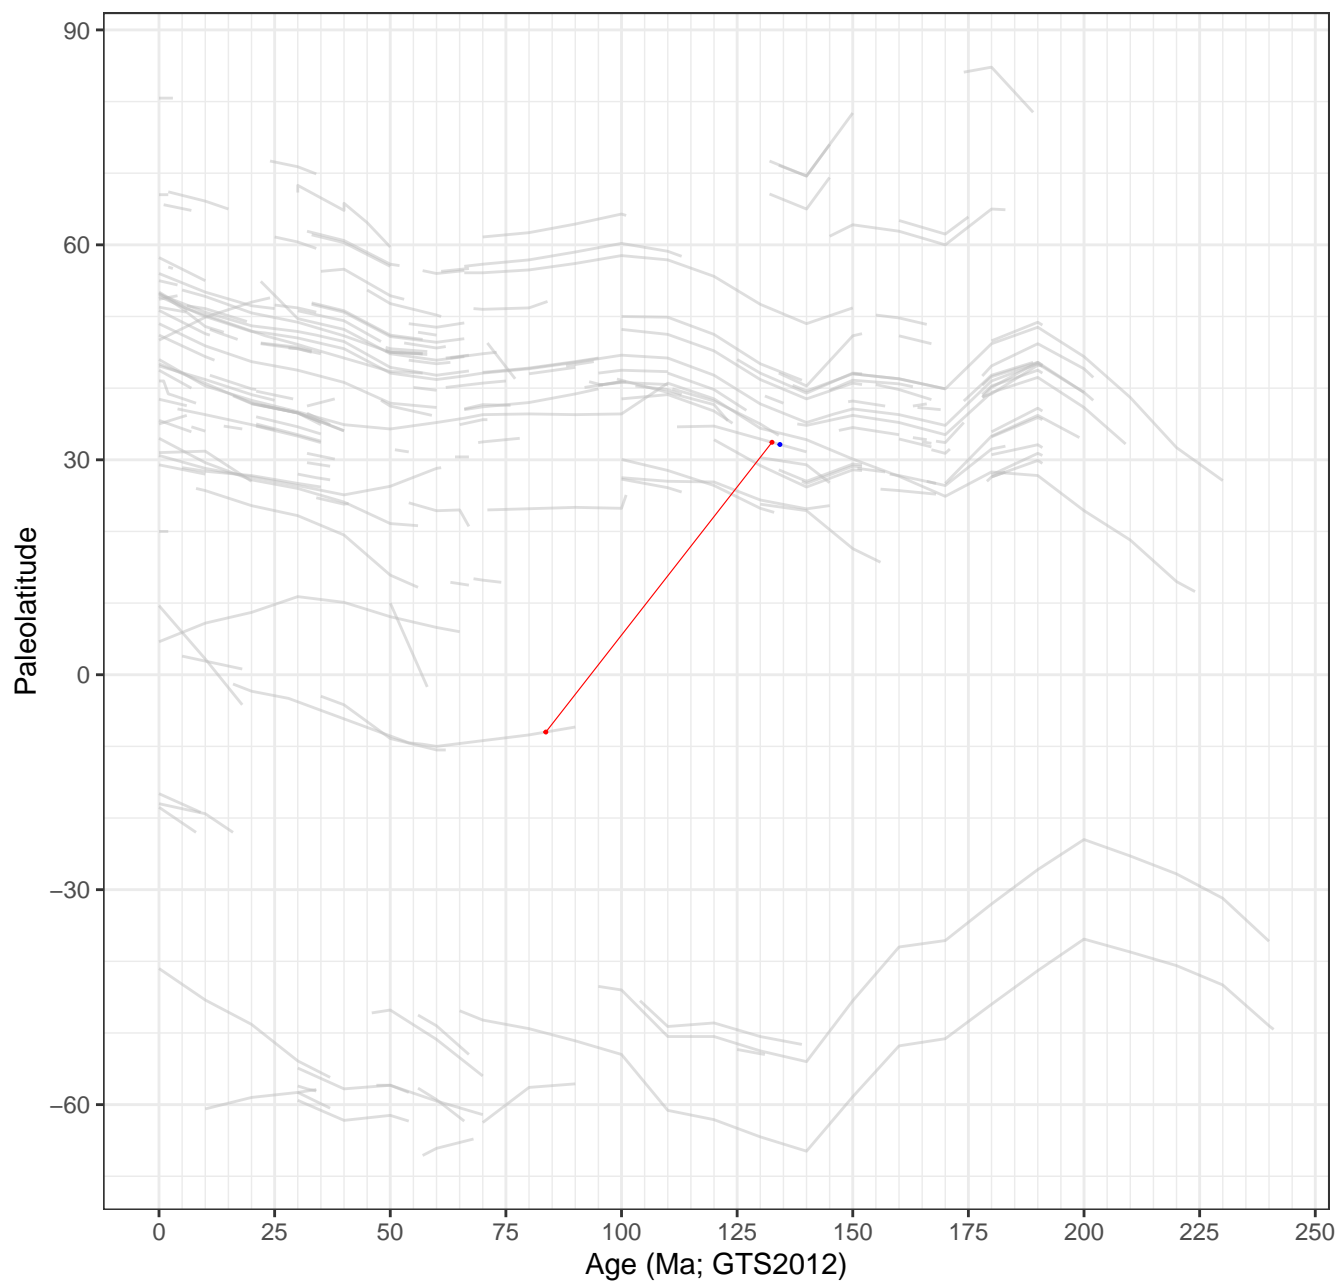

Supplement: Supplementary file 1991 [file Oligosphaeridium dividuum.pdf › Supplement/Supplement 2/Species 1914 plots/Oligosphaeridium dividuum.pdf]

# Species *Oligosphaeridium djenn*

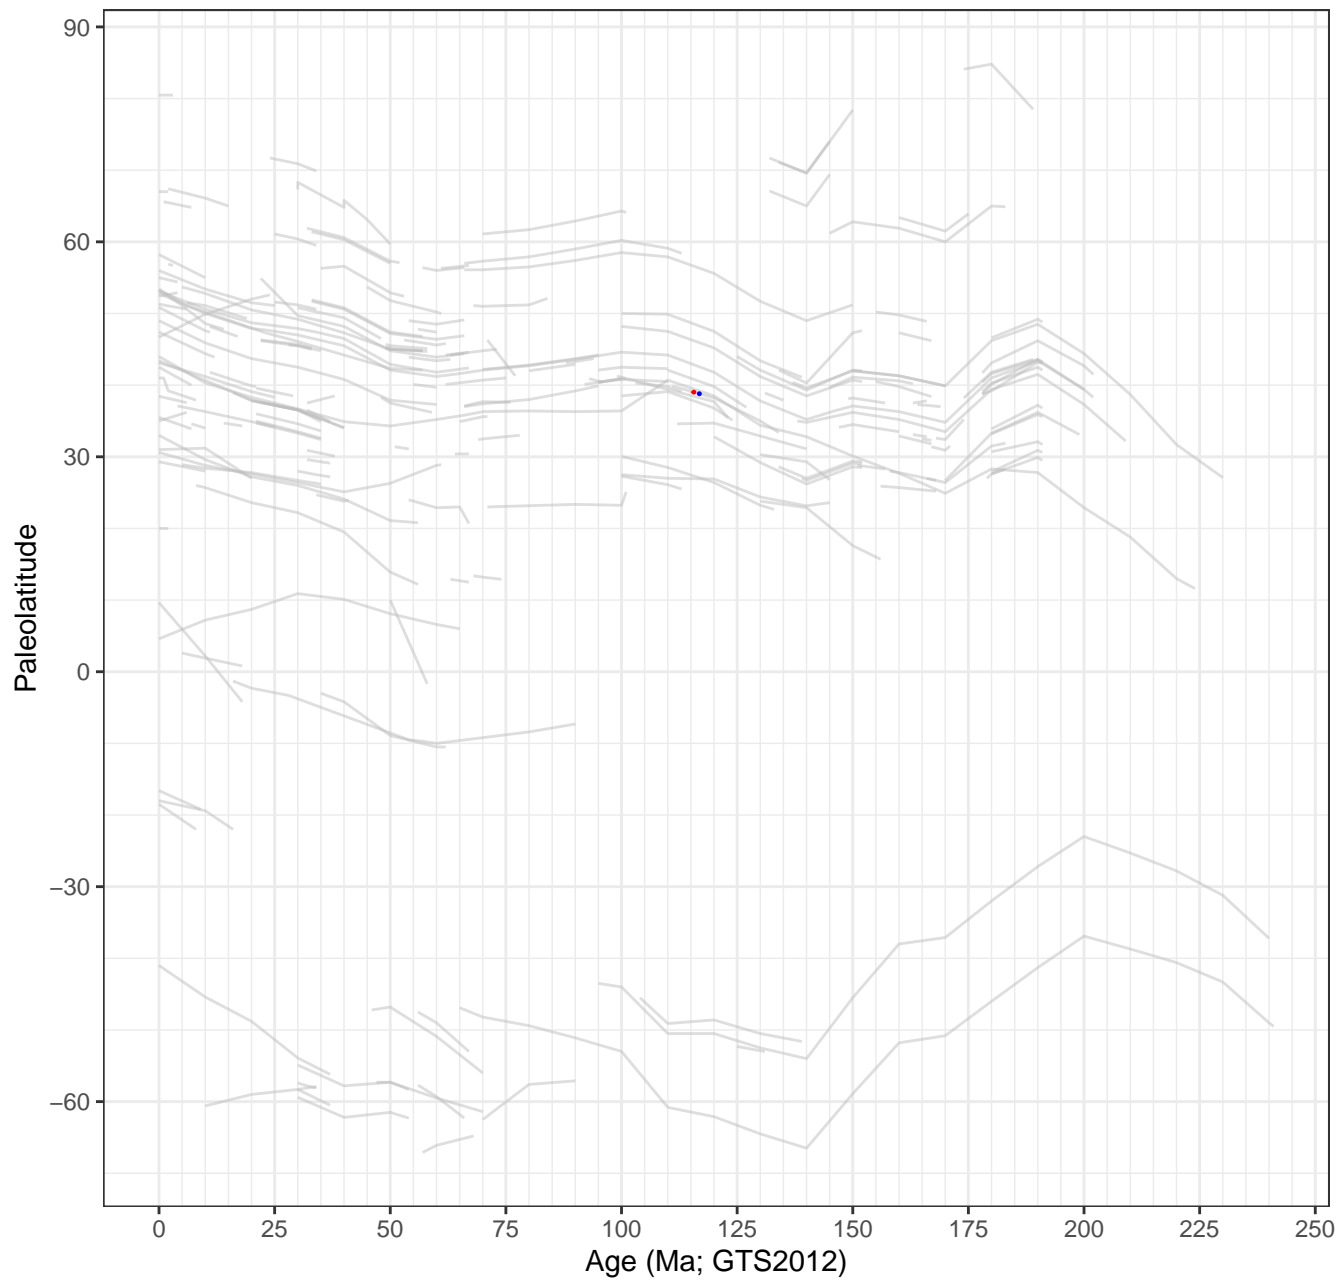

Supplement: Supplementary file 1992 [file Oligosphaeridium djenn.pdf › Supplement/Supplement 2/Species 1914 plots/Oligosphaeridium djenn.pdf]

# Species *Oligosphaeridium junctum*

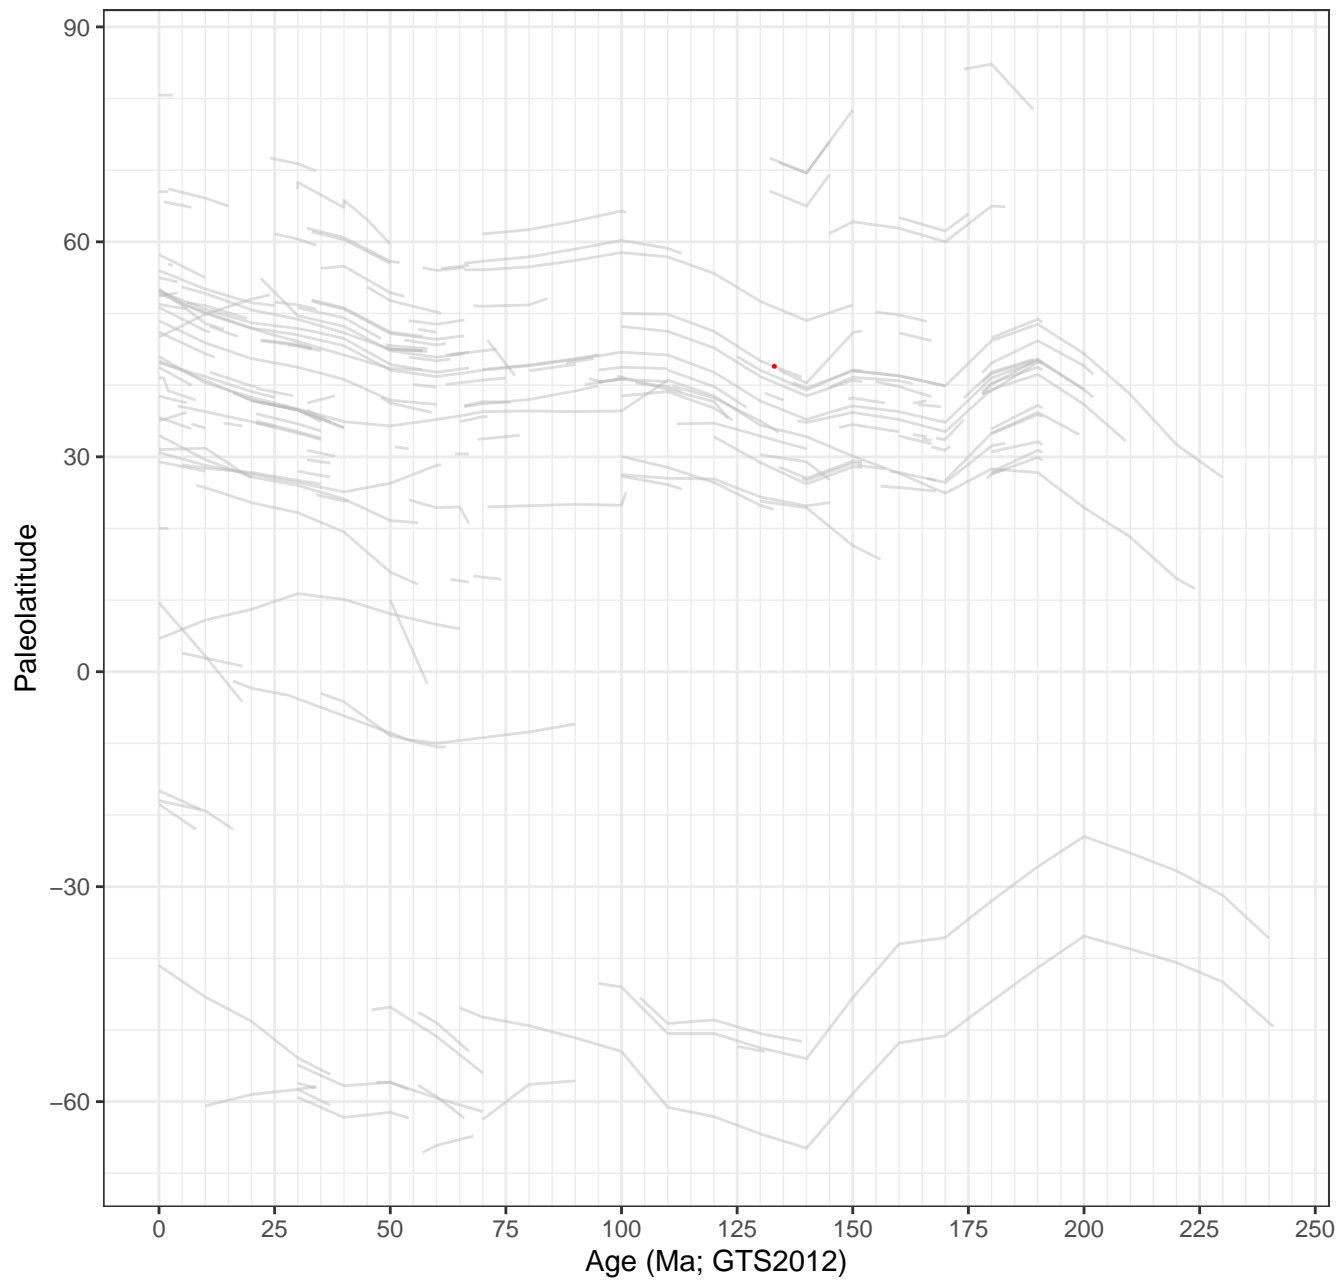

Supplement: Supplementary file 1993 [file Oligosphaeridium junctum.pdf › Supplement/Supplement 2/Species 1914 plots/Oligosphaeridium junctum.pdf]

# Species *Oligosphaeridium patulum*

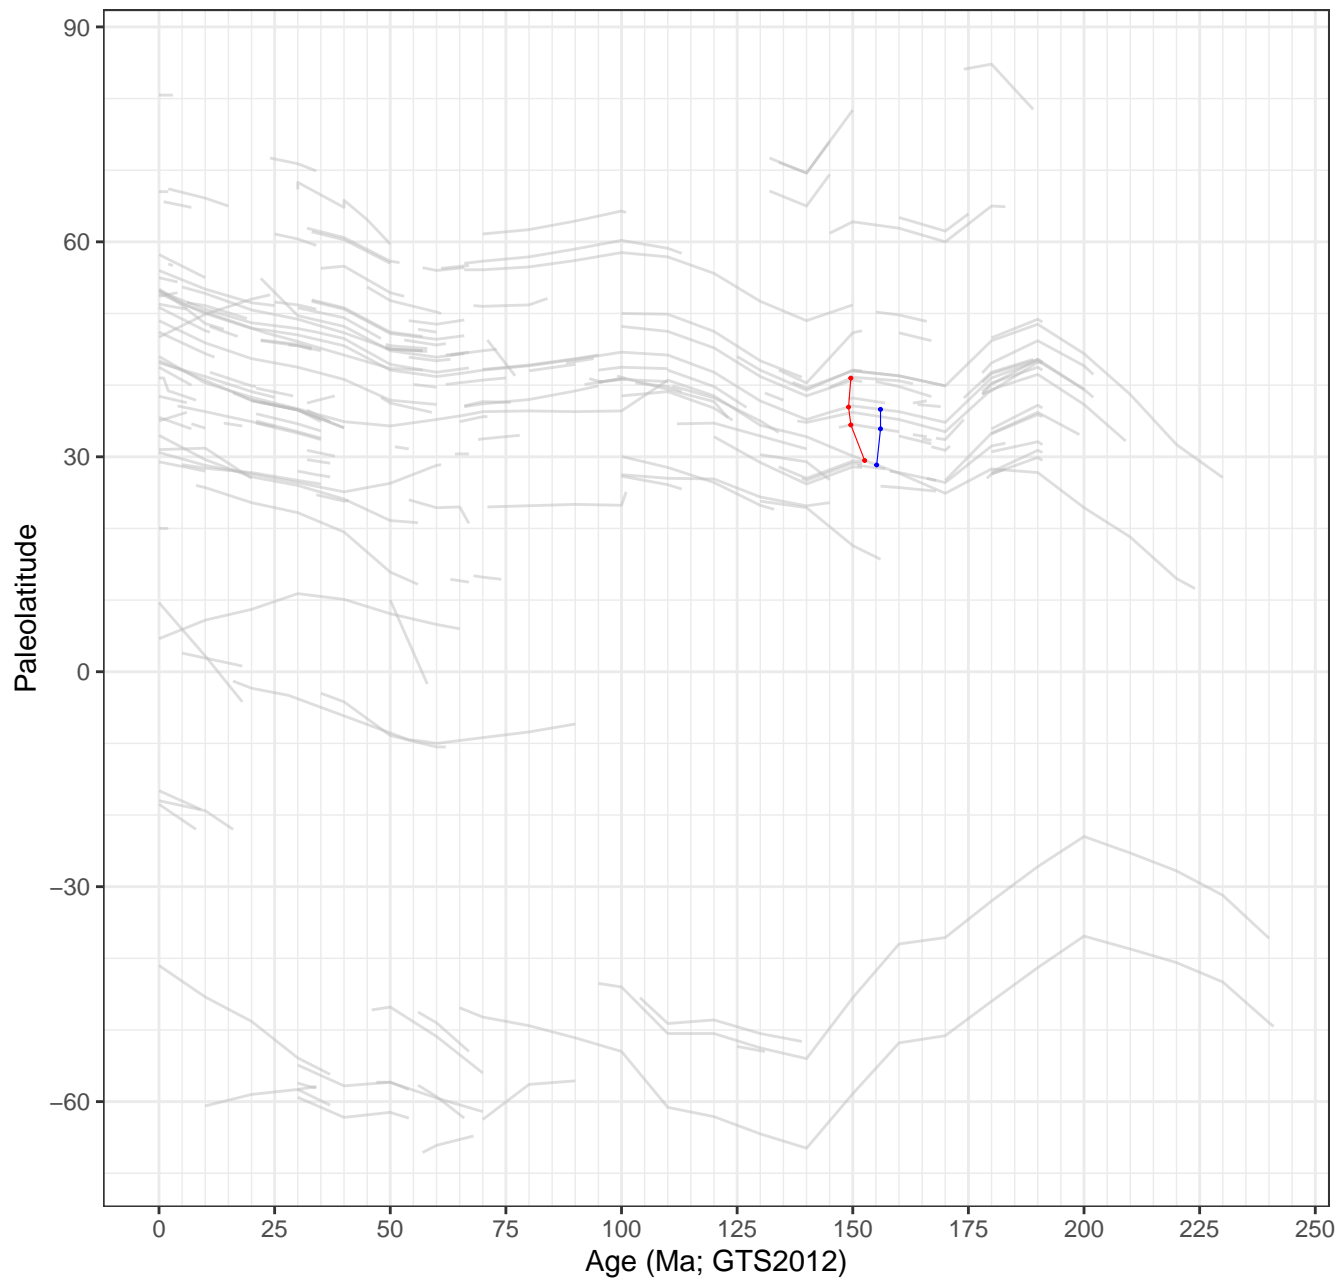

Supplement: Supplementary file 1994 [file Oligosphaeridium patulum.pdf › Supplement/Supplement 2/Species 1914 plots/Oligosphaeridium patulum.pdf]

# Species *Oligosphaeridium perforatum* column

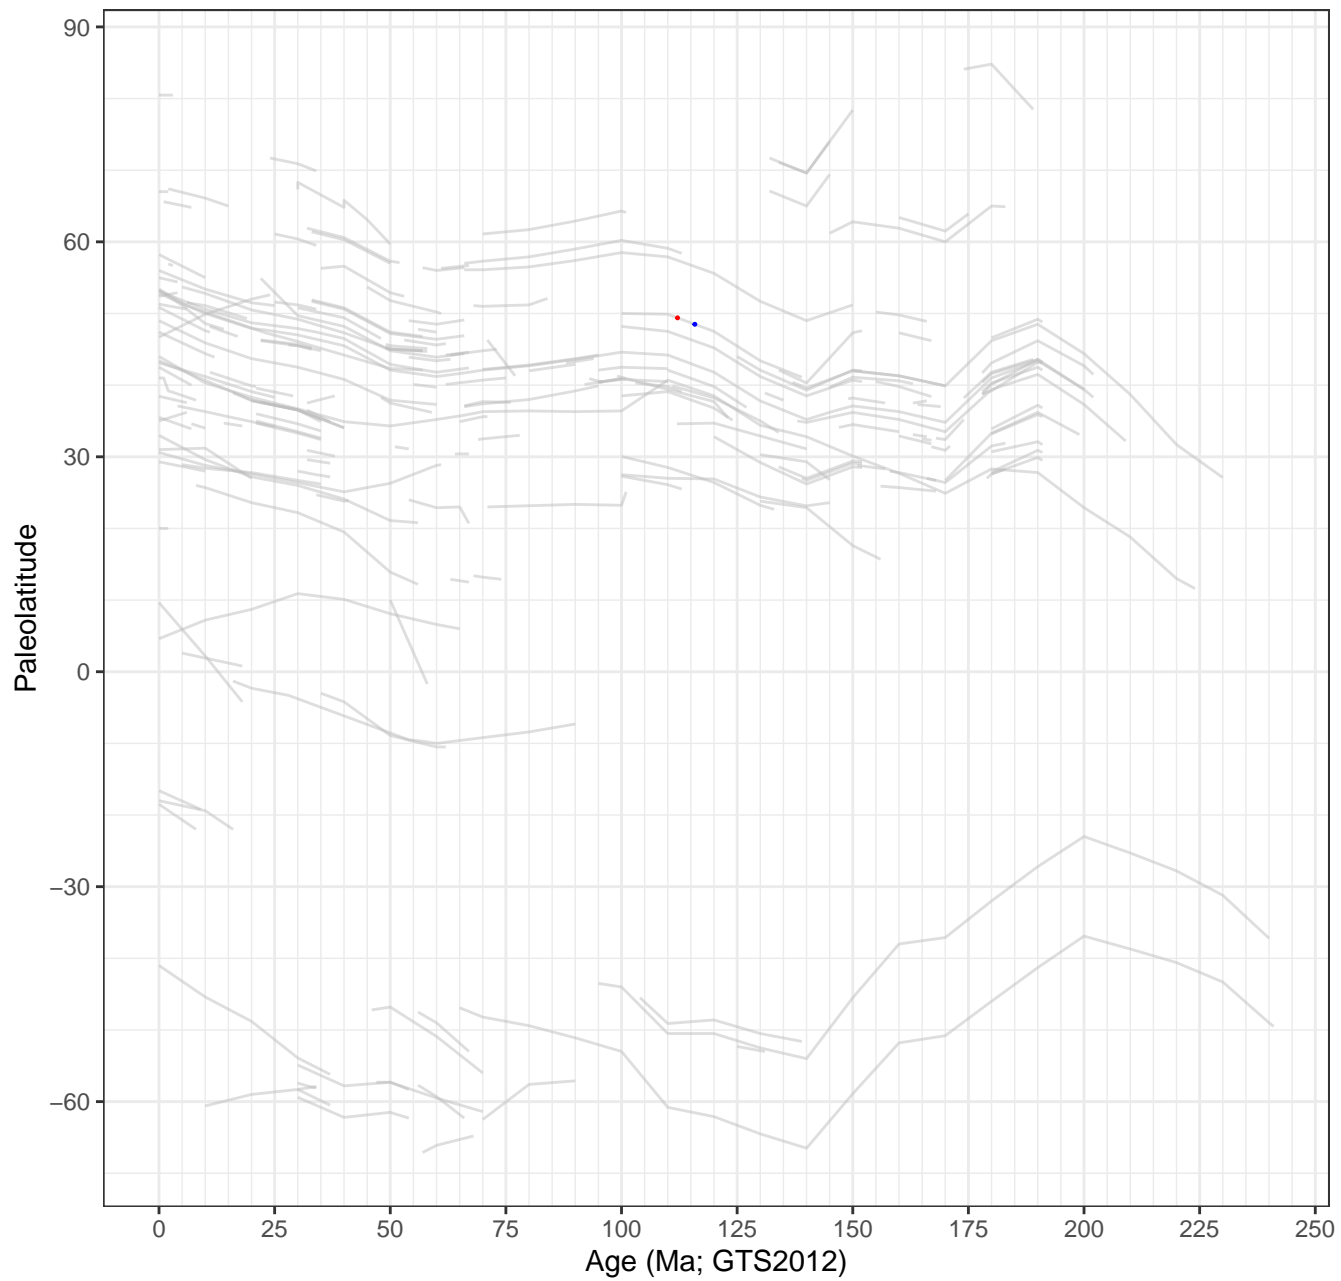

Supplement: Supplementary file 1995 [file Oligosphaeridium perforatum colum.pdf › Supplement/Supplement 2/Species 1914 plots/Oligosphaeridium perforatum colum.pdf]

# Species *Oligosphaeridium perforatum*

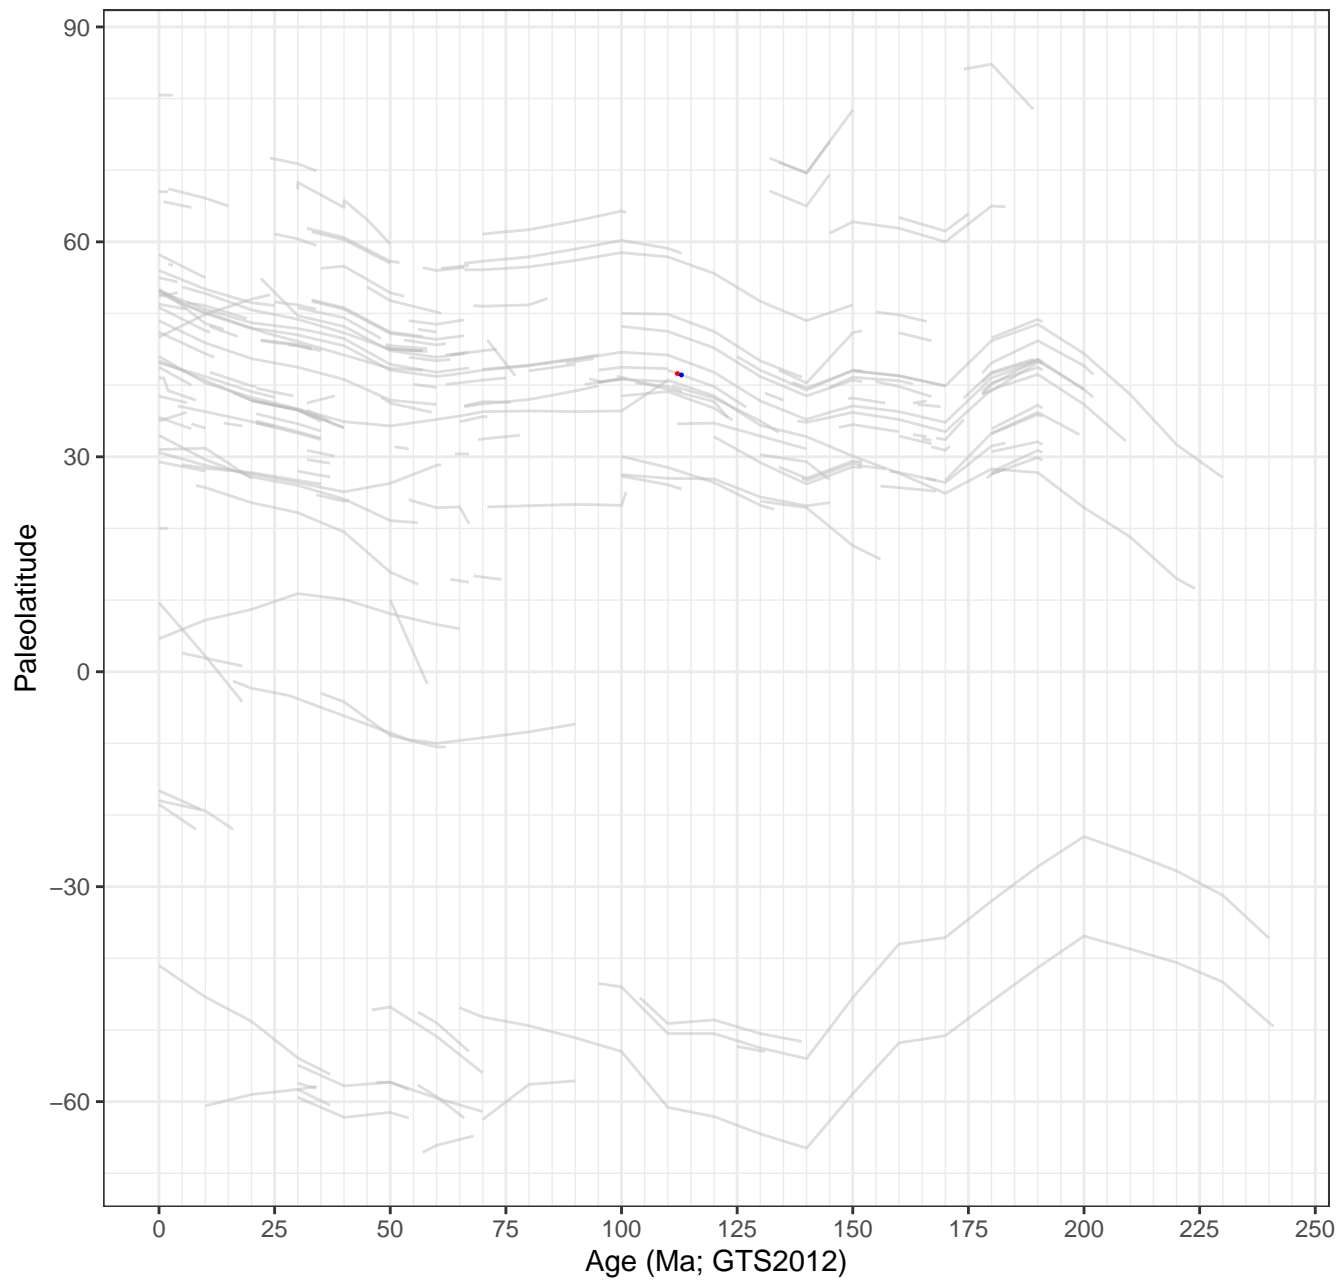

Supplement: Supplementary file 1996 [file Oligosphaeridium perforatum.pdf › Supplement/Supplement 2/Species 1914 plots/Oligosphaeridium perforatum.pdf]

# Species *Oligosphaeridium poculum*

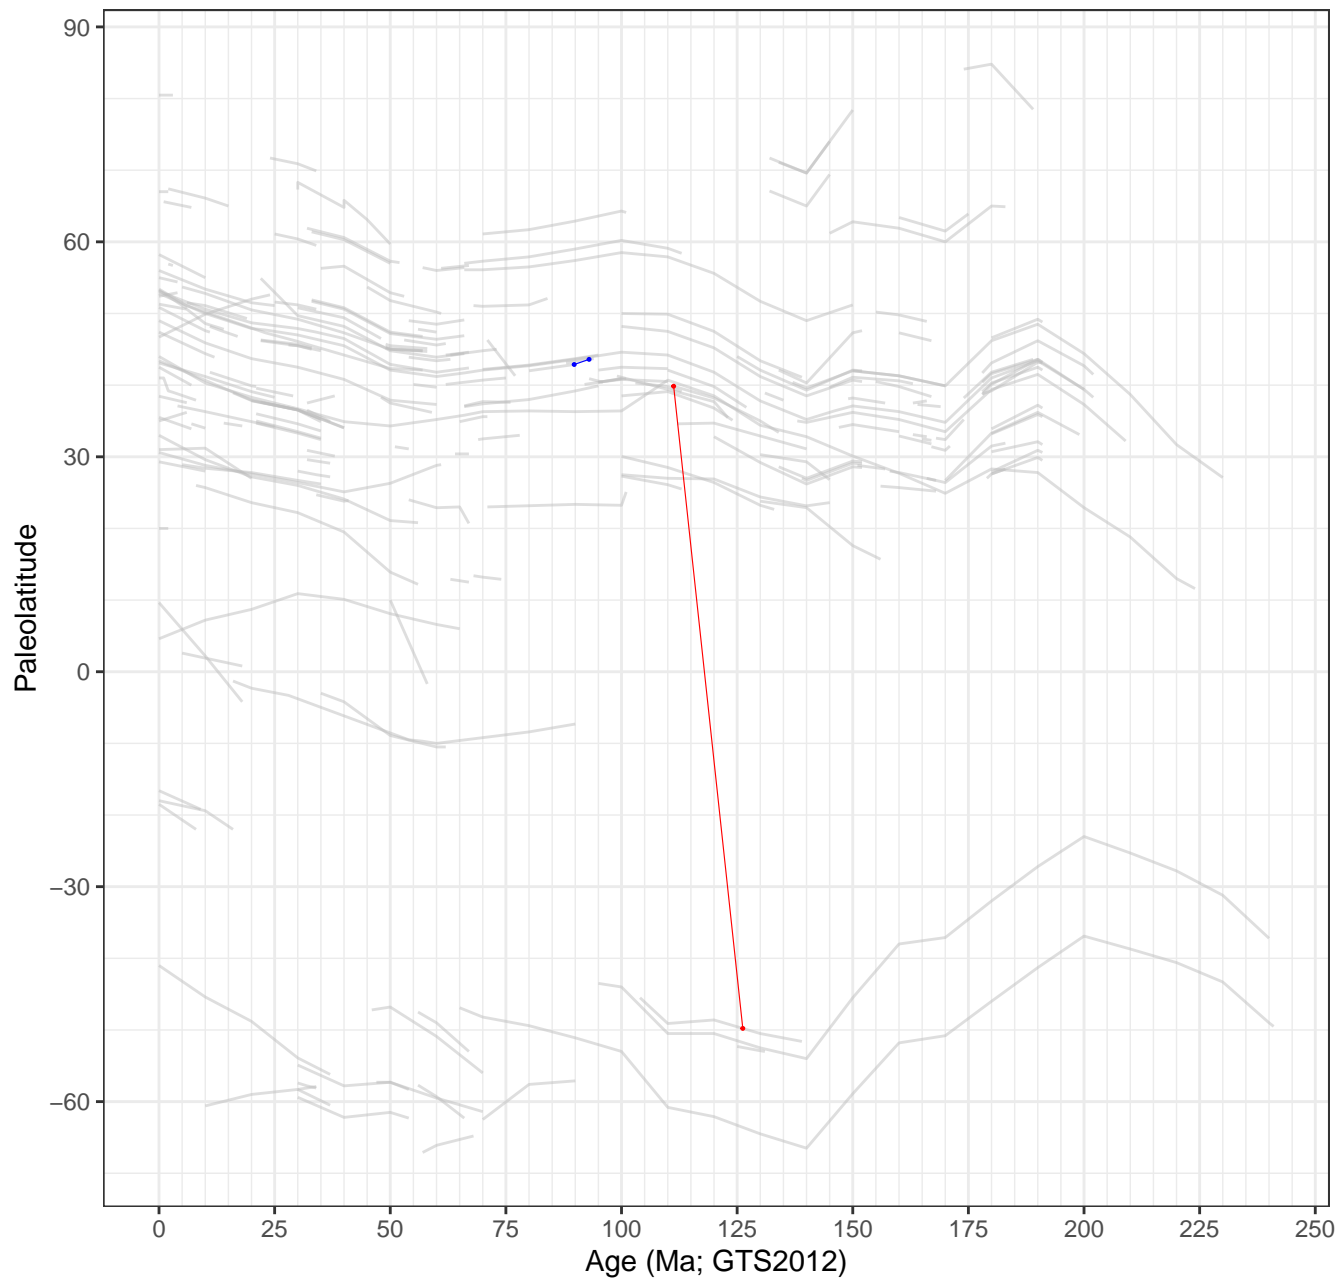

Supplement: Supplementary file 1997 [file Oligosphaeridium poculum.pdf › Supplement/Supplement 2/Species 1914 plots/Oligosphaeridium poculum.pdf]

# Species *Oligosphaeridium porosum*

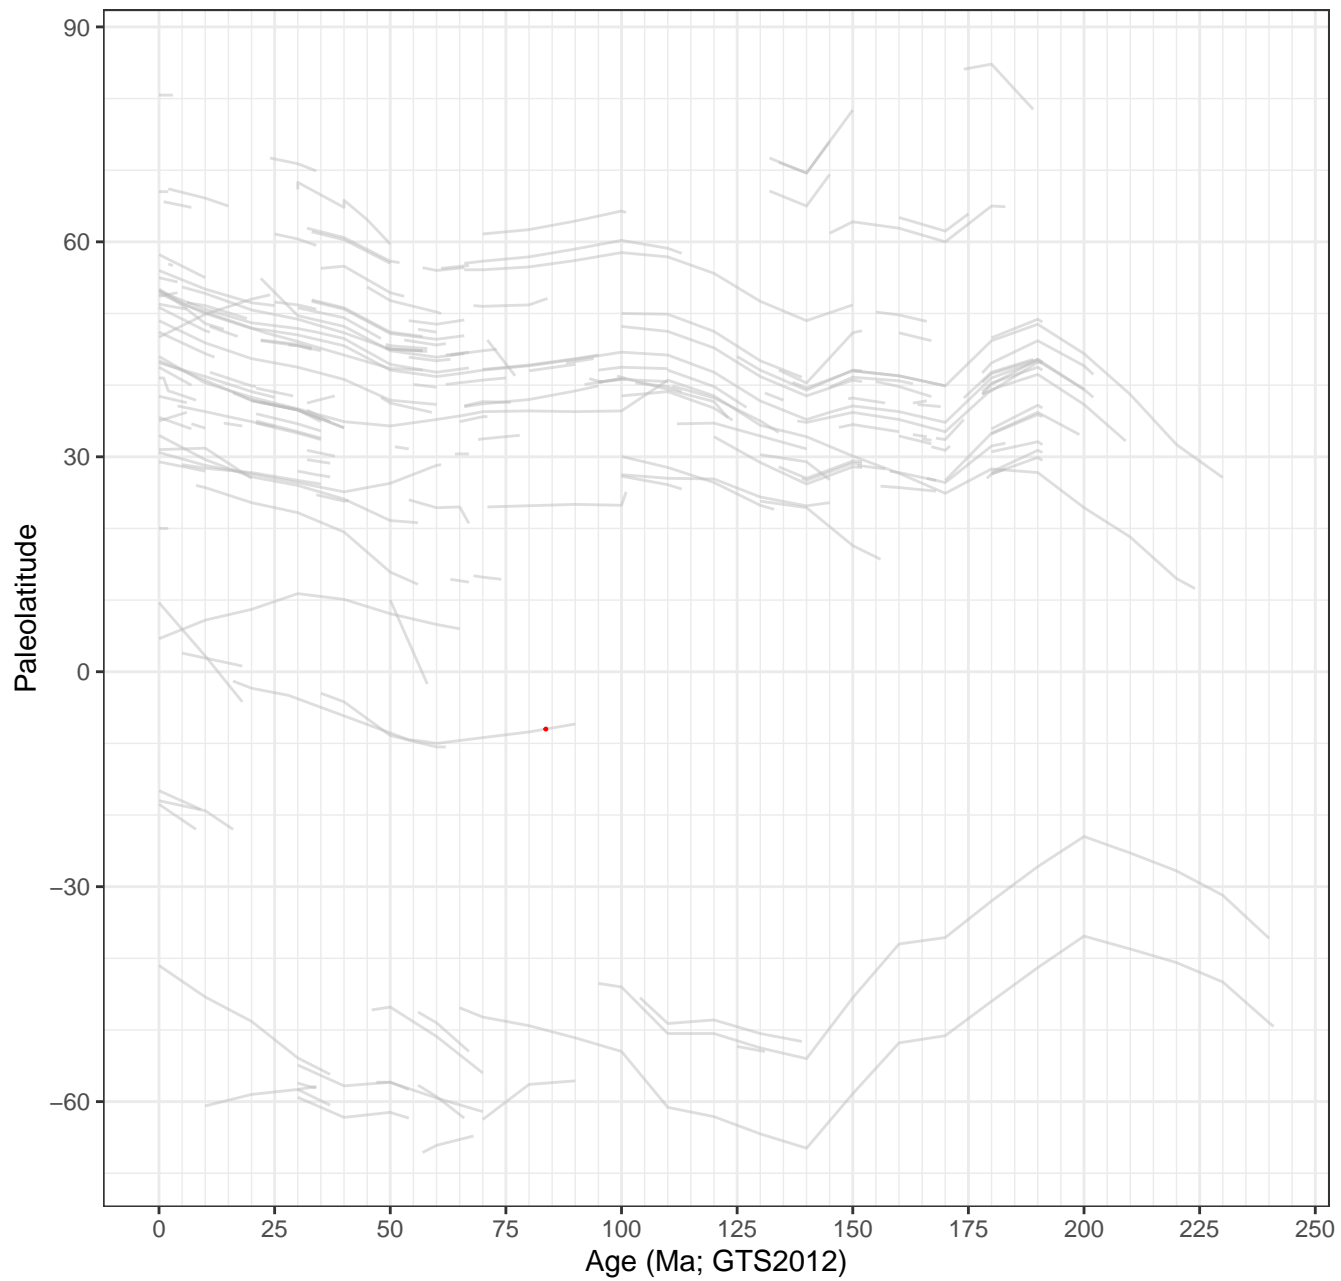

Supplement: Supplementary file 1998 [file Oligosphaeridium porosum.pdf › Supplement/Supplement 2/Species 1914 plots/Oligosphaeridium porosum.pdf]

# Species *Oligosphaeridium prolixispinosum*

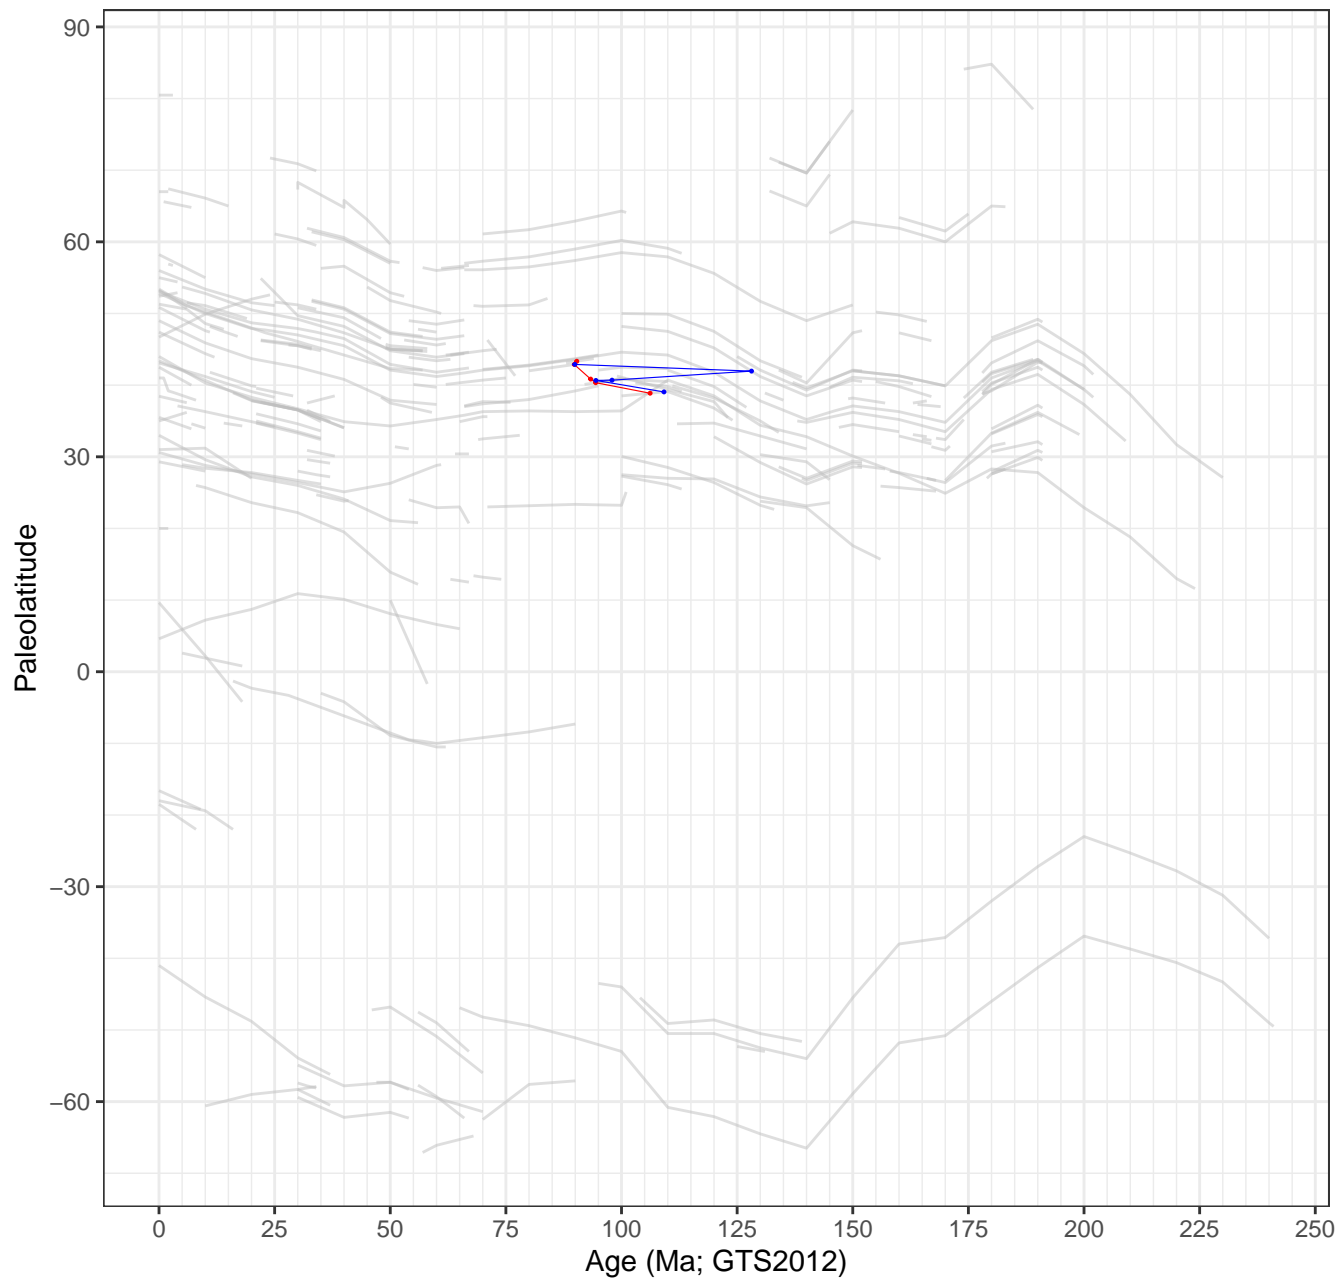

Supplement: Supplementary file 1999 [file Oligosphaeridium prolixispinosum.pdf › Supplement/Supplement 2/Species 1914 plots/Oligosphaeridium prolixispinosum.pdf]

# Species *Oligosphaeridium pulcherrimum*

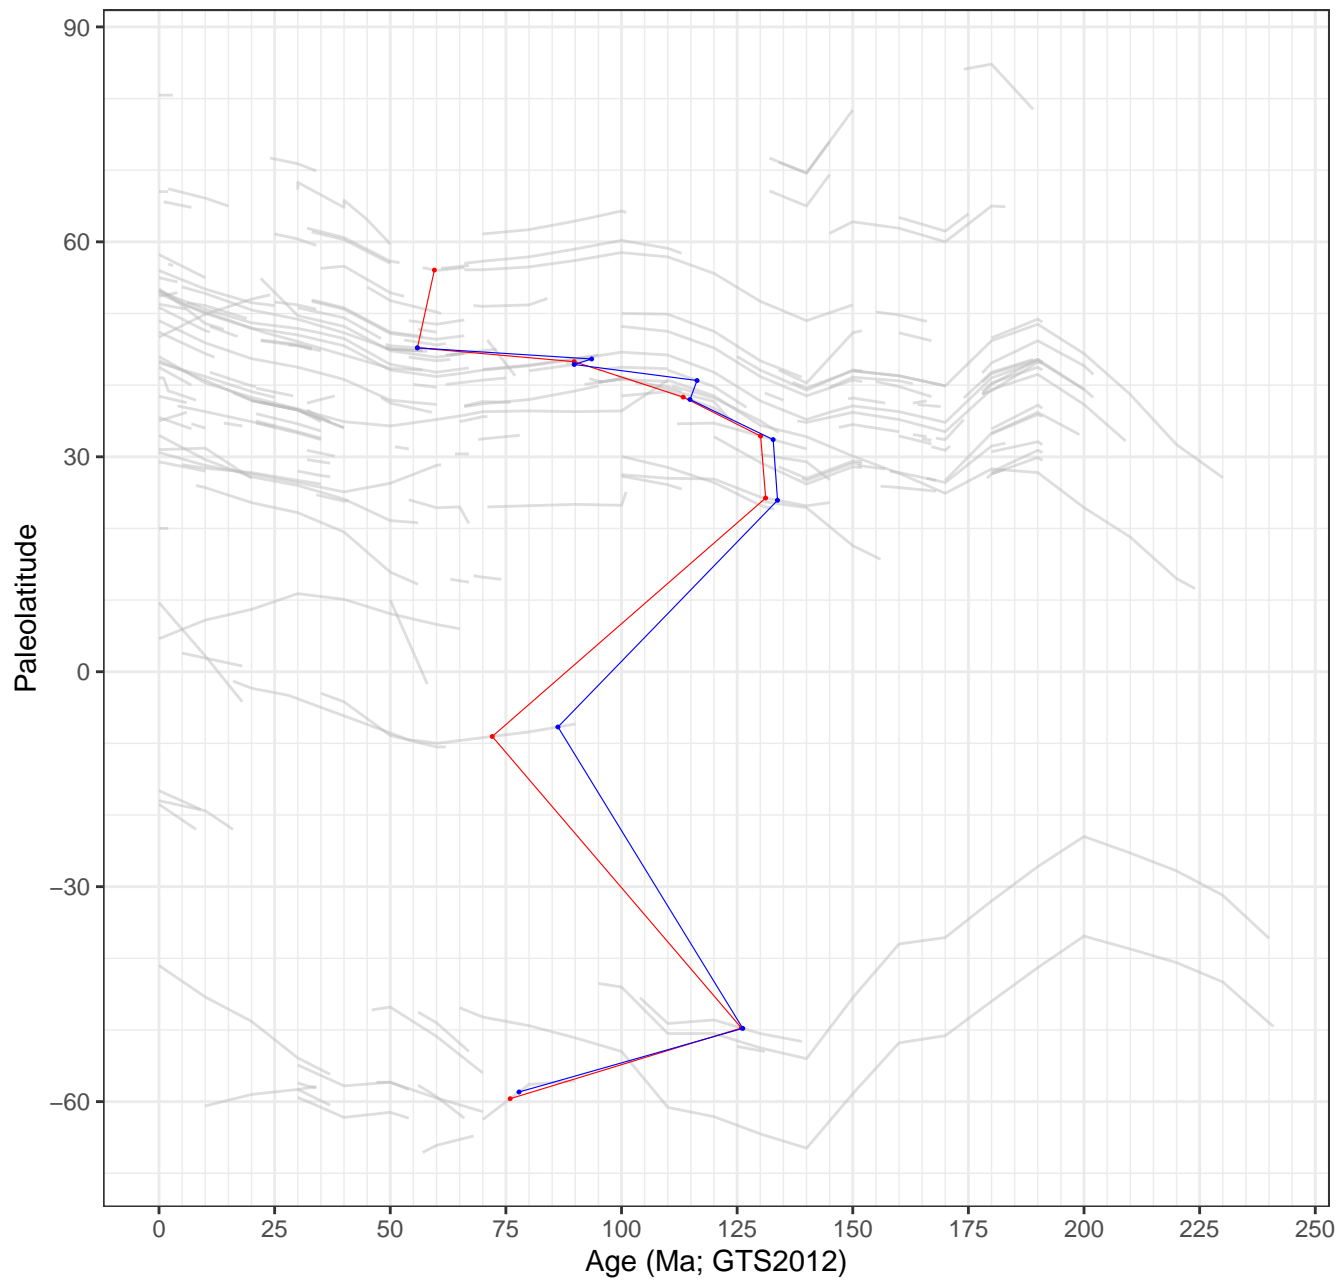

Supplement: Supplementary file 2000 [file Oligosphaeridium pulcherrimum.pdf › Supplement/Supplement 2/Species 1914 plots/Oligosphaeridium pulcherrimum.pdf]

# Species *Oligosphaeridium reticulatum*

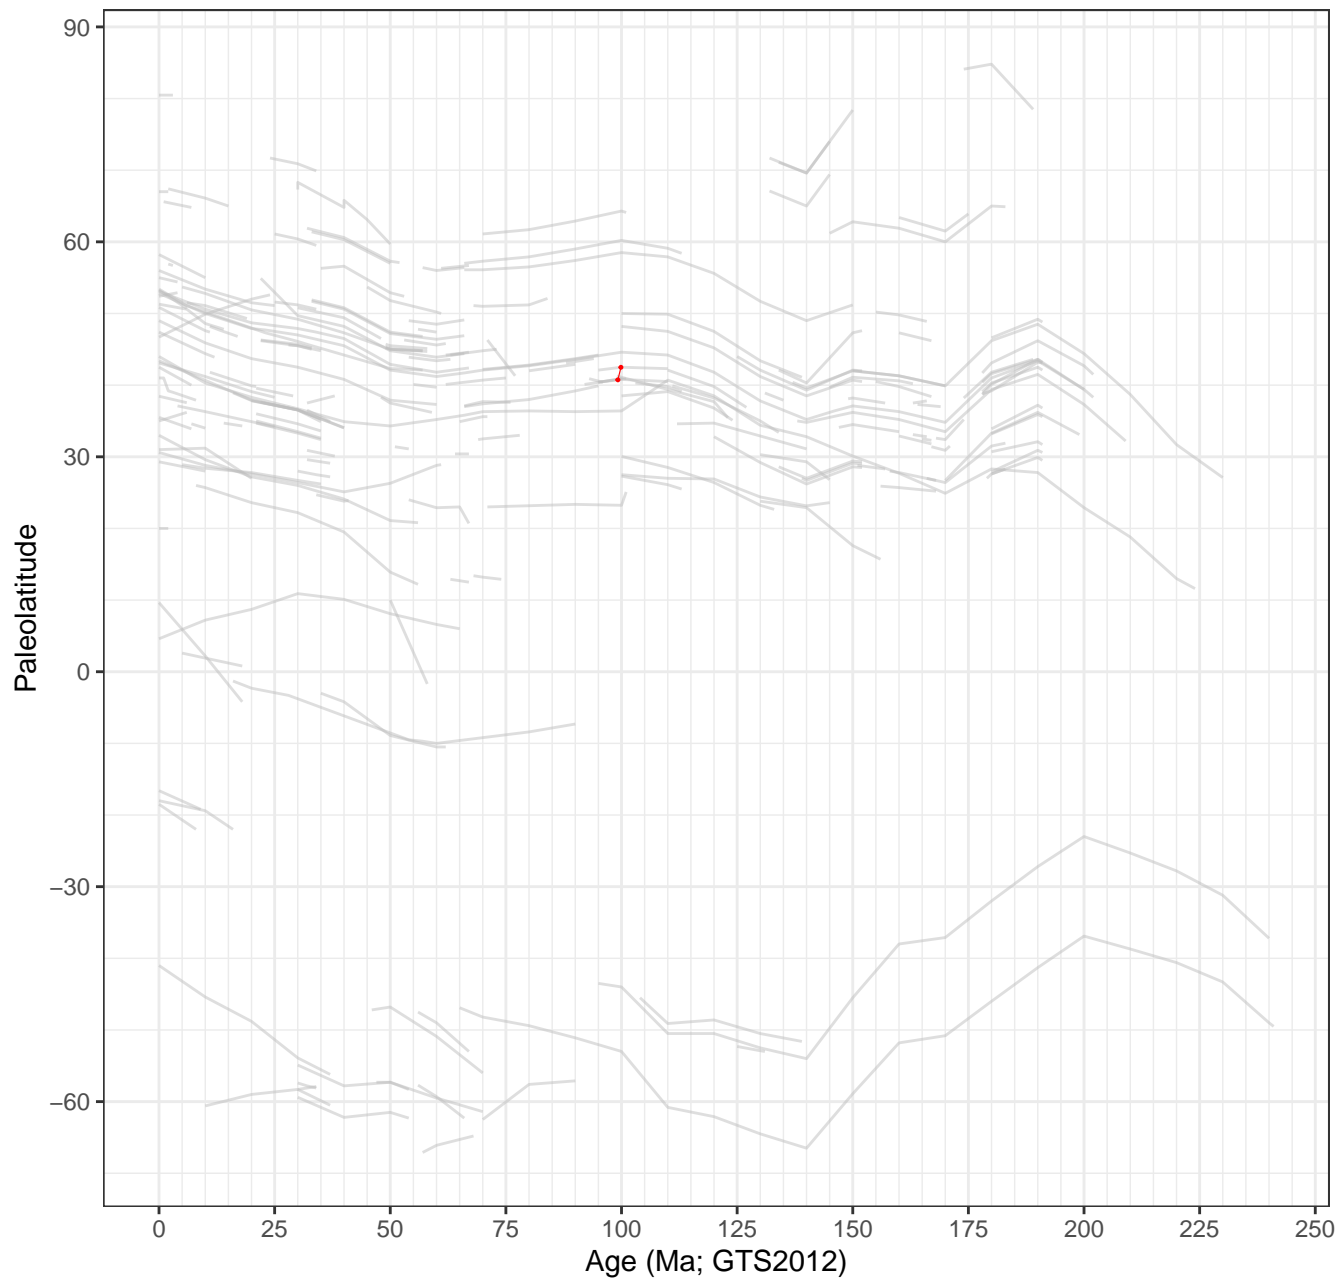

Supplement: Supplementary file 2001 [file Oligosphaeridium reticulatum.pdf › Supplement/Supplement 2/Species 1914 plots/Oligosphaeridium reticulatum.pdf]

# Species *Oligosphaeridium saghirum*

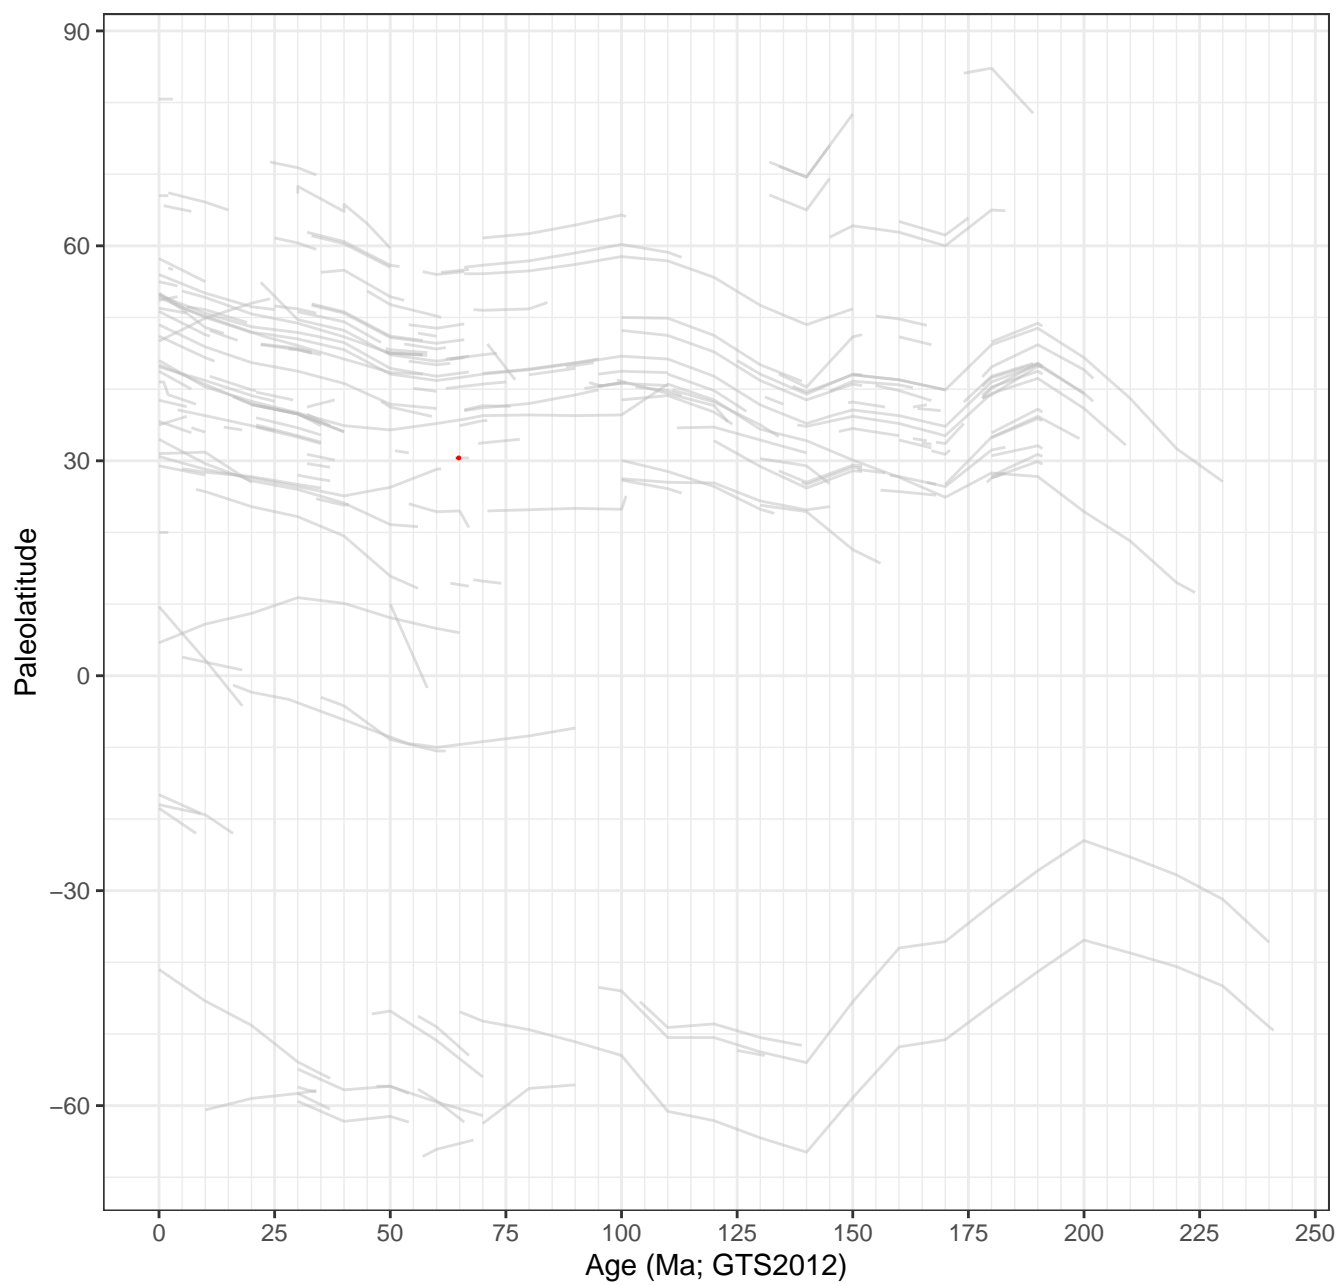

Supplement: Supplementary file 2002 [file Oligosphaeridium saghirum.pdf › Supplement/Supplement 2/Species 1914 plots/Oligosphaeridium saghirum.pdf]

# Species *Oligosphaeridium swanense*

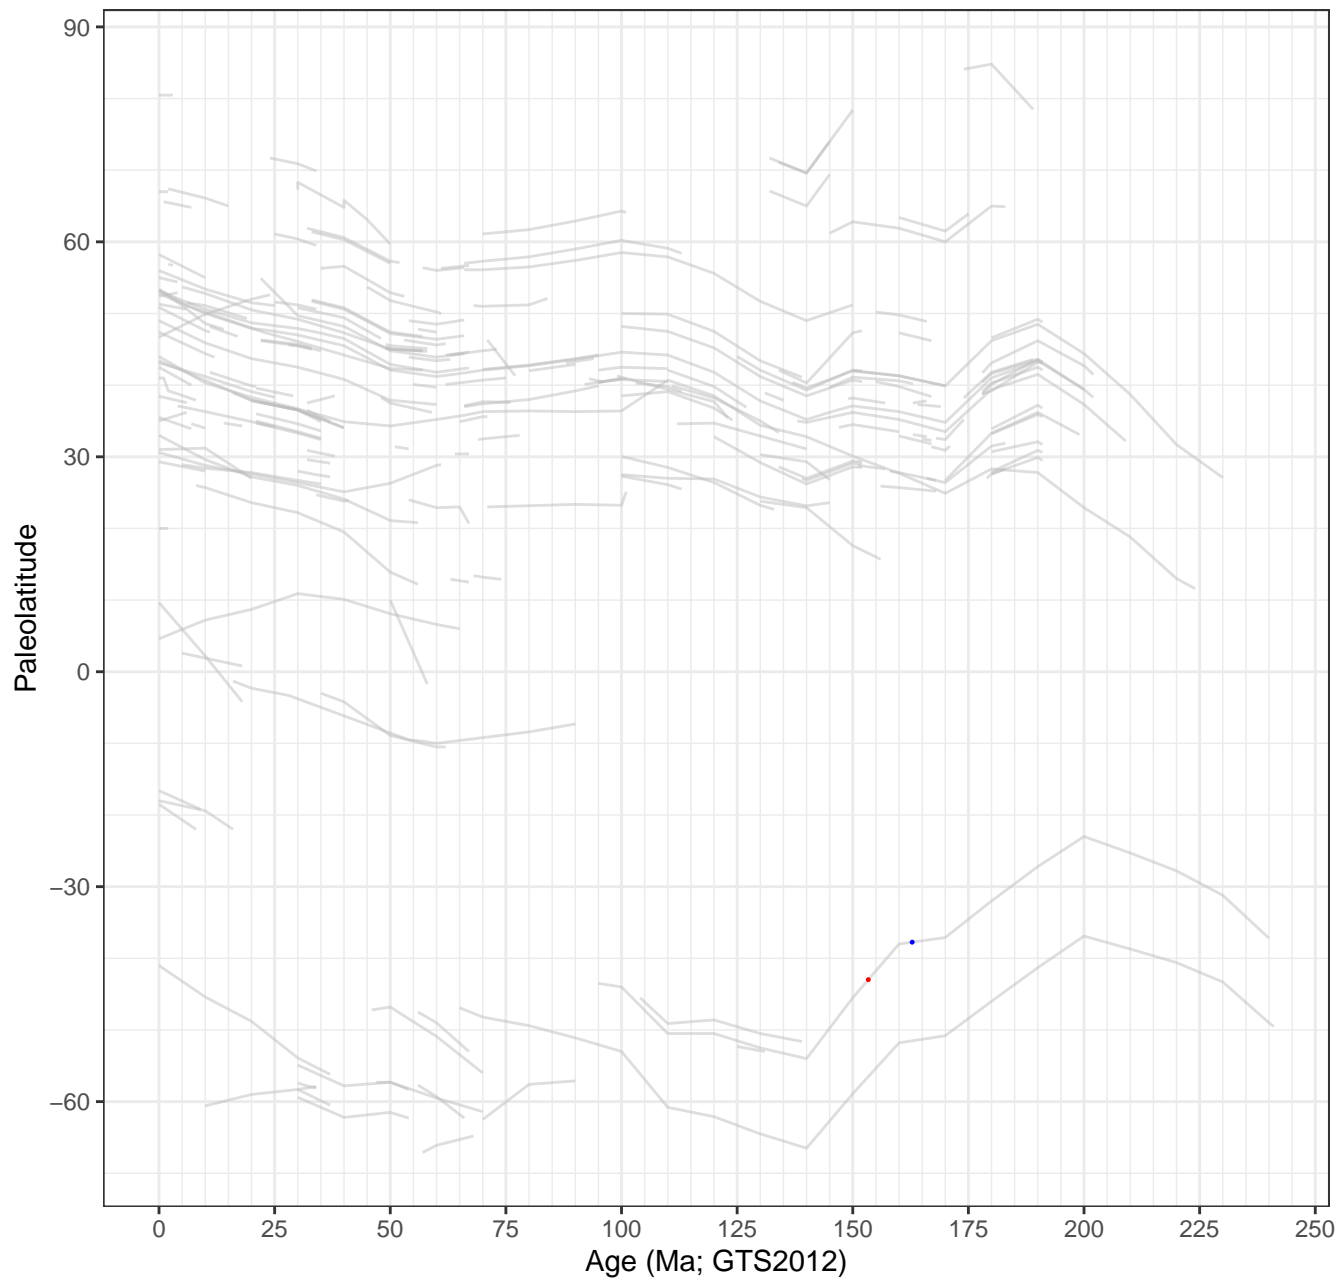

Supplement: Supplementary file 2003 [file Oligosphaeridium swanense.pdf › Supplement/Supplement 2/Species 1914 plots/Oligosphaeridium swanense.pdf]

# Species *Oligosphaeridium totum*

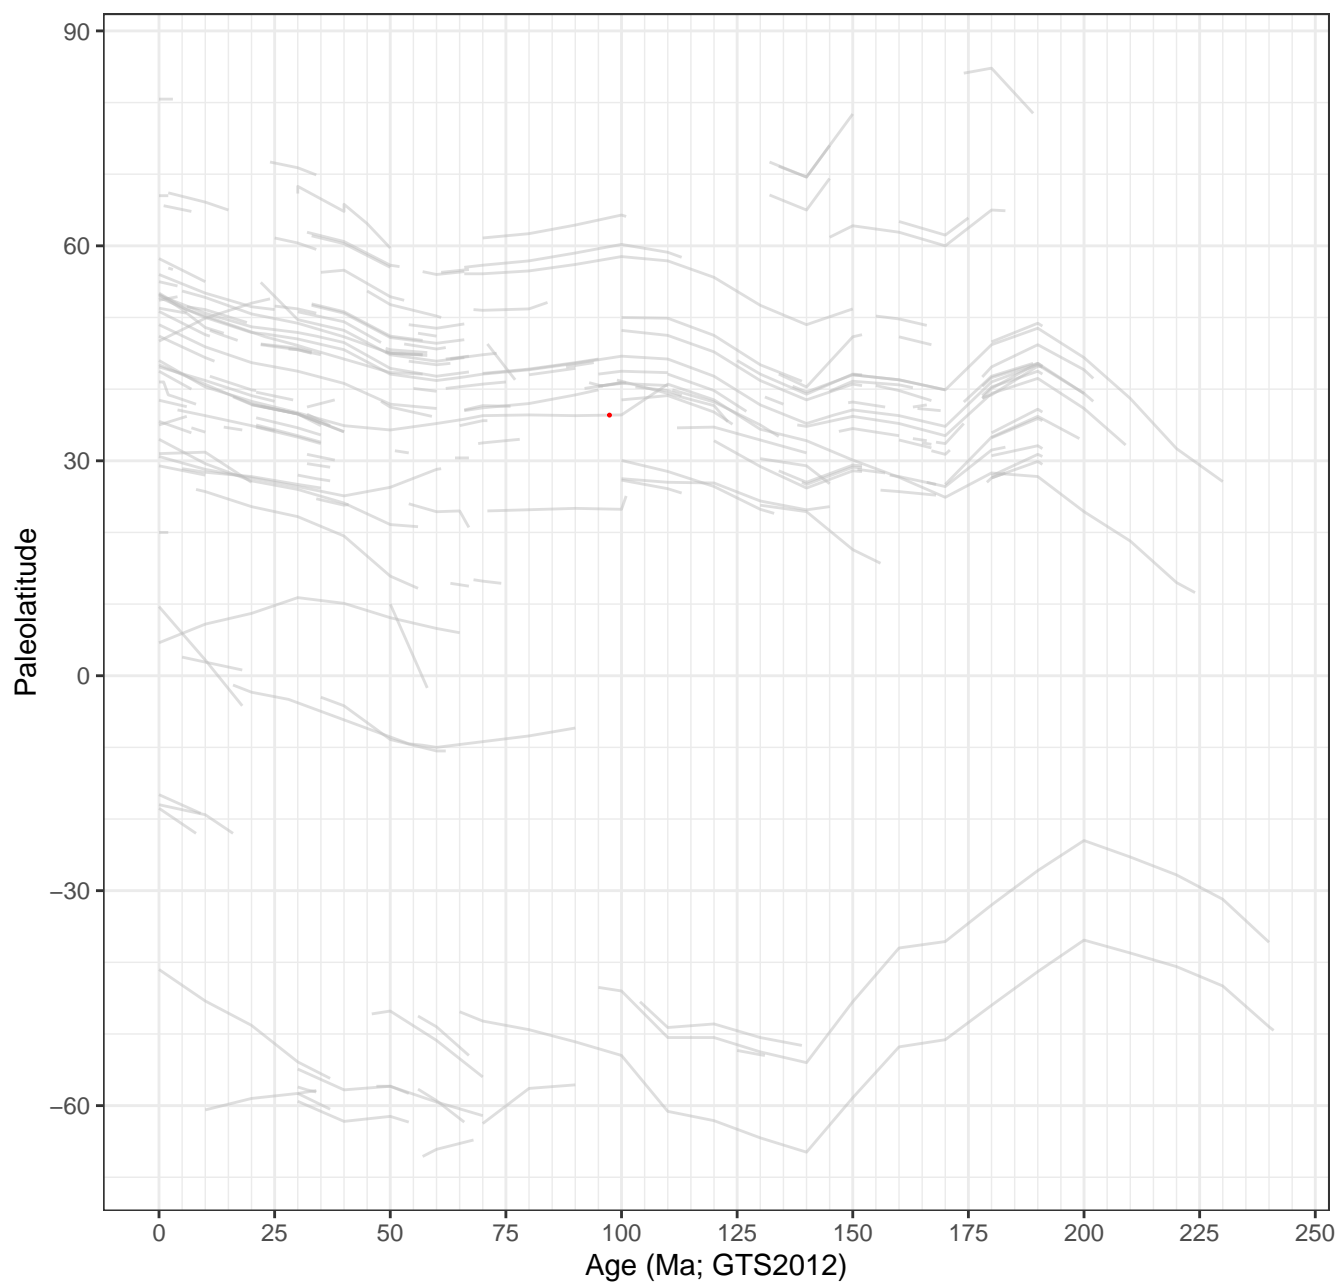

Supplement: Supplementary file 2004 [file Oligosphaeridium totum.pdf › Supplement/Supplement 2/Species 1914 plots/Oligosphaeridium totum.pdf]

# Species *Oligosphaeridium umbaculum*

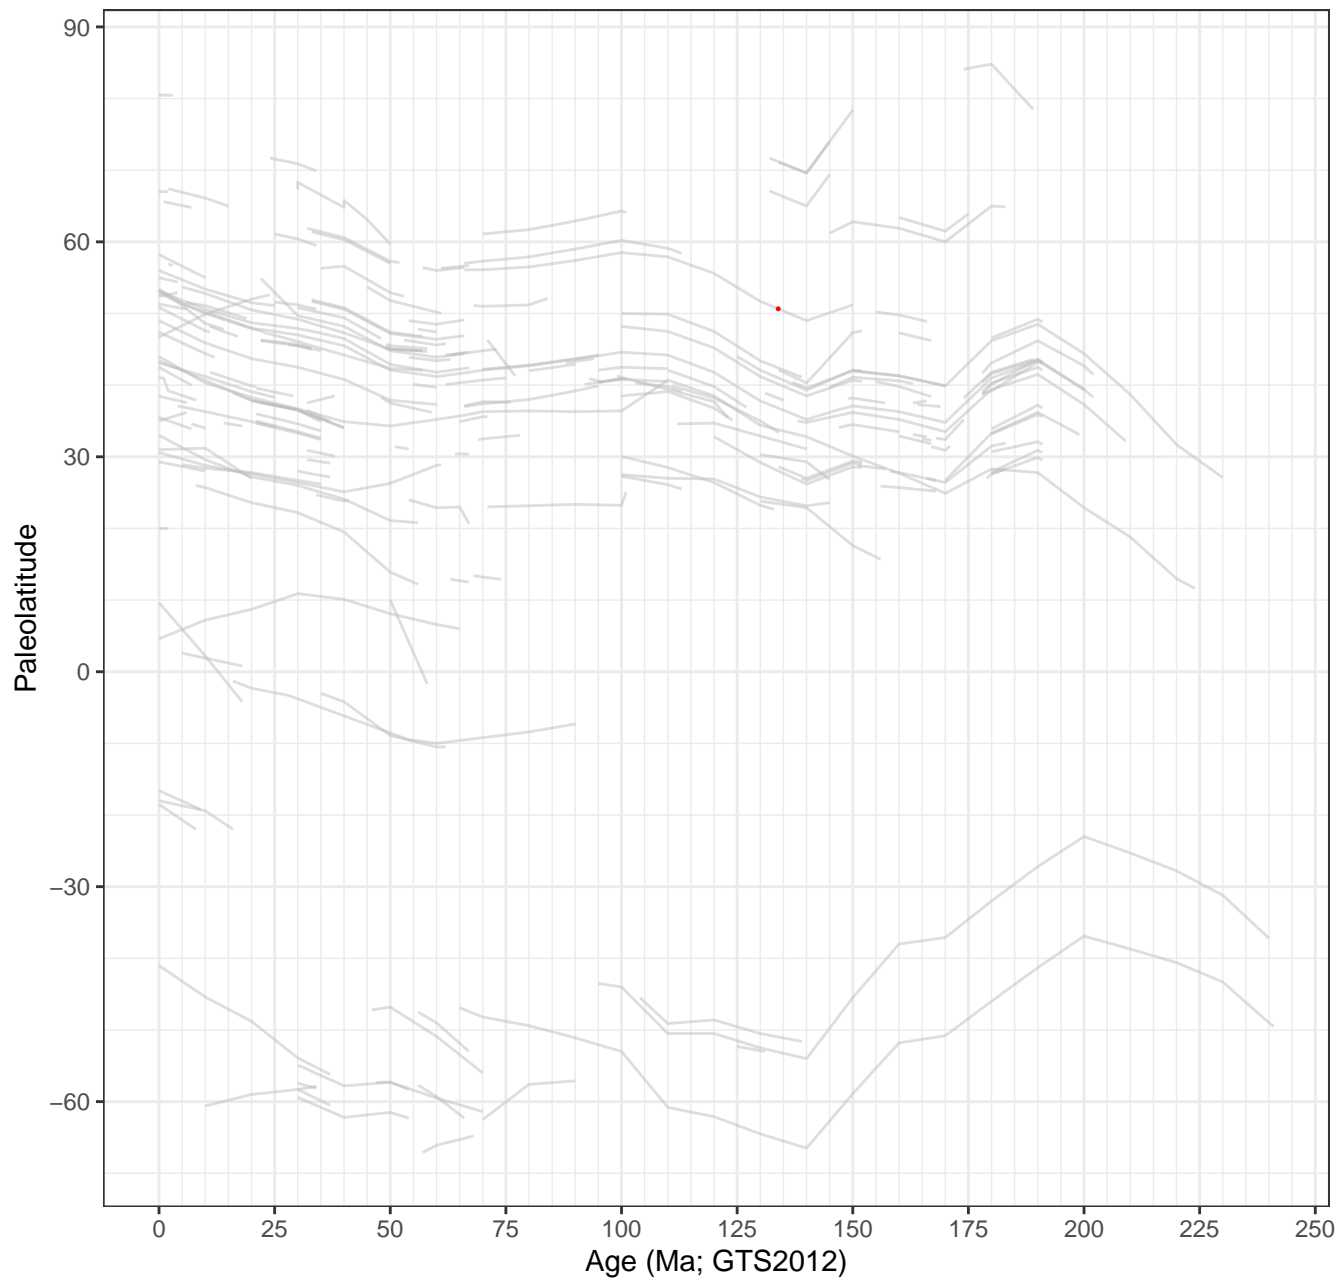

Supplement: Supplementary file 2005 [file Oligosphaeridium umbaculum.pdf › Supplement/Supplement 2/Species 1914 plots/Oligosphaeridium umbaculum.pdf]

# Species *Oligosphaeridium verrucosum*

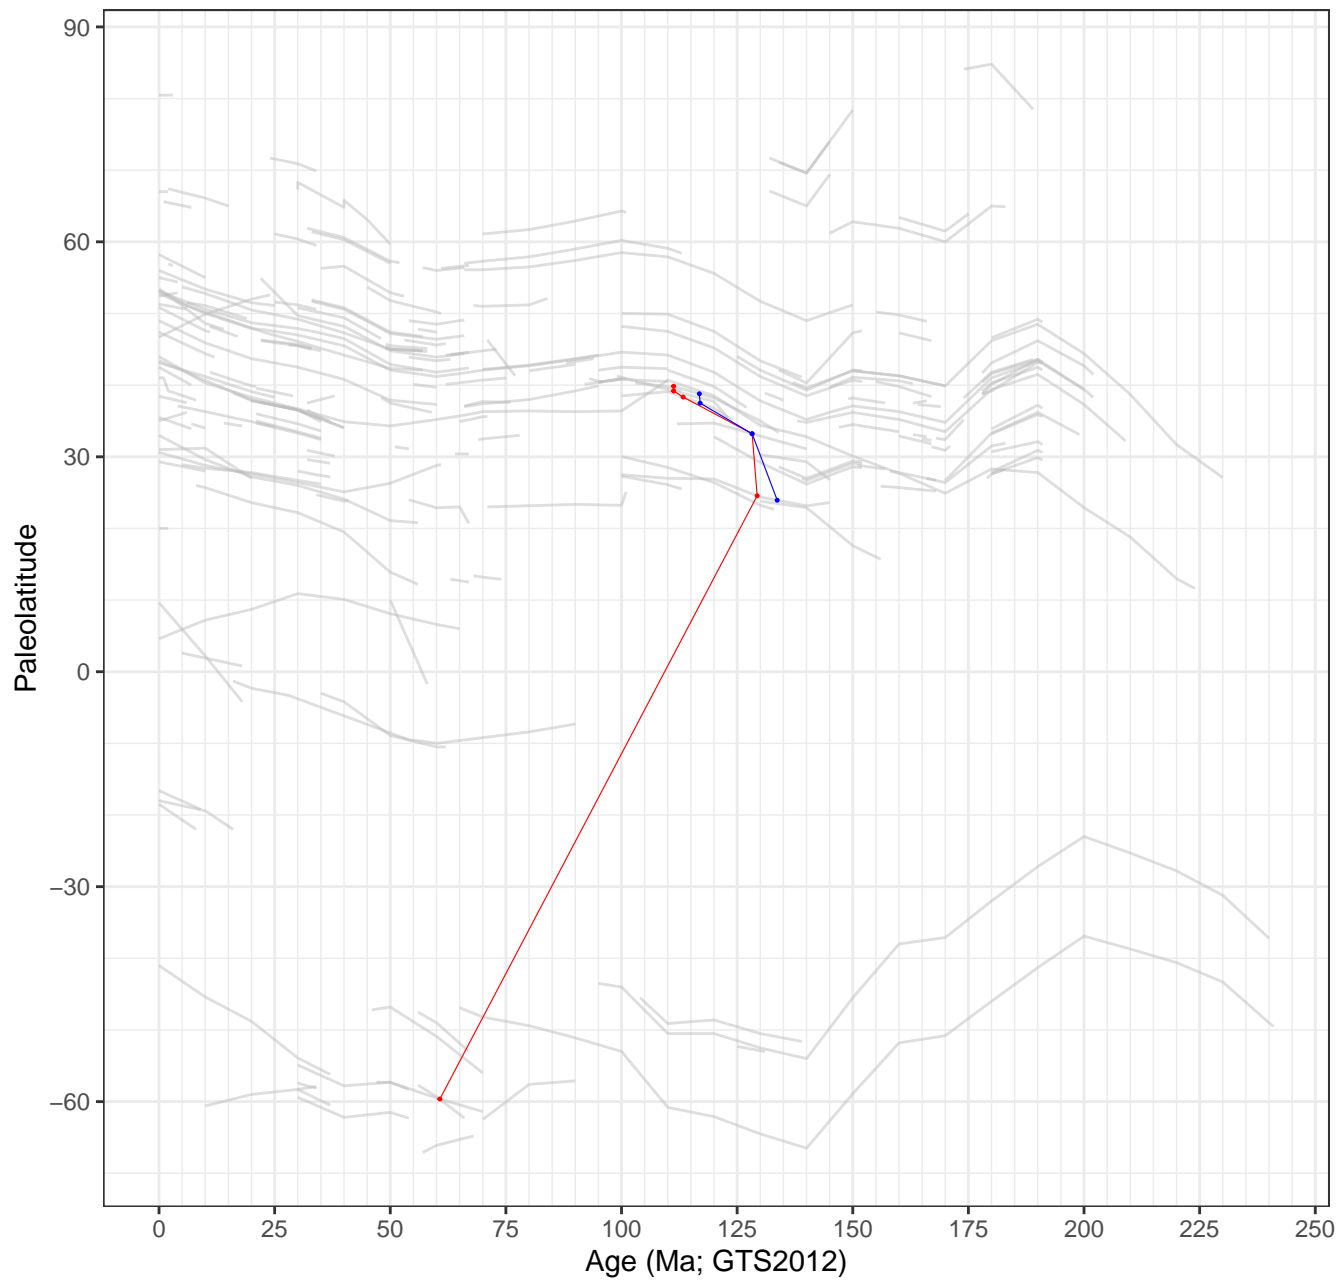

Supplement: Supplementary file 2006 [file Oligosphaeridium verrucosum.pdf › Supplement/Supplement 2/Species 1914 plots/Oligosphaeridium verrucosum.pdf]

# Species *Omatia montgomeryi*

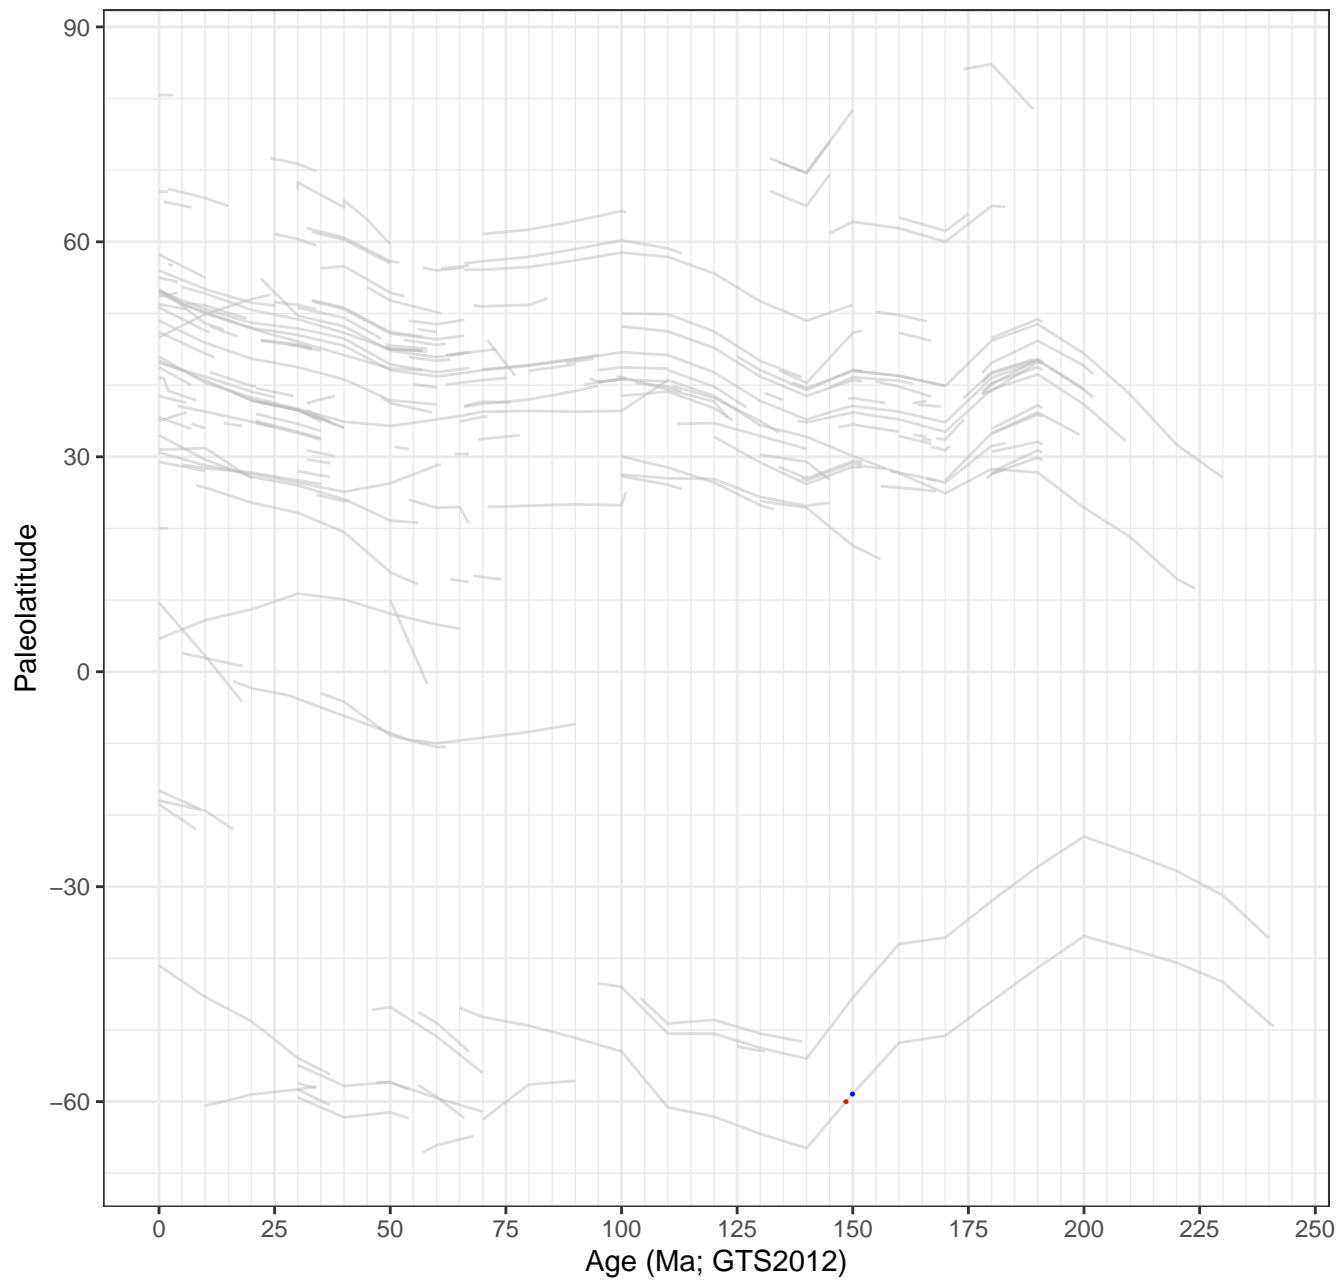

Supplement: Supplementary file 2007 [file Omatia montgomeryi.pdf › Supplement/Supplement 2/Species 1914 plots/Omatia montgomeryi.pdf]

# Species *Operculodinium aguinawense*

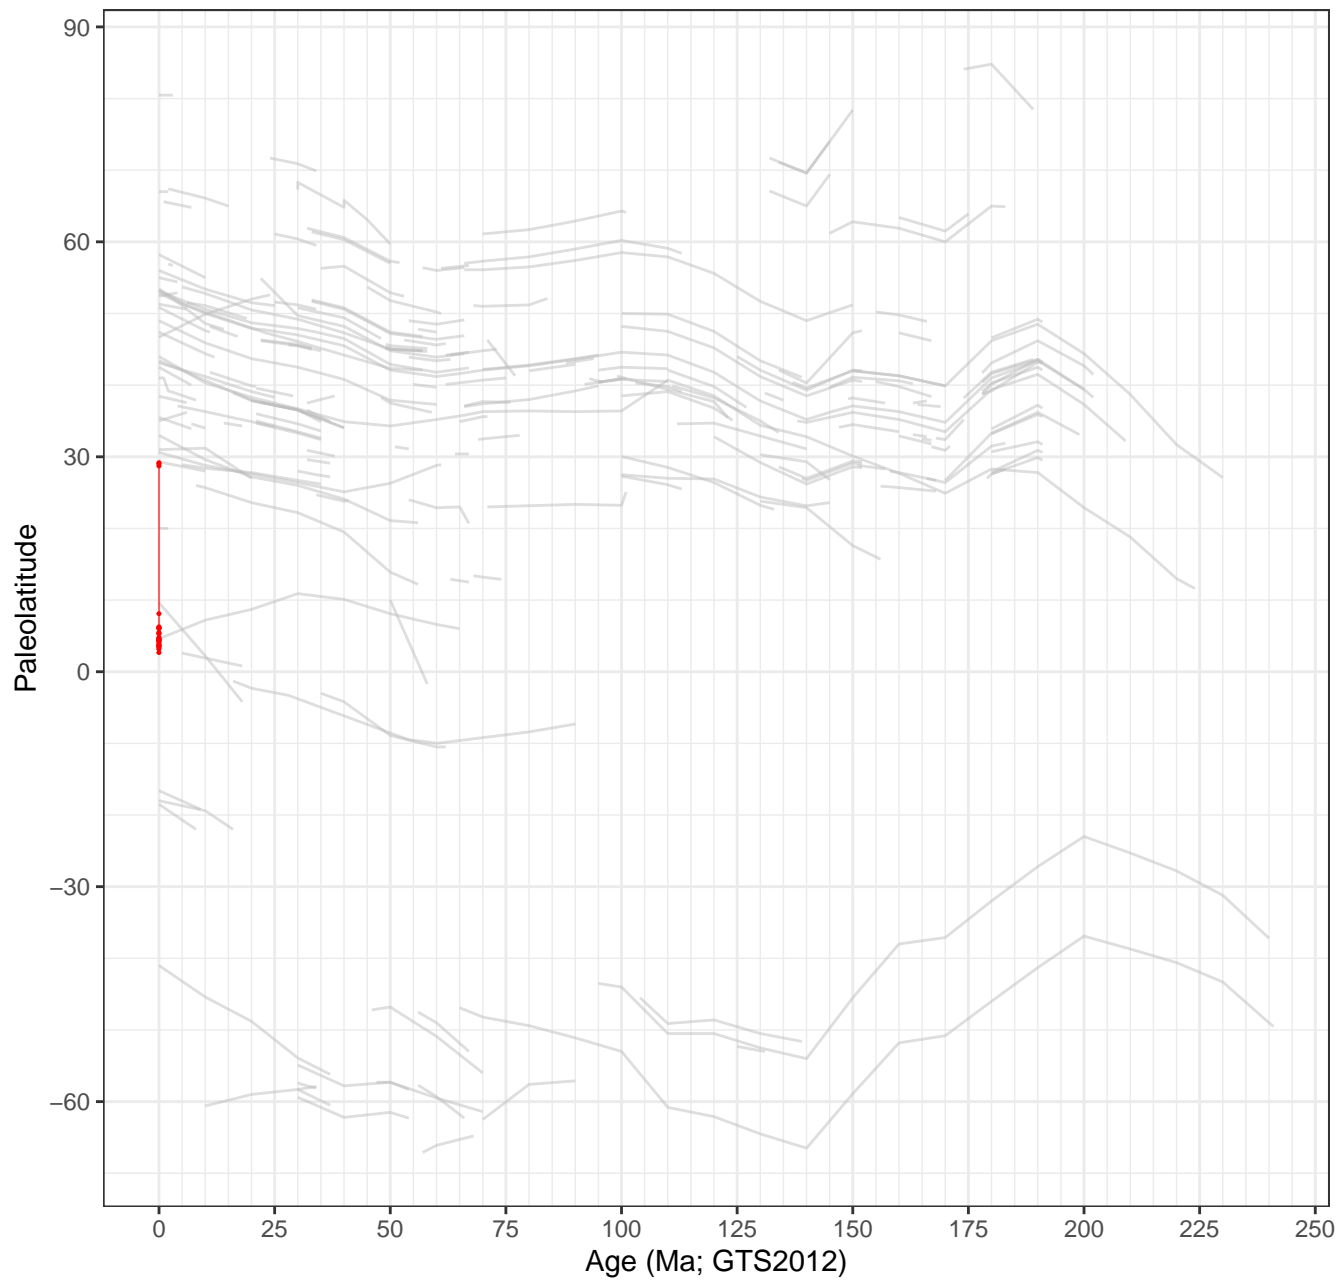

Supplement: Supplementary file 2008 [file Operculodinium aguinawense.pdf › Supplement/Supplement 2/Species 1914 plots/Operculodinium aguinawense.pdf]

# Species *Operculodinium borgerholtense*

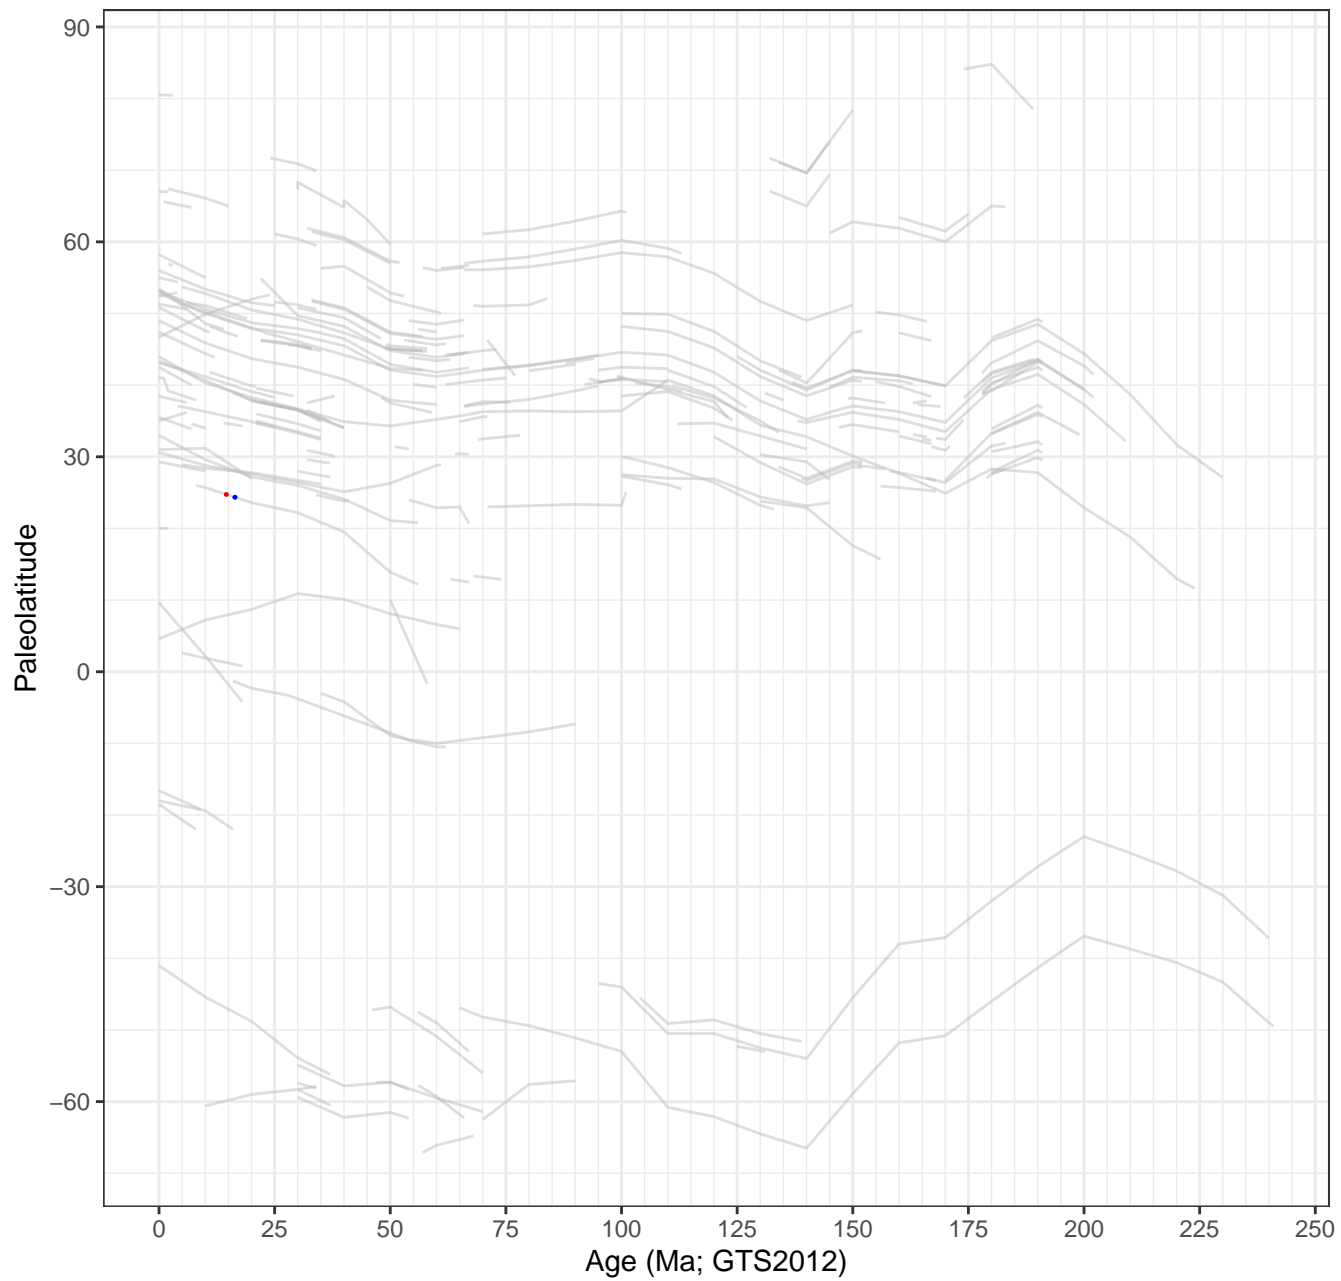

Supplement: Supplementary file 2009 [file Operculodinium borgerholtense.pdf › Supplement/Supplement 2/Species 1914 plots/Operculodinium borgerholtense.pdf]

# Species *Operculodinium centrocarpum*

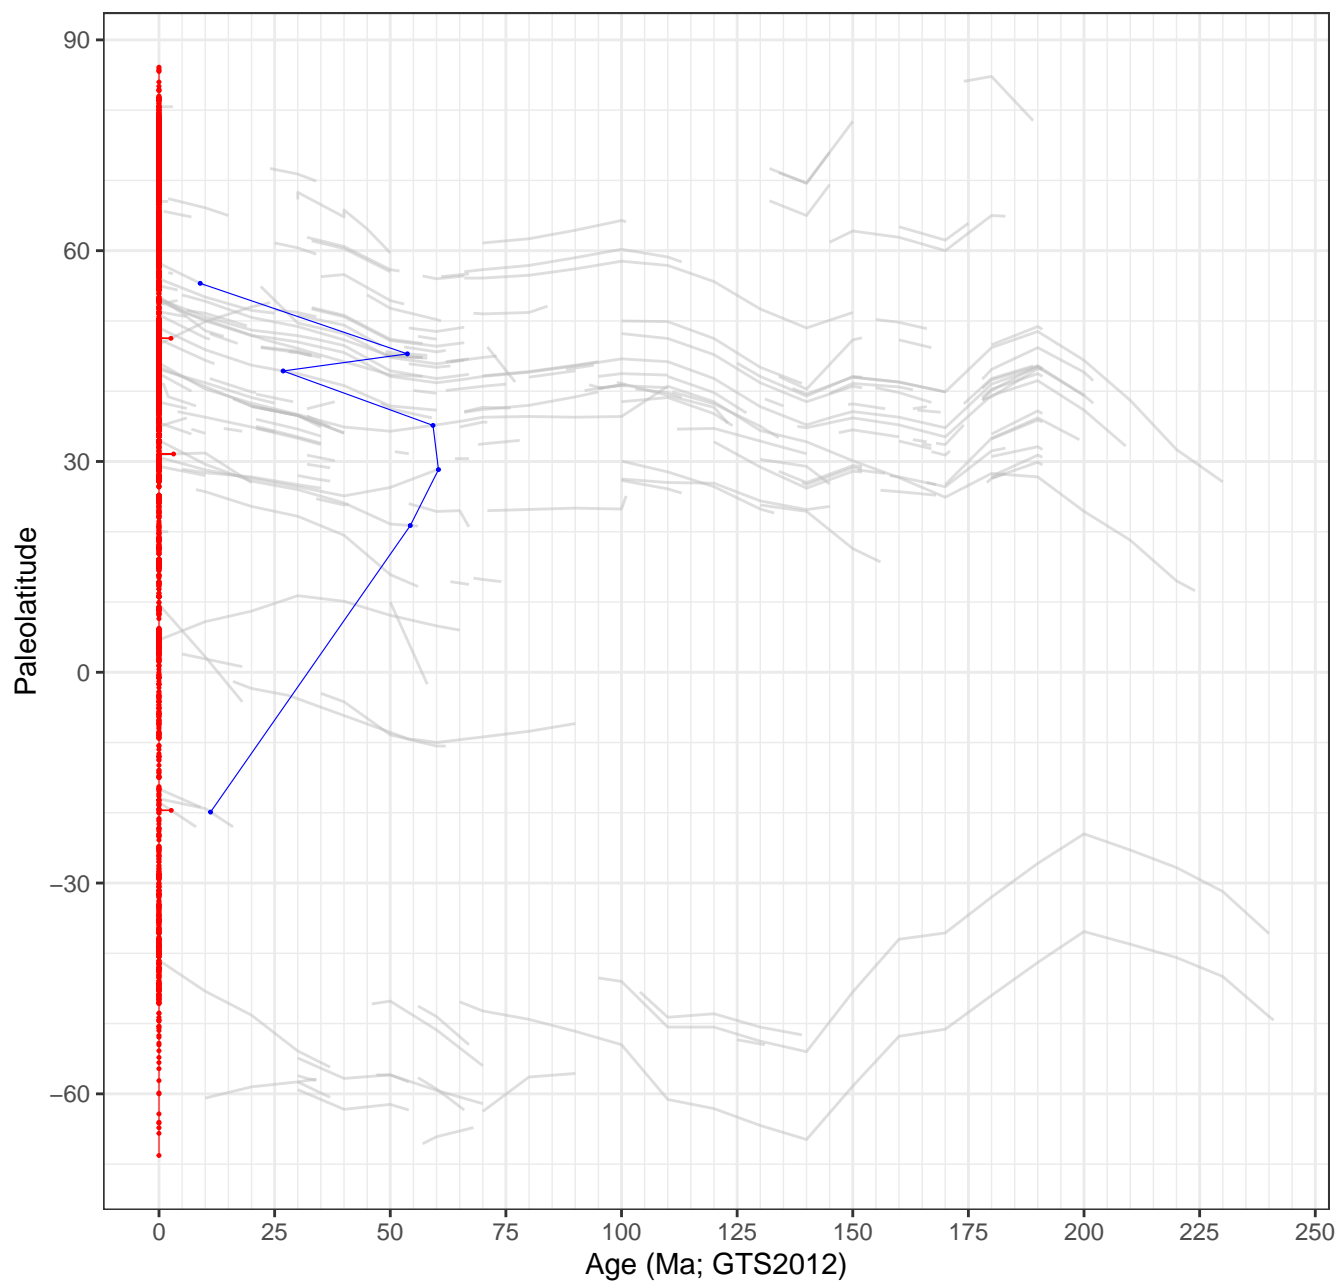

Supplement: Supplementary file 2010 [file Operculodinium centrocarpum.pdf › Supplement/Supplement 2/Species 1914 plots/Operculodinium centrocarpum.pdf]

# Species *Operculodinium crassum*

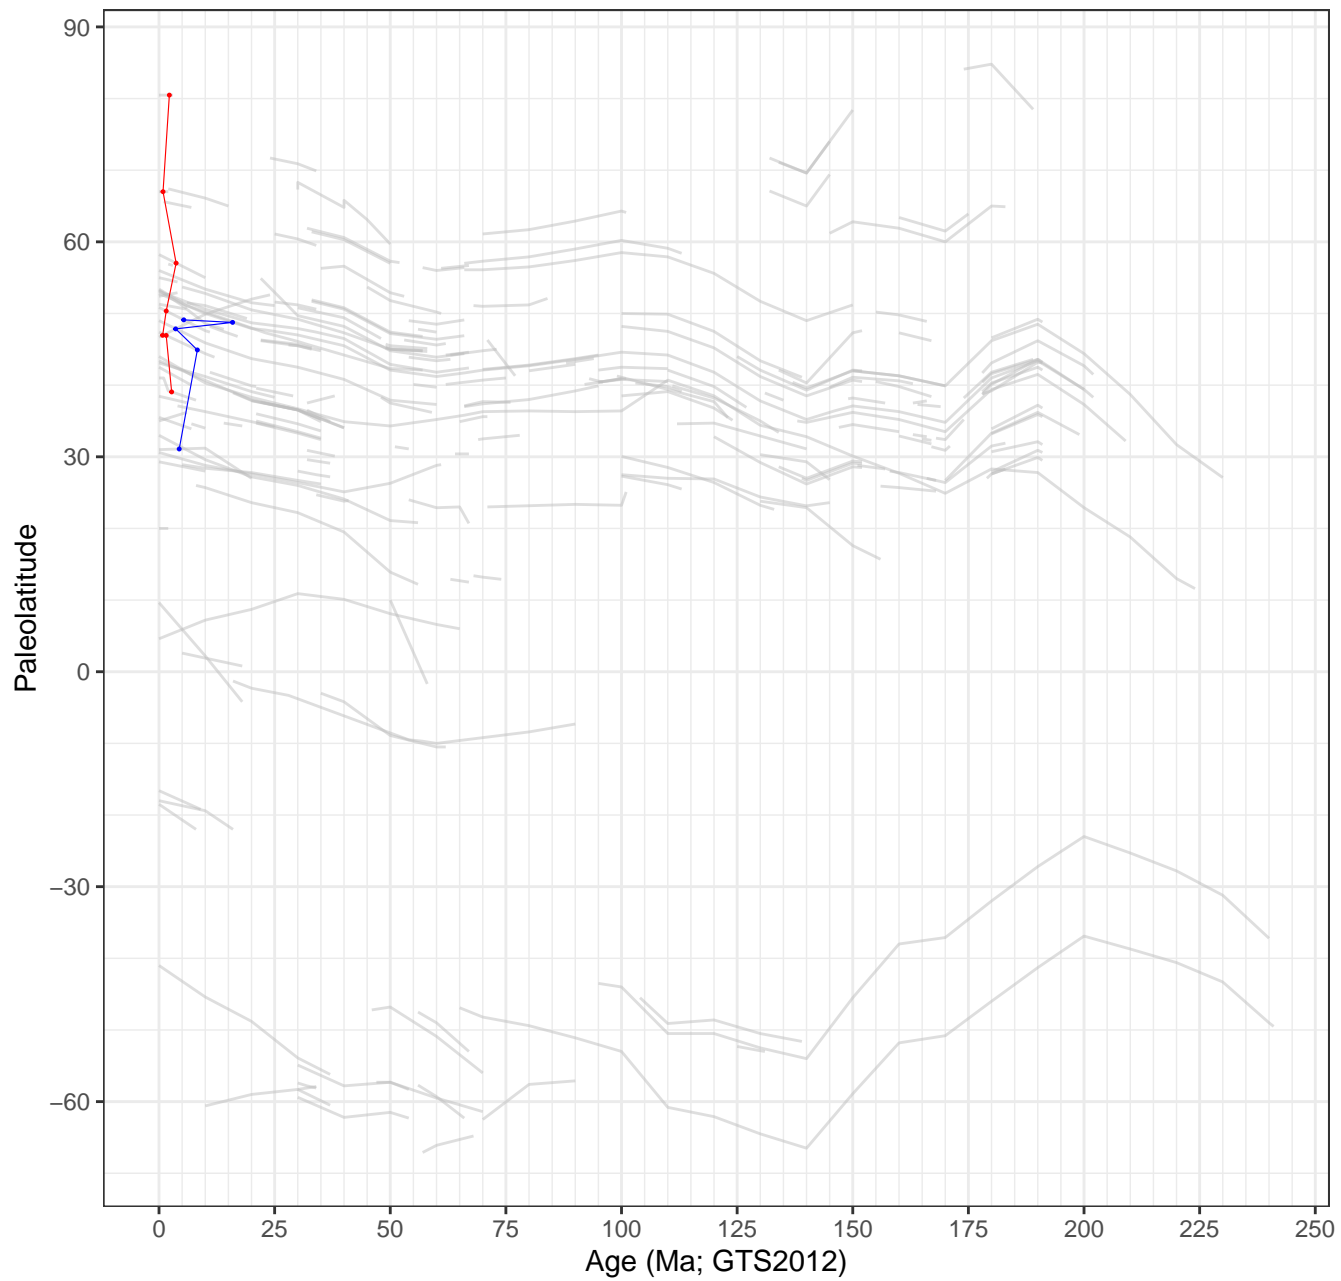

Supplement: Supplementary file 2011 [file Operculodinium crassum.pdf › Supplement/Supplement 2/Species 1914 plots/Operculodinium crassum.pdf]

# Species *Operculodinium divergens*

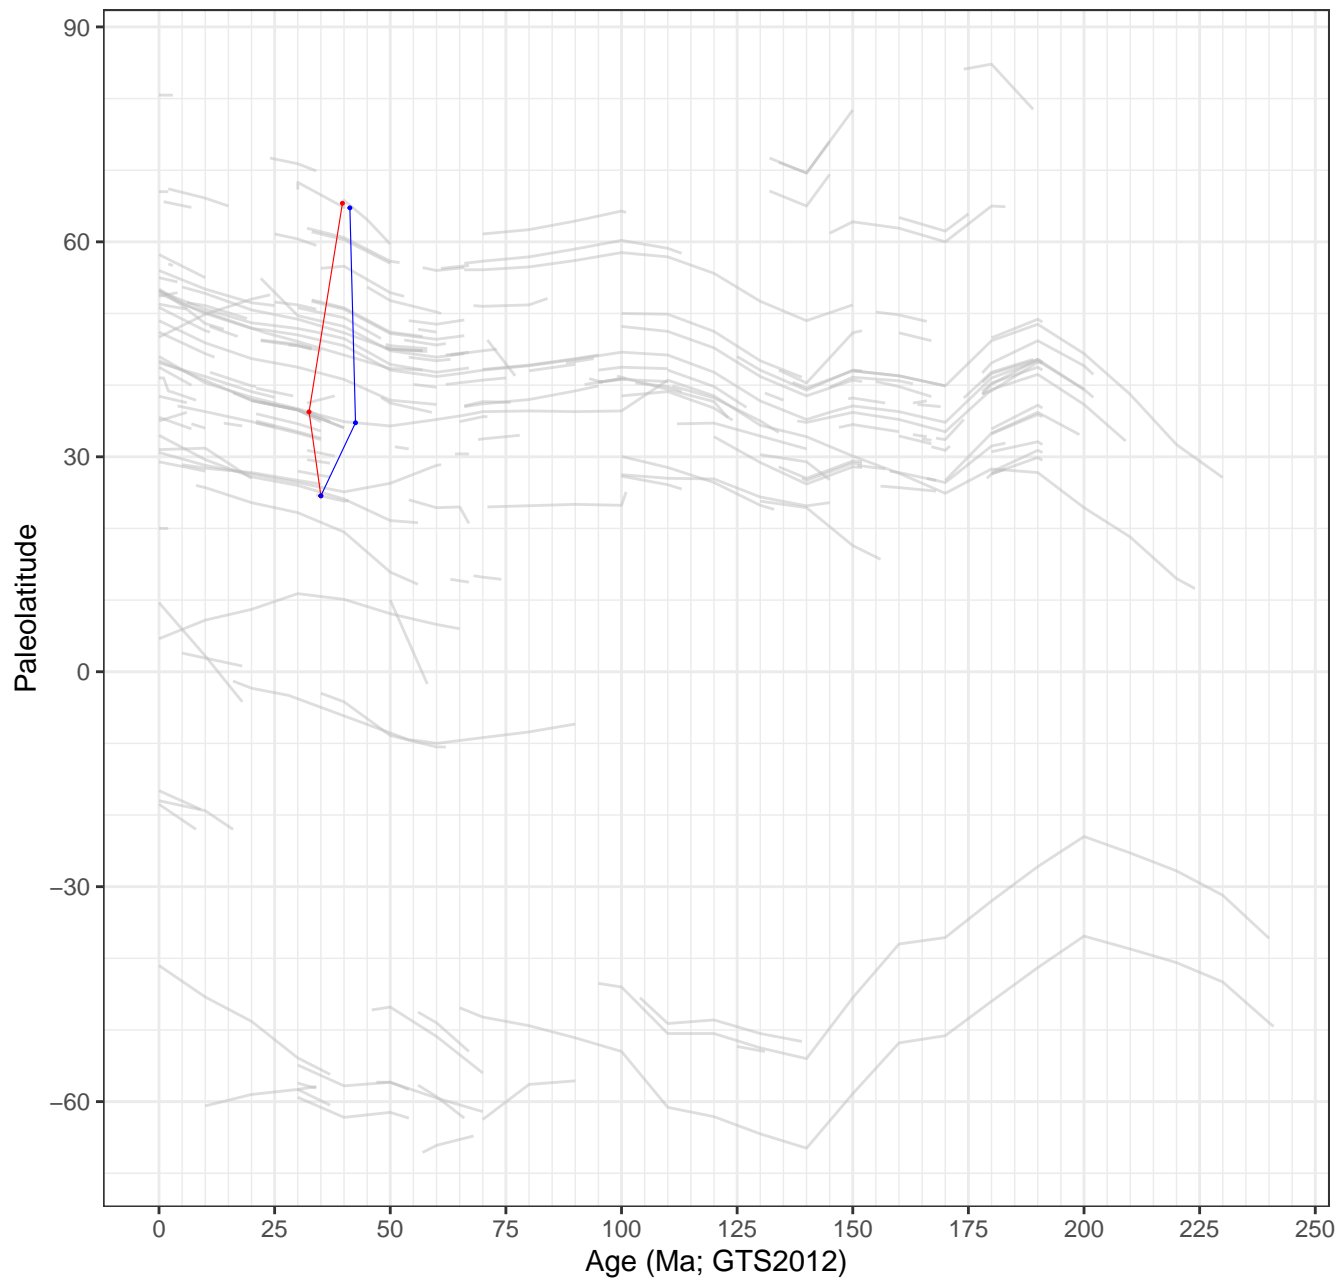

Supplement: Supplementary file 2012 [file Operculodinium divergens.pdf › Supplement/Supplement 2/Species 1914 plots/Operculodinium divergens.pdf]

# Species *Operculodinium echigoense*

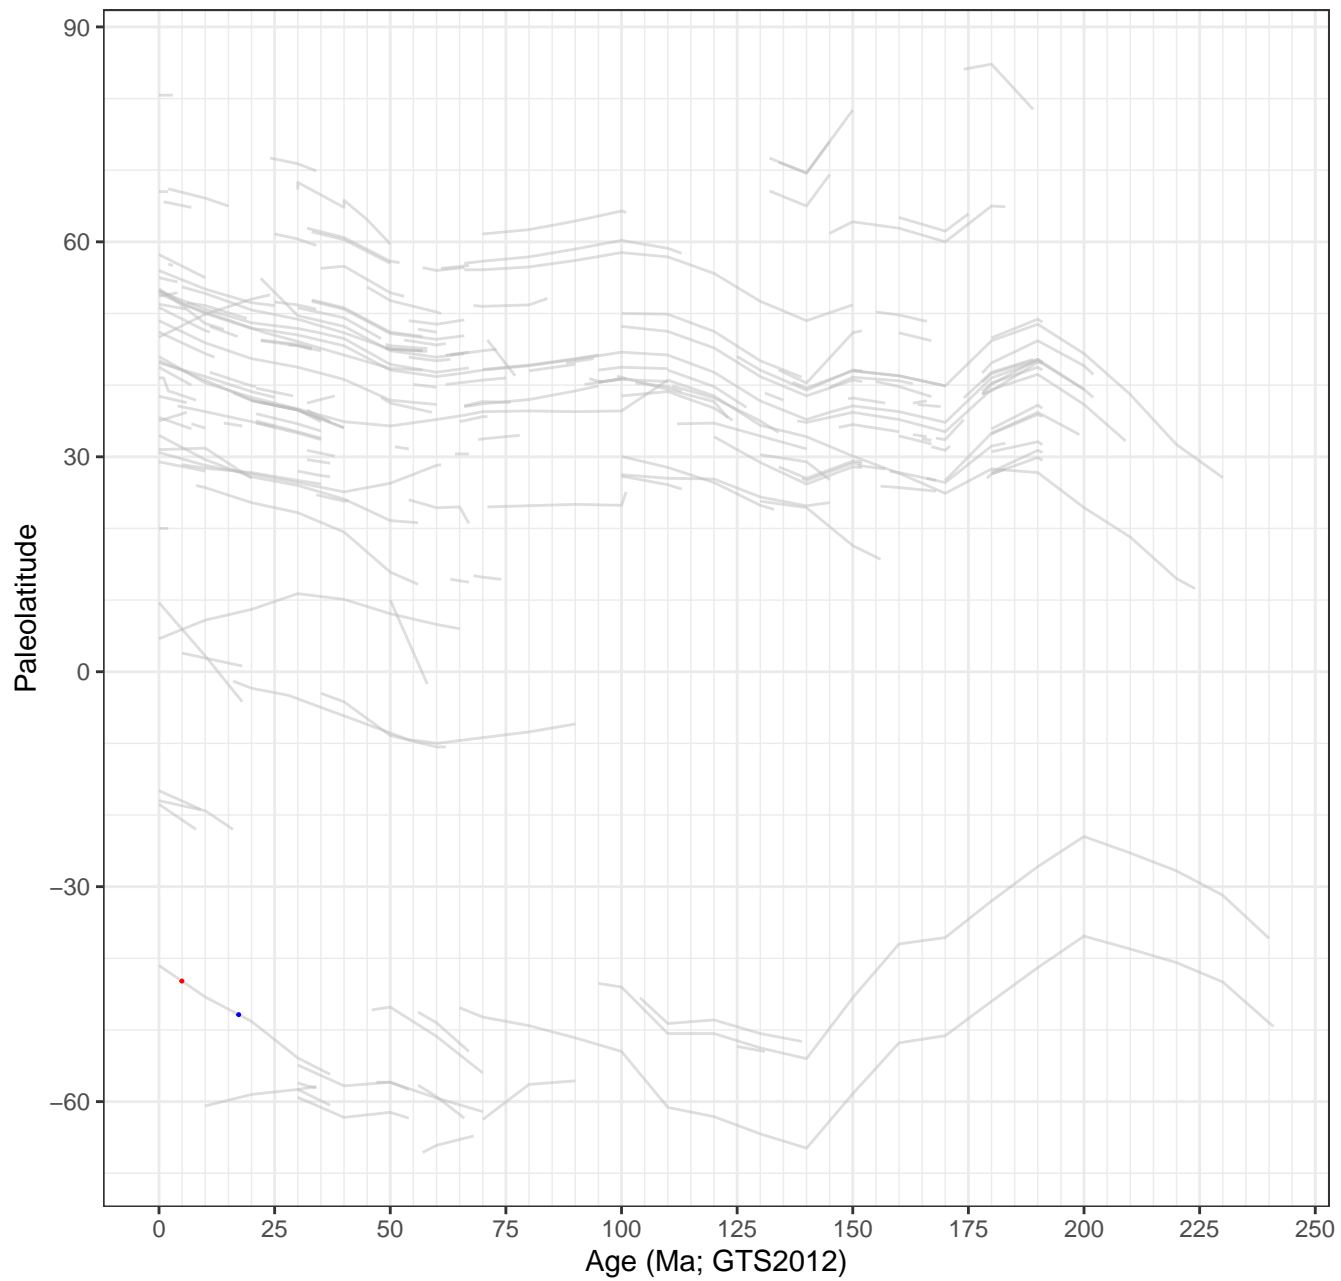

Supplement: Supplementary file 2013 [file Operculodinium echigoense.pdf › Supplement/Supplement 2/Species 1914 plots/Operculodinium echigoense.pdf]

# Species *Operculodinium eirikianum crebrum*

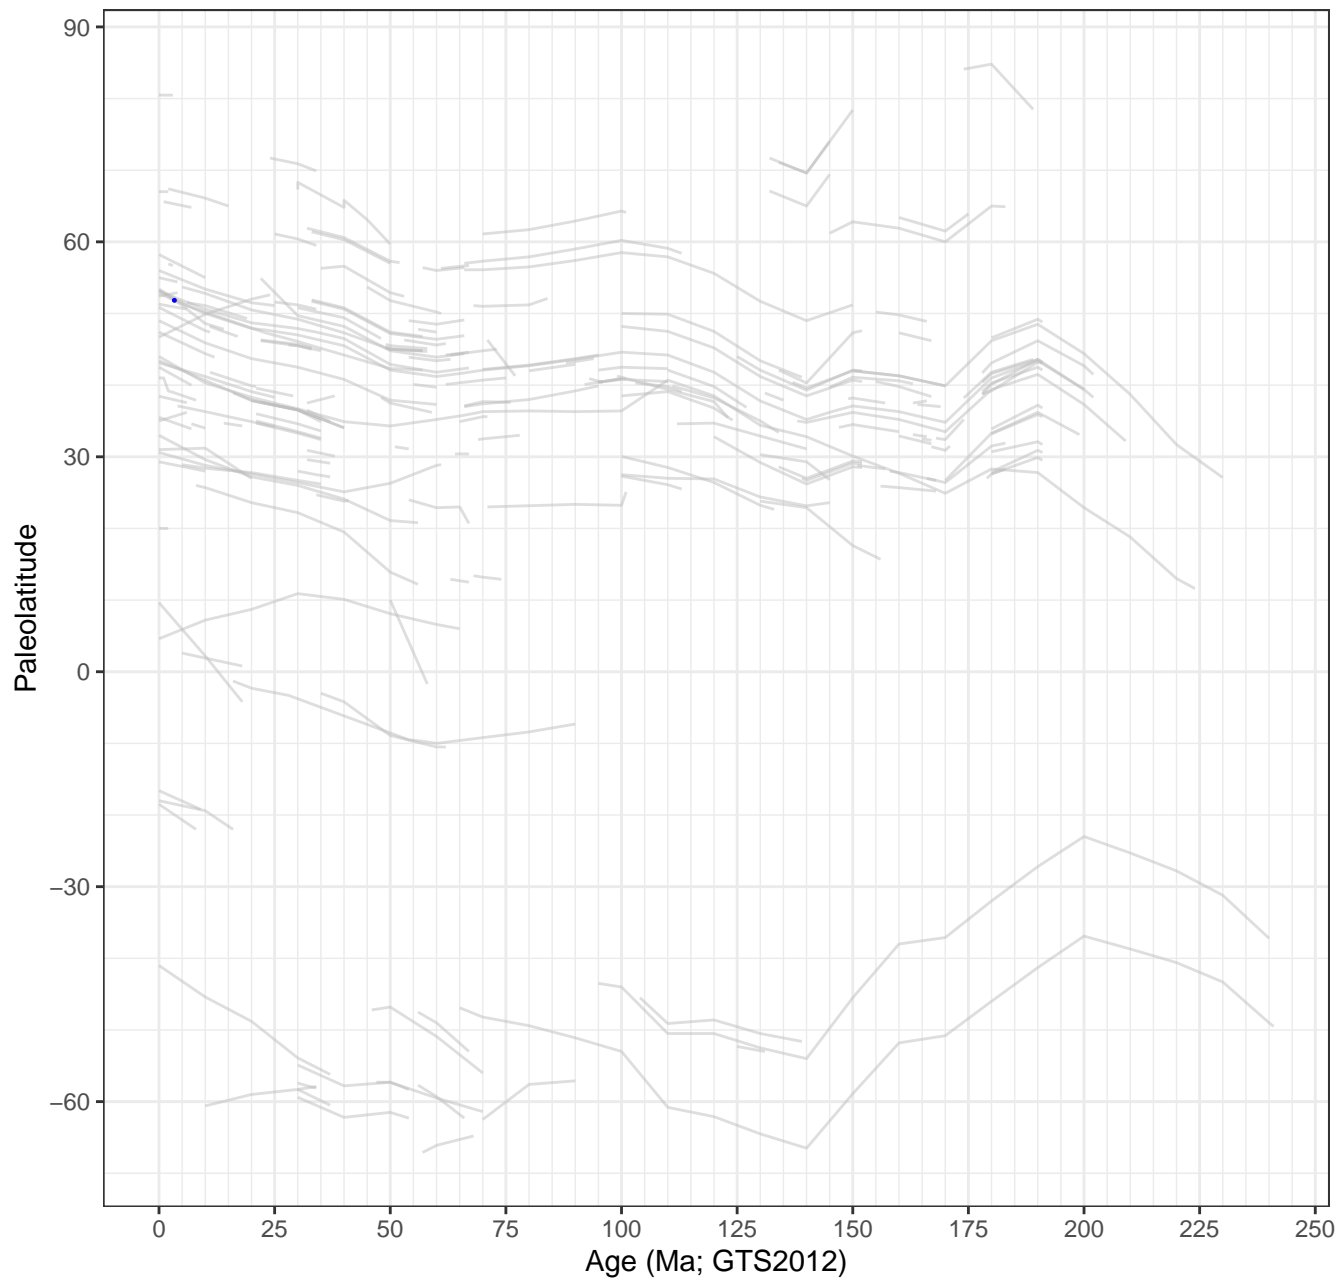

Supplement: Supplementary file 2014 [file Operculodinium eirikianum crebrum.pdf › Supplement/Supplement 2/Species 1914 plots/Operculodinium eirikianum crebrum.pdf]

# Species *Operculodinium eirikianum*

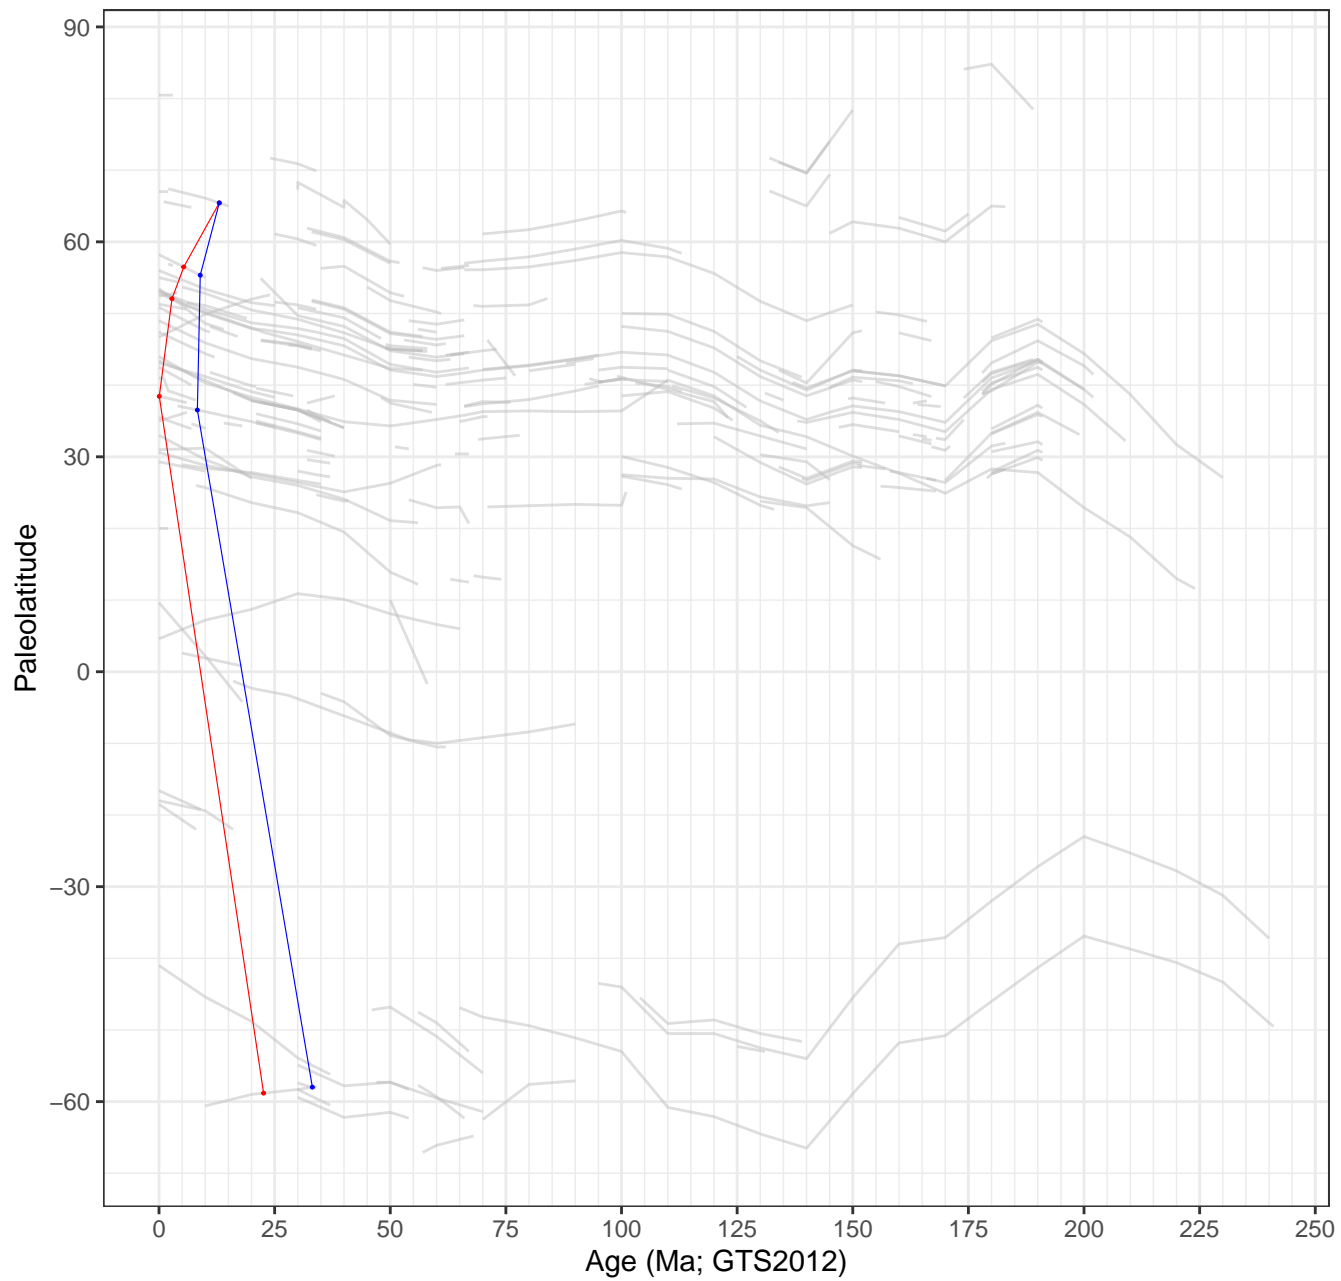

Supplement: Supplementary file 2015 [file Operculodinium eirikianum.pdf › Supplement/Supplement 2/Species 1914 plots/Operculodinium eirikianum.pdf]

# Species *Operculodinium giganteum*

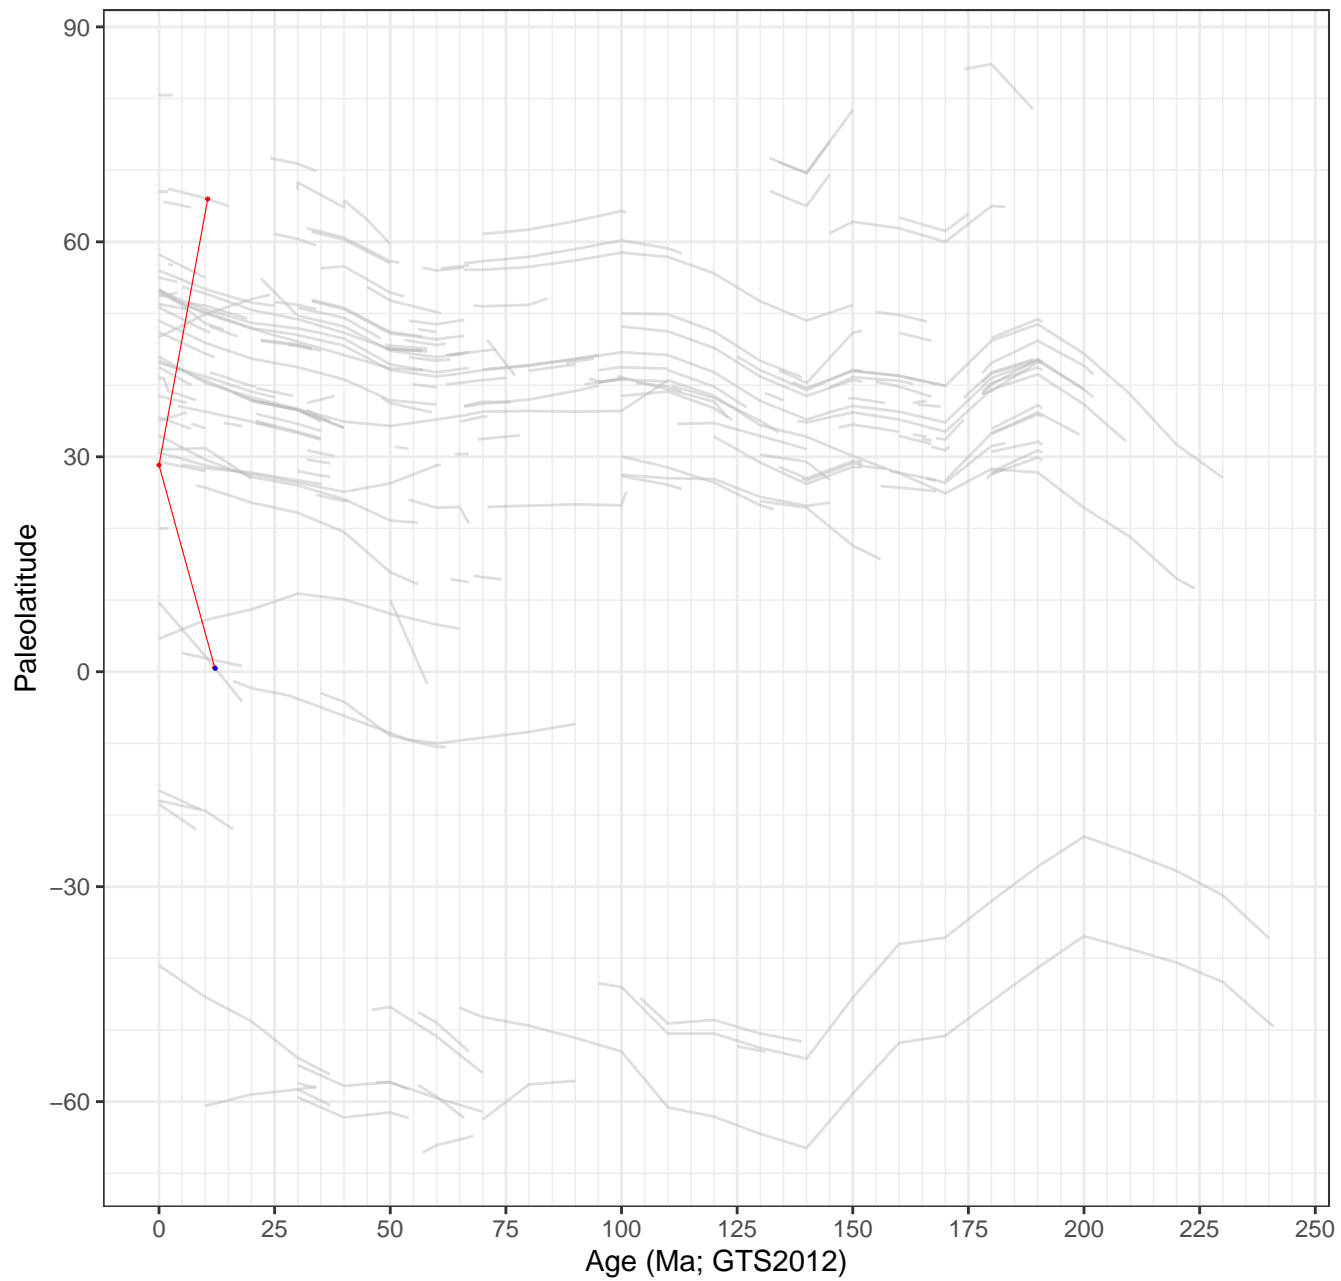

Supplement: Supplementary file 2016 [file Operculodinium giganteum.pdf › Supplement/Supplement 2/Species 1914 plots/Operculodinium giganteum.pdf]

# Species *Operculodinium hirsutum*

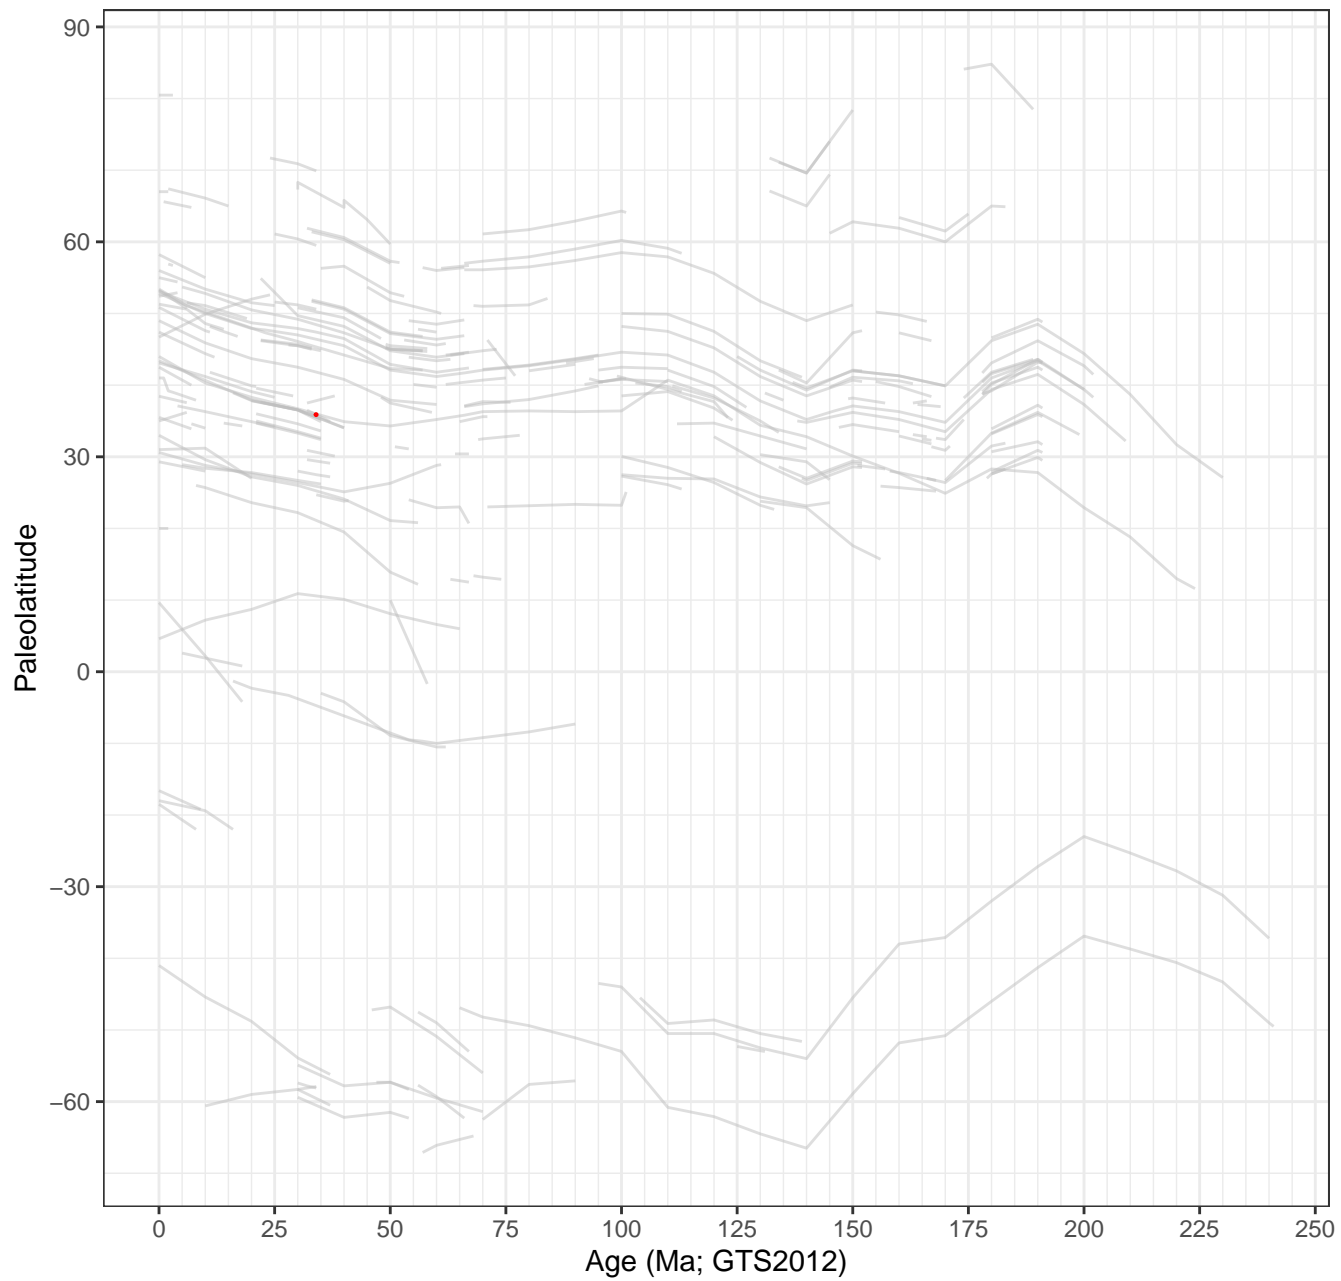

Supplement: Supplementary file 2017 [file Operculodinium hirsutum.pdf › Supplement/Supplement 2/Species 1914 plots/Operculodinium hirsutum.pdf]

# Species *Operculodinium israelianum*

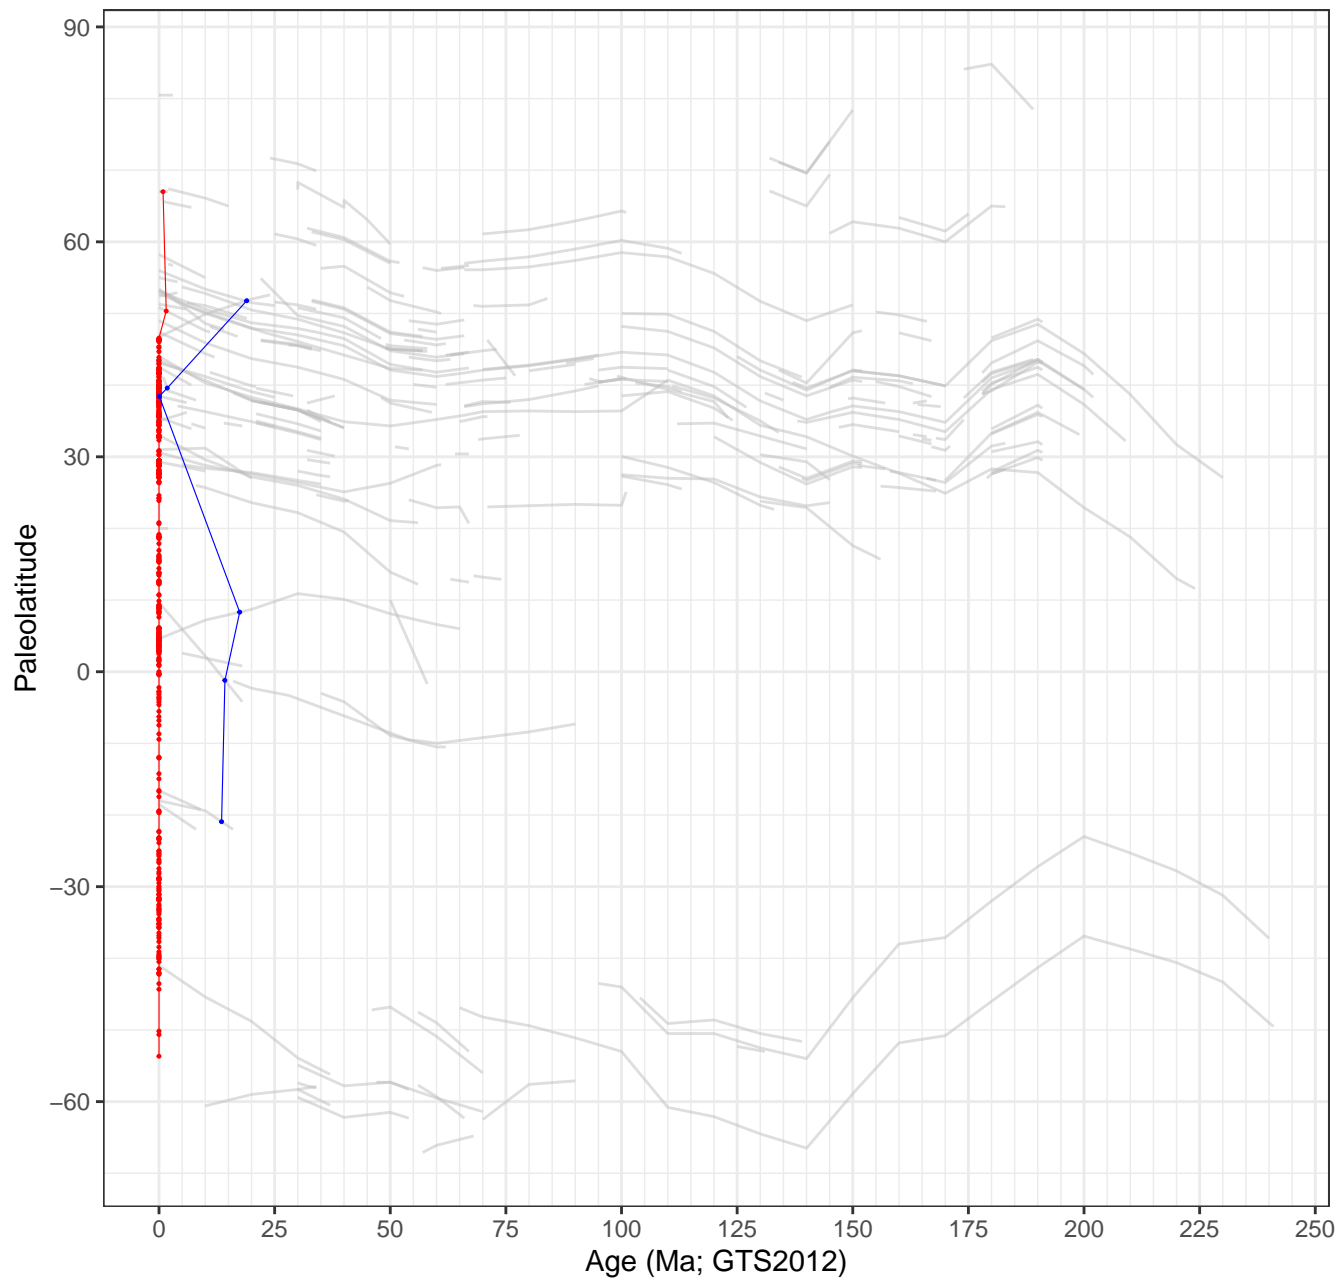

Supplement: Supplementary file 2018 [file Operculodinium israelianum.pdf › Supplement/Supplement 2/Species 1914 plots/Operculodinium israelianum.pdf]

# Species *Operculodinium janduchenei*

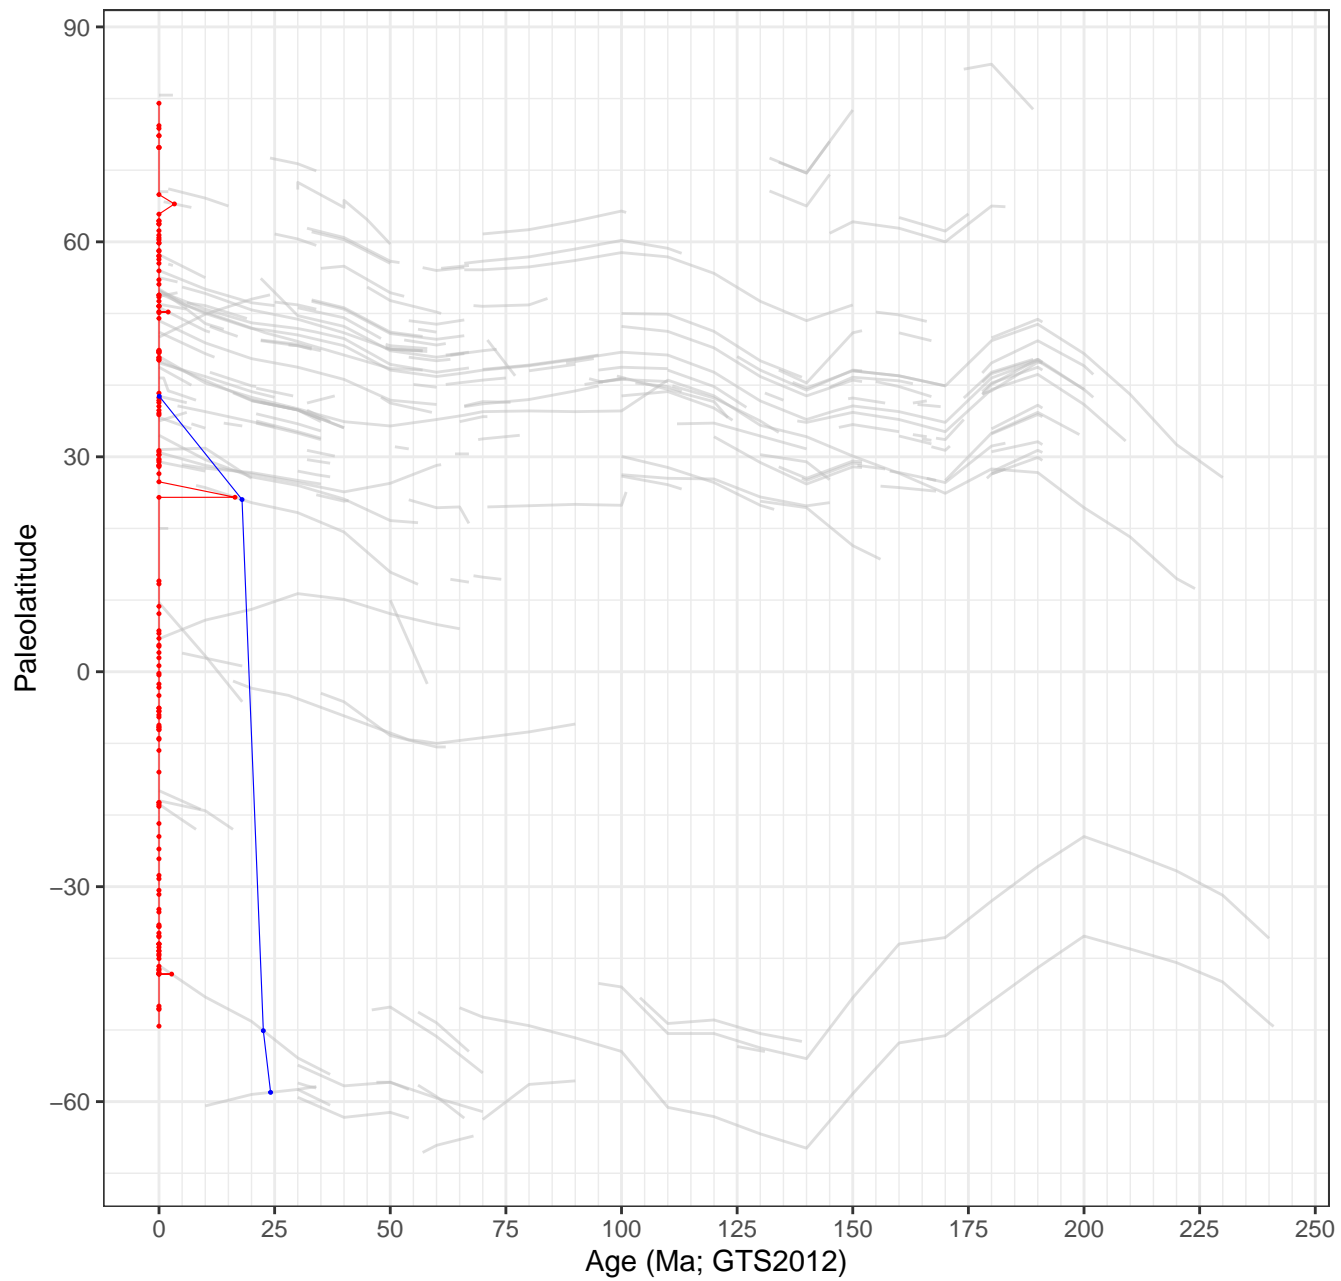

Supplement: Supplementary file 2019 [file Operculodinium janduchenei.pdf › Supplement/Supplement 2/Species 1914 plots/Operculodinium janduchenei.pdf]

# Species *Operculodinium longispinigerum*

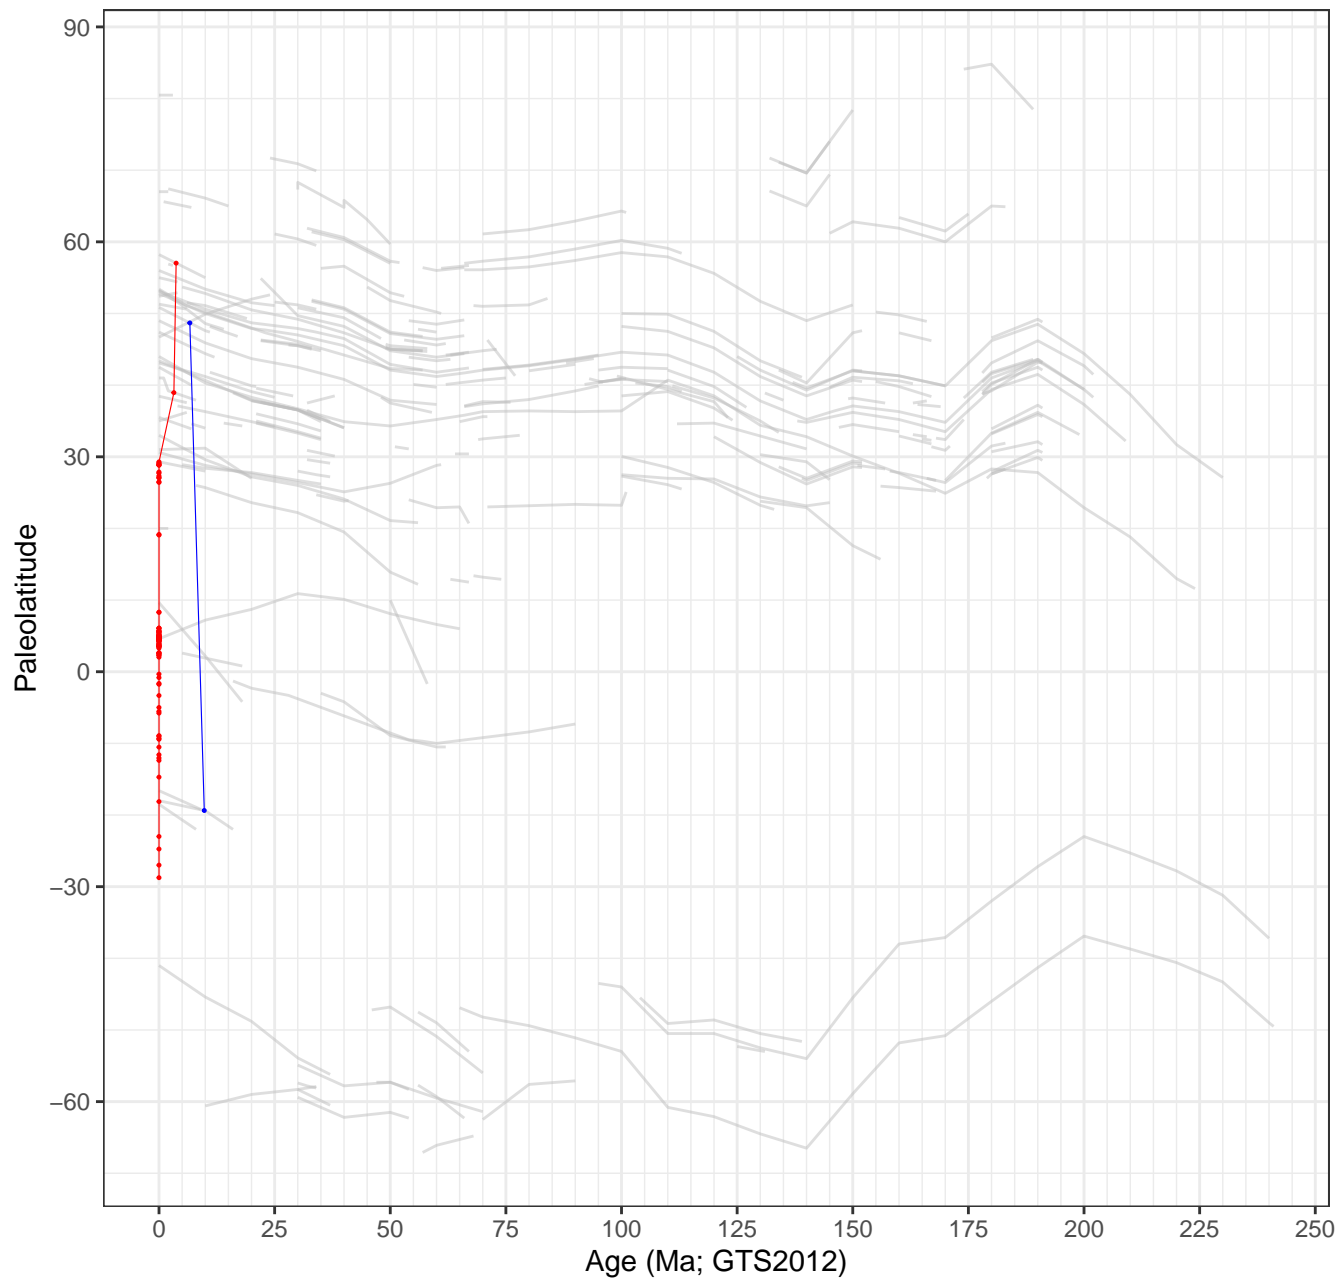

Supplement: Supplementary file 2020 [file Operculodinium longispinigerum.pdf › Supplement/Supplement 2/Species 1914 plots/Operculodinium longispinigerum.pdf]

# Species *Operculodinium microornatum*

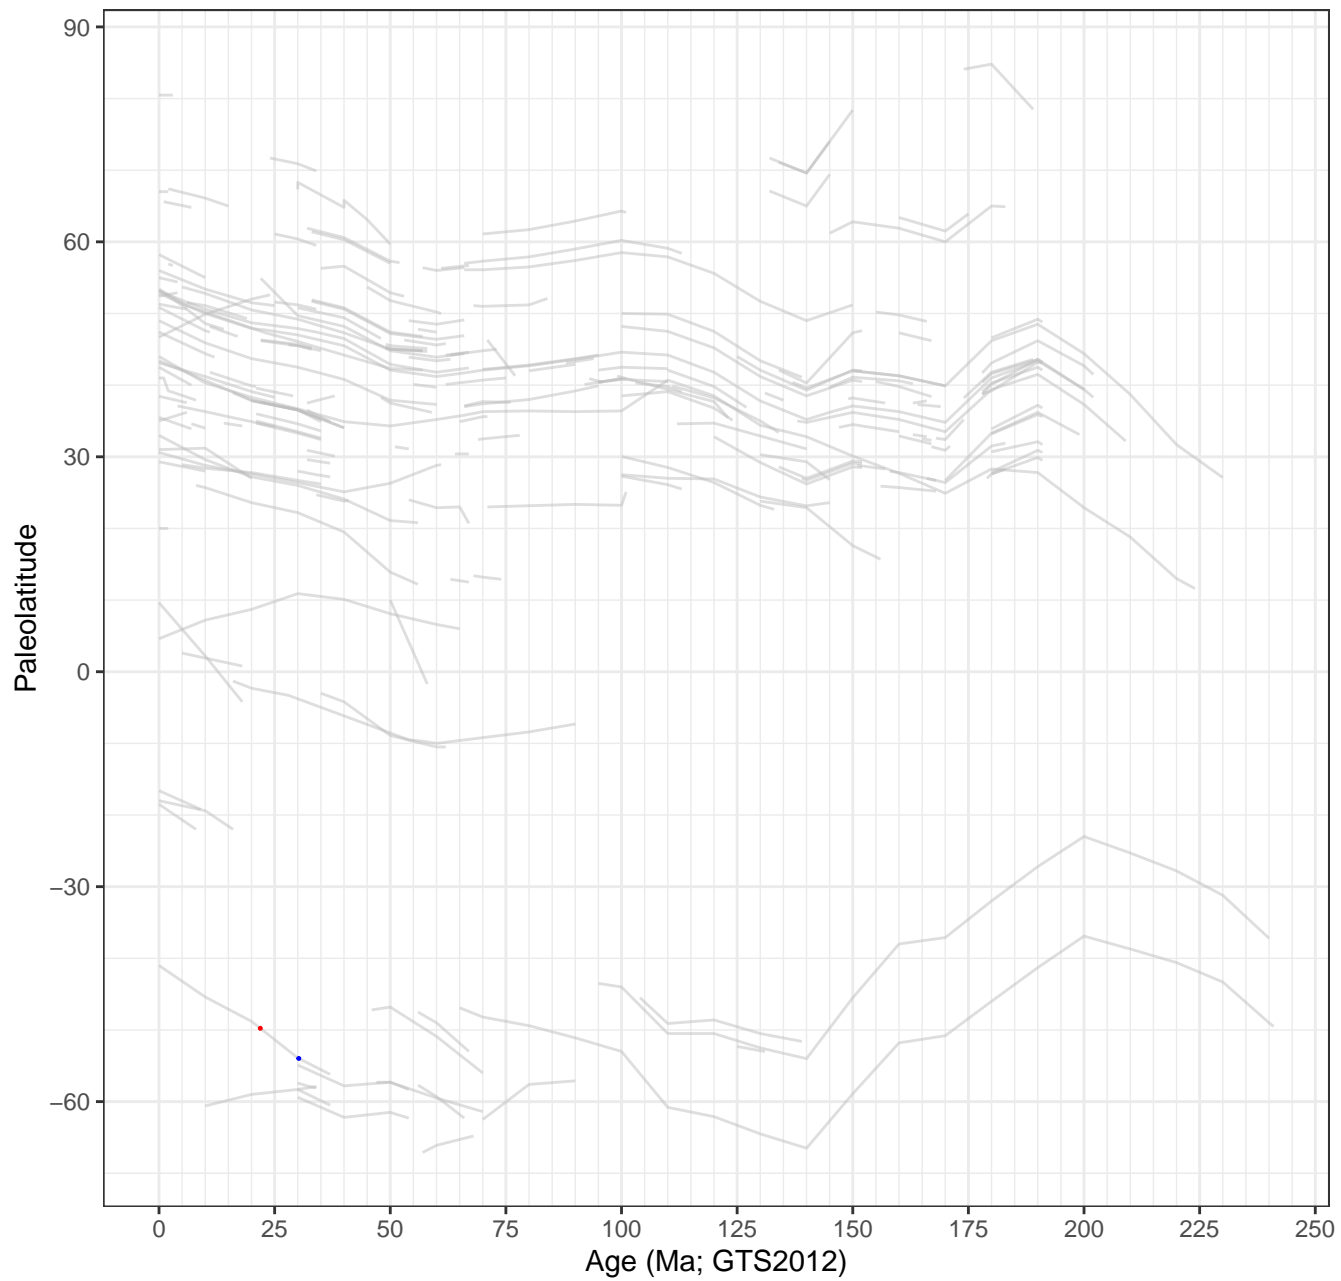

Supplement: Supplementary file 2021 [file Operculodinium microornatum.pdf › Supplement/Supplement 2/Species 1914 plots/Operculodinium microornatum.pdf]

# Species *Operculodinium microtriainum*

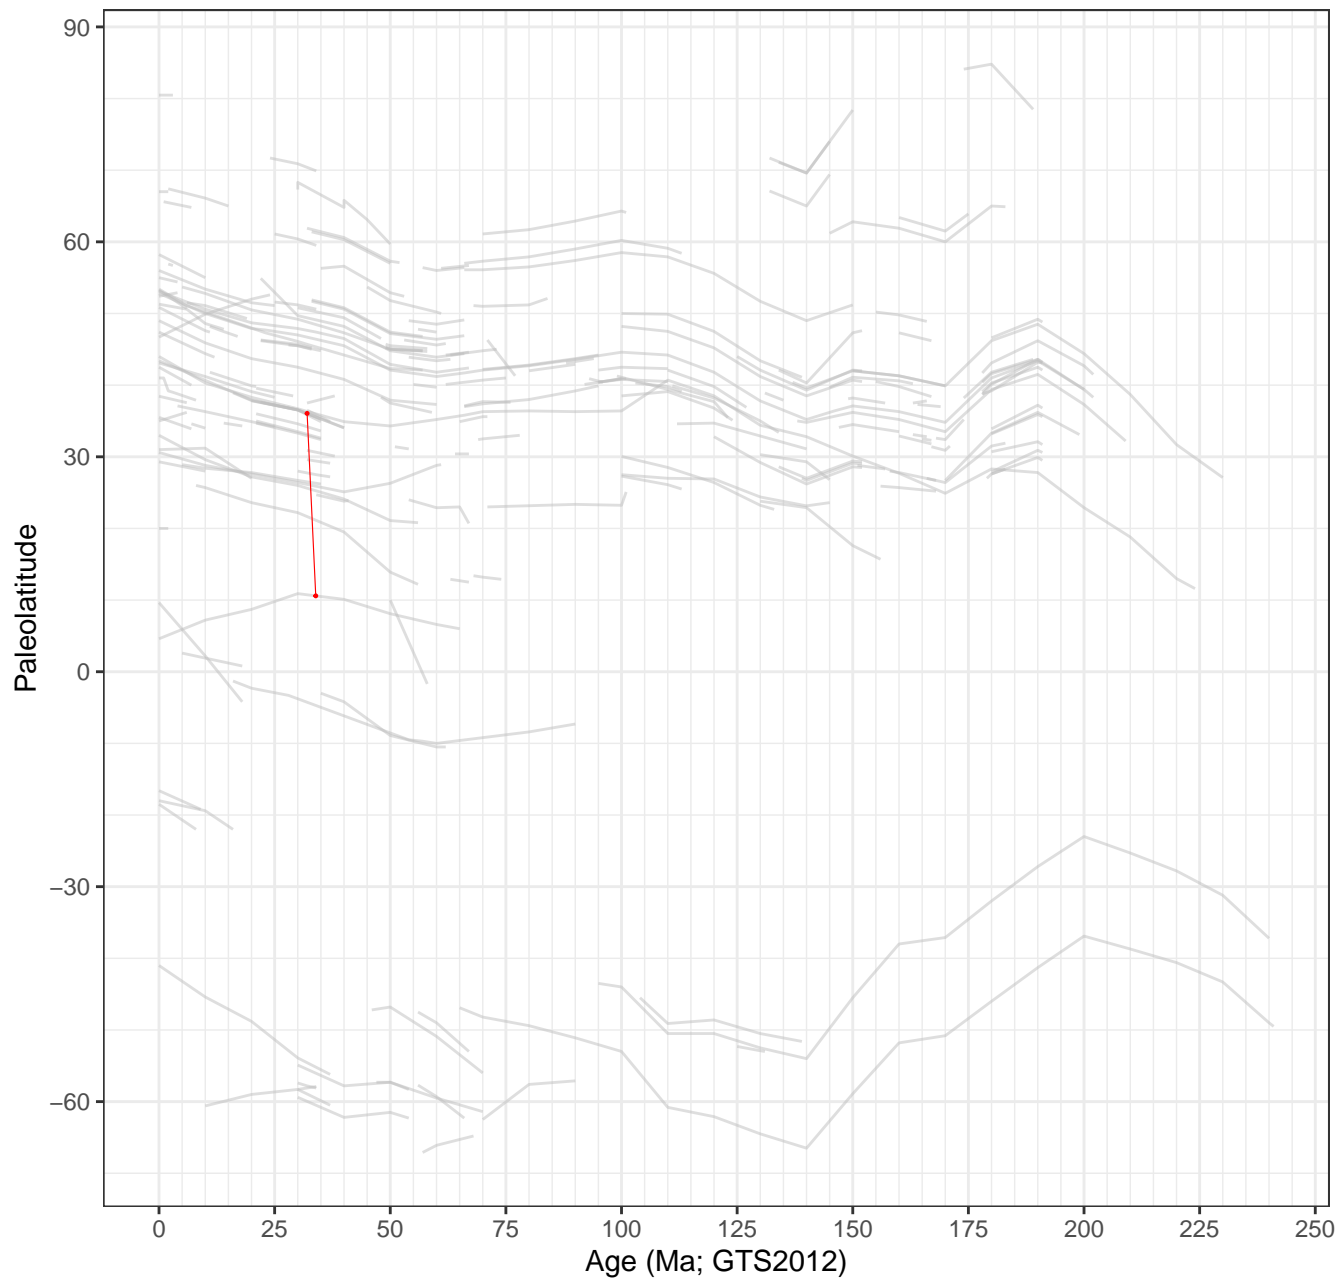

Supplement: Supplementary file 2022 [file Operculodinium microtriainum.pdf › Supplement/Supplement 2/Species 1914 plots/Operculodinium microtriainum.pdf]

# Species *Operculodinium minutum*

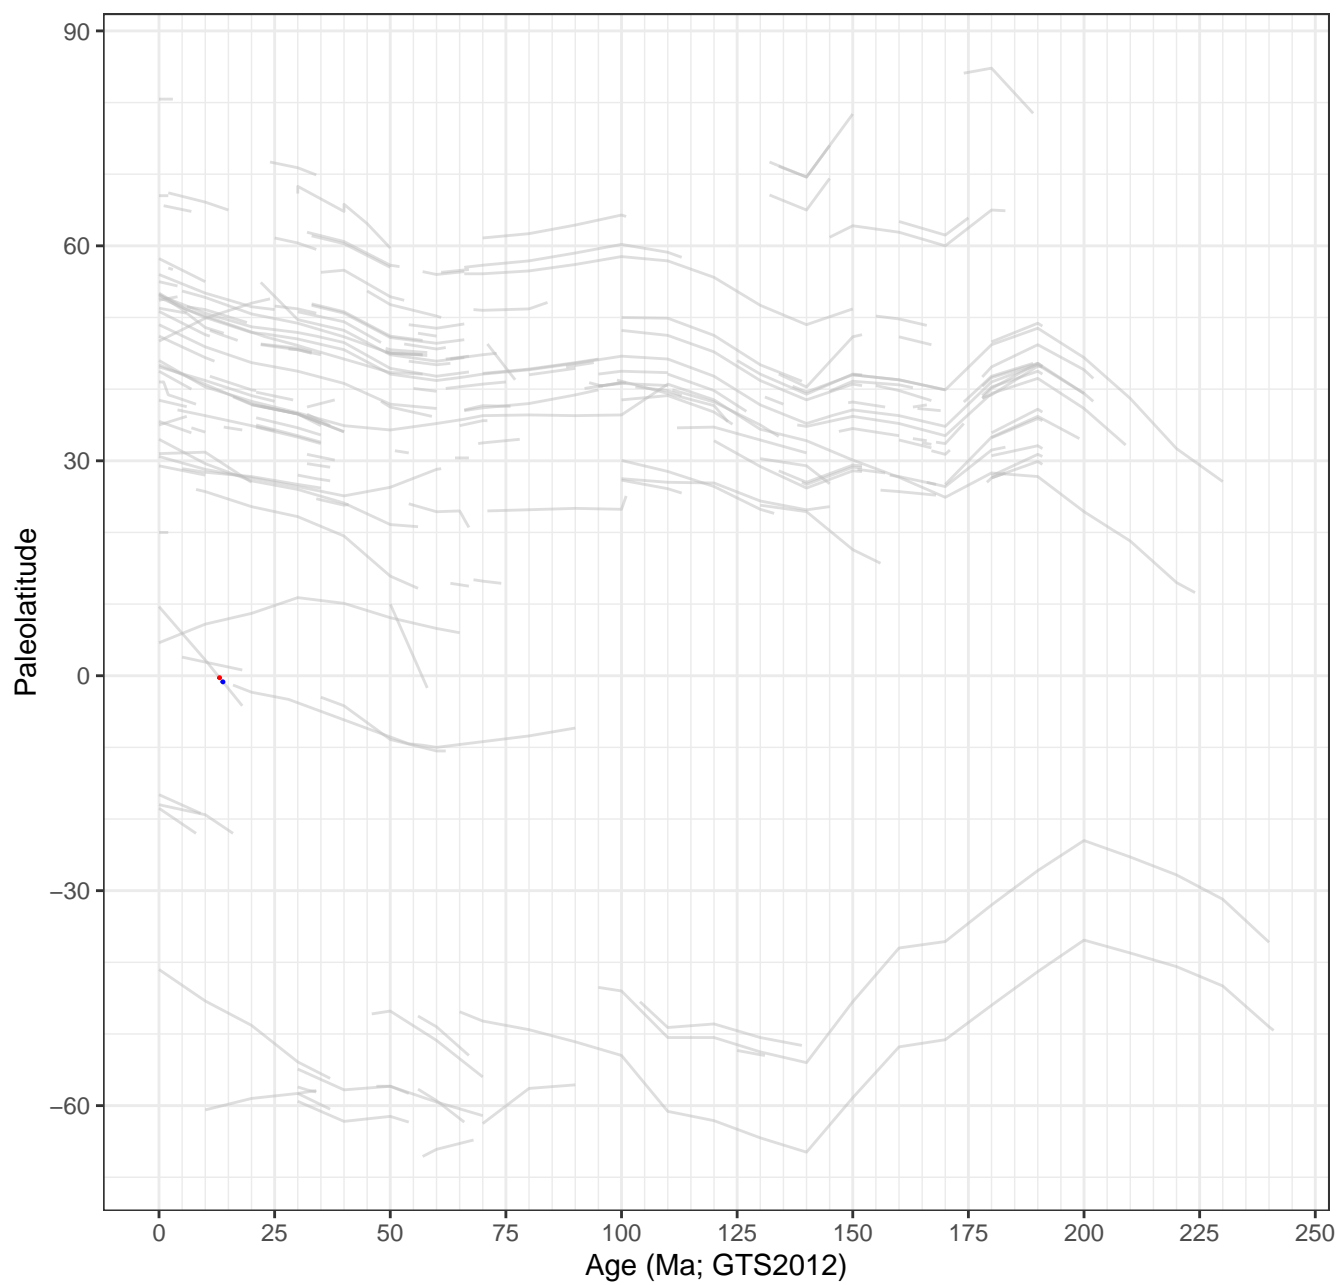

Supplement: Supplementary file 2023 [file Operculodinium minutum.pdf › Supplement/Supplement 2/Species 1914 plots/Operculodinium minutum.pdf]

# Species *Operculodinium nanaconulum*

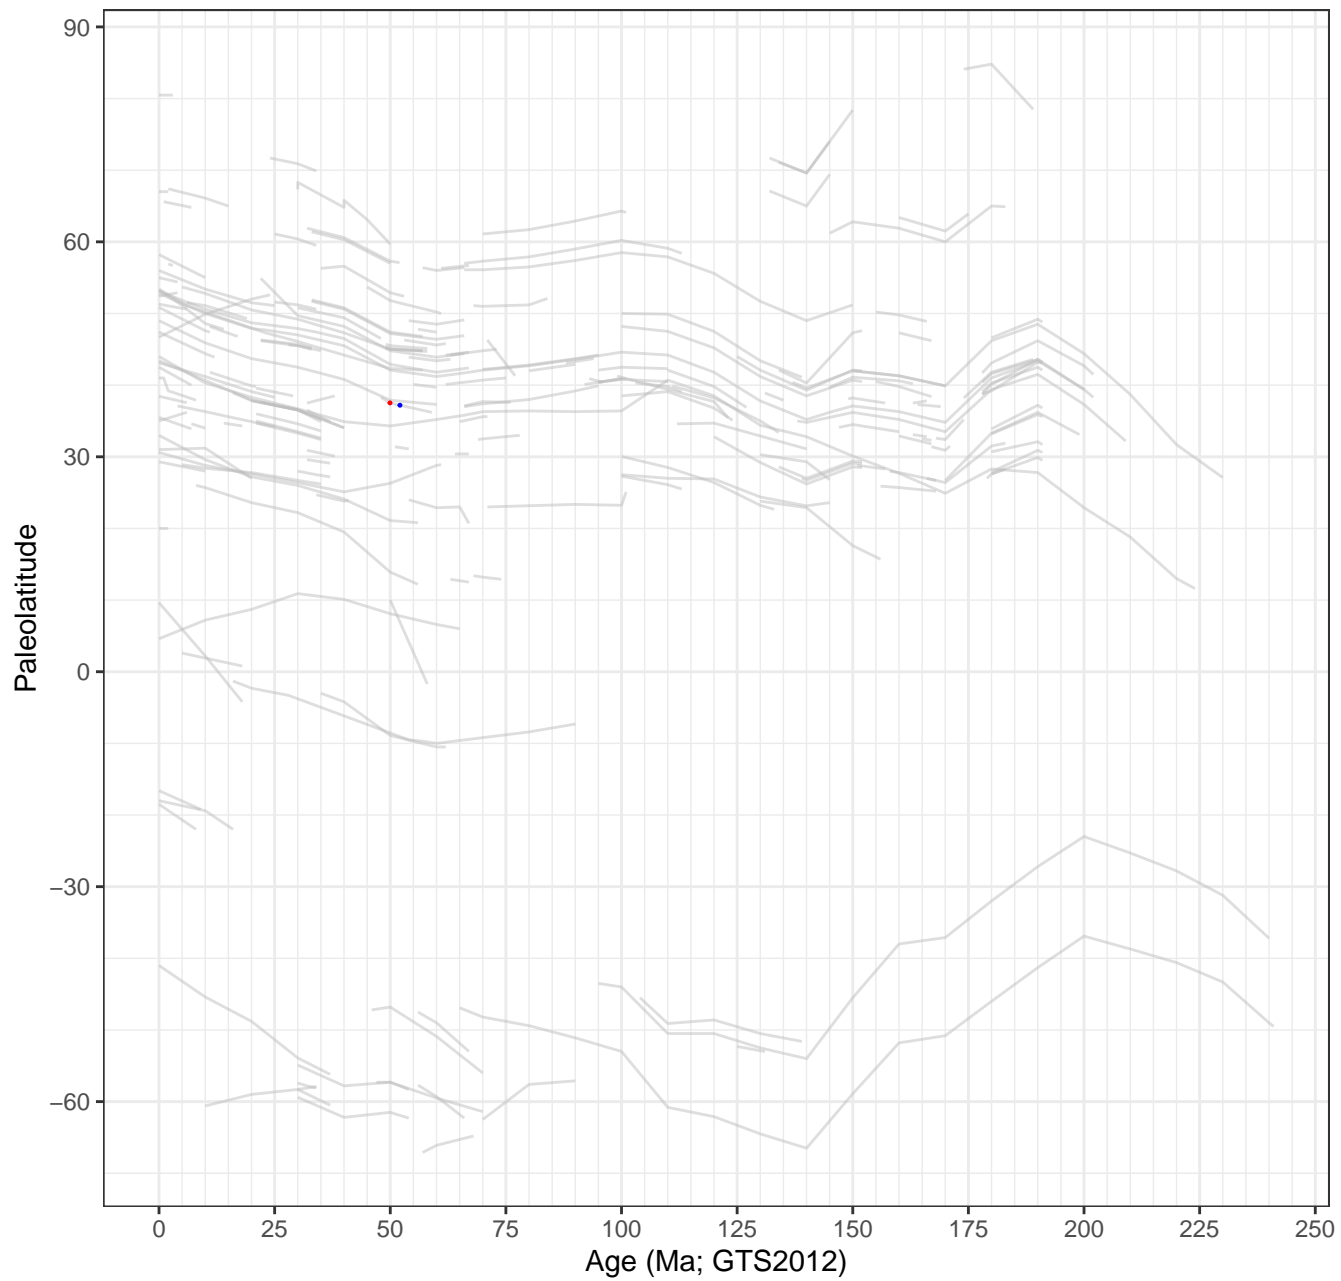

Supplement: Supplementary file 2024 [file Operculodinium nanaconulum.pdf › Supplement/Supplement 2/Species 1914 plots/Operculodinium nanaconulum.pdf]

# Species *Operculodinium piaseckii*

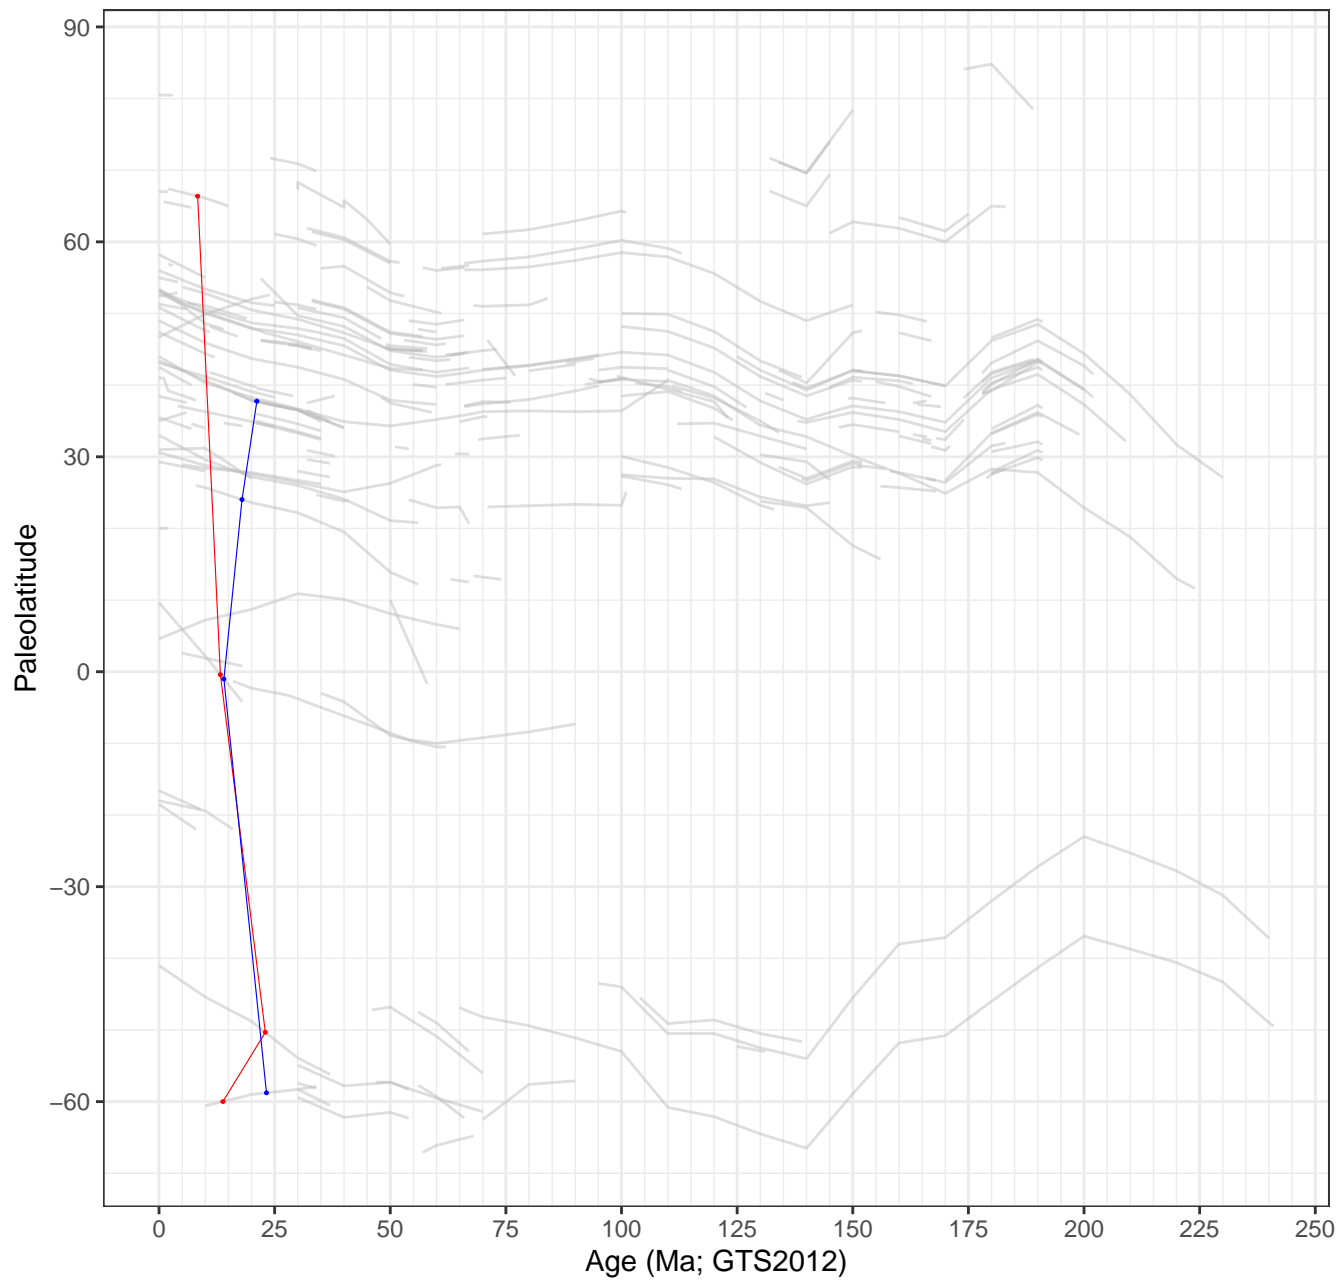

Supplement: Supplementary file 2025 [file Operculodinium piaseckii.pdf › Supplement/Supplement 2/Species 1914 plots/Operculodinium piaseckii.pdf]

# Species *Operculodinium placitum*

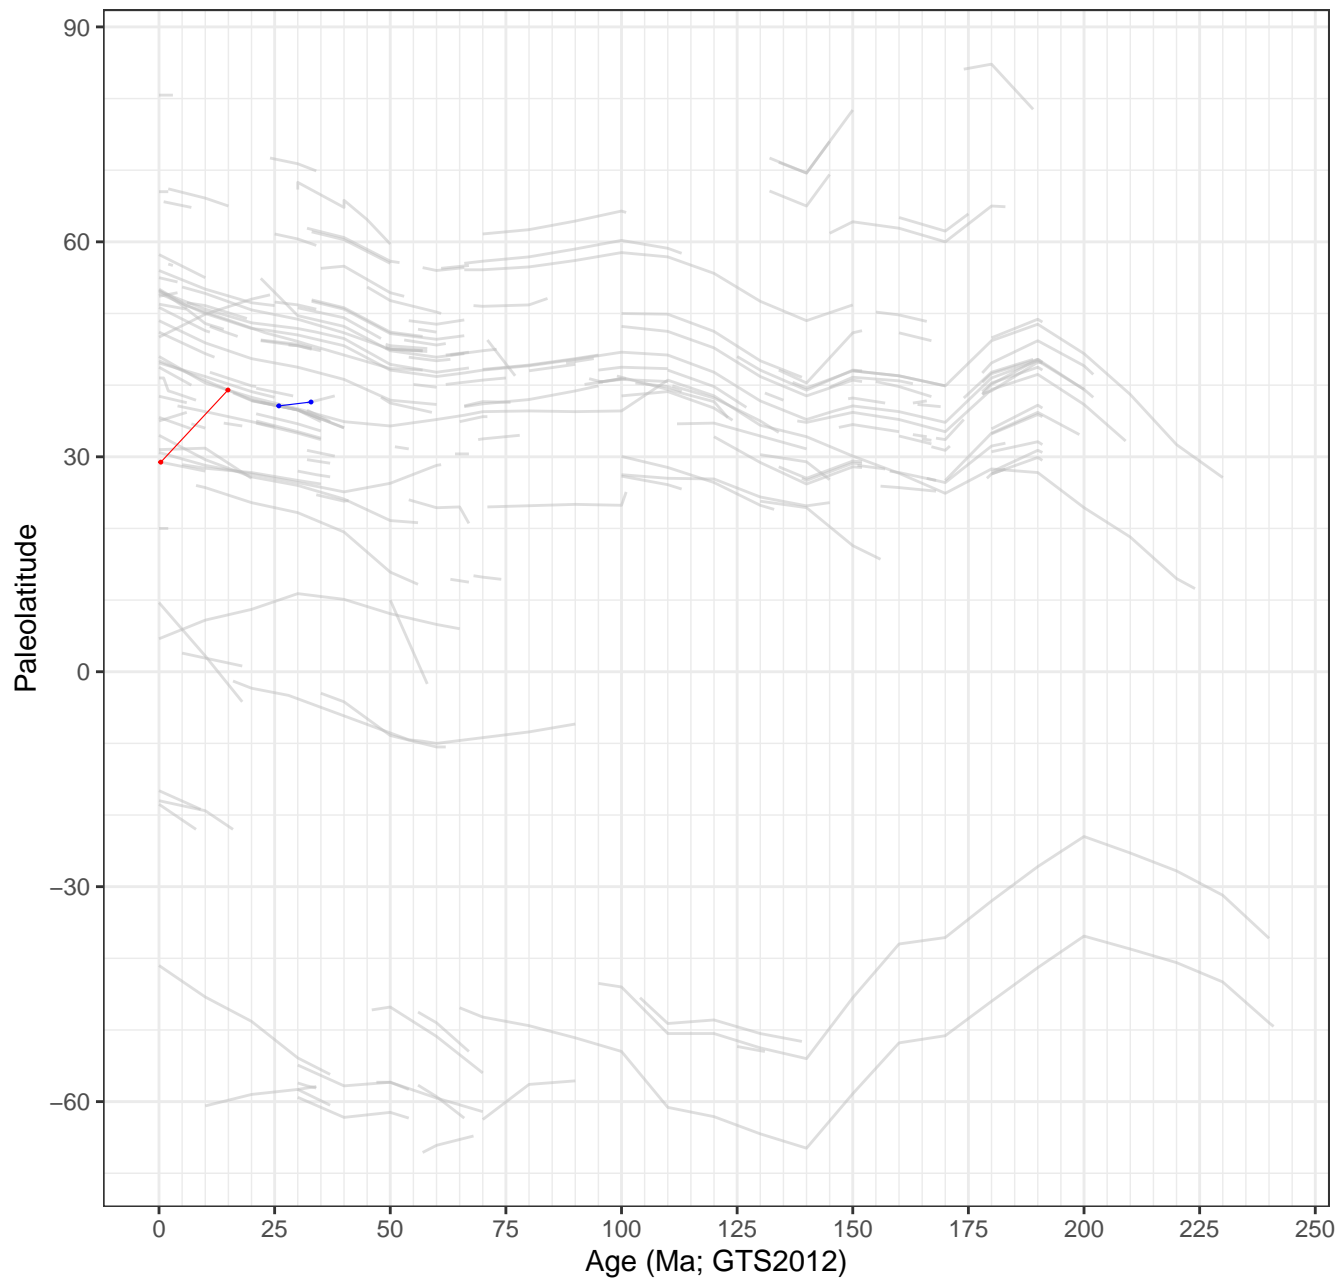

Supplement: Supplementary file 2026 [file Operculodinium placitum.pdf › Supplement/Supplement 2/Species 1914 plots/Operculodinium placitum.pdf]

# Species Operculodinium pontis

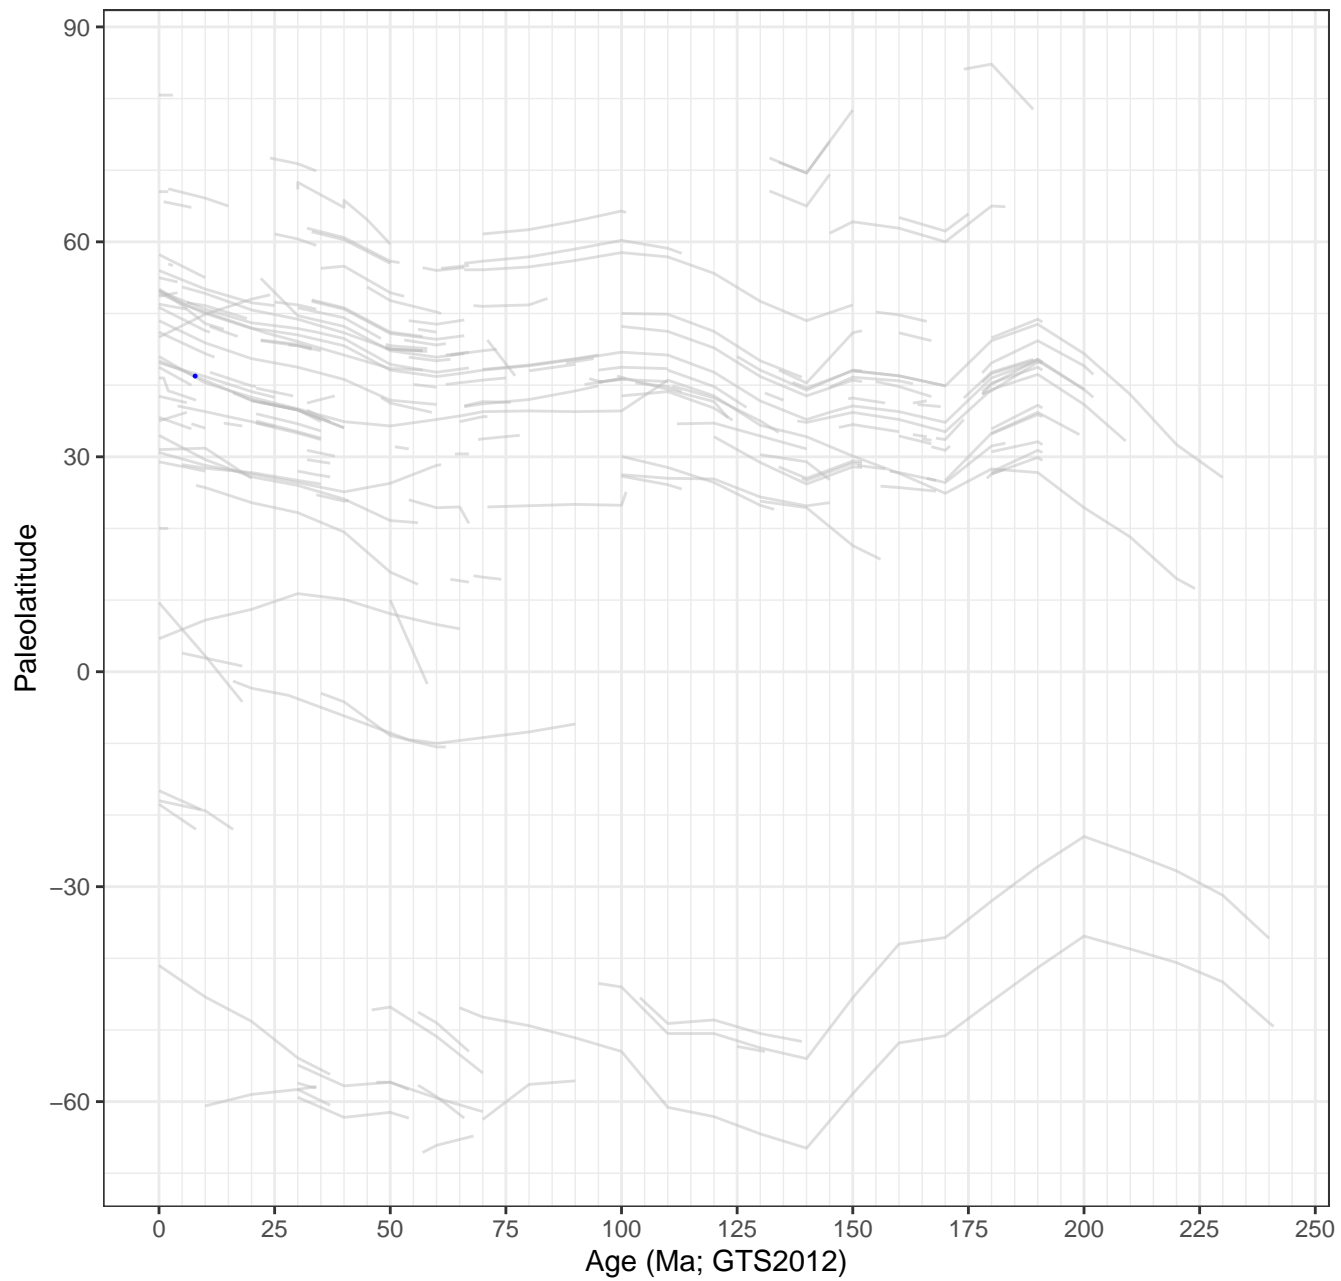

Supplement: Supplementary file 2027 [file Operculodinium pontis.pdf › Supplement/Supplement 2/Species 1914 plots/Operculodinium pontis.pdf]

# Species *Operculodinium psilatium*

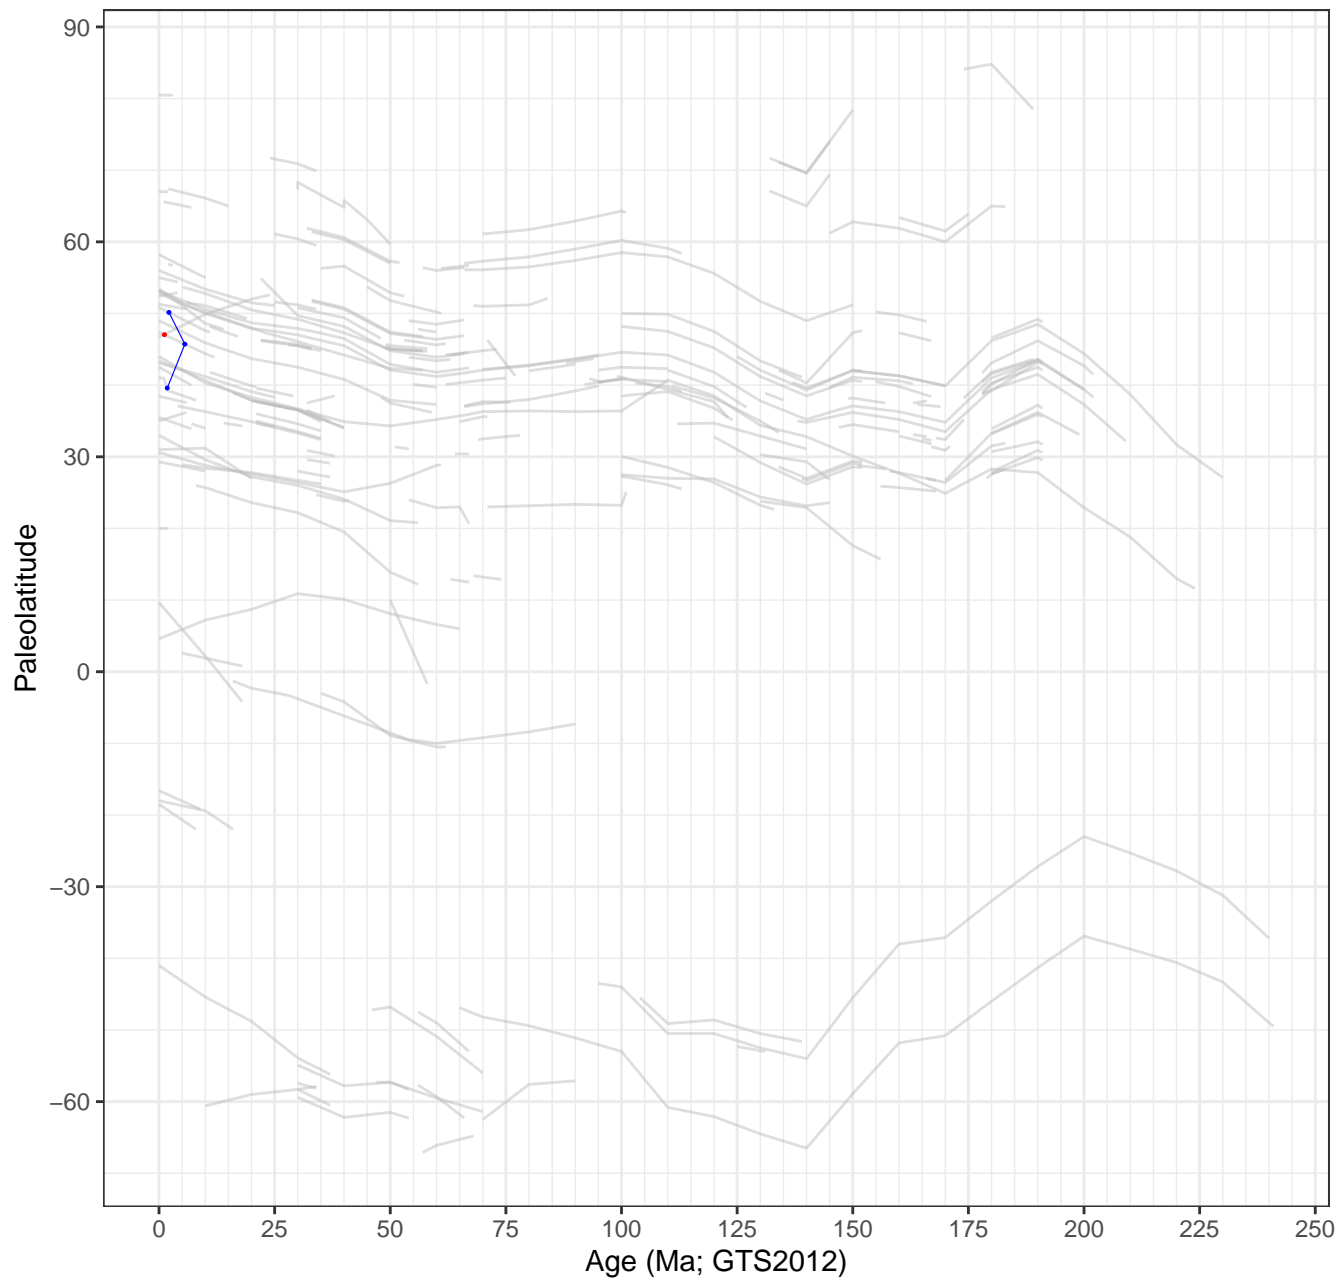

Supplement: Supplementary file 2028 [file Operculodinium psilatum.pdf › Supplement/Supplement 2/Species 1914 plots/Operculodinium psilatum.pdf]

# Species *Operculodinium severinii*

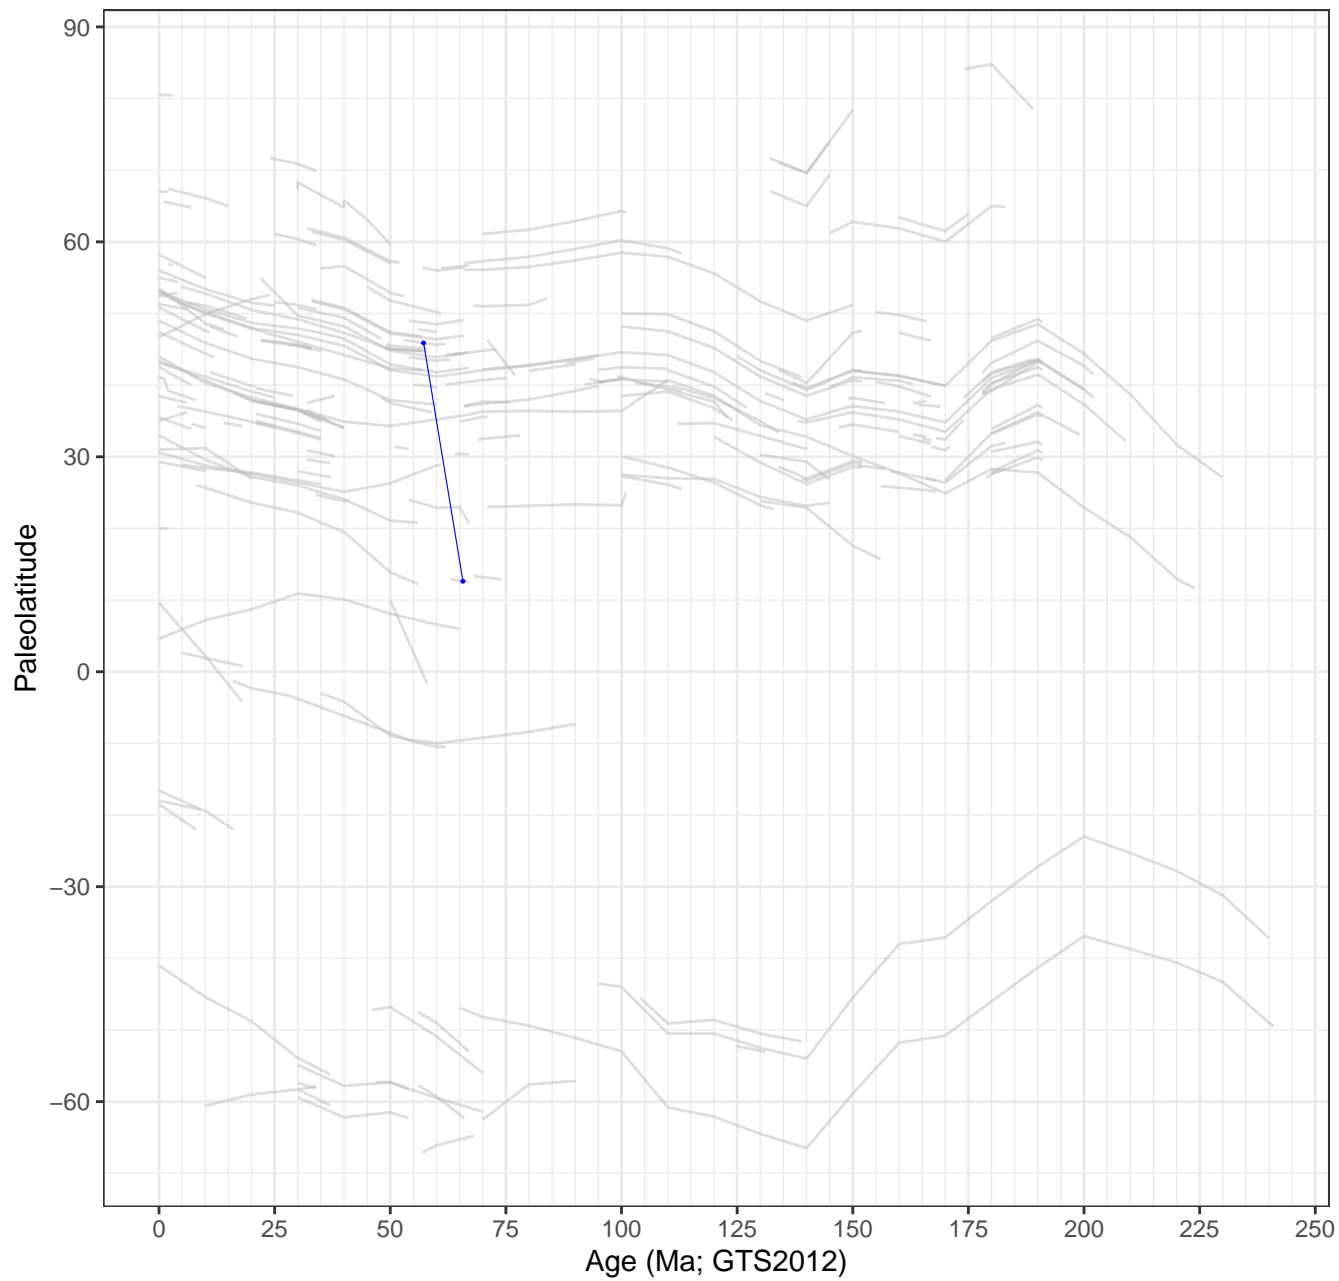

Supplement: Supplementary file 2029 [file Operculodinium severinii.pdf › Supplement/Supplement 2/Species 1914 plots/Operculodinium severinii.pdf]

# Species *Operculodinium spiniferum*

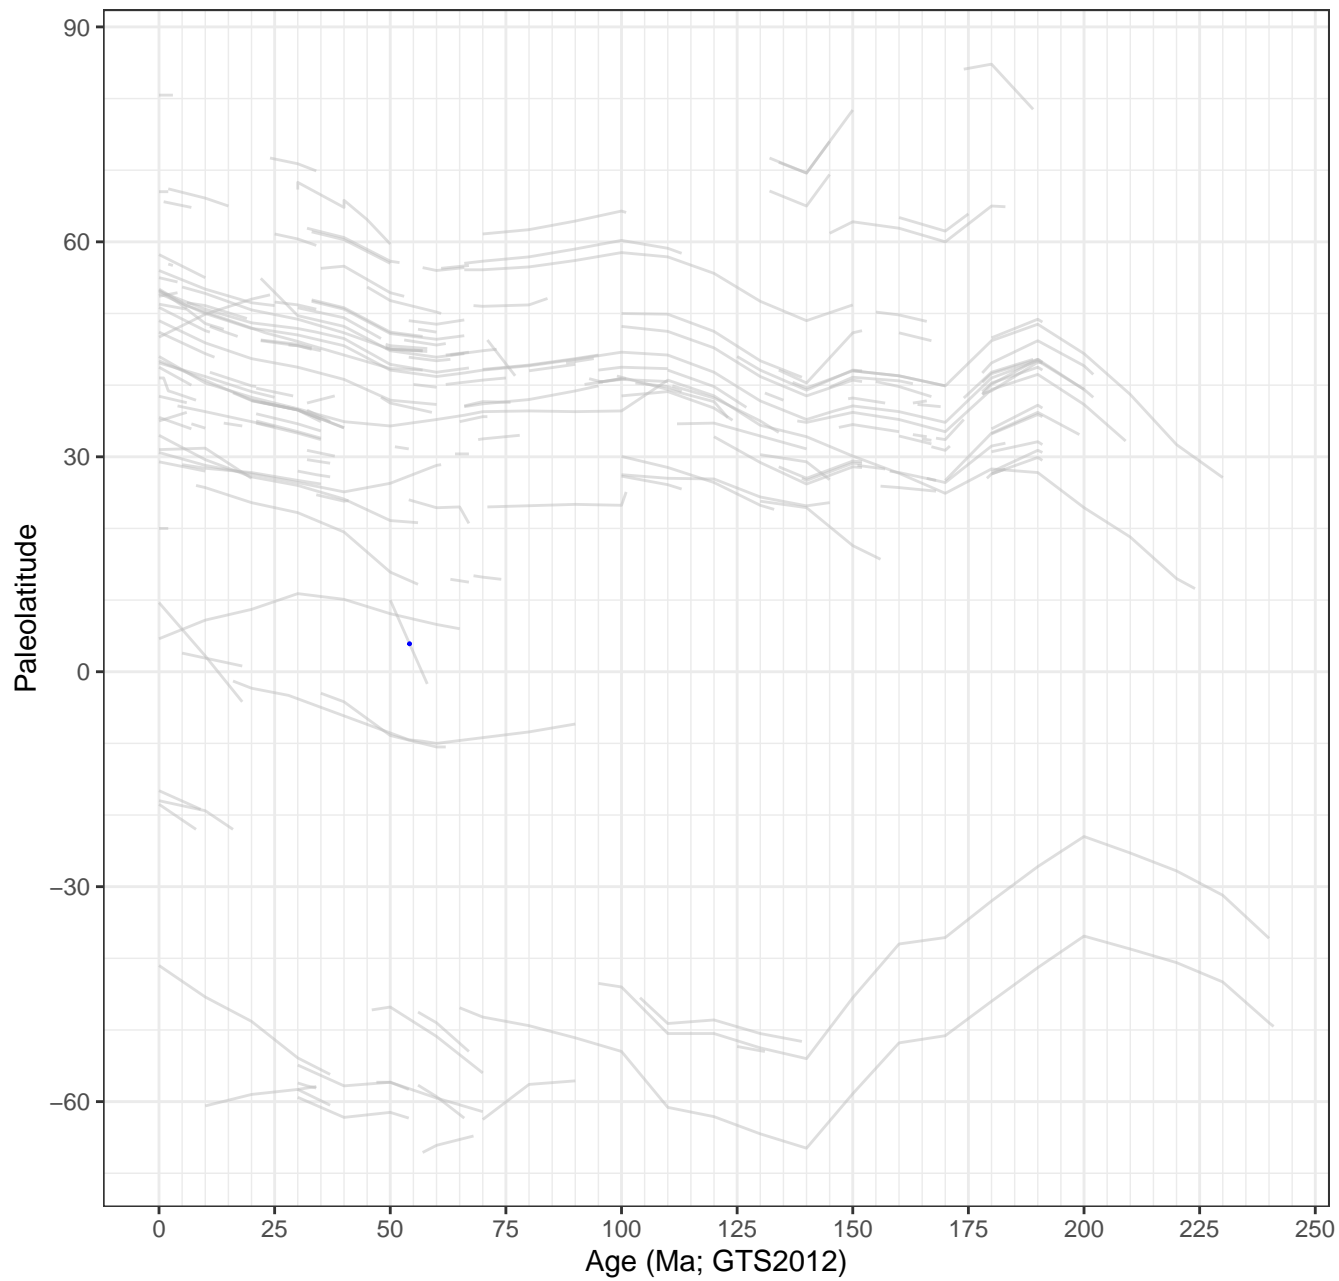

Supplement: Supplementary file 2030 [file Operculodinium spiniferum.pdf › Supplement/Supplement 2/Species 1914 plots/Operculodinium spiniferum.pdf]

# Species *Operculodinium tegillatum*

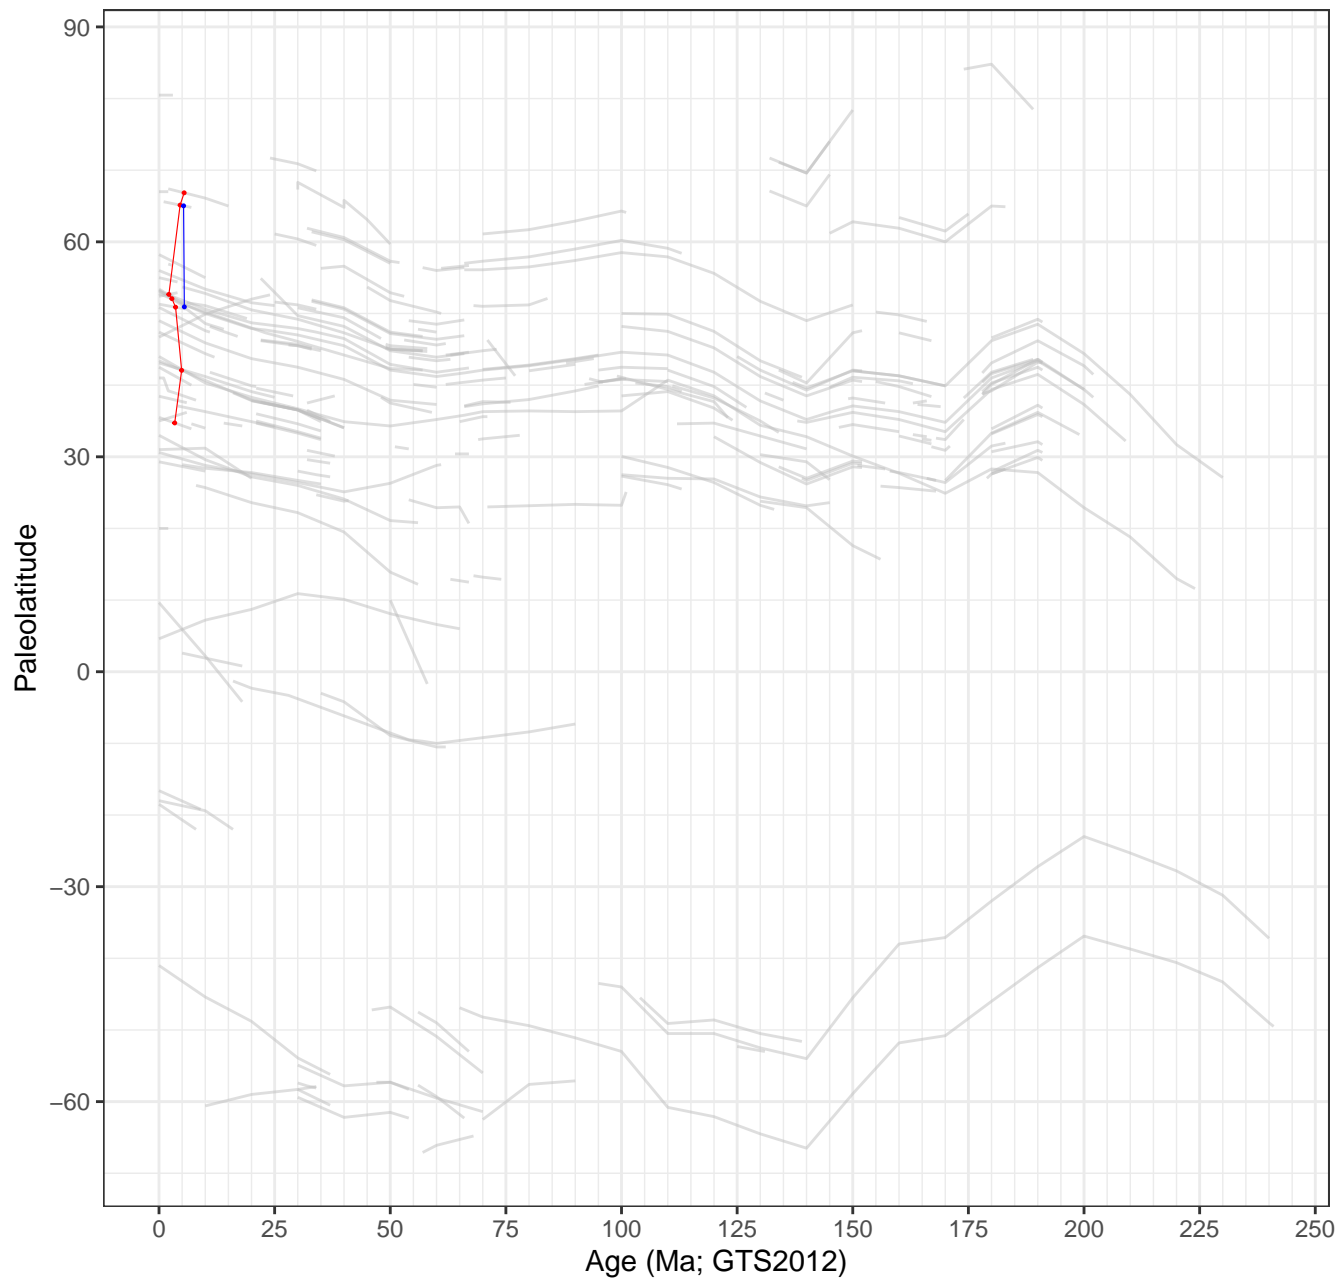

Supplement: Supplementary file 2031 [file Operculodinium tegillatum.pdf › Supplement/Supplement 2/Species 1914 plots/Operculodinium tegillatum.pdf]

# Species *Operculodinium tiara*

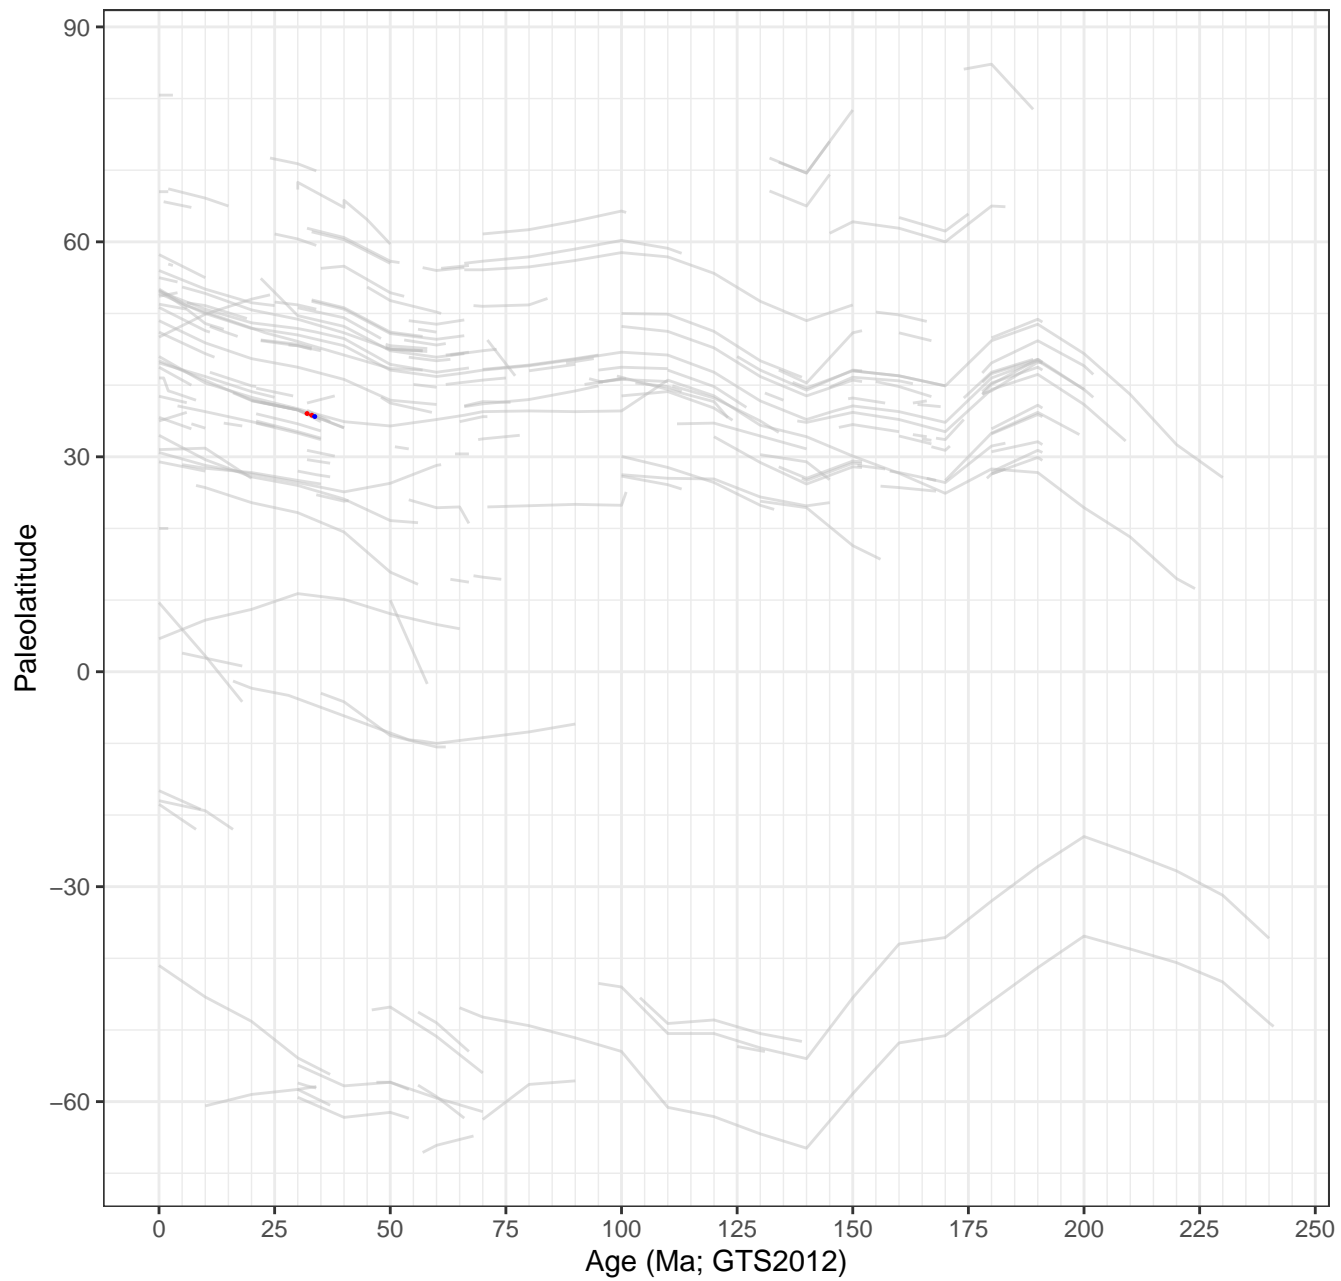

Supplement: Supplementary file 2032 [file Operculodinium tiara.pdf › Supplement/Supplement 2/Species 1914 plots/Operculodinium tiara.pdf]

# Species *Operculodinium uncinispinosum*

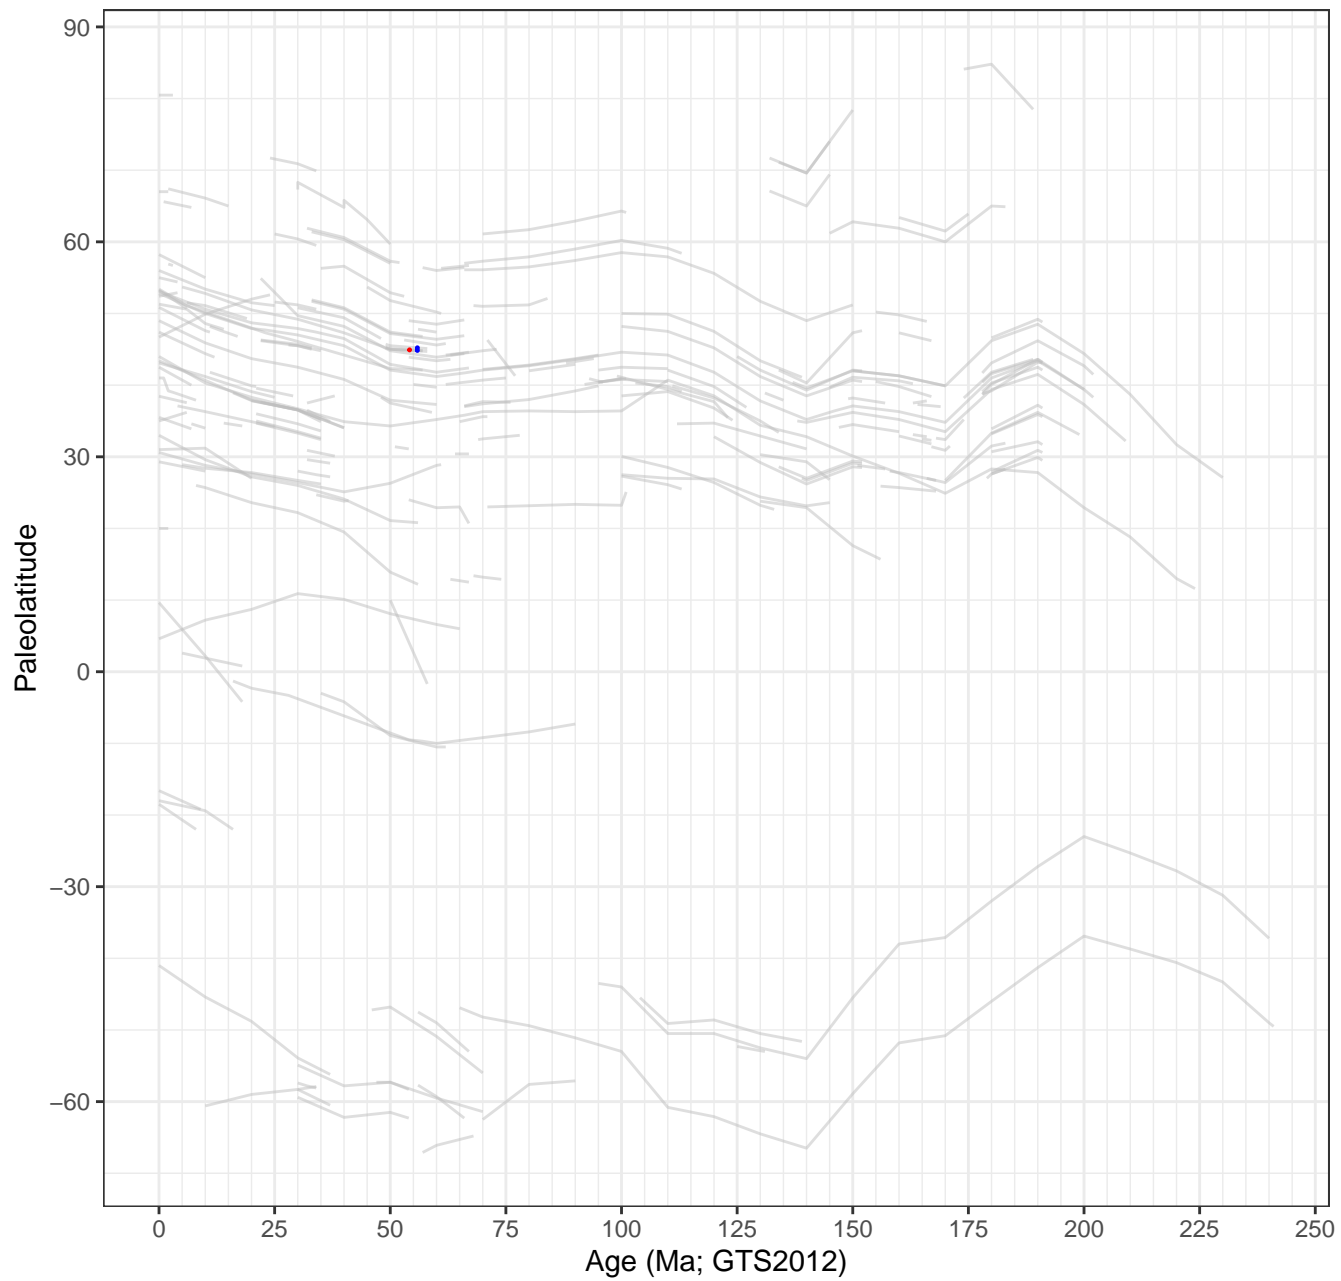

Supplement: Supplementary file 2033 [file Operculodinium uncinispinosum.pdf › Supplement/Supplement 2/Species 1914 plots/Operculodinium uncinispinosum.pdf]
