# Supplementary figures and images for: DINOSTRAT: a global database of the stratigraphic and paleolatitudinal distribution of Mesozoic–Cenozoic organic-walled dinoflagellate cysts (part 21 of 27)
Source: Copernicus journal article supplement (doi:10.5194/essd-14-579-2022), 2022-02-09

# Species *Operculodinium vacuolatum*

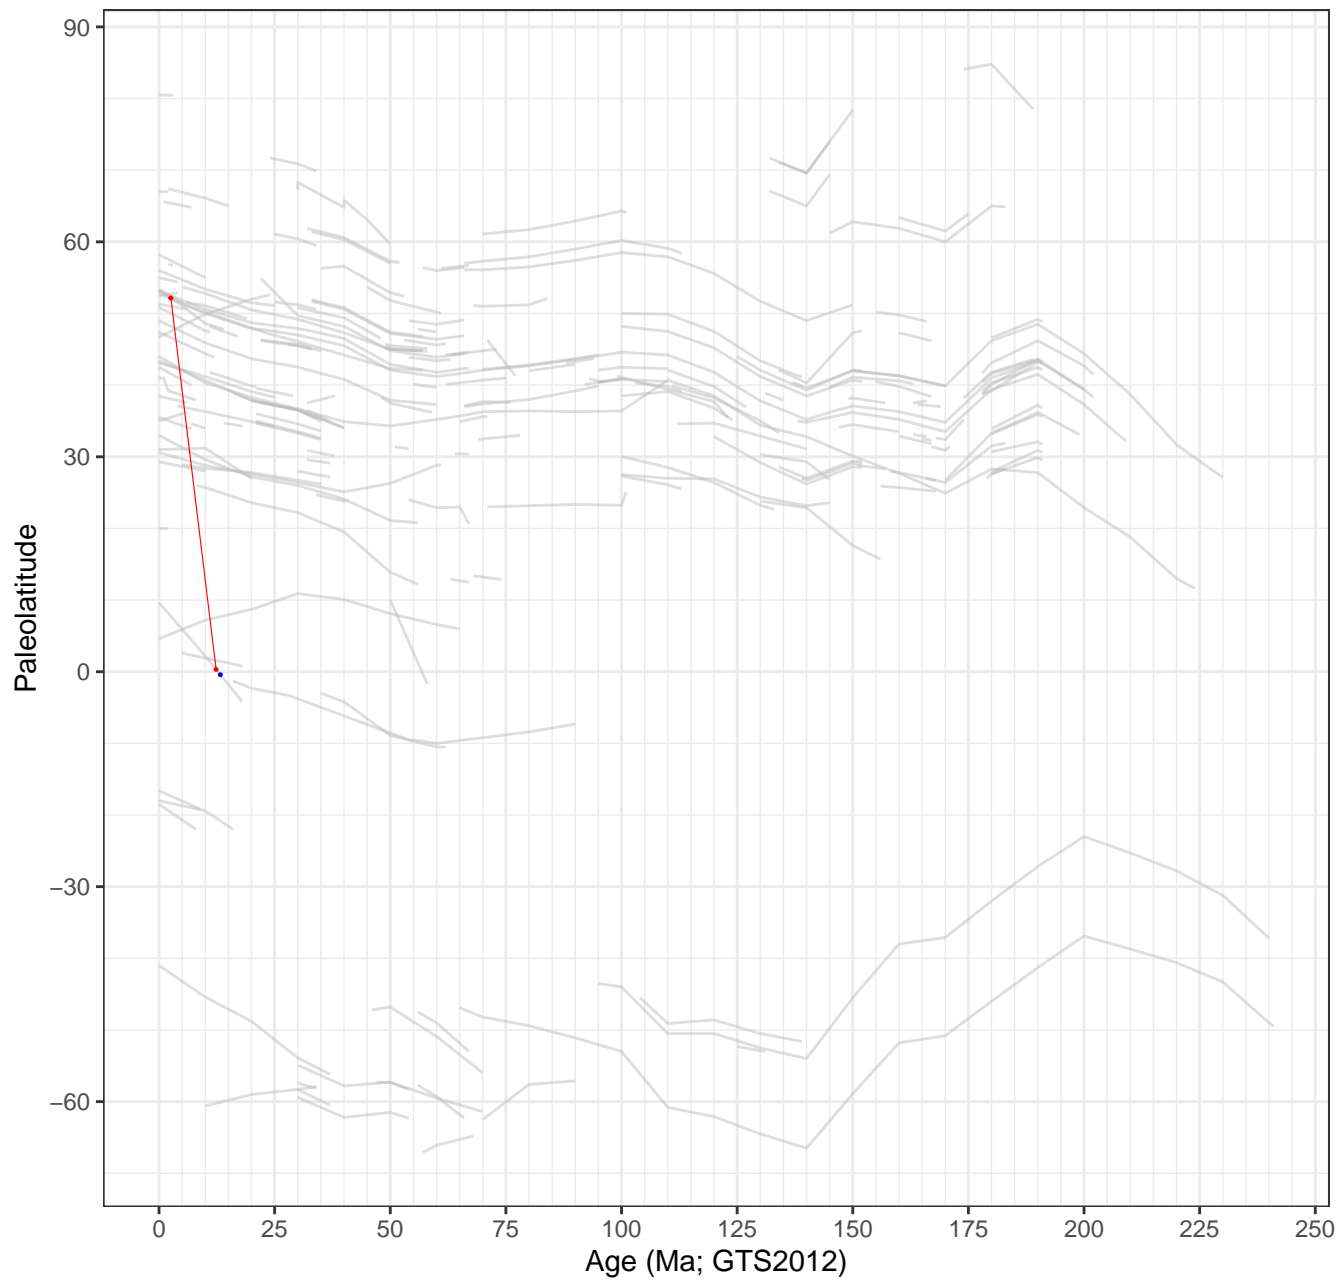

Supplement: Supplementary file 2034 [file Operculodinium vacuolatum.pdf › Supplement/Supplement 2/Species 1914 plots/Operculodinium vacuolatum.pdf]

# Species *Operculodinium variabile*

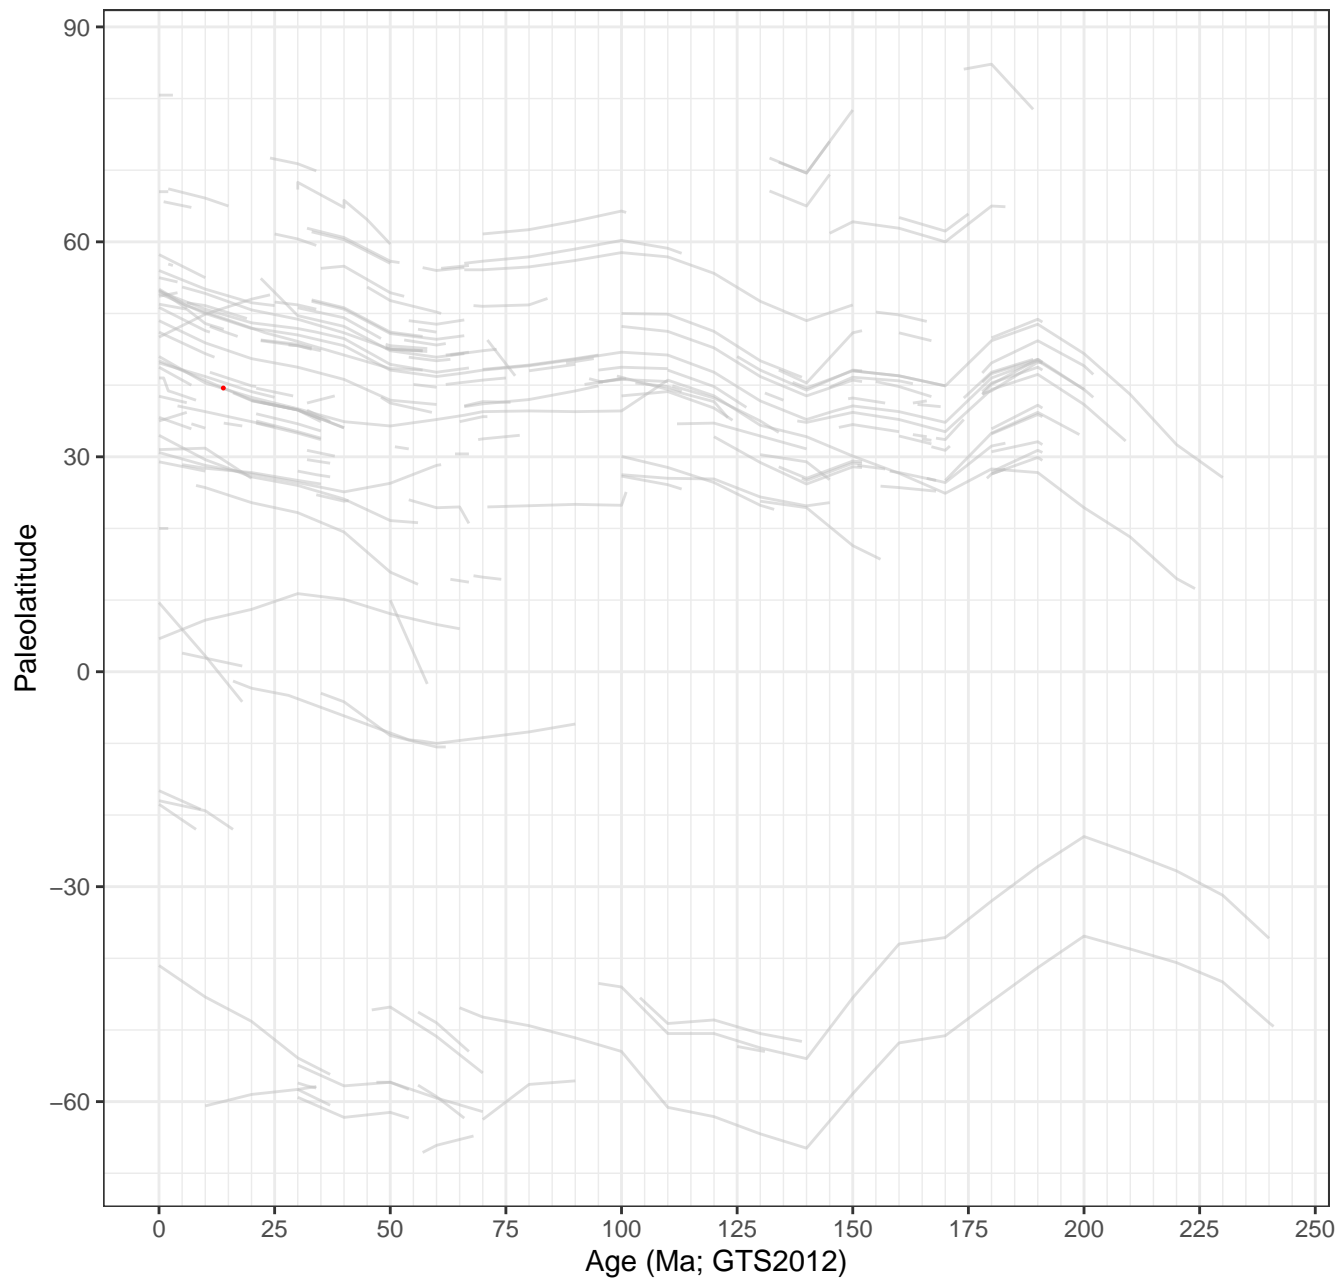

Supplement: Supplementary file 2035 [file Operculodinium variabile.pdf › Supplement/Supplement 2/Species 1914 plots/Operculodinium variabile.pdf]

# Species *Operculodinium wallii*

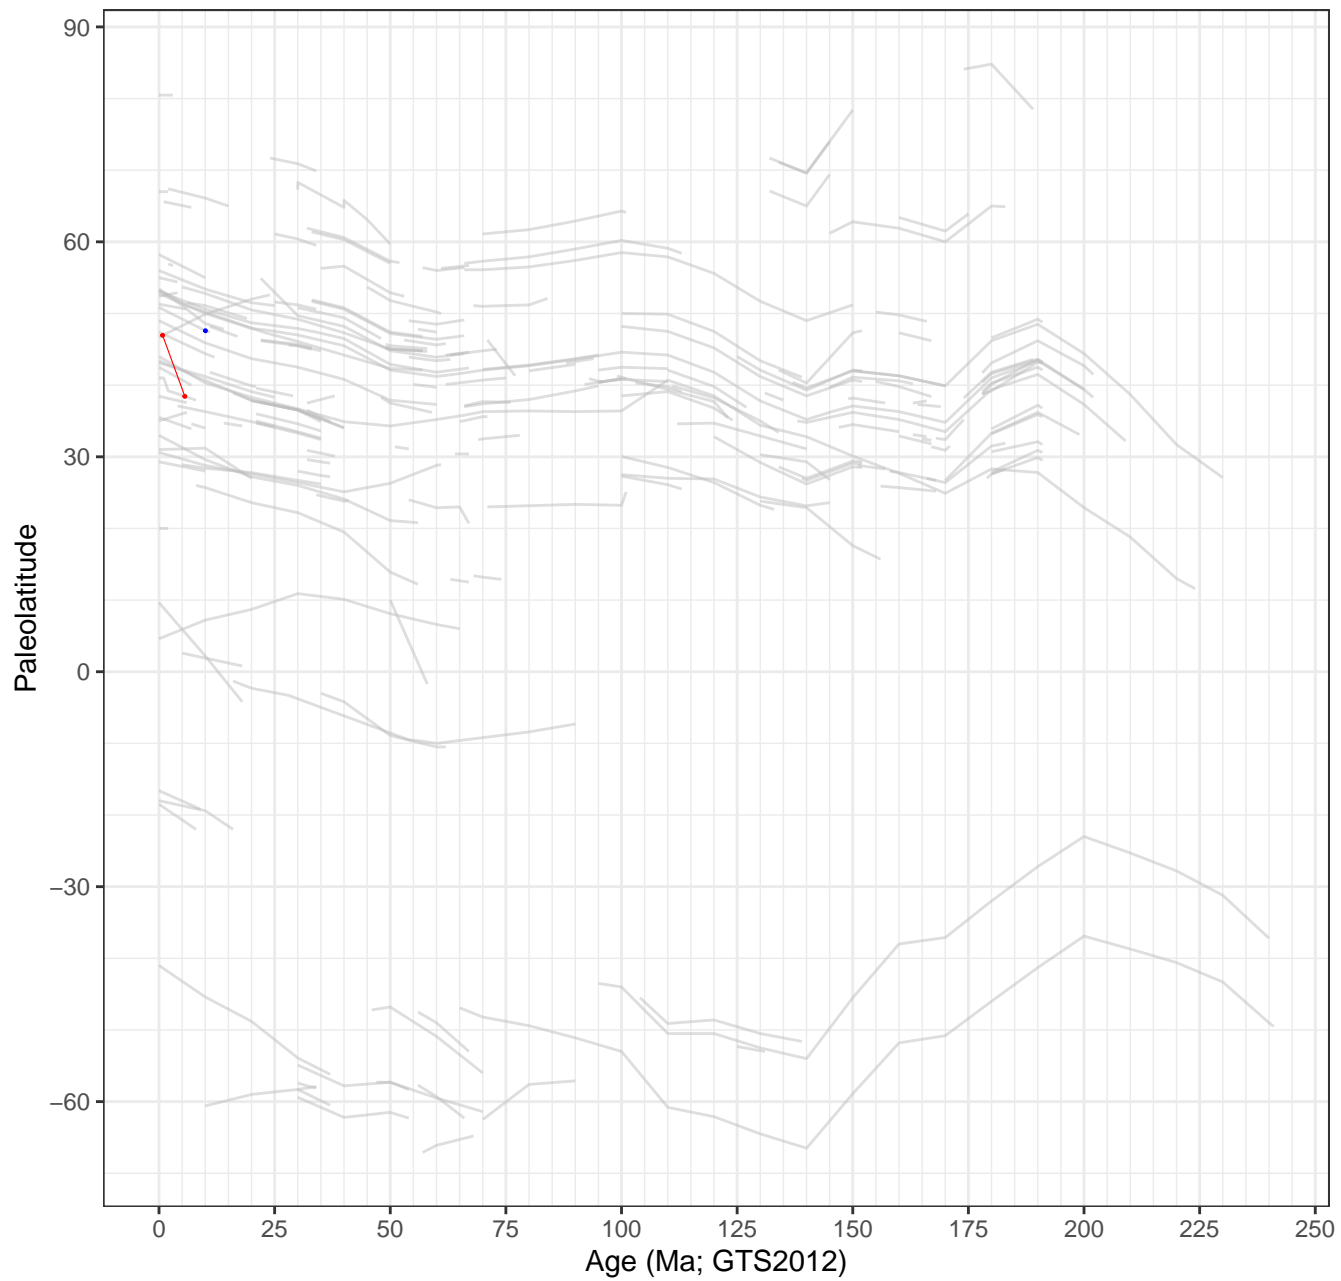

Supplement: Supplementary file 2036 [file Operculodinium wallii.pdf › Supplement/Supplement 2/Species 1914 plots/Operculodinium wallii.pdf]

# Species *Operculodinium xanthium*

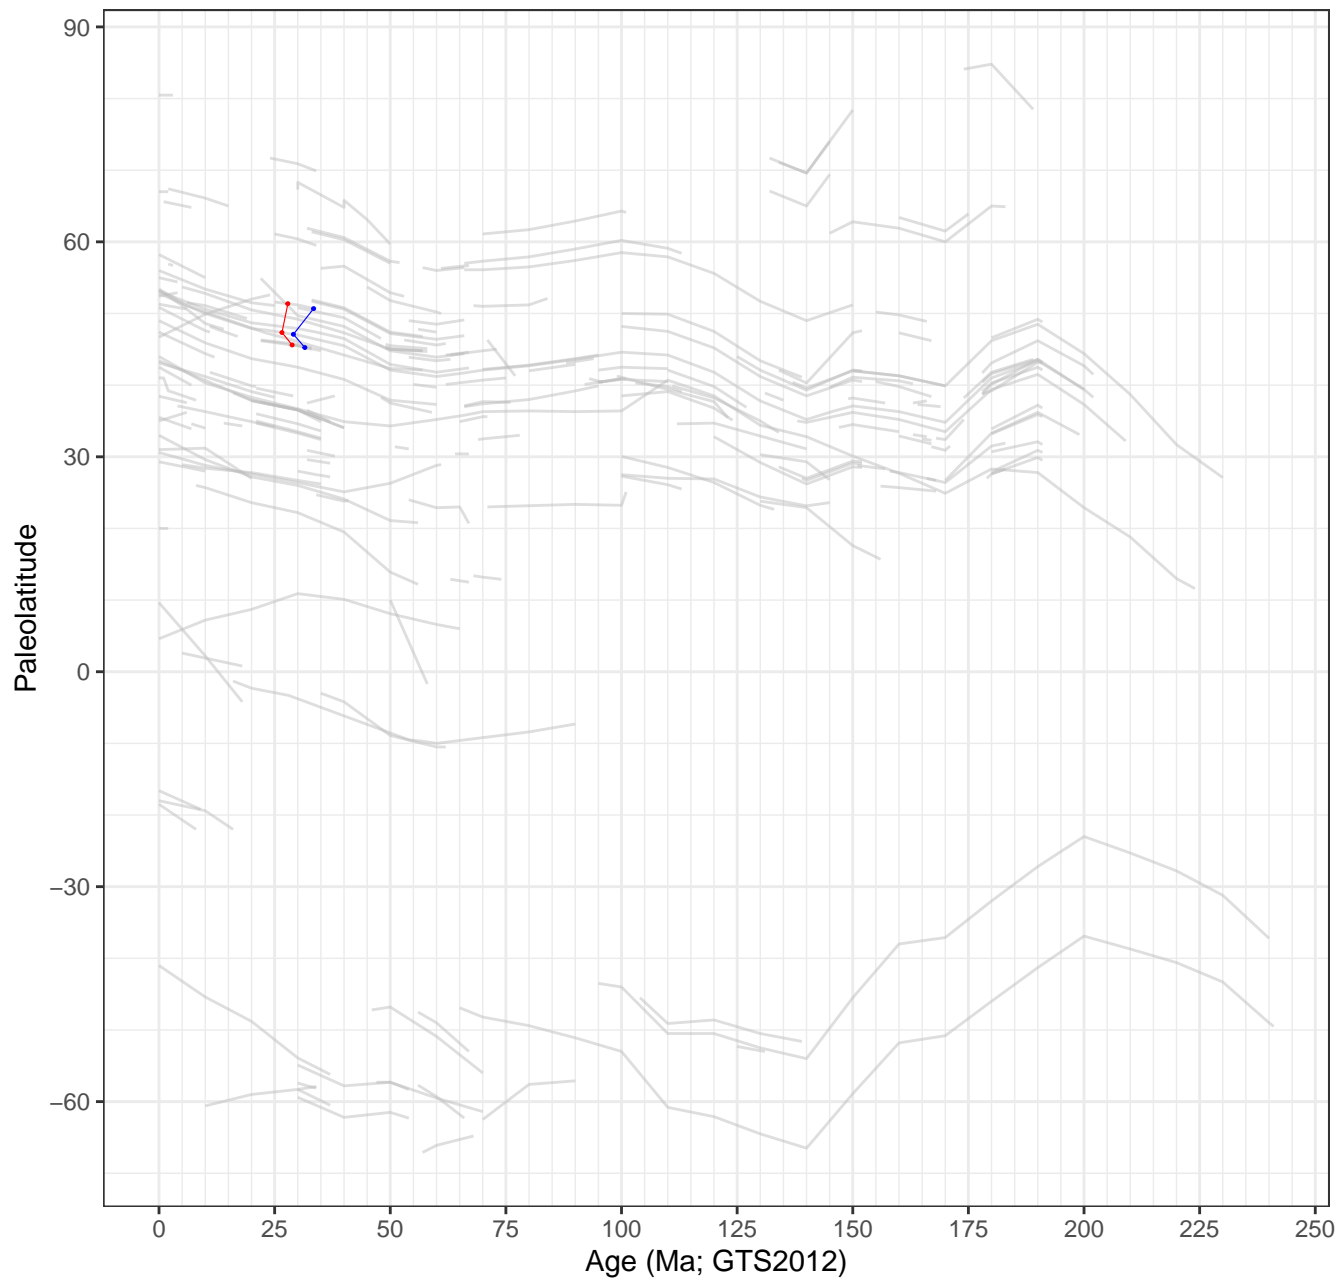

Supplement: Supplementary file 2037 [file Operculodinium xanthium.pdf › Supplement/Supplement 2/Species 1914 plots/Operculodinium xanthium.pdf]

# Species *Orobodinium automobile*

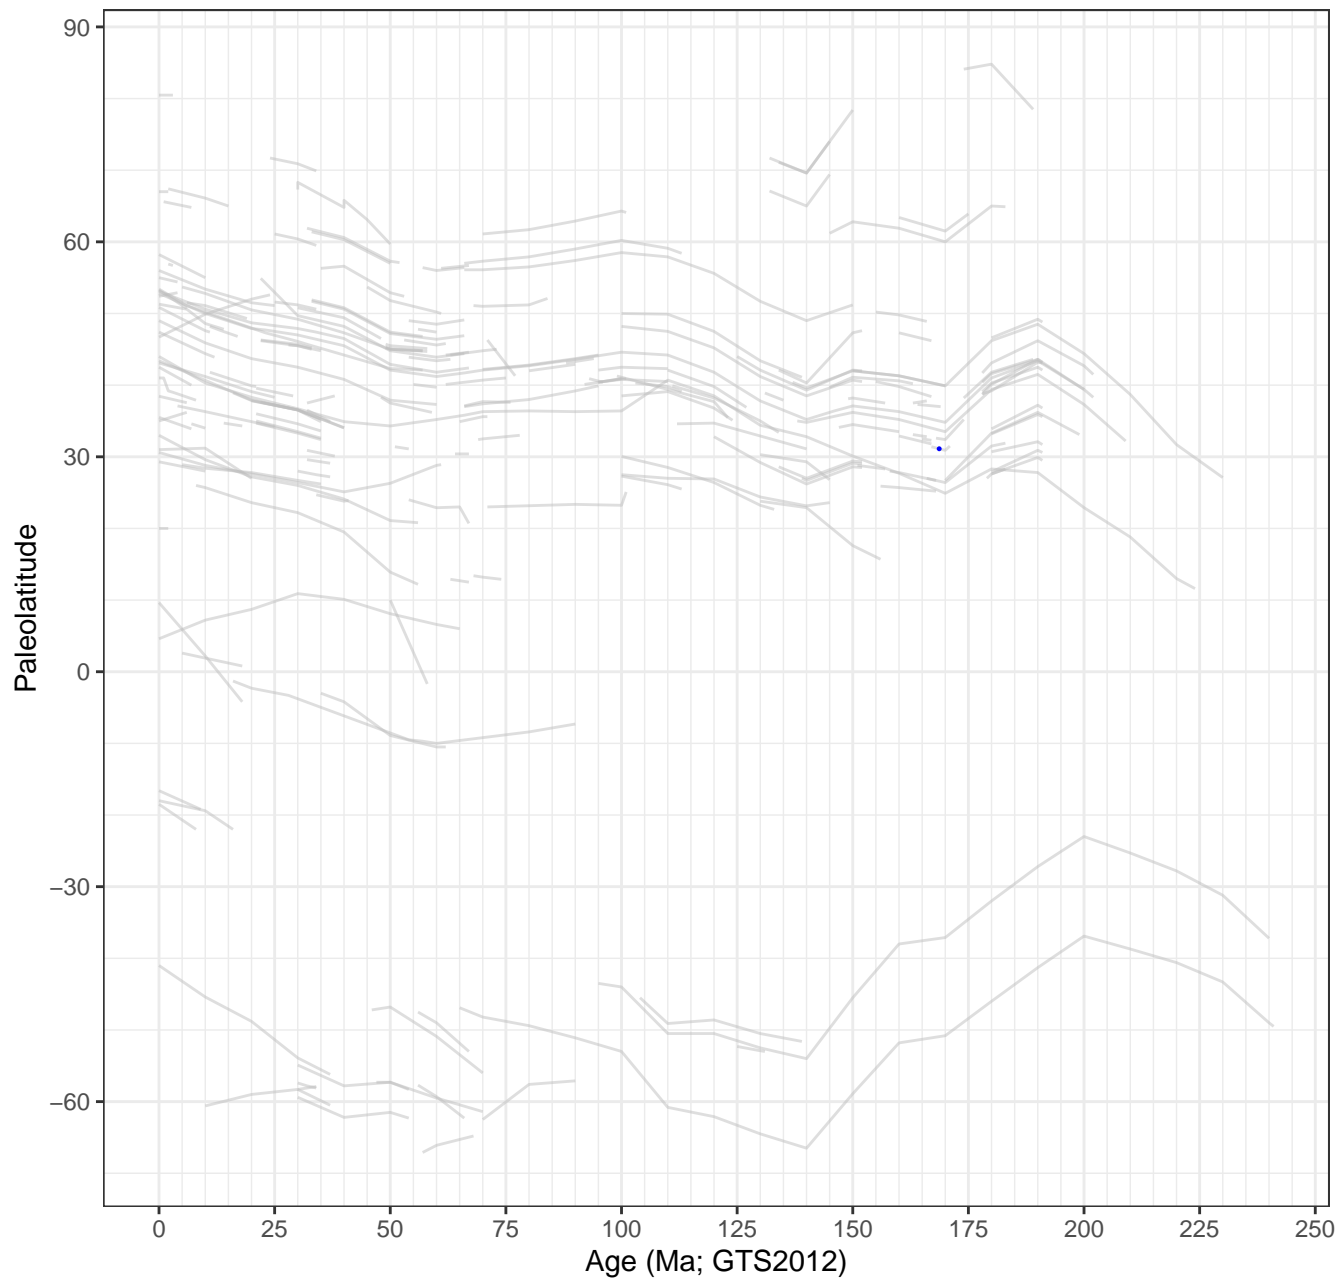

Supplement: Supplementary file 2038 [file Orobodinium automobile.pdf › Supplement/Supplement 2/Species 1914 plots/Orobodinium automobile.pdf]

# Species *Orobodinium rete*

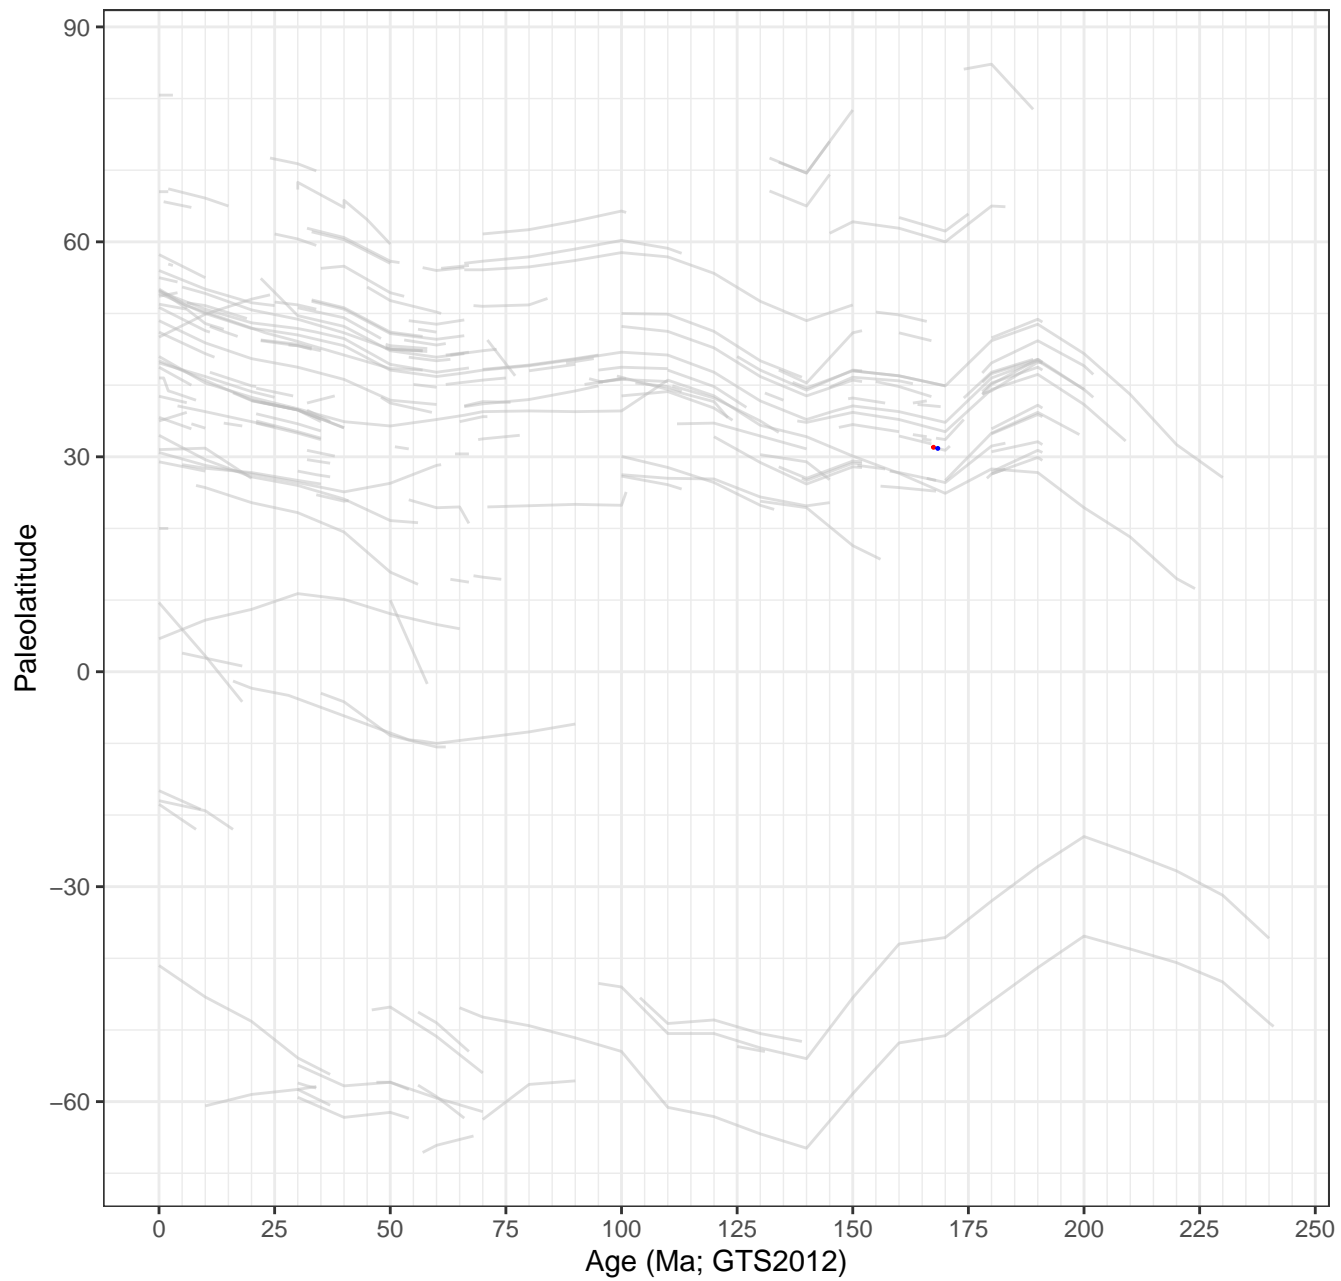

Supplement: Supplementary file 2039 [file Orobodinium rete.pdf › Supplement/Supplement 2/Species 1914 plots/Orobodinium rete.pdf]

# Species *Ovalicysta hiata*

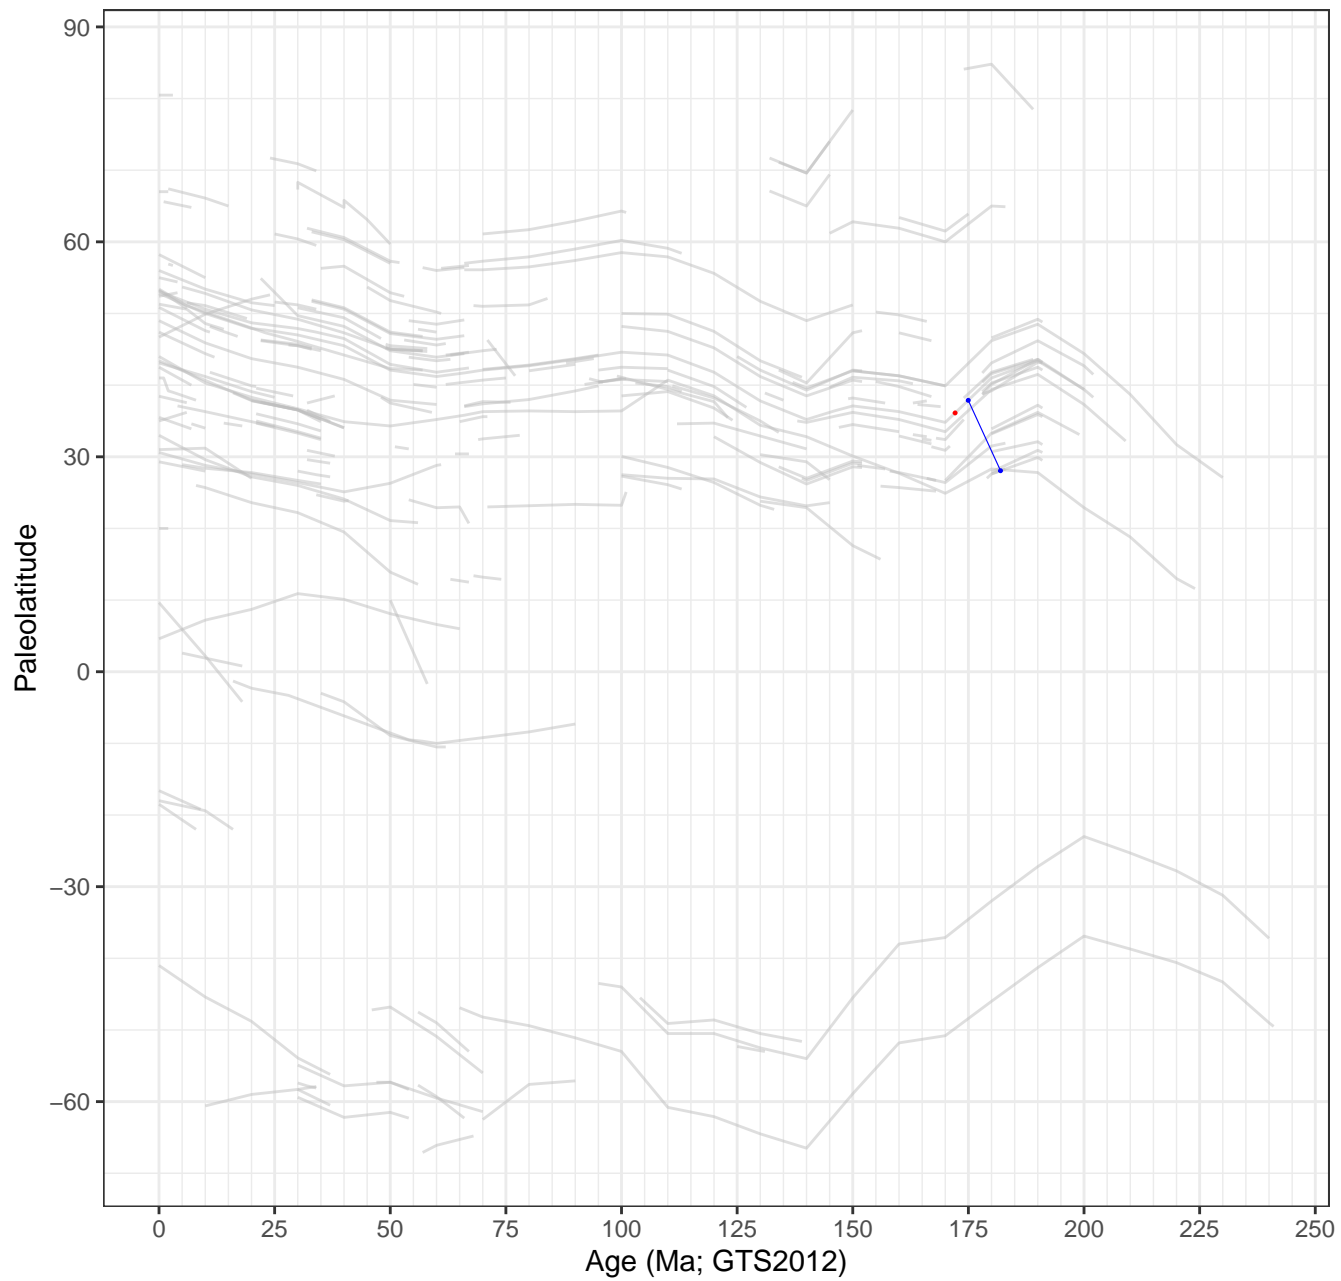

Supplement: Supplementary file 2040 [file Ovalicysta hiata.pdf › Supplement/Supplement 2/Species 1914 plots/Ovalicysta hiata.pdf]

# Species *Ovoidinium cinctum*

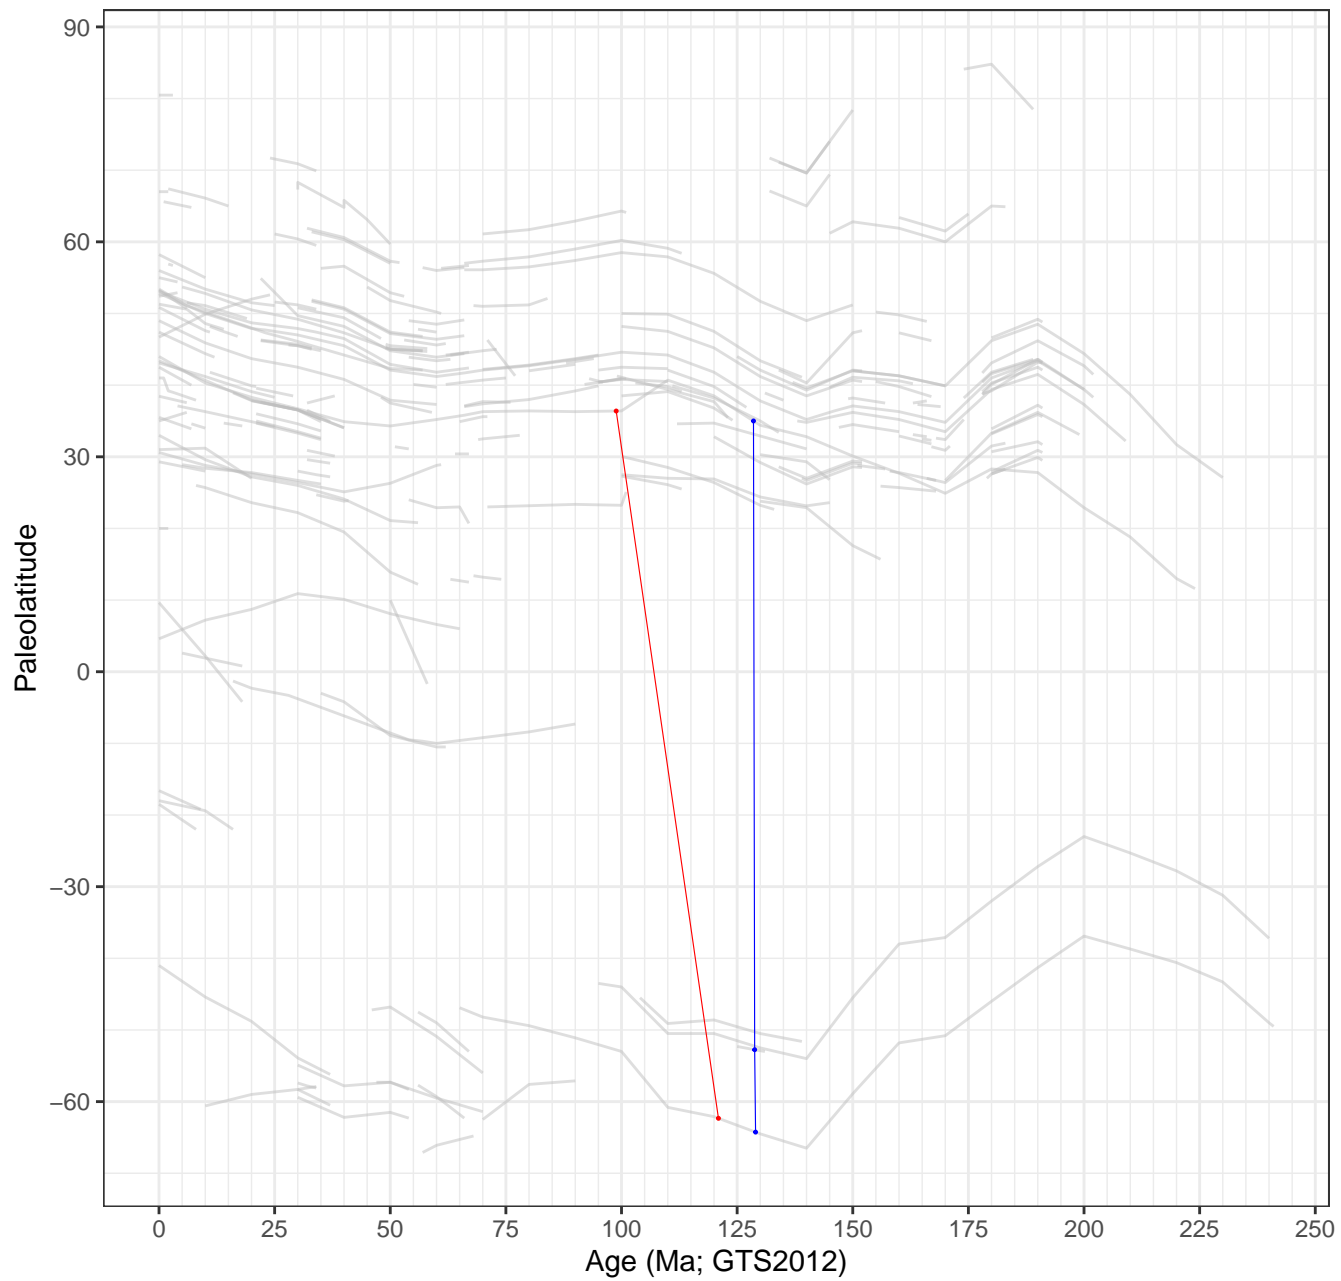

Supplement: Supplementary file 2041 [file Ovoidinium cinctum.pdf › Supplement/Supplement 2/Species 1914 plots/Ovoidinium cinctum.pdf]

# Species *Ovoidinium diversum*

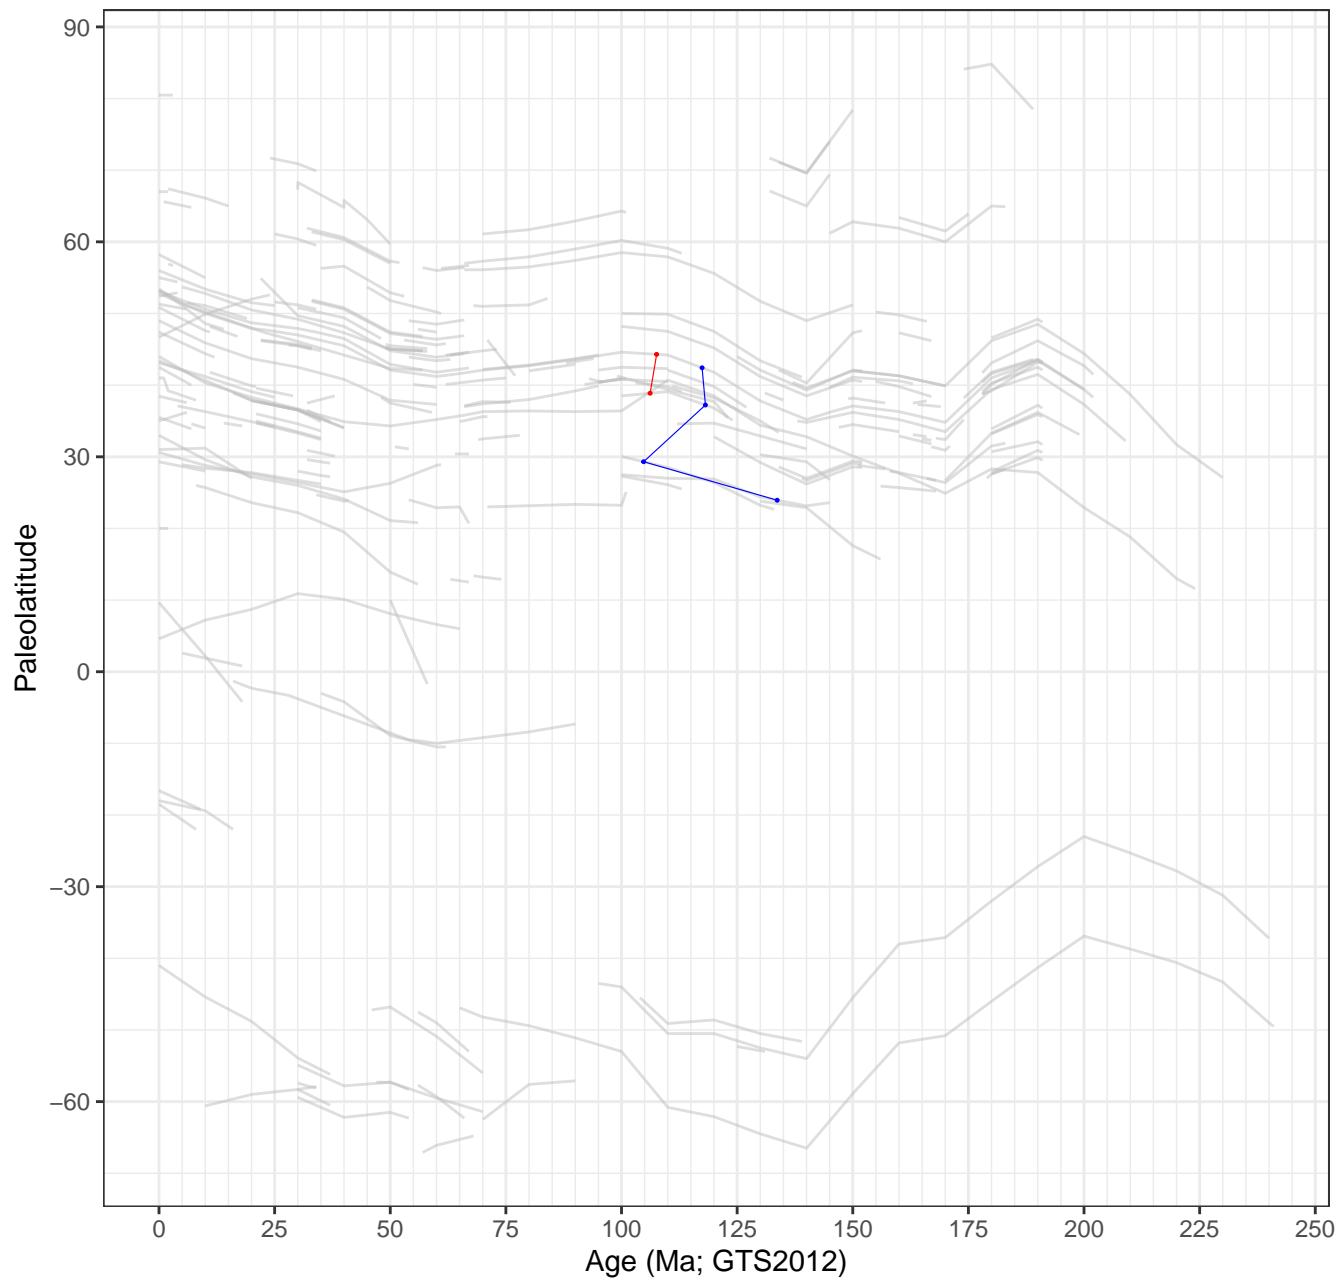

Supplement: Supplementary file 2042 [file Ovoidinium diversum.pdf › Supplement/Supplement 2/Species 1914 plots/Ovoidinium diversum.pdf]

# Species *Ovoidinium epelidosphaeroides*

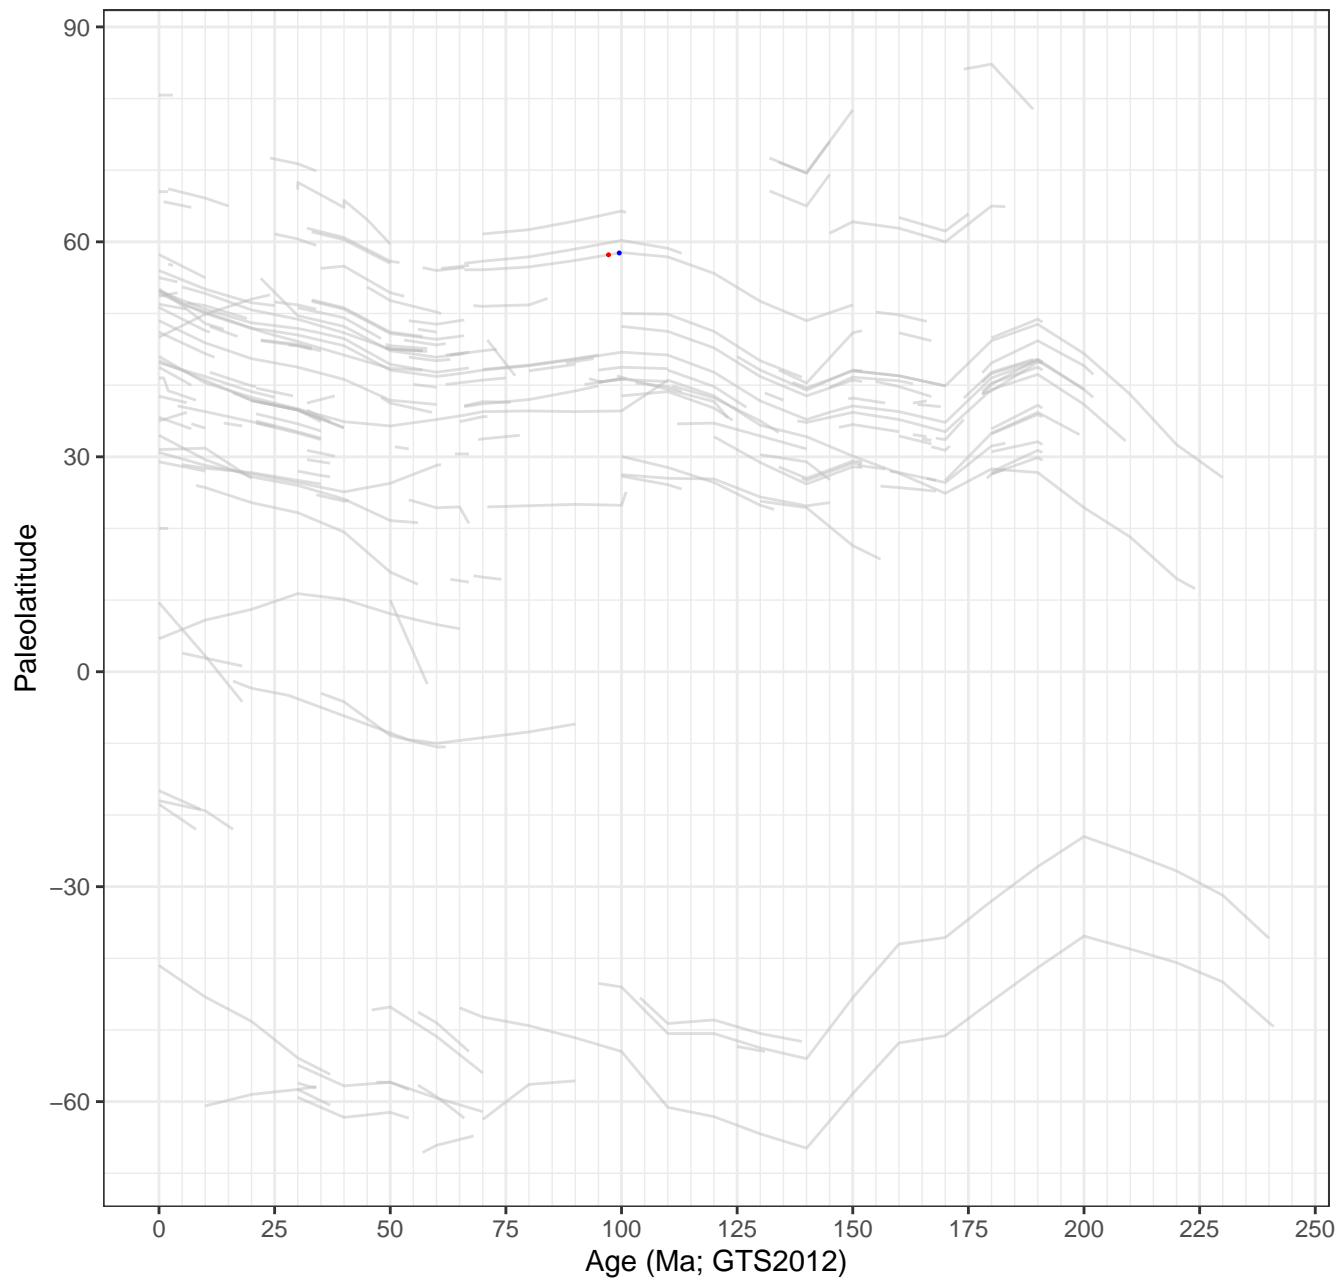

Supplement: Supplementary file 2043 [file Ovoidinium epelidosphaeroides.pdf › Supplement/Supplement 2/Species 1914 plots/Ovoidinium epelidosphaeroides.pdf]

# Species *Ovoidinium implanum*

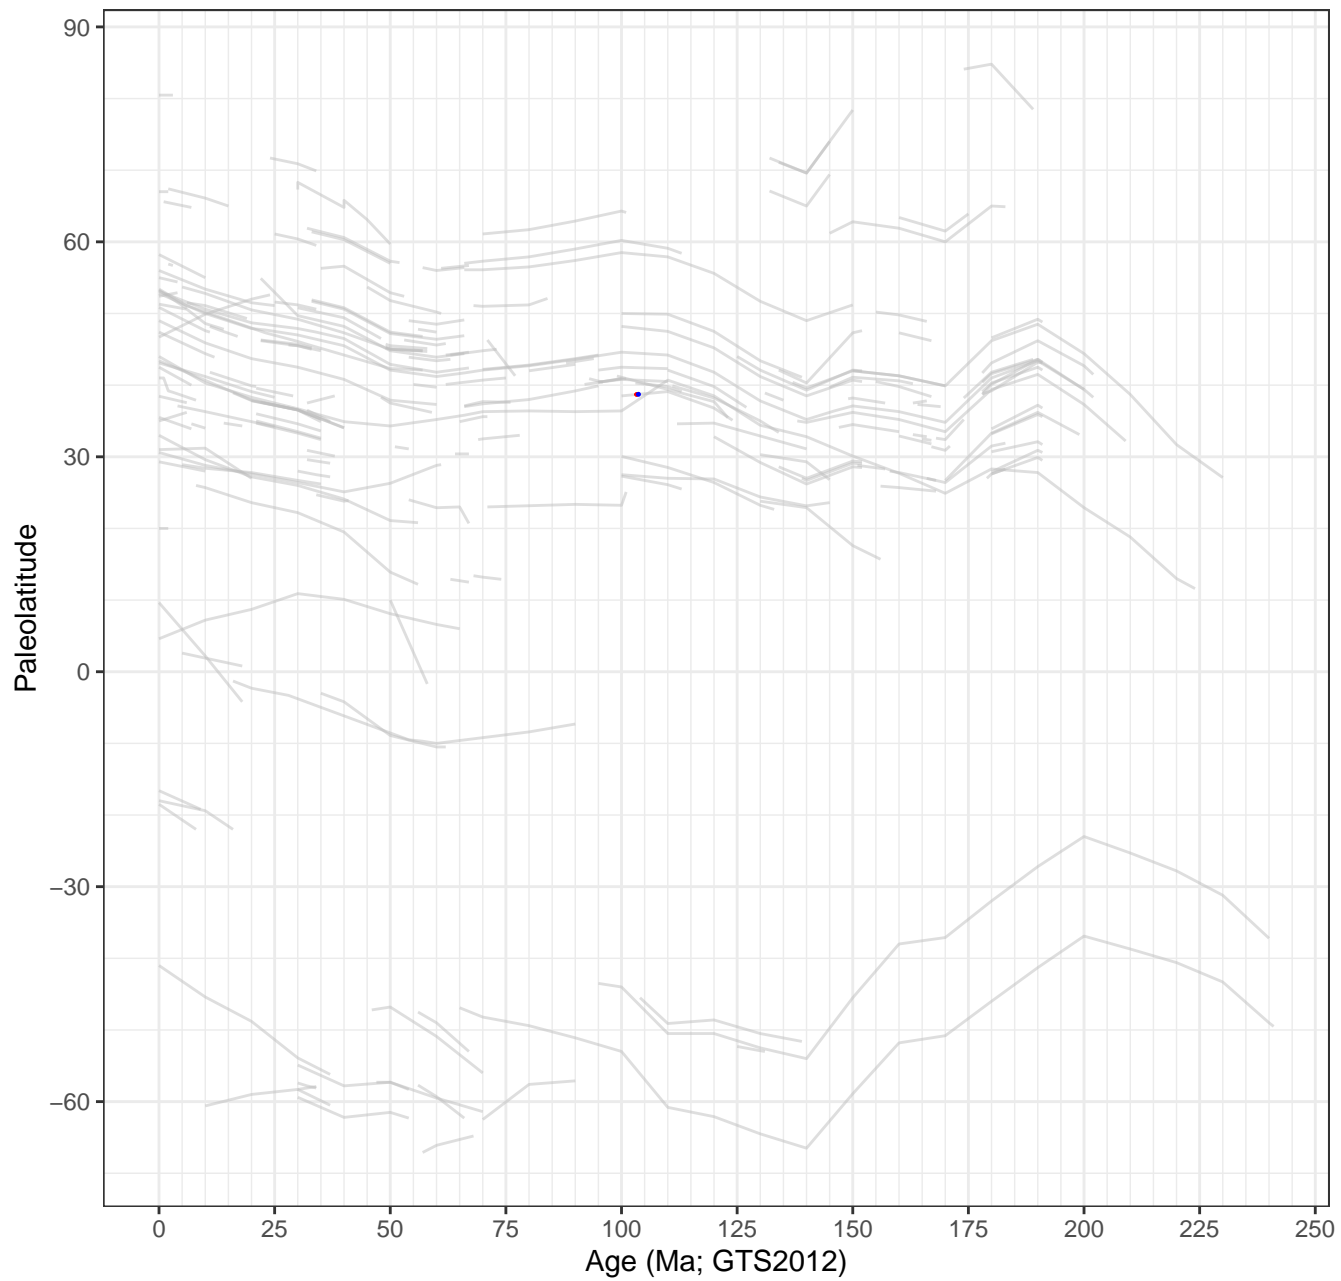

Supplement: Supplementary file 2044 [file Ovoidinium implanum.pdf › Supplement/Supplement 2/Species 1914 plots/Ovoidinium implanum.pdf]

# Species Ovoidinium incomptum

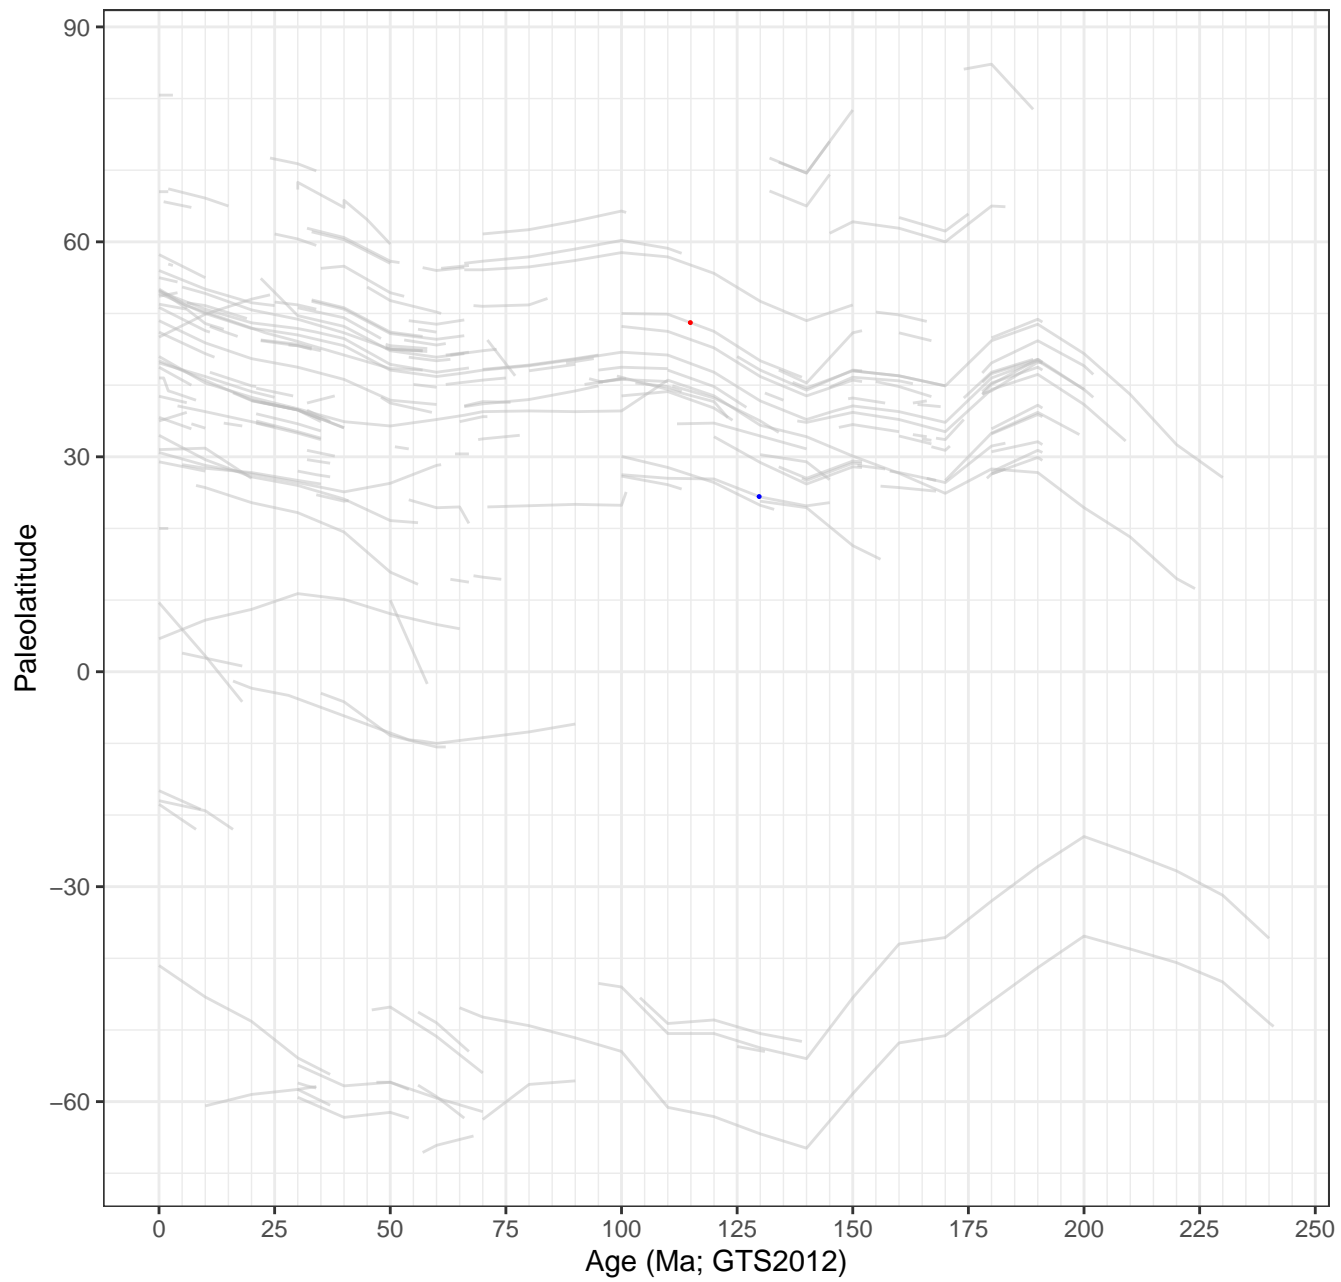

Supplement: Supplementary file 2045 [file Ovoidinium incomptum.pdf › Supplement/Supplement 2/Species 1914 plots/Ovoidinium incomptum.pdf]

# Species *Ovoidinium incorporeum*

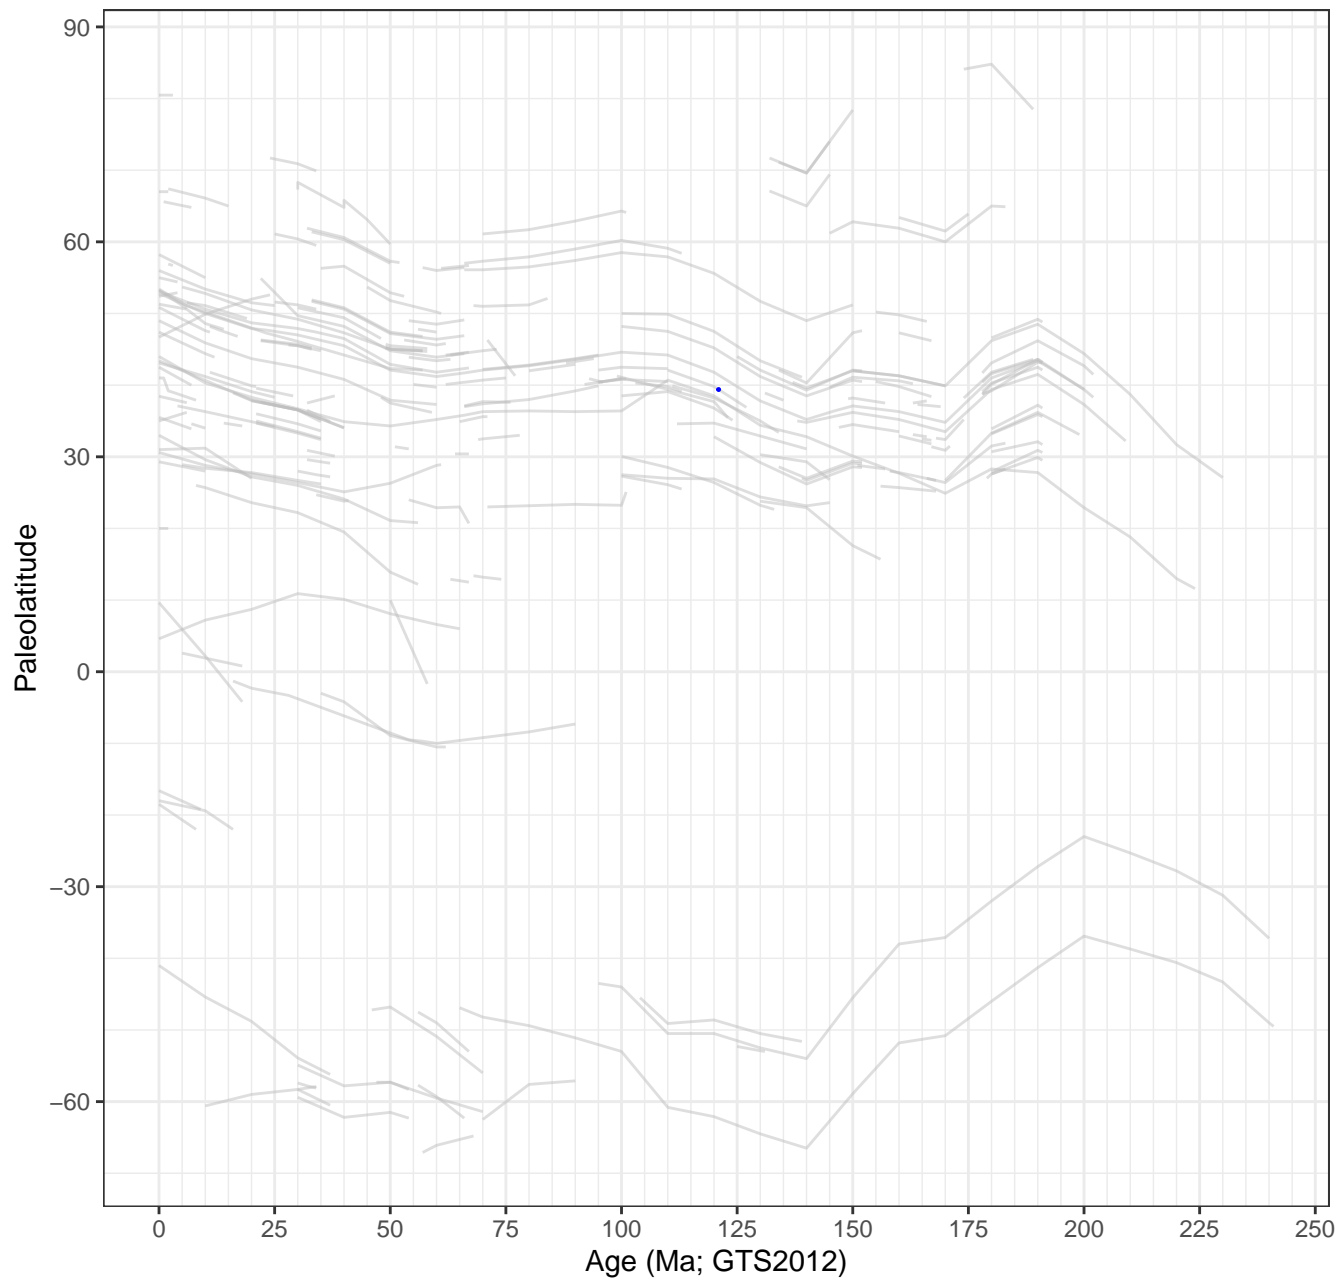

Supplement: Supplementary file 2046 [file Ovoidinium incorporeum.pdf › Supplement/Supplement 2/Species 1914 plots/Ovoidinium incorporeum.pdf]

# Species *Ovoidinium scabrosum*

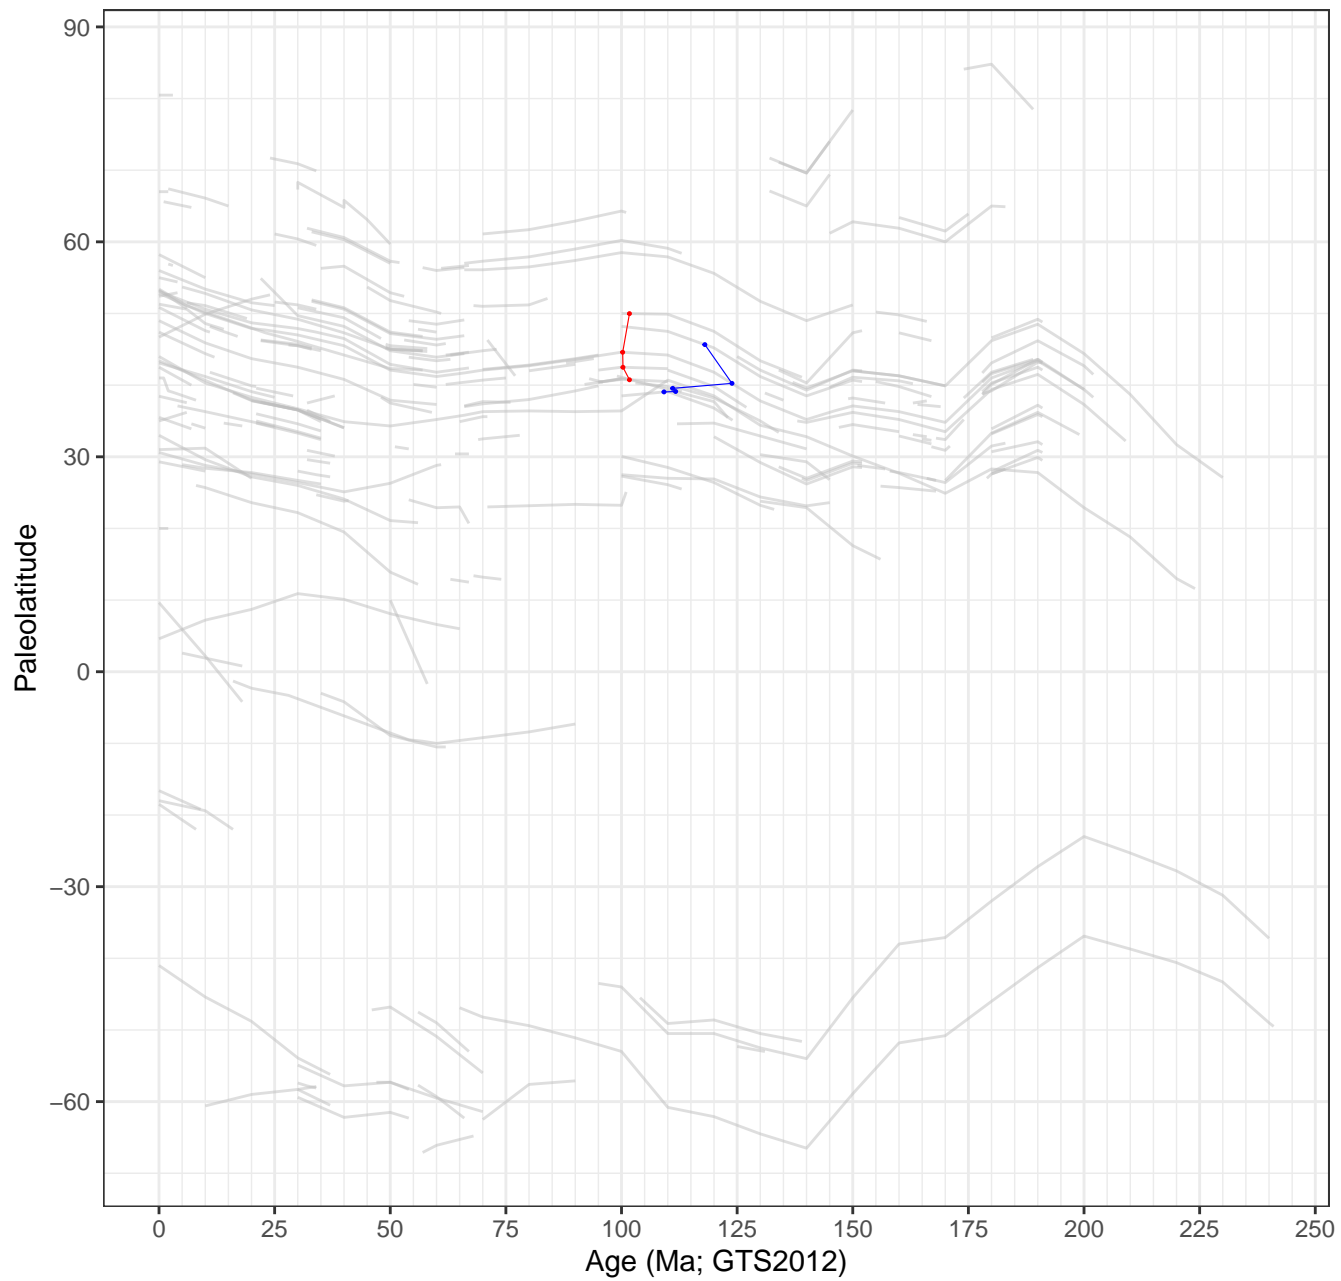

Supplement: Supplementary file 2047 [file Ovoidinium scabrosum.pdf › Supplement/Supplement 2/Species 1914 plots/Ovoidinium scabrosum.pdf]

# Species *Ovoidinium striatum*

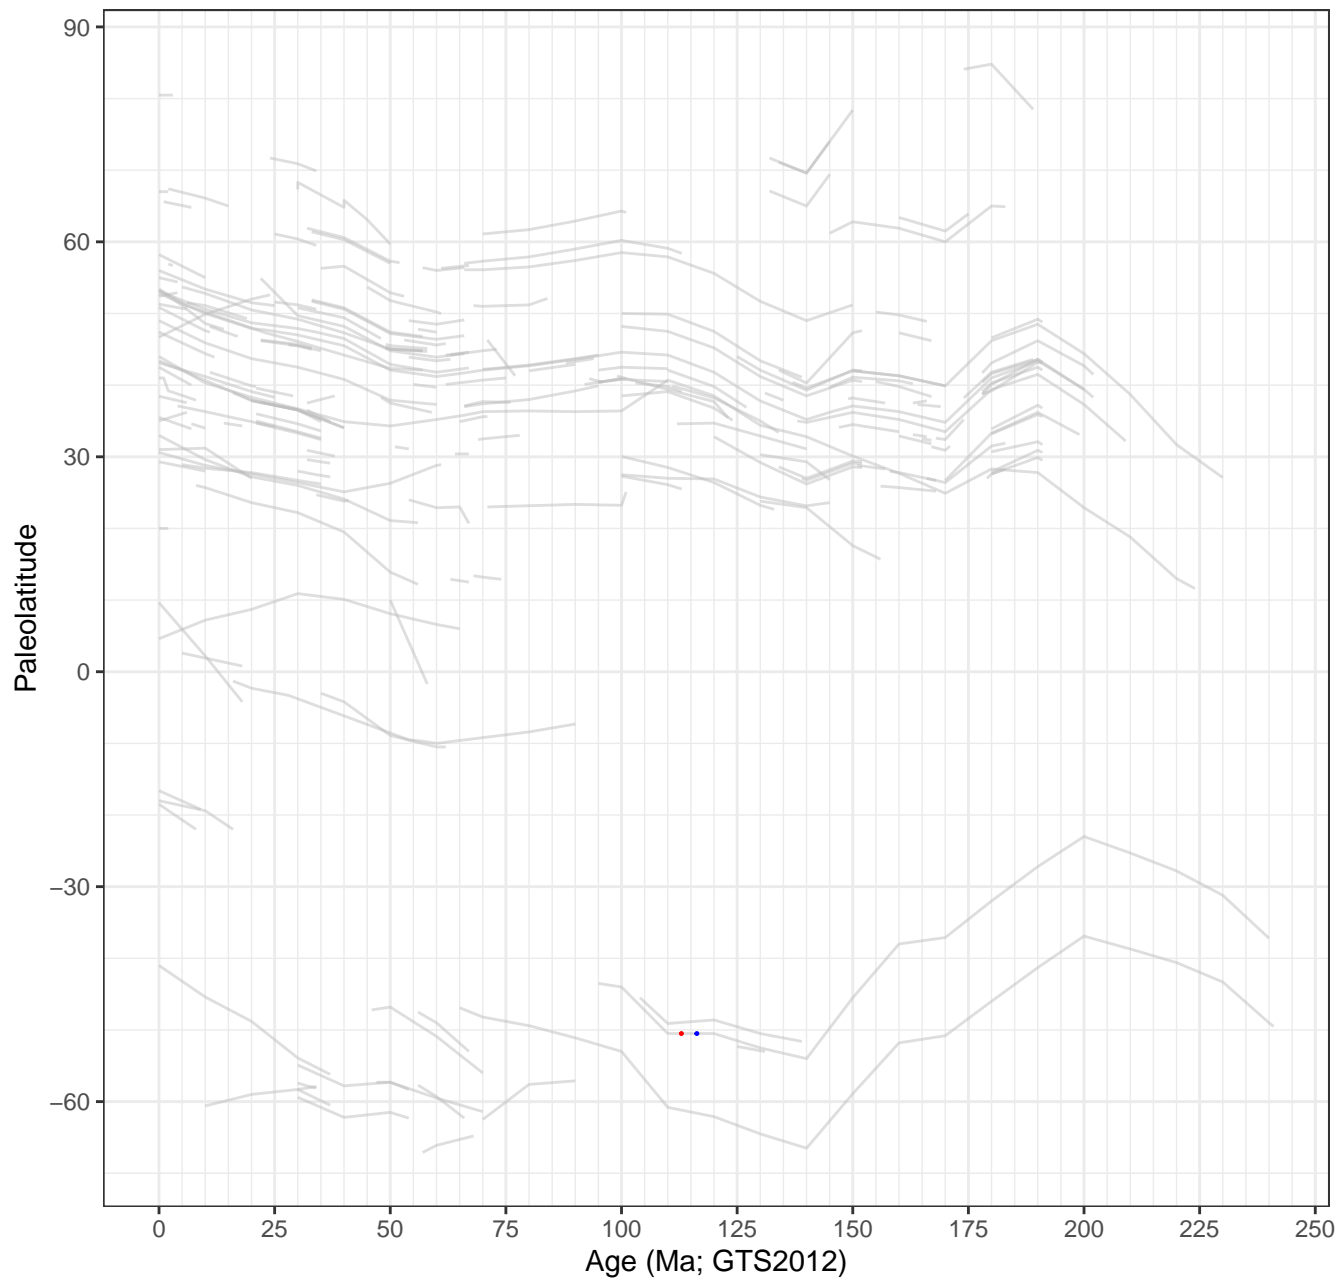

Supplement: Supplementary file 2048 [file Ovoidinium striatum.pdf › Supplement/Supplement 2/Species 1914 plots/Ovoidinium striatum.pdf]

# Species Ovoidinium verrucosum ostium

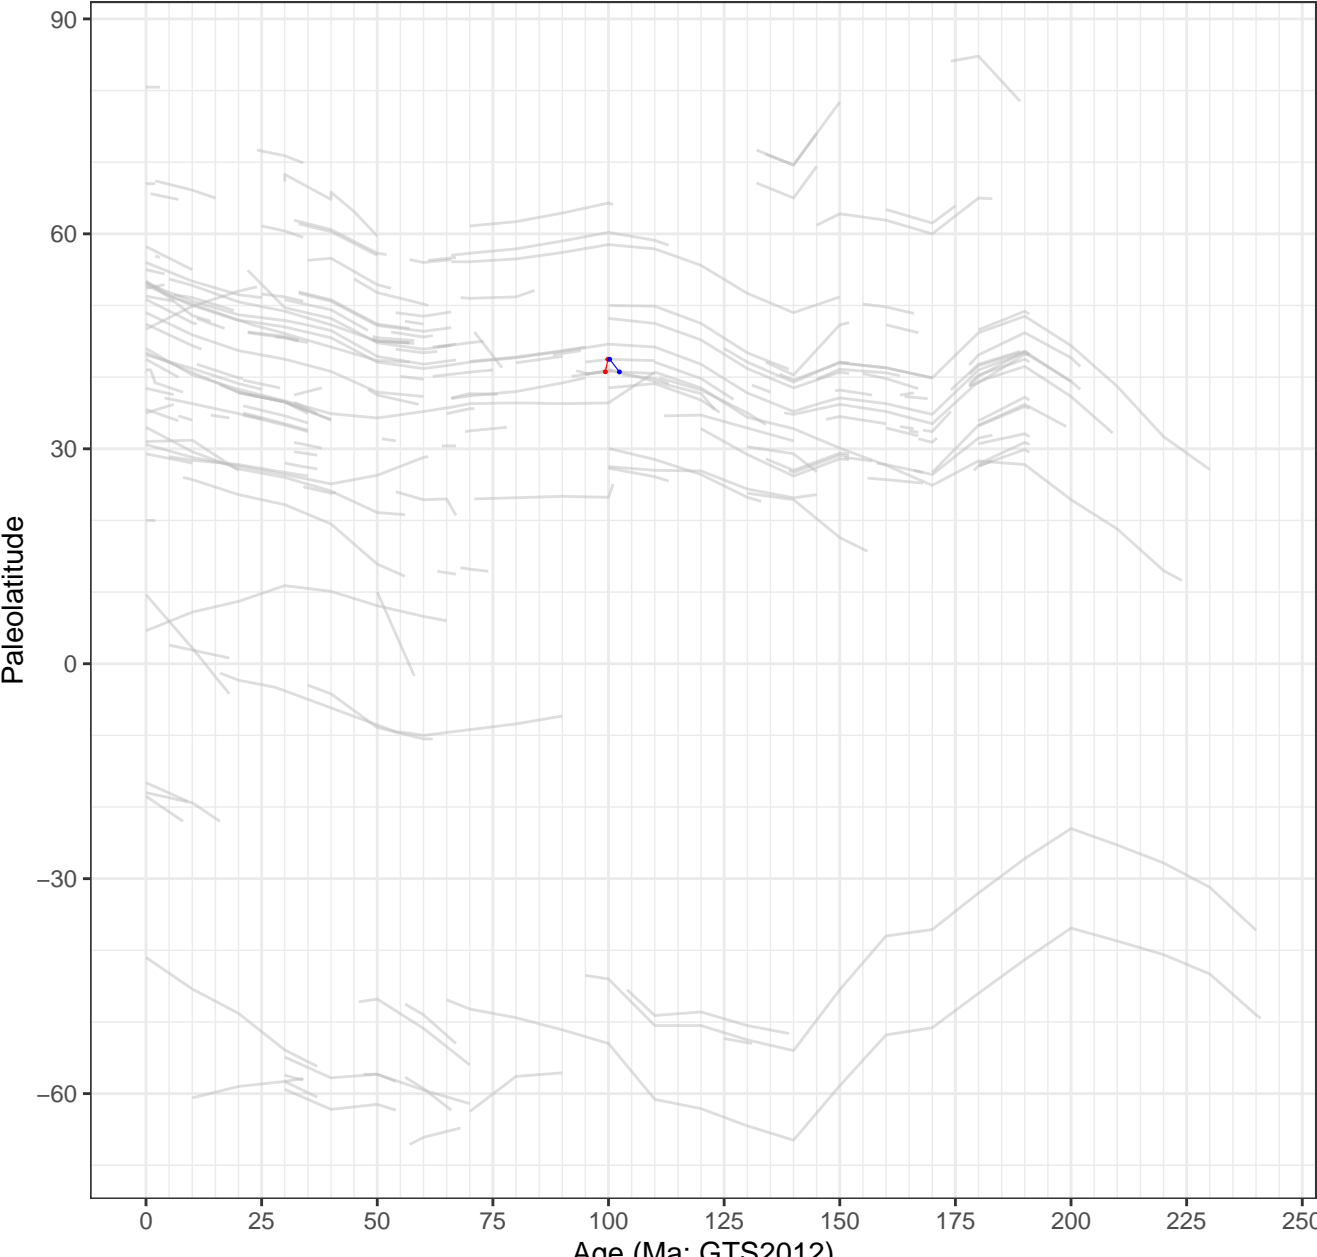

Supplement: Supplementary file 2049 [file Ovoidinium verrucosum ostium.pdf › Supplement/Supplement 2/Species 1914 plots/Ovoidinium verrucosum ostium.pdf]

# Species *Ovoidinium verrucosum verrucosum*

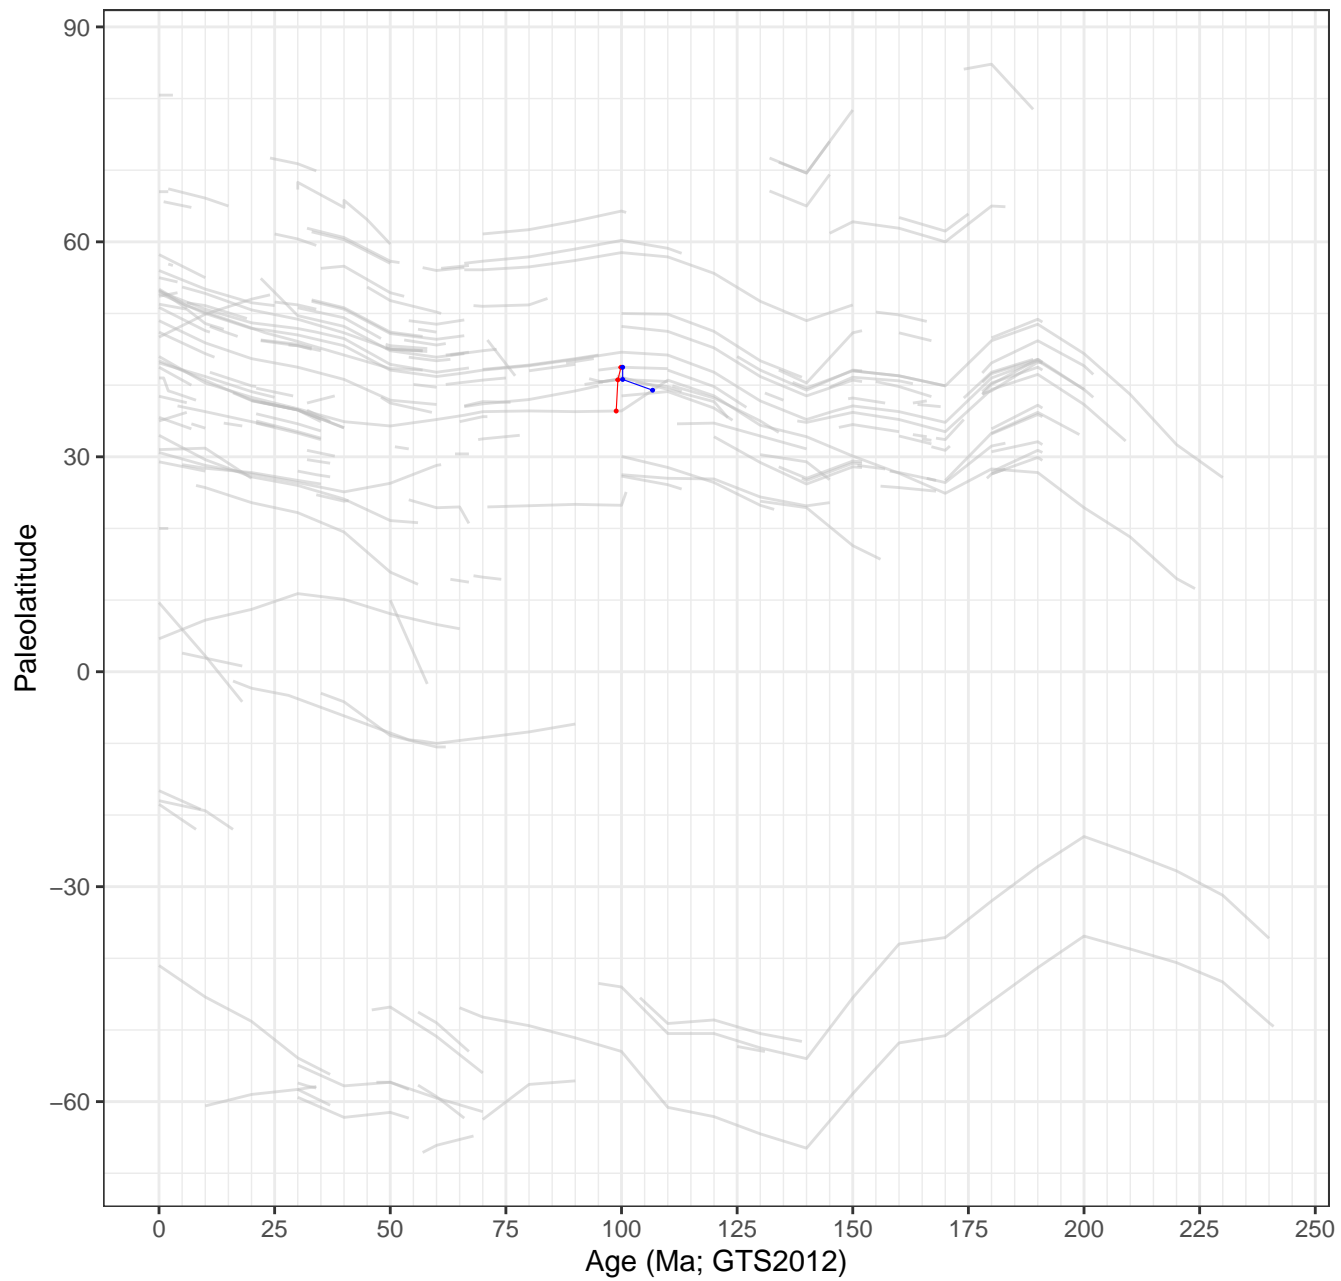

Supplement: Supplementary file 2050 [file Ovoidinium verrucosum verrucosum.pdf › Supplement/Supplement 2/Species 1914 plots/Ovoidinium verrucosum verrucosum.pdf]

# Species *Ovoidinium verrucosum*

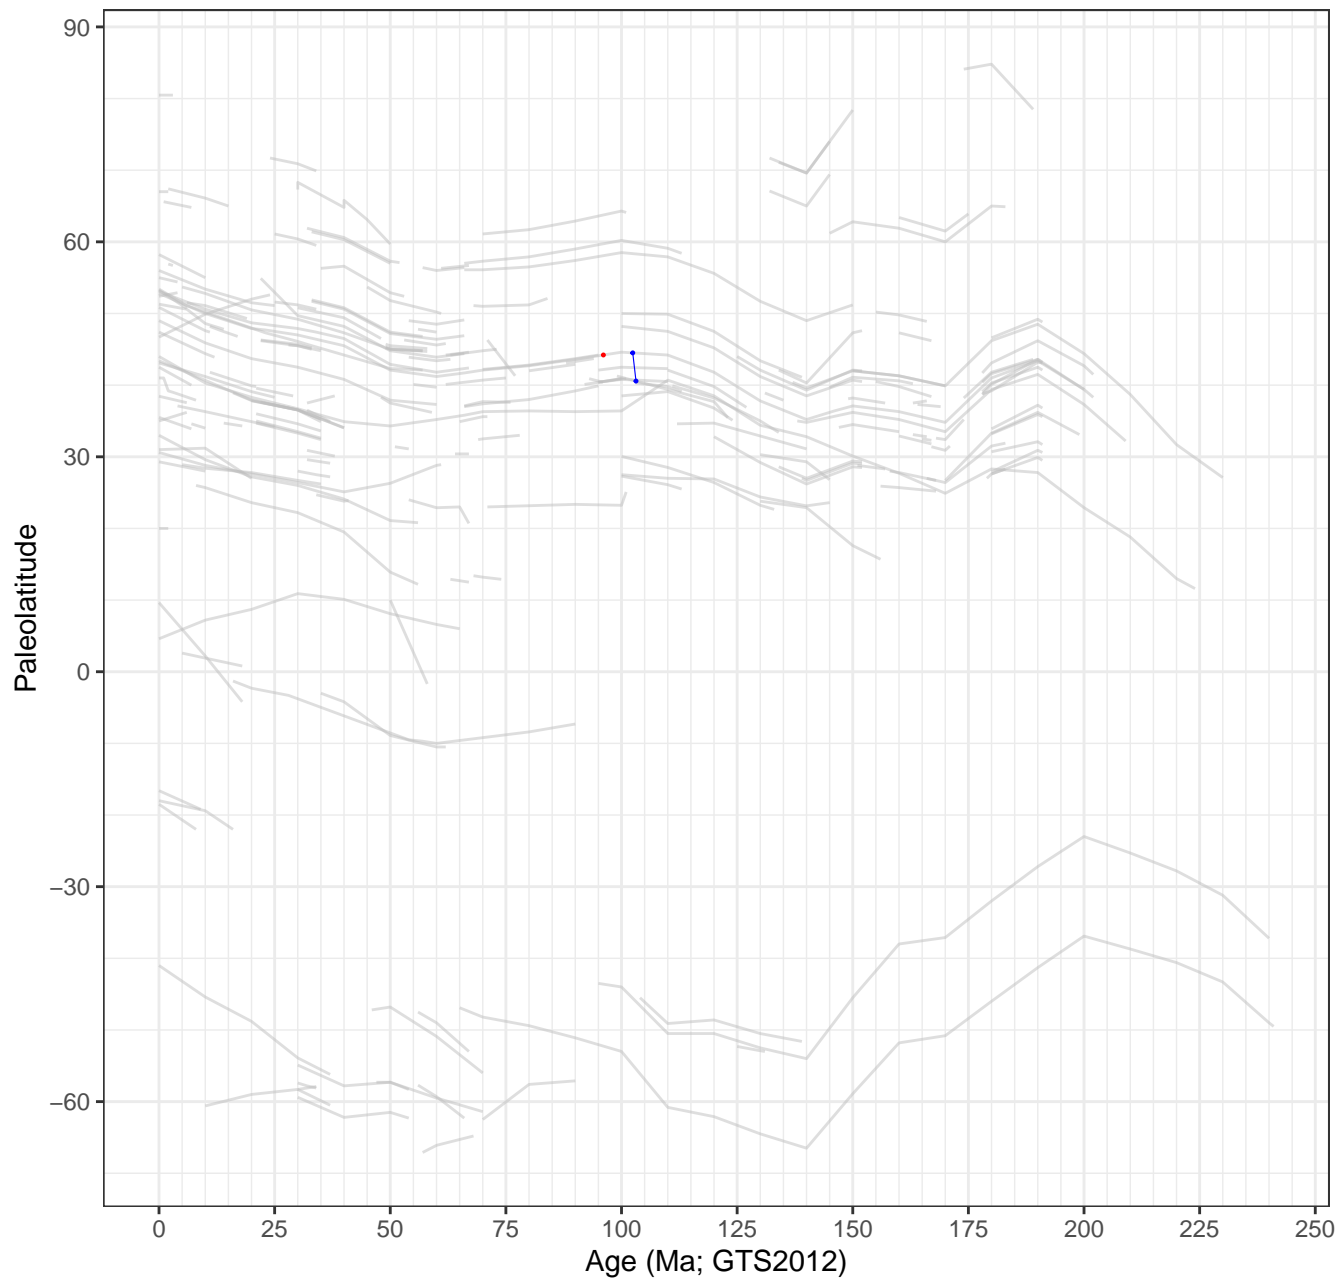

Supplement: Supplementary file 2051 [file Ovoidinium verrucosum.pdf › Supplement/Supplement 2/Species 1914 plots/Ovoidinium verrucosum.pdf]

# Species *Palaecysta complicata*

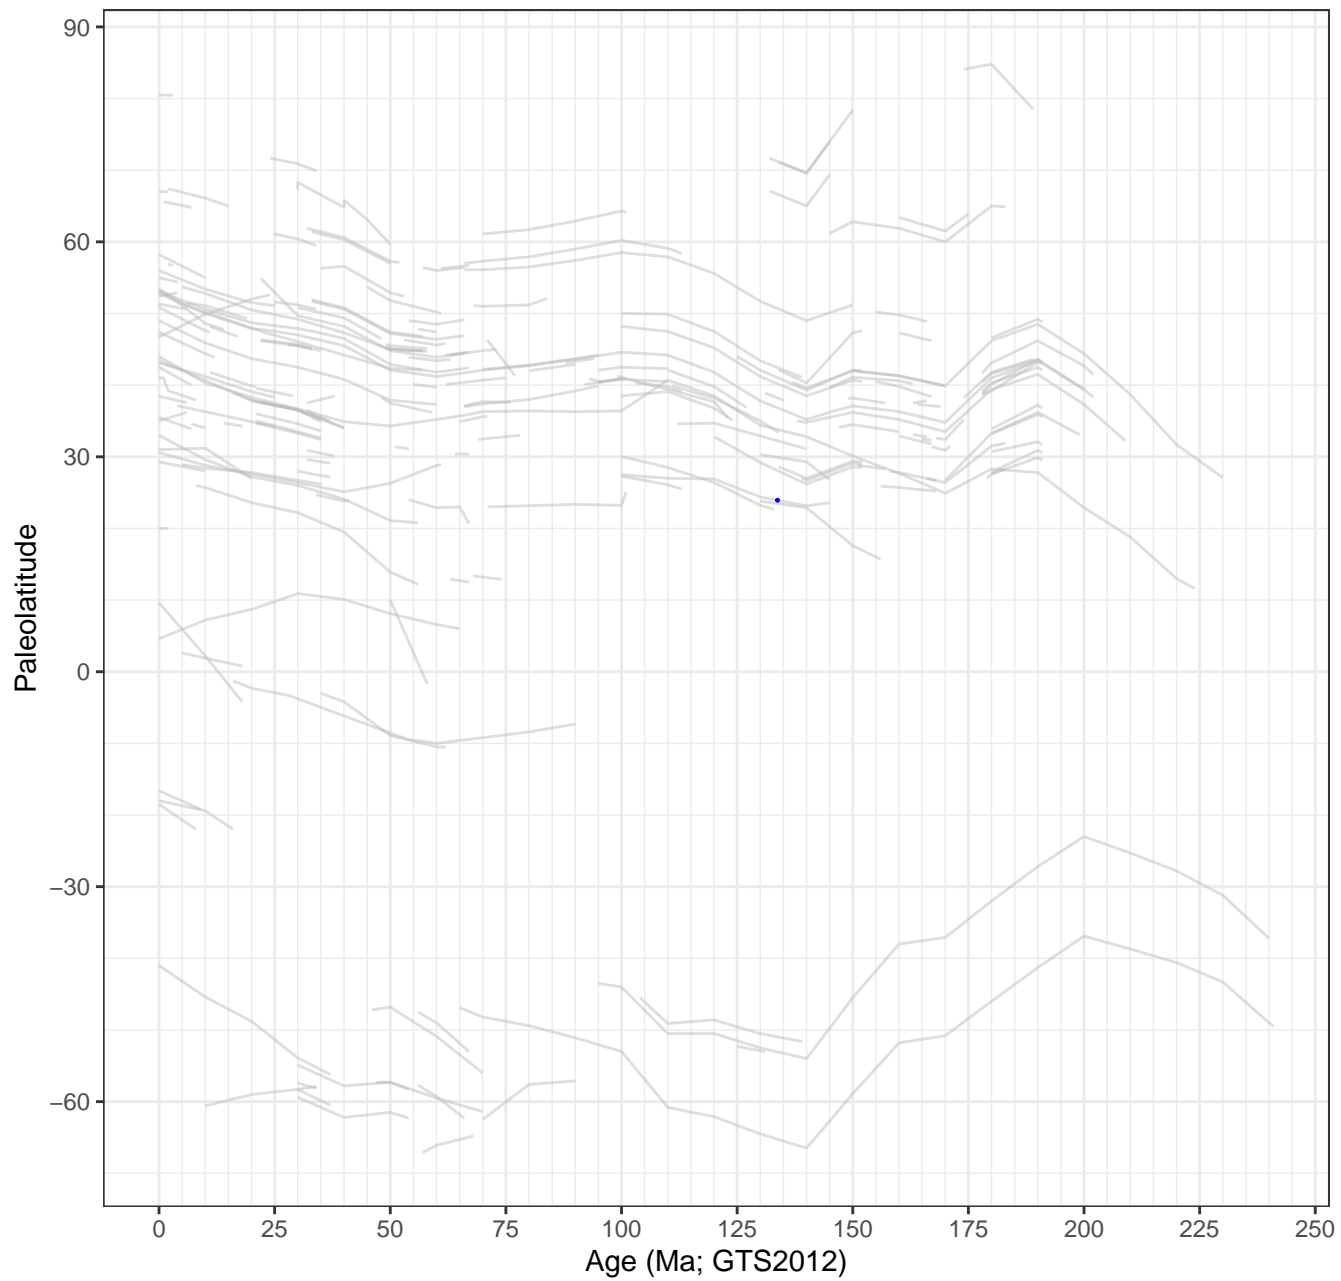

Supplement: Supplementary file 2052 [file Palaecysta complicata.pdf › Supplement/Supplement 2/Species 1914 plots/Palaecysta complicata.pdf]

# Species *Palaecysta palmula*

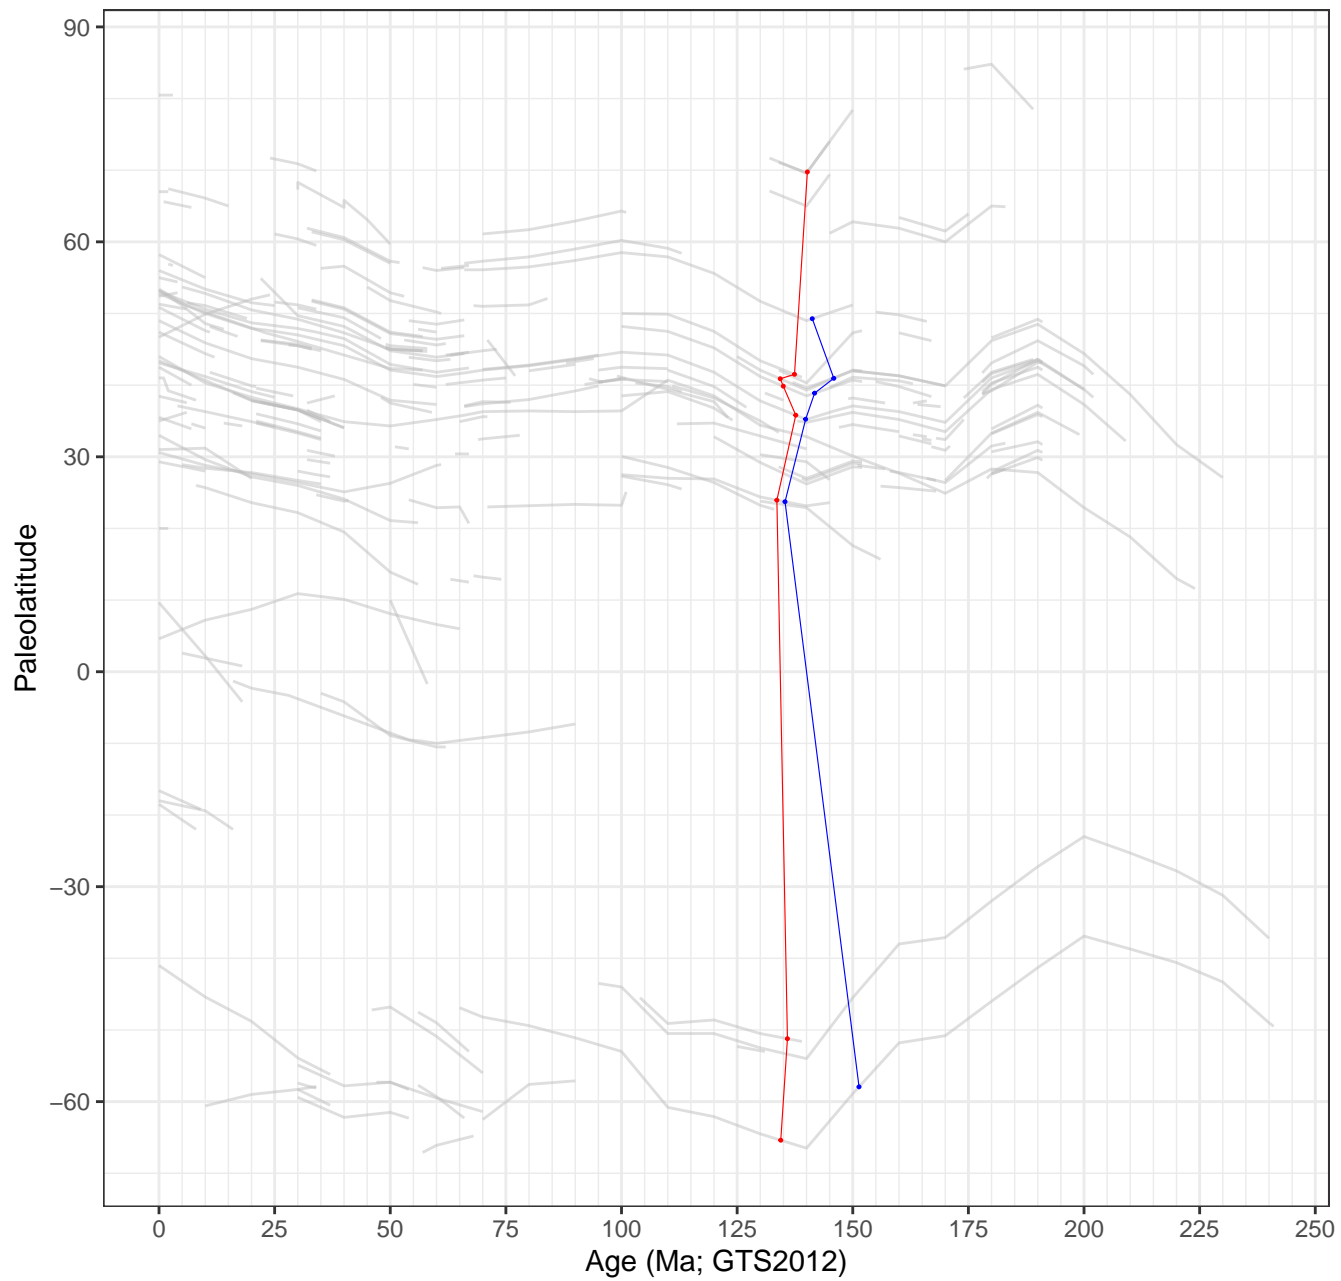

Supplement: Supplementary file 2053 [file Palaecysta palmula.pdf › Supplement/Supplement 2/Species 1914 plots/Palaecysta palmula.pdf]

# Species *Palaeocystodinium australinum*

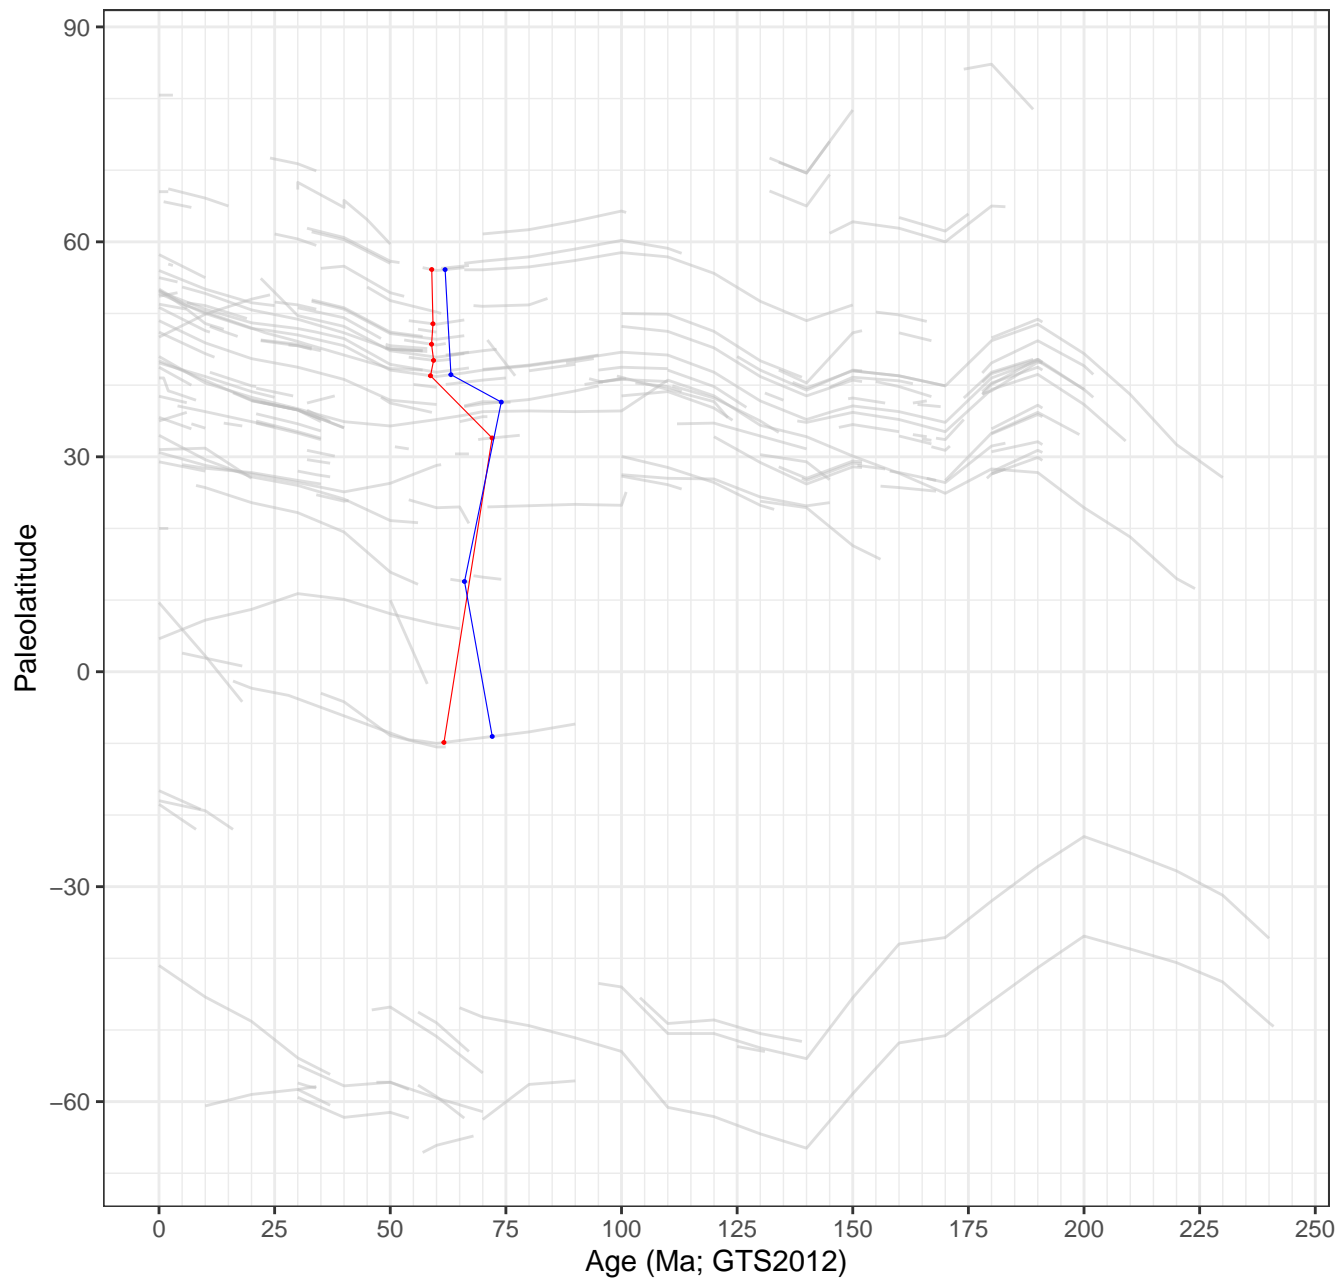

Supplement: Supplementary file 2054 [file Palaeocystodinium australinum.pdf › Supplement/Supplement 2/Species 1914 plots/Palaeocystodinium australinum.pdf]

# Species *Palaeocystodinium bulliforme*

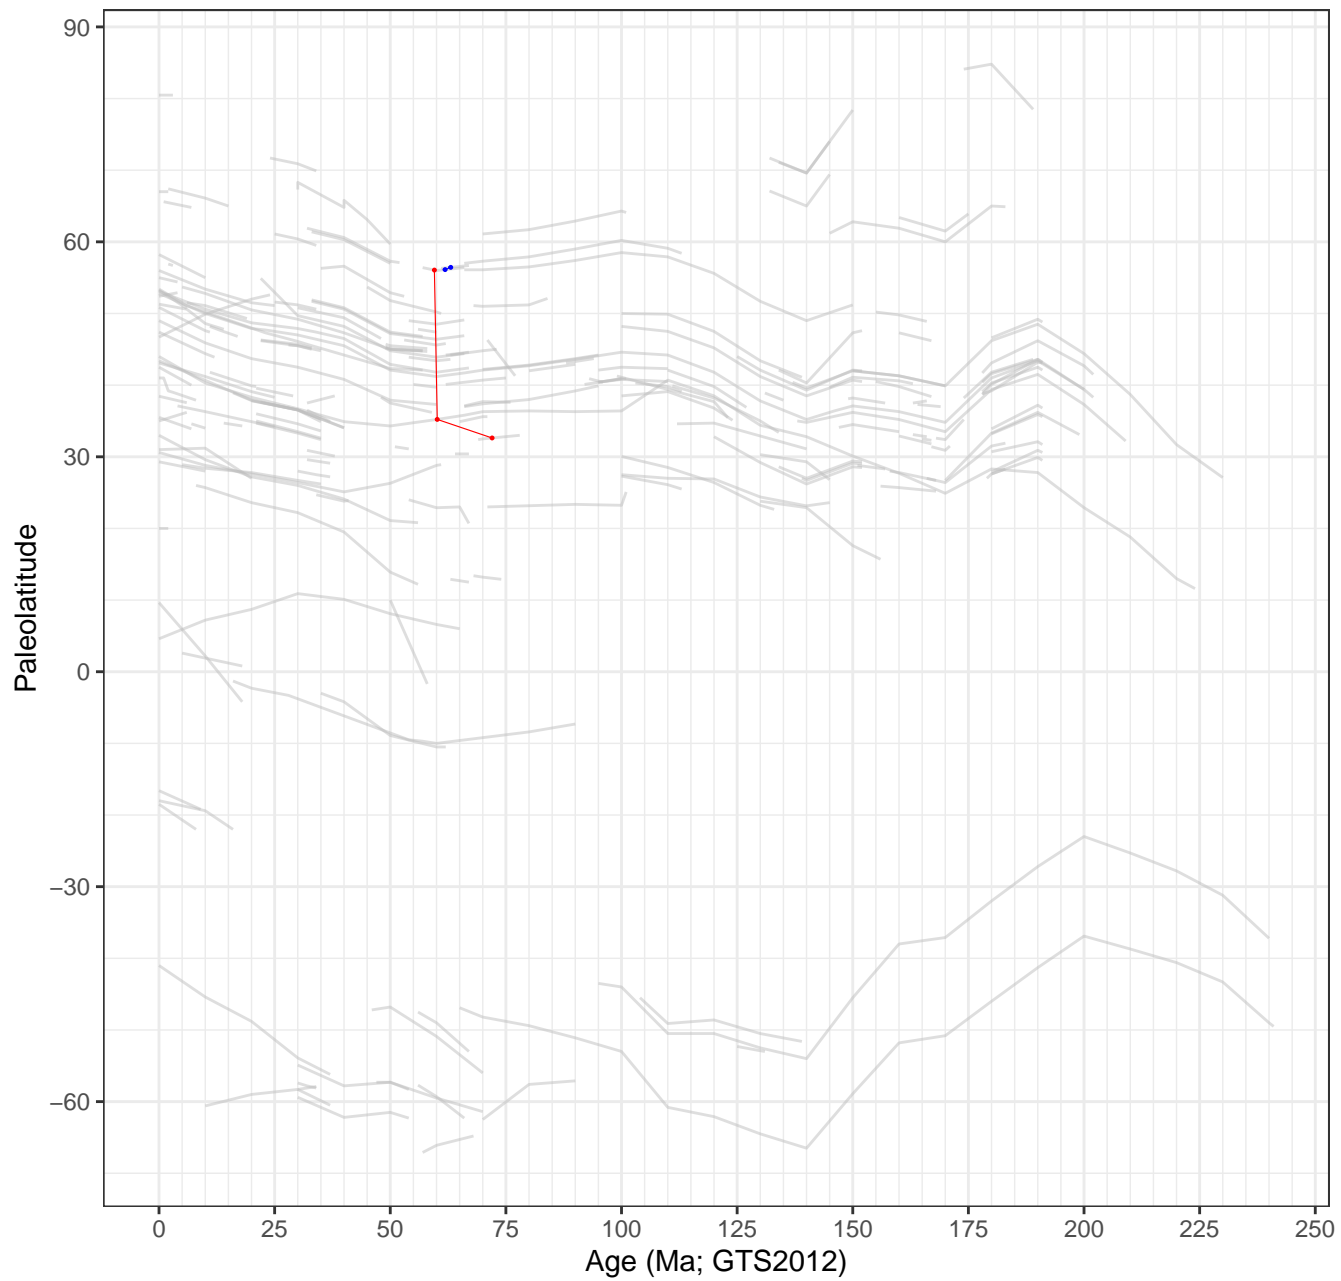

Supplement: Supplementary file 2055 [file Palaeocystodinium bulliforme.pdf › Supplement/Supplement 2/Species 1914 plots/Palaeocystodinium bulliforme.pdf]

# Species *Palaeocystodinium golzowense*

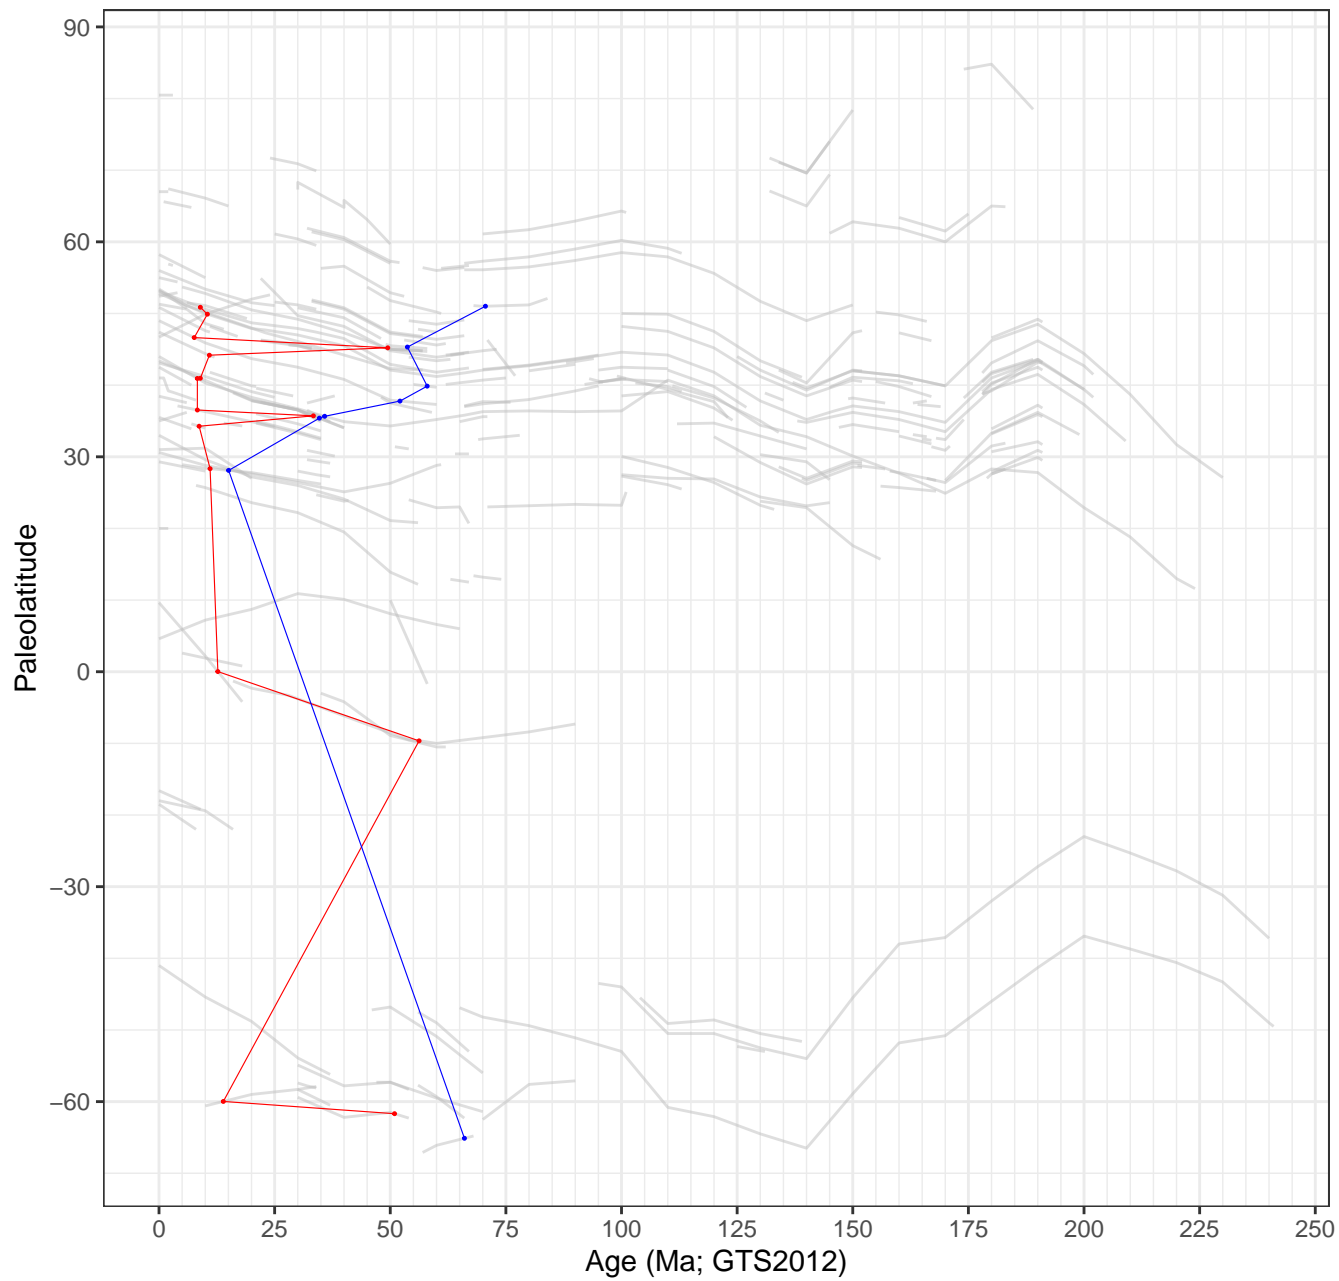

Supplement: Supplementary file 2056 [file Palaeocystodinium golzowense.pdf › Supplement/Supplement 2/Species 1914 plots/Palaeocystodinium golzowense.pdf]

# Species *Palaeocystodinium granulatum*

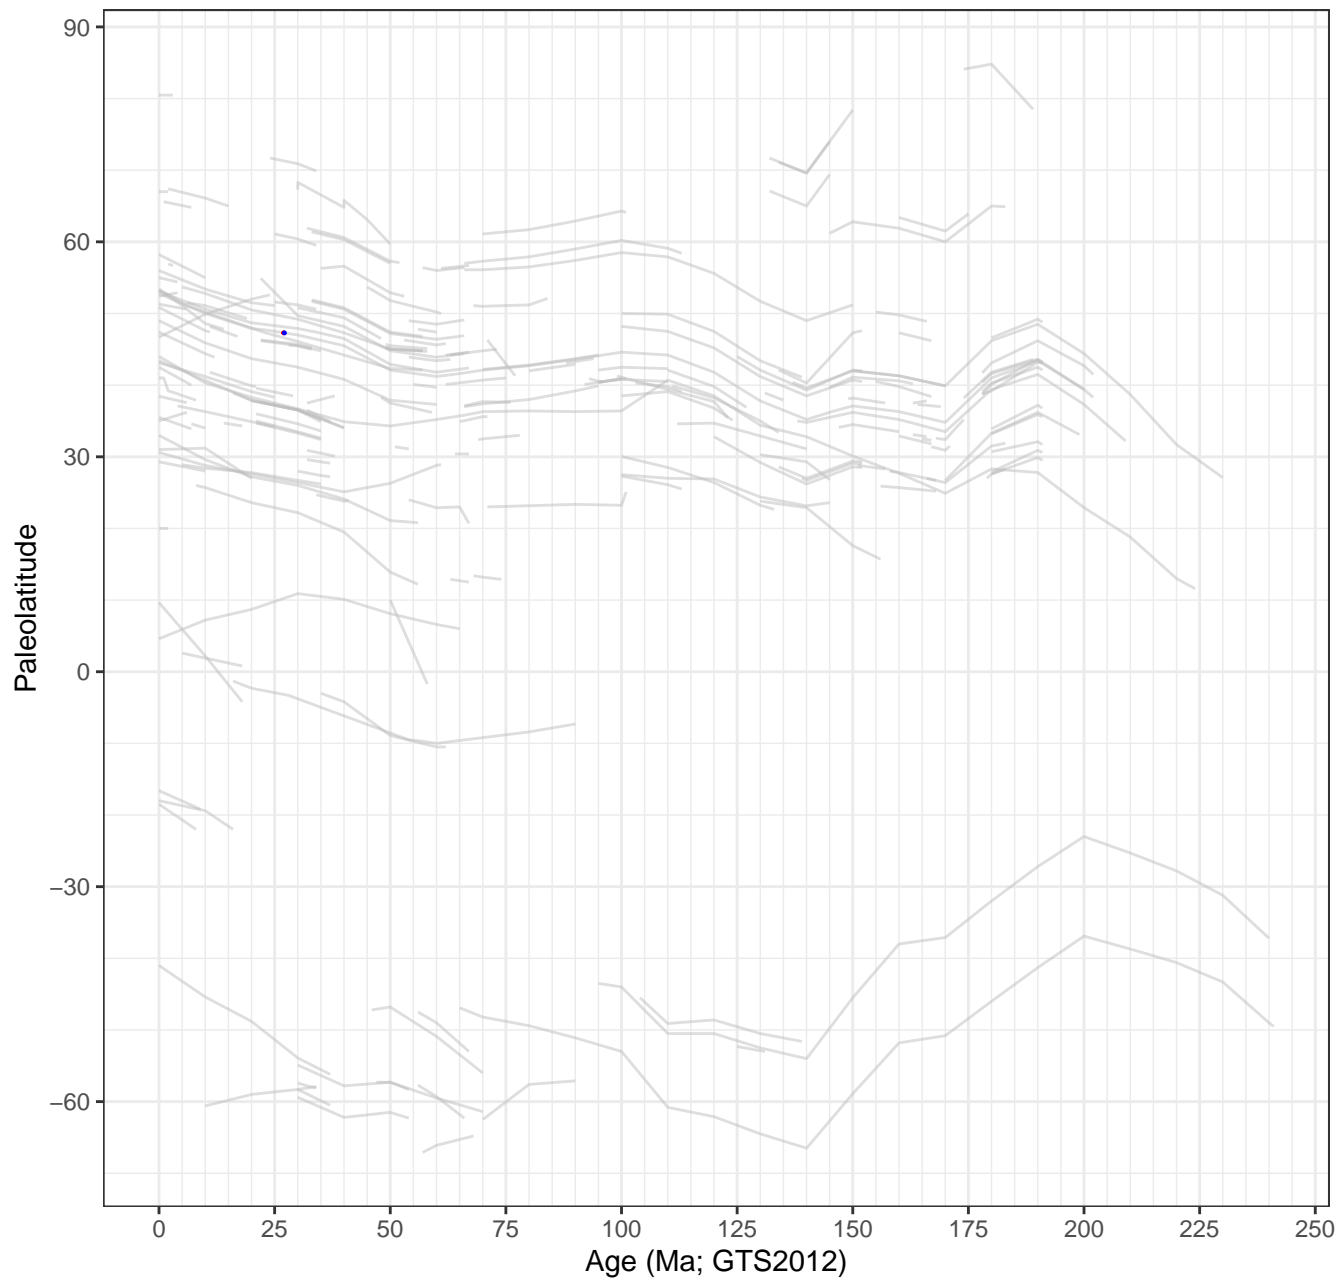

Supplement: Supplementary file 2057 [file Palaeocystodinium granulatum.pdf › Supplement/Supplement 2/Species 1914 plots/Palaeocystodinium granulatum.pdf]

# Species *Palaeocystodinium minor*

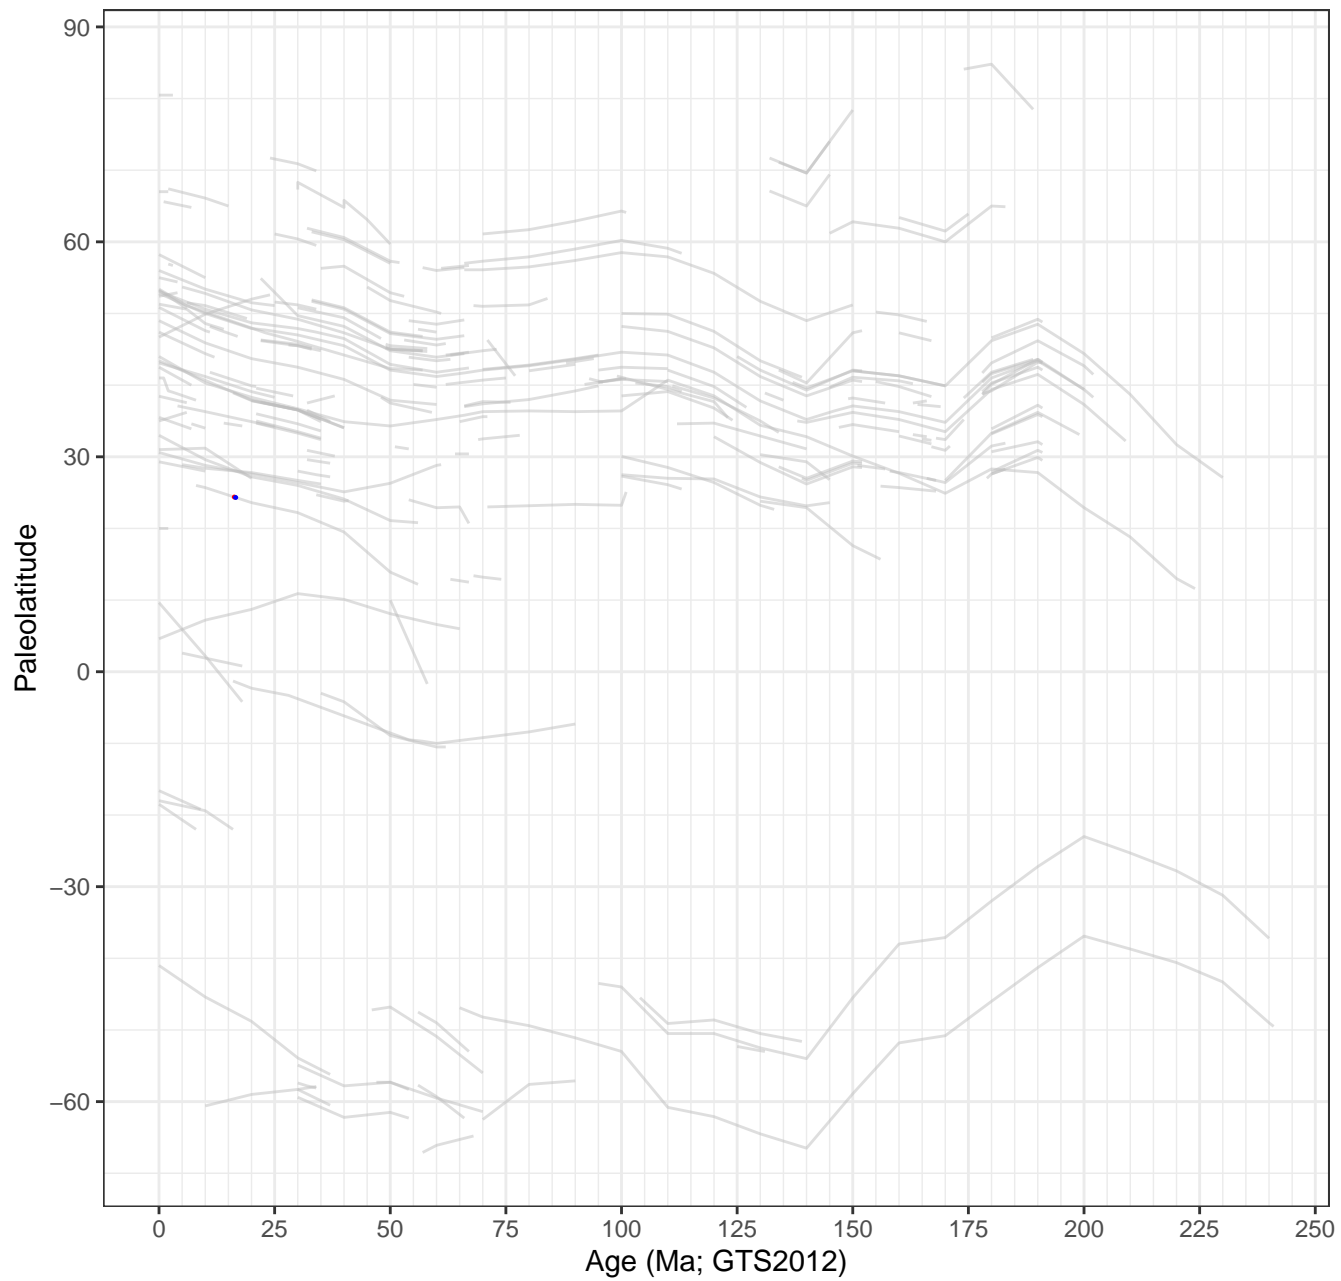

Supplement: Supplementary file 2058 [file Palaeocystodinium minor.pdf › Supplement/Supplement 2/Species 1914 plots/Palaeocystodinium minor.pdf]

# Species *Palaeocystodinium miocaenicum*

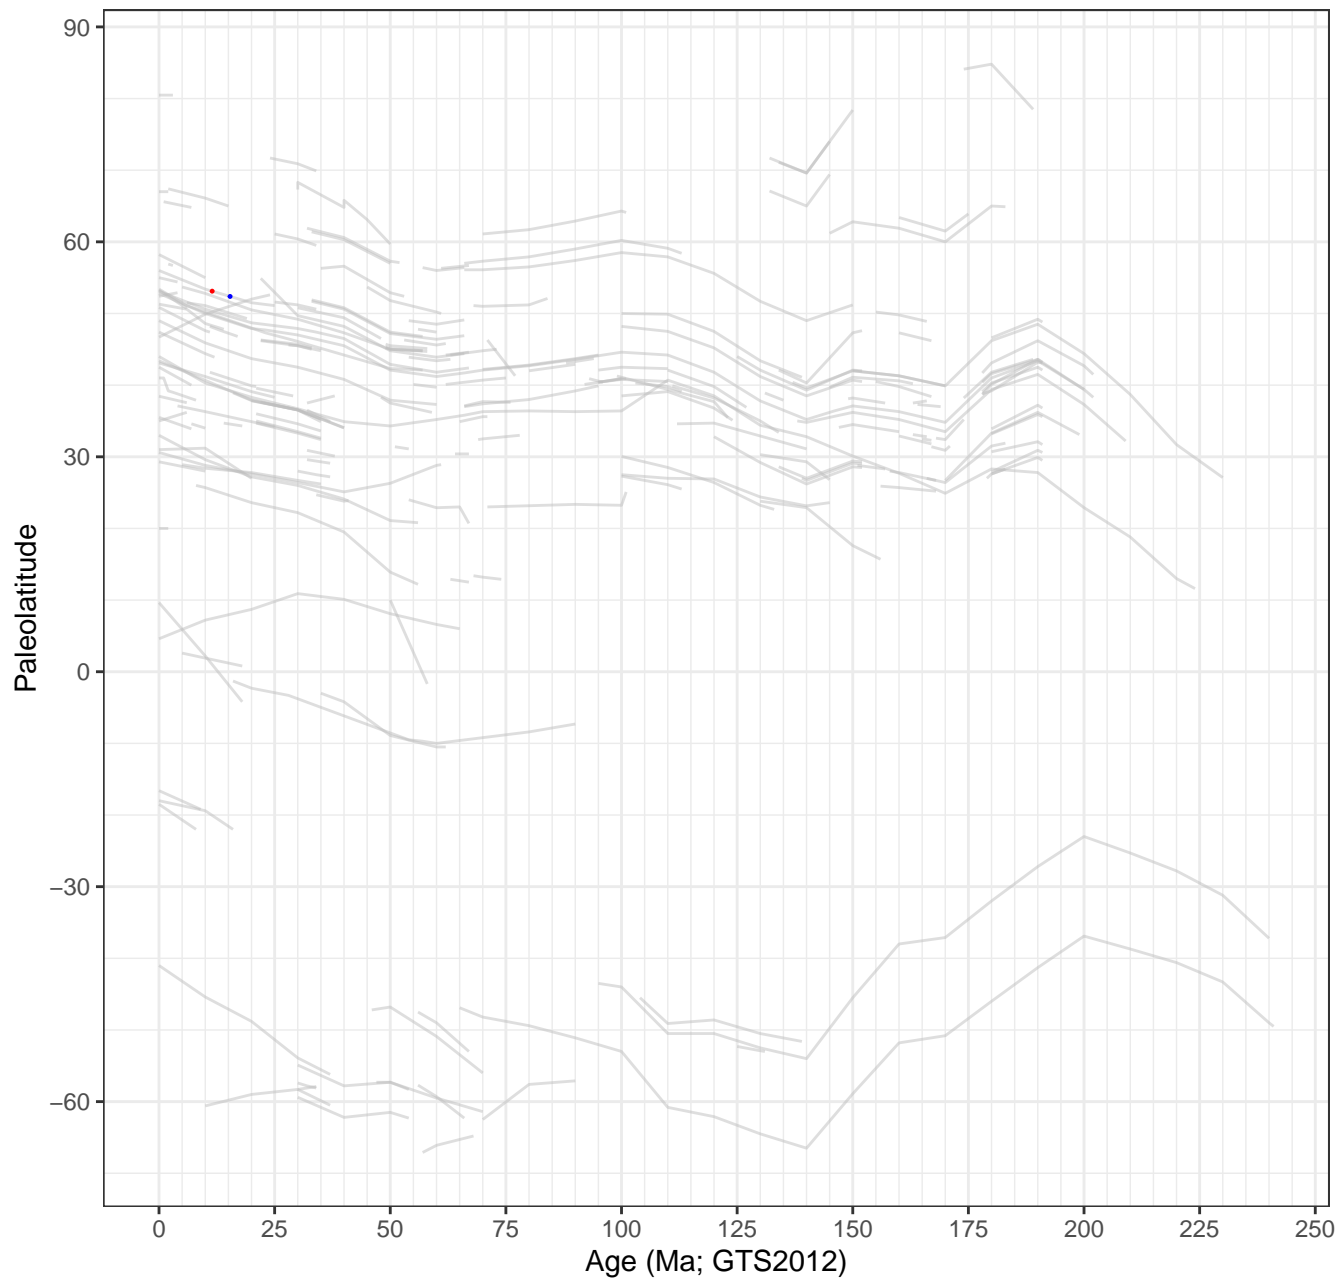

Supplement: Supplementary file 2059 [file Palaeocystodinium miocaenicum.pdf › Supplement/Supplement 2/Species 1914 plots/Palaeocystodinium miocaenicum.pdf]

# Species *Palaeocystodinium obesum*

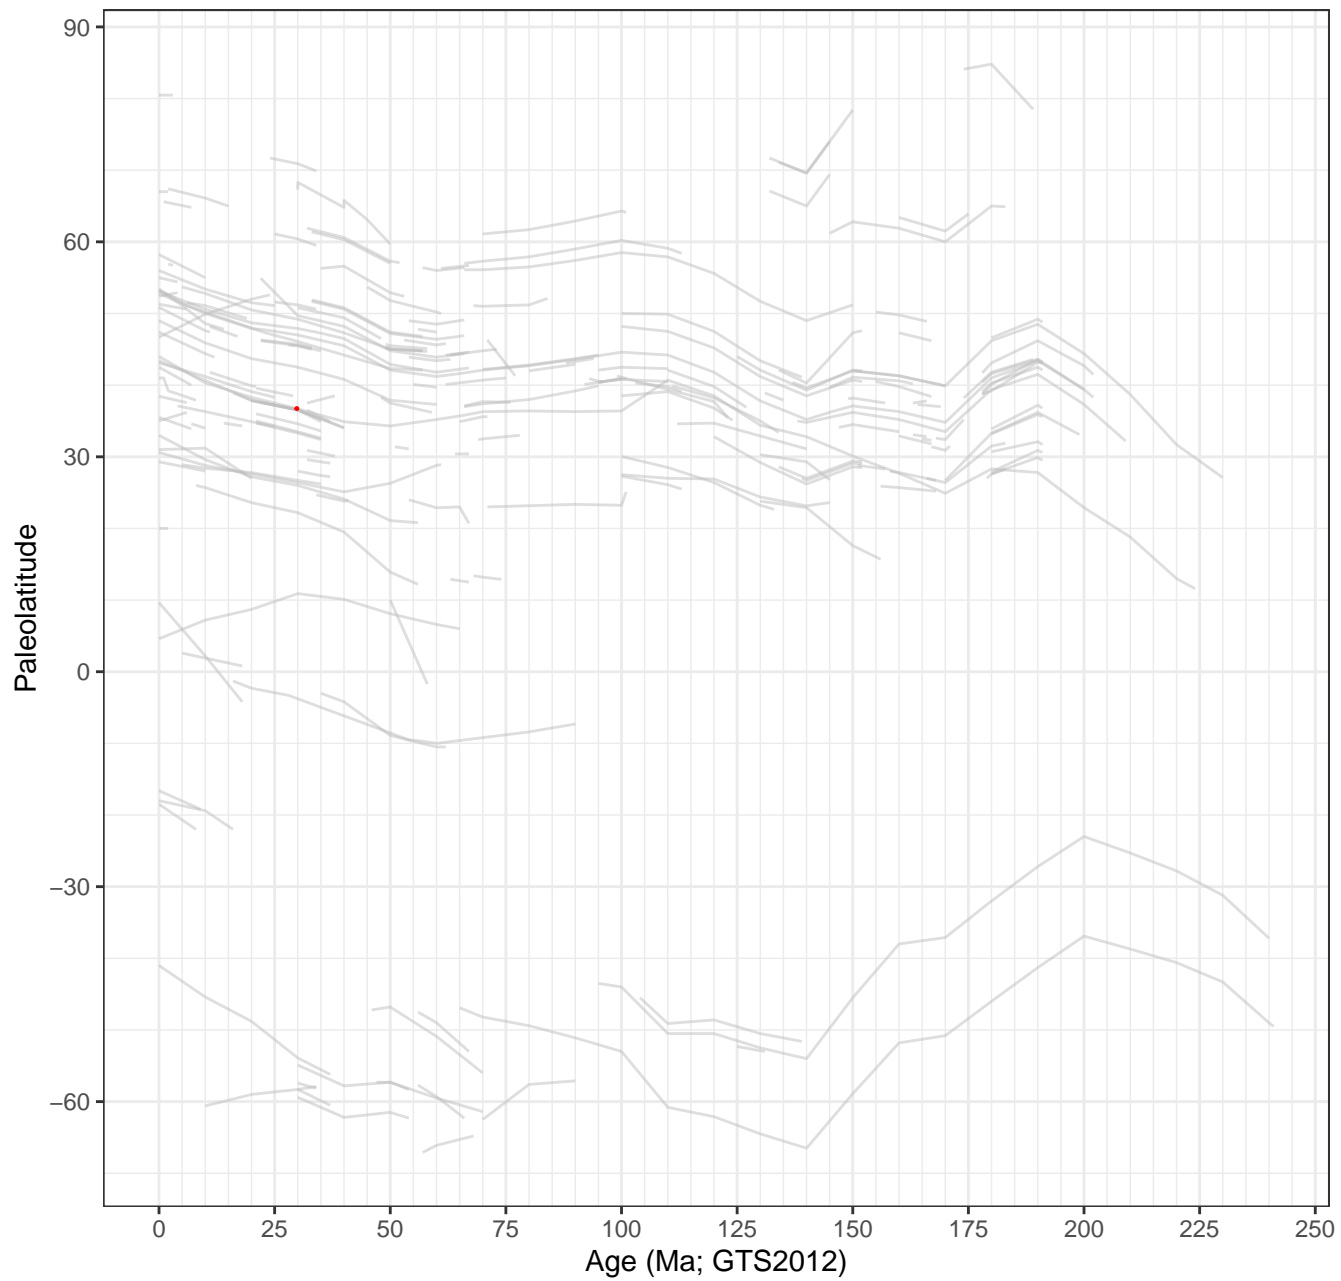

Supplement: Supplementary file 2060 [file Palaeocystodinium obesum.pdf › Supplement/Supplement 2/Species 1914 plots/Palaeocystodinium obesum.pdf]

# Species *Palaeocystodinium powellense*

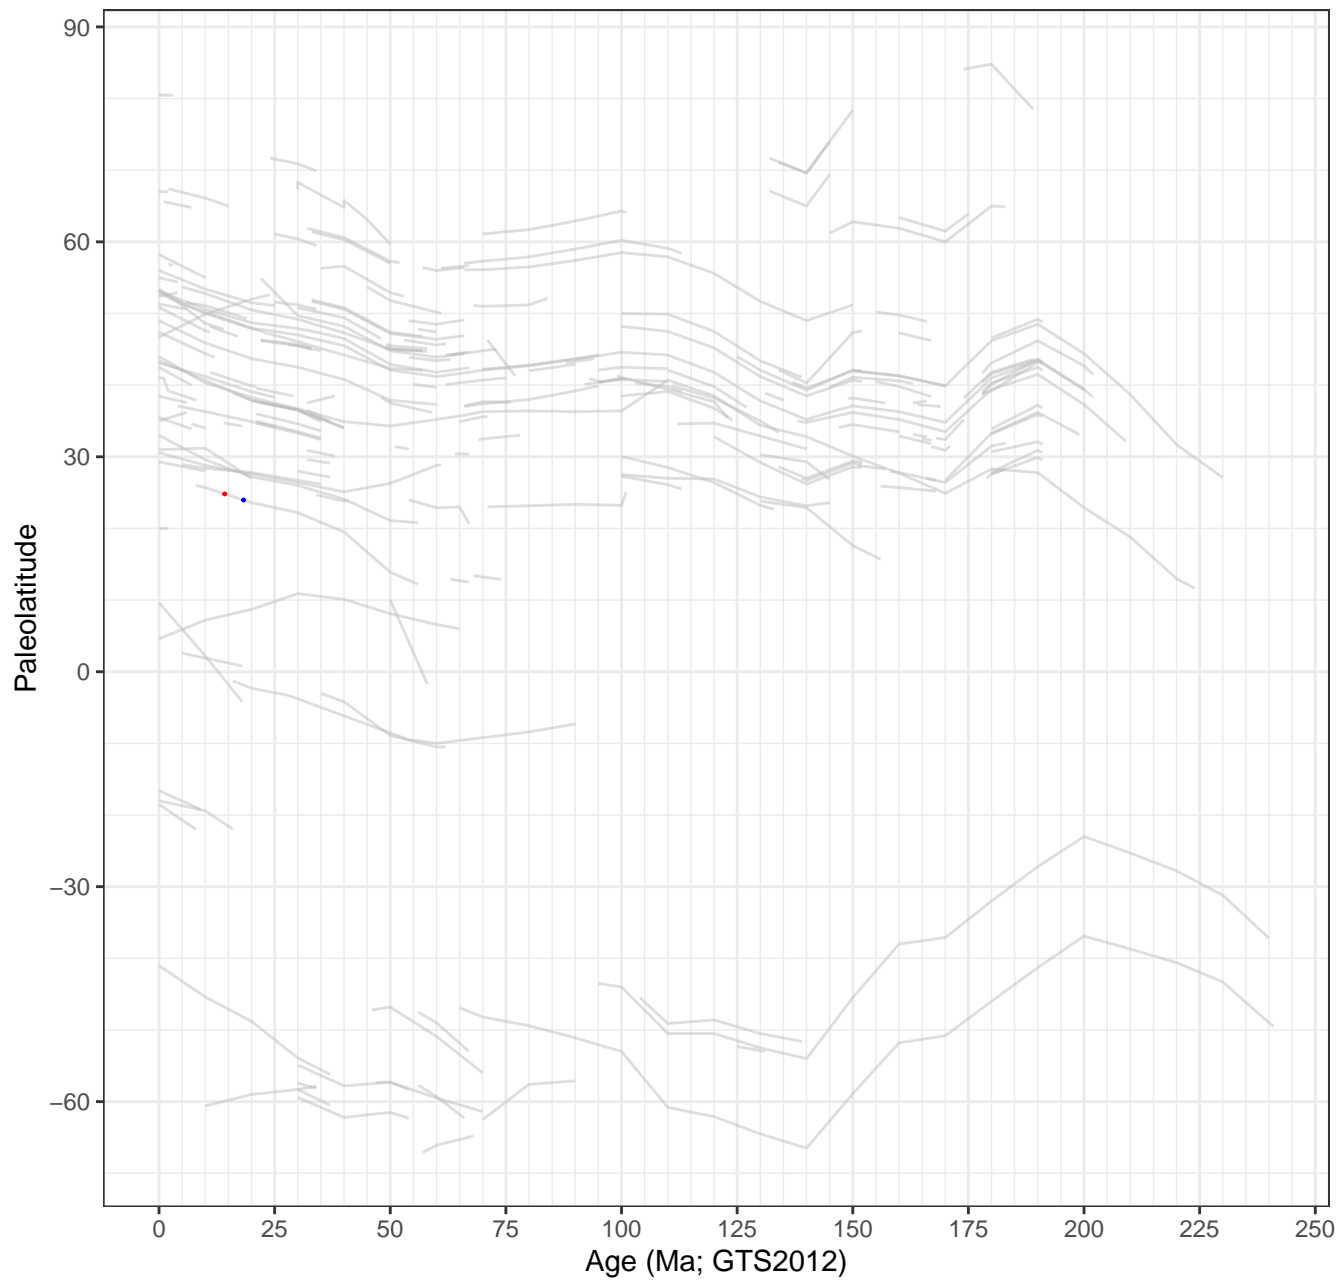

Supplement: Supplementary file 2061 [file Palaeocystodinium powellense.pdf › Supplement/Supplement 2/Species 1914 plots/Palaeocystodinium powellense.pdf]

# Species *Palaeocystodinium striatogranulosum*

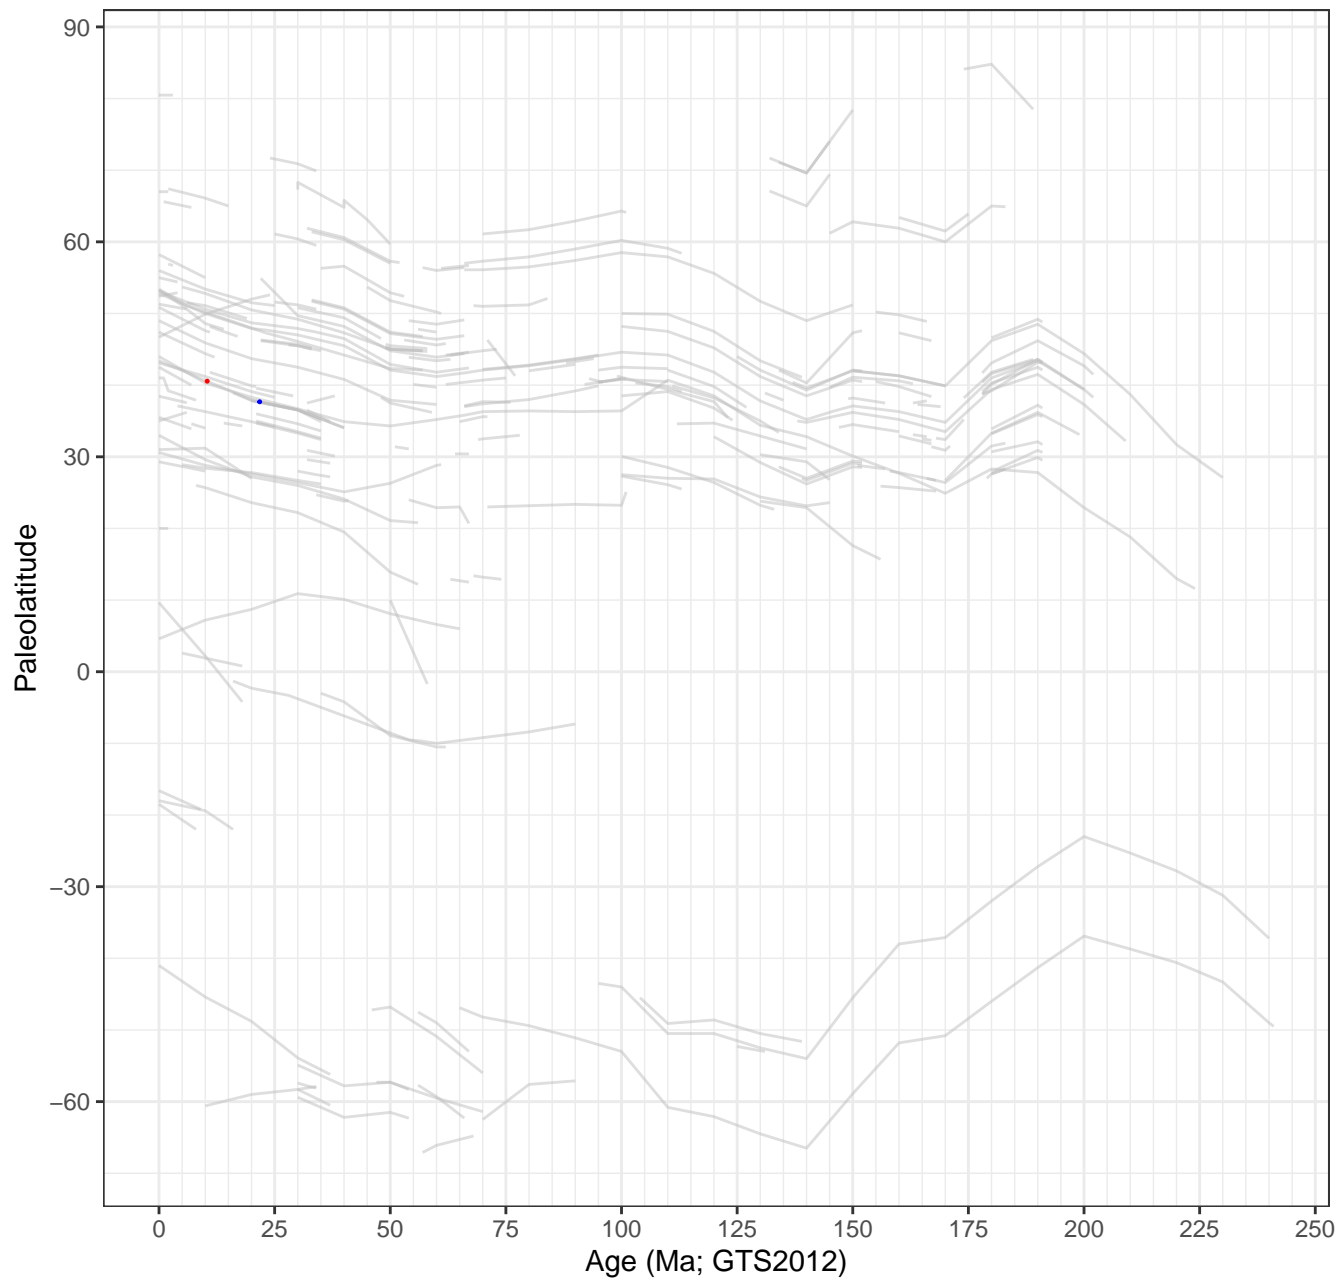

Supplement: Supplementary file 2062 [file Palaeocystodinium striatogranulosum.pdf › Supplement/Supplement 2/Species 1914 plots/Palaeocystodinium striatogranulosum.pdf]

# Species *Palaeocystodinium teespinosum*

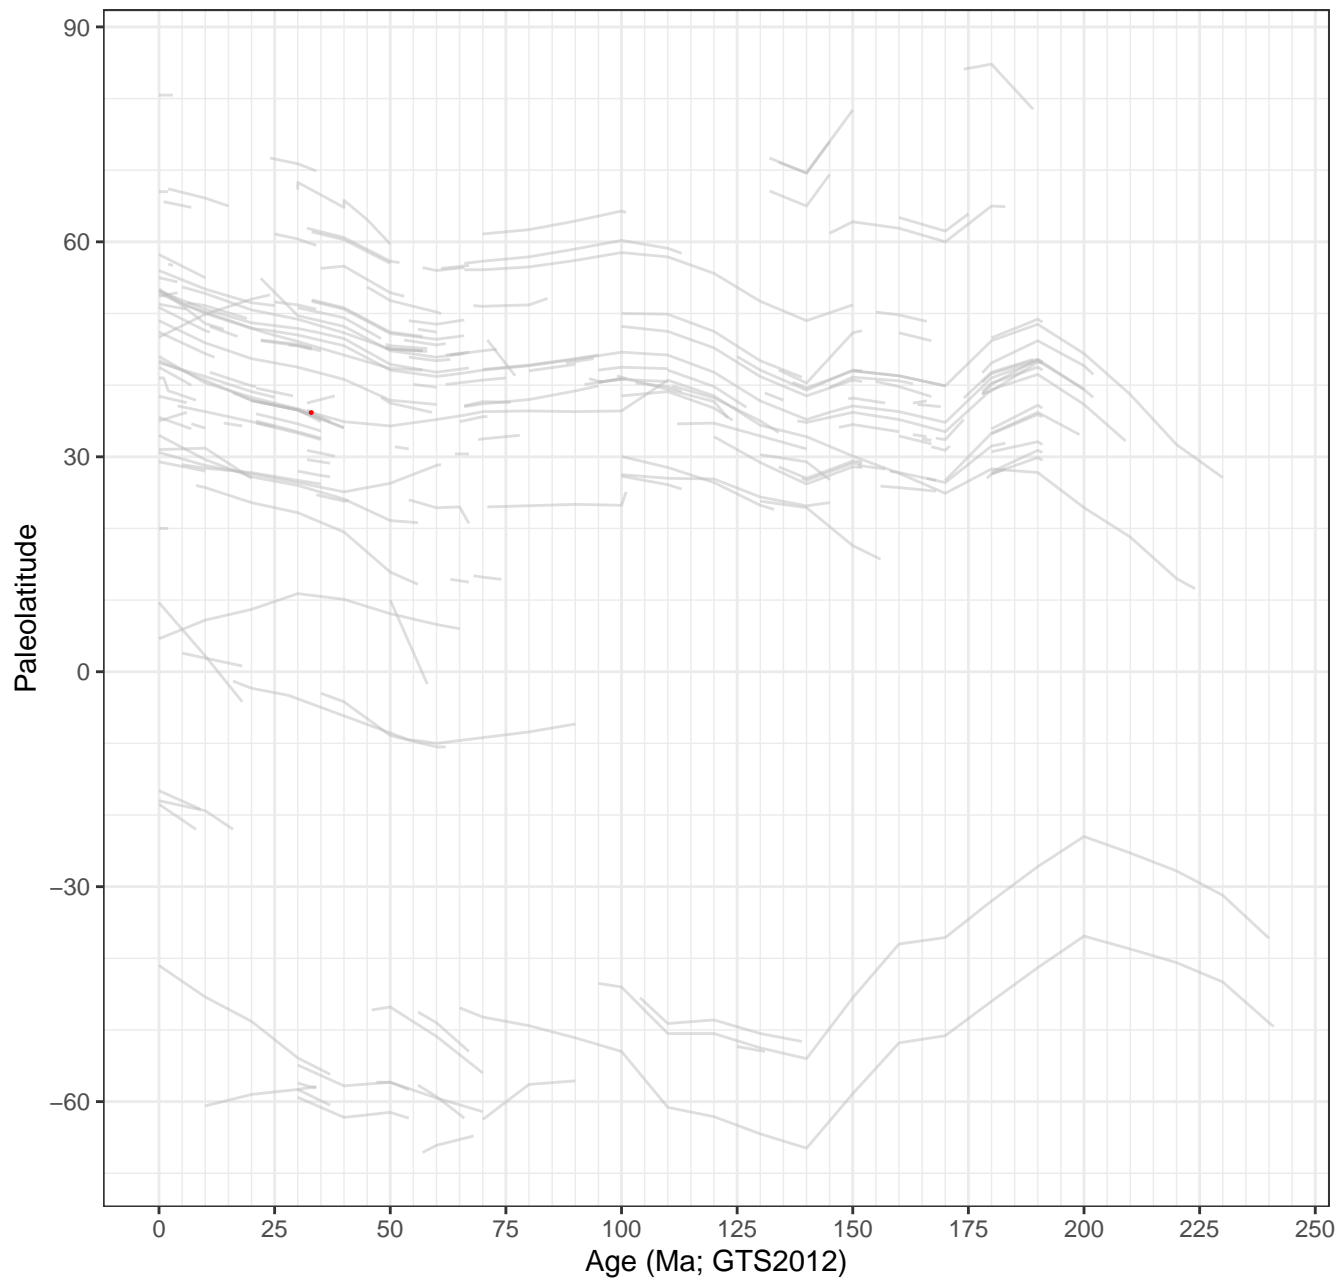

Supplement: Supplementary file 2063 [file Palaeocystodinium teespinosum.pdf › Supplement/Supplement 2/Species 1914 plots/Palaeocystodinium teespinosum.pdf]

# Species *Palaeocystodinium ventricosum*

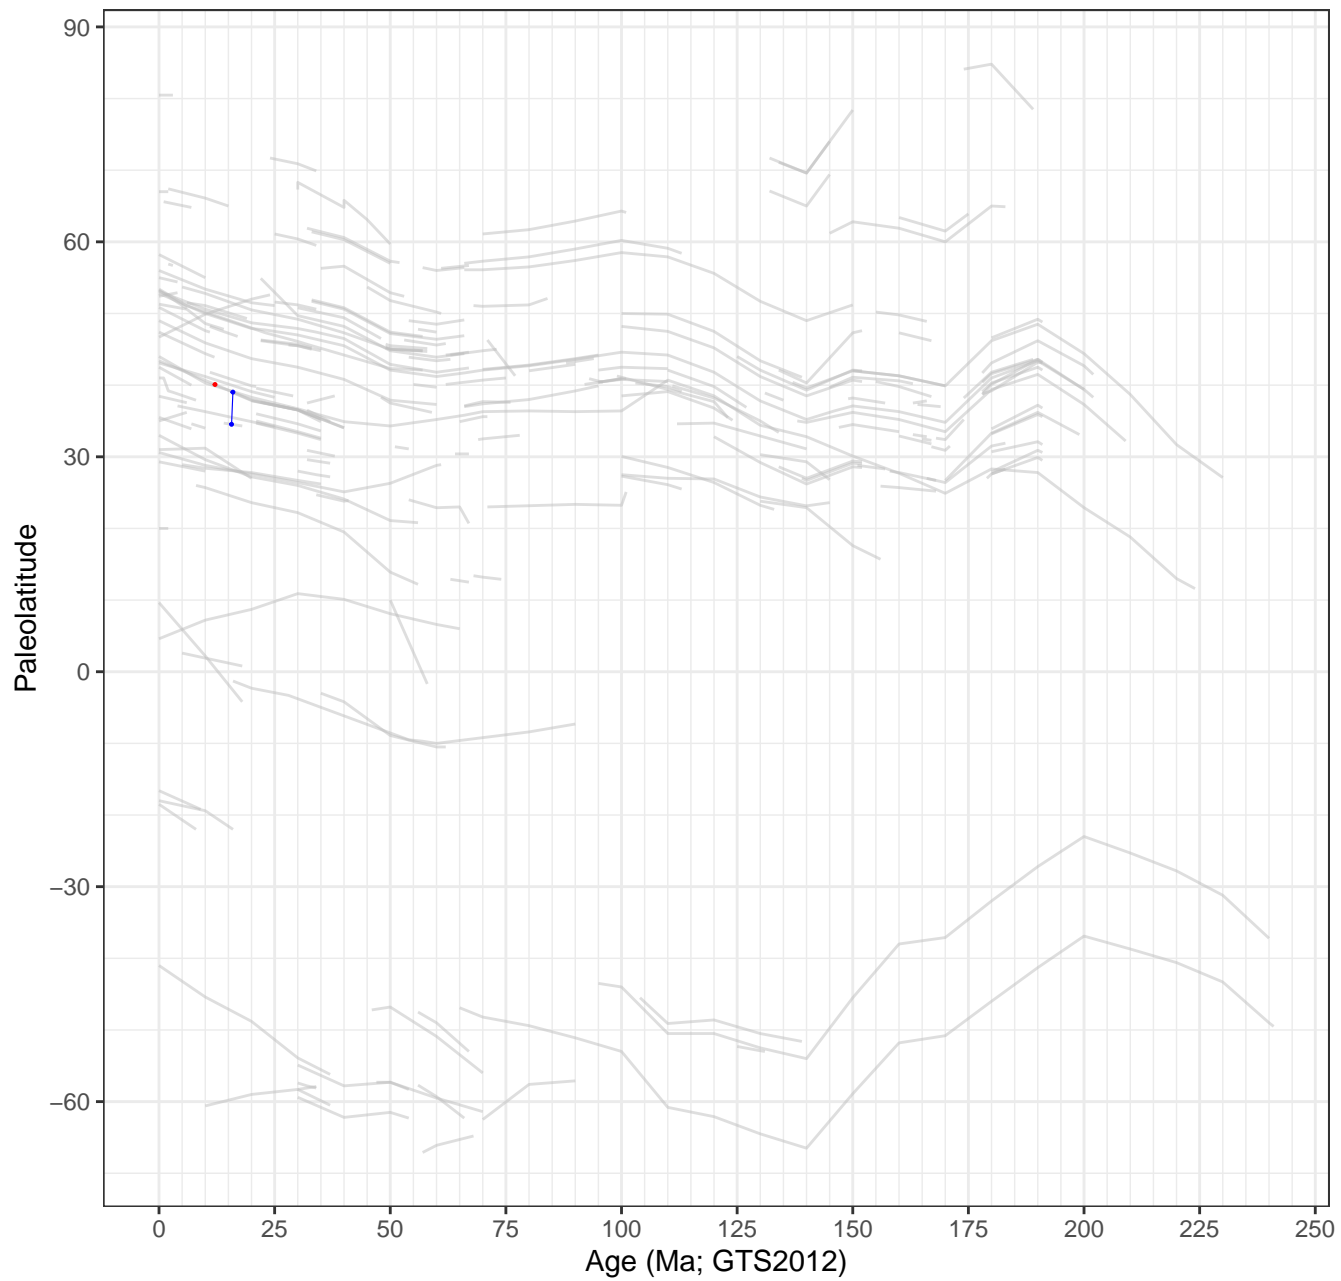

Supplement: Supplementary file 2064 [file Palaeocystodinium ventricosum.pdf › Supplement/Supplement 2/Species 1914 plots/Palaeocystodinium ventricosum.pdf]

# Species *Palaeoglenodinium cretaceum*

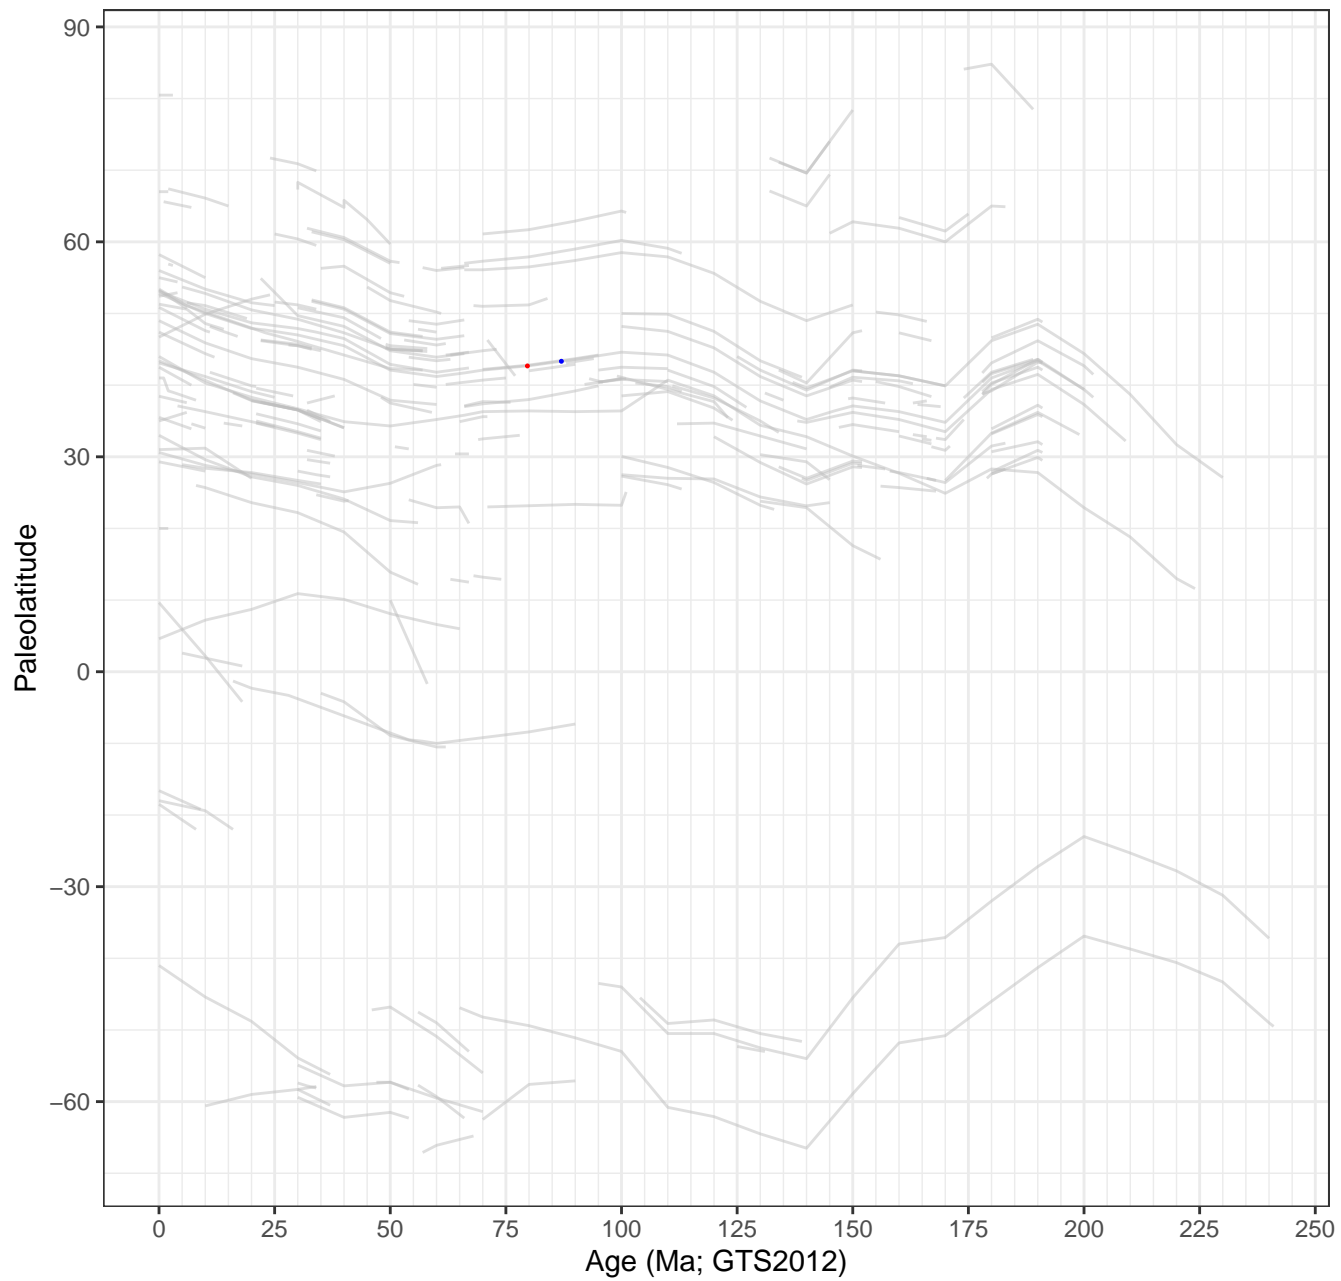

Supplement: Supplementary file 2065 [file Palaeoglenodinium cretaceum.pdf › Supplement/Supplement 2/Species 1914 plots/Palaeoglenodinium cretaceum.pdf]

# Species *Palaeohystrichophora cheit*

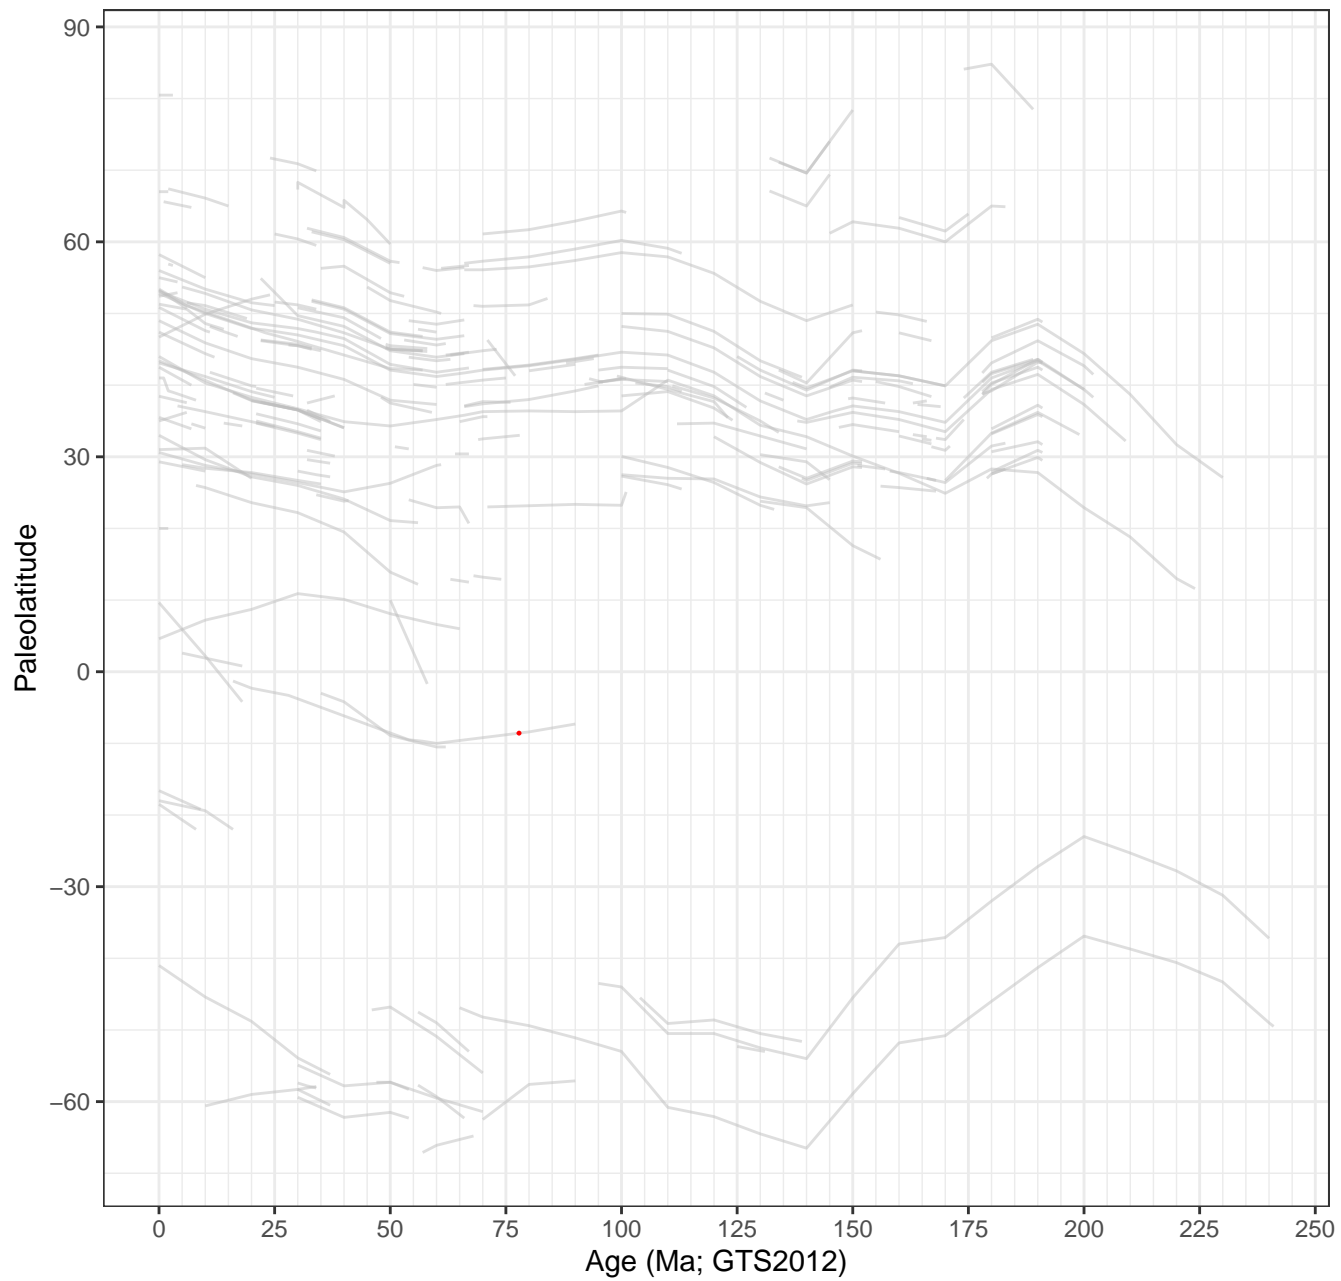

Supplement: Supplementary file 2066 [file Palaeohystrichophora cheit.pdf › Supplement/Supplement 2/Species 1914 plots/Palaeohystrichophora cheit.pdf]

# Species *Palaeohystrichophora infusorioides*

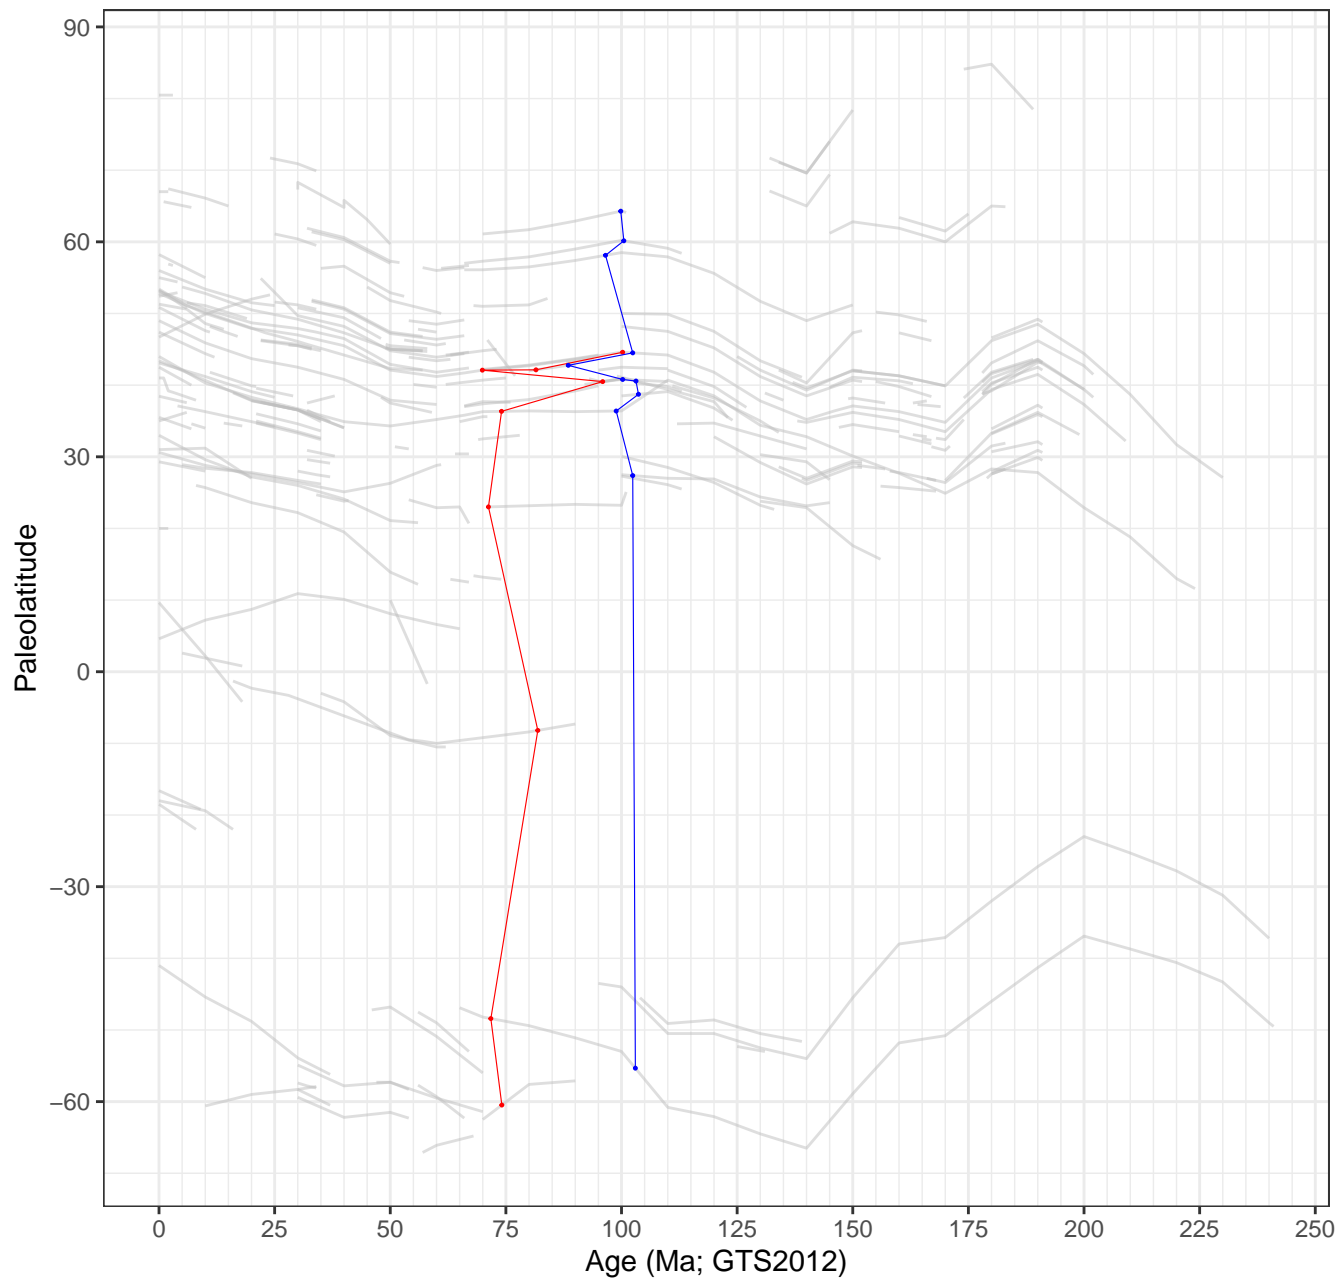

Supplement: Supplementary file 2067 [file Palaeohystrichophora infusorioides.pdf › Supplement/Supplement 2/Species 1914 plots/Palaeohystrichophora infusorioides.pdf]

# Species *Palaeohystrichophora palaeoinfusa*

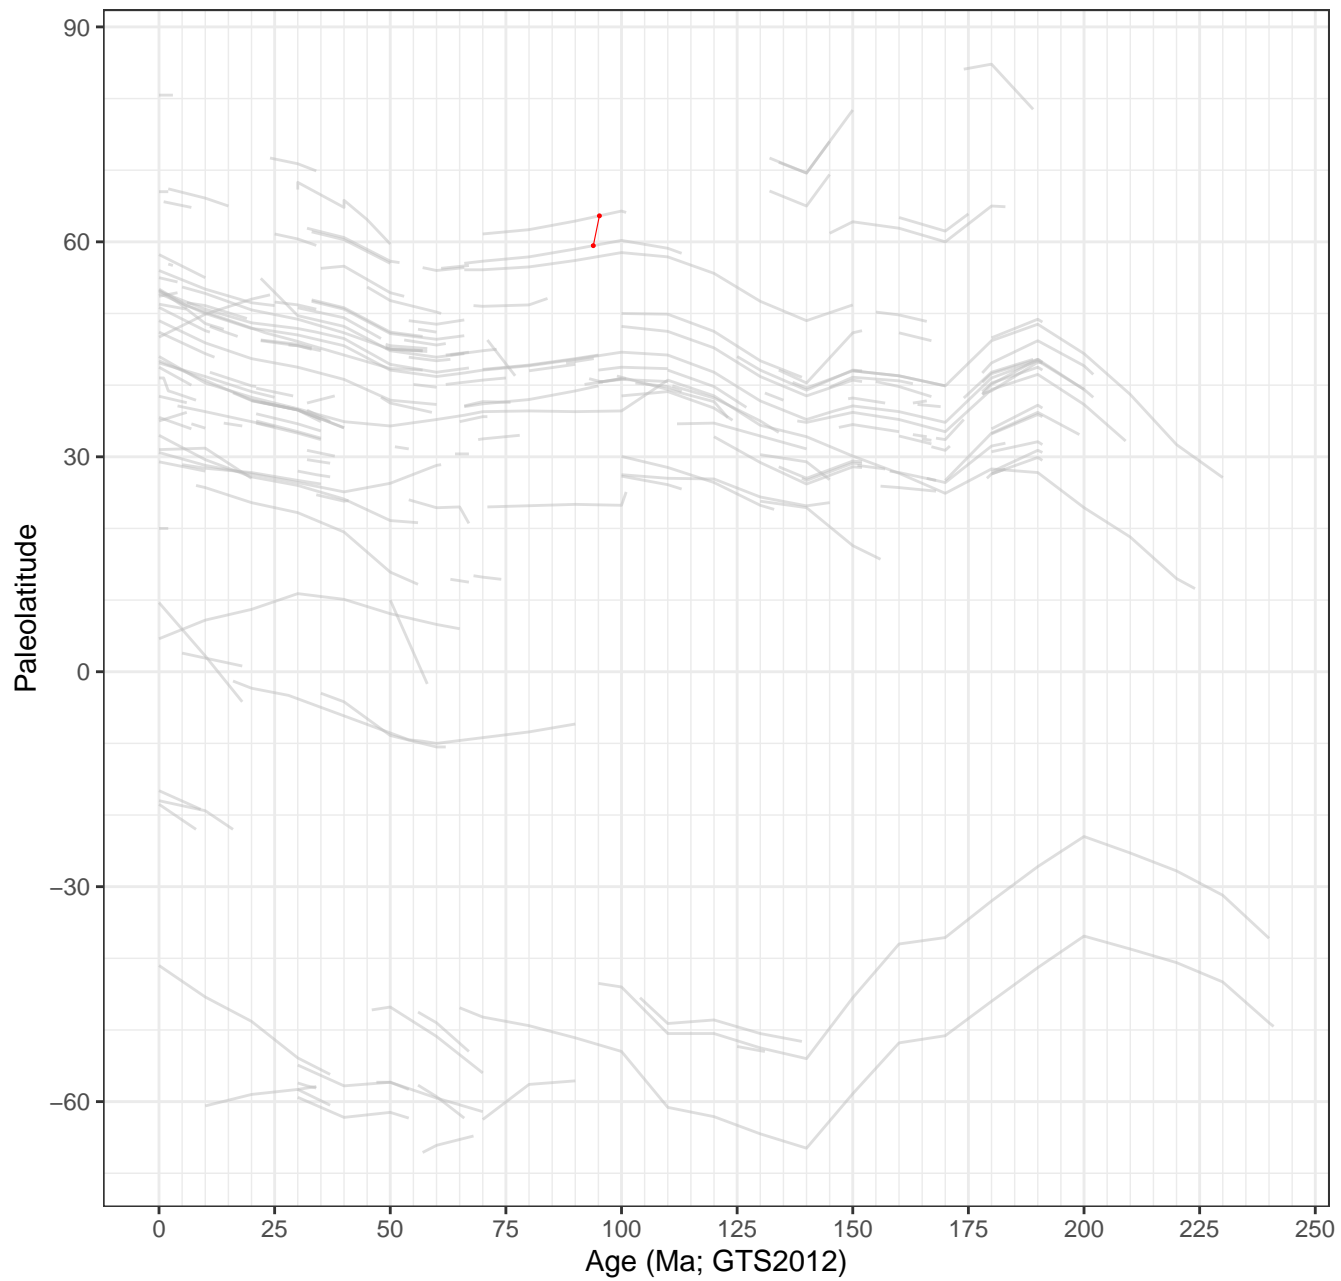

Supplement: Supplementary file 2068 [file Palaeohystrichophora palaeoinfusa.pdf › Supplement/Supplement 2/Species 1914 plots/Palaeohystrichophora palaeoinfusa.pdf]

# Species *Palaeoperidinium cretaceum*

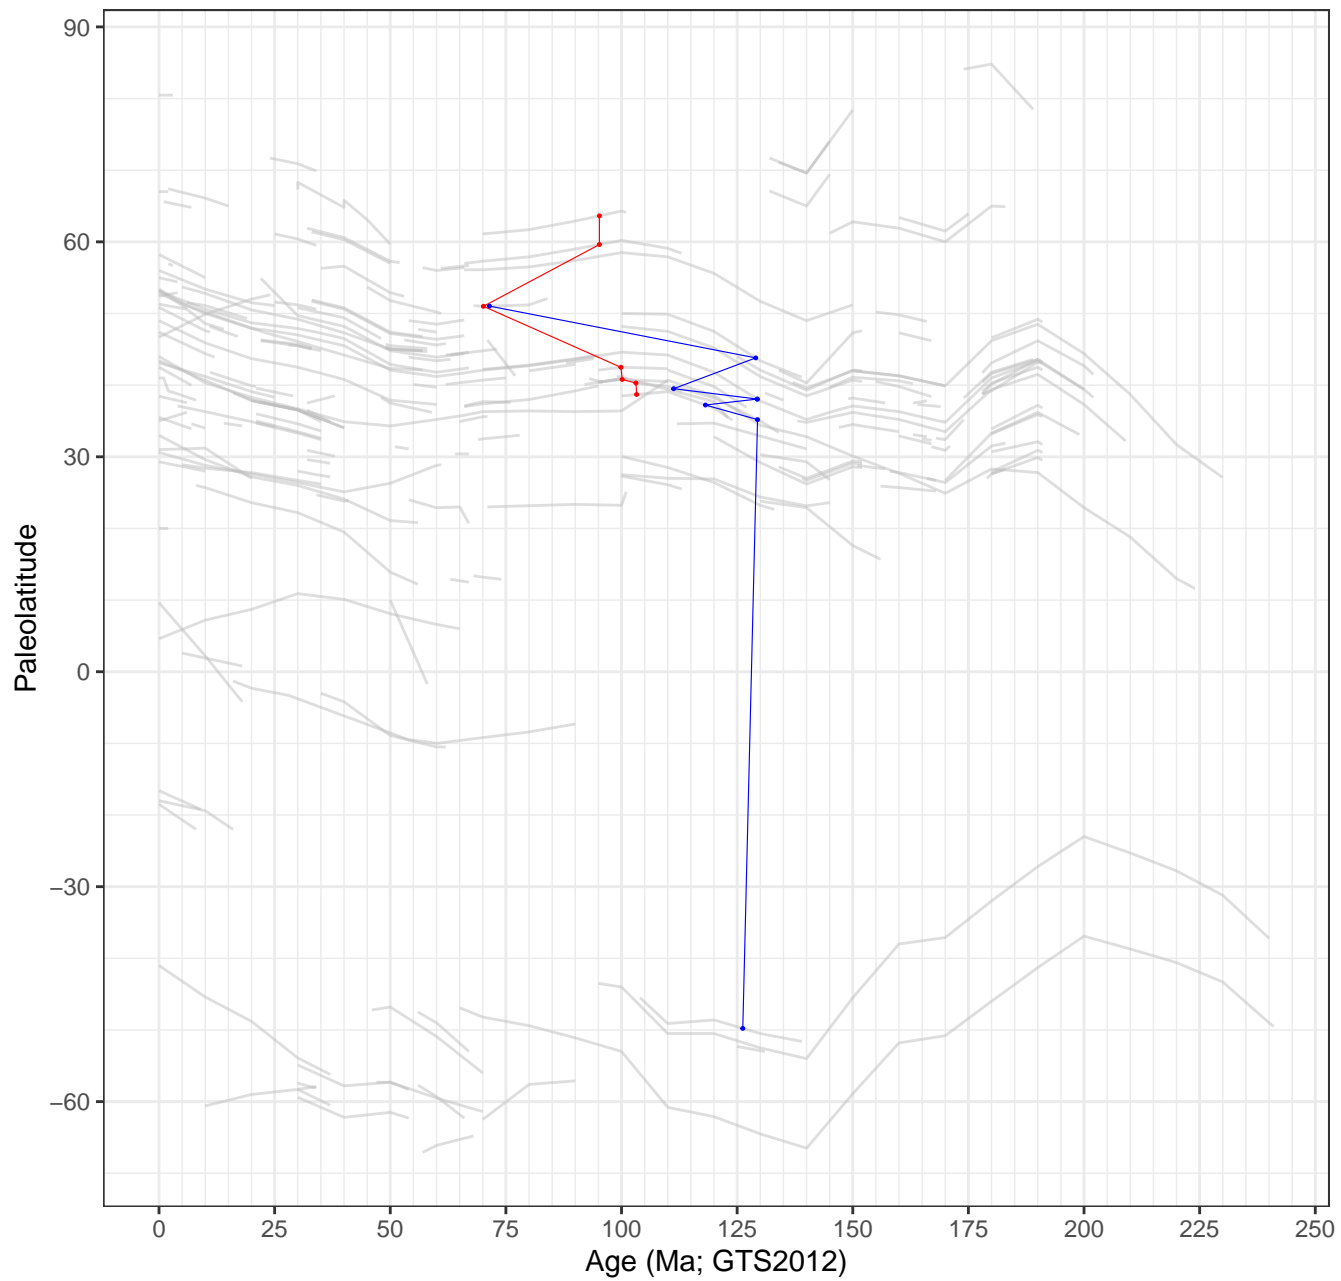

Supplement: Supplementary file 2069 [file Palaeoperidinium cretaceum.pdf › Supplement/Supplement 2/Species 1914 plots/Palaeoperidinium cretaceum.pdf]

# Species *Palaeoperidinium eurpylum*

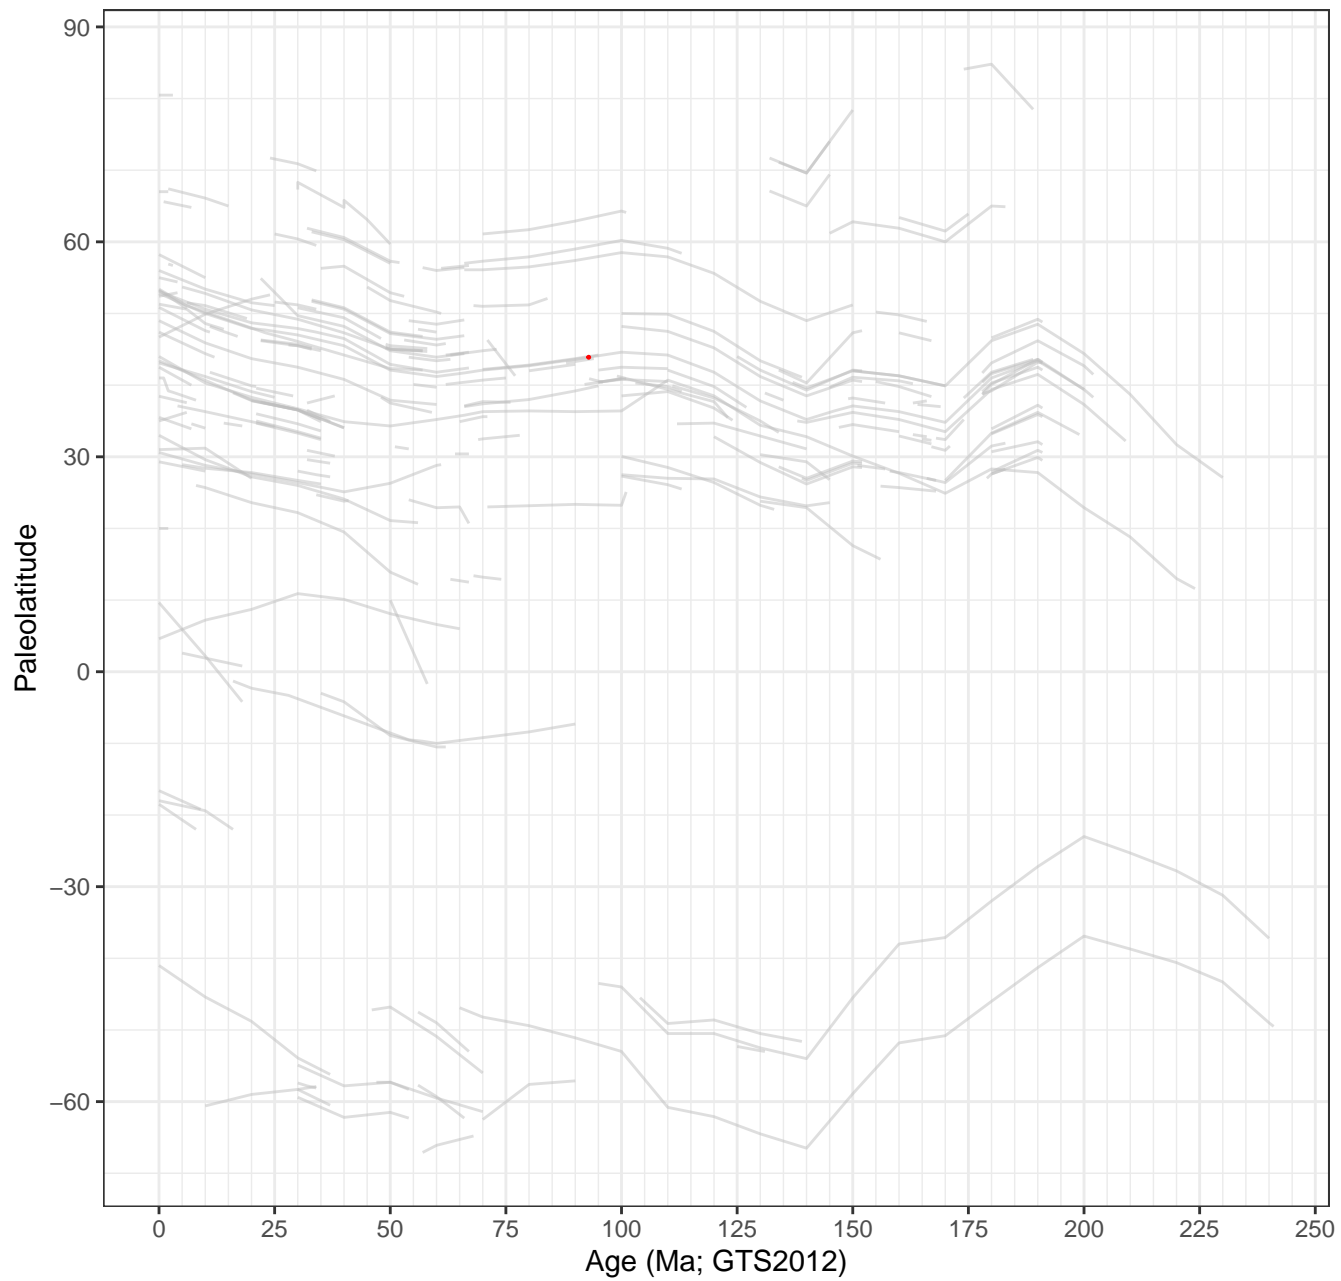

Supplement: Supplementary file 2070 [file Palaeoperidinium eurpylum.pdf › Supplement/Supplement 2/Species 1914 plots/Palaeoperidinium eurpylum.pdf]

# Species *Palaeoperidinium parvum*

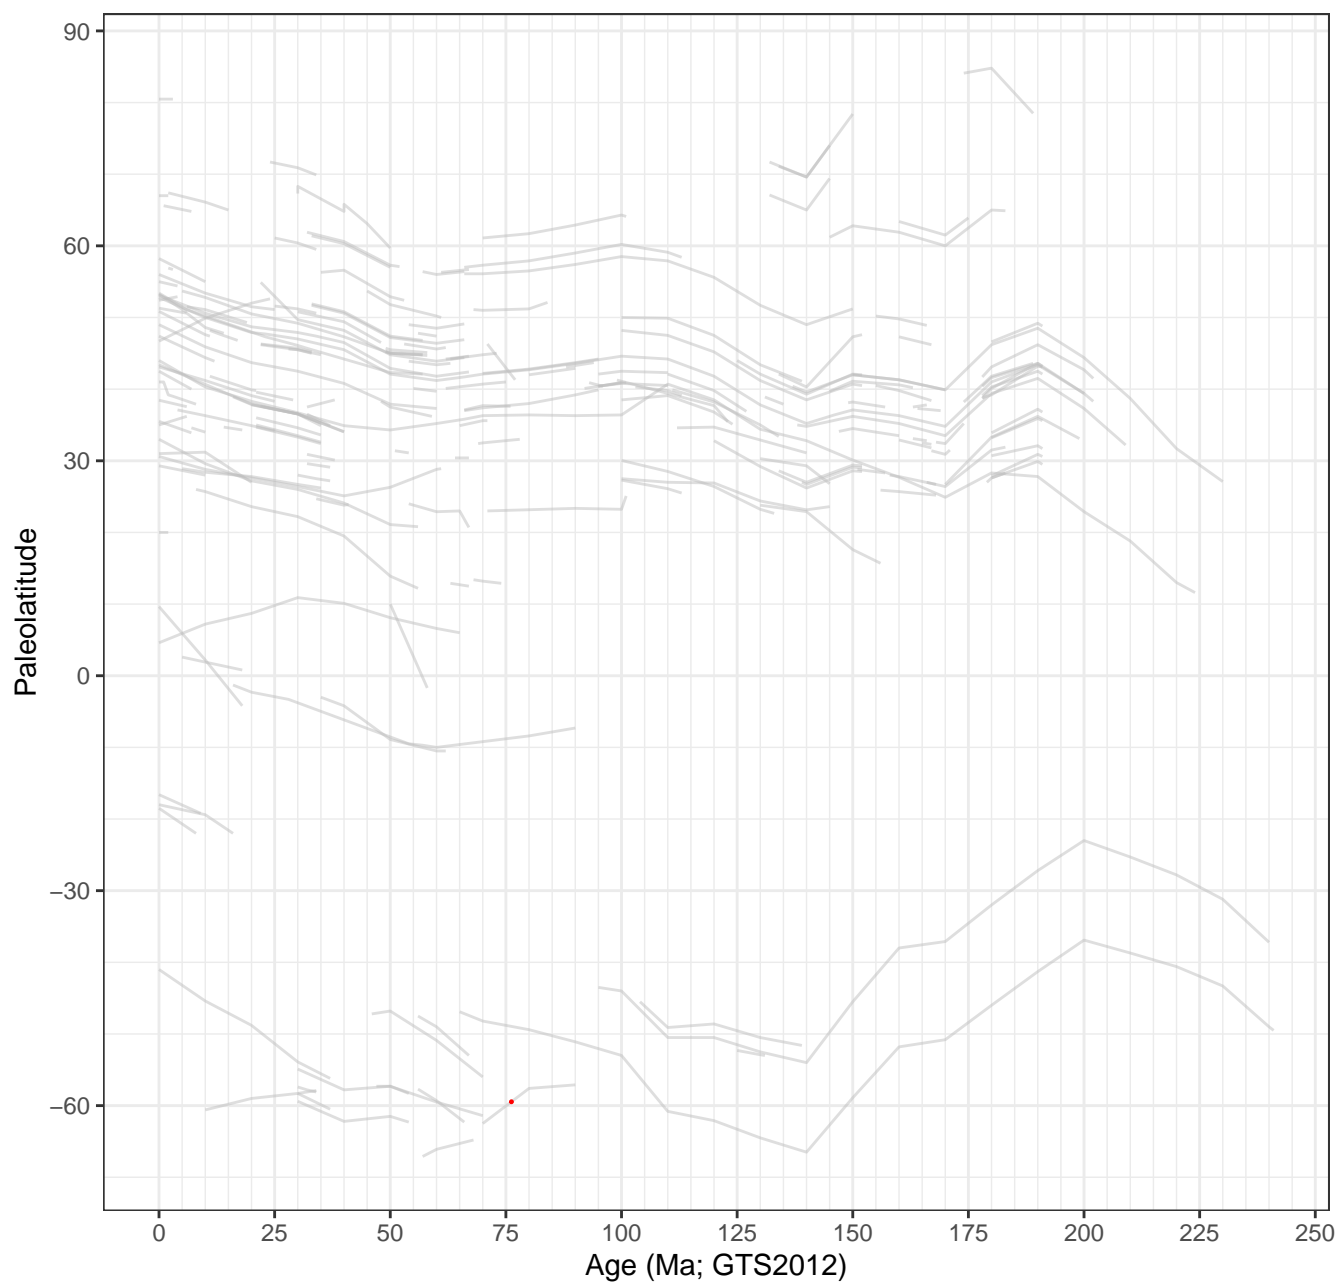

Supplement: Supplementary file 2071 [file Palaeoperidinium parvum.pdf › Supplement/Supplement 2/Species 1914 plots/Palaeoperidinium parvum.pdf]

# Species *Palaeoperidinium pyrophorum*

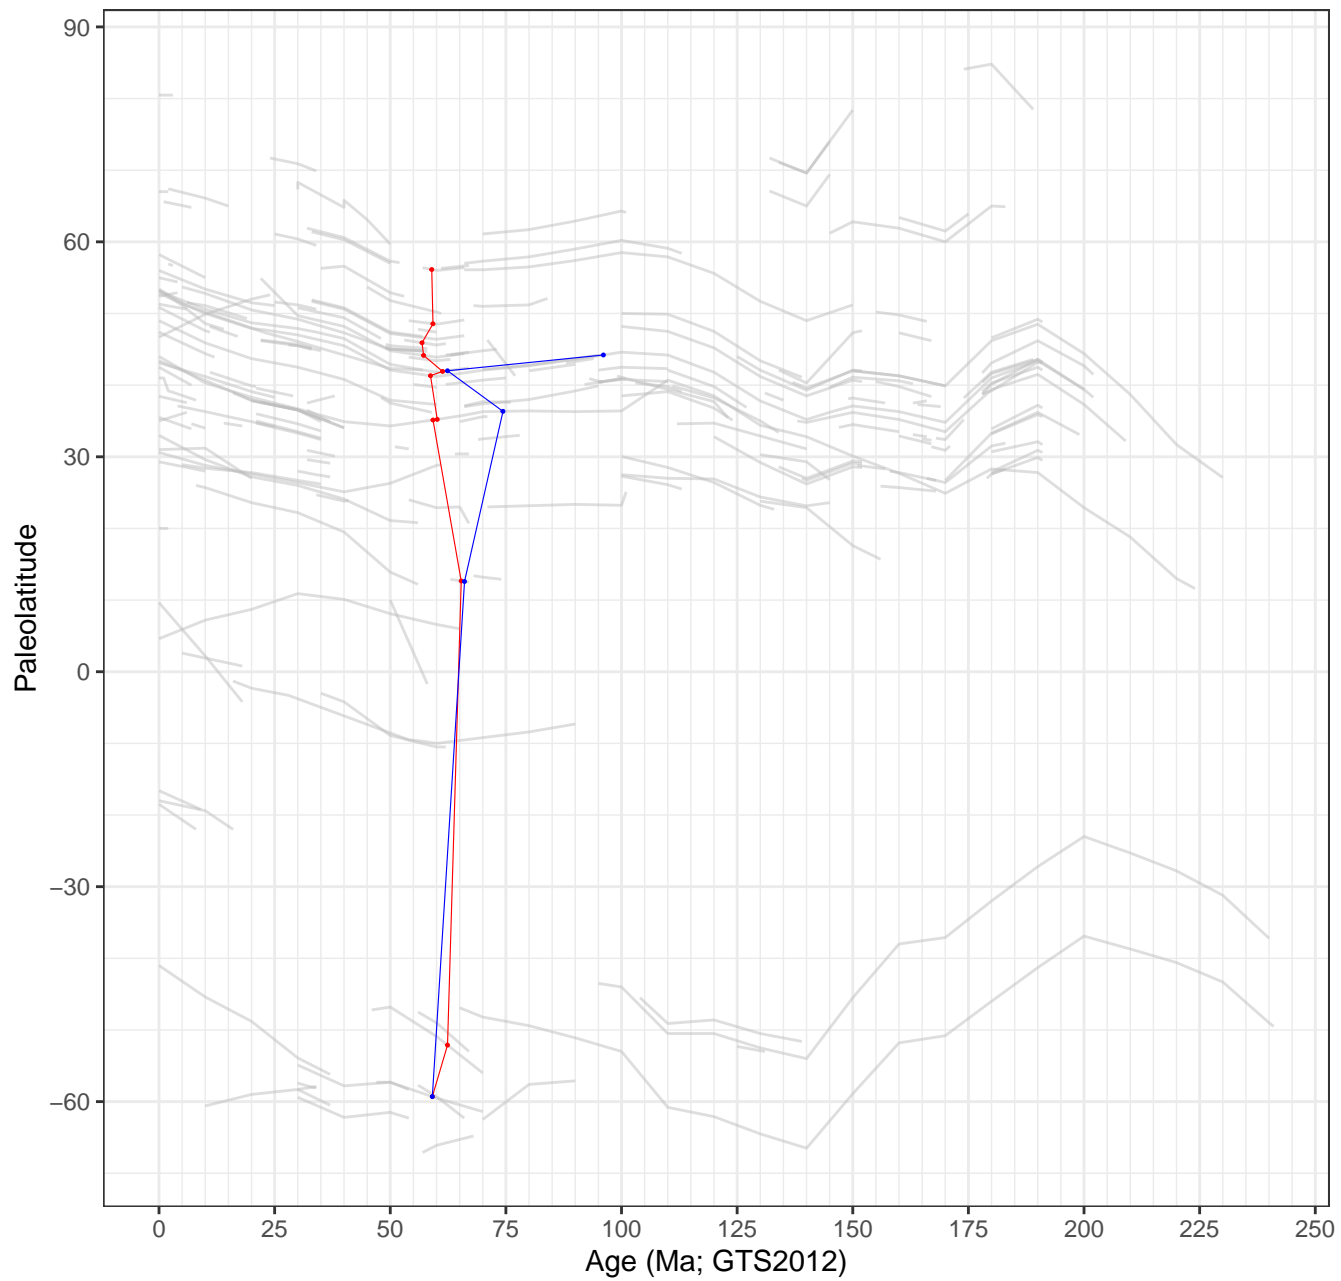

Supplement: Supplementary file 2072 [file Palaeoperidinium pyrophorum.pdf › Supplement/Supplement 2/Species 1914 plots/Palaeoperidinium pyrophorum.pdf]

# Species *Palaeostomocystis reticulata*

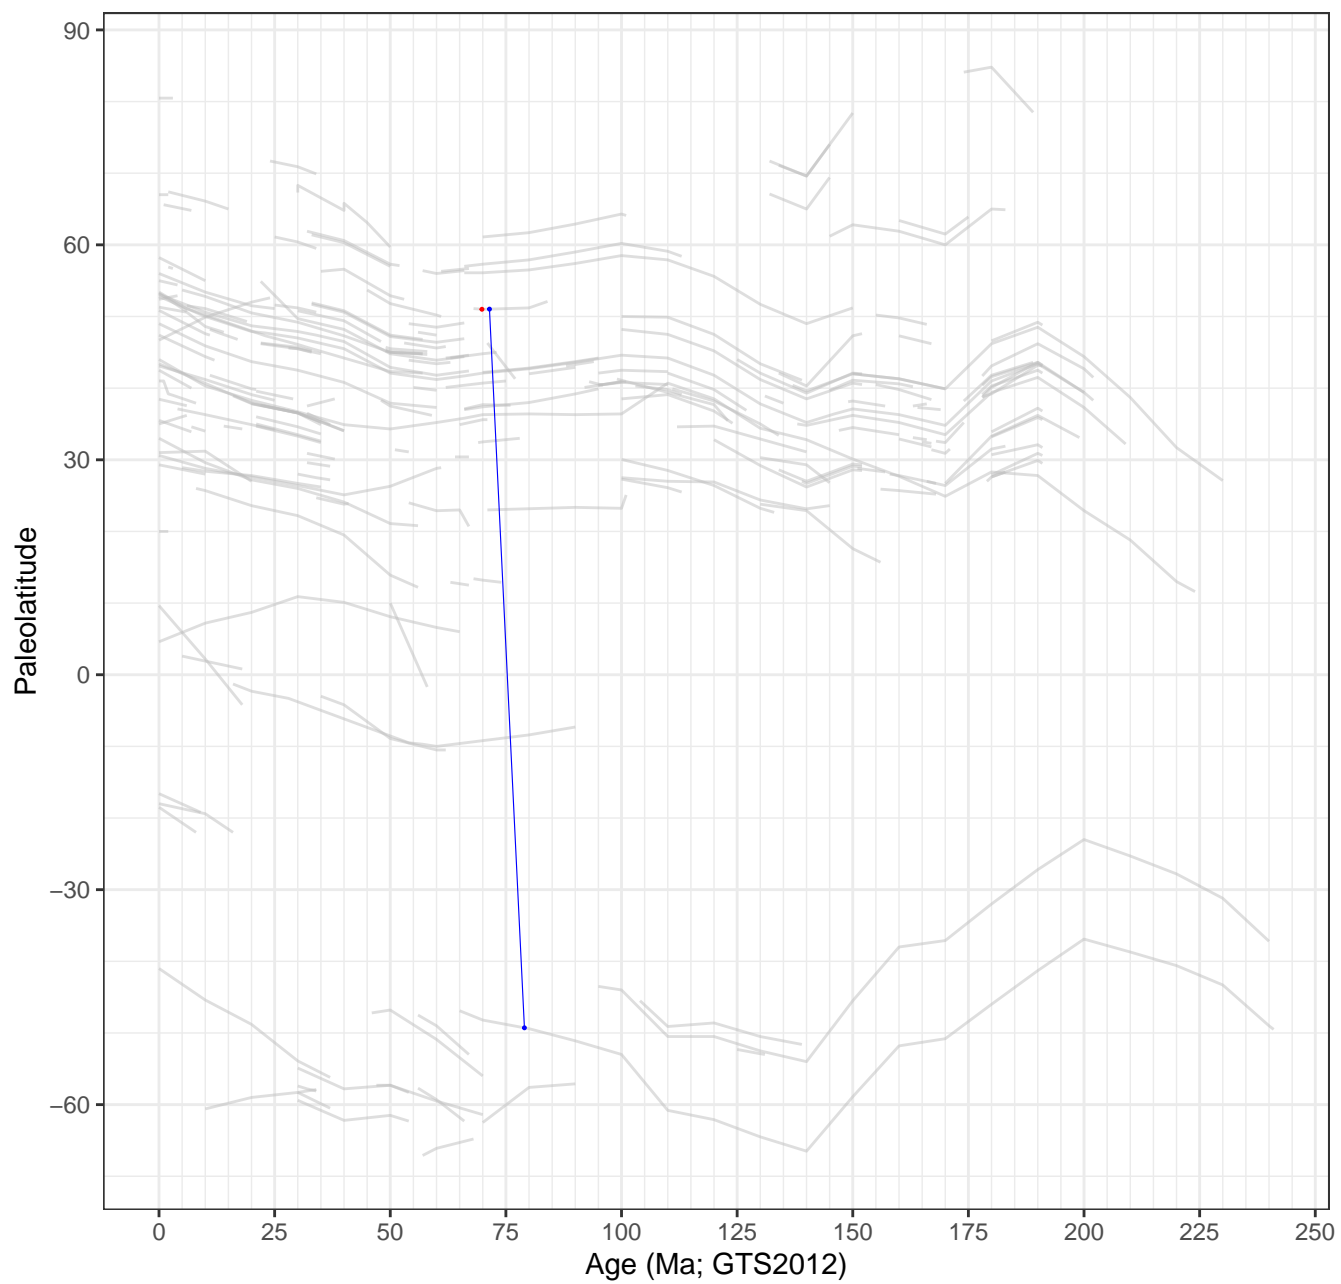

Supplement: Supplementary file 2073 [file Palaeostomocystis reticulata.pdf › Supplement/Supplement 2/Species 1914 plots/Palaeostomocystis reticulata.pdf]

# Species *Palaeostomocystis tornatilis*

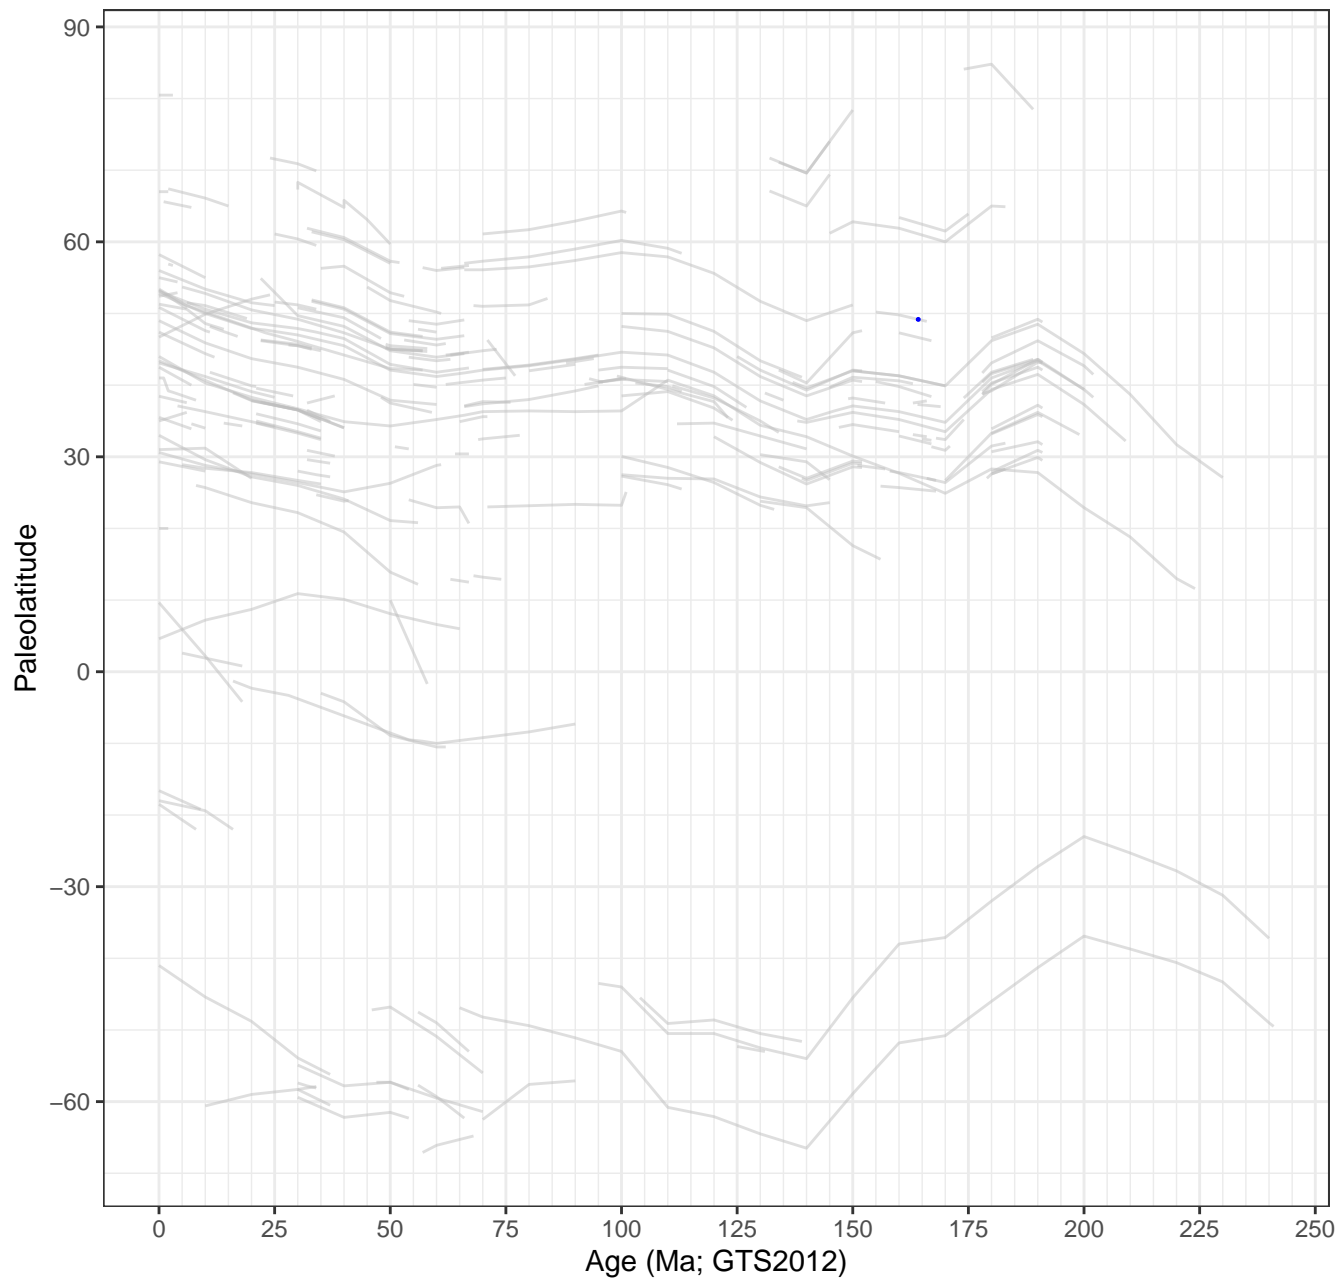

Supplement: Supplementary file 2074 [file Palaeostomocystis tornatilis.pdf › Supplement/Supplement 2/Species 1914 plots/Palaeostomocystis tornatilis.pdf]

# Species *Palaeotetradinium minusculum*

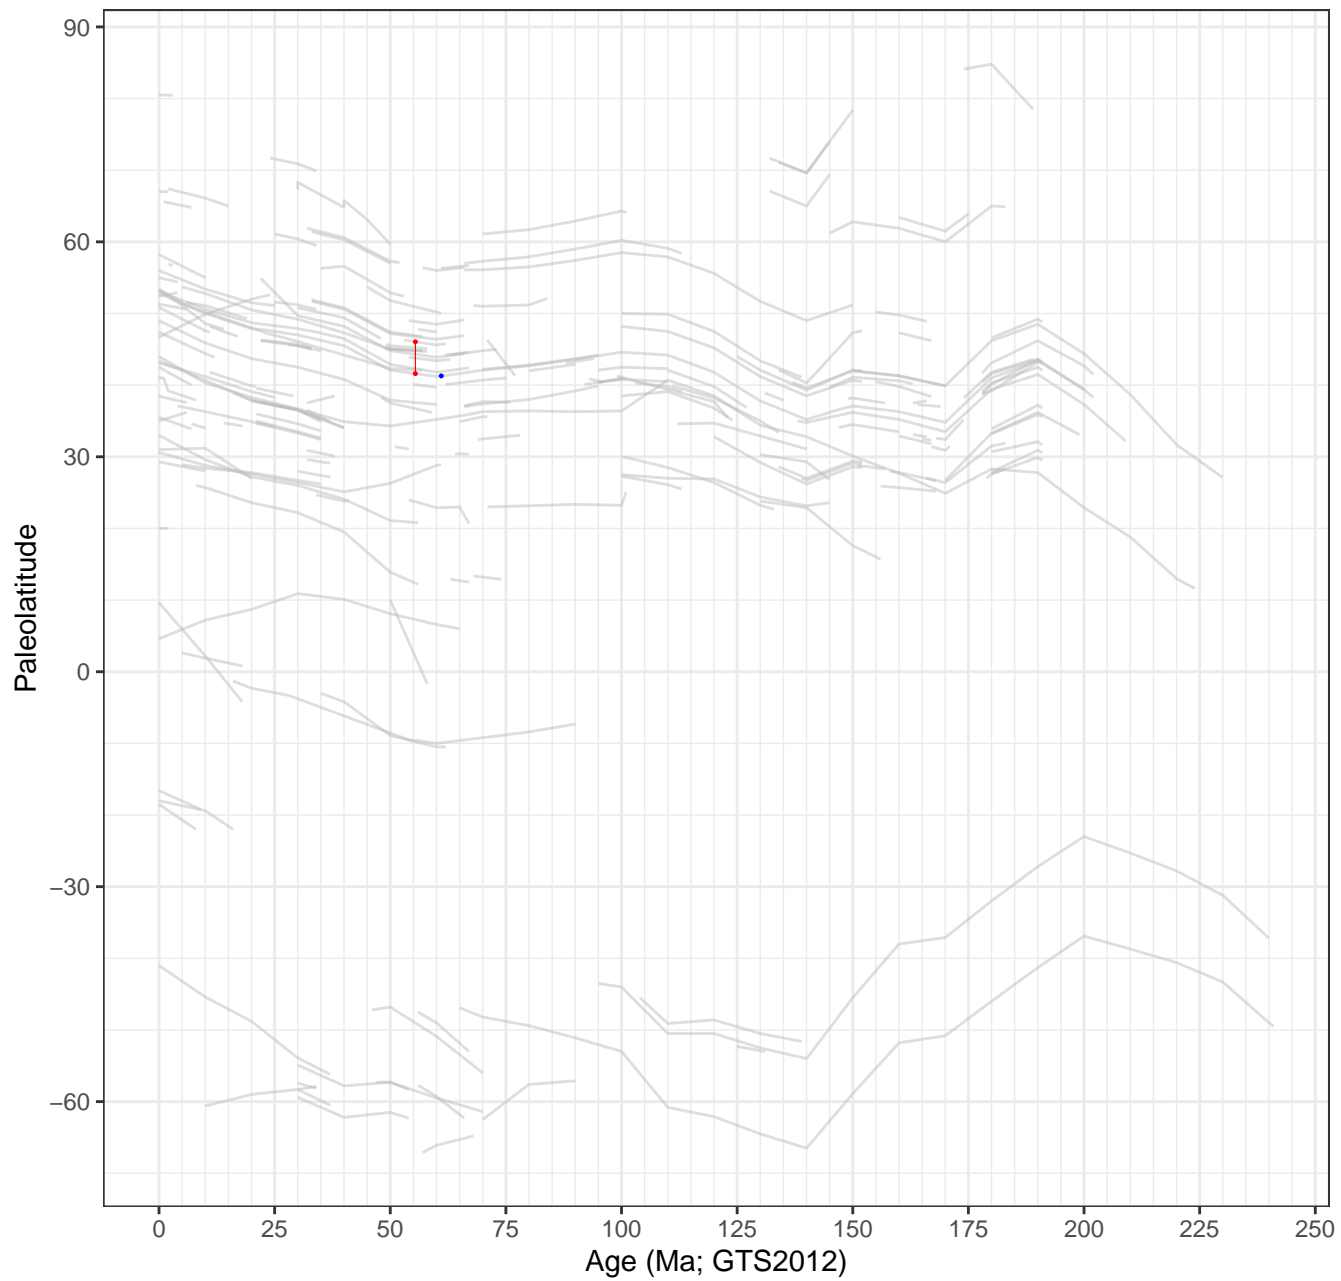

Supplement: Supplementary file 2075 [file Palaeotetradinium minusculum.pdf › Supplement/Supplement 2/Species 1914 plots/Palaeotetradinium minusculum.pdf]

# Species *Palynodinium grallator*

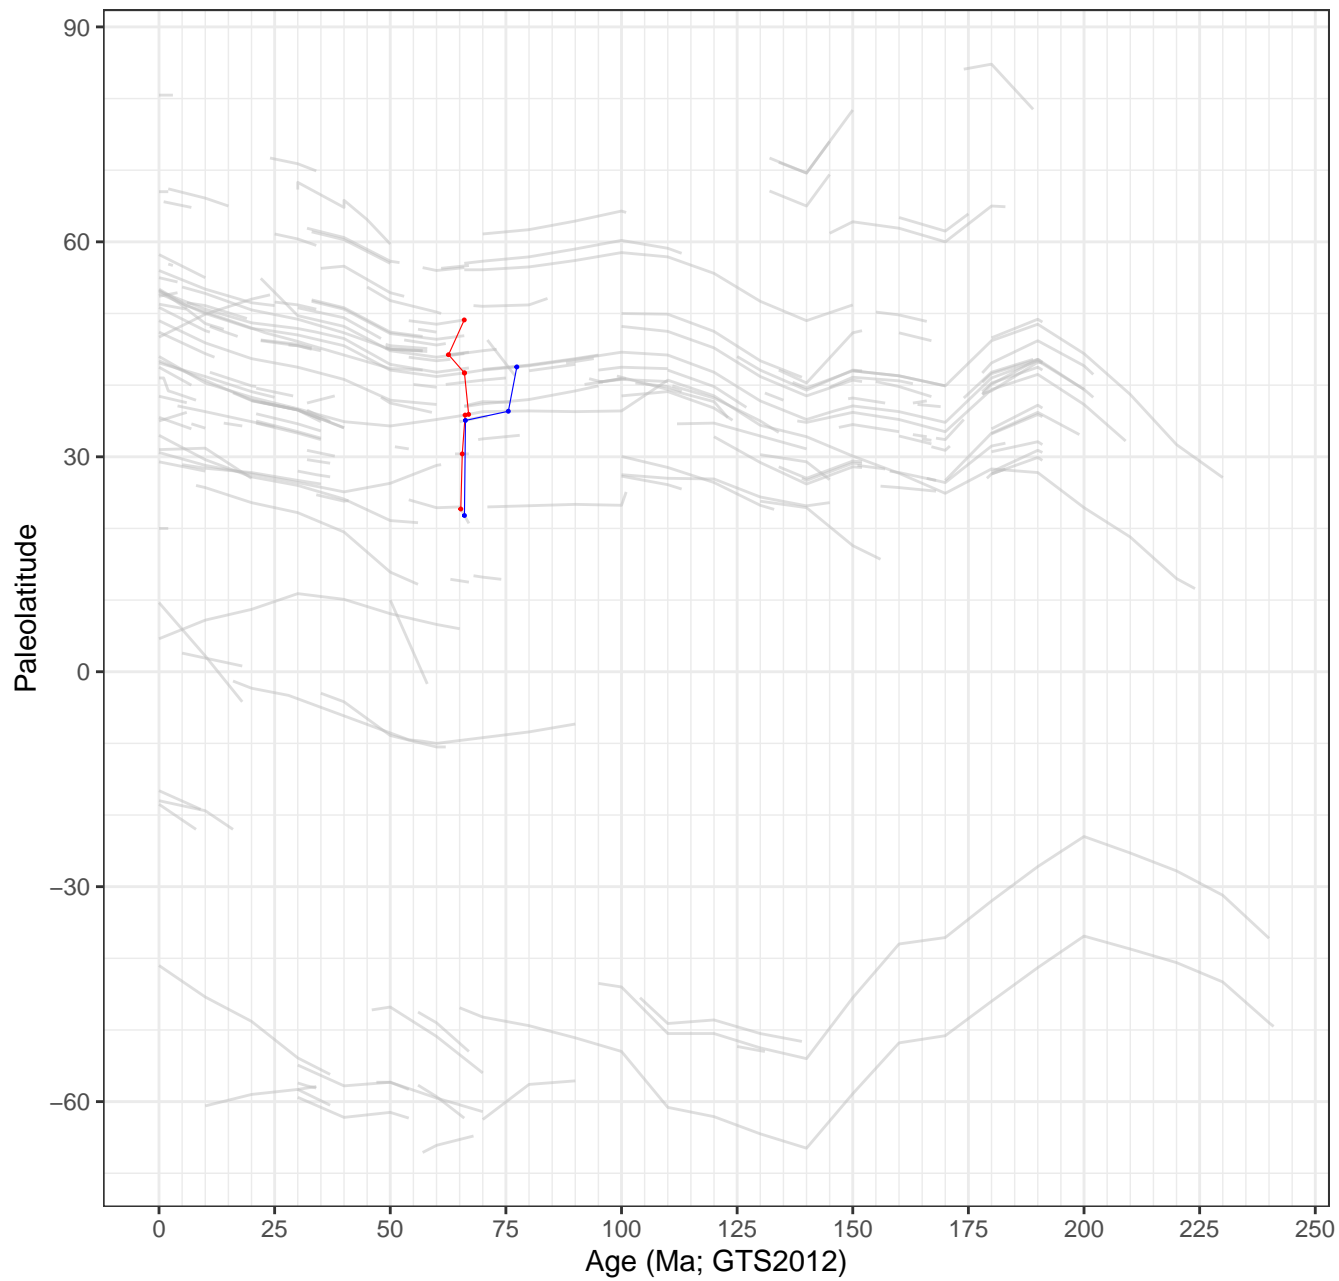

Supplement: Supplementary file 2076 [file Palynodinium grallator.pdf › Supplement/Supplement 2/Species 1914 plots/Palynodinium grallator.pdf]

# Species *Palynodinium helveticum*

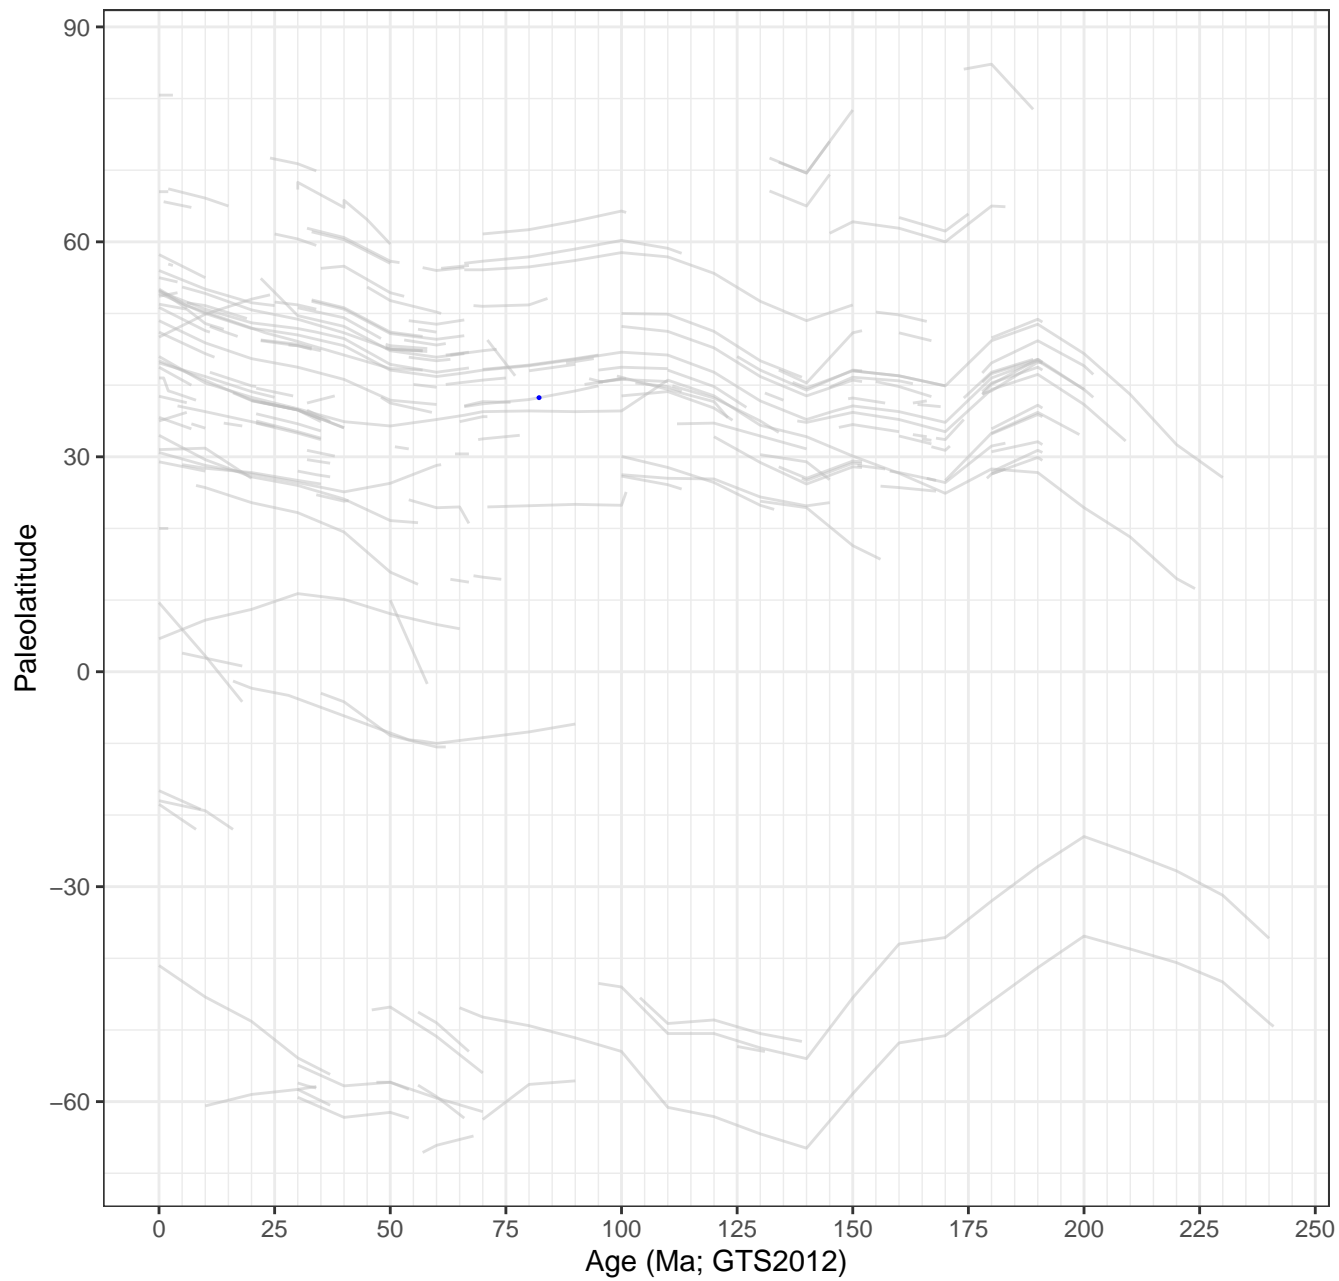

Supplement: Supplementary file 2077 [file Palynodinium helveticum.pdf › Supplement/Supplement 2/Species 1914 plots/Palynodinium helveticum.pdf]

# Species *Palynodinium minus*

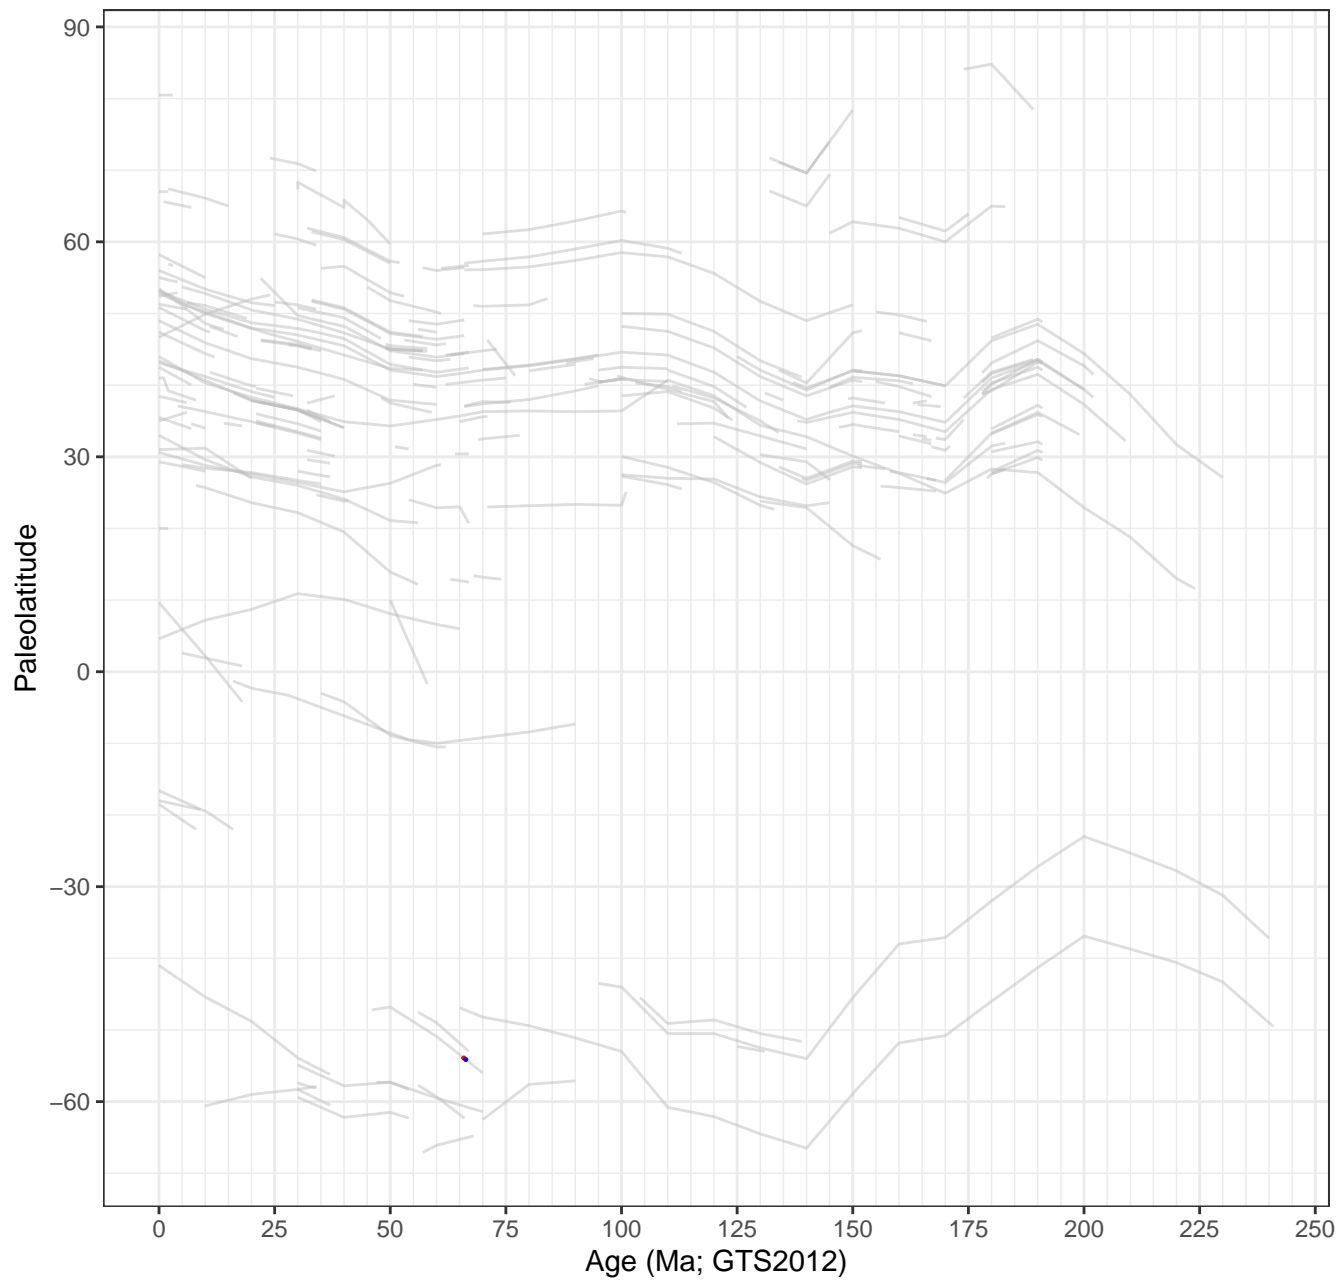

Supplement: Supplementary file 2078 [file Palynodinium minus.pdf › Supplement/Supplement 2/Species 1914 plots/Palynodinium minus.pdf]

# Species *Papuadinium apiculatum*

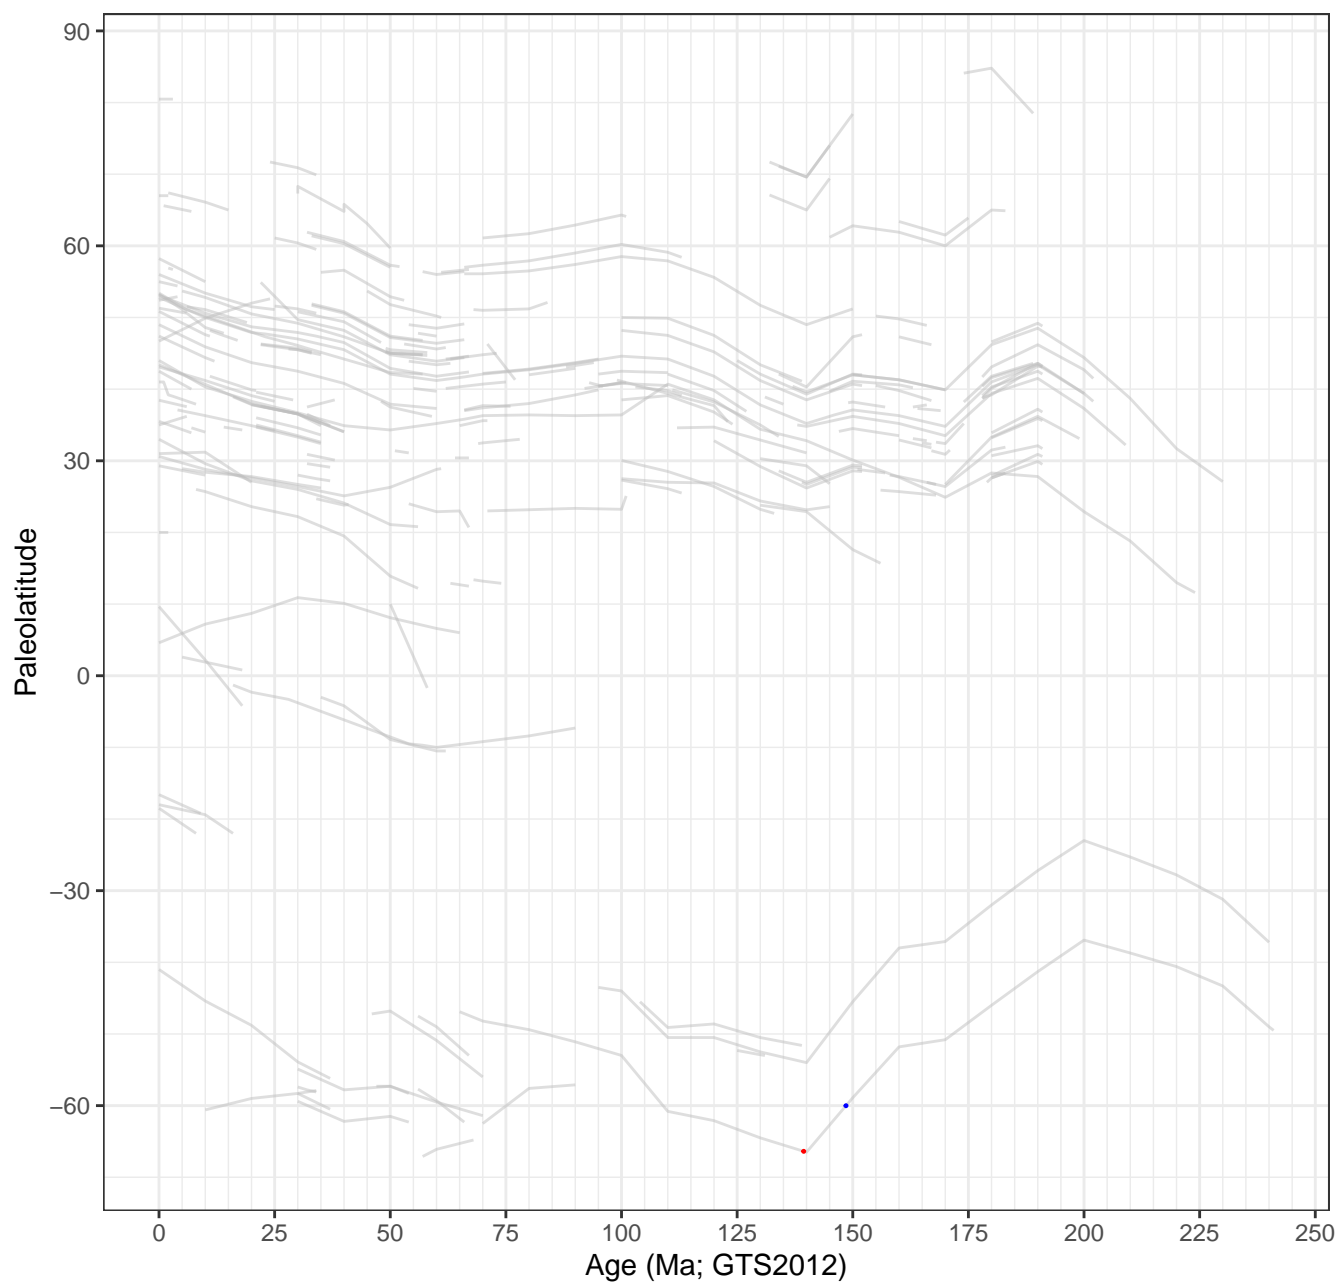

Supplement: Supplementary file 2079 [file Papuadinium apiculatum.pdf › Supplement/Supplement 2/Species 1914 plots/Papuadinium apiculatum.pdf]

# Species *Paraevansia brachythelis*

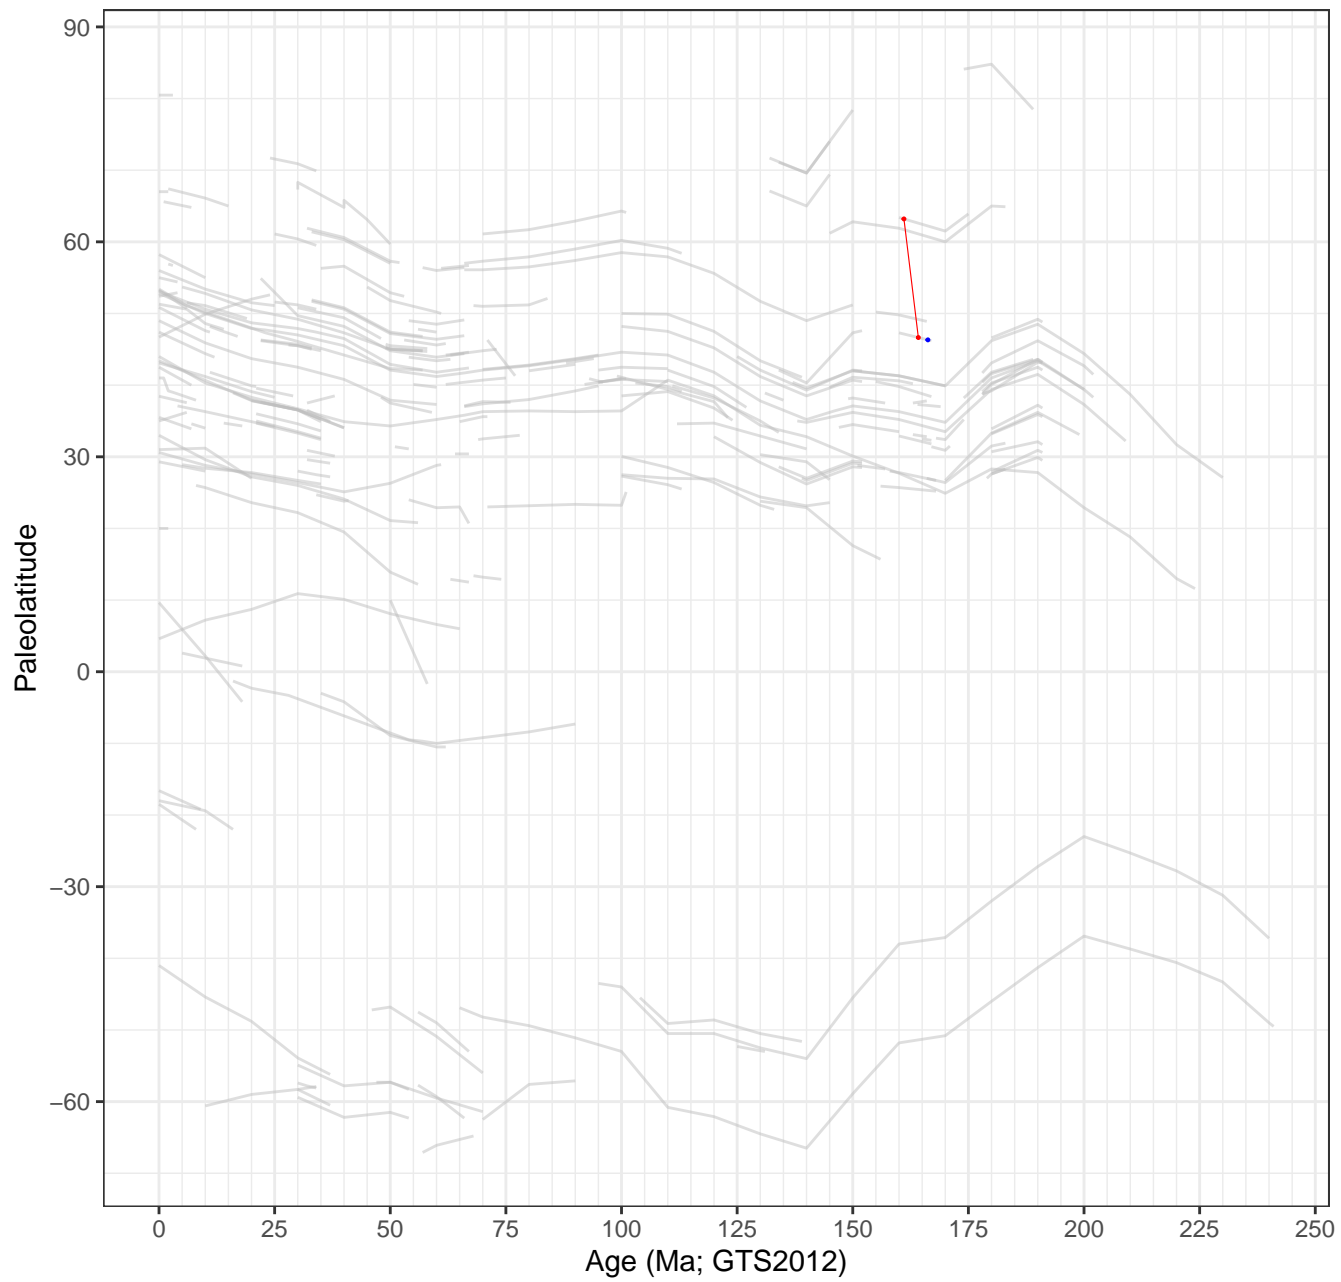

Supplement: Supplementary file 2080 [file Paraevansia brachythelis.pdf › Supplement/Supplement 2/Species 1914 plots/Paraevansia brachythelis.pdf]

# Species *Paragonyaulacysta borealis*

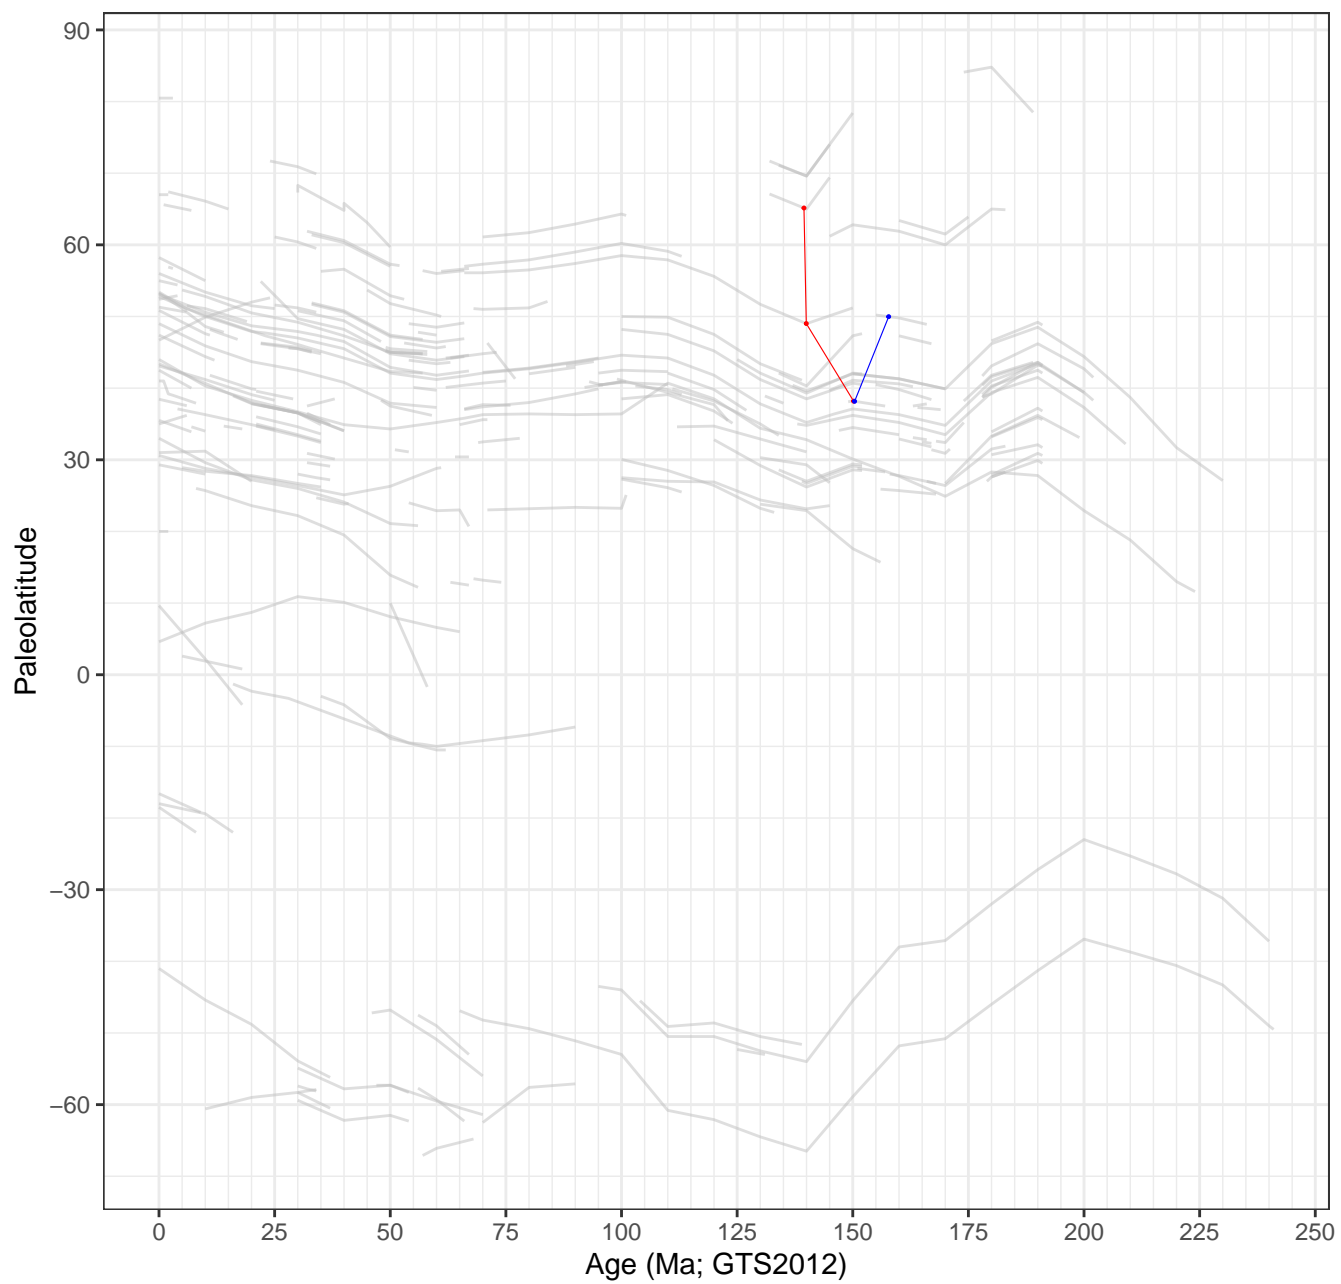

Supplement: Supplementary file 2081 [file Paragonyaulacysta borealis.pdf › Supplement/Supplement 2/Species 1914 plots/Paragonyaulacysta borealis.pdf]

# Species *Paragonyaulacysta calloviensis*

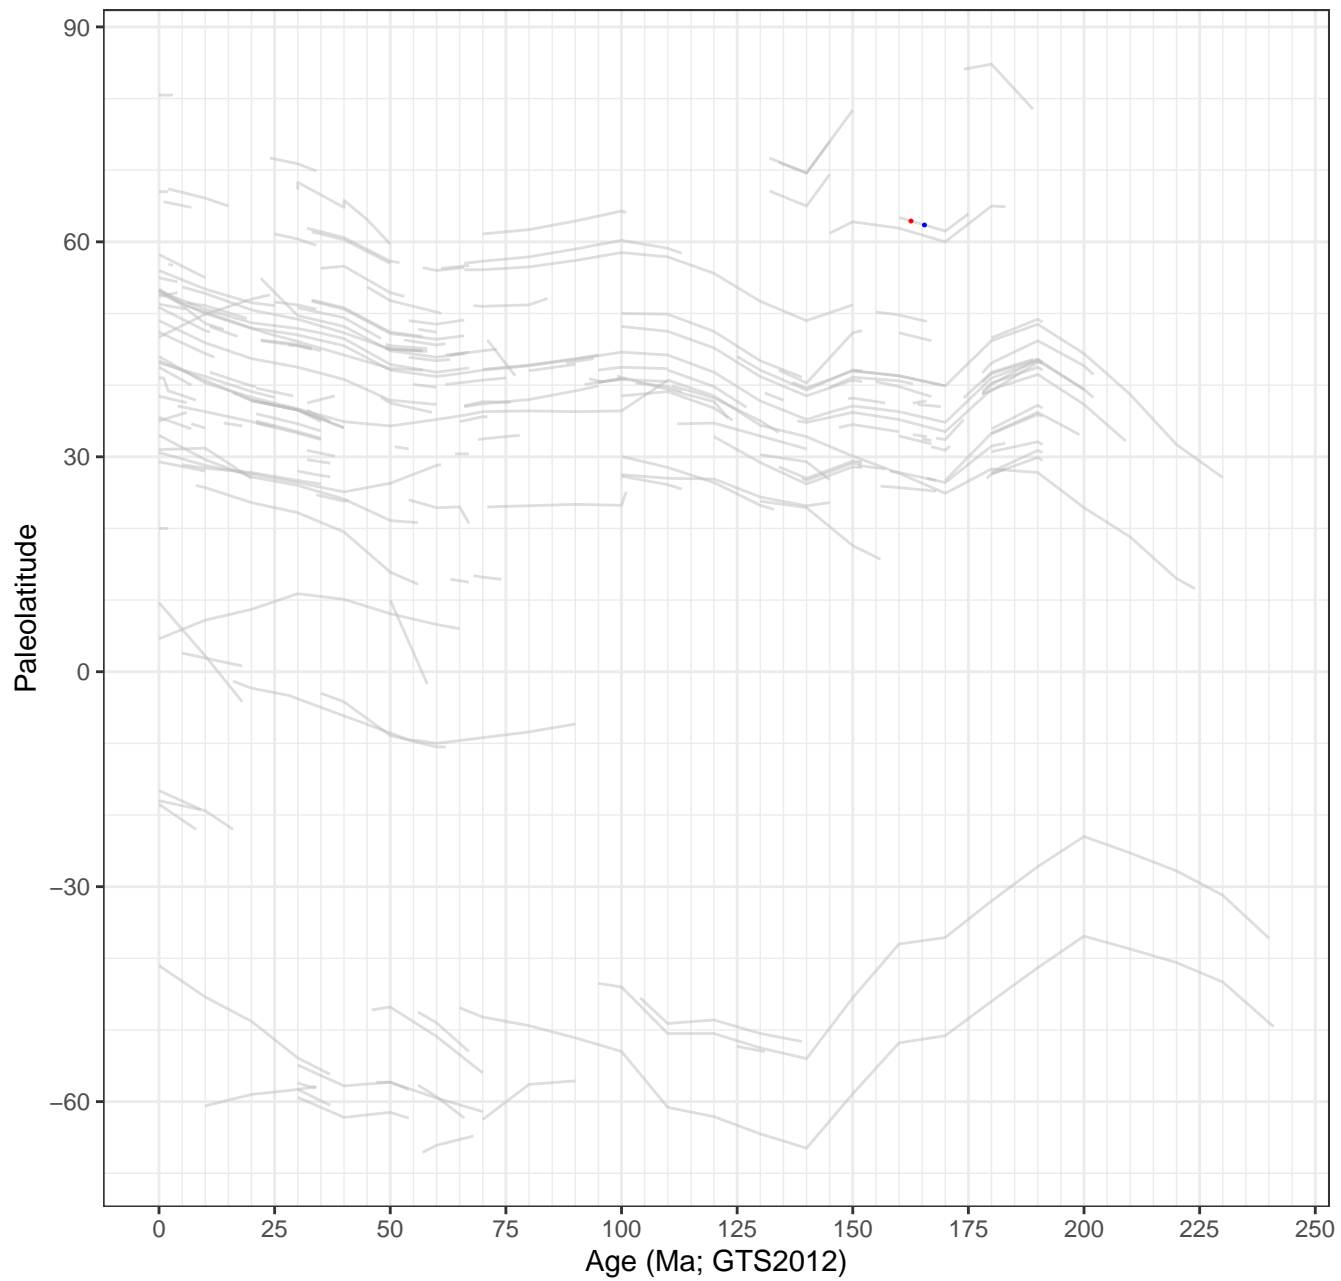

Supplement: Supplementary file 2082 [file Paragonyaulacysta calloviensis.pdf › Supplement/Supplement 2/Species 1914 plots/Paragonyaulacysta calloviensis.pdf]

# Species *Paragonyaulacysta capillosa*

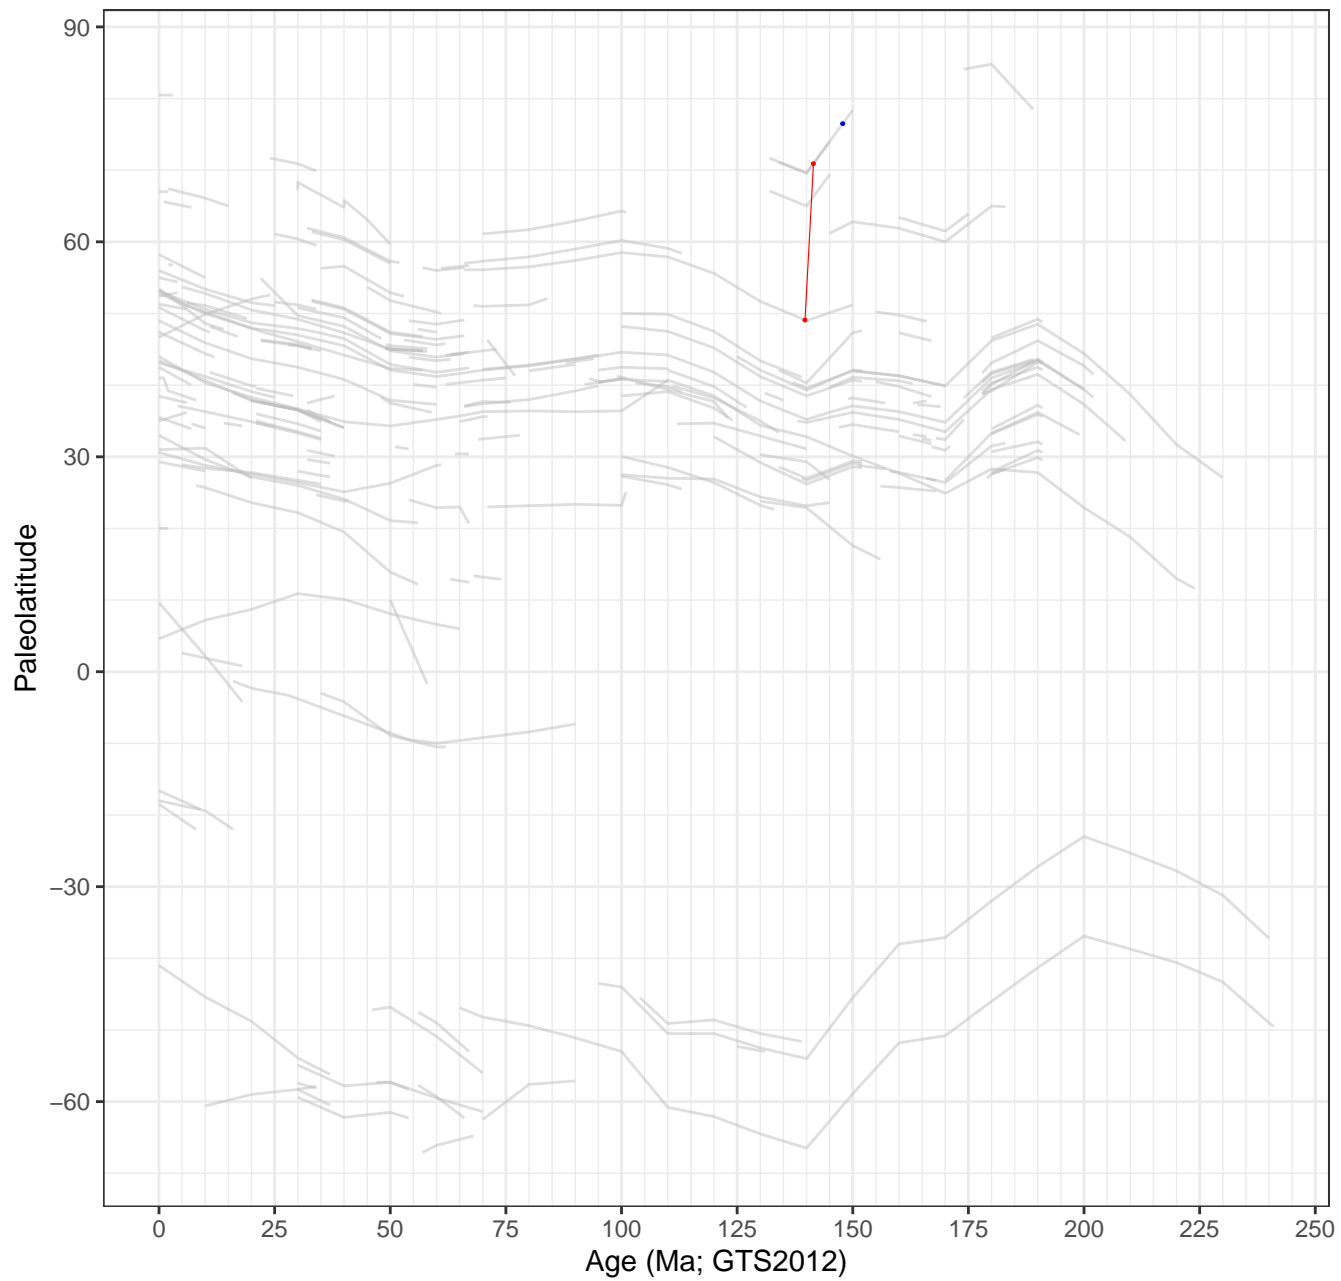

Supplement: Supplementary file 2083 [file Paragonyaulacysta capillosa.pdf › Supplement/Supplement 2/Species 1914 plots/Paragonyaulacysta capillosa.pdf]

# Species *Paragonyaulacysta retiphragmata*

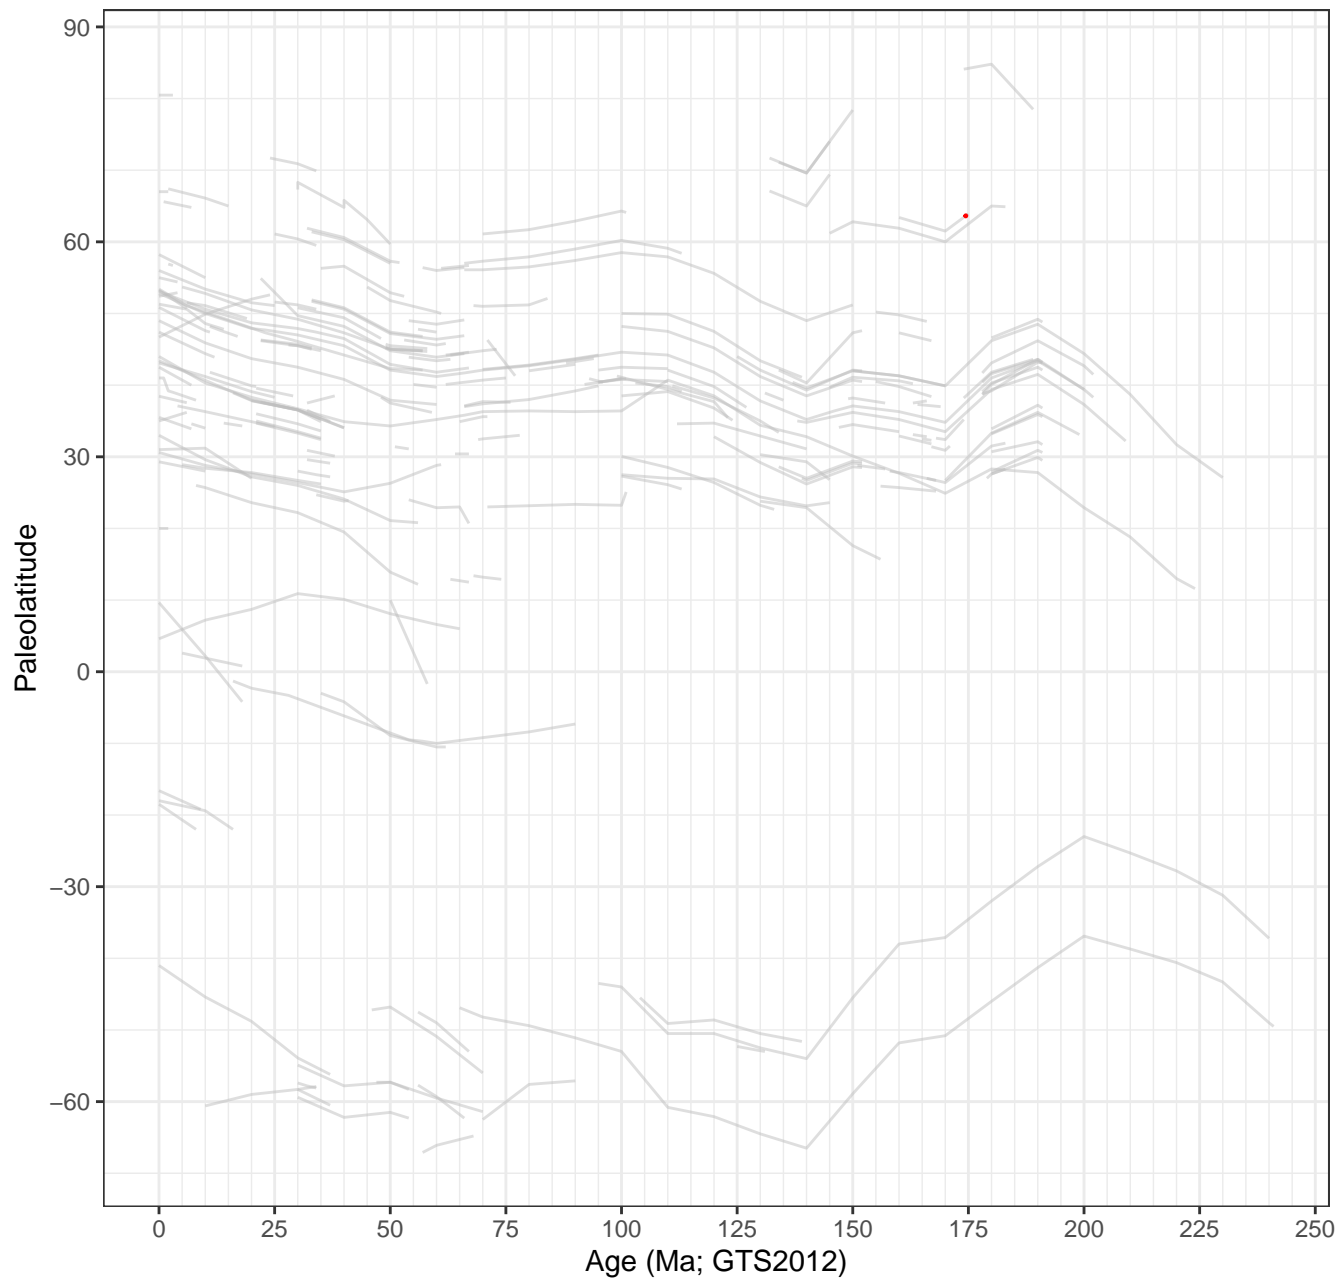

Supplement: Supplementary file 2084 [file Paragonyaulacysta retiphragmata.pdf › Supplement/Supplement 2/Species 1914 plots/Paragonyaulacysta retiphragmata.pdf]

# Species *Parascriniocassis krumbeckii*

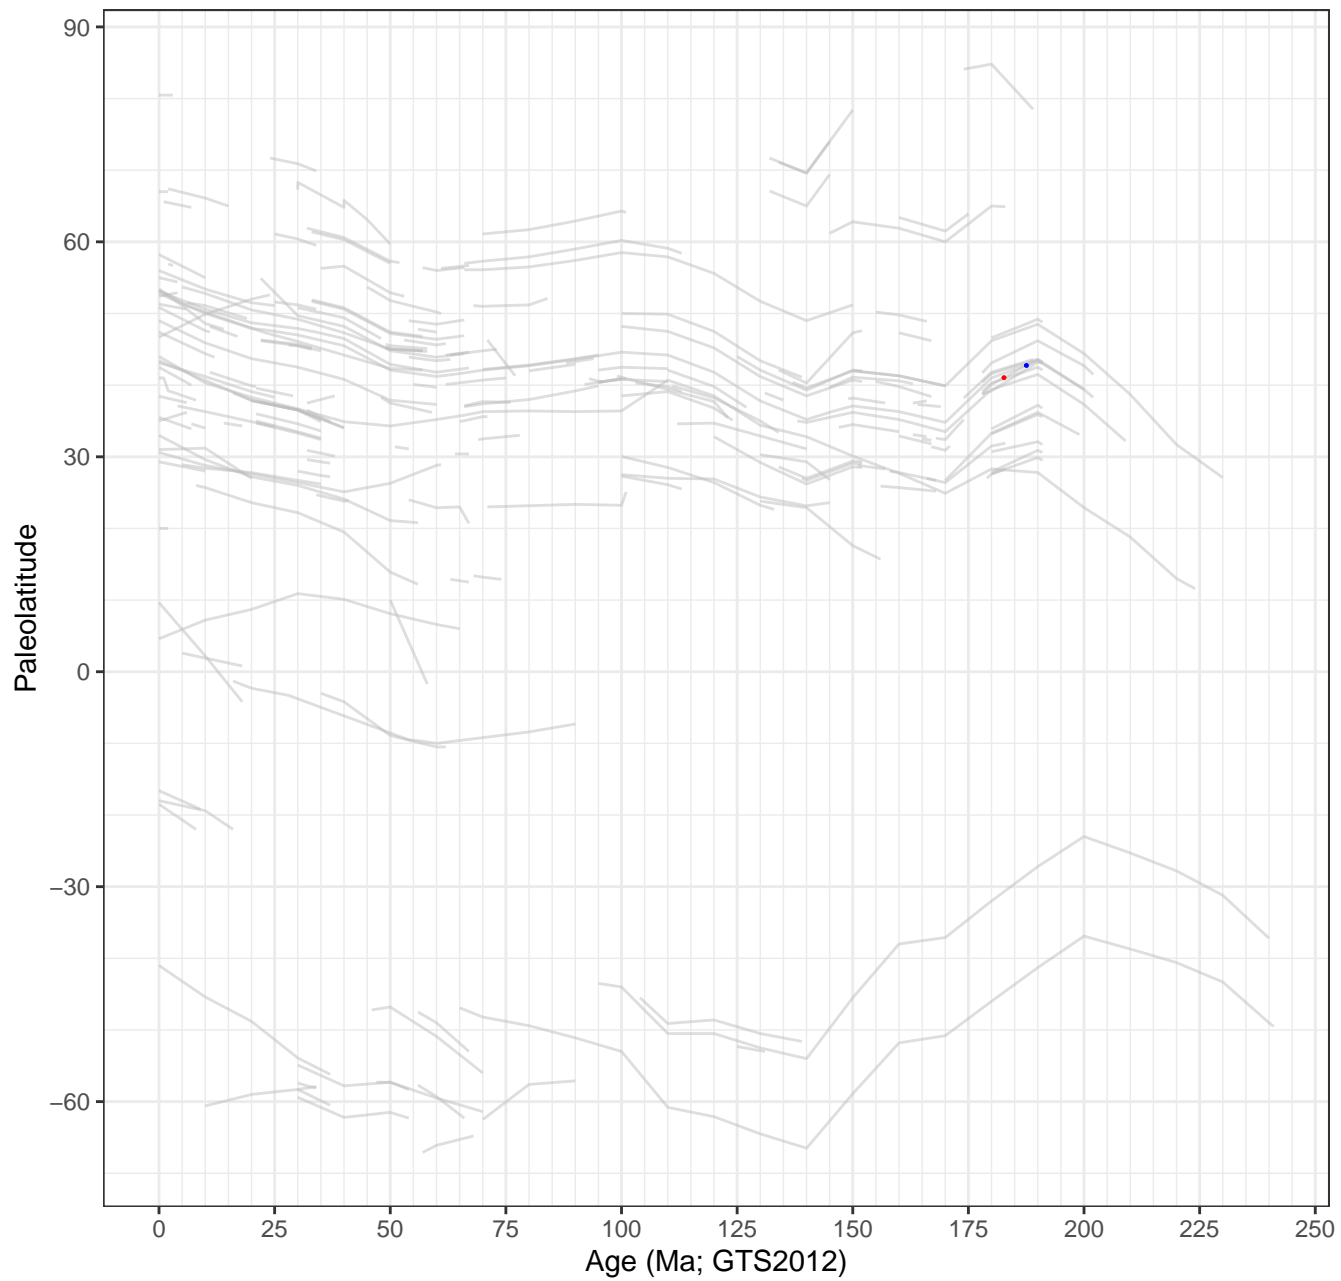

Supplement: Supplementary file 2085 [file Parascriniocassis krumbeckii.pdf › Supplement/Supplement 2/Species 1914 plots/Parascriniocassis krumbeckii.pdf]

# Species *Pareodinia aphelia*

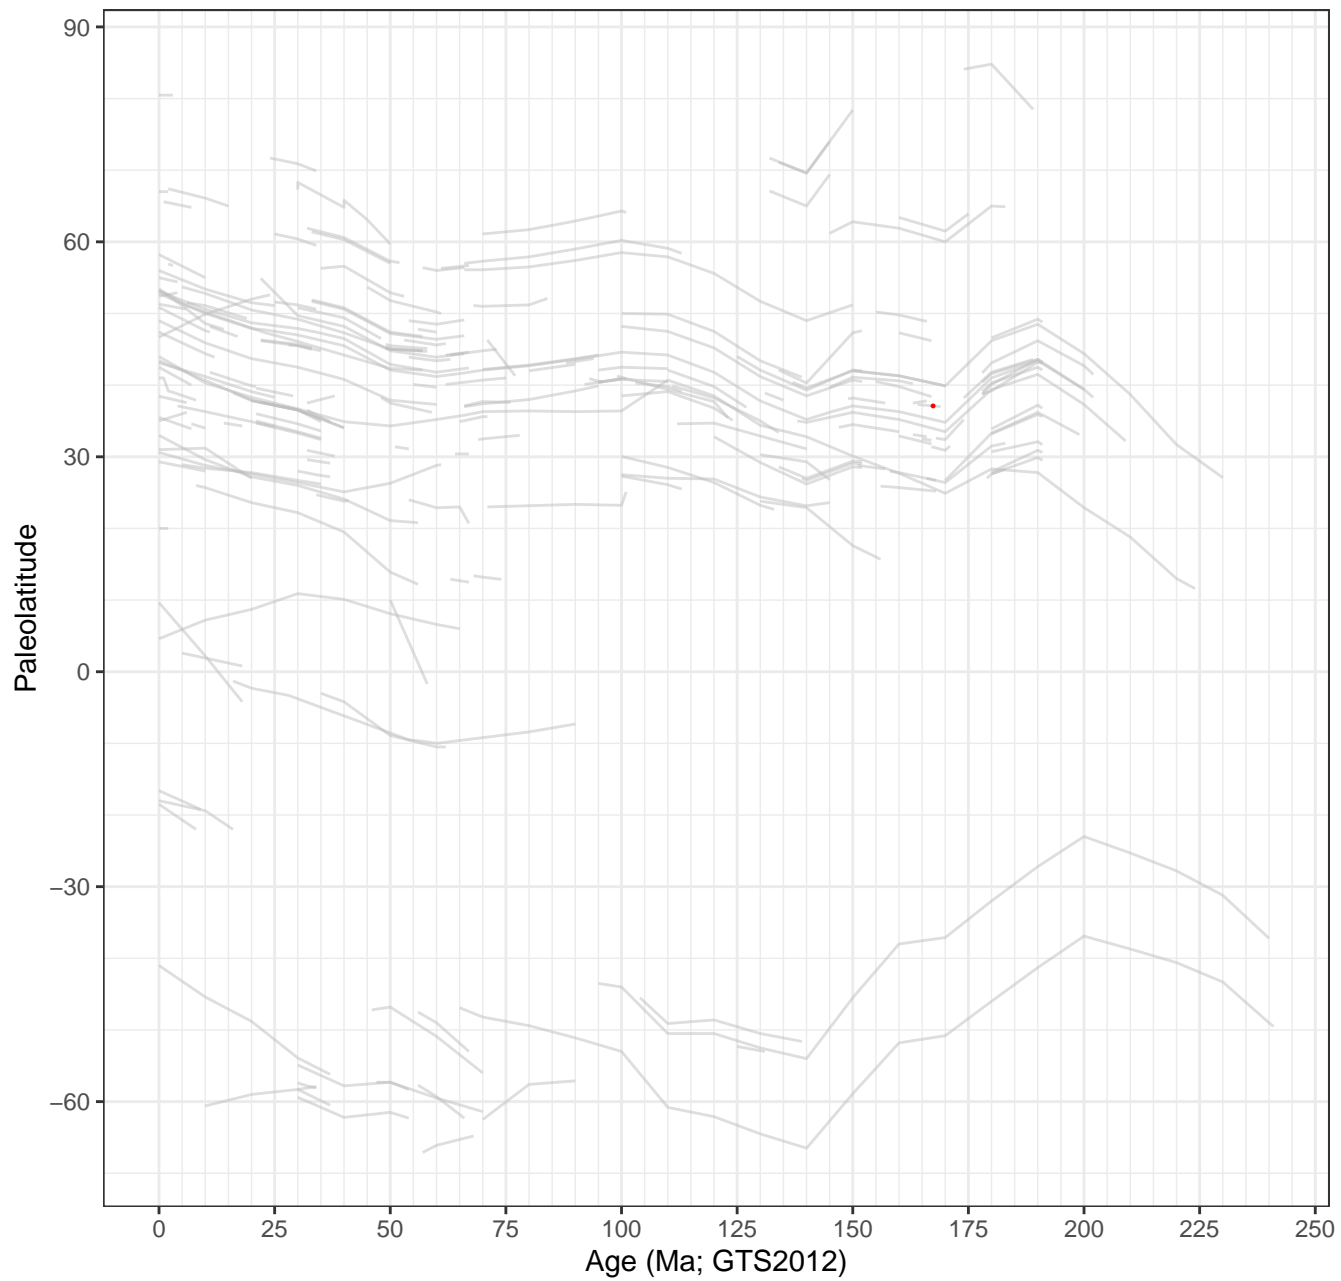

Supplement: Supplementary file 2086 [file Pareodinia aphelia.pdf › Supplement/Supplement 2/Species 1914 plots/Pareodinia aphelia.pdf]

# Species *Pareodinia arctica*

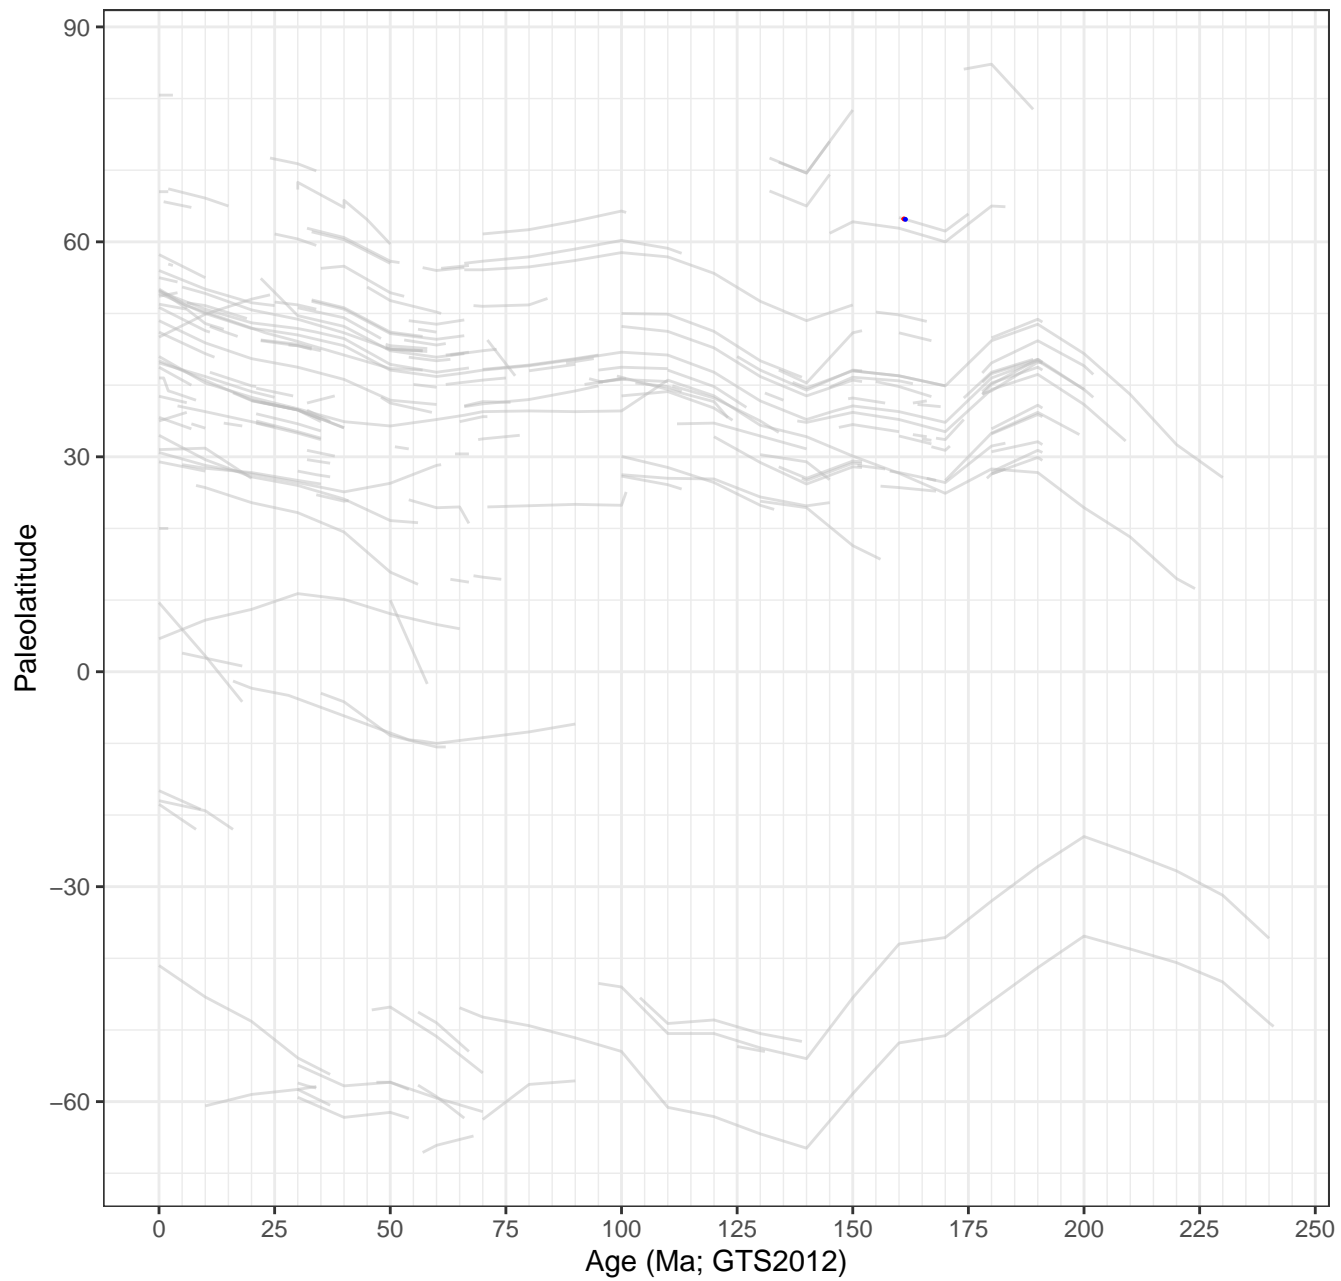

Supplement: Supplementary file 2087 [file Pareodinia arctica.pdf › Supplement/Supplement 2/Species 1914 plots/Pareodinia arctica.pdf]

# Species *Pareodinia ceratophora*

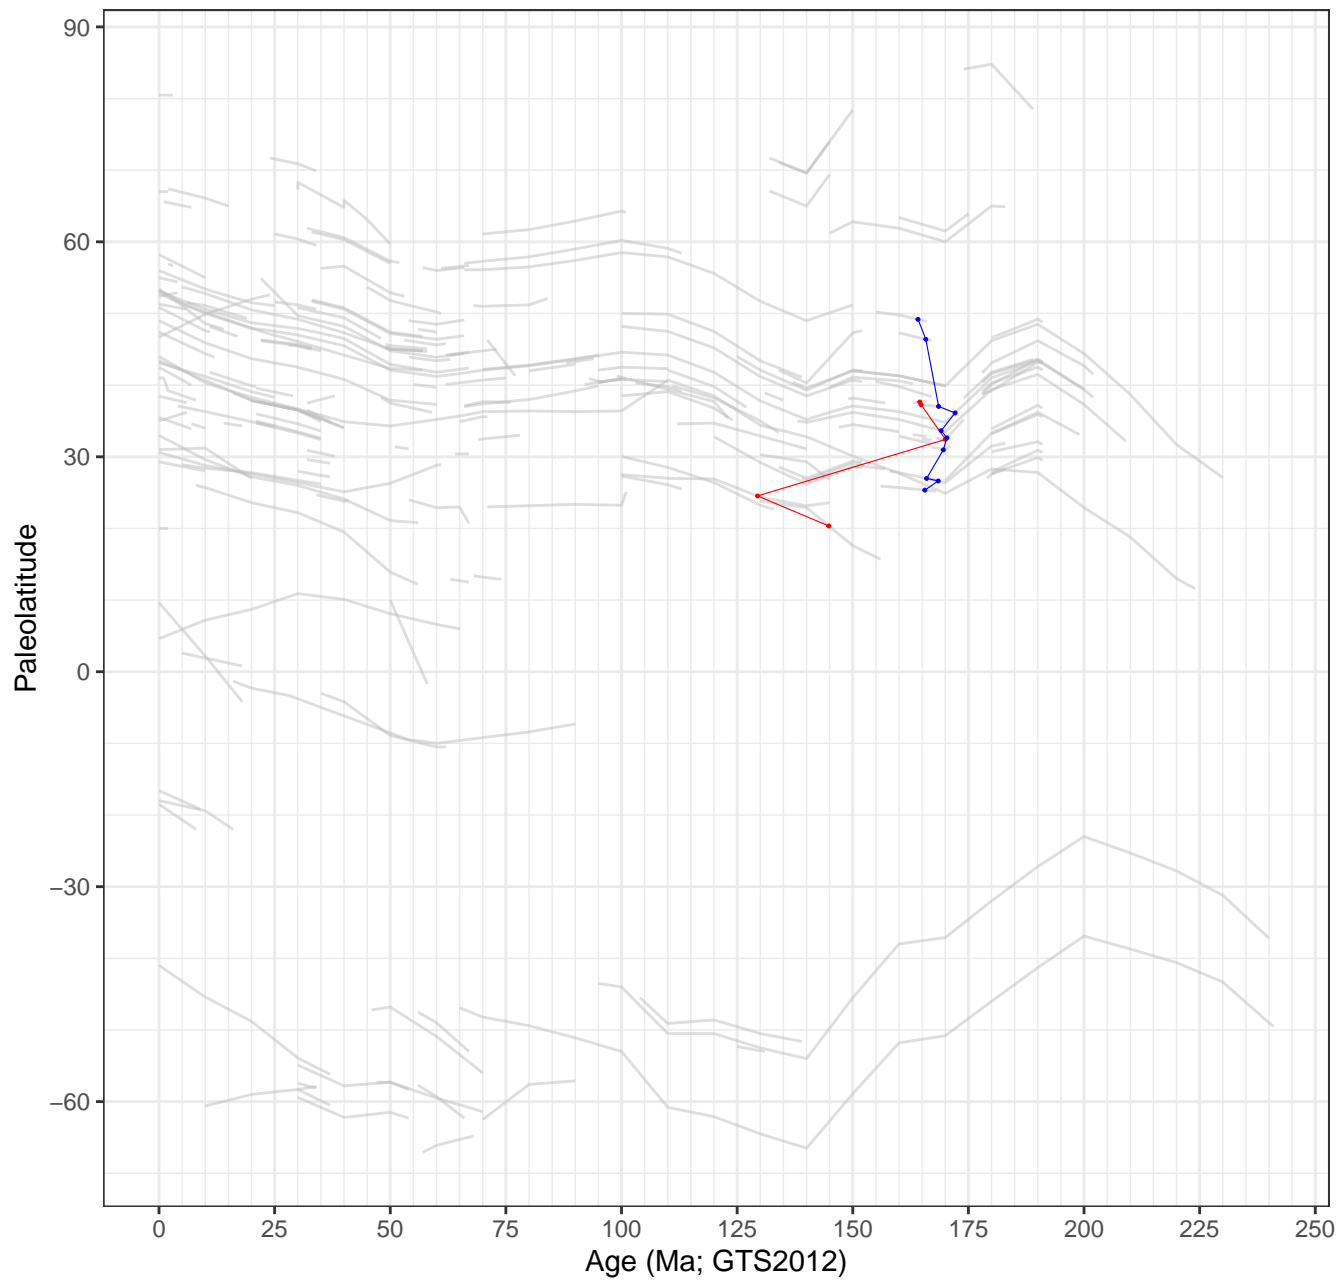

Supplement: Supplementary file 2088 [file Pareodinia ceratophora.pdf › Supplement/Supplement 2/Species 1914 plots/Pareodinia ceratophora.pdf]

# Species *Pareodinia cerebraloides*

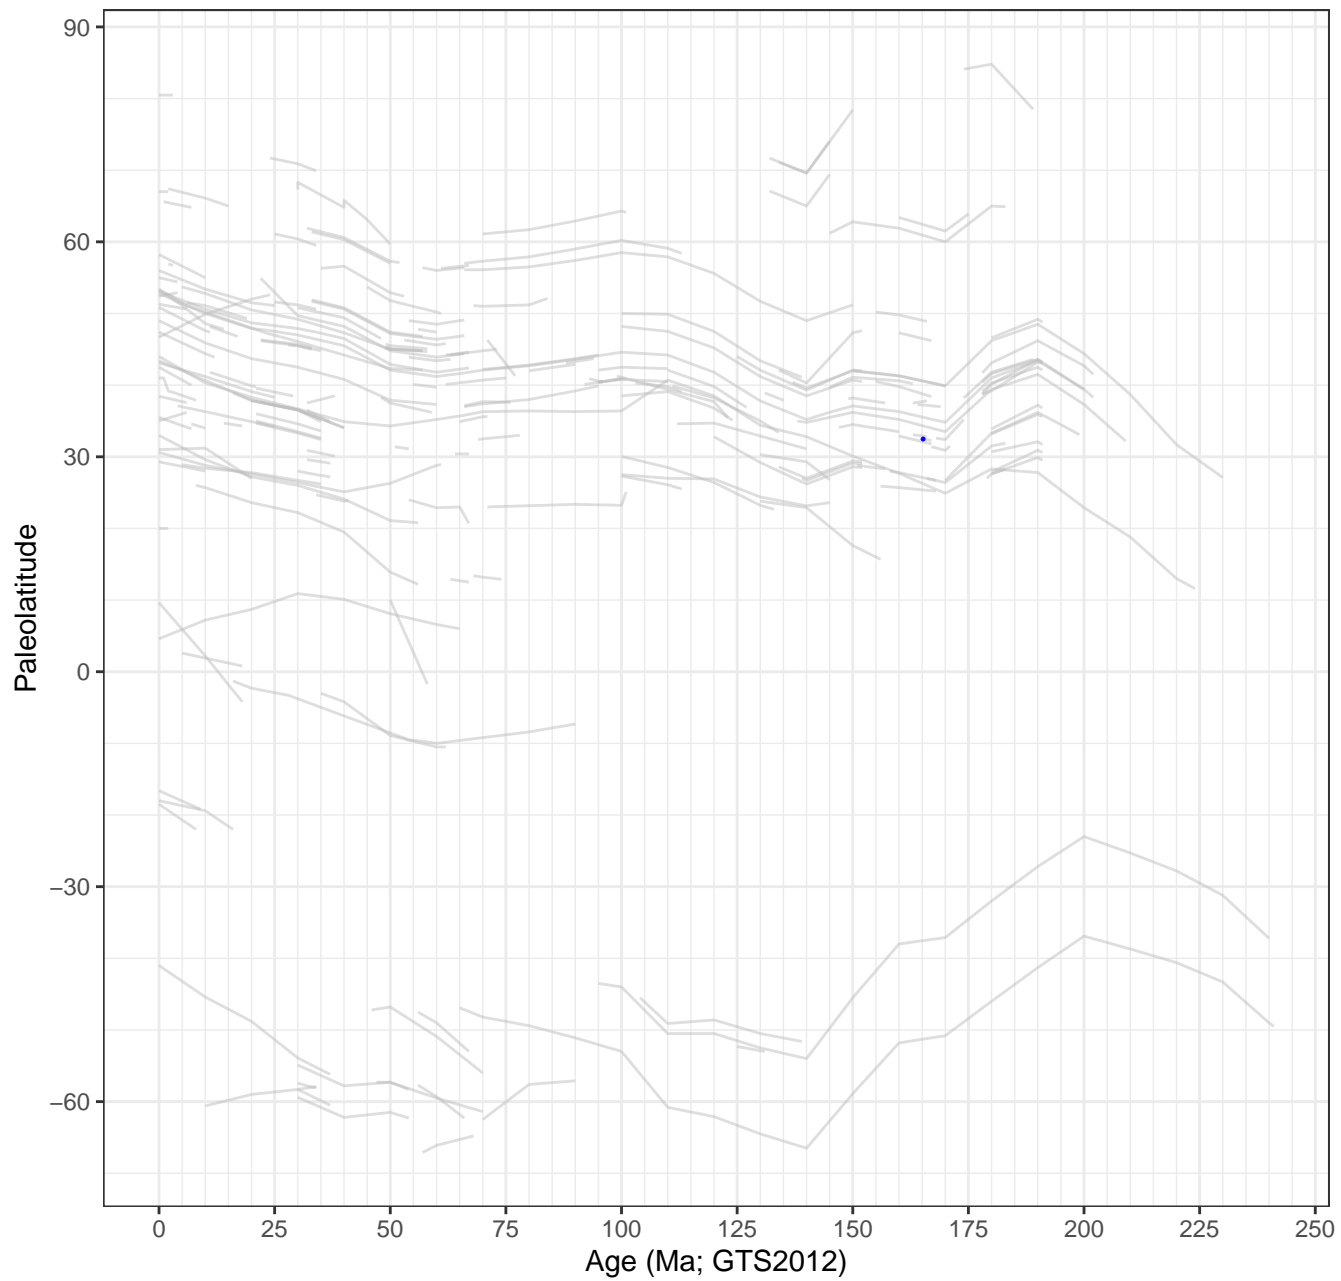

Supplement: Supplementary file 2089 [file Pareodinia cerebraloides.pdf › Supplement/Supplement 2/Species 1914 plots/Pareodinia cerebraloides.pdf]

# Species *Pareodinia halosa*

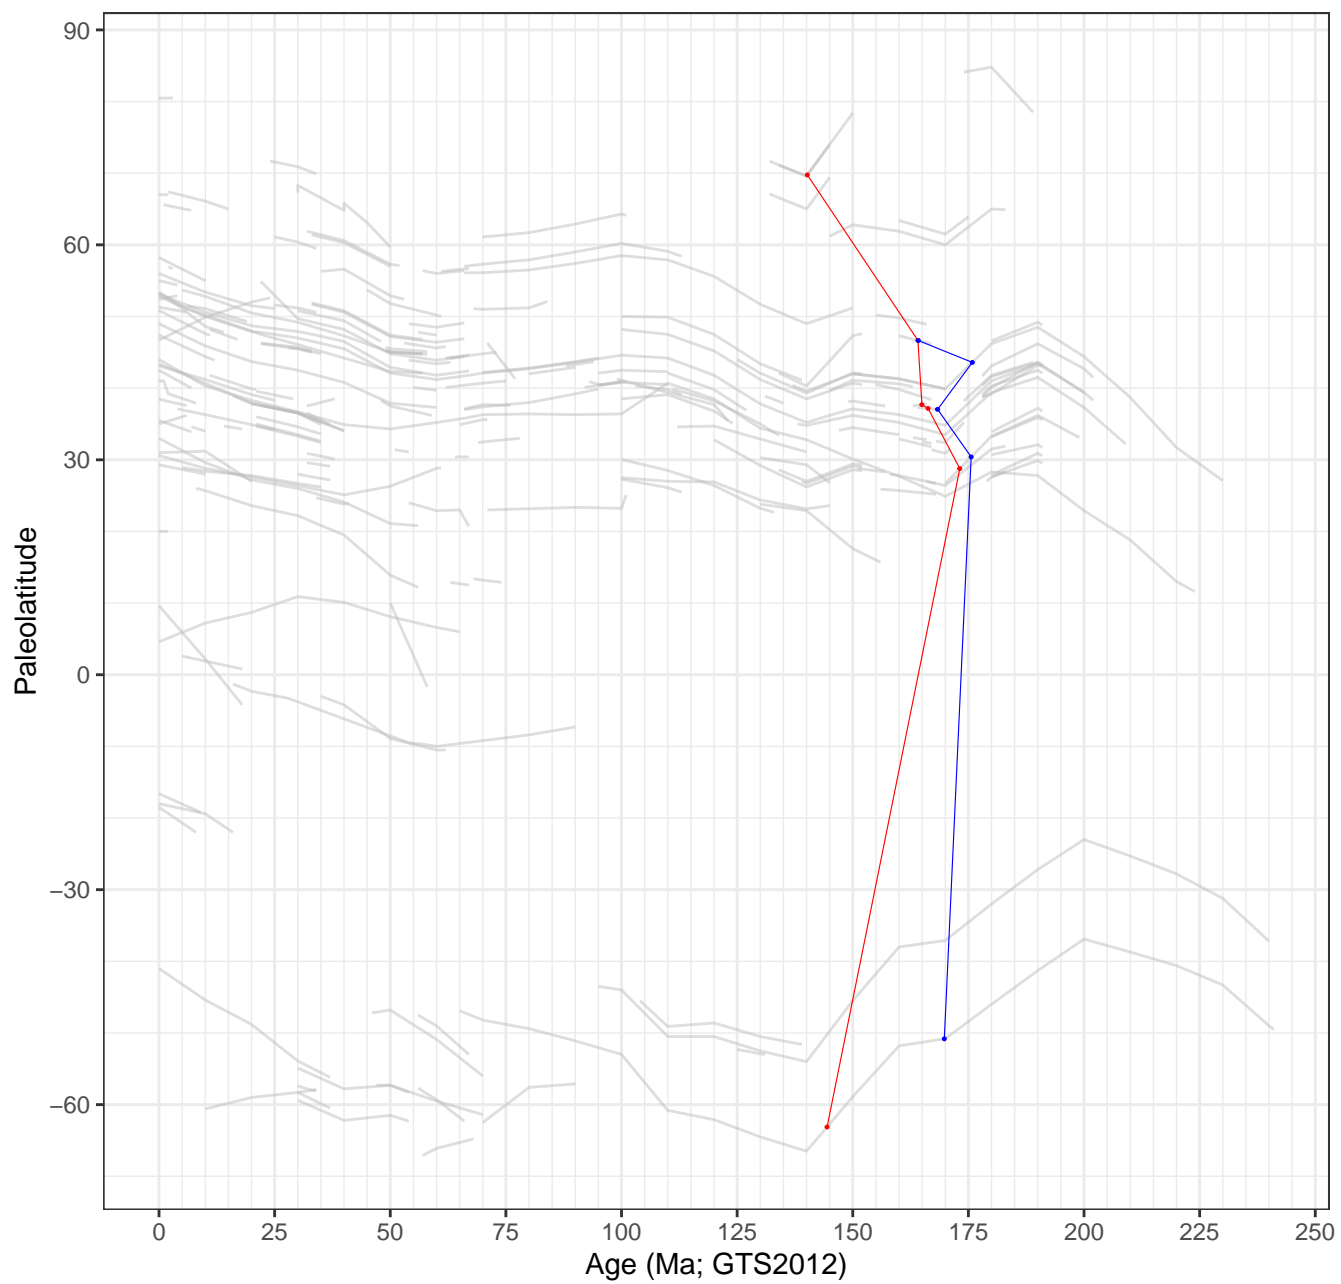

Supplement: Supplementary file 2090 [file Pareodinia halosa.pdf › Supplement/Supplement 2/Species 1914 plots/Pareodinia halosa.pdf]

# Species *Pareodinia prolongata*

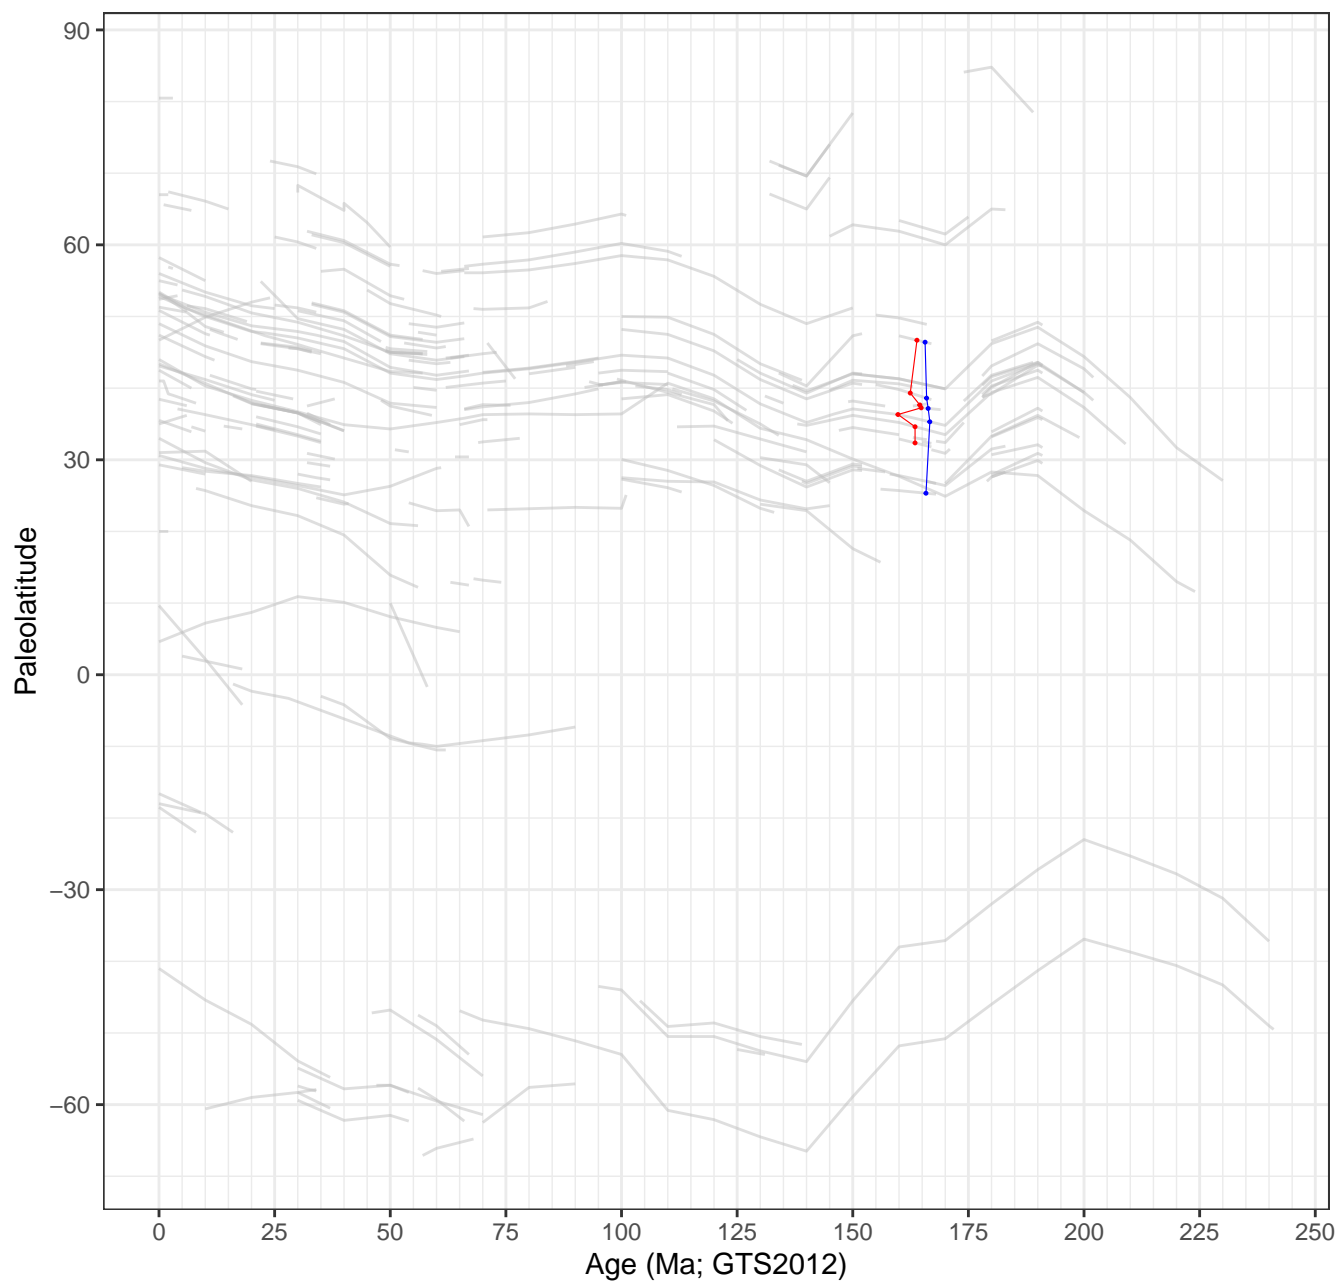

Supplement: Supplementary file 2091 [file Pareodinia prolongata.pdf › Supplement/Supplement 2/Species 1914 plots/Pareodinia prolongata.pdf]

# Species Pareodinia spp.

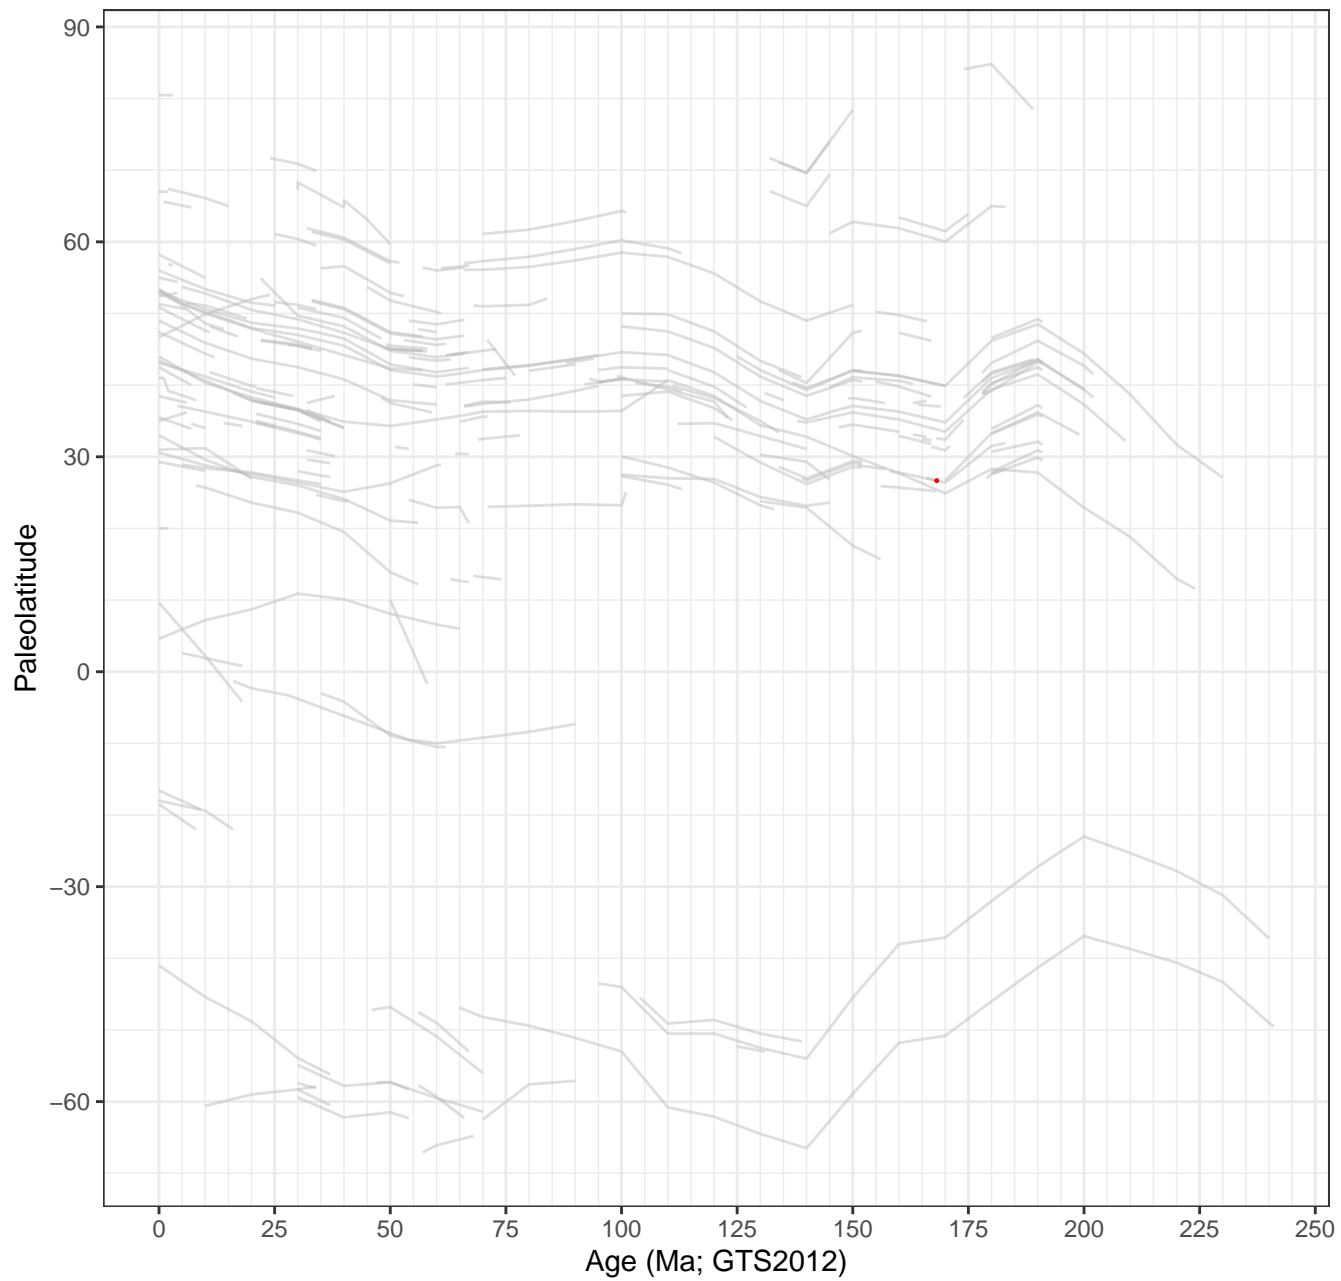

Supplement: Supplementary file 2092 [file Pareodinia spp..pdf › Supplement/Supplement 2/Species 1914 plots/Pareodinia spp..pdf]

# Species *Parvocysta barbosa*

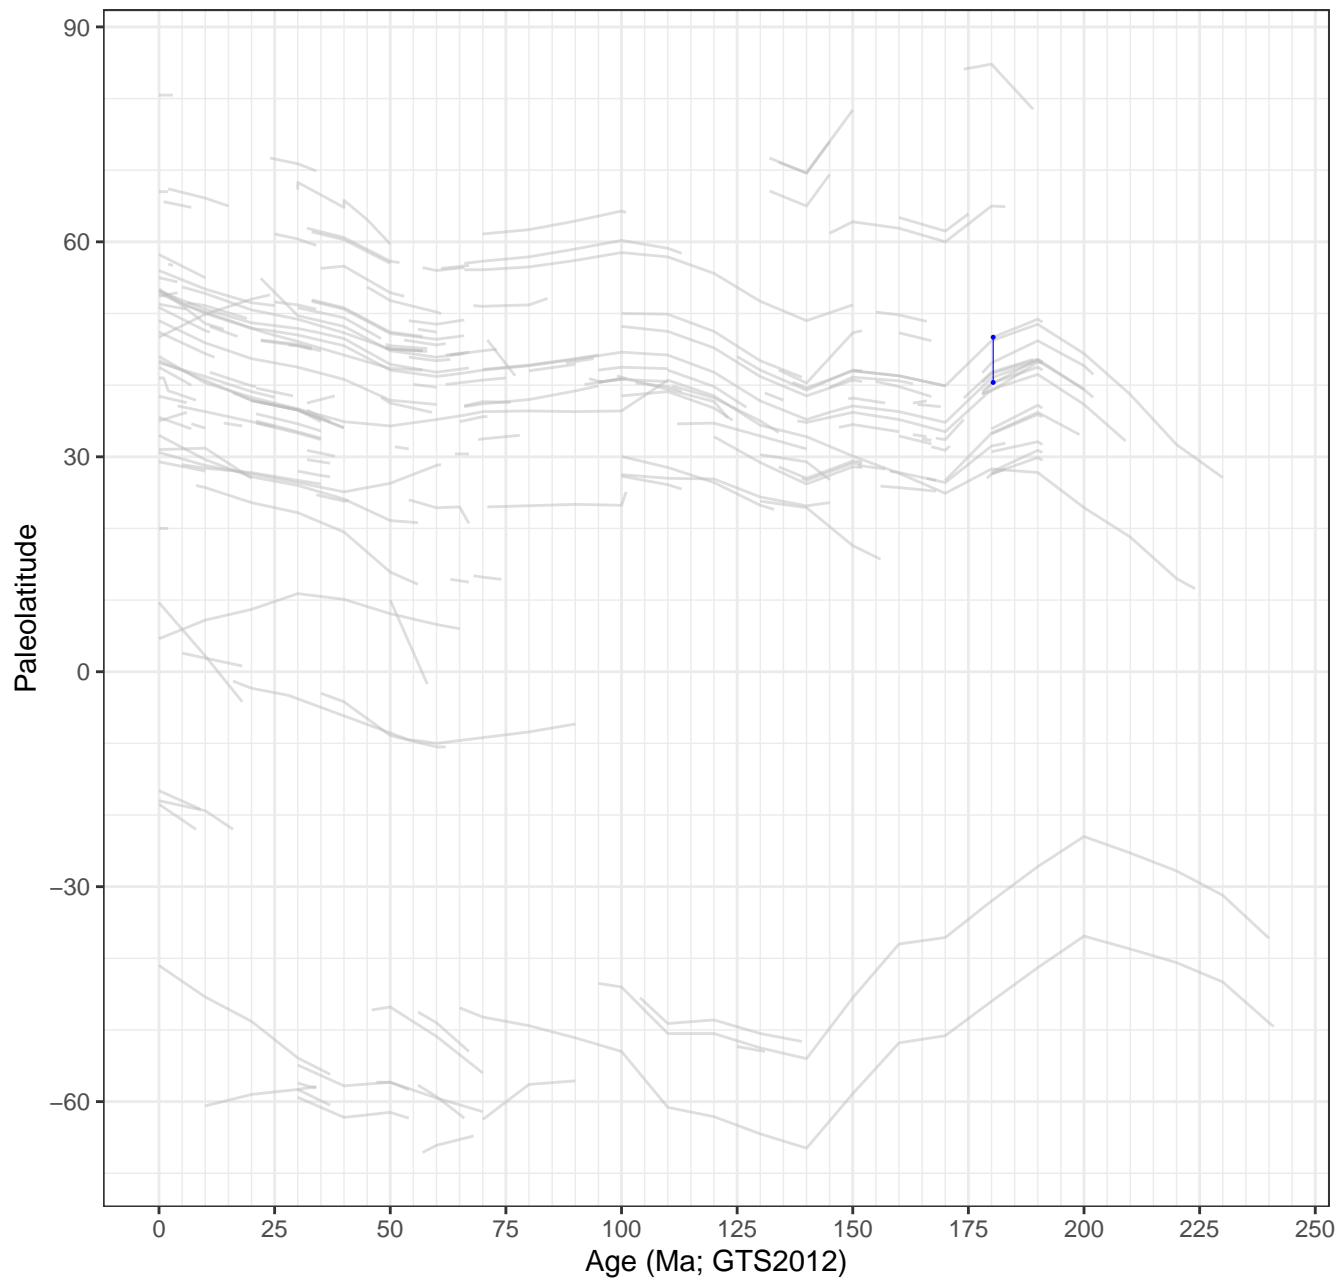

Supplement: Supplementary file 2093 [file Parvocysta barbosa.pdf › Supplement/Supplement 2/Species 1914 plots/Parvocysta barbosa.pdf]

# Species *Parvocysta bullala*

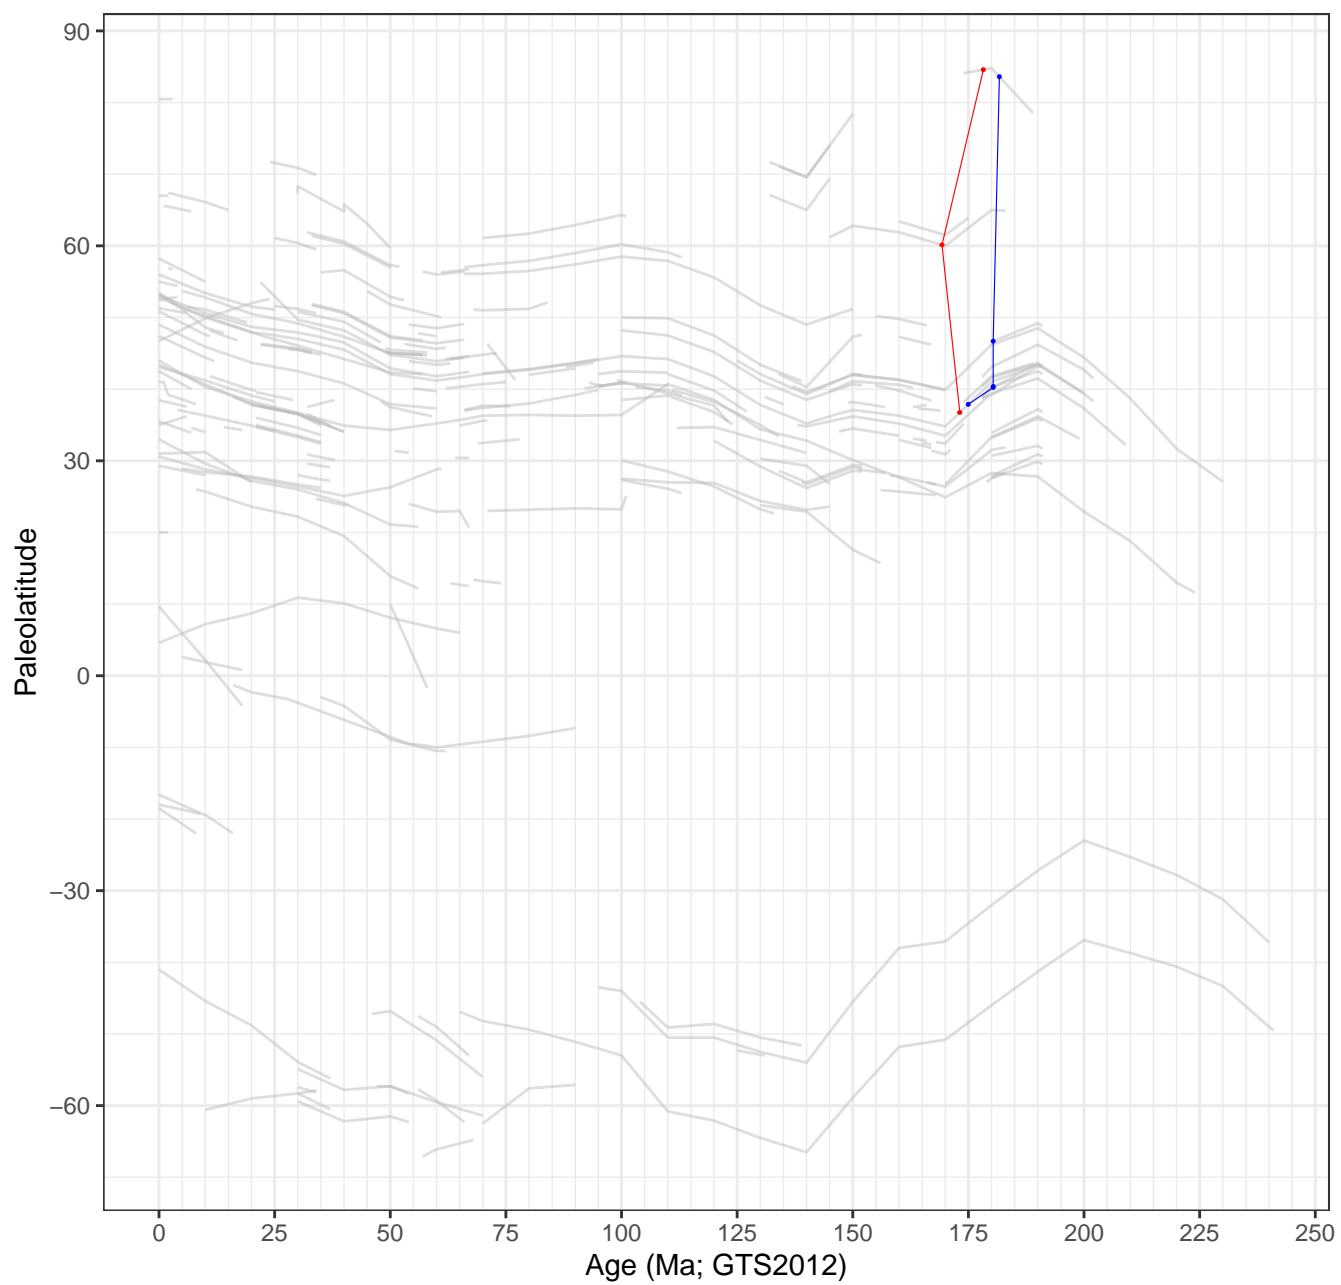

Supplement: Supplementary file 2094 [file Parvocysta bullala.pdf › Supplement/Supplement 2/Species 1914 plots/Parvocysta bullala.pdf]

# Species *Parvocysta nasuta*

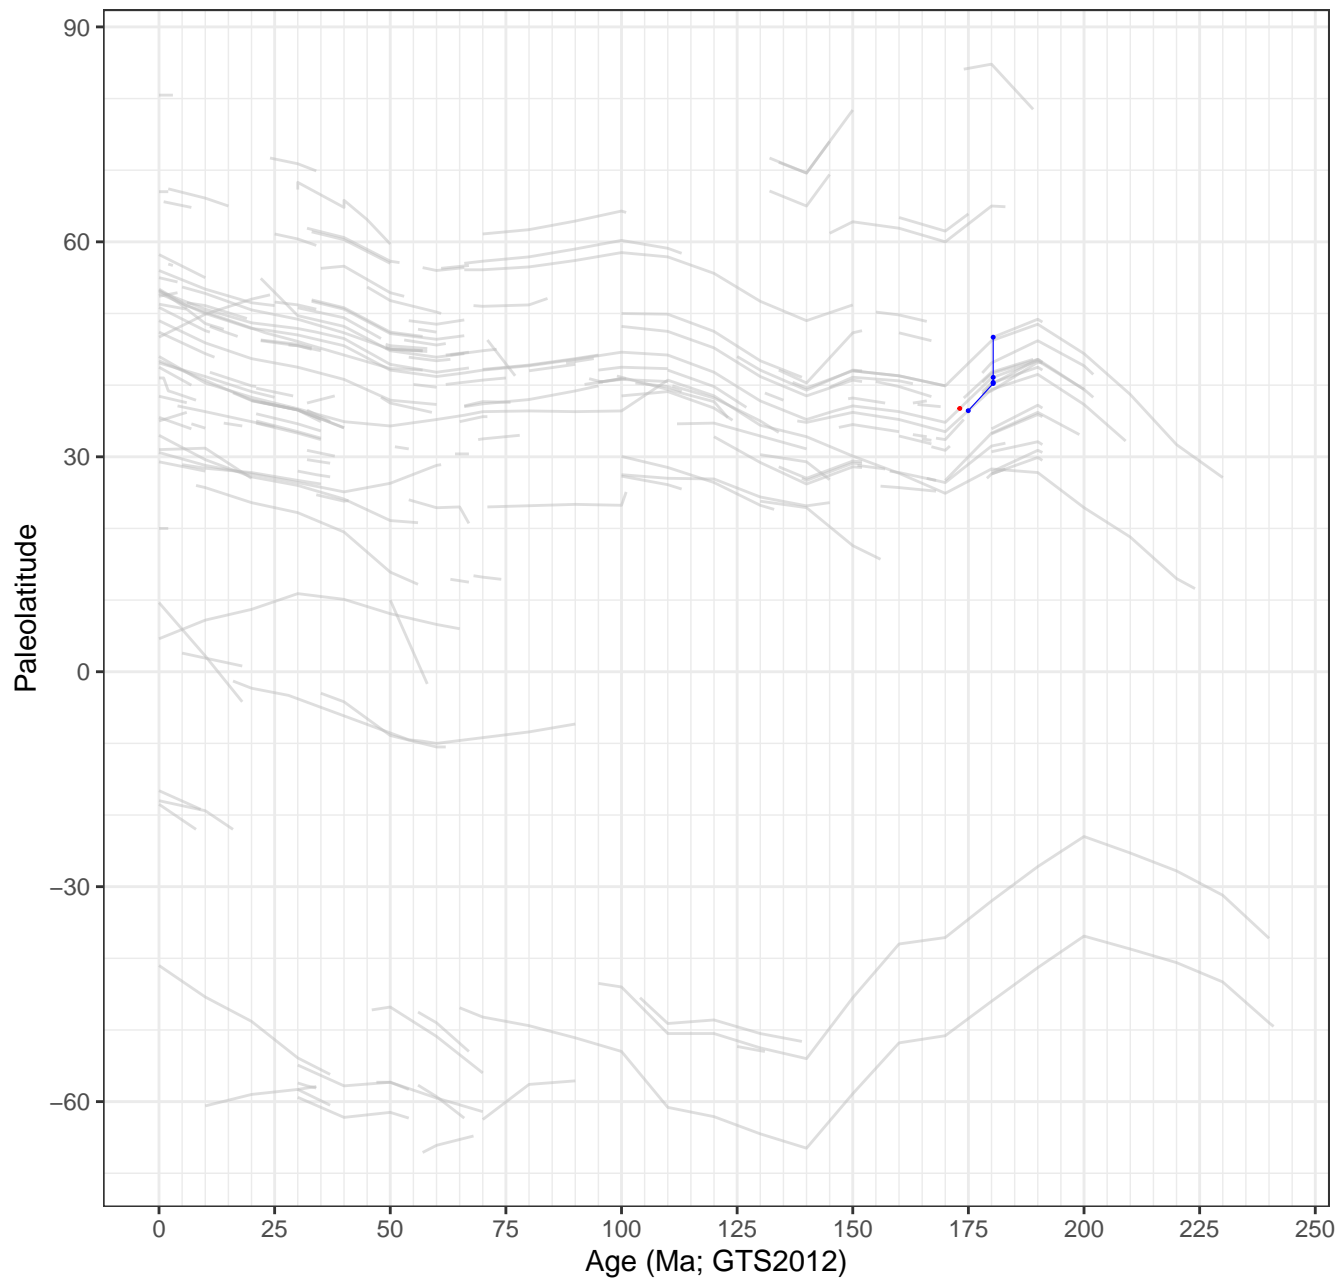

Supplement: Supplementary file 2095 [file Parvocysta nasuta.pdf › Supplement/Supplement 2/Species 1914 plots/Parvocysta nasuta.pdf]

# Species *Parvocysta tricornuta*

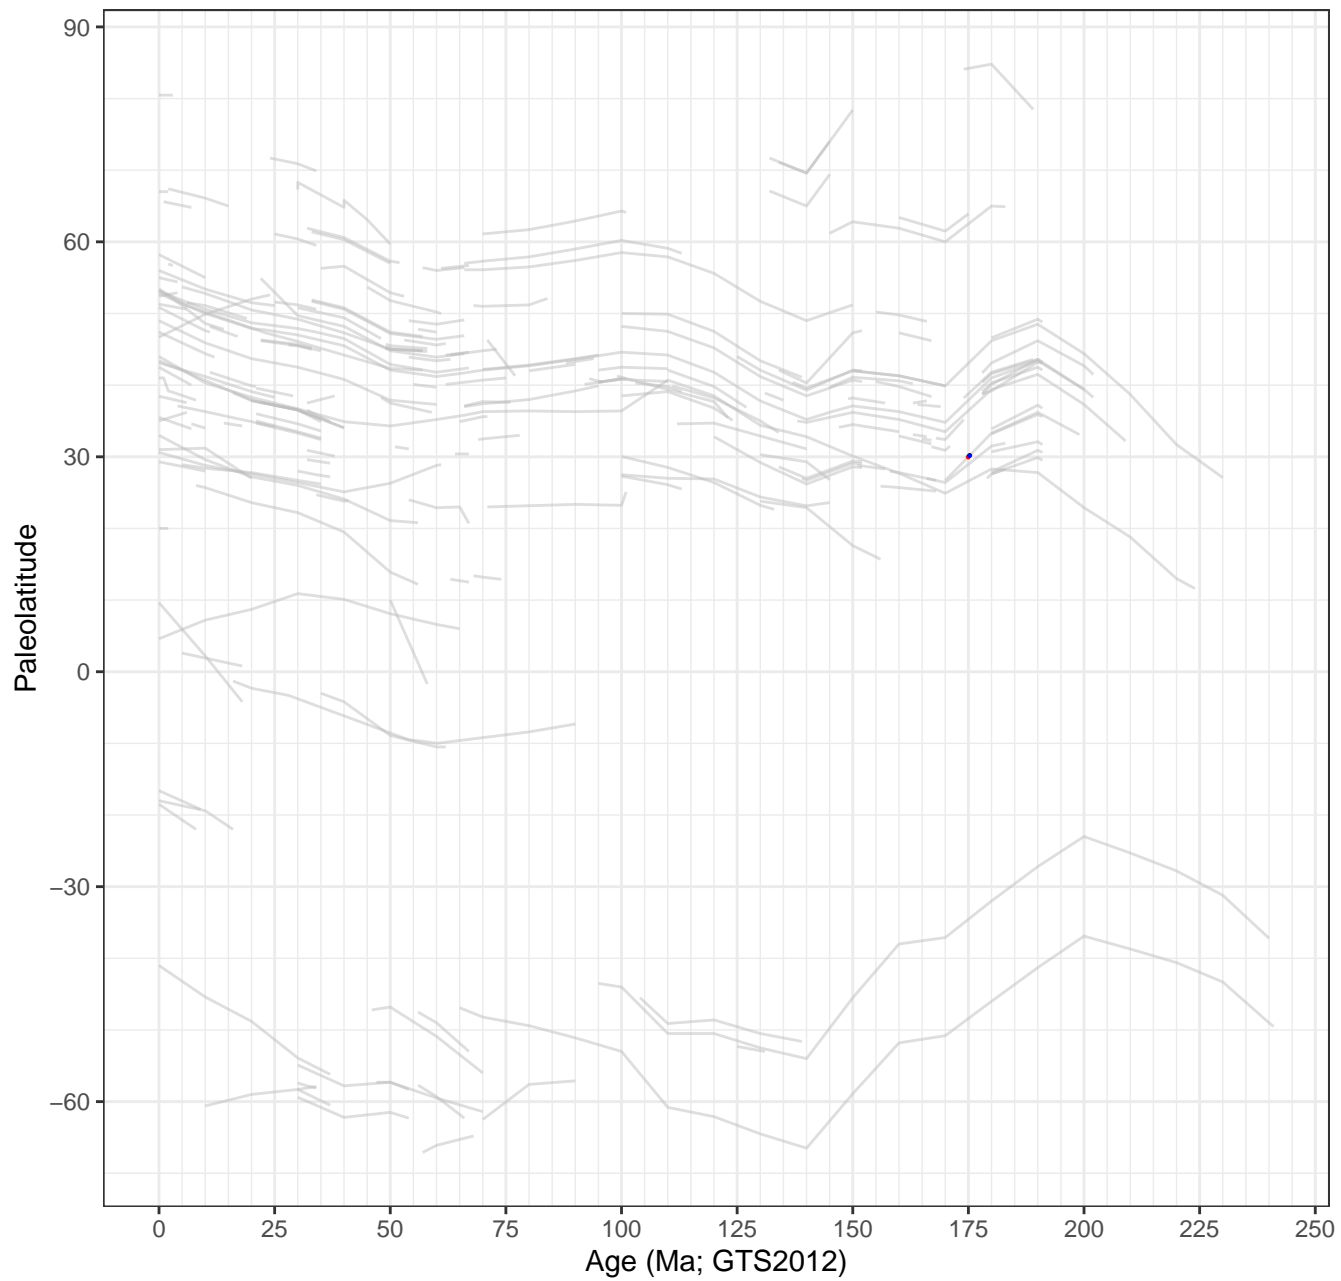

Supplement: Supplementary file 2096 [file Parvocysta tricornuta.pdf › Supplement/Supplement 2/Species 1914 plots/Parvocysta tricornuta.pdf]

# Species *Paucisphaeridium inversibuccinum*

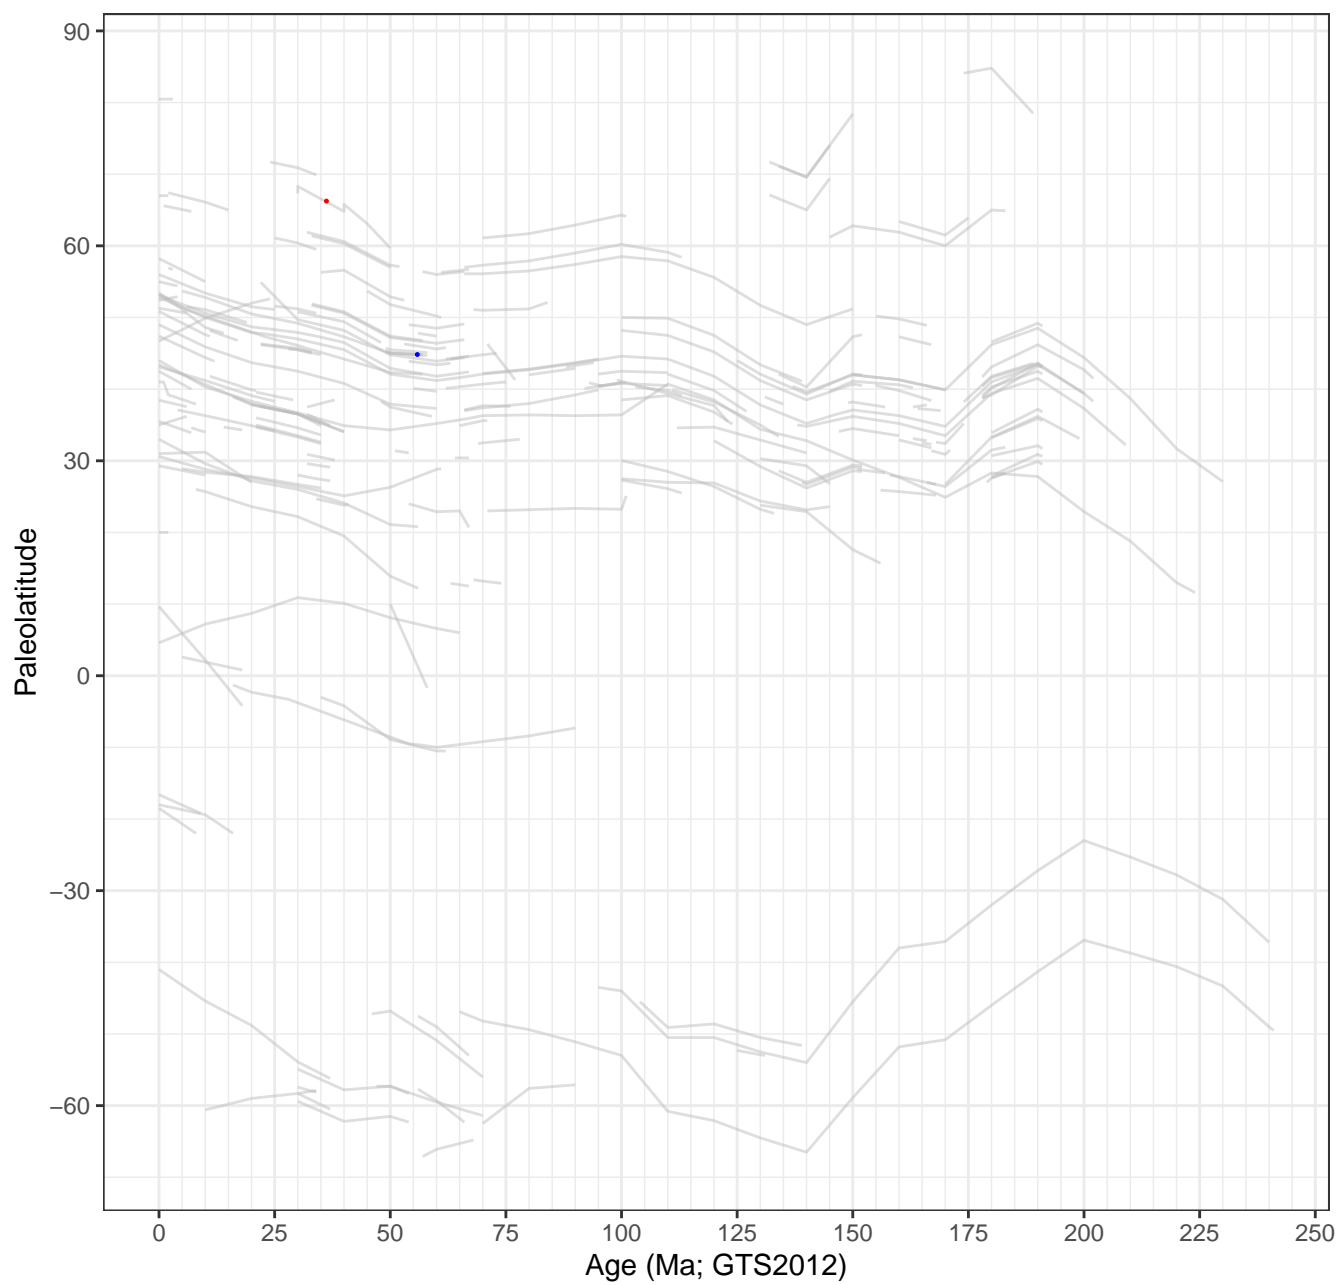

Supplement: Supplementary file 2097 [file Paucisphaeridium inversibuccinum.pdf › Supplement/Supplement 2/Species 1914 plots/Paucisphaeridium inversibuccinum.pdf]

# Species *Pentadinium alabamense*

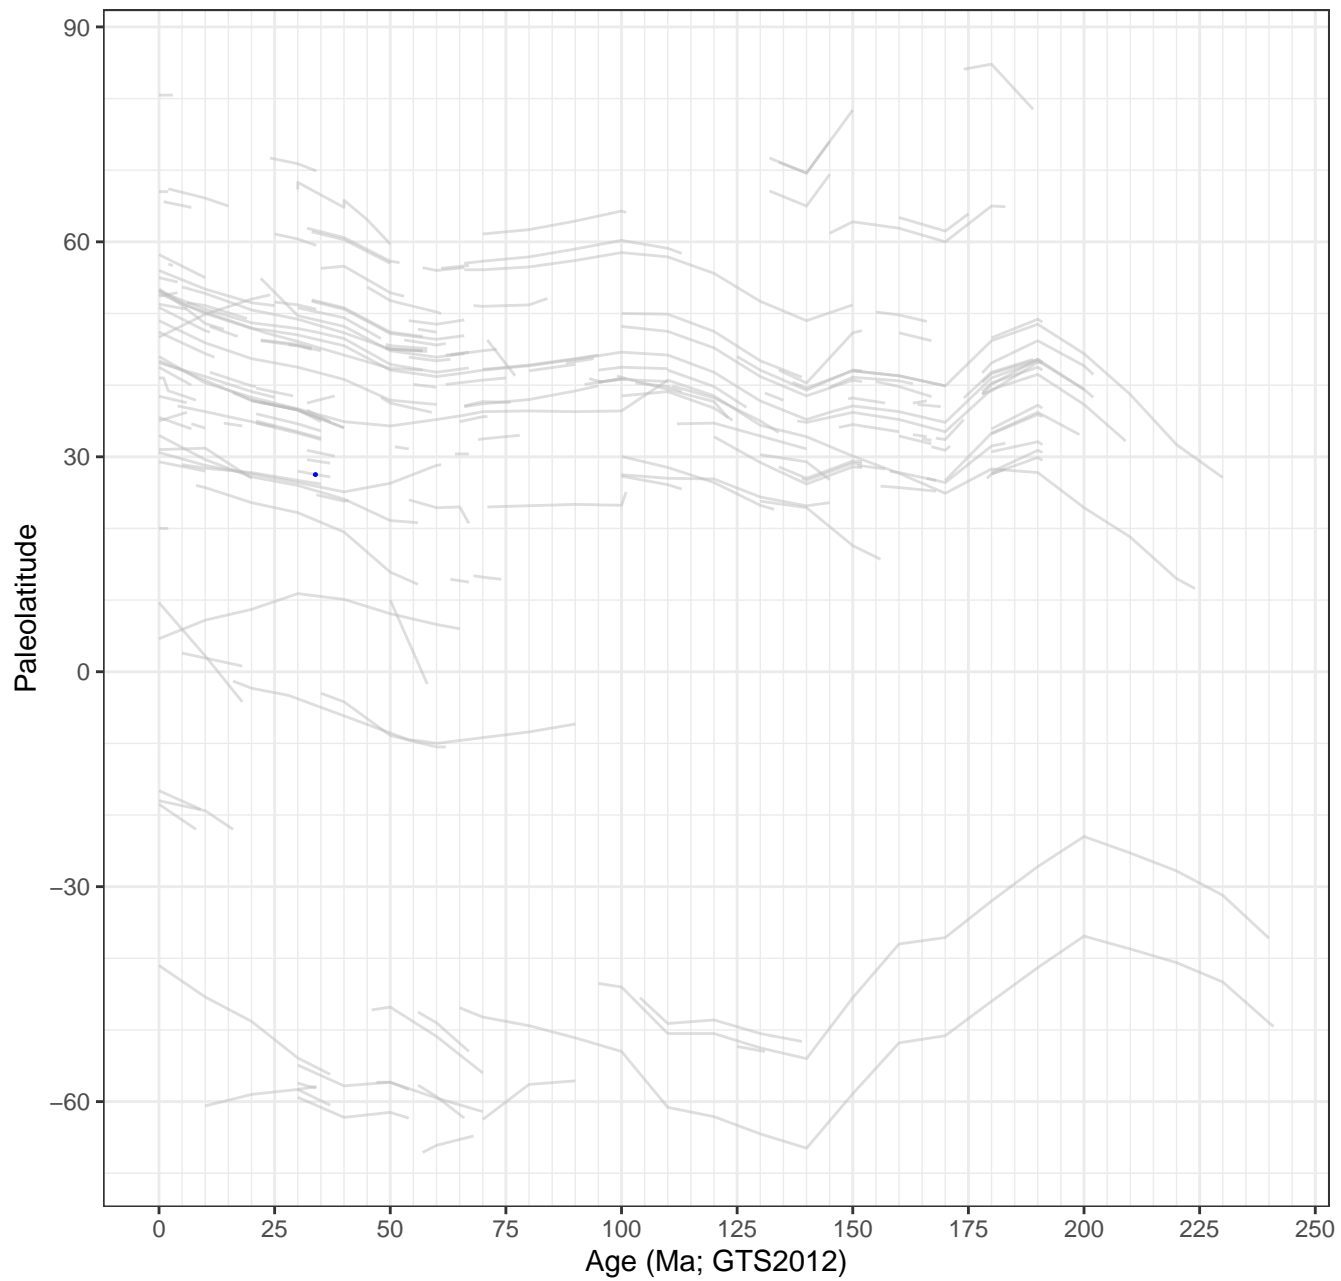

Supplement: Supplementary file 2098 [file Pentadinium alabamense.pdf › Supplement/Supplement 2/Species 1914 plots/Pentadinium alabamense.pdf]

# Species *Pentadinium goniferum*

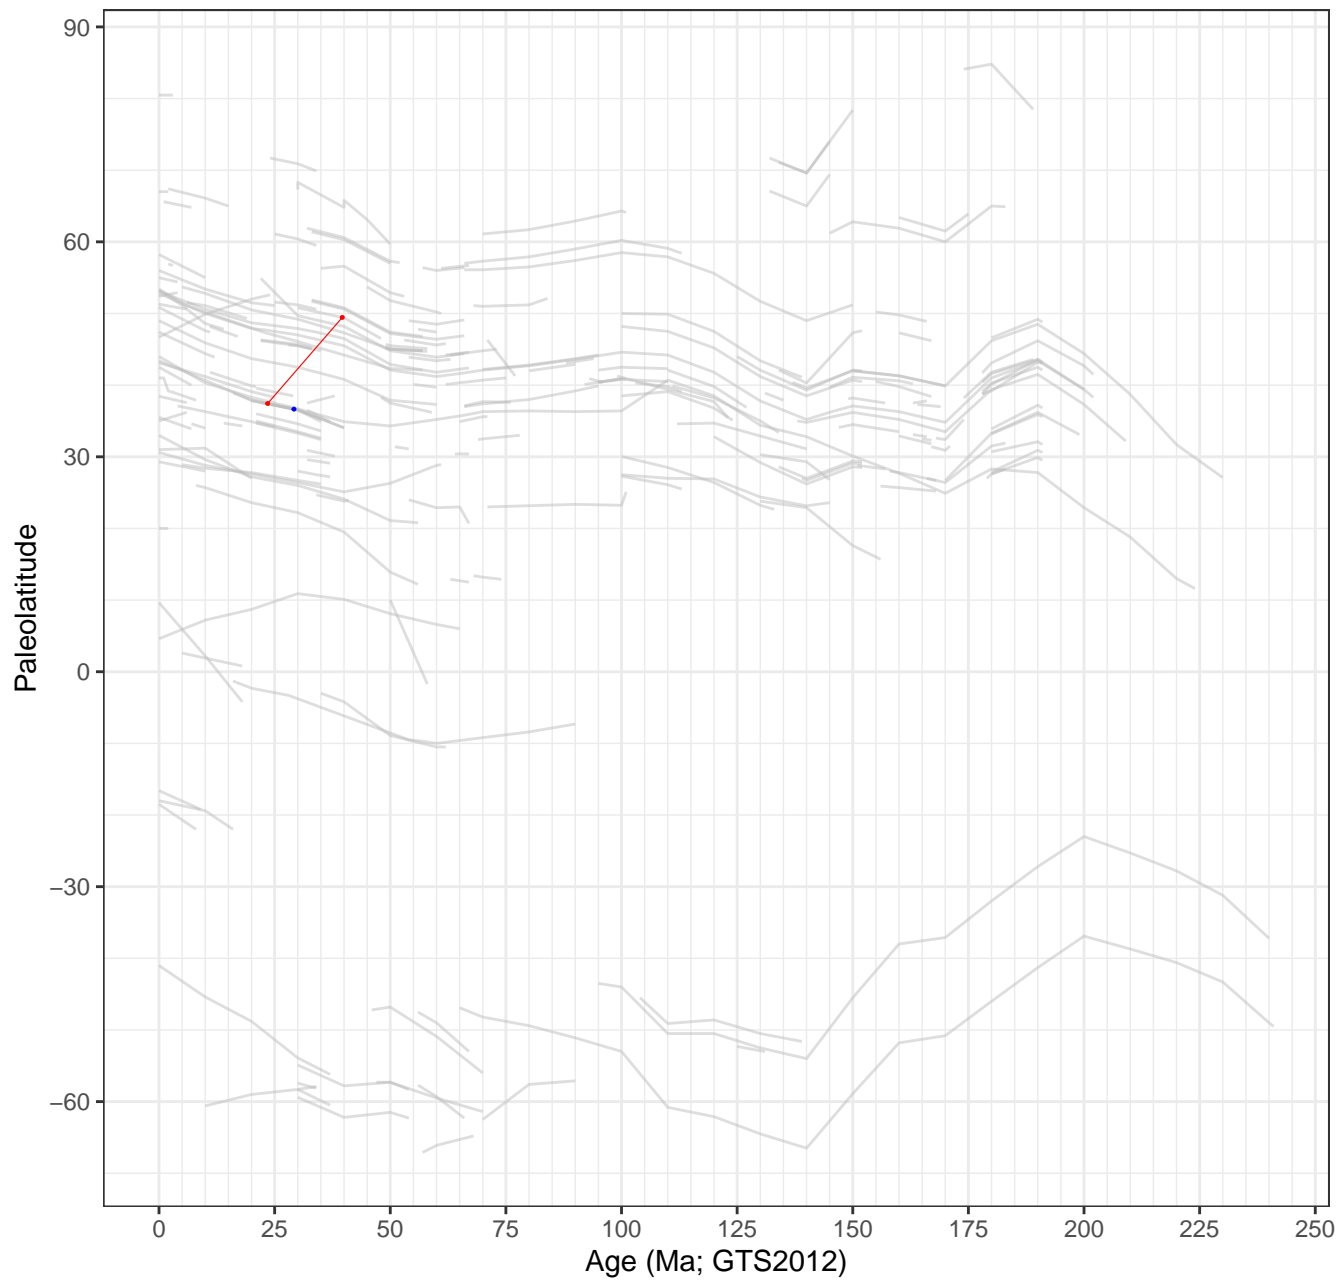

Supplement: Supplementary file 2099 [file Pentadinium goniferum.pdf › Supplement/Supplement 2/Species 1914 plots/Pentadinium goniferum.pdf]

# Species *Pentadinium granulatum*

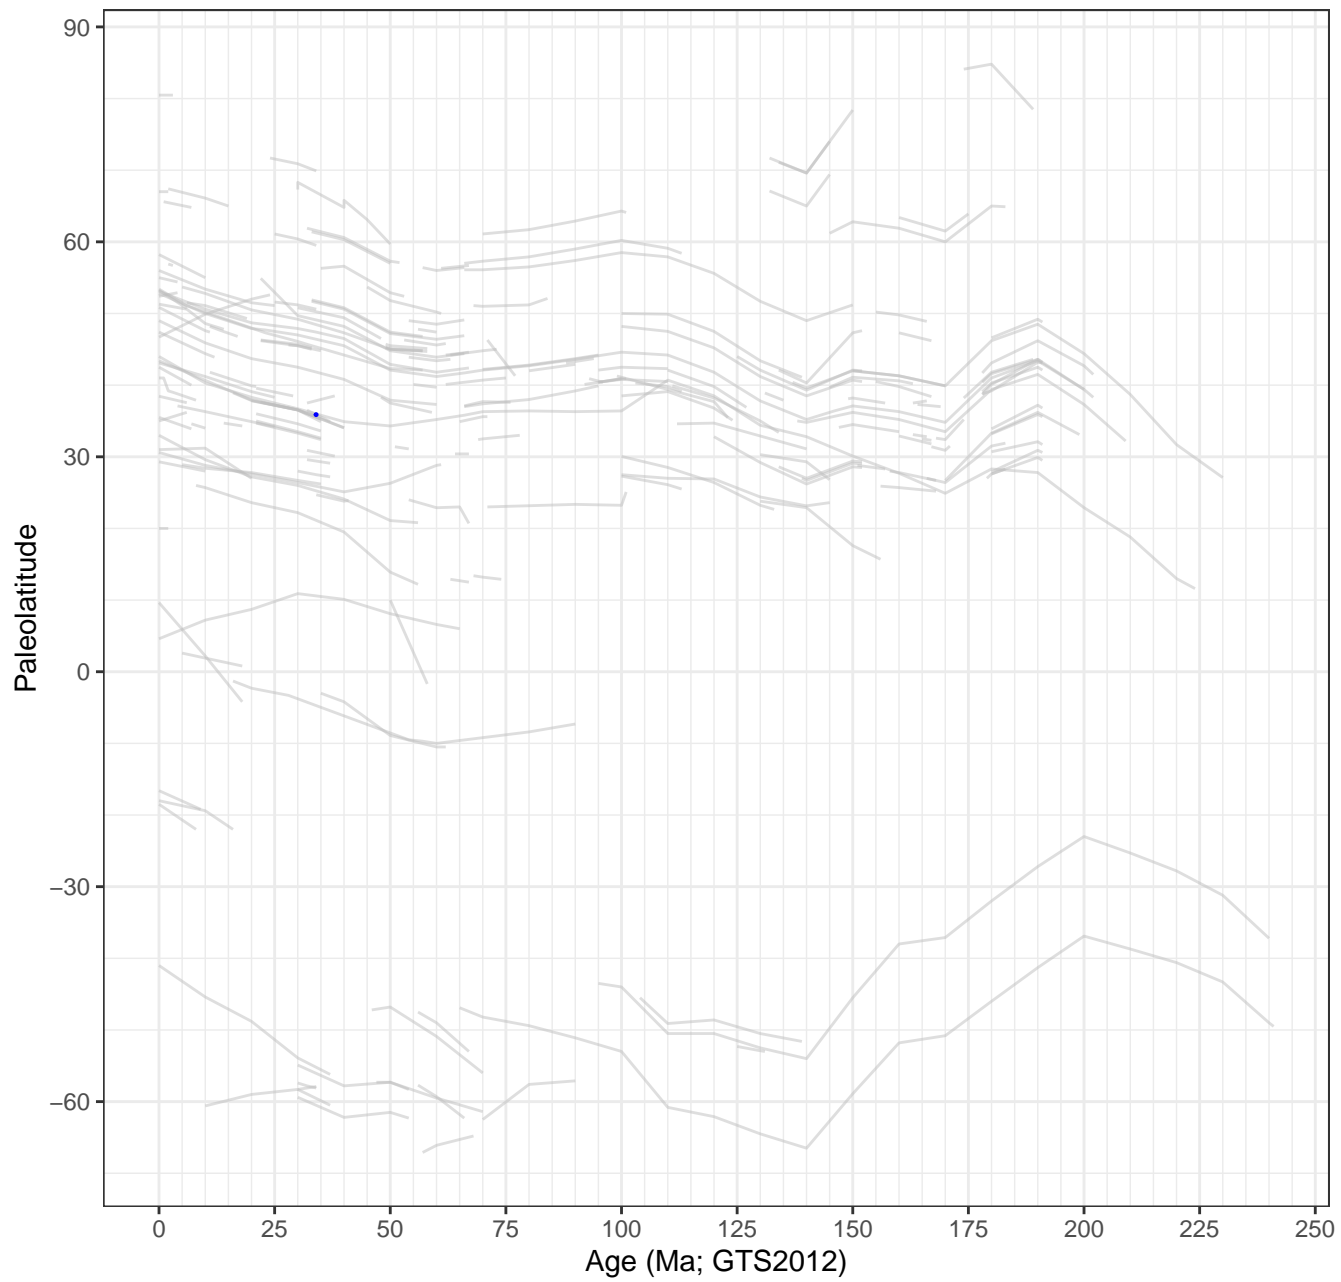

Supplement: Supplementary file 2100 [file Pentadinium granulatum.pdf › Supplement/Supplement 2/Species 1914 plots/Pentadinium granulatum.pdf]

# Species *Pentadinium imaginatium*

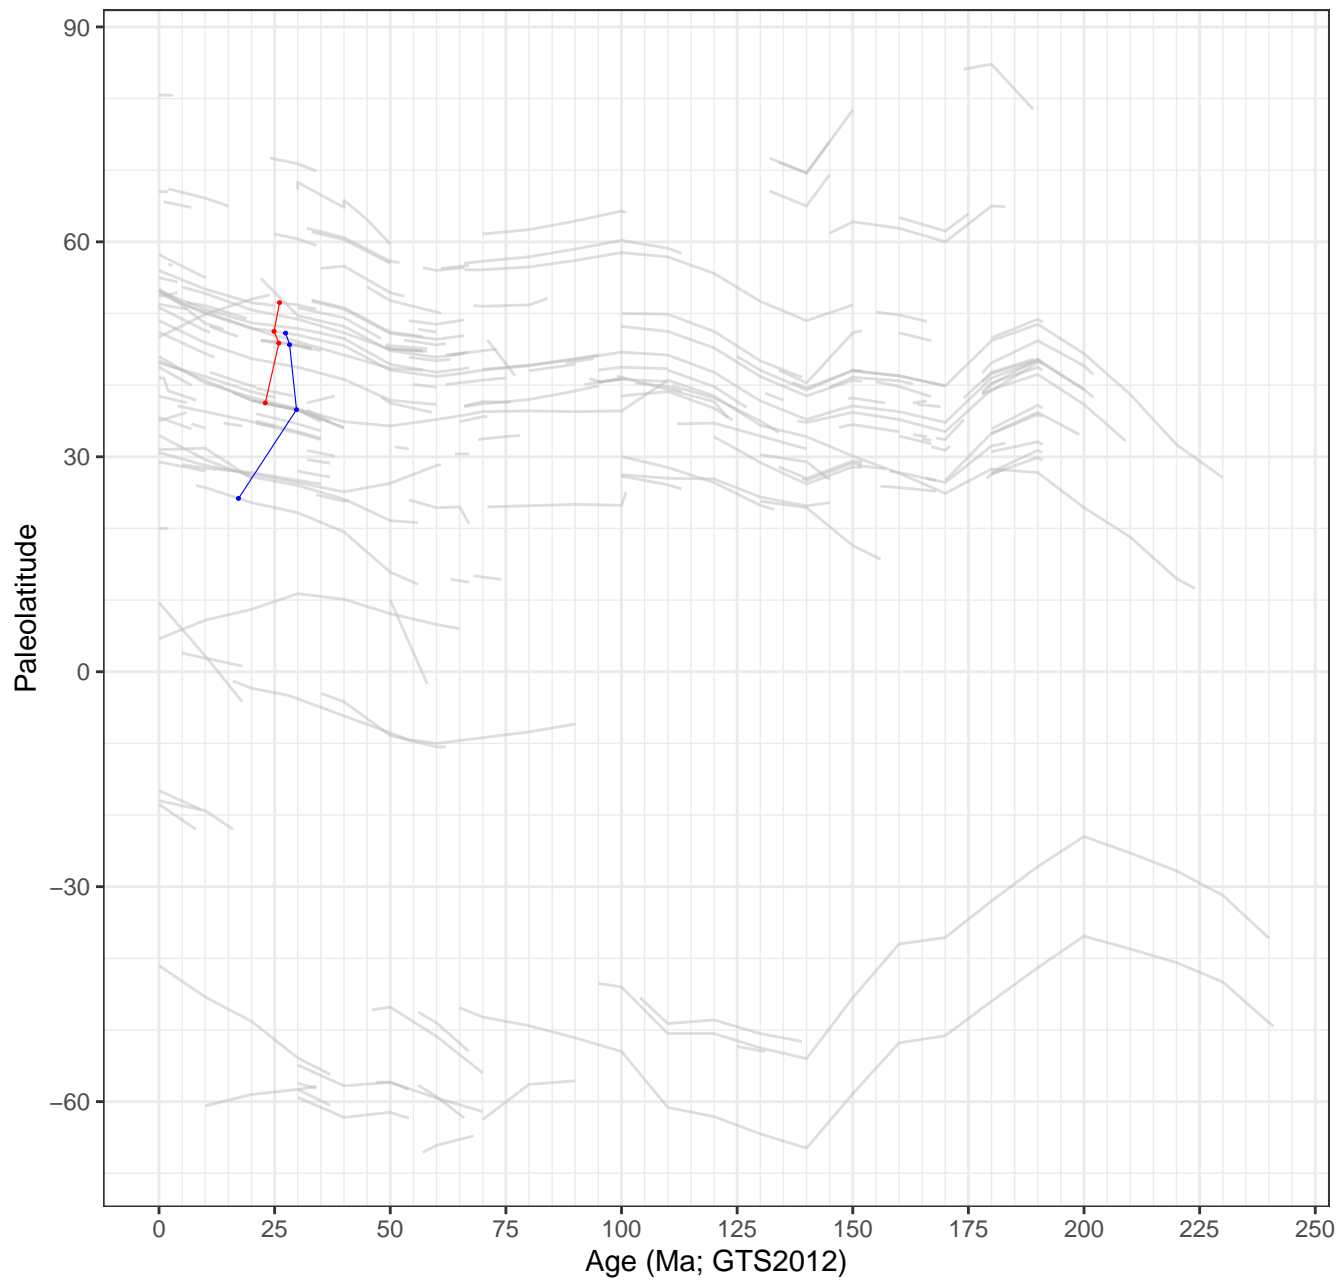

Supplement: Supplementary file 2101 [file Pentadinium imaginatum.pdf › Supplement/Supplement 2/Species 1914 plots/Pentadinium imaginatum.pdf]

# Species *Pentadinium laticinctum*

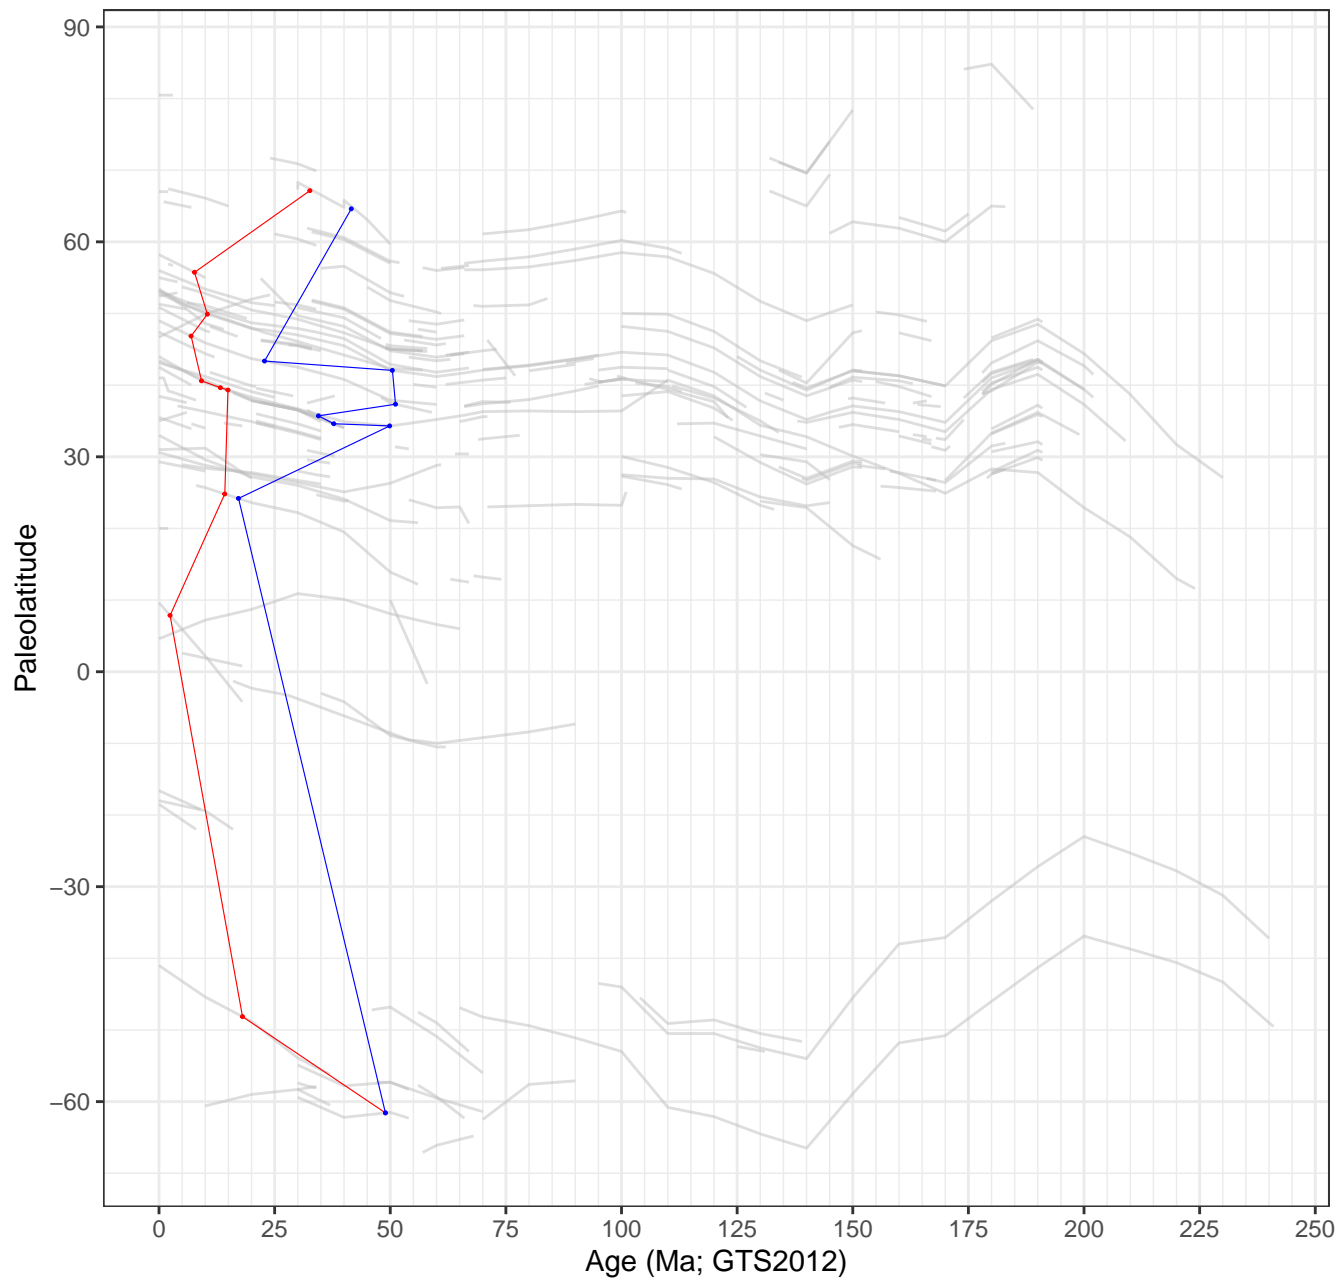

Supplement: Supplementary file 2102 [file Pentadinium laticinctum.pdf › Supplement/Supplement 2/Species 1914 plots/Pentadinium laticinctum.pdf]

# Species *Pentadinium lophophorum*

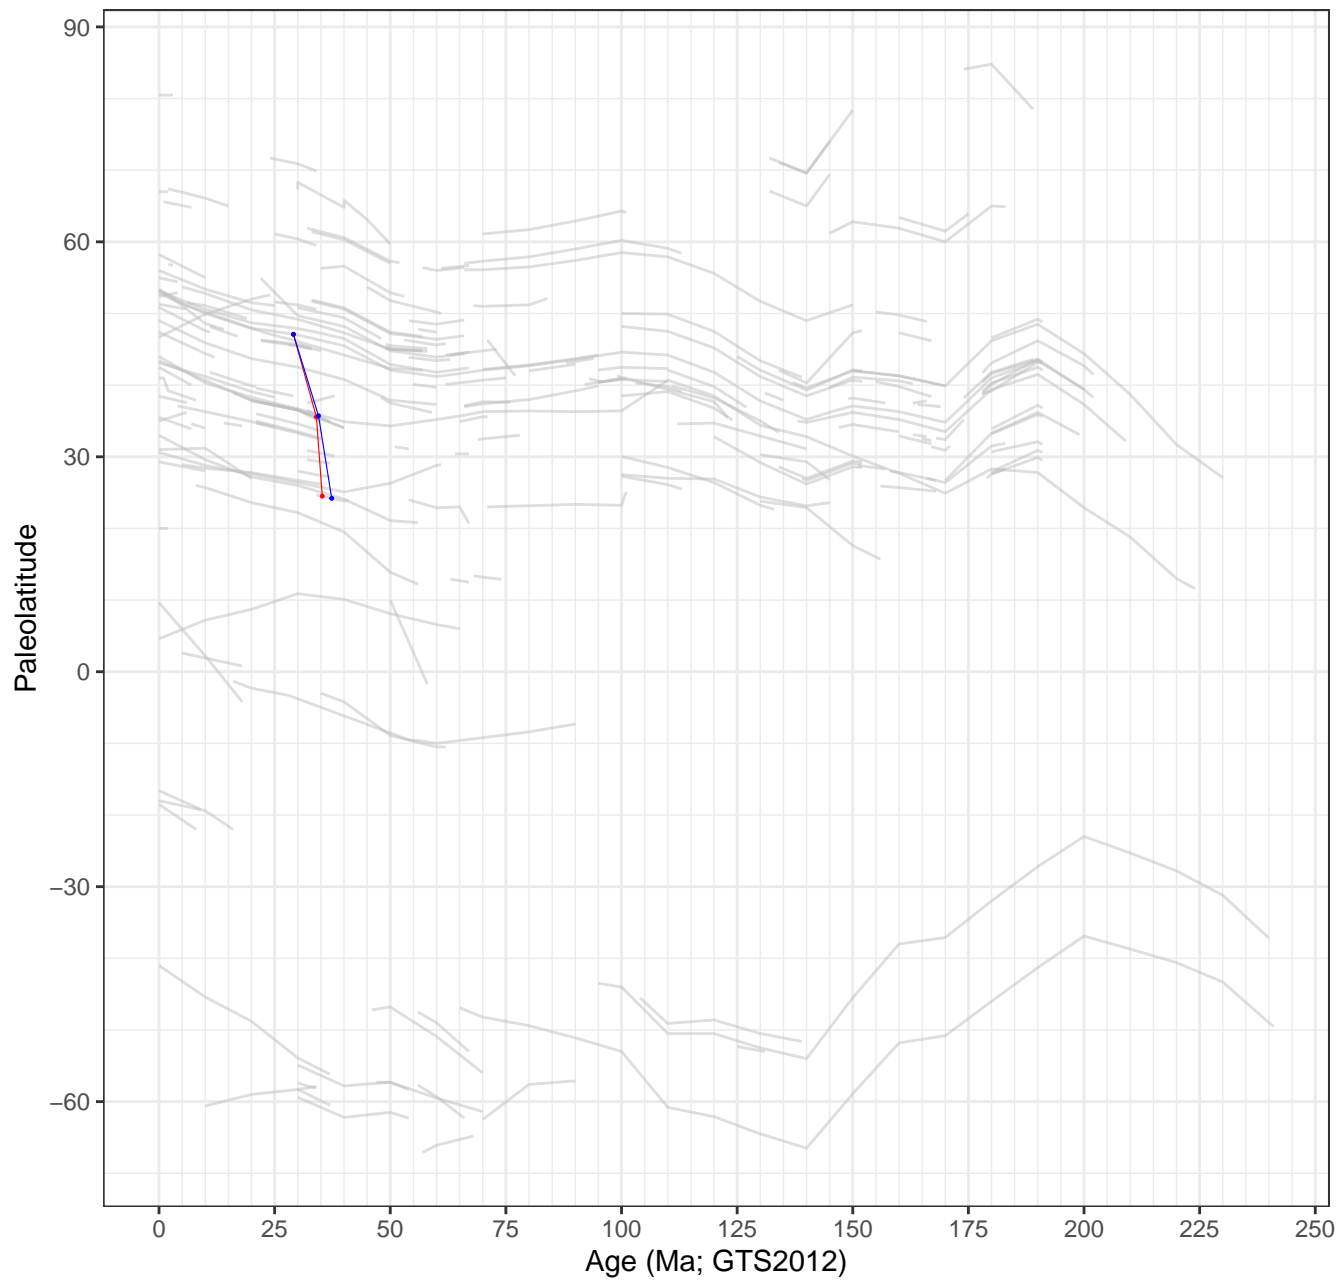

Supplement: Supplementary file 2103 [file Pentadinium lophophorum.pdf › Supplement/Supplement 2/Species 1914 plots/Pentadinium lophophorum.pdf]

# Species *Pentadinium membranaceum*

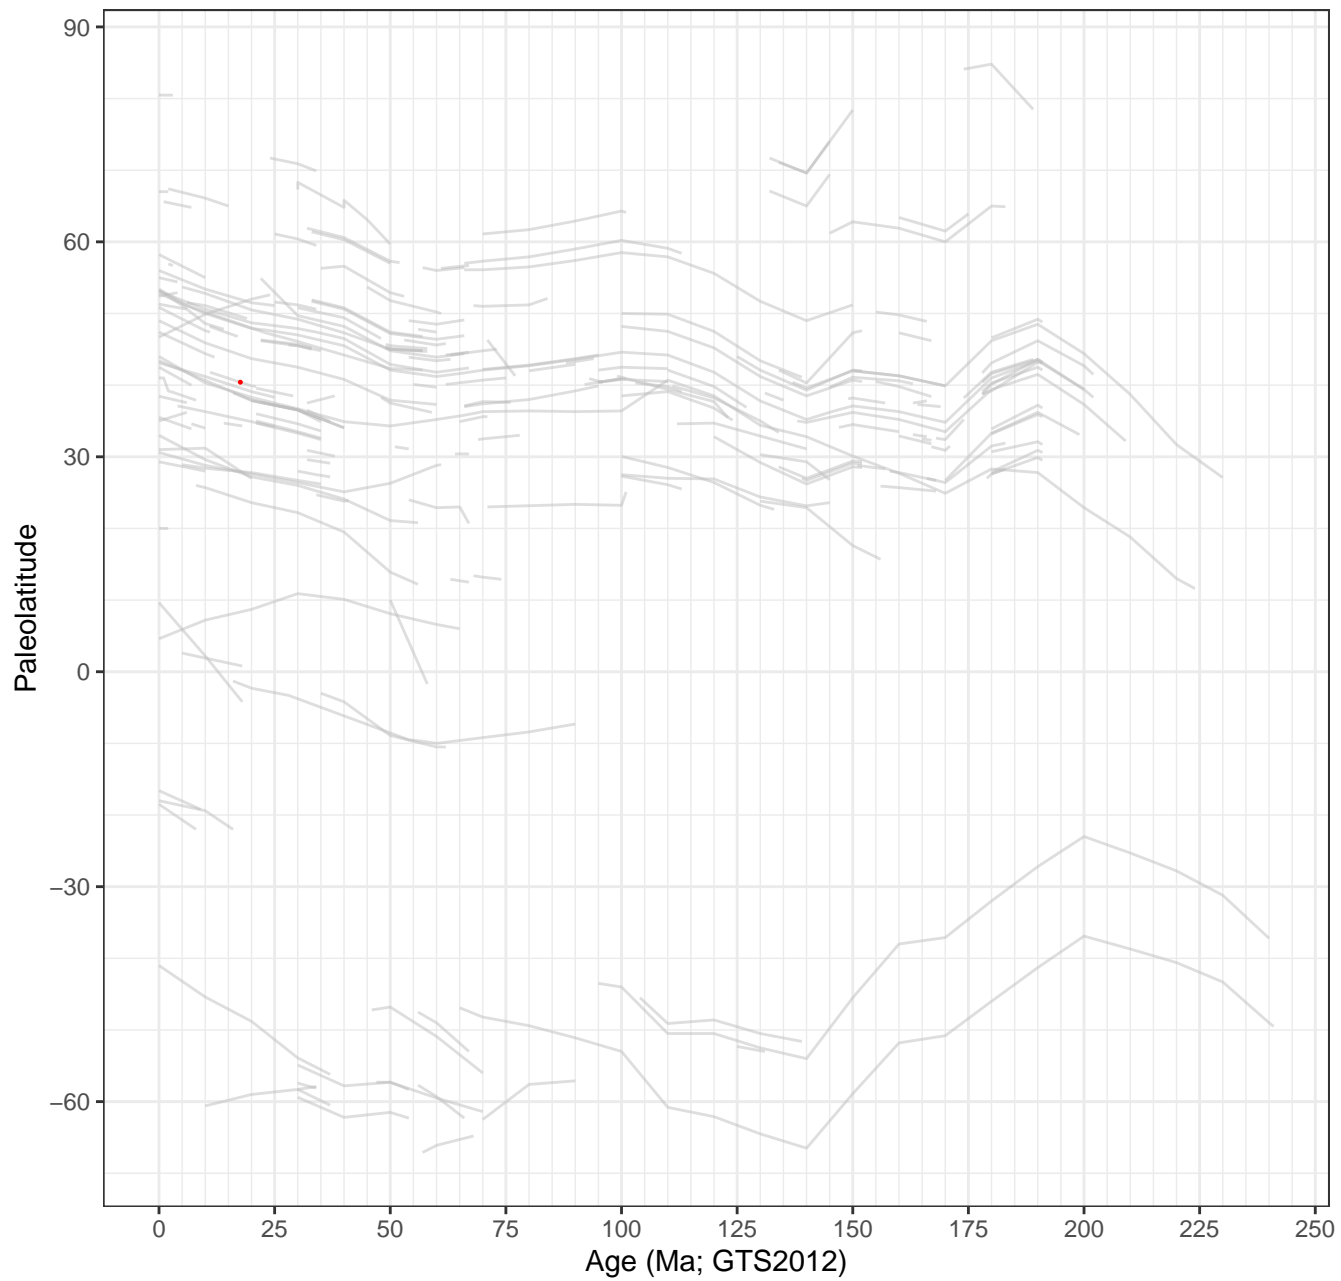

Supplement: Supplementary file 2104 [file Pentadinium membranaceum.pdf › Supplement/Supplement 2/Species 1914 plots/Pentadinium membranaceum.pdf]

# Species *Pentadinium polypodium*

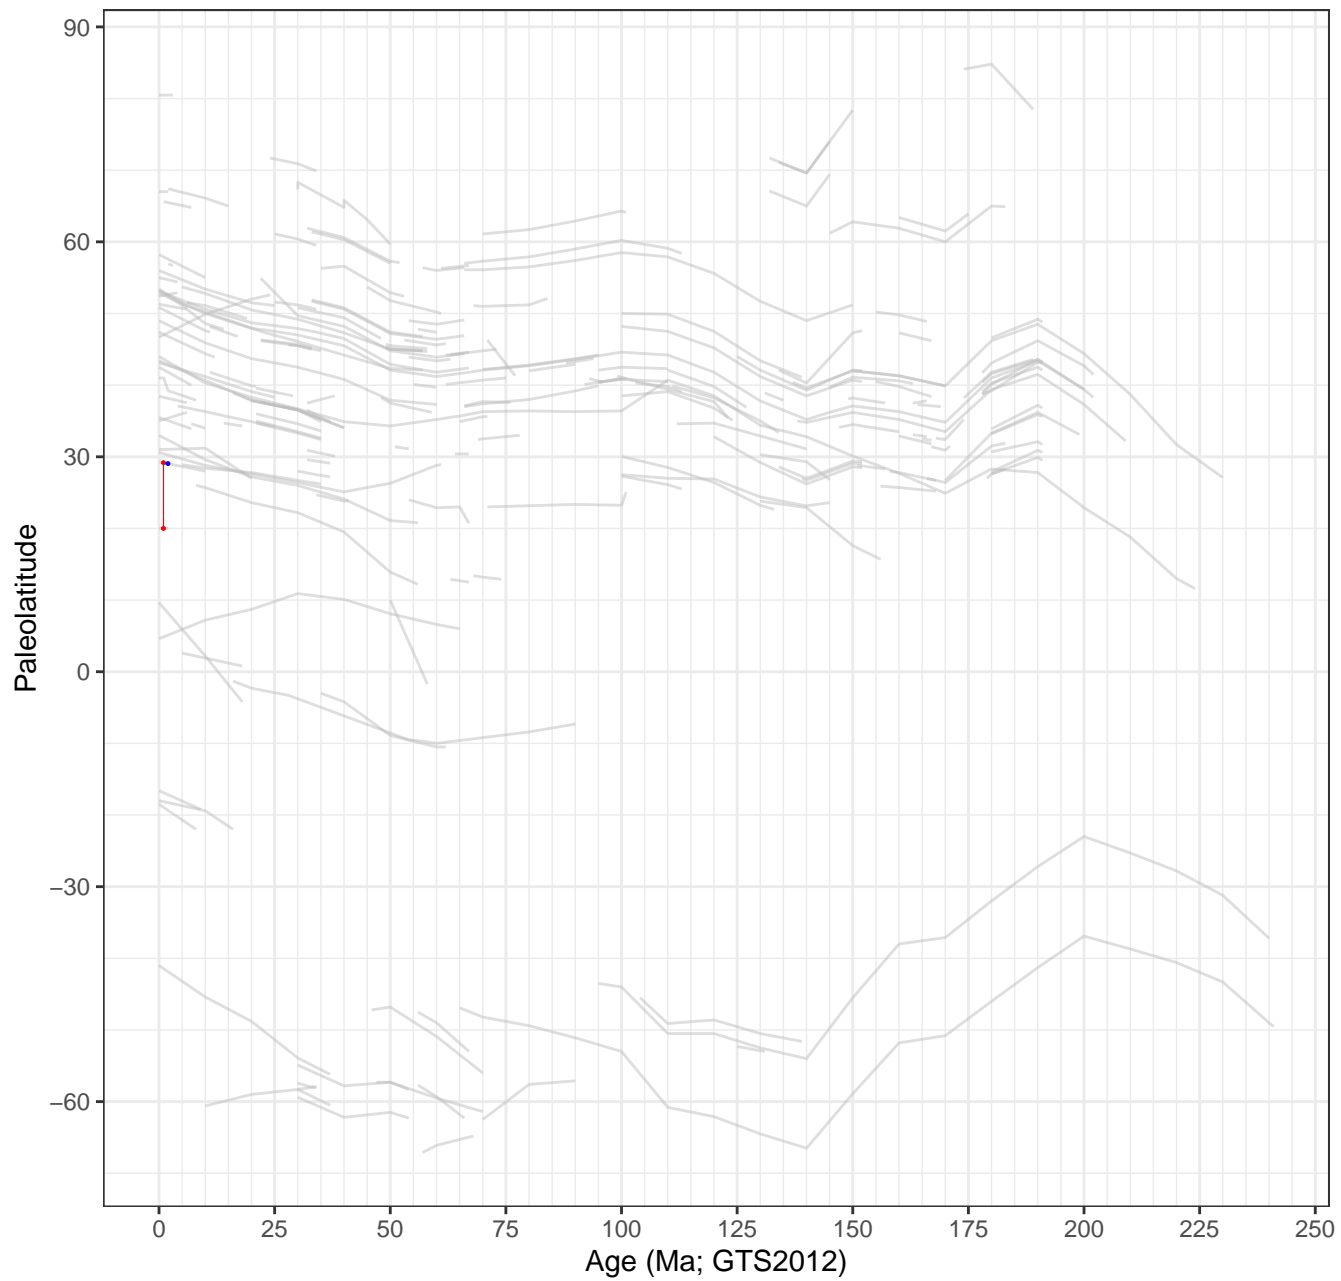

Supplement: Supplementary file 2105 [file Pentadinium polypodum.pdf › Supplement/Supplement 2/Species 1914 plots/Pentadinium polypodum.pdf]

# Species *Pentadinium sabulum*

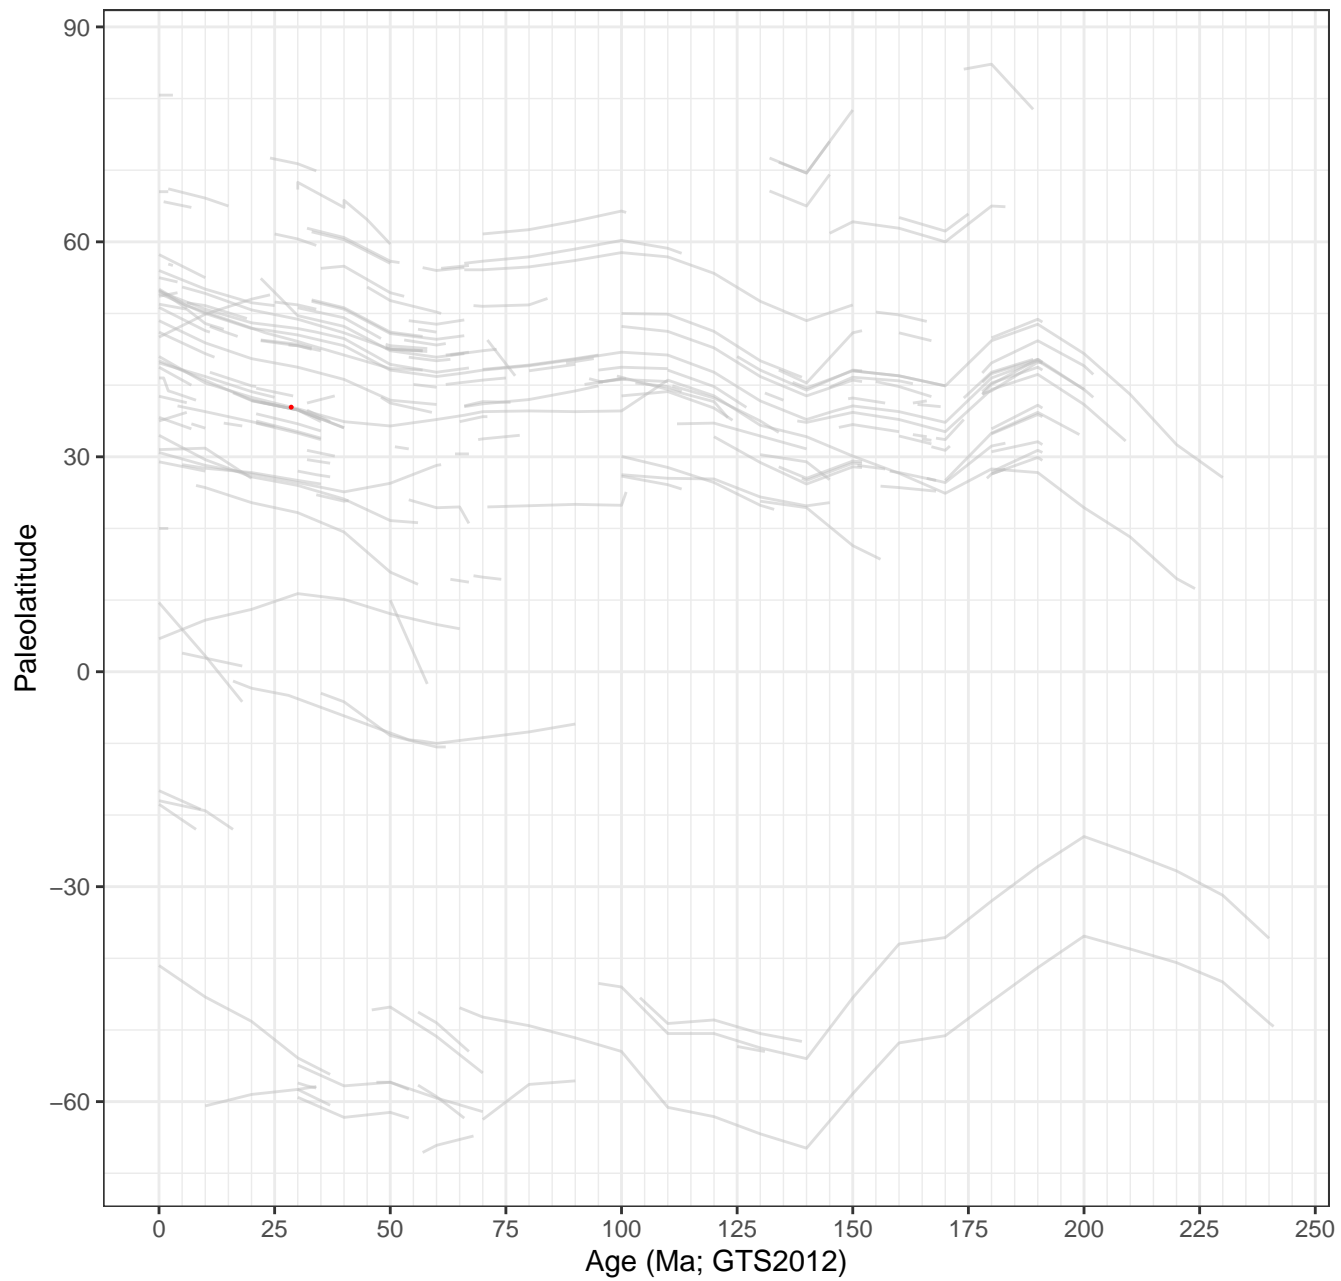

Supplement: Supplementary file 2106 [file Pentadinium sabulum.pdf › Supplement/Supplement 2/Species 1914 plots/Pentadinium sabulum.pdf]

# Species *Pentadinium spinulum*

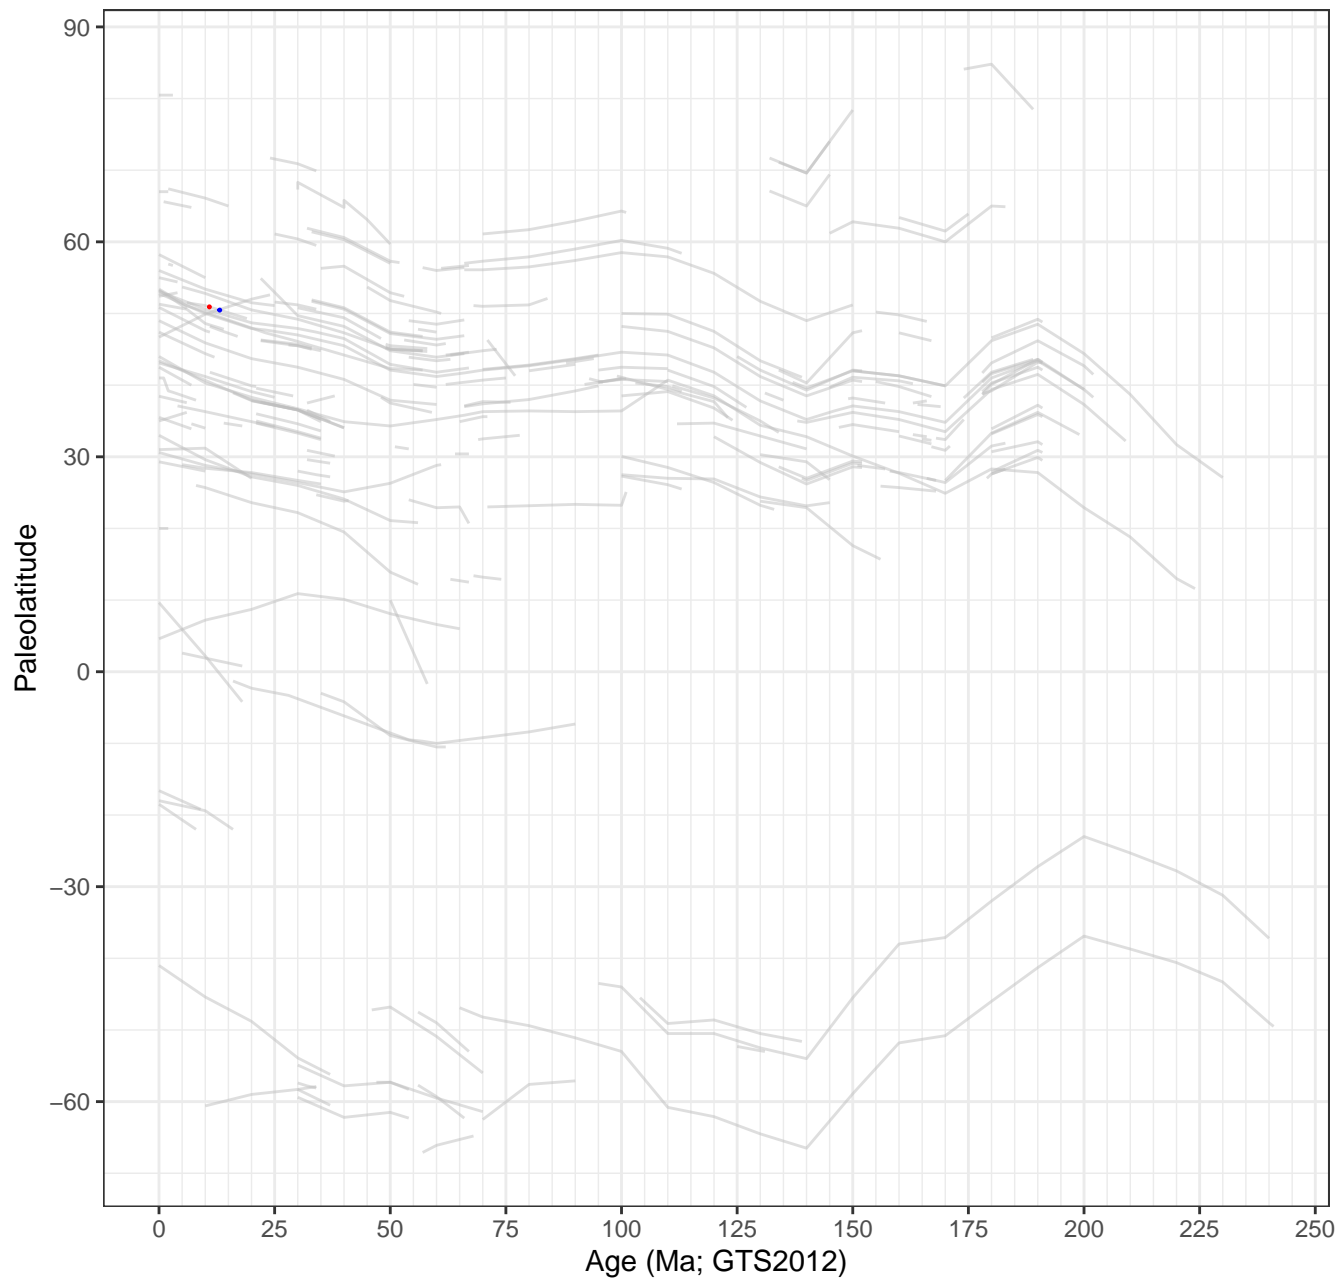

Supplement: Supplementary file 2107 [file Pentadinium spinulum.pdf › Supplement/Supplement 2/Species 1914 plots/Pentadinium spinulum.pdf]

# Species *Pentadinium taeniagerum*

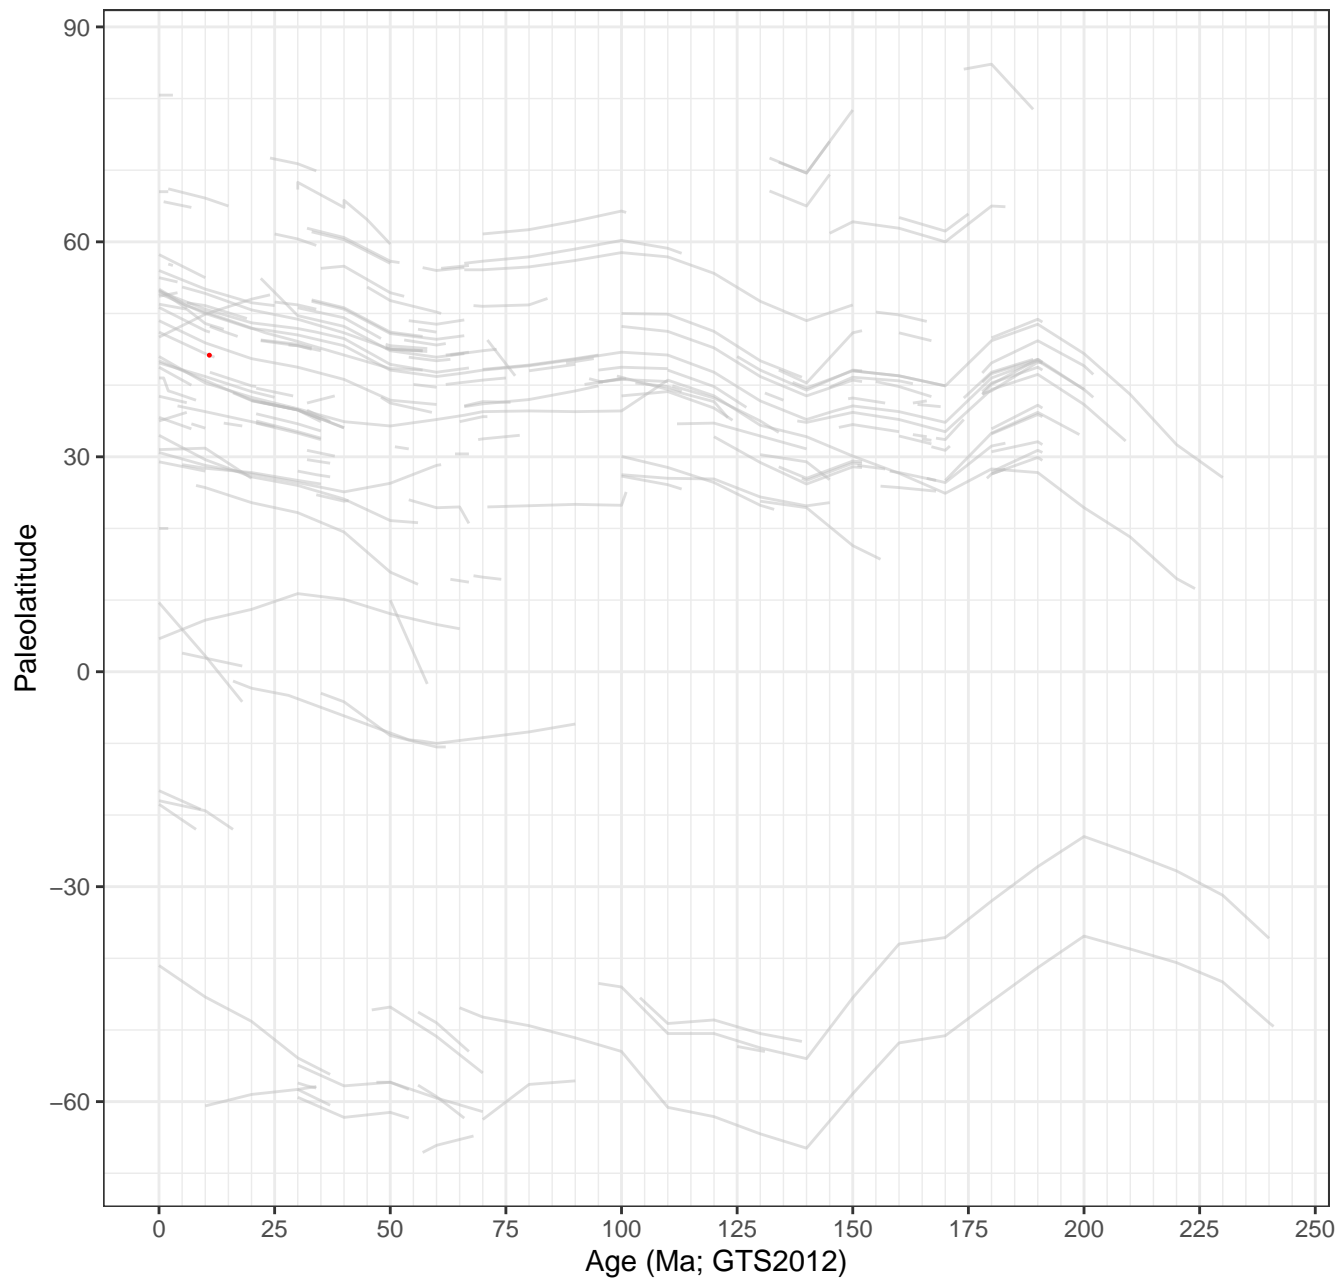

Supplement: Supplementary file 2108 [file Pentadinium taeniagerum.pdf › Supplement/Supplement 2/Species 1914 plots/Pentadinium taeniagerum.pdf]

# Species *Pentapharsodinium dalei*

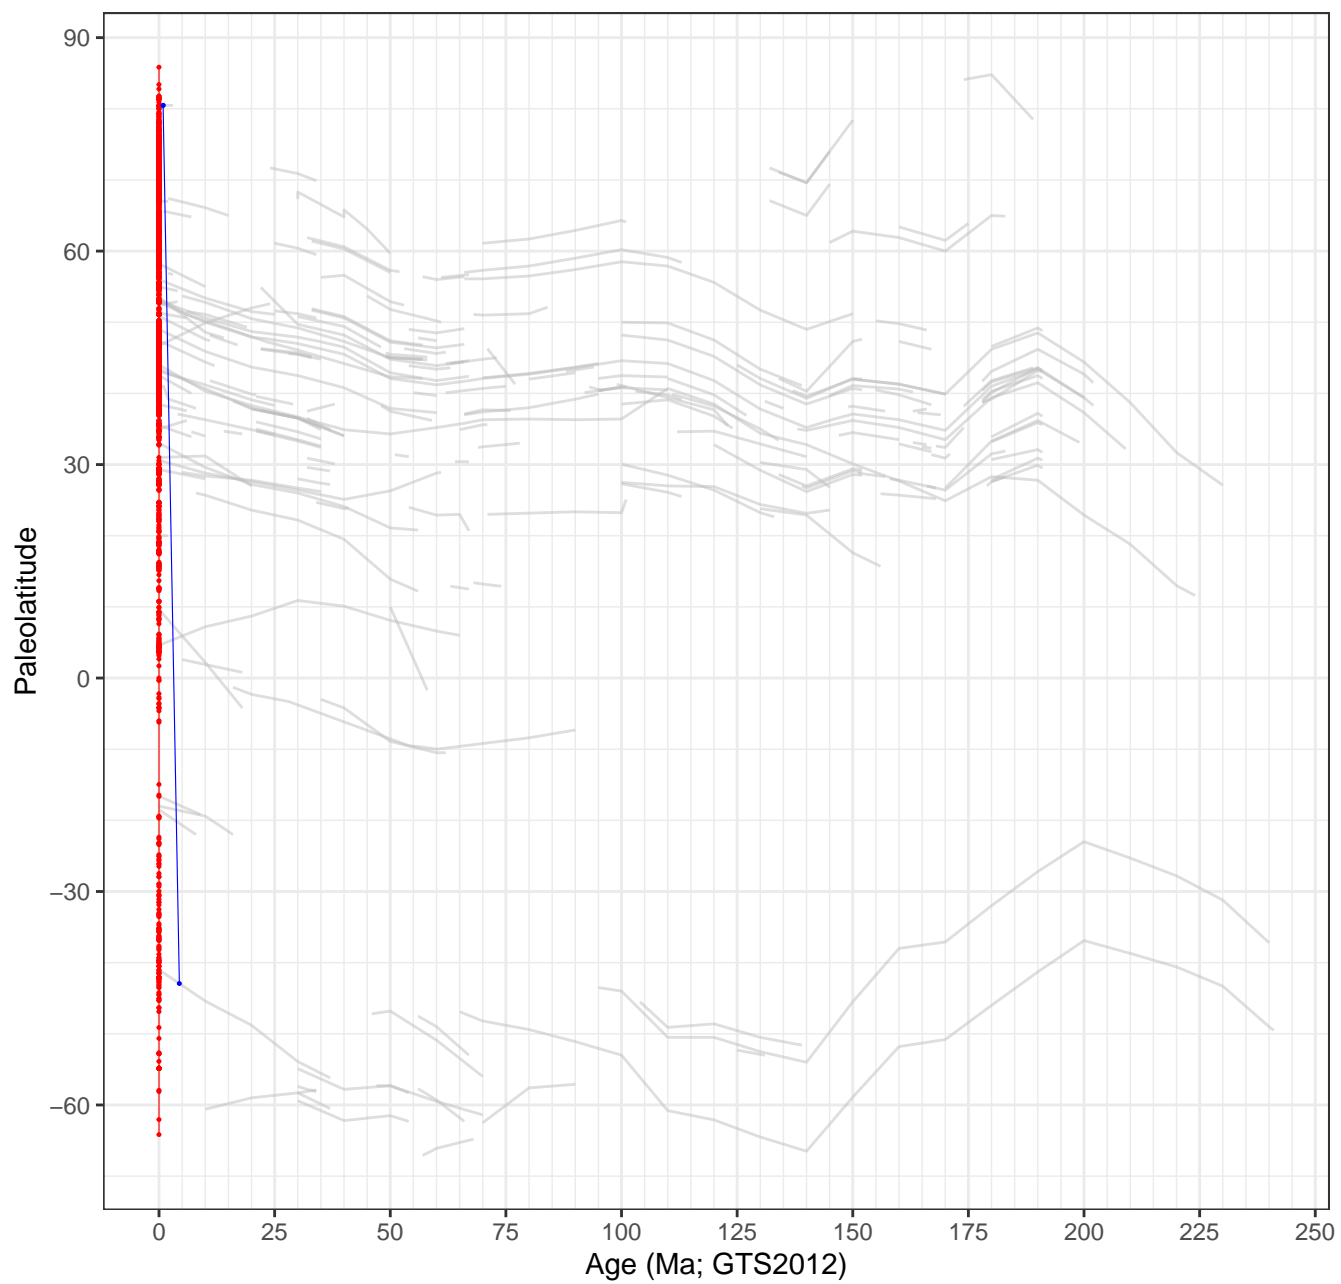

Supplement: Supplementary file 2109 [file Pentapharsodinium dalei.pdf › Supplement/Supplement 2/Species 1914 plots/Pentapharsodinium dalei.pdf]

# Species *Peridictyocysta mirabilis*

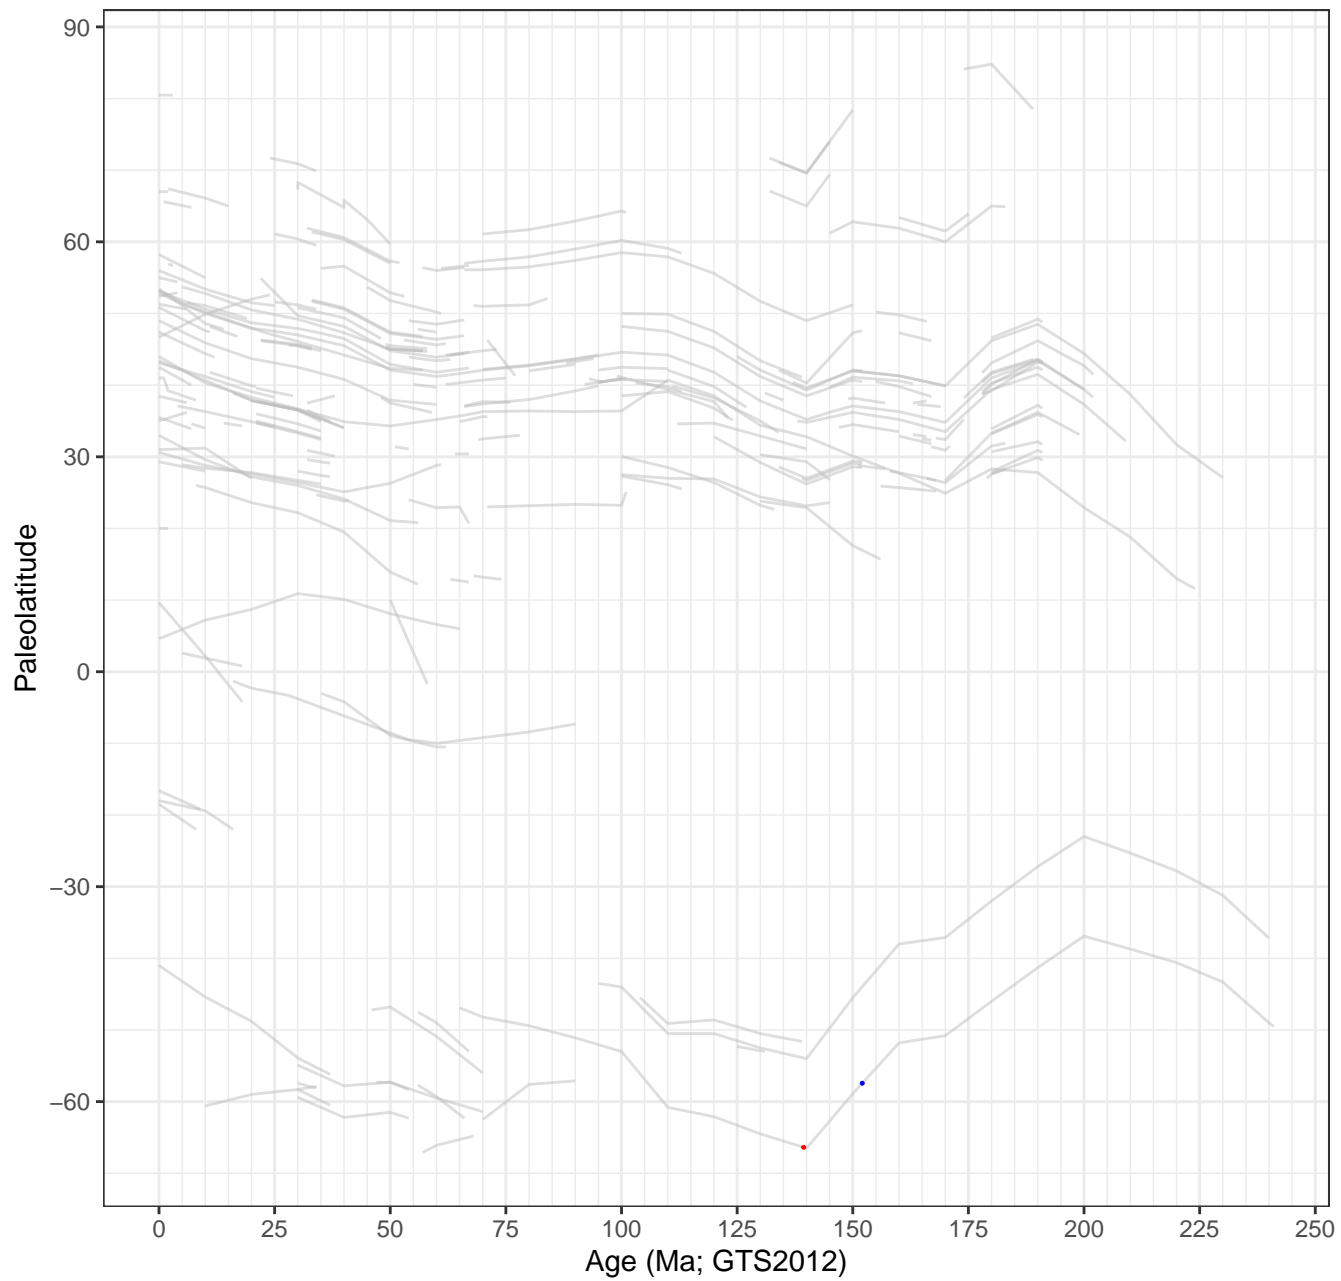

Supplement: Supplementary file 2110 [file Peridictyocysta mirabilis.pdf › Supplement/Supplement 2/Species 1914 plots/Peridictyocysta mirabilis.pdf]

# Species *Peridinium faeroense*

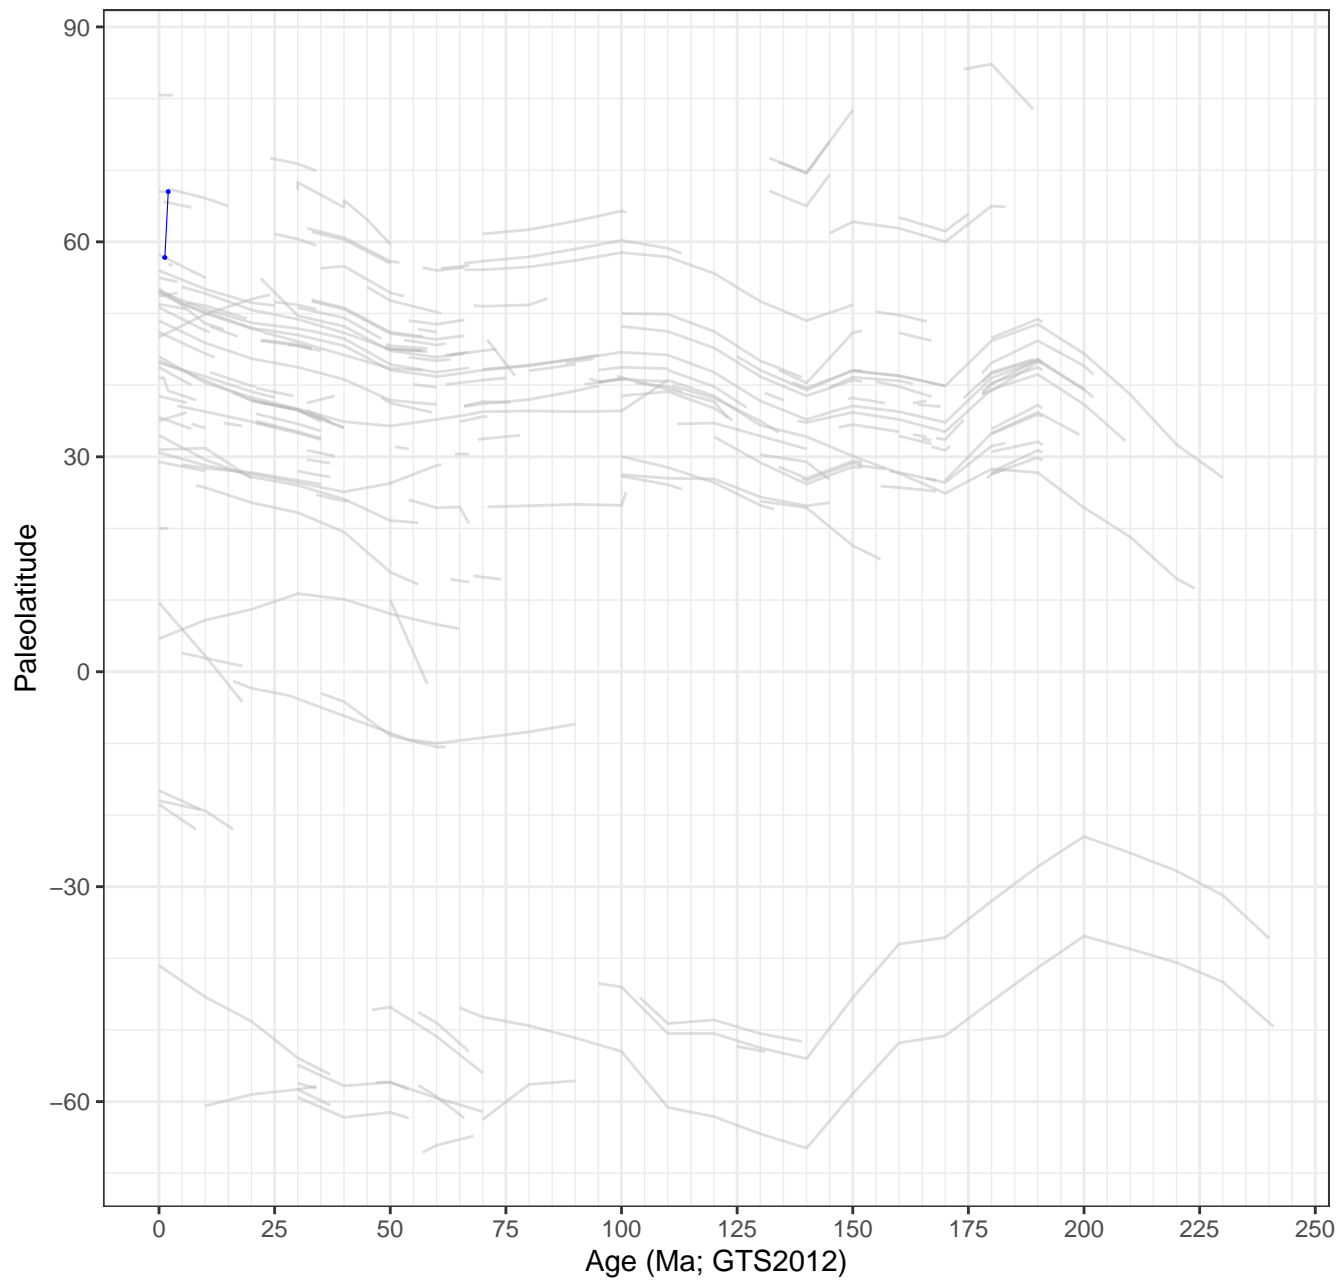

Supplement: Supplementary file 2111 [file Peridinium faeroense.pdf › Supplement/Supplement 2/Species 1914 plots/Peridinium faeroense.pdf]

# Species *Peridinium ponticum*

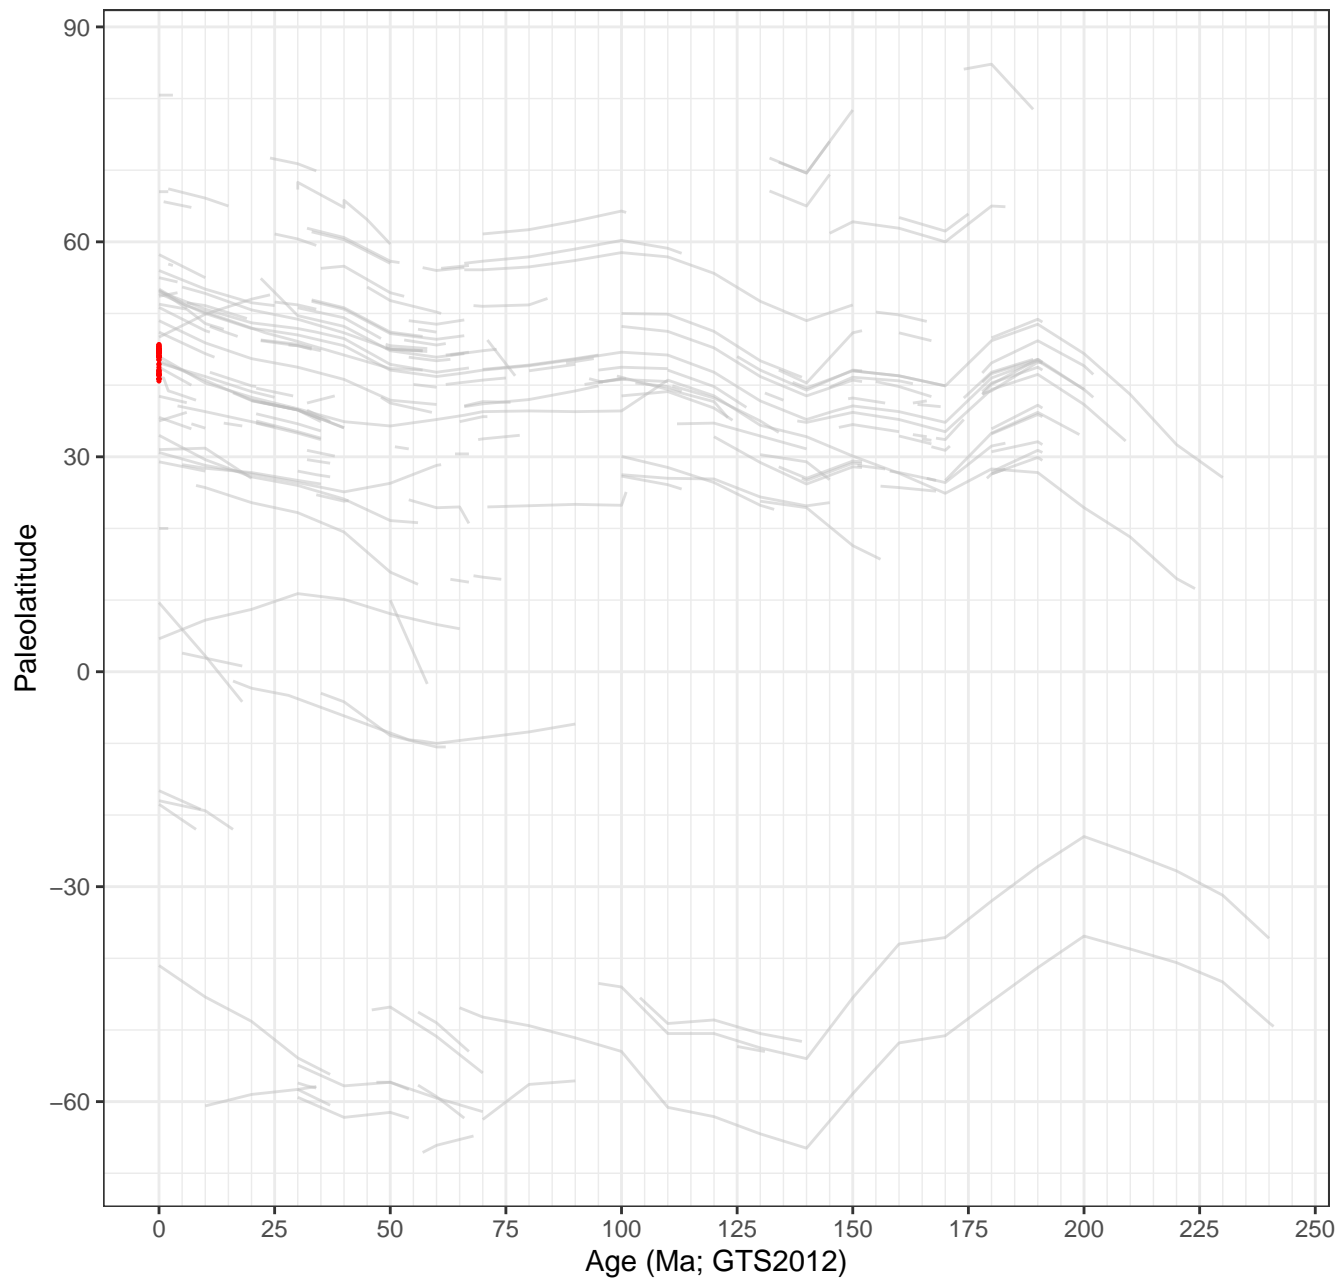

Supplement: Supplementary file 2112 [file Peridinium ponticum.pdf › Supplement/Supplement 2/Species 1914 plots/Peridinium ponticum.pdf]

# Species Peridinium spp.

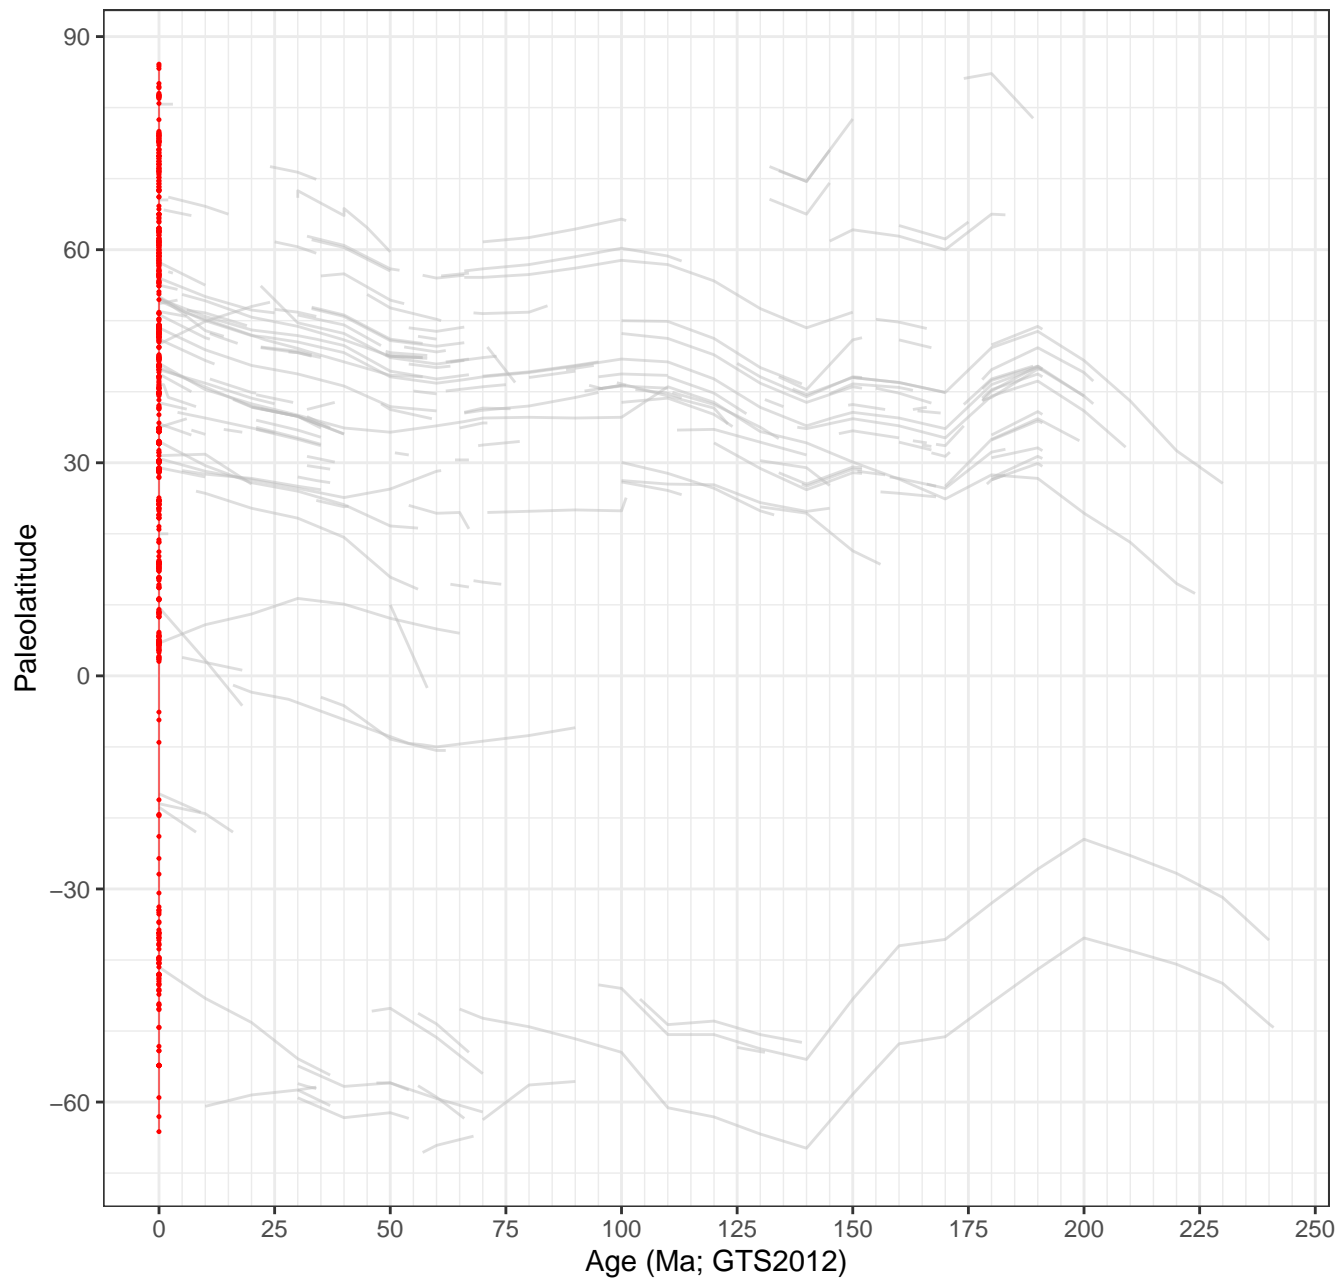

Supplement: Supplementary file 2113 [file Peridinium spp..pdf › Supplement/Supplement 2/Species 1914 plots/Peridinium spp..pdf]

# Species *Perisseiasphaeridium ingegerdiae*

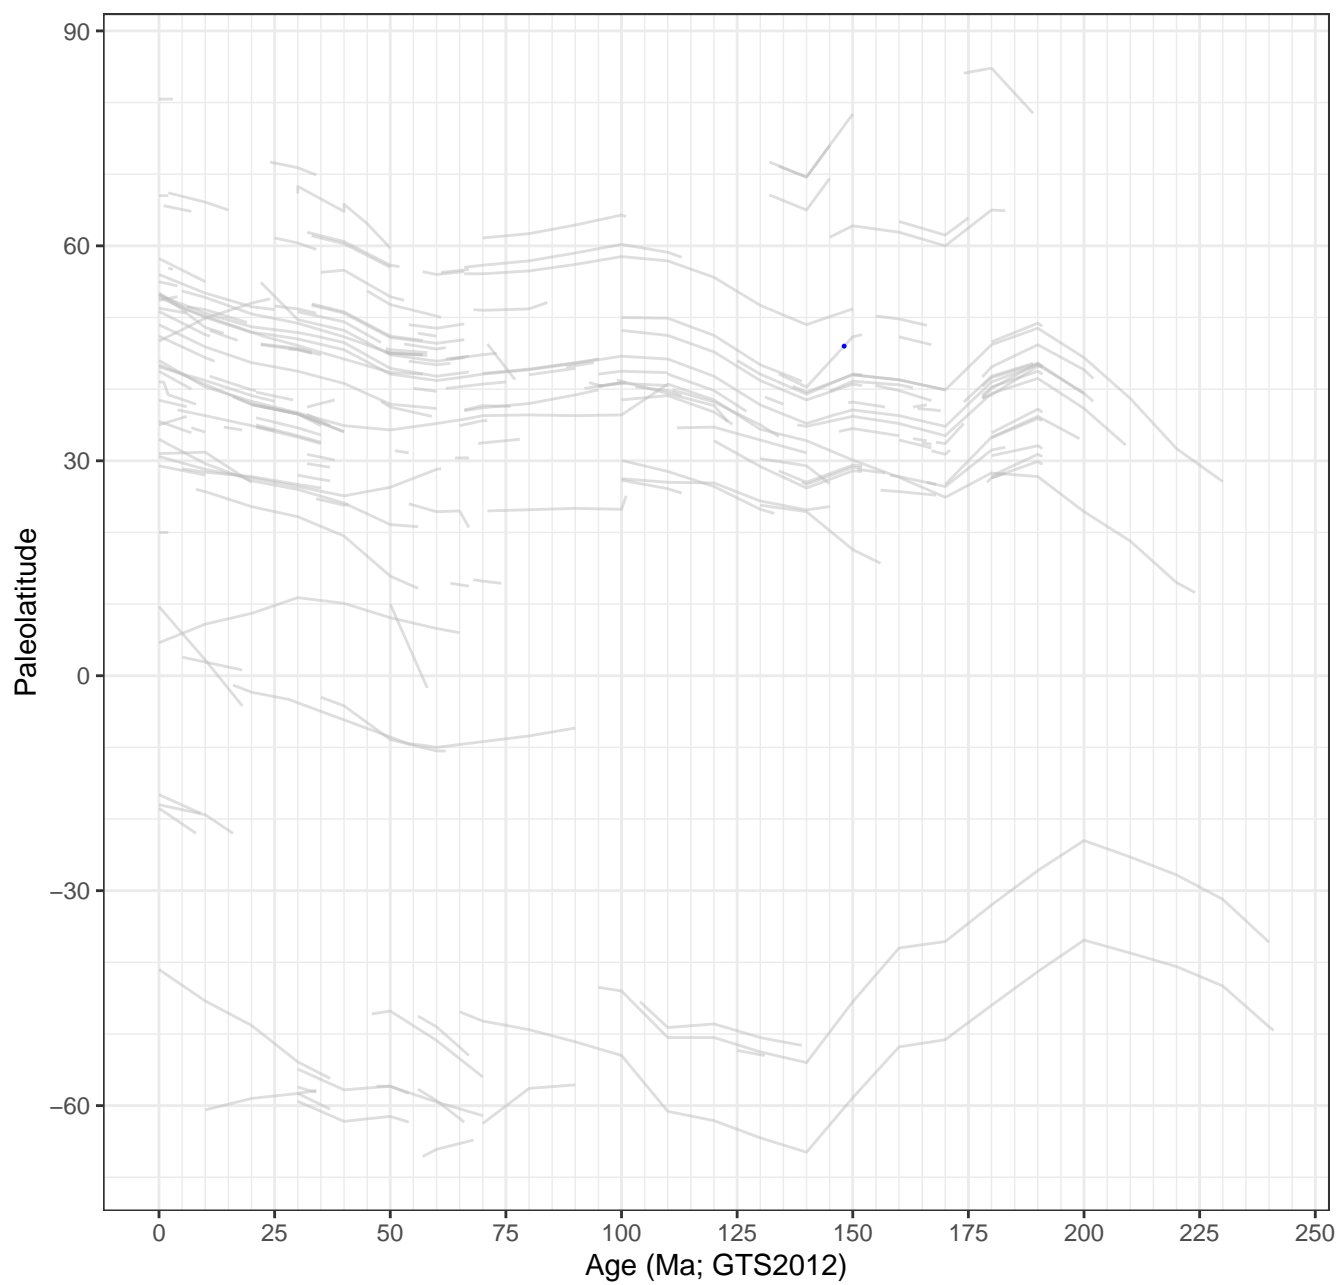

Supplement: Supplementary file 2114 [file Perisseiasphaeridium ingegerdiae.pdf › Supplement/Supplement 2/Species 1914 plots/Perisseiasphaeridium ingegerdiae.pdf]

# Species *Perisseiasphaeridium insolitum*

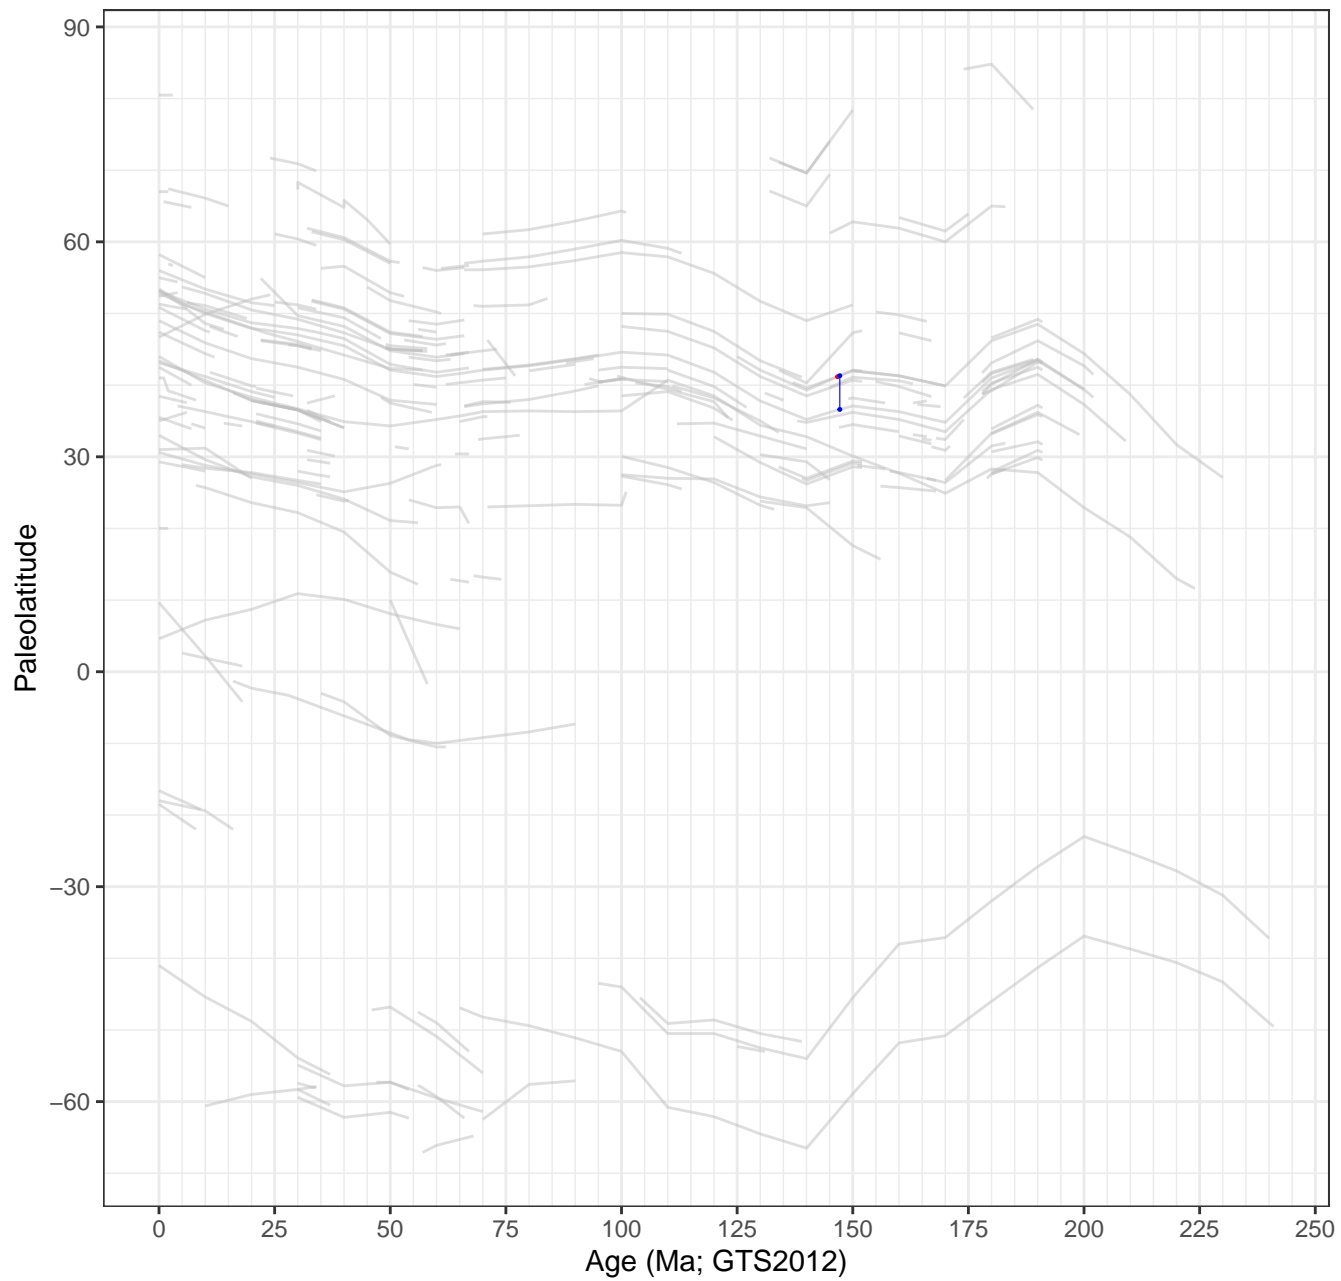

Supplement: Supplementary file 2115 [file Perisseiasphaeridium insolitum.pdf › Supplement/Supplement 2/Species 1914 plots/Perisseiasphaeridium insolitum.pdf]

# Species *Perisseiasphaeridium inusitatum*

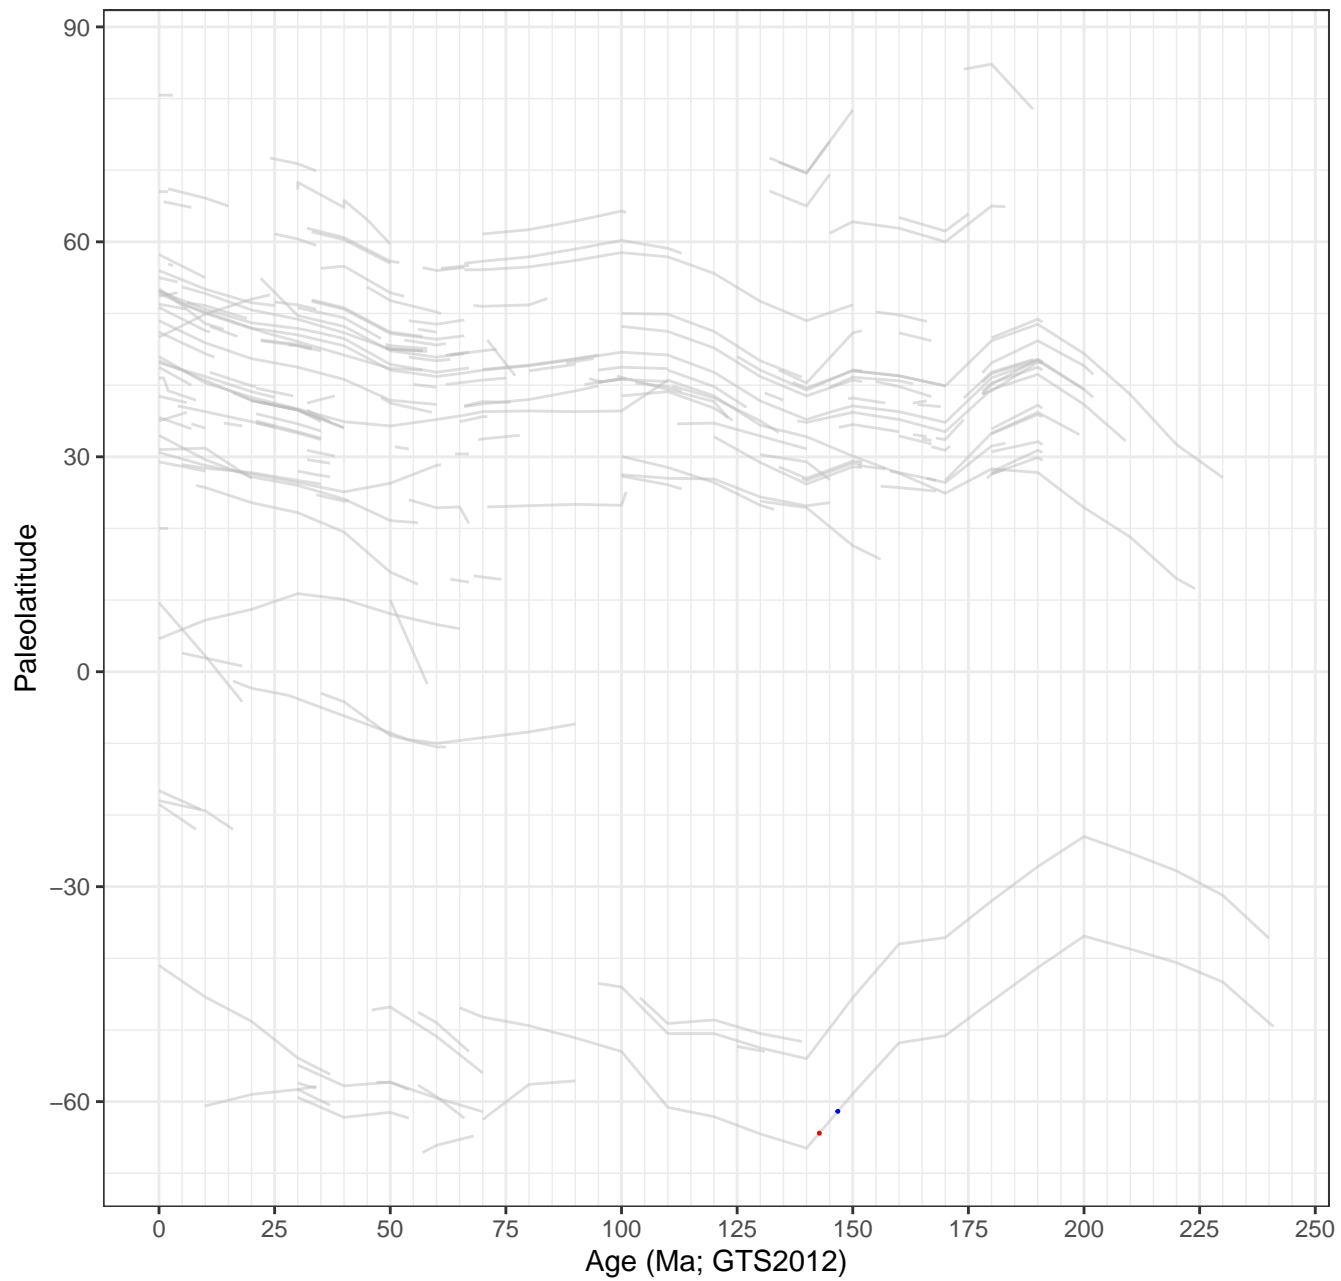

Supplement: Supplementary file 2116 [file Perisseiasphaeridium inusitatum.pdf › Supplement/Supplement 2/Species 1914 plots/Perisseiasphaeridium inusitatum.pdf]

# Species *Perisseiasphaeridium pannosum*

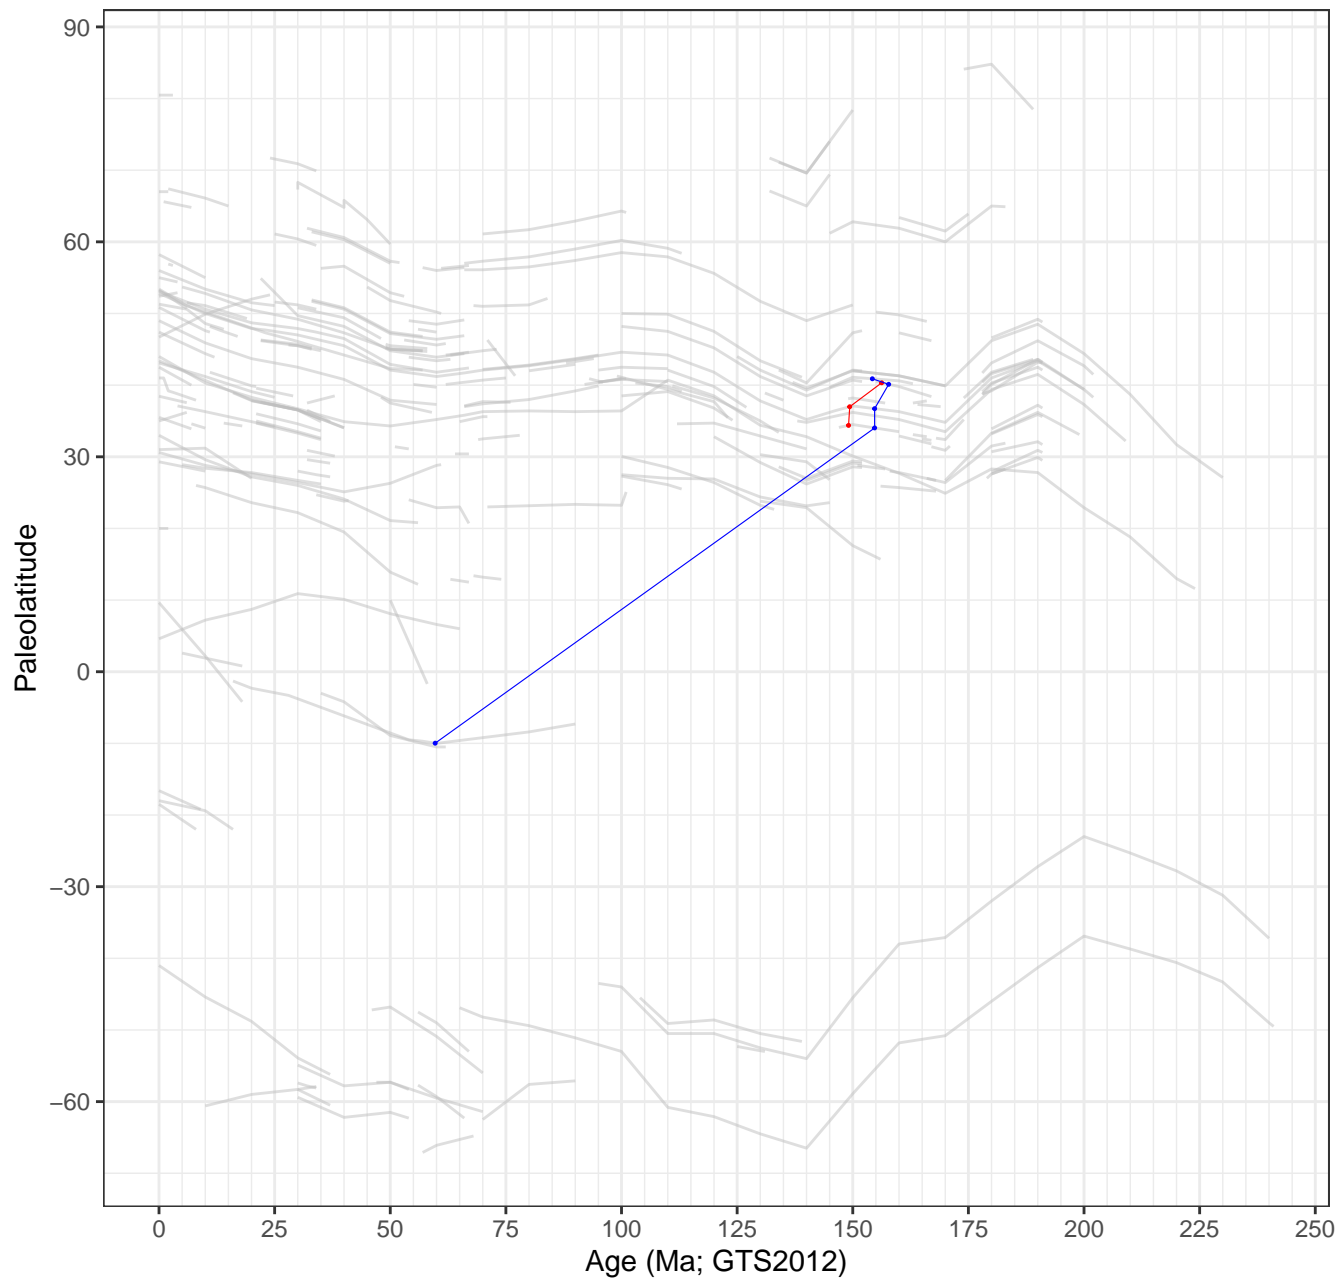

Supplement: Supplementary file 2117 [file Perisseiasphaeridium pannosum.pdf › Supplement/Supplement 2/Species 1914 plots/Perisseiasphaeridium pannosum.pdf]

# Species *Pervosphaeridium bifidum*

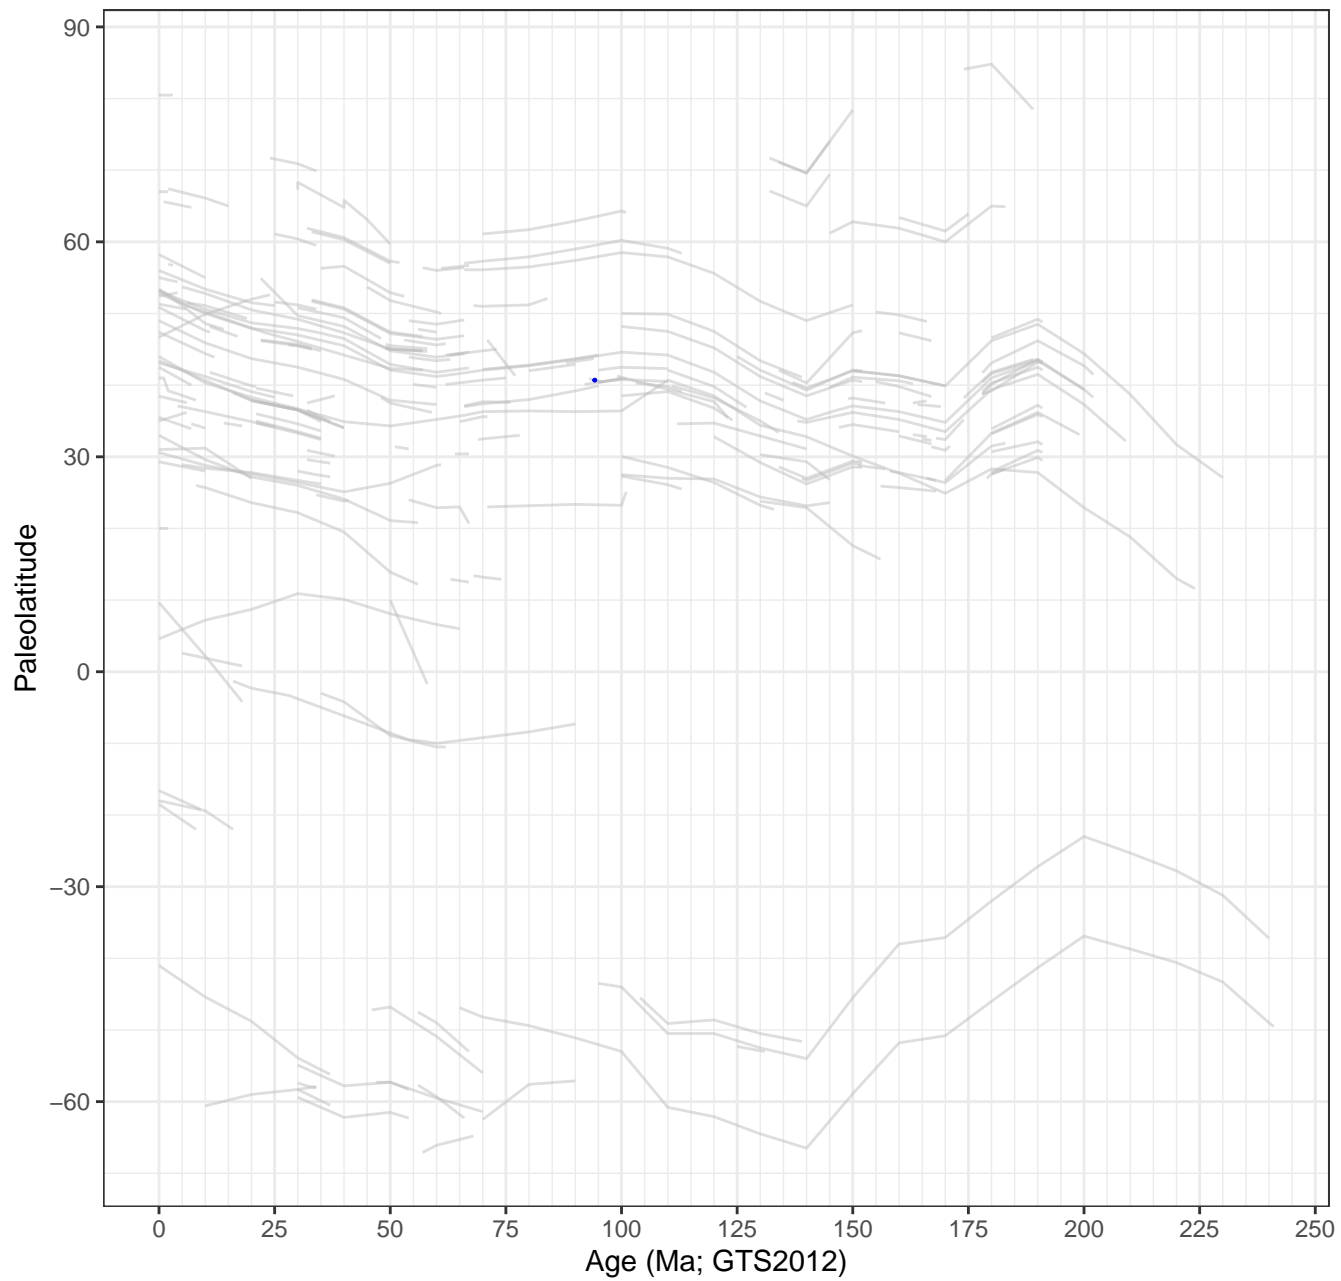

Supplement: Supplementary file 2118 [file Pervosphaeridium bifidum.pdf › Supplement/Supplement 2/Species 1914 plots/Pervosphaeridium bifidum.pdf]

# Species *Pervosphaeridium cenomaniense*

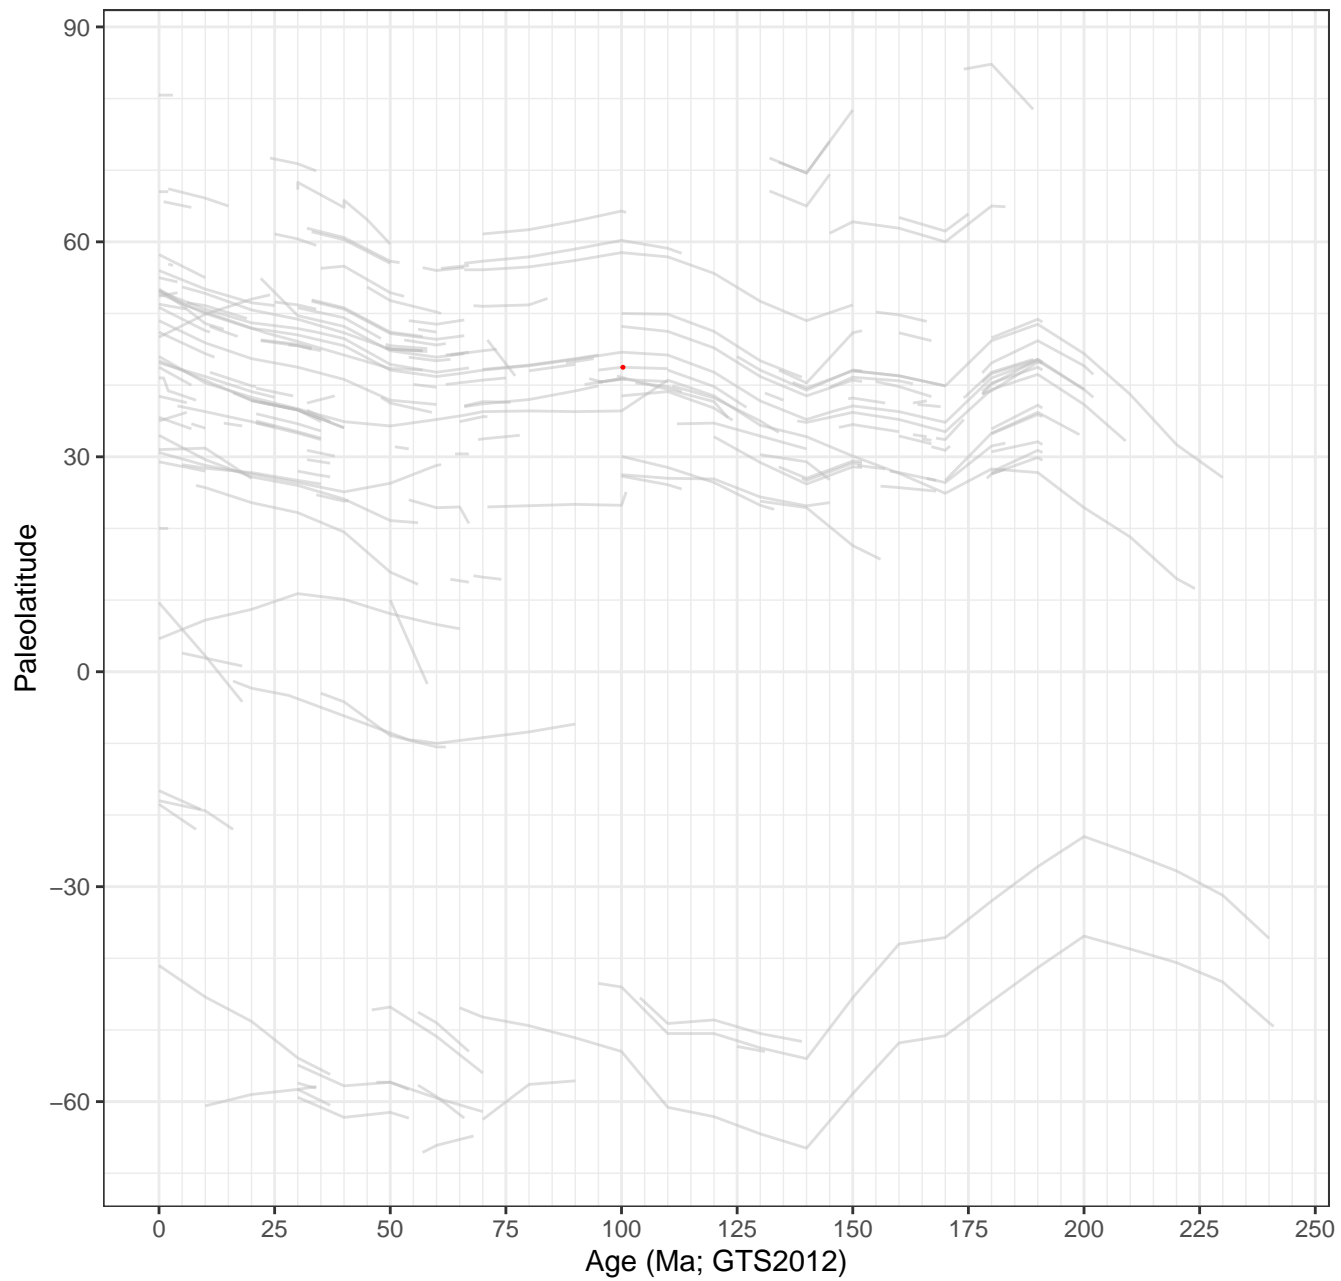

Supplement: Supplementary file 2119 [file Pervosphaeridium cenomaniense.pdf › Supplement/Supplement 2/Species 1914 plots/Pervosphaeridium cenomaniense.pdf]

# Species *Pervosphaeridium granaculare*

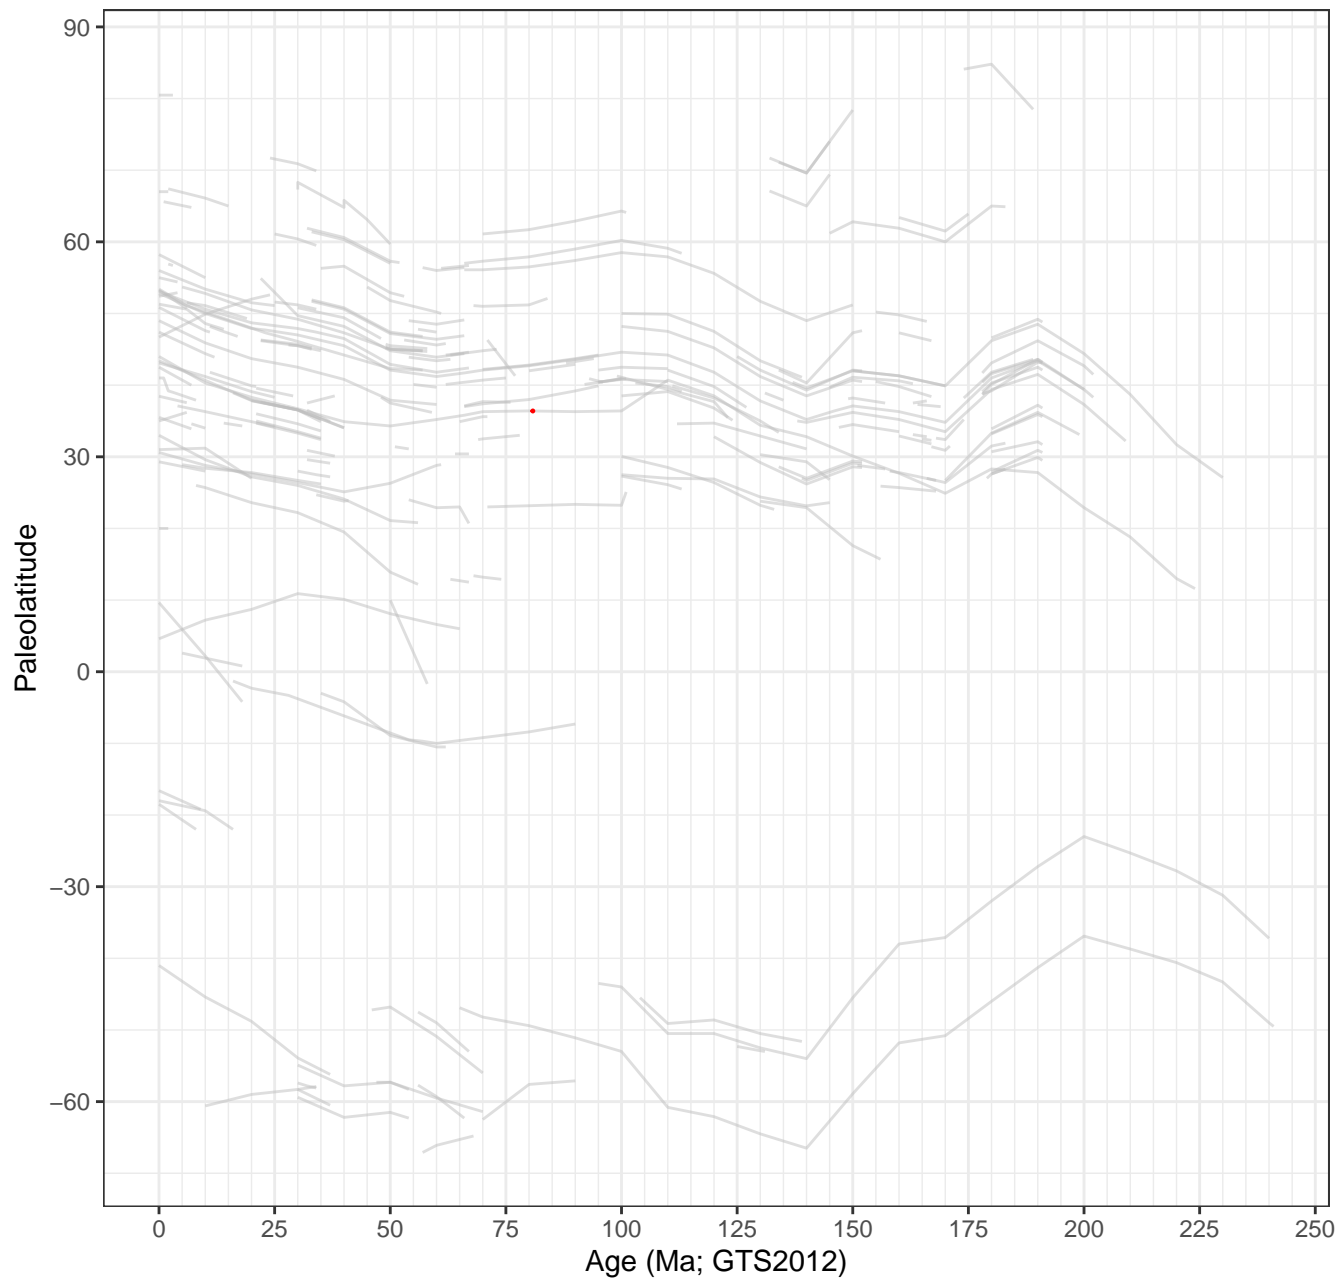

Supplement: Supplementary file 2120 [file Pervosphaeridium granaciculare.pdf › Supplement/Supplement 2/Species 1914 plots/Pervosphaeridium granaciculare.pdf]

# Species *Pervosphaeridium intervelum*

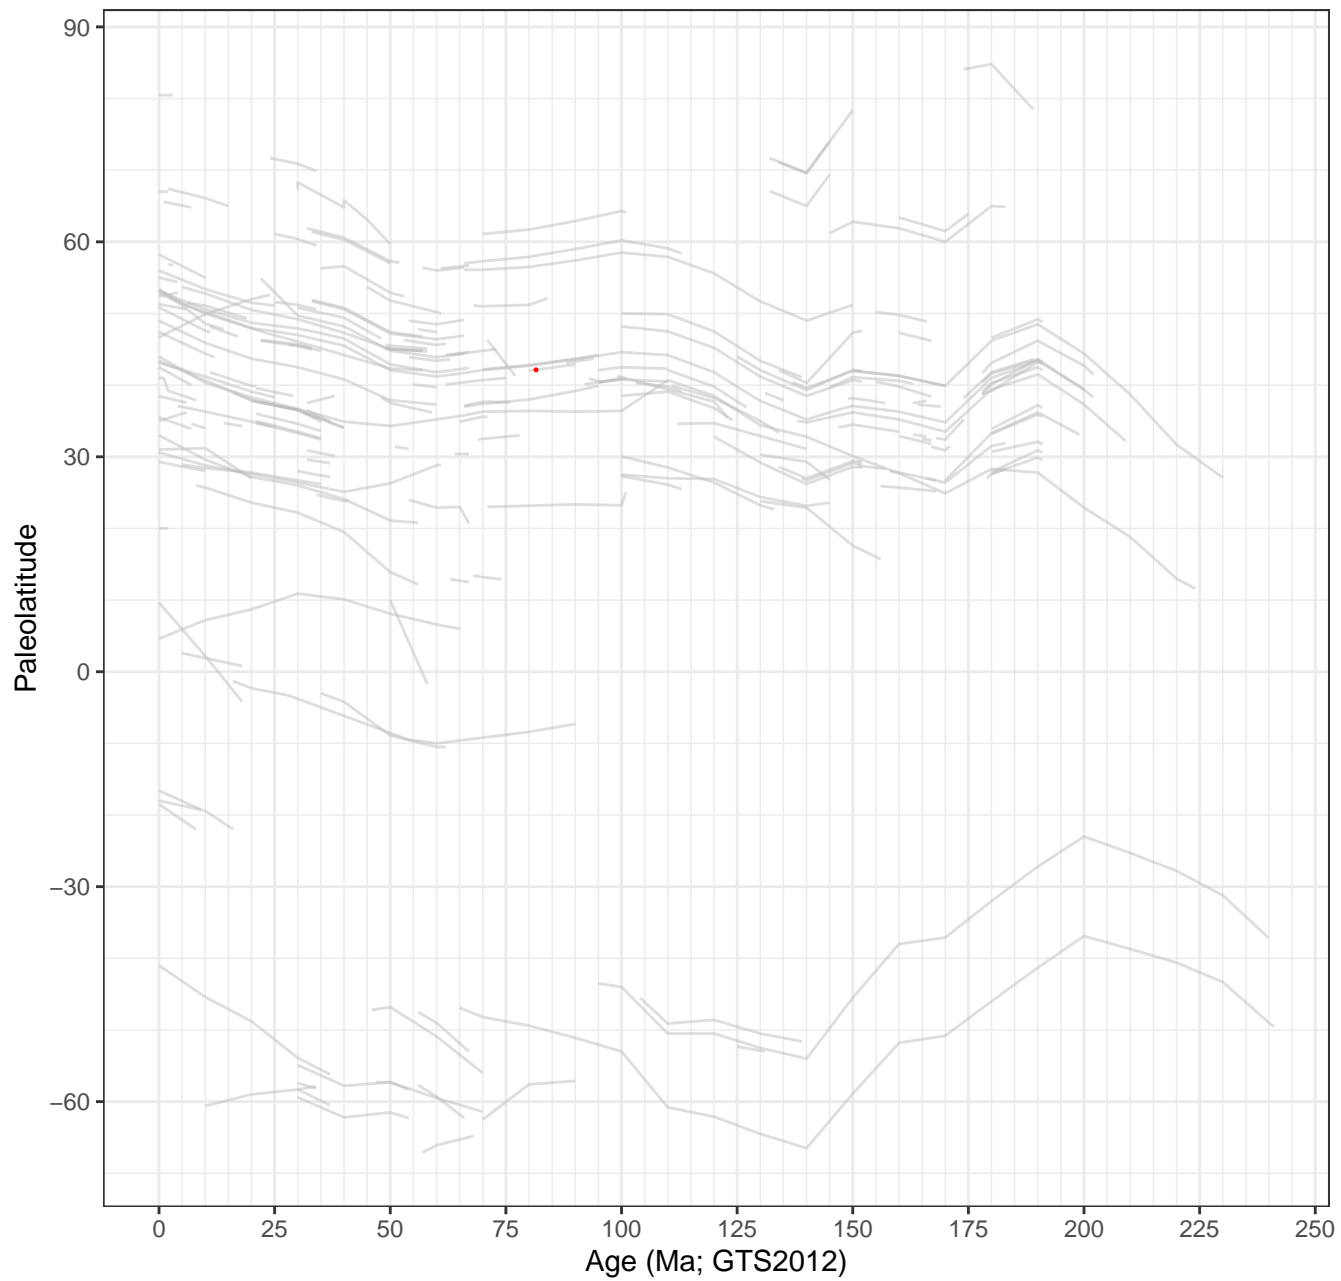

Supplement: Supplementary file 2121 [file Pervosphaeridium intervelum.pdf › Supplement/Supplement 2/Species 1914 plots/Pervosphaeridium intervelum.pdf]

# Species *Pervosphaeridium monasteriense*

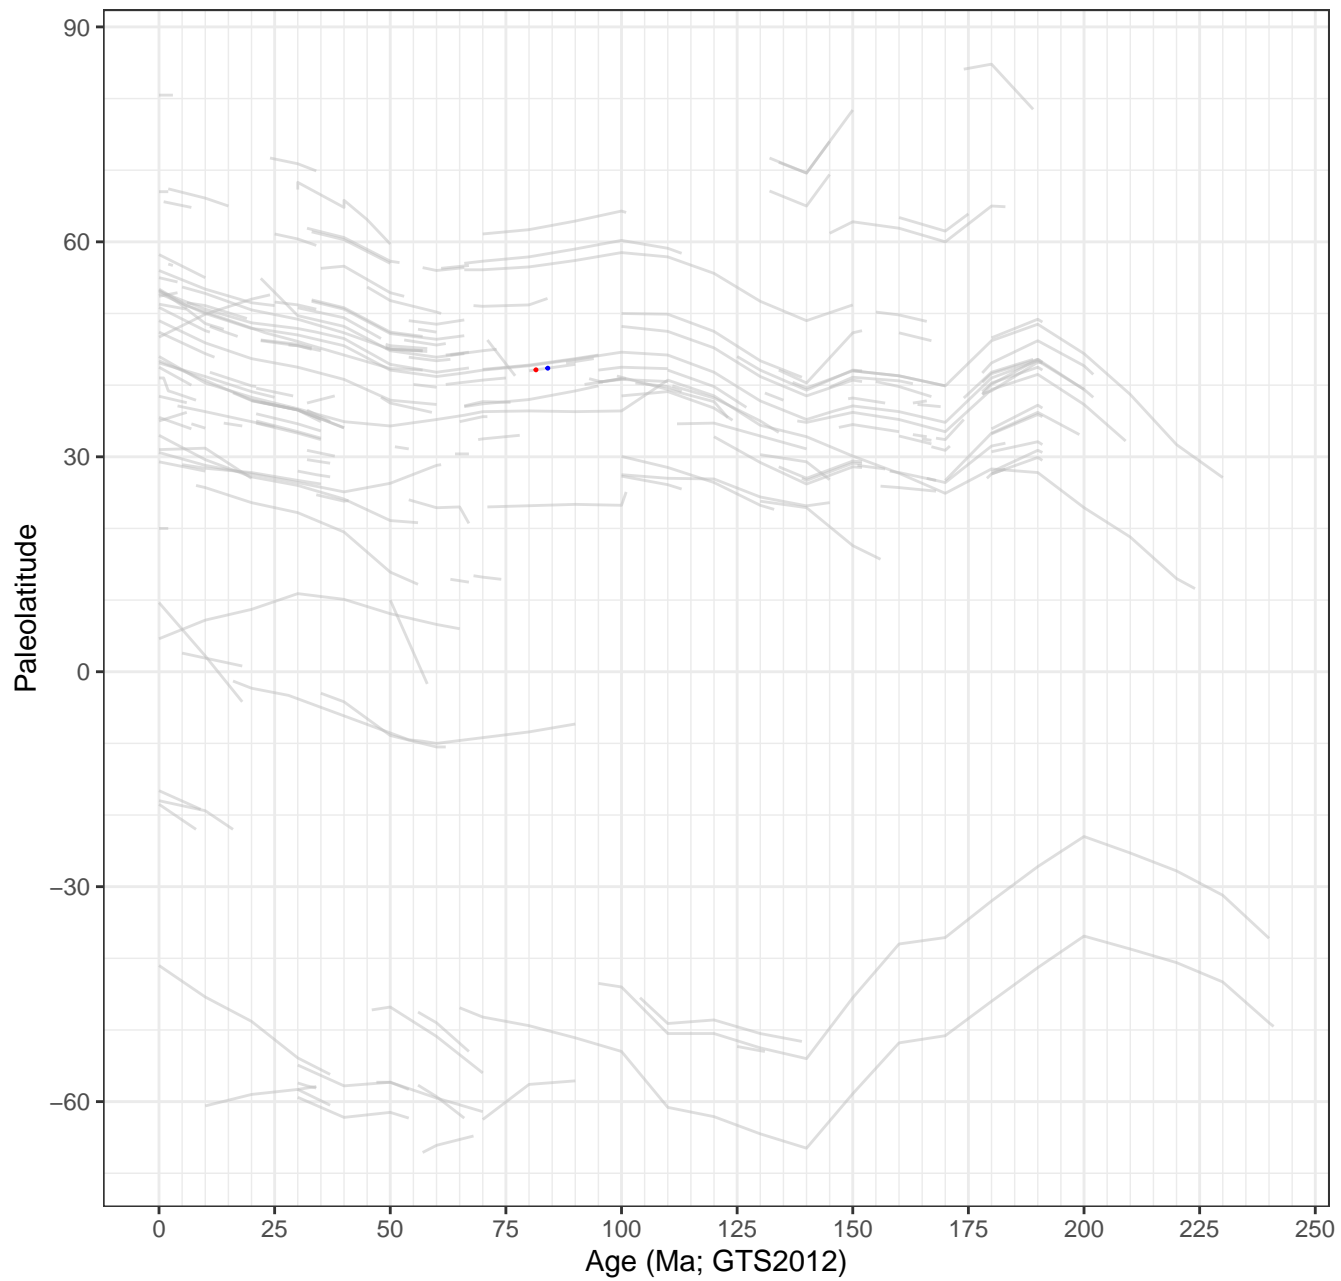

Supplement: Supplementary file 2122 [file Pervosphaeridium monasteriense.pdf › Supplement/Supplement 2/Species 1914 plots/Pervosphaeridium monasteriense.pdf]

# Species *Pervosphaeridium pseudohystrichodinium*

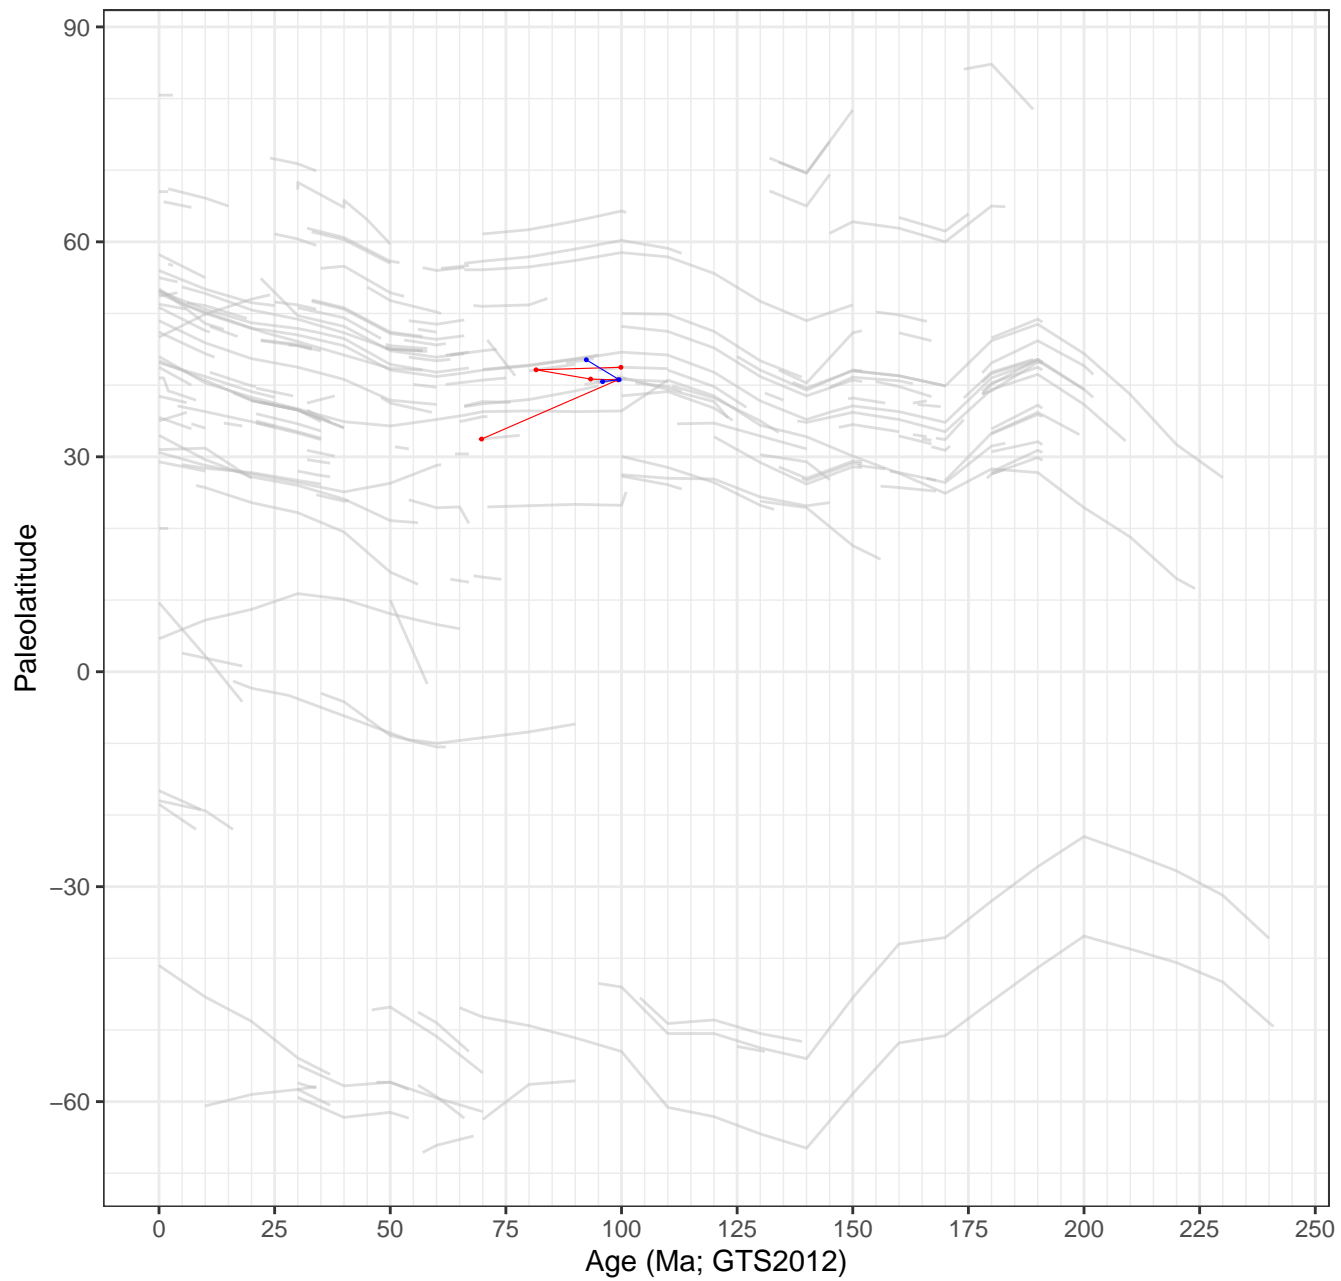

Supplement: Supplementary file 2123 [file Pervosphaeridium pseudohystrichodinium.pdf › Supplement/Supplement 2/Species 1914 plots/Pervosphaeridium pseudohystrichodinium.pdf]

# Species *Pervosphaeridium truncatum*

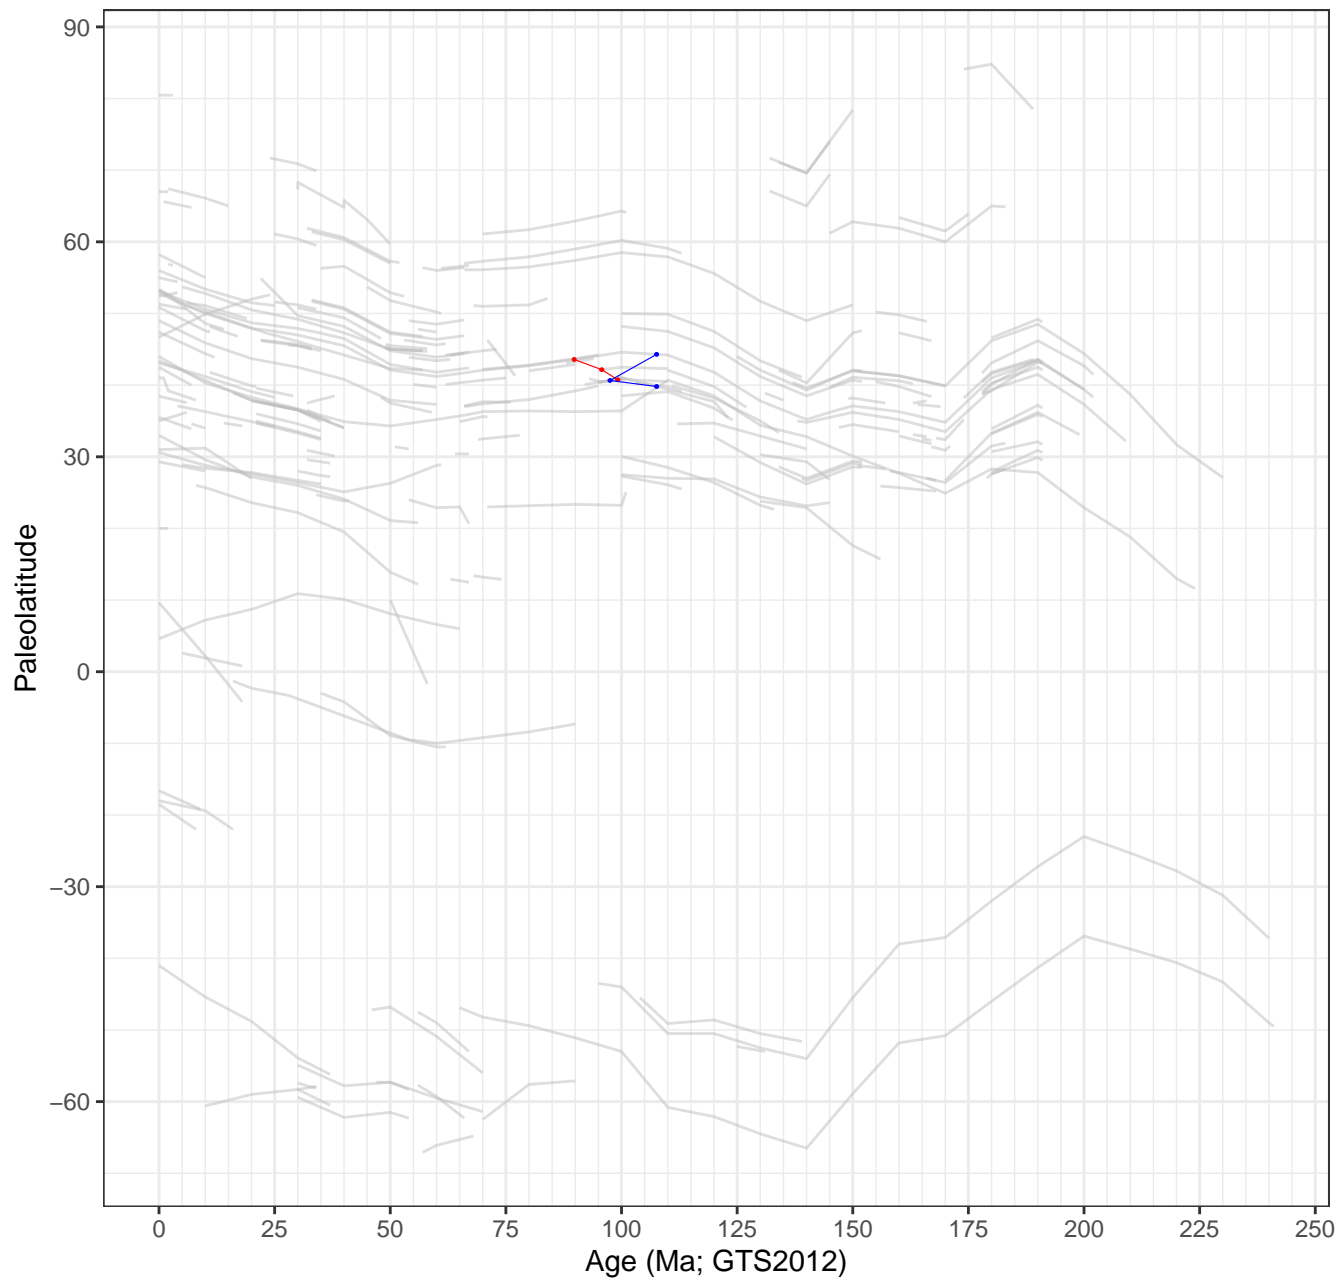

Supplement: Supplementary file 2124 [file Pervosphaeridium truncatum.pdf › Supplement/Supplement 2/Species 1914 plots/Pervosphaeridium truncatum.pdf]

# Species *Petalodinium condylos*

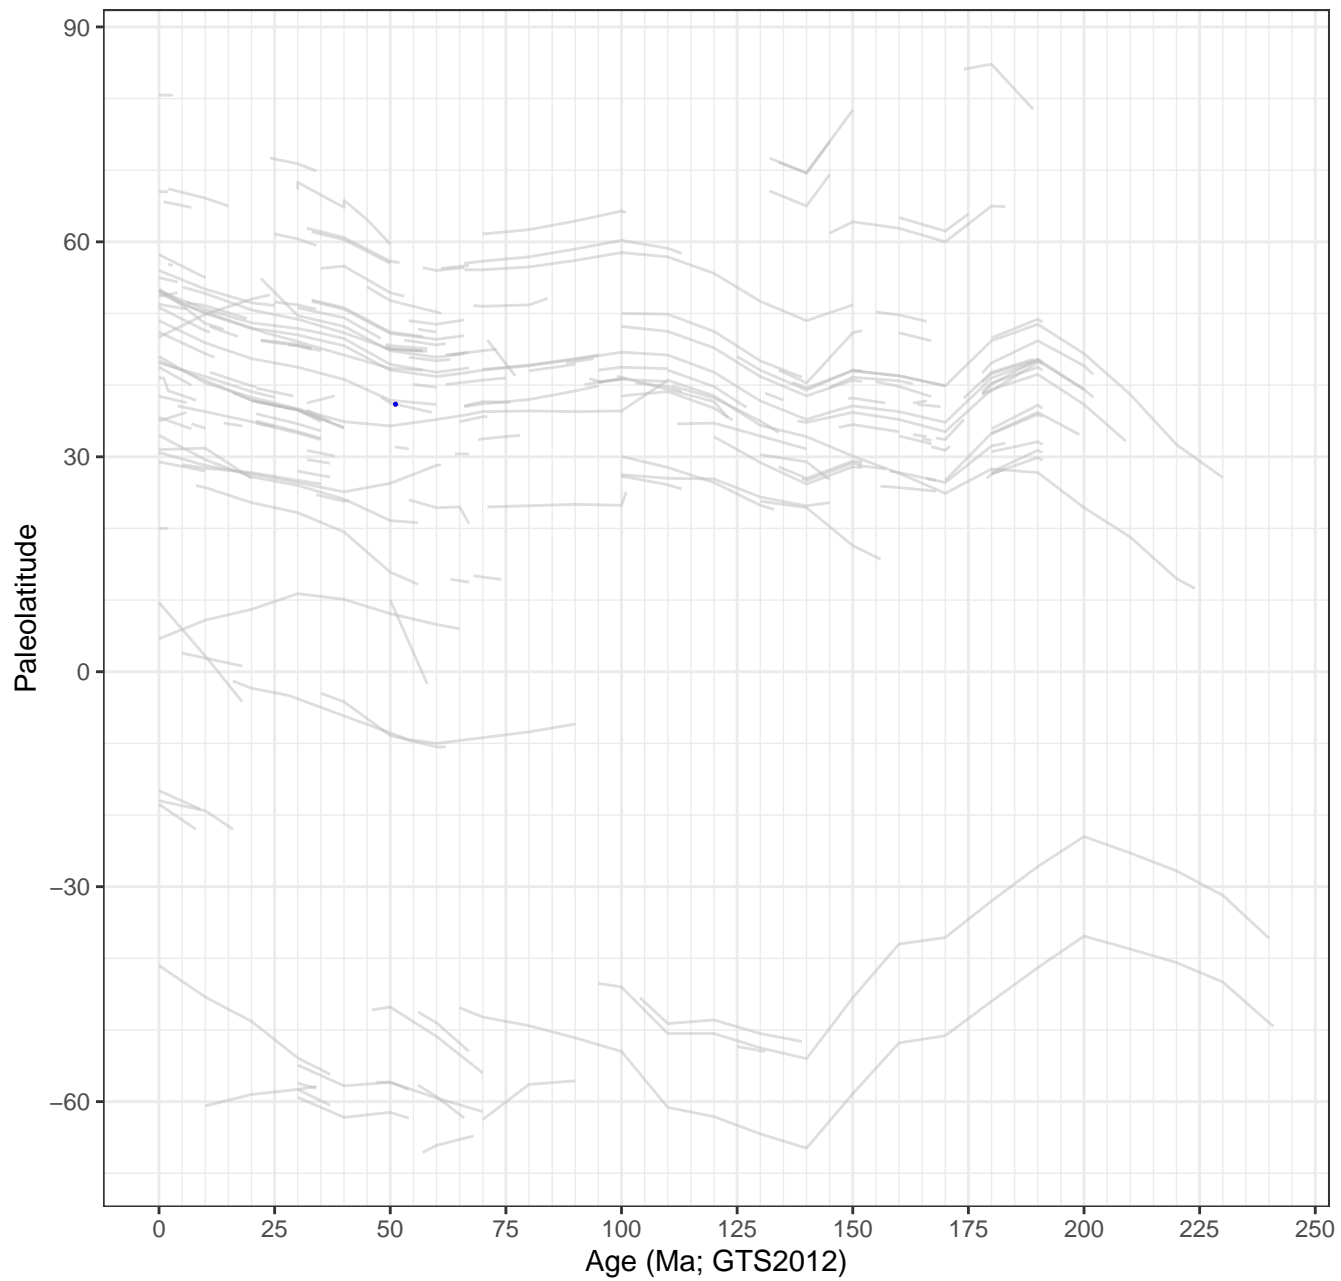

Supplement: Supplementary file 2125 [file Petalodinium condylos.pdf › Supplement/Supplement 2/Species 1914 plots/Petalodinium condylos.pdf]

# Species *Petalodinium robertknoxii*

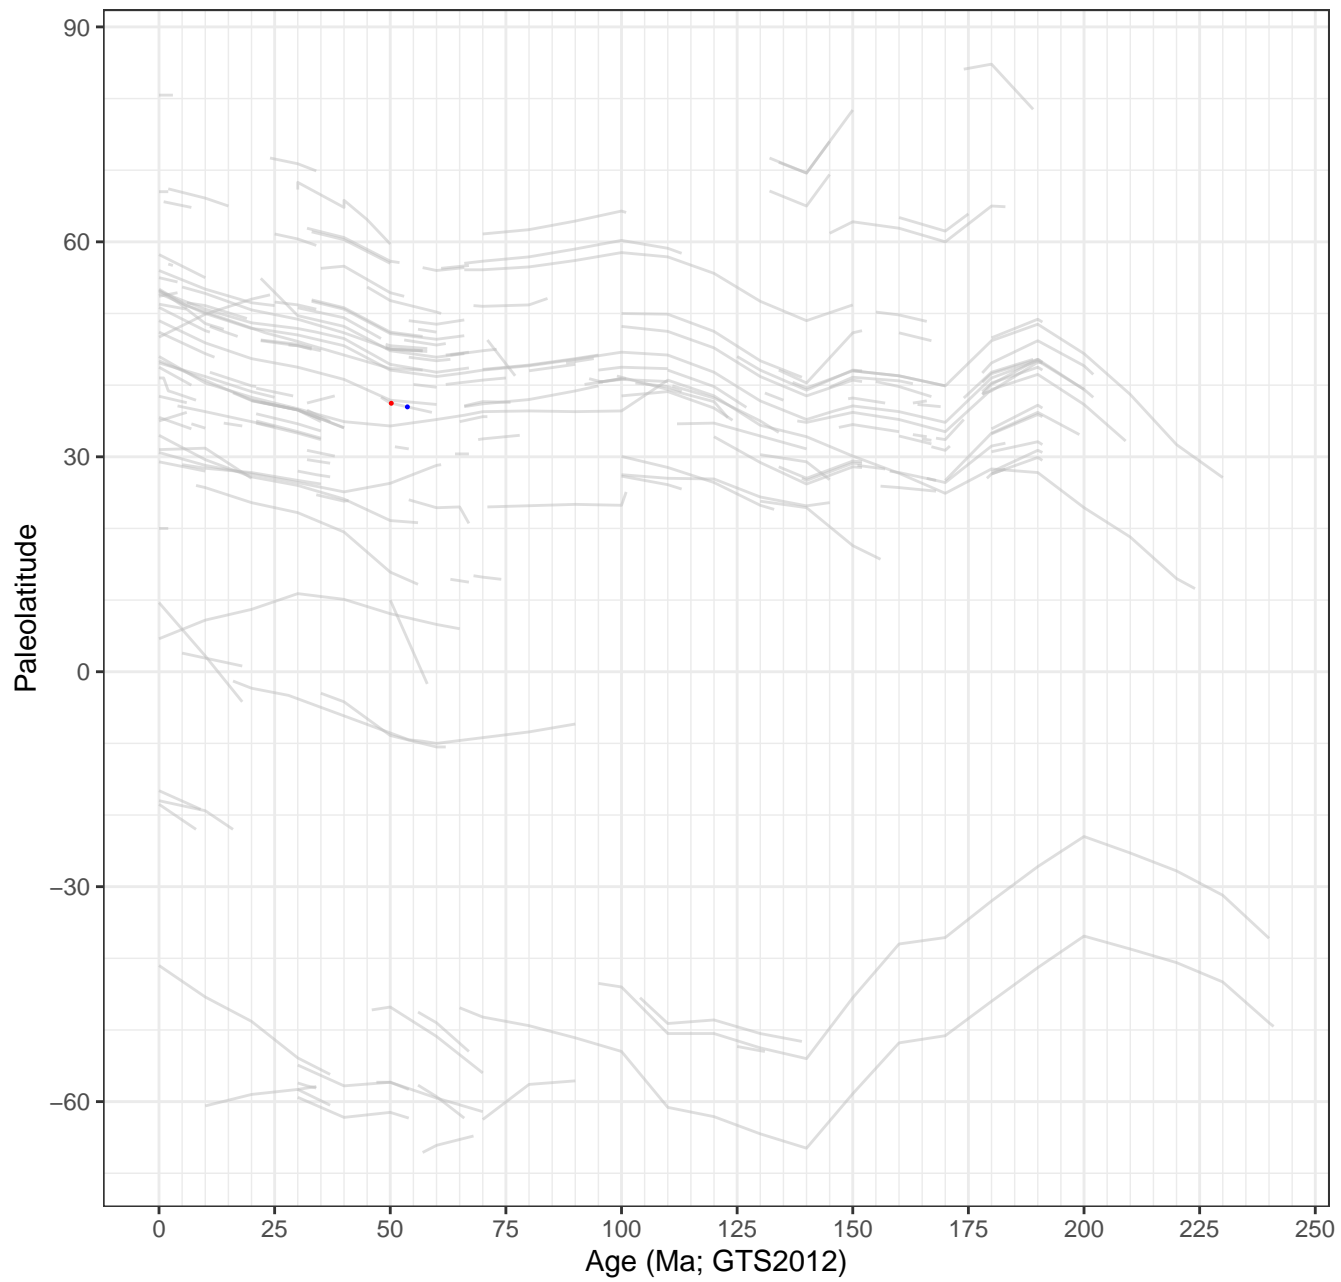

Supplement: Supplementary file 2126 [file Petalodinium robertknoxii.pdf › Supplement/Supplement 2/Species 1914 plots/Petalodinium robertknoxii.pdf]

# Species *Phallocysta elongata*

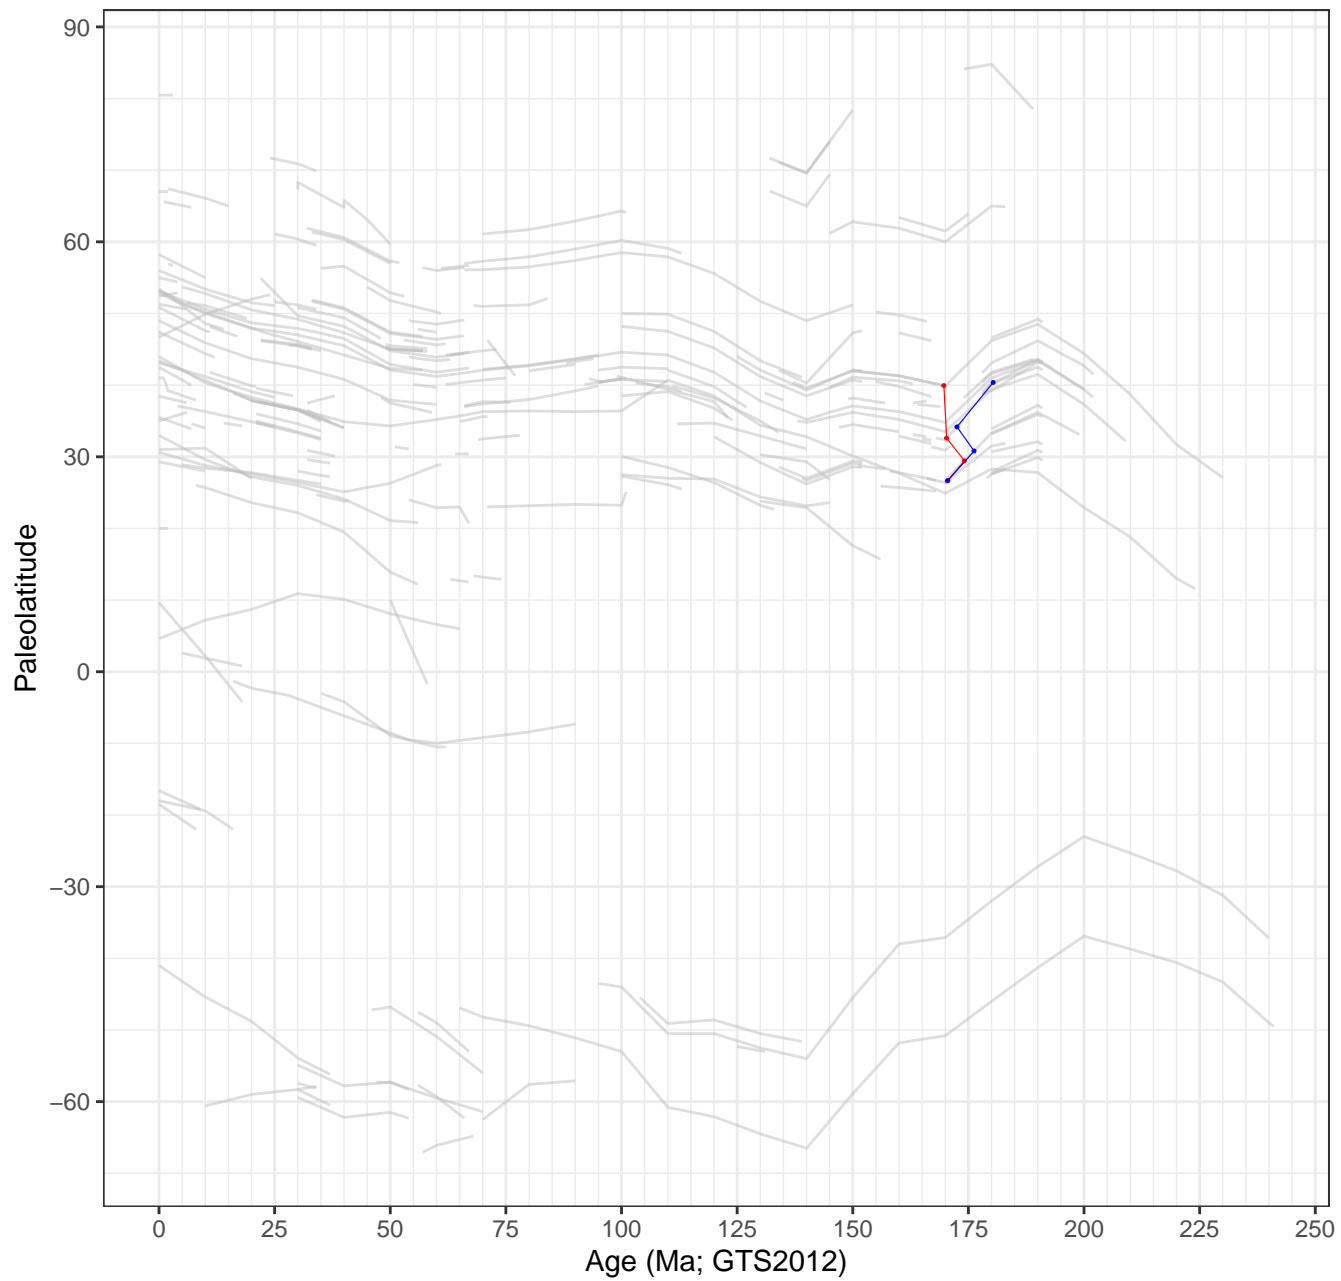

Supplement: Supplementary file 2127 [file Phallocysta elongata.pdf › Supplement/Supplement 2/Species 1914 plots/Phallocysta elongata.pdf]

# Species *Phallocysta erregulensis*

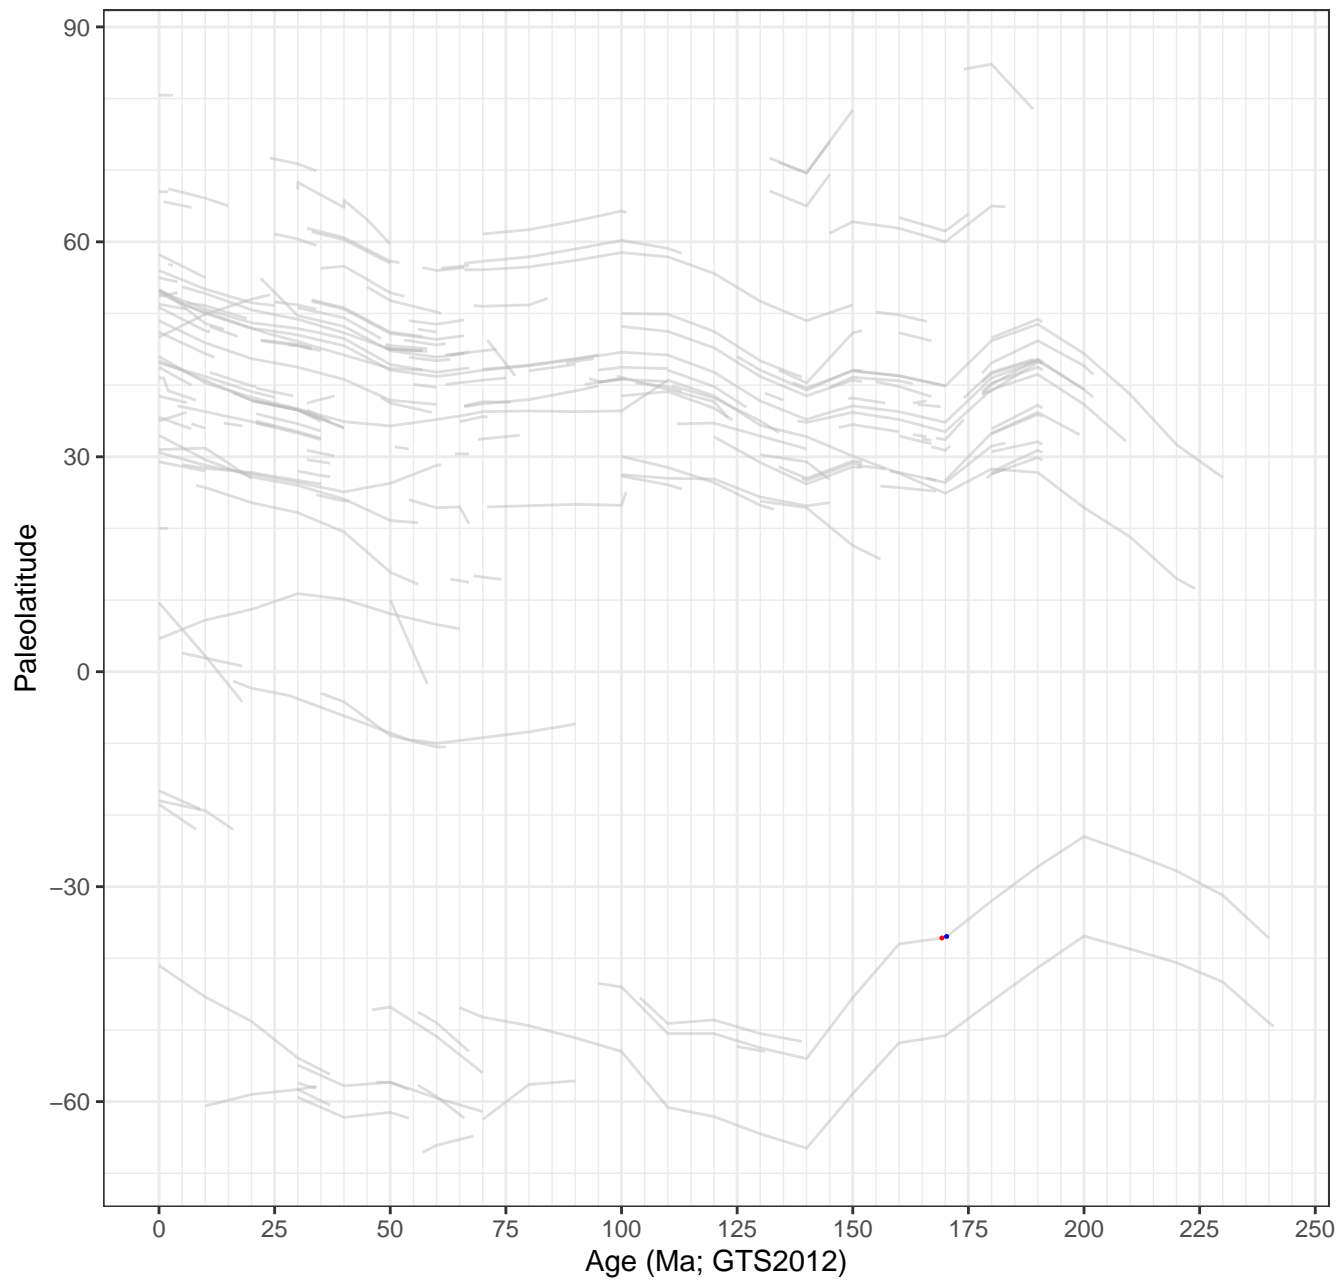

Supplement: Supplementary file 2128 [file Phallocysta erregulensis.pdf › Supplement/Supplement 2/Species 1914 plots/Phallocysta erregulensis.pdf]

# Species *Phallocysta eumekes*

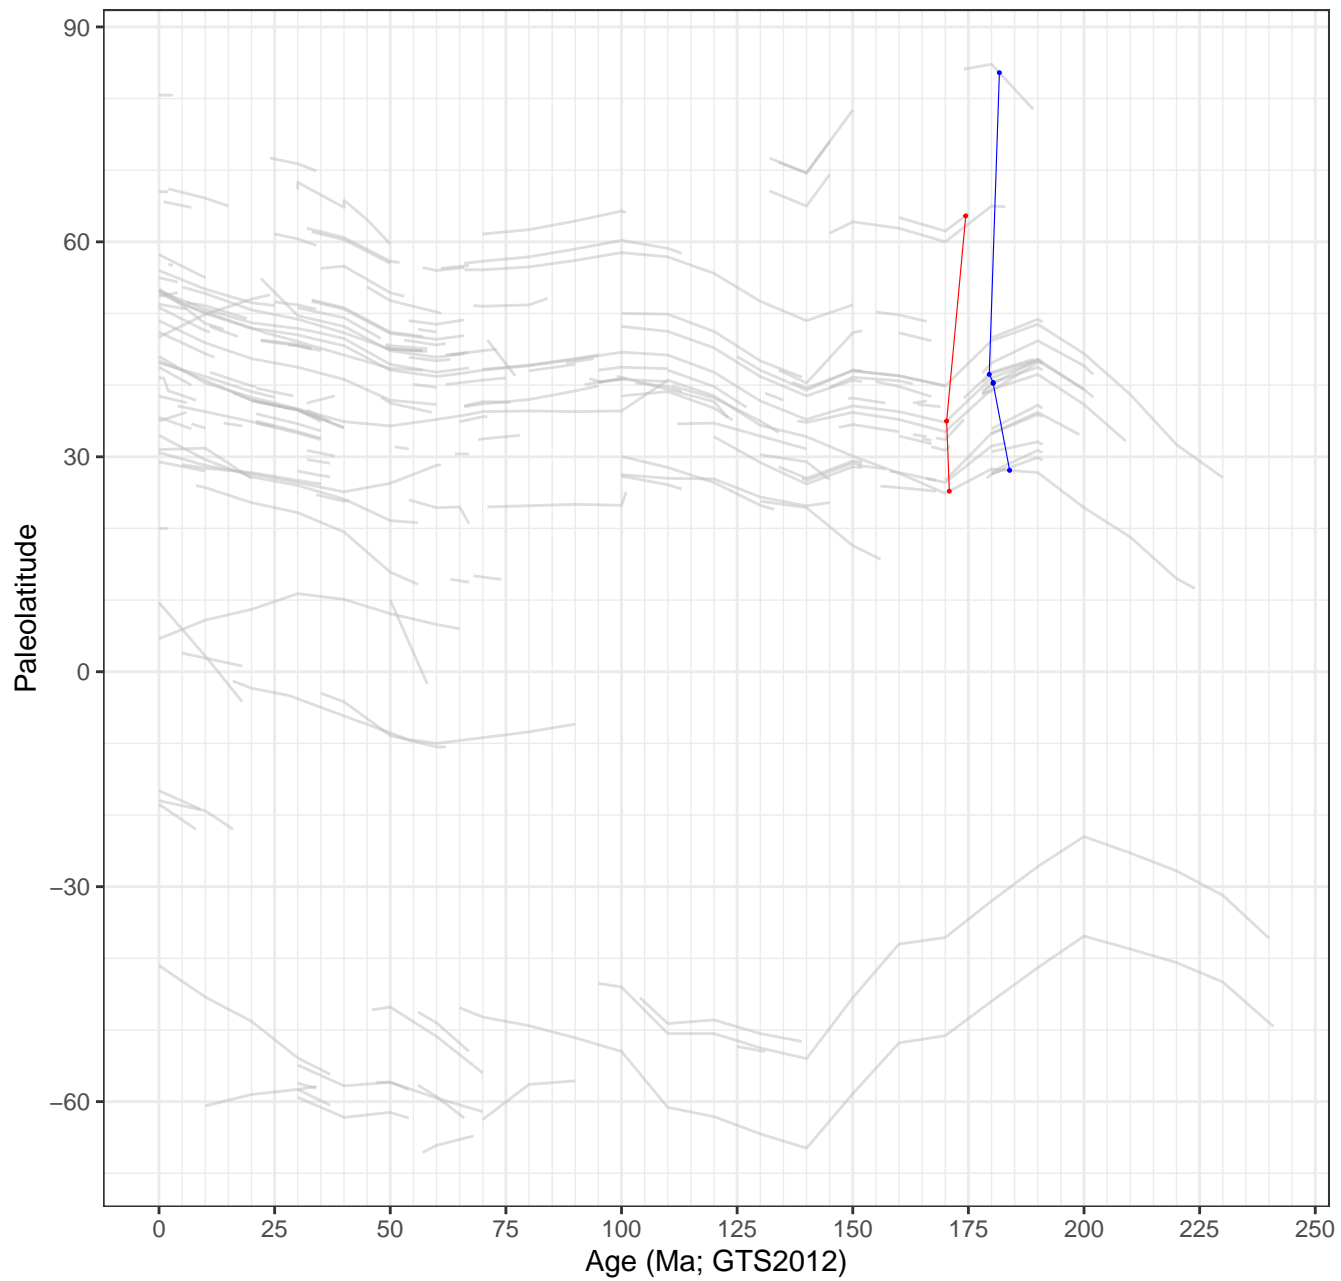

Supplement: Supplementary file 2129 [file Phallocysta eumekes.pdf › Supplement/Supplement 2/Species 1914 plots/Phallocysta eumekes.pdf]

# Species *Phallocysta granosa*

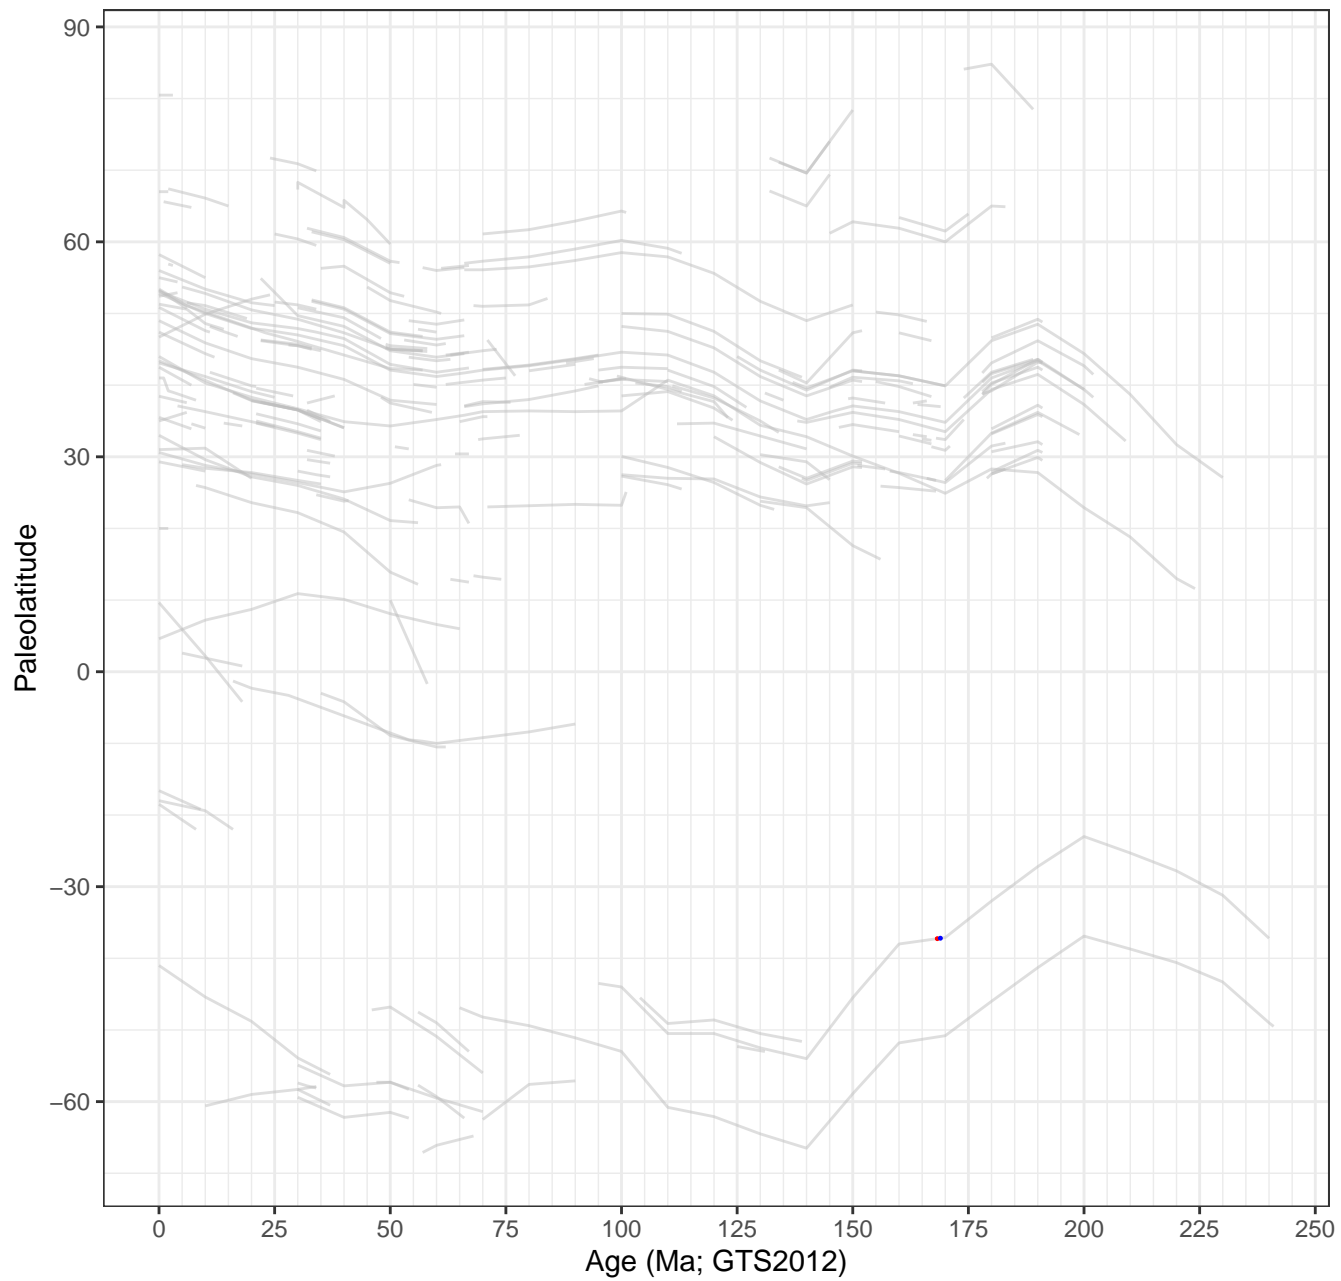

Supplement: Supplementary file 2130 [file Phallocysta granosa.pdf › Supplement/Supplement 2/Species 1914 plots/Phallocysta granosa.pdf]

# Species *Phallocysta thomassii*

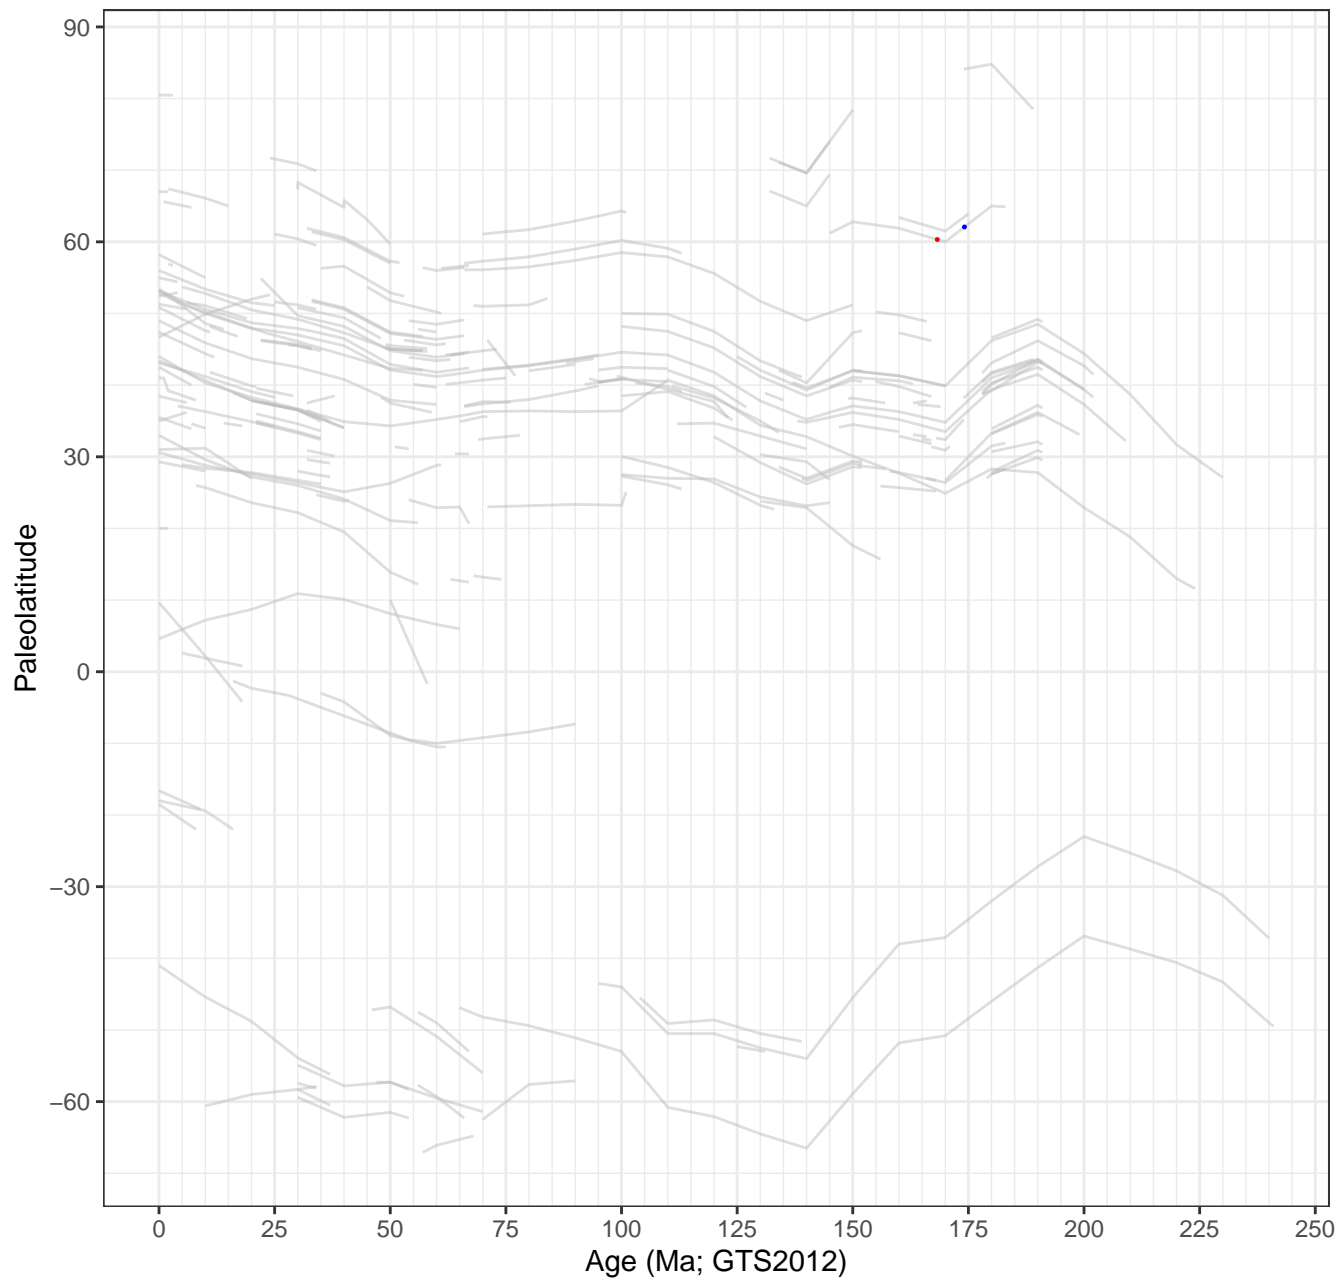

Supplement: Supplementary file 2131 [file Phallocysta thomassii.pdf › Supplement/Supplement 2/Species 1914 plots/Phallocysta thomassii.pdf]

# Species *Phanerodinium belgicum*

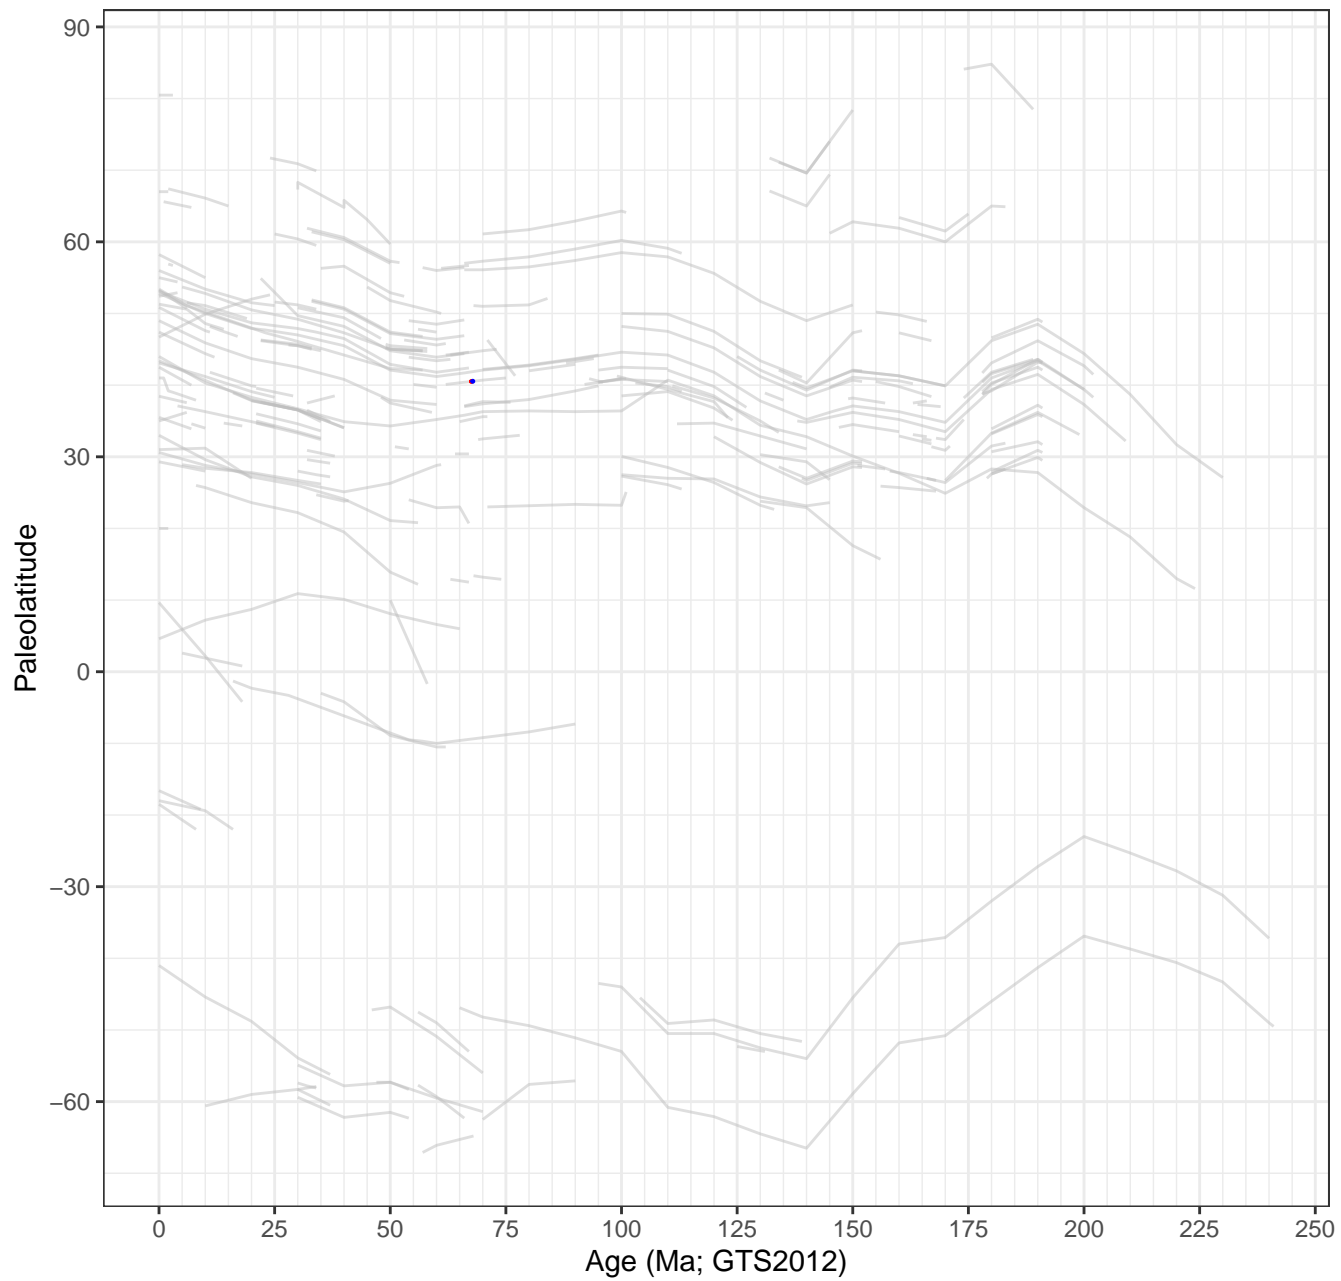

Supplement: Supplementary file 2132 [file Phanerodinium belgicum.pdf › Supplement/Supplement 2/Species 1914 plots/Phanerodinium belgicum.pdf]

# Species *Phanerodinium fourmarieri*

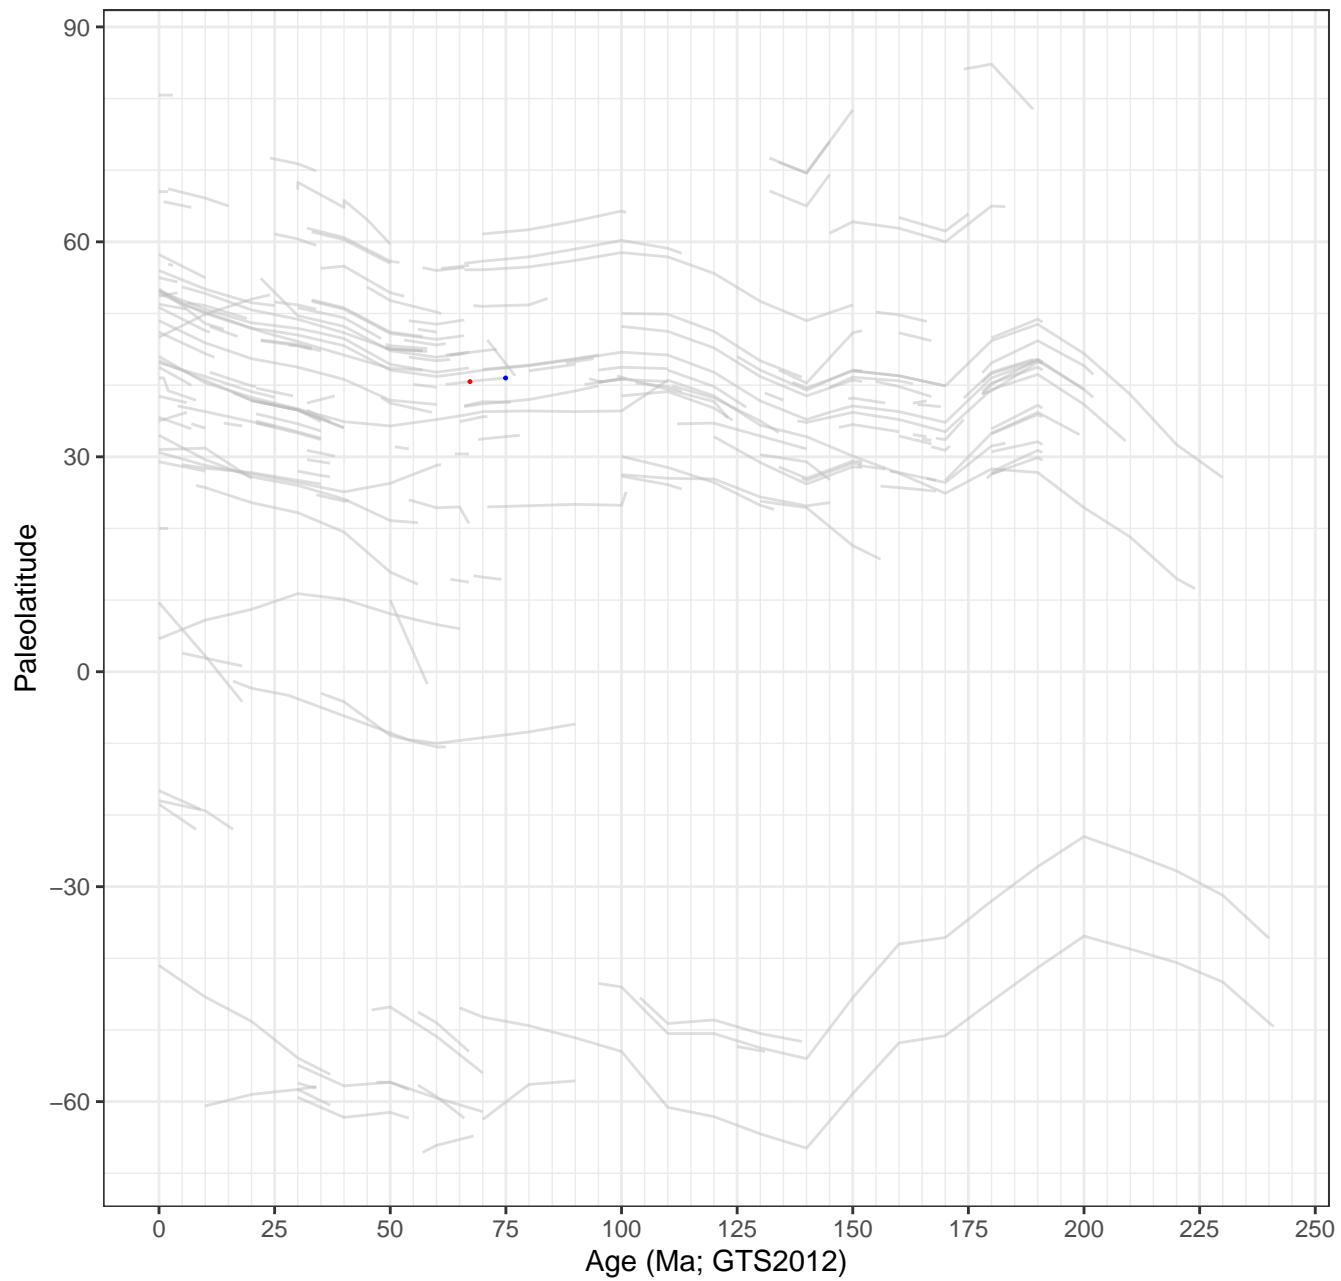

Supplement: Supplementary file 2133 [file Phanerodinium fourmarieri.pdf › Supplement/Supplement 2/Species 1914 plots/Phanerodinium fourmarieri.pdf]
