# Supplementary figures and images for: DINOSTRAT: a global database of the stratigraphic and paleolatitudinal distribution of Mesozoic–Cenozoic organic-walled dinoflagellate cysts (part 22 of 27)
Source: Copernicus journal article supplement (doi:10.5194/essd-14-579-2022), 2022-02-09

# Species *Phelodinium kozlowskii*

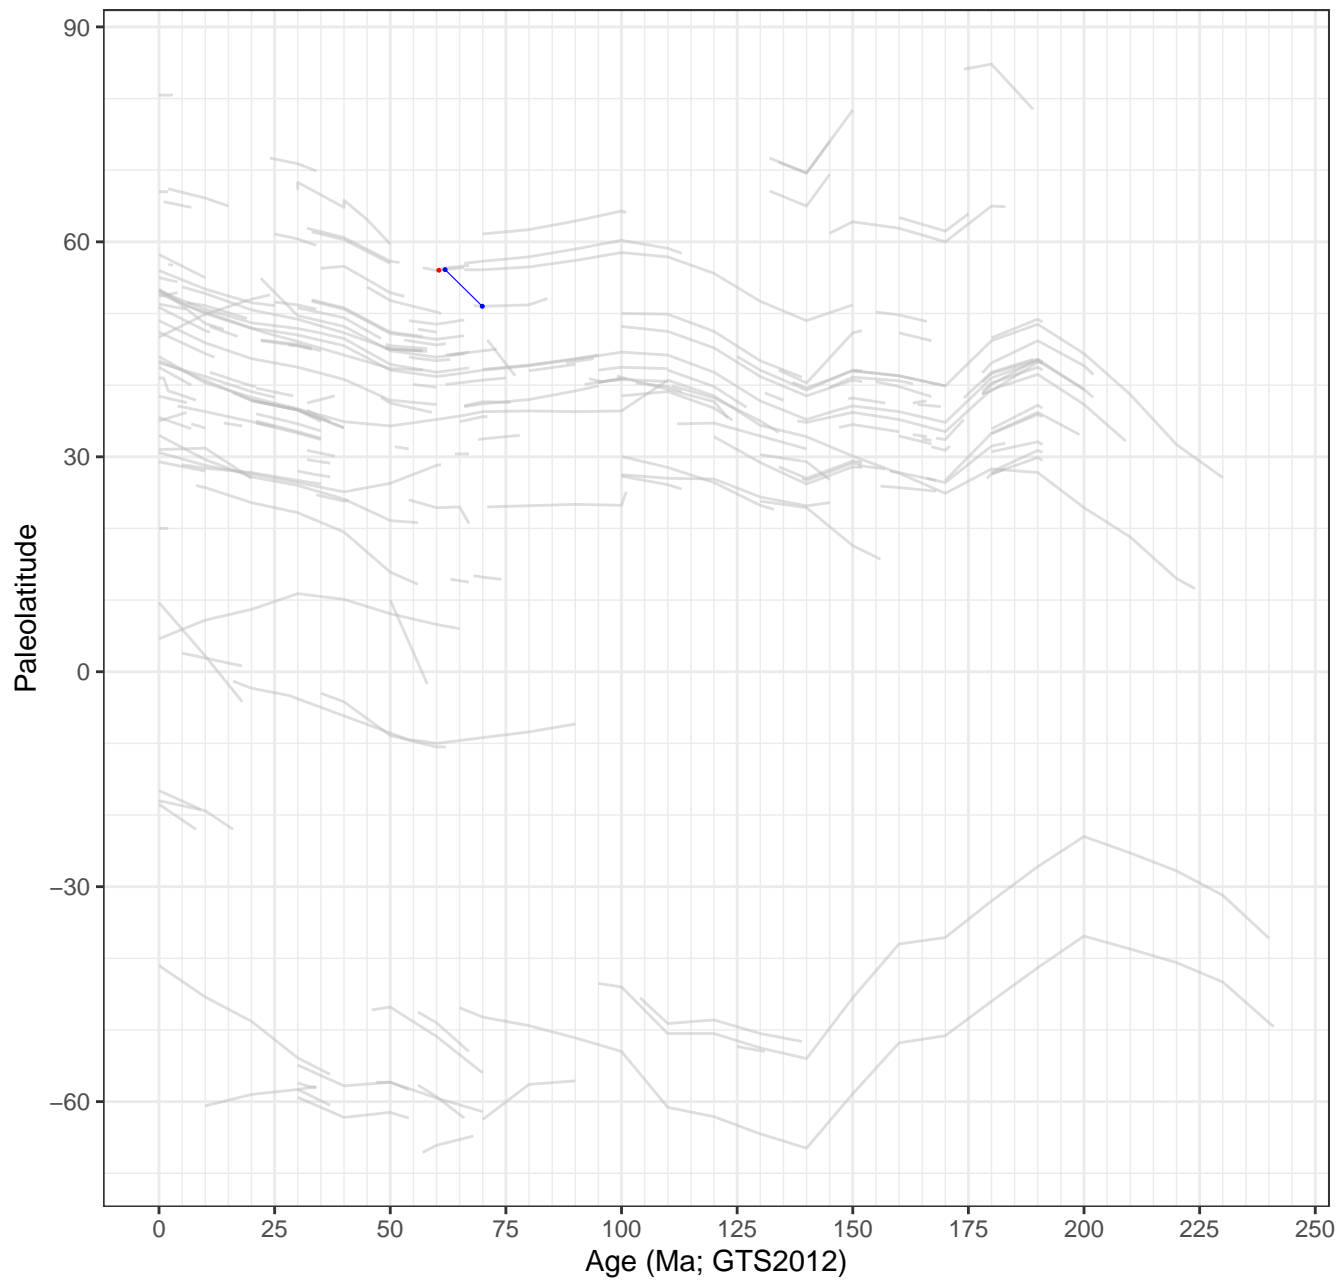

Supplement: Supplementary file 2134 [file Phelodinium kozlowskii.pdf › Supplement/Supplement 2/Species 1914 plots/Phelodinium kozlowskii.pdf]

# Species *Phelodinium magnificum*

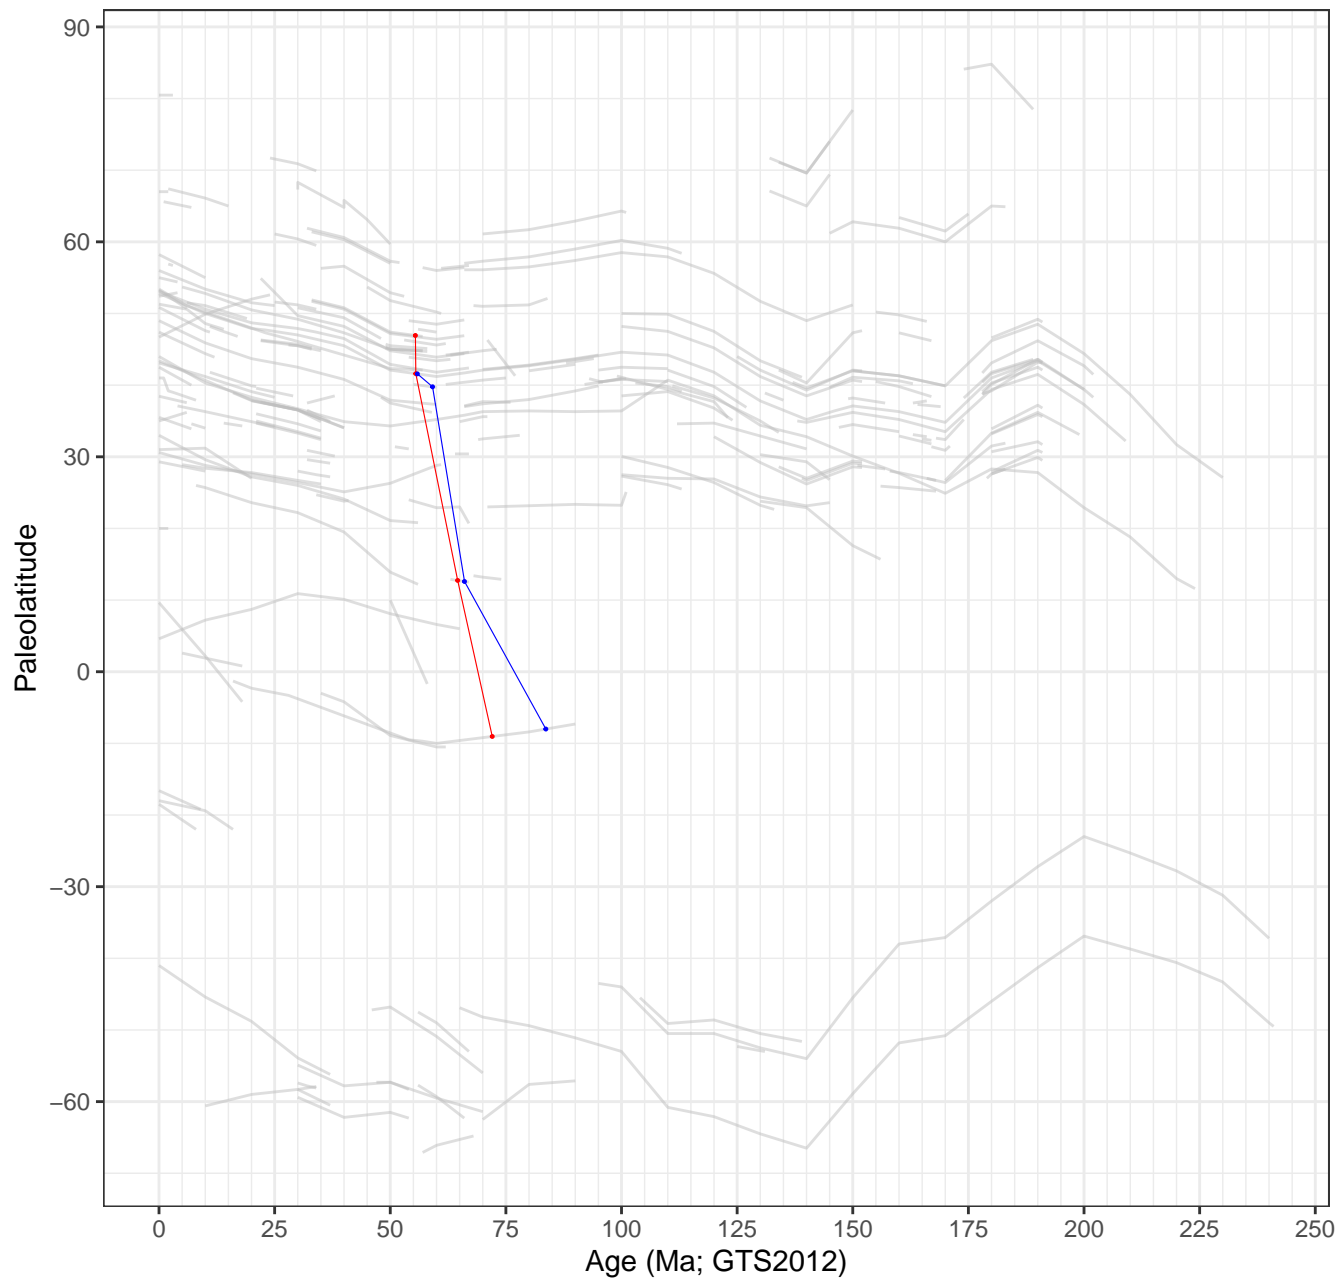

Supplement: Supplementary file 2135 [file Phelodinium magnificum.pdf › Supplement/Supplement 2/Species 1914 plots/Phelodinium magnificum.pdf]

# Species *Phelodinium pachyceras*

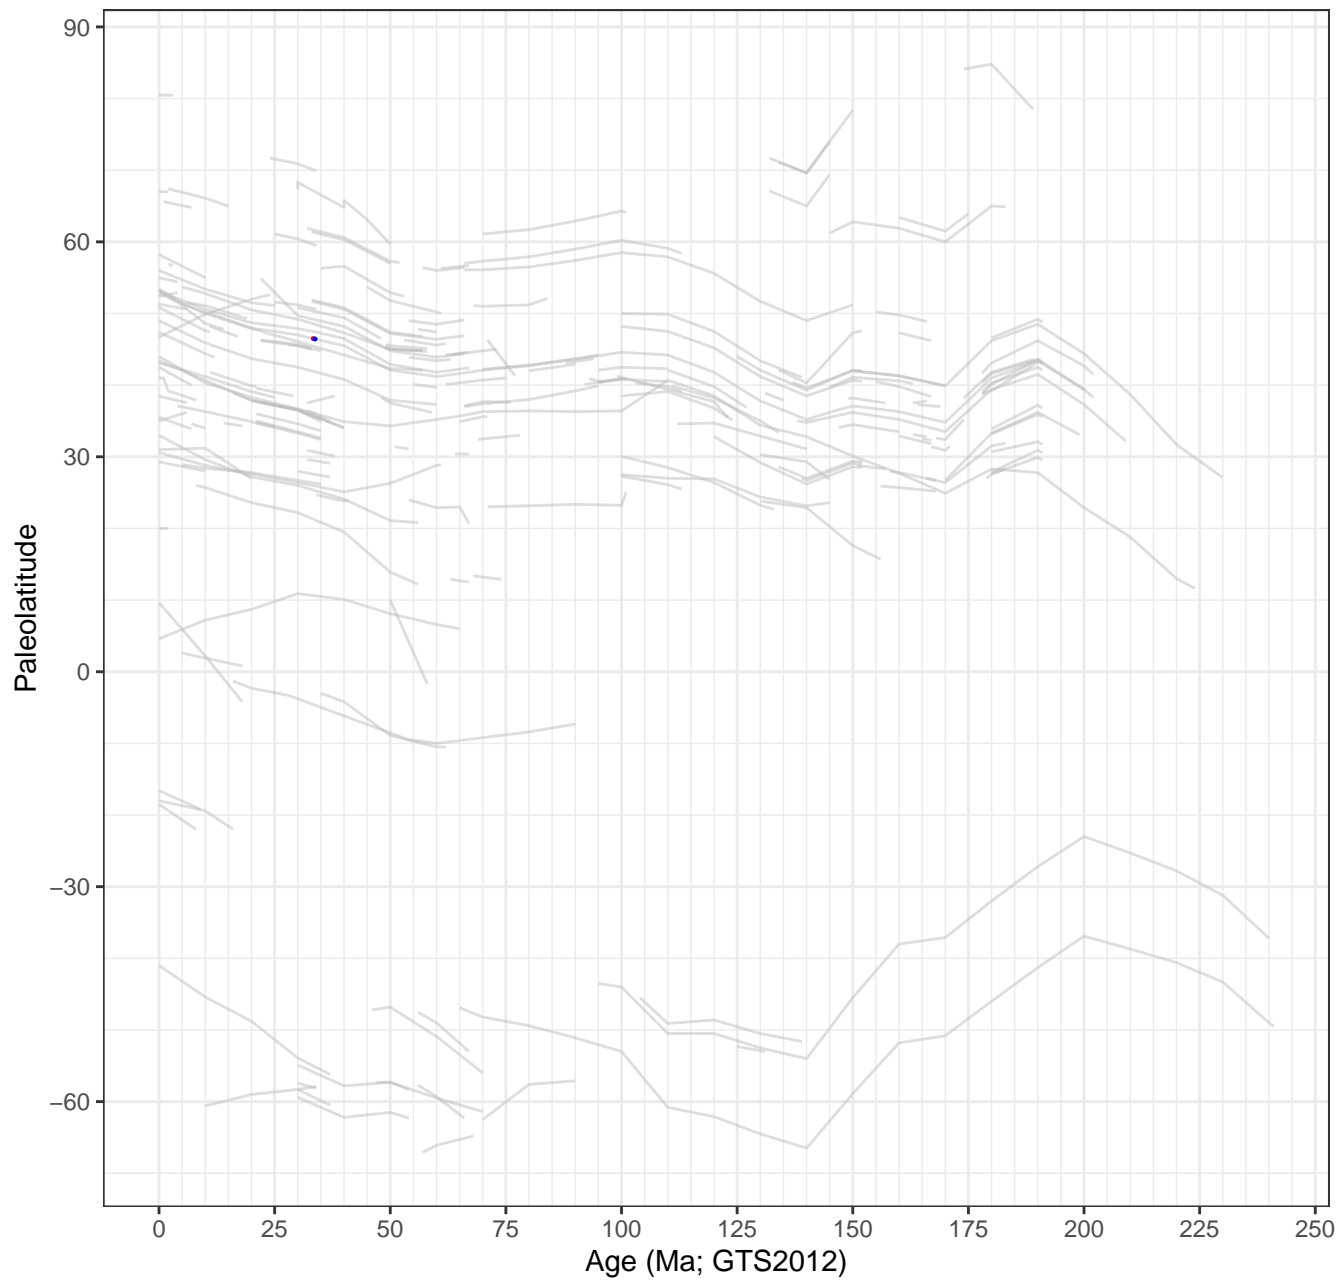

Supplement: Supplementary file 2136 [file Phelodinium pachyceras.pdf › Supplement/Supplement 2/Species 1914 plots/Phelodinium pachyceras.pdf]

# Species *Phelodinium tricuspe*

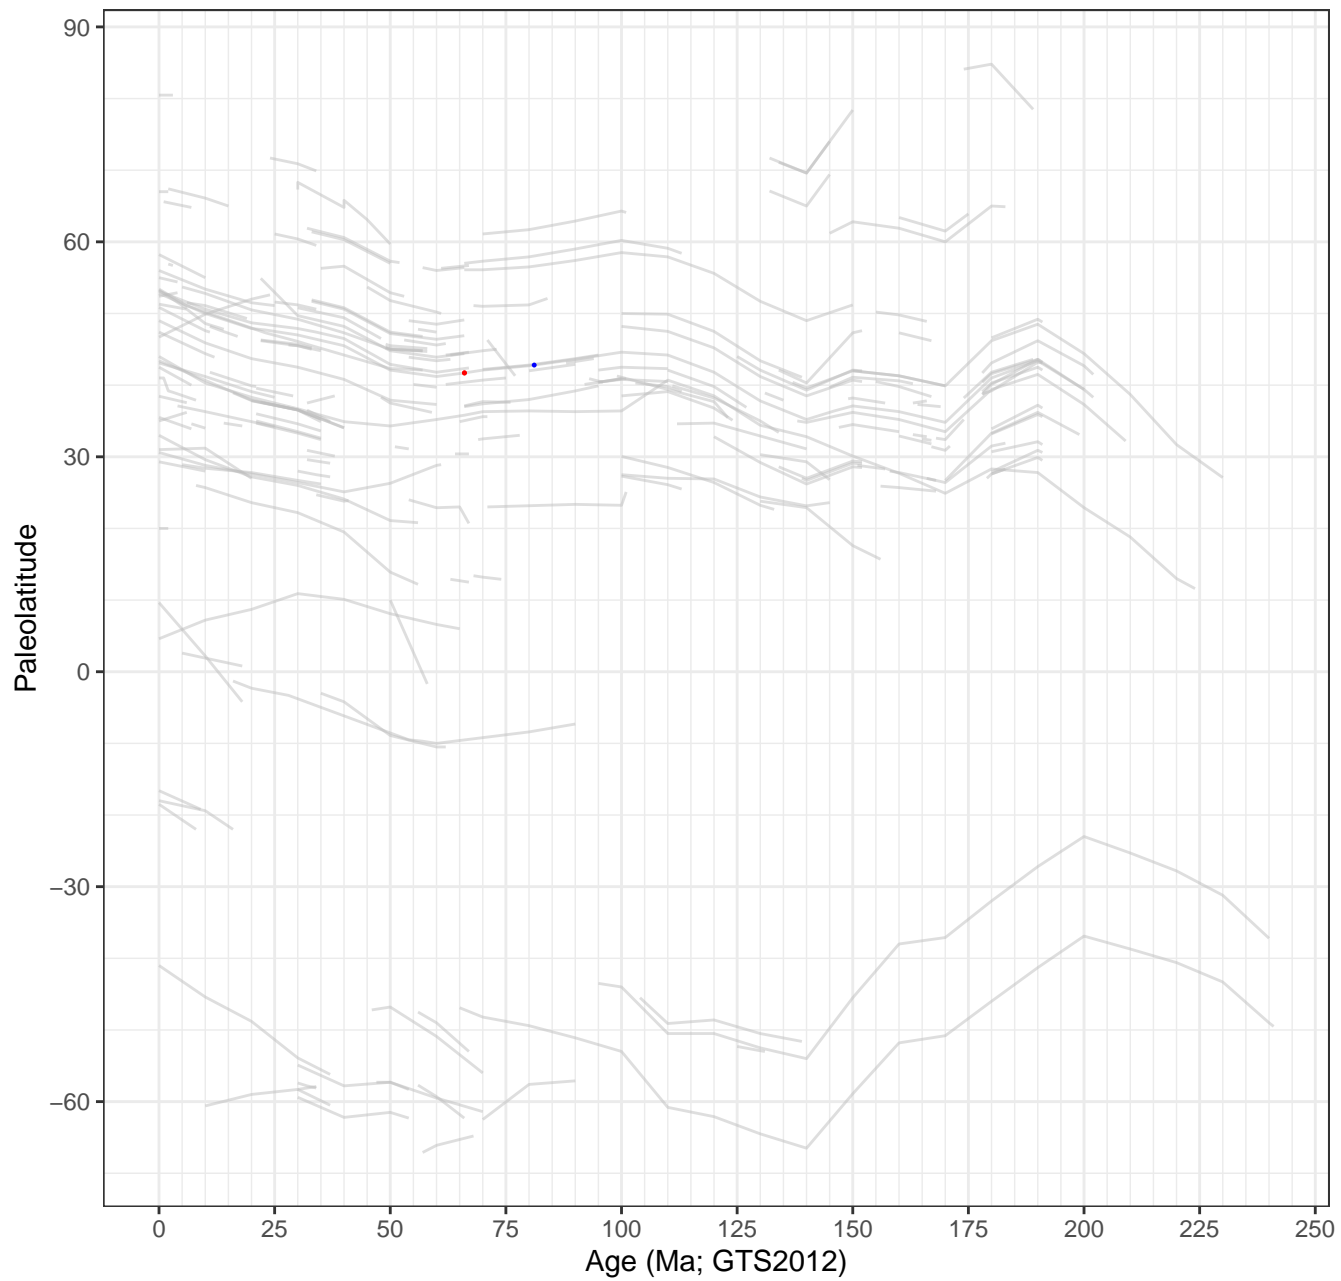

Supplement: Supplementary file 2137 [file Phelodinium tricuspe.pdf › Supplement/Supplement 2/Species 1914 plots/Phelodinium tricuspe.pdf]

# Species *Phoberocysta neocomica neocomica*

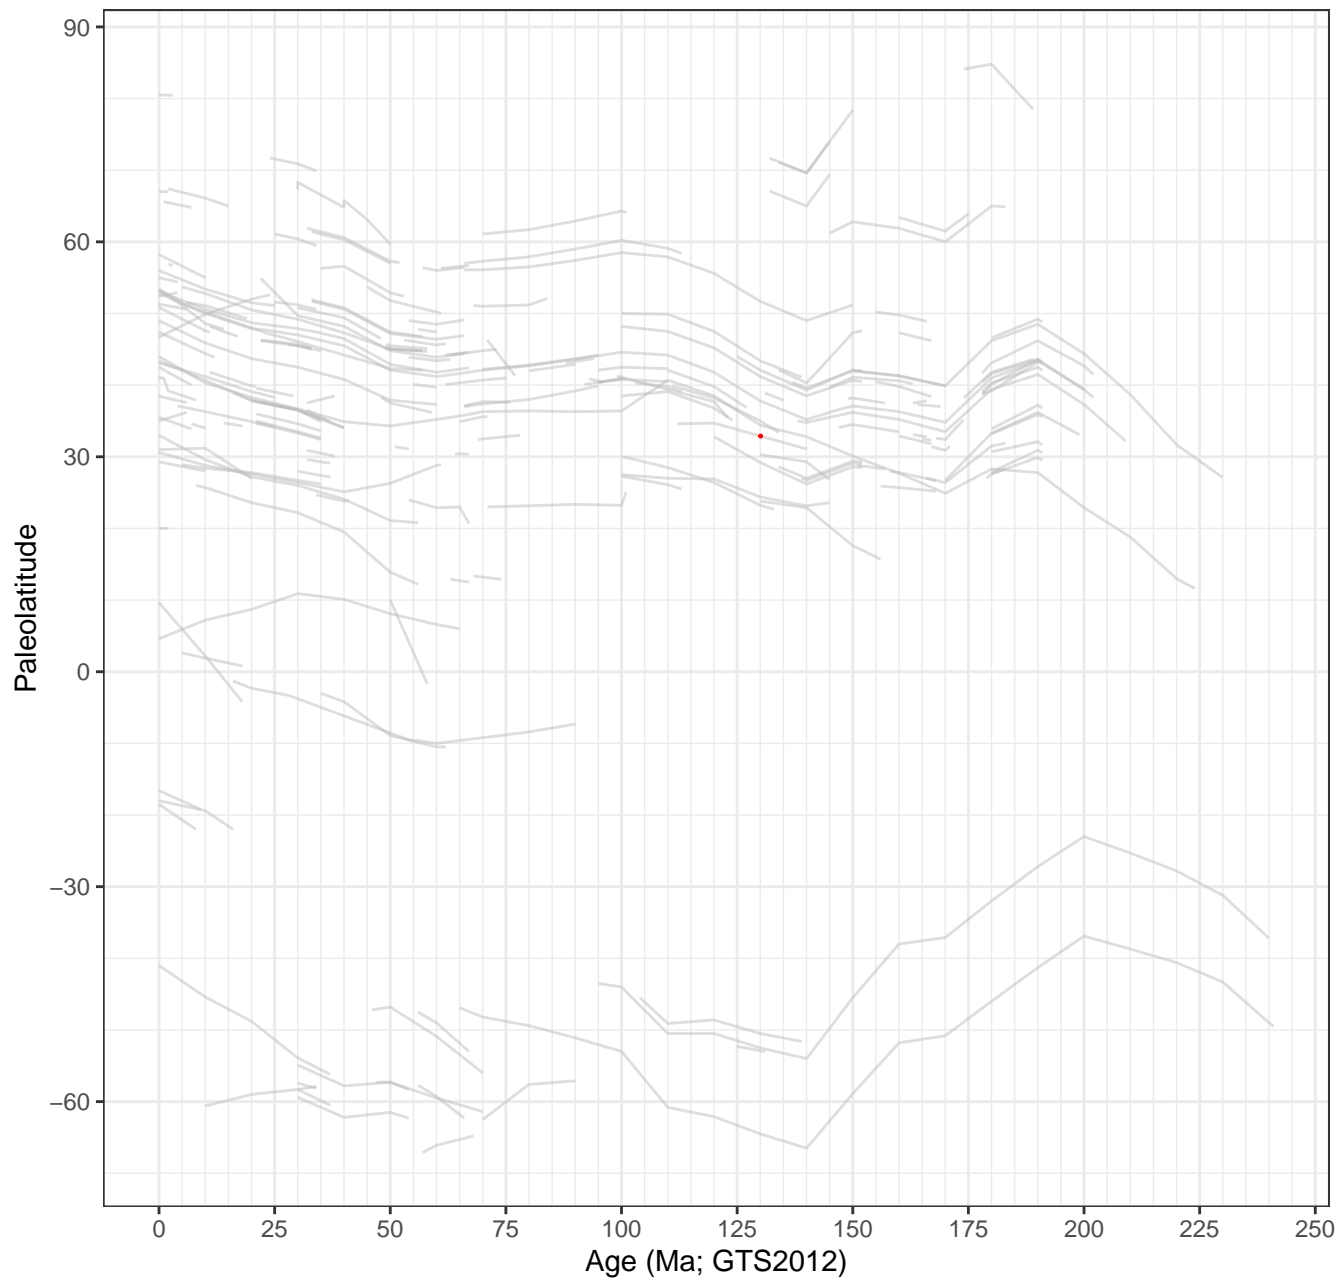

Supplement: Supplementary file 2138 [file Phoberocysta neocomica neocomica.pdf › Supplement/Supplement 2/Species 1914 plots/Phoberocysta neocomica neocomica.pdf]

# Species *Phoberocysta neocomica*

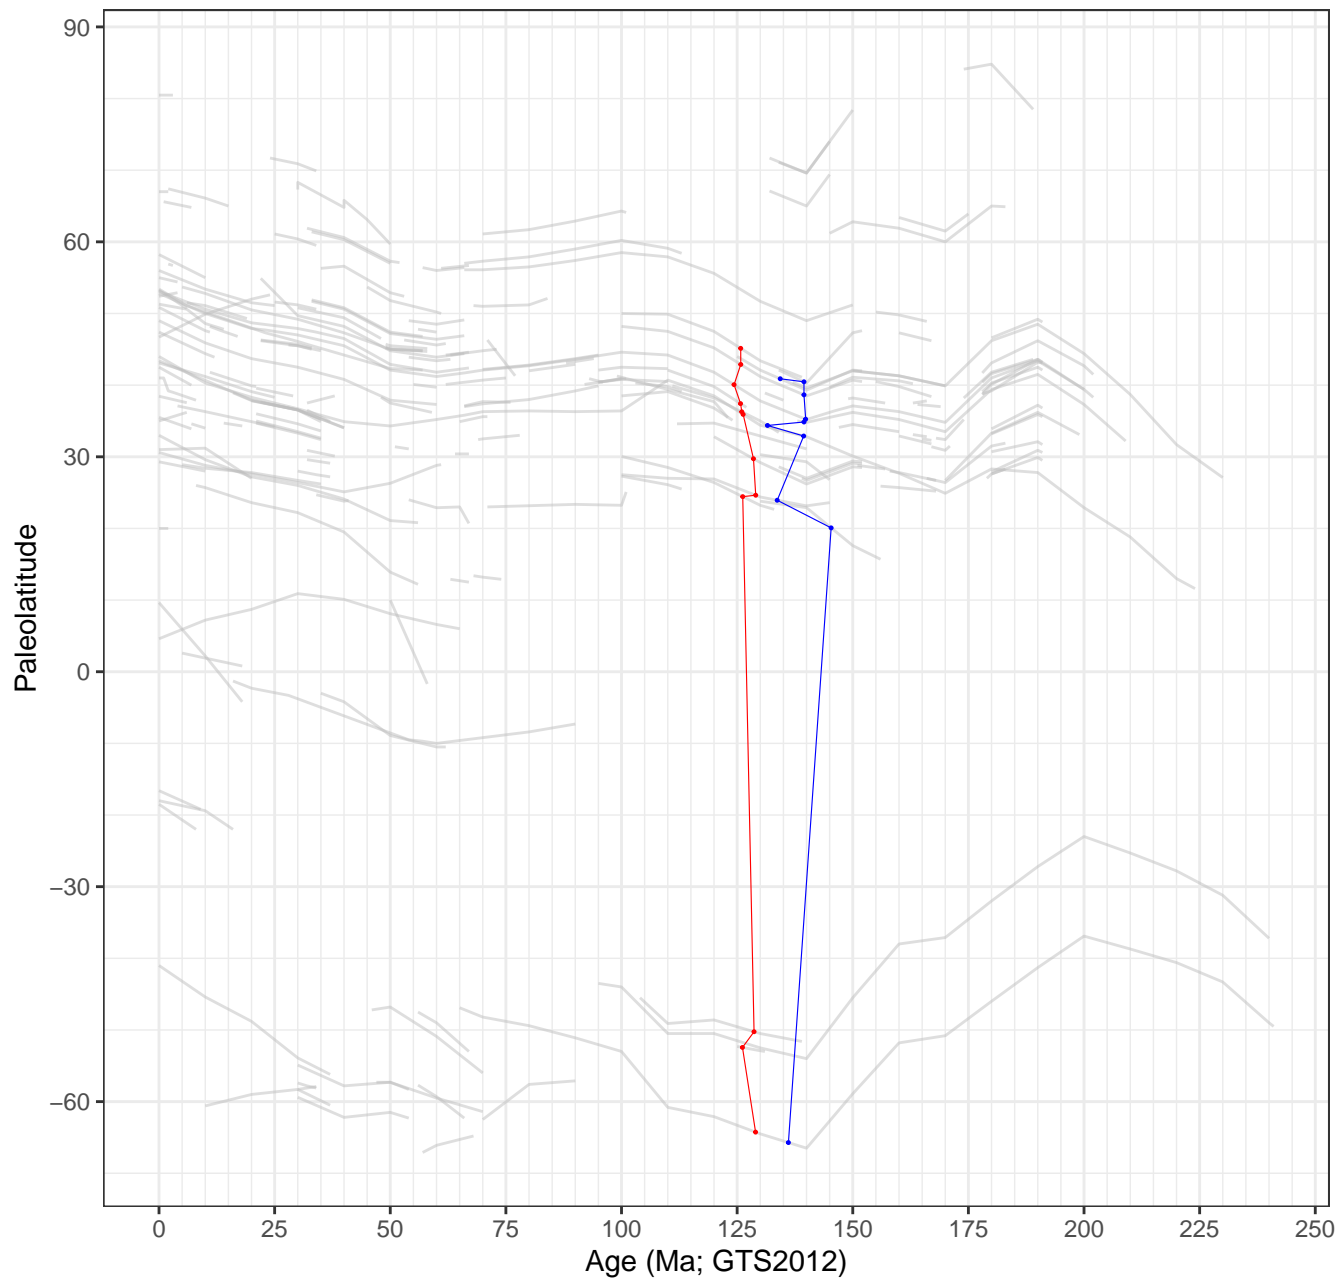

Supplement: Supplementary file 2139 [file Phoberocysta neocomica.pdf › Supplement/Supplement 2/Species 1914 plots/Phoberocysta neocomica.pdf]

# Species *Phoberocysta tabulata*

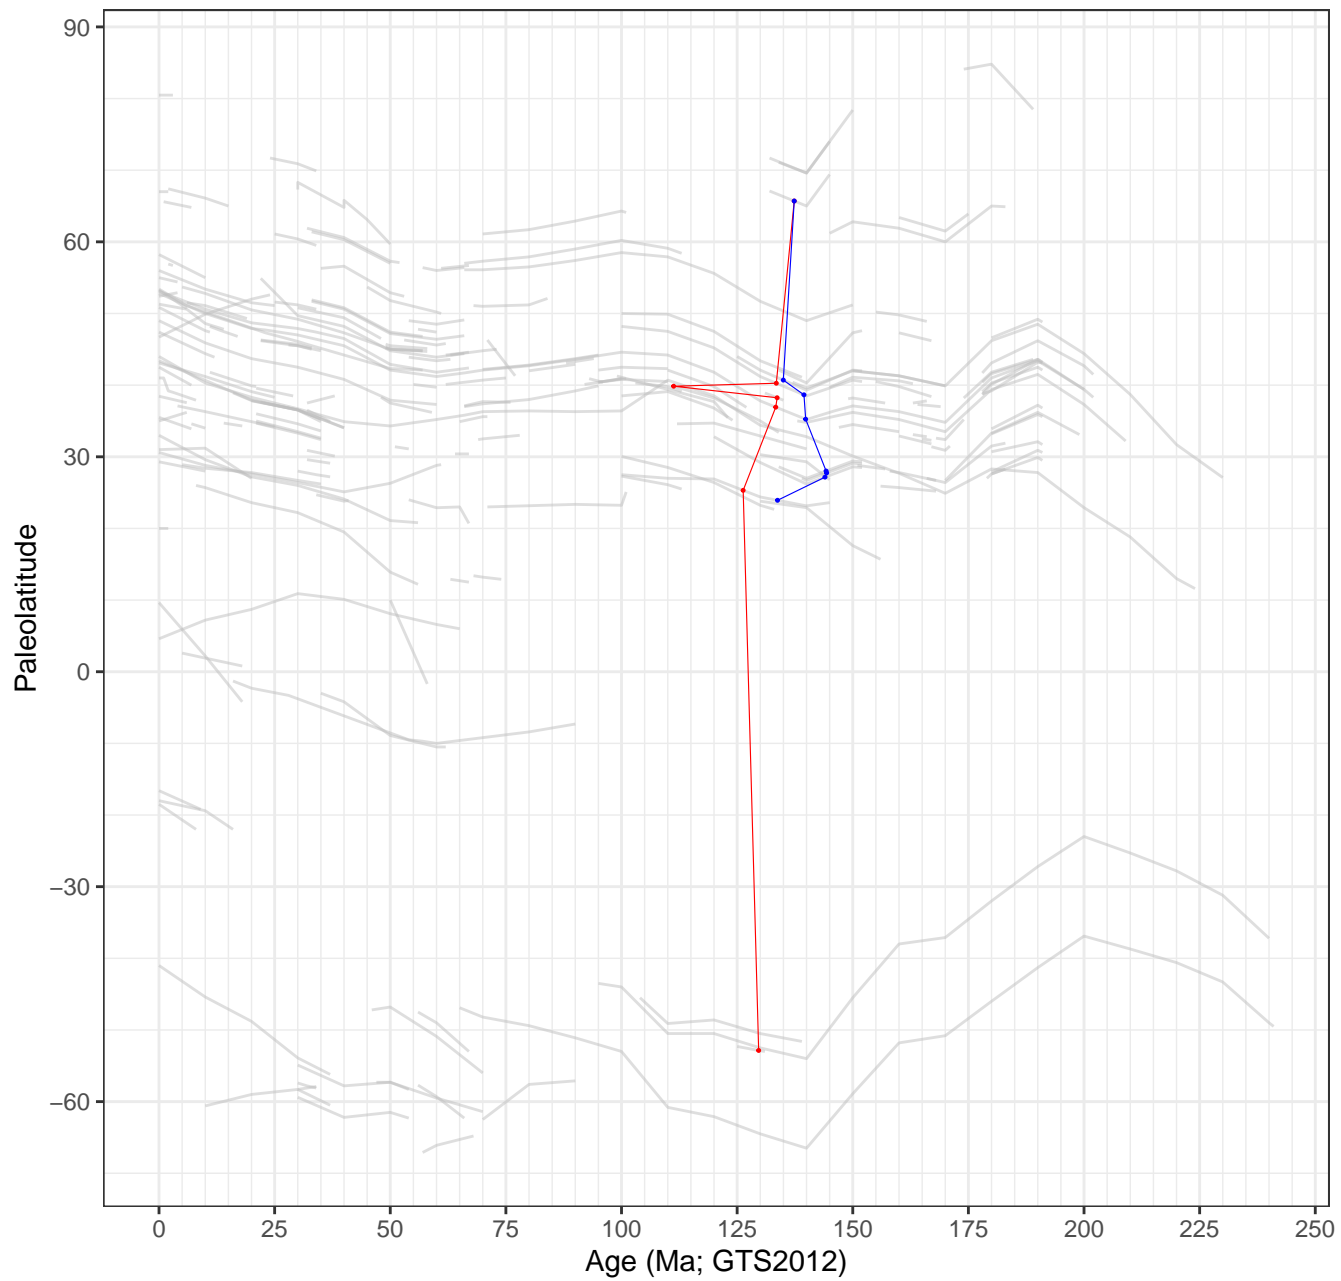

Supplement: Supplementary file 2140 [file Phoberocysta tabulata.pdf › Supplement/Supplement 2/Species 1914 plots/Phoberocysta tabulata.pdf]

# Species *Phthanoperidinium alectrolophum*

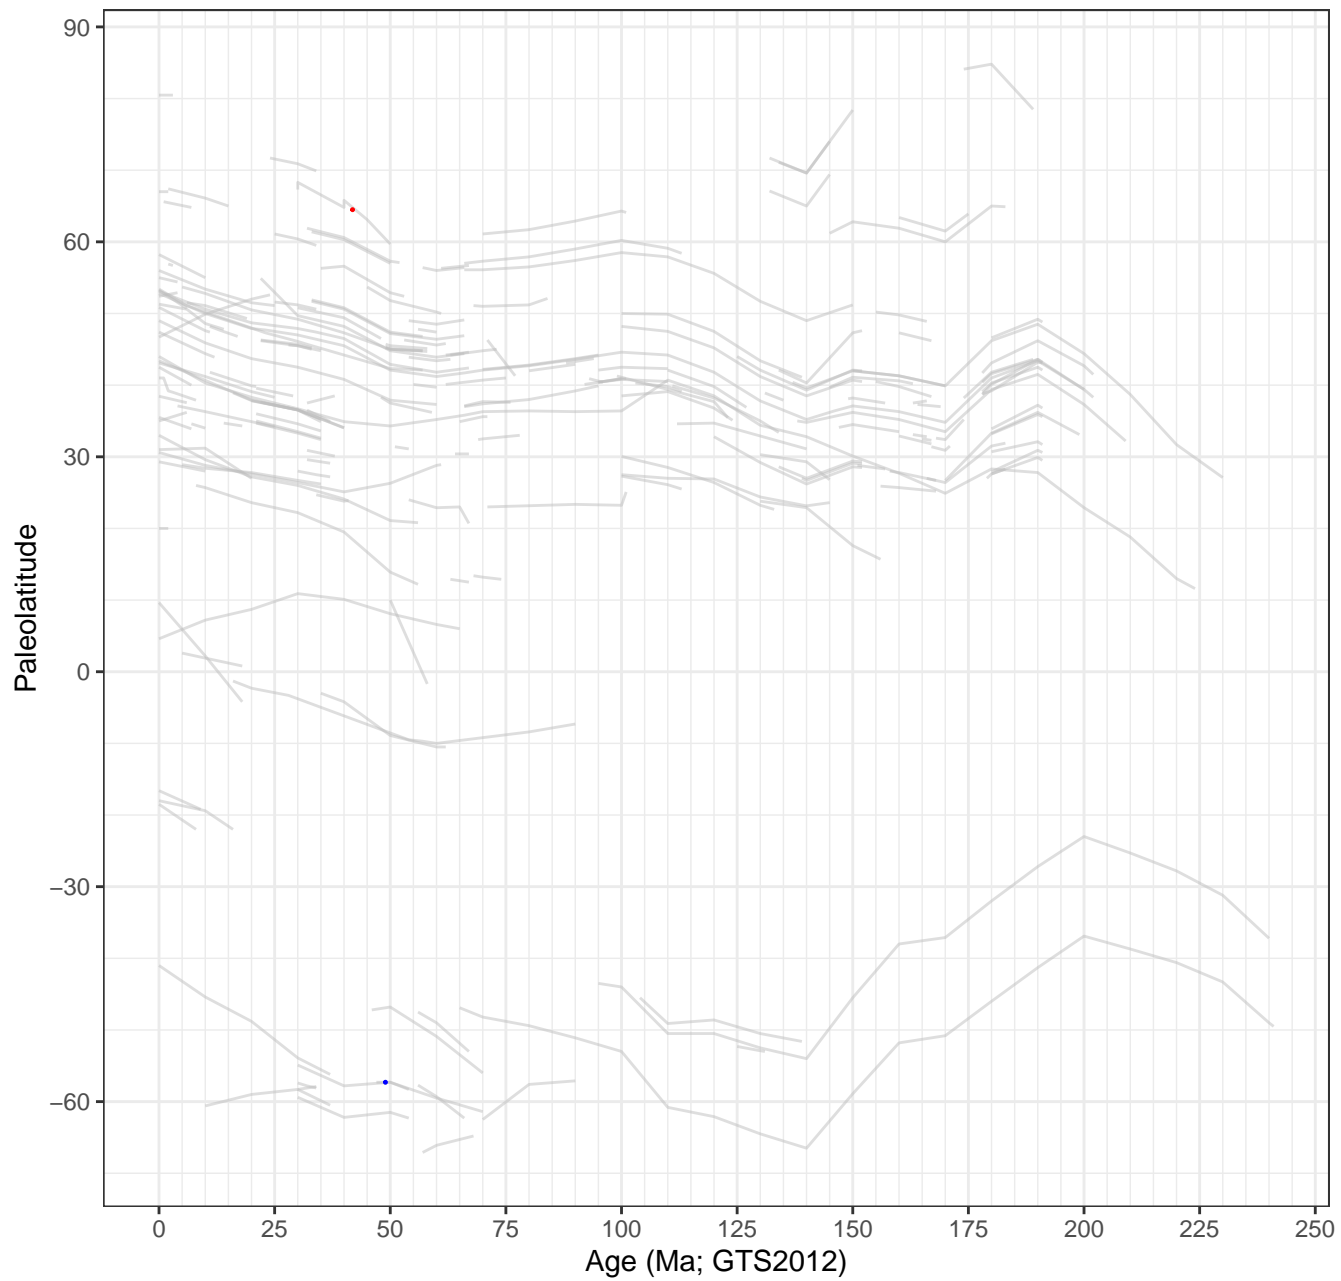

Supplement: Supplementary file 2141 [file Phthanoperidinium alectrolophum.pdf › Supplement/Supplement 2/Species 1914 plots/Phthanoperidinium alectrolophum.pdf]

# Species Phthanoperidinium amoenum

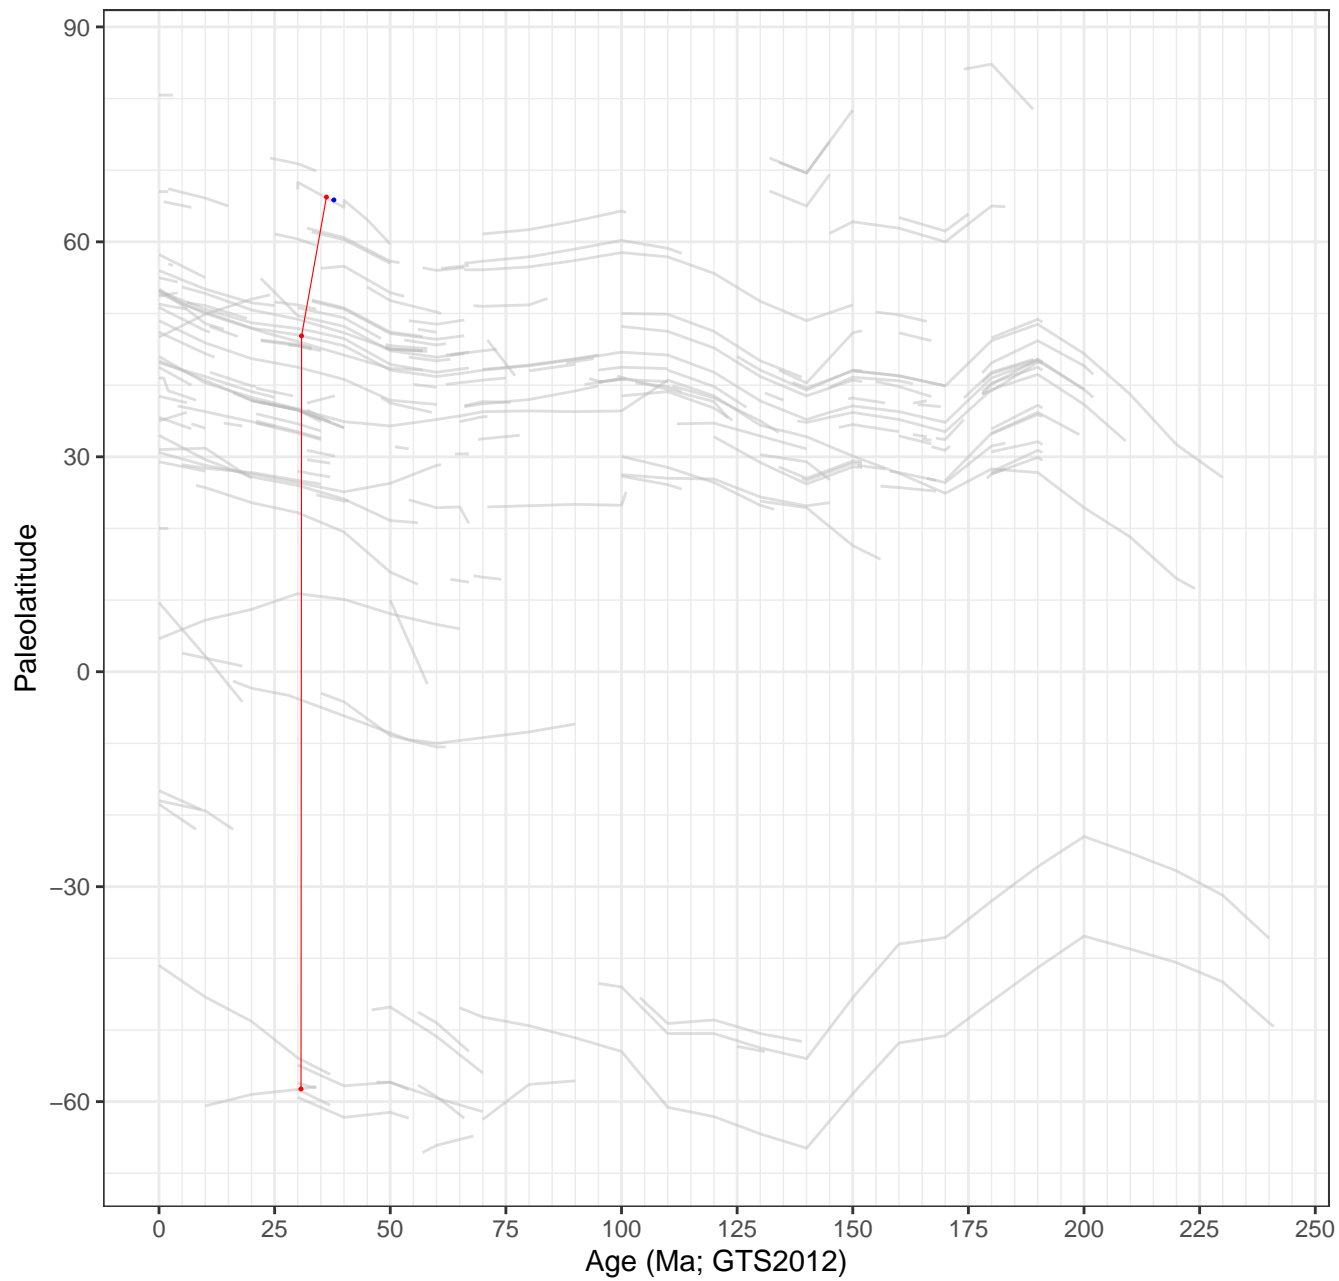

Supplement: Supplementary file 2142 [file Phthanoperidinium amoenum.pdf › Supplement/Supplement 2/Species 1914 plots/Phthanoperidinium amoenum.pdf]

# Species *Phthanoperidinium brooksii*

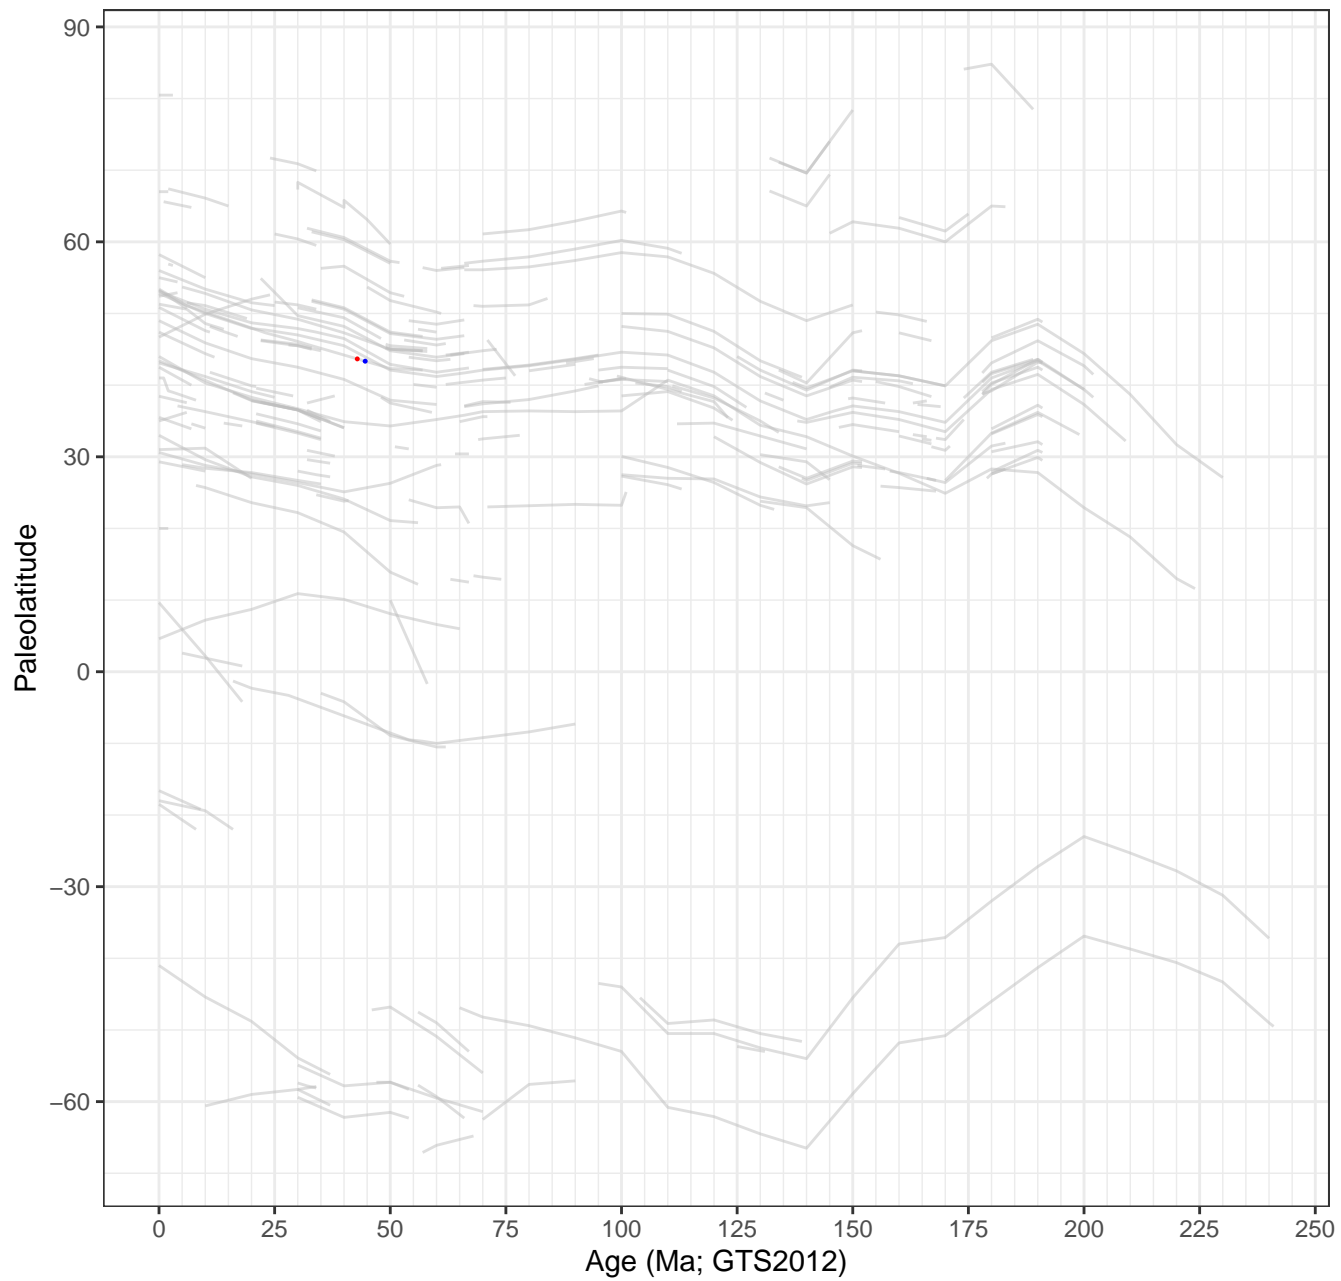

Supplement: Supplementary file 2143 [file Phthanoperidinium brooksii.pdf › Supplement/Supplement 2/Species 1914 plots/Phthanoperidinium brooksii.pdf]

# Species Phthanoperidinium clithridium

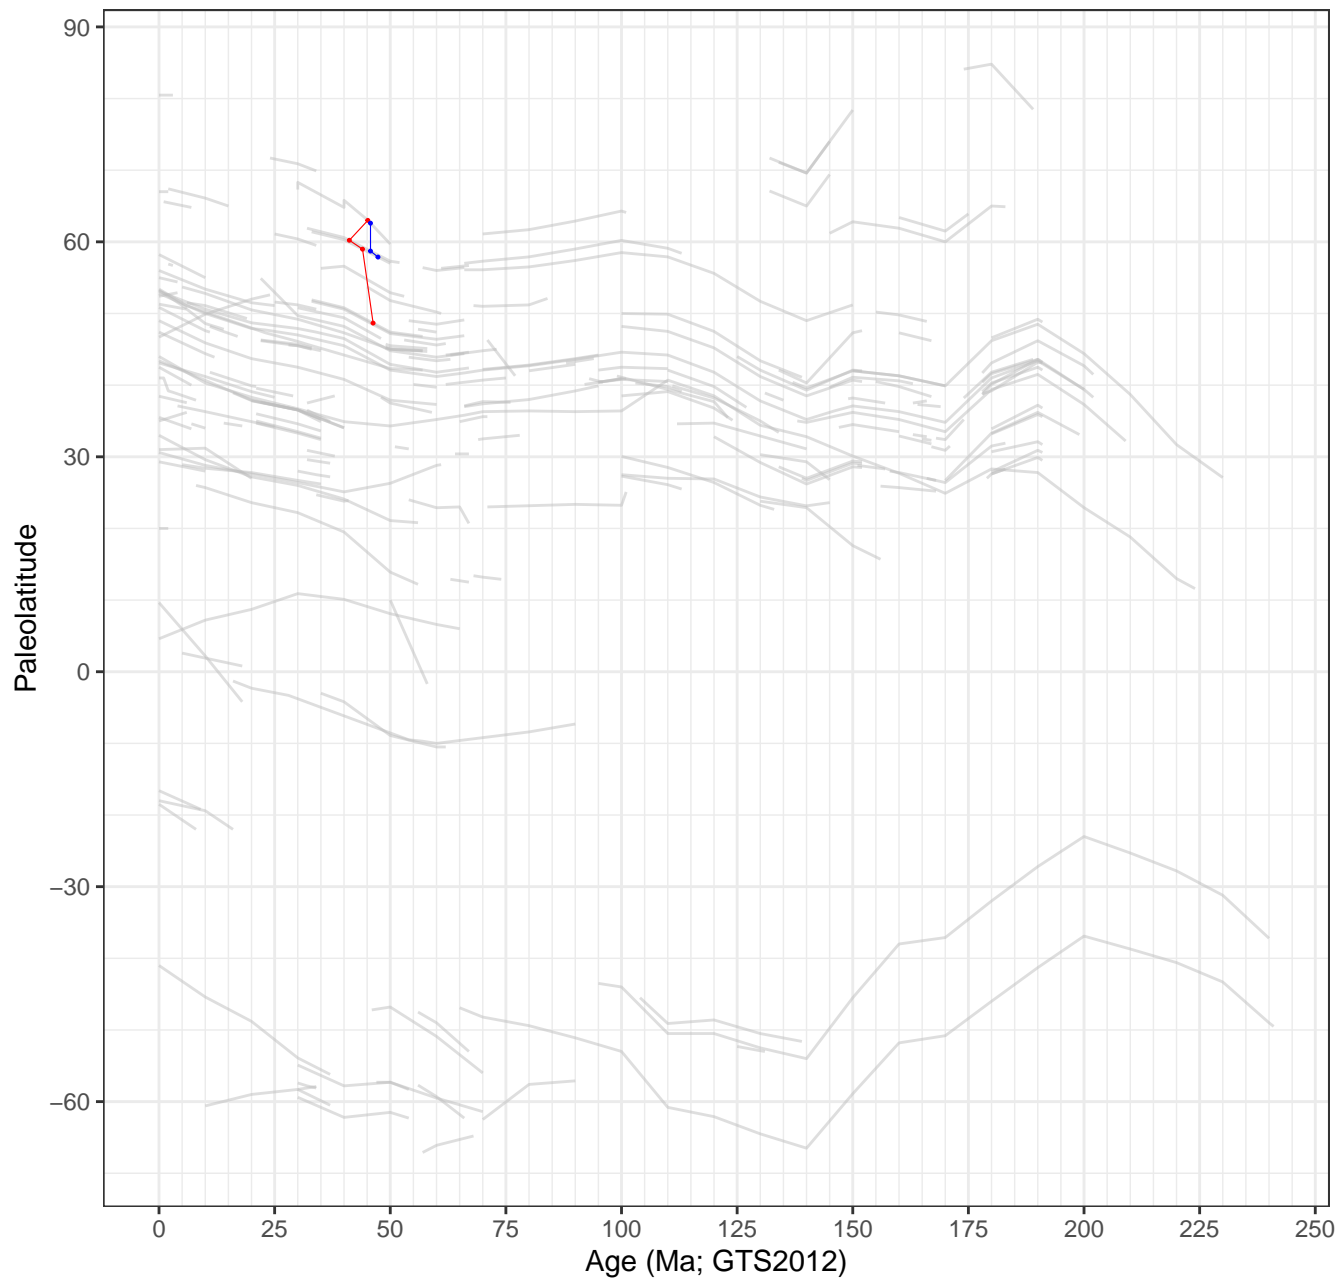

Supplement: Supplementary file 2144 [file Phthanoperidinium clithridium.pdf › Supplement/Supplement 2/Species 1914 plots/Phthanoperidinium clithridium.pdf]

# Species *Phthanoperidinium comatum*

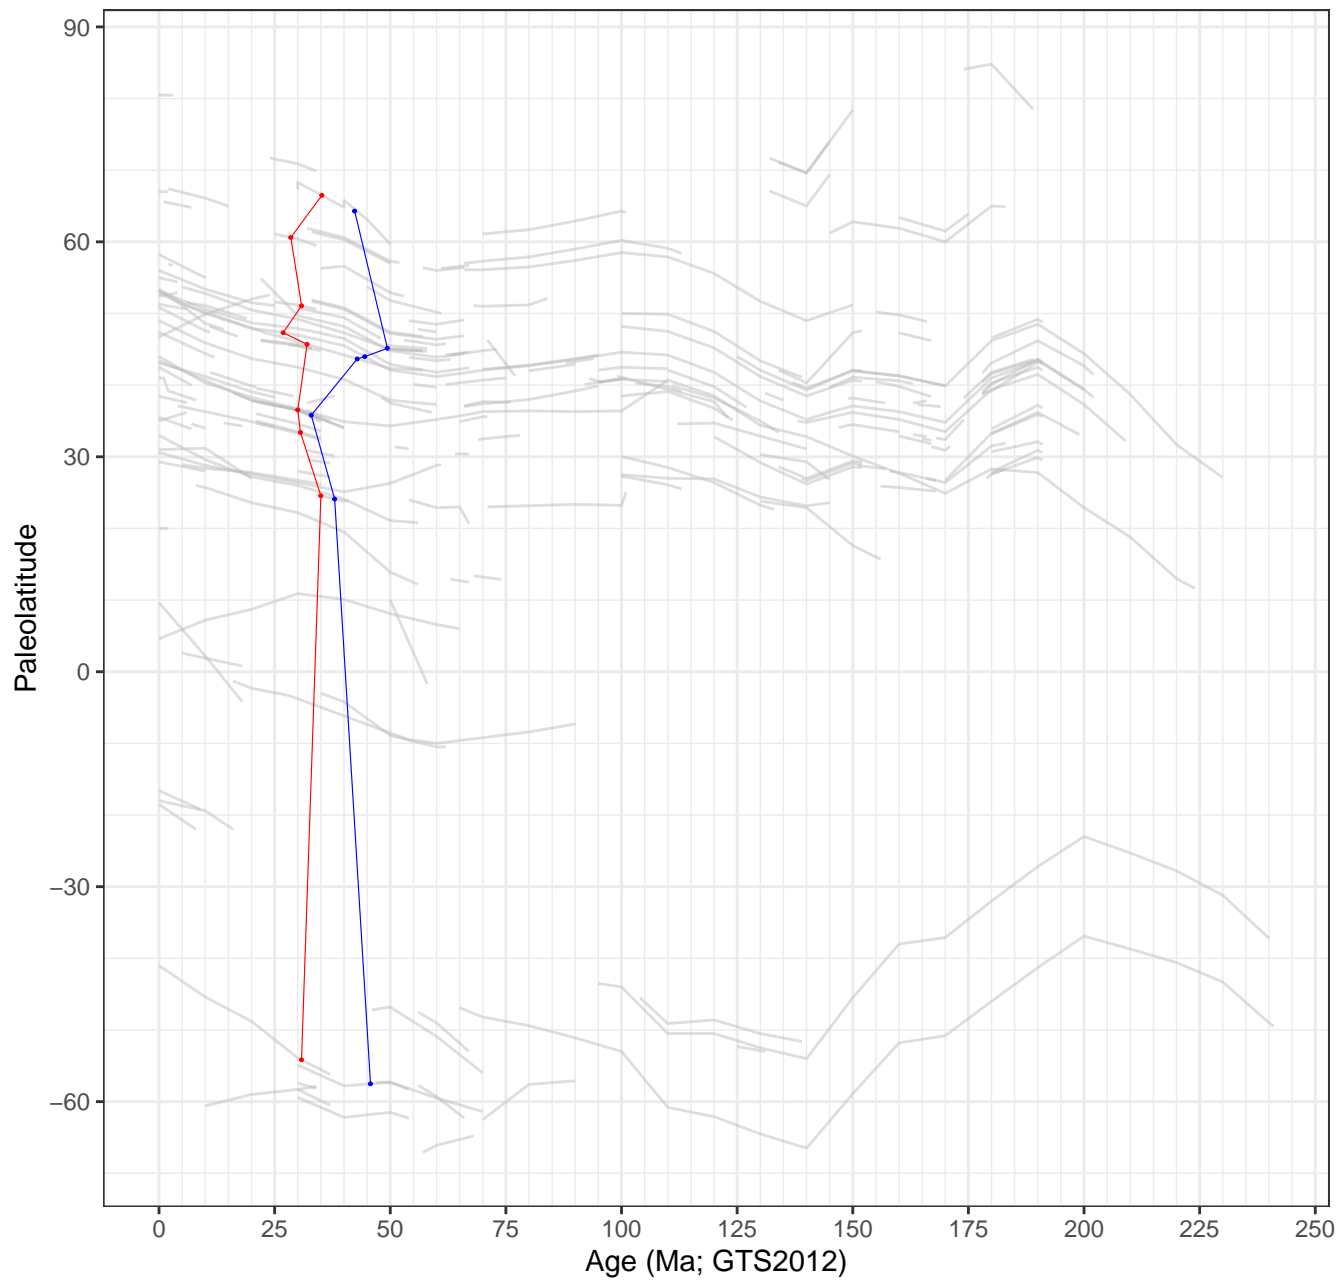

Supplement: Supplementary file 2145 [file Phthanoperidinium comatum.pdf › Supplement/Supplement 2/Species 1914 plots/Phthanoperidinium comatum.pdf]

# Species *Phthanoperidinium coreoides*

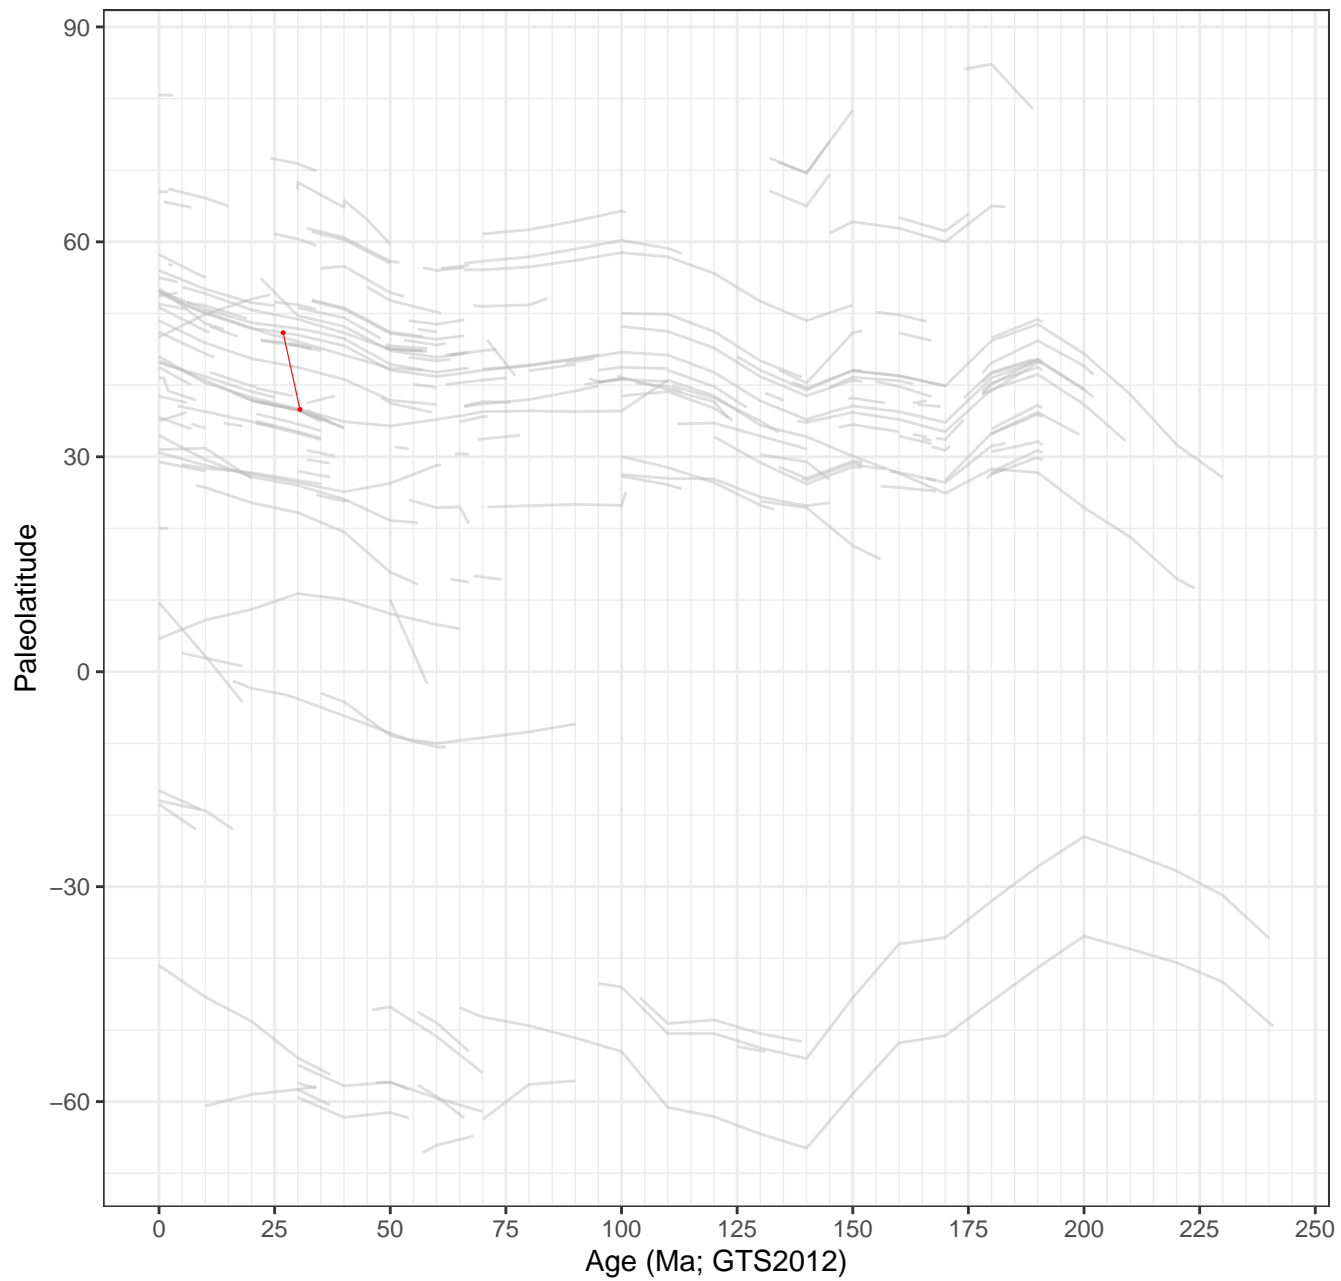

Supplement: Supplementary file 2146 [file Phthanoperidinium coreoides.pdf › Supplement/Supplement 2/Species 1914 plots/Phthanoperidinium coreoides.pdf]

# Species *Phthanoperidinium cornutum*

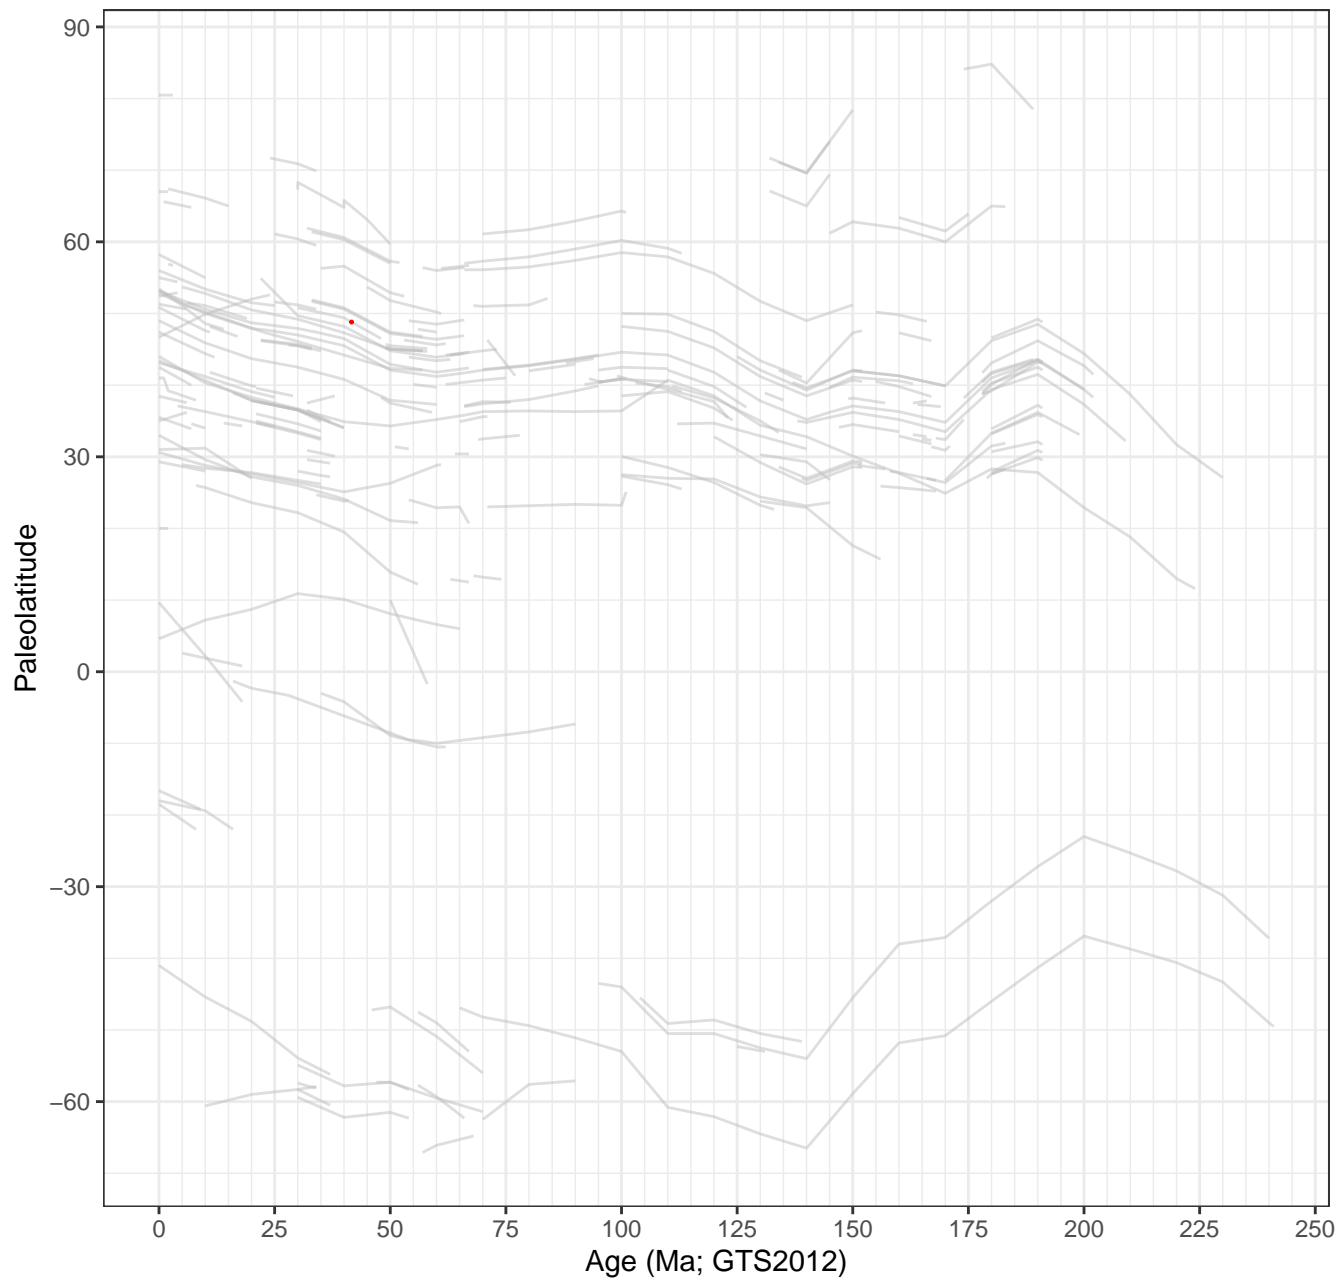

Supplement: Supplementary file 2147 [file Phthanoperidinium cornutum.pdf › Supplement/Supplement 2/Species 1914 plots/Phthanoperidinium cornutum.pdf]

# Species *Phthanoperidinium crenulatum*

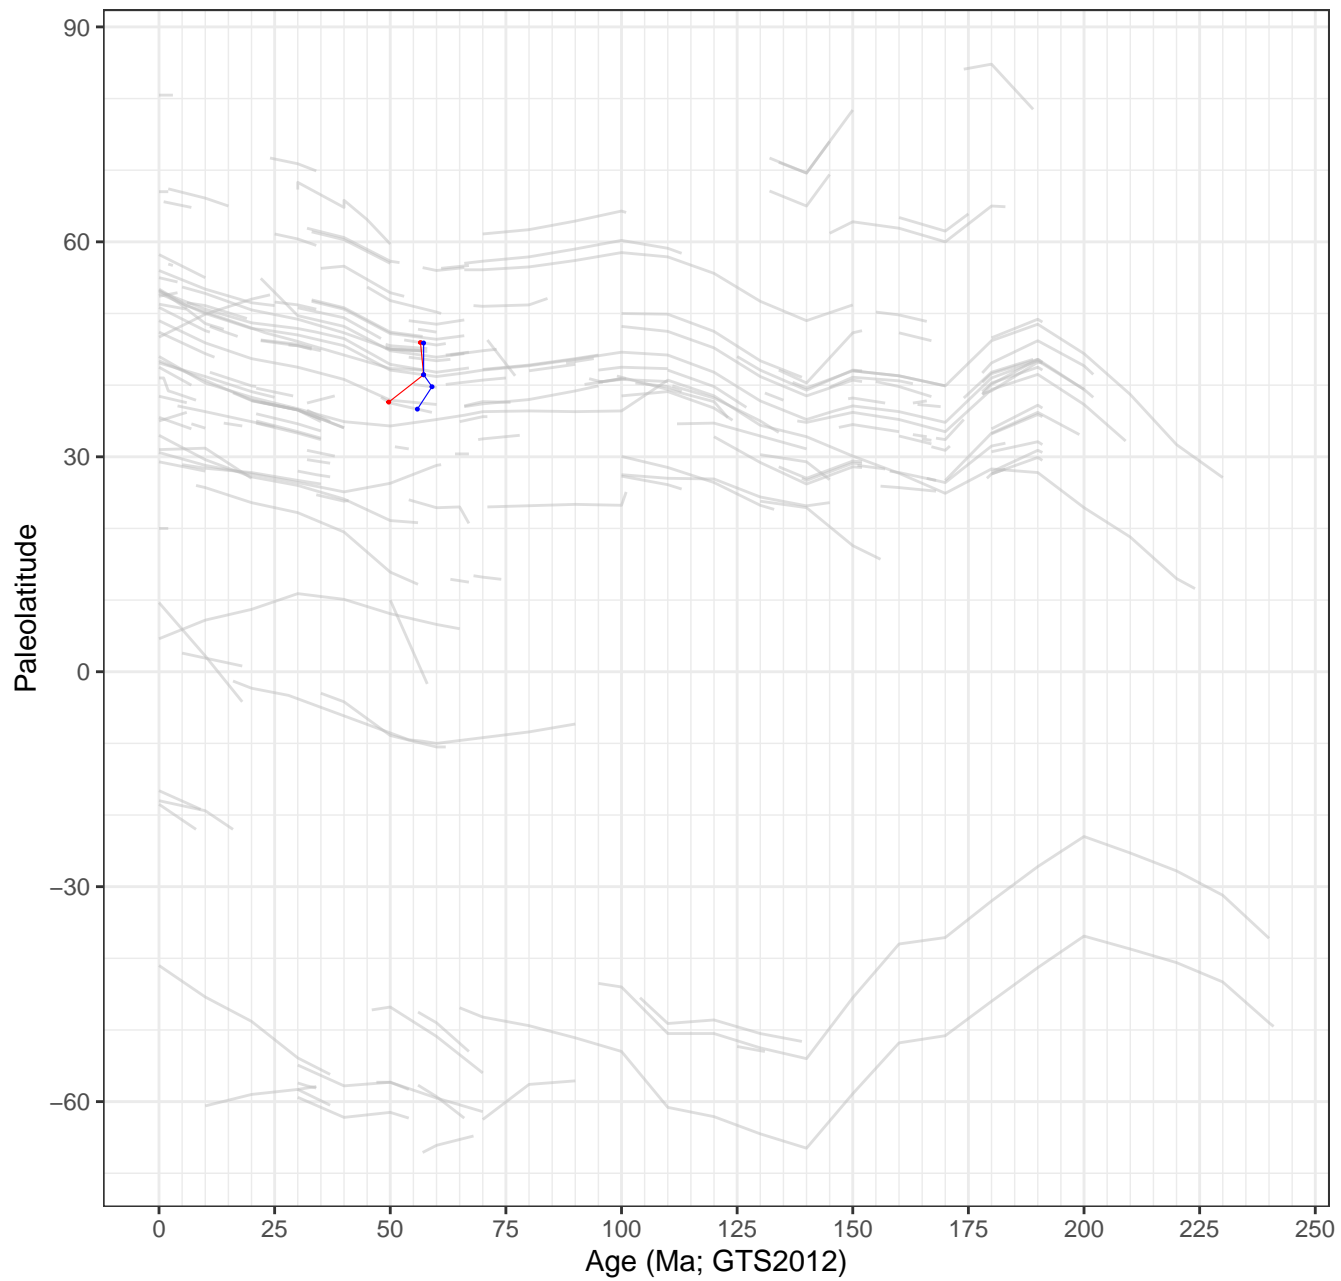

Supplement: Supplementary file 2148 [file Phthanoperidinium crenulatum.pdf › Supplement/Supplement 2/Species 1914 plots/Phthanoperidinium crenulatum.pdf]

# Species *Phthanoperidinium delicatum*

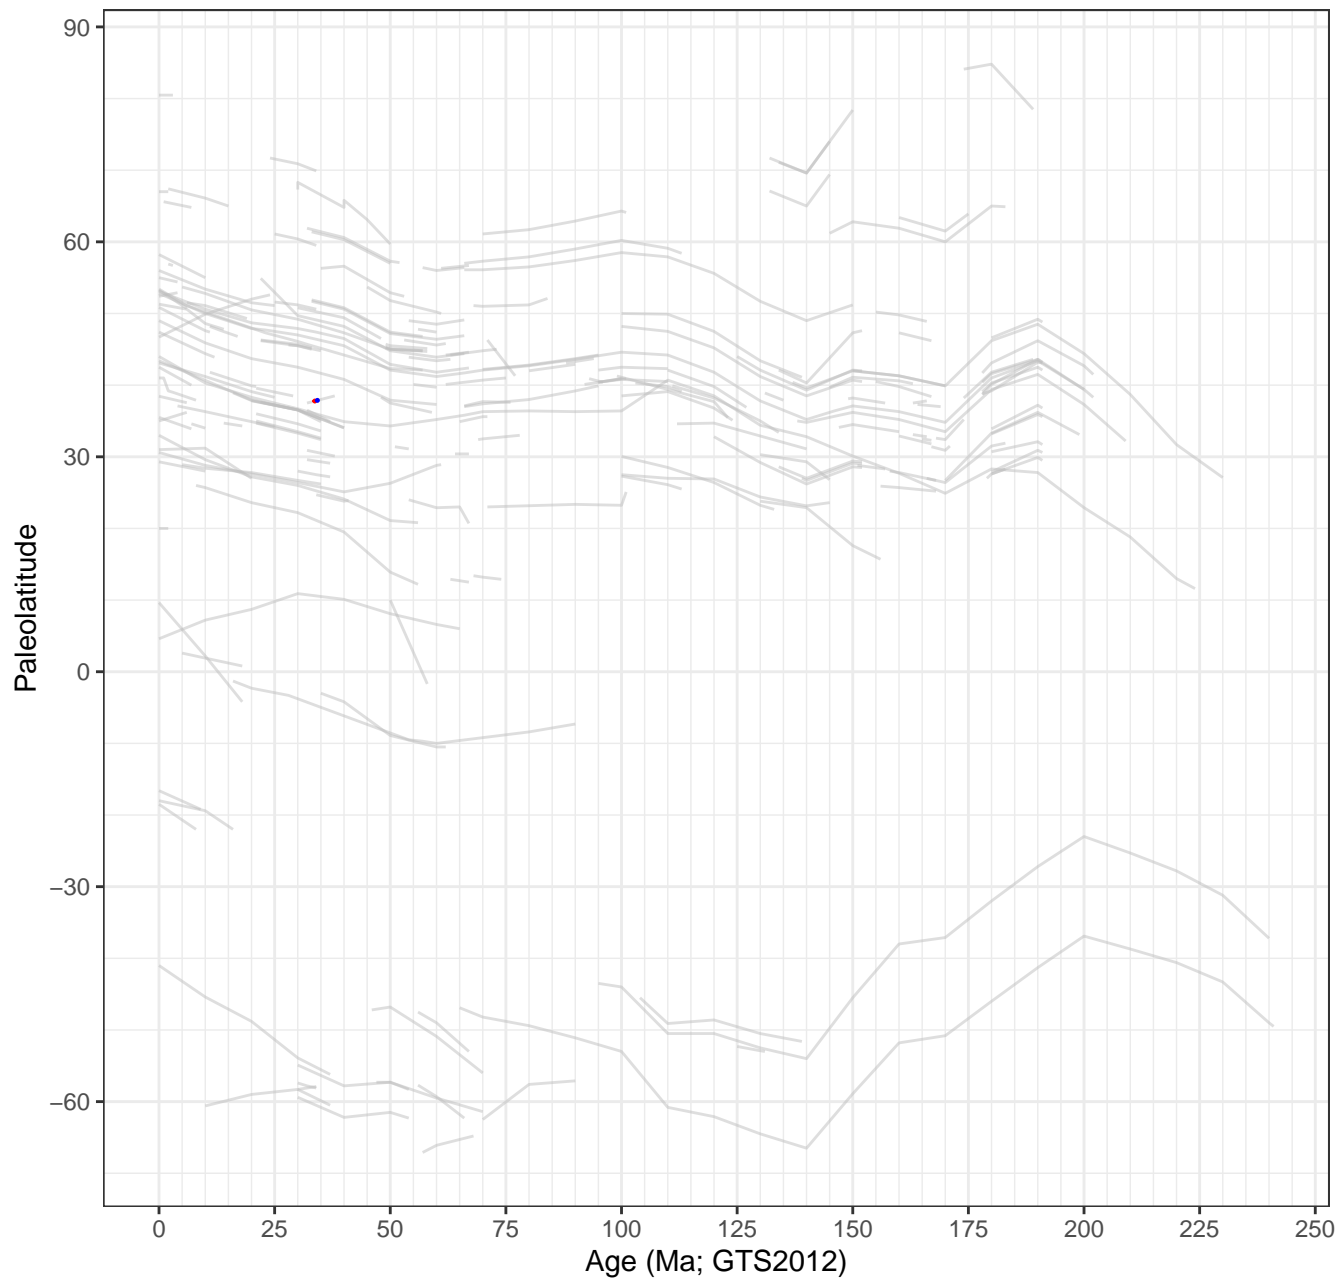

Supplement: Supplementary file 2149 [file Phthanoperidinium delicatum.pdf › Supplement/Supplement 2/Species 1914 plots/Phthanoperidinium delicatum.pdf]

# Species *Phthanoperidinium distinctum*

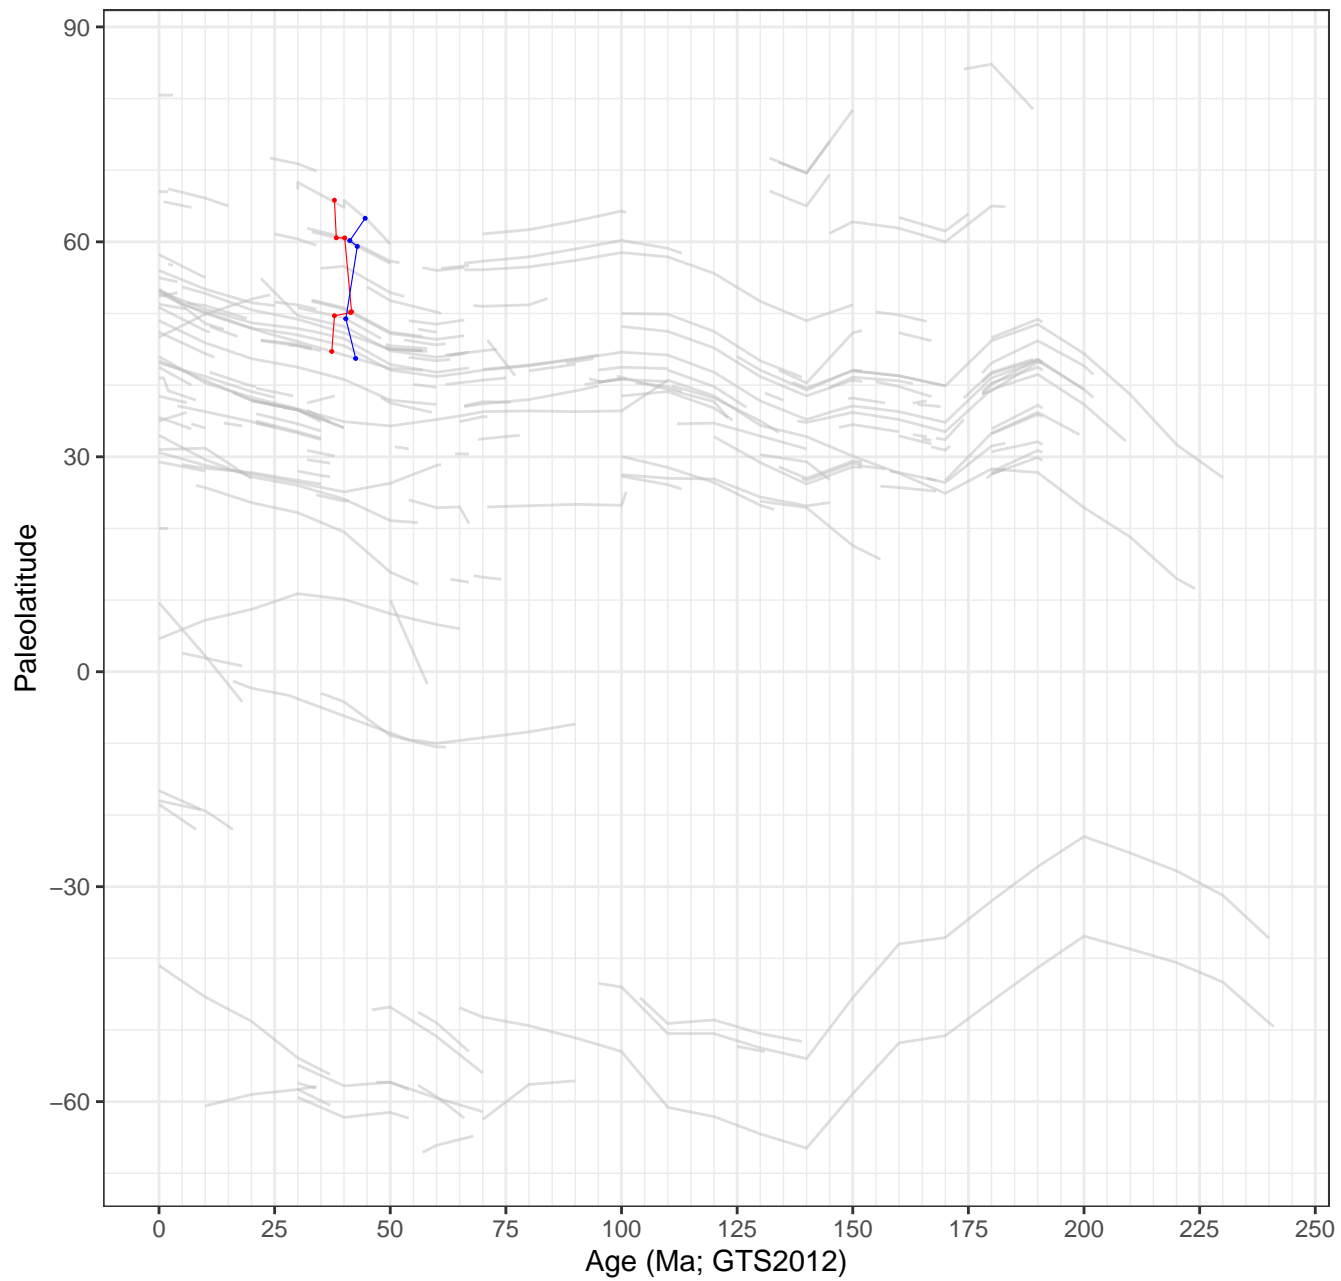

Supplement: Supplementary file 2150 [file Phthanoperidinium distinctum.pdf › Supplement/Supplement 2/Species 1914 plots/Phthanoperidinium distinctum.pdf]

# Species *Phthanoperidinium eocenicum*

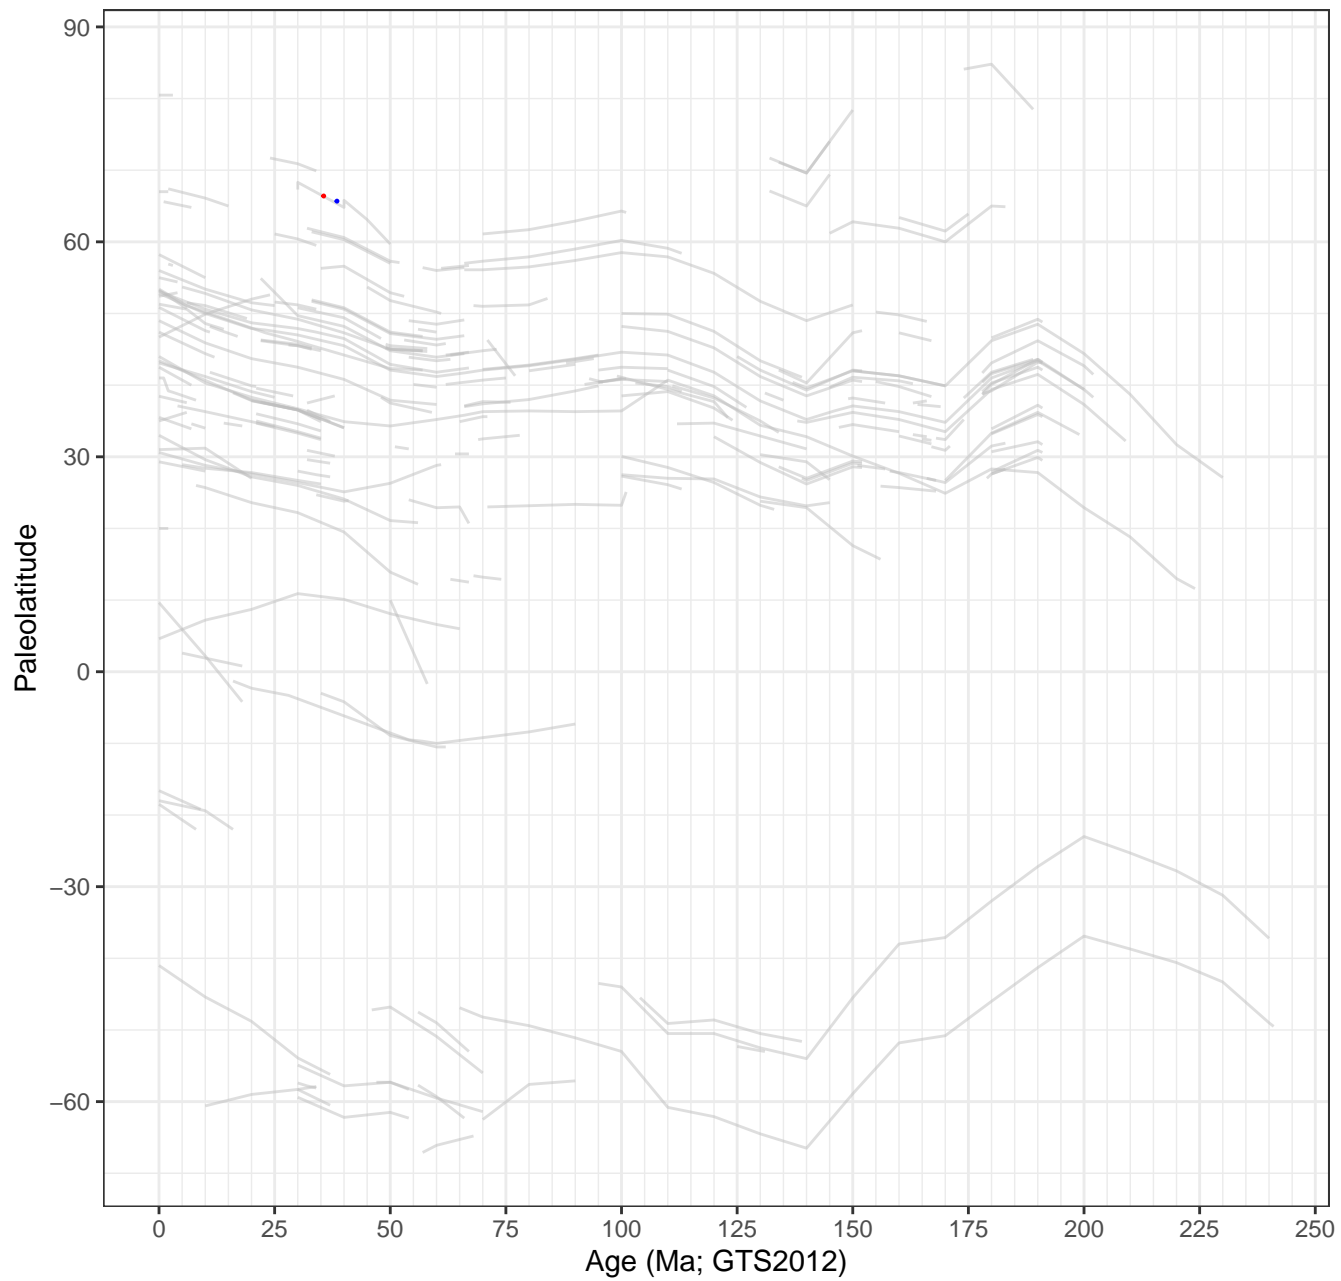

Supplement: Supplementary file 2151 [file Phthanoperidinium eocenicum.pdf › Supplement/Supplement 2/Species 1914 plots/Phthanoperidinium eocenicum.pdf]

# Species *Phthanoperidinium filigranum*

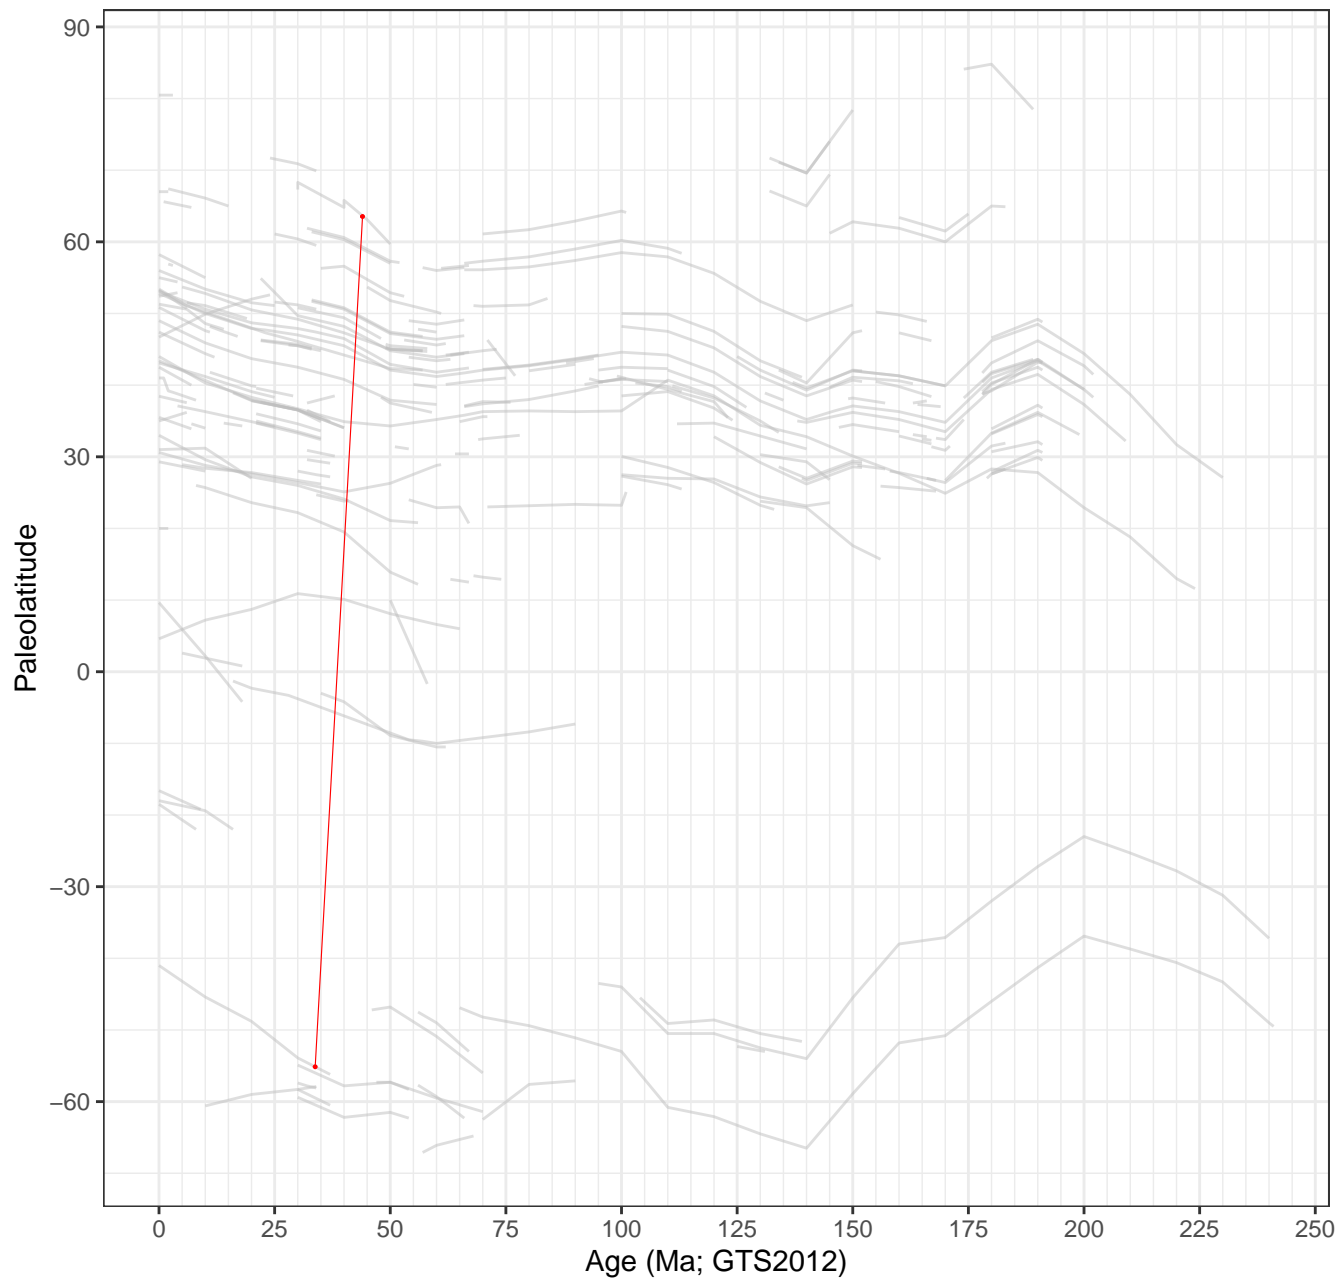

Supplement: Supplementary file 2152 [file Phthanoperidinium filigranum.pdf › Supplement/Supplement 2/Species 1914 plots/Phthanoperidinium filigranum.pdf]

# Species *Phthanoperidinium geminatum*

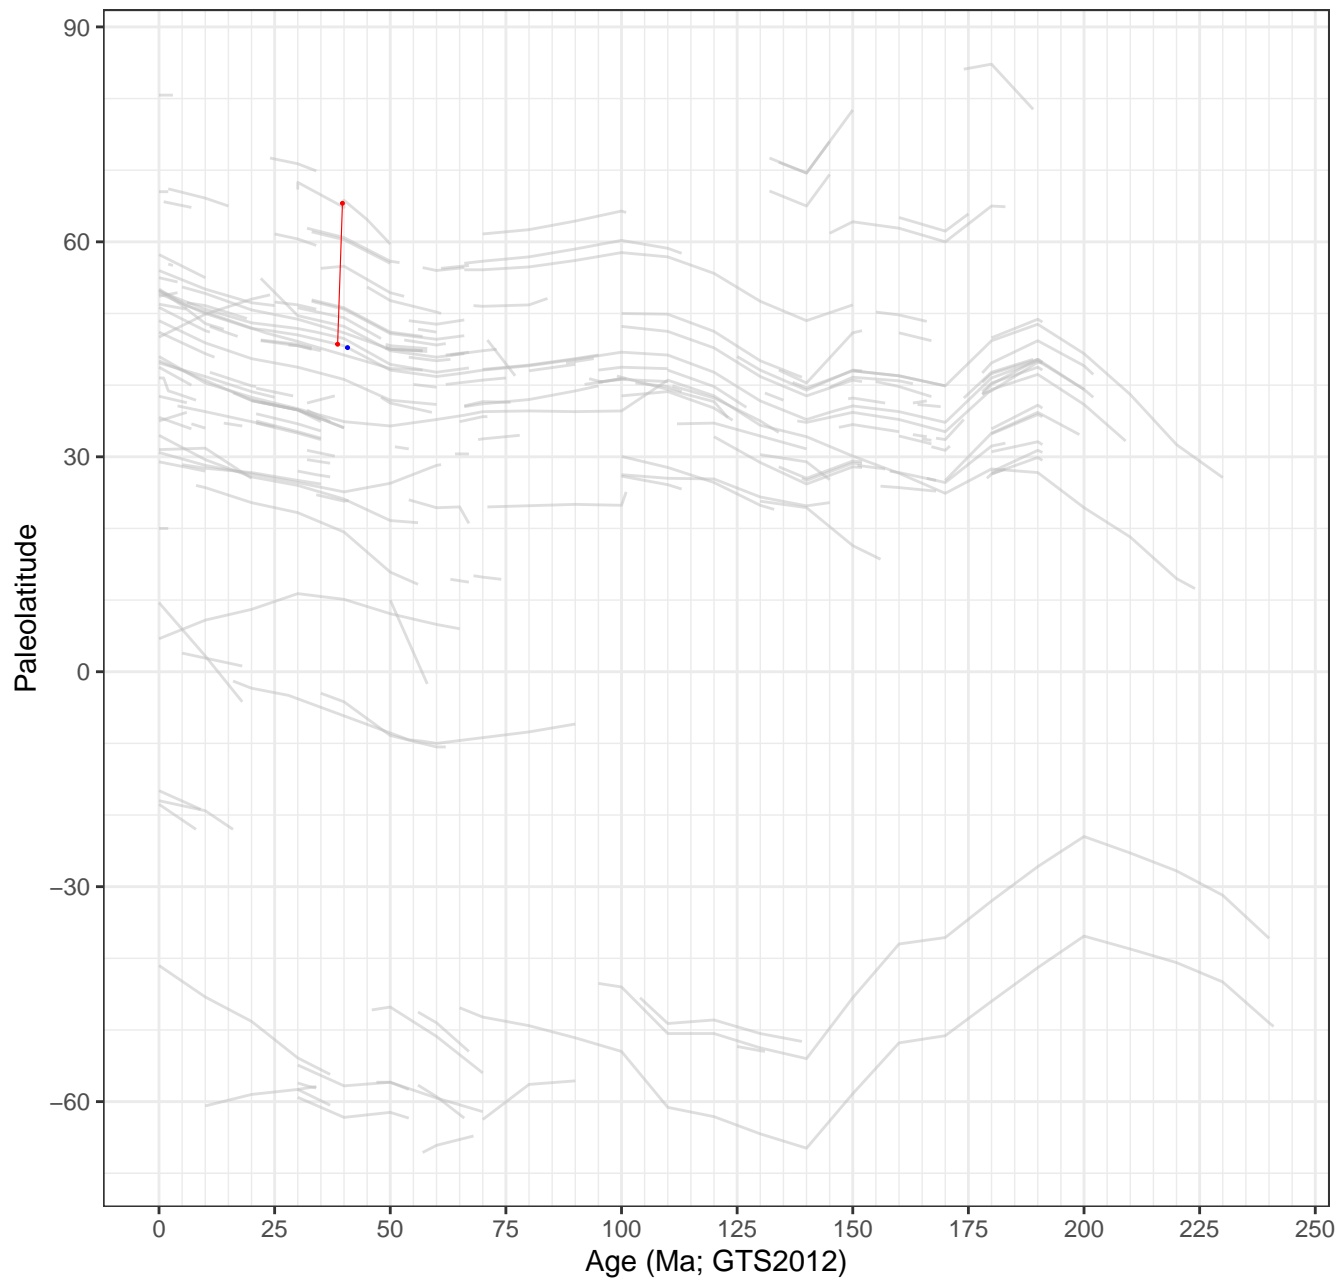

Supplement: Supplementary file 2153 [file Phthanoperidinium geminatum.pdf › Supplement/Supplement 2/Species 1914 plots/Phthanoperidinium geminatum.pdf]

# Species Phthanoperidinium levumurum

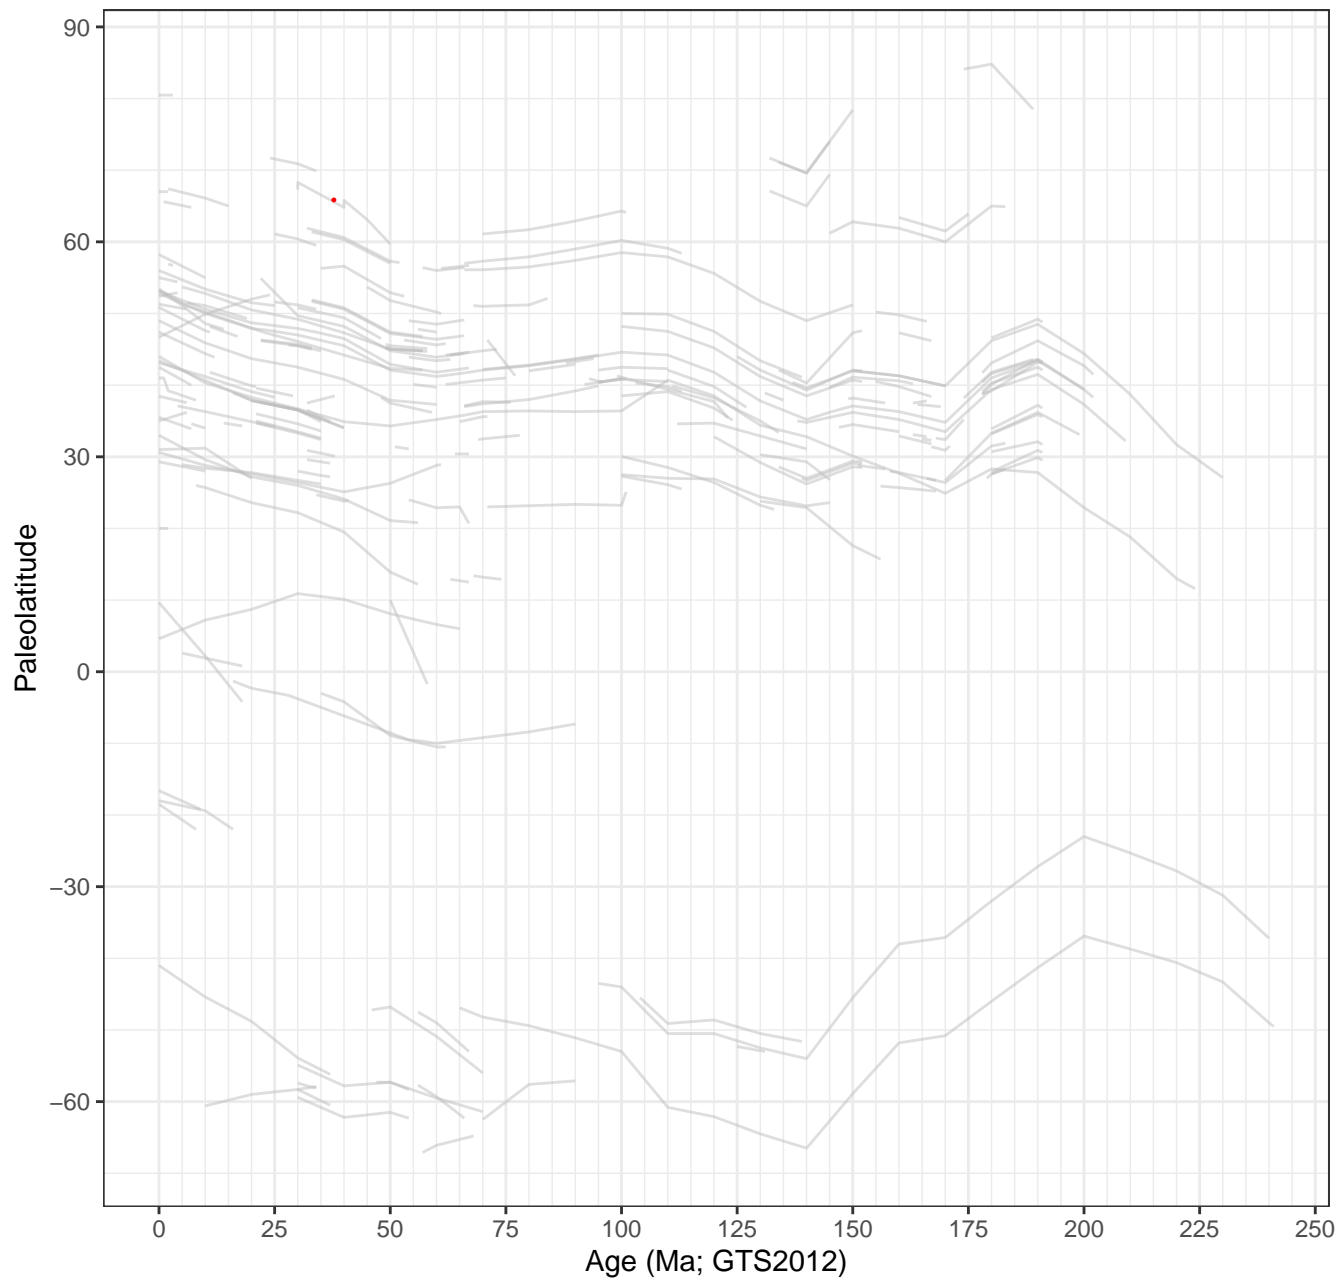

Supplement: Supplementary file 2154 [file Phthanoperidinium levumurum.pdf › Supplement/Supplement 2/Species 1914 plots/Phthanoperidinium levumurum.pdf]

# Species *Phthanoperidinium multispinum*

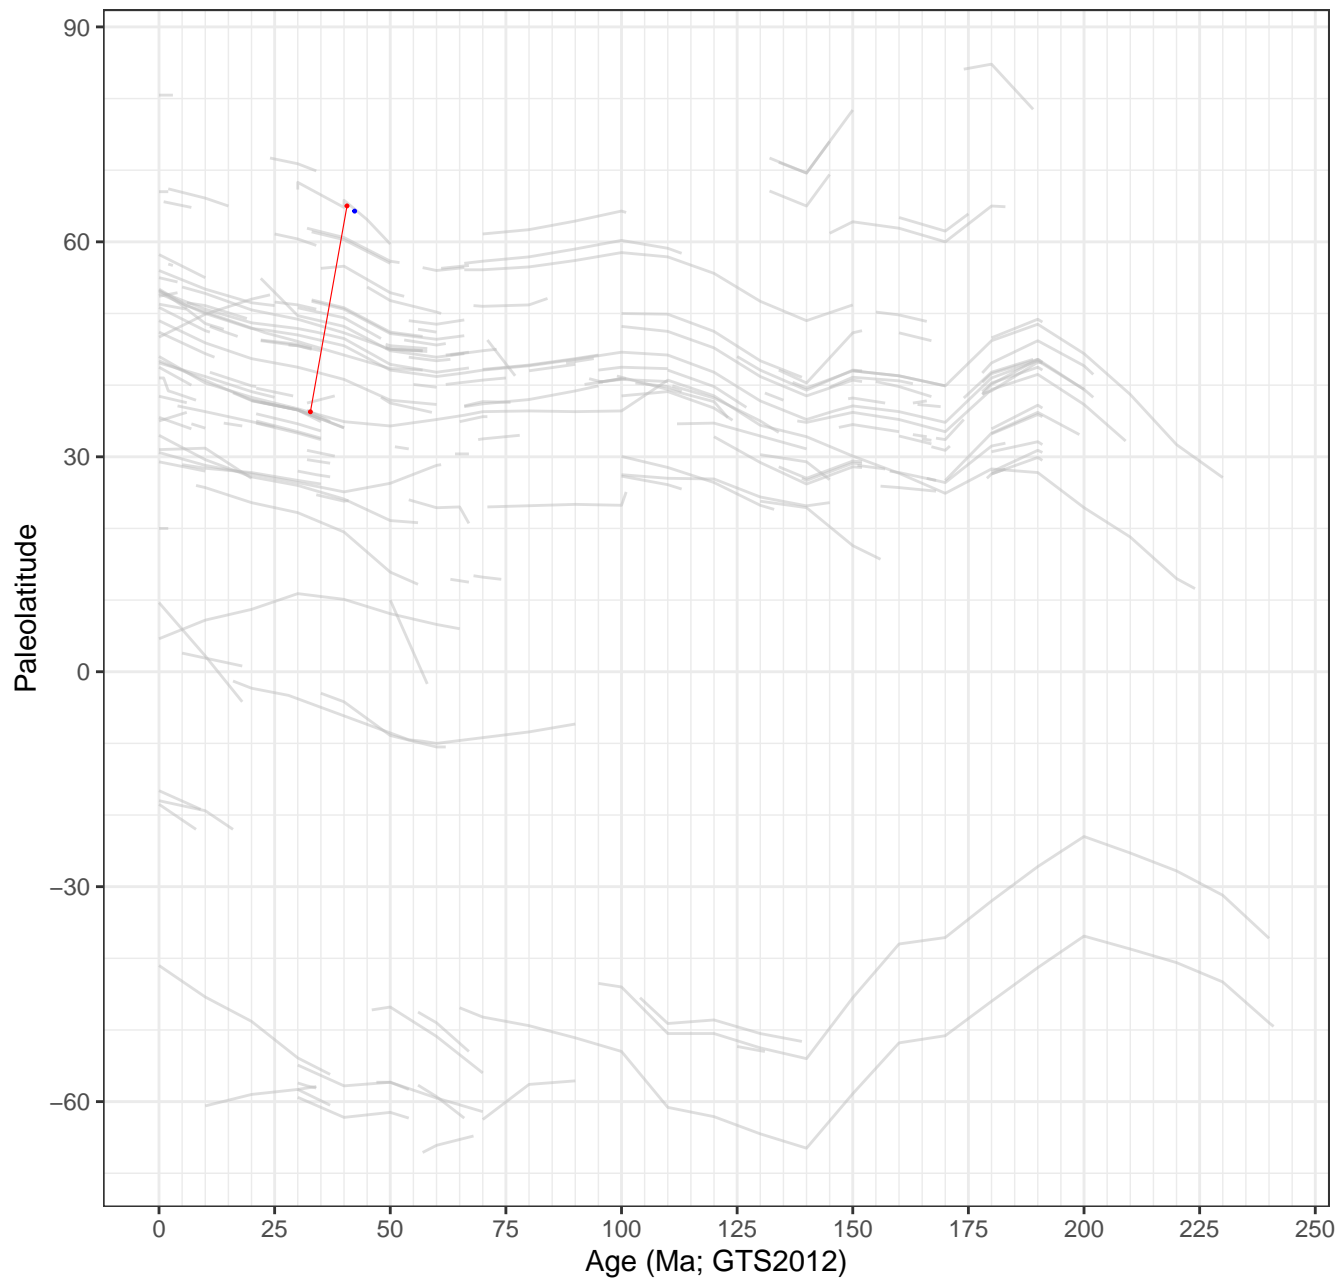

Supplement: Supplementary file 2155 [file Phthanoperidinium multispinum.pdf › Supplement/Supplement 2/Species 1914 plots/Phthanoperidinium multispinum.pdf]

# Species *Phthanoperidinium powellii*

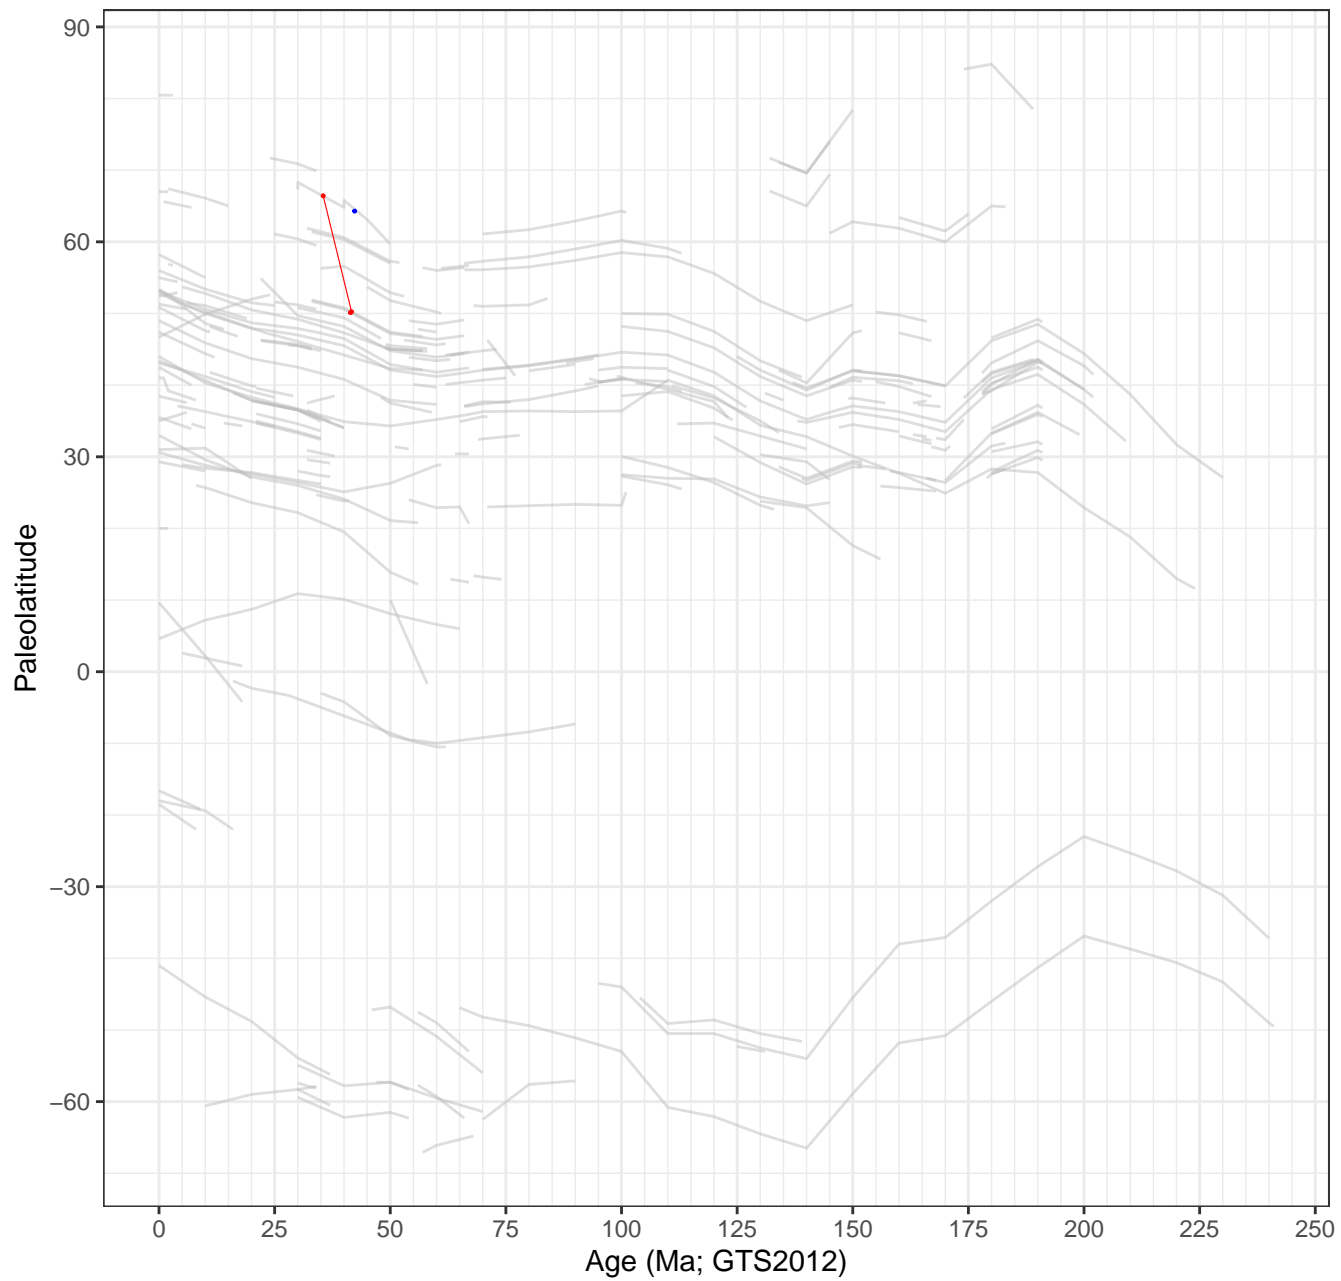

Supplement: Supplementary file 2156 [file Phthanoperidinium powellii.pdf › Supplement/Supplement 2/Species 1914 plots/Phthanoperidinium powellii.pdf]

# Species *Phthanoperidinium regalis*

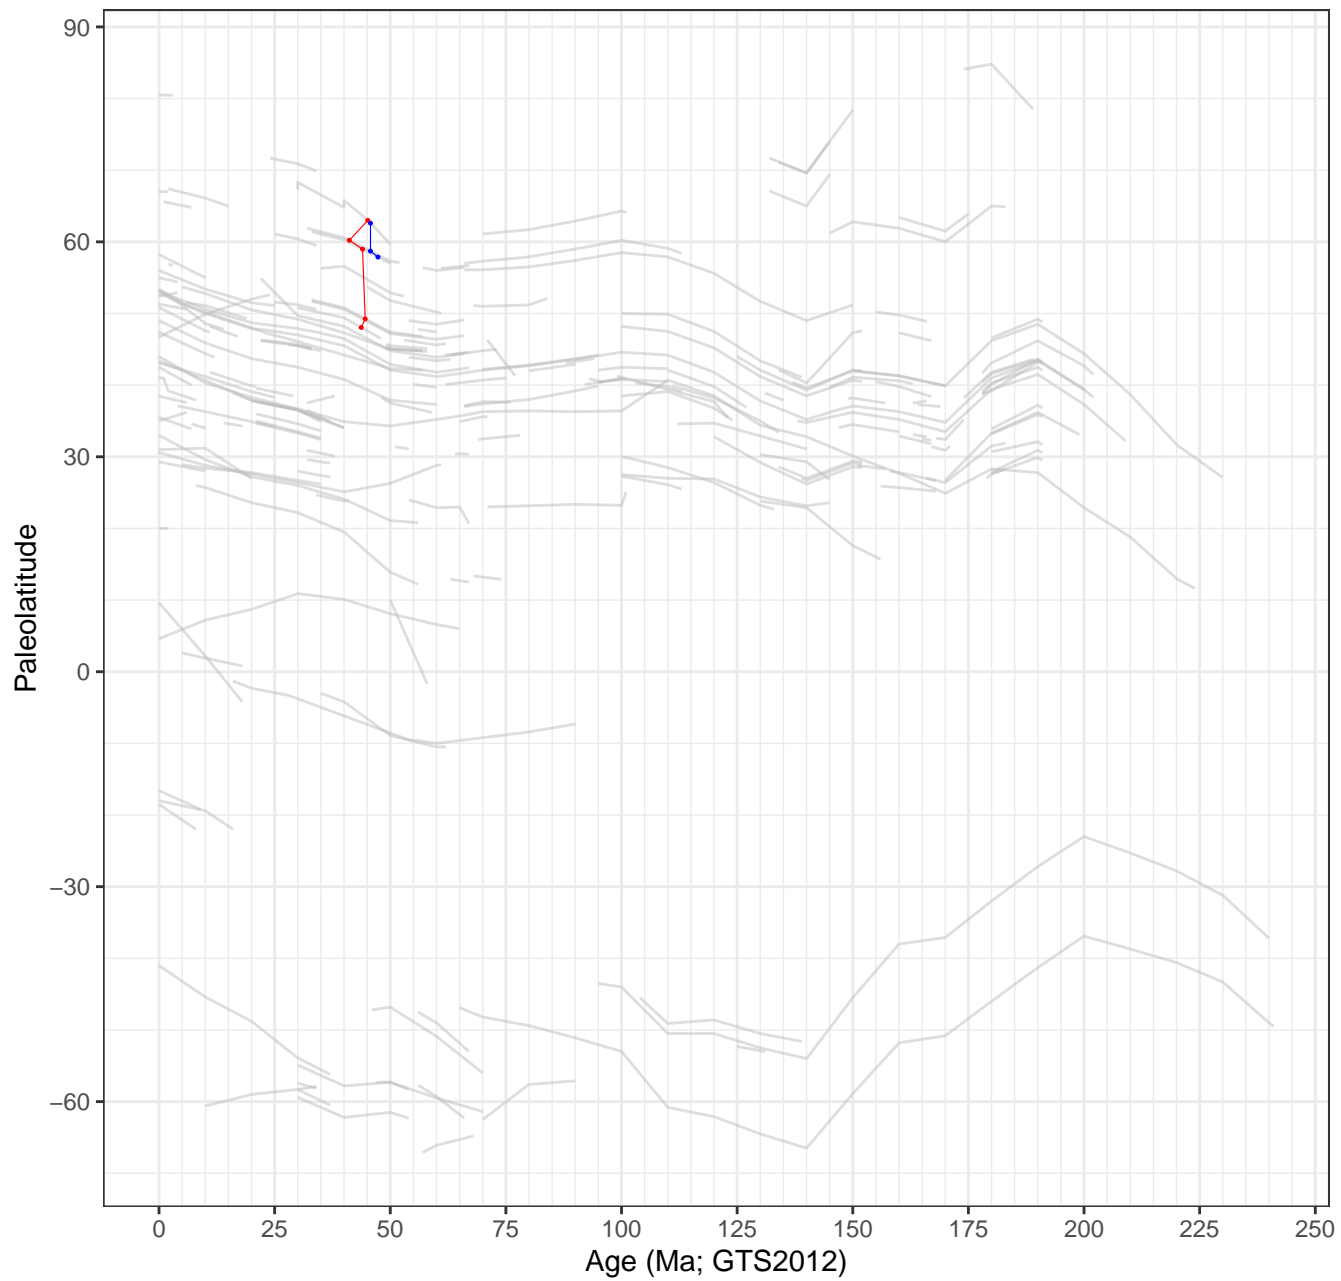

Supplement: Supplementary file 2157 [file Phthanoperidinium regalis.pdf › Supplement/Supplement 2/Species 1914 plots/Phthanoperidinium regalis.pdf]

# Species Phthanoperidinium resistente

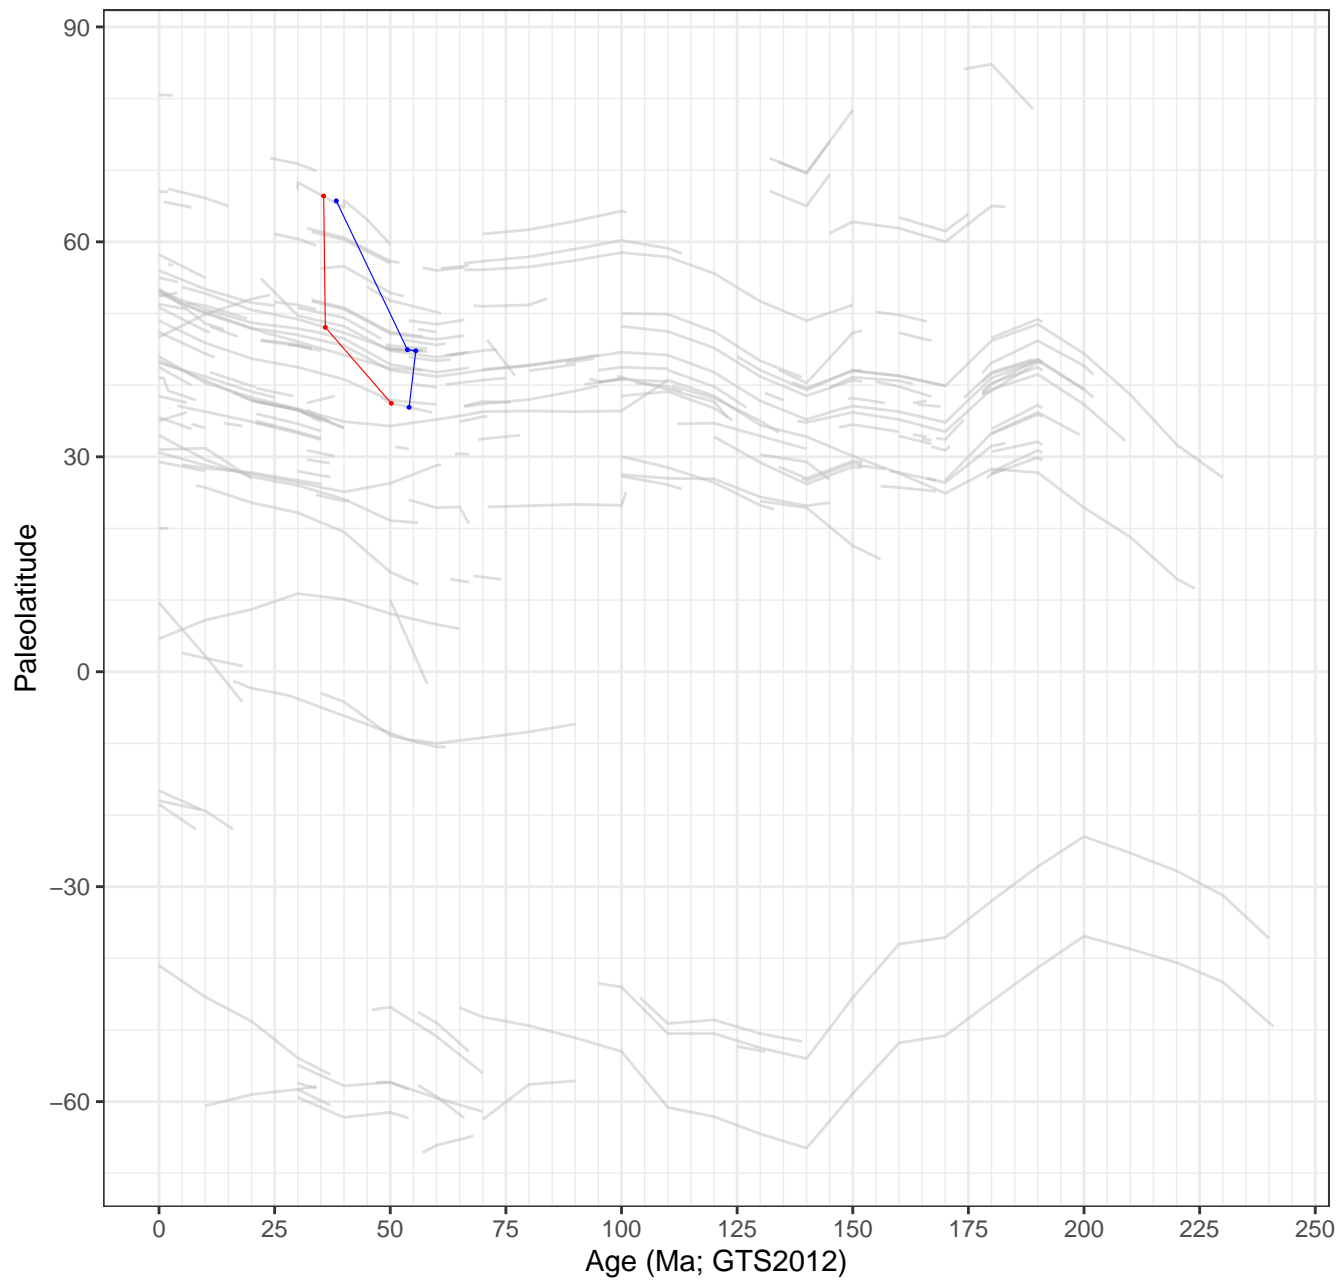

Supplement: Supplementary file 2158 [file Phthanoperidinium resistente.pdf › Supplement/Supplement 2/Species 1914 plots/Phthanoperidinium resistente.pdf]

# Species *Phthanoperidinium stockmansii*

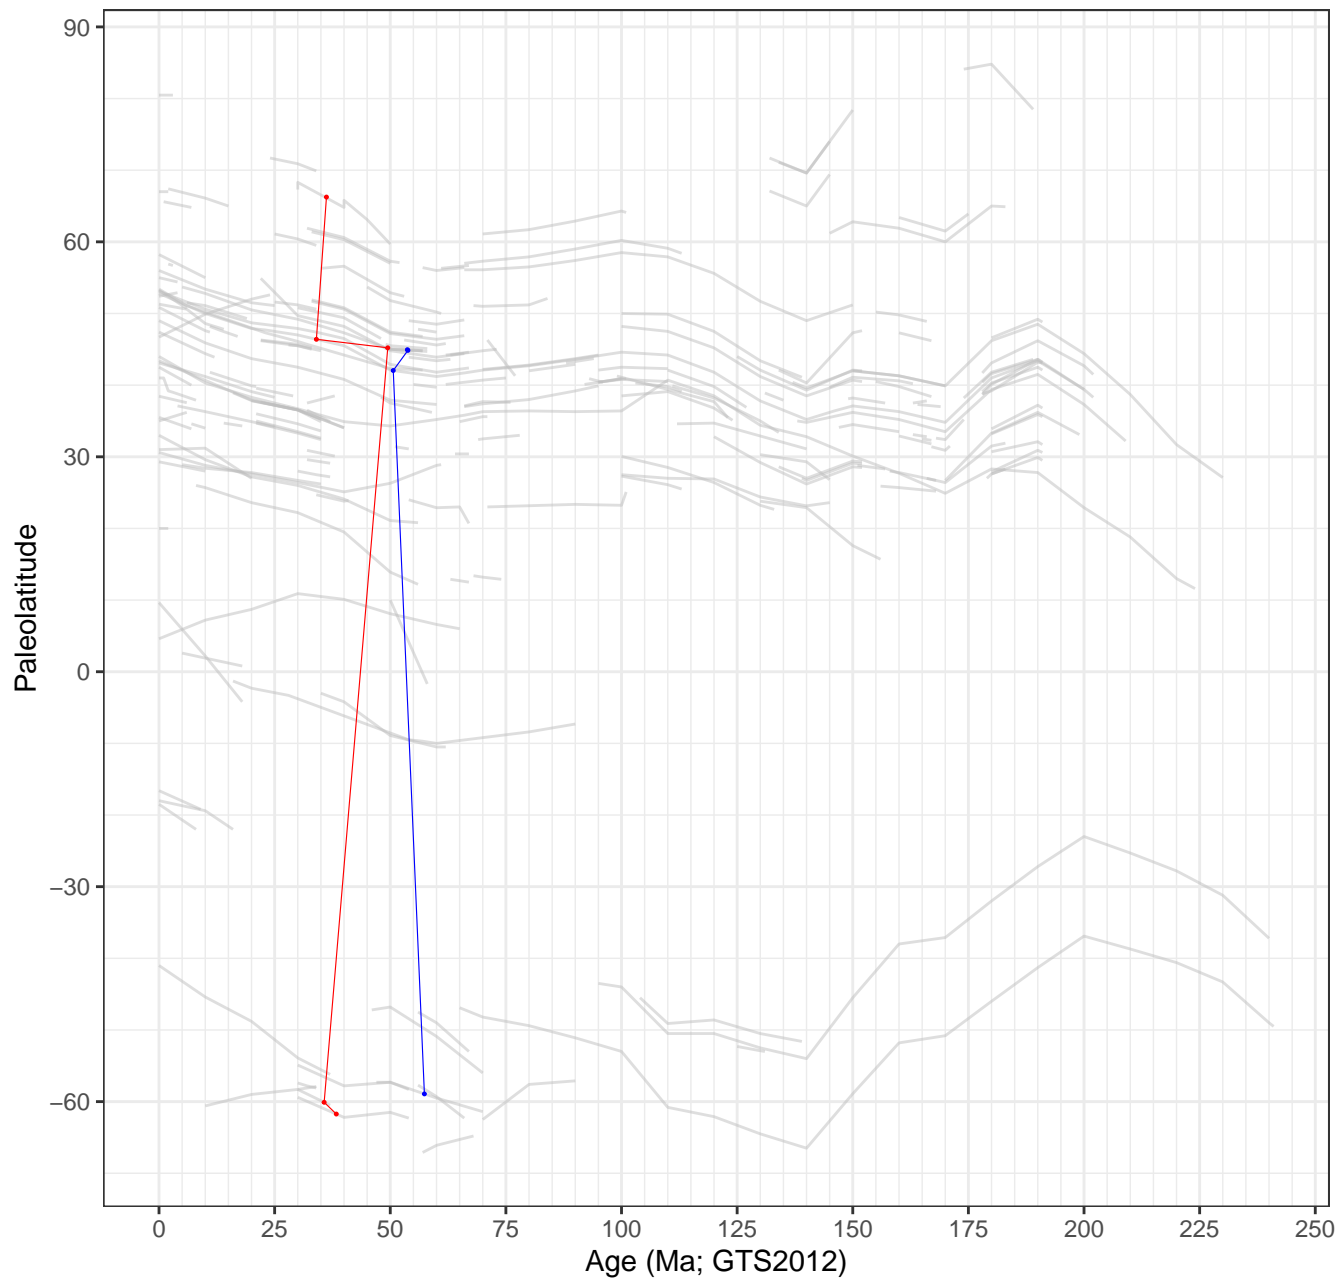

Supplement: Supplementary file 2159 [file Phthanoperidinium stockmansii.pdf › Supplement/Supplement 2/Species 1914 plots/Phthanoperidinium stockmansii.pdf]

# Species *Pierceites pentagona*

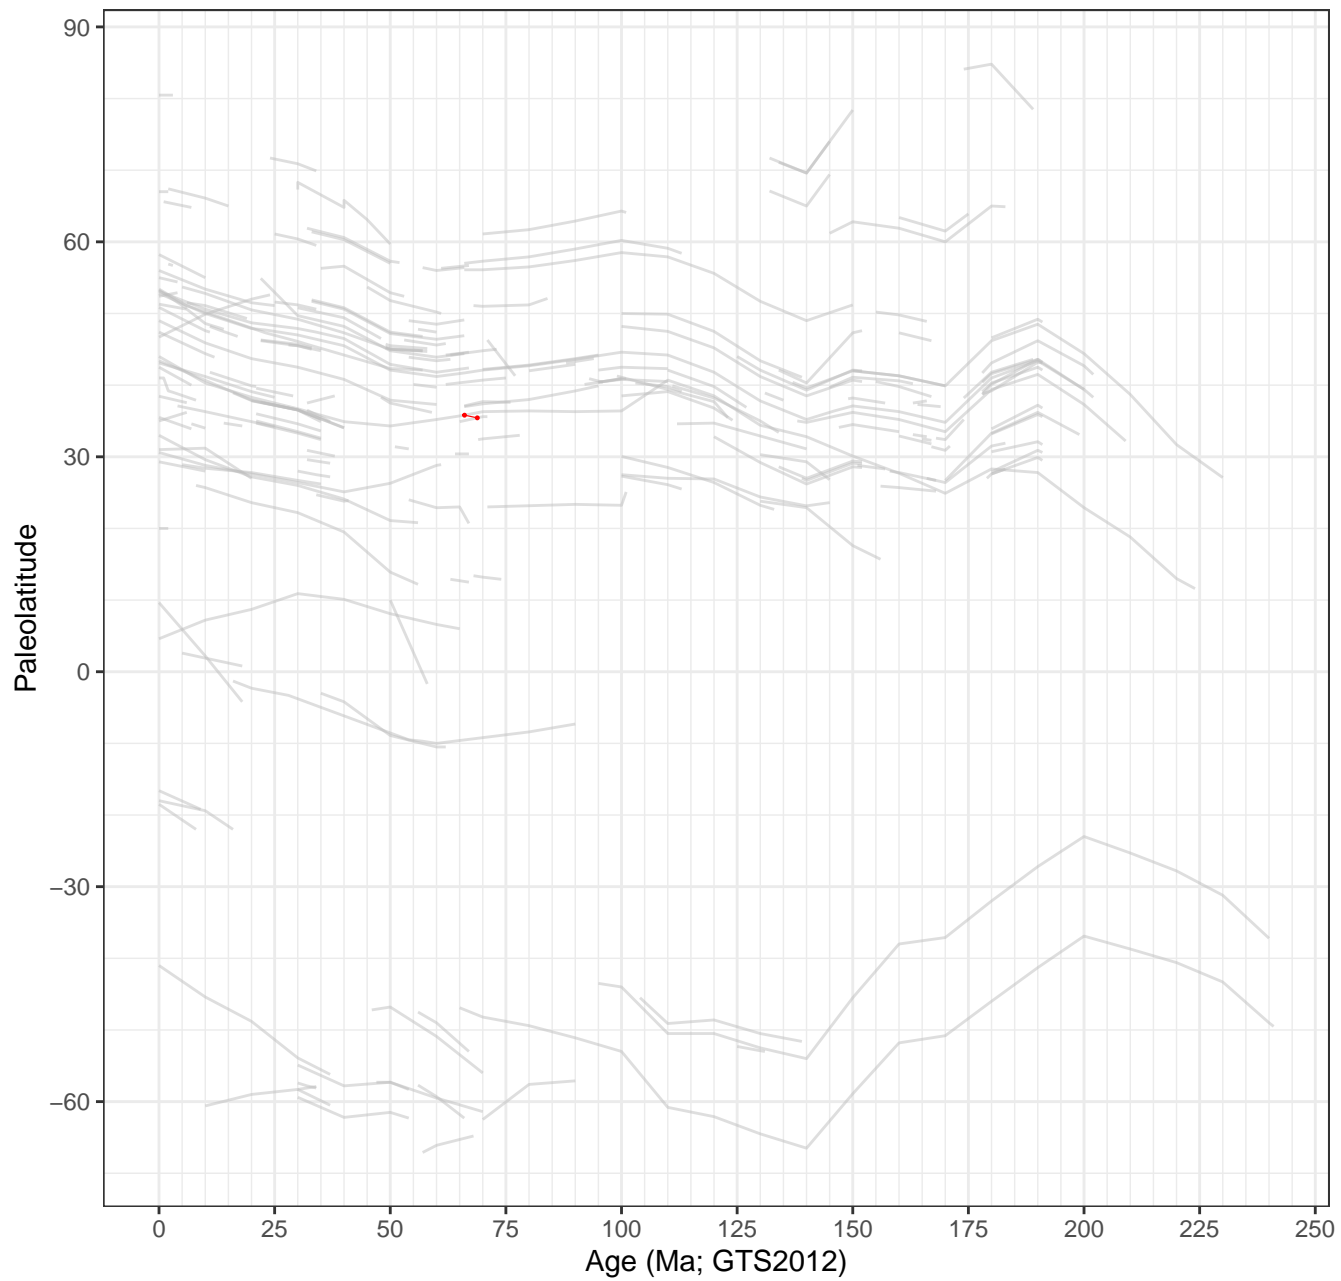

Supplement: Supplementary file 2160 [file Pierceites pentagona.pdf › Supplement/Supplement 2/Species 1914 plots/Pierceites pentagona.pdf]

# Species *Pierceites schizocystus*

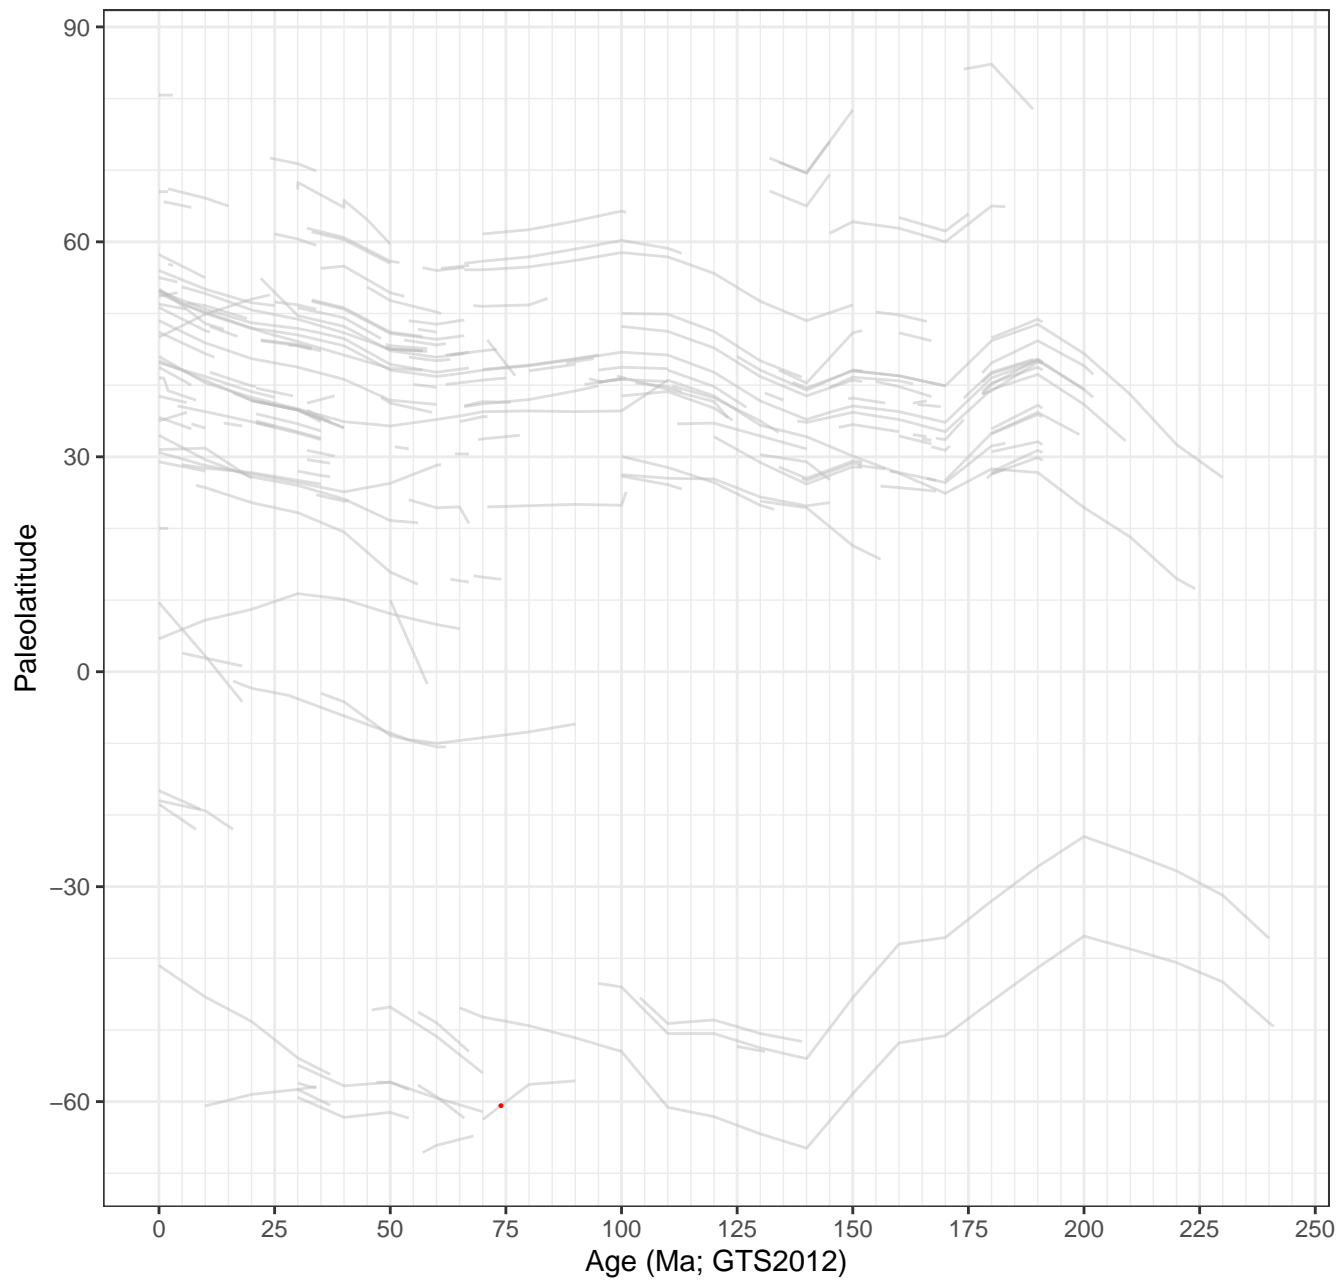

Supplement: Supplementary file 2161 [file Pierceites schizocystus.pdf › Supplement/Supplement 2/Species 1914 plots/Pierceites schizocystus.pdf]

# Species *Pilosodinium asymmetricum*

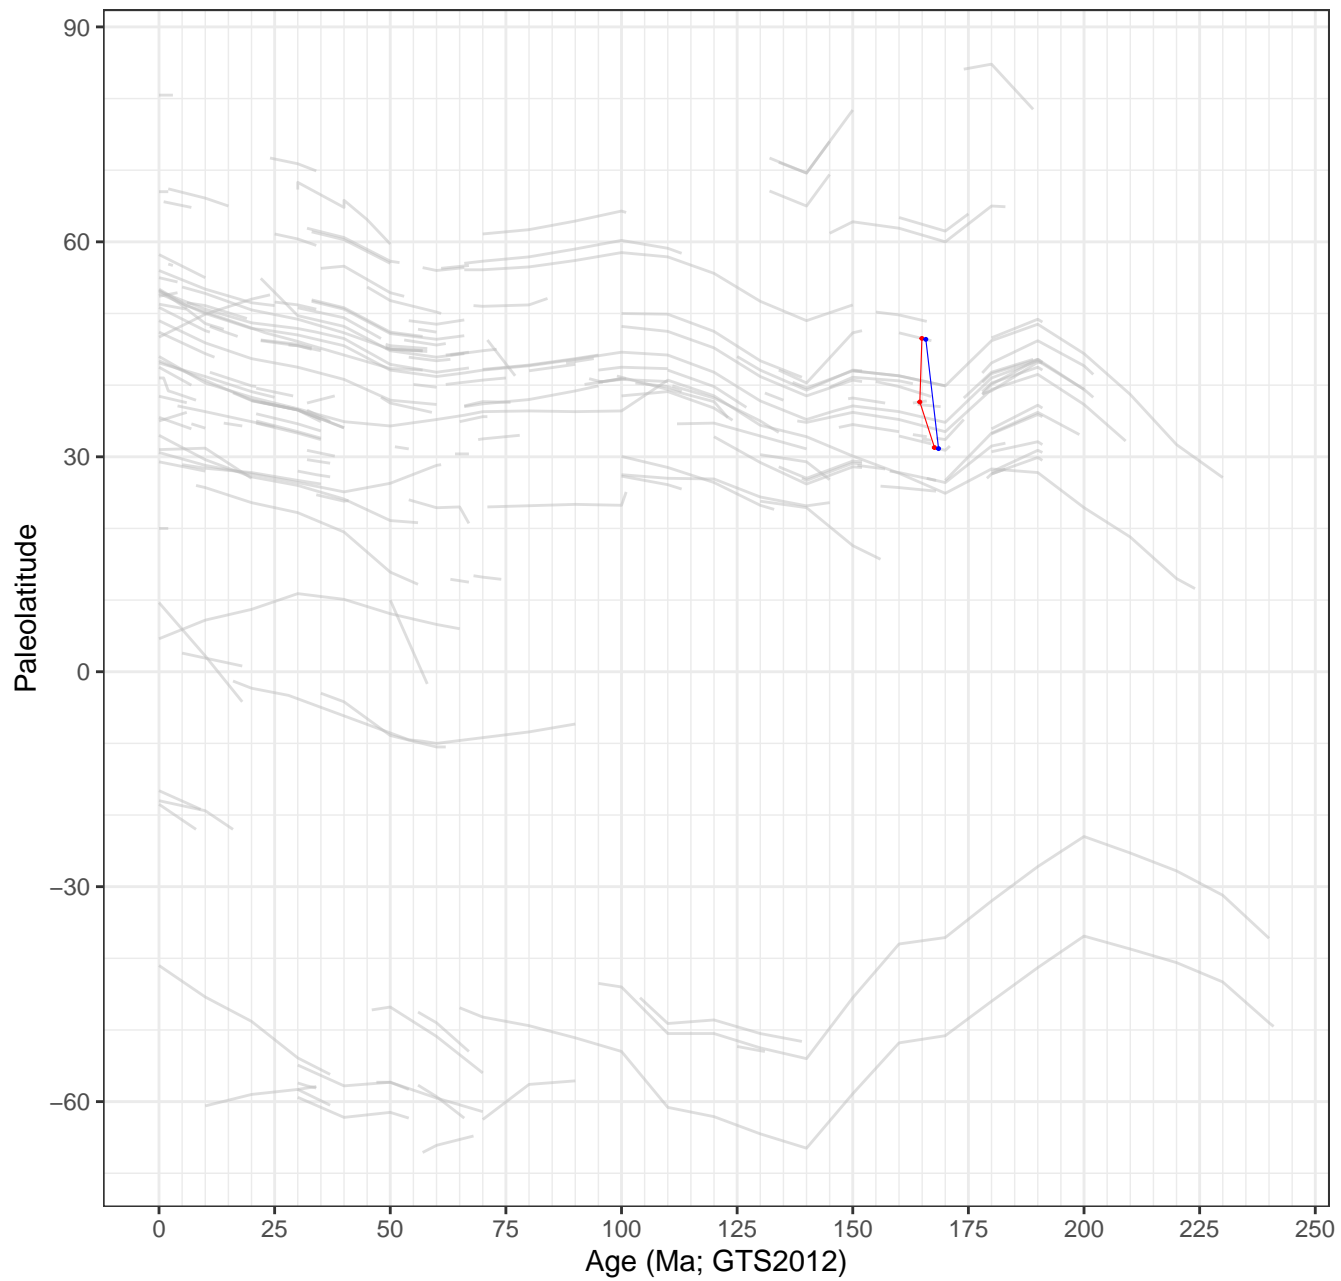

Supplement: Supplementary file 2162 [file Pilosidinium assymmetricum.pdf › Supplement/Supplement 2/Species 1914 plots/Pilosidinium assymmetricum.pdf]

# Species *Pilosodinium echinatum*

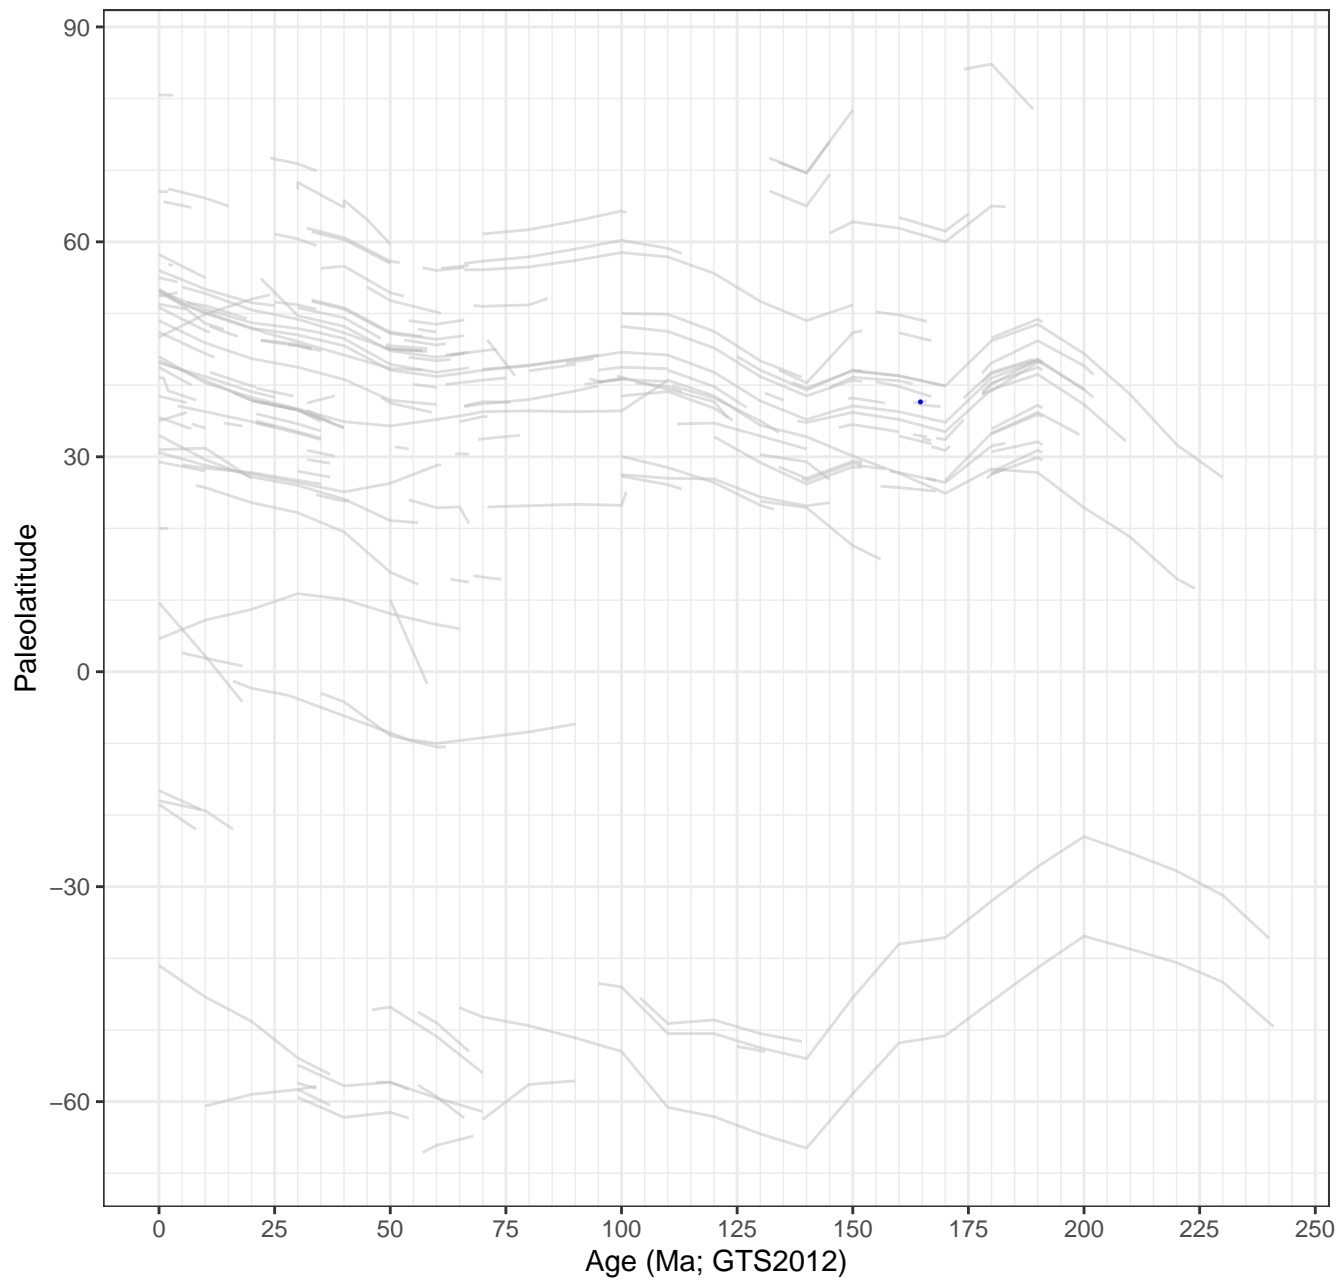

Supplement: Supplementary file 2163 [file Pilosidinium echinatum.pdf › Supplement/Supplement 2/Species 1914 plots/Pilosidinium echinatum.pdf]

# Species *Pinocchiodinium erbae*

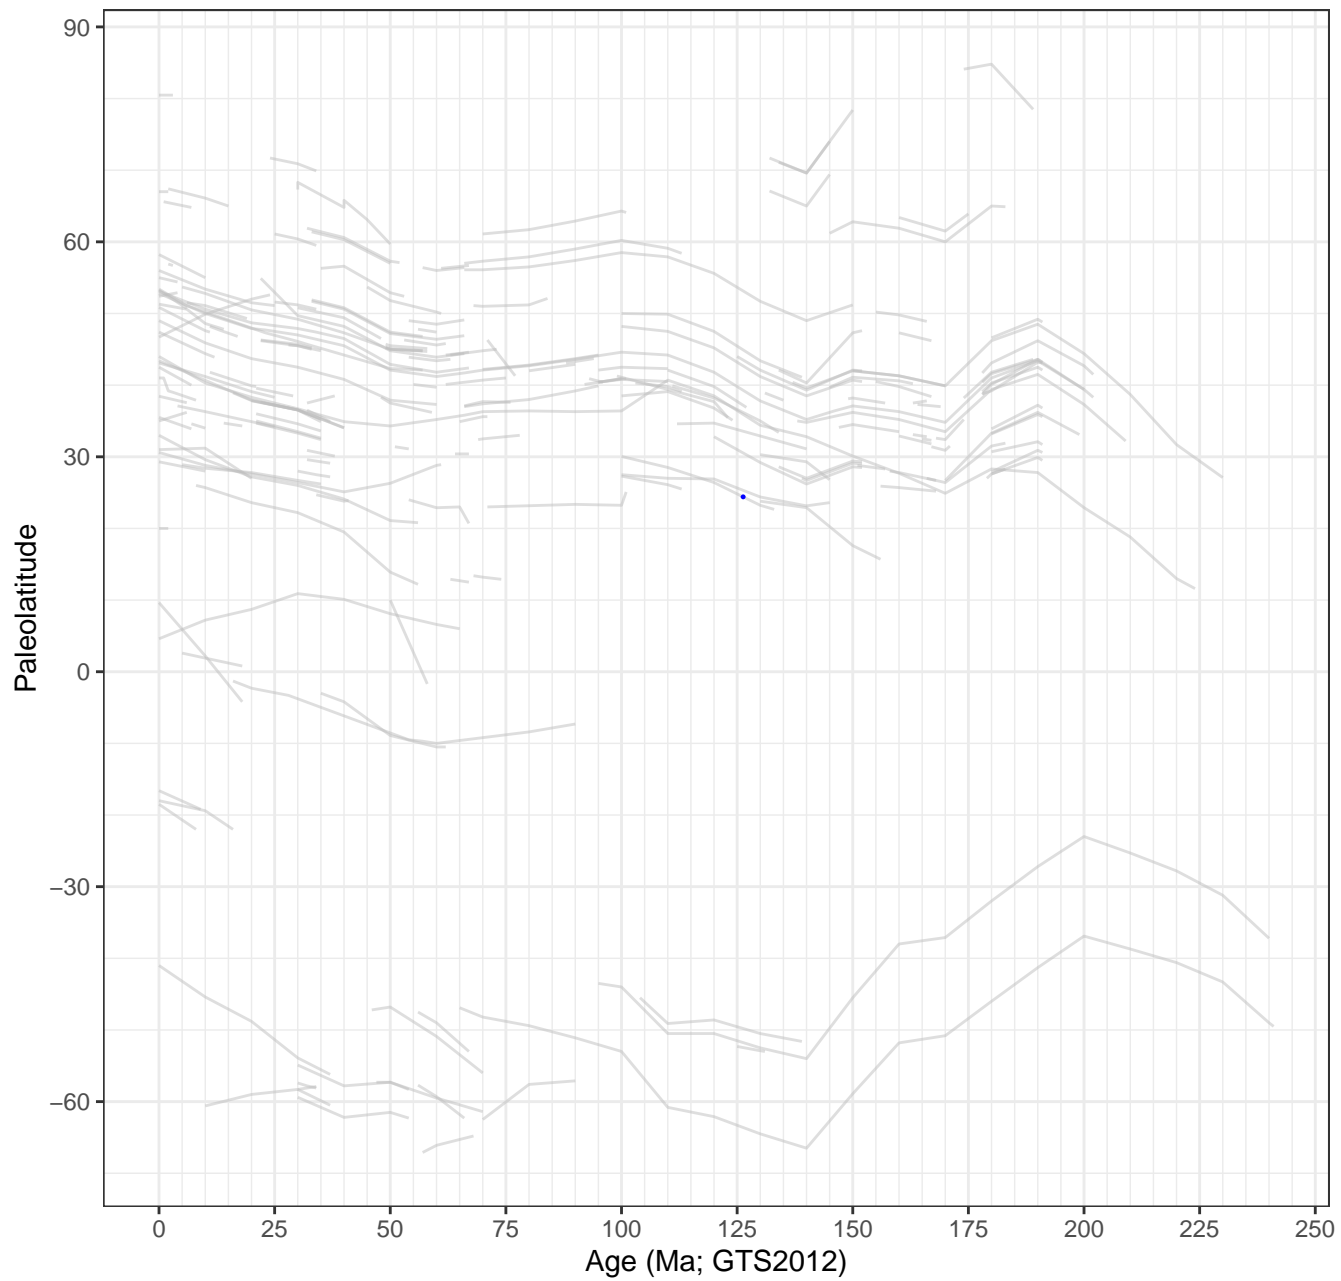

Supplement: Supplementary file 2164 [file Pinocchiodinium erbae.pdf › Supplement/Supplement 2/Species 1914 plots/Pinocchiodinium erbae.pdf]

# Species *Piperodinium perplexum*

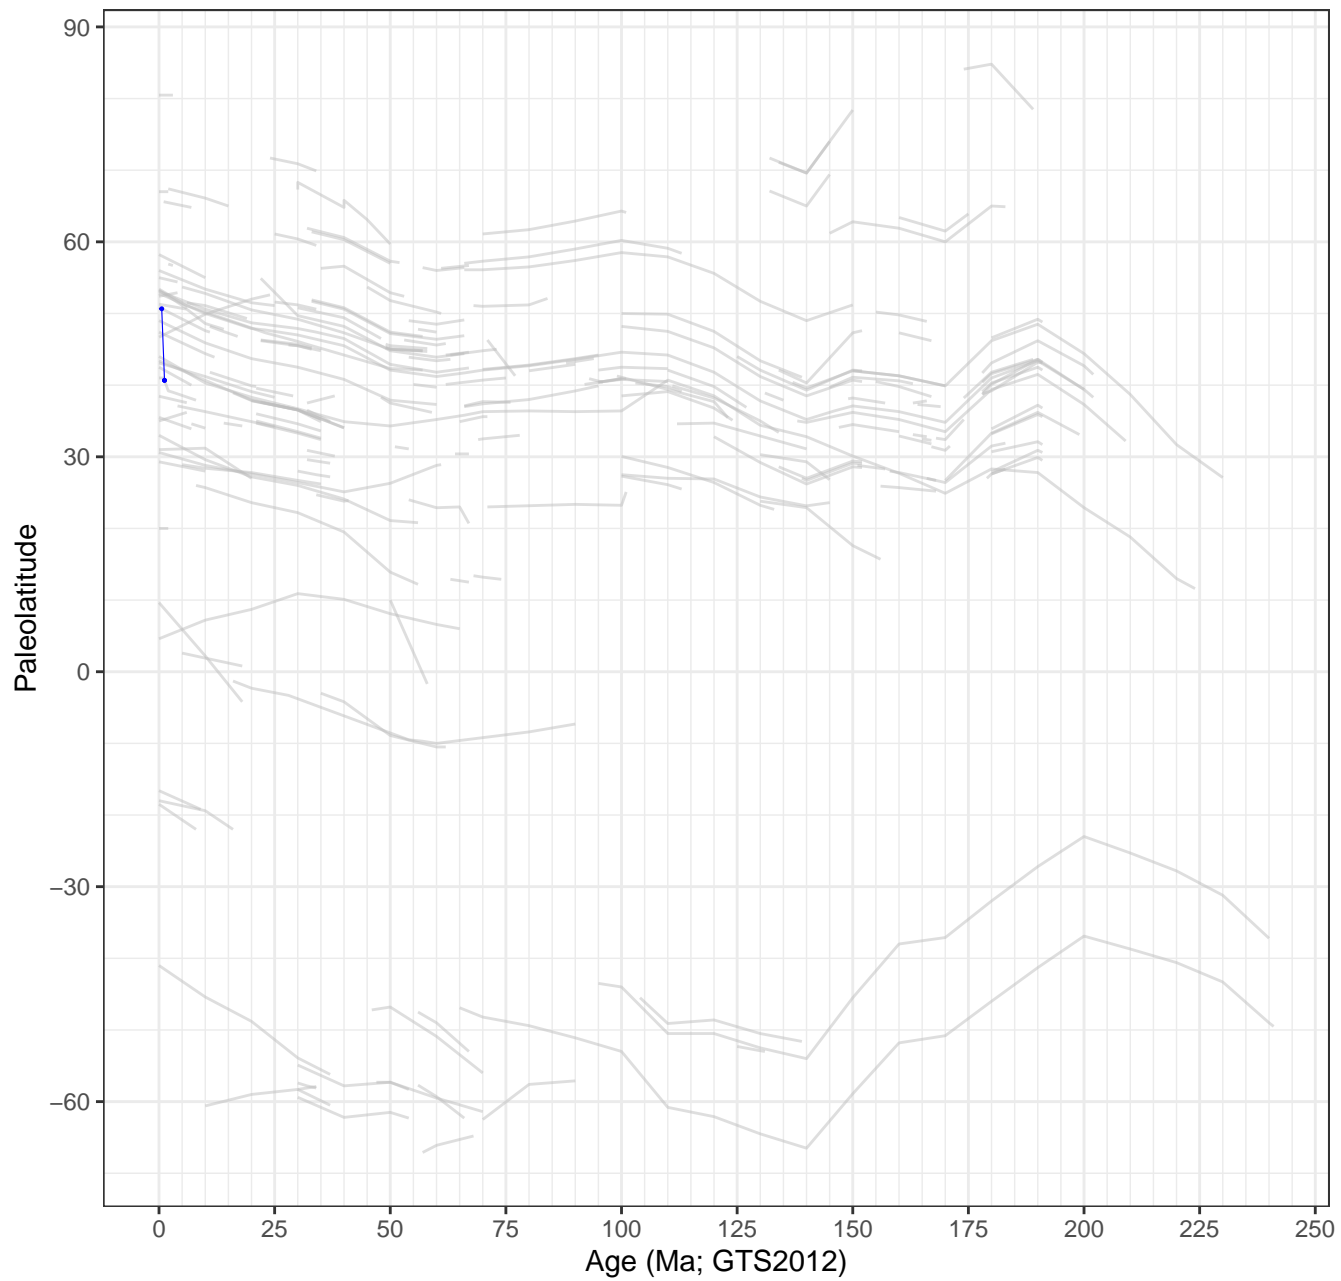

Supplement: Supplementary file 2165 [file Piperodinium perplexum.pdf › Supplement/Supplement 2/Species 1914 plots/Piperodinium perplexum.pdf]

# Species *Platycystidia eisenackii*

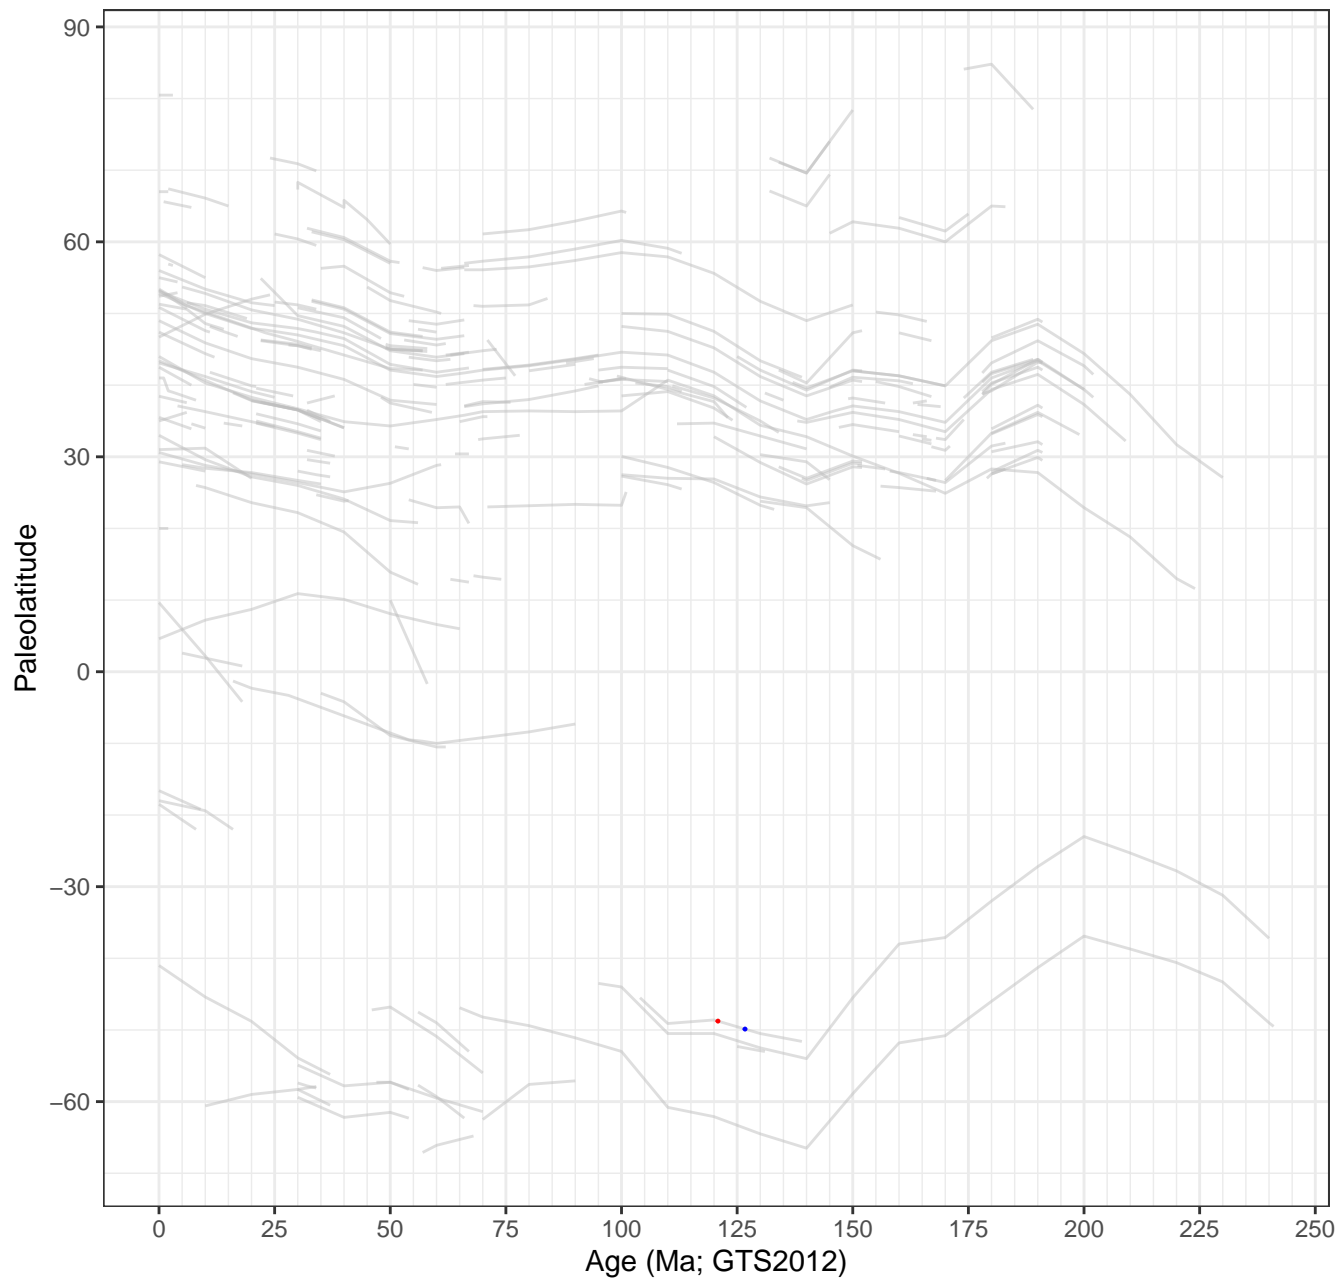

Supplement: Supplementary file 2166 [file Platycystidia eisenackii.pdf › Supplement/Supplement 2/Species 1914 plots/Platycystidia eisenackii.pdf]

# Species *Pluriarvalium osmingtonense*

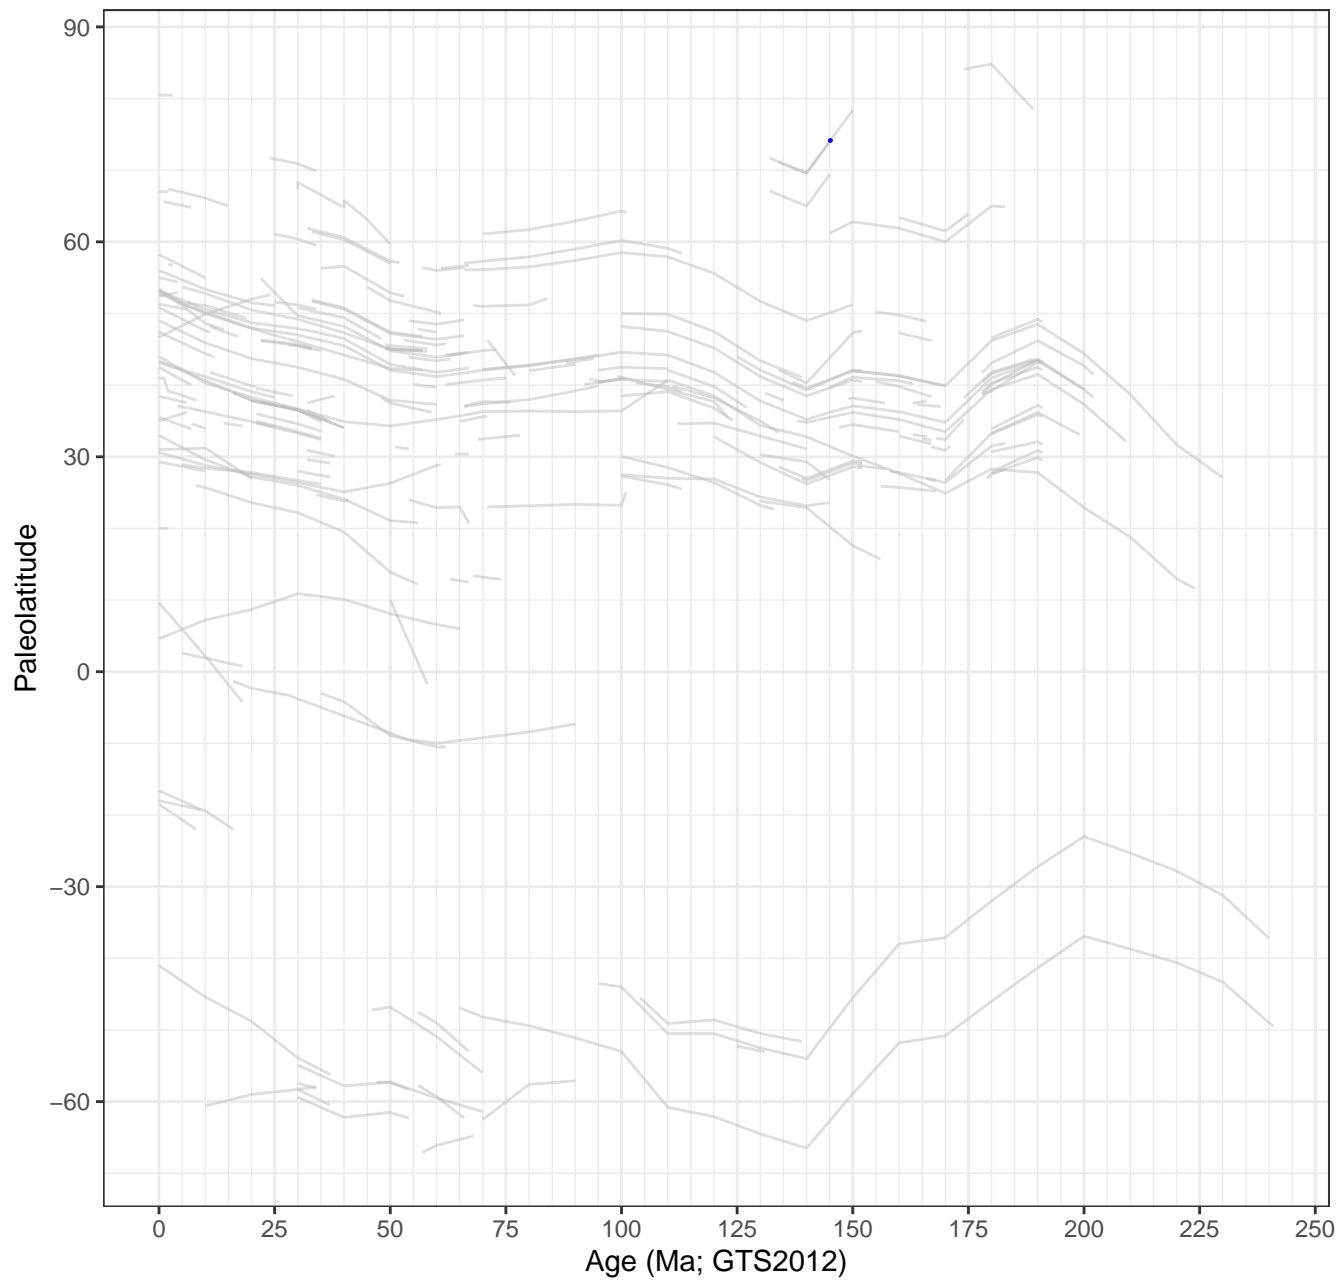

Supplement: Supplementary file 2167 [file Pluriarvalium osmingtonense.pdf › Supplement/Supplement 2/Species 1914 plots/Pluriarvalium osmingtonense.pdf]

# Species *Polygonifera evittii*

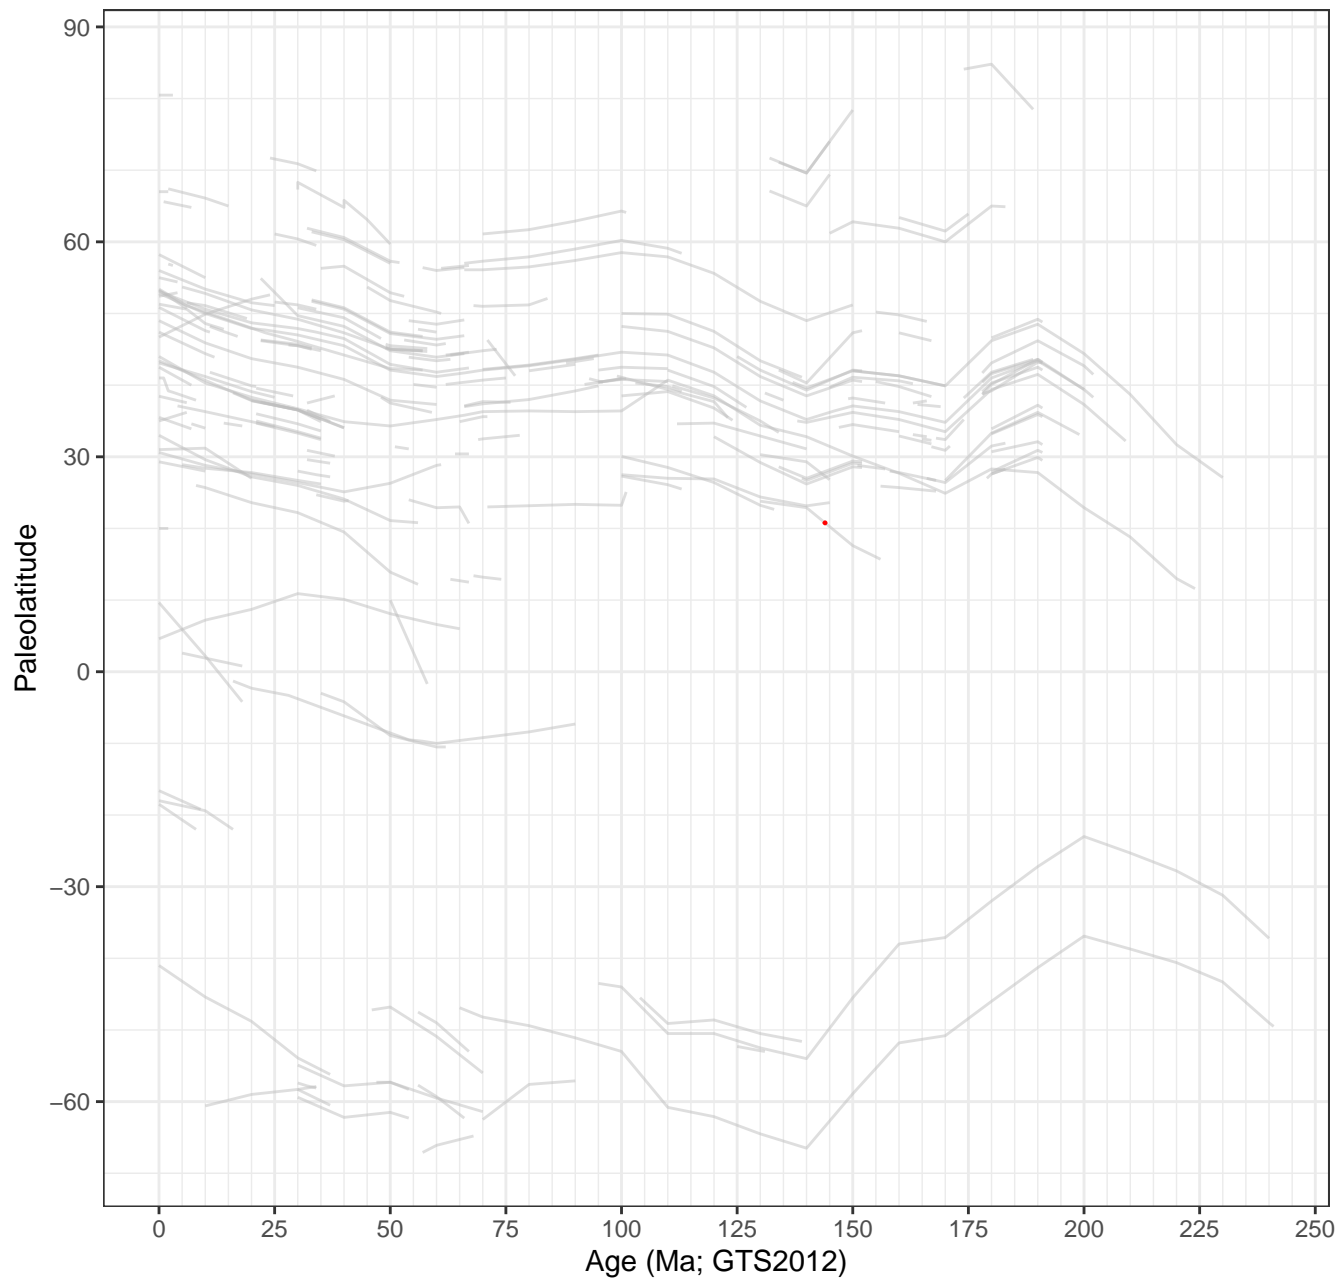

Supplement: Supplementary file 2168 [file Polygonifera evittii.pdf › Supplement/Supplement 2/Species 1914 plots/Polygonifera evittii.pdf]

# Species *Polykrikos quadratus*

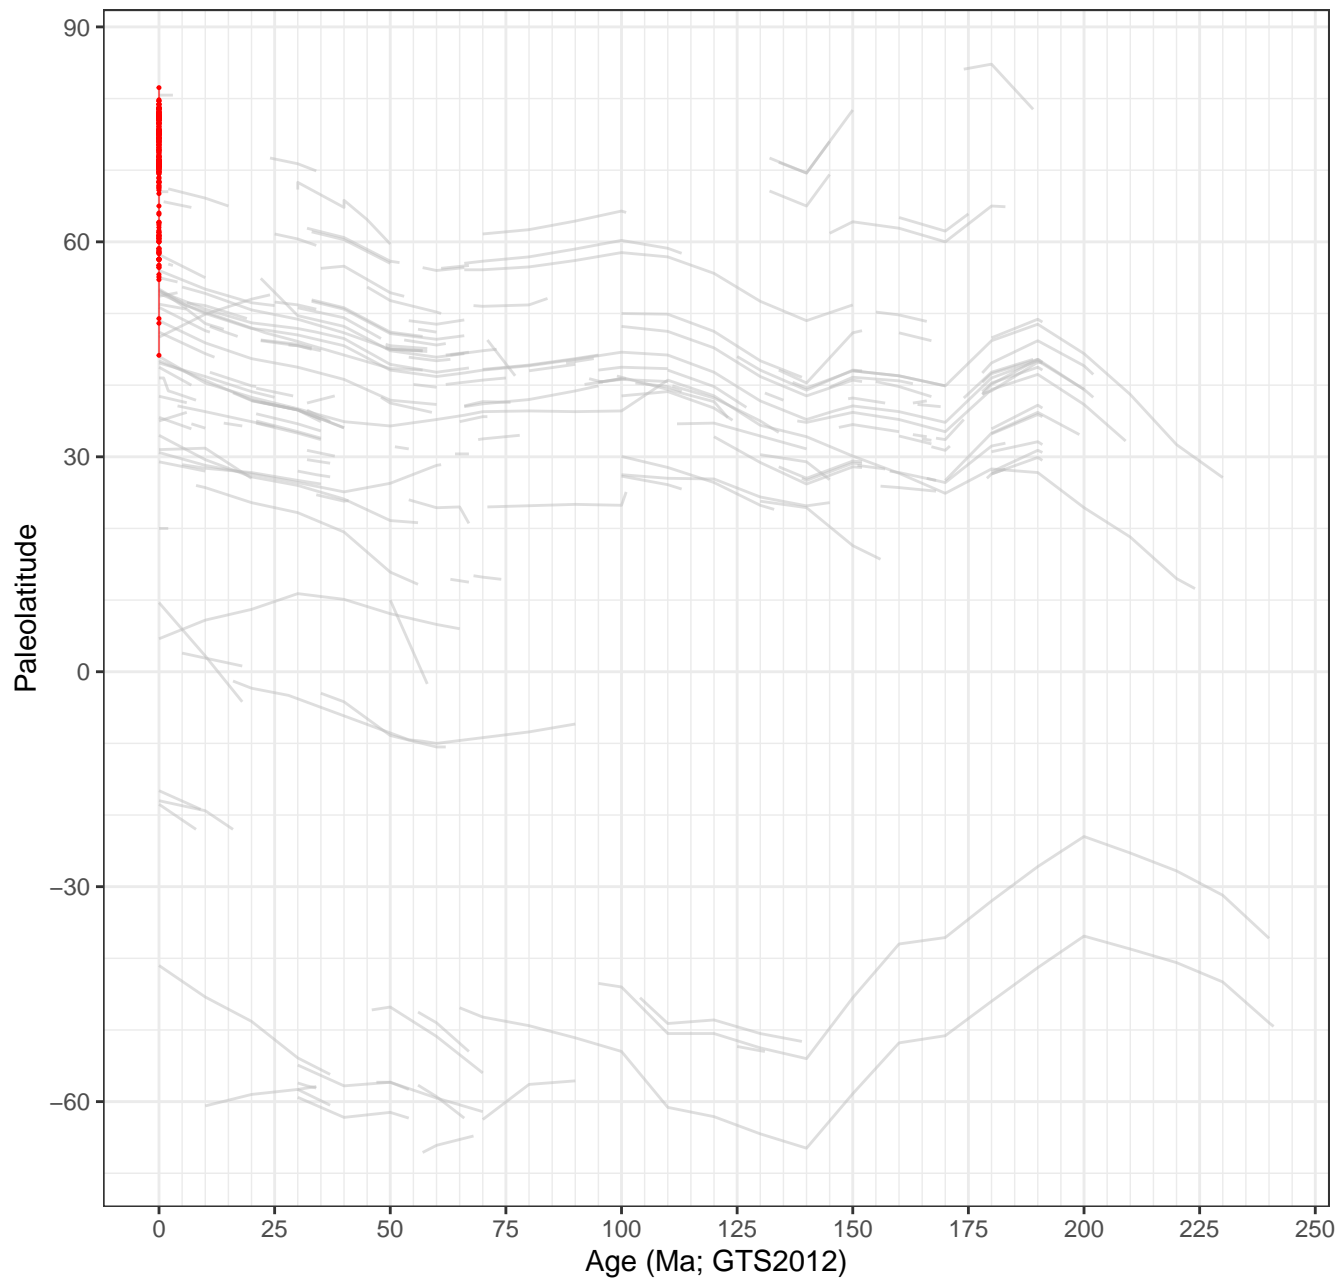

Supplement: Supplementary file 2169 [file Polykrikos quadratus.pdf › Supplement/Supplement 2/Species 1914 plots/Polykrikos quadratus.pdf]

# Species *Polysphaeridium congregatum*

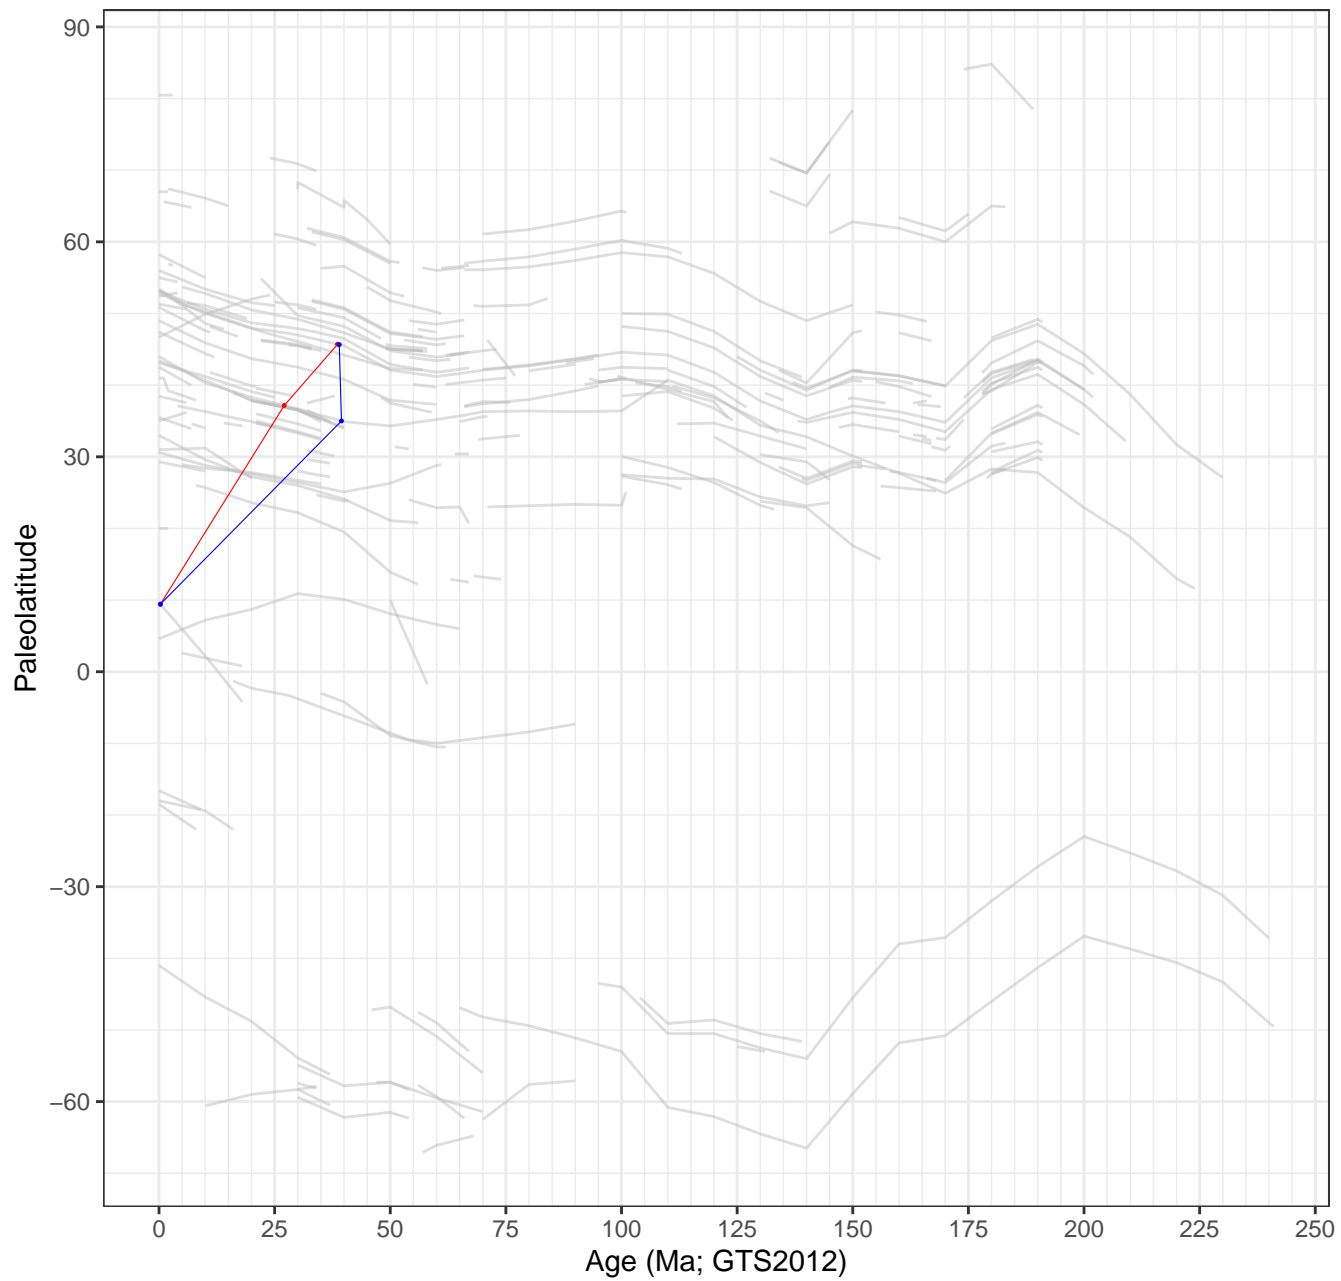

Supplement: Supplementary file 2170 [file Polysphaeridium congregatum.pdf › Supplement/Supplement 2/Species 1914 plots/Polysphaeridium congregatum.pdf]

# Species *Polysphaeridium subtile*

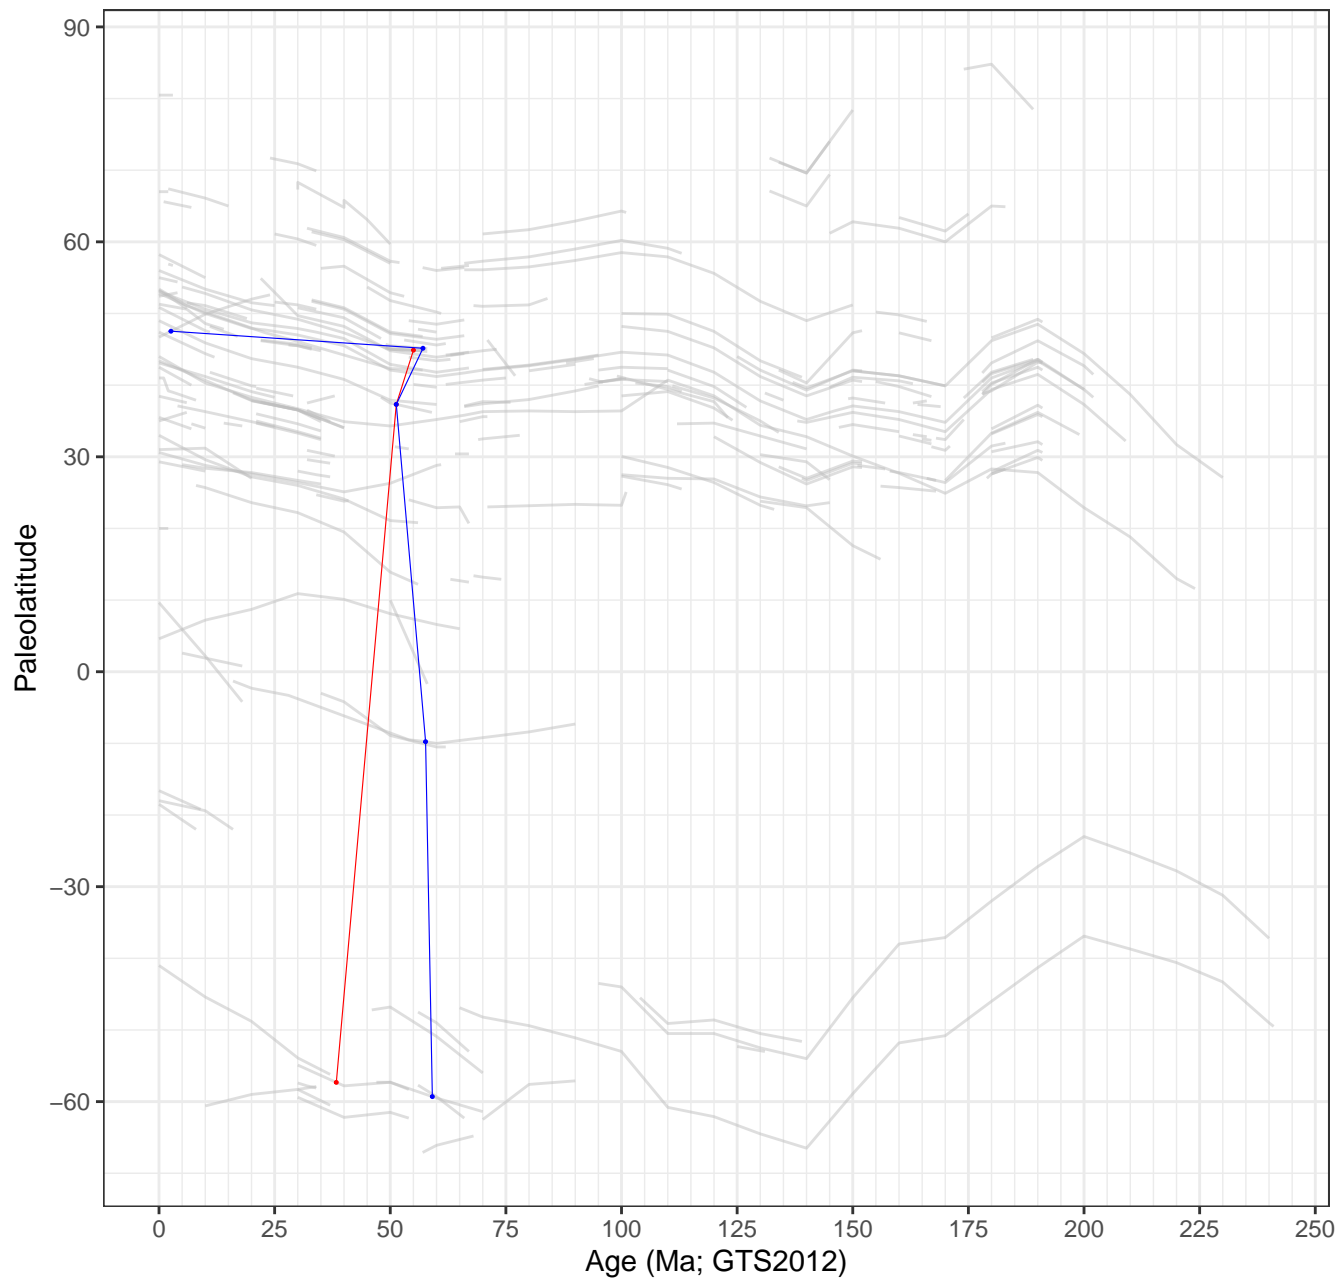

Supplement: Supplementary file 2171 [file Polysphaeridium subtile.pdf › Supplement/Supplement 2/Species 1914 plots/Polysphaeridium subtile.pdf]

# Species *Polysphaeridium zoharyi* ktana

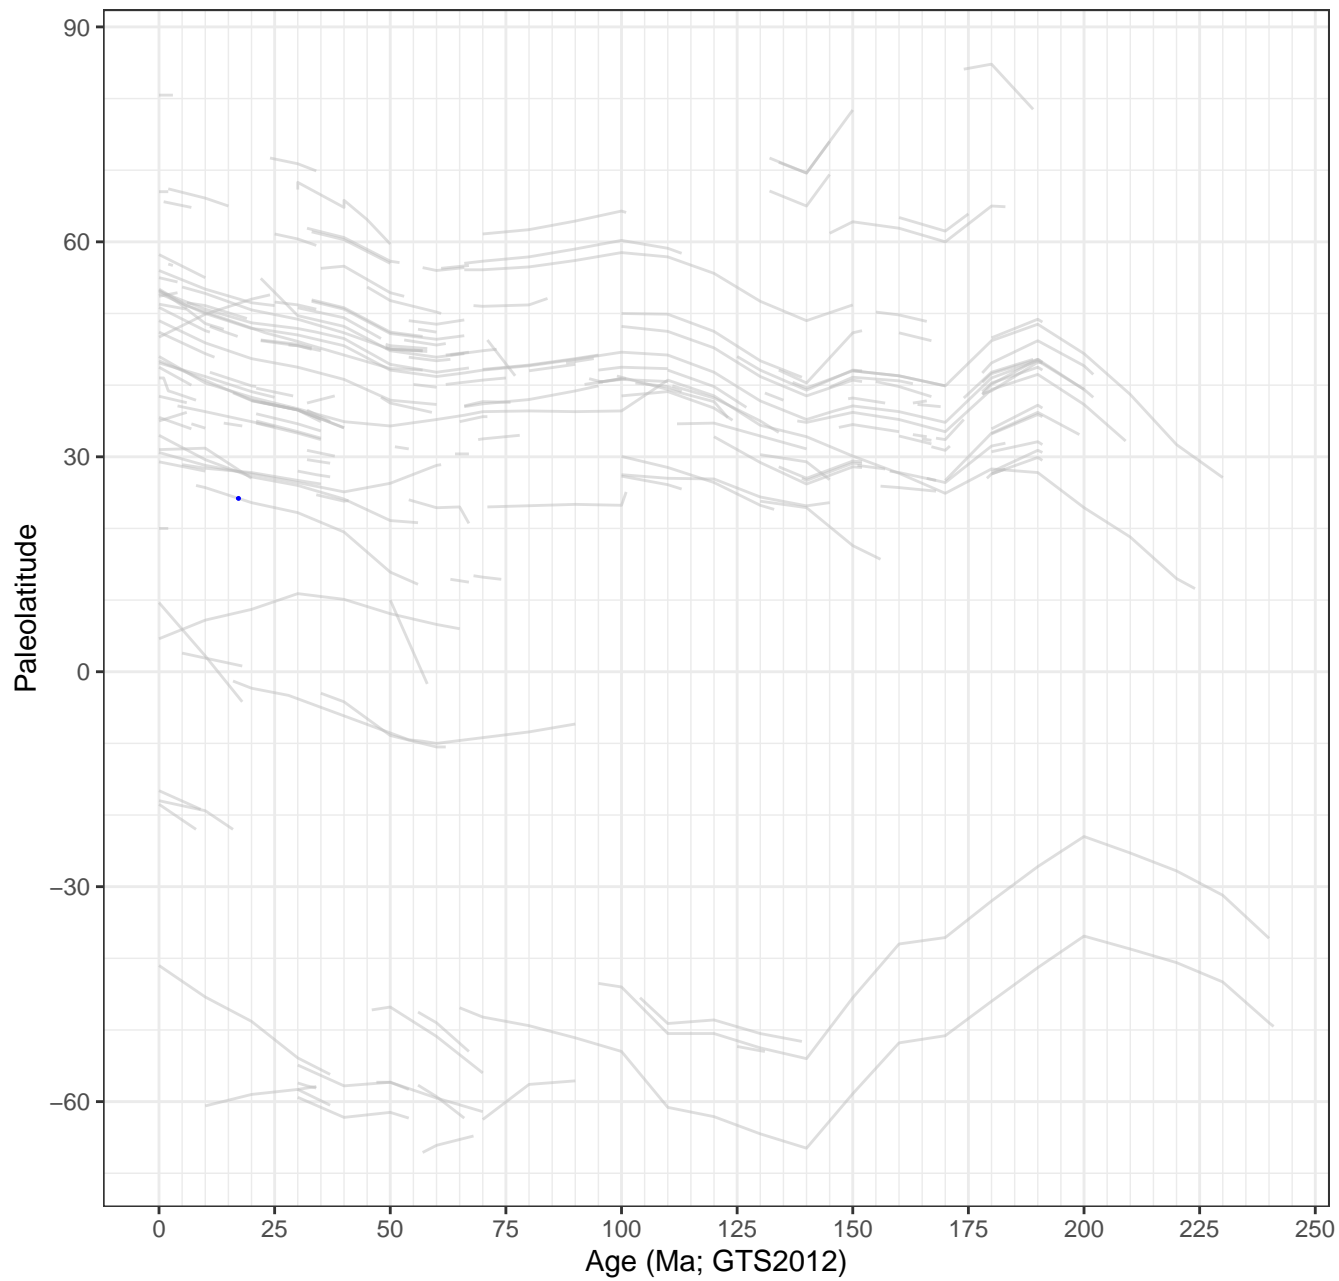

Supplement: Supplementary file 2172 [file Polysphaeridium zoharyi ktana.pdf › Supplement/Supplement 2/Species 1914 plots/Polysphaeridium zoharyi ktana.pdf]

# Species *Polysphaeridium zoharyi*

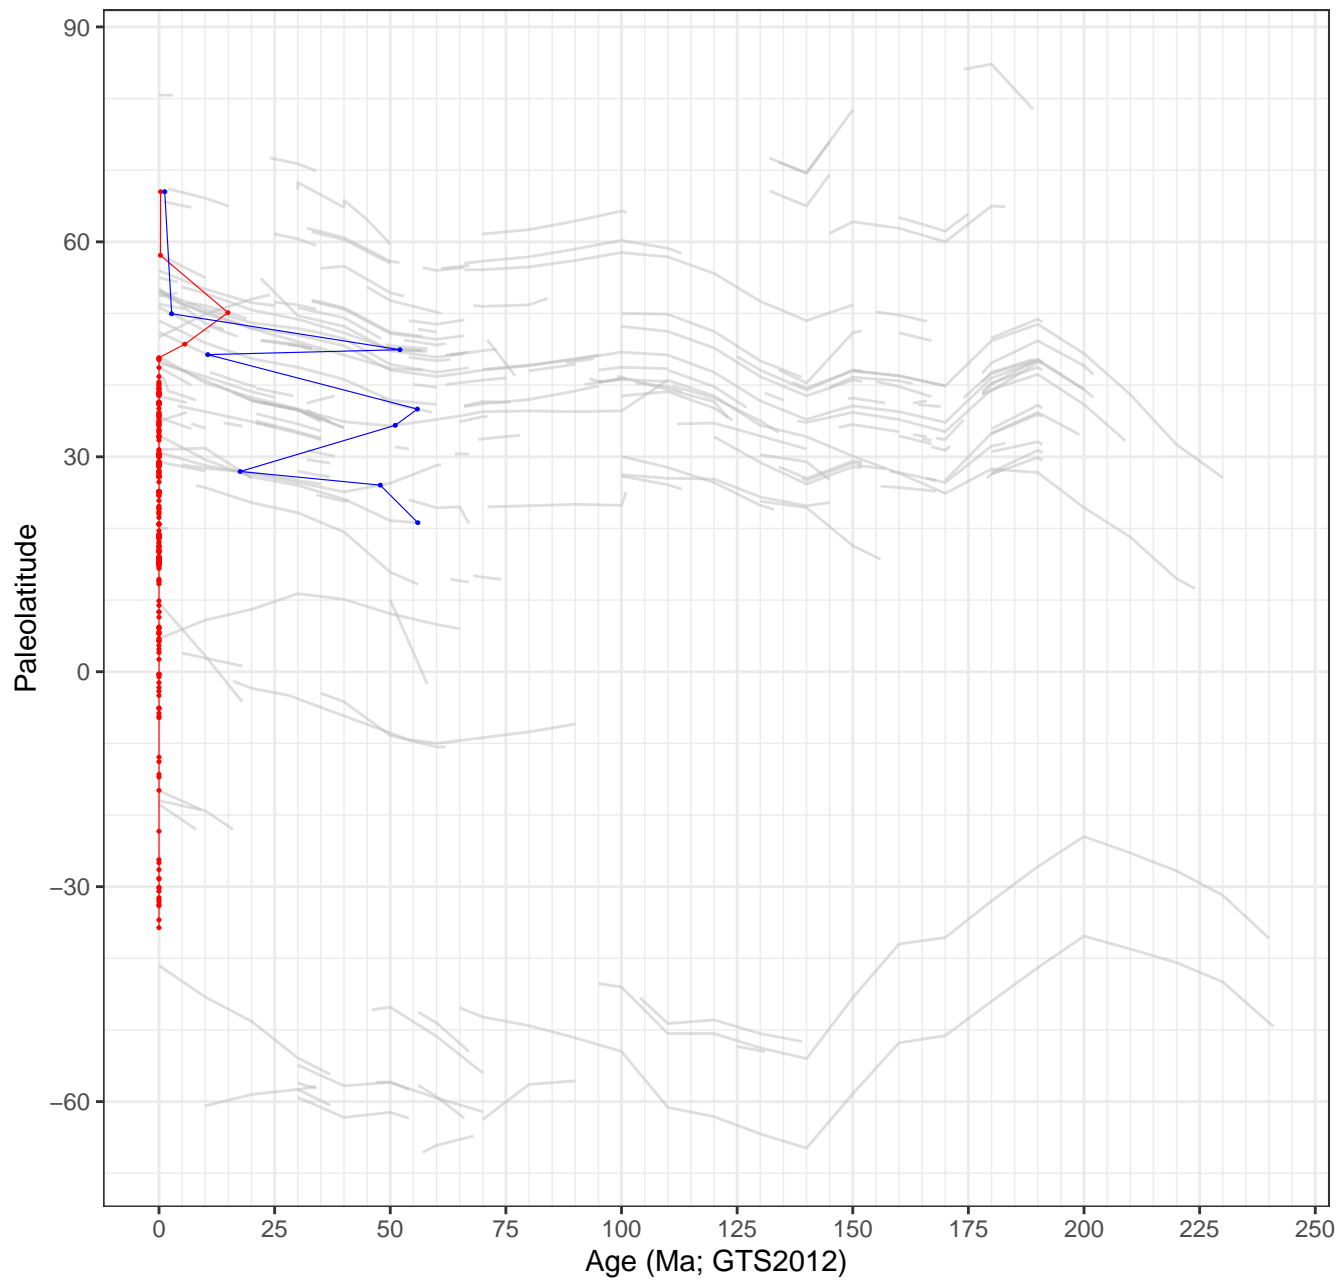

Supplement: Supplementary file 2173 [file Polysphaeridium zoharyi.pdf › Supplement/Supplement 2/Species 1914 plots/Polysphaeridium zoharyi.pdf]

# Species *Polystephanephorus calathus*

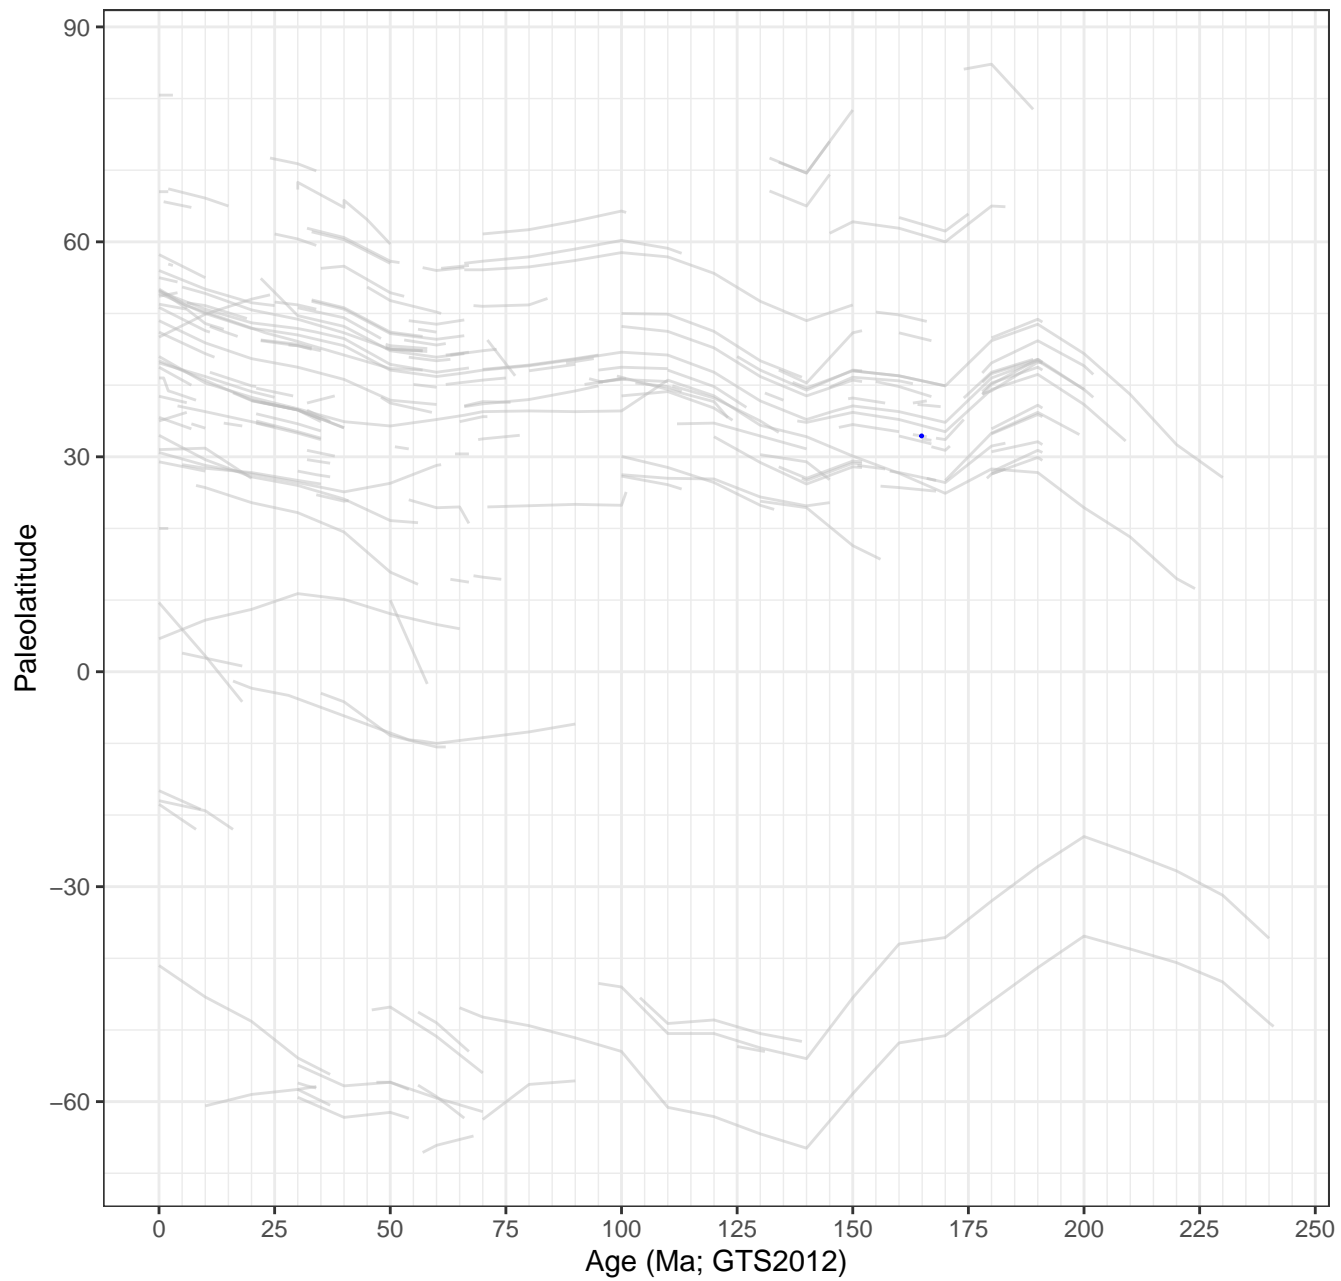

Supplement: Supplementary file 2174 [file Polystephanephorus calathus.pdf › Supplement/Supplement 2/Species 1914 plots/Polystephanephorus calathus.pdf]

# Species *Prolixosphaeridiopsis spissa*

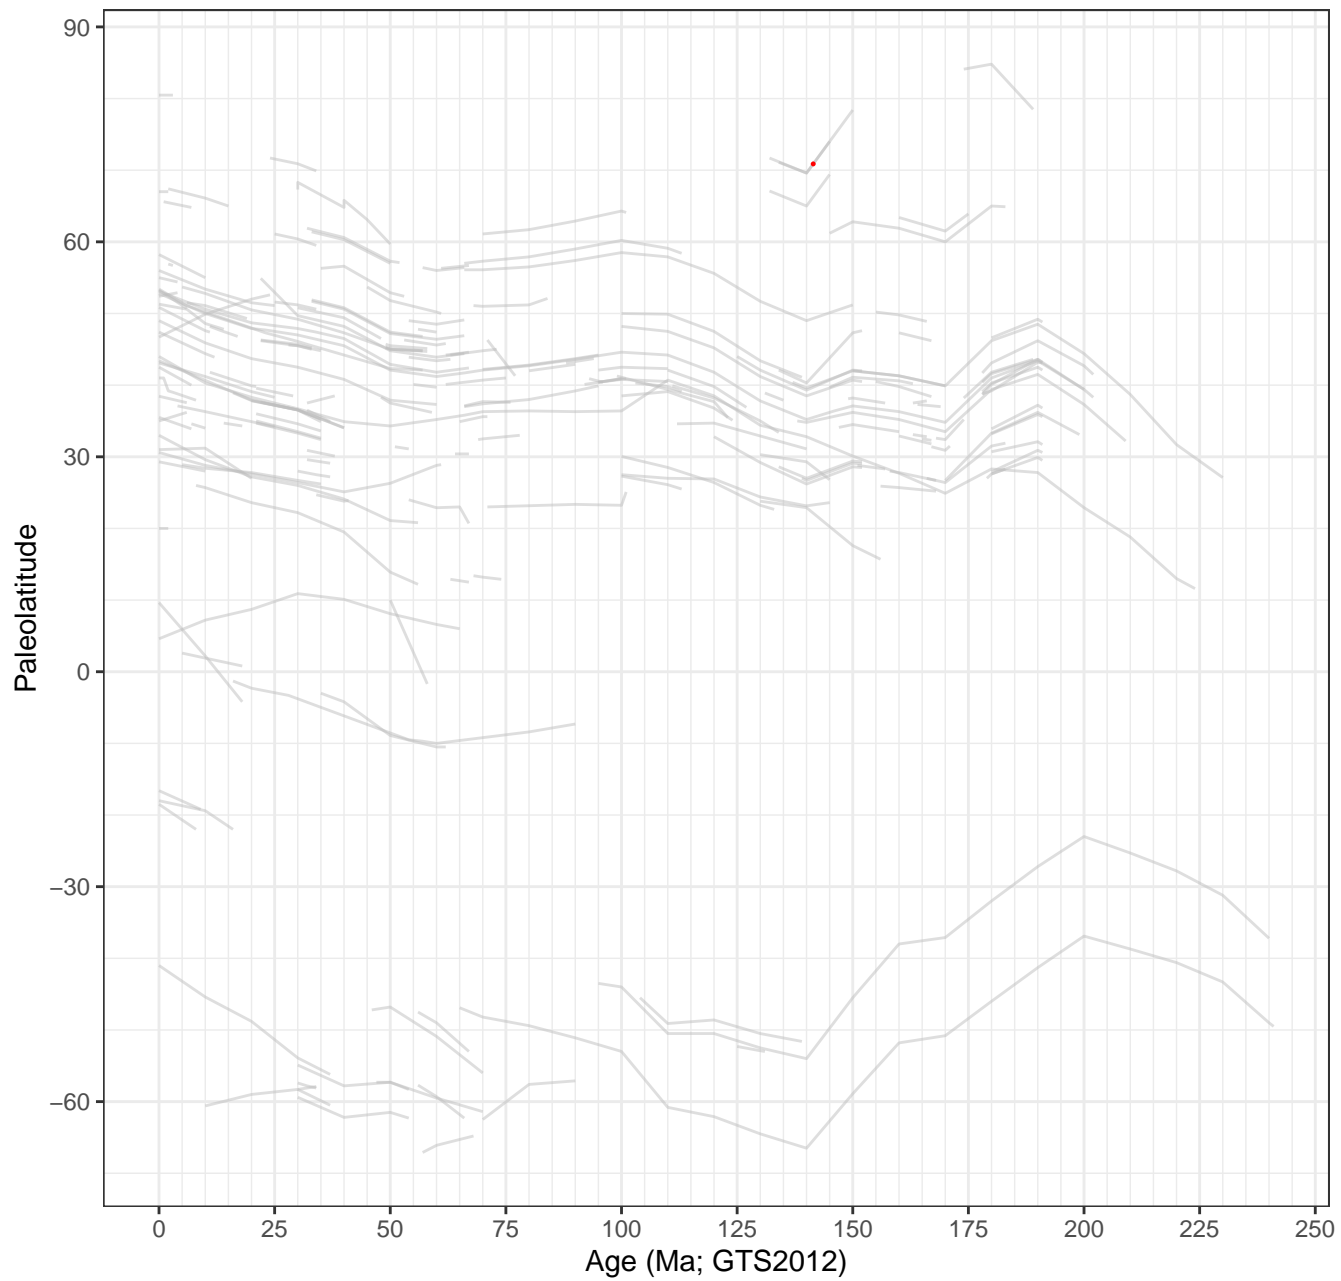

Supplement: Supplementary file 2175 [file Prolixosphaeridiopsis spissa.pdf › Supplement/Supplement 2/Species 1914 plots/Prolixosphaeridiopsis spissa.pdf]

# Species *Prolixosphaeridium anasillum*

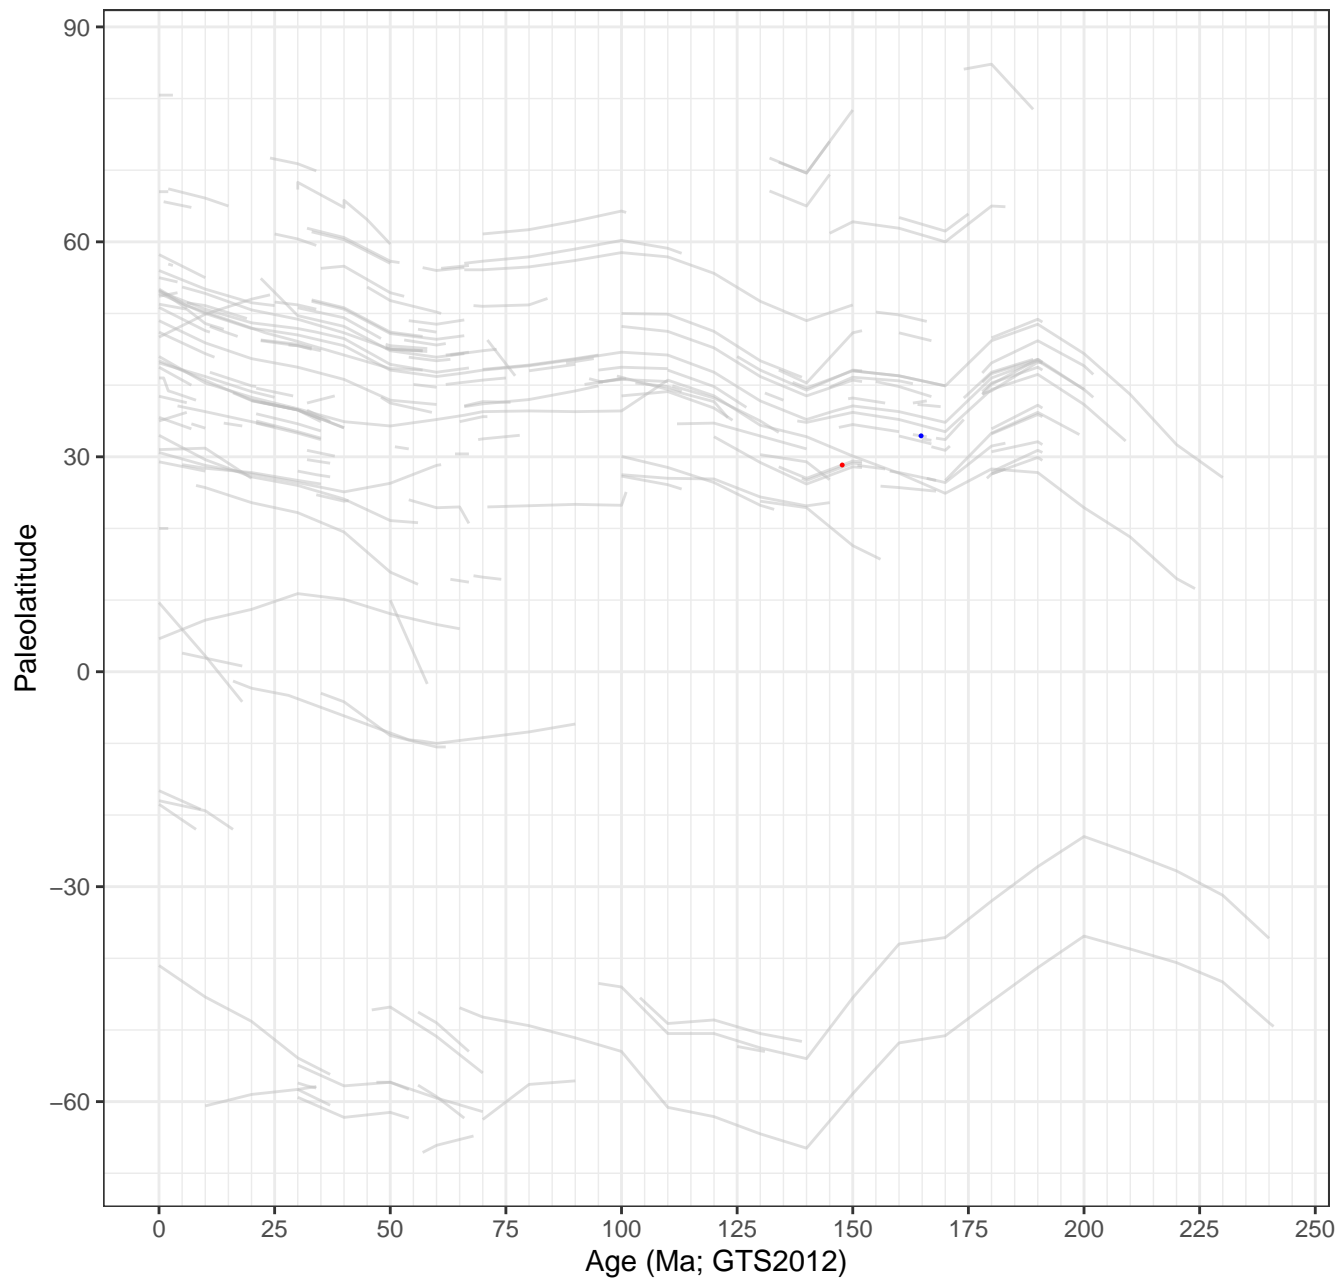

Supplement: Supplementary file 2176 [file Prolixosphaeridium anasillum.pdf › Supplement/Supplement 2/Species 1914 plots/Prolixosphaeridium anasillum.pdf]

# Species Prolixosphaeridium basifurcatum

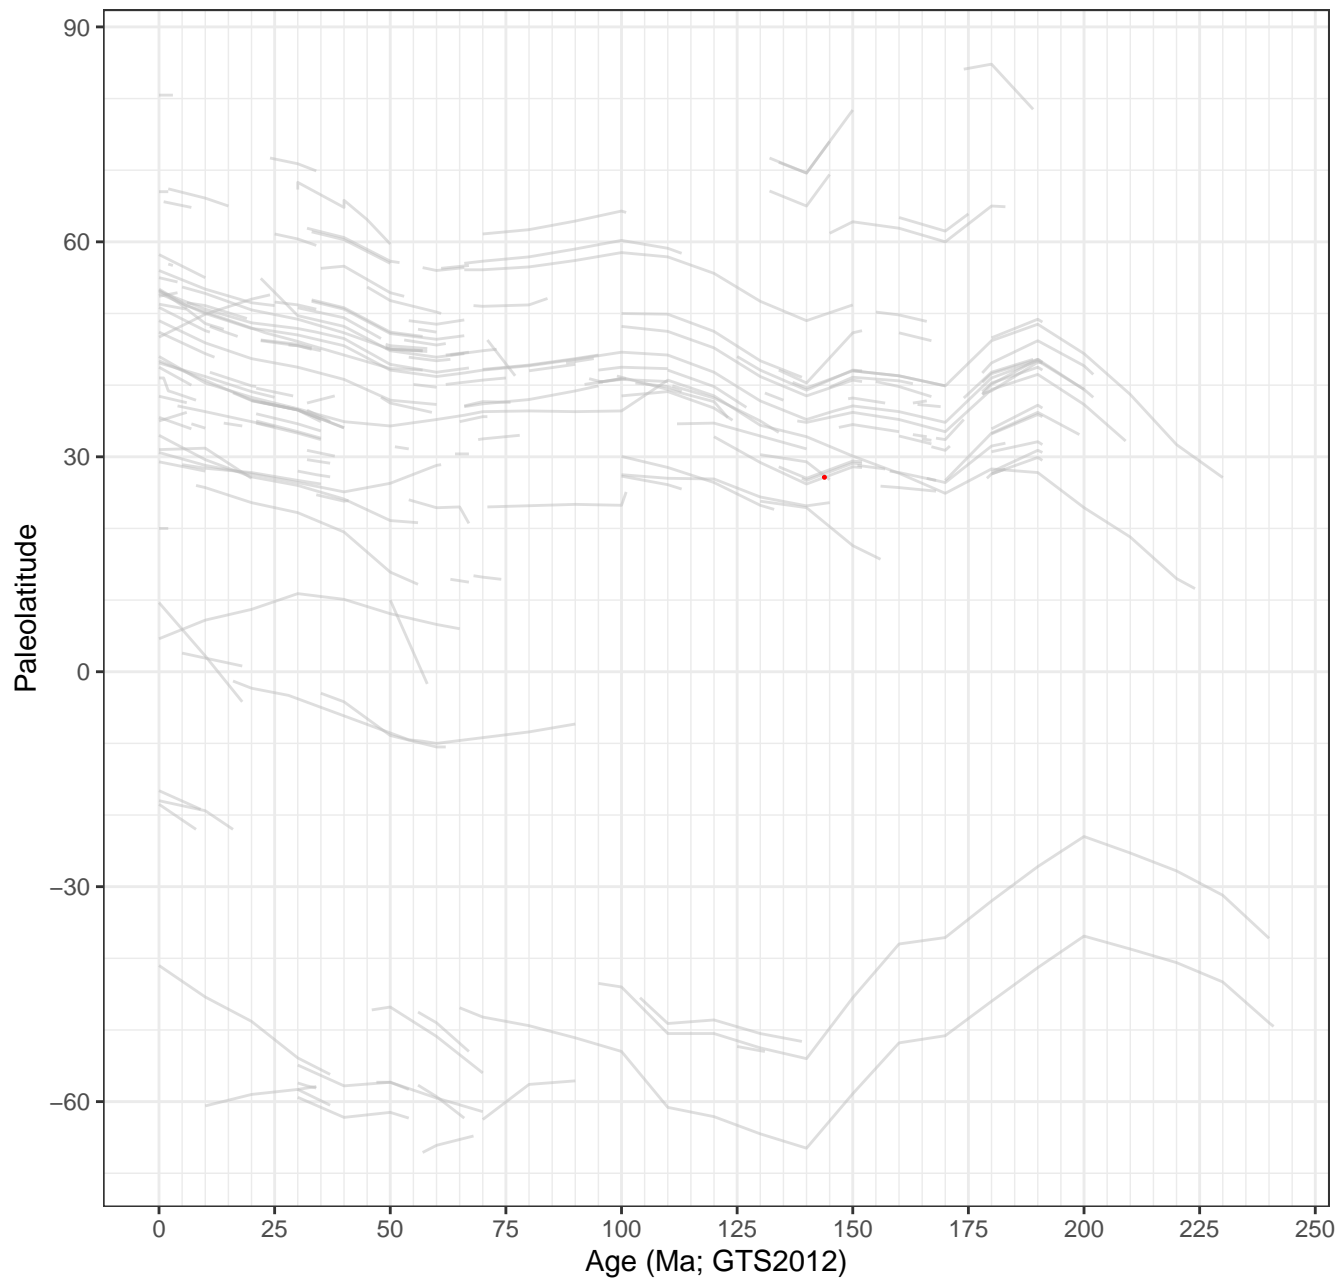

Supplement: Supplementary file 2177 [file Prolixosphaeridium basifurcatum.pdf › Supplement/Supplement 2/Species 1914 plots/Prolixosphaeridium basifurcatum.pdf]

# Species Prolixosphaeridium conulum

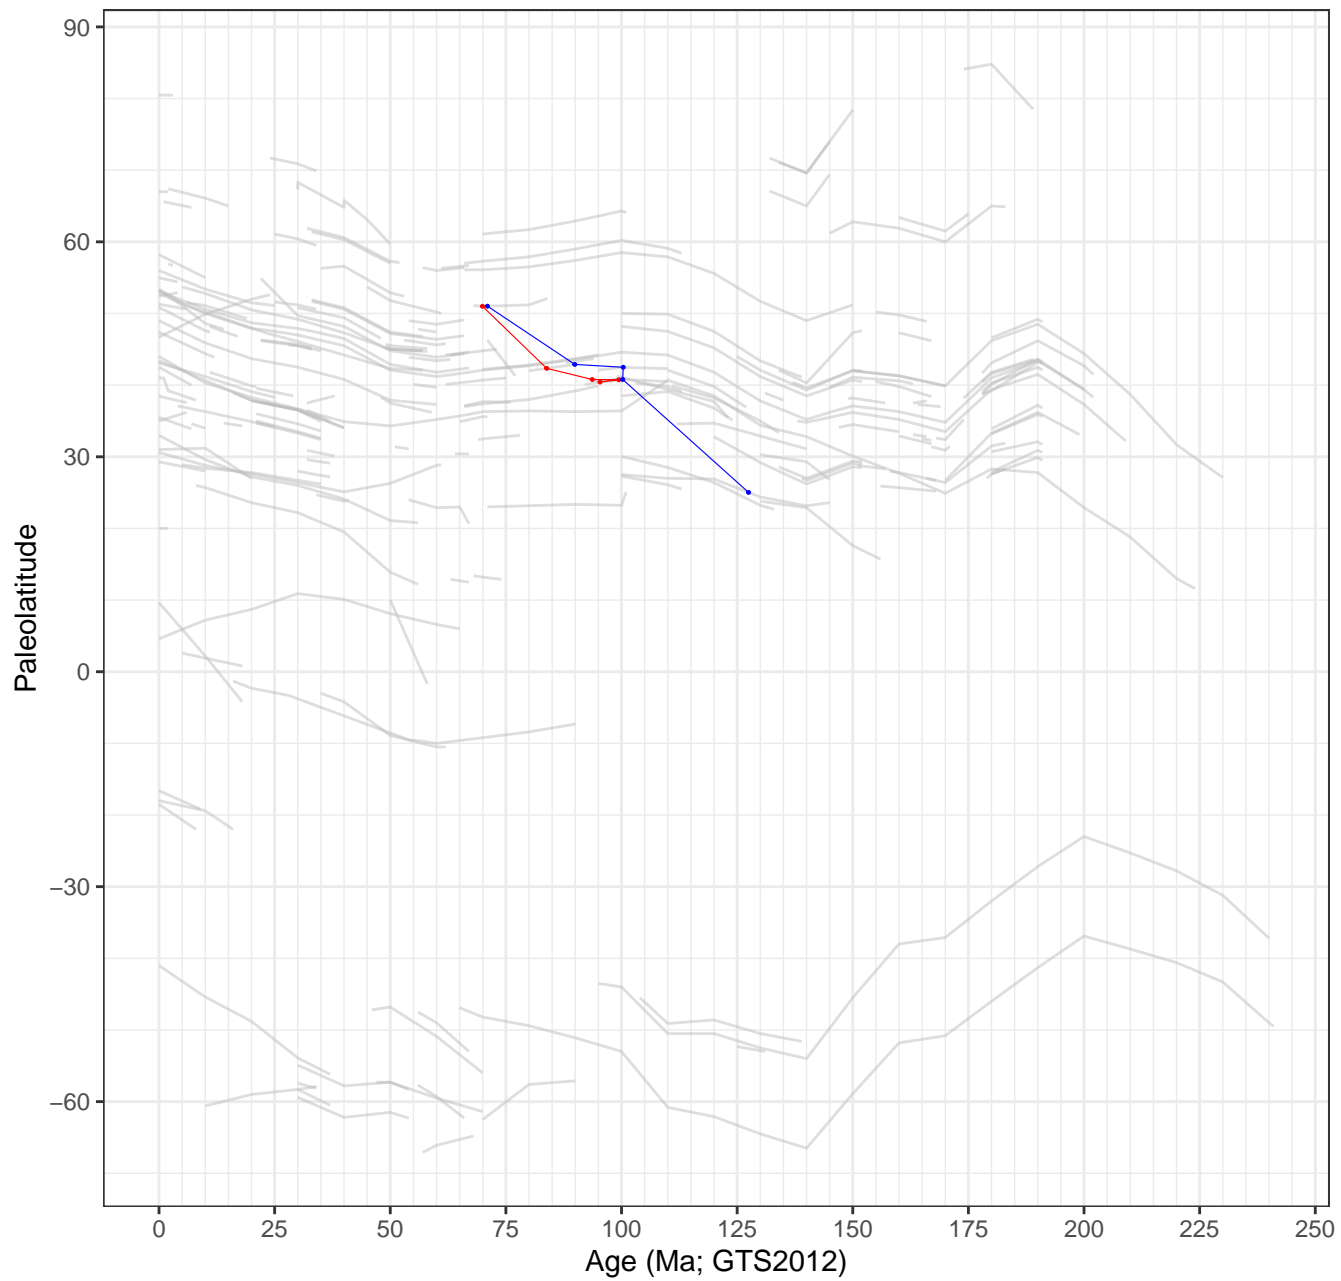

Supplement: Supplementary file 2178 [file Prolixosphaeridium conulum.pdf › Supplement/Supplement 2/Species 1914 plots/Prolixosphaeridium conulum.pdf]

# Species Prolixosphaeridium granulosum

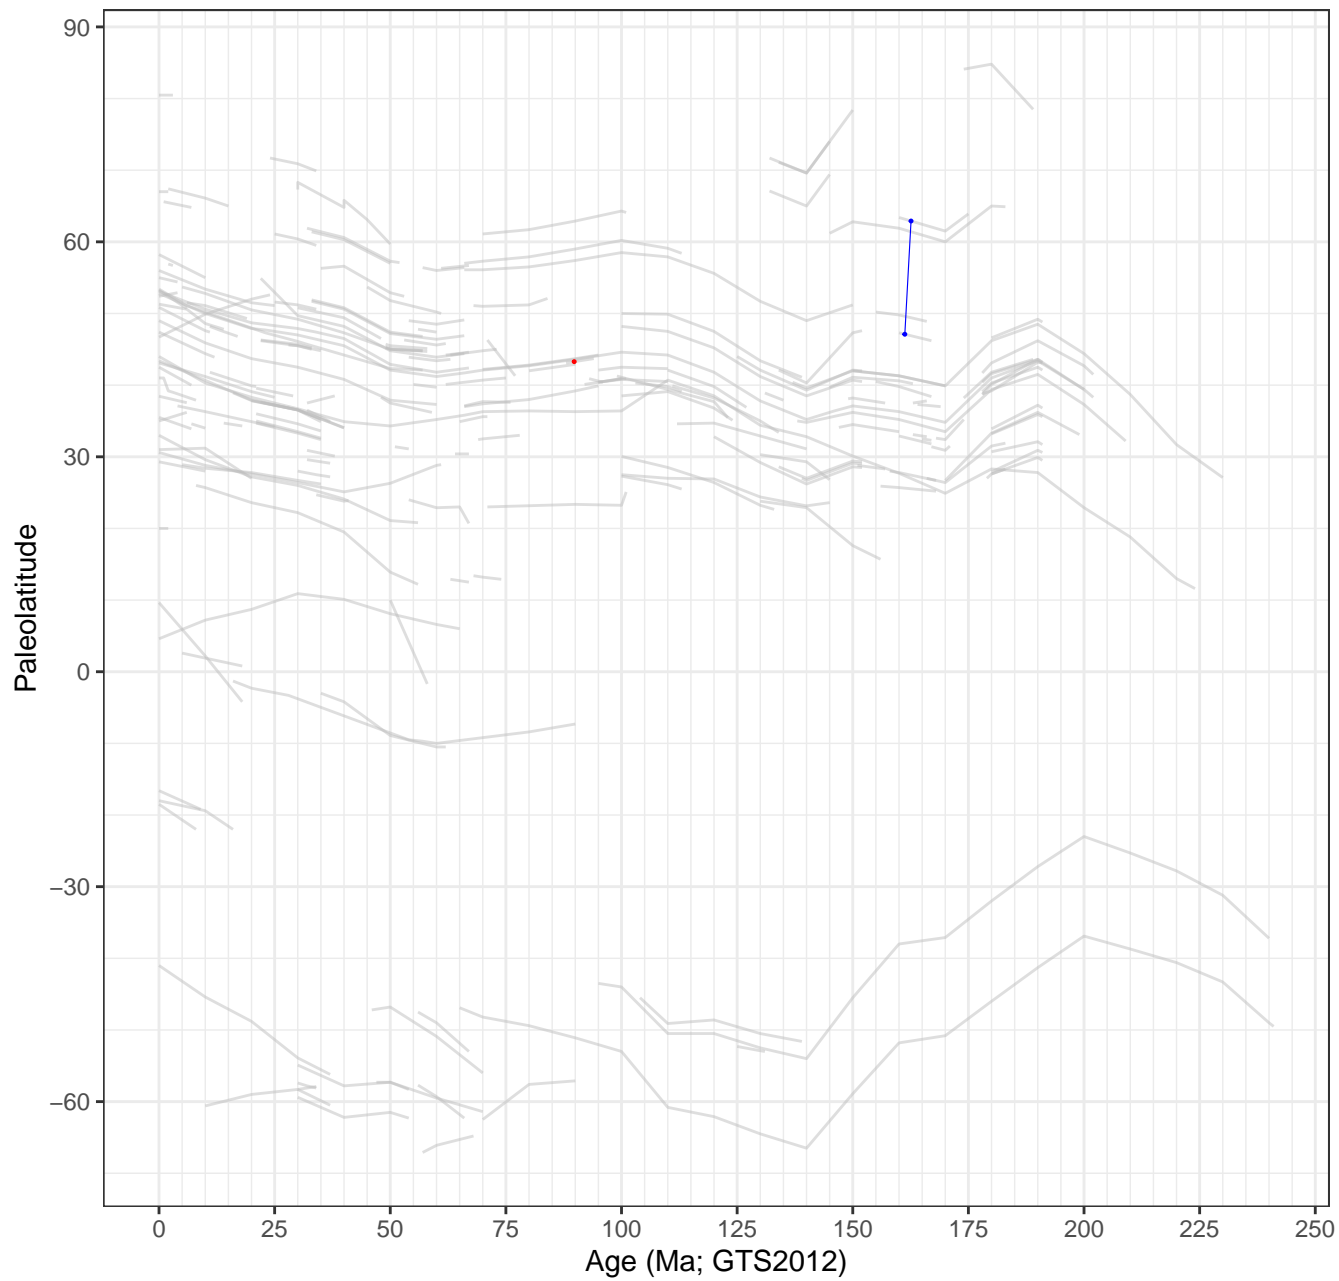

Supplement: Supplementary file 2179 [file Prolixosphaeridium granulosum.pdf › Supplement/Supplement 2/Species 1914 plots/Prolixosphaeridium granulosum.pdf]

# Species Prolixosphaeridium inequioratum

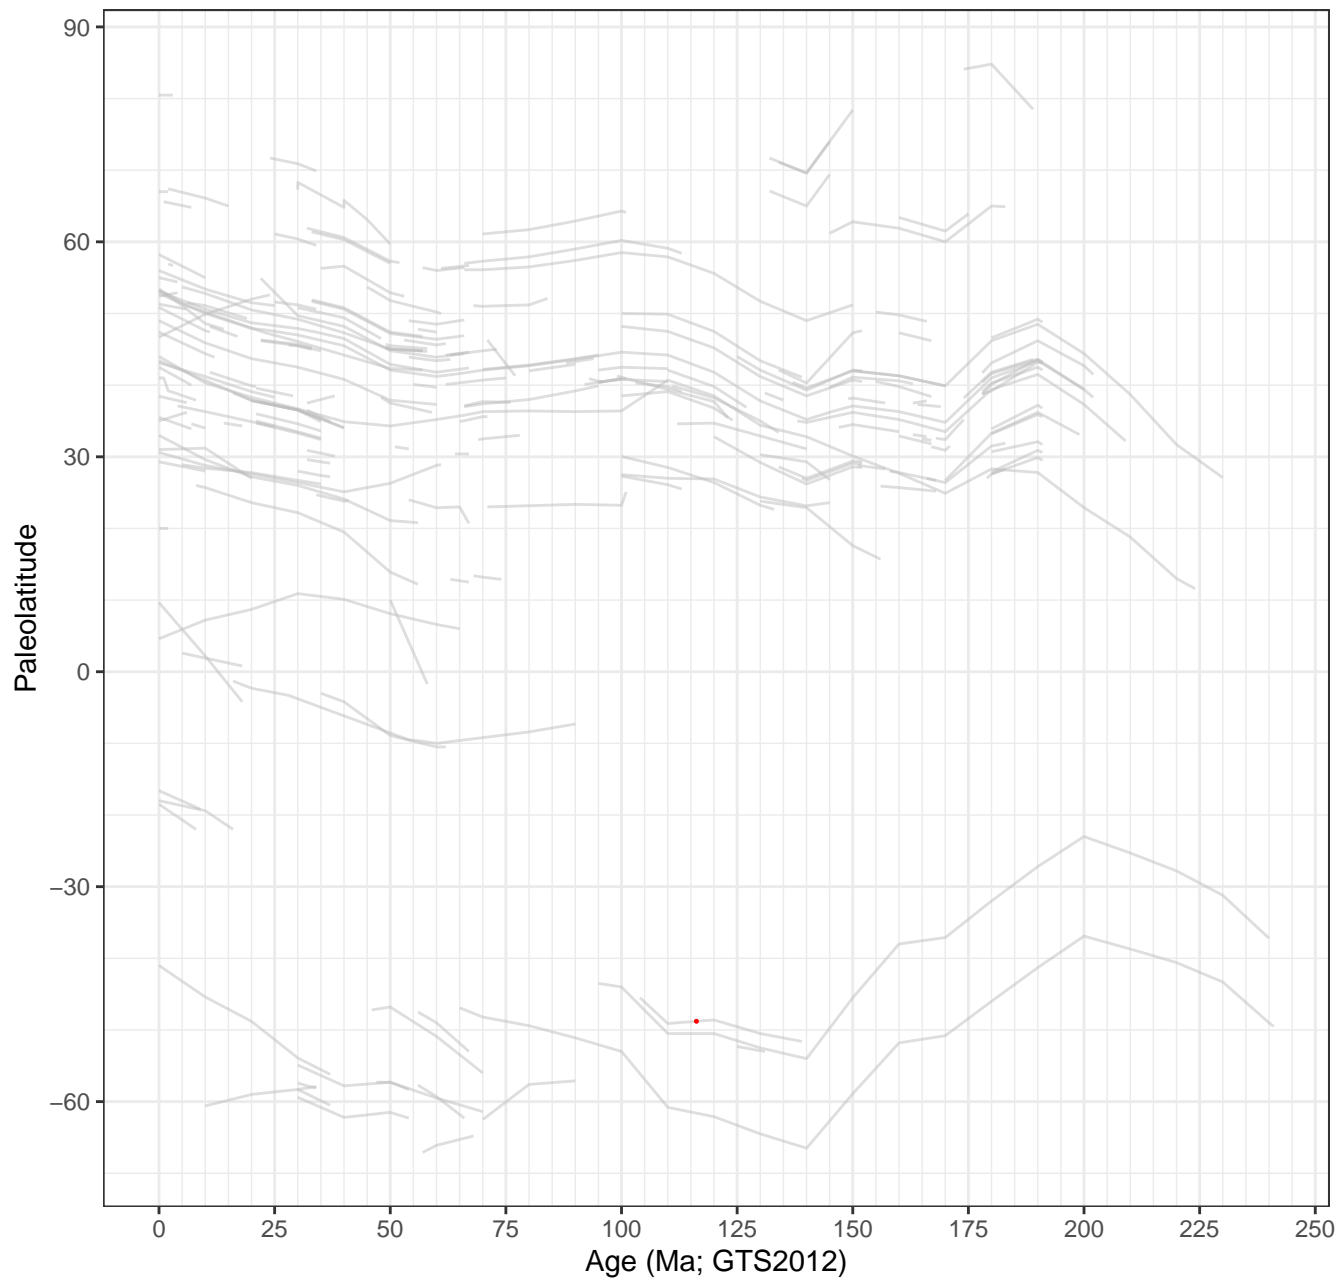

Supplement: Supplementary file 2180 [file Prolixosphaeridium inequiornatum.pdf › Supplement/Supplement 2/Species 1914 plots/Prolixosphaeridium inequiornatum.pdf]

# Species *Prolixosphaeridium mixtispinosum*

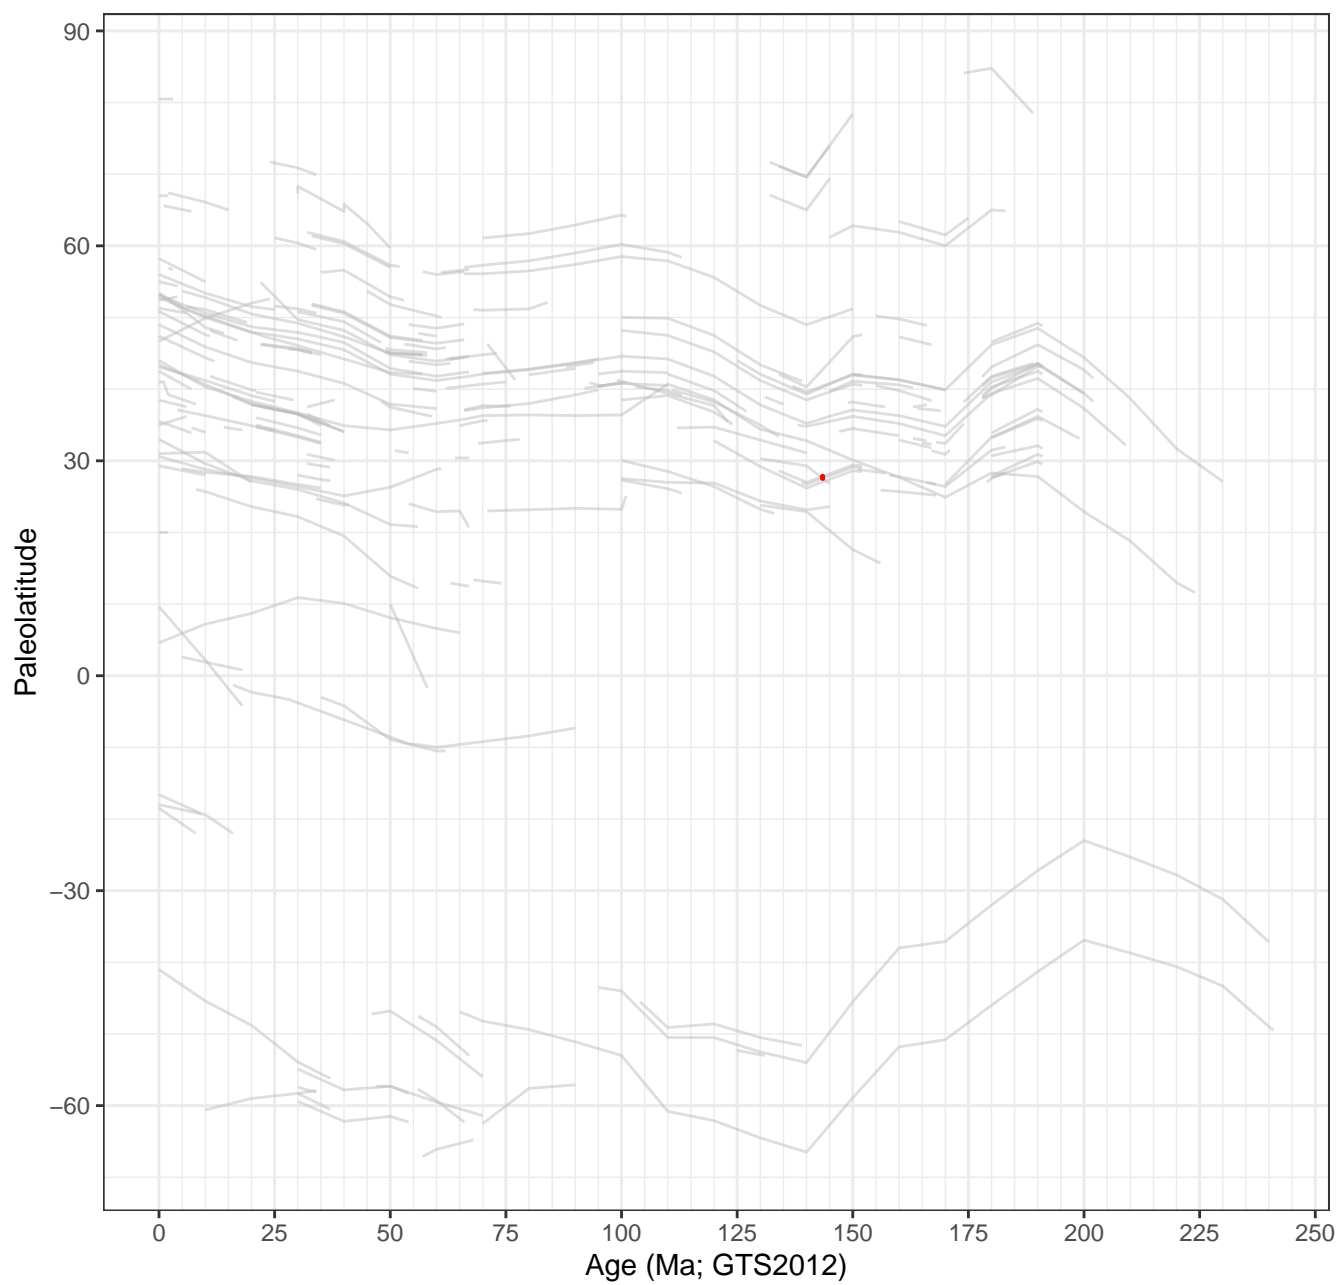

Supplement: Supplementary file 2181 [file Prolixosphaeridium mixtispinosum.pdf › Supplement/Supplement 2/Species 1914 plots/Prolixosphaeridium mixtispinosum.pdf]

# Species *Prolixosphaeridium parvispinum*

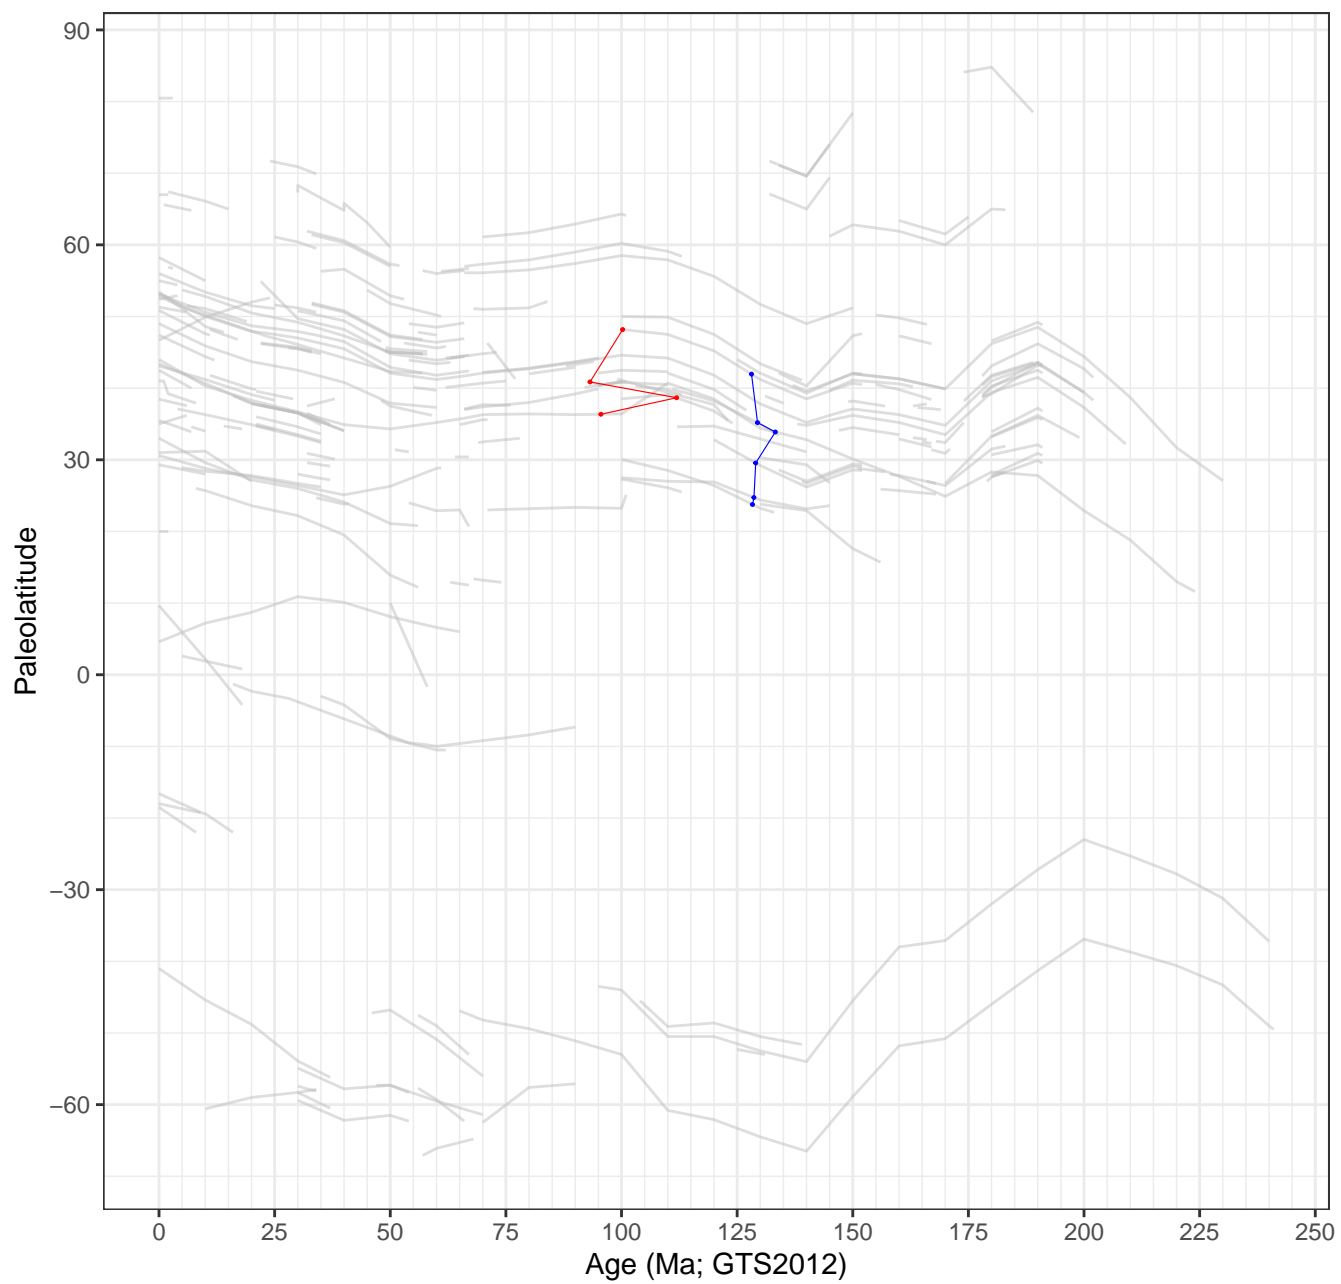

Supplement: Supplementary file 2182 [file Prolixosphaeridium parvispinum.pdf › Supplement/Supplement 2/Species 1914 plots/Prolixosphaeridium parvispinum.pdf]

# Species *Protobatioladinium lunare*

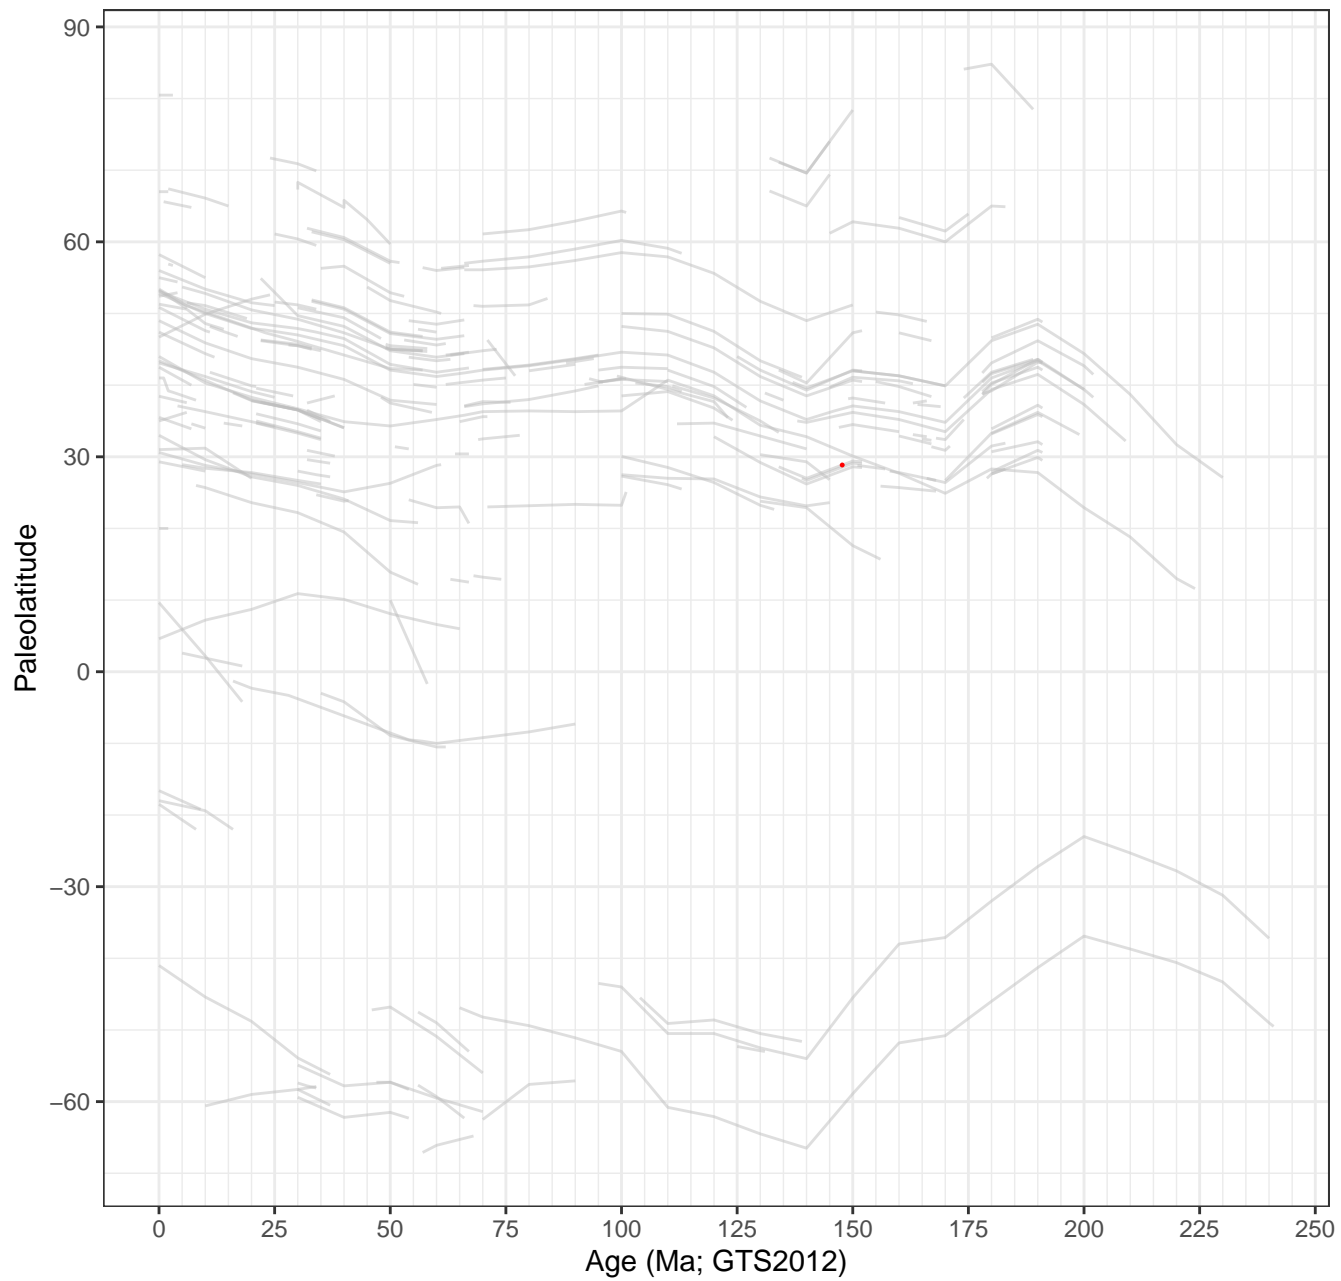

Supplement: Supplementary file 2183 [file Protobatioladinium lunare.pdf › Supplement/Supplement 2/Species 1914 plots/Protobatioladinium lunare.pdf]

# Species *Protobatioladinium westburiense*

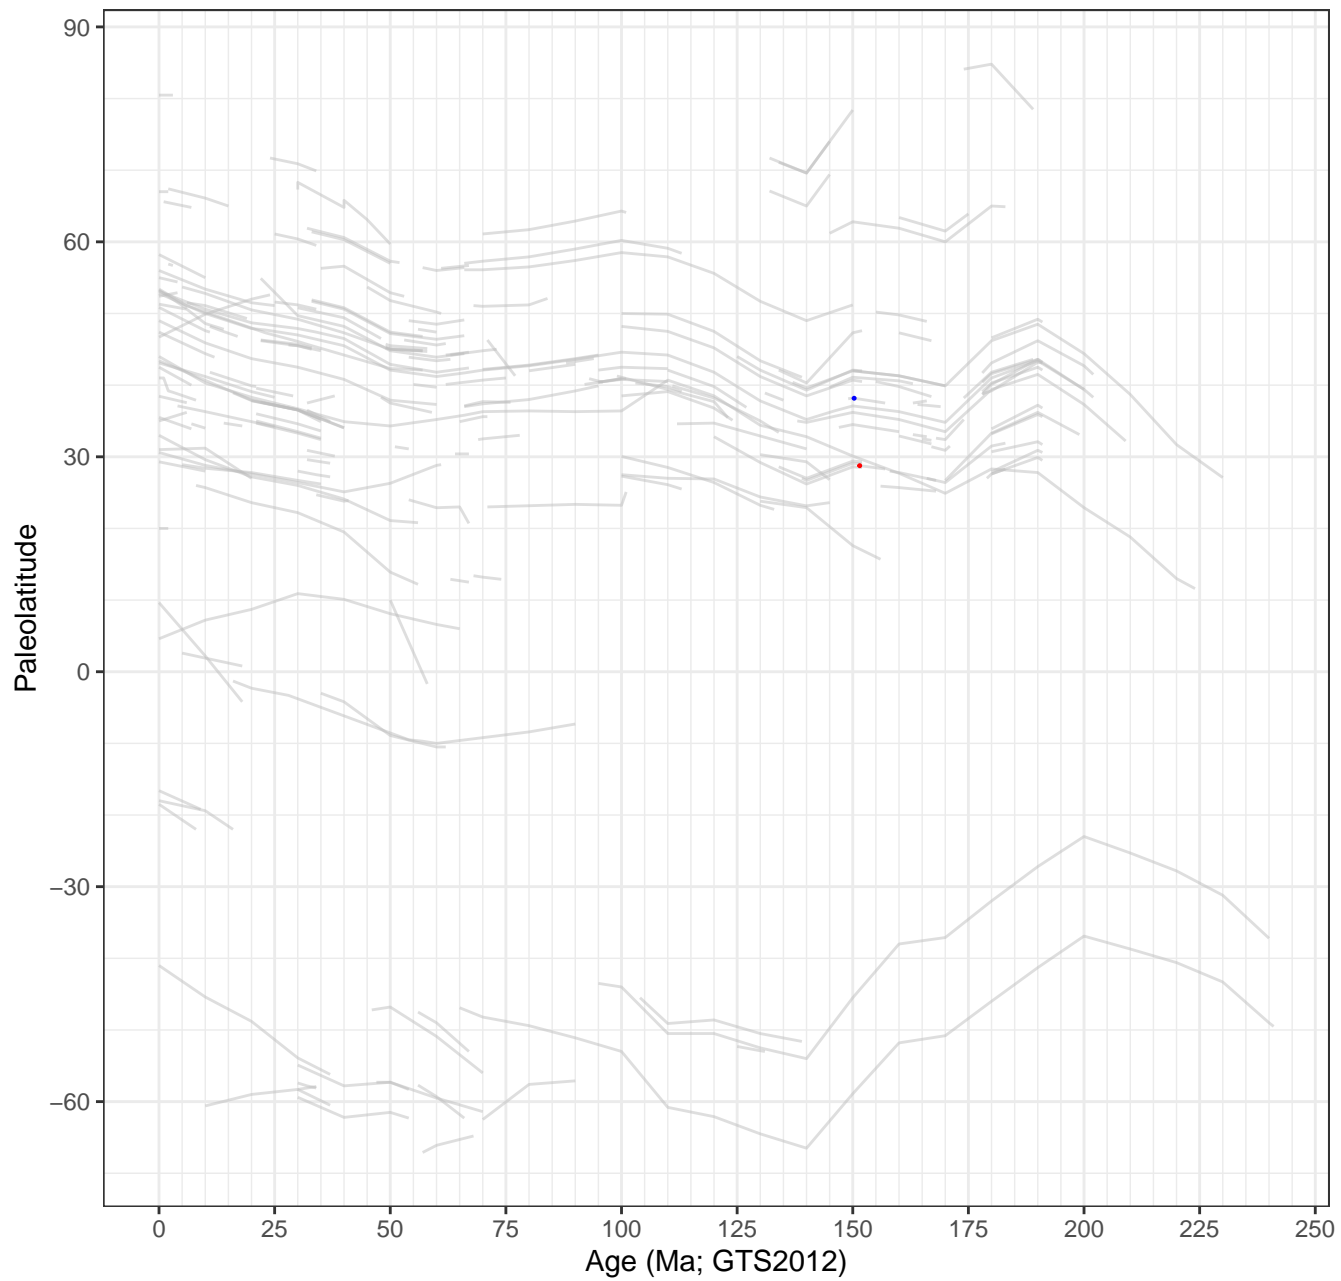

Supplement: Supplementary file 2184 [file Protobatioladinium westburiense.pdf › Supplement/Supplement 2/Species 1914 plots/Protobatioladinium westburiense.pdf]

# Species *Protoellipsodinium clavulus*

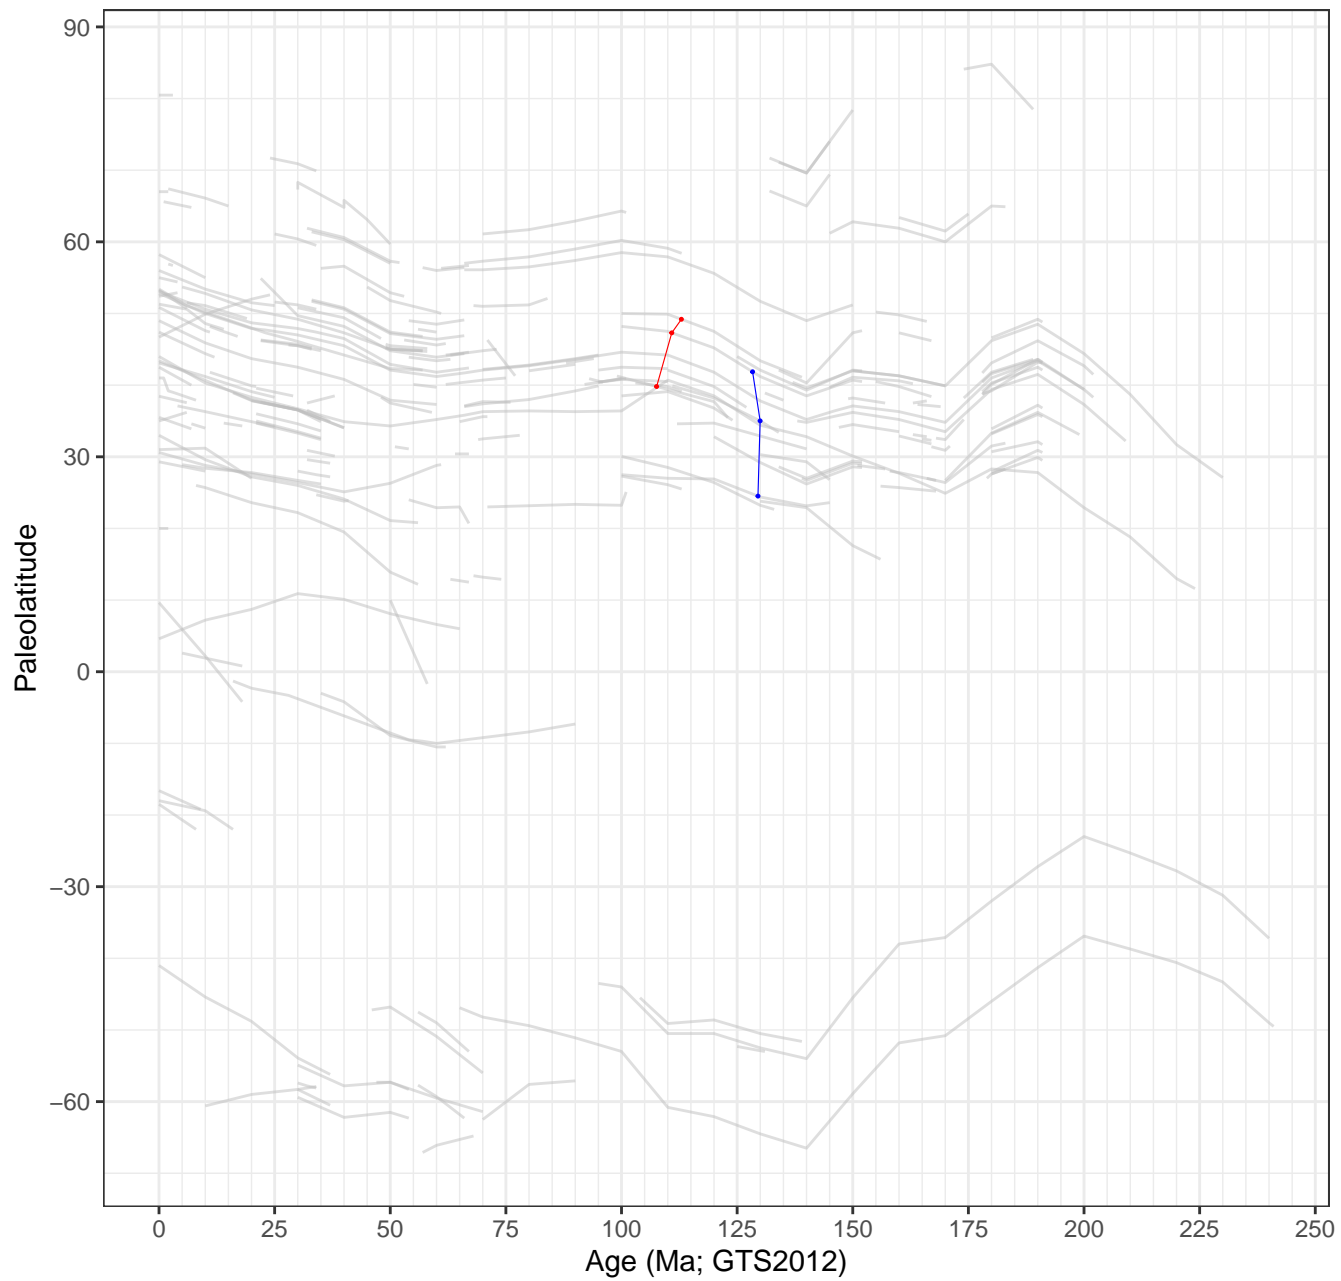

Supplement: Supplementary file 2185 [file Protoellipsodinium clavulus.pdf › Supplement/Supplement 2/Species 1914 plots/Protoellipsodinium clavulus.pdf]

# Species Protoellipsodinium seghire medaure

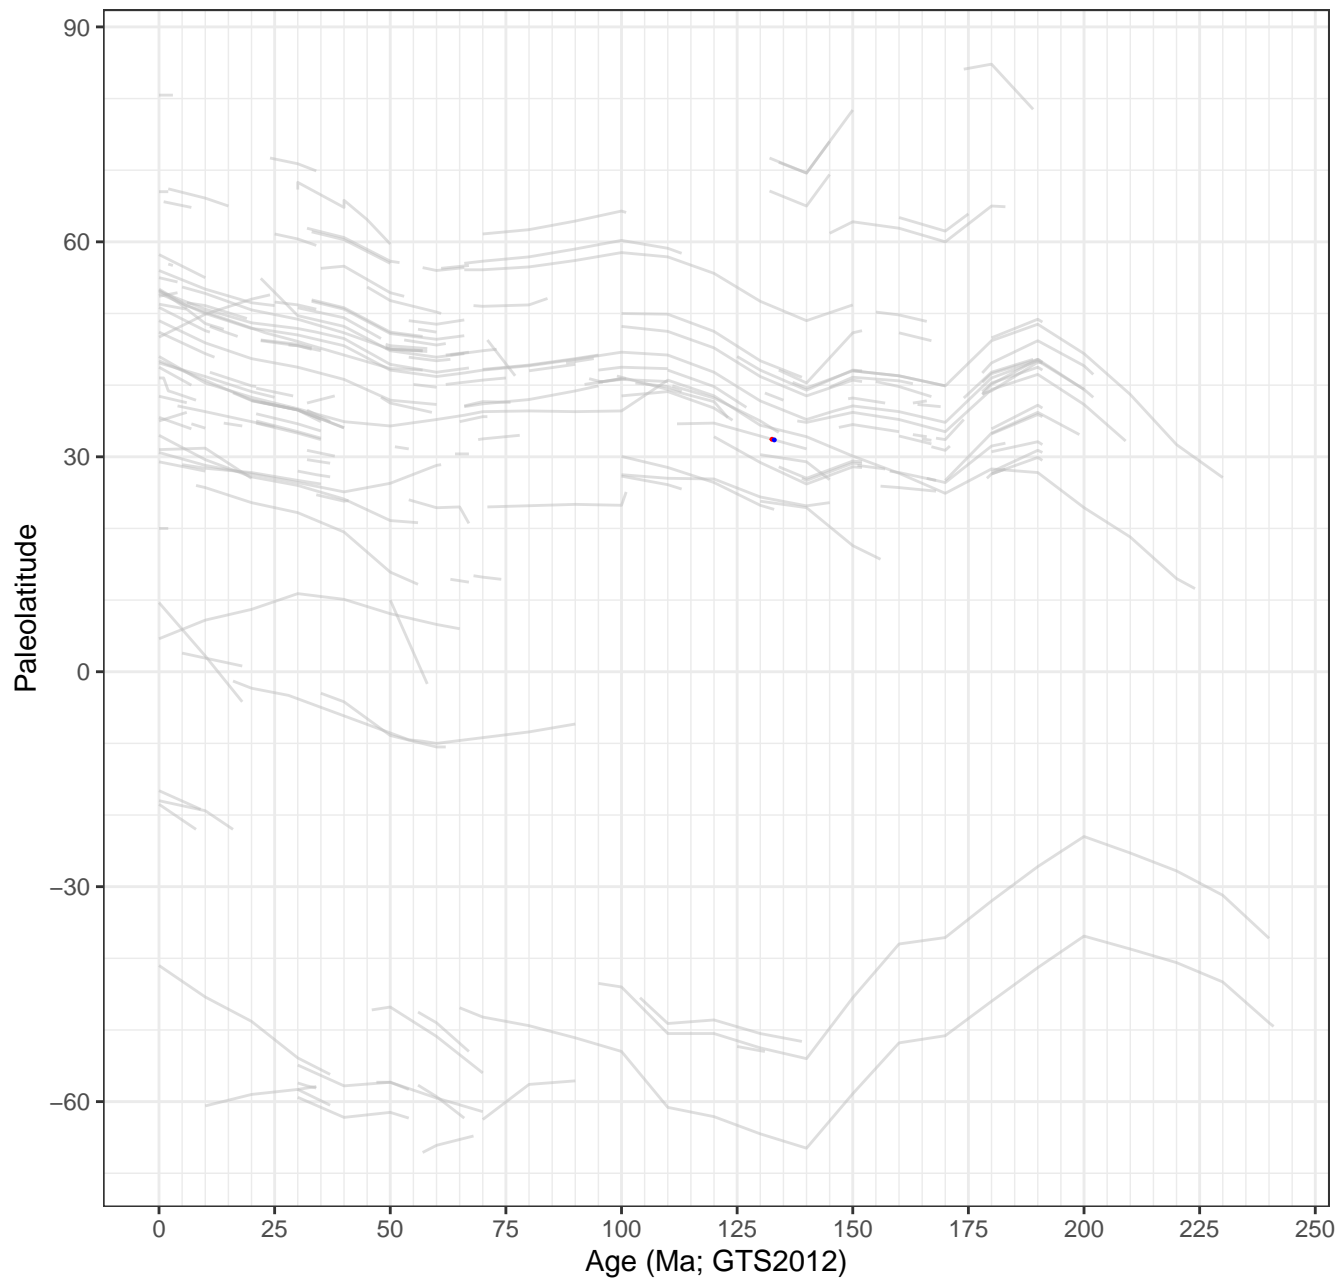

Supplement: Supplementary file 2186 [file Protoellipsodinium seghire medaaure.pdf › Supplement/Supplement 2/Species 1914 plots/Protoellipsodinium seghire medaaure.pdf]

# Species *Protoellipsodinium spinocristatum*

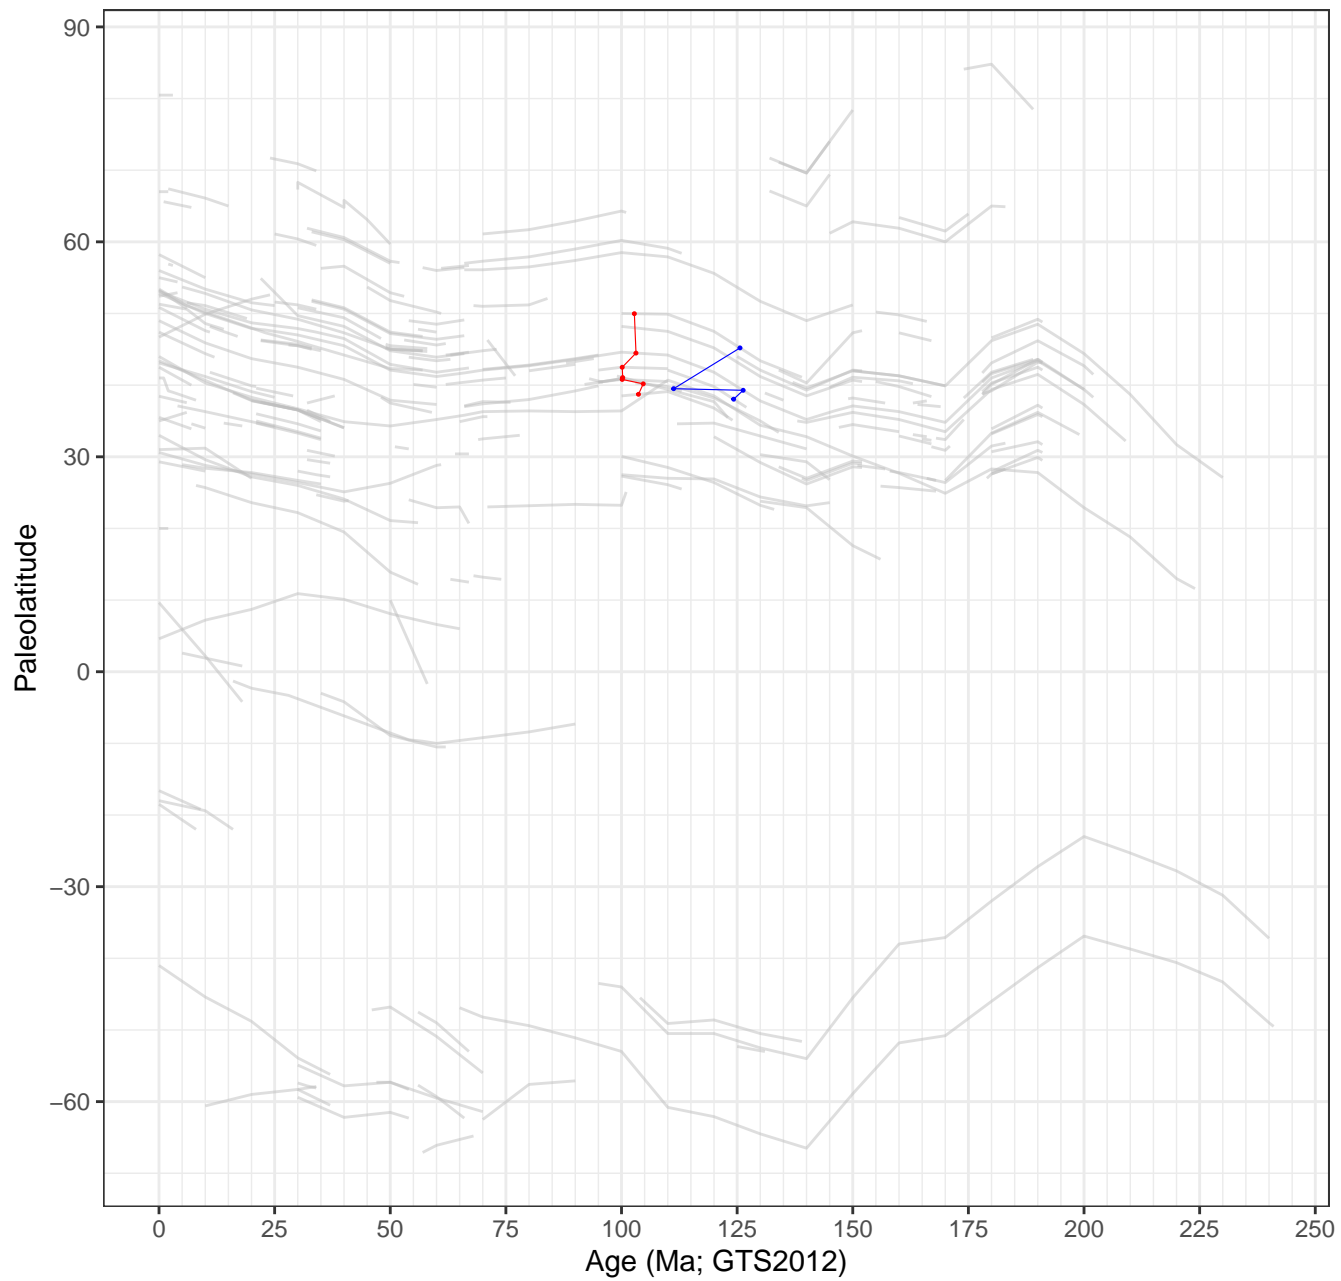

Supplement: Supplementary file 2187 [file Protoellipsodinium spinocristatum.pdf › Supplement/Supplement 2/Species 1914 plots/Protoellipsodinium spinocristatum.pdf]

# Species *Protoellipsodinium spinosum*

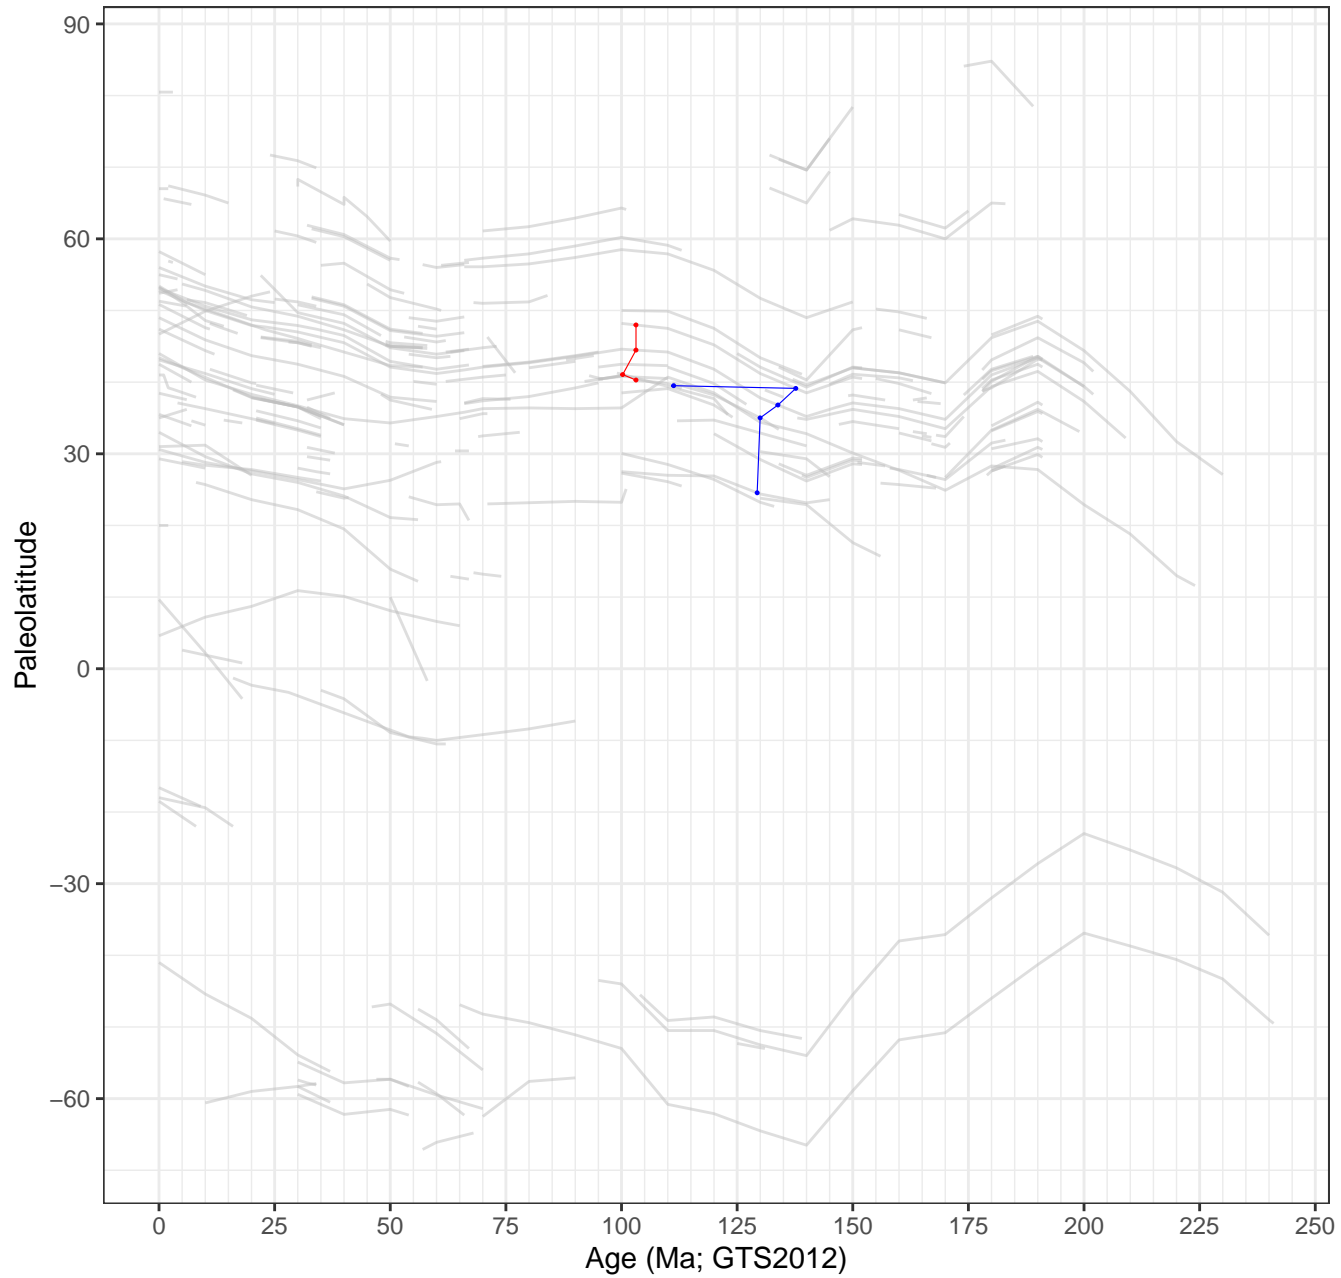

Supplement: Supplementary file 2188 [file Protoellipsodinium spinosum.pdf › Supplement/Supplement 2/Species 1914 plots/Protoellipsodinium spinosum.pdf]

# Species *Protoellipsodinium touille mugatae*

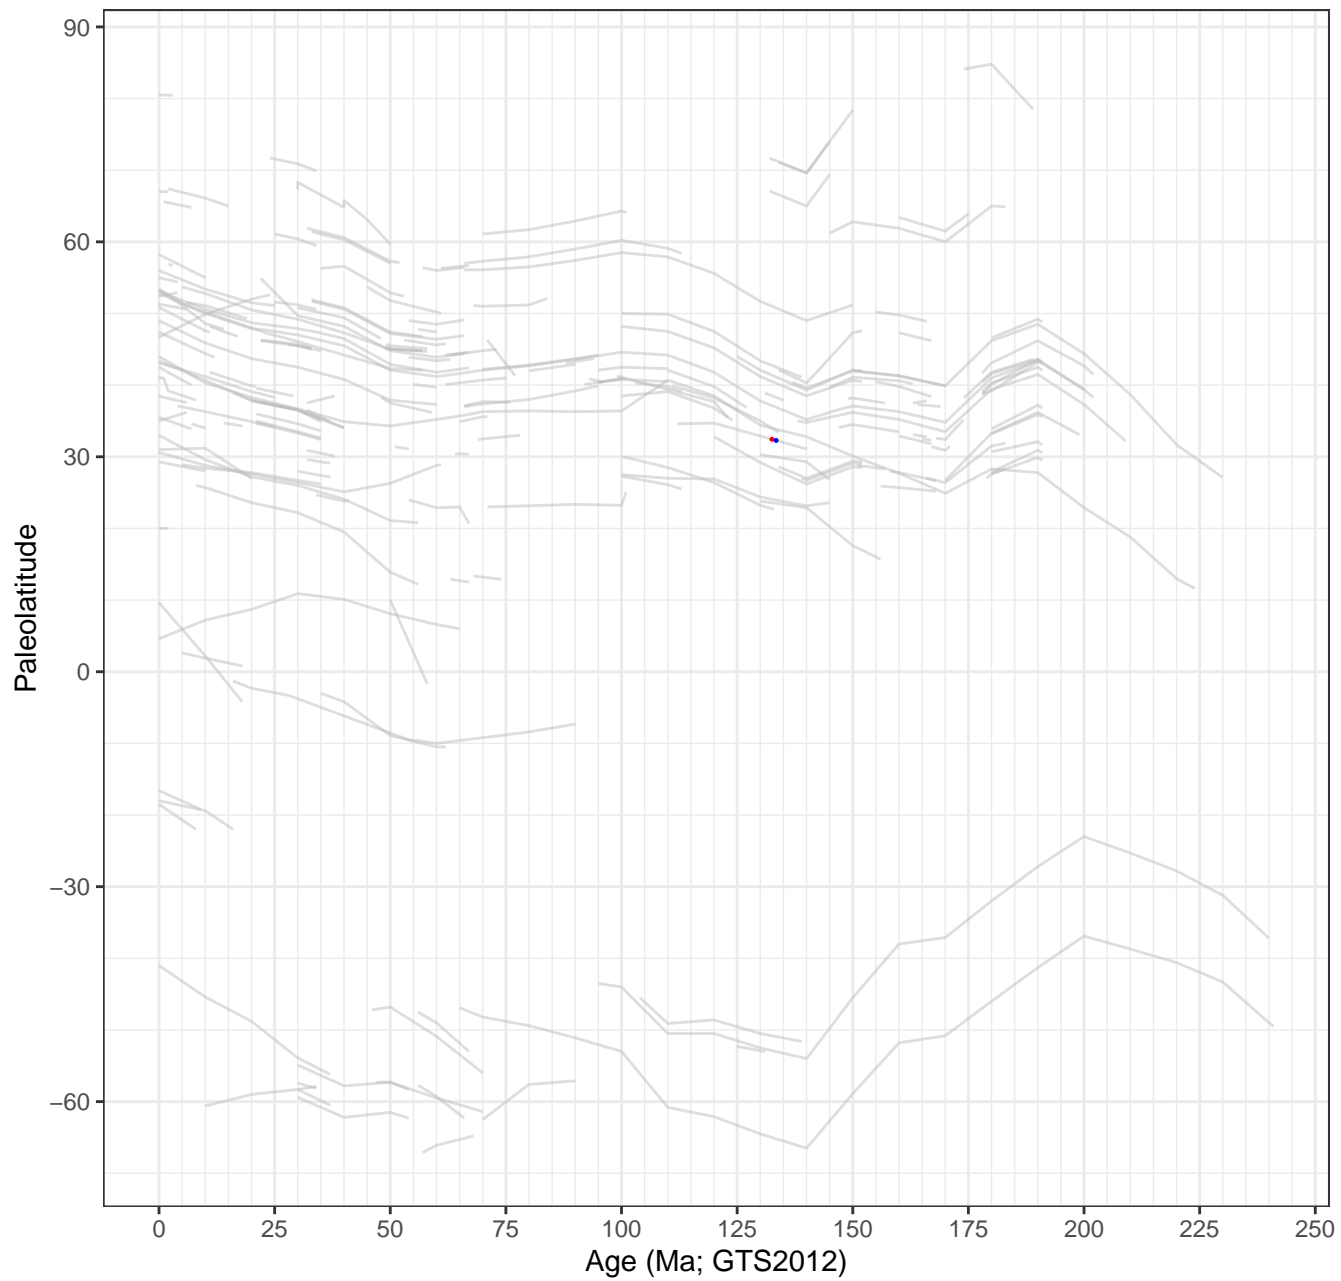

Supplement: Supplementary file 2189 [file Protoellipsodinium touille mugatae.pdf › Supplement/Supplement 2/Species 1914 plots/Protoellipsodinium touille mugatae.pdf]

# Species Protoellipsodinium touille

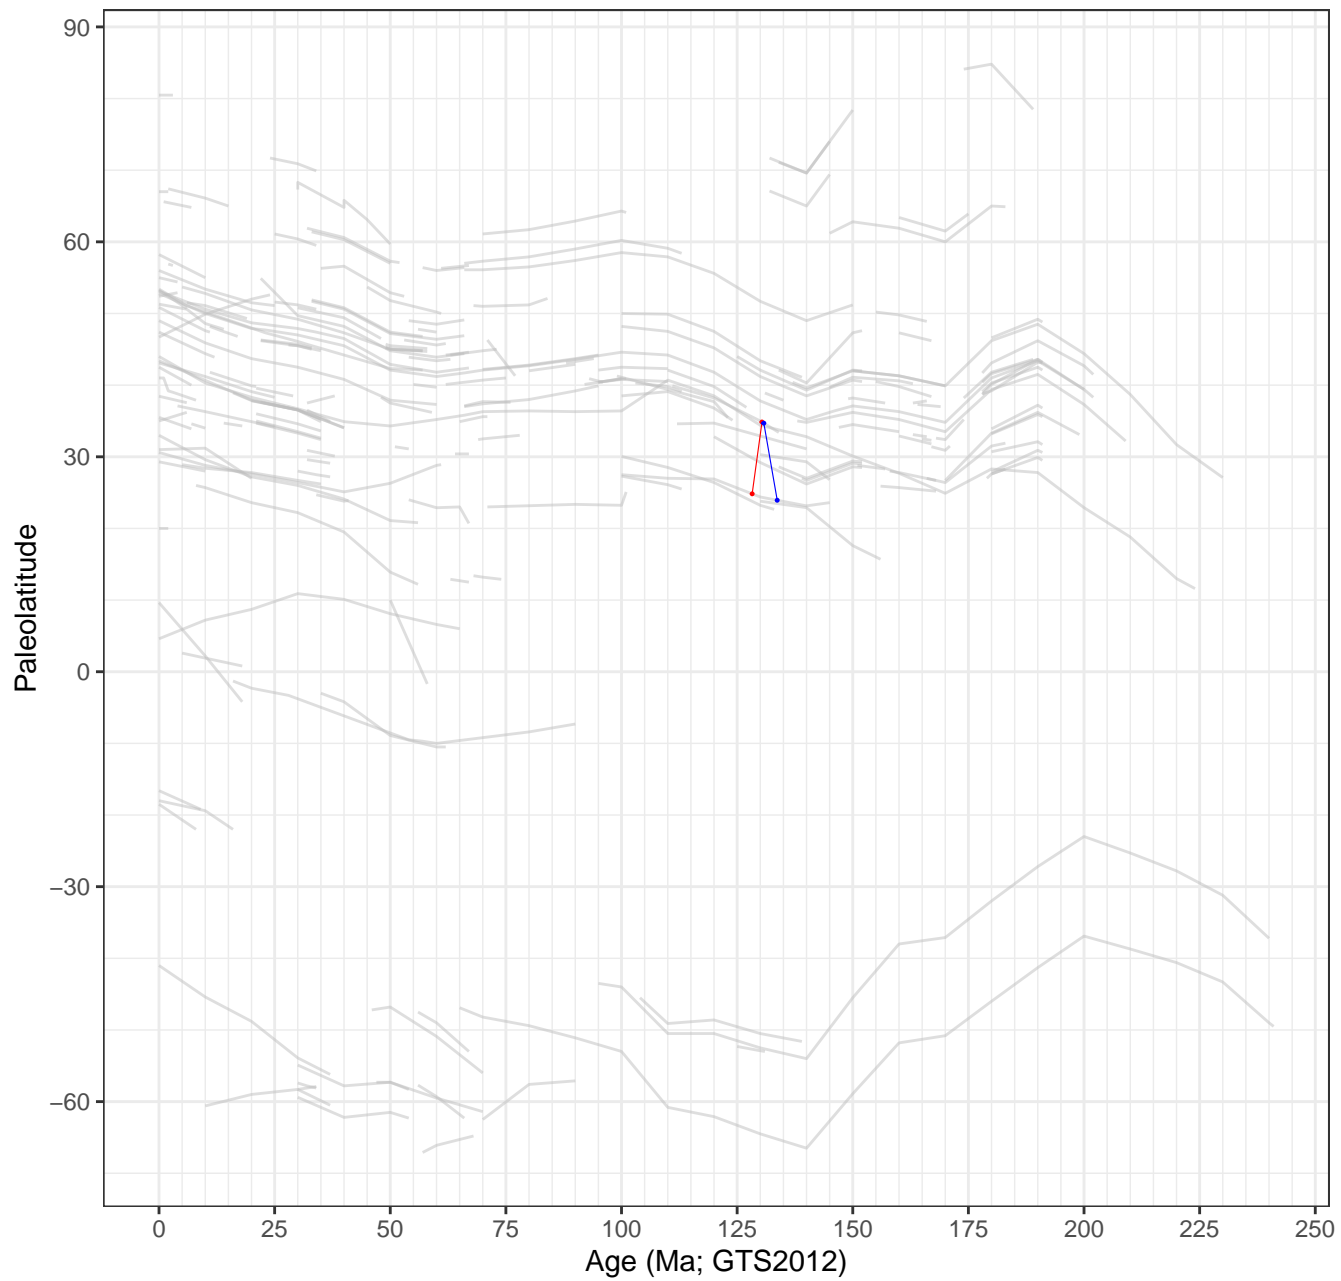

Supplement: Supplementary file 2190 [file Protoellipsodinium touille.pdf › Supplement/Supplement 2/Species 1914 plots/Protoellipsodinium touille.pdf]

# Species *Psaligonyaulax cypraea*

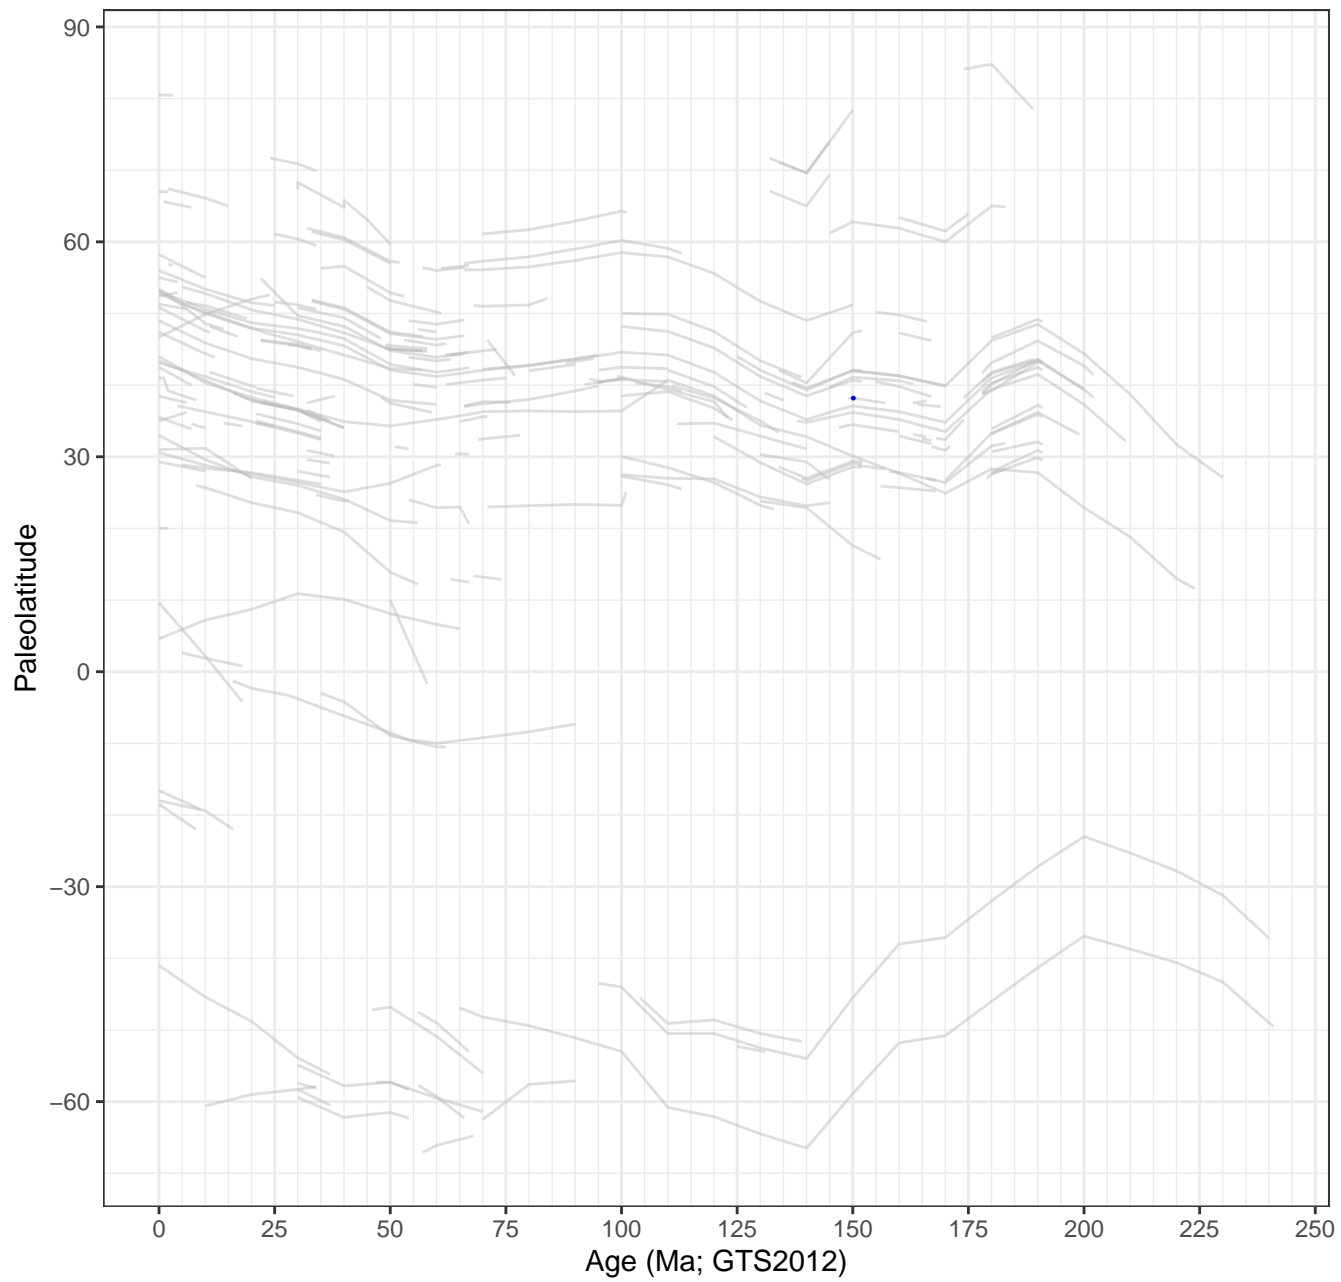

Supplement: Supplementary file 2191 [file Psaligonyaulax cypraea.pdf › Supplement/Supplement 2/Species 1914 plots/Psaligonyaulax cypraea.pdf]

# Species *Psaligonyaulax deflandrei*

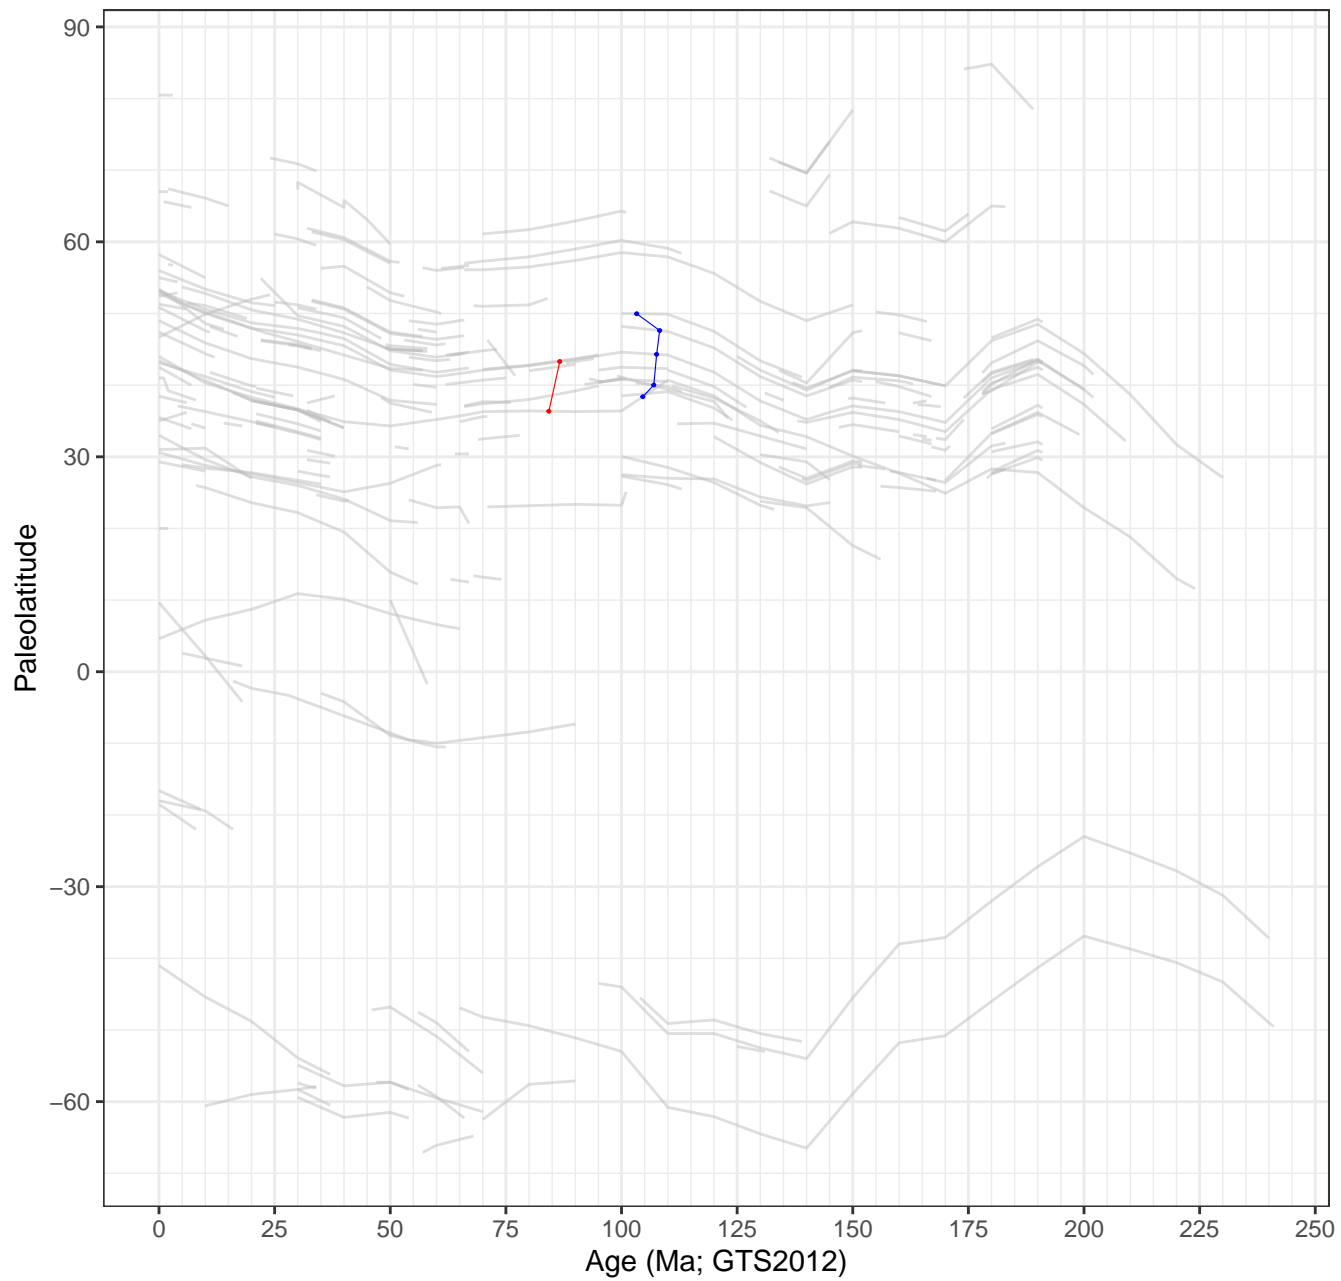

Supplement: Supplementary file 2192 [file Psaligonyaulax deflandrei.pdf › Supplement/Supplement 2/Species 1914 plots/Psaligonyaulax deflandrei.pdf]

# Species *Pseudoceratium anaphrissum*

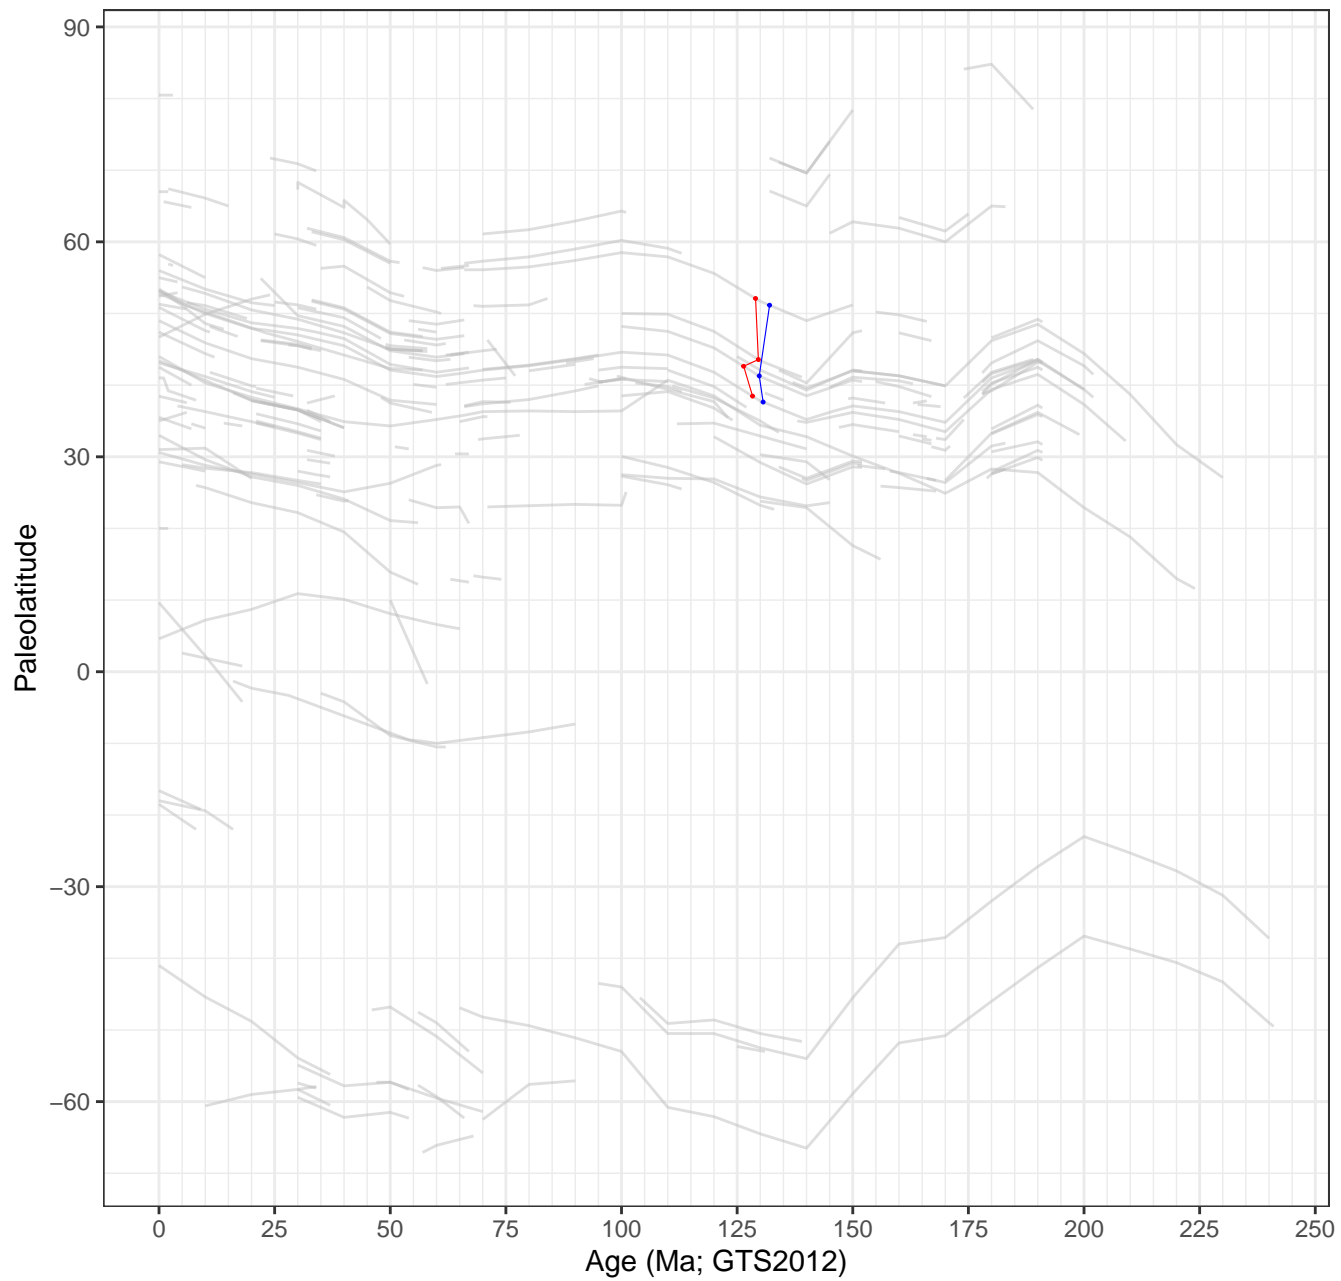

Supplement: Supplementary file 2193 [file Pseudoceratium anaphrissum.pdf › Supplement/Supplement 2/Species 1914 plots/Pseudoceratium anaphrissum.pdf]

# Species *Pseudoceratium brevicornutum*

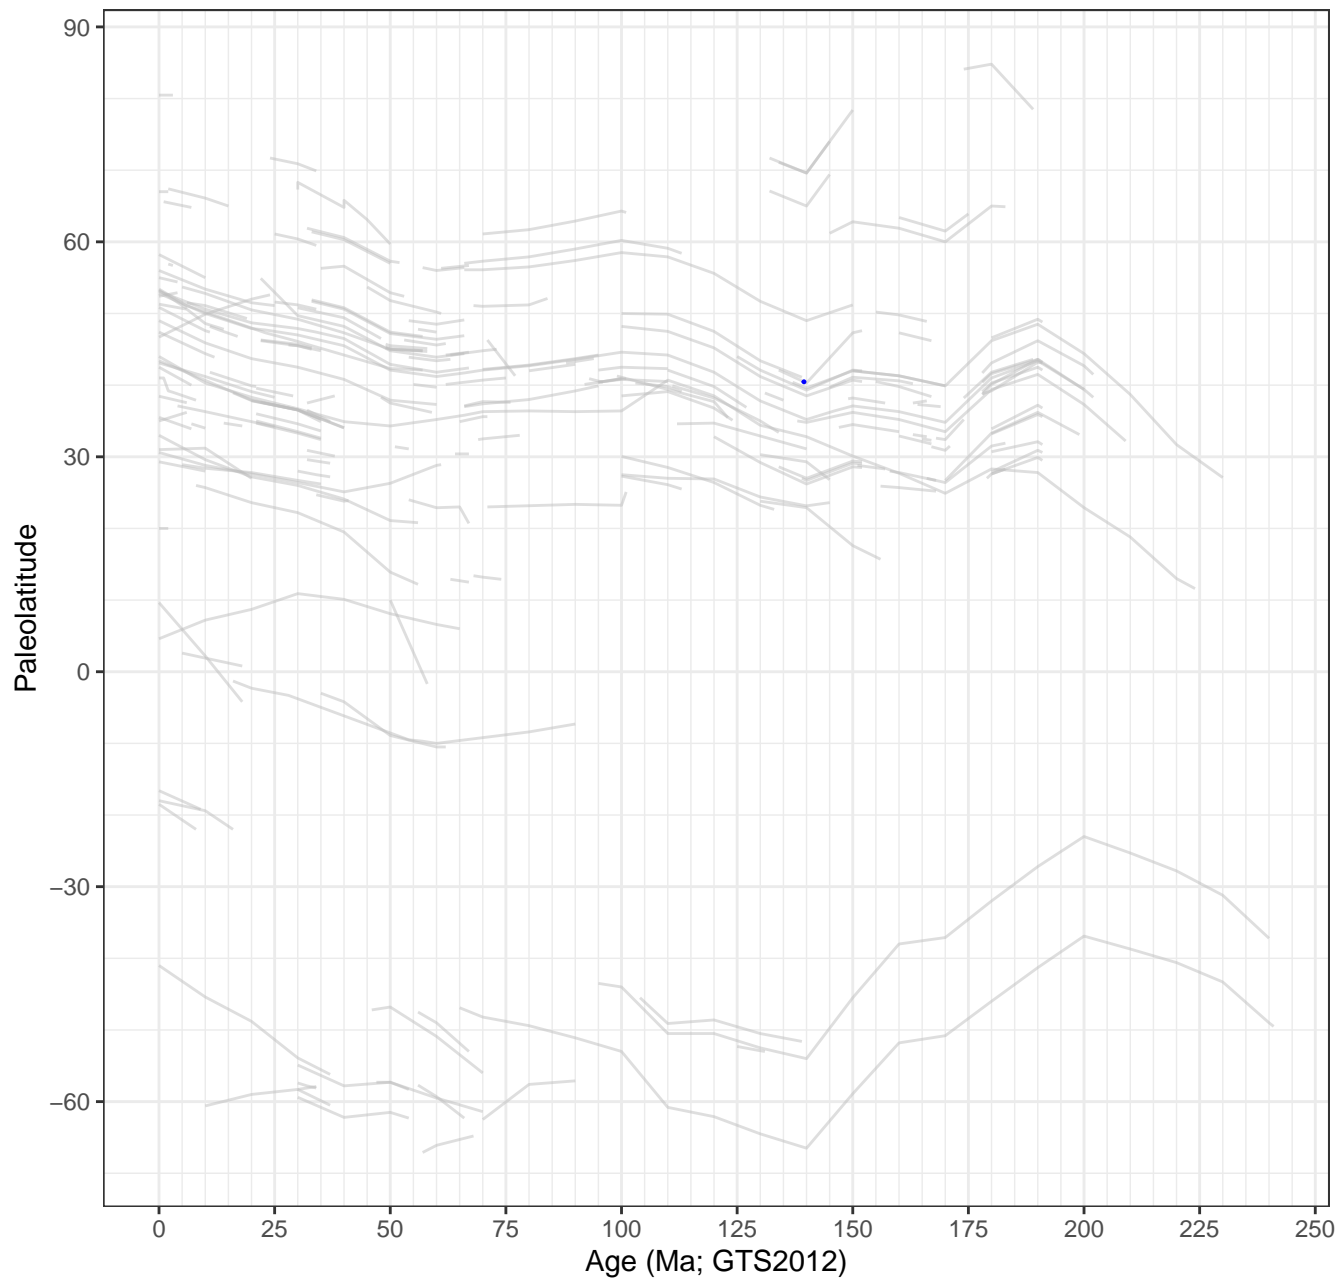

Supplement: Supplementary file 2194 [file Pseudoceratium brevicornutum.pdf › Supplement/Supplement 2/Species 1914 plots/Pseudoceratium brevicornutum.pdf]

# Species *Pseudoceratium distinctum*

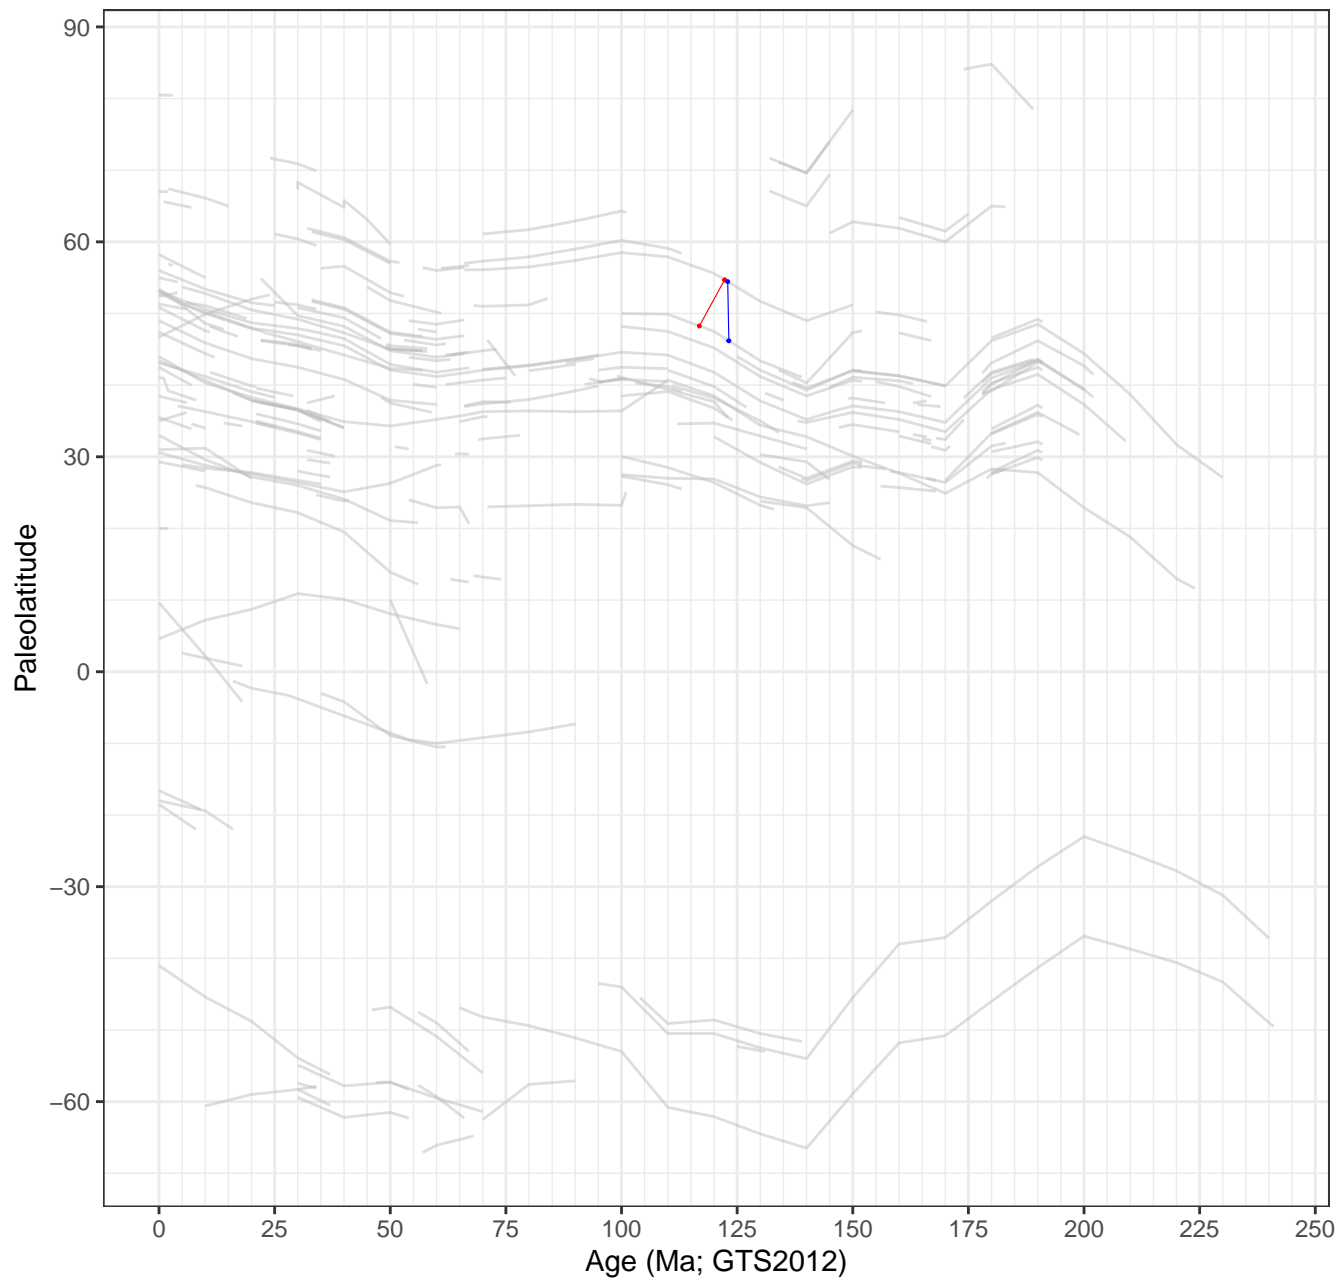

Supplement: Supplementary file 2195 [file Pseudoceratium distinctum.pdf › Supplement/Supplement 2/Species 1914 plots/Pseudoceratium distinctum.pdf]

# Species *Pseudoceratium eisenackii*

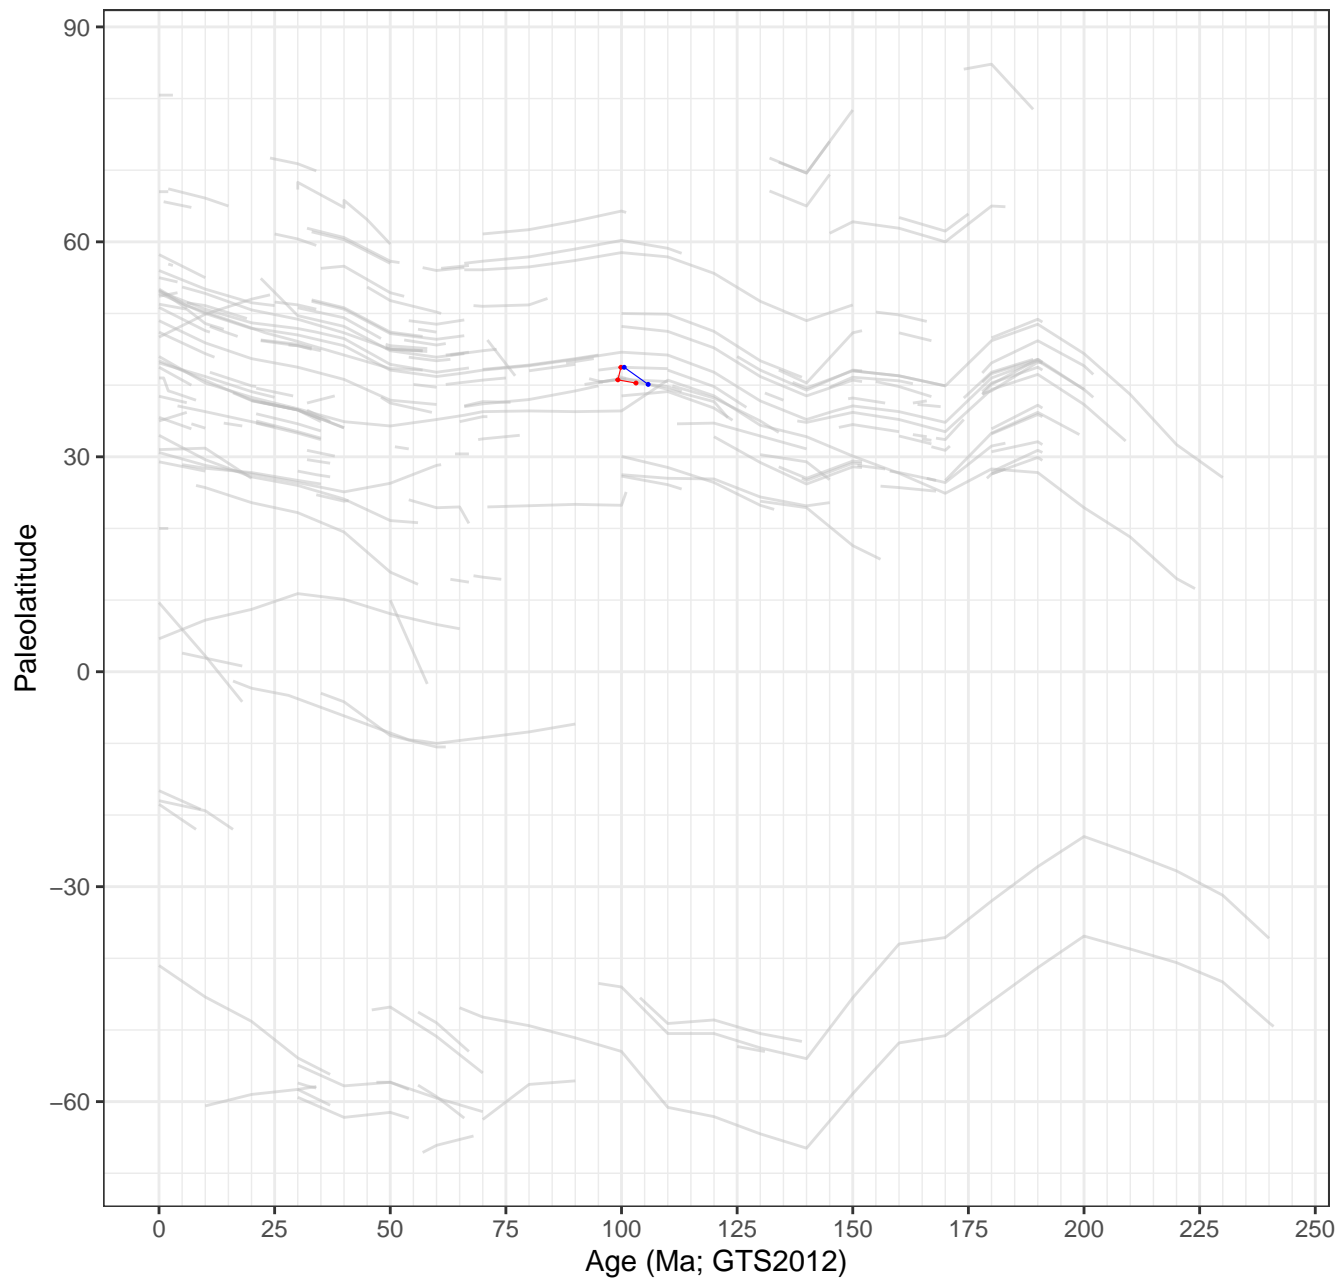

Supplement: Supplementary file 2196 [file Pseudoceratium eisenackii.pdf › Supplement/Supplement 2/Species 1914 plots/Pseudoceratium eisenackii.pdf]

# Species *Pseudoceratium expositum*

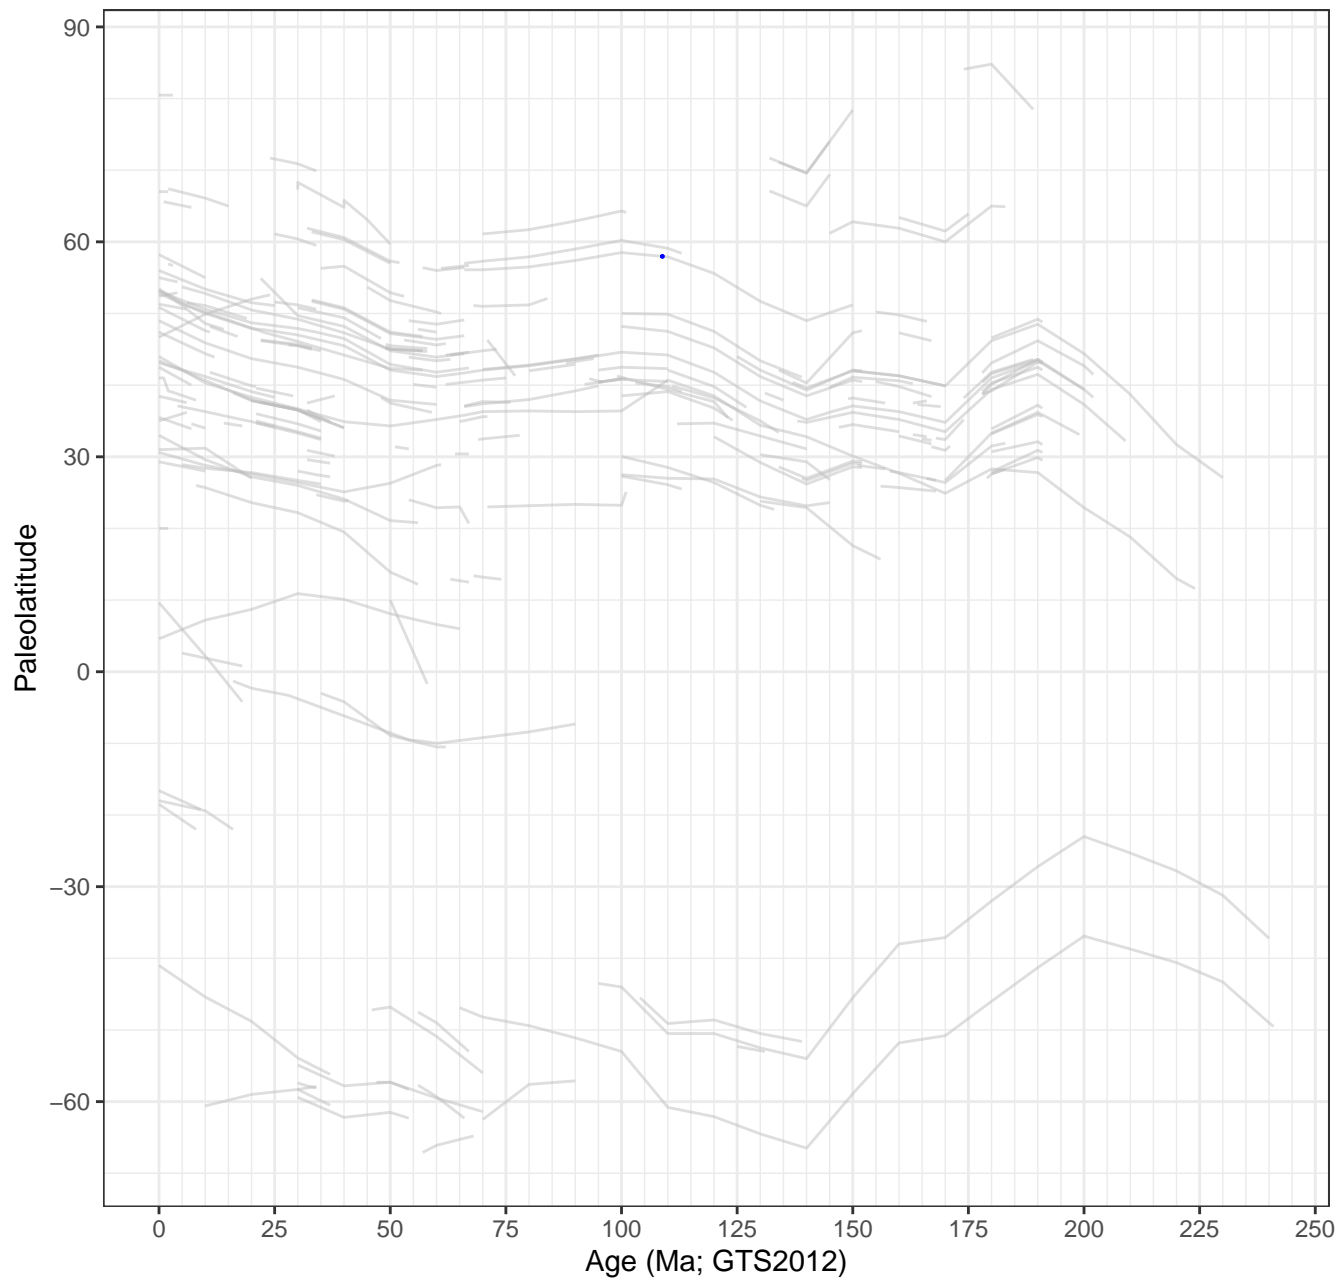

Supplement: Supplementary file 2197 [file Pseudoceratium expolitum.pdf › Supplement/Supplement 2/Species 1914 plots/Pseudoceratium expolitum.pdf]

# Species *Pseudoceratium iehiense*

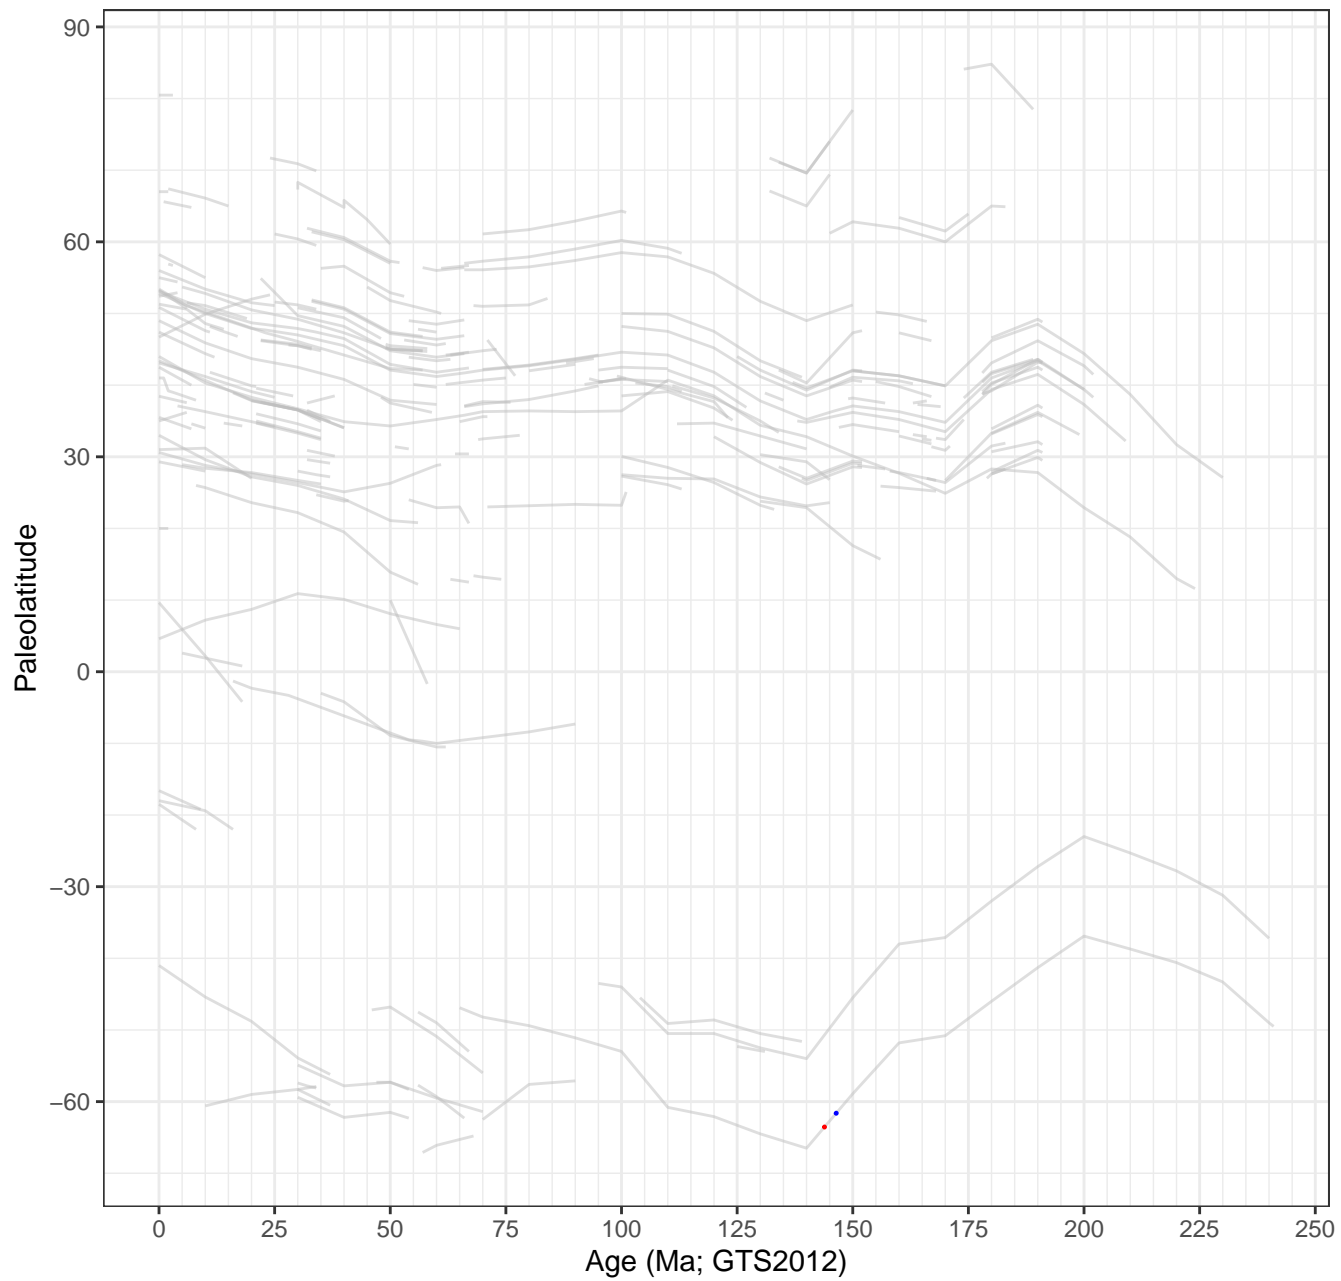

Supplement: Supplementary file 2198 [file Pseudoceratium iehiense.pdf › Supplement/Supplement 2/Species 1914 plots/Pseudoceratium iehiense.pdf]

# Species *Pseudoceratium iveri*

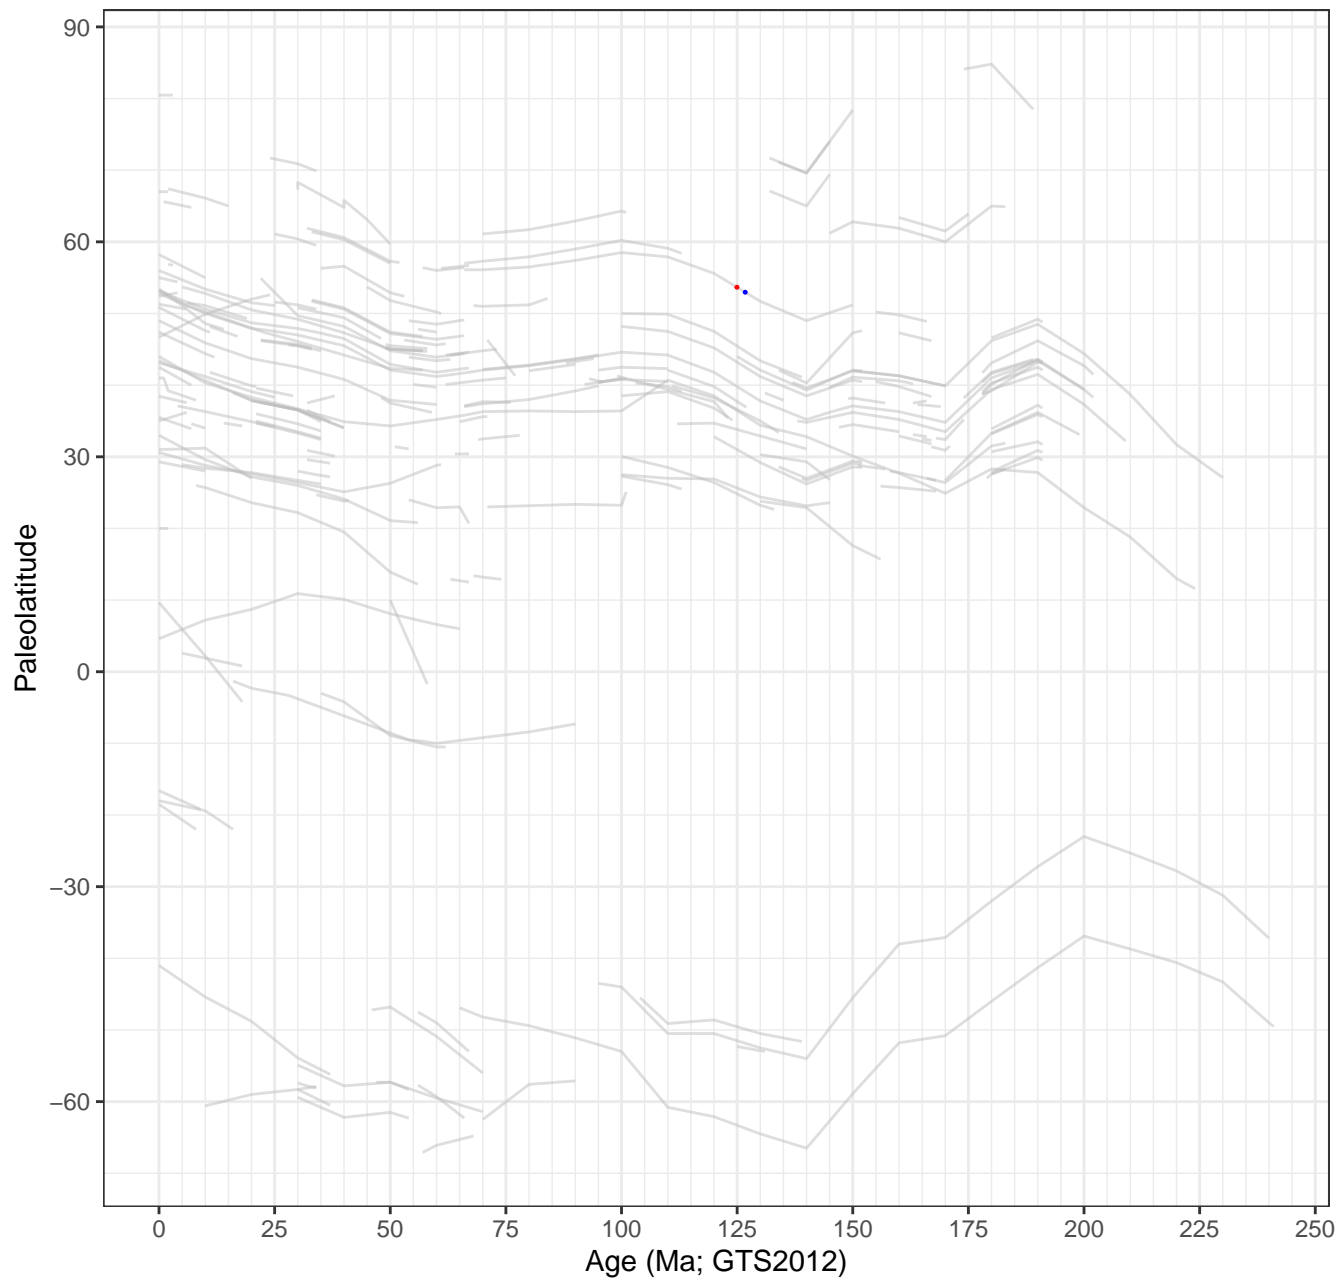

Supplement: Supplementary file 2199 [file Pseudoceratium iveri.pdf › Supplement/Supplement 2/Species 1914 plots/Pseudoceratium iveri.pdf]

# Species *Pseudoceratium pelliferum*

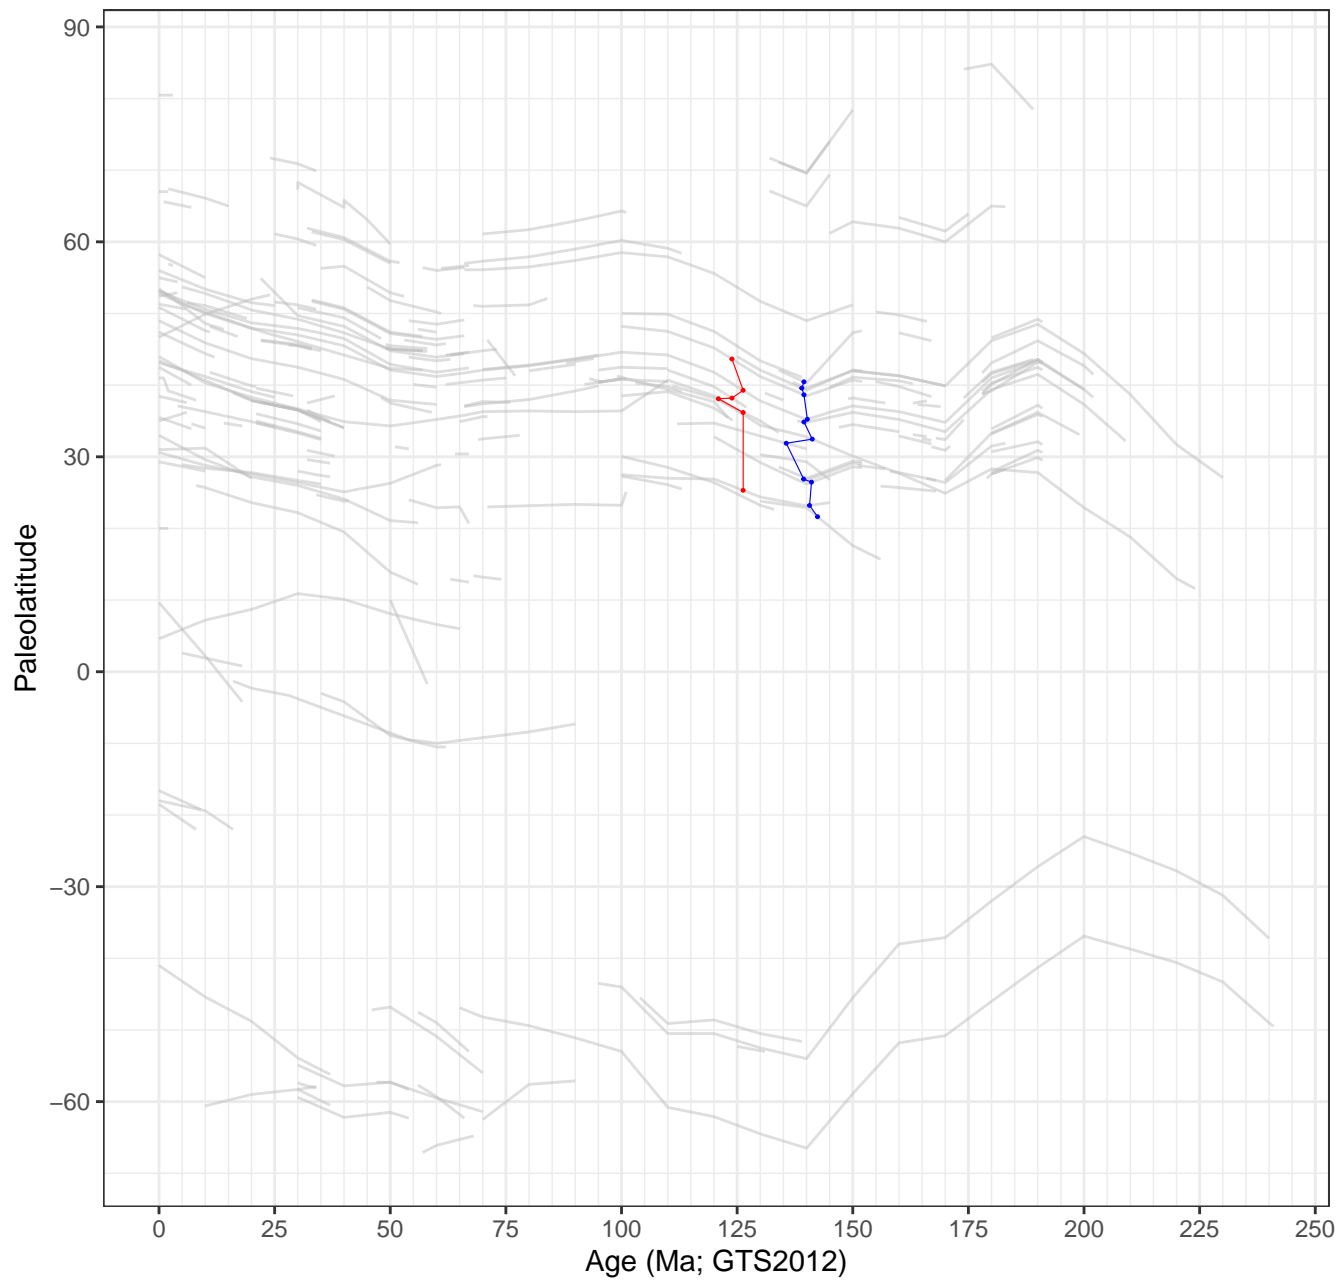

Supplement: Supplementary file 2200 [file Pseudoceratium pelliferum.pdf › Supplement/Supplement 2/Species 1914 plots/Pseudoceratium pelliferum.pdf]

# Species *Pseudoceratium plerum*

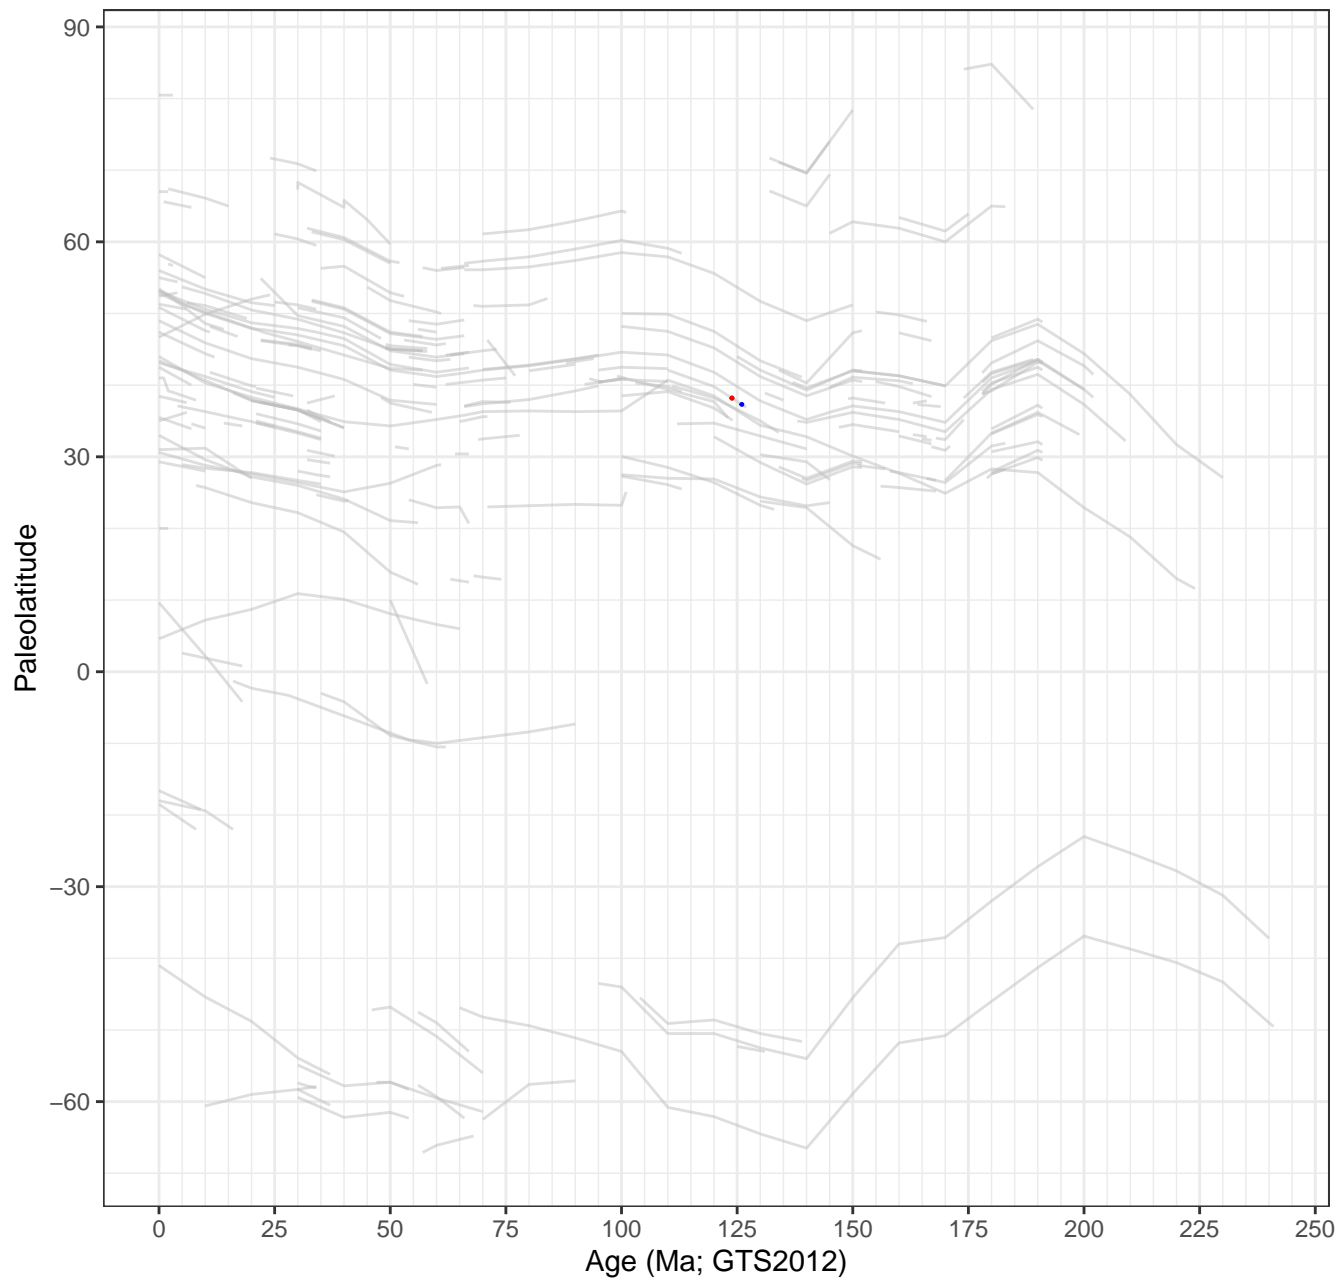

Supplement: Supplementary file 2201 [file Pseudoceratium plerum.pdf › Supplement/Supplement 2/Species 1914 plots/Pseudoceratium plerum.pdf]

# Species *Pseudoceratium polymorphum*

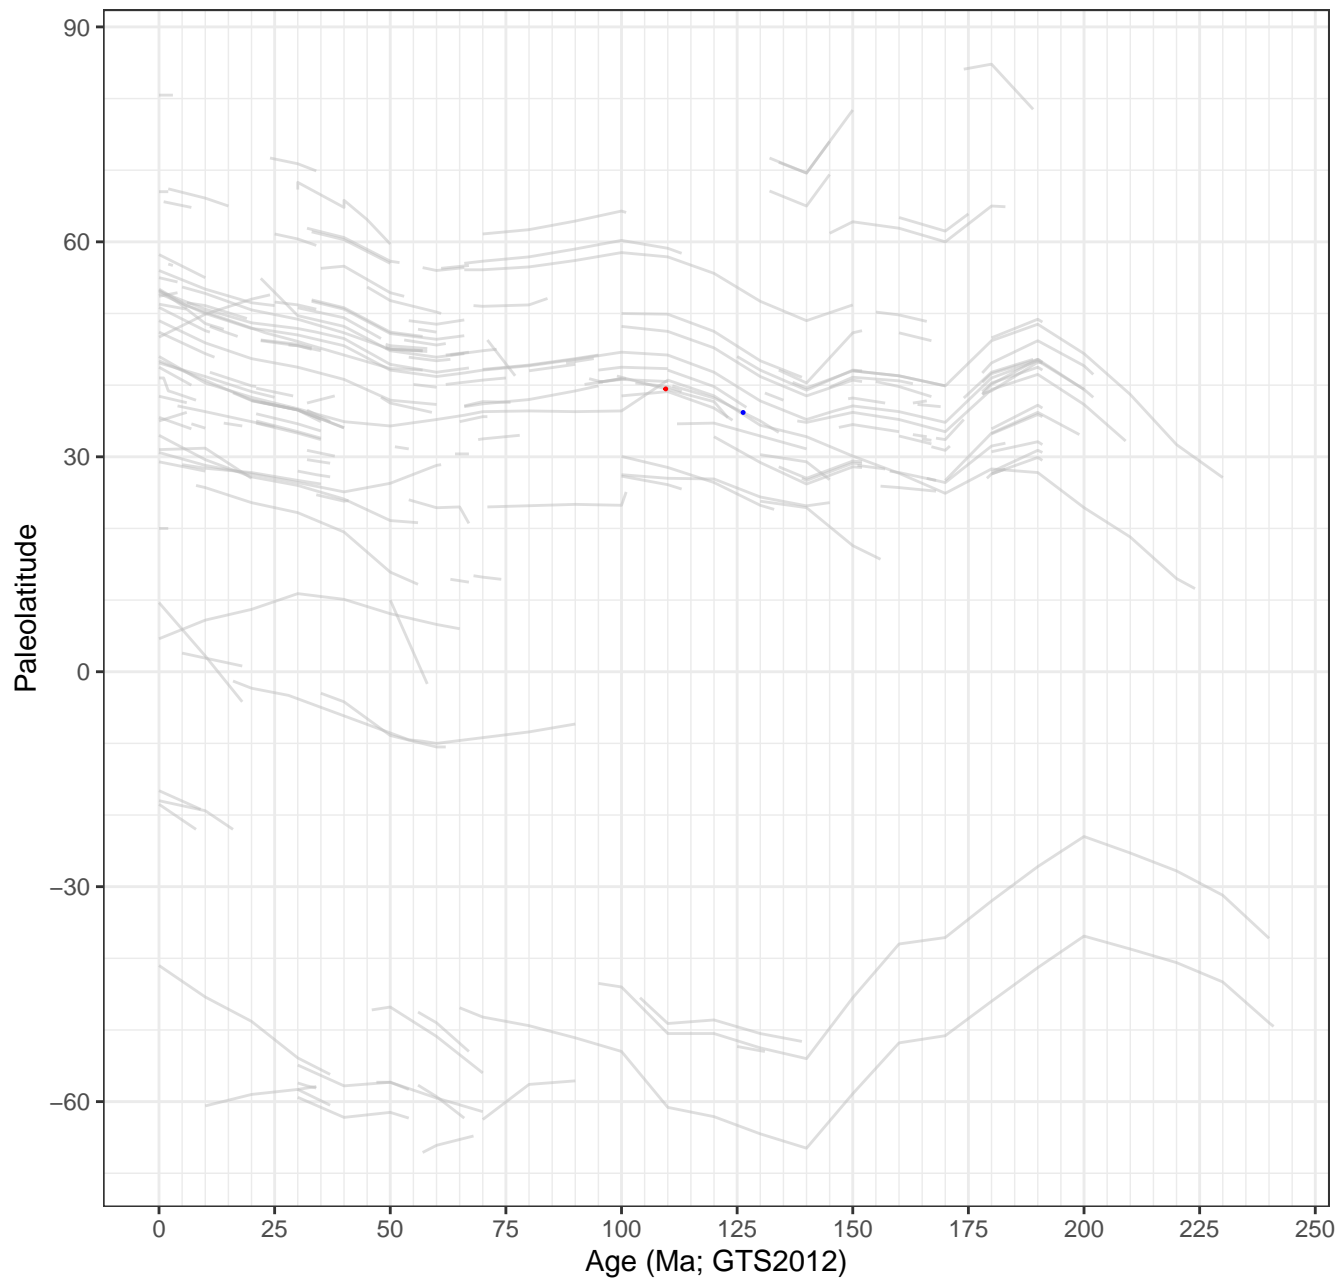

Supplement: Supplementary file 2202 [file Pseudoceratium polymorphum.pdf › Supplement/Supplement 2/Species 1914 plots/Pseudoceratium polymorphum.pdf]

# Species *Pseudoceratium retusum*

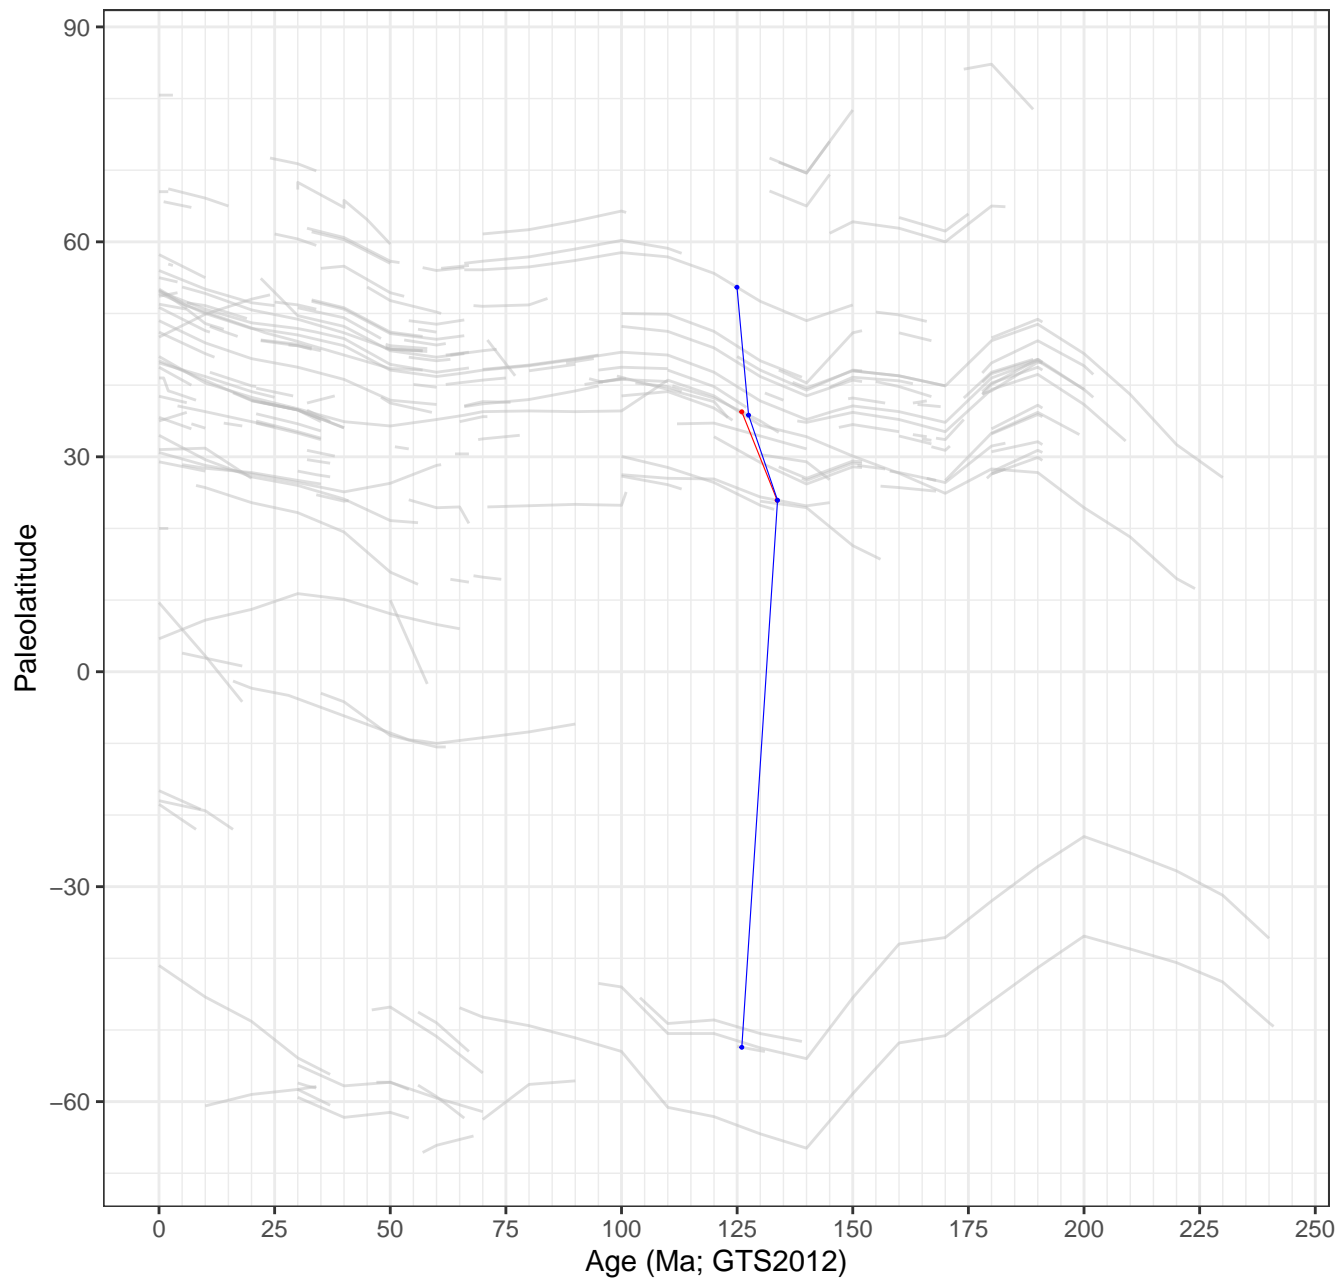

Supplement: Supplementary file 2203 [file Pseudoceratium retusum.pdf › Supplement/Supplement 2/Species 1914 plots/Pseudoceratium retusum.pdf]

# Species *Pseudoceratium robustum*

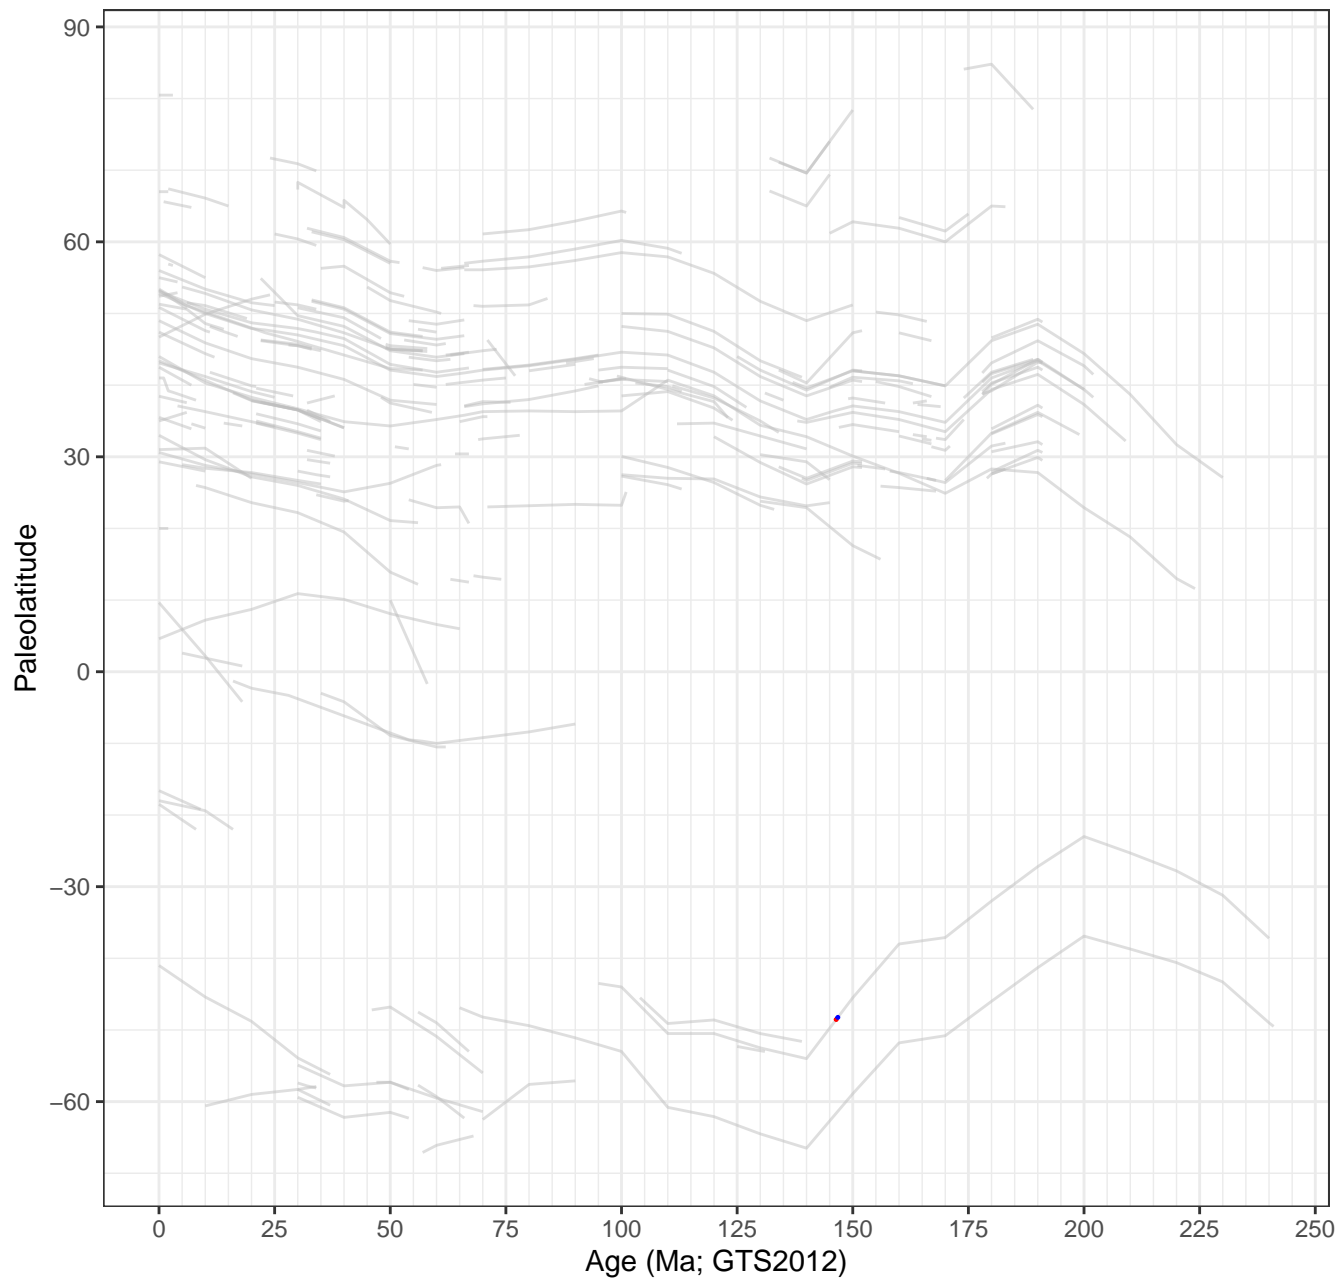

Supplement: Supplementary file 2204 [file Pseudoceratium robustum.pdf › Supplement/Supplement 2/Species 1914 plots/Pseudoceratium robustum.pdf]

# Species *Pseudoceratium securigerum*

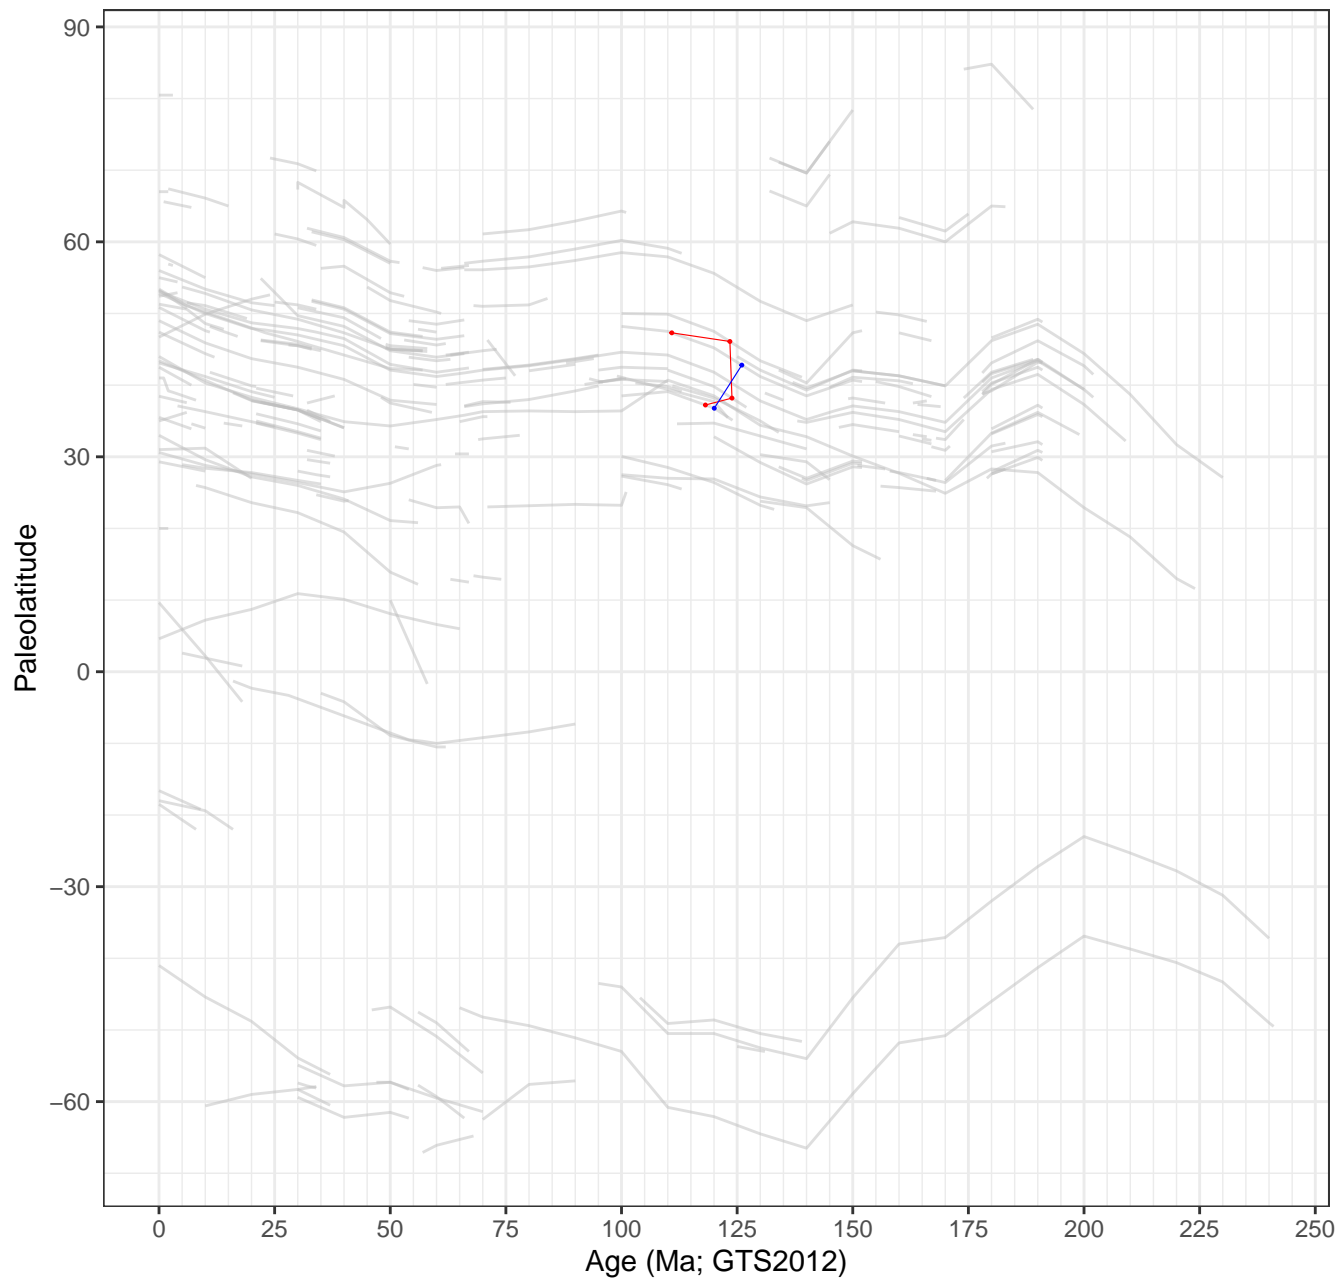

Supplement: Supplementary file 2205 [file Pseudoceratium securigerum.pdf › Supplement/Supplement 2/Species 1914 plots/Pseudoceratium securigerum.pdf]

# Species *Pseudoceratium solocispinum*

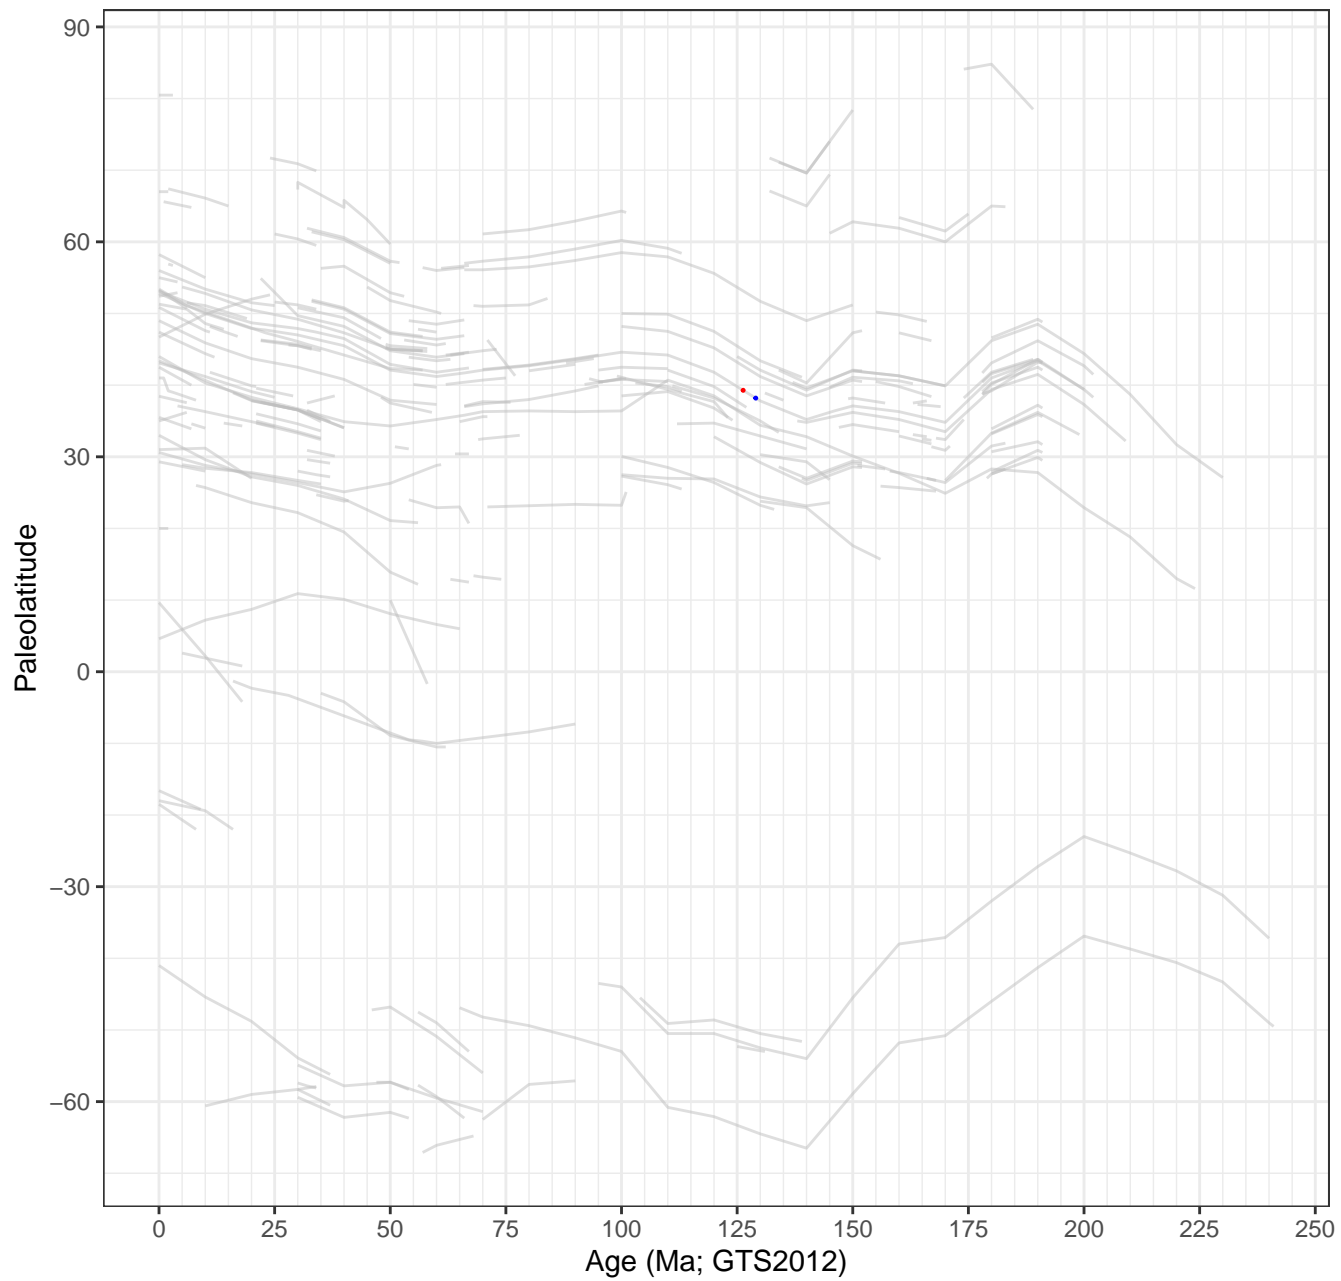

Supplement: Supplementary file 2206 [file Pseudoceratium solocispinum.pdf › Supplement/Supplement 2/Species 1914 plots/Pseudoceratium solocispinum.pdf]

# Species *Pseudoceratium toveae*

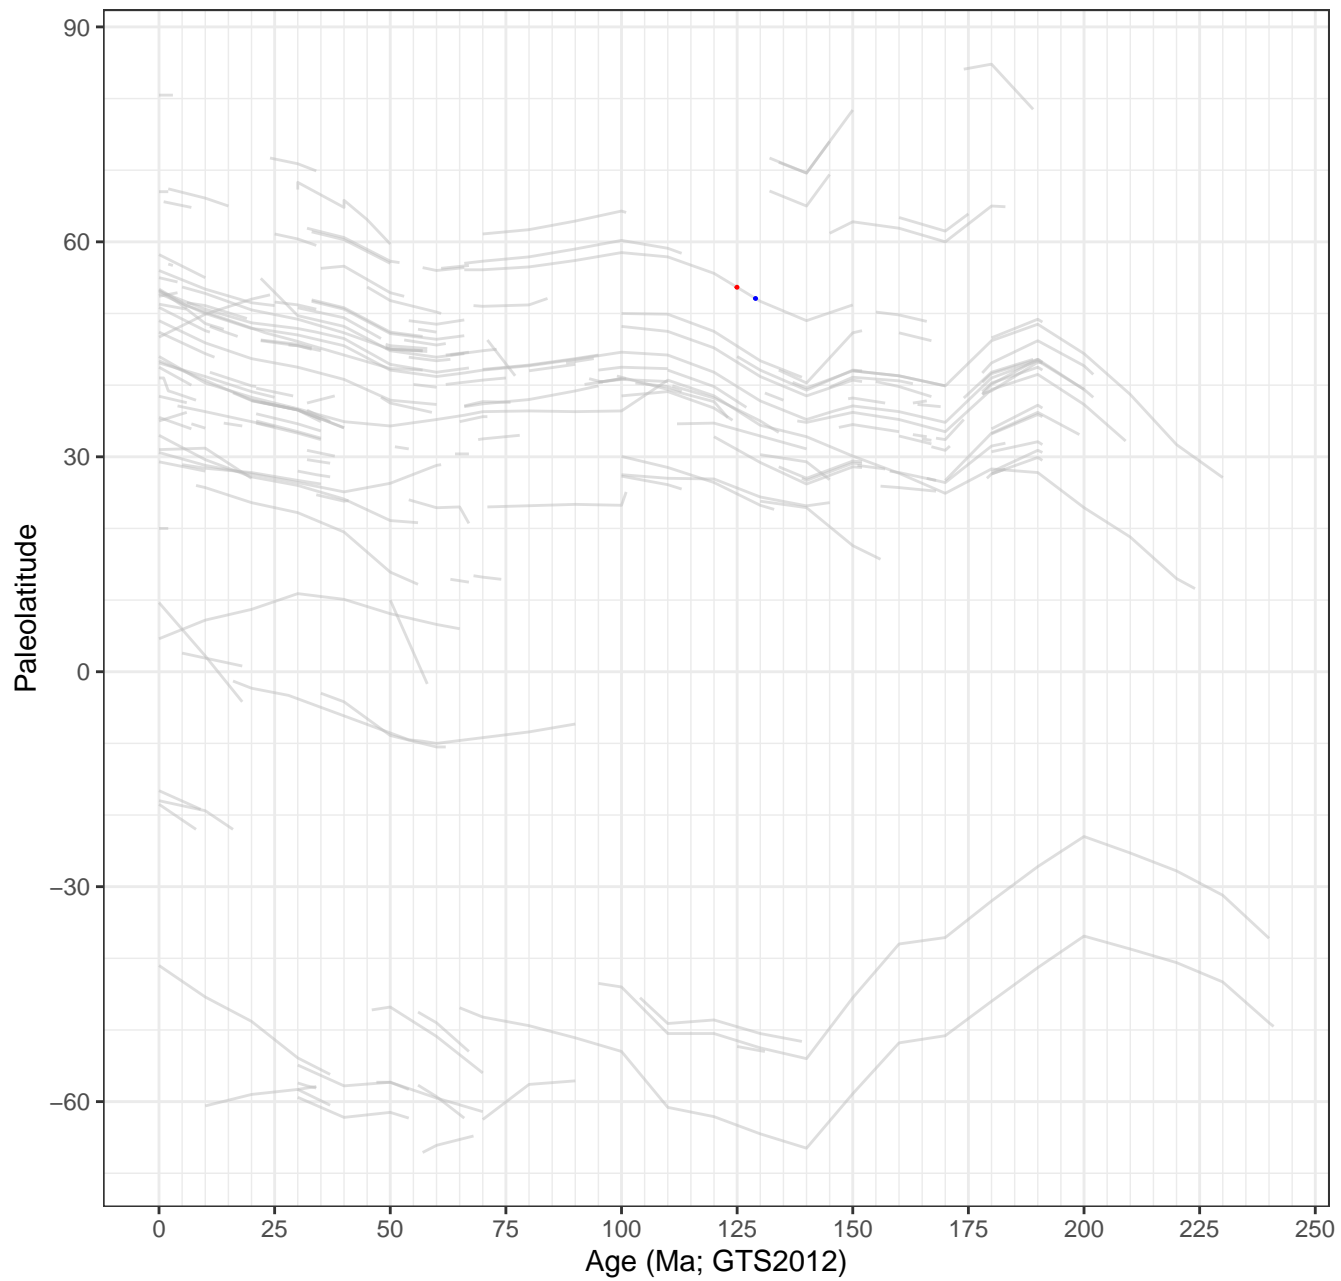

Supplement: Supplementary file 2207 [file Pseudoceratium toveae.pdf › Supplement/Supplement 2/Species 1914 plots/Pseudoceratium toveae.pdf]

# Species *Pterodinium aliferum*

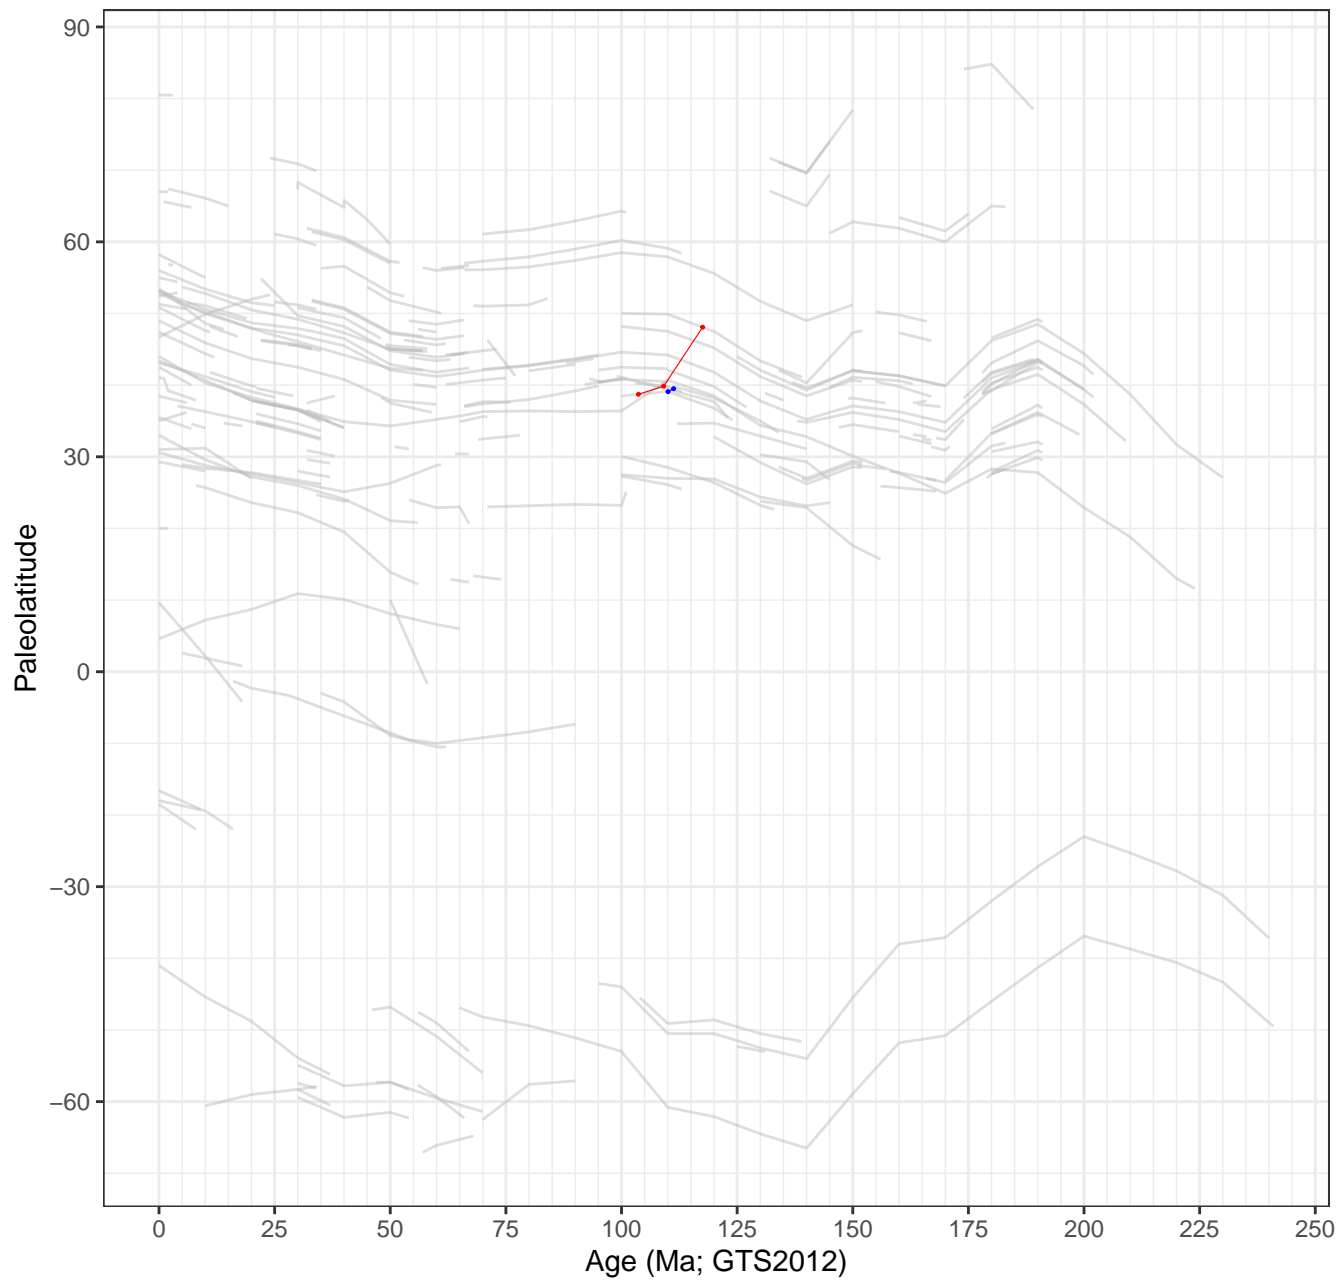

Supplement: Supplementary file 2208 [file Pterodinium aliferum.pdf › Supplement/Supplement 2/Species 1914 plots/Pterodinium aliferum.pdf]

# Species *Pterodinium cingulatum cingulatum*

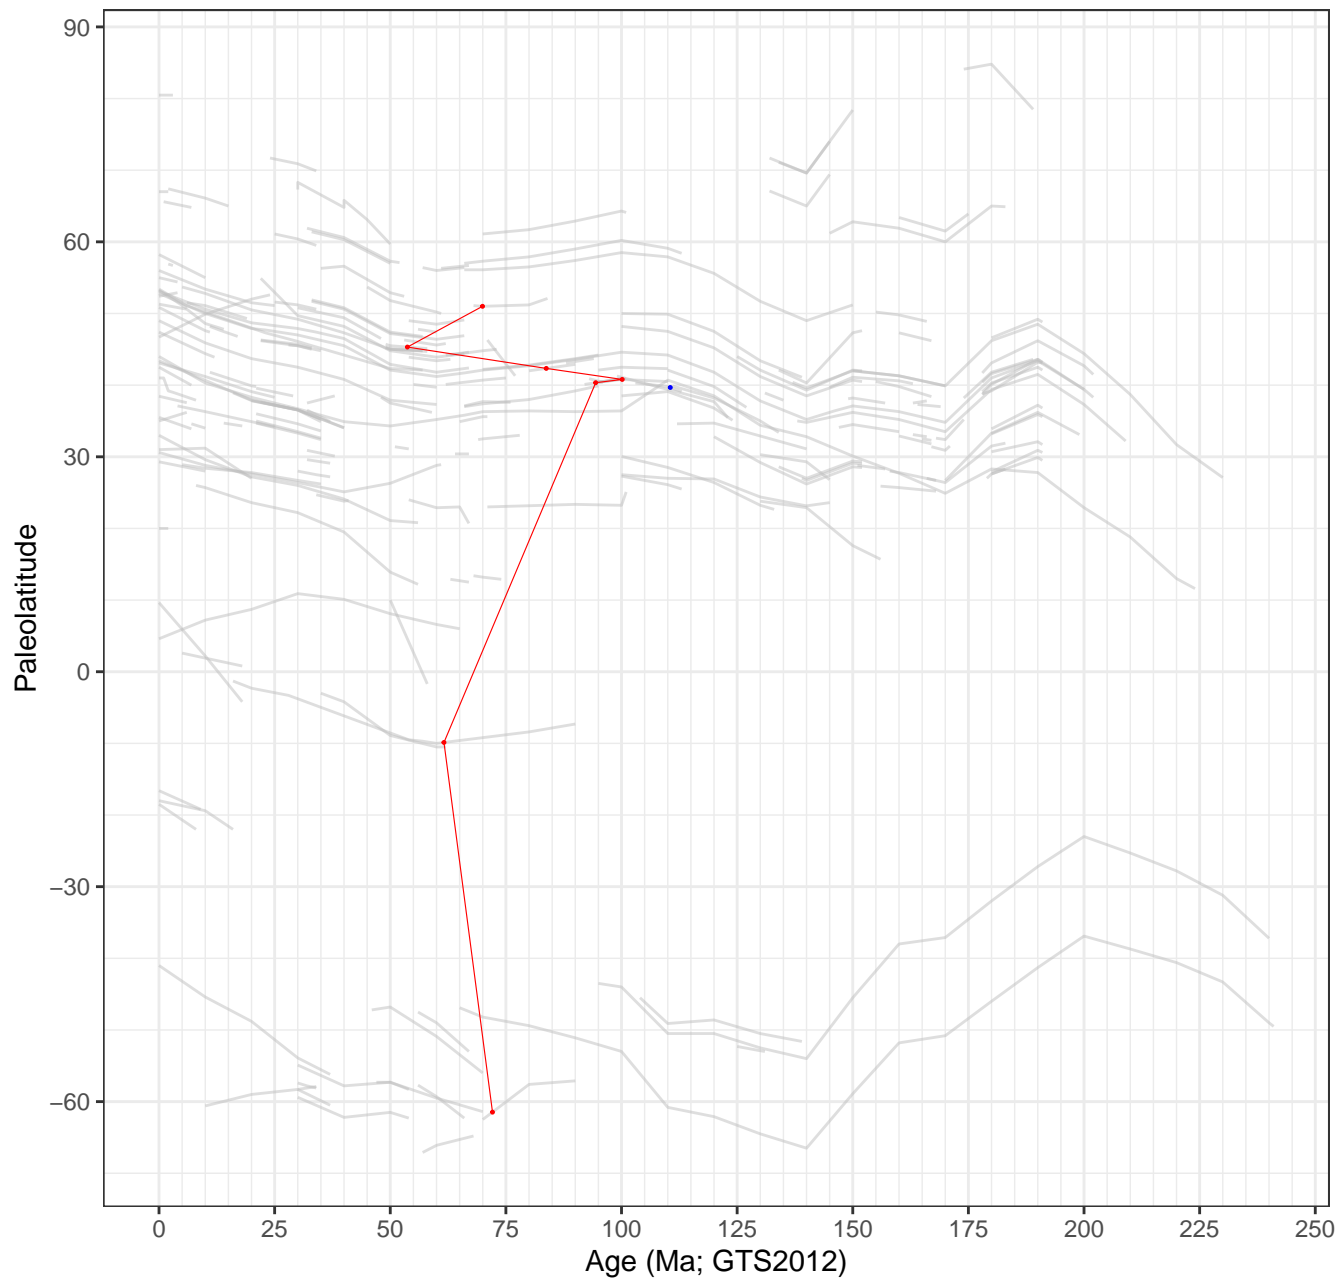

Supplement: Supplementary file 2209 [file Pterodinium cingulatum cingulatum.pdf › Supplement/Supplement 2/Species 1914 plots/Pterodinium cingulatum cingulatum.pdf]

# Species *Pterodinium cingulatum granulatum*

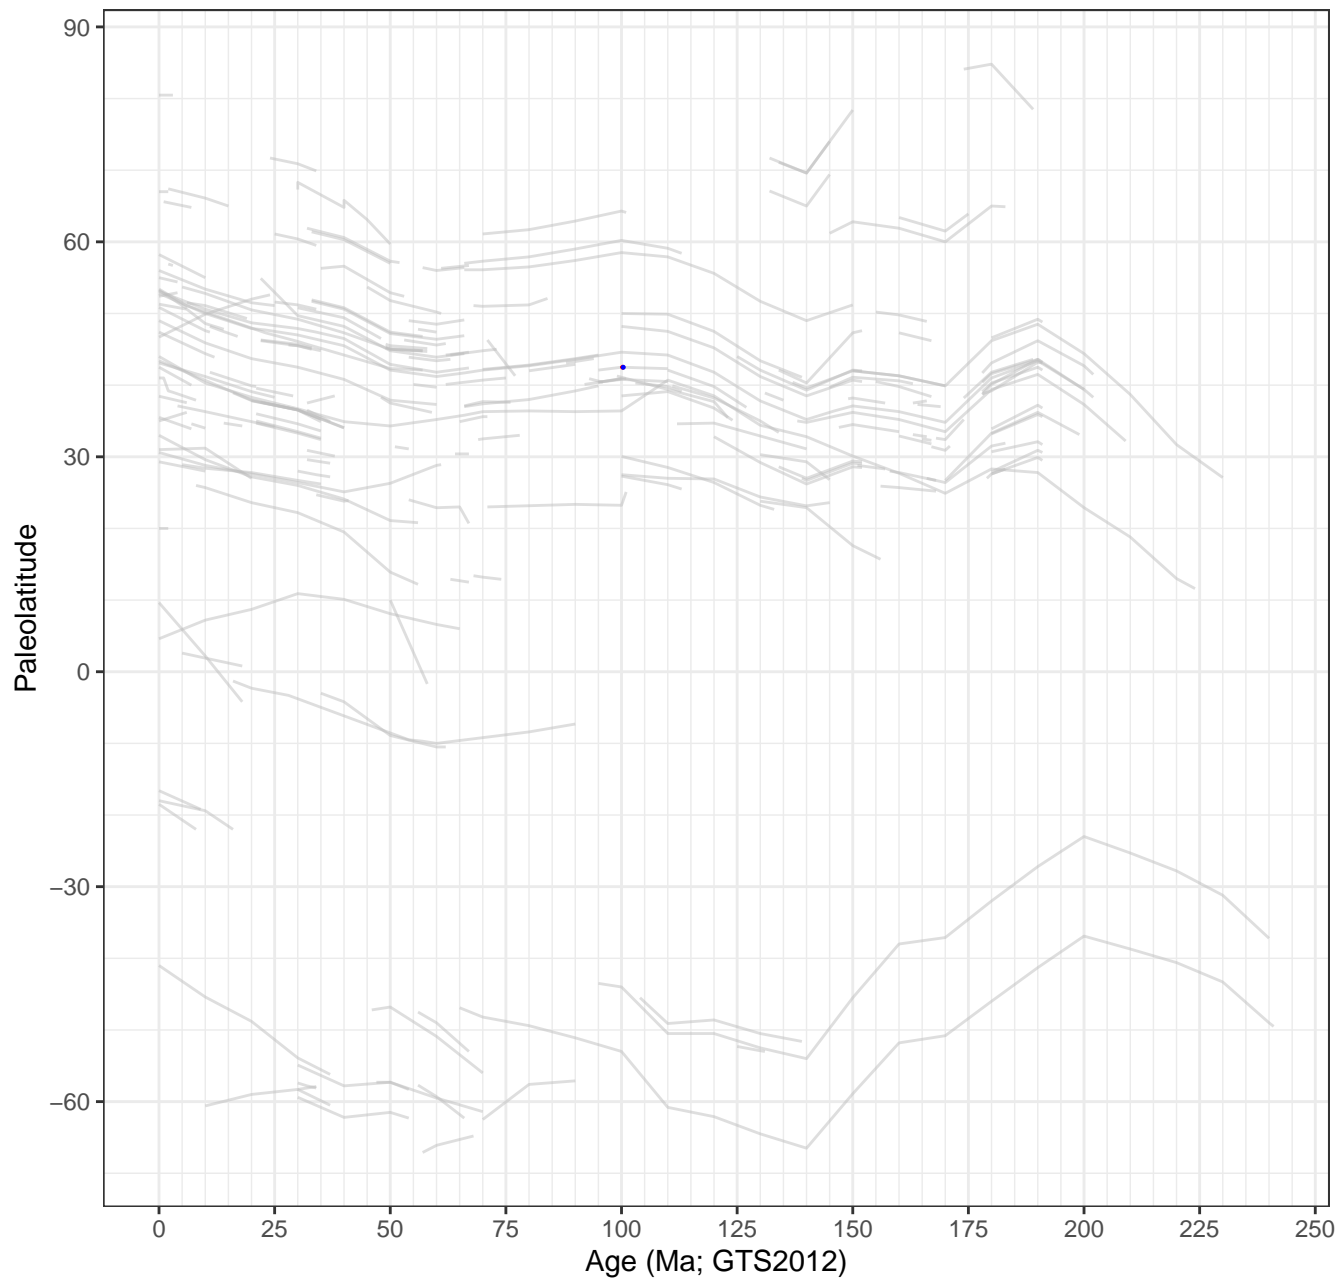

Supplement: Supplementary file 2210 [file Pterodinium cingulatum granulatum.pdf › Supplement/Supplement 2/Species 1914 plots/Pterodinium cingulatum granulatum.pdf]

# Species *Pterodinium cingulatum reticulatum*

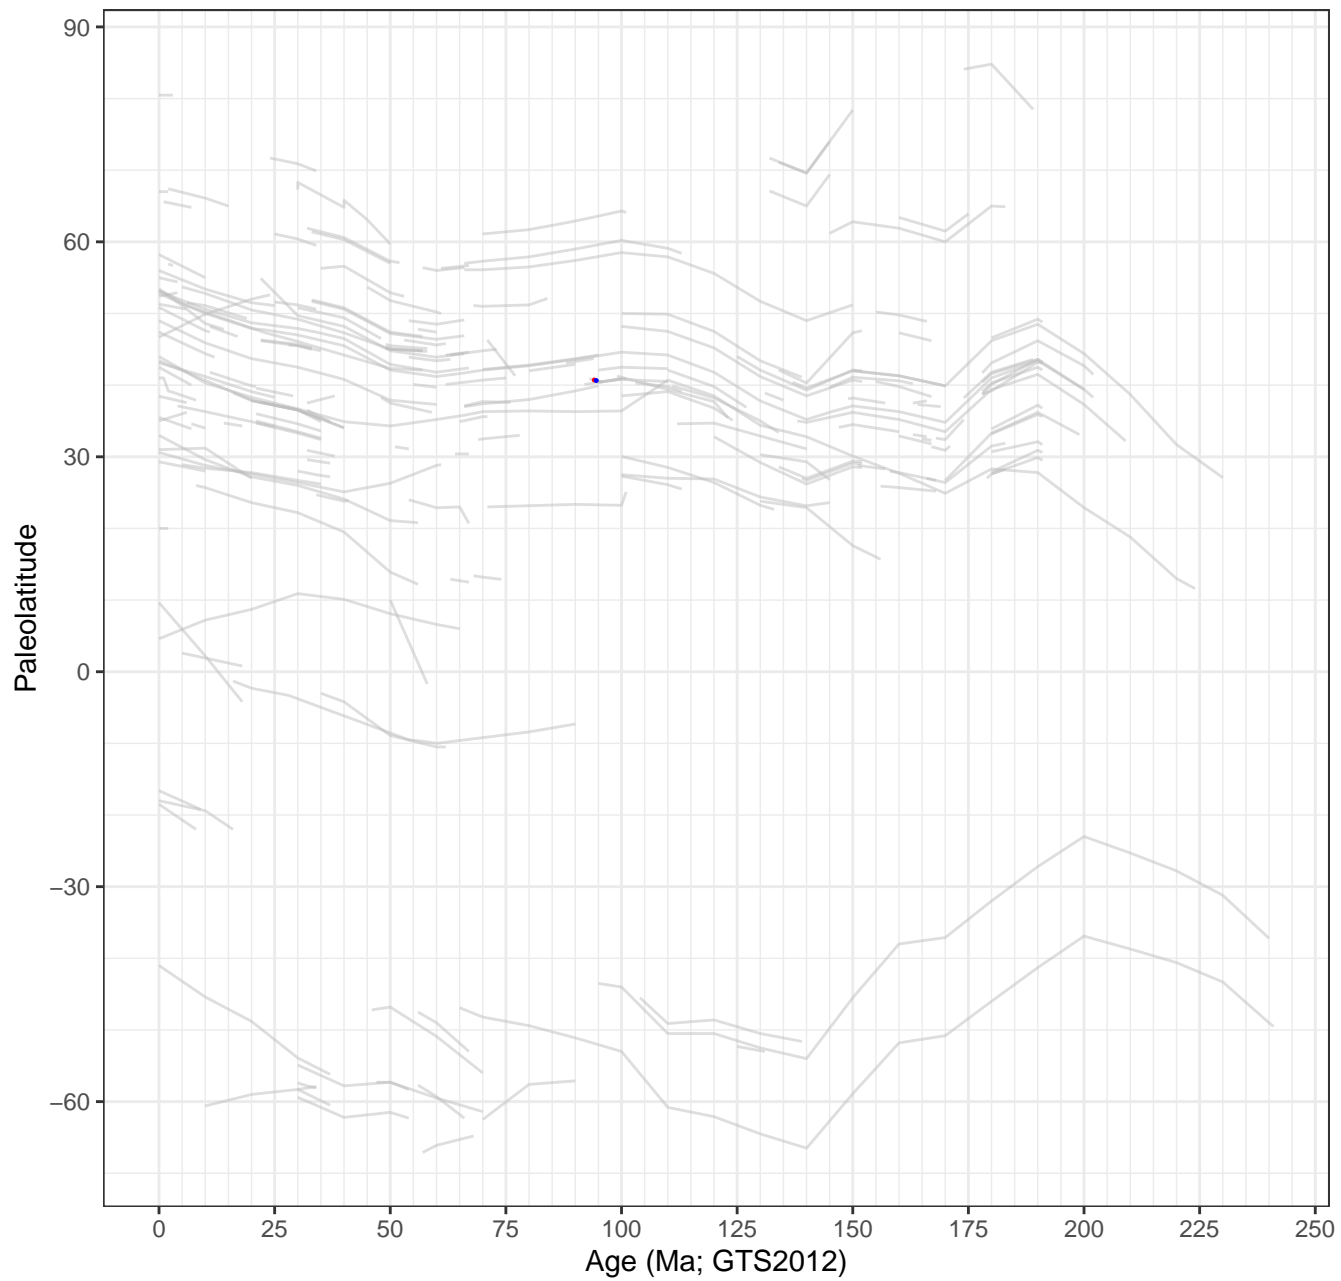

Supplement: Supplementary file 2211 [file Pterodinium cingulatum reticulatum.pdf › Supplement/Supplement 2/Species 1914 plots/Pterodinium cingulatum reticulatum.pdf]

# Species *Pterodinium cingulatum*

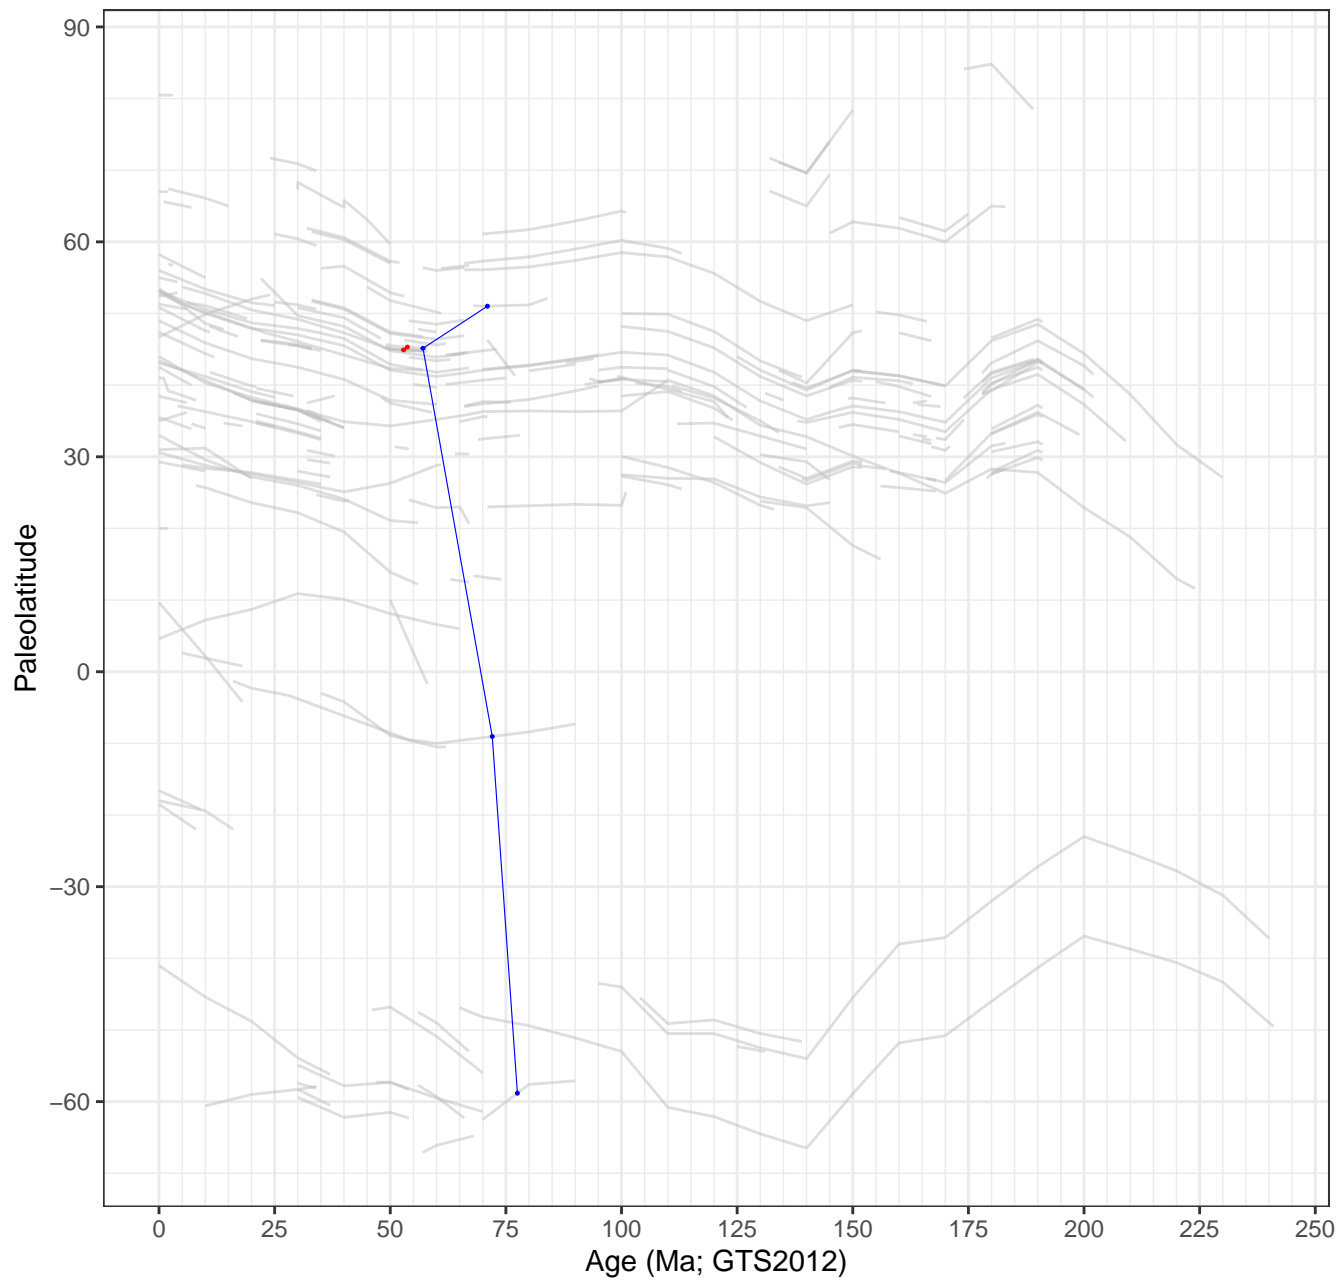

Supplement: Supplementary file 2212 [file Pterodinium cingulatum.pdf › Supplement/Supplement 2/Species 1914 plots/Pterodinium cingulatum.pdf]

# Species *Pterodinium premnon*

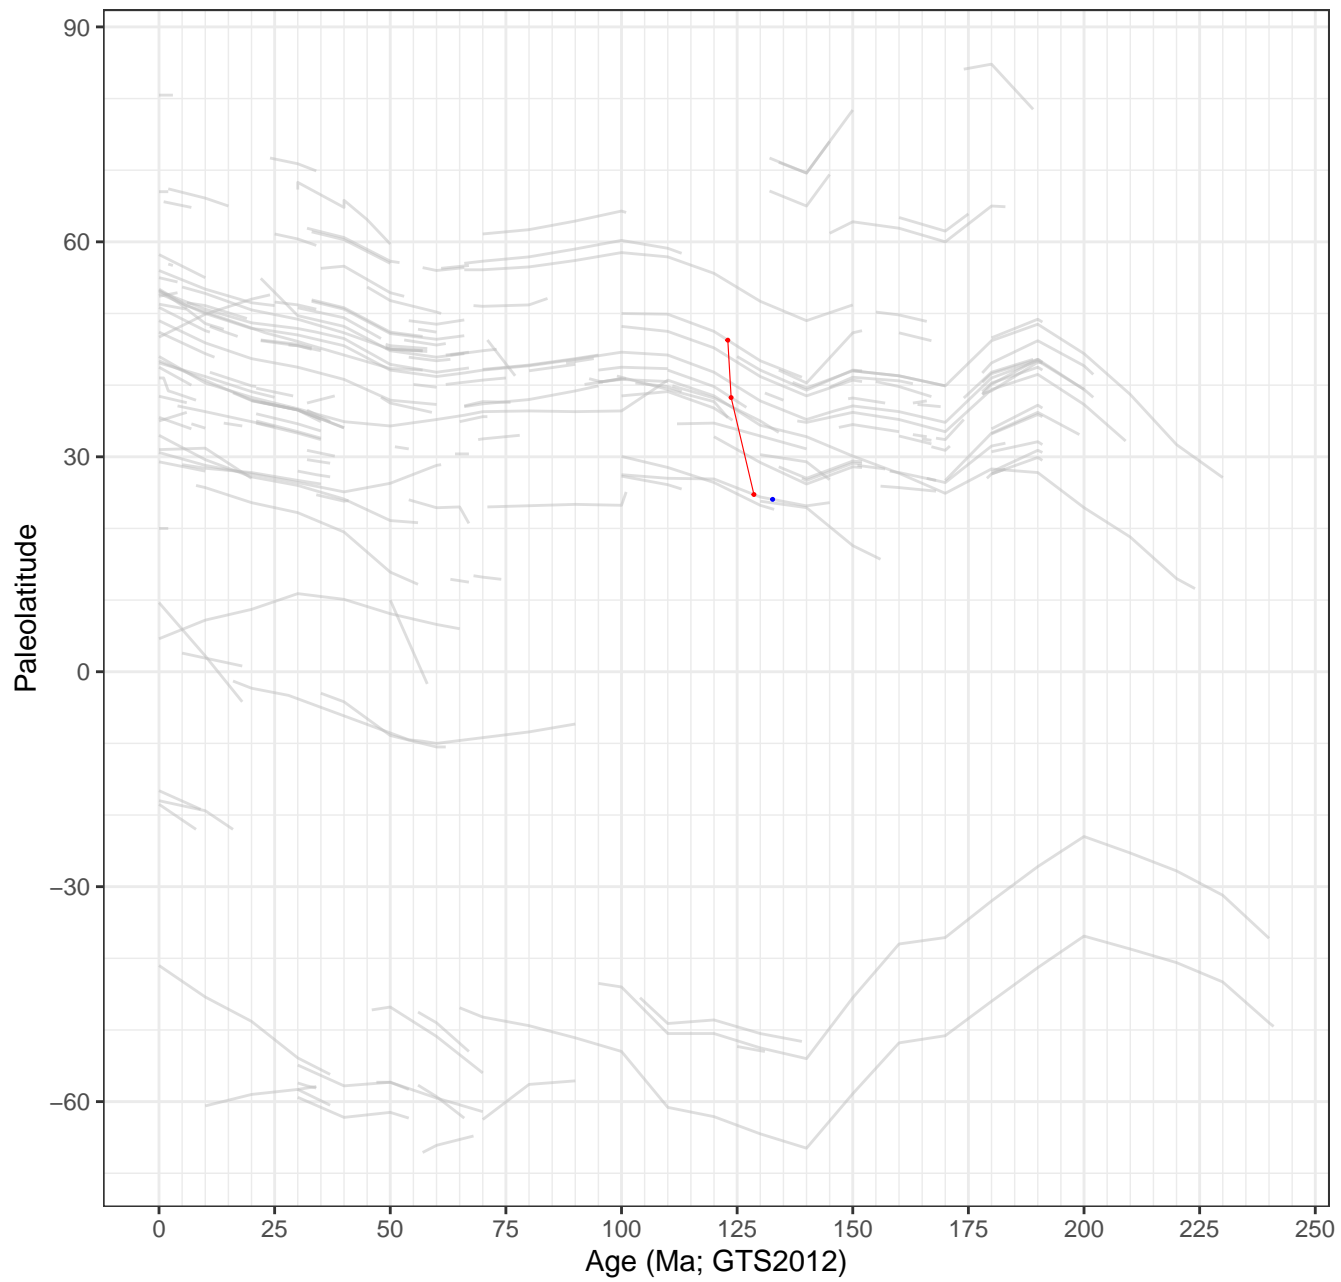

Supplement: Supplementary file 2213 [file Pterodinium premnon.pdf › Supplement/Supplement 2/Species 1914 plots/Pterodinium premnon.pdf]

# Species *Pulchrasphaera minuscula*

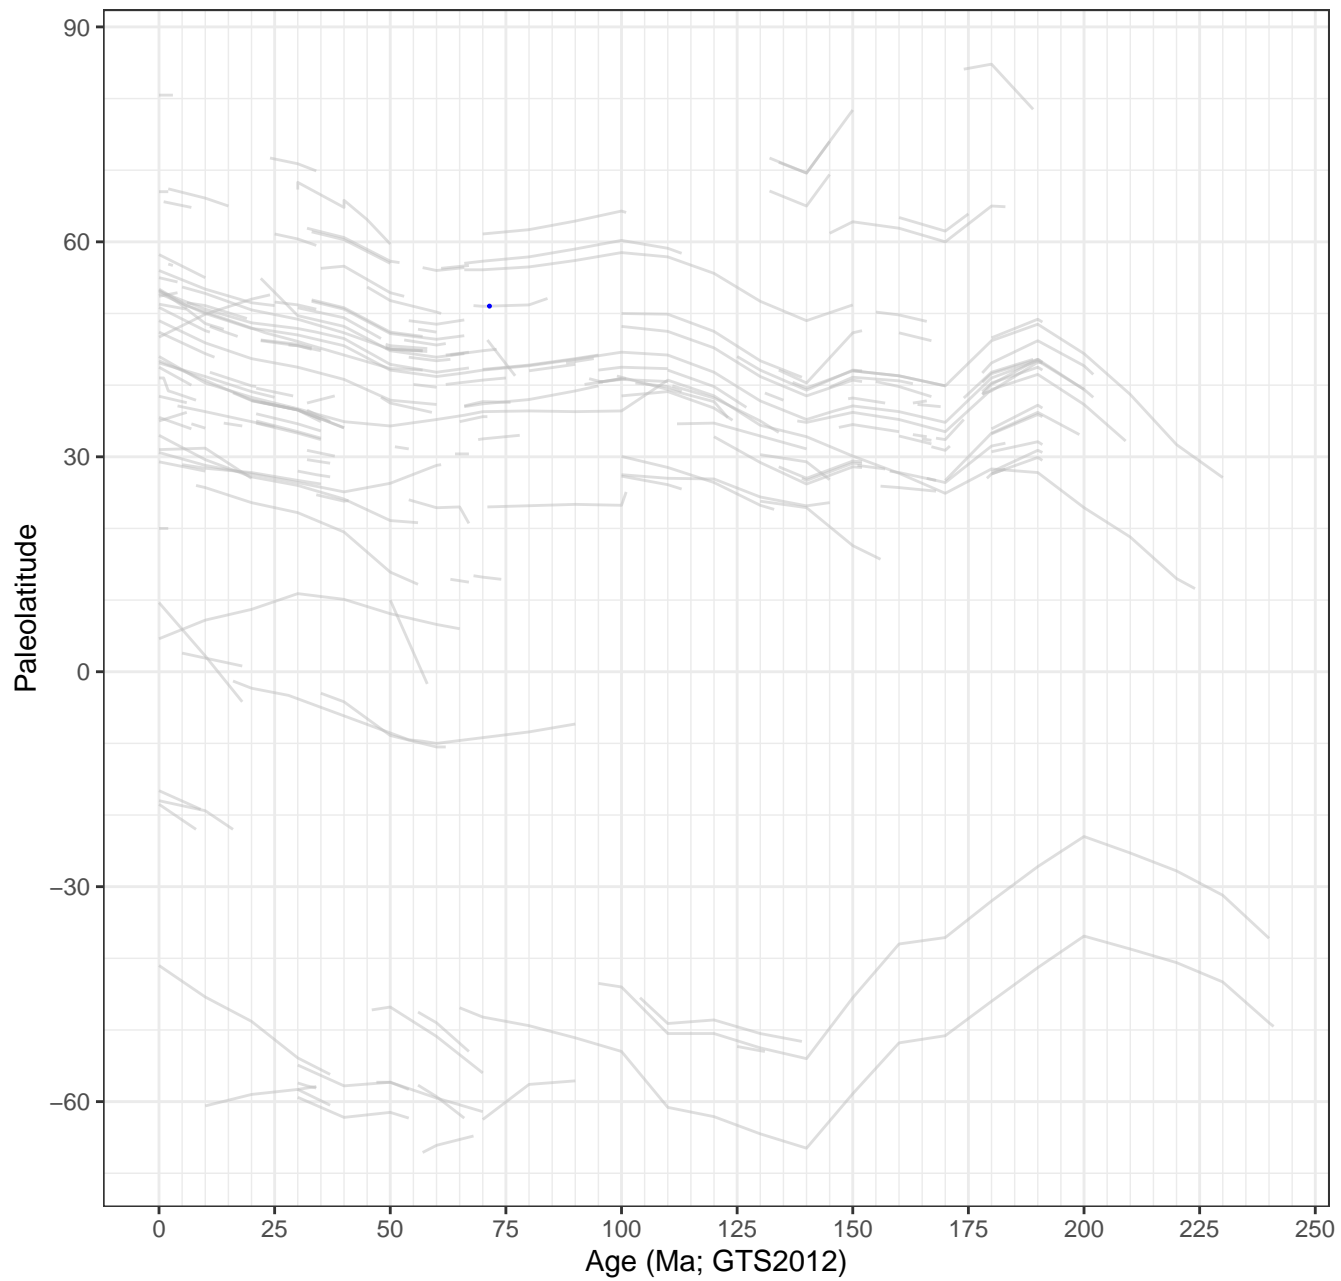

Supplement: Supplementary file 2214 [file Pulchrasphaera minuscula.pdf › Supplement/Supplement 2/Species 1914 plots/Pulchrasphaera minuscula.pdf]

# Species *Pyxidiella pandora*

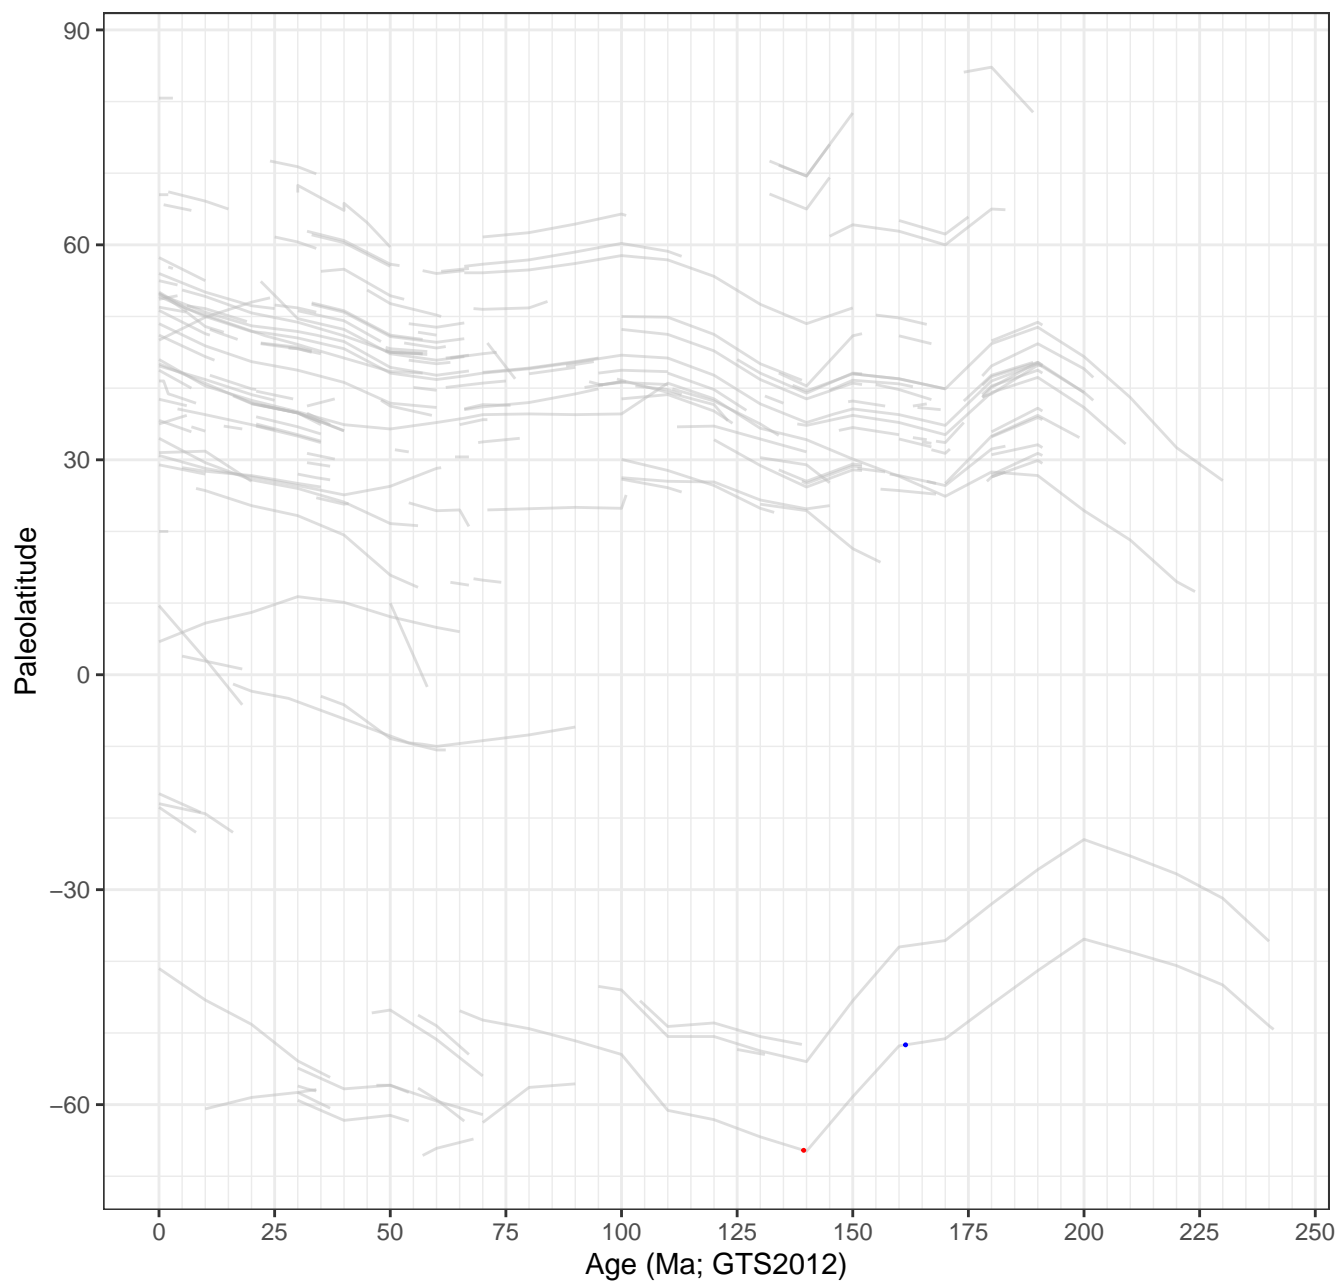

Supplement: Supplementary file 2215 [file Pyxidiella pandora.pdf › Supplement/Supplement 2/Species 1914 plots/Pyxidiella pandora.pdf]

# Species *Pyxidiella simplex*

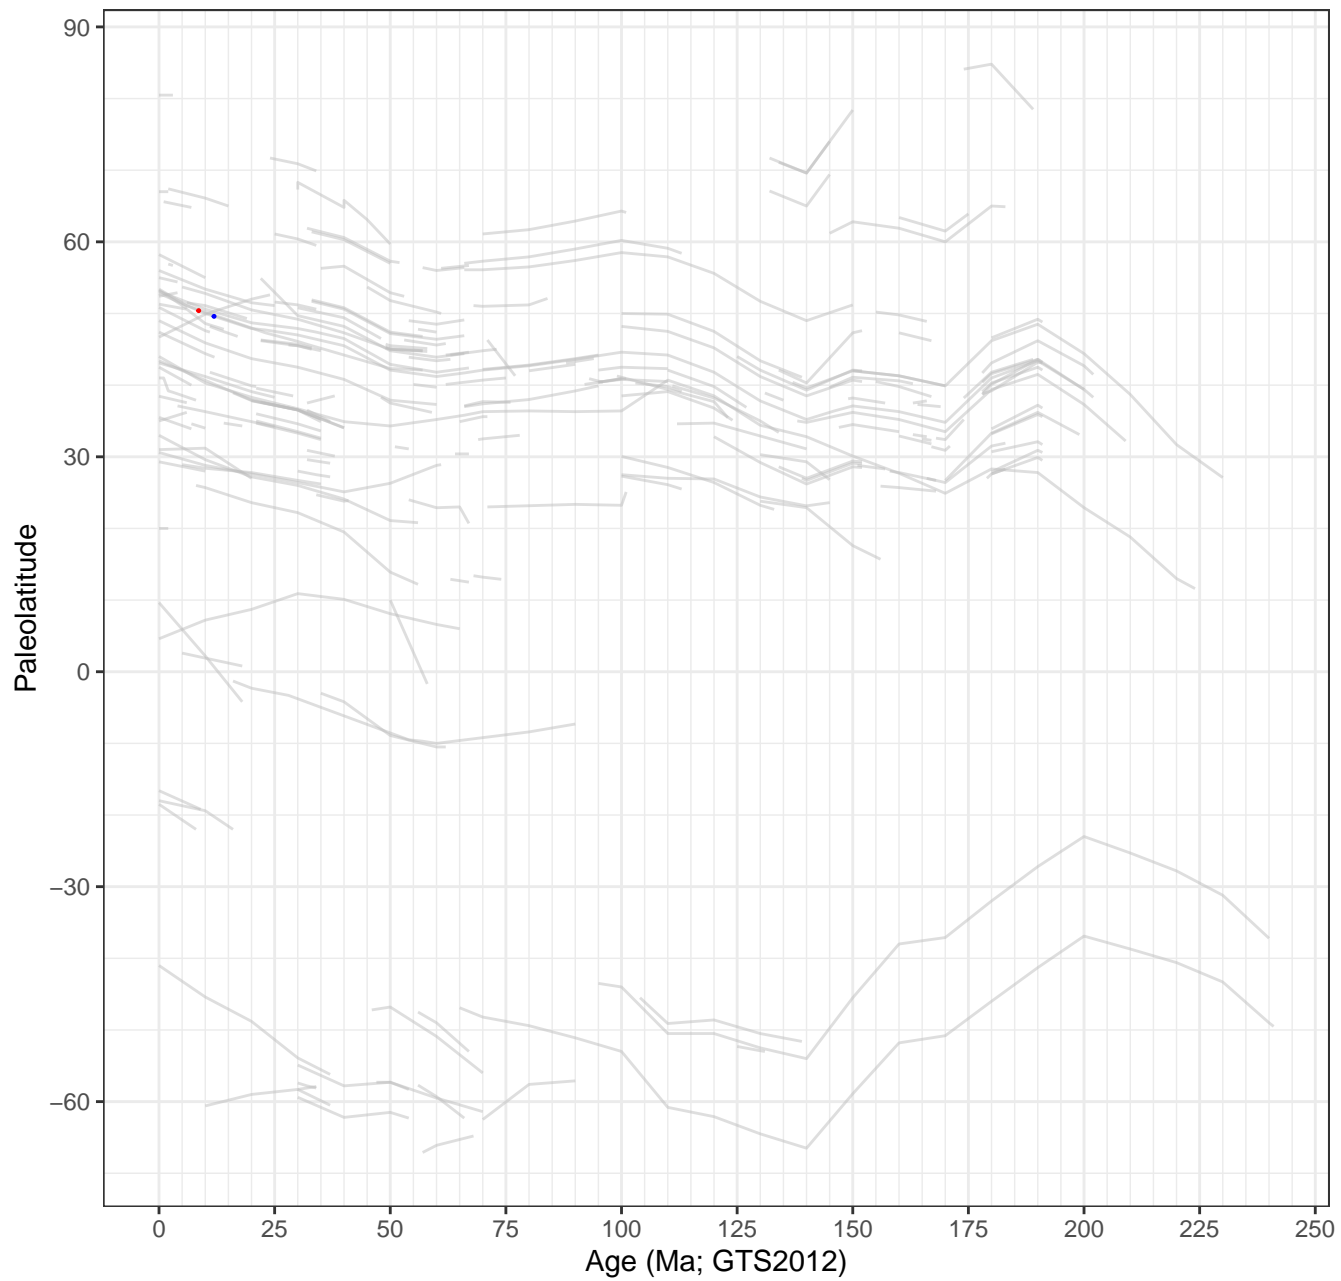

Supplement: Supplementary file 2216 [file Pyxidiella simplex.pdf › Supplement/Supplement 2/Species 1914 plots/Pyxidiella simplex.pdf]

# Species *Pyxidiella tumida*

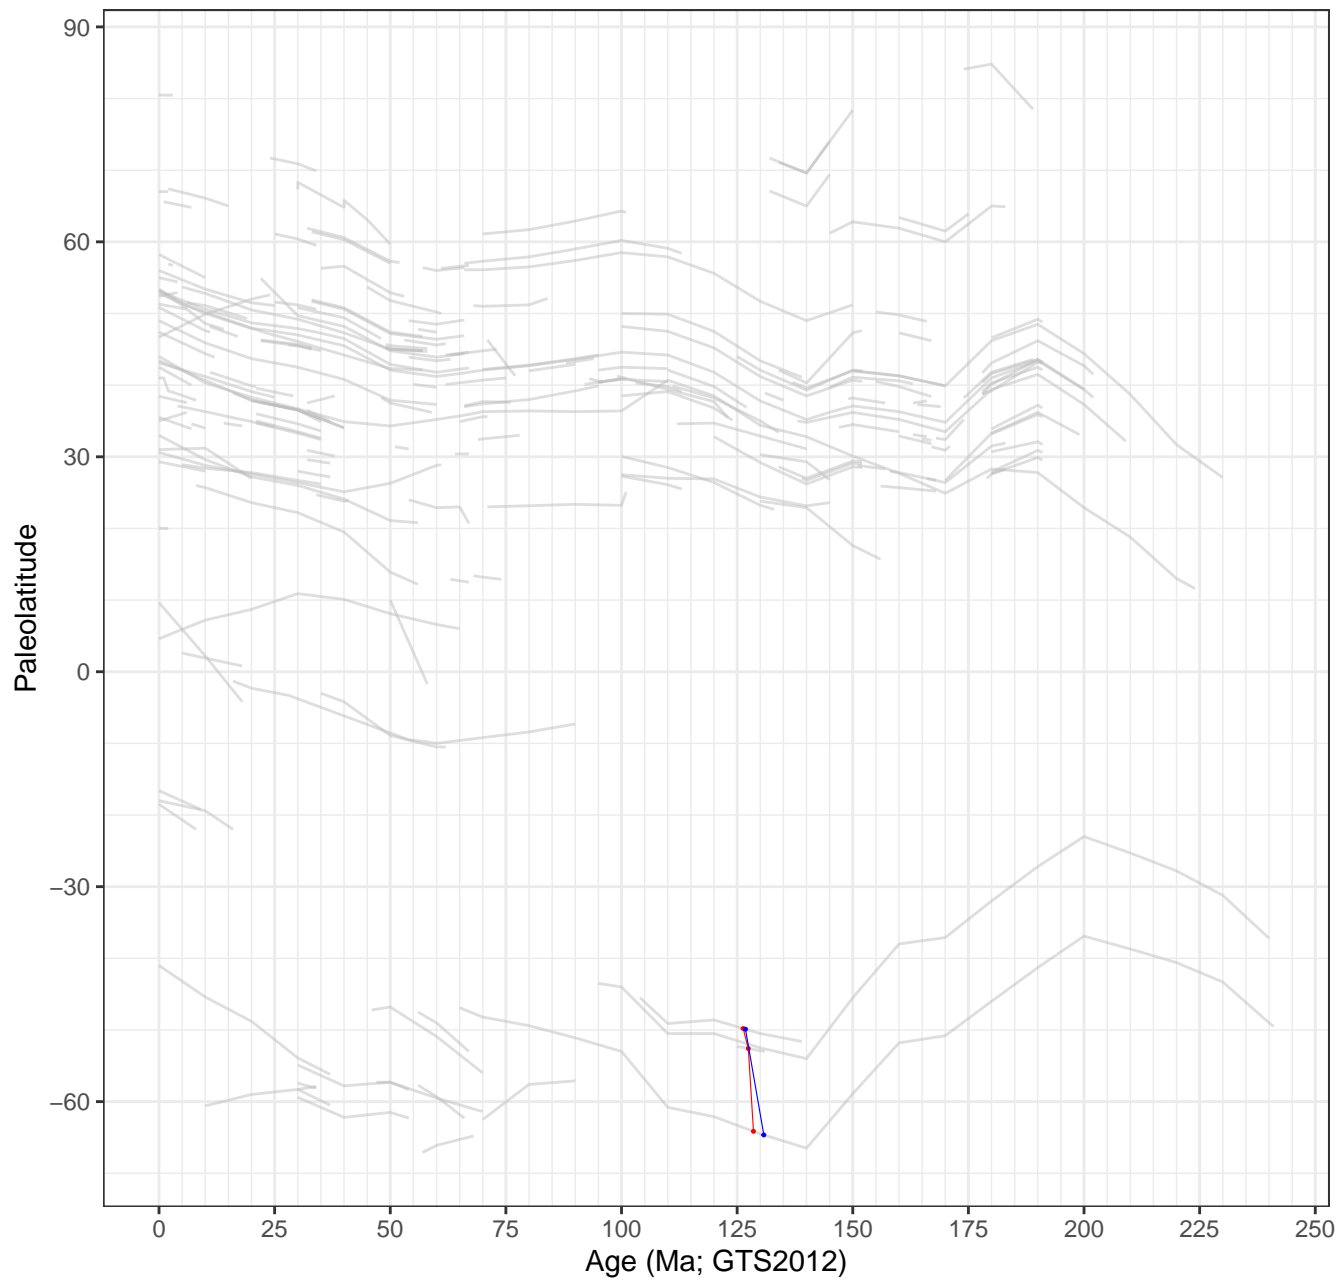

Supplement: Supplementary file 2217 [file Pyxidiella tumida.pdf › Supplement/Supplement 2/Species 1914 plots/Pyxidiella tumida.pdf]

# Species *Pyxidopsis ardonensis*

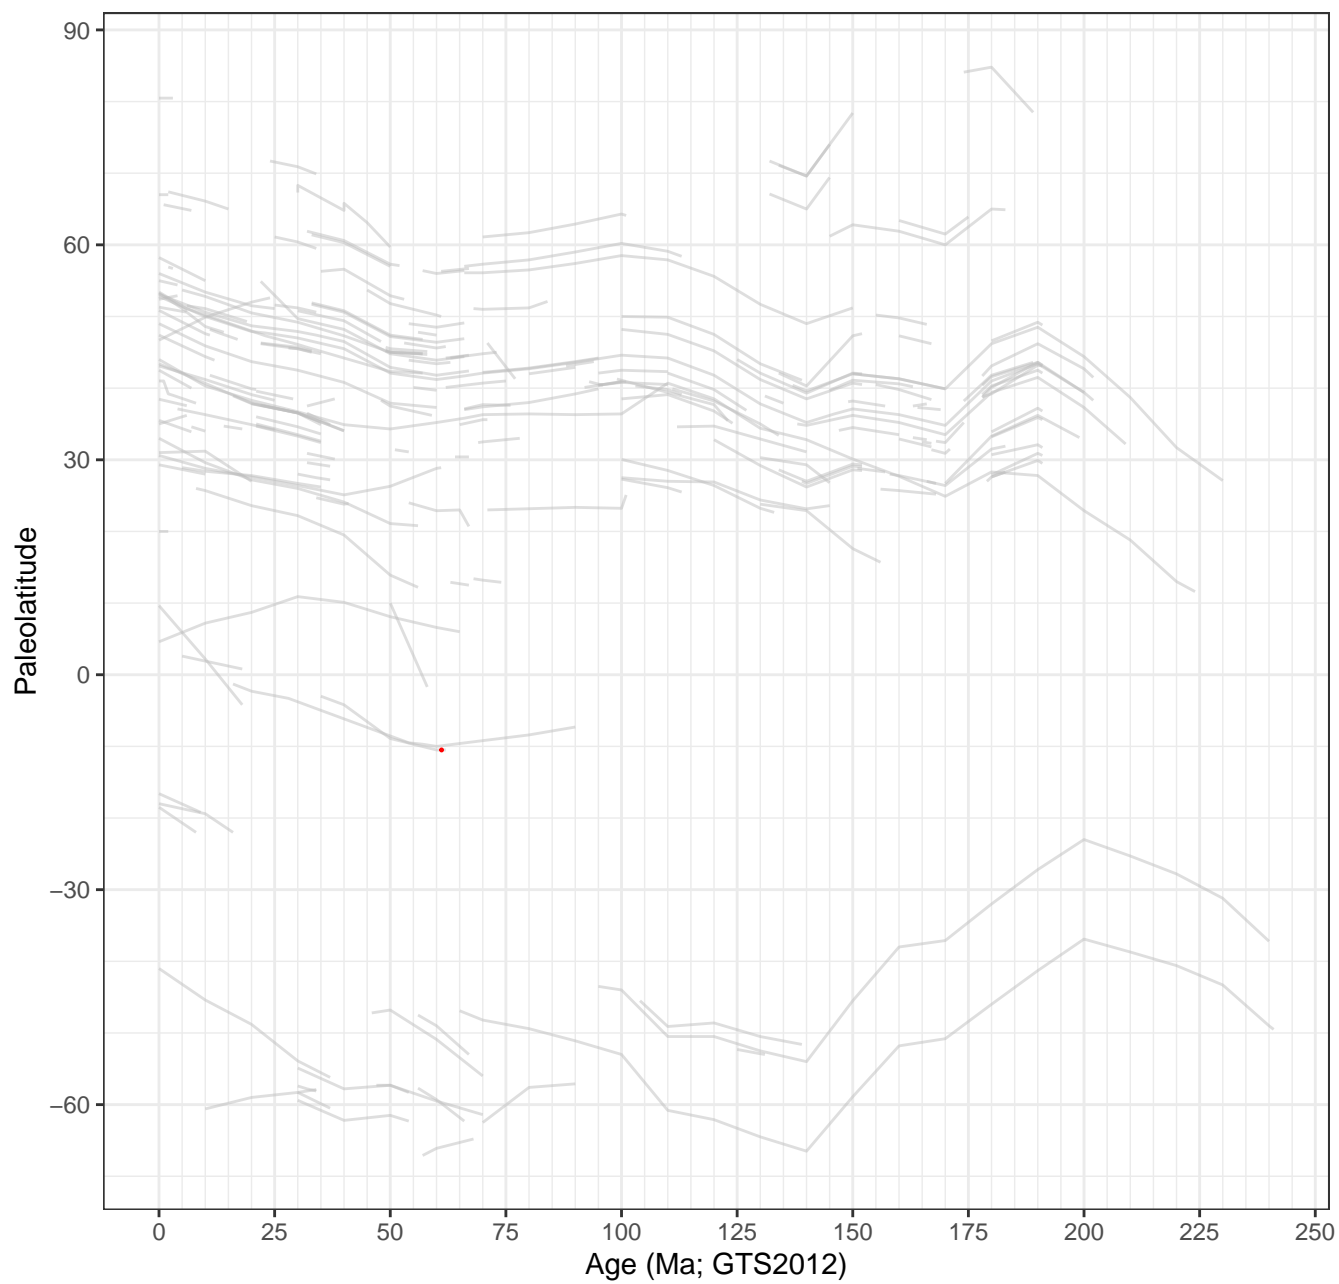

Supplement: Supplementary file 2218 [file Pyxidinopsis ardonensis.pdf › Supplement/Supplement 2/Species 1914 plots/Pyxidinopsis ardonensis.pdf]

# Species *Pyxidinopsis braboi*

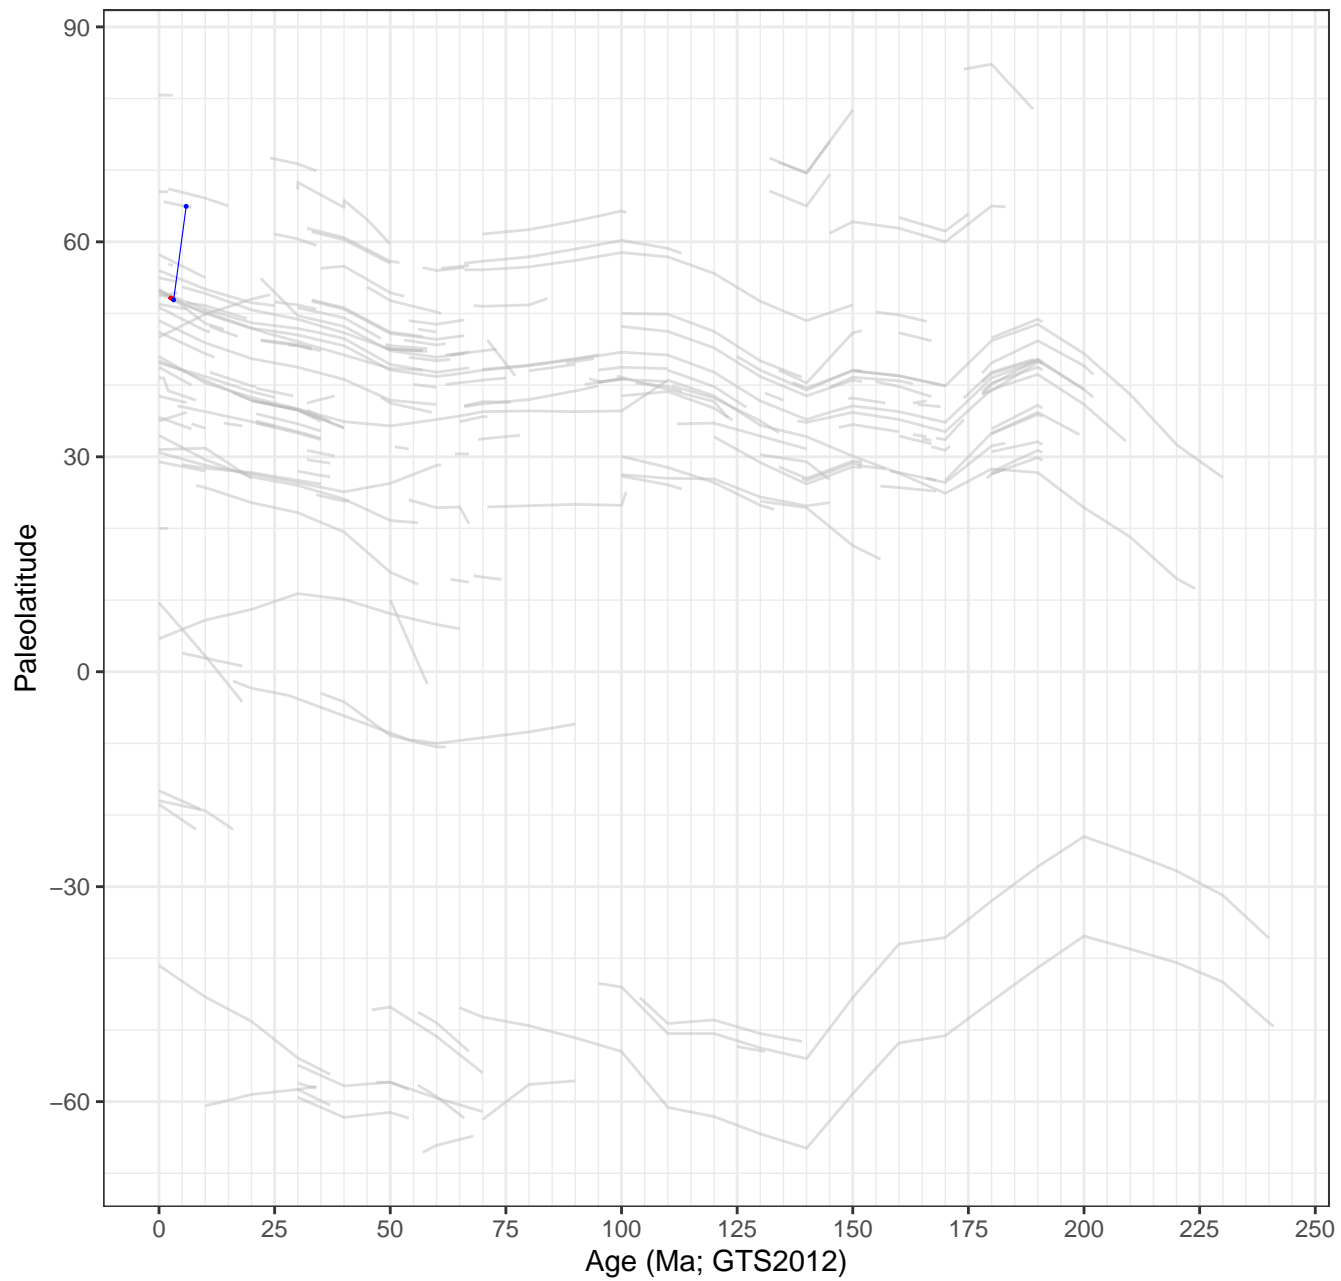

Supplement: Supplementary file 2219 [file Pyxidinopsis braboi.pdf › Supplement/Supplement 2/Species 1914 plots/Pyxidinopsis braboi.pdf]

# Species *Pyxidinopsis challengerensis*

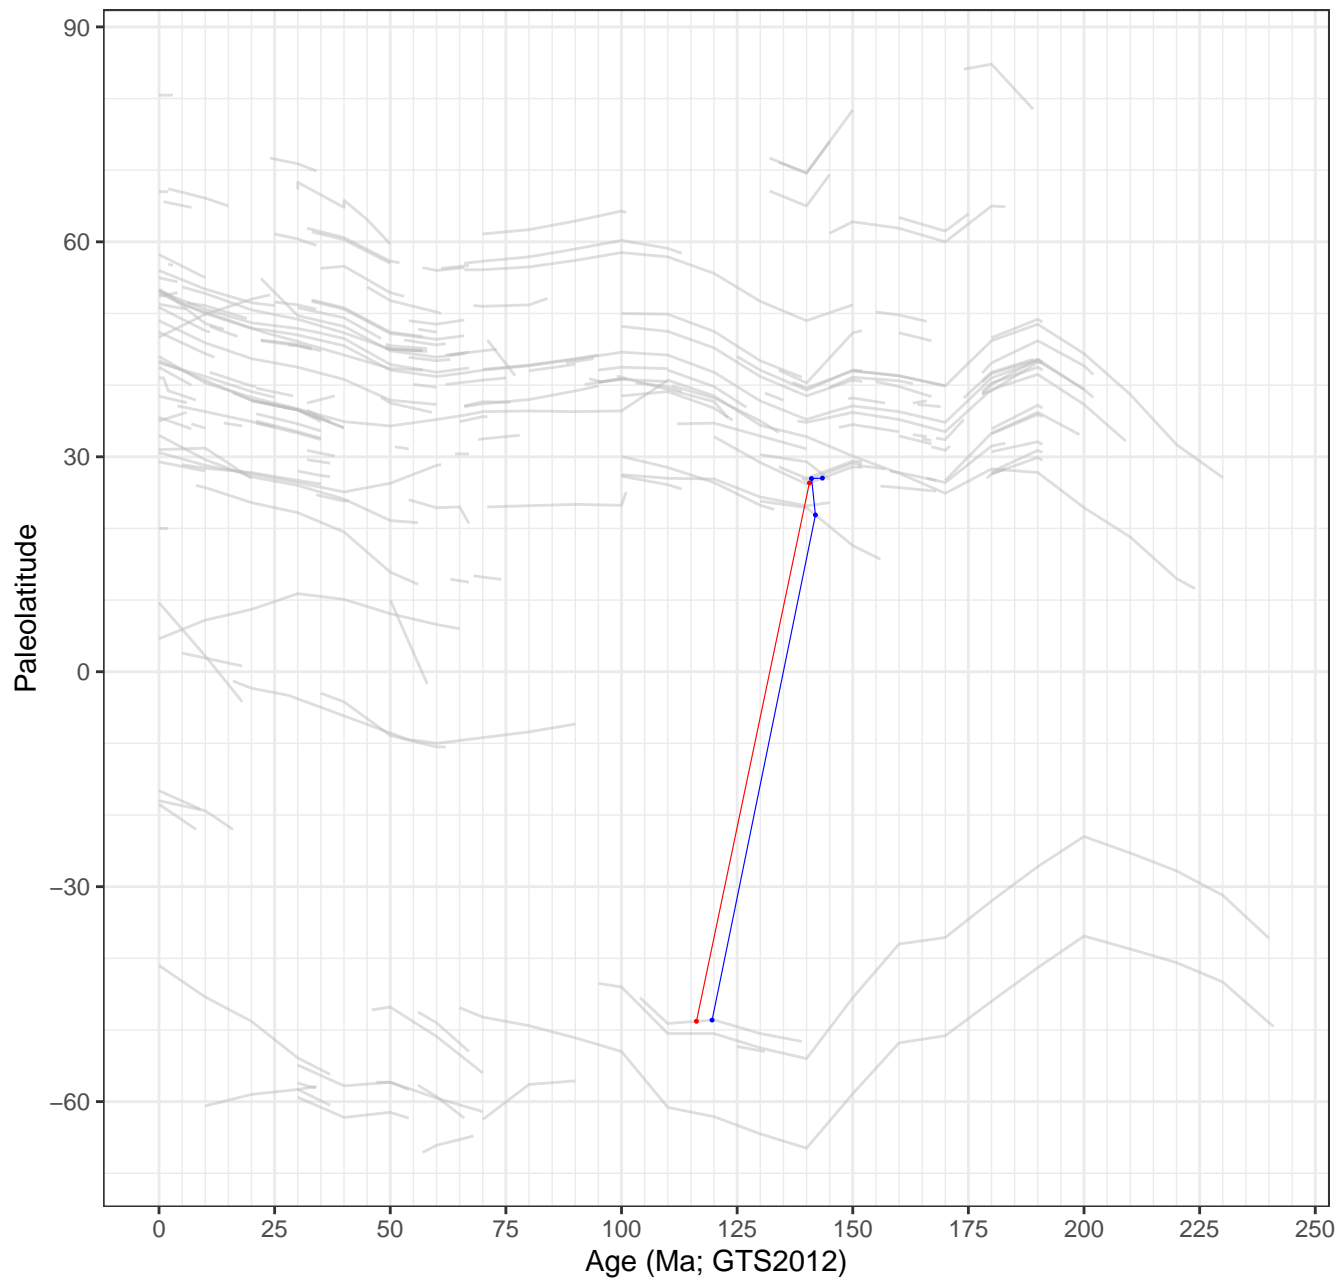

Supplement: Supplementary file 2220 [file Pyxidinopsis challengerensis.pdf › Supplement/Supplement 2/Species 1914 plots/Pyxidinopsis challengerensis.pdf]

# Species *Pyxidinopsis delicata*

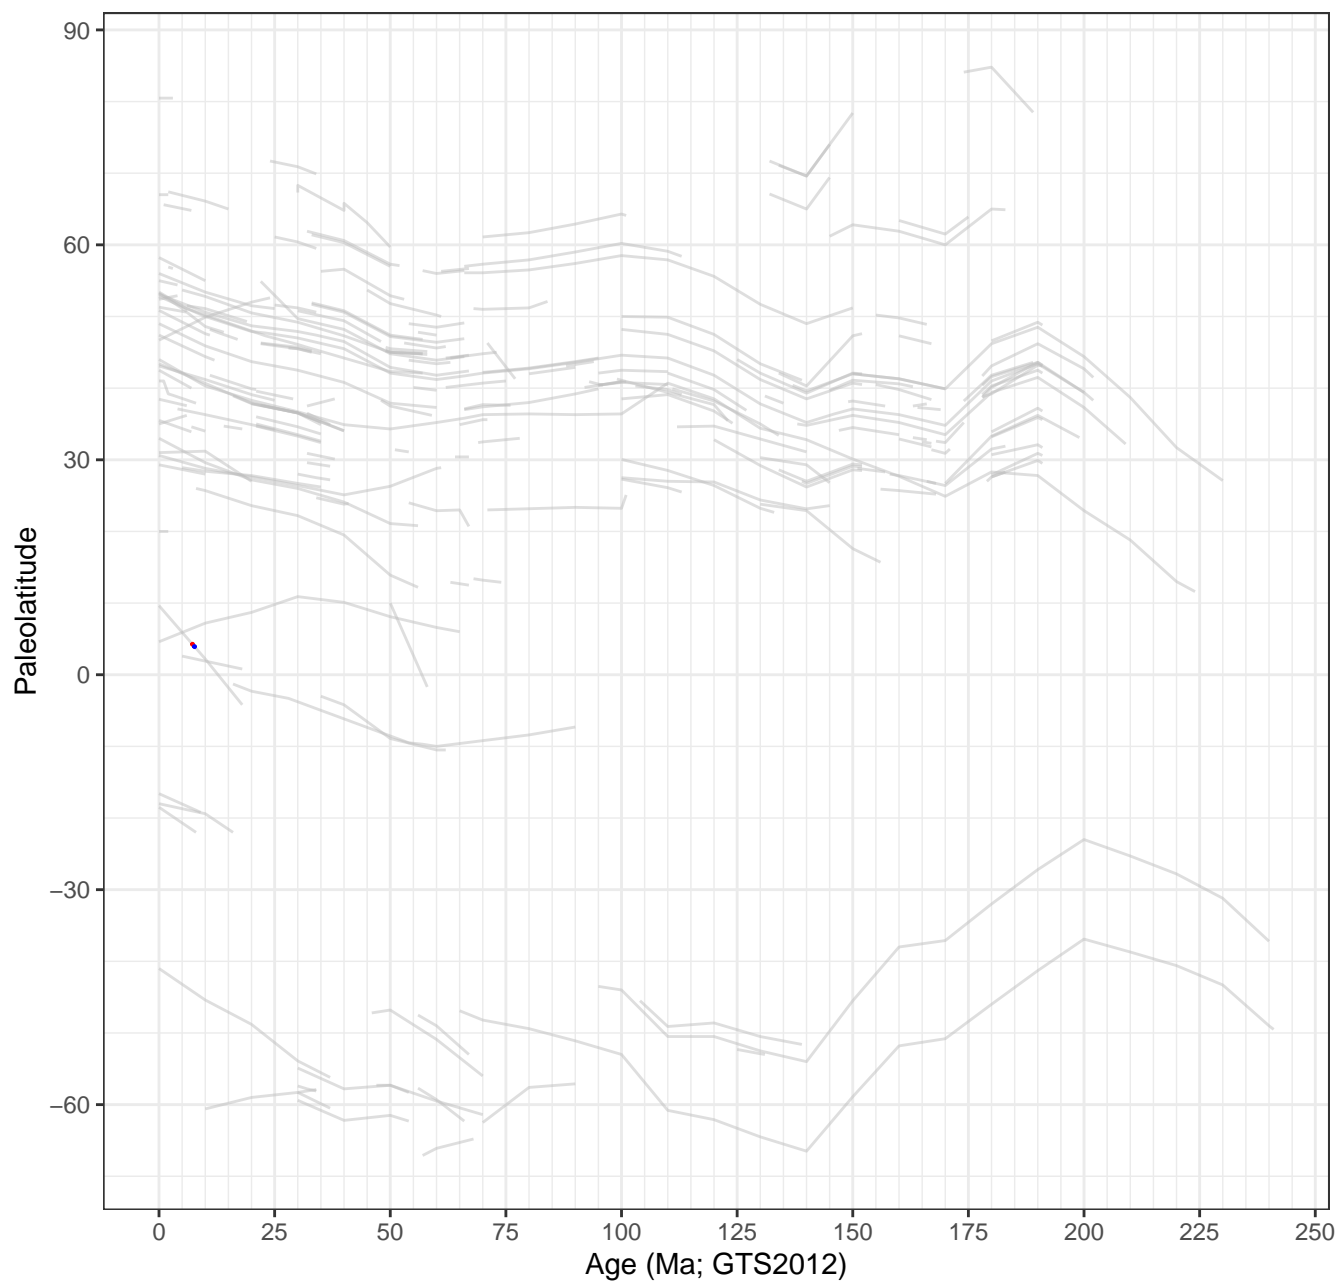

Supplement: Supplementary file 2221 [file Pyxidinopsis delicata.pdf › Supplement/Supplement 2/Species 1914 plots/Pyxidinopsis delicata.pdf]

# Species *Pyxidinopsis densepunctata*

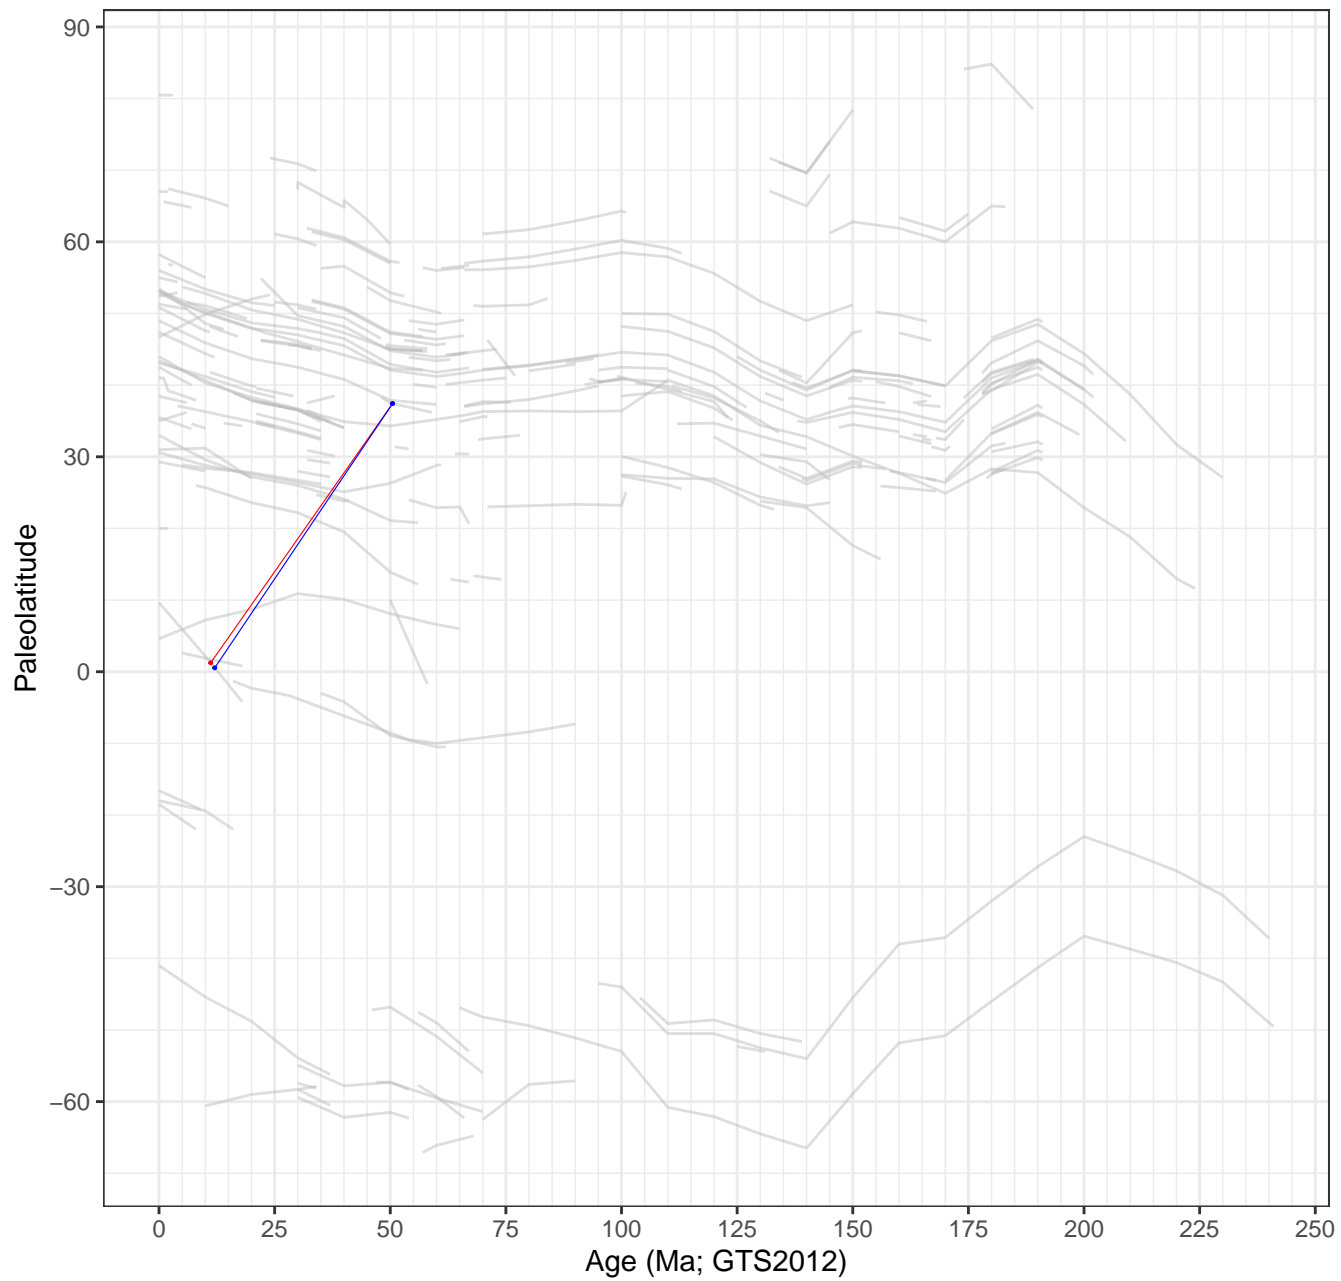

Supplement: Supplementary file 2222 [file Pyxidinopsis densepunctata.pdf › Supplement/Supplement 2/Species 1914 plots/Pyxidinopsis densepunctata.pdf]

# Species *Pyxidopsis elliptica*

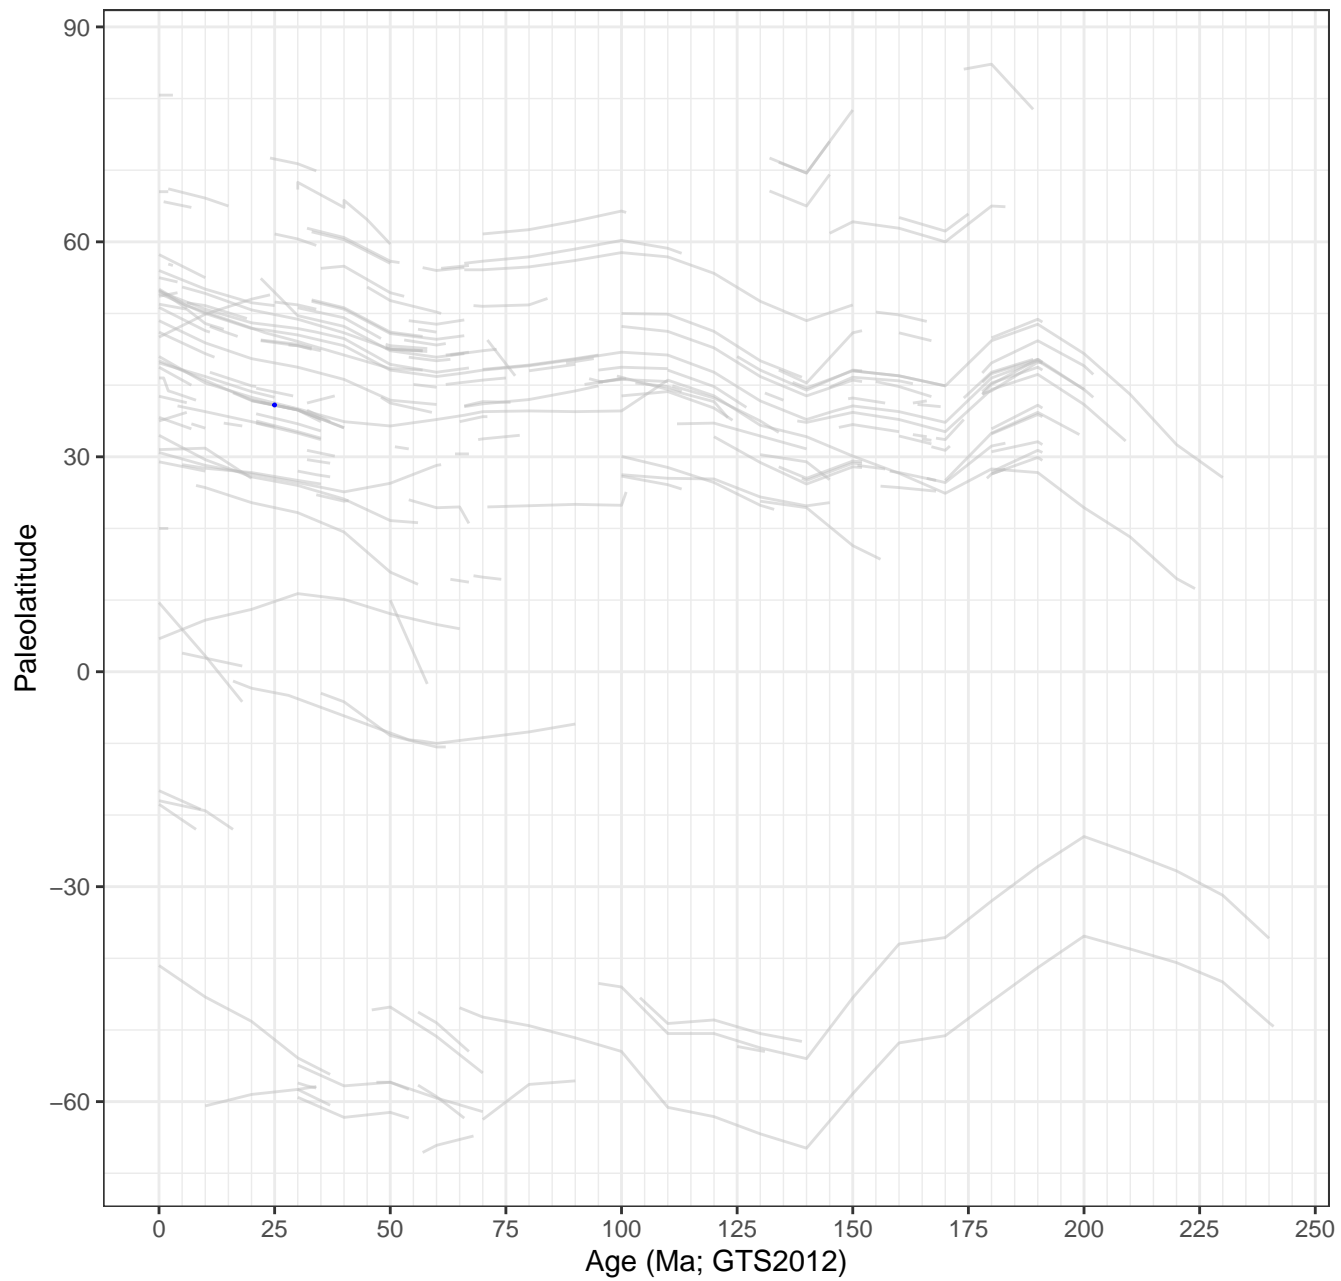

Supplement: Supplementary file 2223 [file Pyxidinopsis elliptica.pdf › Supplement/Supplement 2/Species 1914 plots/Pyxidinopsis elliptica.pdf]

# Species *Pyxidiniopsis epakros*

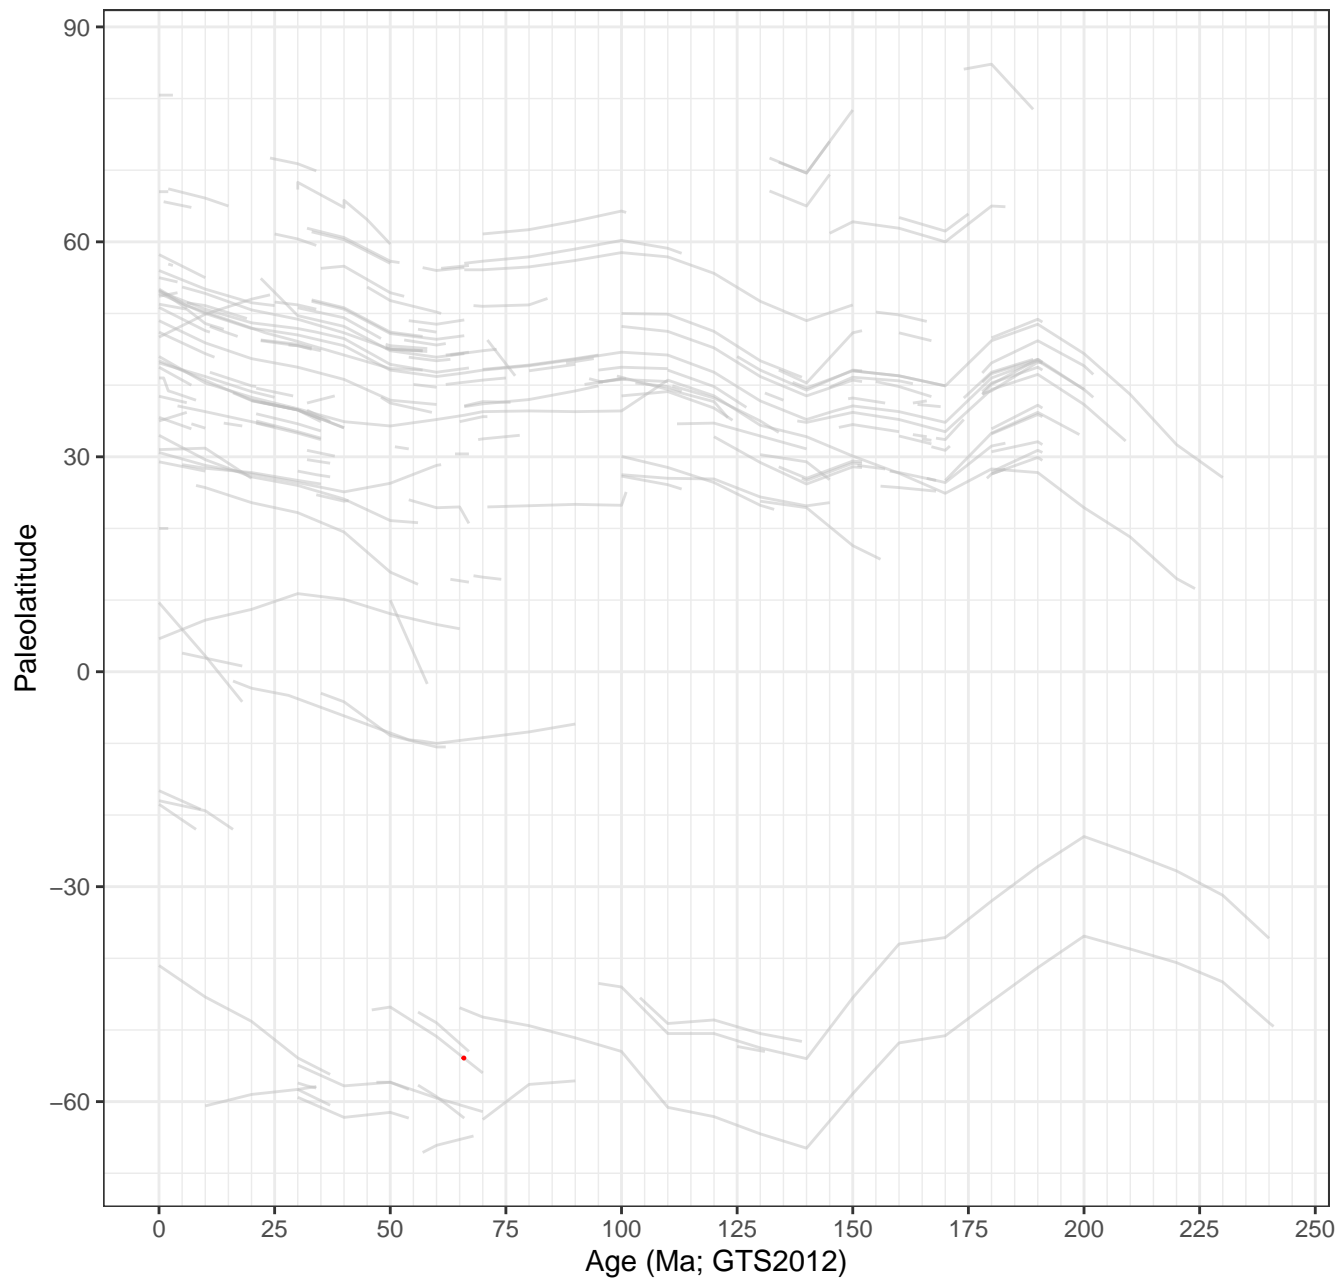

Supplement: Supplementary file 2224 [file Pyxidinopsis epakros.pdf › Supplement/Supplement 2/Species 1914 plots/Pyxidinopsis epakros.pdf]

# Species *Pyxidopsis everriculum*



Supplement: Supplementary file 2225 [file Pyxidinopsis everriculum.pdf › Supplement/Supplement 2/Species 1914 plots/Pyxidinopsis everriculum.pdf]

# Species *Pyxidopsis fairhavenensis*

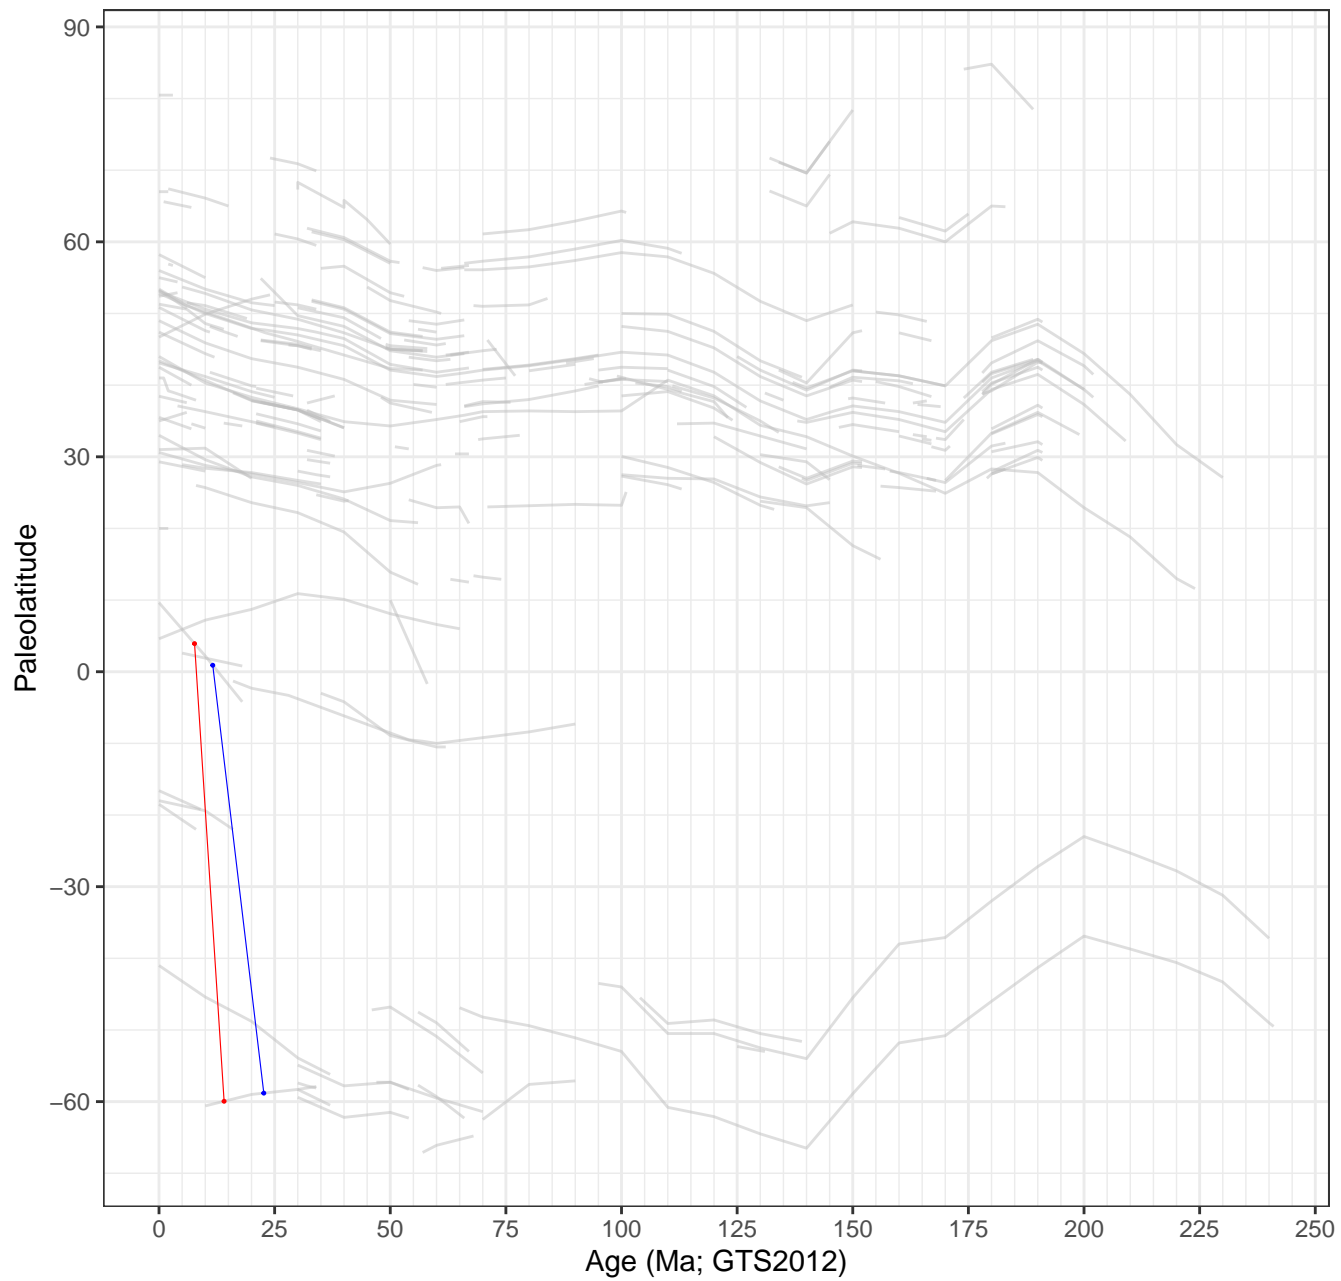

Supplement: Supplementary file 2226 [file Pyxidinopsis fairhavenensis.pdf › Supplement/Supplement 2/Species 1914 plots/Pyxidinopsis fairhavenensis.pdf]

# Species *Pyxidiniopsis meadensis*



Supplement: Supplementary file 2227 [file Pyxidinopsis meadensis.pdf › Supplement/Supplement 2/Species 1914 plots/Pyxidinopsis meadensis.pdf]

# Species *Pyxidiniopsis ovis*

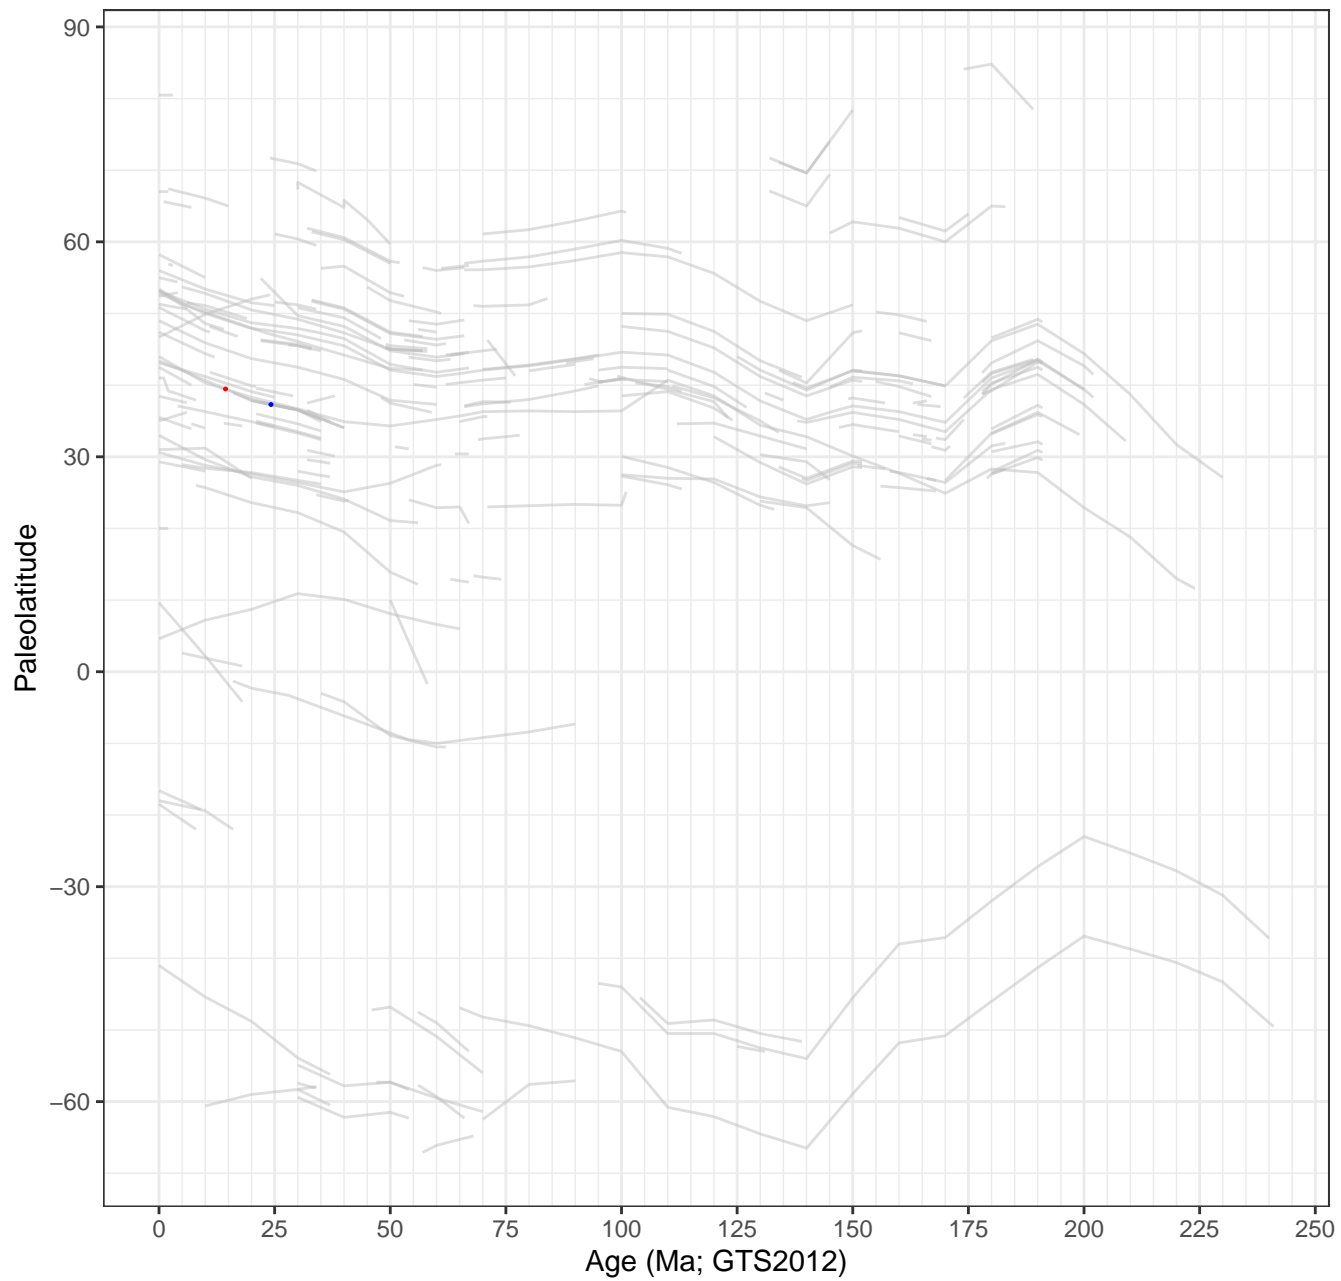

Supplement: Supplementary file 2228 [file Pyxidinopsis ovis.pdf › Supplement/Supplement 2/Species 1914 plots/Pyxidinopsis ovis.pdf]

# Species *Pyxidopsis pastilliformis*

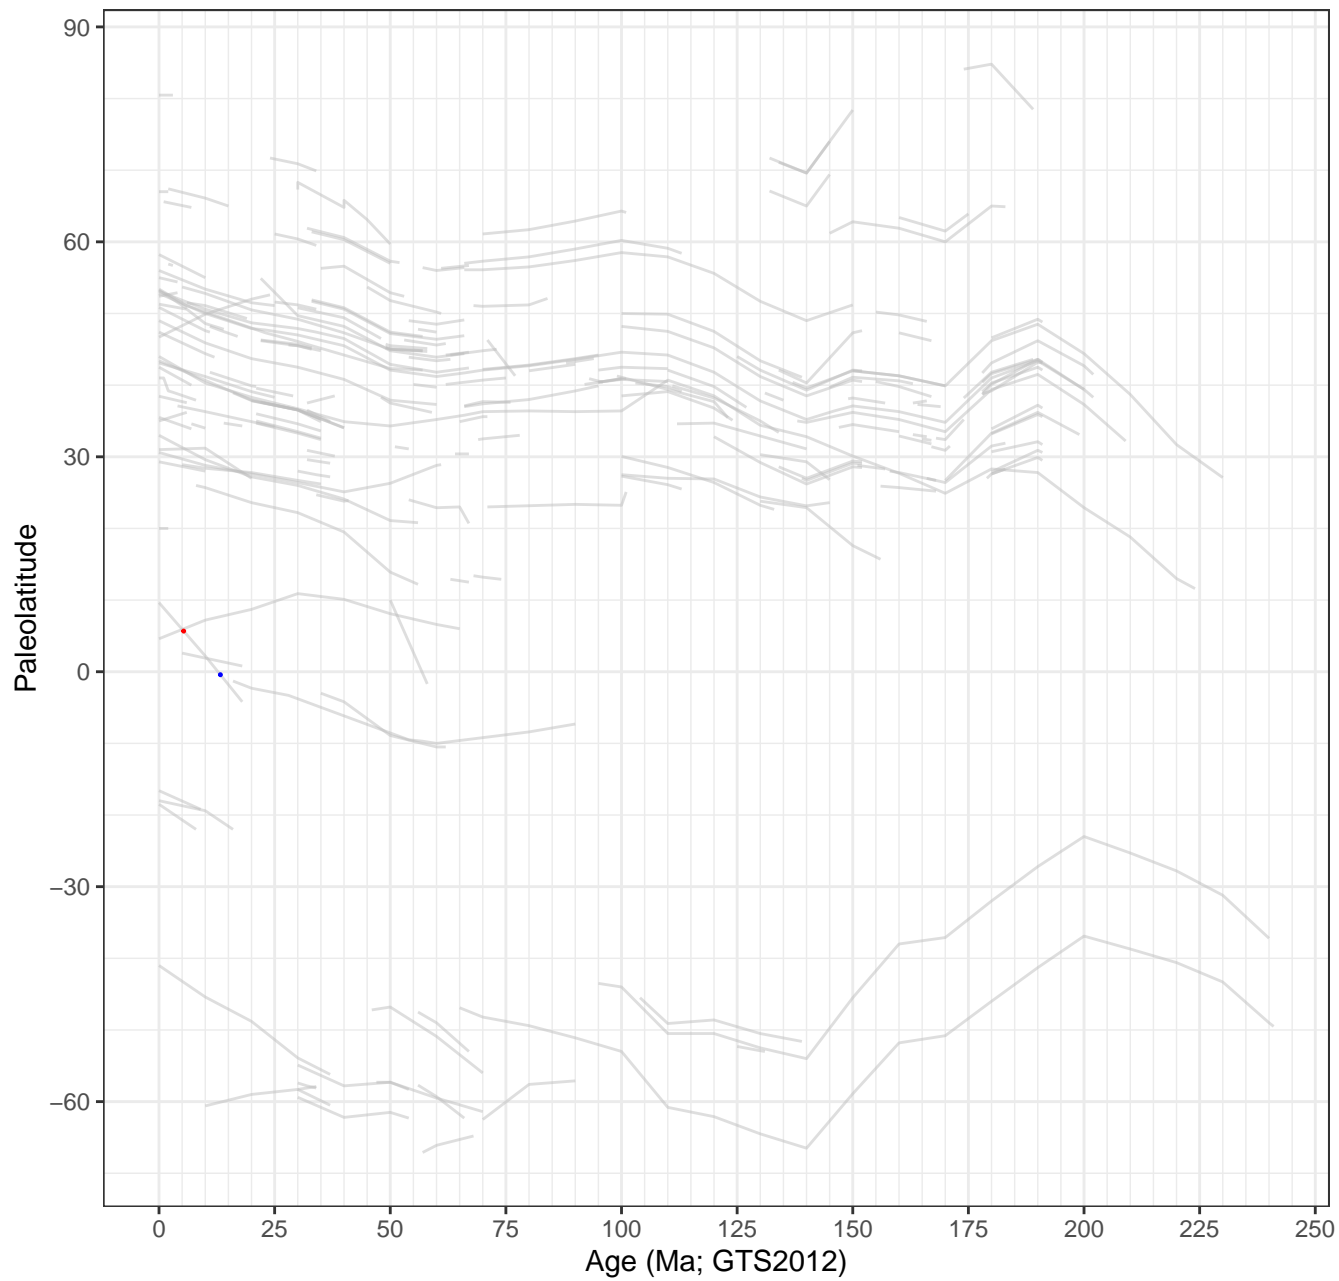

Supplement: Supplementary file 2229 [file Pyxidinopsis pastilliformis.pdf › Supplement/Supplement 2/Species 1914 plots/Pyxidinopsis pastilliformis.pdf]

# Species *Pyxidopsis protospinosus*

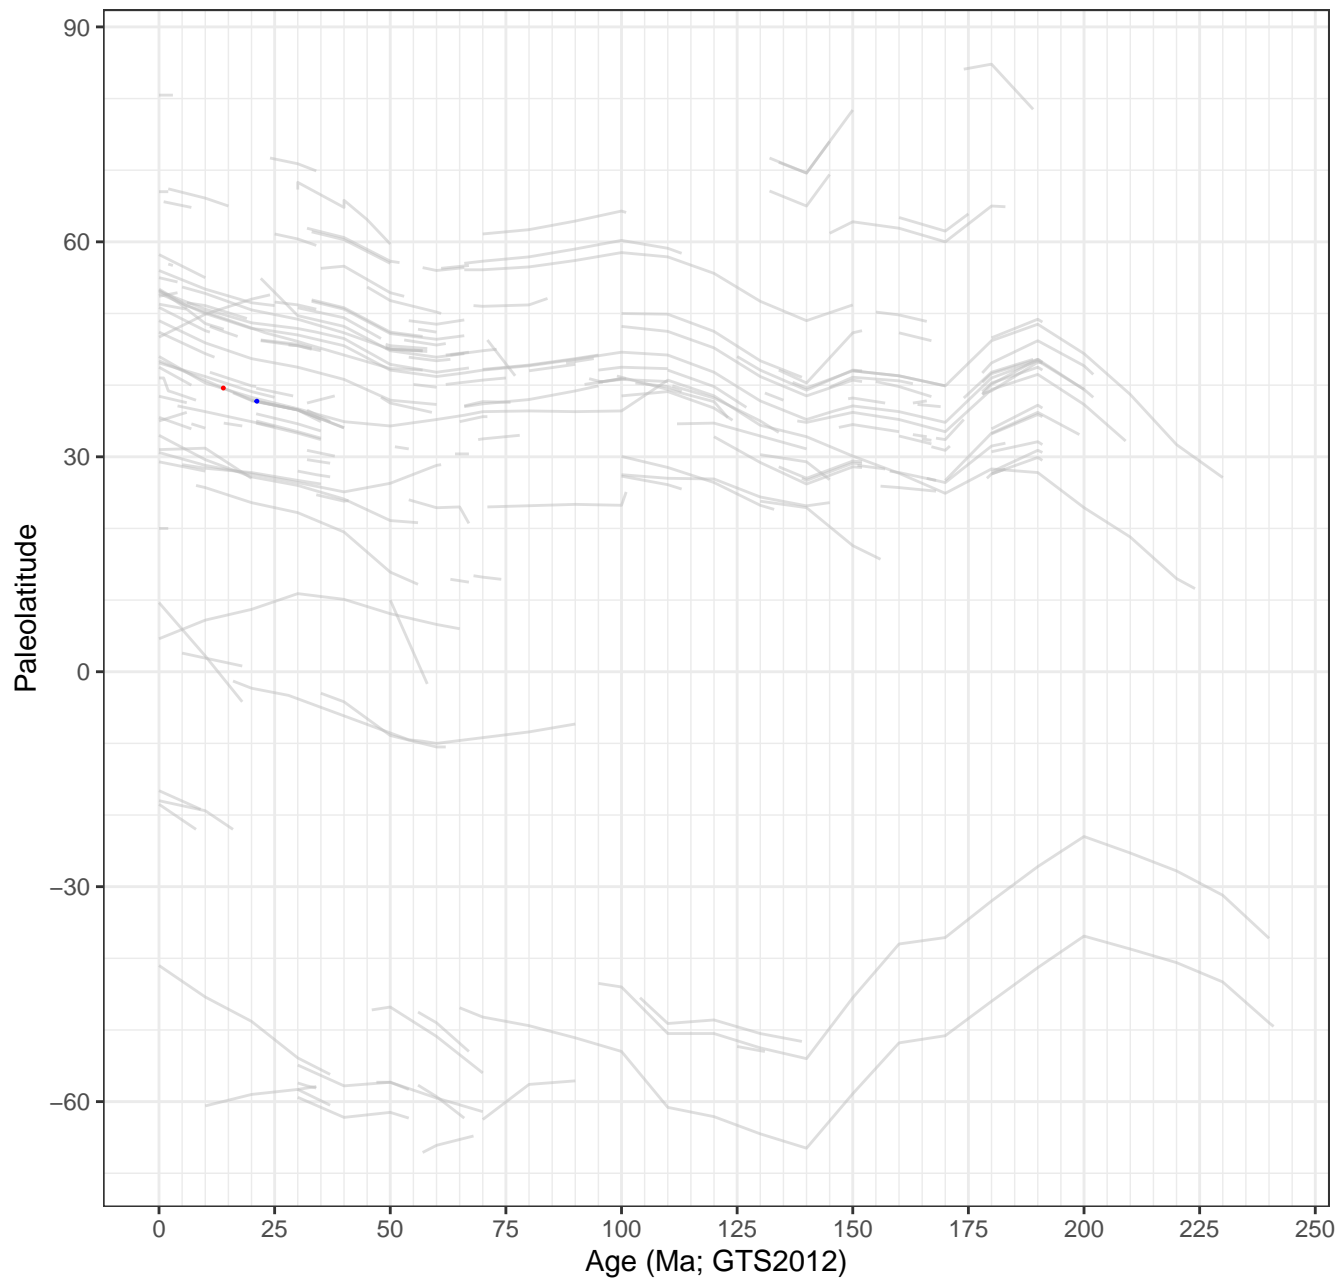

Supplement: Supplementary file 2230 [file Pyxidinopsis protospinosus.pdf › Supplement/Supplement 2/Species 1914 plots/Pyxidinopsis protospinosus.pdf]

# Species *Pyxidinopsis psilata*

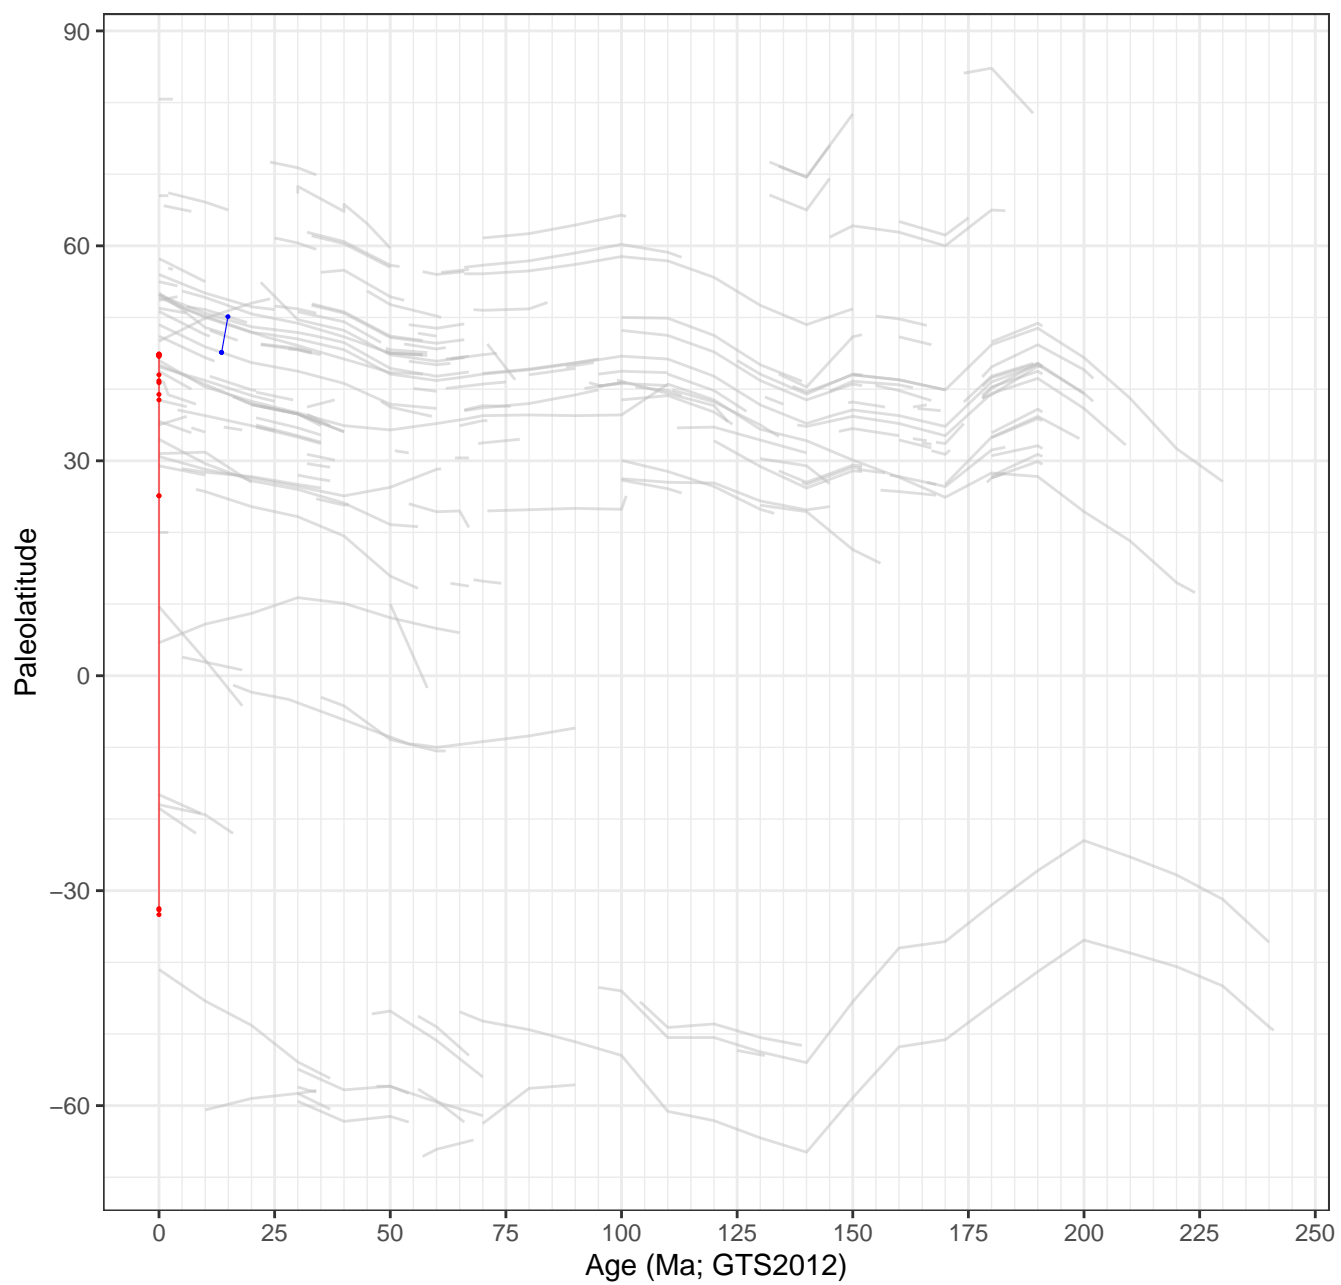

Supplement: Supplementary file 2231 [file Pyxidinopsis psilata.pdf › Supplement/Supplement 2/Species 1914 plots/Pyxidinopsis psilata.pdf]

# Species *Pyxidinopsis reticulata*

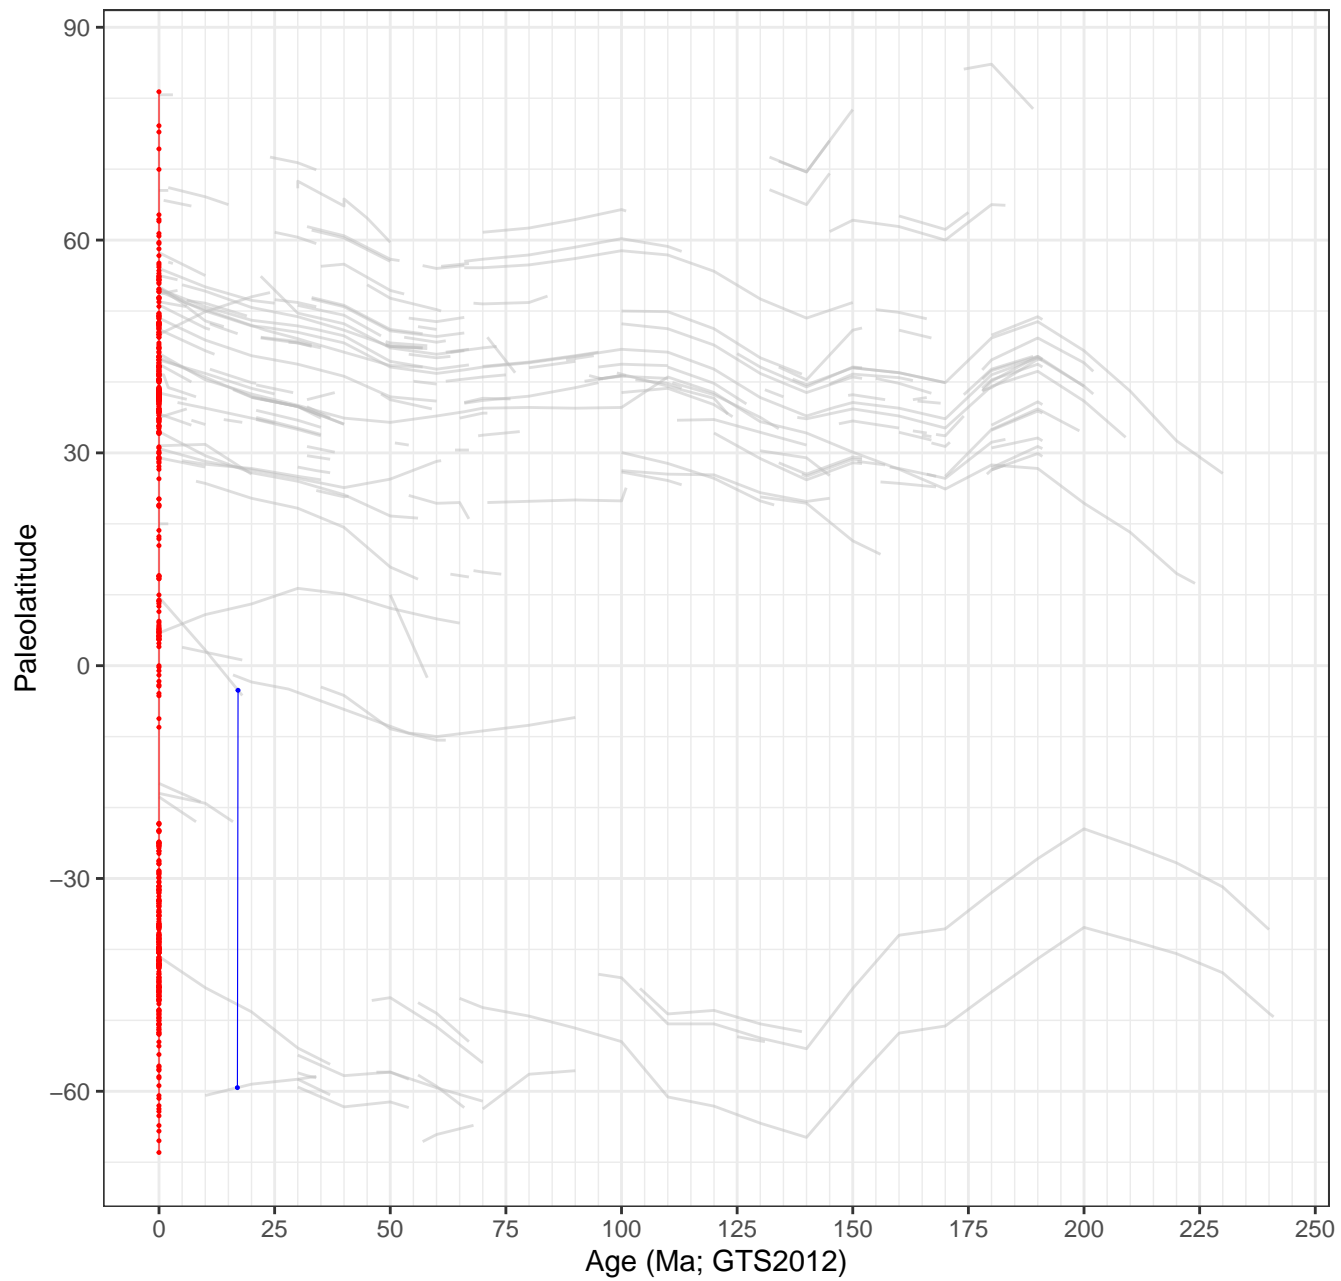

Supplement: Supplementary file 2232 [file Pyxidinopsis reticulata.pdf › Supplement/Supplement 2/Species 1914 plots/Pyxidinopsis reticulata.pdf]

# Species *Pyxidiniopsis* sp. 2

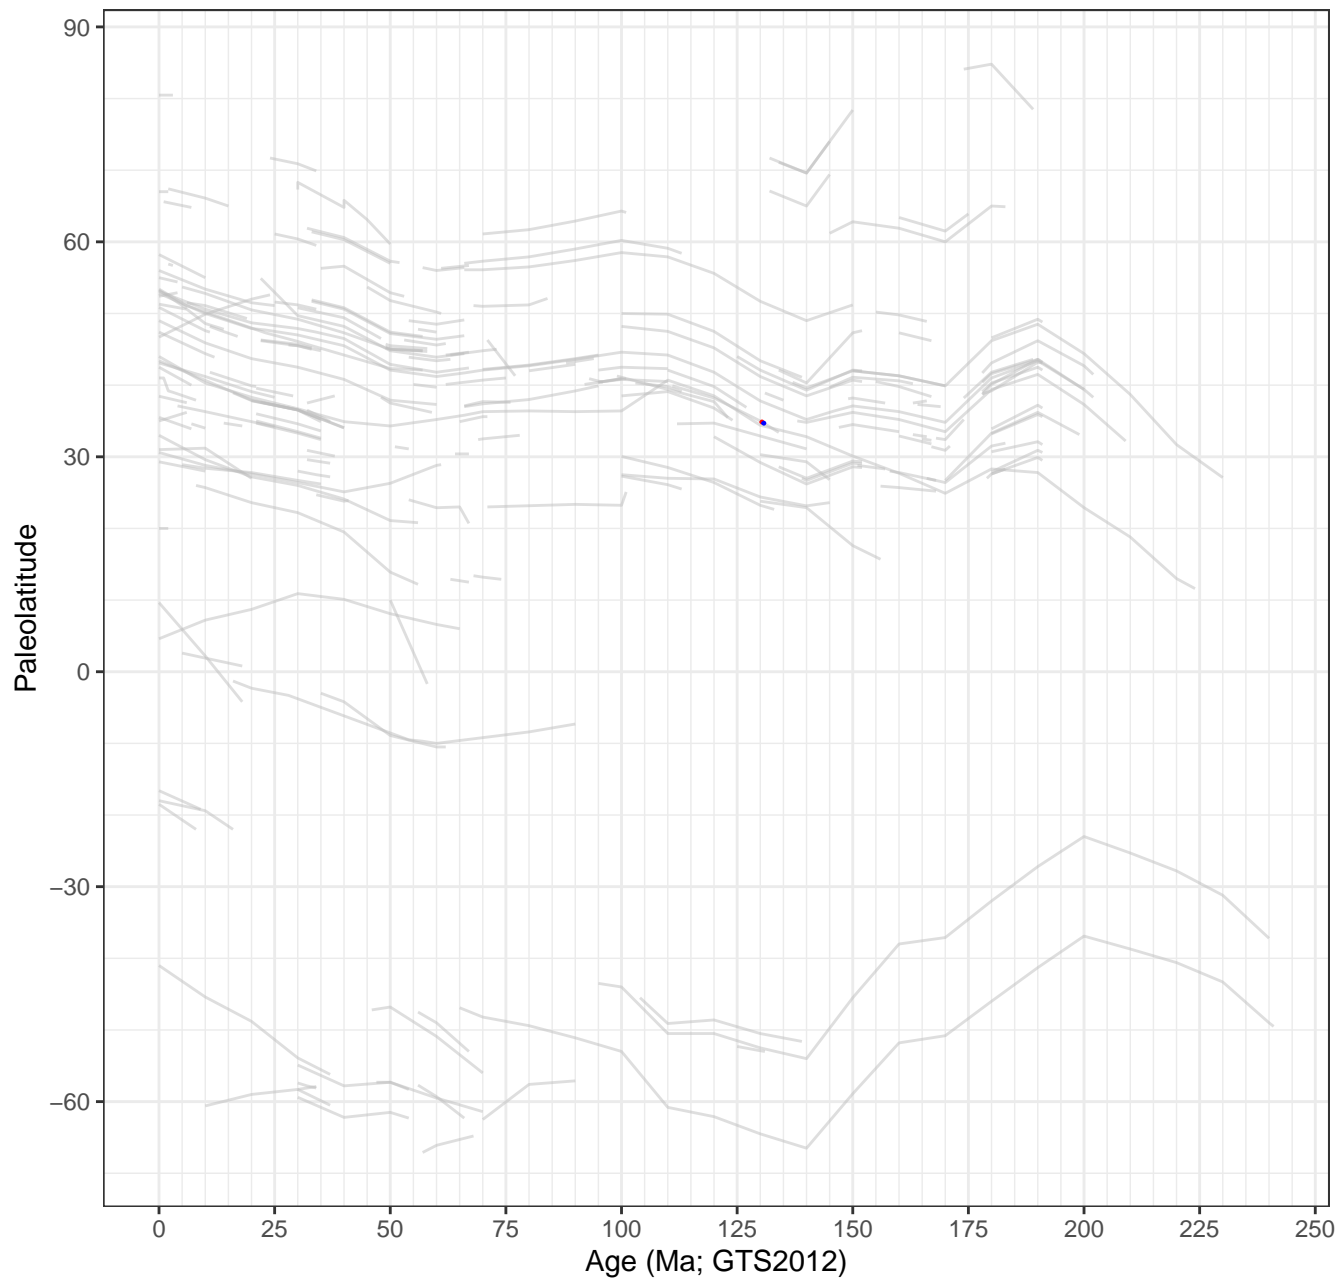

Supplement: Supplementary file 2233 [file Pyxidinopsis sp. 2.pdf › Supplement/Supplement 2/Species 1914 plots/Pyxidinopsis sp. 2.pdf]
