# Supplementary figures and images for: DINOSTRAT: a global database of the stratigraphic and paleolatitudinal distribution of Mesozoic–Cenozoic organic-walled dinoflagellate cysts (part 23 of 27)
Source: Copernicus journal article supplement (doi:10.5194/essd-14-579-2022), 2022-02-09

# Species *Pyxidiniopsis tuberculata*

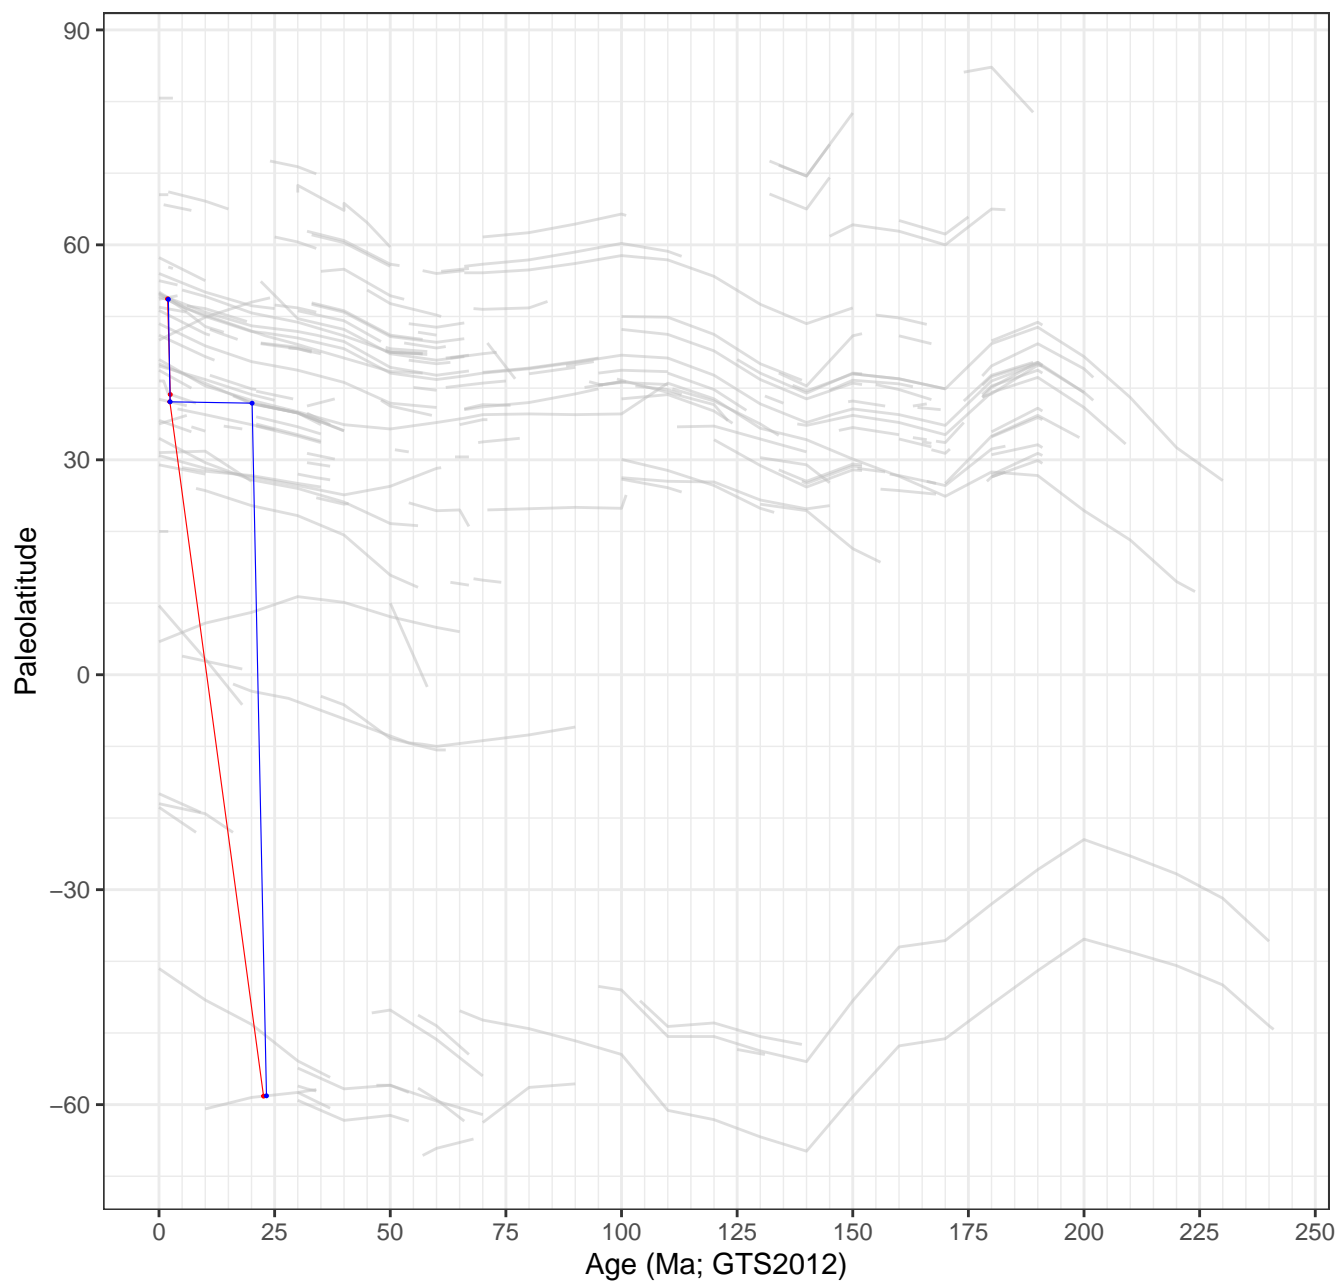

Supplement: Supplementary file 2234 [file Pyxidinopsis tuberculata.pdf › Supplement/Supplement 2/Species 1914 plots/Pyxidinopsis tuberculata.pdf]

# Species *Pyxidiniopsis vesiculata*

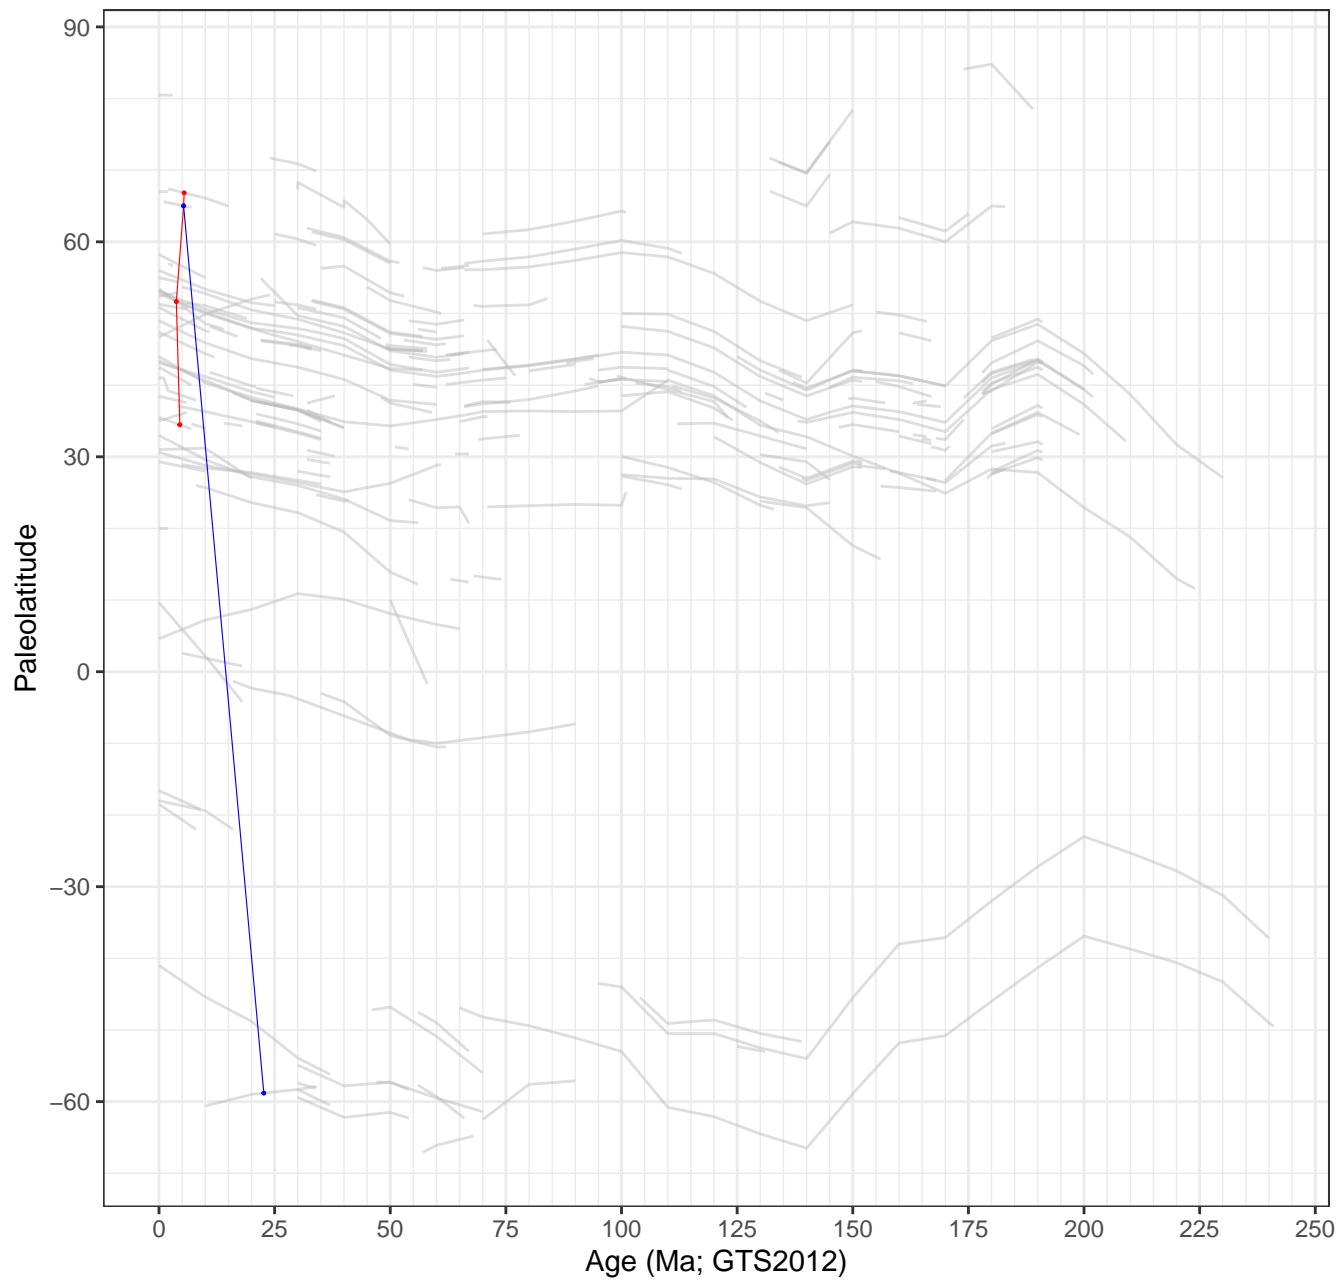

Supplement: Supplementary file 2235 [file Pyxidinopsis vesiculata.pdf › Supplement/Supplement 2/Species 1914 plots/Pyxidinopsis vesiculata.pdf]

# Species *Quinquecupis concreta*

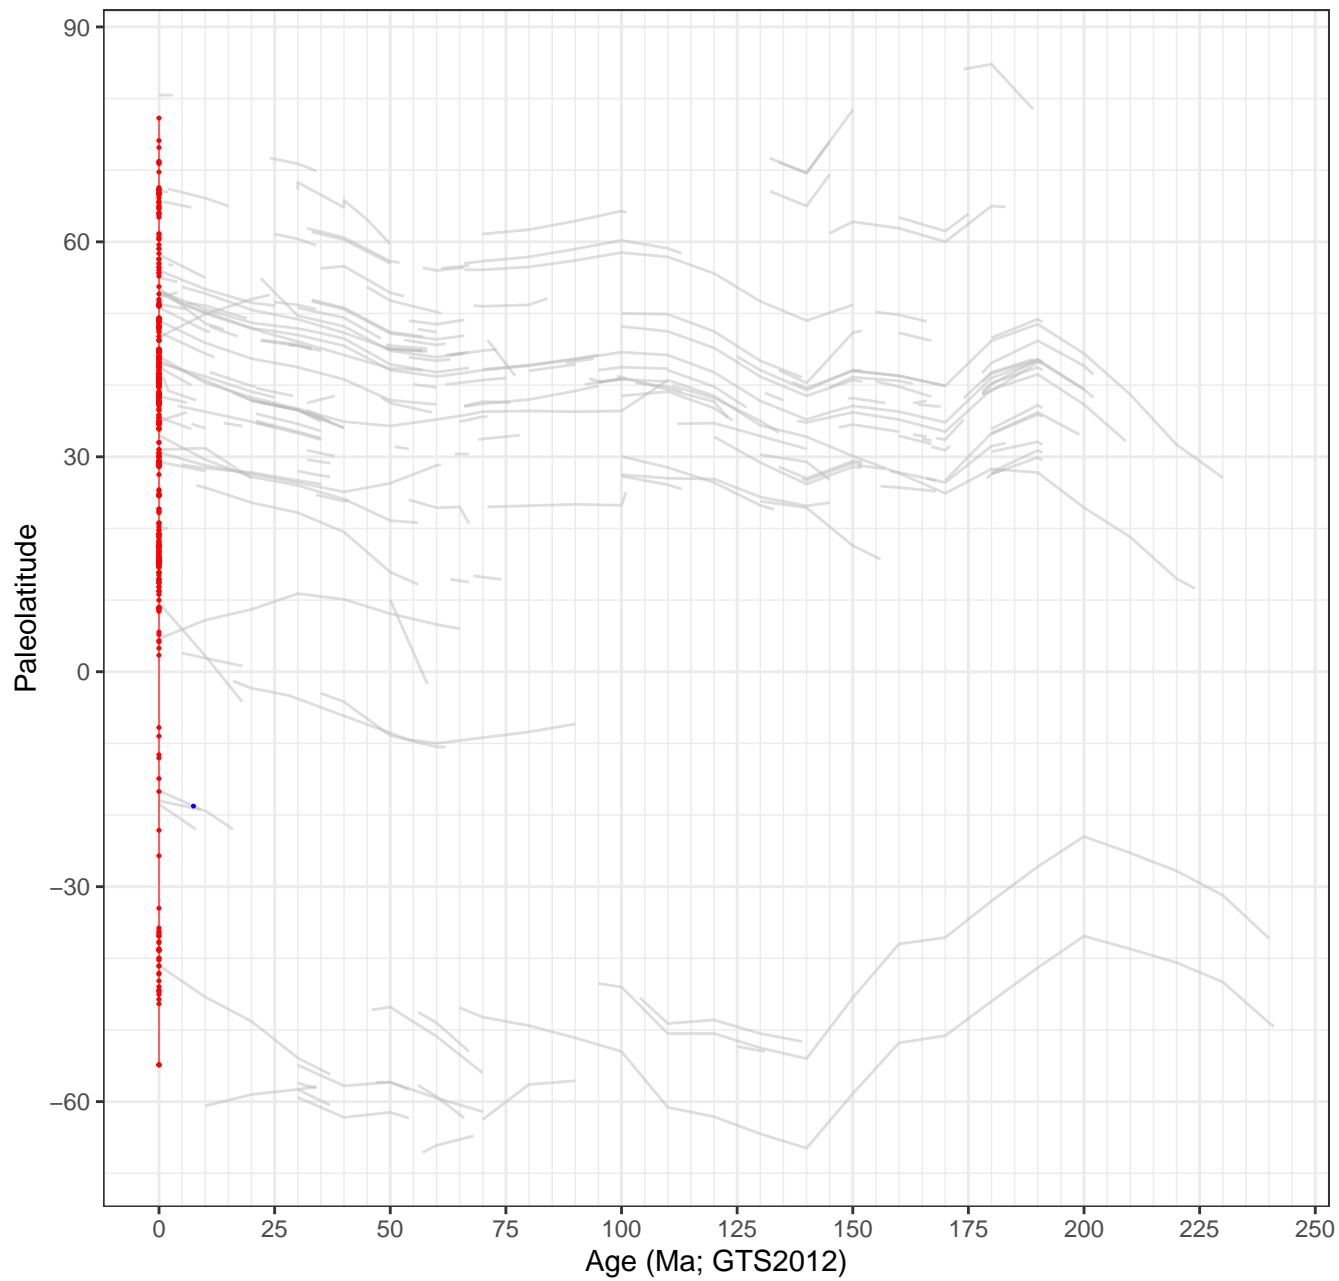

Supplement: Supplementary file 2236 [file Quinquecuspis concreta.pdf › Supplement/Supplement 2/Species 1914 plots/Quinquecuspis concreta.pdf]

# Species *Raetiaedinium truncigerum*

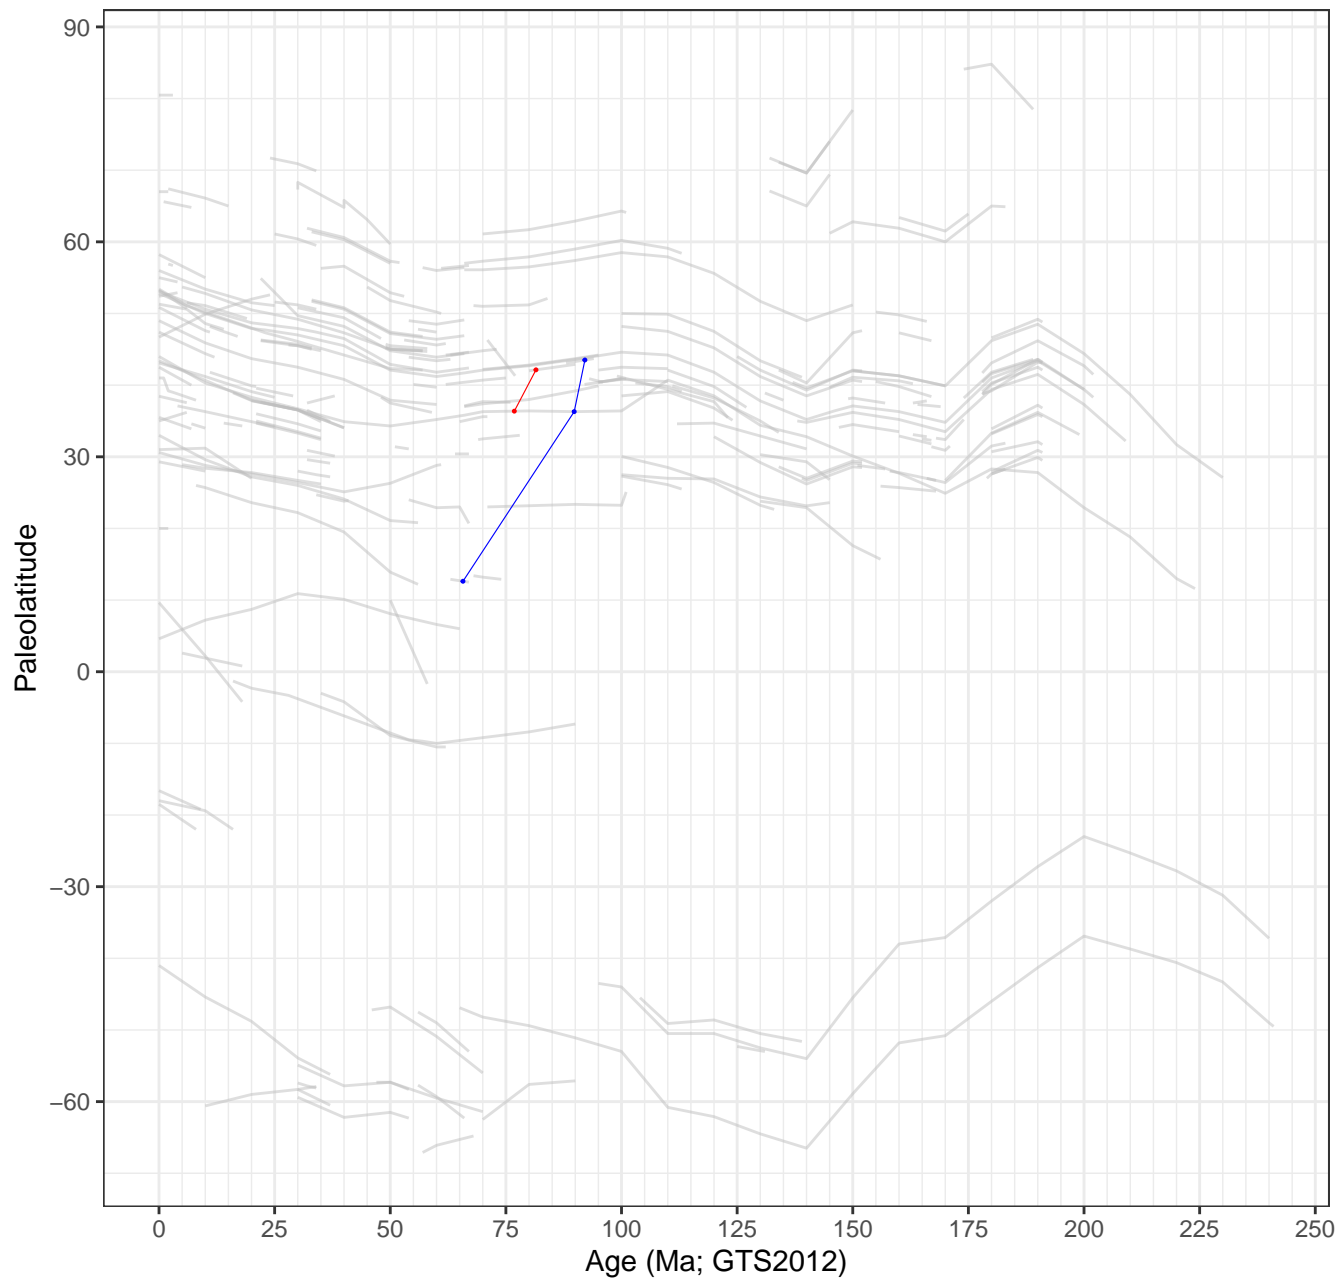

Supplement: Supplementary file 2237 [file Raetiaedinium truncigerum.pdf › Supplement/Supplement 2/Species 1914 plots/Raetiaedinium truncigerum.pdf]

# Species *Raphidodinium fucatum*

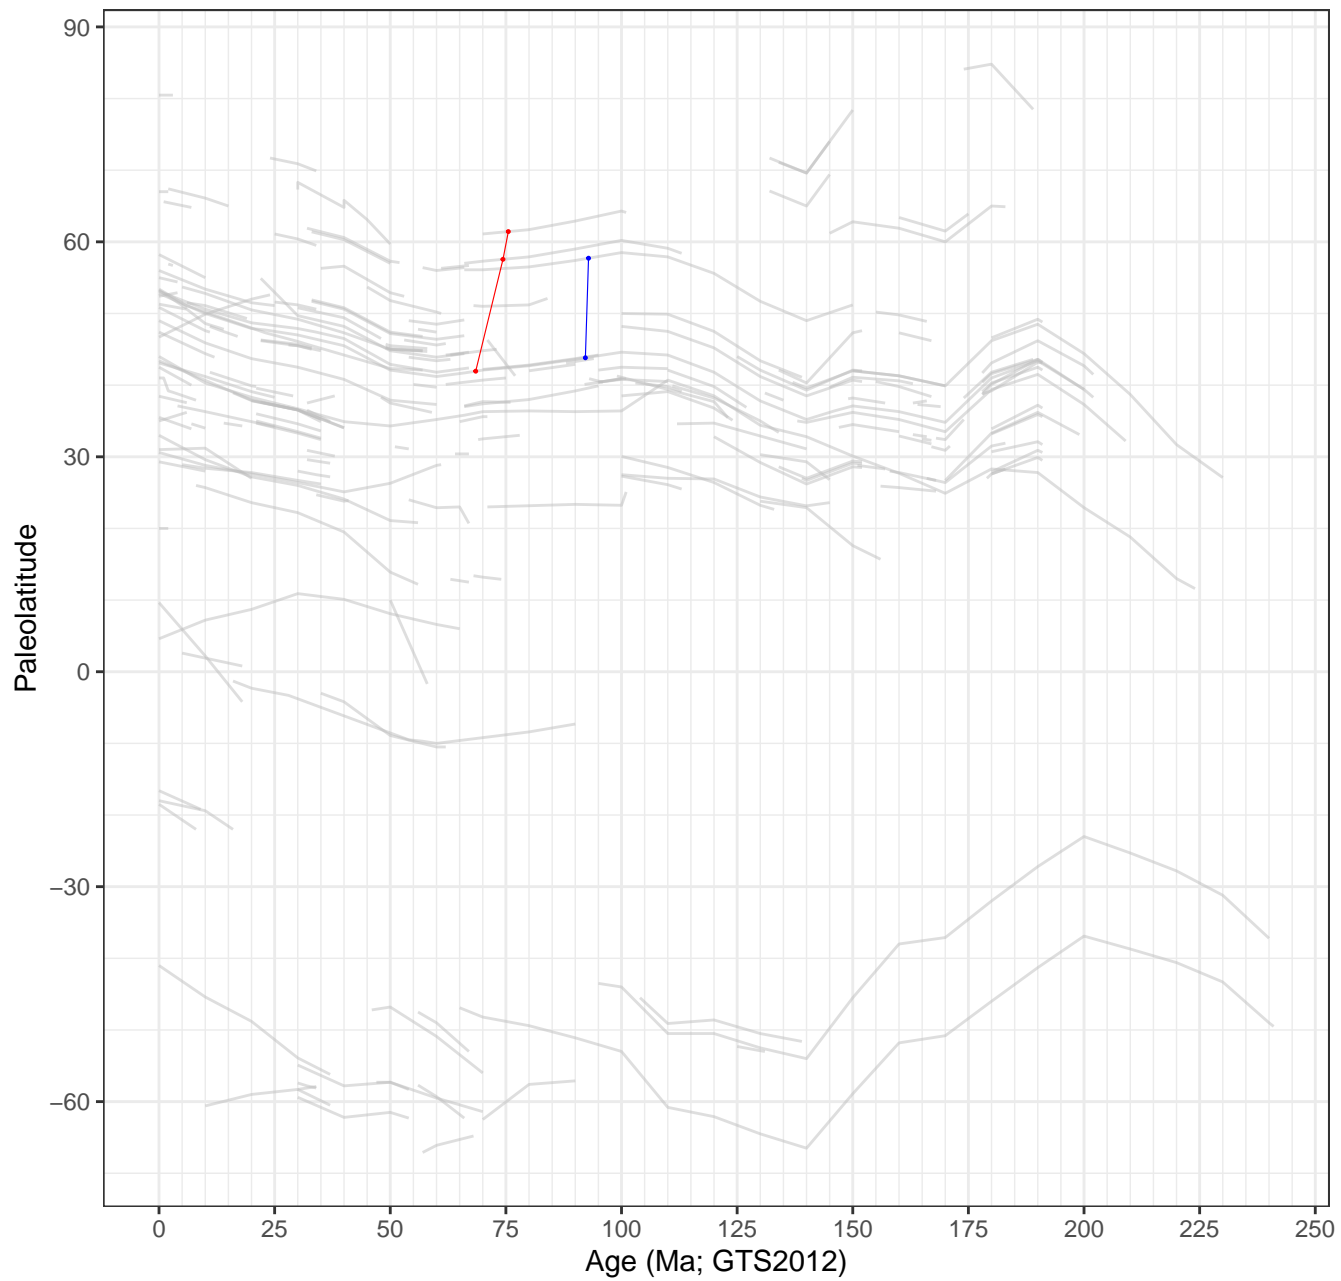

Supplement: Supplementary file 2238 [file Raphidodinium fucatum.pdf › Supplement/Supplement 2/Species 1914 plots/Raphidodinium fucatum.pdf]

# Species *Renidinium gracile*

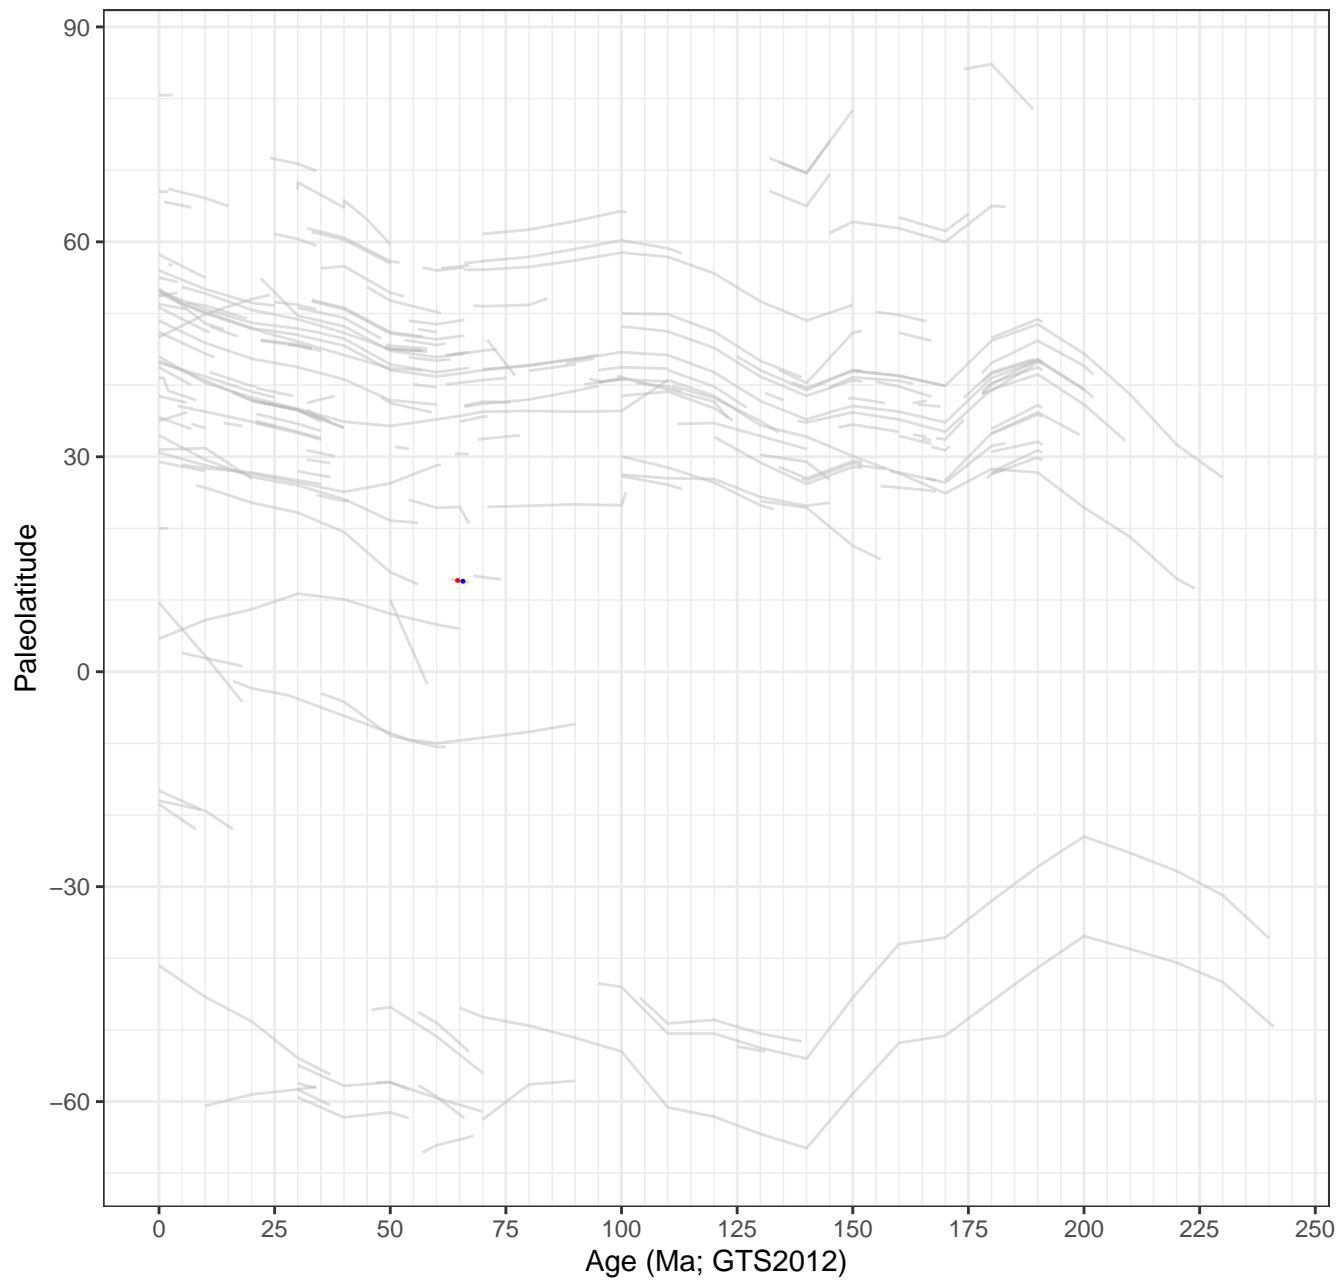

Supplement: Supplementary file 2239 [file Renidinium gracile.pdf › Supplement/Supplement 2/Species 1914 plots/Renidinium gracile.pdf]

# Species *Reticulosphaera actinocoronata*

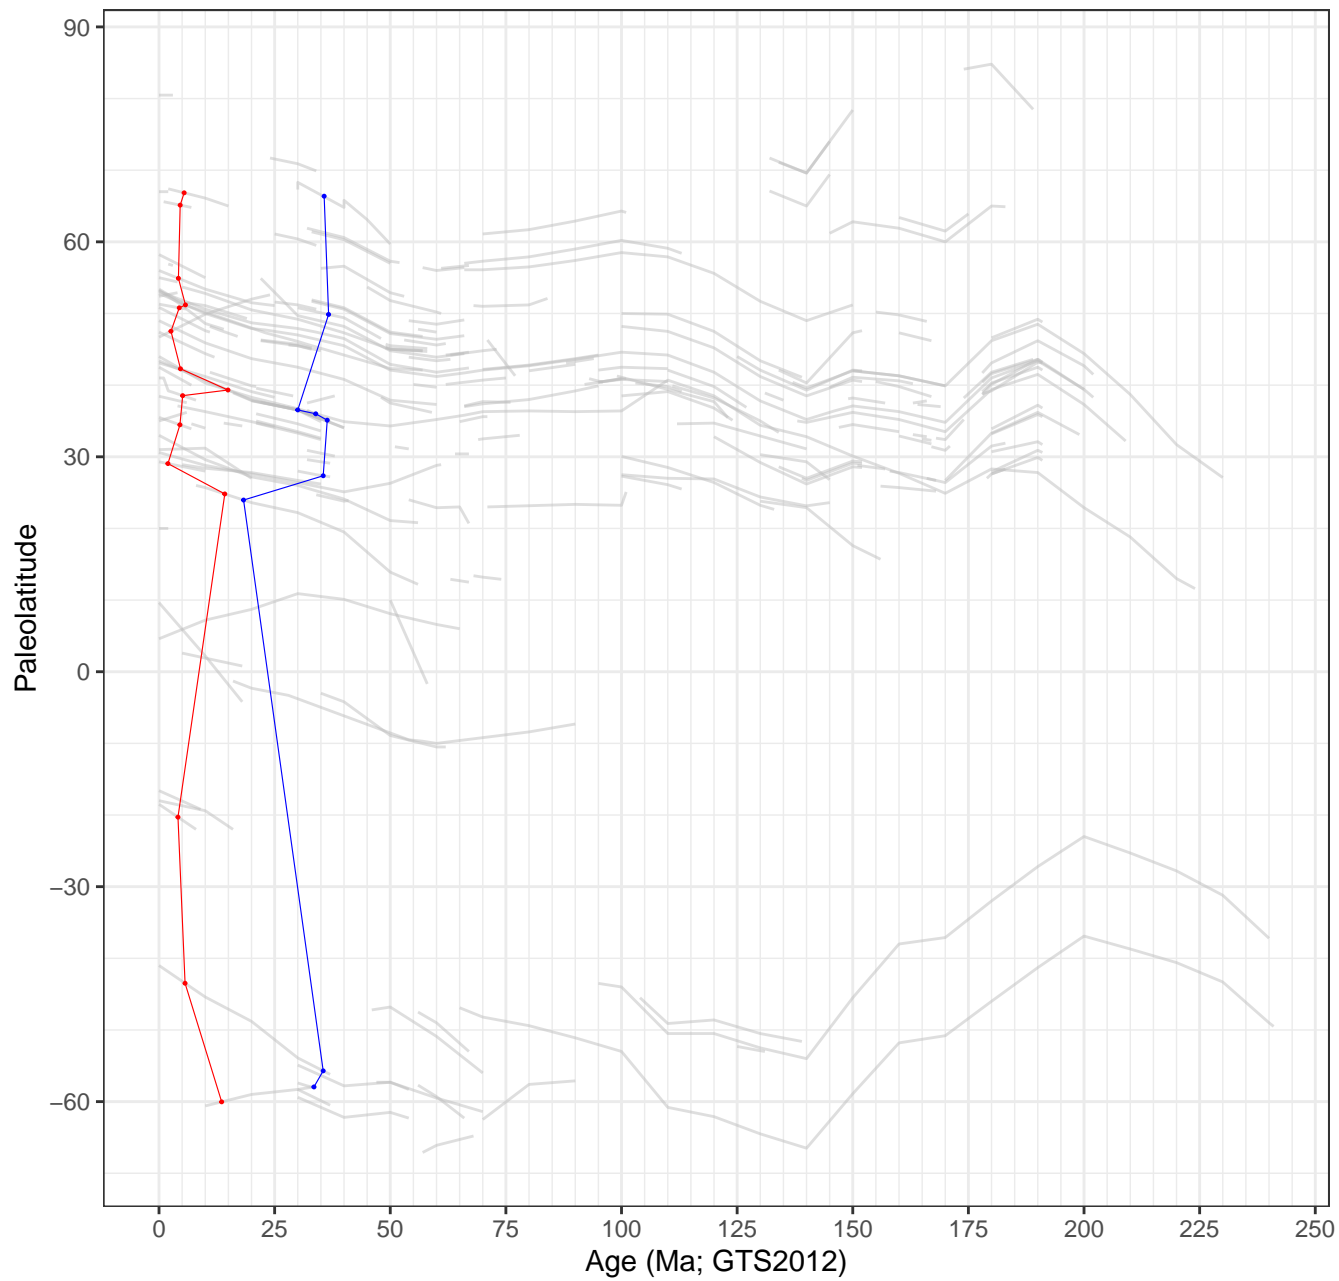

Supplement: Supplementary file 2240 [file Reticulatosphaera actinocoronata.pdf › Supplement/Supplement 2/Species 1914 plots/Reticulatosphaera actinocoronata.pdf]

# Species *Reutlingia cardobarbata*

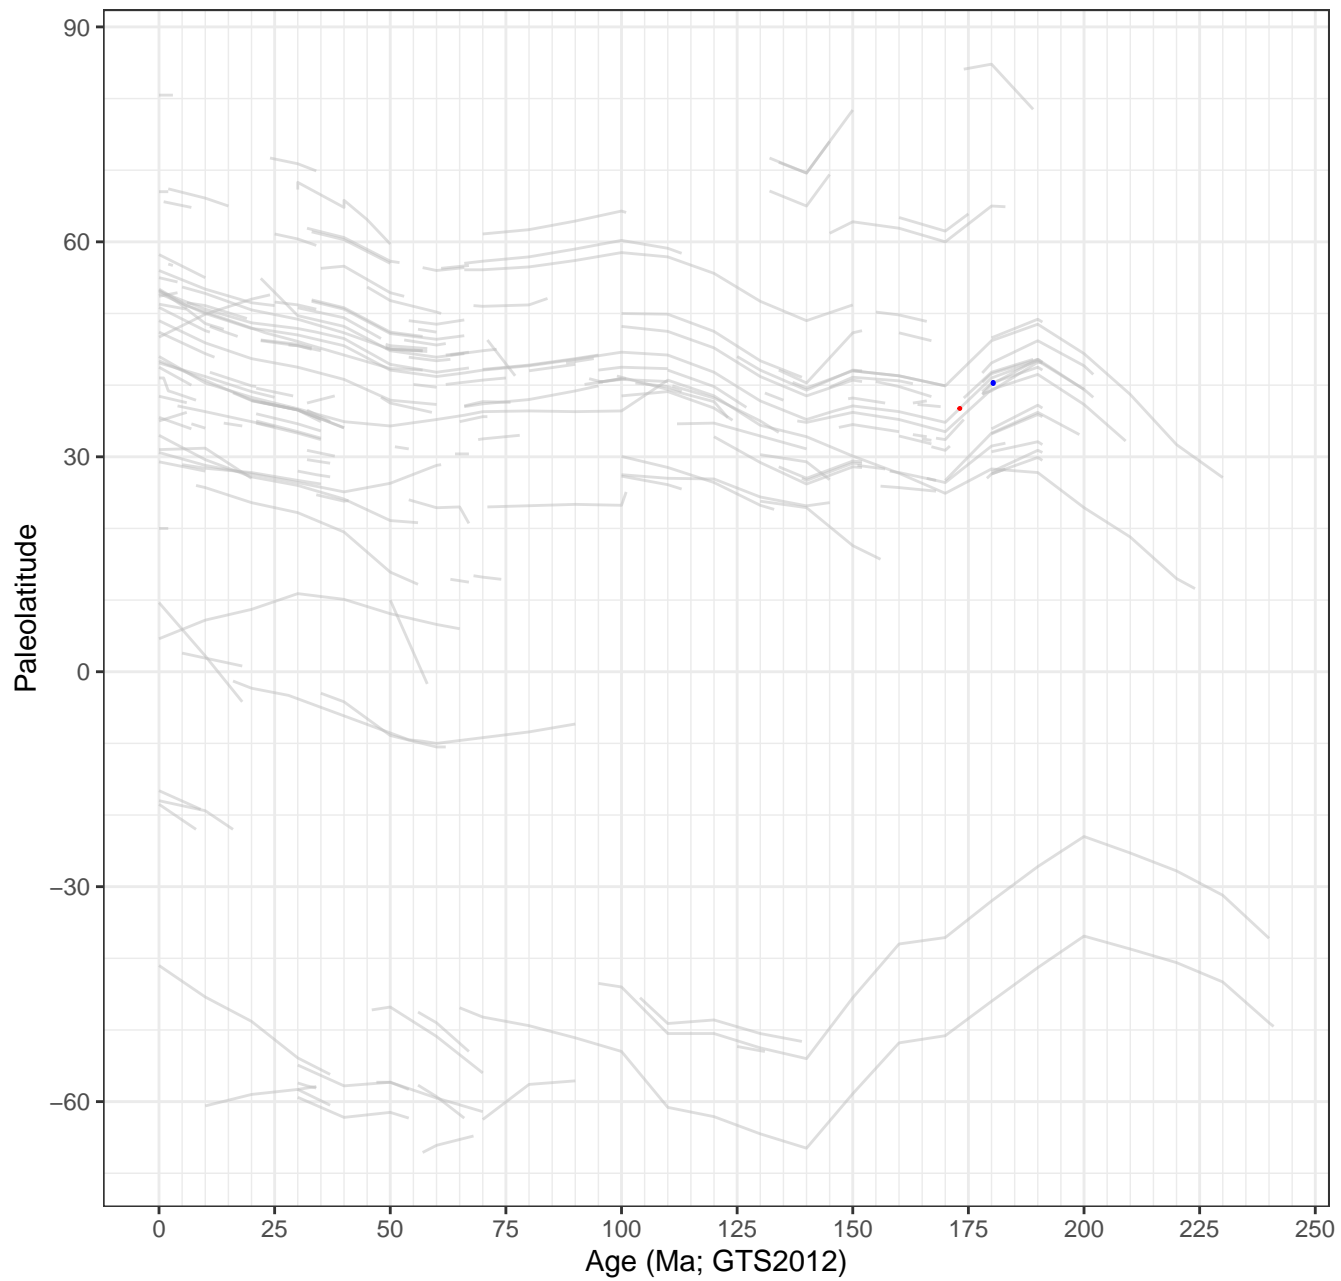

Supplement: Supplementary file 2241 [file Reutlingia cardobarbata.pdf › Supplement/Supplement 2/Species 1914 plots/Reutlingia cardobarbata.pdf]

# Species *Reutlingia cracens*

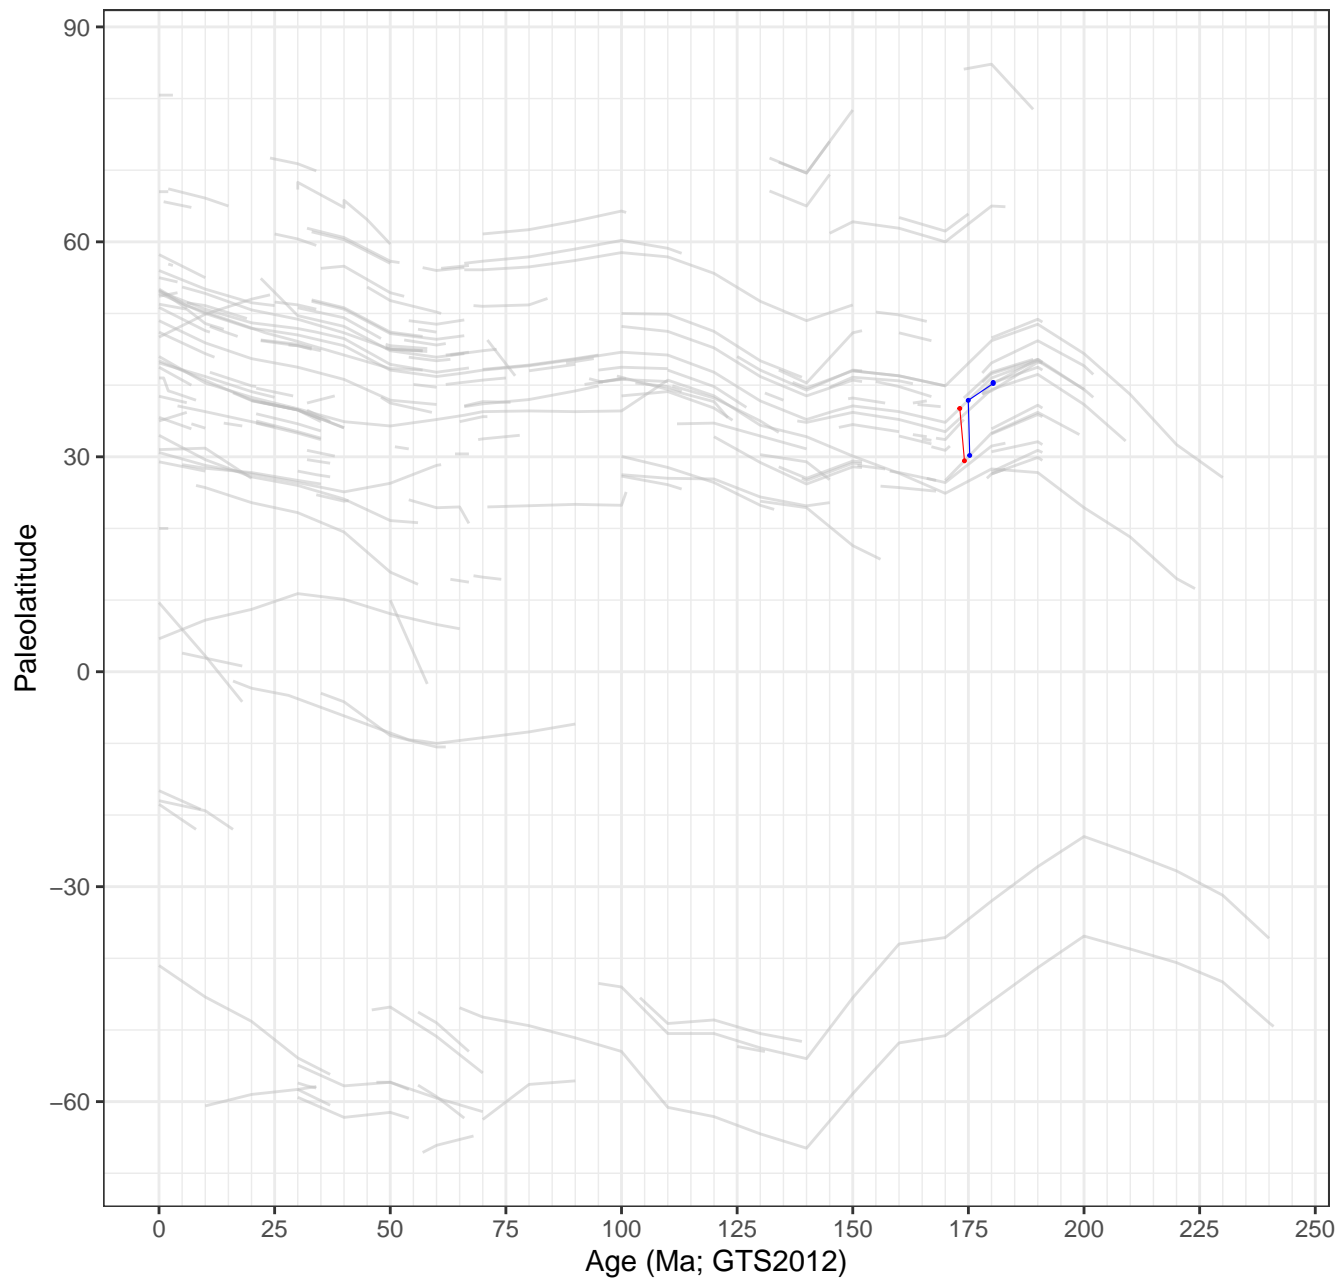

Supplement: Supplementary file 2242 [file Reutlingia cracens.pdf › Supplement/Supplement 2/Species 1914 plots/Reutlingia cracens.pdf]

# Species *Reutlingia gochtii*

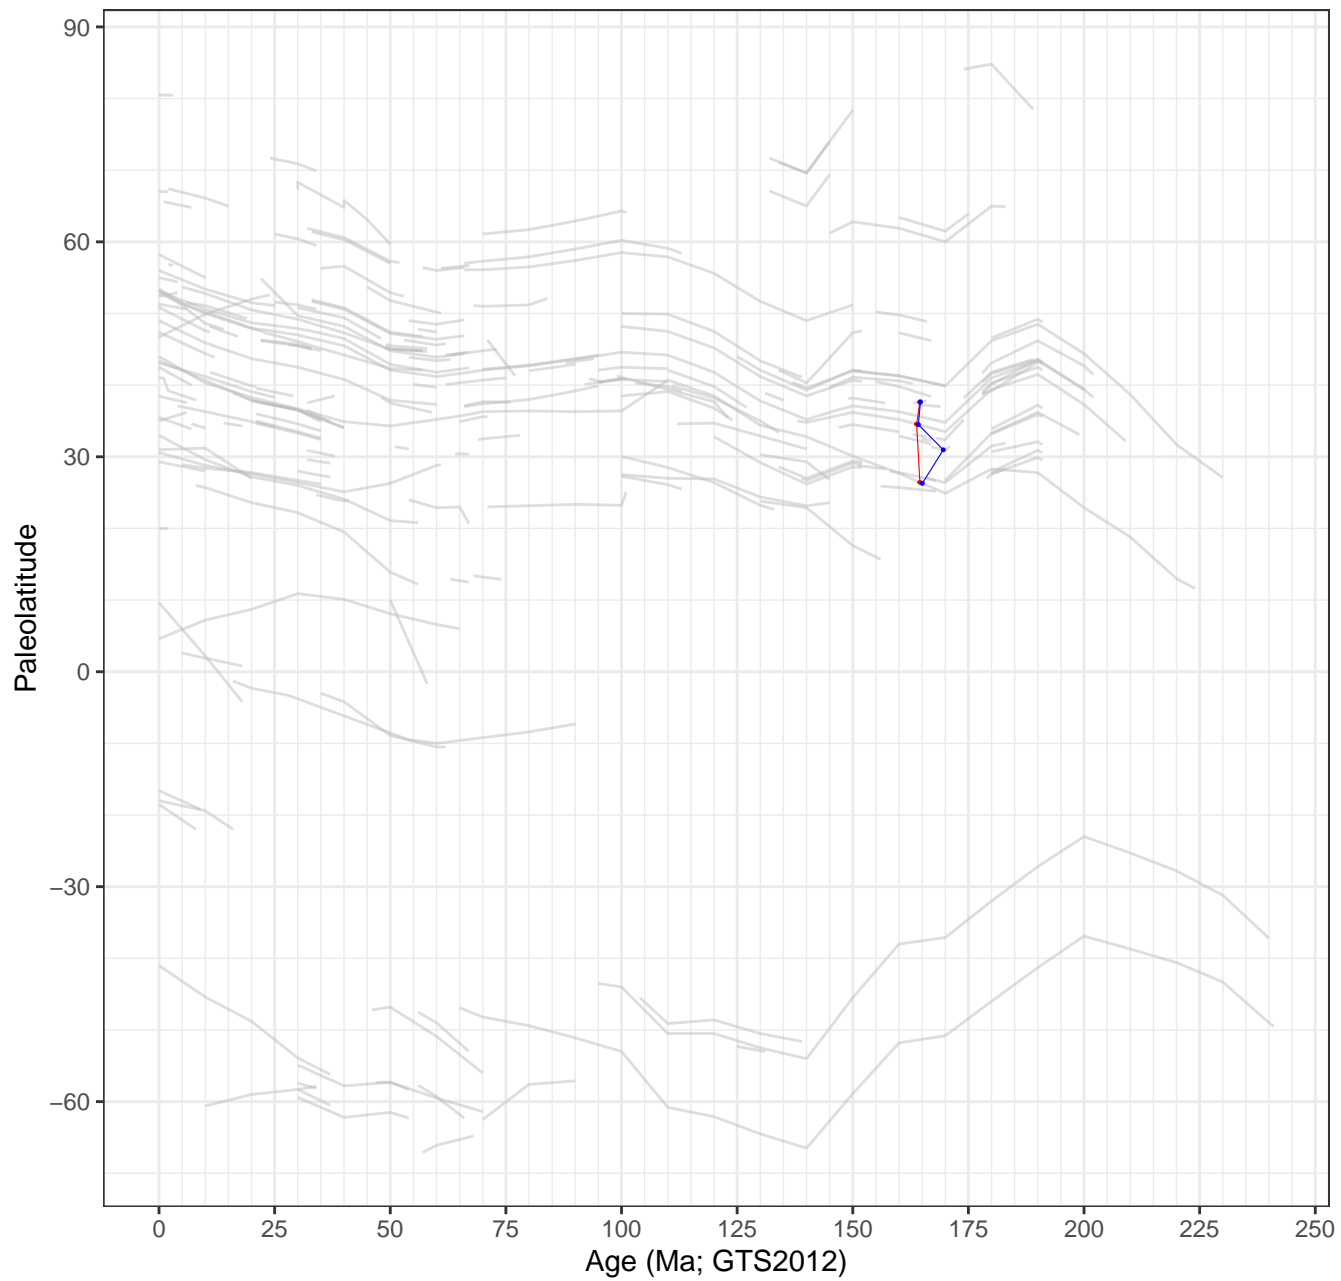

Supplement: Supplementary file 2243 [file Reutlingia gochtii.pdf › Supplement/Supplement 2/Species 1914 plots/Reutlingia gochtii.pdf]

# Species *Reutlingia sekheladonensis*

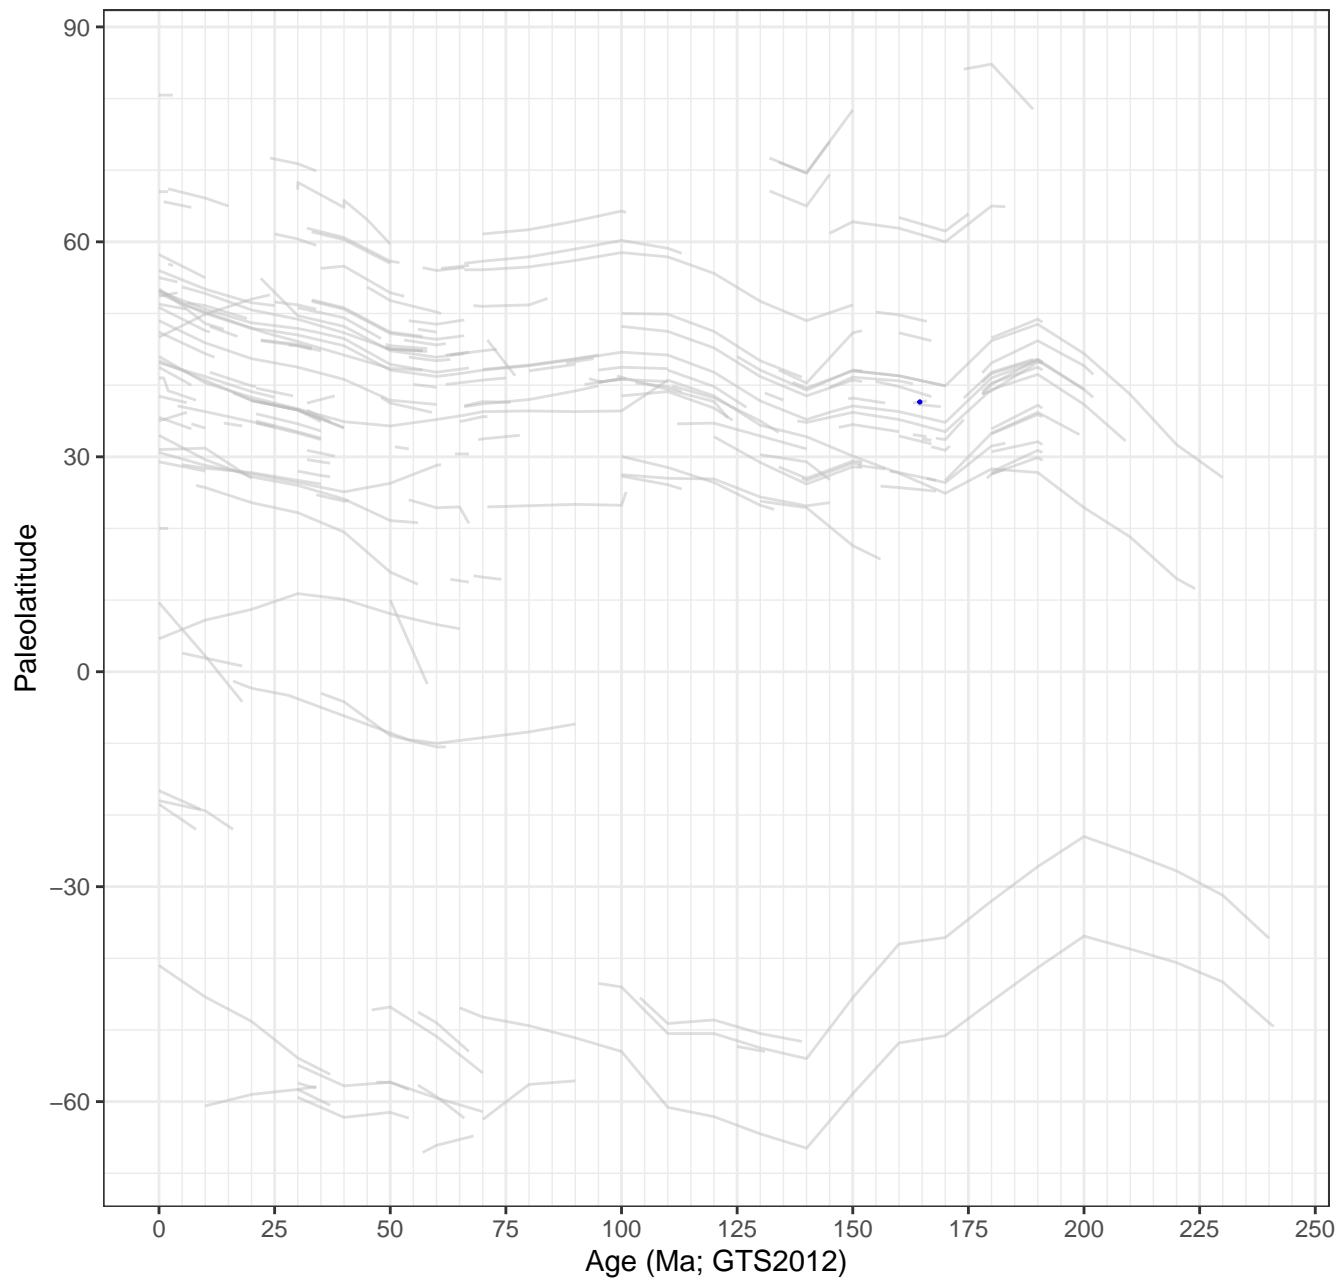

Supplement: Supplementary file 2244 [file Reutlingia sekheladonensis.pdf › Supplement/Supplement 2/Species 1914 plots/Reutlingia sekheladonensis.pdf]

# Species Reutlingia spp.

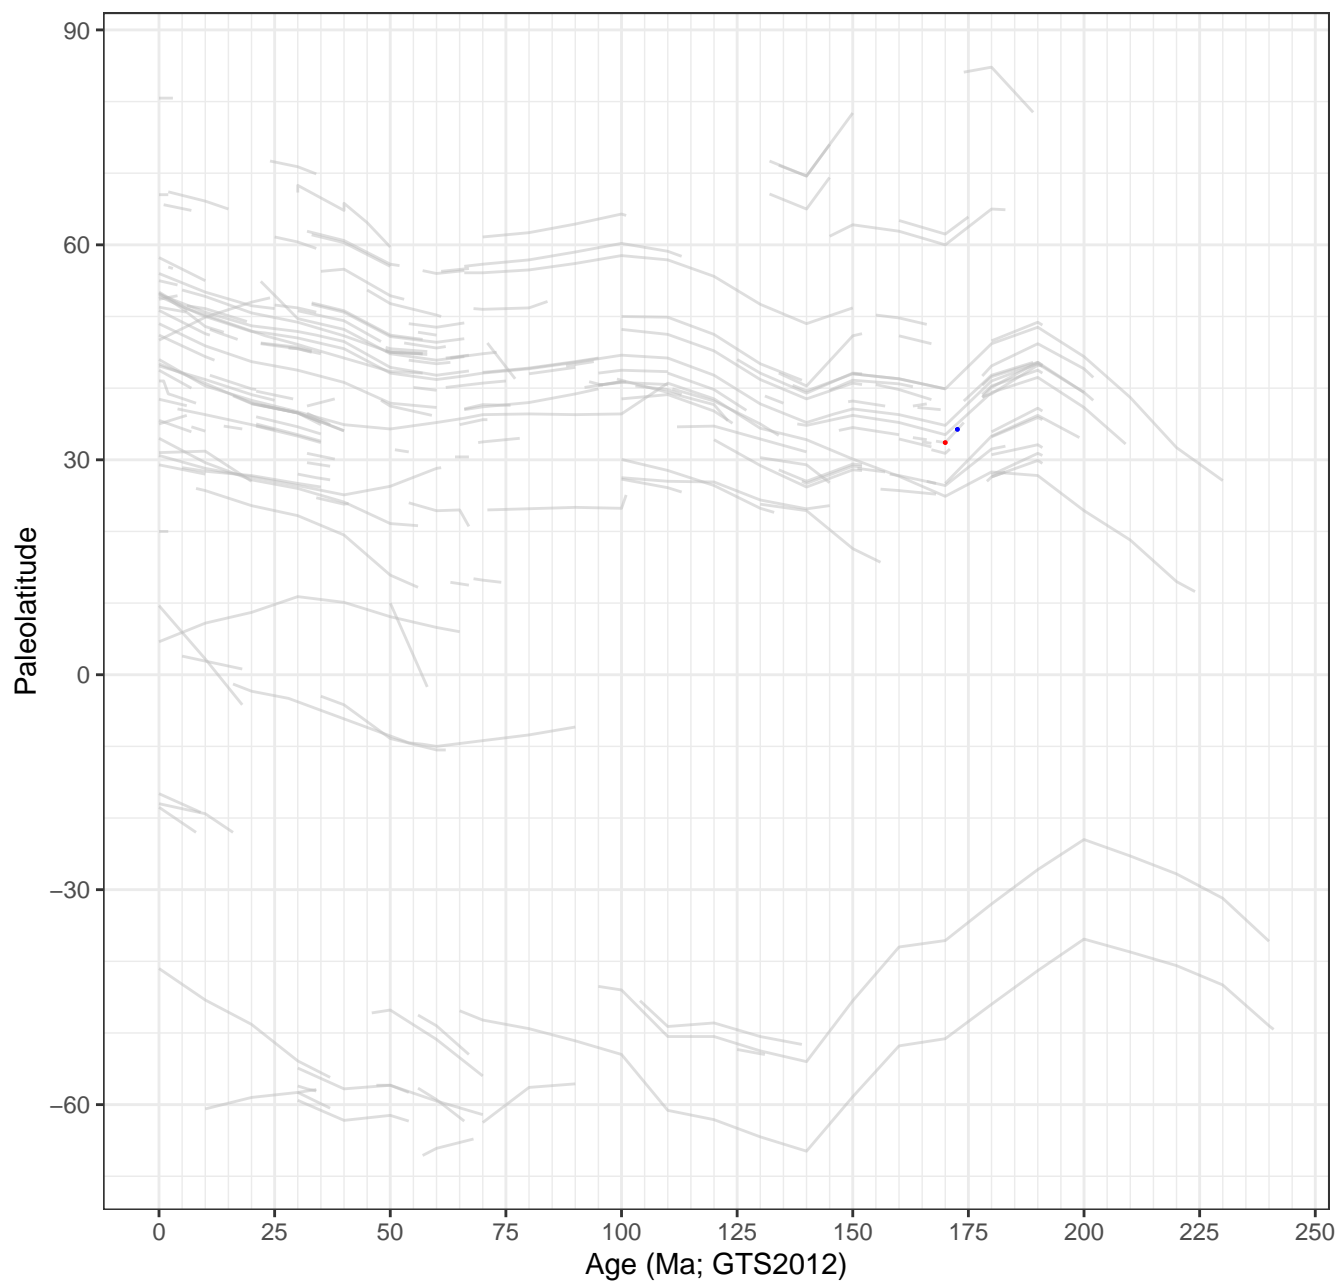

Supplement: Supplementary file 2245 [file Reutlingia spp..pdf › Supplement/Supplement 2/Species 1914 plots/Reutlingia spp..pdf]

# Species *Rhadinodinium glabrum*

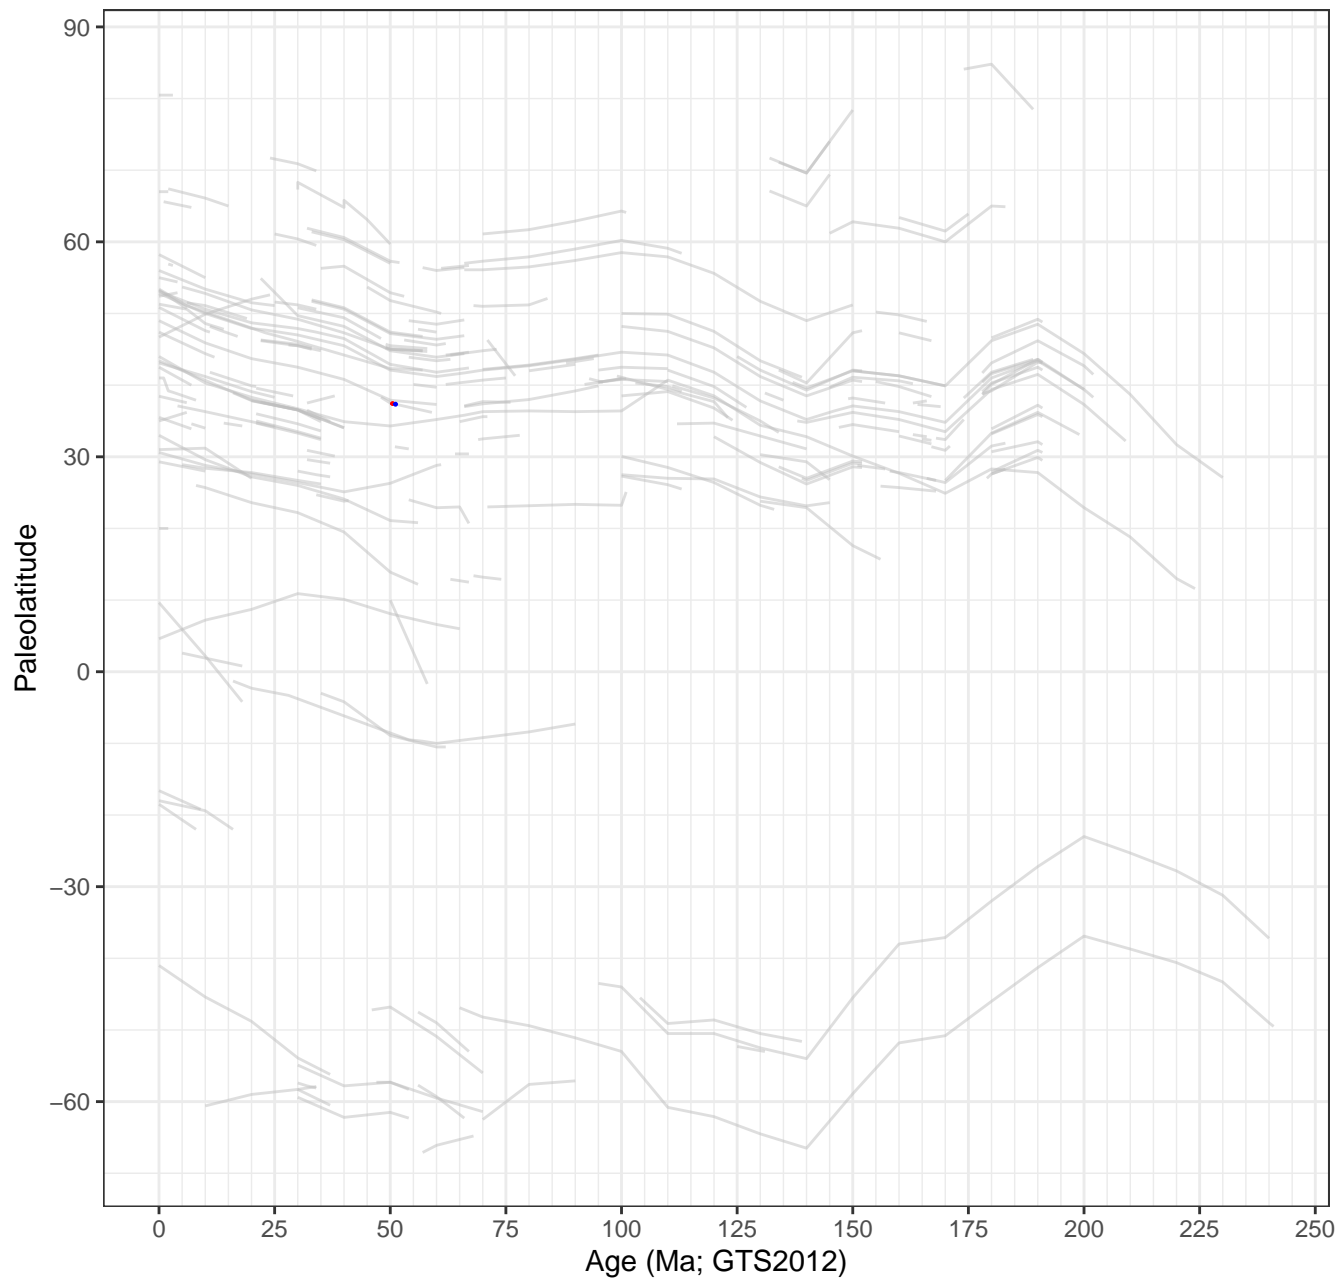

Supplement: Supplementary file 2246 [file Rhadinodinium glabrum.pdf › Supplement/Supplement 2/Species 1914 plots/Rhadinodinium glabrum.pdf]

# Species *Rhadinodinium politum*



Supplement: Supplementary file 2247 [file Rhadinodinium politum.pdf › Supplement/Supplement 2/Species 1914 plots/Rhadinodinium politum.pdf]

# Species *Rhaetogonyaulax rhaetica*

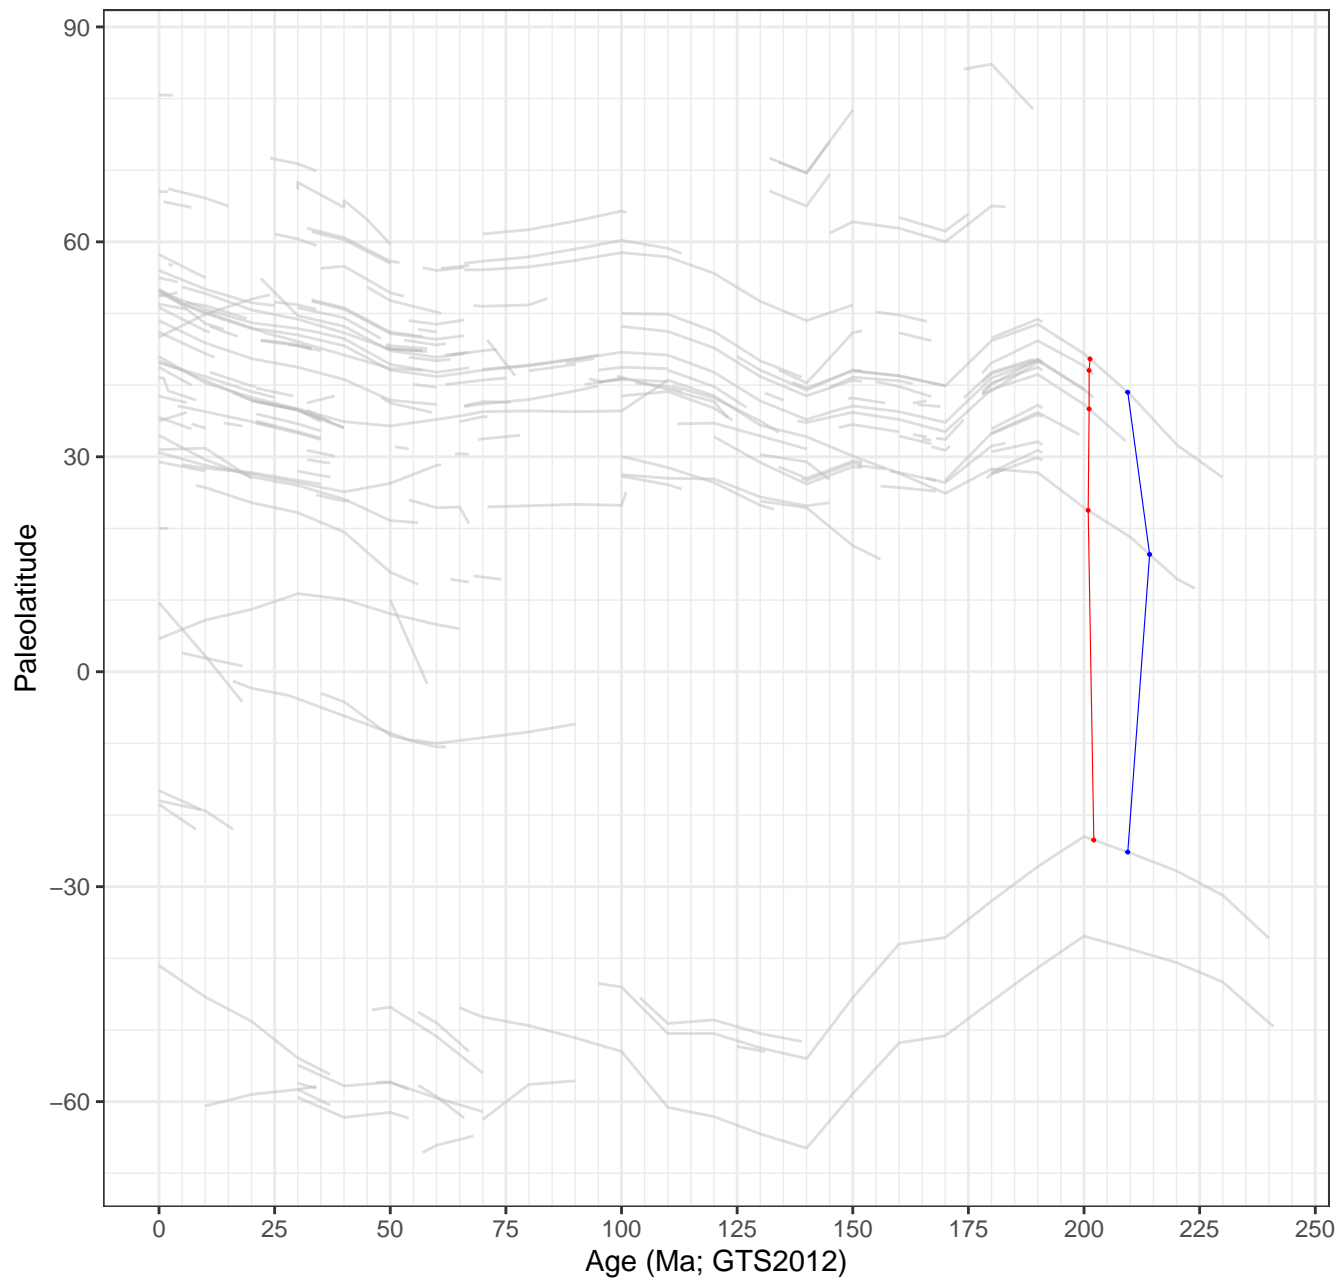

Supplement: Supplementary file 2248 [file Rhaetogonyaulax rhaetica.pdf › Supplement/Supplement 2/Species 1914 plots/Rhaetogonyaulax rhaetica.pdf]

# Species *Rhaetogonyaulax wigginsii*

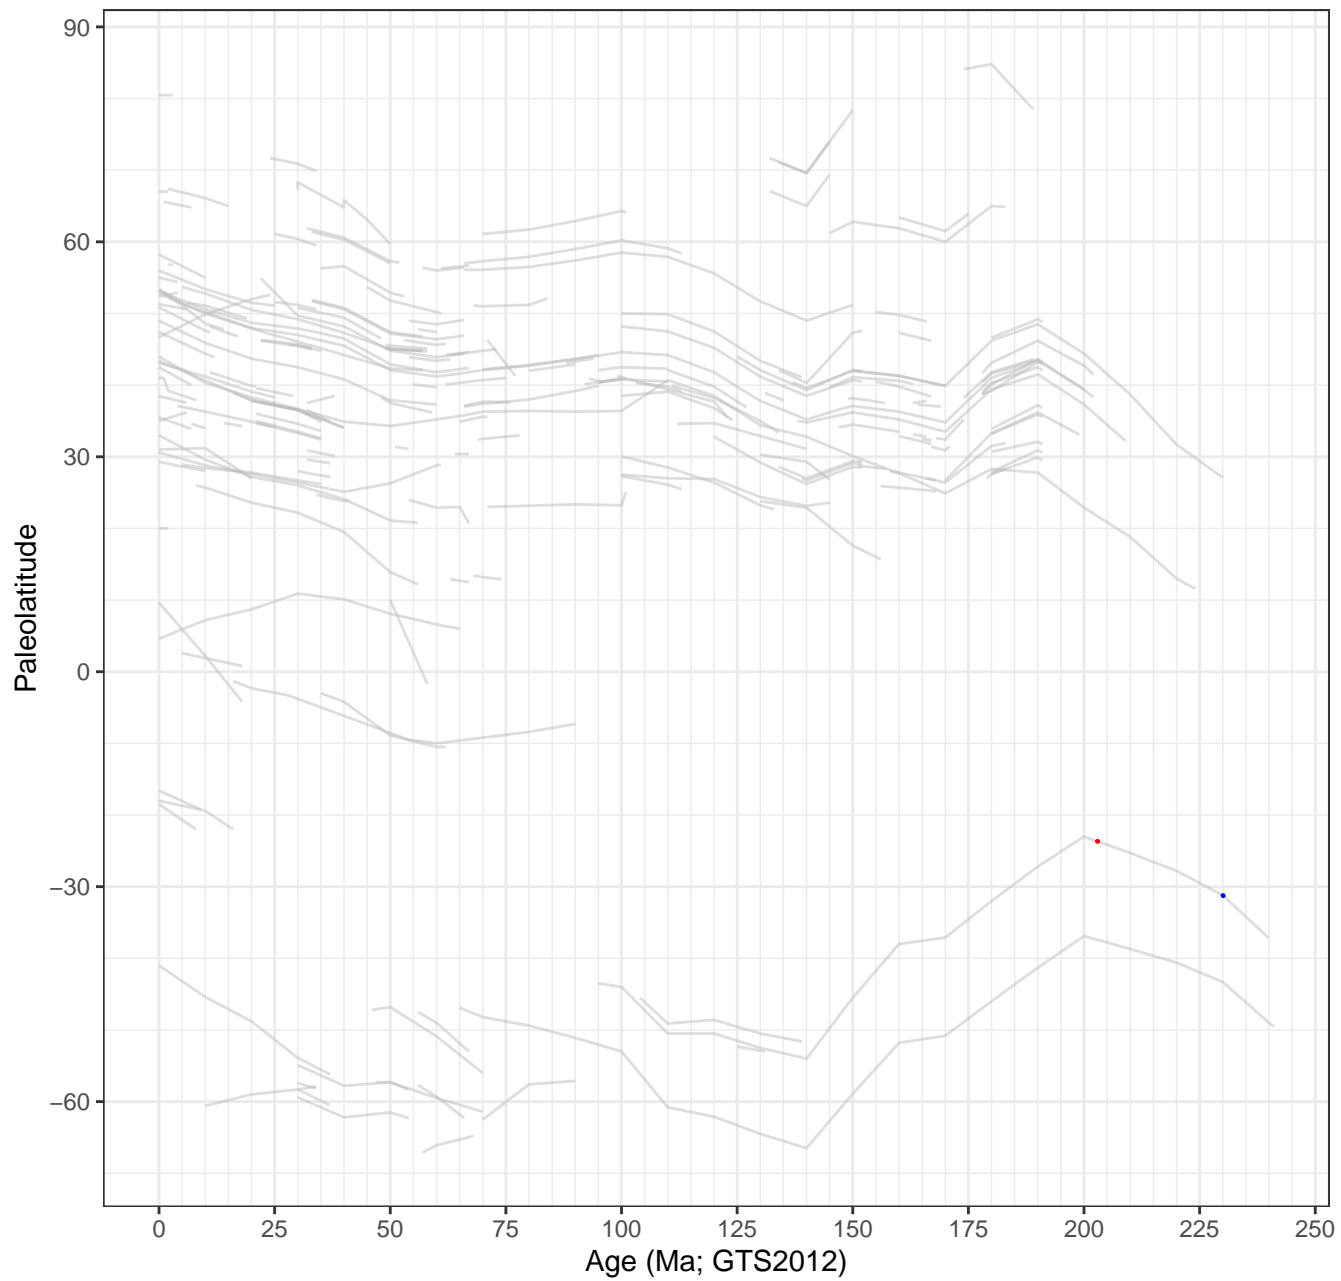

Supplement: Supplementary file 2249 [file Rhaetogonyaulax wigginsii.pdf › Supplement/Supplement 2/Species 1914 plots/Rhaetogonyaulax wigginsii.pdf]

# Species *Rhiptocorys veligera*

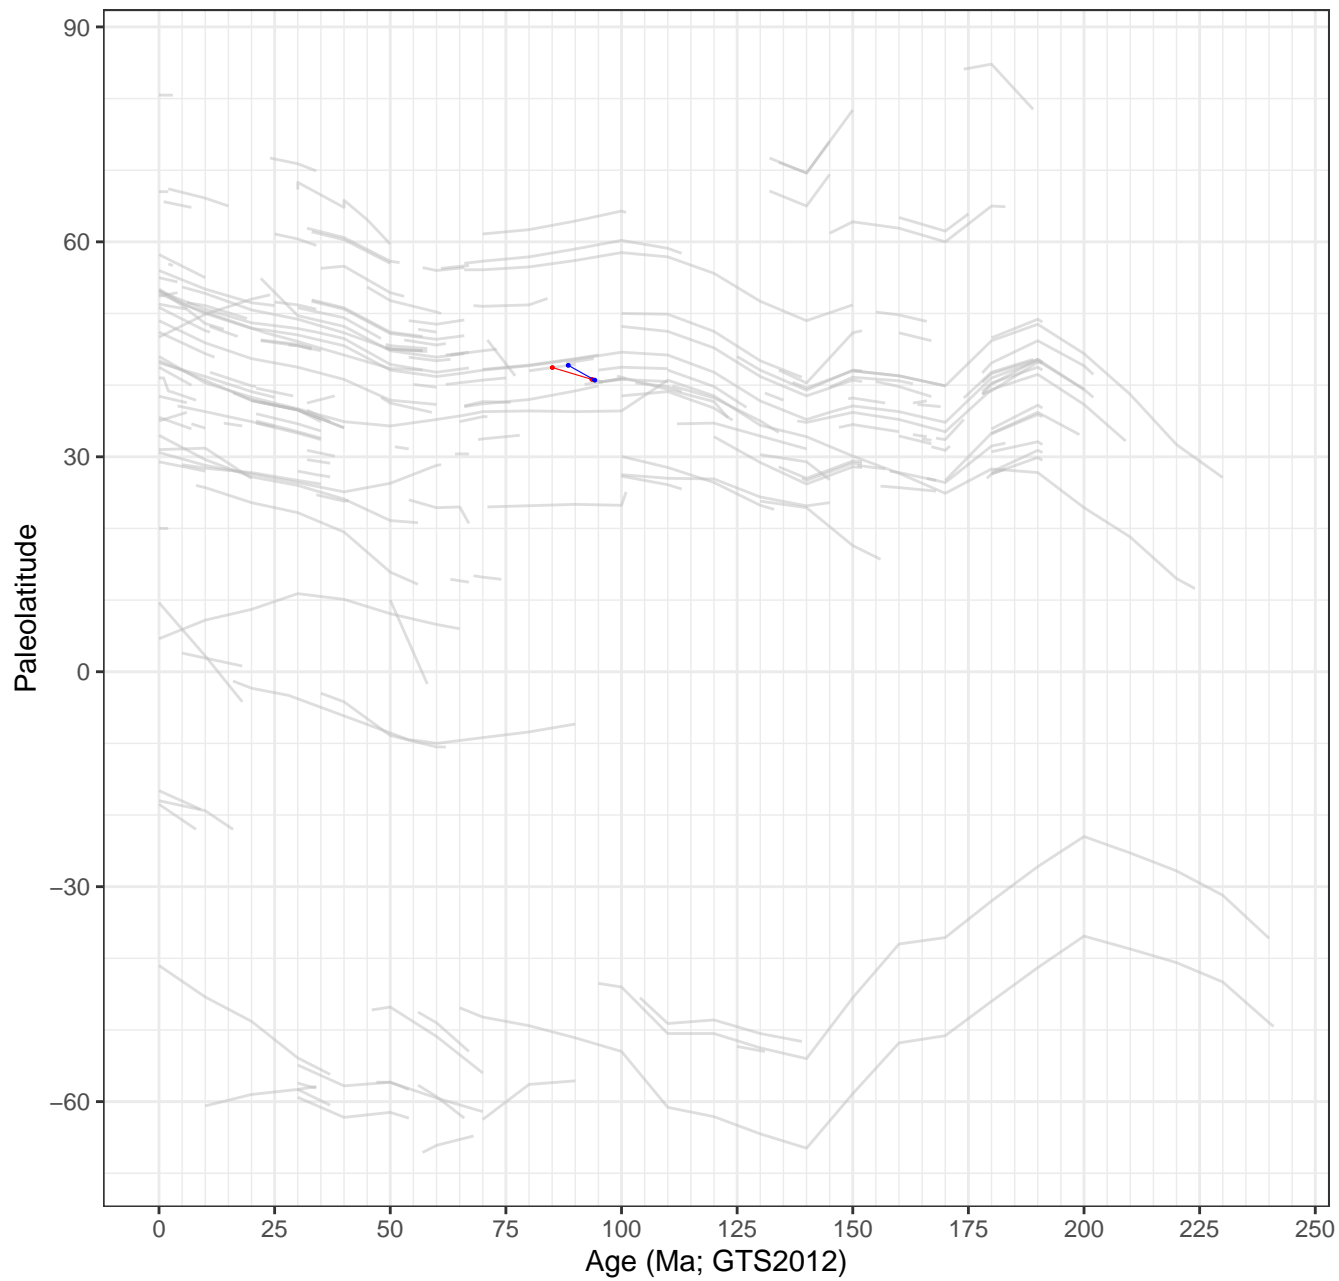

Supplement: Supplementary file 2250 [file Rhiptocorys veligera.pdf › Supplement/Supplement 2/Species 1914 plots/Rhiptocorys veligera.pdf]

# Species *Rhombodella paucispina*

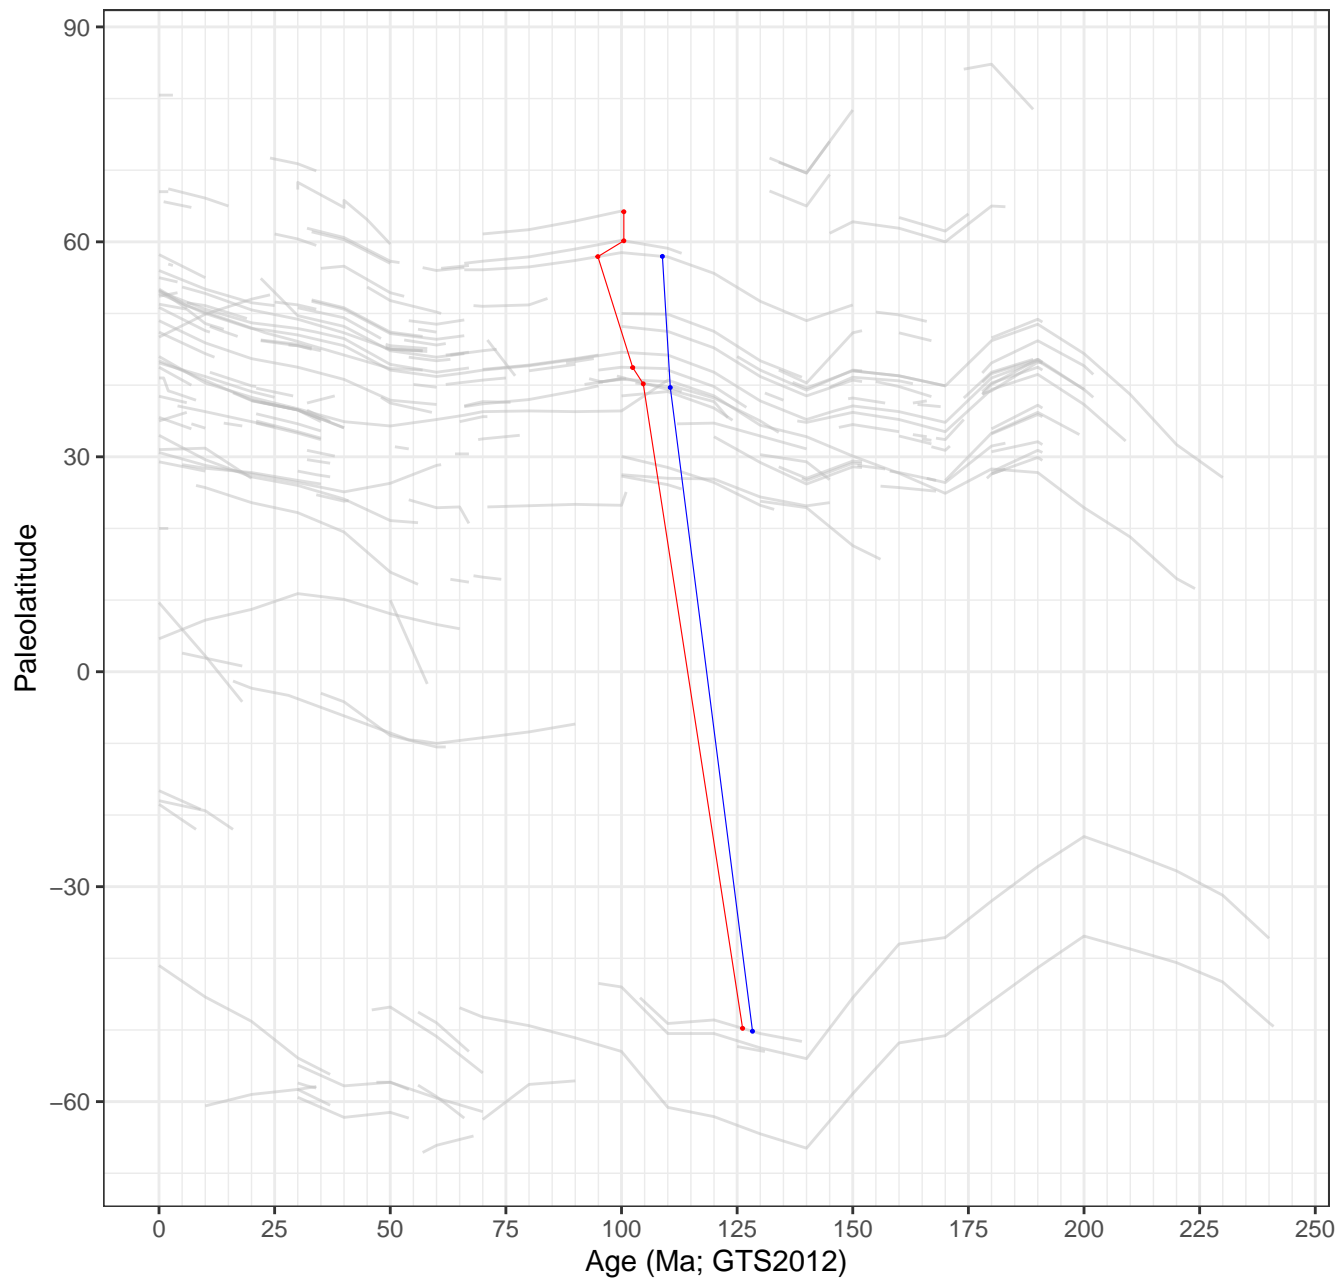

Supplement: Supplementary file 2251 [file Rhombodella paucispina.pdf › Supplement/Supplement 2/Species 1914 plots/Rhombodella paucispina.pdf]

# Species *Rhombodella vesca*

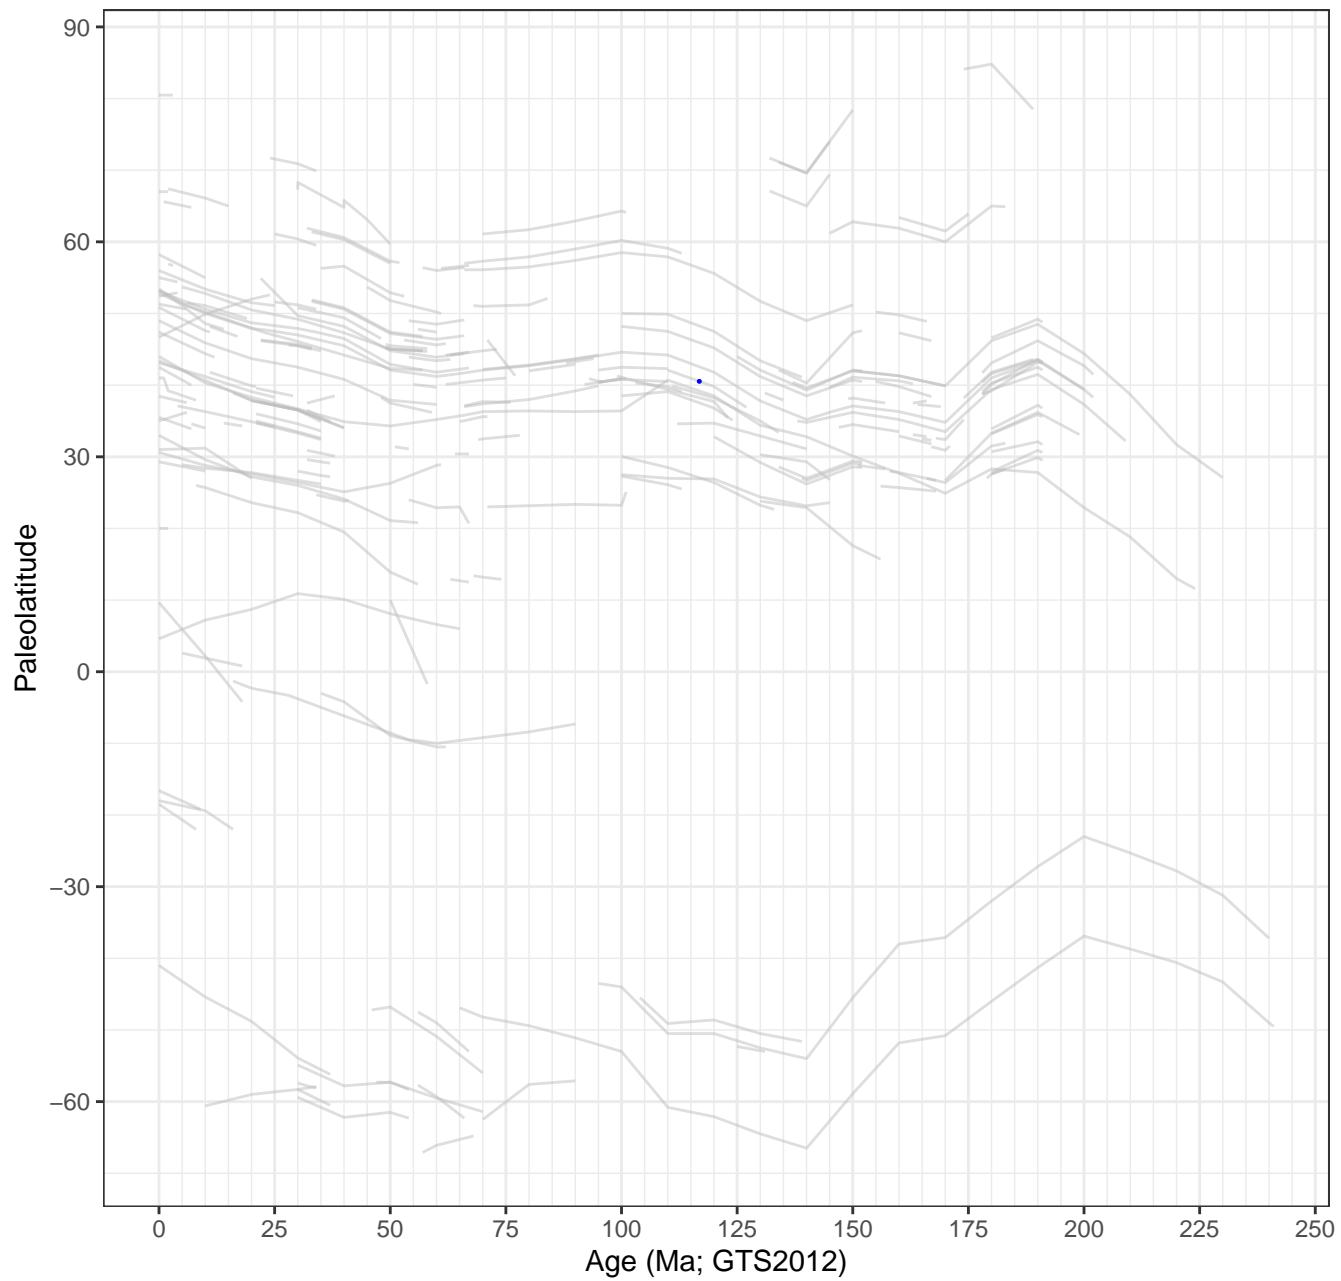

Supplement: Supplementary file 2252 [file Rhombodella vesca.pdf › Supplement/Supplement 2/Species 1914 plots/Rhombodella vesca.pdf]

# Species *Rhombodinium draco*

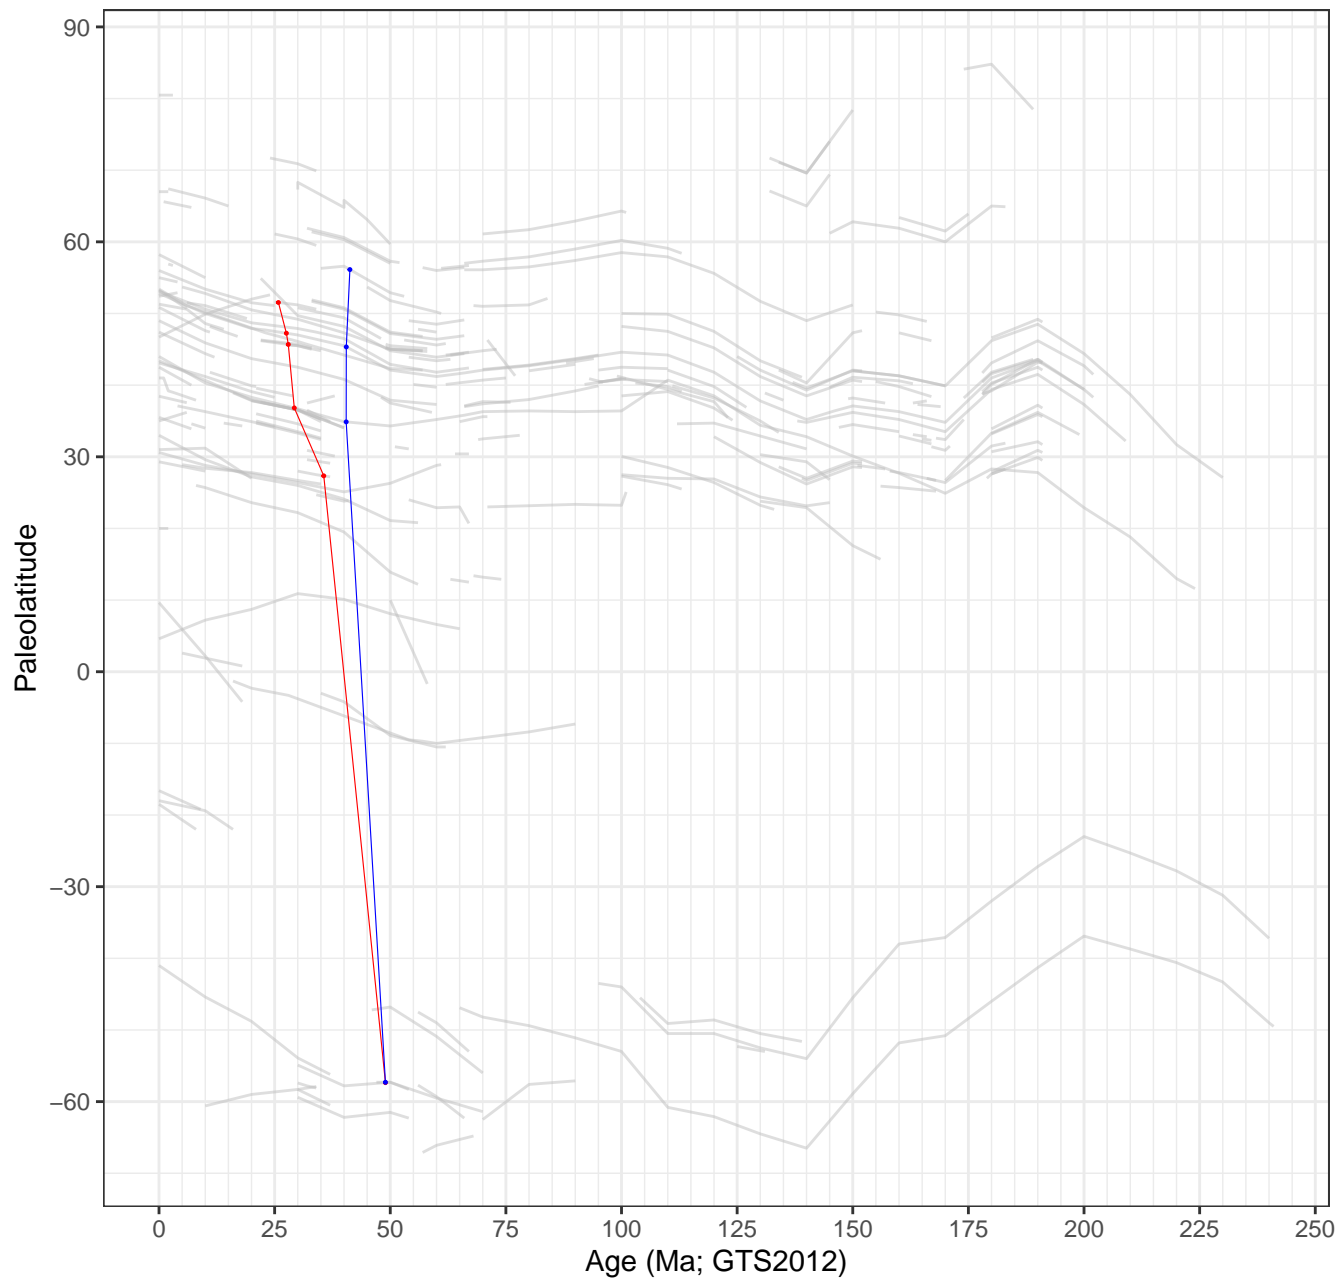

Supplement: Supplementary file 2253 [file Rhombodinium draco.pdf › Supplement/Supplement 2/Species 1914 plots/Rhombodinium draco.pdf]

# Species *Rhombodinium glabrum*

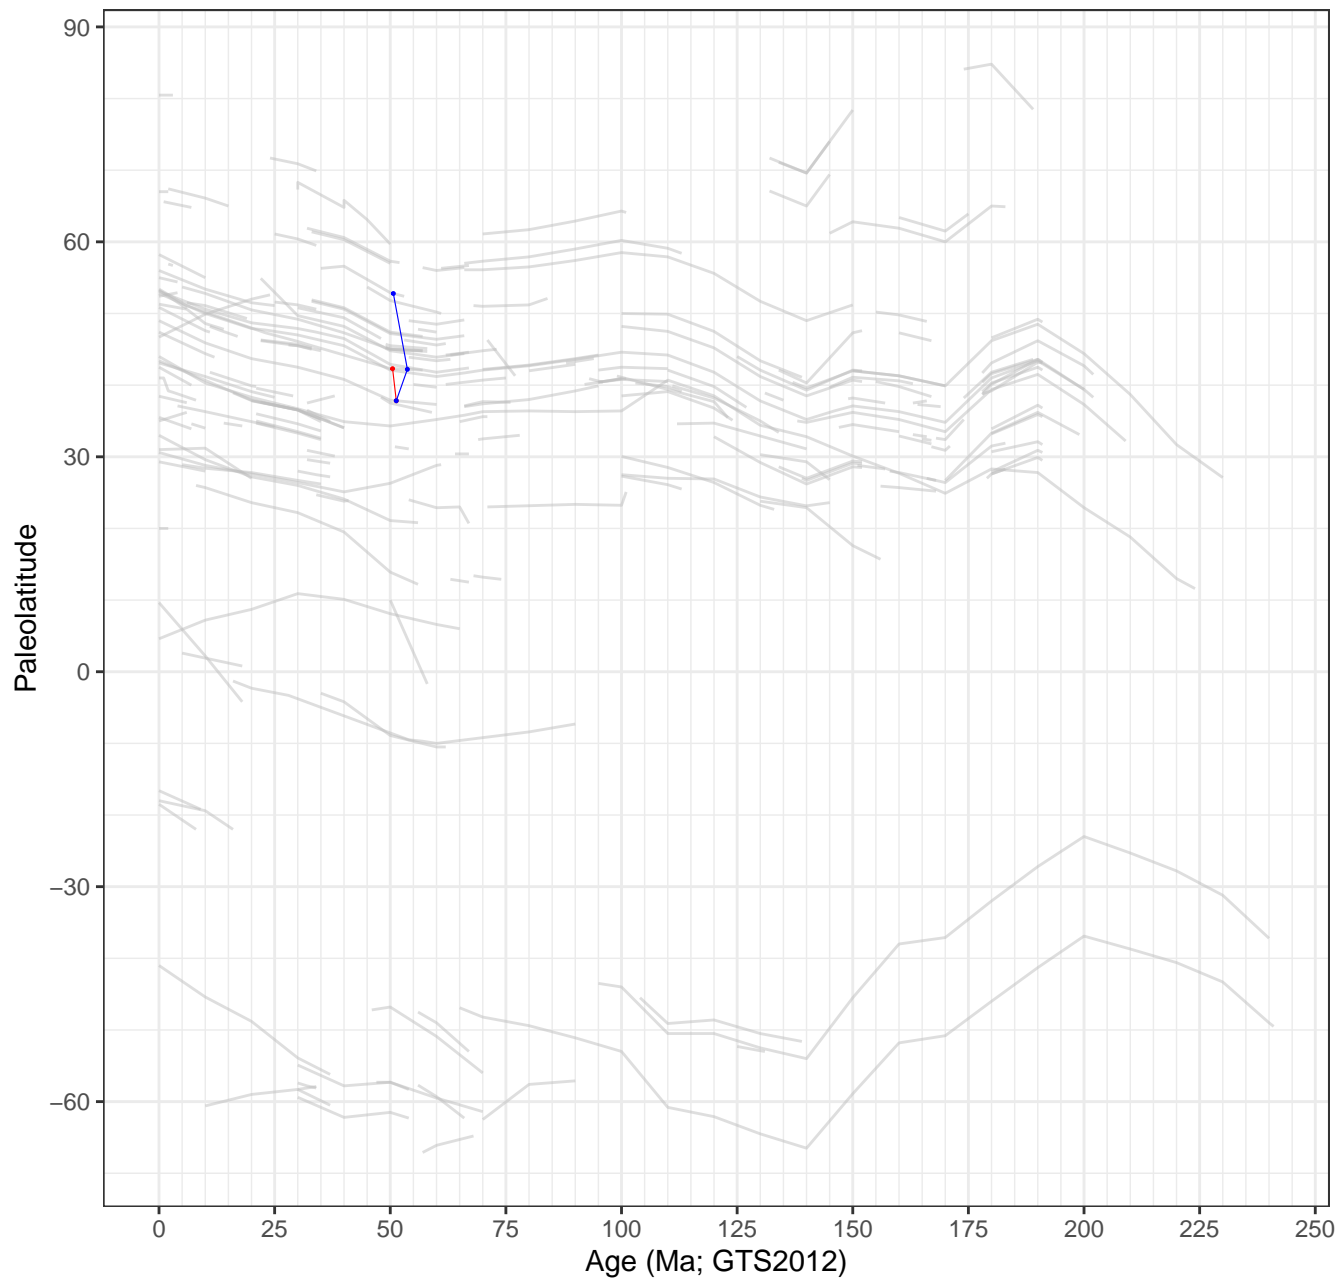

Supplement: Supplementary file 2254 [file Rhombodinium glabrum.pdf › Supplement/Supplement 2/Species 1914 plots/Rhombodinium glabrum.pdf]

# Species *Rhombodinium longimanum*

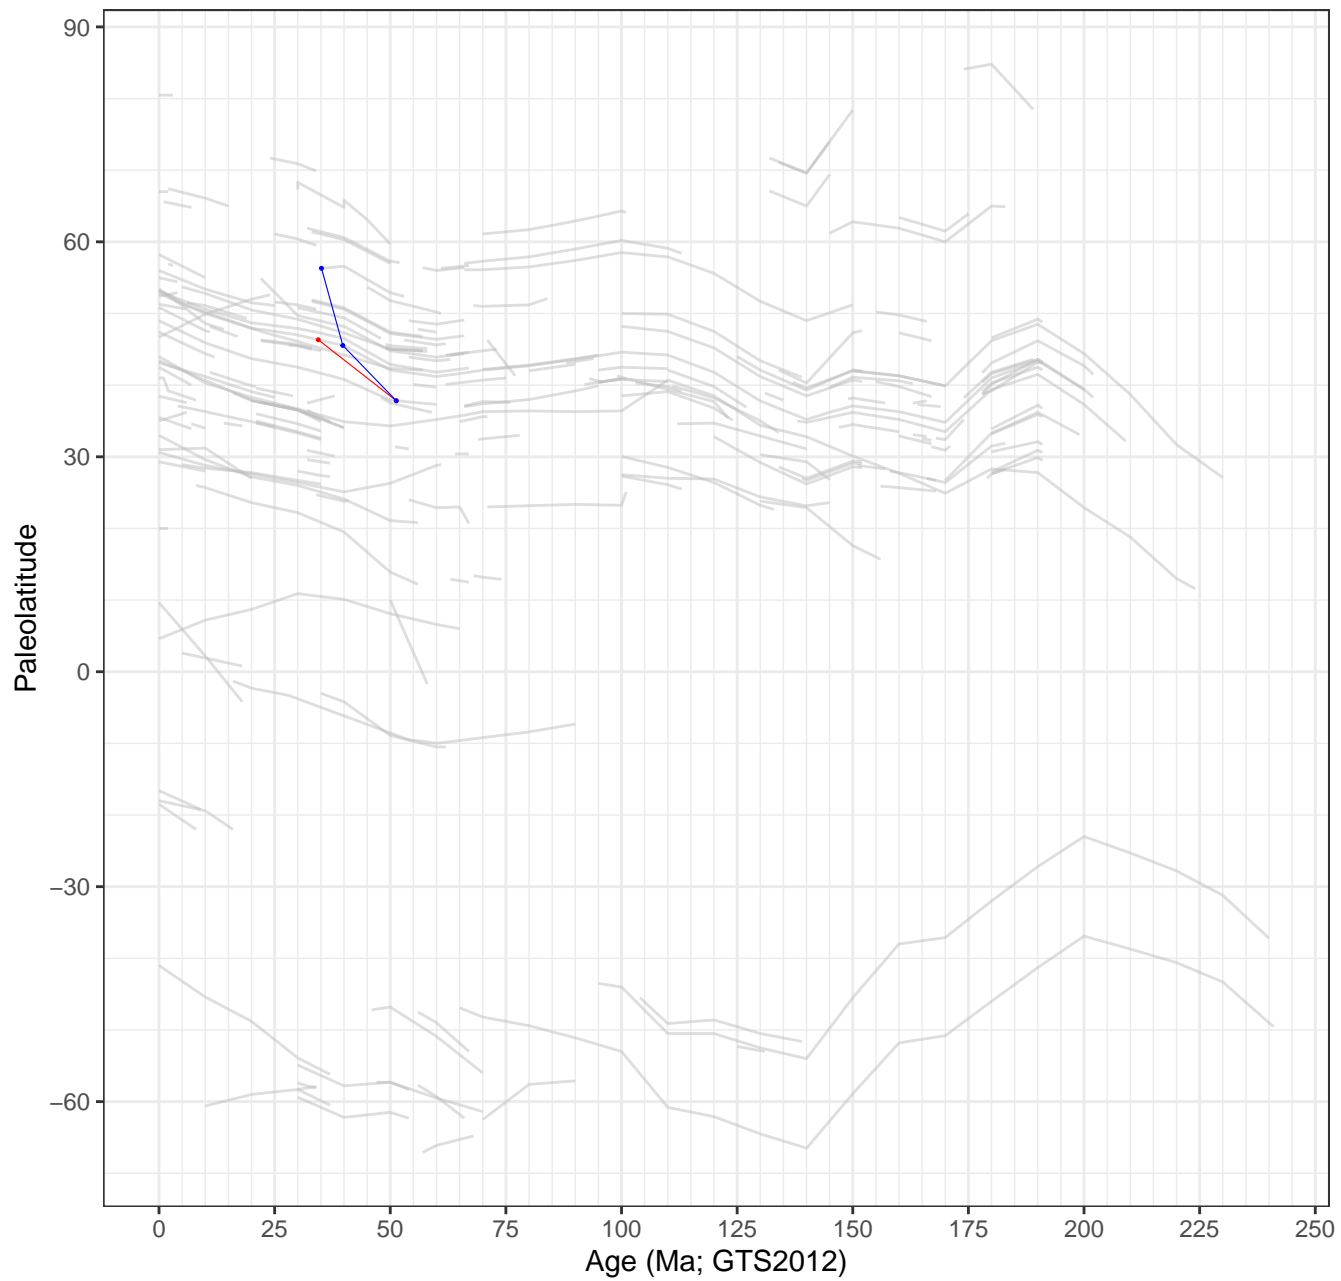

Supplement: Supplementary file 2255 [file Rhombodinium longimanum.pdf › Supplement/Supplement 2/Species 1914 plots/Rhombodinium longimanum.pdf]

# Species *Rhombodinium perforatum*

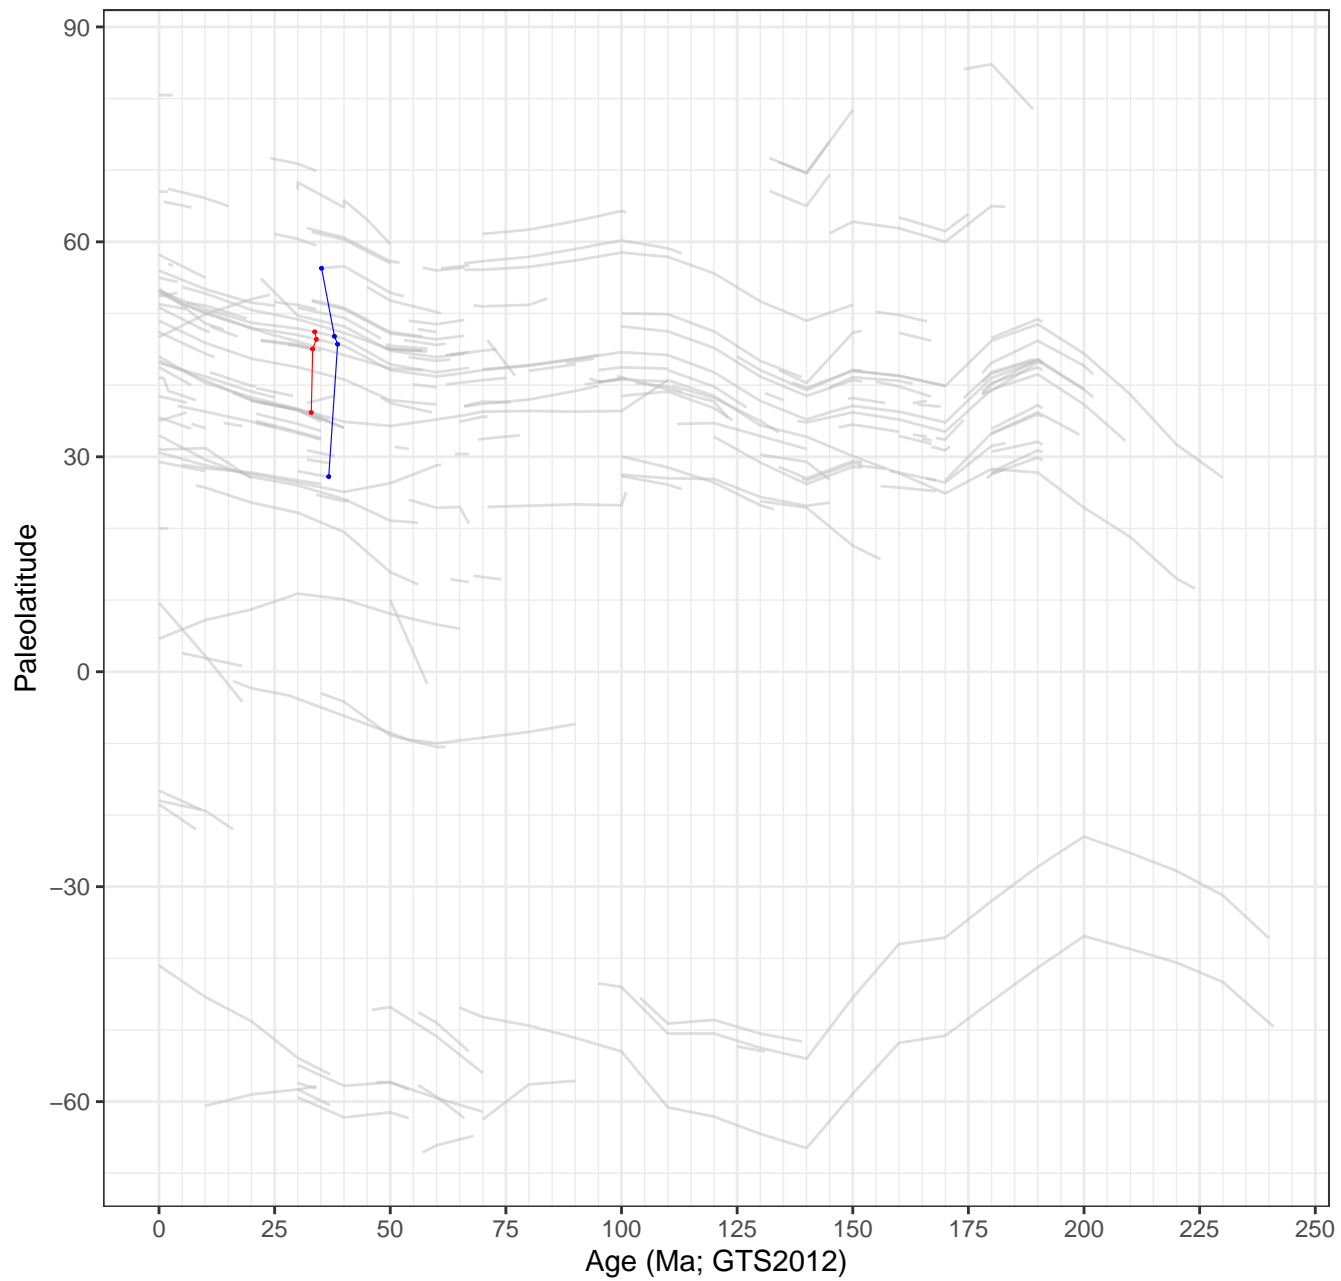

Supplement: Supplementary file 2256 [file Rhombodinium perforatum.pdf › Supplement/Supplement 2/Species 1914 plots/Rhombodinium perforatum.pdf]

# Species *Rhombodinium porosum*

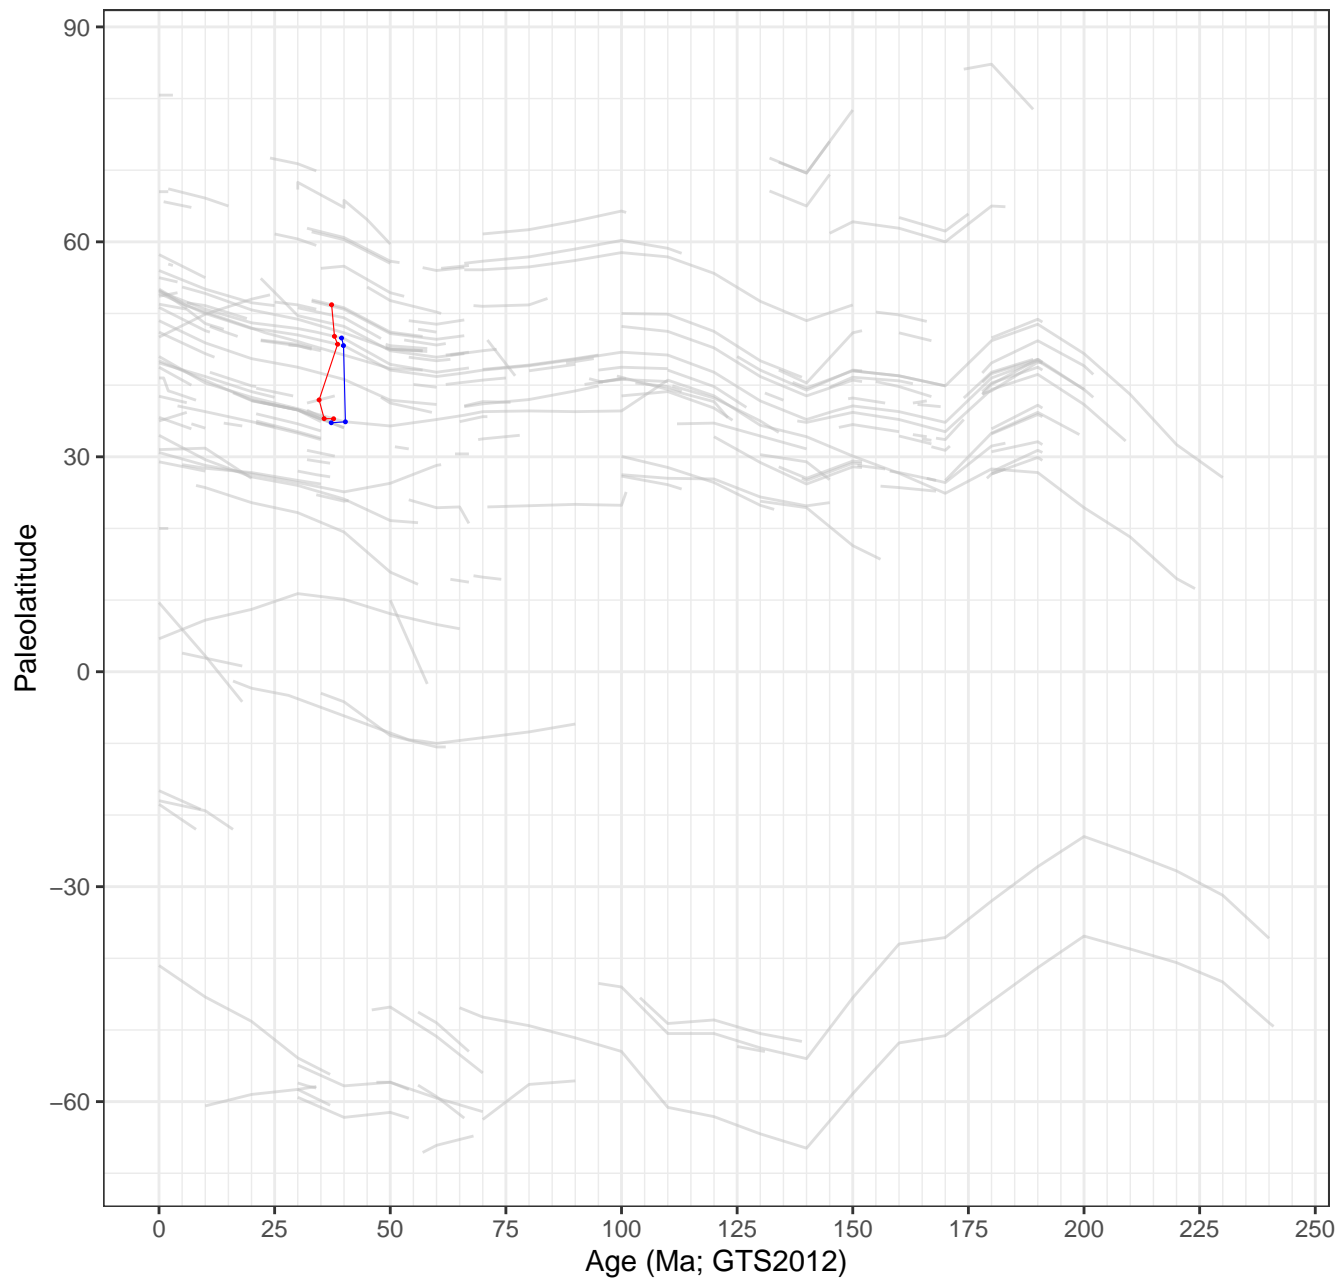

Supplement: Supplementary file 2257 [file Rhombodinium porosum.pdf › Supplement/Supplement 2/Species 1914 plots/Rhombodinium porosum.pdf]

# Species *Rhombodinium subtile*

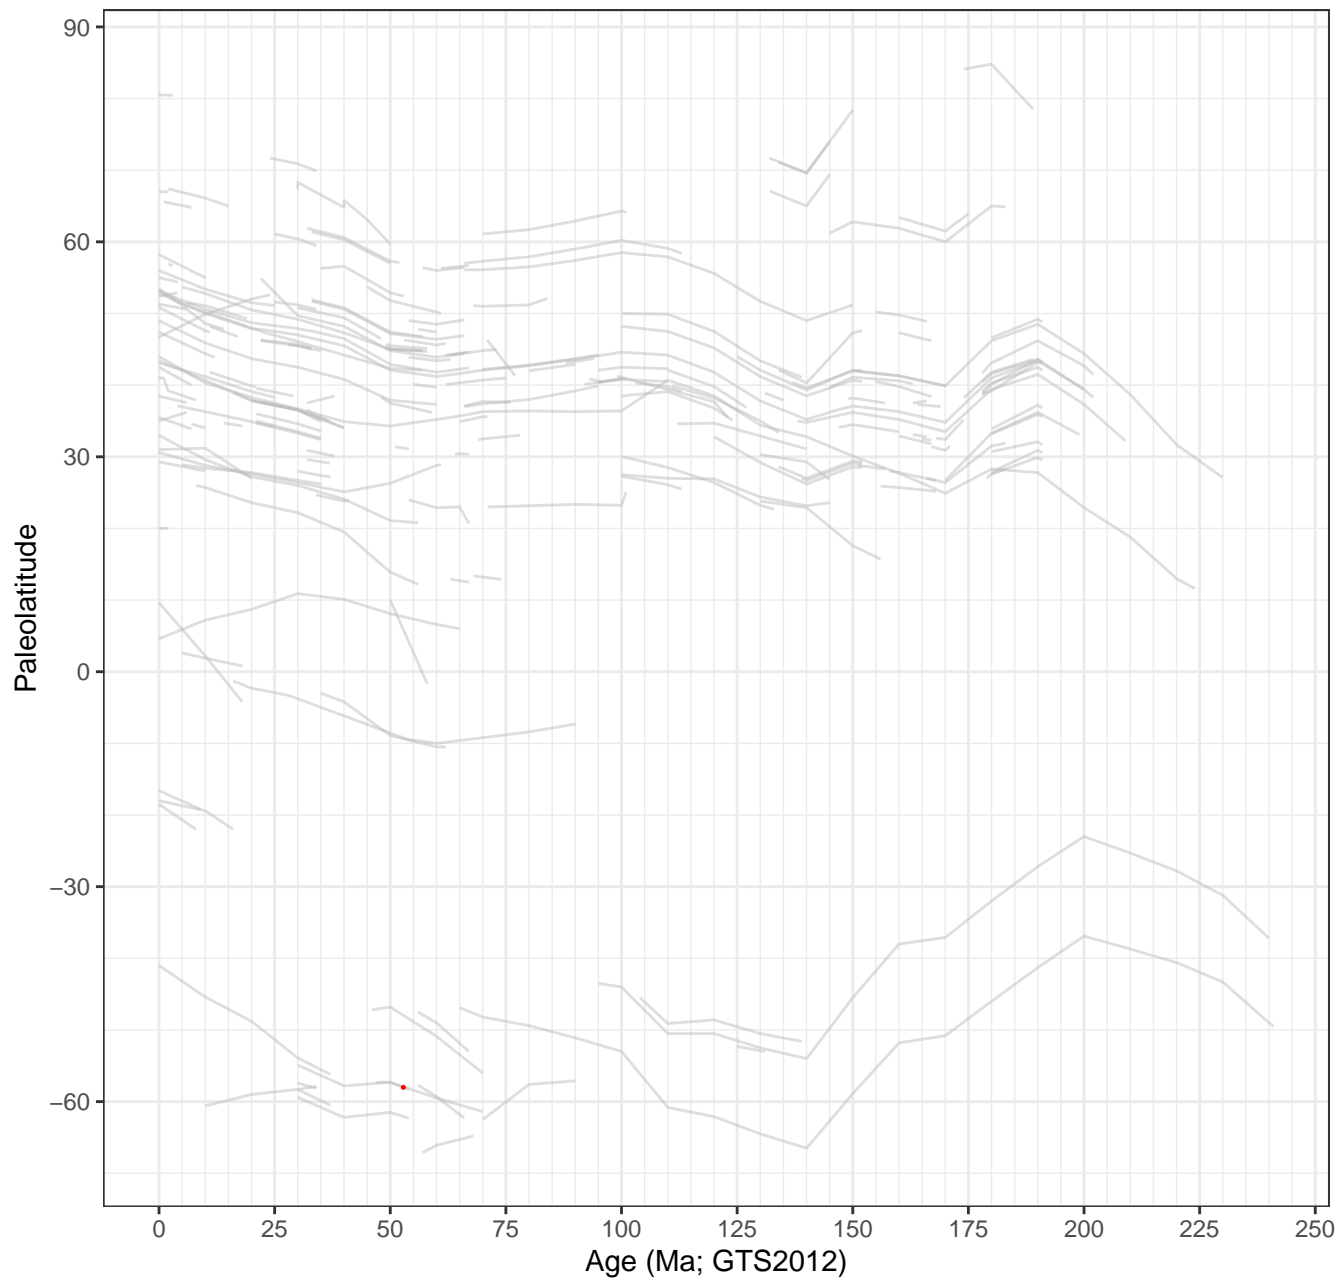

Supplement: Supplementary file 2258 [file Rhombodinium subtile.pdf › Supplement/Supplement 2/Species 1914 plots/Rhombodinium subtile.pdf]

# Species *Rhynchodiniopsis aptiana*

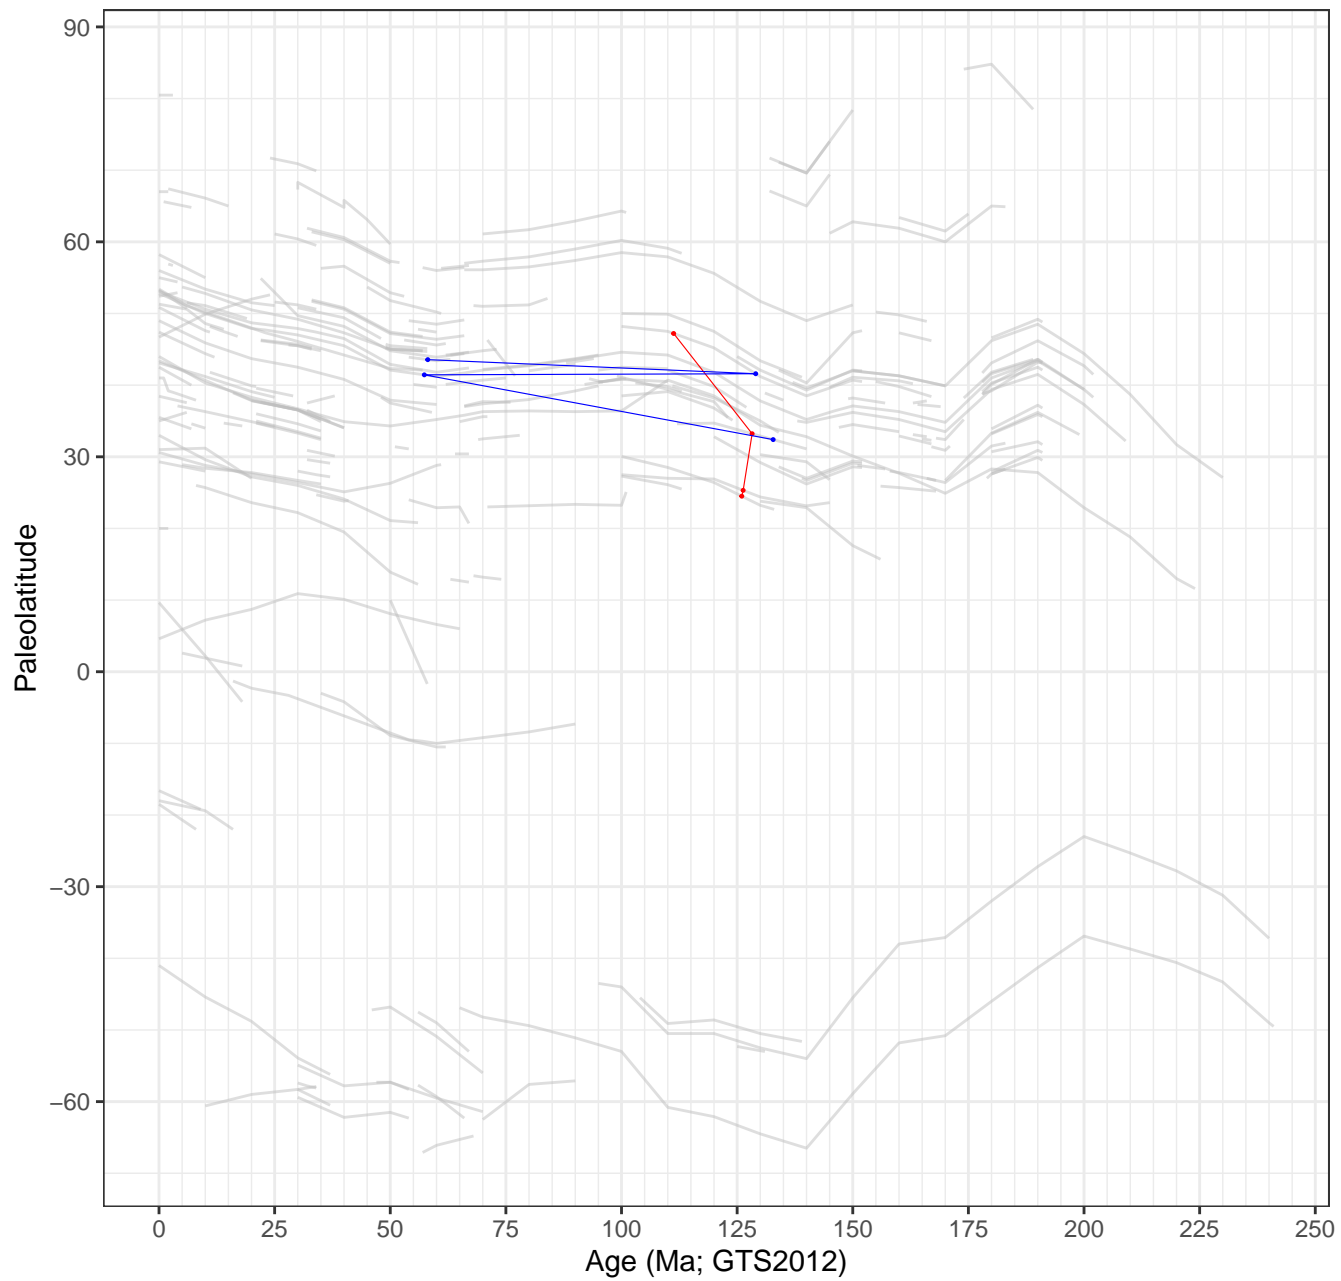

Supplement: Supplementary file 2259 [file Rhynchodiniopsis aptiana.pdf › Supplement/Supplement 2/Species 1914 plots/Rhynchodiniopsis aptiana.pdf]

# Species *Rhynchodiniopsis cladophora*

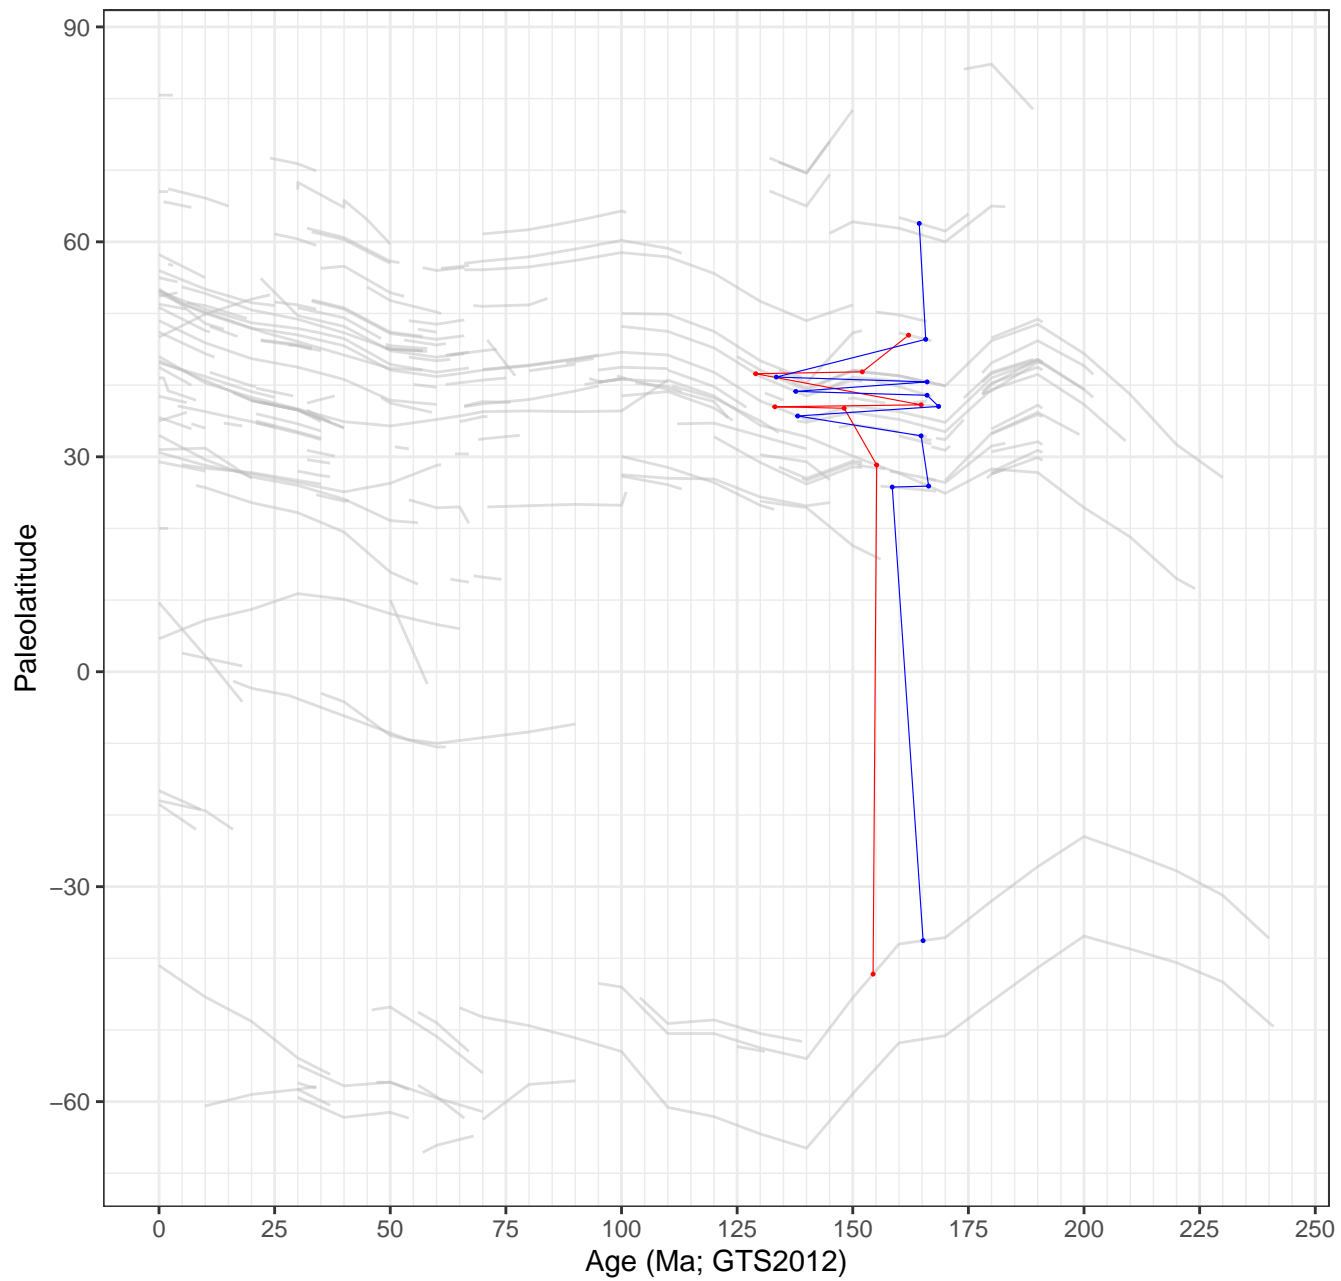

Supplement: Supplementary file 2260 [file Rhynchodiniopsis cladophora.pdf › Supplement/Supplement 2/Species 1914 plots/Rhynchodiniopsis cladophora.pdf]

# Species *Rhynchodiniopsis fimbriata*

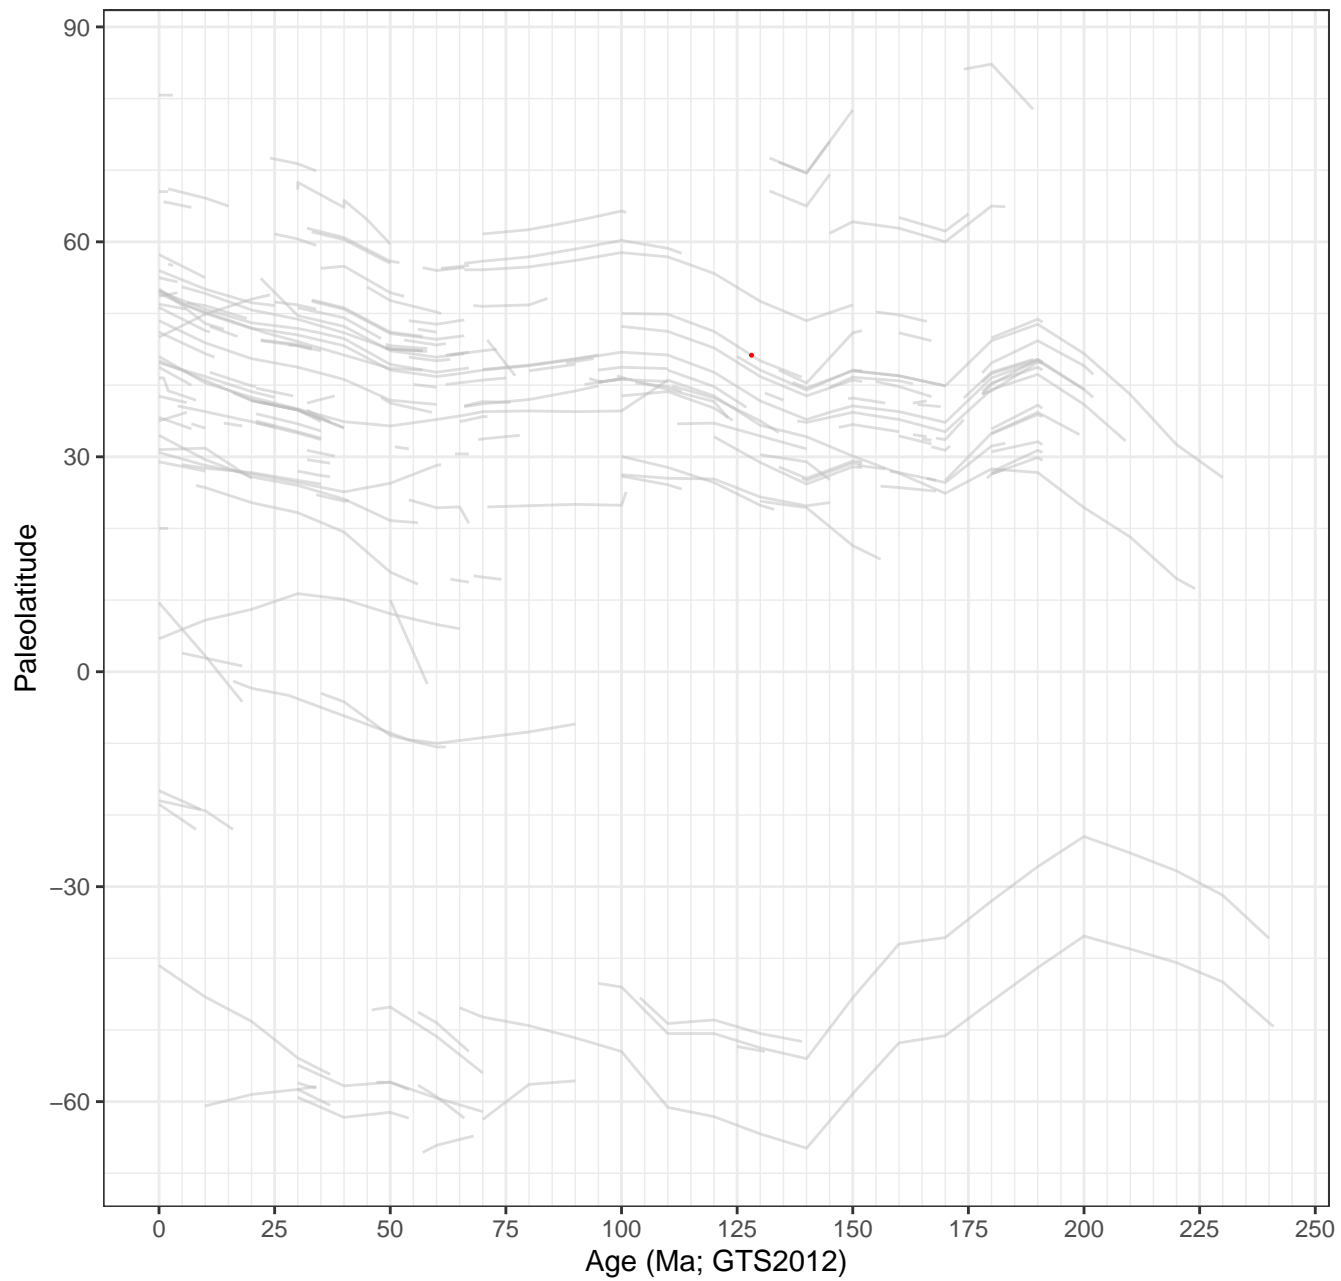

Supplement: Supplementary file 2261 [file Rhynchodiniopsis fimbriata.pdf › Supplement/Supplement 2/Species 1914 plots/Rhynchodiniopsis fimbriata.pdf]

# Species *Rhynchodiniopsis martonensis*

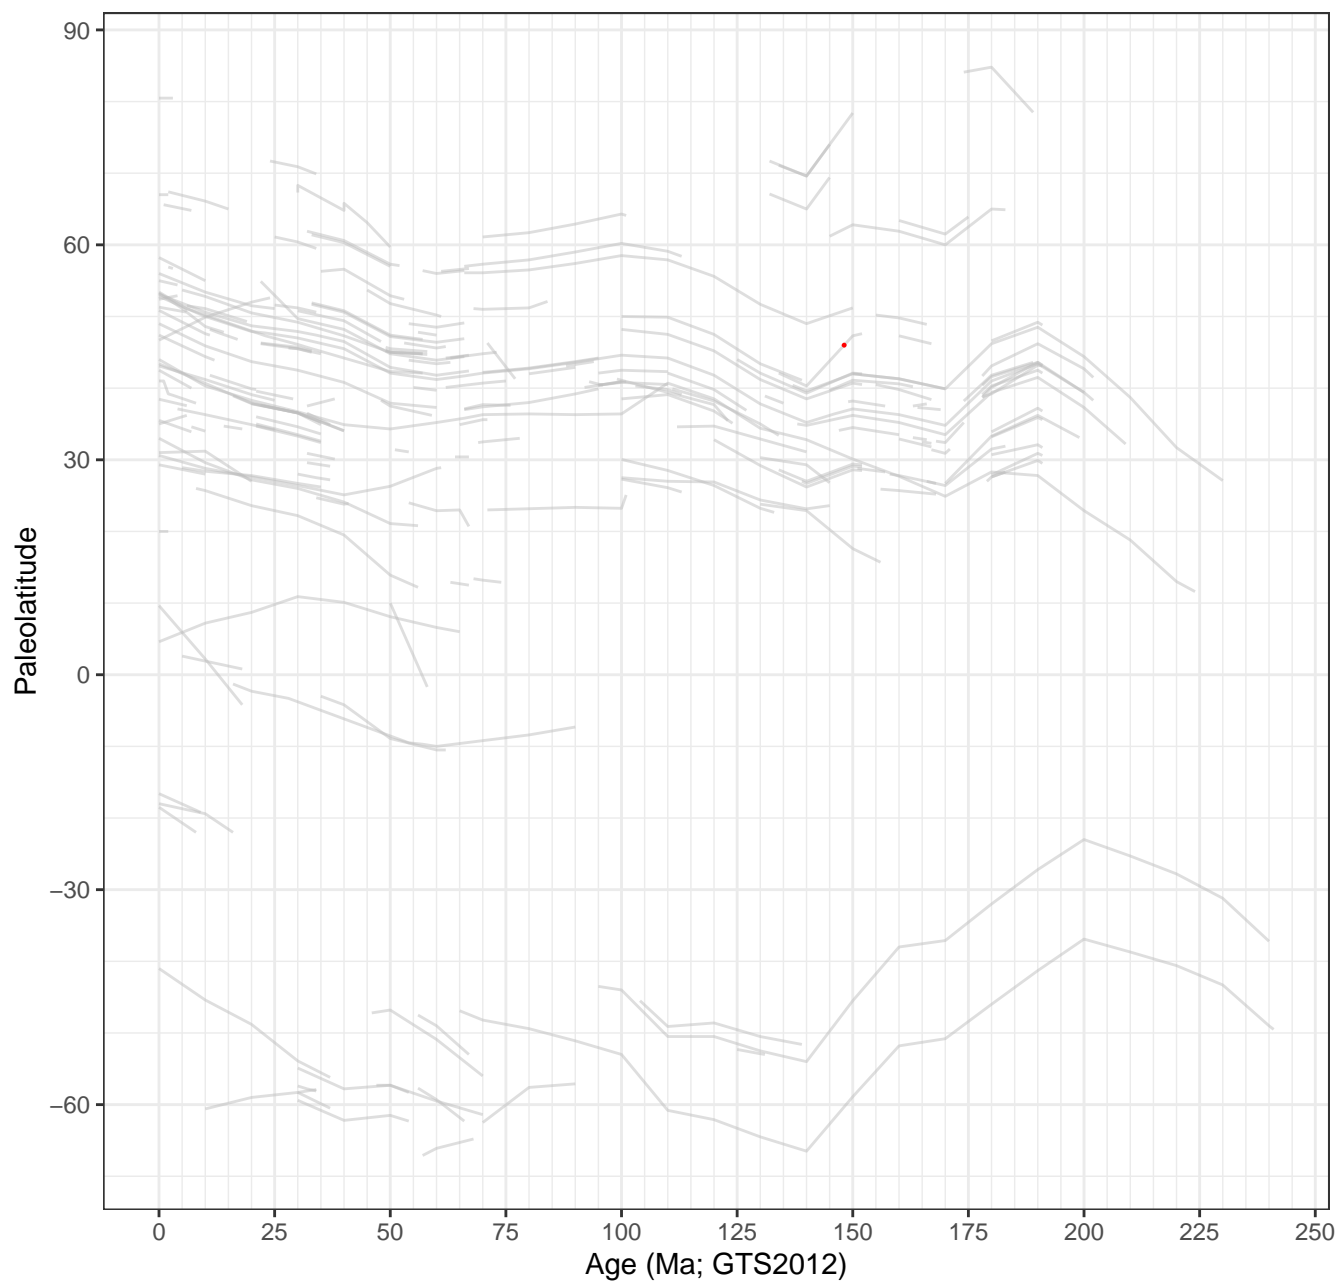

Supplement: Supplementary file 2262 [file Rhynchodiniopsis martonensis.pdf › Supplement/Supplement 2/Species 1914 plots/Rhynchodiniopsis martonensis.pdf]

# Species *Rhynchodiniopsis pennata*

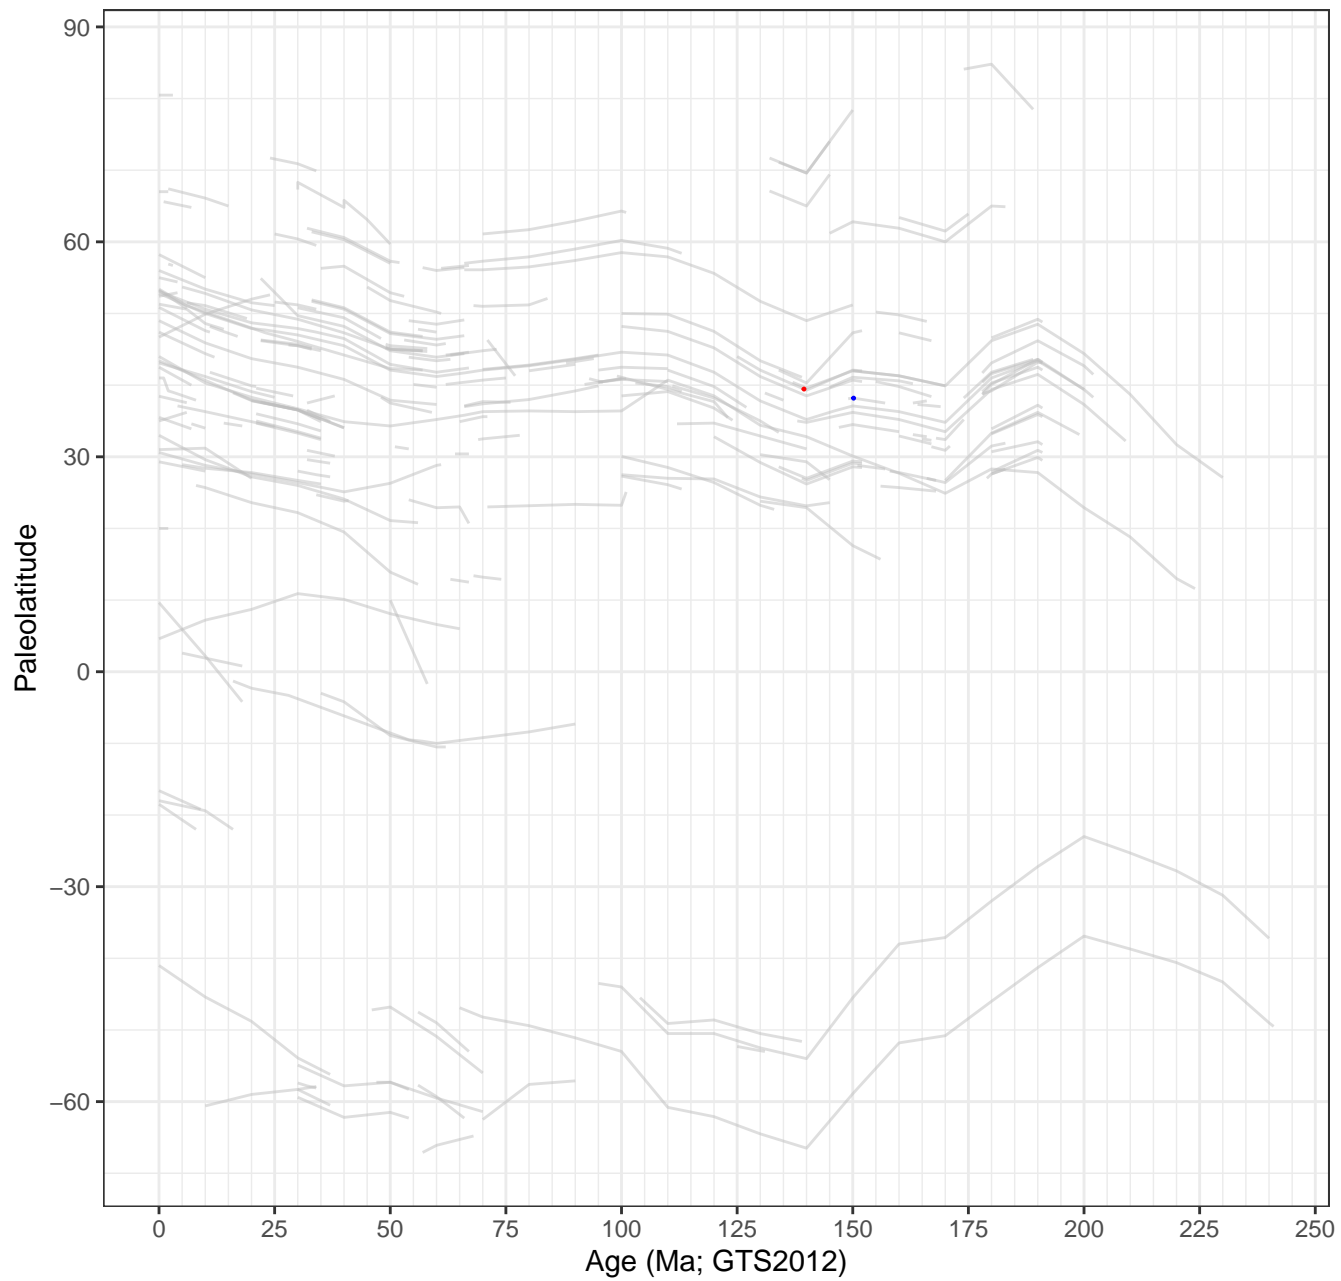

Supplement: Supplementary file 2263 [file Rhynchodiniopsis pennata.pdf › Supplement/Supplement 2/Species 1914 plots/Rhynchodiniopsis pennata.pdf]

# Species *Rhynchodiniopsis regalis*

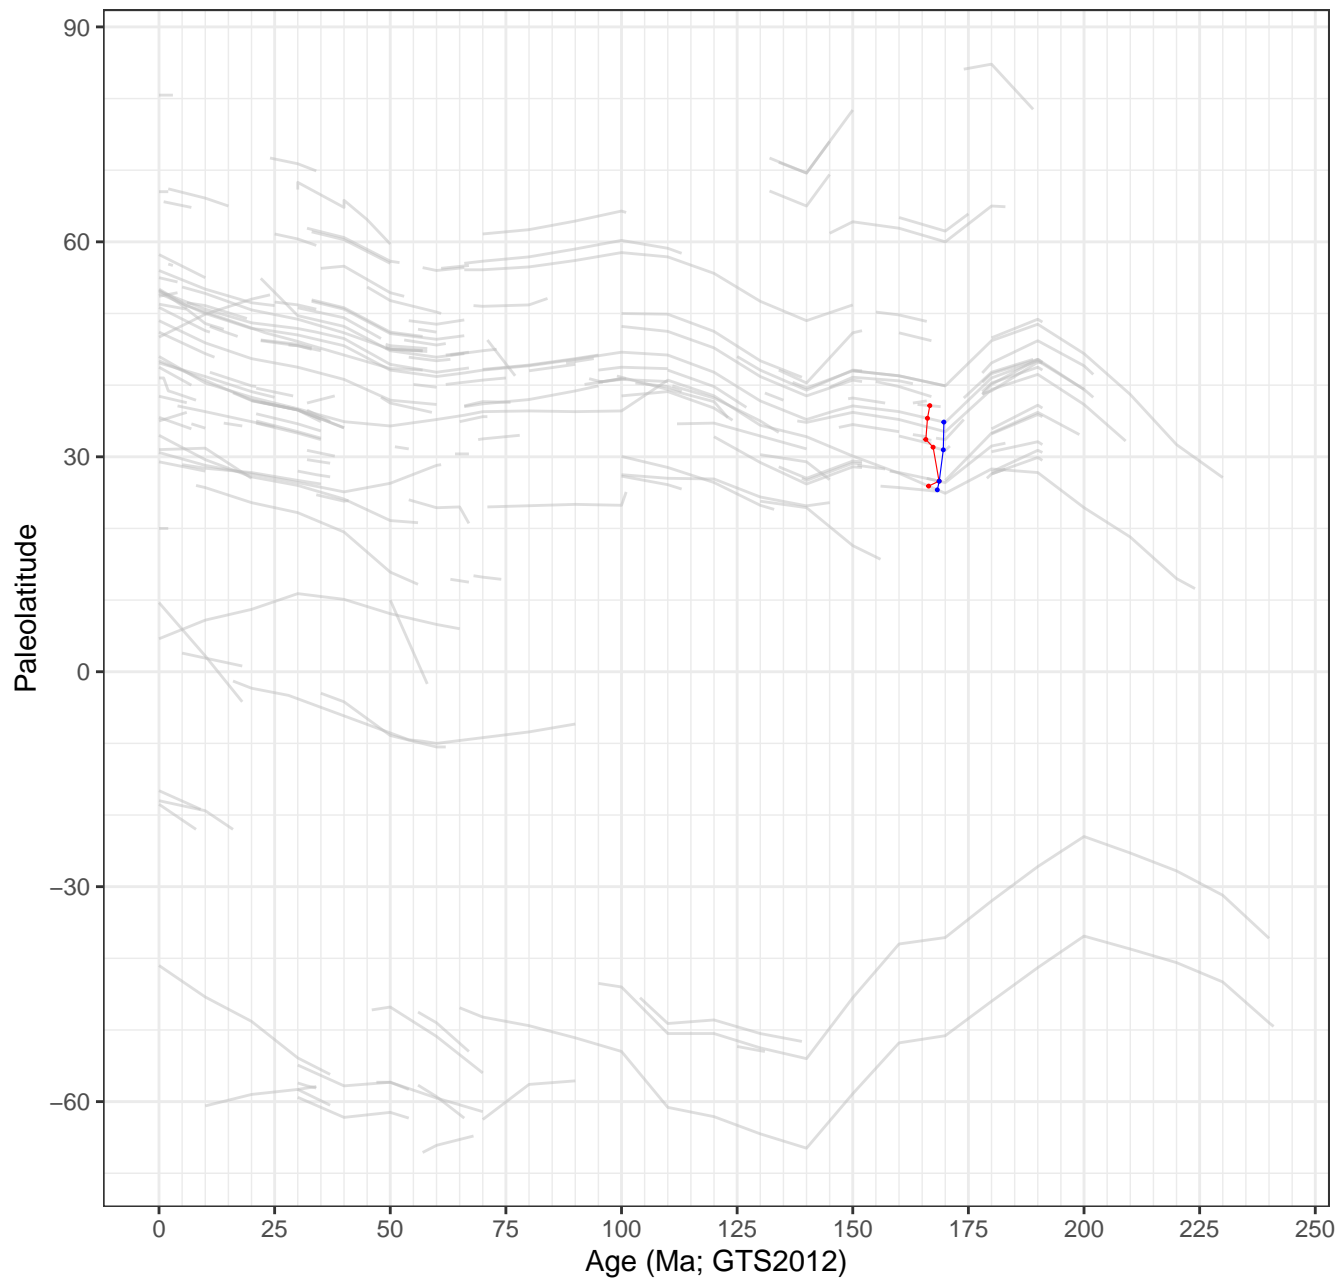

Supplement: Supplementary file 2264 [file Rhynchodiniopsis regalis.pdf › Supplement/Supplement 2/Species 1914 plots/Rhynchodiniopsis regalis.pdf]

# Species *Rhynchodiniopsis saliorum*

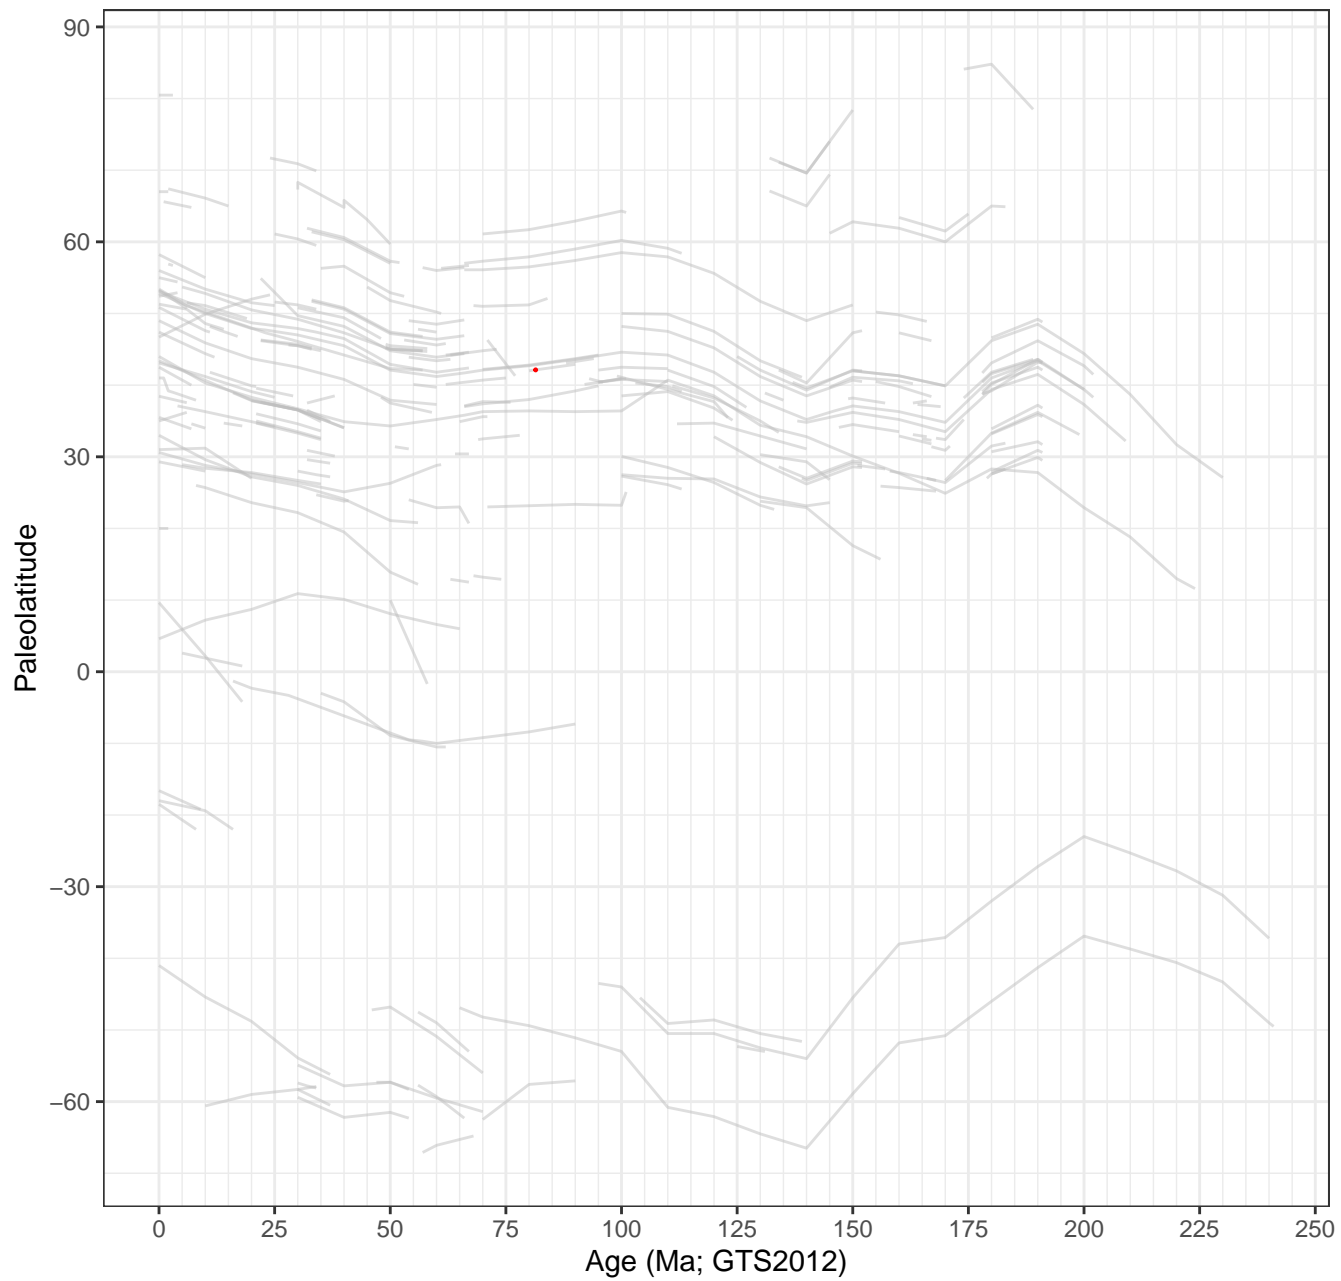

Supplement: Supplementary file 2265 [file Rhynchodiniopsis saliorum.pdf › Supplement/Supplement 2/Species 1914 plots/Rhynchodiniopsis saliorum.pdf]

# Species *Rhynchodiniopsis serrata*

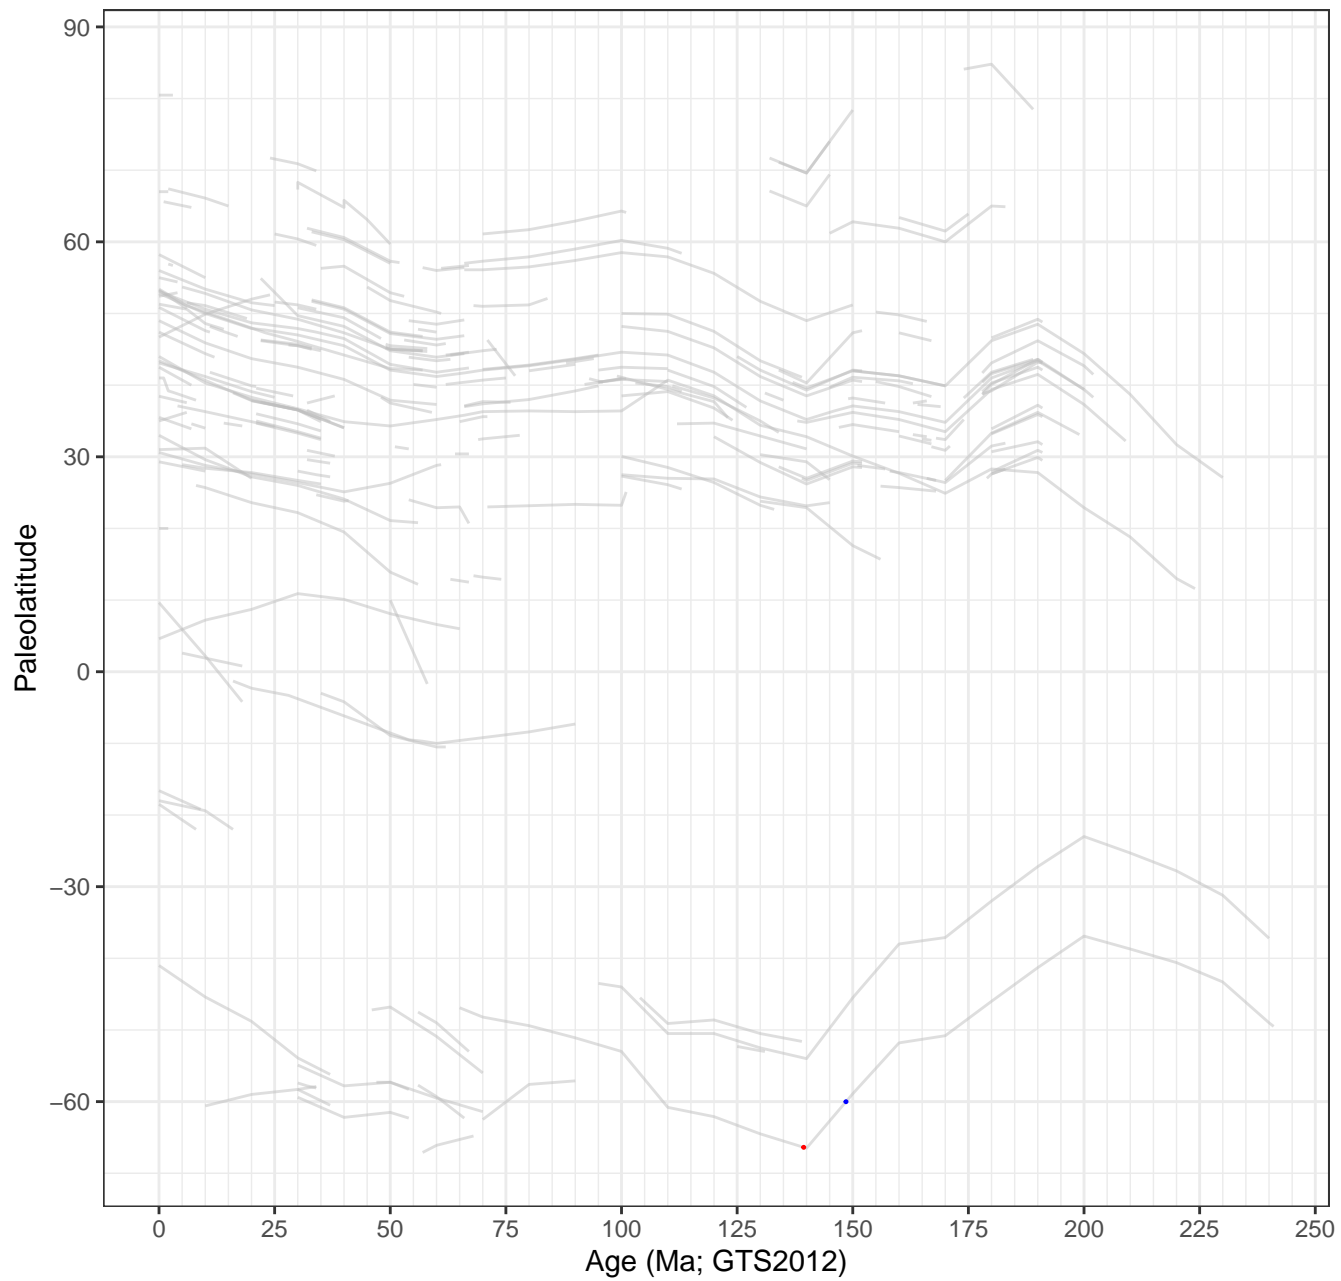

Supplement: Supplementary file 2266 [file Rhynchodiniopsis serrata.pdf › Supplement/Supplement 2/Species 1914 plots/Rhynchodiniopsis serrata.pdf]

# Species *Rigaudella aemula*

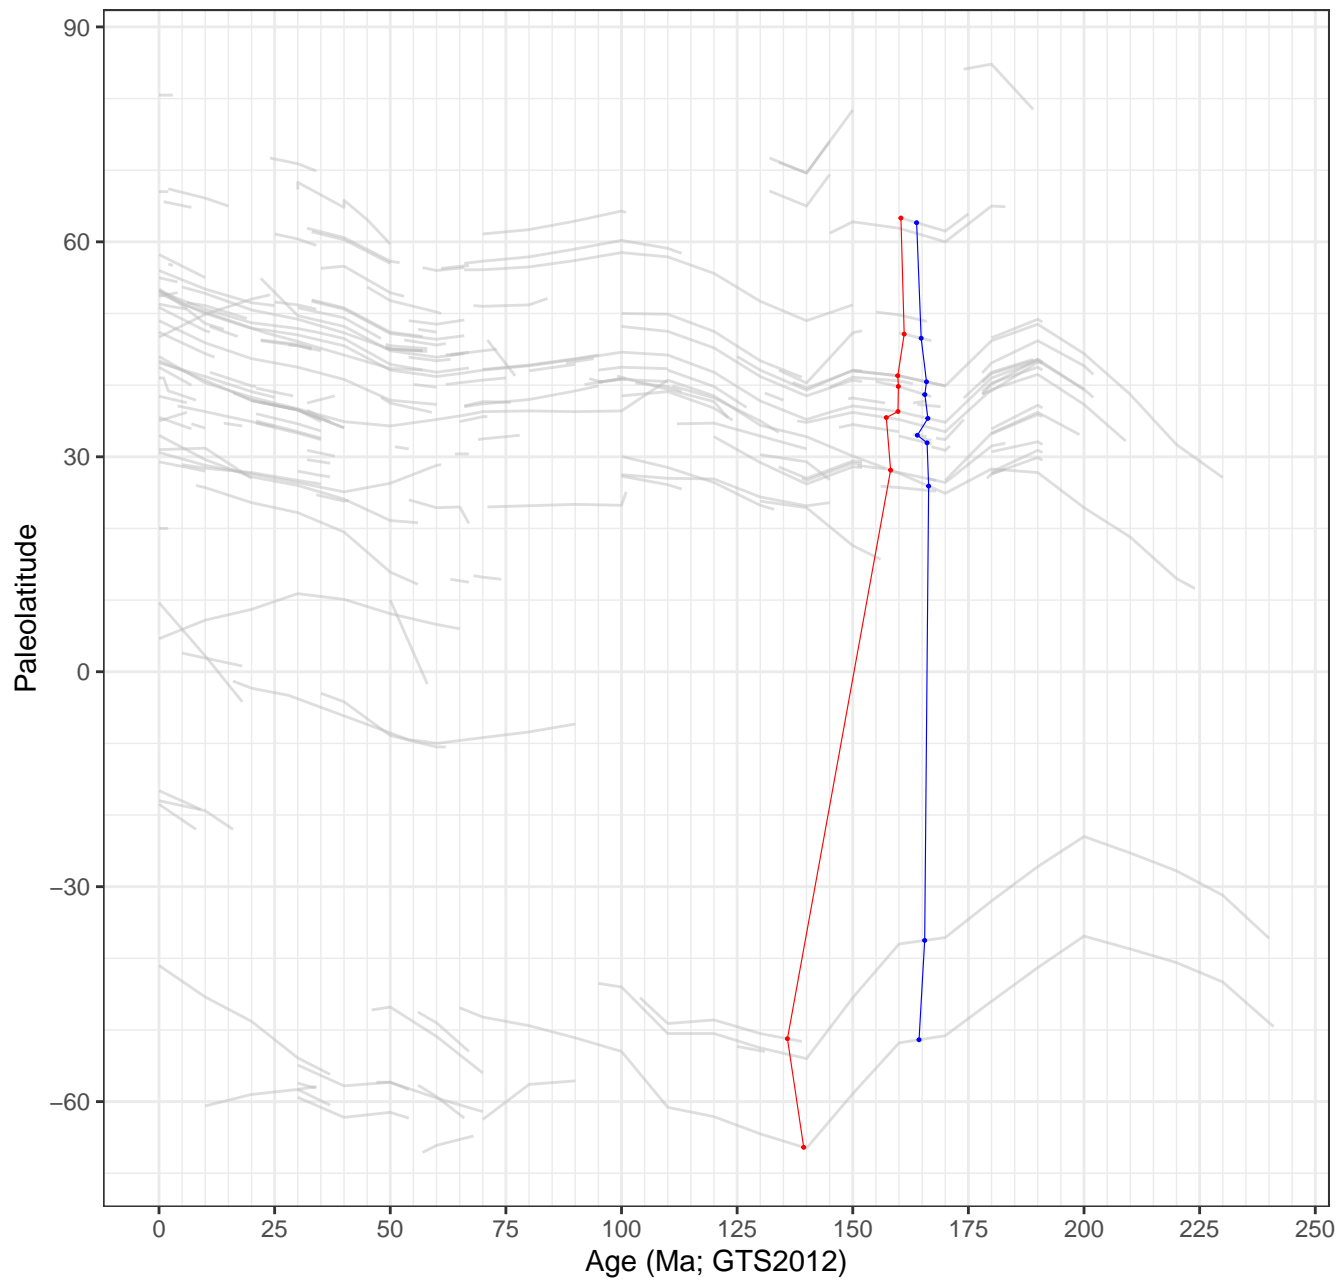

Supplement: Supplementary file 2267 [file Rigaudella aemula.pdf › Supplement/Supplement 2/Species 1914 plots/Rigaudella aemula.pdf]

# Species *Rigaudella caulleryi*

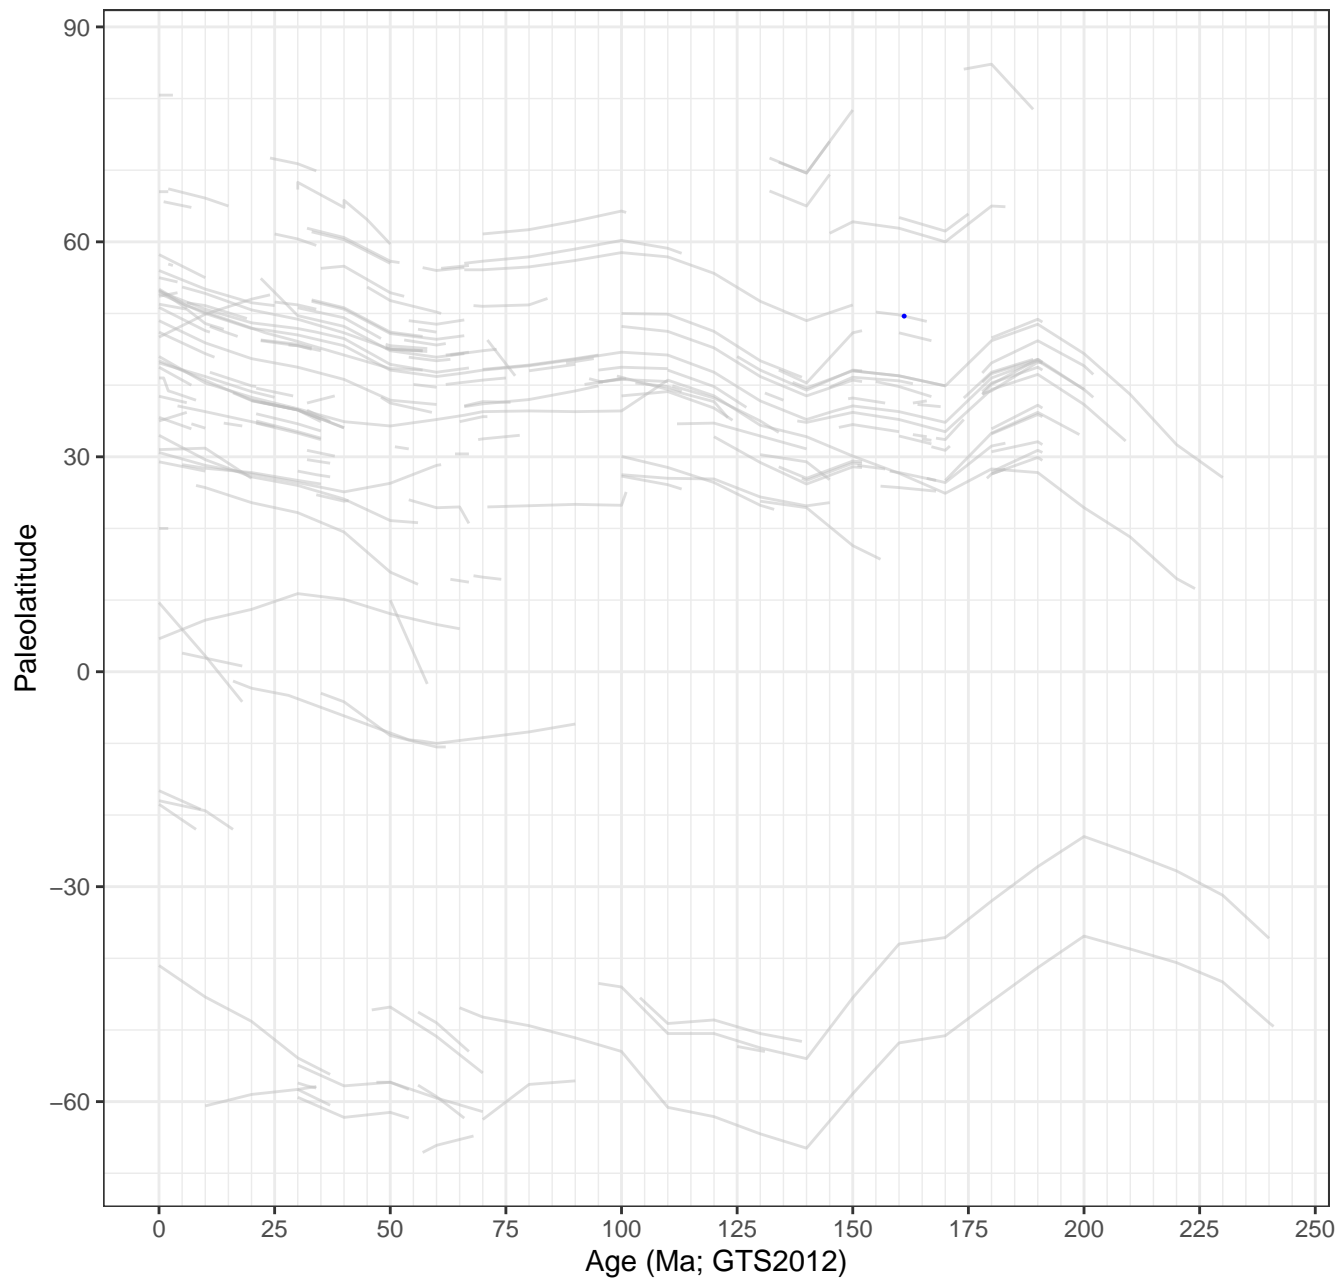

Supplement: Supplementary file 2268 [file Rigaudella caulleryi.pdf › Supplement/Supplement 2/Species 1914 plots/Rigaudella caulleryi.pdf]

# Species *Rigaudella filamentosa*

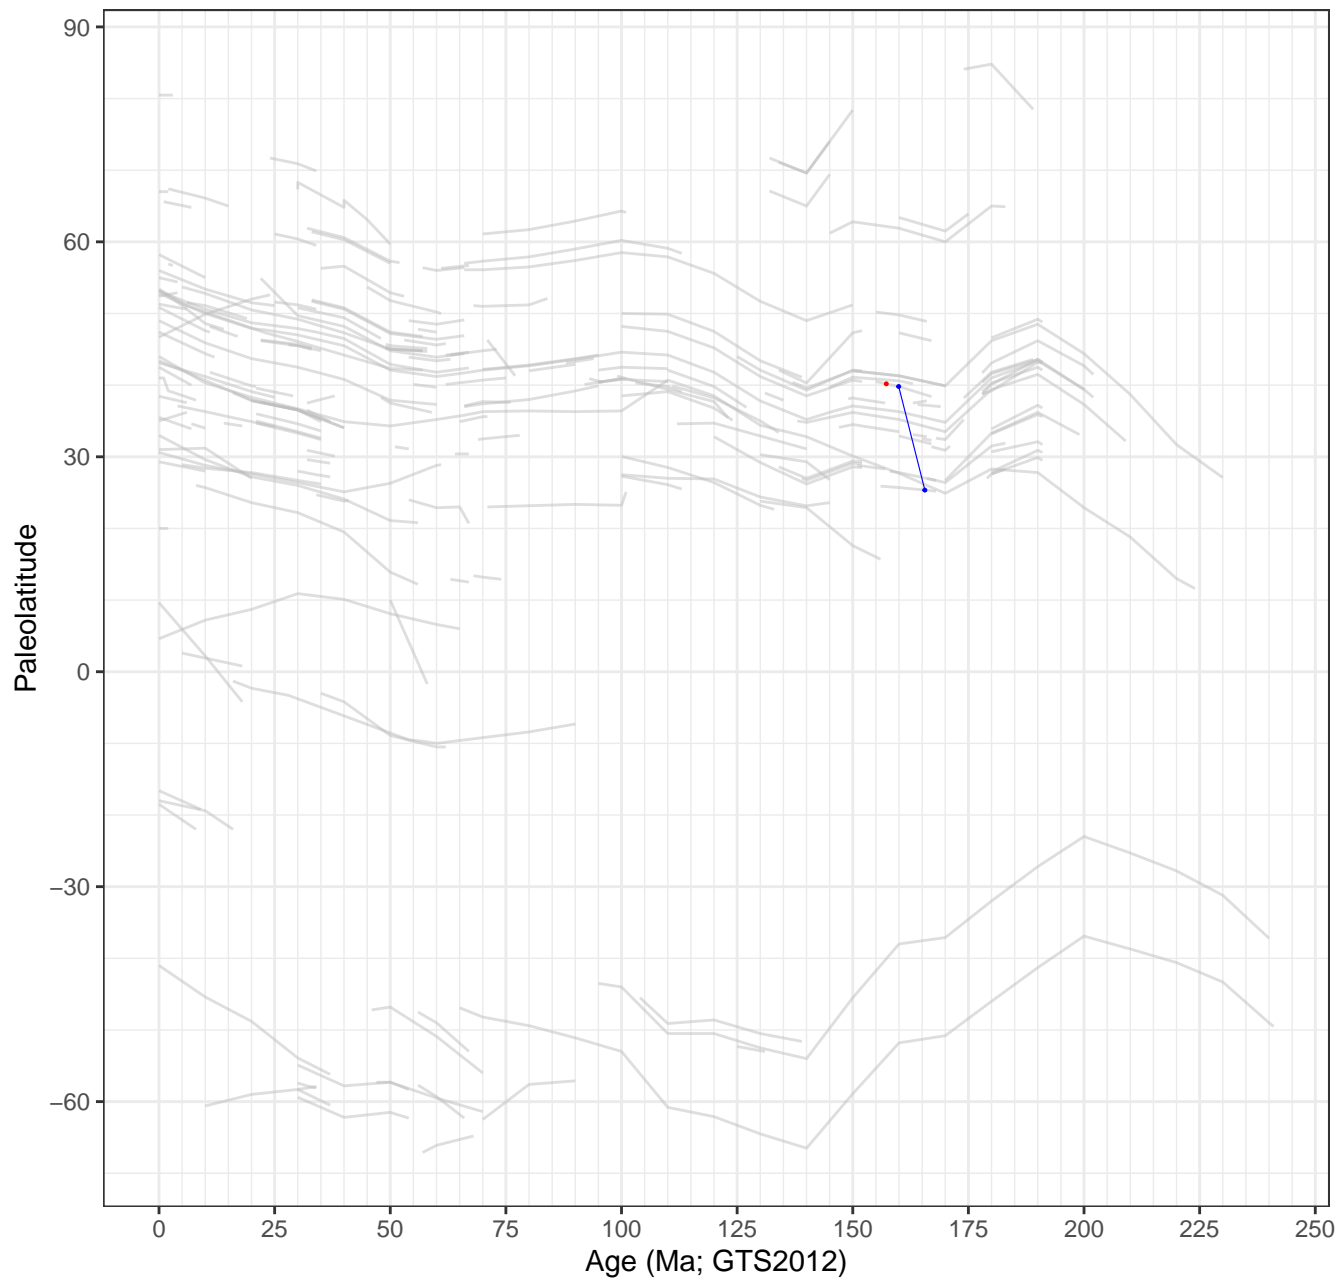

Supplement: Supplementary file 2269 [file Rigaudella filamentosa.pdf › Supplement/Supplement 2/Species 1914 plots/Rigaudella filamentosa.pdf]

# Species *Rosswangia simplex*

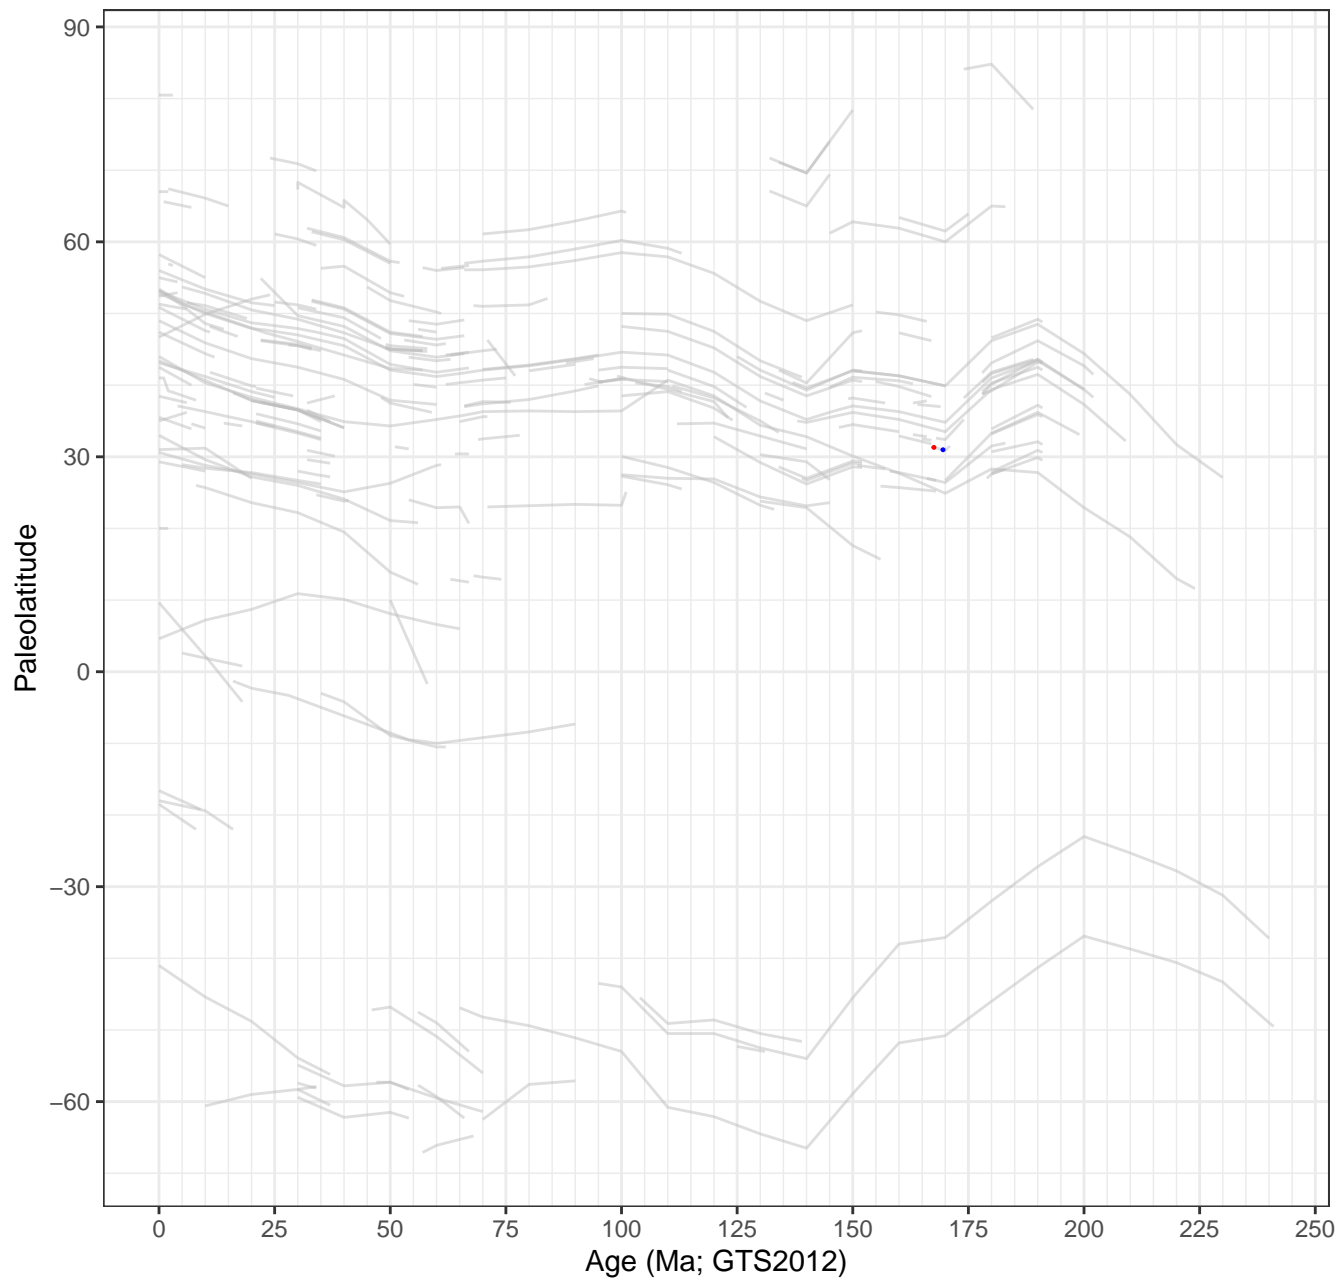

Supplement: Supplementary file 2270 [file Rosswangia simplex.pdf › Supplement/Supplement 2/Species 1914 plots/Rosswangia simplex.pdf]

# Species *Rotosphaeropsis thula*

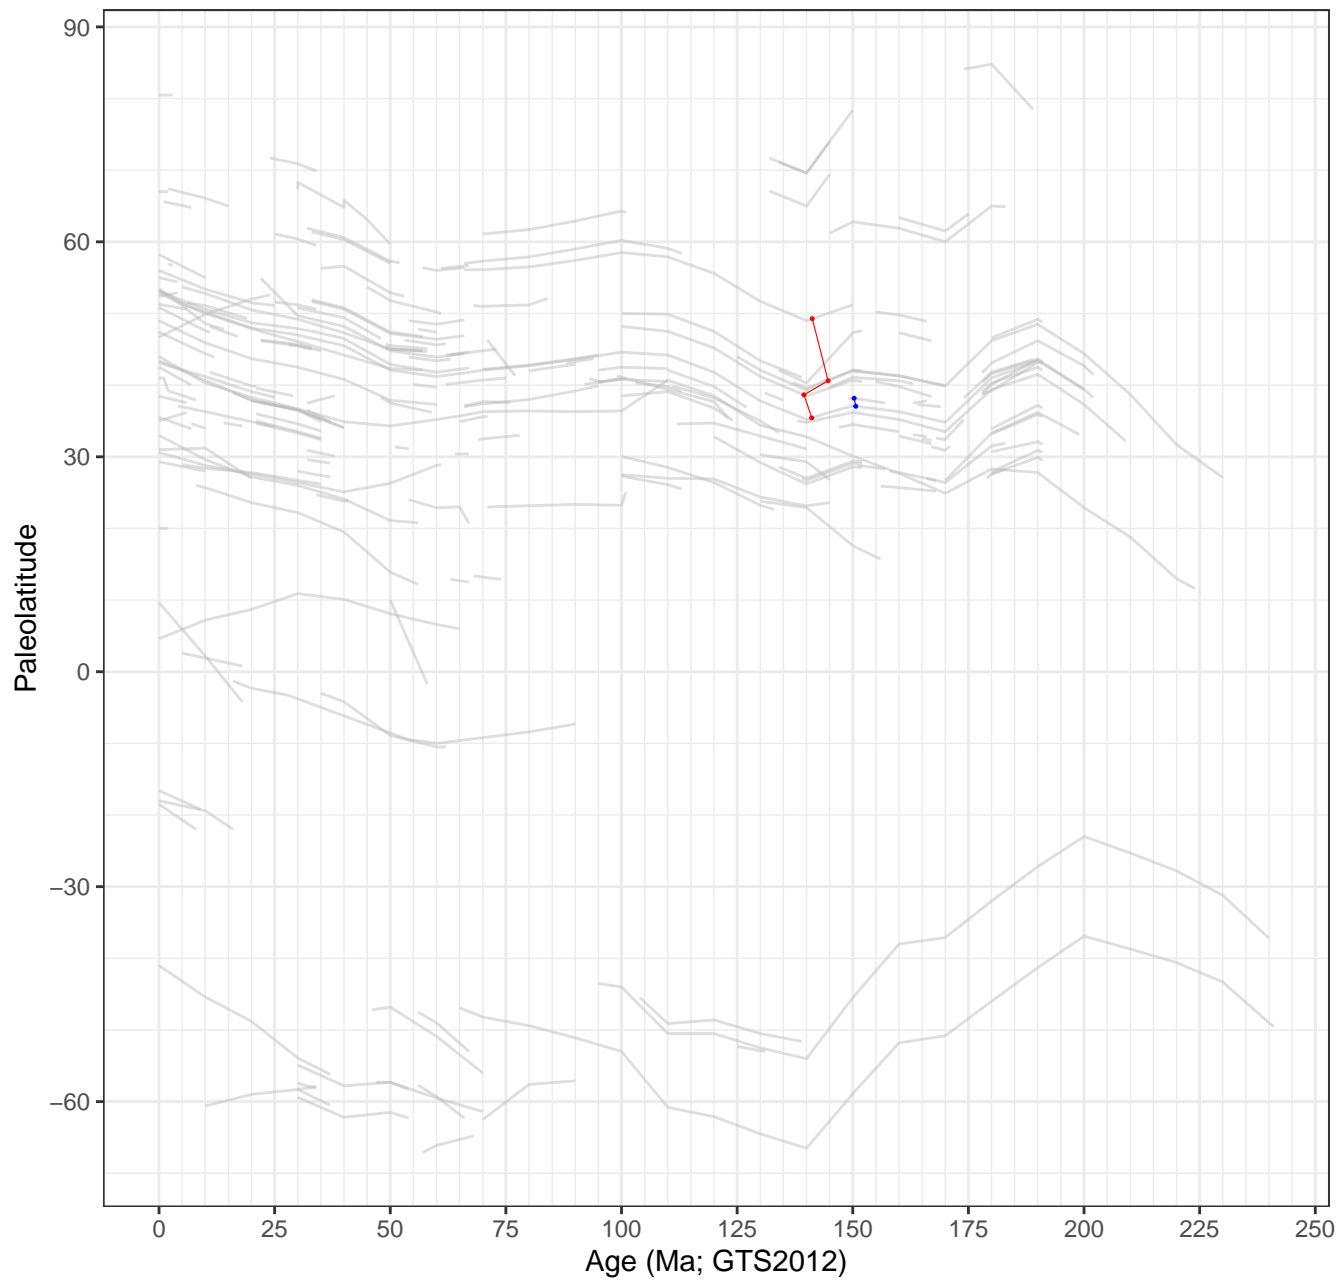

Supplement: Supplementary file 2271 [file Rotosphaeropsis thula.pdf › Supplement/Supplement 2/Species 1914 plots/Rotosphaeropsis thula.pdf]

# Species Rottnestia borussica

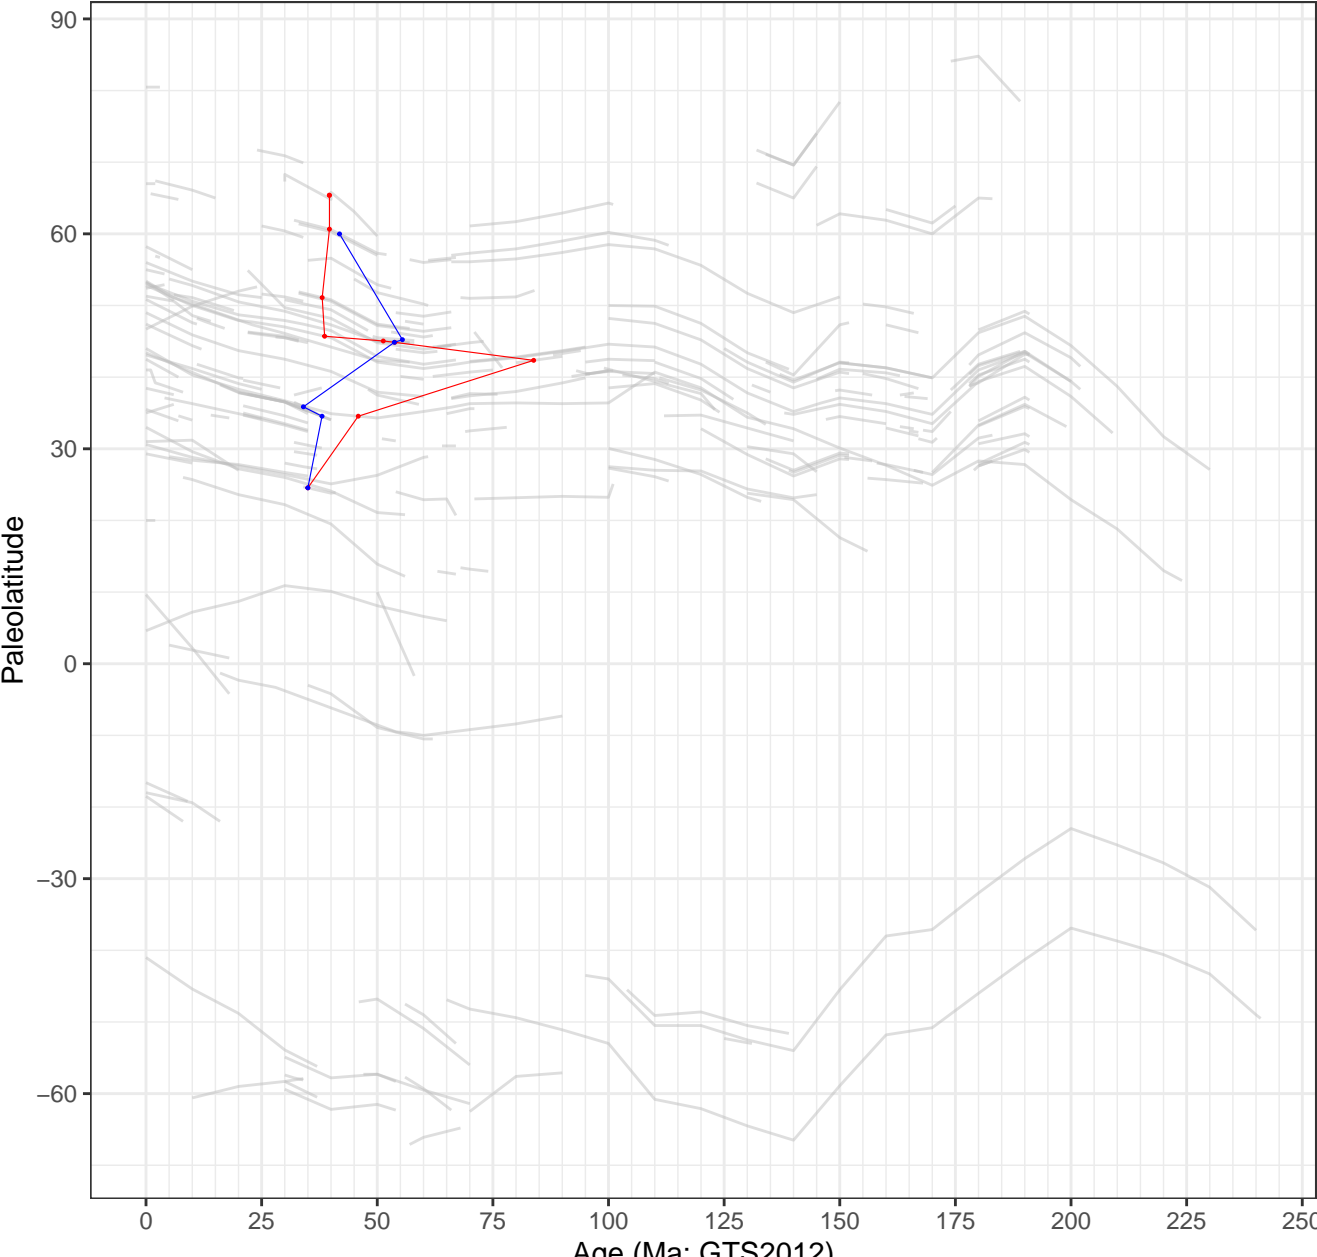

Supplement: Supplementary file 2272 [file Rottnestia borussica.pdf › Supplement/Supplement 2/Species 1914 plots/Rottnestia borussica.pdf]

# Species *Rottnestia wetzelii*

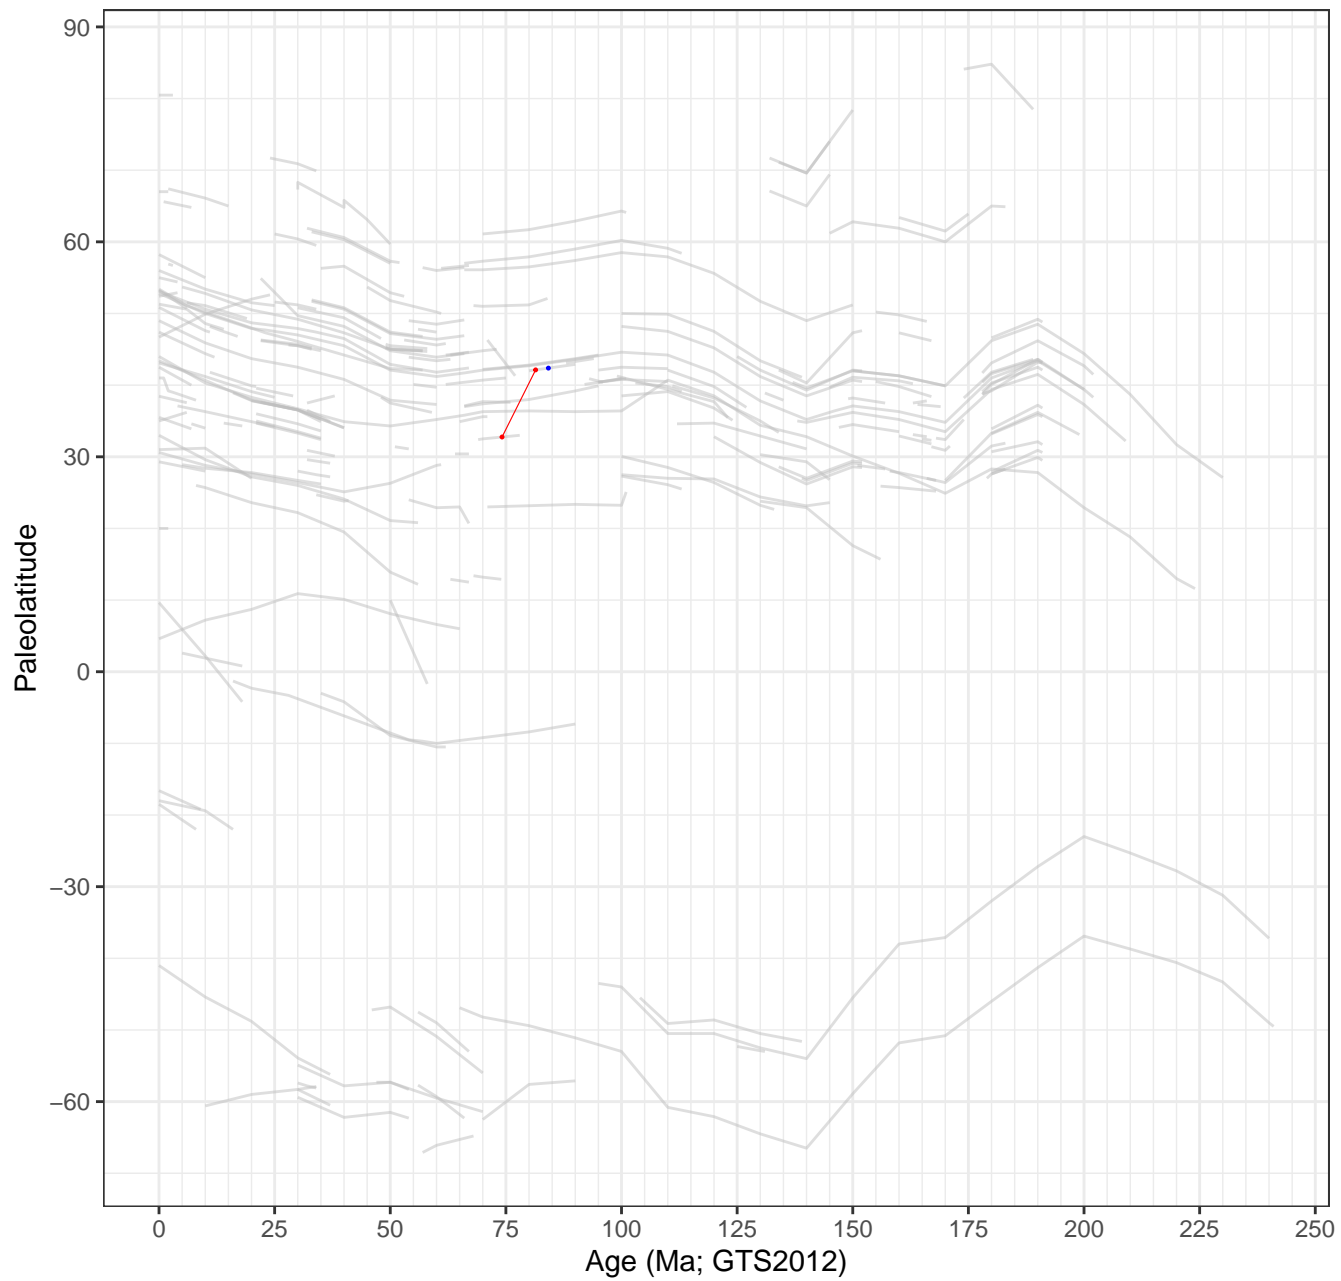

Supplement: Supplementary file 2273 [file Rottnestia wetzelii.pdf › Supplement/Supplement 2/Species 1914 plots/Rottnestia wetzelii.pdf]

# Species *Sahulidiniun ottii*

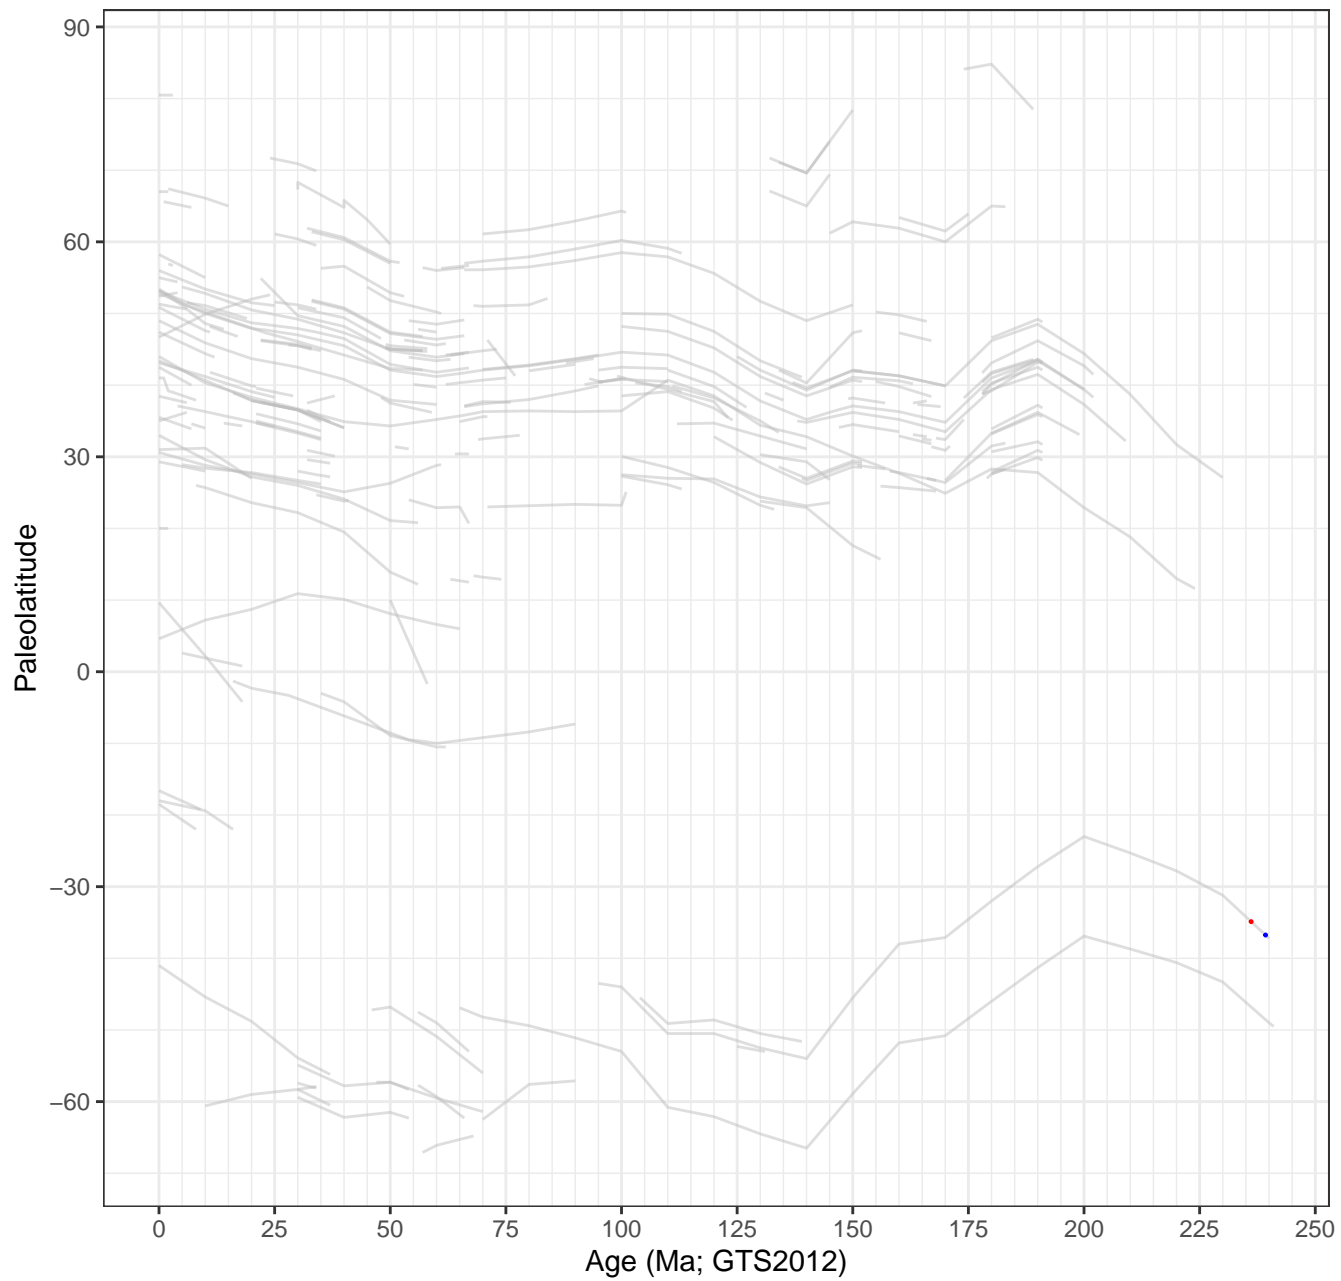

Supplement: Supplementary file 2274 [file Sahulidiniun ottii.pdf › Supplement/Supplement 2/Species 1914 plots/Sahulidiniun ottii.pdf]

# Species *Samlandia carnarvonensis*

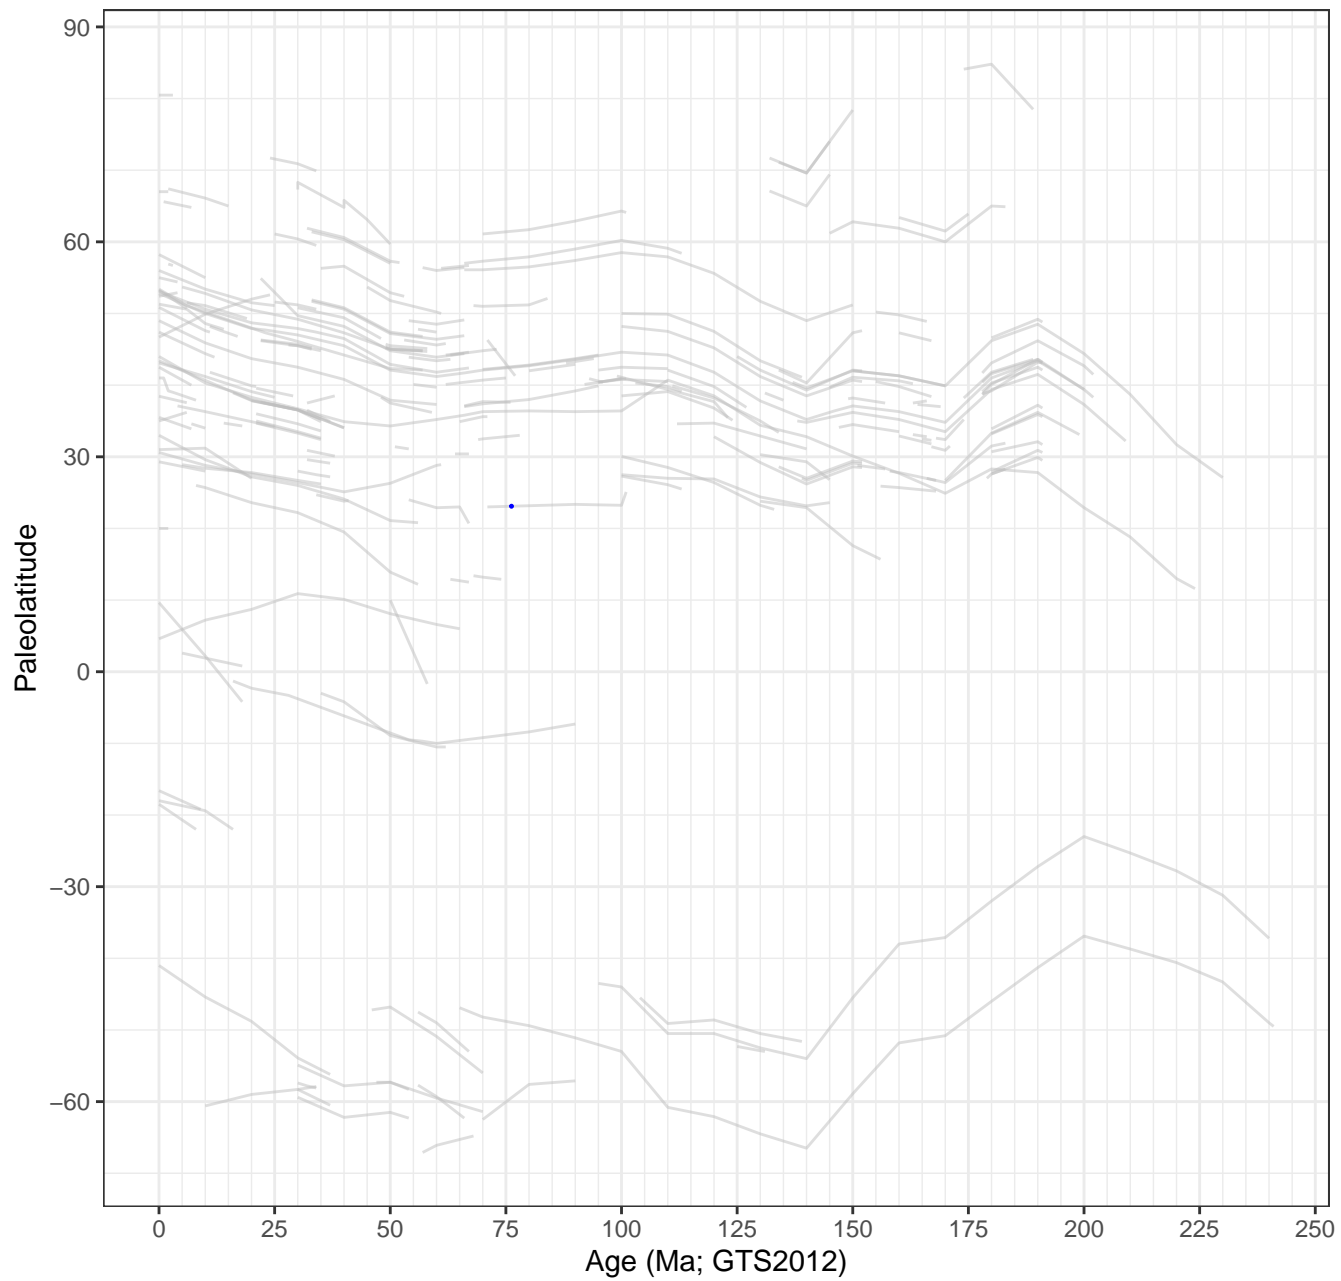

Supplement: Supplementary file 2275 [file Samlandia carnarvonensis.pdf › Supplement/Supplement 2/Species 1914 plots/Samlandia carnarvonensis.pdf]

# Species *Samlandia chlamydophora*

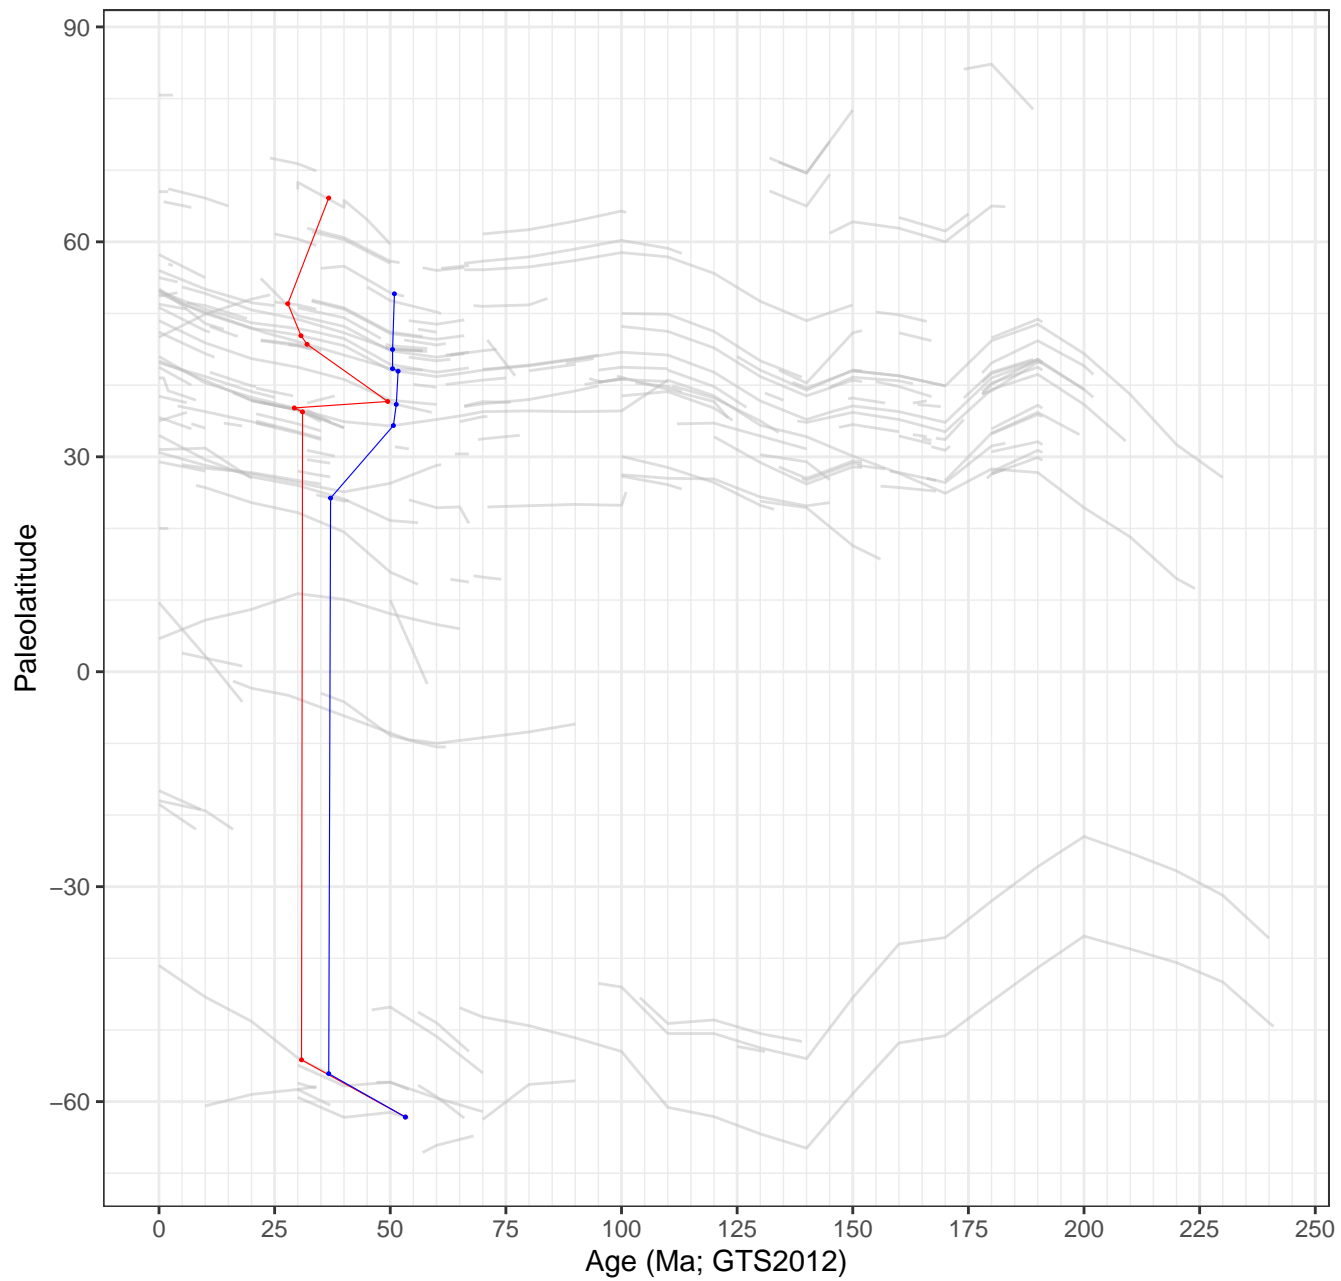

Supplement: Supplementary file 2276 [file Samlandia chlamydophora.pdf › Supplement/Supplement 2/Species 1914 plots/Samlandia chlamydophora.pdf]

# Species *Samlandia delicata*

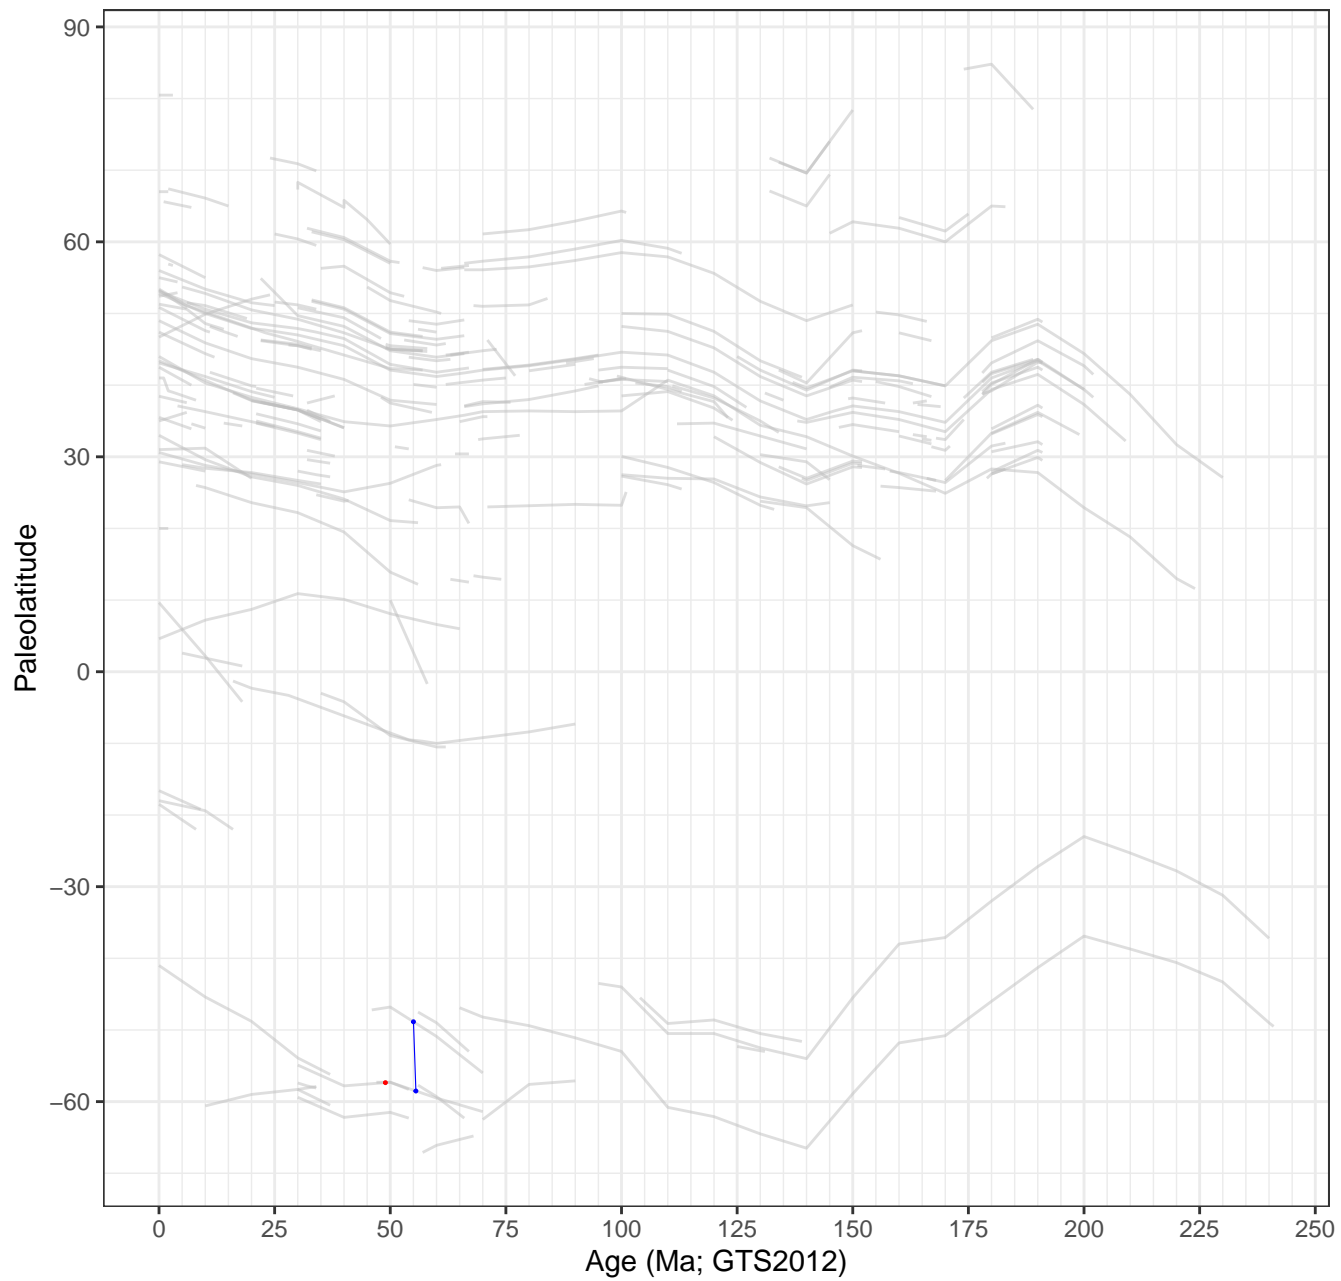

Supplement: Supplementary file 2277 [file Samlandia delicata.pdf › Supplement/Supplement 2/Species 1914 plots/Samlandia delicata.pdf]

# Species *Samlandia mayii*

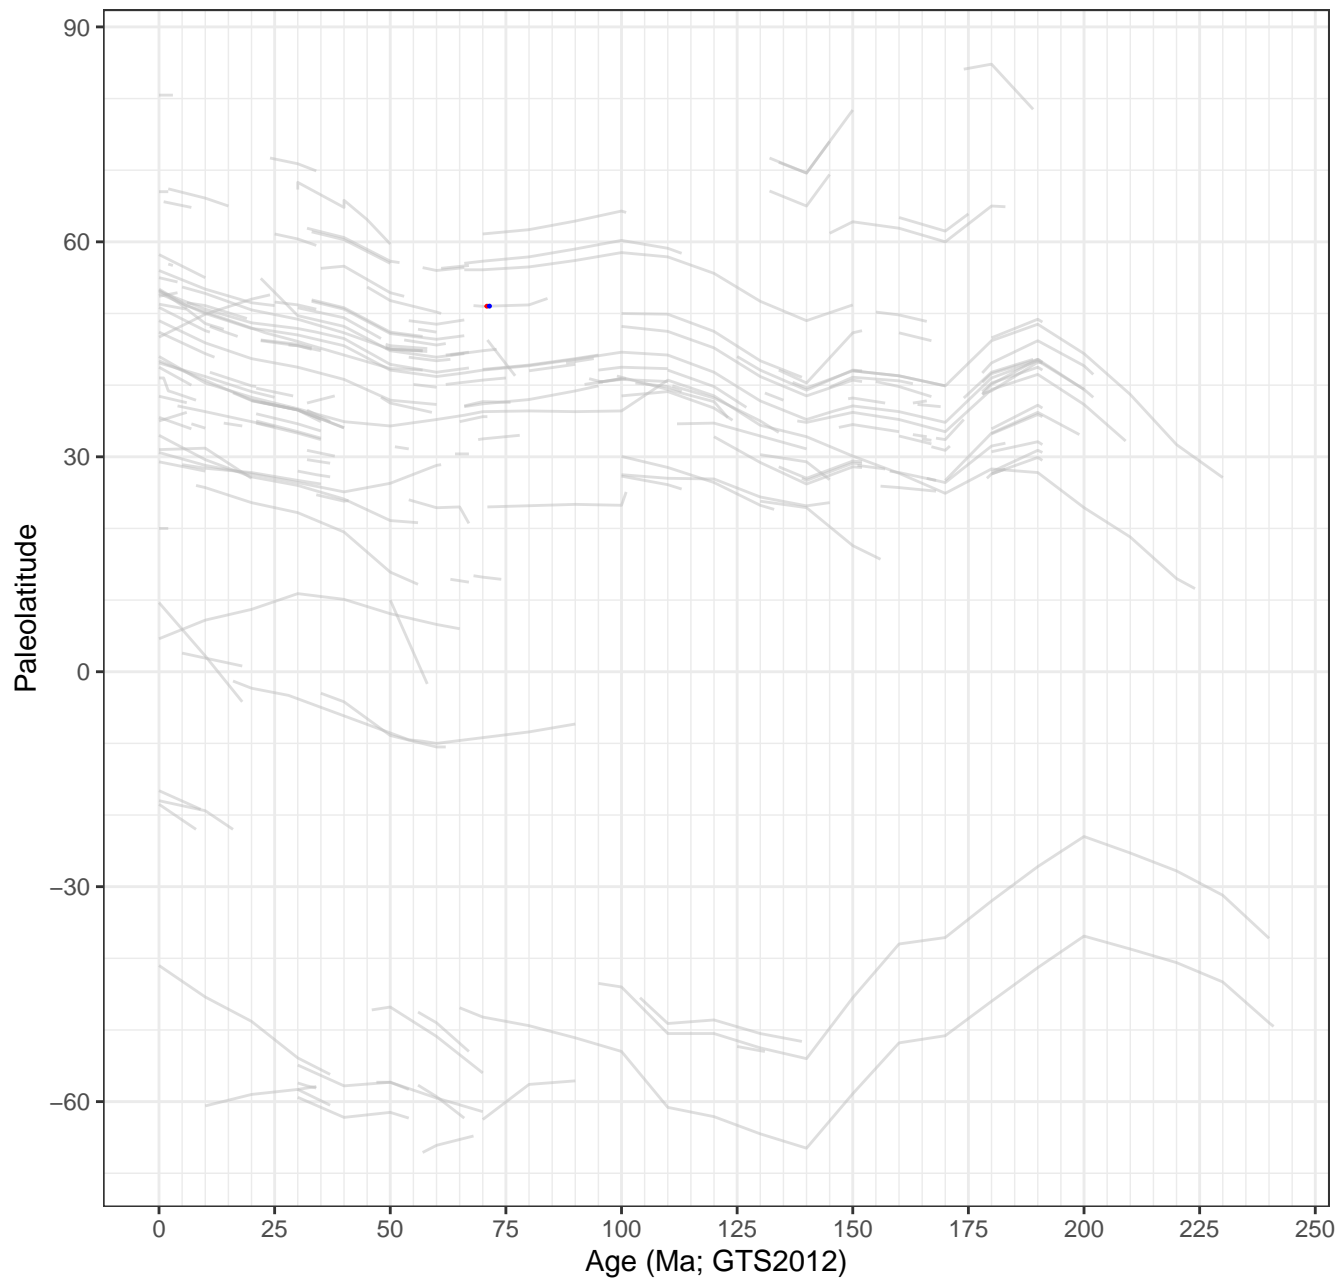

Supplement: Supplementary file 2278 [file Samlandia mayii.pdf › Supplement/Supplement 2/Species 1914 plots/Samlandia mayii.pdf]

# Species *Samlandia septata*

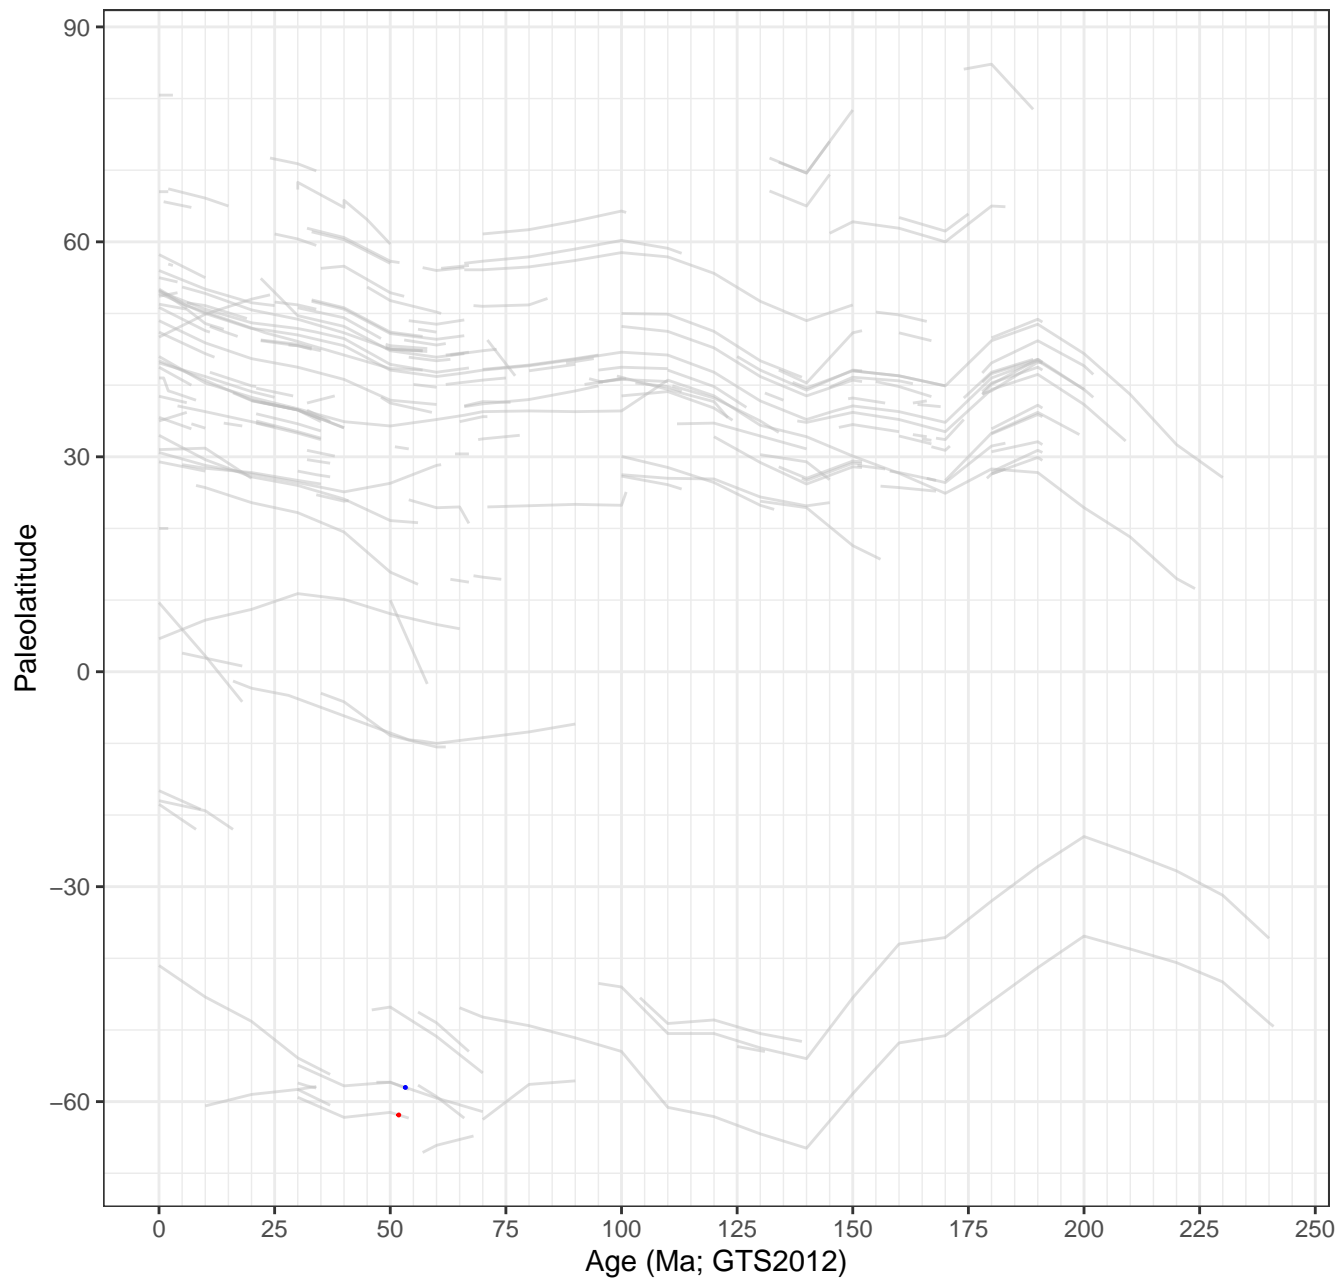

Supplement: Supplementary file 2279 [file Samlandia septata.pdf › Supplement/Supplement 2/Species 1914 plots/Samlandia septata.pdf]

# Species *Saturnodinium pansum*

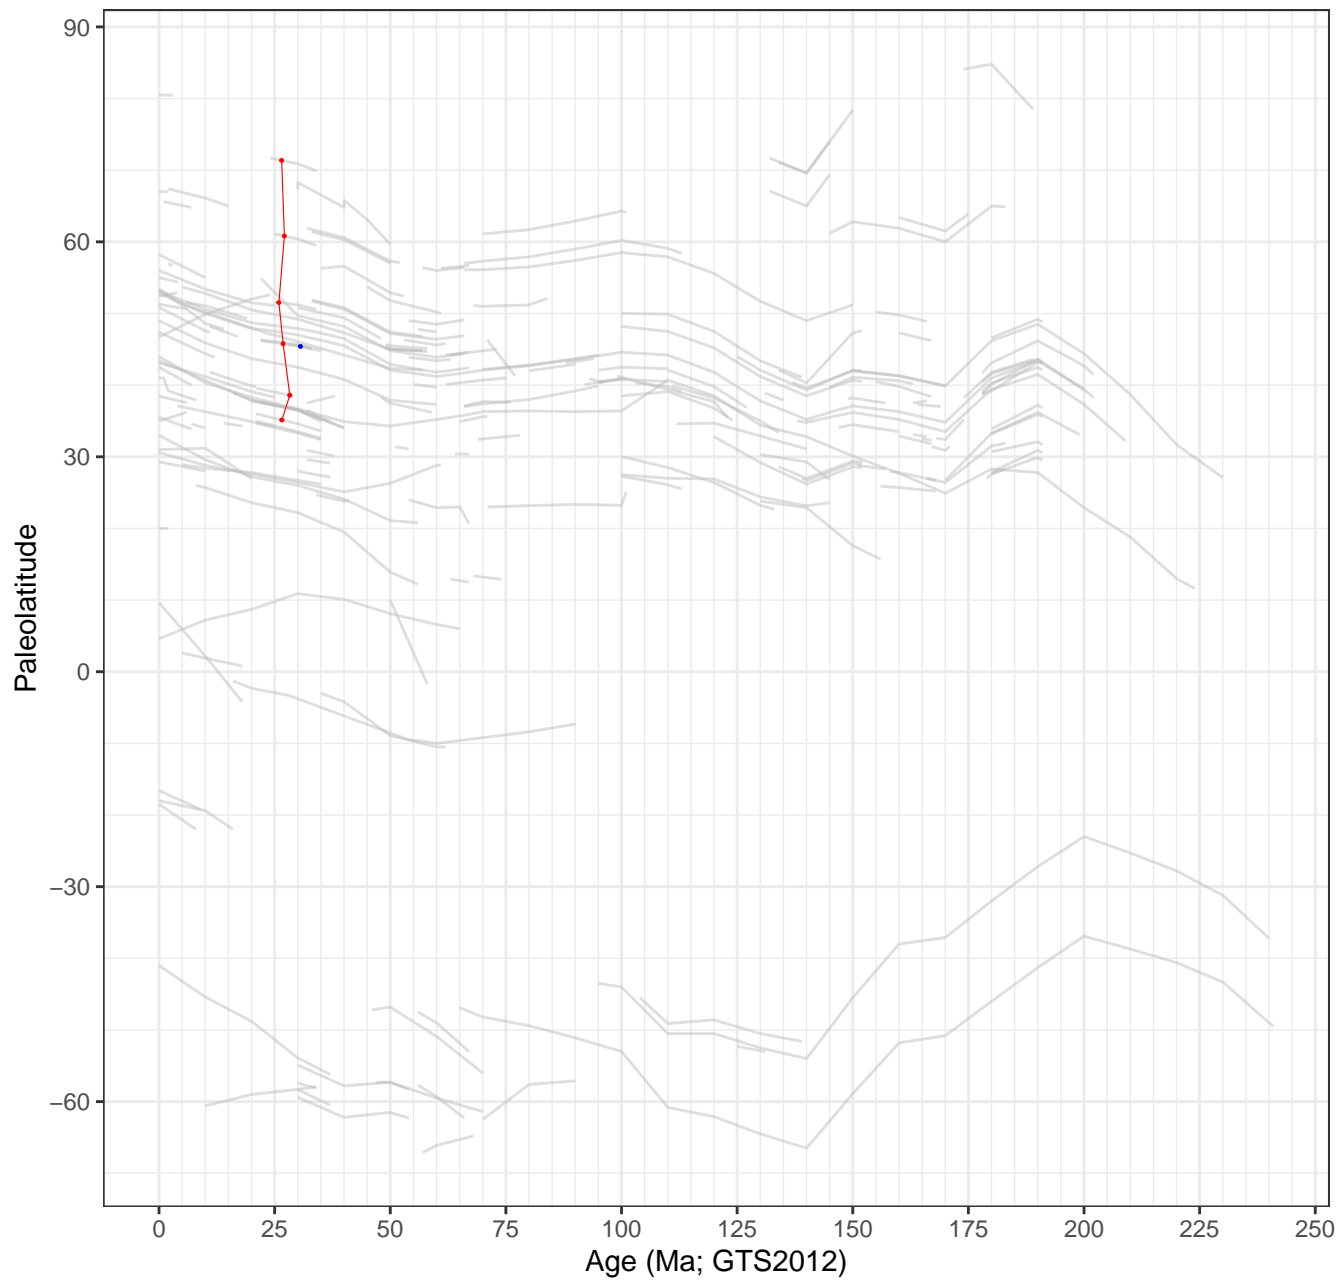

Supplement: Supplementary file 2280 [file Saturnodinium pansum.pdf › Supplement/Supplement 2/Species 1914 plots/Saturnodinium pansum.pdf]

# Species *Saturnodinium perforatum*

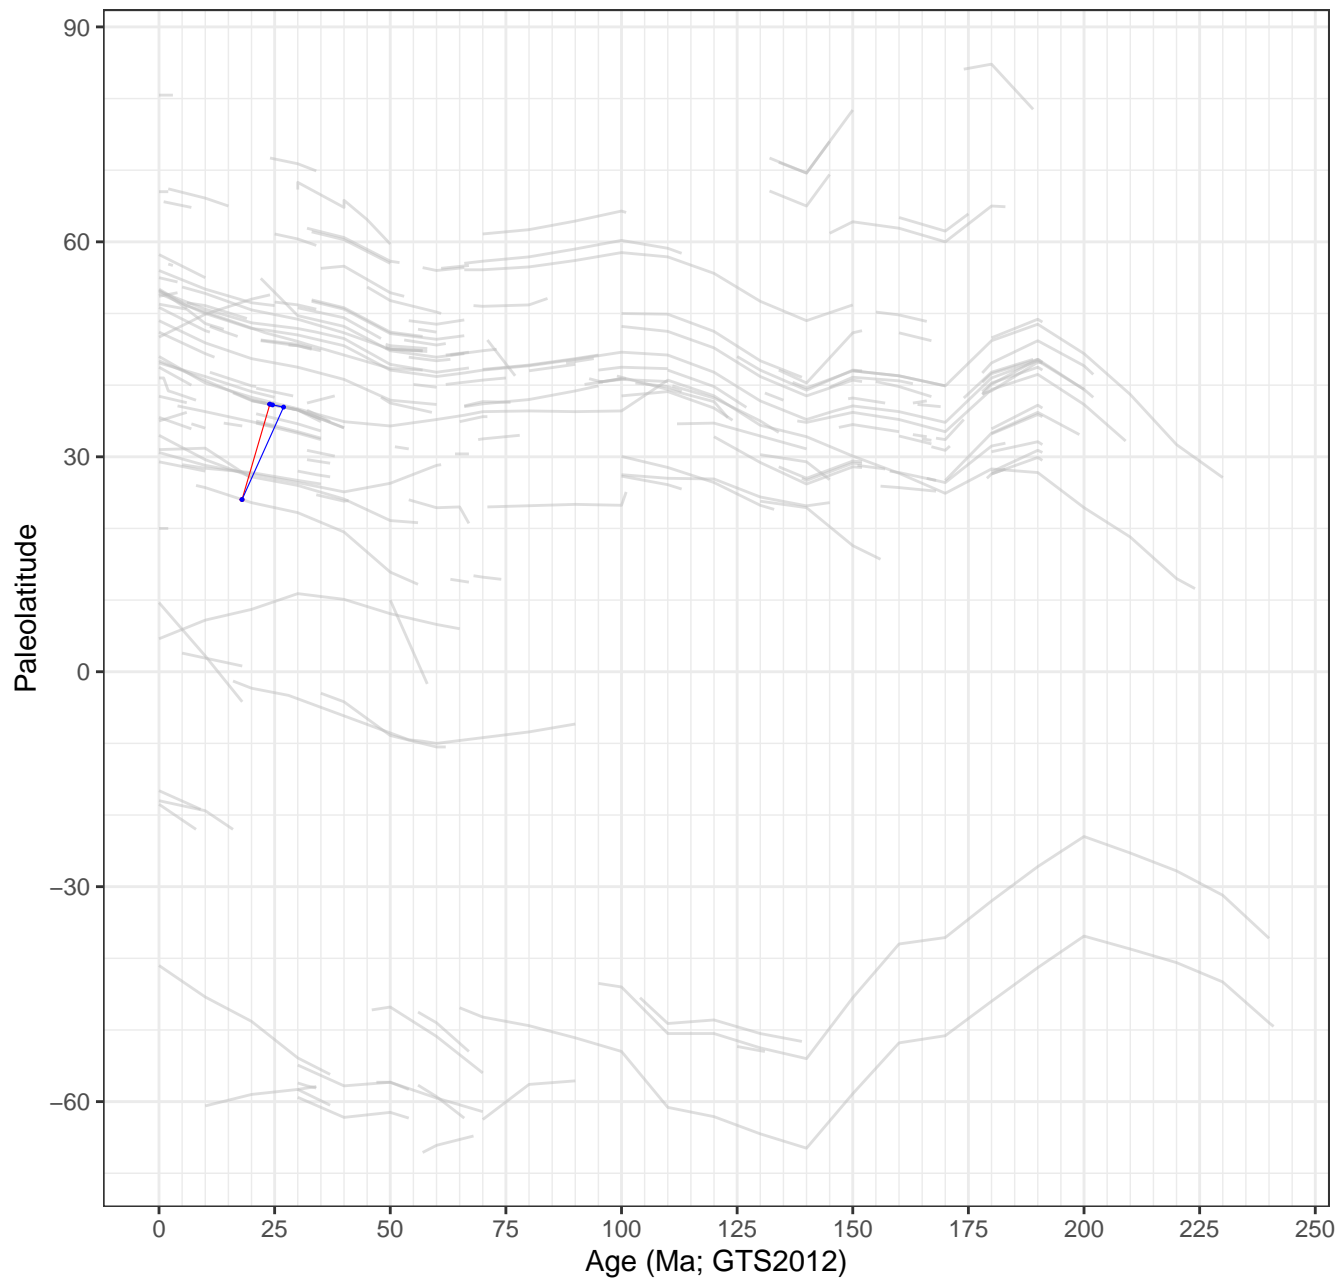

Supplement: Supplementary file 2281 [file Saturnodinium perforatum.pdf › Supplement/Supplement 2/Species 1914 plots/Saturnodinium perforatum.pdf]

# Species *Satyrodinium bengalense*

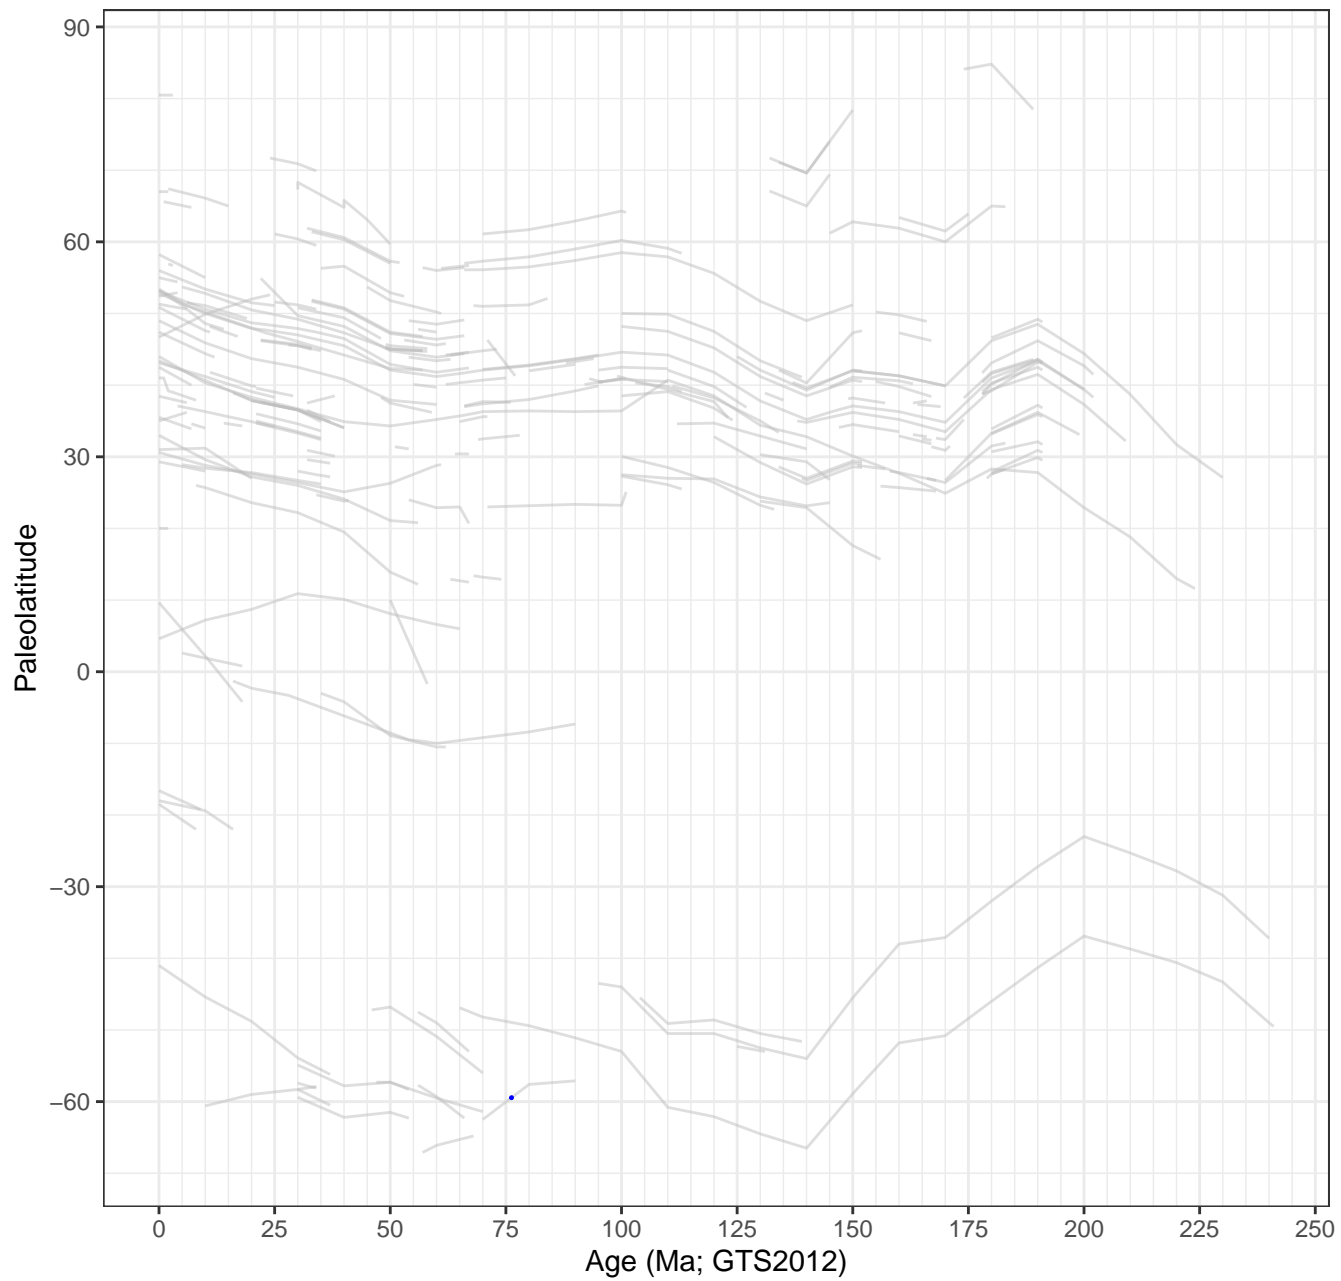

Supplement: Supplementary file 2282 [file Satyrodinium bengalense.pdf › Supplement/Supplement 2/Species 1914 plots/Satyrodinium bengalense.pdf]

# Species *Satyrodinium haumuriense*

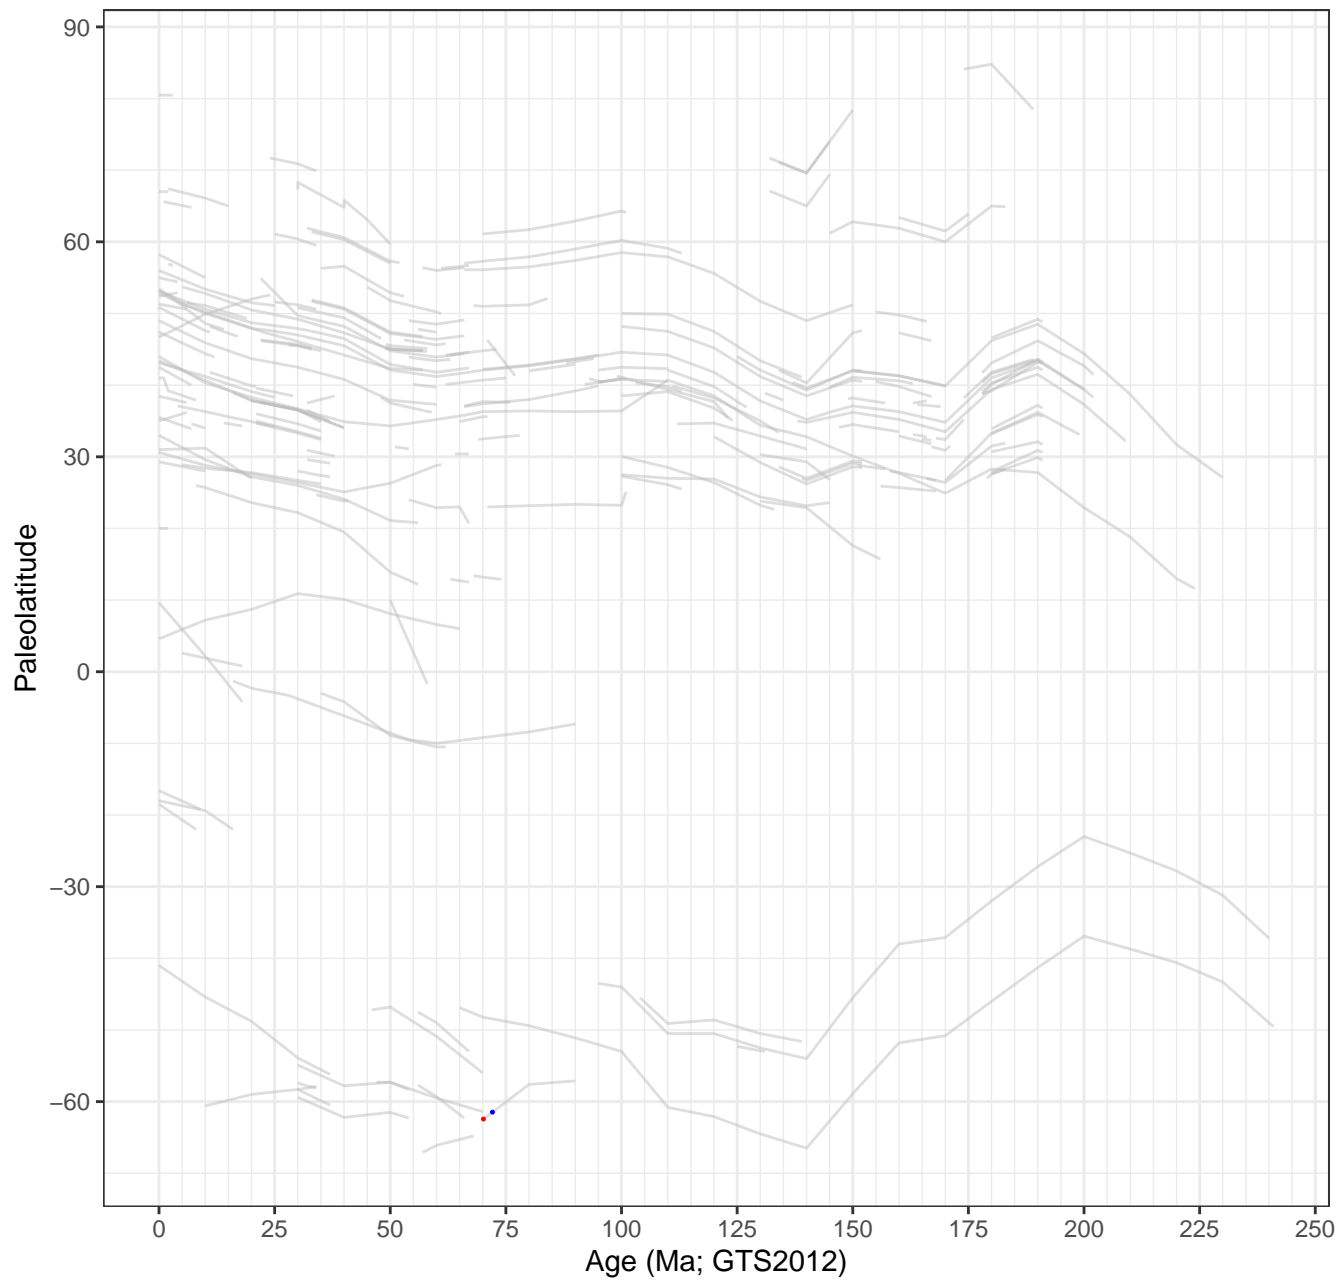

Supplement: Supplementary file 2283 [file Satyrodinium haumuriense.pdf › Supplement/Supplement 2/Species 1914 plots/Satyrodinium haumuriense.pdf]

# Species *Schematophora obscura*

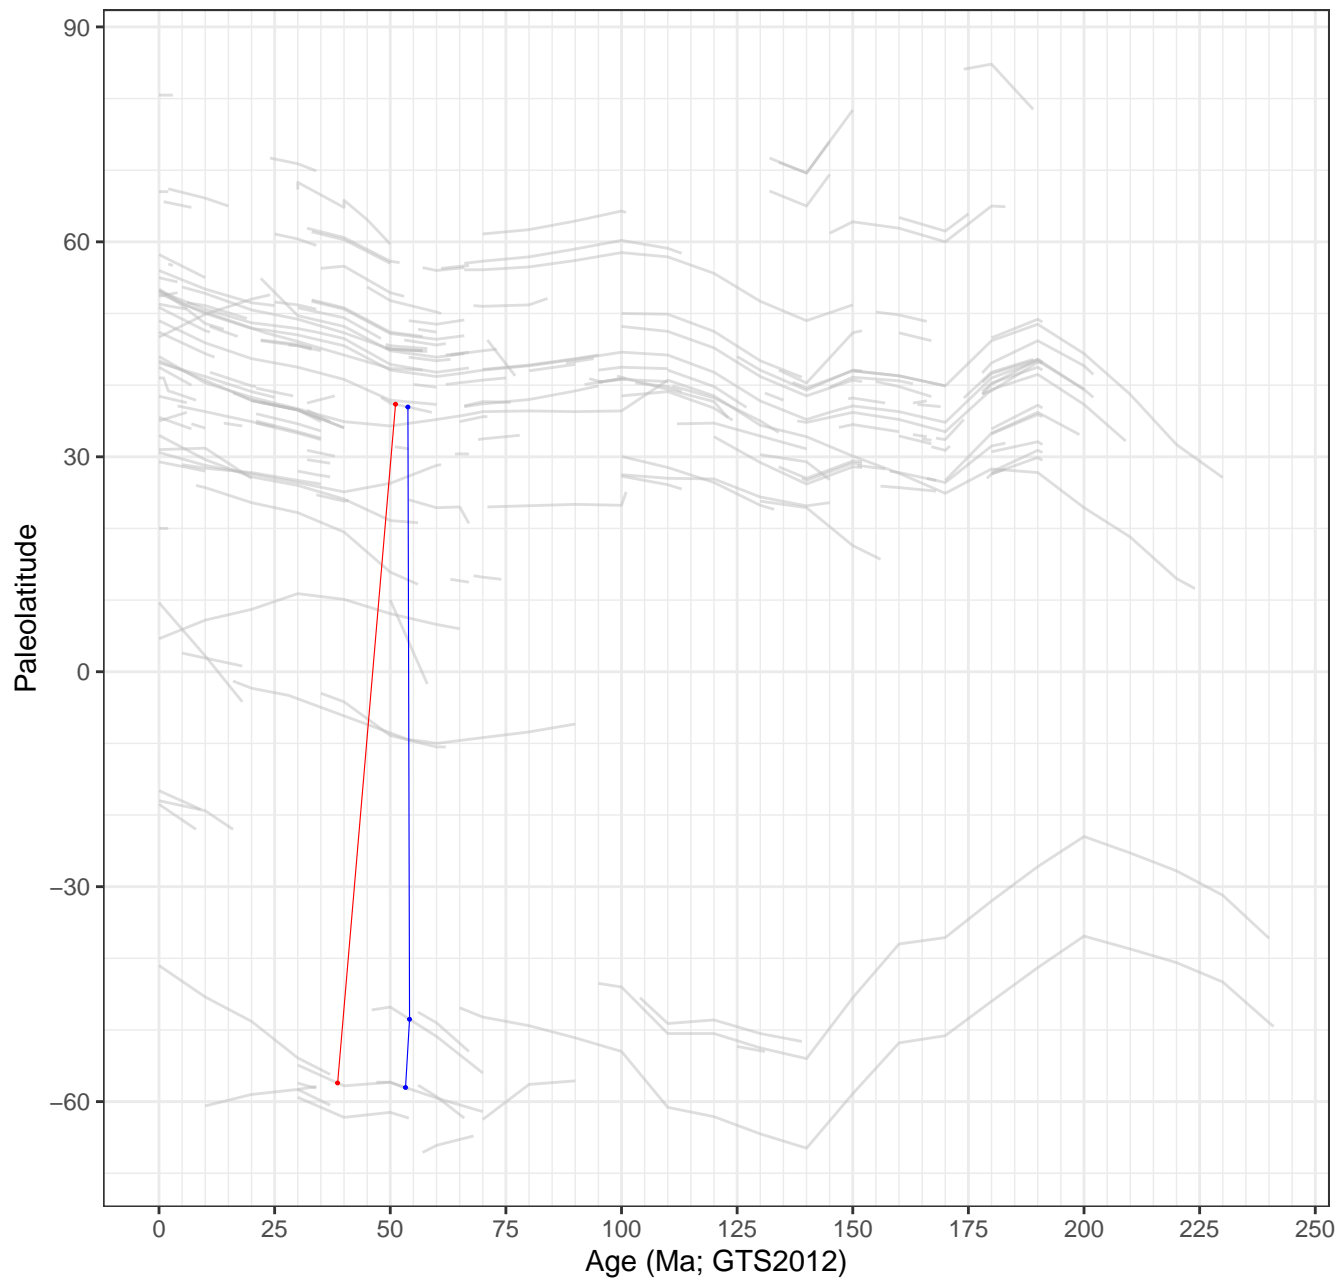

Supplement: Supplementary file 2284 [file Schematophora obscura.pdf › Supplement/Supplement 2/Species 1914 plots/Schematophora obscura.pdf]

# Species *Schematophora speciosa*

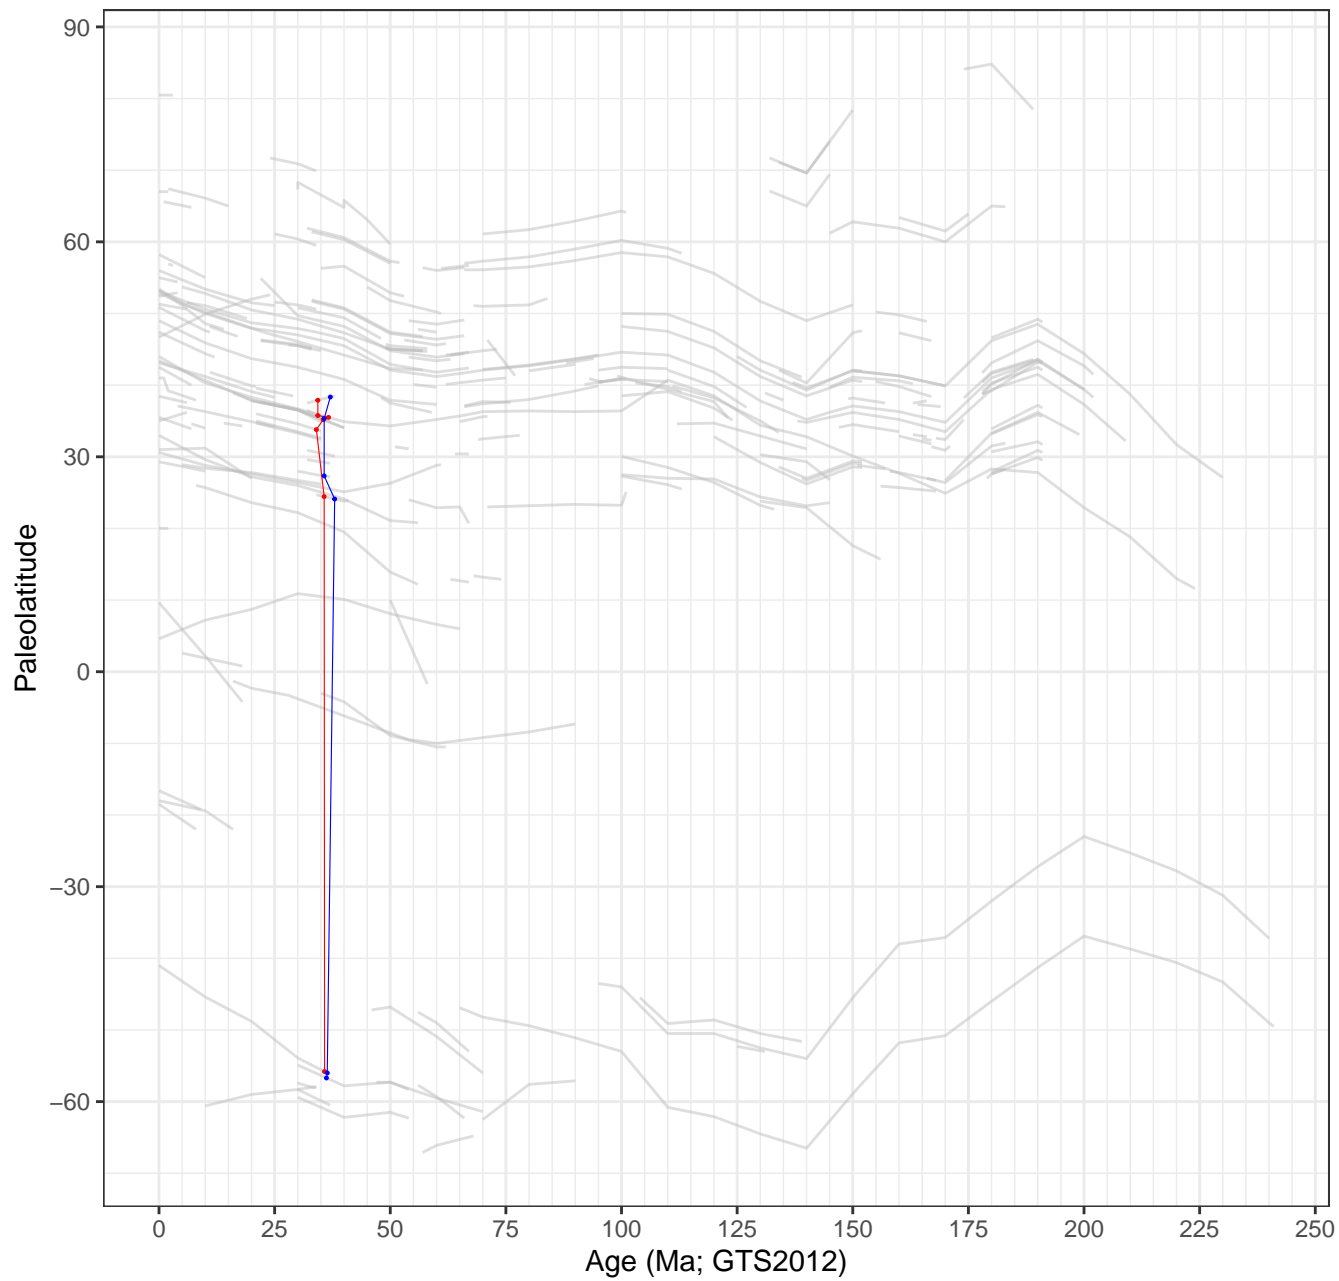

Supplement: Supplementary file 2285 [file Schematophora speciosa.pdf › Supplement/Supplement 2/Species 1914 plots/Schematophora speciosa.pdf]

# Species *Schizocystia laevigula*

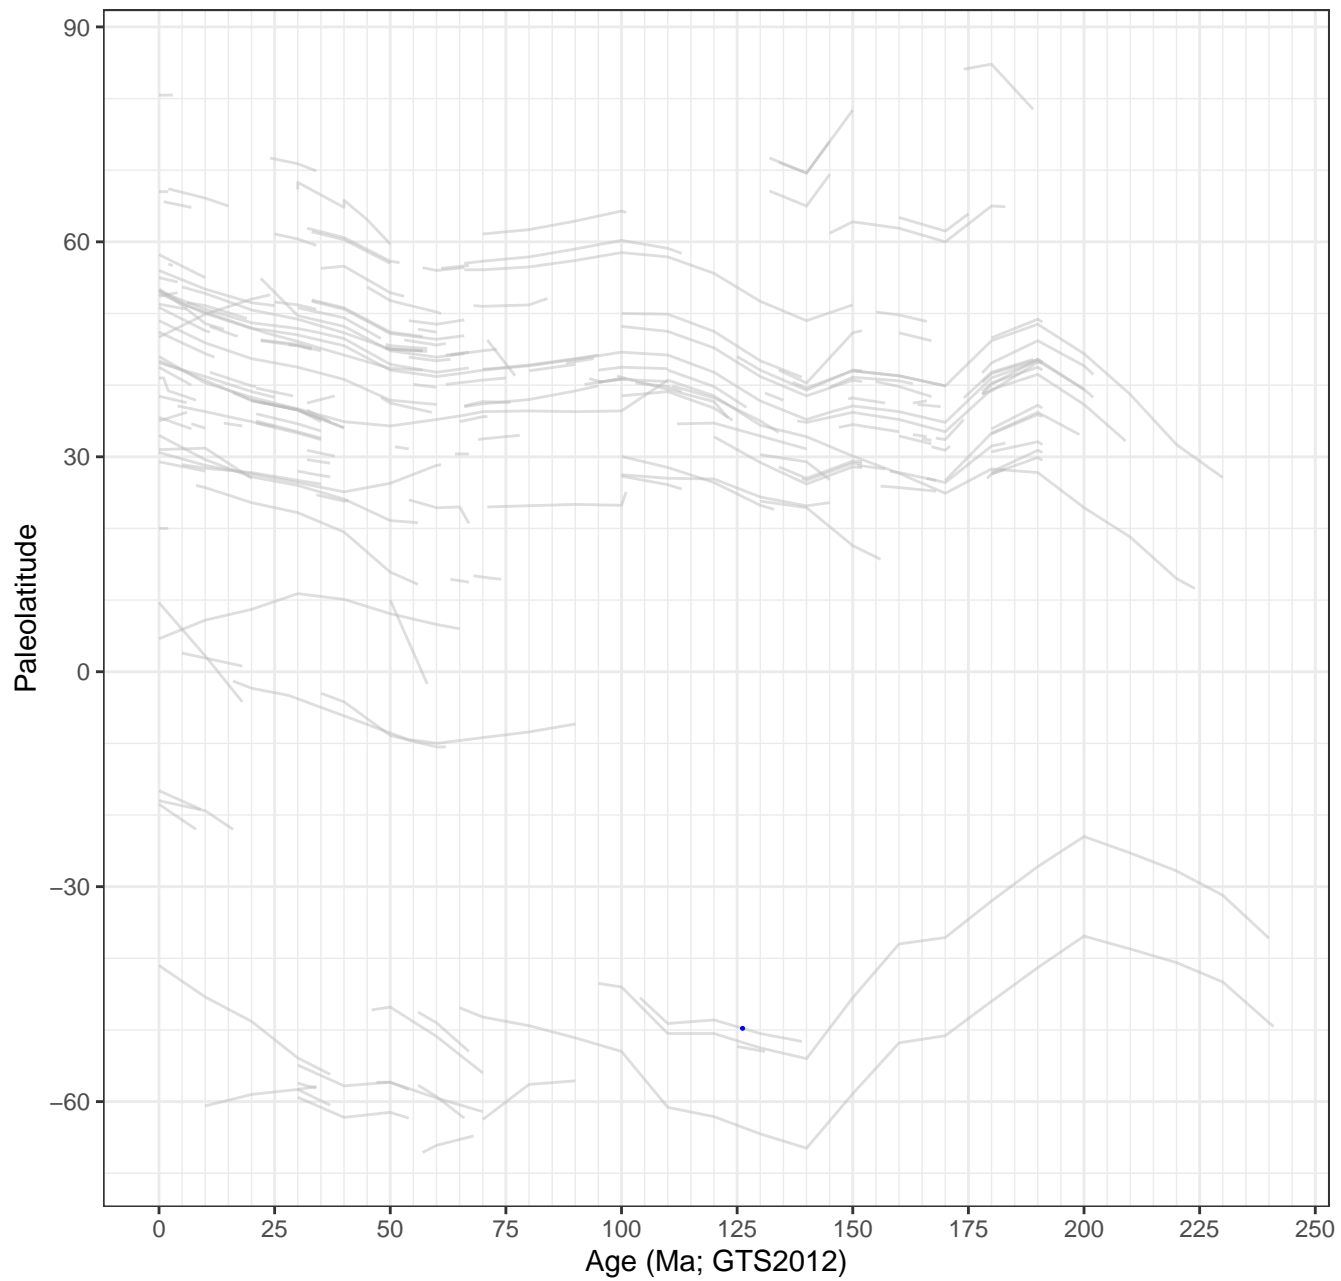

Supplement: Supplementary file 2286 [file Schizocystia laevigula.pdf › Supplement/Supplement 2/Species 1914 plots/Schizocystia laevigula.pdf]

# Species *Scriniocassis priscus*

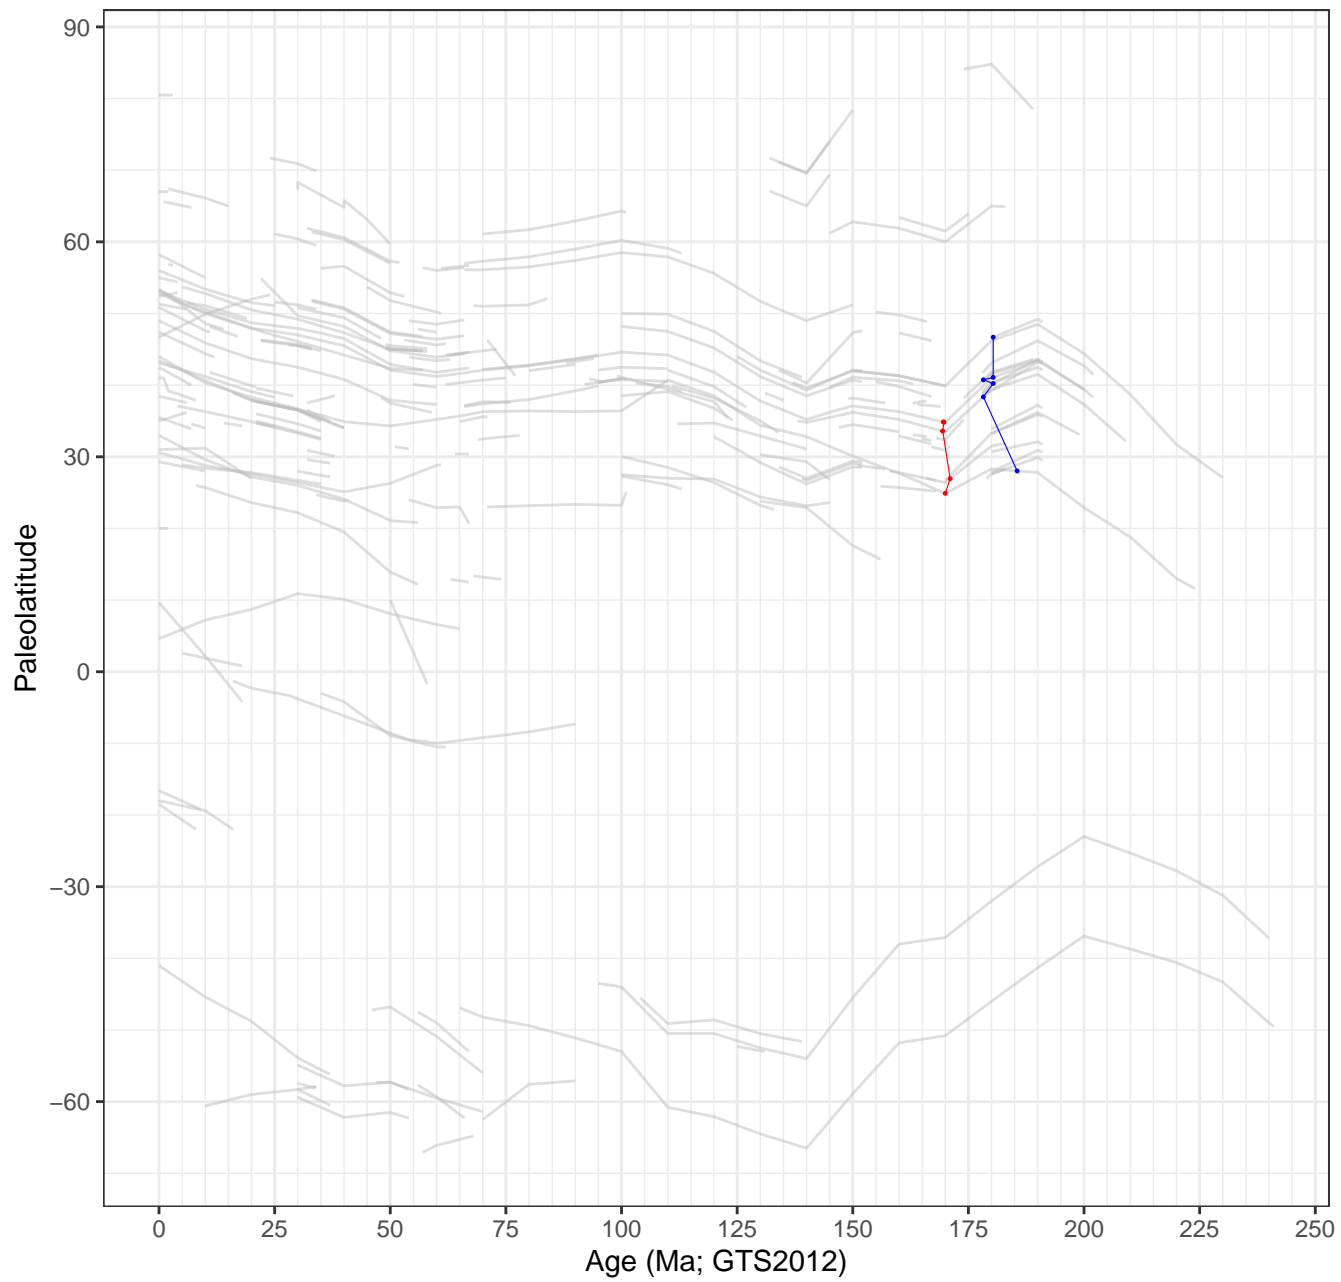

Supplement: Supplementary file 2287 [file Scriniocassis priscus.pdf › Supplement/Supplement 2/Species 1914 plots/Scriniocassis priscus.pdf]

# Species *Scriniocassis weberi*

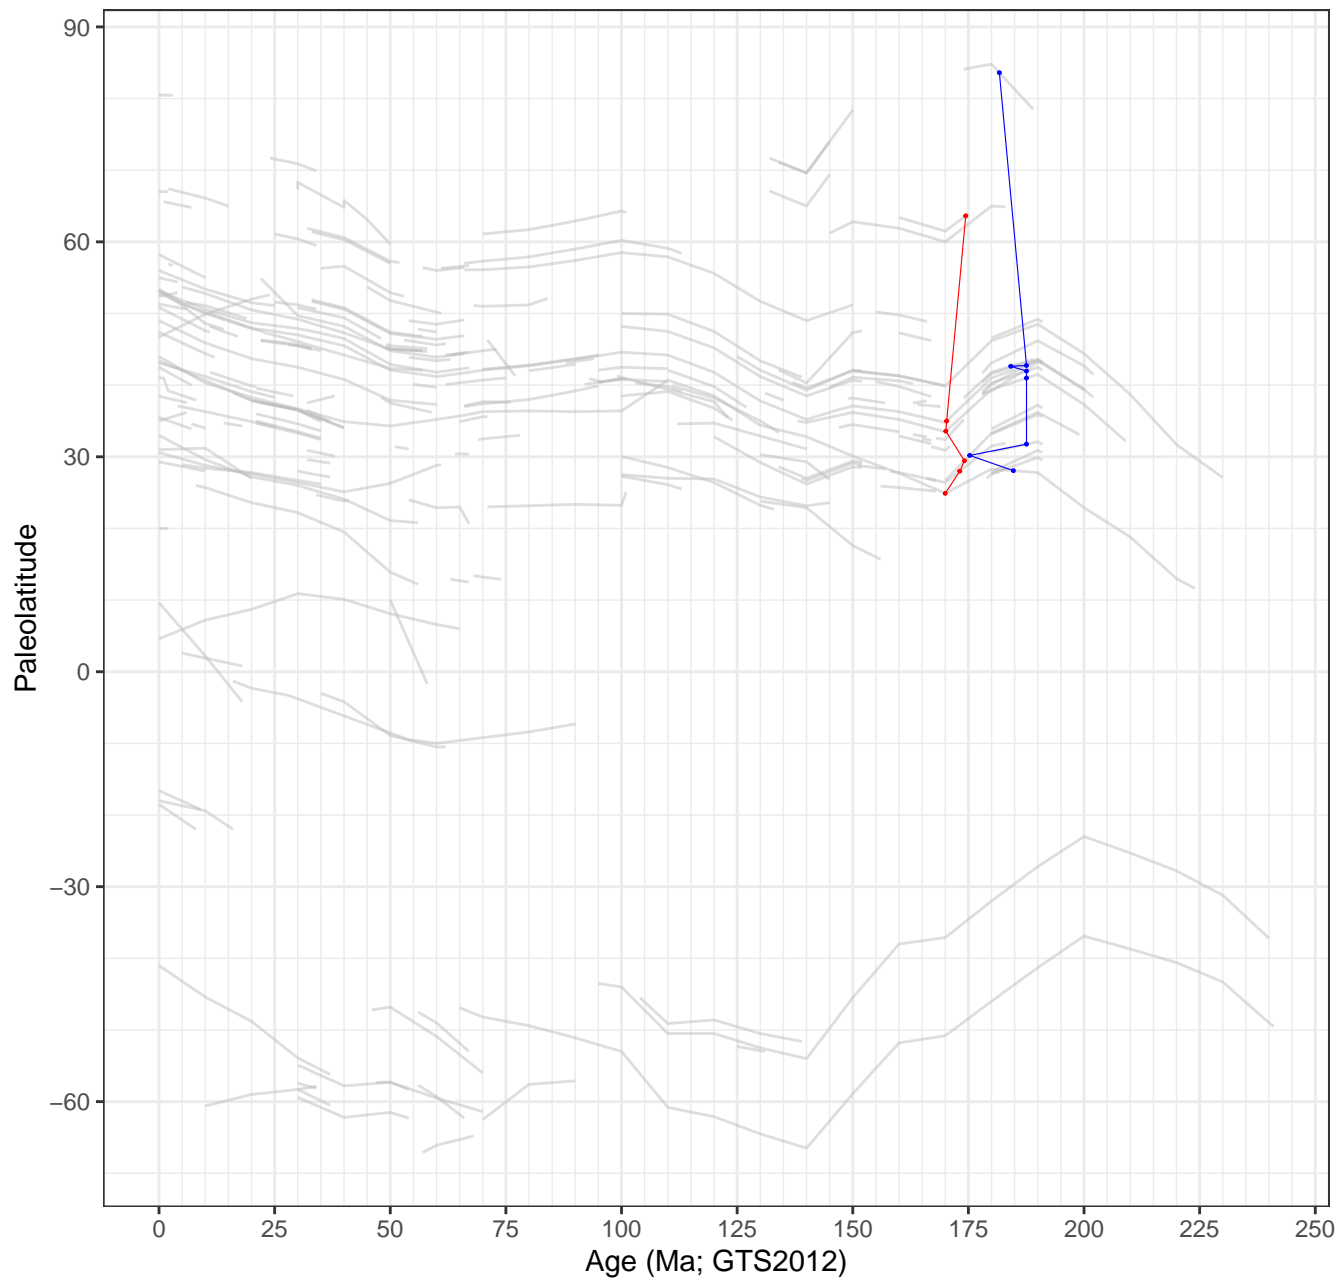

Supplement: Supplementary file 2288 [file Scriniocassis weberi.pdf › Supplement/Supplement 2/Species 1914 plots/Scriniocassis weberi.pdf]

# Species *Scriniodinium anceps*

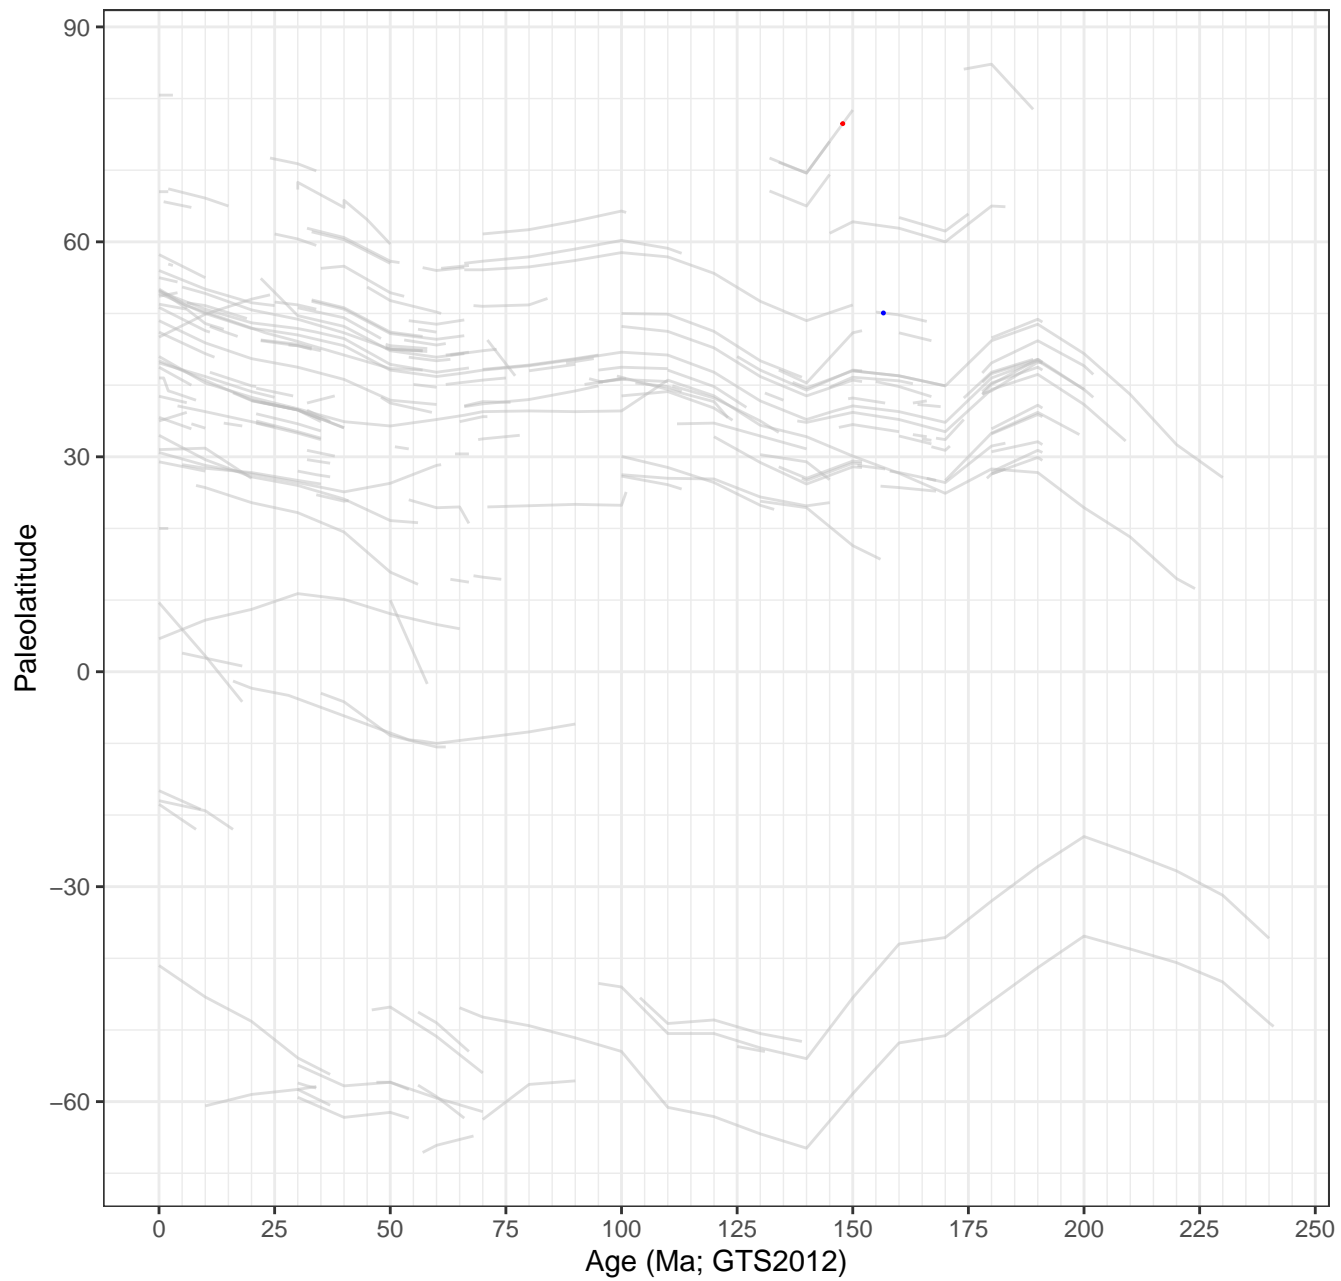

Supplement: Supplementary file 2289 [file Scriniodinium anceps.pdf › Supplement/Supplement 2/Species 1914 plots/Scriniodinium anceps.pdf]

# Species *Scriniodinium barremianum*

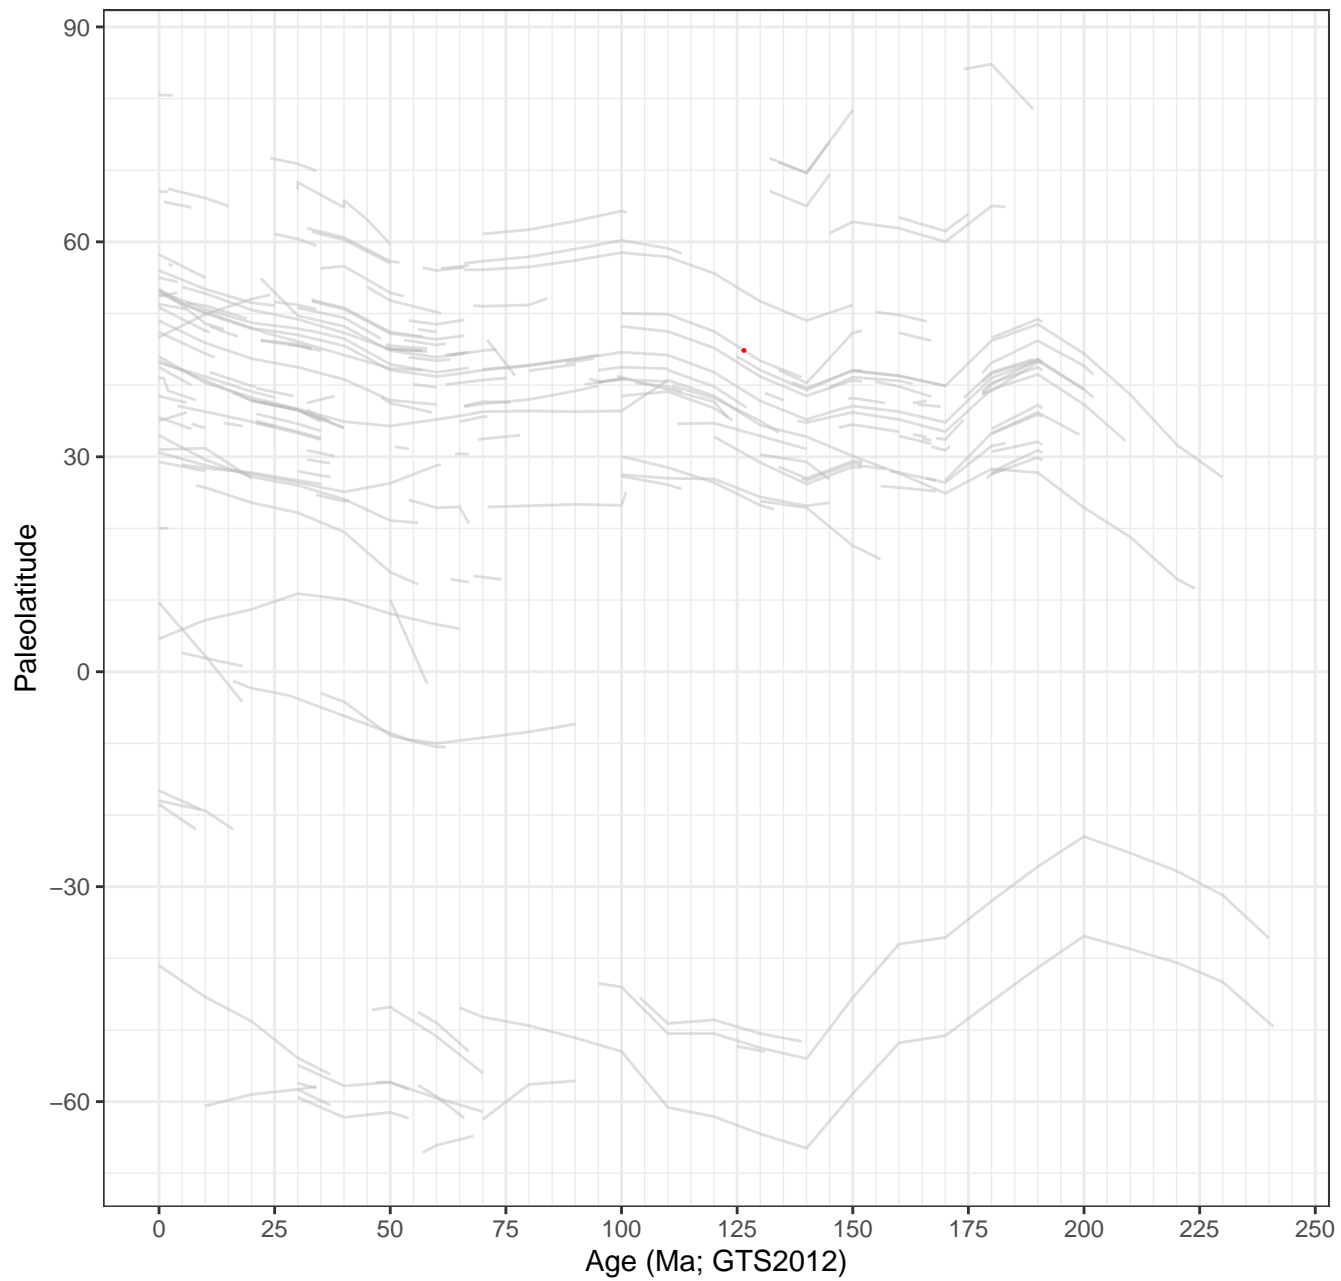

Supplement: Supplementary file 2290 [file Scriniodinium barremianum.pdf › Supplement/Supplement 2/Species 1914 plots/Scriniodinium barremianum.pdf]

# Species *Scriniodinium campanula*

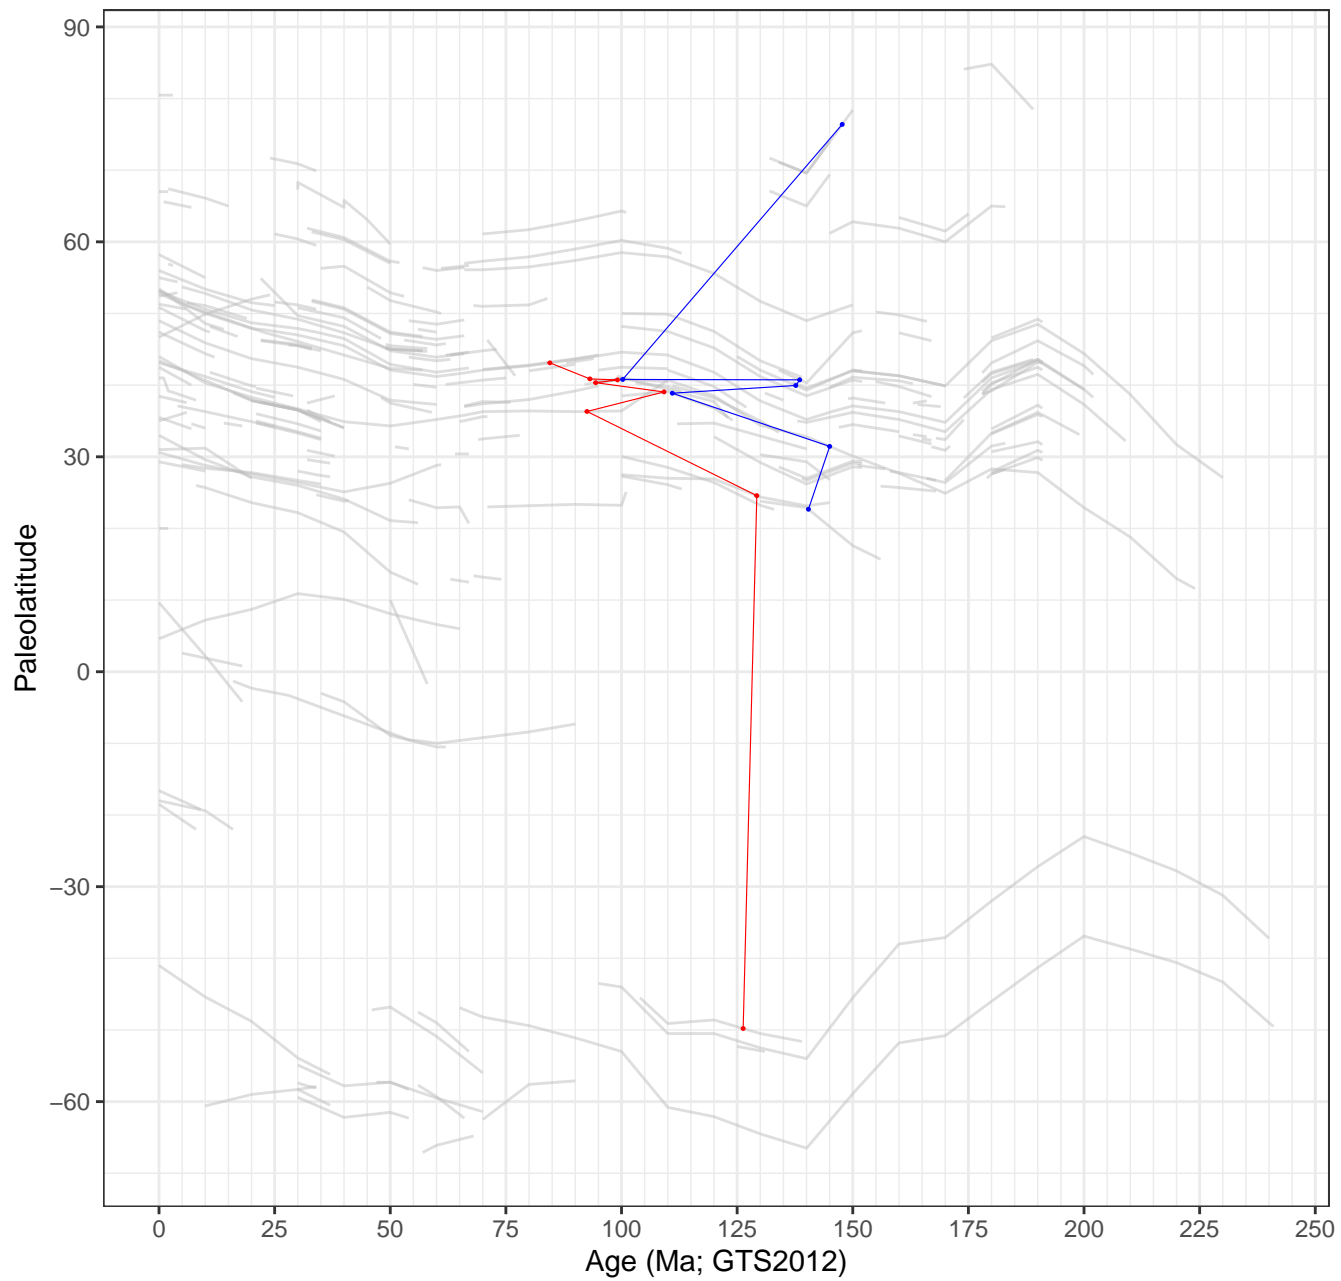

Supplement: Supplementary file 2291 [file Scriniodinium campanula.pdf › Supplement/Supplement 2/Species 1914 plots/Scriniodinium campanula.pdf]

# Species *Scriniiodinium crystallinum*

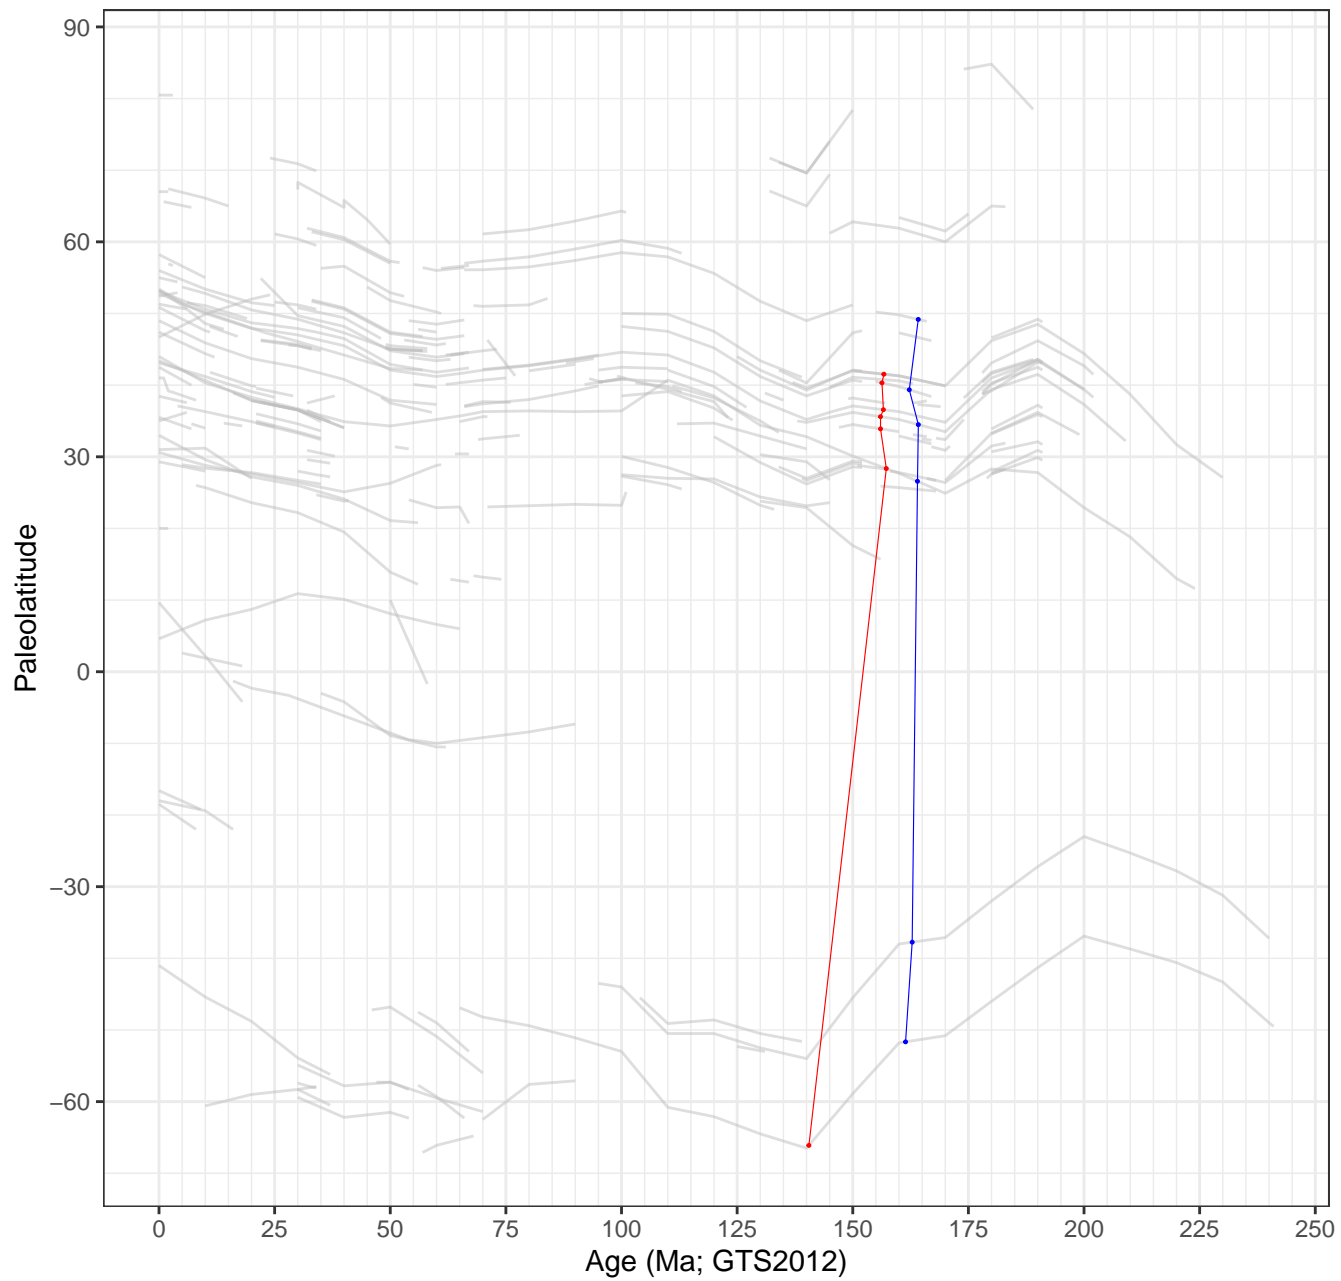

Supplement: Supplementary file 2292 [file Scriniodinium crystallinum.pdf › Supplement/Supplement 2/Species 1914 plots/Scriniodinium crystallinum.pdf]

# Species *Scriniodinium dictyophorum*

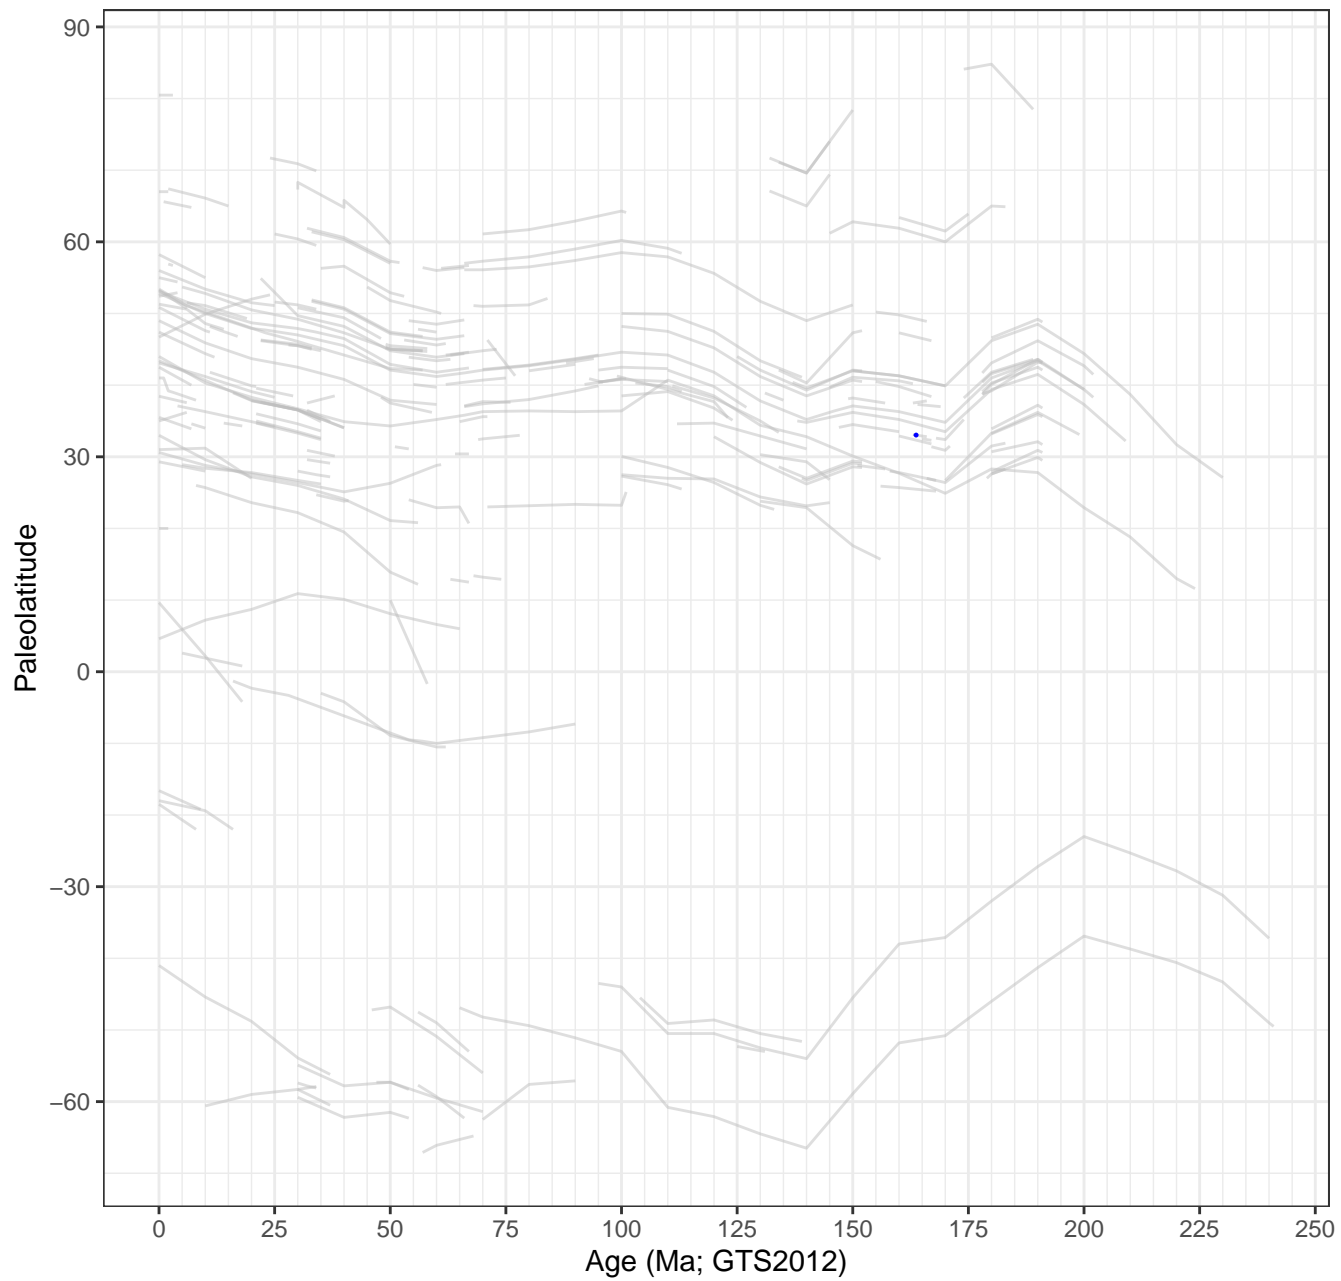

Supplement: Supplementary file 2293 [file Scriniodinium dictyophorum.pdf › Supplement/Supplement 2/Species 1914 plots/Scriniodinium dictyophorum.pdf]

# Species *Scriniodinium dictyotum dictyotum*

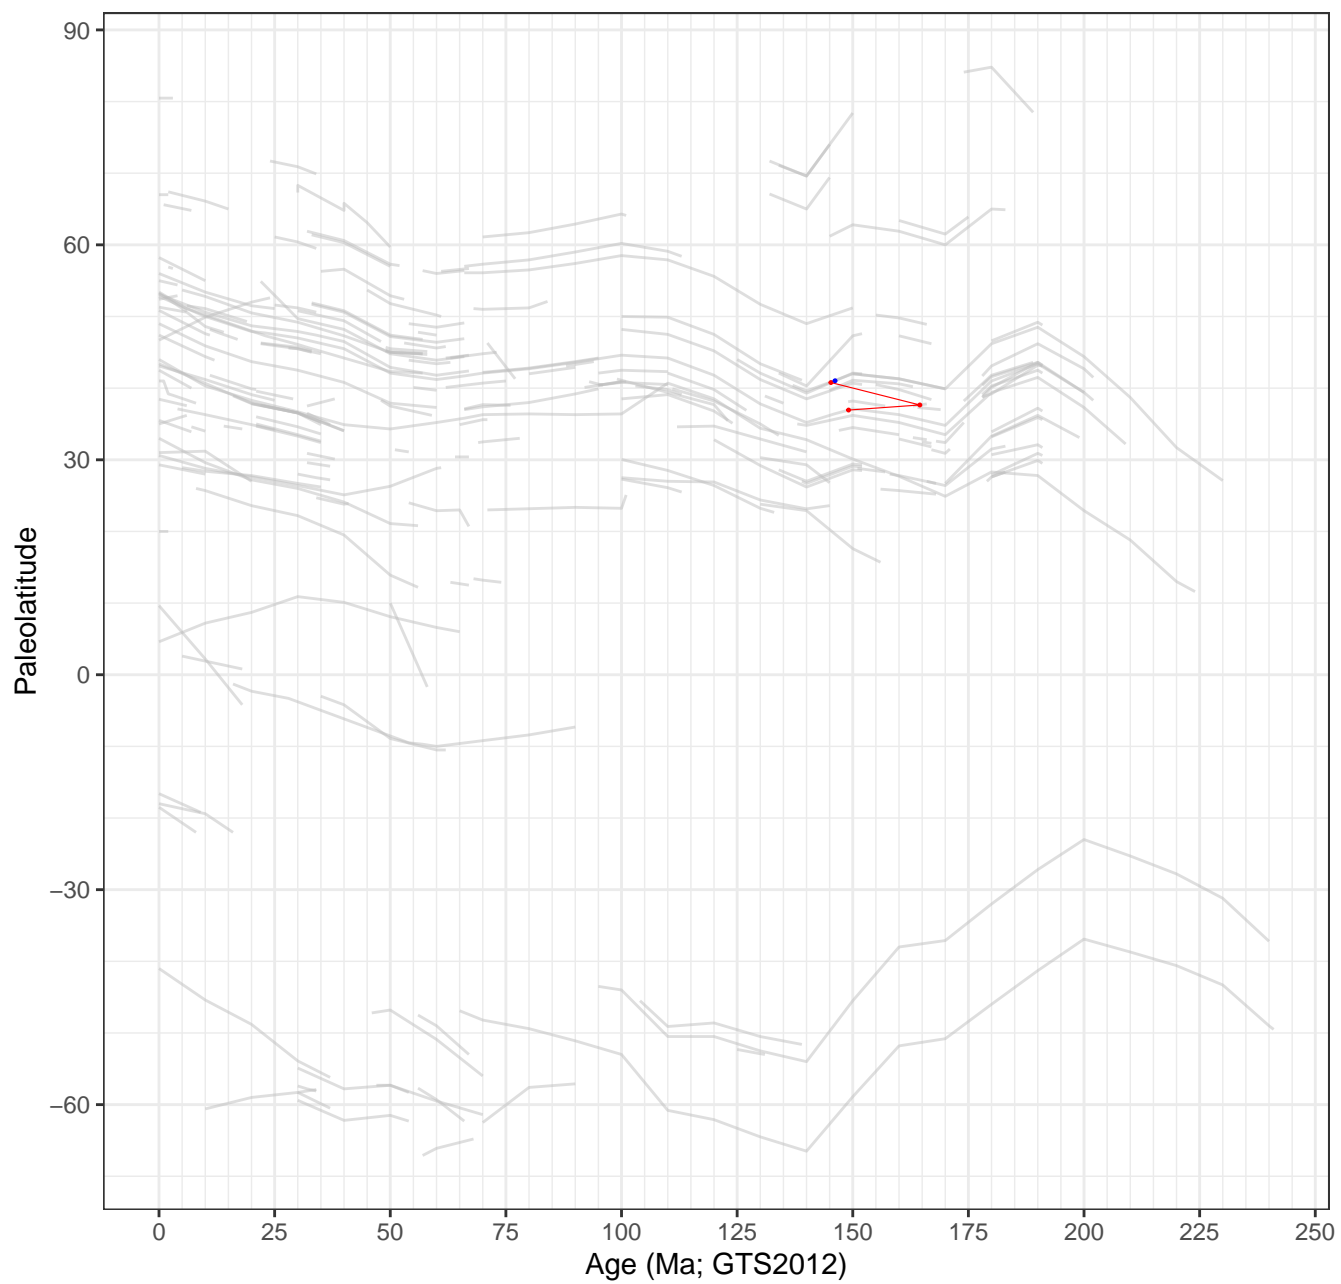

Supplement: Supplementary file 2294 [file Scriniodinium dictyotum dictyotum.pdf › Supplement/Supplement 2/Species 1914 plots/Scriniodinium dictyotum dictyotum.pdf]

# Species *Scriniodinium dictyotum papillatum*

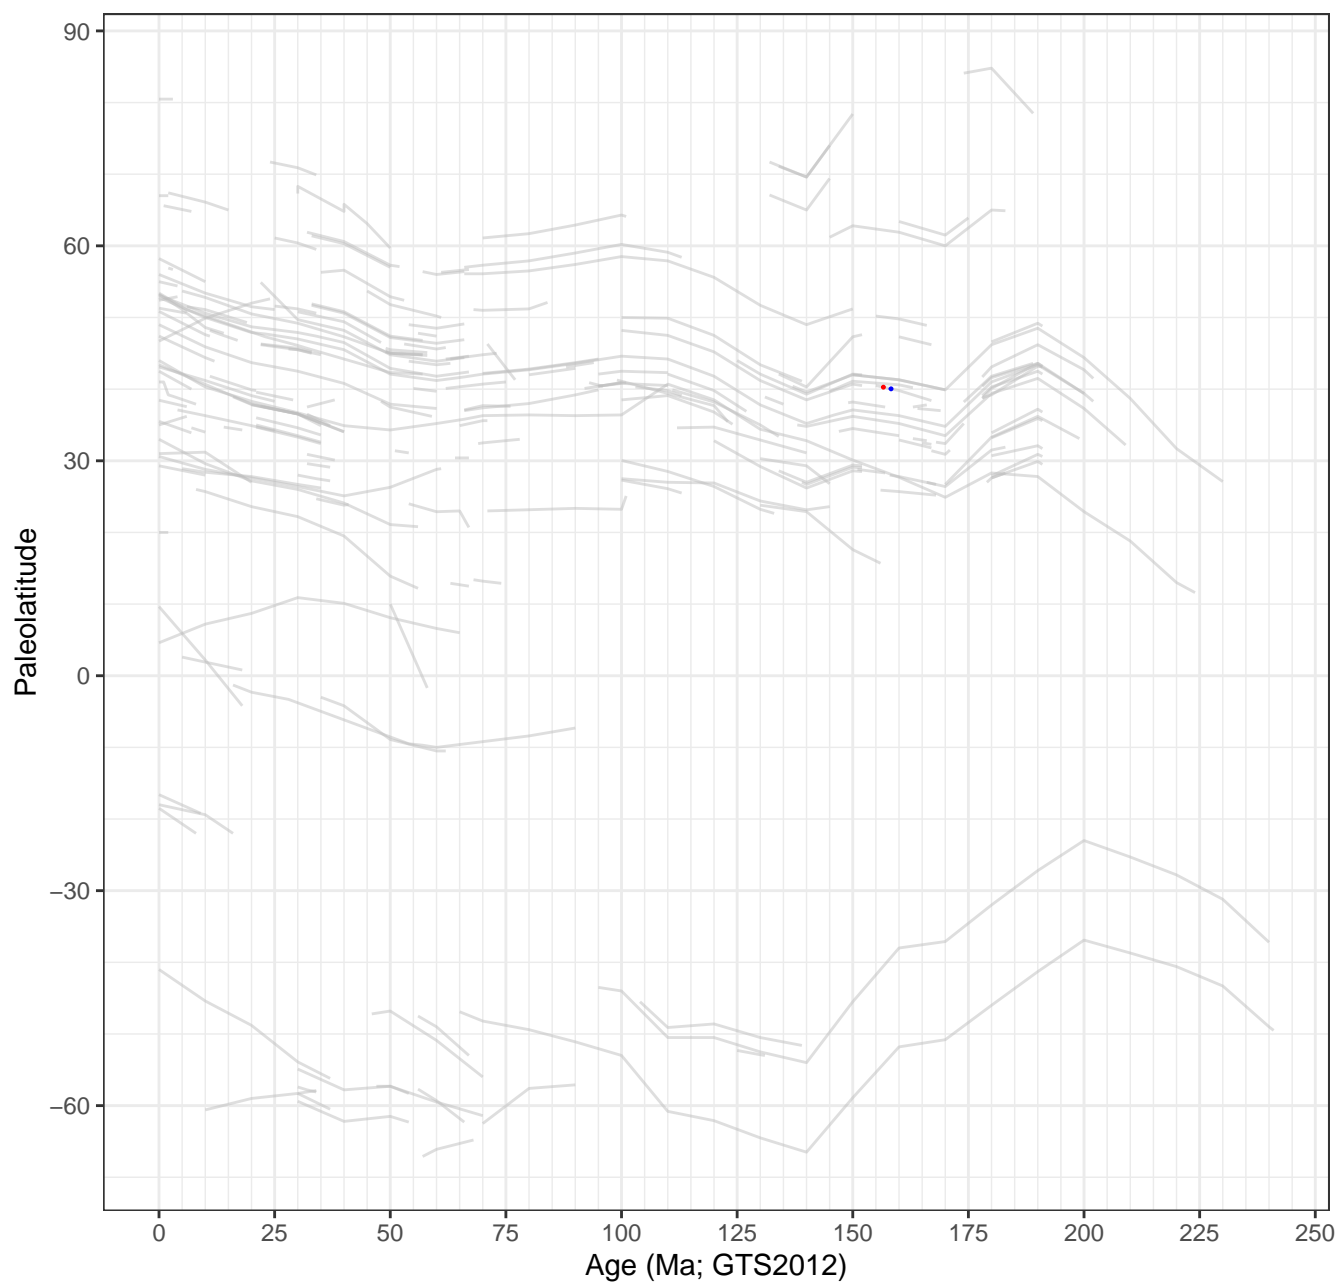

Supplement: Supplementary file 2295 [file Scriniodinium dictyotum papillatum.pdf › Supplement/Supplement 2/Species 1914 plots/Scriniodinium dictyotum papillatum.pdf]

# Species *Scriniodinium dictyotum pyrum*

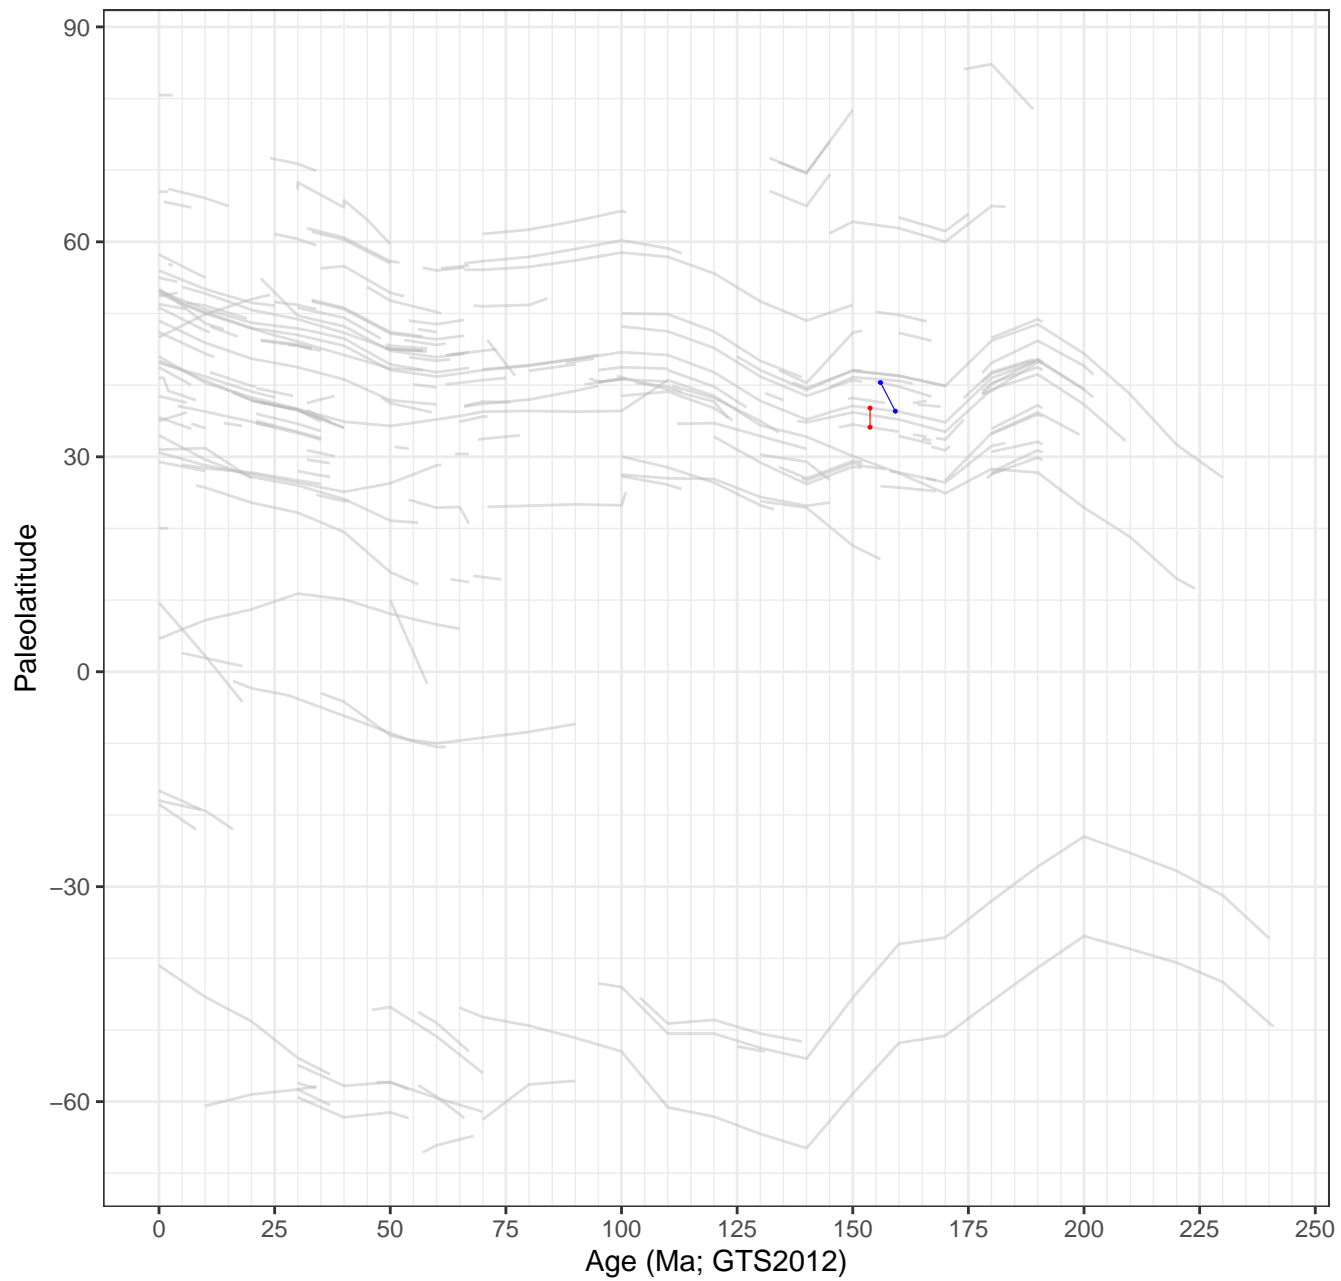

Supplement: Supplementary file 2296 [file Scriniodinium dictyotum pyrum.pdf › Supplement/Supplement 2/Species 1914 plots/Scriniodinium dictyotum pyrum.pdf]

# Species *Scriniodinium dictyotum*

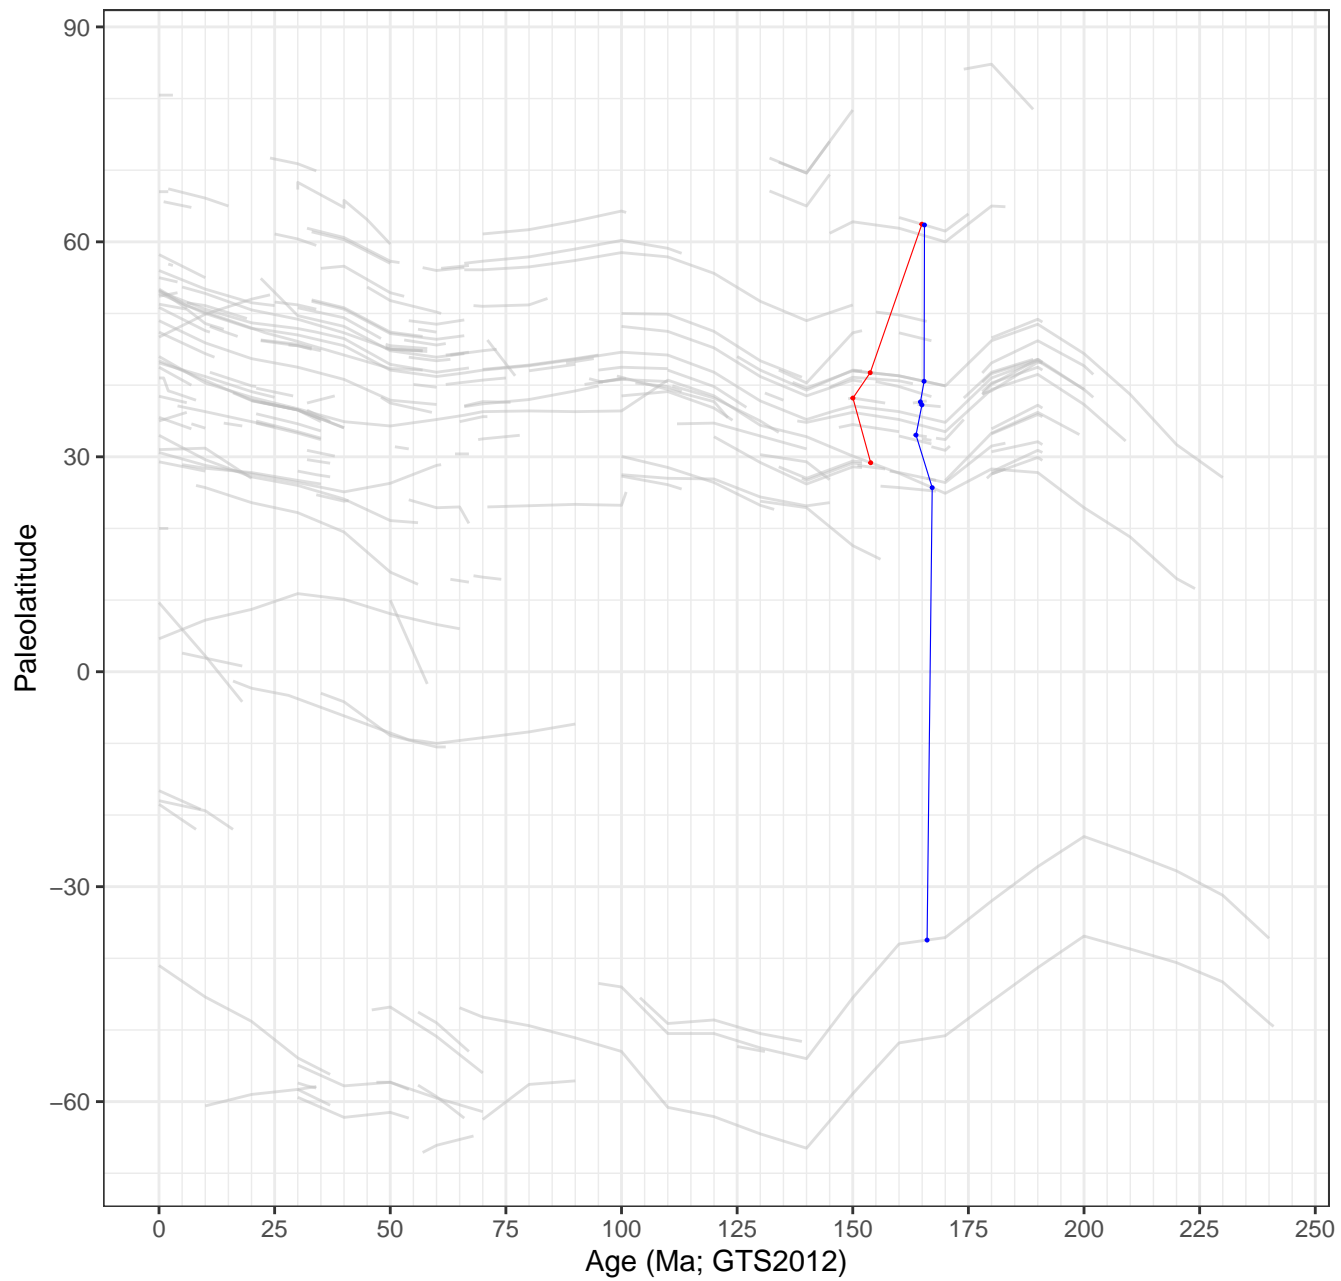

Supplement: Supplementary file 2297 [file Scriniodinium dictyotum.pdf › Supplement/Supplement 2/Species 1914 plots/Scriniodinium dictyotum.pdf]

# Species *Scriniodinium iritibile*

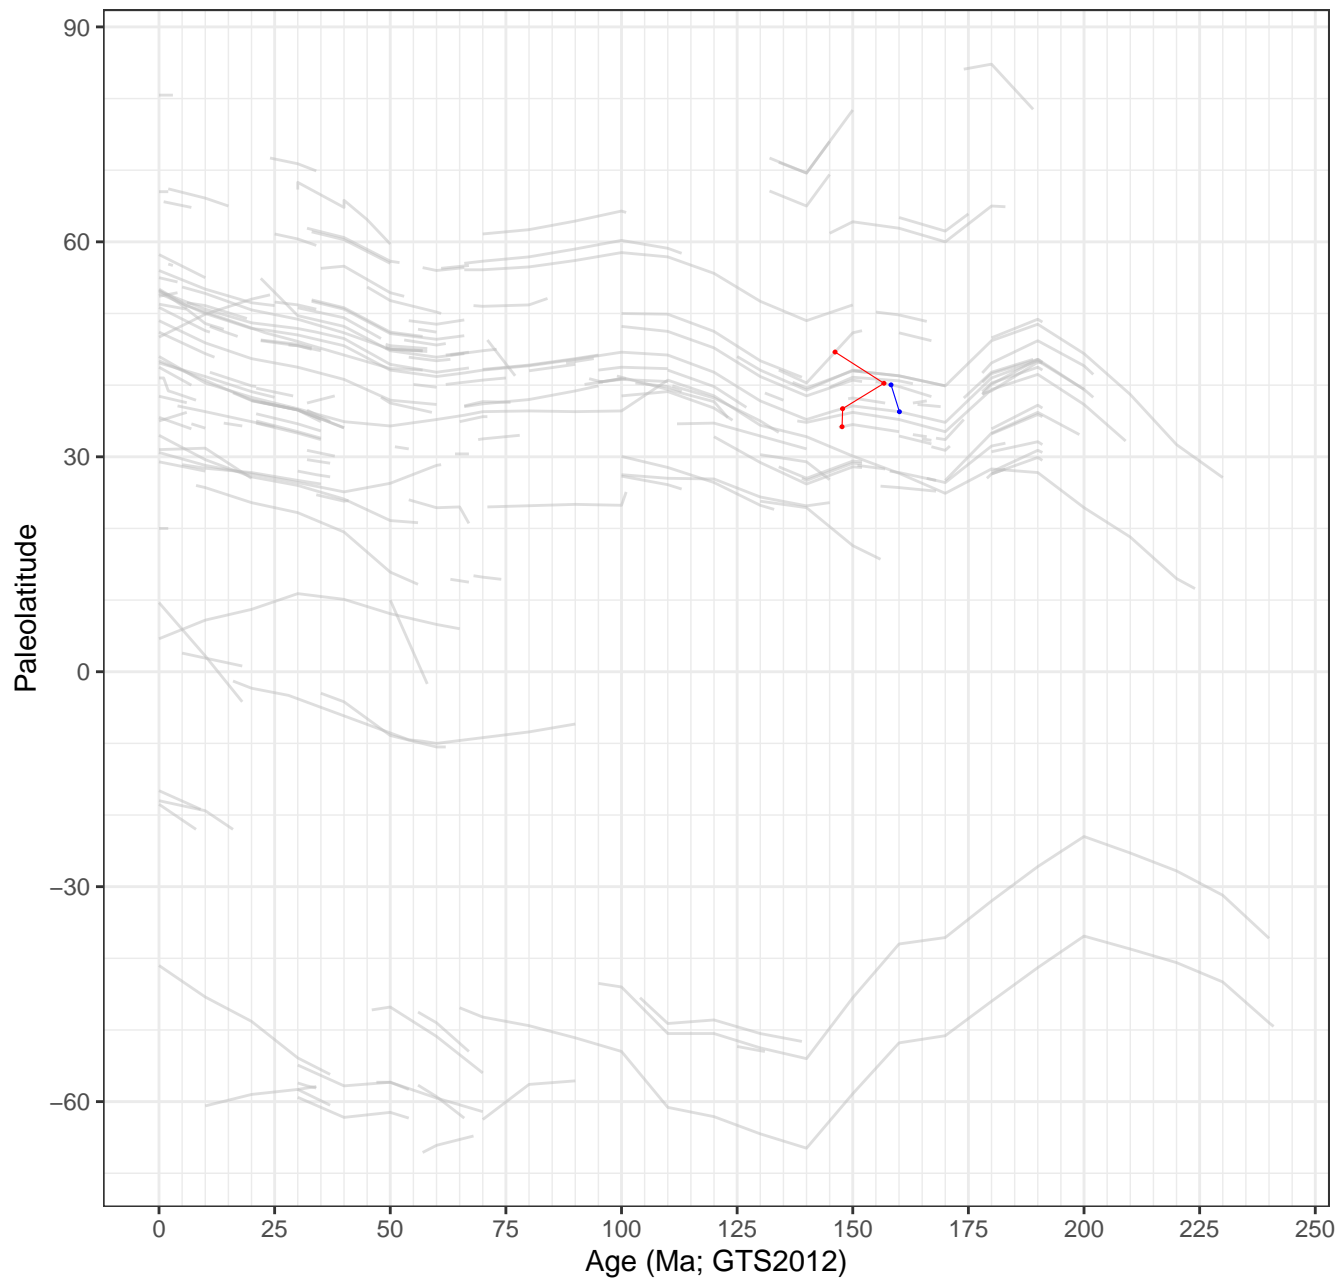

Supplement: Supplementary file 2298 [file Scriniodinium inritibile.pdf › Supplement/Supplement 2/Species 1914 plots/Scriniodinium inritibile.pdf]

# Species *Scriniodinium oxfordianum*

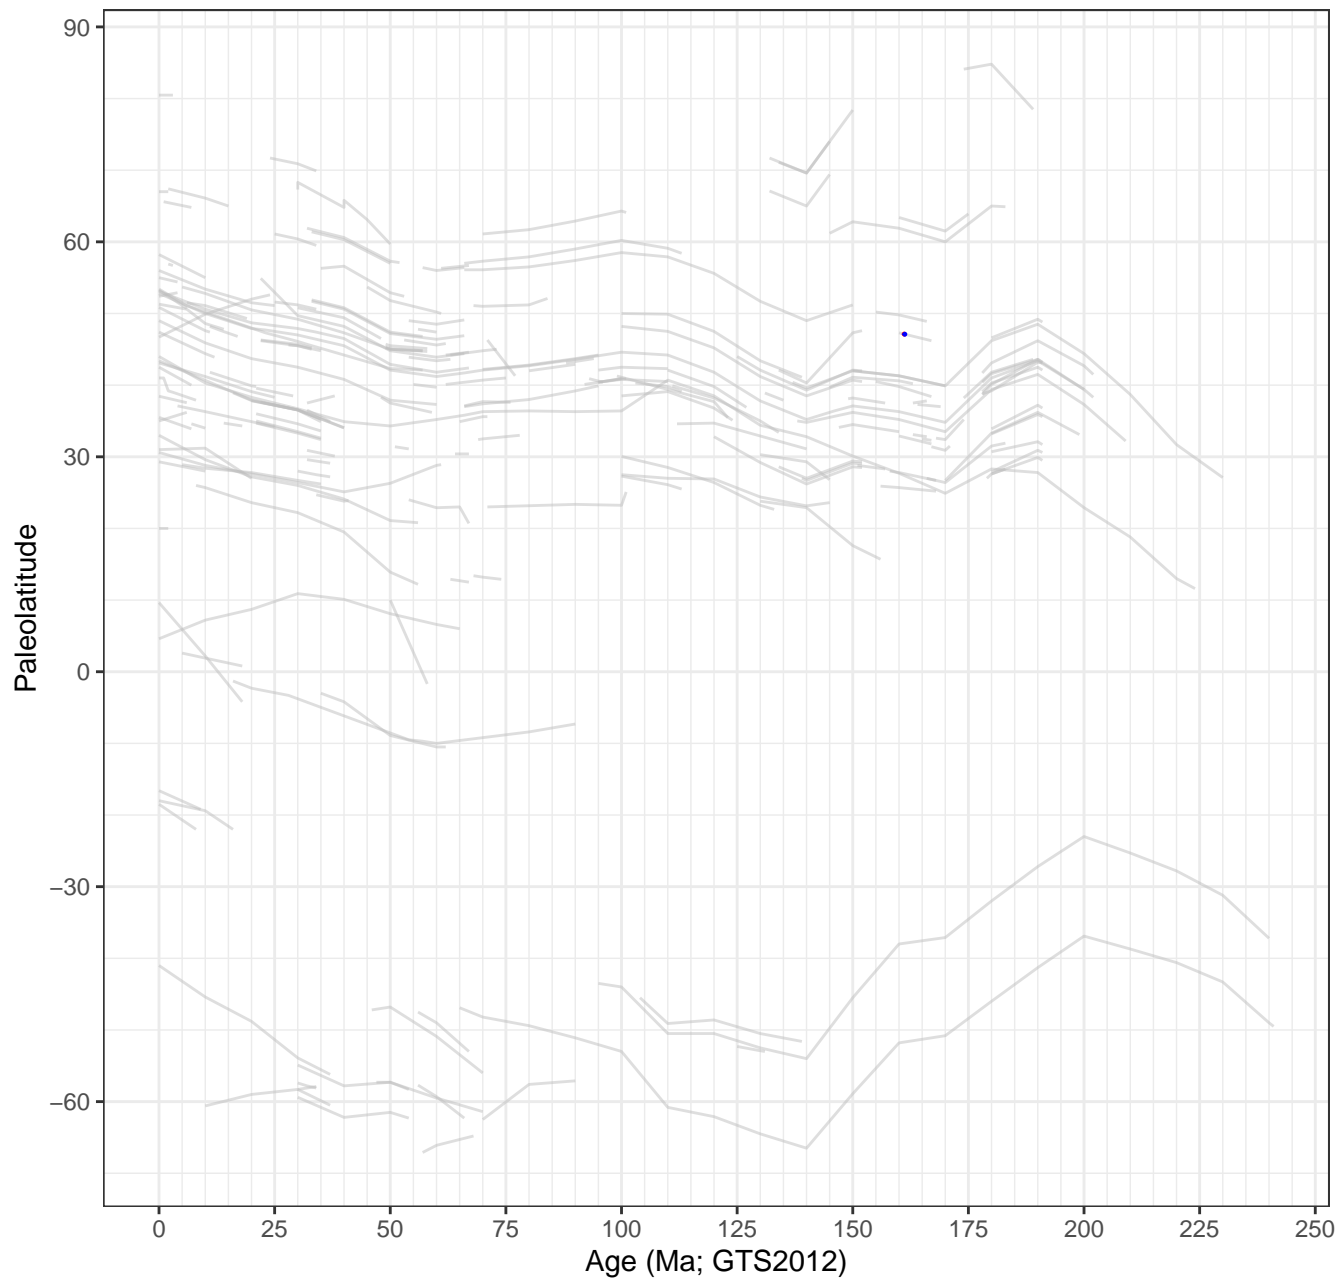

Supplement: Supplementary file 2299 [file Scriniodinium oxfordianum.pdf › Supplement/Supplement 2/Species 1914 plots/Scriniodinium oxfordianum.pdf]

# Species *Scriniodinium pharo*

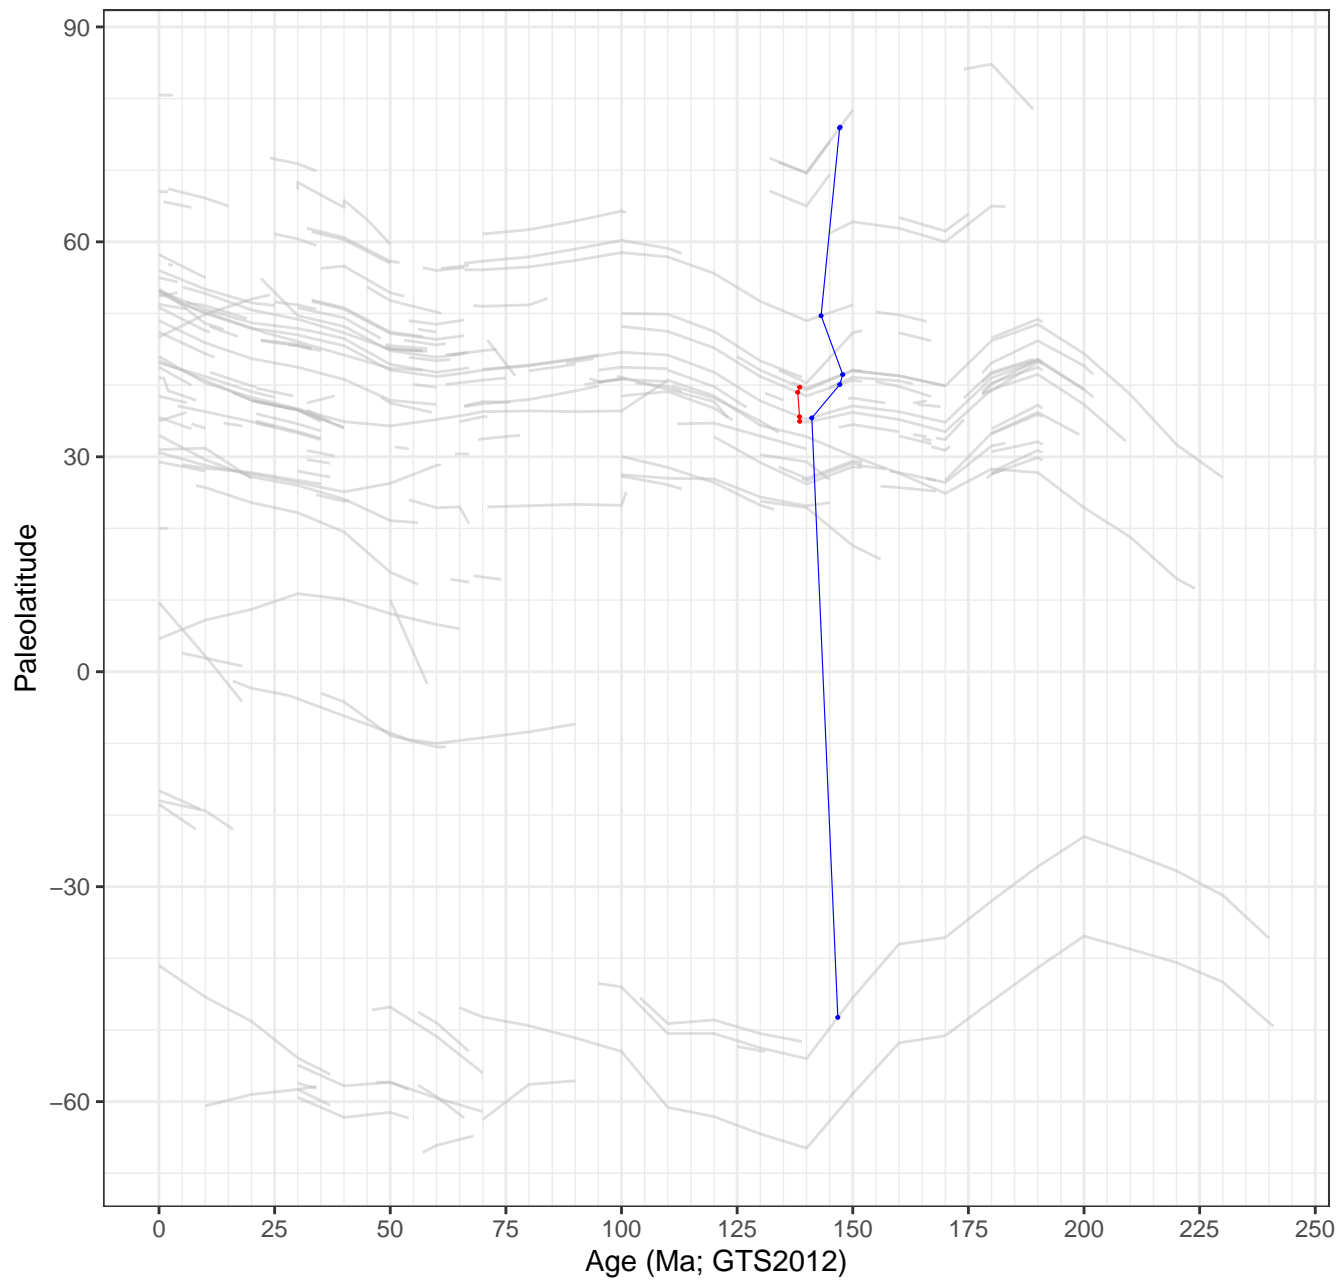

Supplement: Supplementary file 2300 [file Scriniodinium pharo.pdf › Supplement/Supplement 2/Species 1914 plots/Scriniodinium pharo.pdf]

# Species *Scriniodinium* spp.

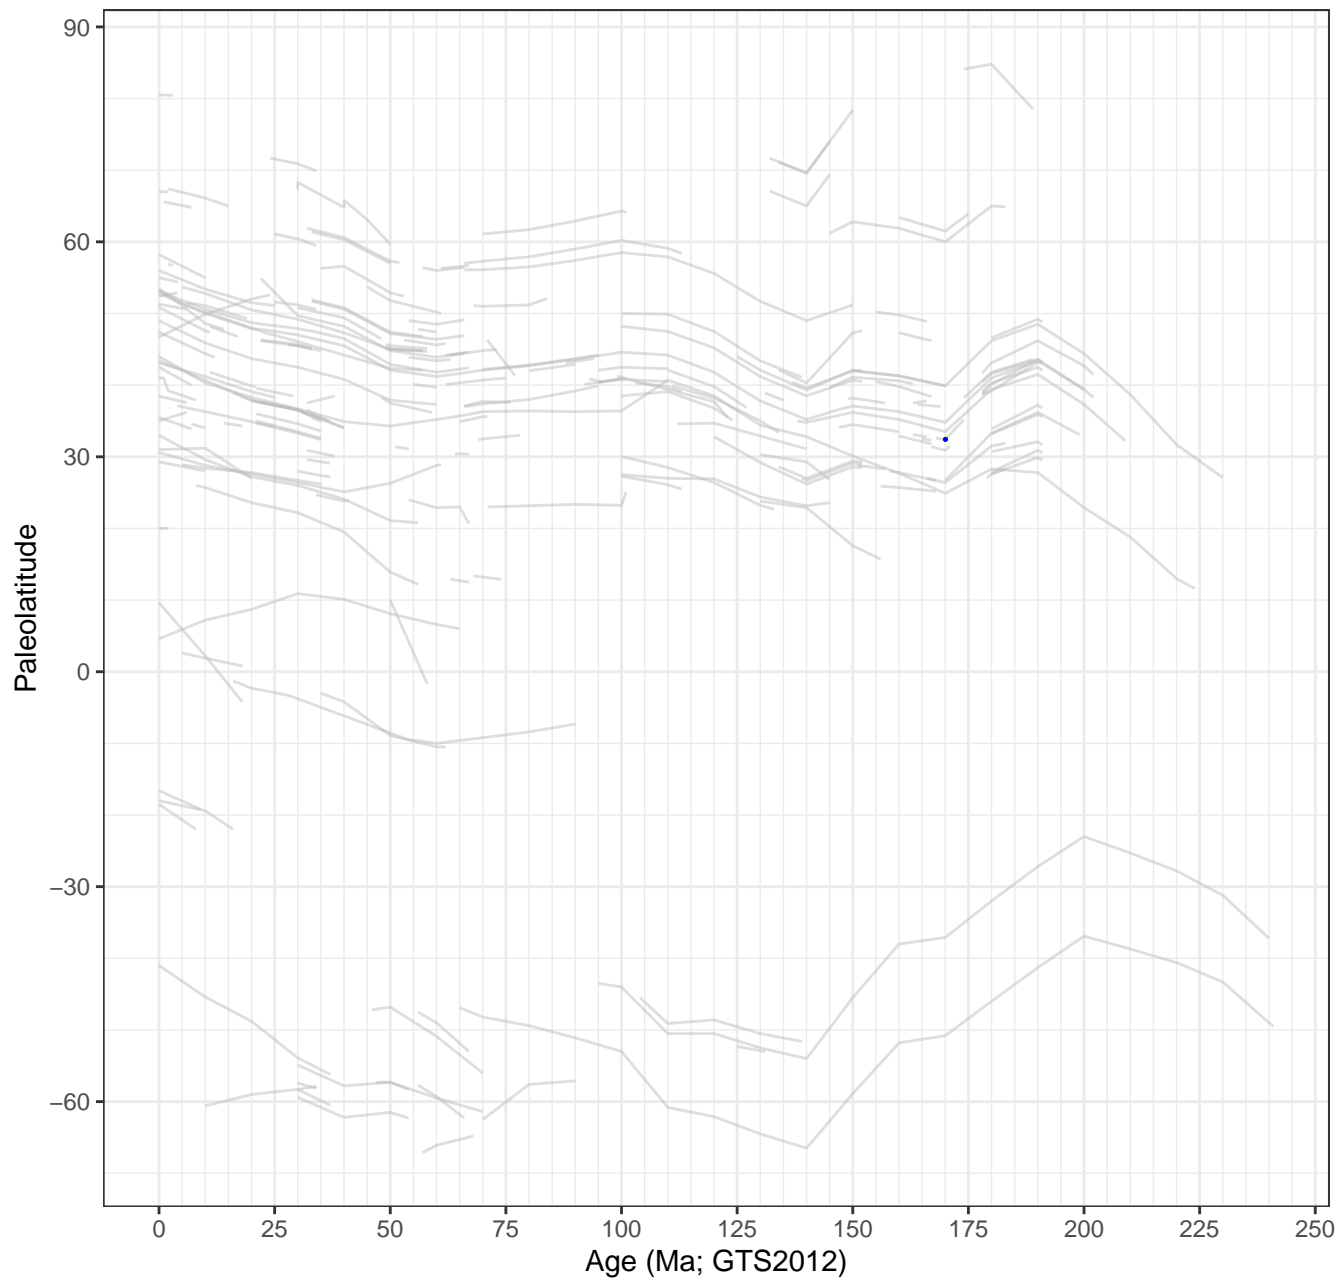

Supplement: Supplementary file 2301 [file Scriniodinium spp..pdf › Supplement/Supplement 2/Species 1914 plots/Scriniodinium spp..pdf]

# Species *Selenopemphix antarctica*

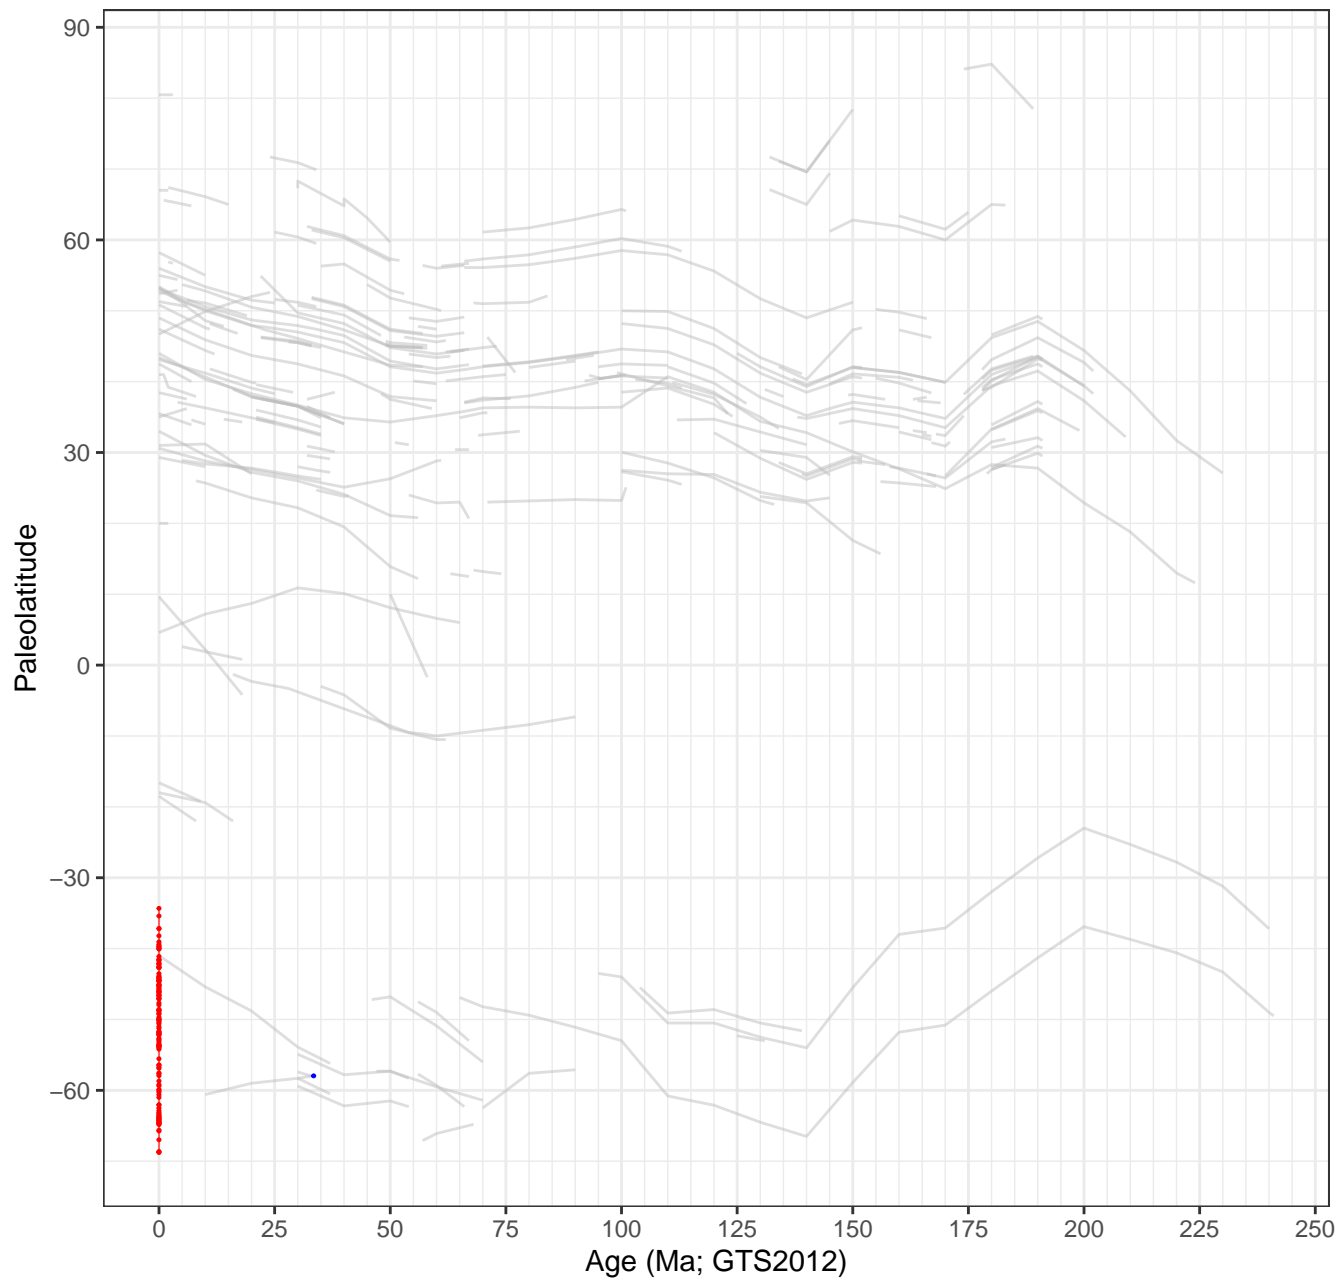

Supplement: Supplementary file 2302 [file Selenopemphix antarctica.pdf › Supplement/Supplement 2/Species 1914 plots/Selenopemphix antarctica.pdf]

# Species *Selenopemphix armageddonensis*

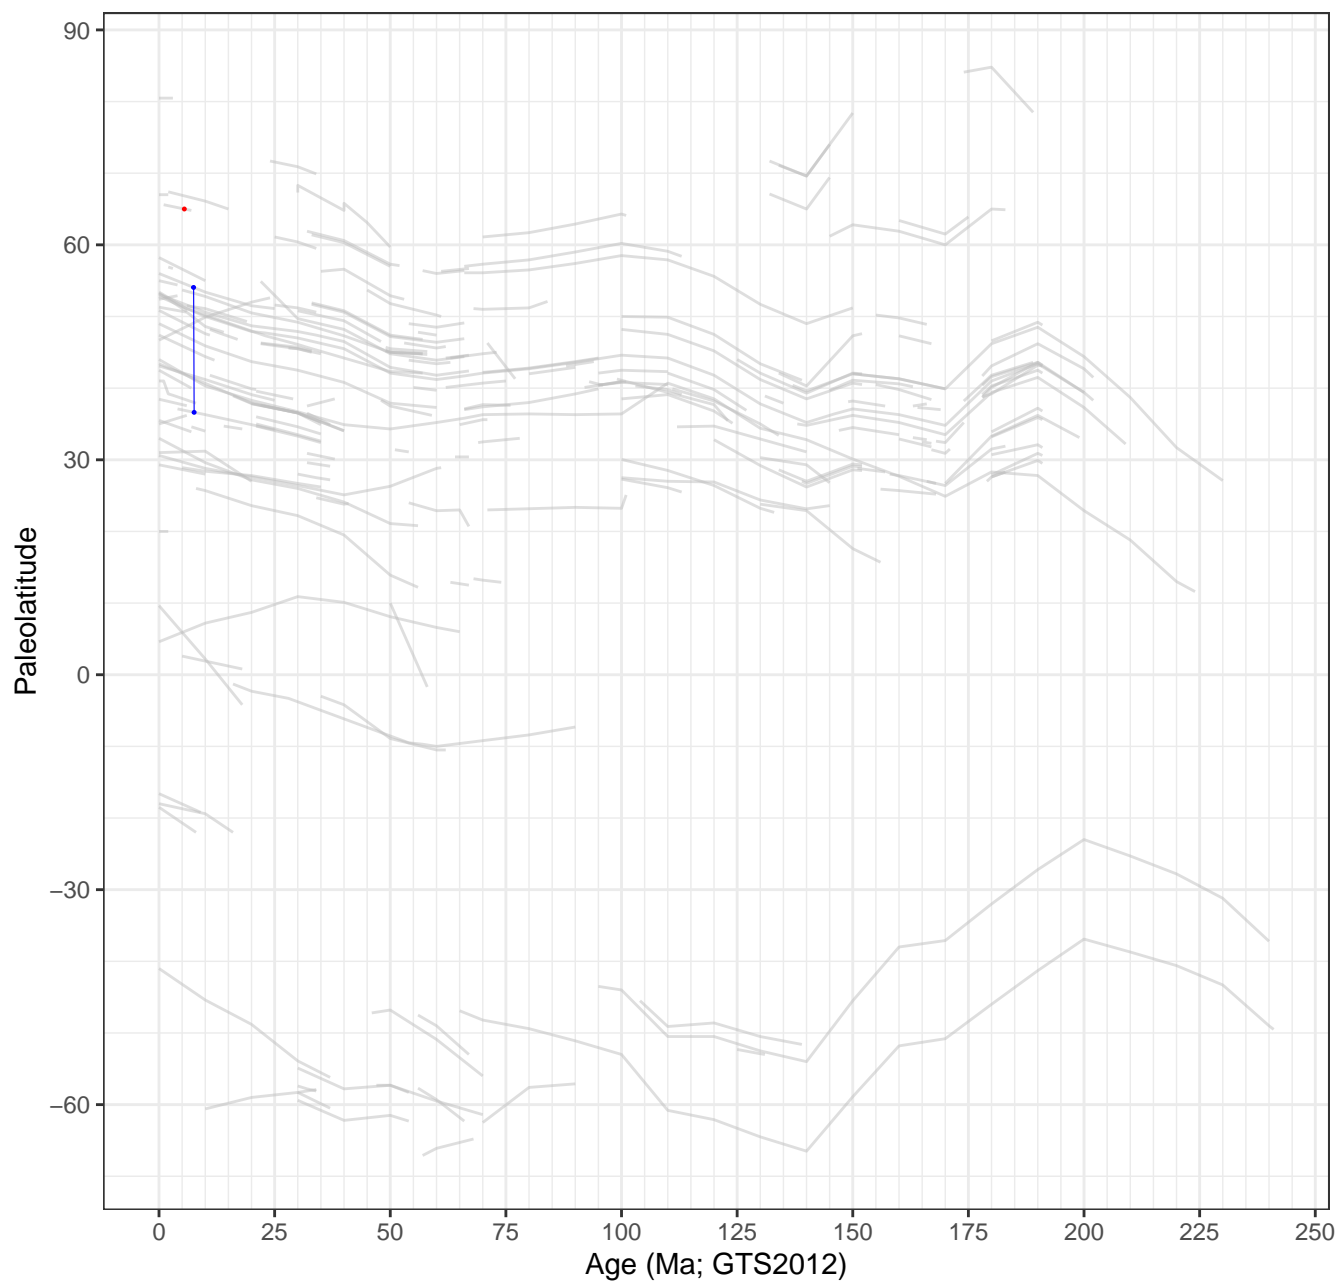

Supplement: Supplementary file 2303 [file Selenopemphix armageddonensis.pdf › Supplement/Supplement 2/Species 1914 plots/Selenopemphix armageddonensis.pdf]

# Species *Selenopemphix armata*

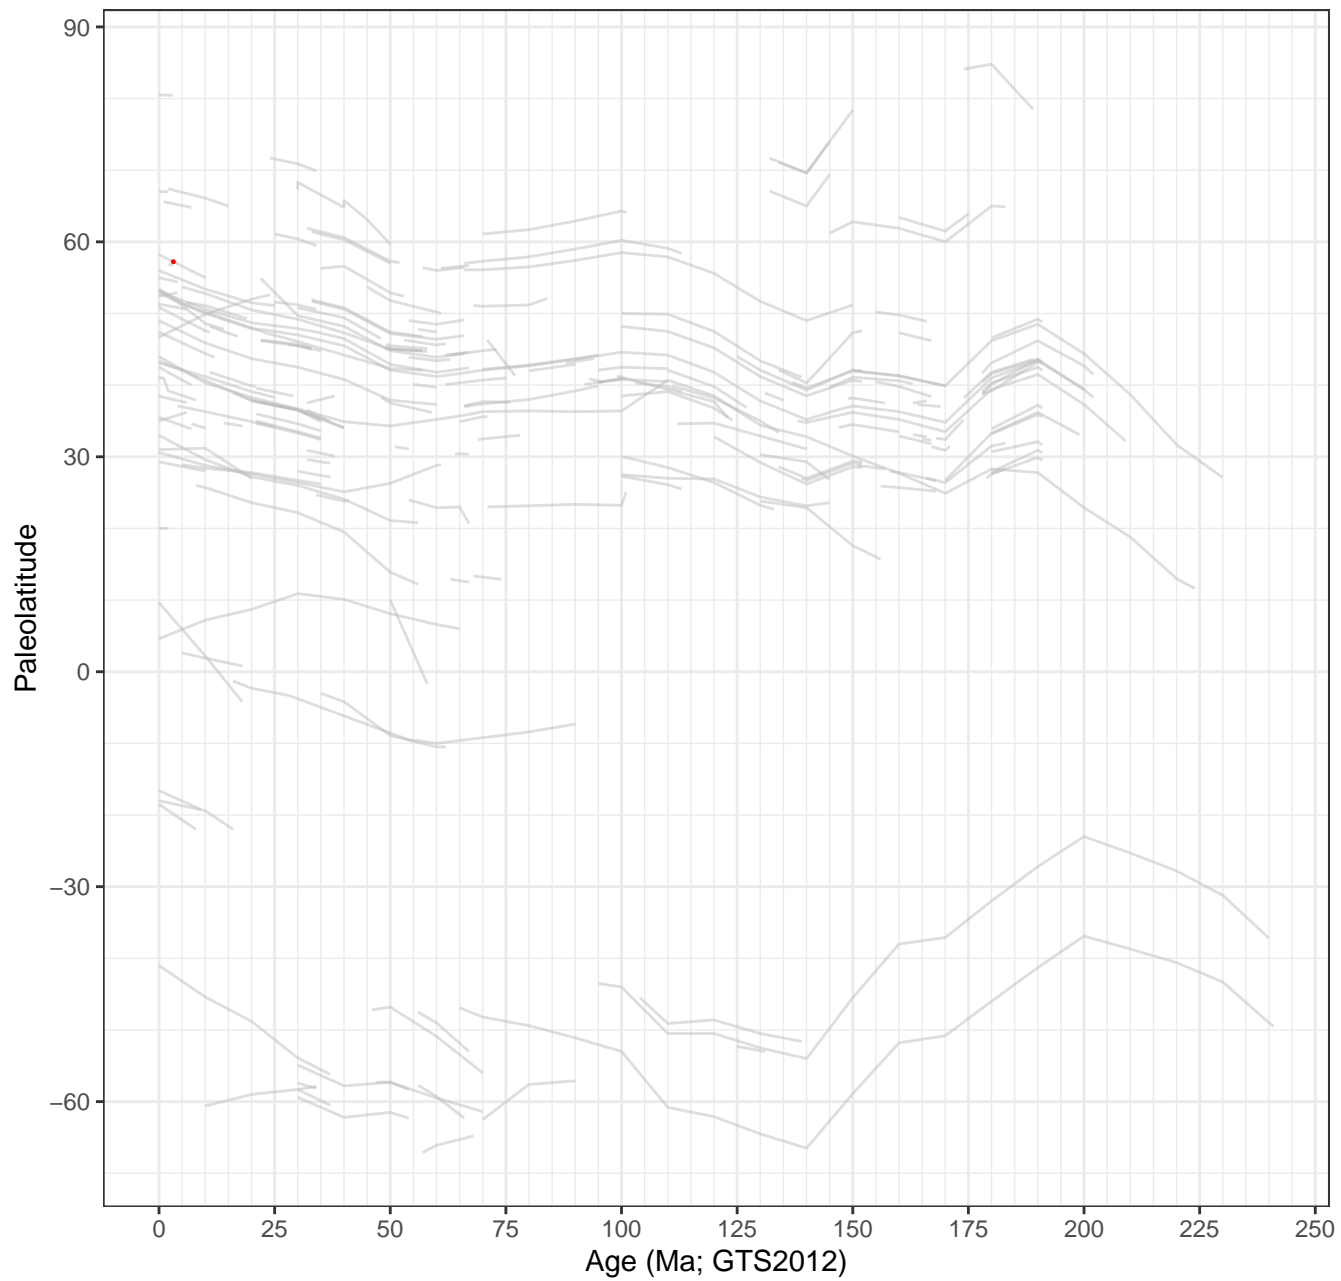

Supplement: Supplementary file 2304 [file Selenopemphix armata.pdf › Supplement/Supplement 2/Species 1914 plots/Selenopemphix armata.pdf]

# Species *Selenopemphix brevispinosa*

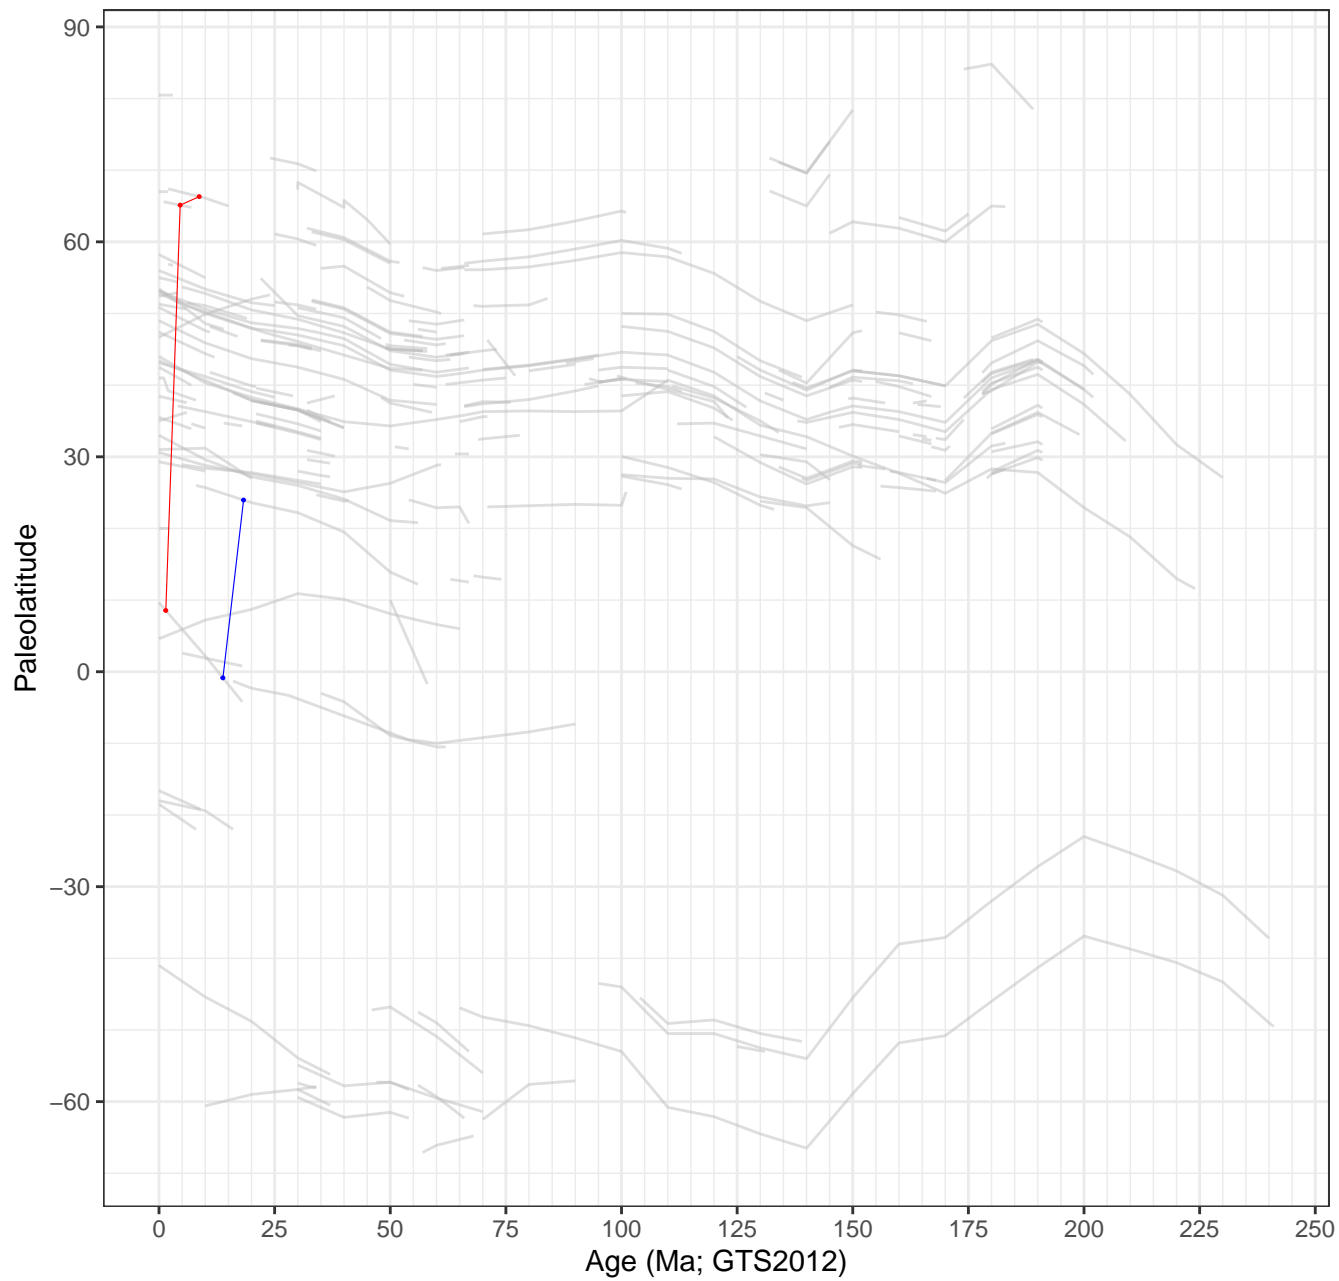

Supplement: Supplementary file 2305 [file Selenopemphix brevispinosa.pdf › Supplement/Supplement 2/Species 1914 plots/Selenopemphix brevispinosa.pdf]

# Species *Selenopemphix brinkhuisii*

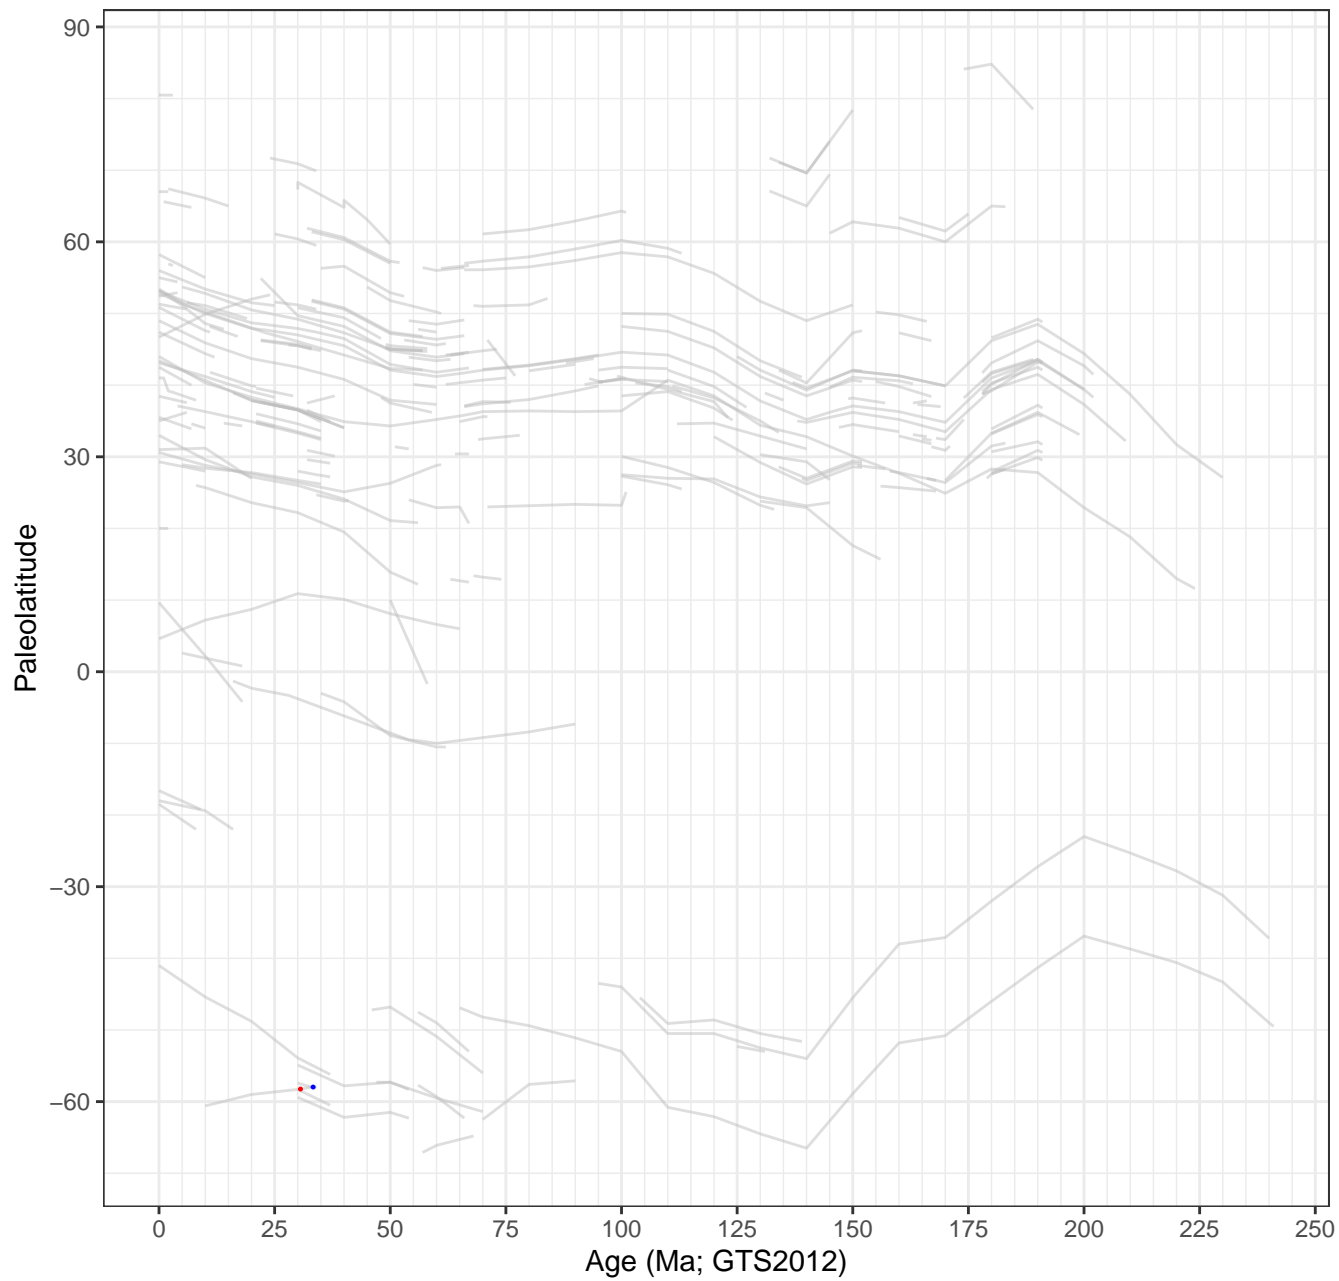

Supplement: Supplementary file 2306 [file Selenopemphix brinkhuisii.pdf › Supplement/Supplement 2/Species 1914 plots/Selenopemphix brinkhuisii.pdf]

# Species *Selenopemphix conspicua*

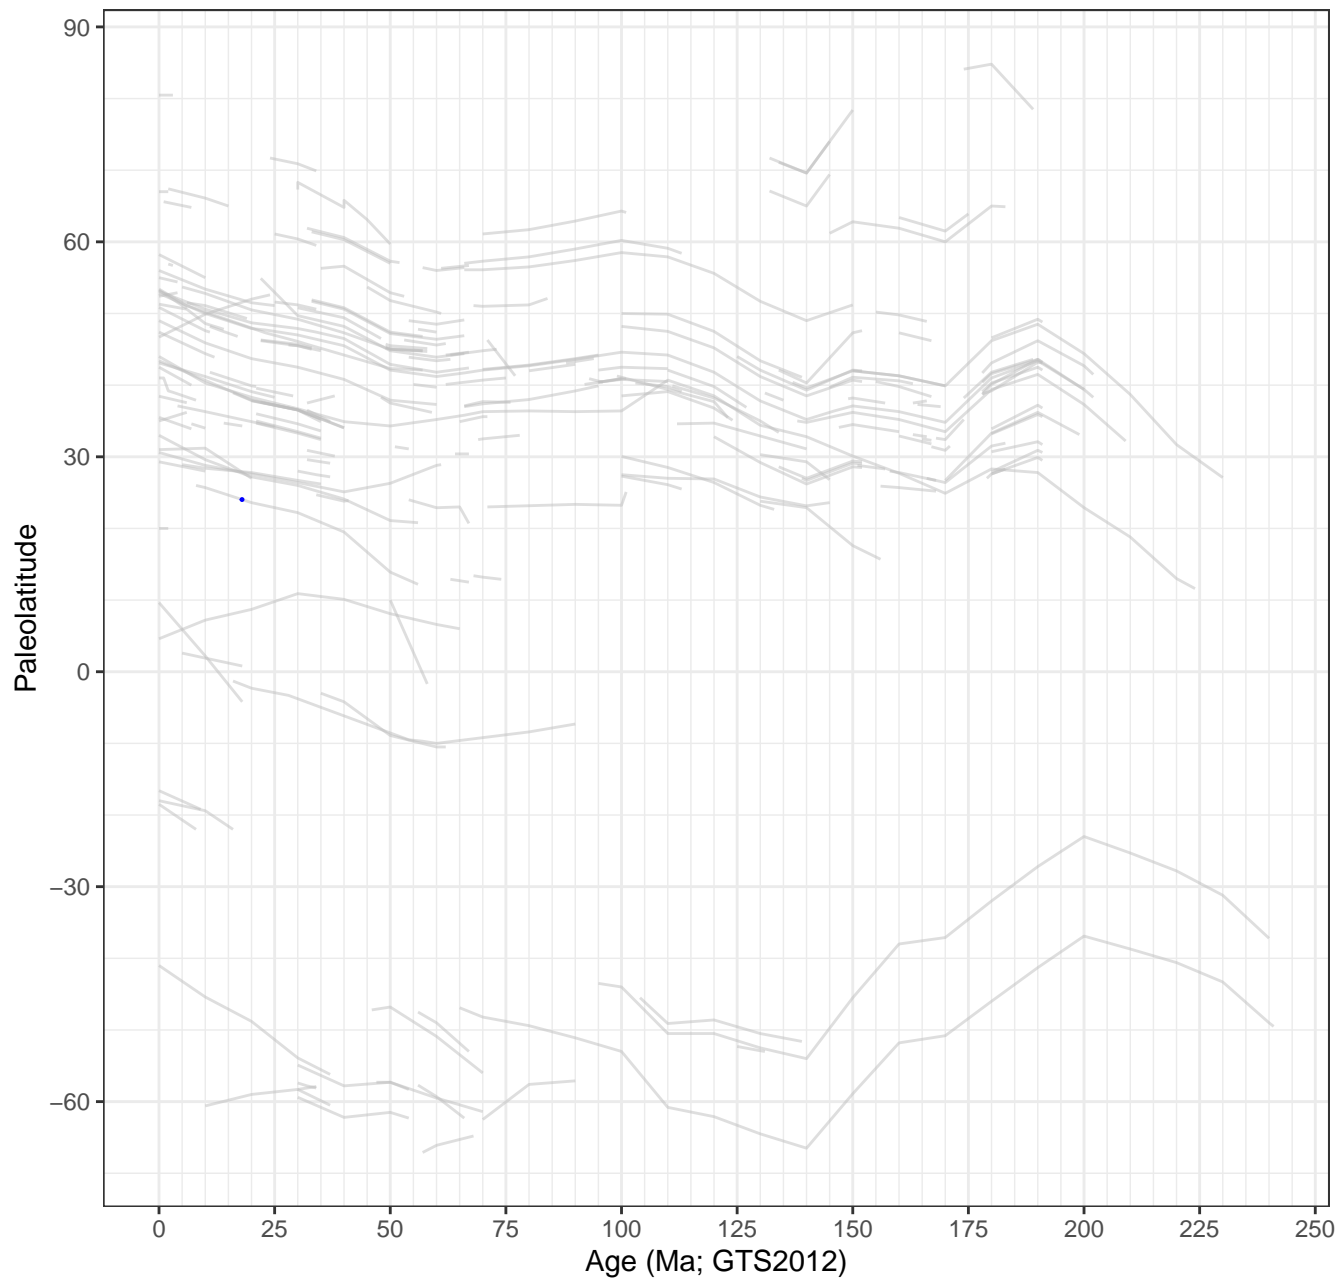

Supplement: Supplementary file 2307 [file Selenopemphix conspicua.pdf › Supplement/Supplement 2/Species 1914 plots/Selenopemphix conspicua.pdf]

# Species *Selenopemphix dionaeacysta*

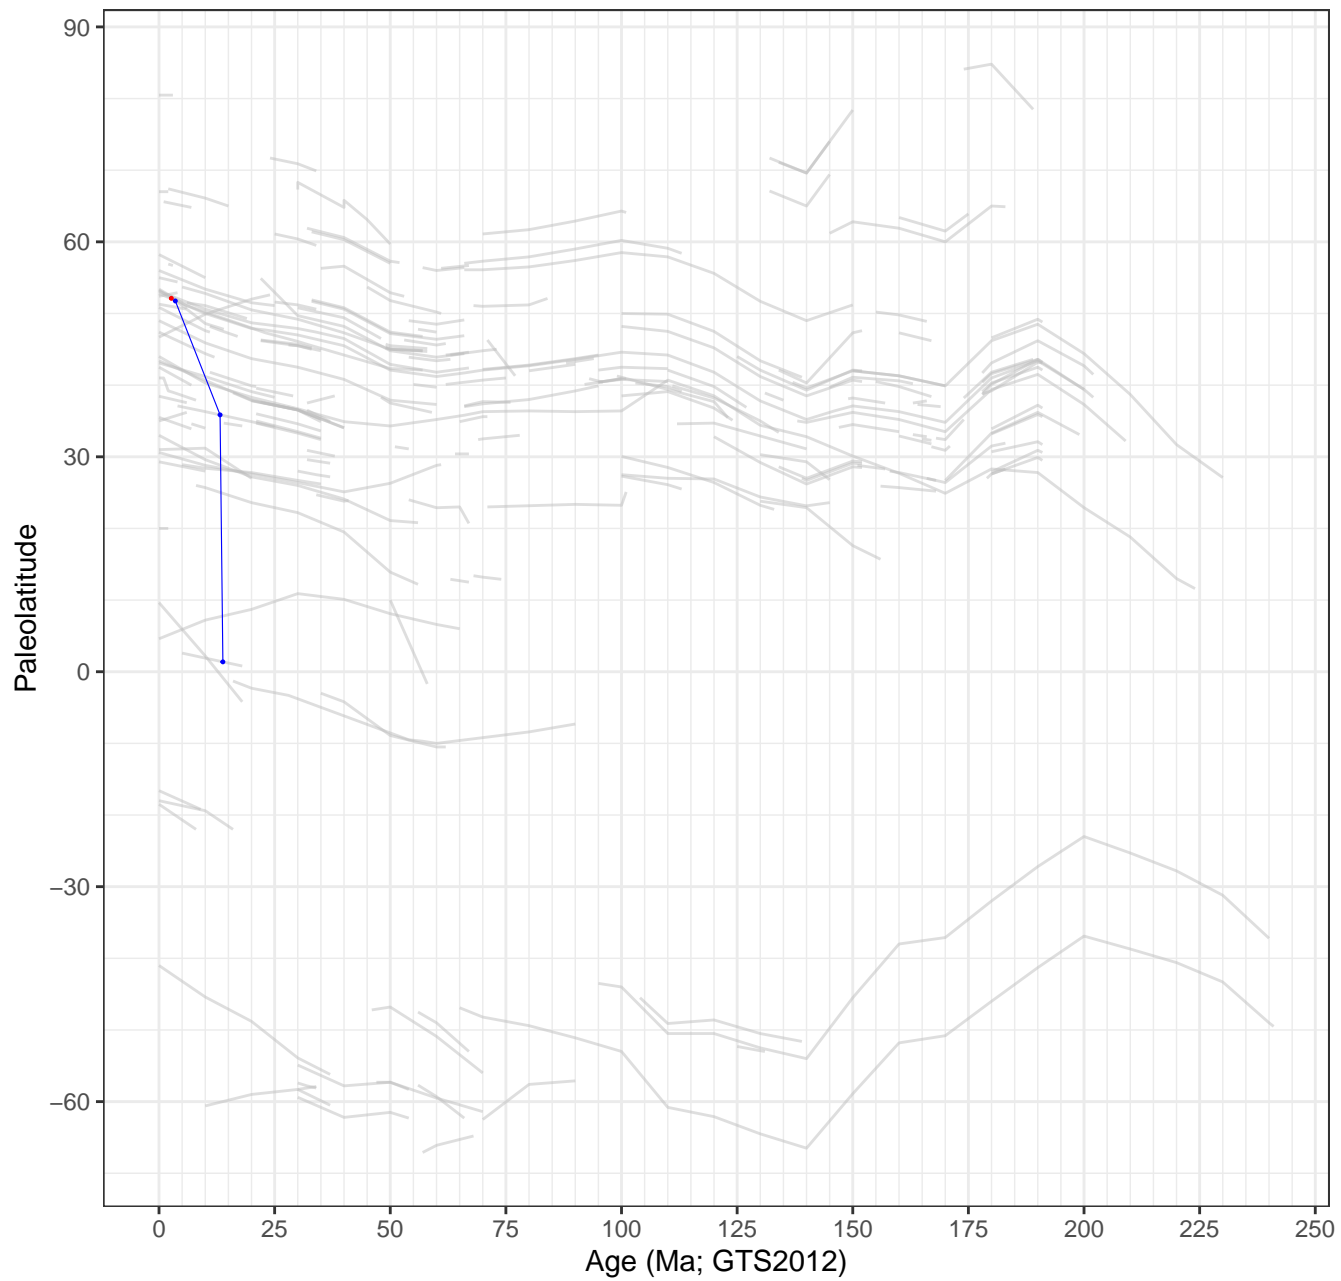

Supplement: Supplementary file 2308 [file Selenopemphix dionaeacysta.pdf › Supplement/Supplement 2/Species 1914 plots/Selenopemphix dionaeacysta.pdf]

# Species *Selenopemphix indentata*

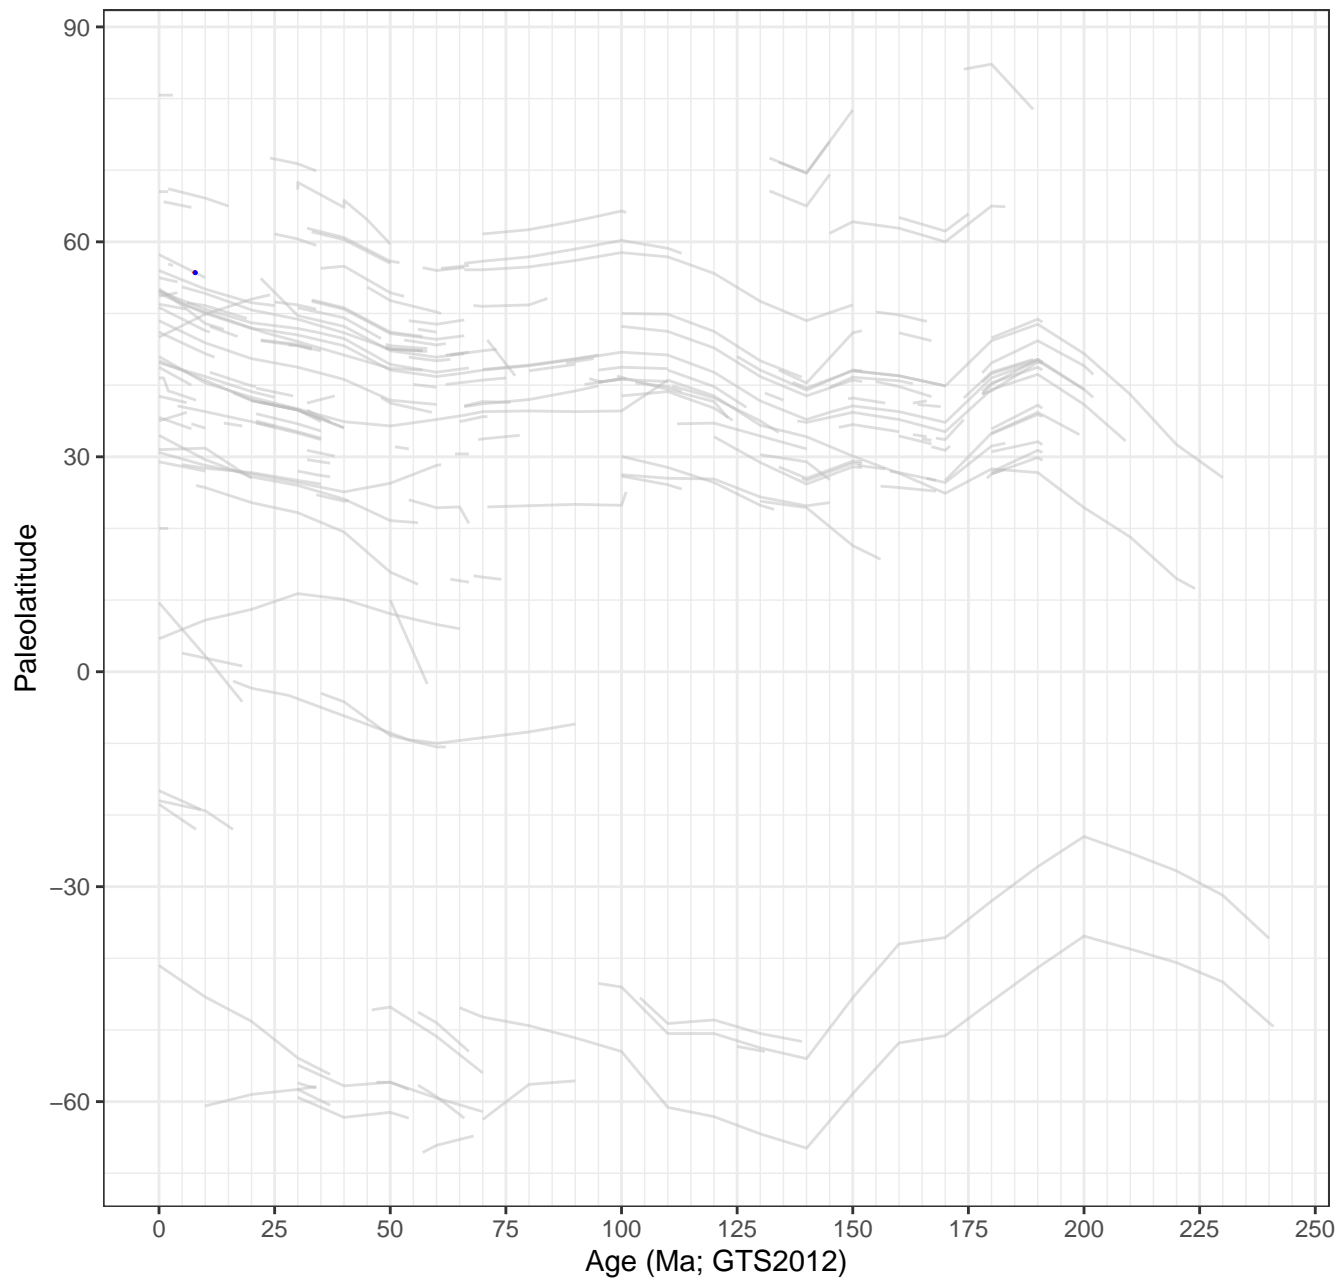

Supplement: Supplementary file 2309 [file Selenopemphix indentata.pdf › Supplement/Supplement 2/Species 1914 plots/Selenopemphix indentata.pdf]

# Species *Selenopemphix minusa*

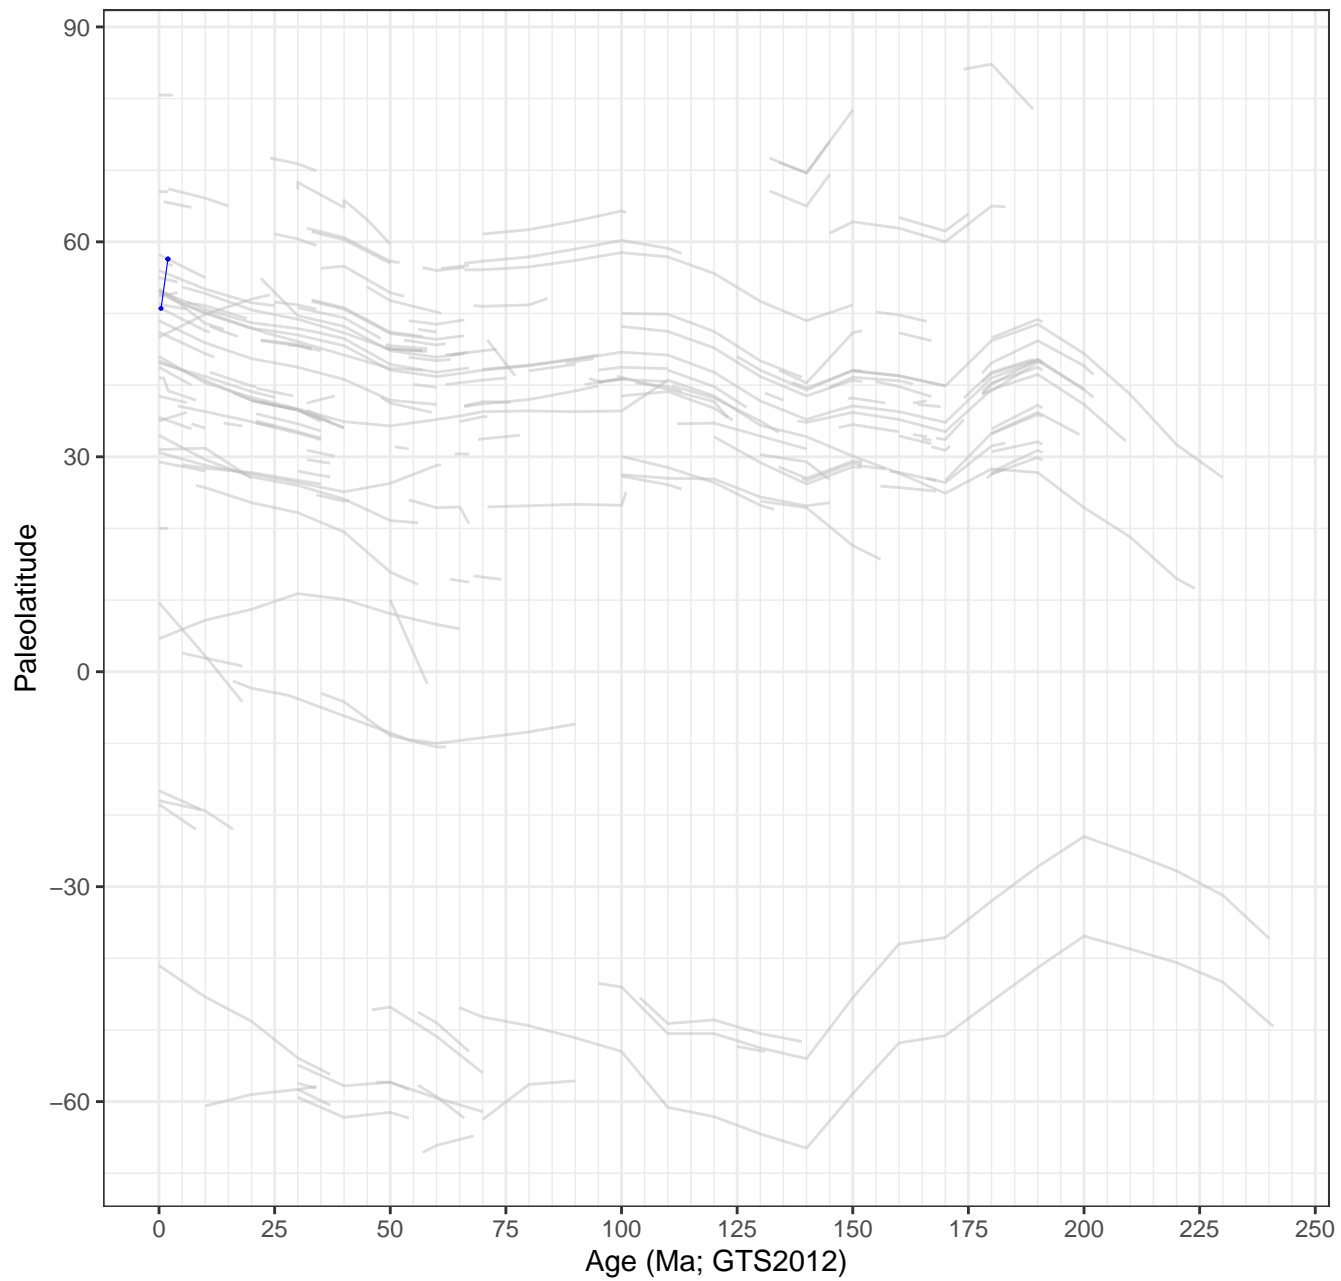

Supplement: Supplementary file 2310 [file Selenopemphix minusa.pdf › Supplement/Supplement 2/Species 1914 plots/Selenopemphix minusa.pdf]

# Species *Selenopemphix nephroides*

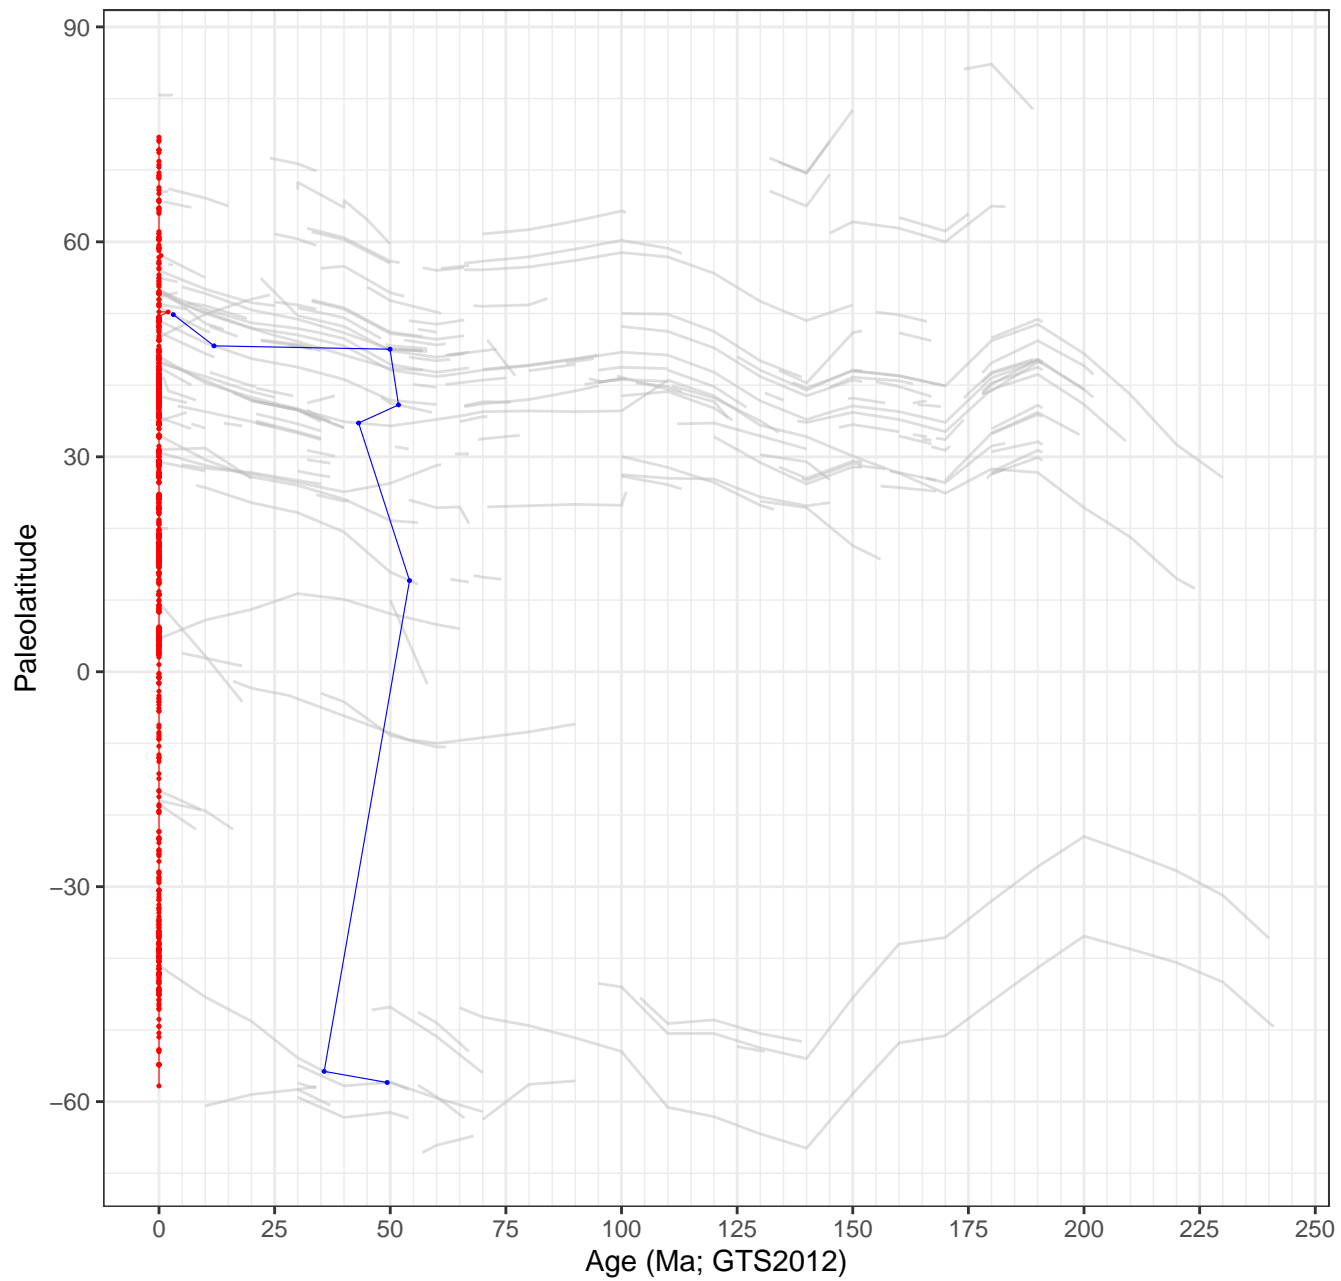

Supplement: Supplementary file 2311 [file Selenopemphix nephroides.pdf › Supplement/Supplement 2/Species 1914 plots/Selenopemphix nephroides.pdf]

# Species *Selenopemphix quanta*

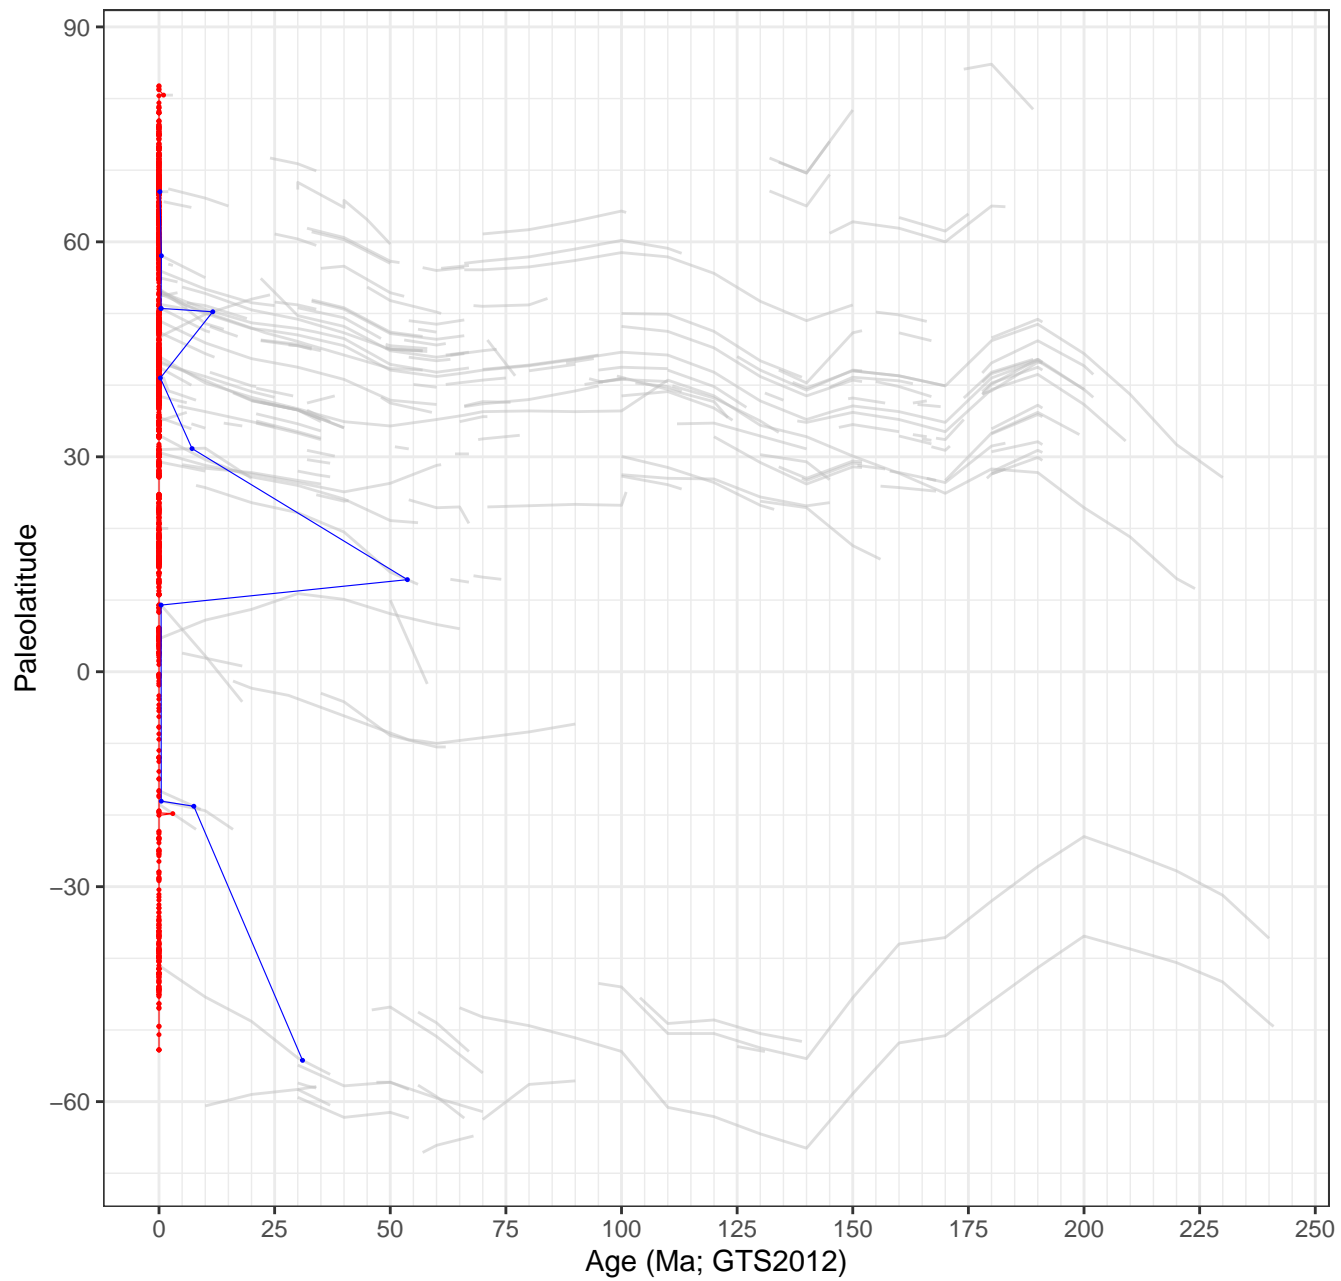

Supplement: Supplementary file 2312 [file Selenopemphix quanta.pdf › Supplement/Supplement 2/Species 1914 plots/Selenopemphix quanta.pdf]

# Species *Selenopemphix septum*

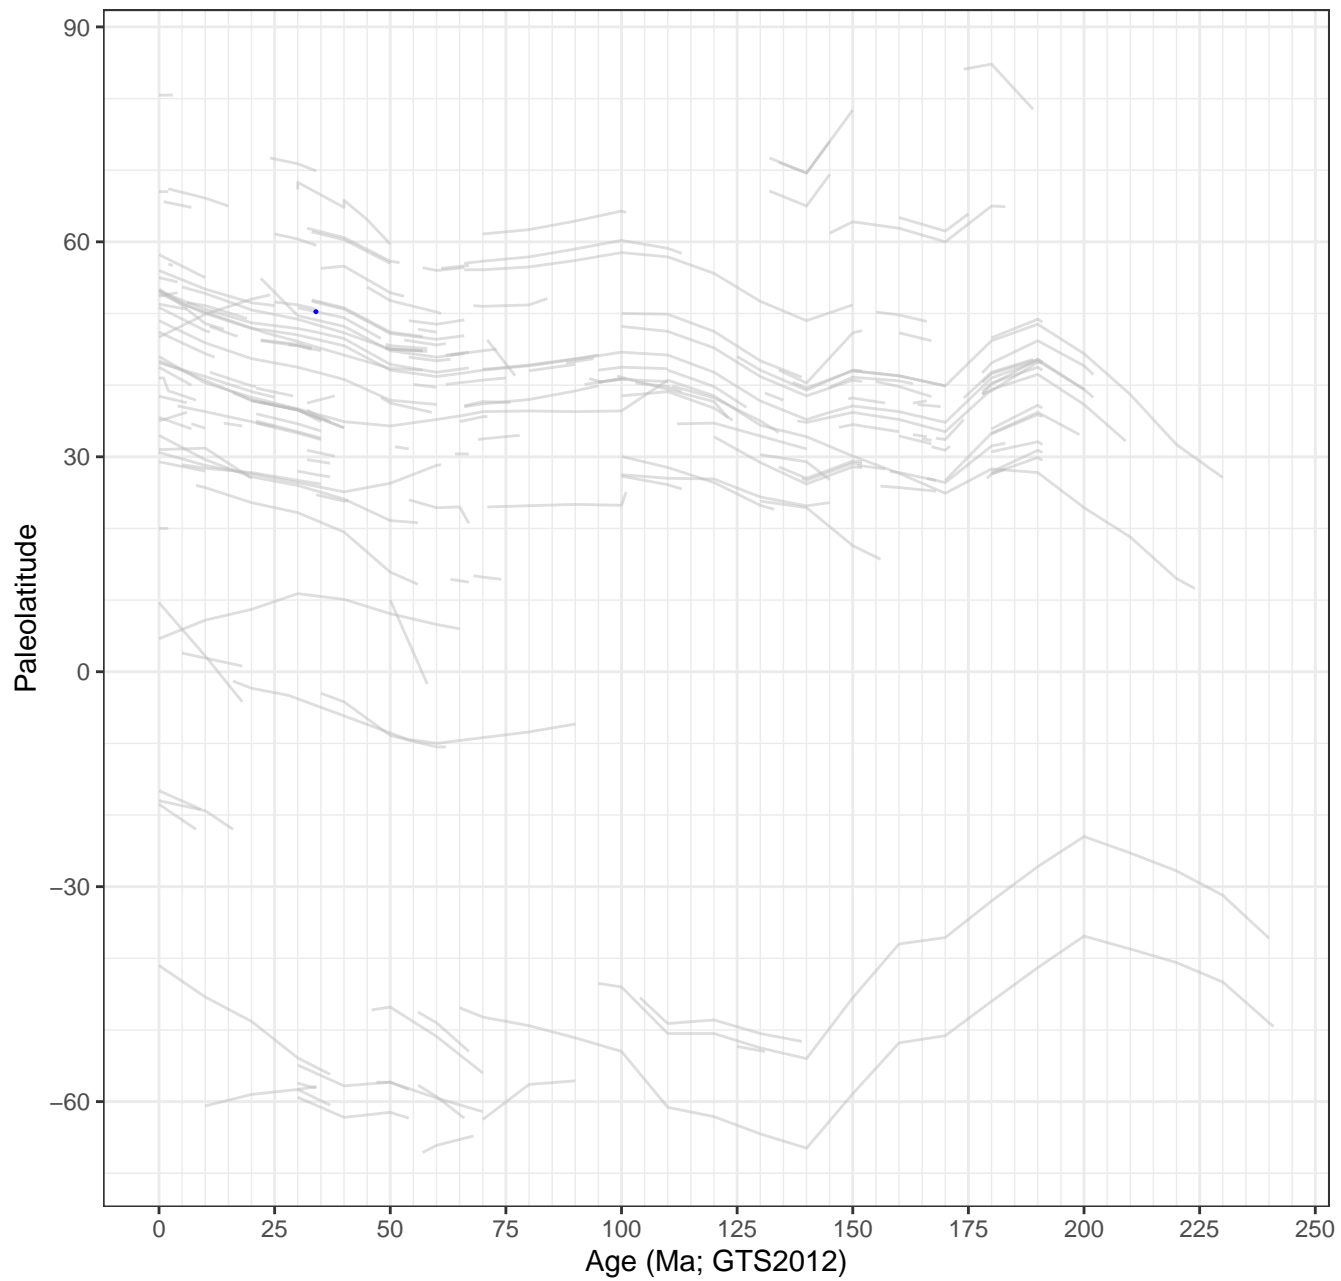

Supplement: Supplementary file 2313 [file Selenopemphix septum.pdf › Supplement/Supplement 2/Species 1914 plots/Selenopemphix septum.pdf]

# Species *Selenopemphix undulata*

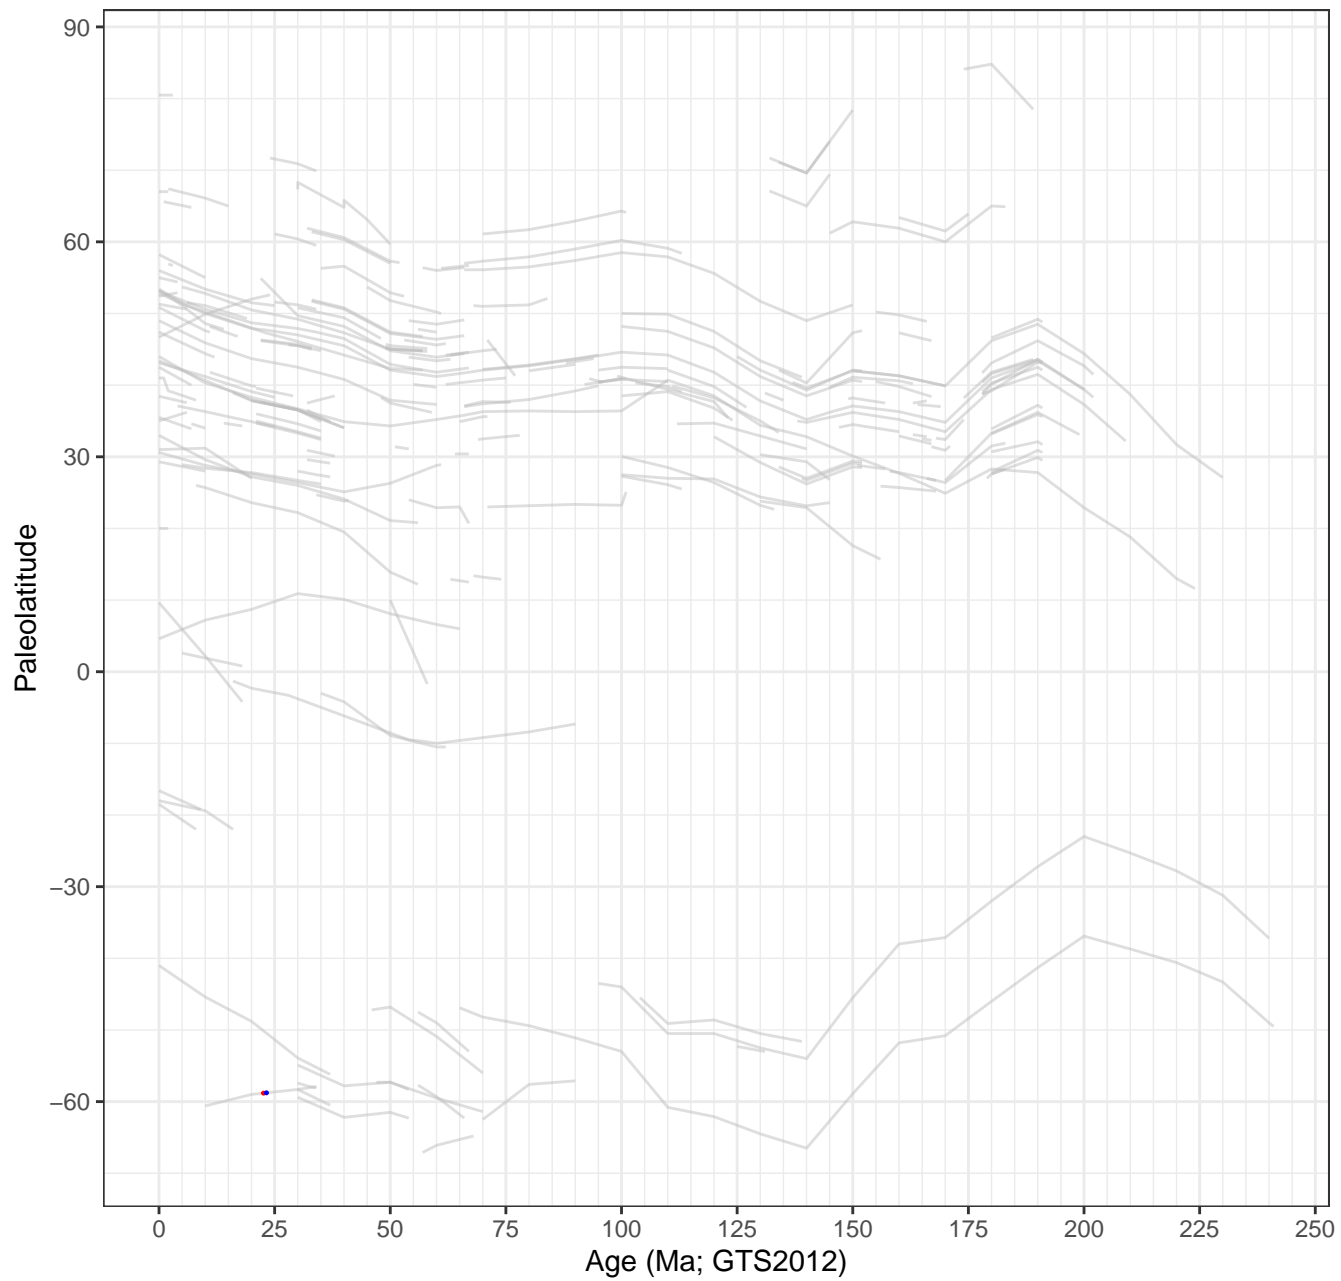

Supplement: Supplementary file 2314 [file Selenopemphix undulata.pdf › Supplement/Supplement 2/Species 1914 plots/Selenopemphix undulata.pdf]

# Species *Semicavidinium mitra*

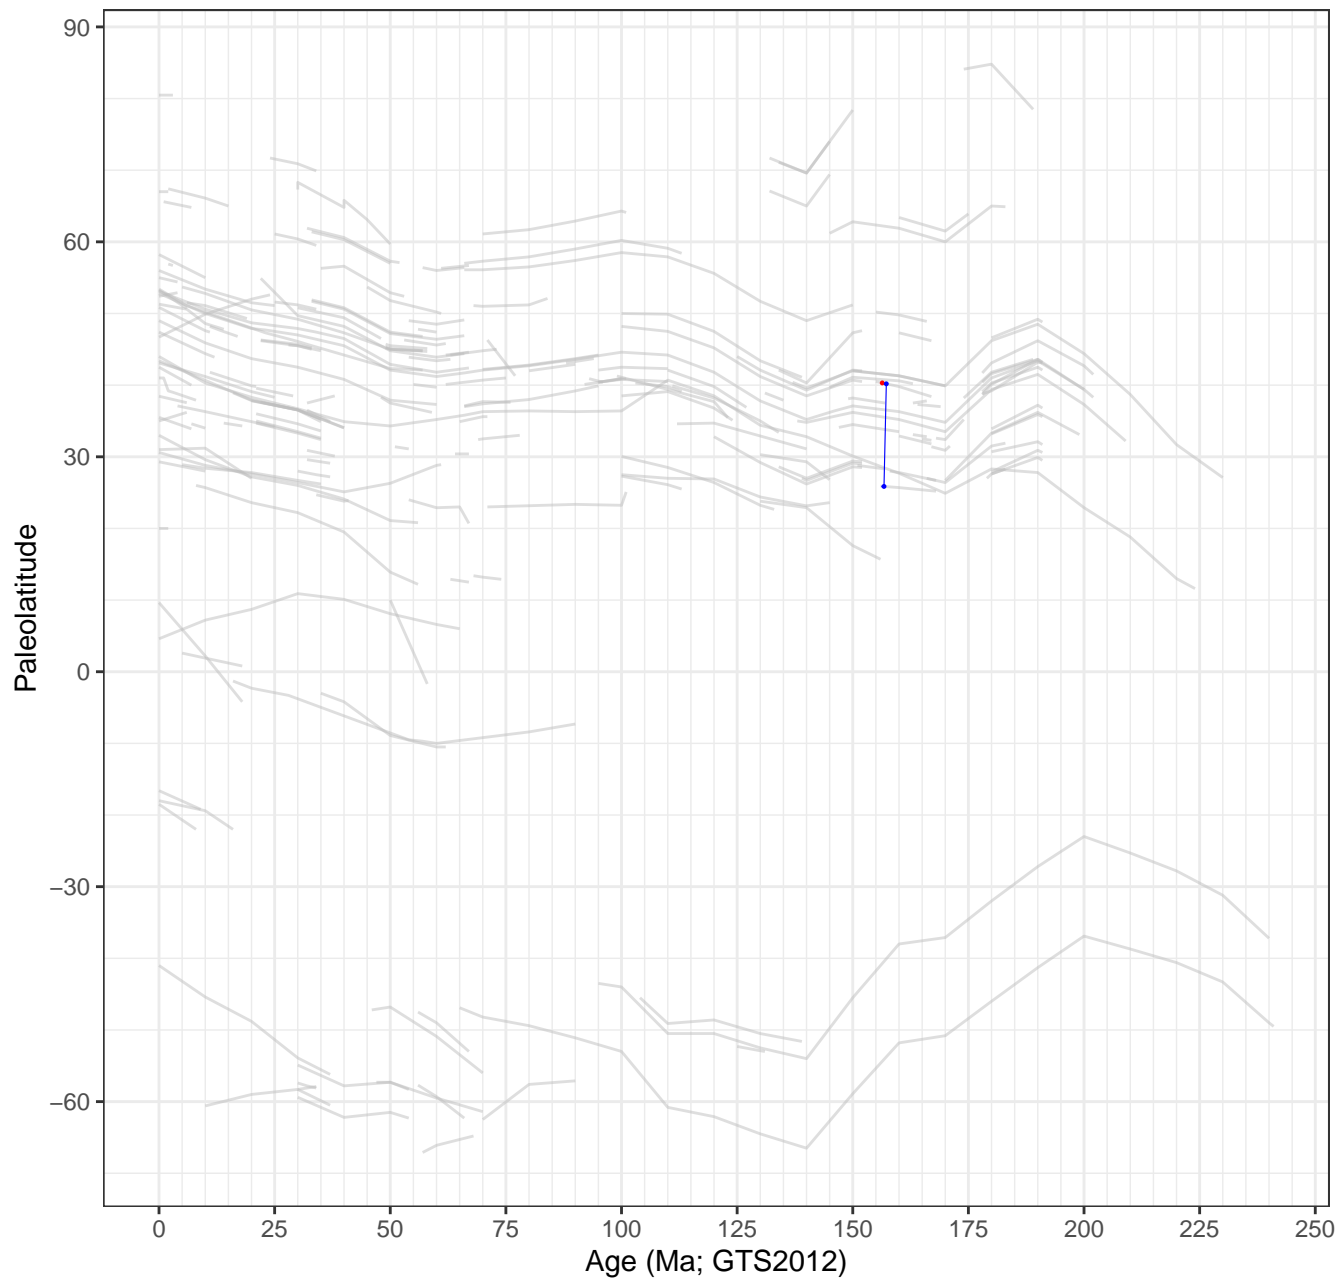

Supplement: Supplementary file 2315 [file Semicavidinium mitra.pdf › Supplement/Supplement 2/Species 1914 plots/Semicavidinium mitra.pdf]

# Species *Senegalinium bicavatum*

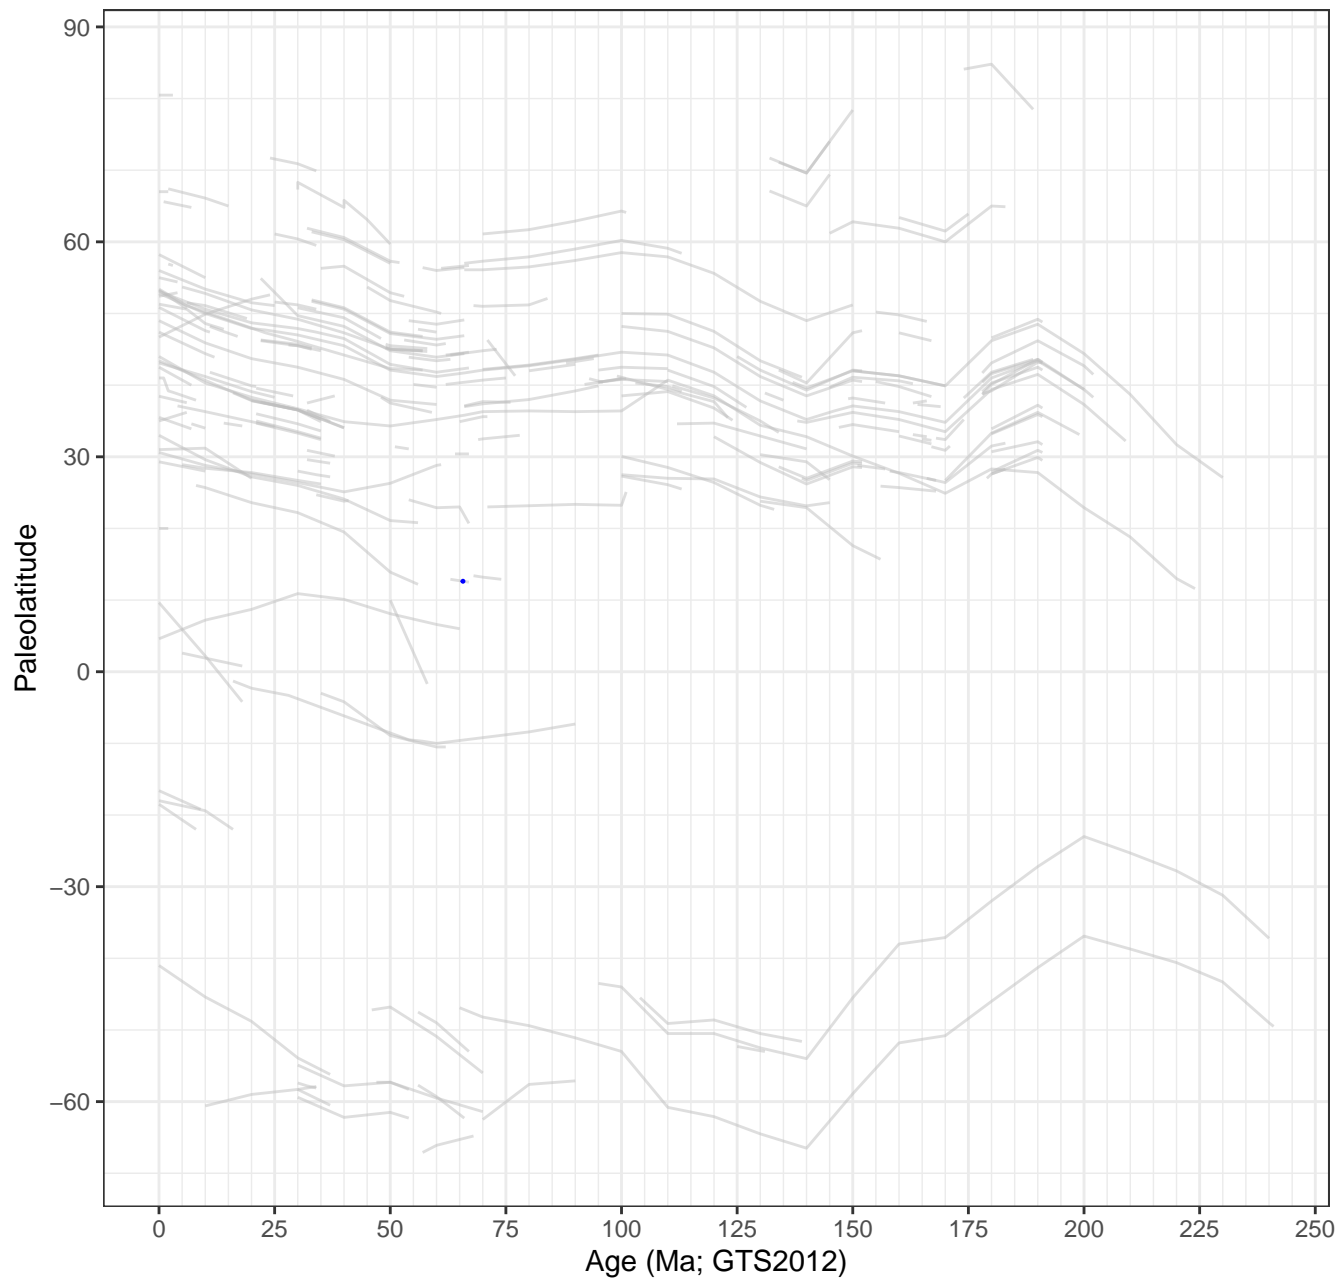

Supplement: Supplementary file 2316 [file Senegalinium bicavatum.pdf › Supplement/Supplement 2/Species 1914 plots/Senegalinium bicavatum.pdf]

# Species *Senegalinium dilwynense*

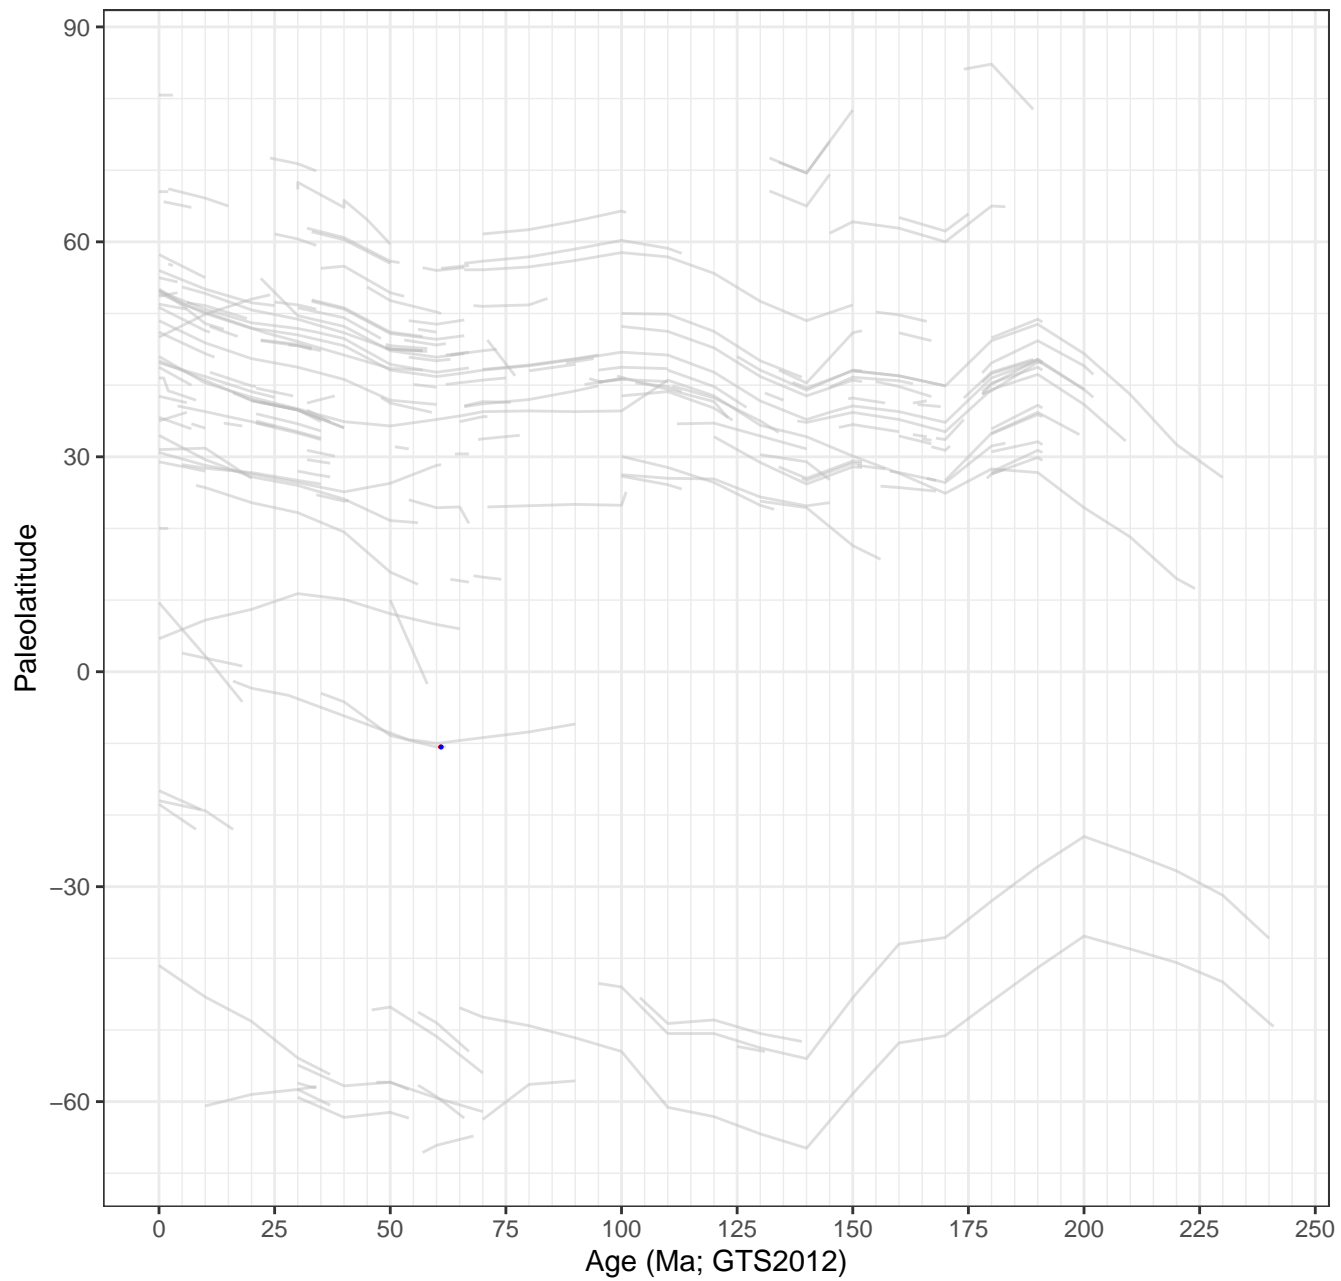

Supplement: Supplementary file 2317 [file Senegalinium dilwynense.pdf › Supplement/Supplement 2/Species 1914 plots/Senegalinium dilwynense.pdf]

# Species *Senegalinium interlaeae*

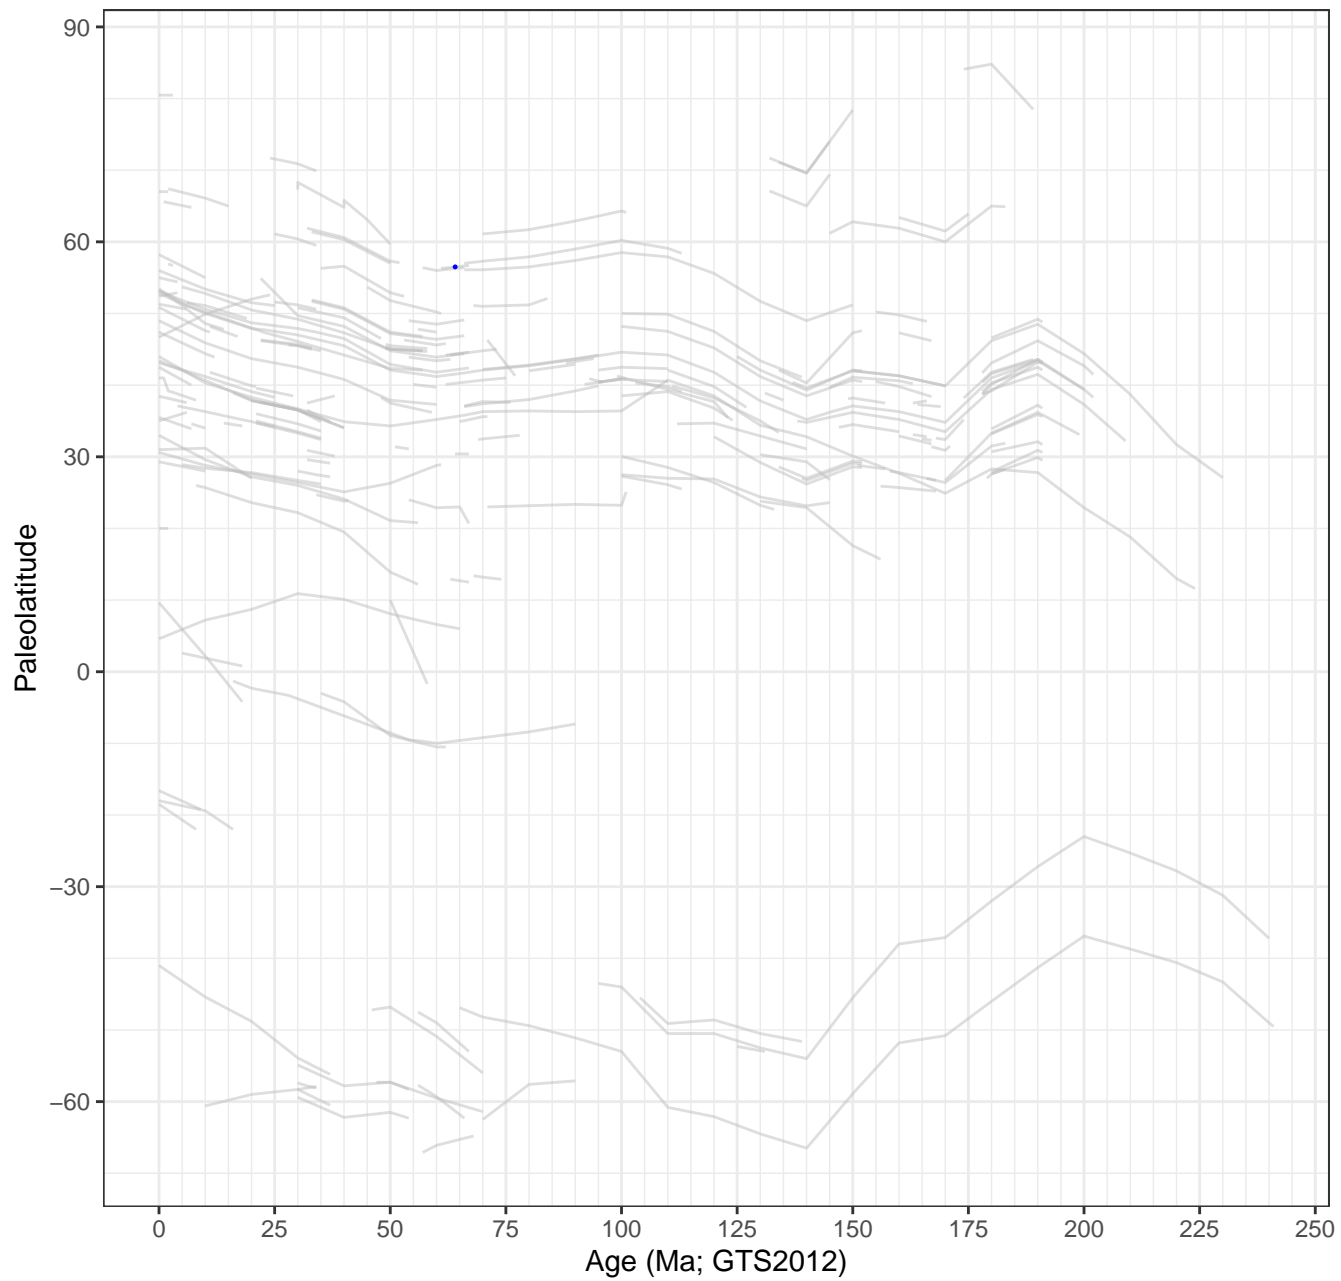

Supplement: Supplementary file 2318 [file Senegalinium interlaaense.pdf › Supplement/Supplement 2/Species 1914 plots/Senegalinium interlaaense.pdf]

# Species *Senegalinium laevigatum*

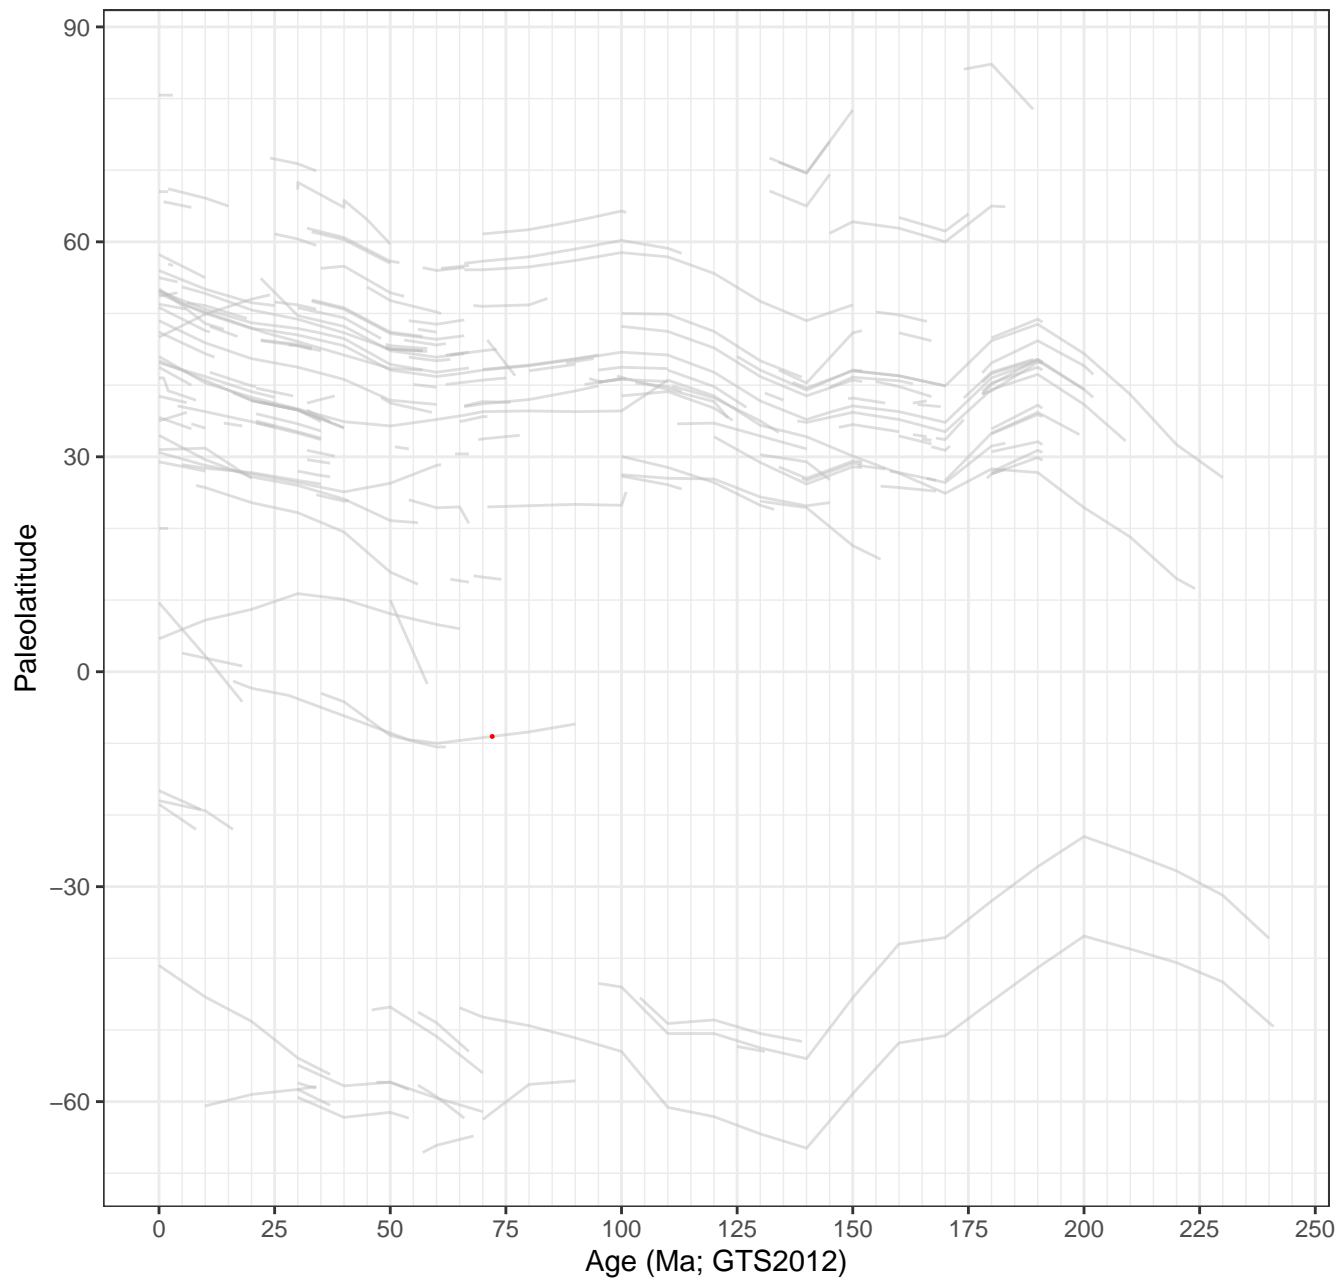

Supplement: Supplementary file 2319 [file Senegalinium laevigatum.pdf › Supplement/Supplement 2/Species 1914 plots/Senegalinium laevigatum.pdf]

# Species *Senegalinium microspinosum*

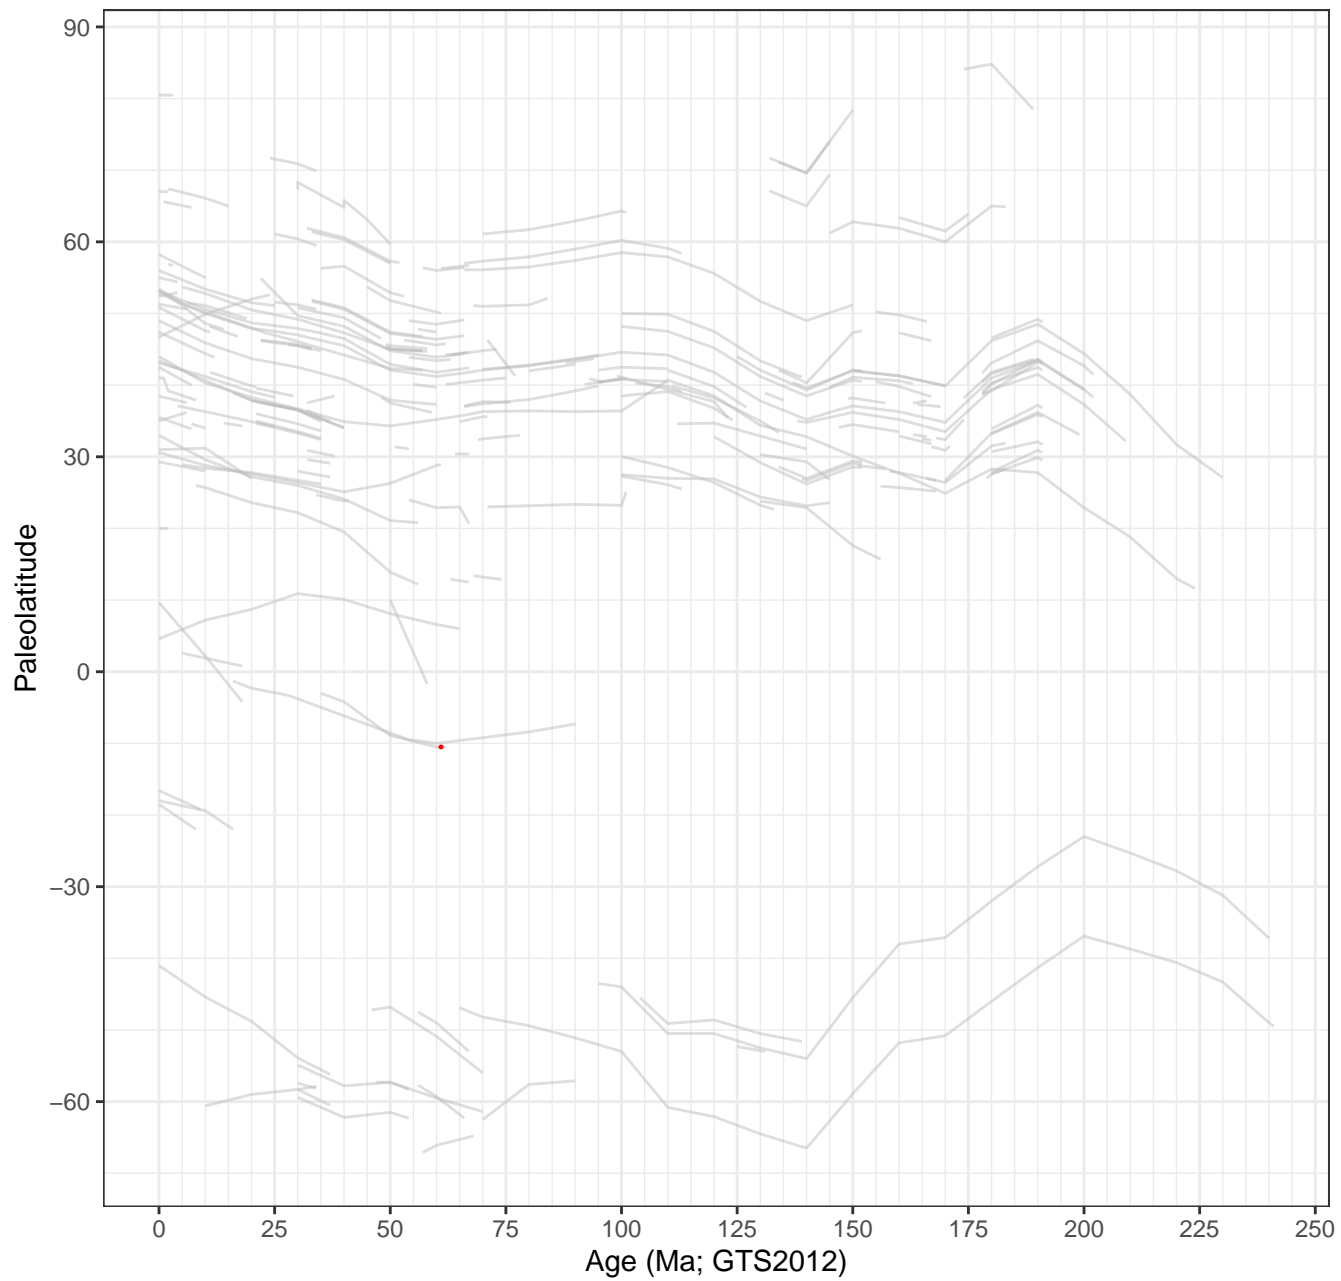

Supplement: Supplementary file 2320 [file Senegalinium microspinosum.pdf › Supplement/Supplement 2/Species 1914 plots/Senegalinium microspinosum.pdf]

# Species *Senegalinium obscurum*

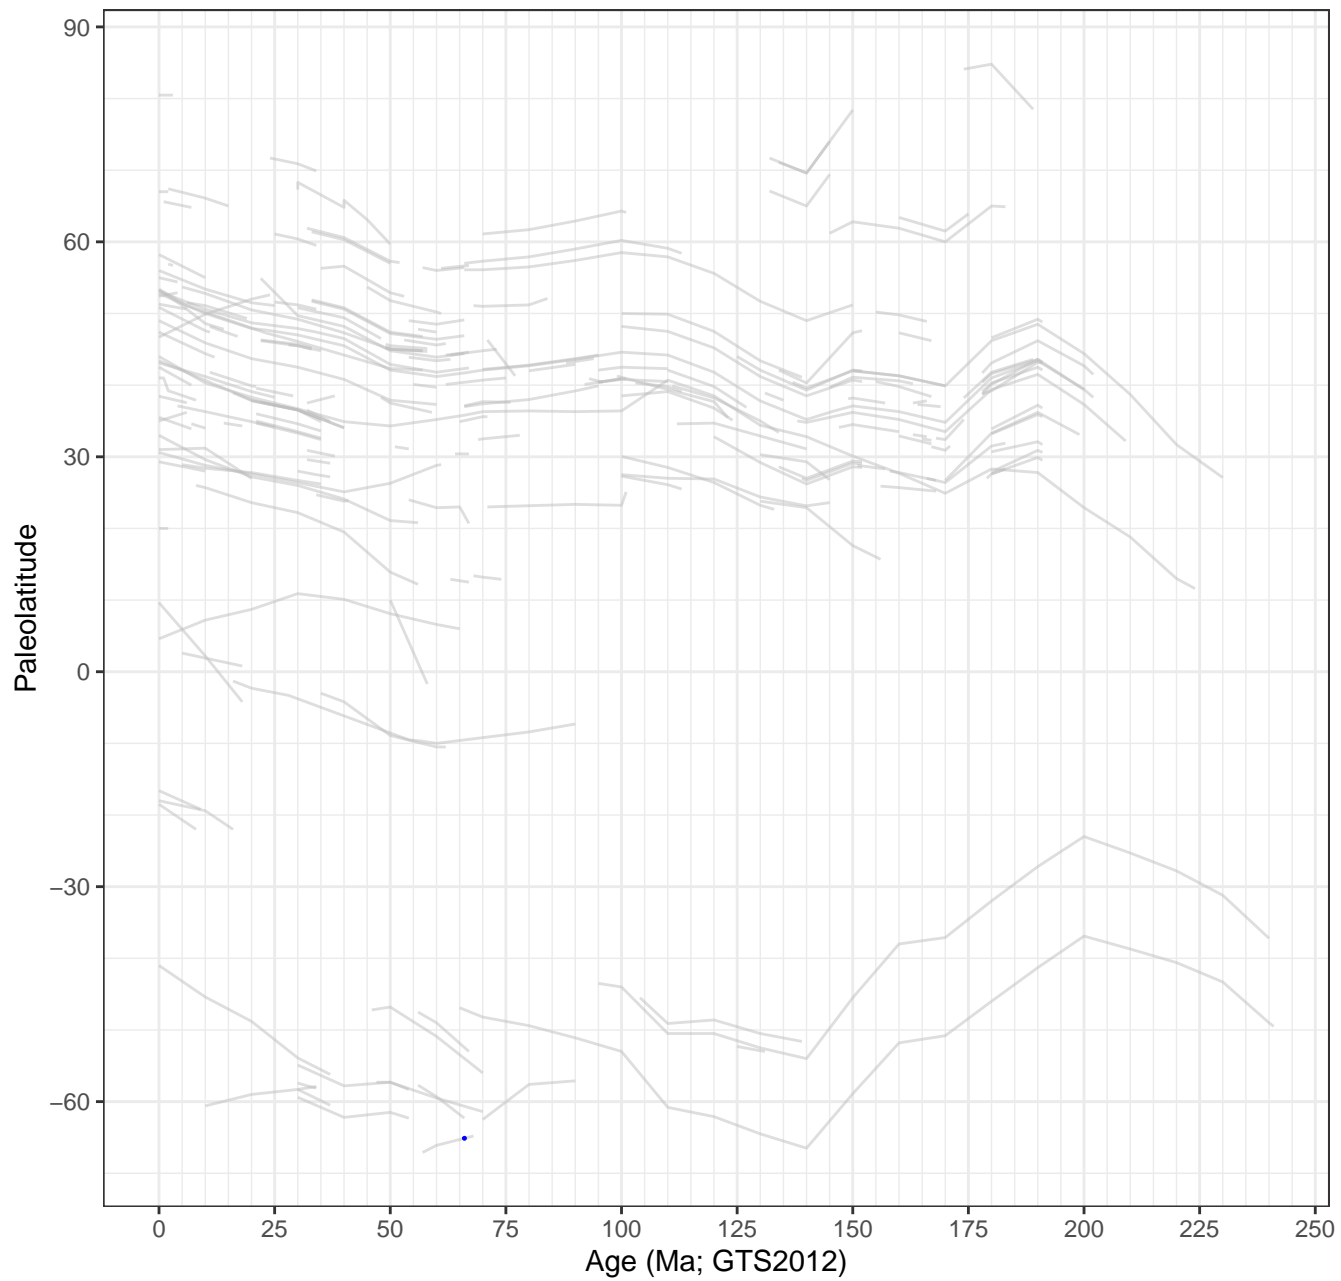

Supplement: Supplementary file 2321 [file Senegalinium obscurum.pdf › Supplement/Supplement 2/Species 1914 plots/Senegalinium obscurum.pdf]

# Species *Senegalinium simplex*

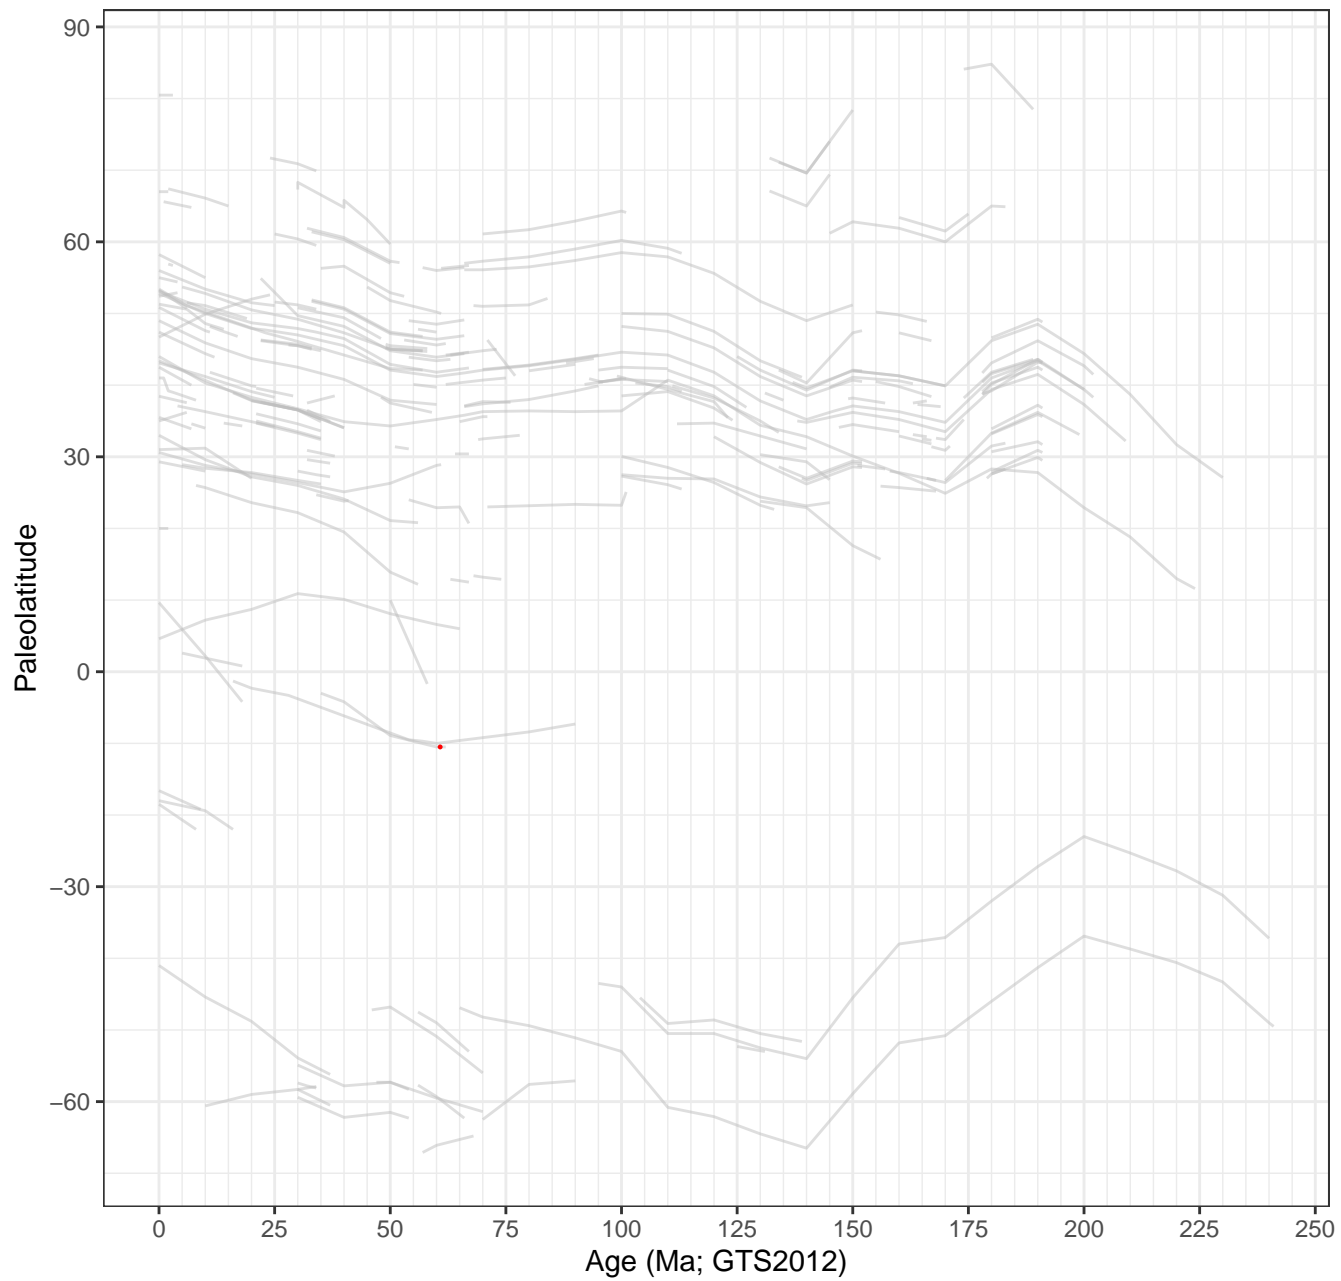

Supplement: Supplementary file 2322 [file Senegalinium simplex.pdf › Supplement/Supplement 2/Species 1914 plots/Senegalinium simplex.pdf]

# Species *Senoniasphaera clavellii*

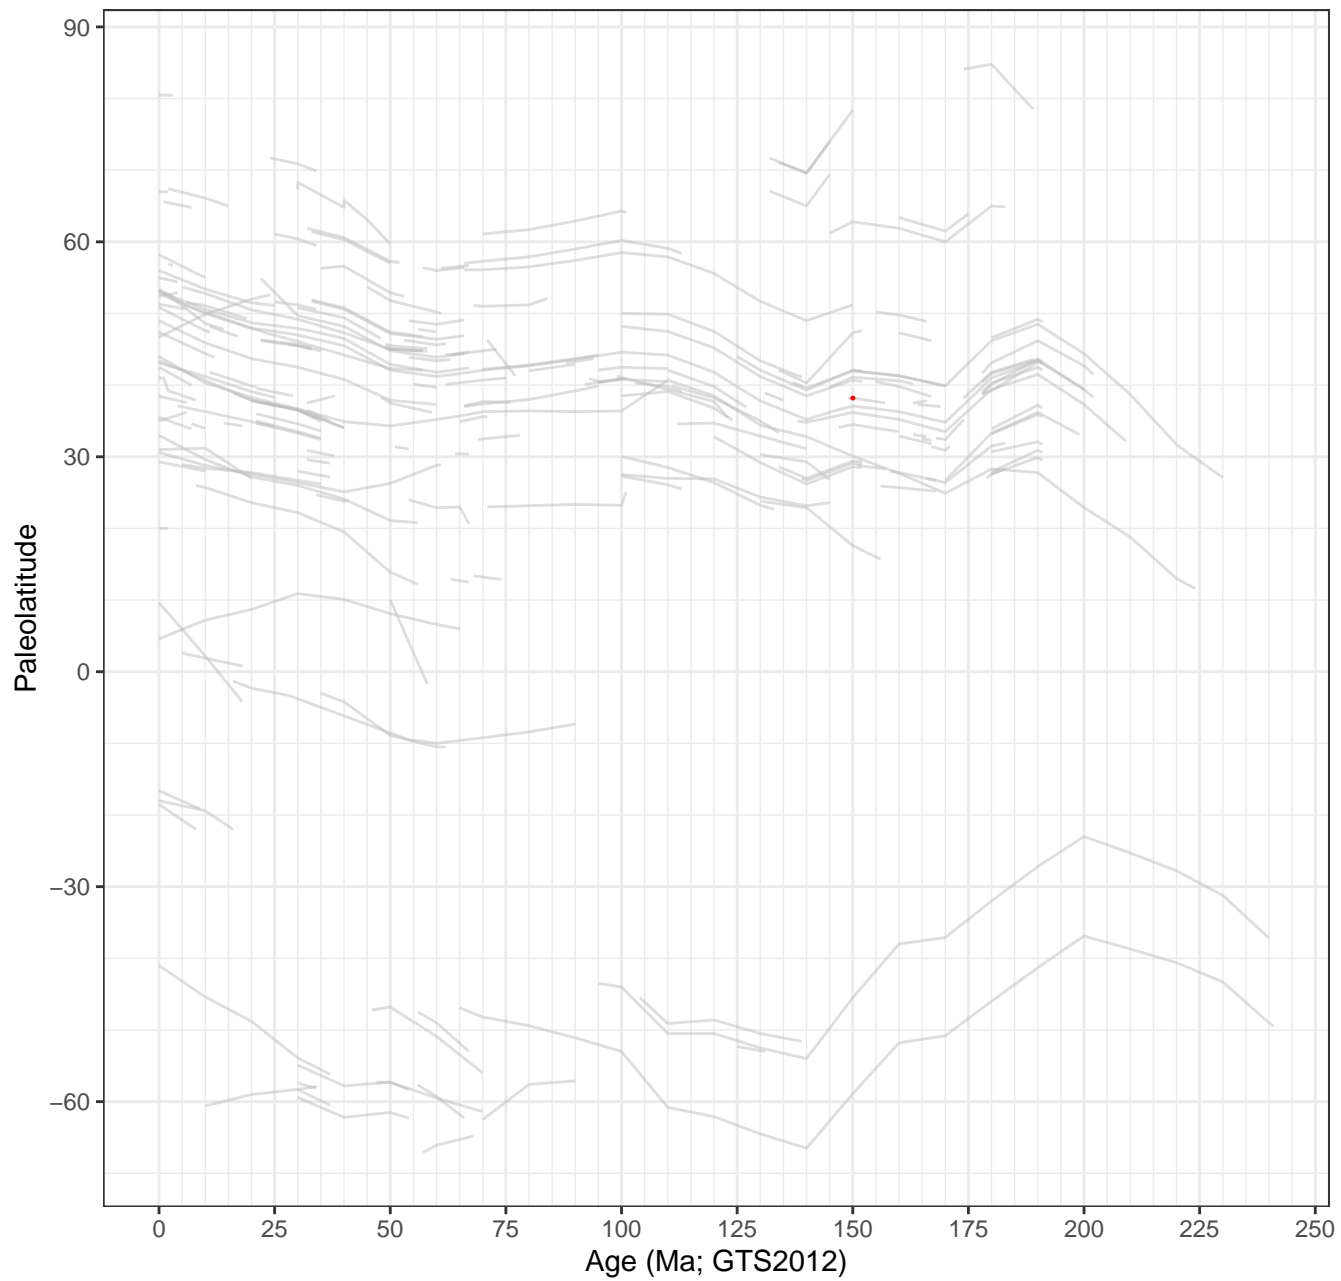

Supplement: Supplementary file 2323 [file Senoniasphaera clavellii.pdf › Supplement/Supplement 2/Species 1914 plots/Senoniasphaera clavellii.pdf]

# Species *Senoniasphaera inornata*

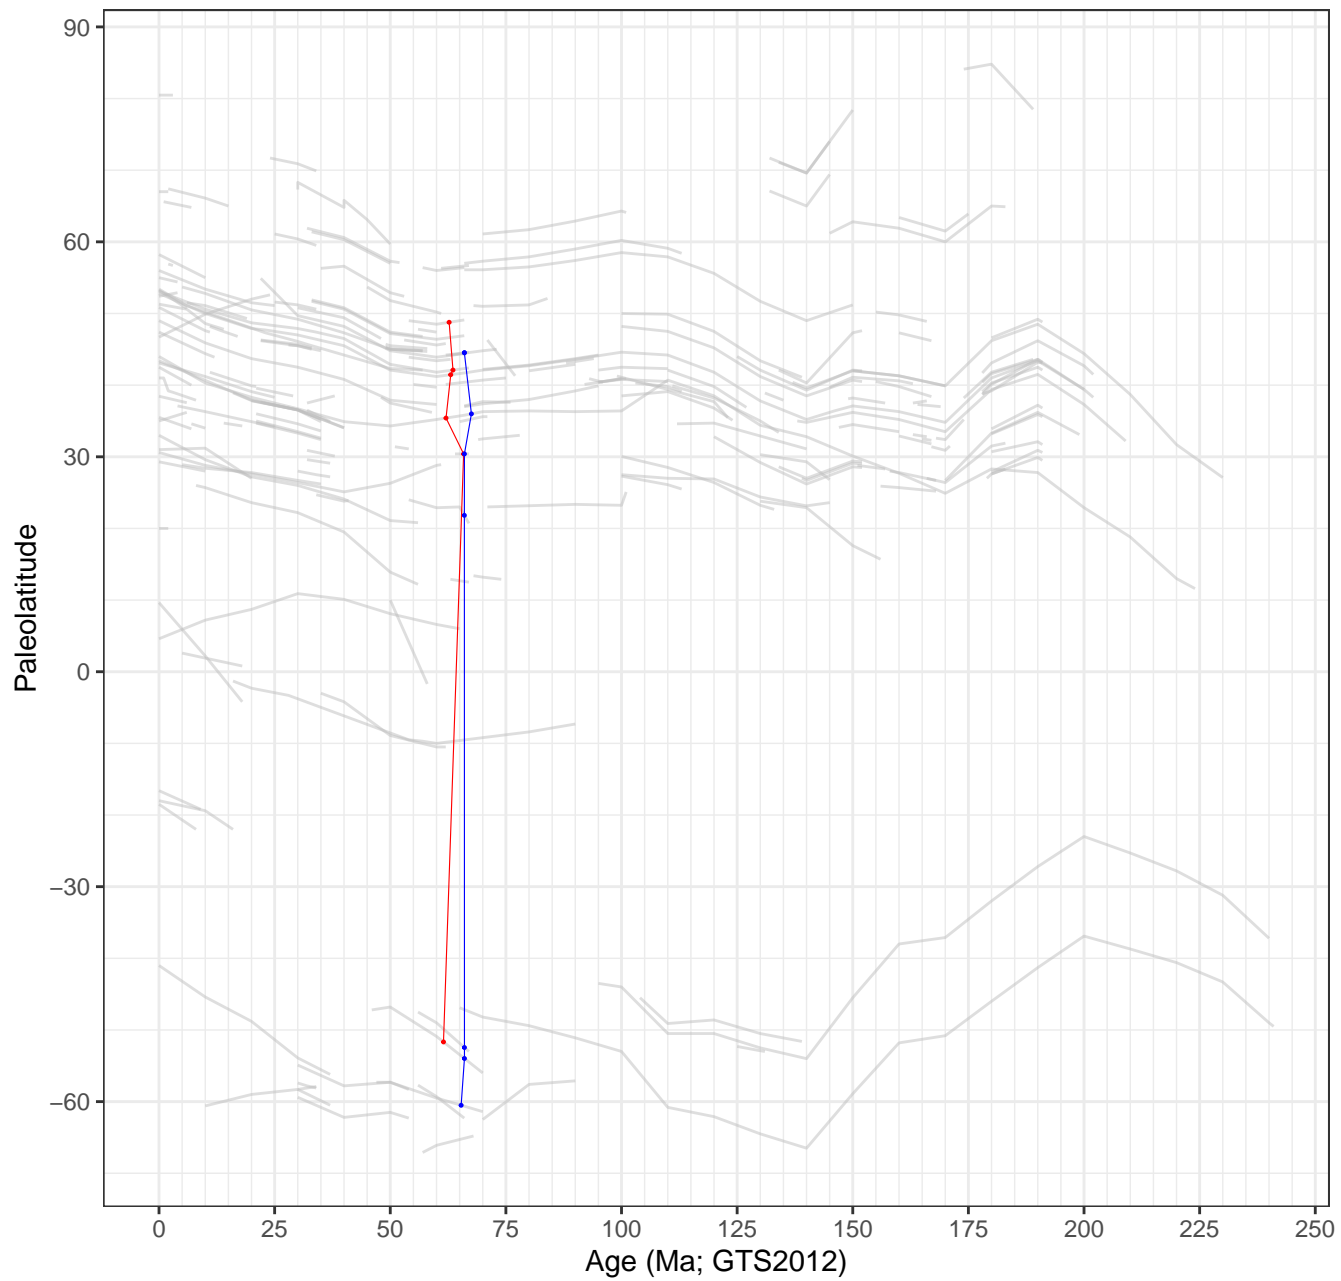

Supplement: Supplementary file 2324 [file Senoniasphaera inornata.pdf › Supplement/Supplement 2/Species 1914 plots/Senoniasphaera inornata.pdf]

# Species *Senoniasphaera jurassica*

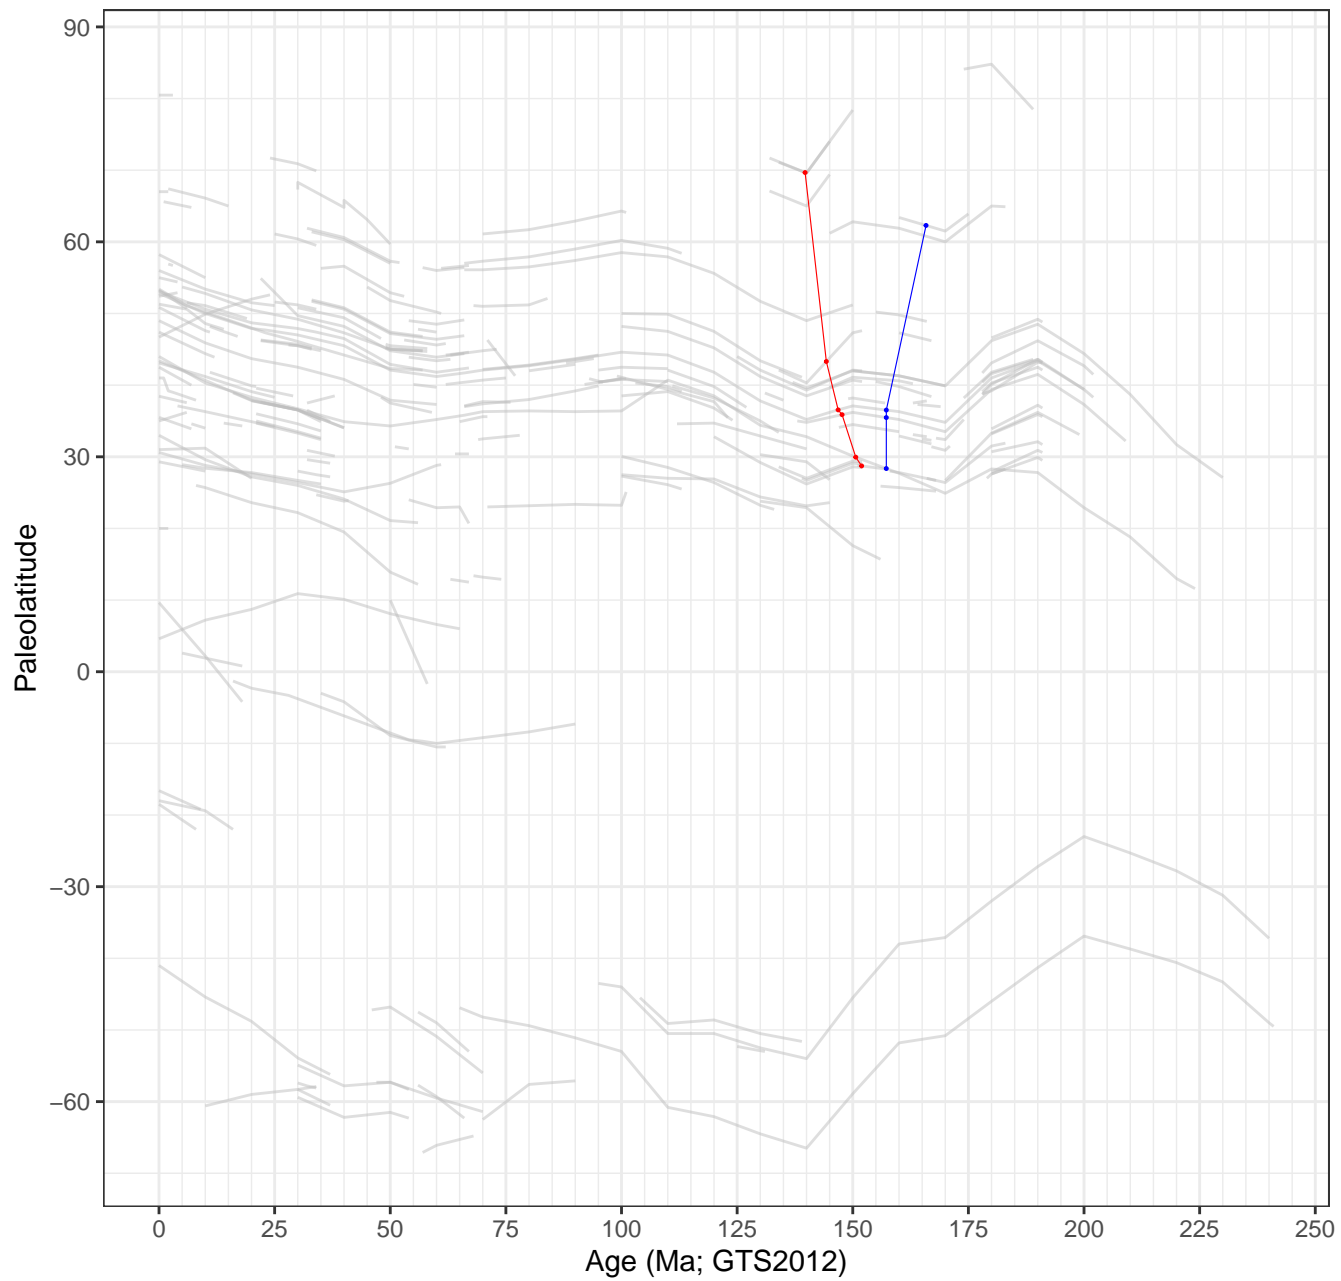

Supplement: Supplementary file 2325 [file Senoniasphaera jurassica.pdf › Supplement/Supplement 2/Species 1914 plots/Senoniasphaera jurassica.pdf]

# Species *Senoniasphaera macroreticulata*

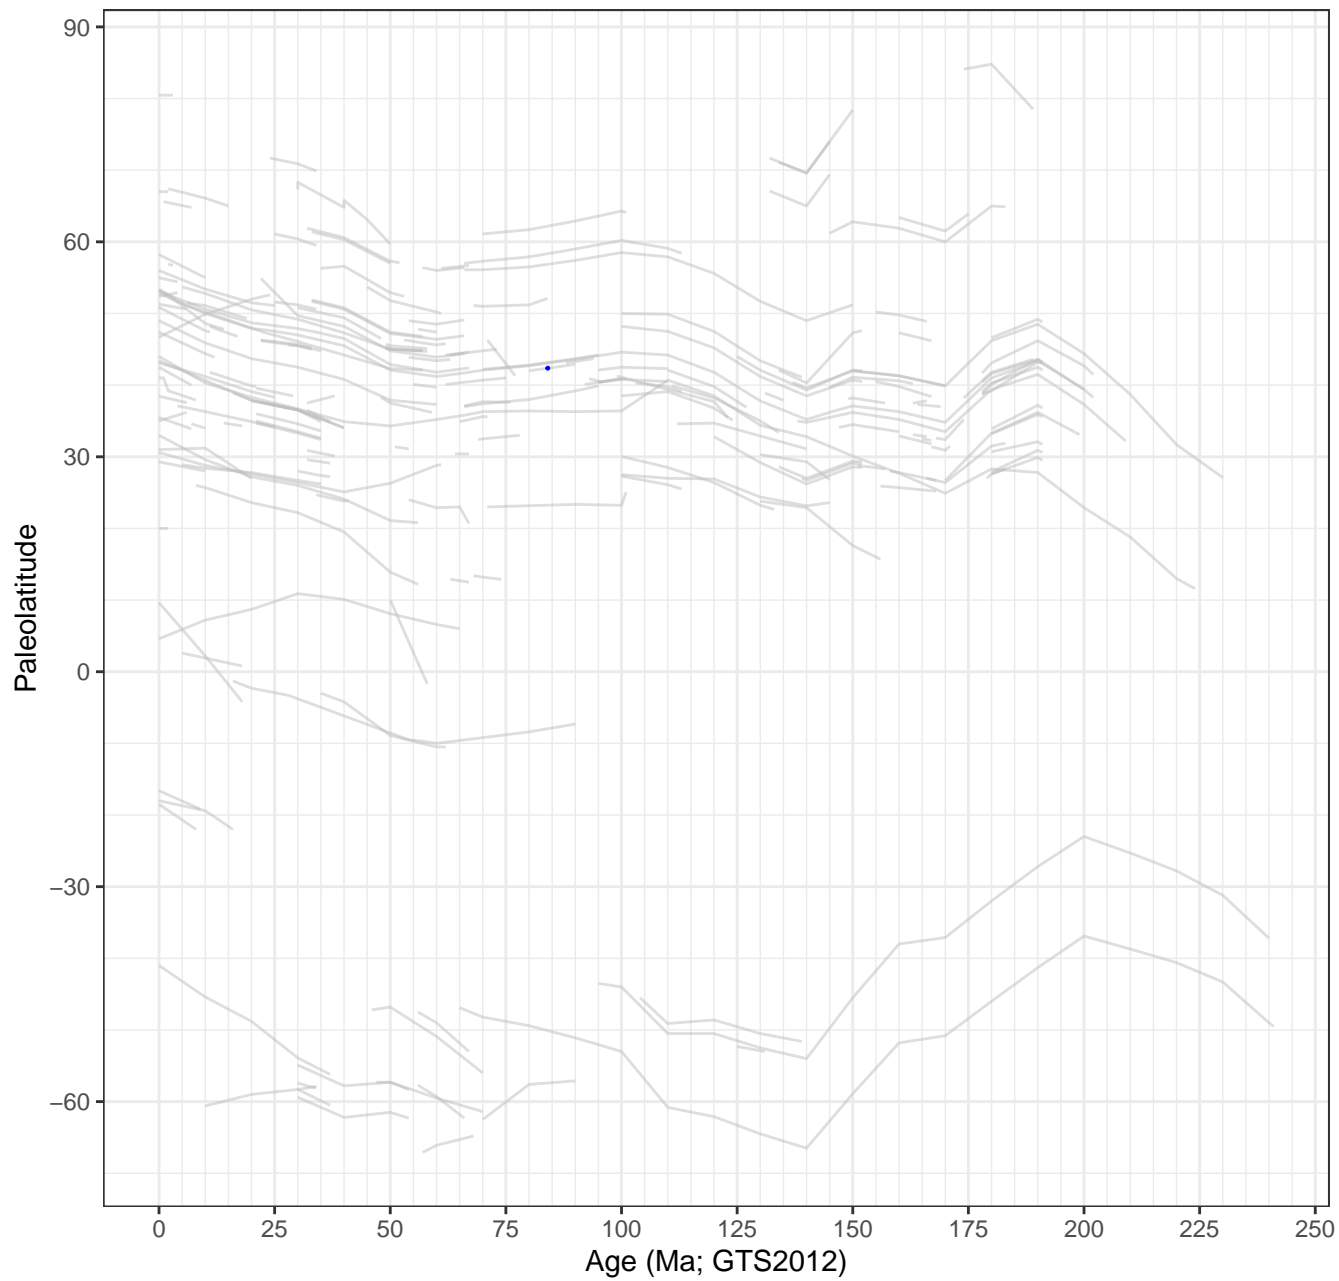

Supplement: Supplementary file 2326 [file Senoniasphaera macroreticulata.pdf › Supplement/Supplement 2/Species 1914 plots/Senoniasphaera macroreticulata.pdf]

# Species *Senoniasphaera microreticulata*

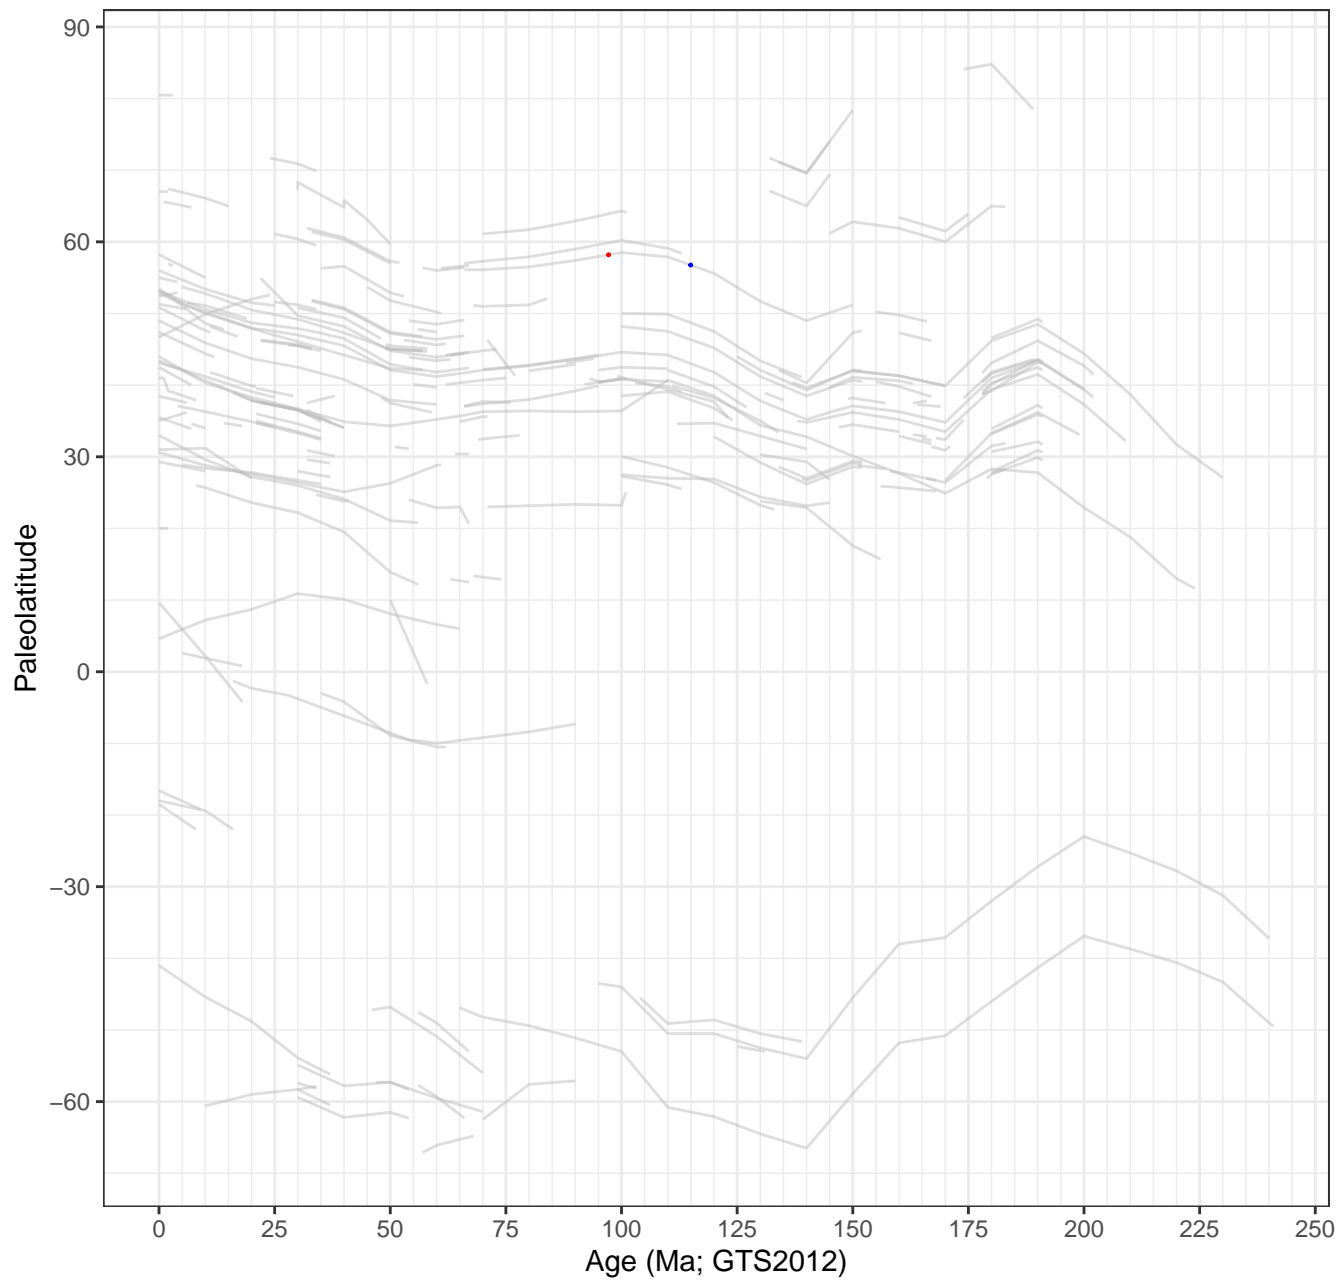

Supplement: Supplementary file 2327 [file Senoniasphaera microreticulata.pdf › Supplement/Supplement 2/Species 1914 plots/Senoniasphaera microreticulata.pdf]

# Species *Senoniasphaera protrusa*

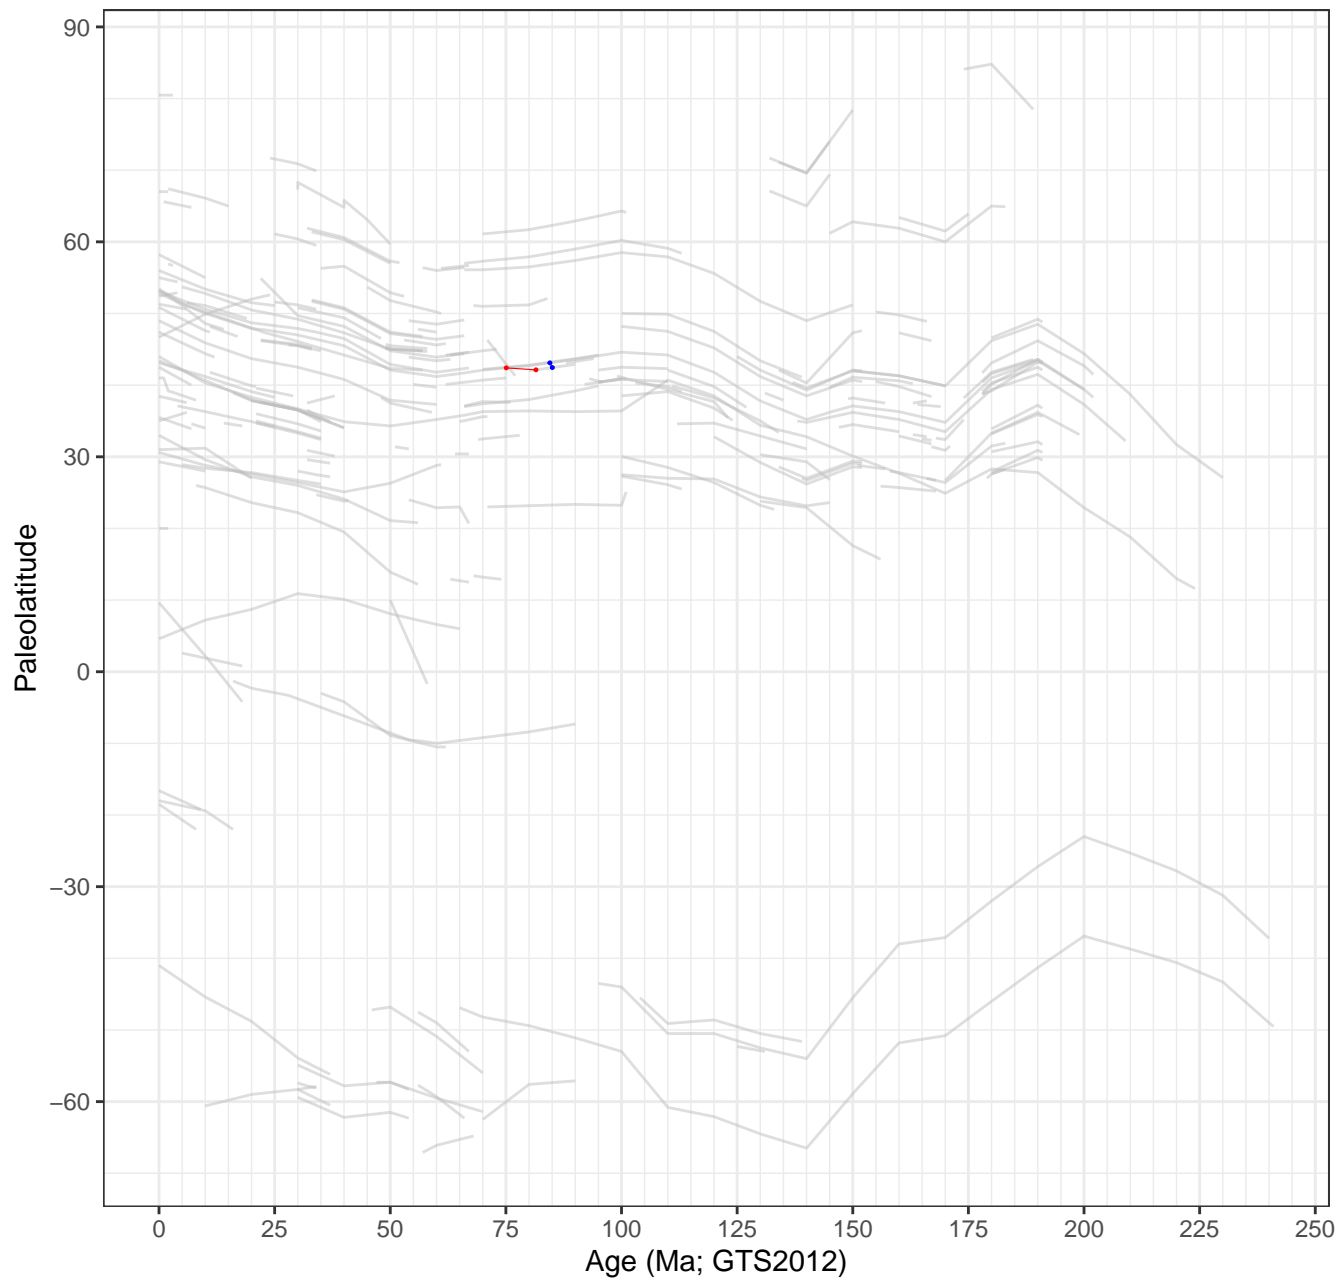

Supplement: Supplementary file 2328 [file Senoniasphaera protrusa.pdf › Supplement/Supplement 2/Species 1914 plots/Senoniasphaera protrusa.pdf]

# Species *Senoniasphaera ptomatis*

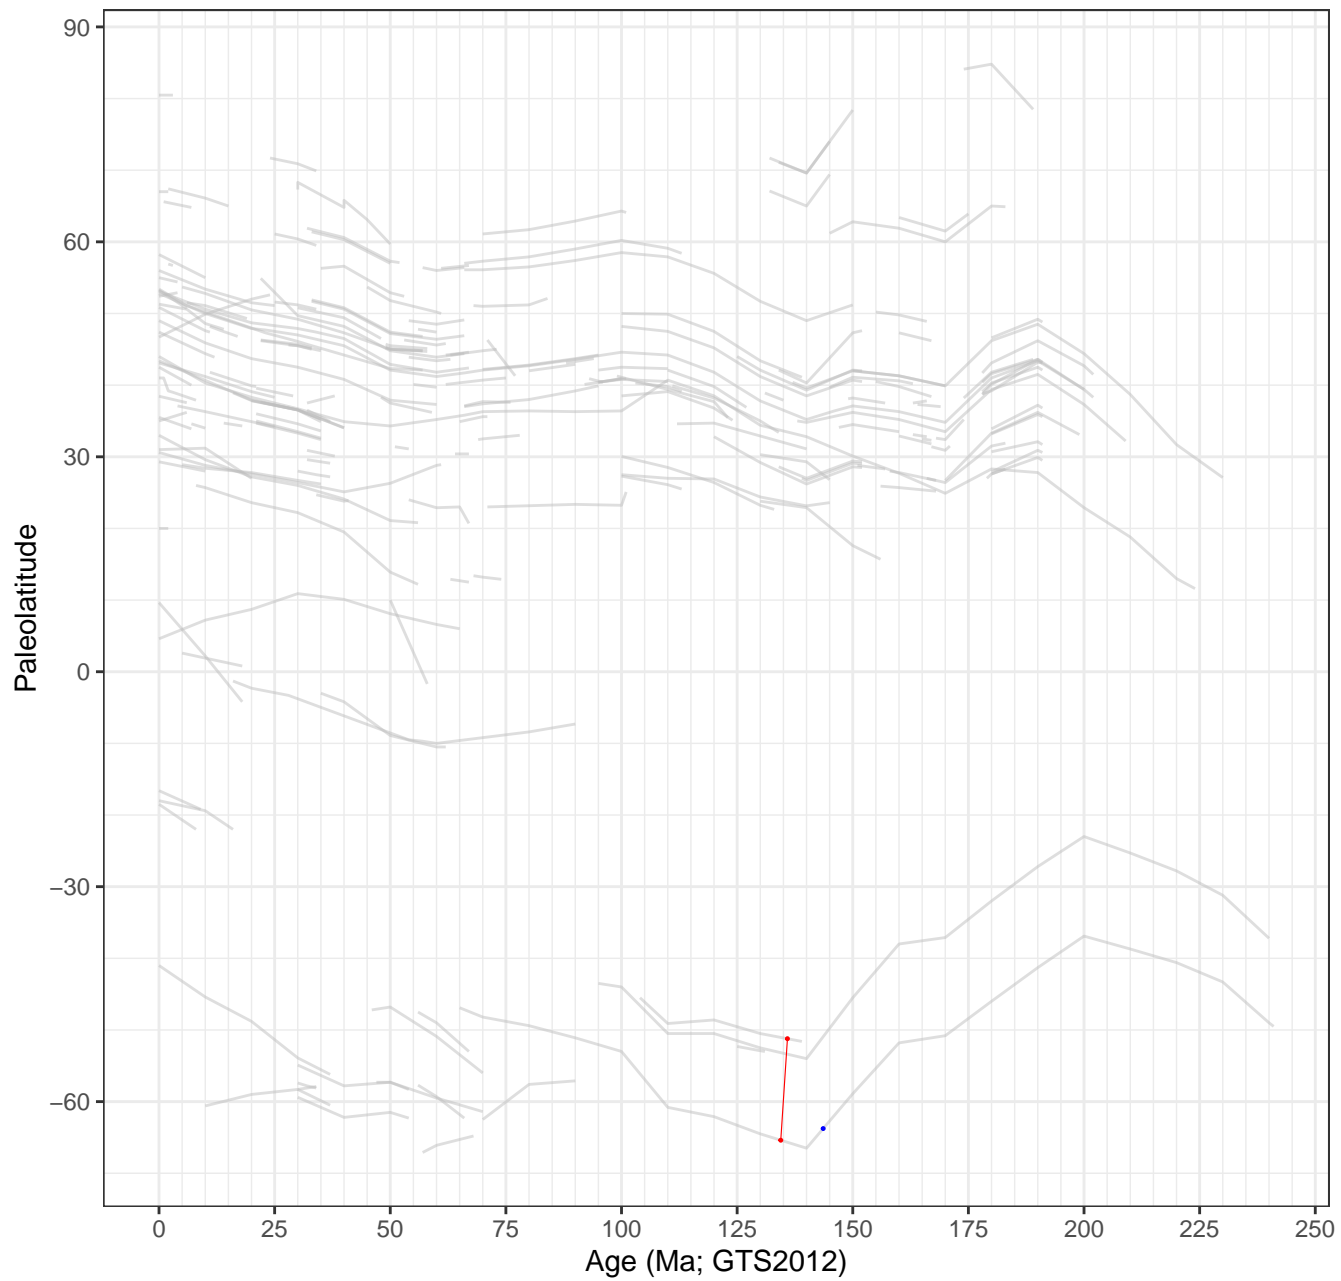

Supplement: Supplementary file 2329 [file Senoniasphaera ptomatis.pdf › Supplement/Supplement 2/Species 1914 plots/Senoniasphaera ptomatis.pdf]

# Species *Senoniasphaera rotundata alveolata*

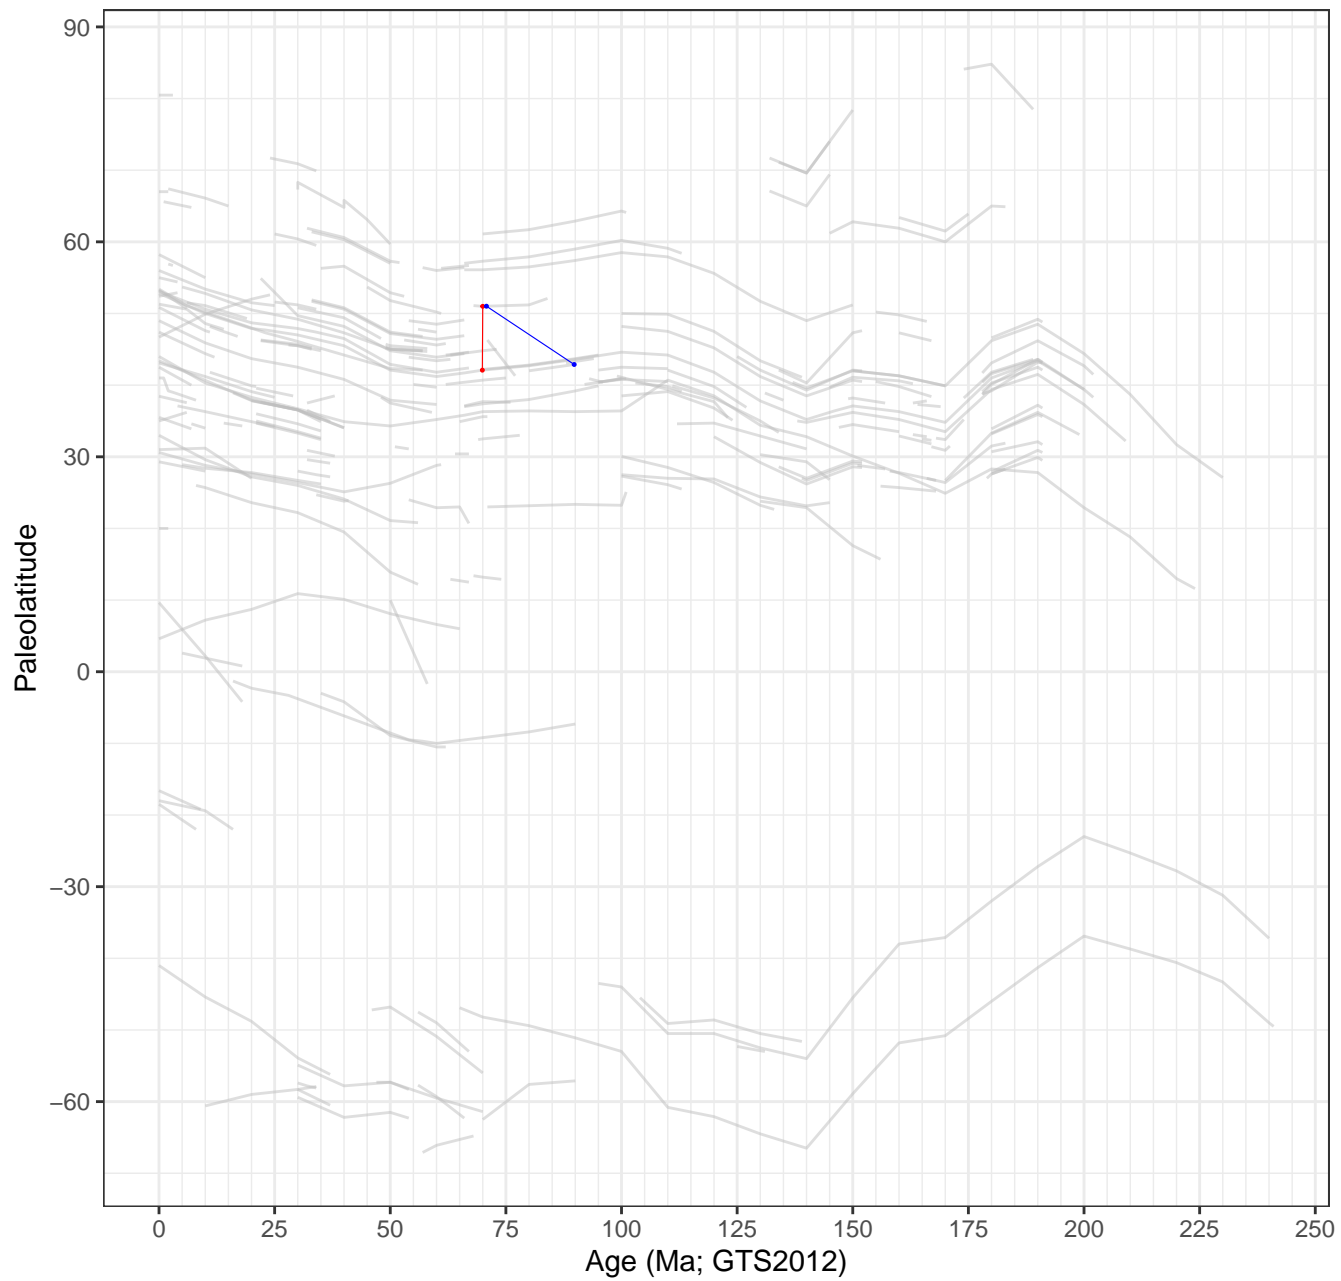

Supplement: Supplementary file 2330 [file Senoniasphaera rotundata alveolata.pdf › Supplement/Supplement 2/Species 1914 plots/Senoniasphaera rotundata alveolata.pdf]

# Species *Senoniasphaera rotundata rotundata*

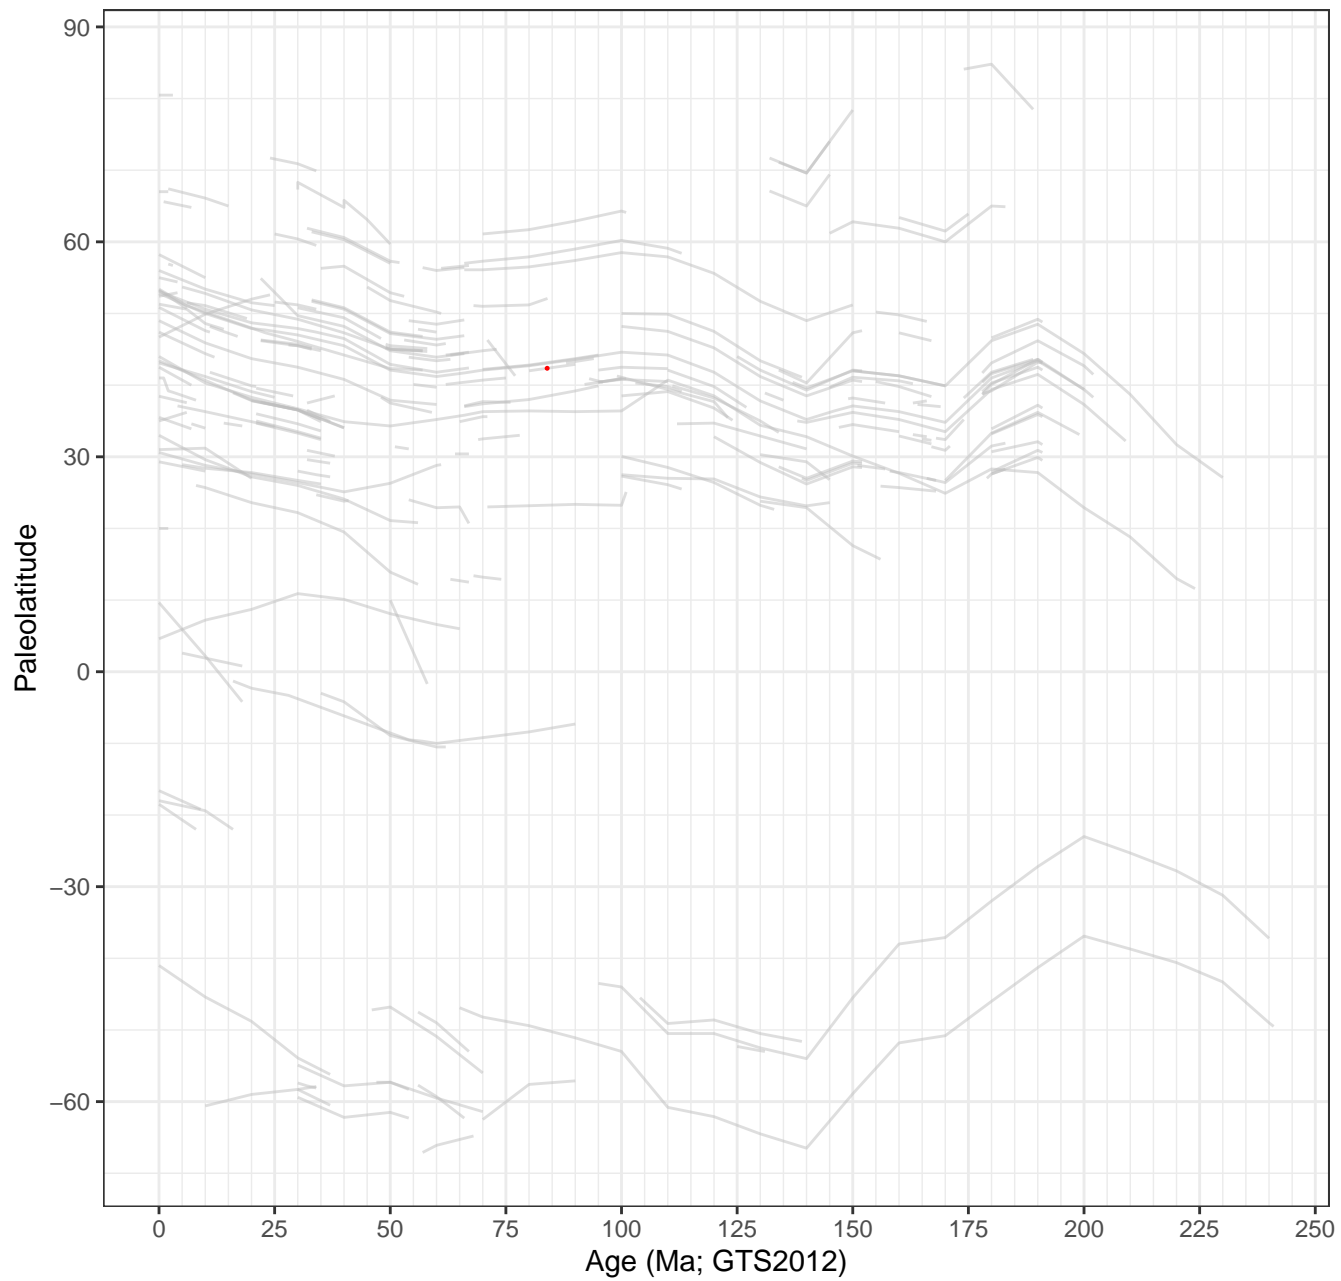

Supplement: Supplementary file 2331 [file Senoniasphaera rotundata rotundata.pdf › Supplement/Supplement 2/Species 1914 plots/Senoniasphaera rotundata rotundata.pdf]

# Species *Senoniasphaera rotundata*

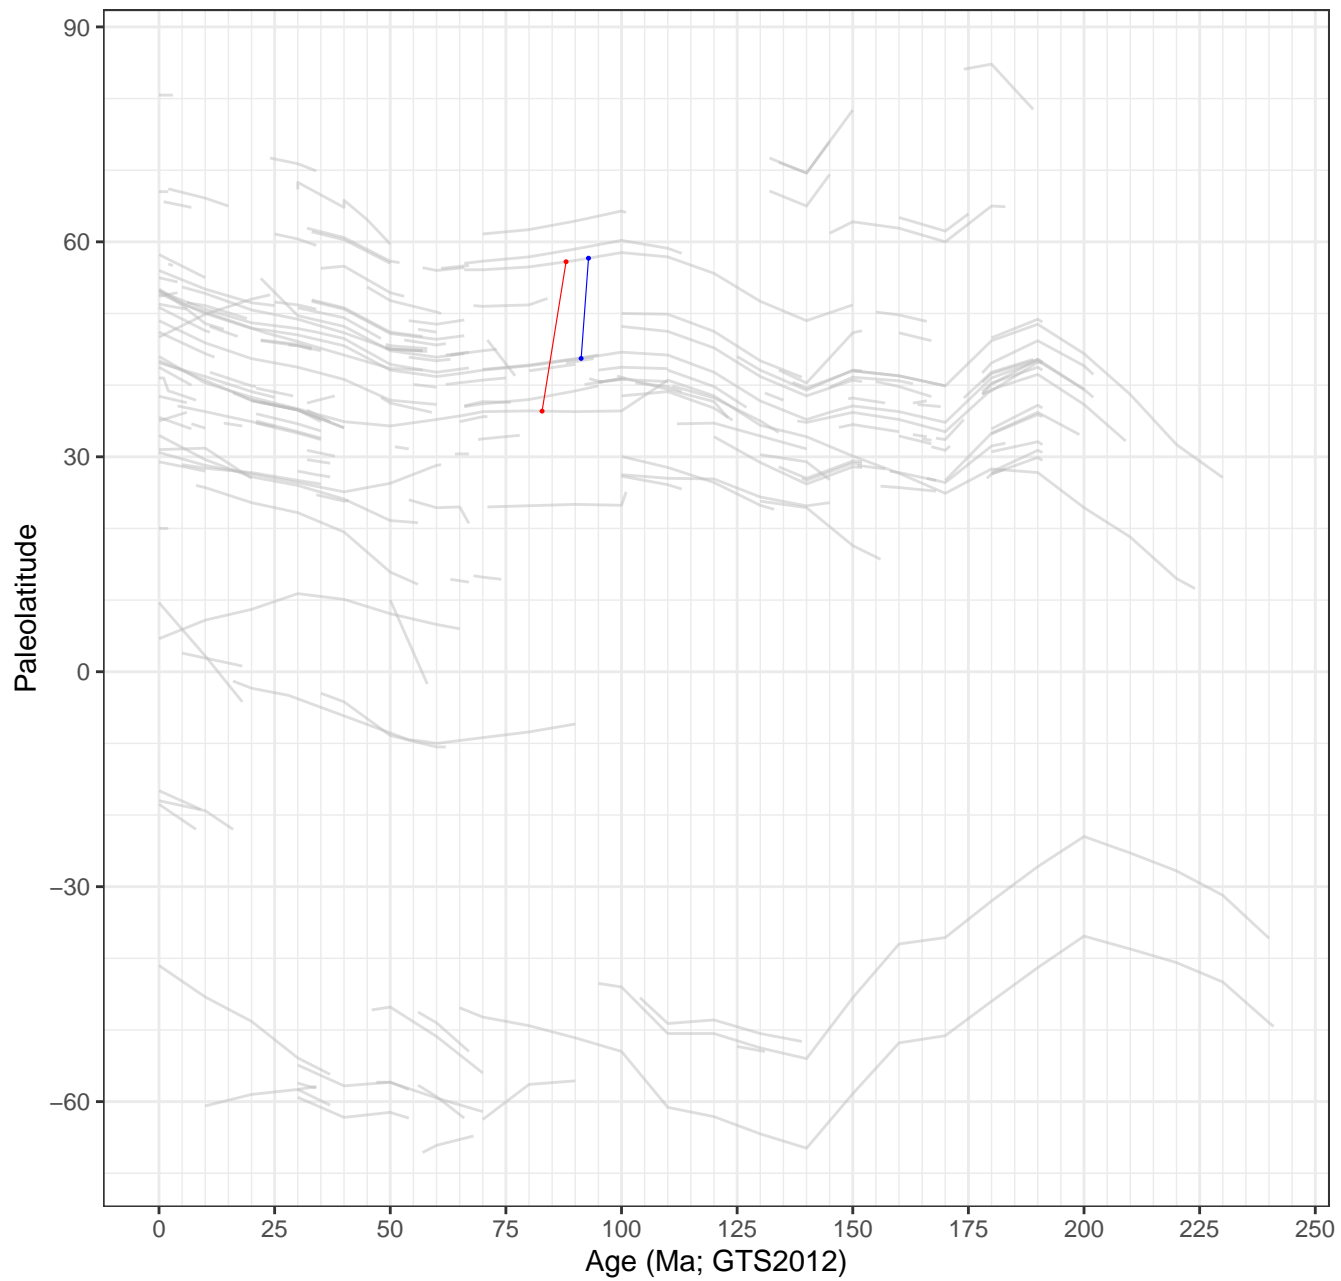

Supplement: Supplementary file 2332 [file Senoniasphaera rotundata.pdf › Supplement/Supplement 2/Species 1914 plots/Senoniasphaera rotundata.pdf]

# Species *Senoniasphaera turonica*

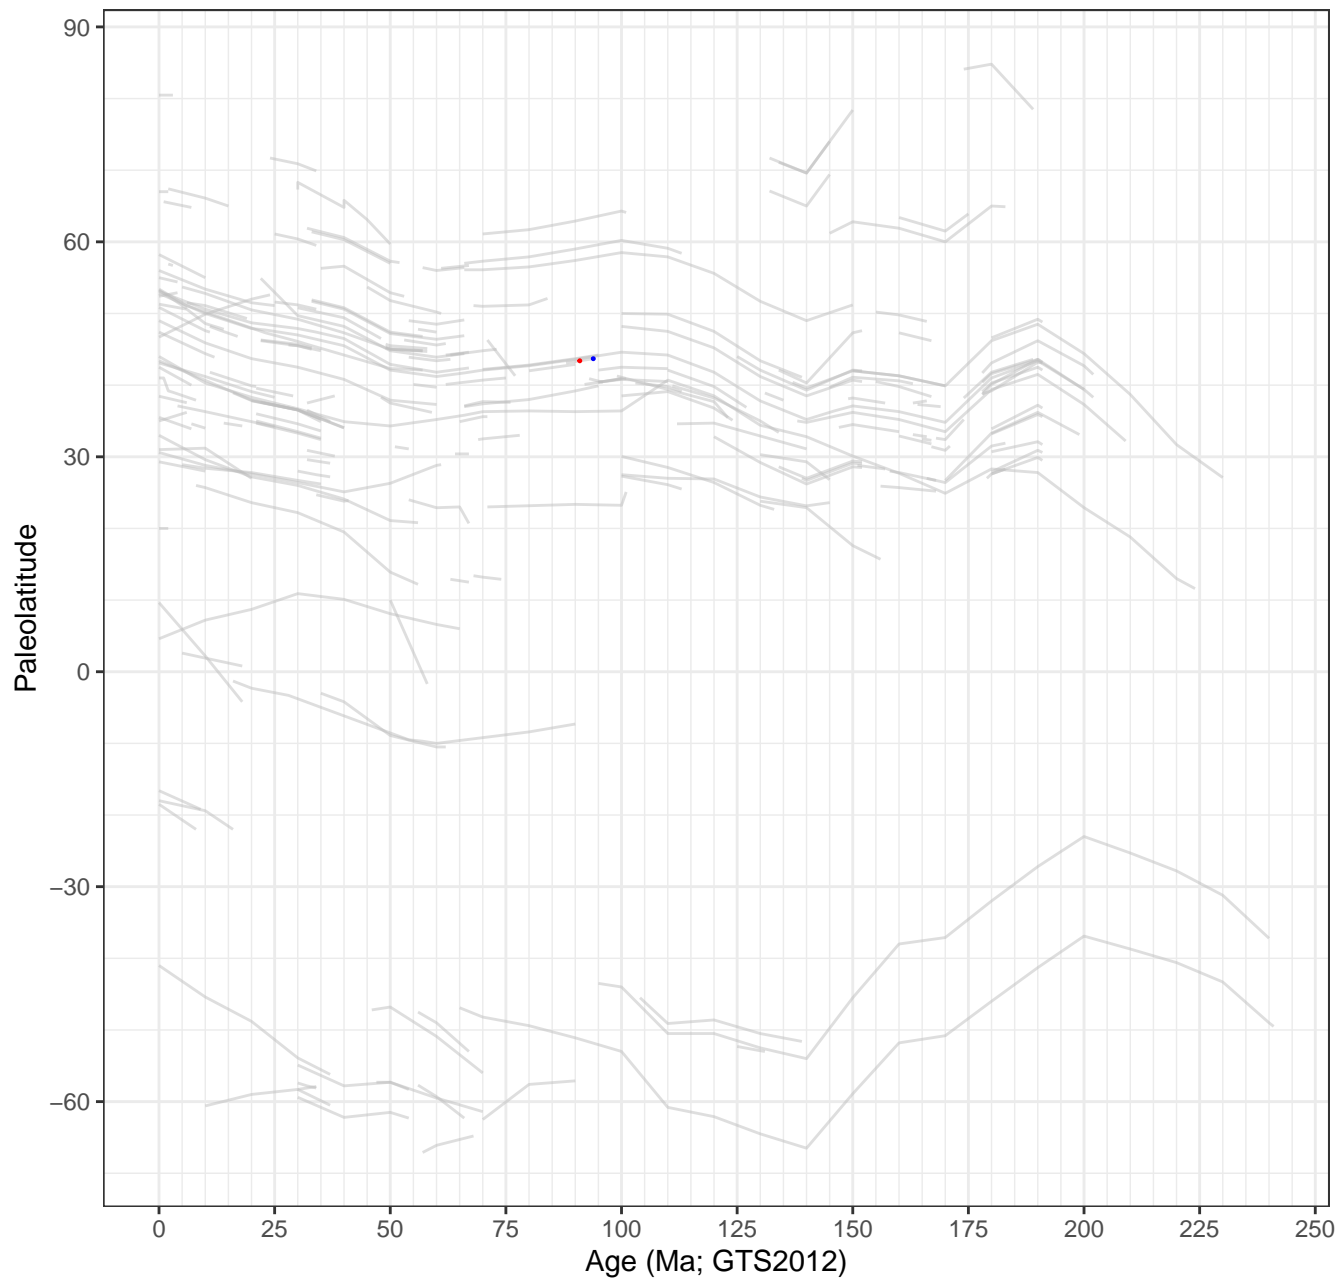

Supplement: Supplementary file 2333 [file Senoniasphaera turonica.pdf › Supplement/Supplement 2/Species 1914 plots/Senoniasphaera turonica.pdf]
