# Supplementary figures and images for: DINOSTRAT: a global database of the stratigraphic and paleolatitudinal distribution of Mesozoic–Cenozoic organic-walled dinoflagellate cysts (part 24 of 27)
Source: Copernicus journal article supplement (doi:10.5194/essd-14-579-2022), 2022-02-09

# Species *Senoniasphaera whitenessii*

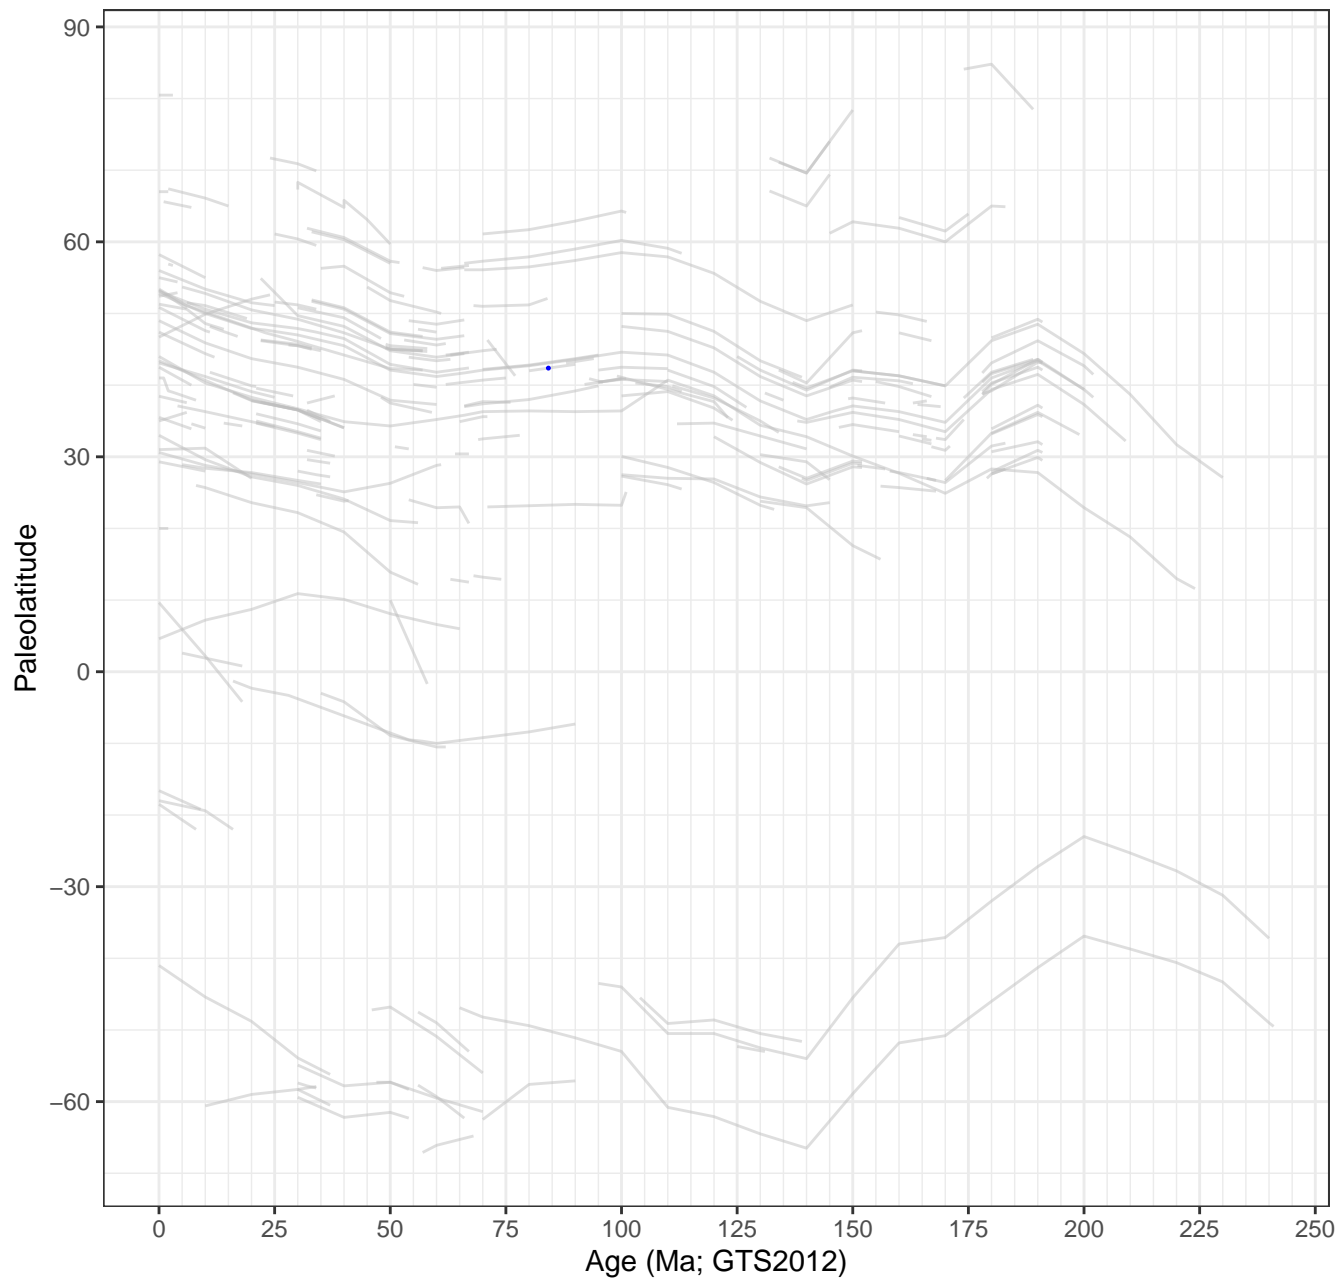

Supplement: Supplementary file 2334 [file Senoniasphaera whitenessii.pdf › Supplement/Supplement 2/Species 1914 plots/Senoniasphaera whitenessii.pdf]

# Species *Sentusidinium rioulti*

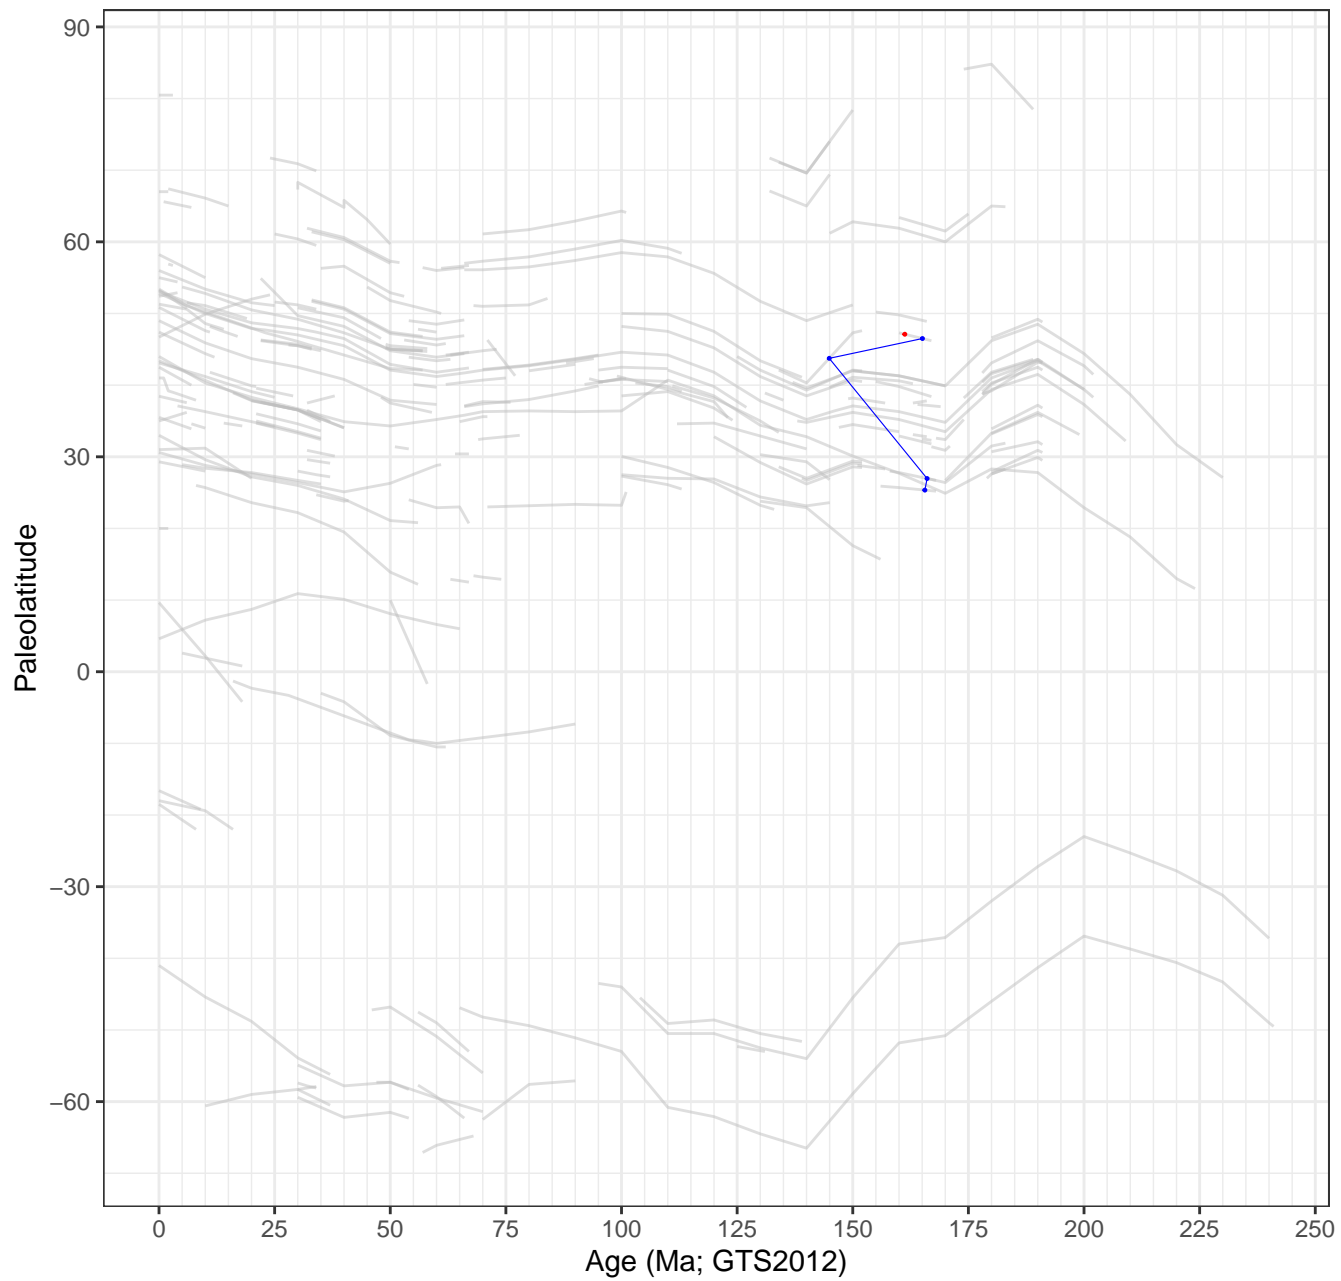

Supplement: Supplementary file 2335 [file Sentusidinium rioulti.pdf › Supplement/Supplement 2/Species 1914 plots/Sentusidinium rioulti.pdf]

# Species *Sentusidinium separatum*

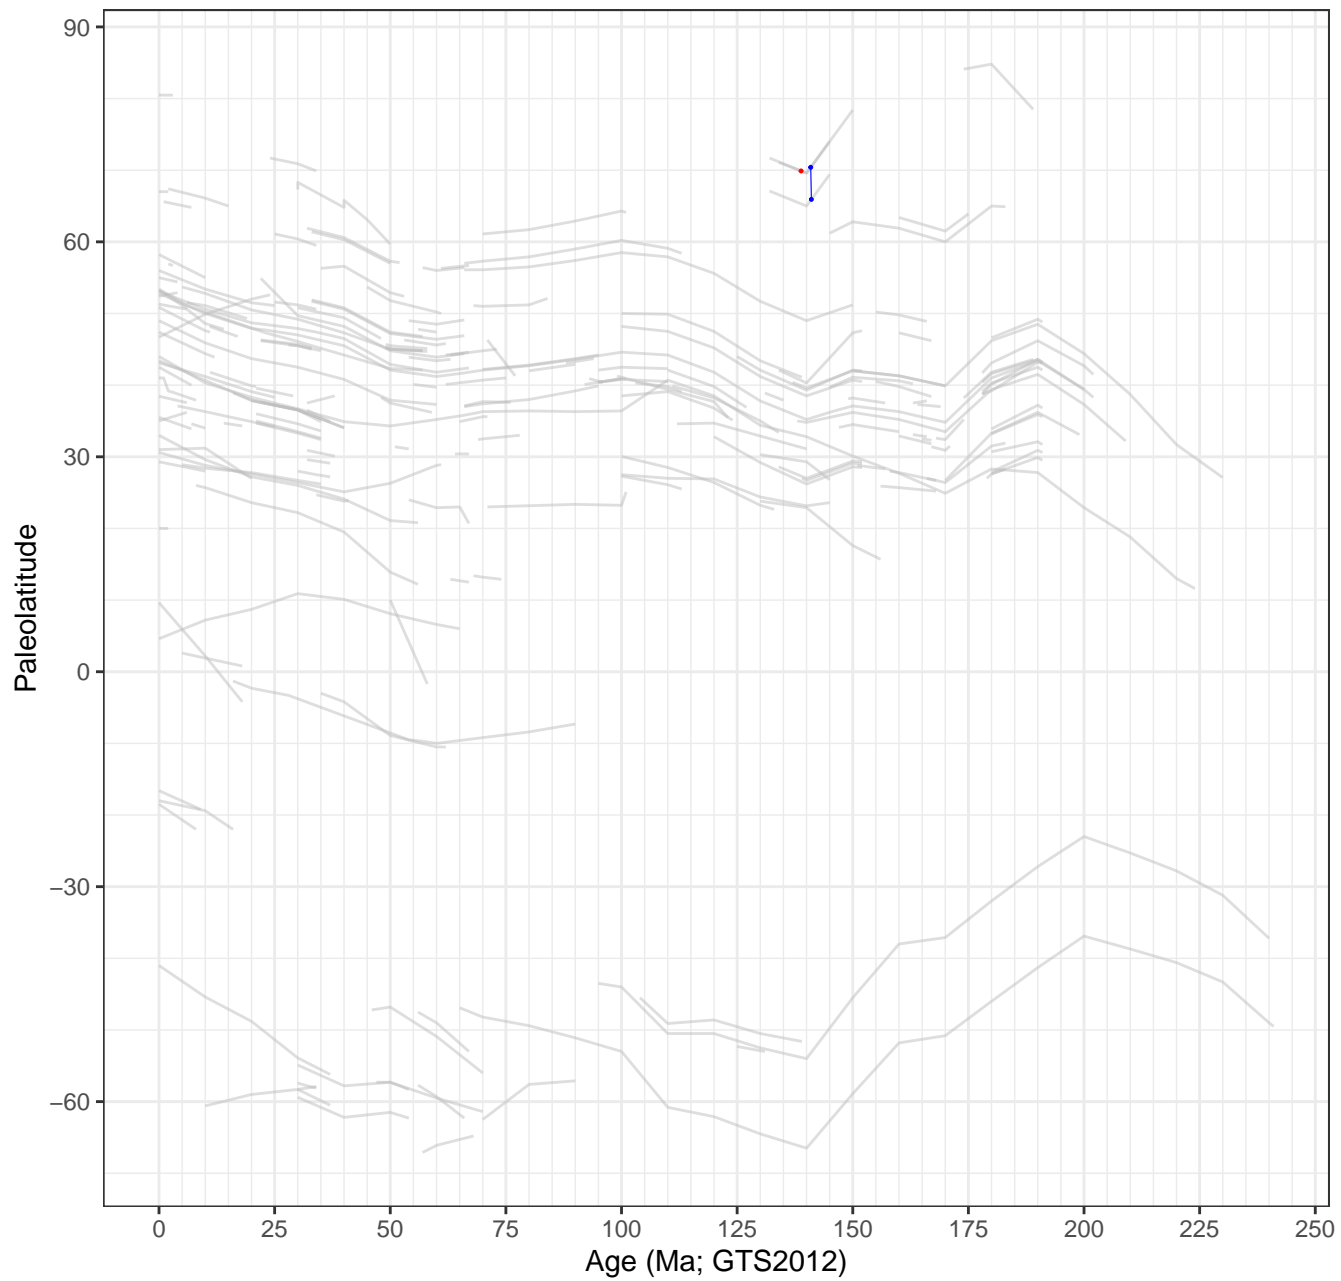

Supplement: Supplementary file 2336 [file Sentusidinium separatum.pdf › Supplement/Supplement 2/Species 1914 plots/Sentusidinium separatum.pdf]

# Species *Sentusidinium sparsibarbatum*

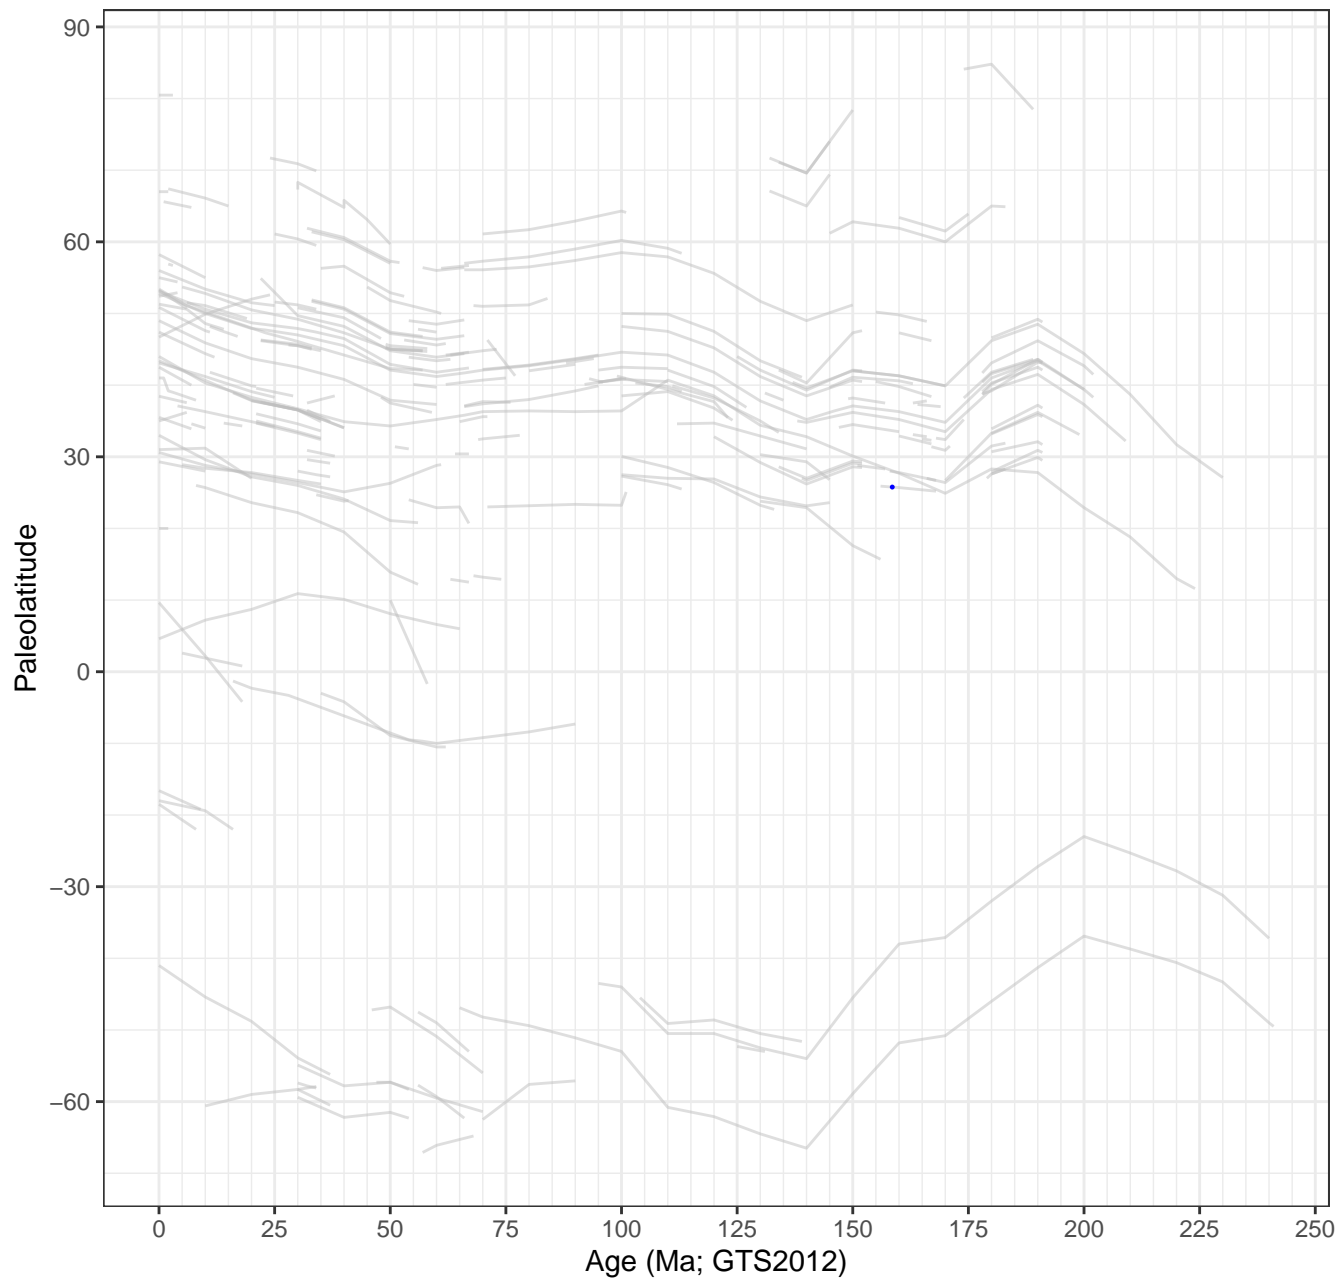

Supplement: Supplementary file 2337 [file Sentusidinium sparsibarbatum.pdf › Supplement/Supplement 2/Species 1914 plots/Sentusidinium sparsibarbatum.pdf]

# Species Sentusidinium spp.

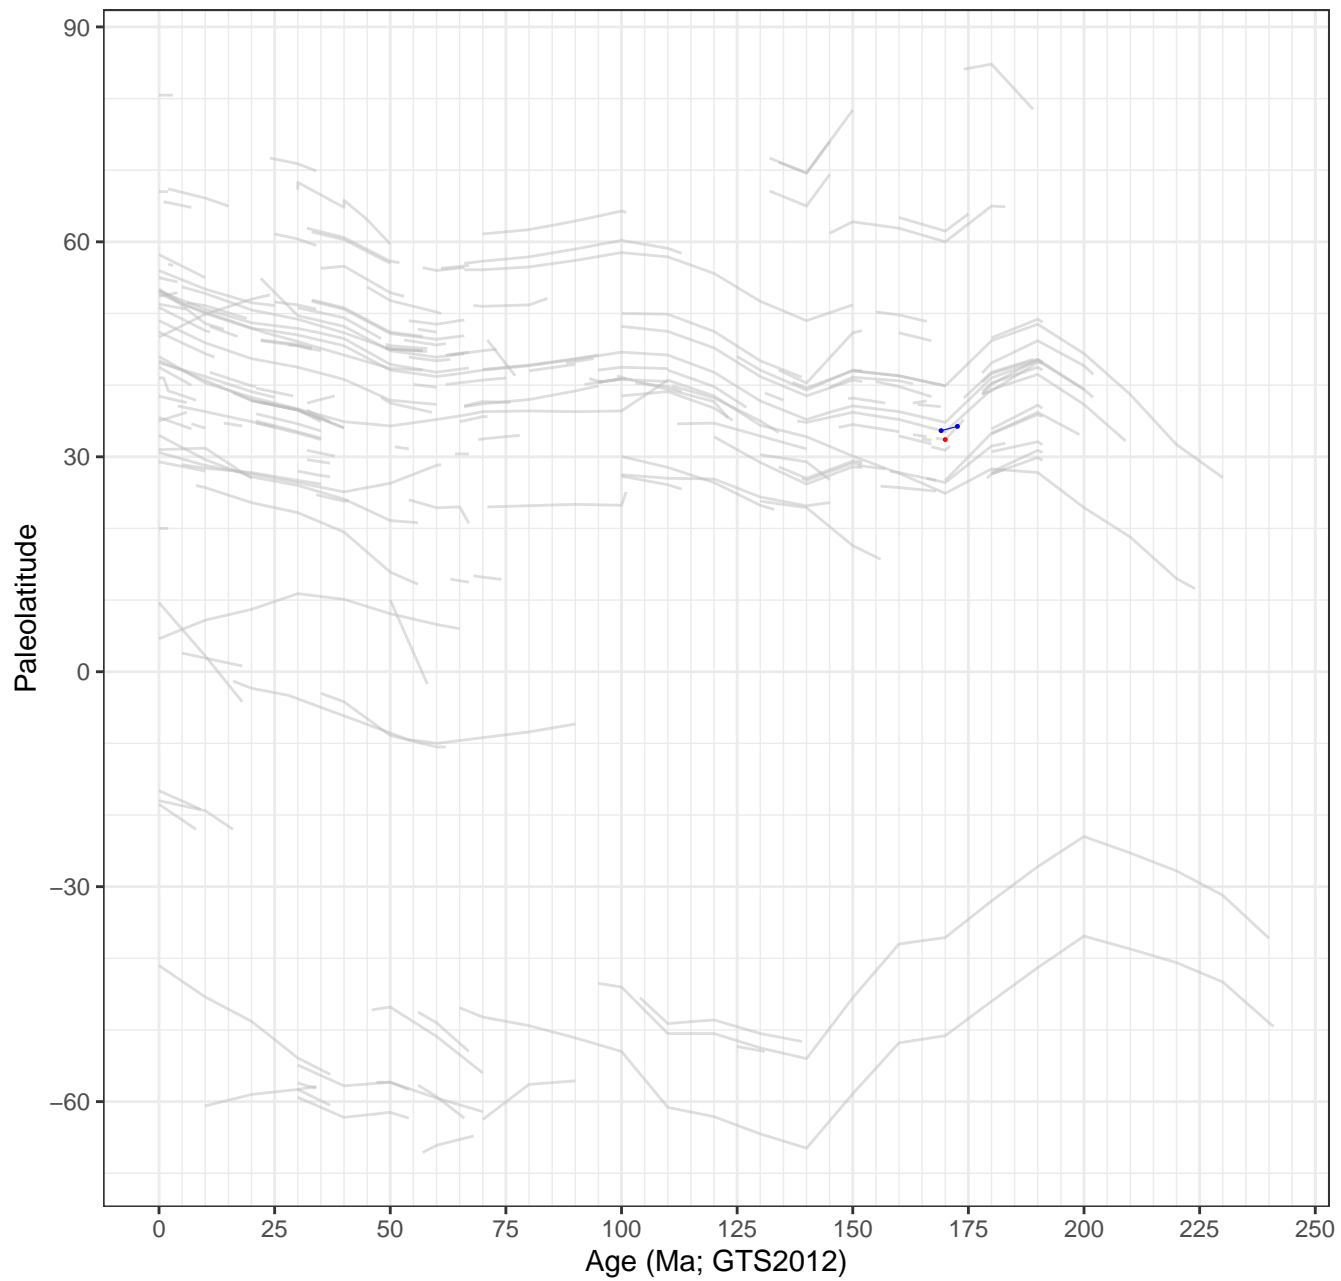

Supplement: Supplementary file 2338 [file Sentusidinium spp..pdf › Supplement/Supplement 2/Species 1914 plots/Sentusidinium spp..pdf]

# Species *Sentusidinium villersense*

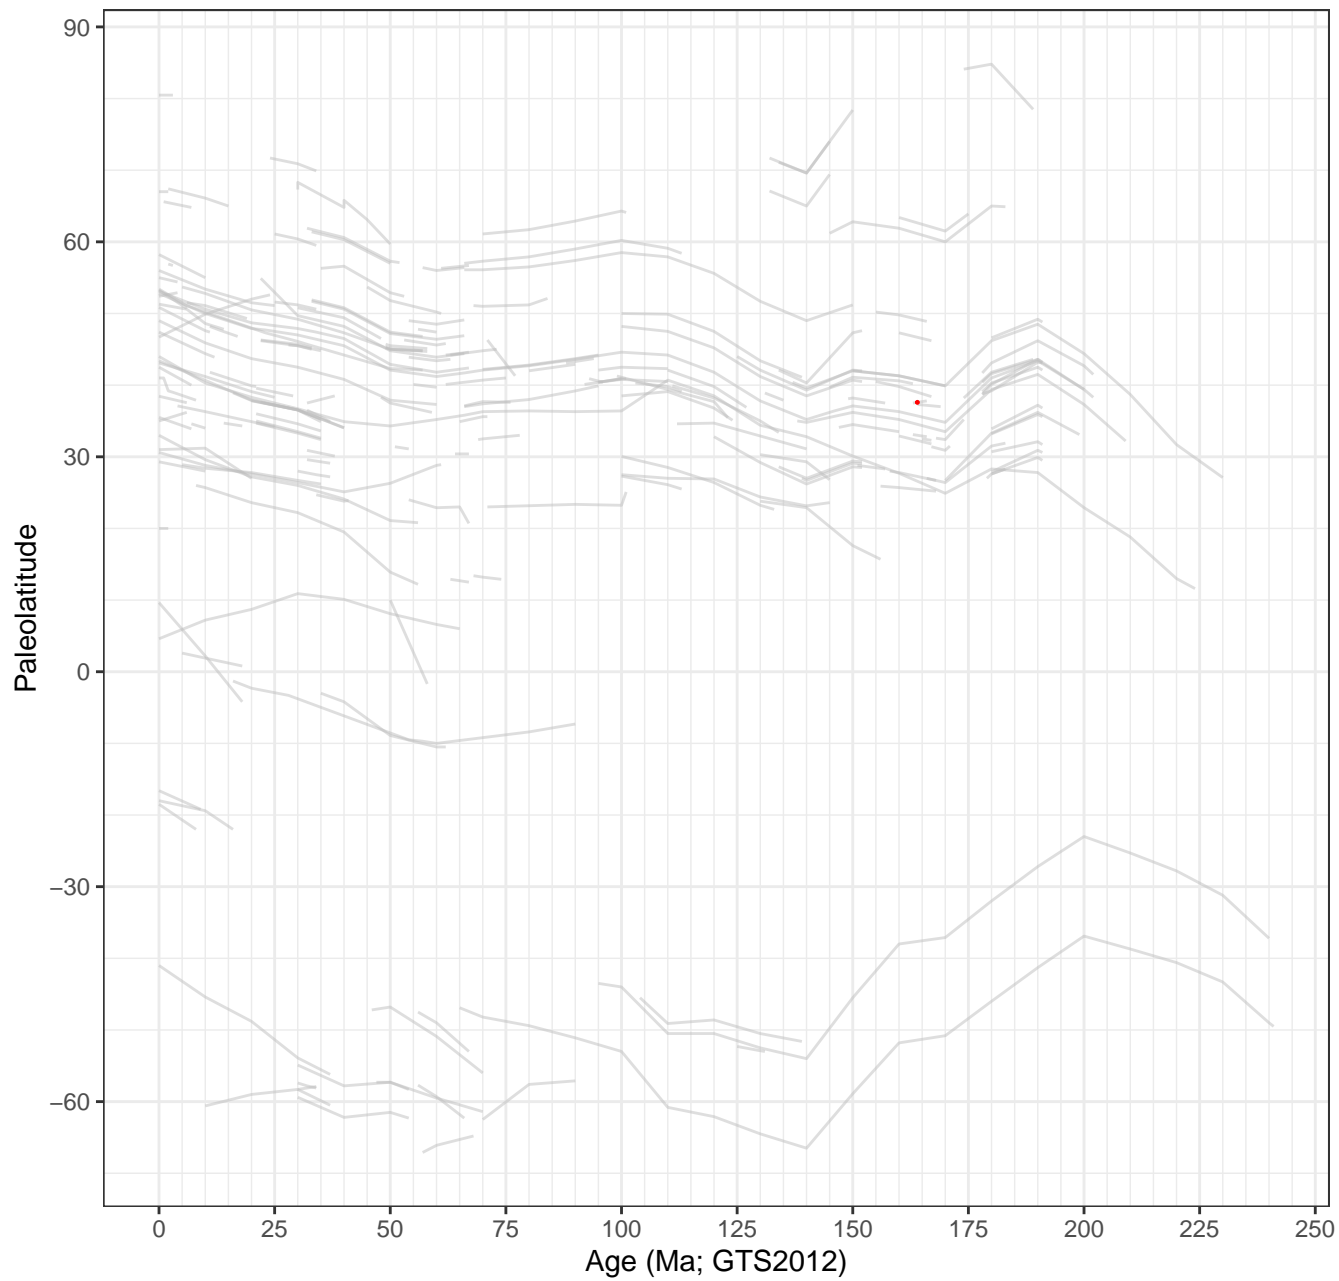

Supplement: Supplementary file 2339 [file Sentusidinium villersense.pdf › Supplement/Supplement 2/Species 1914 plots/Sentusidinium villersense.pdf]

# Species *Sepispinula ambigua ambigua*

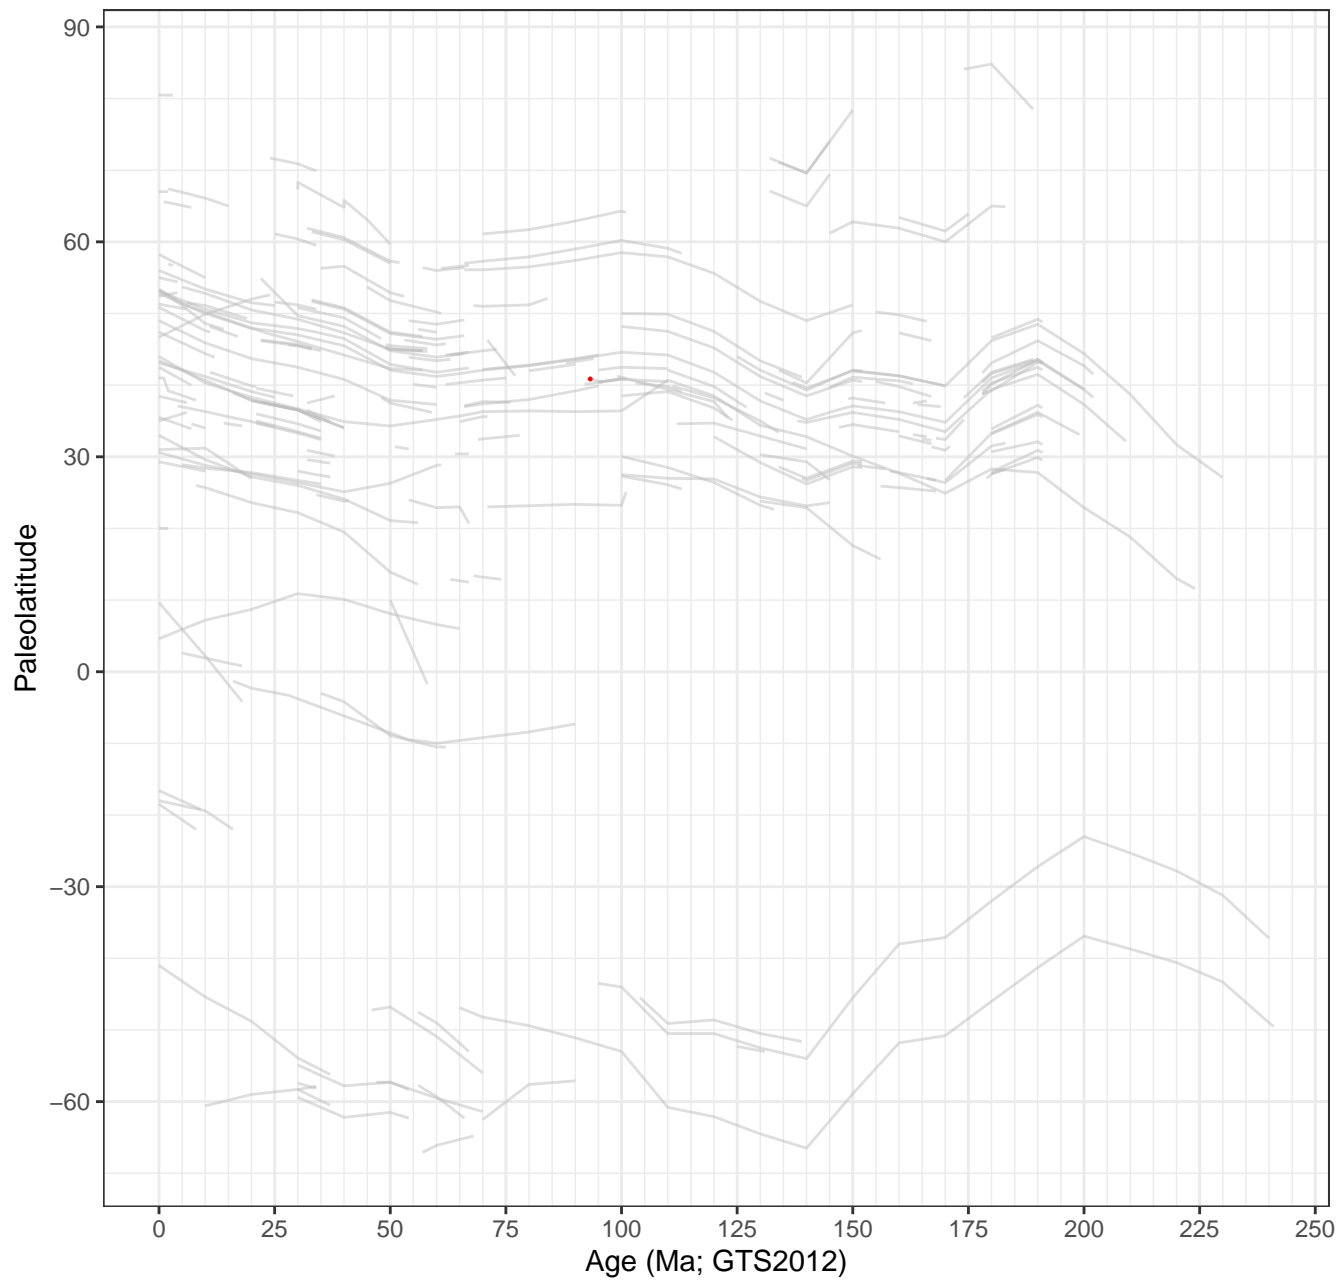

Supplement: Supplementary file 2340 [file Sepispinula ambigua ambigua.pdf › Supplement/Supplement 2/Species 1914 plots/Sepispinula ambigua ambigua.pdf]

# Species *Sepispinula ambigua*

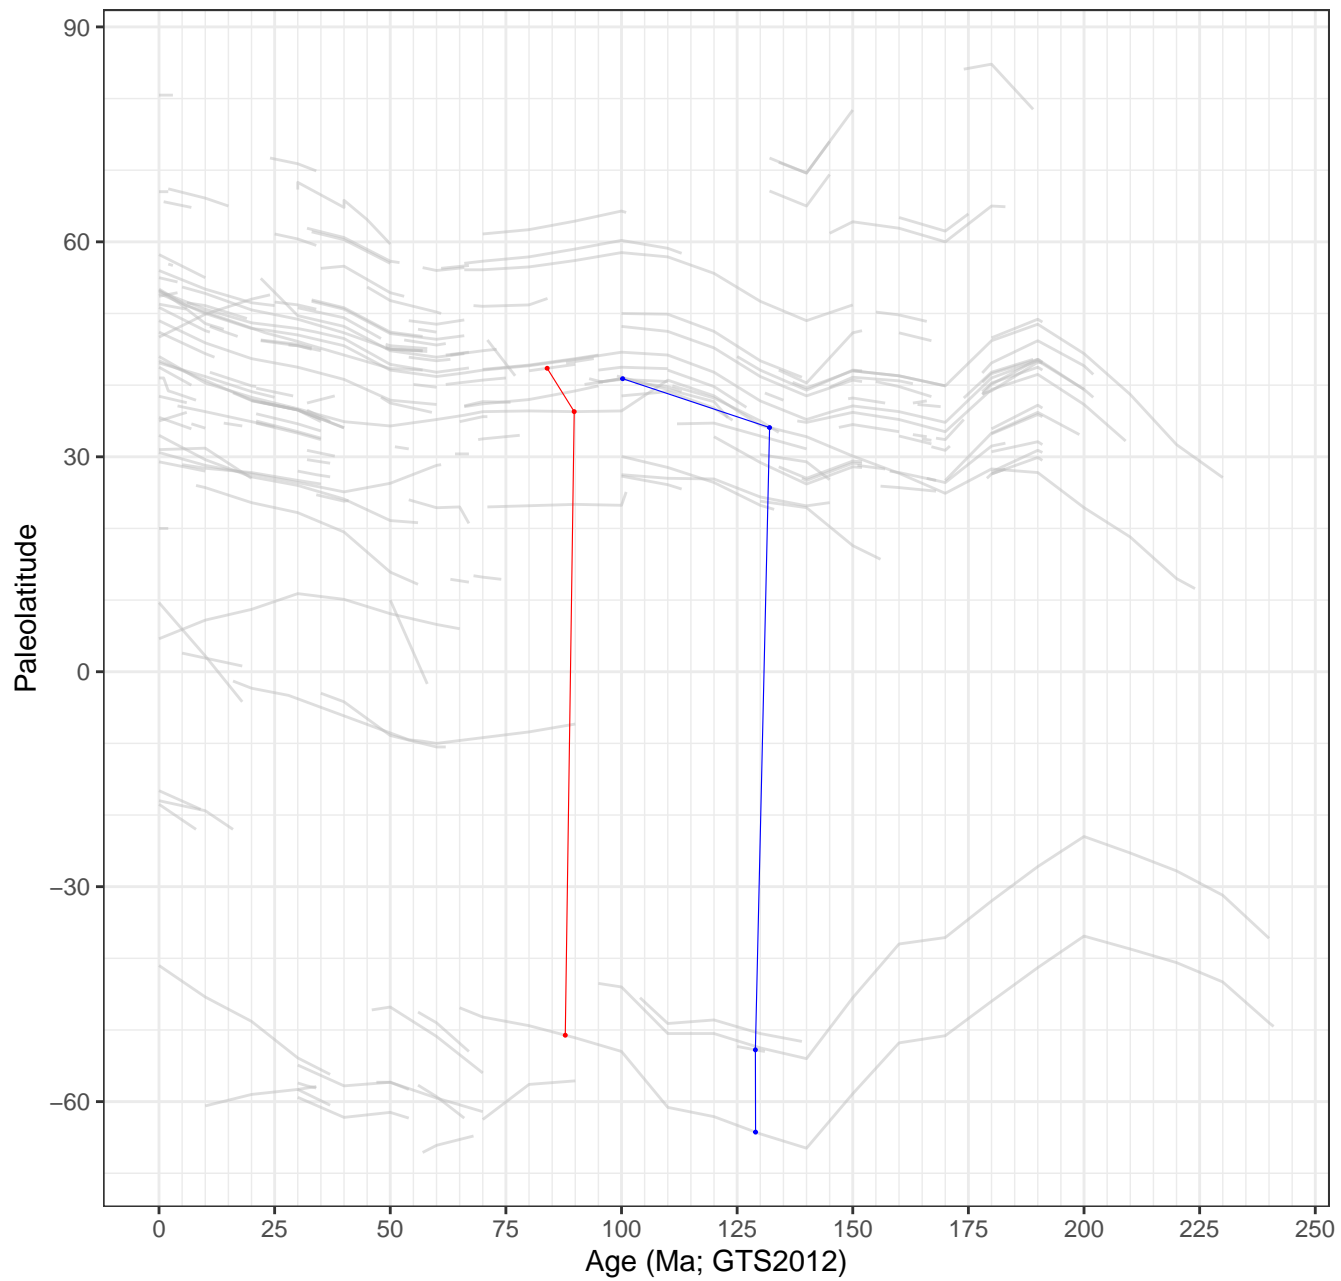

Supplement: Supplementary file 2341 [file Sepispinula ambigua.pdf › Supplement/Supplement 2/Species 1914 plots/Sepispinula ambigua.pdf]

# Species *Sepispinula ancorifera*

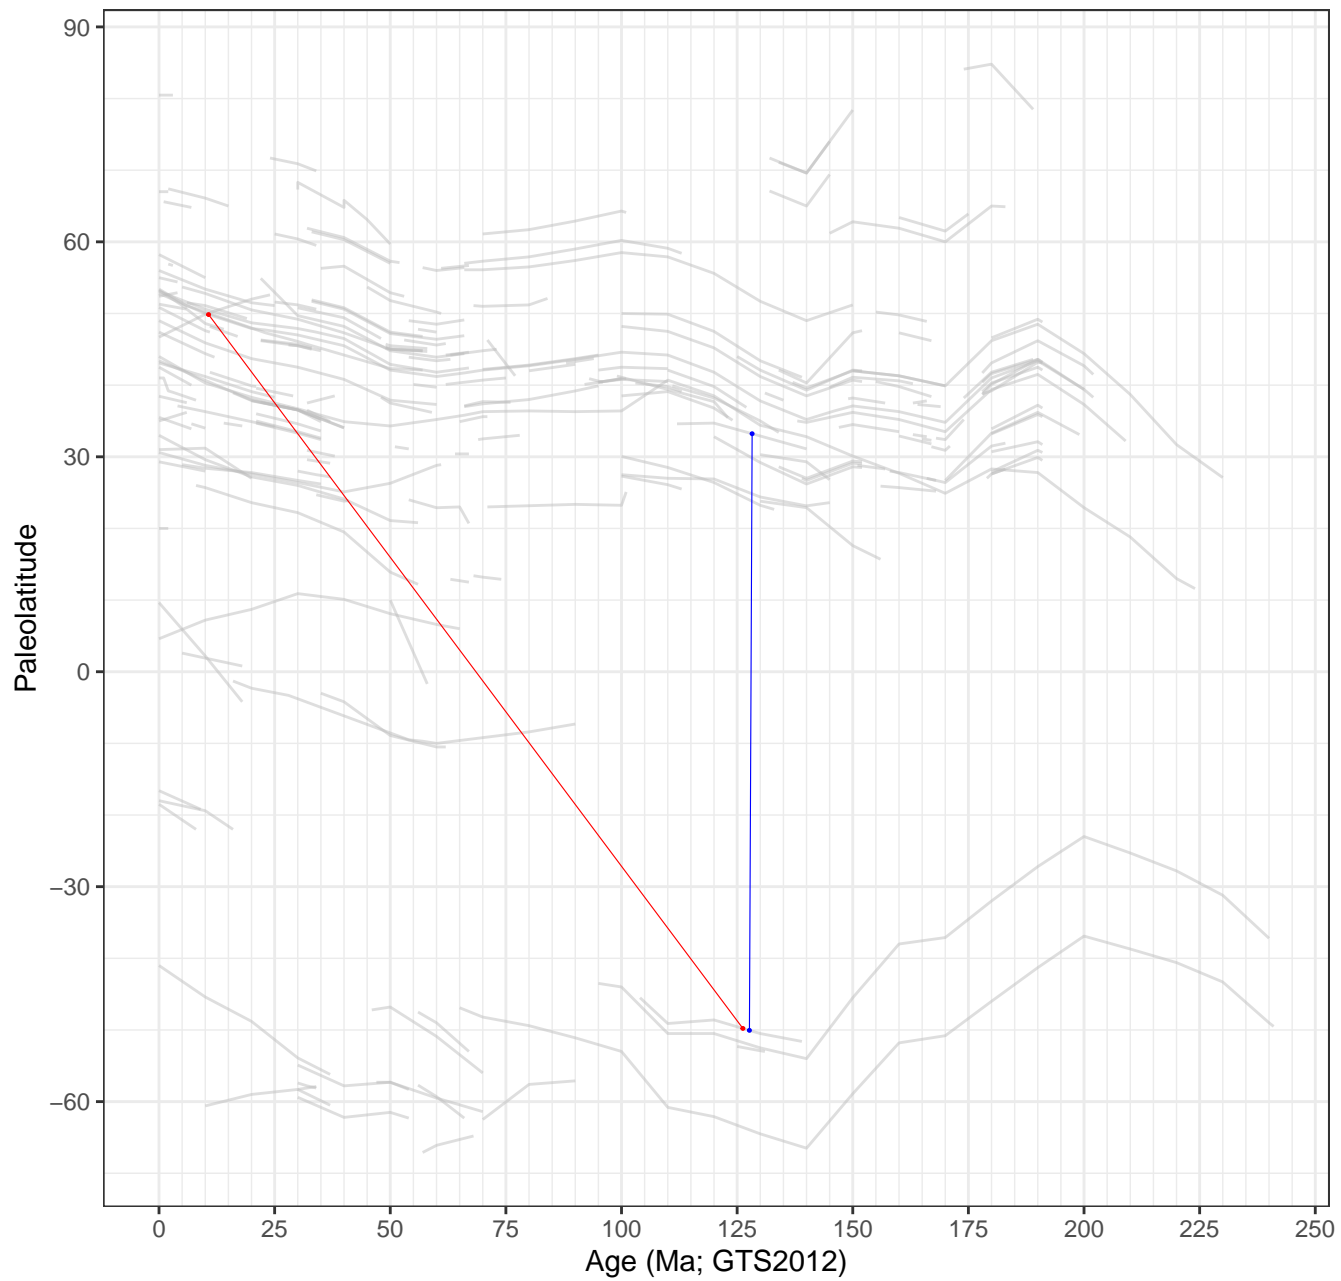

Supplement: Supplementary file 2342 [file Sepispinula ancorifera.pdf › Supplement/Supplement 2/Species 1914 plots/Sepispinula ancorifera.pdf]

# Species *Sepispinula huguoniotti*

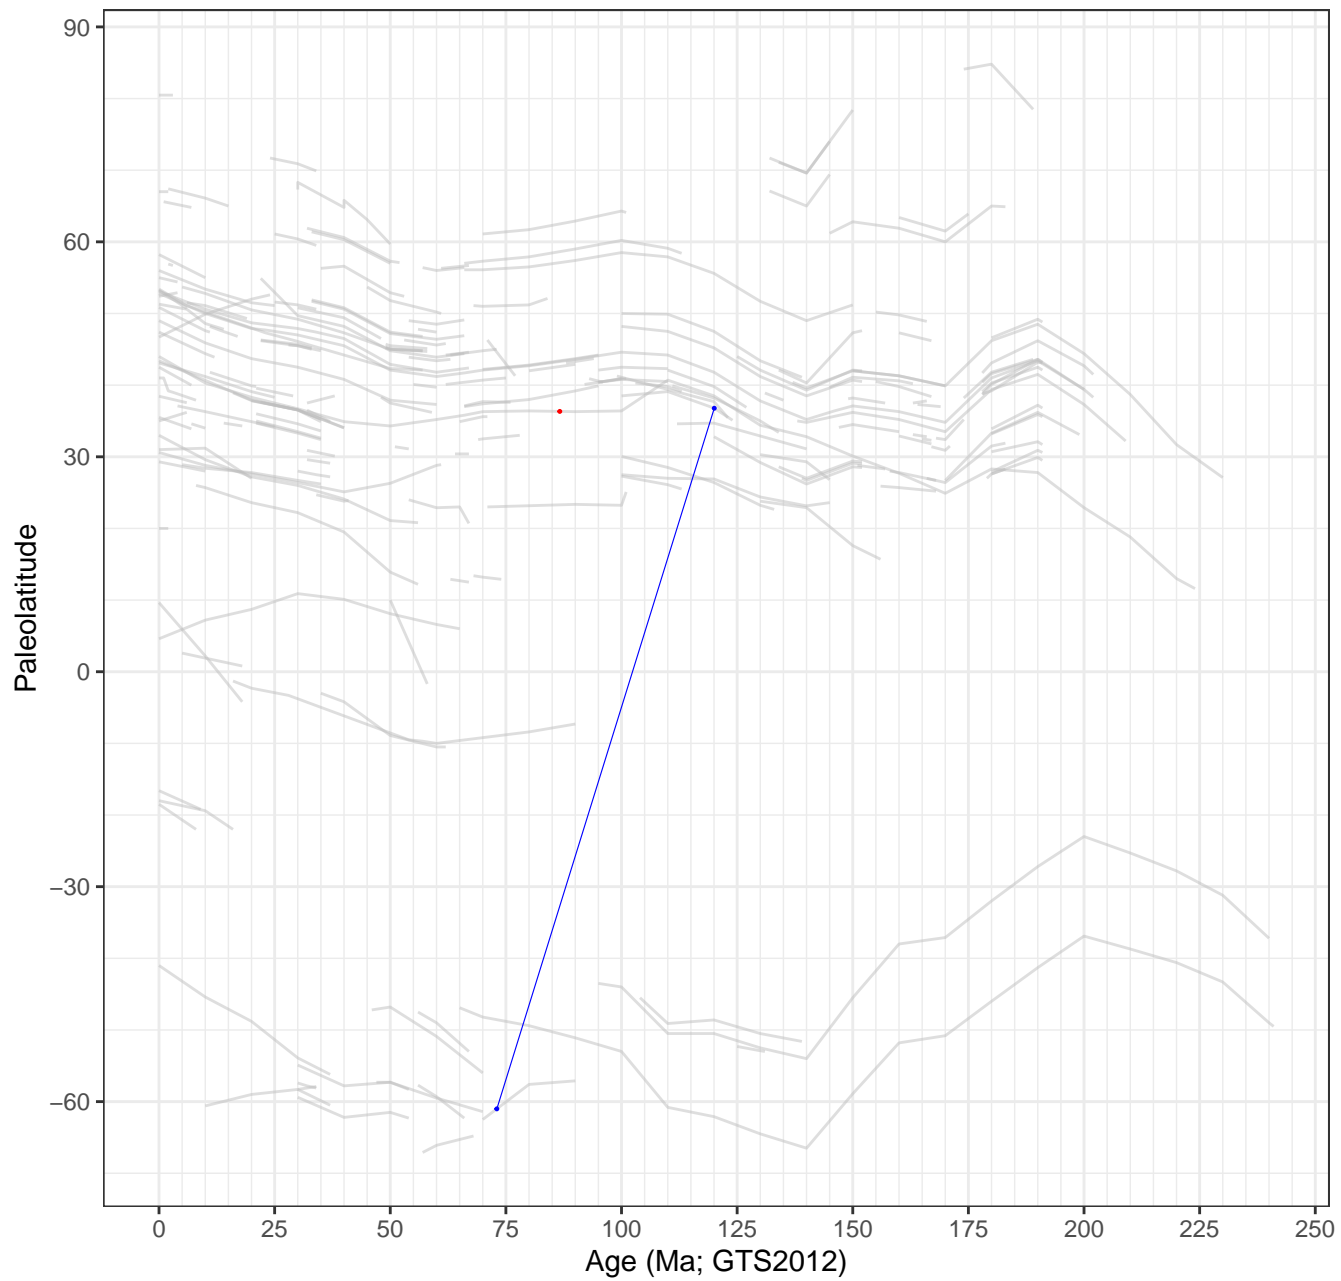

Supplement: Supplementary file 2343 [file Sepispinula huguoniotti.pdf › Supplement/Supplement 2/Species 1914 plots/Sepispinula huguoniotti.pdf]

# Species *Sindridinium anaanae*

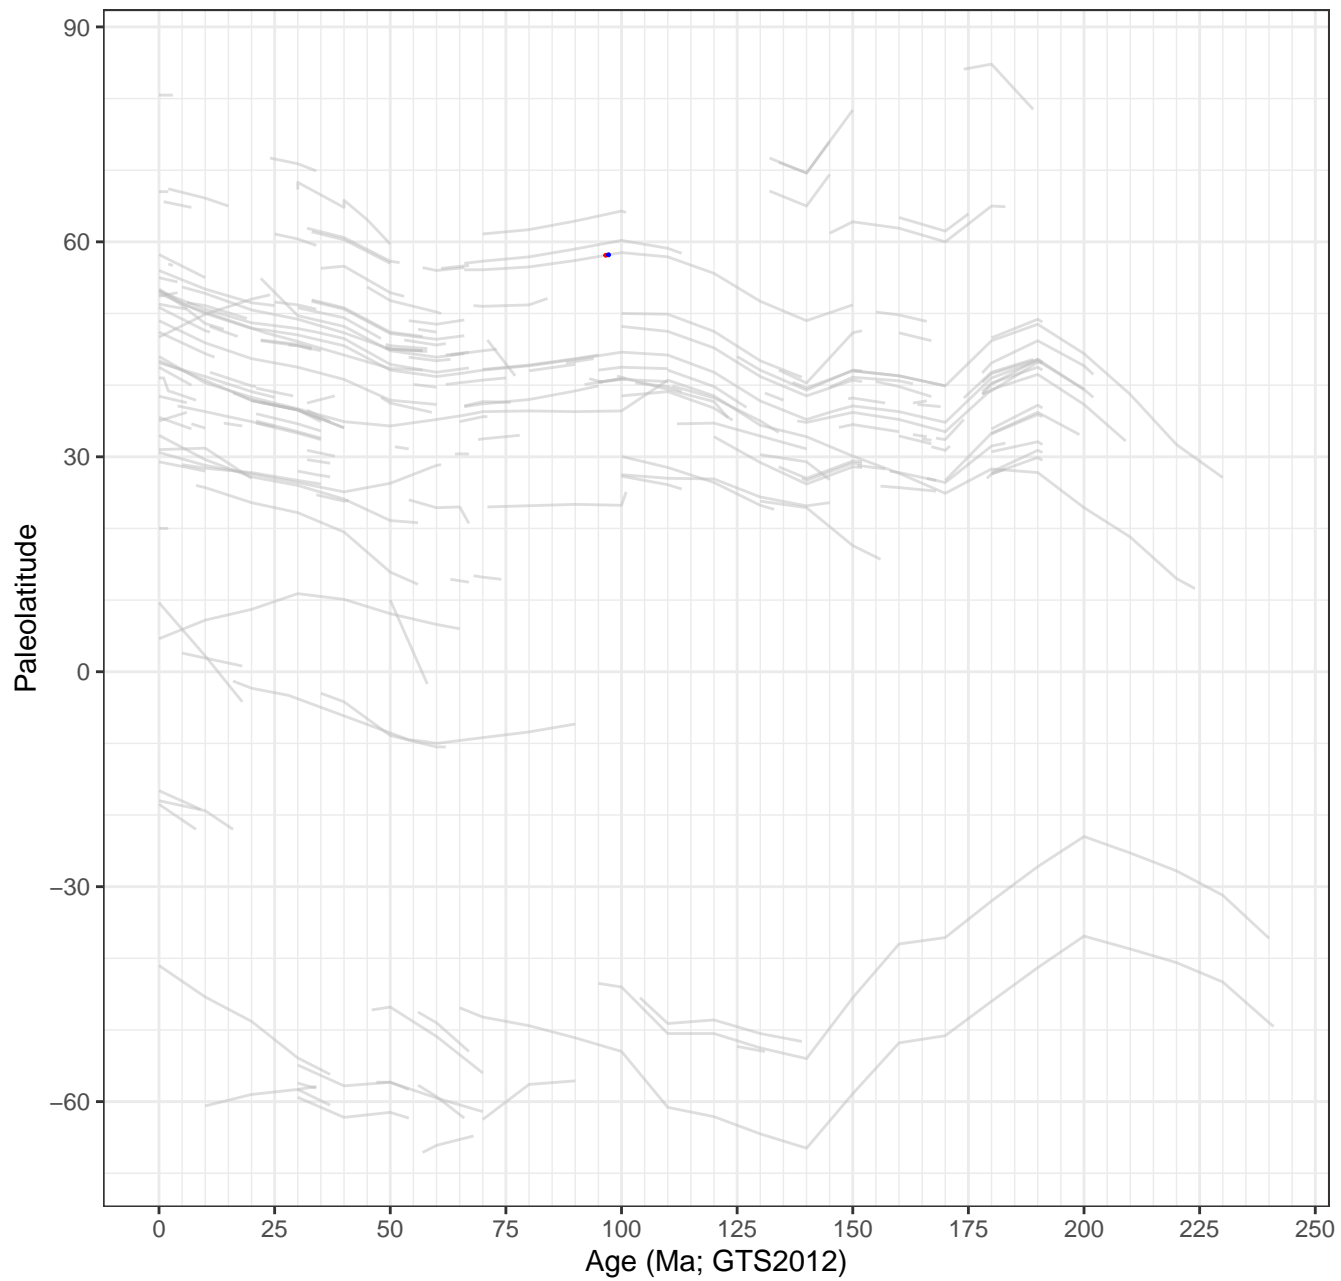

Supplement: Supplementary file 2344 [file Sindridinium anaanae.pdf › Supplement/Supplement 2/Species 1914 plots/Sindridinium anaanae.pdf]

# Species *Sindridinium borealis*

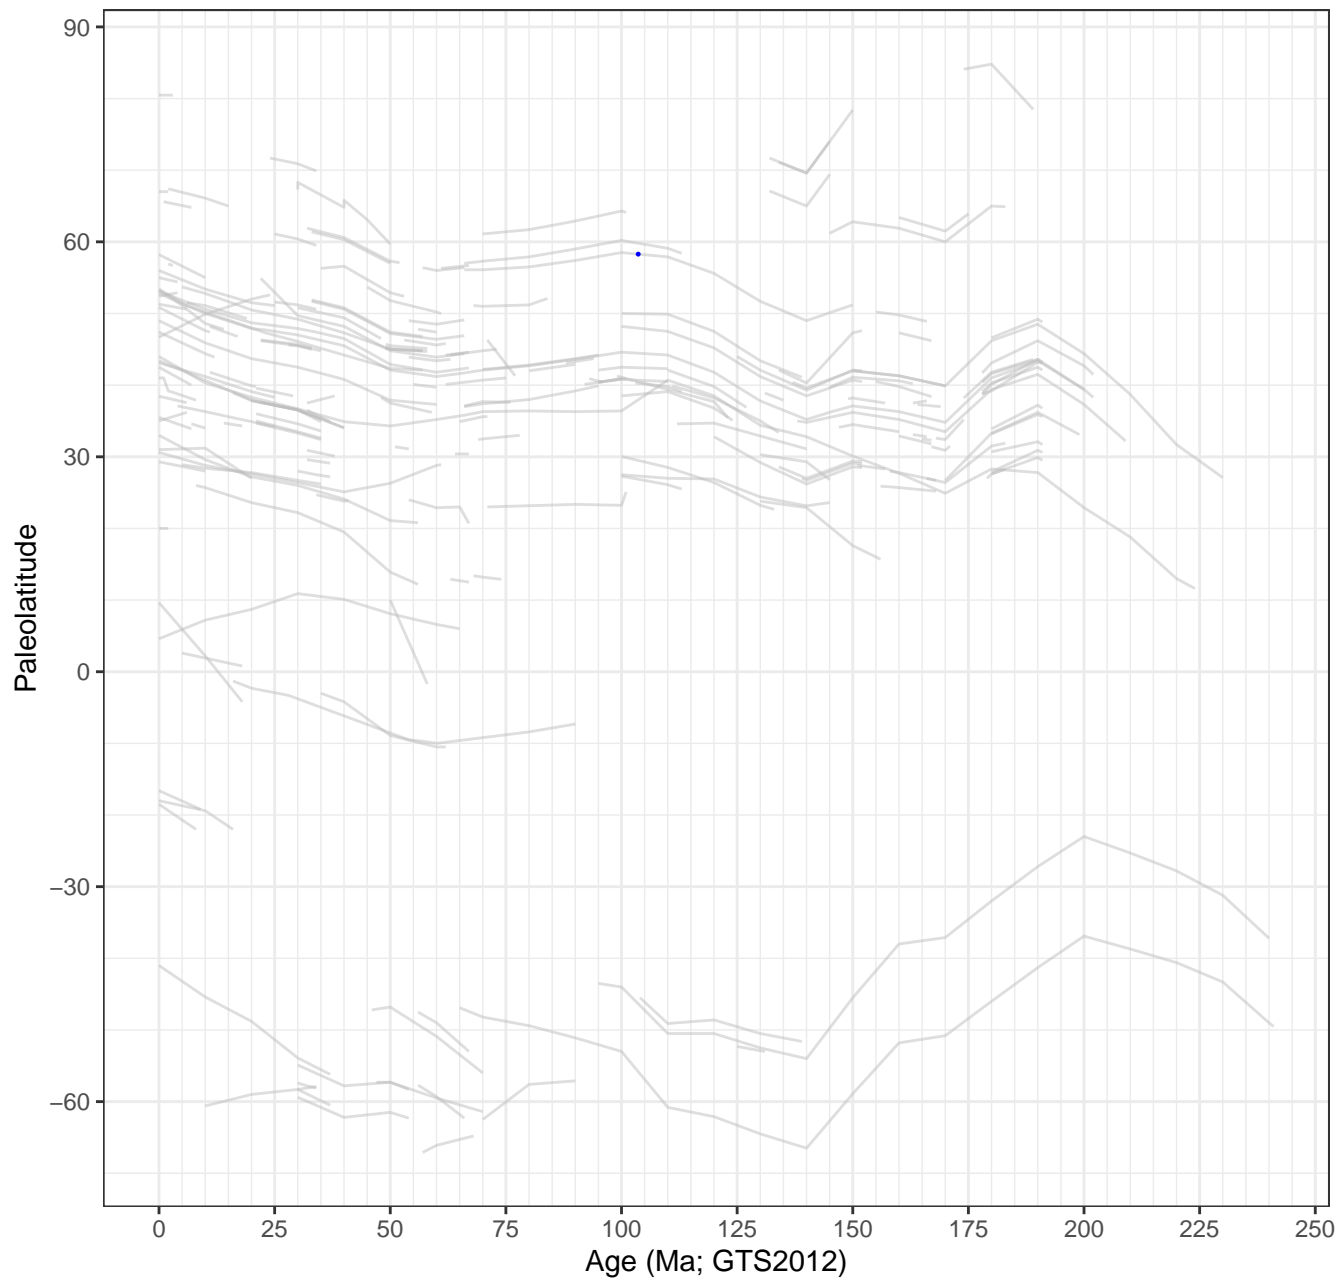

Supplement: Supplementary file 2345 [file Sindridinium borealis.pdf › Supplement/Supplement 2/Species 1914 plots/Sindridinium borealis.pdf]

# Species *Sindridinium tarulosa*

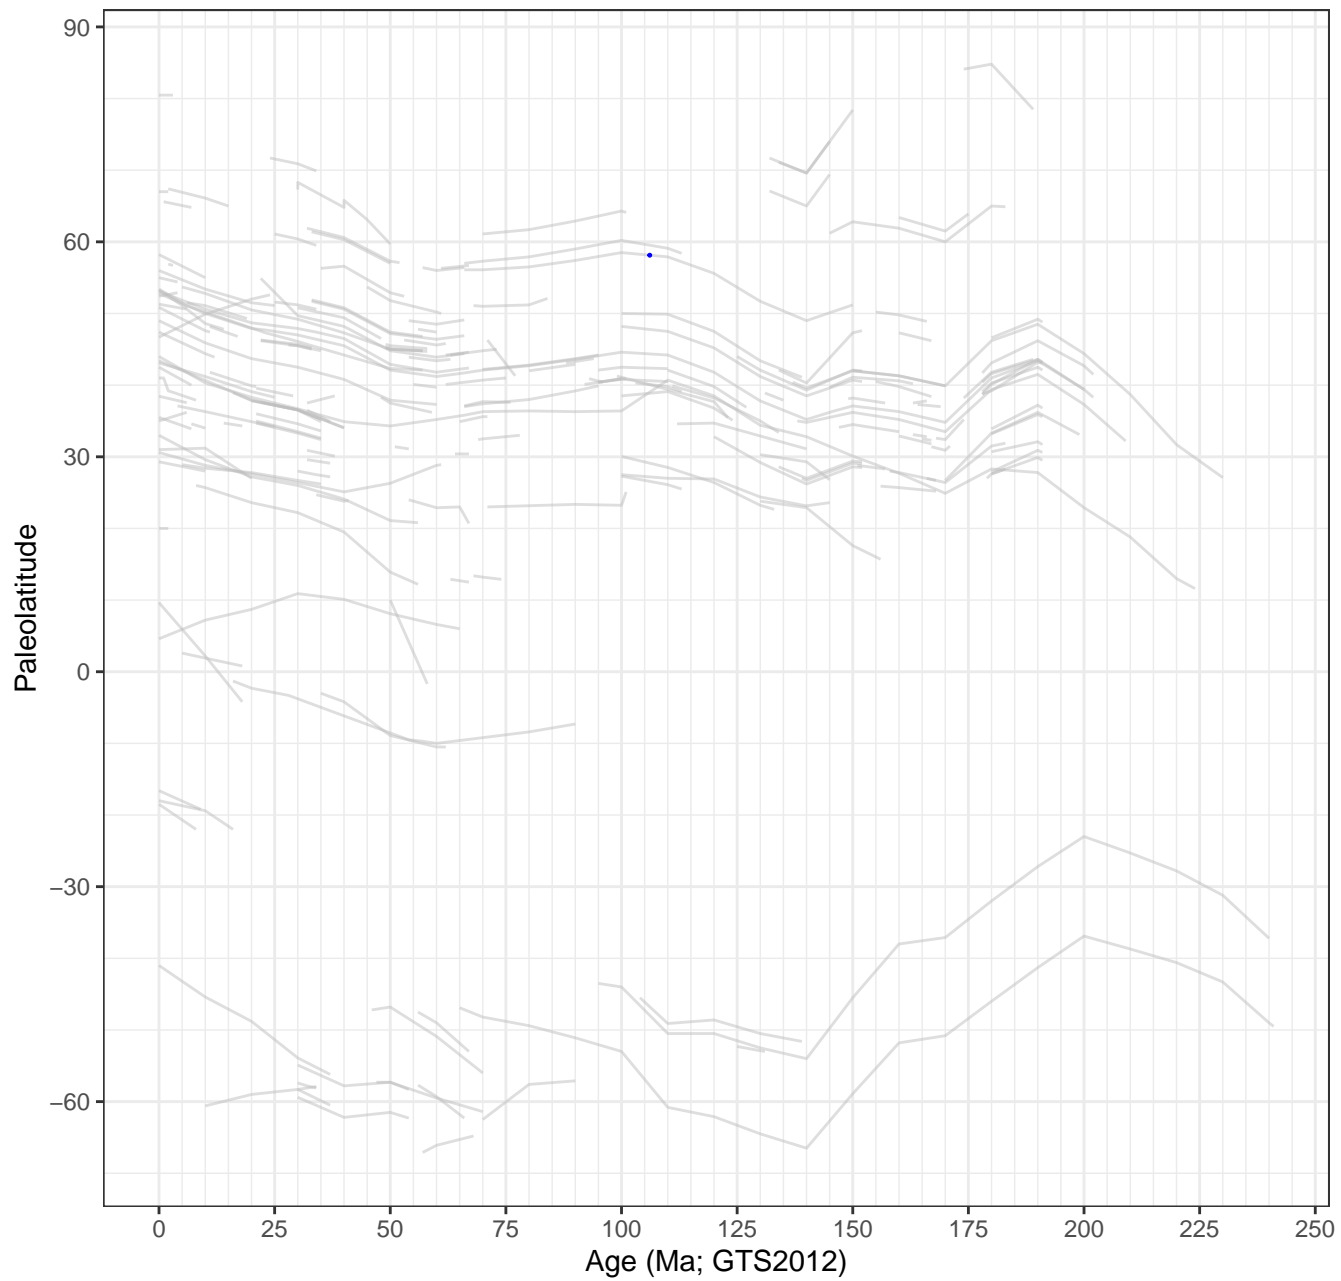

Supplement: Supplementary file 2346 [file Sindridinium tarulosa.pdf › Supplement/Supplement 2/Species 1914 plots/Sindridinium tarulosa.pdf]

# Species *Sirmiodiniopsis orbis*

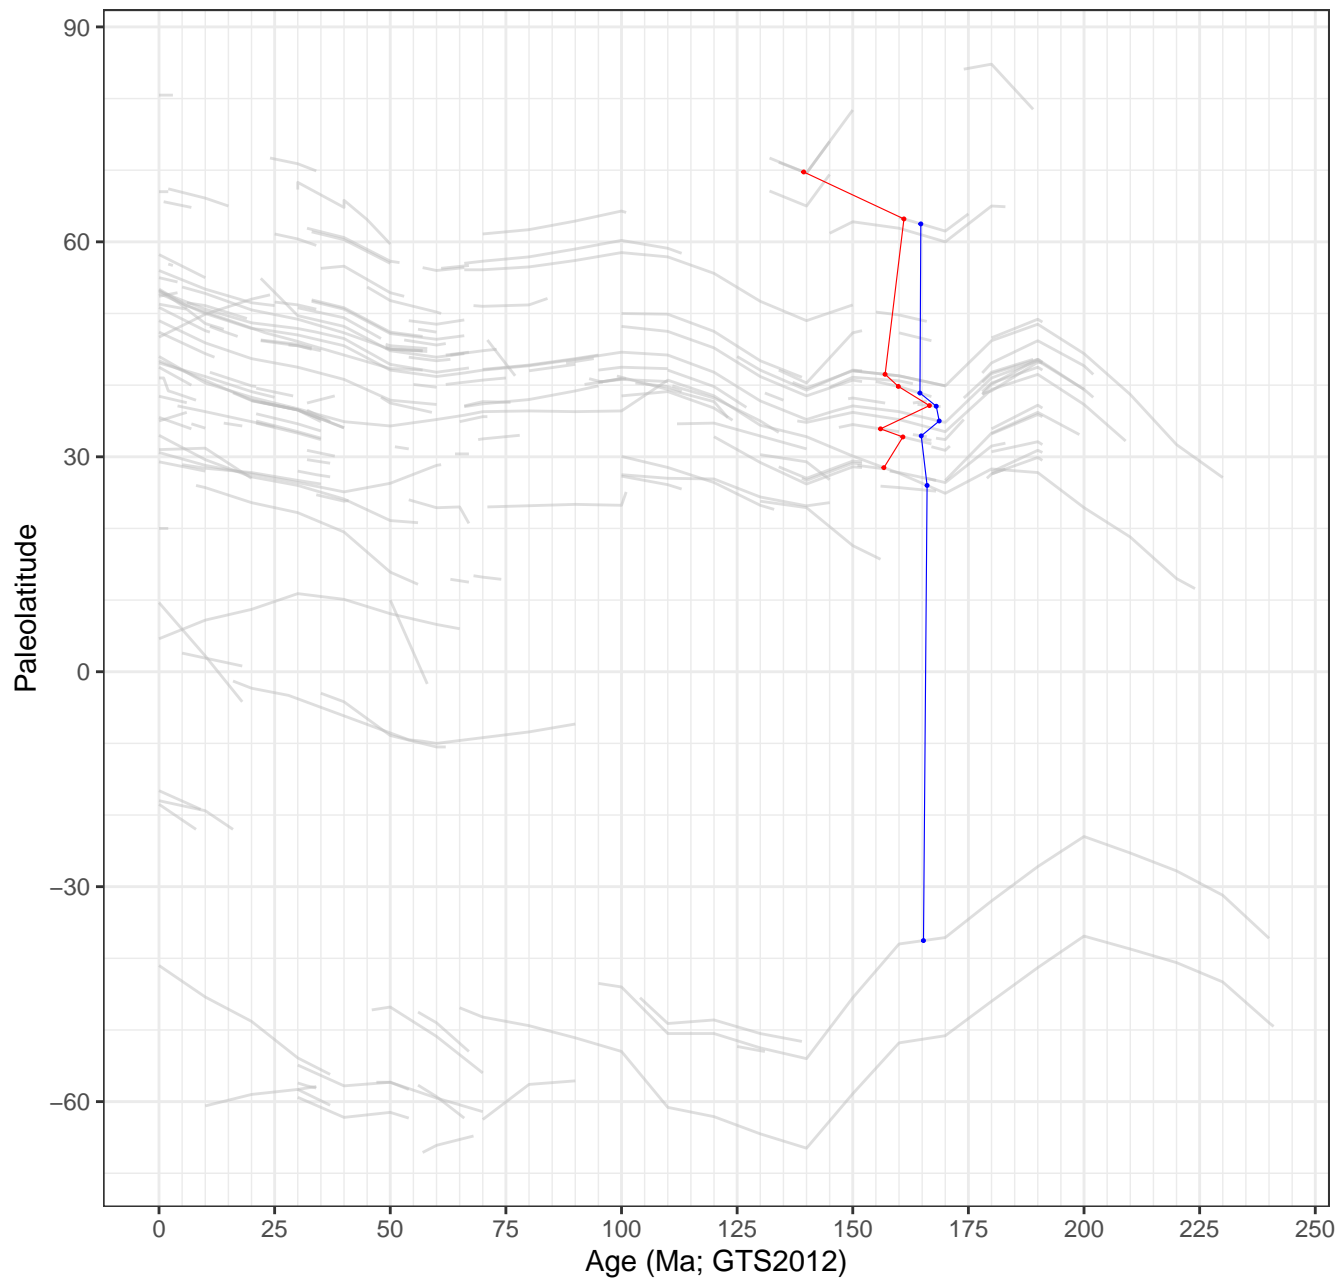

Supplement: Supplementary file 2347 [file Sirmiodiniopsis orbis.pdf › Supplement/Supplement 2/Species 1914 plots/Sirmiodiniopsis orbis.pdf]

# Species *Sirmiodinium grossii*

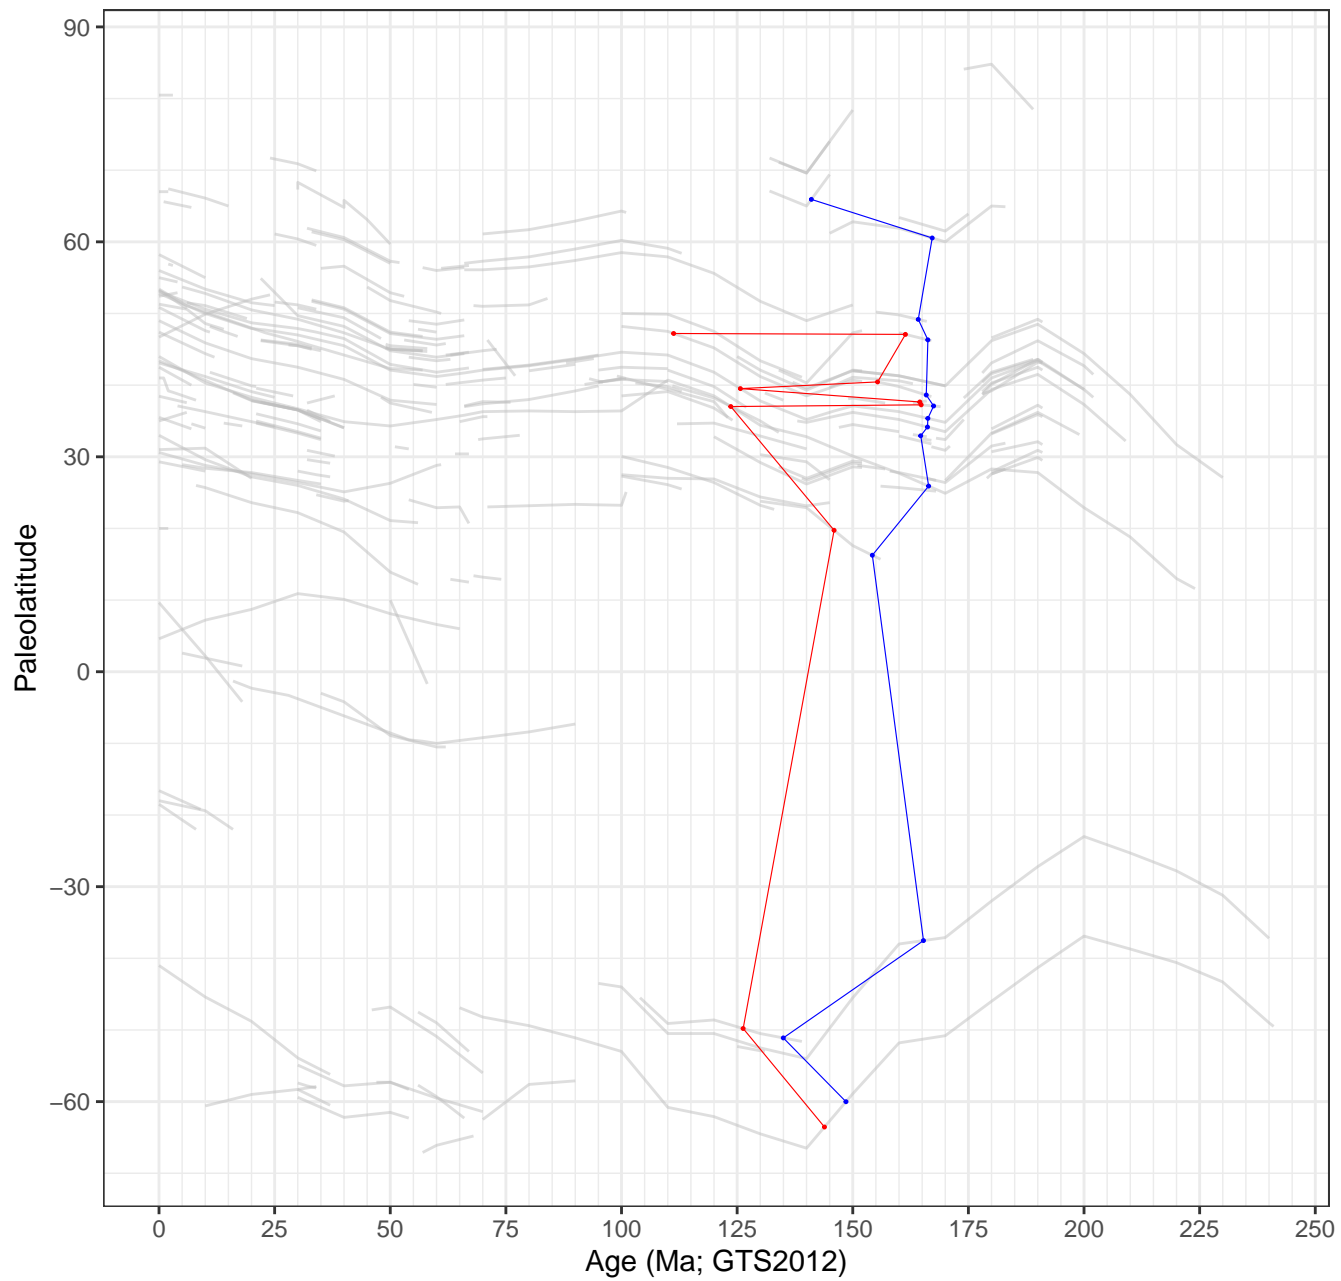

Supplement: Supplementary file 2348 [file Sirmiodinium grossii.pdf › Supplement/Supplement 2/Species 1914 plots/Sirmiodinium grossii.pdf]

# Species *Skuadinium asymmetricum*

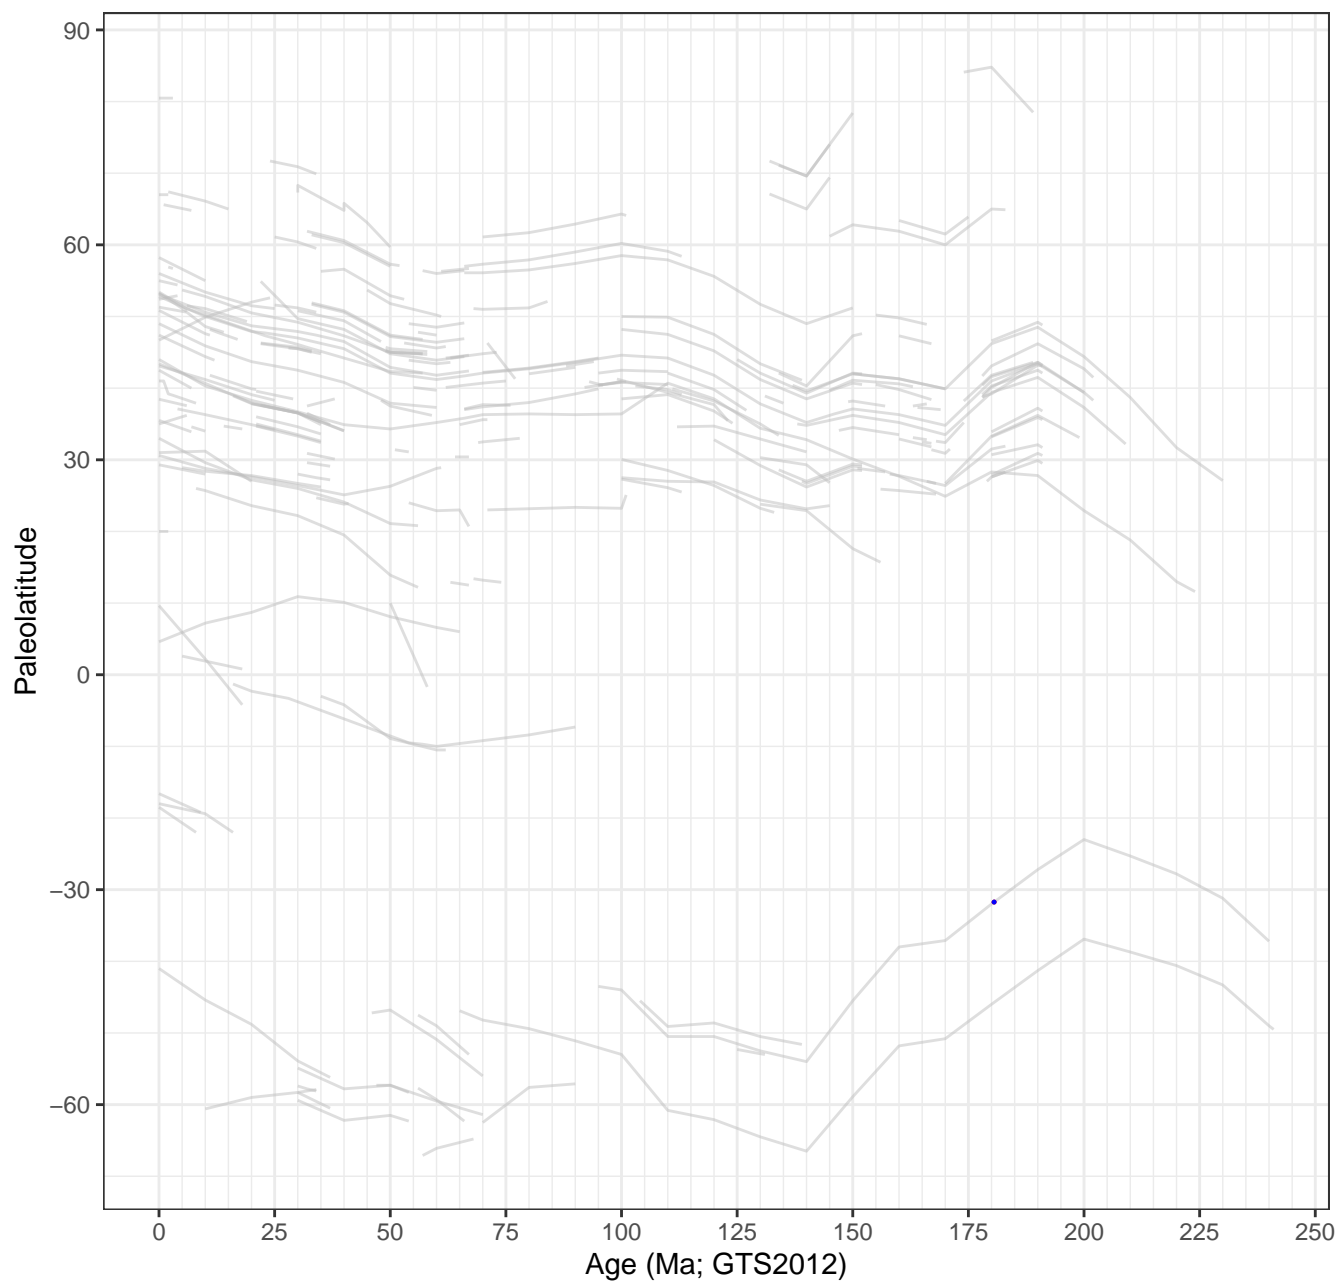

Supplement: Supplementary file 2349 [file Skuadinium assymmetricum.pdf › Supplement/Supplement 2/Species 1914 plots/Skuadinium assymmetricum.pdf]

# Species *Skuadinium biturbinatum*

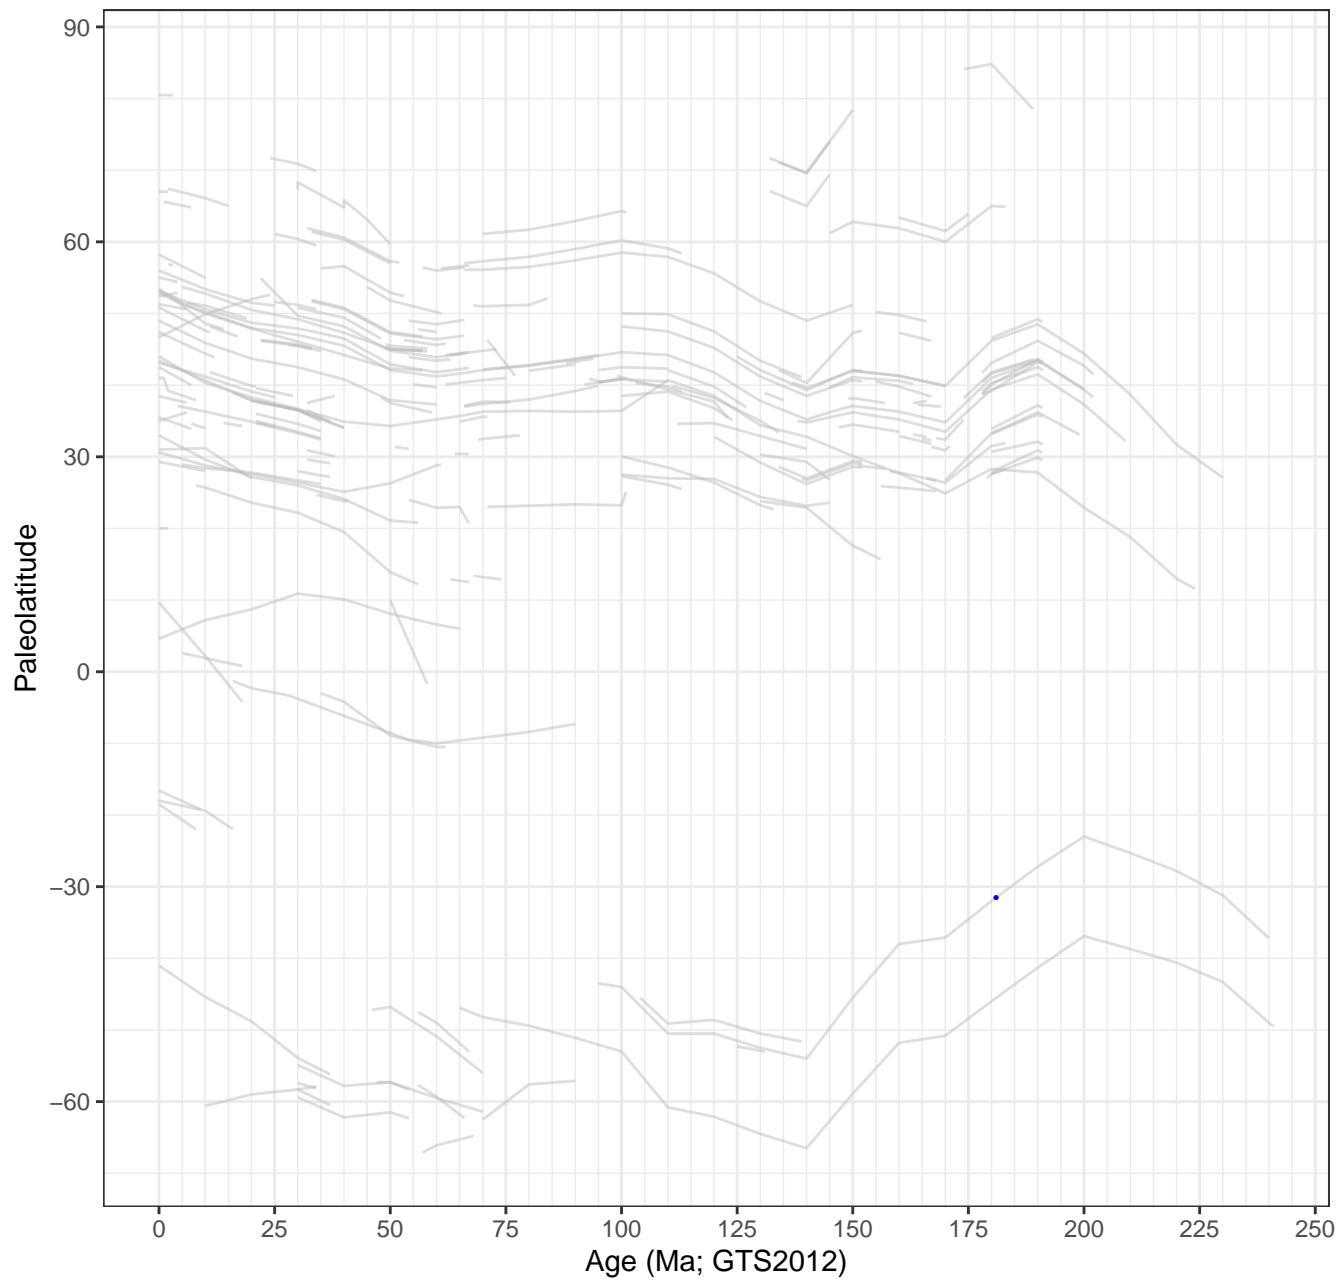

Supplement: Supplementary file 2350 [file Skuadinium biturbinatum.pdf › Supplement/Supplement 2/Species 1914 plots/Skuadinium biturbinatum.pdf]

# Species *Skuadinium reticulatum*

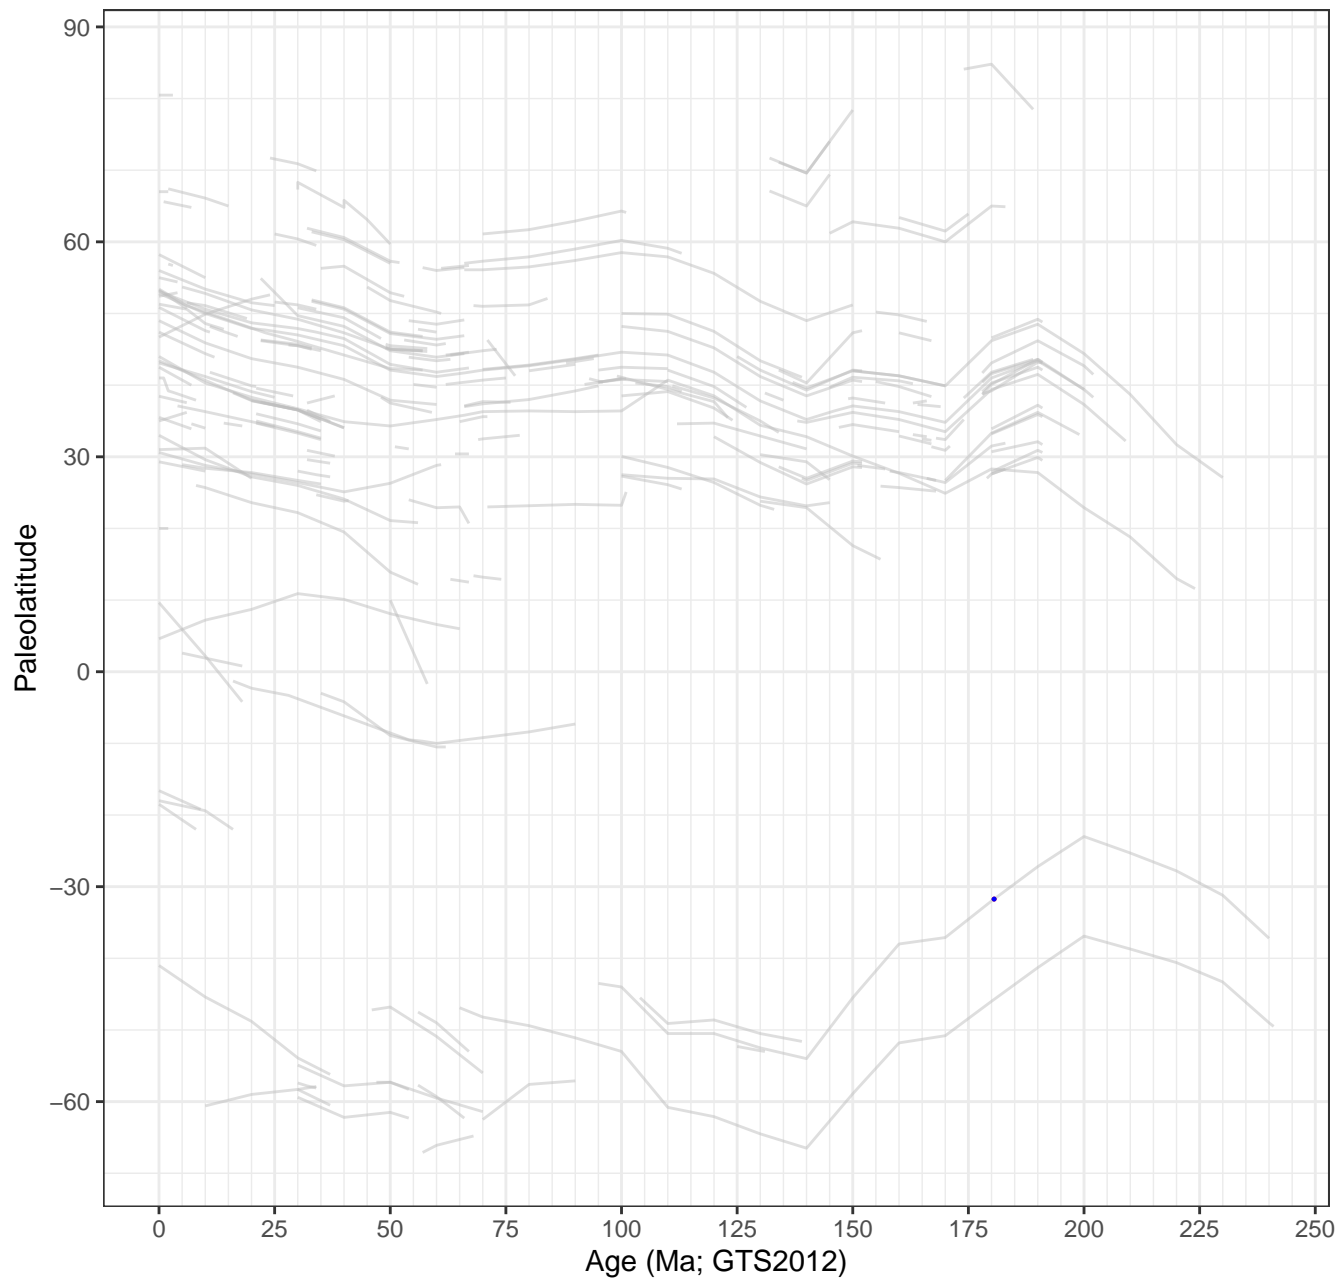

Supplement: Supplementary file 2351 [file Skuadinium reticulatum.pdf › Supplement/Supplement 2/Species 1914 plots/Skuadinium reticulatum.pdf]

# Species *Solisphaeridium brevispinosum*

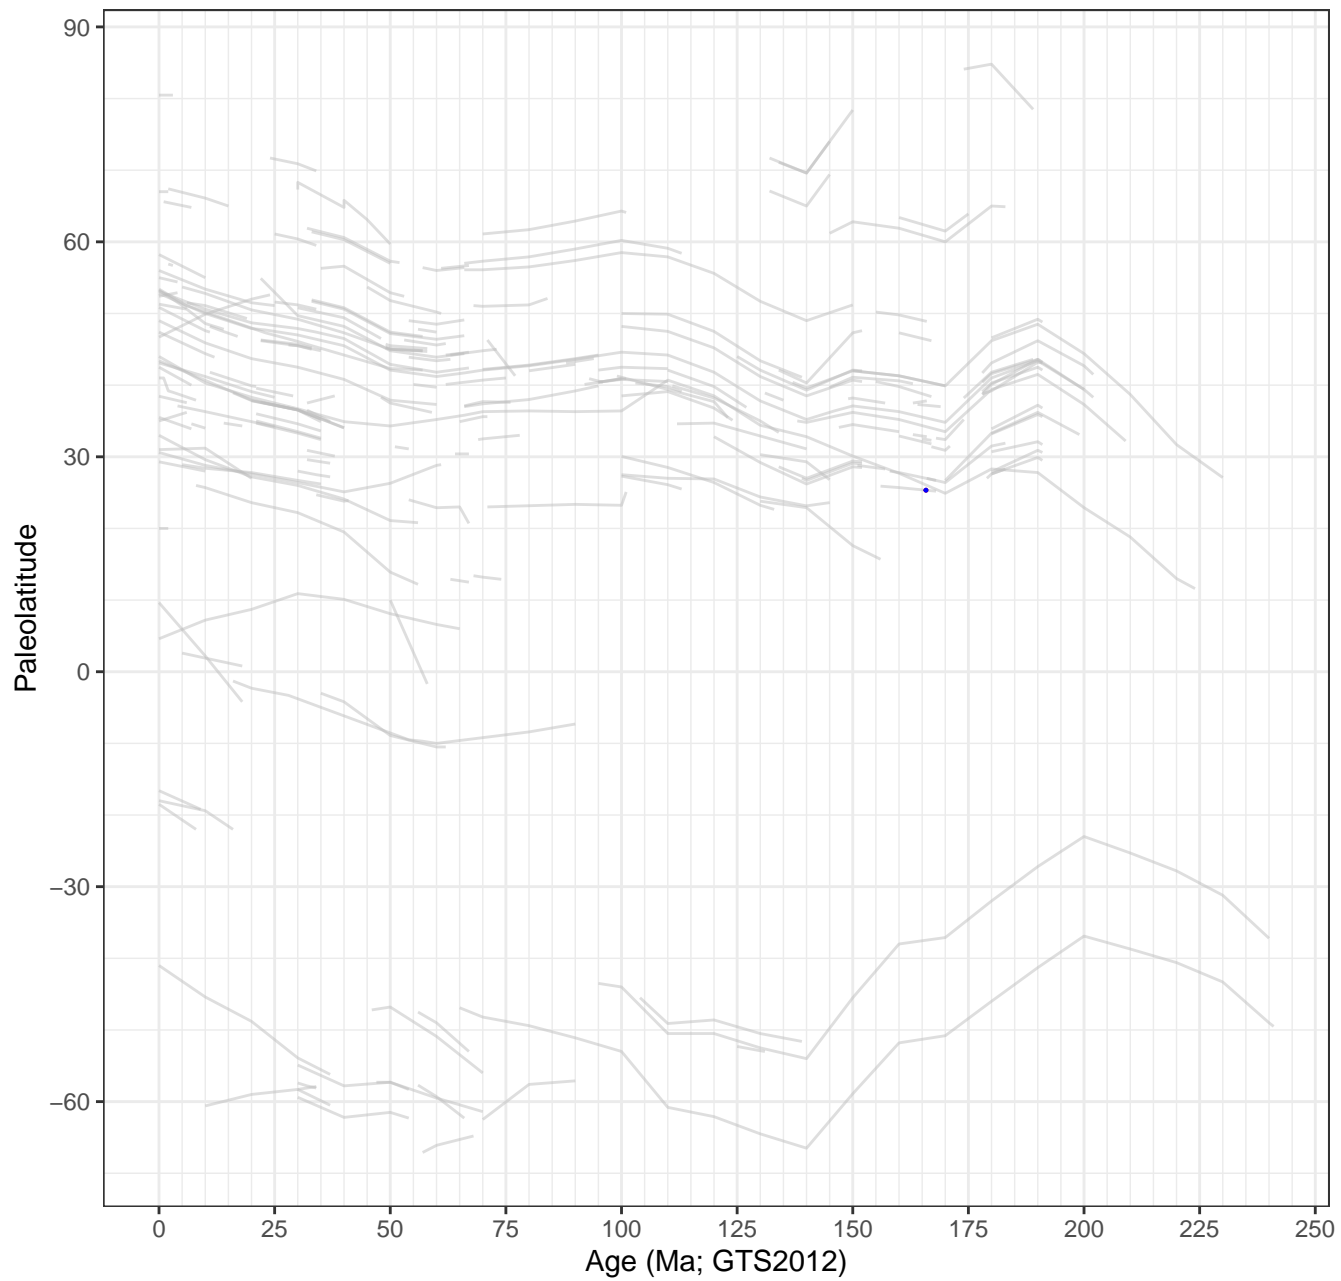

Supplement: Supplementary file 2352 [file Solisphaeridium brevispinosum.pdf › Supplement/Supplement 2/Species 1914 plots/Solisphaeridium brevispinosum.pdf]

# Species *Sophismatia crassoramosa*

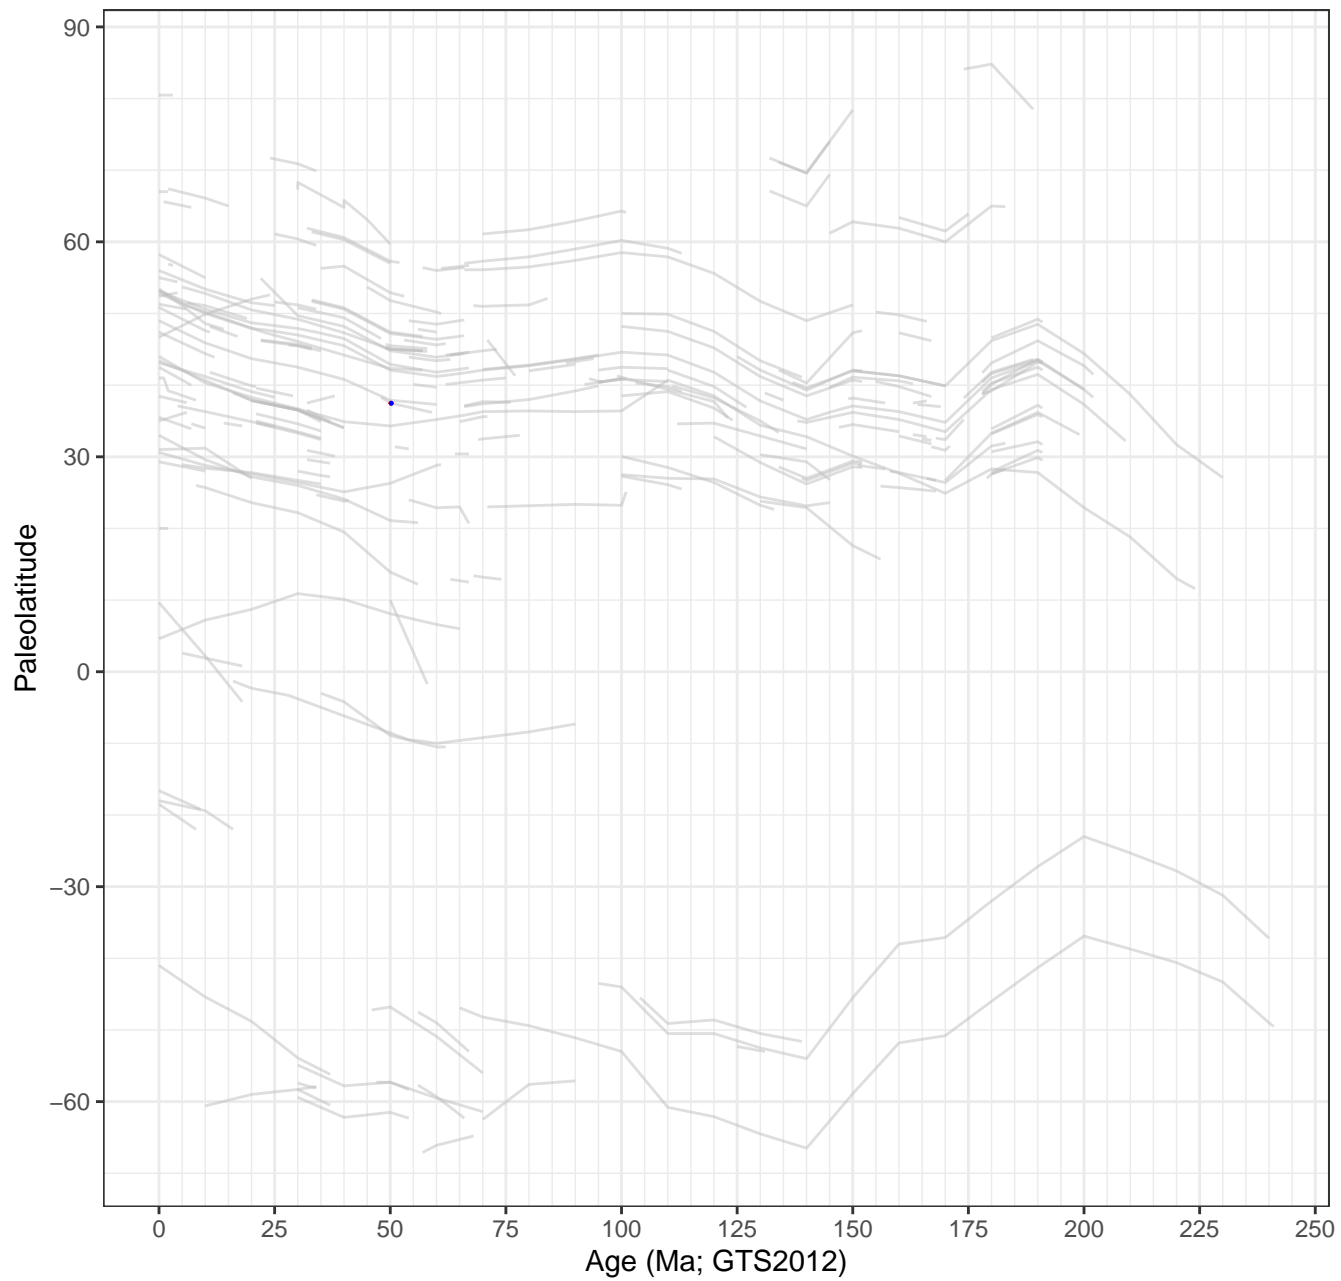

Supplement: Supplementary file 2353 [file Sophismatia crassoramosa.pdf › Supplement/Supplement 2/Species 1914 plots/Sophismatia crassoramosa.pdf]

# Species *Sophismatia insolens*

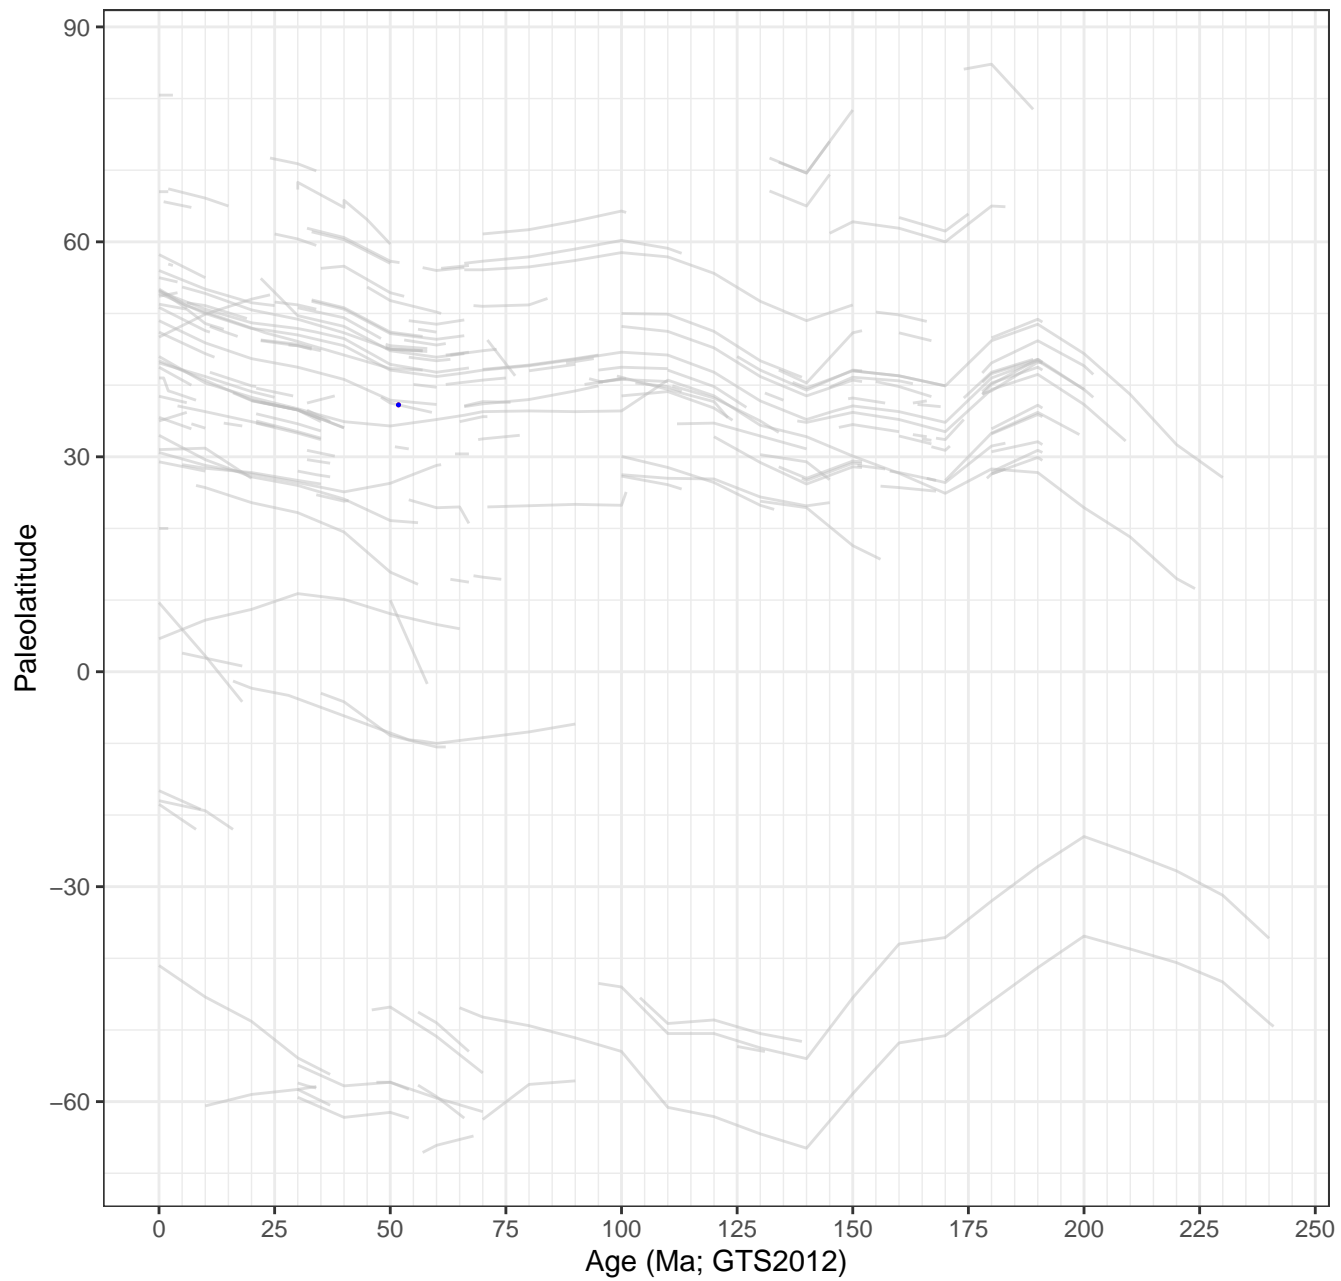

Supplement: Supplementary file 2354 [file Sophismatia insolens.pdf › Supplement/Supplement 2/Species 1914 plots/Sophismatia insolens.pdf]

# Species *Sophismatia tenuivirgula*

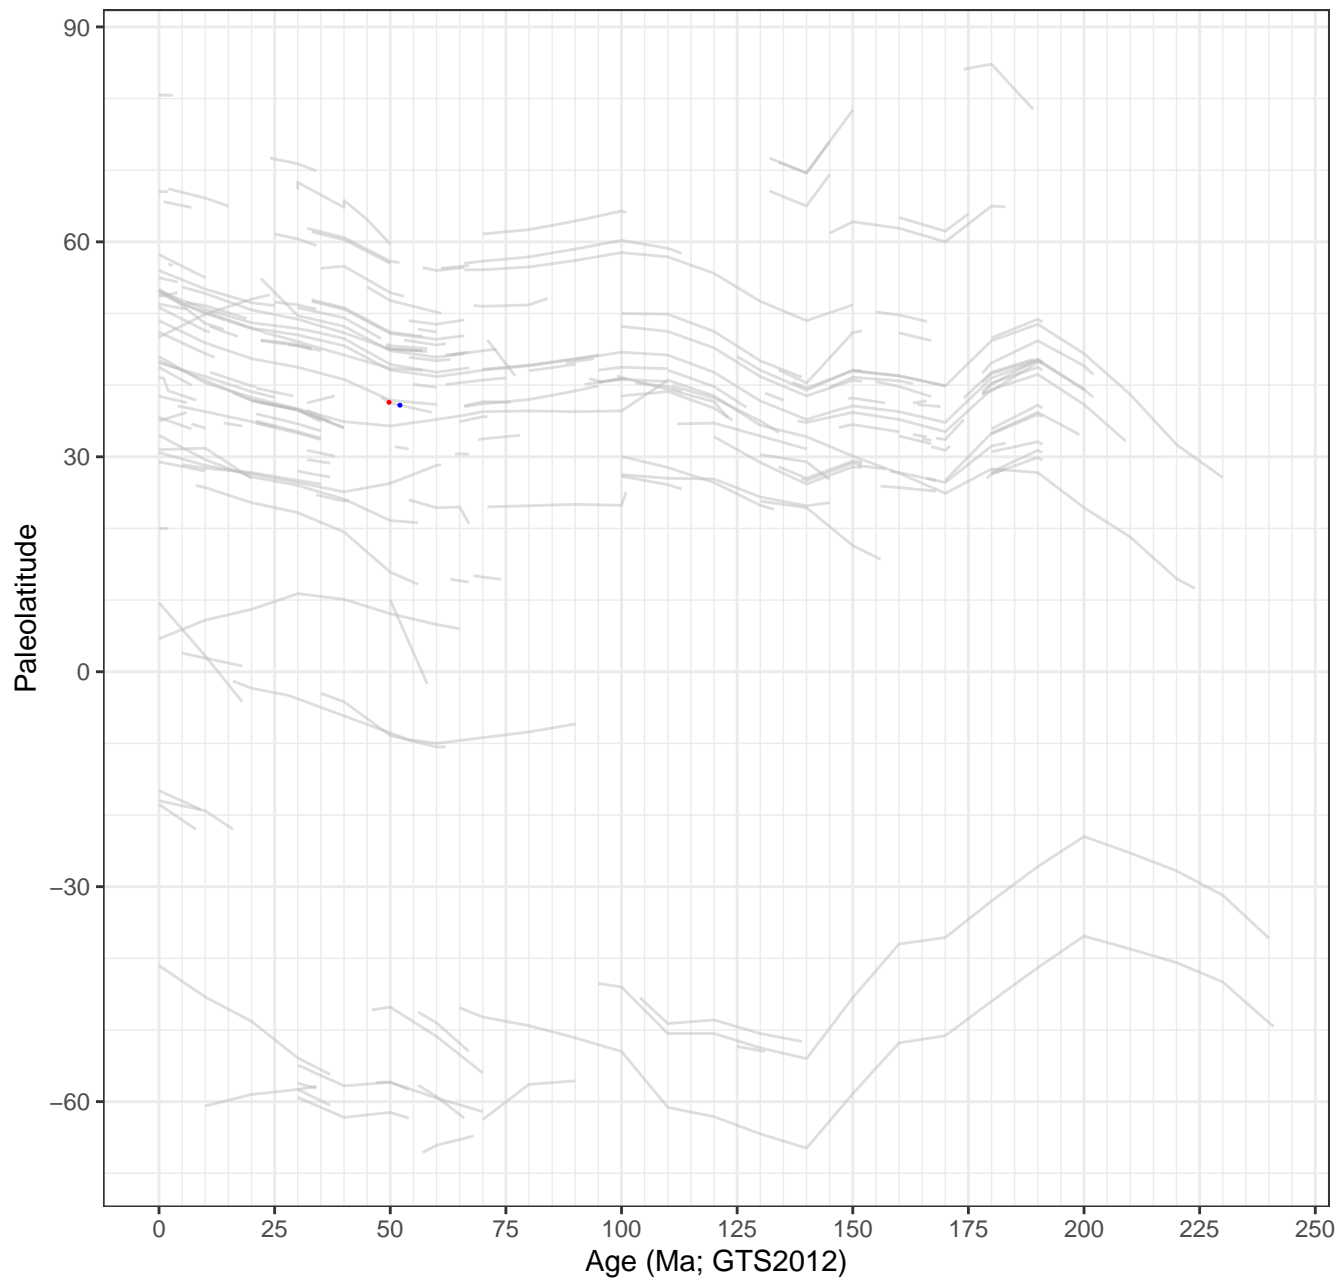

Supplement: Supplementary file 2355 [file Sophismatia tenuivirgula.pdf › Supplement/Supplement 2/Species 1914 plots/Sophismatia tenuivirgula.pdf]

# Species *Spinidinium clavus*

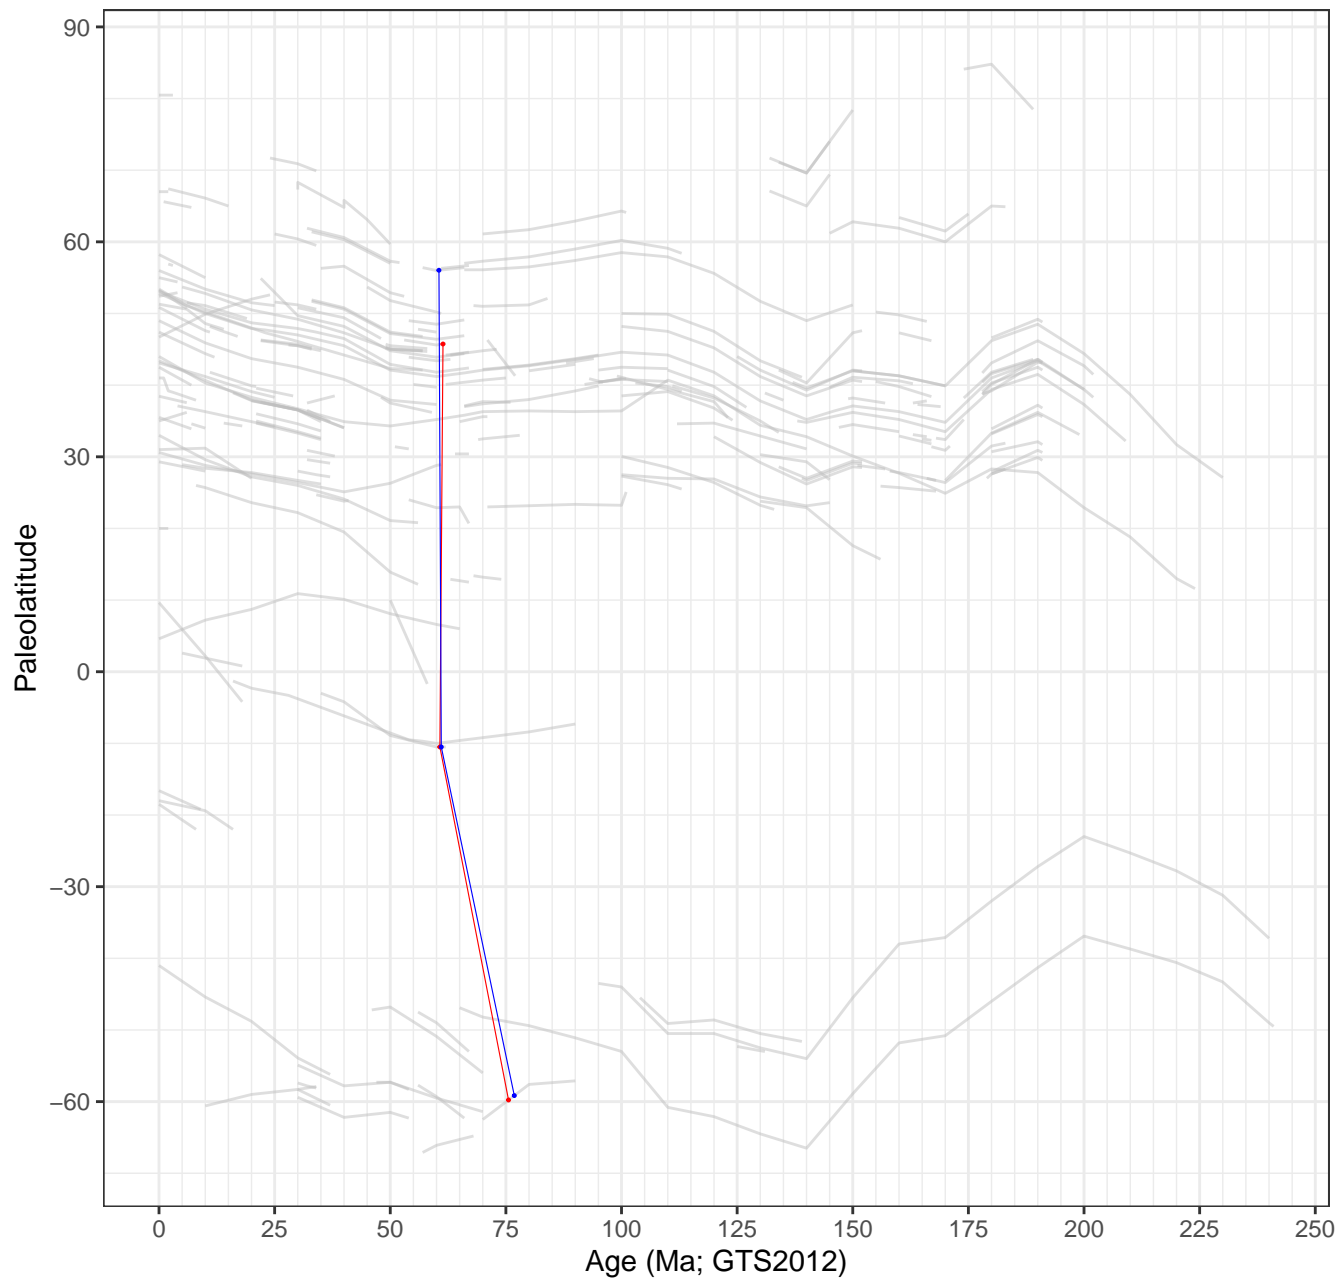

Supplement: Supplementary file 2356 [file Spinidinium clavus.pdf › Supplement/Supplement 2/Species 1914 plots/Spinidinium clavus.pdf]

# Species *Spinidinium colemanii*

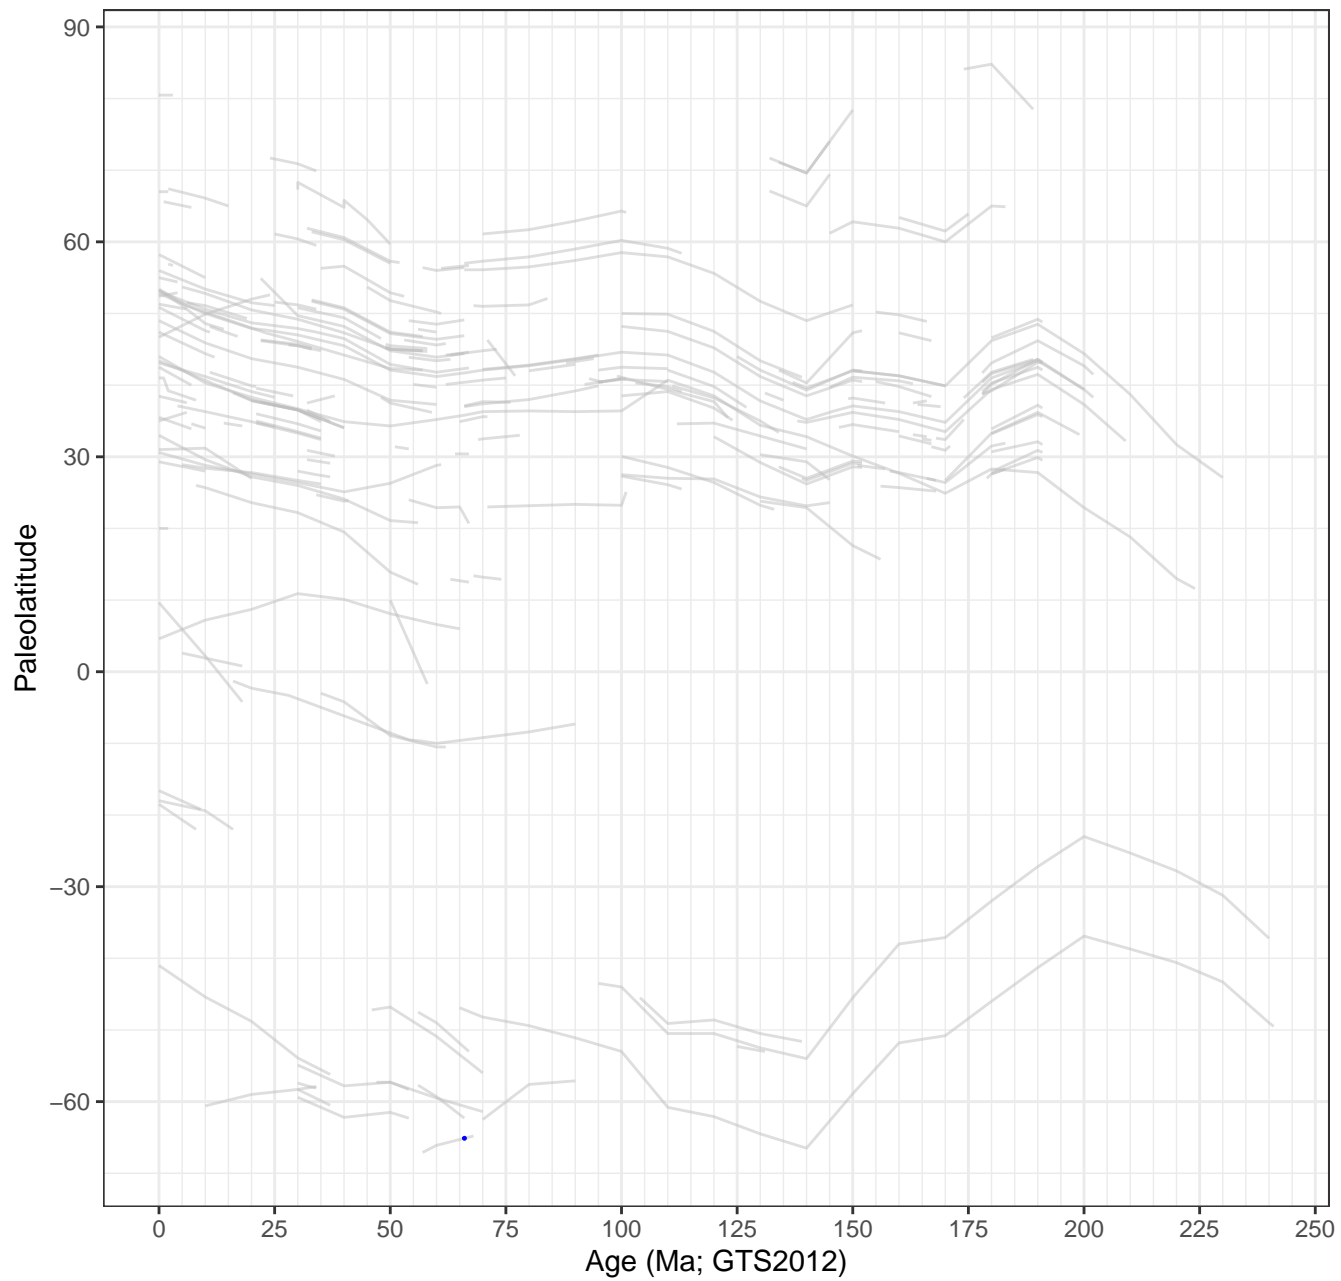

Supplement: Supplementary file 2357 [file Spinidinium colemanii.pdf › Supplement/Supplement 2/Species 1914 plots/Spinidinium colemanii.pdf]

# Species *Spinidinium densispinatum*

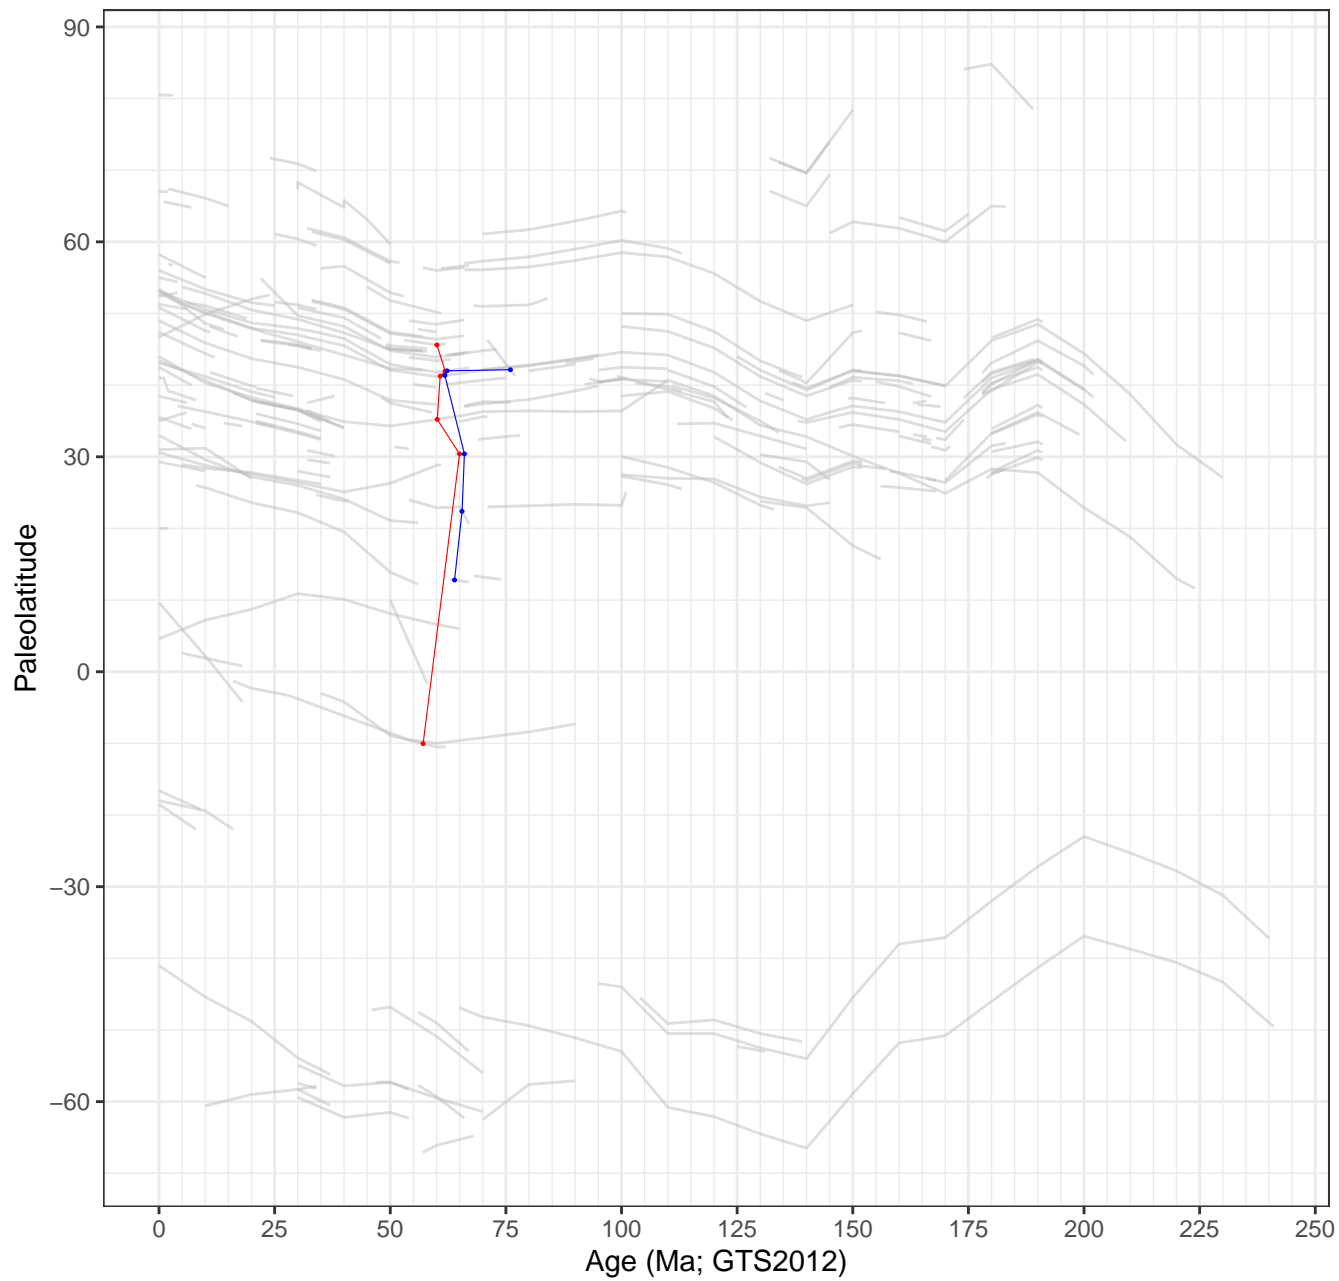

Supplement: Supplementary file 2358 [file Spinidinium densispinatum.pdf › Supplement/Supplement 2/Species 1914 plots/Spinidinium densispinatum.pdf]

# Species *Spinidinium echinoideum*

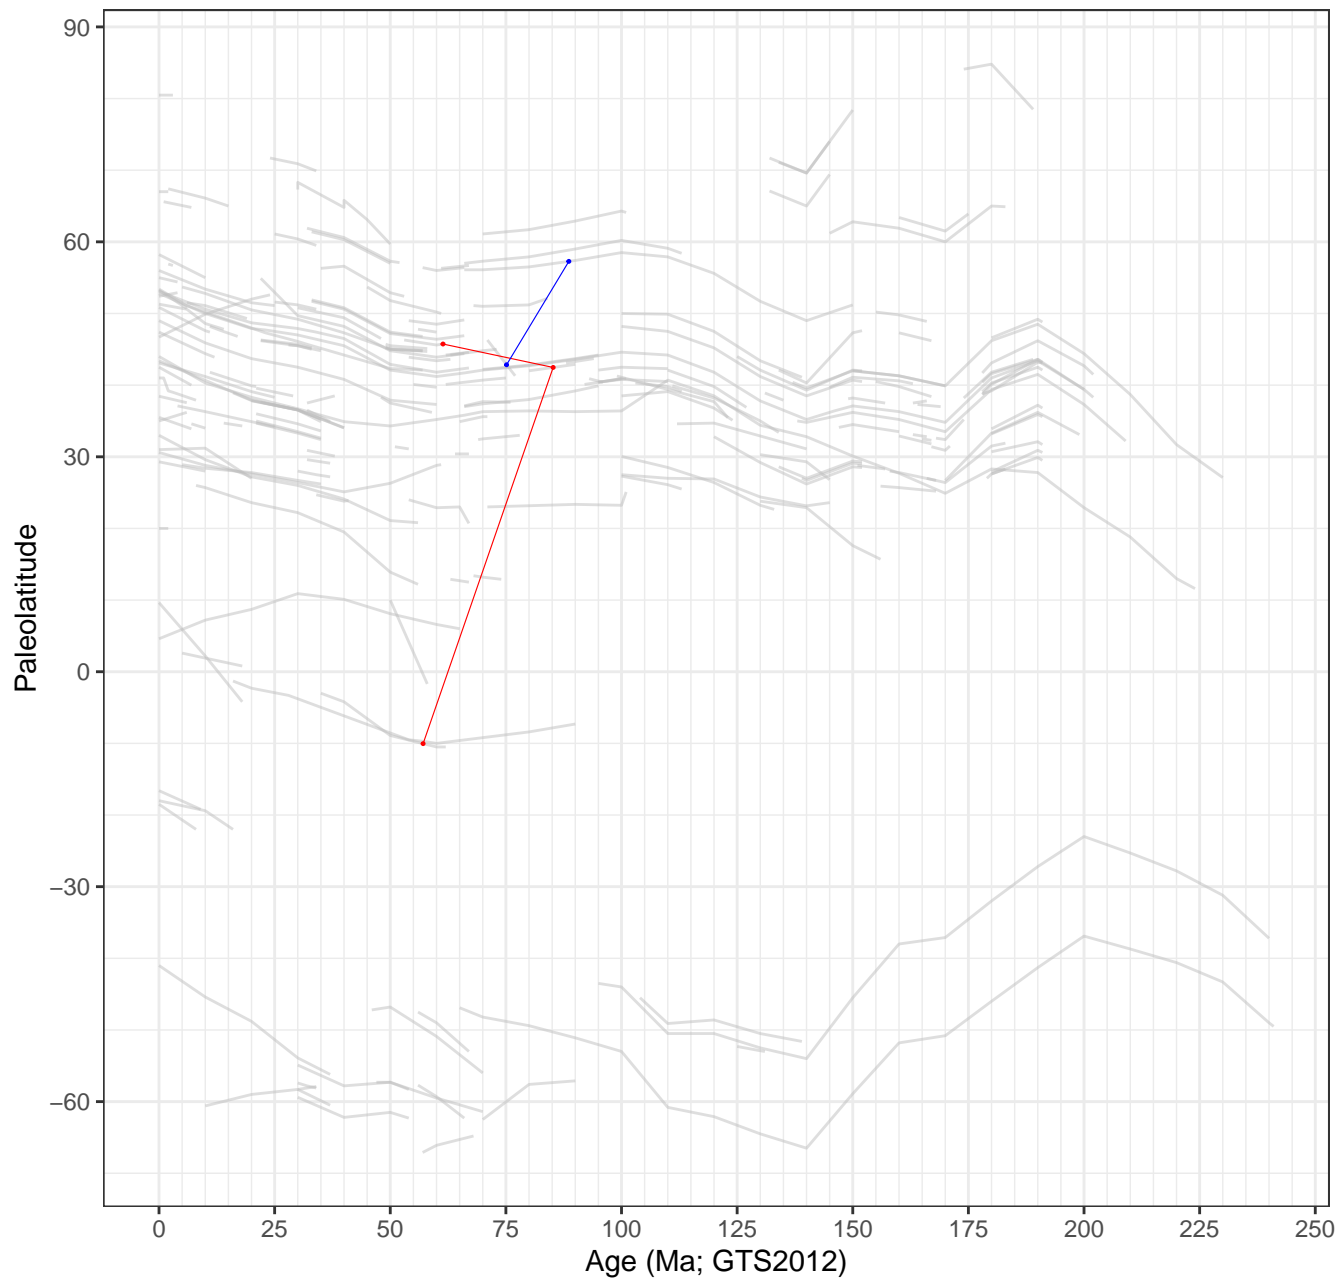

Supplement: Supplementary file 2359 [file Spinidinium echinoideum.pdf › Supplement/Supplement 2/Species 1914 plots/Spinidinium echinoideum.pdf]

# Species *Spinidinium essoii*

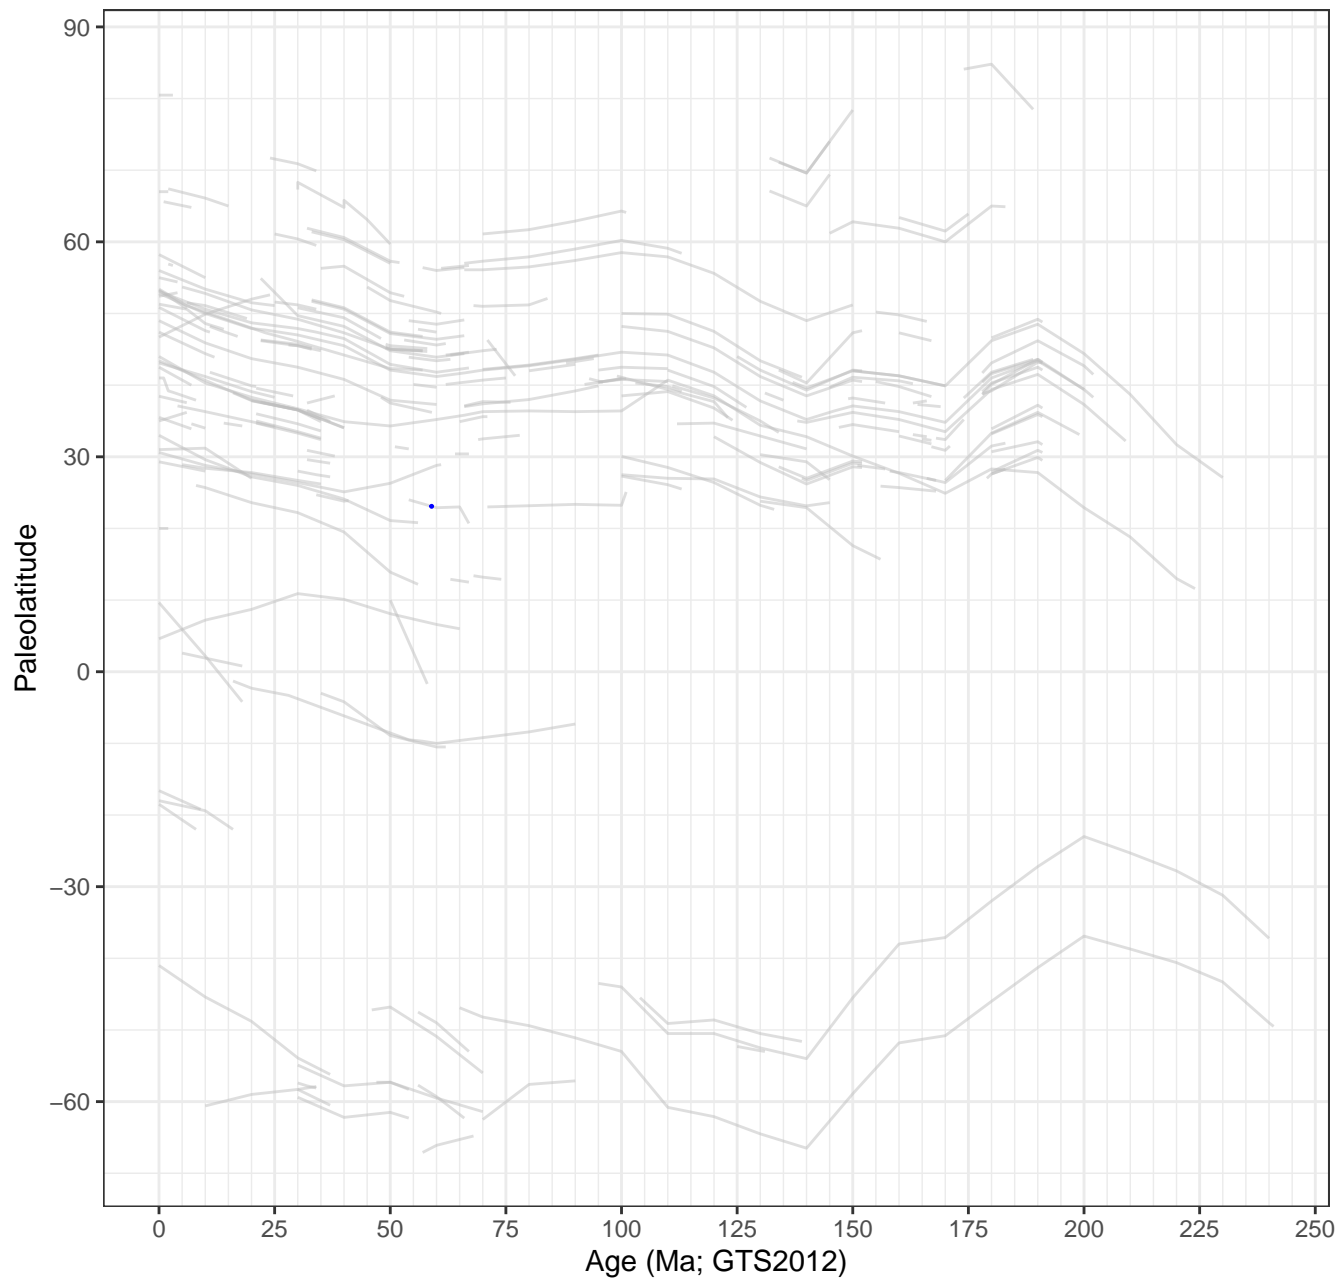

Supplement: Supplementary file 2360 [file Spinidinium essoi.pdf › Supplement/Supplement 2/Species 1914 plots/Spinidinium essoi.pdf]

# Species *Spinidinium lanterna*

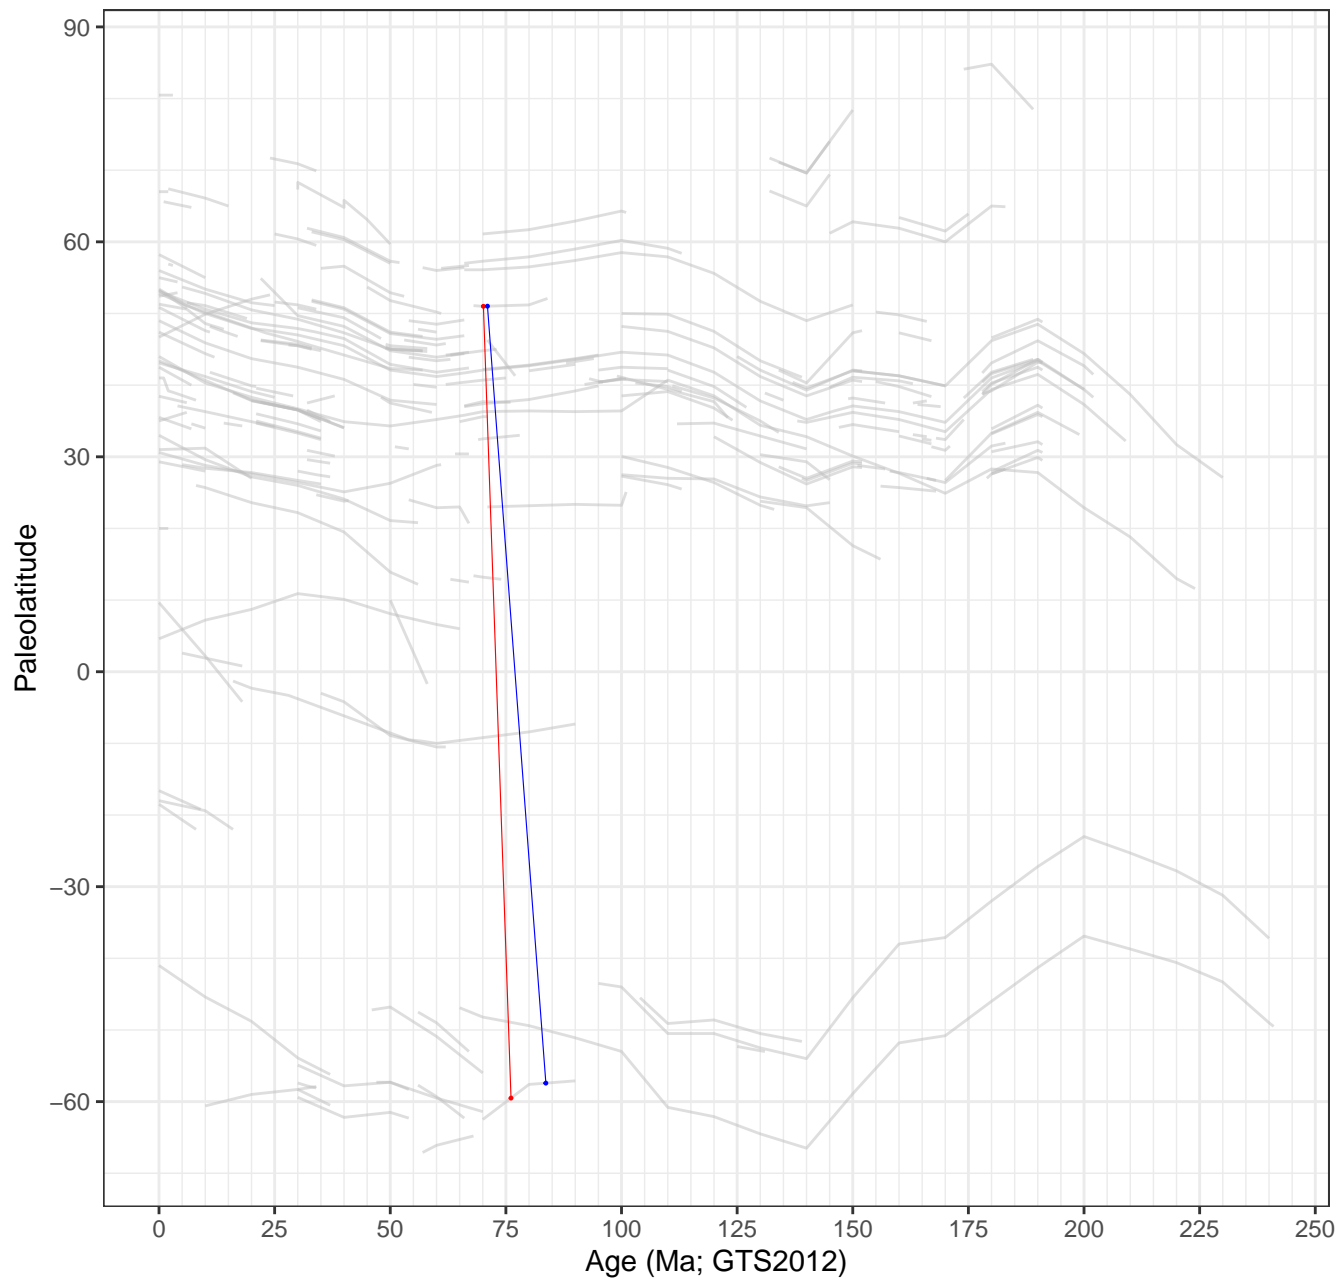

Supplement: Supplementary file 2361 [file Spinidinium lanterna.pdf › Supplement/Supplement 2/Species 1914 plots/Spinidinium lanterna.pdf]

# Species *Spinidinium macmurdoense*

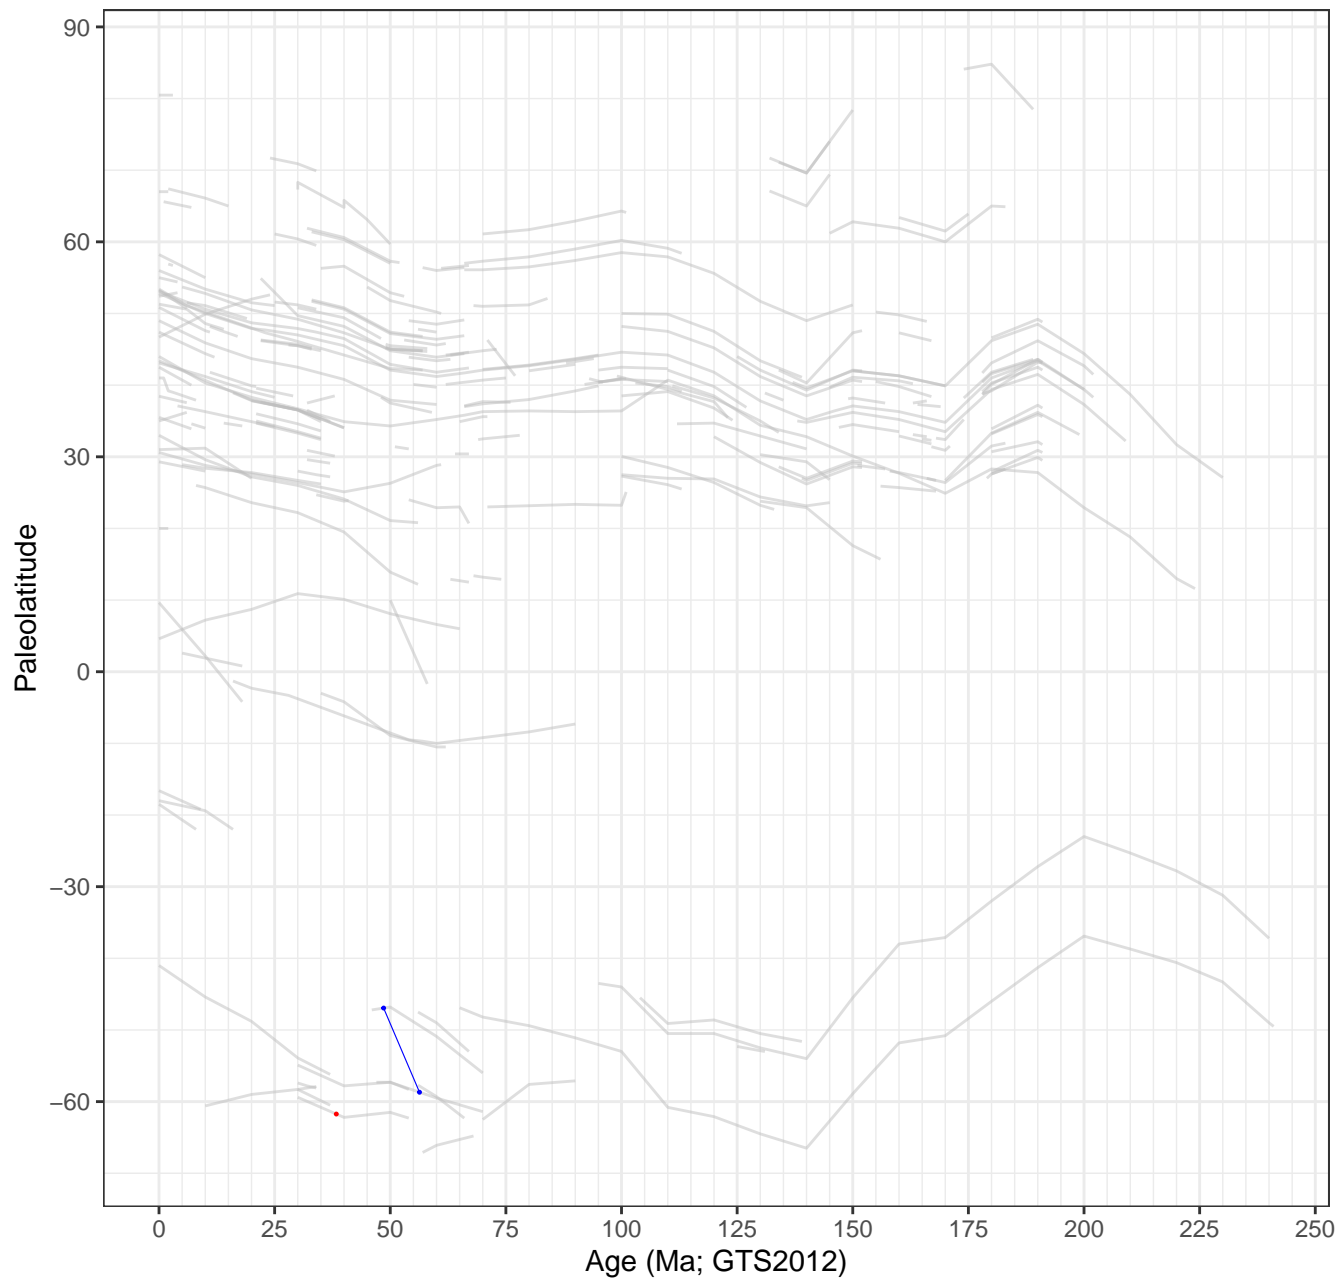

Supplement: Supplementary file 2362 [file Spinidinium macmurdoense.pdf › Supplement/Supplement 2/Species 1914 plots/Spinidinium macmurdoense.pdf]

# Species *Spinidinium ornatum*

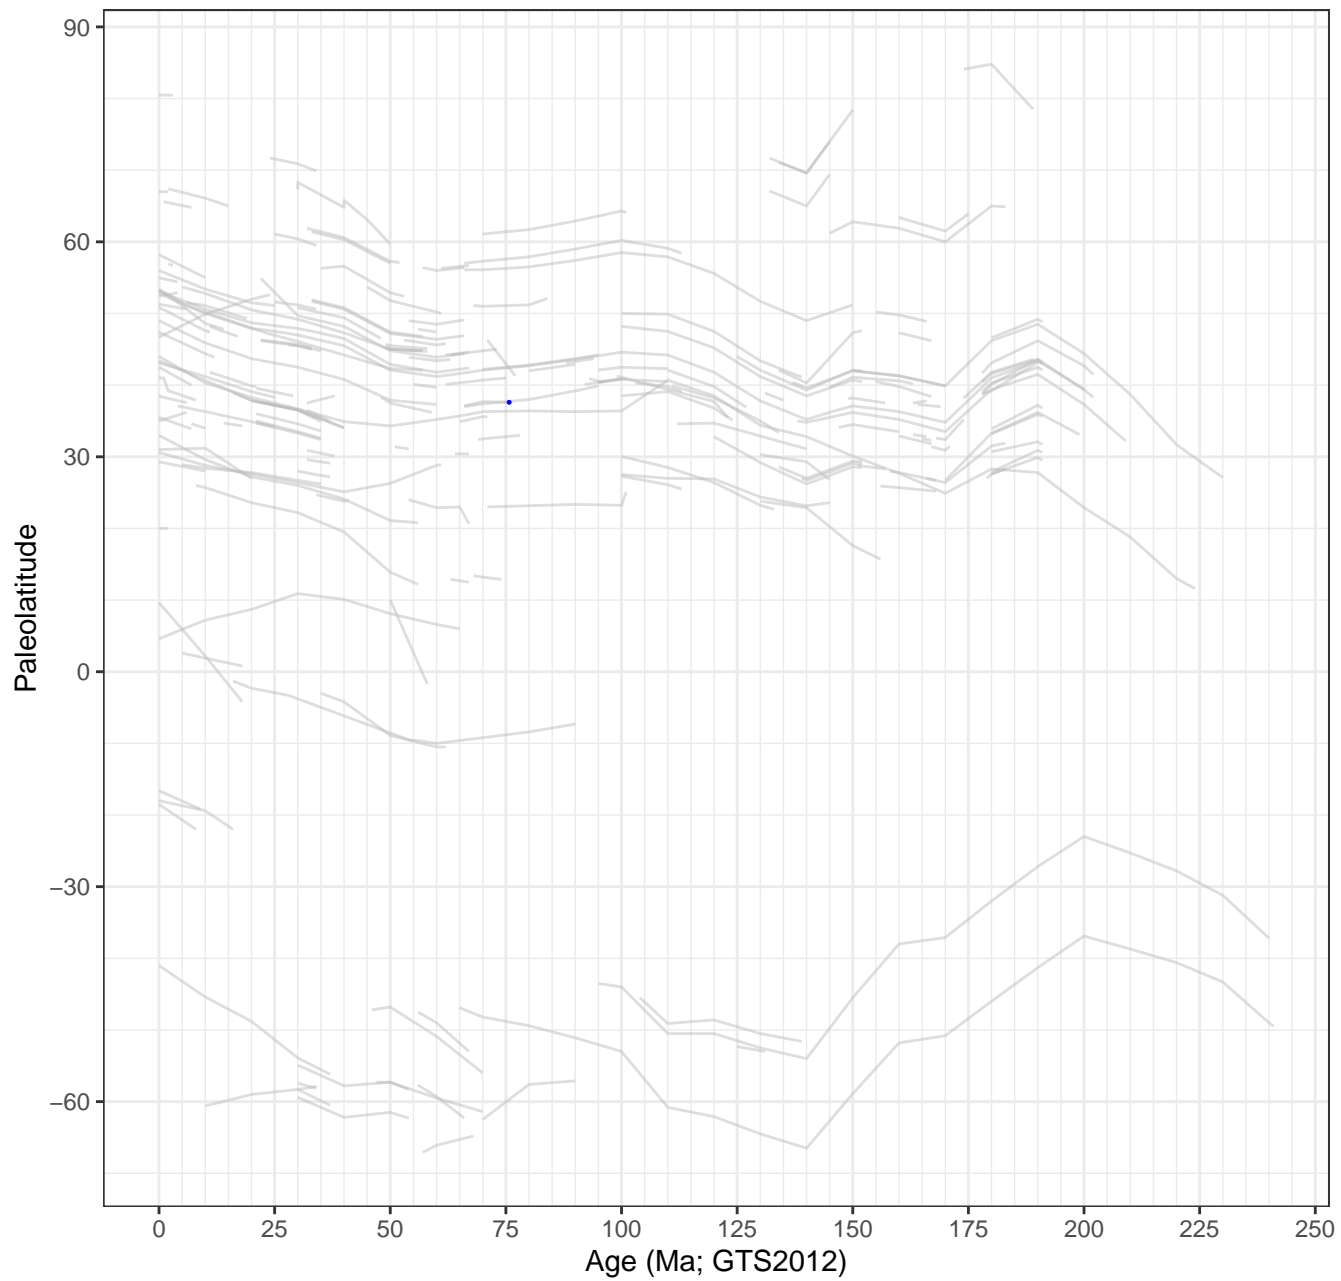

Supplement: Supplementary file 2363 [file Spinidinium ornatum.pdf › Supplement/Supplement 2/Species 1914 plots/Spinidinium ornatum.pdf]

# Species *Spinidinium ovale*

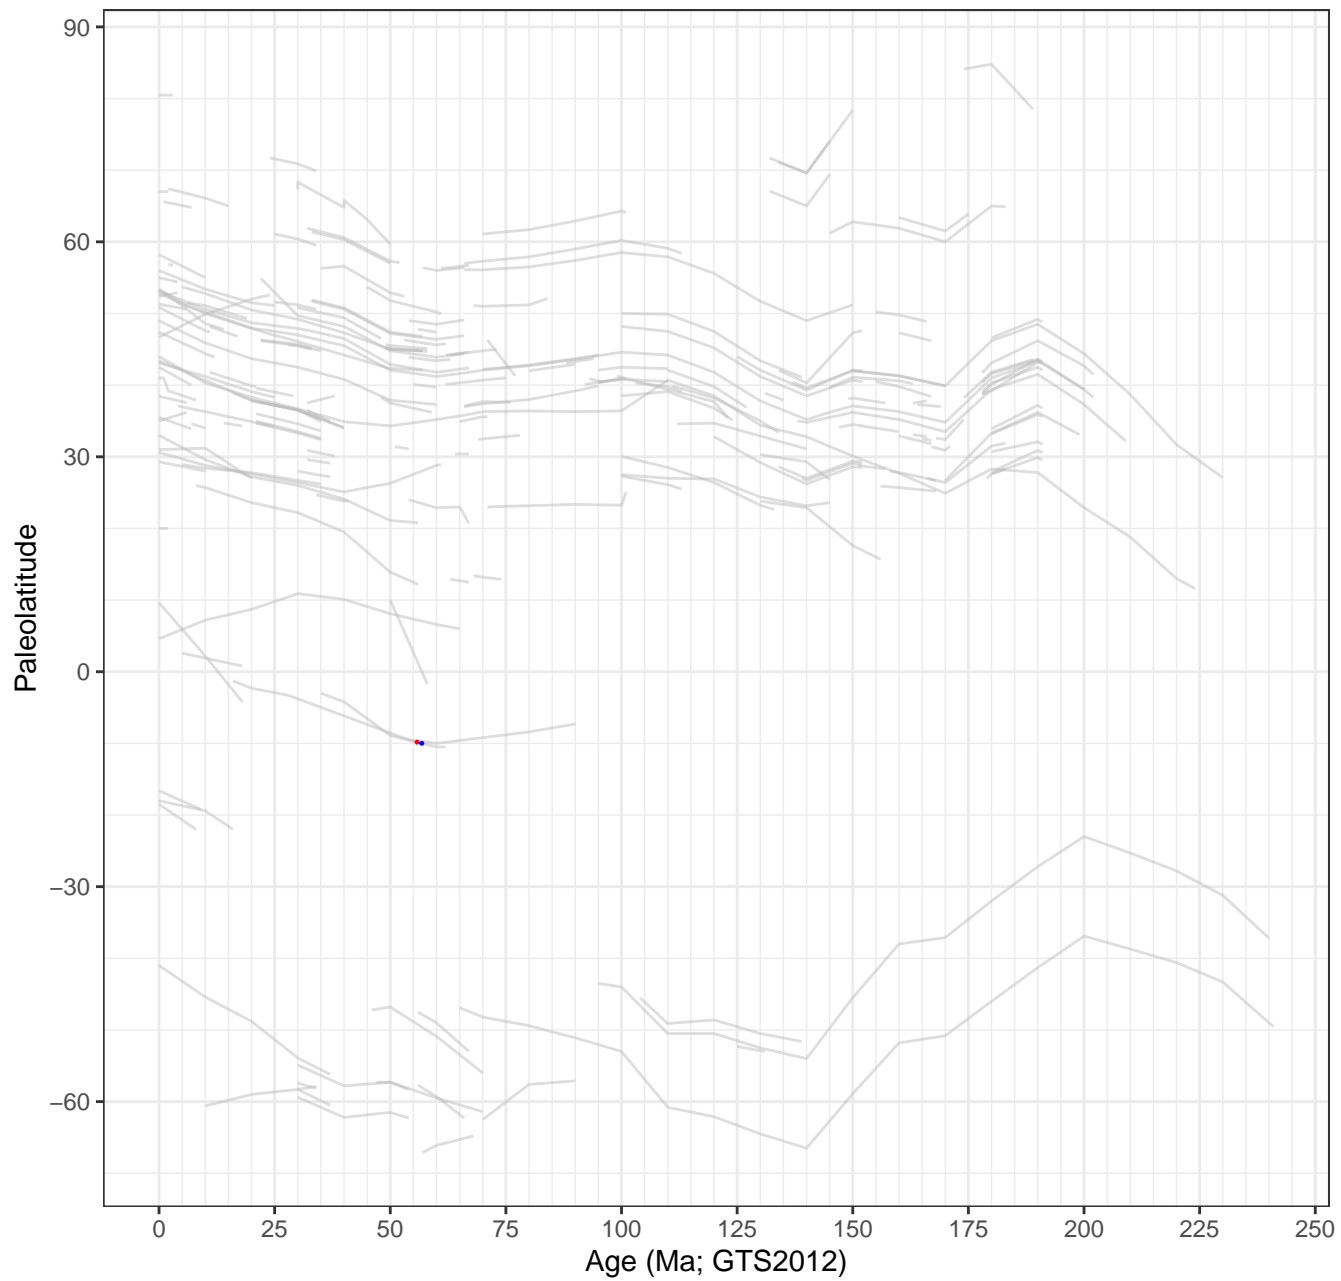

Supplement: Supplementary file 2364 [file Spinidinium ovale.pdf › Supplement/Supplement 2/Species 1914 plots/Spinidinium ovale.pdf]

# Species *Spinidinium schellenbergii*

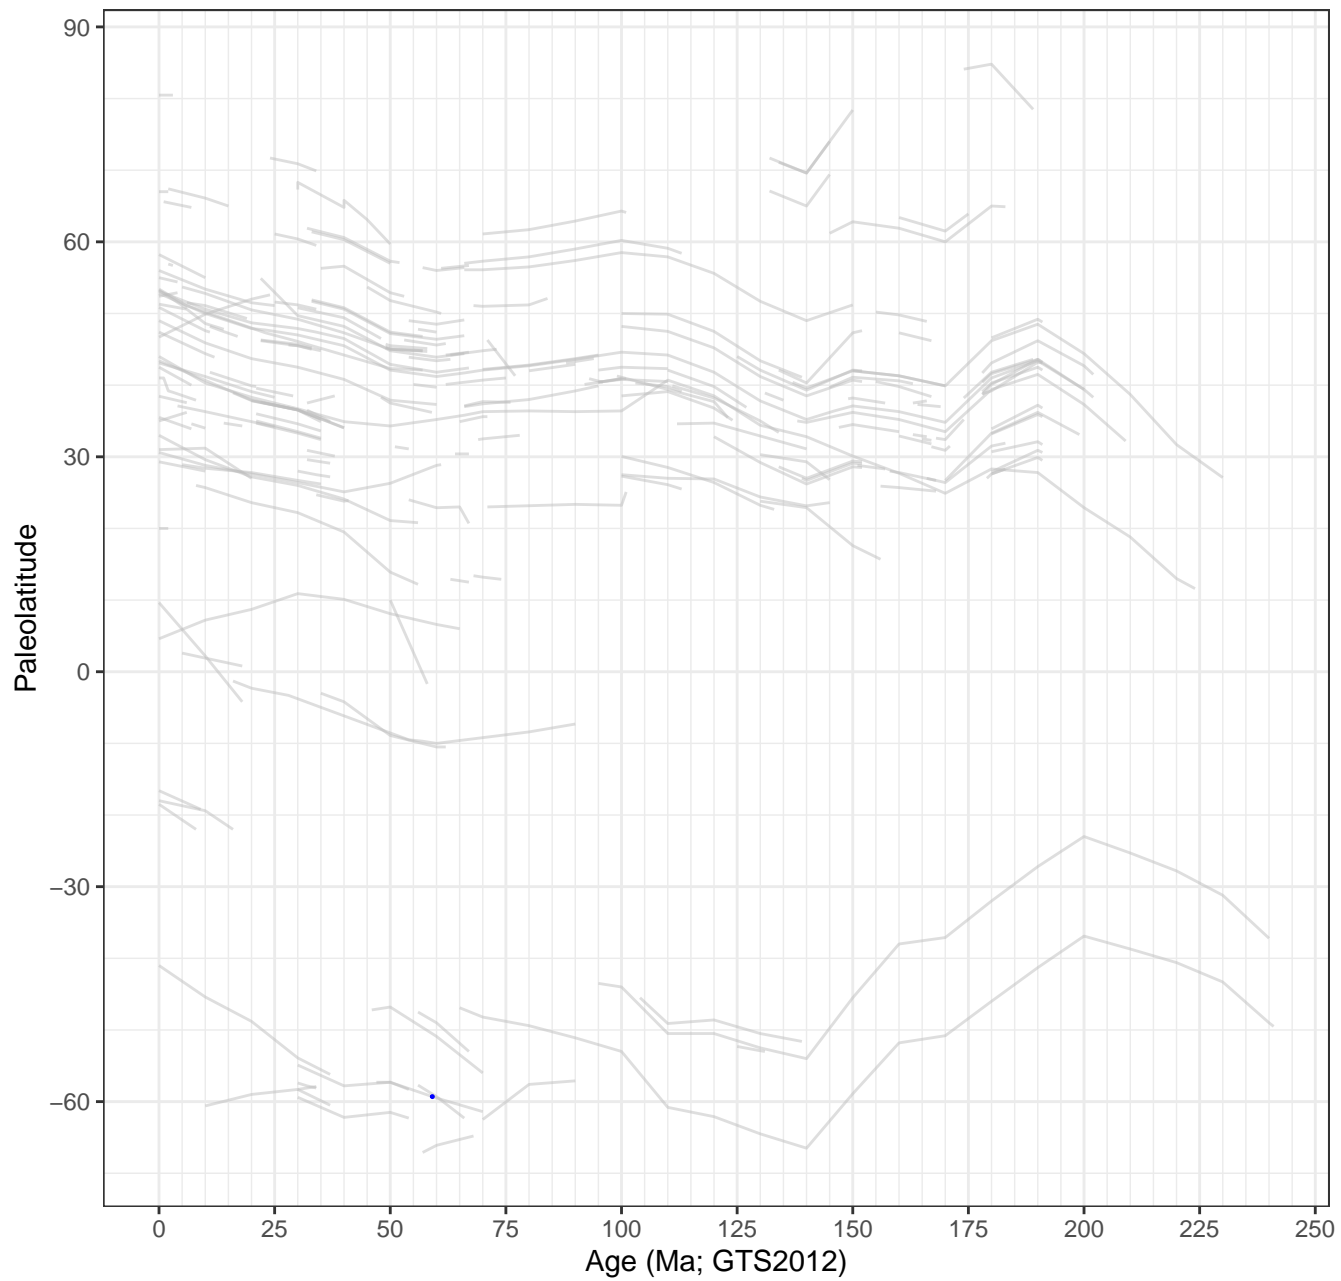

Supplement: Supplementary file 2365 [file Spinidinium schellenbergii.pdf › Supplement/Supplement 2/Species 1914 plots/Spinidinium schellenbergii.pdf]

# Species *Spinidinium uncinatum*

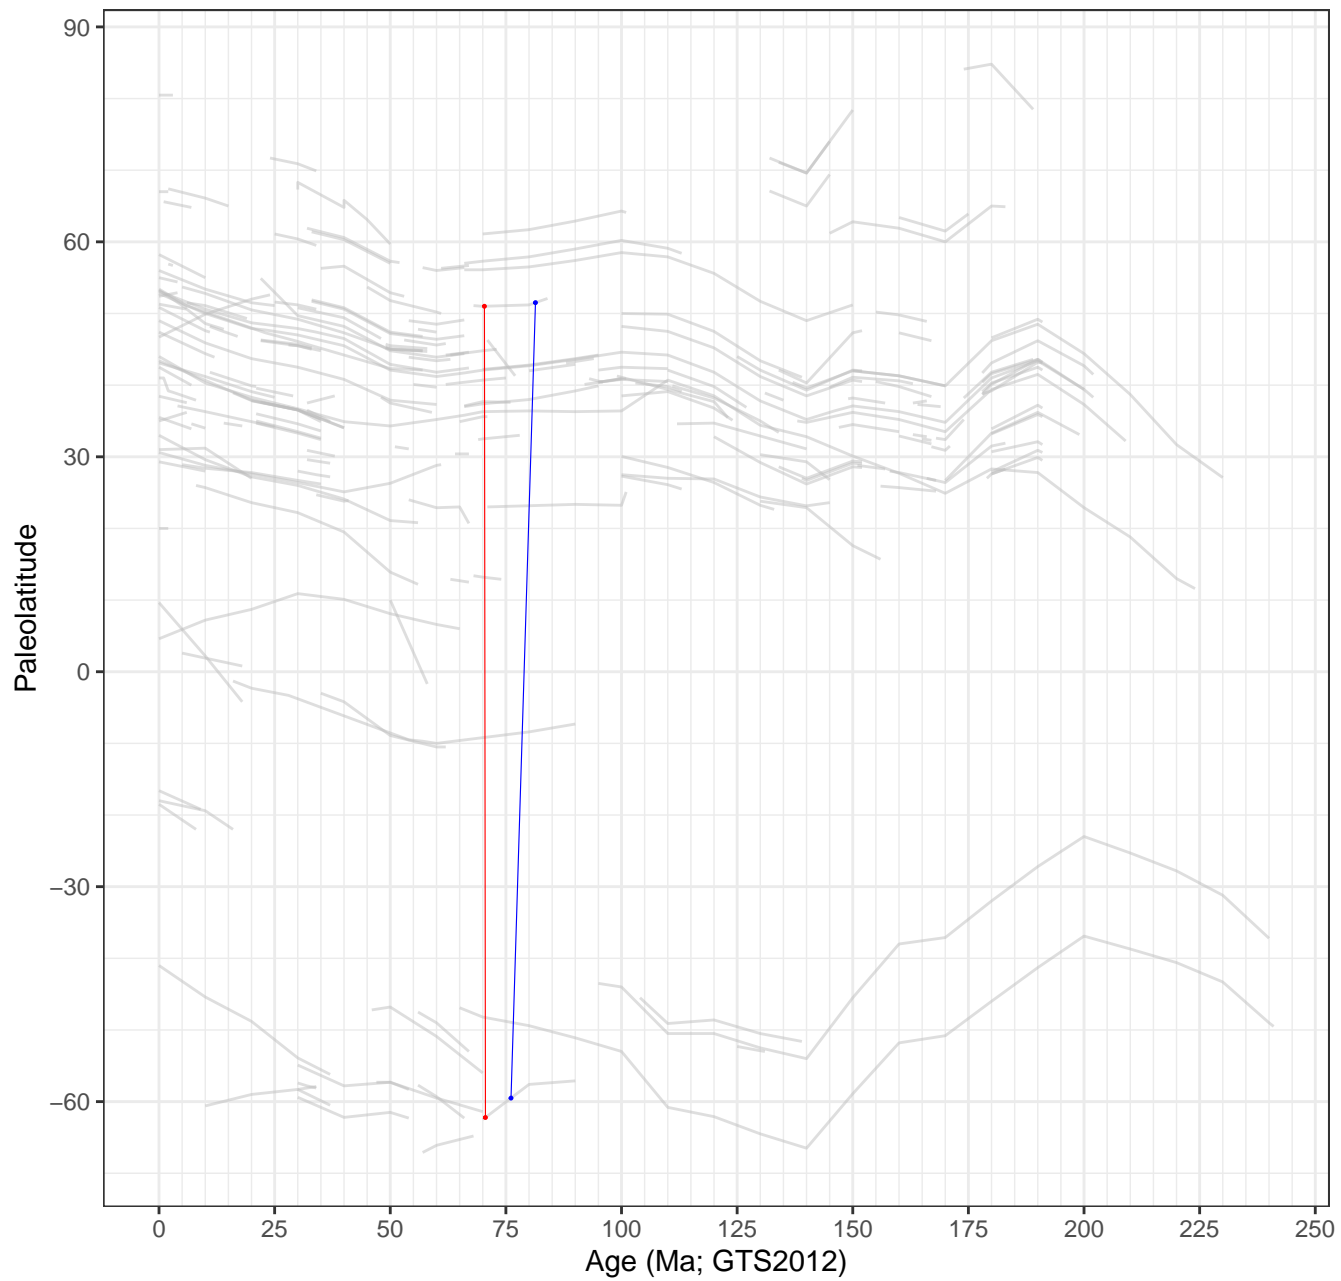

Supplement: Supplementary file 2366 [file Spinidinium uncinatum.pdf › Supplement/Supplement 2/Species 1914 plots/Spinidinium uncinatum.pdf]

# Species *Spiniferella cornuta*

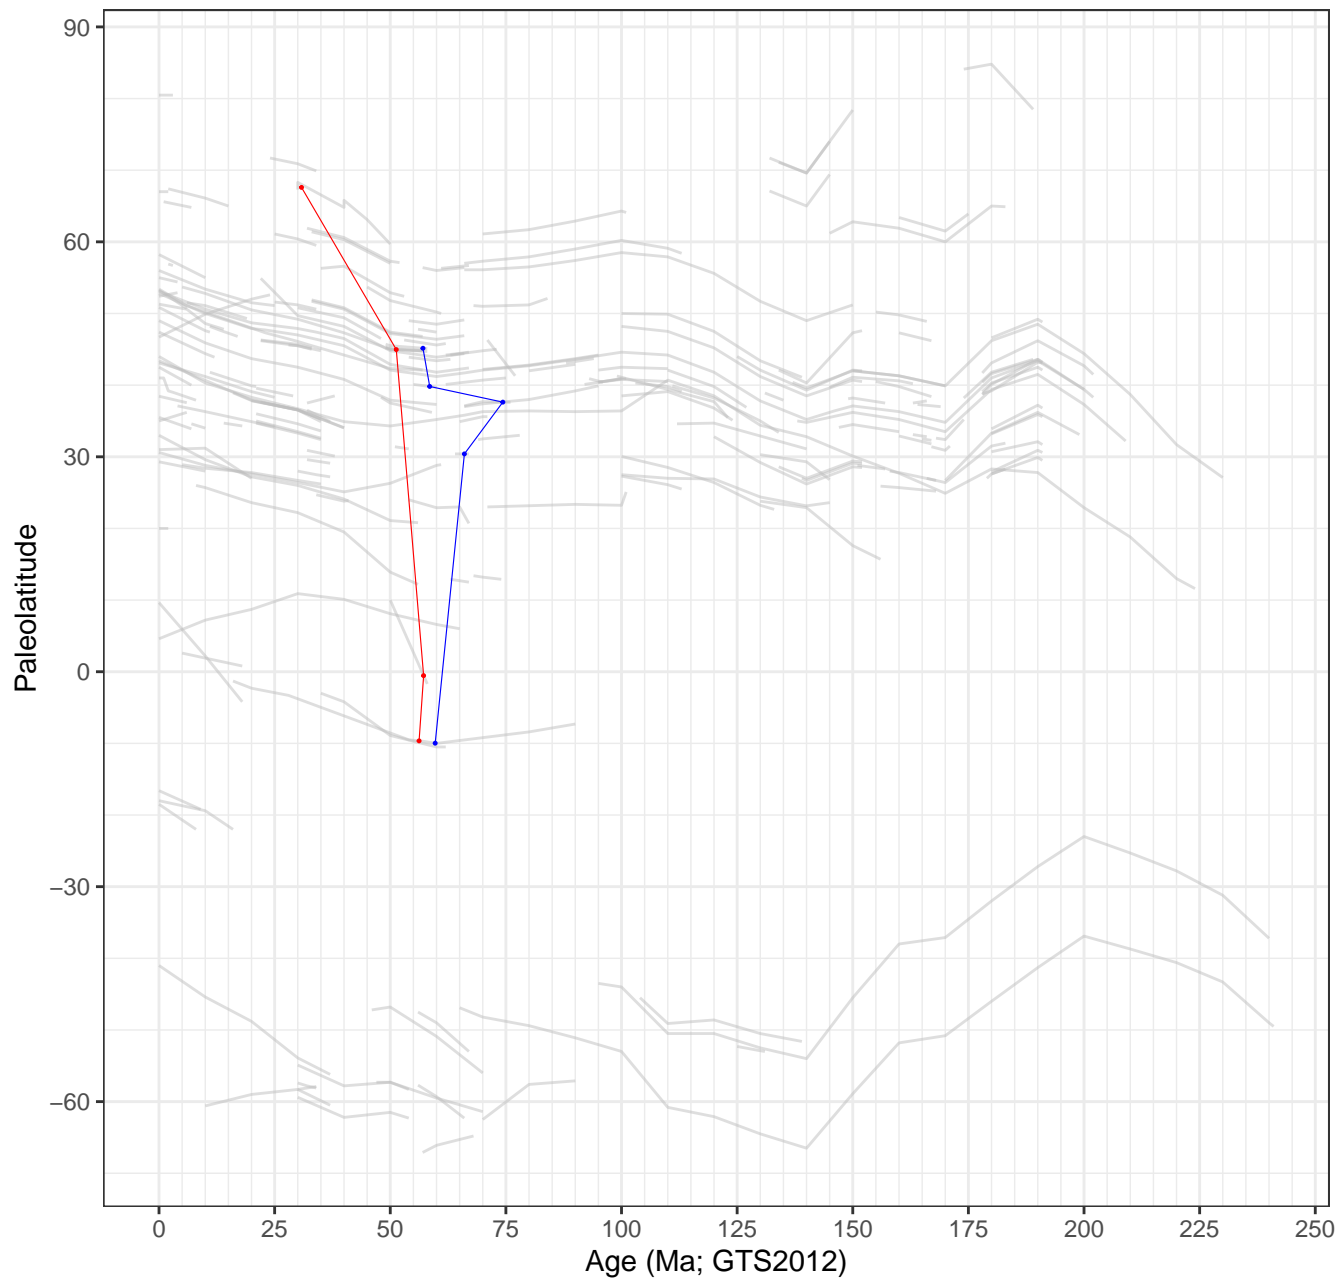

Supplement: Supplementary file 2367 [file Spiniferella cornuta.pdf › Supplement/Supplement 2/Species 1914 plots/Spiniferella cornuta.pdf]

# Species *Spiniferites asperulus*

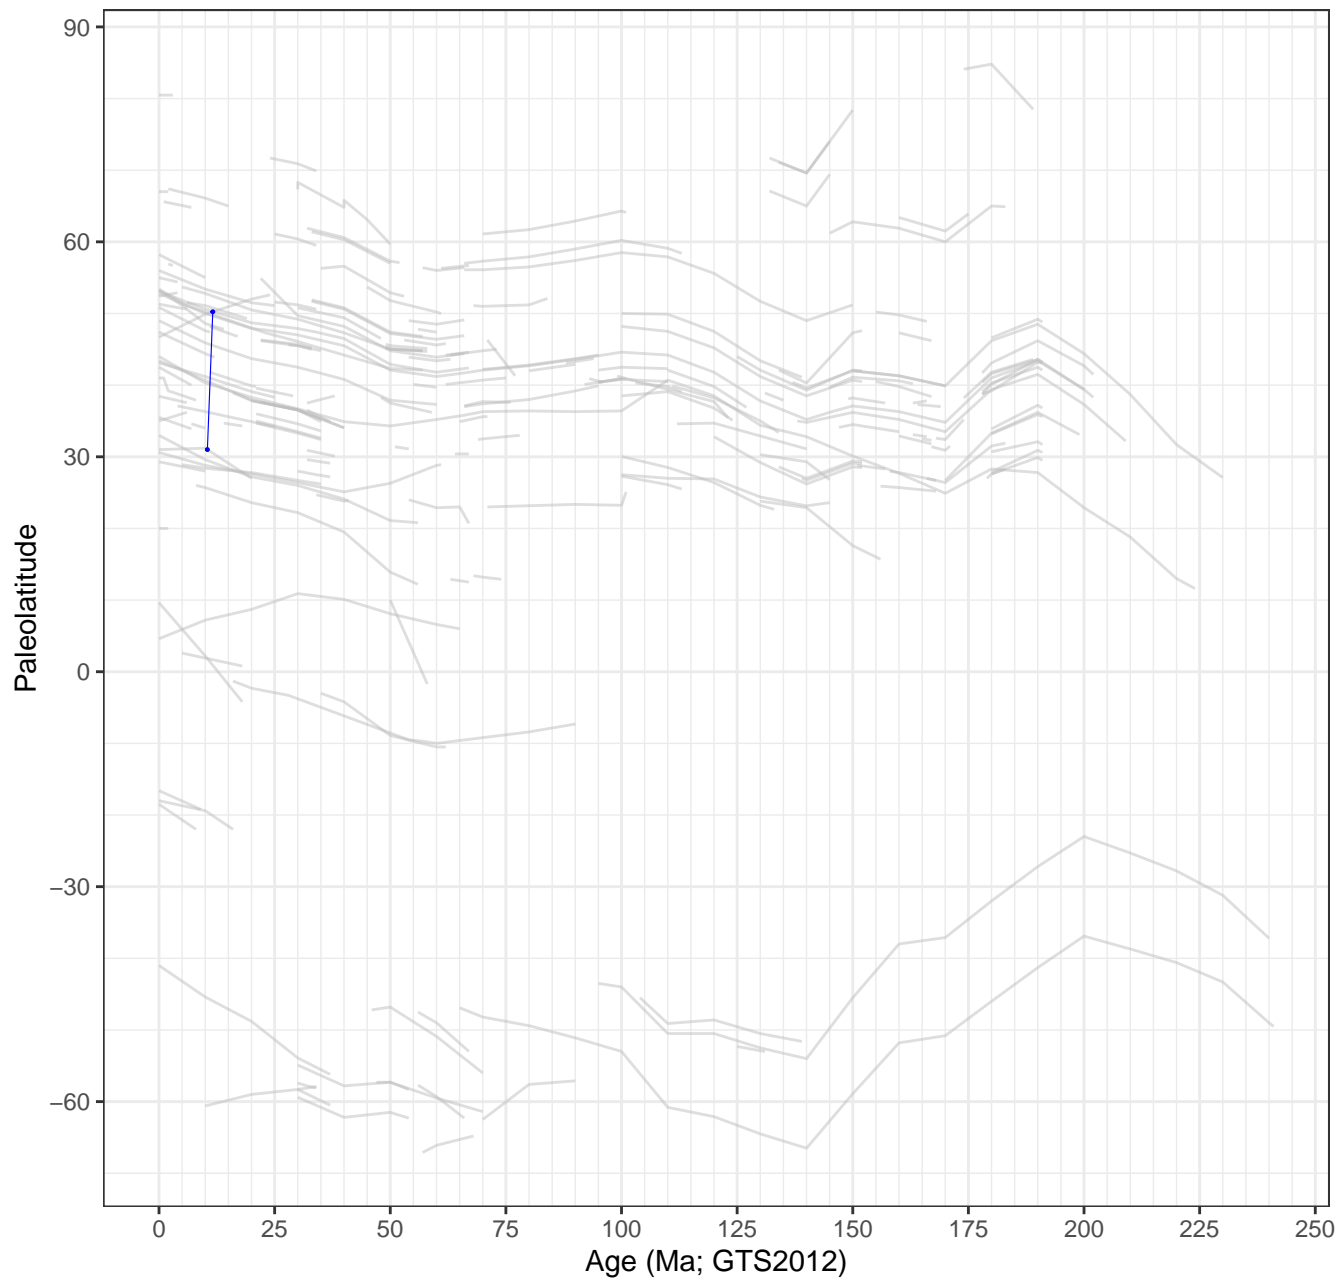

Supplement: Supplementary file 2368 [file Spiniferites asperulus.pdf › Supplement/Supplement 2/Species 1914 plots/Spiniferites asperulus.pdf]

# Species *Spiniferites bejui*

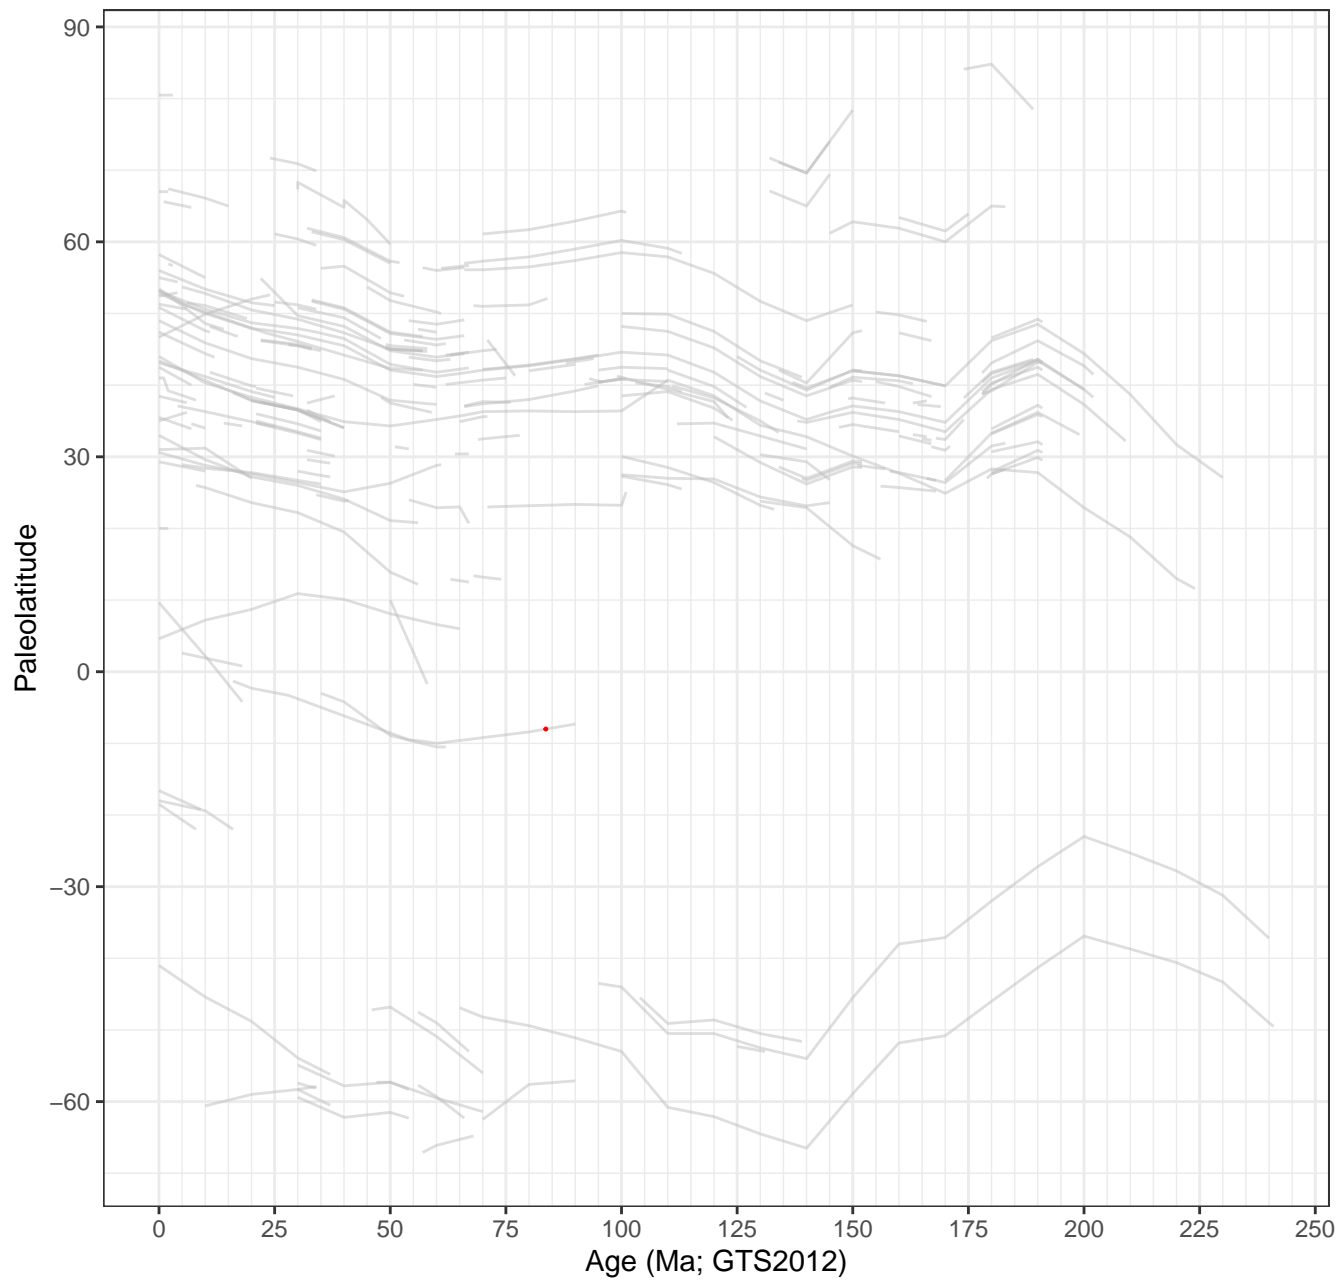

Supplement: Supplementary file 2369 [file Spiniferites bejui.pdf › Supplement/Supplement 2/Species 1914 plots/Spiniferites bejui.pdf]

# Species *Spiniferites belerius*

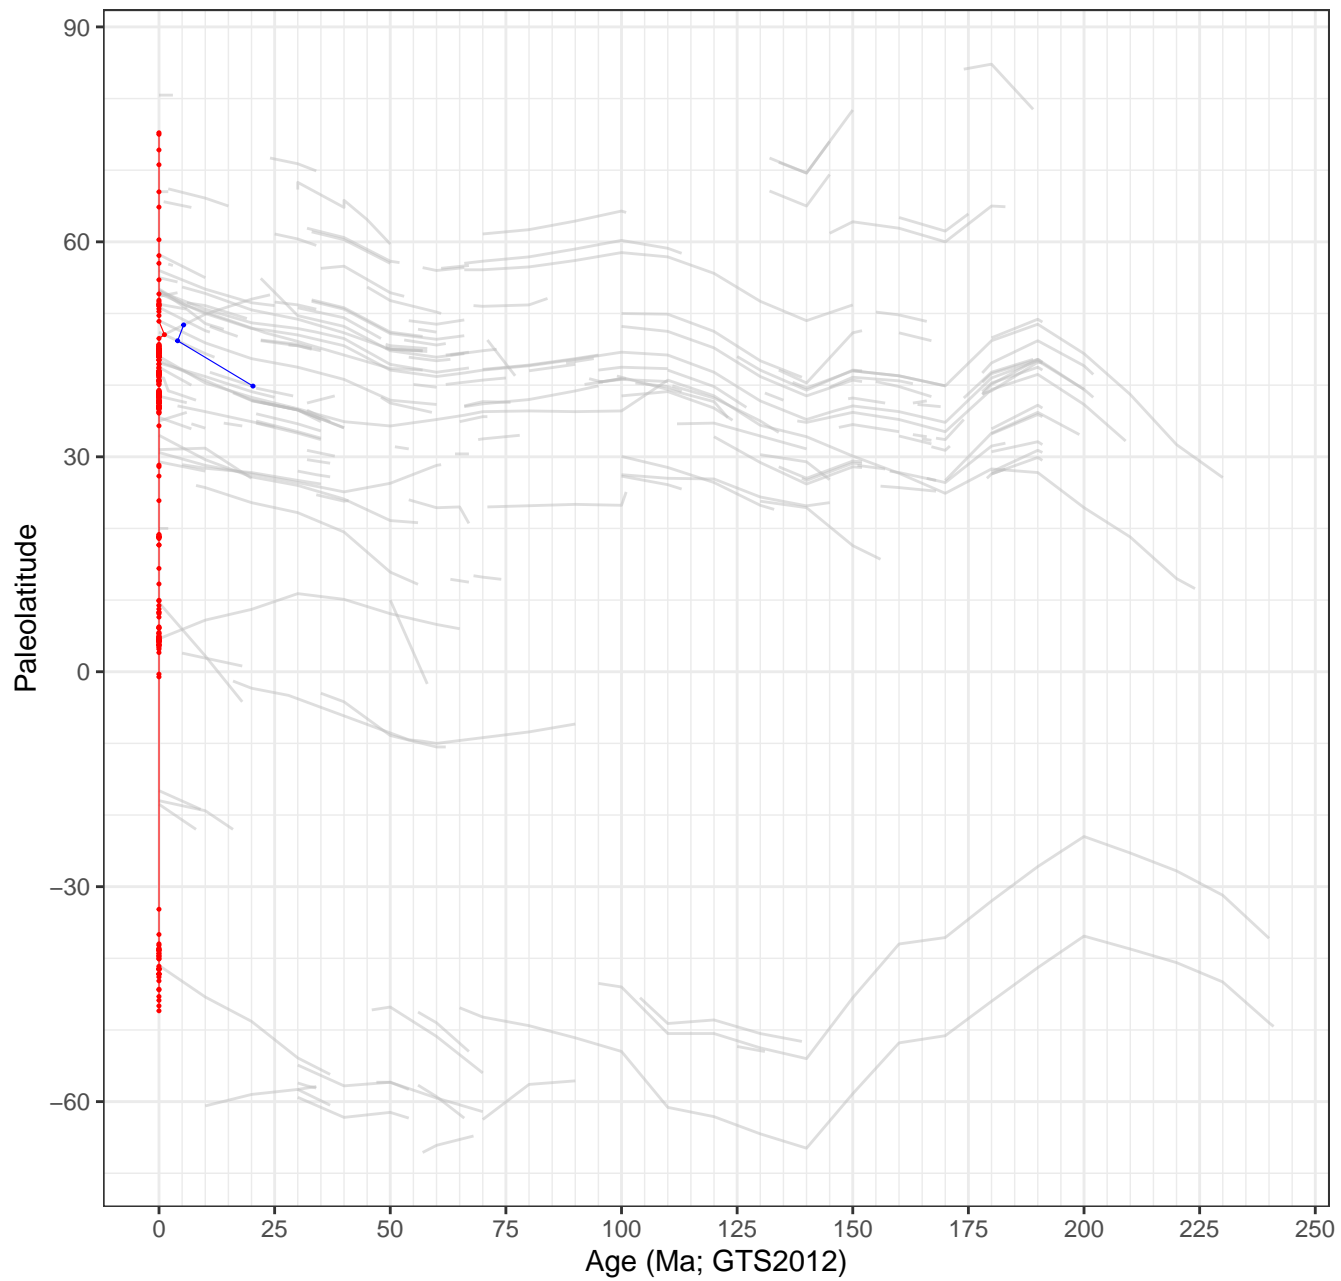

Supplement: Supplementary file 2370 [file Spiniferites belerius.pdf › Supplement/Supplement 2/Species 1914 plots/Spiniferites belerius.pdf]

# Species *Spiniferites bentorii*

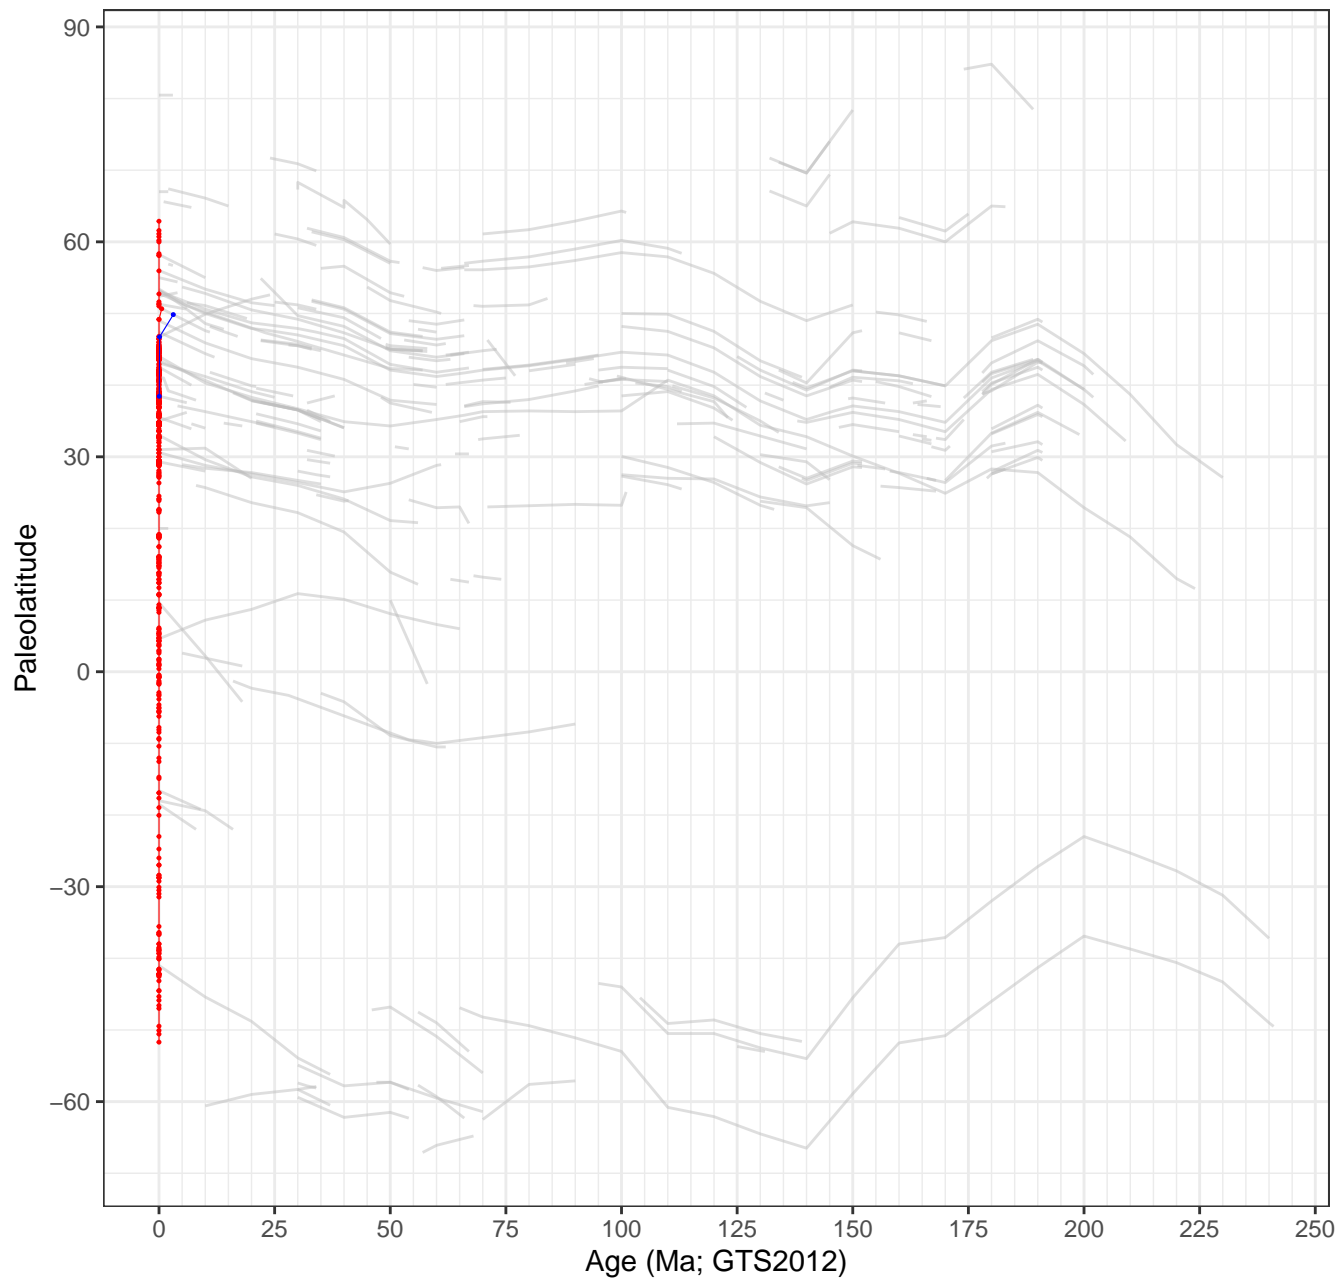

Supplement: Supplementary file 2371 [file Spiniferites bentorii.pdf › Supplement/Supplement 2/Species 1914 plots/Spiniferites bentorii.pdf]

# Species *Spiniferites bulloideus*

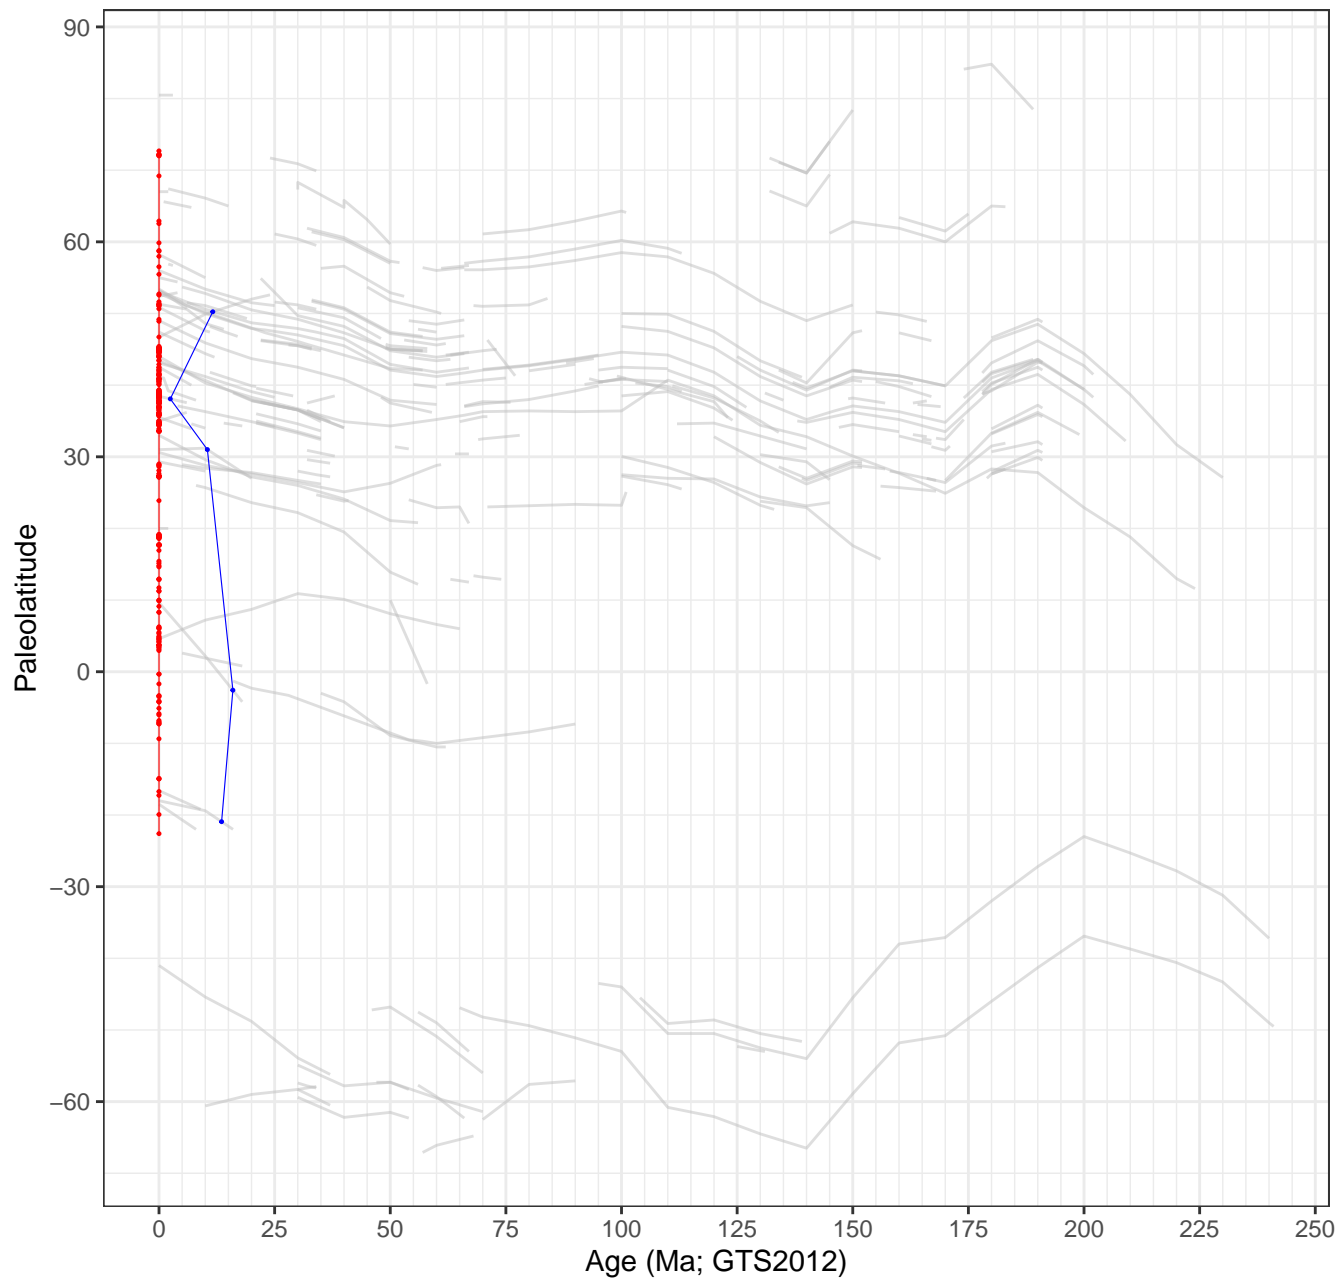

Supplement: Supplementary file 2372 [file Spiniferites bulloideus.pdf › Supplement/Supplement 2/Species 1914 plots/Spiniferites bulloideus.pdf]

# Species *Spiniferites clavus*

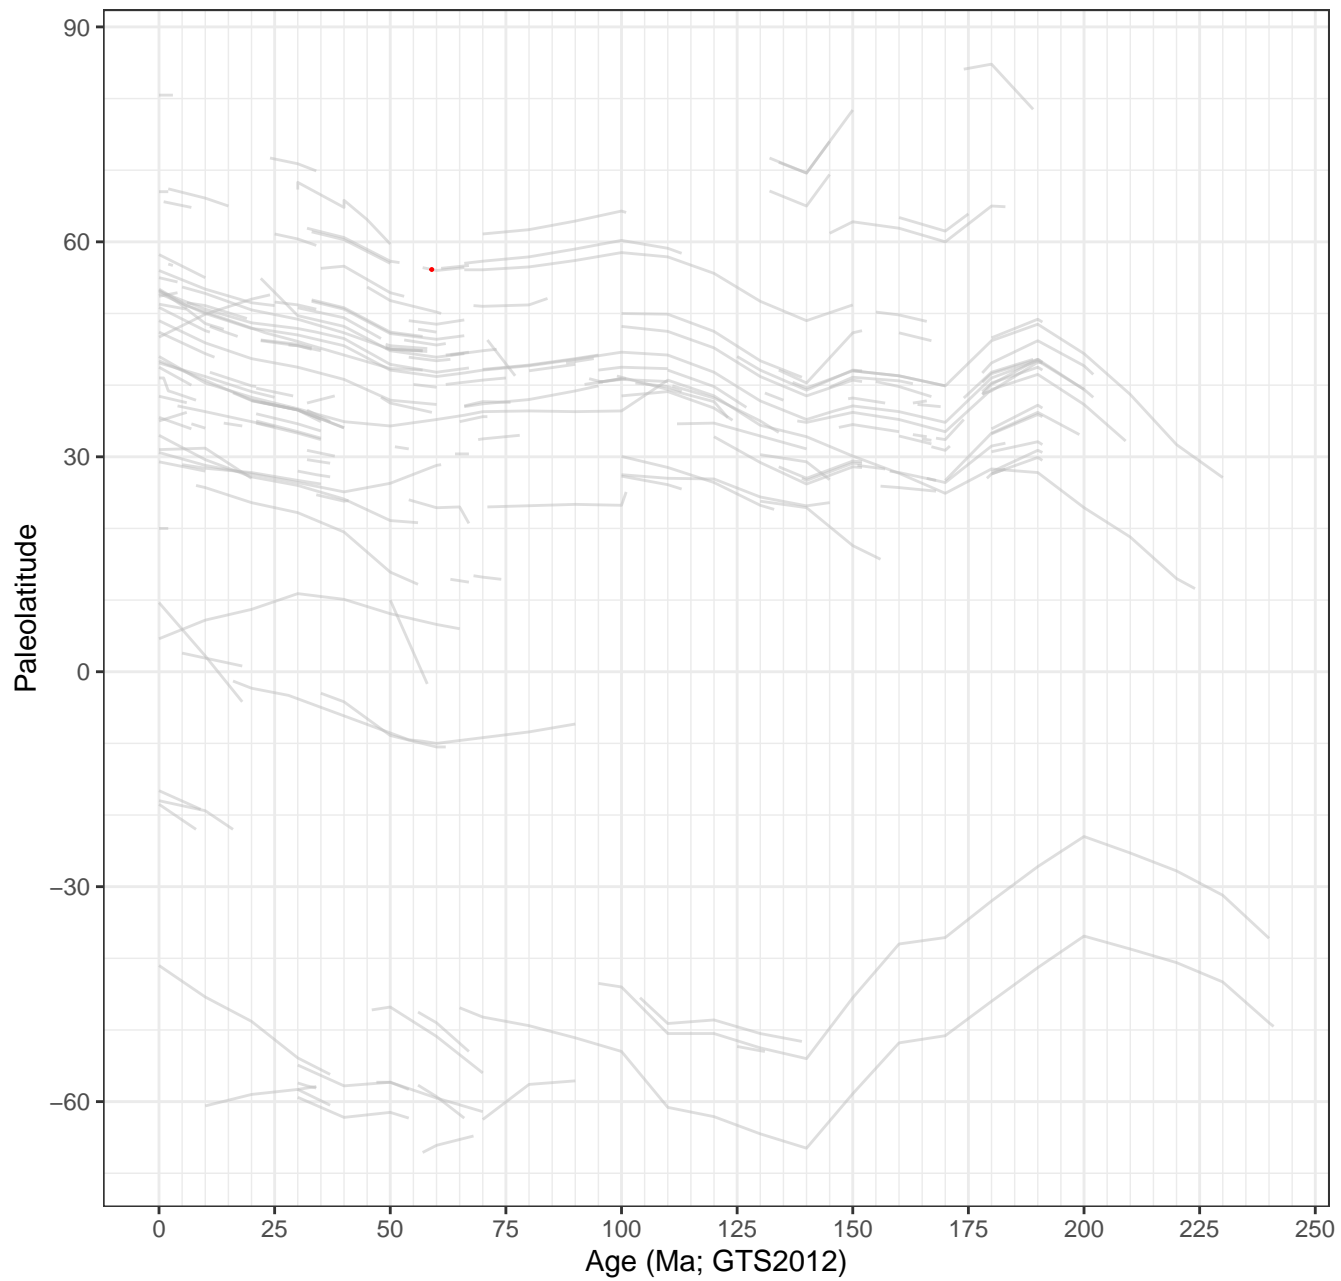

Supplement: Supplementary file 2373 [file Spiniferites clavus.pdf › Supplement/Supplement 2/Species 1914 plots/Spiniferites clavus.pdf]

# Species *Spiniferites confossus*

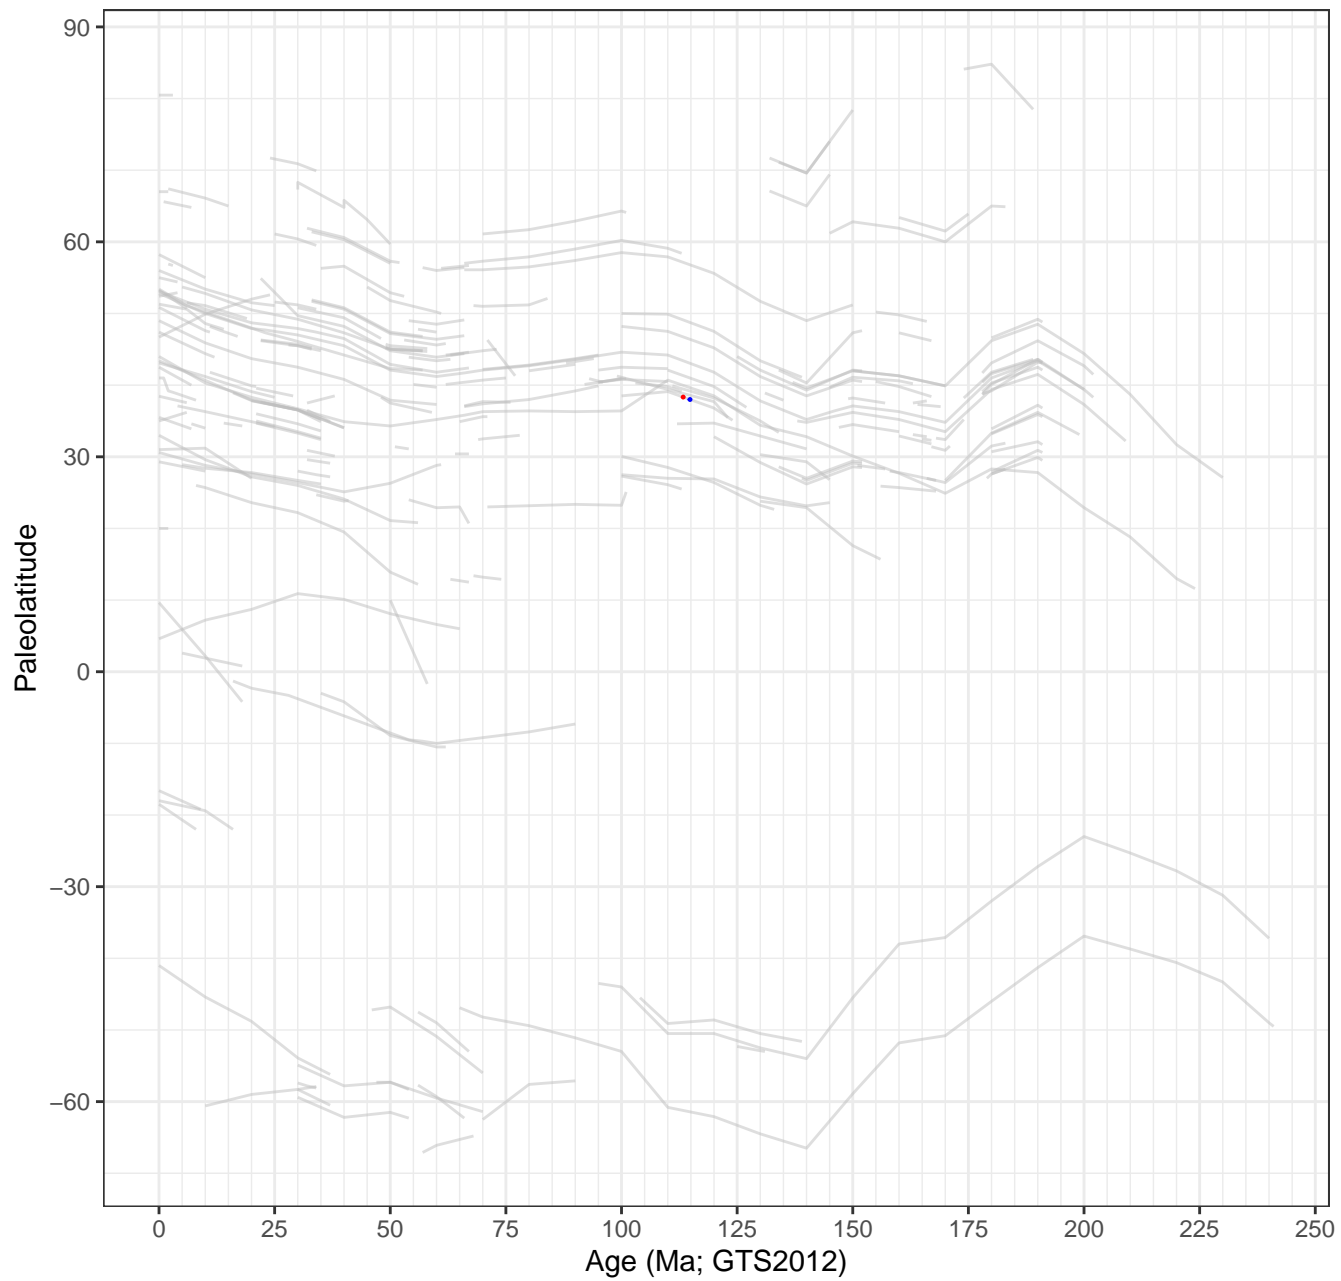

Supplement: Supplementary file 2374 [file Spiniferites confossus.pdf › Supplement/Supplement 2/Species 1914 plots/Spiniferites confossus.pdf]

# Species *Spiniferites cruciformis*

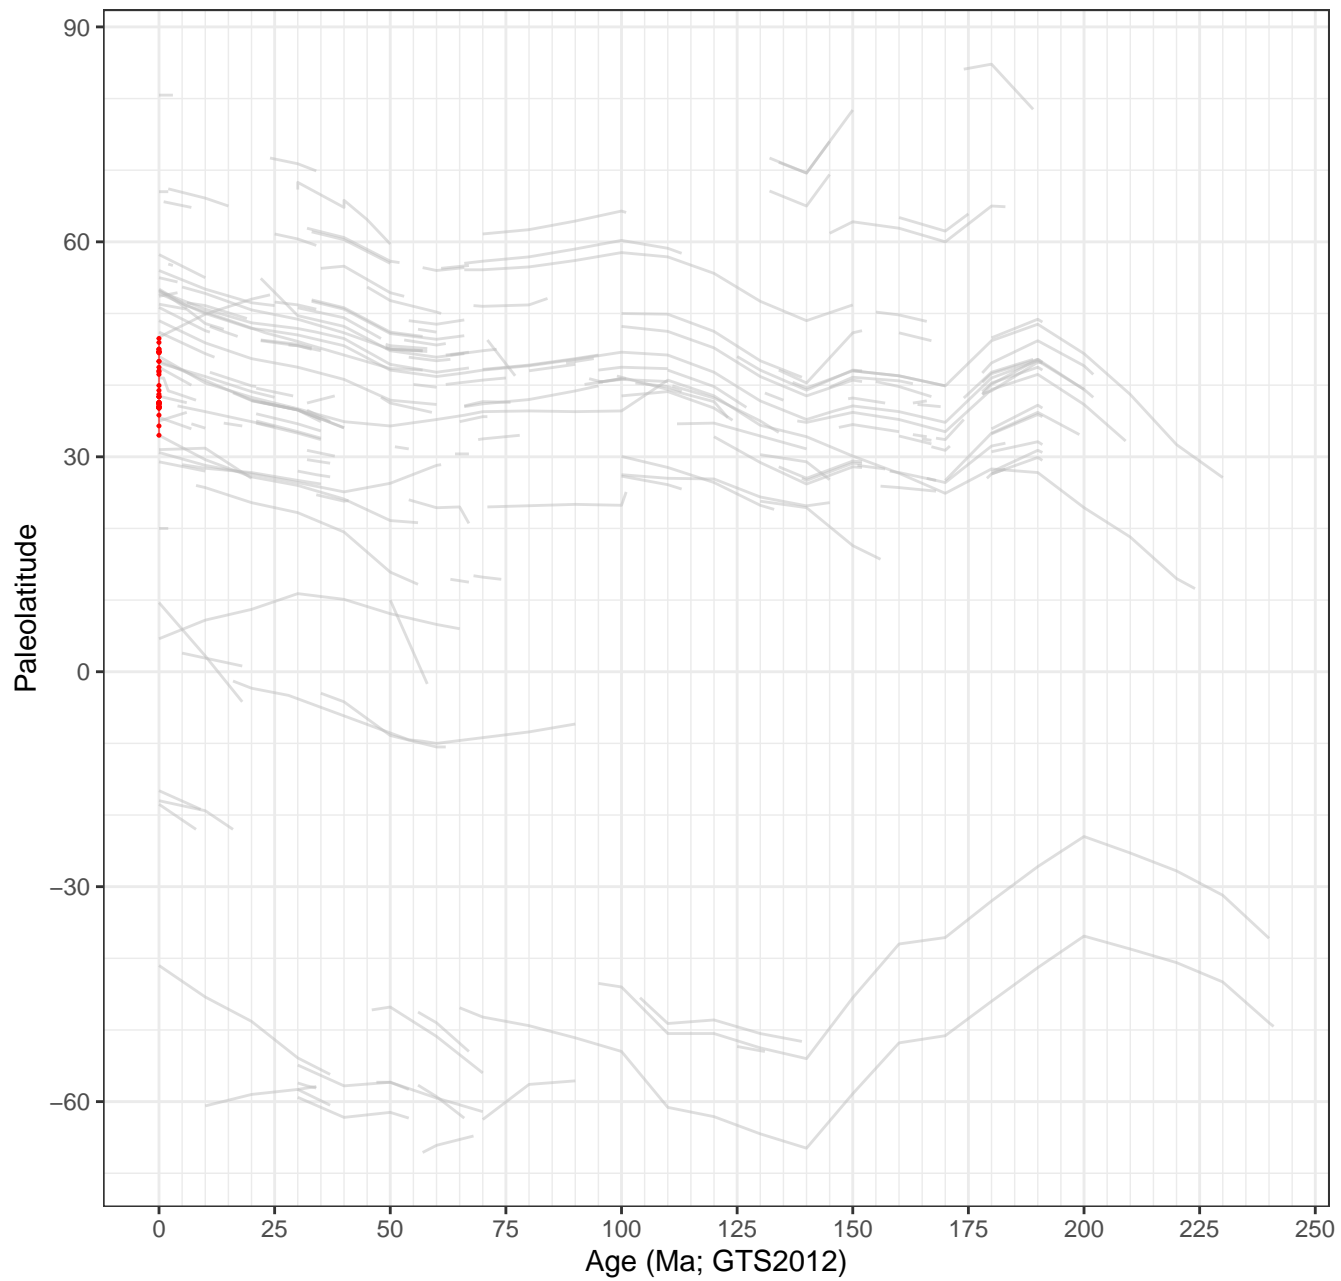

Supplement: Supplementary file 2375 [file Spiniferites cruciformis.pdf › Supplement/Supplement 2/Species 1914 plots/Spiniferites cruciformis.pdf]

# Species *Spiniferites delicatus*

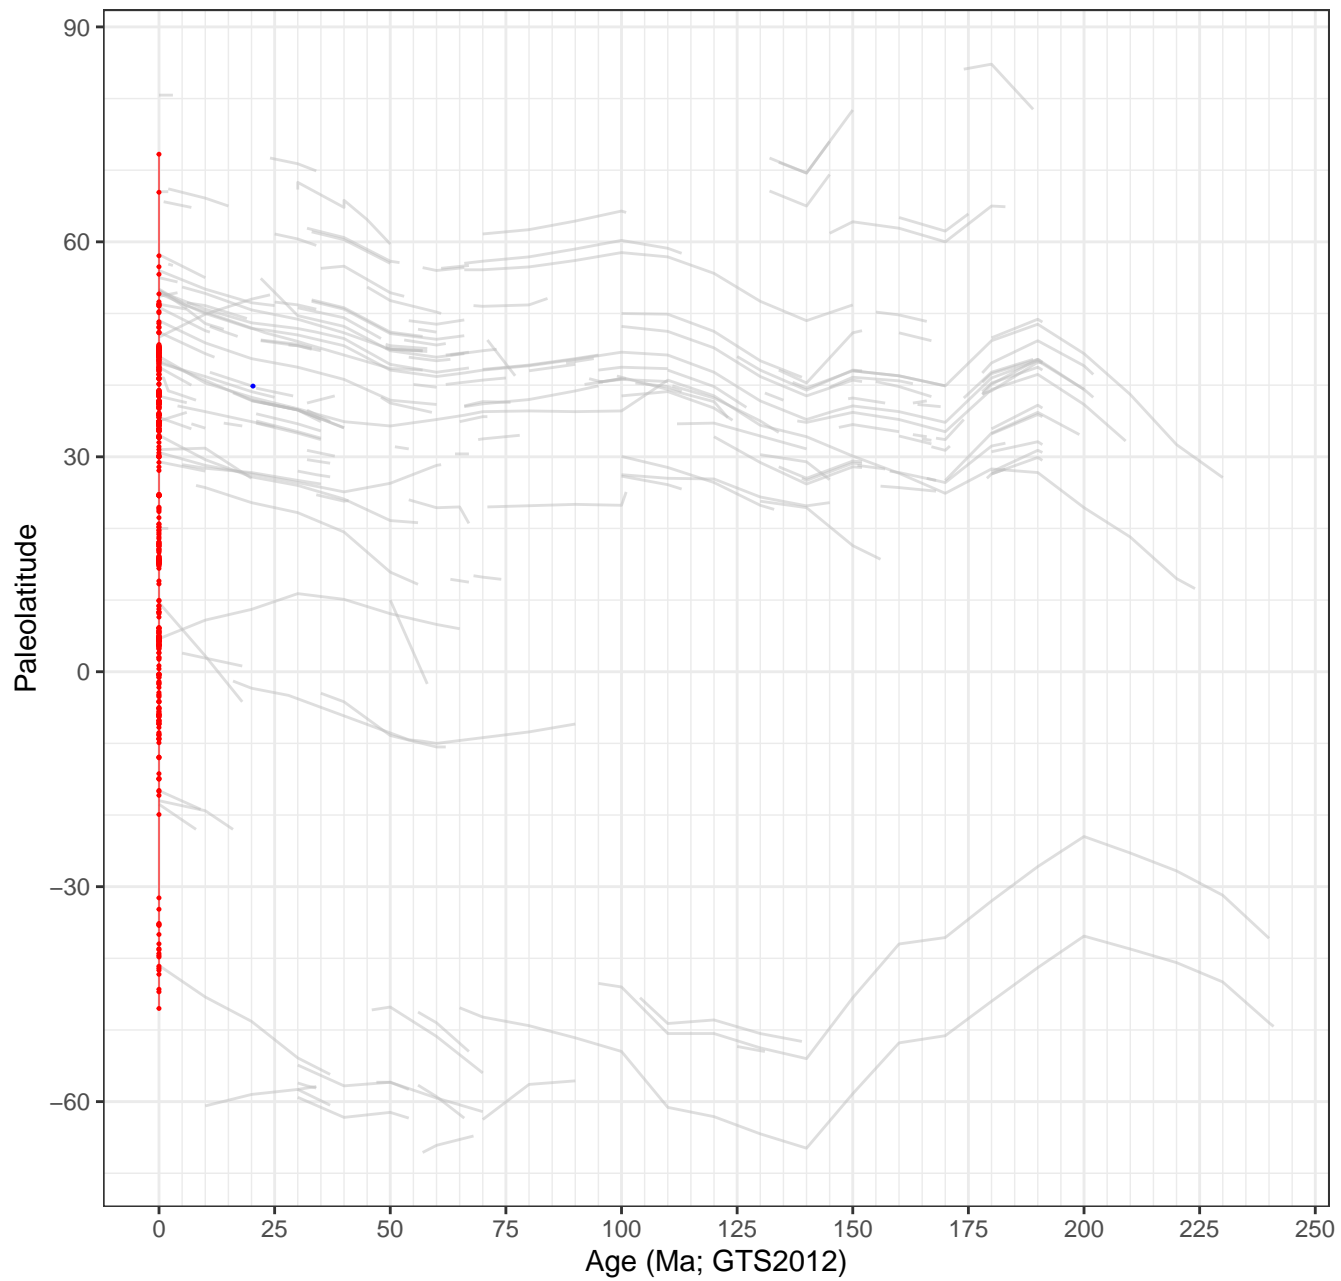

Supplement: Supplementary file 2376 [file Spiniferites delicatus.pdf › Supplement/Supplement 2/Species 1914 plots/Spiniferites delicatus.pdf]

# Species *Spiniferites dentatus*

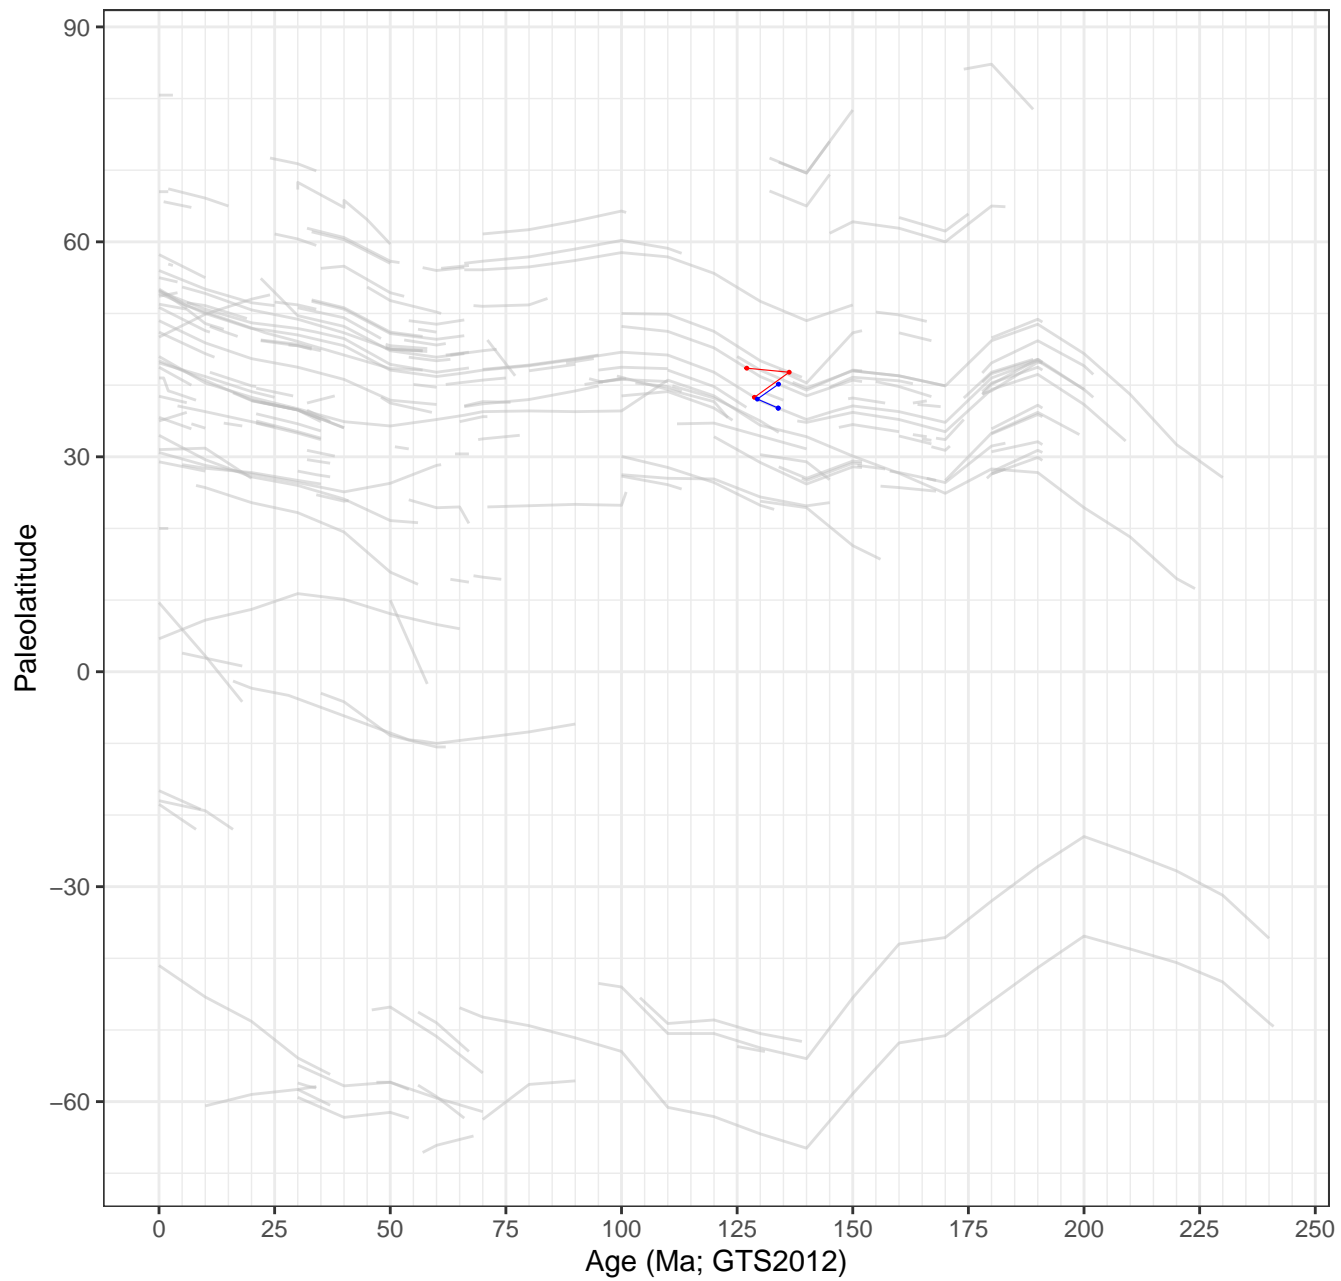

Supplement: Supplementary file 2377 [file Spiniferites dentatus.pdf › Supplement/Supplement 2/Species 1914 plots/Spiniferites dentatus.pdf]

# Species *Spiniferites ellipsoideus*

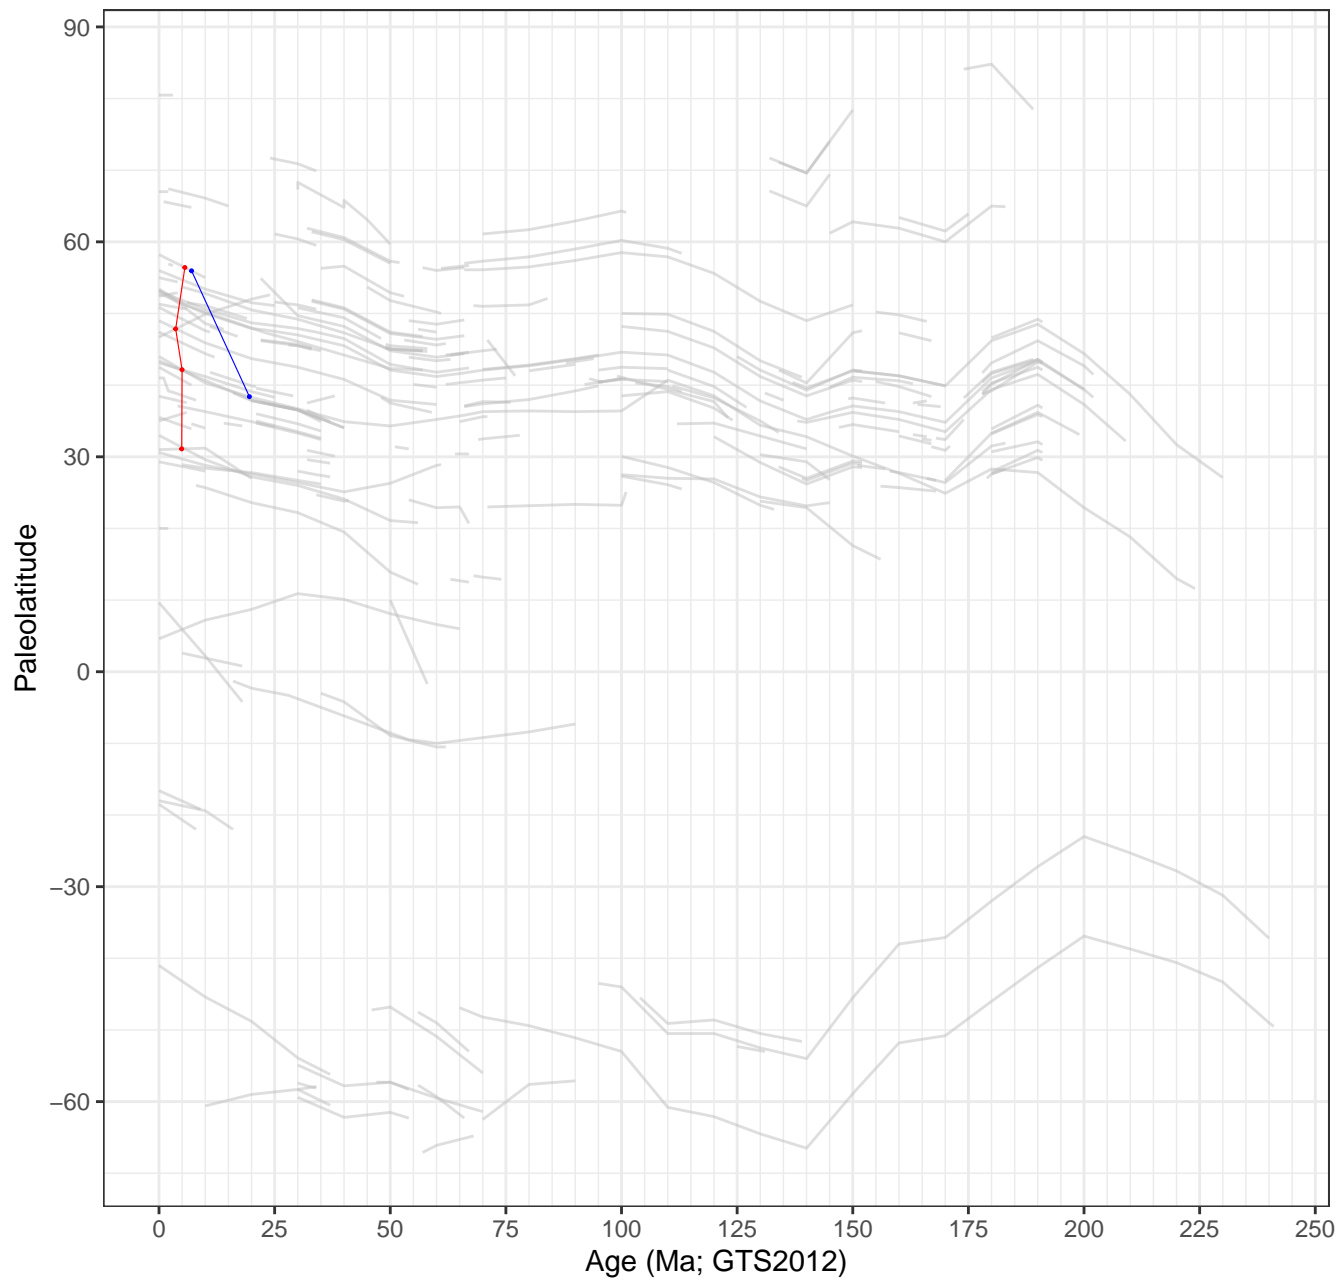

Supplement: Supplementary file 2378 [file Spiniferites ellipsoideus.pdf › Supplement/Supplement 2/Species 1914 plots/Spiniferites ellipsoideus.pdf]

# Species *Spiniferites elongatus*

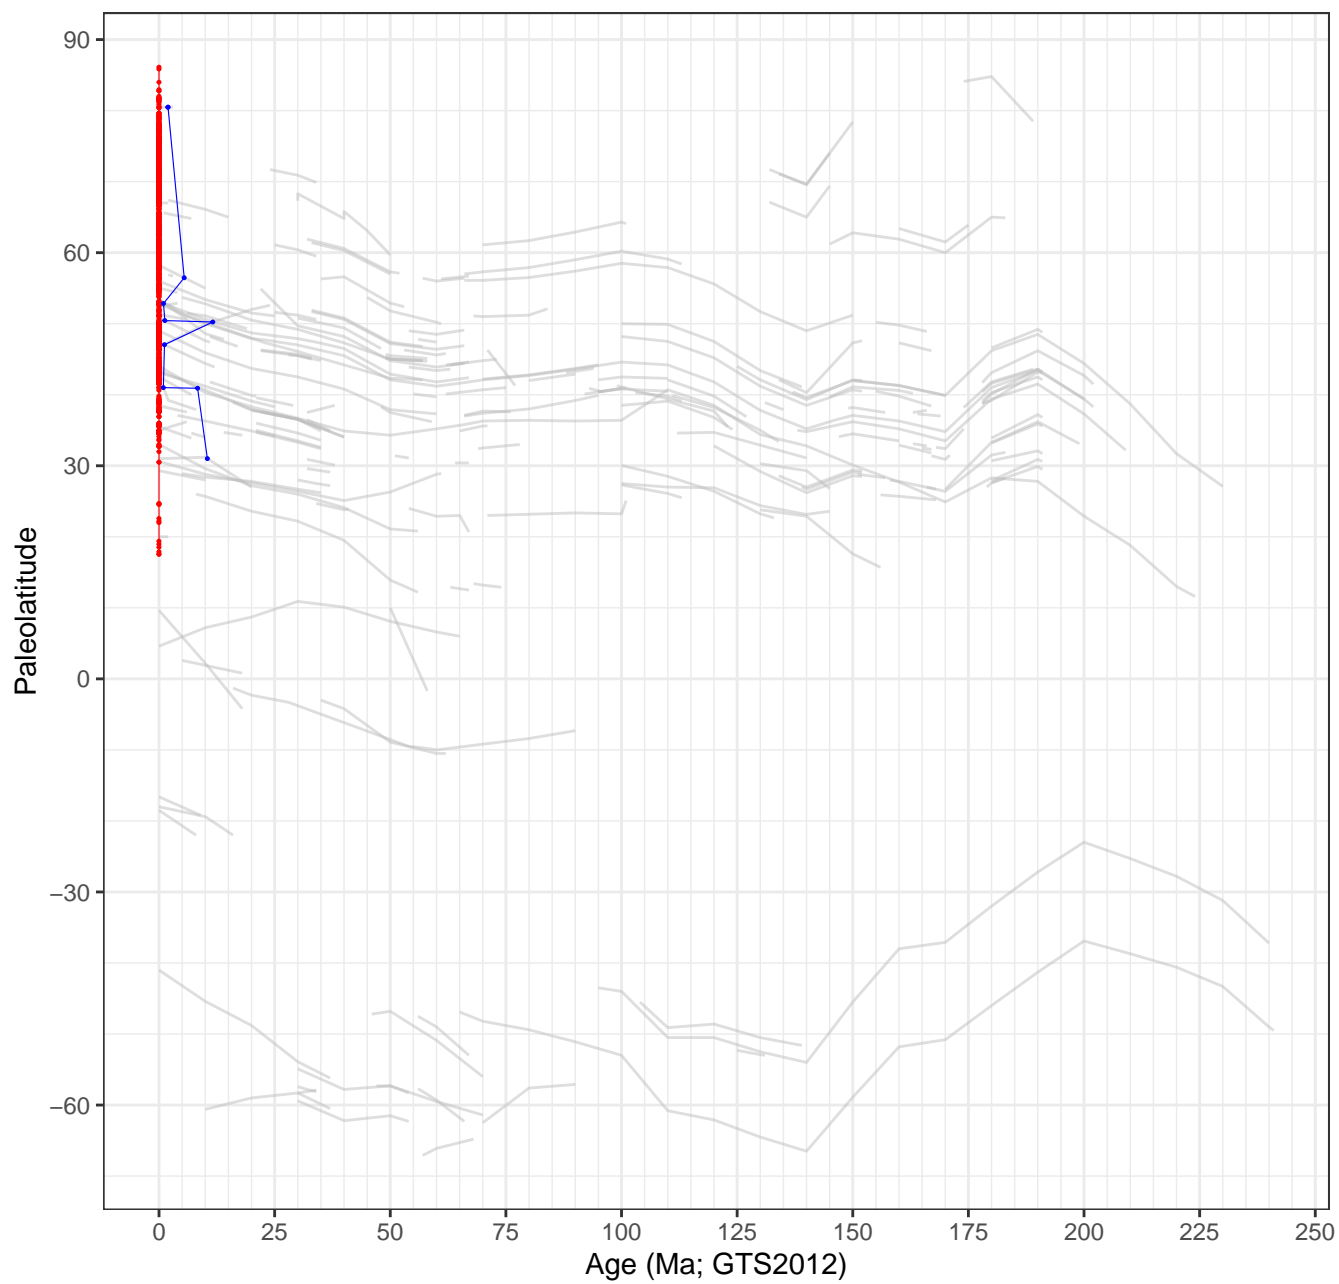

Supplement: Supplementary file 2379 [file Spiniferites elongatus.pdf › Supplement/Supplement 2/Species 1914 plots/Spiniferites elongatus.pdf]

# Species *Spiniferites fenestratus*

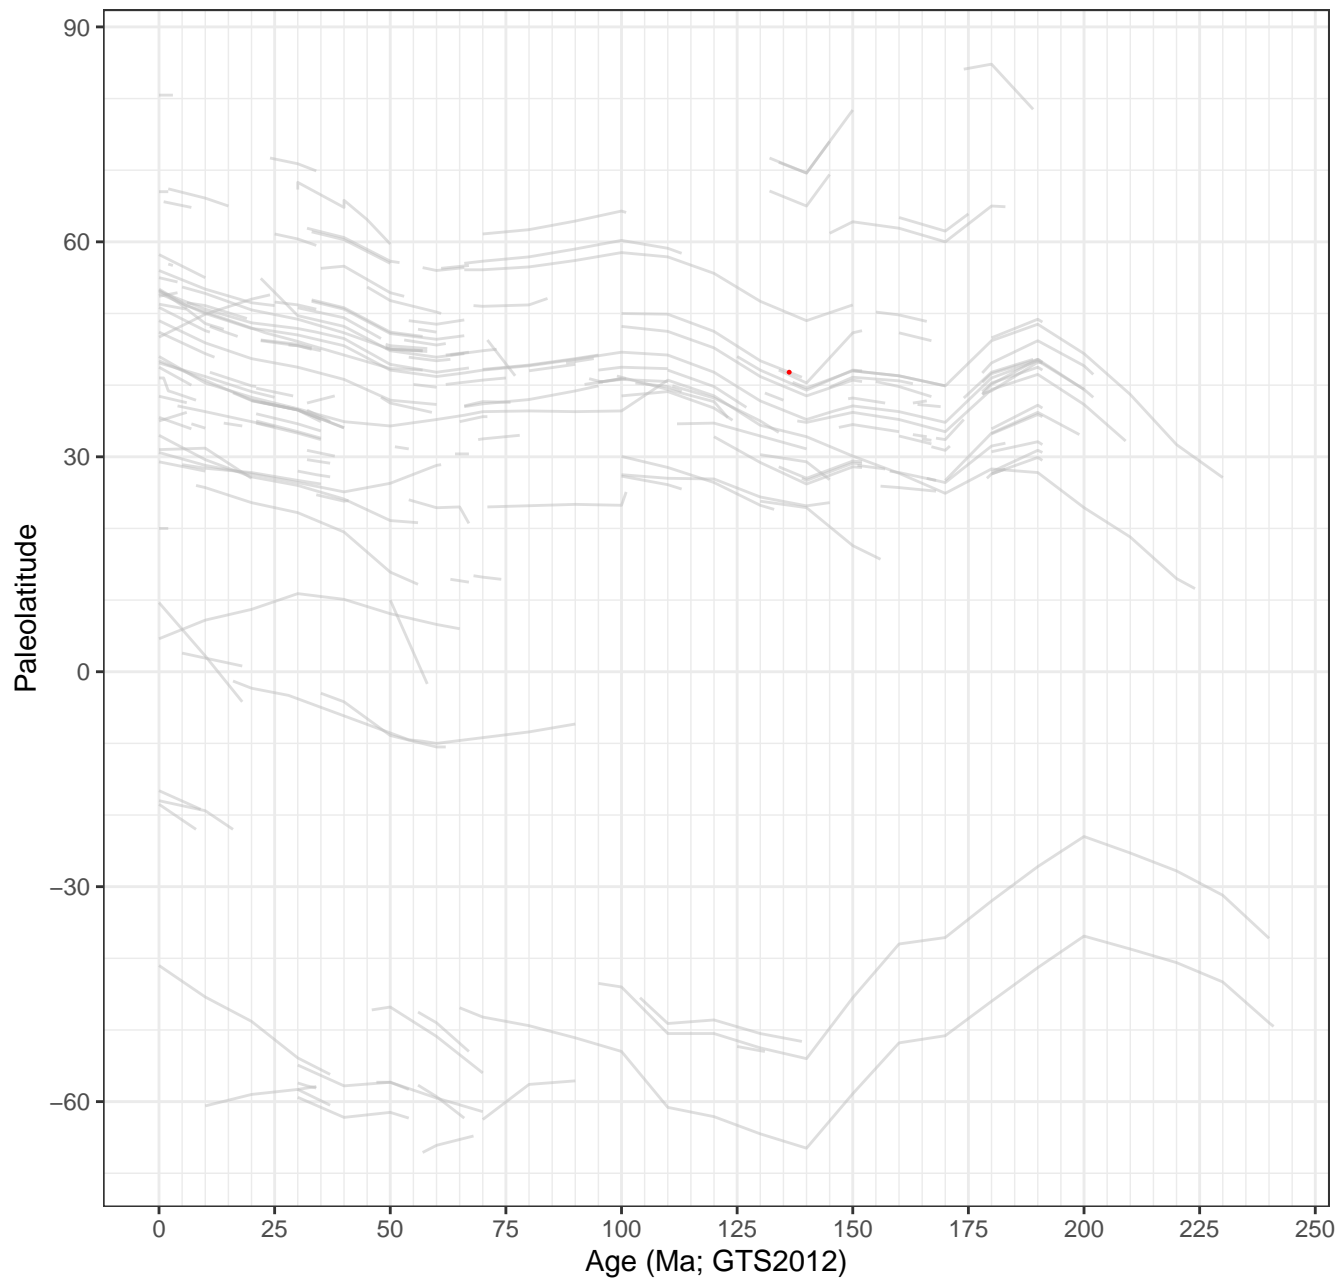

Supplement: Supplementary file 2380 [file Spiniferites fenestratus.pdf › Supplement/Supplement 2/Species 1914 plots/Spiniferites fenestratus.pdf]

# Species *Spiniferites fentonii*

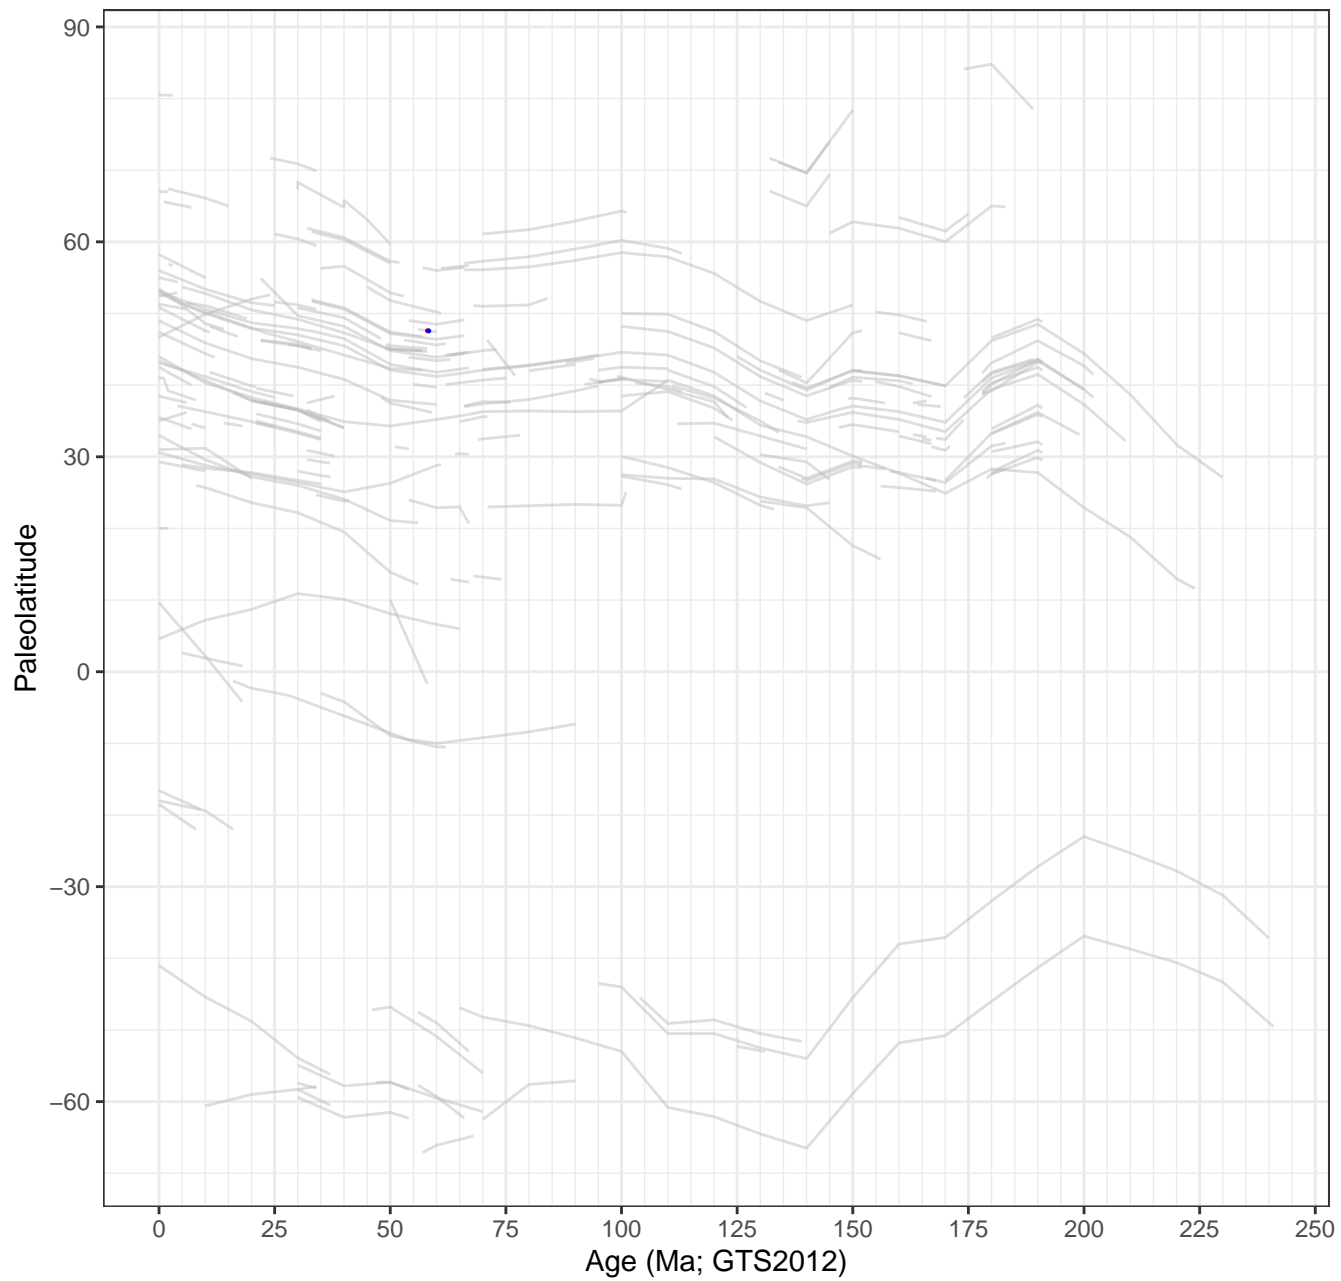

Supplement: Supplementary file 2381 [file Spiniferites fentonii.pdf › Supplement/Supplement 2/Species 1914 plots/Spiniferites fentonii.pdf]

# Species *Spiniferites firmus*

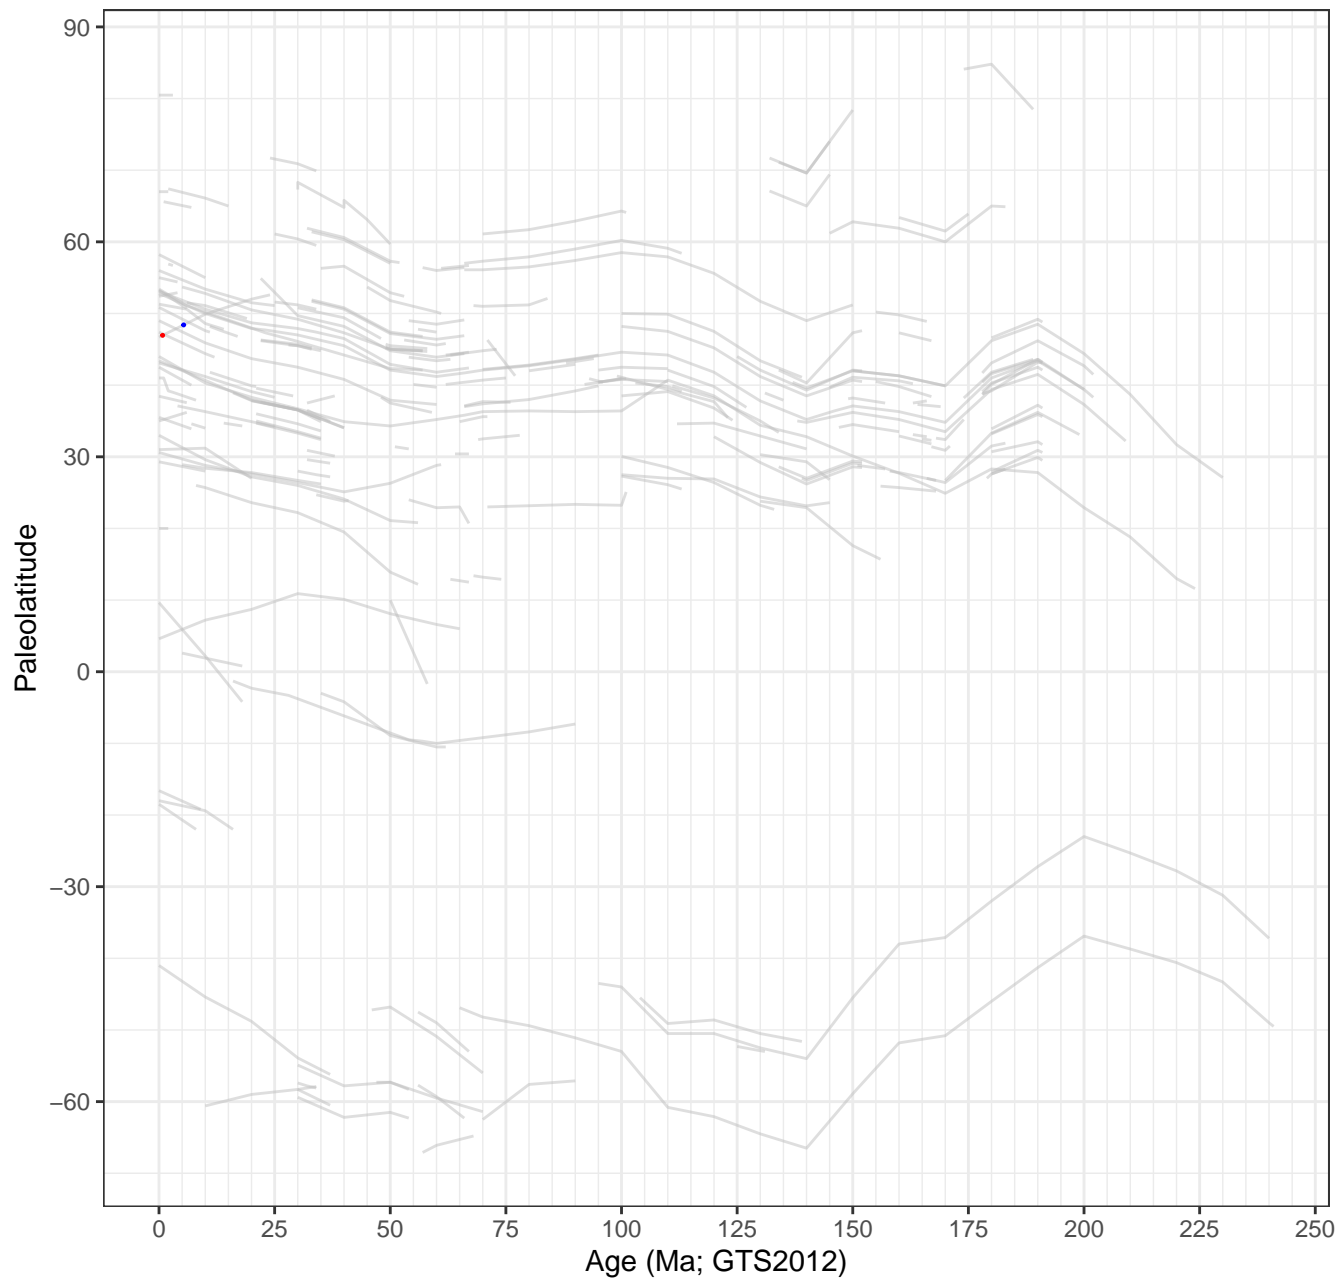

Supplement: Supplementary file 2382 [file Spiniferites firmus.pdf › Supplement/Supplement 2/Species 1914 plots/Spiniferites firmus.pdf]

# Species *Spiniferites foveolatus*

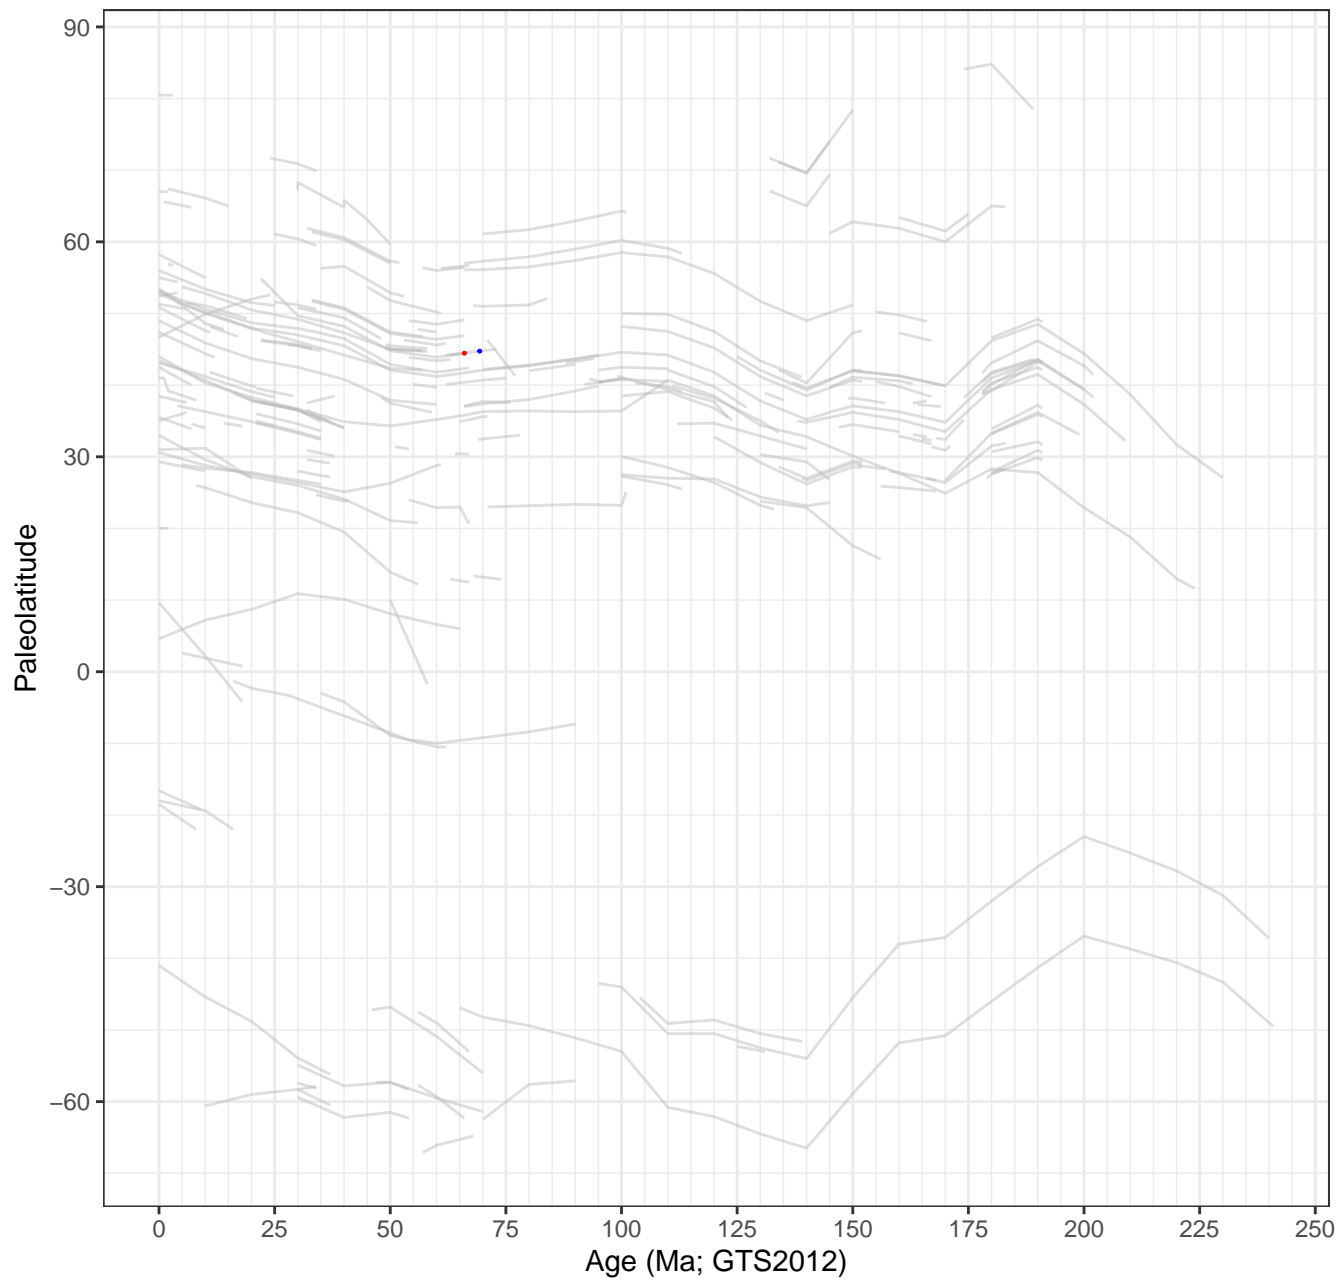

Supplement: Supplementary file 2383 [file Spiniferites foveolatus.pdf › Supplement/Supplement 2/Species 1914 plots/Spiniferites foveolatus.pdf]

# Species *Spiniferites frigidus*

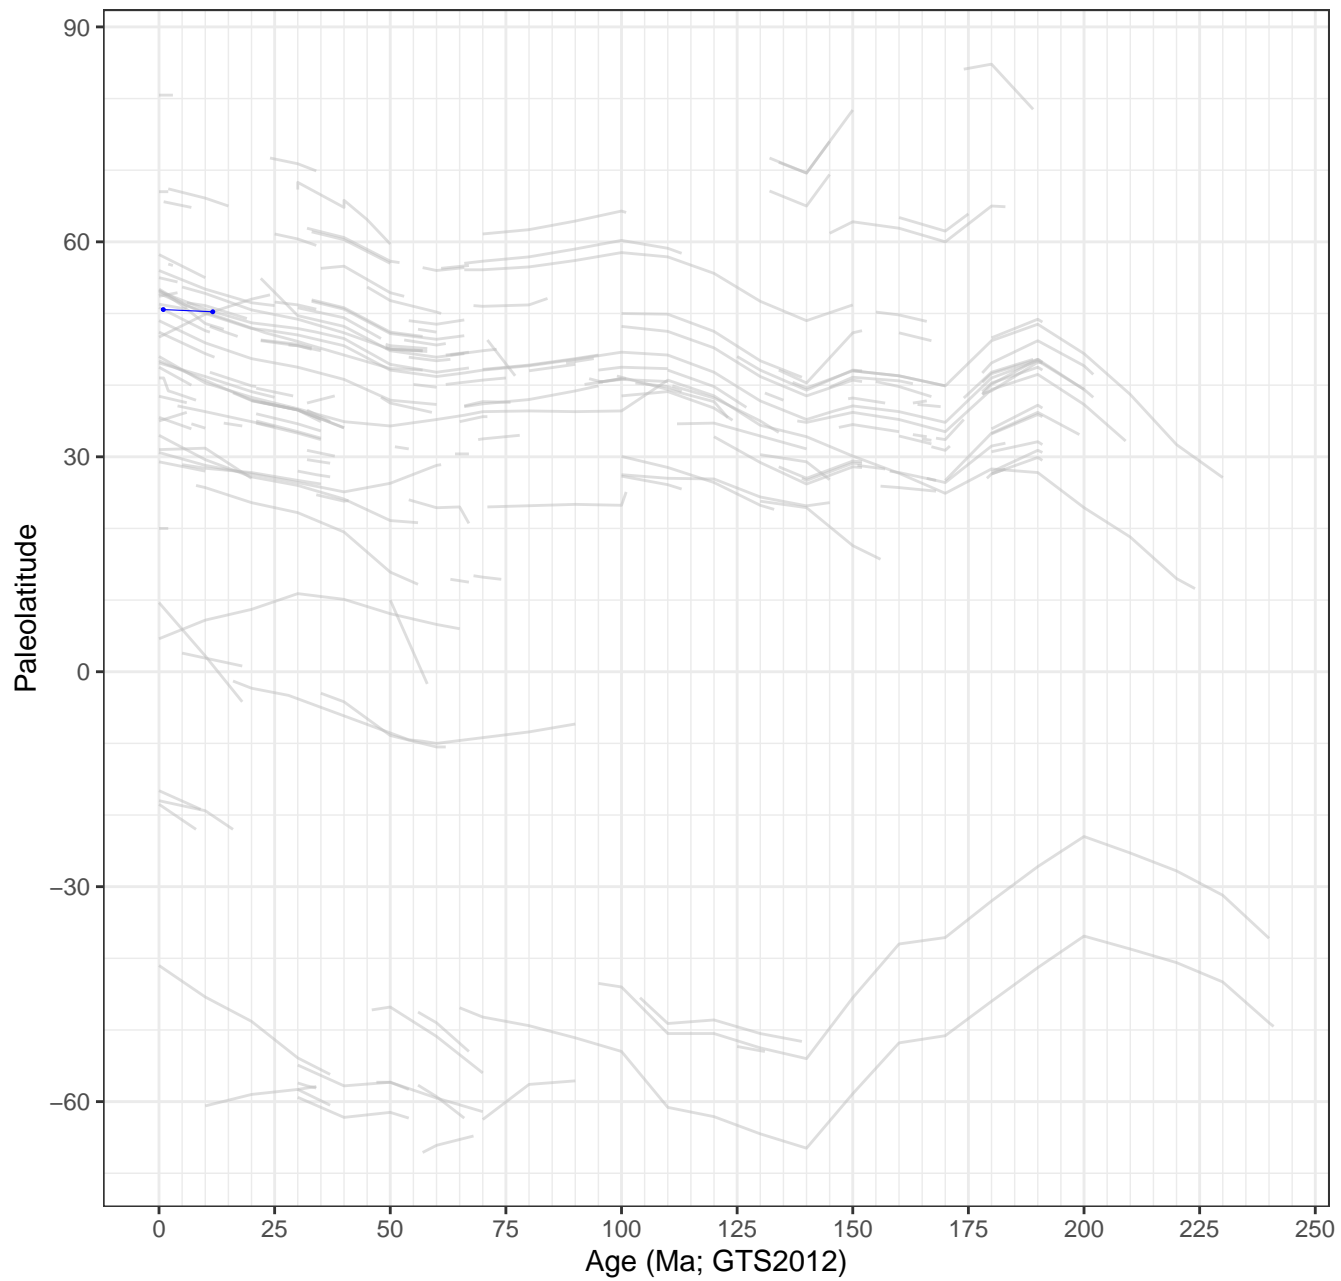

Supplement: Supplementary file 2384 [file Spiniferites frigidus.pdf › Supplement/Supplement 2/Species 1914 plots/Spiniferites frigidus.pdf]

# Species *Spiniferites hexatypicus*

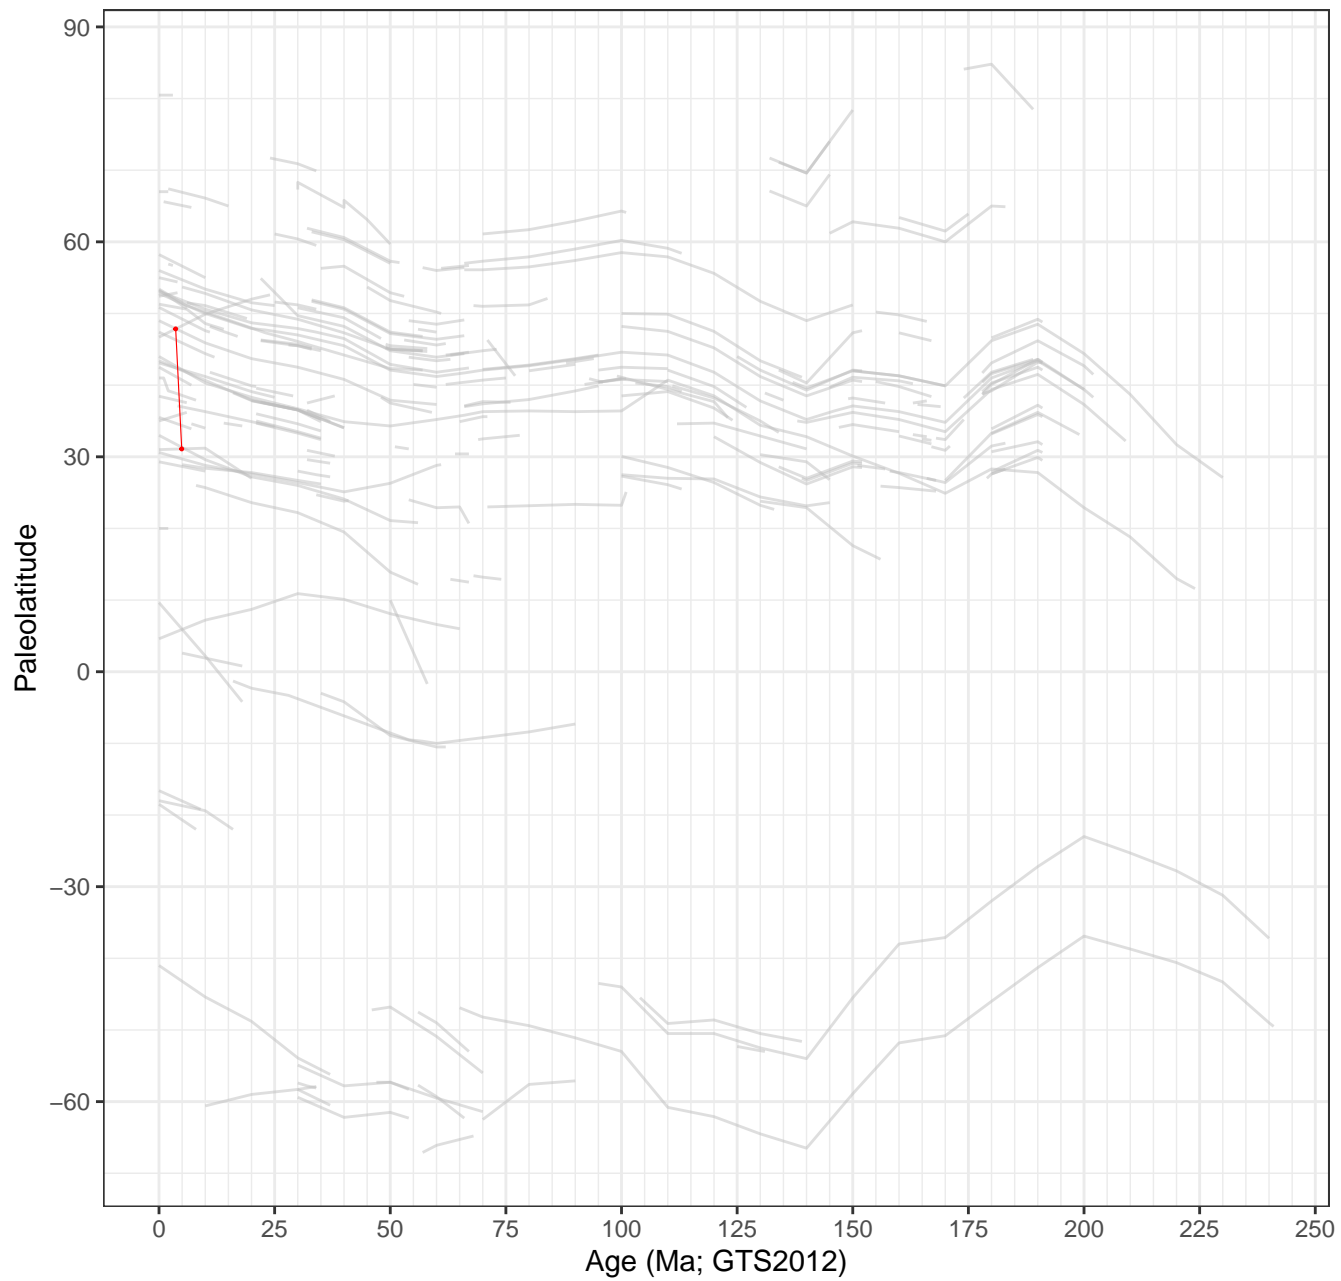

Supplement: Supplementary file 2385 [file Spiniferites hexatypicus.pdf › Supplement/Supplement 2/Species 1914 plots/Spiniferites hexatypicus.pdf]

# Species *Spiniferites hyperacanthus*

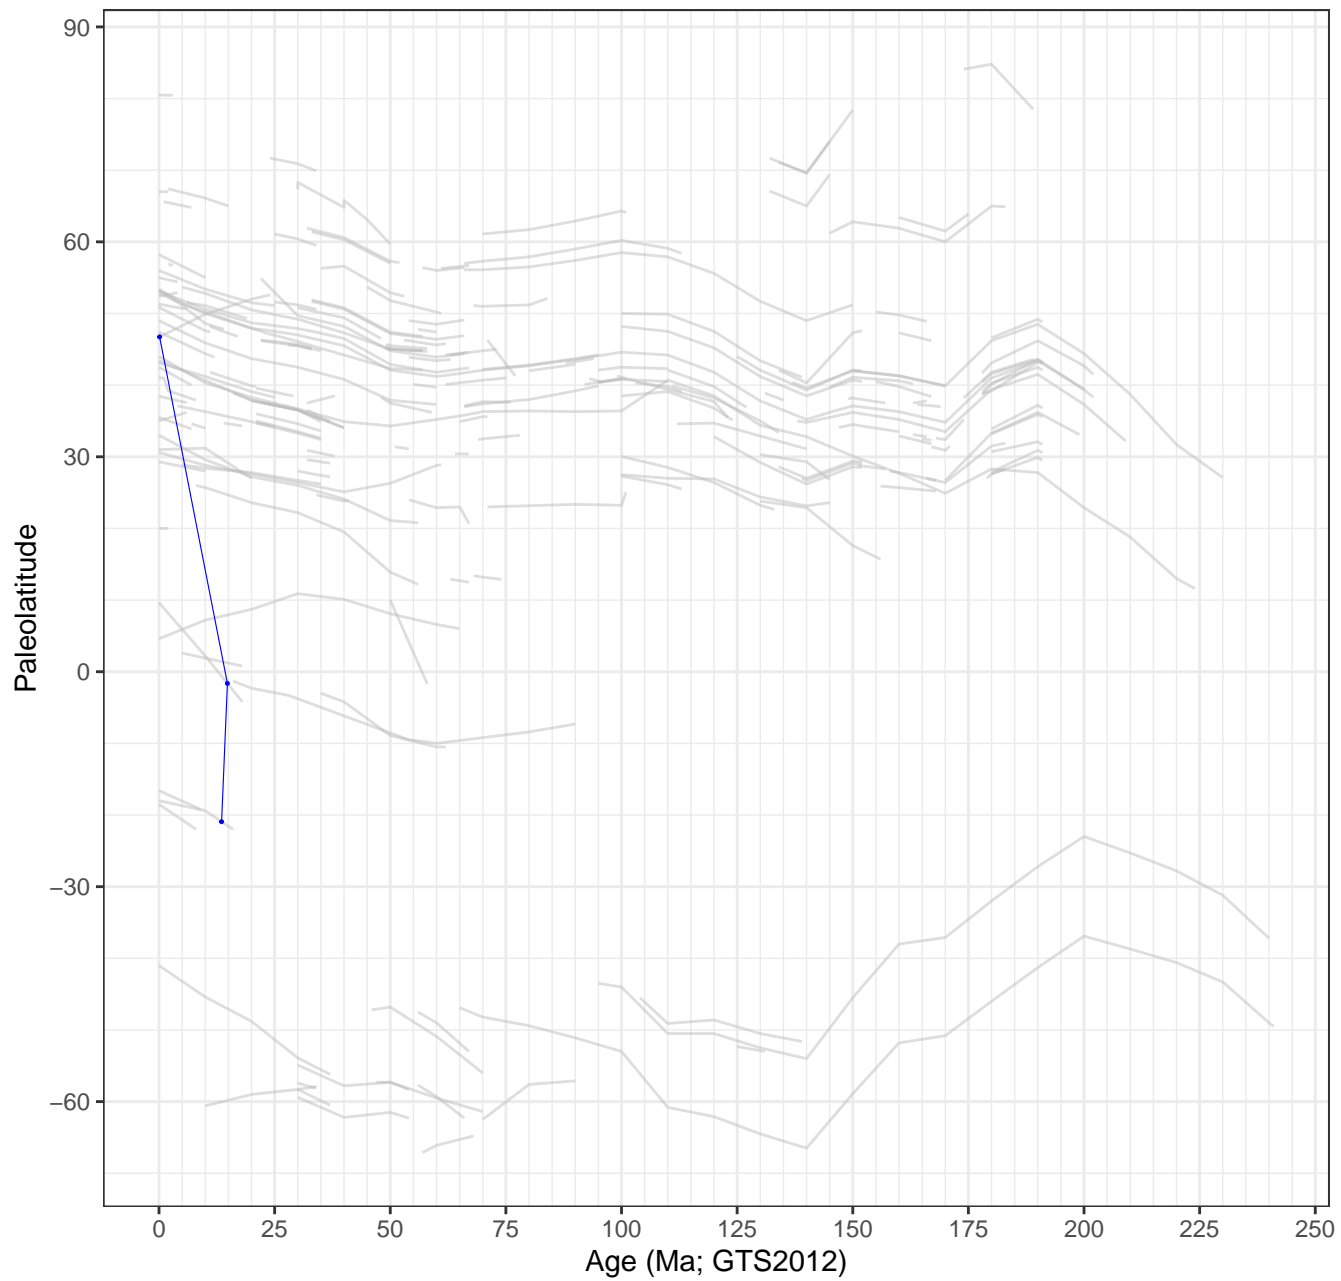

Supplement: Supplementary file 2386 [file Spiniferites hyperacanthus.pdf › Supplement/Supplement 2/Species 1914 plots/Spiniferites hyperacanthus.pdf]

# Species *Spiniferites jarvisii*

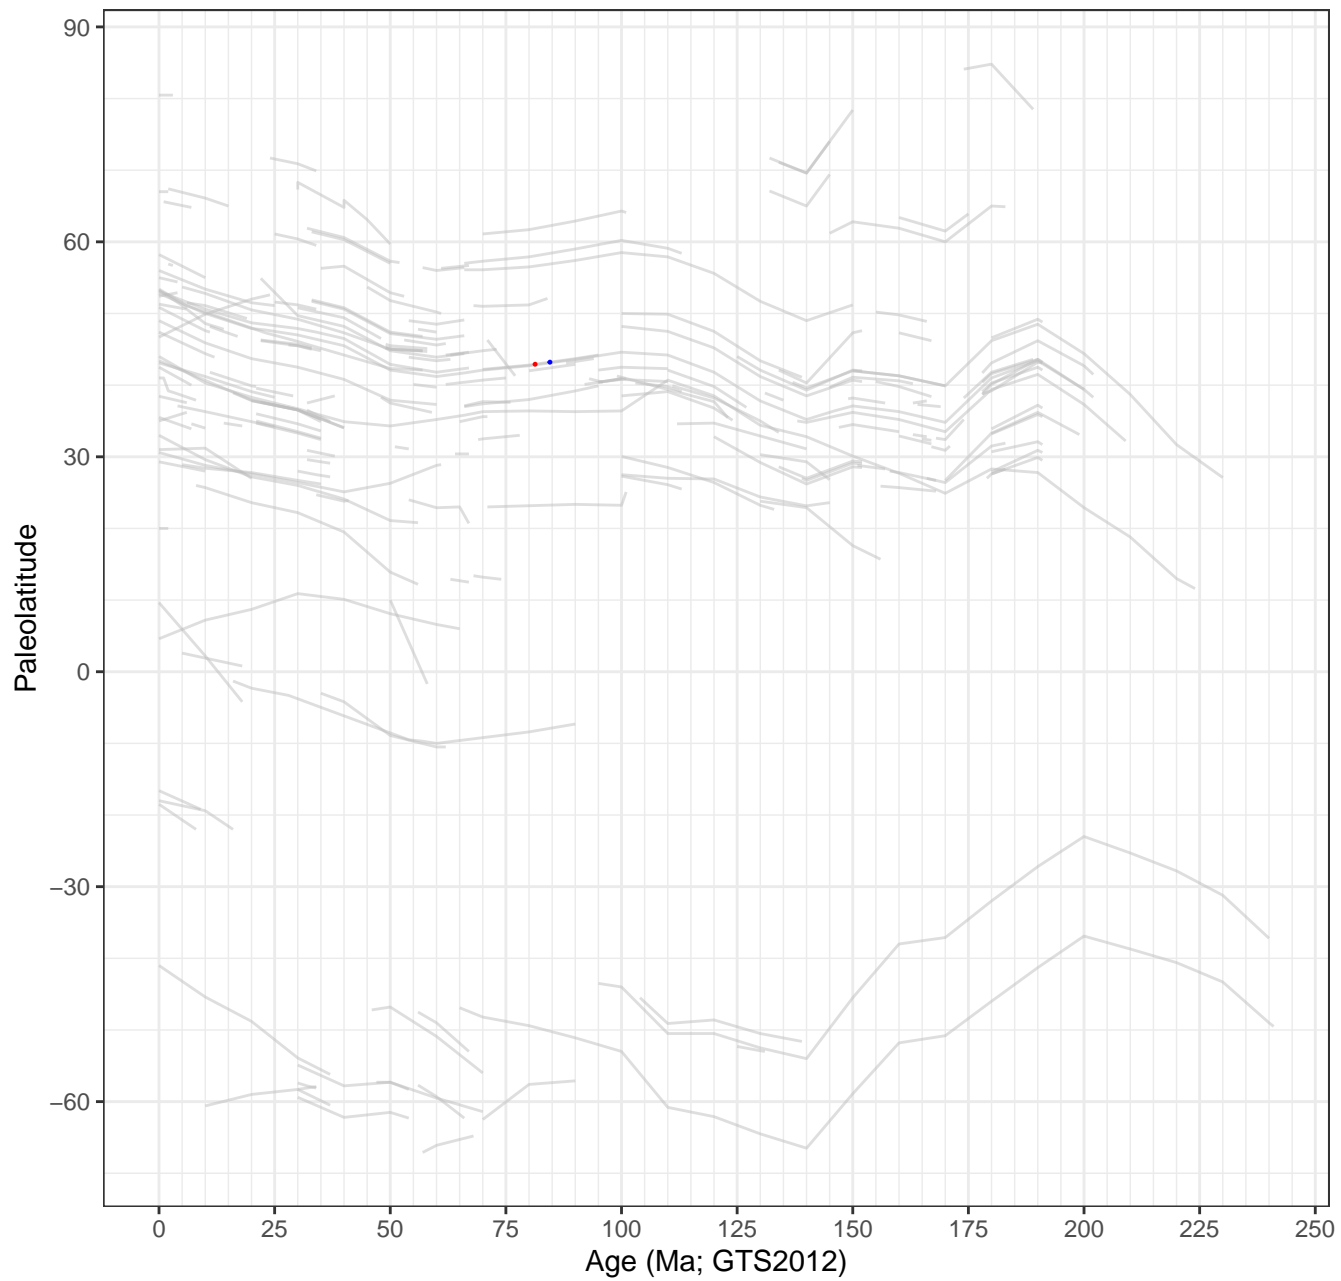

Supplement: Supplementary file 2387 [file Spiniferites jarvisii.pdf › Supplement/Supplement 2/Species 1914 plots/Spiniferites jarvisii.pdf]

# Species *Spiniferites lazus*

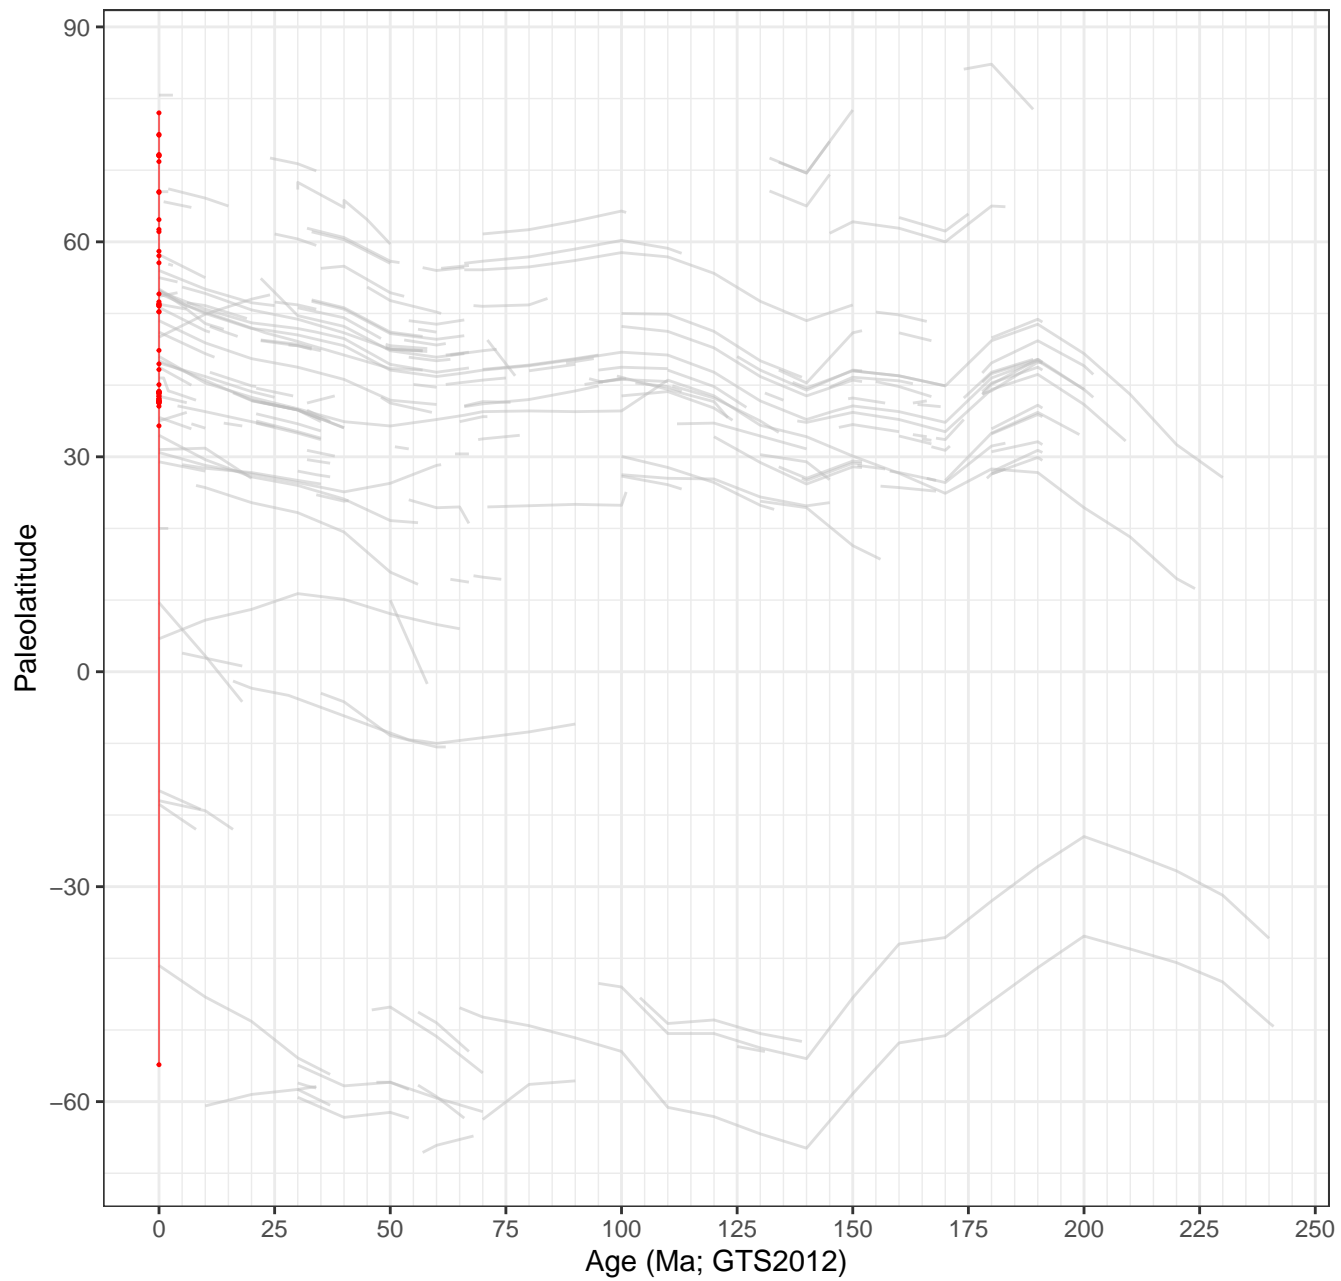

Supplement: Supplementary file 2388 [file Spiniferites lazus.pdf › Supplement/Supplement 2/Species 1914 plots/Spiniferites lazus.pdf]

# Species *Spiniferites manumii*

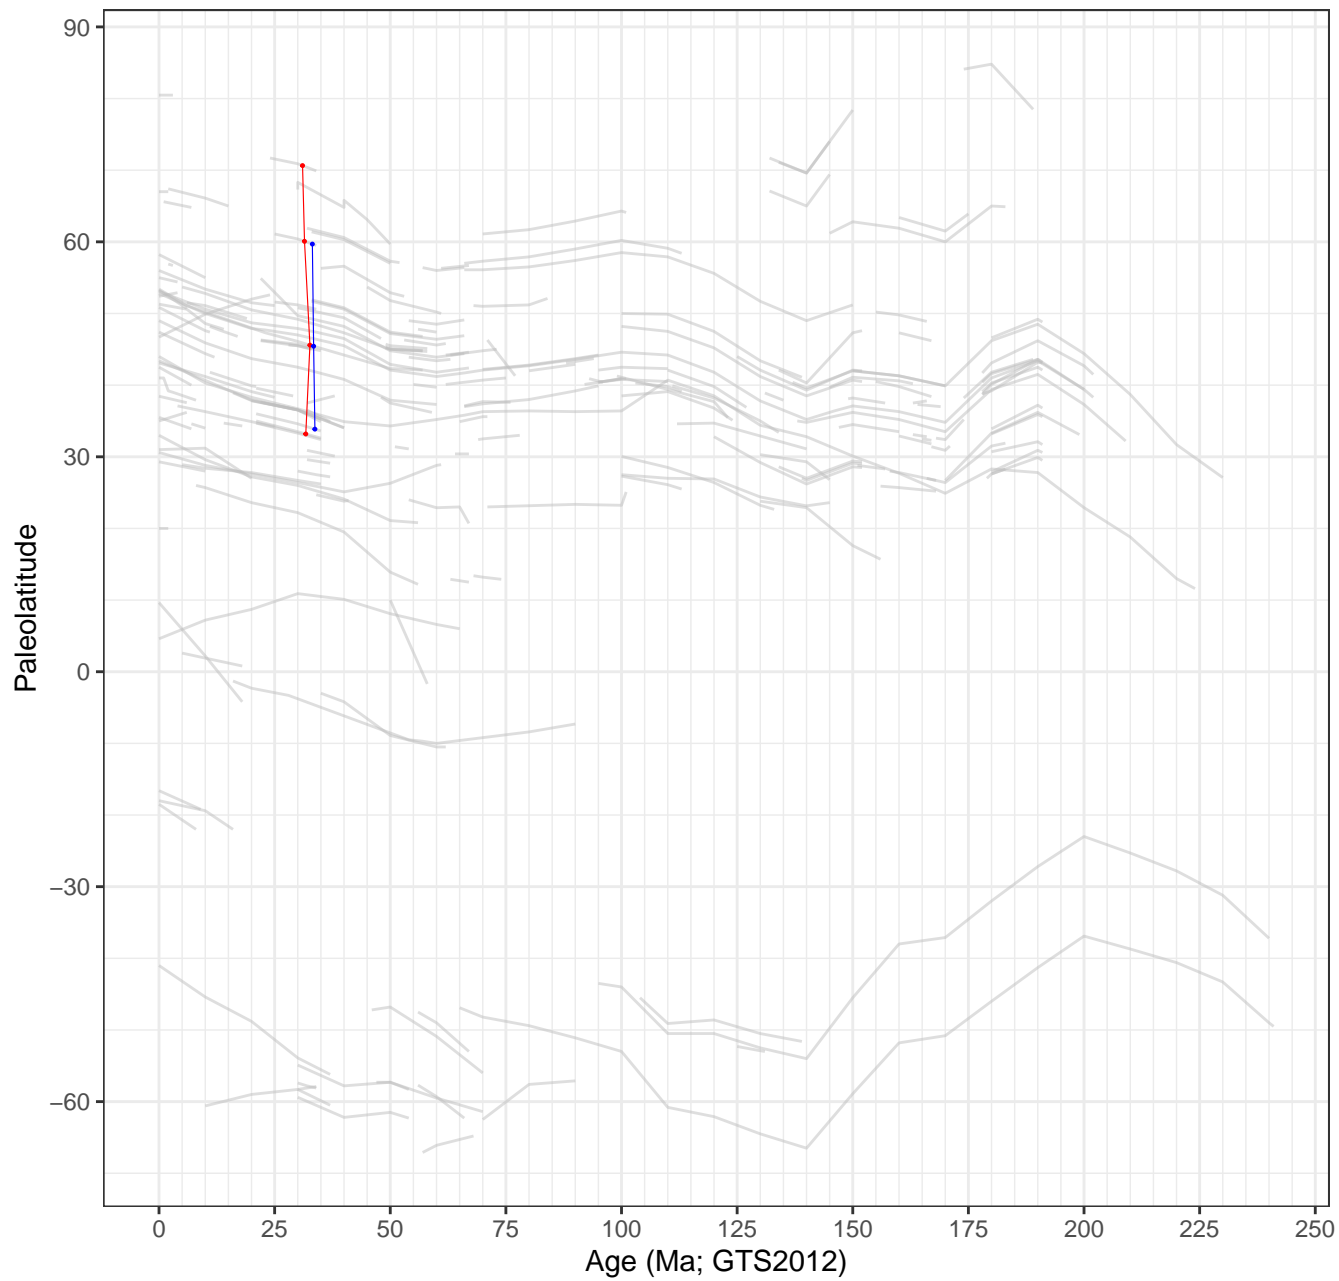

Supplement: Supplementary file 2389 [file Spiniferites manumii.pdf › Supplement/Supplement 2/Species 1914 plots/Spiniferites manumii.pdf]

# Species *Spiniferites membranaceus*

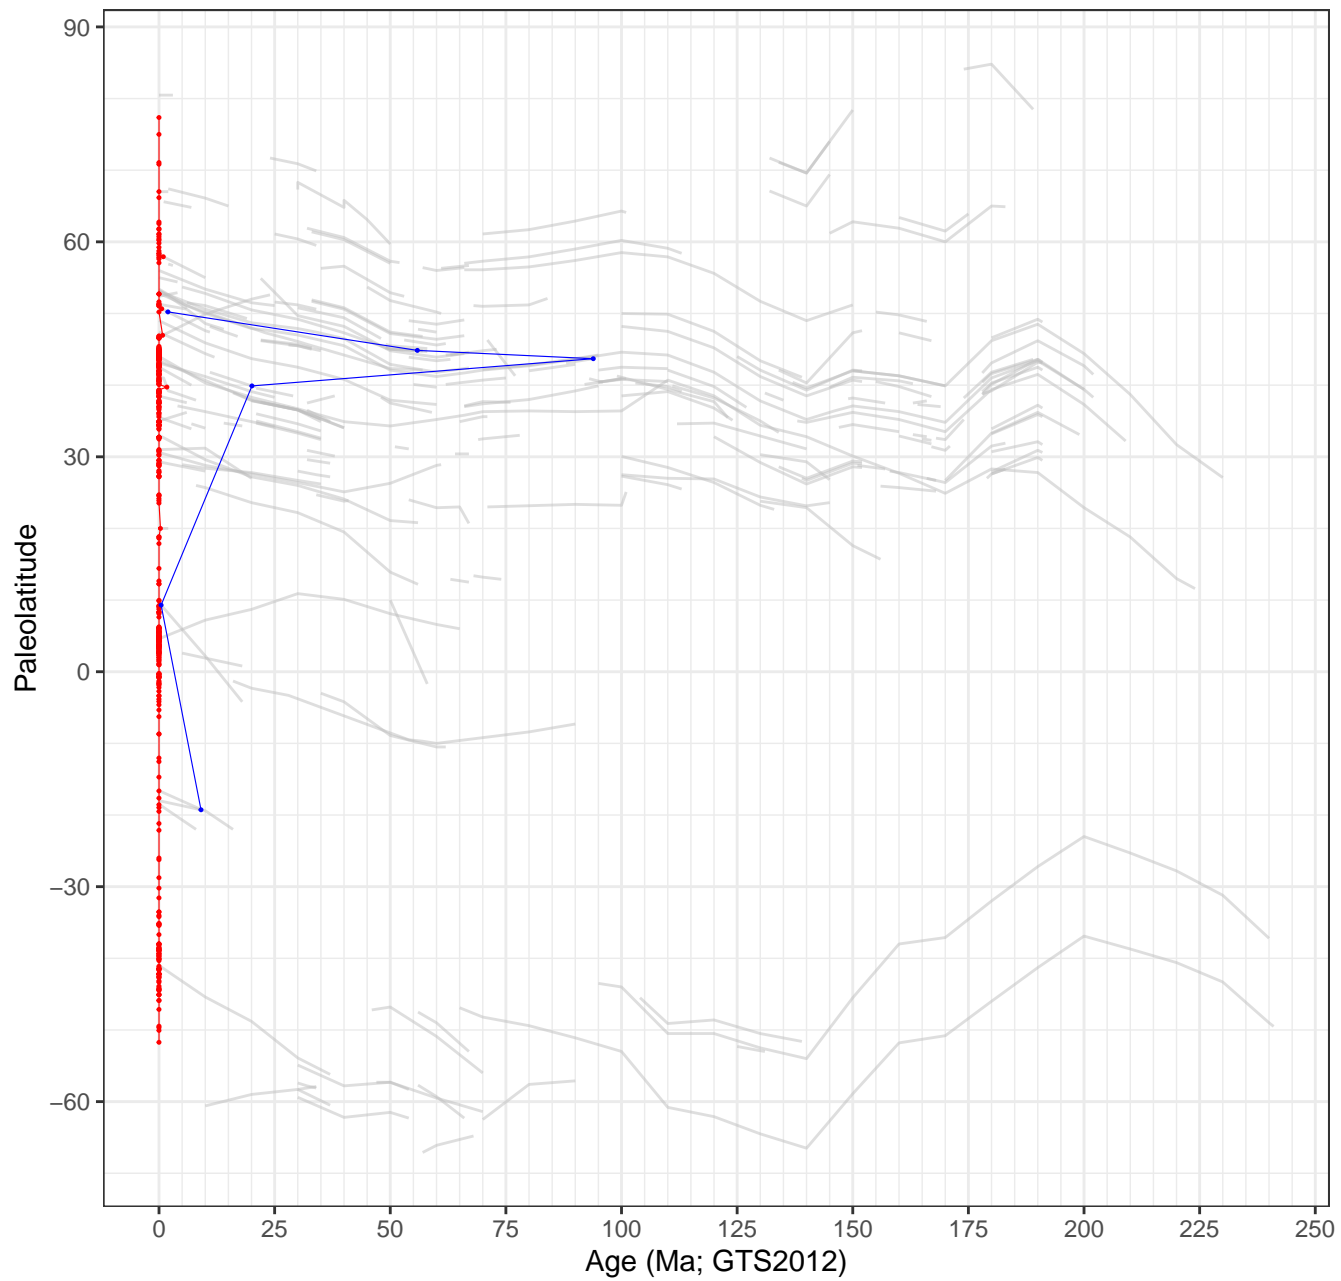

Supplement: Supplementary file 2390 [file Spiniferites membranaceus.pdf › Supplement/Supplement 2/Species 1914 plots/Spiniferites membranaceus.pdf]

# Species *Spiniferites mirabilis*

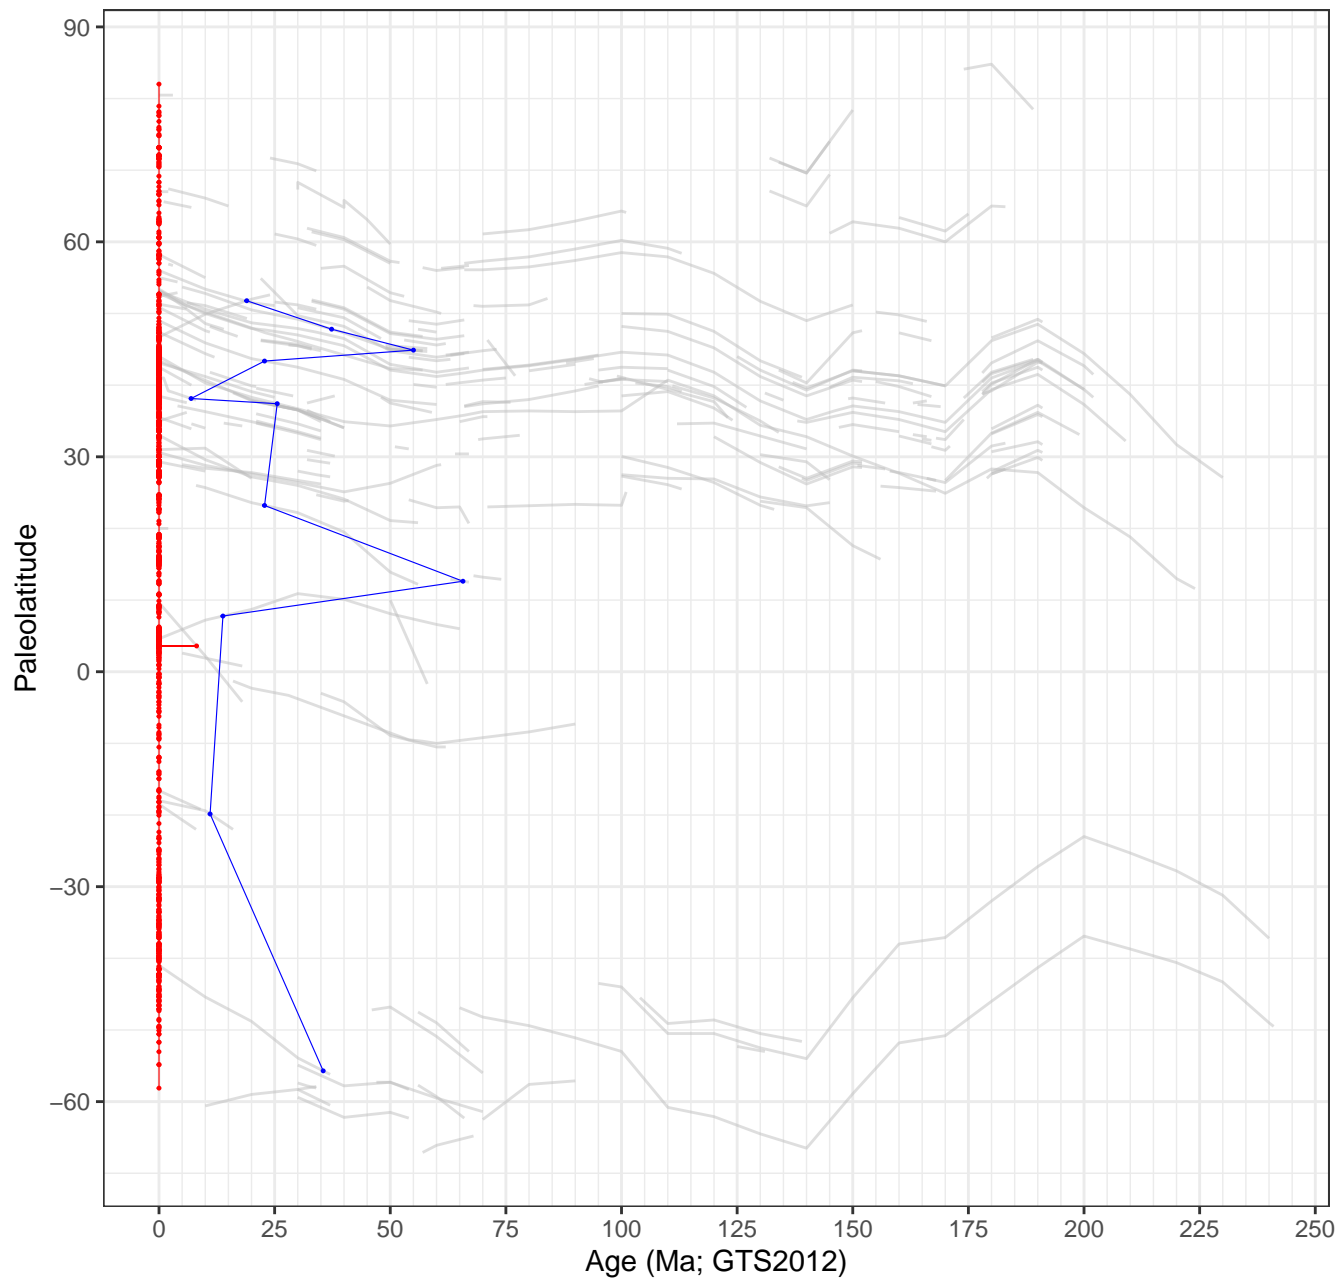

Supplement: Supplementary file 2391 [file Spiniferites mirabilis.pdf › Supplement/Supplement 2/Species 1914 plots/Spiniferites mirabilis.pdf]

# Species *Spiniferites monilis*

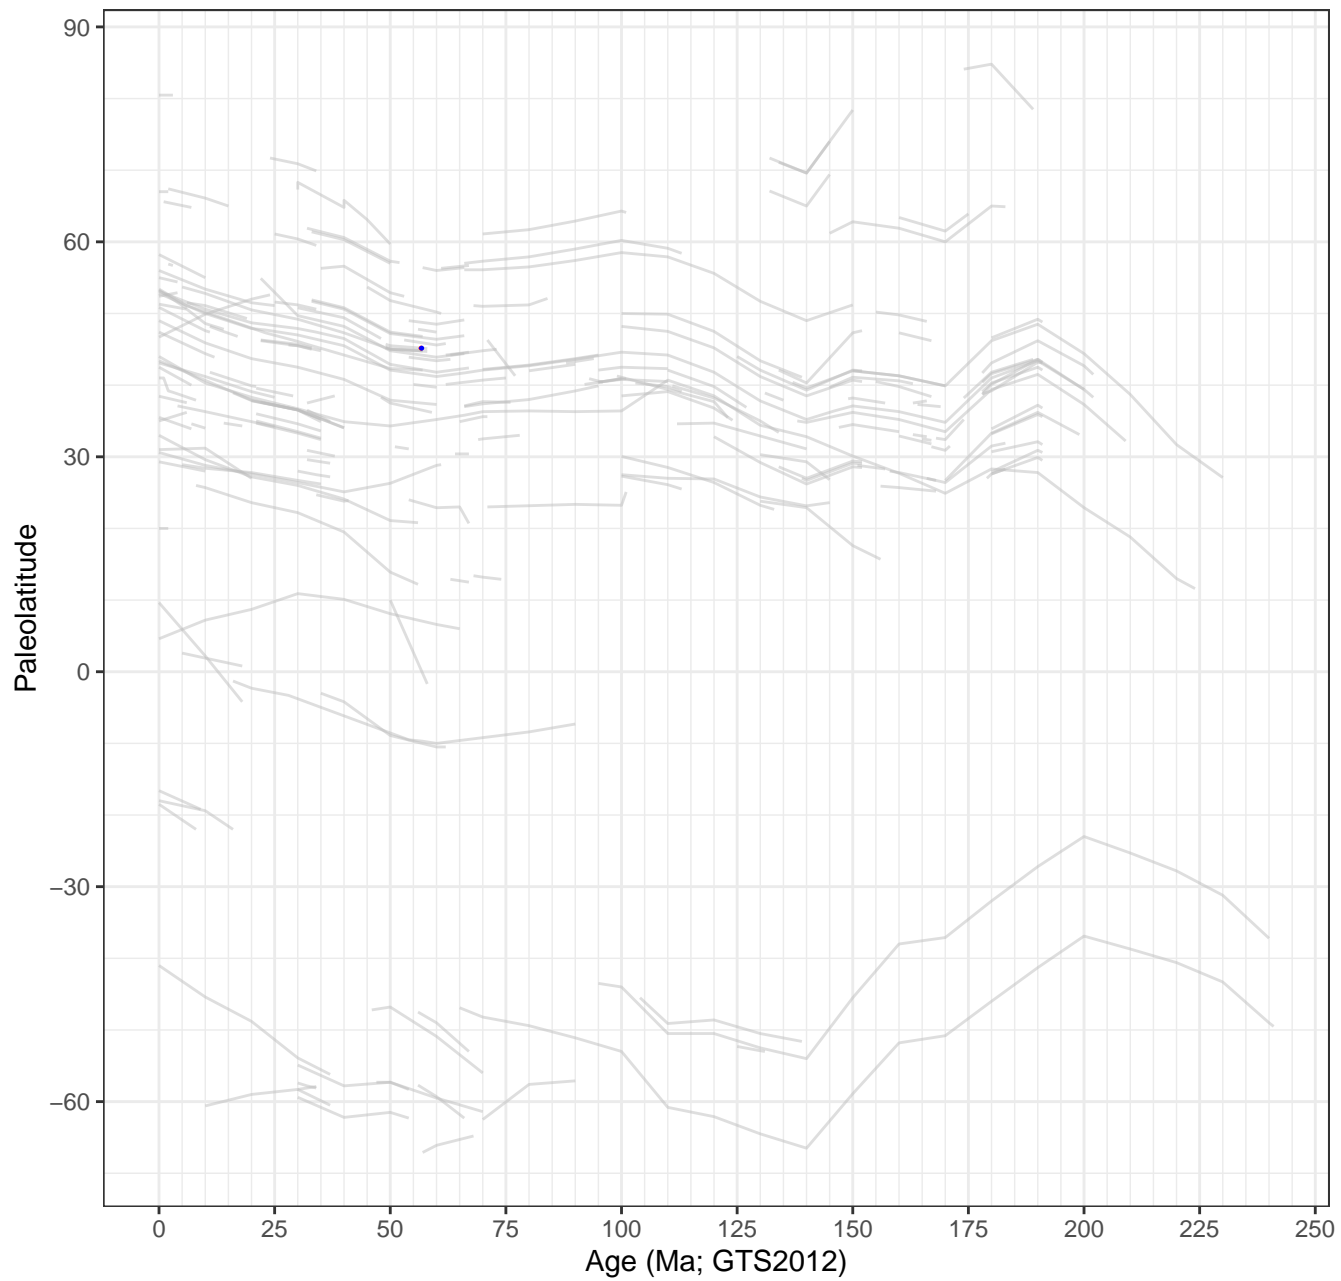

Supplement: Supplementary file 2392 [file Spiniferites monilis.pdf › Supplement/Supplement 2/Species 1914 plots/Spiniferites monilis.pdf]

# Species *Spiniferites multispinulus*

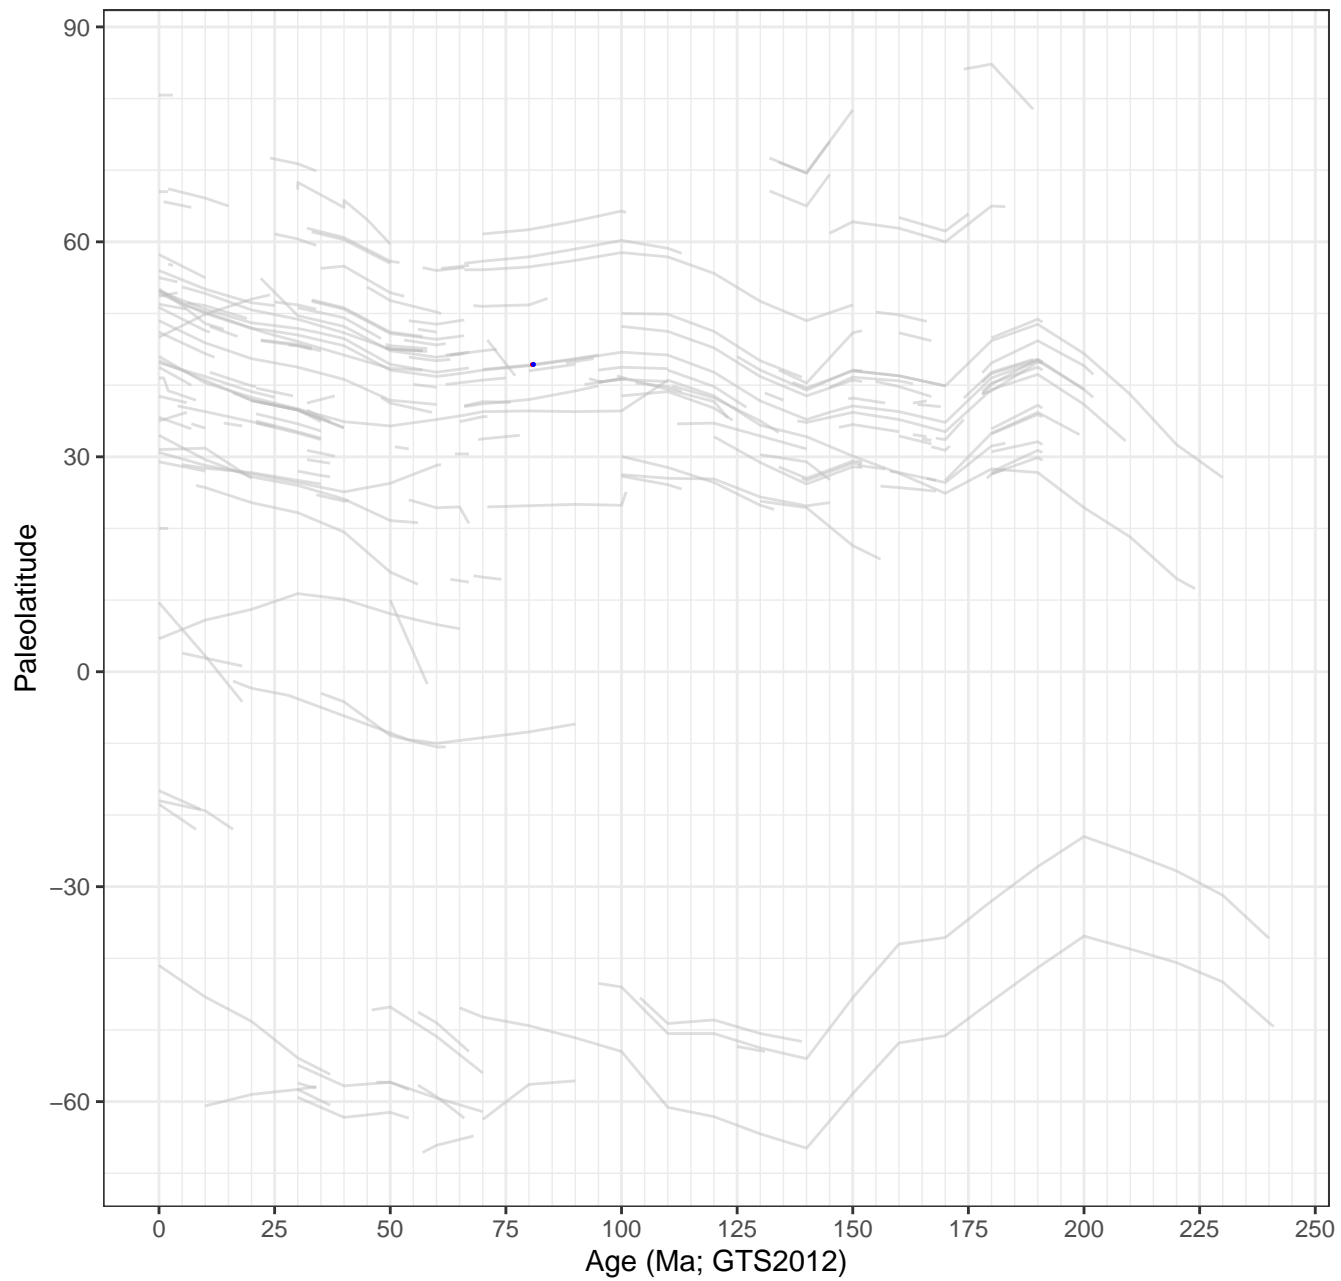

Supplement: Supplementary file 2393 [file Spiniferites multispinulus.pdf › Supplement/Supplement 2/Species 1914 plots/Spiniferites multispinulus.pdf]

# Species *Spiniferites ovatus*

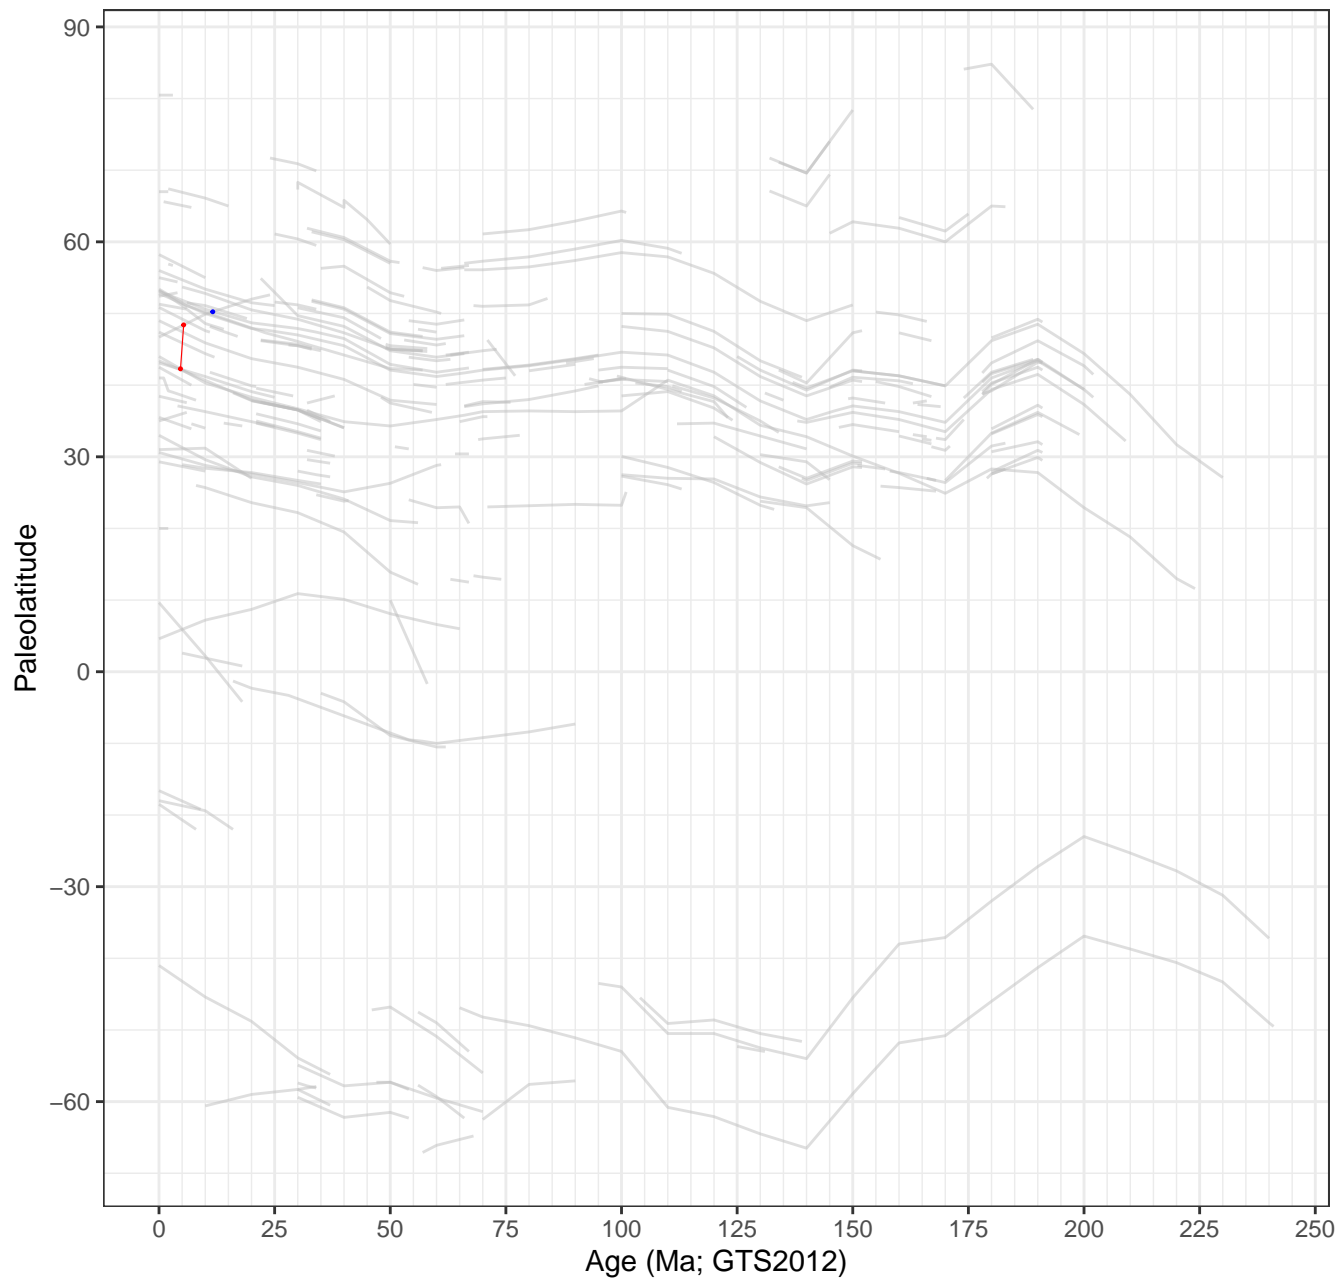

Supplement: Supplementary file 2394 [file Spiniferites ovatus.pdf › Supplement/Supplement 2/Species 1914 plots/Spiniferites ovatus.pdf]

# Species *Spiniferites pachydermus*

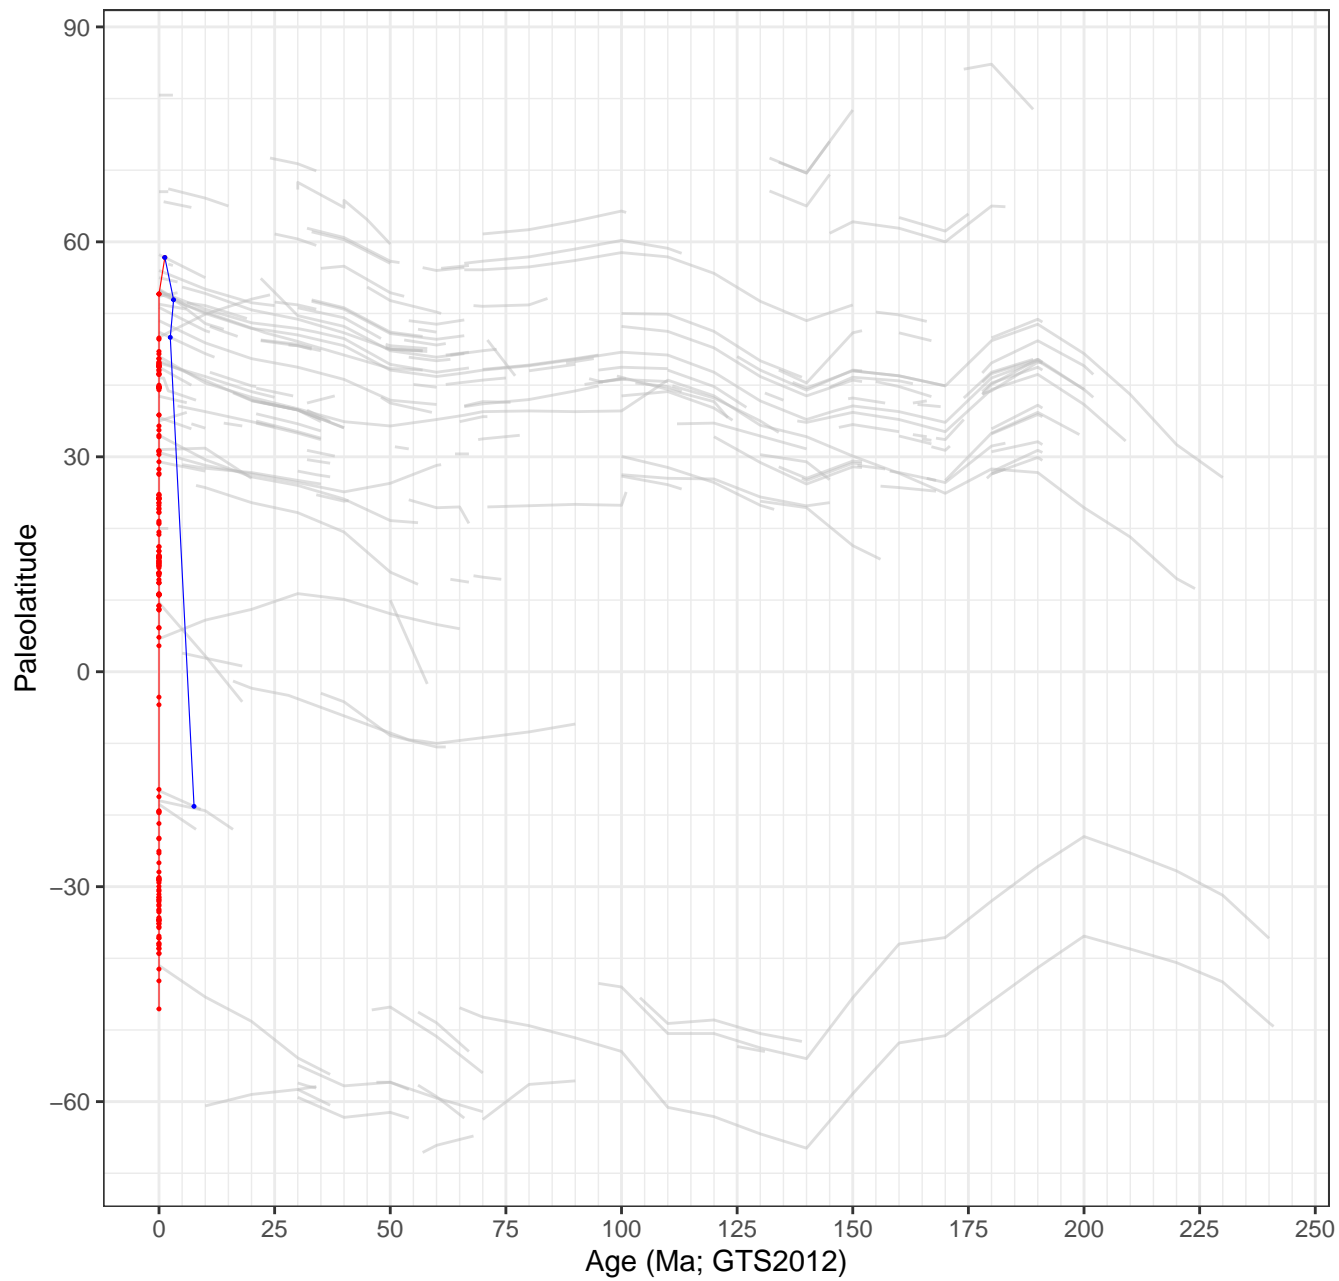

Supplement: Supplementary file 2395 [file Spiniferites pachydermus.pdf › Supplement/Supplement 2/Species 1914 plots/Spiniferites pachydermus.pdf]

# Species *Spiniferites paradoxus*

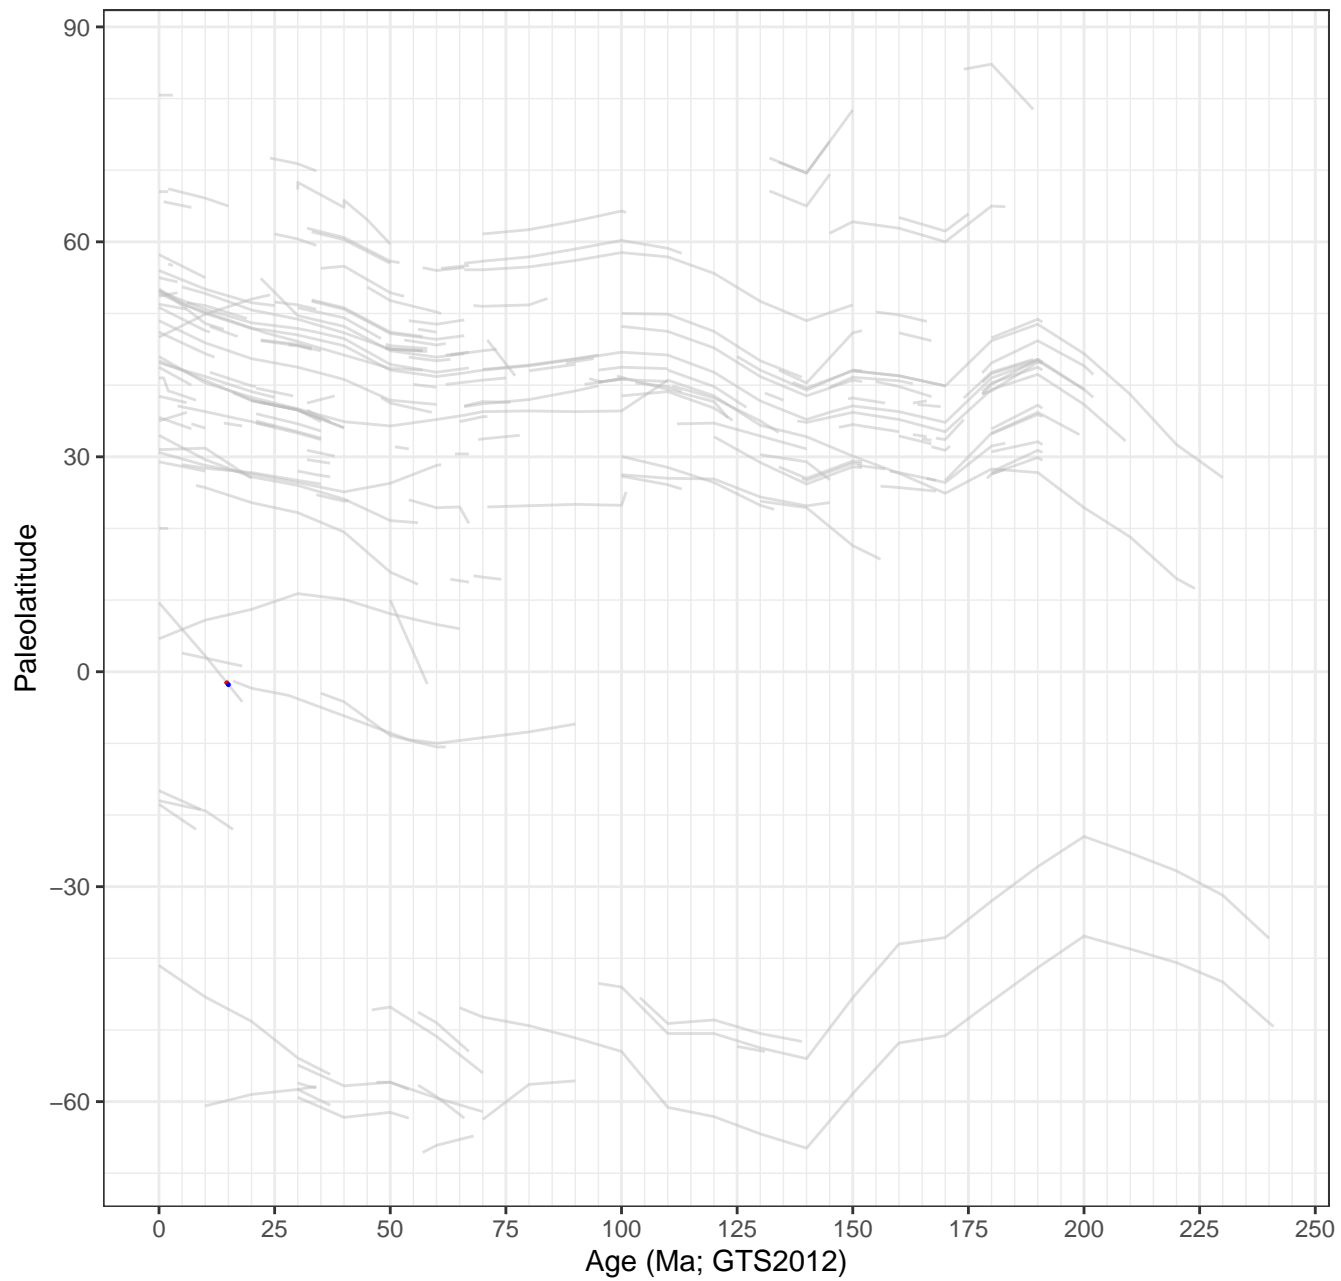

Supplement: Supplementary file 2396 [file Spiniferites paradoxus.pdf › Supplement/Supplement 2/Species 1914 plots/Spiniferites paradoxus.pdf]

# Species *Spiniferites primaevus*

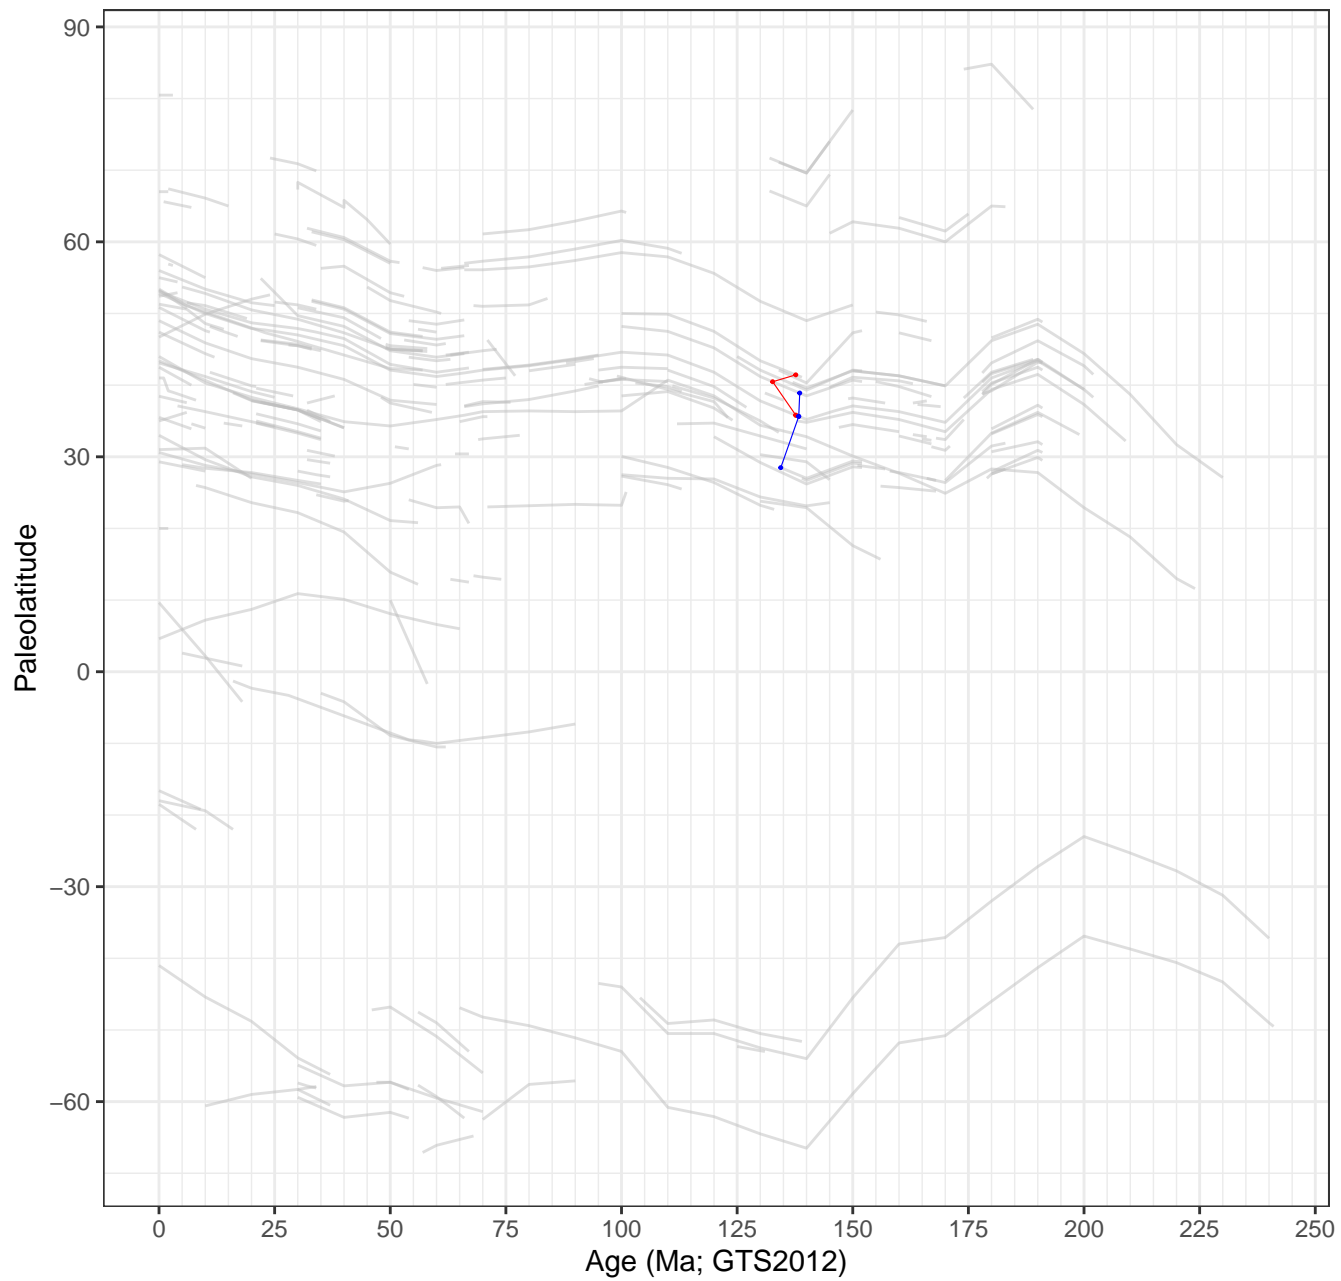

Supplement: Supplementary file 2397 [file Spiniferites primaevus.pdf › Supplement/Supplement 2/Species 1914 plots/Spiniferites primaevus.pdf]

# Species *Spiniferites pseudofurcatus granulosis*

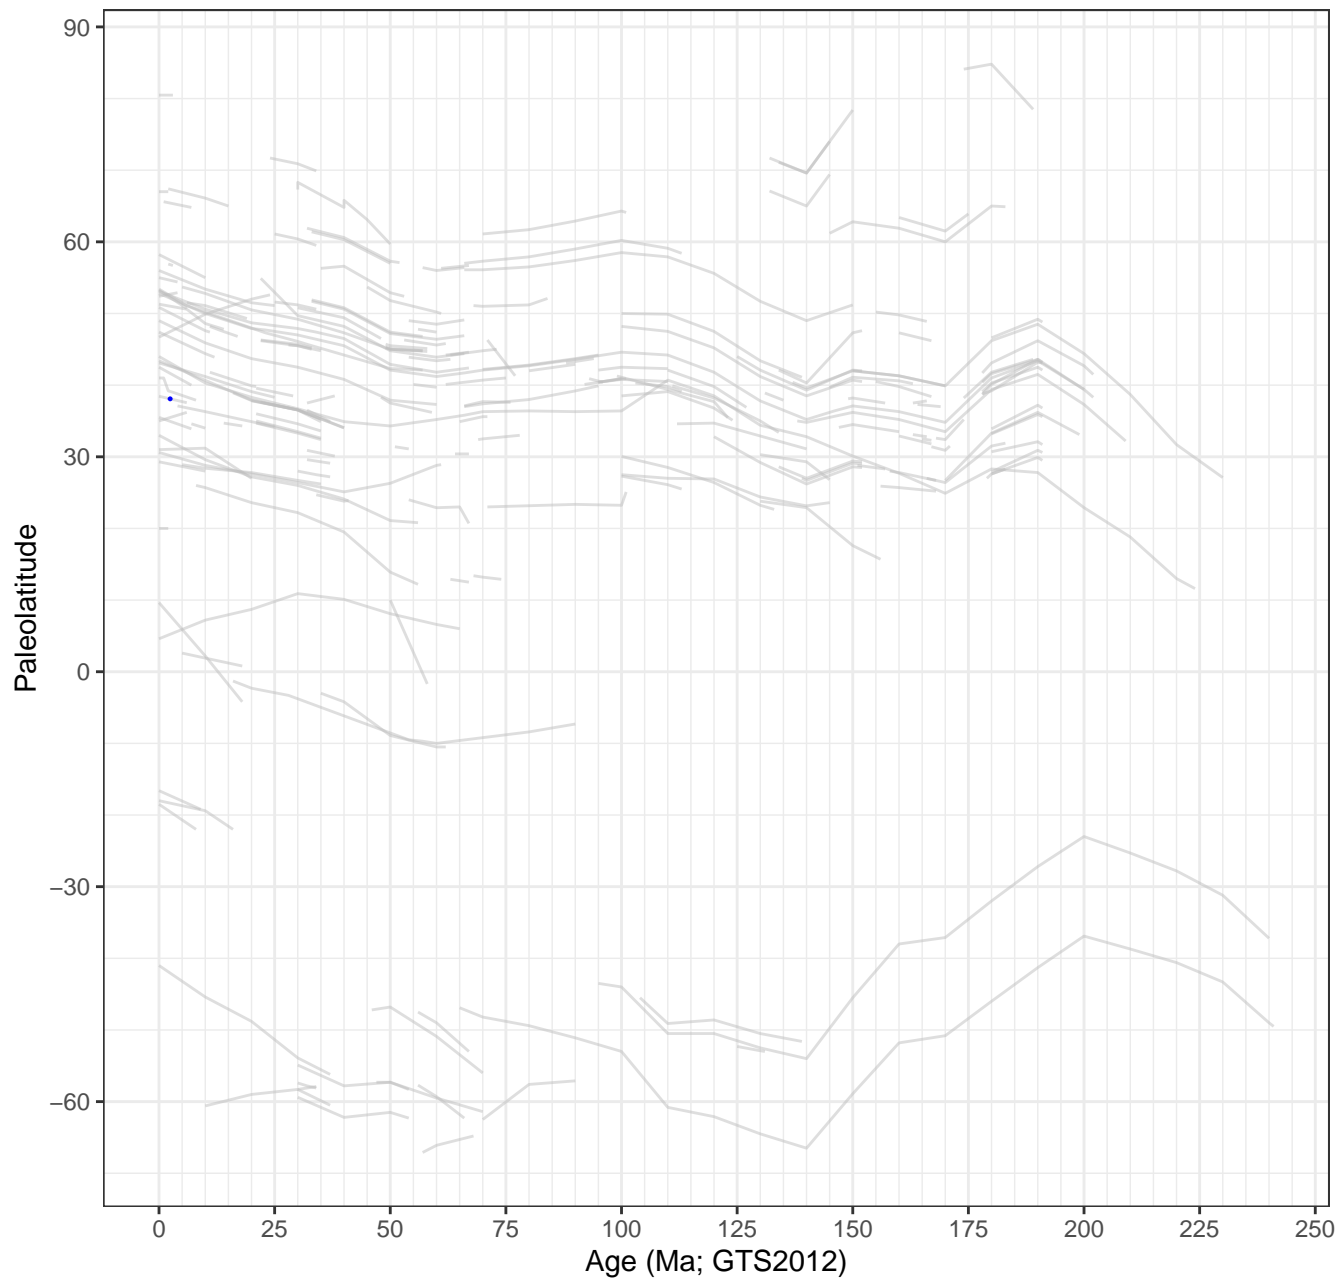

Supplement: Supplementary file 2398 [file Spiniferites pseudofurcatus granulosus.pdf › Supplement/Supplement 2/Species 1914 plots/Spiniferites pseudofurcatus granulosus.pdf]

# Species *Spiniferites pseudofurcatus*

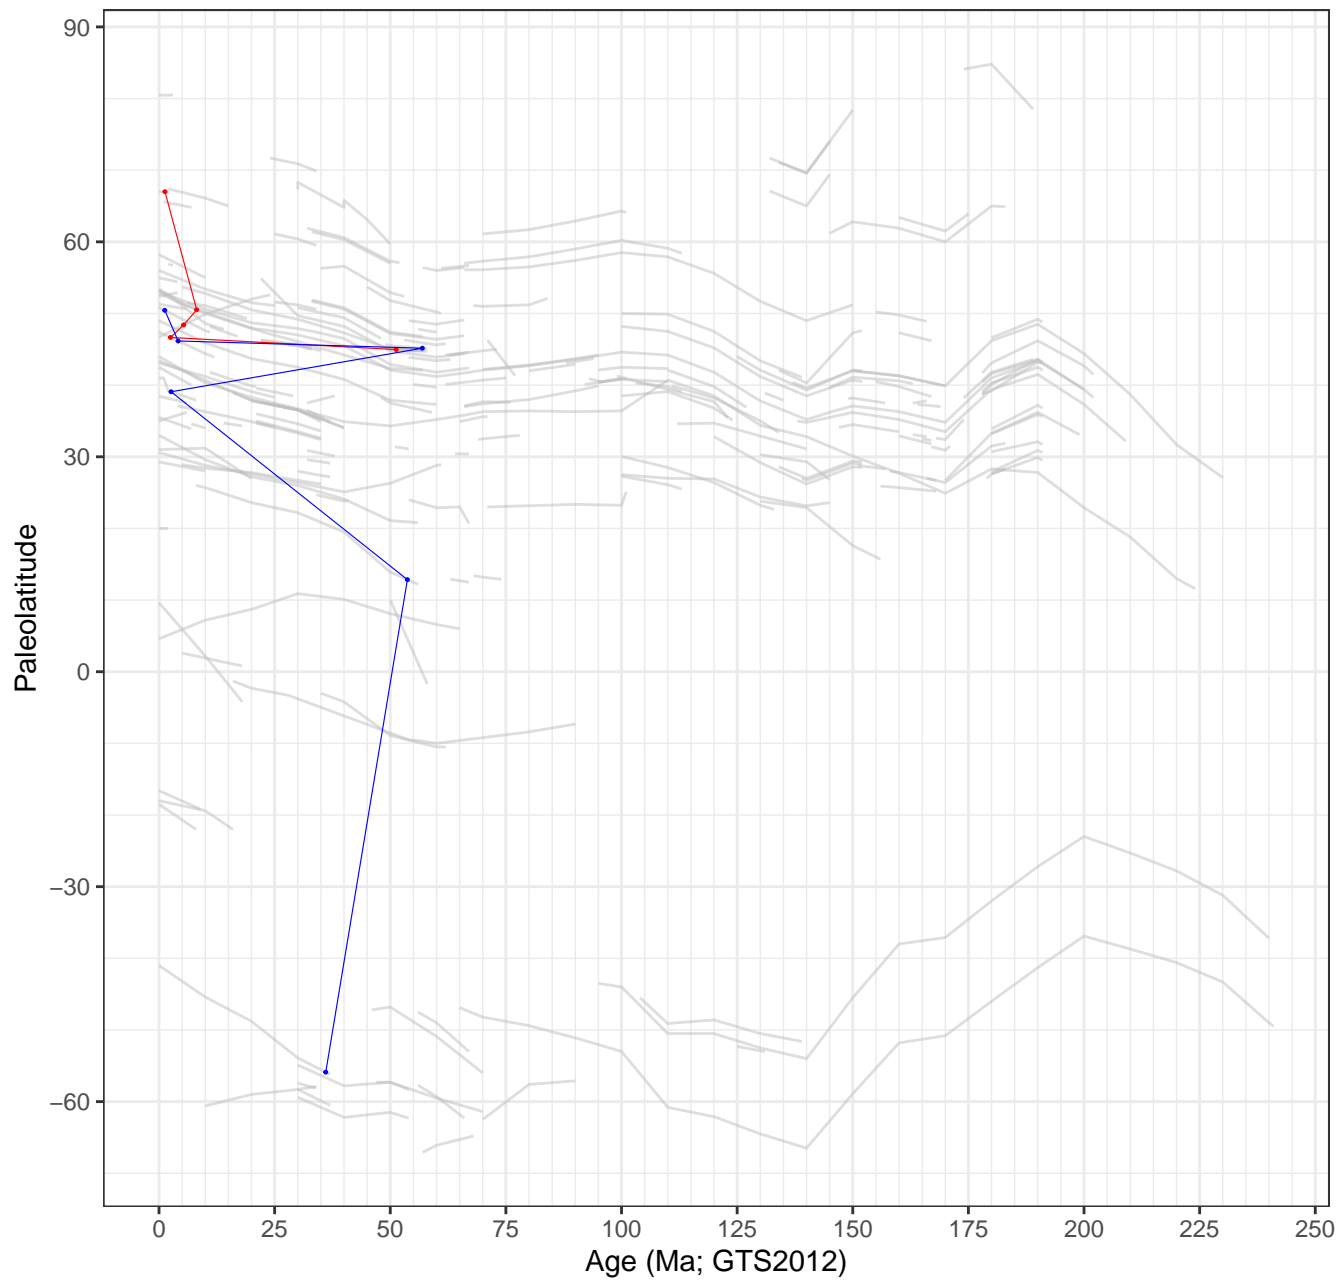

Supplement: Supplementary file 2399 [file Spiniferites pseudofurcatus.pdf › Supplement/Supplement 2/Species 1914 plots/Spiniferites pseudofurcatus.pdf]

# Species *Spiniferites ramosus gracilis*

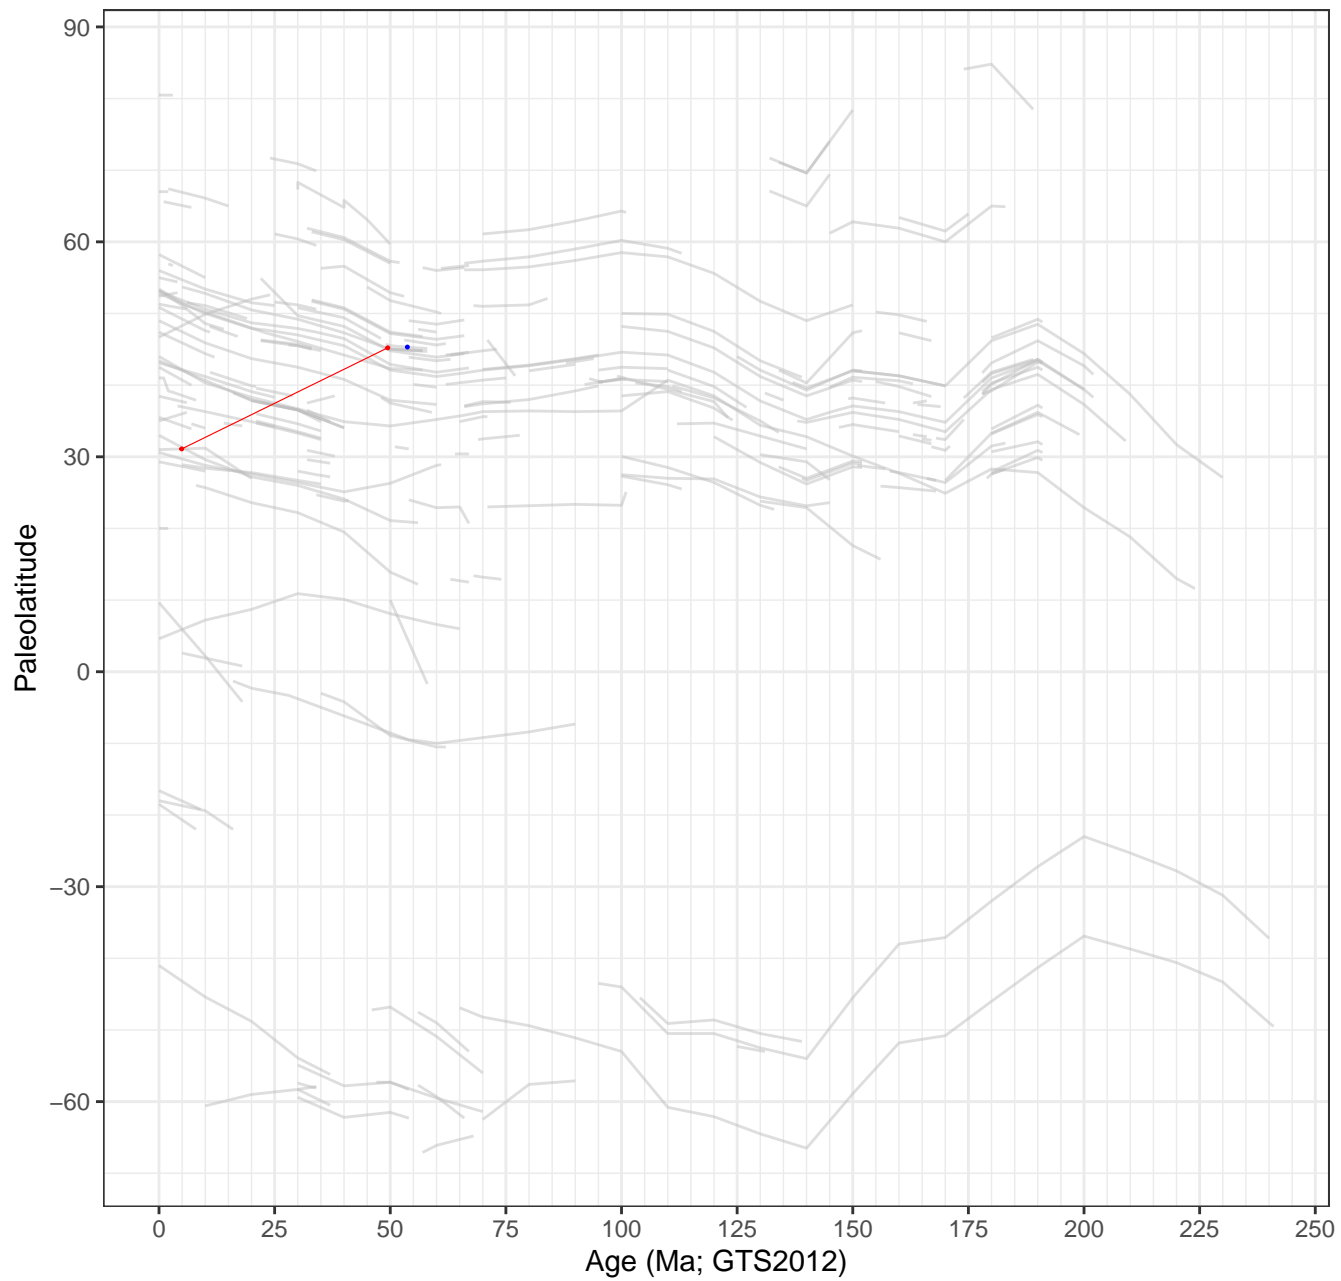

Supplement: Supplementary file 2400 [file Spiniferites ramosus gracilis.pdf › Supplement/Supplement 2/Species 1914 plots/Spiniferites ramosus gracilis.pdf]

# Species *Spiniferites ramosus granosus*

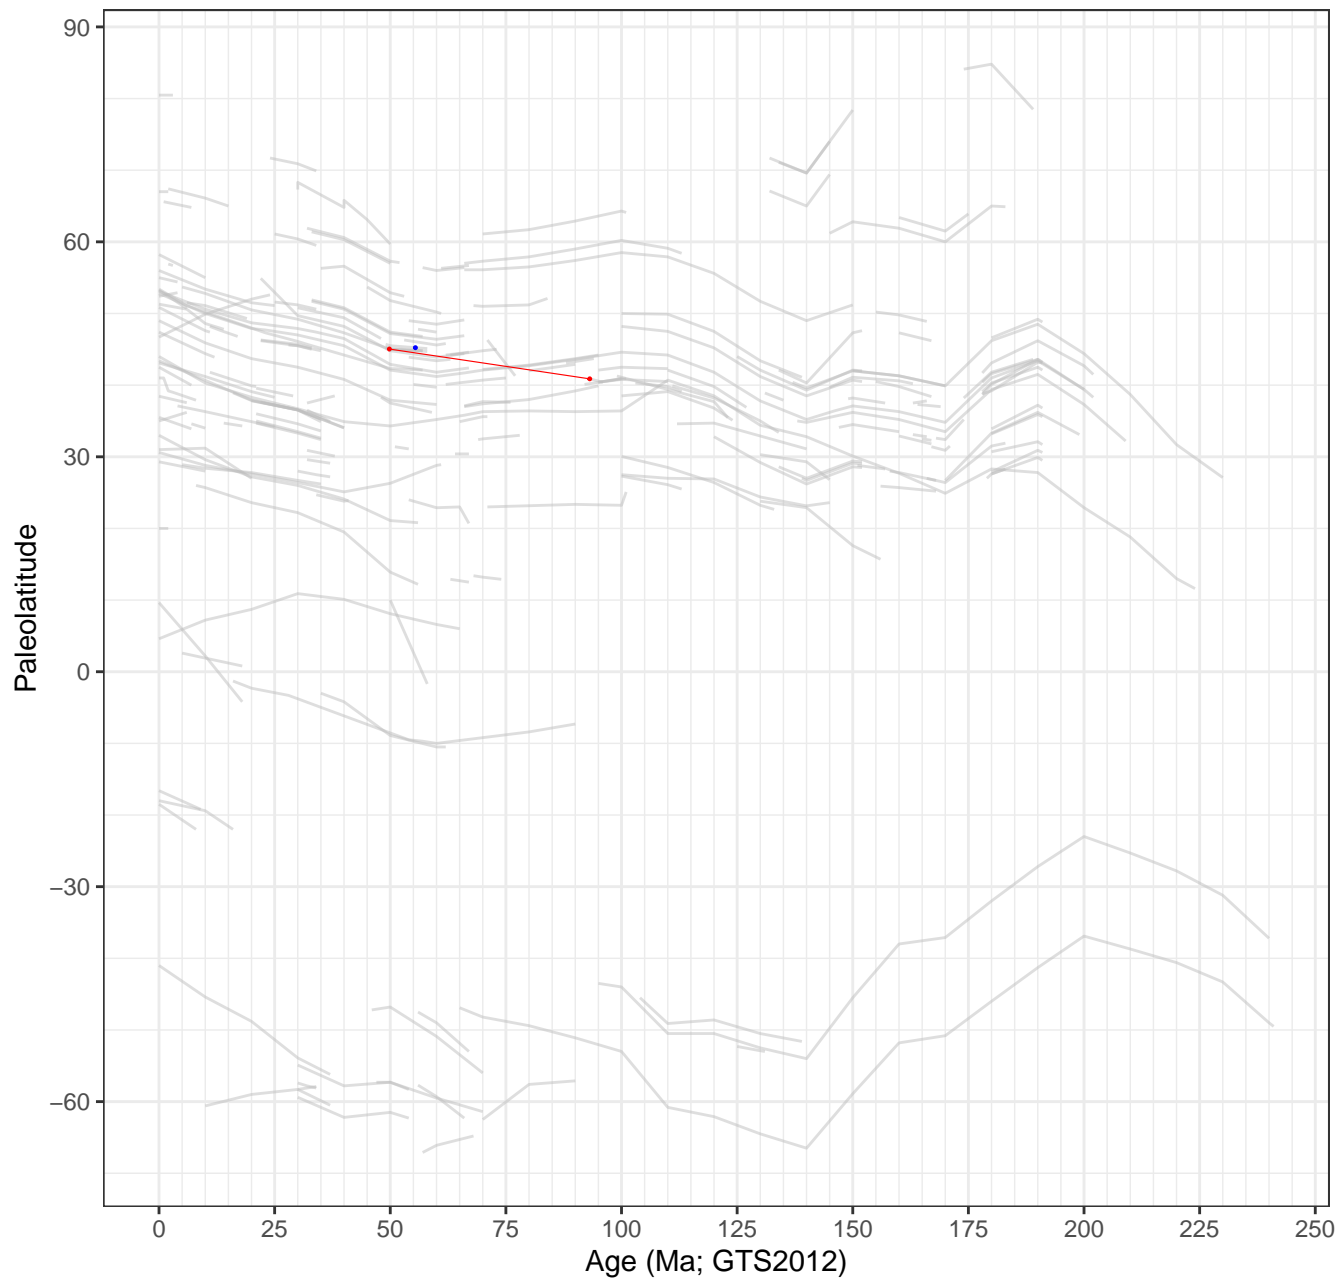

Supplement: Supplementary file 2401 [file Spiniferites ramosus granosus.pdf › Supplement/Supplement 2/Species 1914 plots/Spiniferites ramosus granosus.pdf]

# Species *Spiniferites ramosus multibrevis*

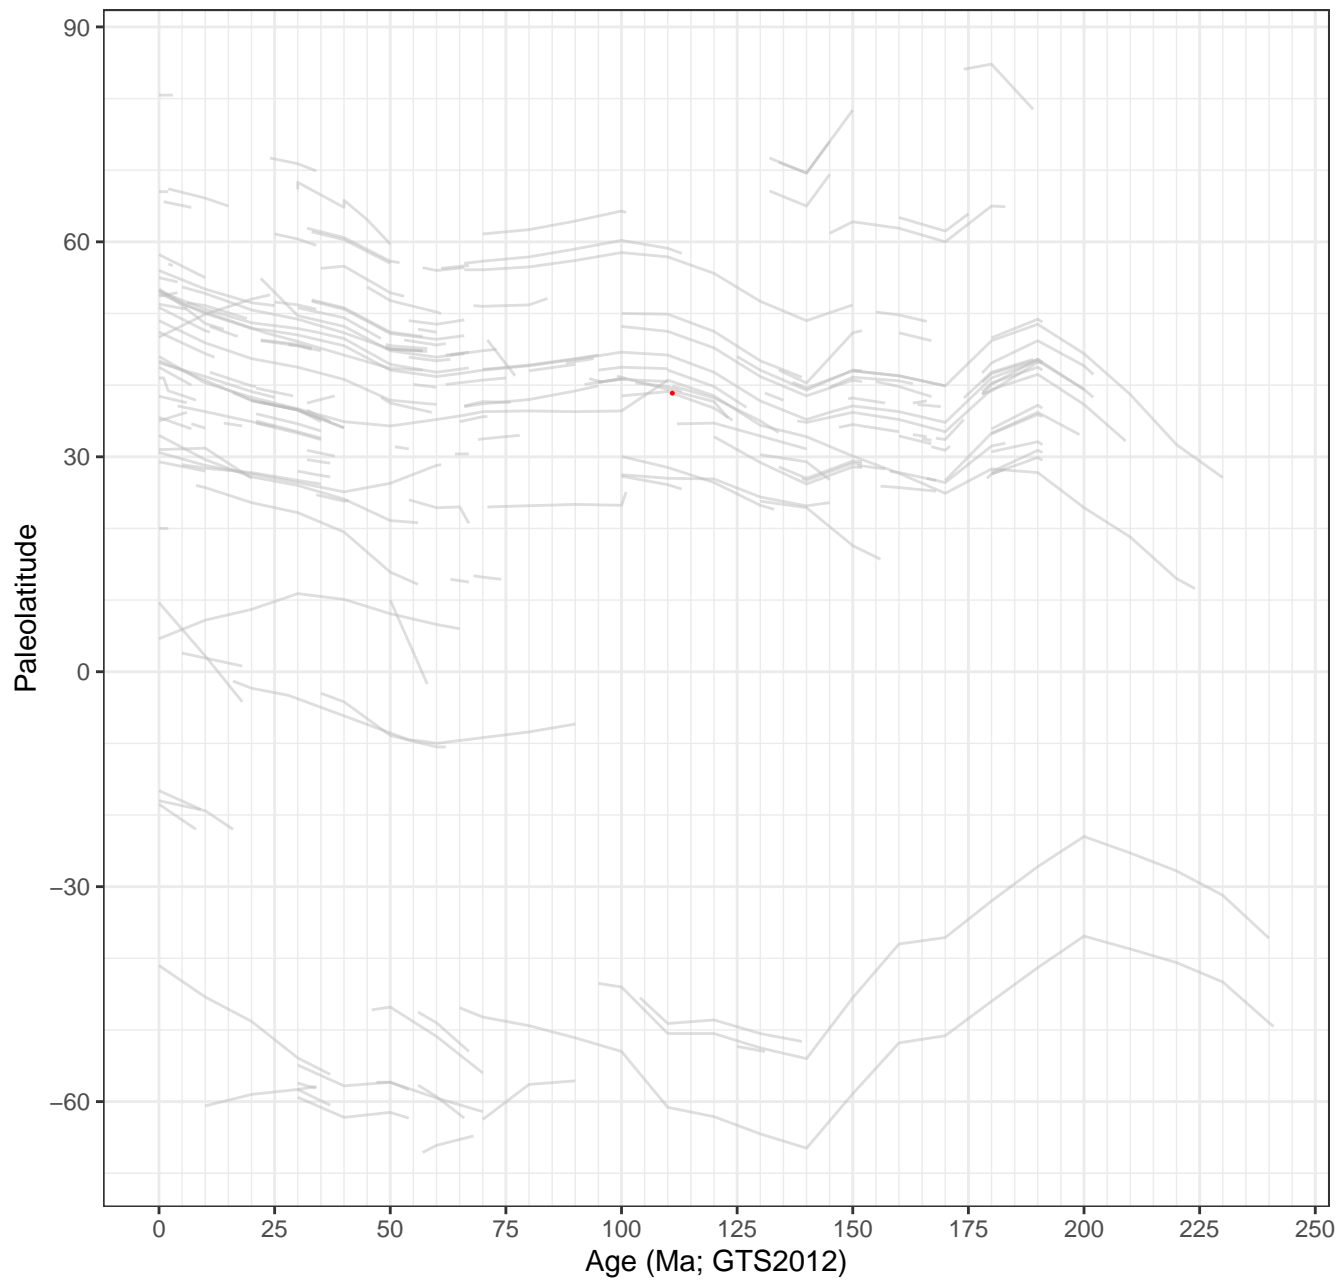

Supplement: Supplementary file 2402 [file Spiniferites ramosus multibrevis.pdf › Supplement/Supplement 2/Species 1914 plots/Spiniferites ramosus multibrevis.pdf]

# Species *Spiniferites ramosus multiplicatus*

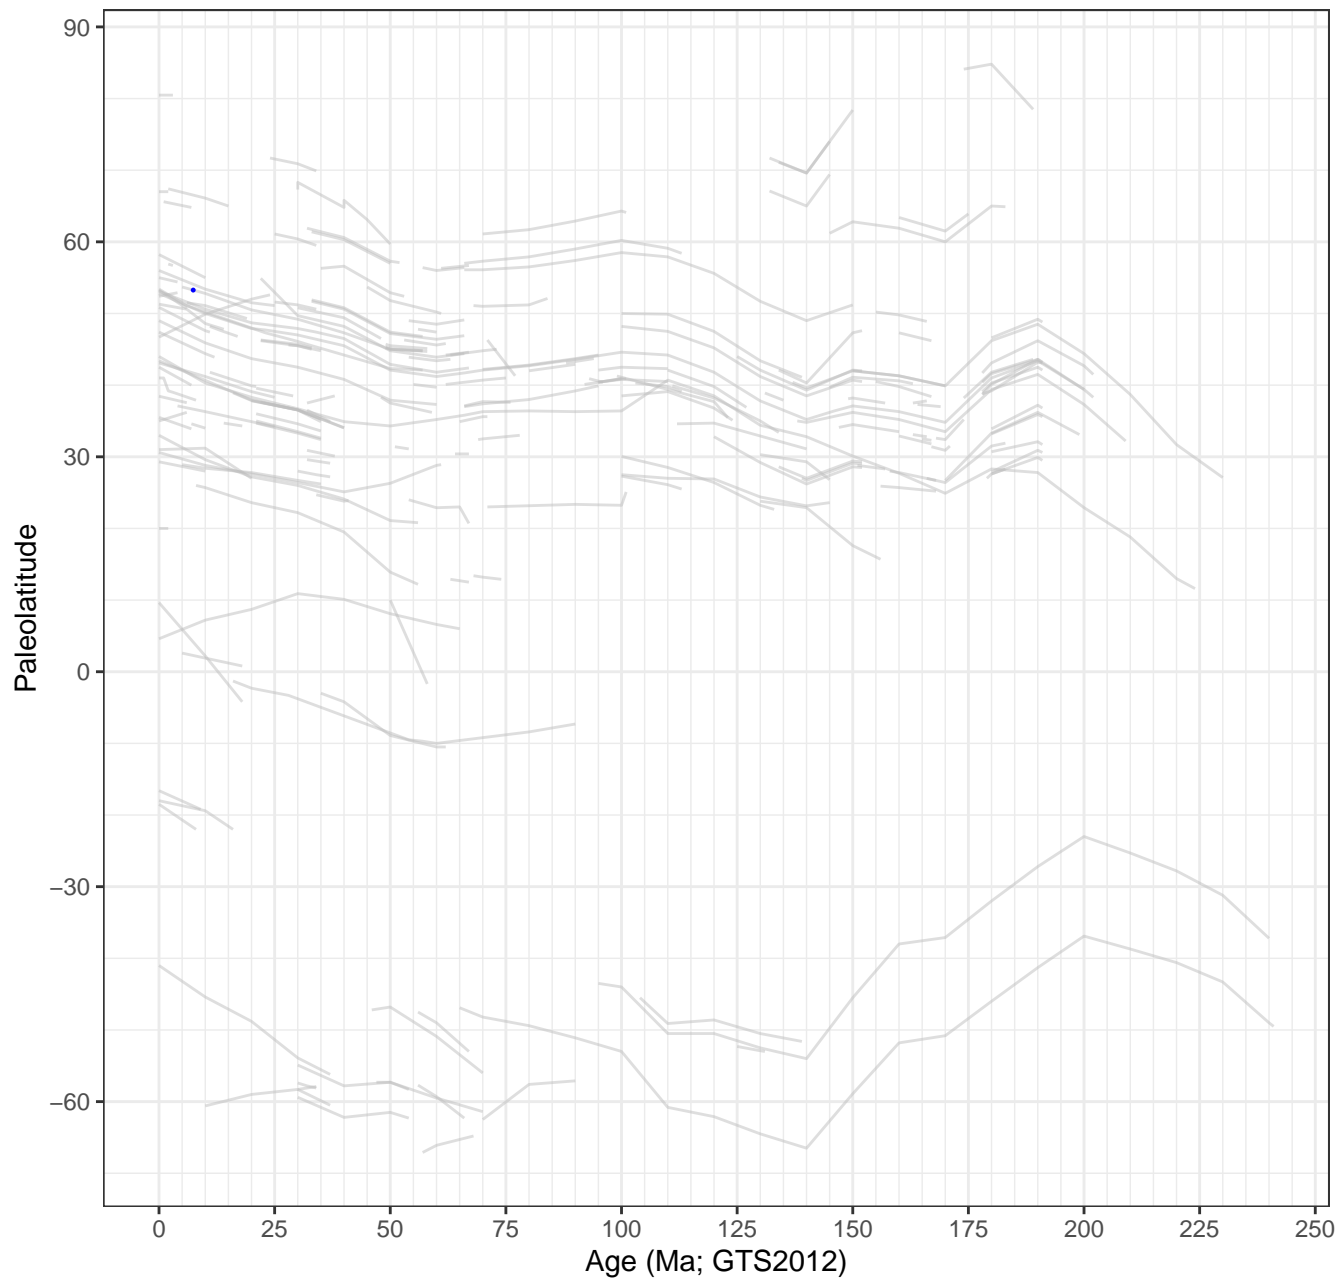

Supplement: Supplementary file 2403 [file Spiniferites ramosus multiplicatus.pdf › Supplement/Supplement 2/Species 1914 plots/Spiniferites ramosus multiplicatus.pdf]

# Species *Spiniferites ramosus ramosus*

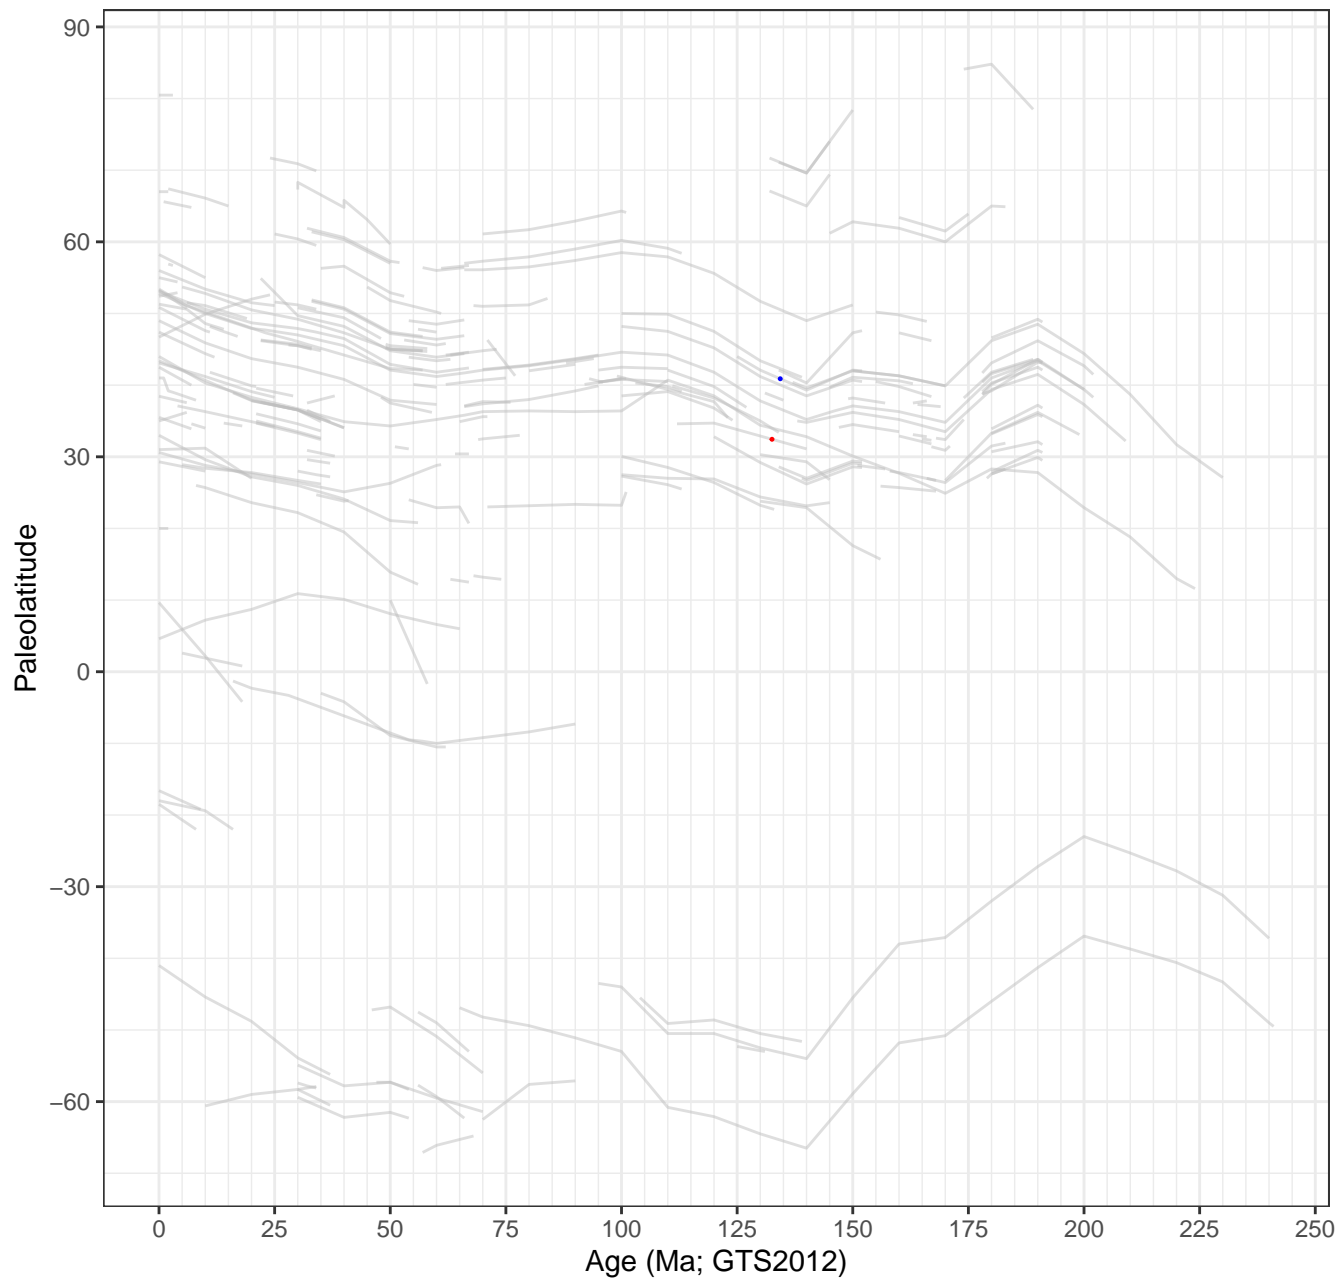

Supplement: Supplementary file 2404 [file Spiniferites ramosus ramosus.pdf › Supplement/Supplement 2/Species 1914 plots/Spiniferites ramosus ramosus.pdf]

# Species *Spiniferites ramosus reticulatus*

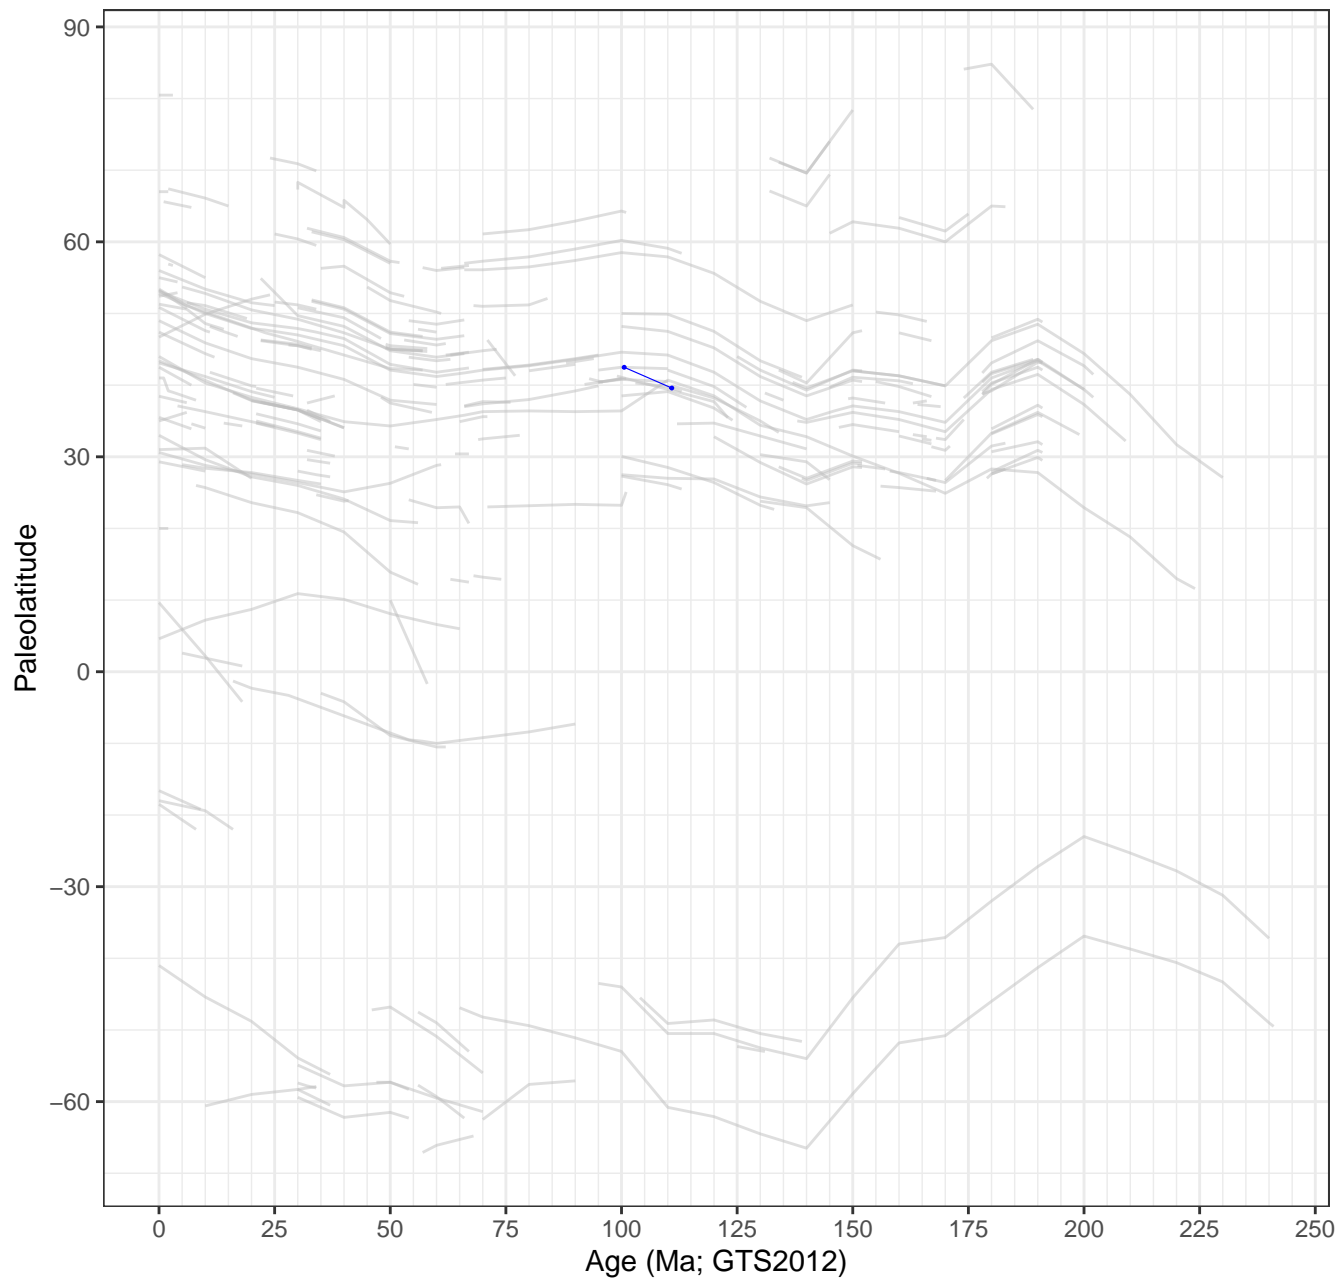

Supplement: Supplementary file 2405 [file Spiniferites ramosus reticulatus.pdf › Supplement/Supplement 2/Species 1914 plots/Spiniferites ramosus reticulatus.pdf]

# Species *Spiniferites ramosus*

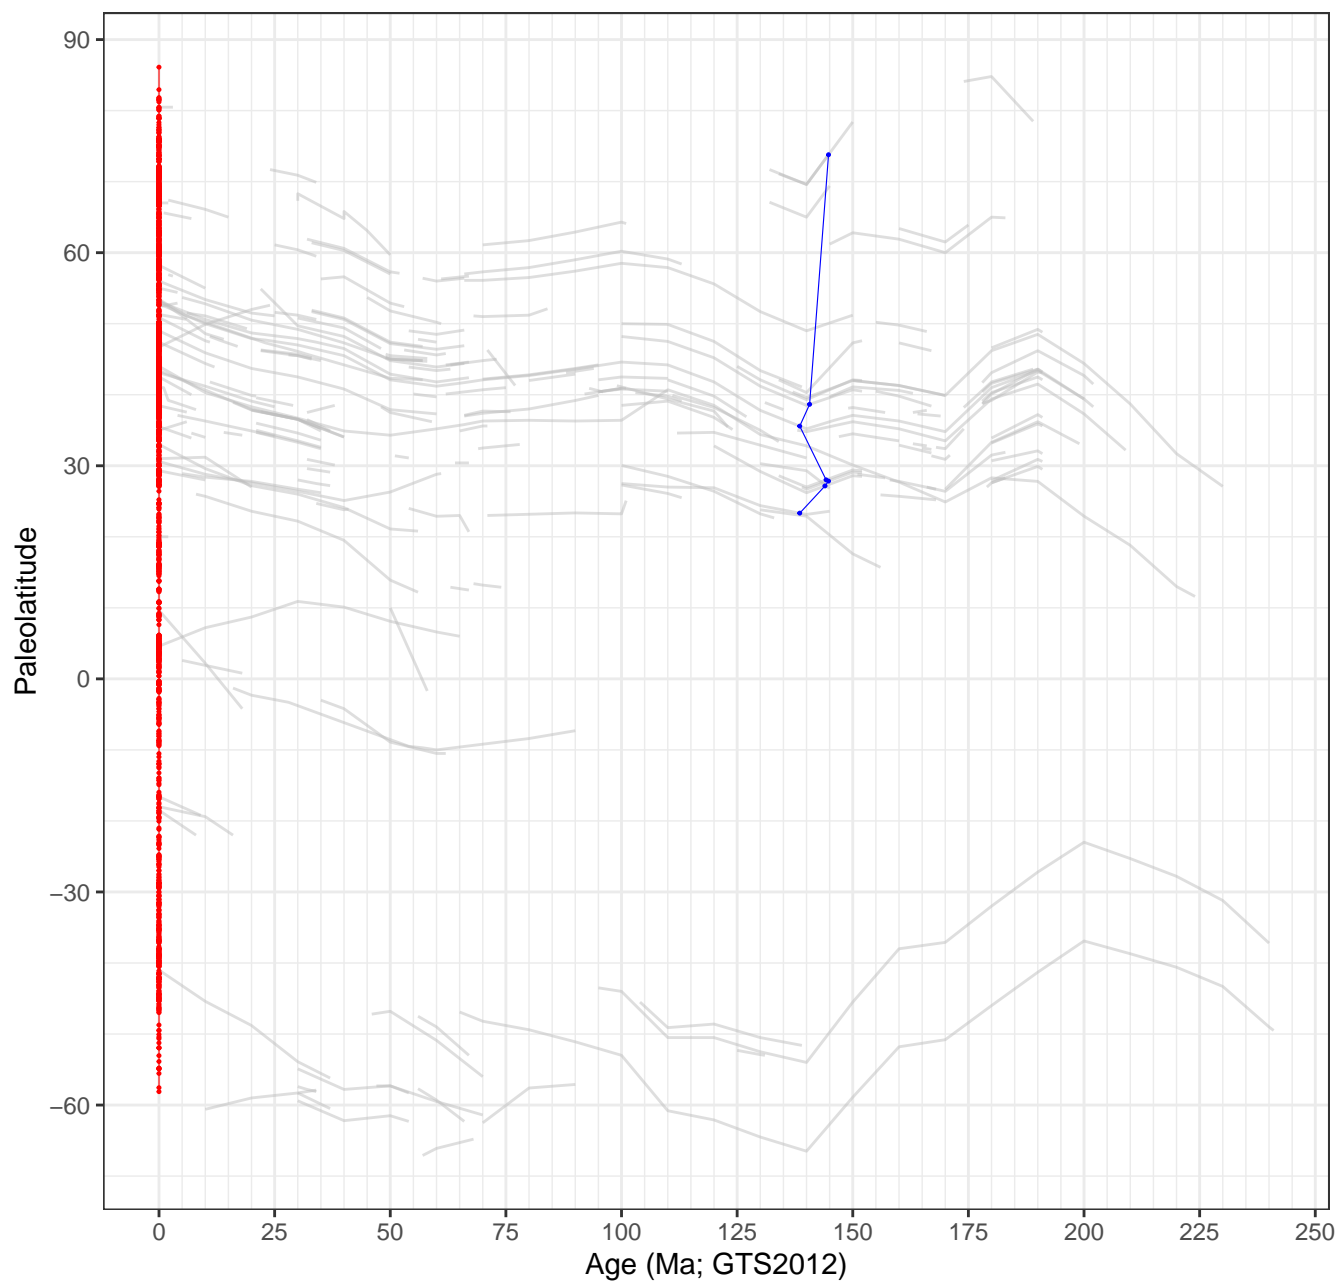

Supplement: Supplementary file 2406 [file Spiniferites ramosus.pdf › Supplement/Supplement 2/Species 1914 plots/Spiniferites ramosus.pdf]

# Species *Spiniferites rhomboideus*

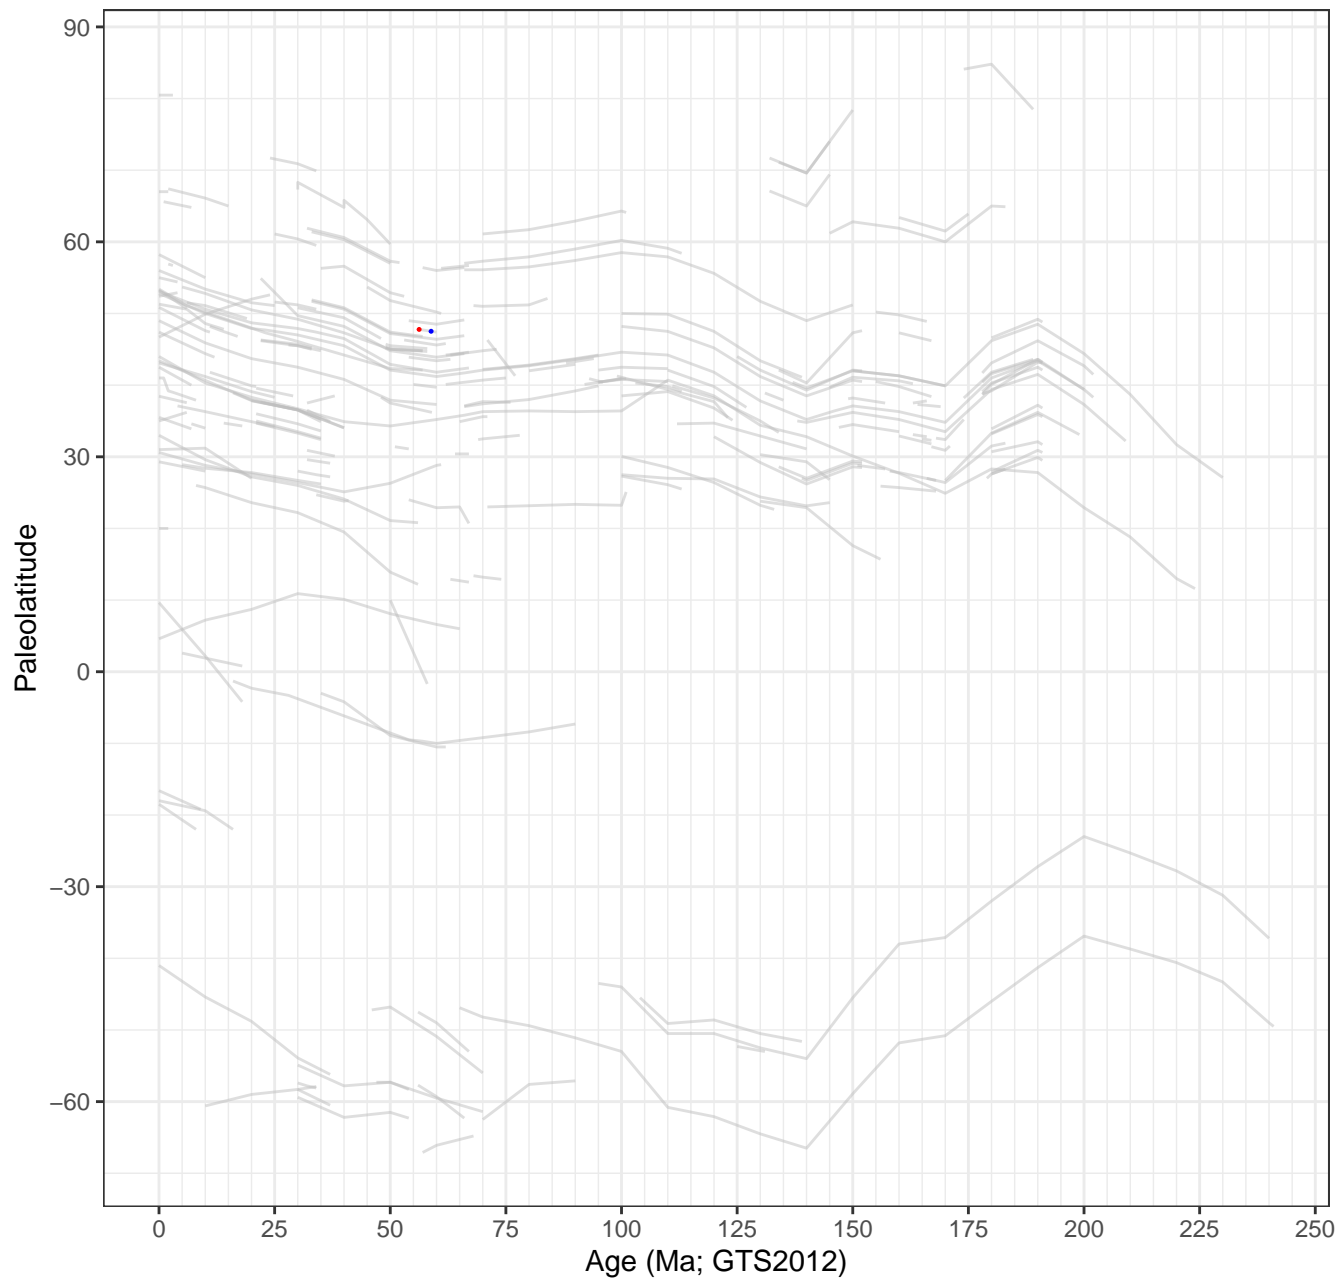

Supplement: Supplementary file 2407 [file Spiniferites rhomboideus.pdf › Supplement/Supplement 2/Species 1914 plots/Spiniferites rhomboideus.pdf]

# Species *Spiniferites rubinus*

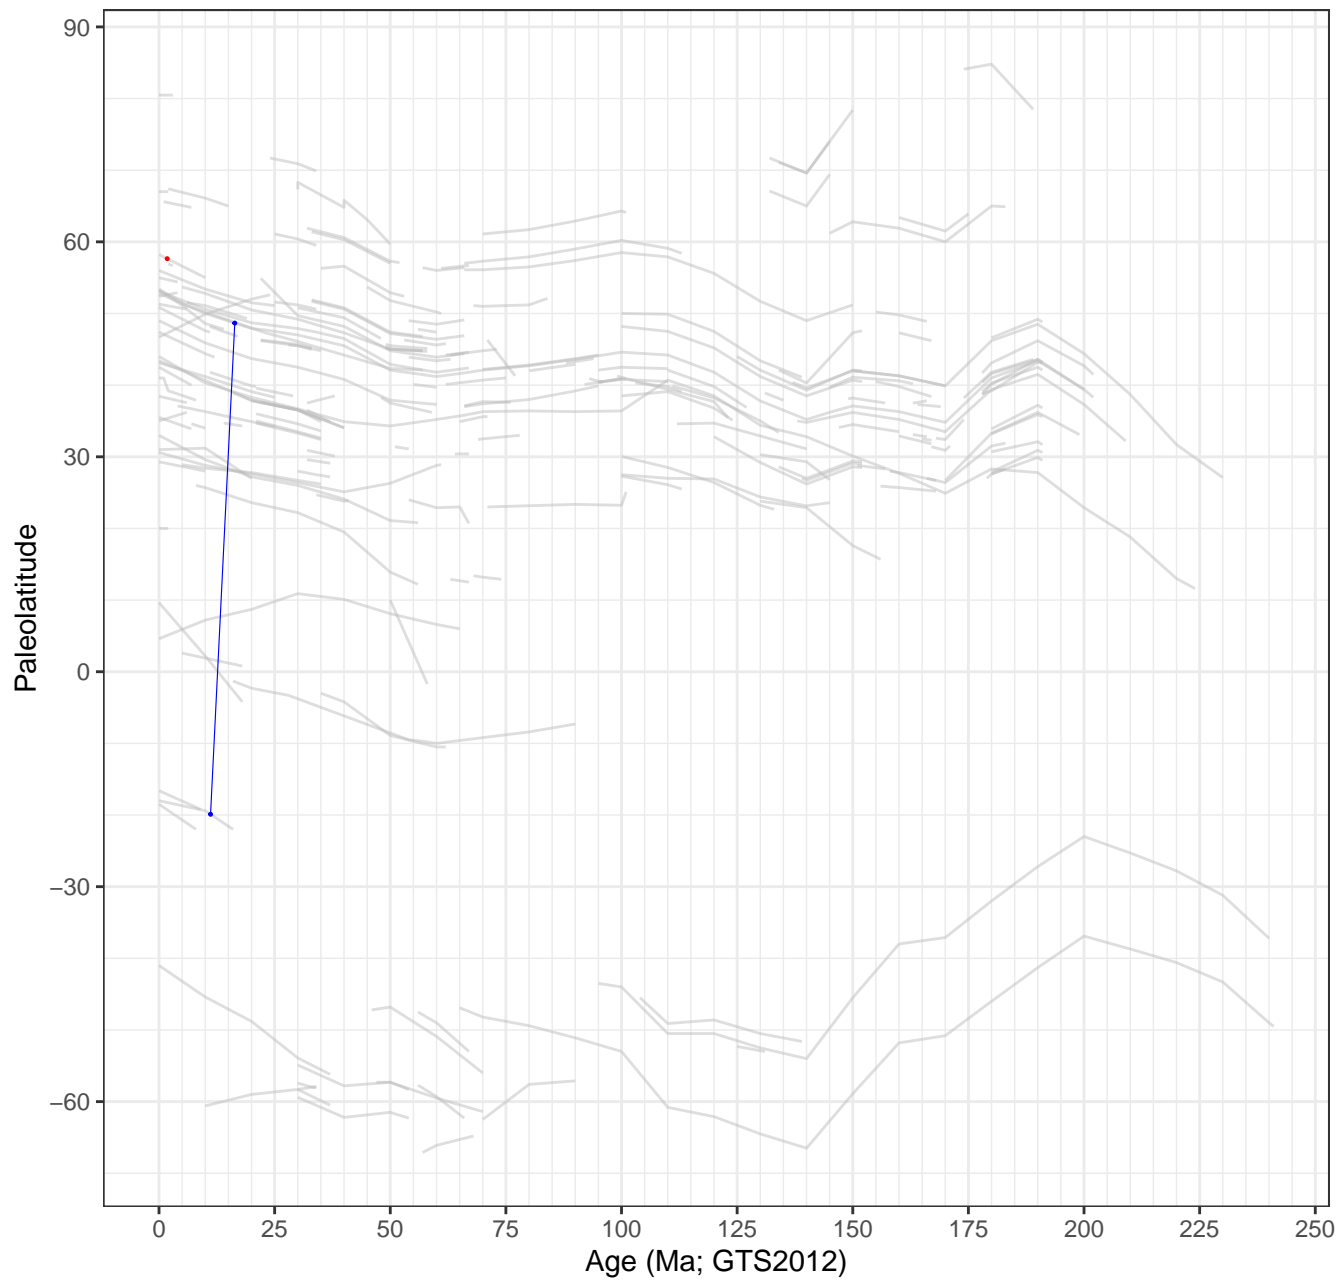

Supplement: Supplementary file 2408 [file Spiniferites rubinus.pdf › Supplement/Supplement 2/Species 1914 plots/Spiniferites rubinus.pdf]

# Species *Spiniferites scabratus*

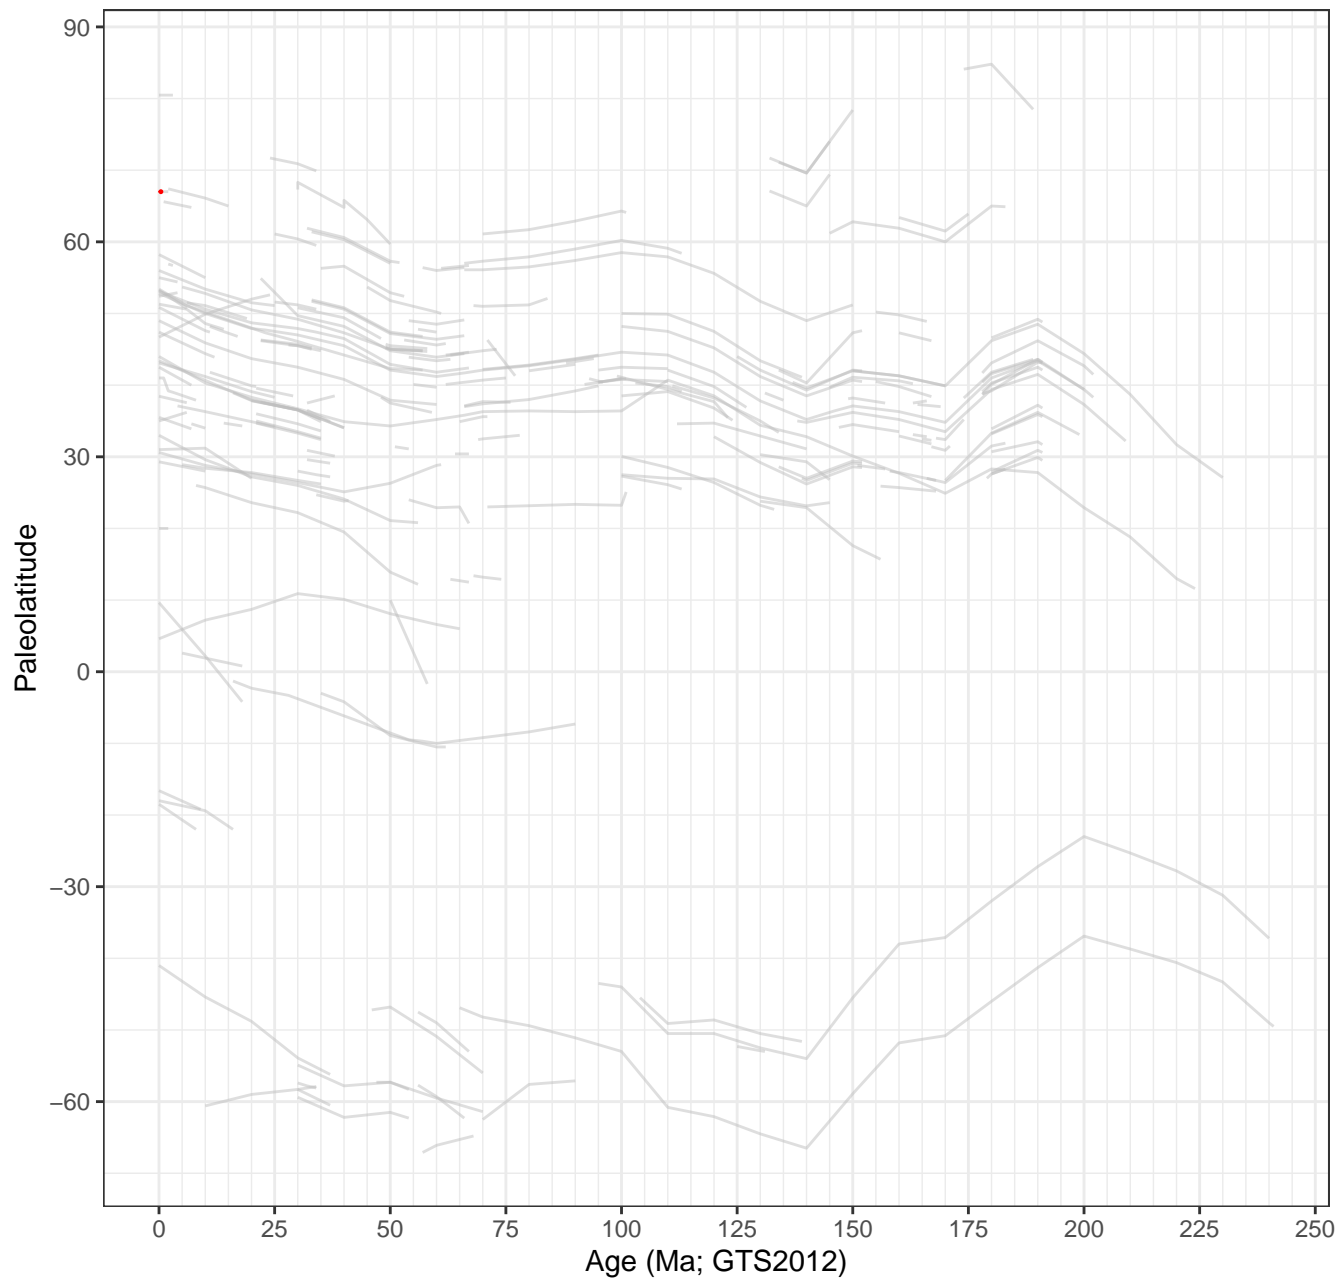

Supplement: Supplementary file 2409 [file Spiniferites scabratus.pdf › Supplement/Supplement 2/Species 1914 plots/Spiniferites scabratus.pdf]

# Species *Spiniferites scabrosus*

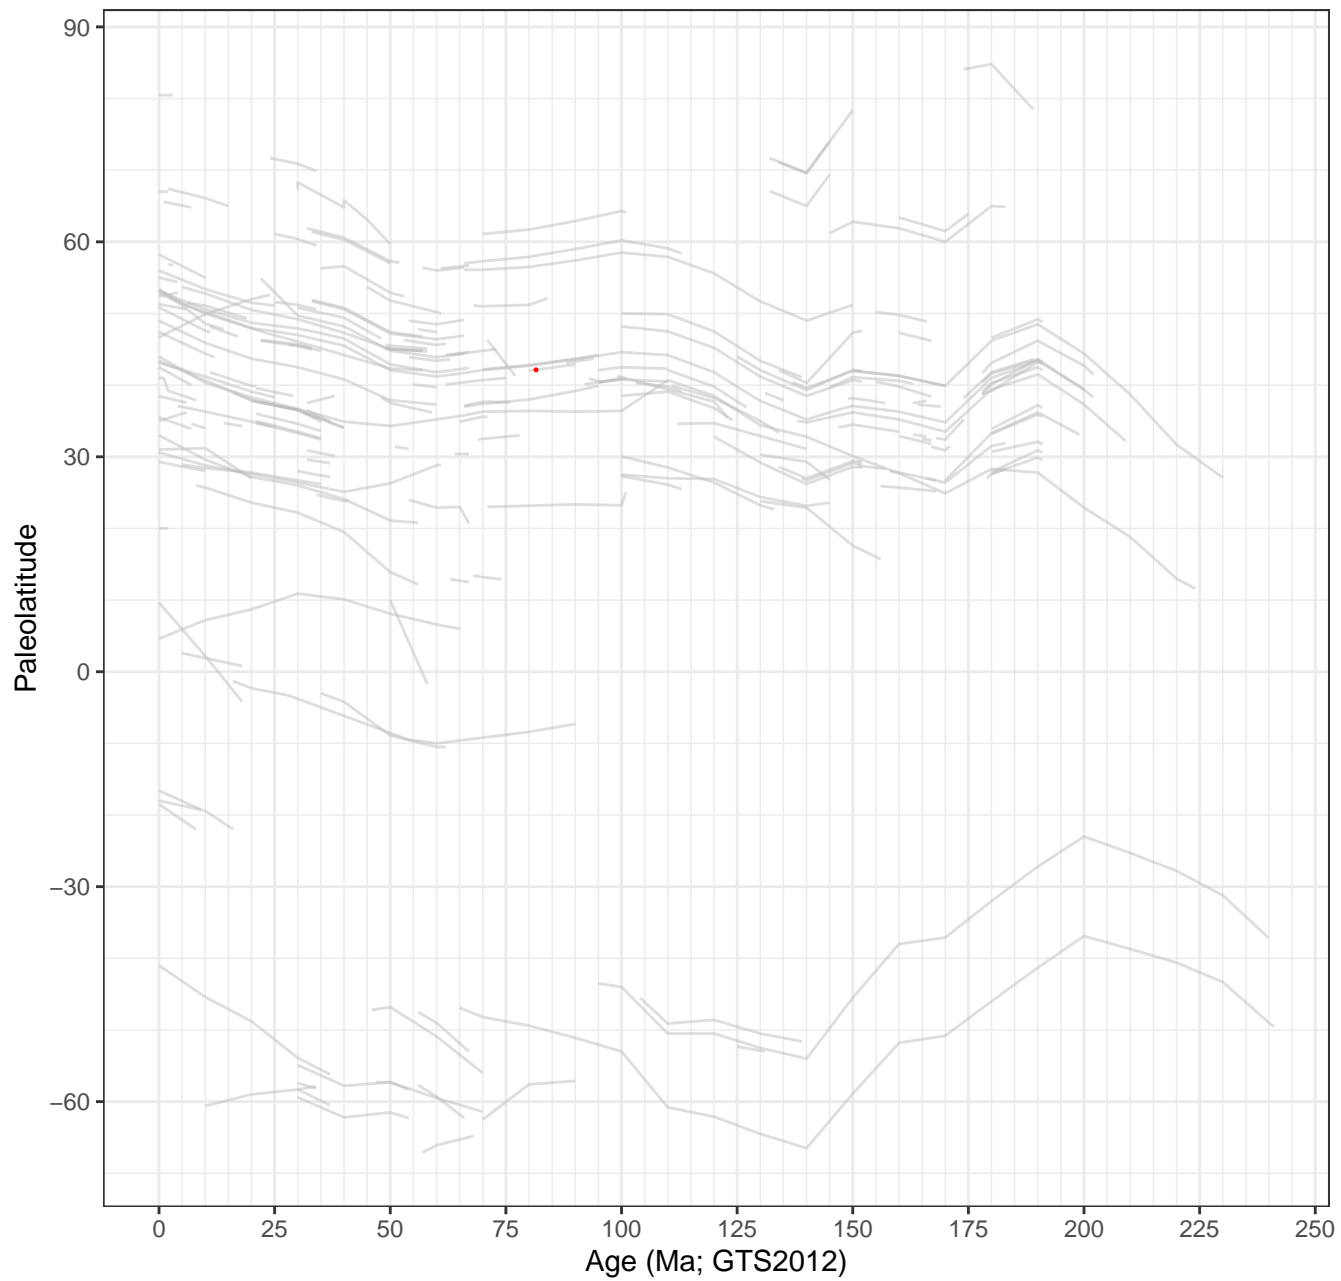

Supplement: Supplementary file 2410 [file Spiniferites scabrosus.pdf › Supplement/Supplement 2/Species 1914 plots/Spiniferites scabrosus.pdf]

# Species *Spiniferites septentrionalis*

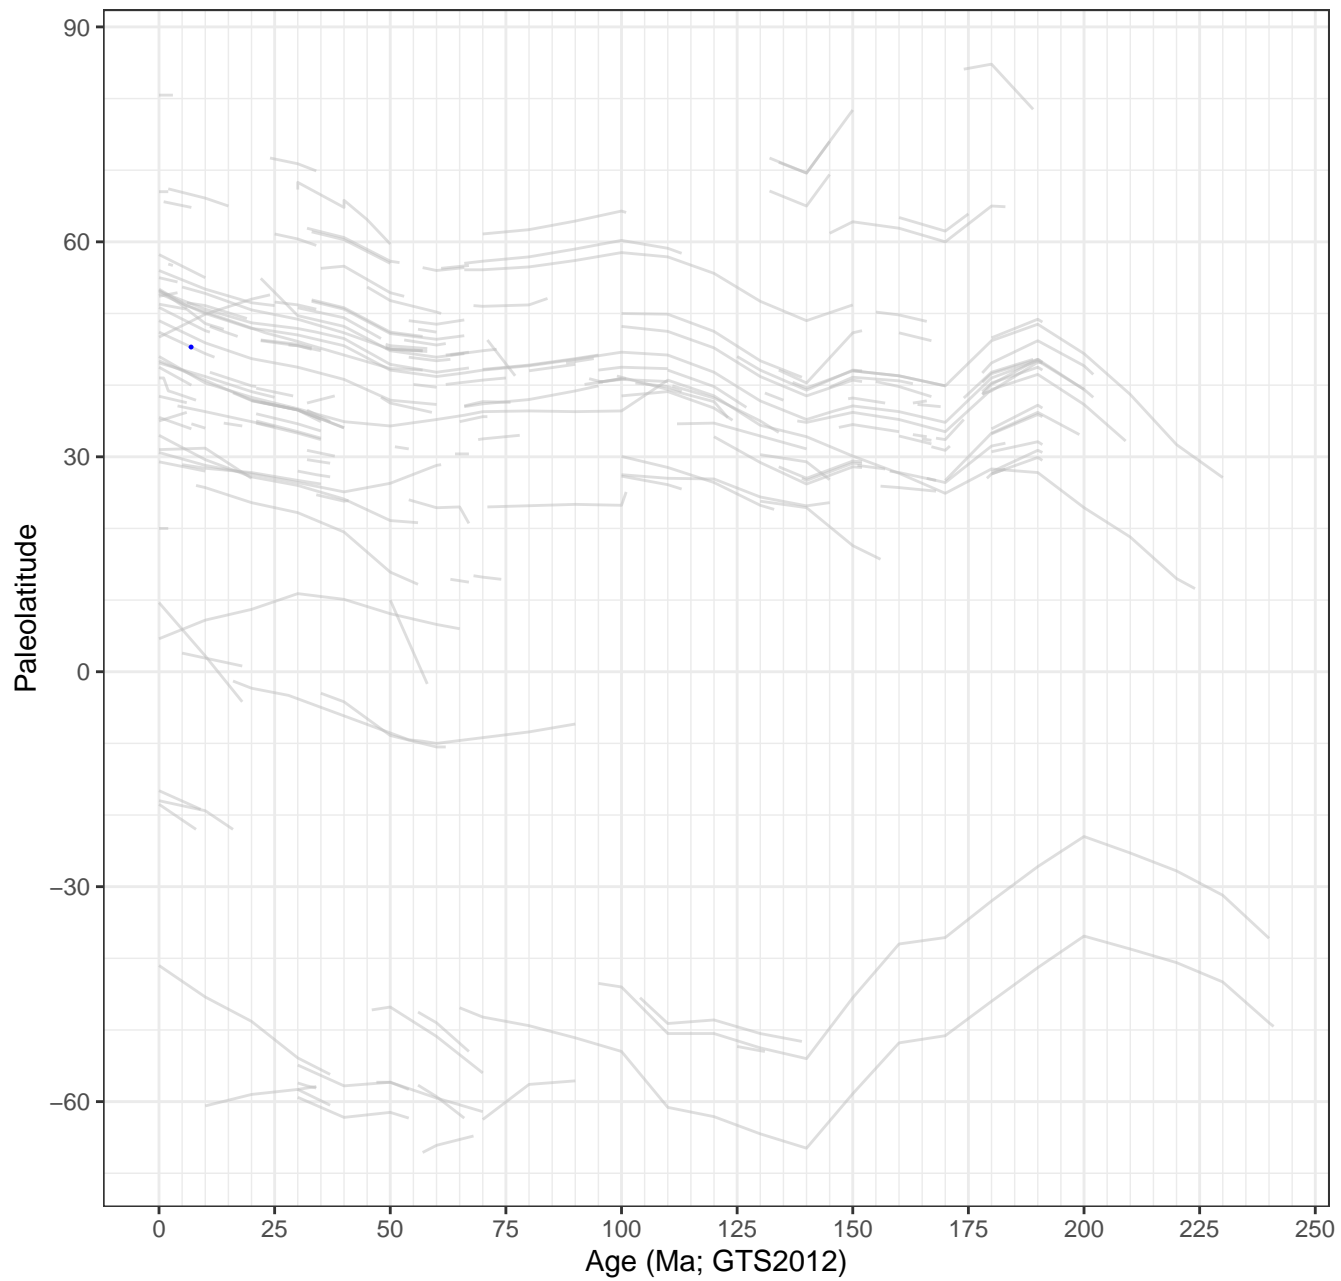

Supplement: Supplementary file 2411 [file Spiniferites septentrionalis.pdf › Supplement/Supplement 2/Species 1914 plots/Spiniferites septentrionalis.pdf]

# Species *Spiniferites serratus*

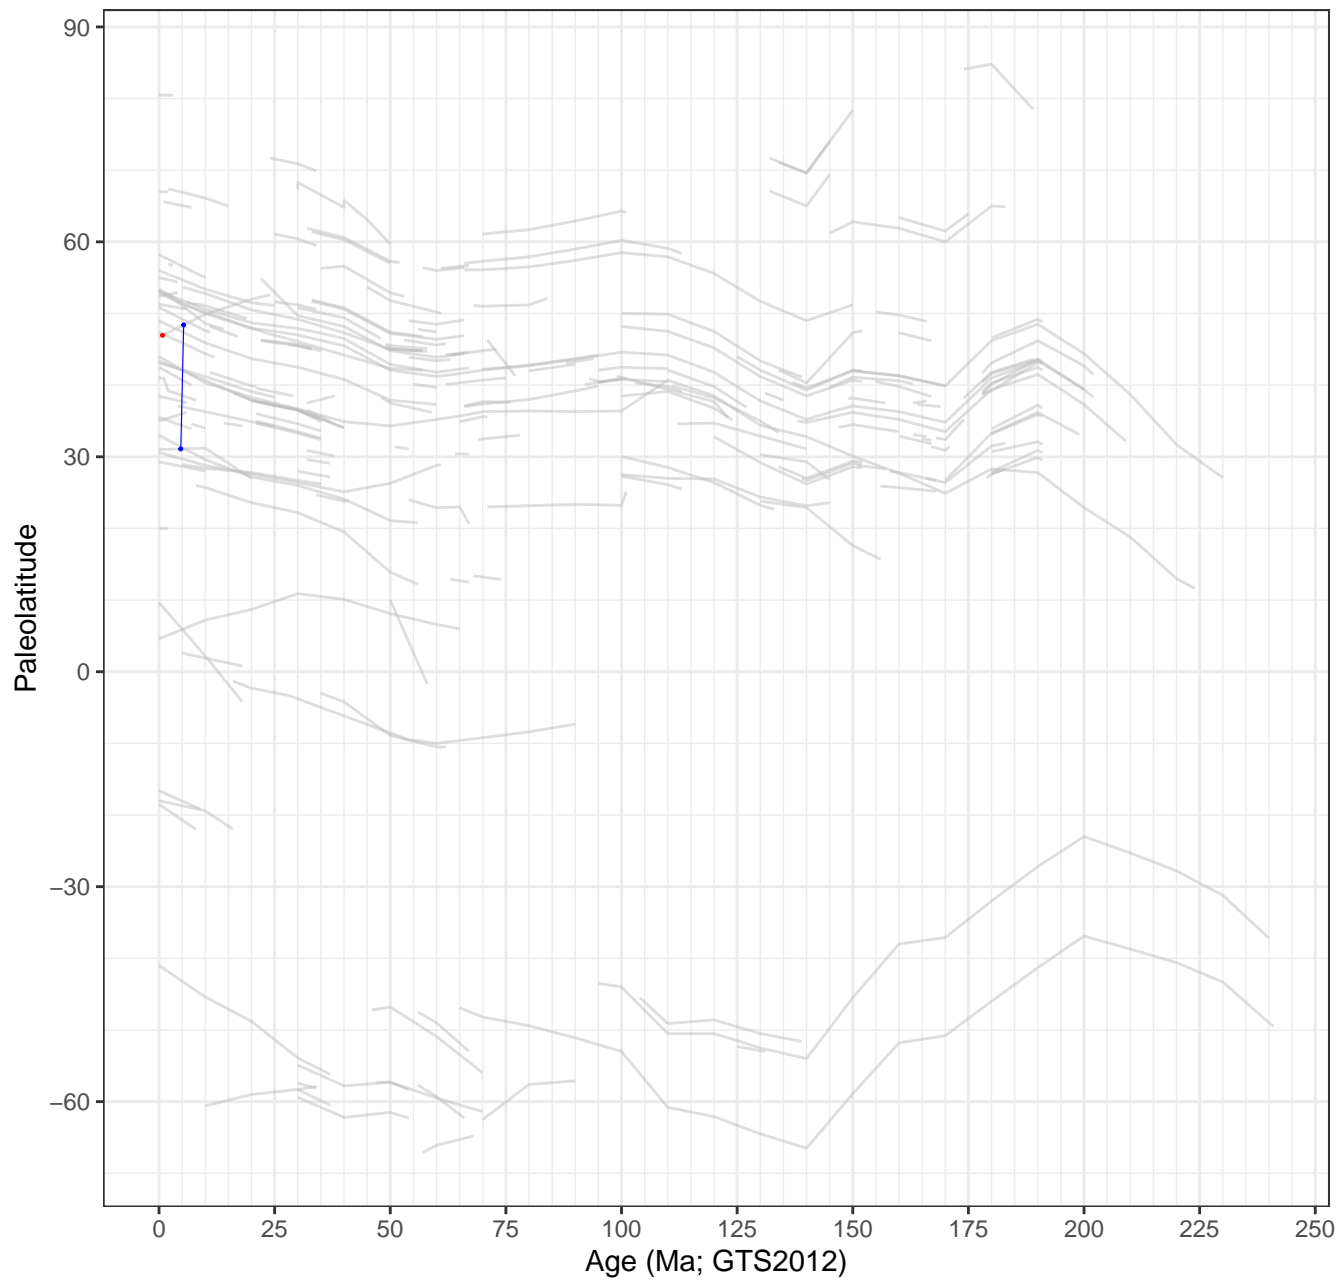

Supplement: Supplementary file 2412 [file Spiniferites serratus.pdf › Supplement/Supplement 2/Species 1914 plots/Spiniferites serratus.pdf]

# Species *Spiniferites* sp.

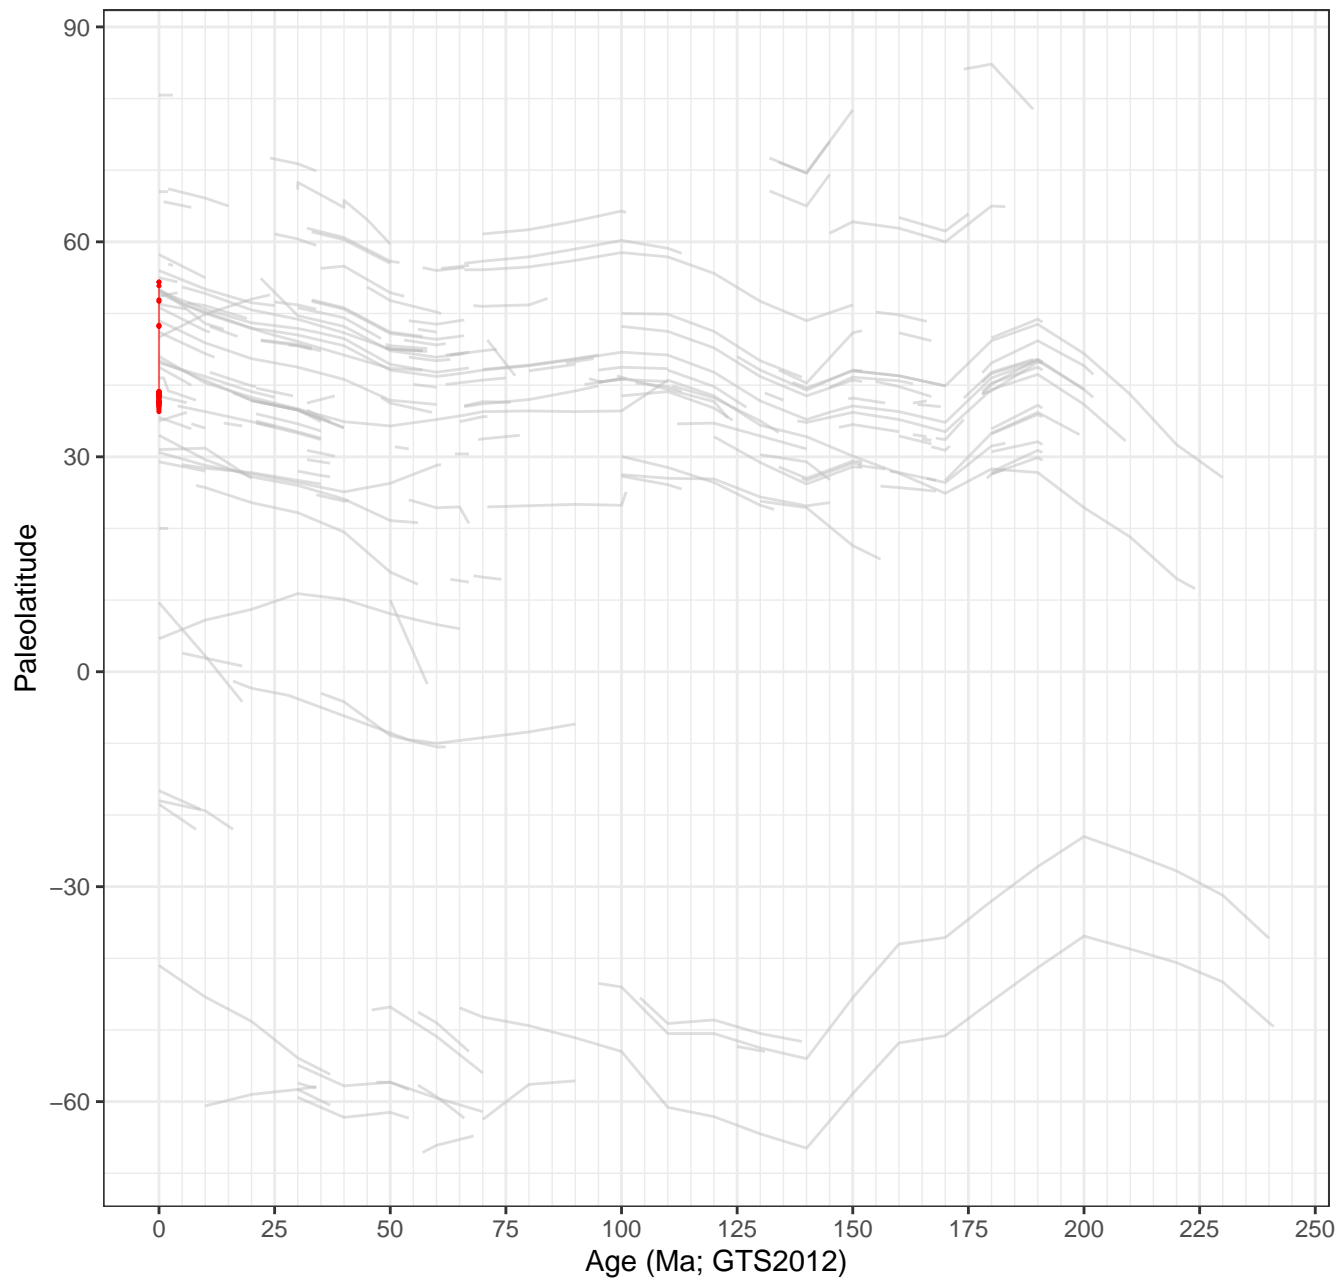

Supplement: Supplementary file 2413 [file Spiniferites sp..pdf › Supplement/Supplement 2/Species 1914 plots/Spiniferites sp..pdf]

# Species *Spiniferites splendidus*

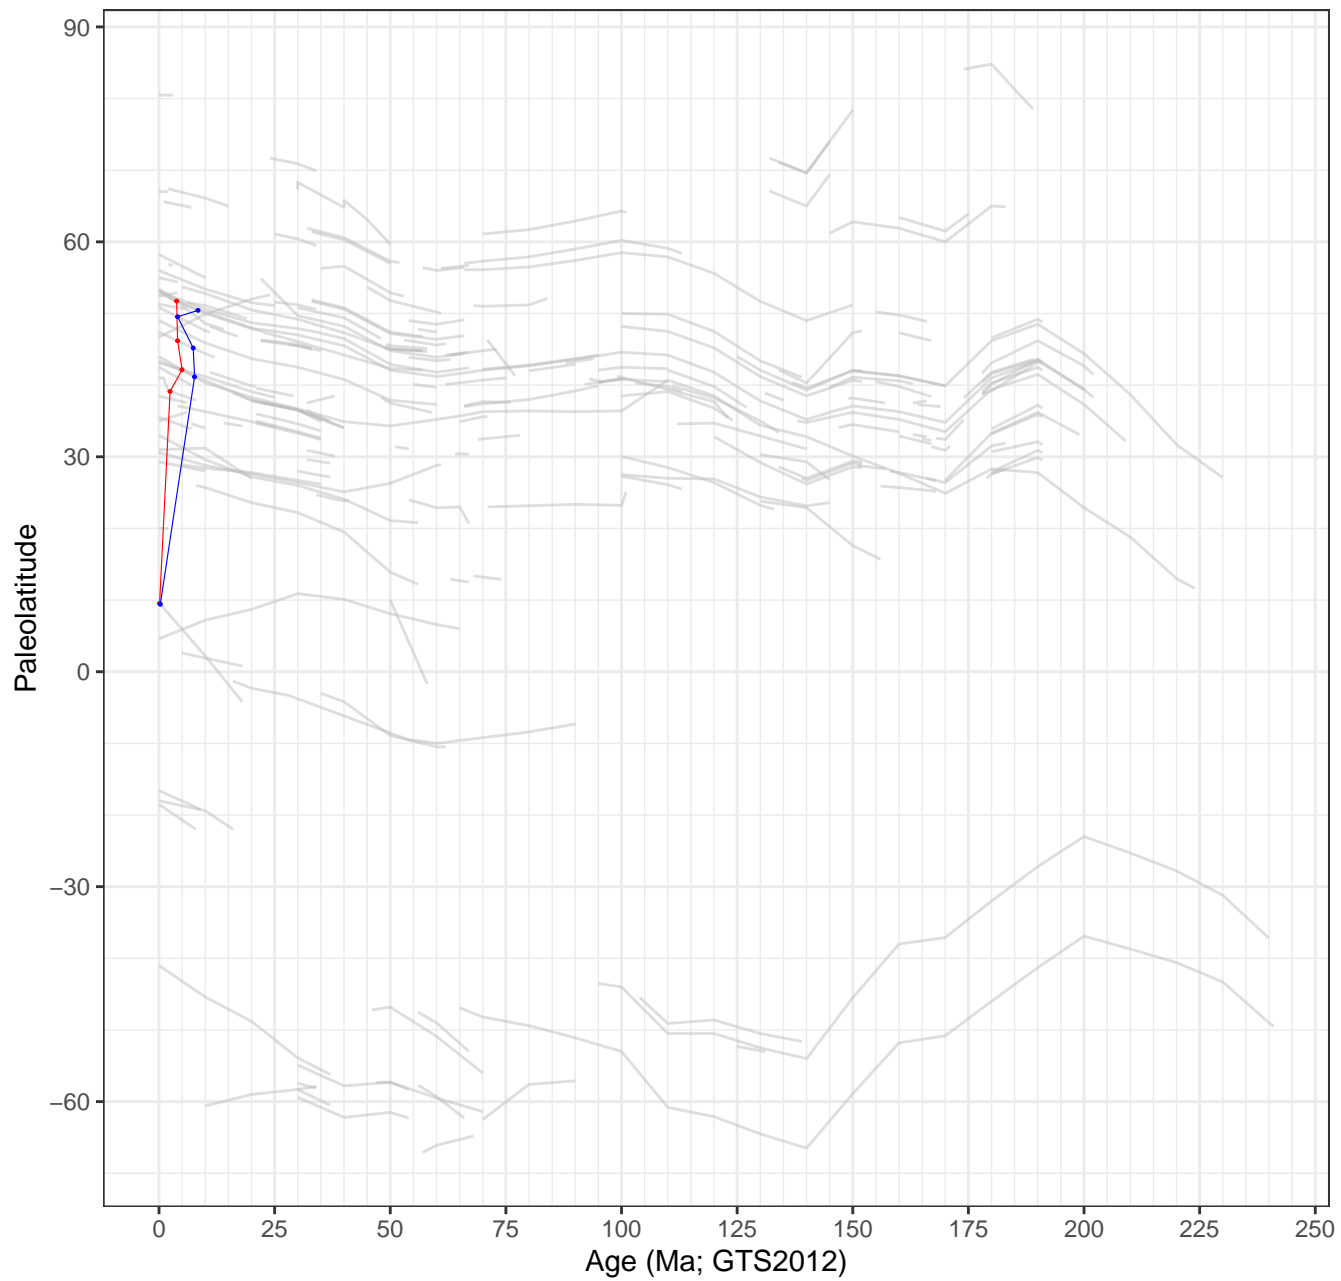

Supplement: Supplementary file 2414 [file Spiniferites splendidus.pdf › Supplement/Supplement 2/Species 1914 plots/Spiniferites splendidus.pdf]

# Species *Spiniferites* spp.

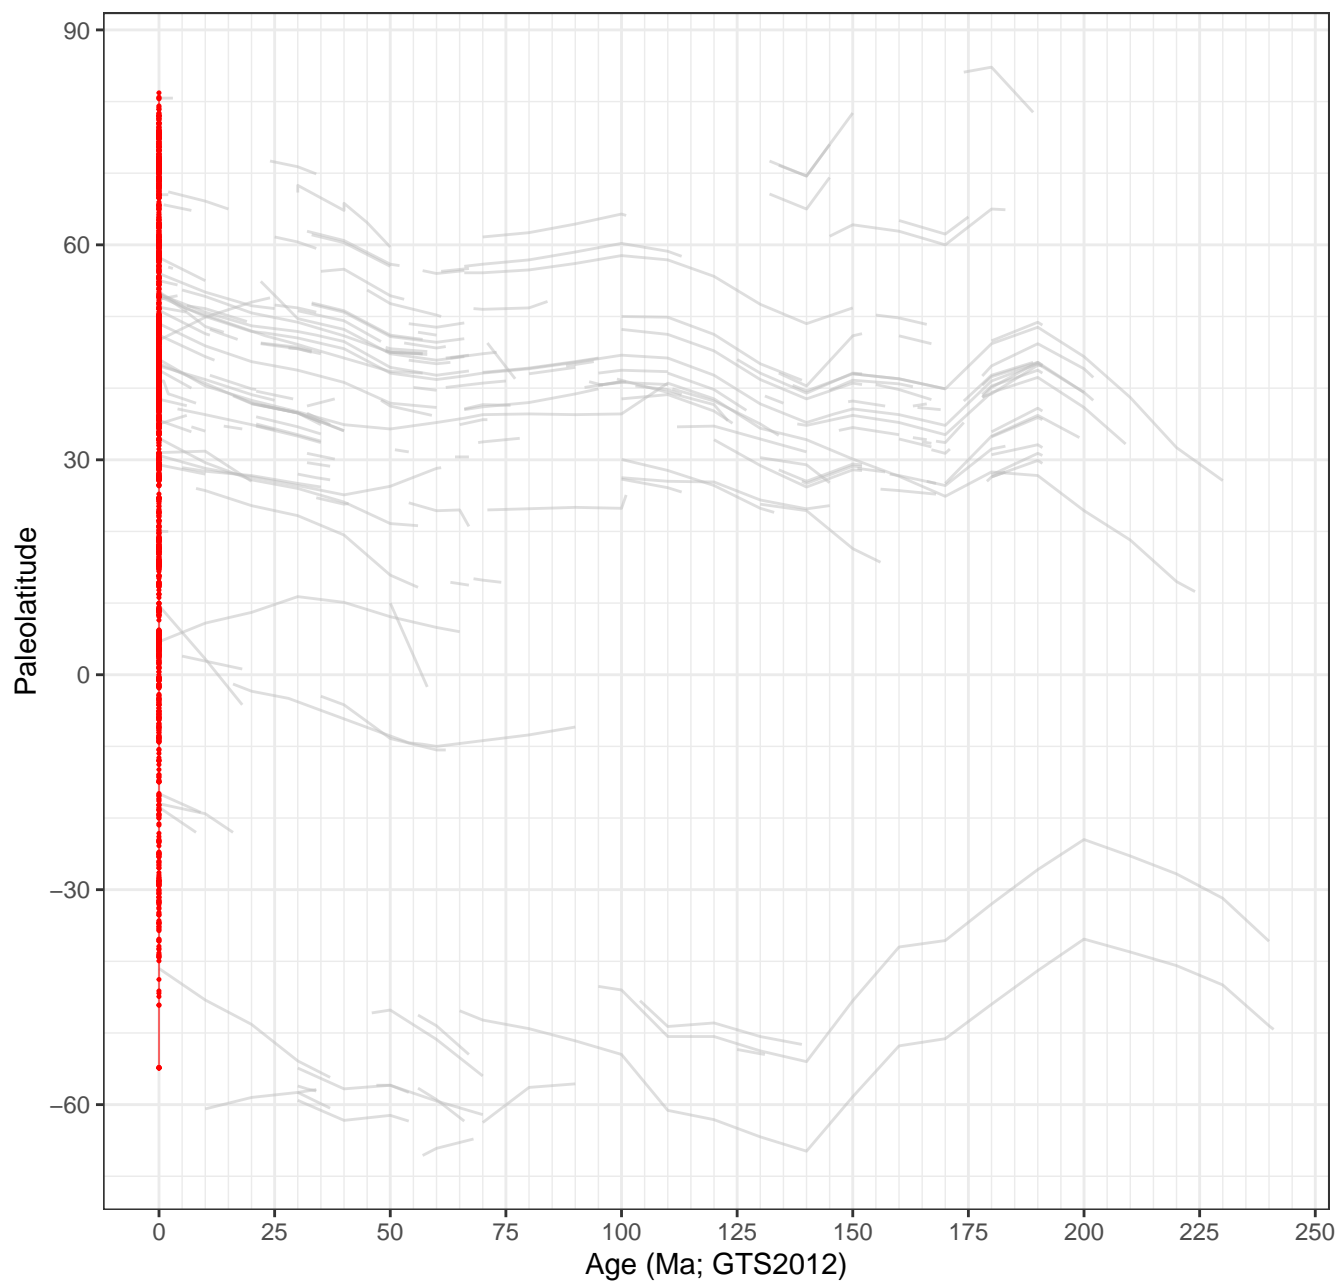

Supplement: Supplementary file 2415 [file Spiniferites spp..pdf › Supplement/Supplement 2/Species 1914 plots/Spiniferites spp..pdf]

# Species *Spiniferites strictus*

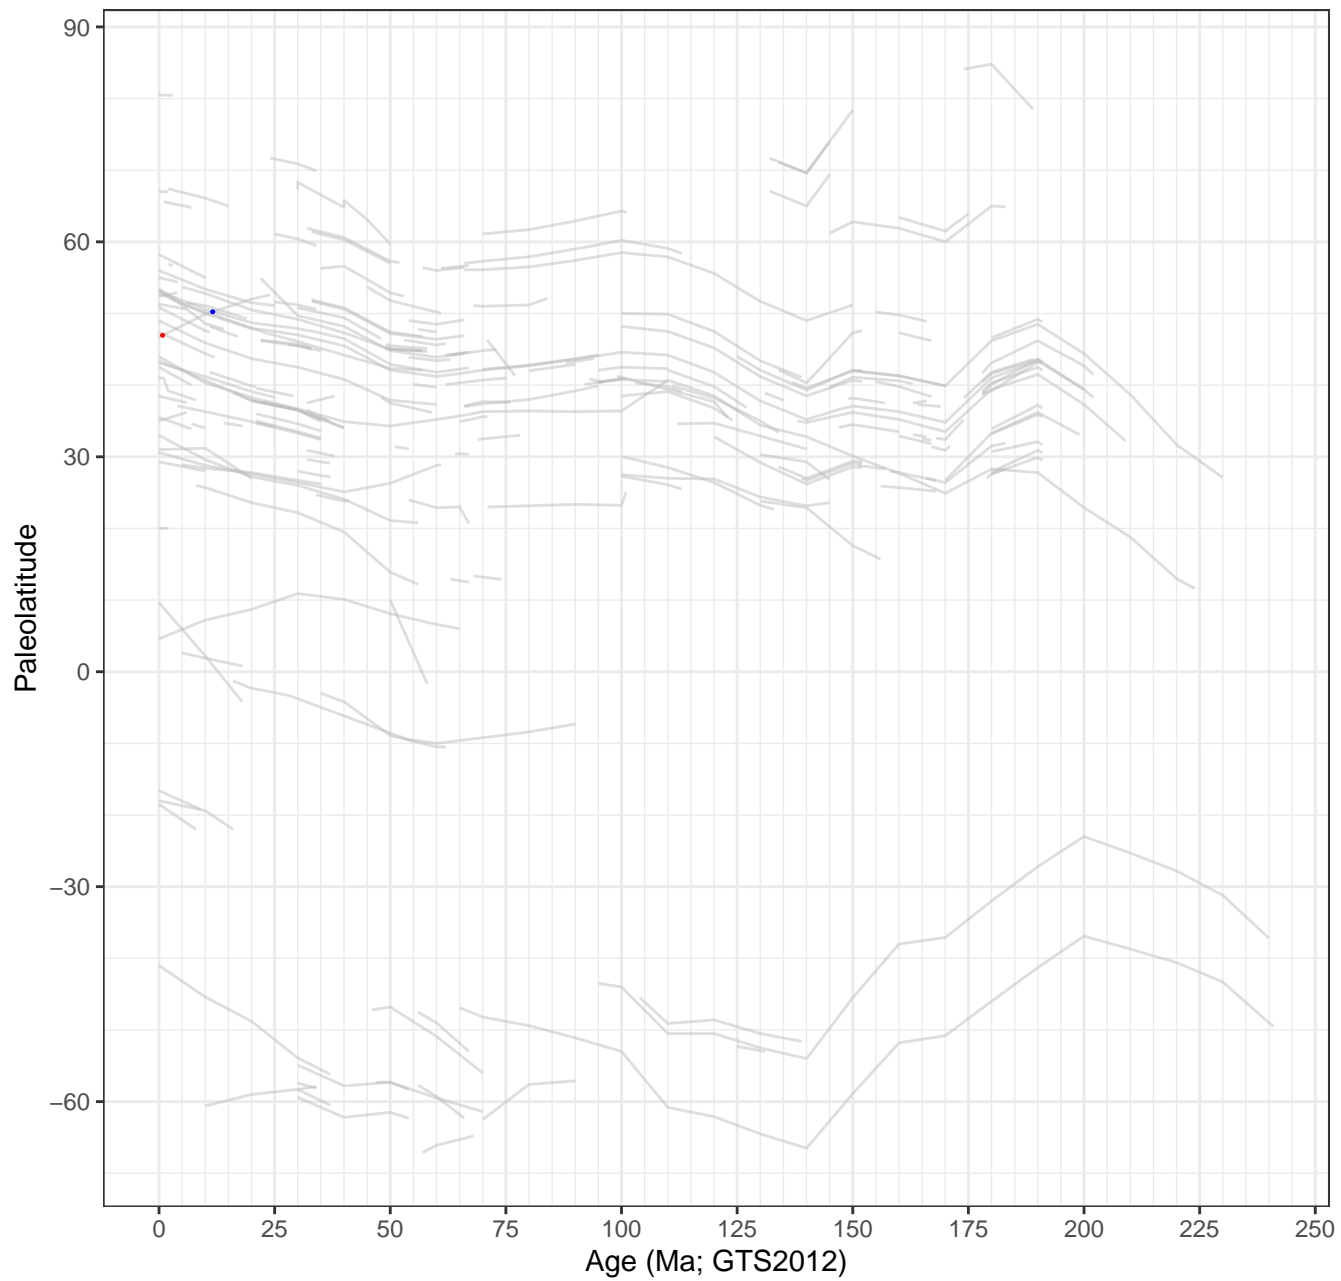

Supplement: Supplementary file 2416 [file Spiniferites strictus.pdf › Supplement/Supplement 2/Species 1914 plots/Spiniferites strictus.pdf]

# Species *Spiniferites supparus*

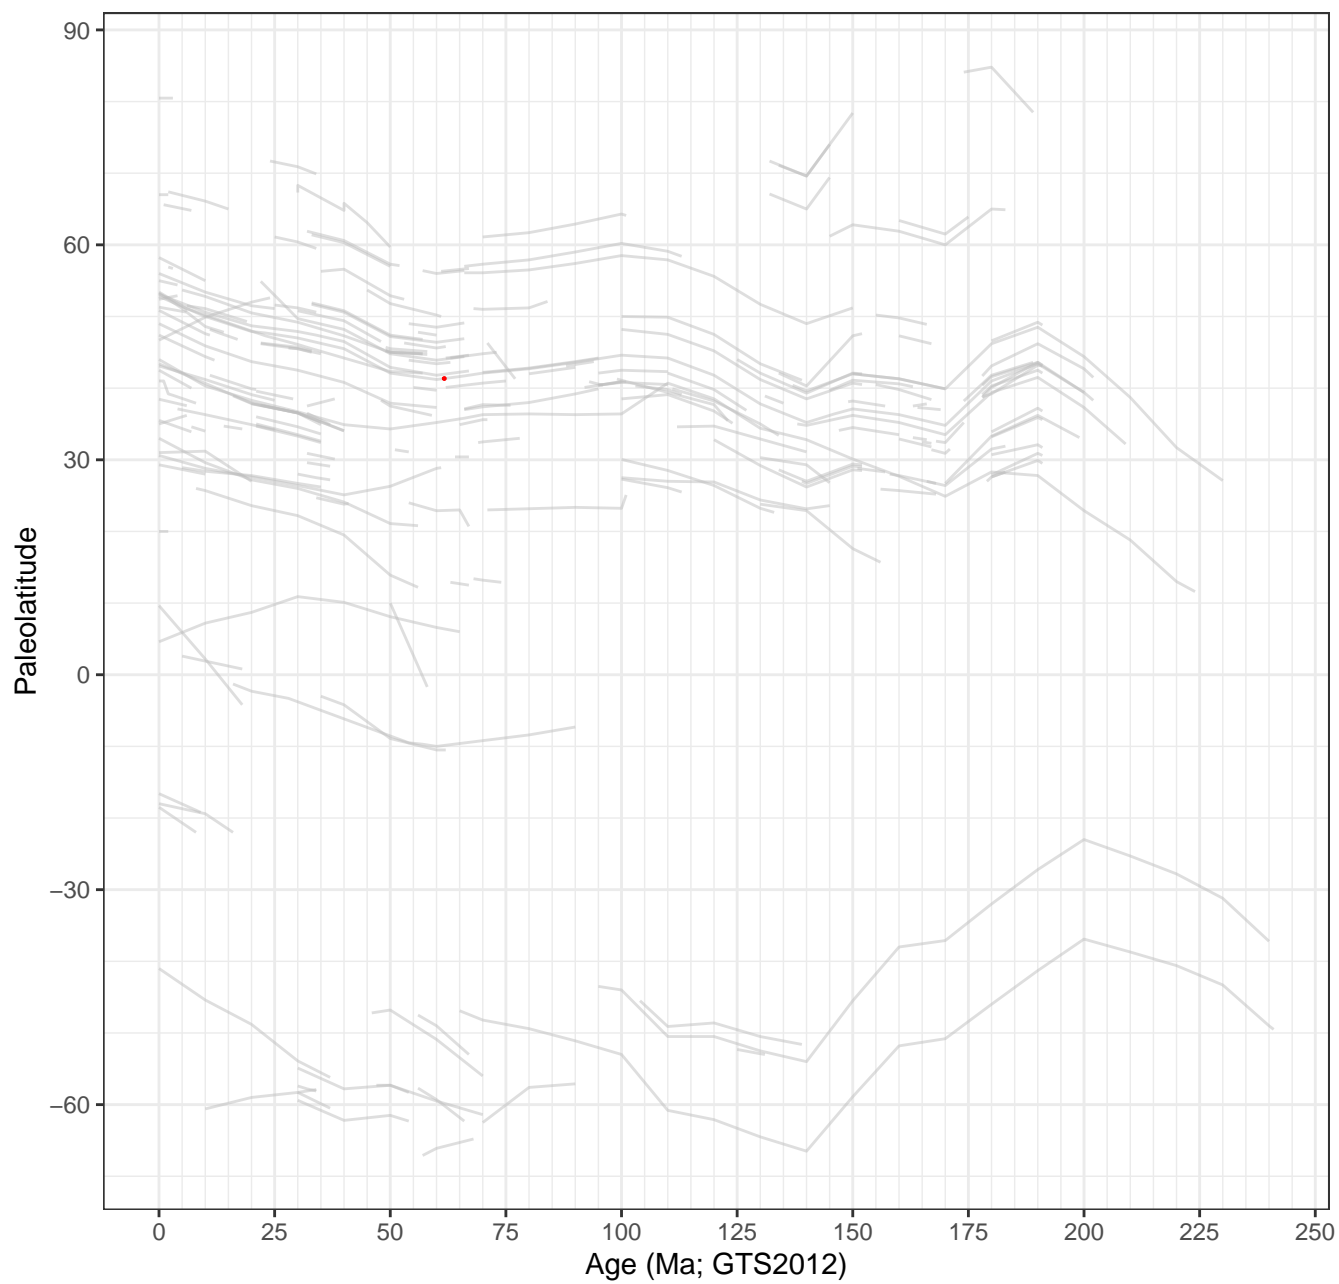

Supplement: Supplementary file 2417 [file Spiniferites supparus.pdf › Supplement/Supplement 2/Species 1914 plots/Spiniferites supparus.pdf]

# Species *Spiniferites truncatus*

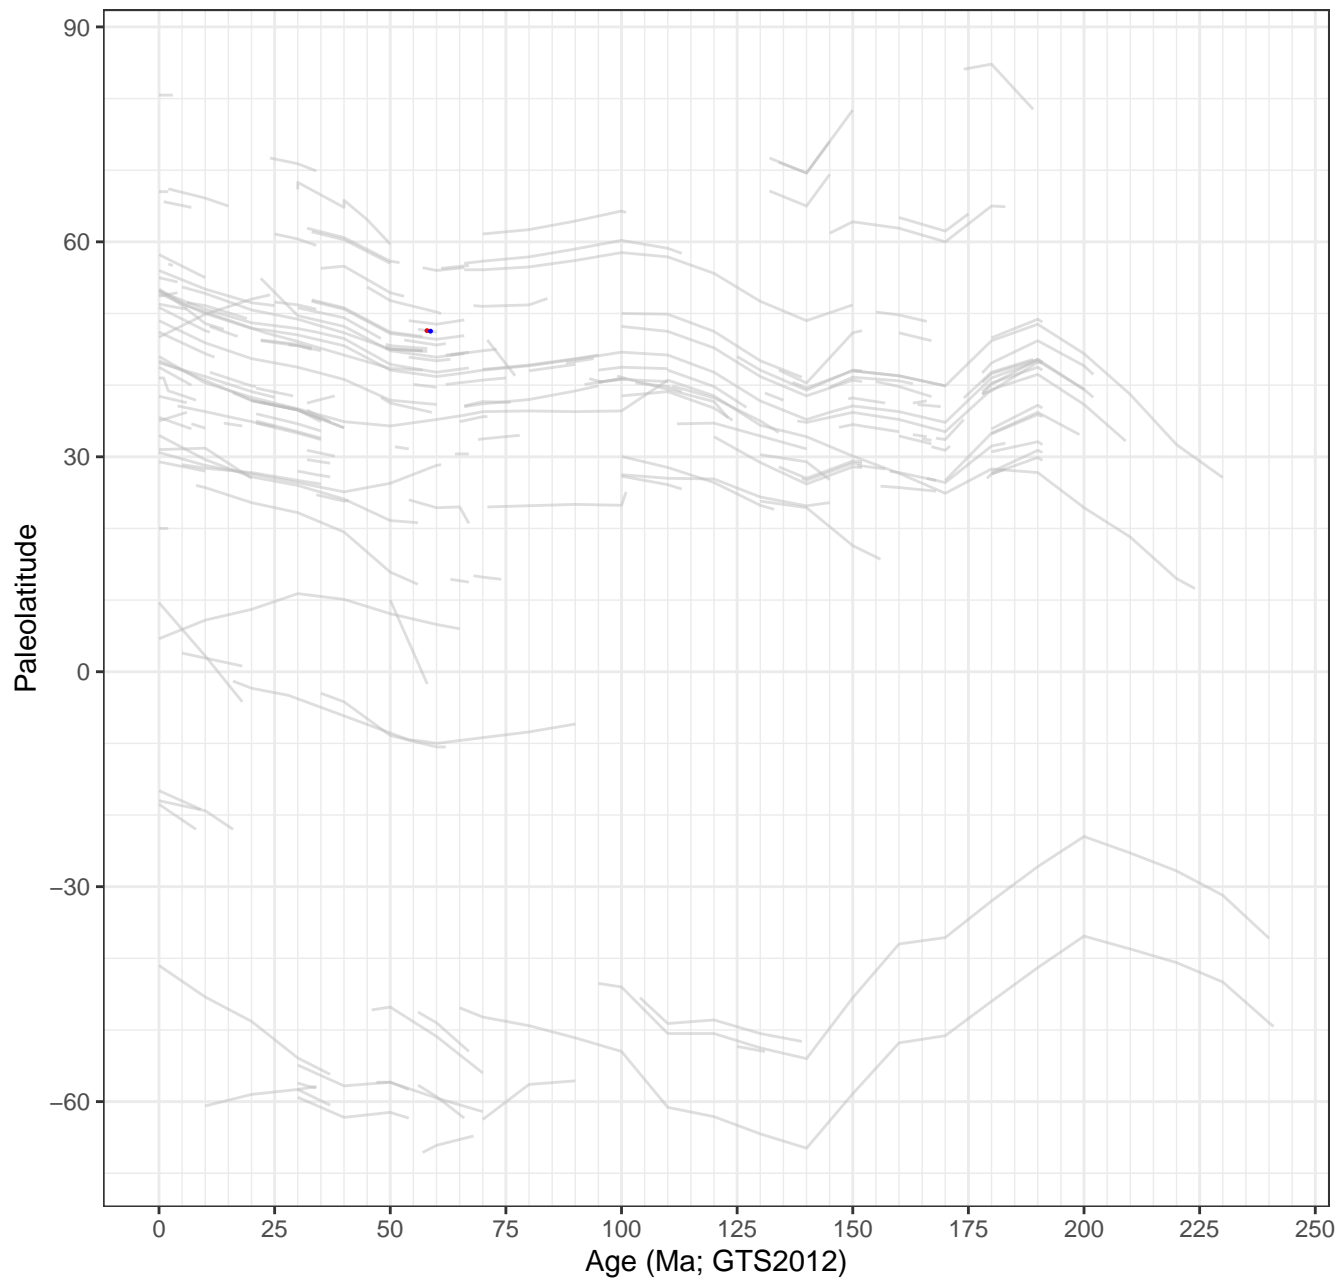

Supplement: Supplementary file 2418 [file Spiniferites truncatus.pdf › Supplement/Supplement 2/Species 1914 plots/Spiniferites truncatus.pdf]

# Species *Spiniferites twistringiensis*

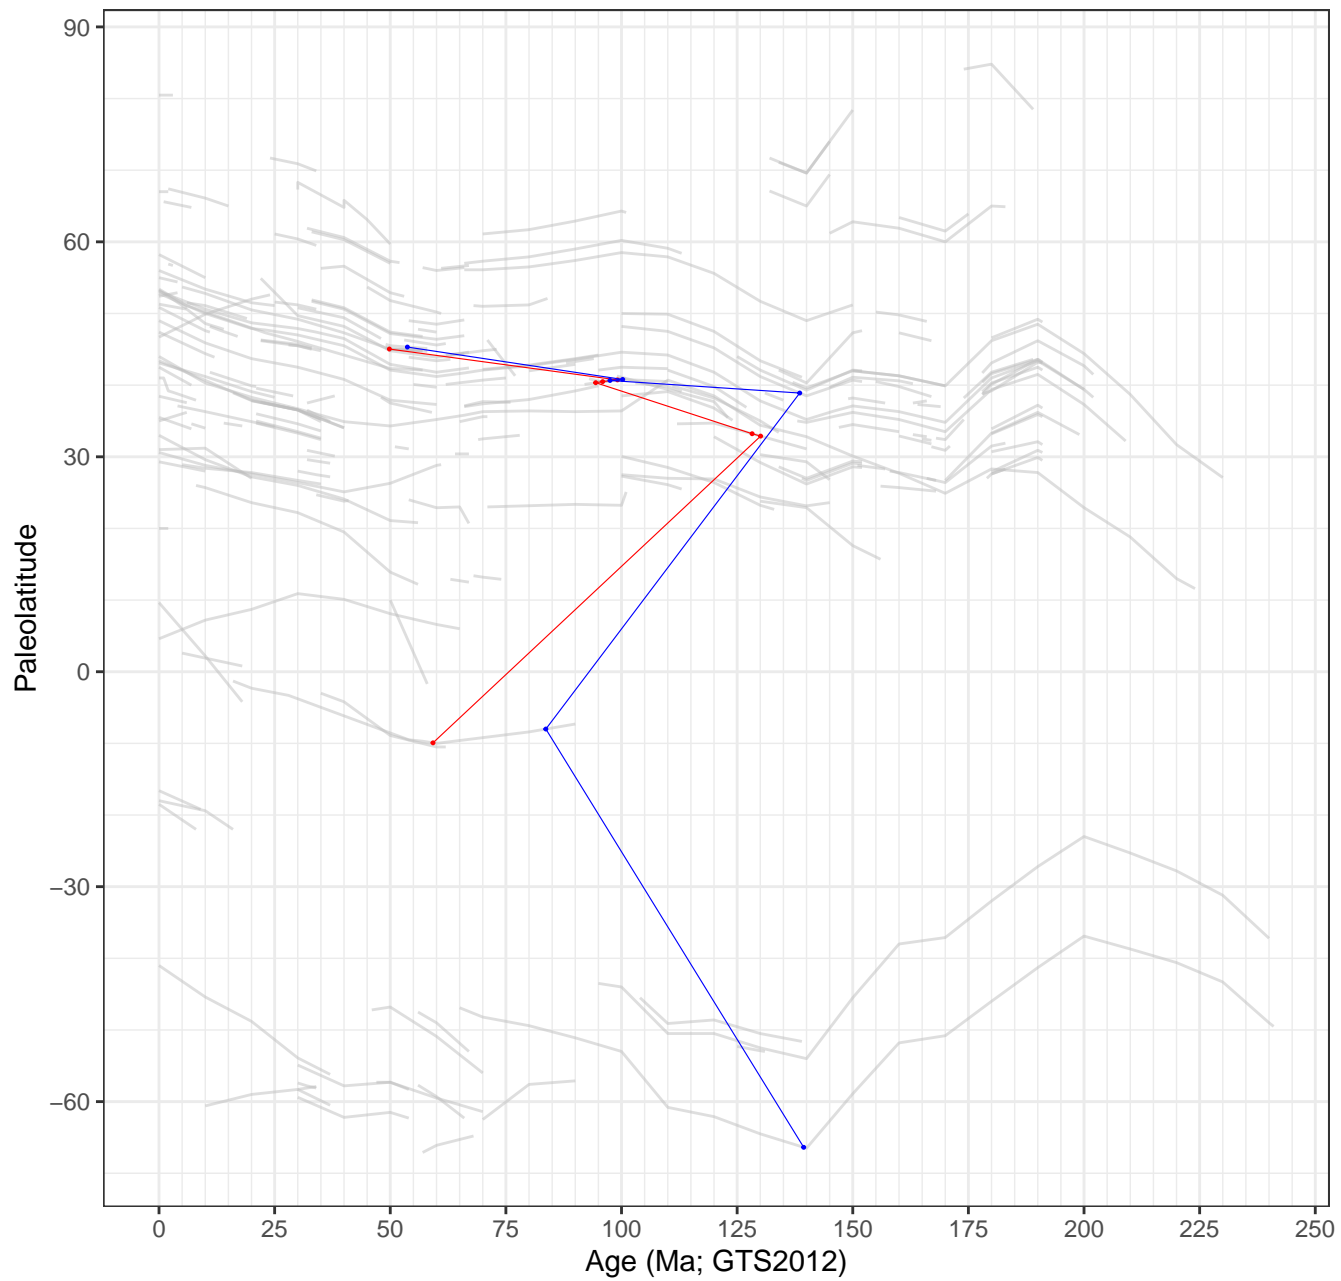

Supplement: Supplementary file 2419 [file Spiniferites twistringiensis.pdf › Supplement/Supplement 2/Species 1914 plots/Spiniferites twistringiensis.pdf]

# Species *Spiniferites varmae*

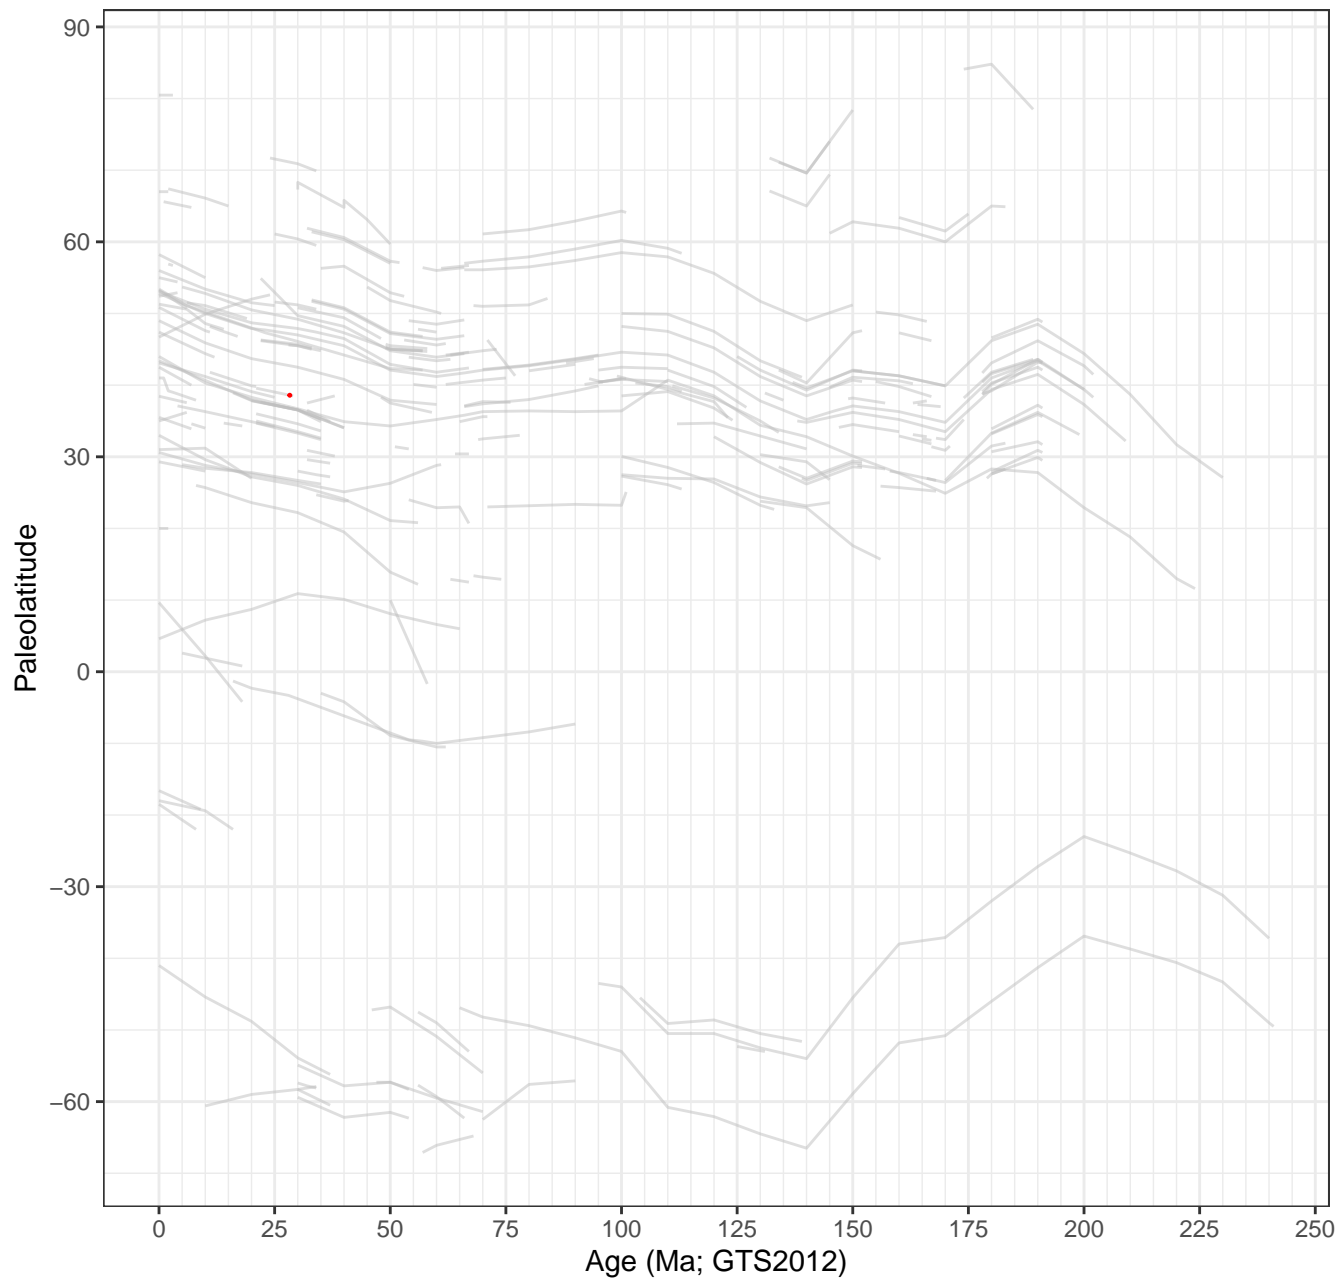

Supplement: Supplementary file 2420 [file Spiniferites varmae.pdf › Supplement/Supplement 2/Species 1914 plots/Spiniferites varmae.pdf]

# Species *Spongodinium delitiense*

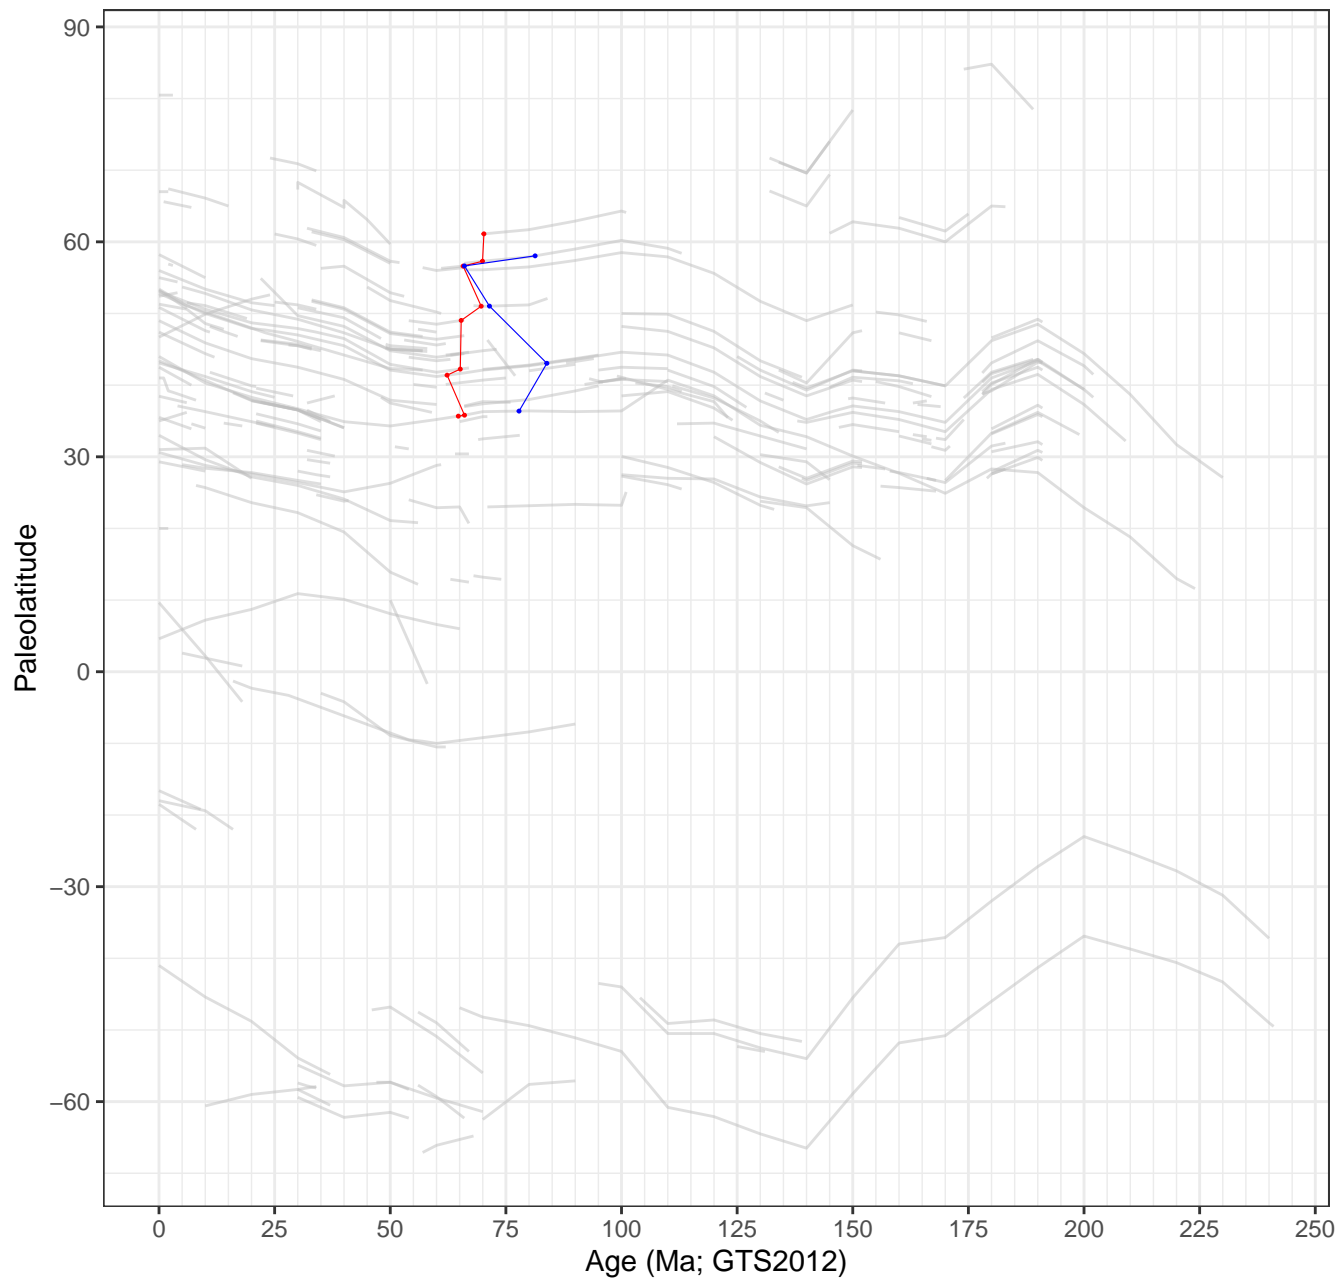

Supplement: Supplementary file 2421 [file Spongodinium delitiense.pdf › Supplement/Supplement 2/Species 1914 plots/Spongodinium delitiense.pdf]

# Species *Stanfordella cretacea*

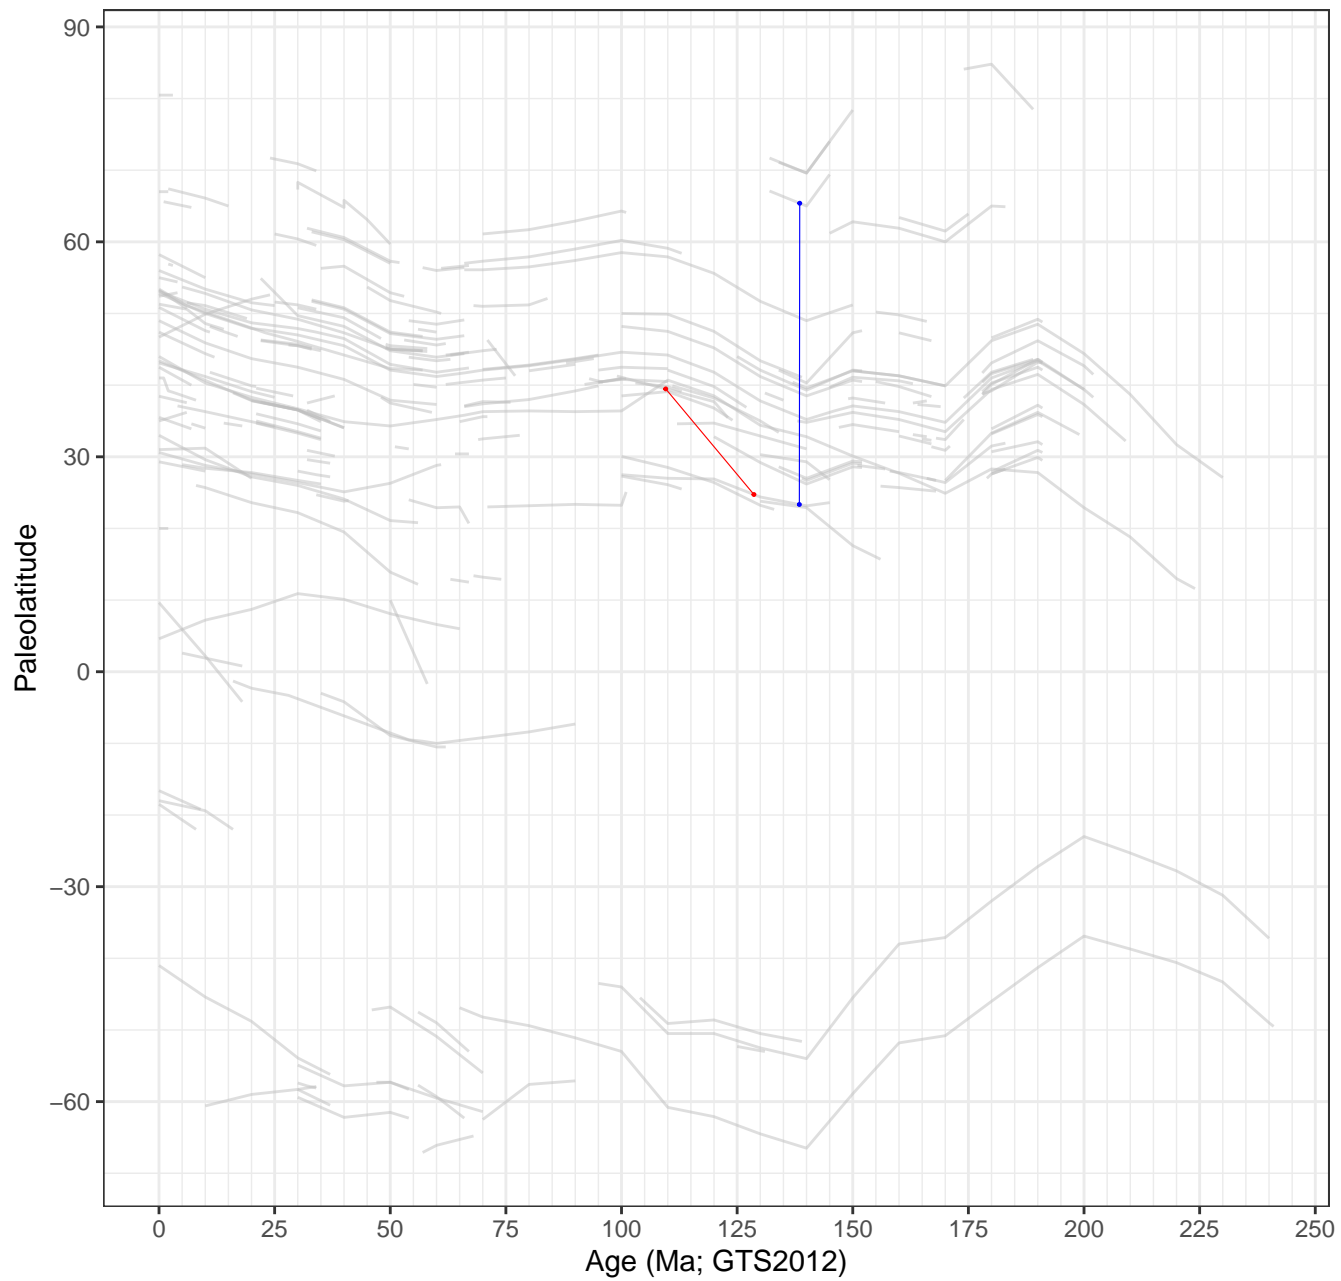

Supplement: Supplementary file 2422 [file Stanfordella cretacea.pdf › Supplement/Supplement 2/Species 1914 plots/Stanfordella cretacea.pdf]

# Species *Stanfordella exsanguia*

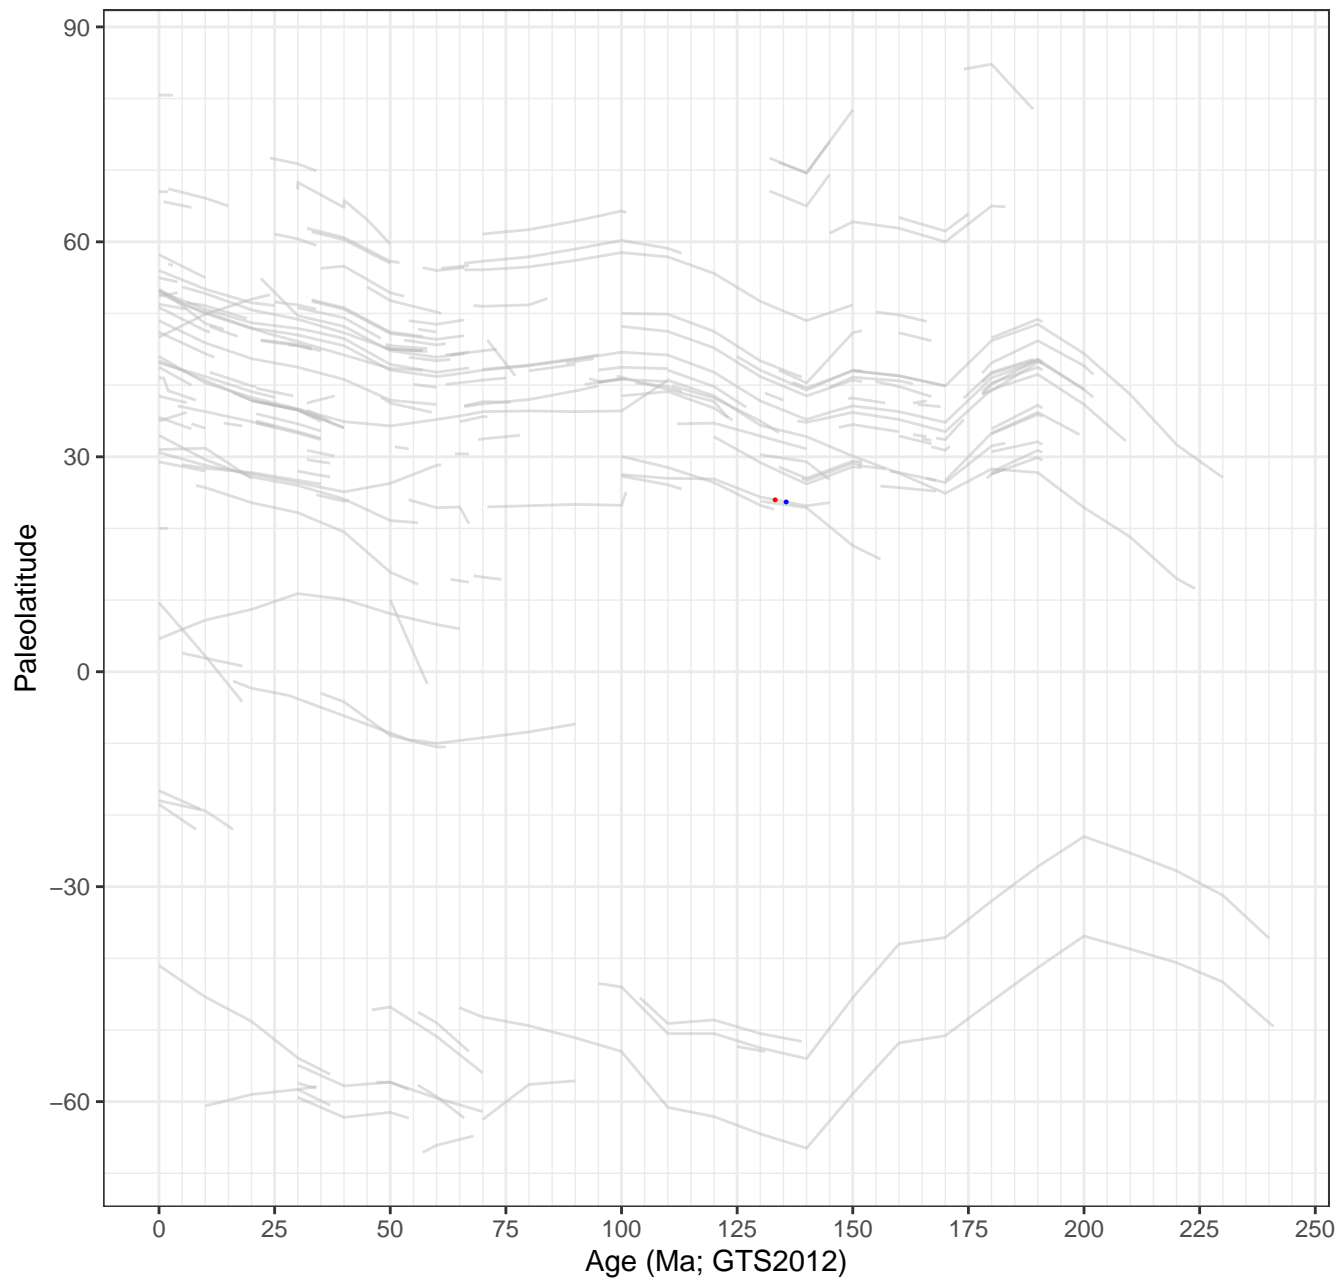

Supplement: Supplementary file 2423 [file Stanfordella exsanguia.pdf › Supplement/Supplement 2/Species 1914 plots/Stanfordella exsanguia.pdf]

# Species *Stanfordella fastigiata*

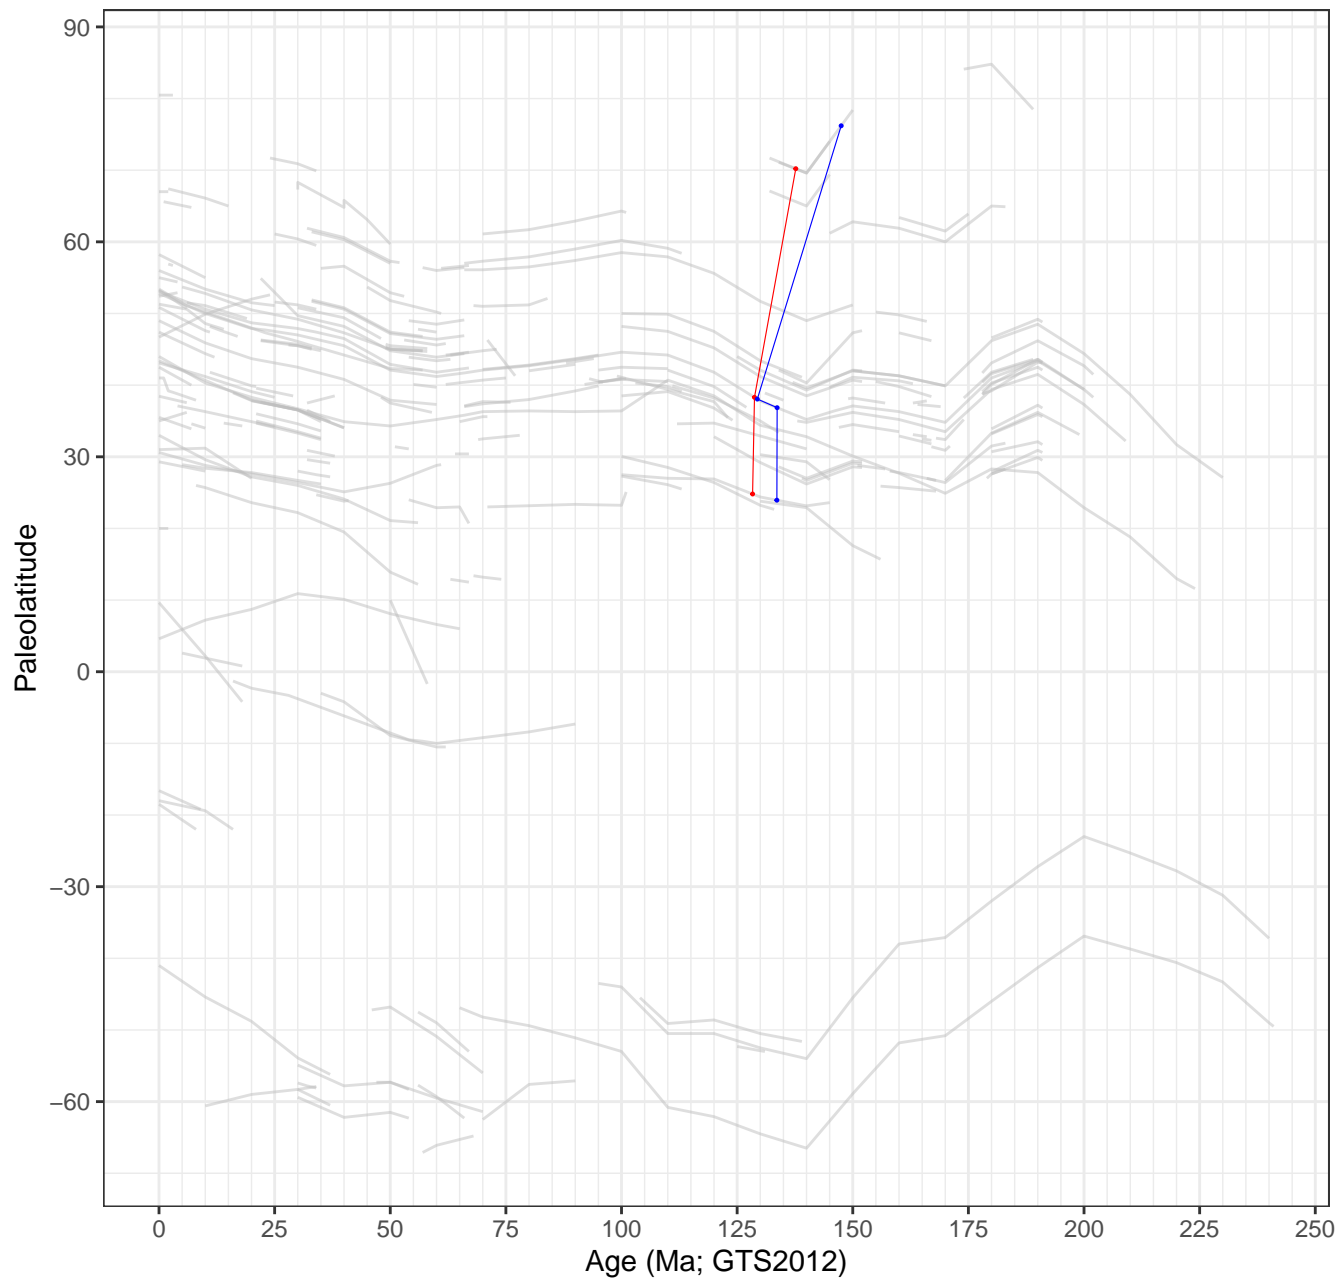

Supplement: Supplementary file 2424 [file Stanfordella fastigiata.pdf › Supplement/Supplement 2/Species 1914 plots/Stanfordella fastigiata.pdf]

# Species *Stanfordella granulosa*

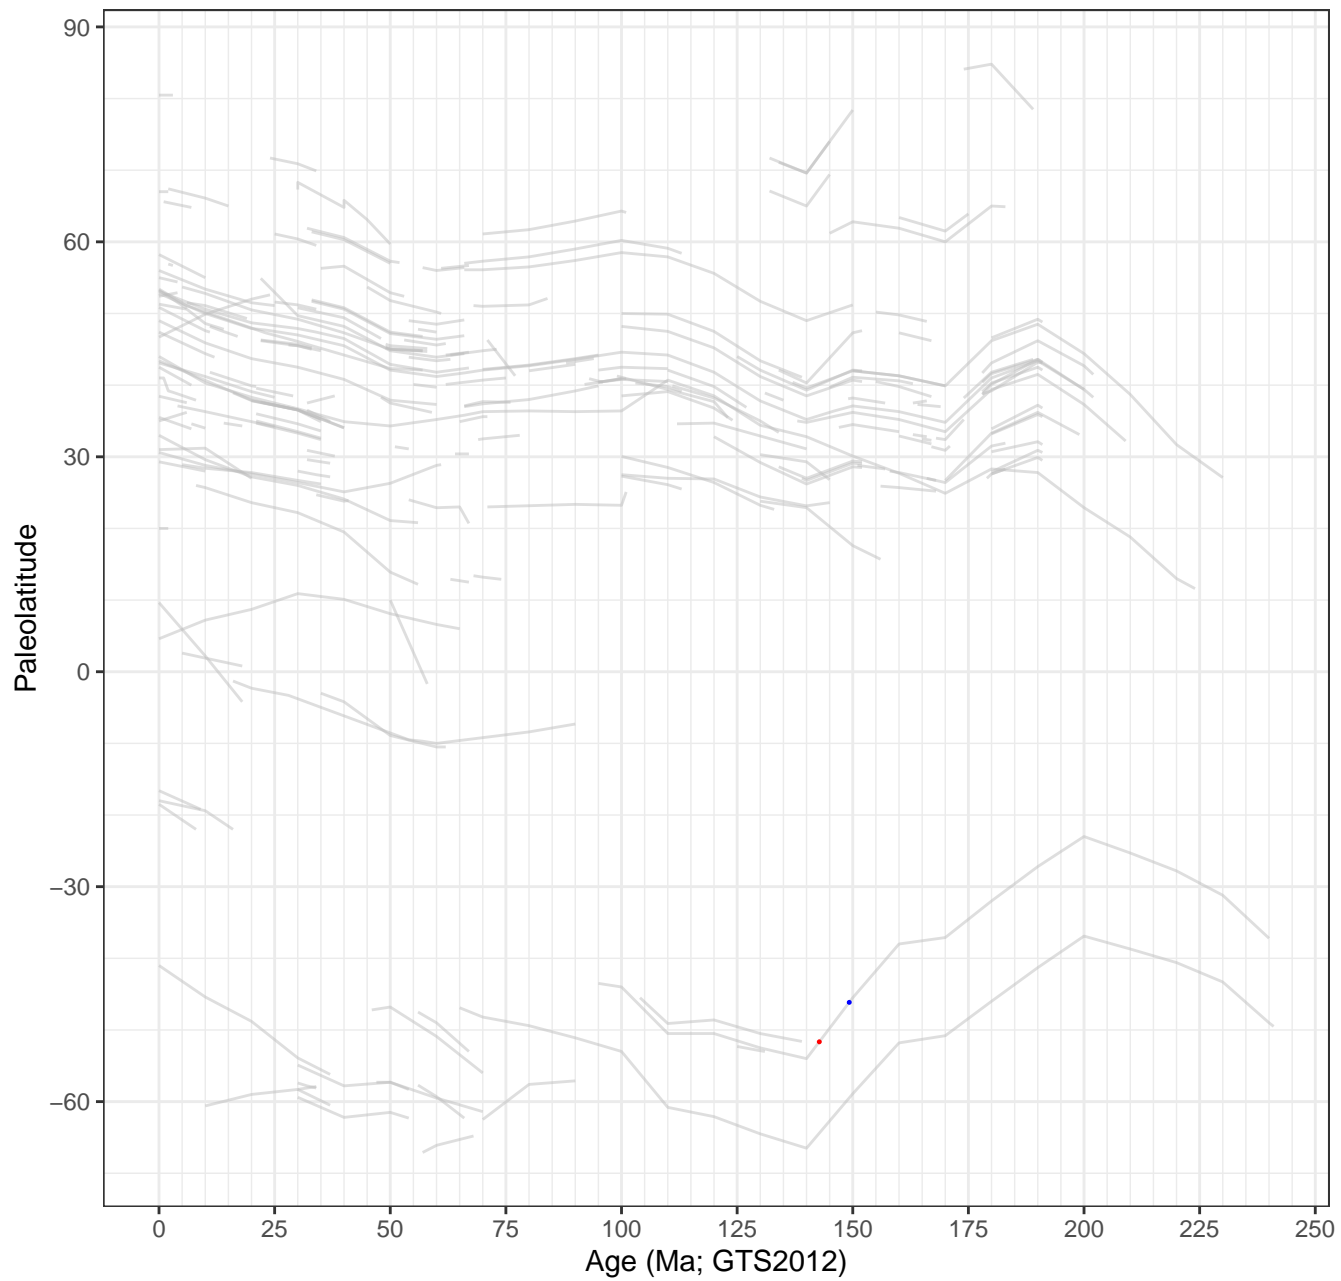

Supplement: Supplementary file 2425 [file Stanfordella granulosa.pdf › Supplement/Supplement 2/Species 1914 plots/Stanfordella granulosa.pdf]

# Species *Stanfordella ordocava*

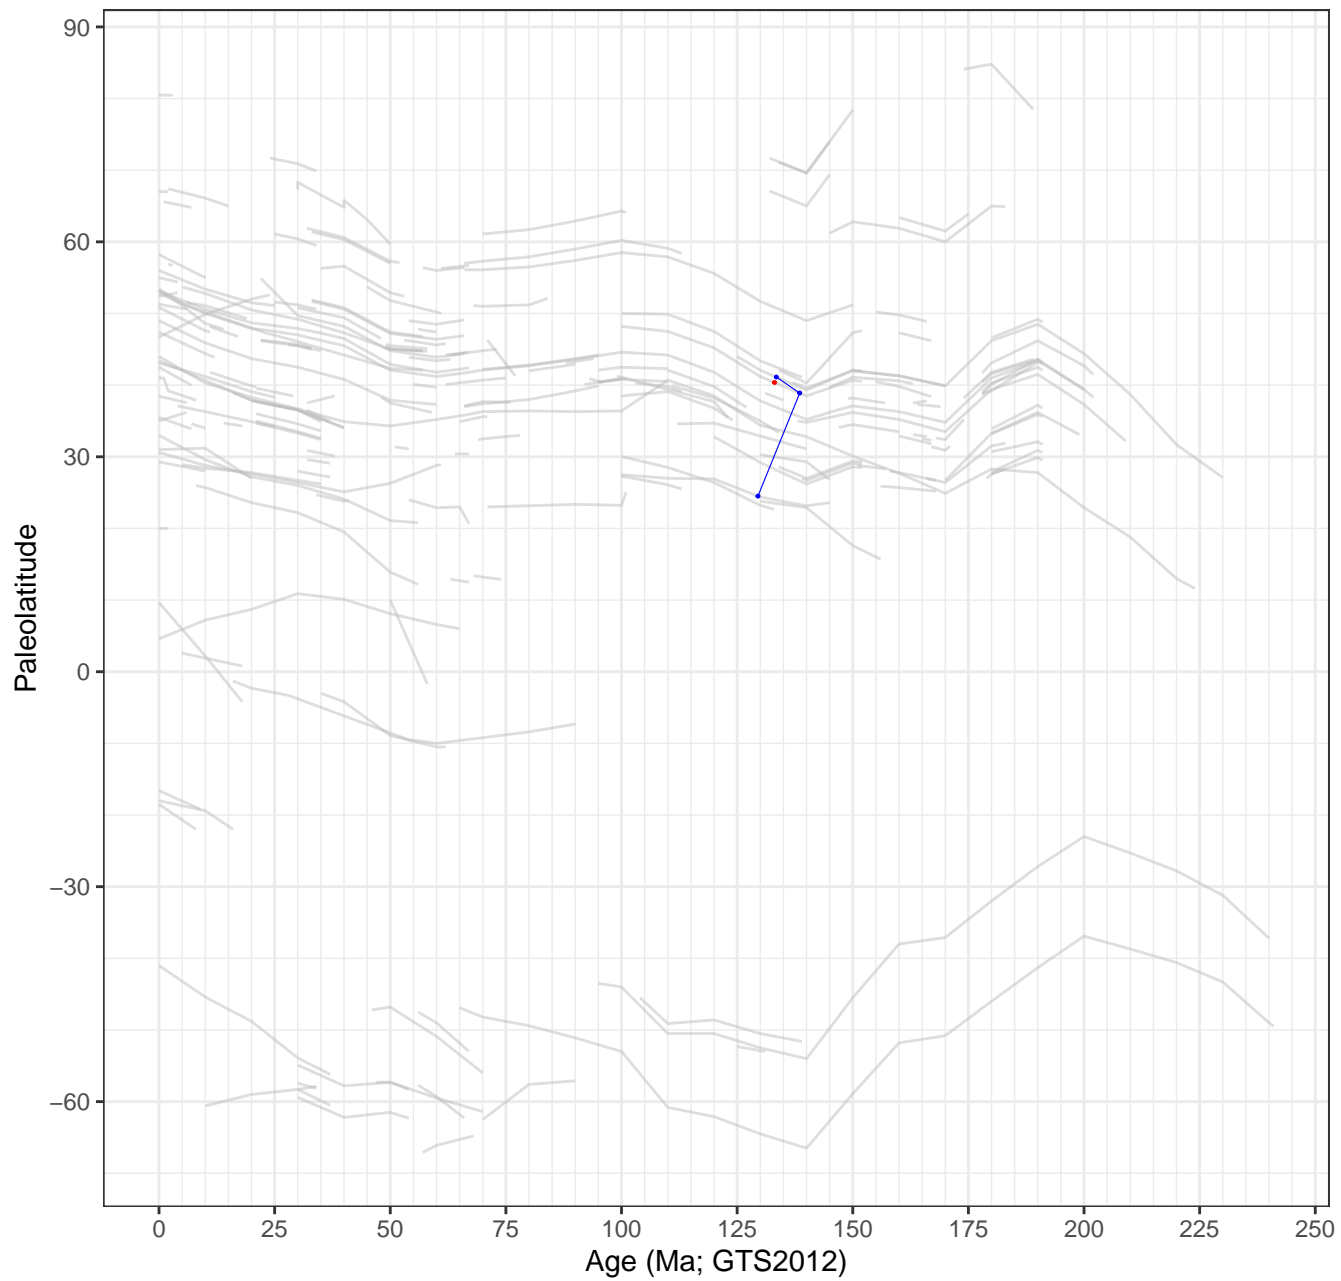

Supplement: Supplementary file 2426 [file Stanfordella ordocava.pdf › Supplement/Supplement 2/Species 1914 plots/Stanfordella ordocava.pdf]

# Species *Stelladinium abei*

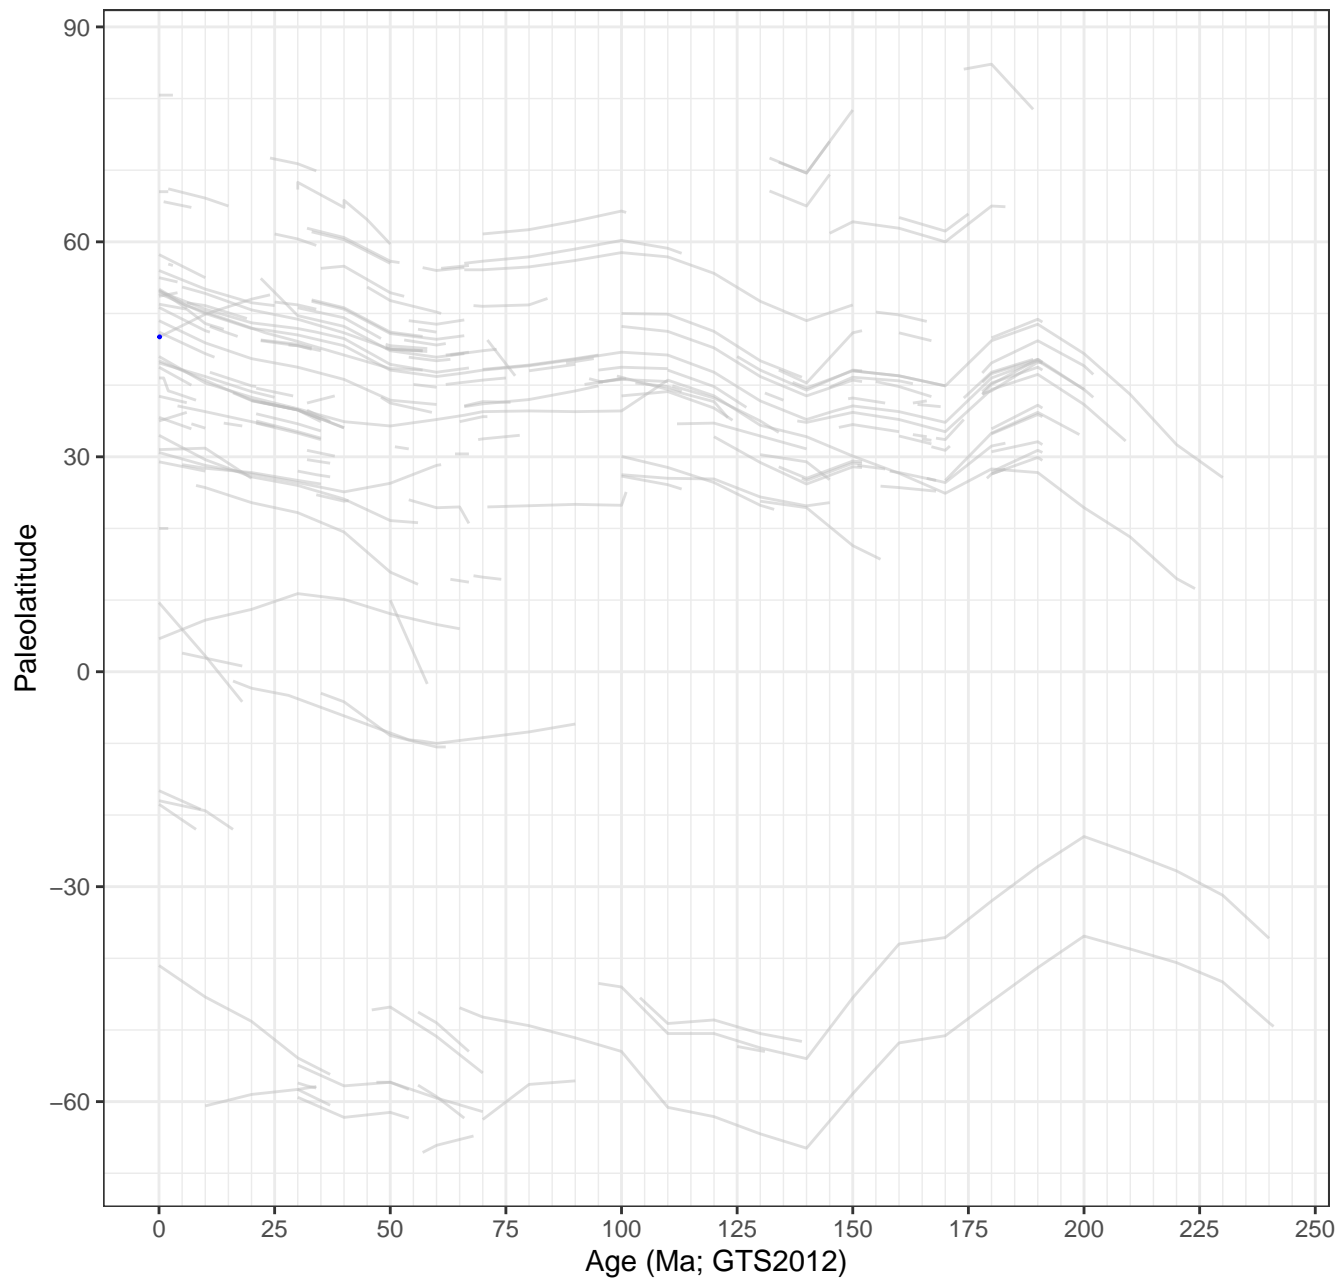

Supplement: Supplementary file 2427 [file Stelladinium abei.pdf › Supplement/Supplement 2/Species 1914 plots/Stelladinium abei.pdf]

# Species *Stelladinium bifurcatum*

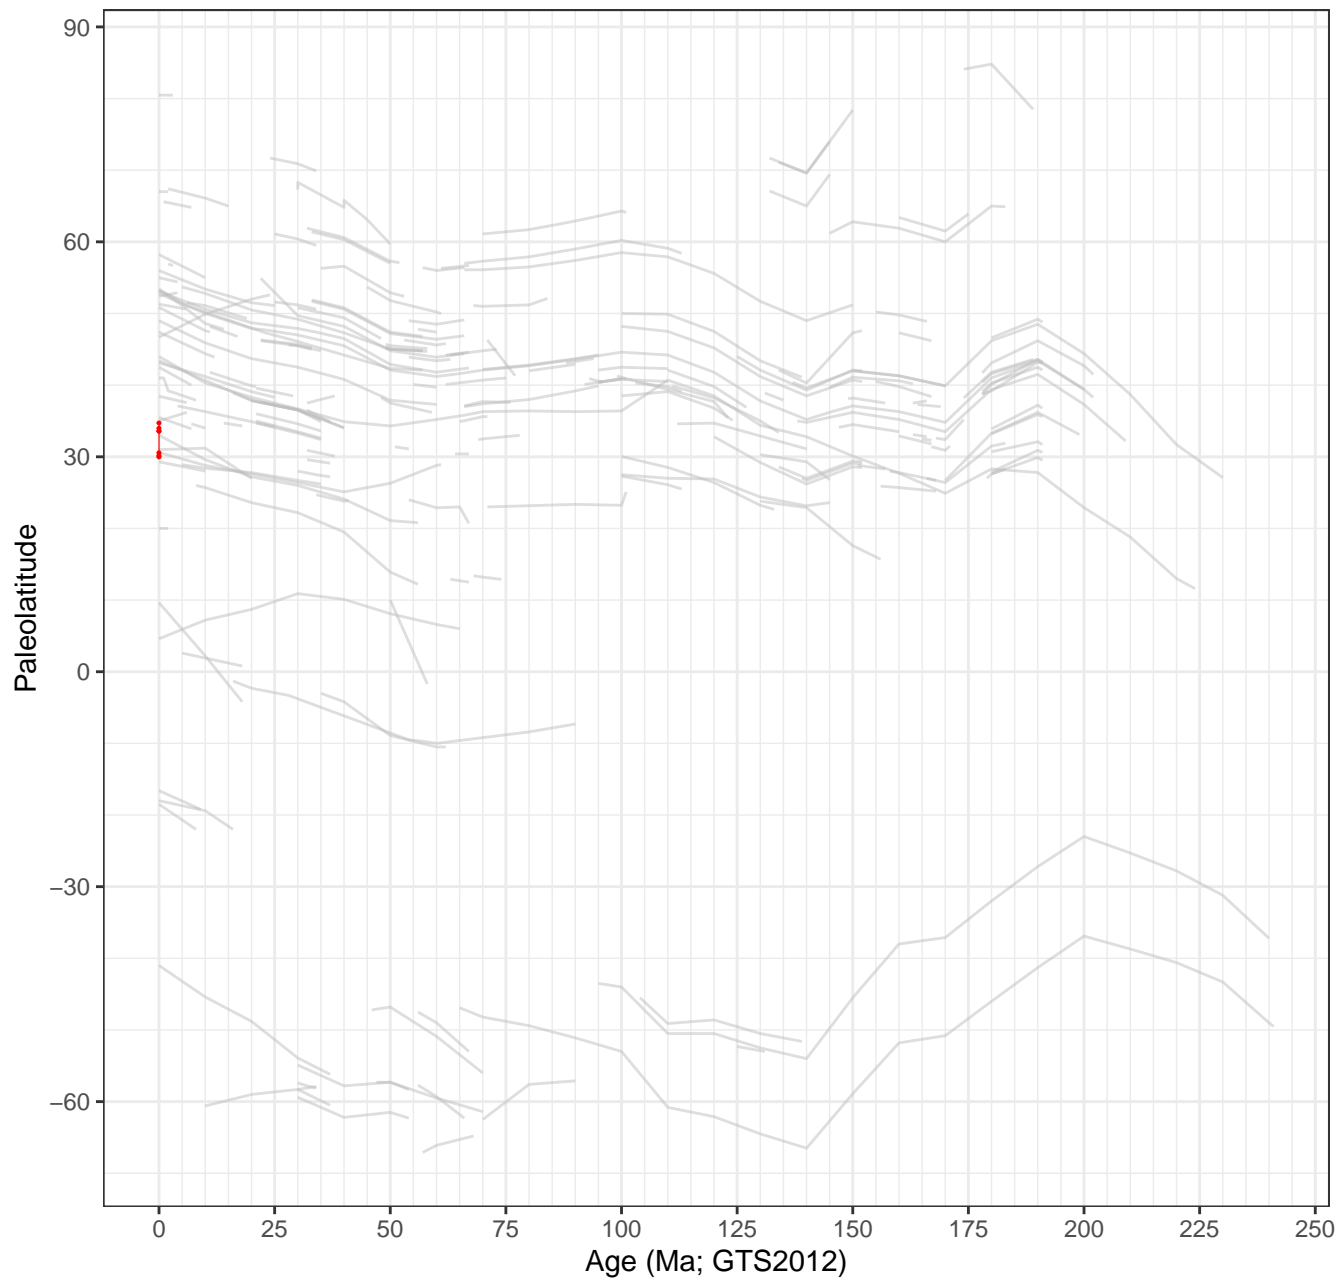

Supplement: Supplementary file 2428 [file Stelladinium bifurcatum.pdf › Supplement/Supplement 2/Species 1914 plots/Stelladinium bifurcatum.pdf]

# Species *Stelladinium reidii*

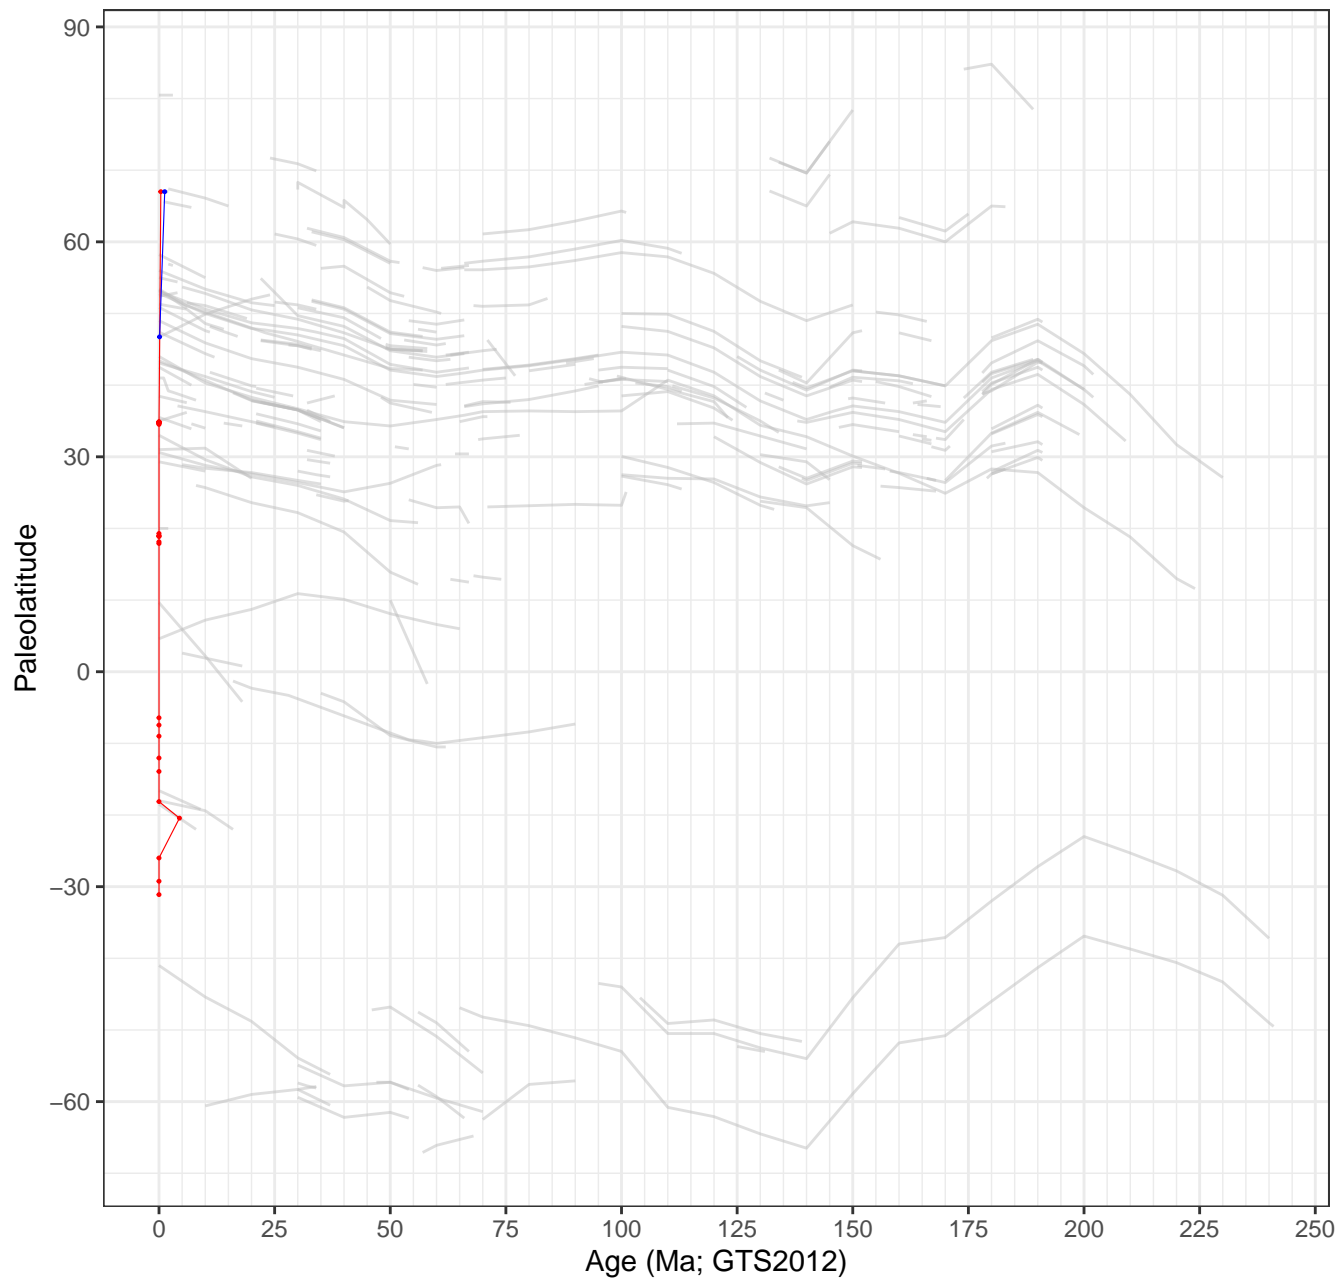

Supplement: Supplementary file 2429 [file Stelladinium reidii.pdf › Supplement/Supplement 2/Species 1914 plots/Stelladinium reidii.pdf]

# Species *Stelladinium robustum*

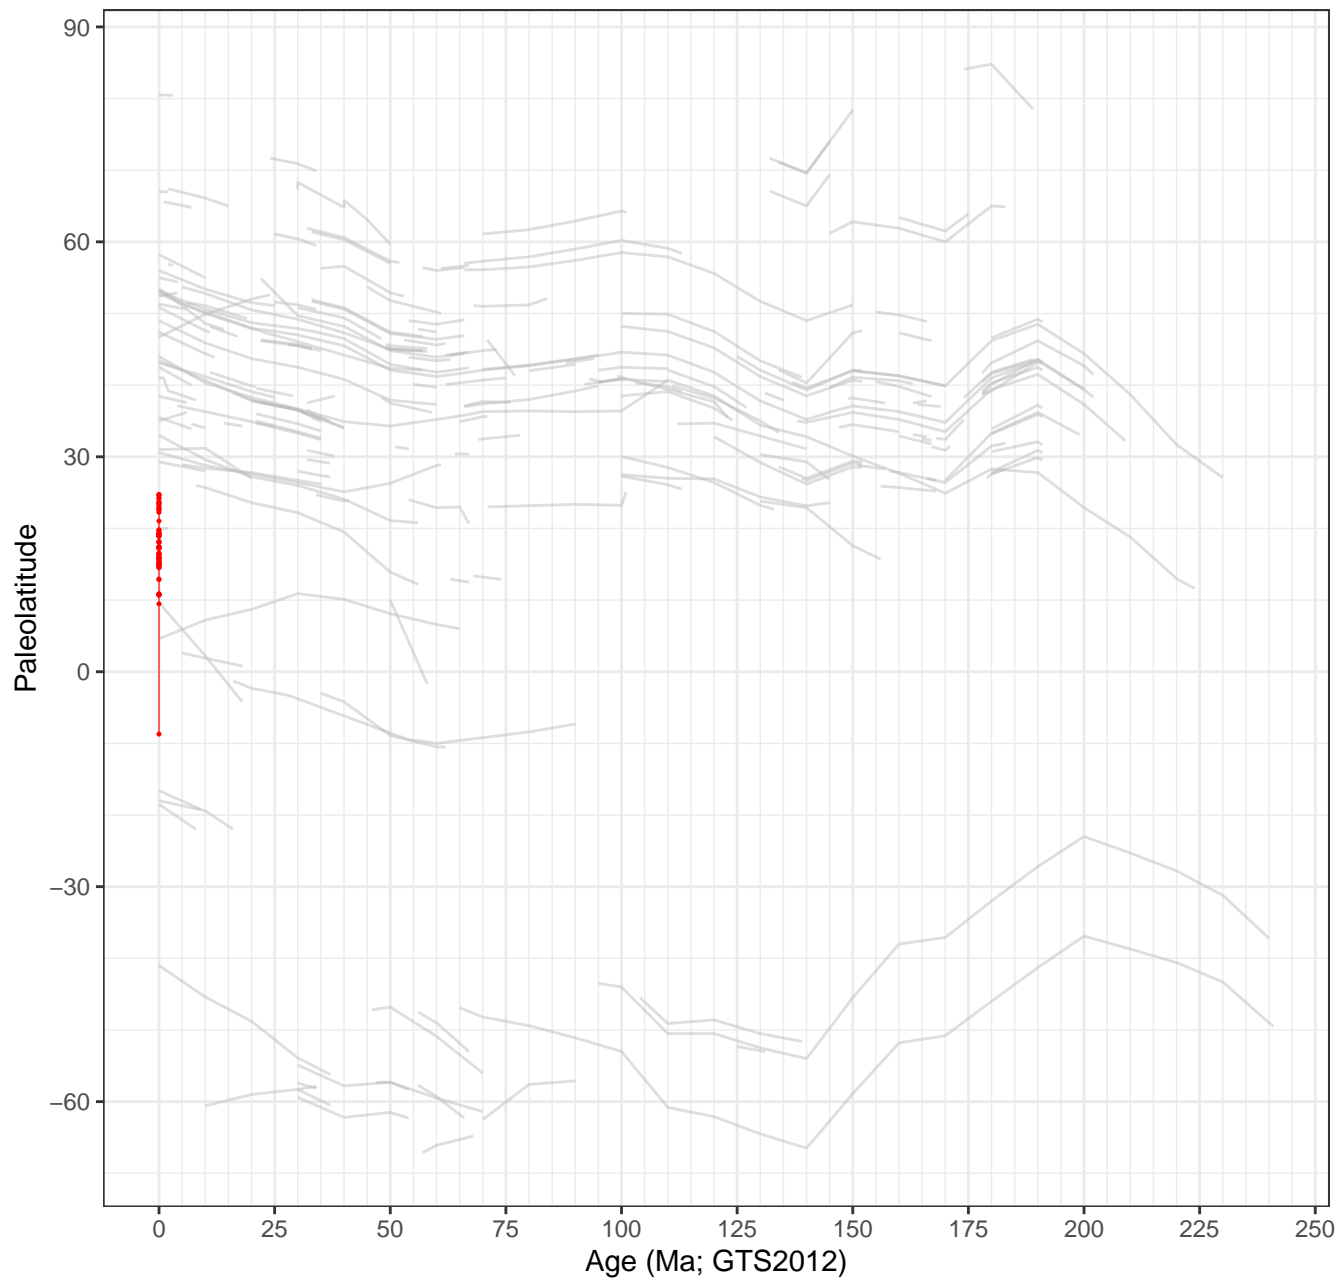

Supplement: Supplementary file 2430 [file Stelladinium robustum.pdf › Supplement/Supplement 2/Species 1914 plots/Stelladinium robustum.pdf]

# Species *Stelladinium stellatum*

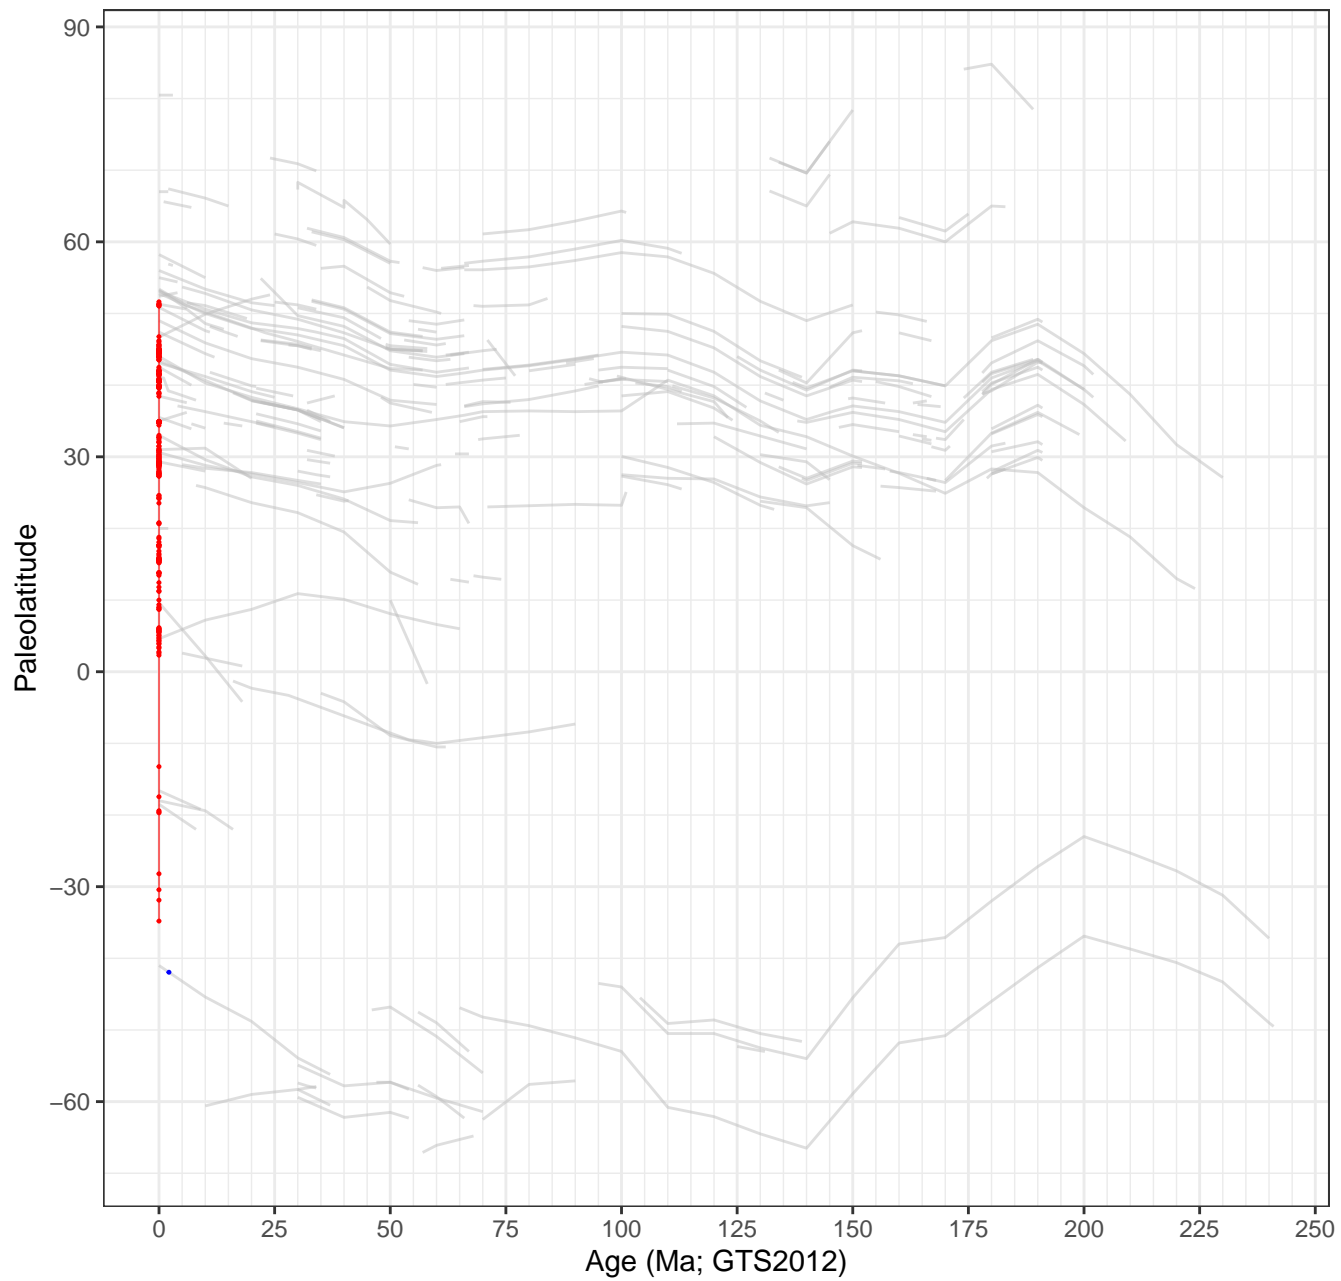

Supplement: Supplementary file 2431 [file Stelladinium stellatum.pdf › Supplement/Supplement 2/Species 1914 plots/Stelladinium stellatum.pdf]

# Species *Stephanelytron callovianum*

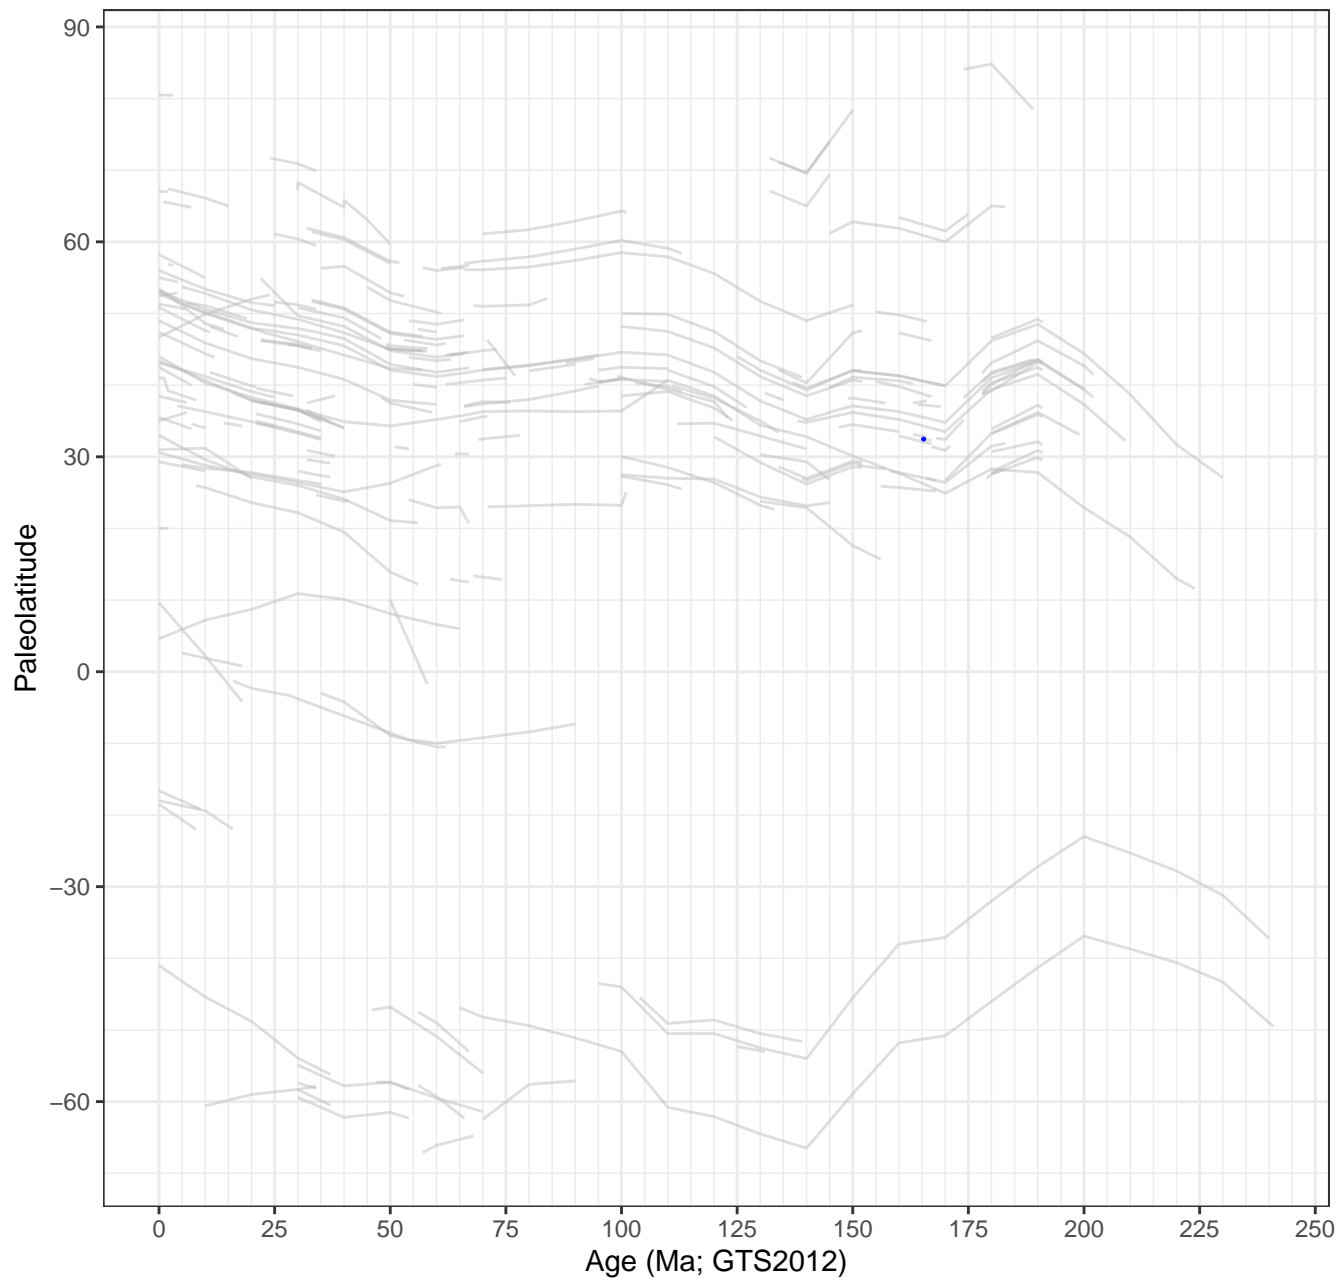

Supplement: Supplementary file 2432 [file Stephanelytron callovianum.pdf › Supplement/Supplement 2/Species 1914 plots/Stephanelytron callovianum.pdf]

# Species *Stephanelytron caytonense*

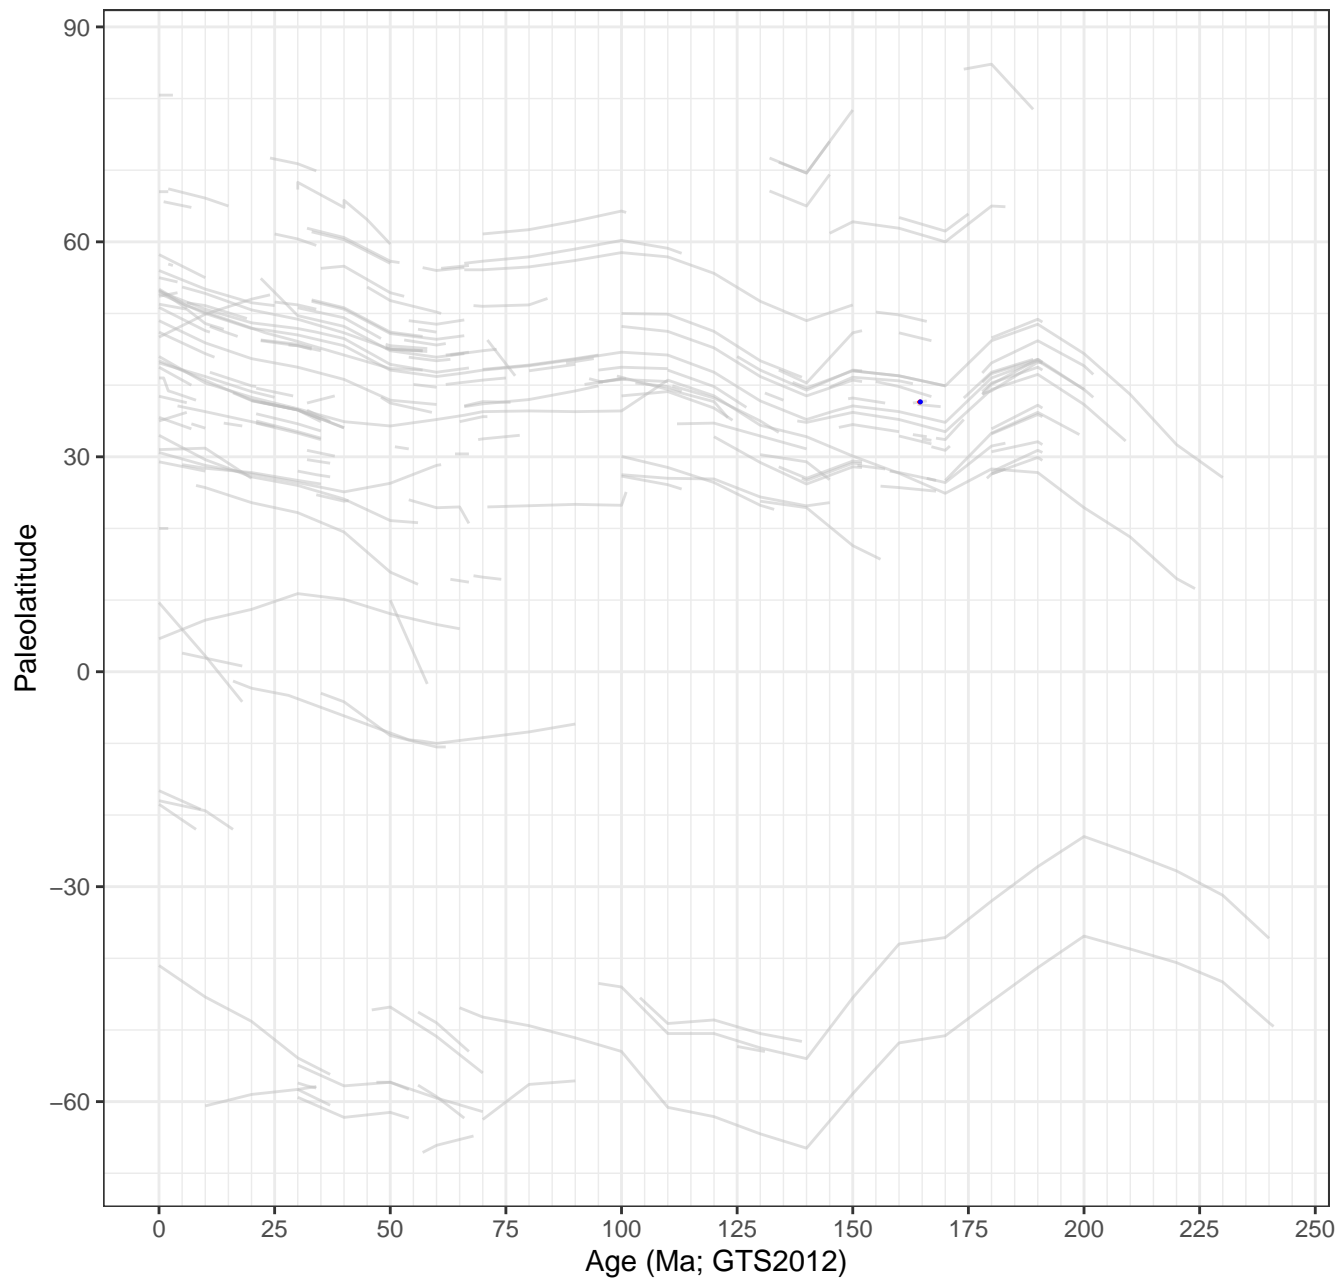

Supplement: Supplementary file 2433 [file Stephanelytron caytonense.pdf › Supplement/Supplement 2/Species 1914 plots/Stephanelytron caytonense.pdf]
