# Supplementary figures and images for: DINOSTRAT: a global database of the stratigraphic and paleolatitudinal distribution of Mesozoic–Cenozoic organic-walled dinoflagellate cysts (part 25 of 27)
Source: Copernicus journal article supplement (doi:10.5194/essd-14-579-2022), 2022-02-09

# Species *Stephanelytron membranoideum*

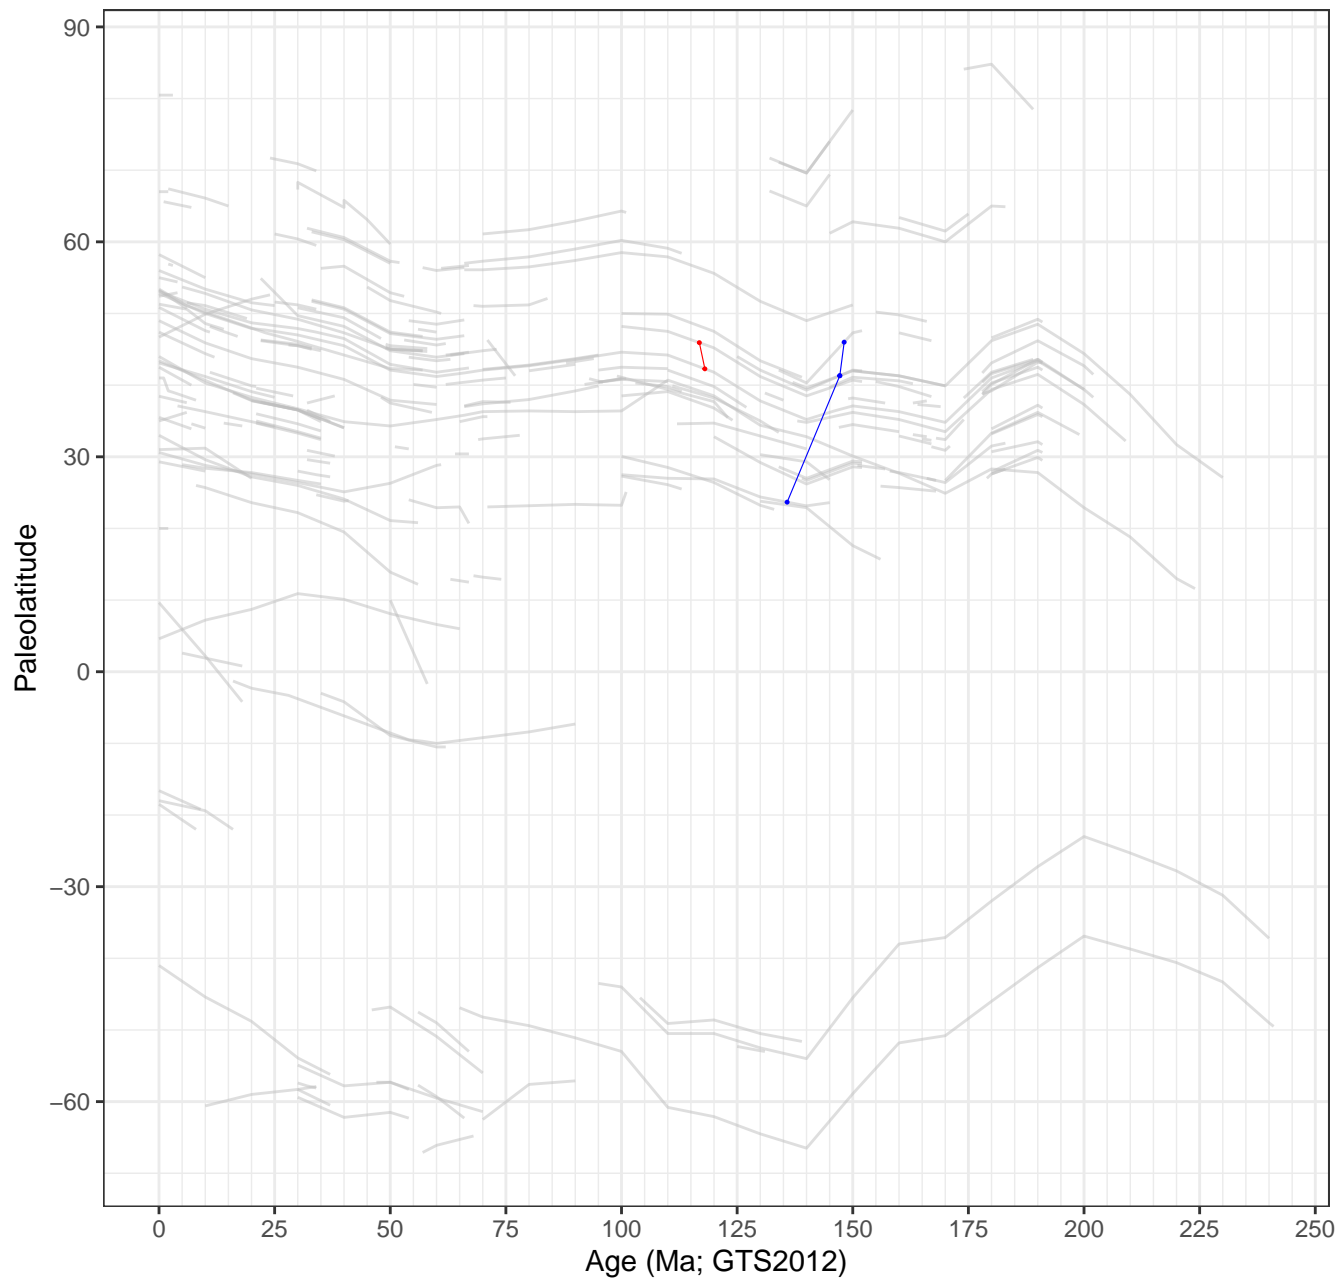

Supplement: Supplementary file 2434 [file Stephanelytron membranoideum.pdf › Supplement/Supplement 2/Species 1914 plots/Stephanelytron membranoideum.pdf]

# Species *Stephanelytron redcliffense*

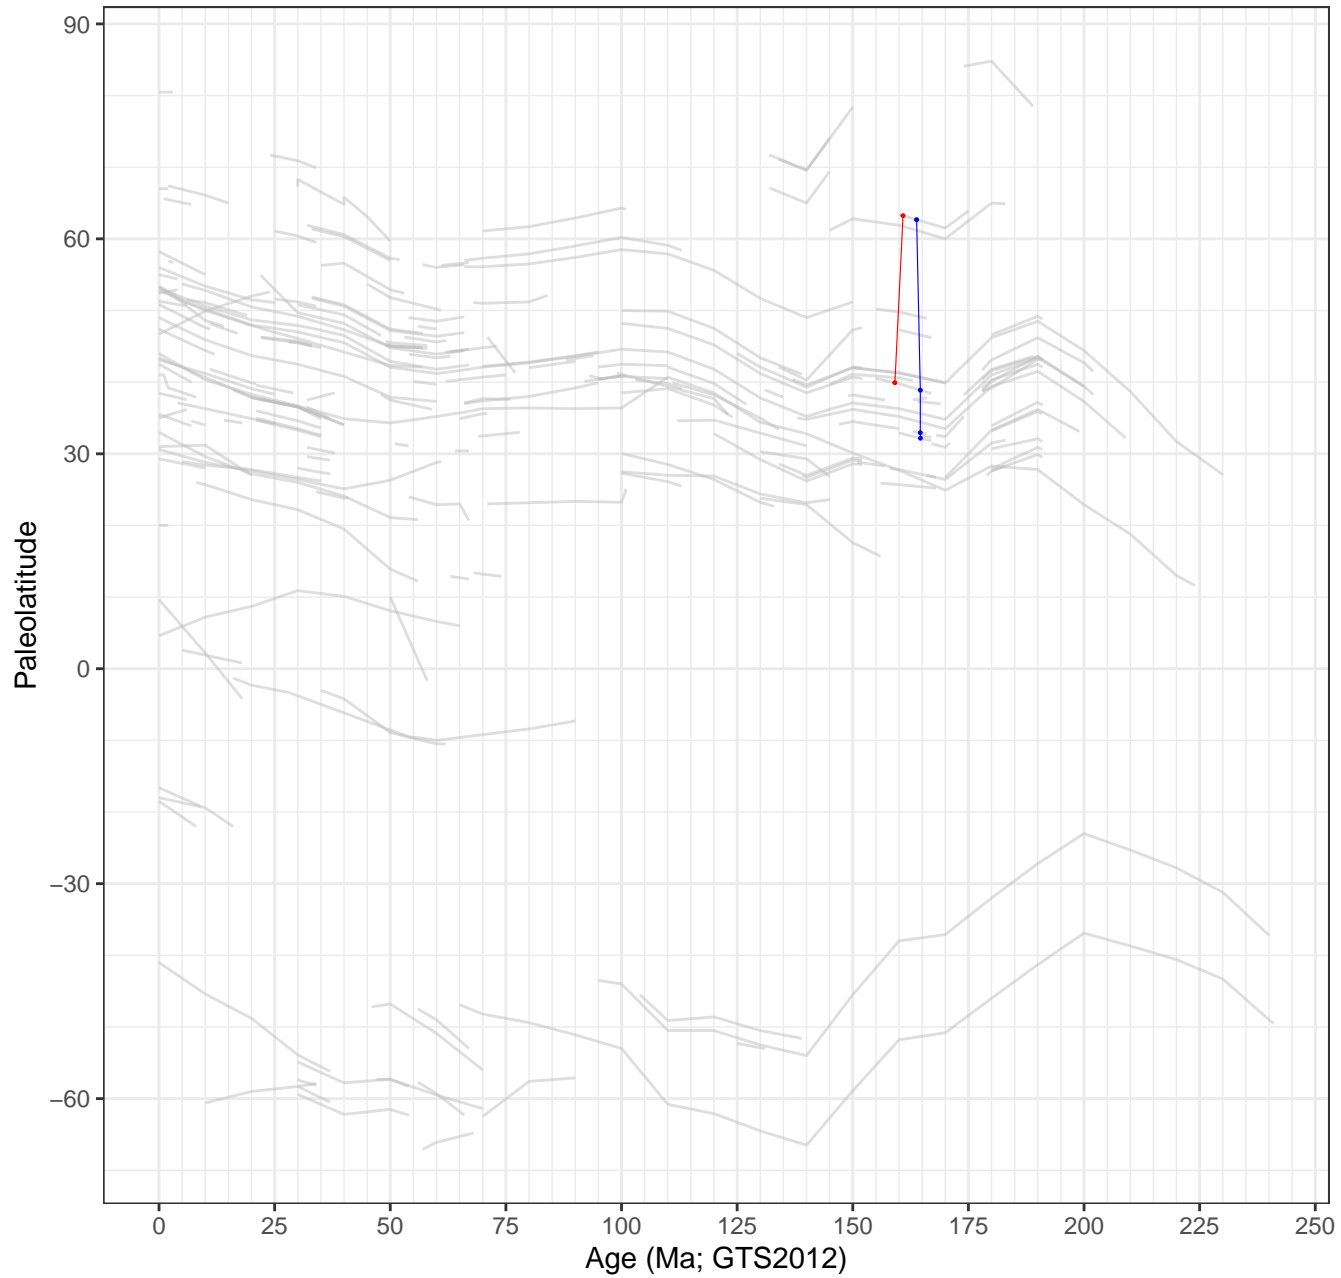

Supplement: Supplementary file 2435 [file Stephanelytron redcliffense.pdf › Supplement/Supplement 2/Species 1914 plots/Stephanelytron redcliffense.pdf]

# Species *Stephanelytron scurburghense*

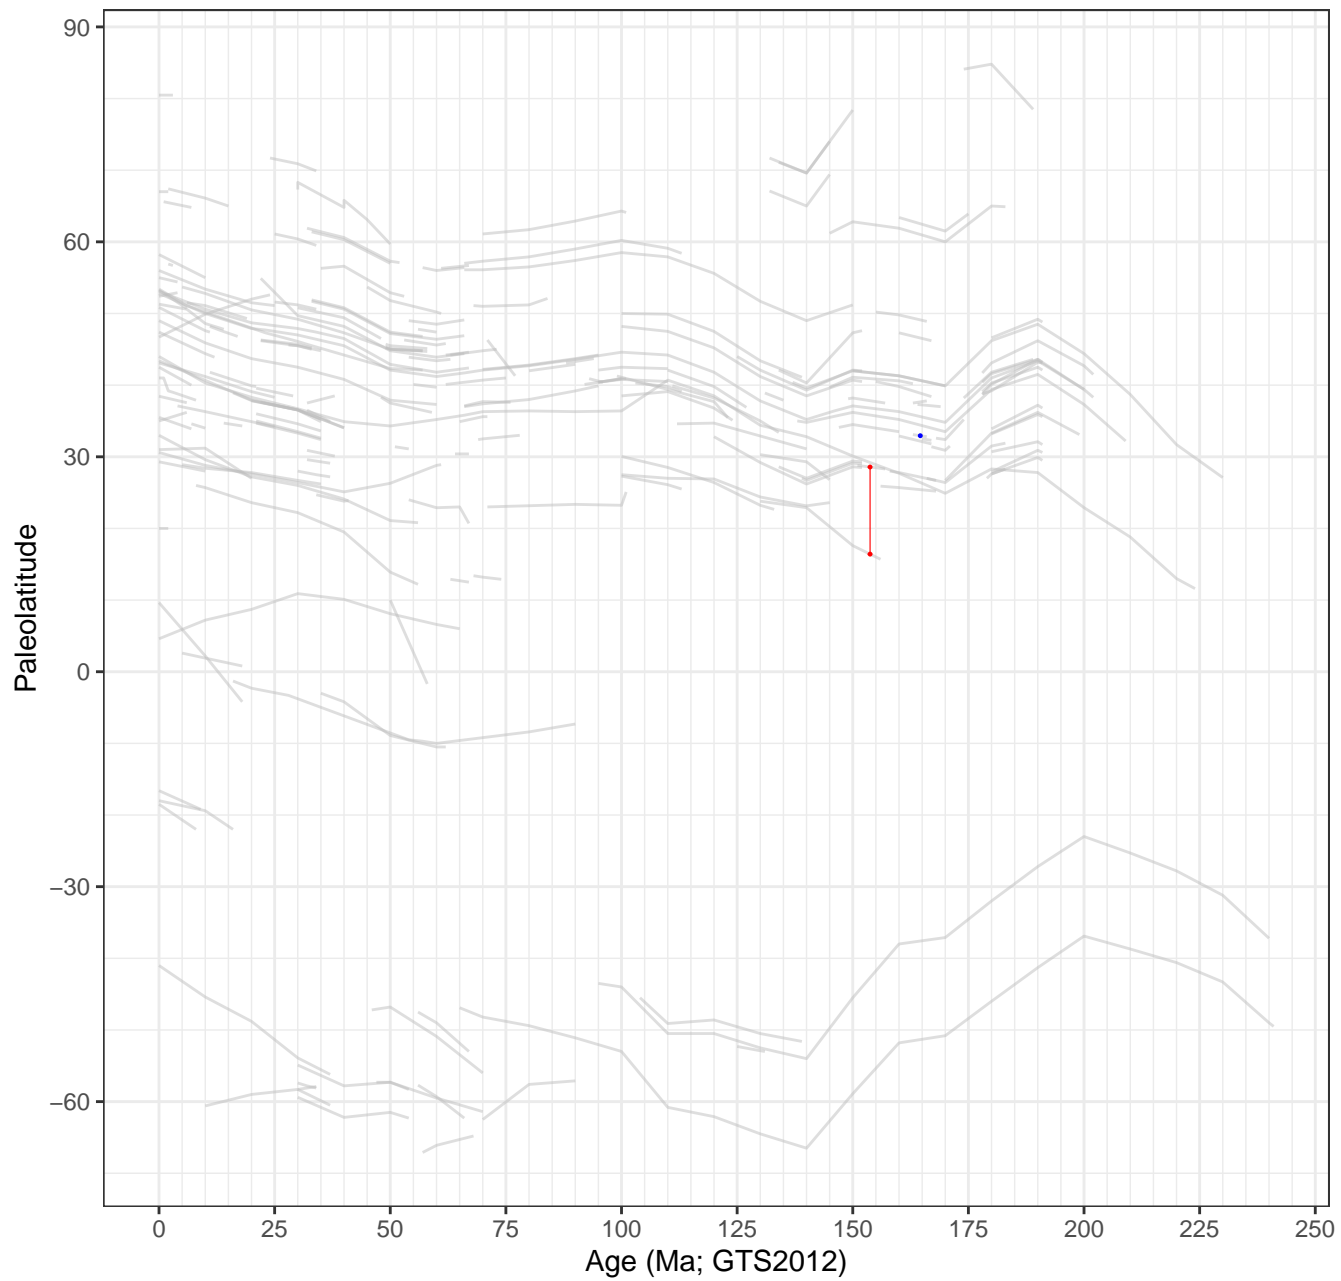

Supplement: Supplementary file 2436 [file Stephanelytron scurburghense.pdf › Supplement/Supplement 2/Species 1914 plots/Stephanelytron scurburghense.pdf]

# Species *Stephanelytron* spp.

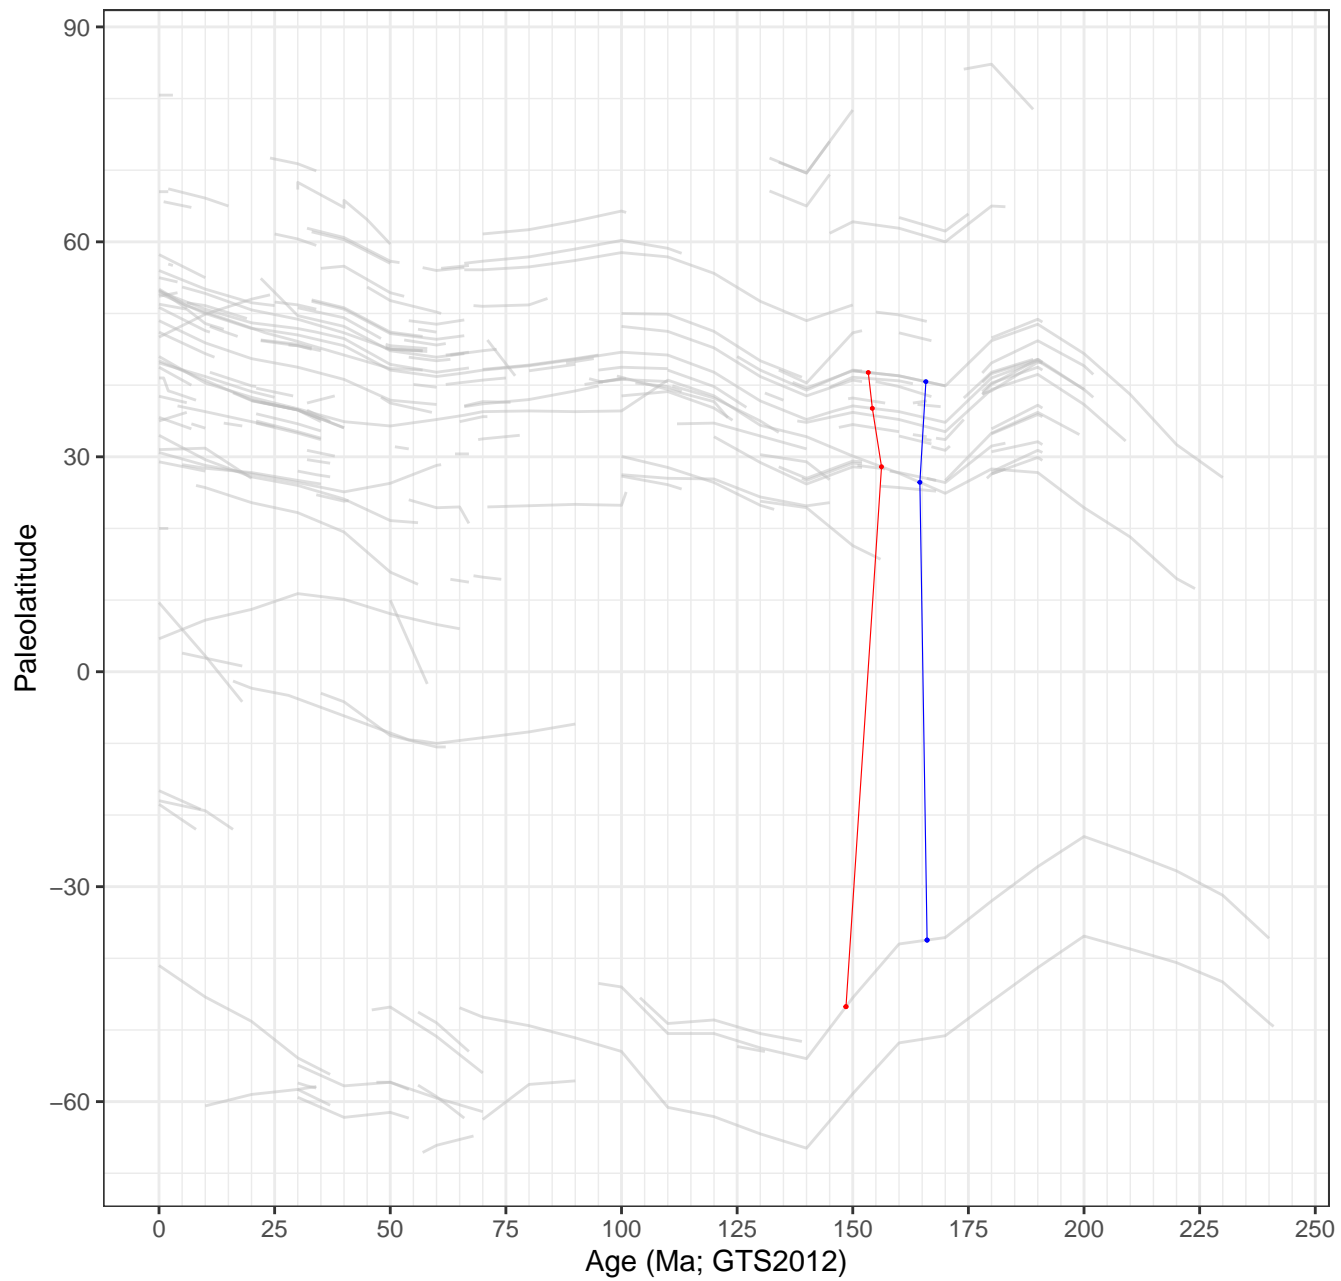

Supplement: Supplementary file 2437 [file Stephanelytron spp..pdf › Supplement/Supplement 2/Species 1914 plots/Stephanelytron spp..pdf]

# Species *Stephodinium australicum*

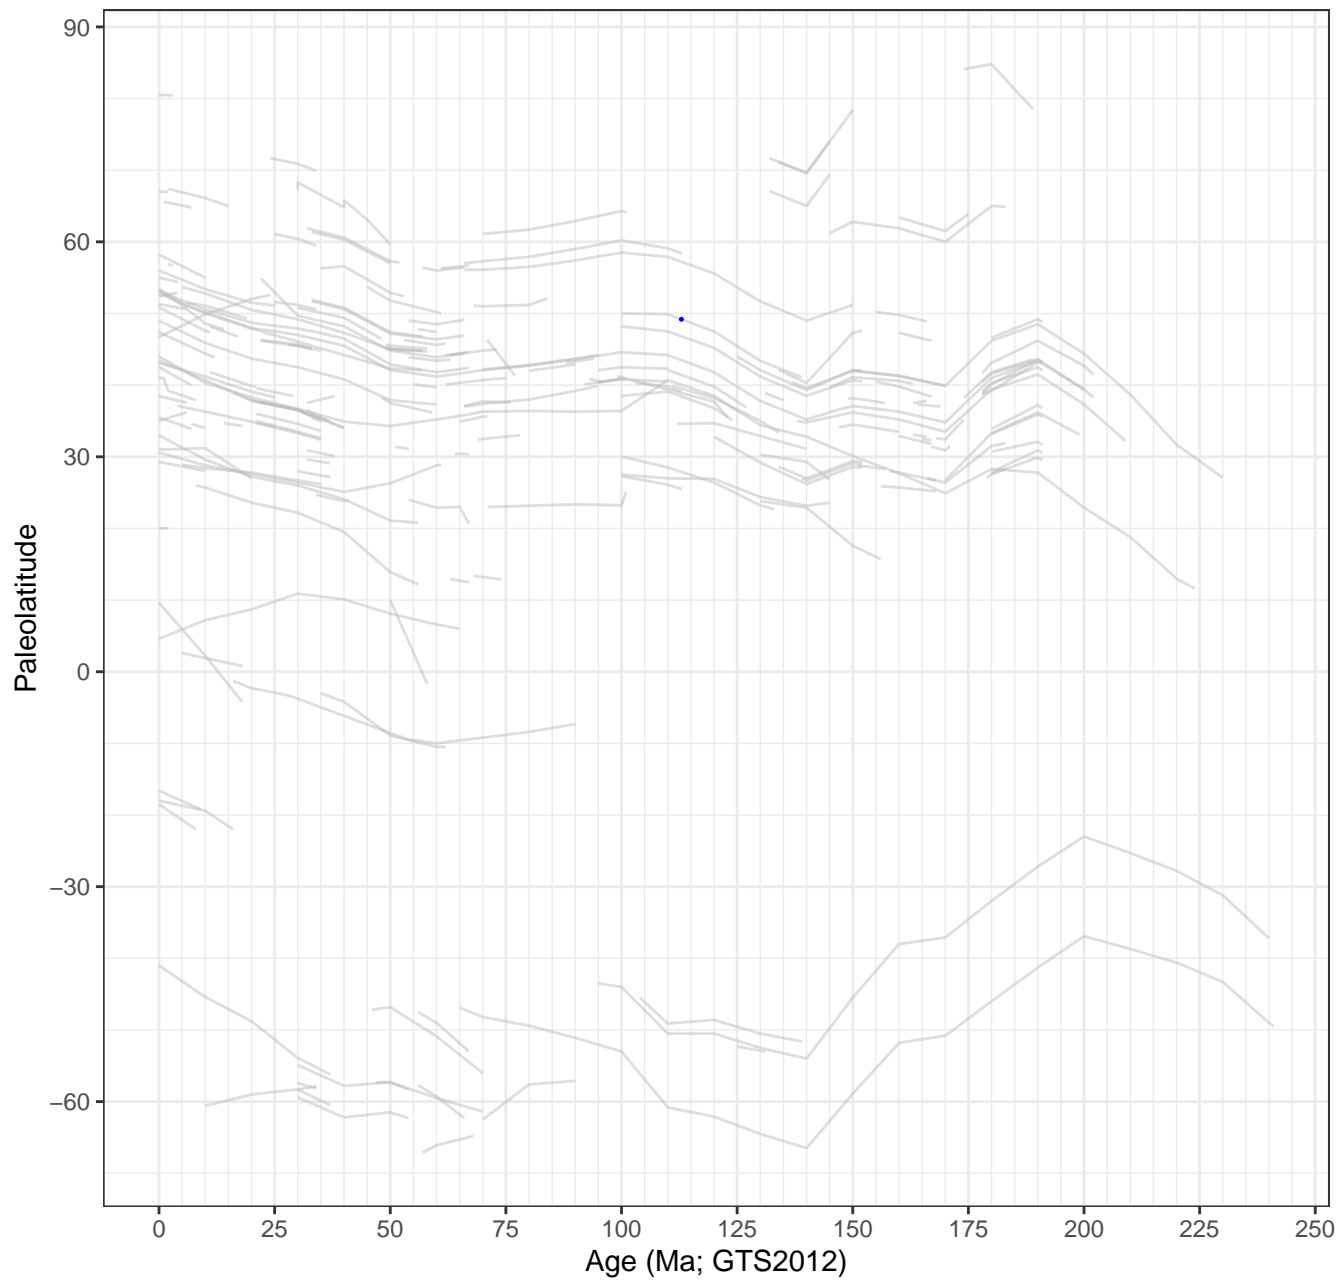

Supplement: Supplementary file 2438 [file Stephodinium australicum.pdf › Supplement/Supplement 2/Species 1914 plots/Stephodinium australicum.pdf]

# Species *Stephodinium coronatum*

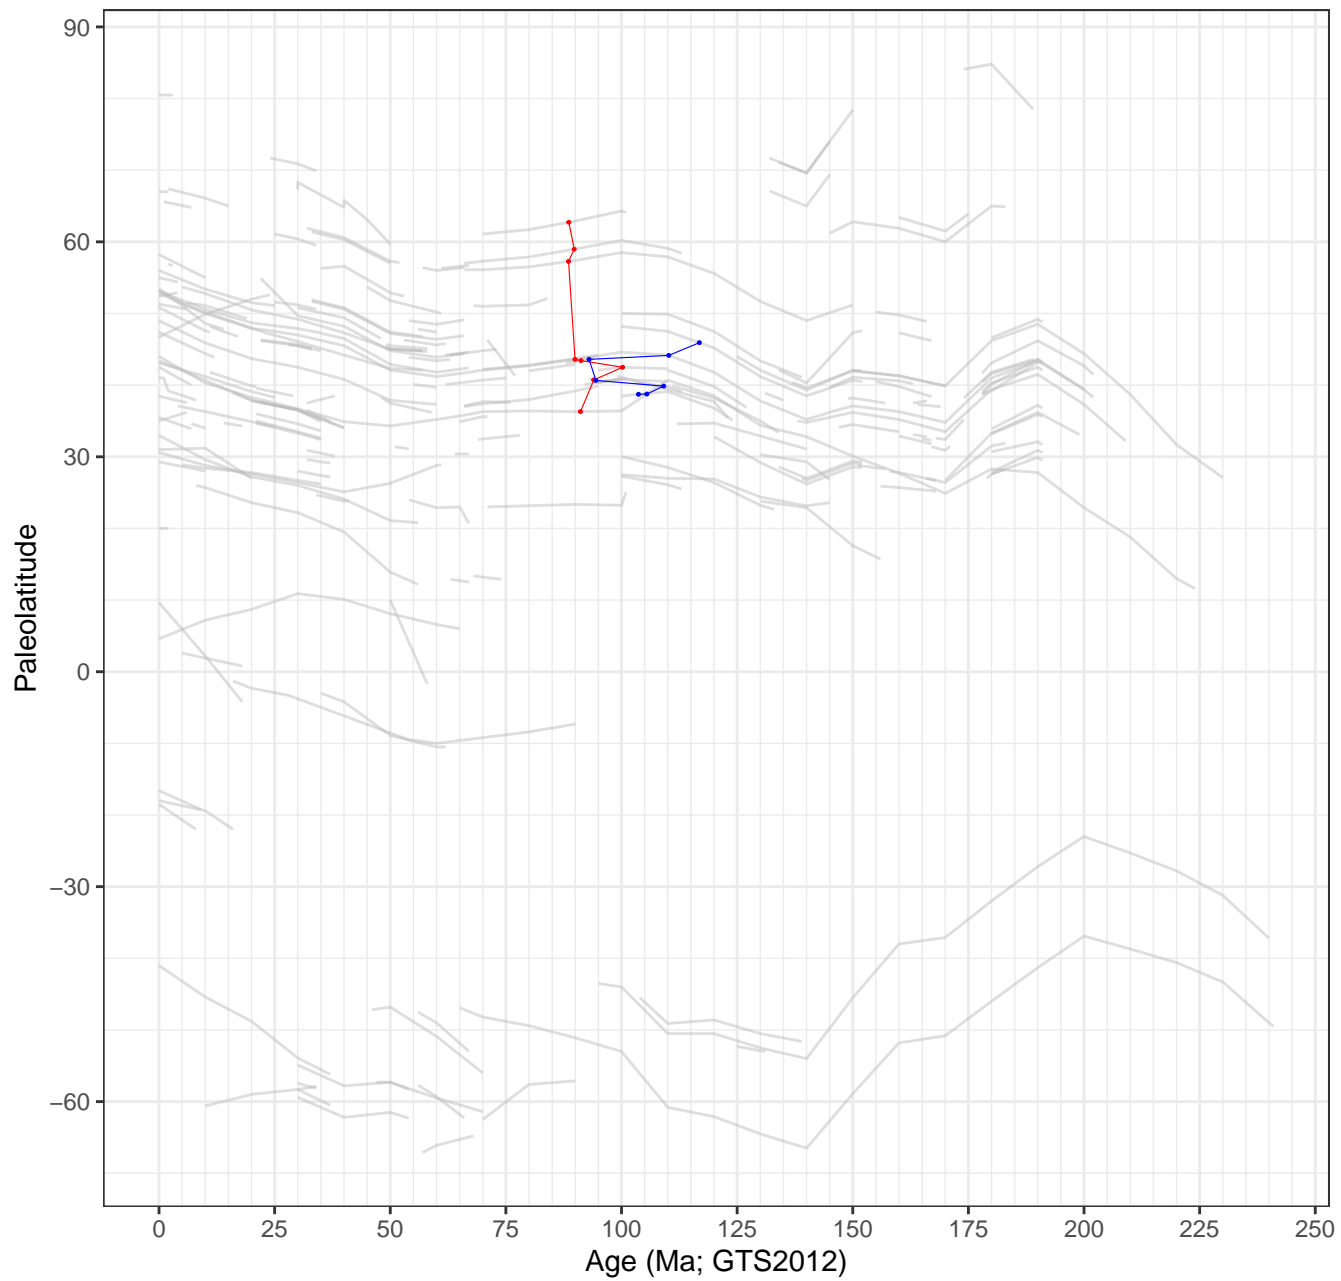

Supplement: Supplementary file 2439 [file Stephodinium coronatum.pdf › Supplement/Supplement 2/Species 1914 plots/Stephodinium coronatum.pdf]

# Species *Stephodinium dianneae*

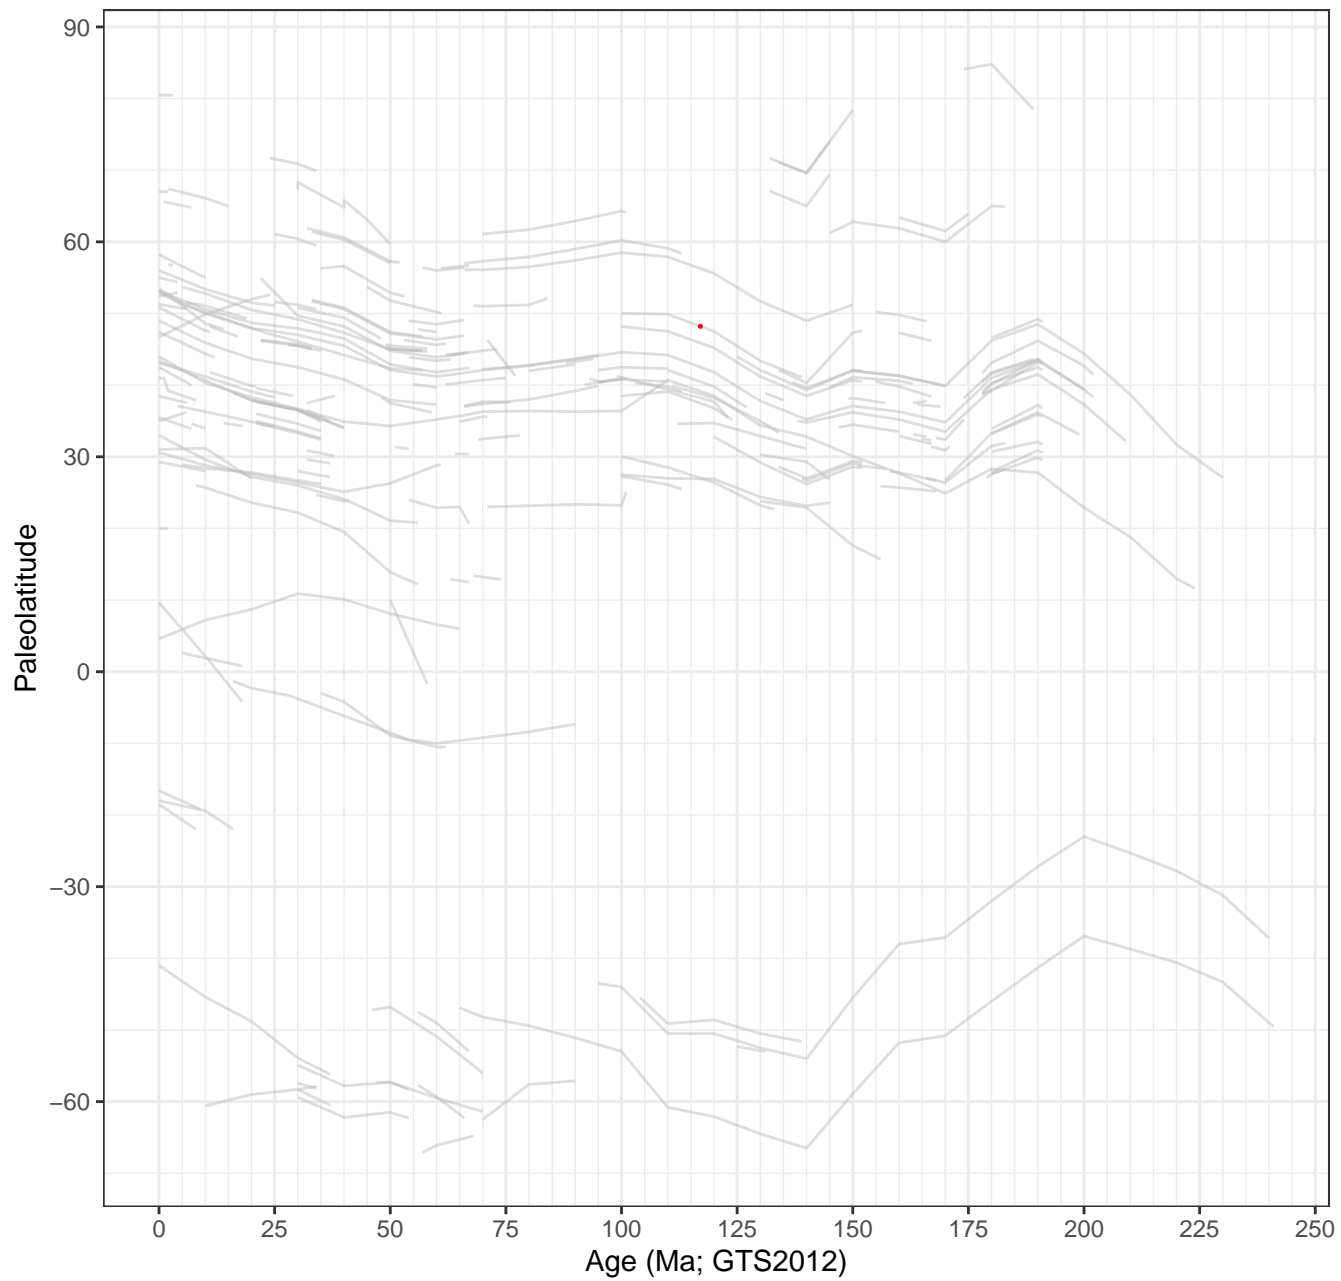

Supplement: Supplementary file 2440 [file Stephodinium dianneae.pdf › Supplement/Supplement 2/Species 1914 plots/Stephodinium dianneae.pdf]

# Species *Stephodinium spinulosum*

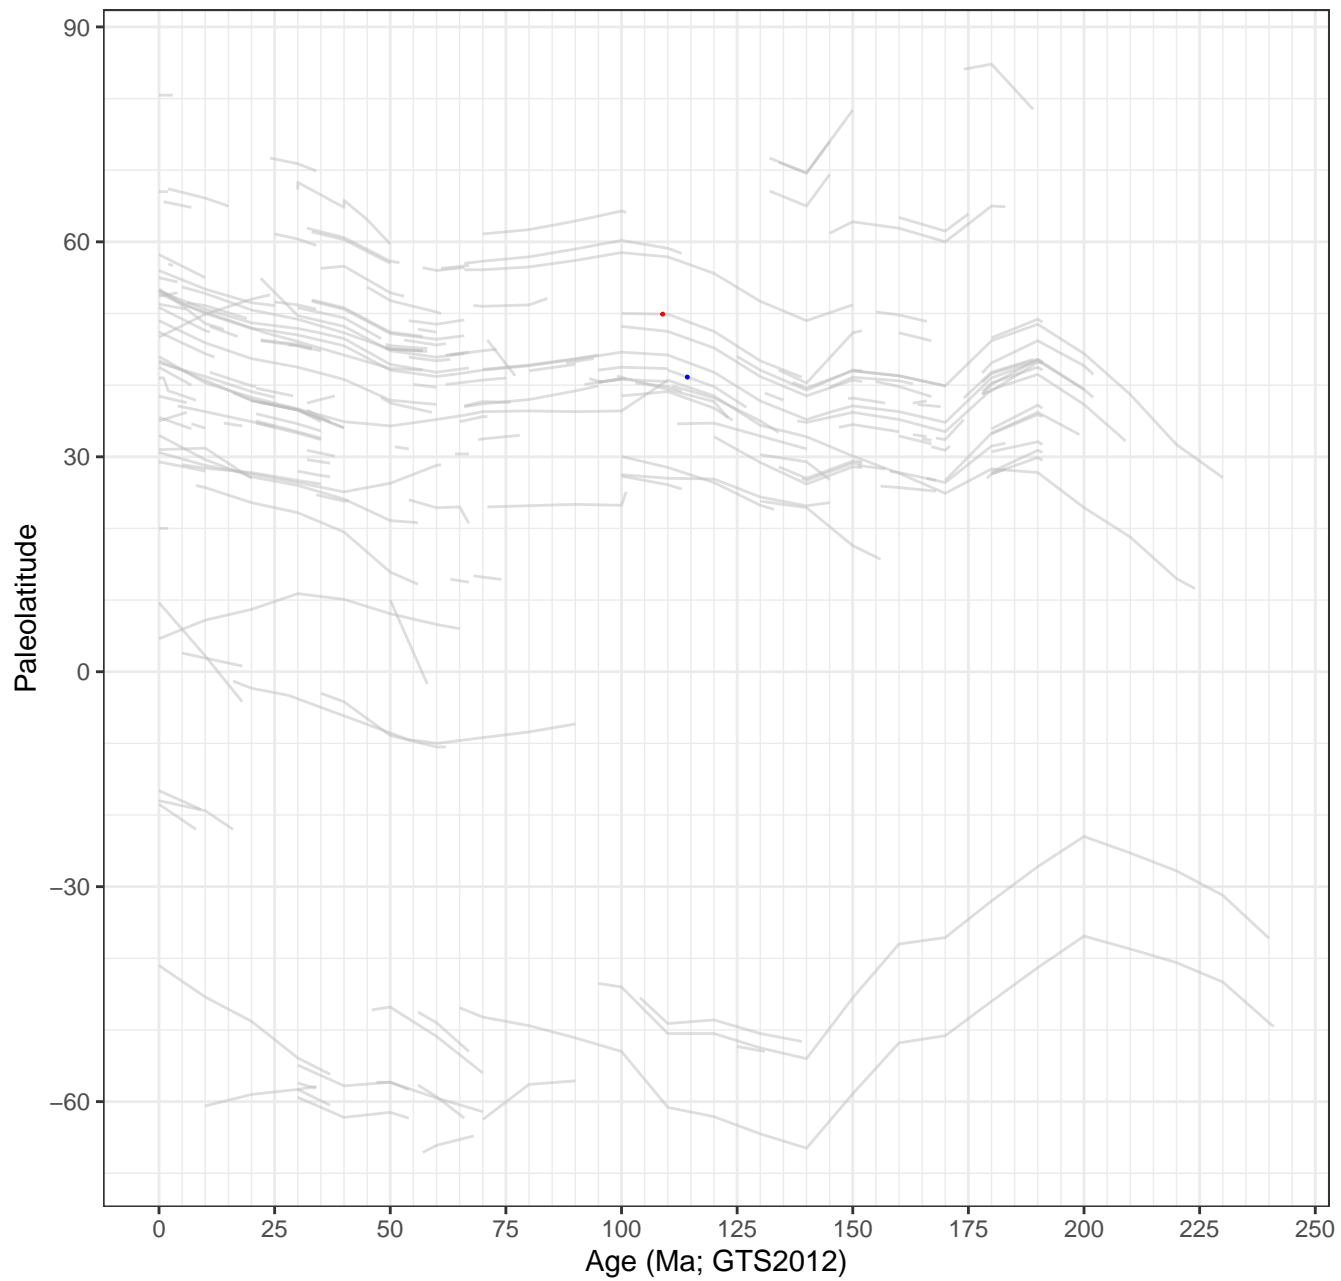

Supplement: Supplementary file 2441 [file Stephodinium spinulosum.pdf › Supplement/Supplement 2/Species 1914 plots/Stephodinium spinulosum.pdf]

# Species *Stiphrosphaeridium antophorum*

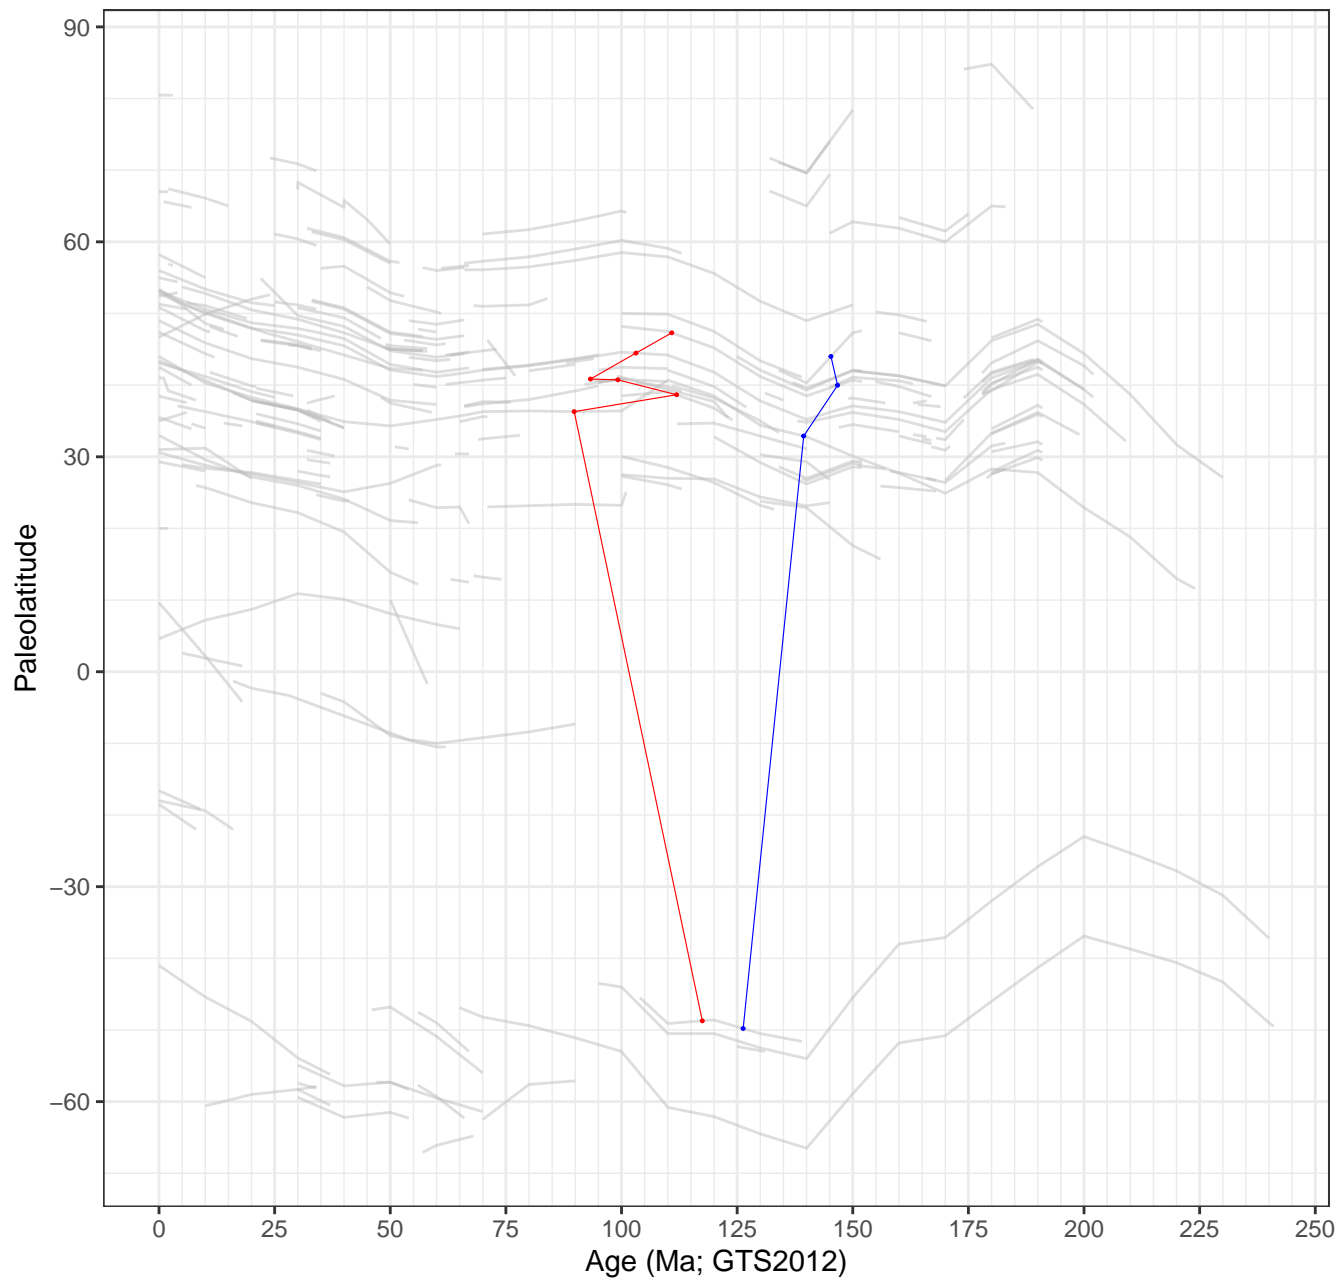

Supplement: Supplementary file 2442 [file Stiphrosphaeridium antophorum.pdf › Supplement/Supplement 2/Species 1914 plots/Stiphrosphaeridium antophorum.pdf]

# Species *Stiphrosphaeridium arbustum*

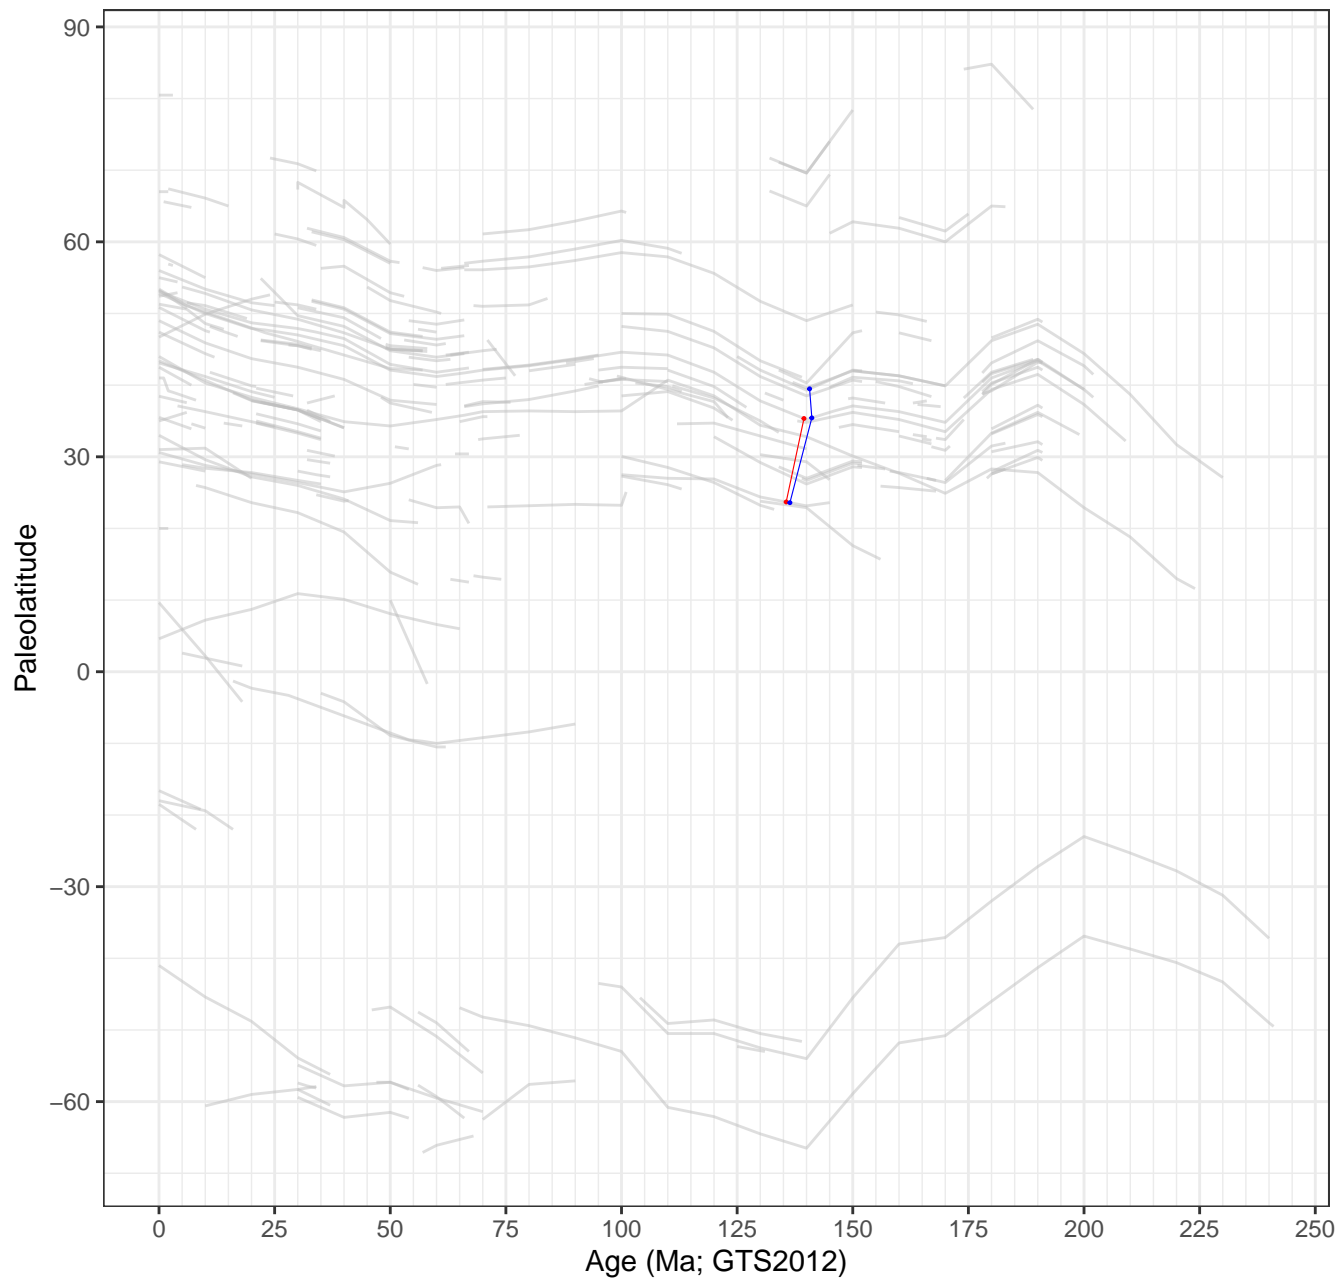

Supplement: Supplementary file 2443 [file Stiphrosphaeridium arbustum.pdf › Supplement/Supplement 2/Species 1914 plots/Stiphrosphaeridium arbustum.pdf]

# Species *Stiphrosphaeridium dictyophorum*

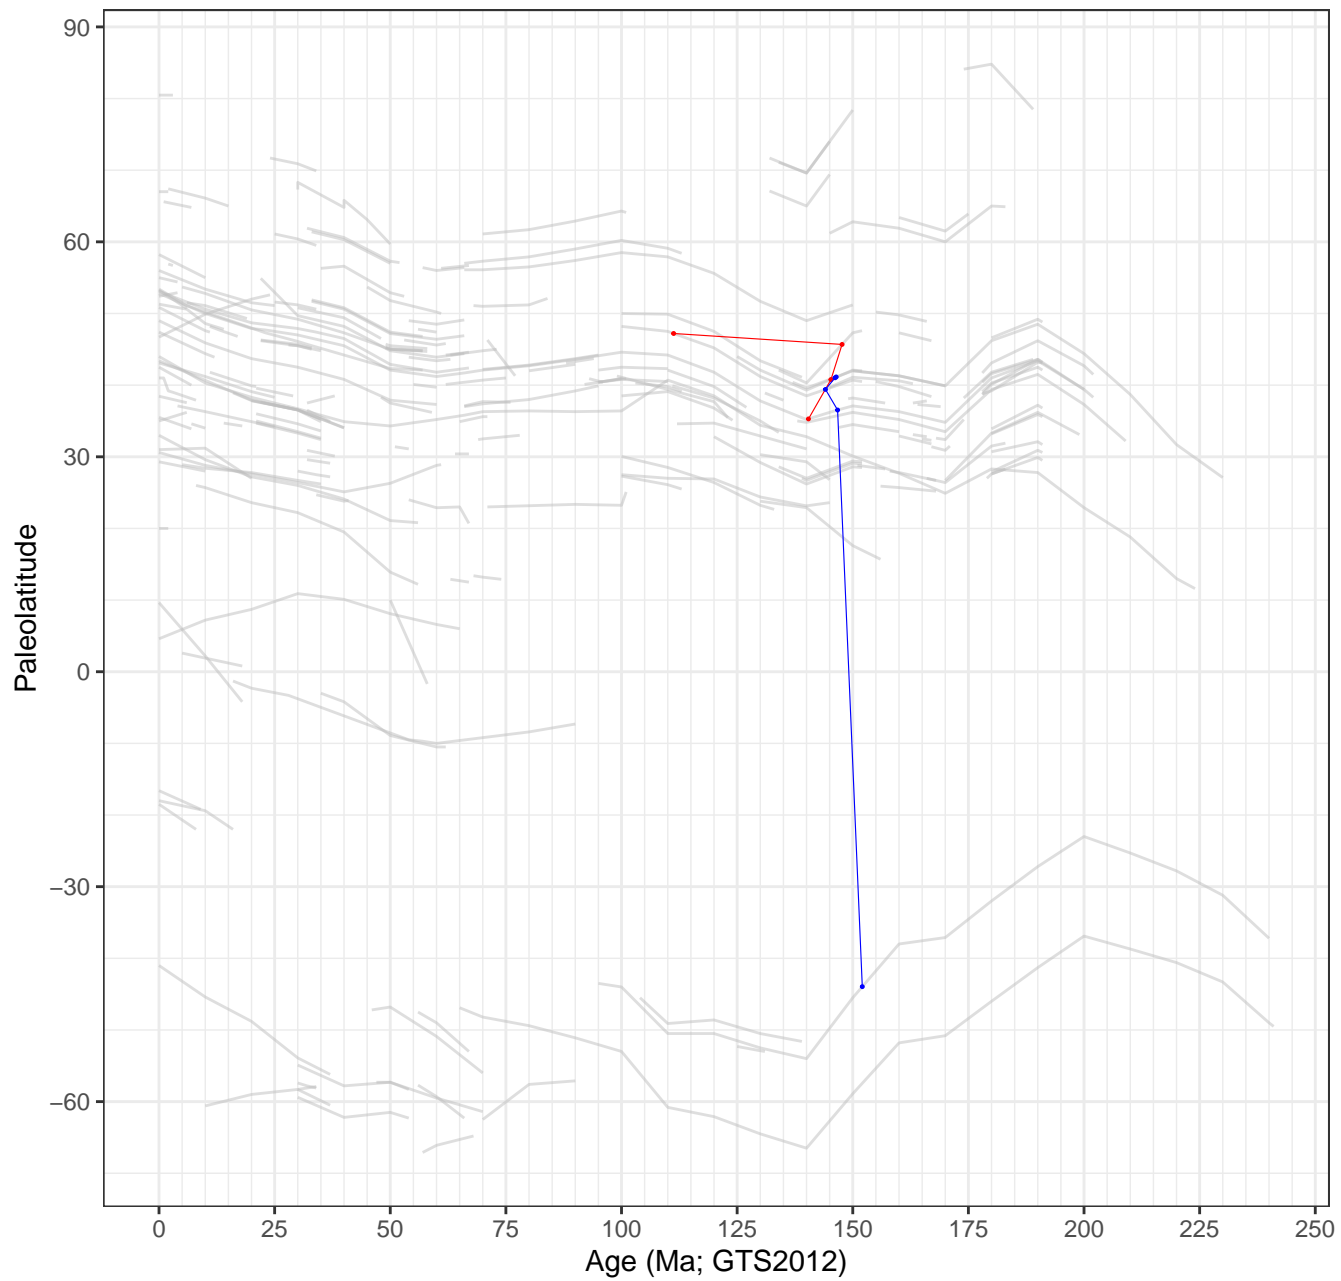

Supplement: Supplementary file 2444 [file Stiphrosphaeridium dictyophorum.pdf › Supplement/Supplement 2/Species 1914 plots/Stiphrosphaeridium dictyophorum.pdf]

# Species *Stoveracysta conerae*

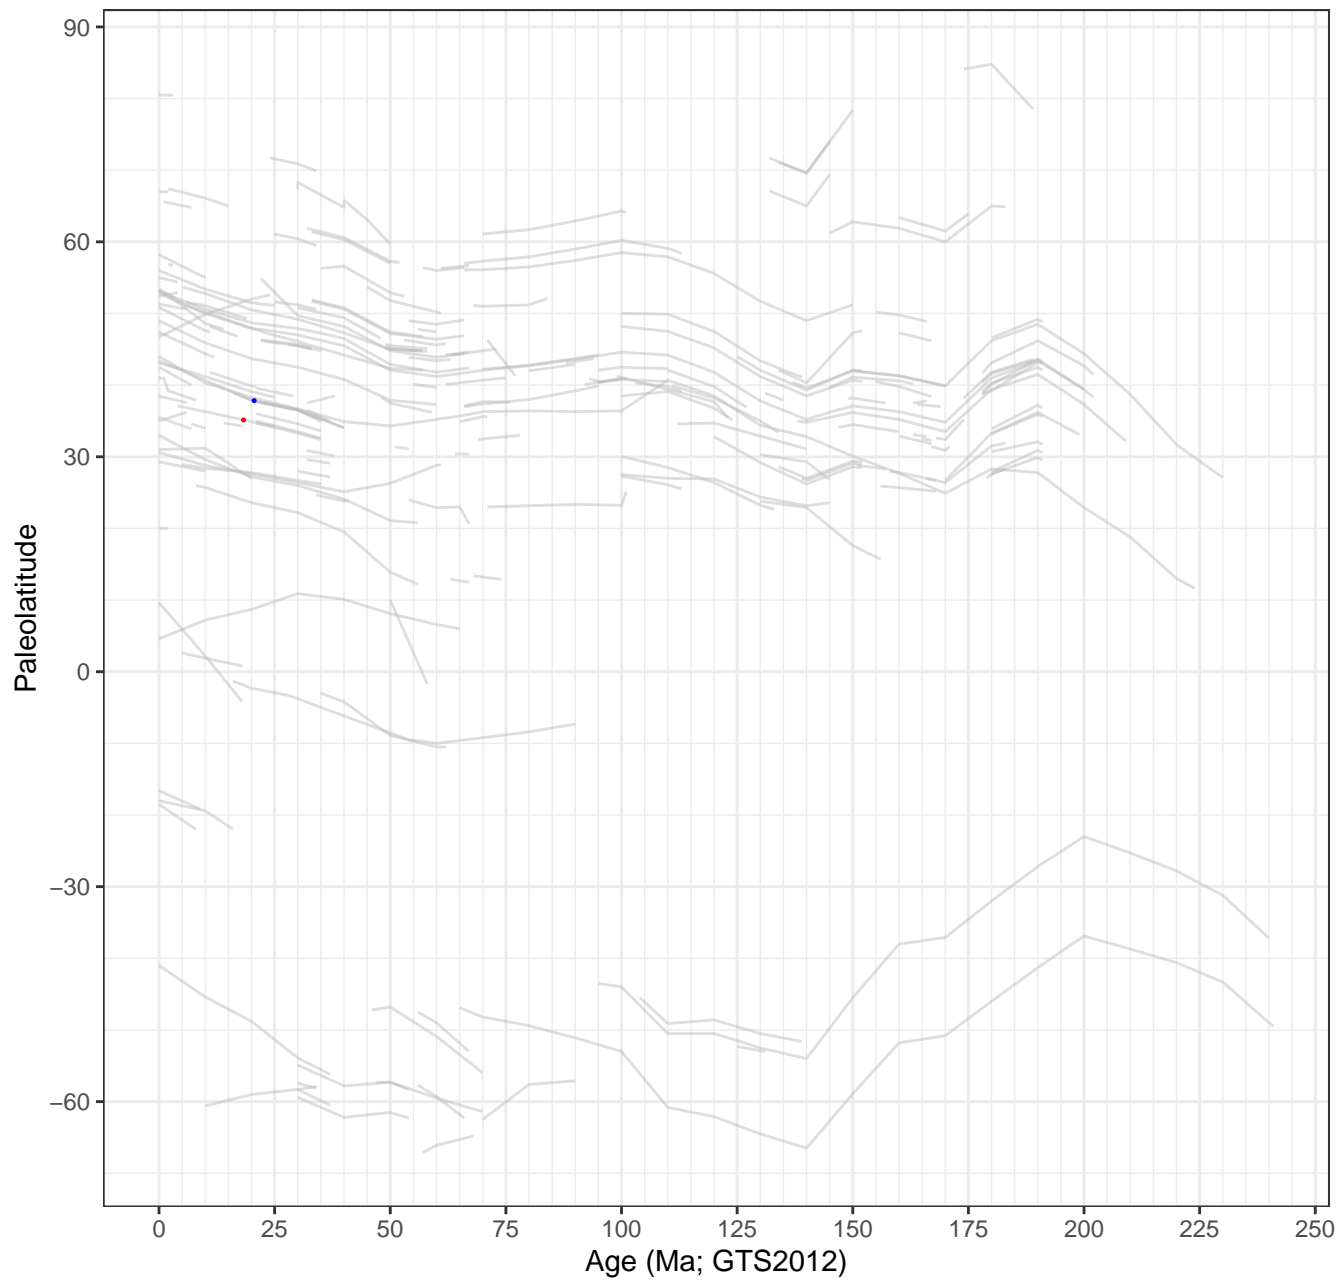

Supplement: Supplementary file 2445 [file Stoveracysta conerae.pdf › Supplement/Supplement 2/Species 1914 plots/Stoveracysta conerae.pdf]

# Species *Stoveracysta kakanuiensis*

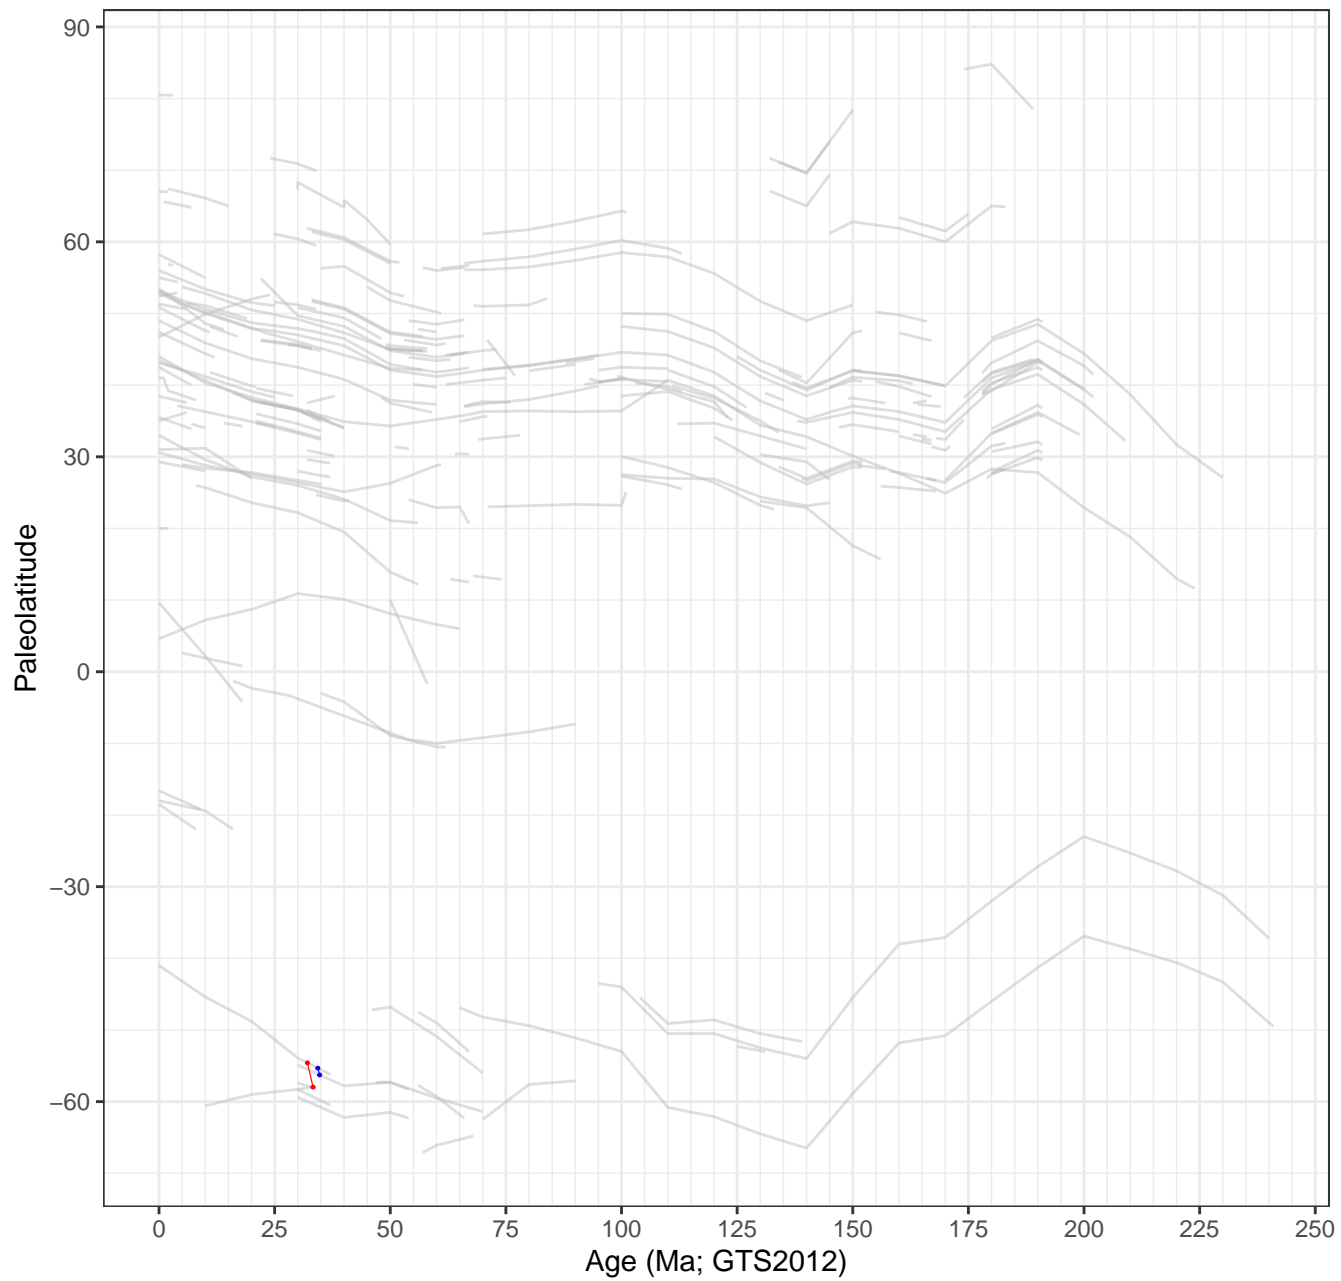

Supplement: Supplementary file 2446 [file Stoveracysta kakanuiensis.pdf › Supplement/Supplement 2/Species 1914 plots/Stoveracysta kakanuiensis.pdf]

# Species *Stoveracysta ornata*

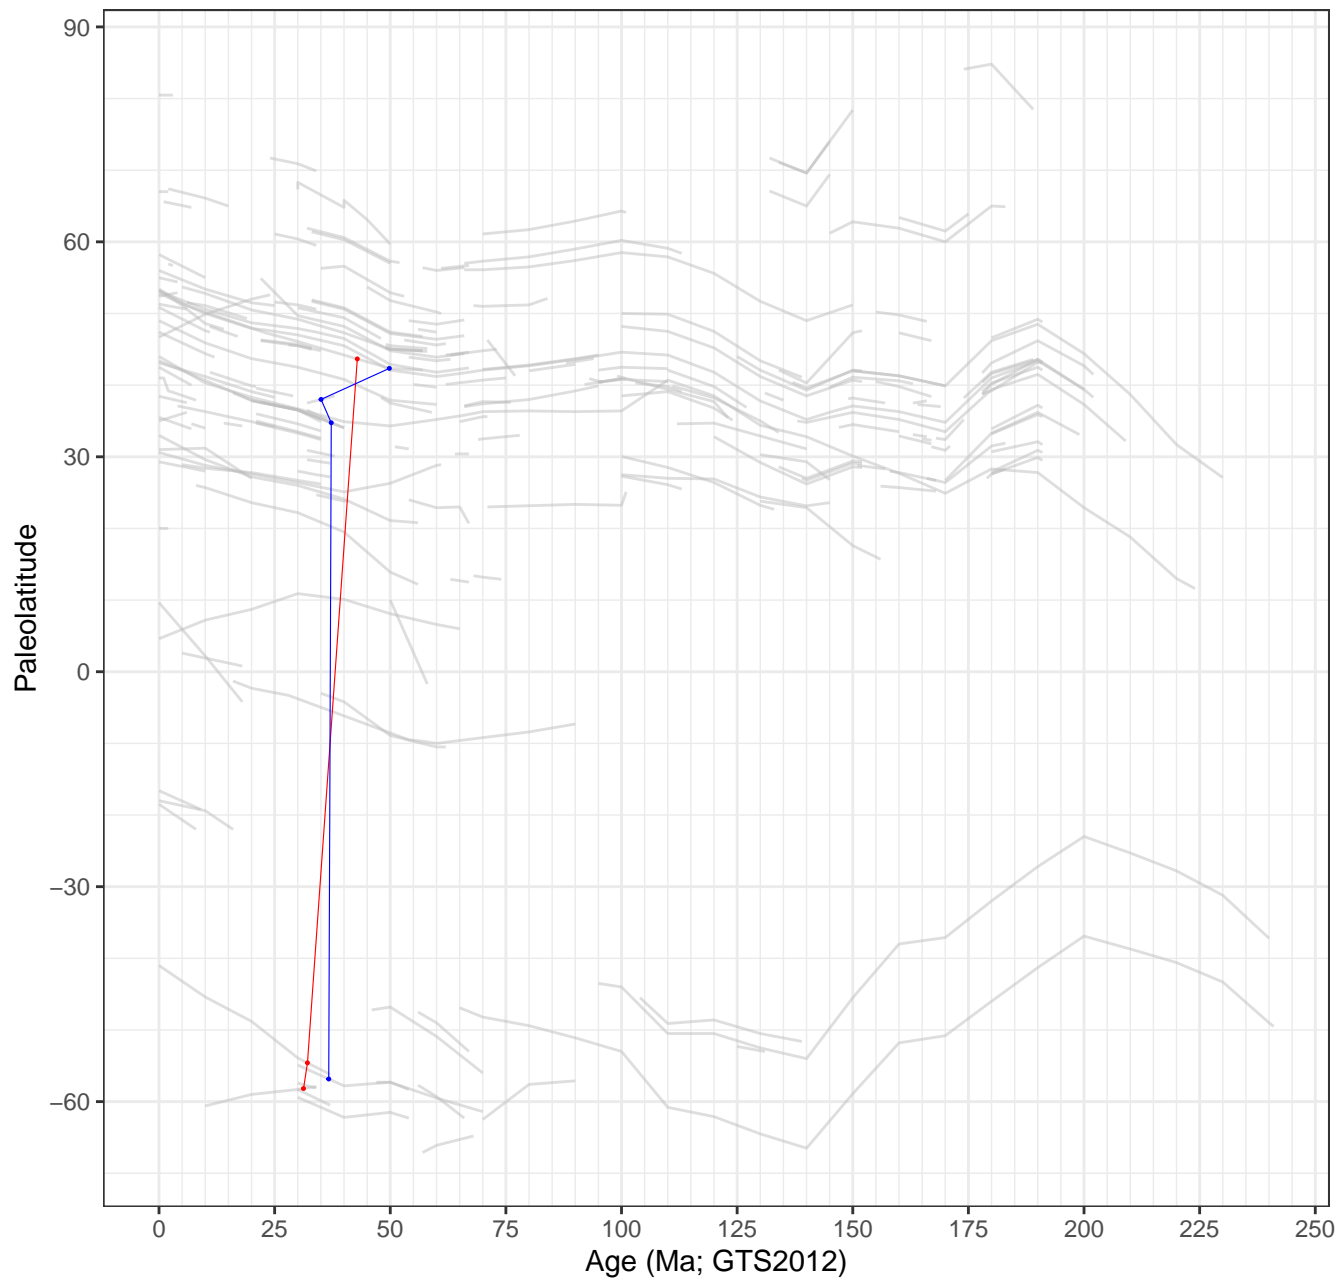

Supplement: Supplementary file 2447 [file Stoveracysta ornata.pdf › Supplement/Supplement 2/Species 1914 plots/Stoveracysta ornata.pdf]

# Species *Striatodinium lineatum*

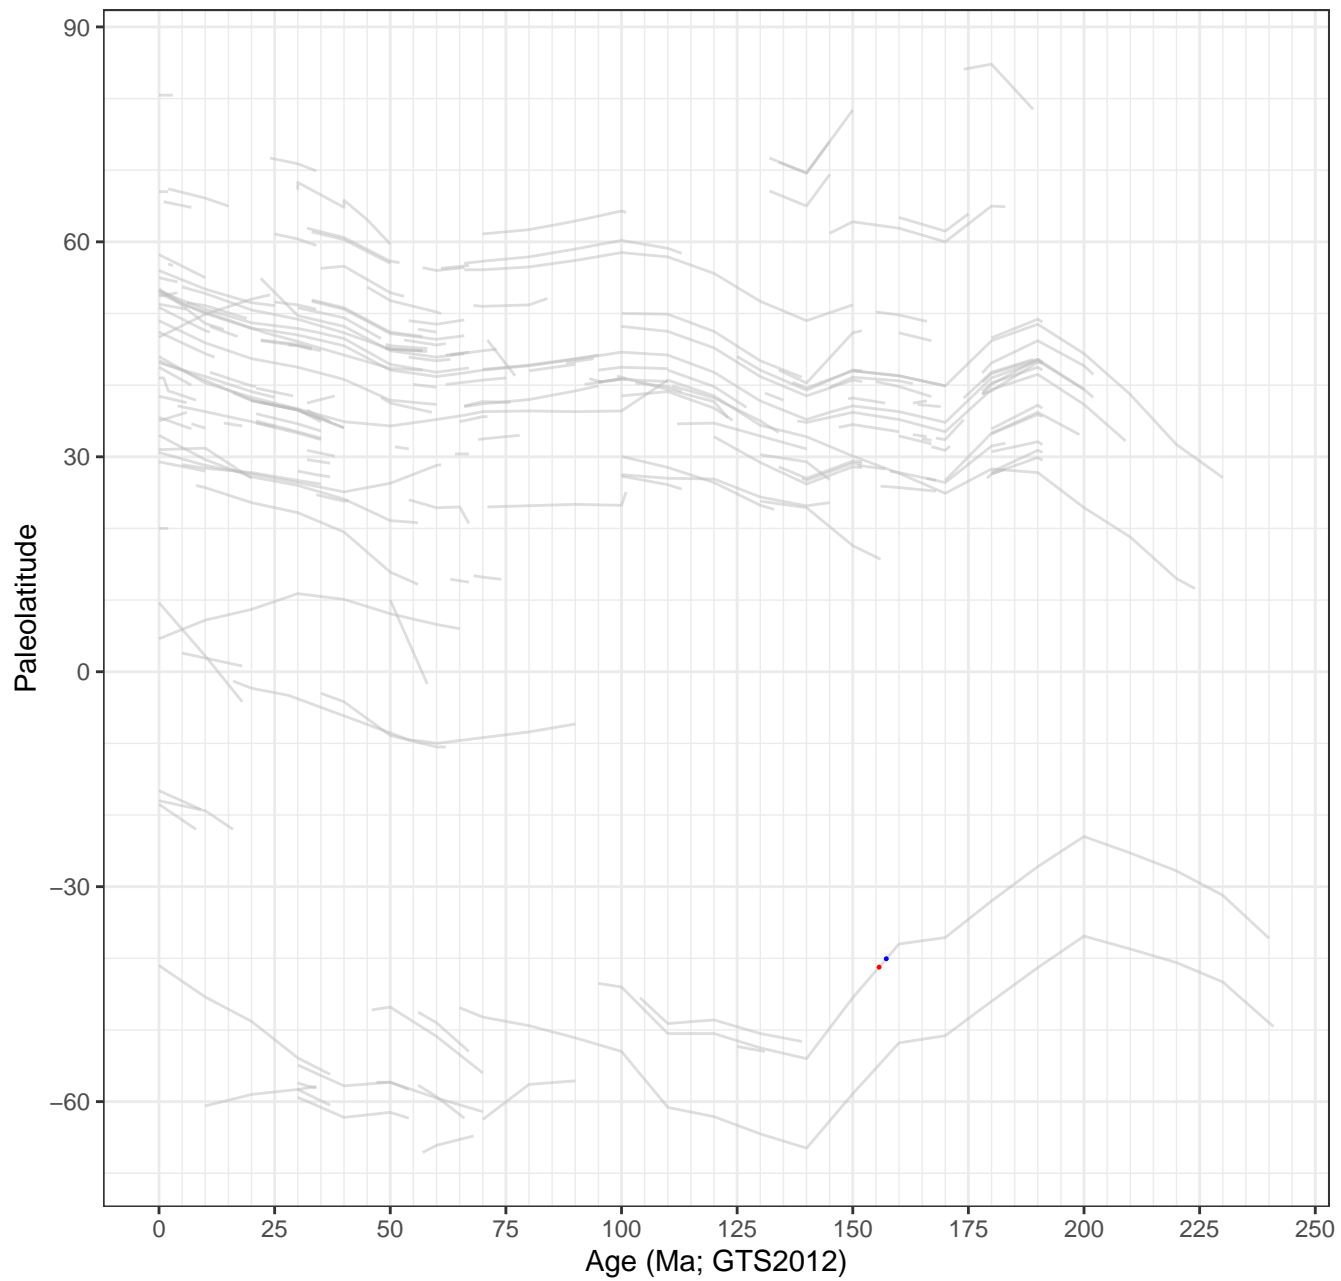

Supplement: Supplementary file 2448 [file Striatodinium lineatum.pdf › Supplement/Supplement 2/Species 1914 plots/Striatodinium lineatum.pdf]

# Species *Striatodinium ottii*



Supplement: Supplementary file 2449 [file Striatodinium ottii.pdf › Supplement/Supplement 2/Species 1914 plots/Striatodinium ottii.pdf]

# Species *Subtilisphaera deformans*

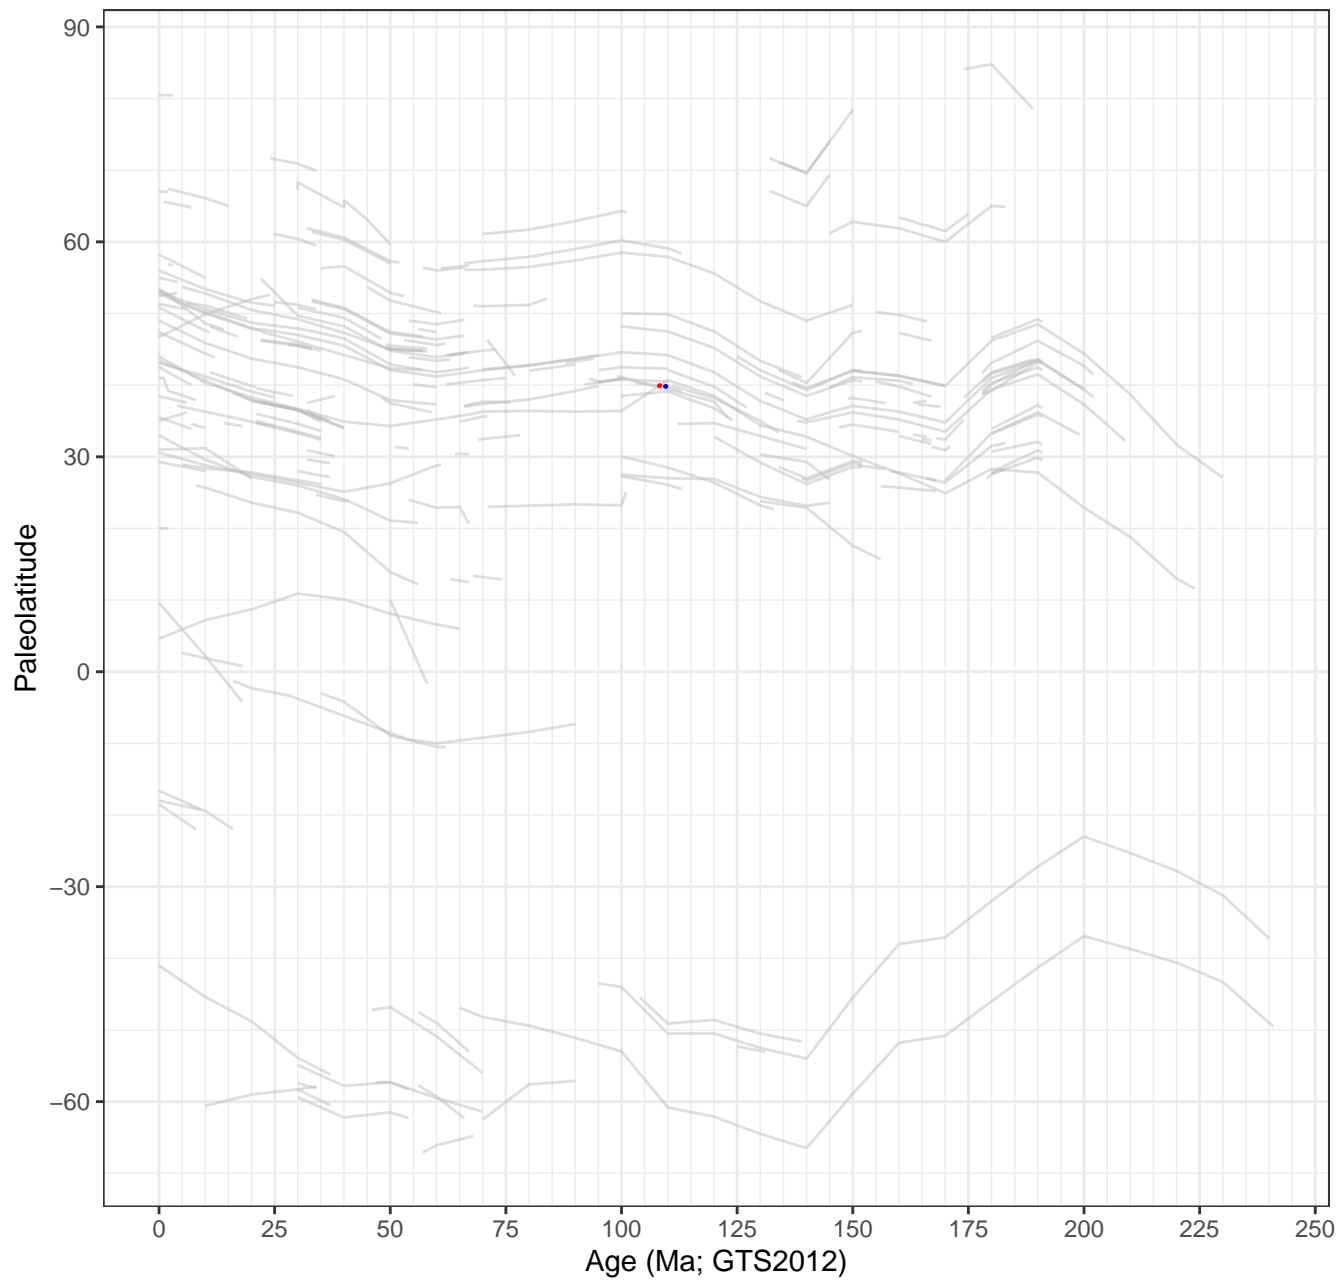

Supplement: Supplementary file 2450 [file Subtilisphaera deformans.pdf › Supplement/Supplement 2/Species 1914 plots/Subtilisphaera deformans.pdf]

# Species *Subtilisphaera hyalina*

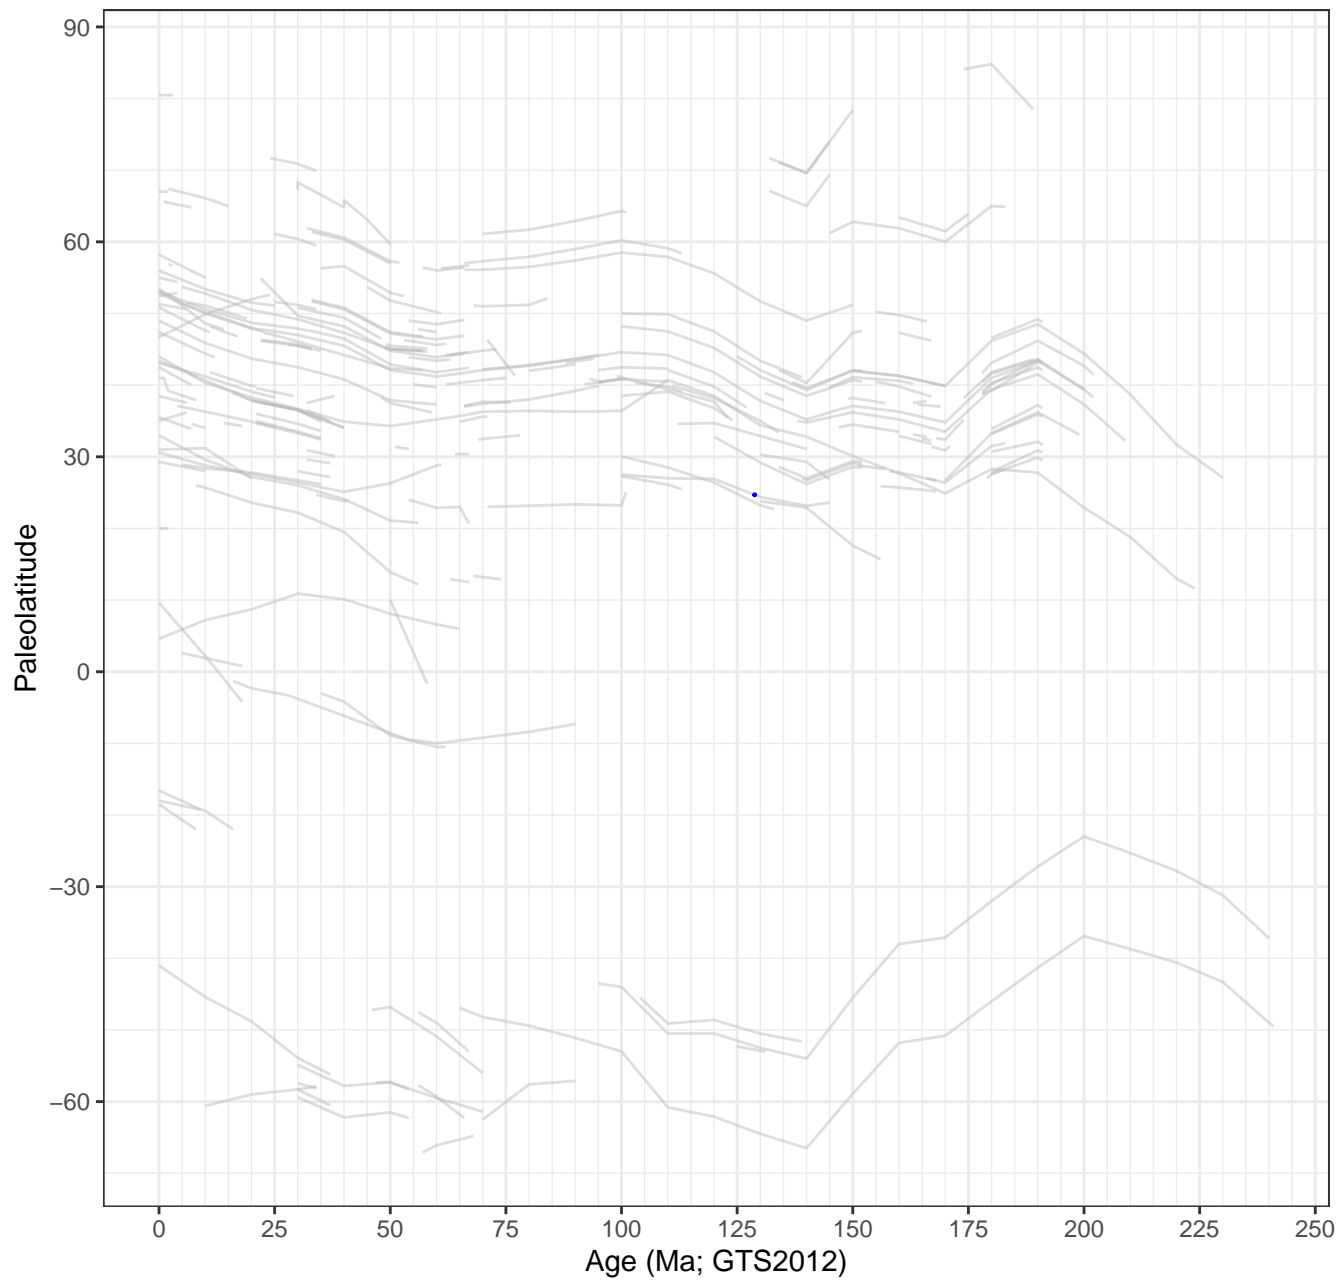

Supplement: Supplementary file 2451 [file Subtilisphaera hyalina.pdf › Supplement/Supplement 2/Species 1914 plots/Subtilisphaera hyalina.pdf]

# Species *Subtilisphaera kalaalliti*

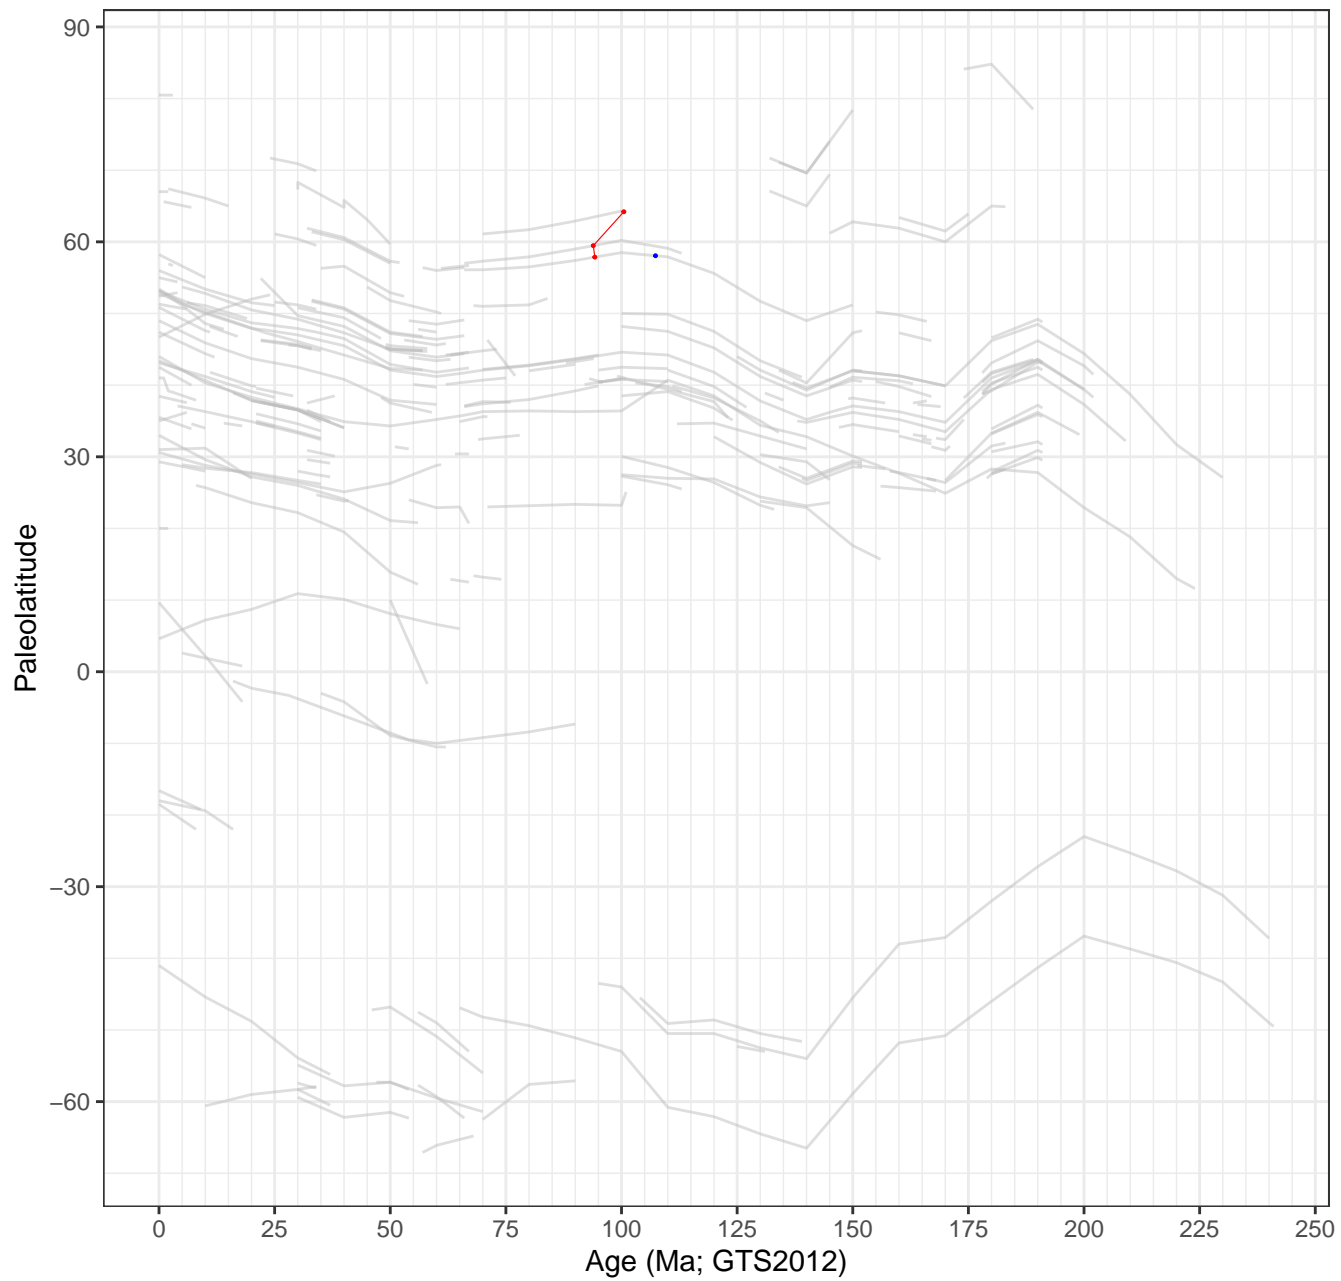

Supplement: Supplementary file 2452 [file Subtilisphaera kalaalliti.pdf › Supplement/Supplement 2/Species 1914 plots/Subtilisphaera kalaalliti.pdf]

# Species *Subtilisphaera perlucida*

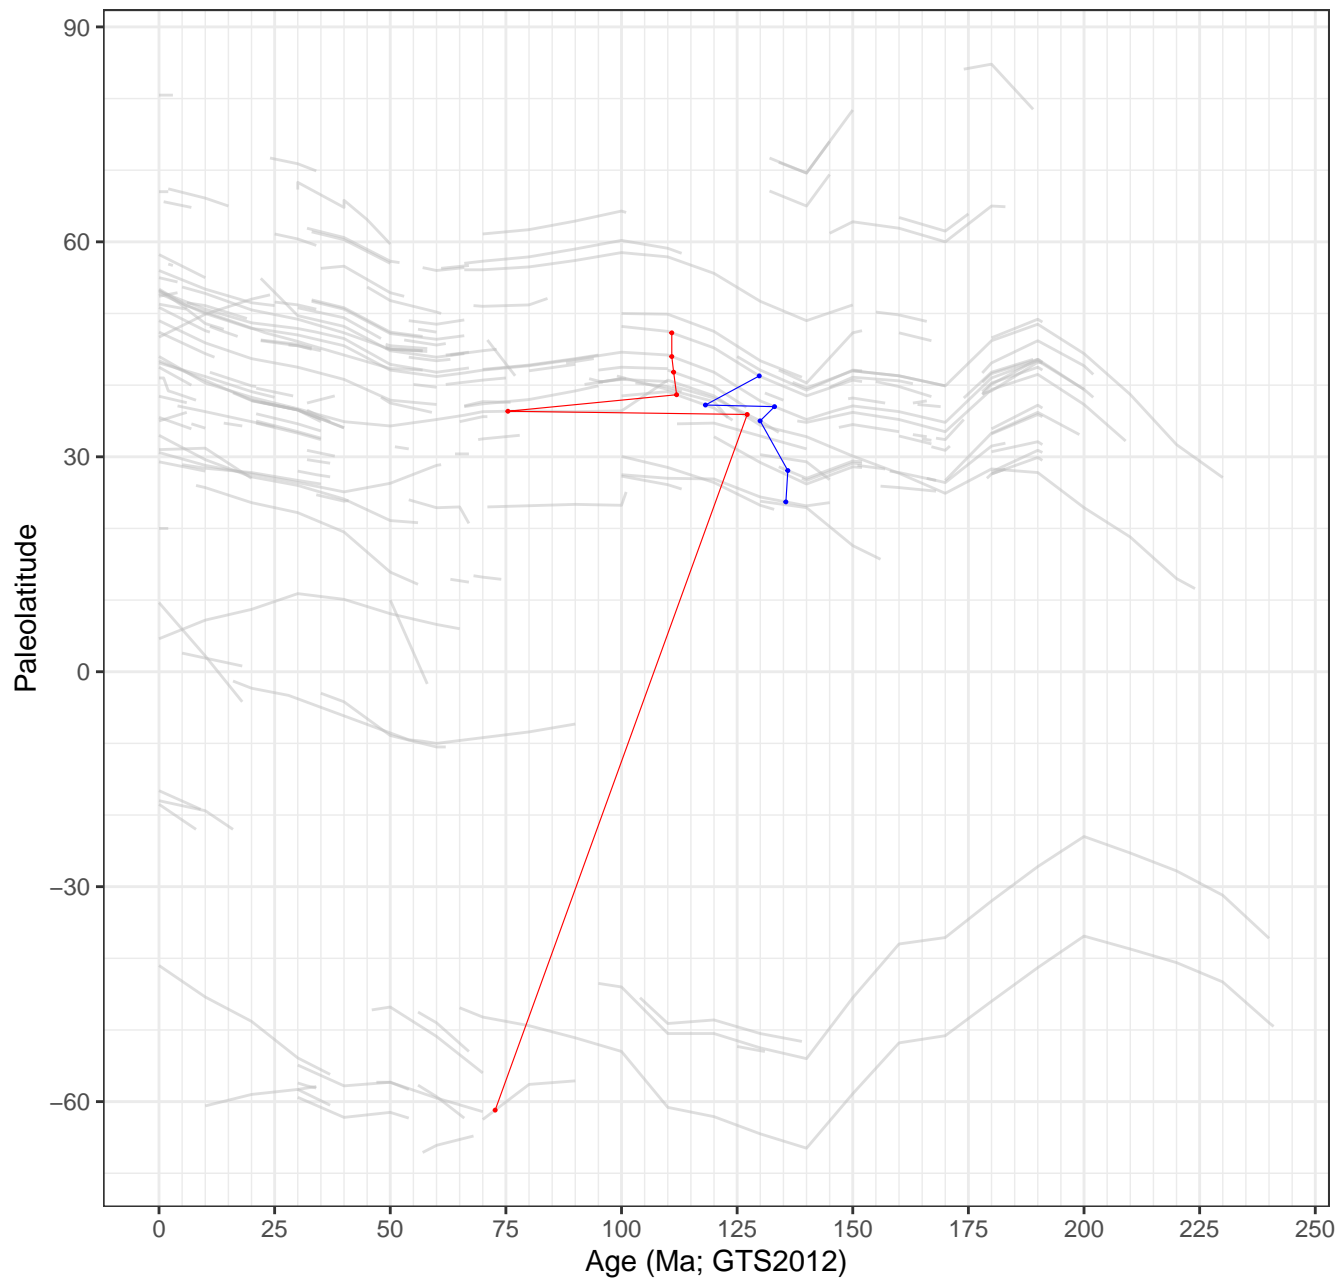

Supplement: Supplementary file 2453 [file Subtilisphaera perlucida.pdf › Supplement/Supplement 2/Species 1914 plots/Subtilisphaera perlucida.pdf]

# Species *Subtilisphaera pimaensis*

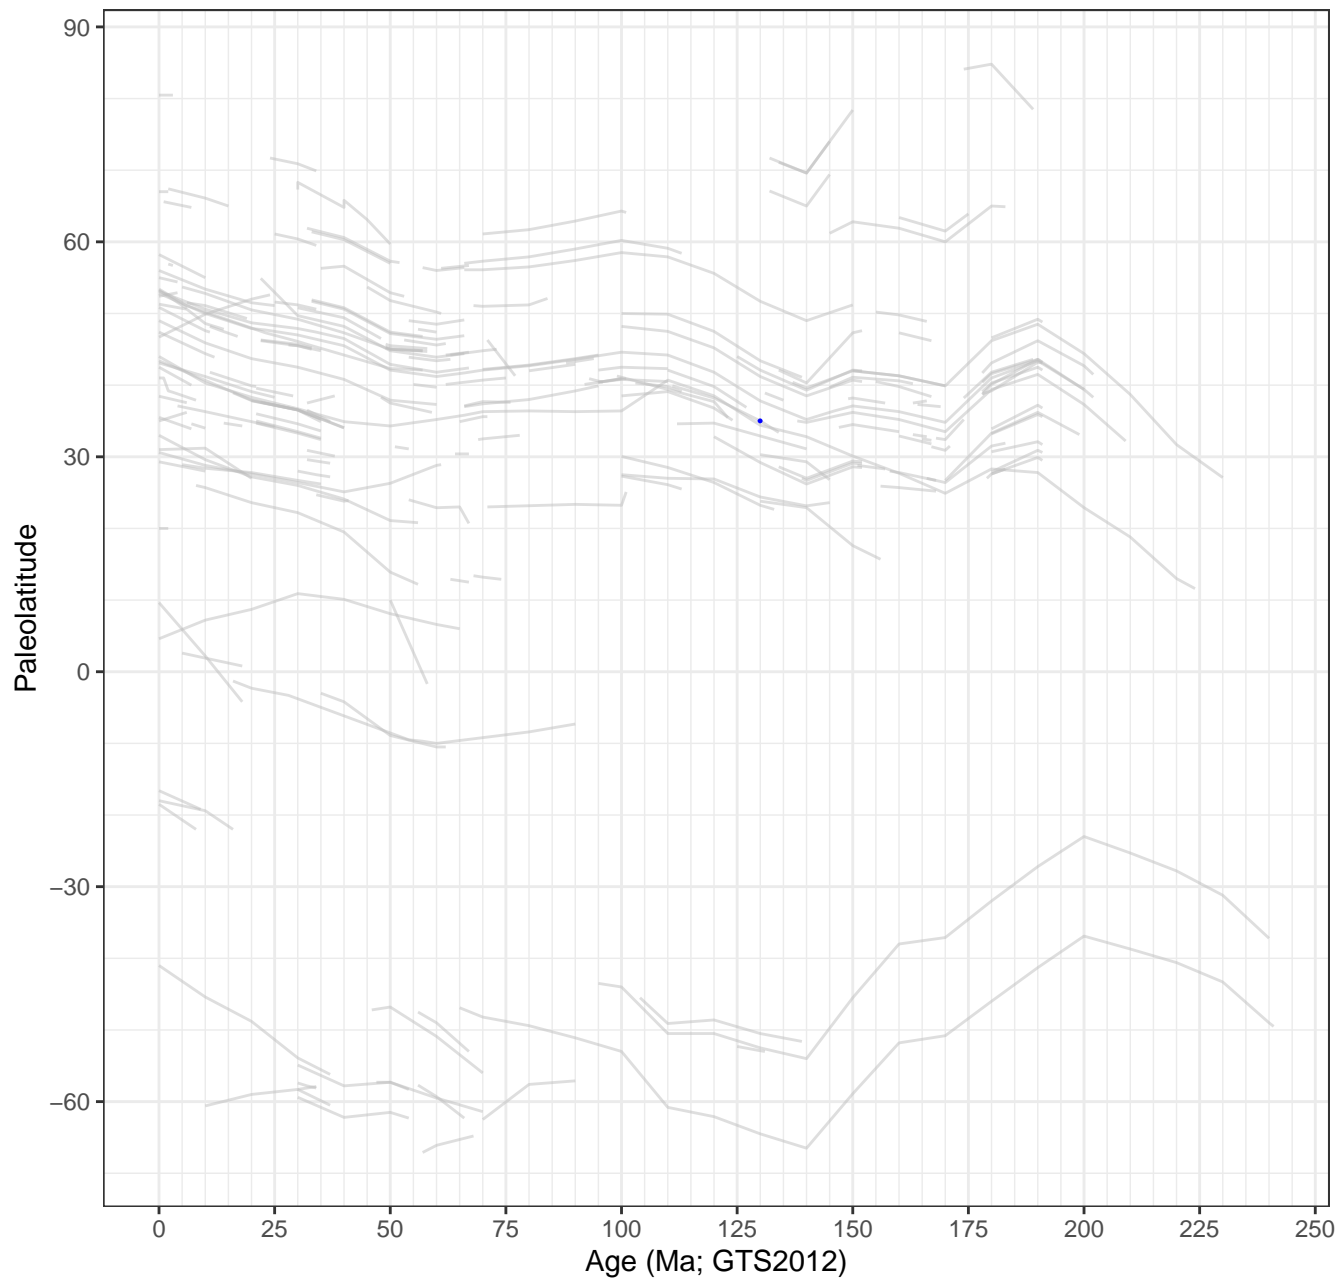

Supplement: Supplementary file 2454 [file Subtilisphaera pimaensis.pdf › Supplement/Supplement 2/Species 1914 plots/Subtilisphaera pimaensis.pdf]

# Species *Subtilisphaera pontis-mariae*

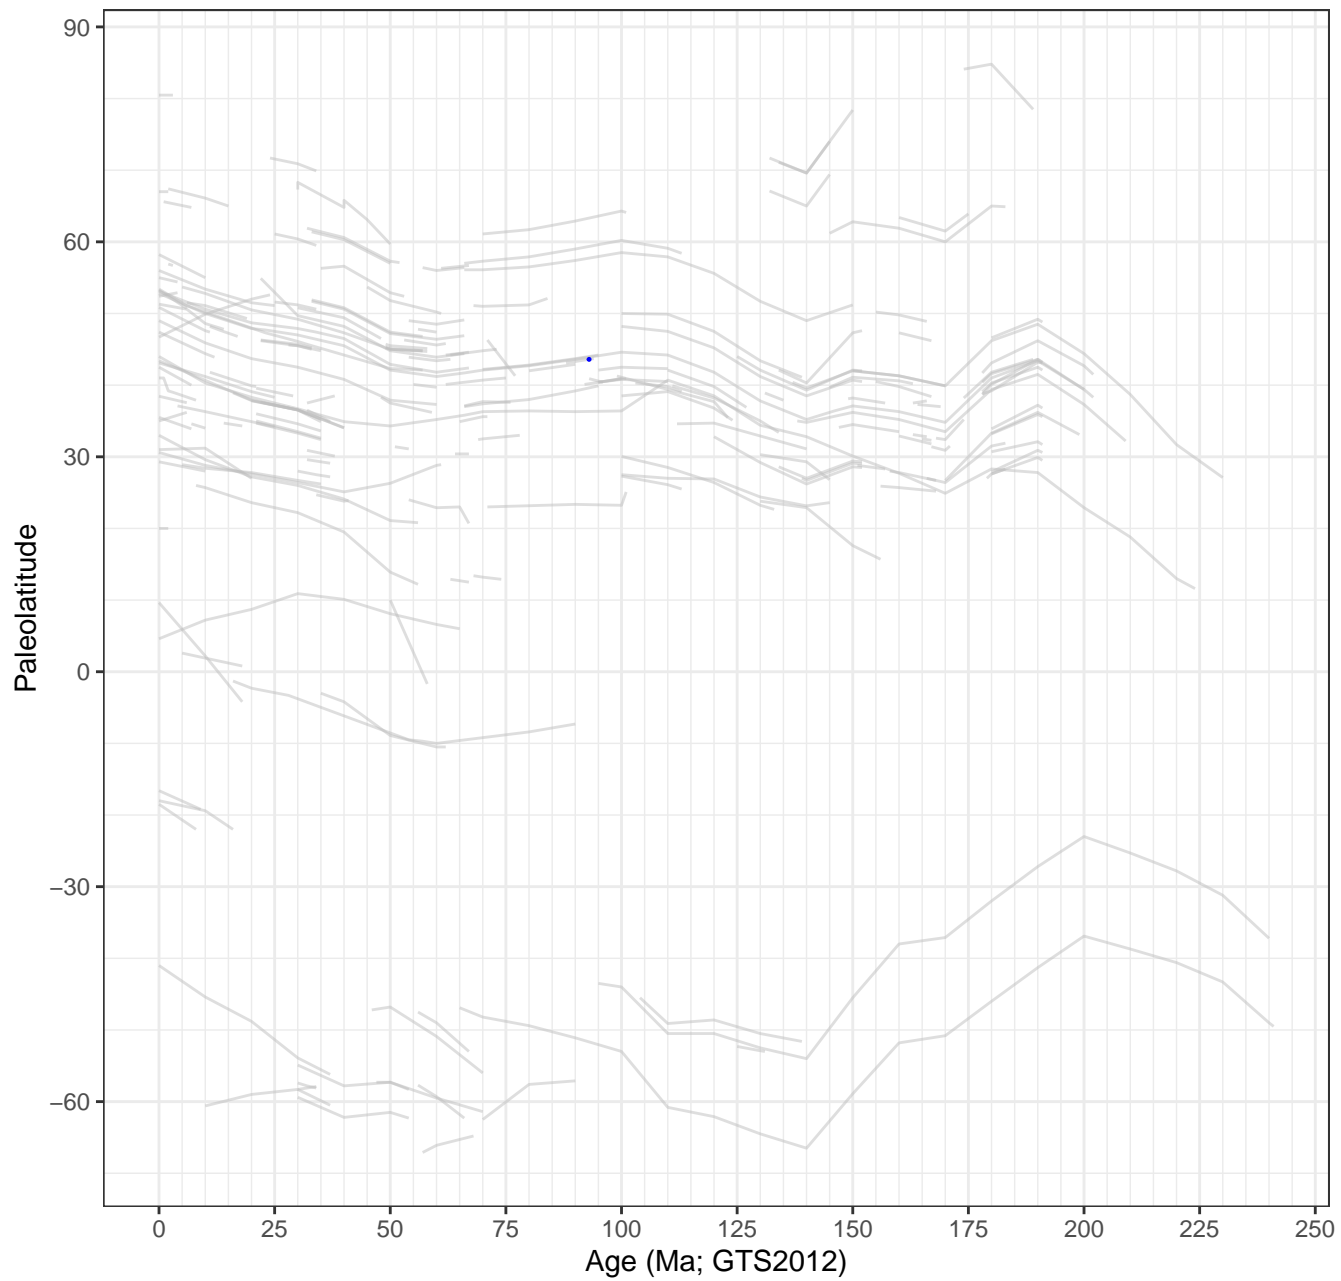

Supplement: Supplementary file 2455 [file Subtilisphaera pontis-mariae.pdf › Supplement/Supplement 2/Species 1914 plots/Subtilisphaera pontis-mariae.pdf]

# Species *Subtilisphaera scabrata*

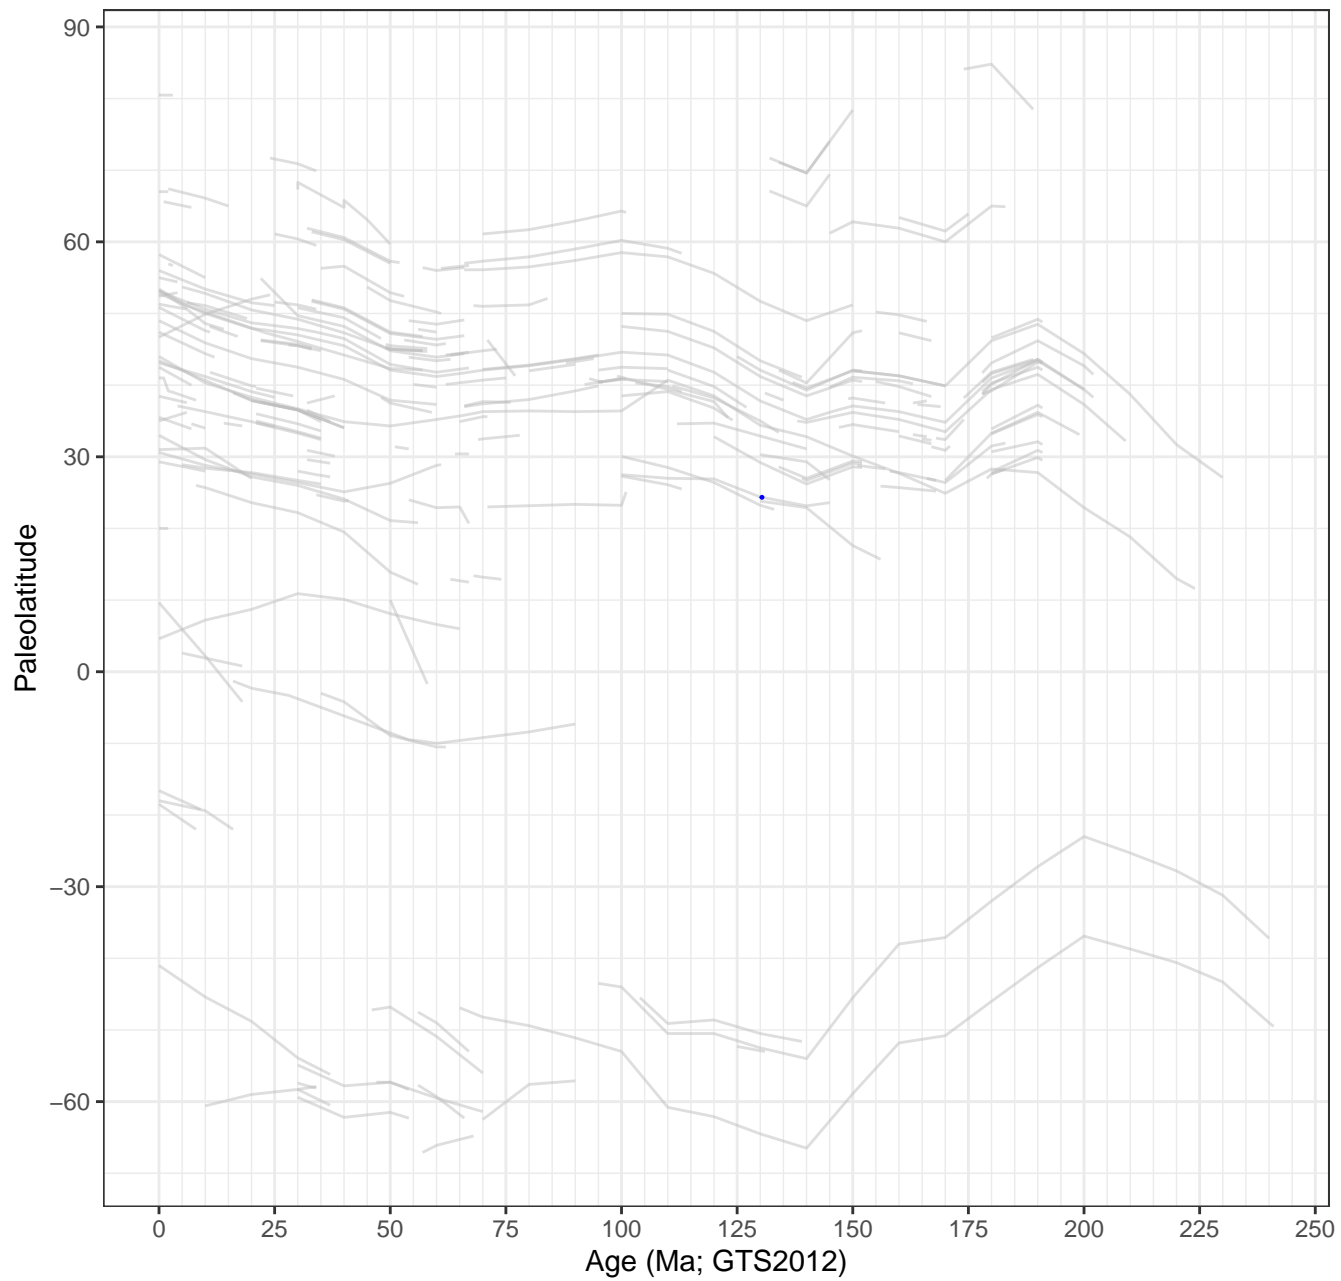

Supplement: Supplementary file 2456 [file Subtilisphaera scabrata.pdf › Supplement/Supplement 2/Species 1914 plots/Subtilisphaera scabrata.pdf]

# Species *Subtilisphaera senegalensis*

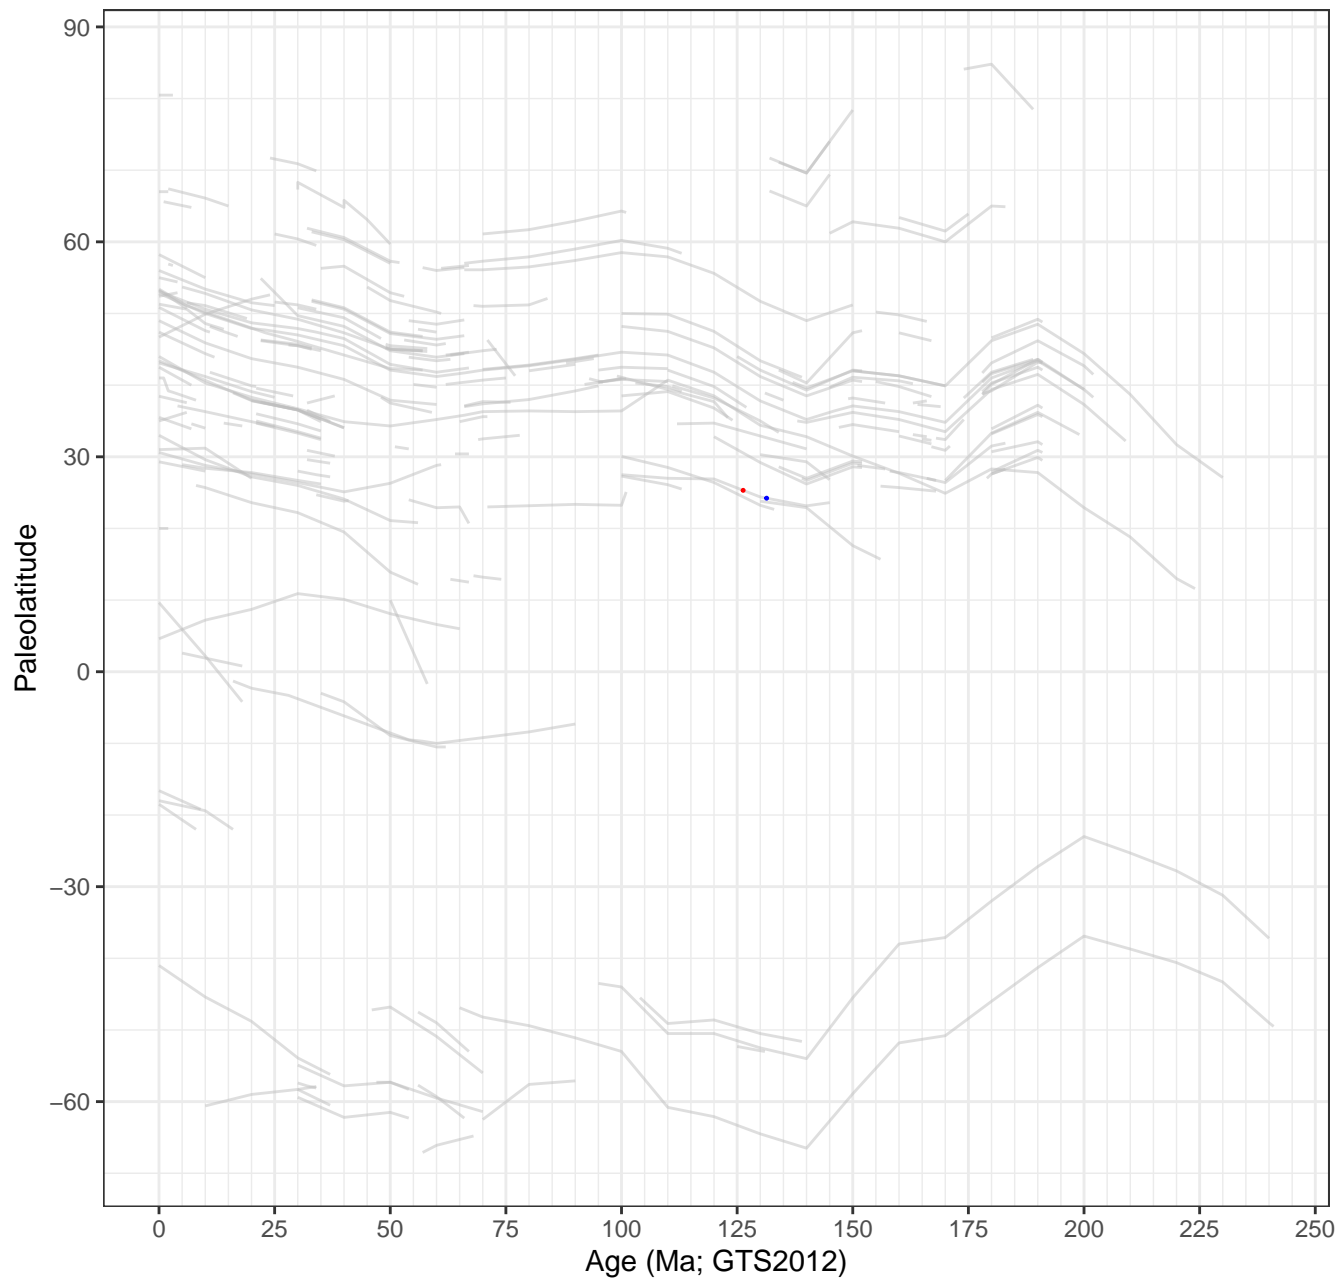

Supplement: Supplementary file 2457 [file Subtilisphaera senegalensis.pdf › Supplement/Supplement 2/Species 1914 plots/Subtilisphaera senegalensis.pdf]

# Species *Subtilisphaera terrula*

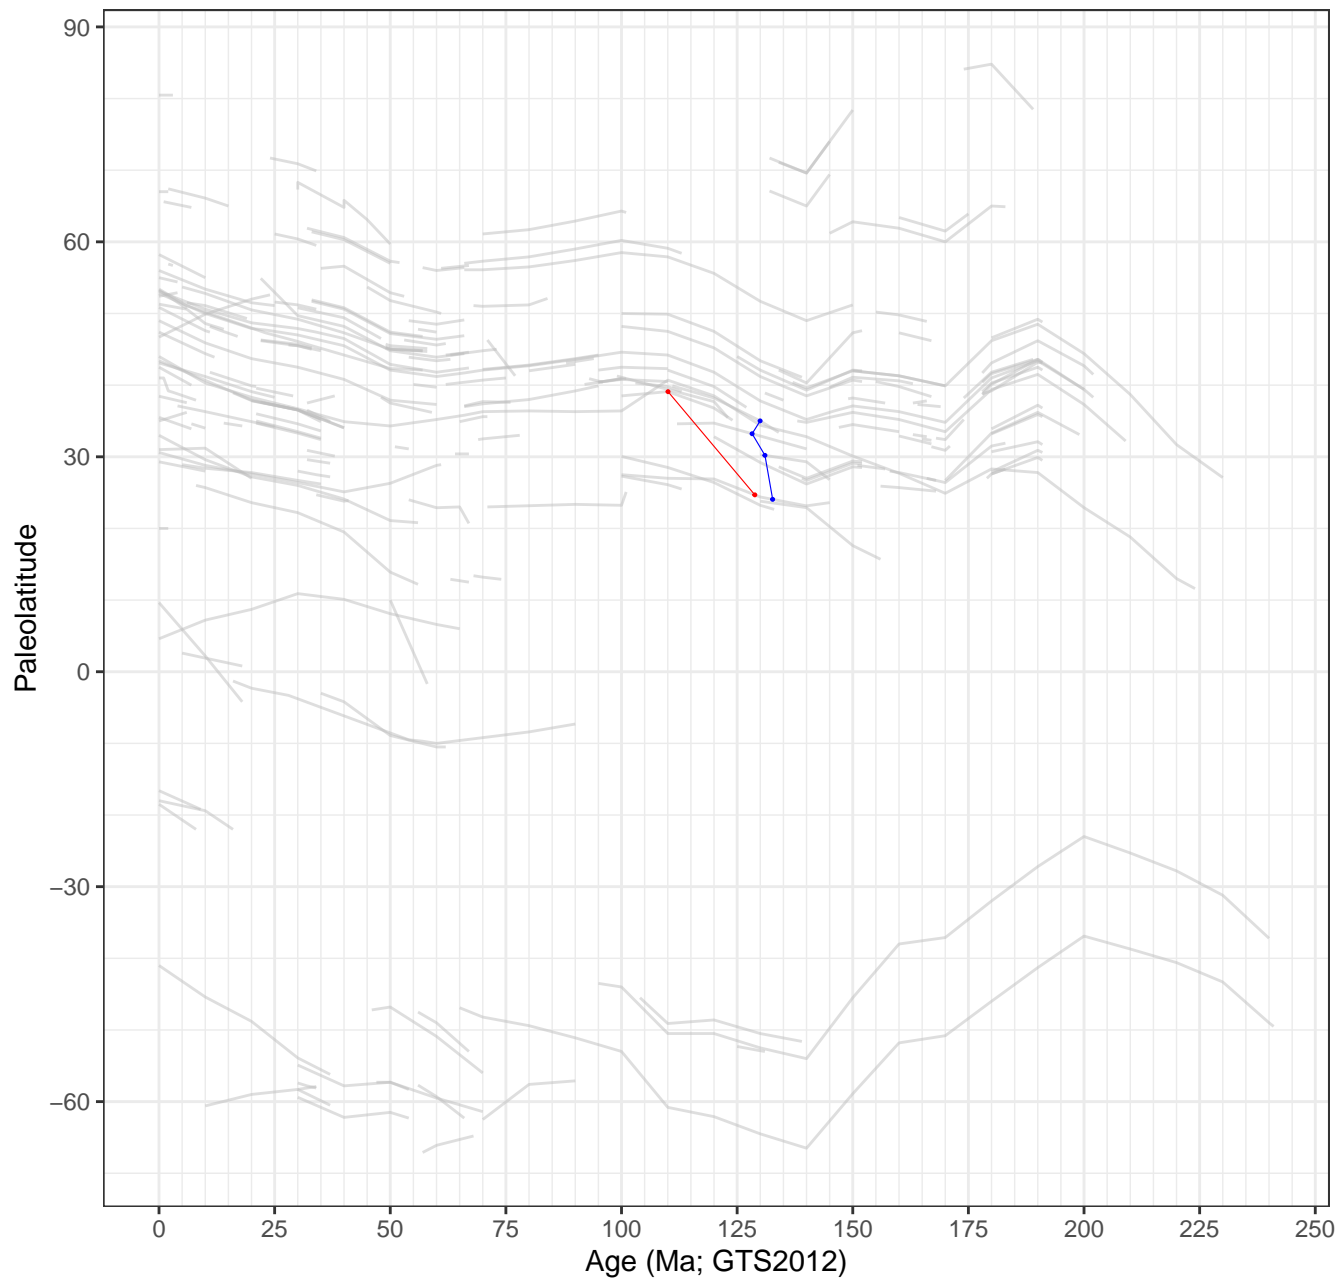

Supplement: Supplementary file 2458 [file Subtilisphaera terrula.pdf › Supplement/Supplement 2/Species 1914 plots/Subtilisphaera terrula.pdf]

# Species *Suessia swabiana*

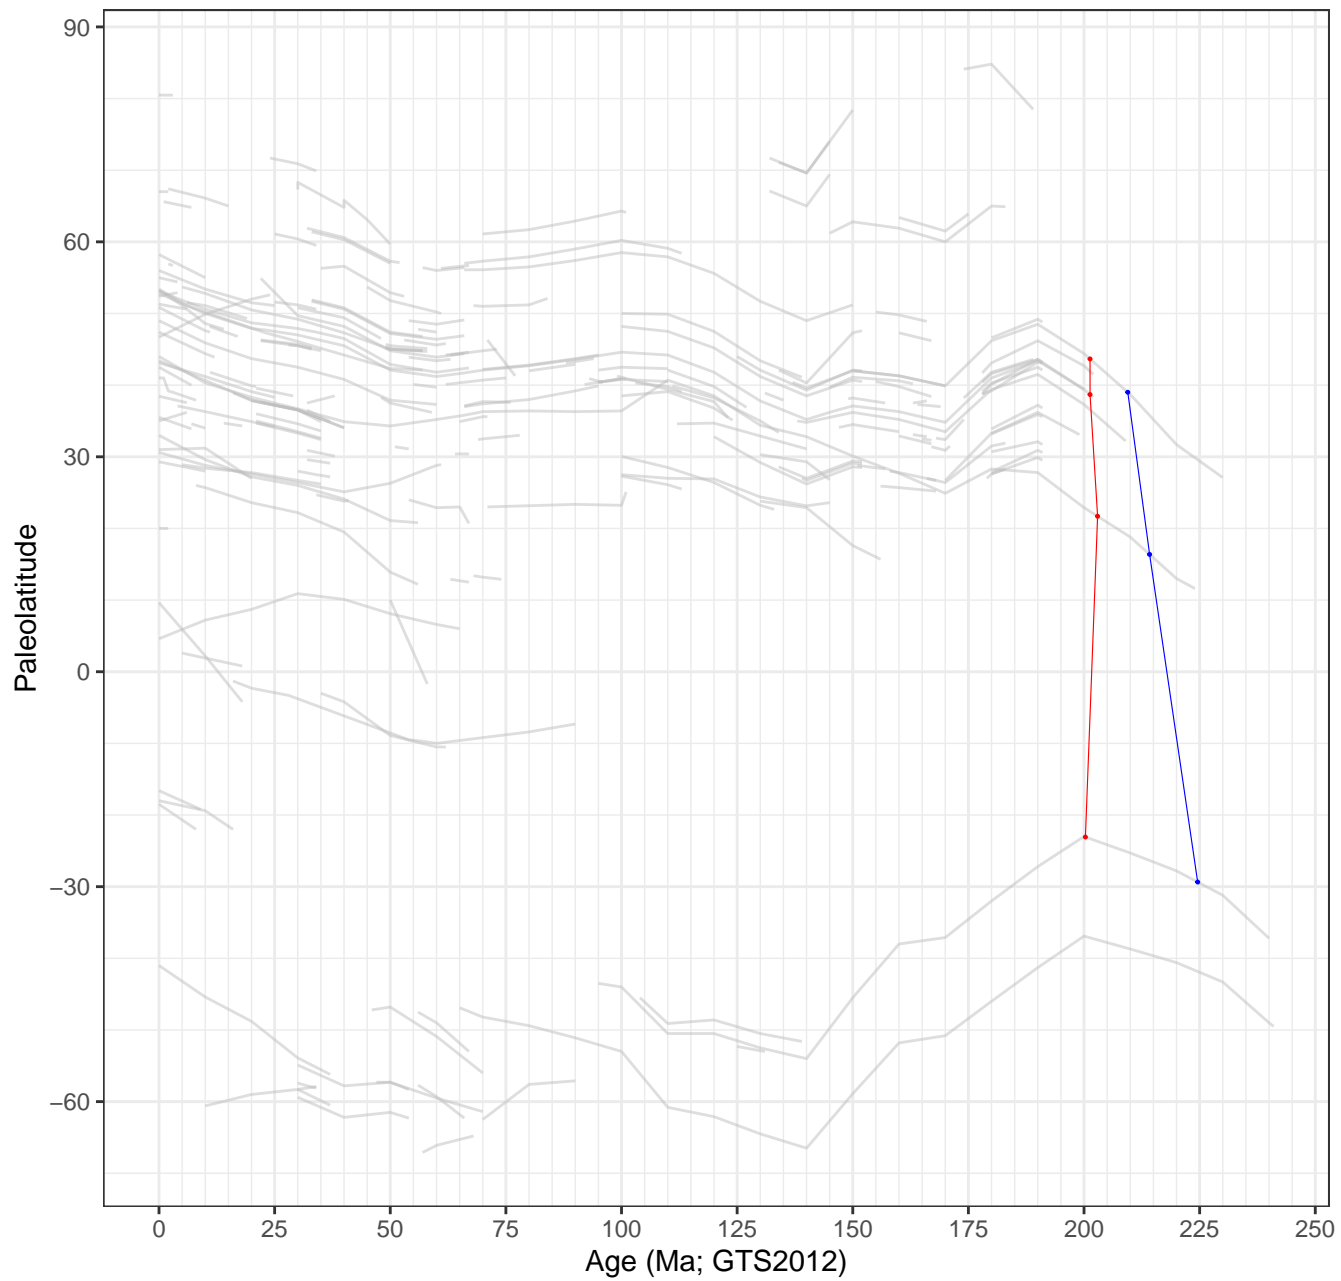

Supplement: Supplementary file 2459 [file Suessia swabiana.pdf › Supplement/Supplement 2/Species 1914 plots/Suessia swabiana.pdf]

# Species *Sumatradinium druggii*

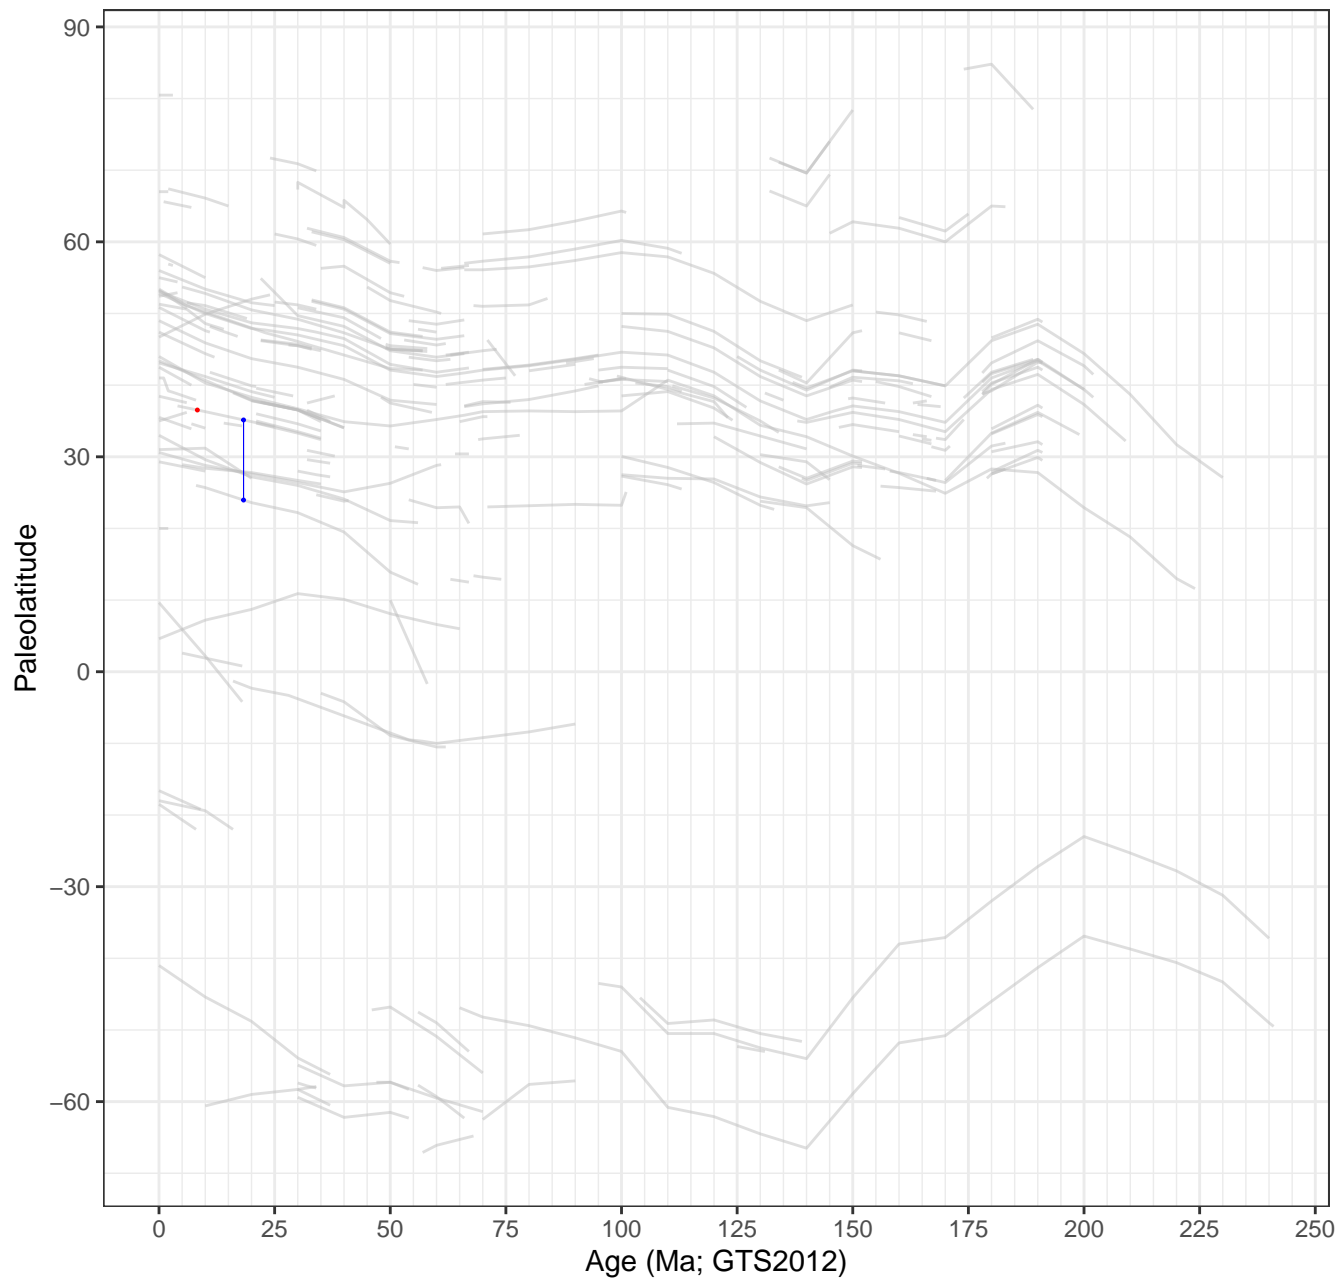

Supplement: Supplementary file 2460 [file Sumatradinium druggii.pdf › Supplement/Supplement 2/Species 1914 plots/Sumatradinium druggii.pdf]

# Species *Sumatradinium hamulatum*

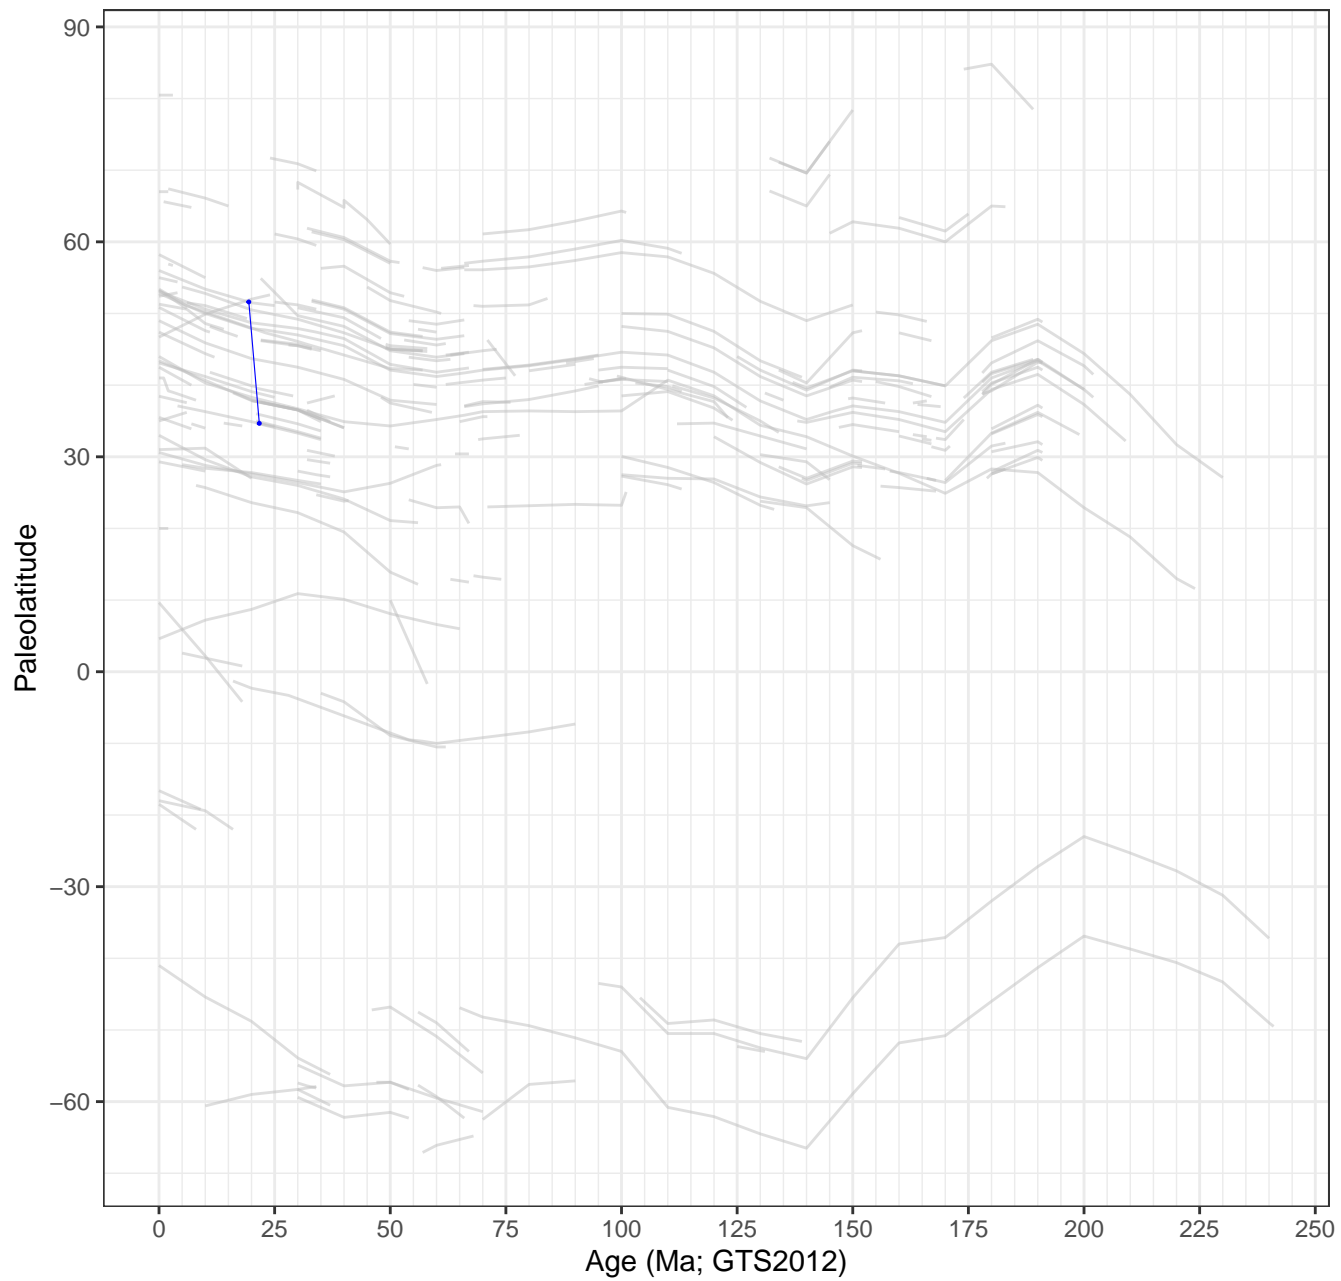

Supplement: Supplementary file 2461 [file Sumatradinium hamulatum.pdf › Supplement/Supplement 2/Species 1914 plots/Sumatradinium hamulatum.pdf]

# Species *Sumatradinium hispidum*

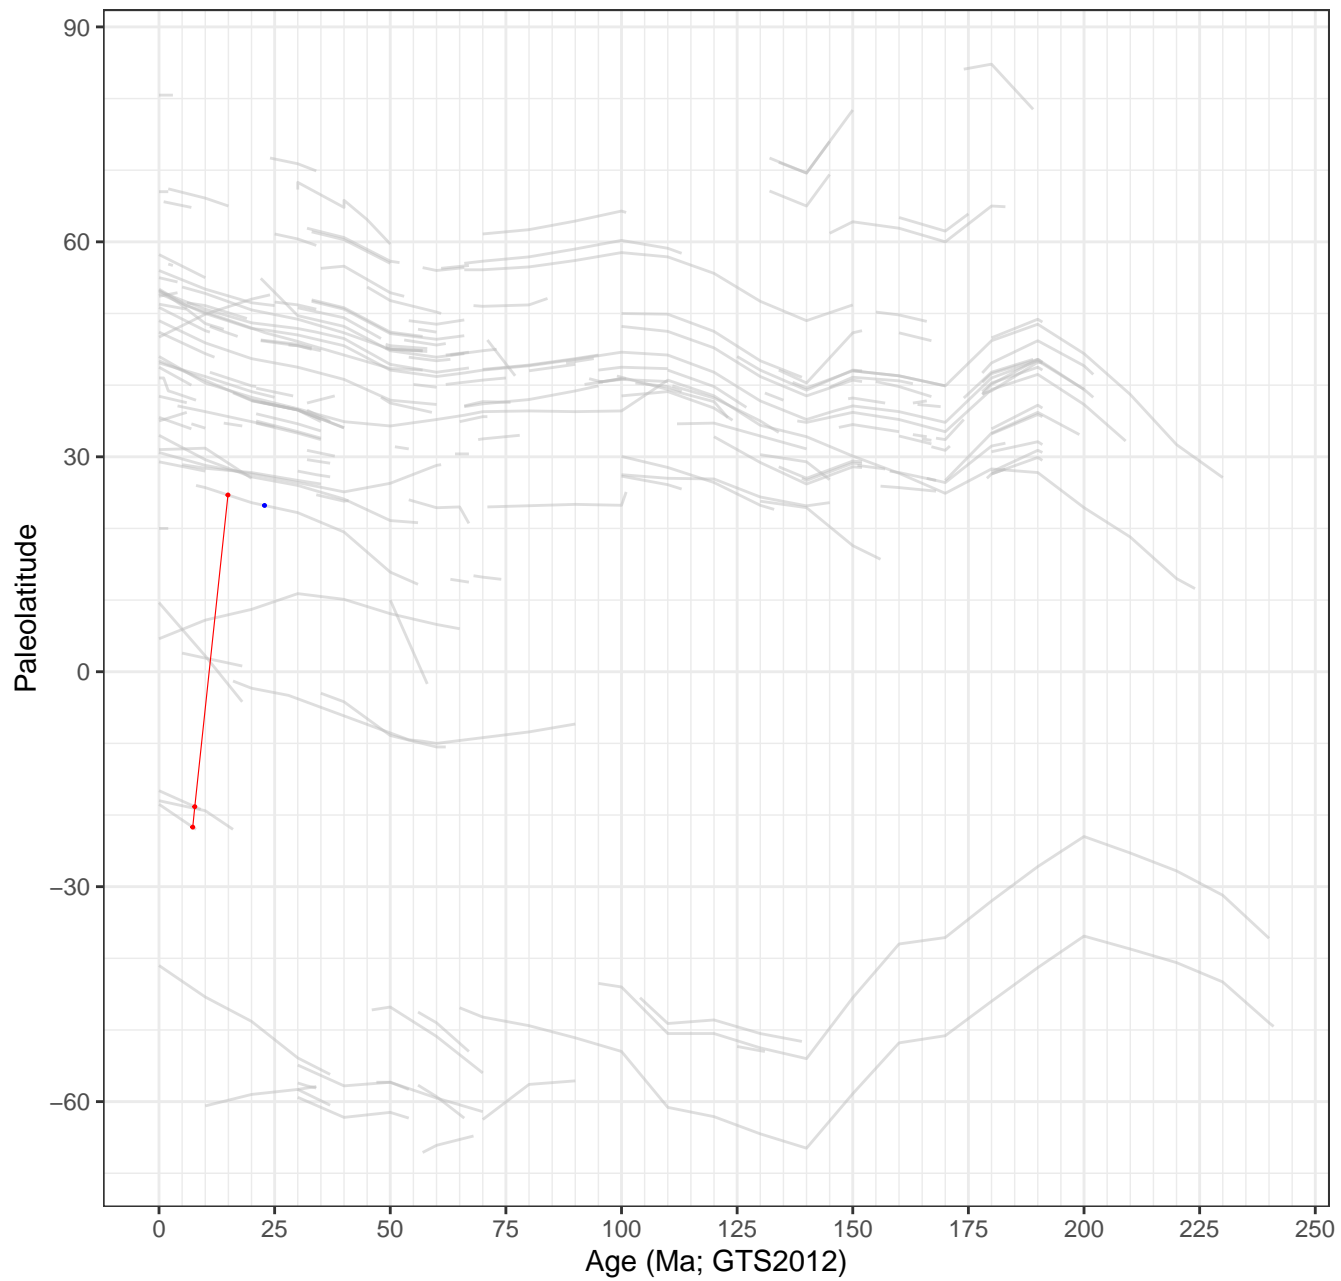

Supplement: Supplementary file 2462 [file Sumatradinium hispidum.pdf › Supplement/Supplement 2/Species 1914 plots/Sumatradinium hispidum.pdf]

# Species *Sumatradinium soucouyantae*

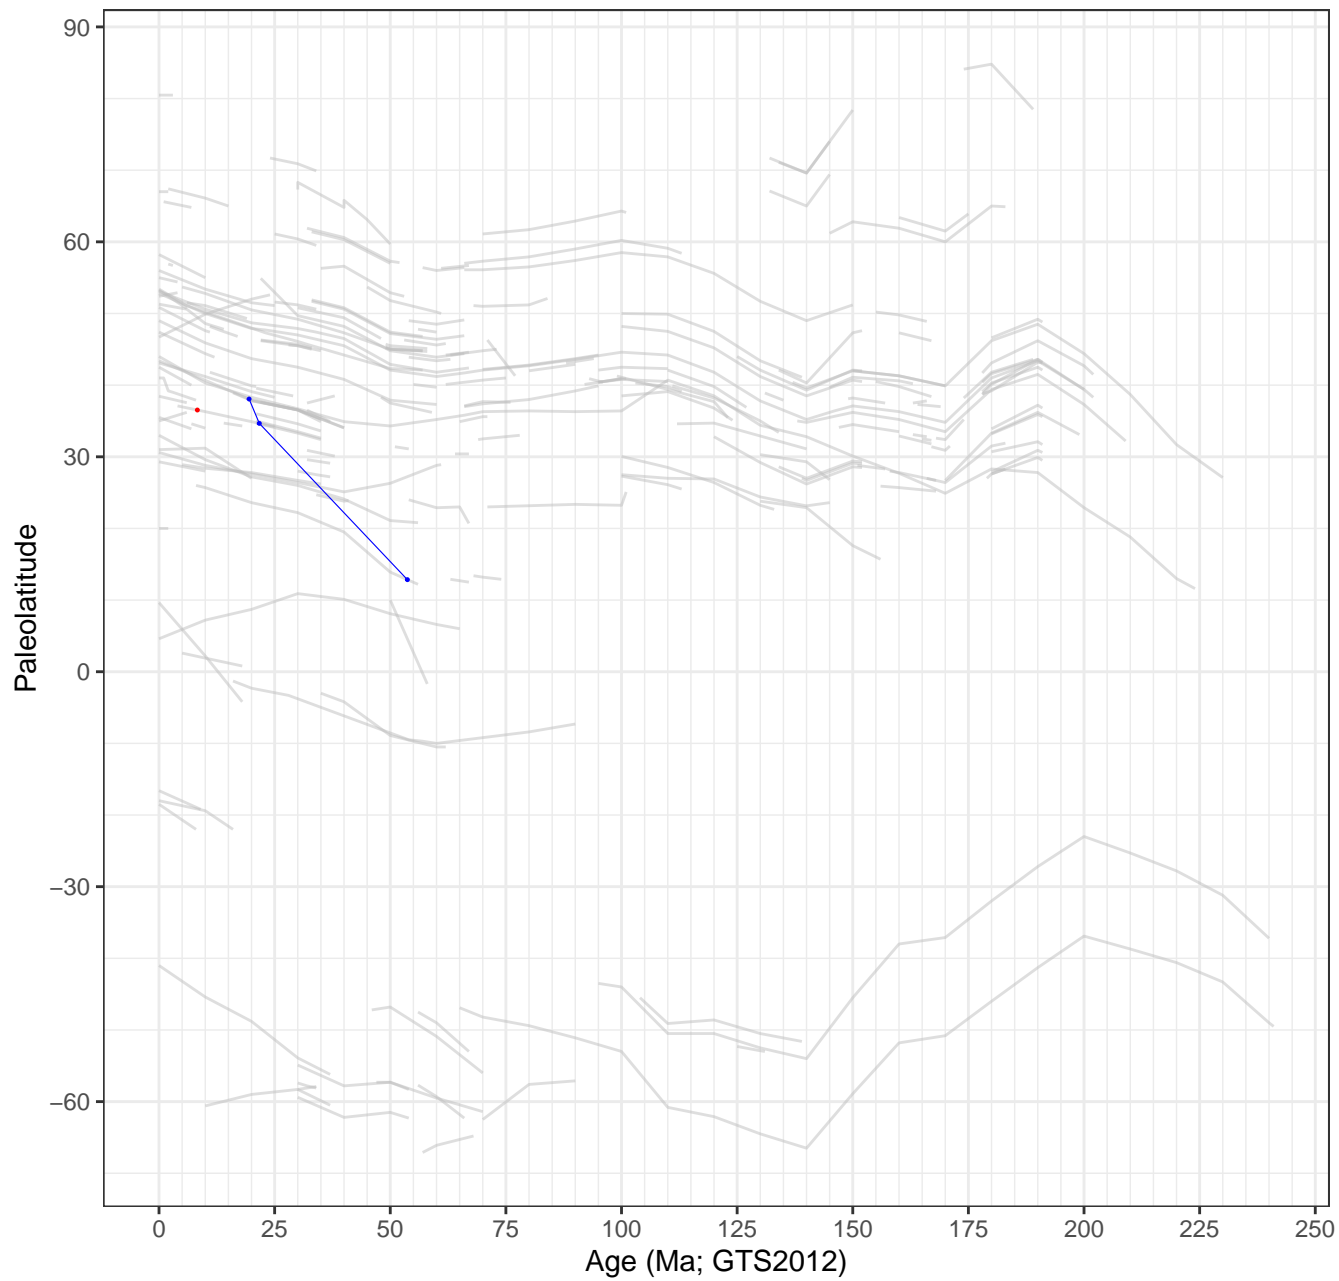

Supplement: Supplementary file 2463 [file Sumatradinium soucouyantae.pdf › Supplement/Supplement 2/Species 1914 plots/Sumatradinium soucouyantae.pdf]

# Species Sumatradinium spp.

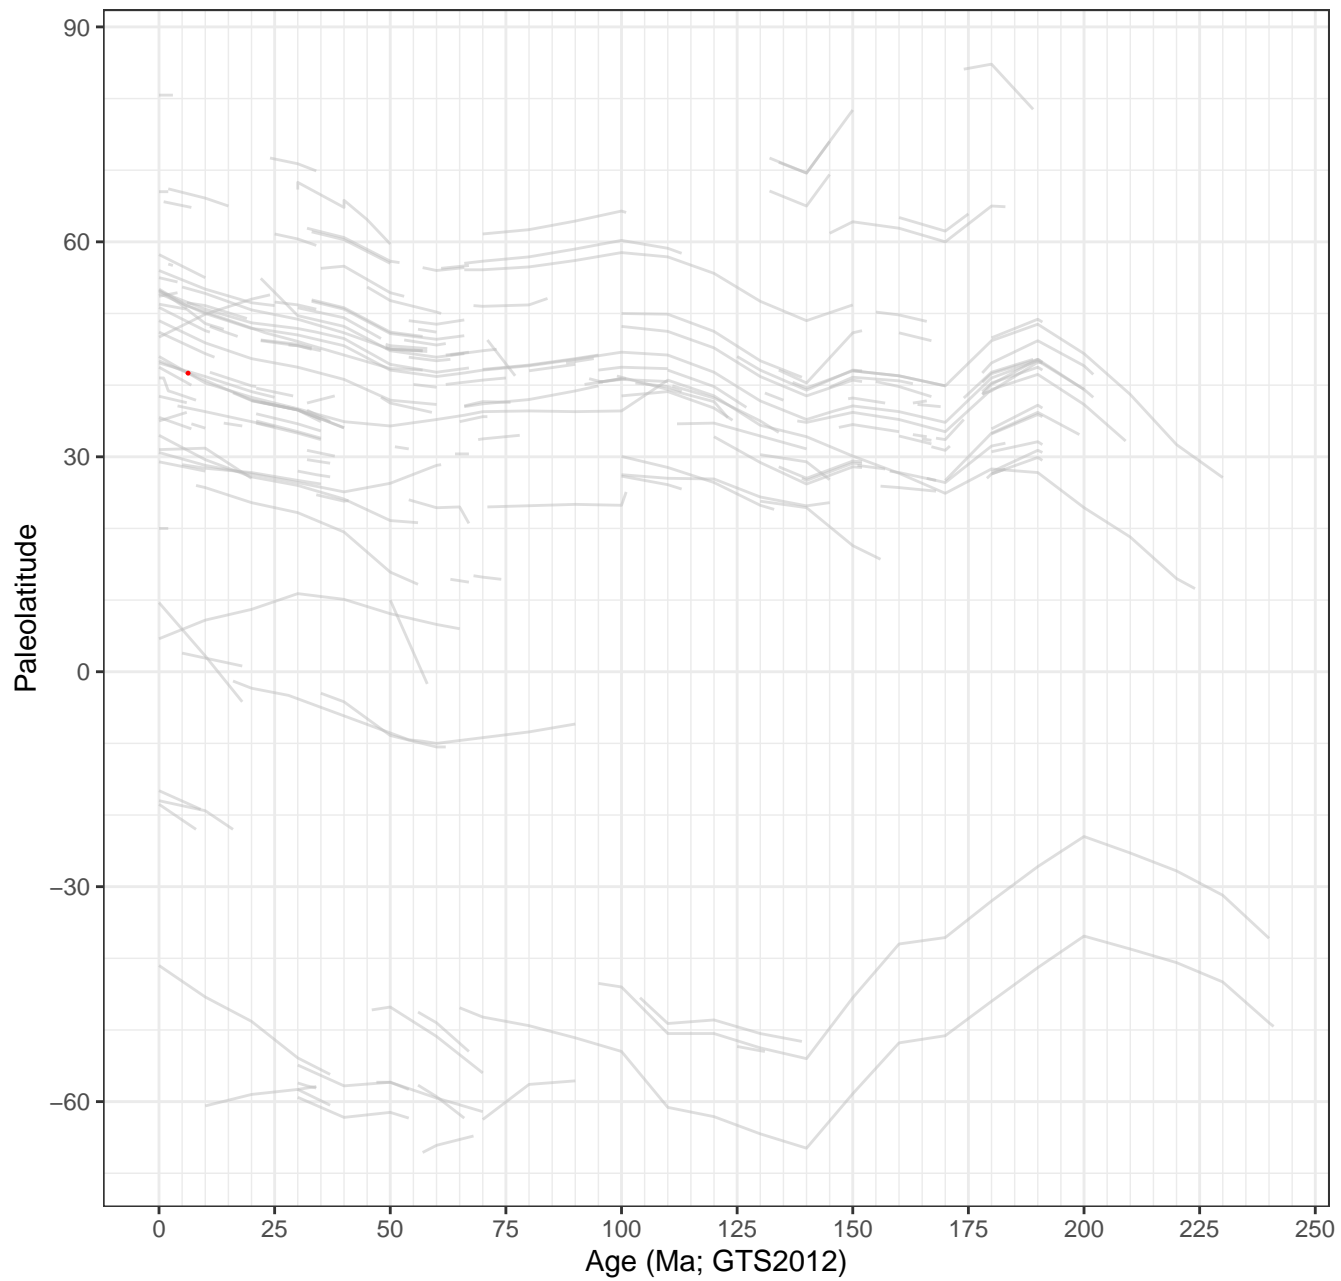

Supplement: Supplementary file 2464 [file Sumatradinium spp..pdf › Supplement/Supplement 2/Species 1914 plots/Sumatradinium spp..pdf]

# Species *Surculosphaeridium basifurcatum*

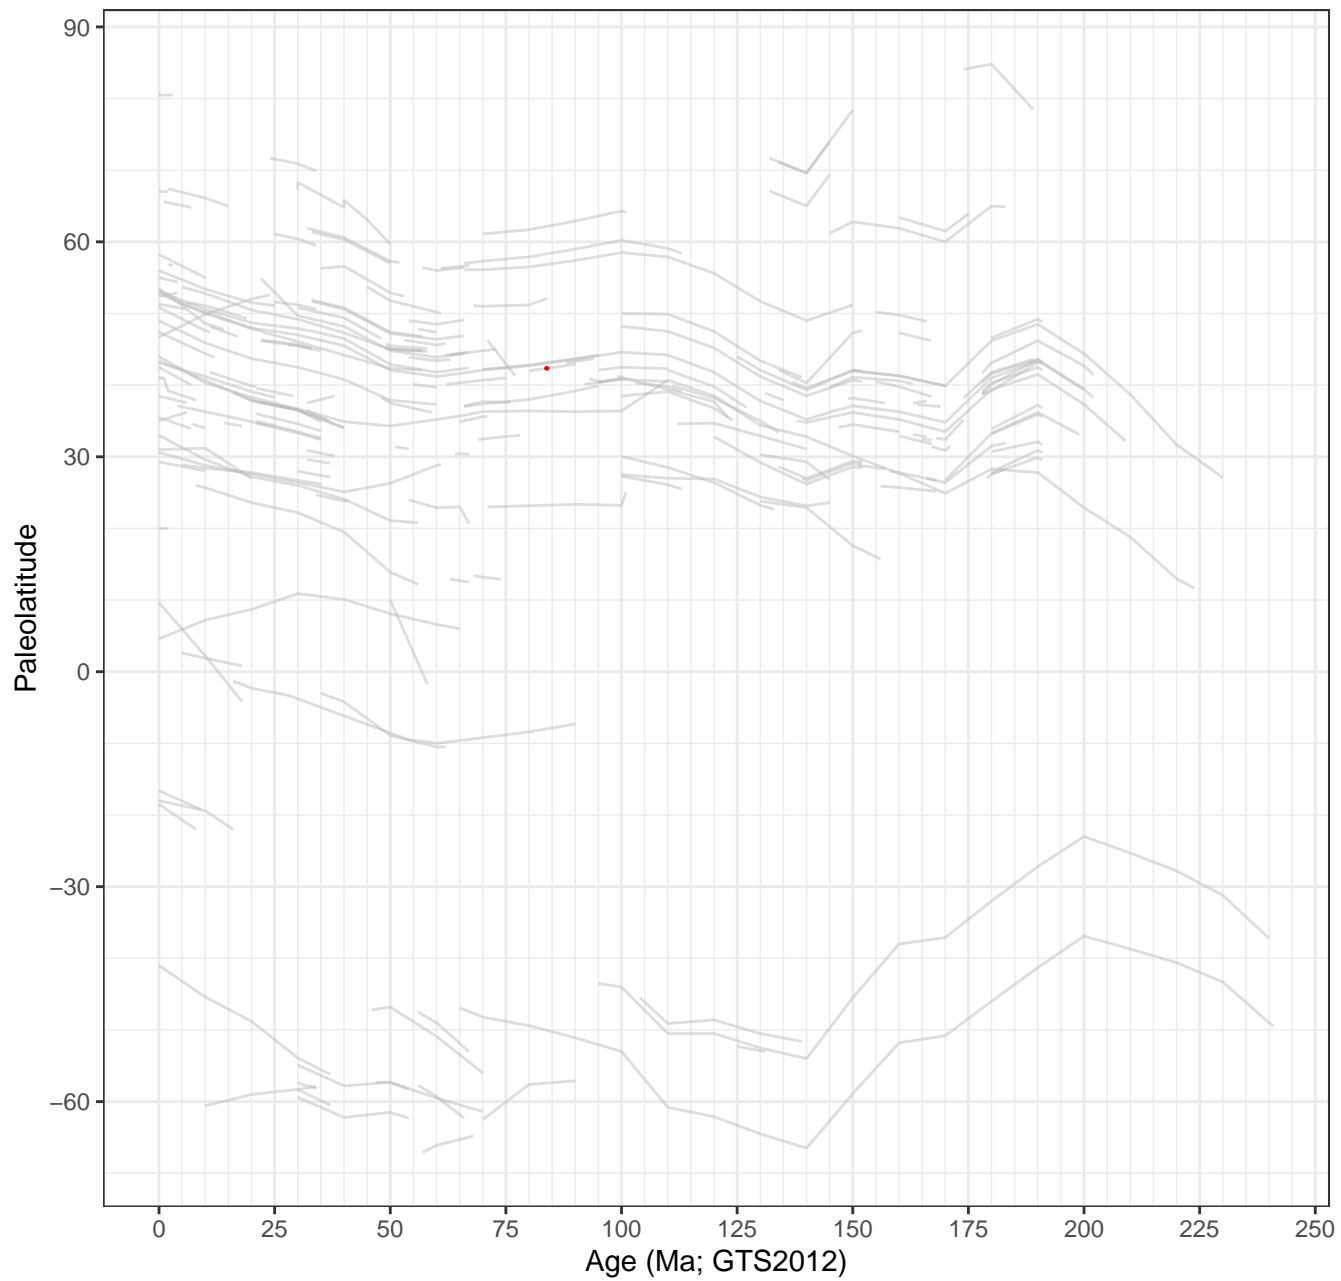

Supplement: Supplementary file 2465 [file Surculosphaeridium basifurcatum.pdf › Supplement/Supplement 2/Species 1914 plots/Surculosphaeridium basifurcatum.pdf]

# Species *Surculosphaeridium belowii*

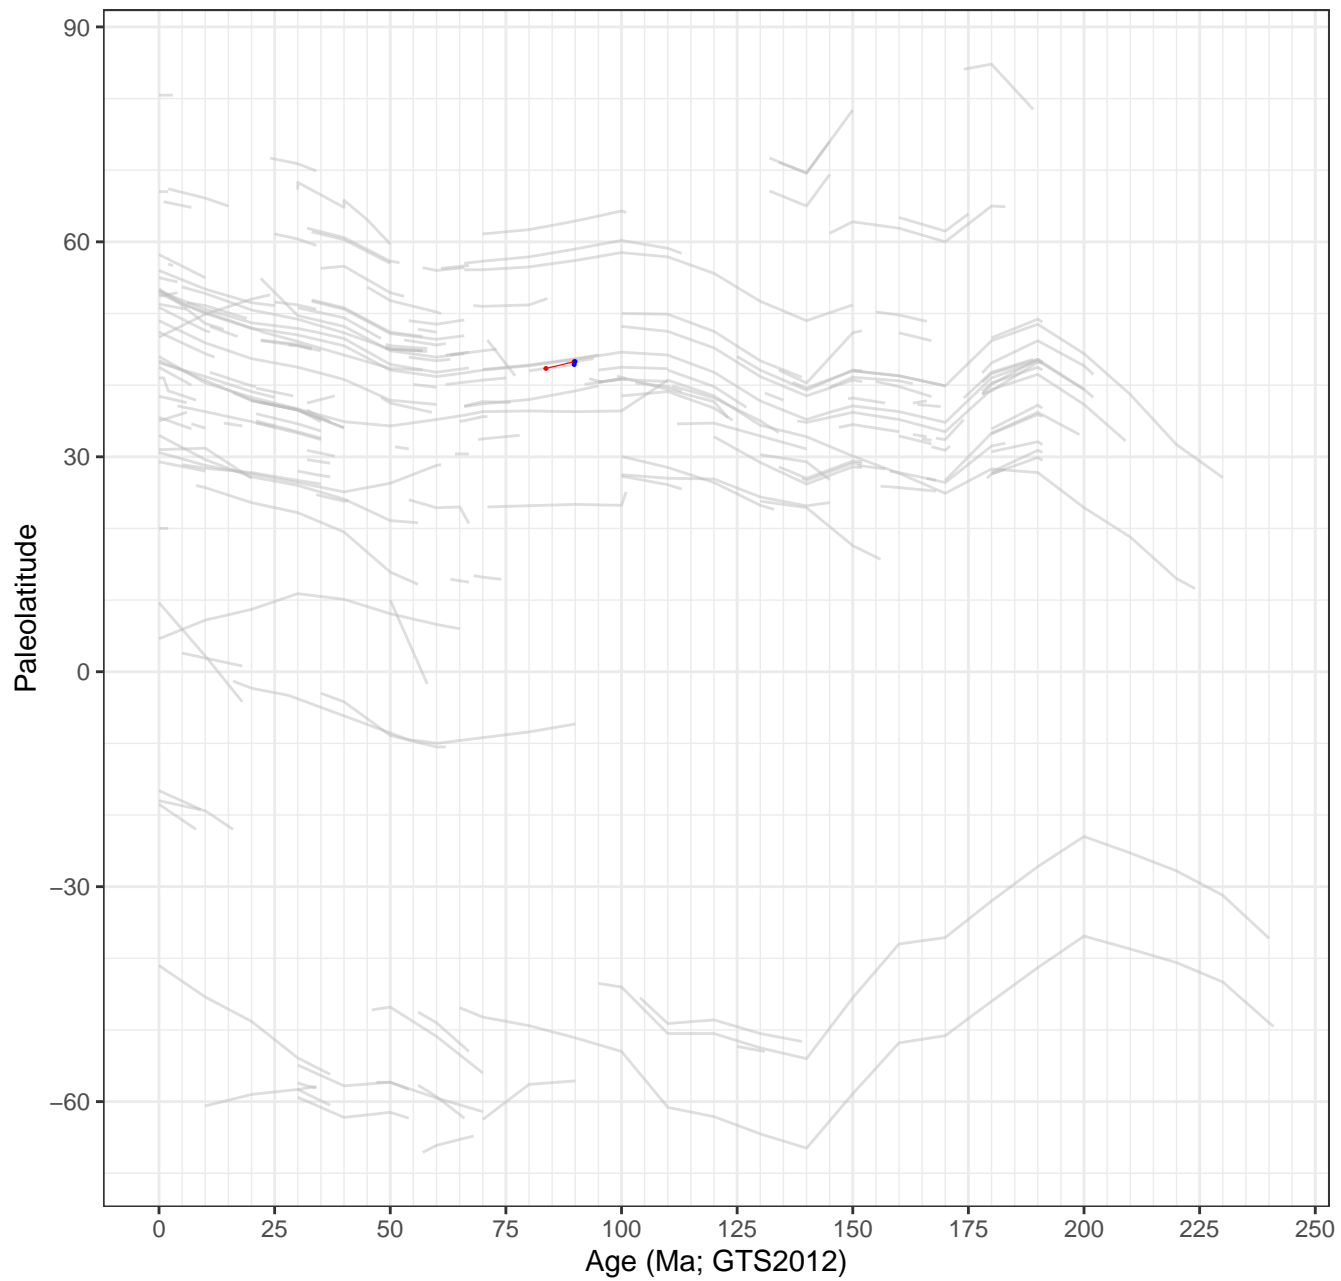

Supplement: Supplementary file 2466 [file Surculosphaeridium belowii.pdf › Supplement/Supplement 2/Species 1914 plots/Surculosphaeridium belowii.pdf]

# Species *Surculosphaeridium cassospinum*

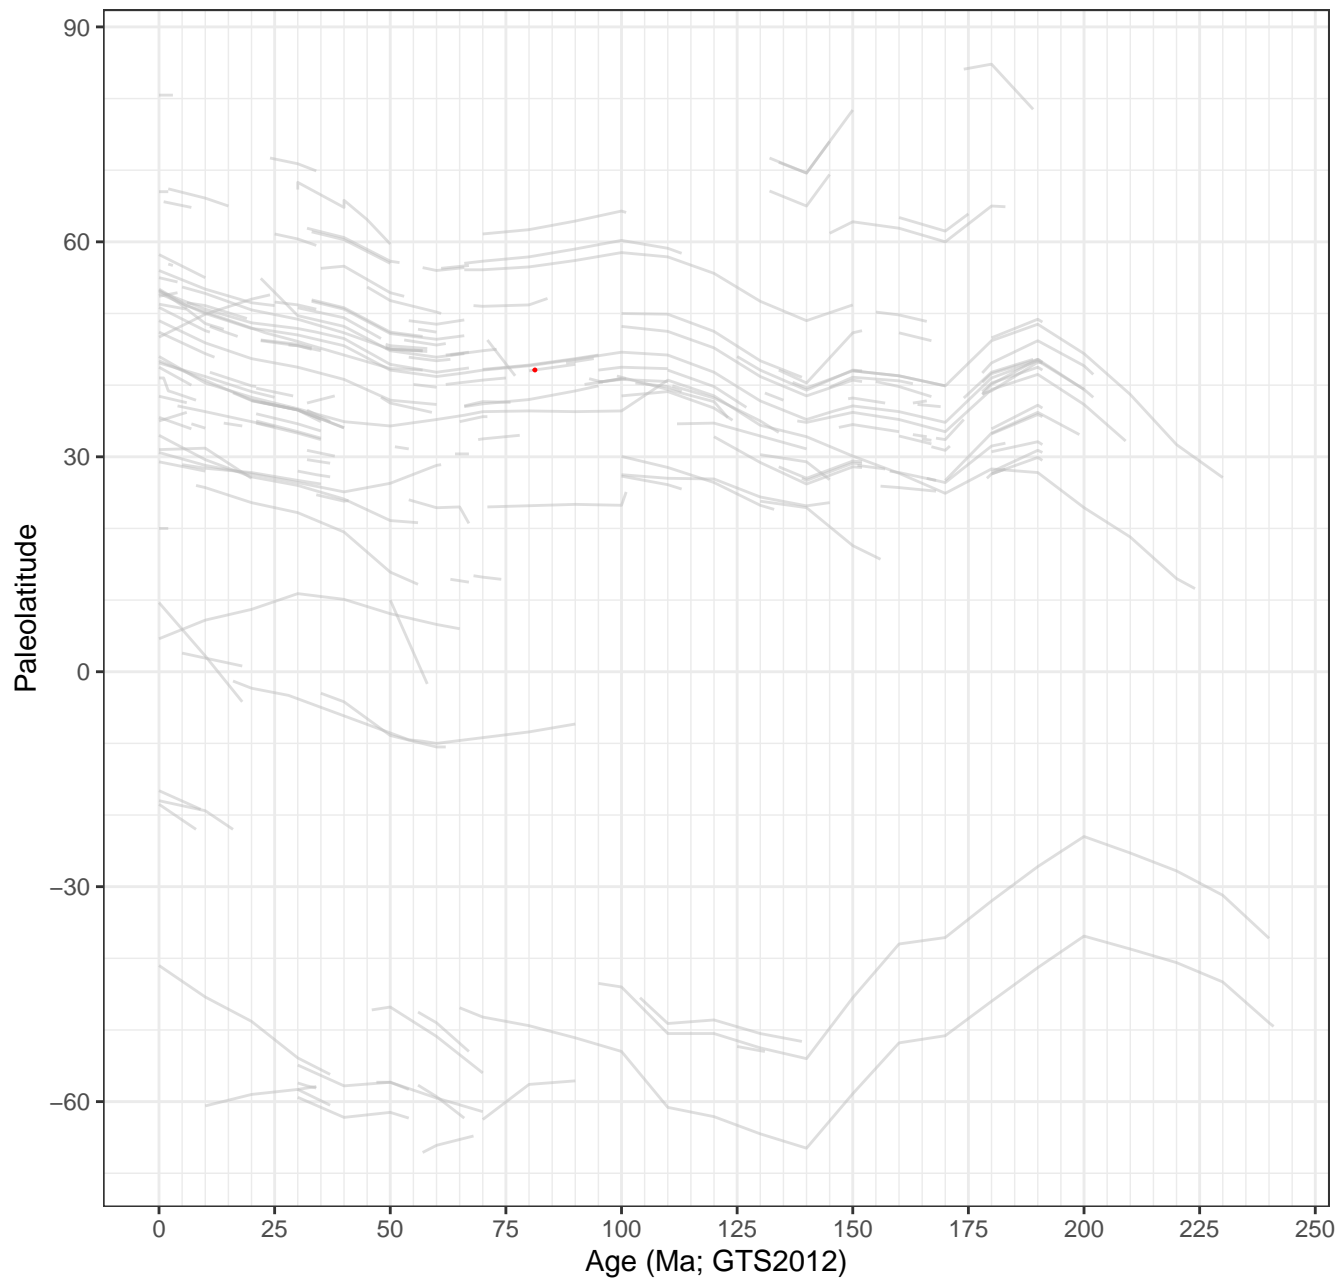

Supplement: Supplementary file 2467 [file Surculosphaeridium cassospinum.pdf › Supplement/Supplement 2/Species 1914 plots/Surculosphaeridium cassospinum.pdf]

# Species *Surculosphaeridium cribratubiferum*

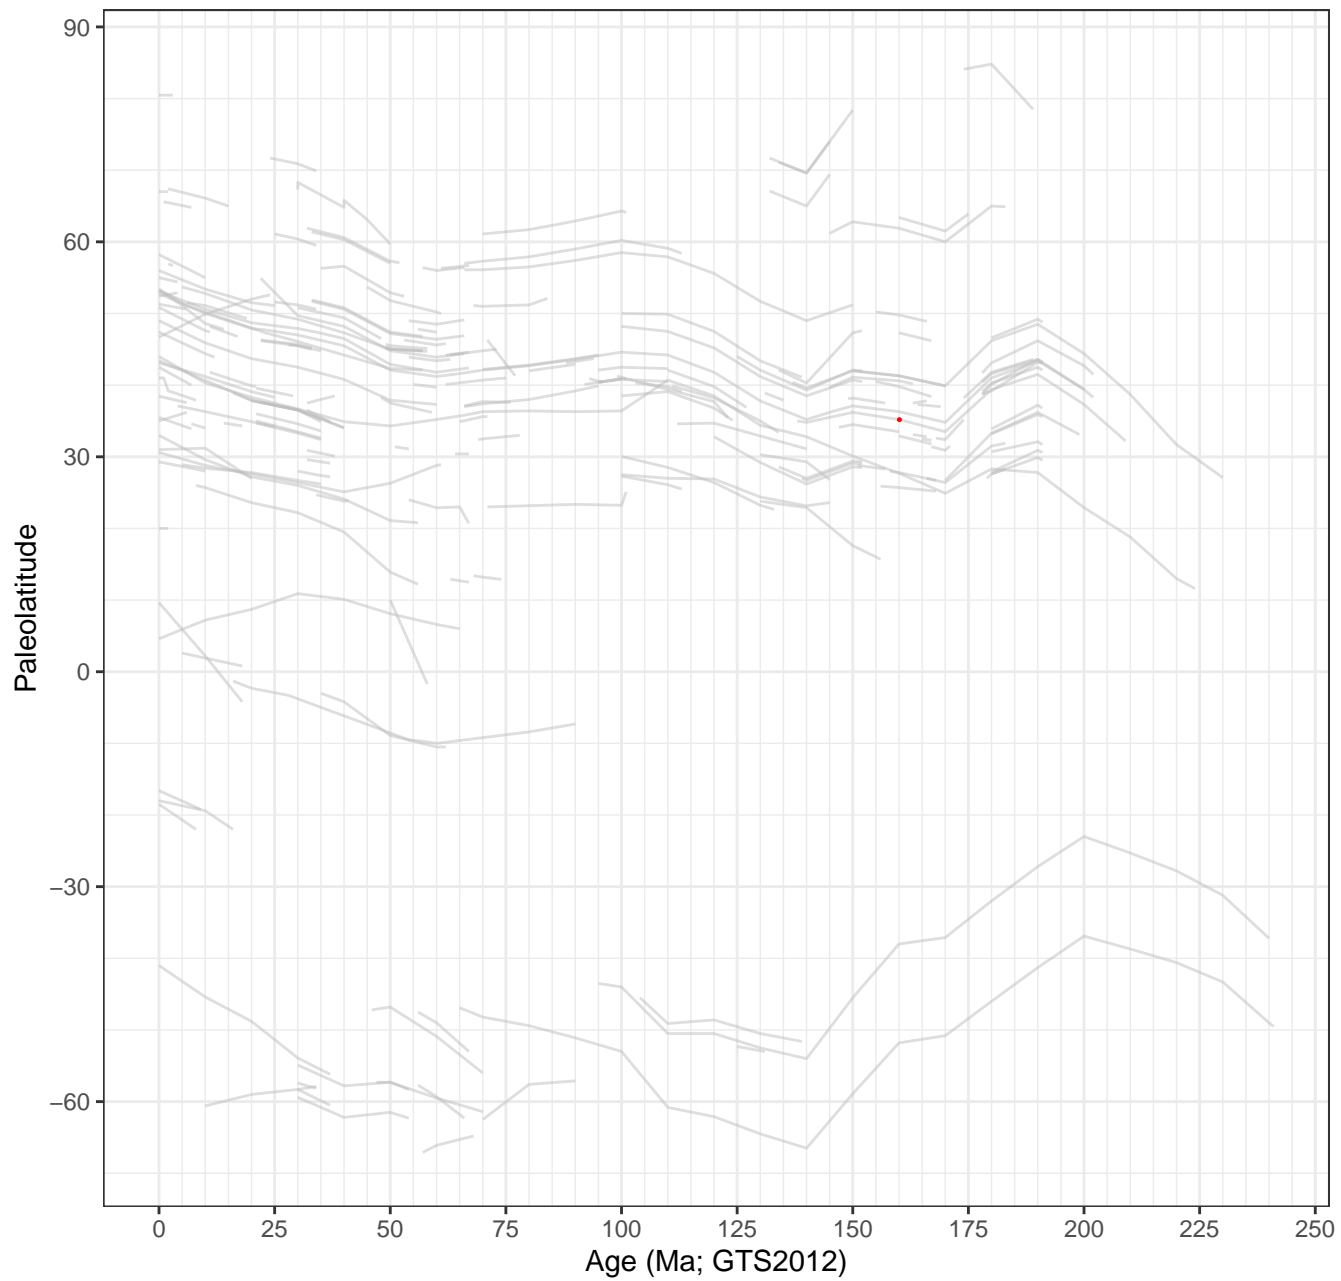

Supplement: Supplementary file 2468 [file Surculosphaeridium cribrotubiferum.pdf › Supplement/Supplement 2/Species 1914 plots/Surculosphaeridium cribrotubiferum.pdf]

# Species *Surculosphaeridium longifurcatum*

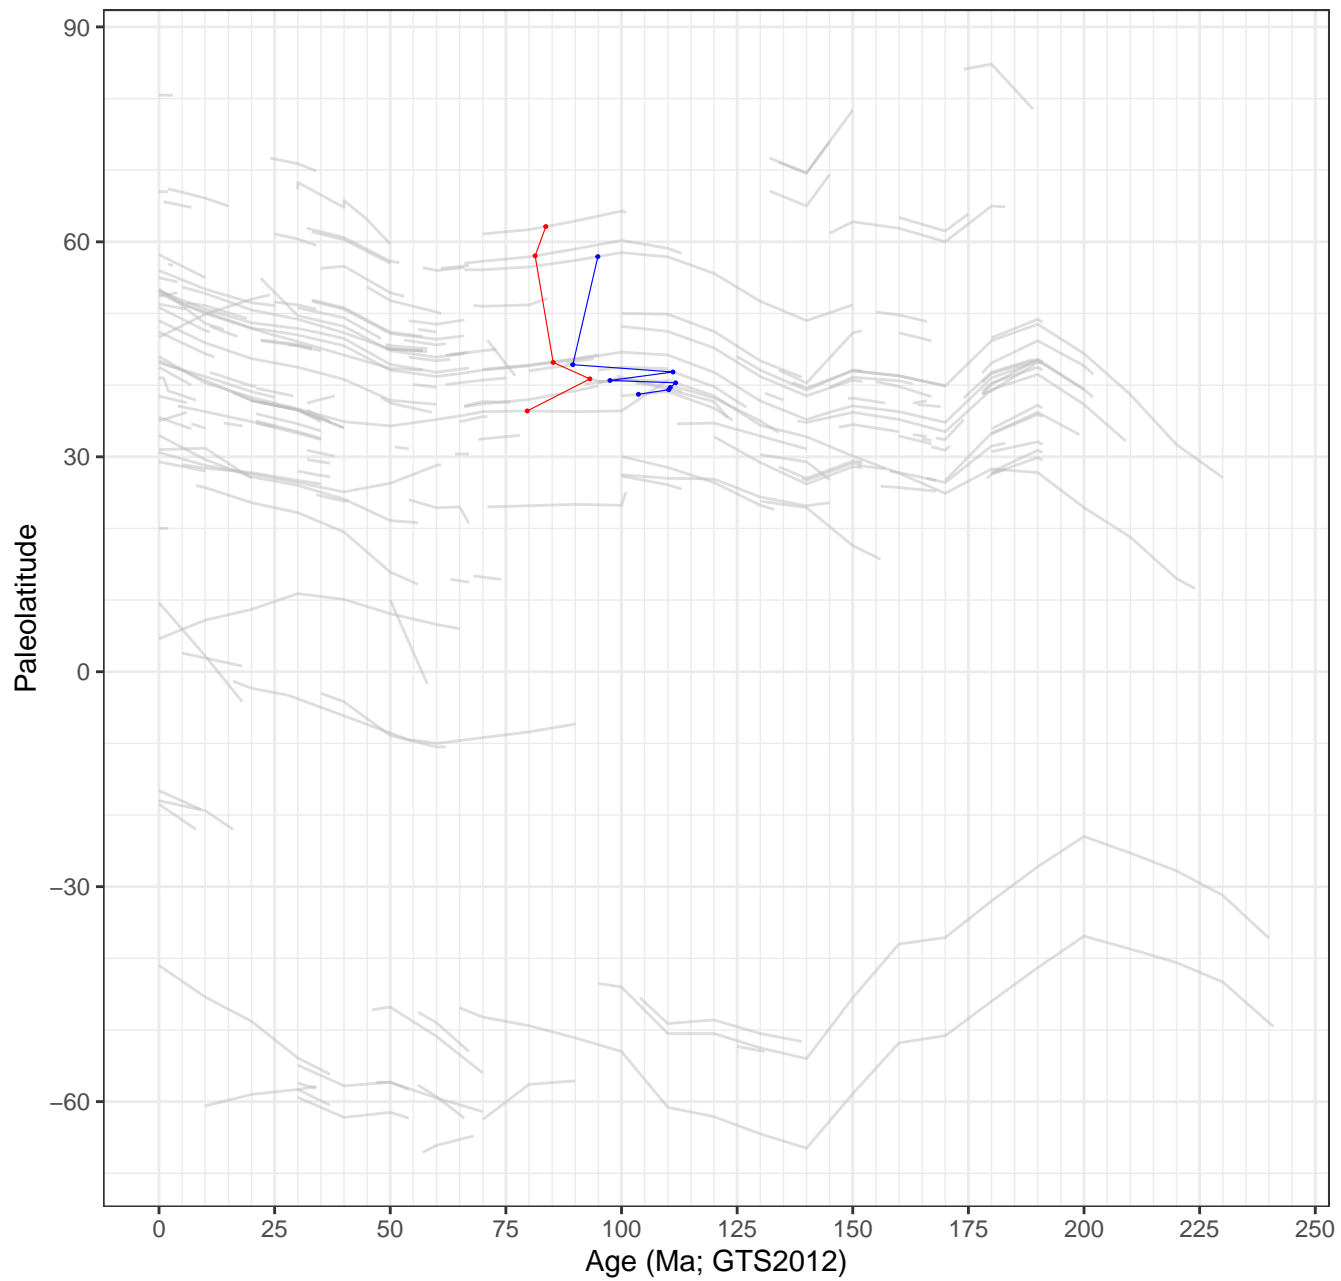

Supplement: Supplementary file 2469 [file Surculosphaeridium longifurcatum.pdf › Supplement/Supplement 2/Species 1914 plots/Surculosphaeridium longifurcatum.pdf]

# Species *Surculosphaeridium trunculum*

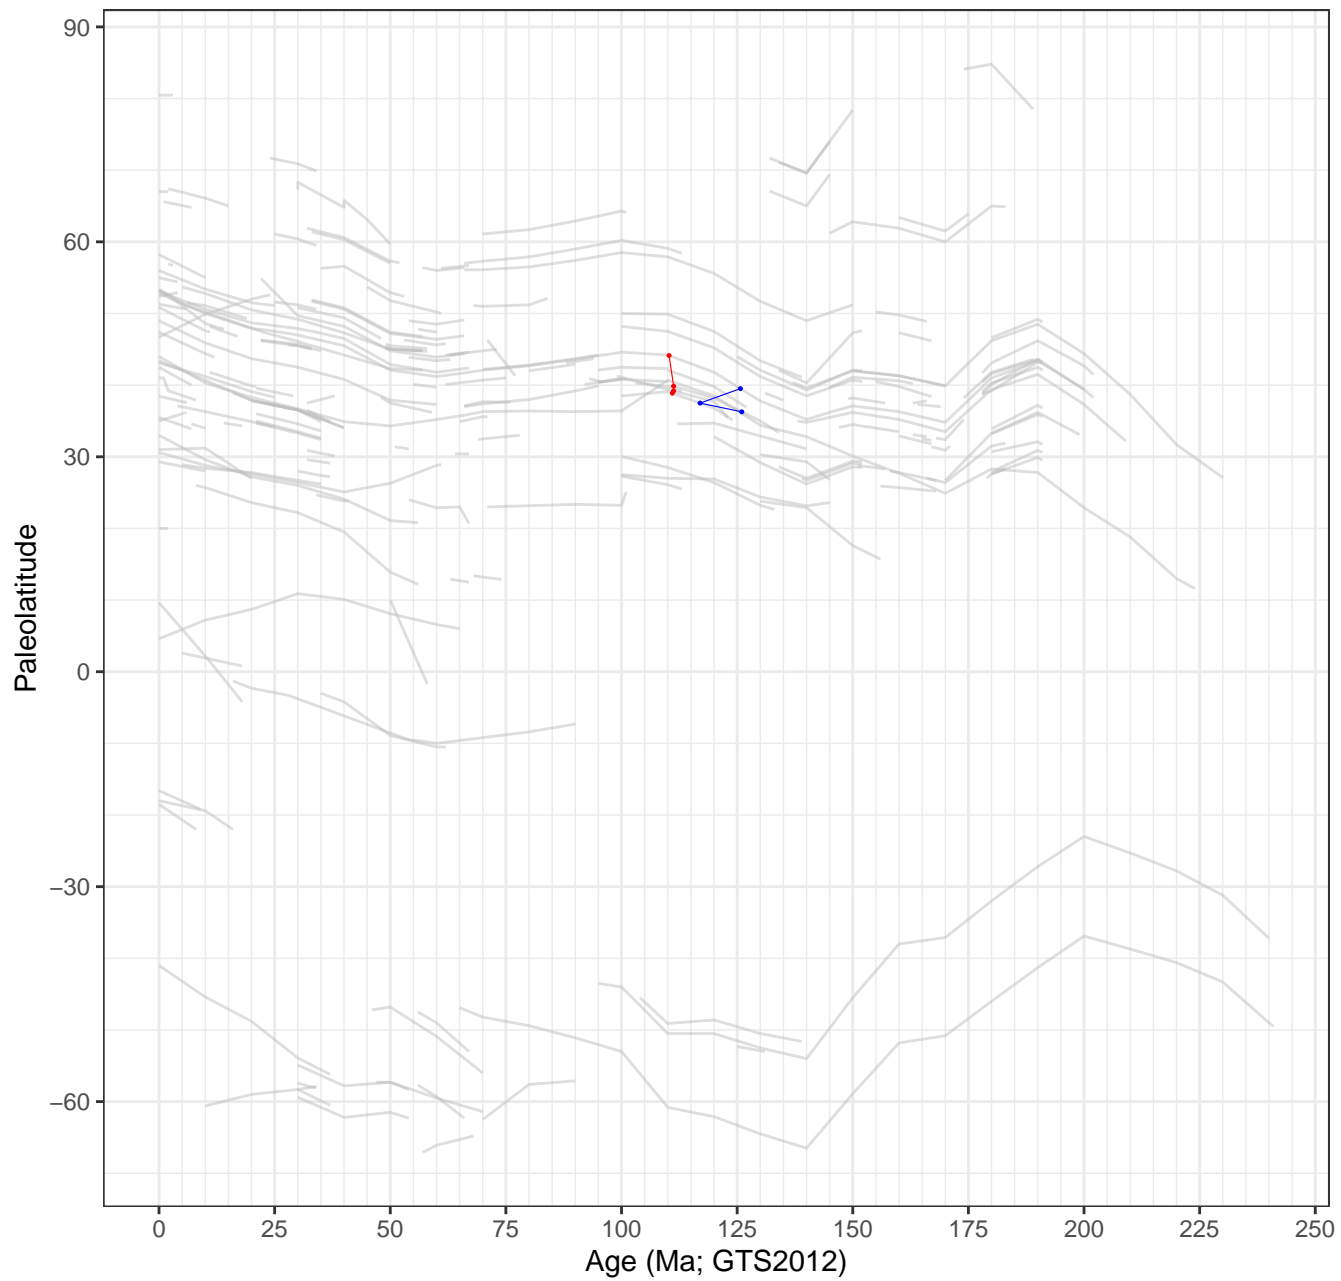

Supplement: Supplementary file 2470 [file Surculosphaeridium trunculum.pdf › Supplement/Supplement 2/Species 1914 plots/Surculosphaeridium trunculum.pdf]

# Species *Surculosphaeridium vestitum*

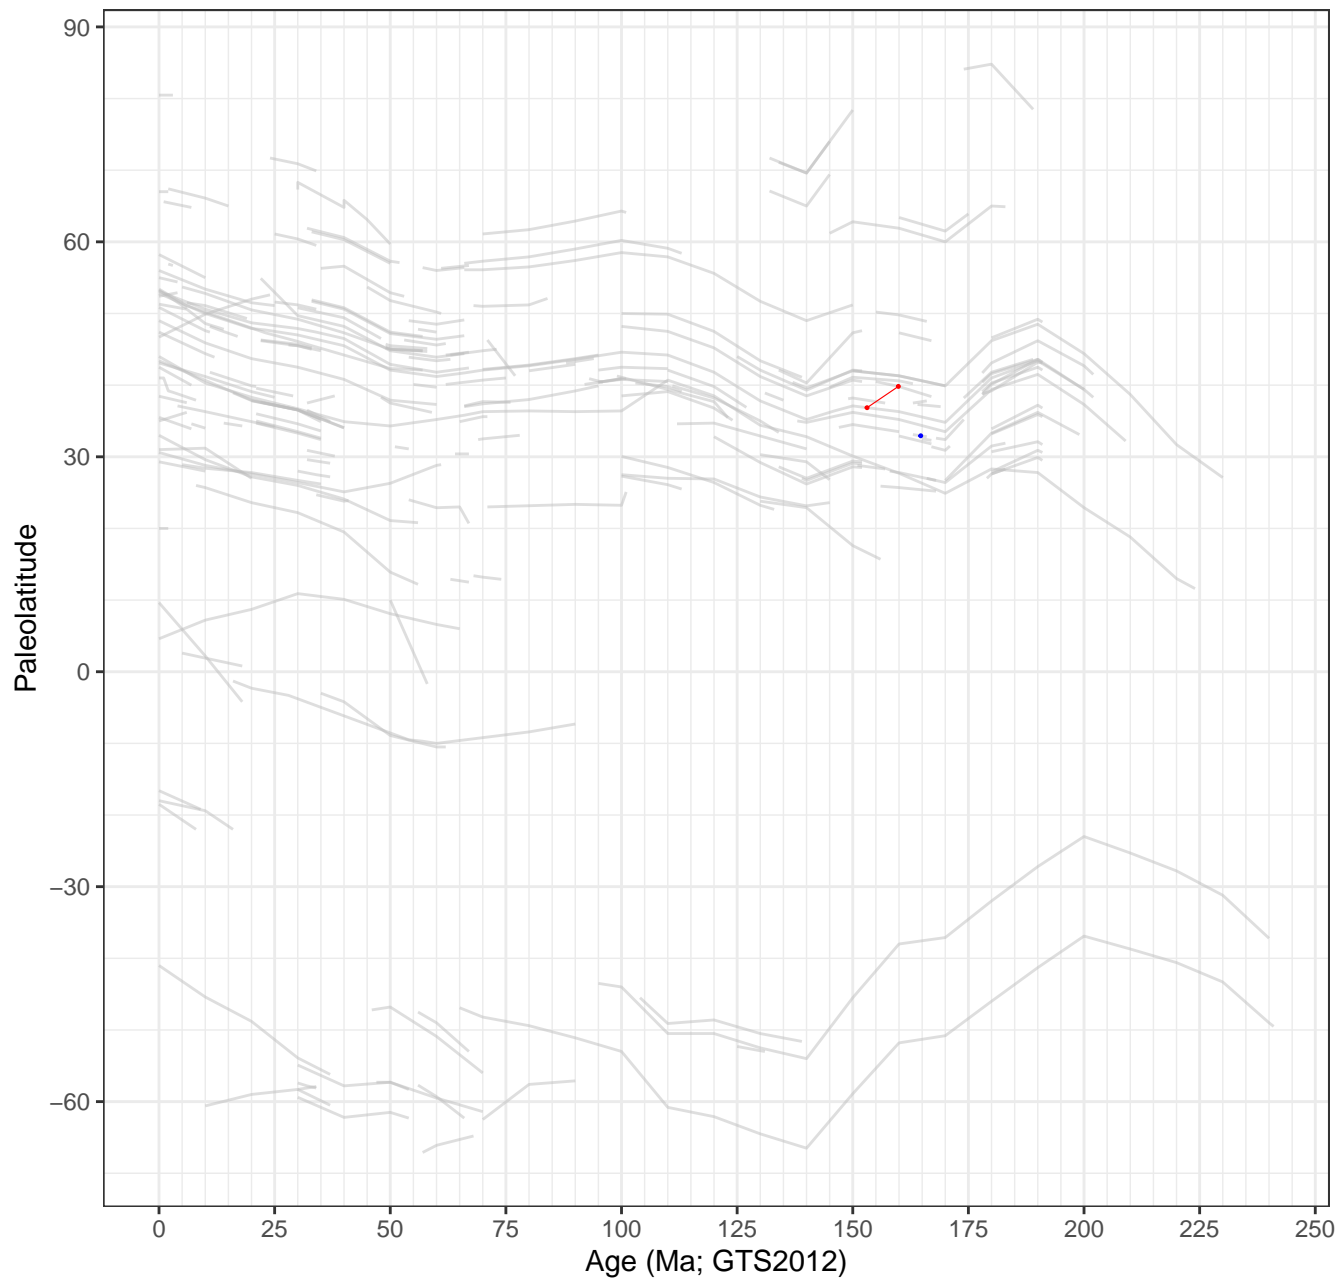

Supplement: Supplementary file 2471 [file Surculosphaeridium vestitum.pdf › Supplement/Supplement 2/Species 1914 plots/Surculosphaeridium vestitum.pdf]

# Species *Susadinium australe*

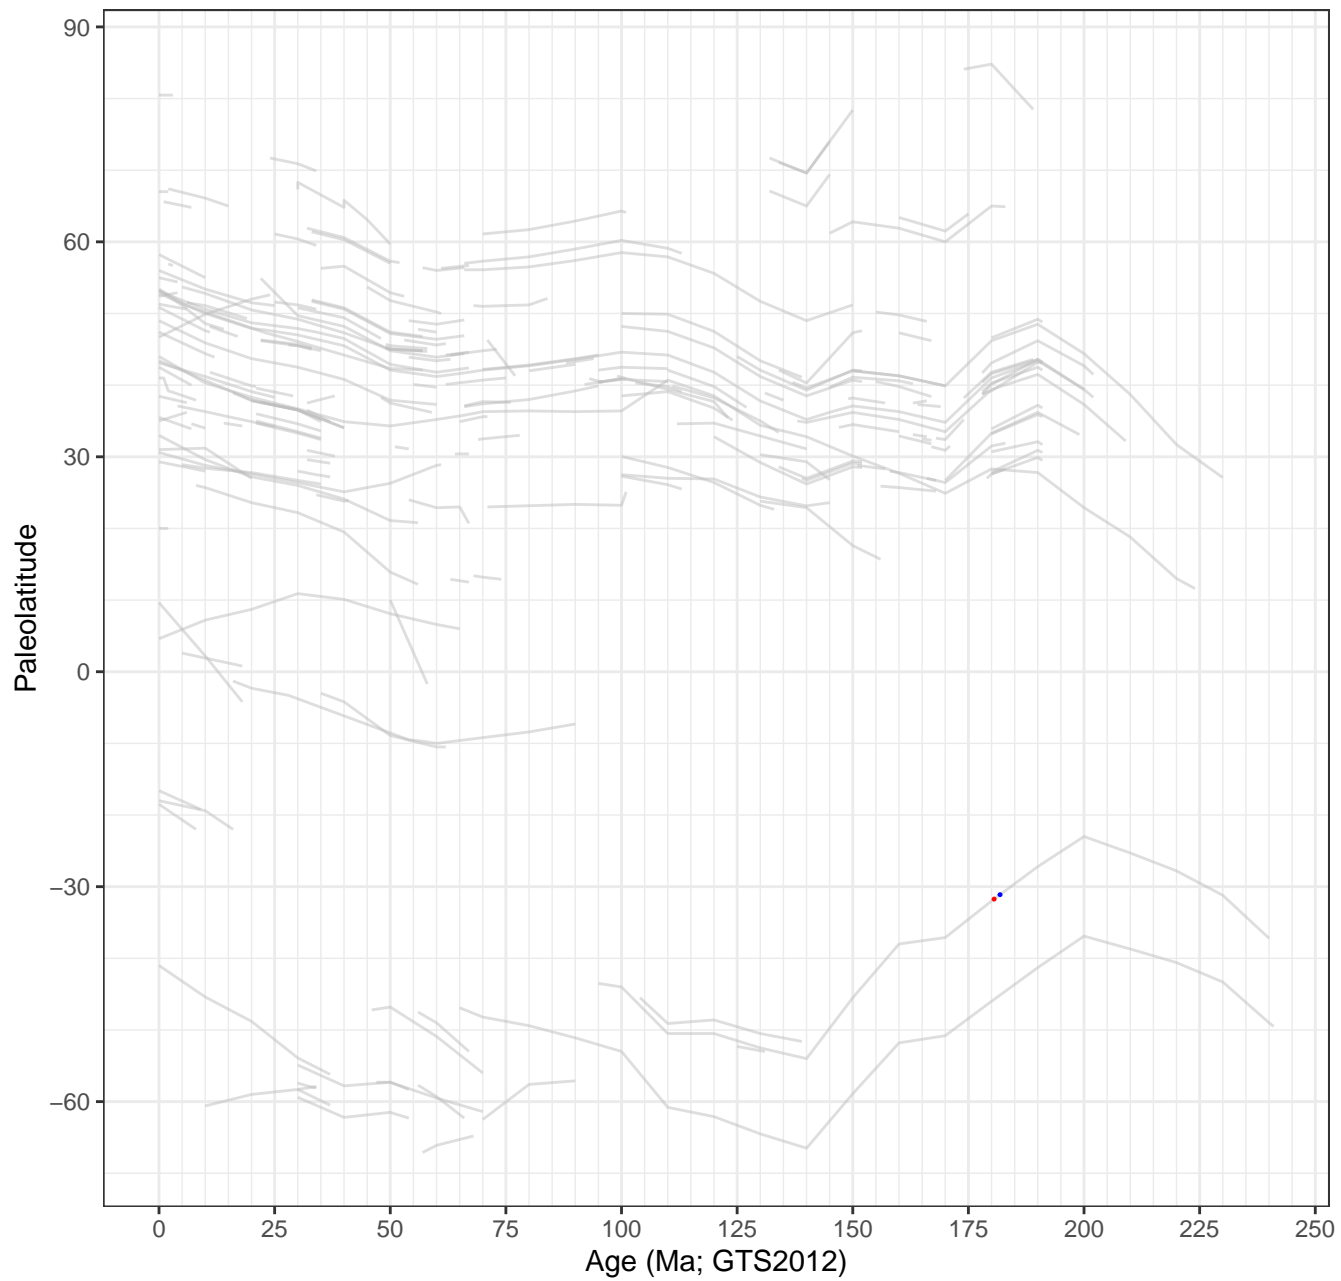

Supplement: Supplementary file 2472 [file Susadinium australe.pdf › Supplement/Supplement 2/Species 1914 plots/Susadinium australe.pdf]

# Species *Susadinium faustum*

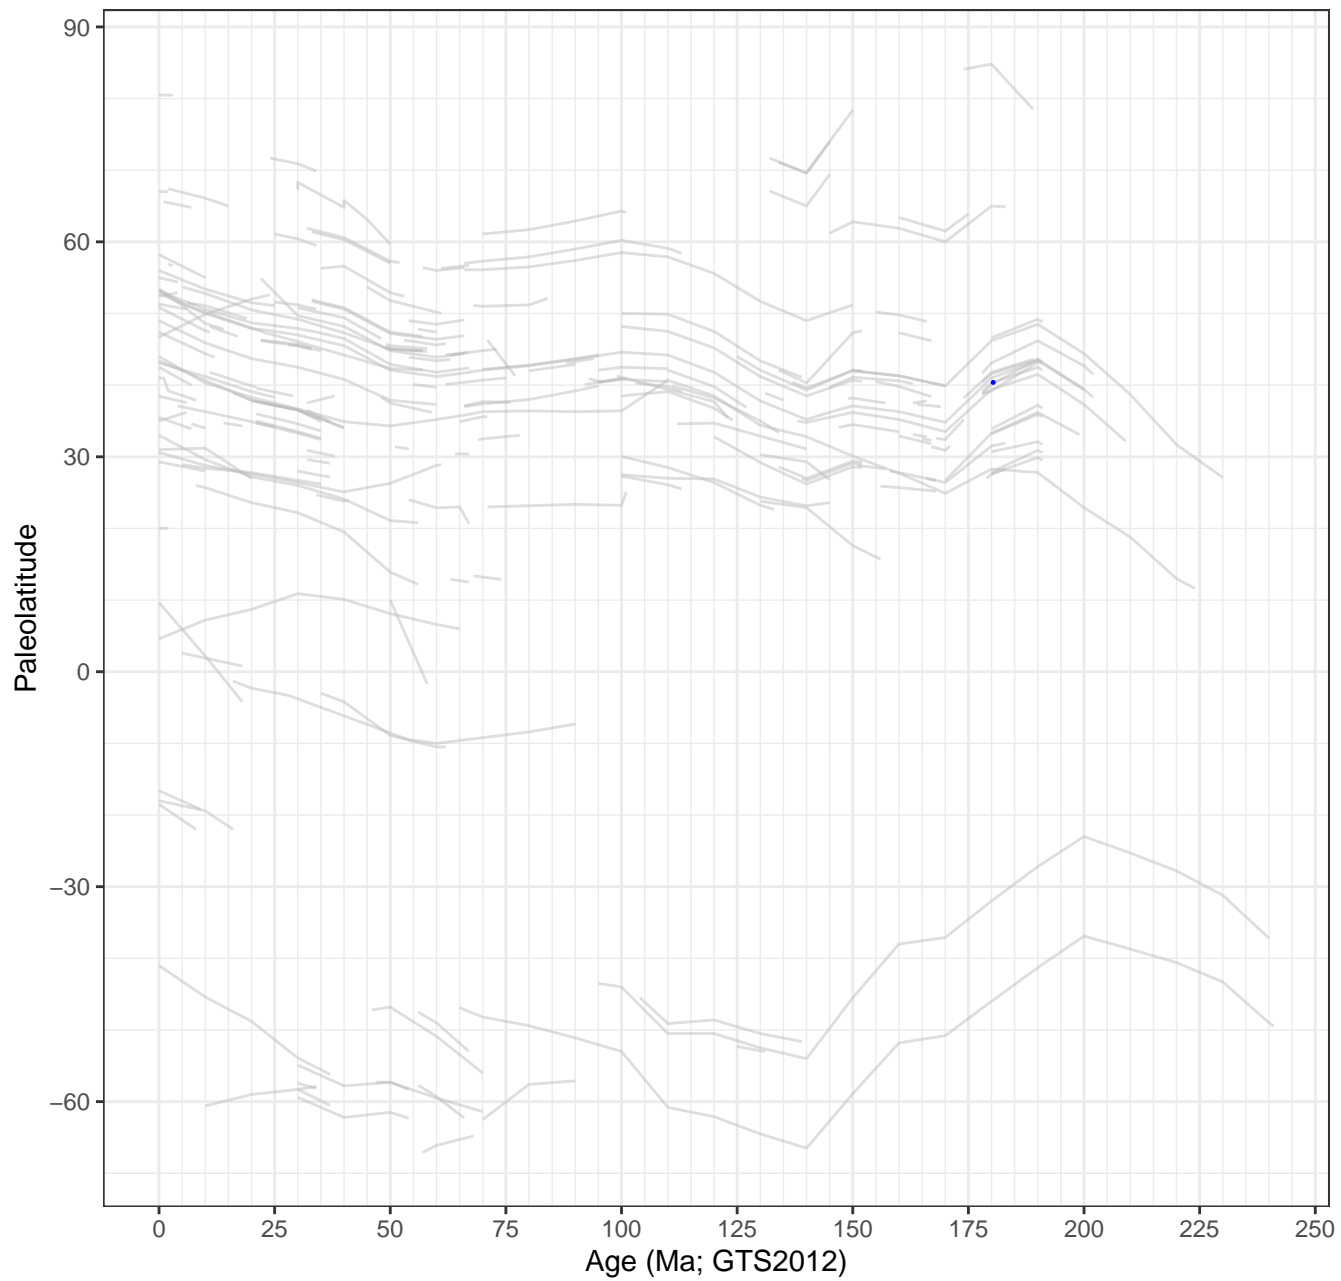

Supplement: Supplementary file 2473 [file Susadinium faustum.pdf › Supplement/Supplement 2/Species 1914 plots/Susadinium faustum.pdf]

# Species *Susadinium knertense*

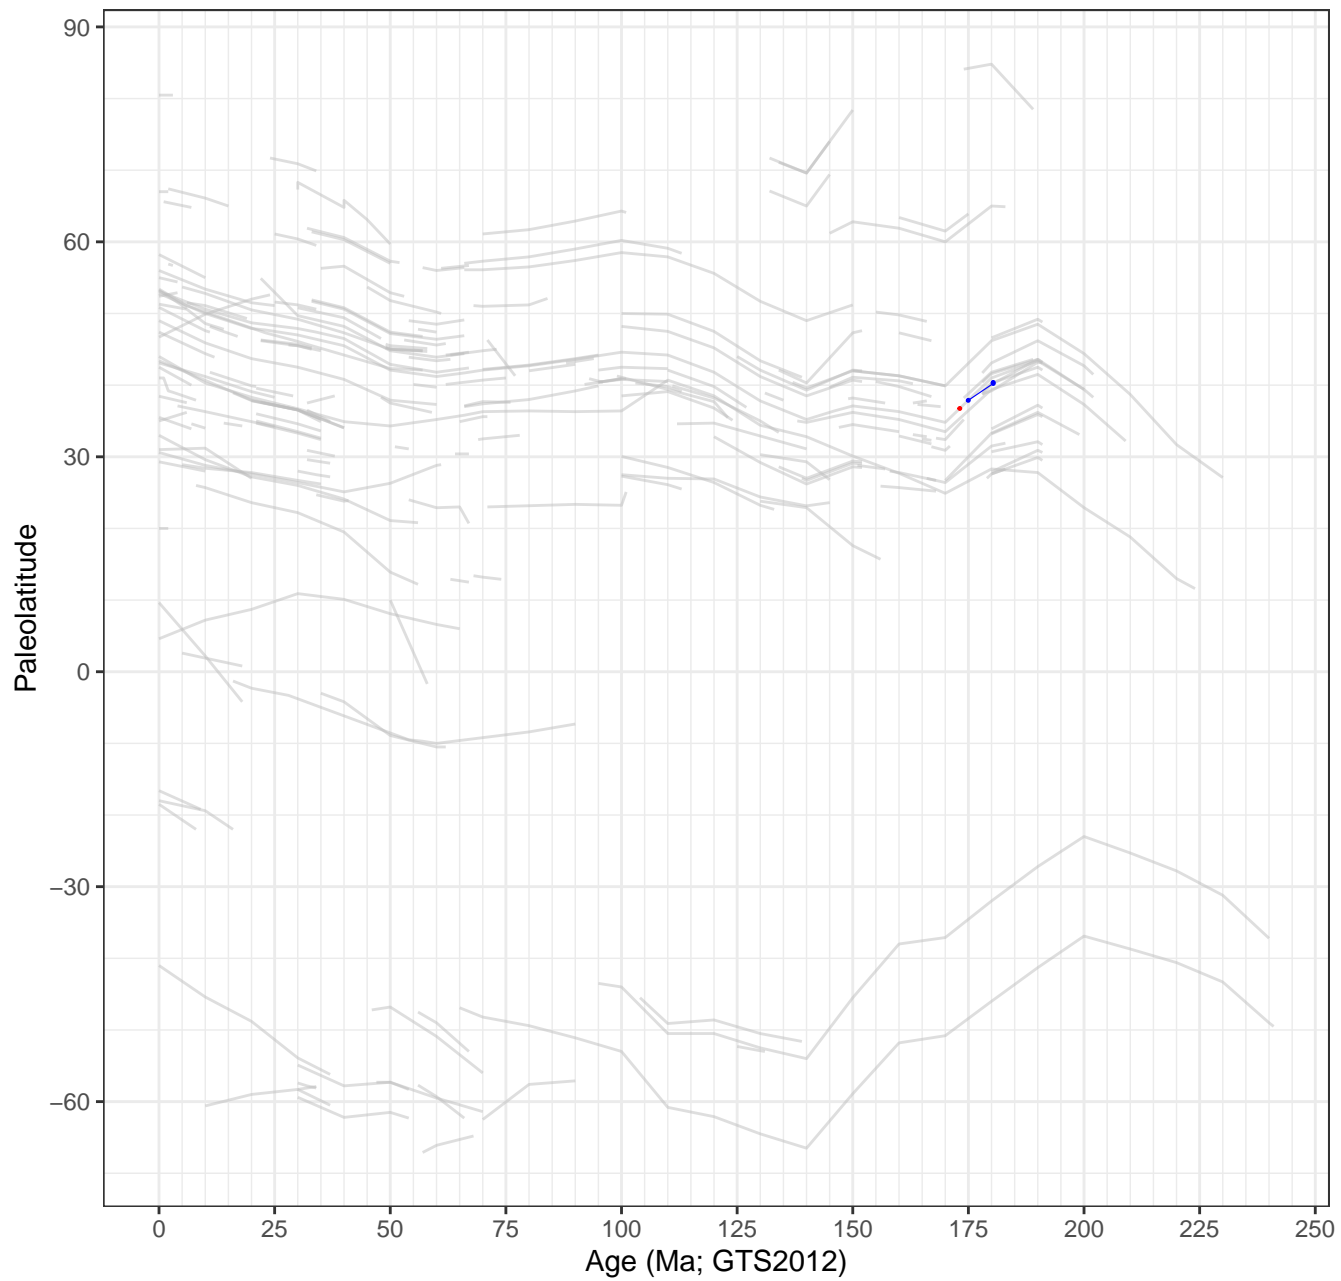

Supplement: Supplementary file 2474 [file Susadinium knertense.pdf › Supplement/Supplement 2/Species 1914 plots/Susadinium knertense.pdf]

# Species *Susadinium scrofoides*

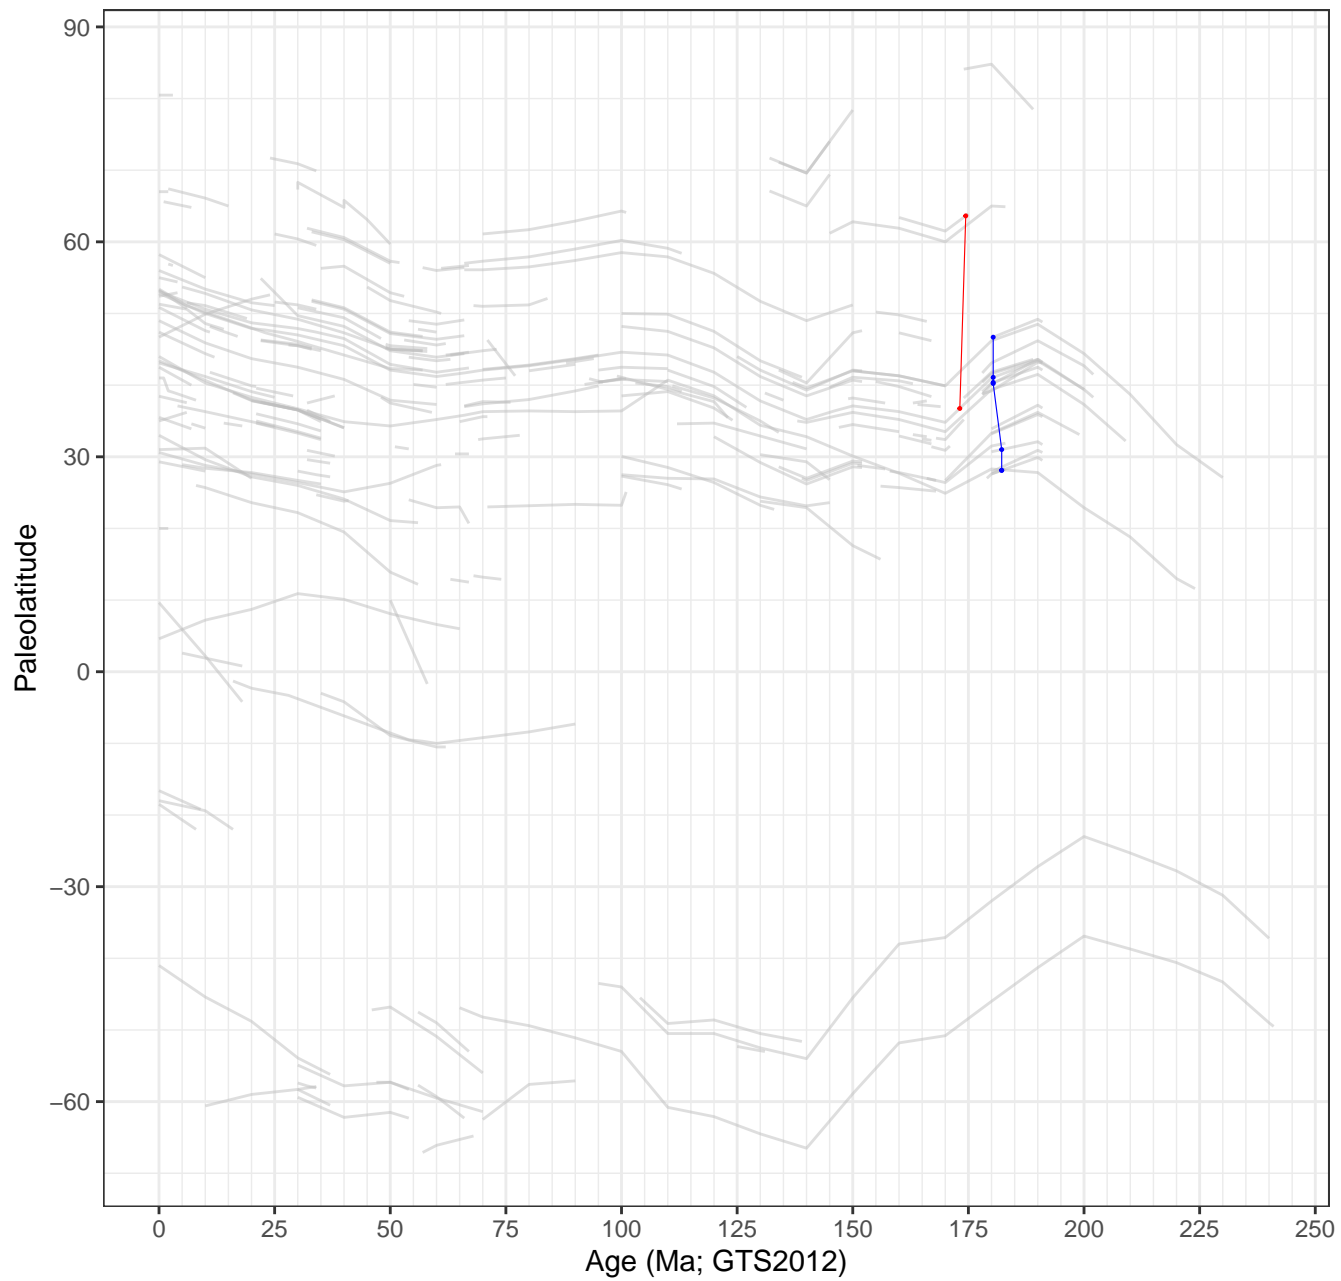

Supplement: Supplementary file 2475 [file Susadinium scrofoides.pdf › Supplement/Supplement 2/Species 1914 plots/Susadinium scrofoides.pdf]

# Species *Susadinium* spp.

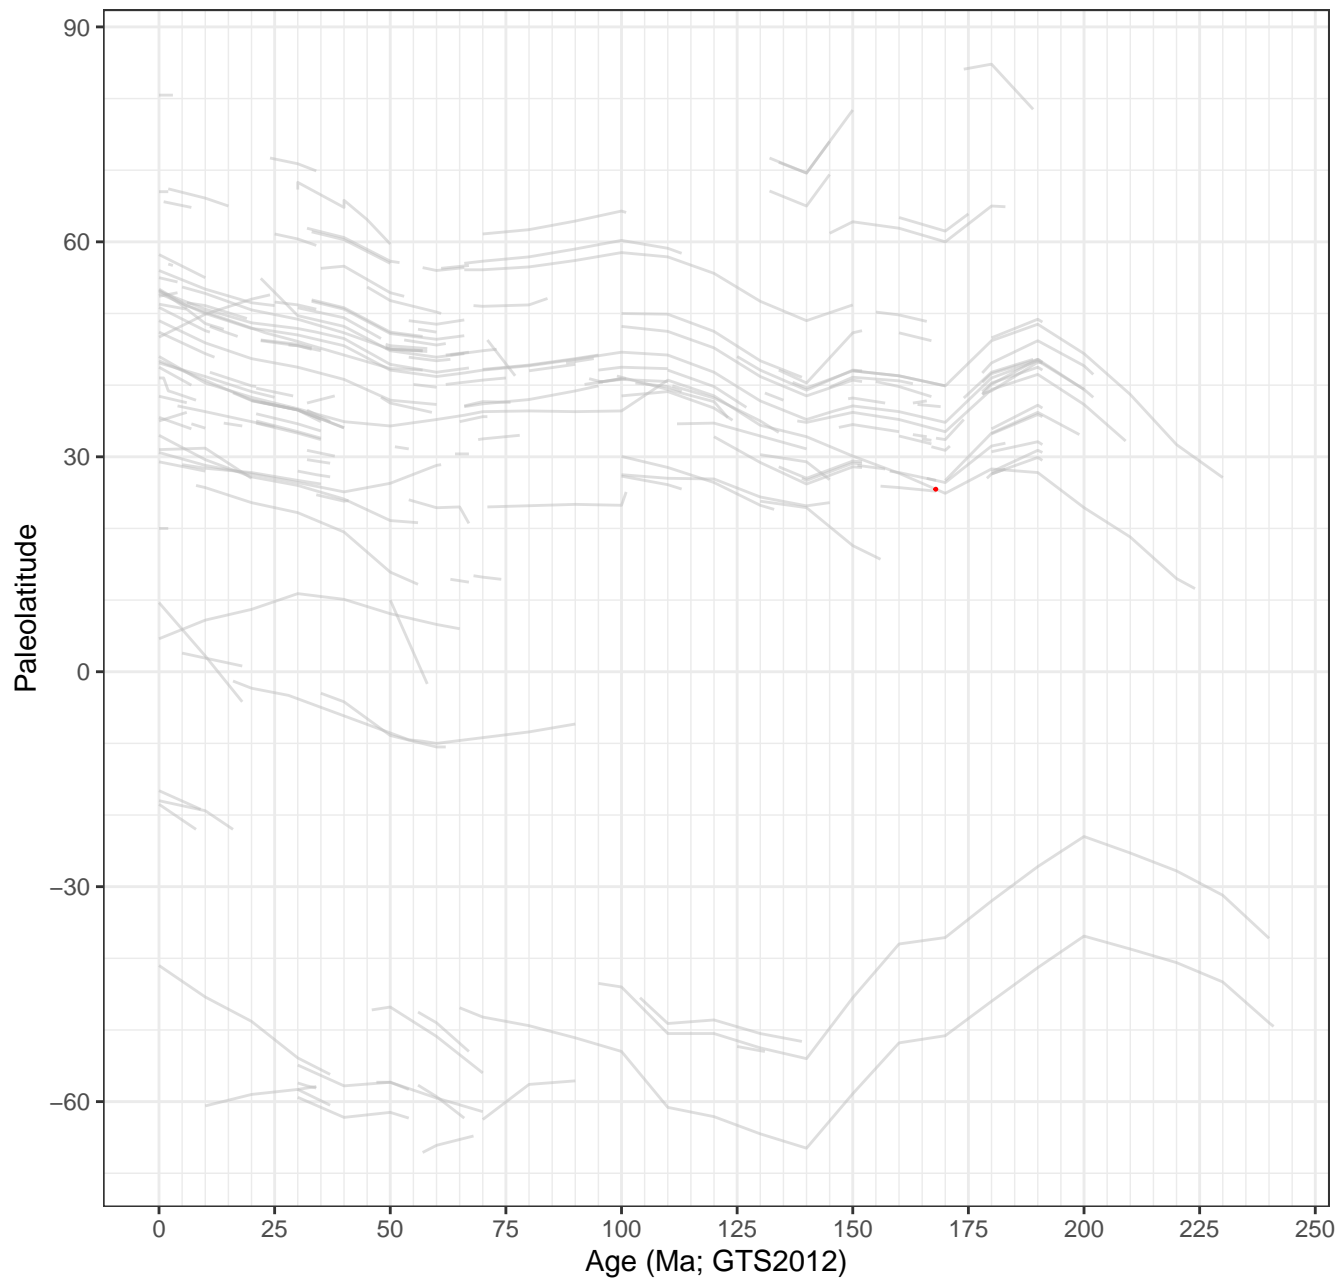

Supplement: Supplementary file 2476 [file Susadinium spp..pdf › Supplement/Supplement 2/Species 1914 plots/Susadinium spp..pdf]

# Species *Svalbardella cooksoniae*

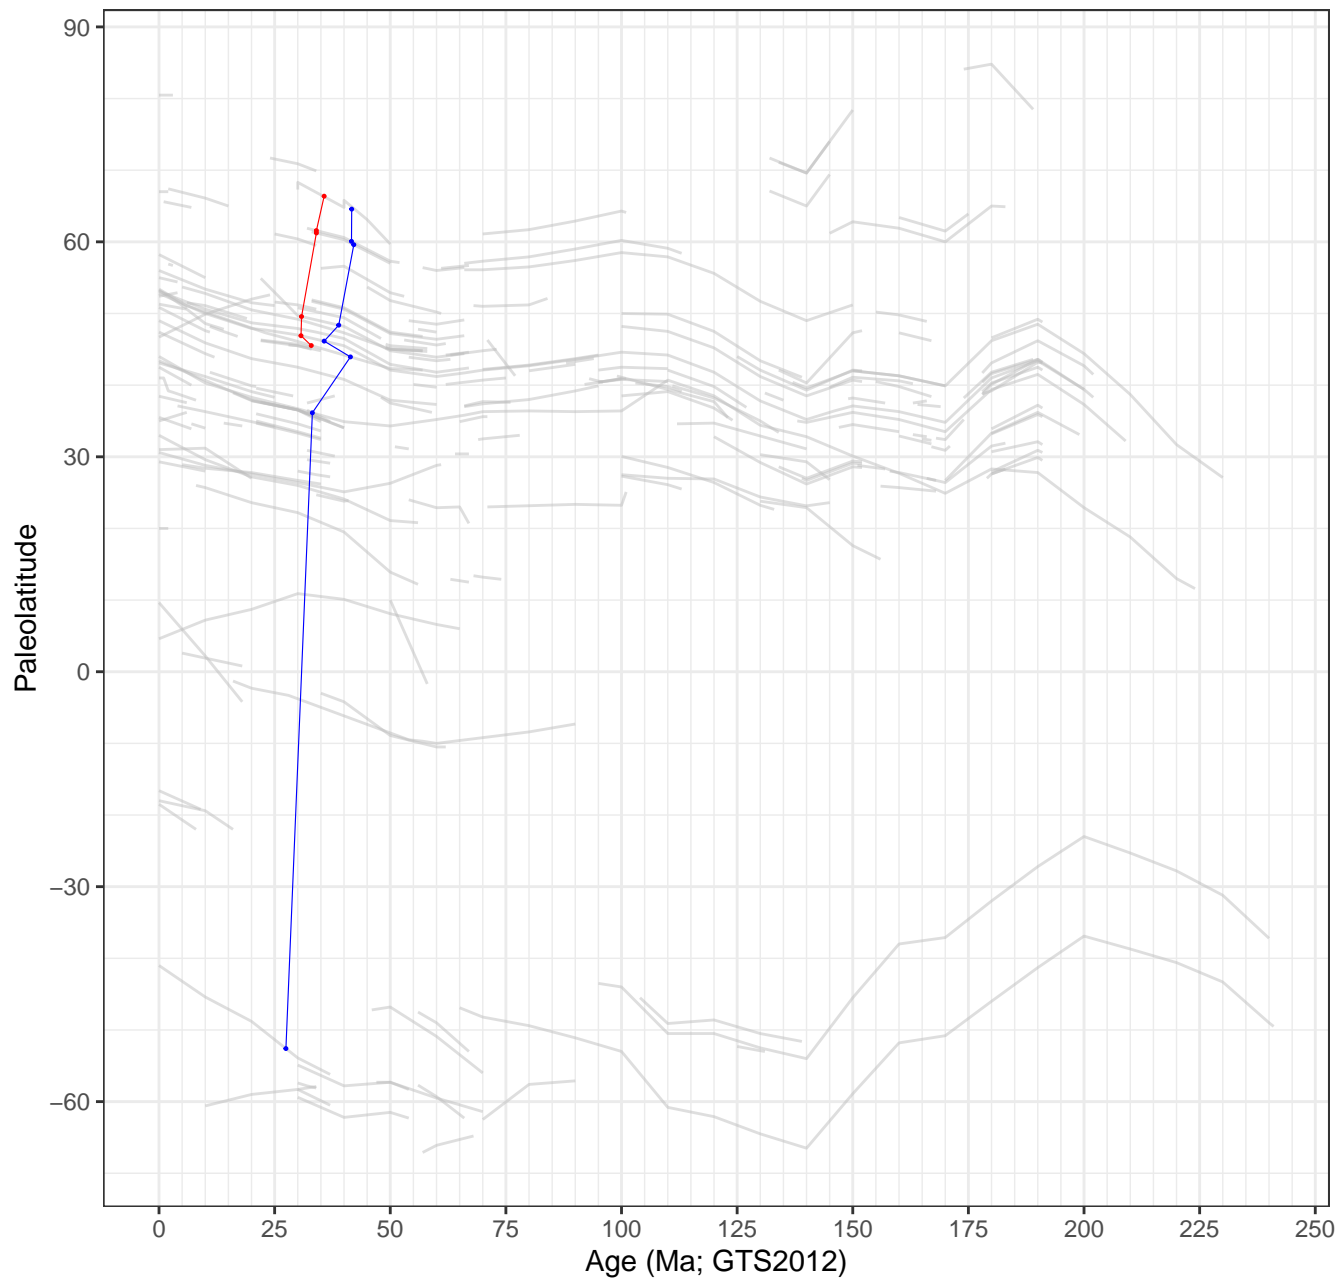

Supplement: Supplementary file 2477 [file Svalbardella cooksoniae.pdf › Supplement/Supplement 2/Species 1914 plots/Svalbardella cooksoniae.pdf]

# Species *Svalbardella* spp.

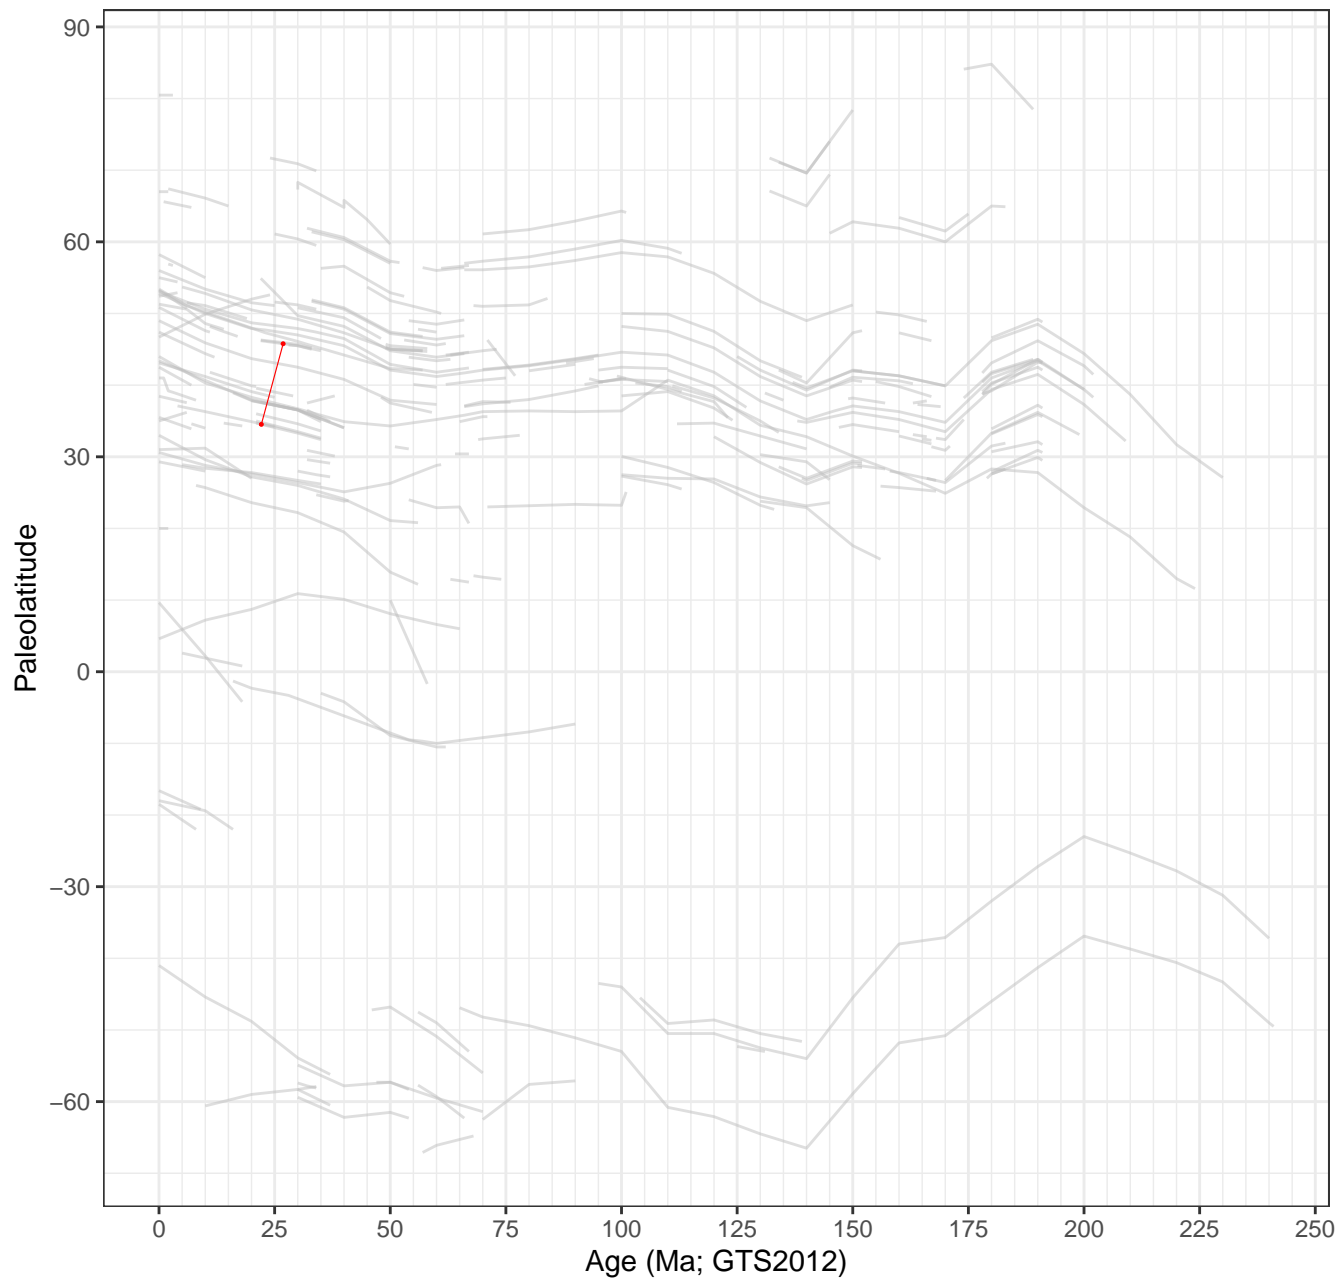

Supplement: Supplementary file 2478 [file Svalbardella spp..pdf › Supplement/Supplement 2/Species 1914 plots/Svalbardella spp..pdf]

# Species *Sverdrupiella mutabilis*

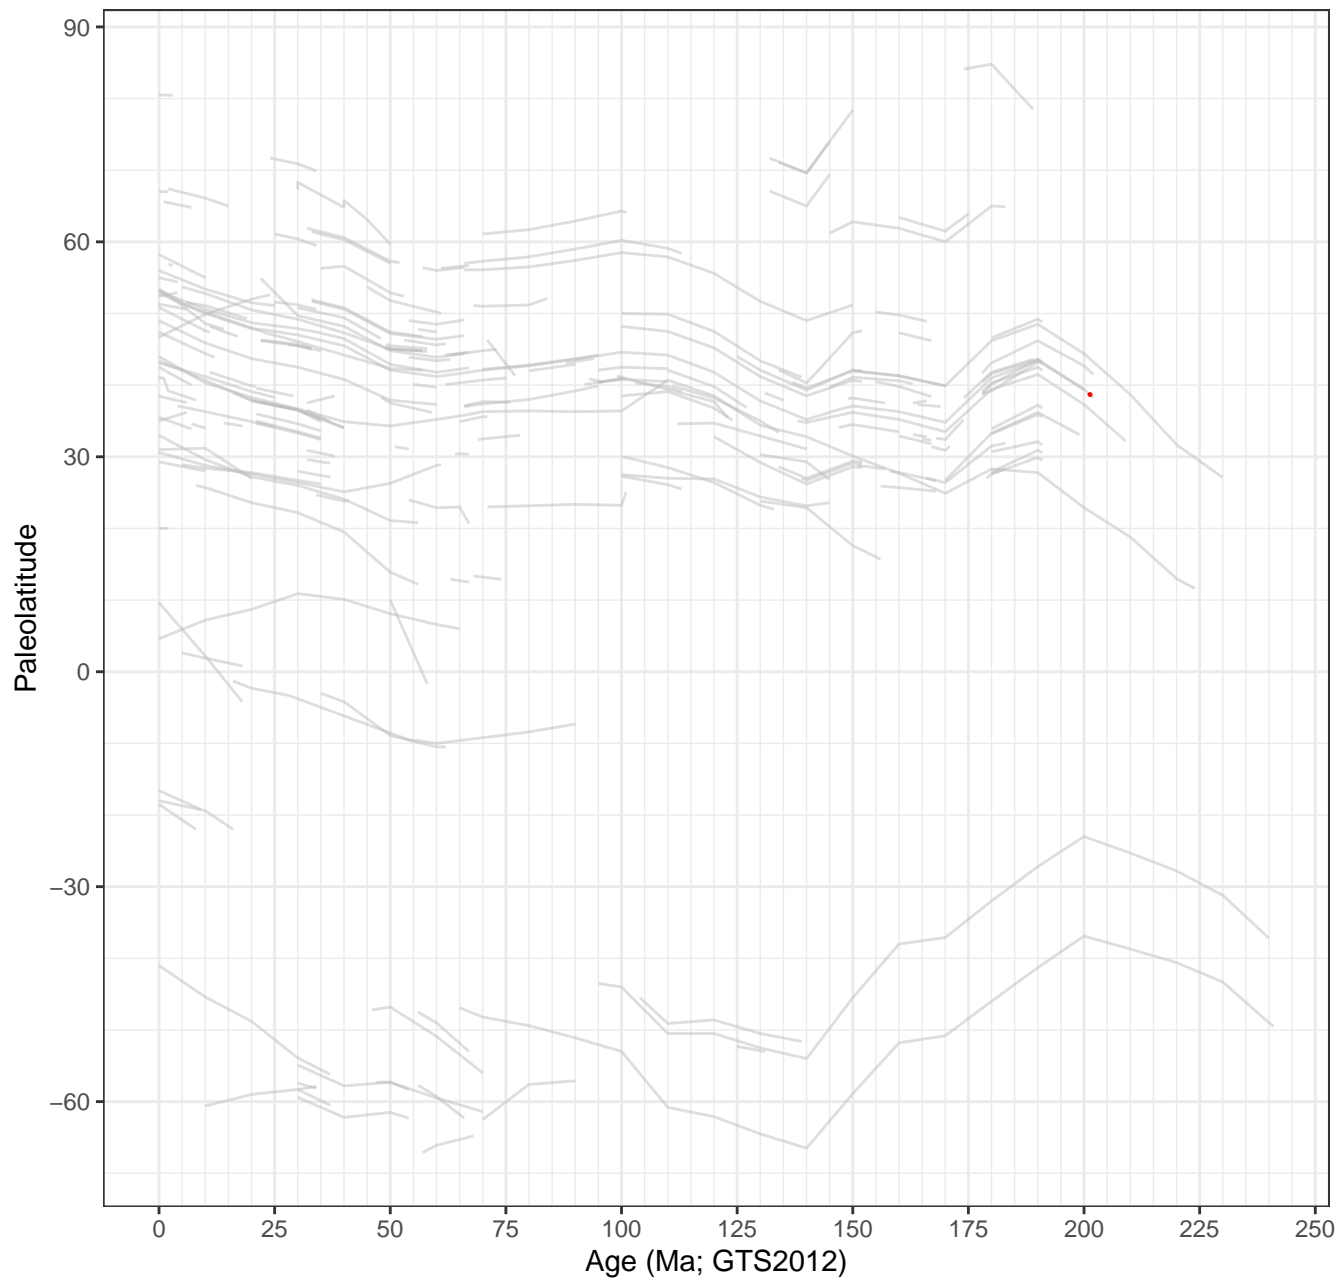

Supplement: Supplementary file 2479 [file Sverdrupiella mutabilis.pdf › Supplement/Supplement 2/Species 1914 plots/Sverdrupiella mutabilis.pdf]

# Species *Sverdrupiella* spp.

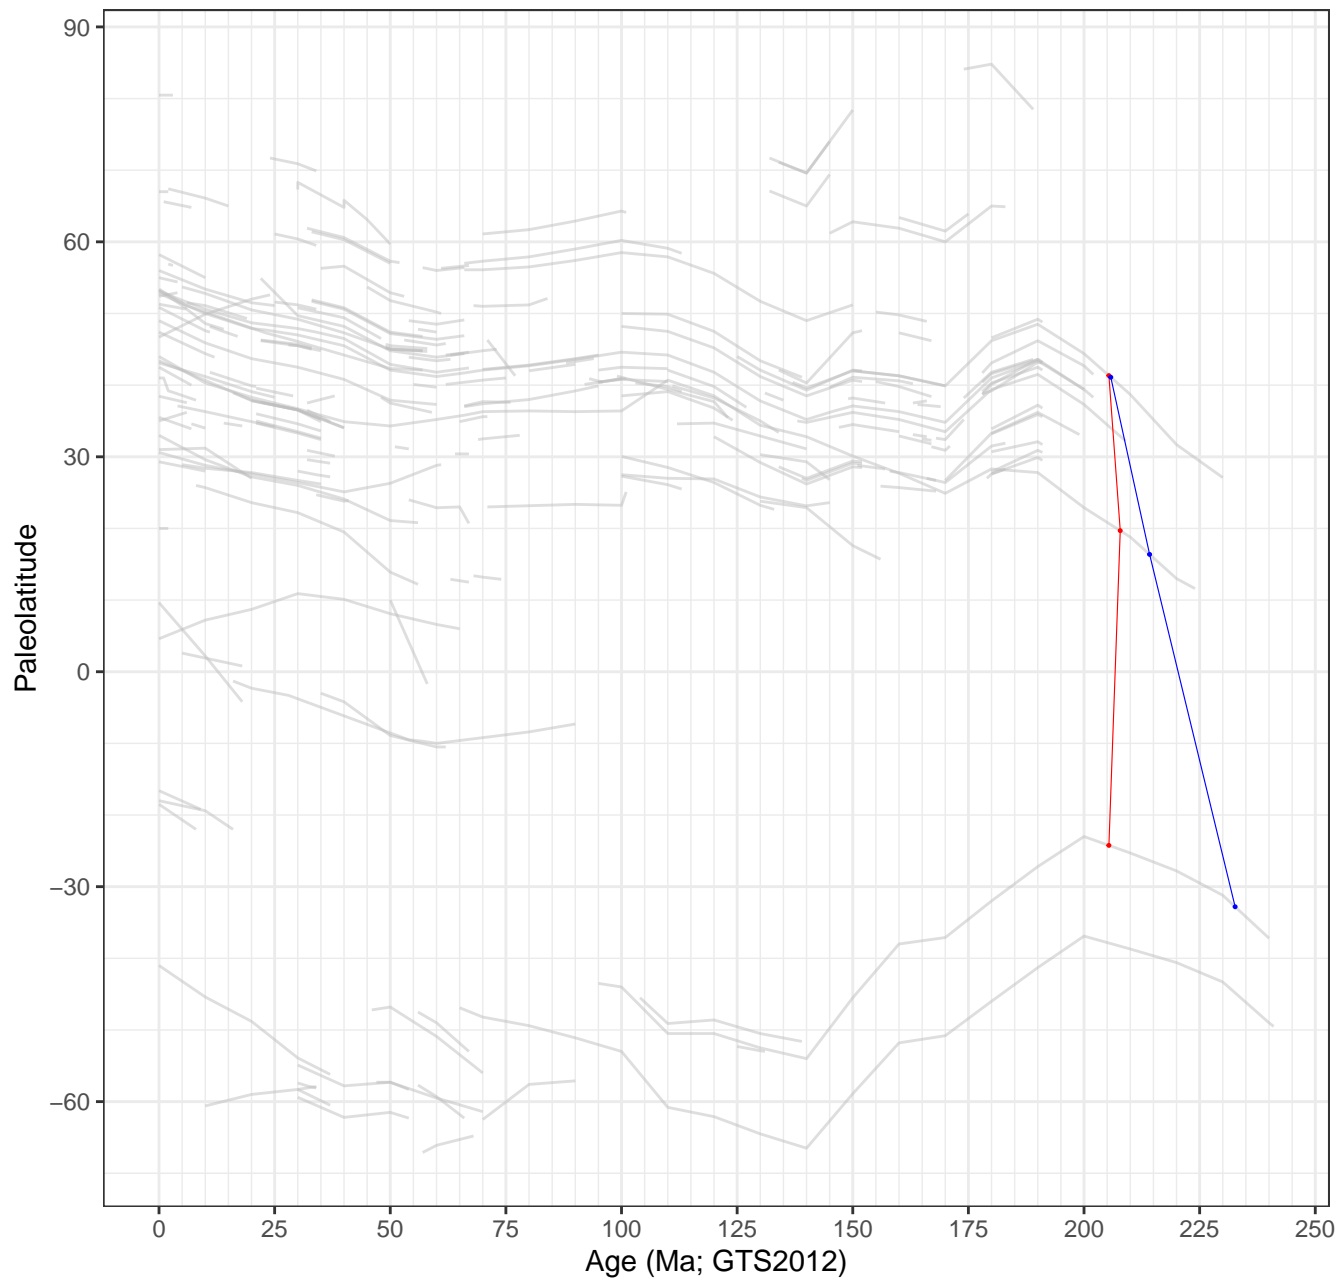

Supplement: Supplementary file 2480 [file Sverdrupiella spp..pdf › Supplement/Supplement 2/Species 1914 plots/Sverdrupiella spp..pdf]

# Species *Systematophora areolata*

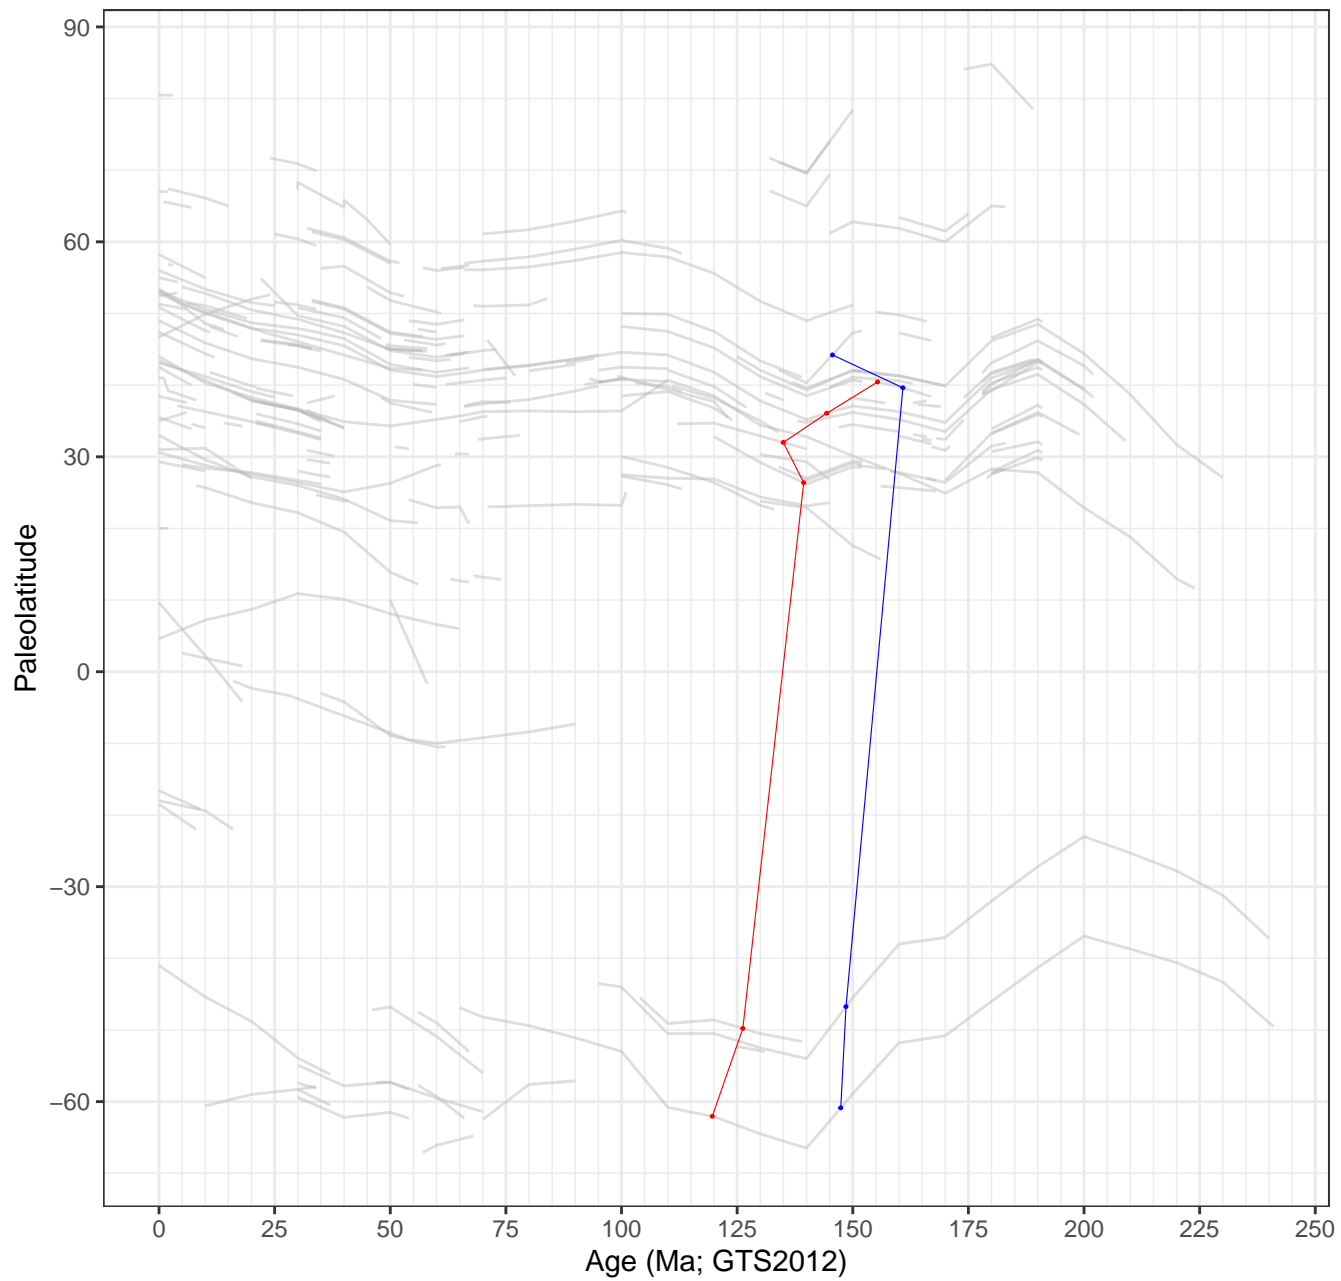

Supplement: Supplementary file 2481 [file Systematophora areolata.pdf › Supplement/Supplement 2/Species 1914 plots/Systematophora areolata.pdf]

# Species Systematophora cretacea

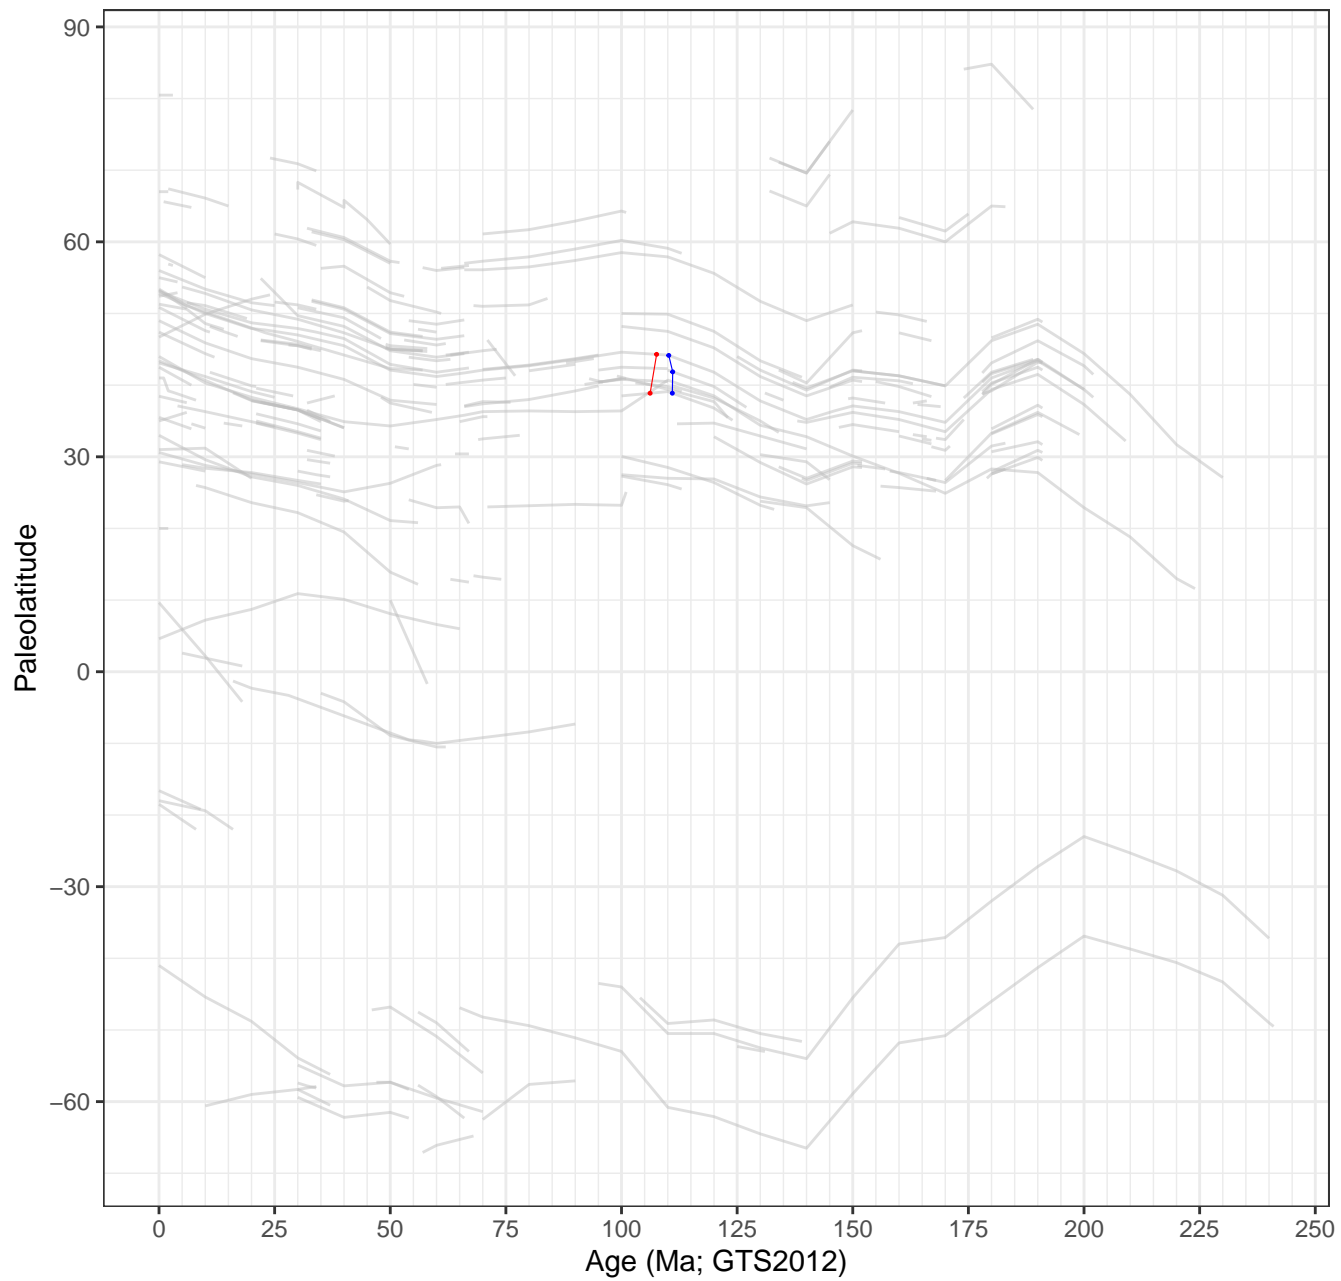

Supplement: Supplementary file 2482 [file Systematophora cretacea.pdf › Supplement/Supplement 2/Species 1914 plots/Systematophora cretacea.pdf]

# Species *Systematophora daveyi*

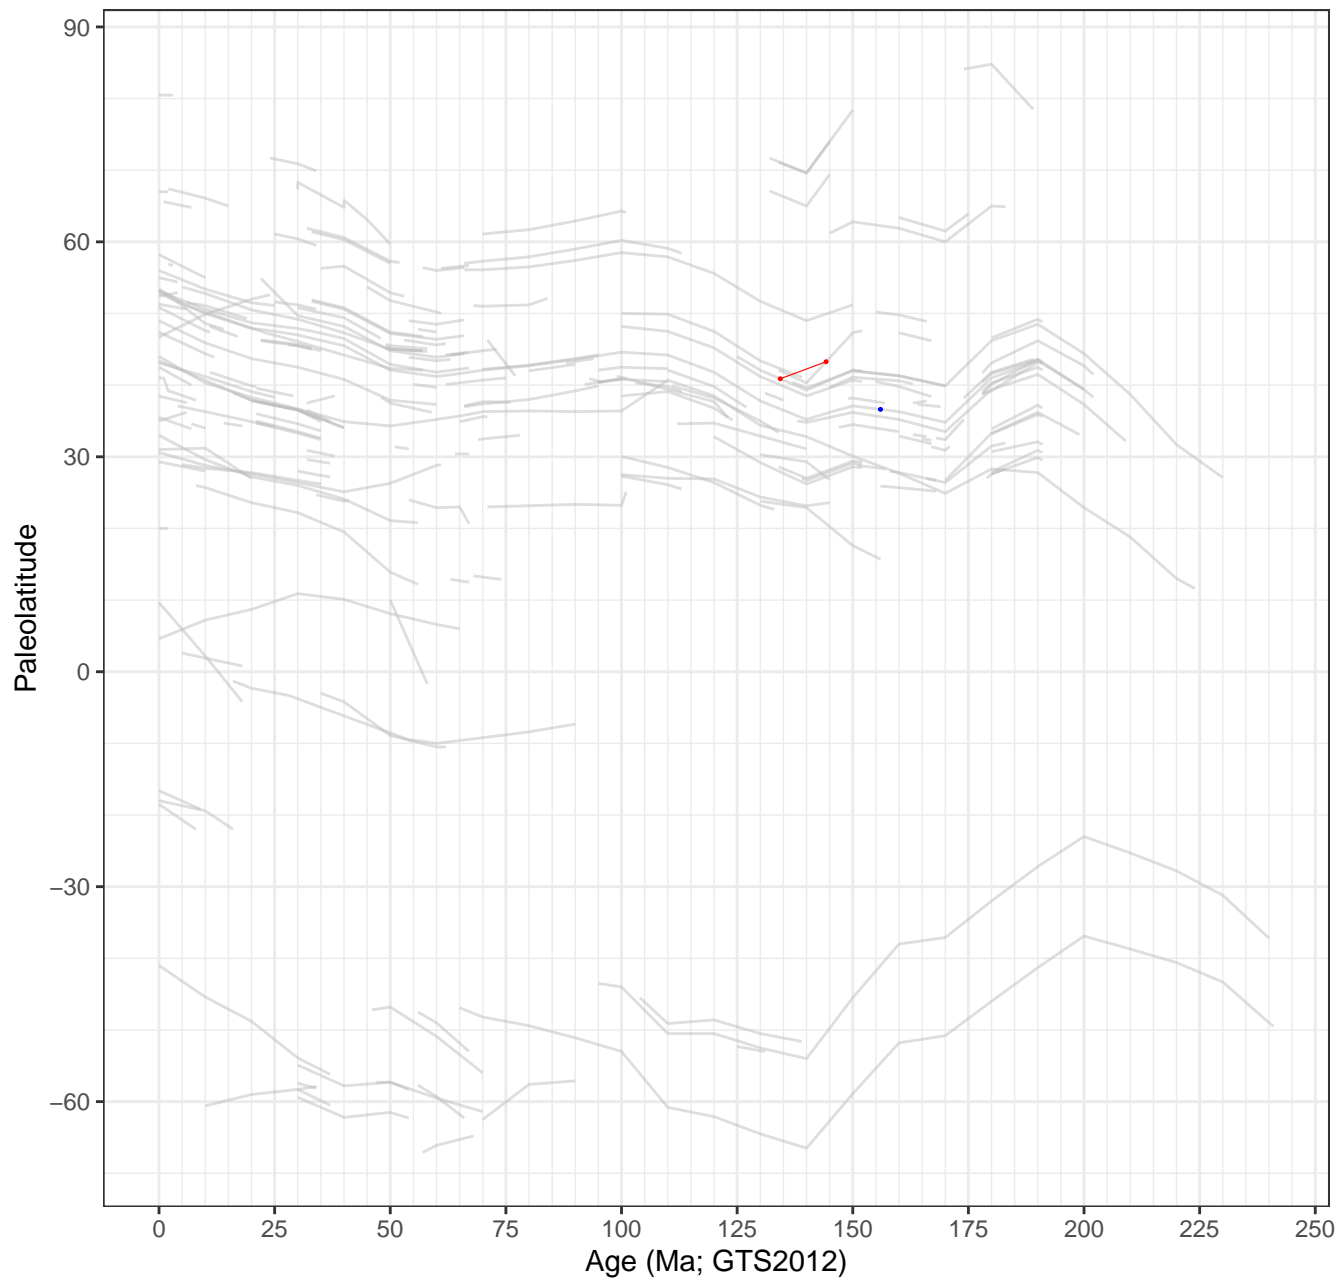

Supplement: Supplementary file 2483 [file Systematophora daveyi.pdf › Supplement/Supplement 2/Species 1914 plots/Systematophora daveyi.pdf]

# Species Systematophora geminus

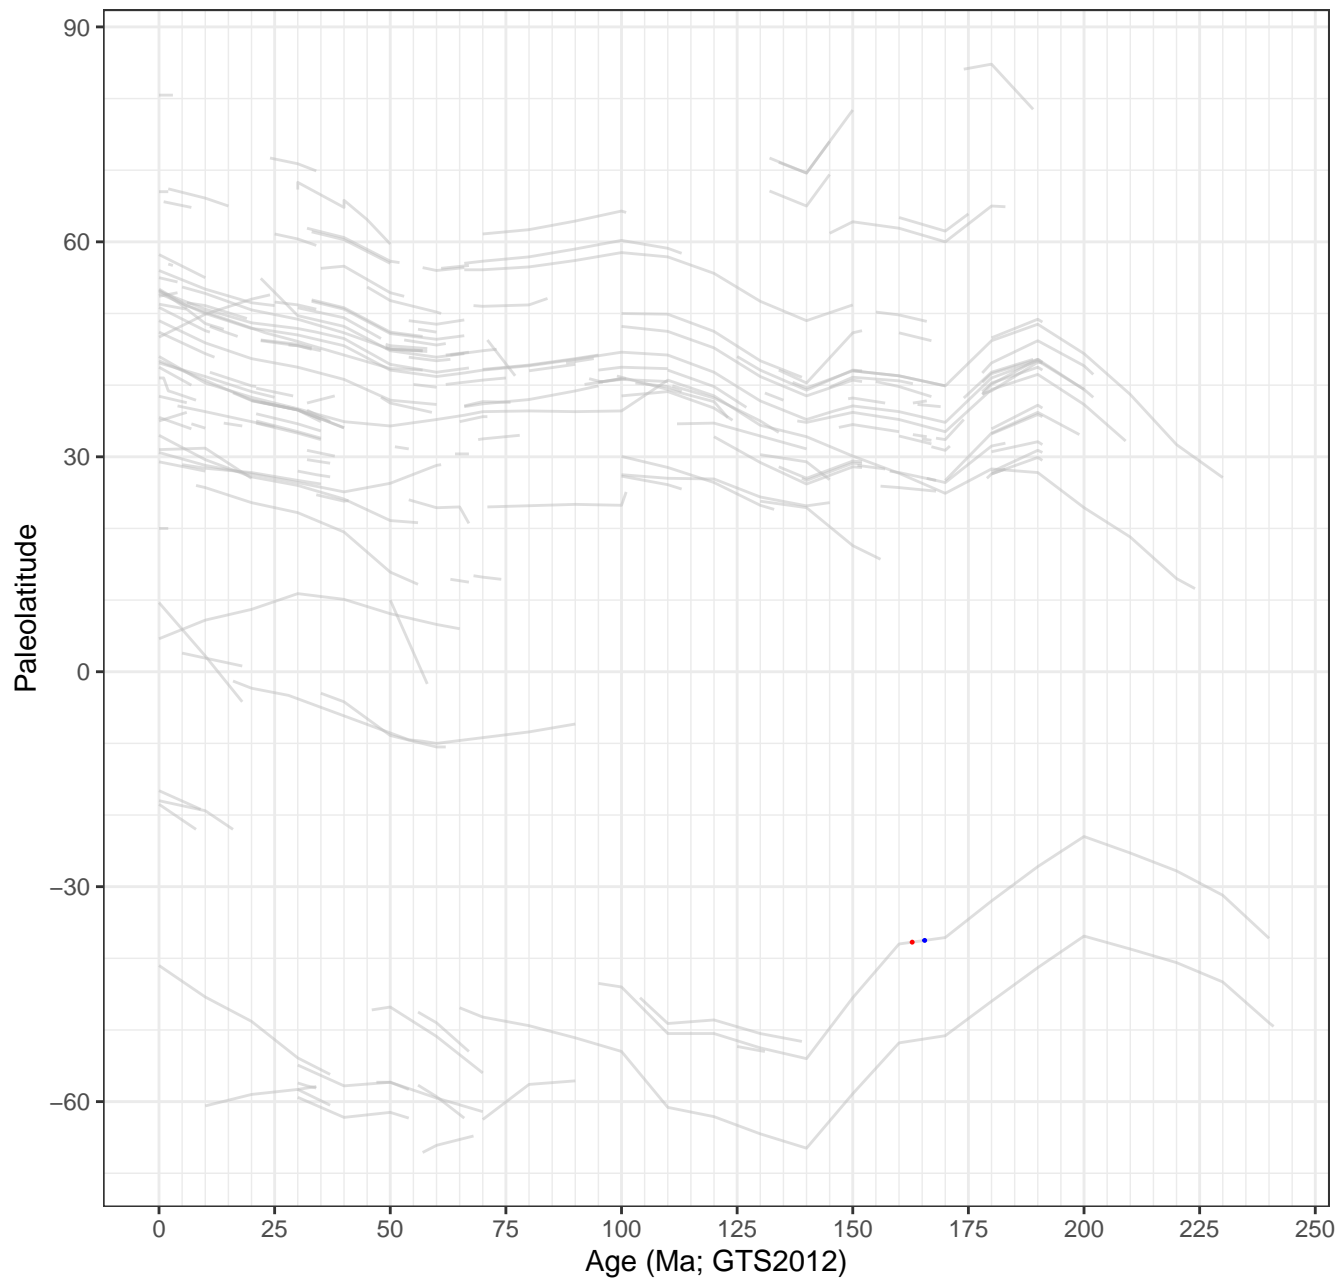

Supplement: Supplementary file 2484 [file Systematophora geminus.pdf › Supplement/Supplement 2/Species 1914 plots/Systematophora geminus.pdf]

# Species Systematophora ovata

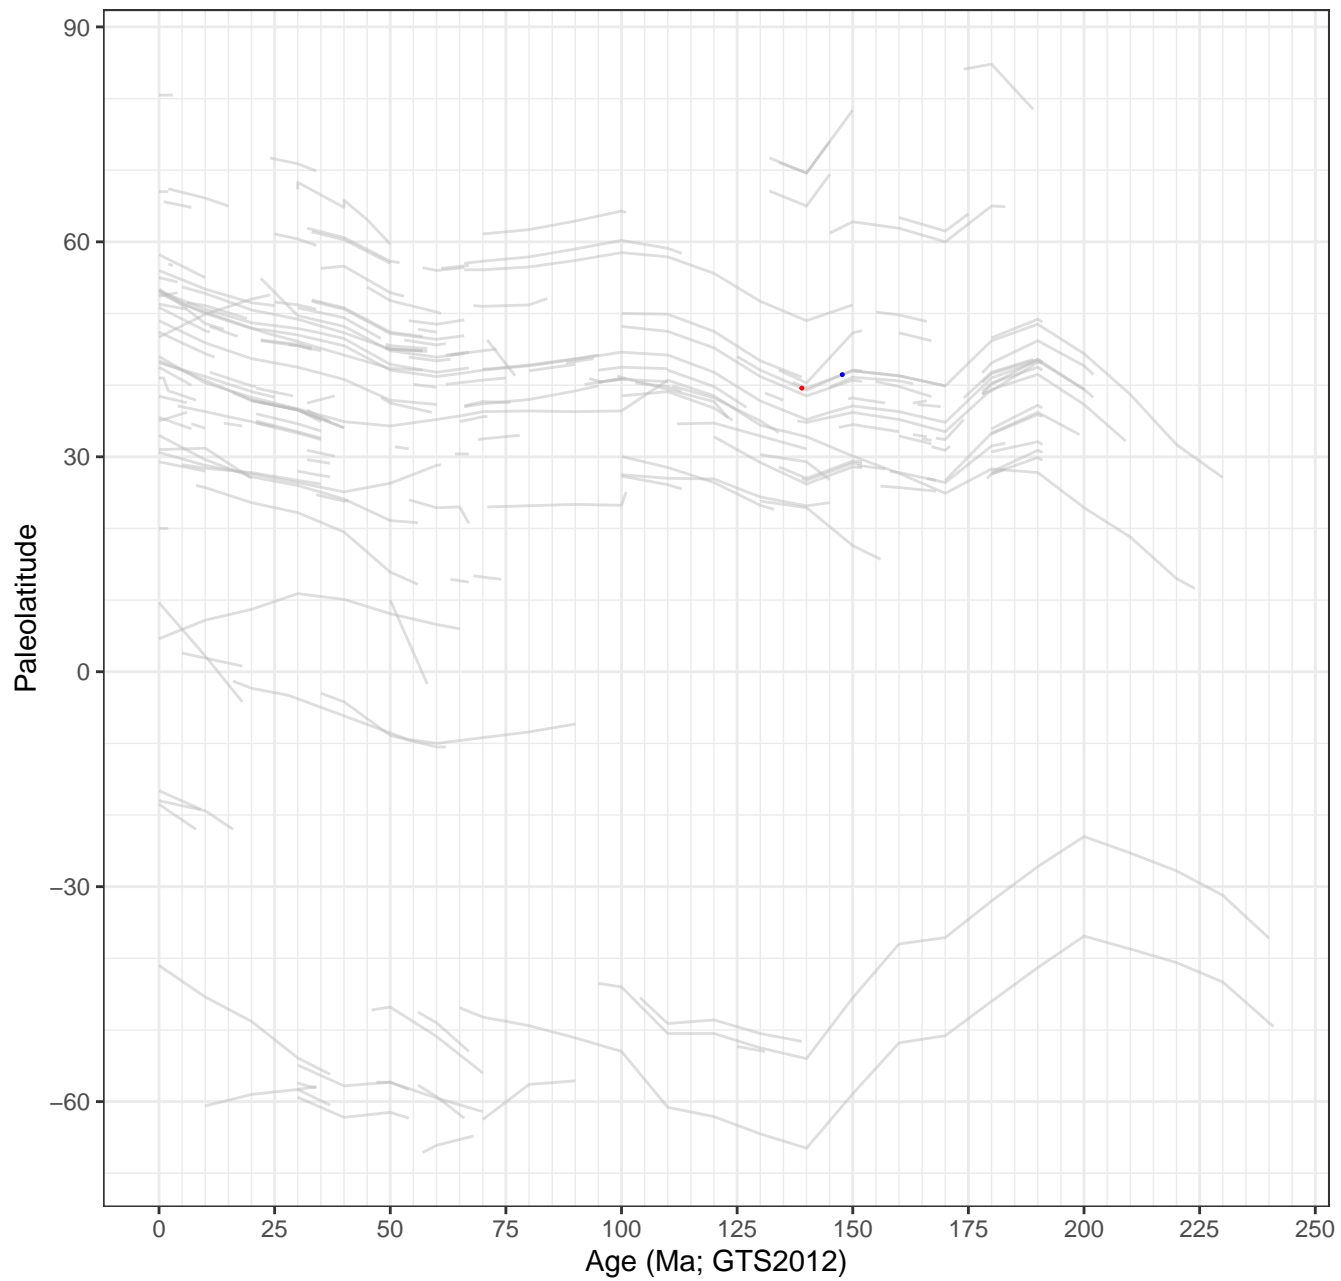

Supplement: Supplementary file 2485 [file Systematophora ovata.pdf › Supplement/Supplement 2/Species 1914 plots/Systematophora ovata.pdf]

# Species Systematophora penicillata

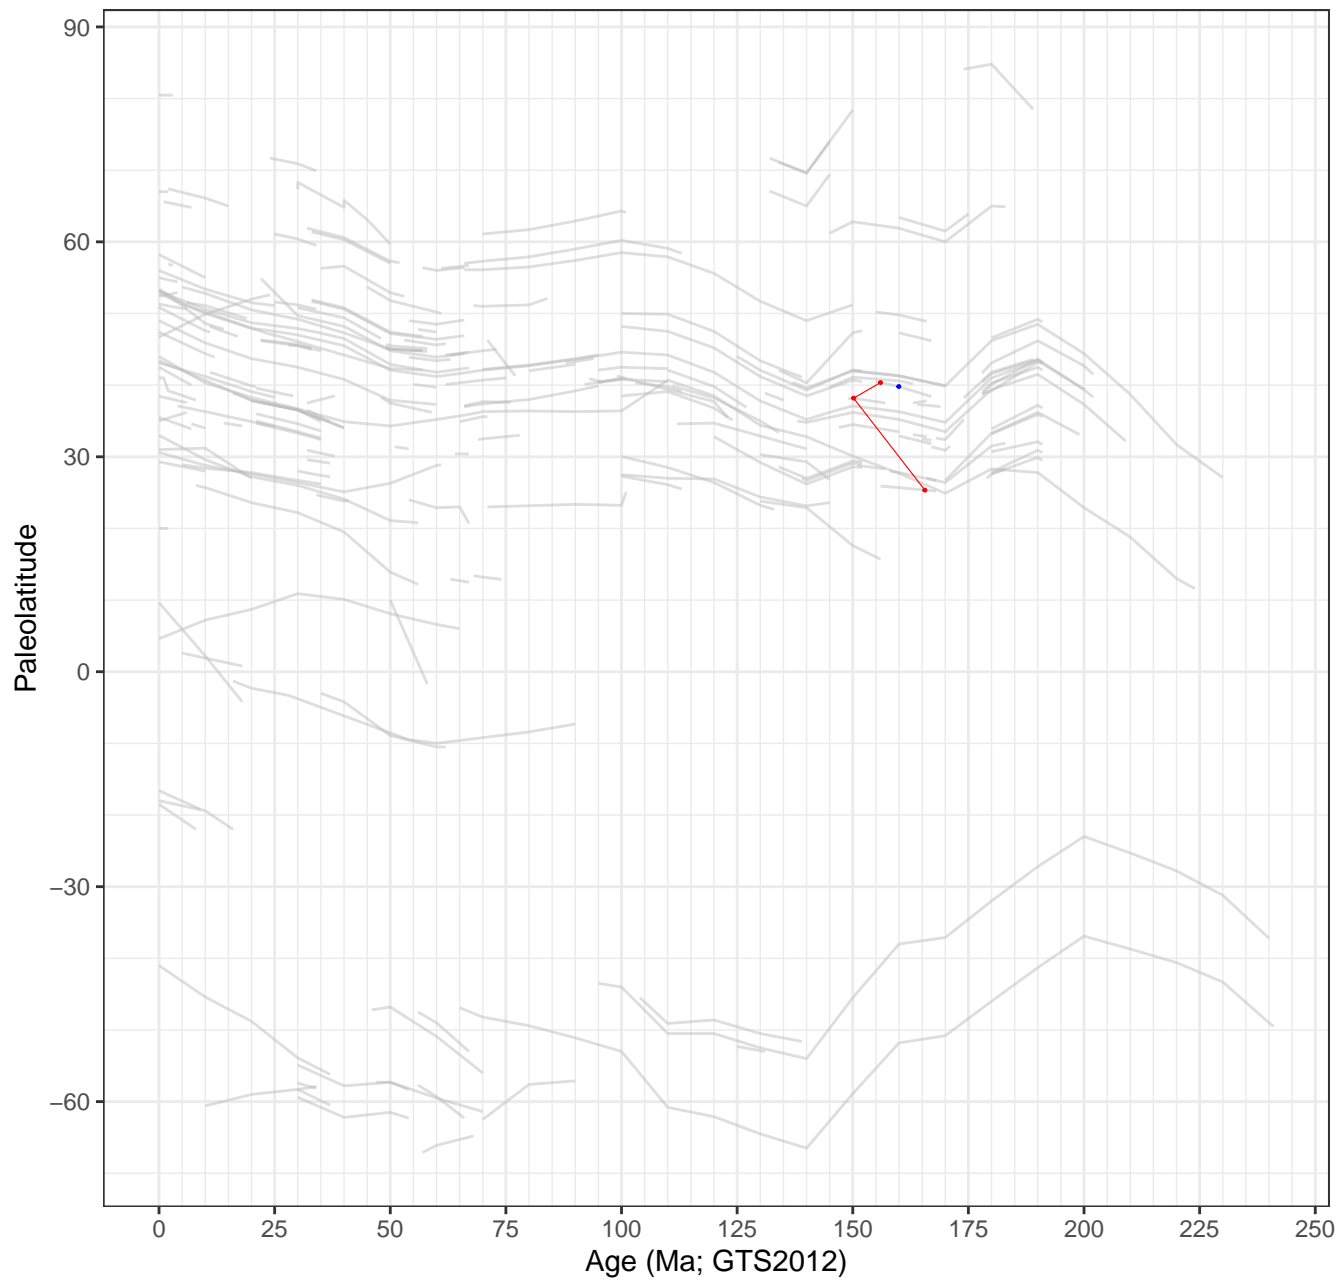

Supplement: Supplementary file 2486 [file Systematophora penicillata.pdf › Supplement/Supplement 2/Species 1914 plots/Systematophora penicillata.pdf]

# Species *Systematophora scoriacea*

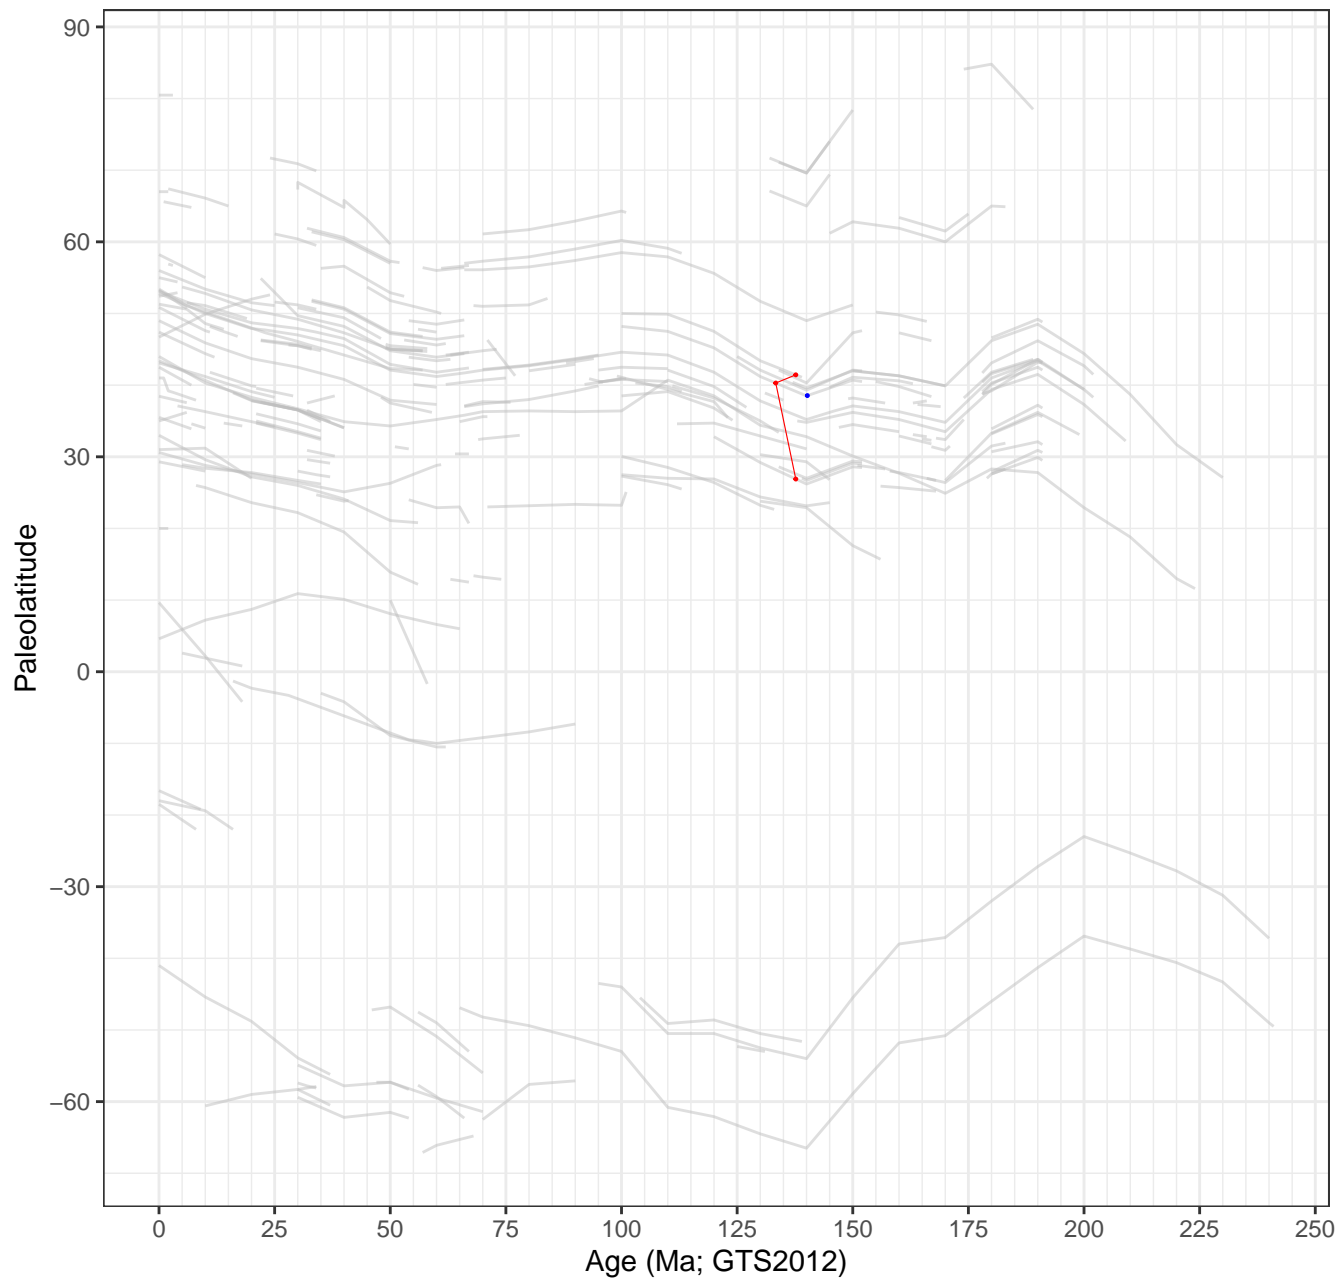

Supplement: Supplementary file 2487 [file Systematophora scoriacea.pdf › Supplement/Supplement 2/Species 1914 plots/Systematophora scoriacea.pdf]

# Species *Systematophora silybum*

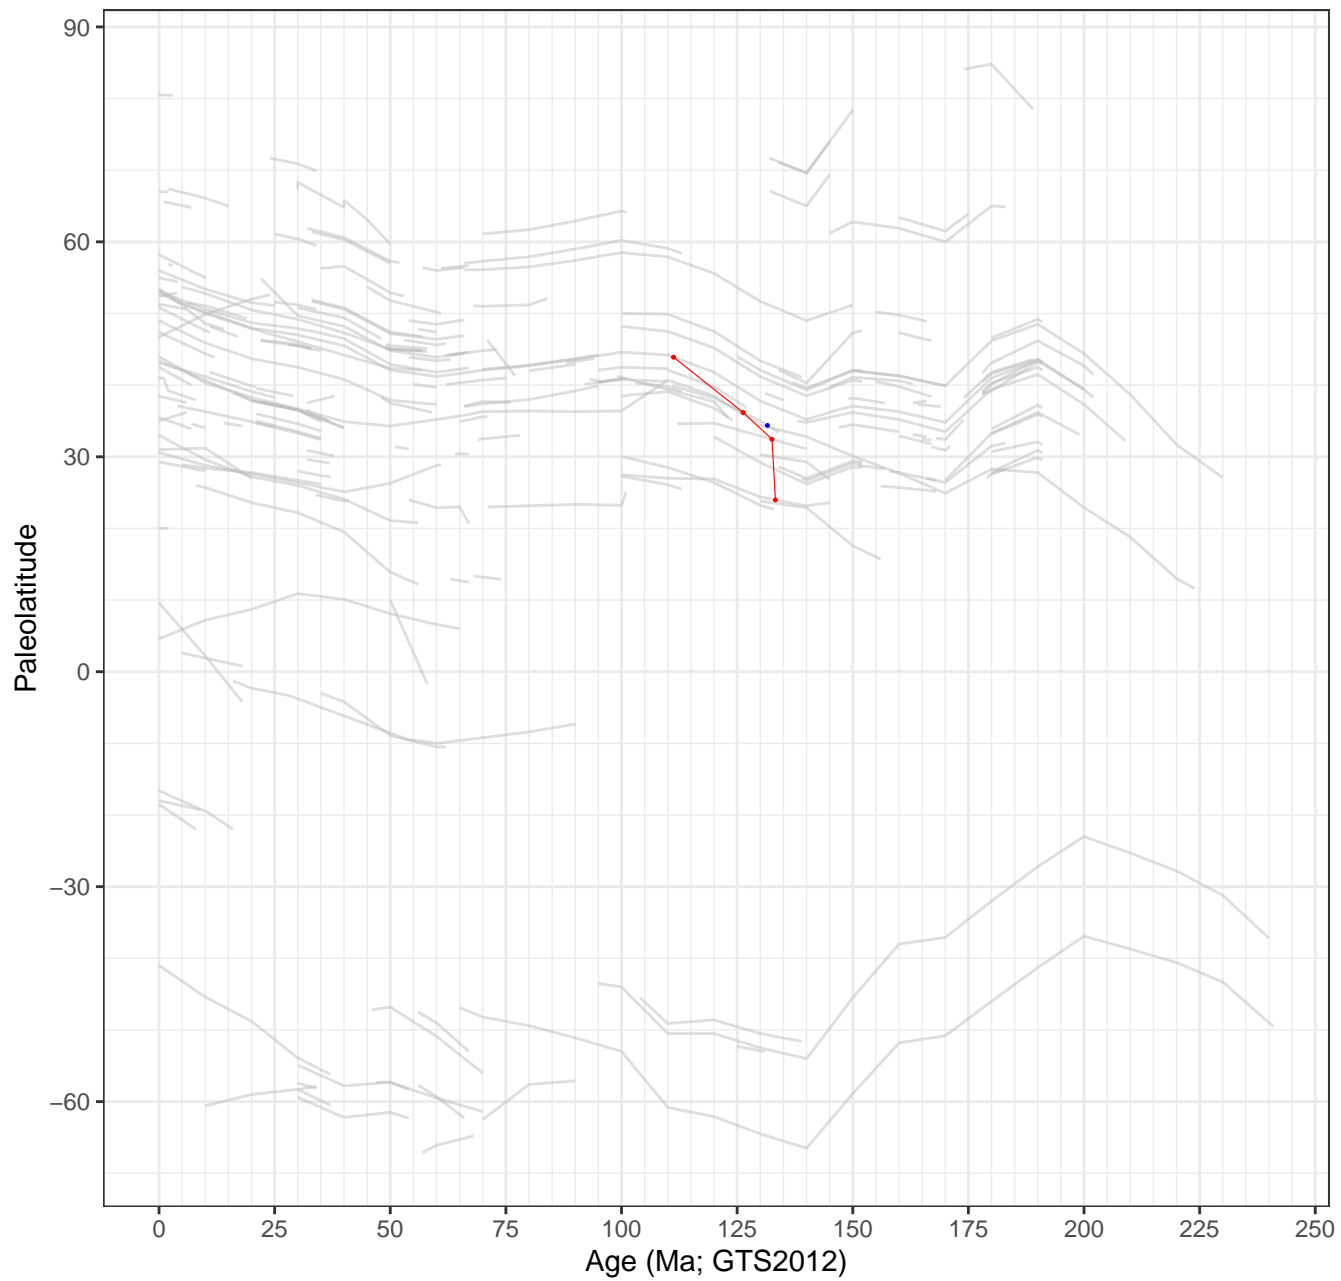

Supplement: Supplementary file 2488 [file Systematophora silybum.pdf › Supplement/Supplement 2/Species 1914 plots/Systematophora silybum.pdf]

# Species Systematophora sylibum

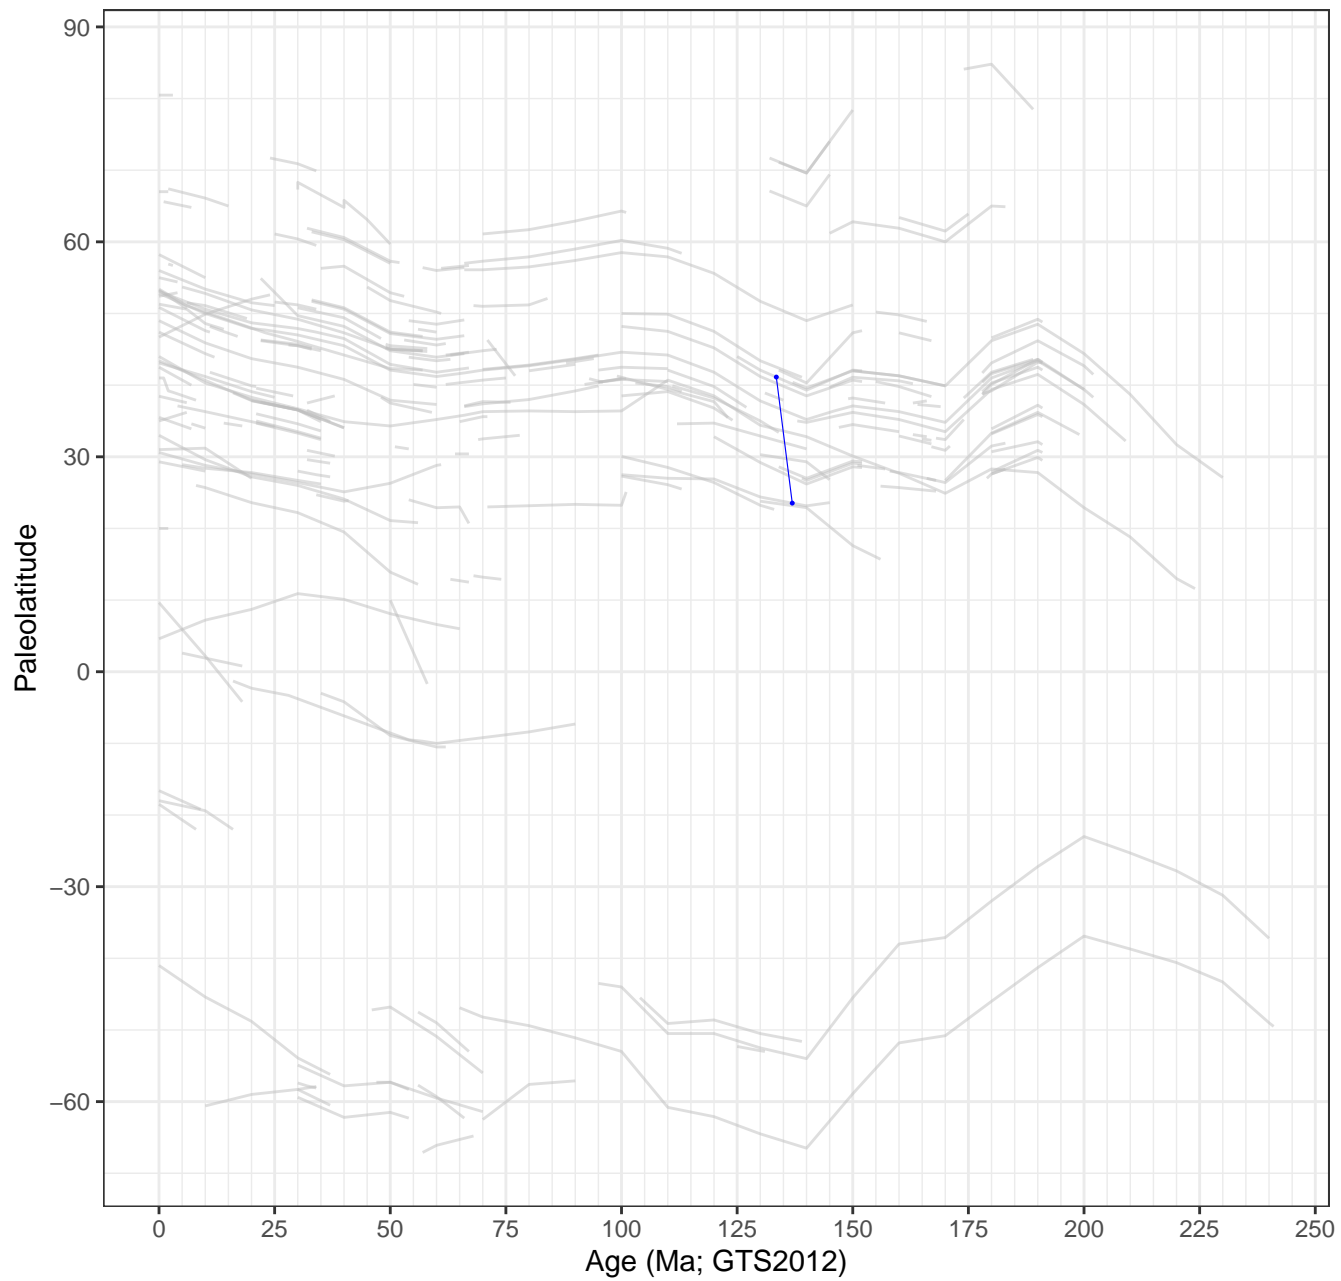

Supplement: Supplementary file 2489 [file Systematophora sylibum.pdf › Supplement/Supplement 2/Species 1914 plots/Systematophora sylibum.pdf]

# Species *Systematophora urbinii*

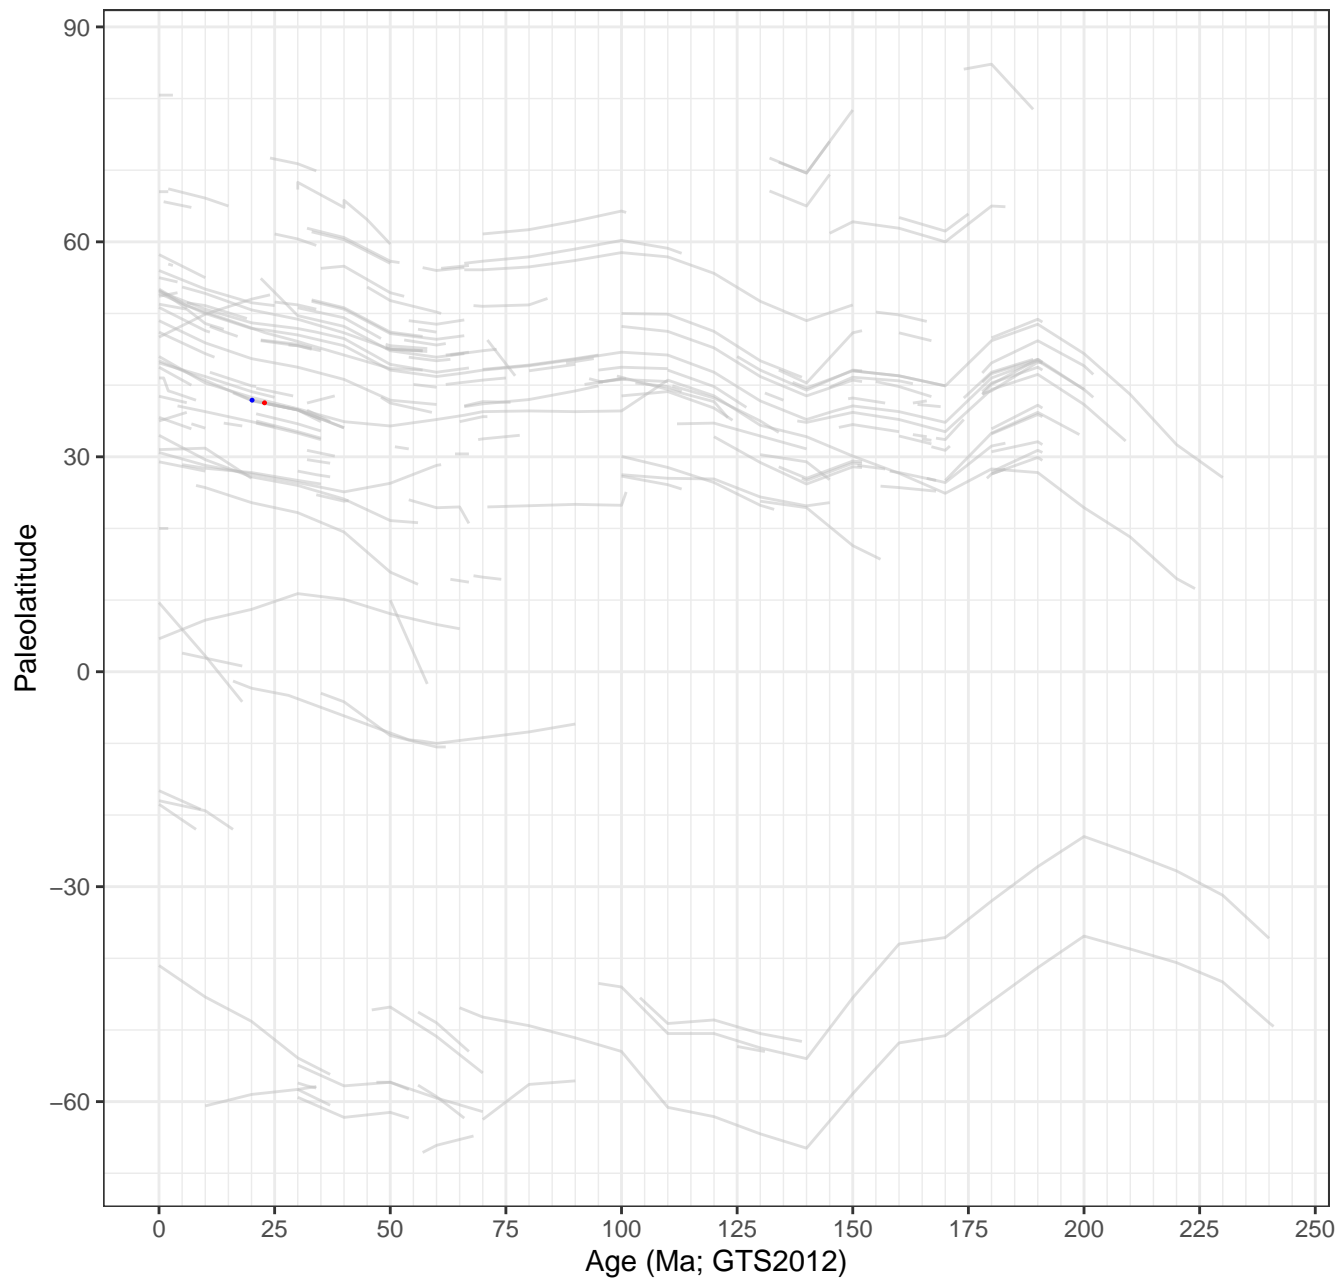

Supplement: Supplementary file 2490 [file Systematophora urbinii.pdf › Supplement/Supplement 2/Species 1914 plots/Systematophora urbinii.pdf]

# Species *Systematophora valensii*

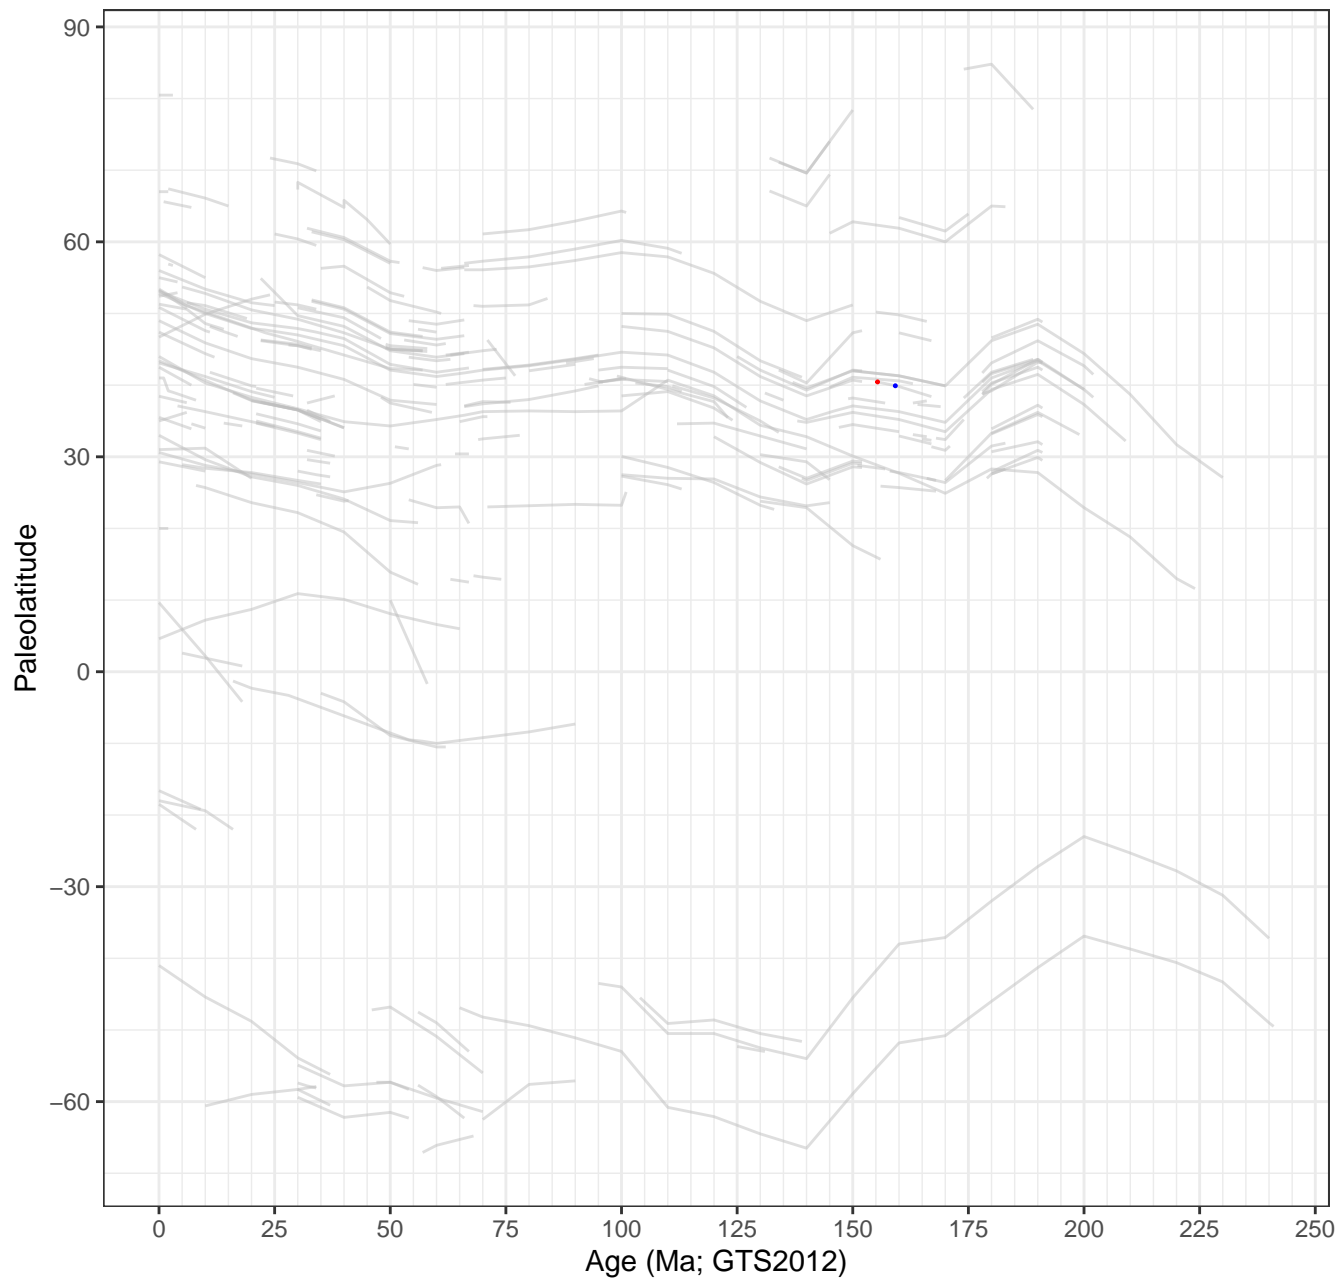

Supplement: Supplementary file 2491 [file Systematophora valensii.pdf › Supplement/Supplement 2/Species 1914 plots/Systematophora valensii.pdf]

# Species *Tabulodinium senarium*

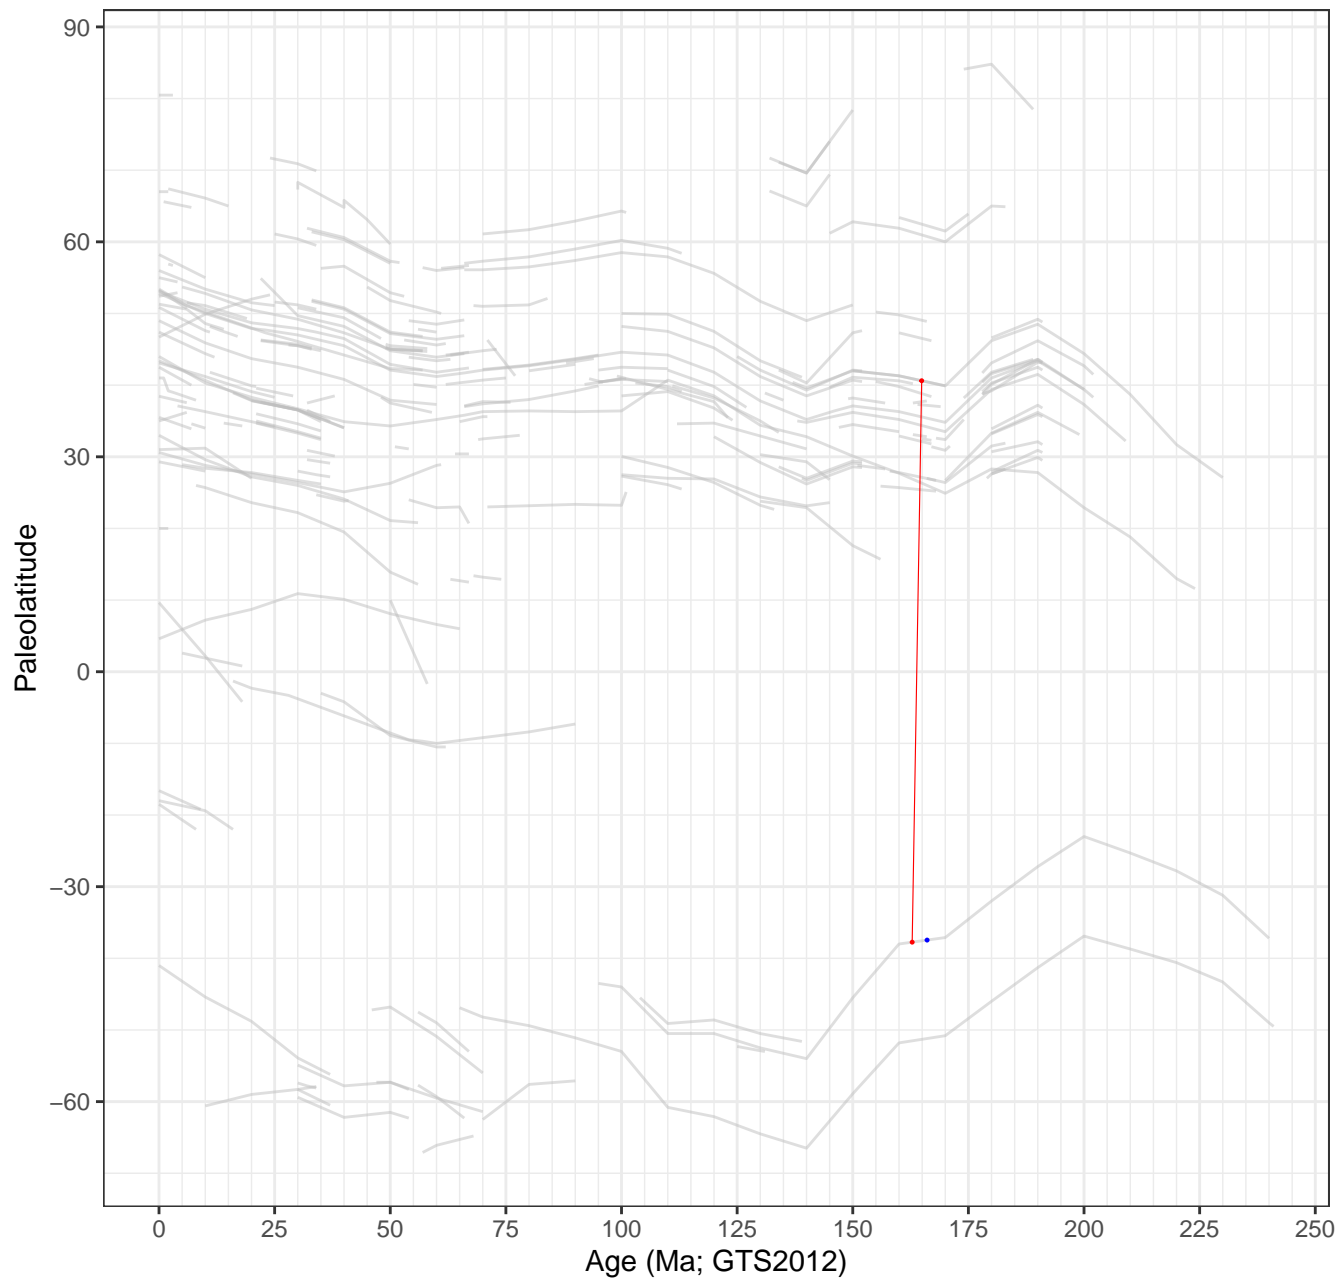

Supplement: Supplementary file 2492 [file Tabulodinium senarium.pdf › Supplement/Supplement 2/Species 1914 plots/Tabulodinium senarium.pdf]

# Species *Taleisphaera hydra*

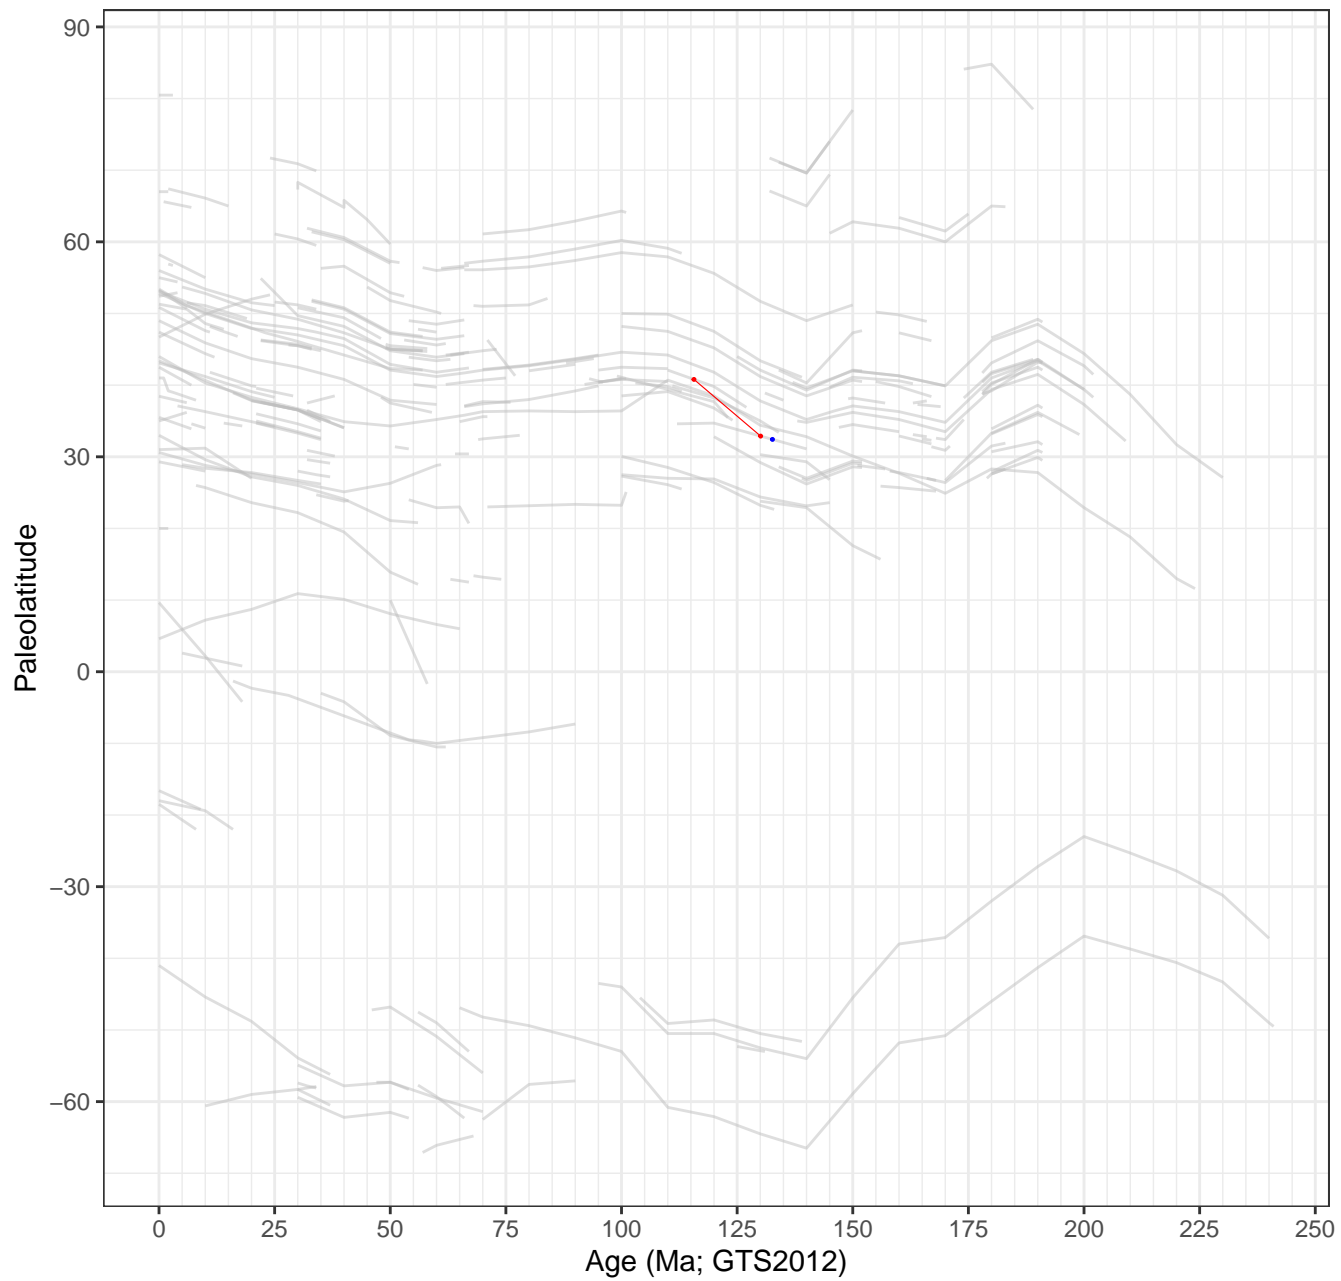

Supplement: Supplementary file 2493 [file Taleisphaera hydra.pdf › Supplement/Supplement 2/Species 1914 plots/Taleisphaera hydra.pdf]

# Species *Tanyosphaeridium boletus*

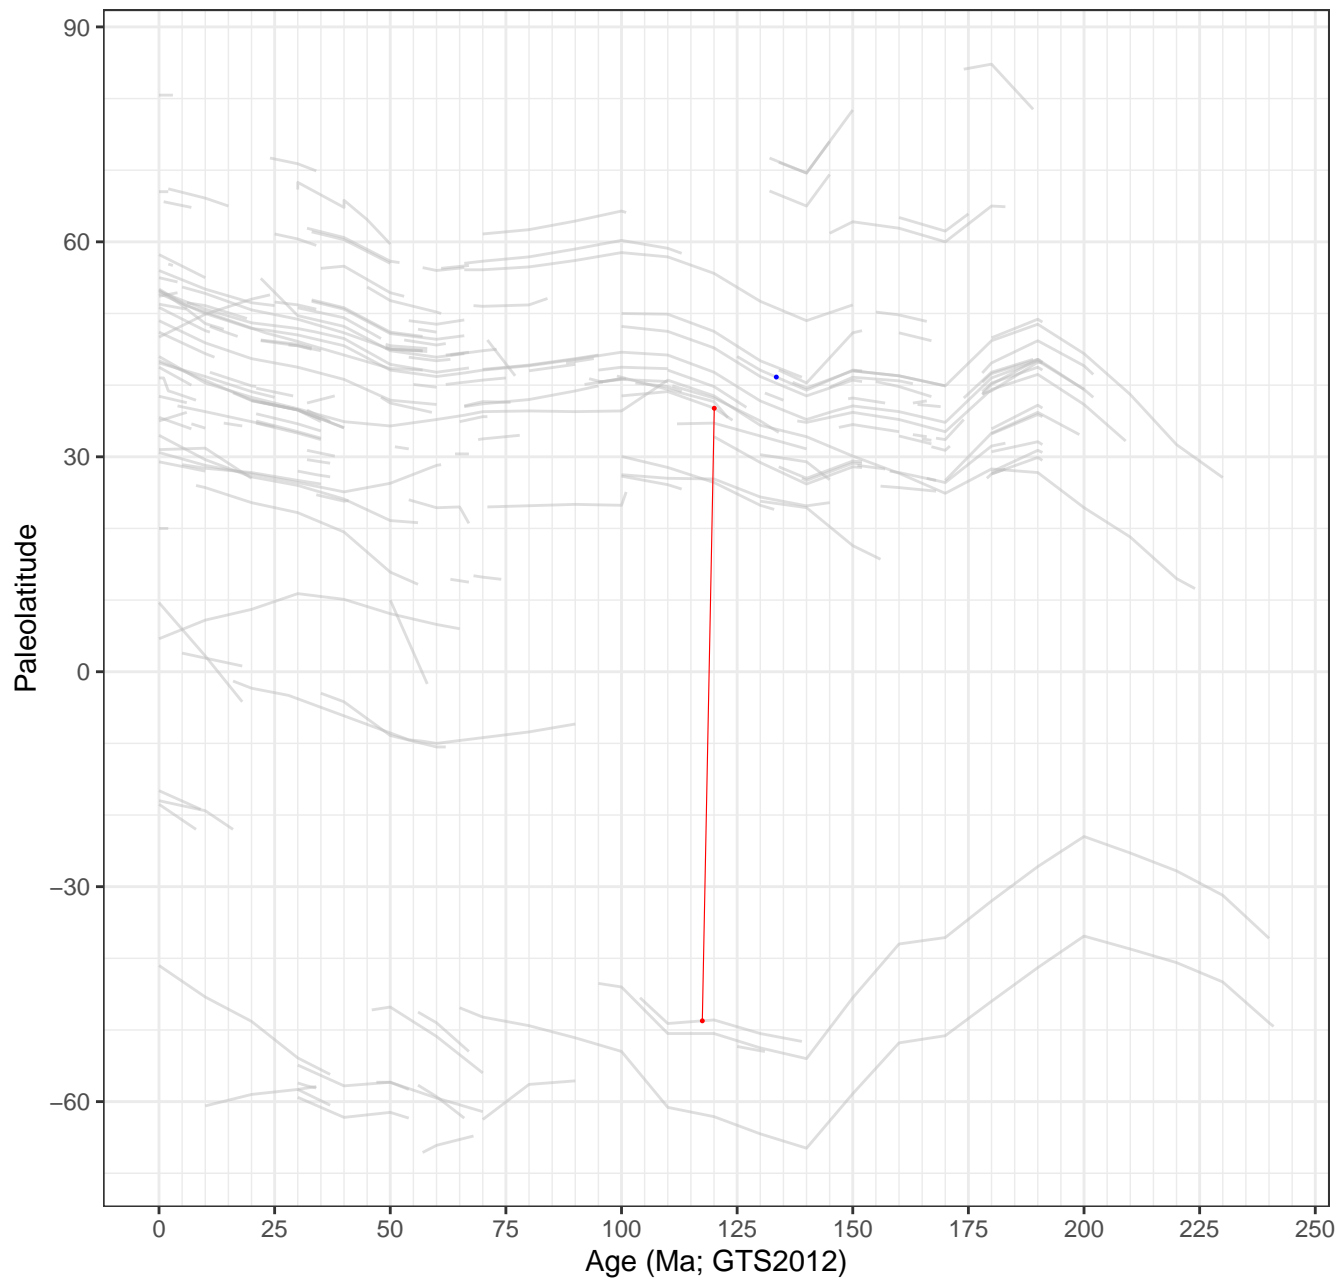

Supplement: Supplementary file 2494 [file Tanyosphaeridium boletus.pdf › Supplement/Supplement 2/Species 1914 plots/Tanyosphaeridium boletus.pdf]

# Species *Tanyosphaeridium isocalamus*

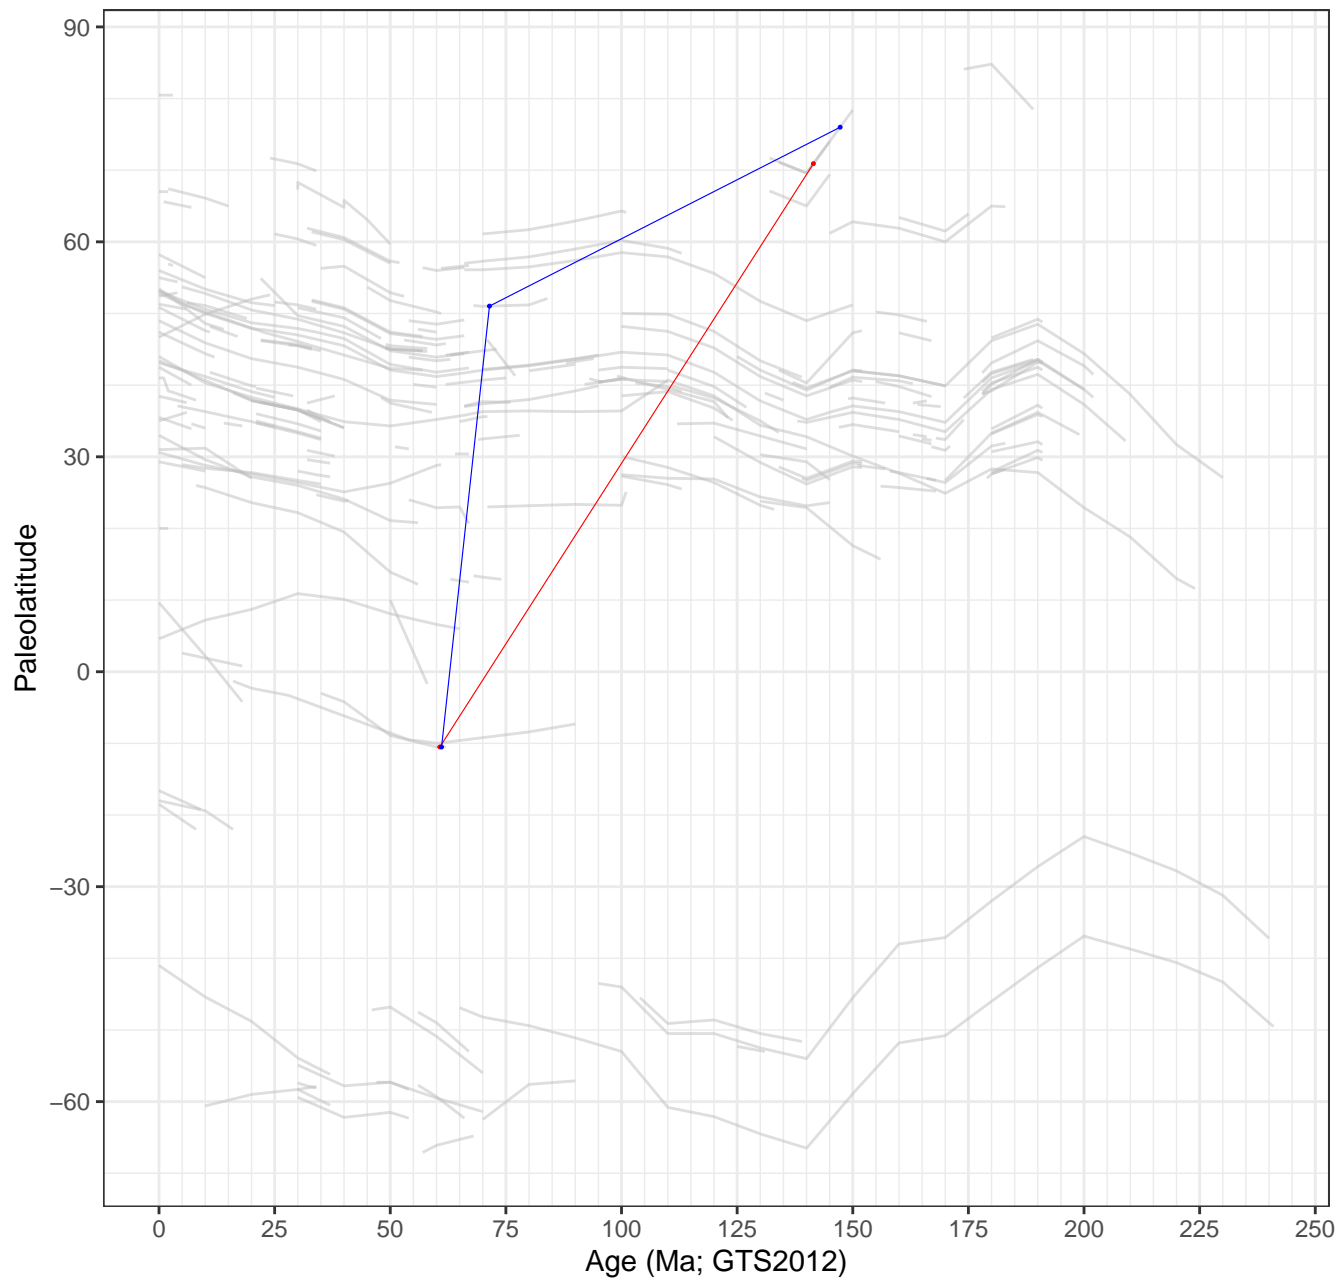

Supplement: Supplementary file 2495 [file Tanyosphaeridium isocalamus.pdf › Supplement/Supplement 2/Species 1914 plots/Tanyosphaeridium isocalamus.pdf]

# Species *Tanyosphaeridium magneticum*

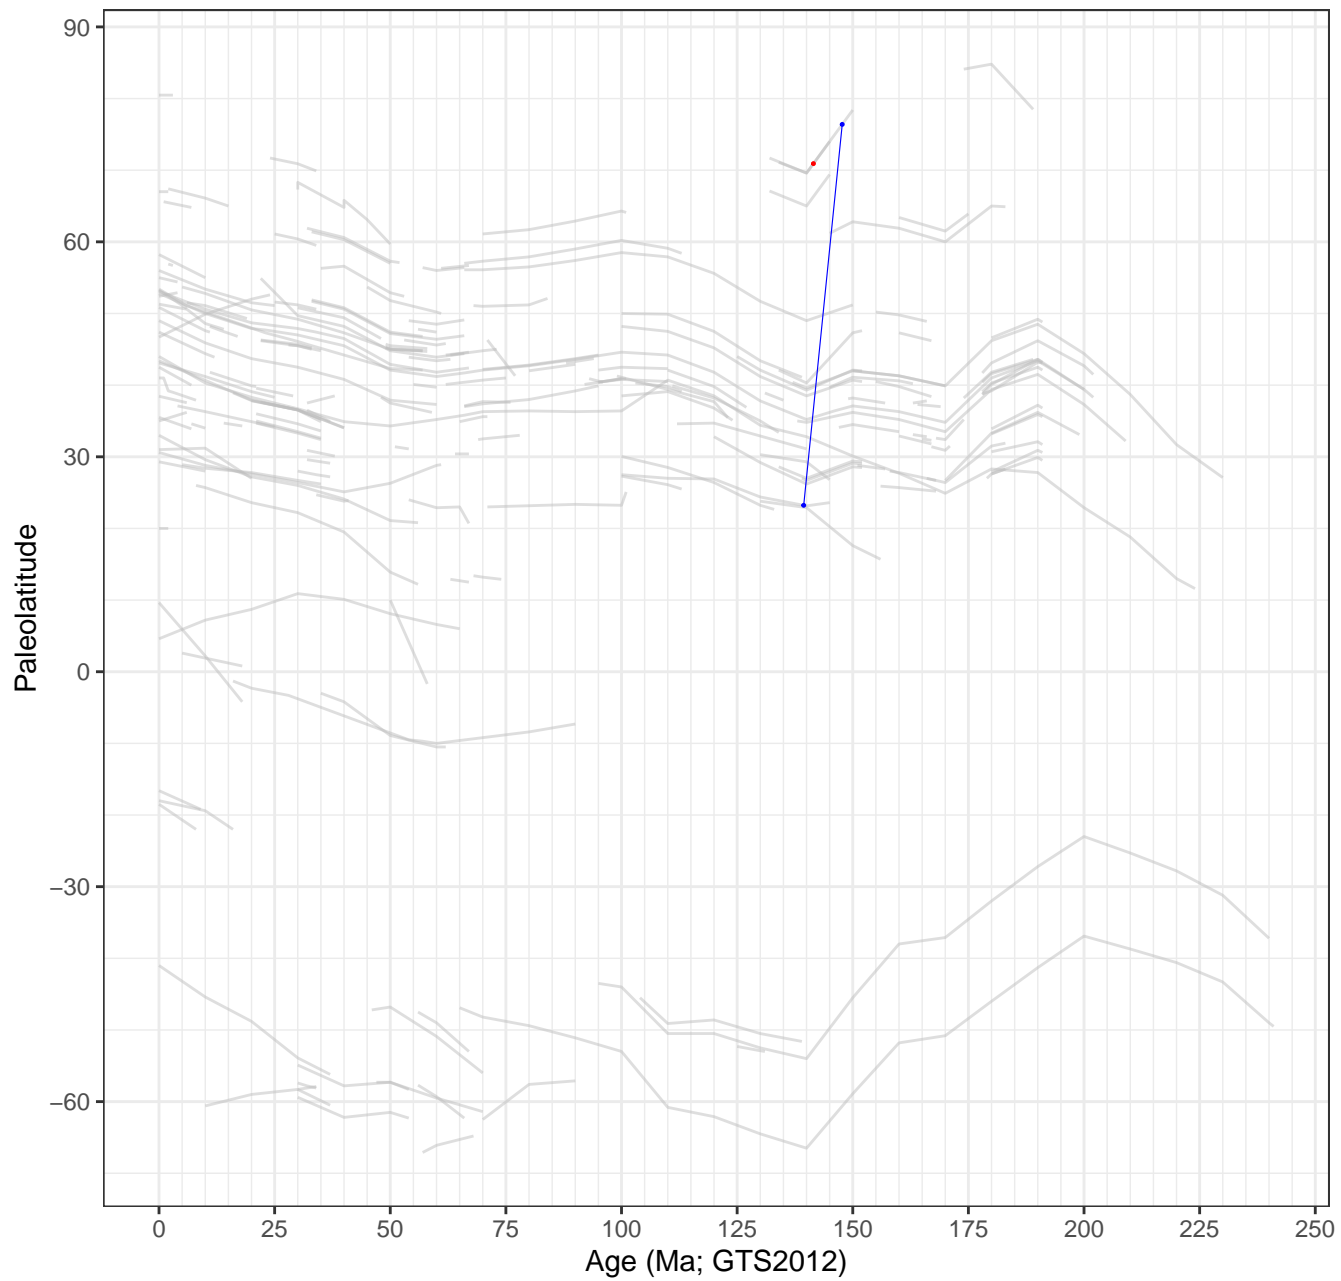

Supplement: Supplementary file 2496 [file Tanyosphaeridium magneticum.pdf › Supplement/Supplement 2/Species 1914 plots/Tanyosphaeridium magneticum.pdf]

# Species *Tanyosphaeridium regulare*

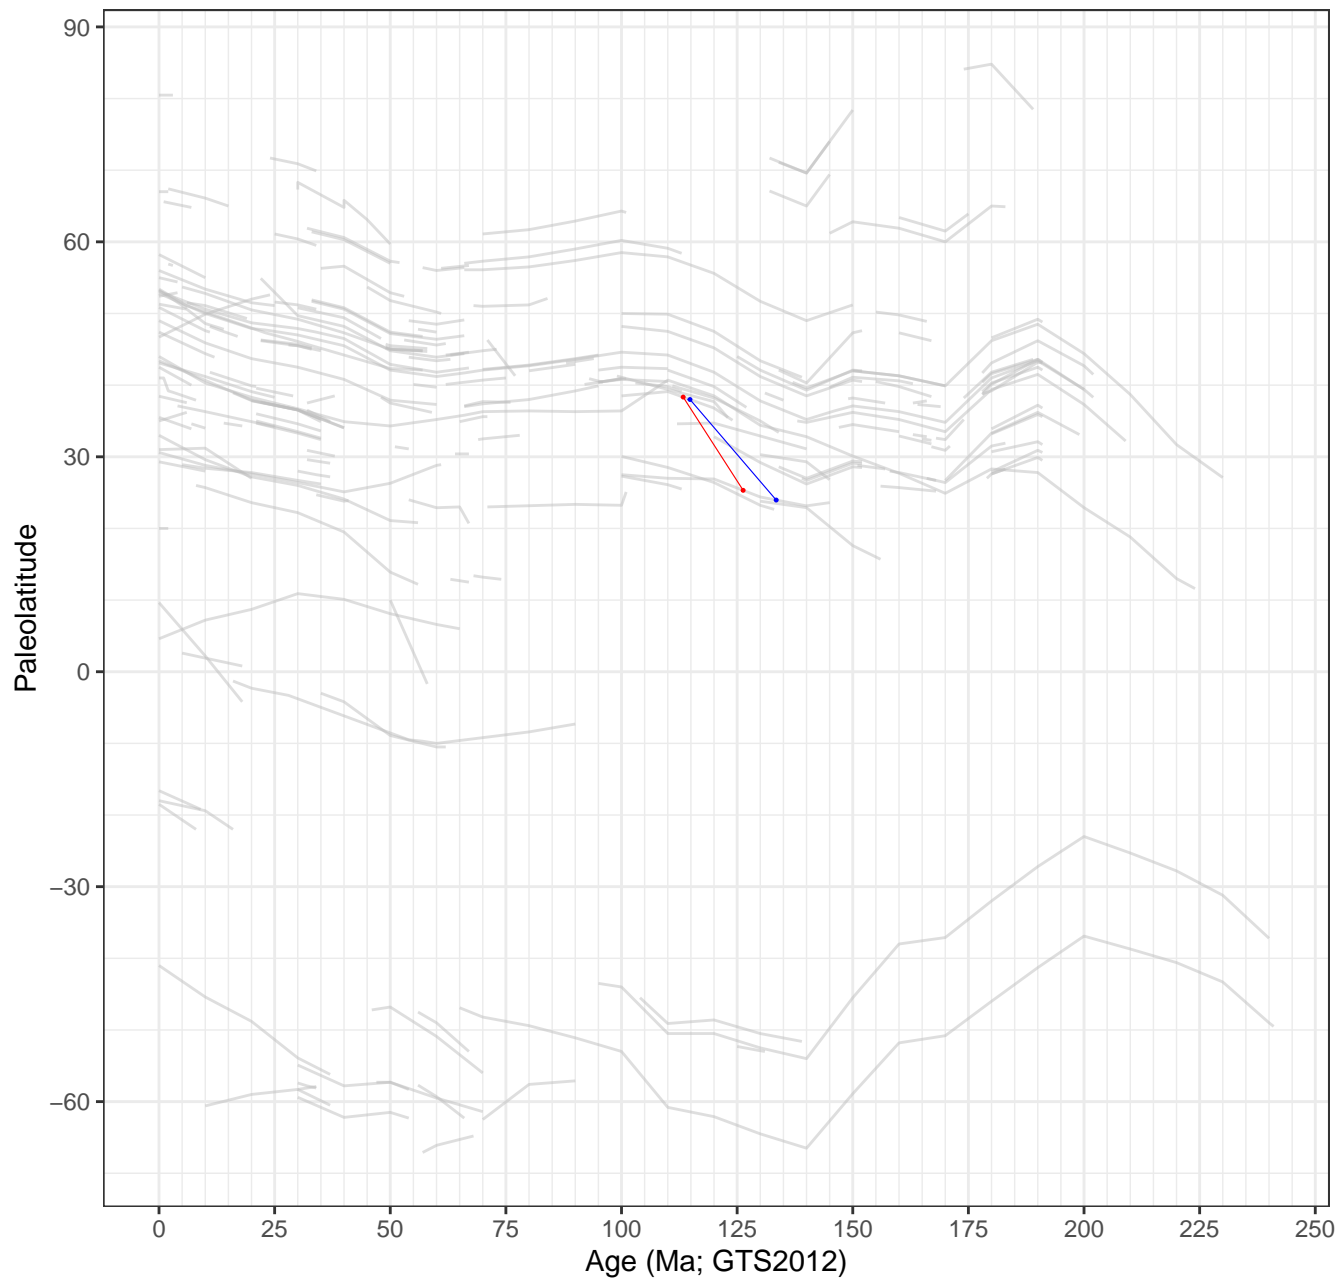

Supplement: Supplementary file 2497 [file Tanyosphaeridium regulare.pdf › Supplement/Supplement 2/Species 1914 plots/Tanyosphaeridium regulare.pdf]

# Species *Tanyosphaeridium salpinx*

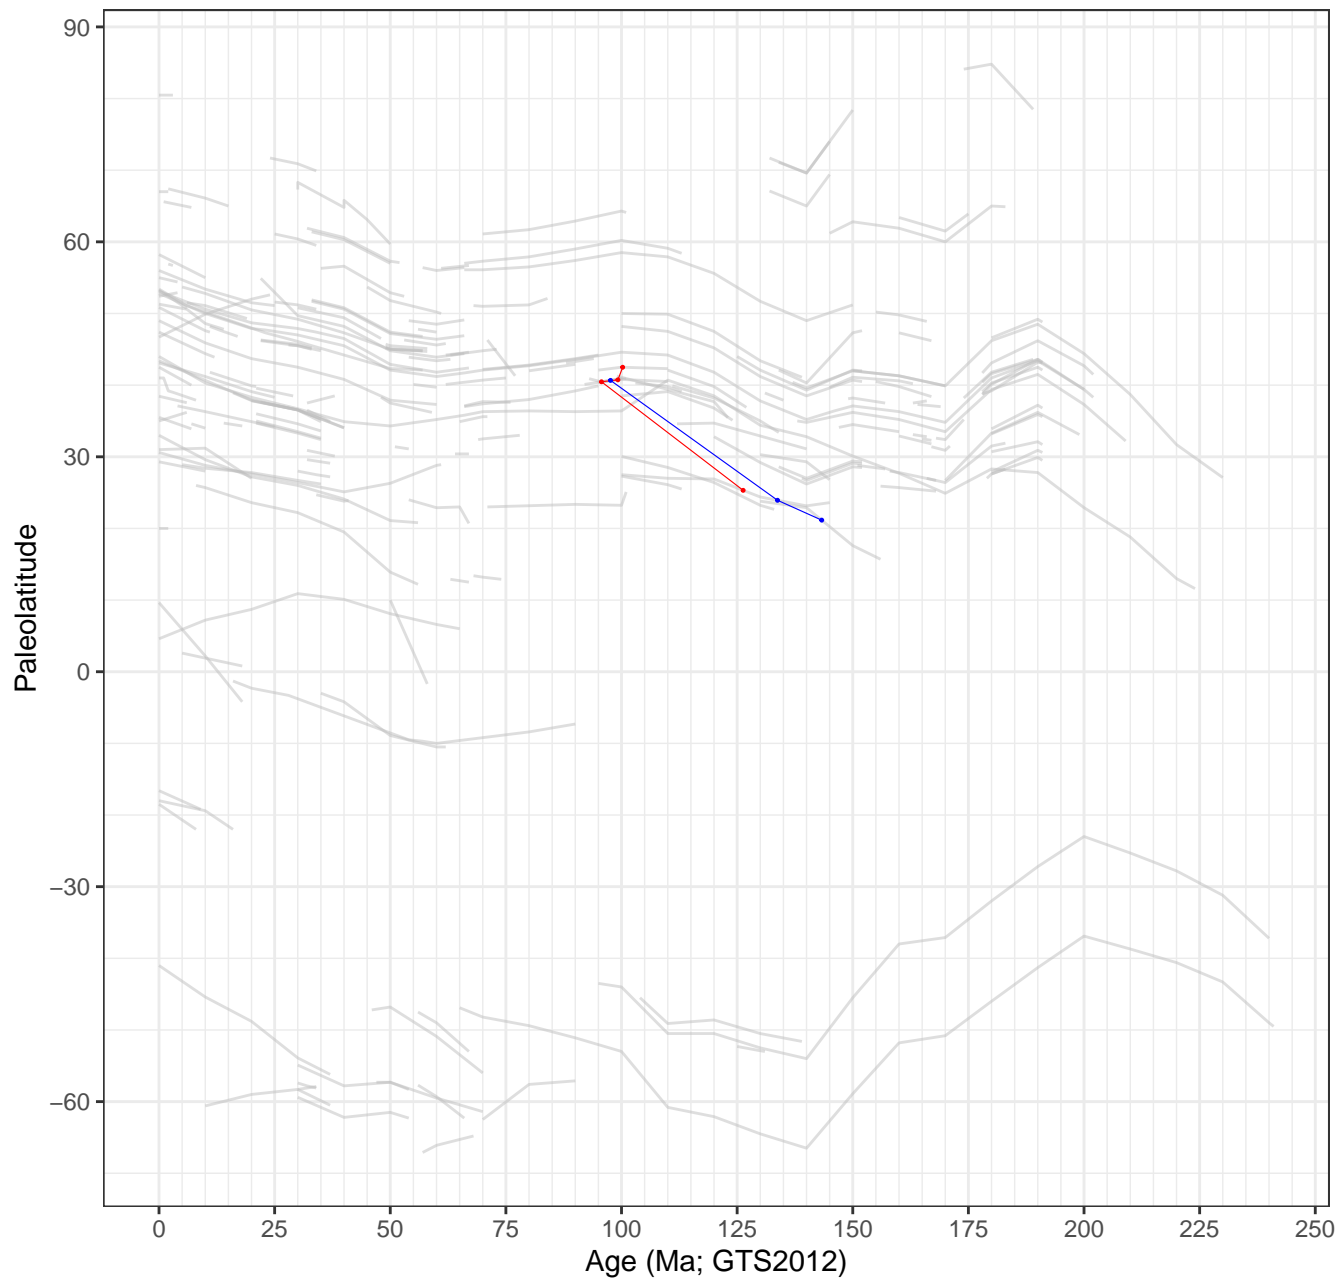

Supplement: Supplementary file 2498 [file Tanyosphaeridium salpinx.pdf › Supplement/Supplement 2/Species 1914 plots/Tanyosphaeridium salpinx.pdf]

# Species *Tanyosphaeridium variecalamus*

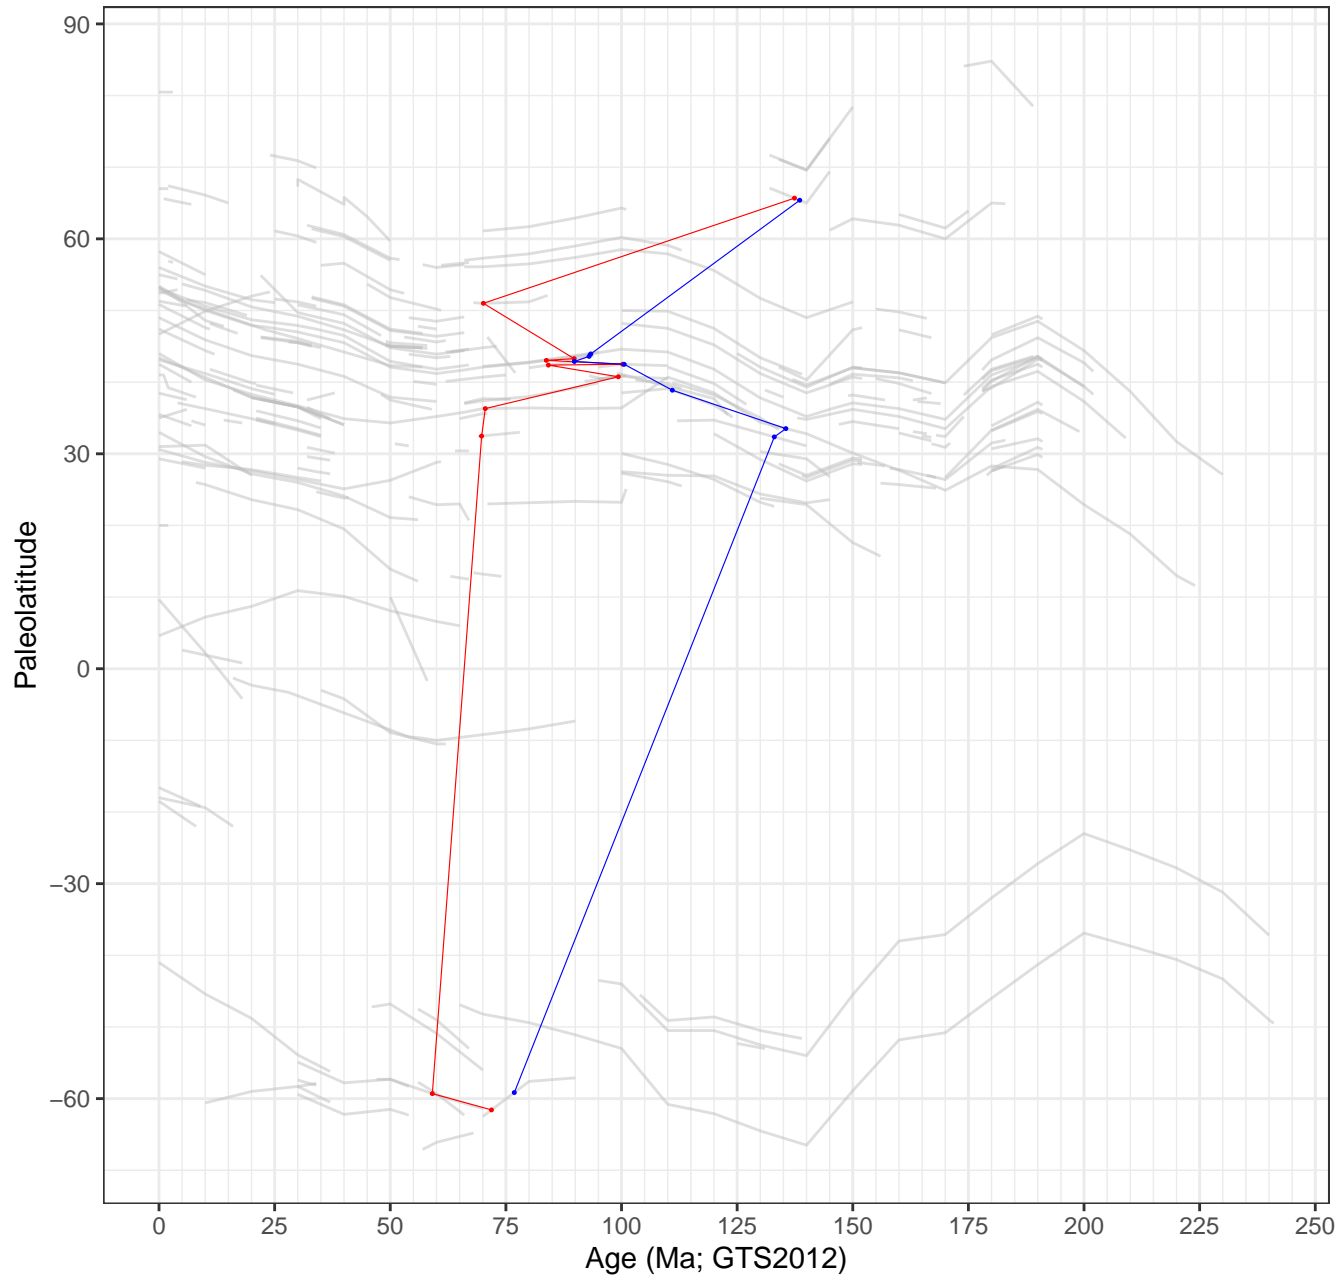

Supplement: Supplementary file 2499 [file Tanyosphaeridium variecalamus.pdf › Supplement/Supplement 2/Species 1914 plots/Tanyosphaeridium variecalamus.pdf]

# Species *Tanyosphaeridium xanthiopyxides*

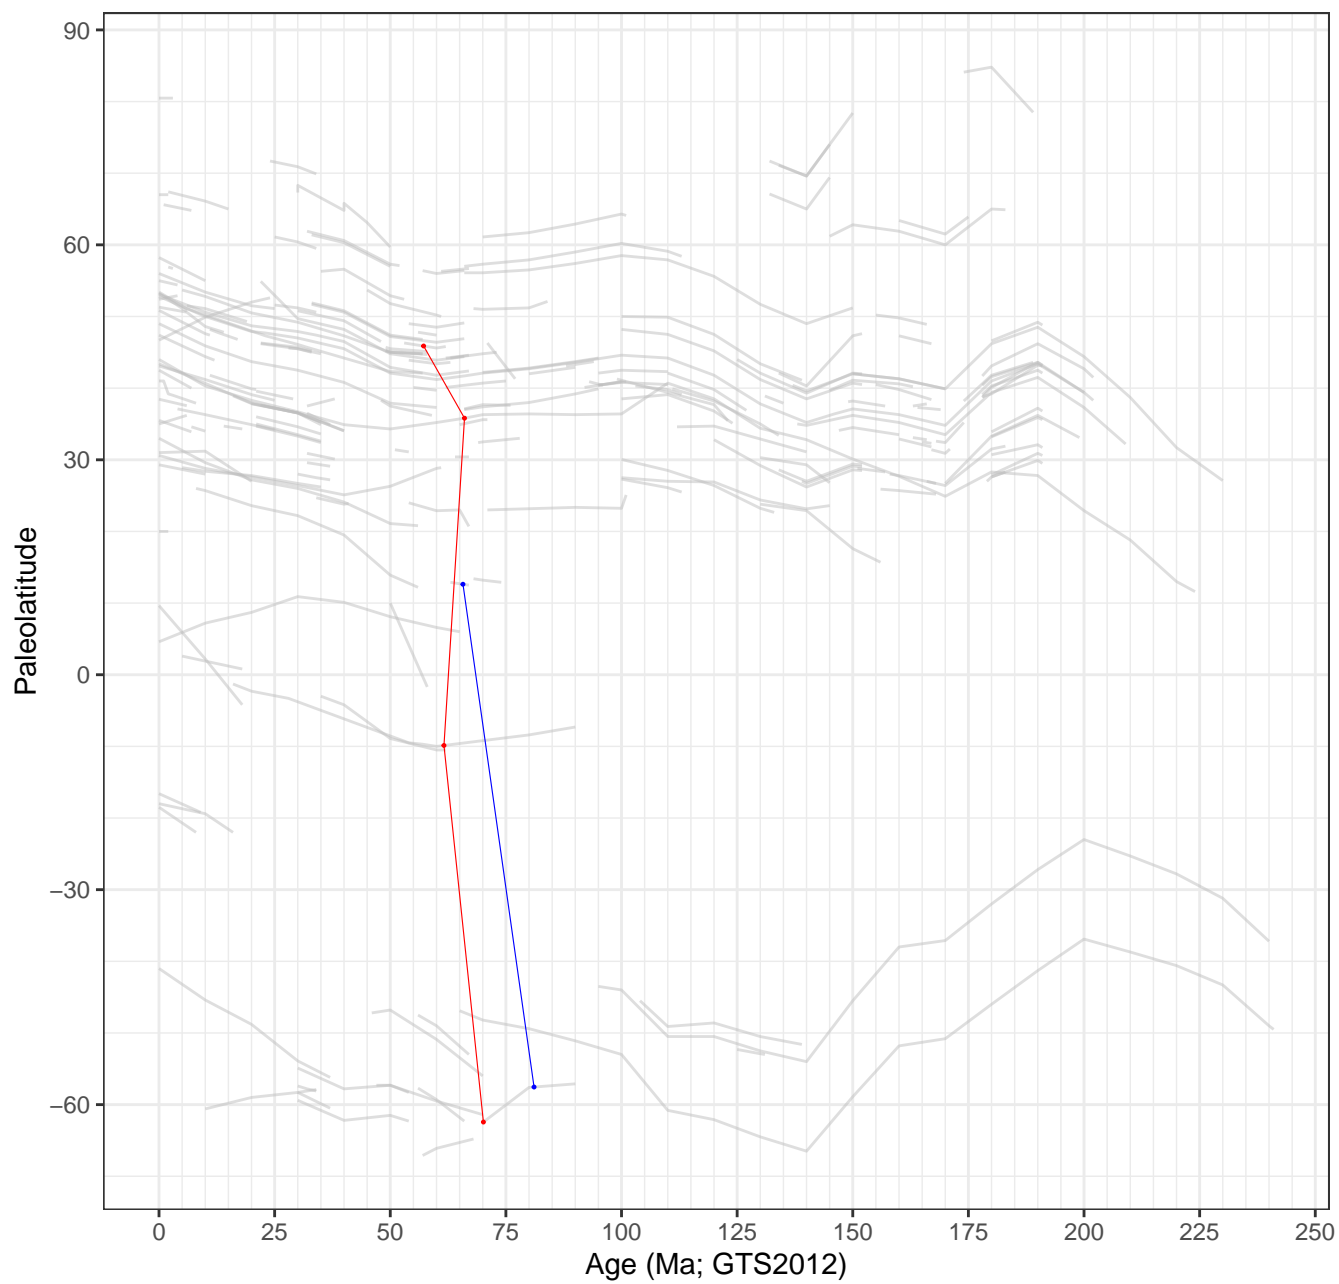

Supplement: Supplementary file 2500 [file Tanyosphaeridium xanthiopyxides.pdf › Supplement/Supplement 2/Species 1914 plots/Tanyosphaeridium xanthiopyxides.pdf]

# Species *Tectatodinium nigeriae*

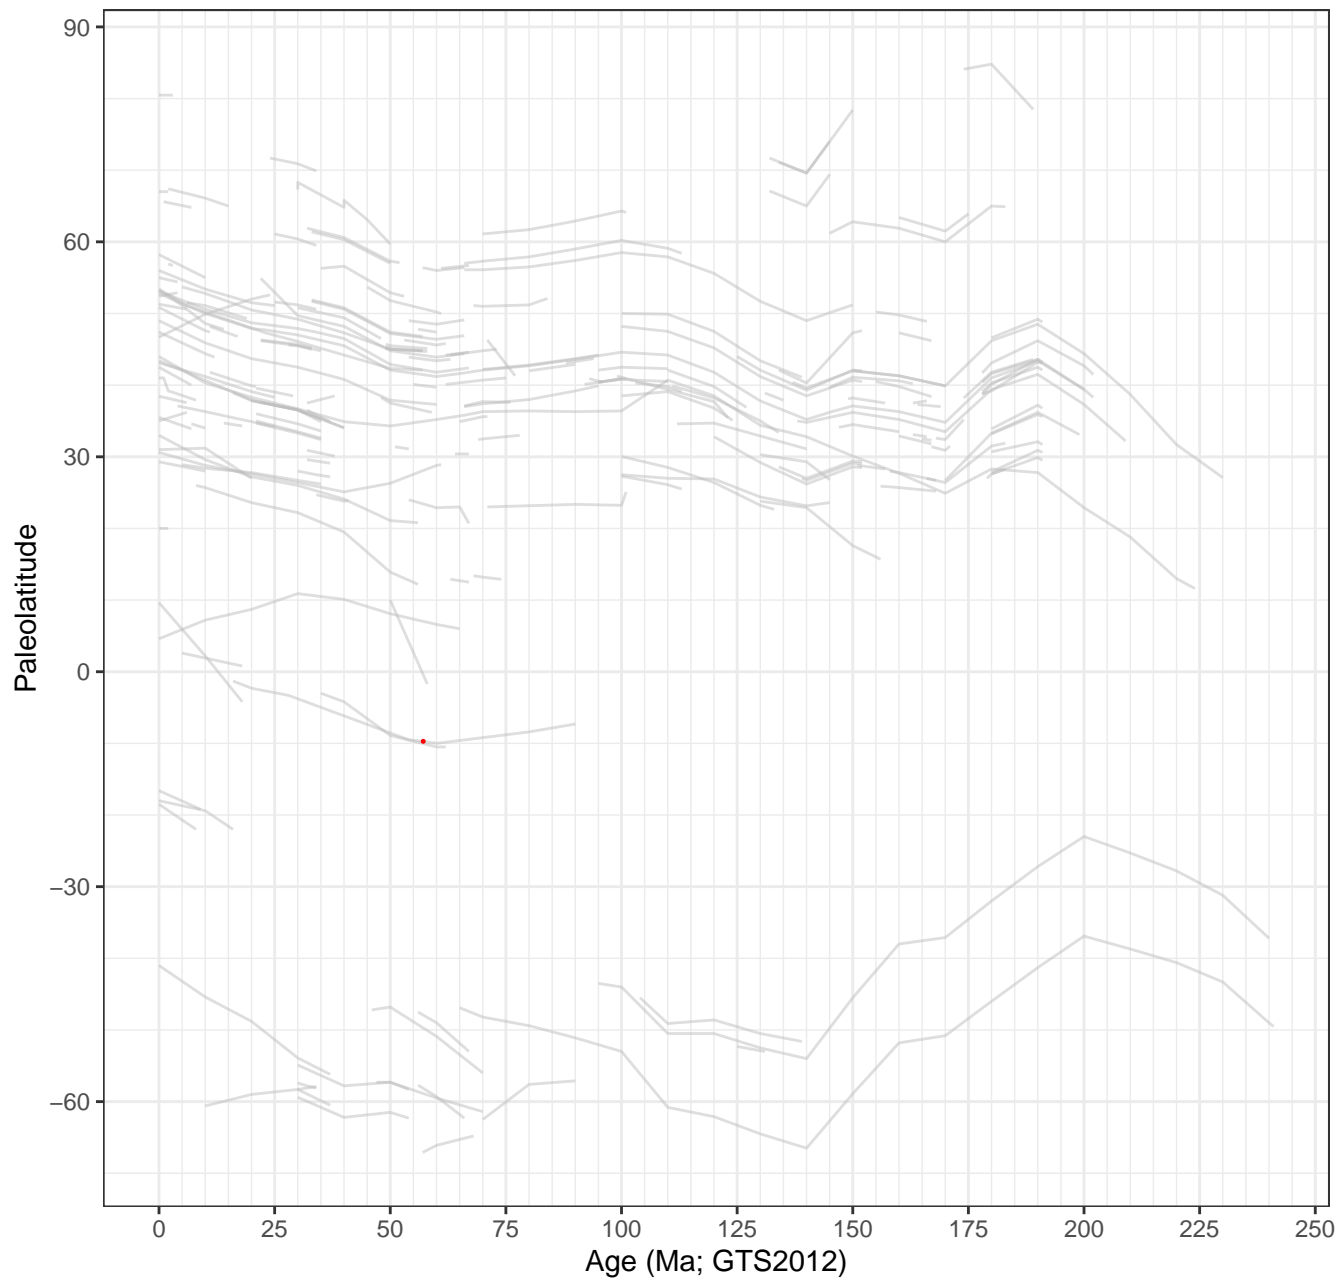

Supplement: Supplementary file 2501 [file Tectatodinium nigeriaense.pdf › Supplement/Supplement 2/Species 1914 plots/Tectatodinium nigeriaense.pdf]

# Species *Tectatodinium pellitum*

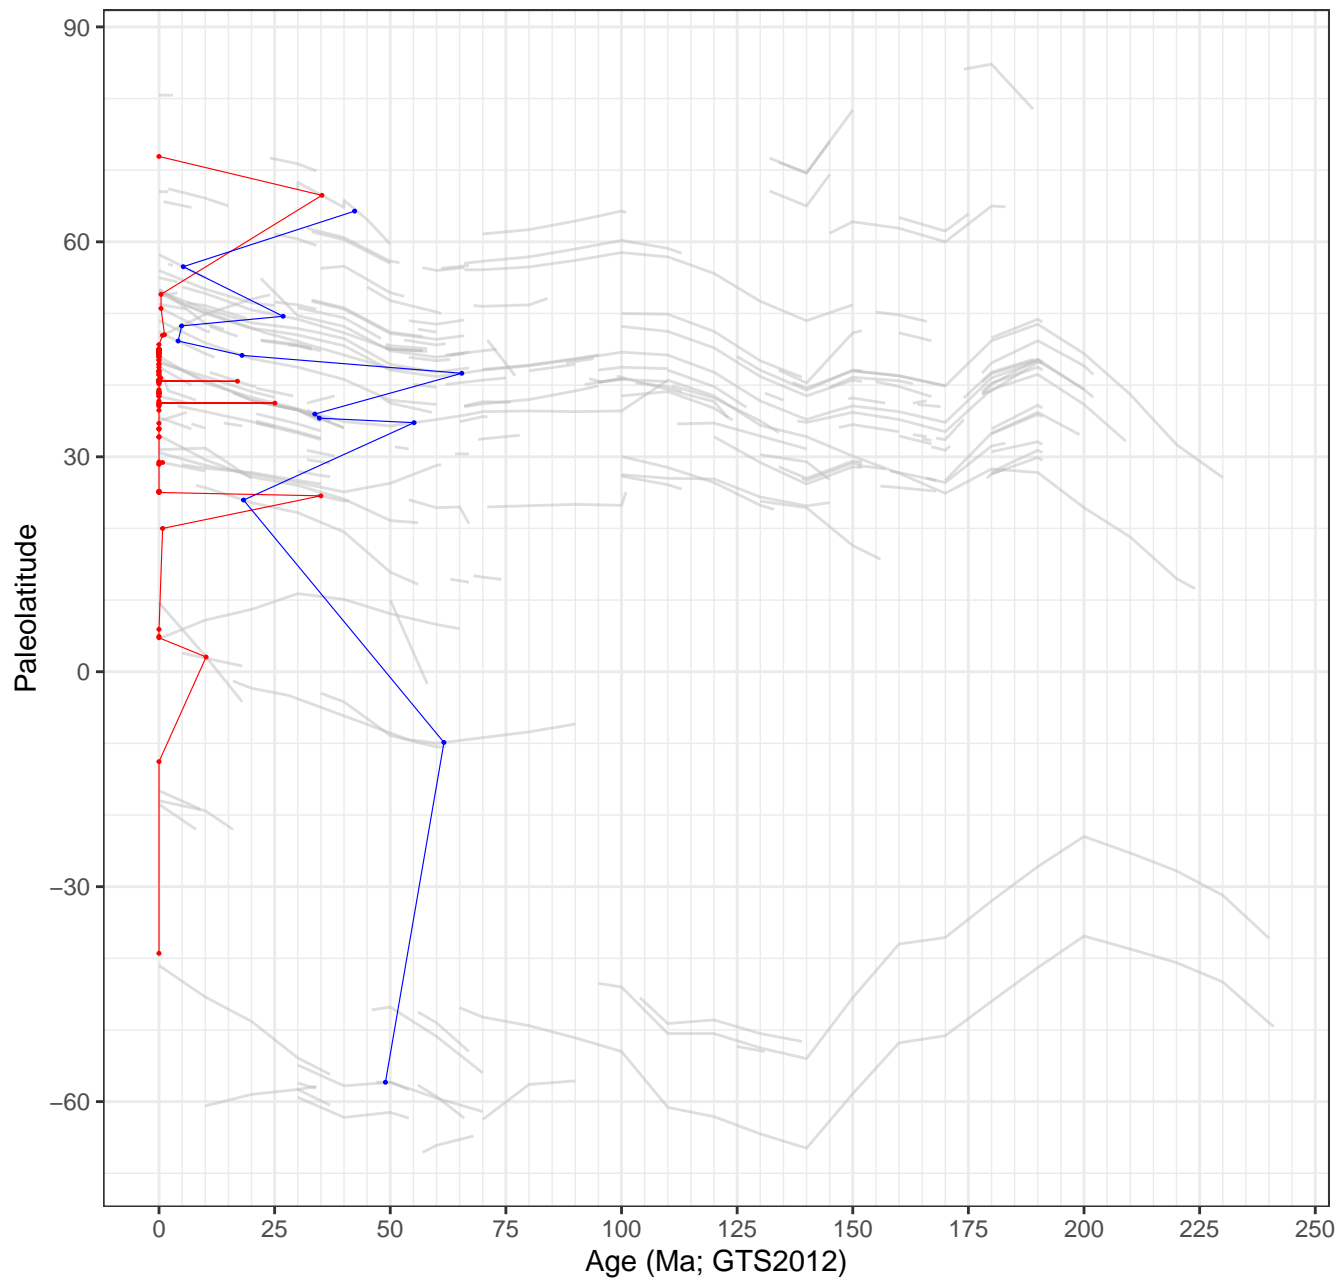

Supplement: Supplementary file 2502 [file Tectatodinium pellitum.pdf › Supplement/Supplement 2/Species 1914 plots/Tectatodinium pellitum.pdf]

# Species *Tehamadinium brixii*

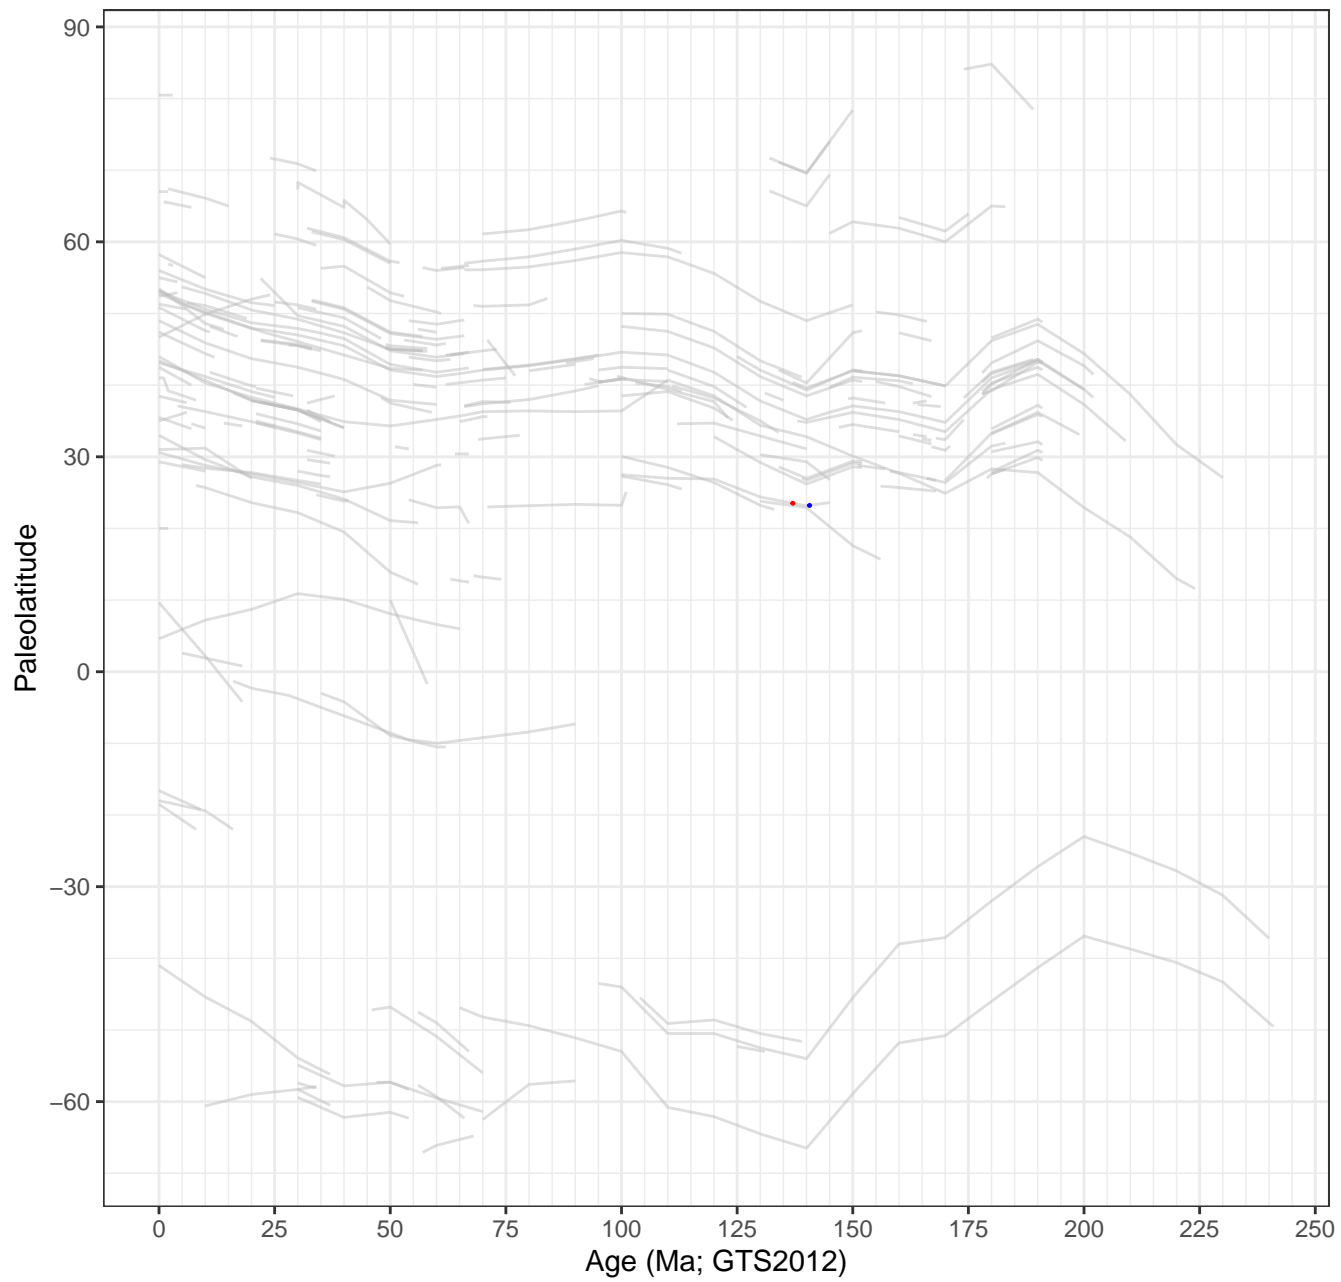

Supplement: Supplementary file 2503 [file Tehamadinium brixii.pdf › Supplement/Supplement 2/Species 1914 plots/Tehamadinium brixii.pdf]

# Species *Tehamadinium daveyii*

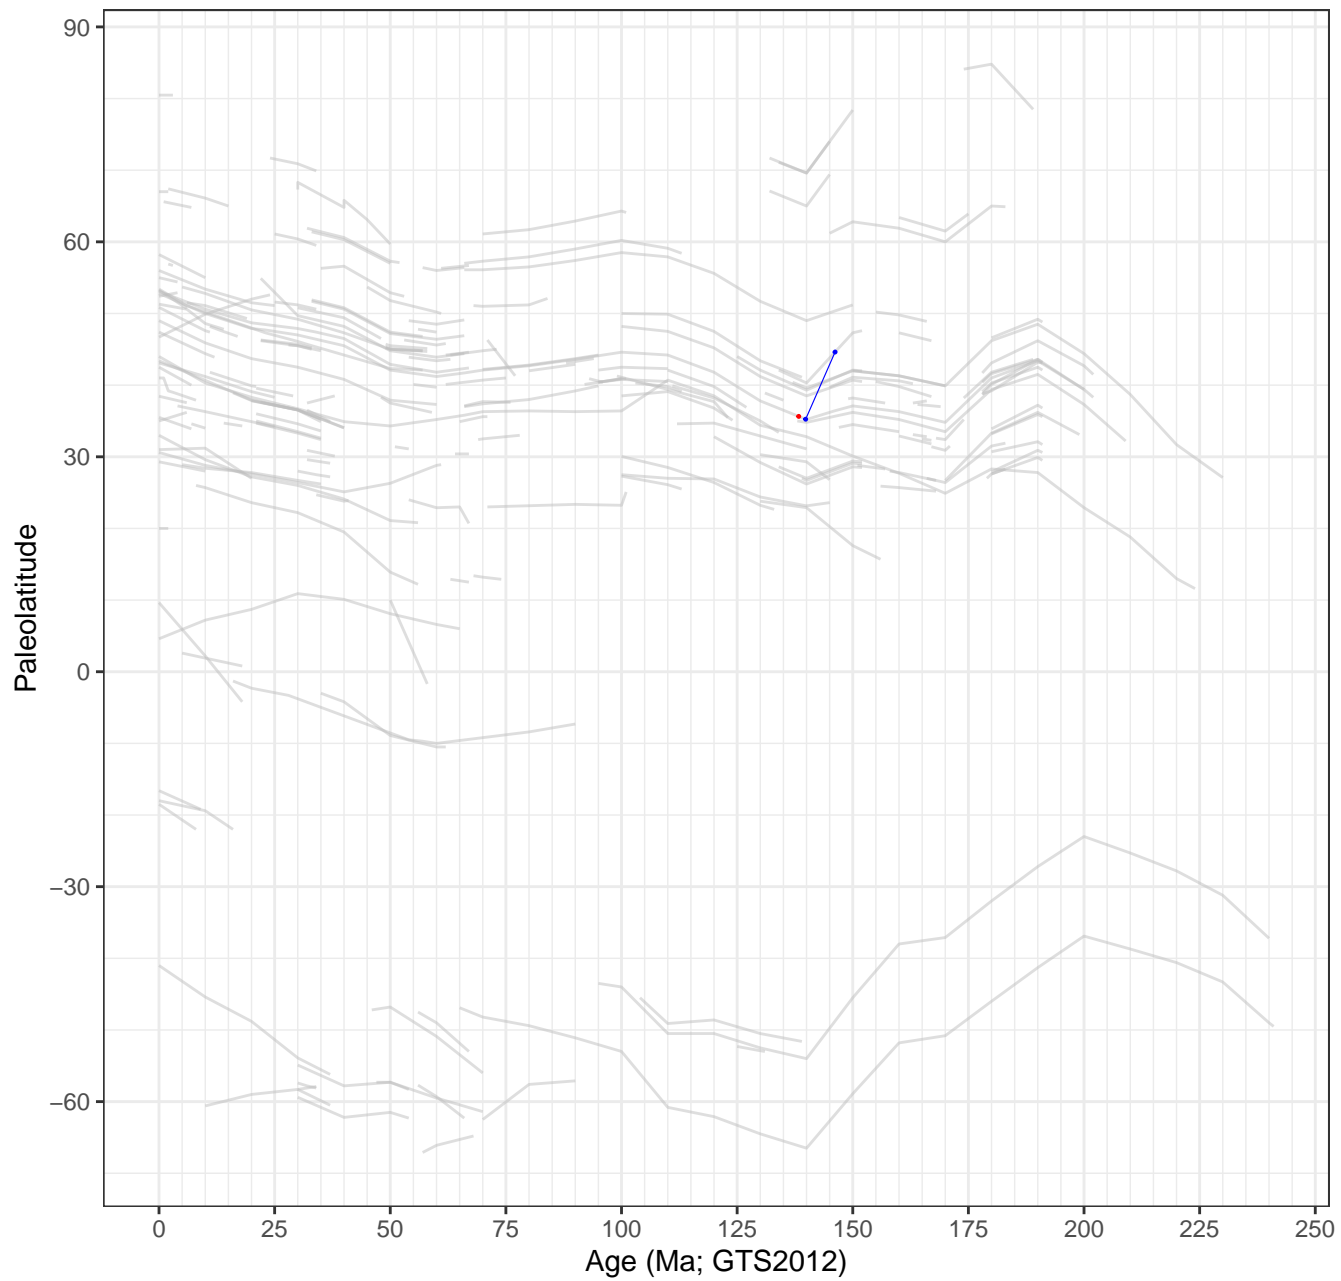

Supplement: Supplementary file 2504 [file Tehamadinium daveyii.pdf › Supplement/Supplement 2/Species 1914 plots/Tehamadinium daveyii.pdf]

# Species *Tehamadinium dodekovae*

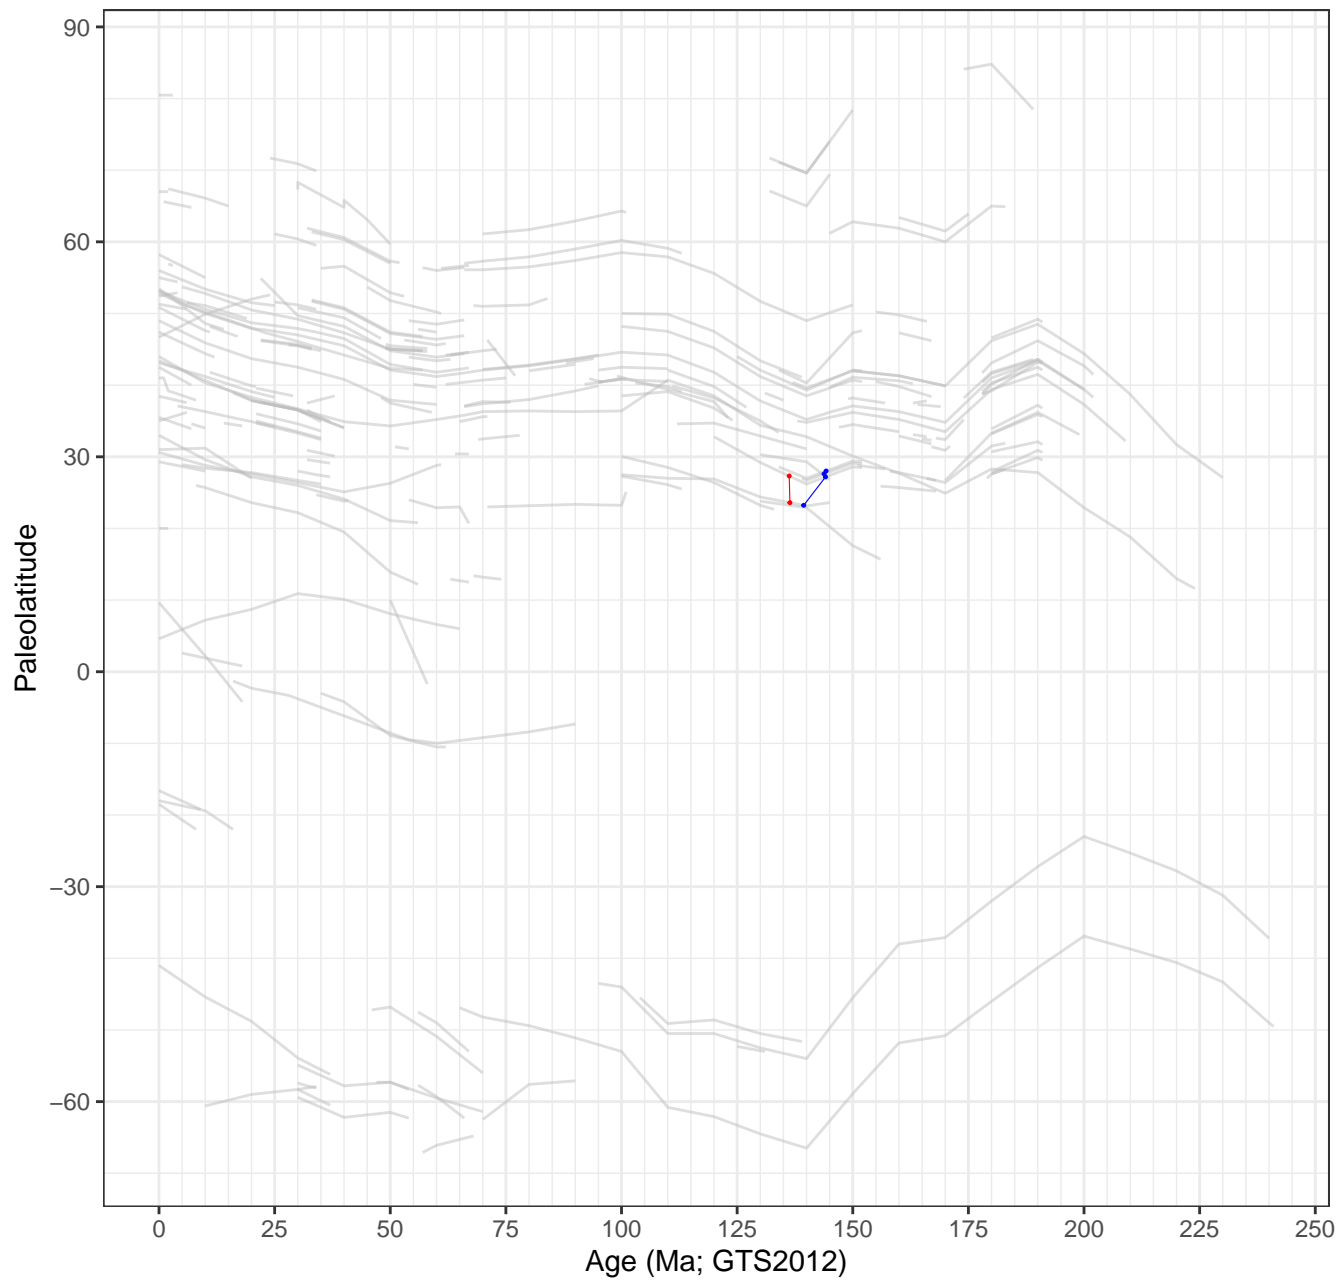

Supplement: Supplementary file 2505 [file Tehamadinium dodekovae.pdf › Supplement/Supplement 2/Species 1914 plots/Tehamadinium dodekovae.pdf]

# Species *Tehamadinium evittii*

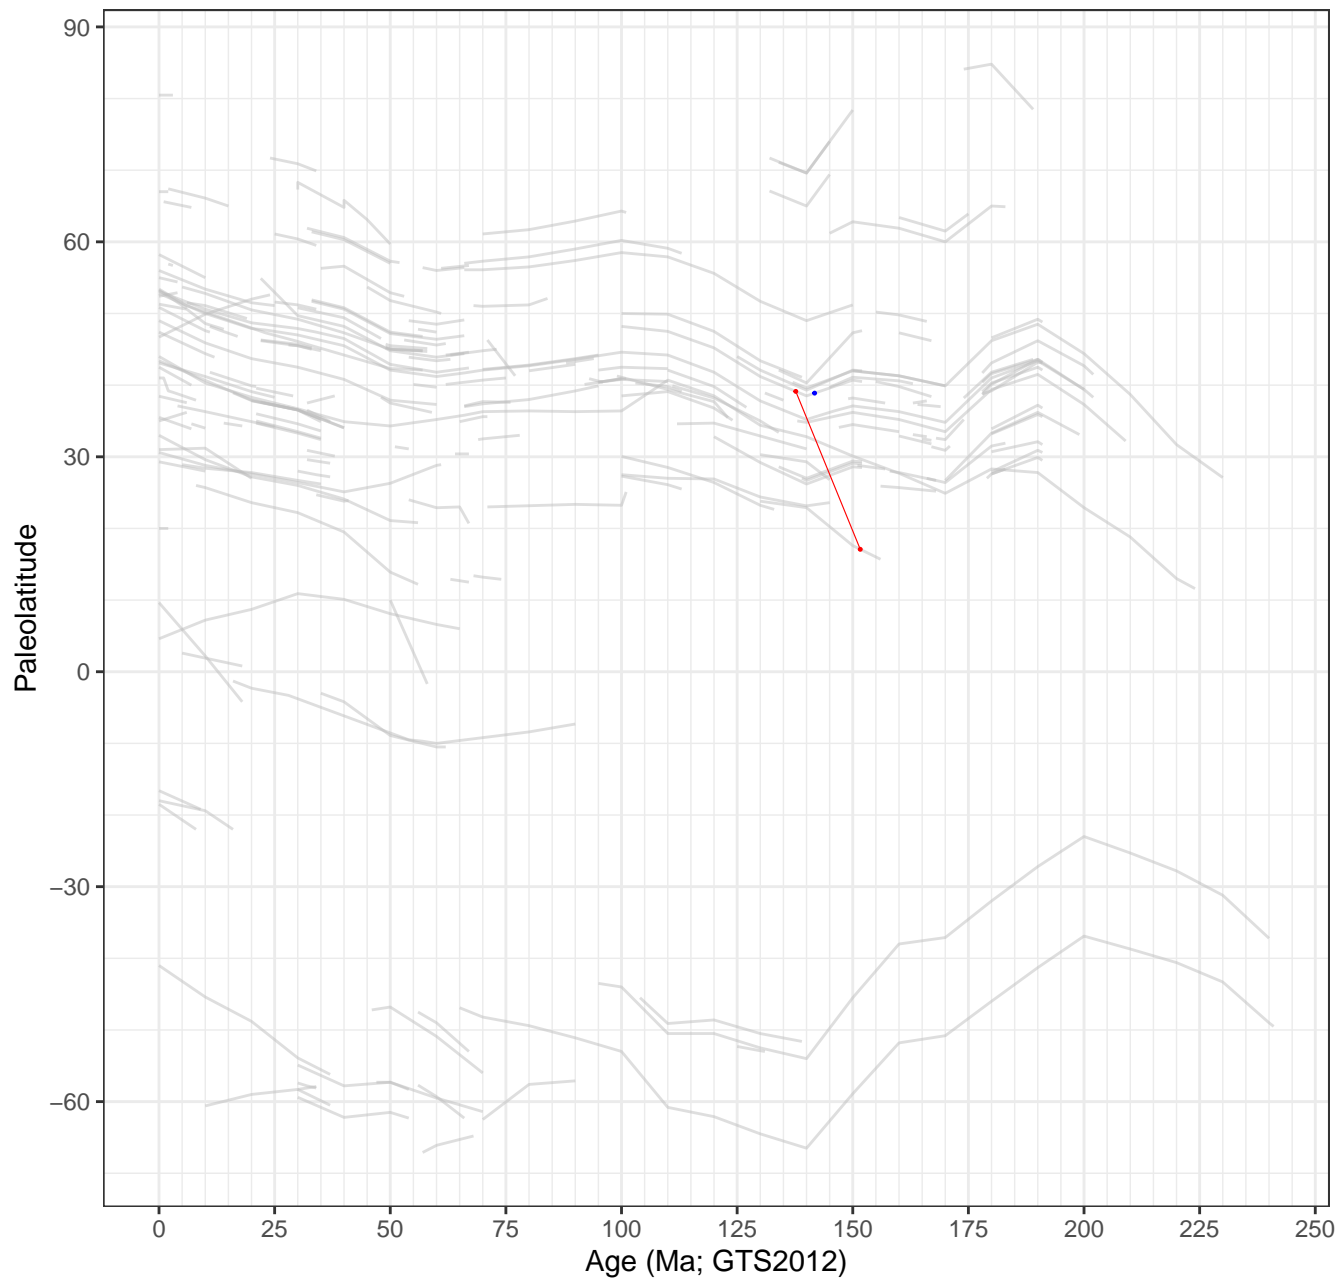

Supplement: Supplementary file 2506 [file Tehamadinium evittii.pdf › Supplement/Supplement 2/Species 1914 plots/Tehamadinium evittii.pdf]

# Species *Tehamadinium sousense*

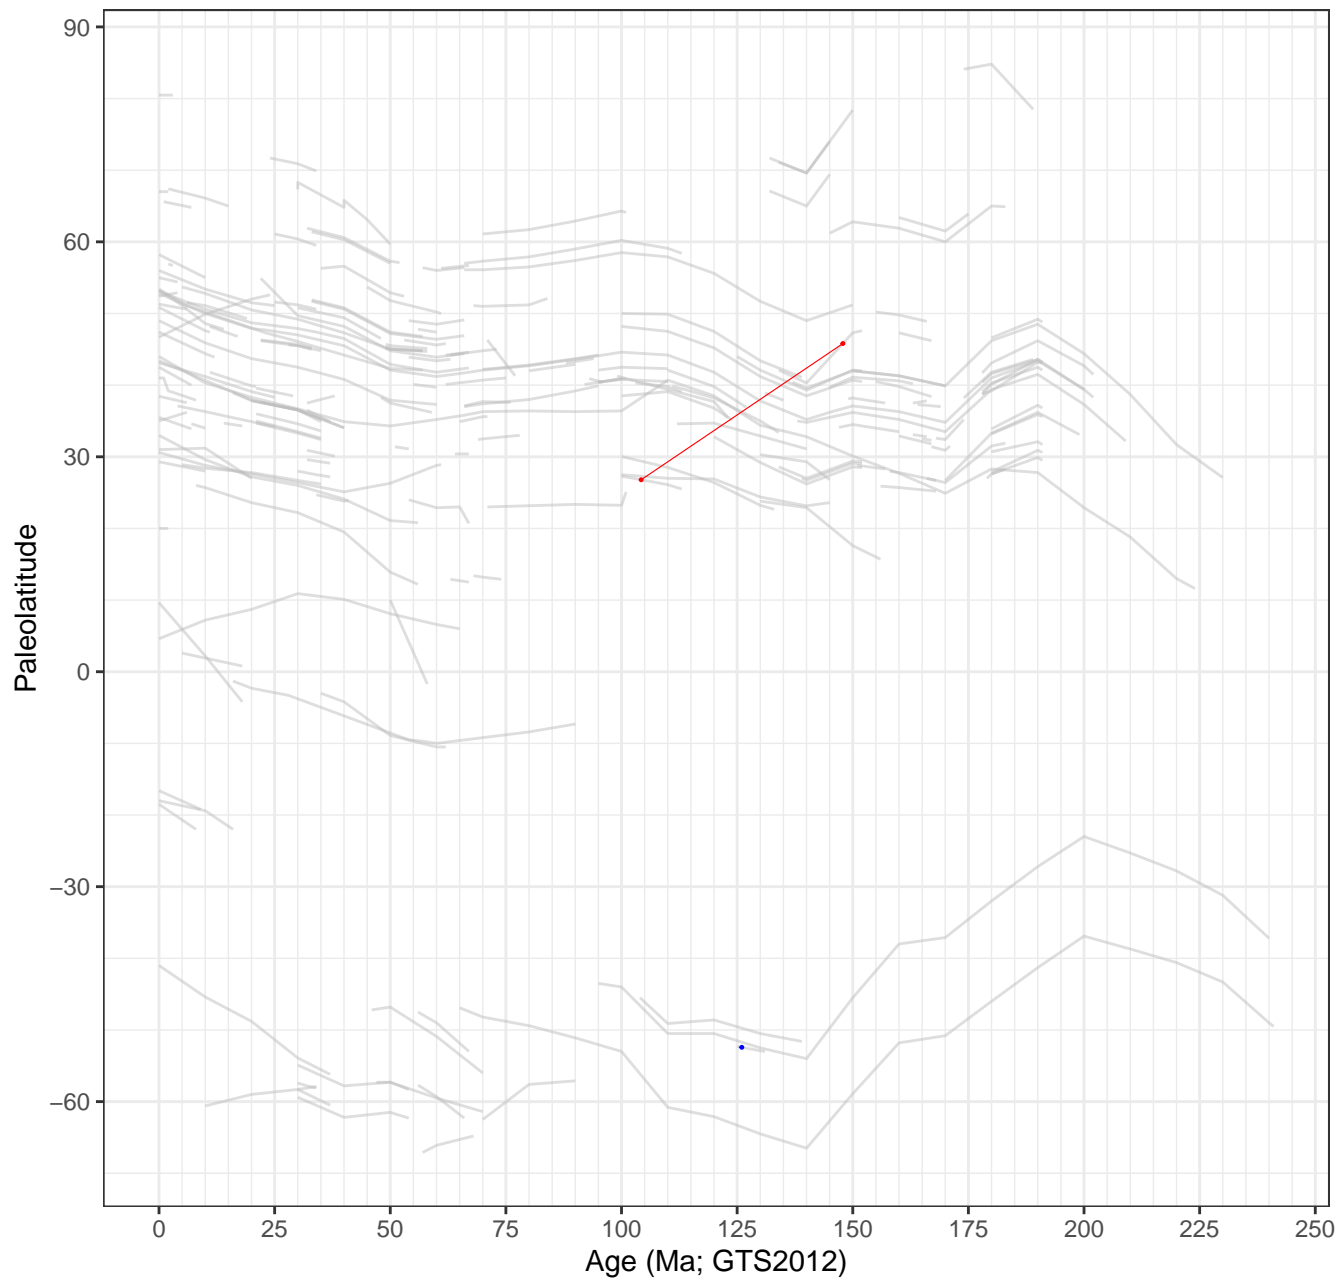

Supplement: Supplementary file 2507 [file Tehamadinium sousense.pdf › Supplement/Supplement 2/Species 1914 plots/Tehamadinium sousense.pdf]

# Species *Tenua hystrix*

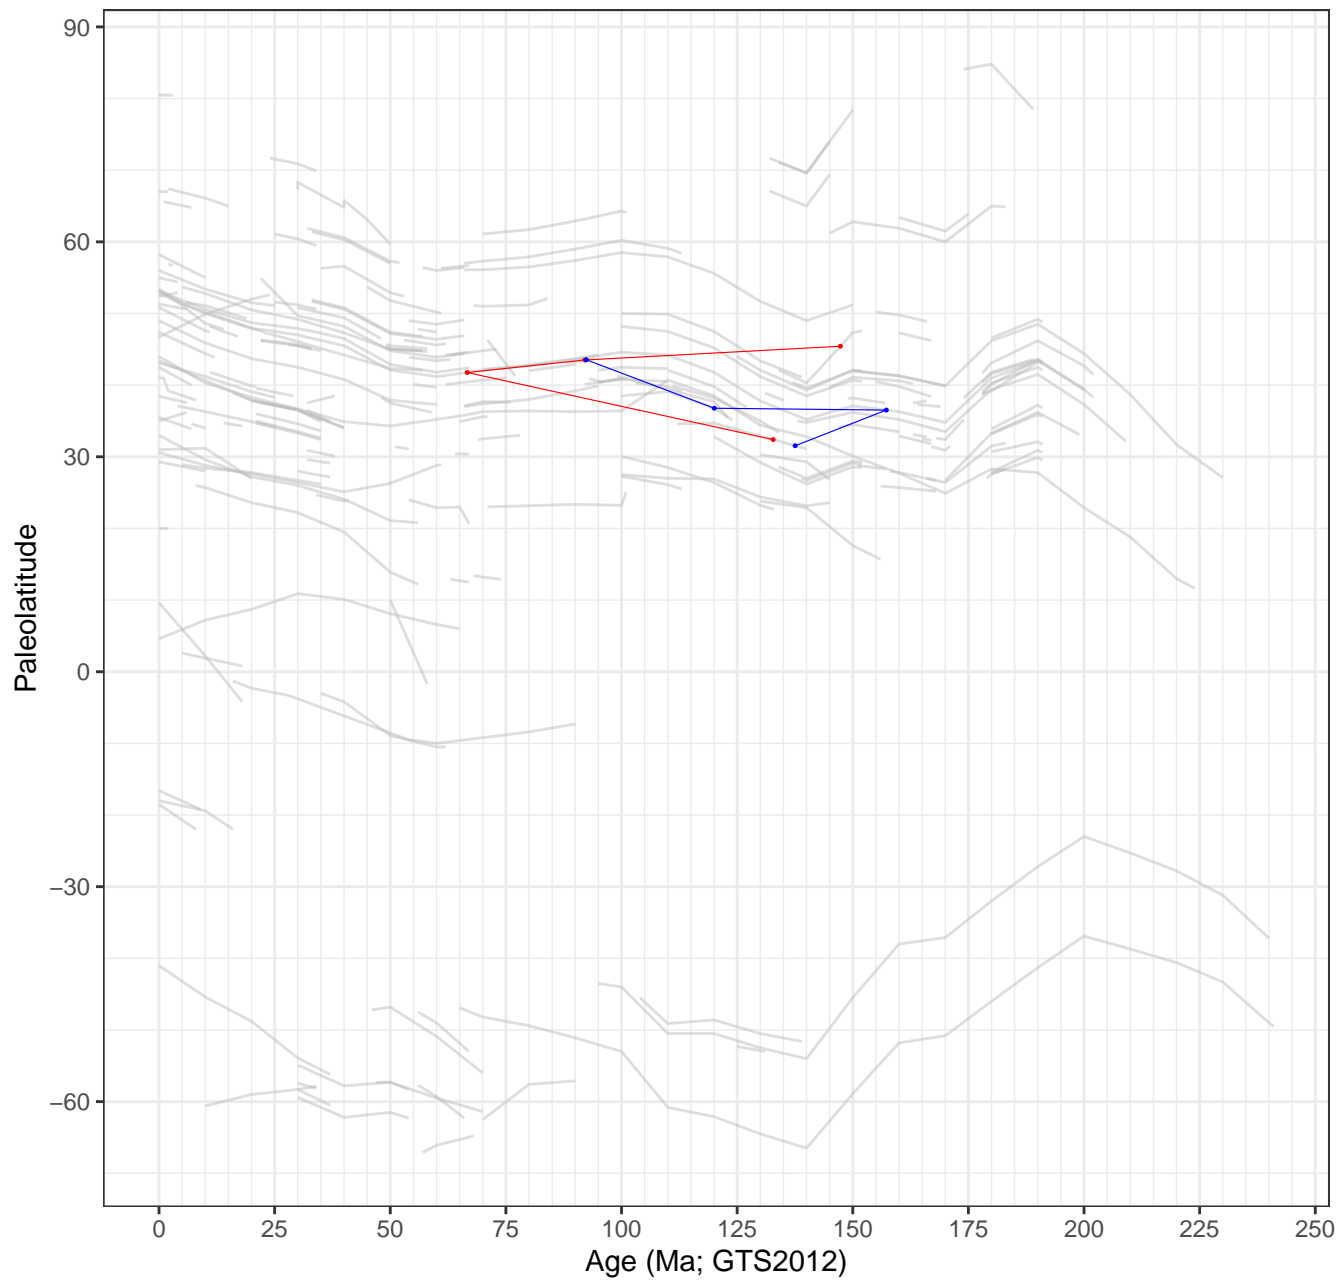

Supplement: Supplementary file 2508 [file Tenua hystrix.pdf › Supplement/Supplement 2/Species 1914 plots/Tenua hystrix.pdf]

# Species *Ternia balmei*

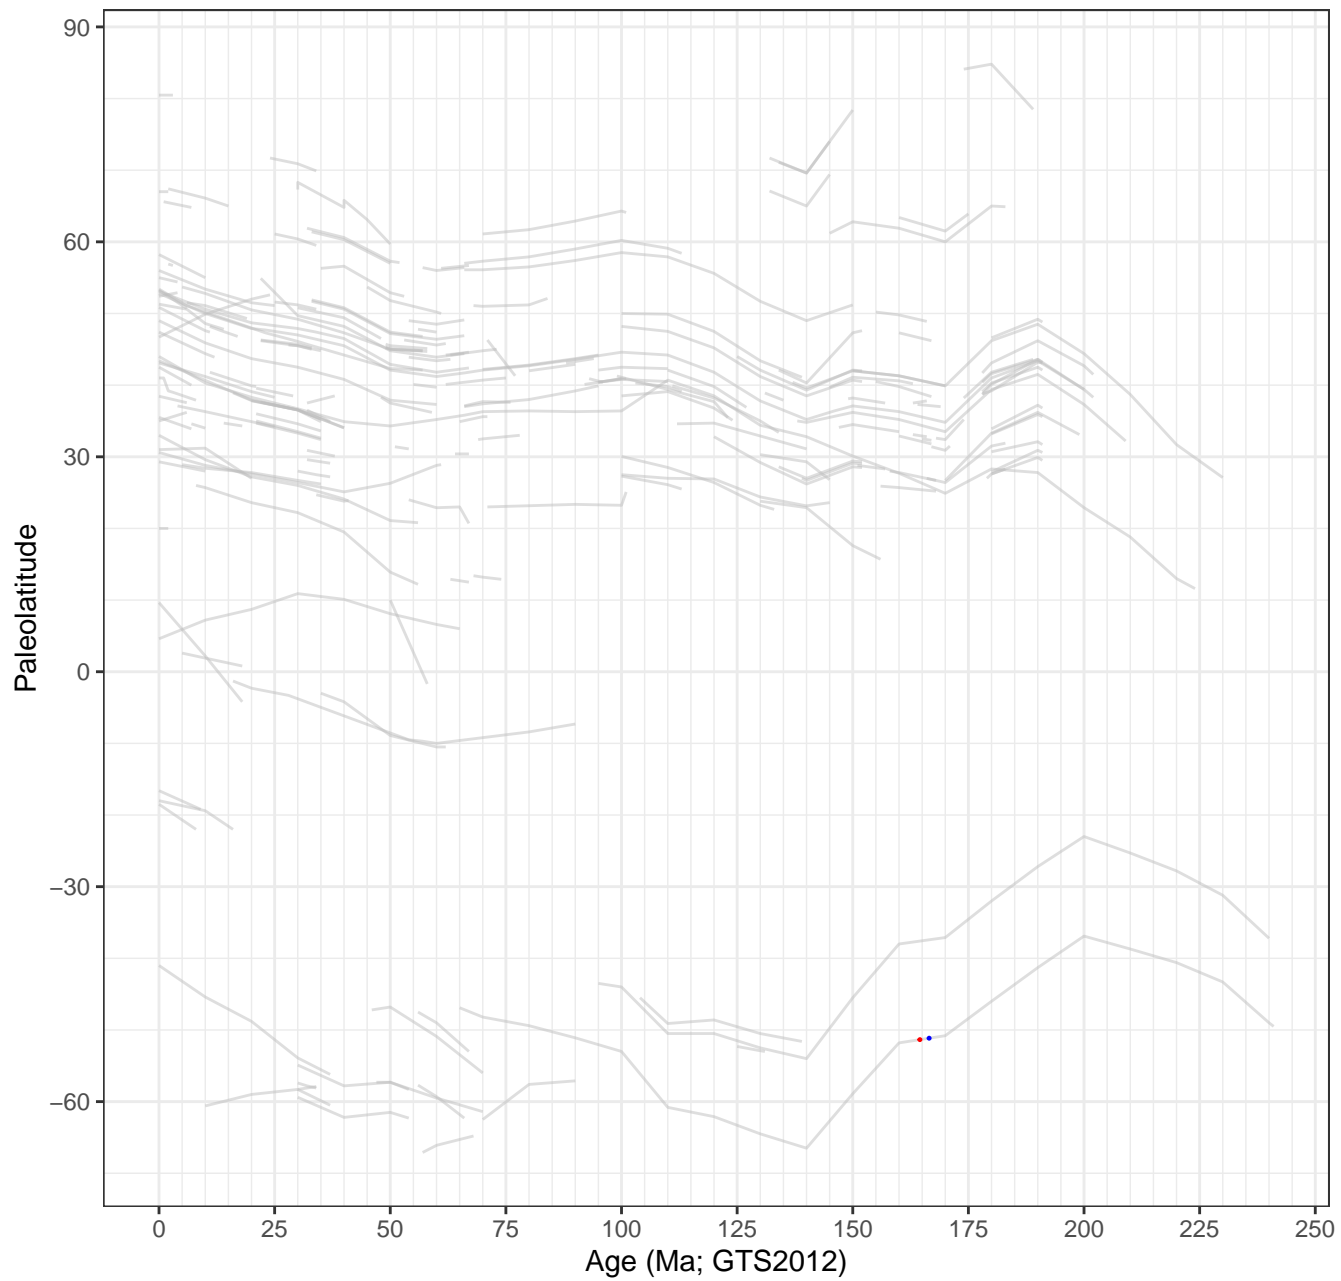

Supplement: Supplementary file 2509 [file Ternia balmei.pdf › Supplement/Supplement 2/Species 1914 plots/Ternia balmei.pdf]

# Species *Thalassiphora decremента*

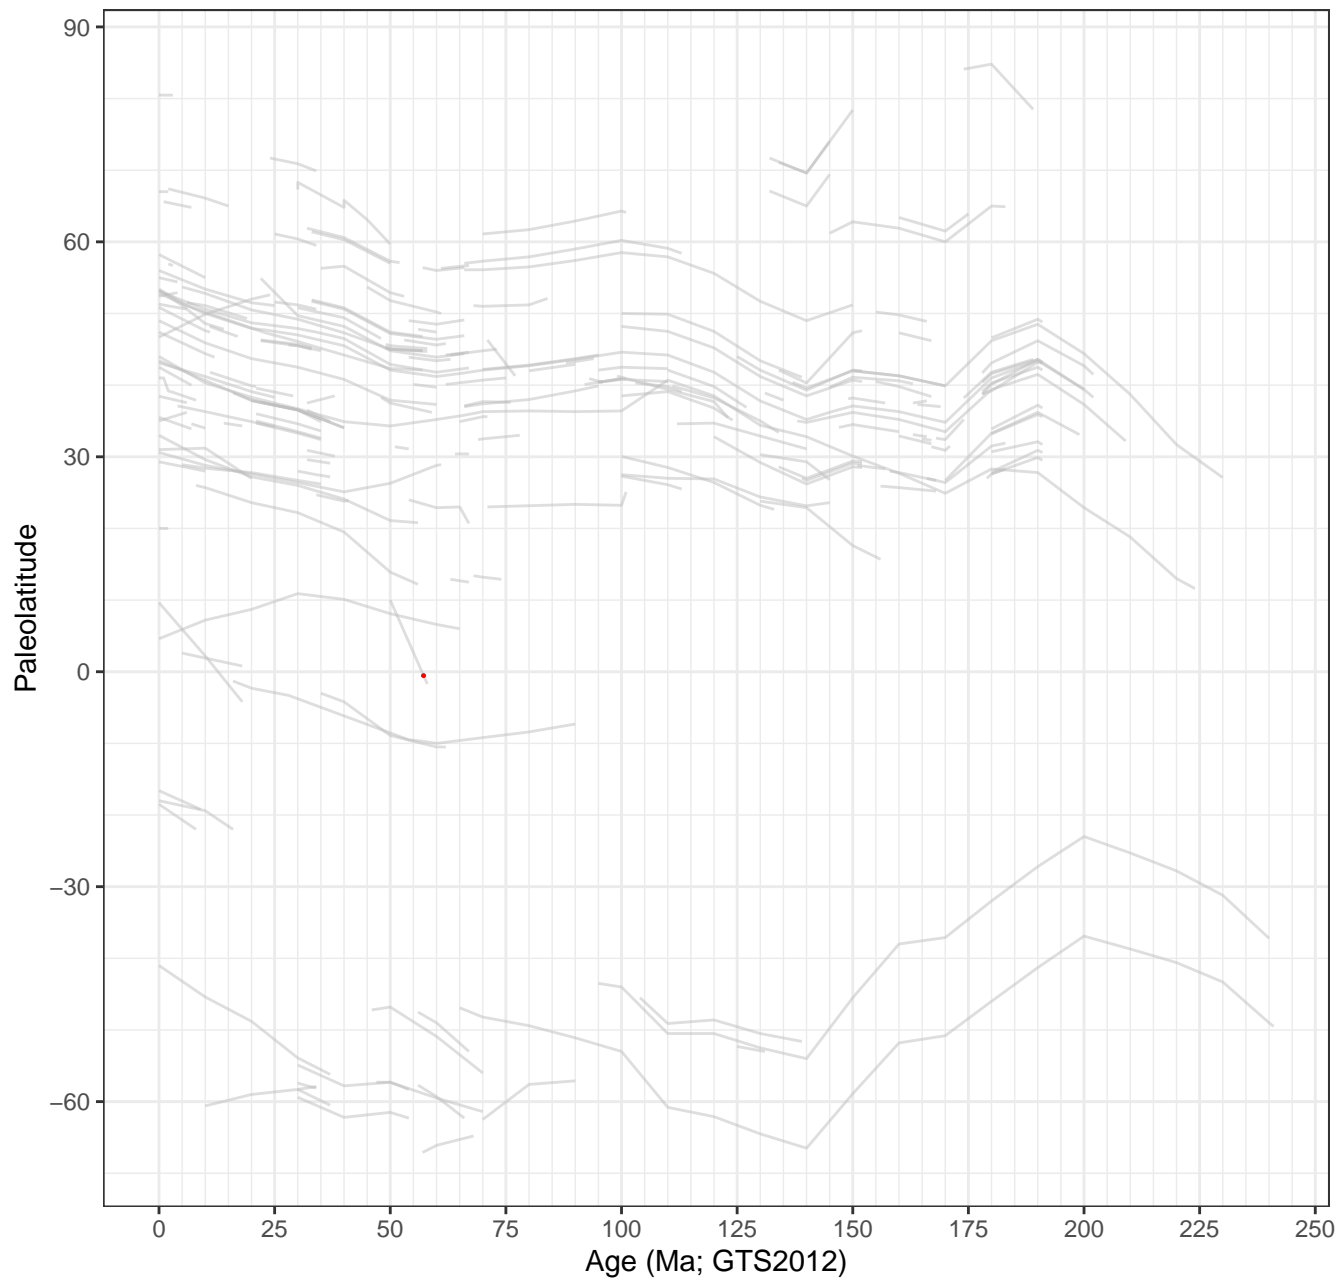

Supplement: Supplementary file 2510 [file Thalassiphora decrementa.pdf › Supplement/Supplement 2/Species 1914 plots/Thalassiphora decrementa.pdf]

# Species *Thalassiphora delicata*

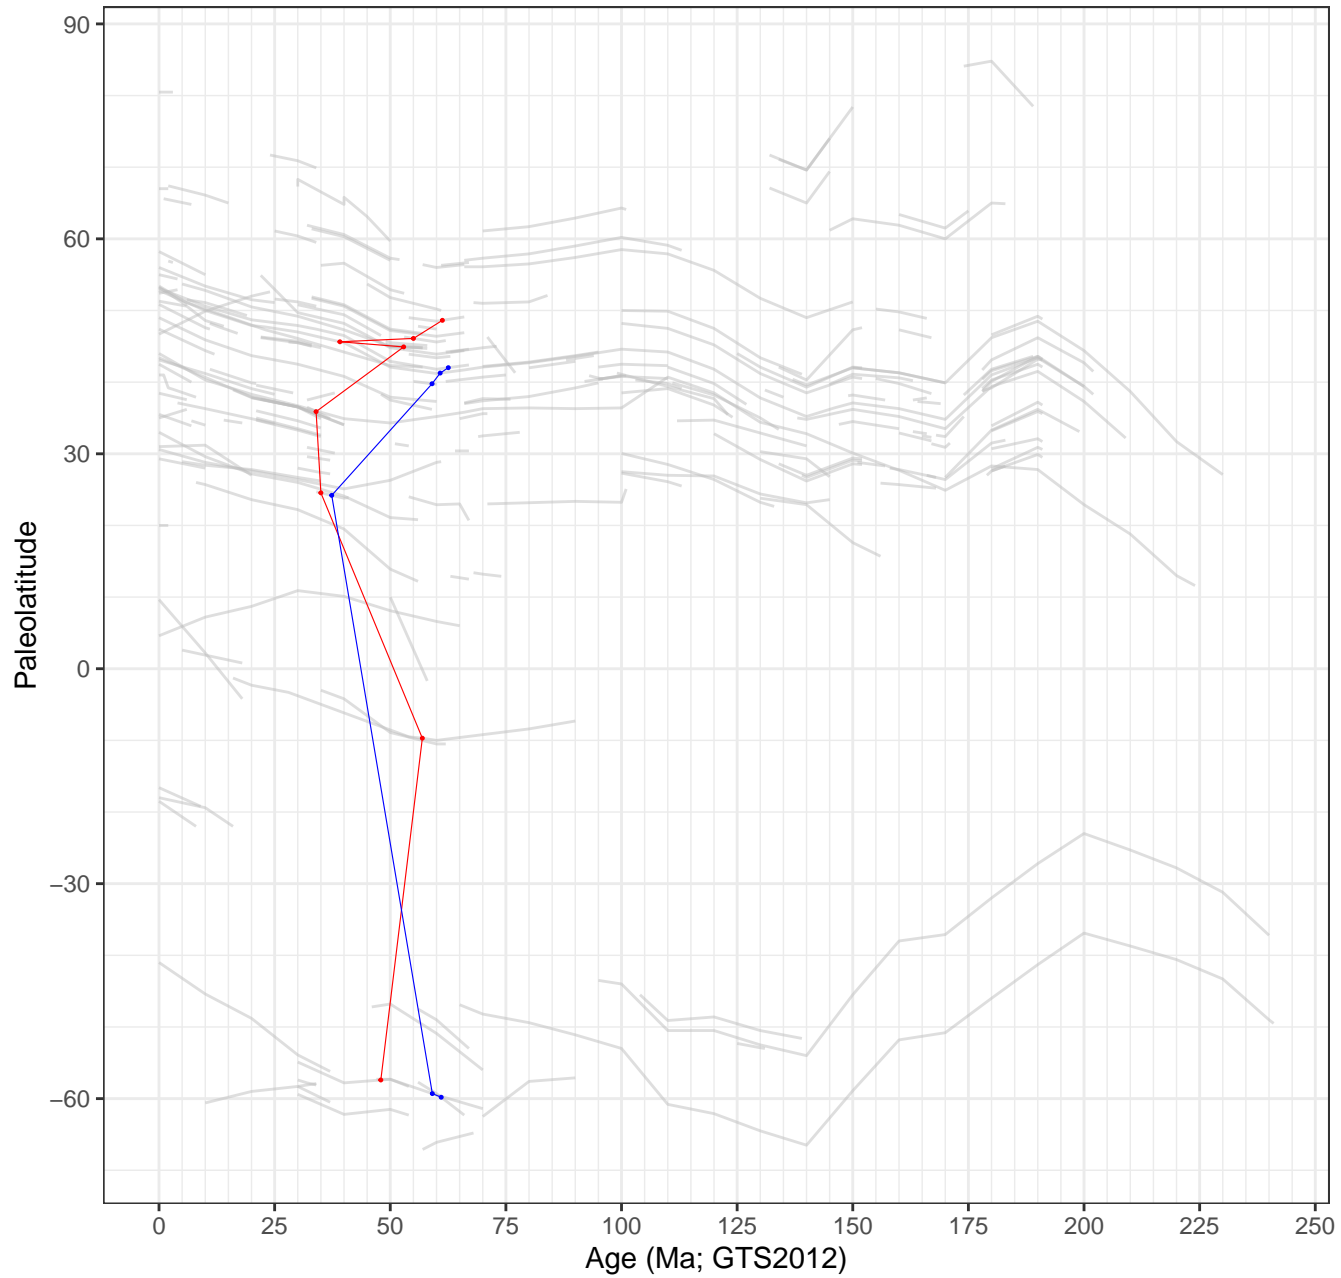

Supplement: Supplementary file 2511 [file Thalassiphora delicata.pdf › Supplement/Supplement 2/Species 1914 plots/Thalassiphora delicata.pdf]

# Species *Thalassiphora dominiquei*

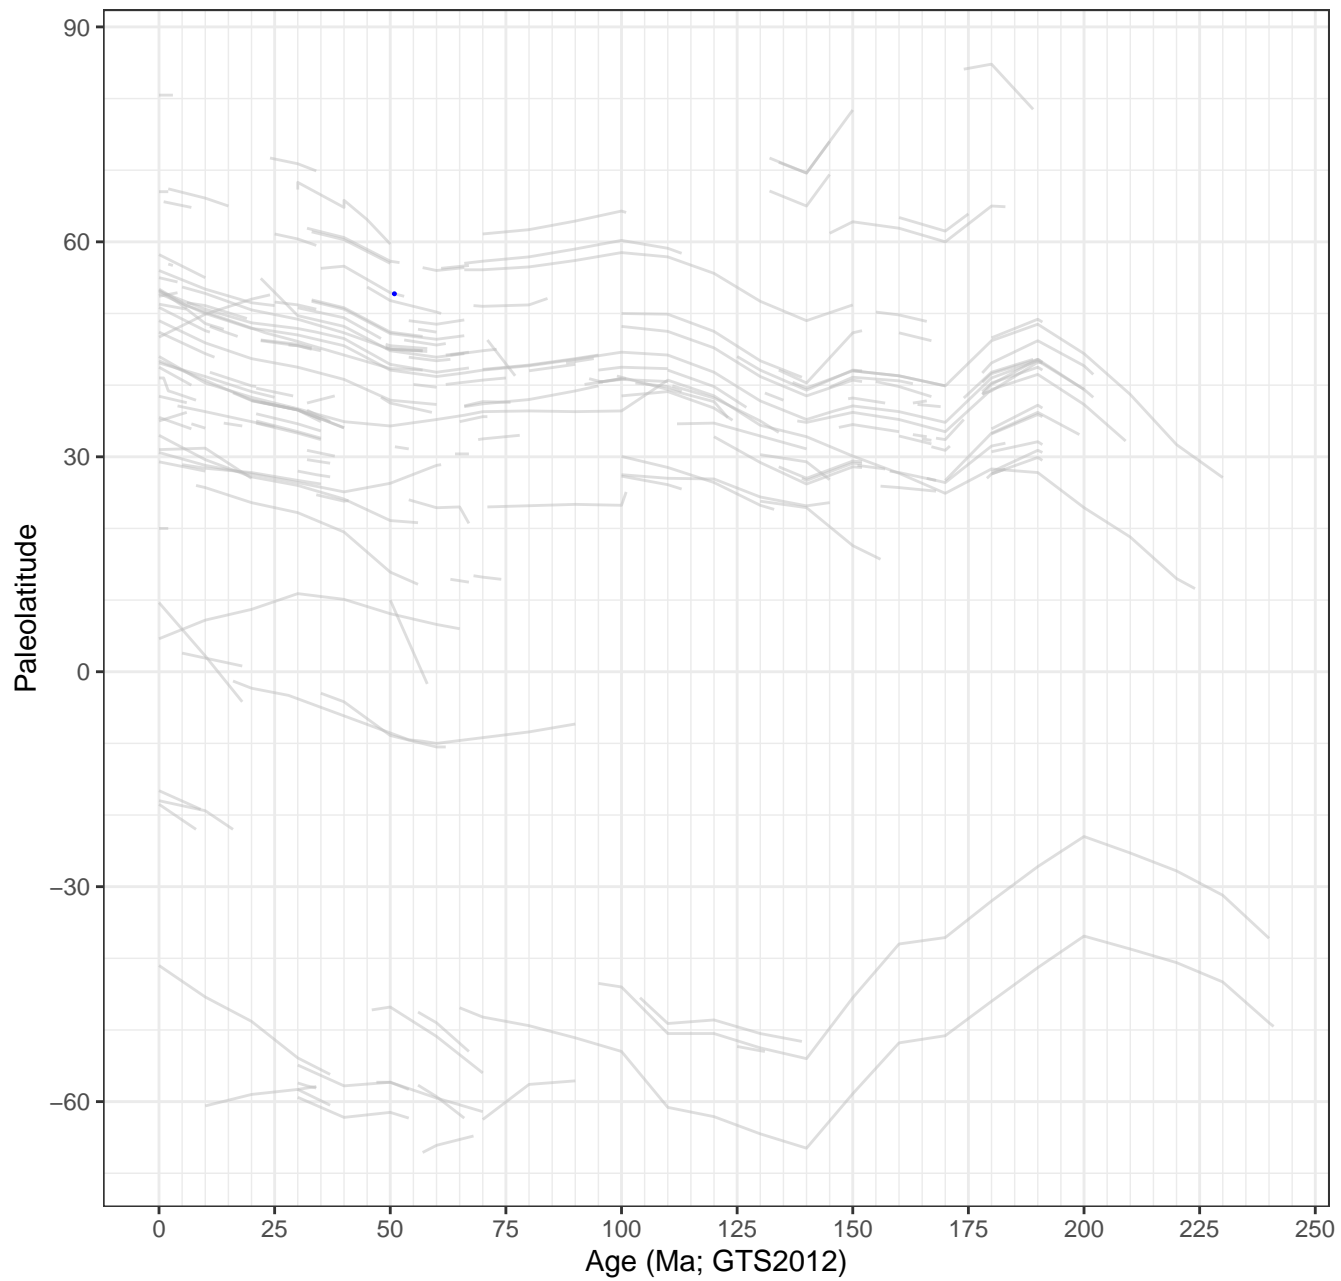

Supplement: Supplementary file 2512 [file Thalassiphora dominiquei.pdf › Supplement/Supplement 2/Species 1914 plots/Thalassiphora dominiquei.pdf]

# Species *Thalassiphora fenestrata*

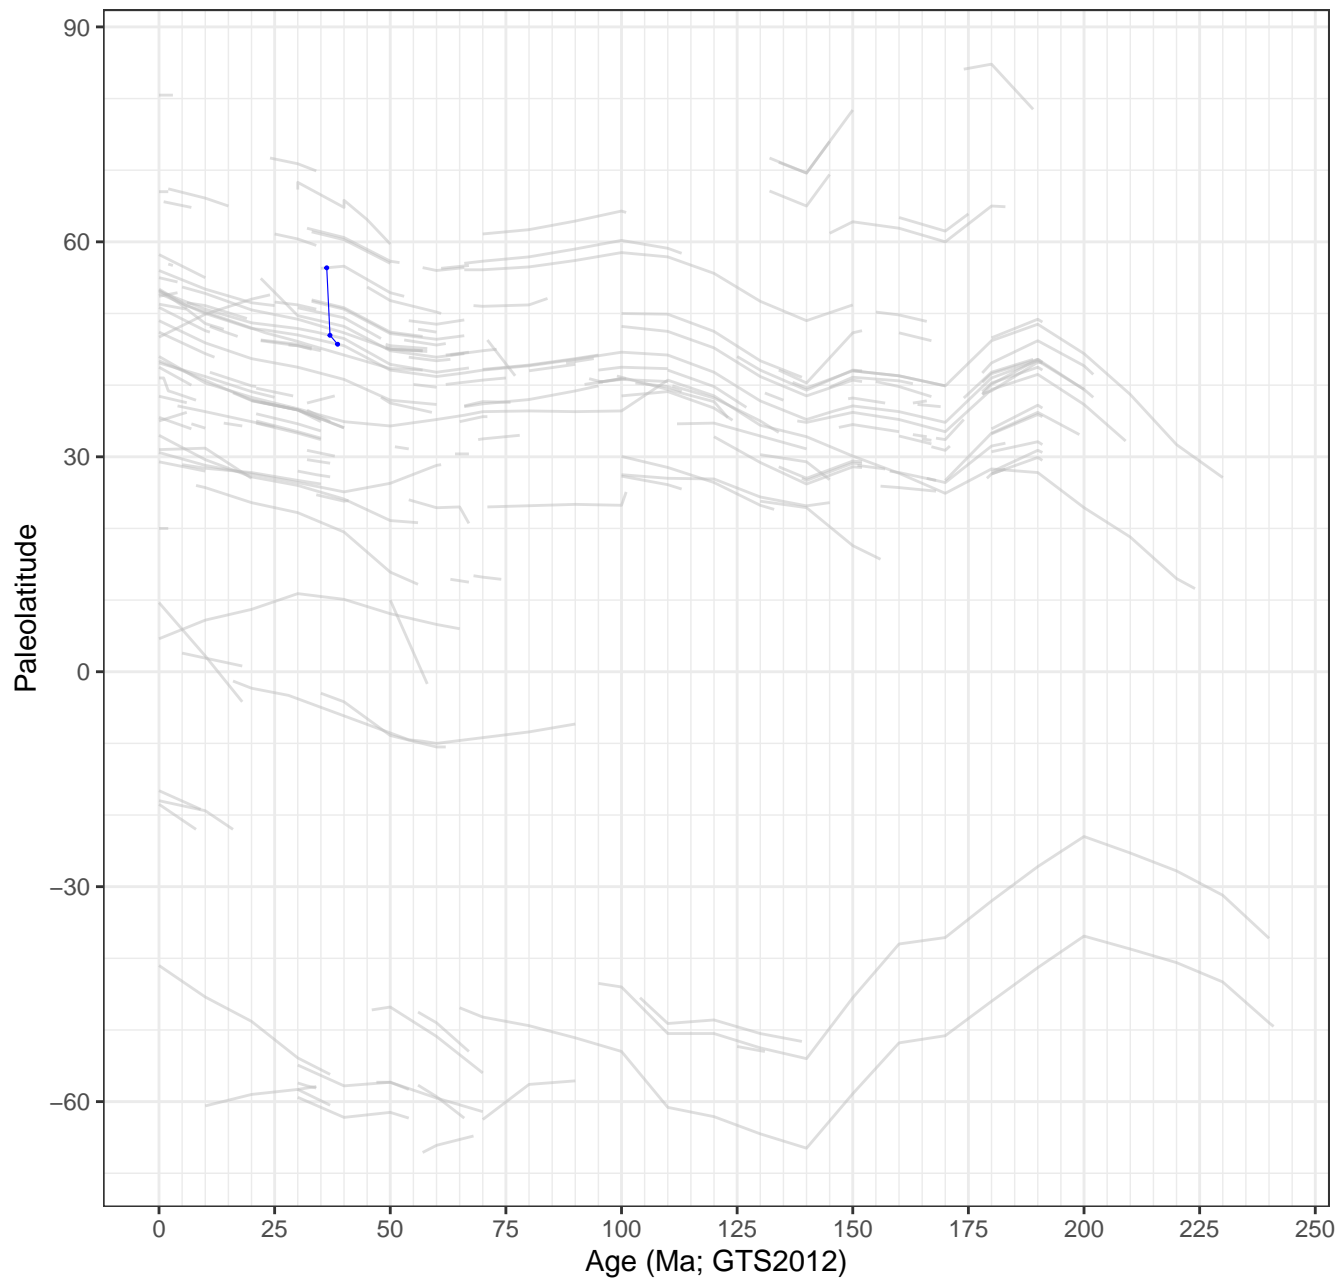

Supplement: Supplementary file 2513 [file Thalassiphora fenestrata.pdf › Supplement/Supplement 2/Species 1914 plots/Thalassiphora fenestrata.pdf]

# Species *Thalassiphora inflata*

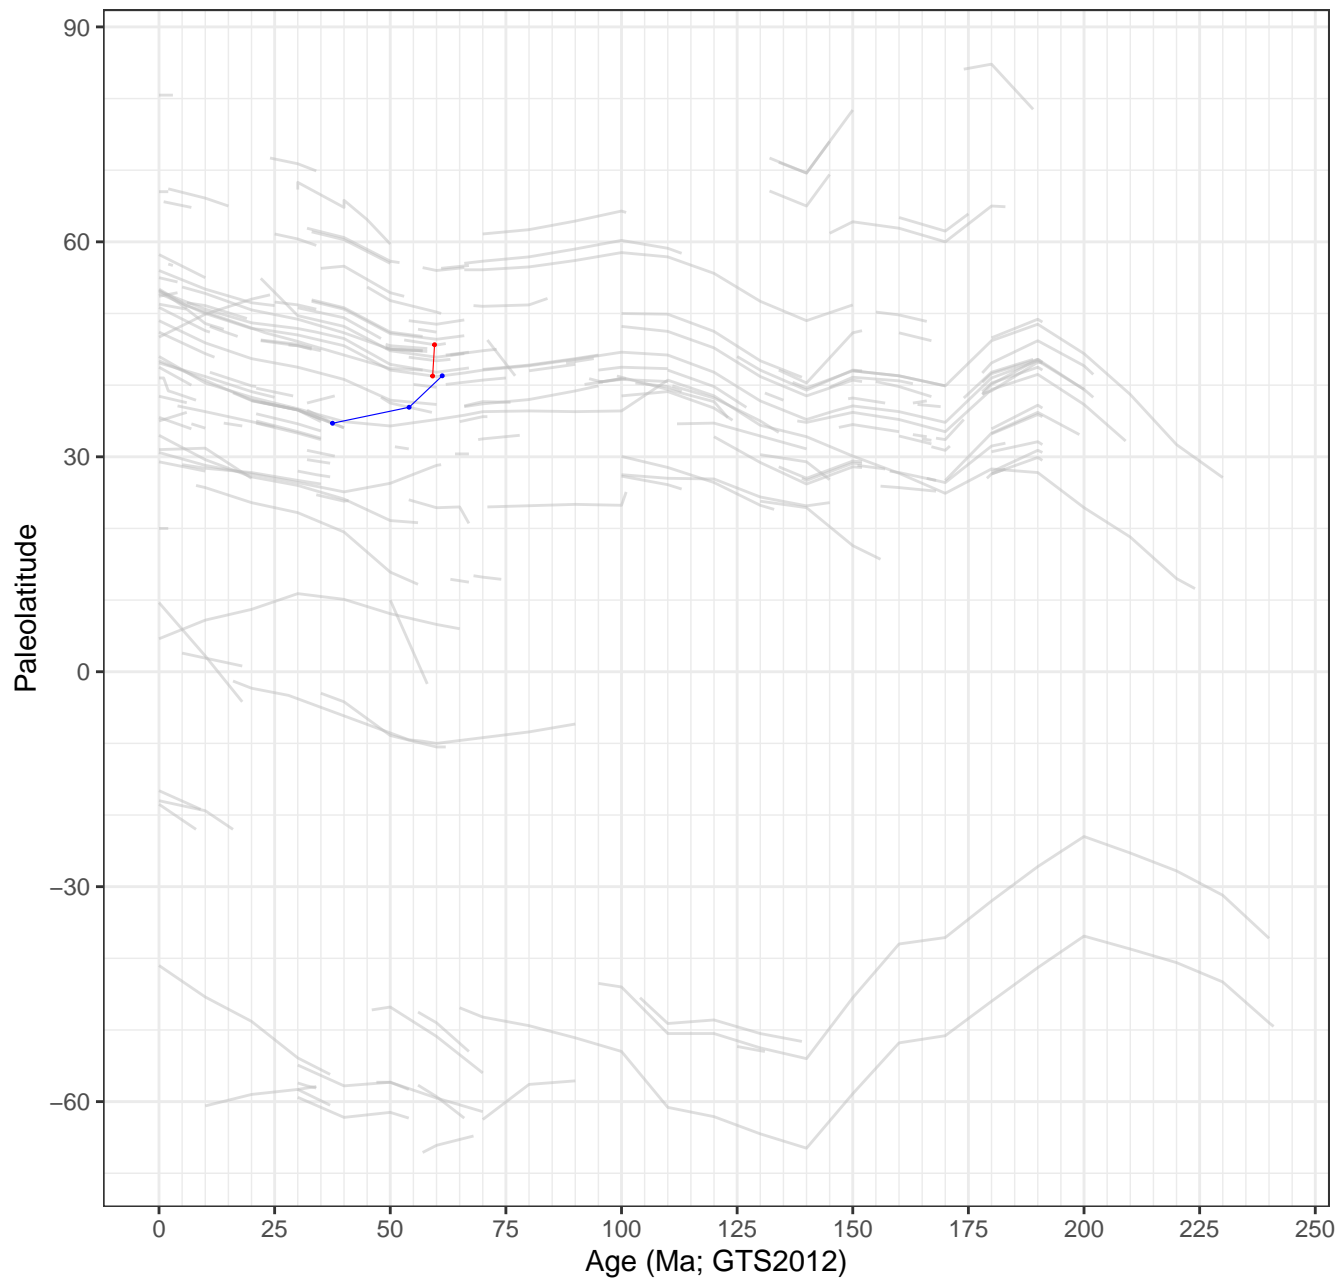

Supplement: Supplementary file 2514 [file Thalassiphora inflata.pdf › Supplement/Supplement 2/Species 1914 plots/Thalassiphora inflata.pdf]

# Species *Thalassiphora patula*

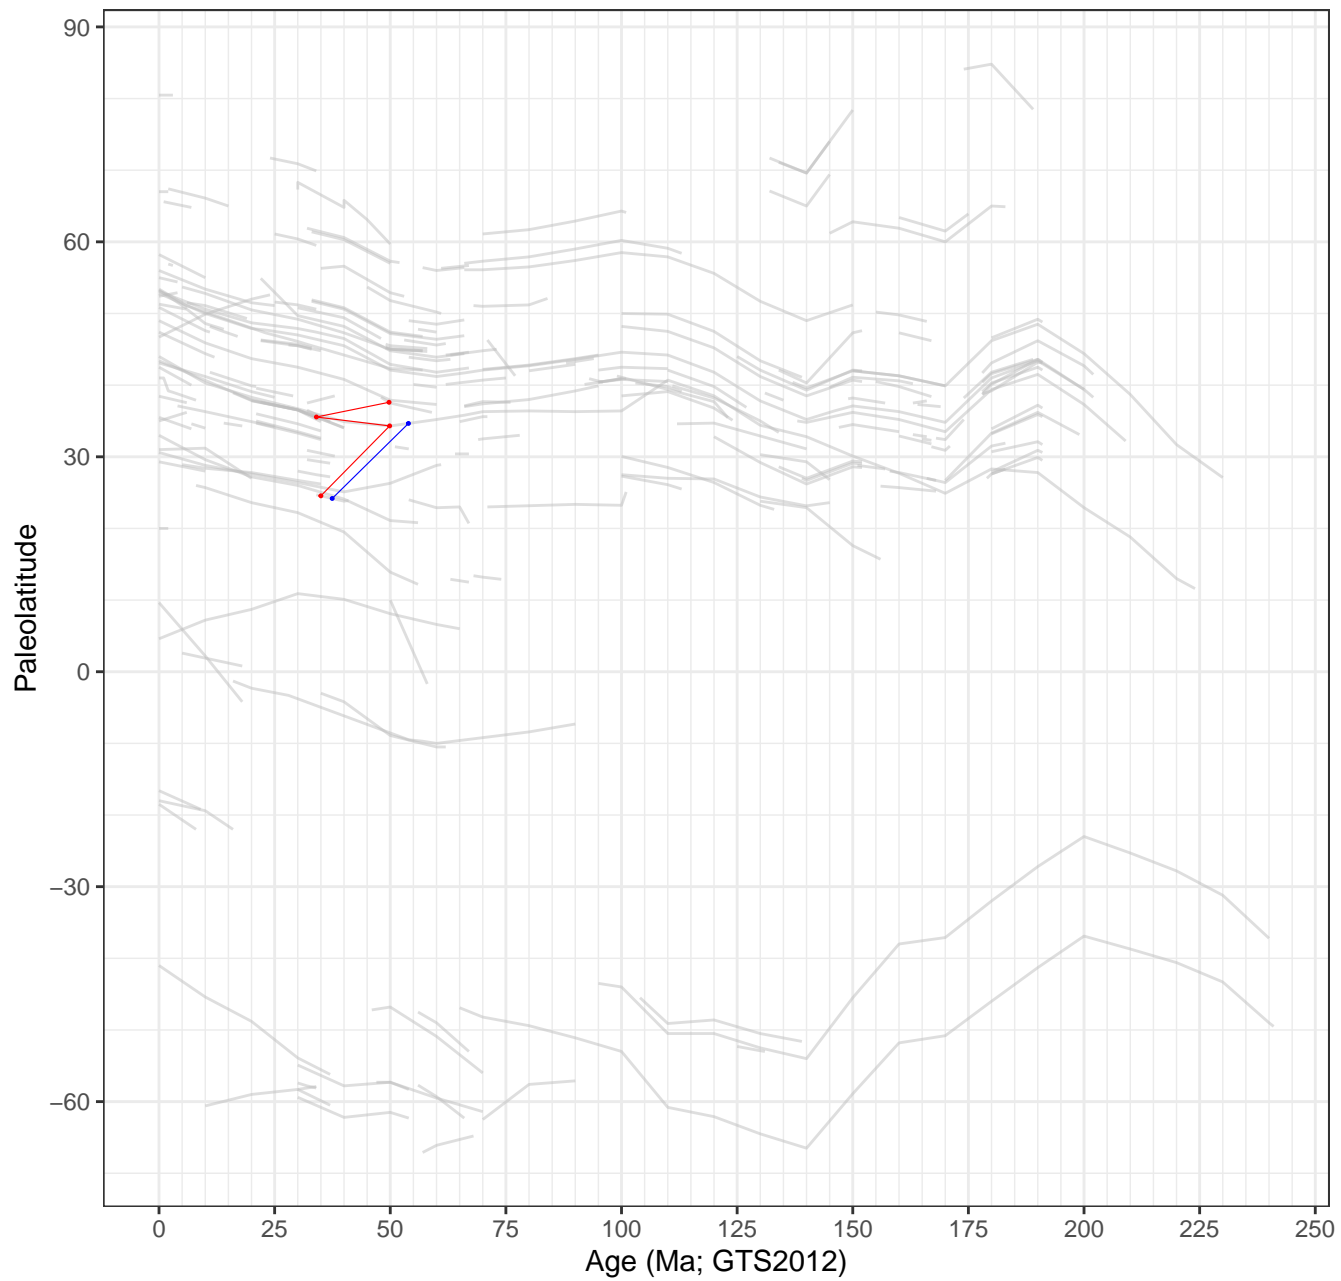

Supplement: Supplementary file 2515 [file Thalassiphora patula.pdf › Supplement/Supplement 2/Species 1914 plots/Thalassiphora patula.pdf]

# Species *Thalassiphora pelagica*

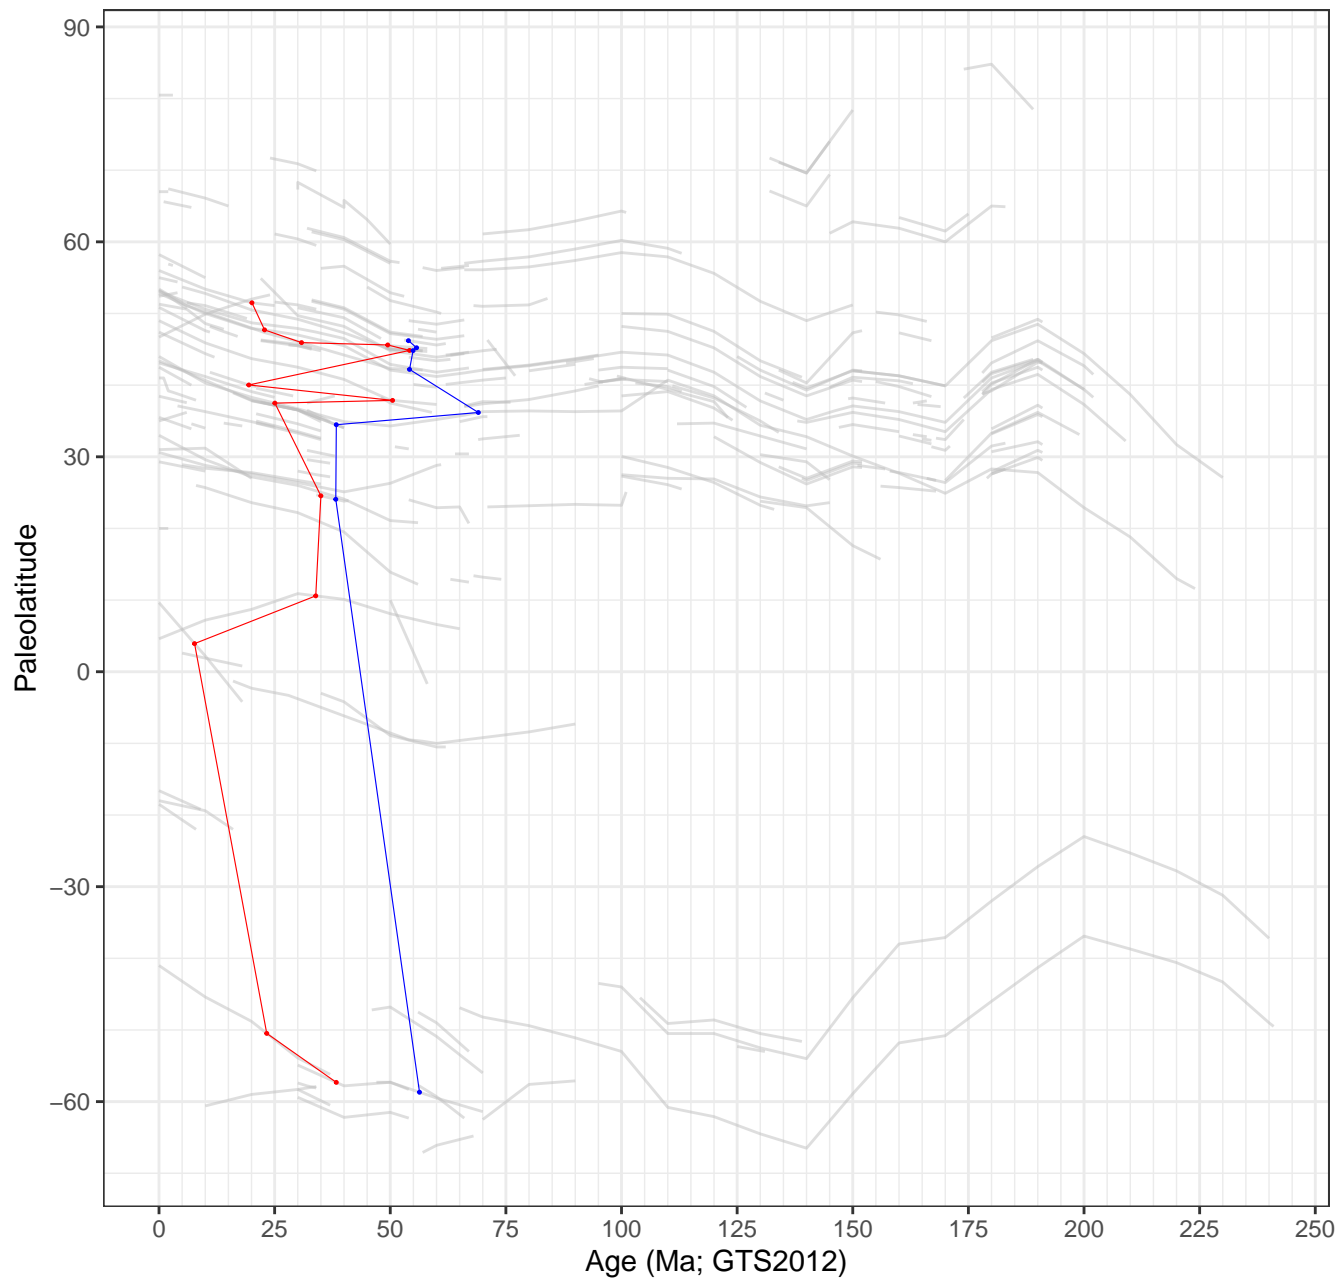

Supplement: Supplementary file 2516 [file Thalassiphora pelagica.pdf › Supplement/Supplement 2/Species 1914 plots/Thalassiphora pelagica.pdf]

# Species *Thalassiphora reticulata*

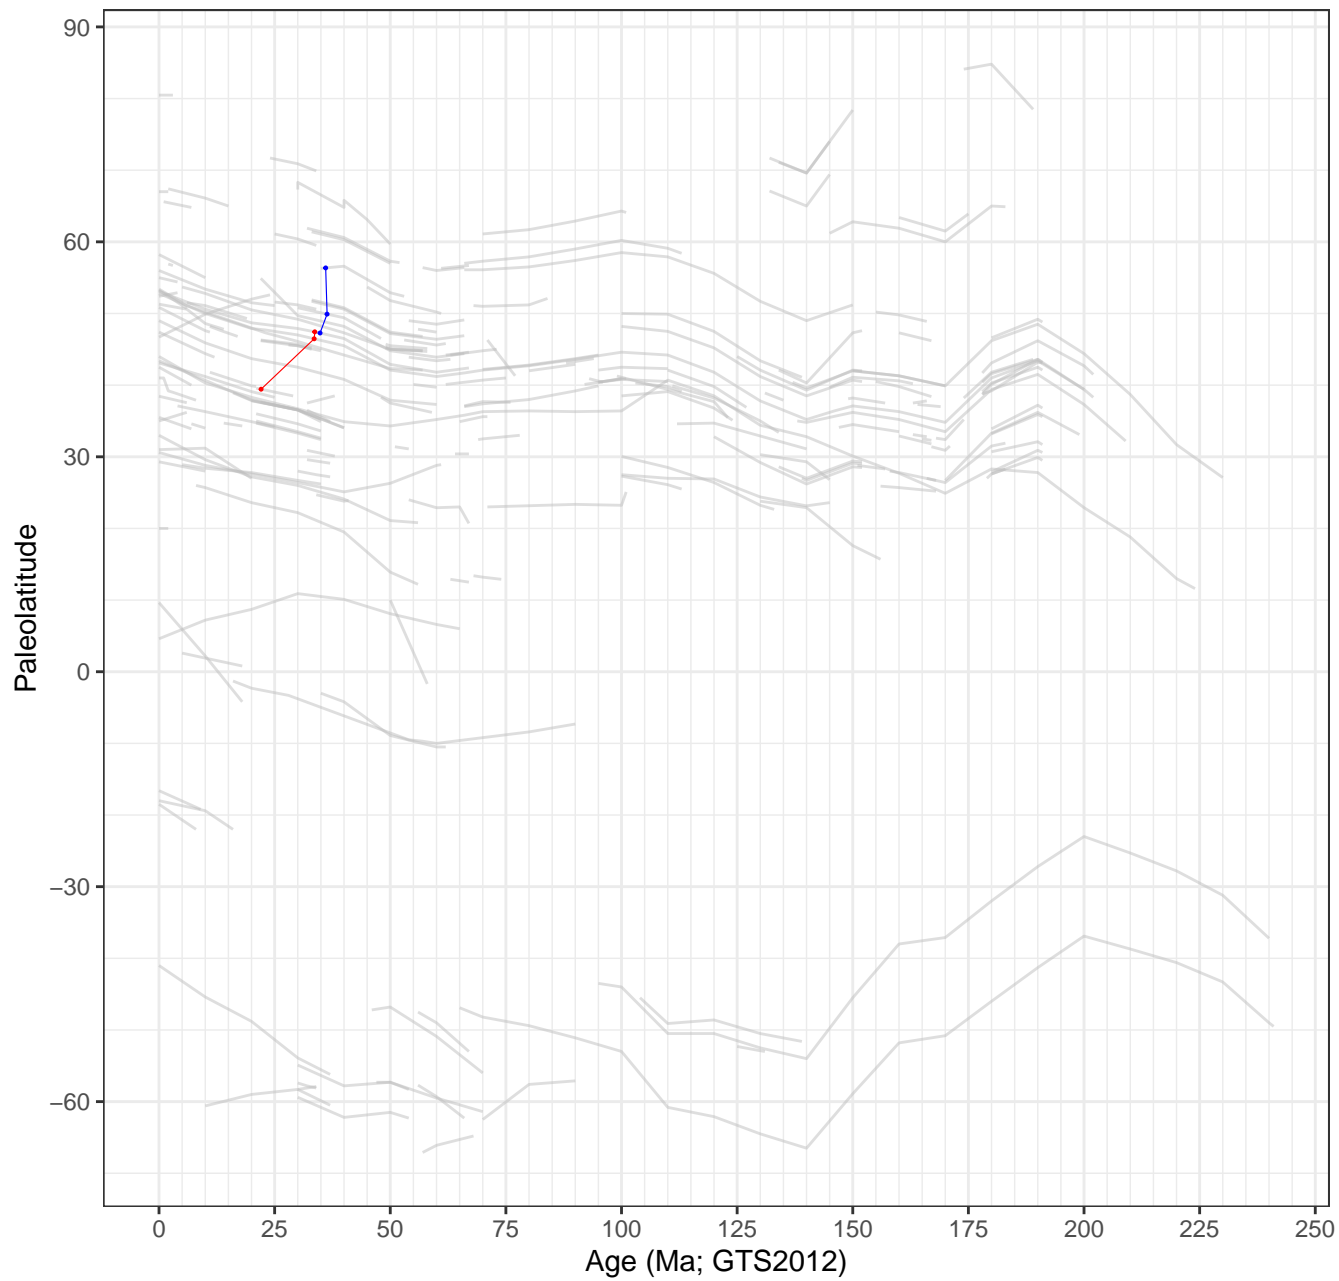

Supplement: Supplementary file 2517 [file Thalassiphora reticulata.pdf › Supplement/Supplement 2/Species 1914 plots/Thalassiphora reticulata.pdf]

# Species *Thalassiphora rota*

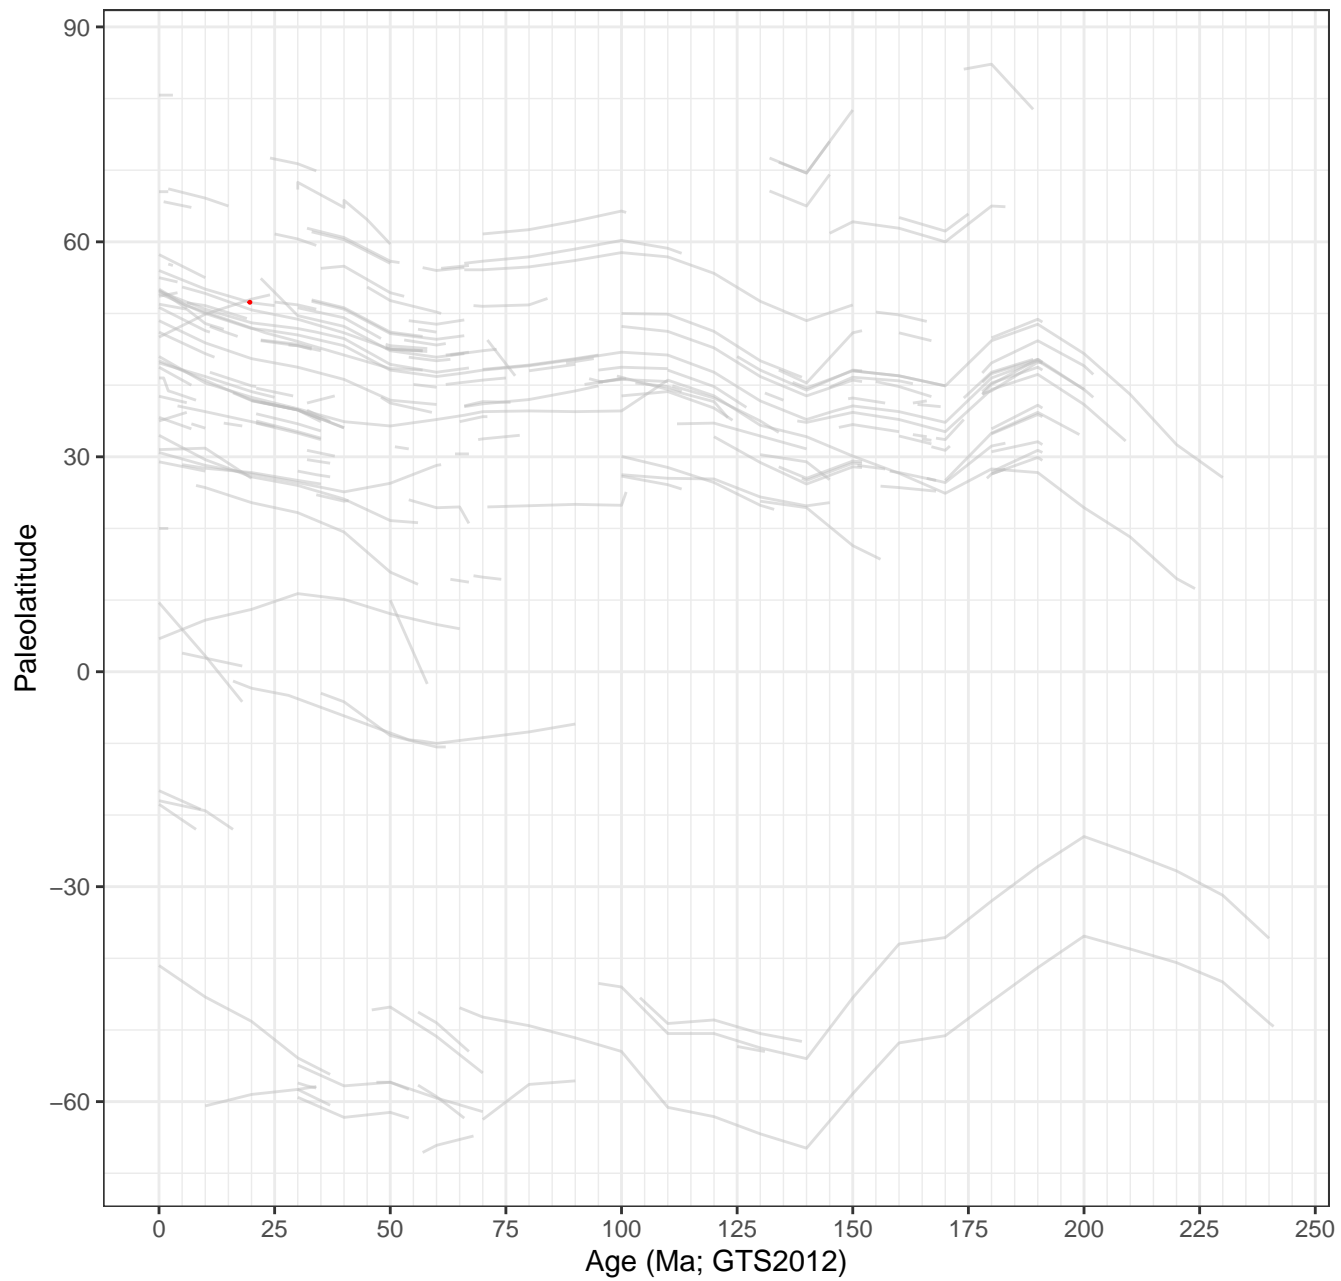

Supplement: Supplementary file 2518 [file Thalassiphora rota.pdf › Supplement/Supplement 2/Species 1914 plots/Thalassiphora rota.pdf]

# Species *Thalassiphora succincta*

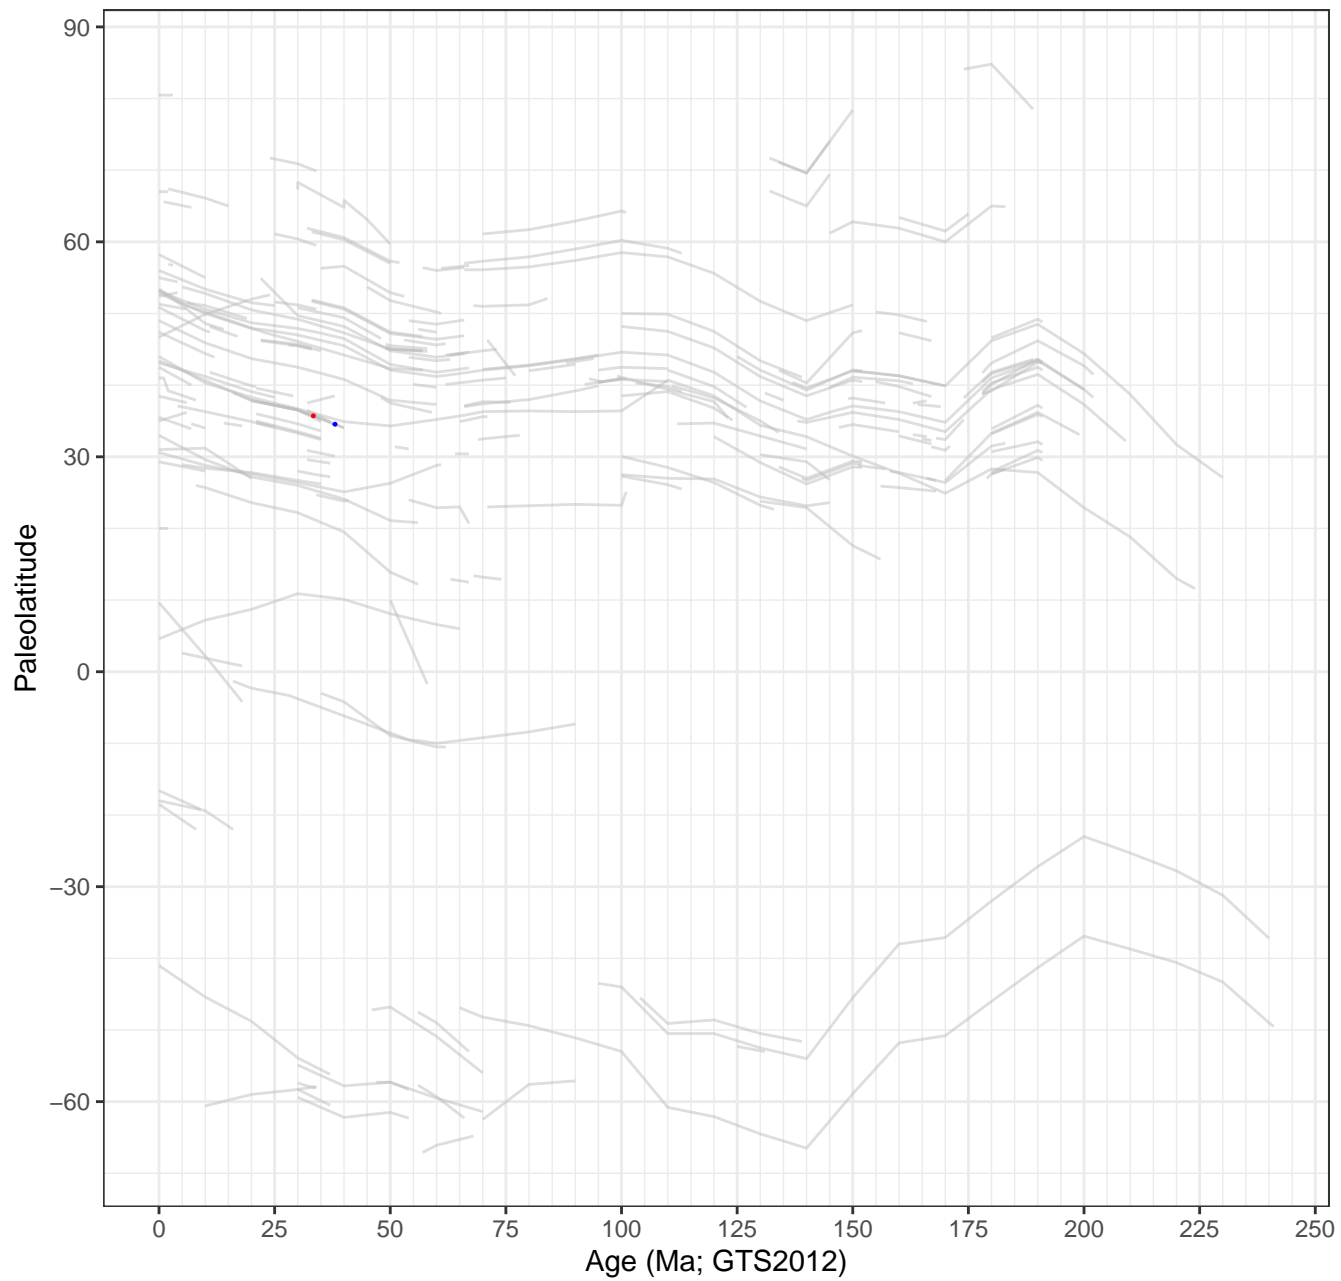

Supplement: Supplementary file 2519 [file Thalassiphora succincta.pdf › Supplement/Supplement 2/Species 1914 plots/Thalassiphora succincta.pdf]

# Species *Thalassiphora velata*

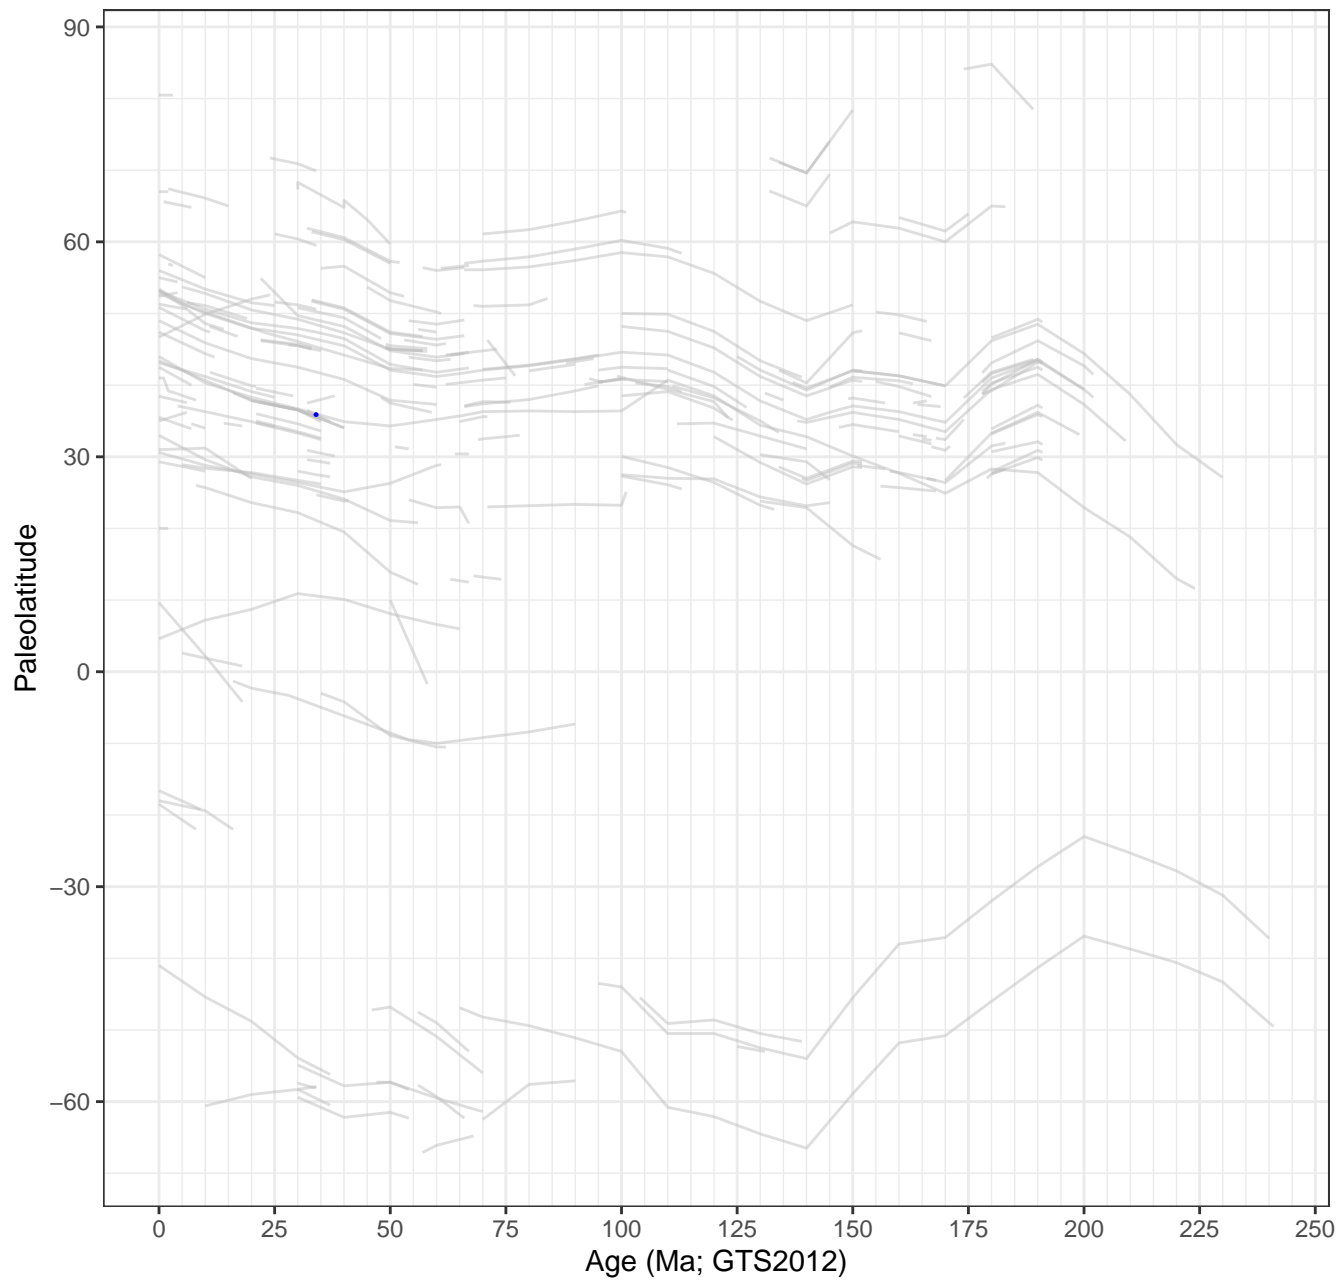

Supplement: Supplementary file 2520 [file Thalassiphora velata.pdf › Supplement/Supplement 2/Species 1914 plots/Thalassiphora velata.pdf]

# Species *Trabeculidinium quinquetrum*

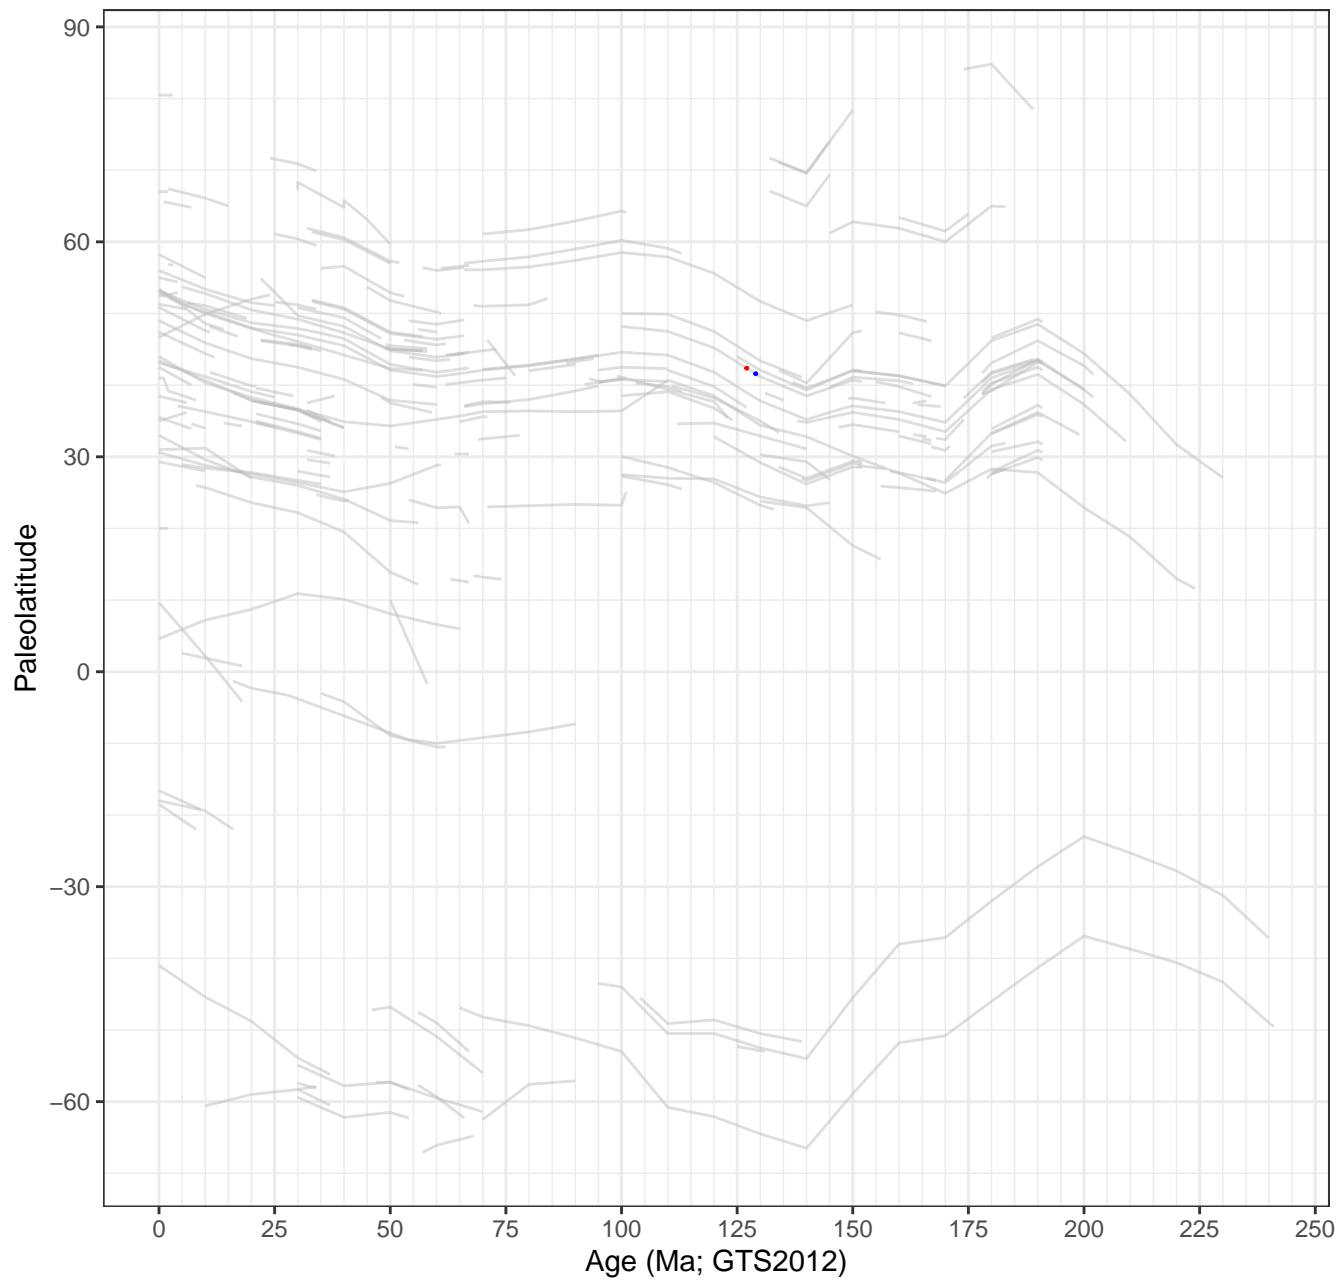

Supplement: Supplementary file 2521 [file Trabeculidinium quinquetrum.pdf › Supplement/Supplement 2/Species 1914 plots/Trabeculidinium quinquetrum.pdf]

# Species *Triblastula utinensis*

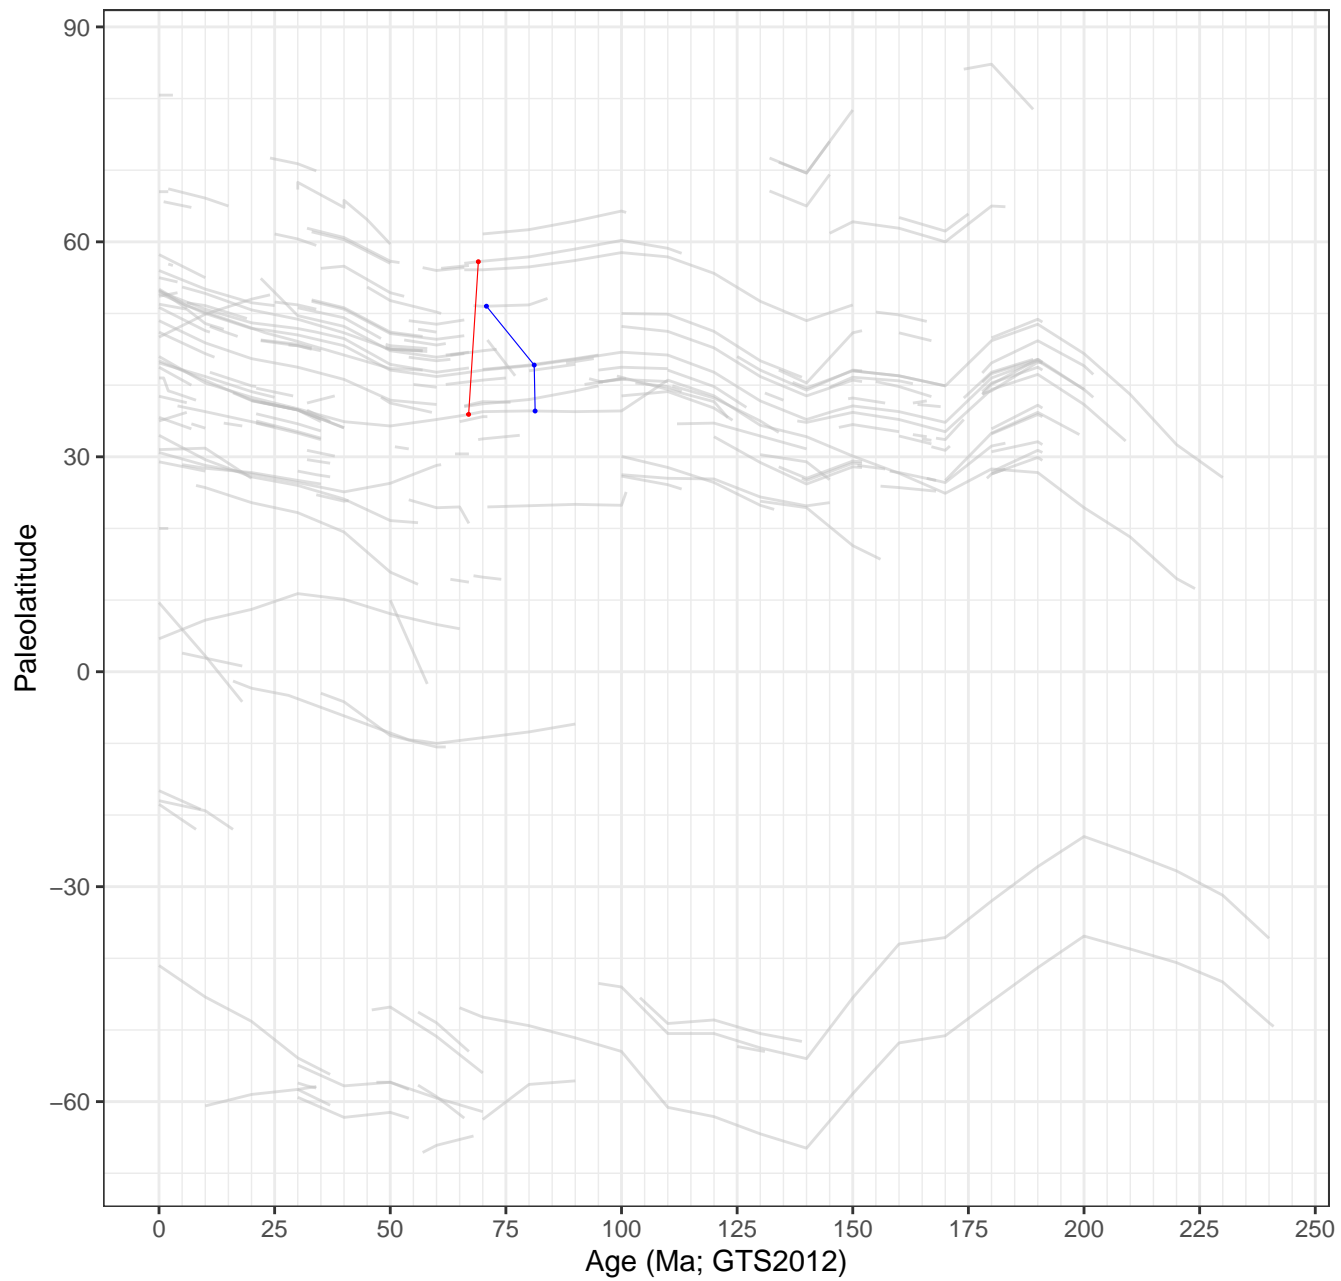

Supplement: Supplementary file 2522 [file Triblastula utinensis.pdf › Supplement/Supplement 2/Species 1914 plots/Triblastula utinensis.pdf]

# Species *Triblastula wilsonii*

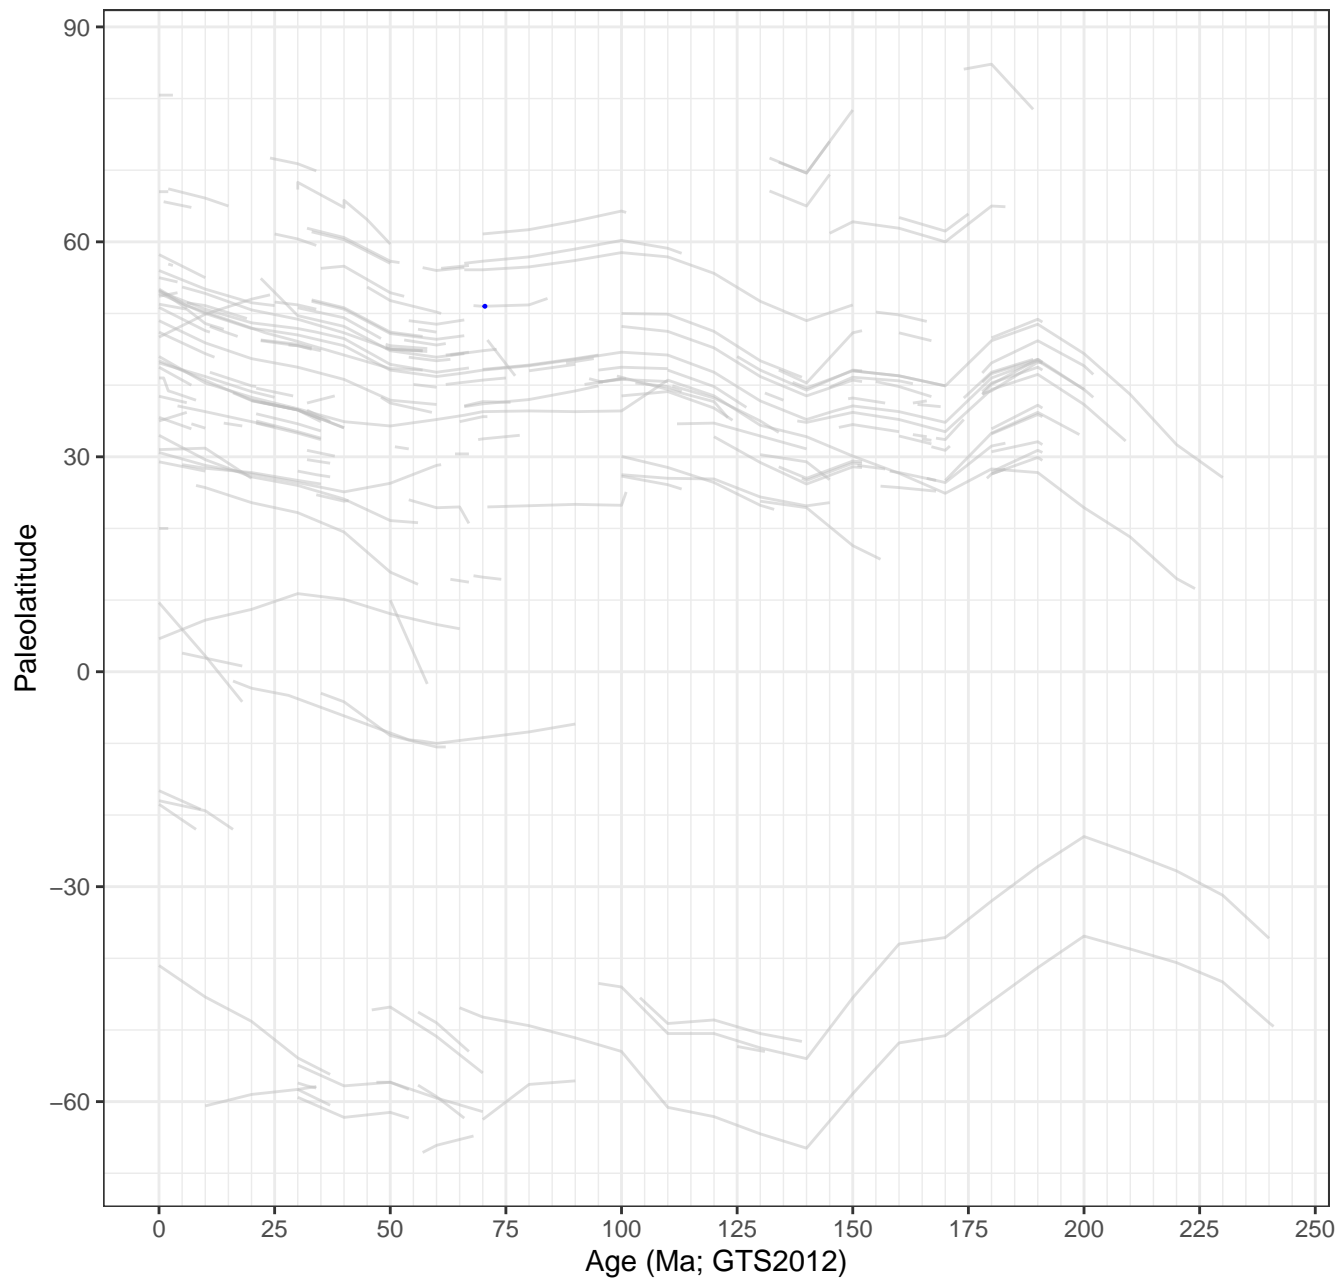

Supplement: Supplementary file 2523 [file Triblastula wilsonii.pdf › Supplement/Supplement 2/Species 1914 plots/Triblastula wilsonii.pdf]

# Species *Trichodinium castanea*

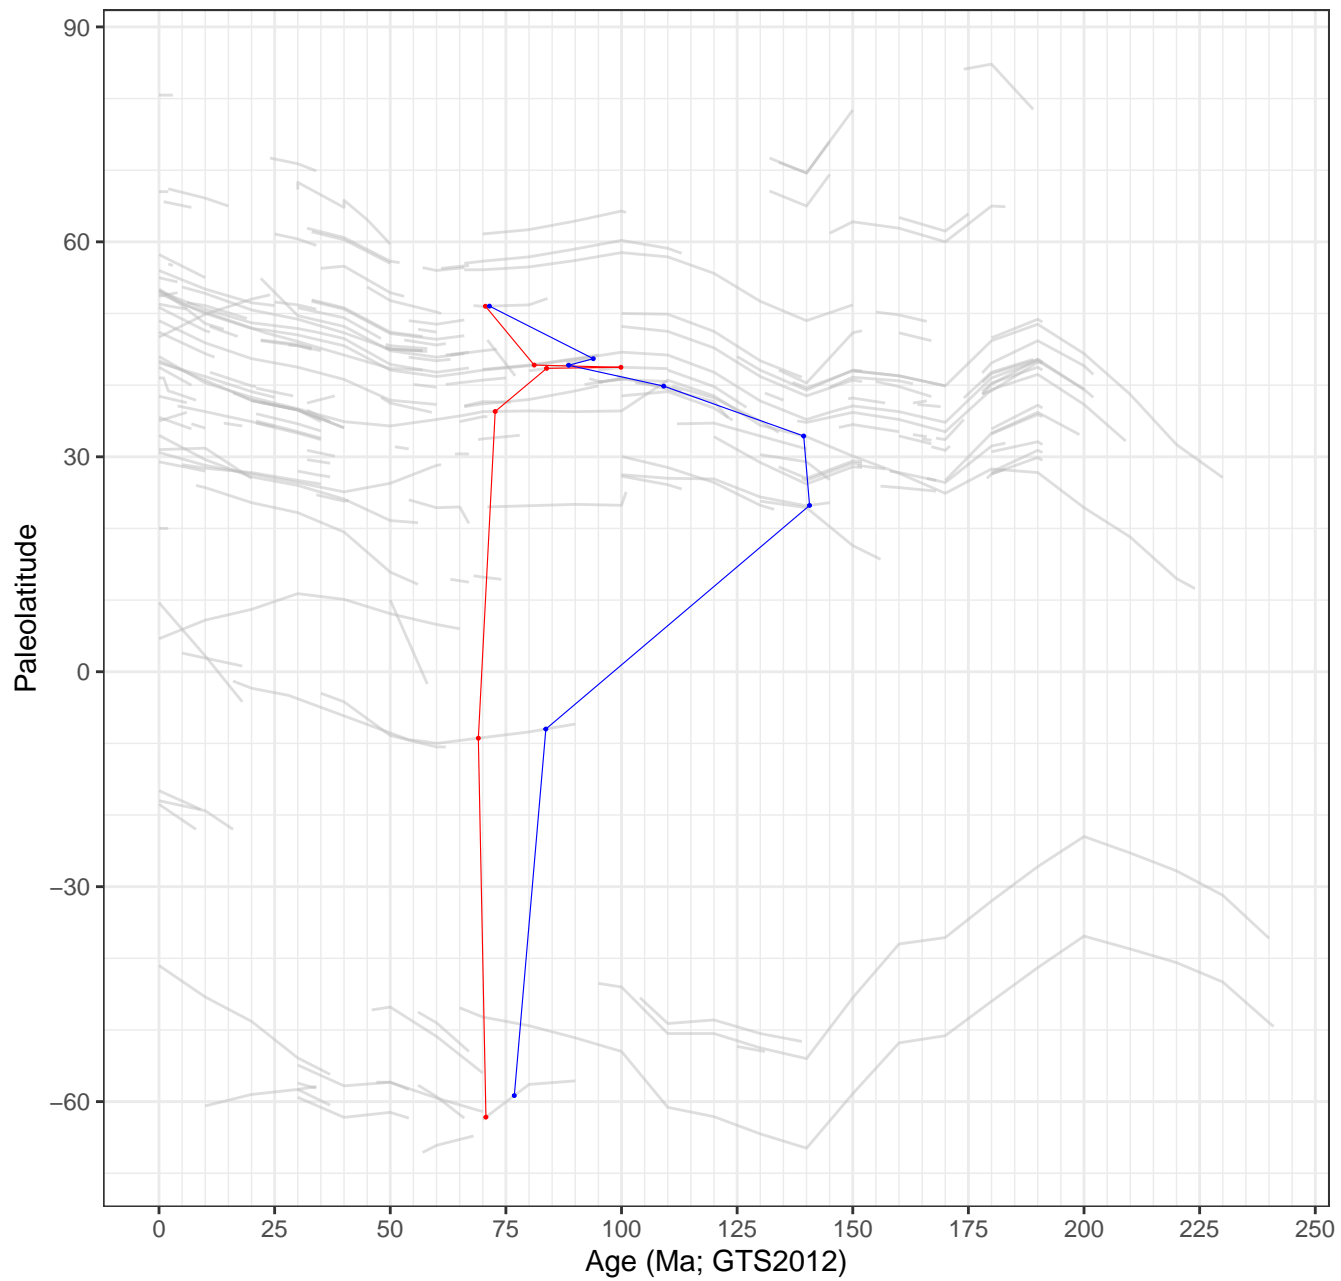

Supplement: Supplementary file 2524 [file Trichodinium castanea.pdf › Supplement/Supplement 2/Species 1914 plots/Trichodinium castanea.pdf]

# Species *Trichodinium ciliatum*

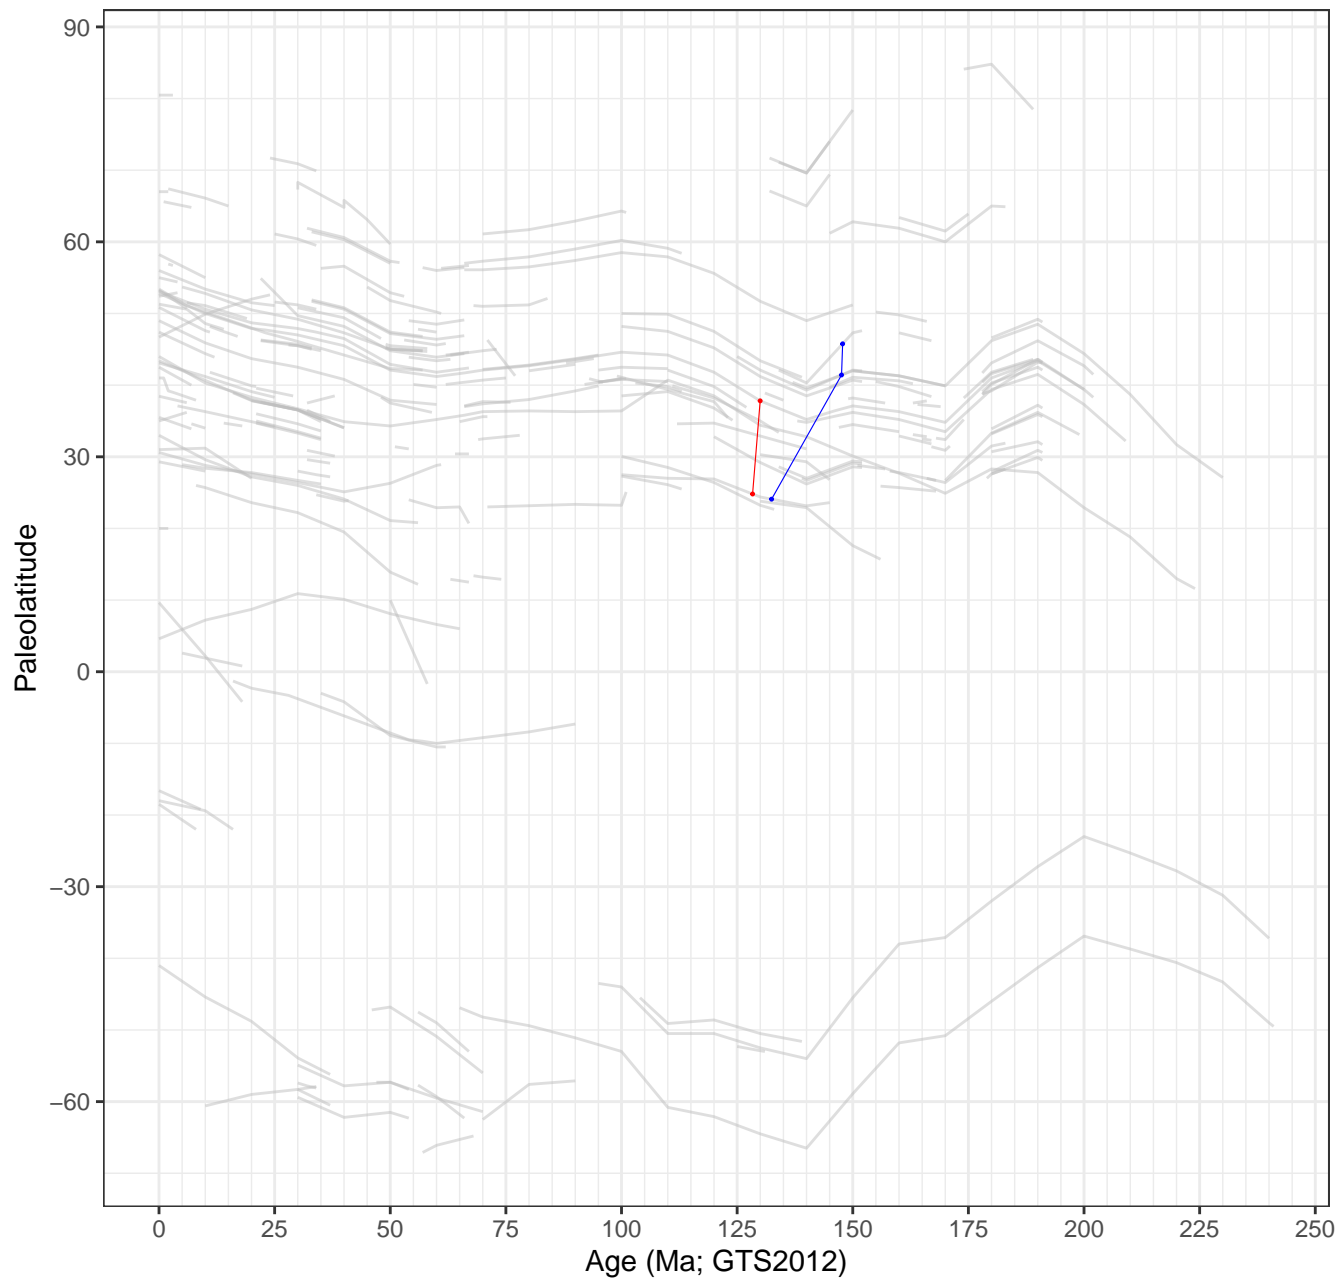

Supplement: Supplementary file 2525 [file Trichodinium ciliatum.pdf › Supplement/Supplement 2/Species 1914 plots/Trichodinium ciliatum.pdf]

# Species *Trichodinium fragile*

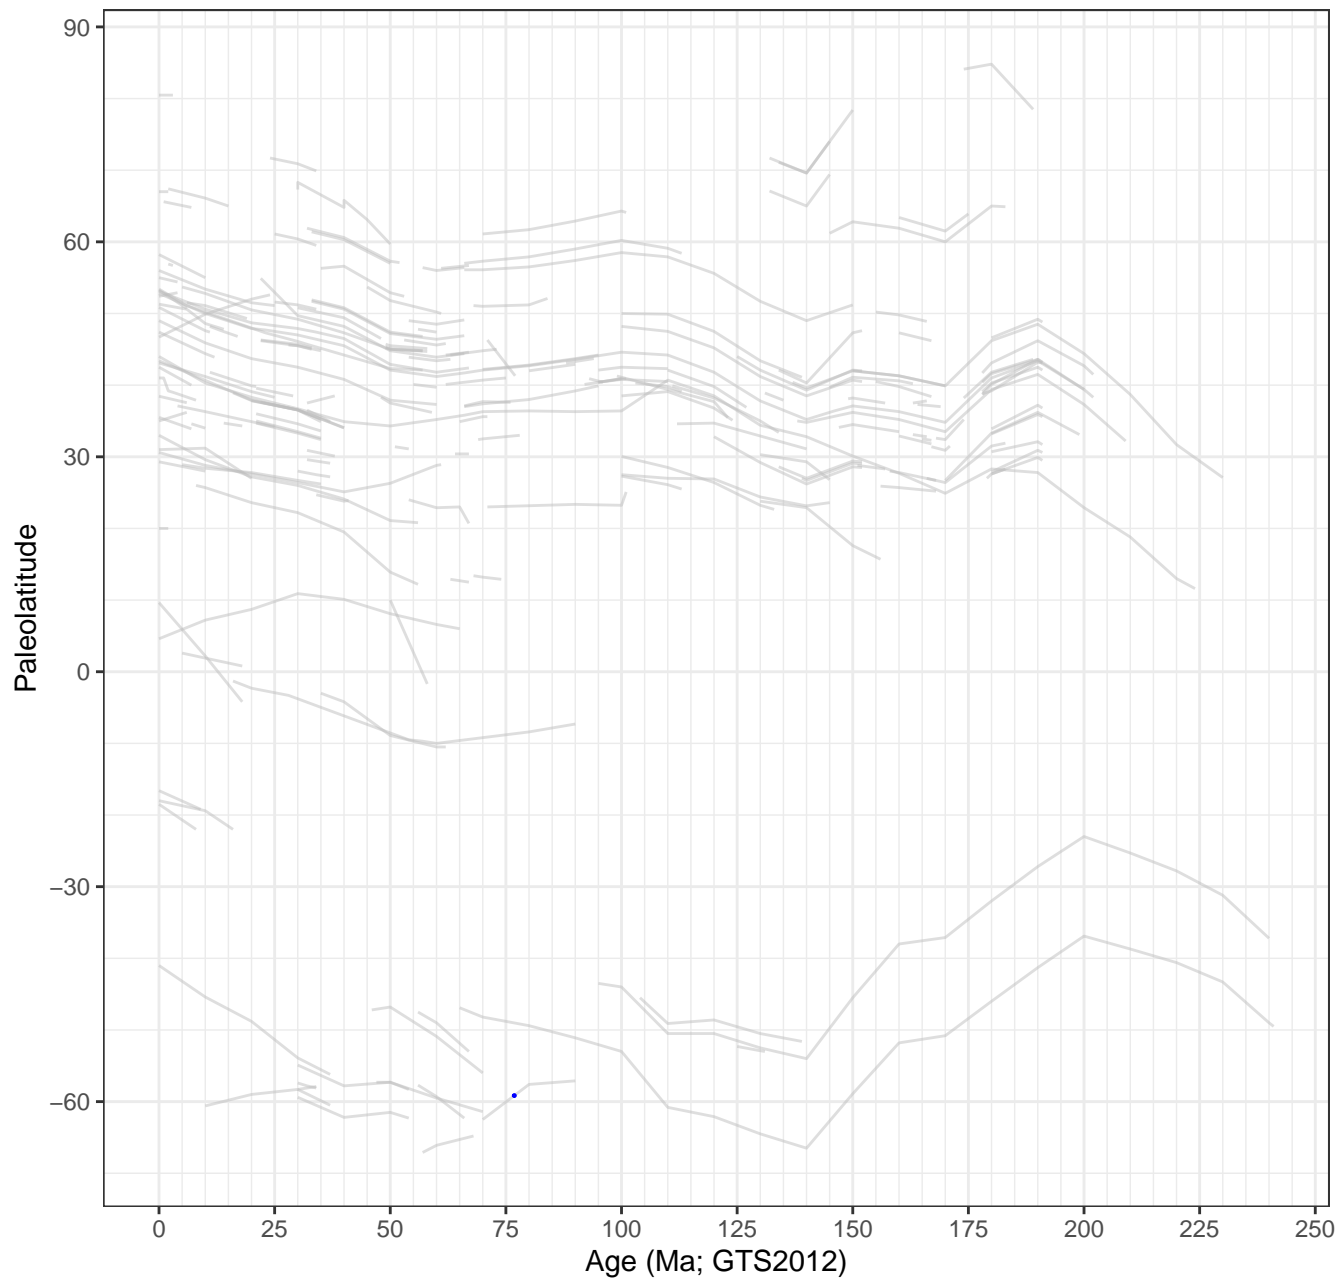

Supplement: Supplementary file 2526 [file Trichodinium fragile.pdf › Supplement/Supplement 2/Species 1914 plots/Trichodinium fragile.pdf]

# Species *Trichodinium hirsutum*

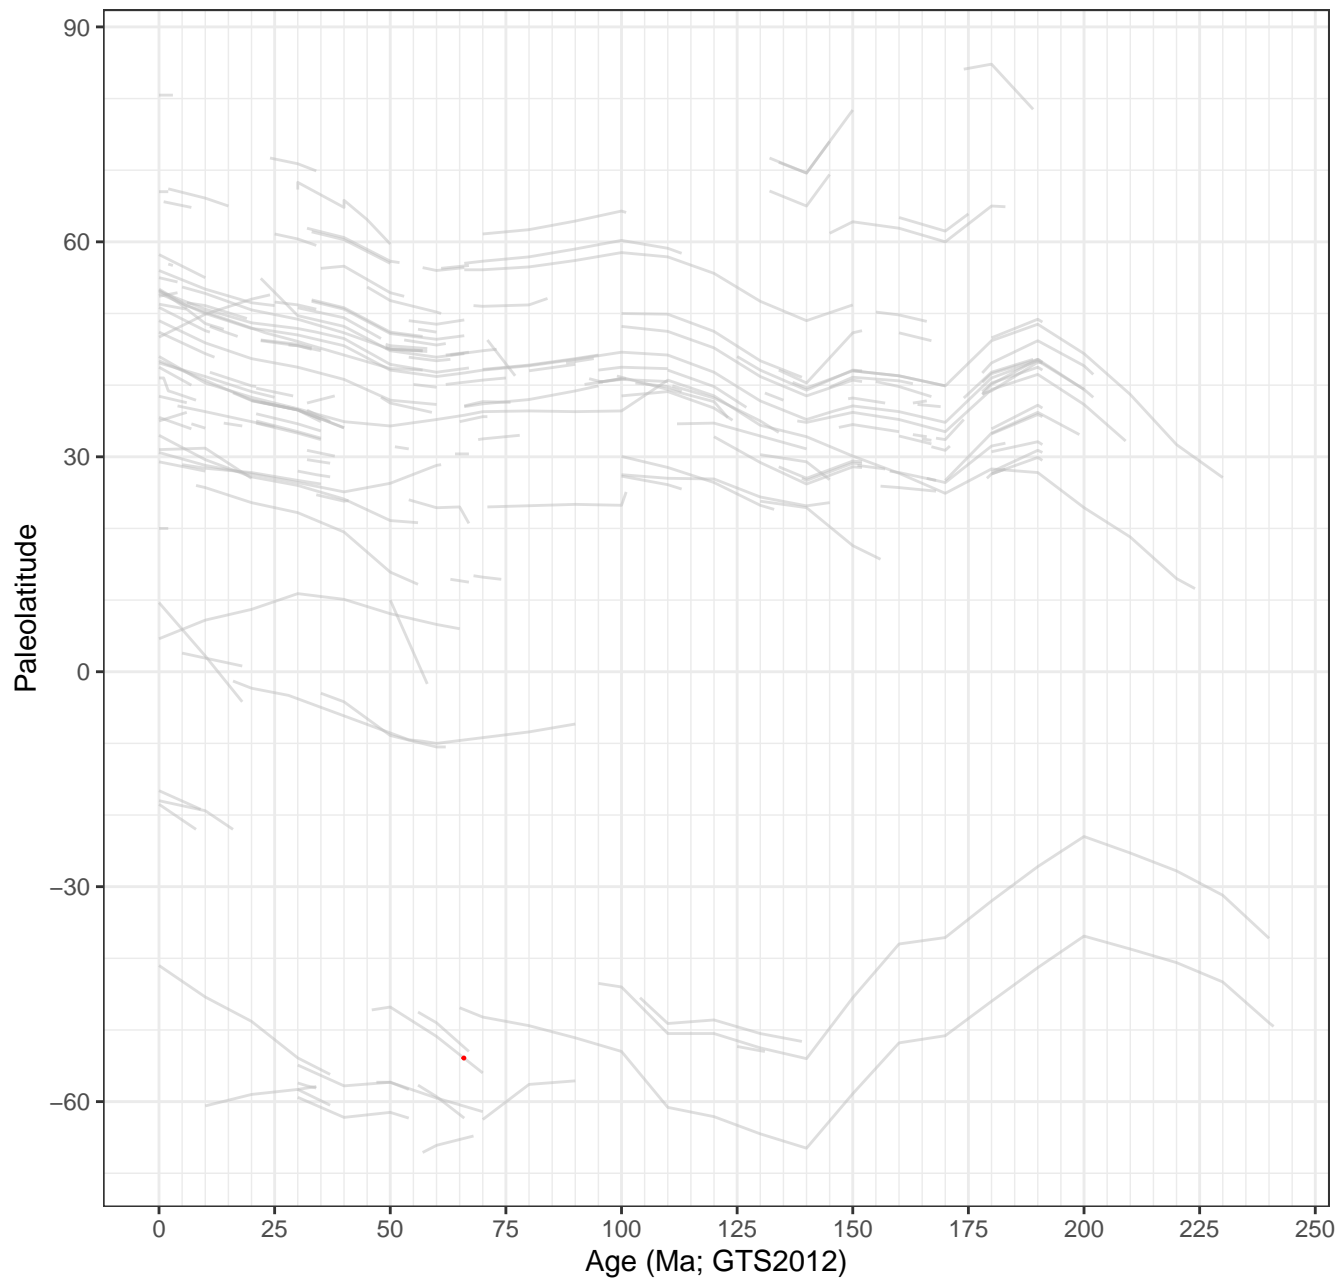

Supplement: Supplementary file 2527 [file Trichodinium hirsutum.pdf › Supplement/Supplement 2/Species 1914 plots/Trichodinium hirsutum.pdf]

# Species *Trichodinium scarburghensis*

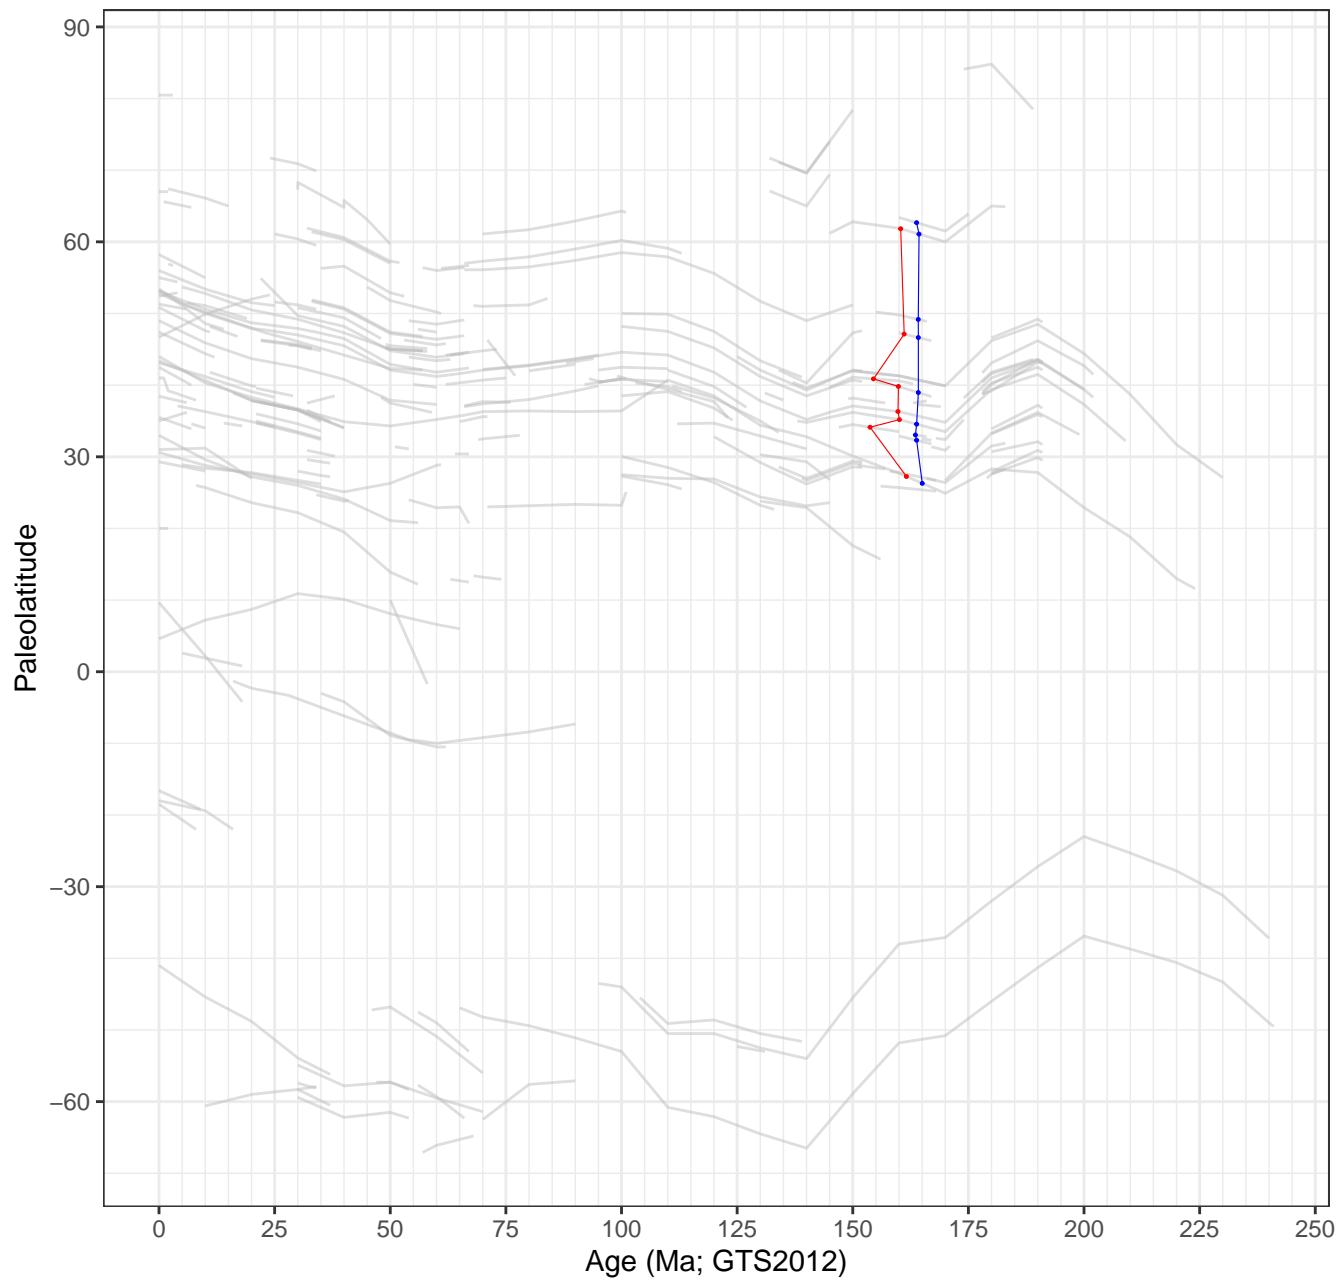

Supplement: Supplementary file 2528 [file Trichodinium scarburghensis.pdf › Supplement/Supplement 2/Species 1914 plots/Trichodinium scarburghensis.pdf]

# Species *Trichodinium speetonense*

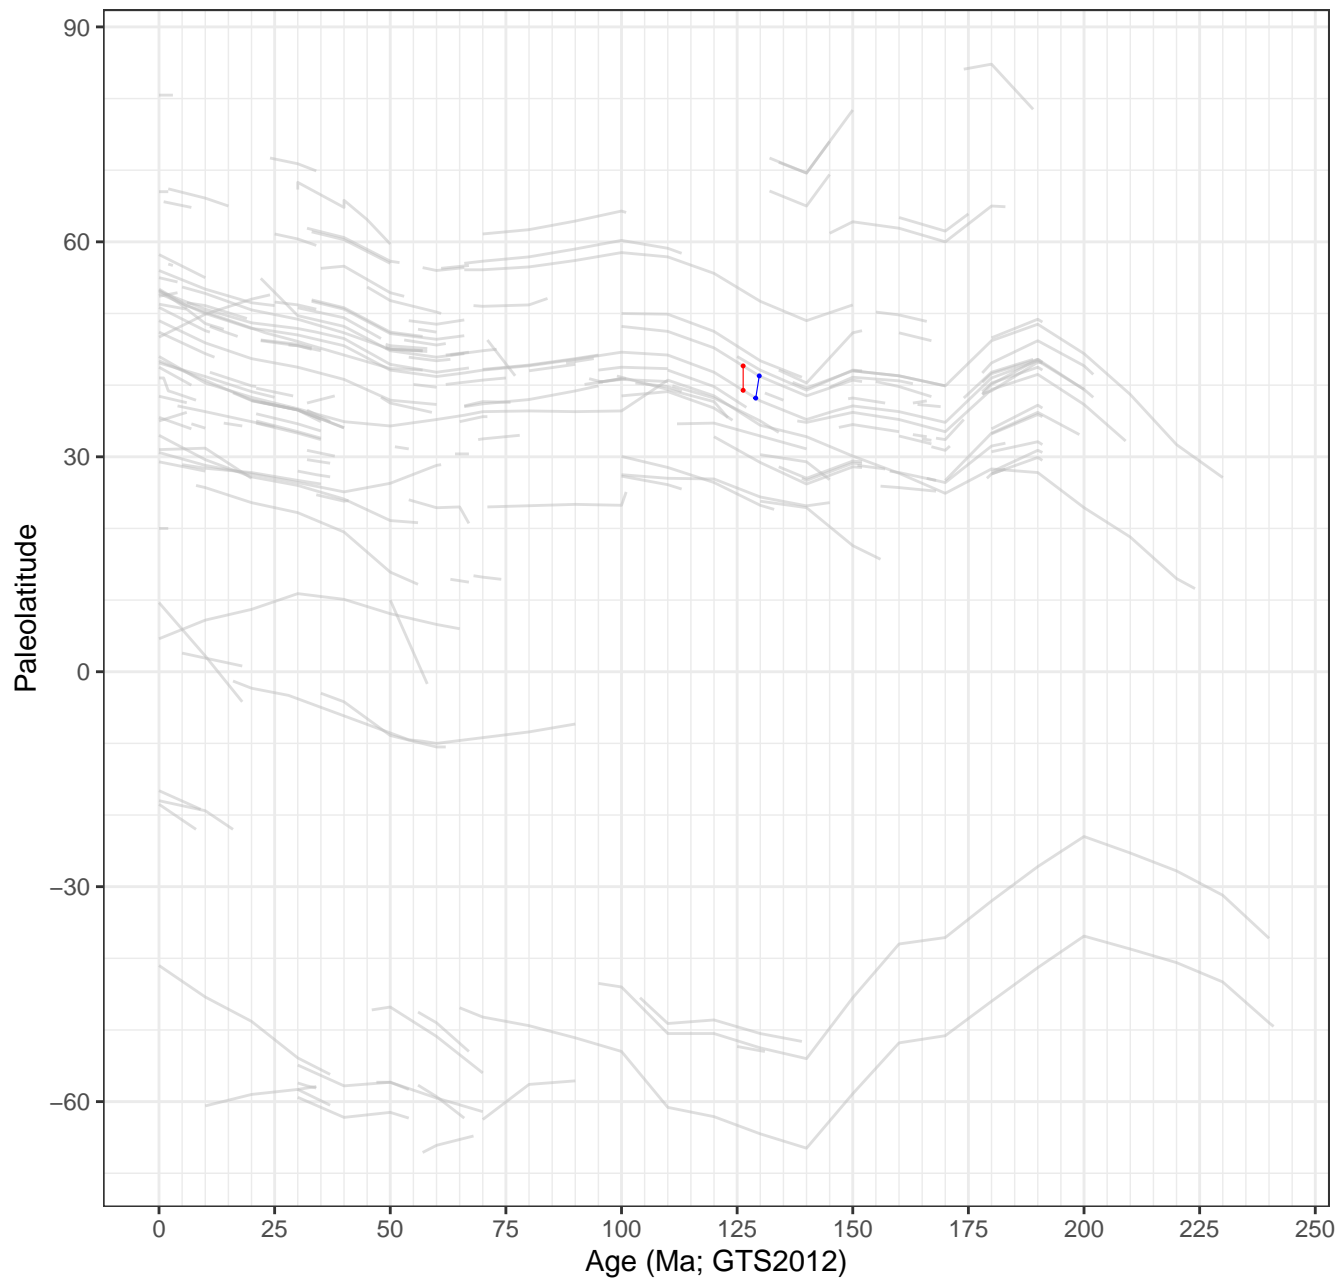

Supplement: Supplementary file 2529 [file Trichodinium speetonense.pdf › Supplement/Supplement 2/Species 1914 plots/Trichodinium speetonense.pdf]

# Species *Tringadinium bjaerkei*

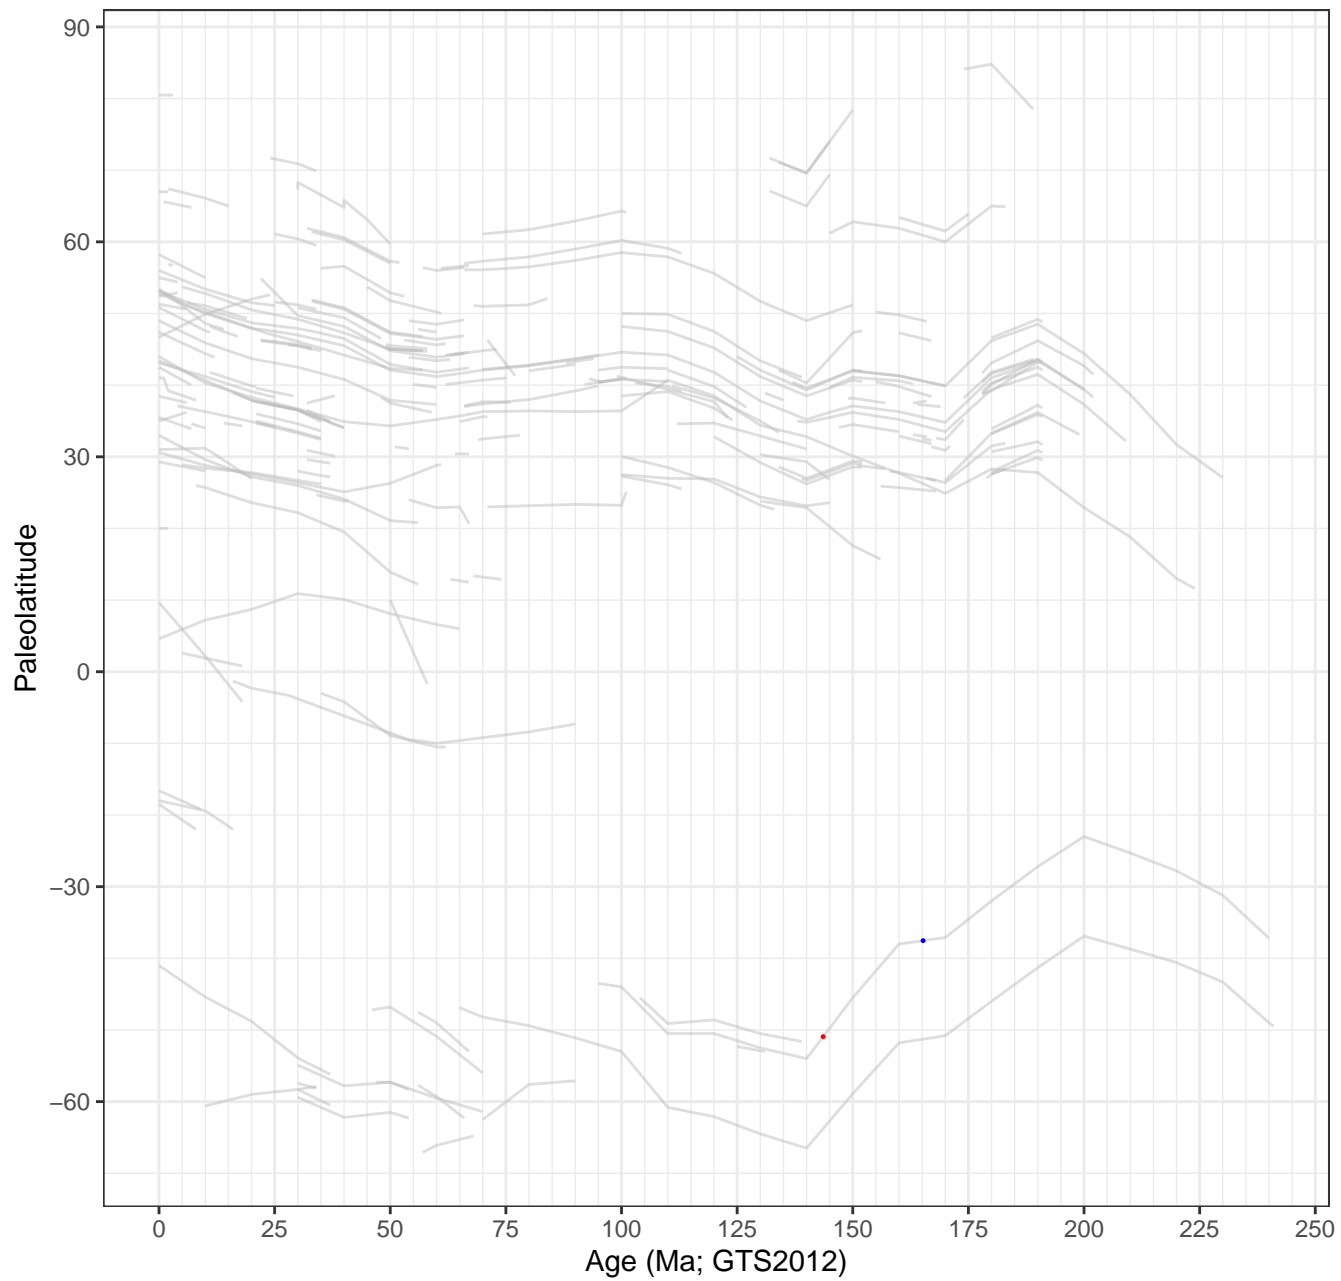

Supplement: Supplementary file 2530 [file Tringadinium bjaerkei.pdf › Supplement/Supplement 2/Species 1914 plots/Tringadinium bjaerkei.pdf]

# Species *Tringadinium comptum*

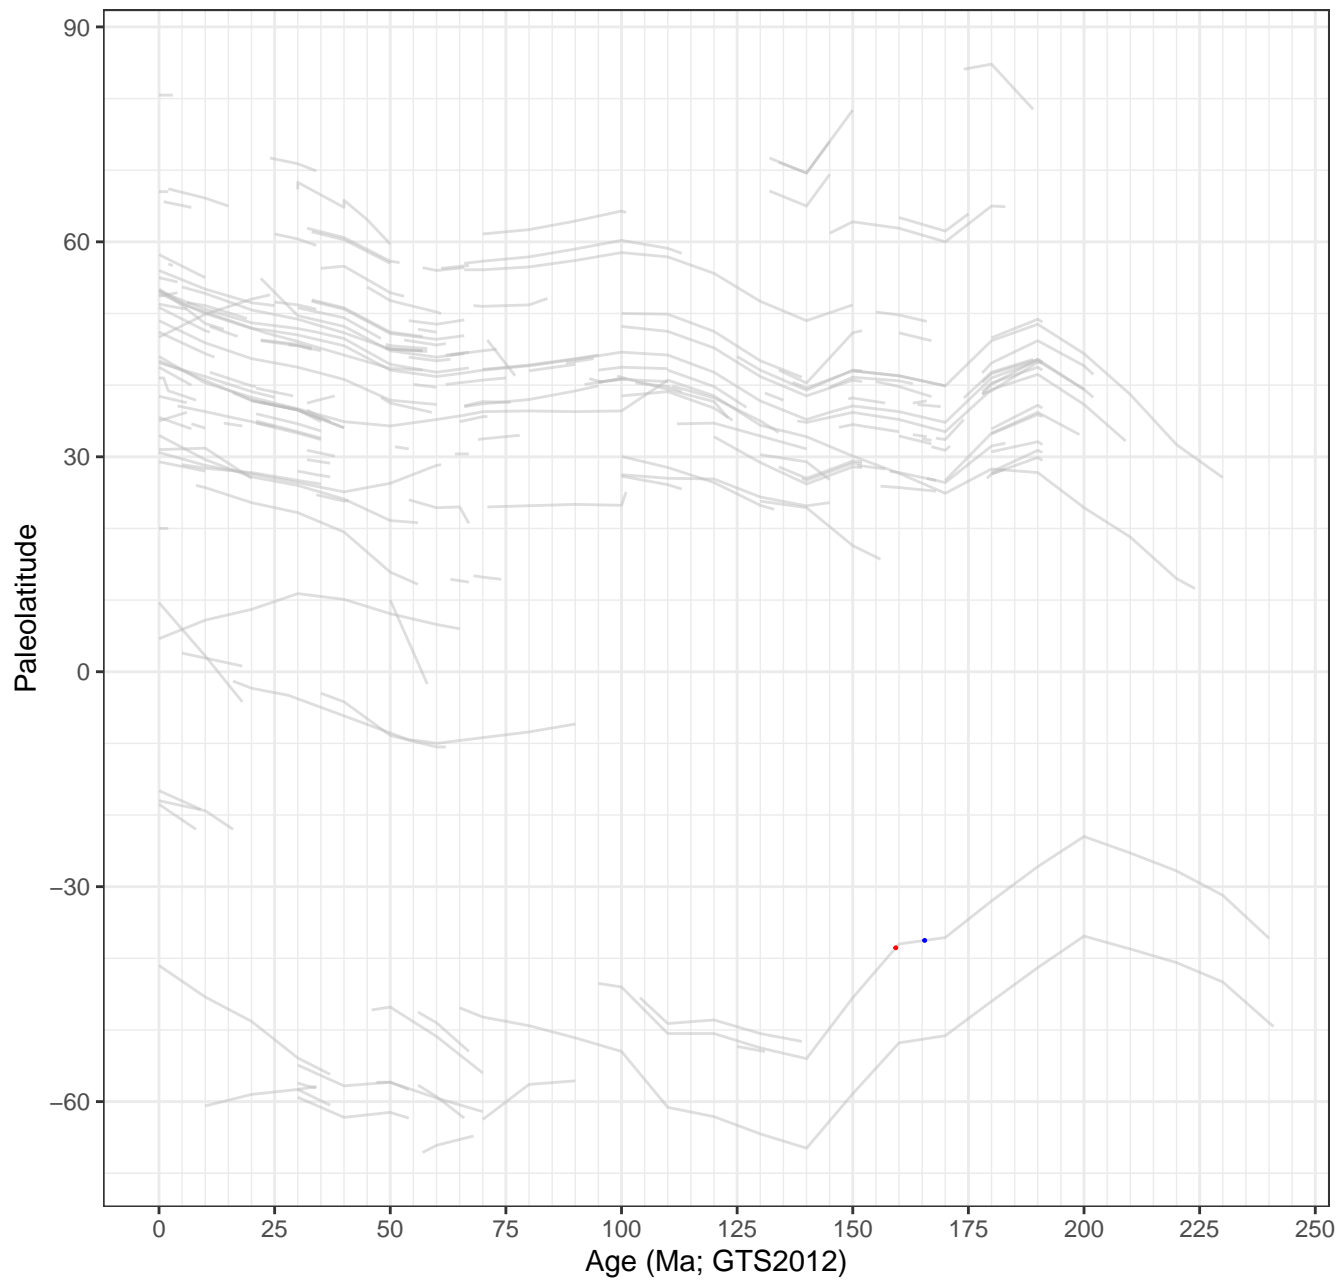

Supplement: Supplementary file 2531 [file Tringadinium comptum.pdf › Supplement/Supplement 2/Species 1914 plots/Tringadinium comptum.pdf]

# Species *Trinovantedinium applanatum*

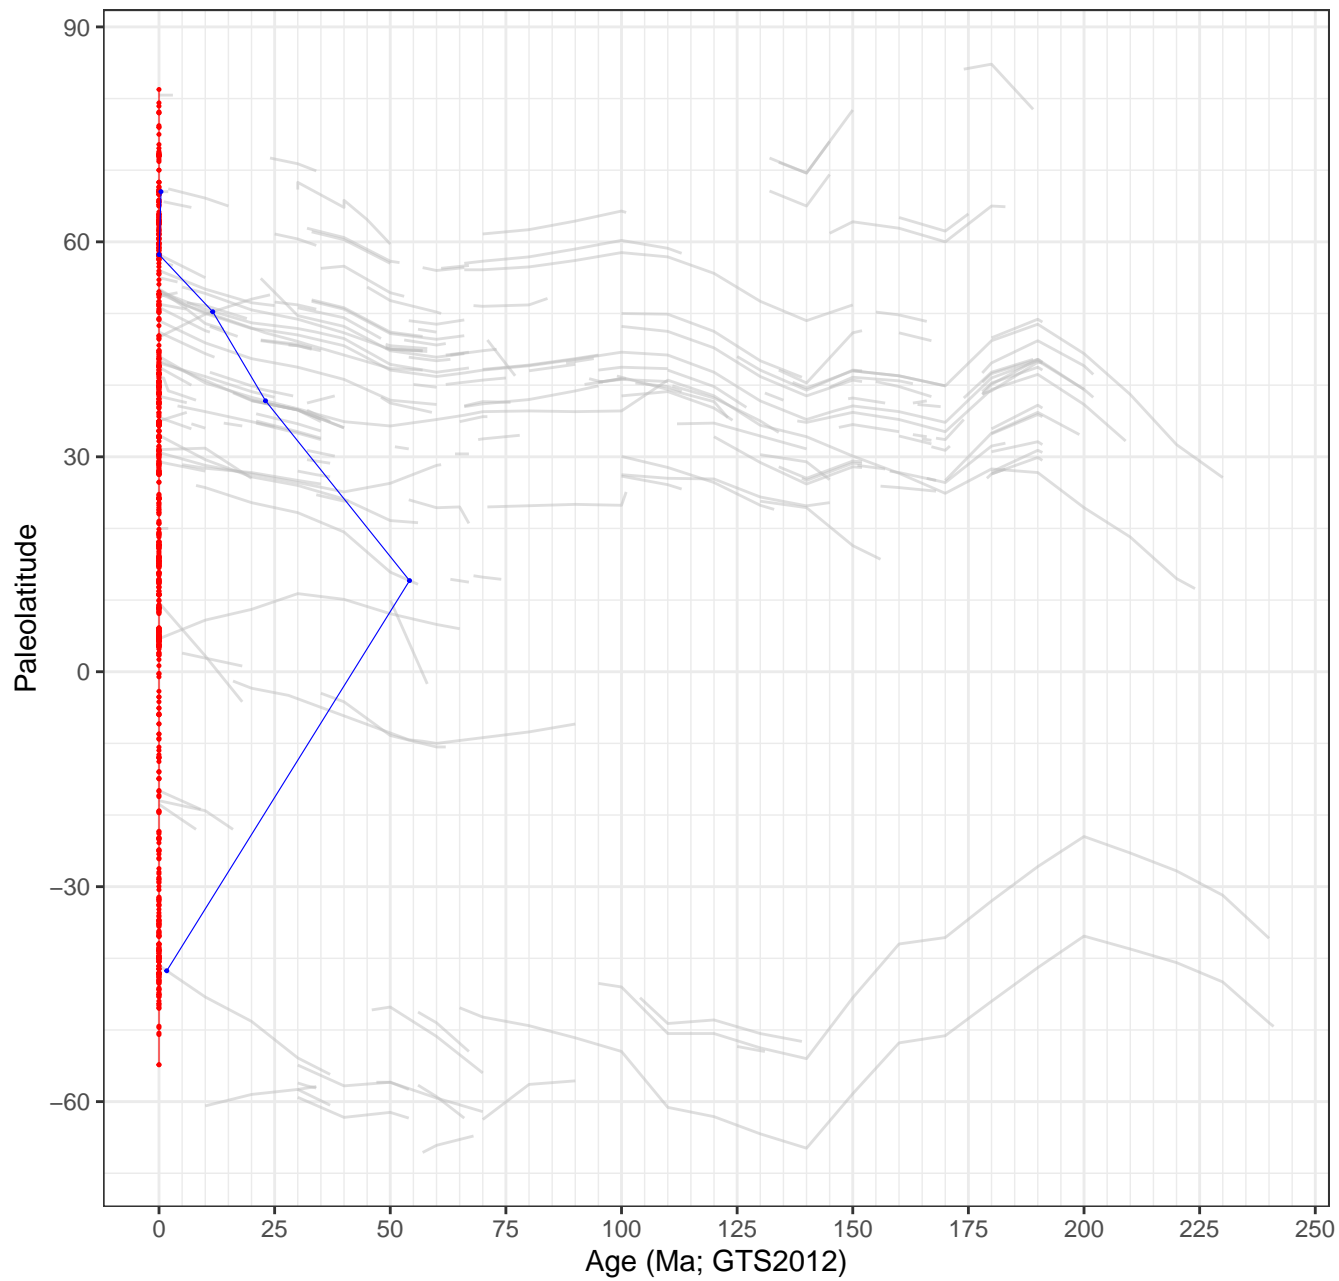

Supplement: Supplementary file 2532 [file Trinovantedinium applanatum.pdf › Supplement/Supplement 2/Species 1914 plots/Trinovantedinium applanatum.pdf]

# Species *Trinovantedinium capitatum*

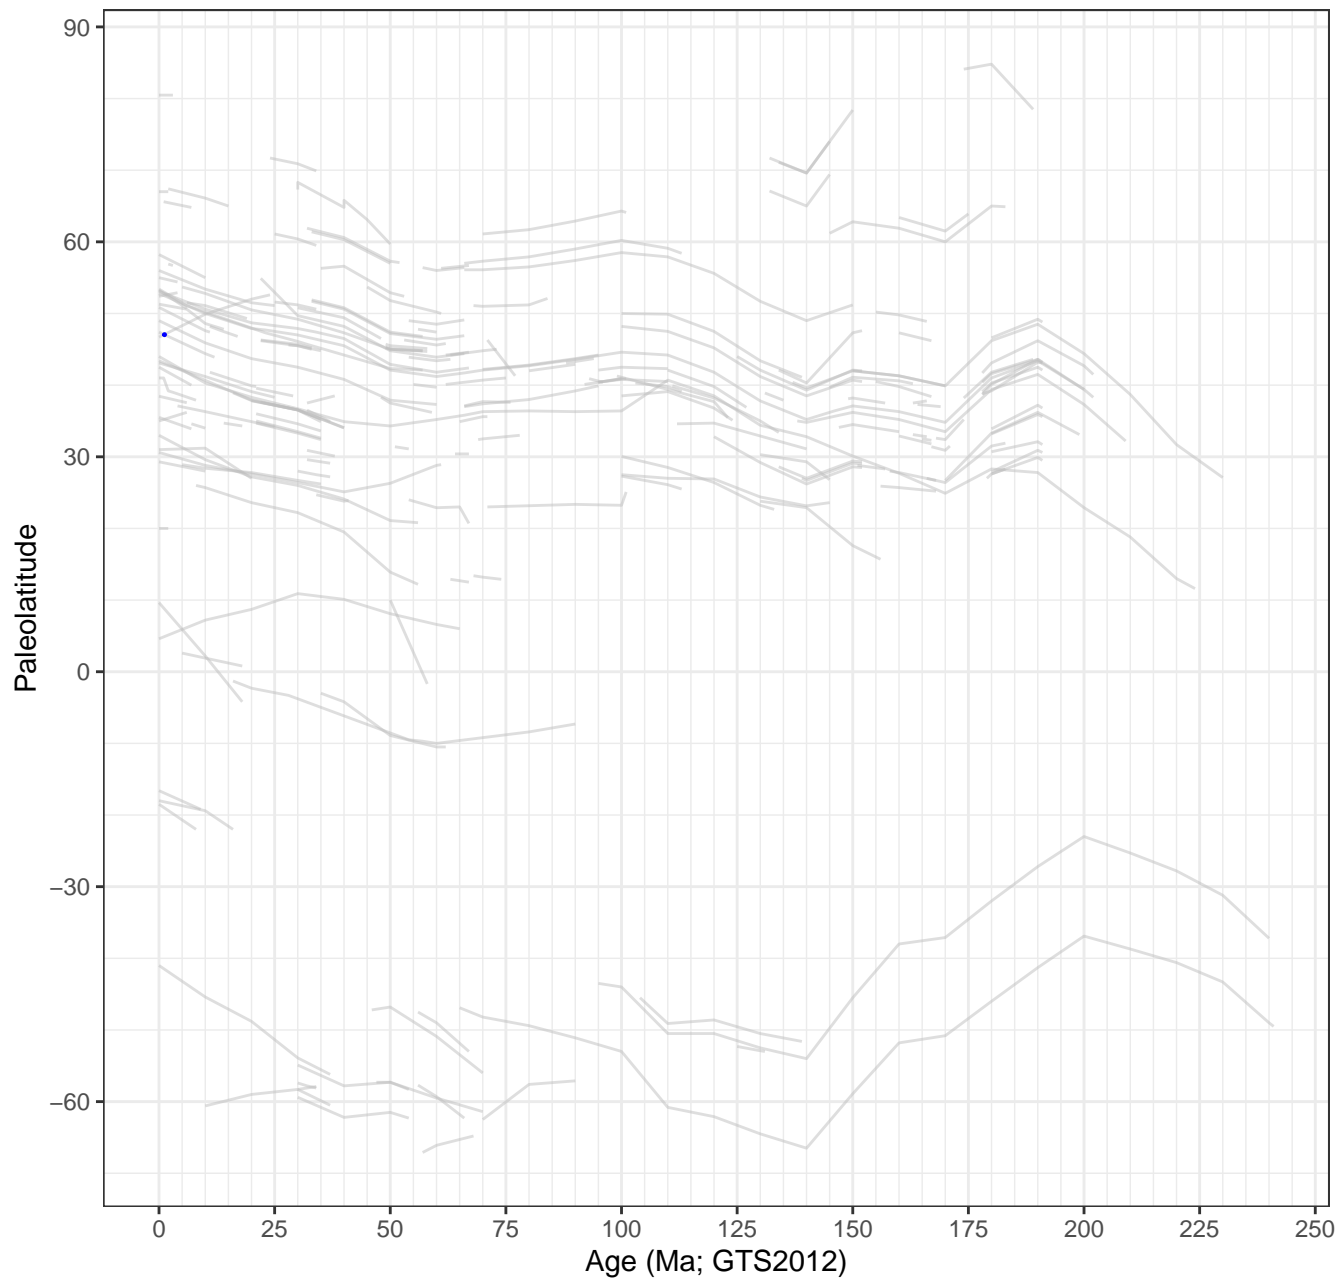

Supplement: Supplementary file 2533 [file Trinovantedinium capitatum.pdf › Supplement/Supplement 2/Species 1914 plots/Trinovantedinium capitatum.pdf]
