# Supplementary figures and images for: DINOSTRAT: a global database of the stratigraphic and paleolatitudinal distribution of Mesozoic–Cenozoic organic-walled dinoflagellate cysts (part 26 of 27)
Source: Copernicus journal article supplement (doi:10.5194/essd-14-579-2022), 2022-02-09

# Species *Trinovantedinium glorianum*

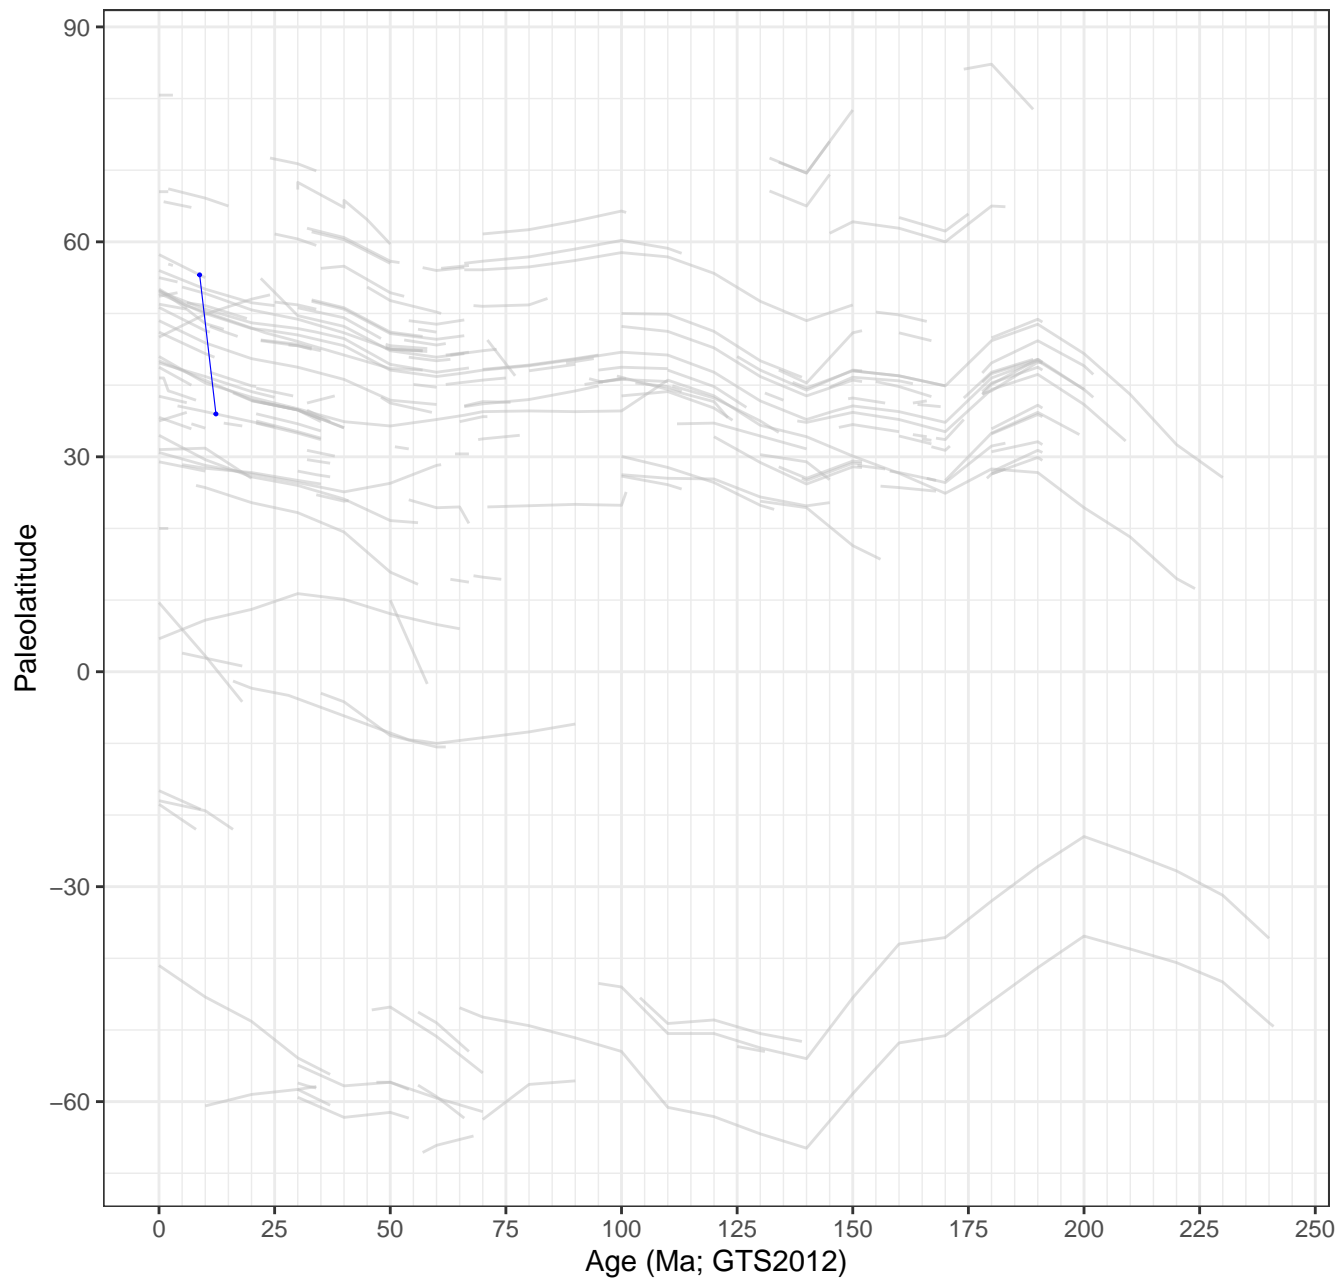

Supplement: Supplementary file 2534 [file Trinovantedinium glorianum.pdf › Supplement/Supplement 2/Species 1914 plots/Trinovantedinium glorianum.pdf]

# Species *Trinovantedinium harpagonium*

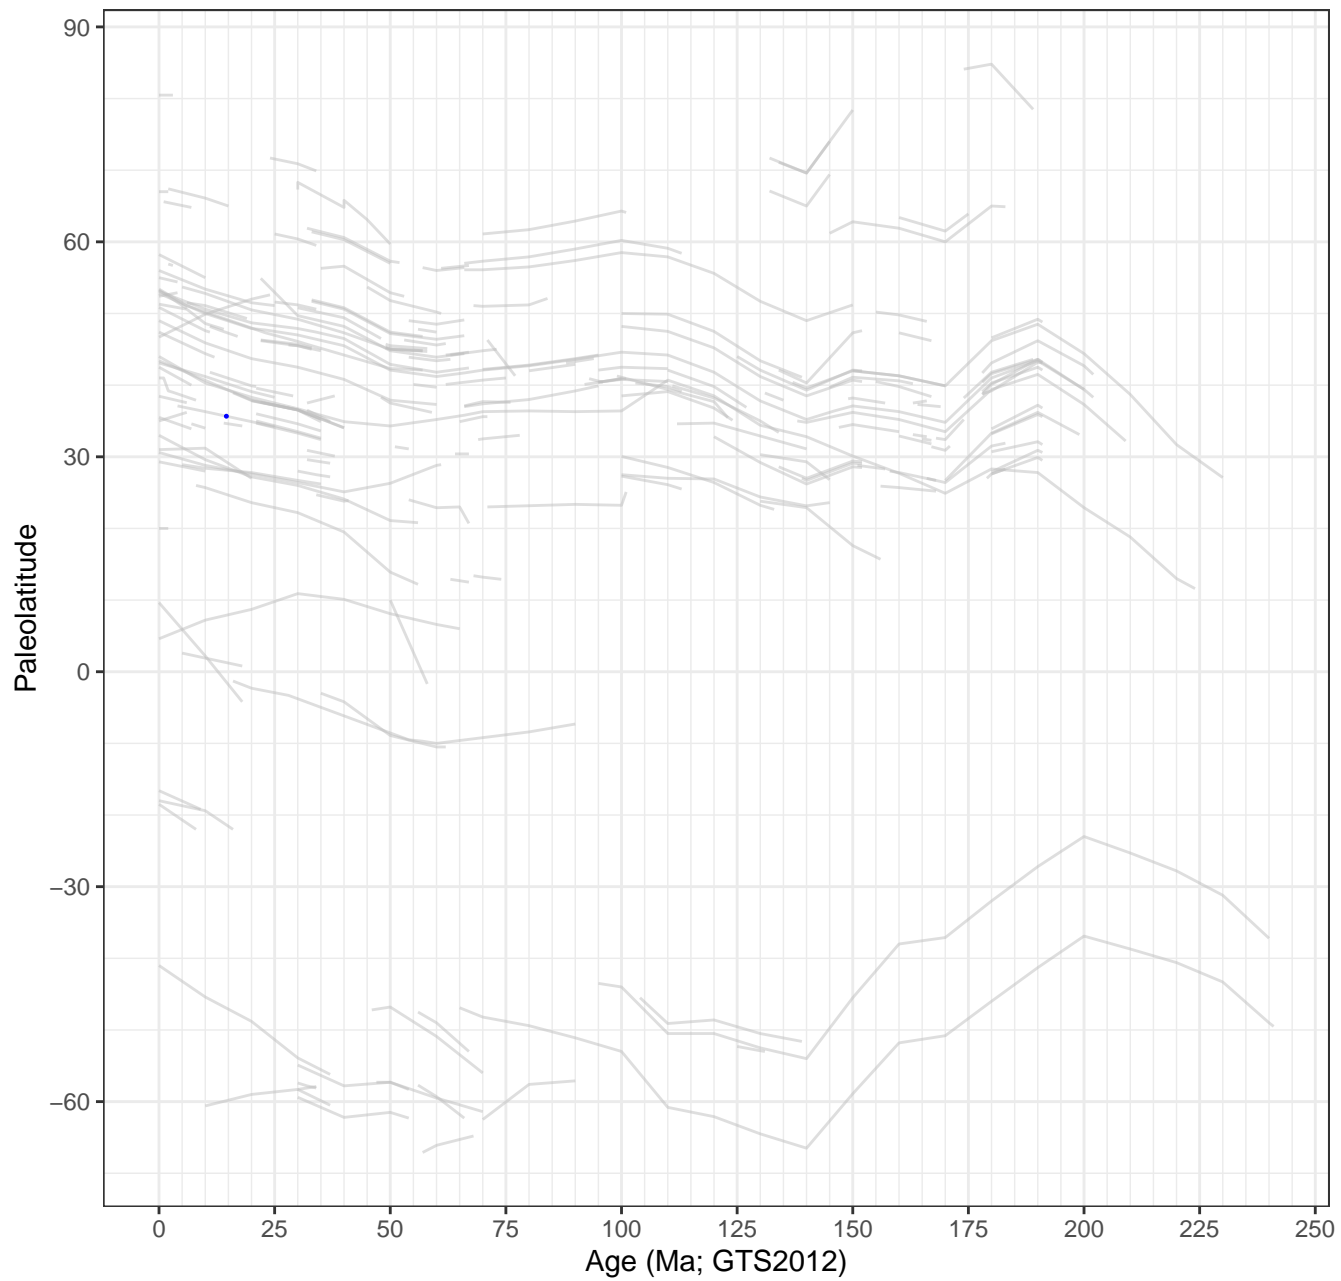

Supplement: Supplementary file 2535 [file Trinovantedinium harpagonium.pdf › Supplement/Supplement 2/Species 1914 plots/Trinovantedinium harpagonium.pdf]

# Species *Trinovantedinium pallidifulum*

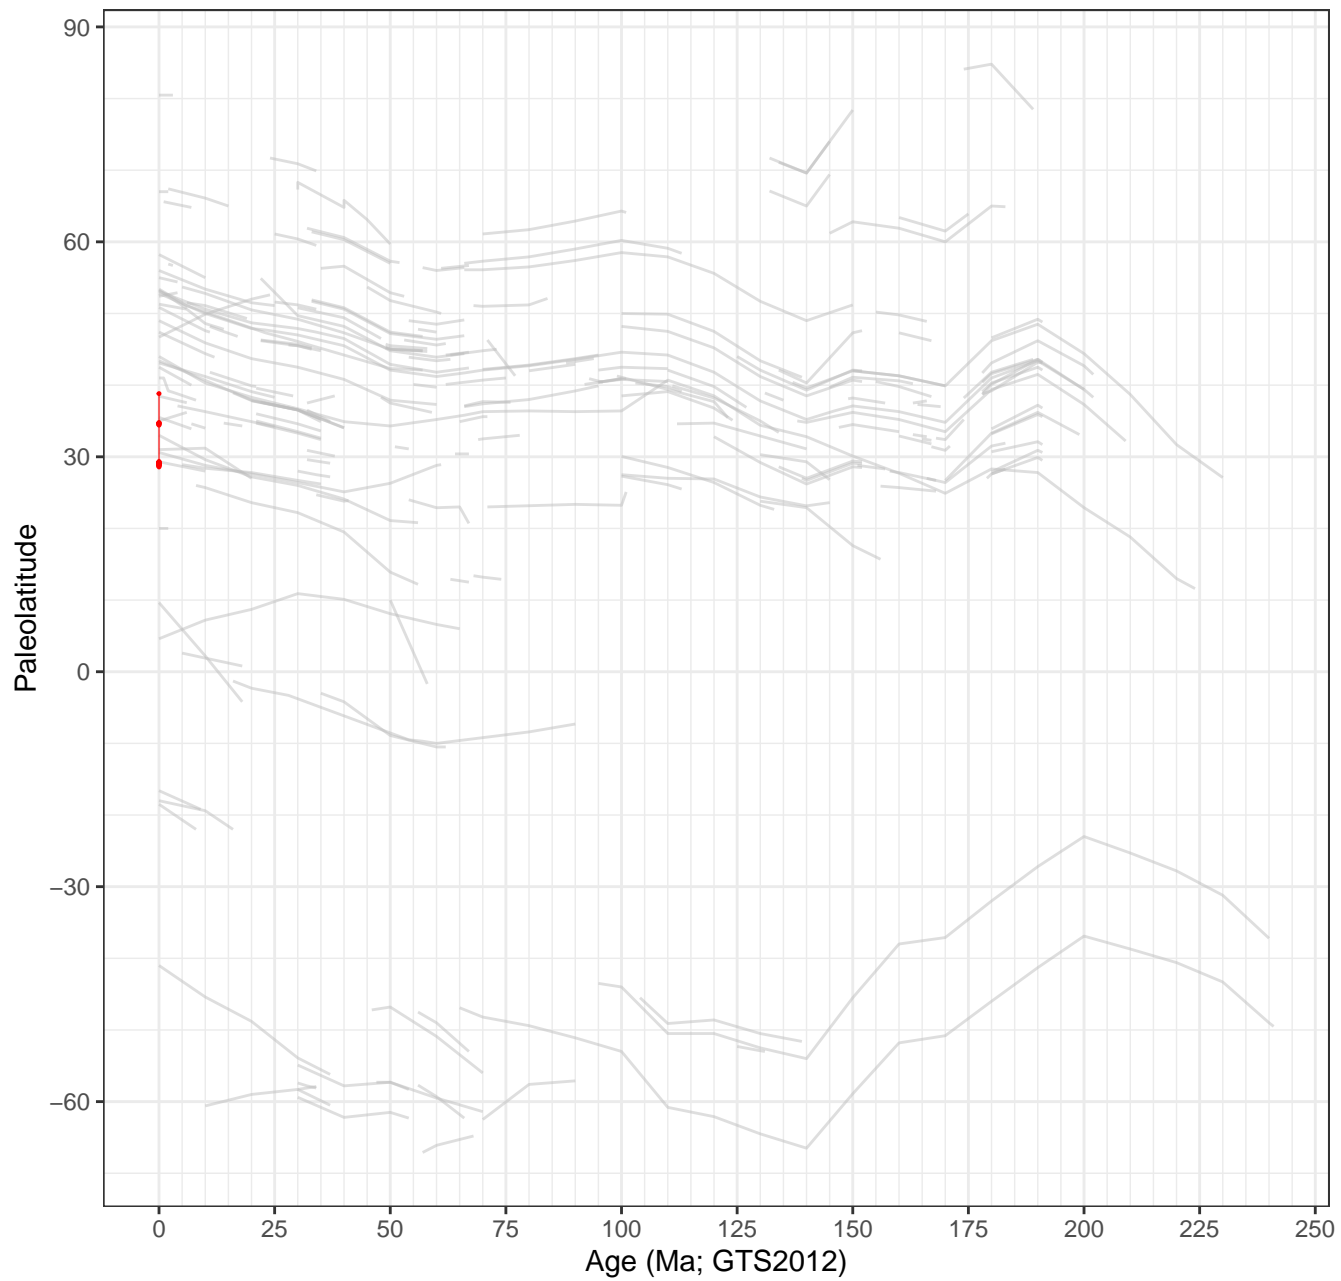

Supplement: Supplementary file 2536 [file Trinovantedinium pallidifulvum.pdf › Supplement/Supplement 2/Species 1914 plots/Trinovantedinium pallidifulvum.pdf]

# Species *Trinovantedinium papulum*



Supplement: Supplementary file 2537 [file Trinovantedinium papulum.pdf › Supplement/Supplement 2/Species 1914 plots/Trinovantedinium papulum.pdf]

# Species *Trinovantedinium variabile*

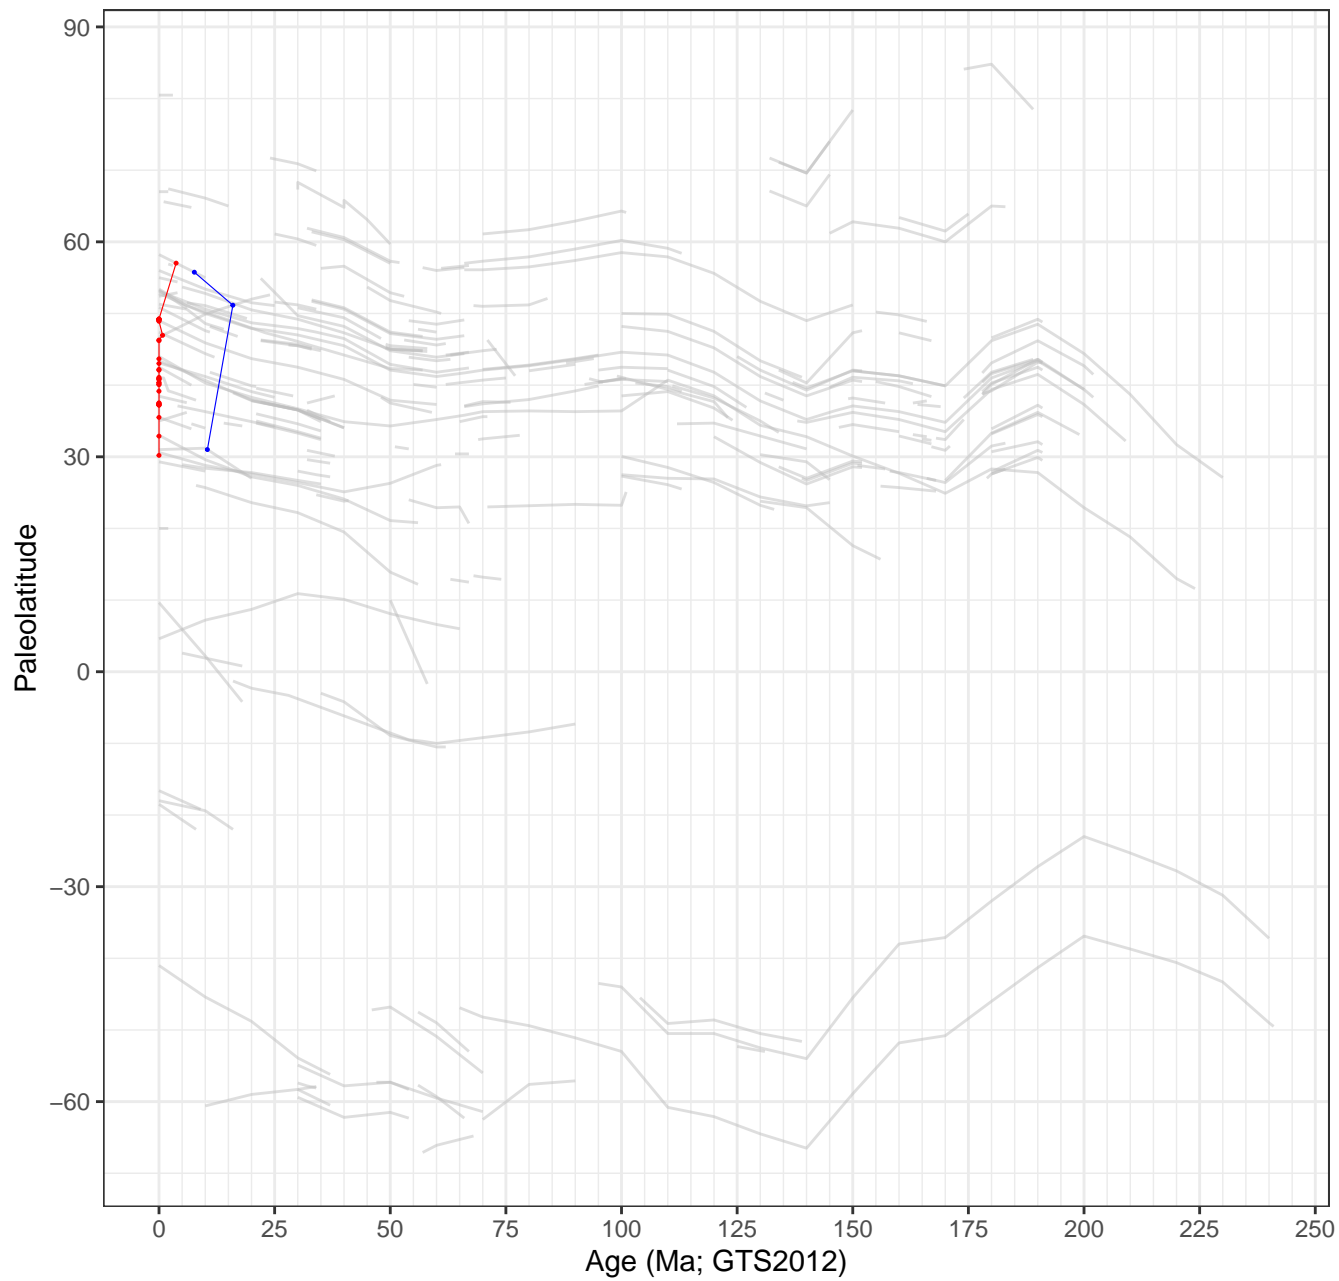

Supplement: Supplementary file 2538 [file Trinovantedinium variabile.pdf › Supplement/Supplement 2/Species 1914 plots/Trinovantedinium variabile.pdf]

# Species *Trinovantedinium xylochoporum*

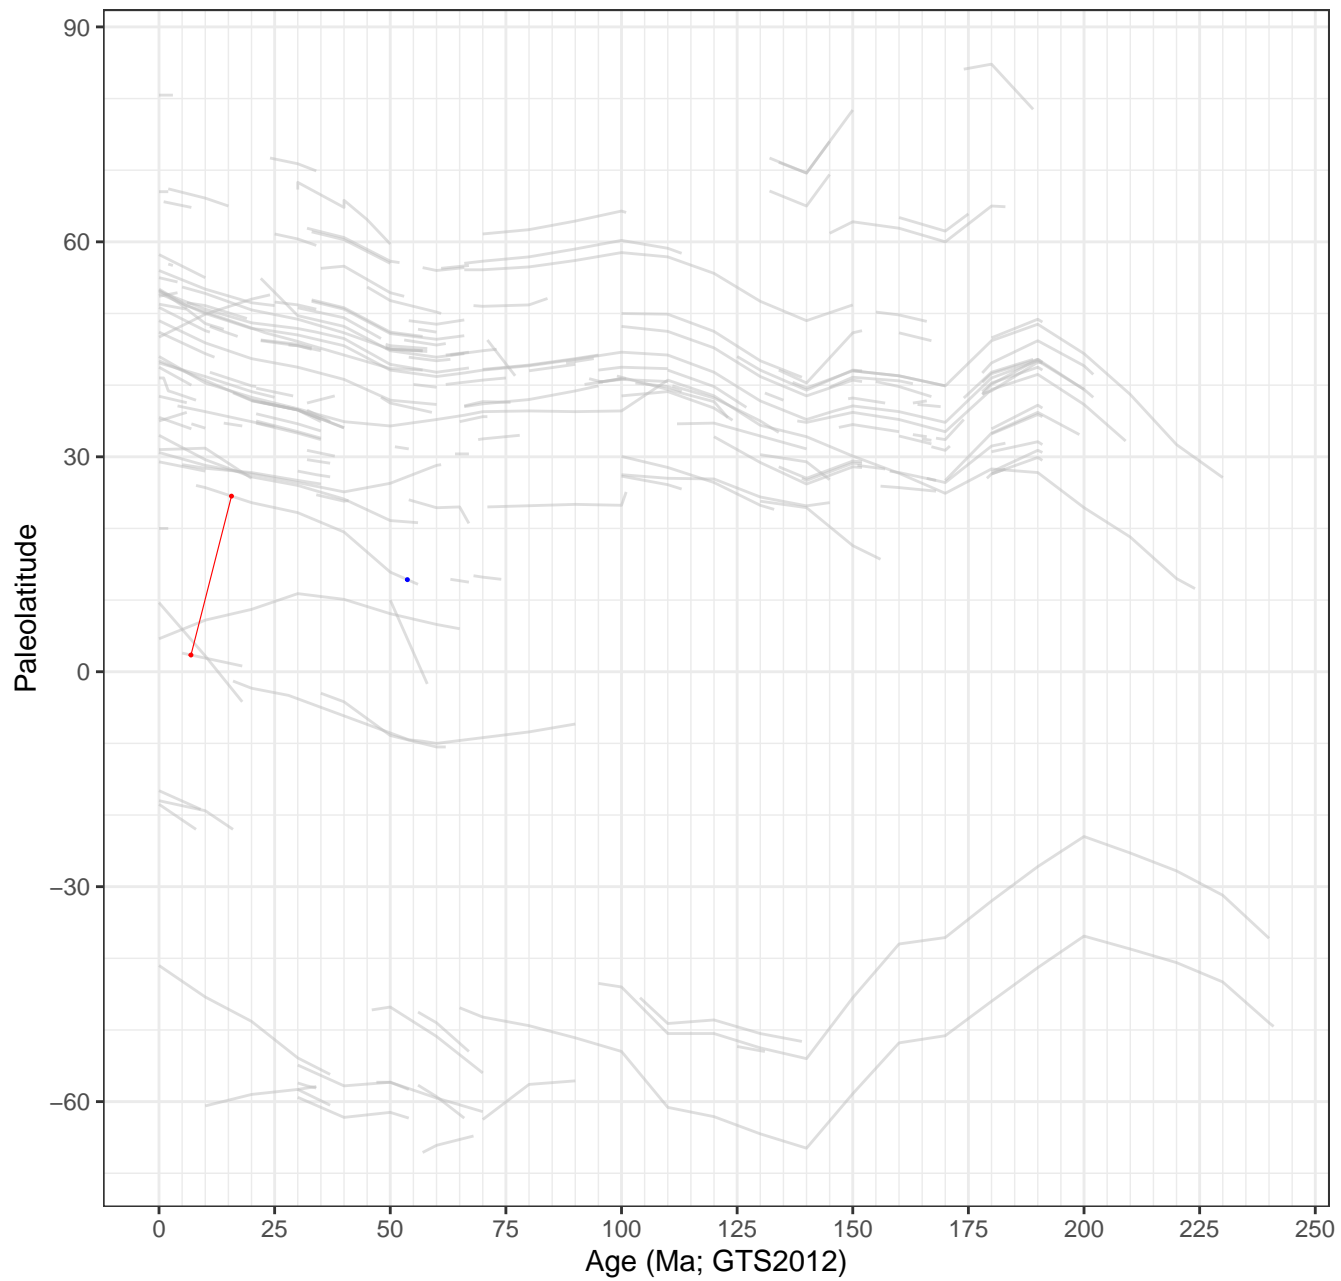

Supplement: Supplementary file 2539 [file Trinovantedinium xylochoporum.pdf › Supplement/Supplement 2/Species 1914 plots/Trinovantedinium xylochoporum.pdf]

# Species *Triphragmadinium demaniae*

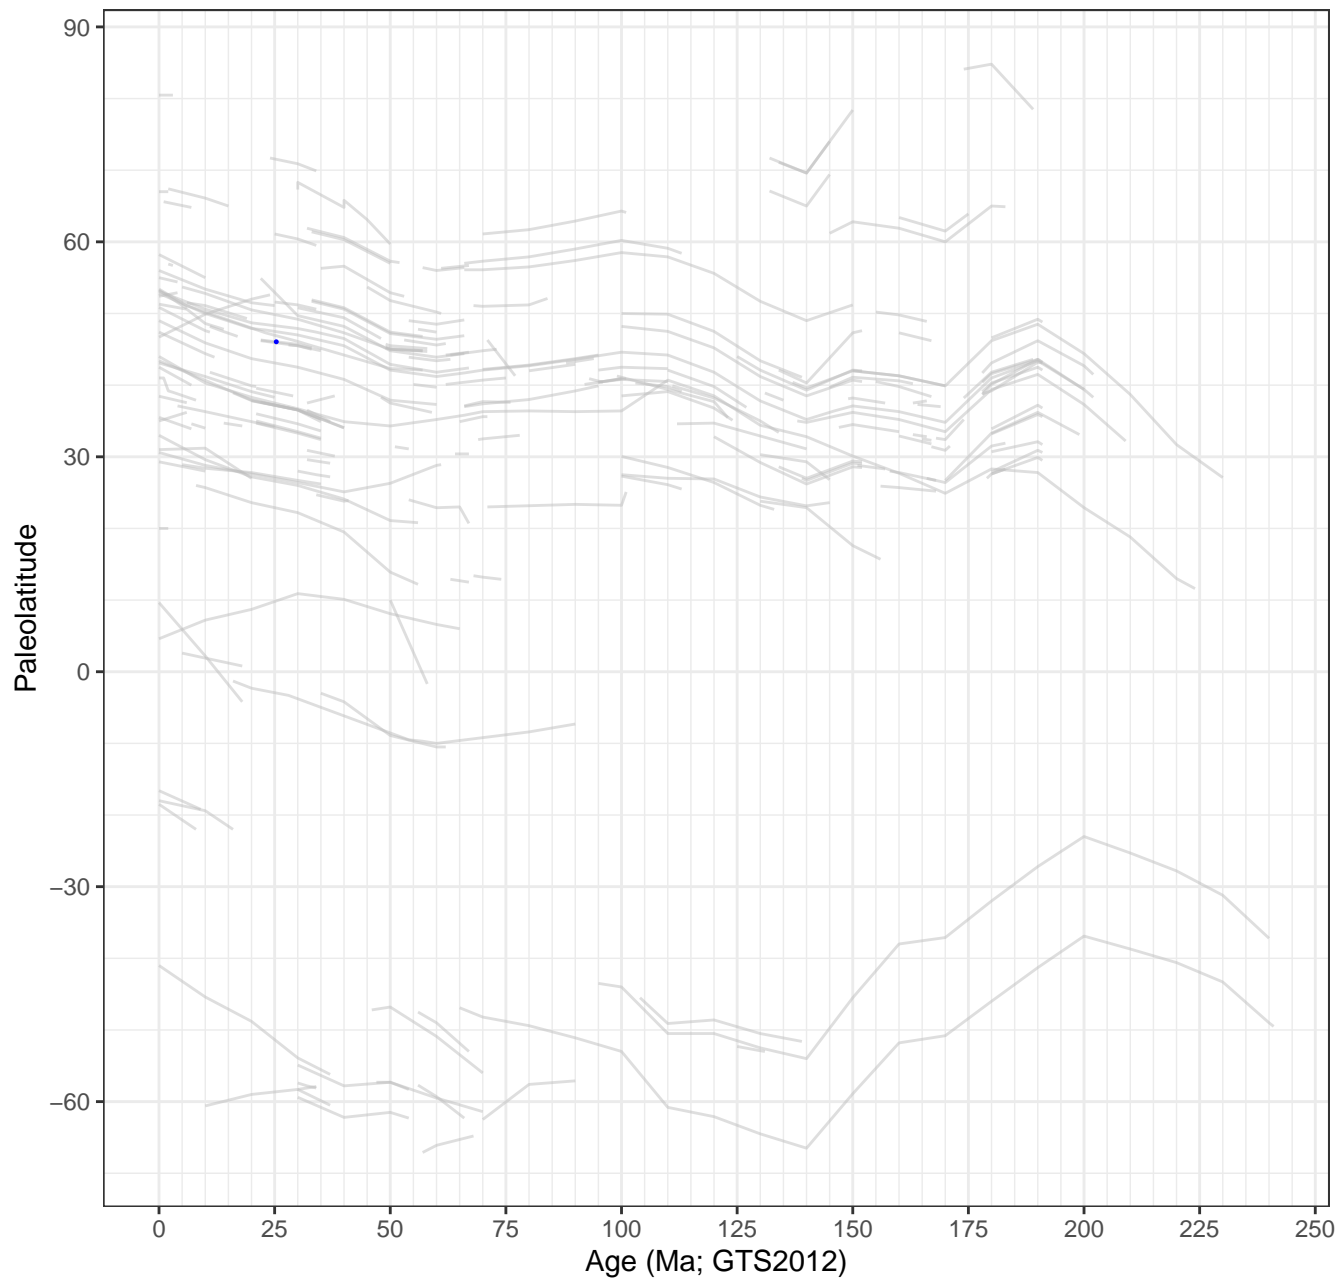

Supplement: Supplementary file 2540 [file Triphragmadinium demaniae.pdf › Supplement/Supplement 2/Species 1914 plots/Triphragmadinium demaniae.pdf]

# Species *Trithyrodinium druggii*

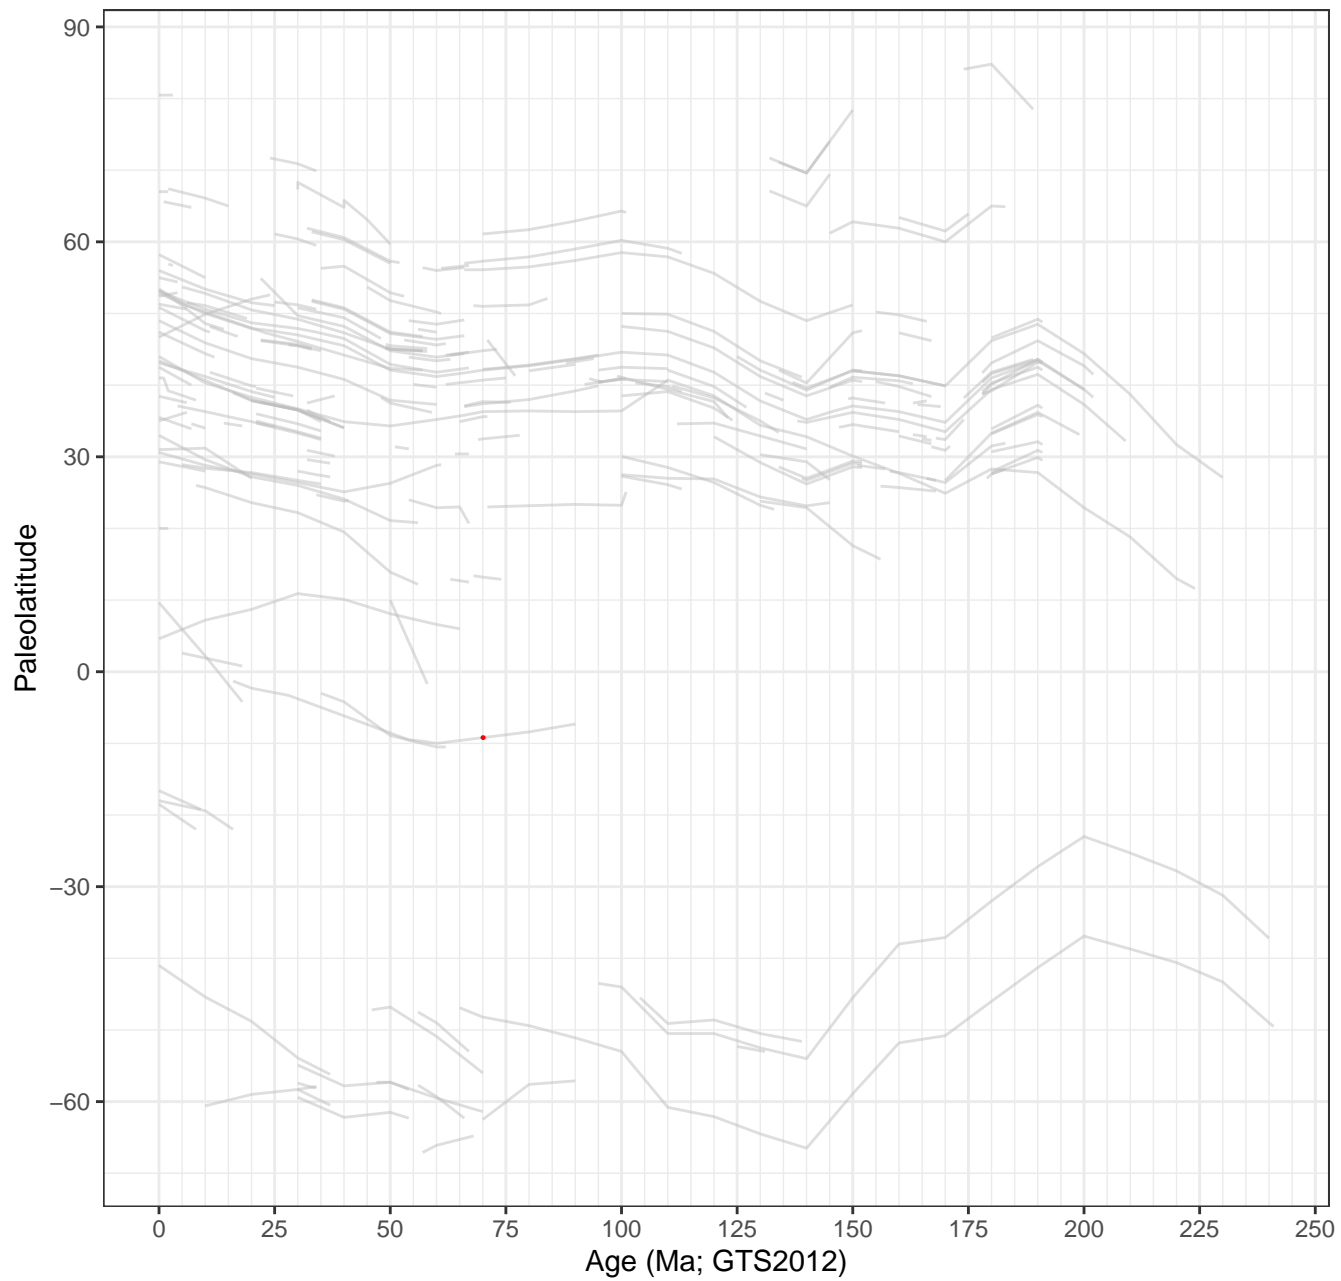

Supplement: Supplementary file 2541 [file Trithyrodinium druggii.pdf › Supplement/Supplement 2/Species 1914 plots/Trithyrodinium druggii.pdf]

# Species *Trithyrodinium evittii*

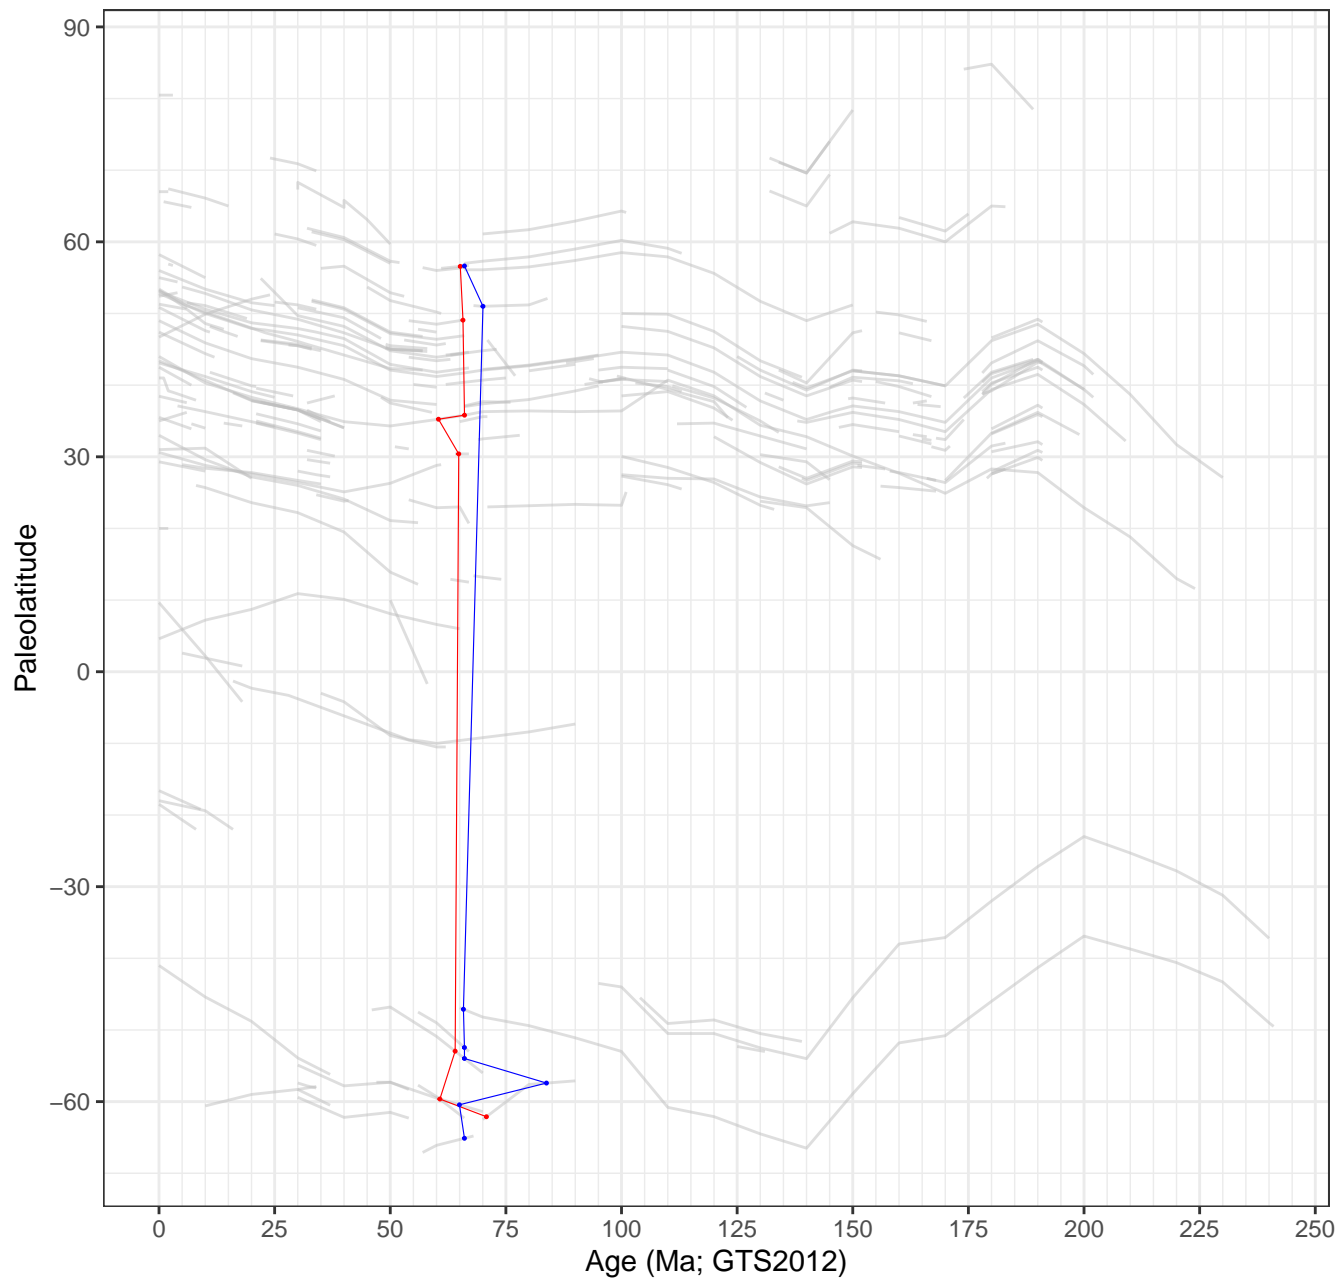

Supplement: Supplementary file 2542 [file Trithyrodinium evittii.pdf › Supplement/Supplement 2/Species 1914 plots/Trithyrodinium evittii.pdf]

# Species *Trithyrodinium partridgei*

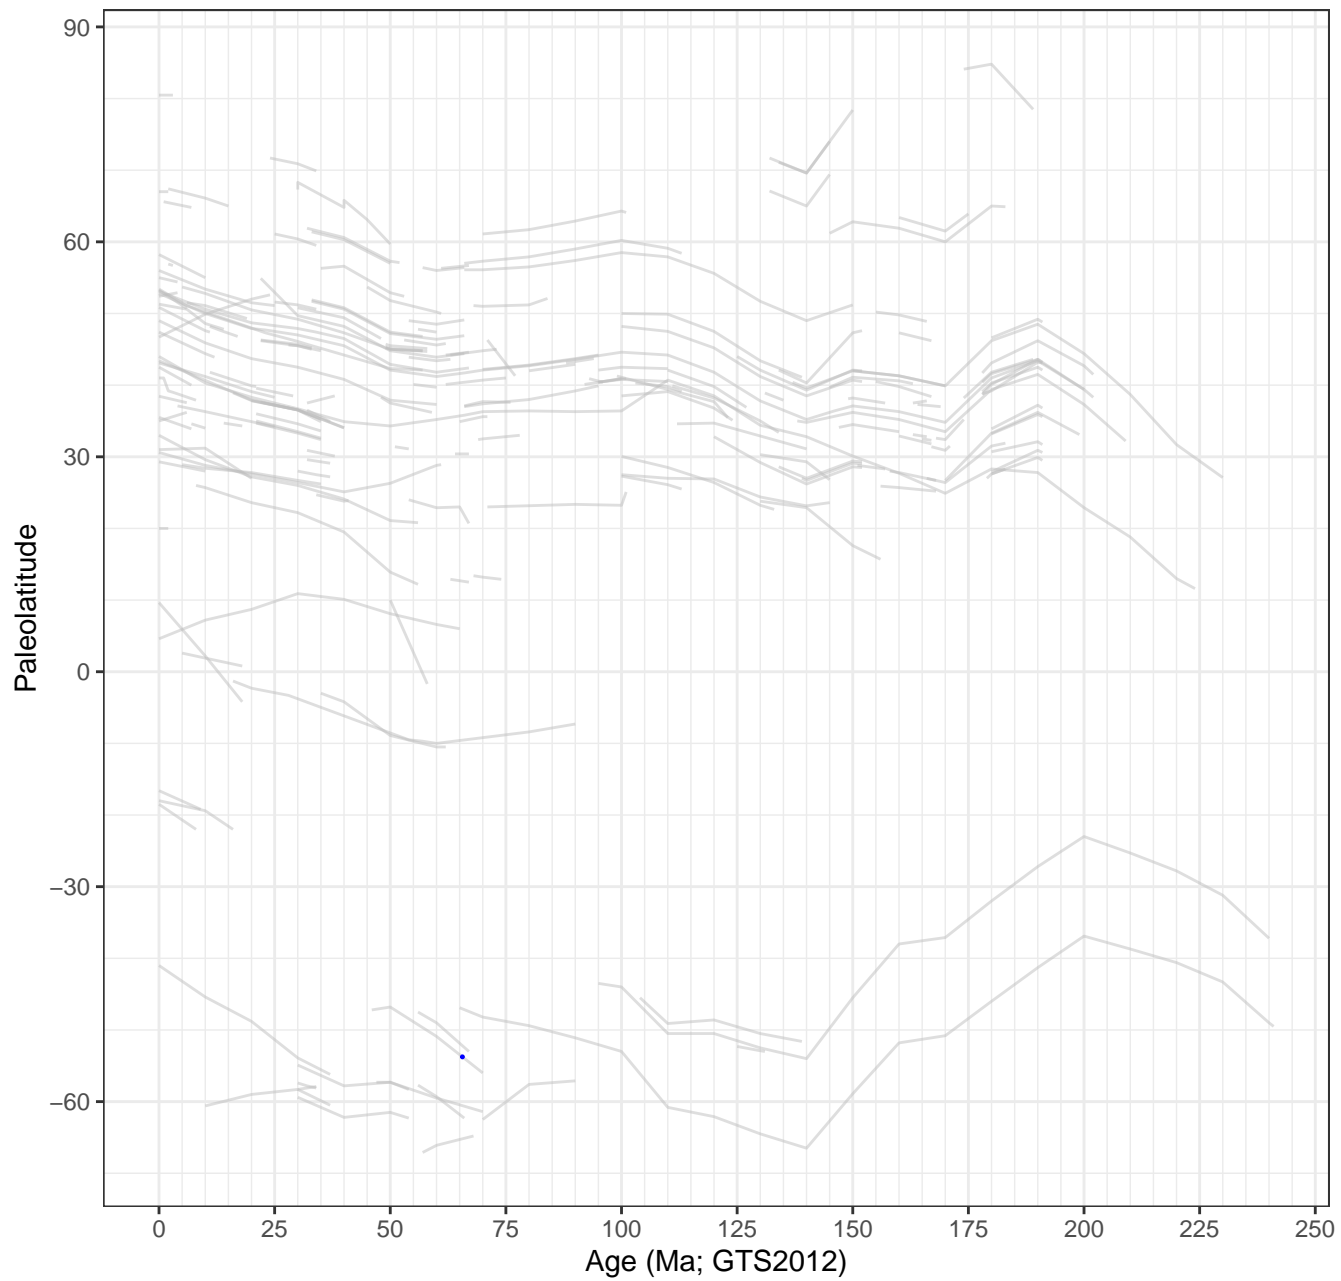

Supplement: Supplementary file 2543 [file Trithyrodinium partridgei.pdf › Supplement/Supplement 2/Species 1914 plots/Trithyrodinium partridgei.pdf]

# Species *Trithyrodinium quinqueangulare*

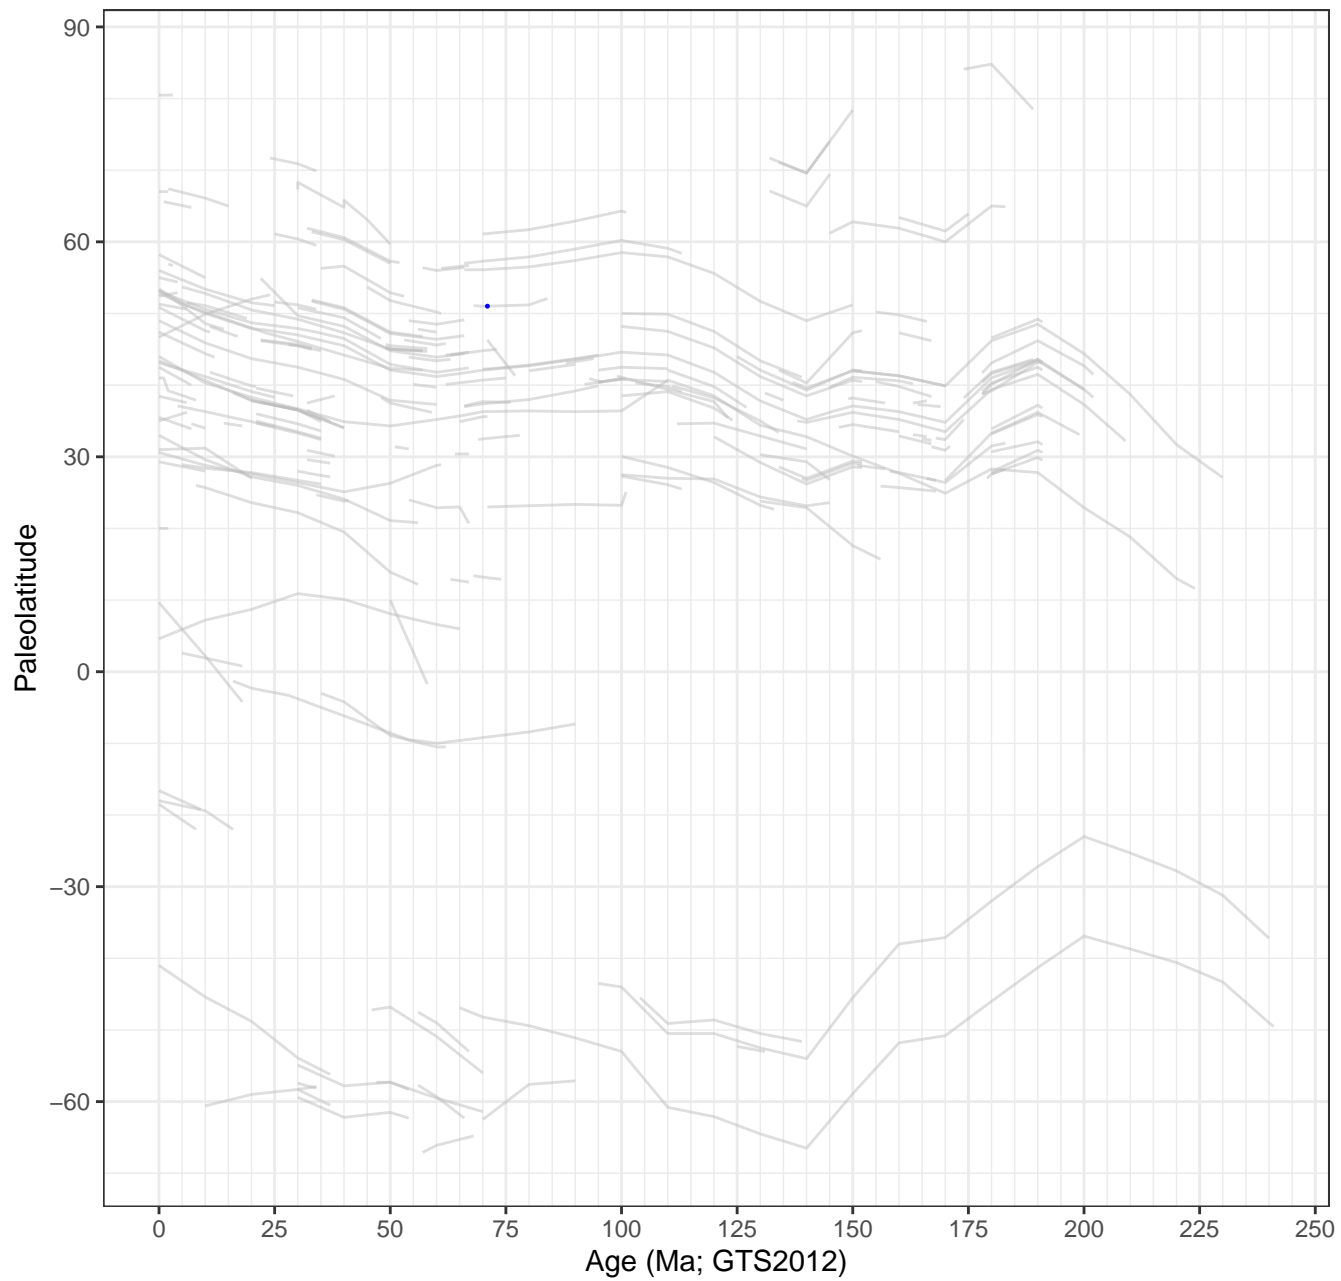

Supplement: Supplementary file 2544 [file Trithyrodinium quinqueangulare.pdf › Supplement/Supplement 2/Species 1914 plots/Trithyrodinium quinqueangulare.pdf]

# Species *Trithyrodinium rhomboideum*

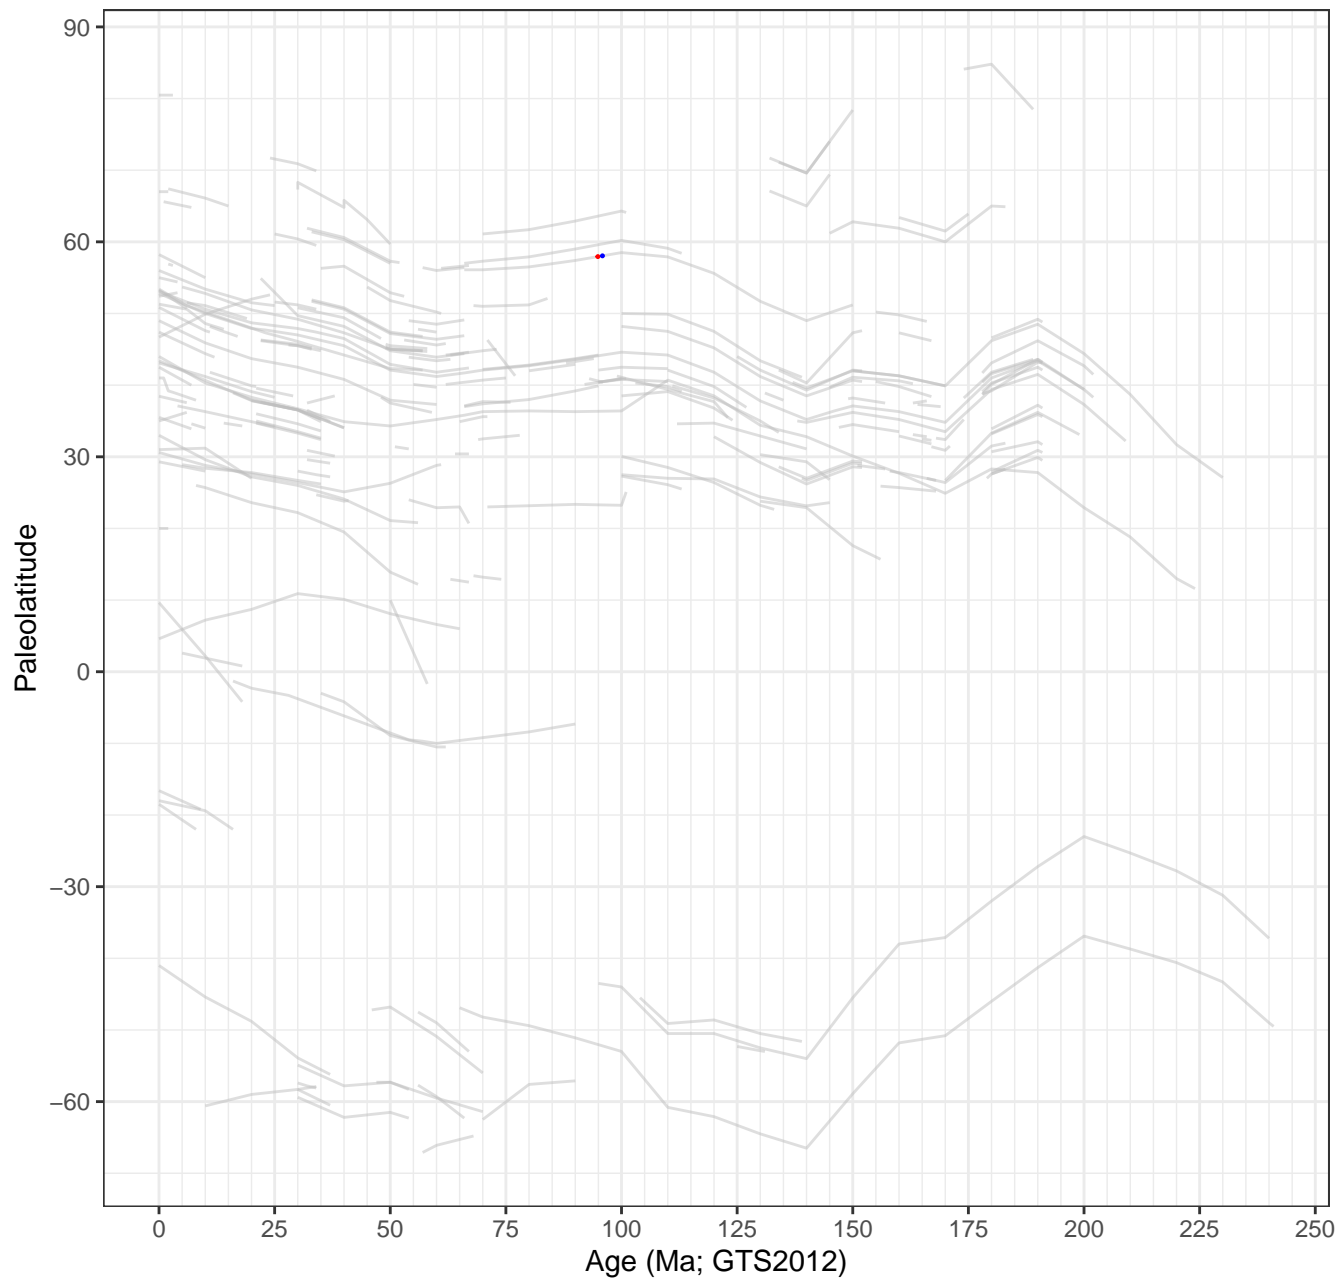

Supplement: Supplementary file 2545 [file Trithyrodinium rhomboideum.pdf › Supplement/Supplement 2/Species 1914 plots/Trithyrodinium rhomboideum.pdf]

# Species *Trithyrodinium suspectum*

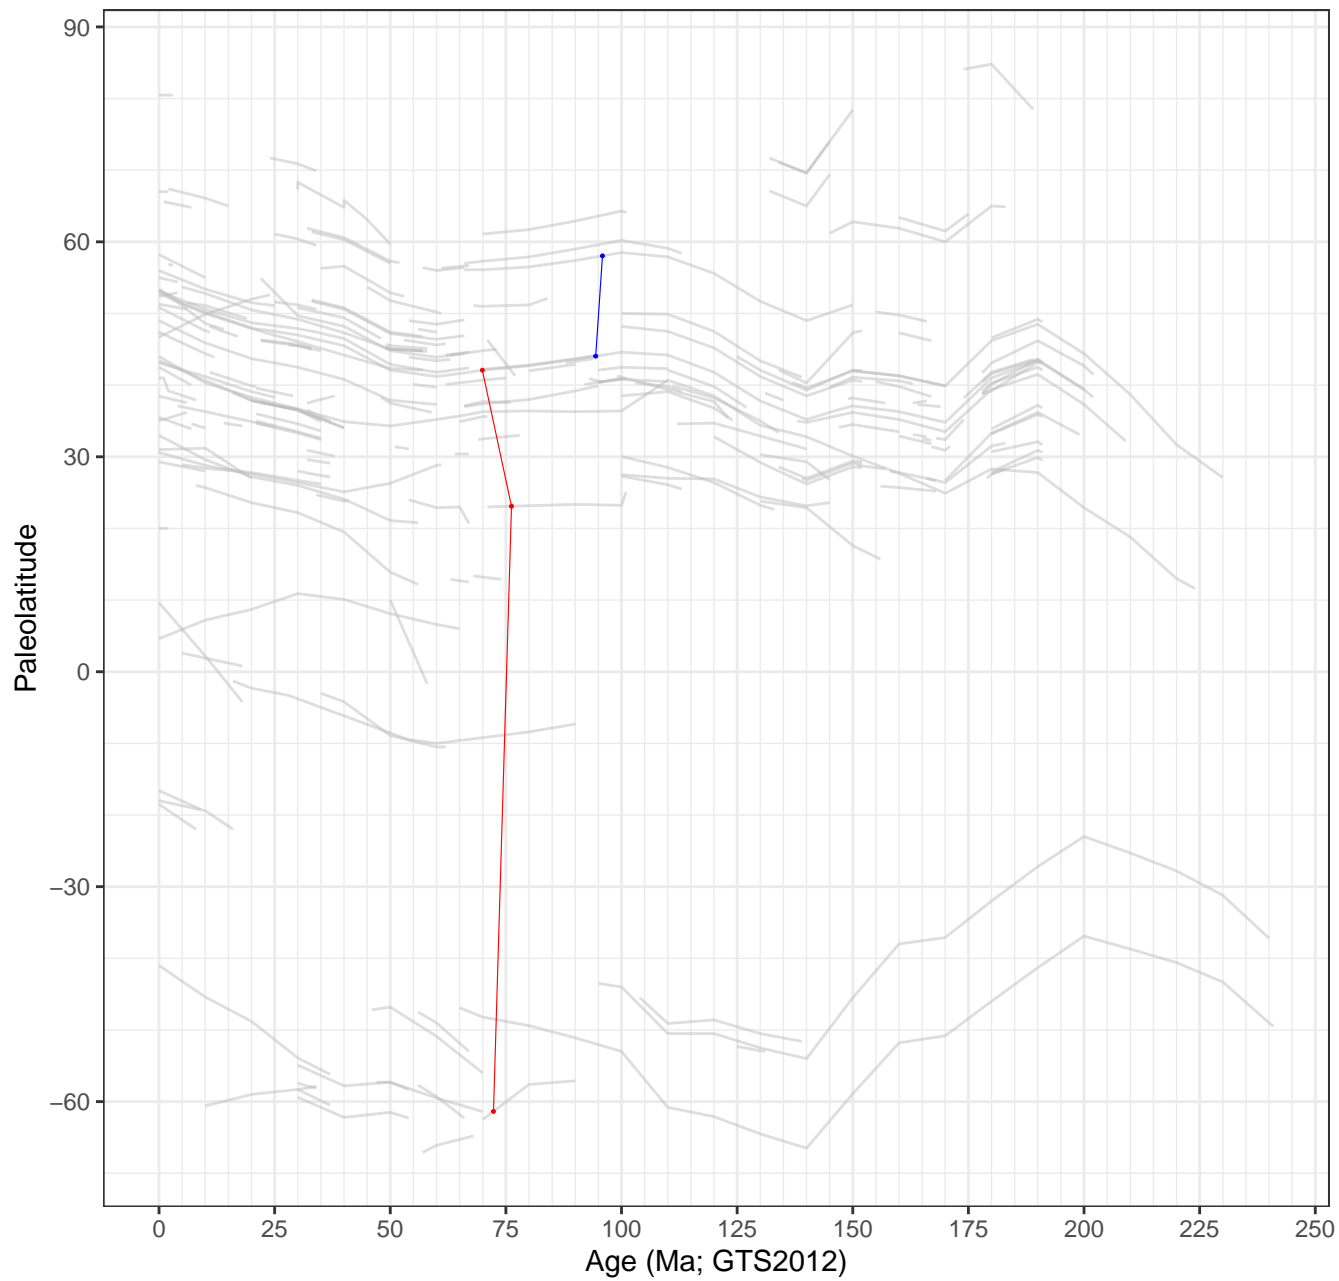

Supplement: Supplementary file 2546 [file Trithyrodinium suspectum.pdf › Supplement/Supplement 2/Species 1914 plots/Trithyrodinium suspectum.pdf]

# Species *Trithyrodinium vermiculatum*

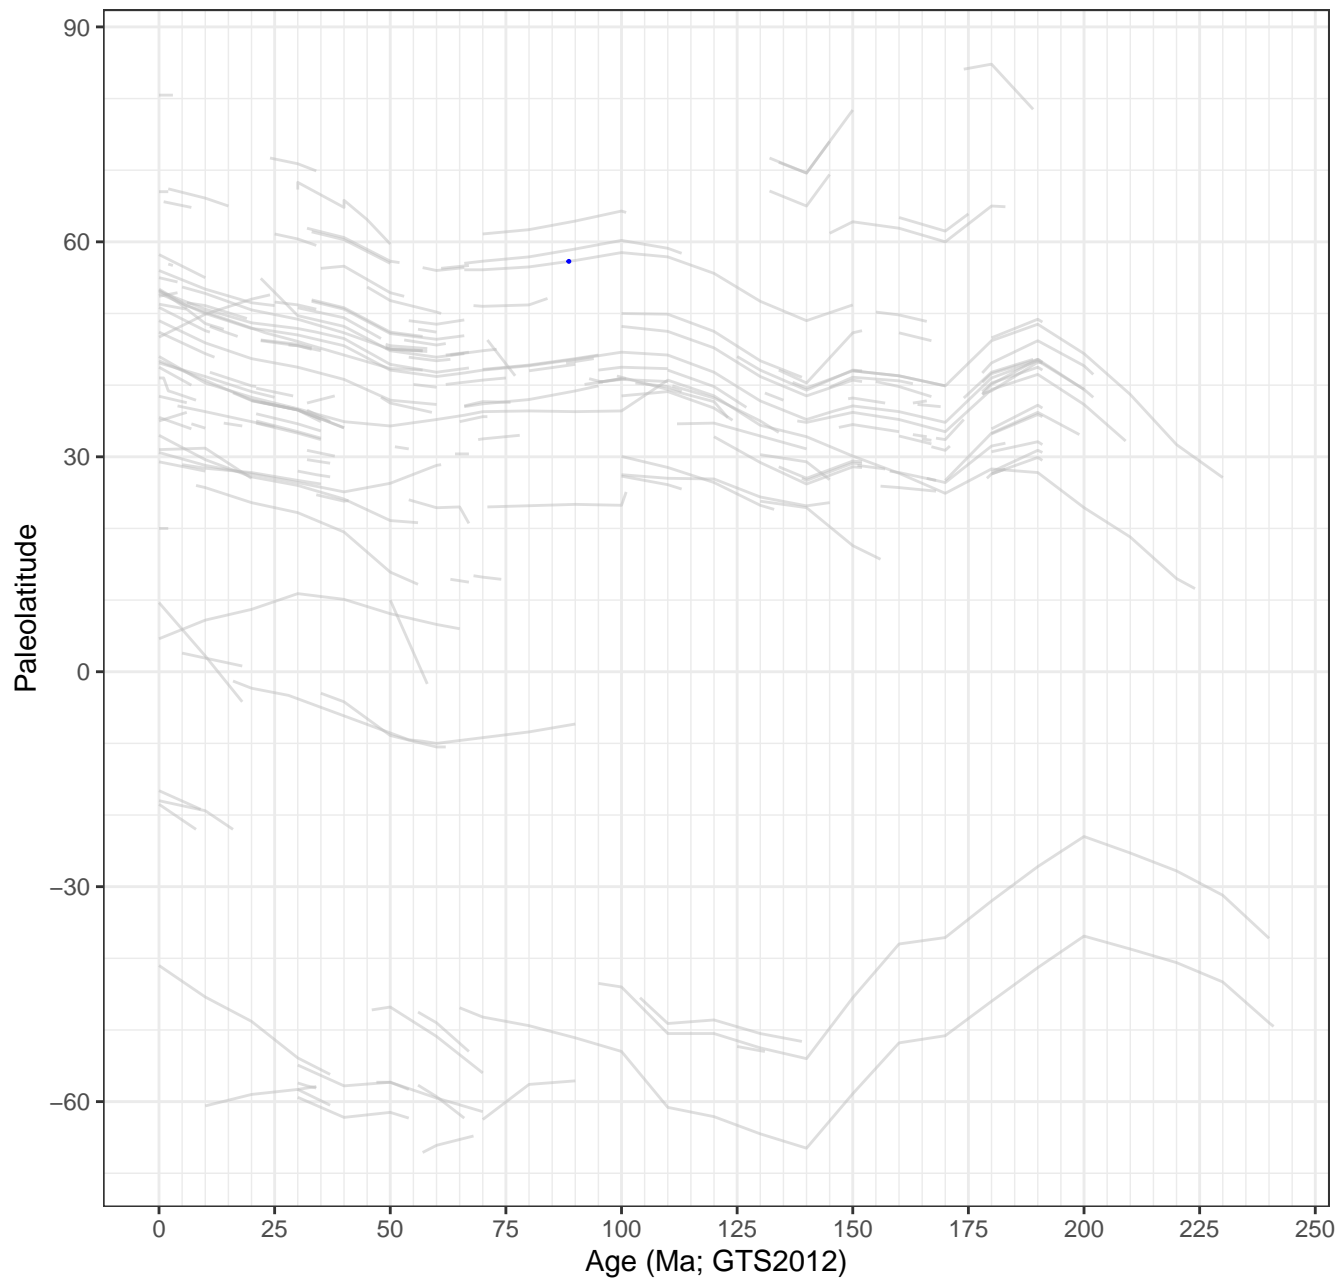

Supplement: Supplementary file 2547 [file Trithyrodinium vermiculatum.pdf › Supplement/Supplement 2/Species 1914 plots/Trithyrodinium vermiculatum.pdf]

# Species *Tuberculodinium vancampoeae*

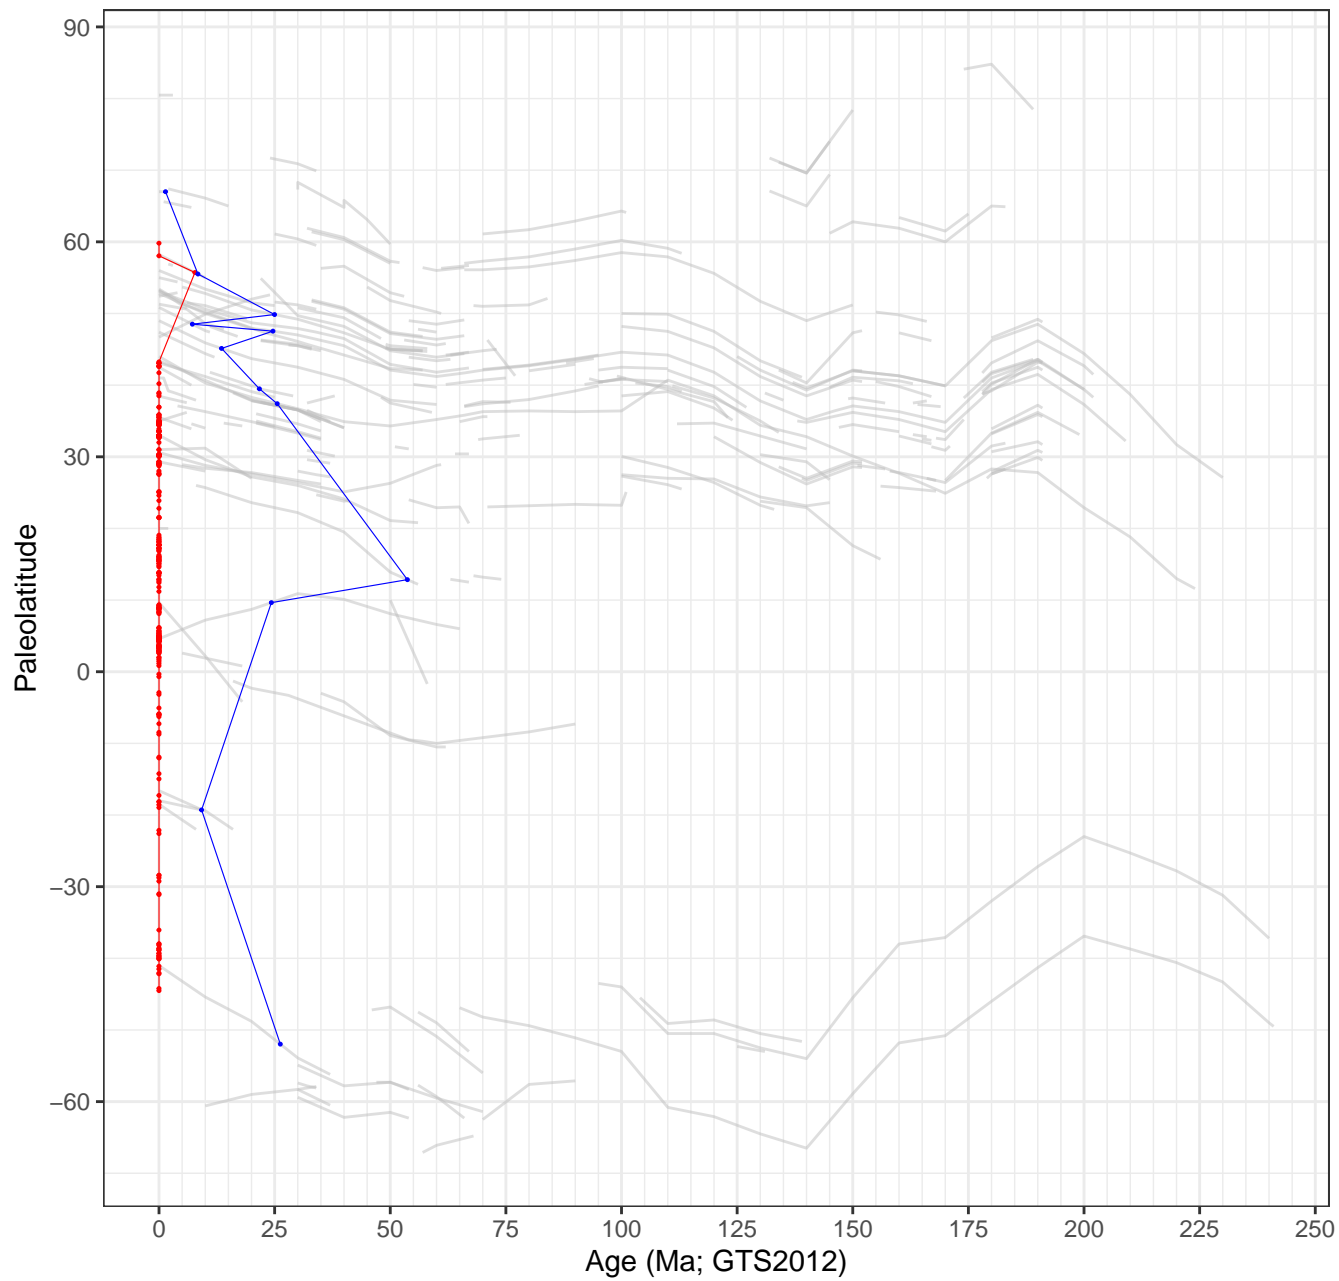

Supplement: Supplementary file 2548 [file Tuberculodinium vancampoae.pdf › Supplement/Supplement 2/Species 1914 plots/Tuberculodinium vancampoae.pdf]

# Species *Tubidermodinium sulcatum*

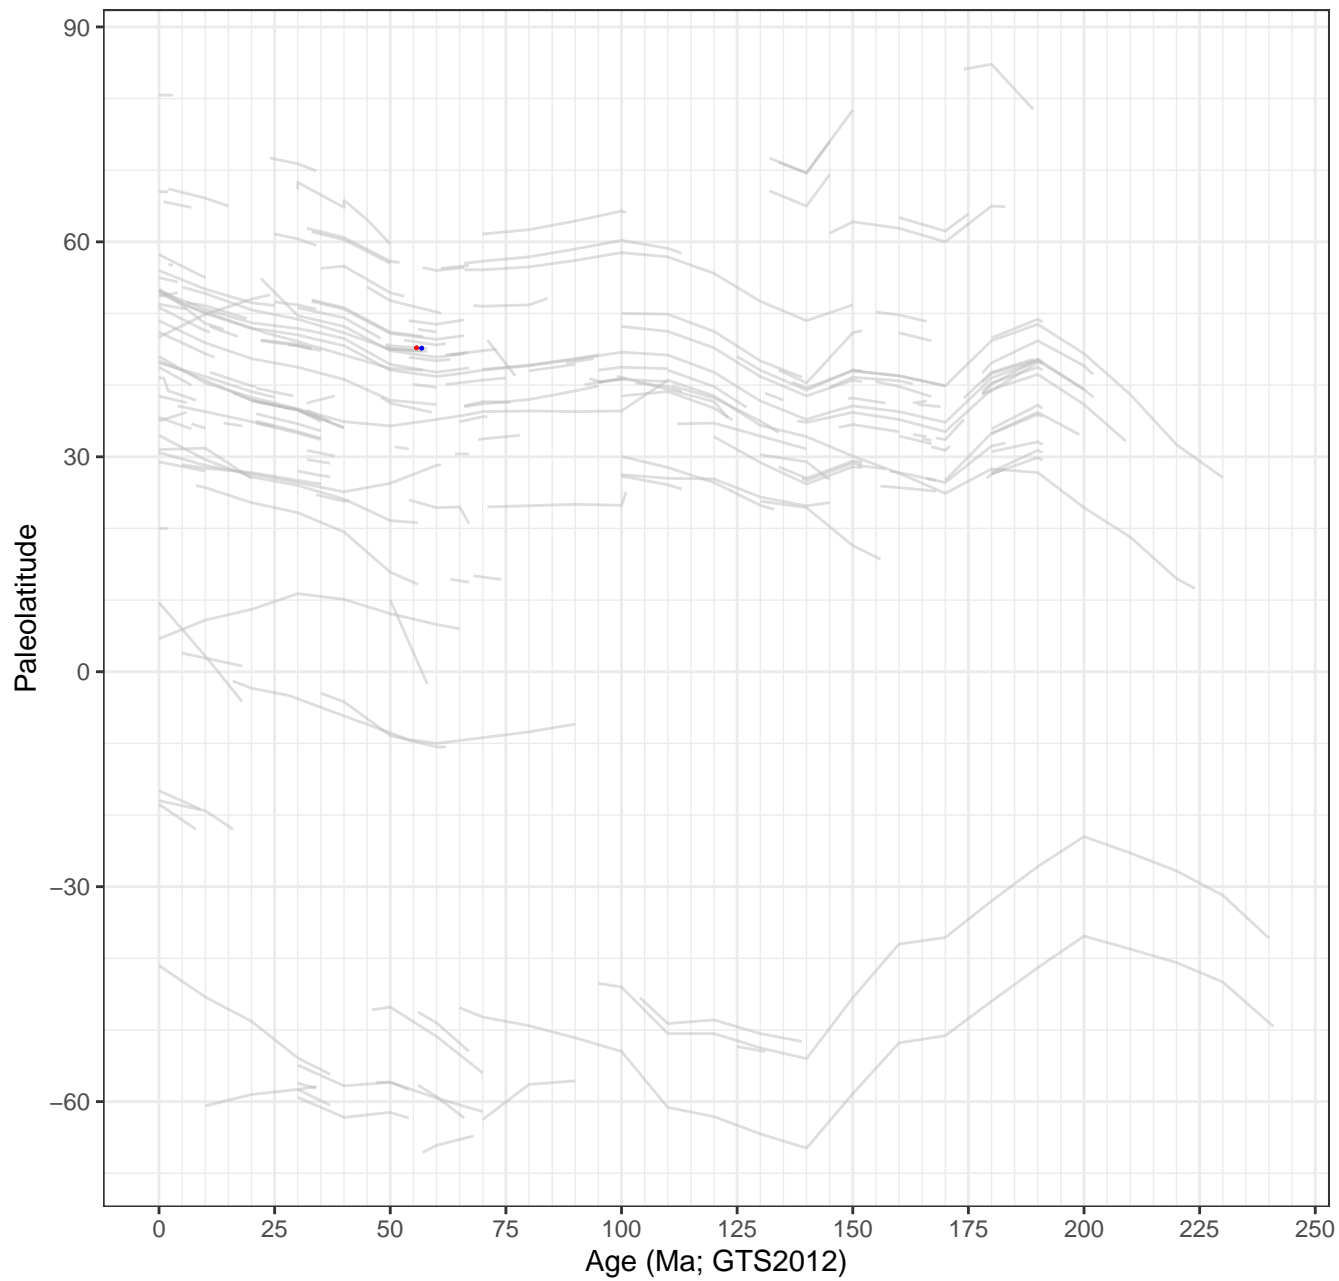

Supplement: Supplementary file 2549 [file Tubidermodinium sulcatum.pdf › Supplement/Supplement 2/Species 1914 plots/Tubidermodinium sulcatum.pdf]

# Species *Tubotuberella apatela*

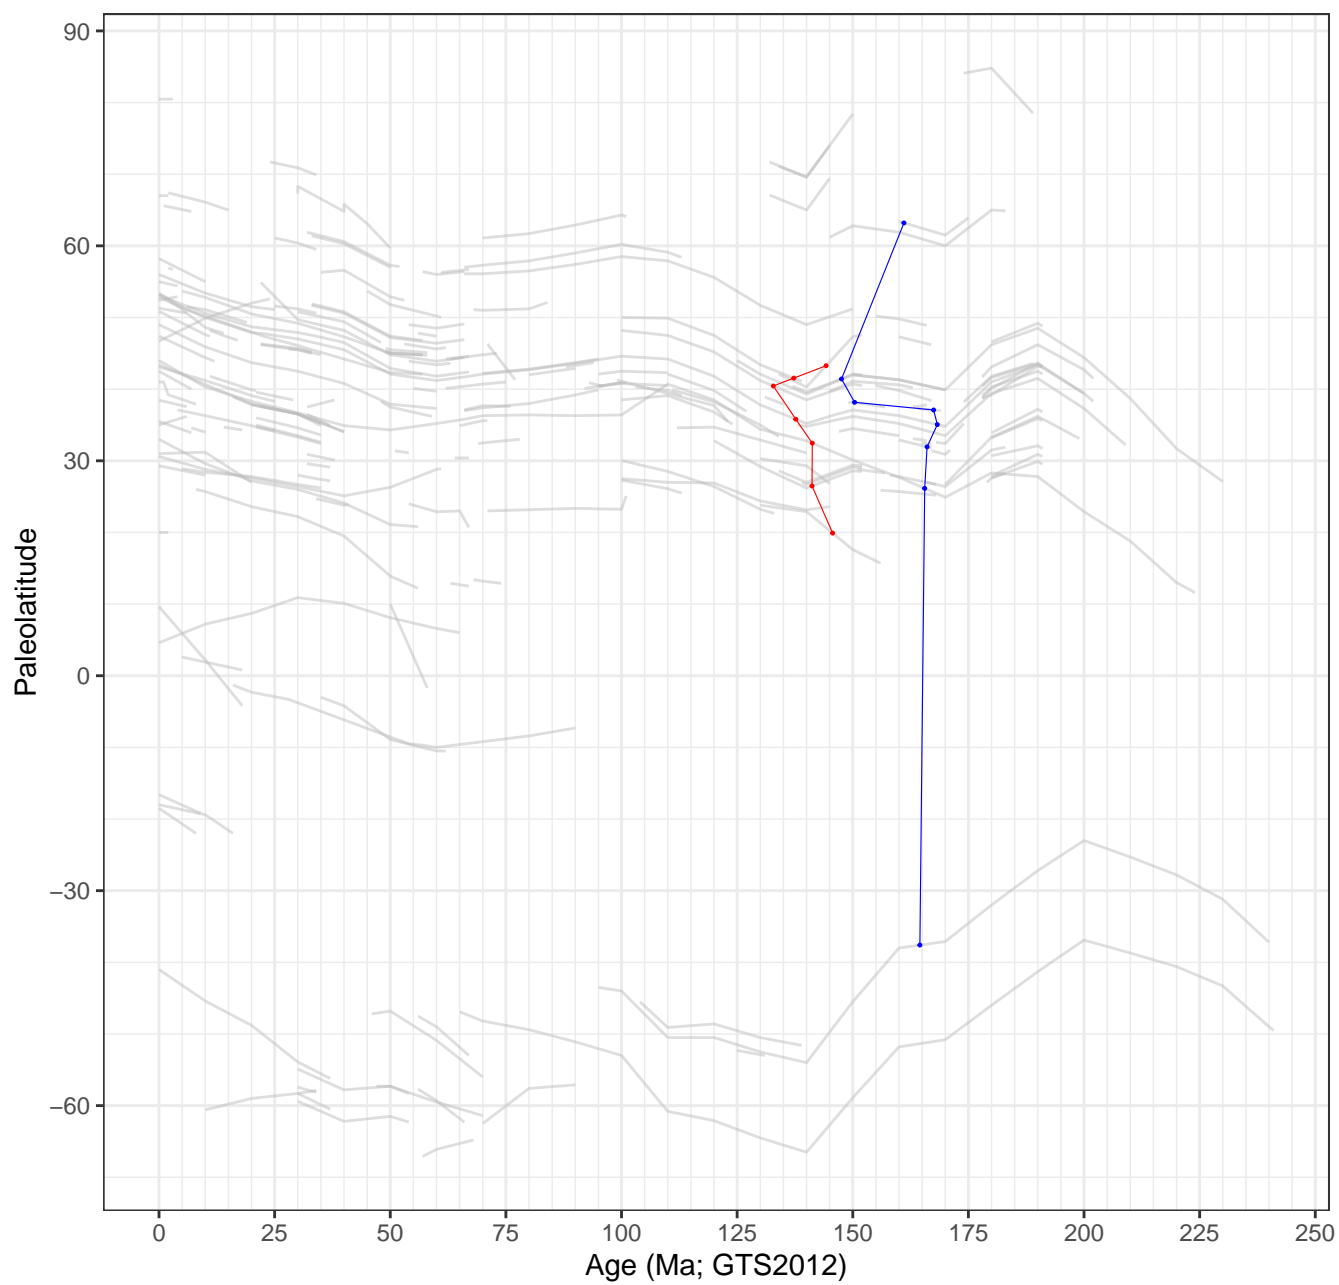

Supplement: Supplementary file 2550 [file Tubotuberella apatela.pdf › Supplement/Supplement 2/Species 1914 plots/Tubotuberella apatela.pdf]

# Species *Tubotuberella dangeardii*

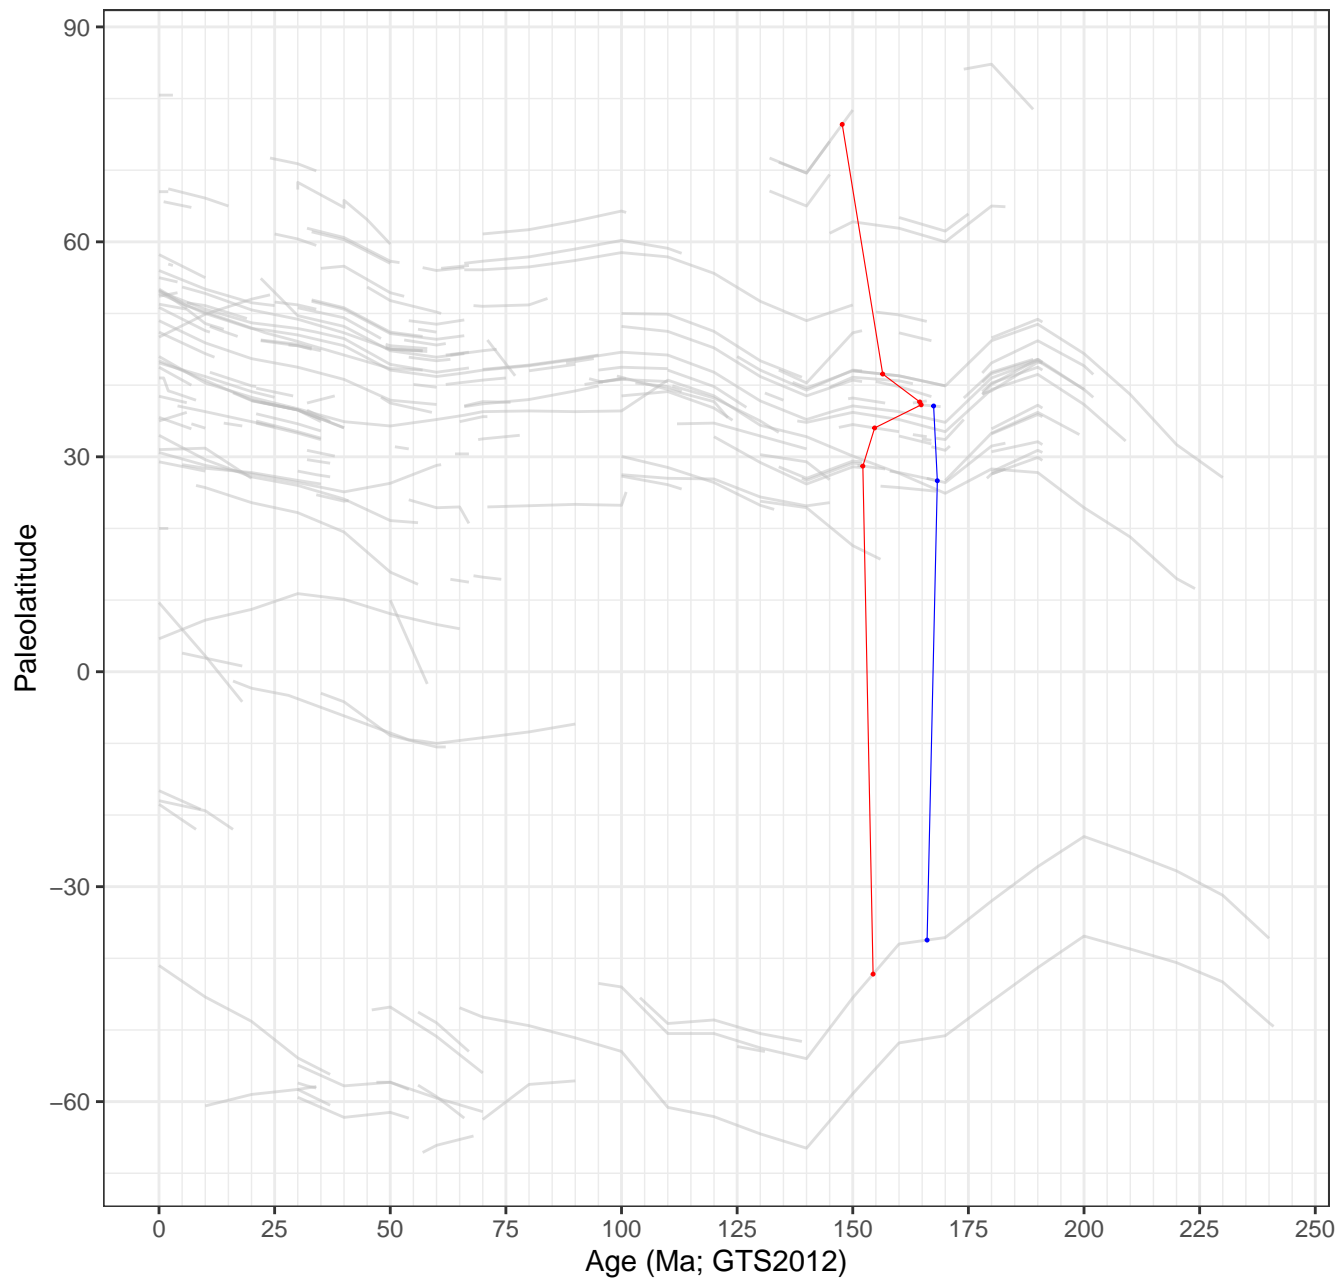

Supplement: Supplementary file 2551 [file Tubotuberella dangeardii.pdf › Supplement/Supplement 2/Species 1914 plots/Tubotuberella dangeardii.pdf]

# Species *Tubotuberella egemeni*

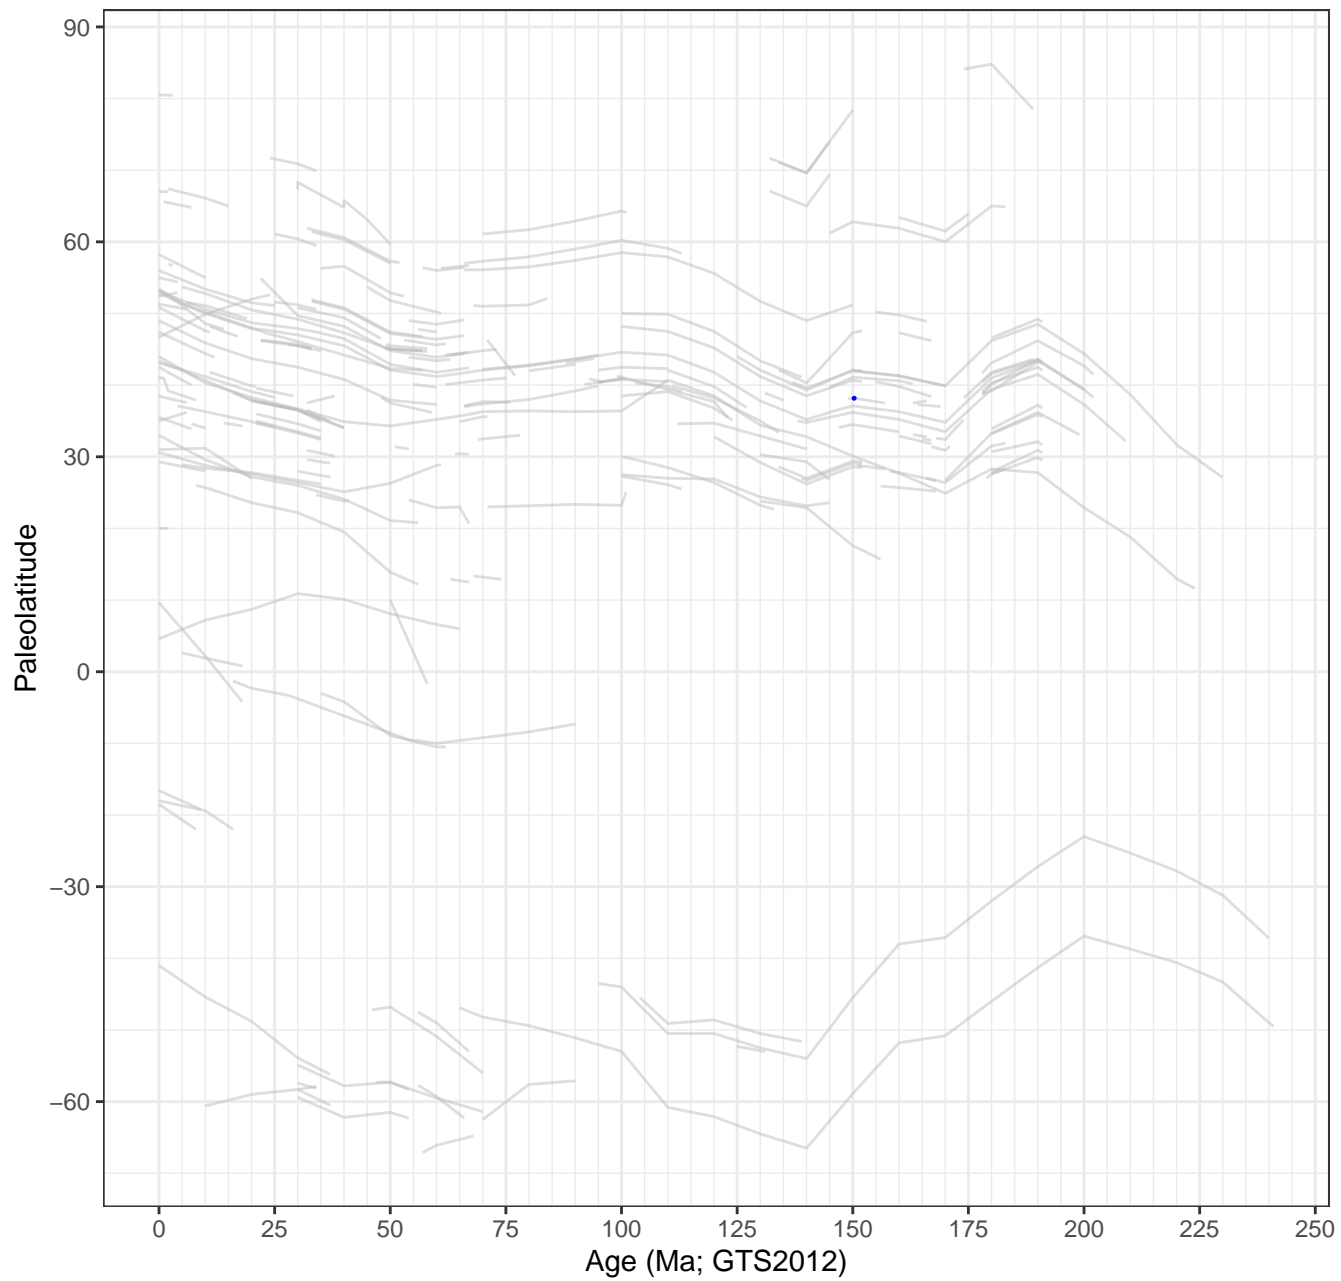

Supplement: Supplementary file 2552 [file Tubotuberella egemeni.pdf › Supplement/Supplement 2/Species 1914 plots/Tubotuberella egemeni.pdf]

# Species *Tubotuberella missilis*

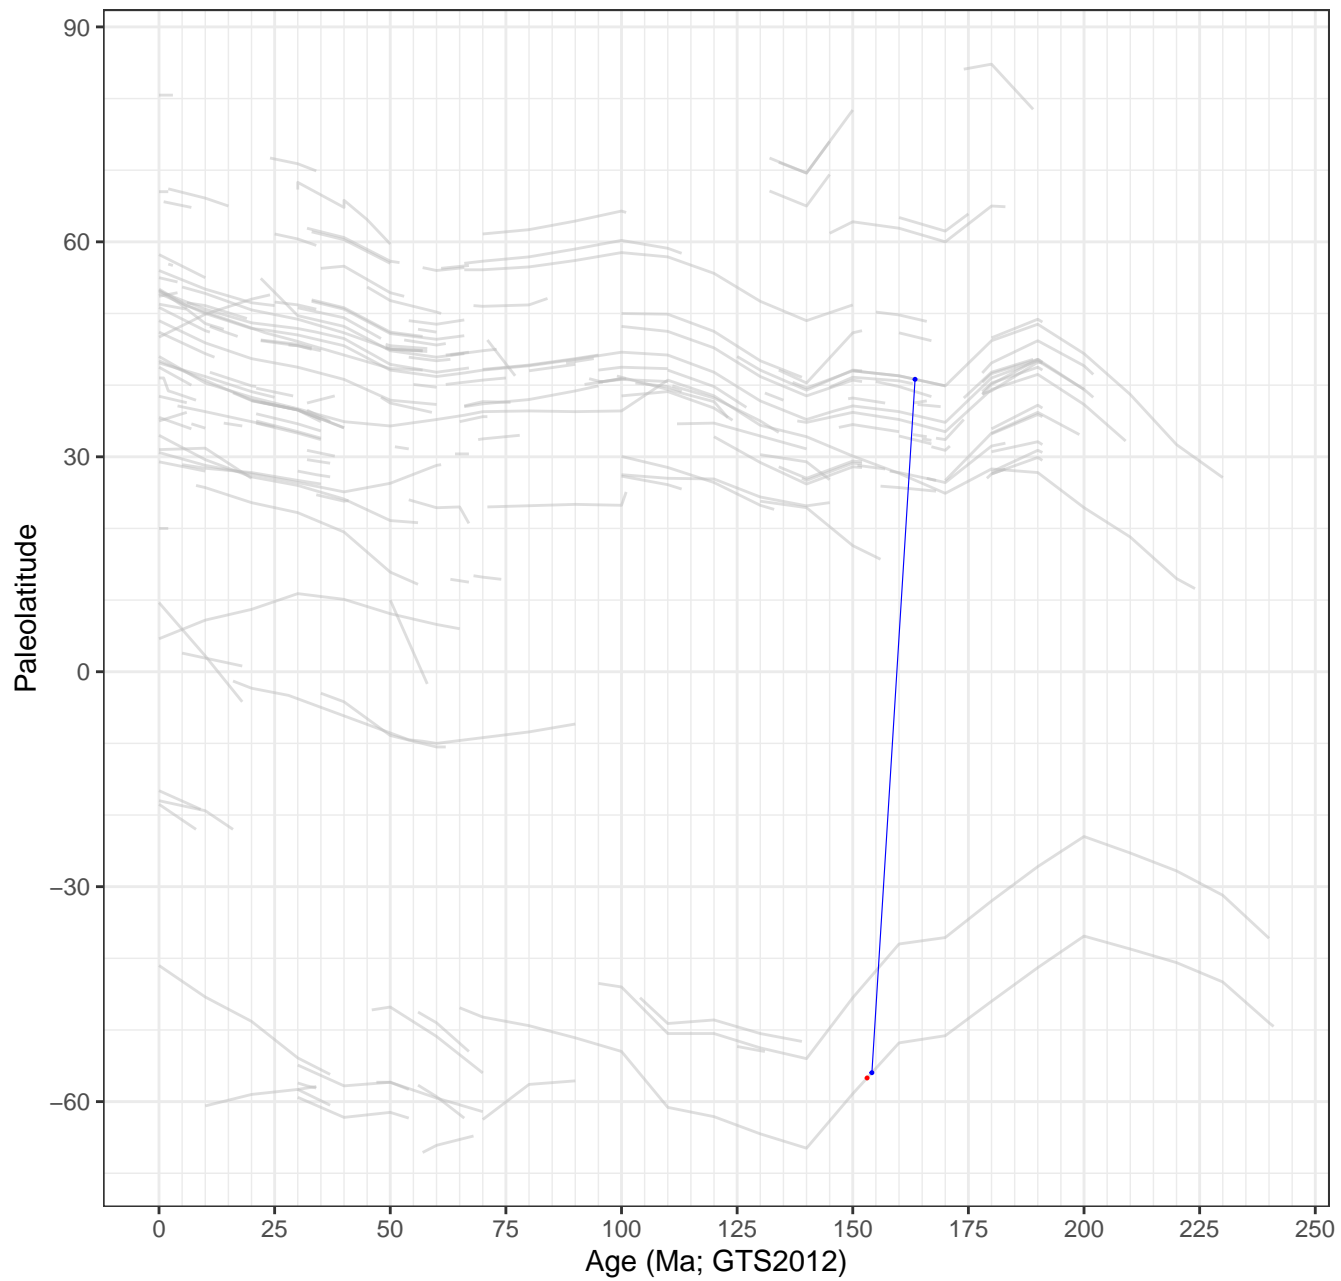

Supplement: Supplementary file 2553 [file Tubotuberella missilis.pdf › Supplement/Supplement 2/Species 1914 plots/Tubotuberella missilis.pdf]

# Species *Tubotuberella rhombiformis*

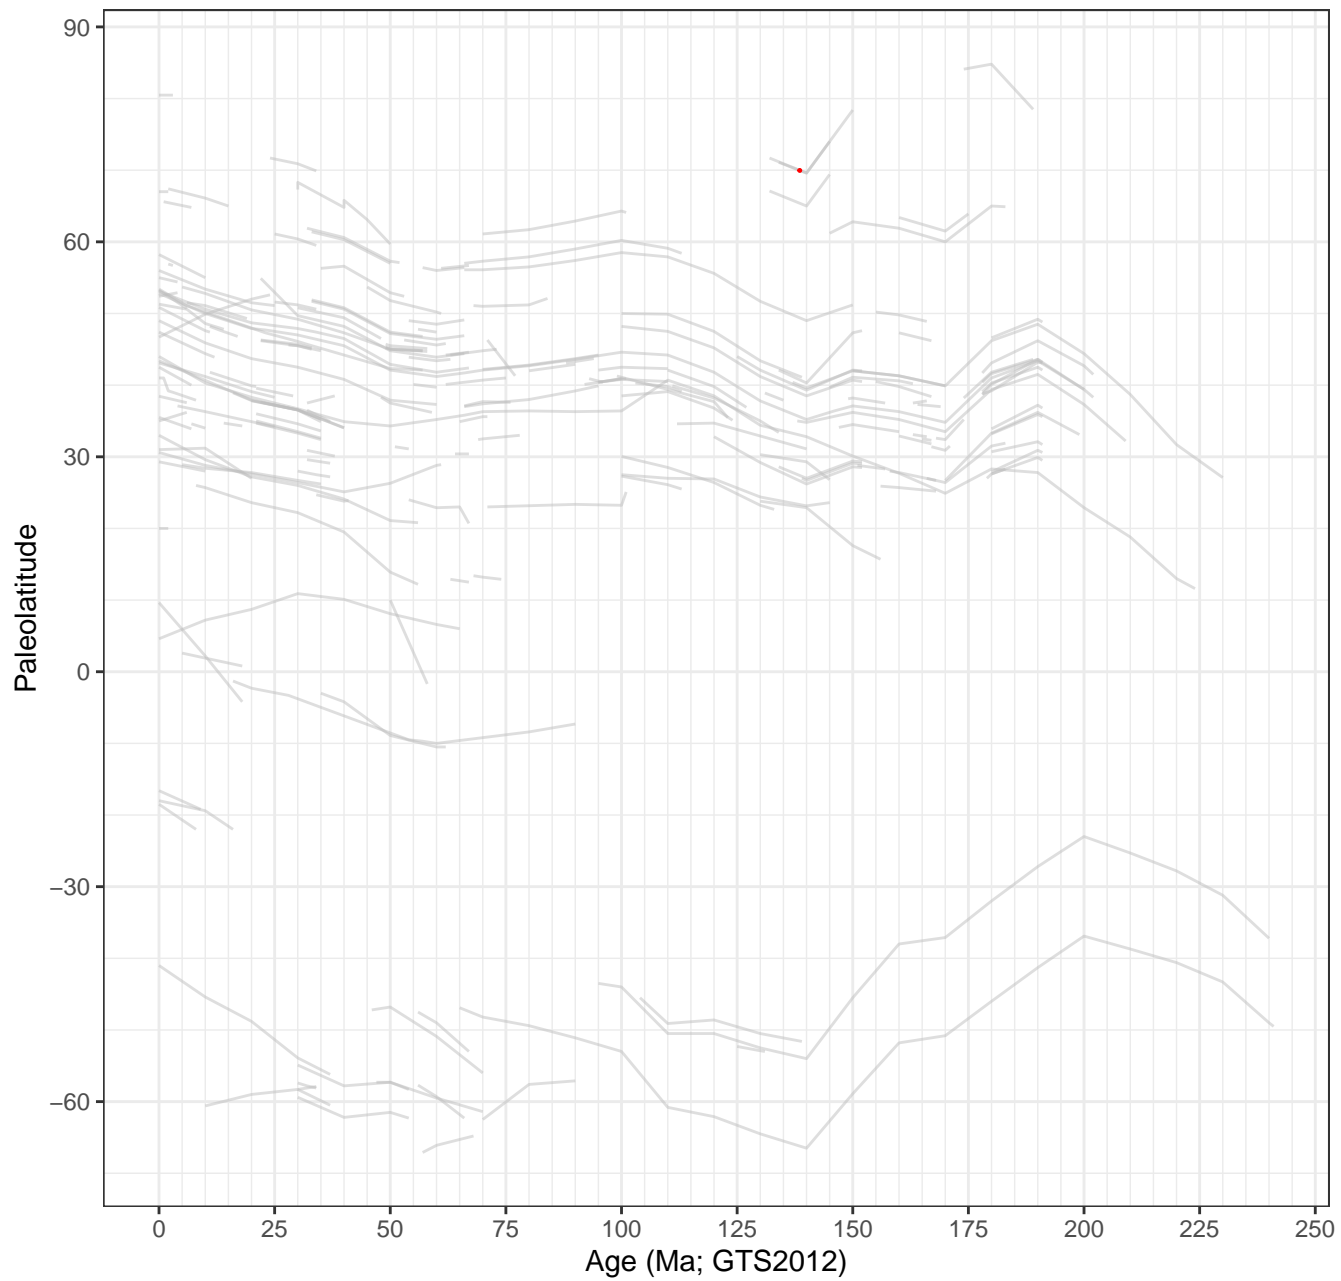

Supplement: Supplementary file 2554 [file Tubotuberella rhombiformis.pdf › Supplement/Supplement 2/Species 1914 plots/Tubotuberella rhombiformis.pdf]

# Species *Tubotuberella* spp.

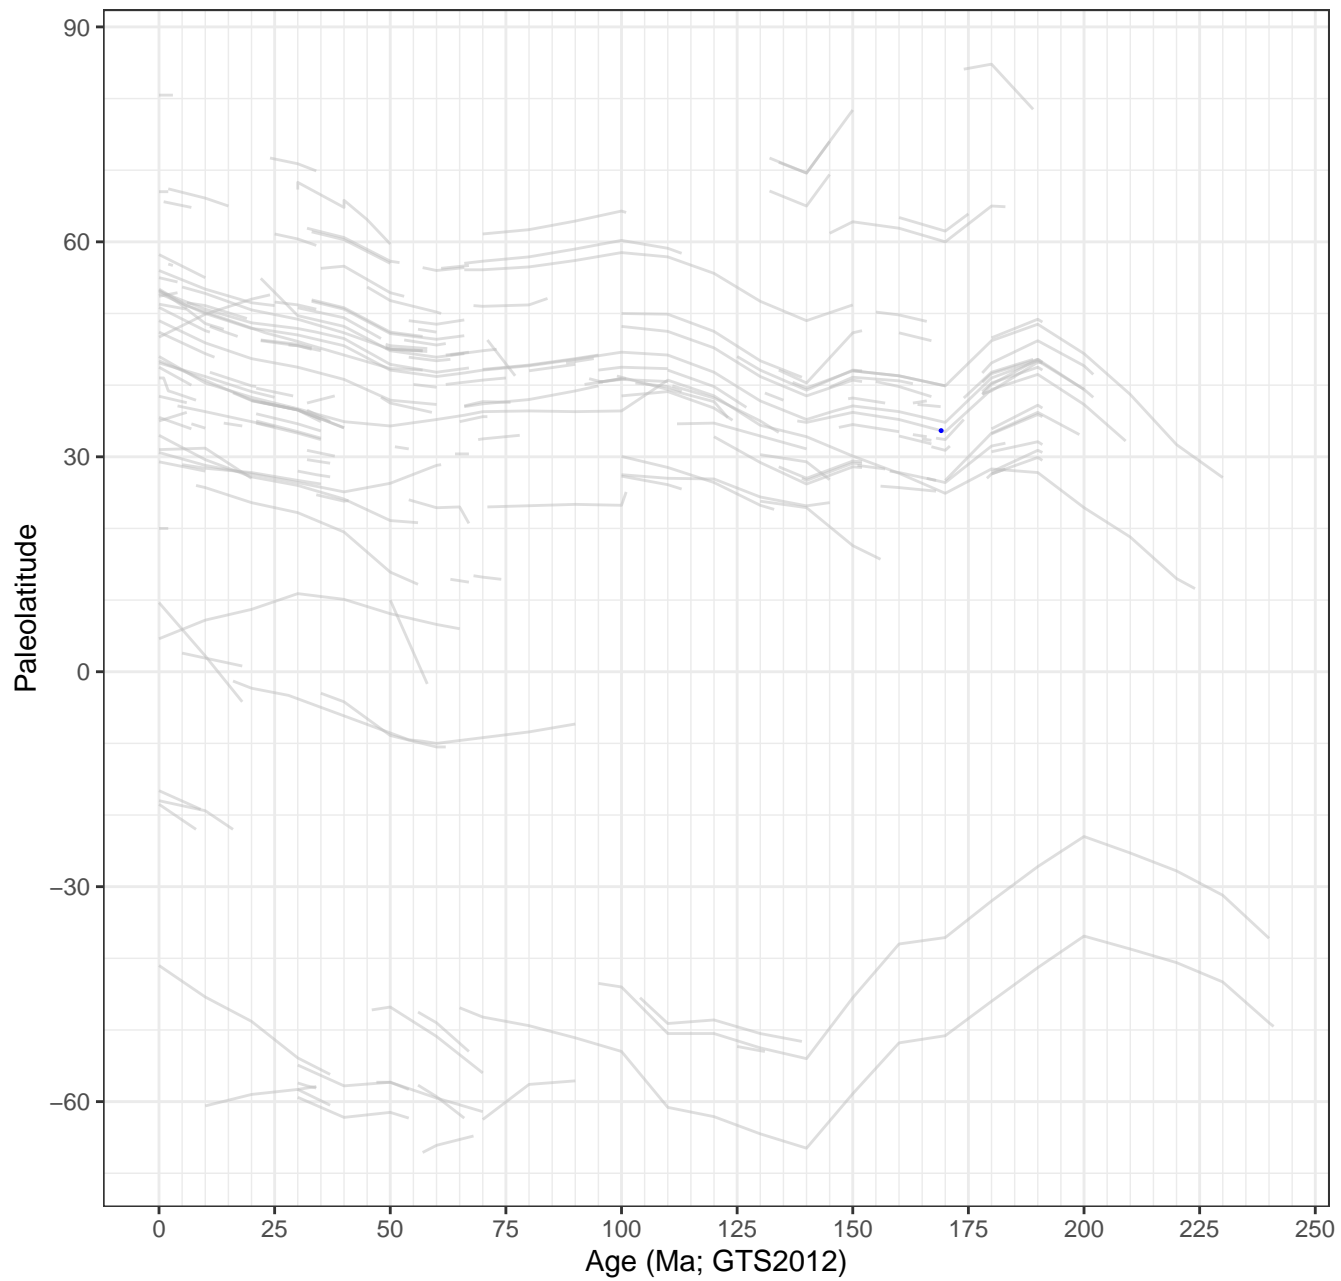

Supplement: Supplementary file 2555 [file Tubotuberella spp..pdf › Supplement/Supplement 2/Species 1914 plots/Tubotuberella spp..pdf]

# Species *Tubotuberella vlamingii*

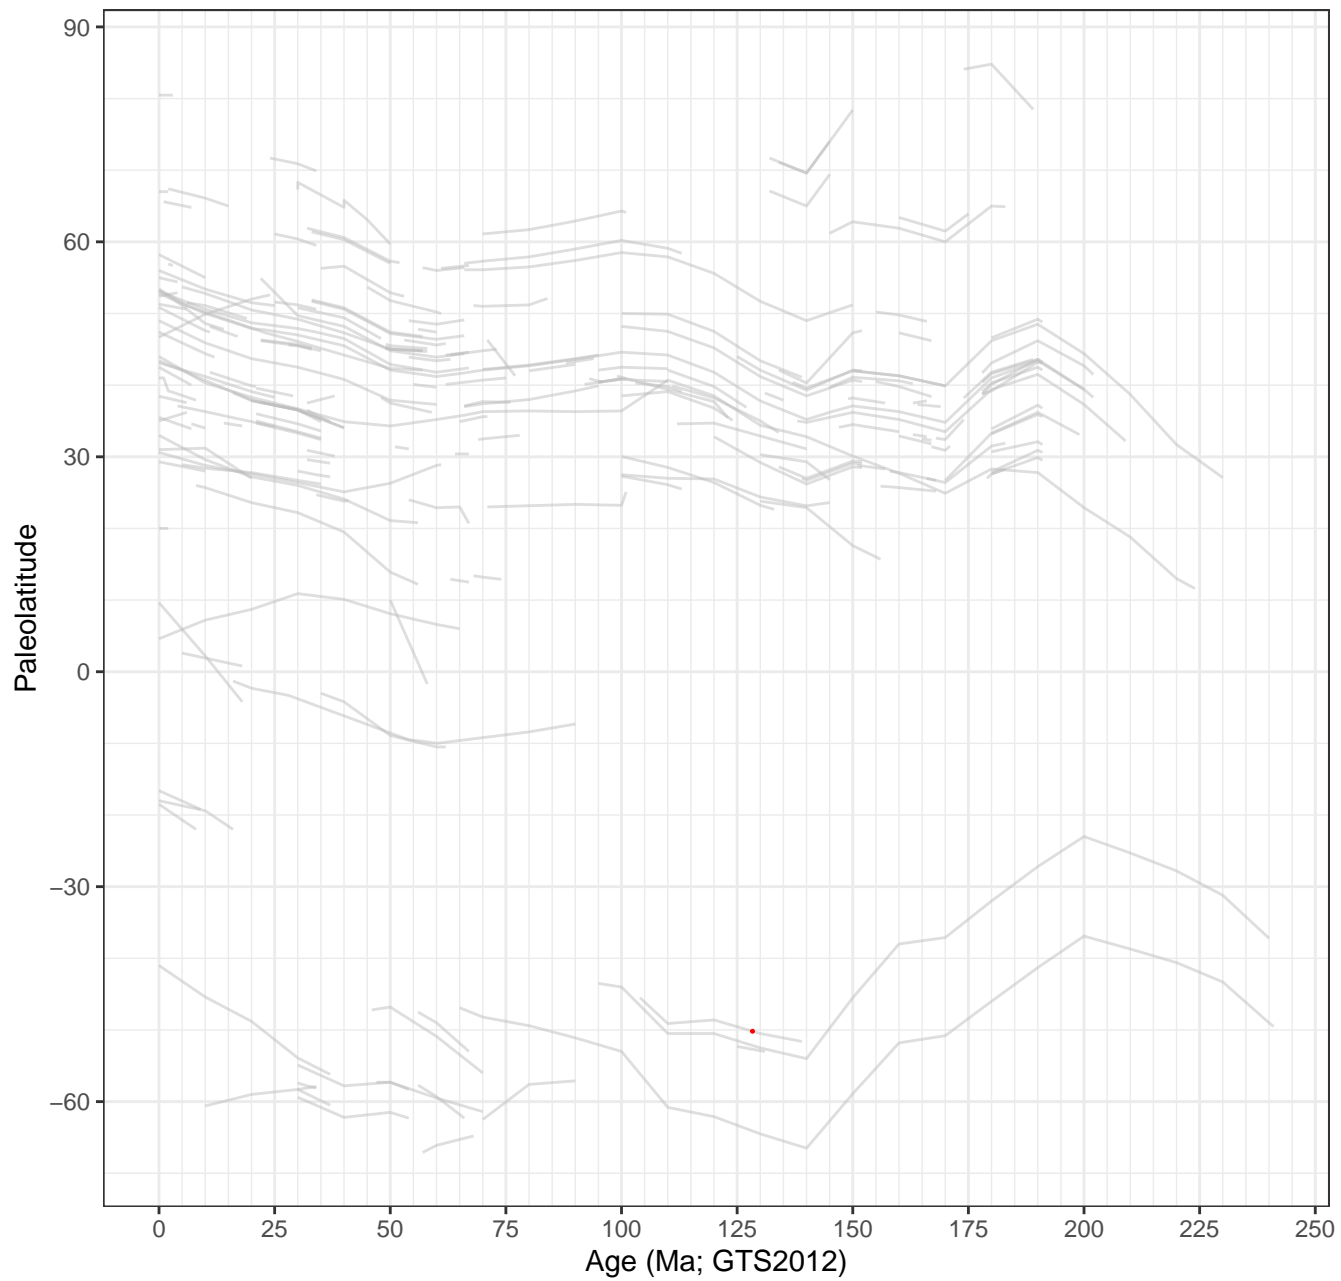

Supplement: Supplementary file 2556 [file Tubotuberella vlamingii.pdf › Supplement/Supplement 2/Species 1914 plots/Tubotuberella vlamingii.pdf]

# Species *Turbiosphaera filosa*

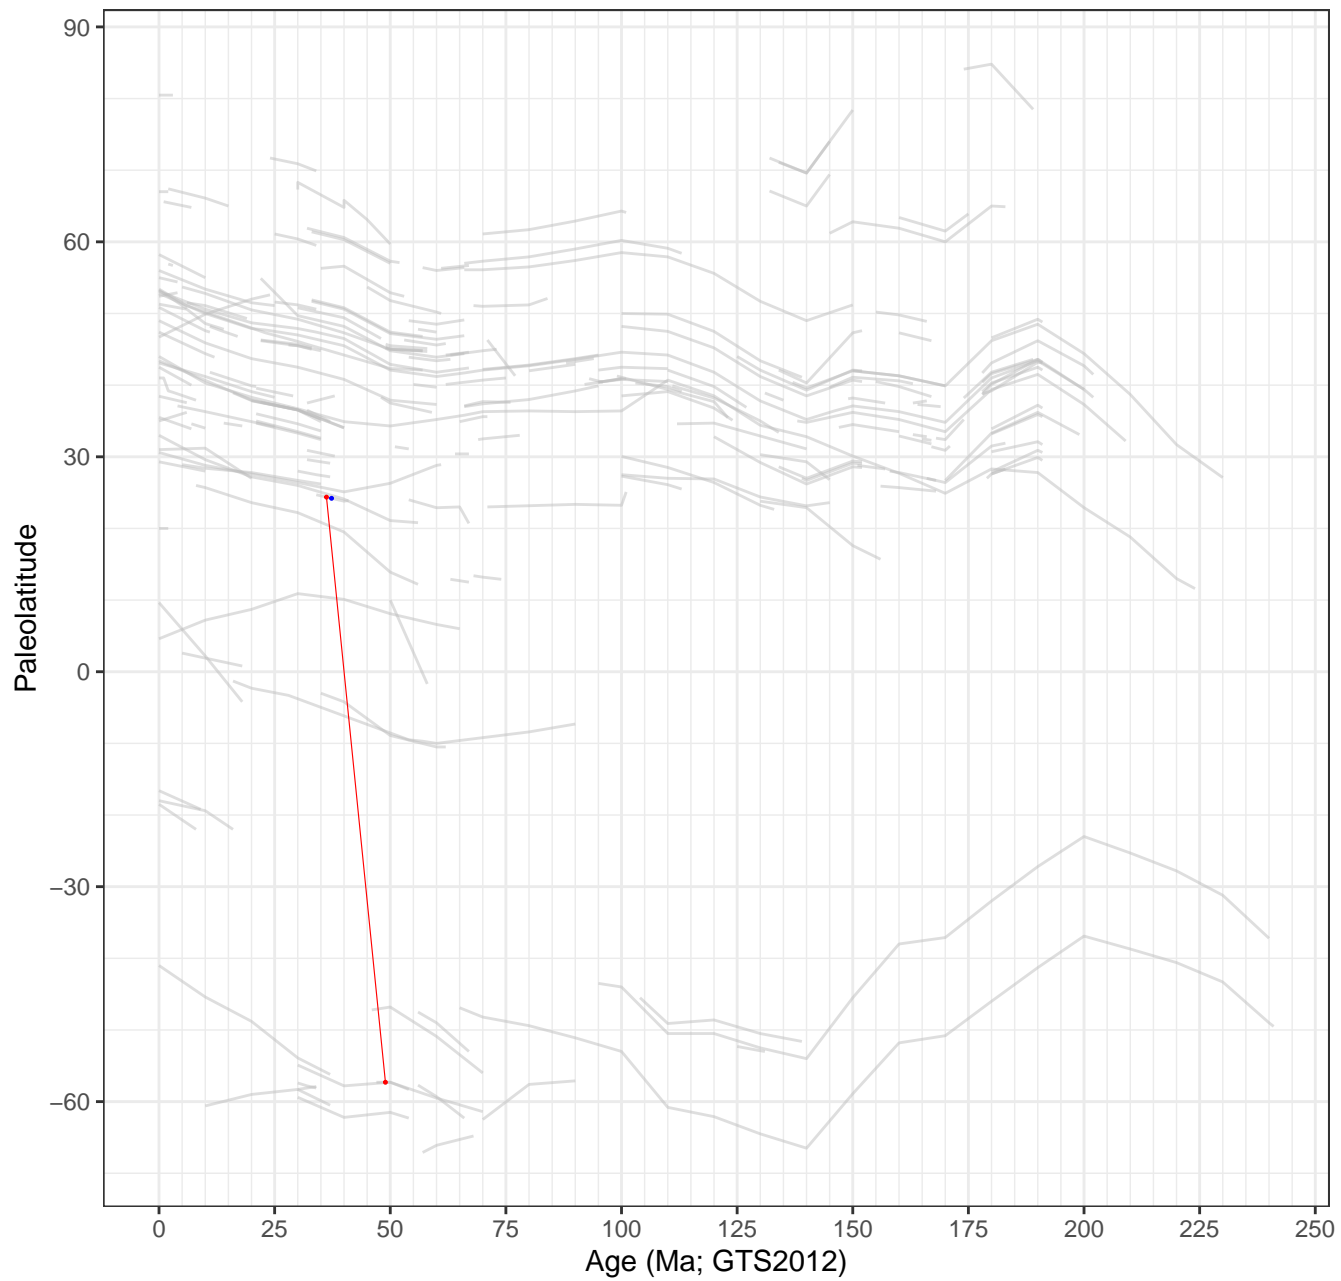

Supplement: Supplementary file 2557 [file Turbiosphaera filosa.pdf › Supplement/Supplement 2/Species 1914 plots/Turbiosphaera filosa.pdf]

# Species *Turbiosphaera galeata*

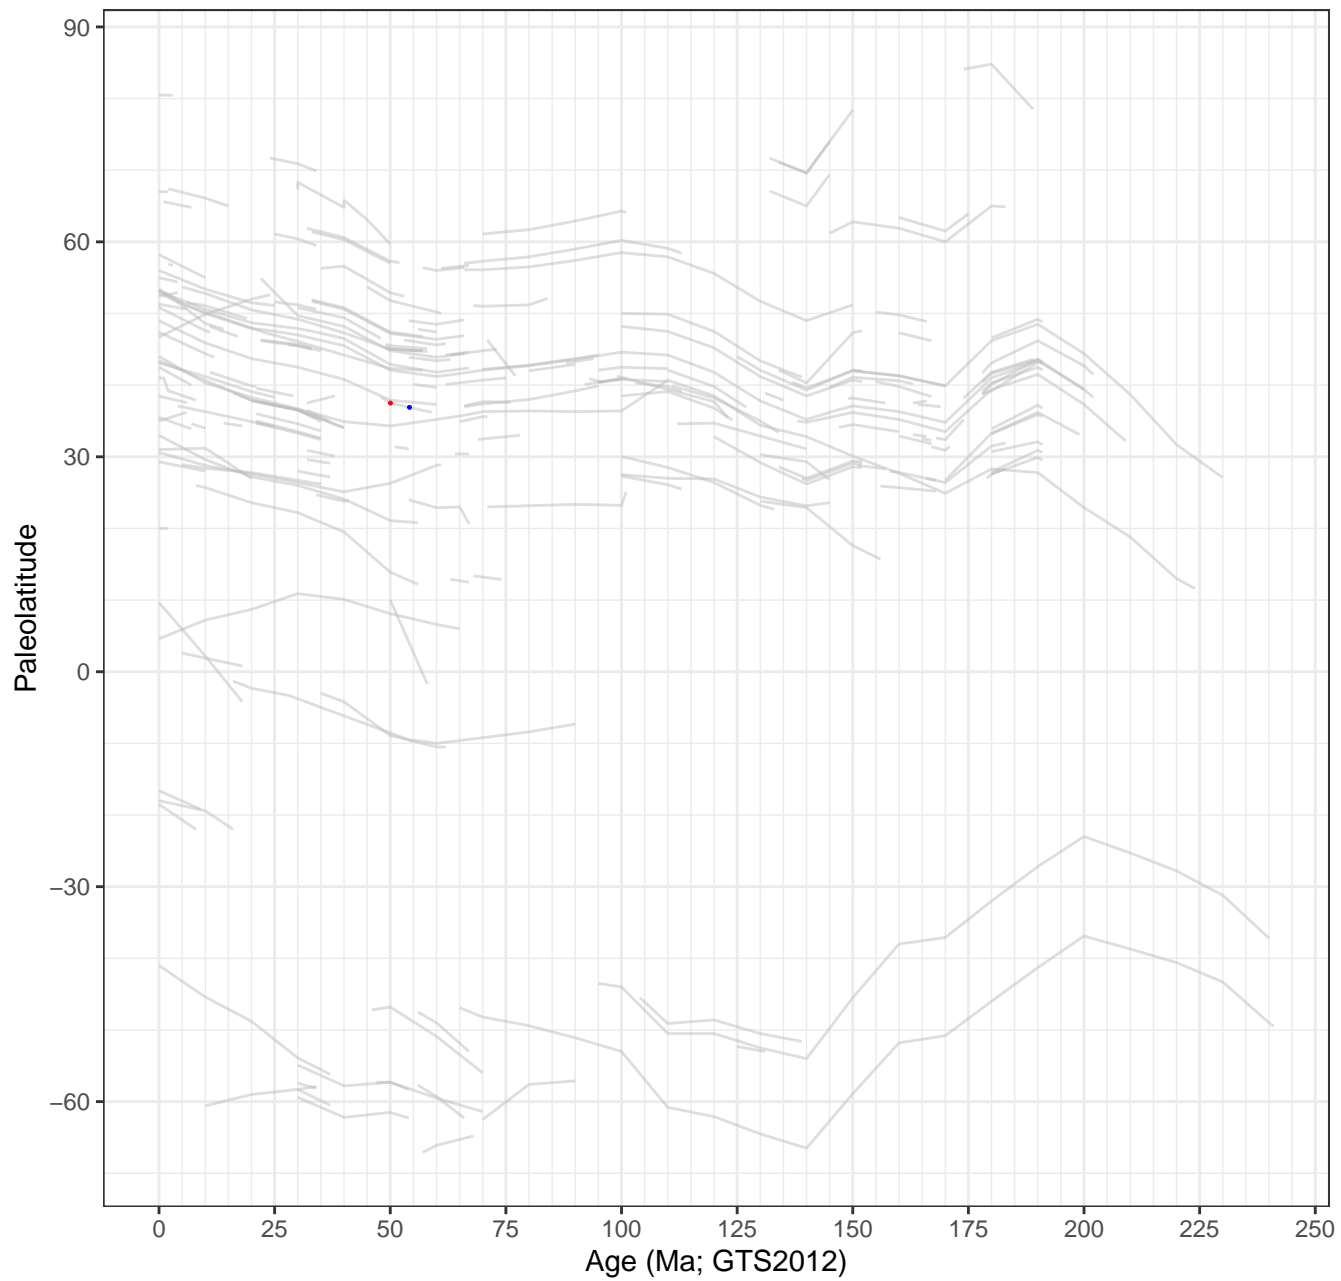

Supplement: Supplementary file 2558 [file Turbiosphaera galeata.pdf › Supplement/Supplement 2/Species 1914 plots/Turbiosphaera galeata.pdf]

# Species *Turbiosphaera guersteiniae*

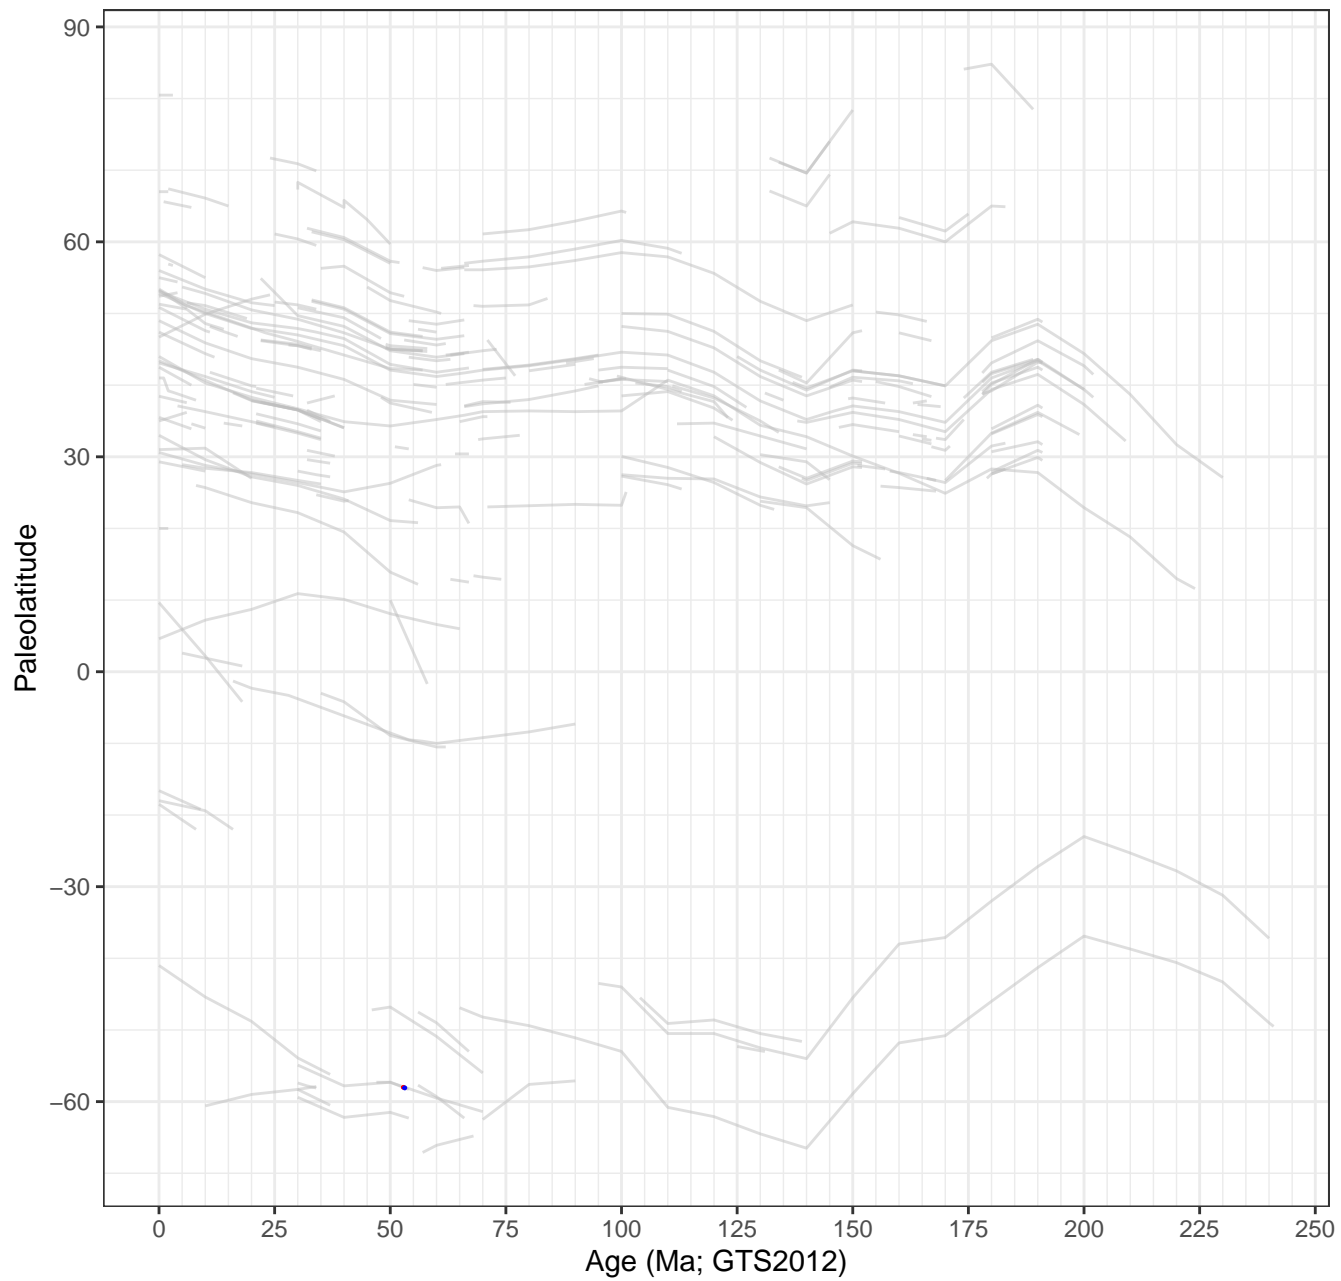

Supplement: Supplementary file 2559 [file Turbiosphaera guersteiniae.pdf › Supplement/Supplement 2/Species 1914 plots/Turbiosphaera guersteiniae.pdf]

# Species *Turbiosphaera magnifica*

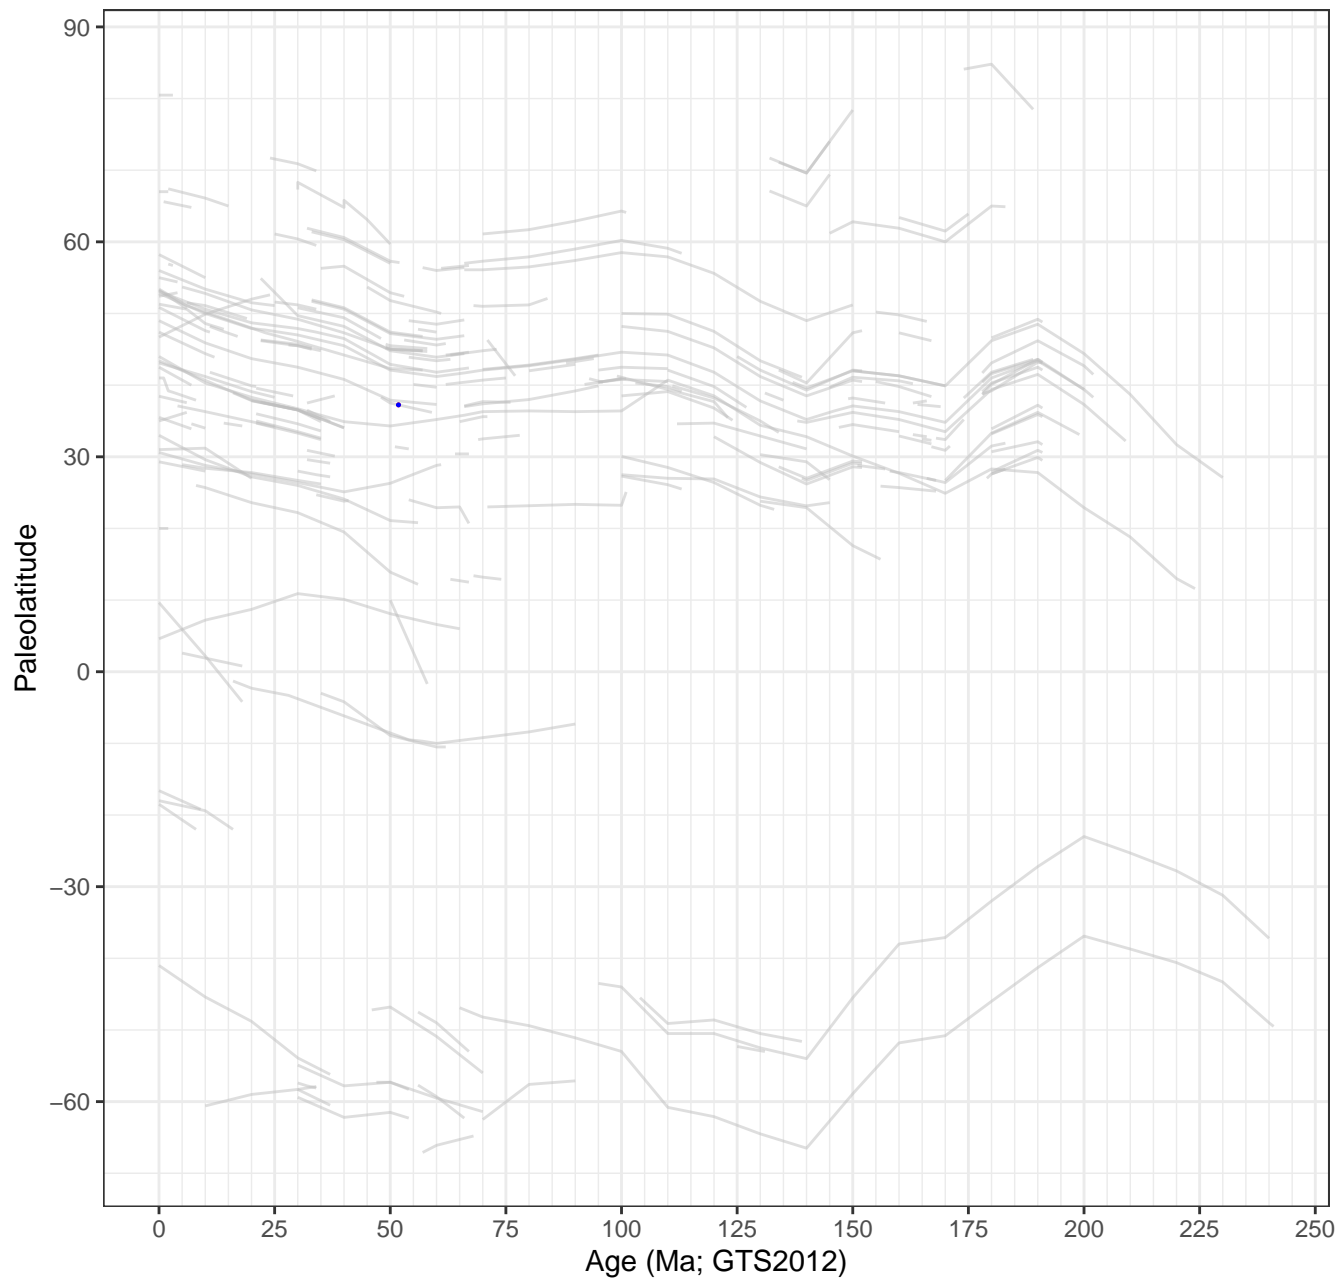

Supplement: Supplementary file 2560 [file Turbiosphaera magnifica.pdf › Supplement/Supplement 2/Species 1914 plots/Turbiosphaera magnifica.pdf]

# Species *Turbiosphaera symmetrica*

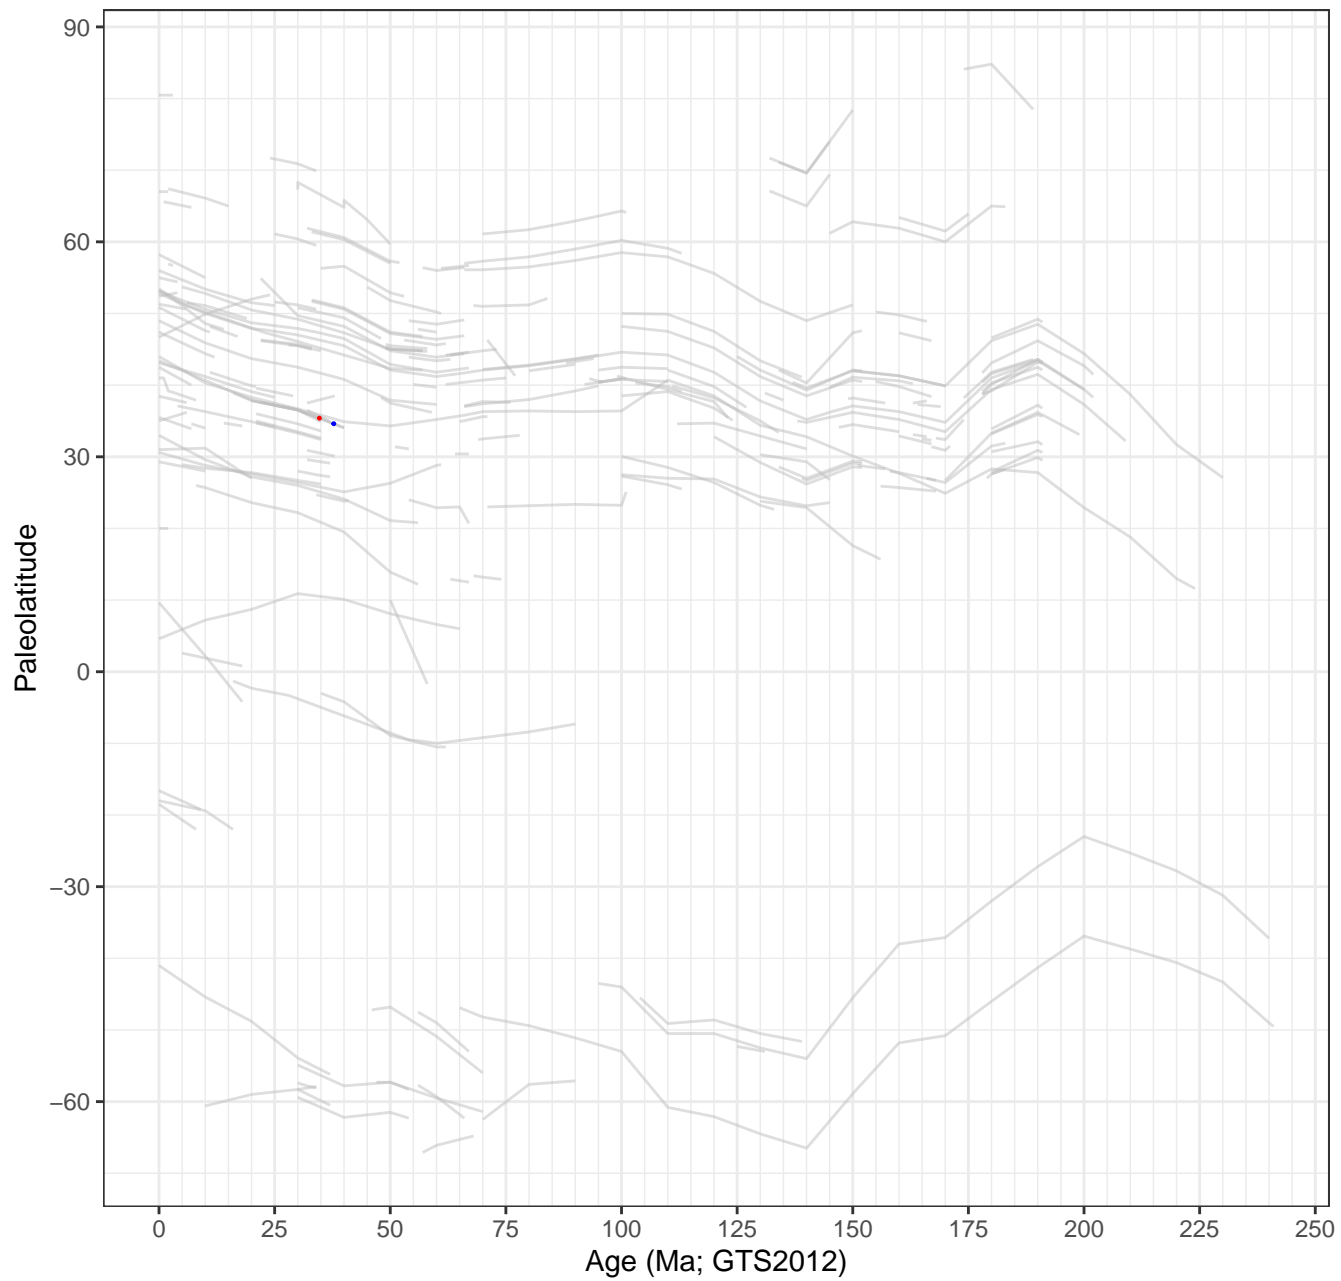

Supplement: Supplementary file 2561 [file Turbiosphaera symmetrica.pdf › Supplement/Supplement 2/Species 1914 plots/Turbiosphaera symmetrica.pdf]

# Species *Umbriadinium mediterraneense*

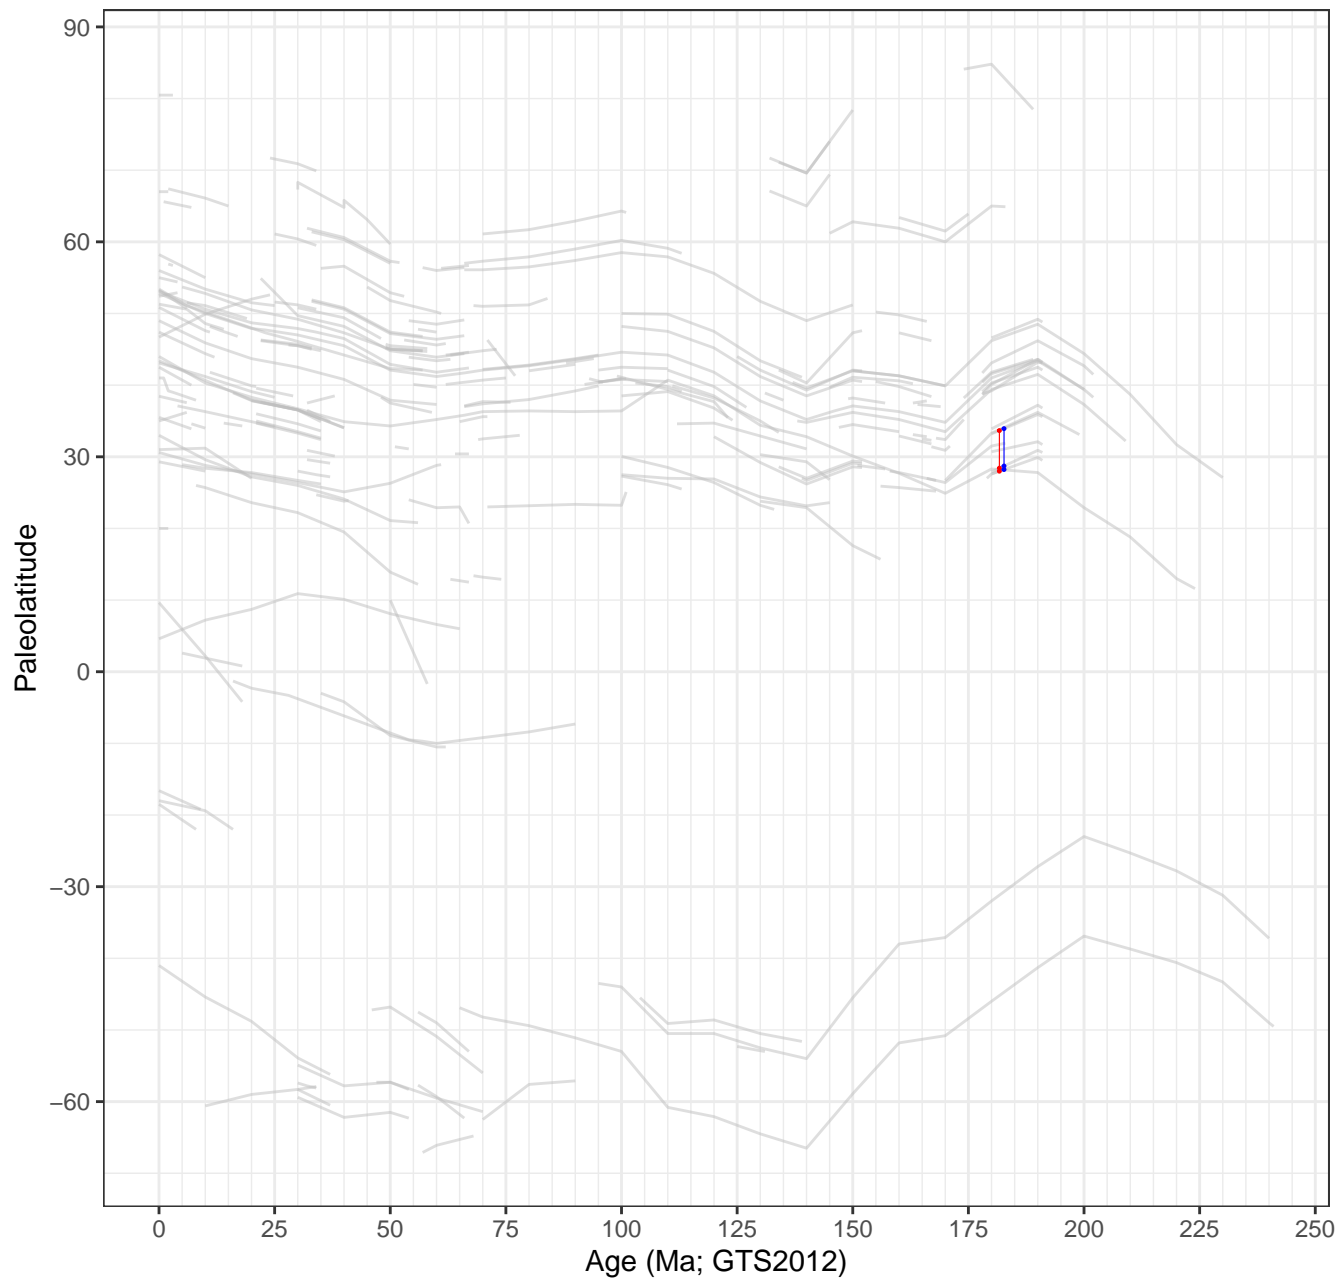

Supplement: Supplementary file 2562 [file Umbriadinium mediterraneense.pdf › Supplement/Supplement 2/Species 1914 plots/Umbriadinium mediterraneense.pdf]

# Species *Unipontidinium aquaeductum*

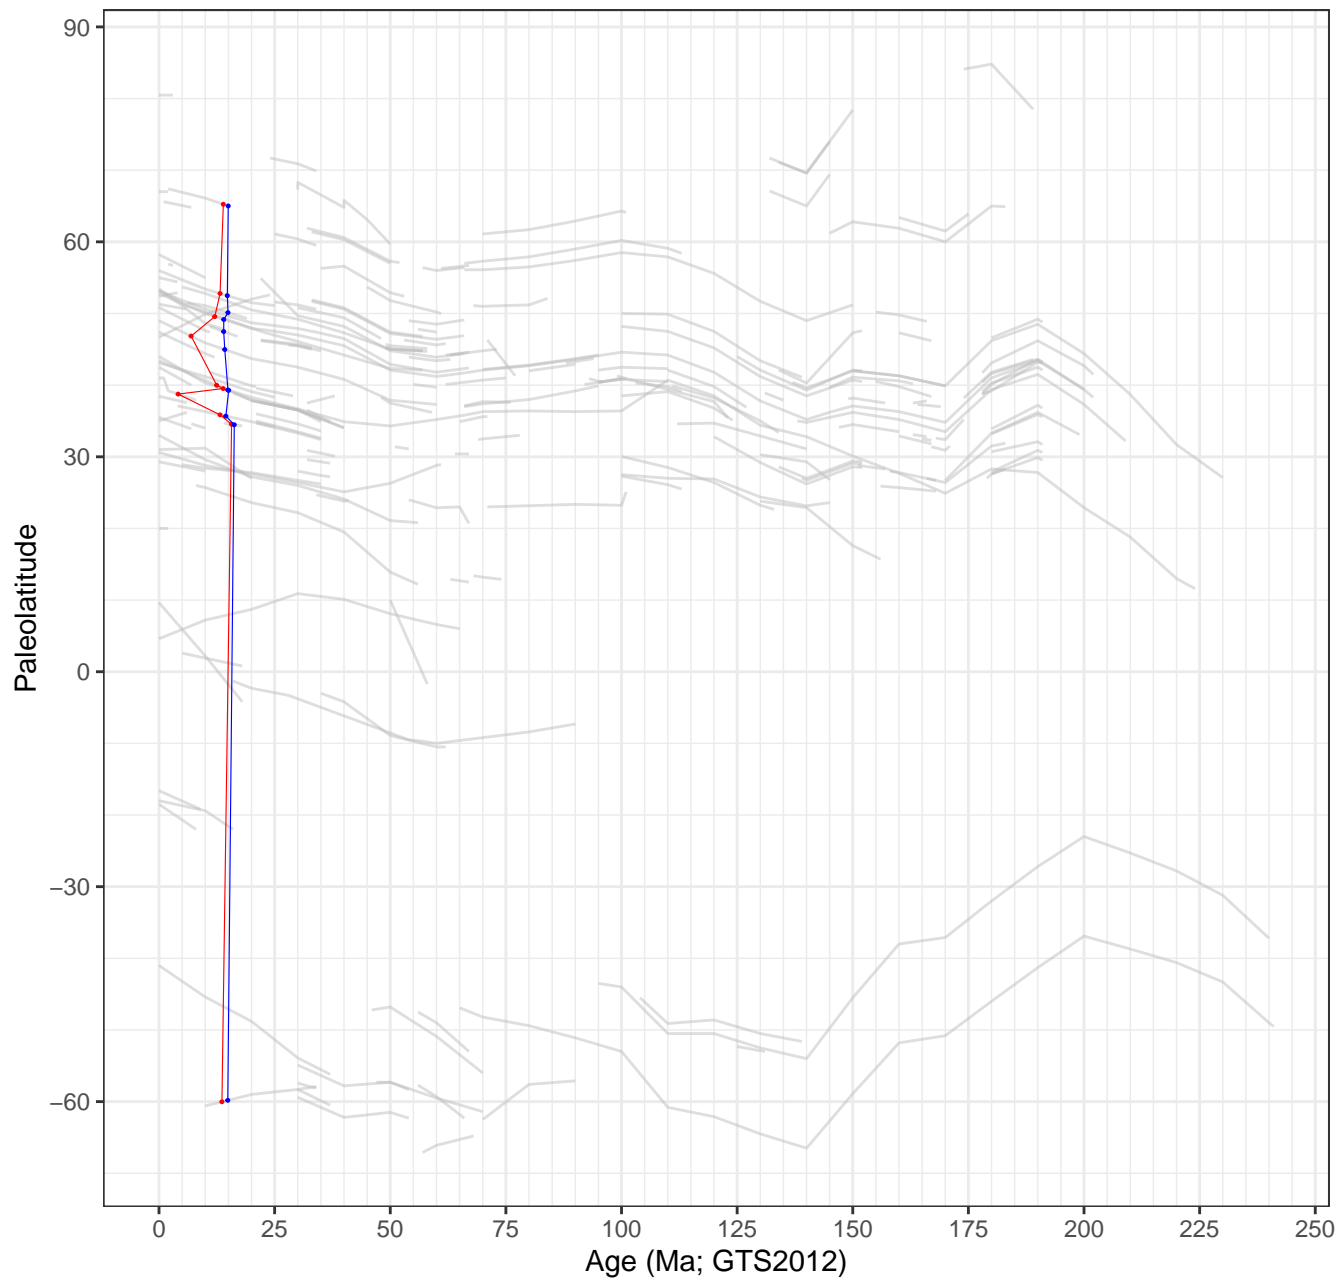

Supplement: Supplementary file 2563 [file Unipontidinium aquaeductum.pdf › Supplement/Supplement 2/Species 1914 plots/Unipontidinium aquaeductum.pdf]

# Species *Unipontidinium grande*

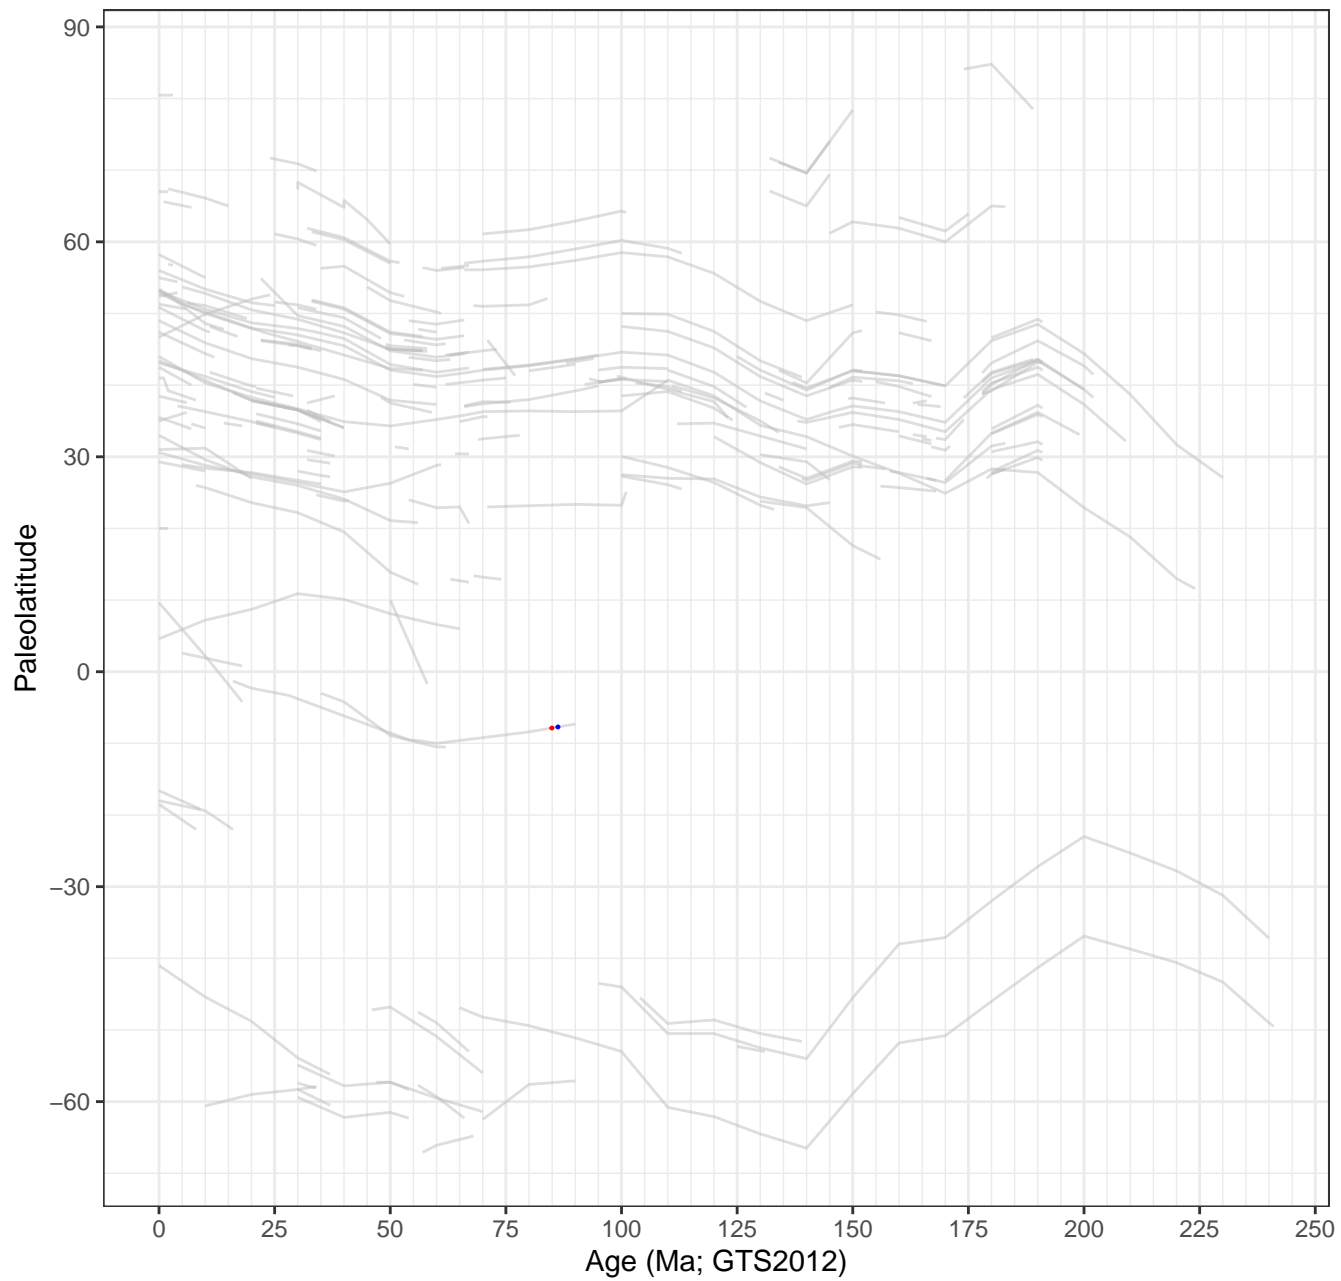

Supplement: Supplementary file 2564 [file Unipontidinium grande.pdf › Supplement/Supplement 2/Species 1914 plots/Unipontidinium grande.pdf]

# Species *Valaveodinium punctatum*

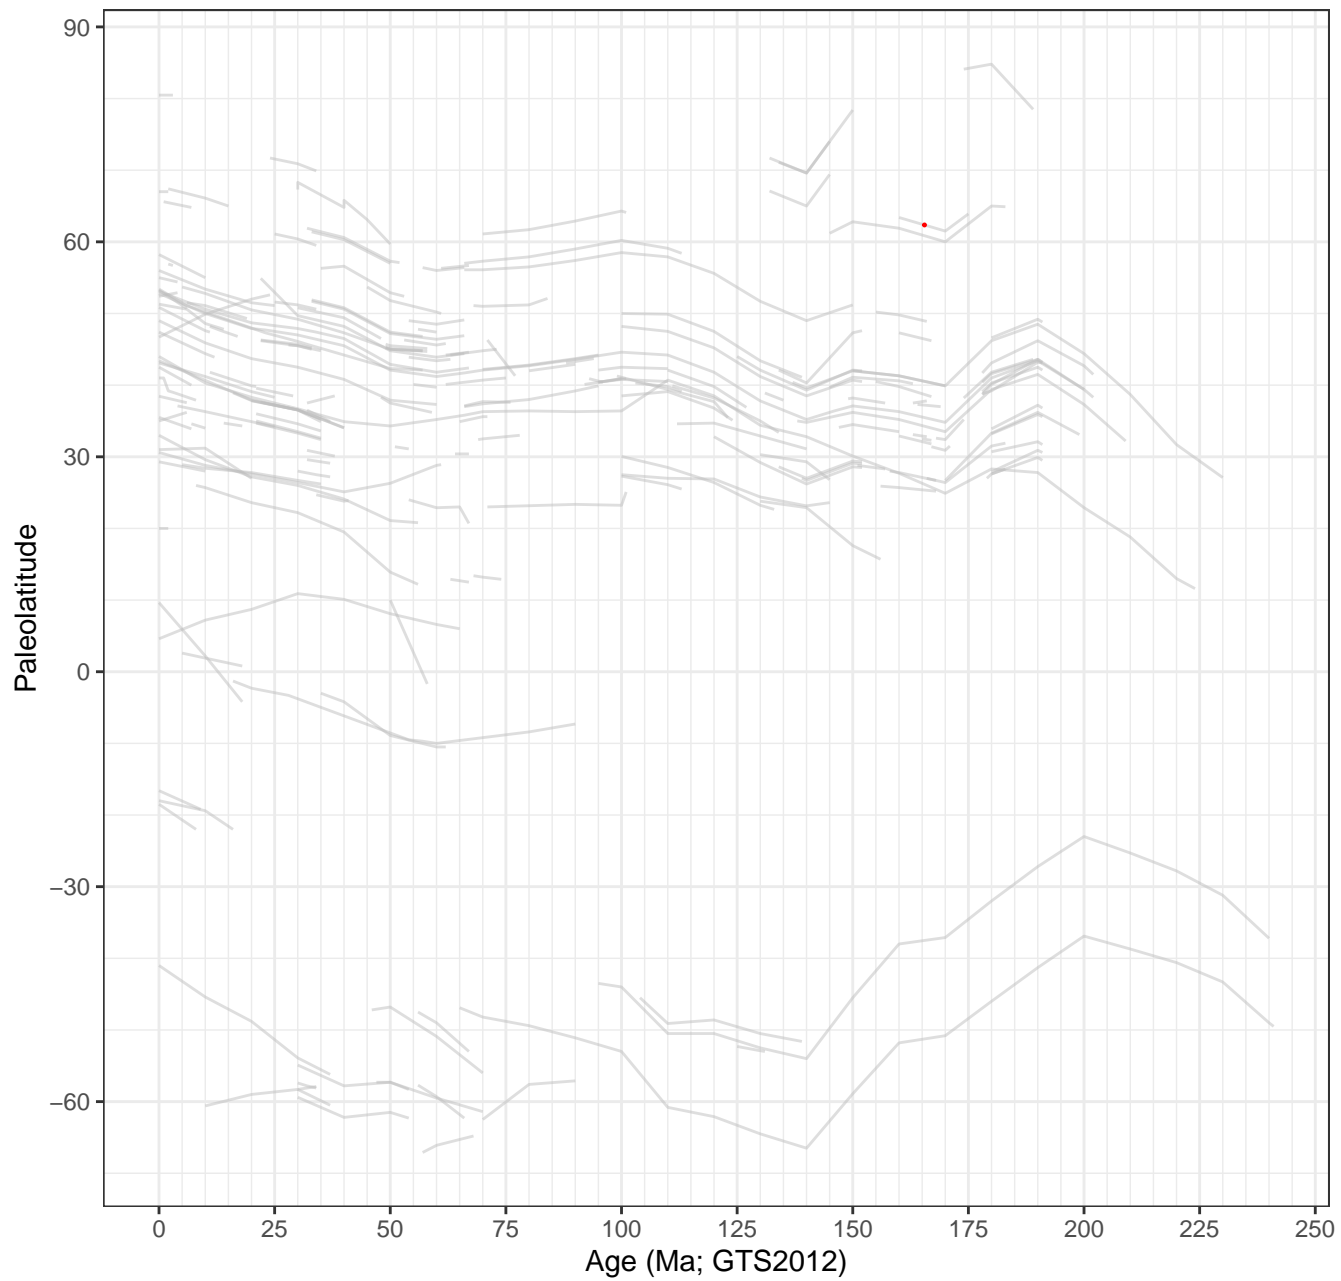

Supplement: Supplementary file 2565 [file Valaveodinium punctatum.pdf › Supplement/Supplement 2/Species 1914 plots/Valaveodinium punctatum.pdf]

# Species *Valensiella ampulla*

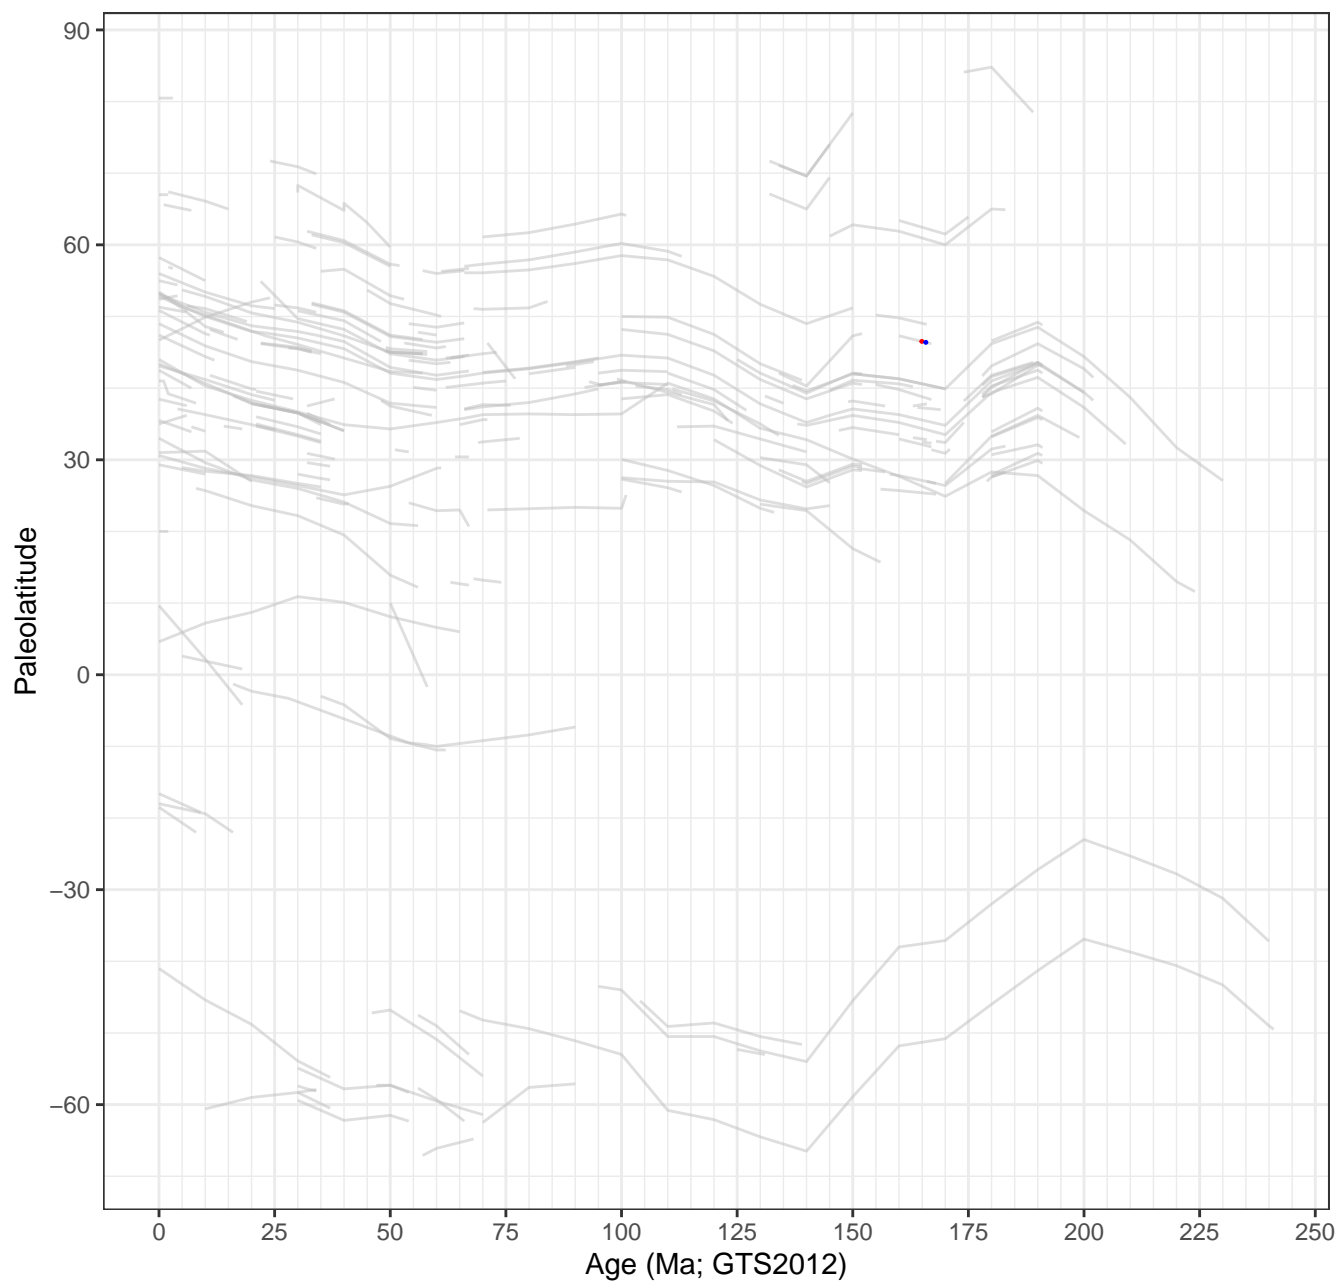

Supplement: Supplementary file 2566 [file Valensiella ampulla.pdf › Supplement/Supplement 2/Species 1914 plots/Valensiella ampulla.pdf]

# Species *Valensiella delicata*

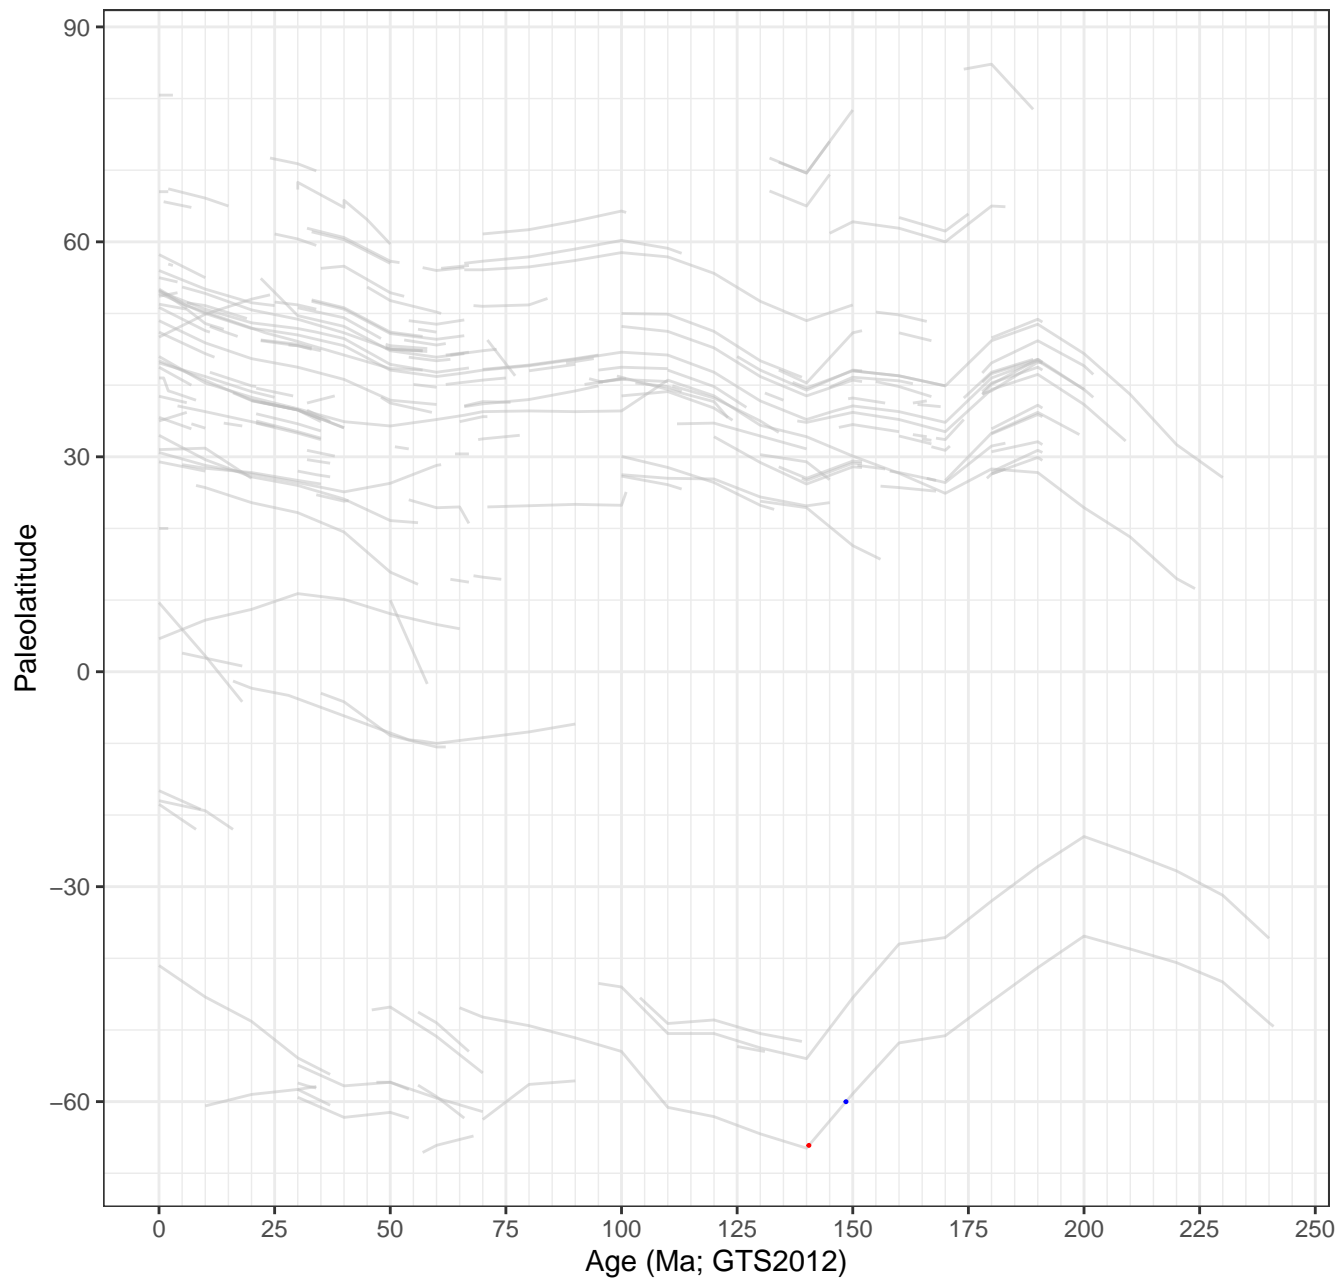

Supplement: Supplementary file 2567 [file Valensiella delicata.pdf › Supplement/Supplement 2/Species 1914 plots/Valensiella delicata.pdf]

# Species *Valensiella dictydia*

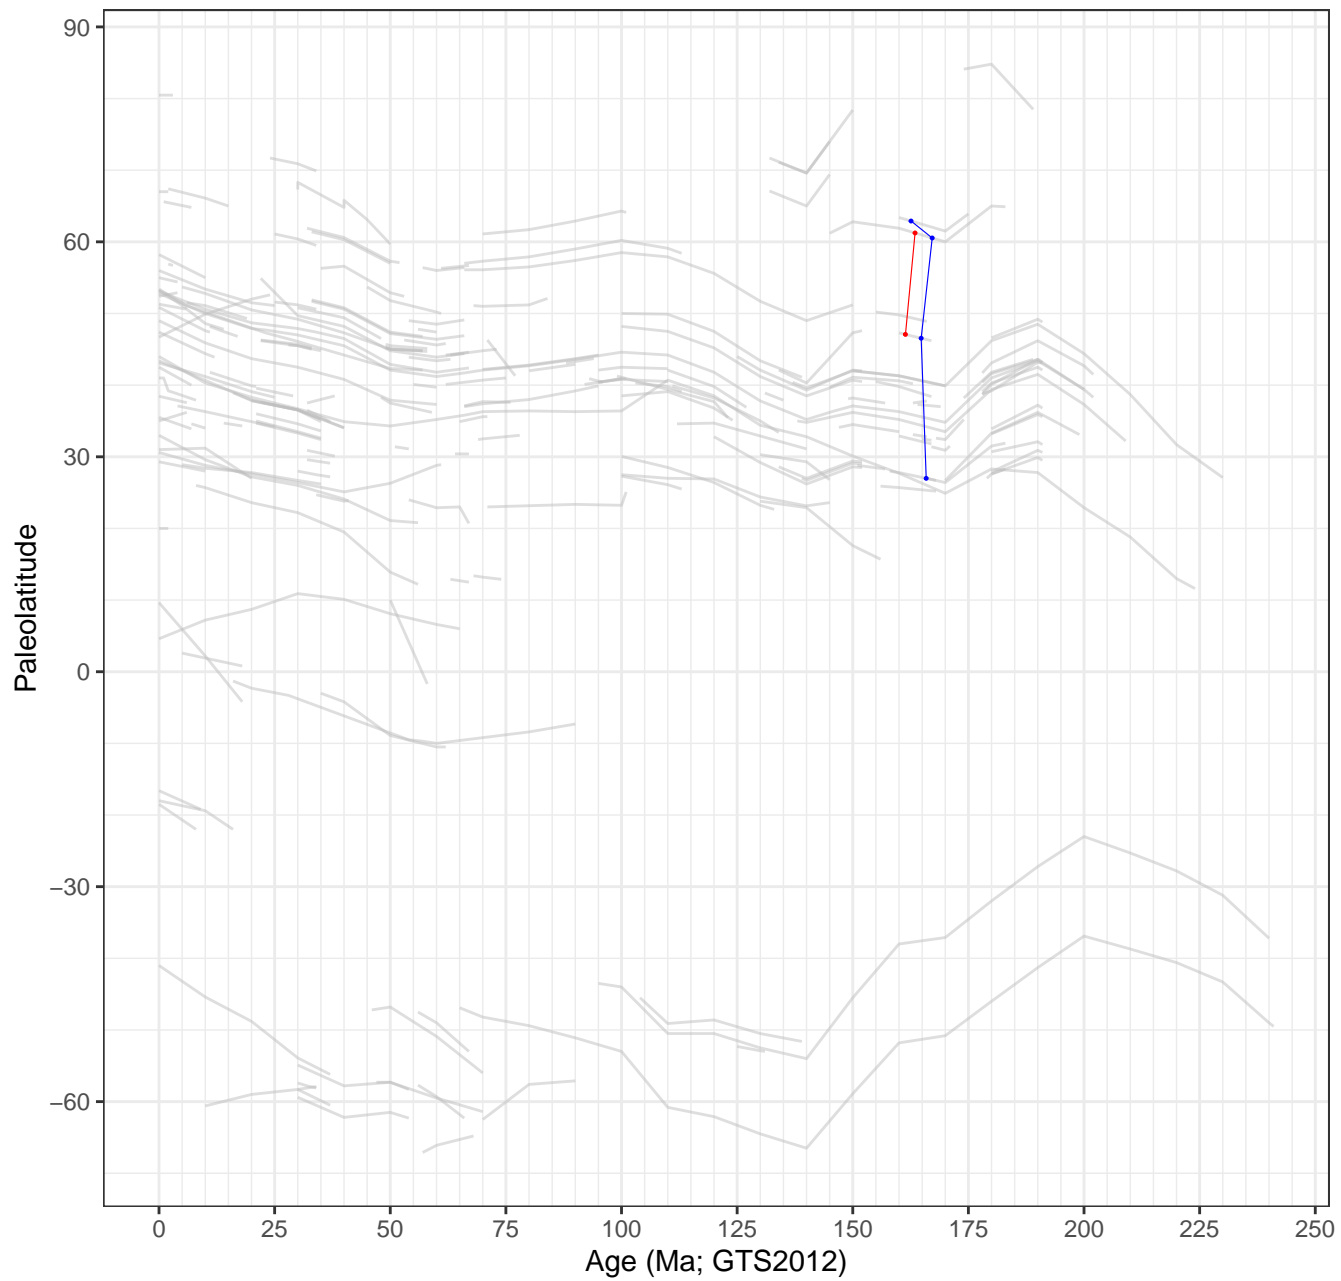

Supplement: Supplementary file 2568 [file Valensiella dictydia.pdf › Supplement/Supplement 2/Species 1914 plots/Valensiella dictydia.pdf]

# Species *Valensiella ovulum*

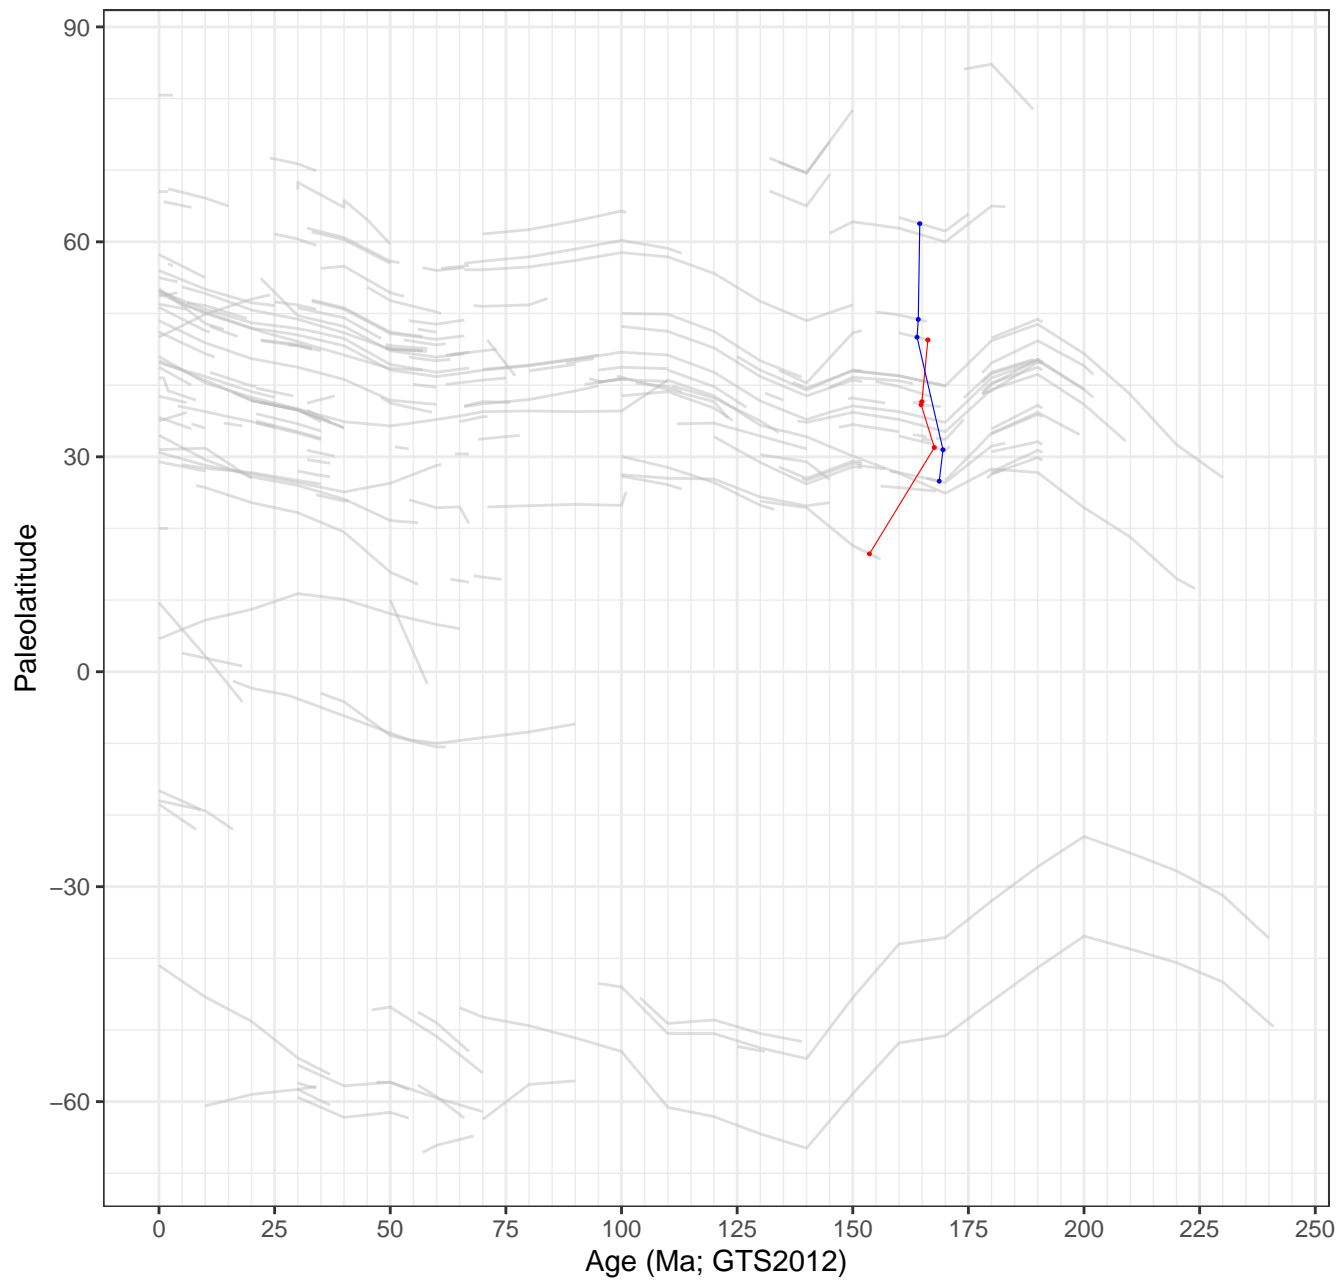

Supplement: Supplementary file 2569 [file Valensiella ovulum.pdf › Supplement/Supplement 2/Species 1914 plots/Valensiella ovulum.pdf]

# Species *Valensiella* spp.

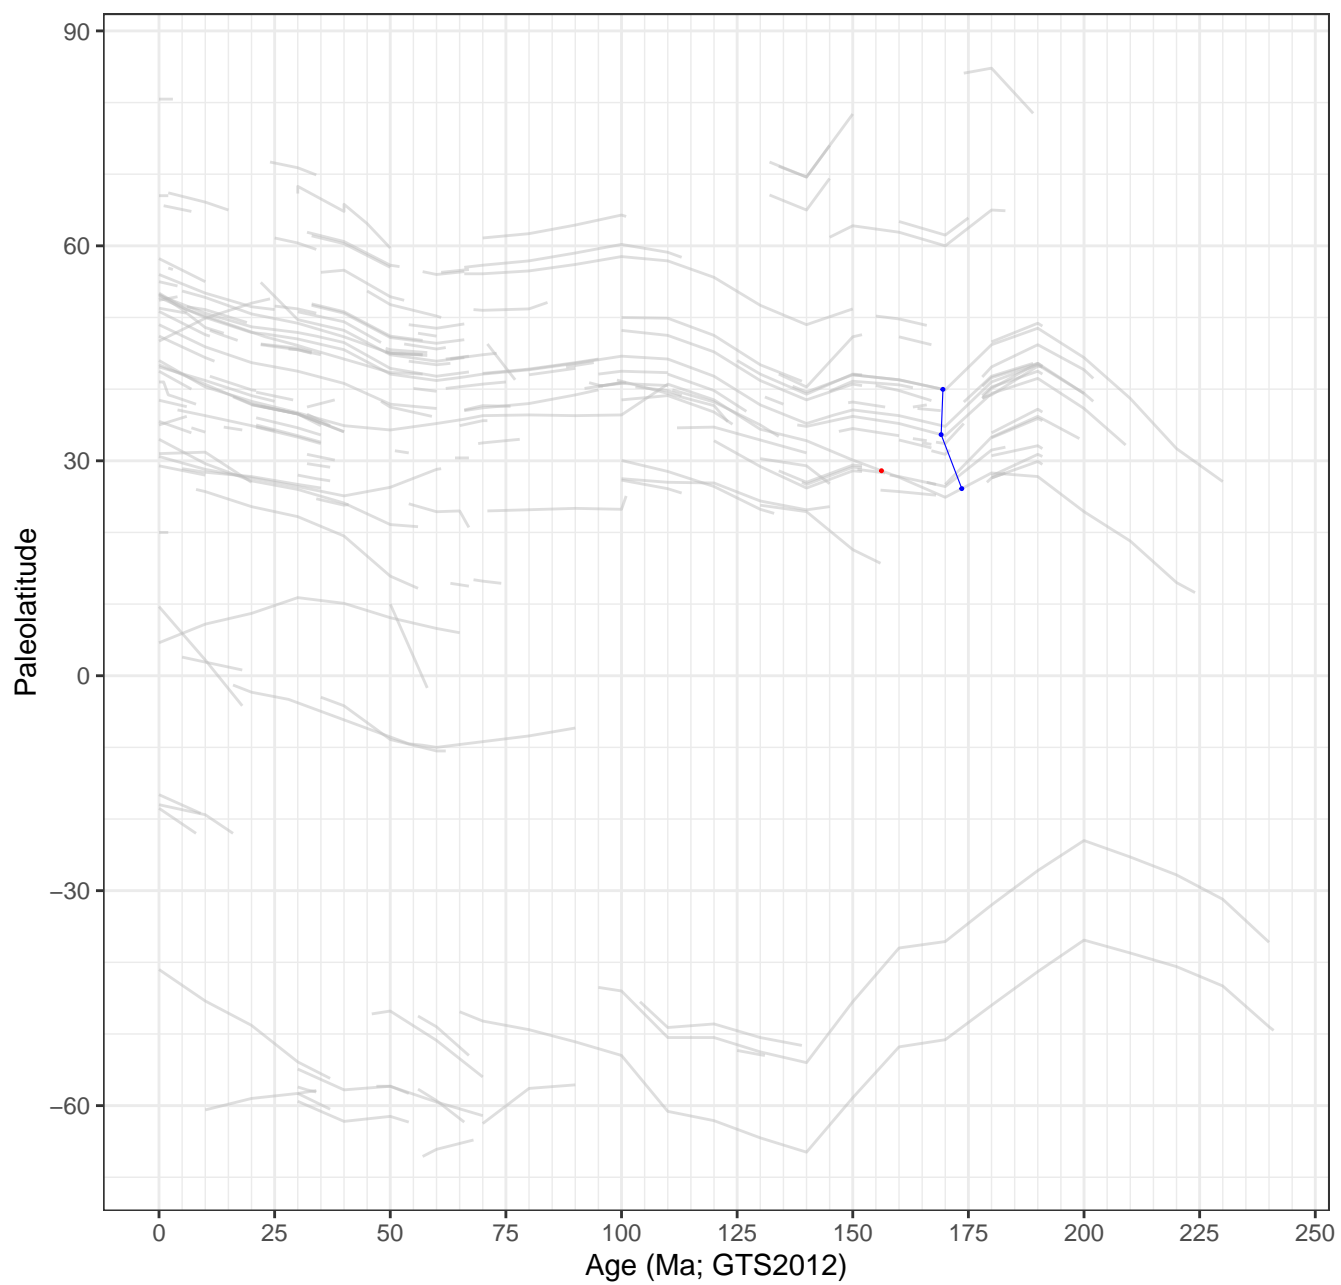

Supplement: Supplementary file 2570 [file Valensiella spp..pdf › Supplement/Supplement 2/Species 1914 plots/Valensiella spp..pdf]

# Species *Valensiella vermiculata*

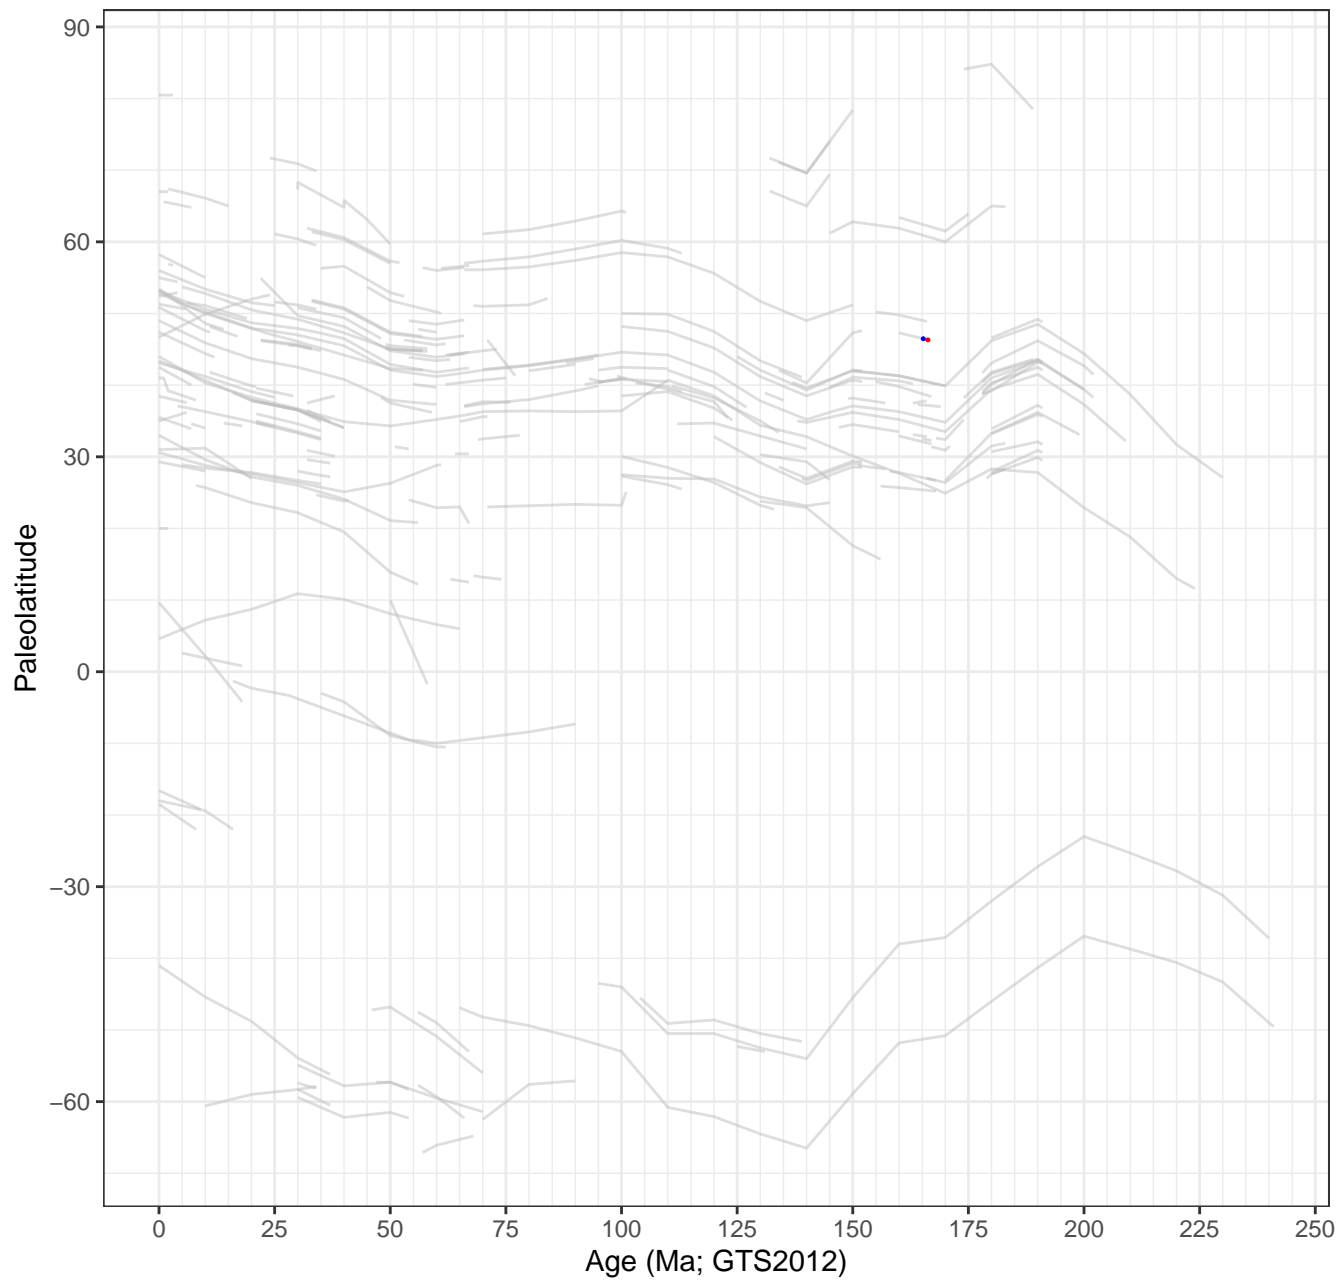

Supplement: Supplementary file 2571 [file Valensiella vermiculata.pdf › Supplement/Supplement 2/Species 1914 plots/Valensiella vermiculata.pdf]

# Species *Valloadinium echinosuturatum*

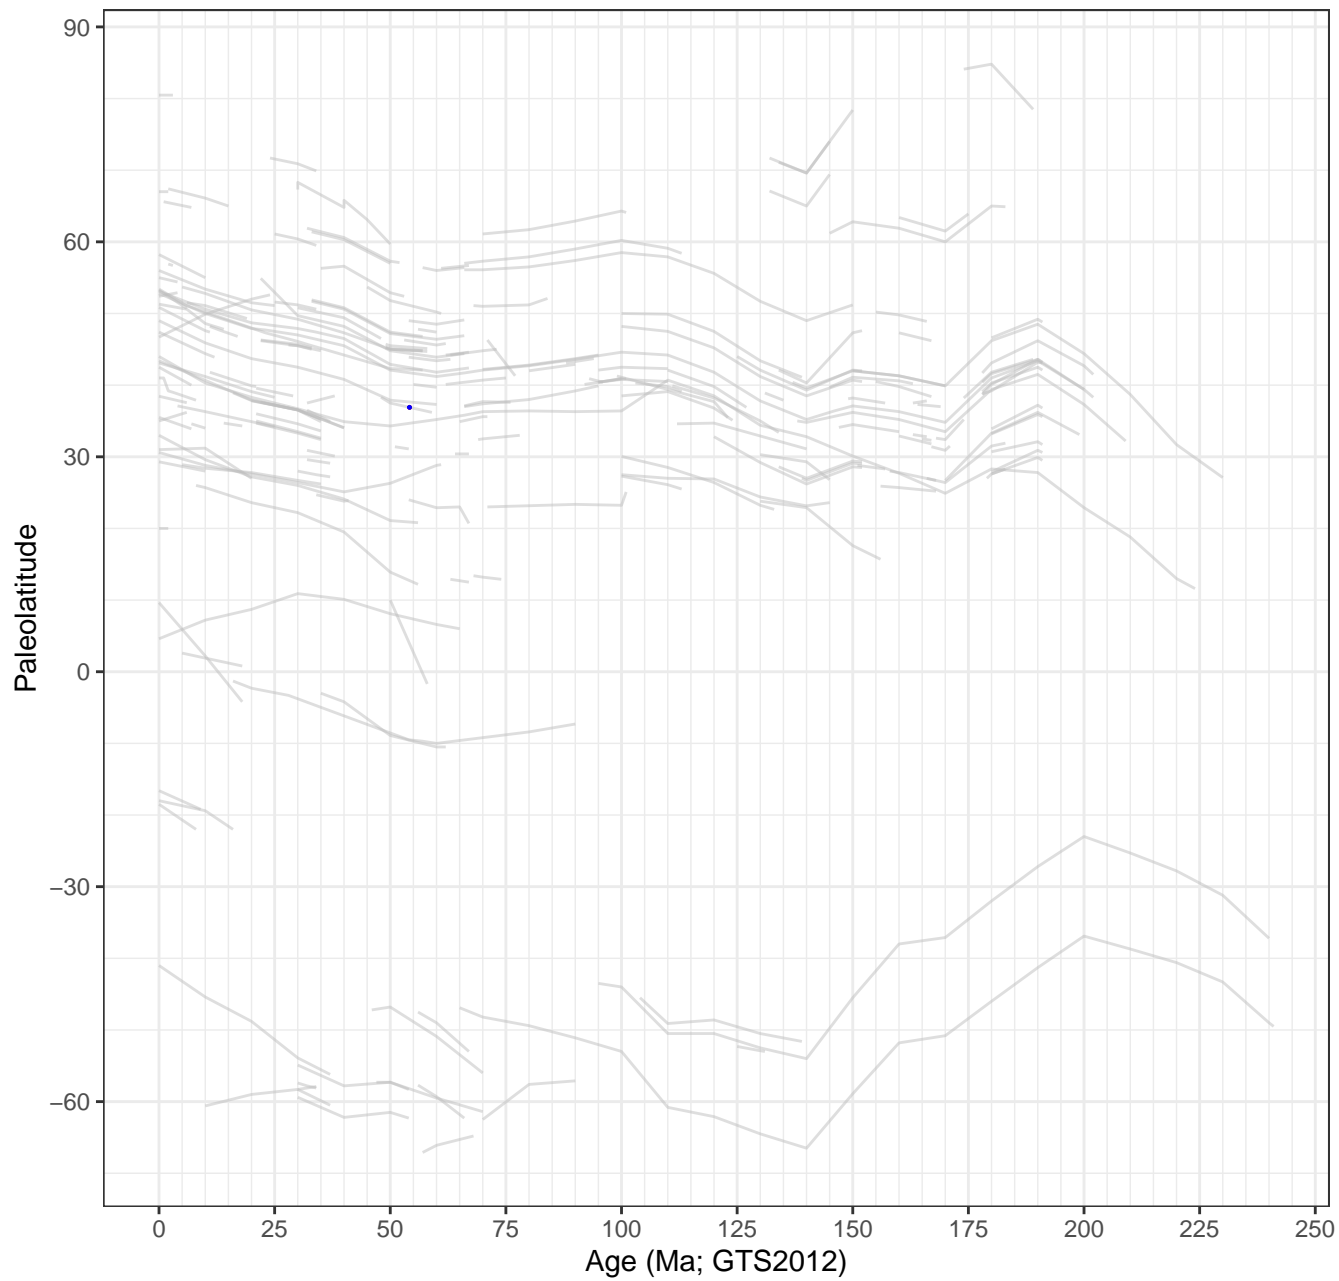

Supplement: Supplementary file 2572 [file Vallodinium echinosuturatum.pdf › Supplement/Supplement 2/Species 1914 plots/Vallodinium echinosuturatum.pdf]

# Species *Valvaeodinium aquilonium*

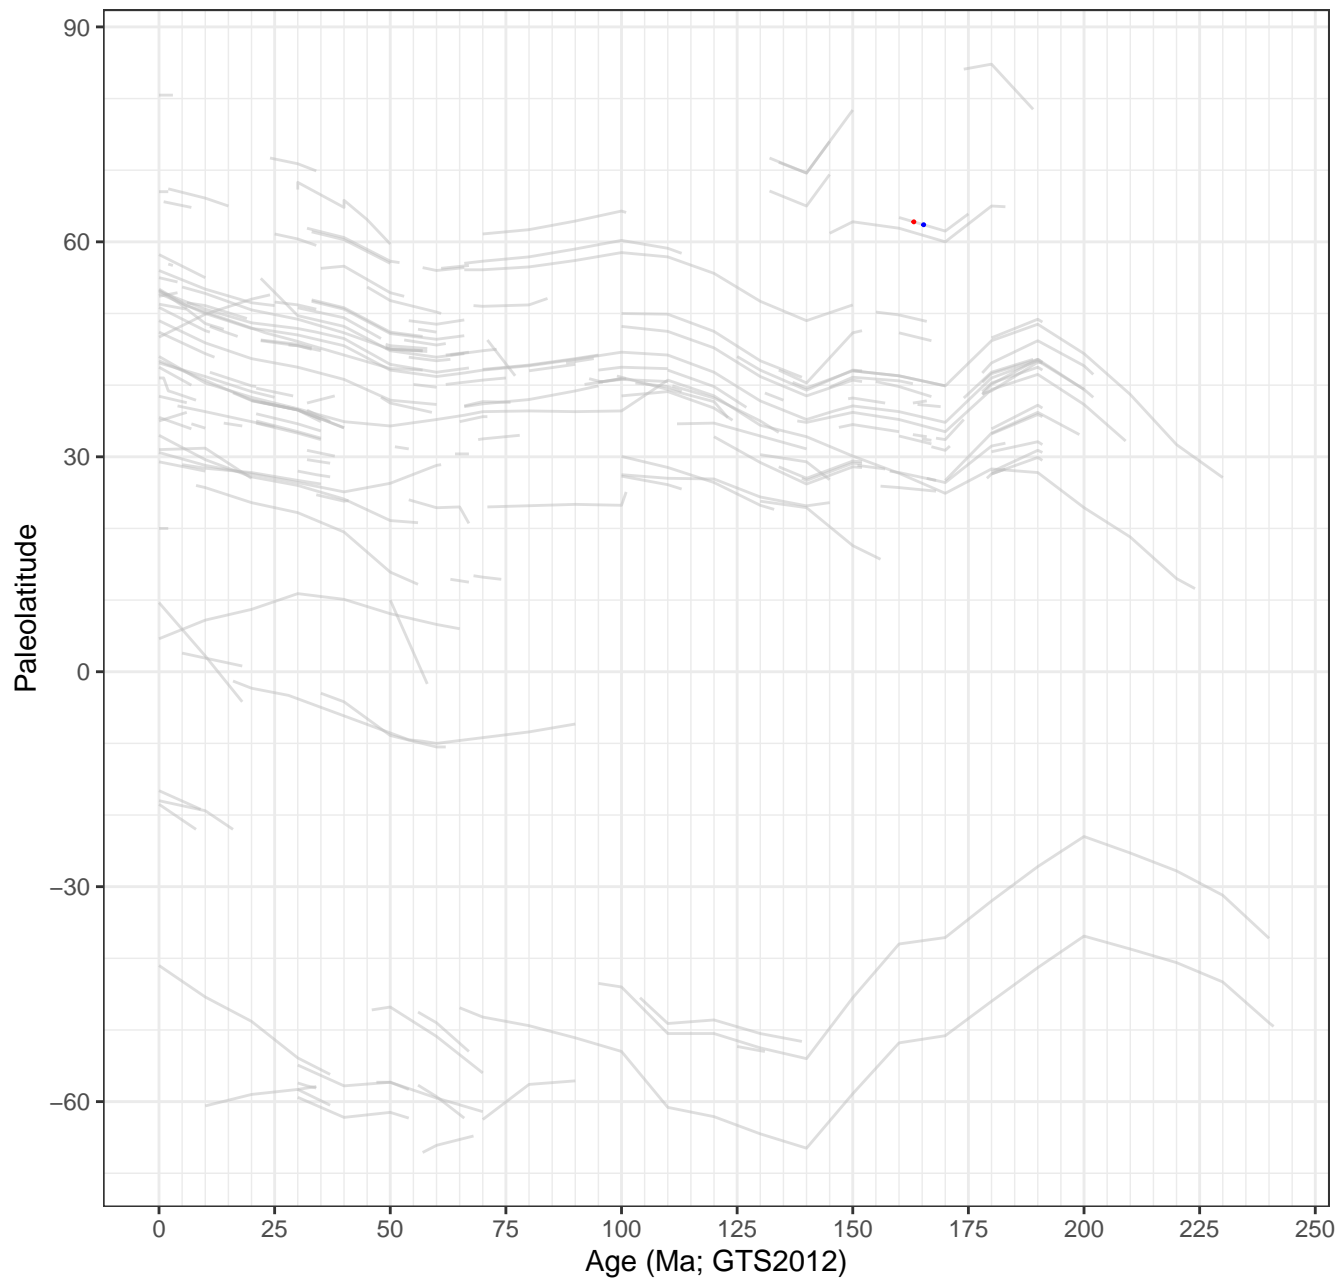

Supplement: Supplementary file 2573 [file Valvaeodinium aquilonium.pdf › Supplement/Supplement 2/Species 1914 plots/Valvaeodinium aquilonium.pdf]

# Species *Valvaedinium armatum*

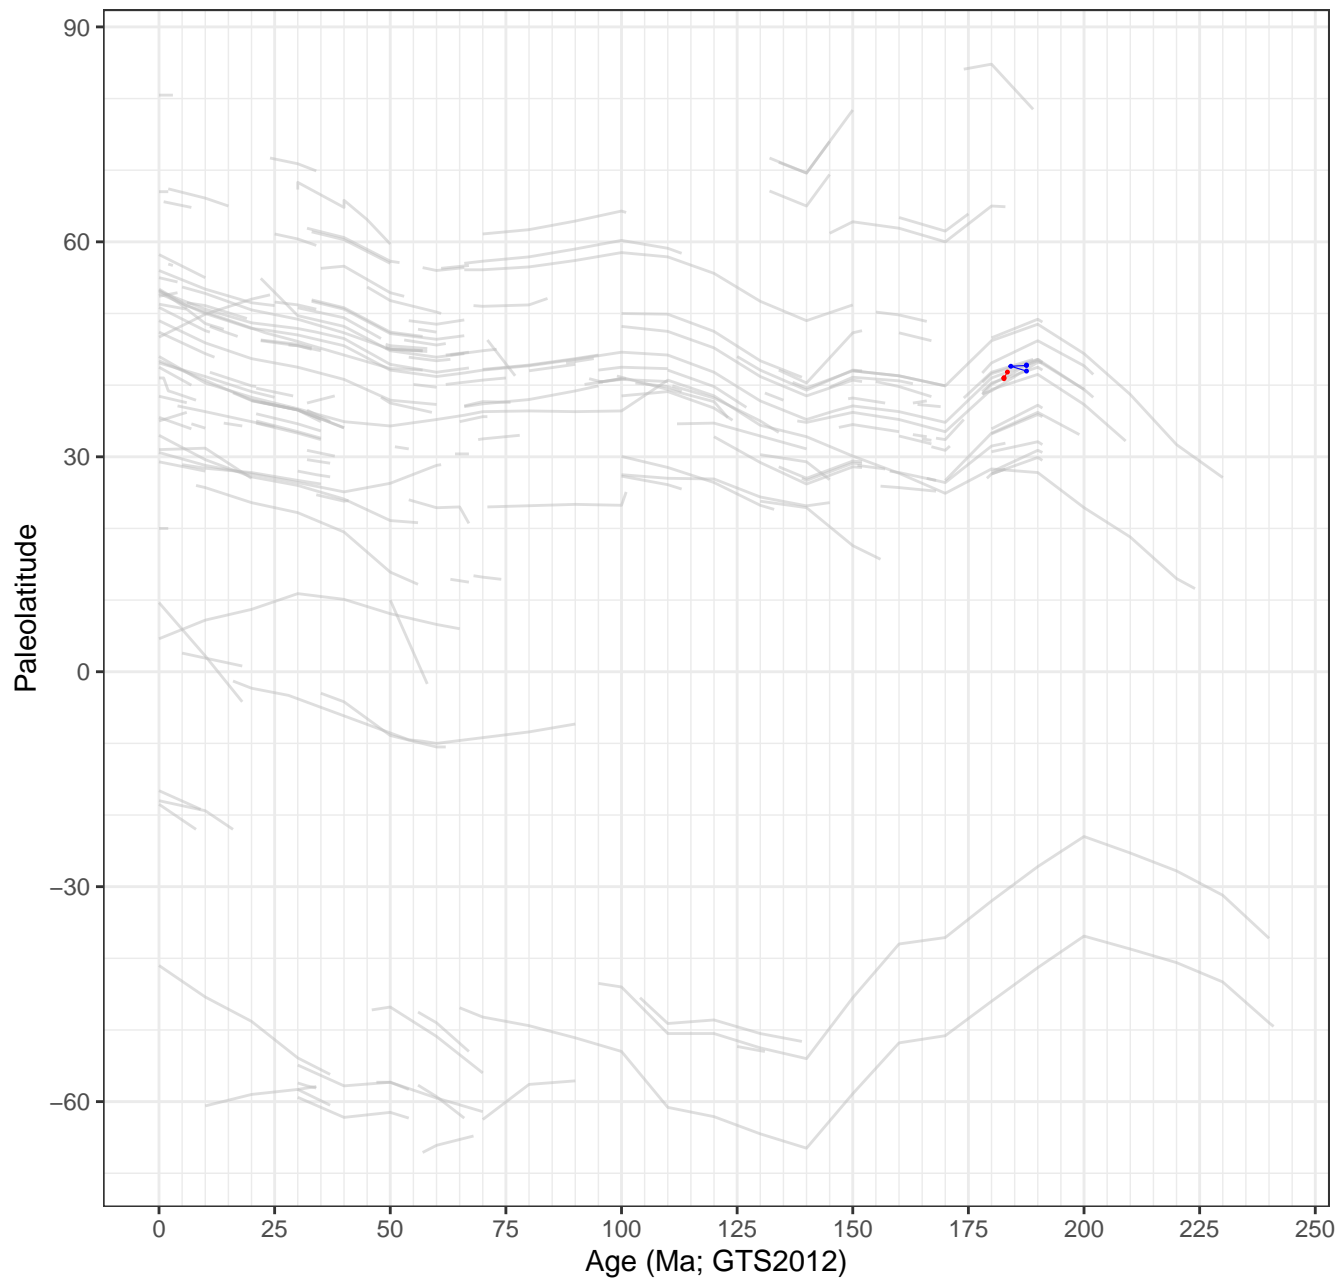

Supplement: Supplementary file 2574 [file Valvaeodinium armatum.pdf › Supplement/Supplement 2/Species 1914 plots/Valvaeodinium armatum.pdf]

# Species *Valvaedinium cavum*

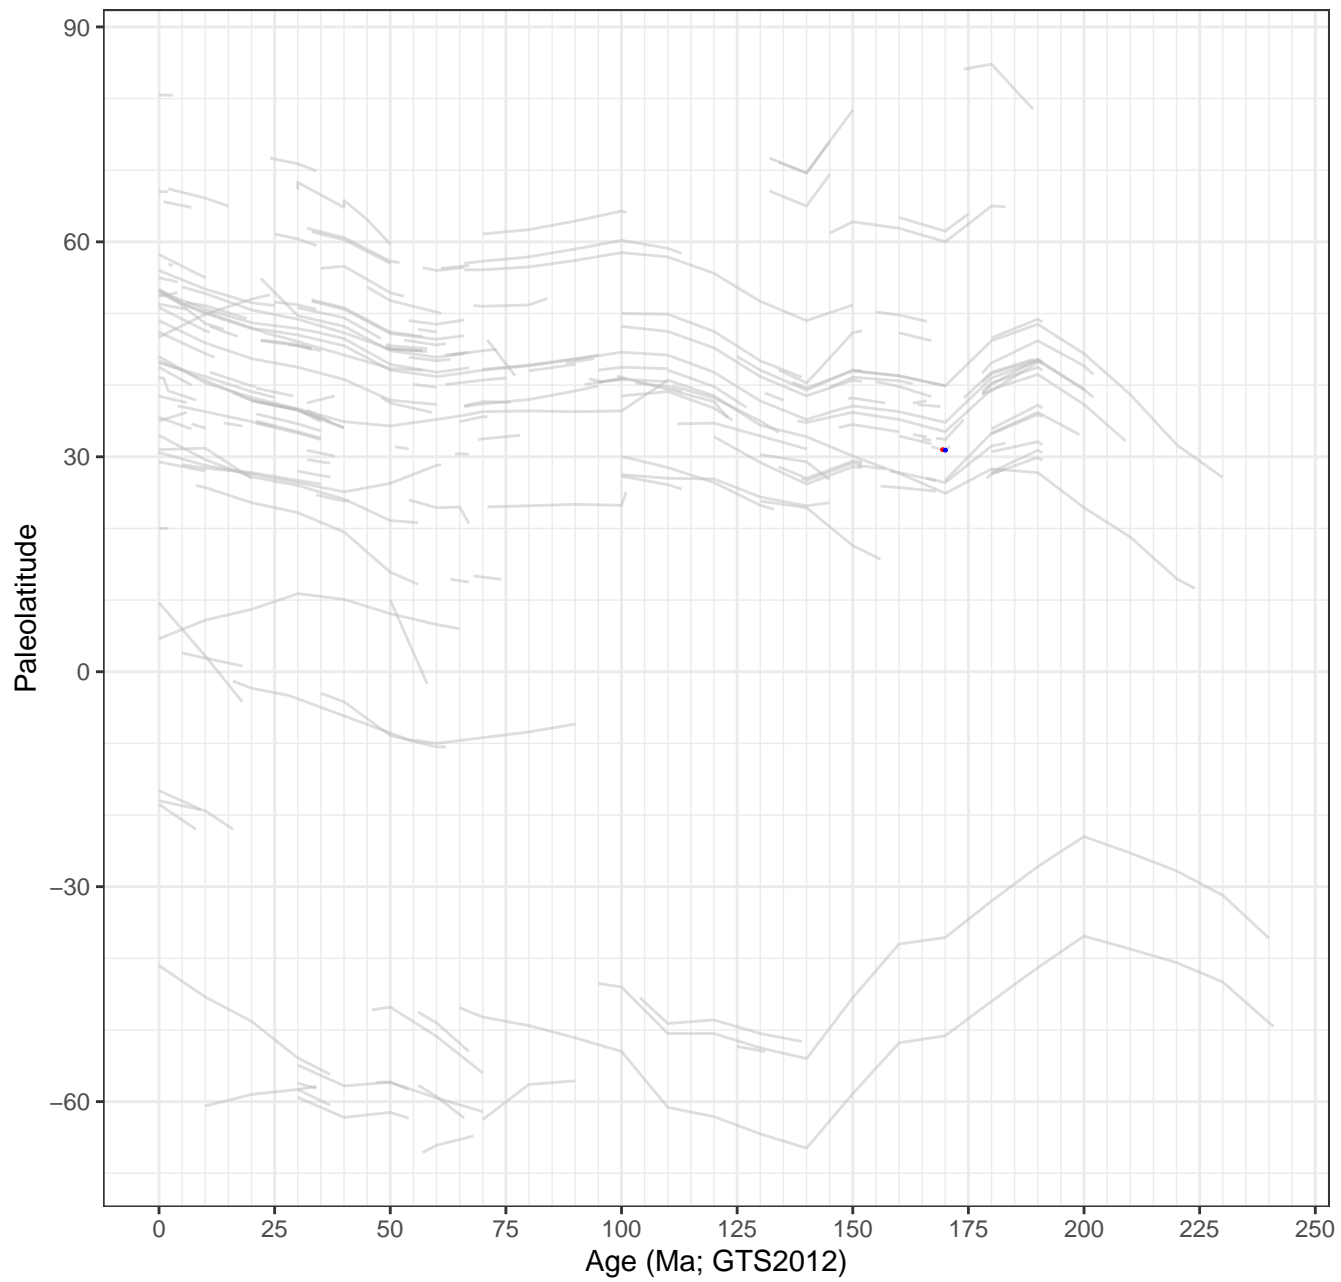

Supplement: Supplementary file 2575 [file Valvaeodinium cavum.pdf › Supplement/Supplement 2/Species 1914 plots/Valvaeodinium cavum.pdf]

# Species *Valvaeodinium flos*

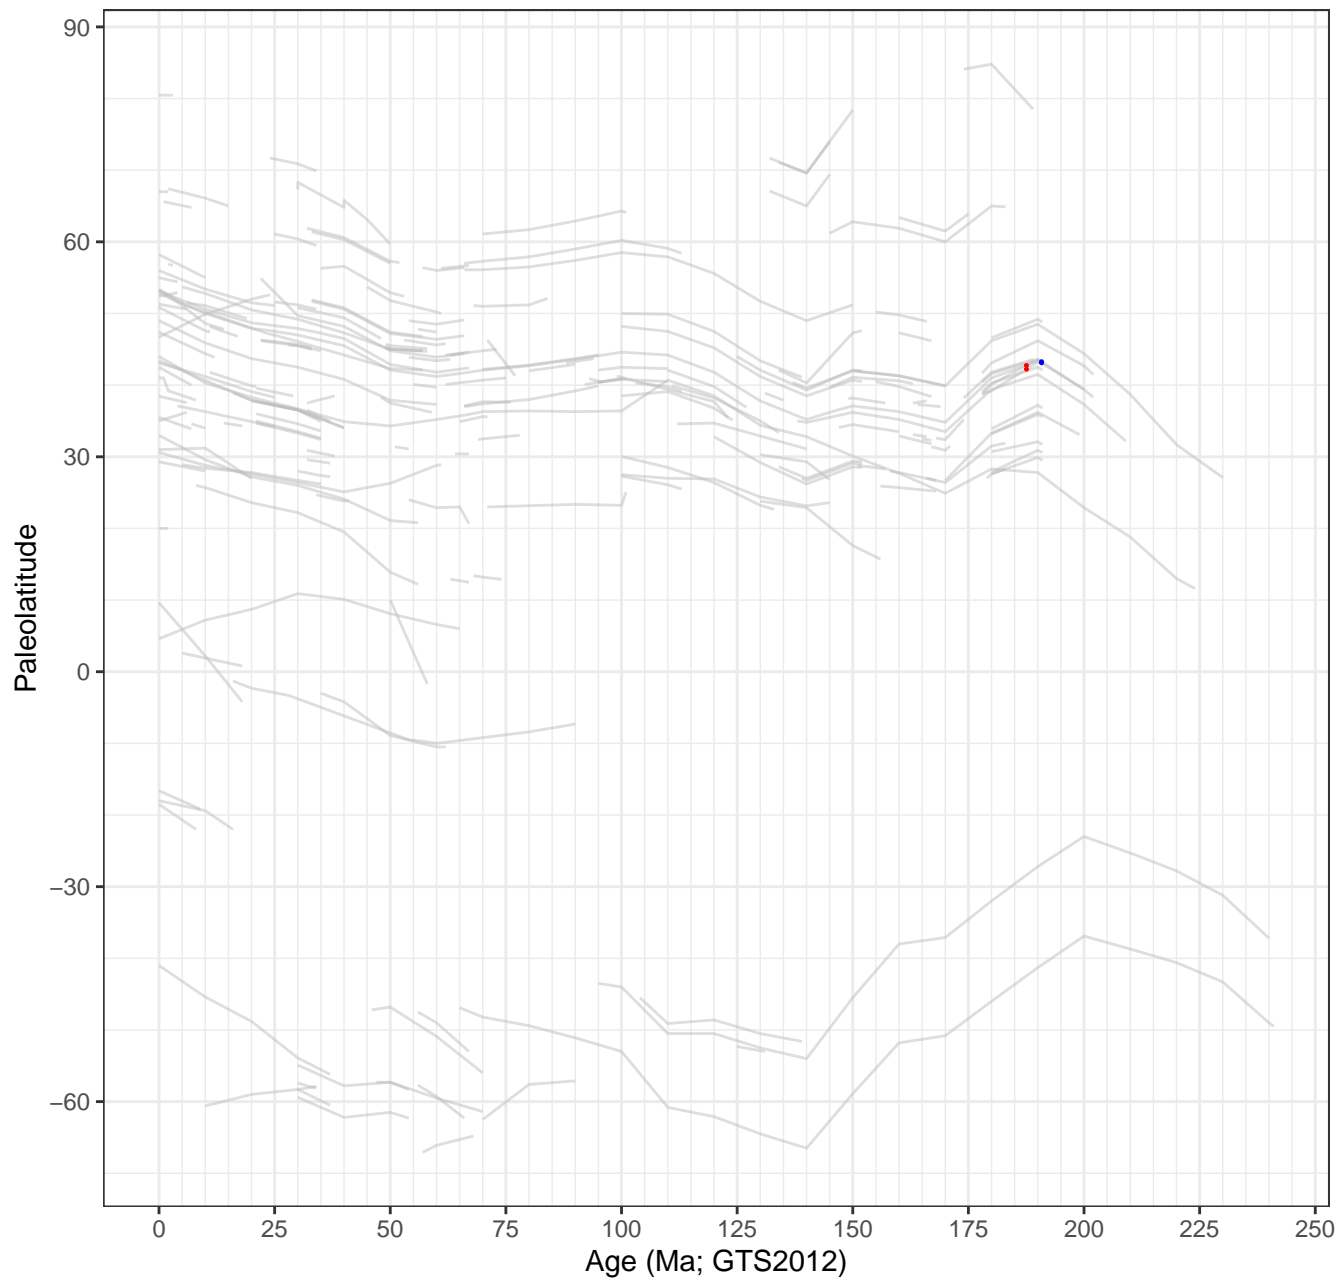

Supplement: Supplementary file 2576 [file Valvaeodinium flos.pdf › Supplement/Supplement 2/Species 1914 plots/Valvaeodinium flos.pdf]

# Species *Valvaeodinium groenlandicum*

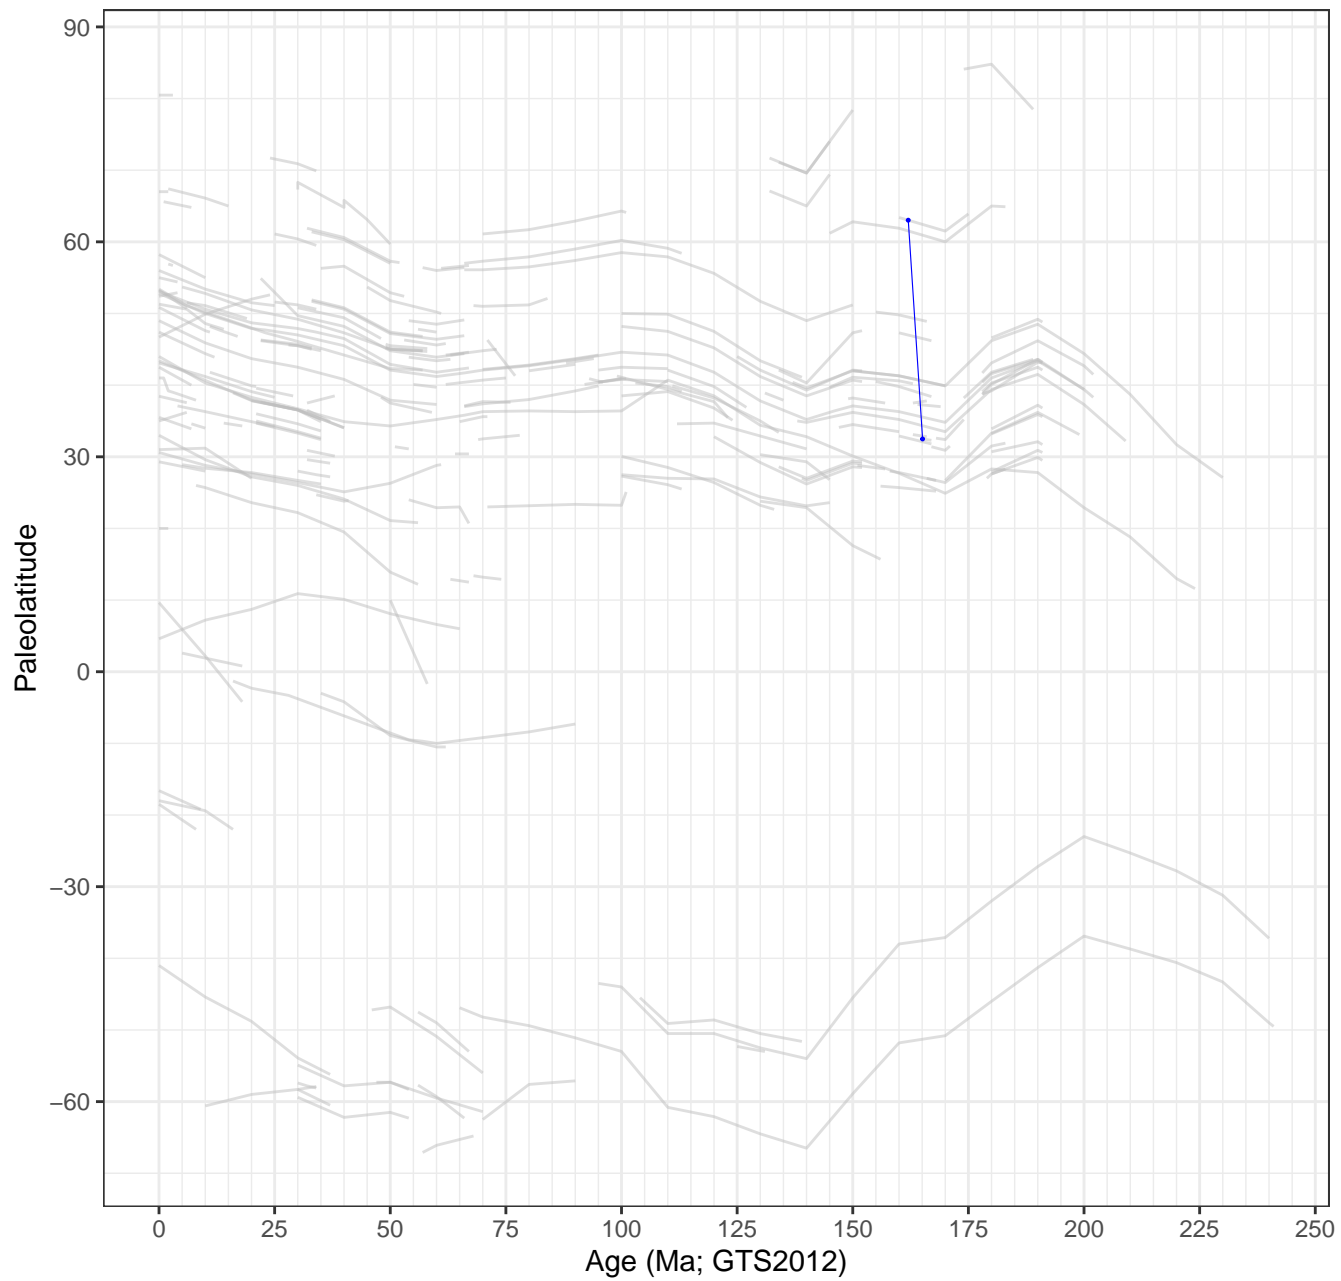

Supplement: Supplementary file 2577 [file Valvaeodinium groenlandicum.pdf › Supplement/Supplement 2/Species 1914 plots/Valvaeodinium groenlandicum.pdf]

# Species *Valvaeodinium hirsutum*

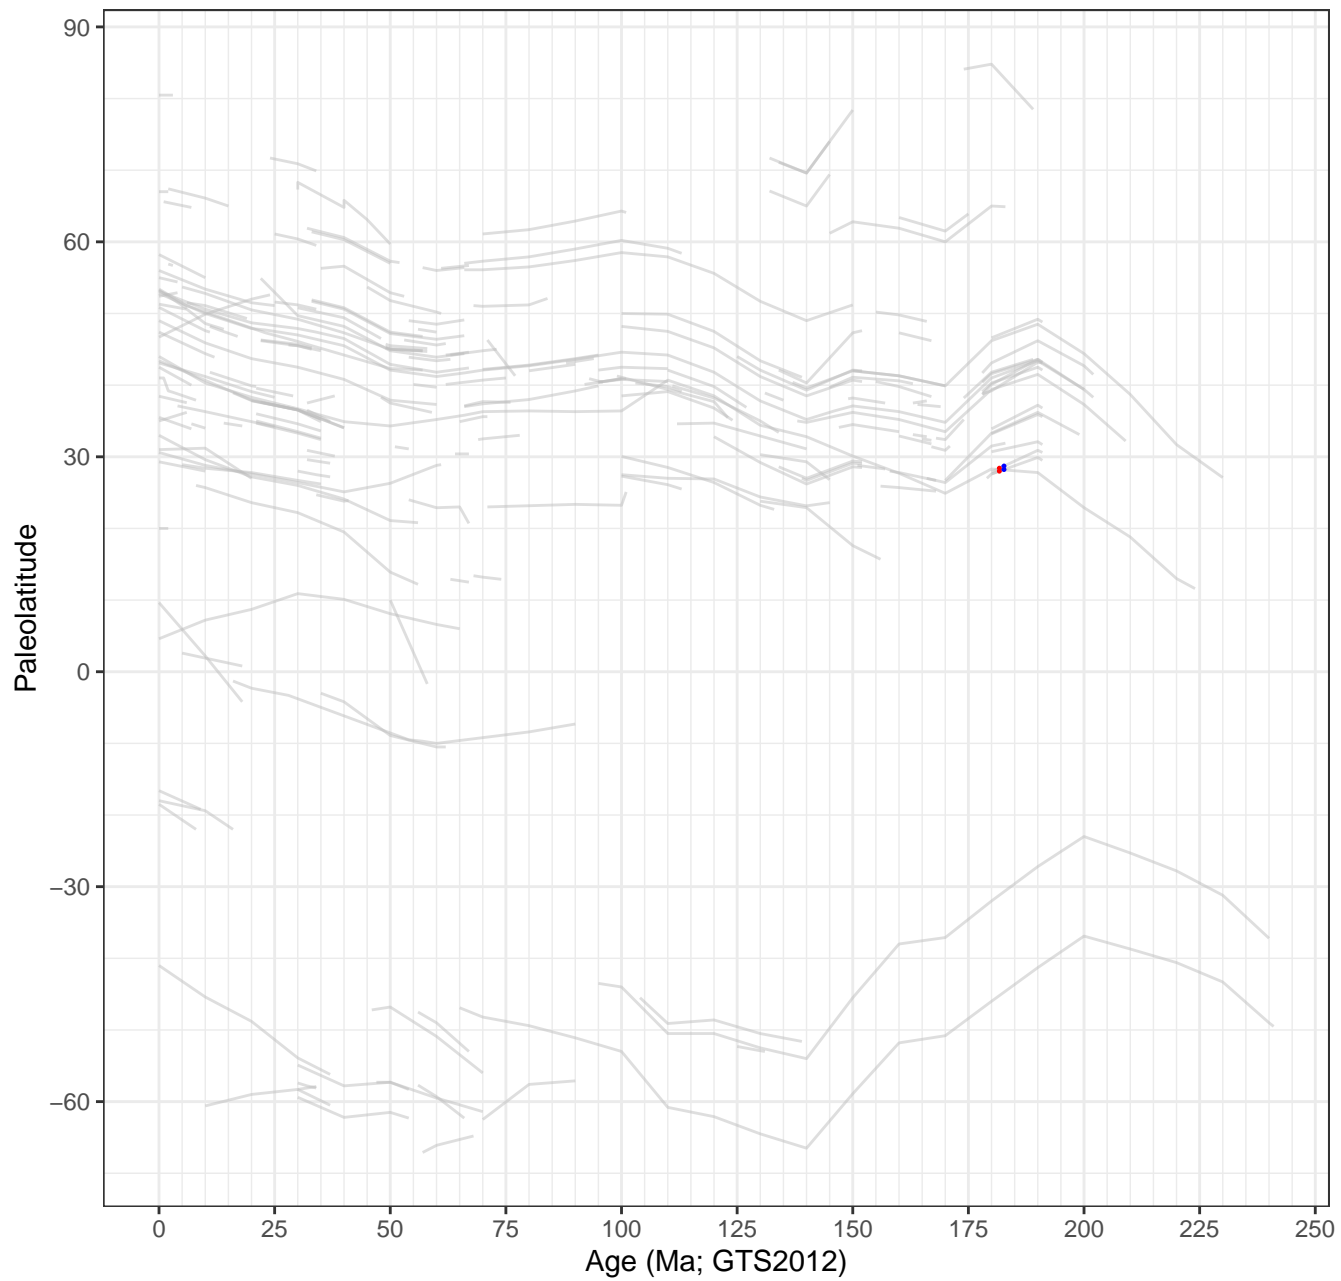

Supplement: Supplementary file 2578 [file Valvaeodinium hirsutum.pdf › Supplement/Supplement 2/Species 1914 plots/Valvaeodinium hirsutum.pdf]

# Species *Valvaedinium koessenium*

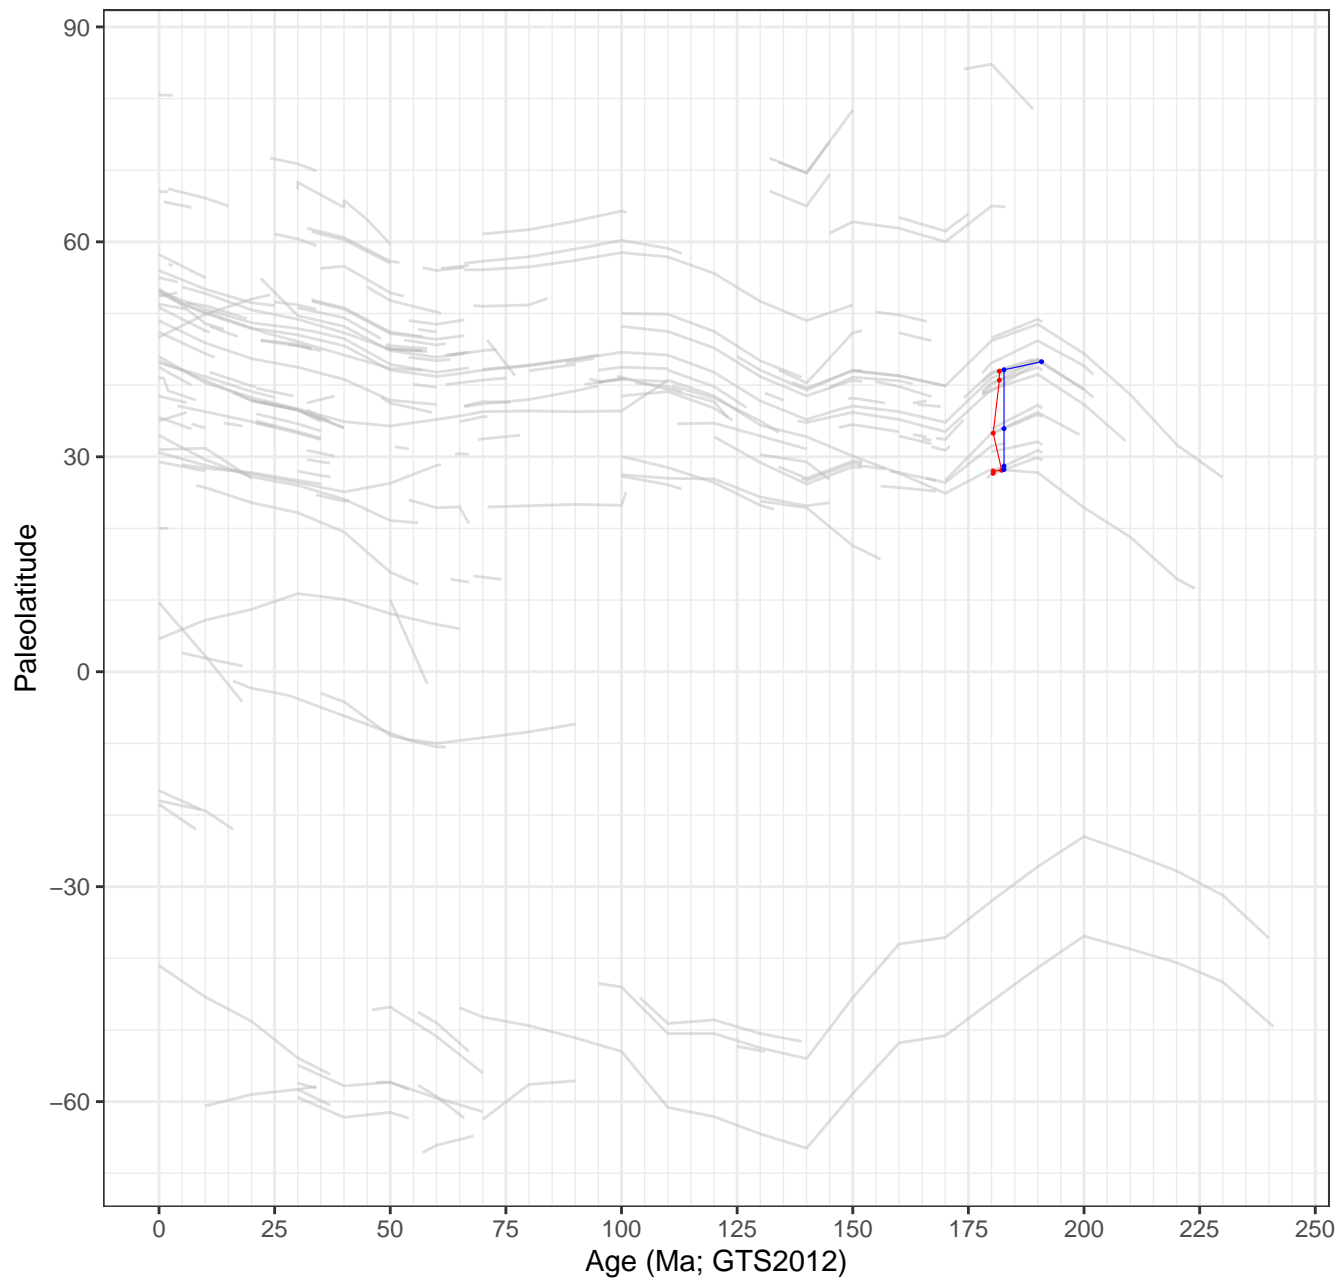

Supplement: Supplementary file 2579 [file Valvaeodinium koessenium.pdf › Supplement/Supplement 2/Species 1914 plots/Valvaeodinium koessenium.pdf]

# Species *Valvaedinium limbafibrosum*

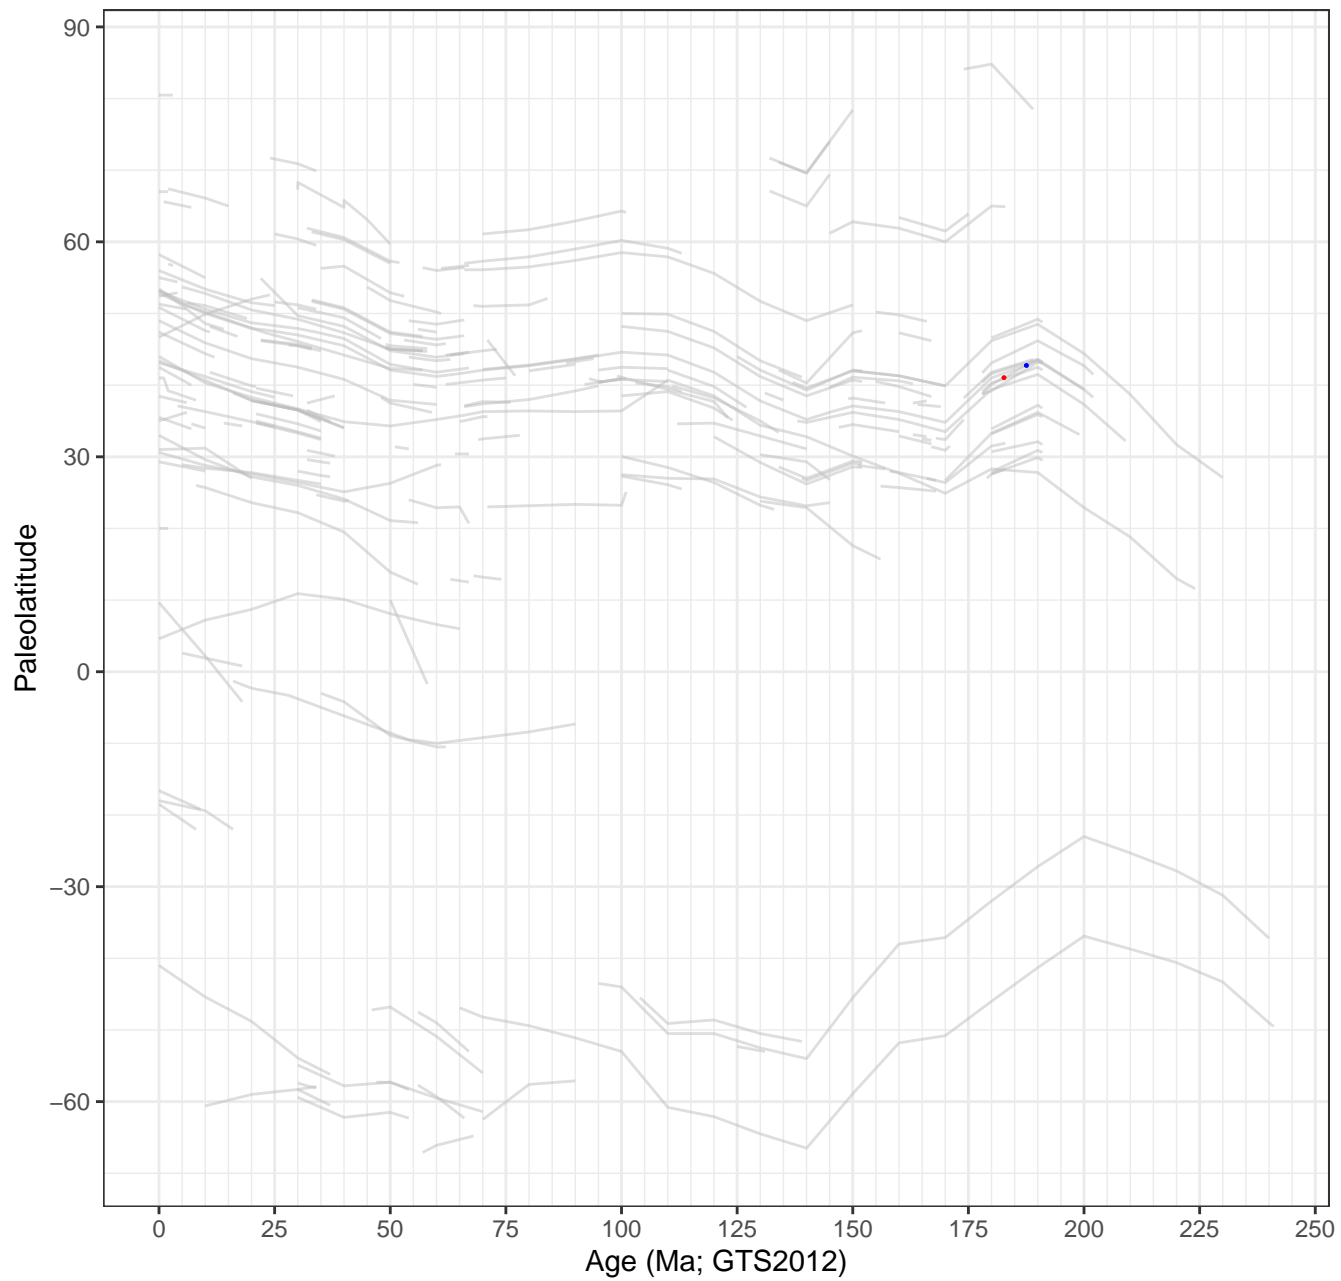

Supplement: Supplementary file 2580 [file Valvaeodinium limbafibrosum.pdf › Supplement/Supplement 2/Species 1914 plots/Valvaeodinium limbafibrosum.pdf]

# Species *Valvaedinium lineatum*

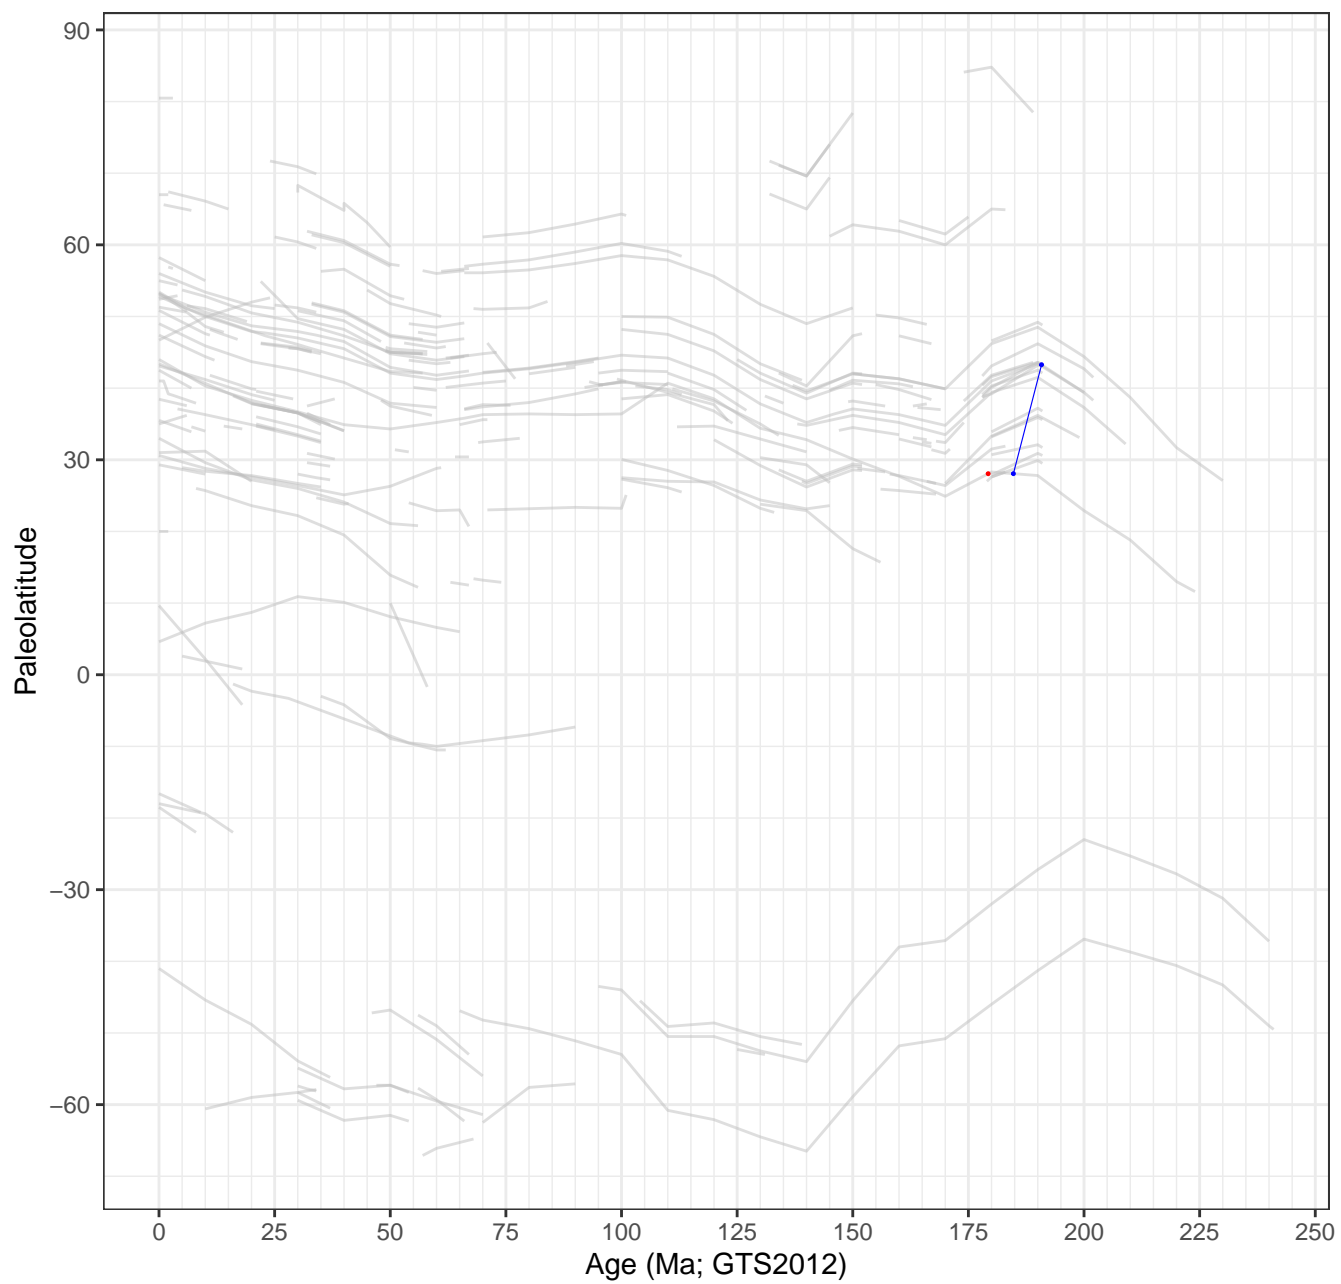

Supplement: Supplementary file 2581 [file Valvaeodinium lineatum.pdf › Supplement/Supplement 2/Species 1914 plots/Valvaeodinium lineatum.pdf]

# Species *Valvaeodinium perpunctatum*

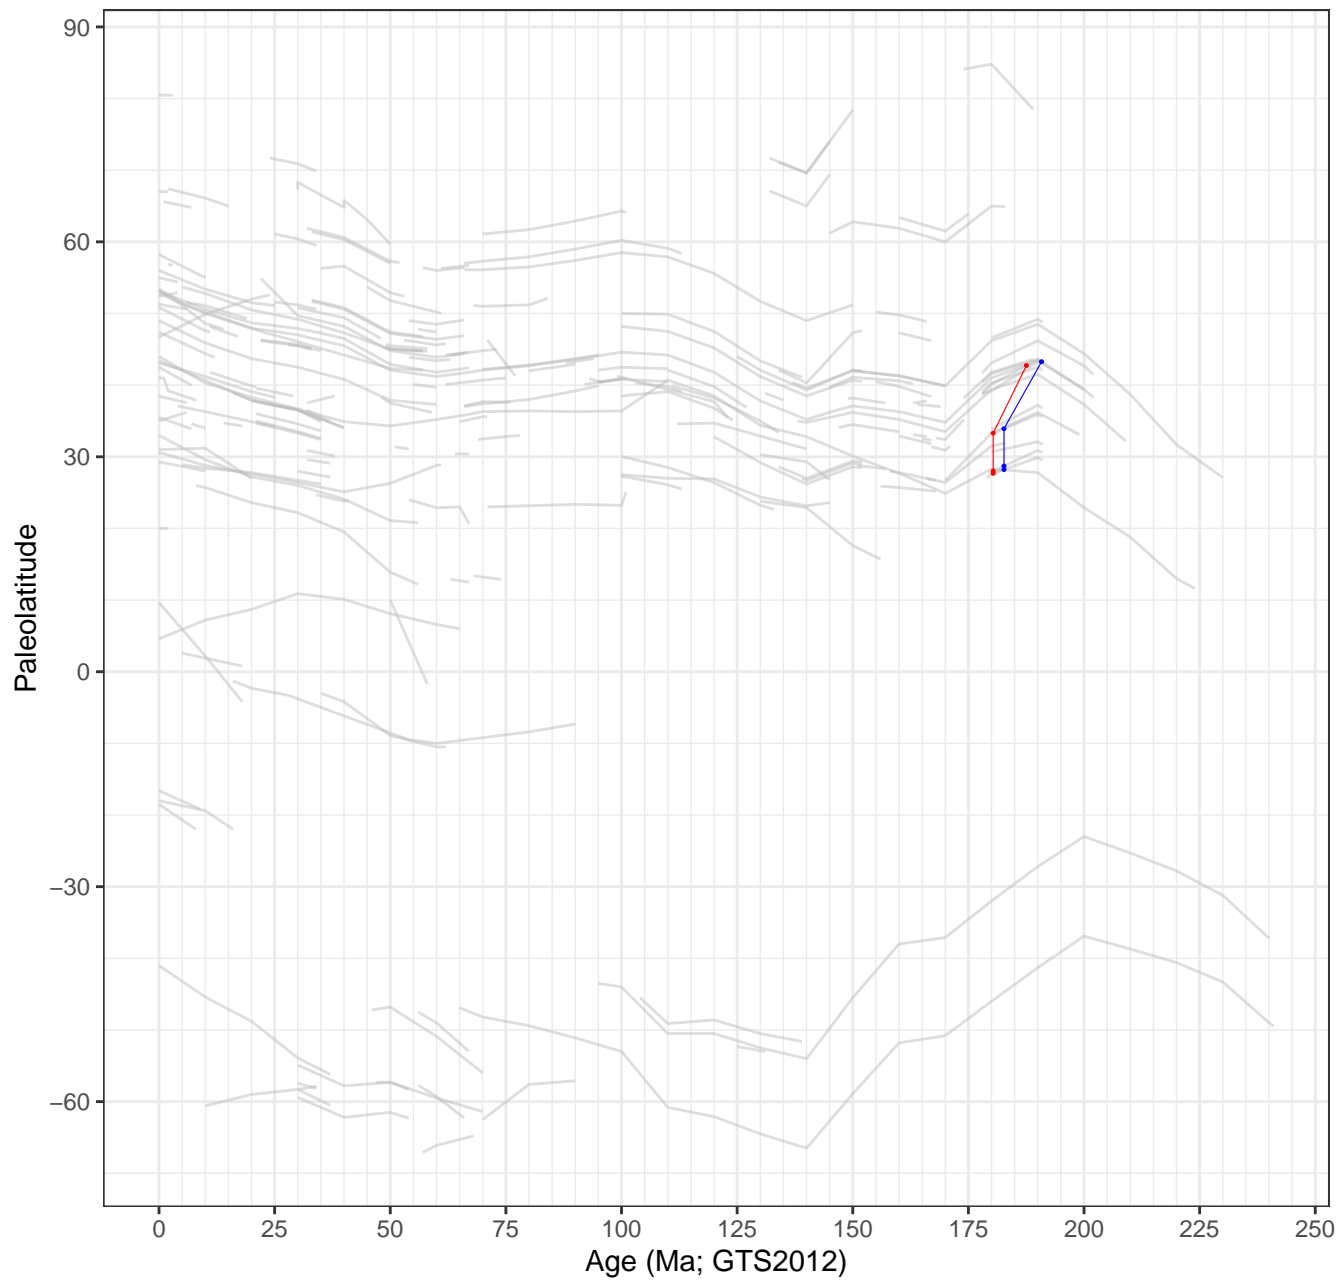

Supplement: Supplementary file 2582 [file Valvaeodinium perpunctatum.pdf › Supplement/Supplement 2/Species 1914 plots/Valvaeodinium perpunctatum.pdf]

# Species *Valvaedinium punctatum*

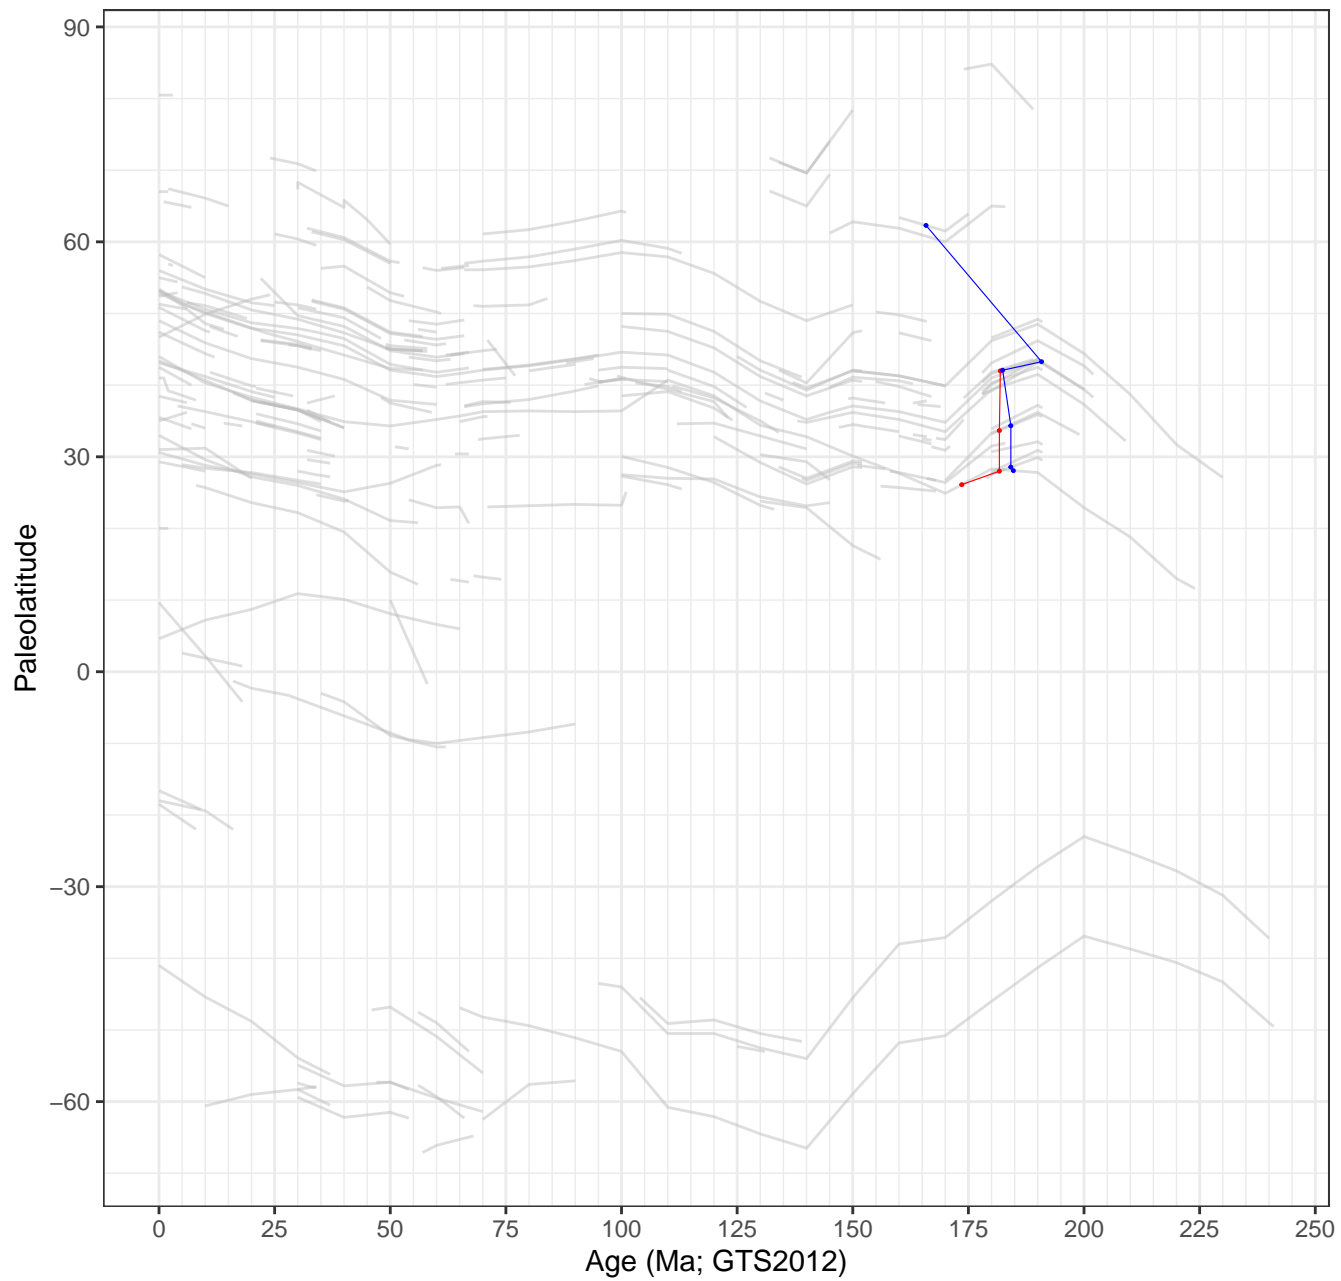

Supplement: Supplementary file 2583 [file Valvaeodinium punctatum.pdf › Supplement/Supplement 2/Species 1914 plots/Valvaeodinium punctatum.pdf]

# Species *Valvaeodinium scalatum*

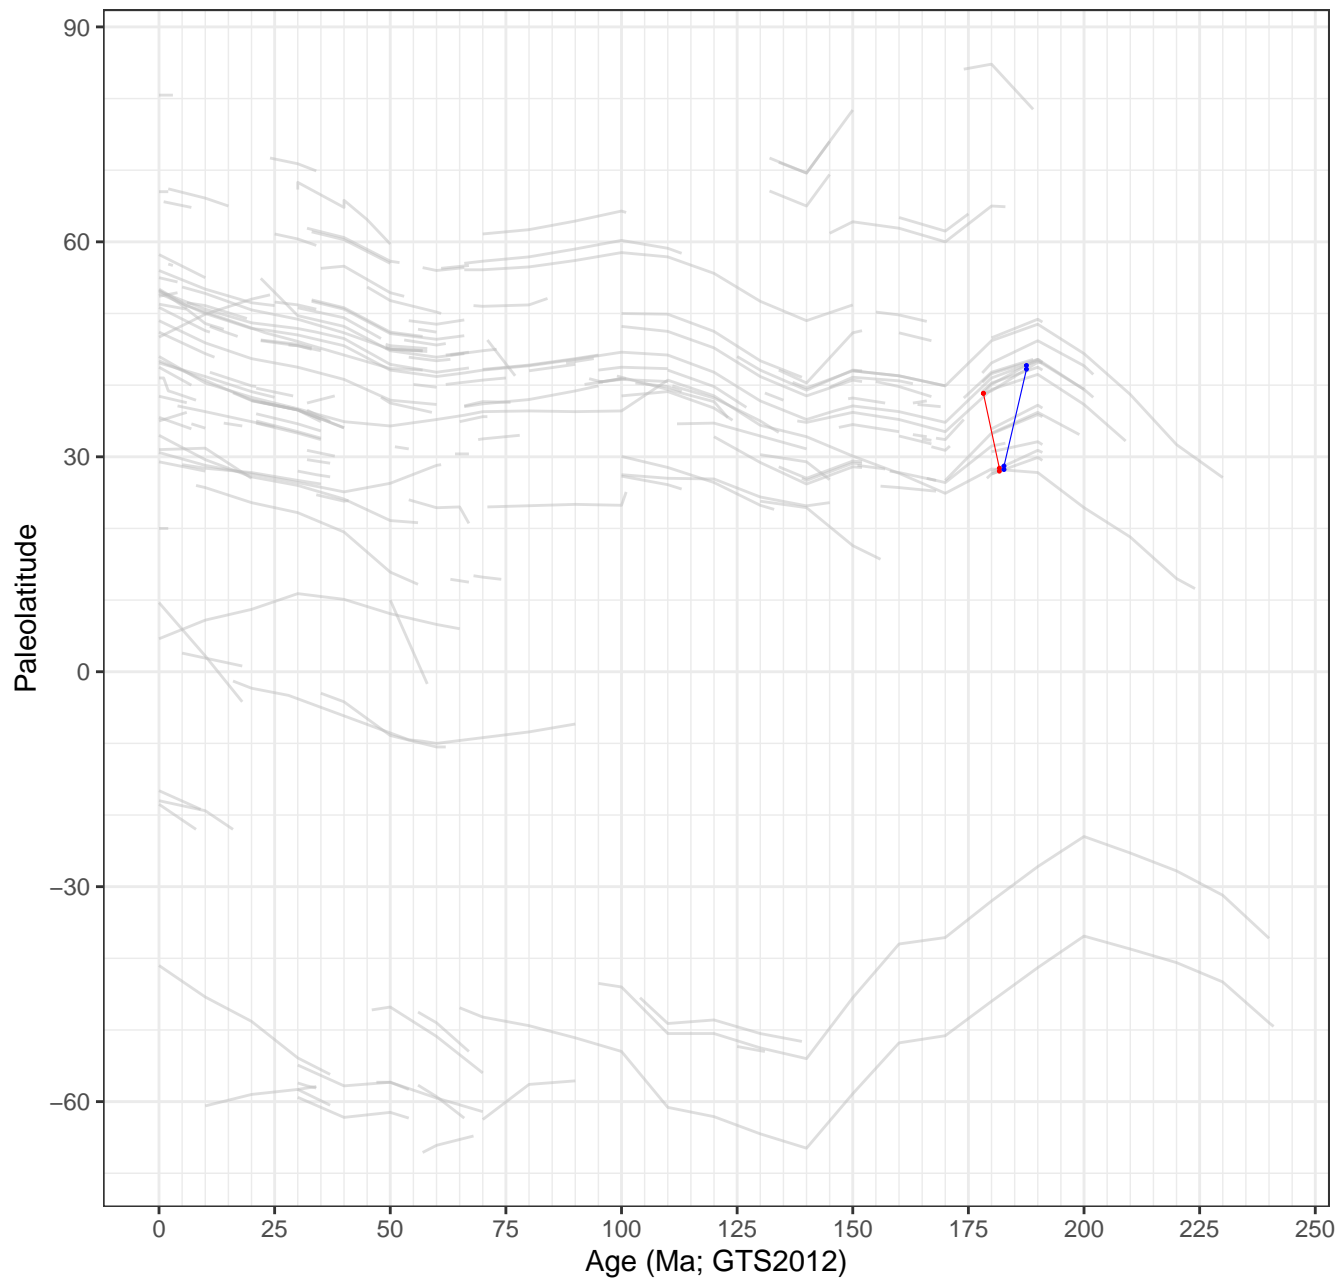

Supplement: Supplementary file 2584 [file Valvaeodinium scalatum.pdf › Supplement/Supplement 2/Species 1914 plots/Valvaeodinium scalatum.pdf]

# Species *Valvaedinium sphaerechinatum*

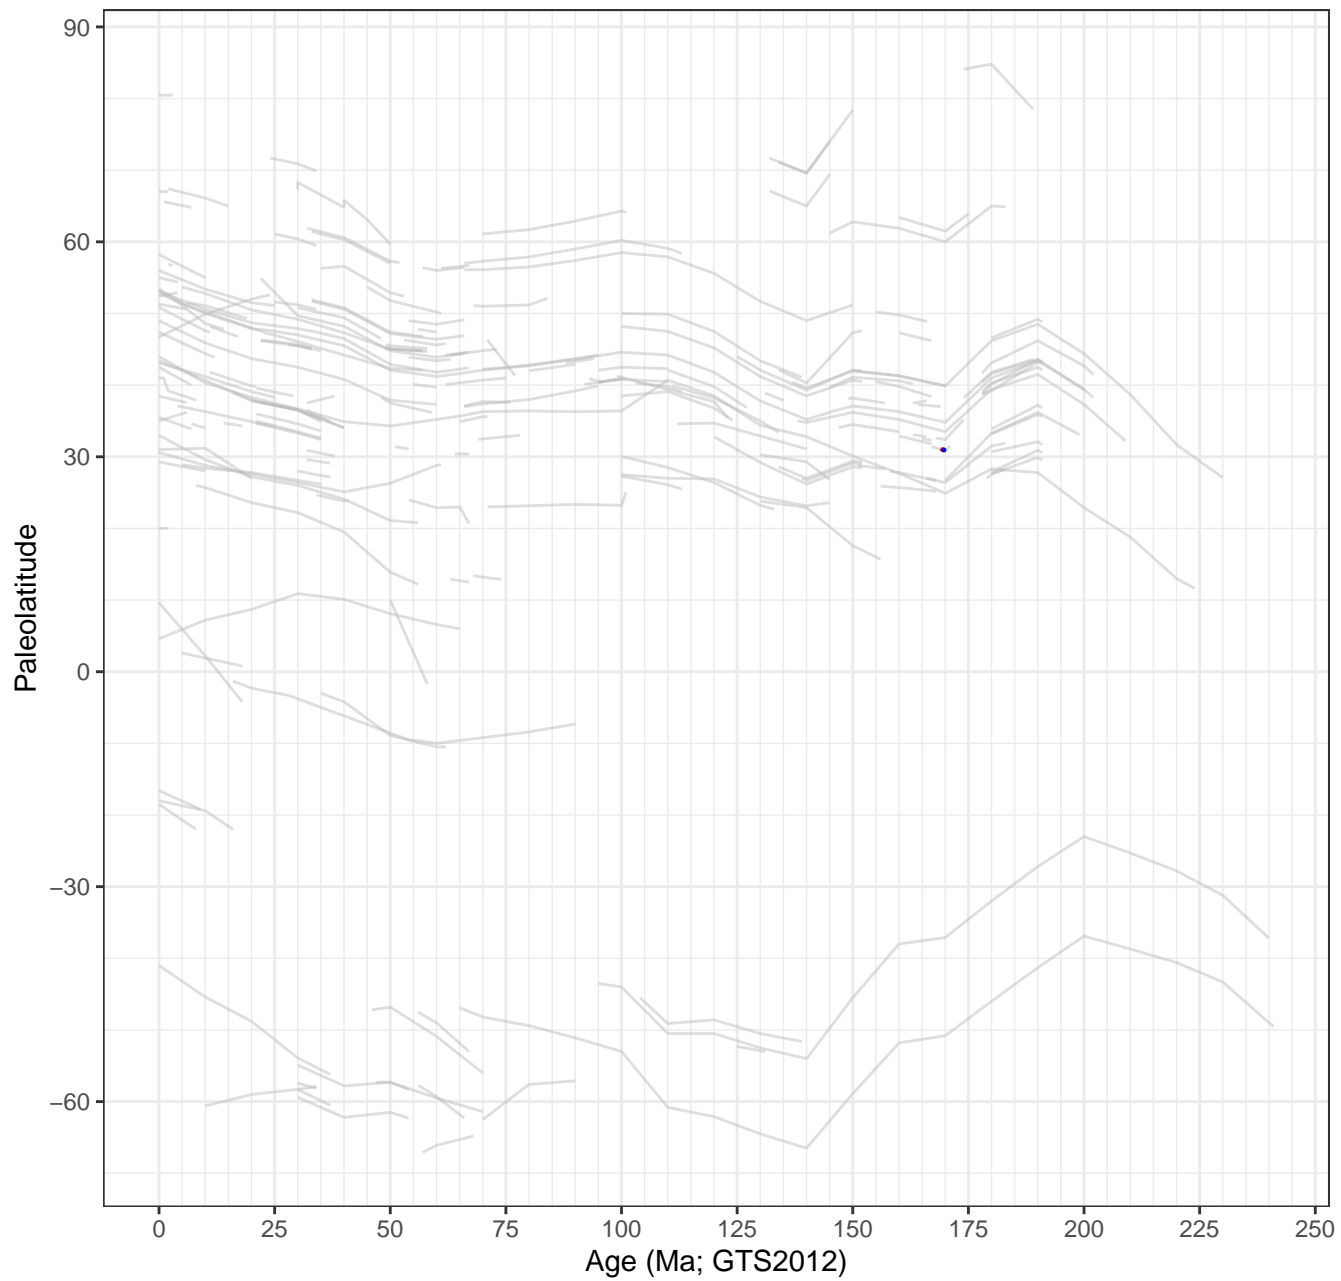

Supplement: Supplementary file 2585 [file Valvaeodinium sphaerechinatum.pdf › Supplement/Supplement 2/Species 1914 plots/Valvaeodinium sphaerechinatum.pdf]

# Species *Valvaeodinium spinosum*

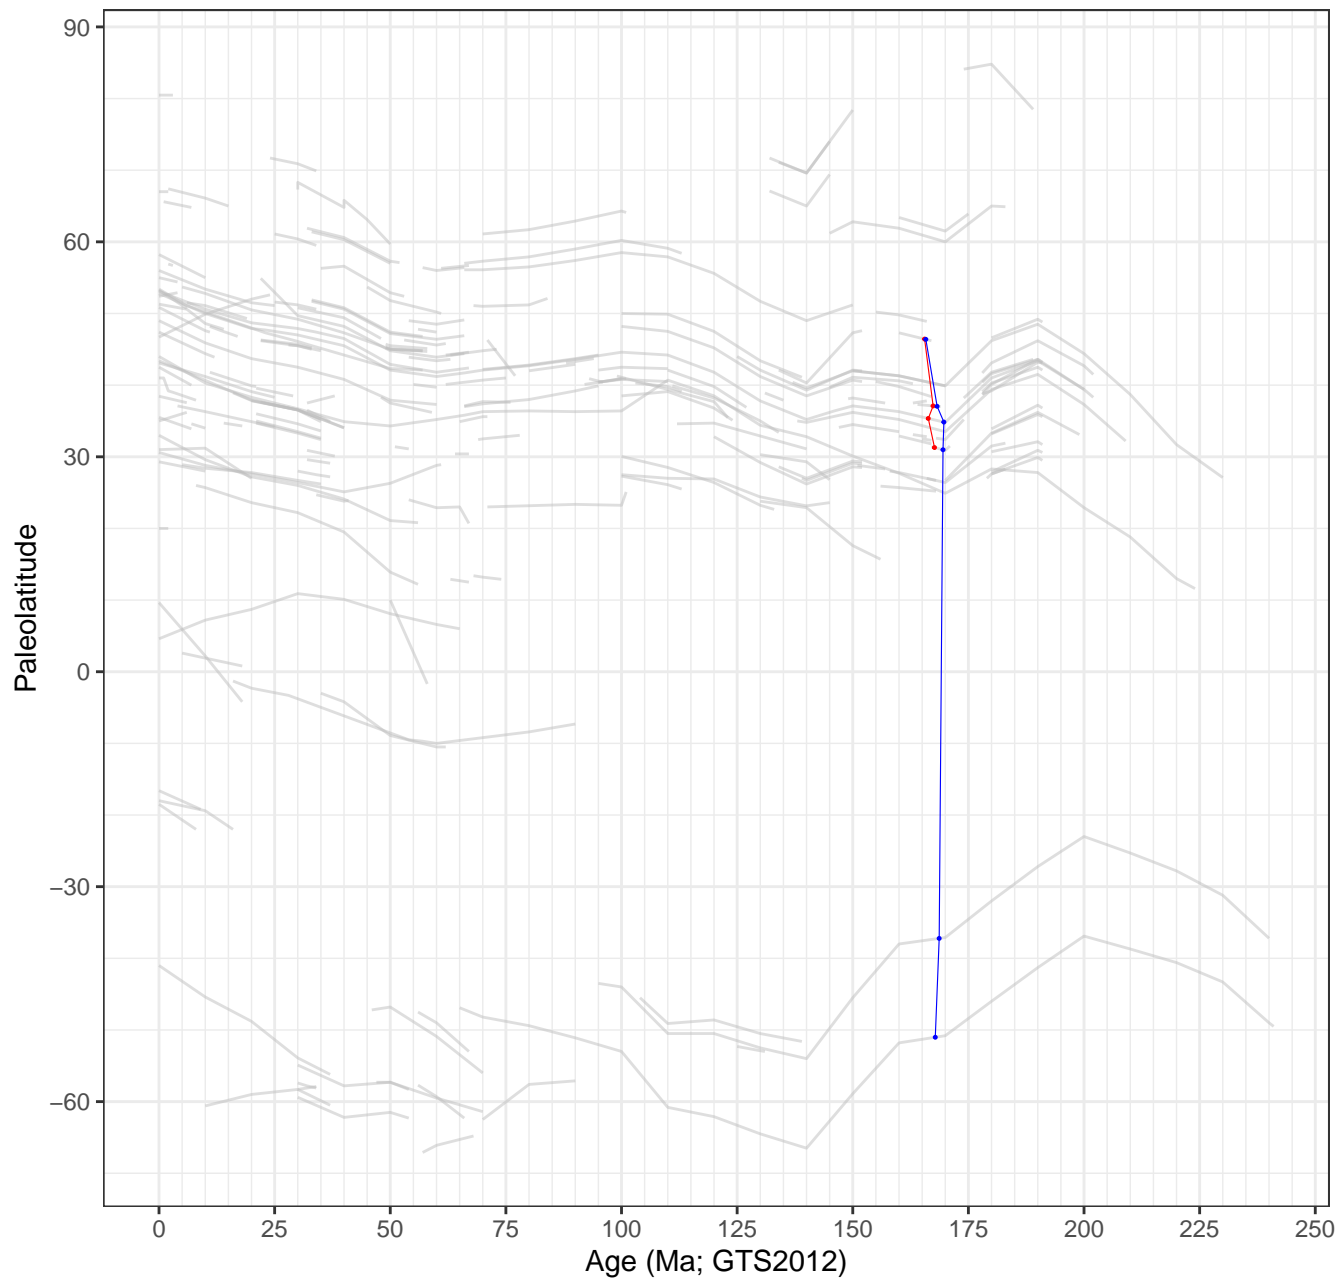

Supplement: Supplementary file 2586 [file Valvaeodinium spinosum.pdf › Supplement/Supplement 2/Species 1914 plots/Valvaeodinium spinosum.pdf]

# Species *Valvaedinium spongiosum*

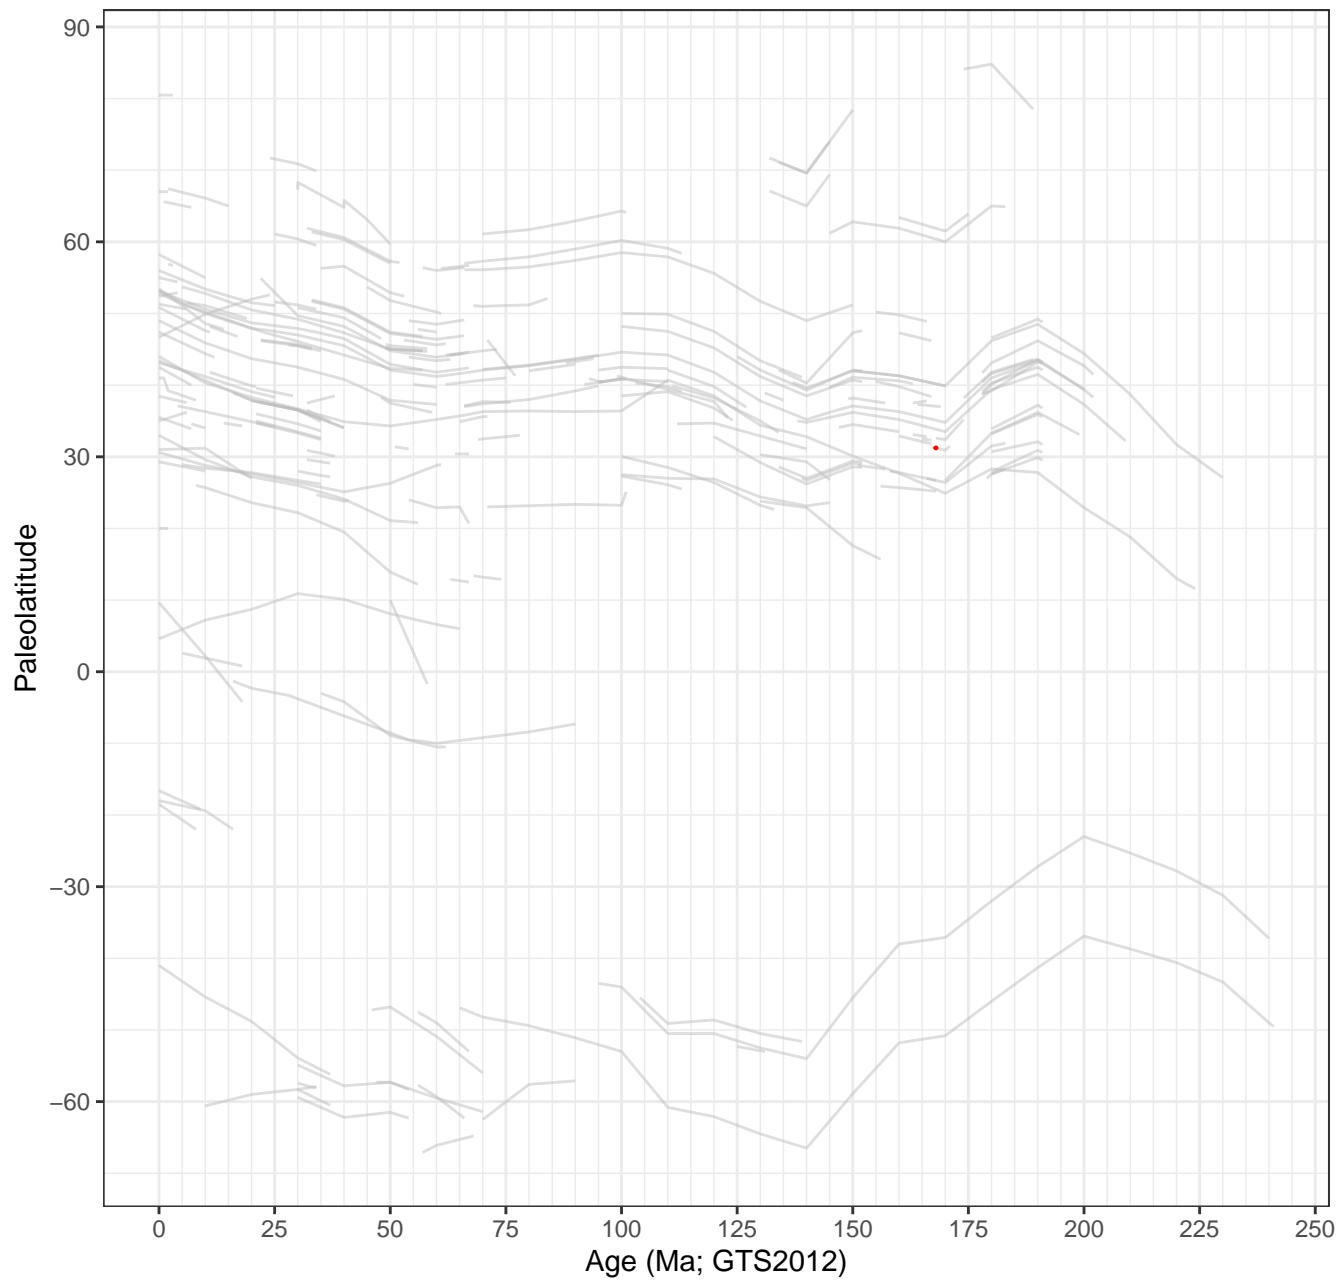

Supplement: Supplementary file 2587 [file Valvaeodinium spongiosum.pdf › Supplement/Supplement 2/Species 1914 plots/Valvaeodinium spongiosum.pdf]

# Species *Valvaeodinium stipulatum*

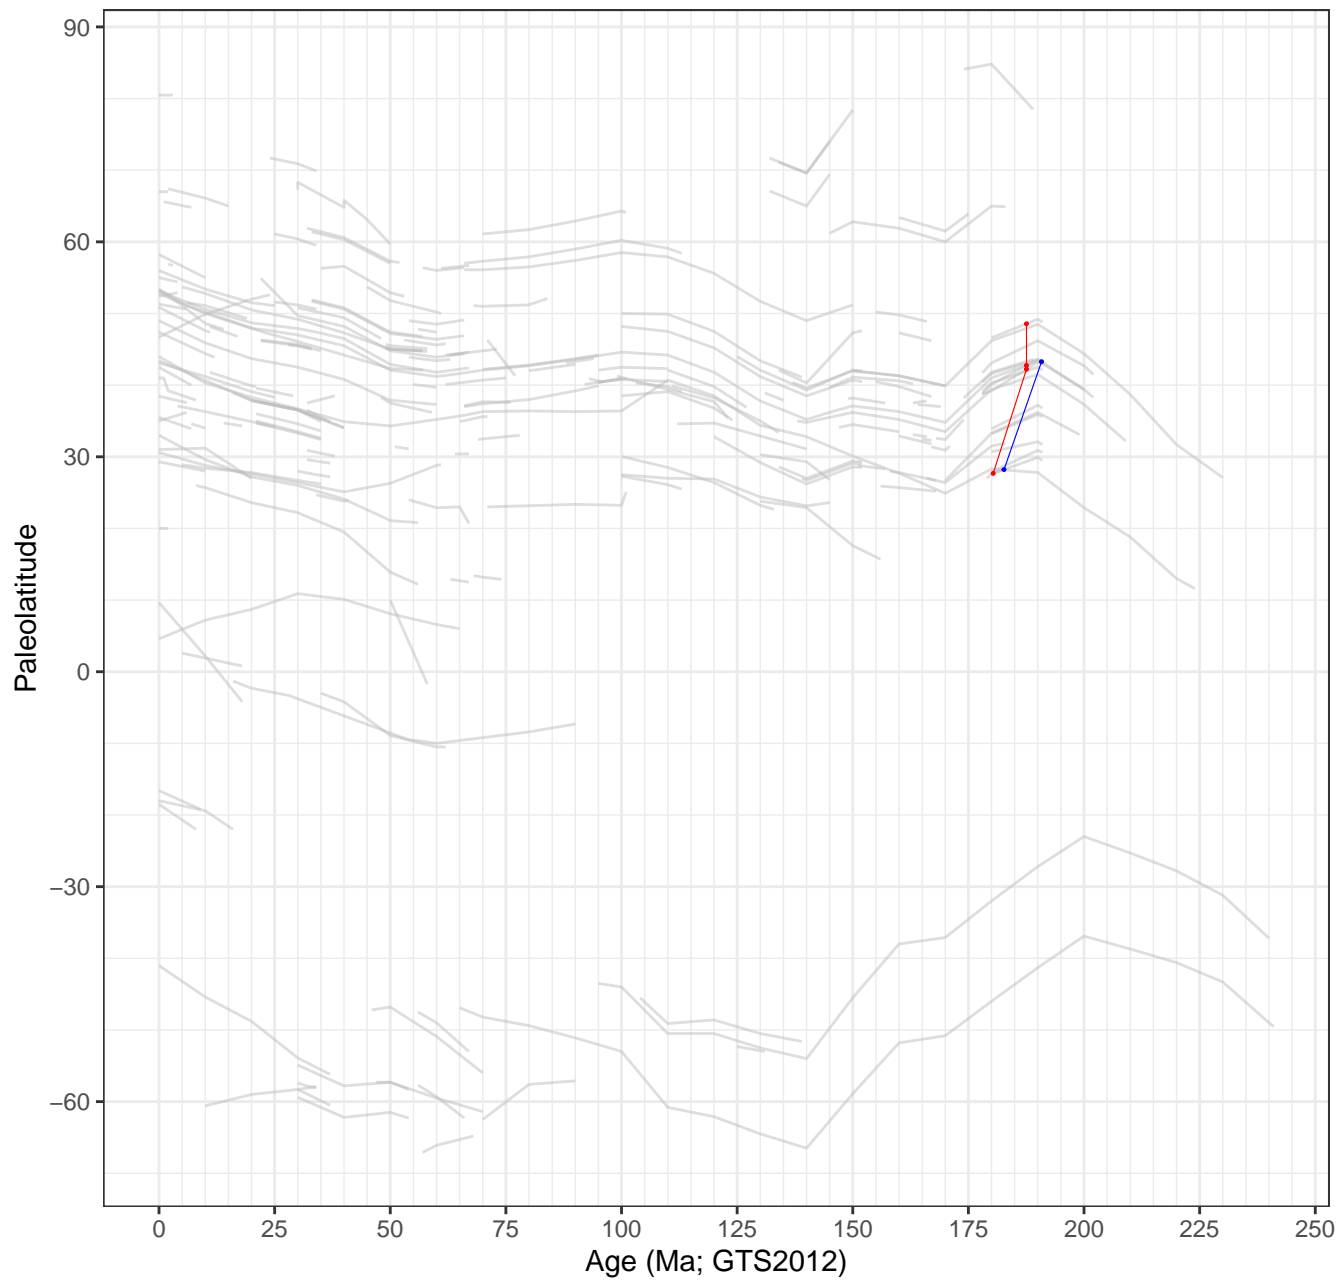

Supplement: Supplementary file 2588 [file Valvaeodinium stipulatum.pdf › Supplement/Supplement 2/Species 1914 plots/Valvaeodinium stipulatum.pdf]

# Species *Valvaedinium vermicylindratum*

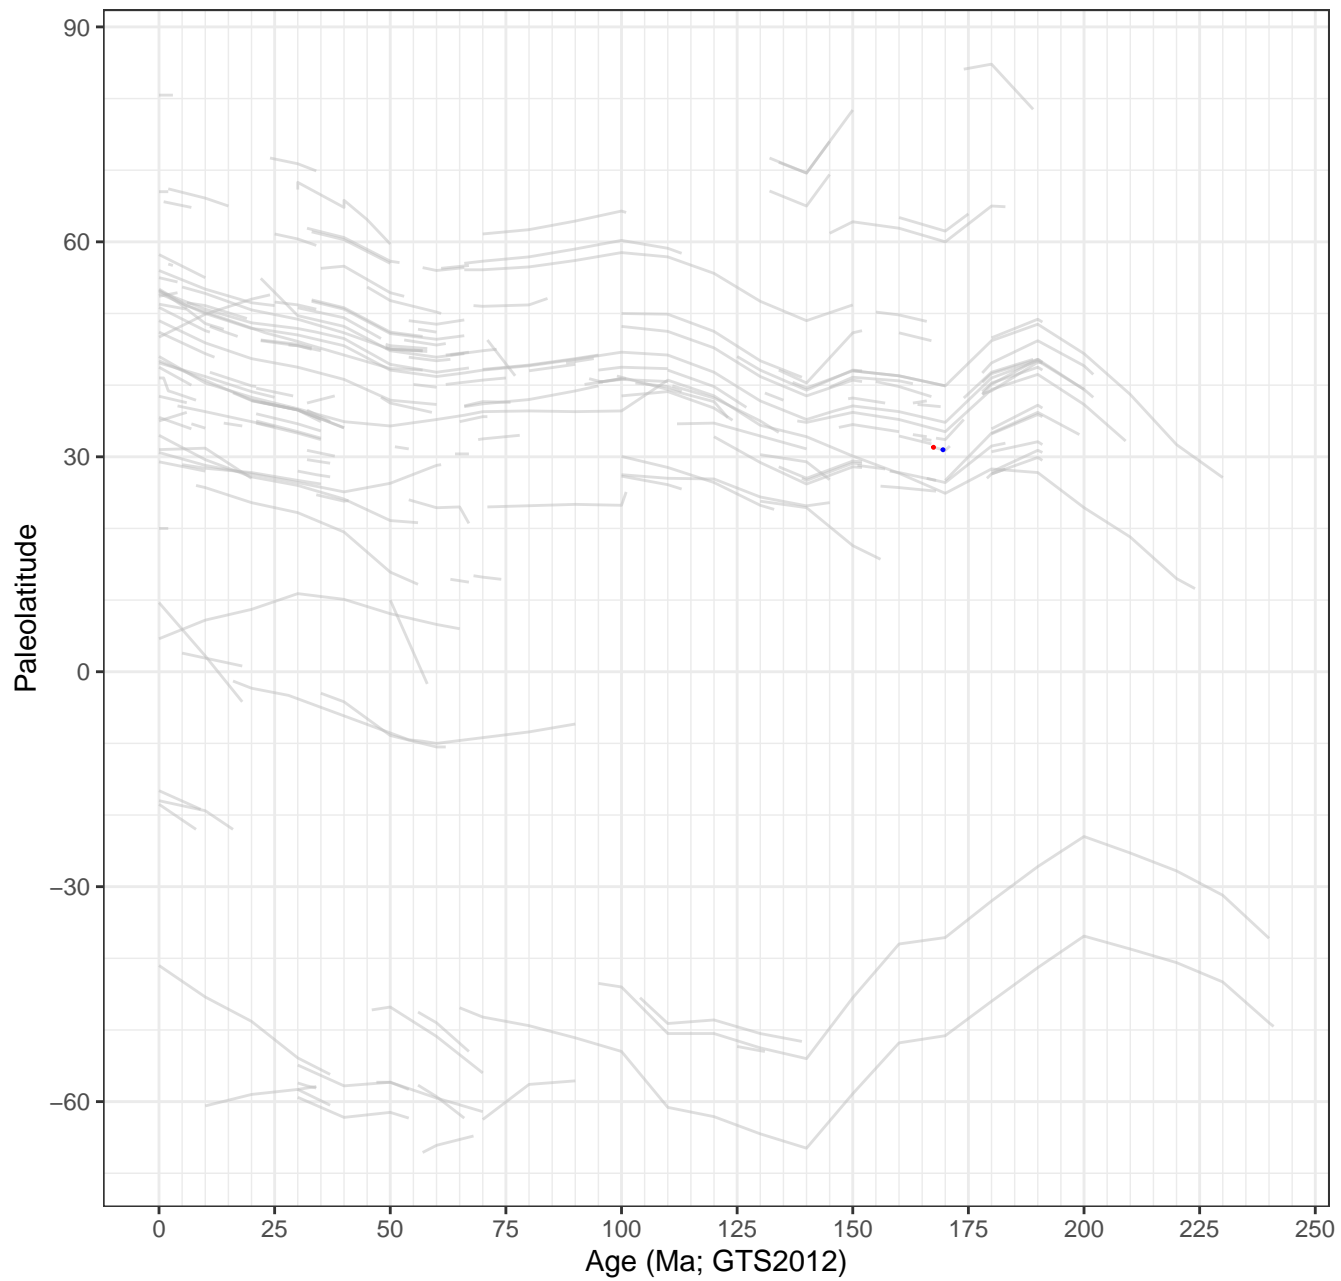

Supplement: Supplementary file 2589 [file Valvaeodinium vermicylindratum.pdf › Supplement/Supplement 2/Species 1914 plots/Valvaeodinium vermicylindratum.pdf]

# Species *Valvaedinium vermiculatum*

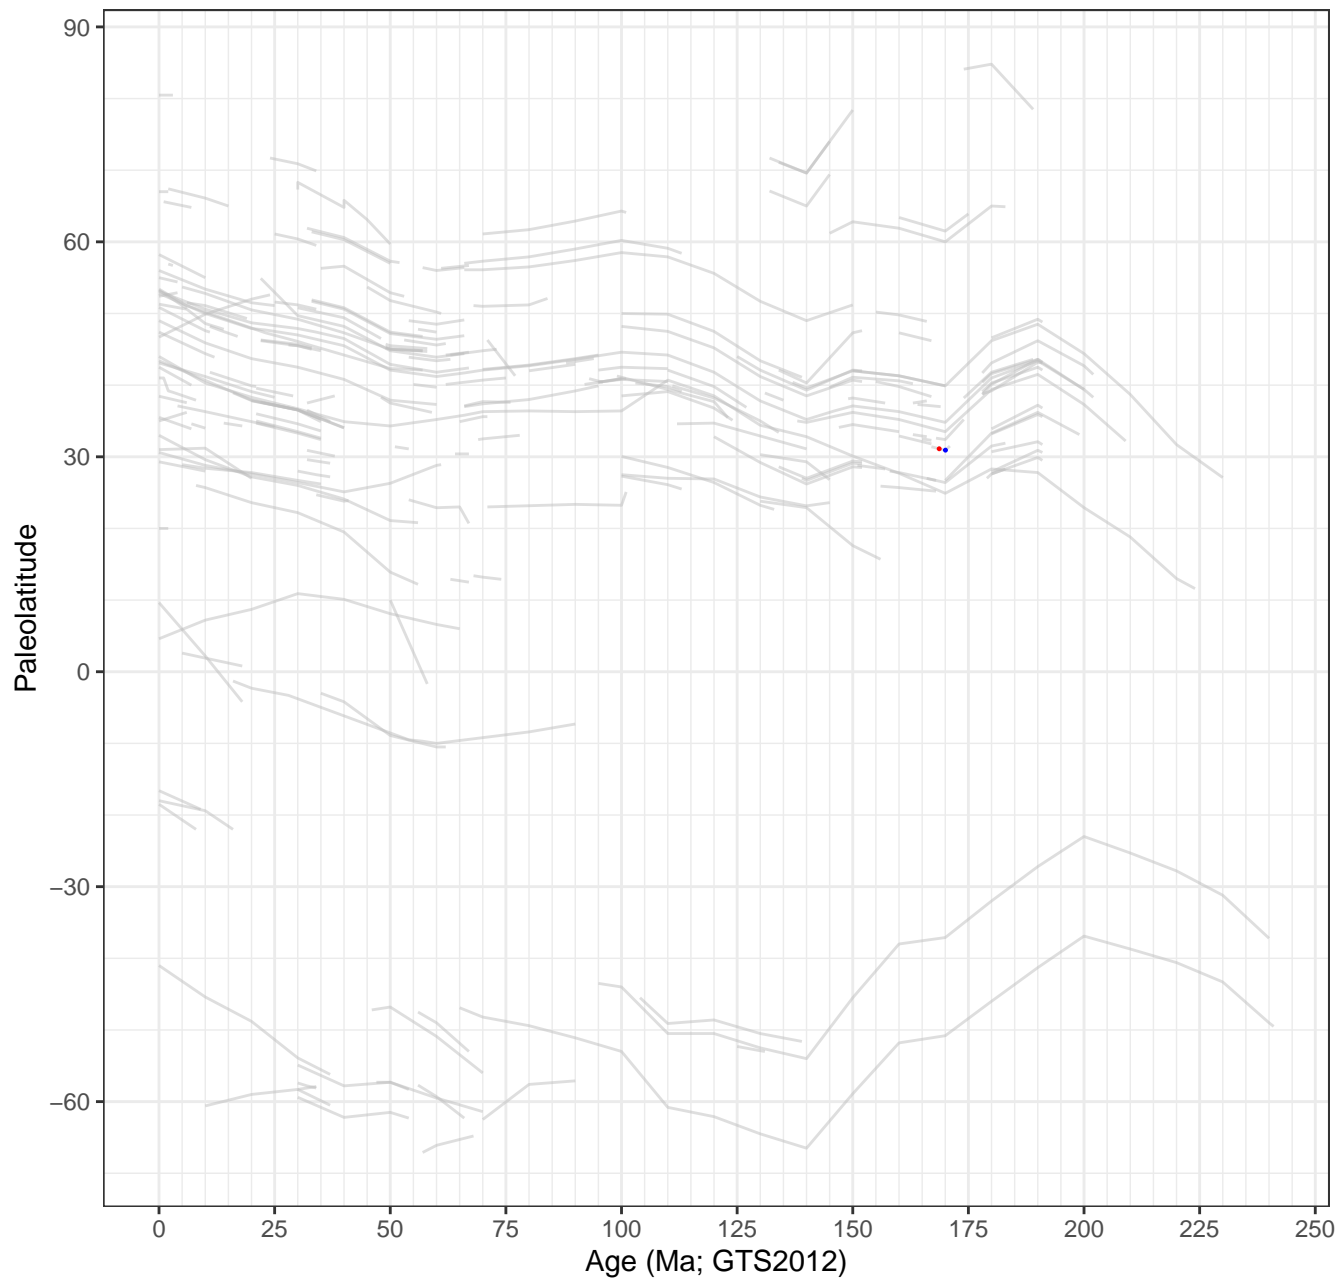

Supplement: Supplementary file 2590 [file Valvaeodinium vermipellitum.pdf › Supplement/Supplement 2/Species 1914 plots/Valvaeodinium vermipellitum.pdf]

# Species *Vectidinium stoveri*

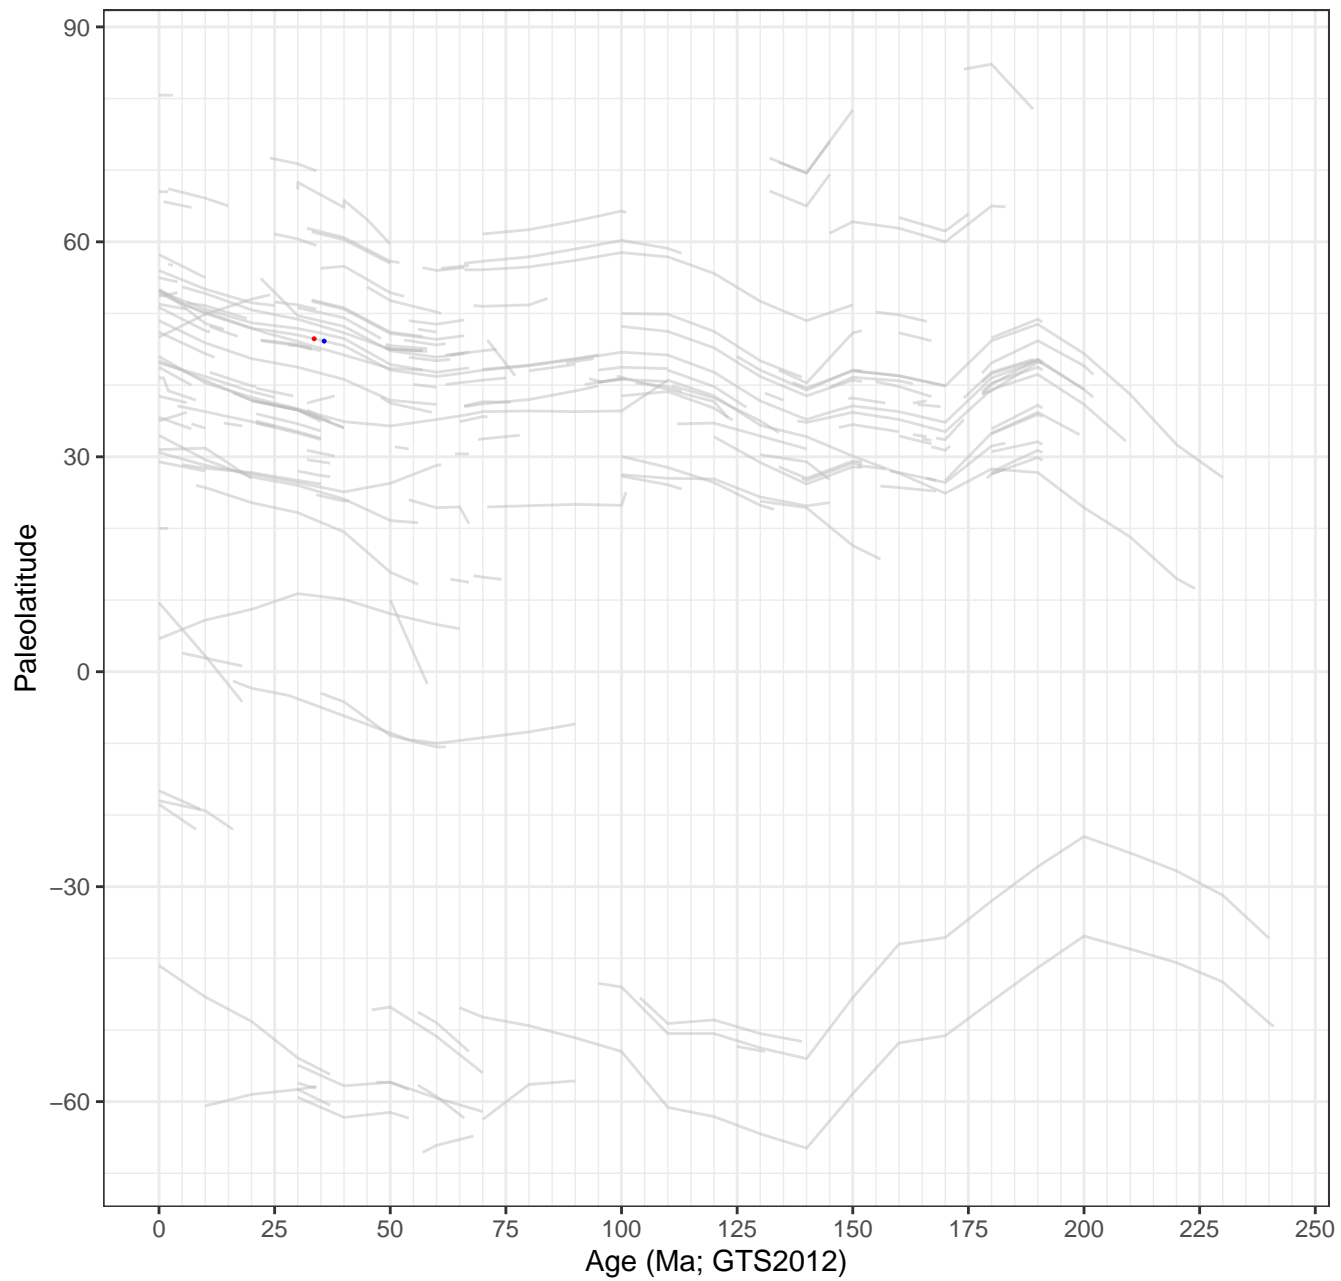

Supplement: Supplementary file 2591 [file Vectidinium stoveri.pdf › Supplement/Supplement 2/Species 1914 plots/Vectidinium stoveri.pdf]

# Species *Vesperopsis digitata*

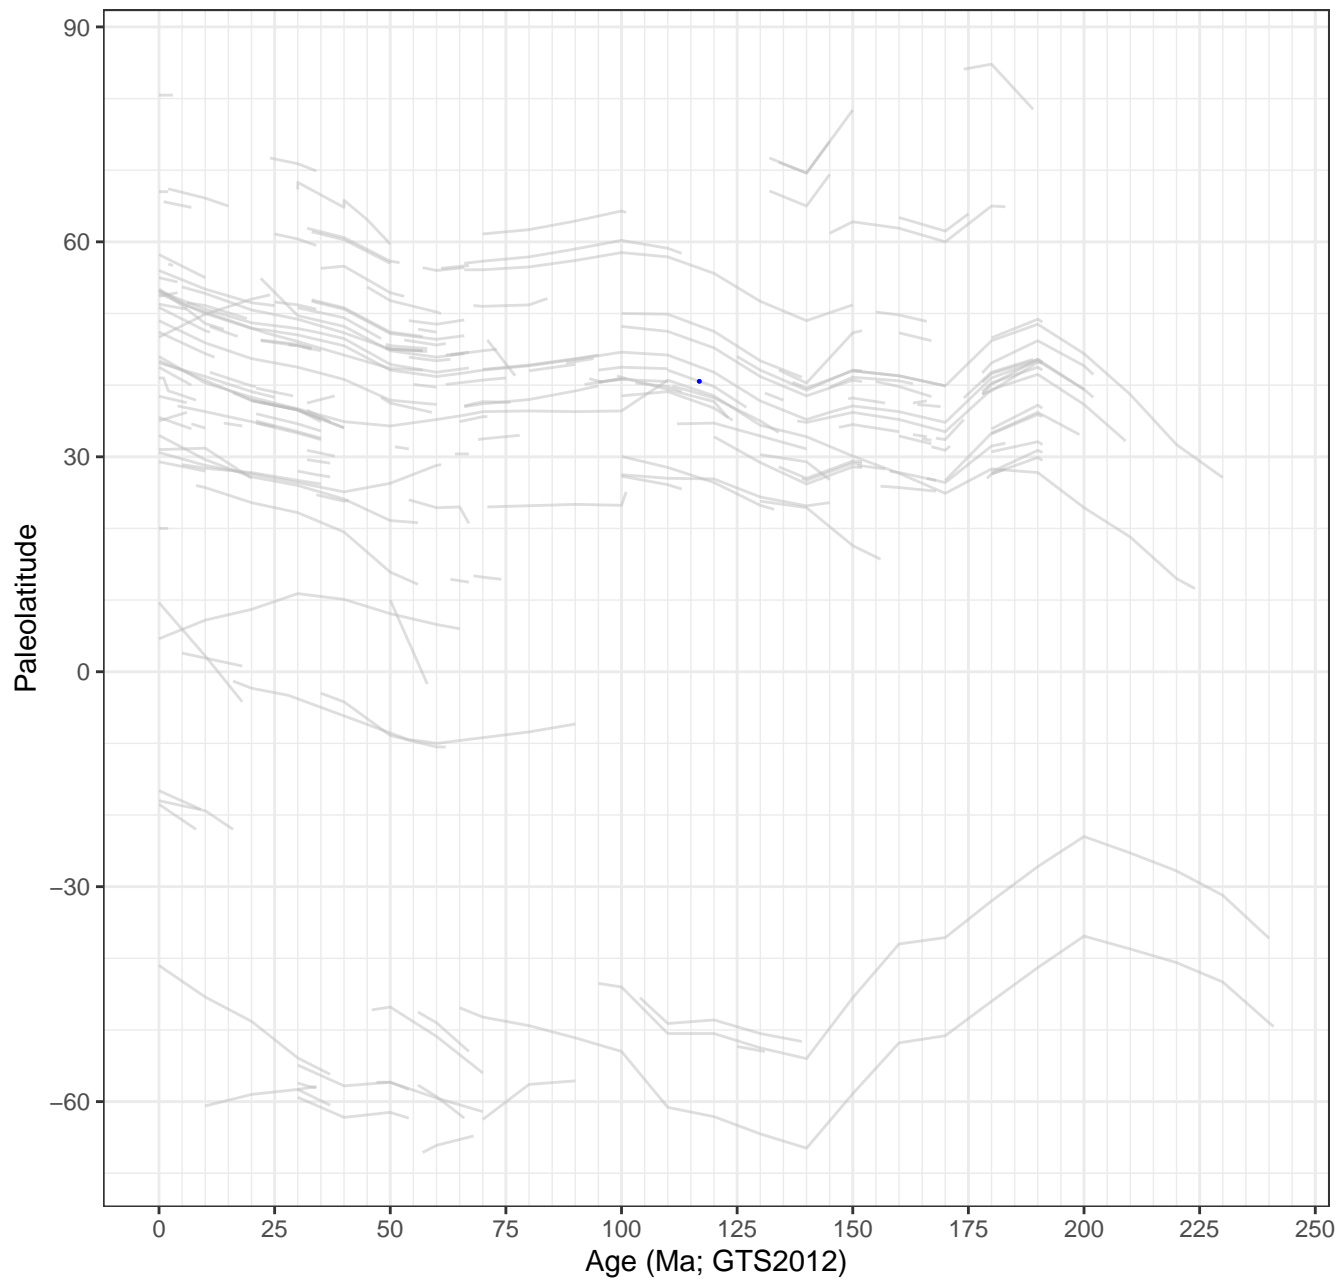

Supplement: Supplementary file 2592 [file Vesperopsis digitata.pdf › Supplement/Supplement 2/Species 1914 plots/Vesperopsis digitata.pdf]

# Species *Vesperopsis longicornis*

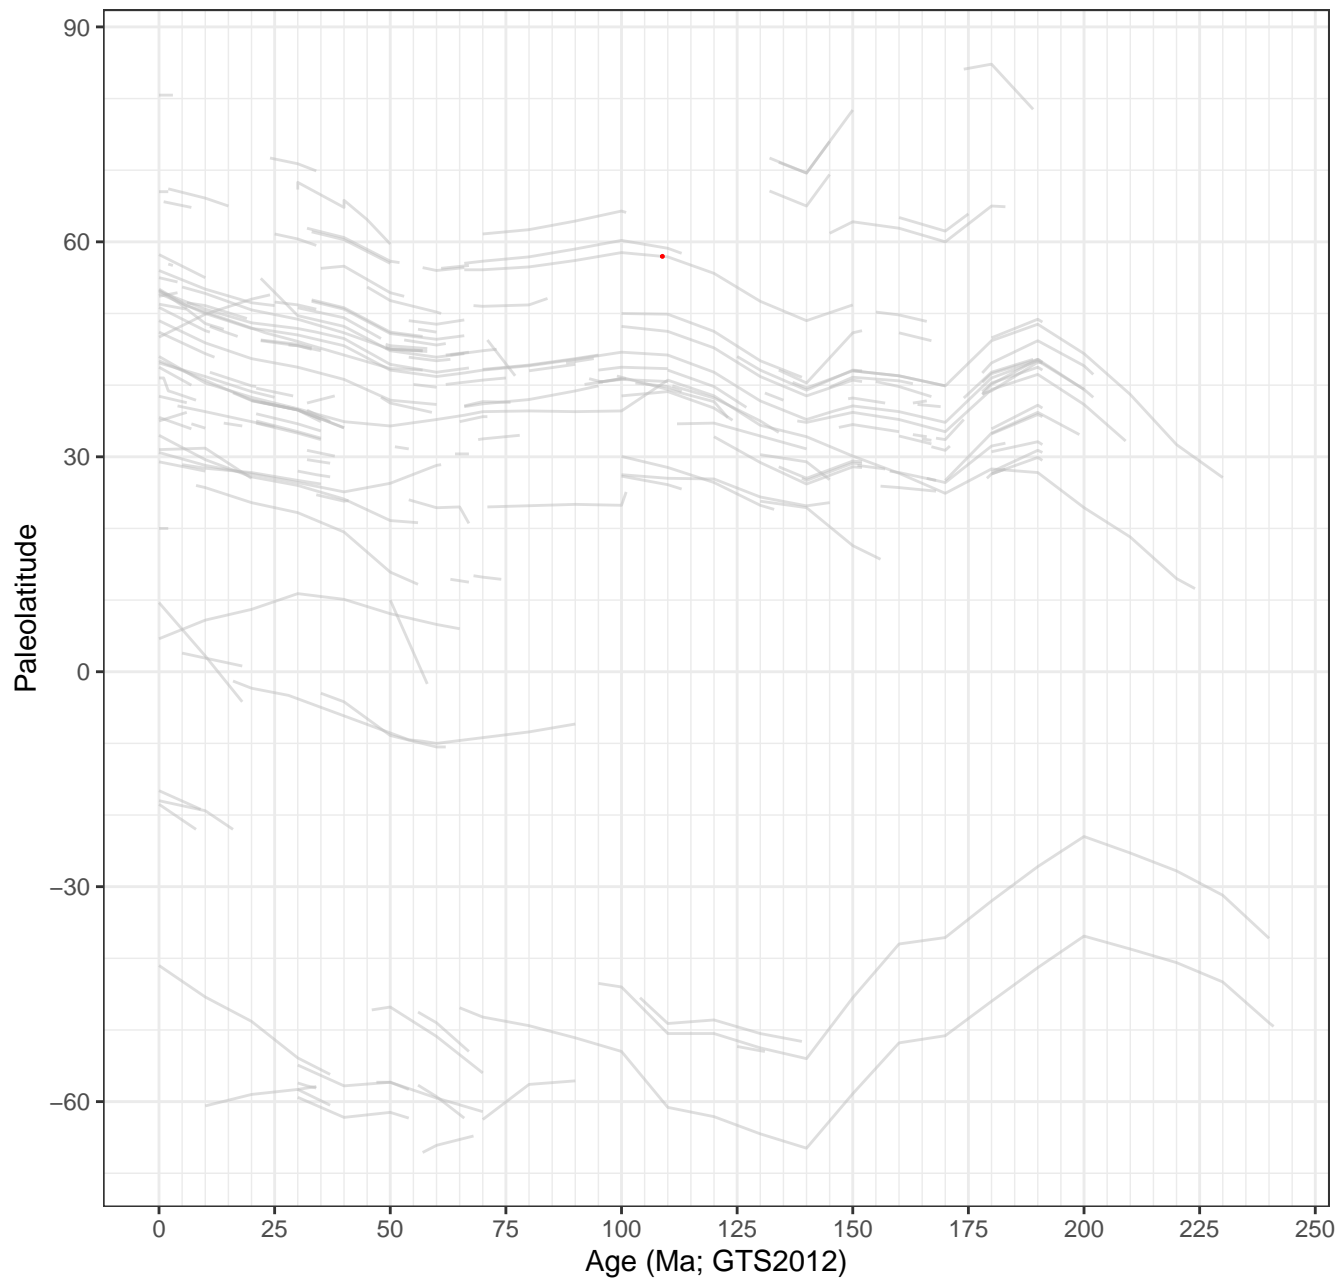

Supplement: Supplementary file 2593 [file Vesperopsis longicornis.pdf › Supplement/Supplement 2/Species 1914 plots/Vesperopsis longicornis.pdf]

# Species *Vesperopsis mayi*

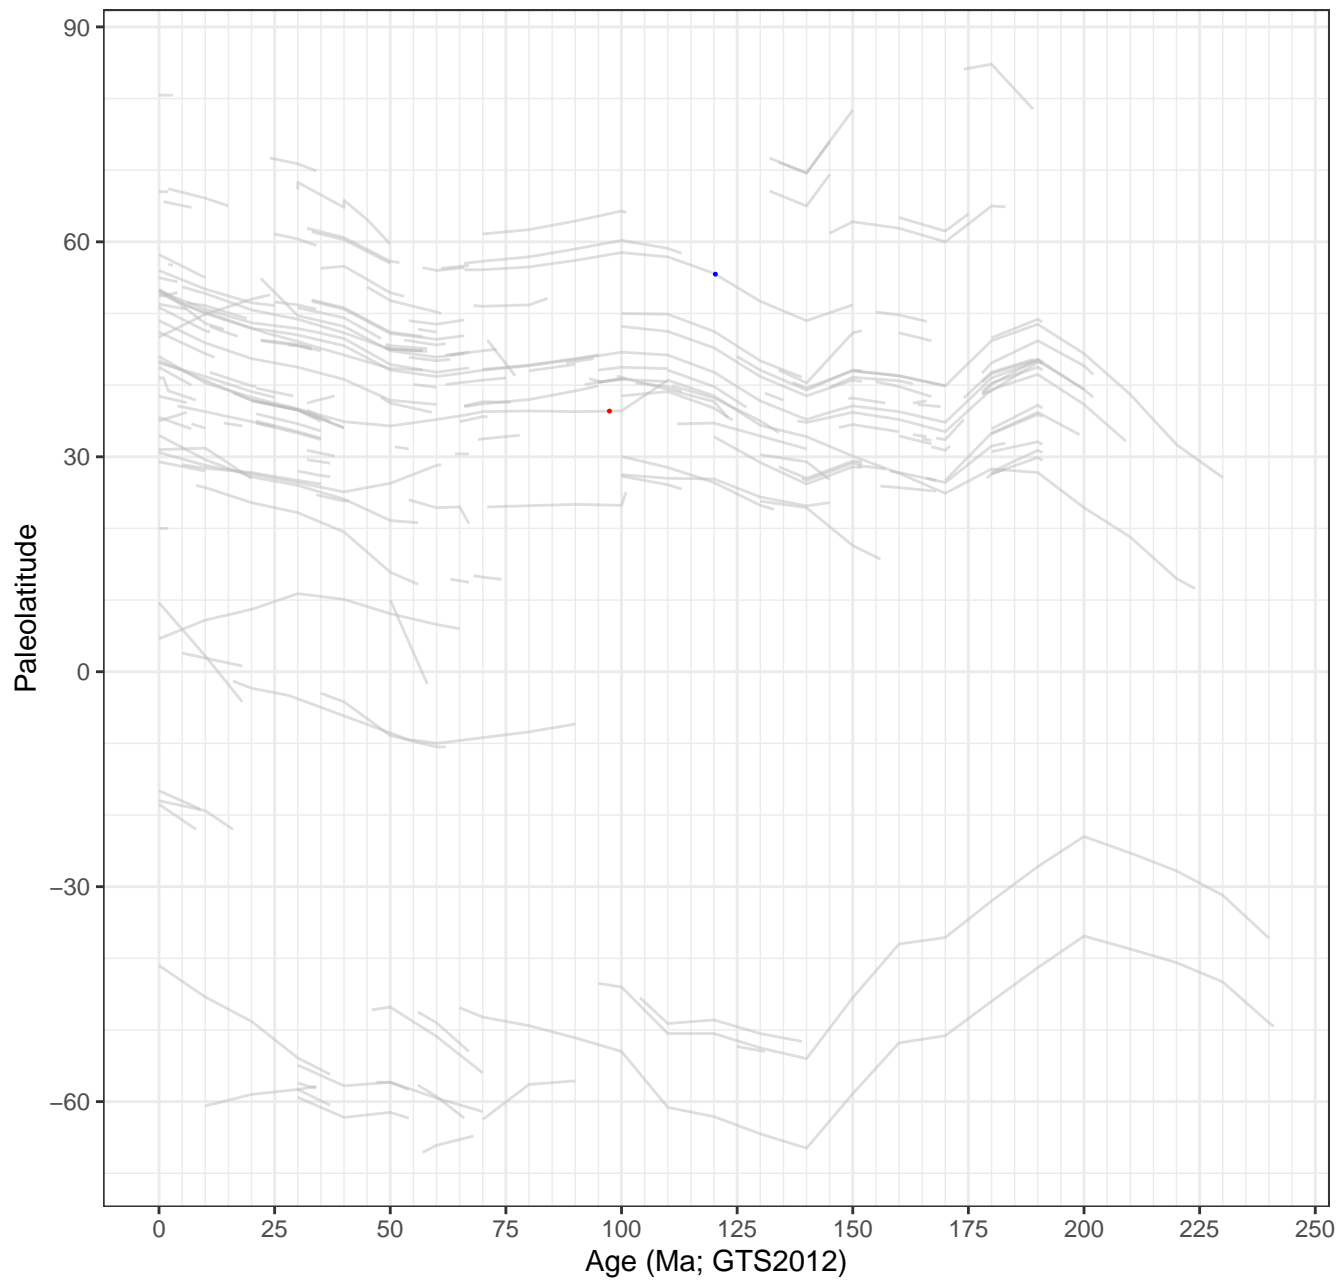

Supplement: Supplementary file 2594 [file Vesperopsis mayi.pdf › Supplement/Supplement 2/Species 1914 plots/Vesperopsis mayi.pdf]

# Species *Vesperopsis* spp.

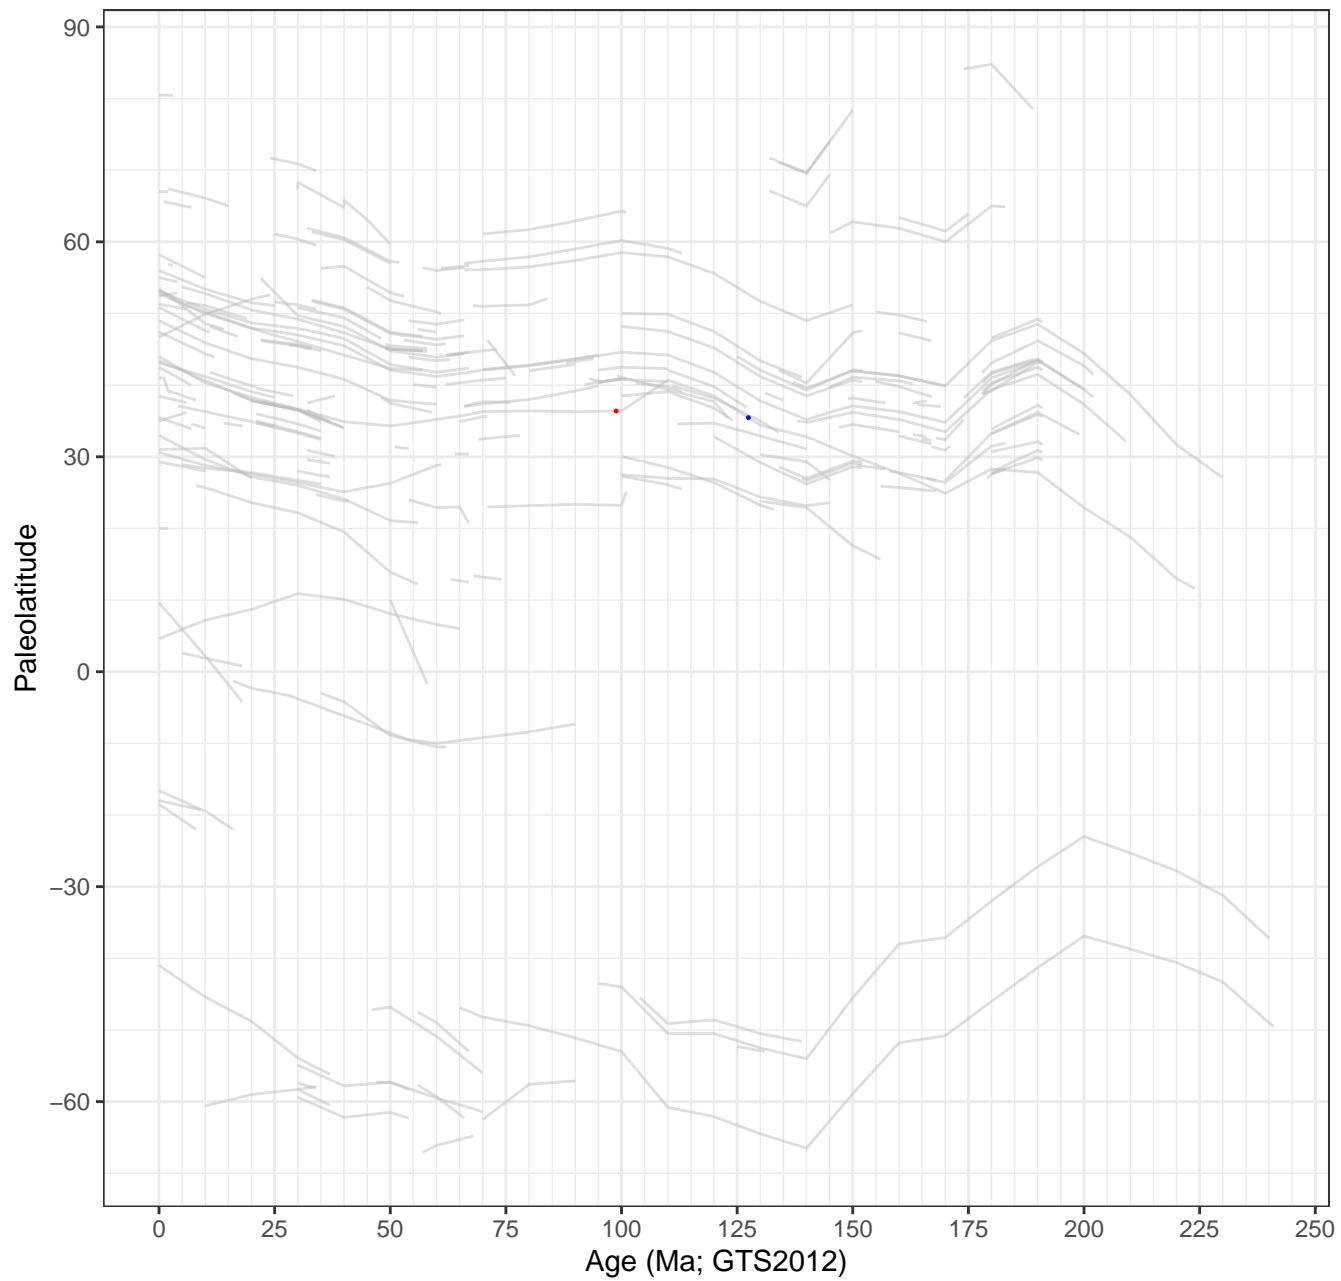

Supplement: Supplementary file 2595 [file Vesperopsis spp..pdf › Supplement/Supplement 2/Species 1914 plots/Vesperopsis spp..pdf]

# Species *Voodooia tabulata*

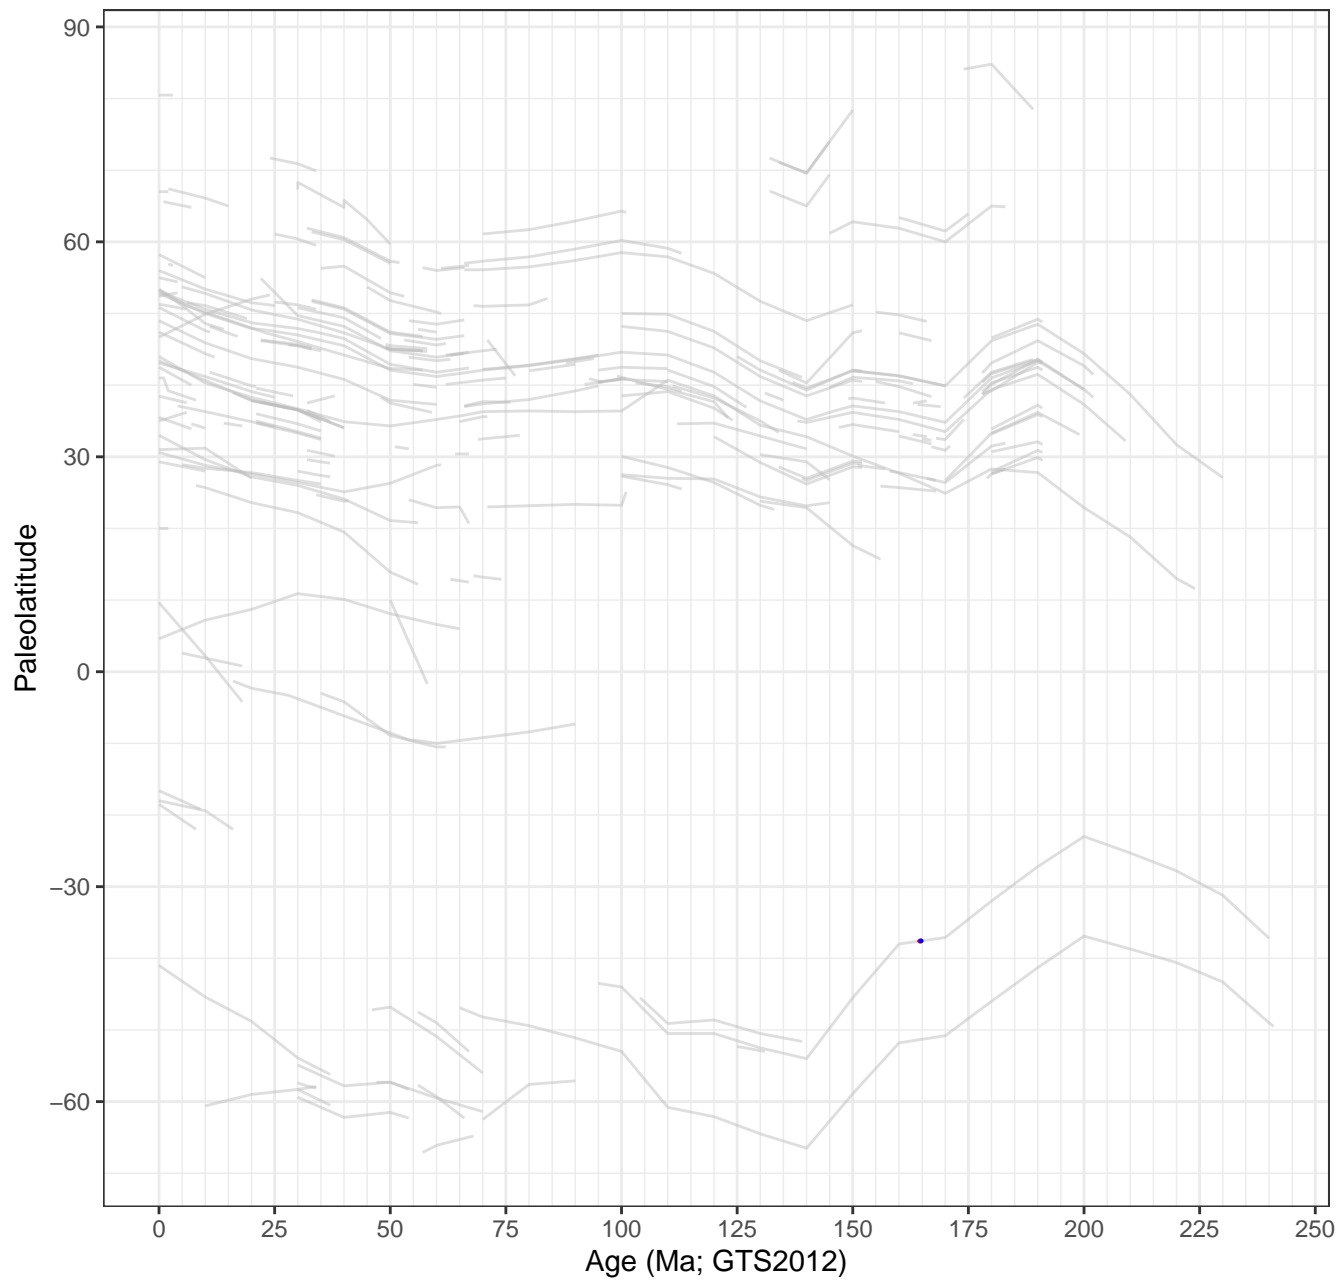

Supplement: Supplementary file 2596 [file Voodooia tabulata.pdf › Supplement/Supplement 2/Species 1914 plots/Voodooia tabulata.pdf]

# Species Votadinium calvum

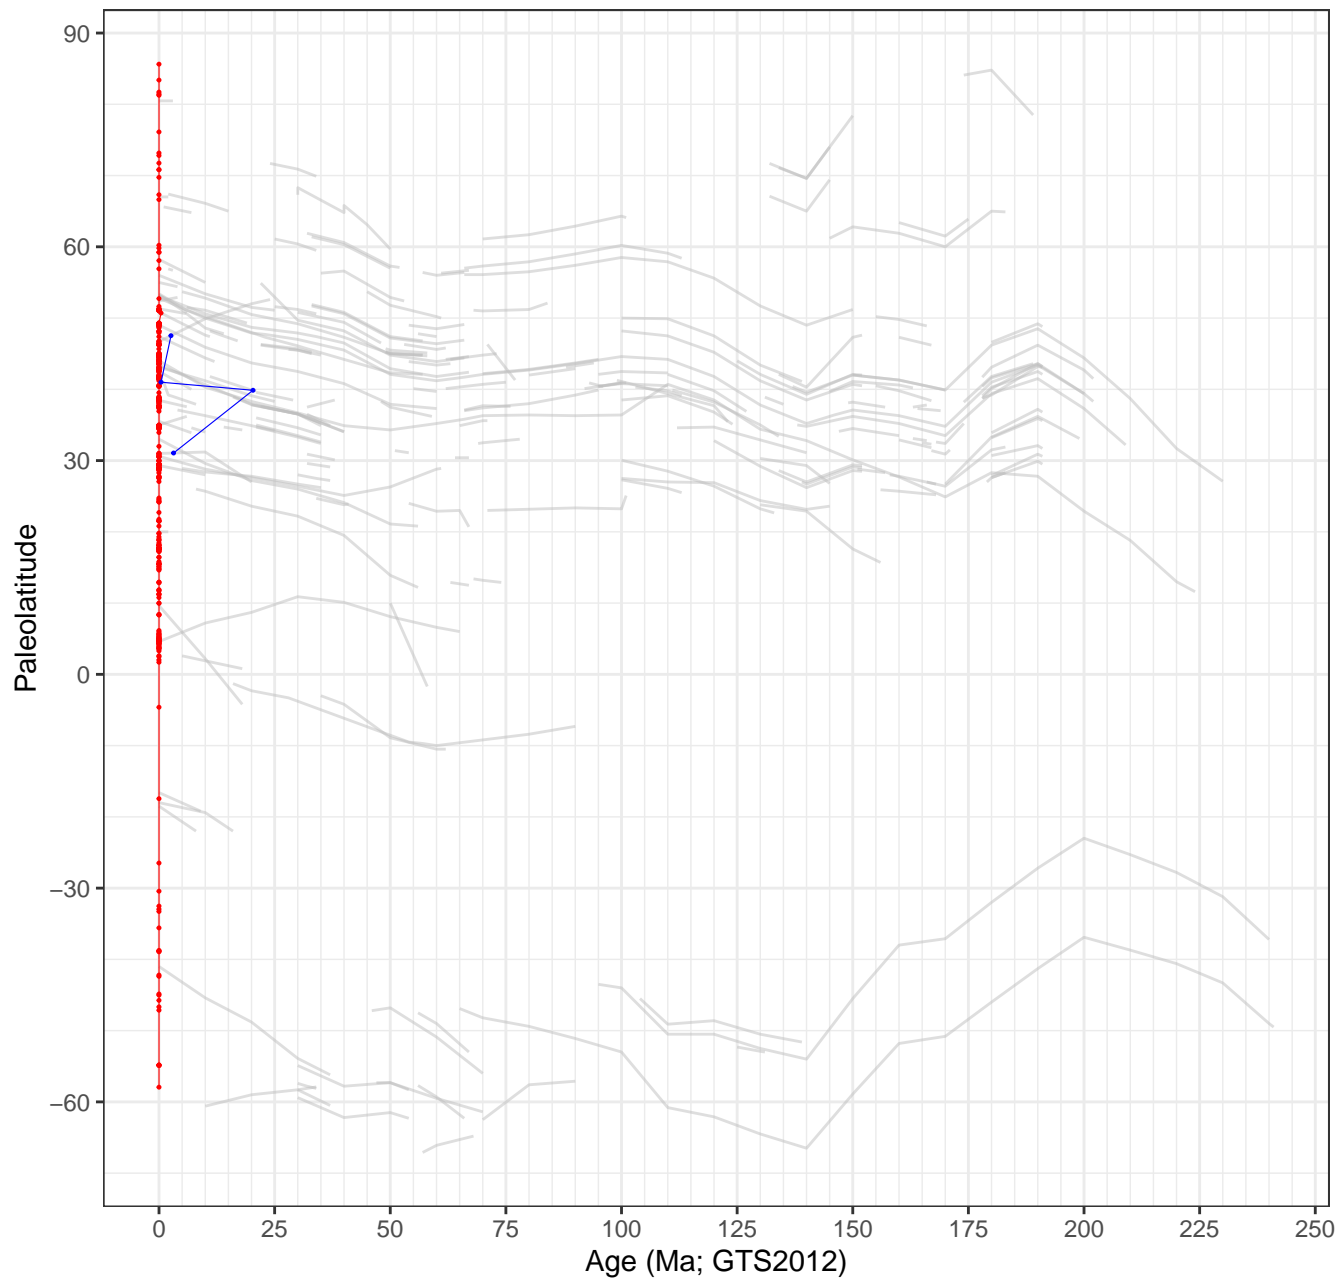

Supplement: Supplementary file 2597 [file Votadinium calvum.pdf › Supplement/Supplement 2/Species 1914 plots/Votadinium calvum.pdf]

# Species *Votadinium spinosum*

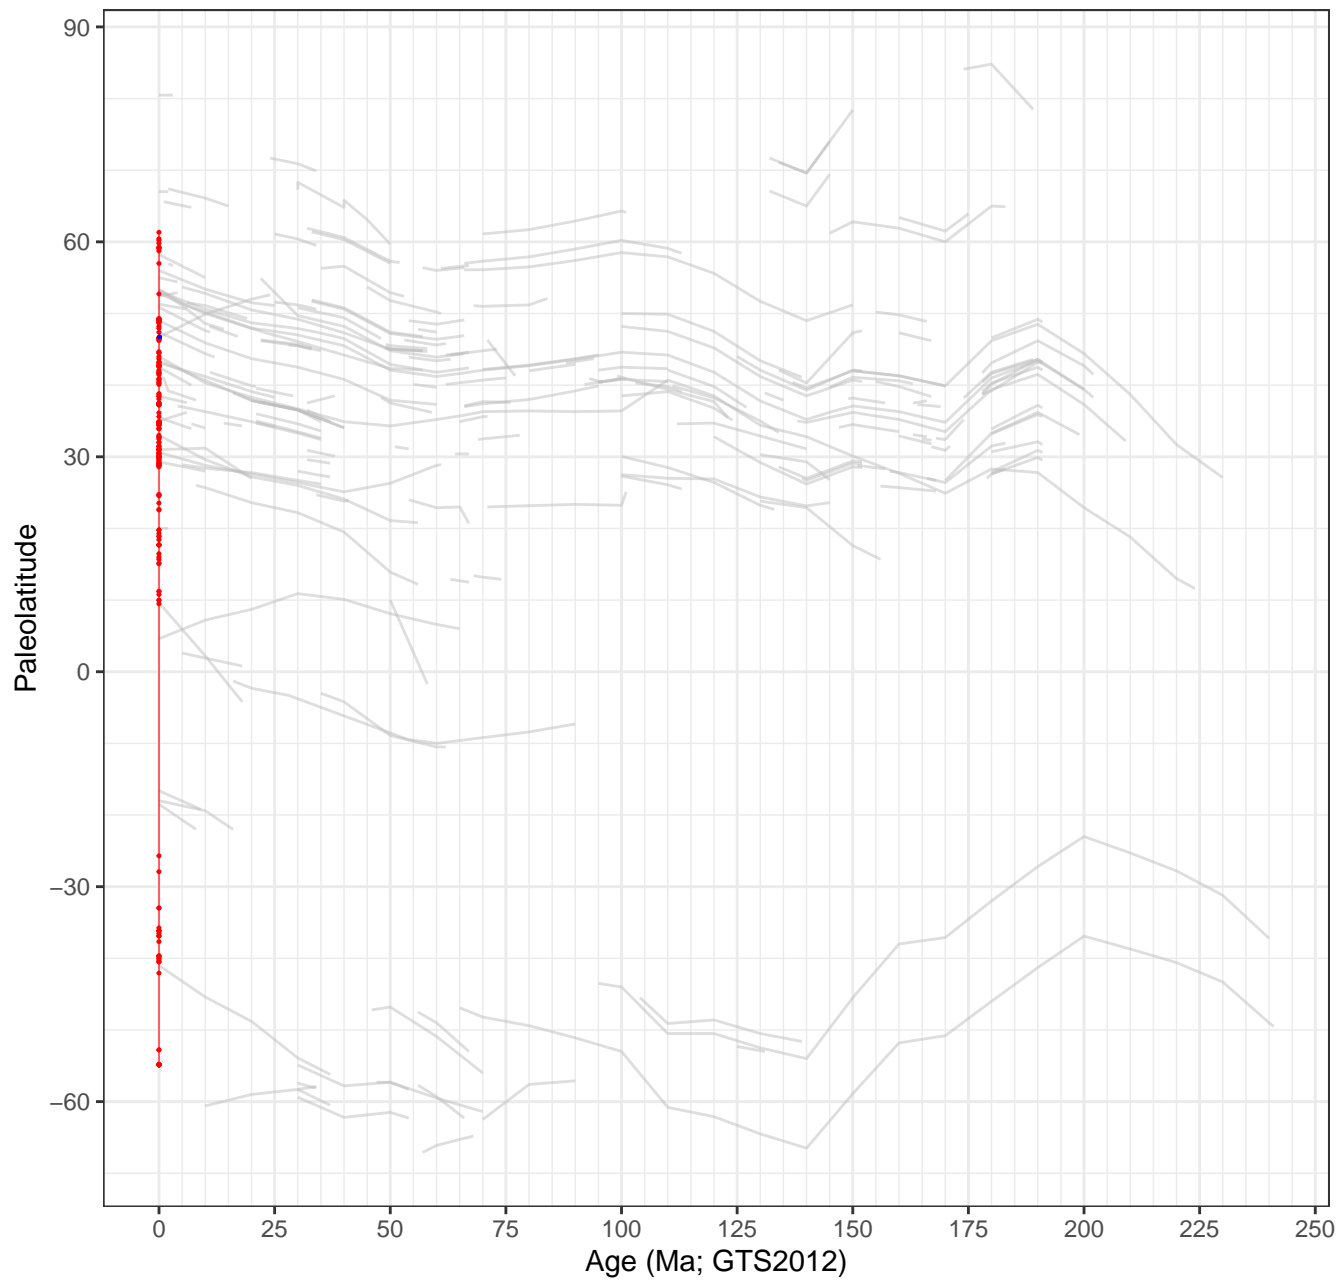

Supplement: Supplementary file 2598 [file Votadinium spinosum.pdf › Supplement/Supplement 2/Species 1914 plots/Votadinium spinosum.pdf]

# Species *Vozzhennikovia angulata*

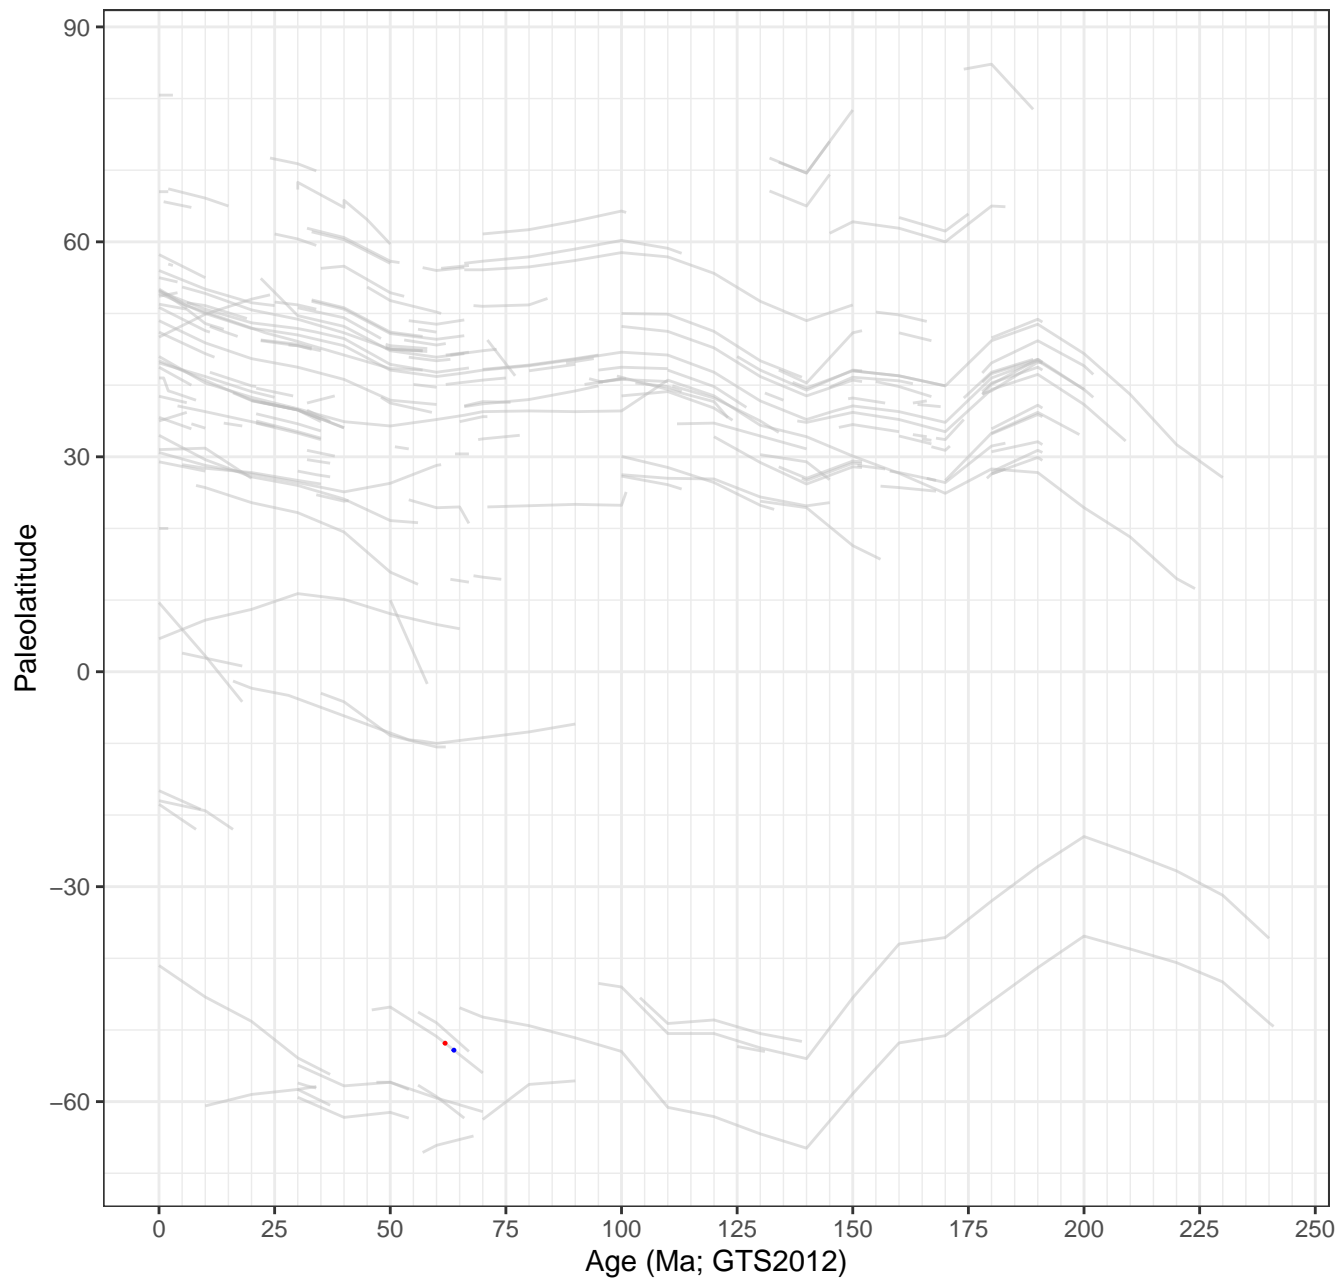

Supplement: Supplementary file 2599 [file Vozzhennikovia angulata.pdf › Supplement/Supplement 2/Species 1914 plots/Vozzhennikovia angulata.pdf]

# Species *Vozzhennikovia apertura*

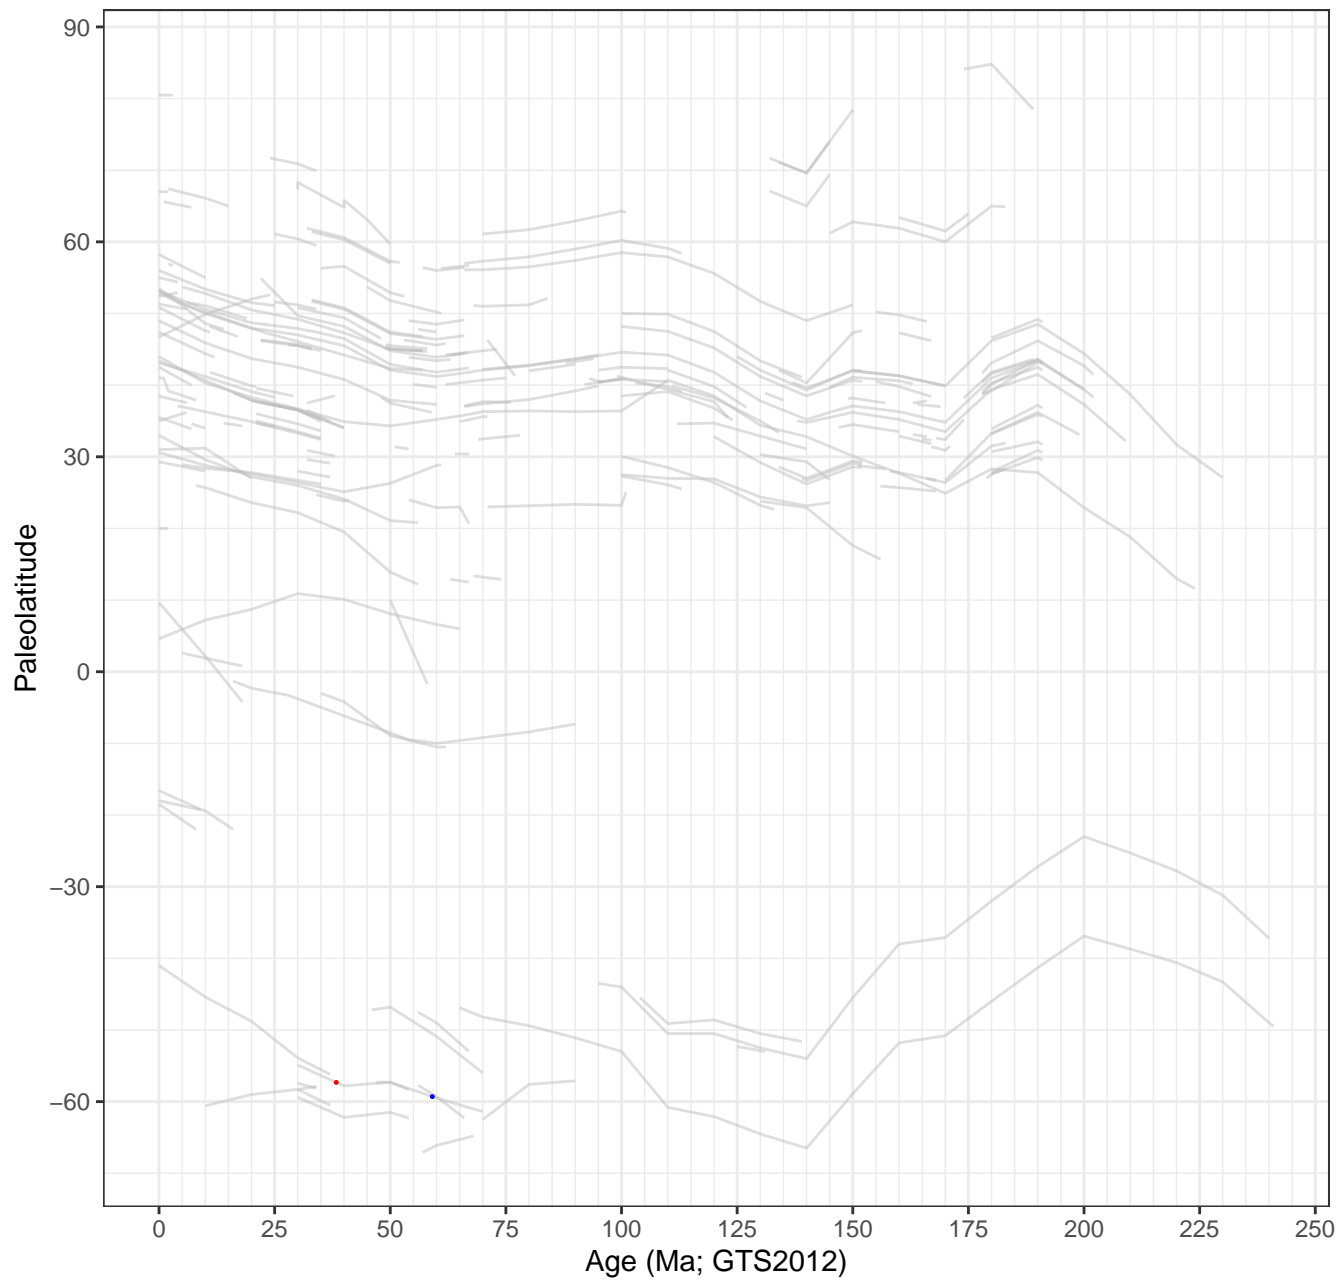

Supplement: Supplementary file 2600 [file Vozzhennikovia apertura.pdf › Supplement/Supplement 2/Species 1914 plots/Vozzhennikovia apertura.pdf]

# Species *Vozzhennikovia roehliae*

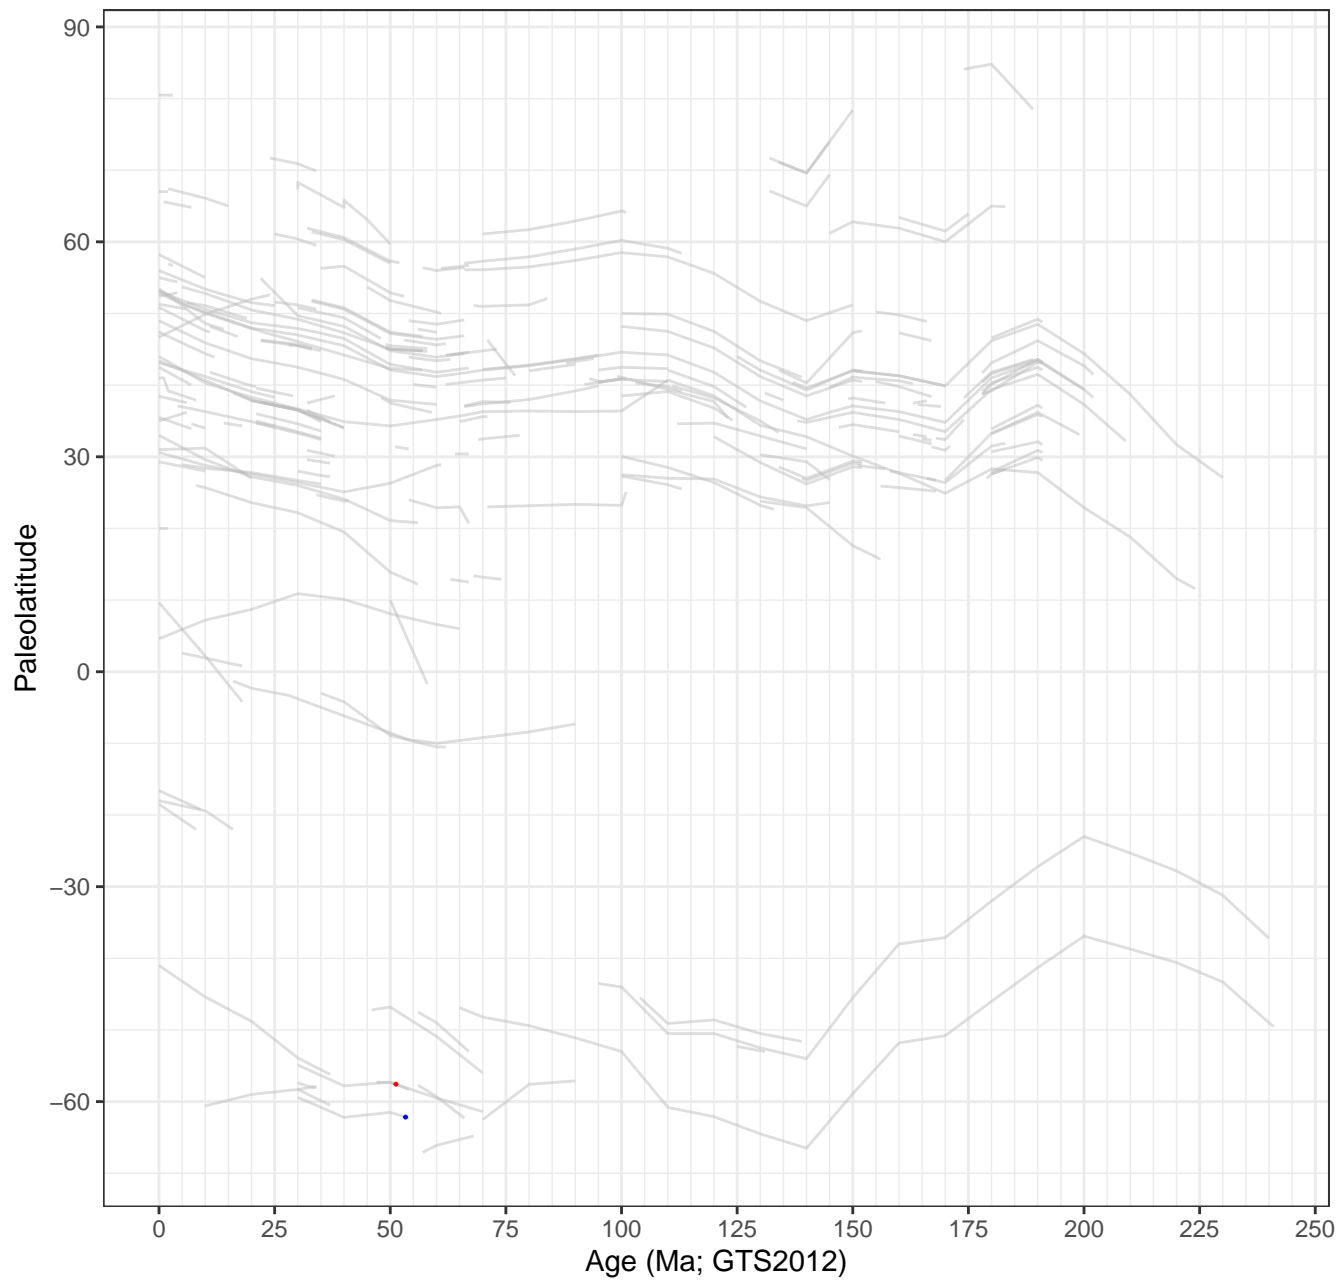

Supplement: Supplementary file 2601 [file Vozzhennikovia roehliae.pdf › Supplement/Supplement 2/Species 1914 plots/Vozzhennikovia roehliae.pdf]

# Species *Vozzhennikovia spinula*

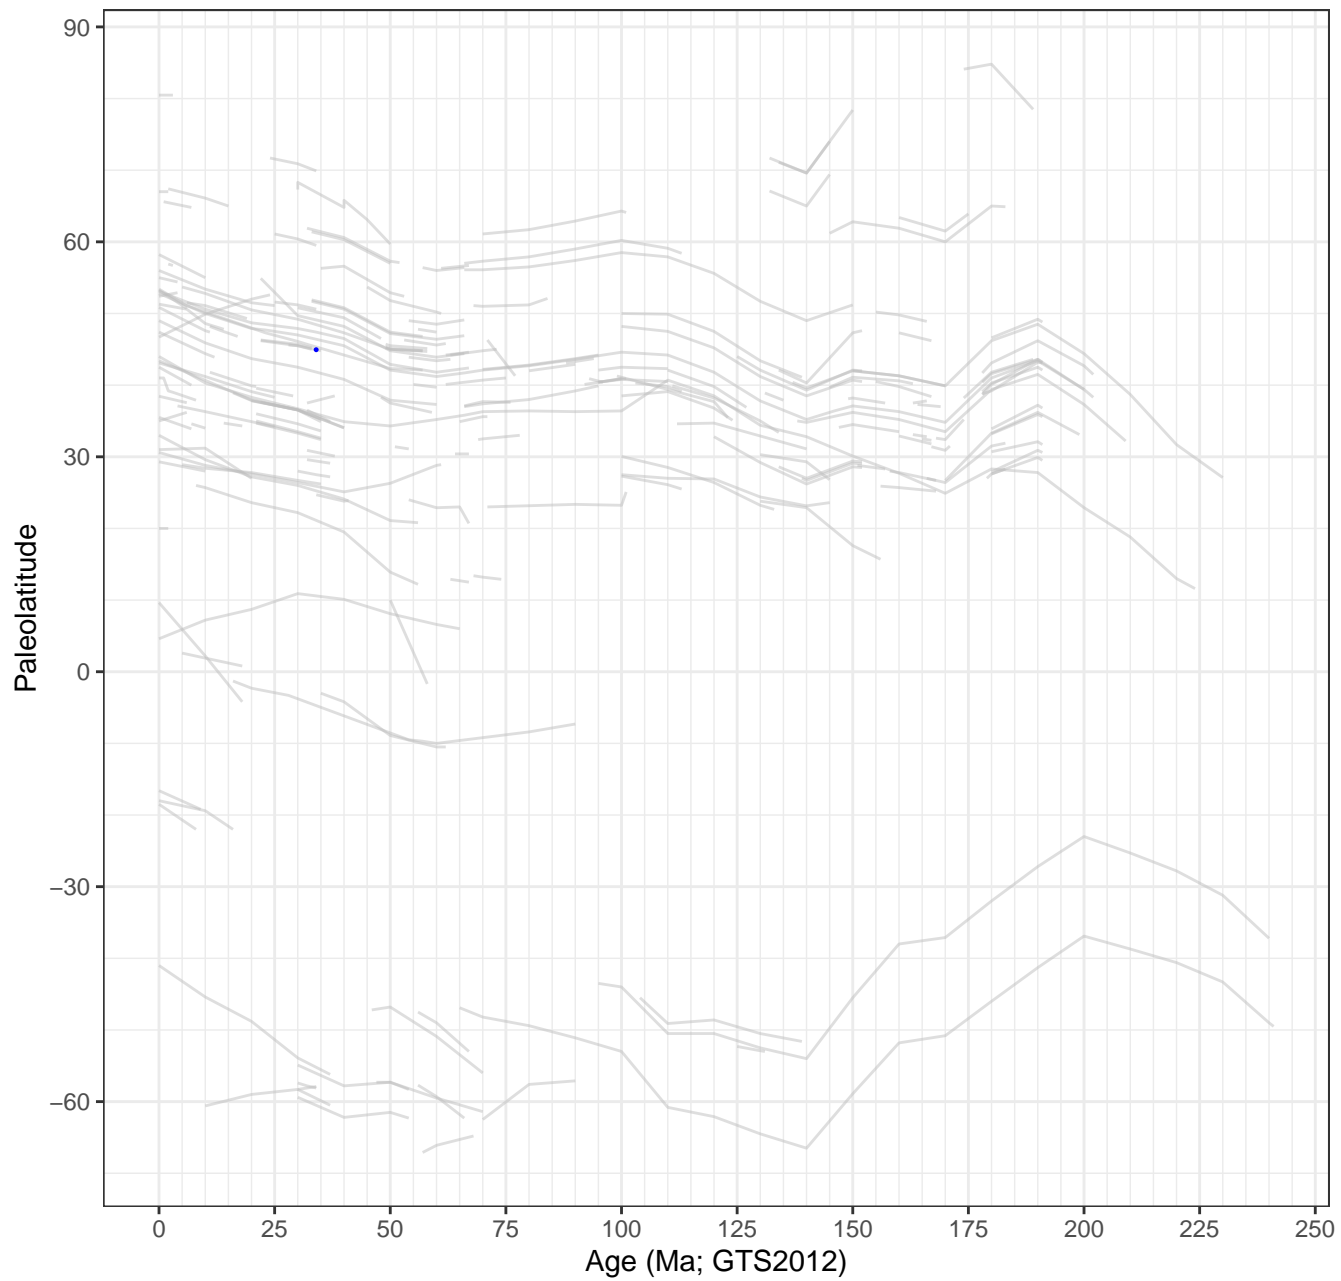

Supplement: Supplementary file 2602 [file Vozzhennikovia spinula.pdf › Supplement/Supplement 2/Species 1914 plots/Vozzhennikovia spinula.pdf]

# Species *Vozzhennikovia stickleyae*

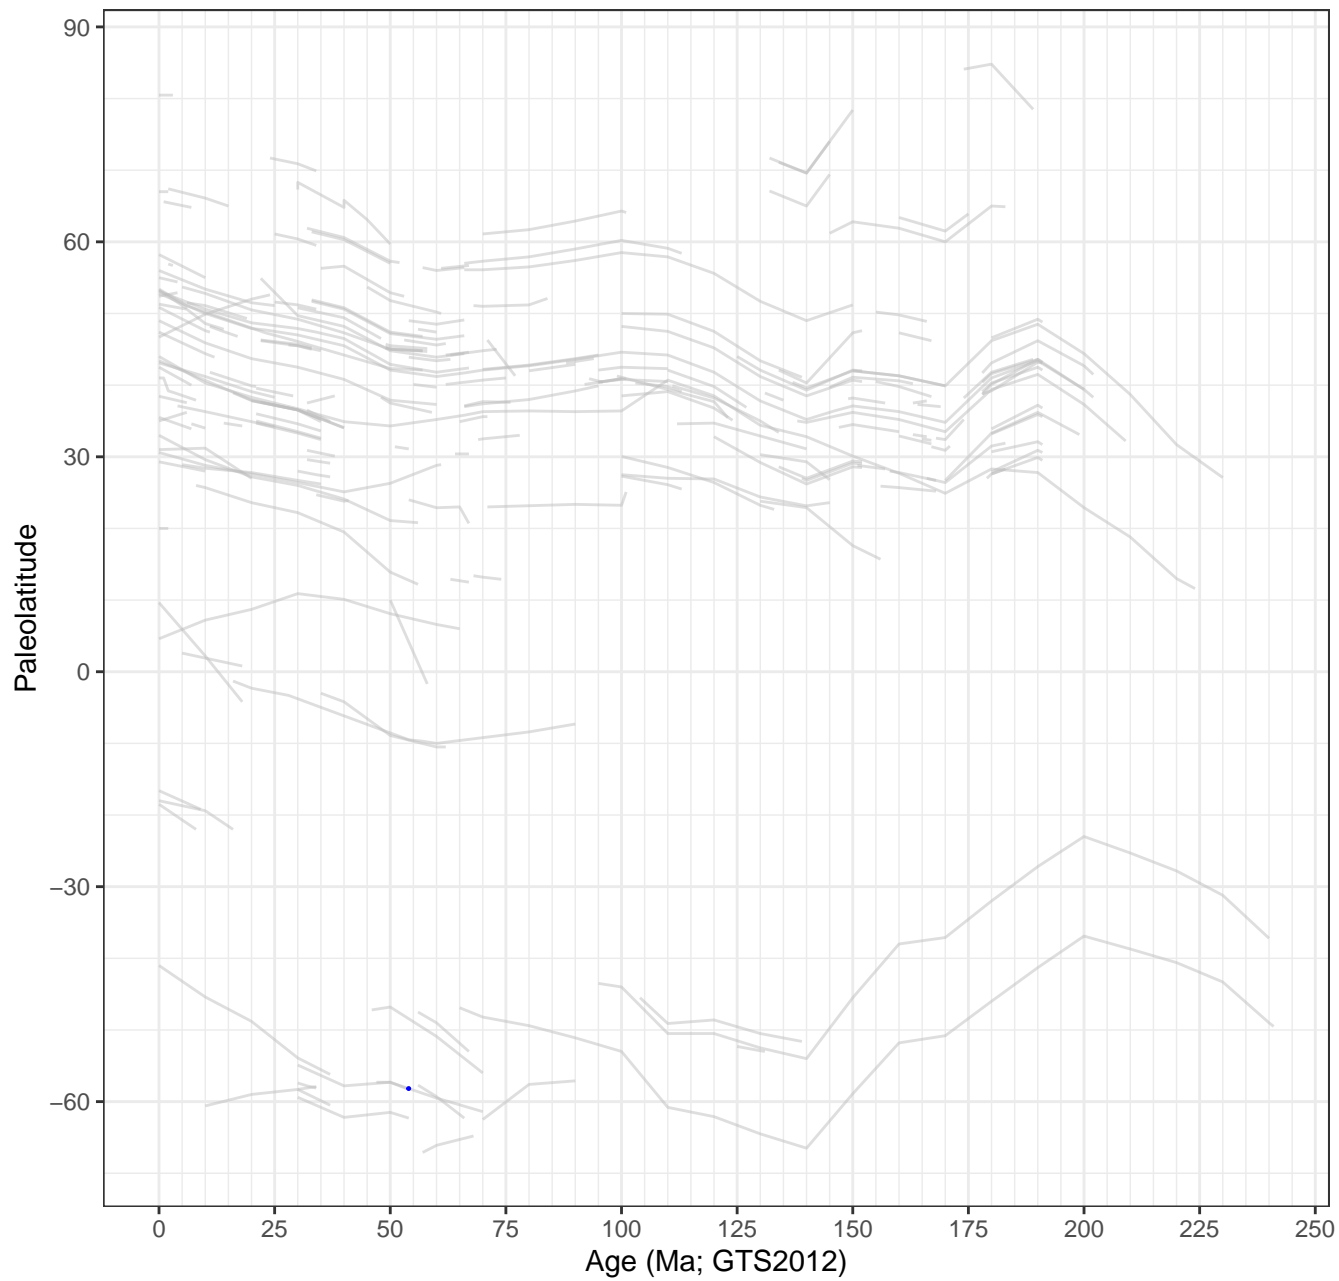

Supplement: Supplementary file 2603 [file Vozzhennikovia stickleyae.pdf › Supplement/Supplement 2/Species 1914 plots/Vozzhennikovia stickleyae.pdf]

# Species *Vozzhennikovia tawanuiensis*

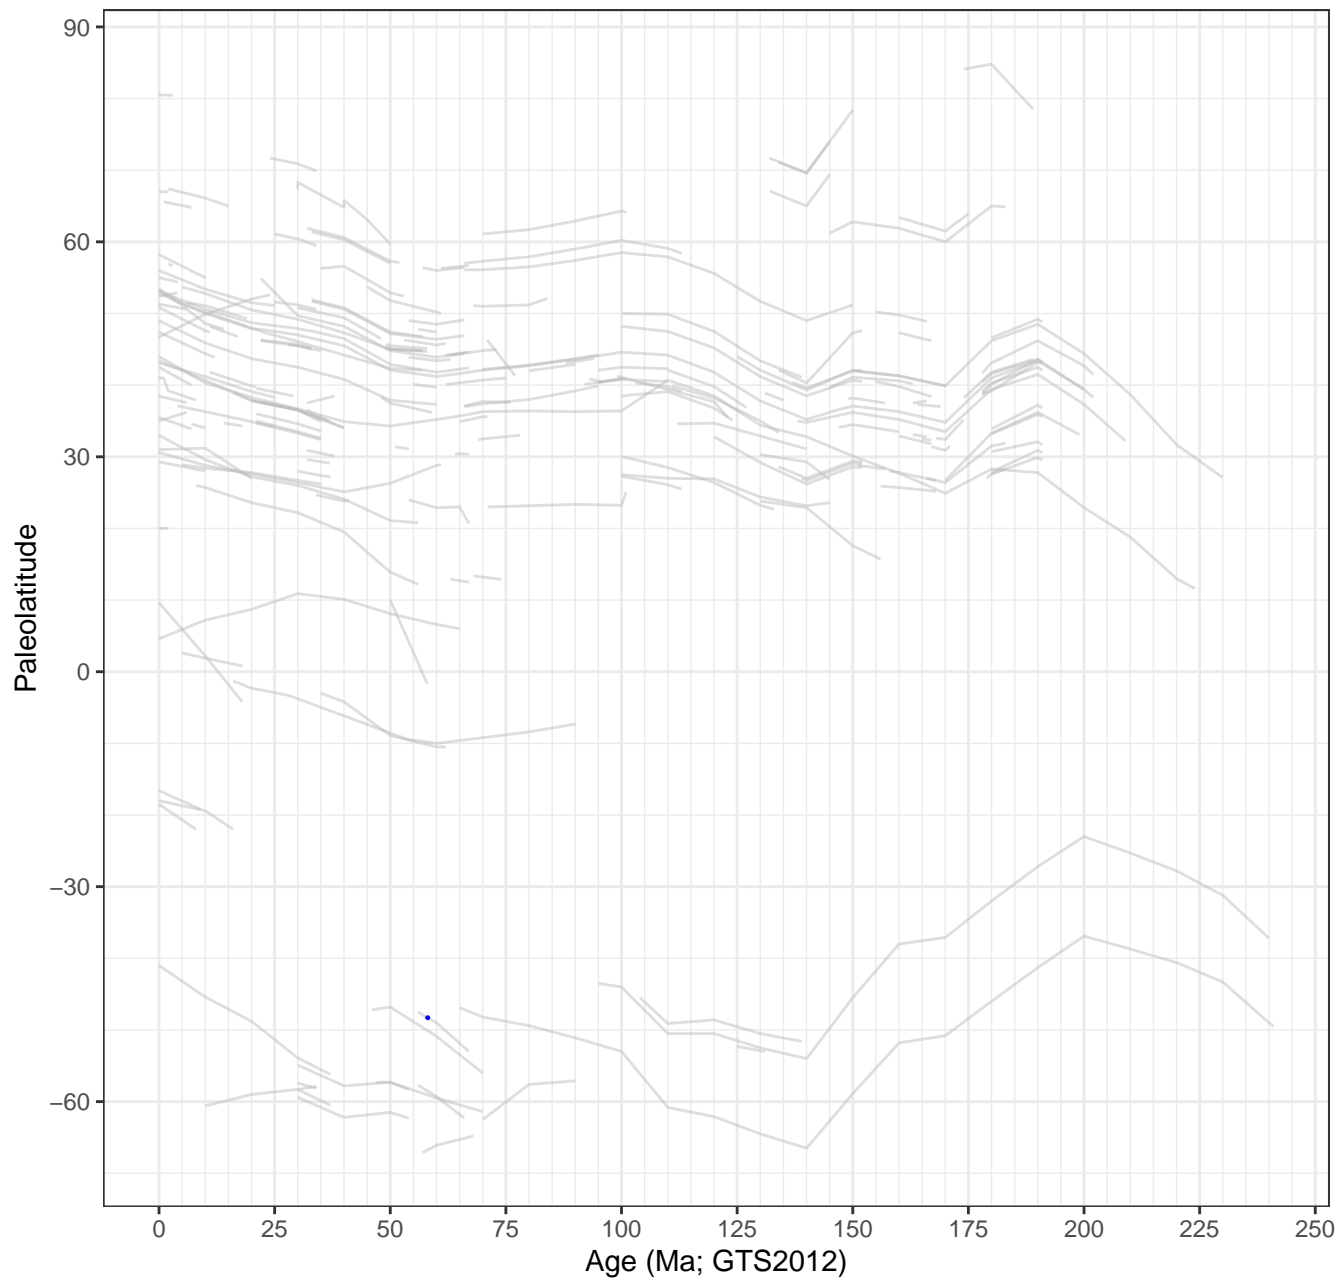

Supplement: Supplementary file 2604 [file Vozzhennikovia tawanuiensis.pdf › Supplement/Supplement 2/Species 1914 plots/Vozzhennikovia tawanuiensis.pdf]

# Species *Walloclinium anglicum*

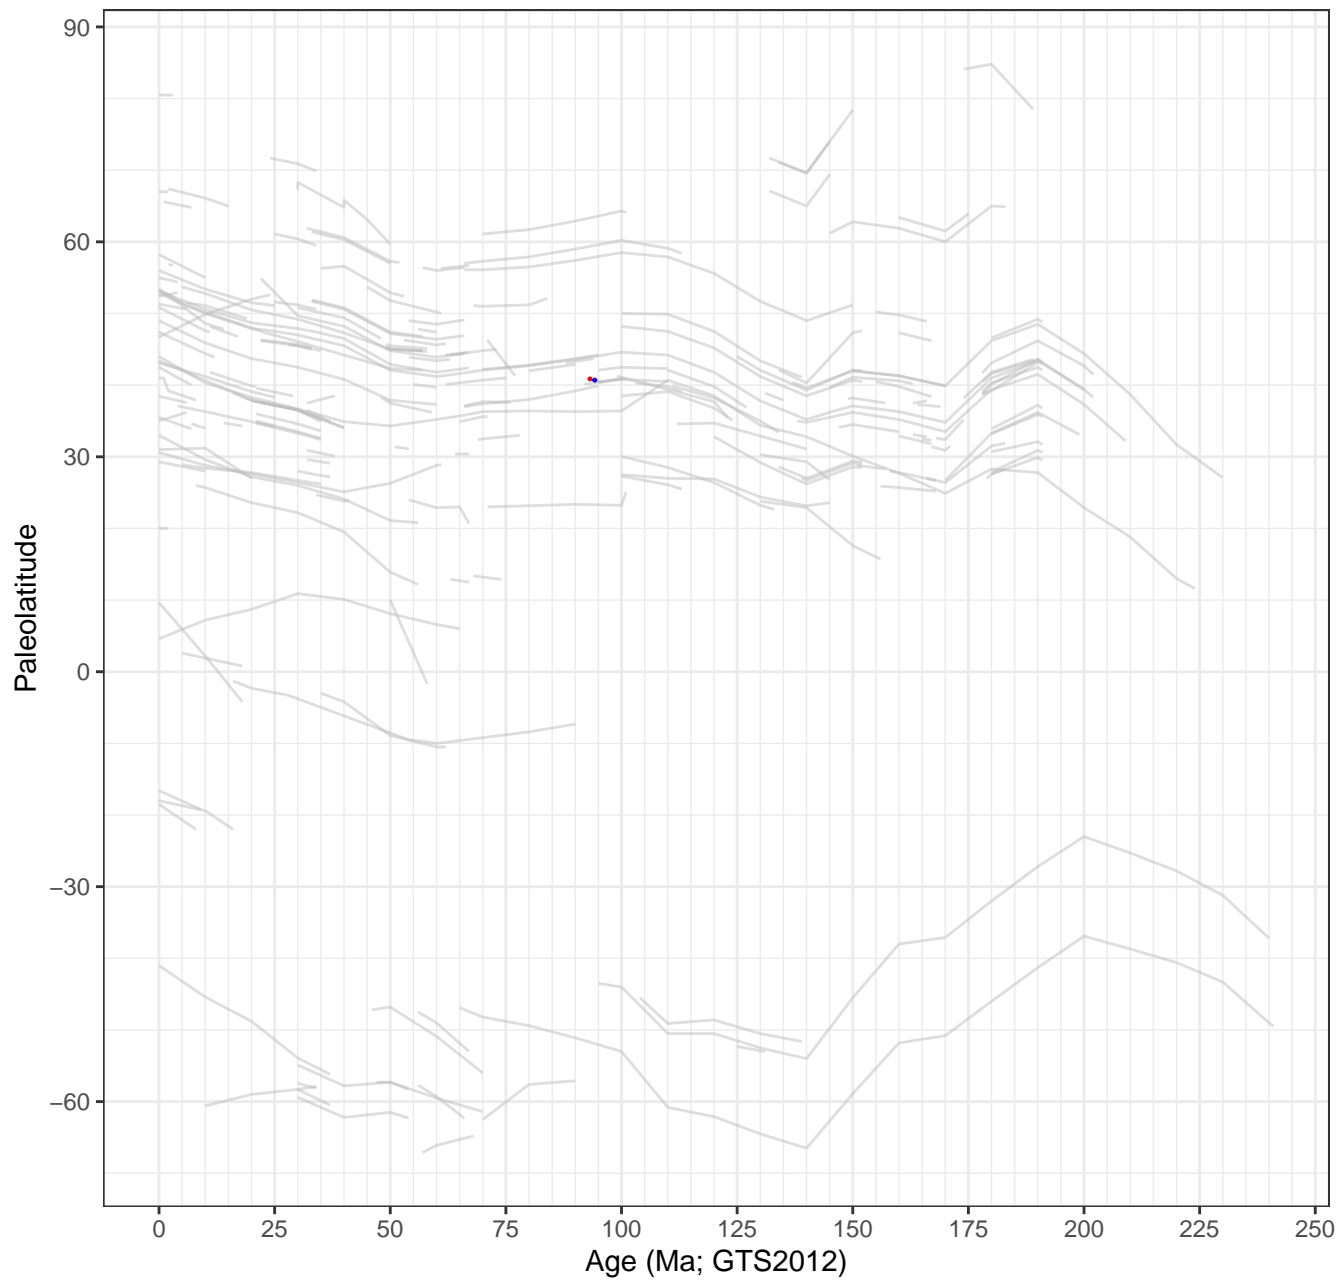

Supplement: Supplementary file 2605 [file Wallodinium anglicum.pdf › Supplement/Supplement 2/Species 1914 plots/Wallodinium anglicum.pdf]

# Species *Walloedinium cylindricum*

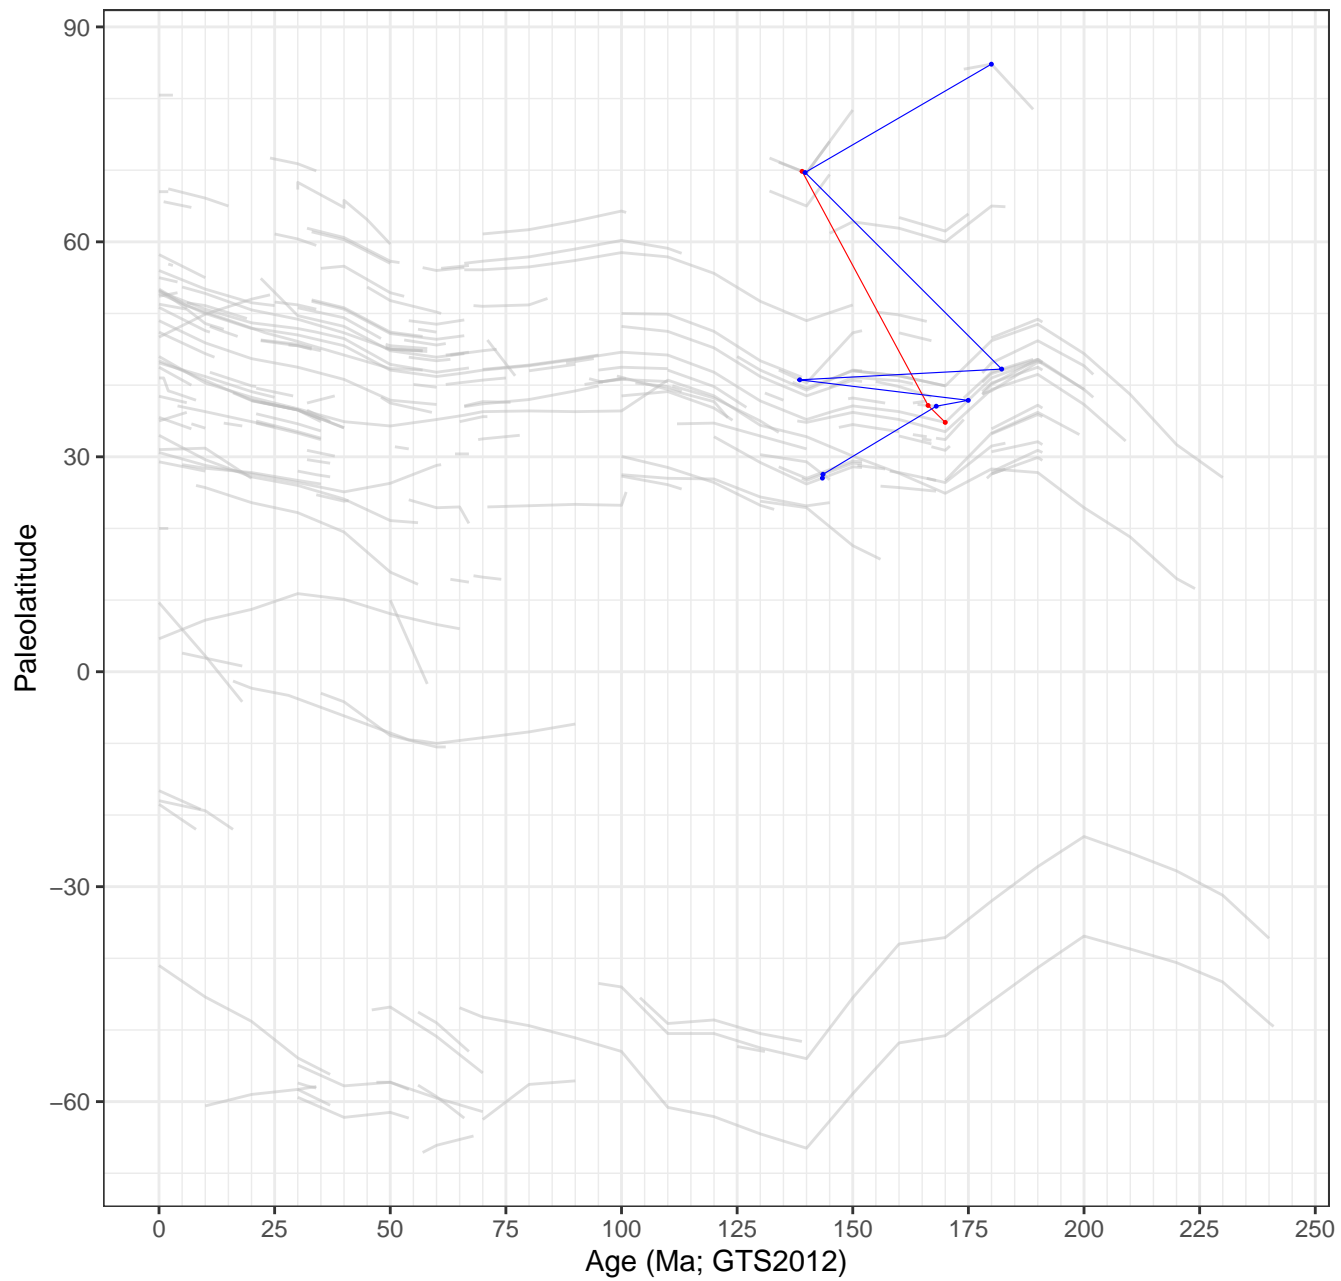

Supplement: Supplementary file 2606 [file Wallodinium cylindricum.pdf › Supplement/Supplement 2/Species 1914 plots/Wallodinium cylindricum.pdf]

# Species *Walloodinium krutzschii*

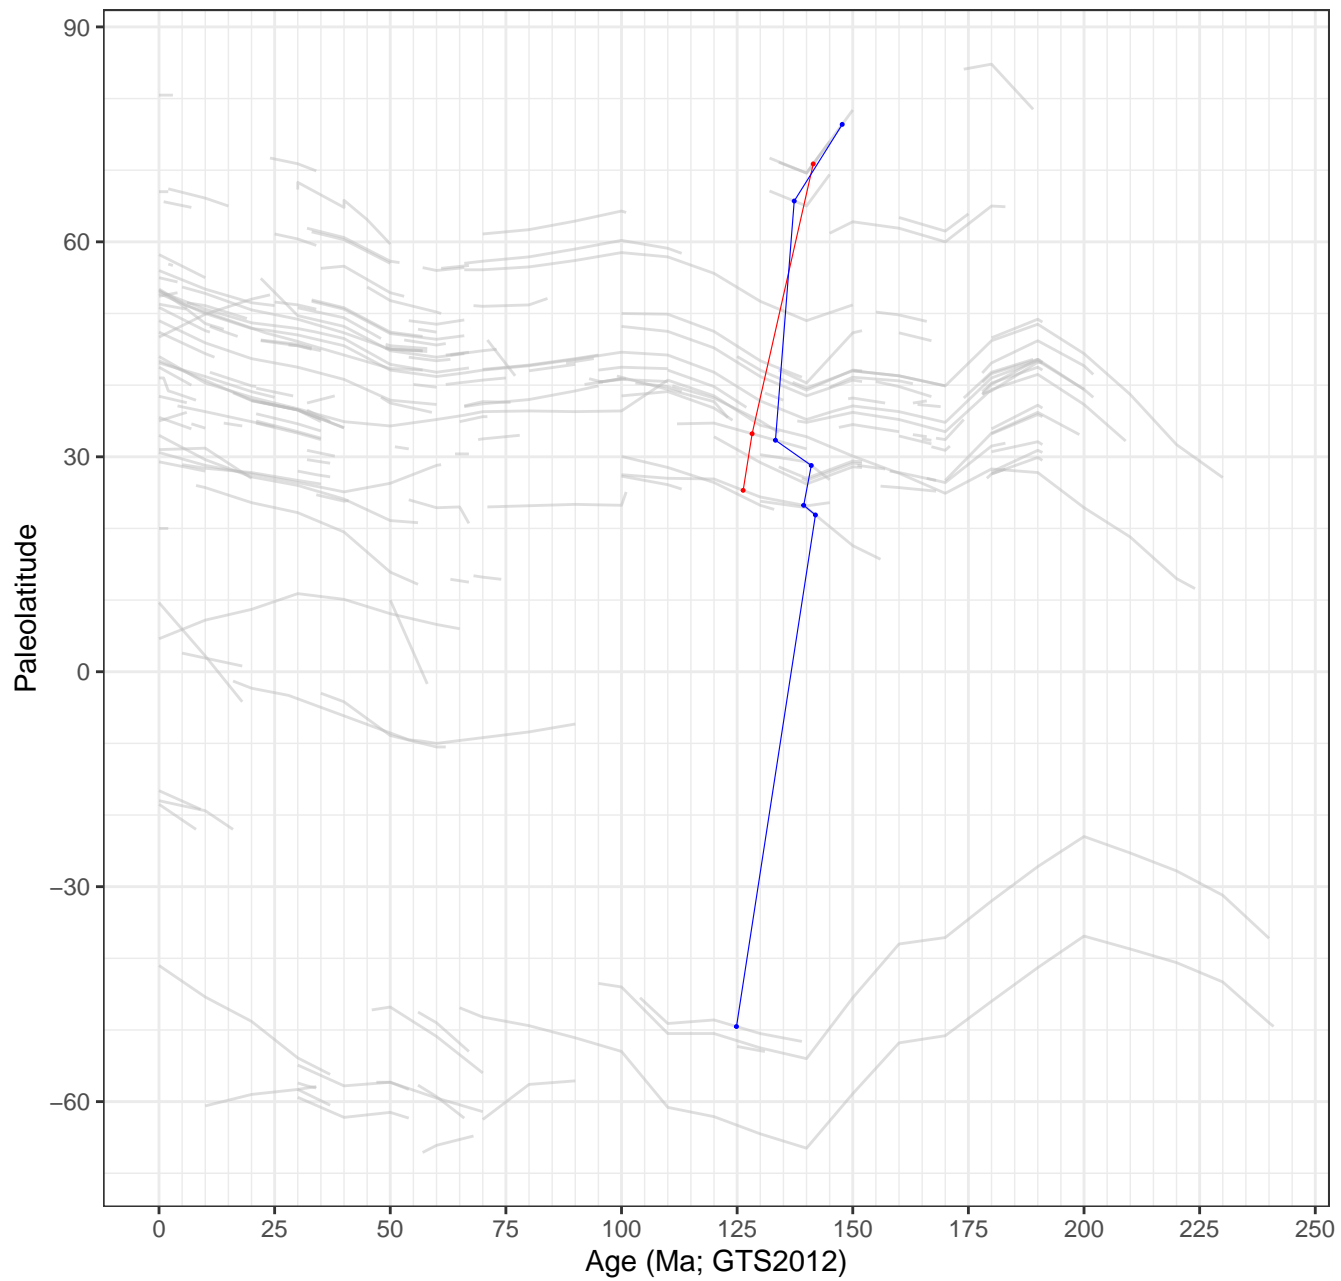

Supplement: Supplementary file 2607 [file Wallodinium krutzschii.pdf › Supplement/Supplement 2/Species 1914 plots/Wallodinium krutzschii.pdf]

# Species *Walloodinium luna*

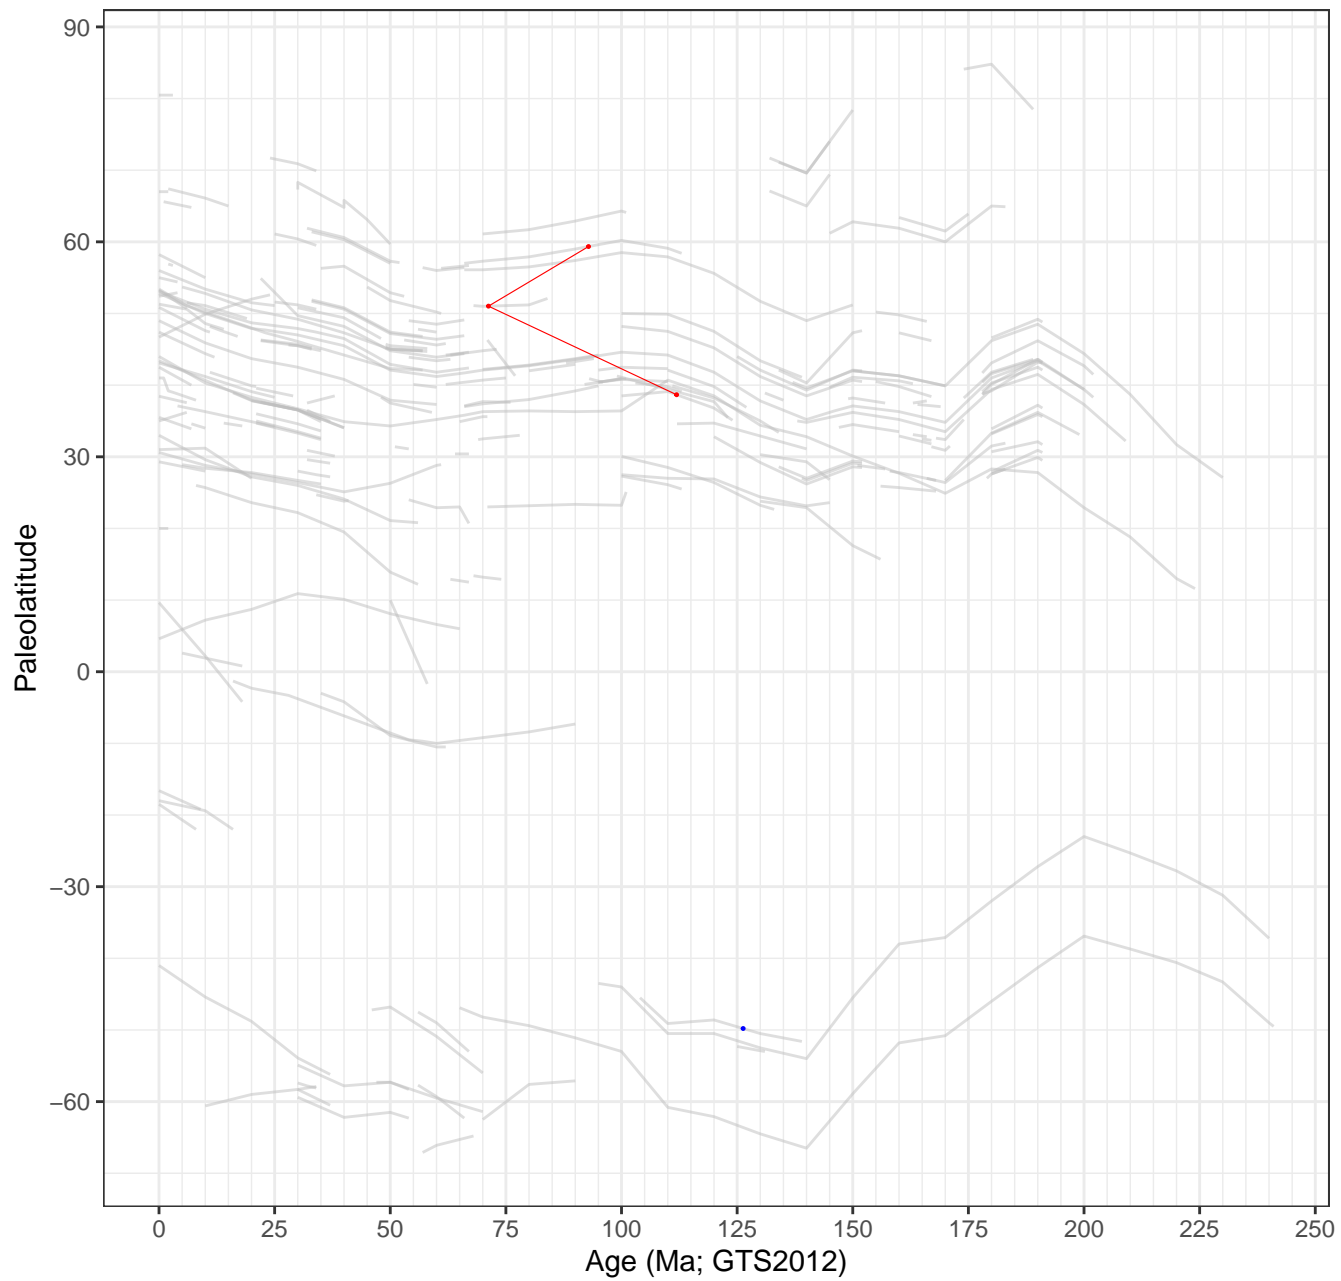

Supplement: Supplementary file 2608 [file Wallodinium luna.pdf › Supplement/Supplement 2/Species 1914 plots/Wallodinium luna.pdf]

# Species *Wanaea acollaris*

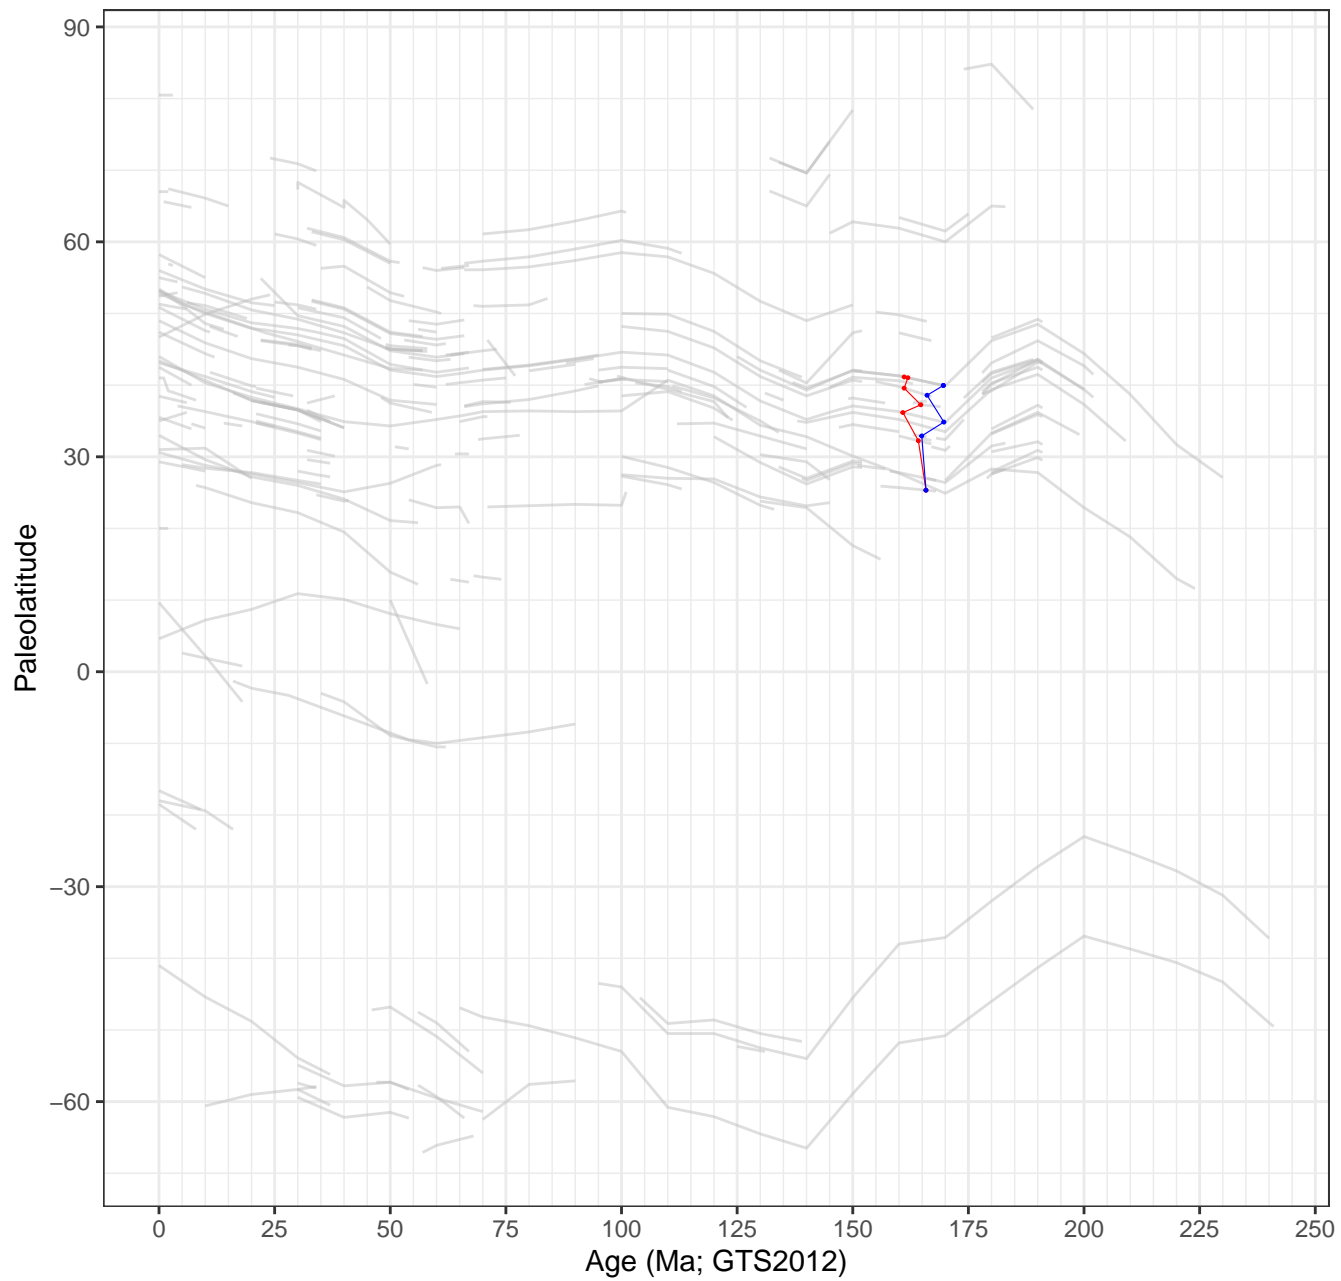

Supplement: Supplementary file 2609 [file Wanaea acollaris.pdf › Supplement/Supplement 2/Species 1914 plots/Wanaea acollaris.pdf]

# Species *Wanaea clathrata*

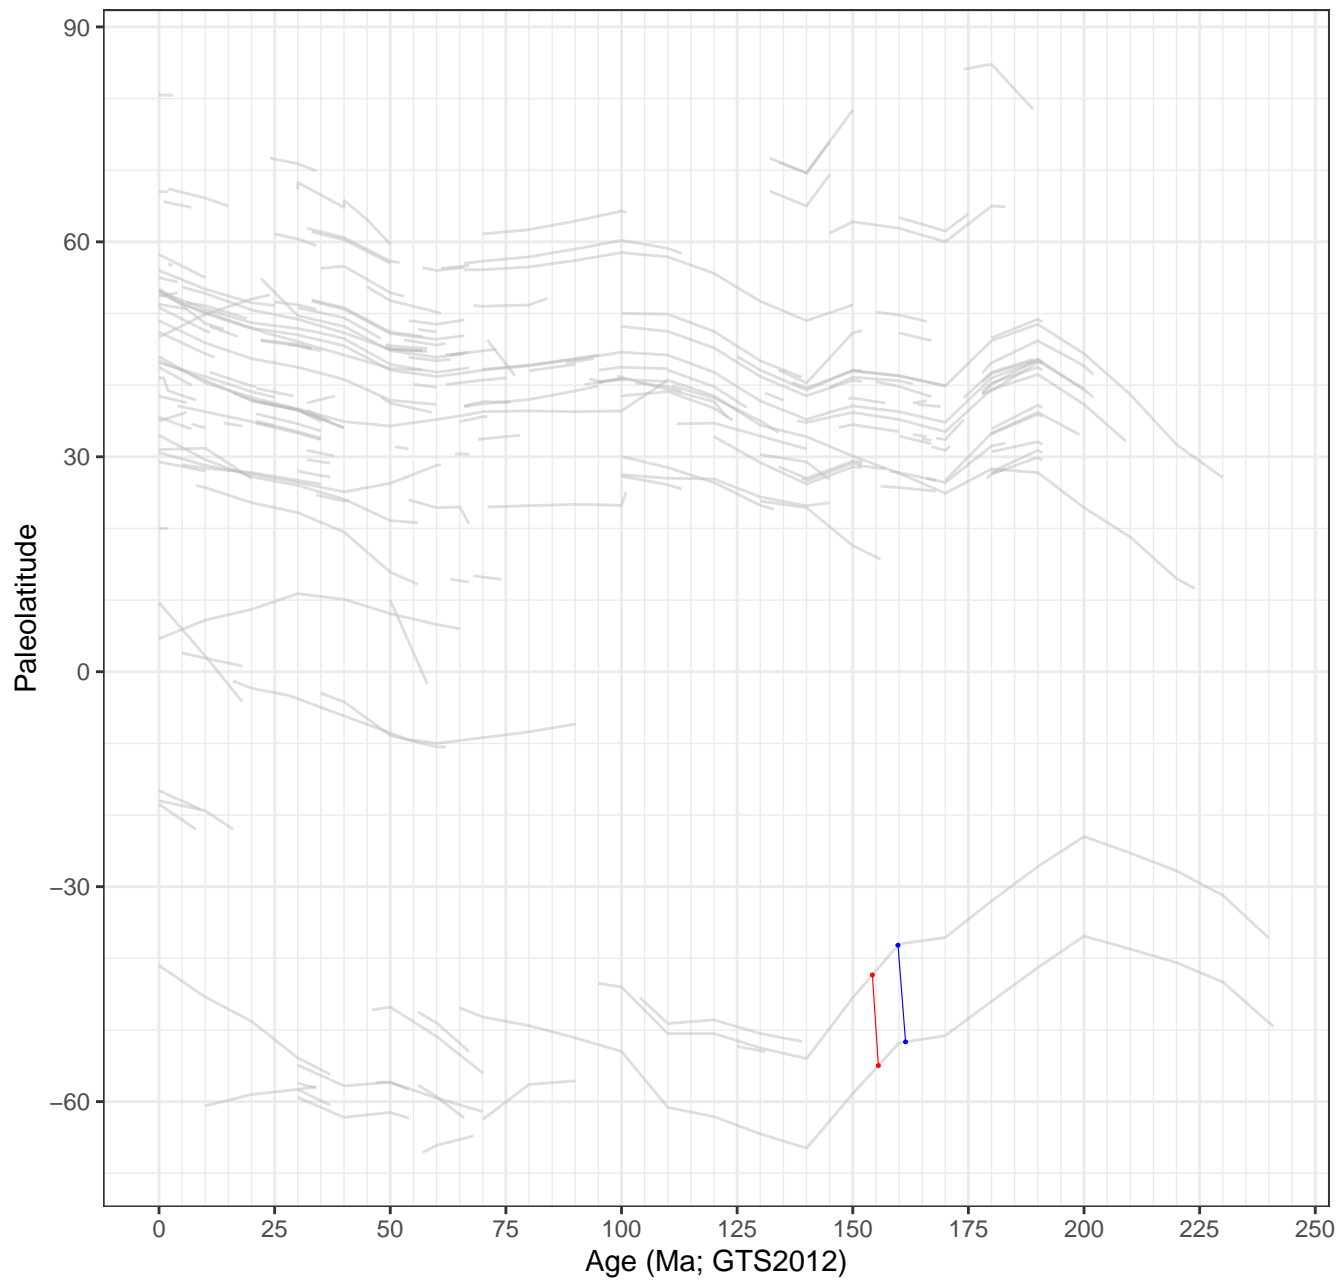

Supplement: Supplementary file 2610 [file Wanaea clathrata.pdf › Supplement/Supplement 2/Species 1914 plots/Wanaea clathrata.pdf]

# Species *Wanaea cornucavata*

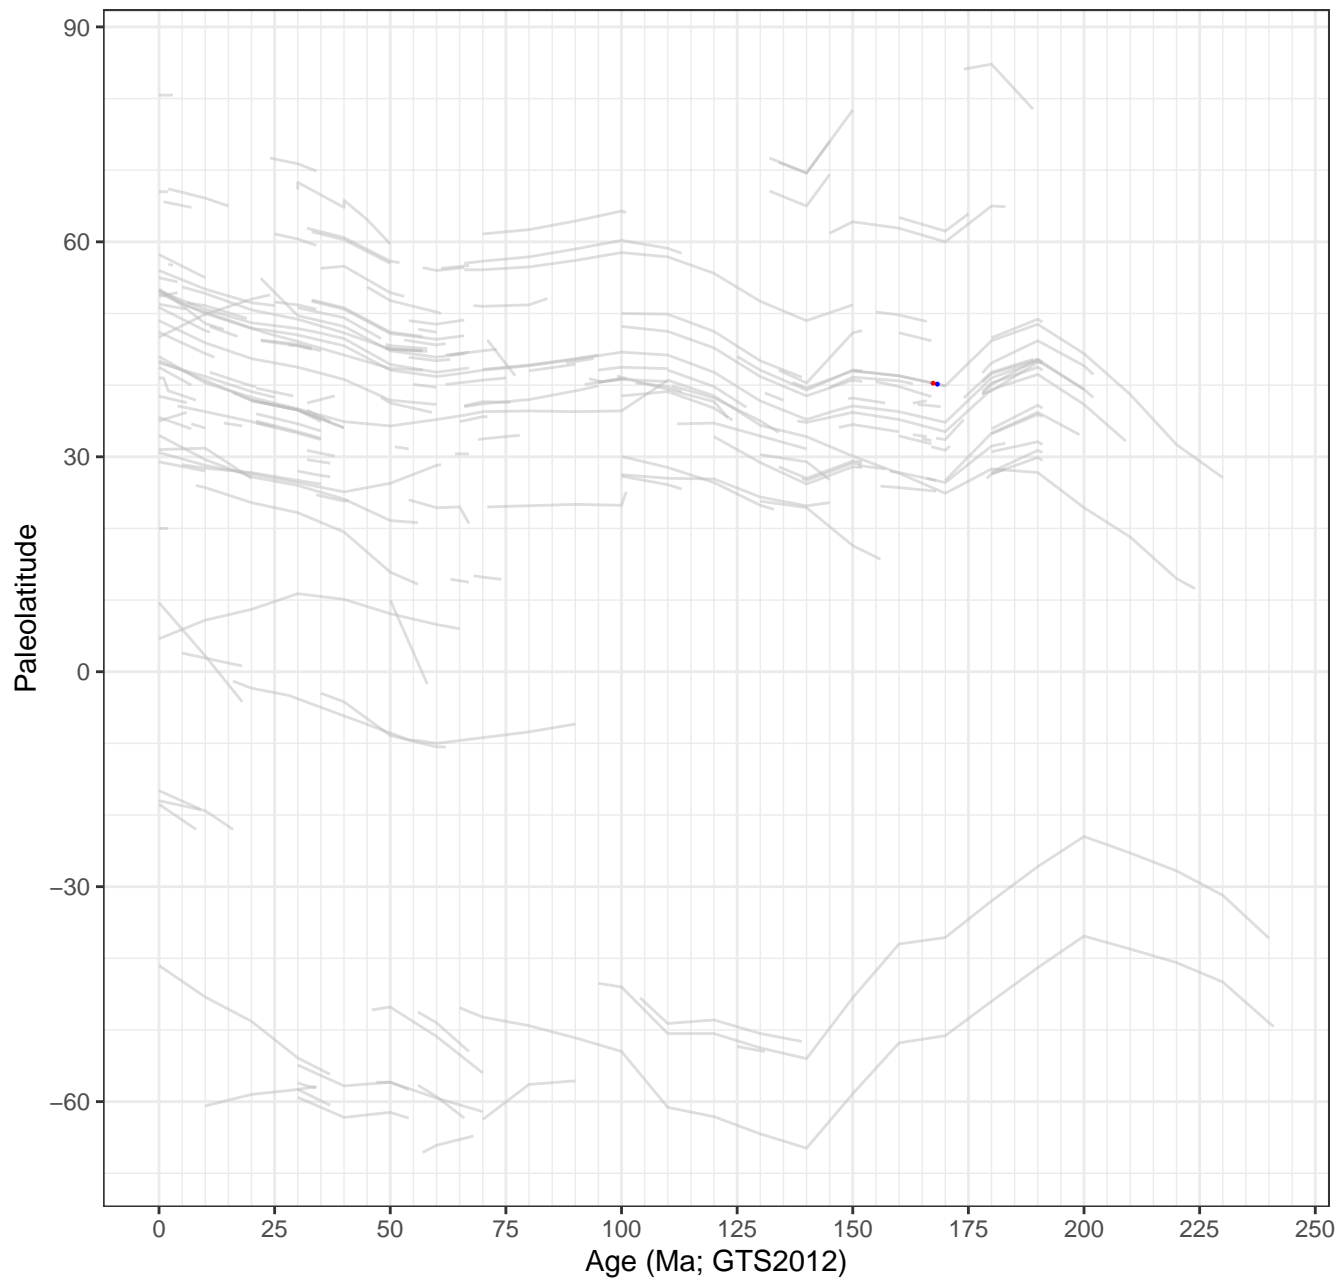

Supplement: Supplementary file 2611 [file Wanaea cornucavata.pdf › Supplement/Supplement 2/Species 1914 plots/Wanaea cornucavata.pdf]

# Species *Wanaea digitata*

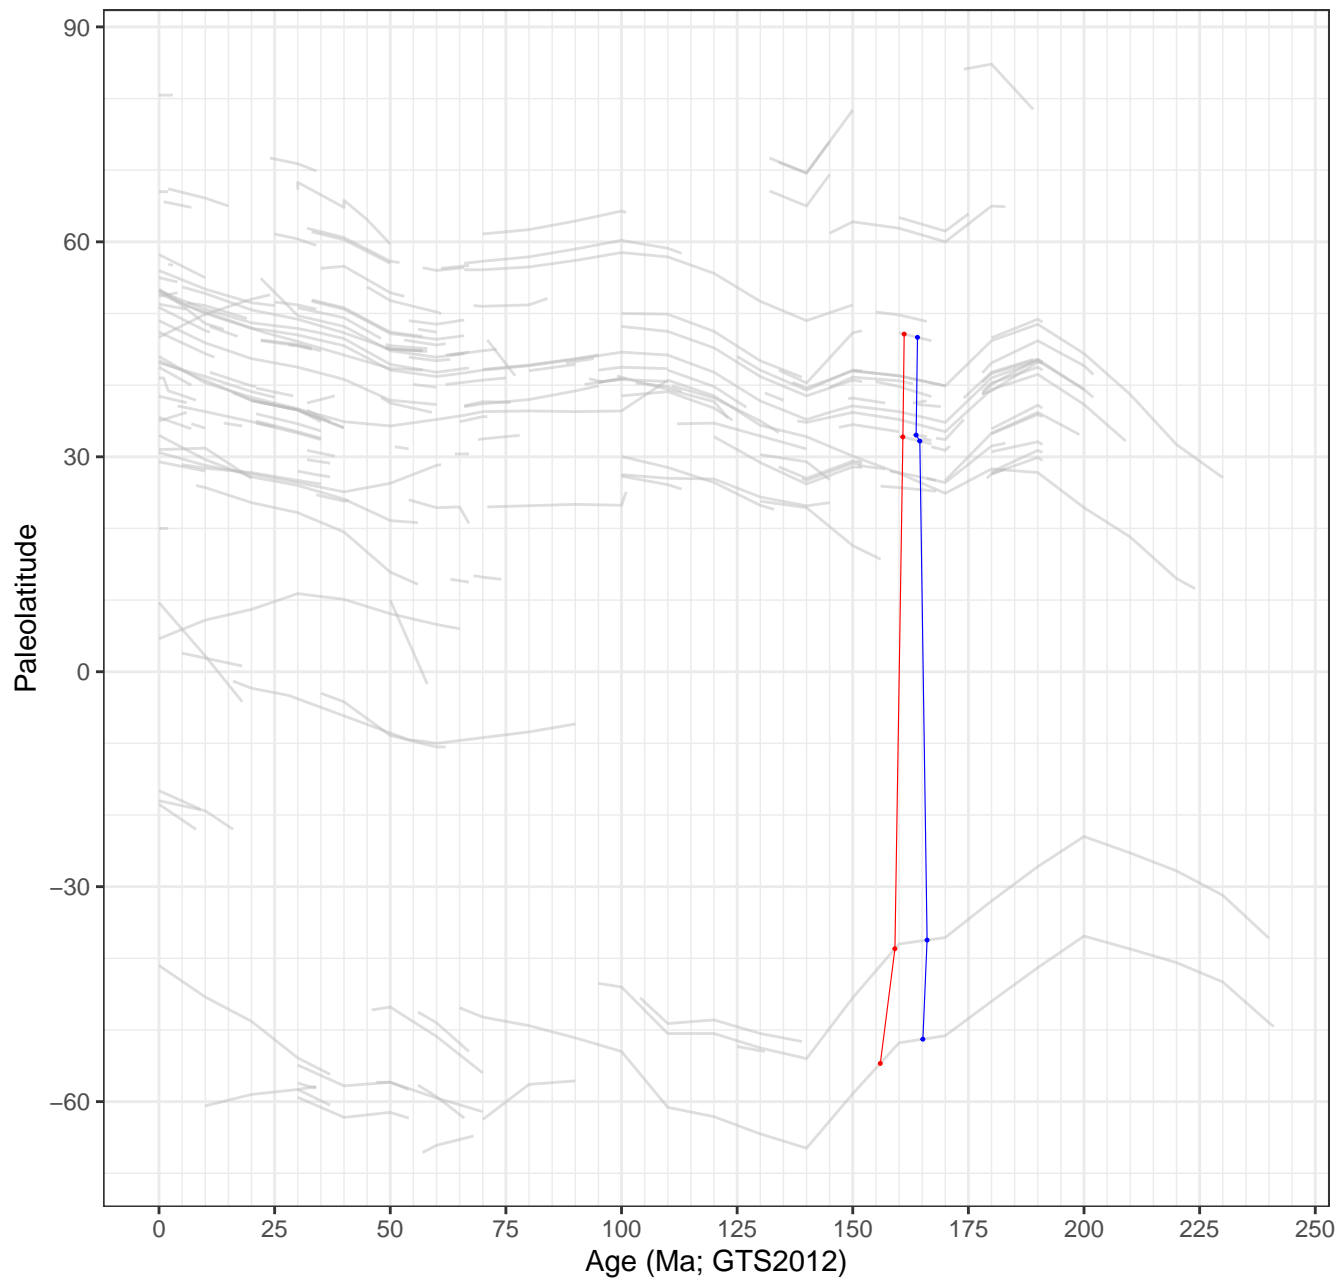

Supplement: Supplementary file 2612 [file Wanaea digitata.pdf › Supplement/Supplement 2/Species 1914 plots/Wanaea digitata.pdf]

# Species *Wanaea enoda*

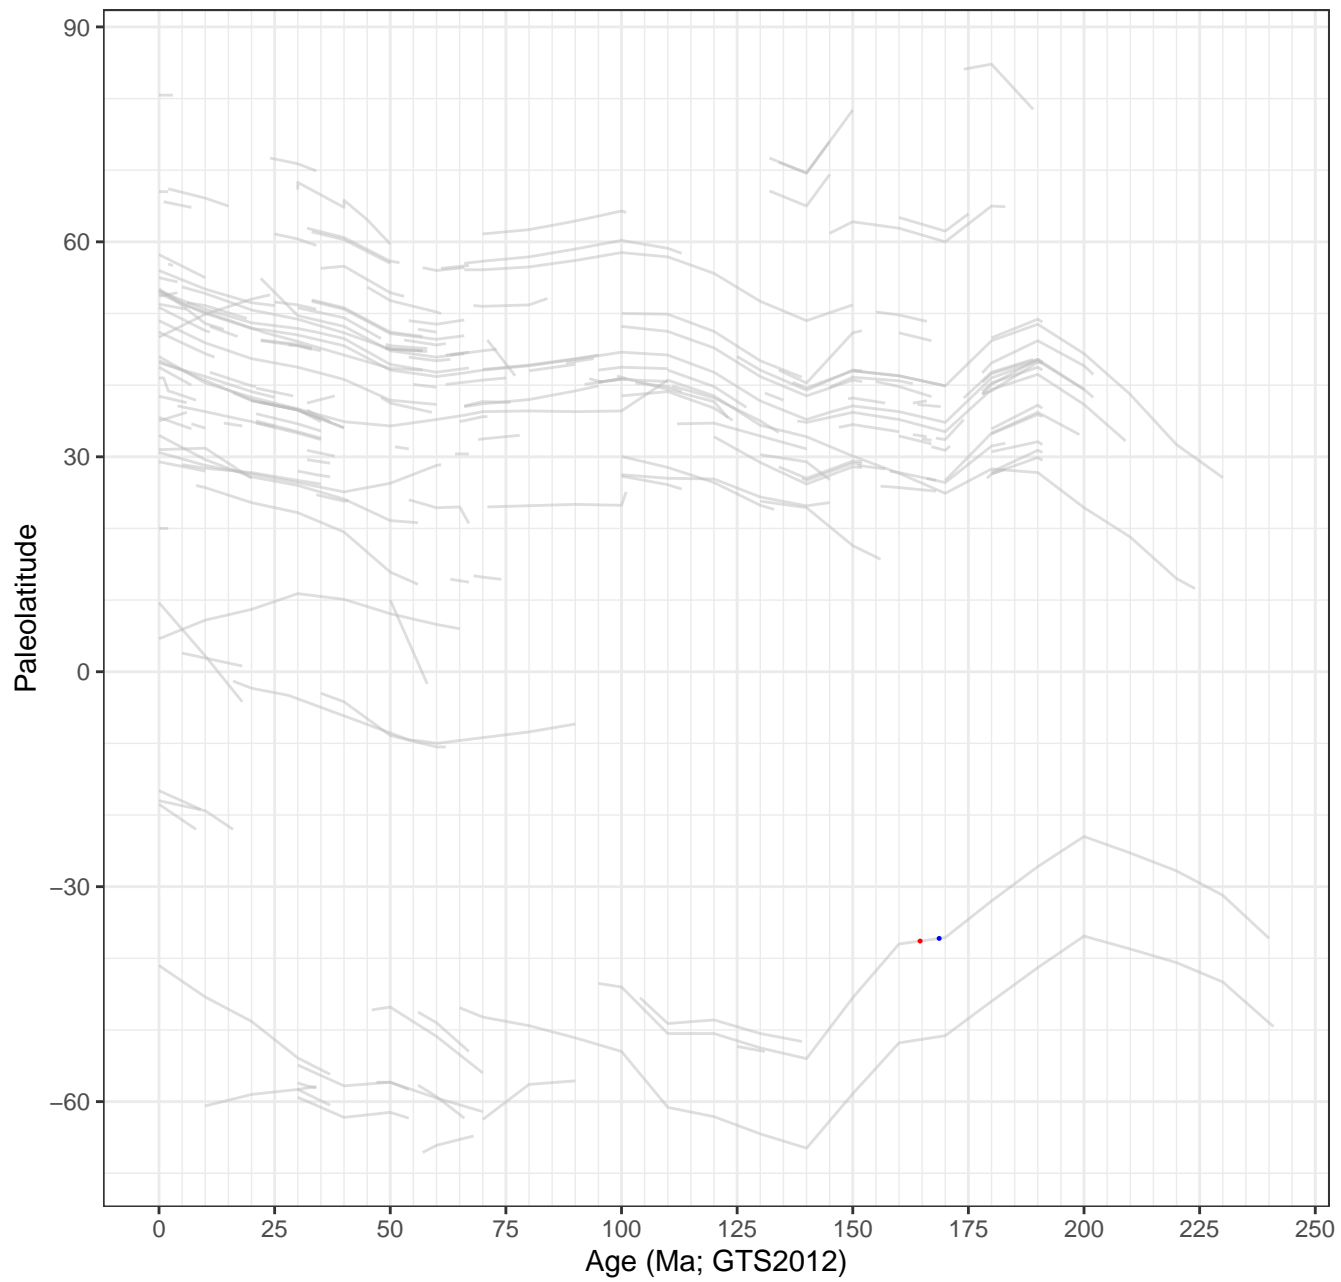

Supplement: Supplementary file 2613 [file Wanaea enoda.pdf › Supplement/Supplement 2/Species 1914 plots/Wanaea enoda.pdf]

# Species *Wanaea fimbriata*

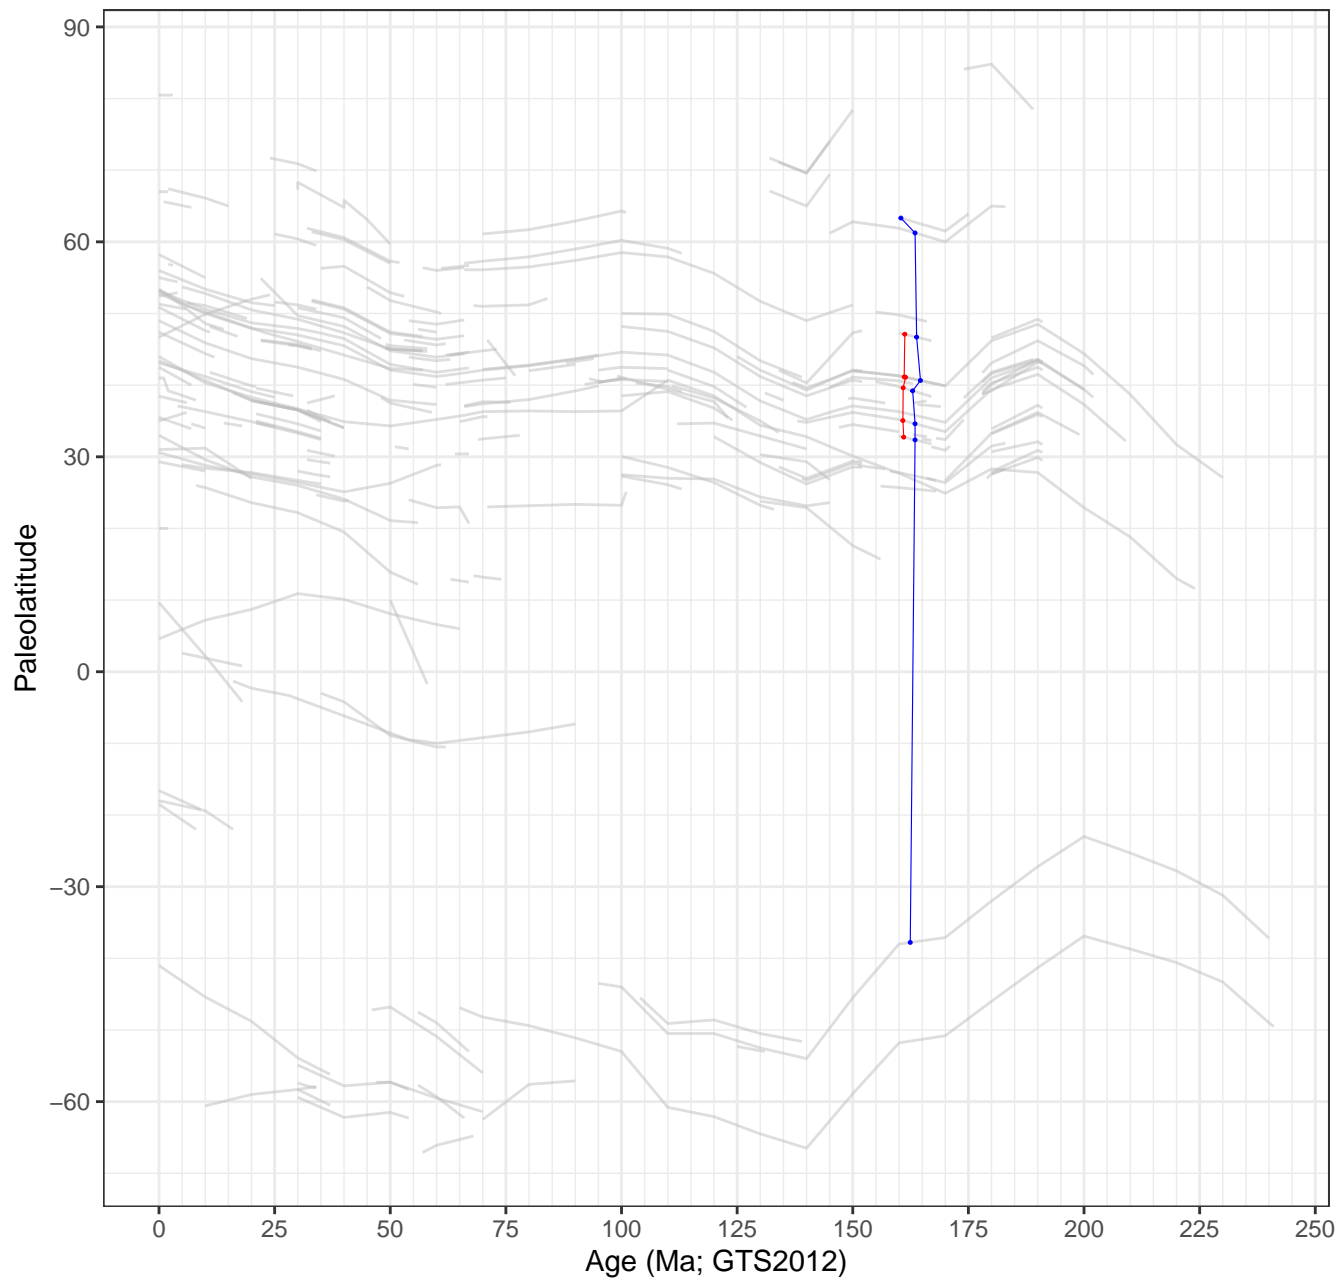

Supplement: Supplementary file 2614 [file Wanaea fimbriata.pdf › Supplement/Supplement 2/Species 1914 plots/Wanaea fimbriata.pdf]

# Species *Wanaea indotata*

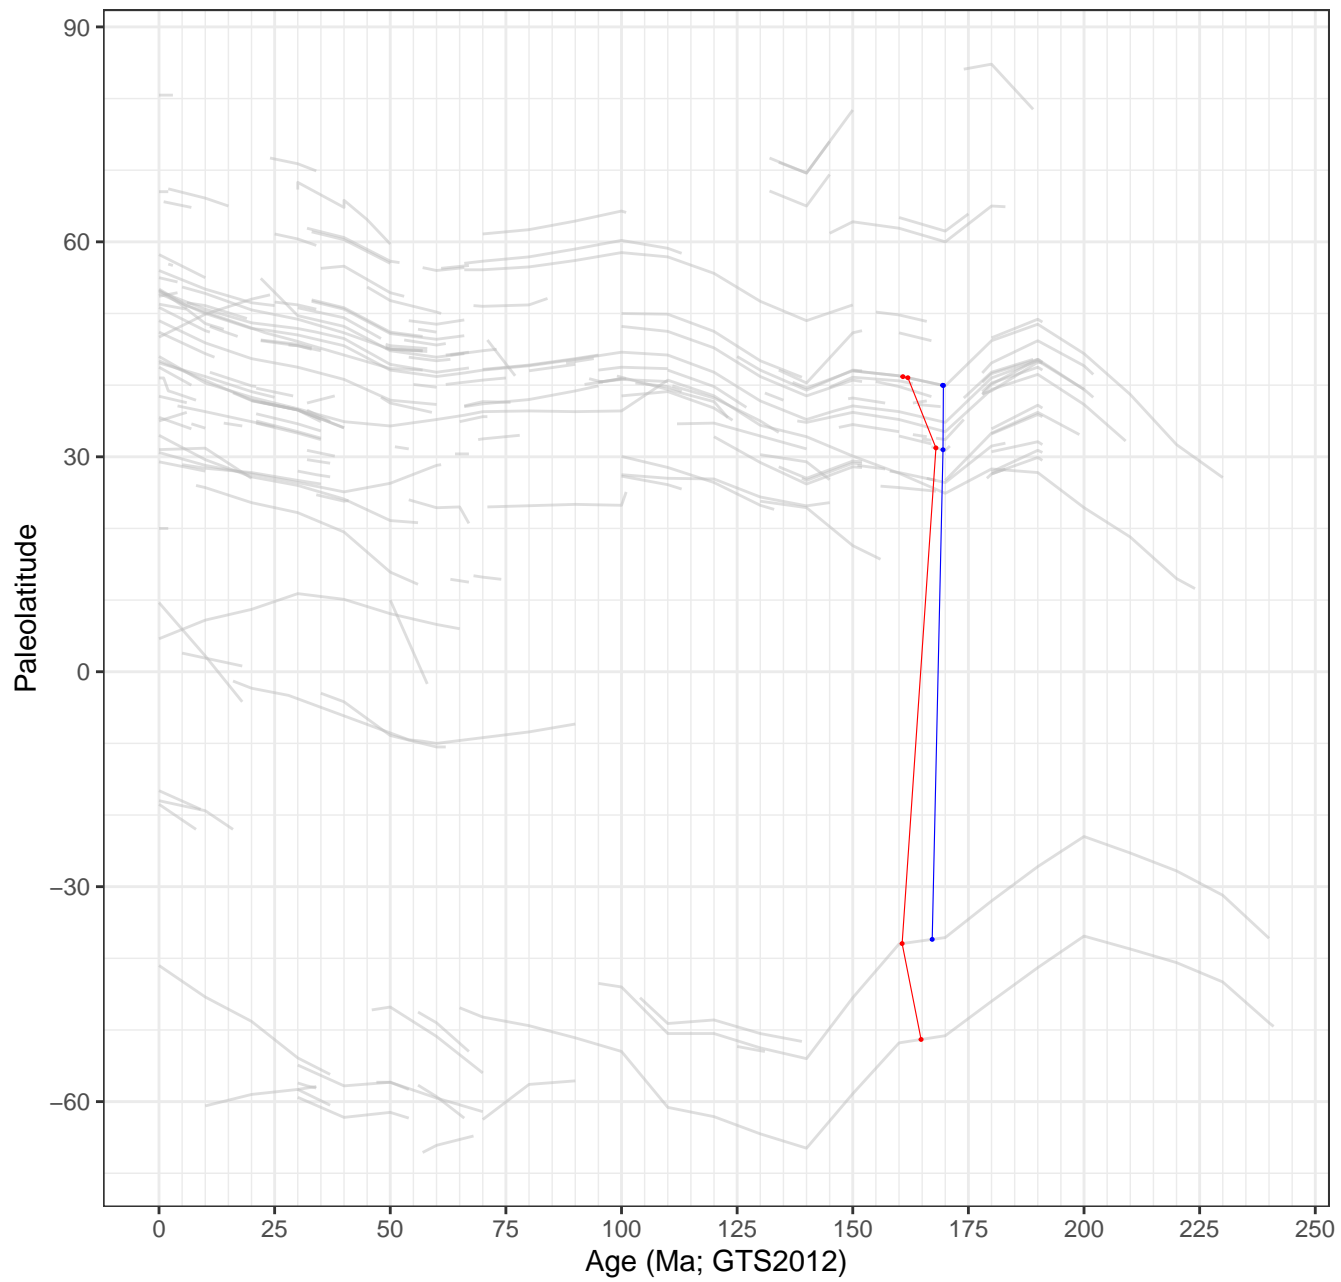

Supplement: Supplementary file 2615 [file Wanaea indotata.pdf › Supplement/Supplement 2/Species 1914 plots/Wanaea indotata.pdf]

# Species *Wanaea lacuna*

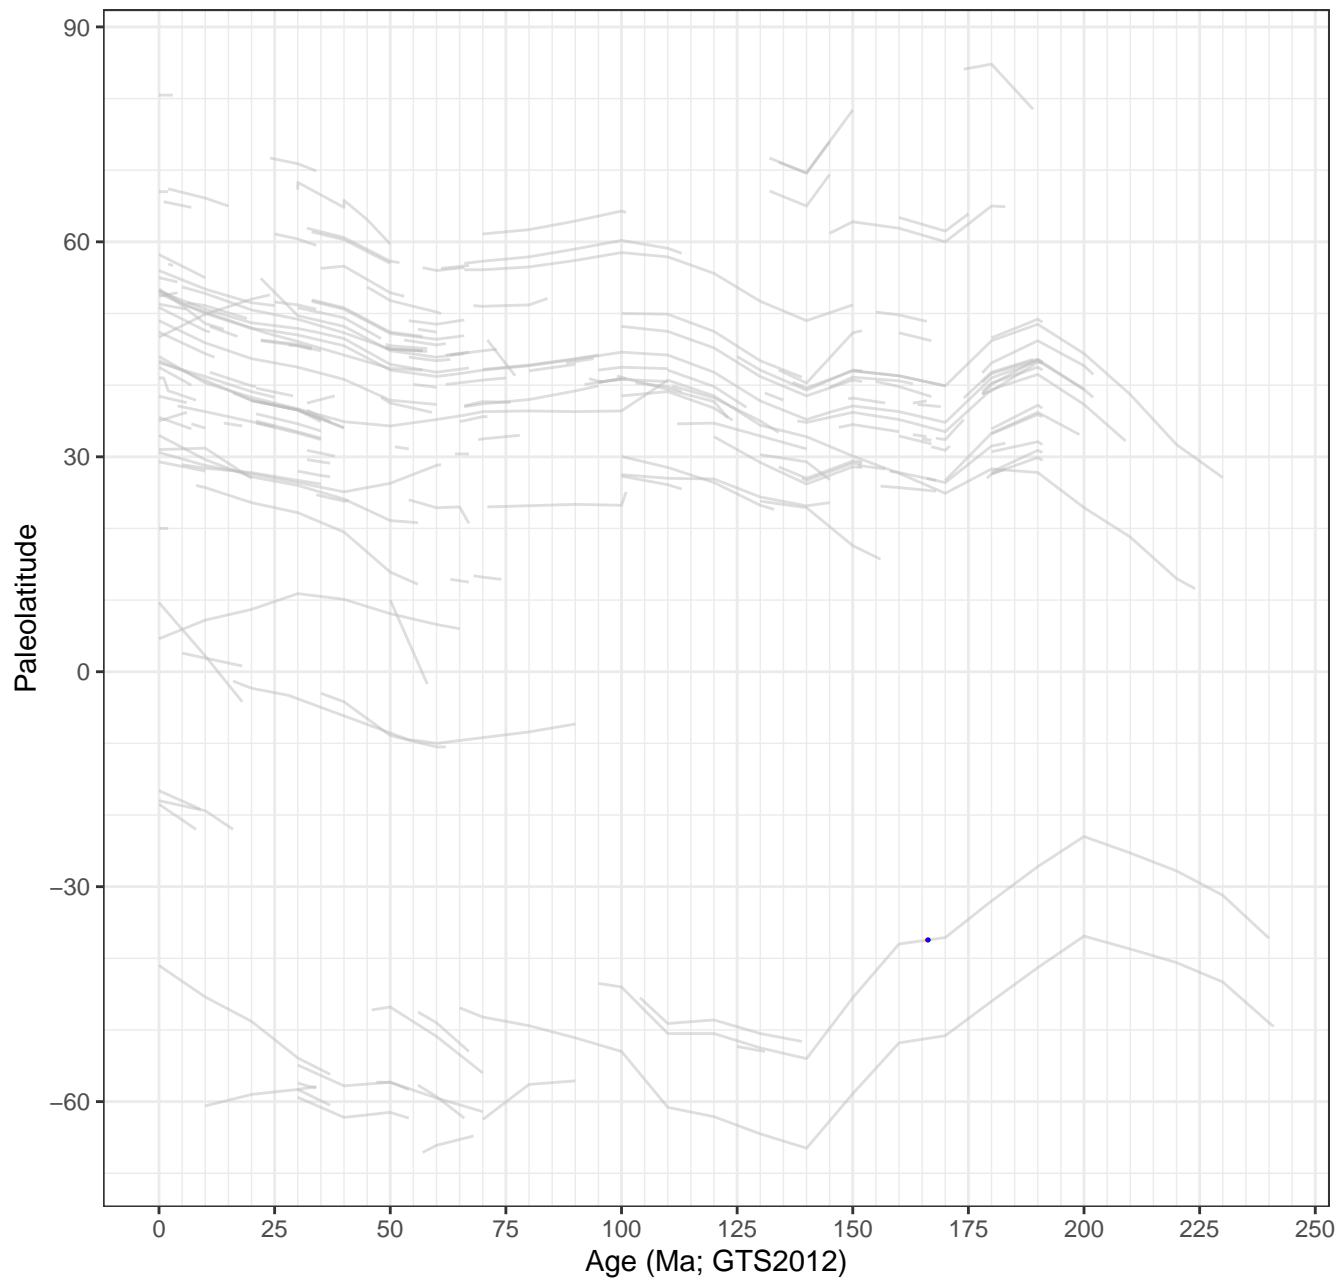

Supplement: Supplementary file 2616 [file Wanaea lacuna.pdf › Supplement/Supplement 2/Species 1914 plots/Wanaea lacuna.pdf]

# Species *Wanaea spectabilis*

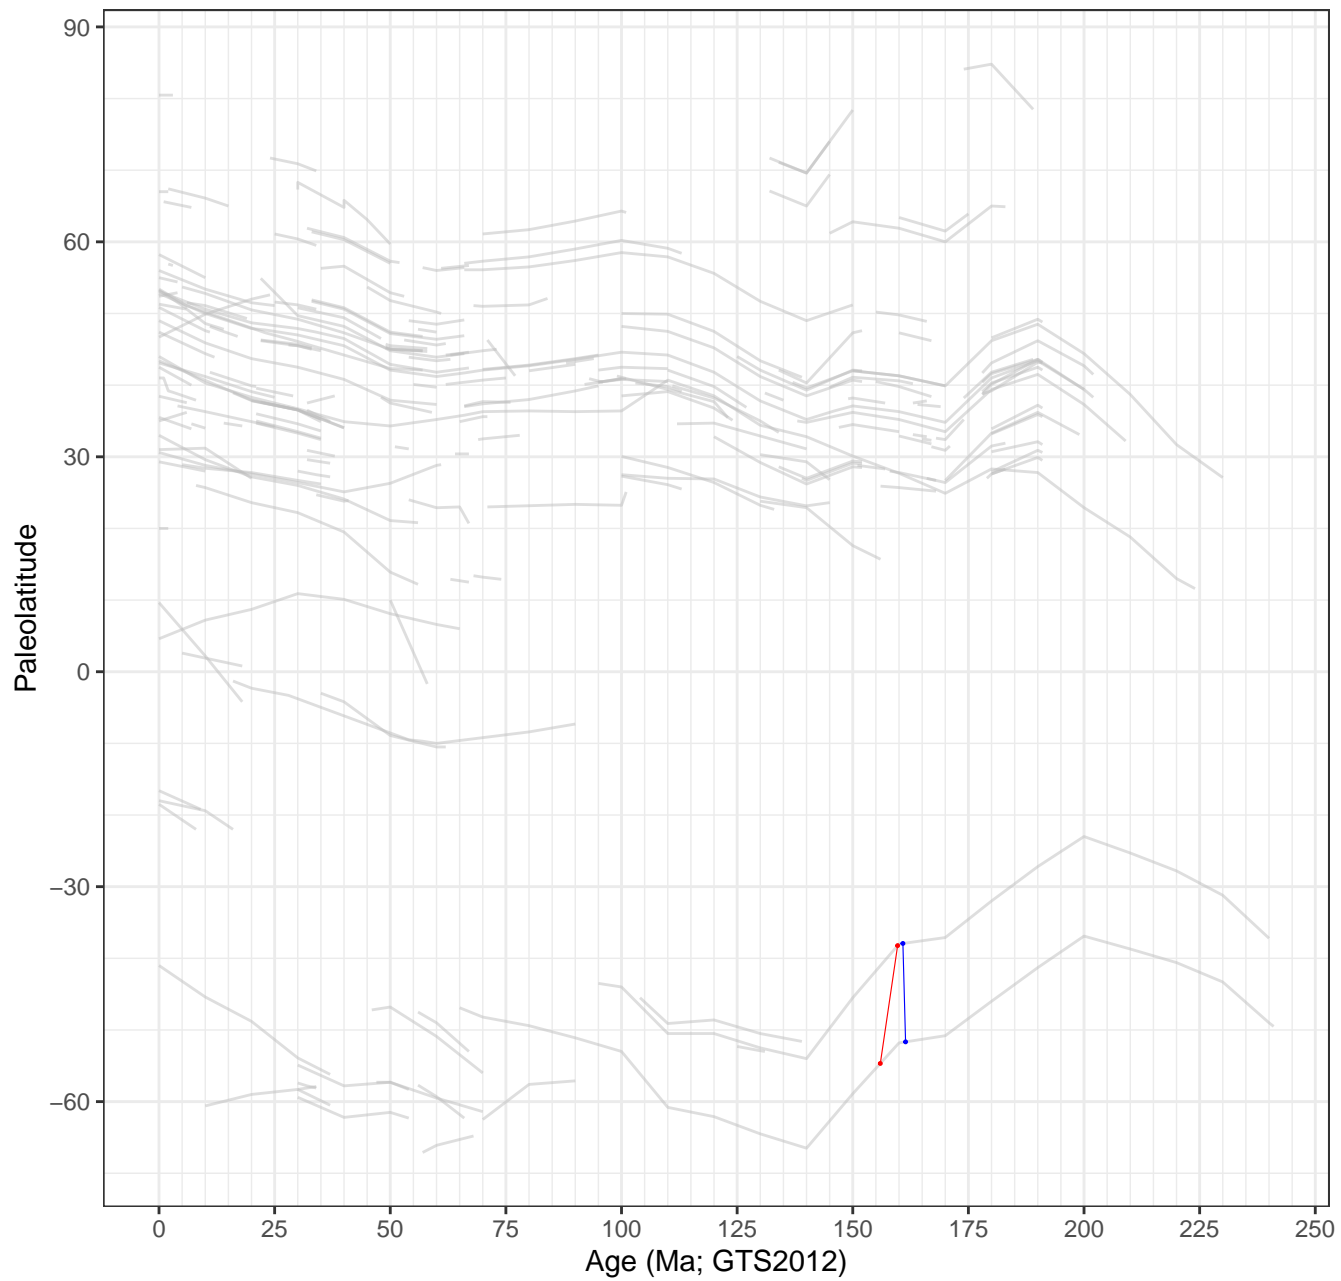

Supplement: Supplementary file 2617 [file Wanaea spectabilis.pdf › Supplement/Supplement 2/Species 1914 plots/Wanaea spectabilis.pdf]

# Species *Wanaea talea*

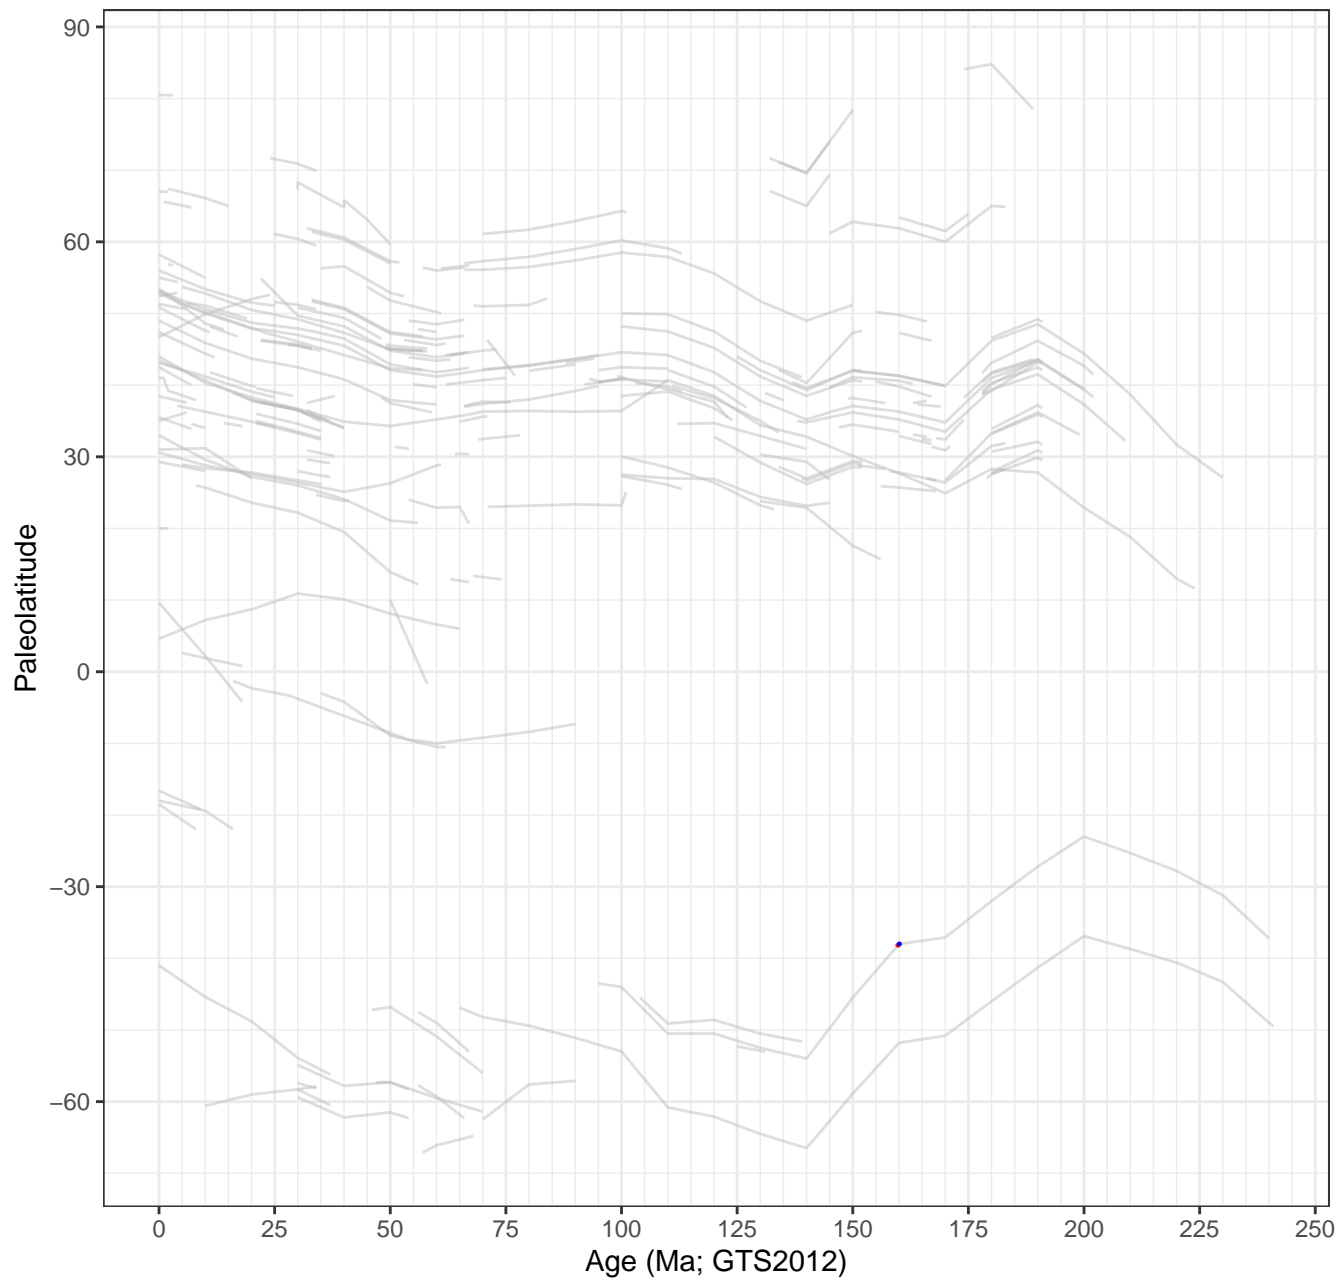

Supplement: Supplementary file 2618 [file Wanaea talea.pdf › Supplement/Supplement 2/Species 1914 plots/Wanaea talea.pdf]

# Species *Wanaea thysanota*

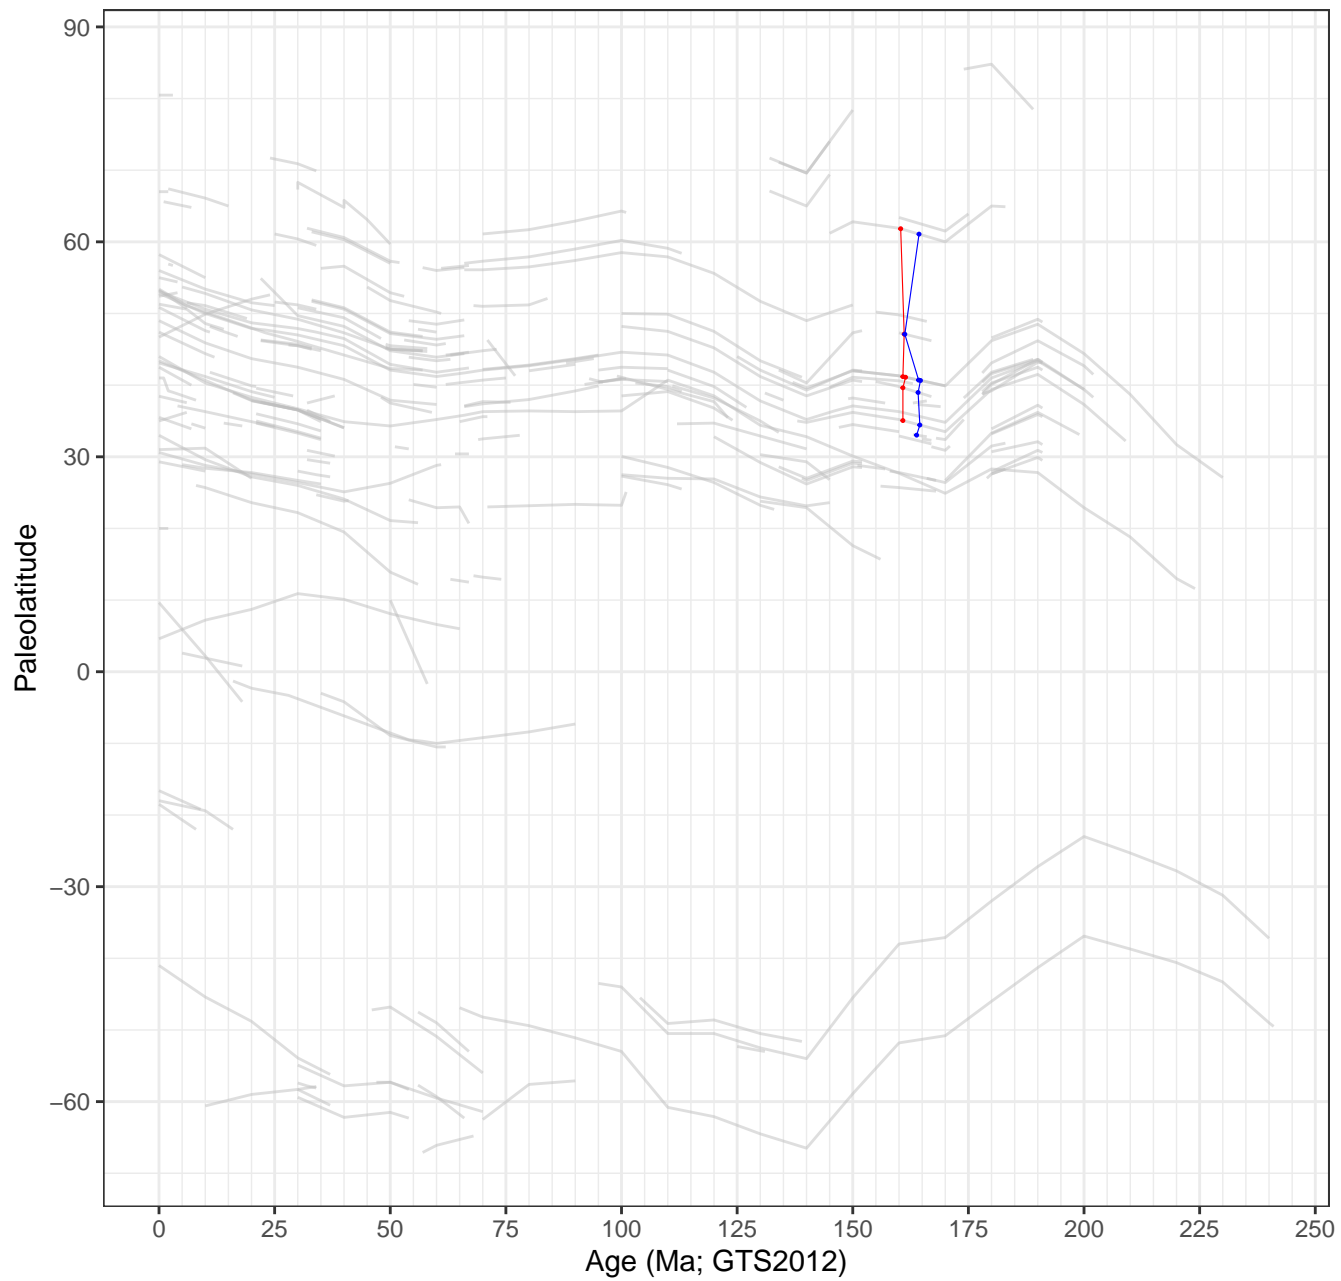

Supplement: Supplementary file 2619 [file Wanaea thysanota.pdf › Supplement/Supplement 2/Species 1914 plots/Wanaea thysanota.pdf]

# Species *Wanaea verrucosa*

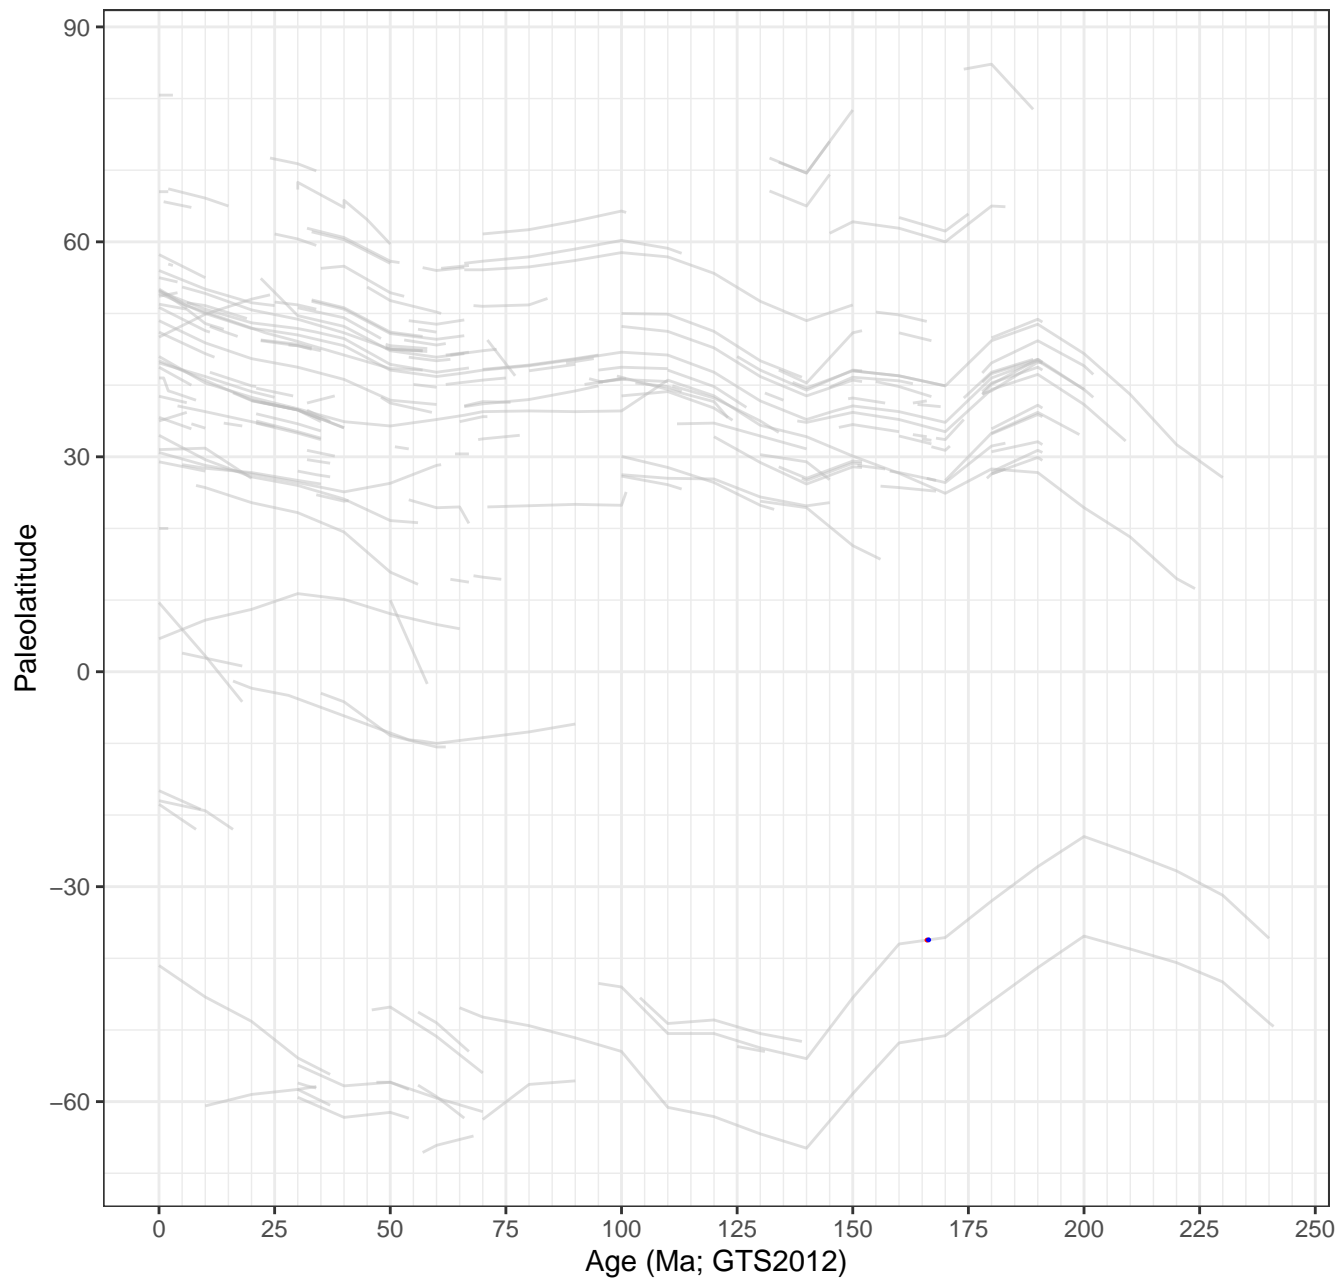

Supplement: Supplementary file 2620 [file Wanaea verrucosa.pdf › Supplement/Supplement 2/Species 1914 plots/Wanaea verrucosa.pdf]

# Species *Wanaea zoharensis*

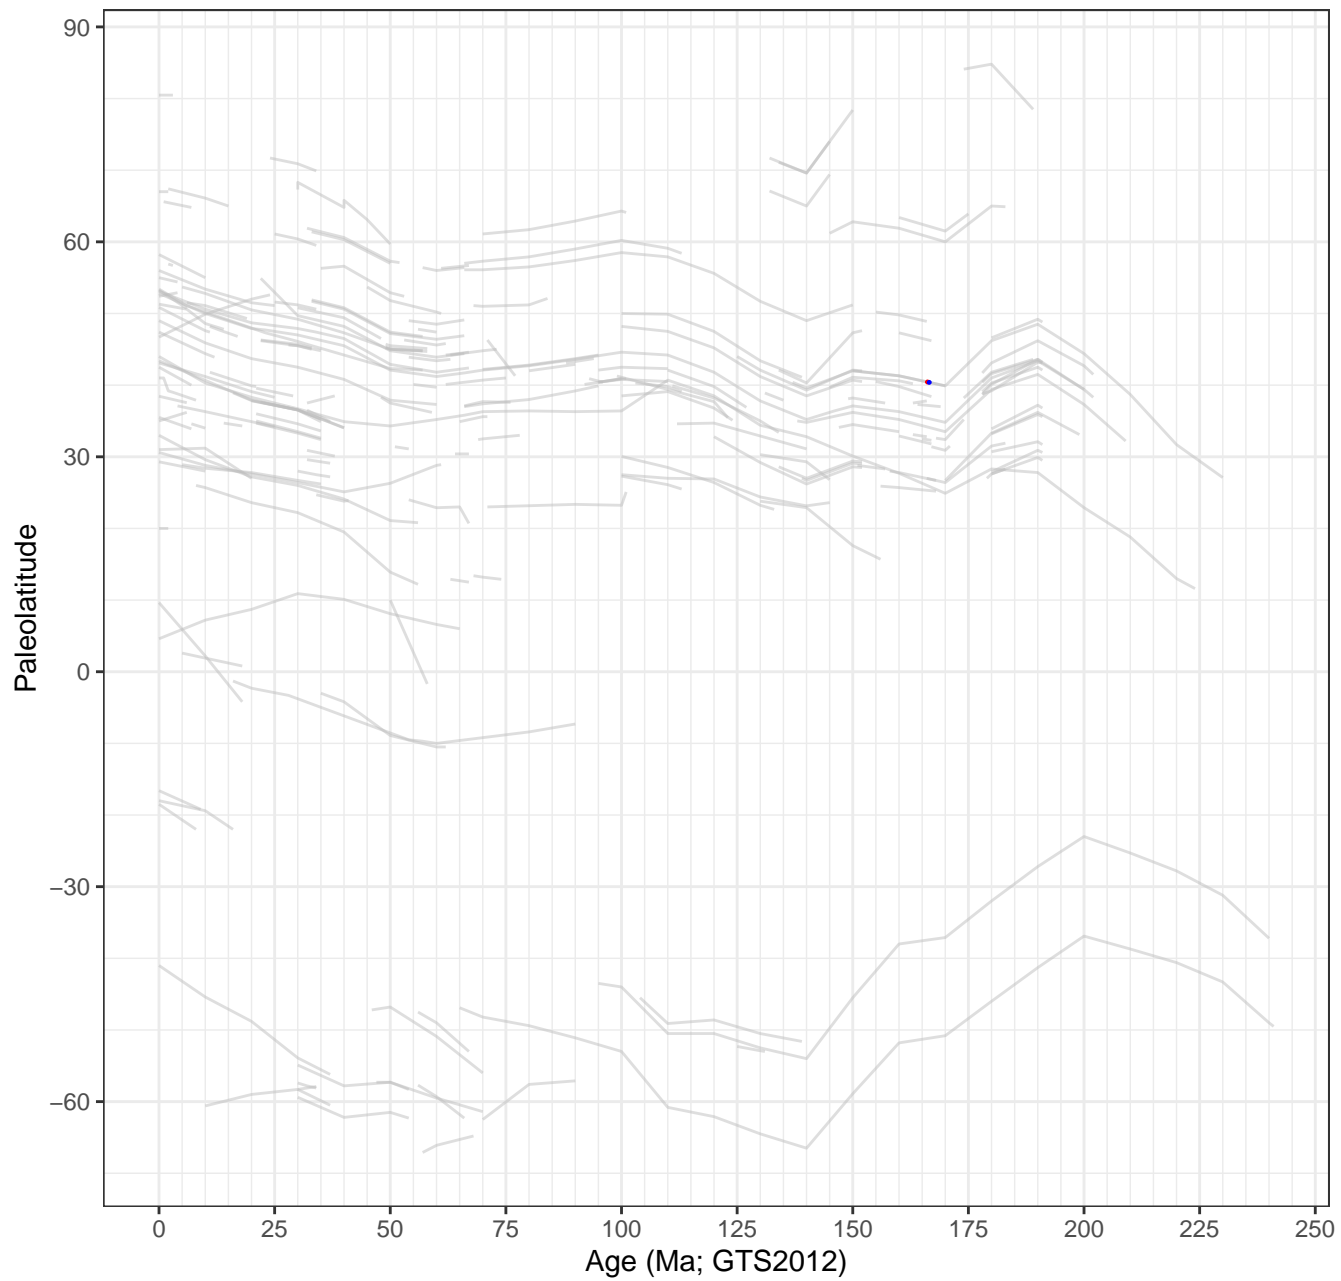

Supplement: Supplementary file 2621 [file Wanaea zoharensis.pdf › Supplement/Supplement 2/Species 1914 plots/Wanaea zoharensis.pdf]

# Species *Wanneria listeri*

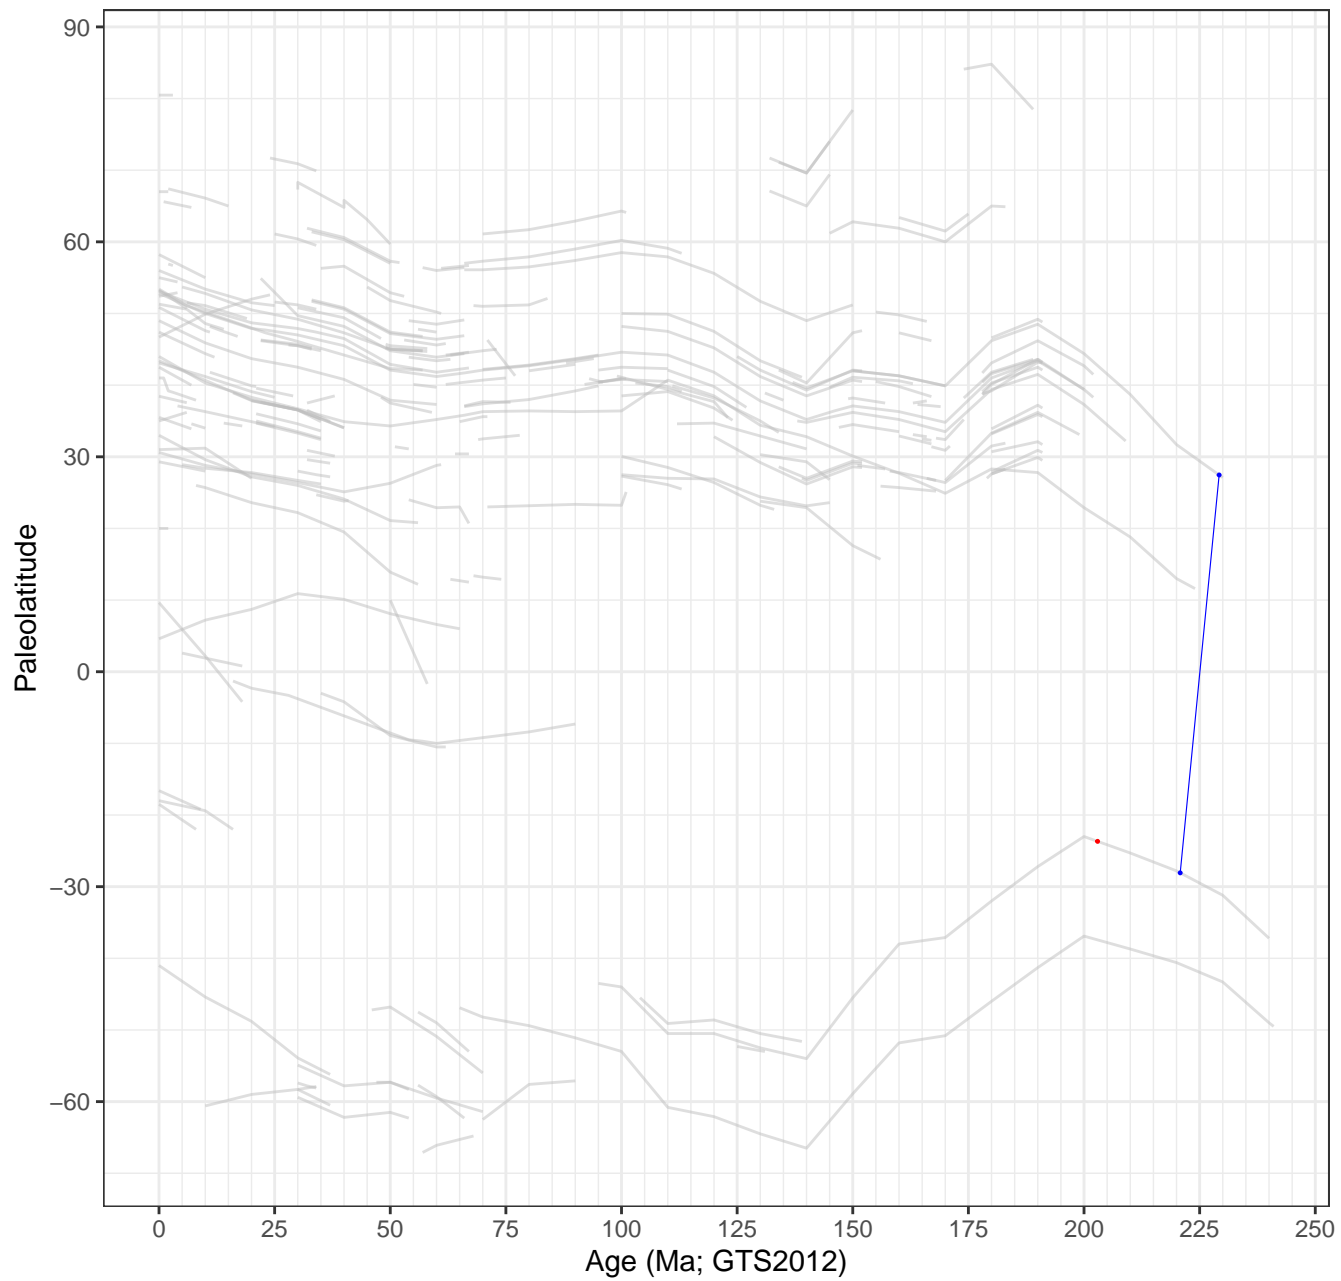

Supplement: Supplementary file 2622 [file Wanneria listeri.pdf › Supplement/Supplement 2/Species 1914 plots/Wanneria listeri.pdf]

# Species *Warrenia californica*

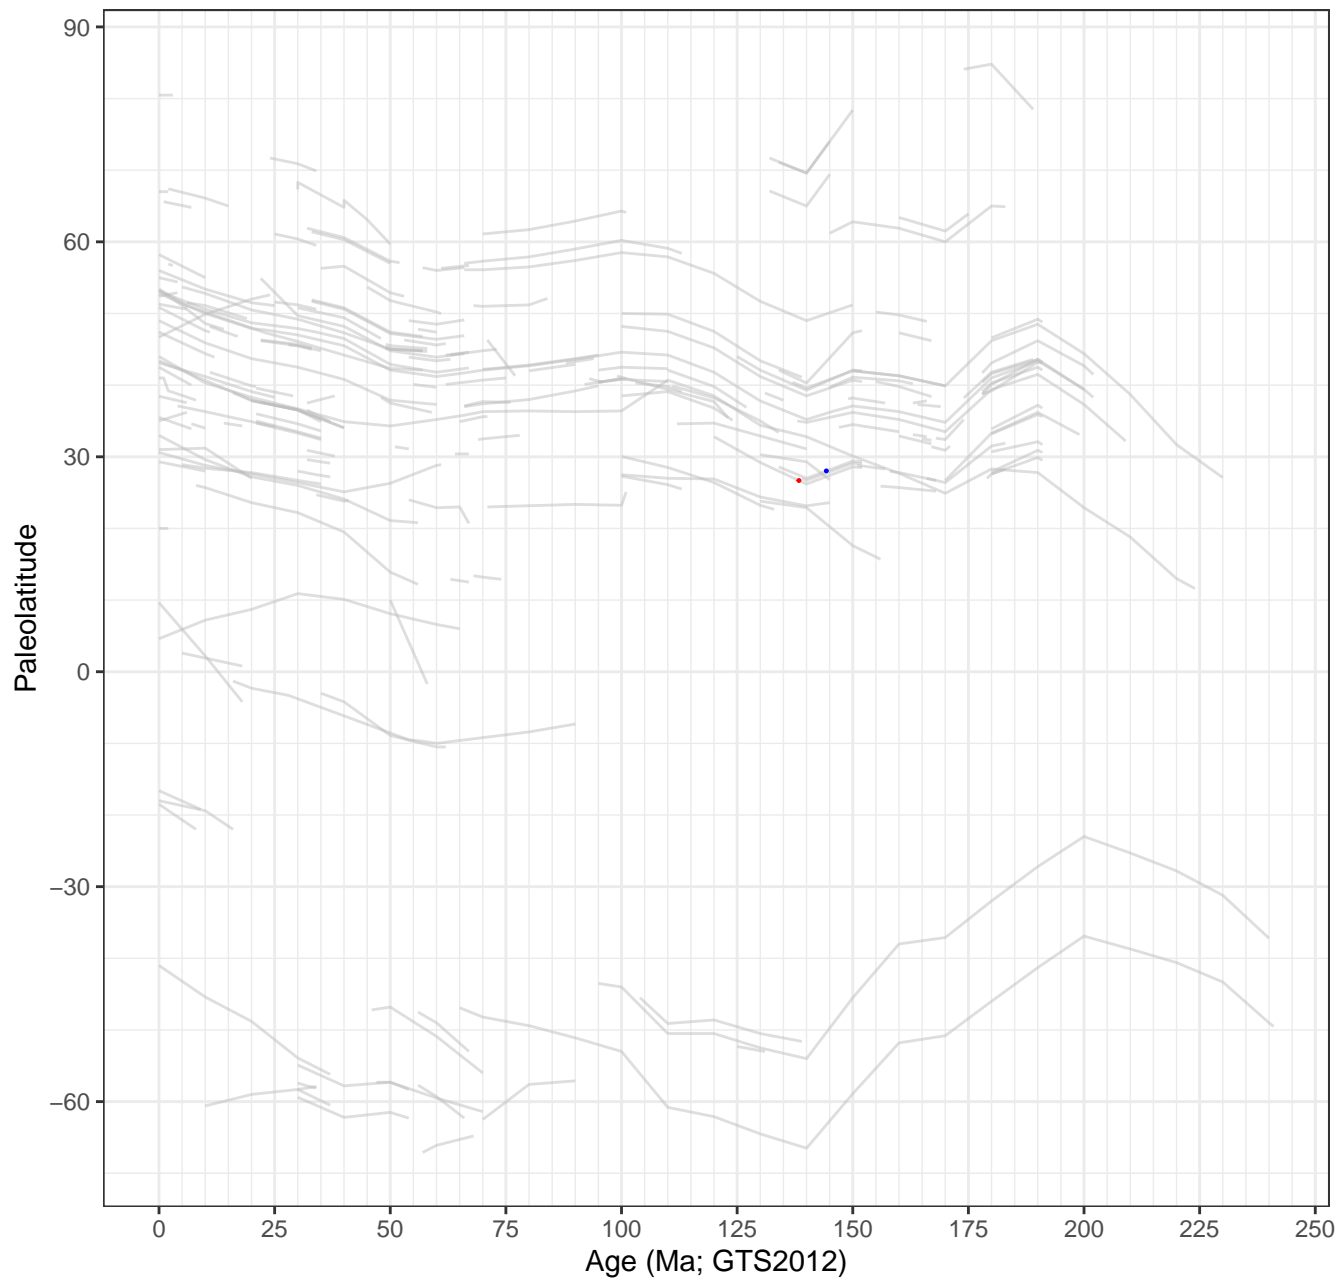

Supplement: Supplementary file 2623 [file Warrenia californica.pdf › Supplement/Supplement 2/Species 1914 plots/Warrenia californica.pdf]

# Species *Wetzeliella articulata*

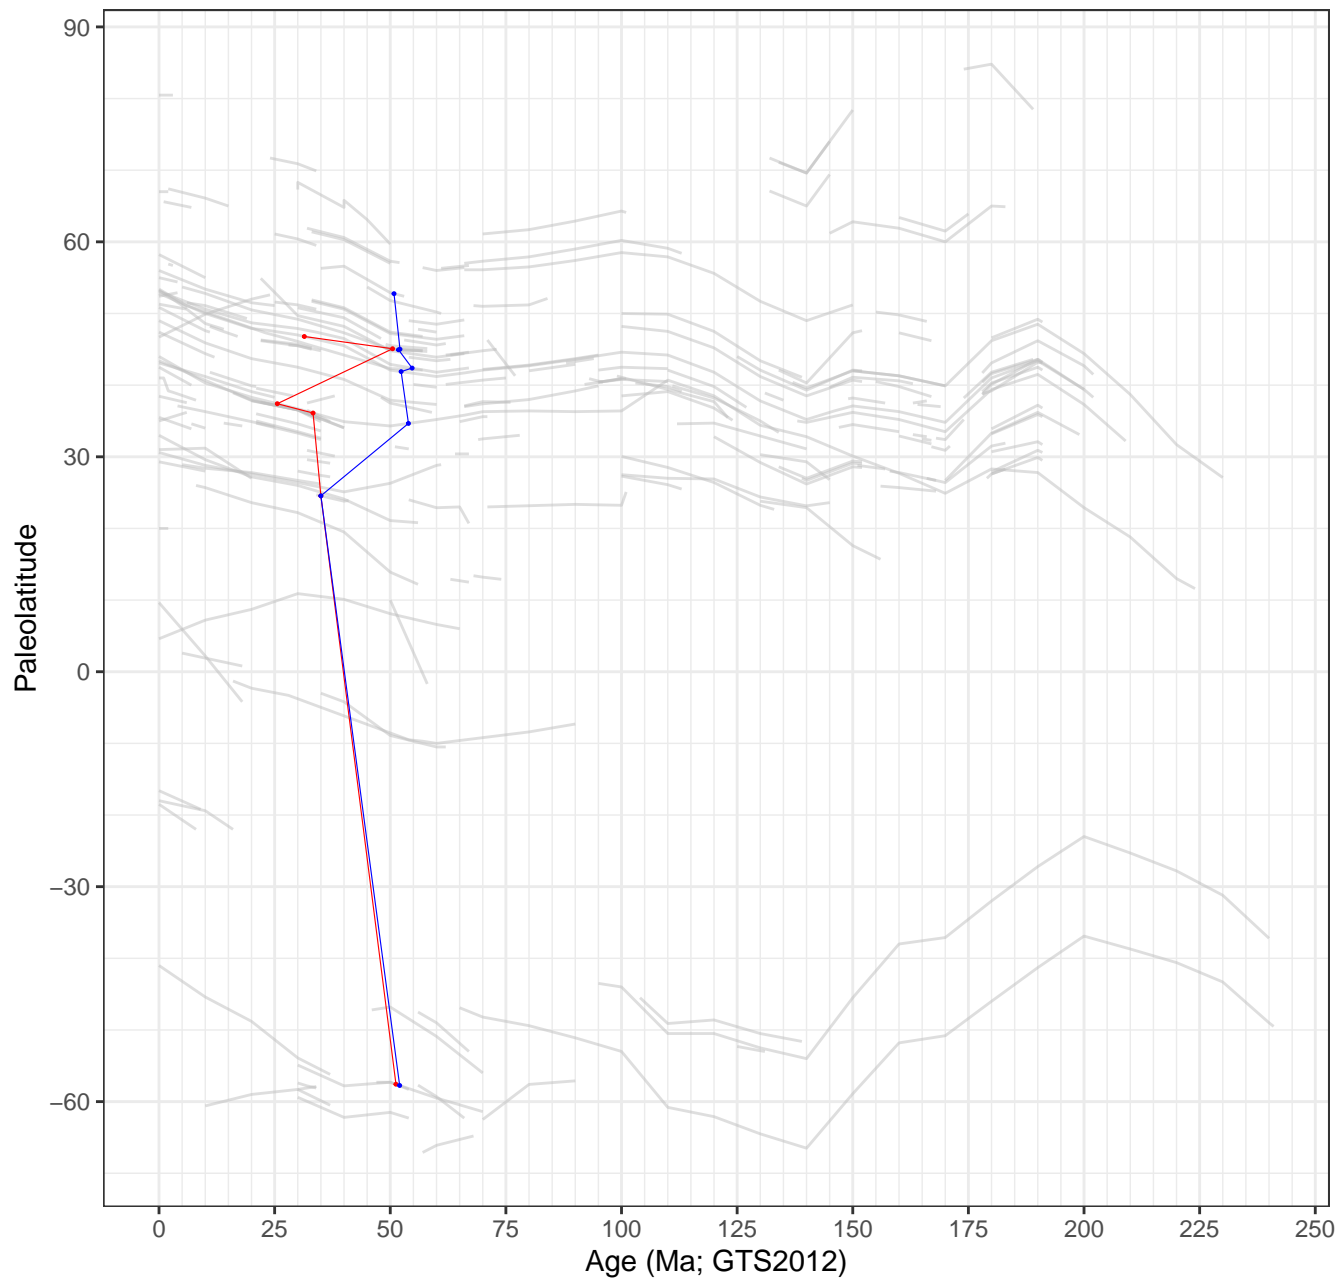

Supplement: Supplementary file 2624 [file Wetzeliella articulata.pdf › Supplement/Supplement 2/Species 1914 plots/Wetzeliella articulata.pdf]

# Species *Wetzeliella astra*

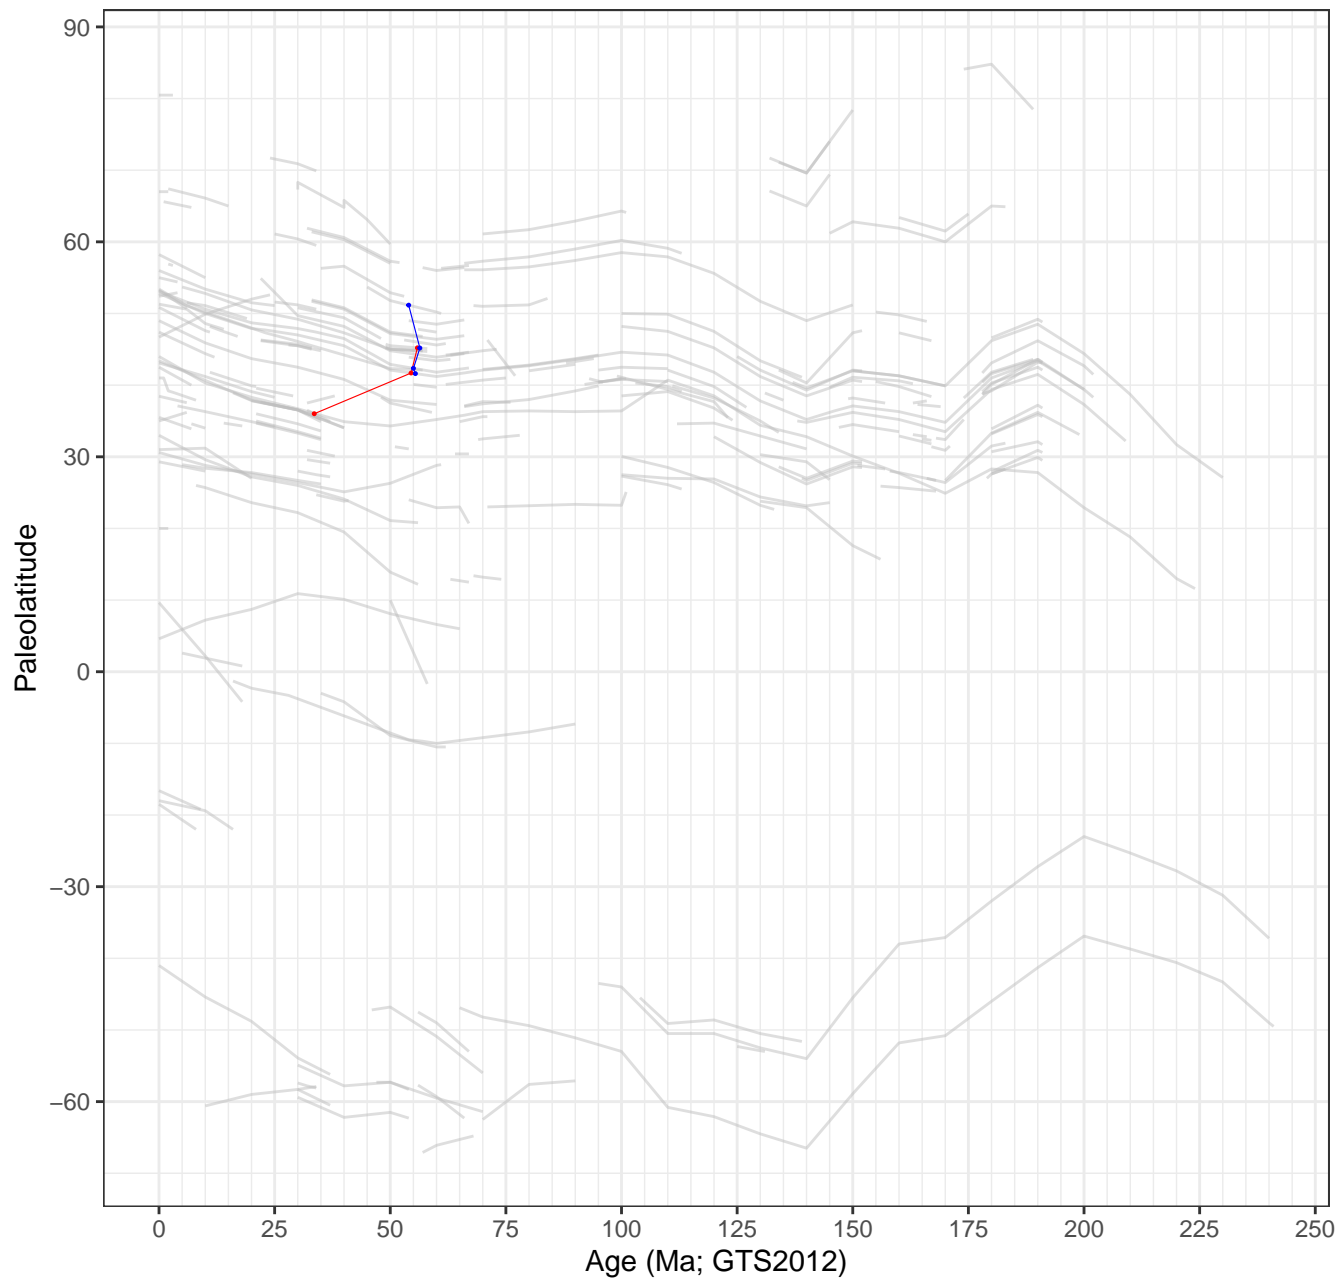

Supplement: Supplementary file 2625 [file Wetzeliella astra.pdf › Supplement/Supplement 2/Species 1914 plots/Wetzeliella astra.pdf]

# Species *Wetzeliella caviarticulata*

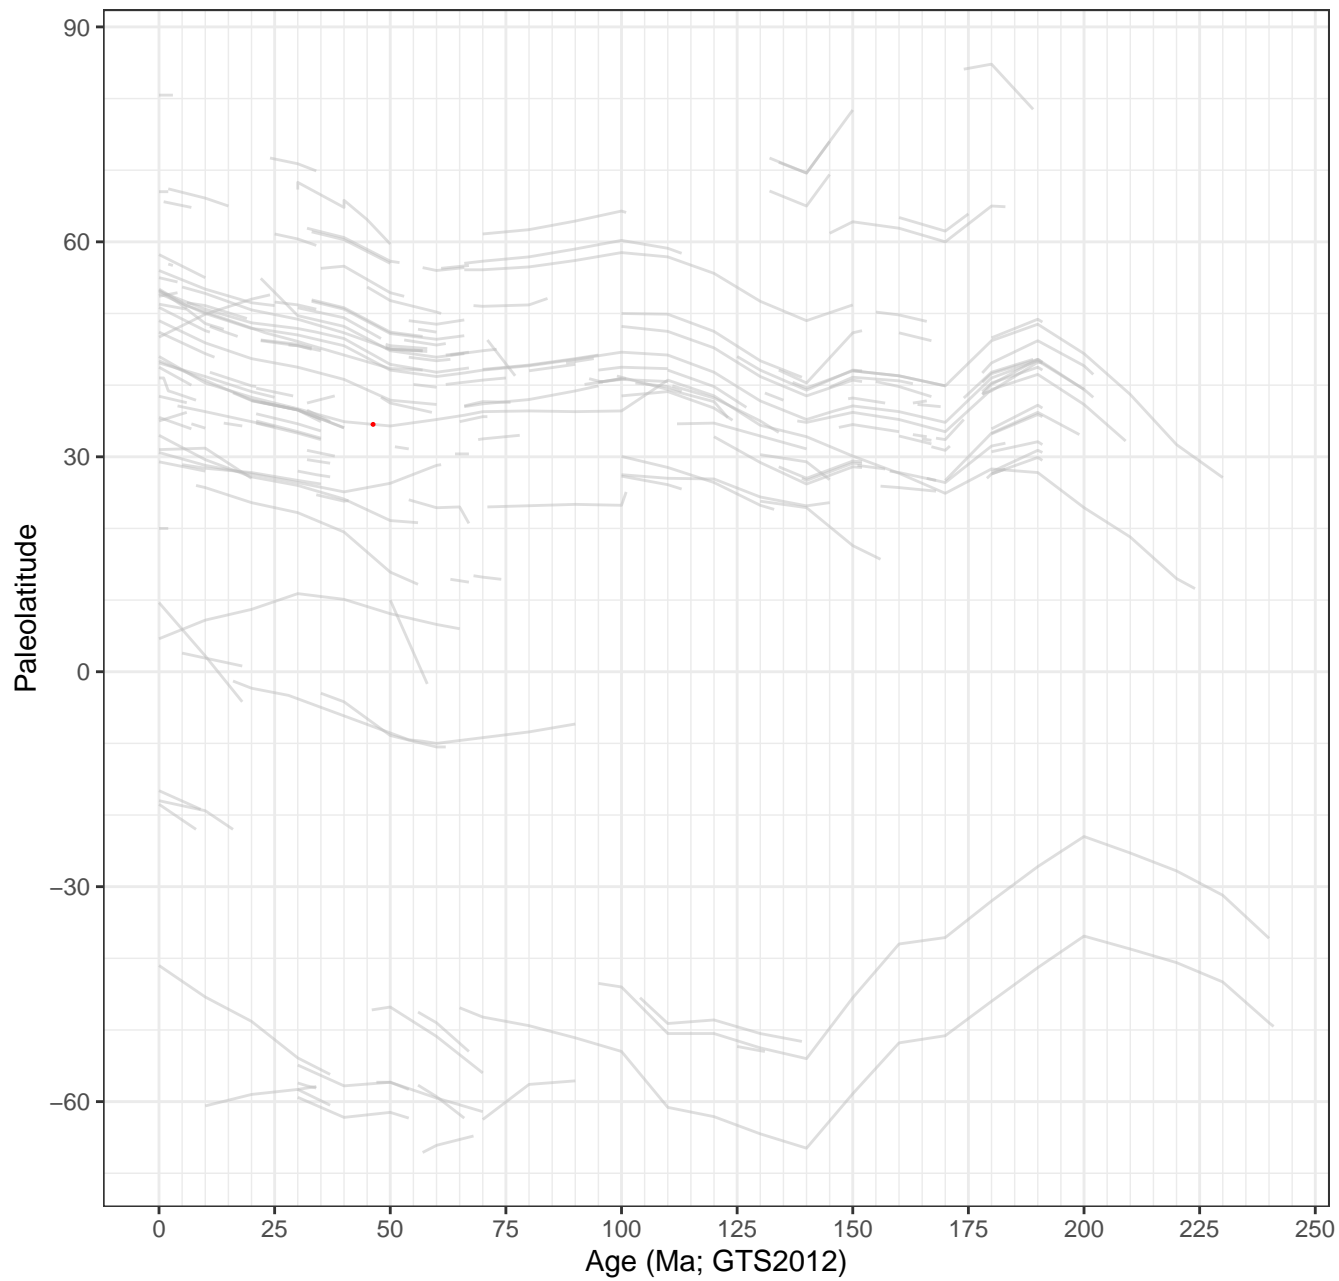

Supplement: Supplementary file 2626 [file Wetzeliella caviarticulata.pdf › Supplement/Supplement 2/Species 1914 plots/Wetzeliella caviarticulata.pdf]

# Species *Wetzeliella eocaenica*

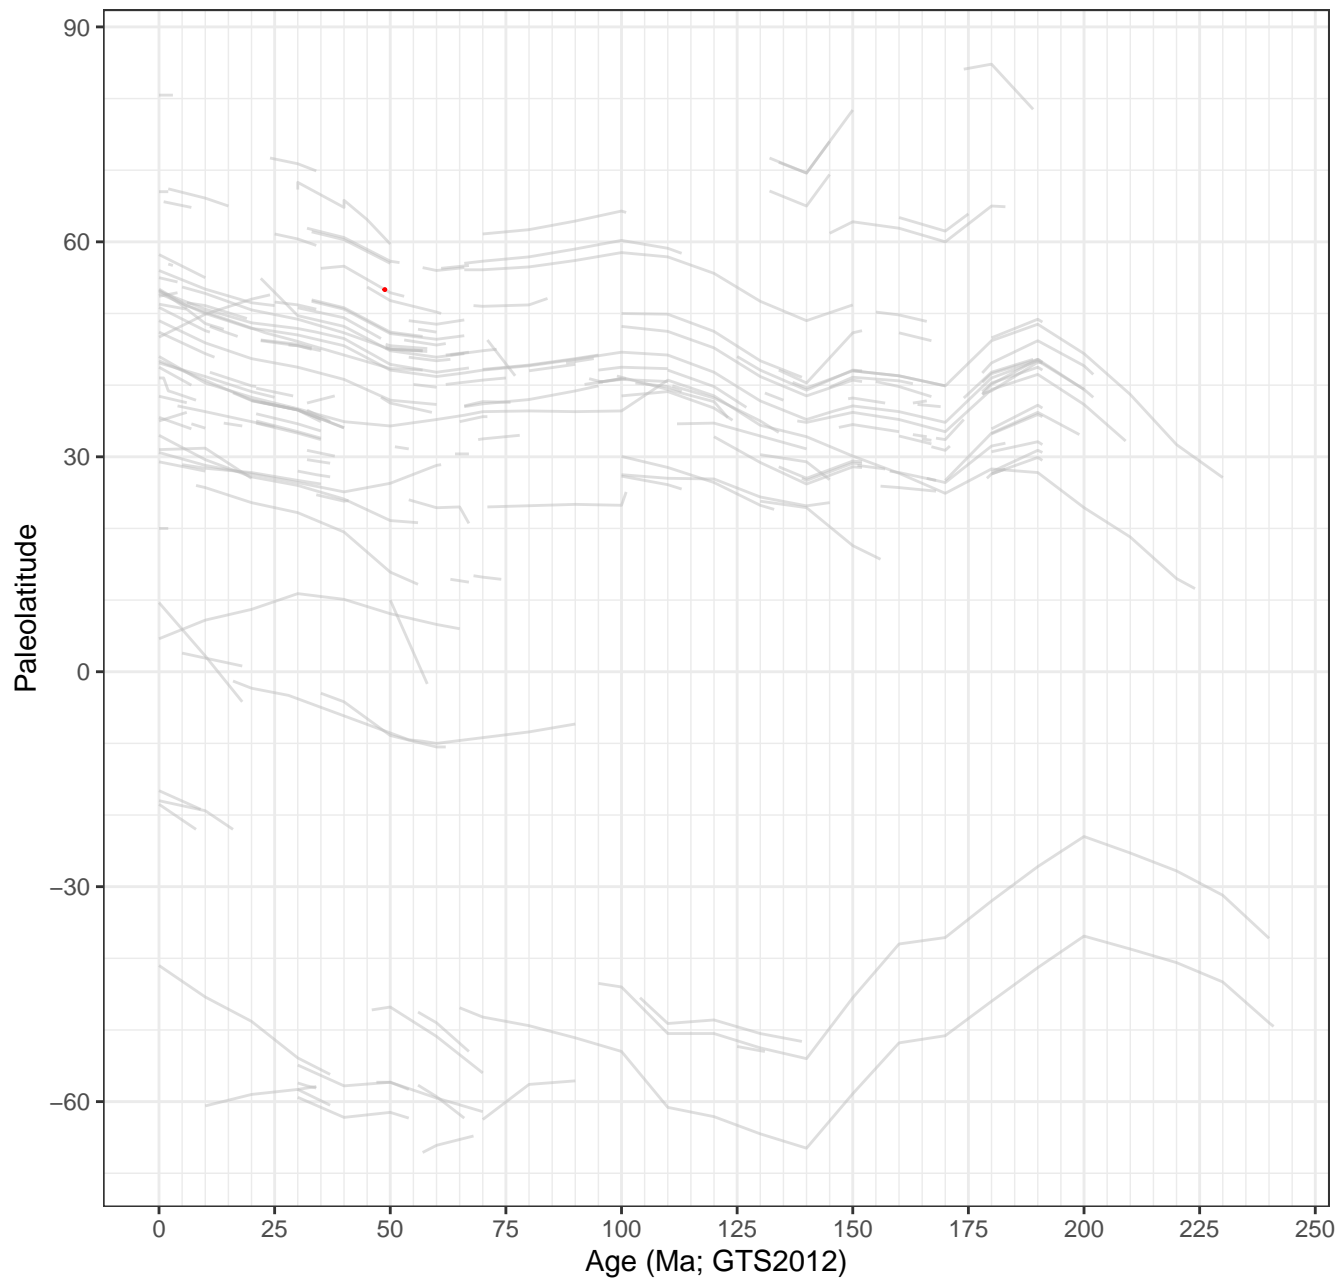

Supplement: Supplementary file 2627 [file Wetzeliella eocaenica.pdf › Supplement/Supplement 2/Species 1914 plots/Wetzeliella eocaenica.pdf]

# Species *Wetzeliella gochtii*

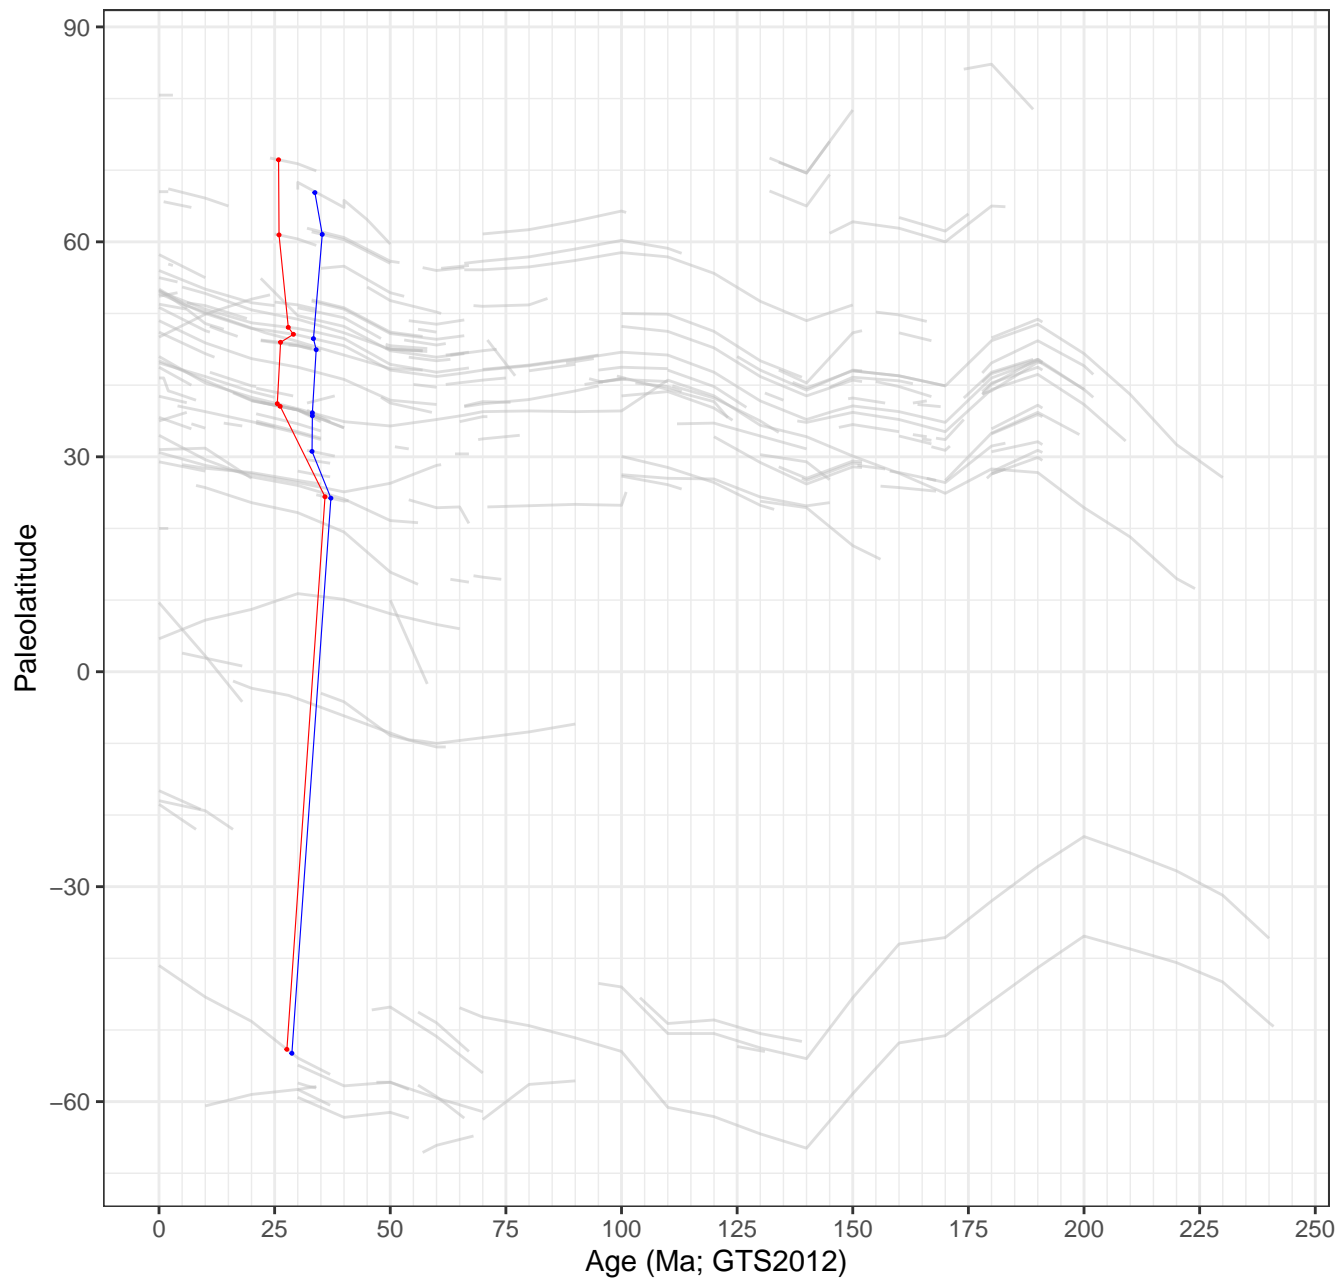

Supplement: Supplementary file 2628 [file Wetzeliella gochtii.pdf › Supplement/Supplement 2/Species 1914 plots/Wetzeliella gochtii.pdf]

# Species *Wetzeliella irtyschensis*

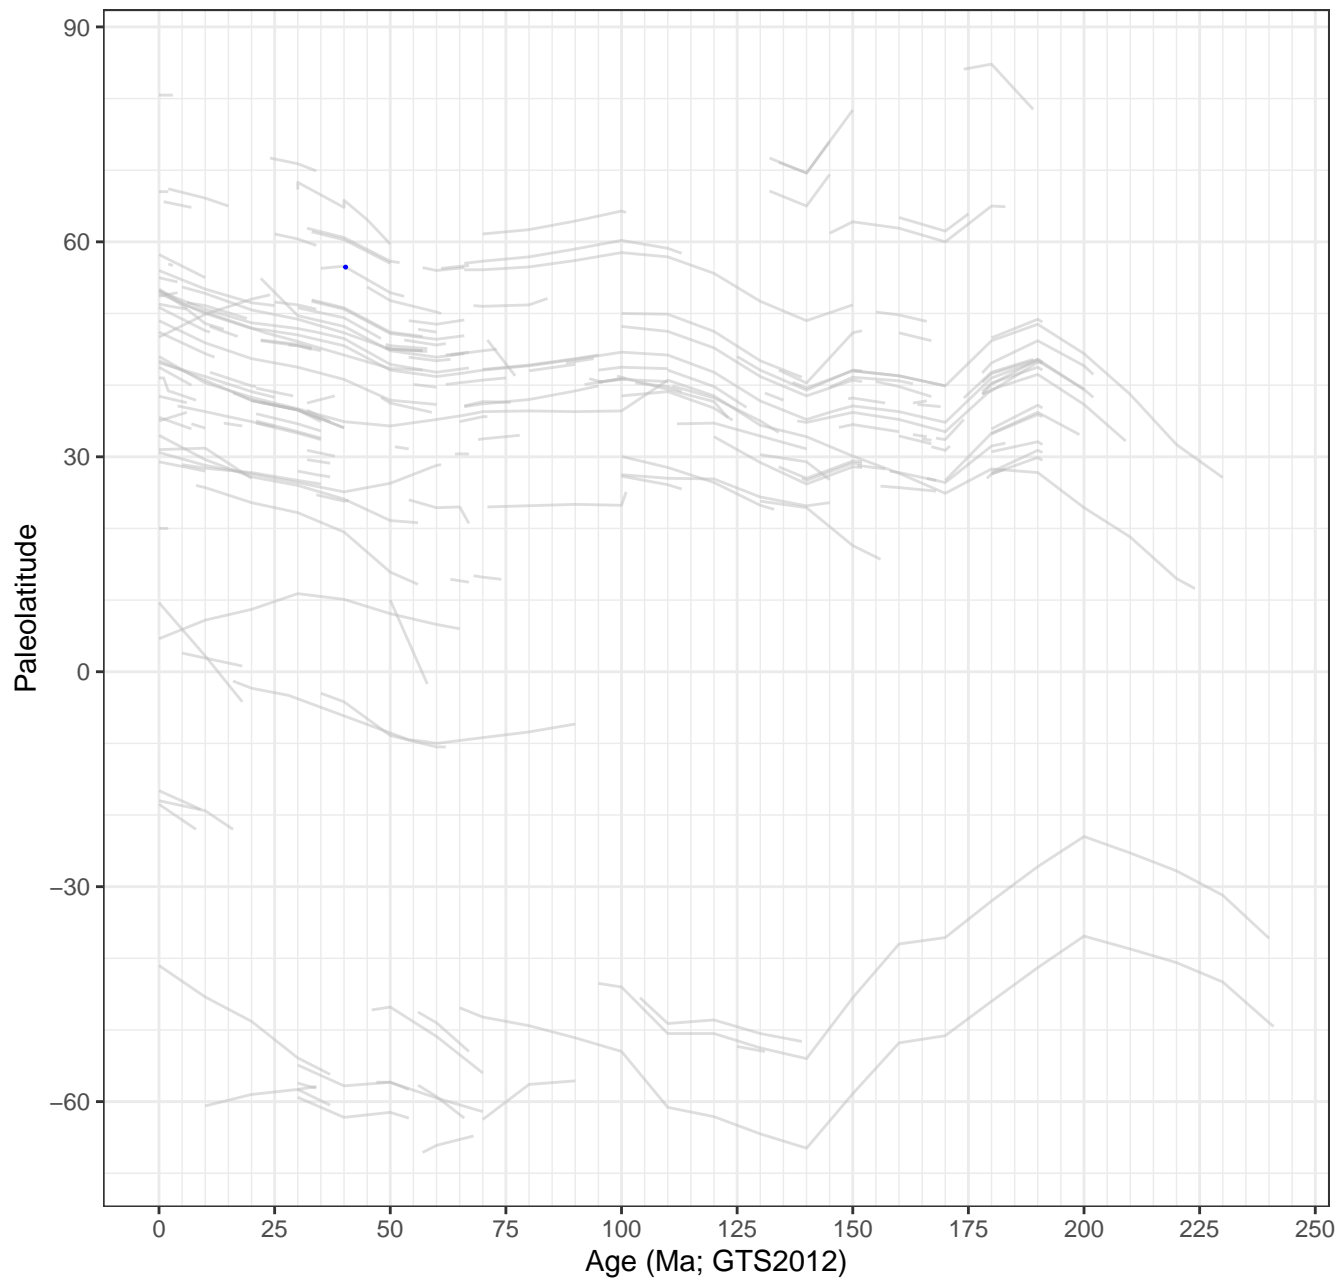

Supplement: Supplementary file 2629 [file Wetzeliella irtyschensis.pdf › Supplement/Supplement 2/Species 1914 plots/Wetzeliella irtyschensis.pdf]

# Species *Wetzeliella lunaris*

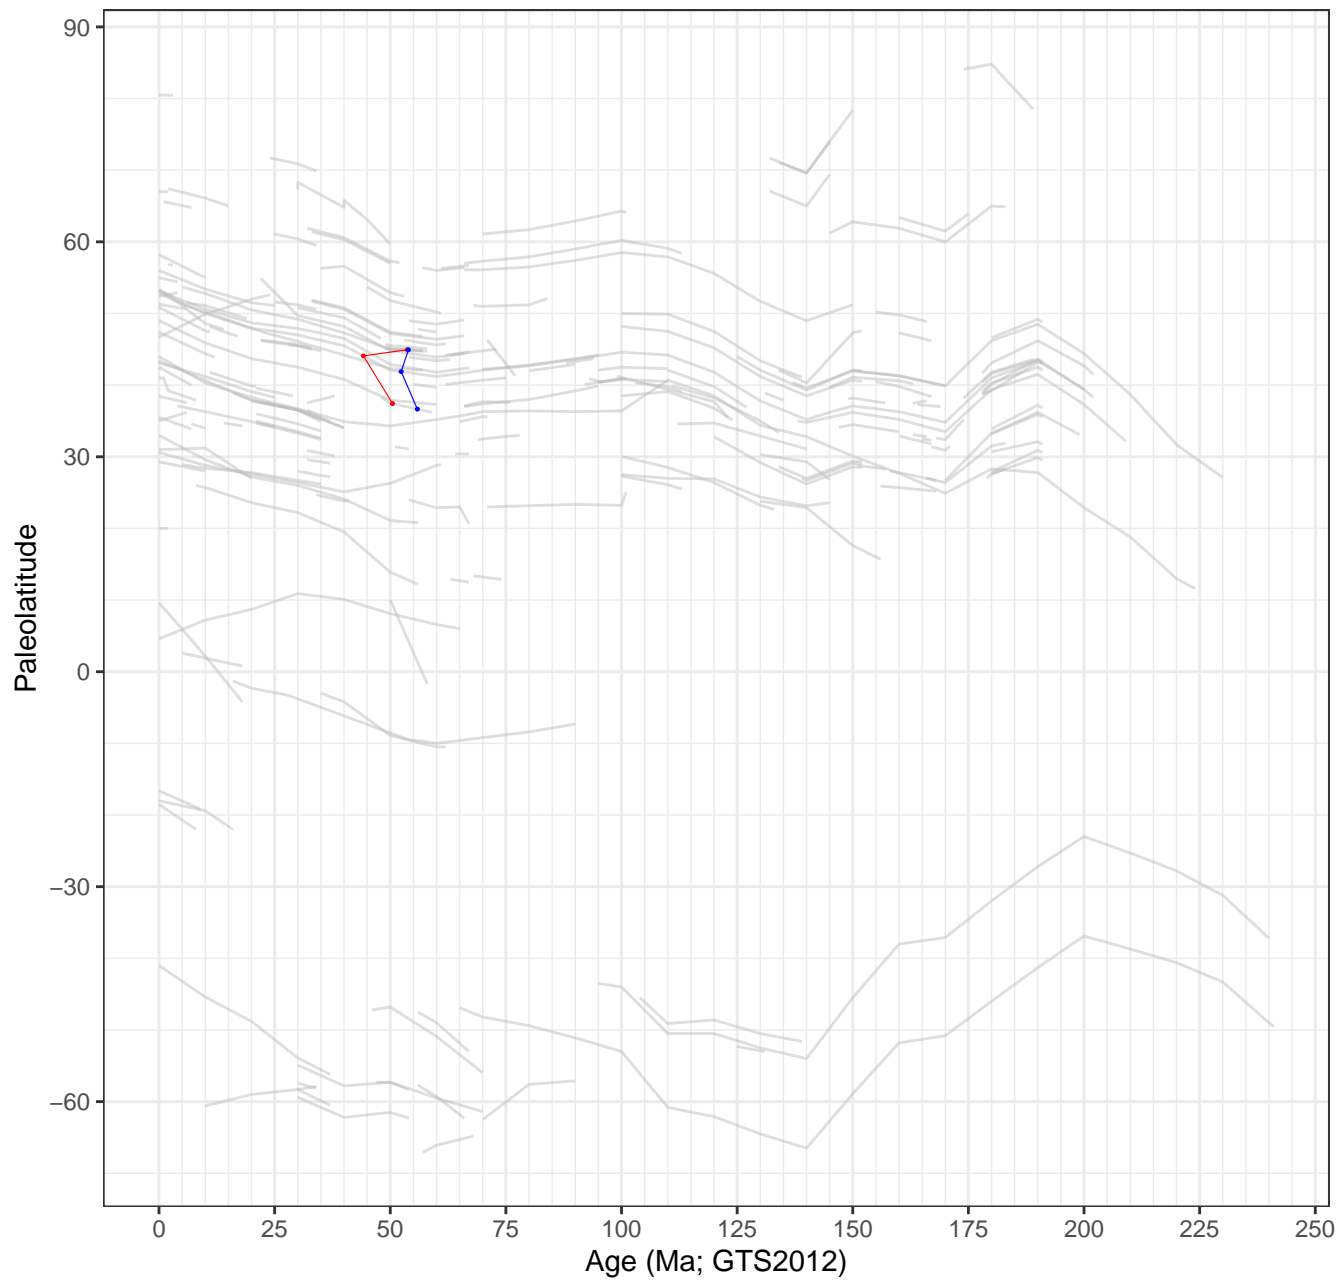

Supplement: Supplementary file 2630 [file Wetzeliella lunaris.pdf › Supplement/Supplement 2/Species 1914 plots/Wetzeliella lunaris.pdf]

# Species *Wetzeliella meckelfeldensis*

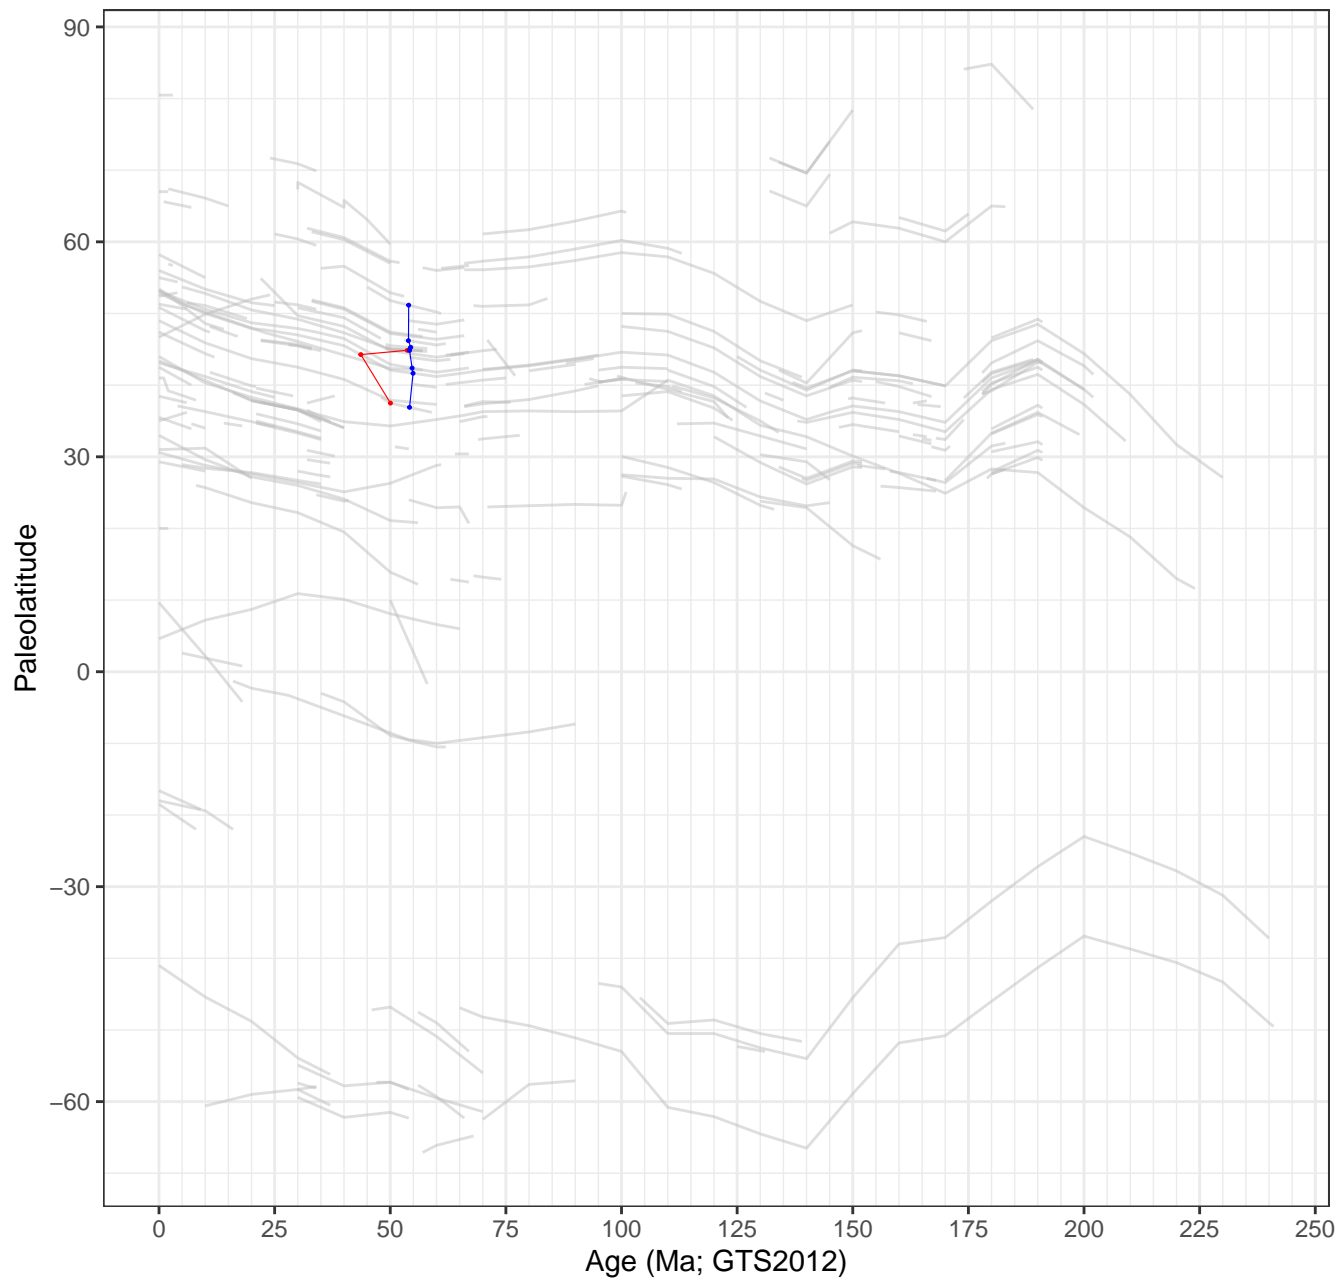

Supplement: Supplementary file 2631 [file Wetzeliella meckelfeldensis.pdf › Supplement/Supplement 2/Species 1914 plots/Wetzeliella meckelfeldensis.pdf]

# Species *Wetzelietta ovalis*

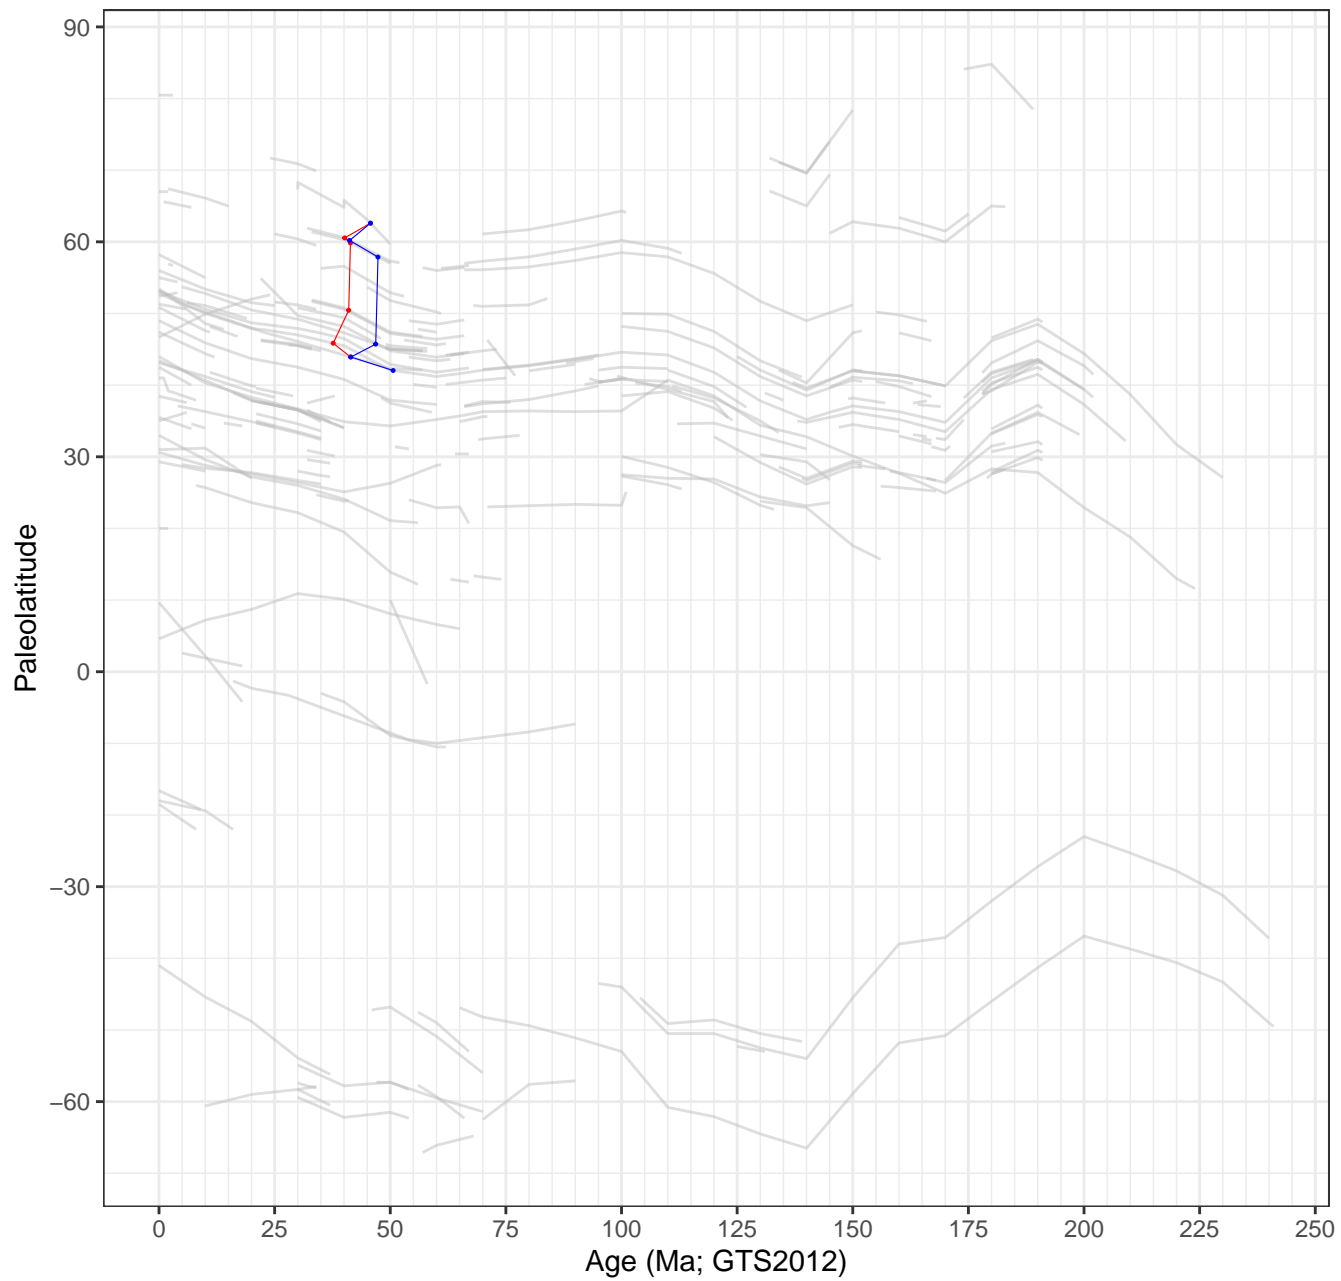

Supplement: Supplementary file 2632 [file Wetzeliella ovalis.pdf › Supplement/Supplement 2/Species 1914 plots/Wetzeliella ovalis.pdf]

# Species *Wetzeliella samlandica*

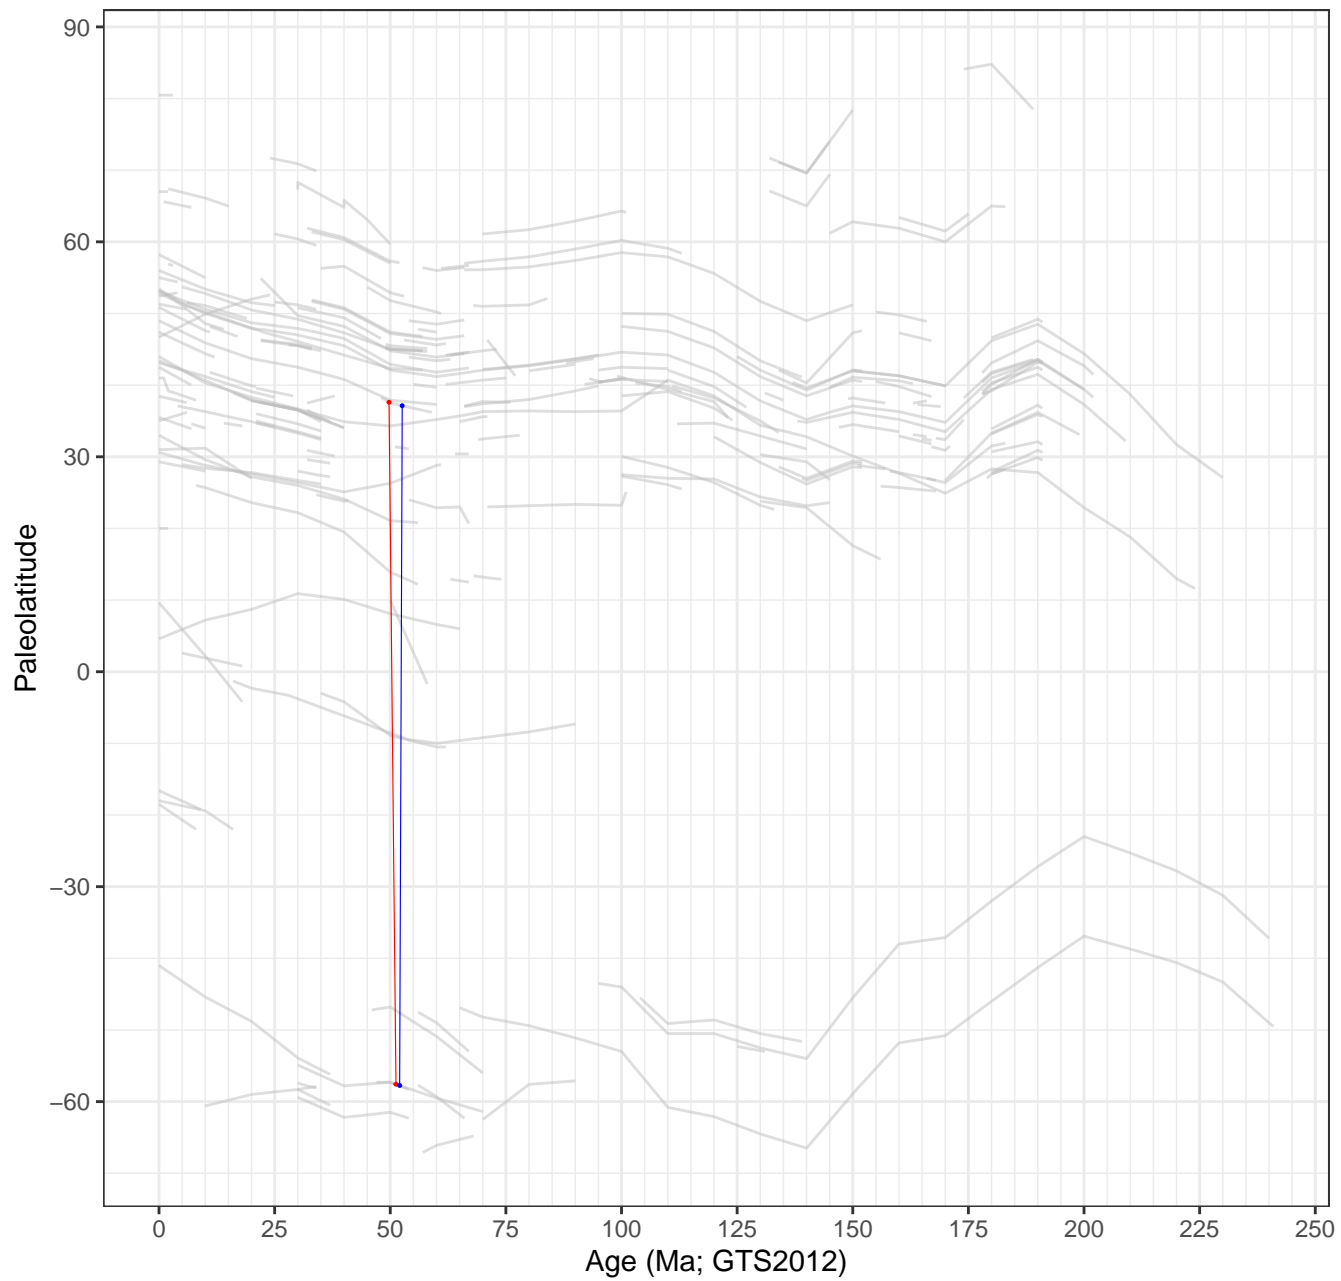

Supplement: Supplementary file 2633 [file Wetzeliella samlandica.pdf › Supplement/Supplement 2/Species 1914 plots/Wetzeliella samlandica.pdf]
