# Supplementary figures and images for: DINOSTRAT: a global database of the stratigraphic and paleolatitudinal distribution of Mesozoic–Cenozoic organic-walled dinoflagellate cysts (part 27 of 27)
Source: Copernicus journal article supplement (doi:10.5194/essd-14-579-2022), 2022-02-09

# Species *Wetzeliella simplex*

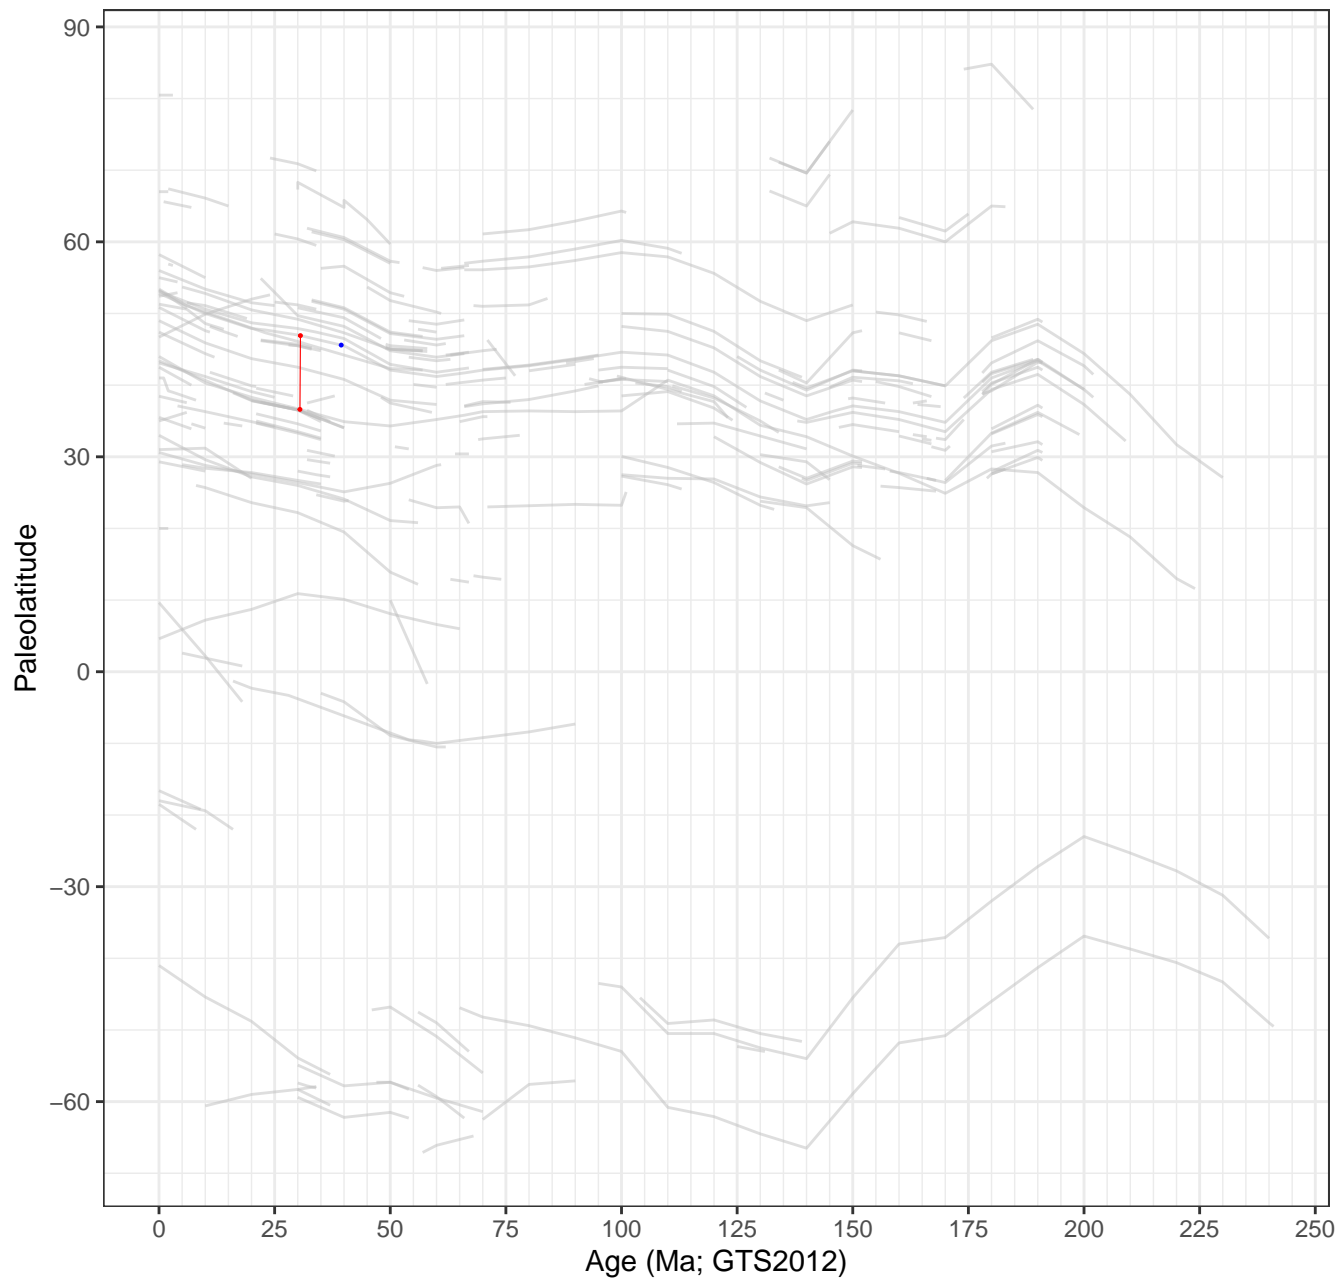

Supplement: Supplementary file 2634 [file Wetzeliella simplex.pdf › Supplement/Supplement 2/Species 1914 plots/Wetzeliella simplex.pdf]

# Species *Wetzeliella symmetrica*

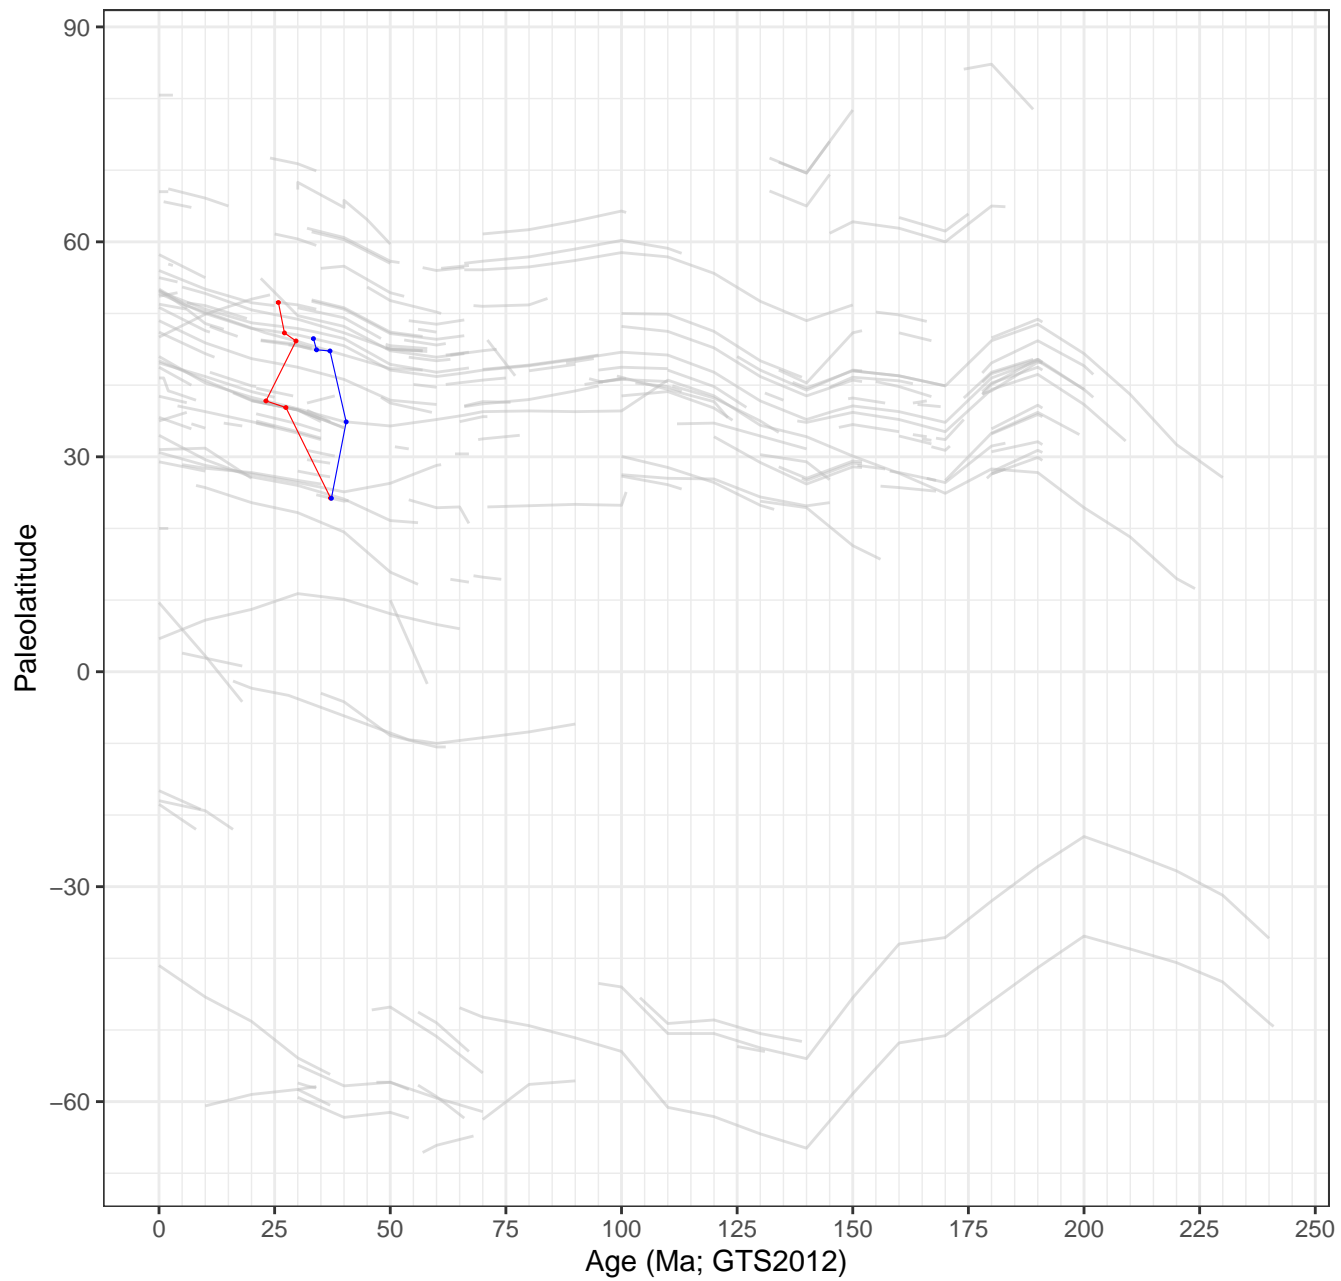

Supplement: Supplementary file 2635 [file Wetzeliella symmetrica.pdf › Supplement/Supplement 2/Species 1914 plots/Wetzeliella symmetrica.pdf]

# Species *Whitecliffia spinosa*

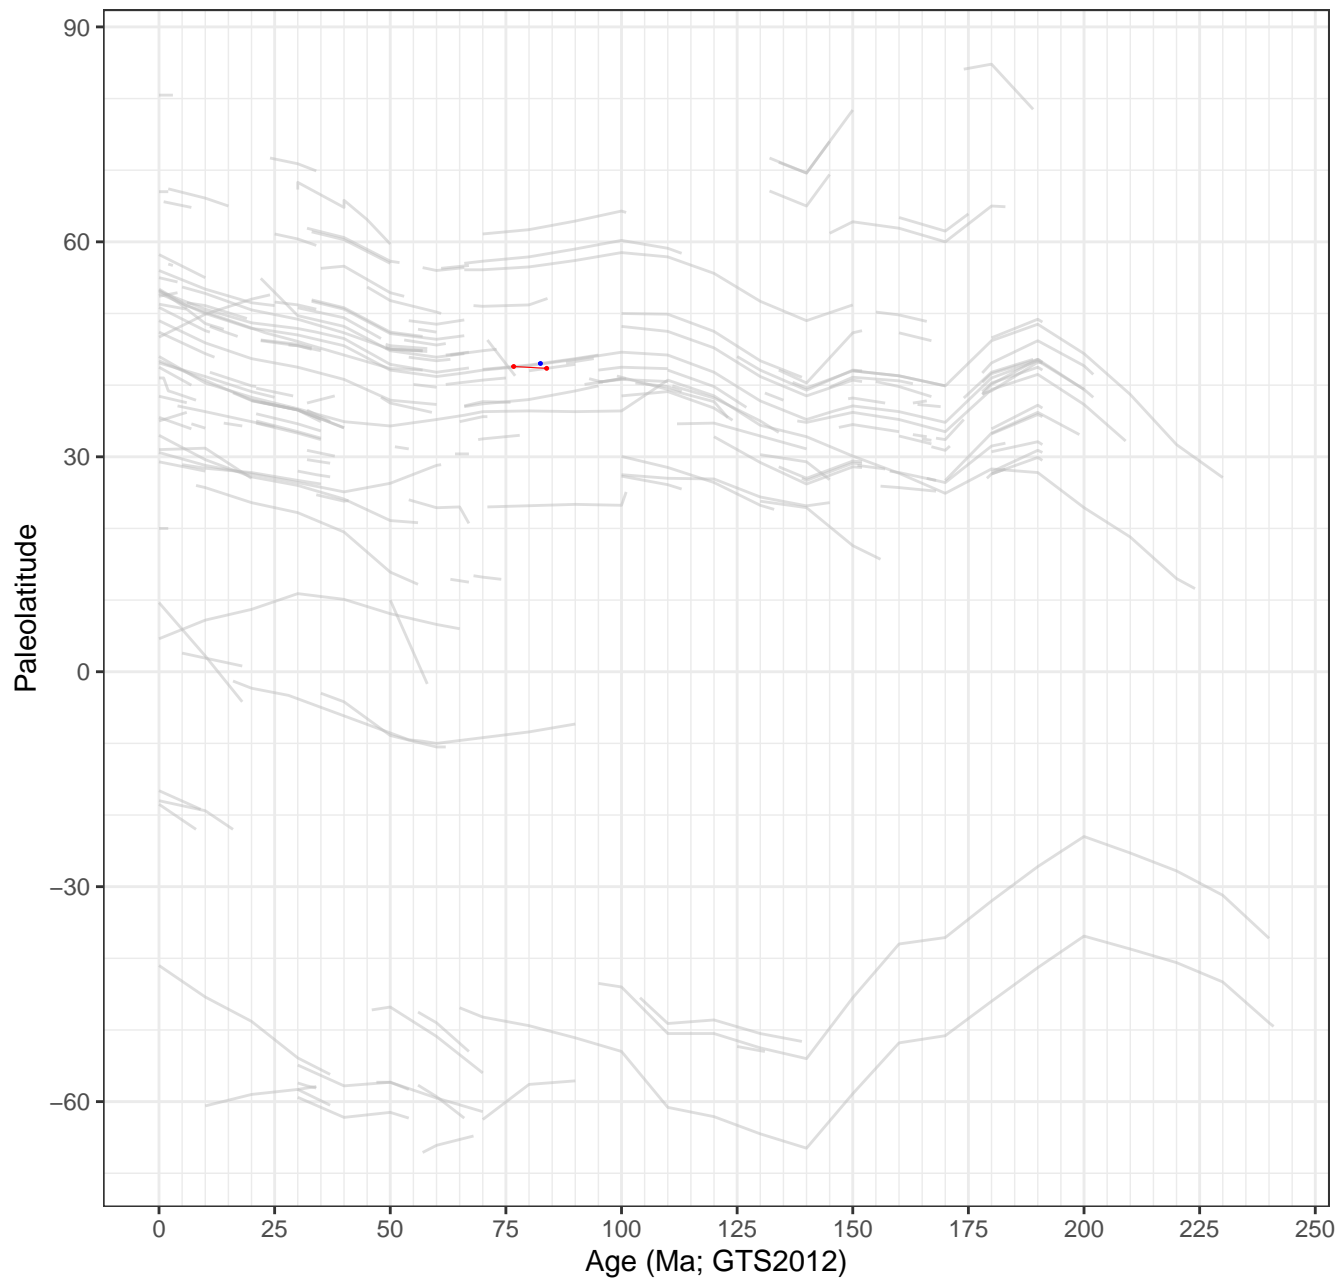

Supplement: Supplementary file 2636 [file Whitecliffia spinosa.pdf › Supplement/Supplement 2/Species 1914 plots/Whitecliffia spinosa.pdf]

# Species *Wigginsella grandstandica*

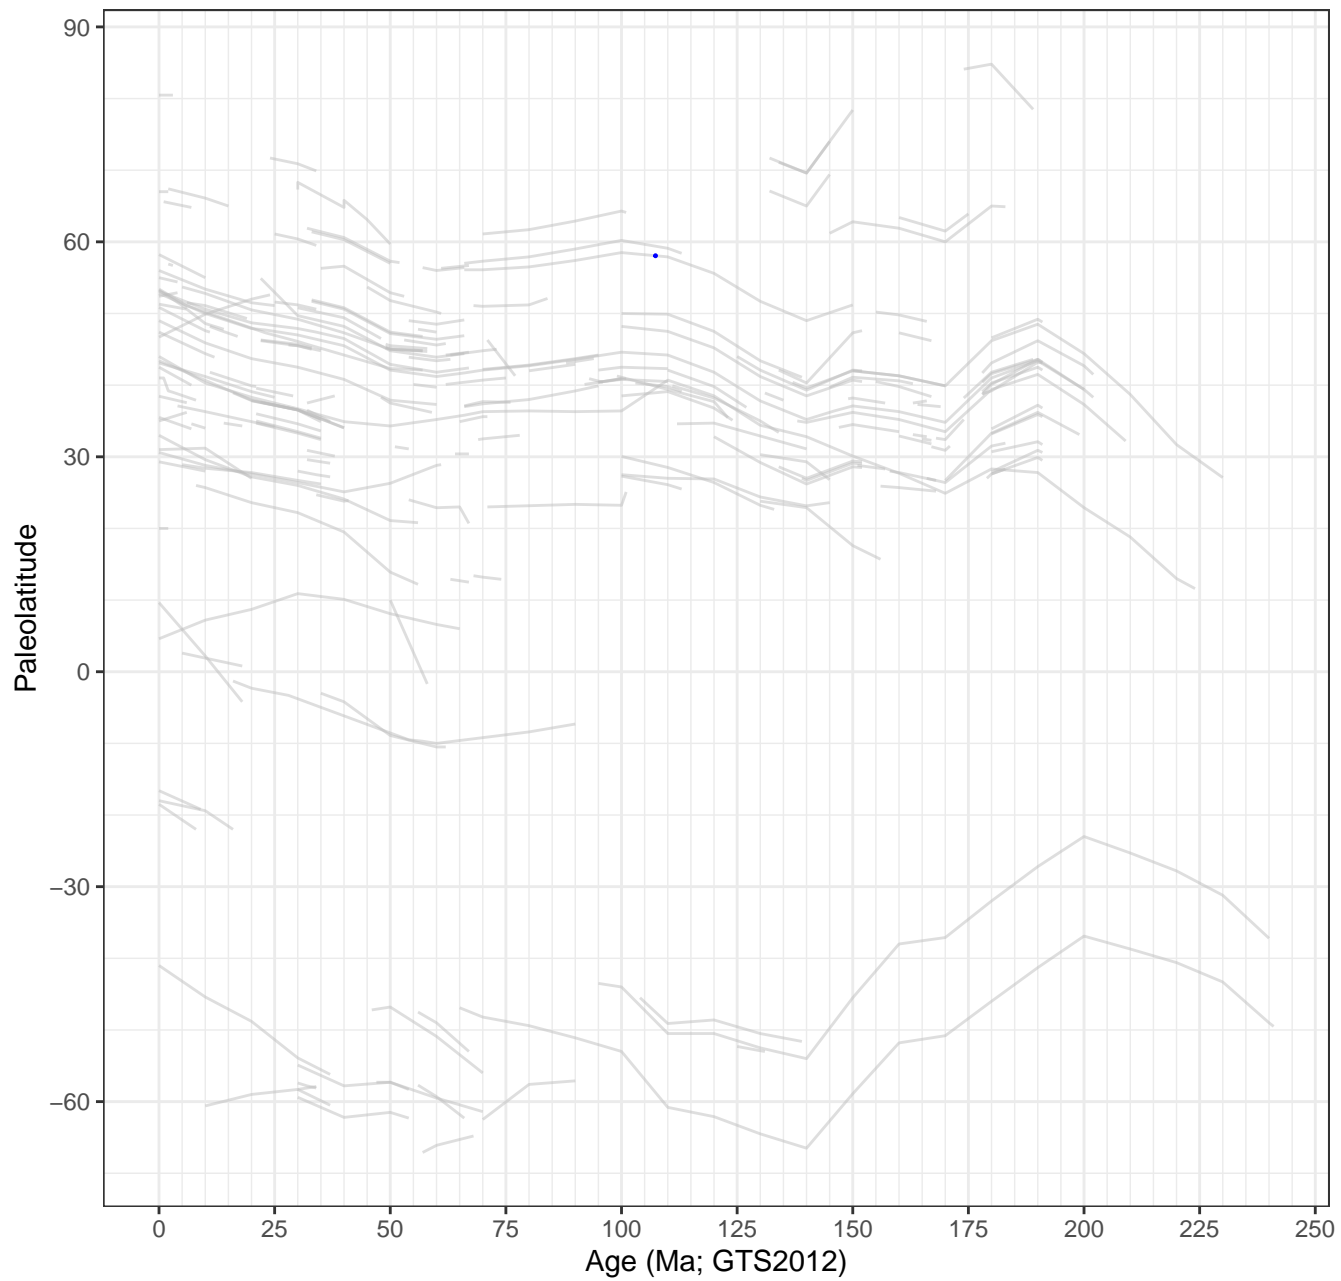

Supplement: Supplementary file 2637 [file Wigginsiella grandstandica.pdf › Supplement/Supplement 2/Species 1914 plots/Wigginsiella grandstandica.pdf]

# Species *Willeidinium baiocassinum*

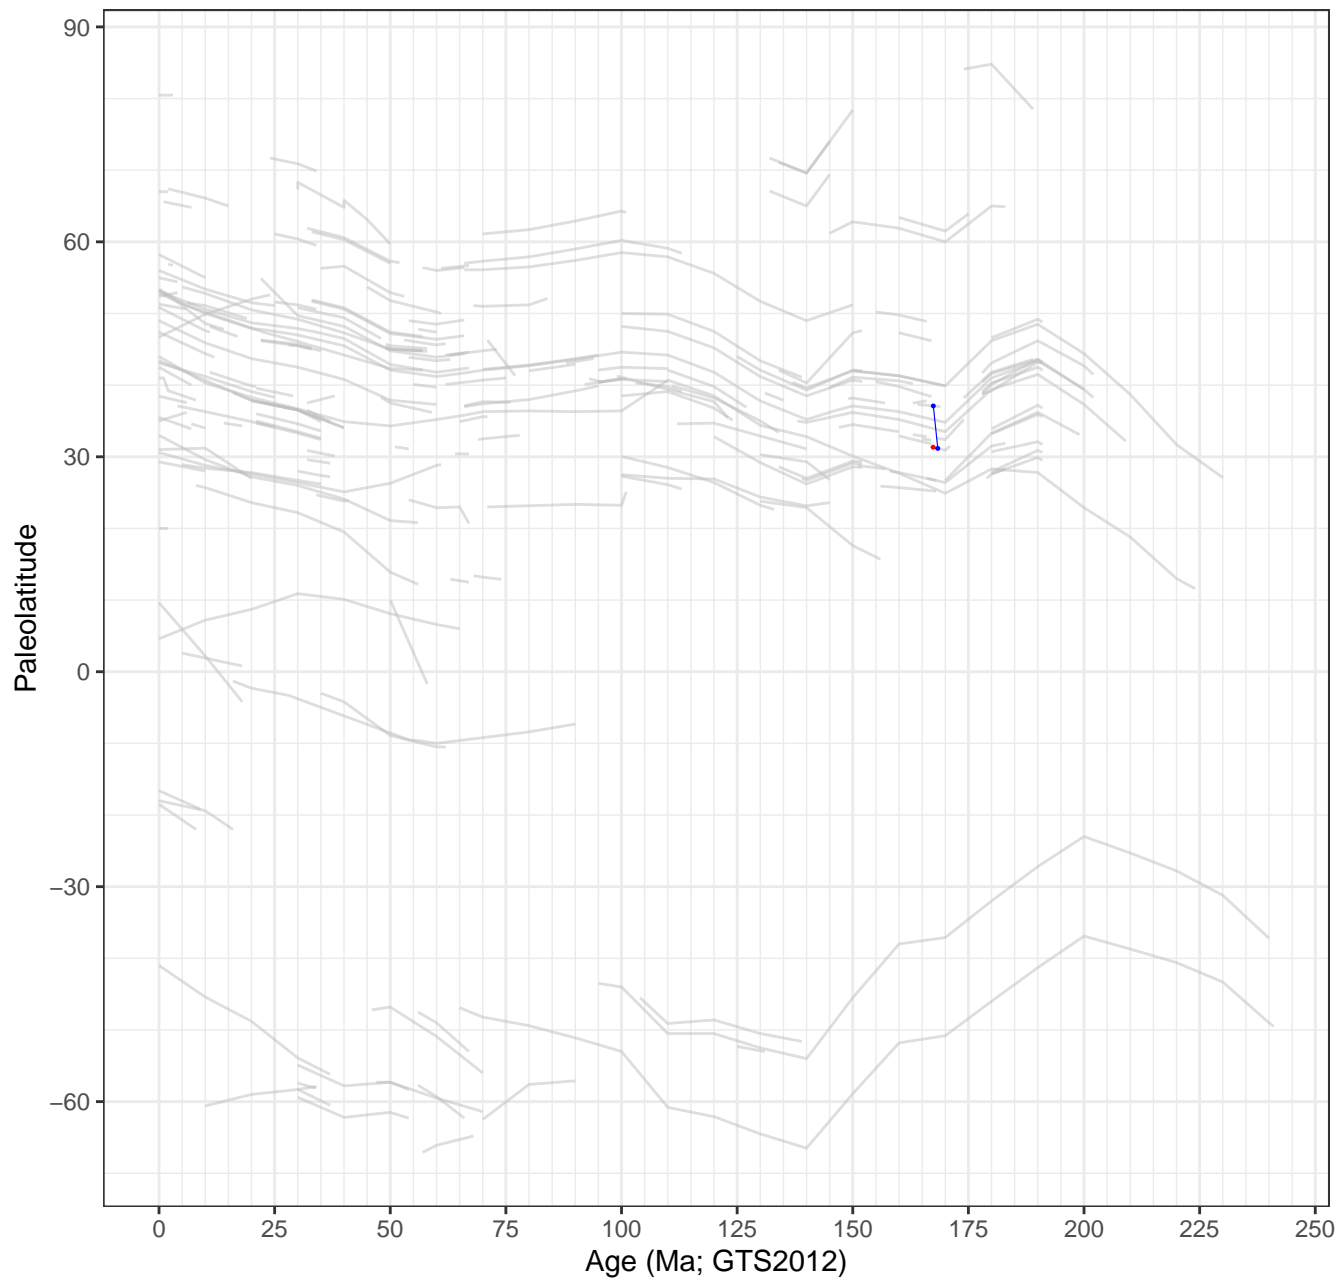

Supplement: Supplementary file 2638 [file Willeidinium baiocassinum.pdf › Supplement/Supplement 2/Species 1914 plots/Willeidinium baiocassinum.pdf]

# Species *Wilsonidinium echinosuturatum*

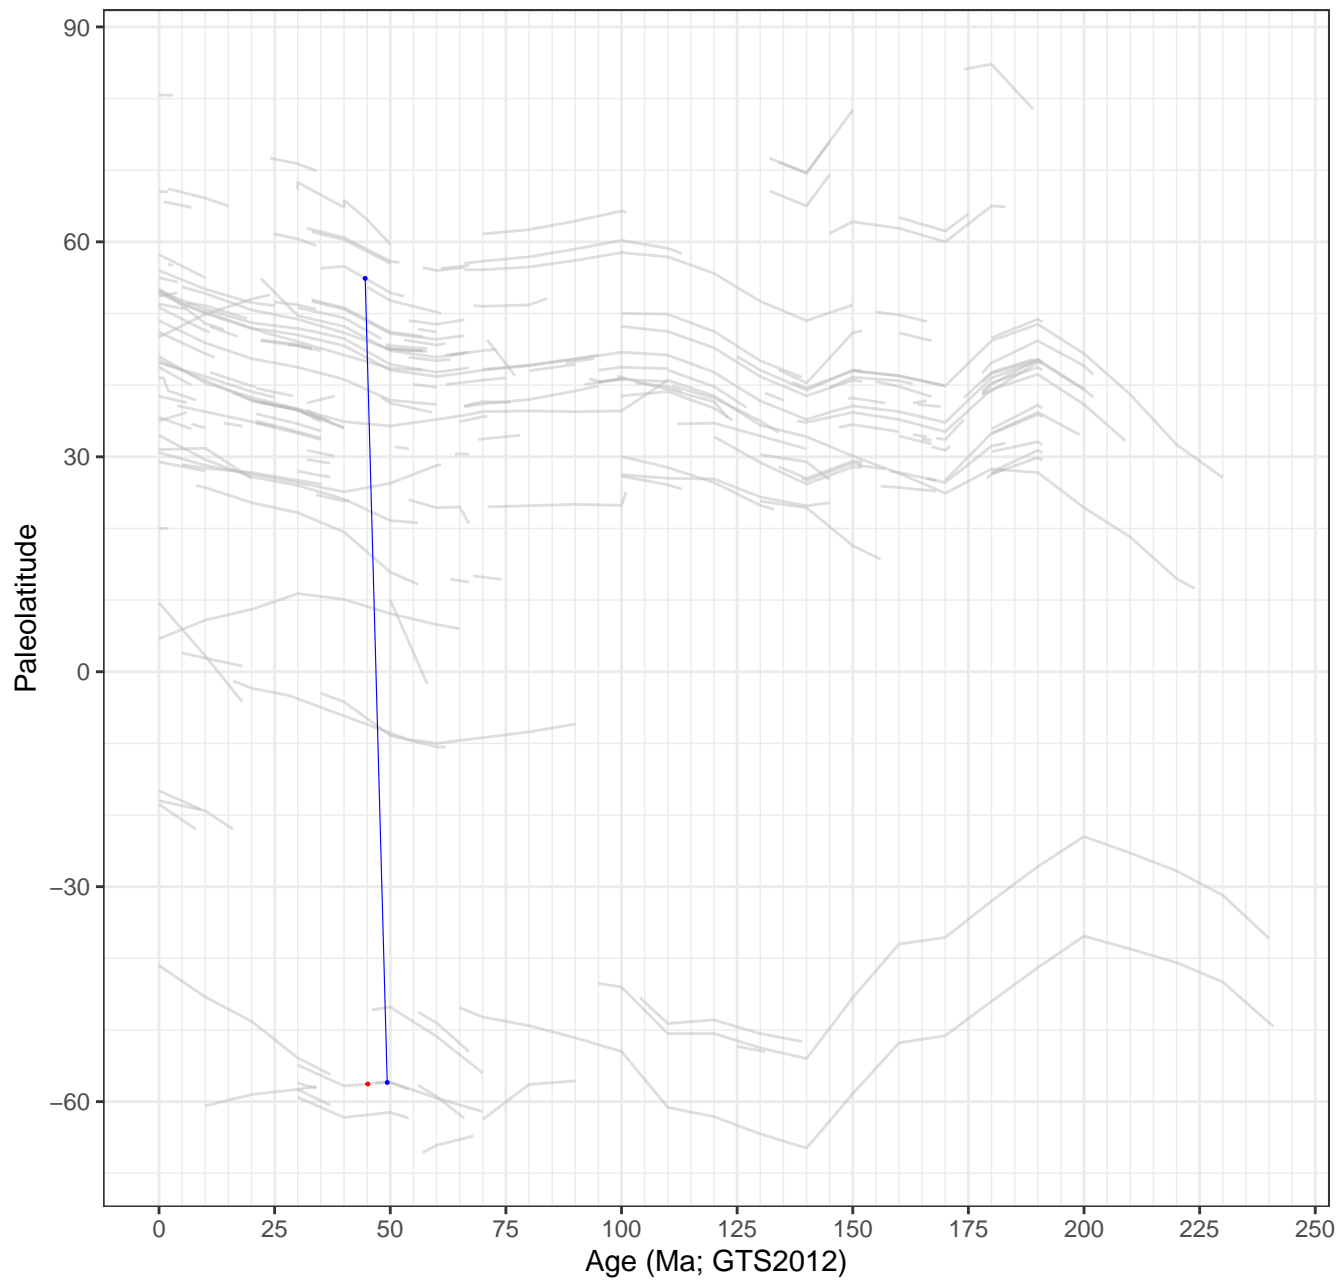

Supplement: Supplementary file 2639 [file Wilsonidinium echinosuturatum.pdf › Supplement/Supplement 2/Species 1914 plots/Wilsonidinium echinosuturatum.pdf]

# Species *Wilsonidinium lineidentatum*

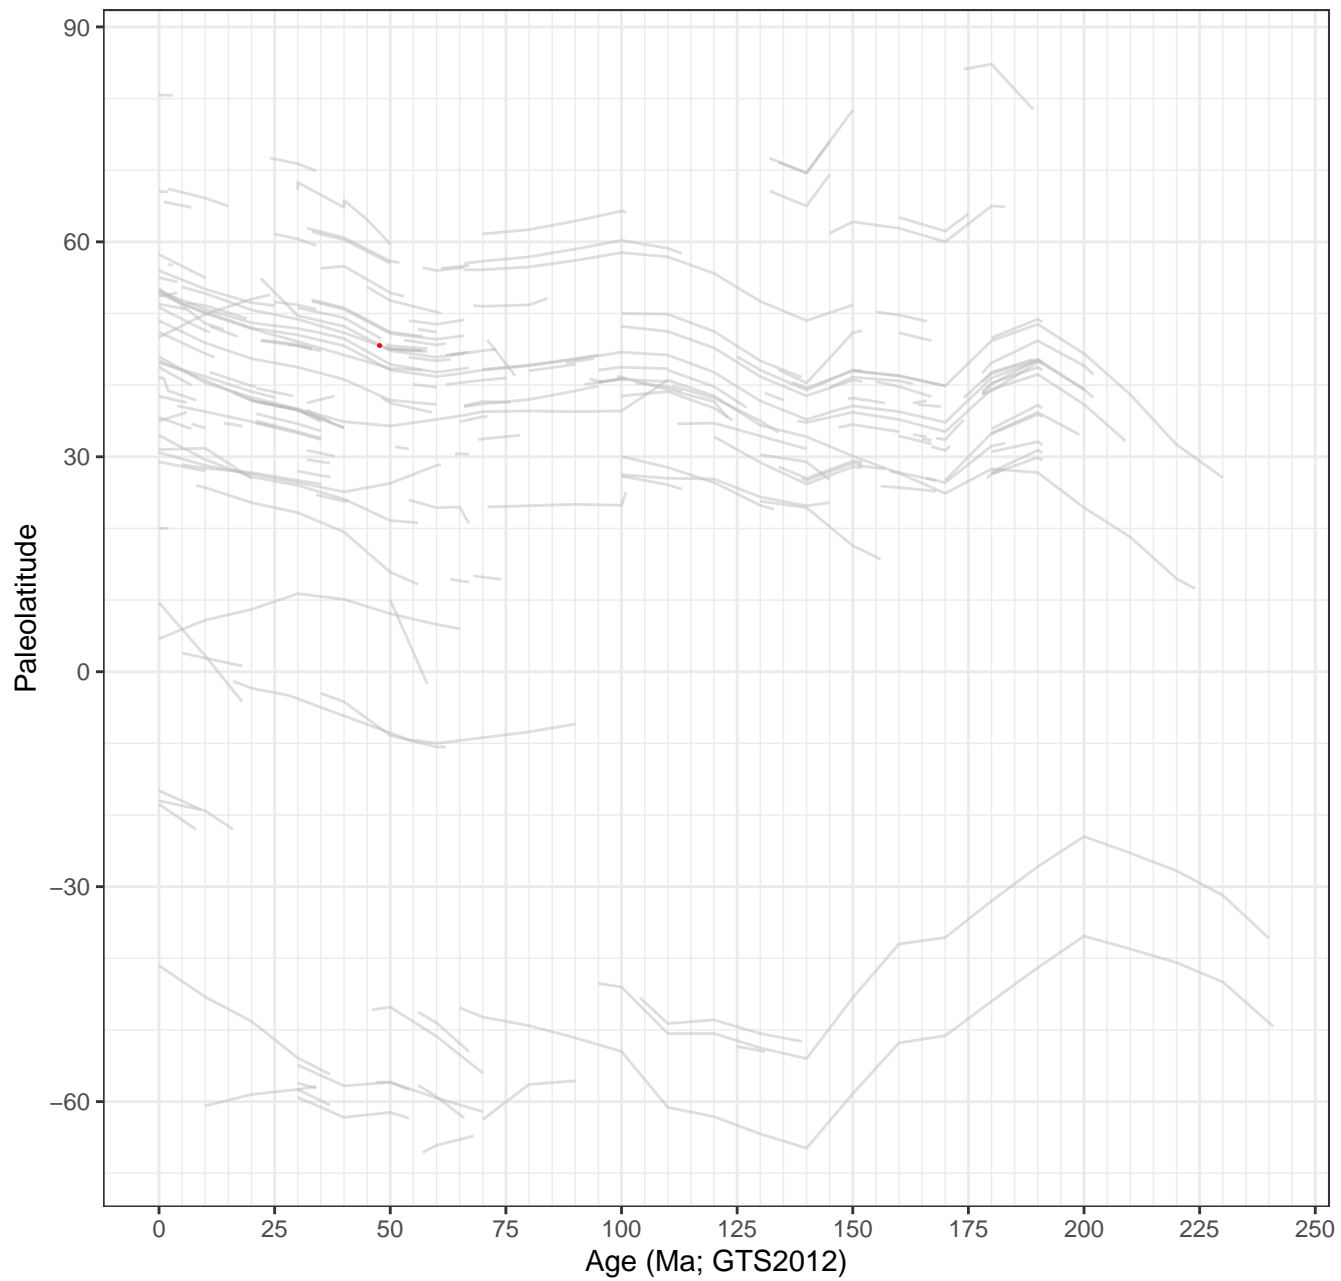

Supplement: Supplementary file 2640 [file Wilsonidinium lineidentatum.pdf › Supplement/Supplement 2/Species 1914 plots/Wilsonidinium lineidentatum.pdf]

# Species *Wilsoni* *nigeriaense*

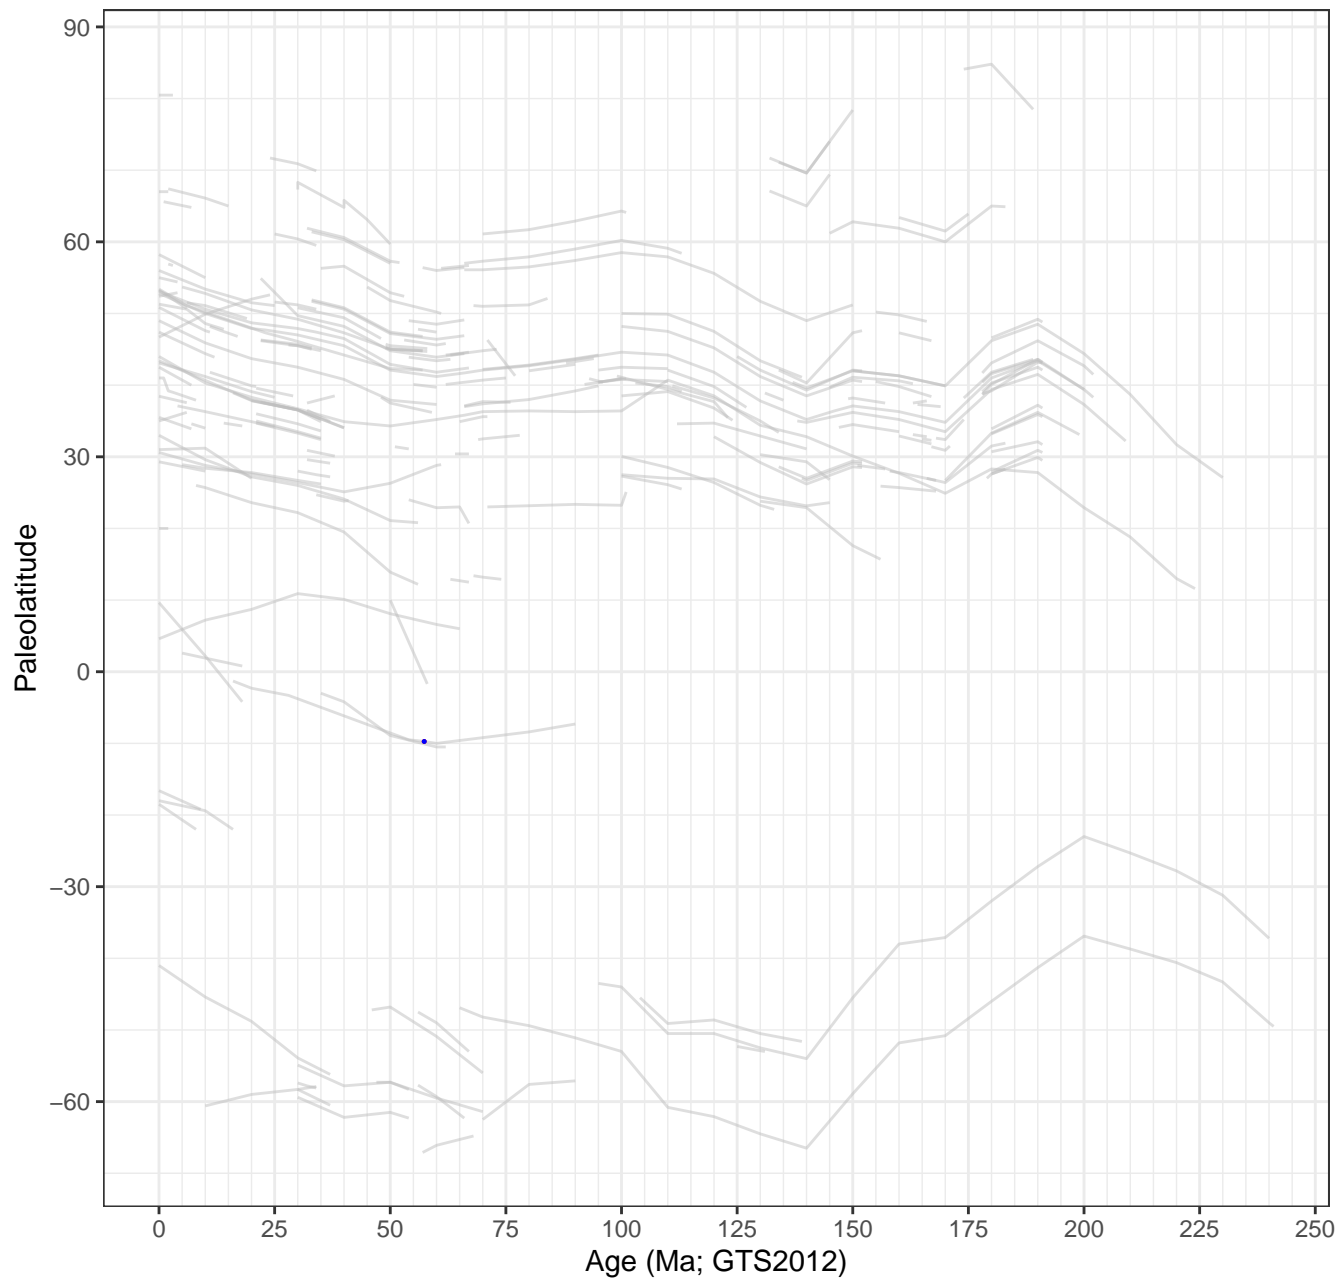

Supplement: Supplementary file 2641 [file Wilsonidinium nigeriaense.pdf › Supplement/Supplement 2/Species 1914 plots/Wilsonidinium nigeriaense.pdf]

# Species *Wilsonidinium ornatum*

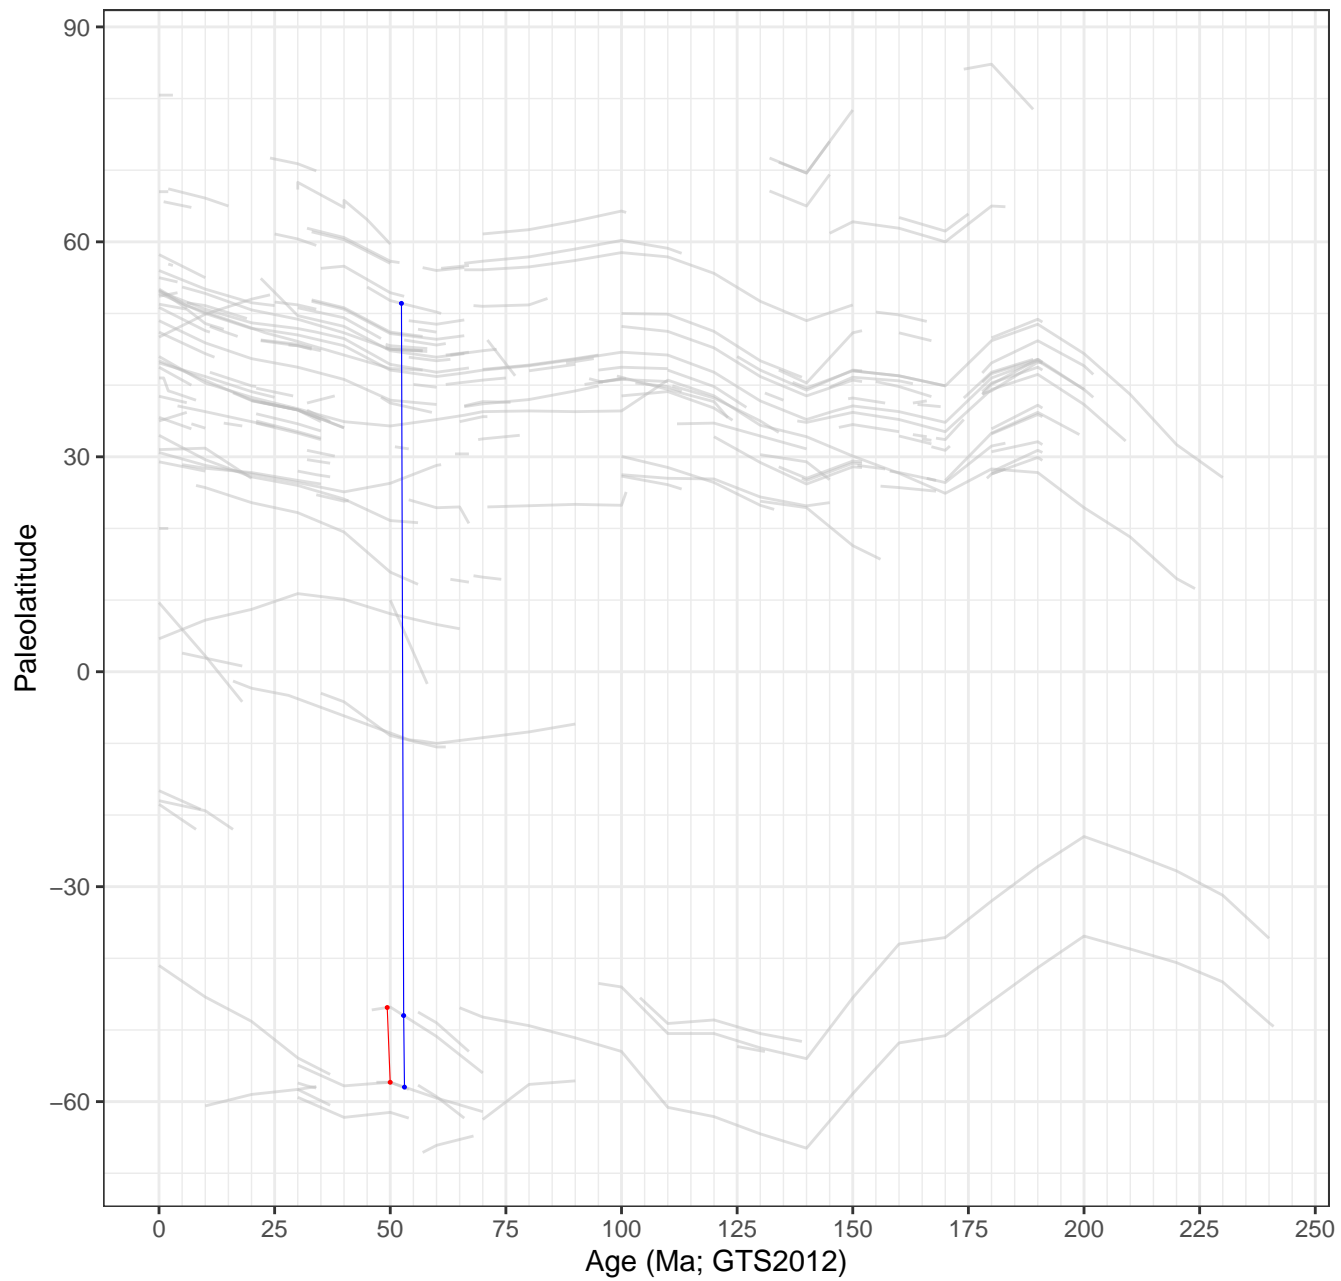

Supplement: Supplementary file 2642 [file Wilsonidinium ornatum.pdf › Supplement/Supplement 2/Species 1914 plots/Wilsonidinium ornatum.pdf]

# Species *Wilsonidinium pechoricum*

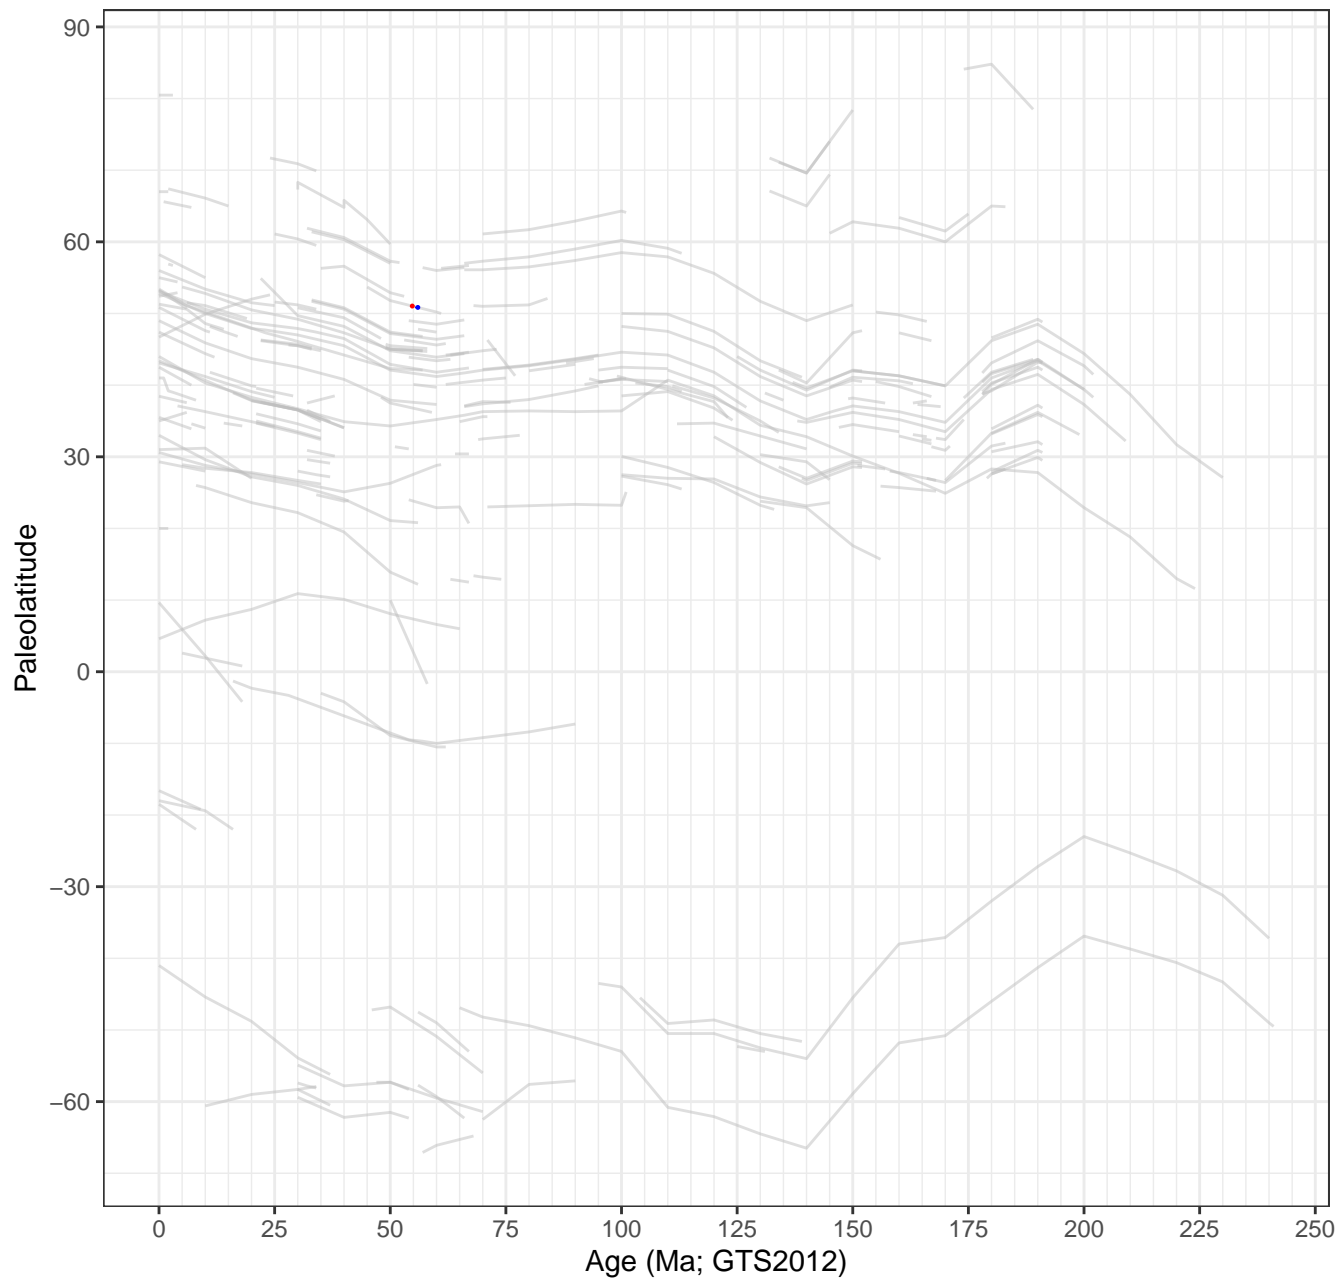

Supplement: Supplementary file 2643 [file Wilsonidinium pechoricum.pdf › Supplement/Supplement 2/Species 1914 plots/Wilsonidinium pechoricum.pdf]

# Species *Wilsonidinium tabulatum*

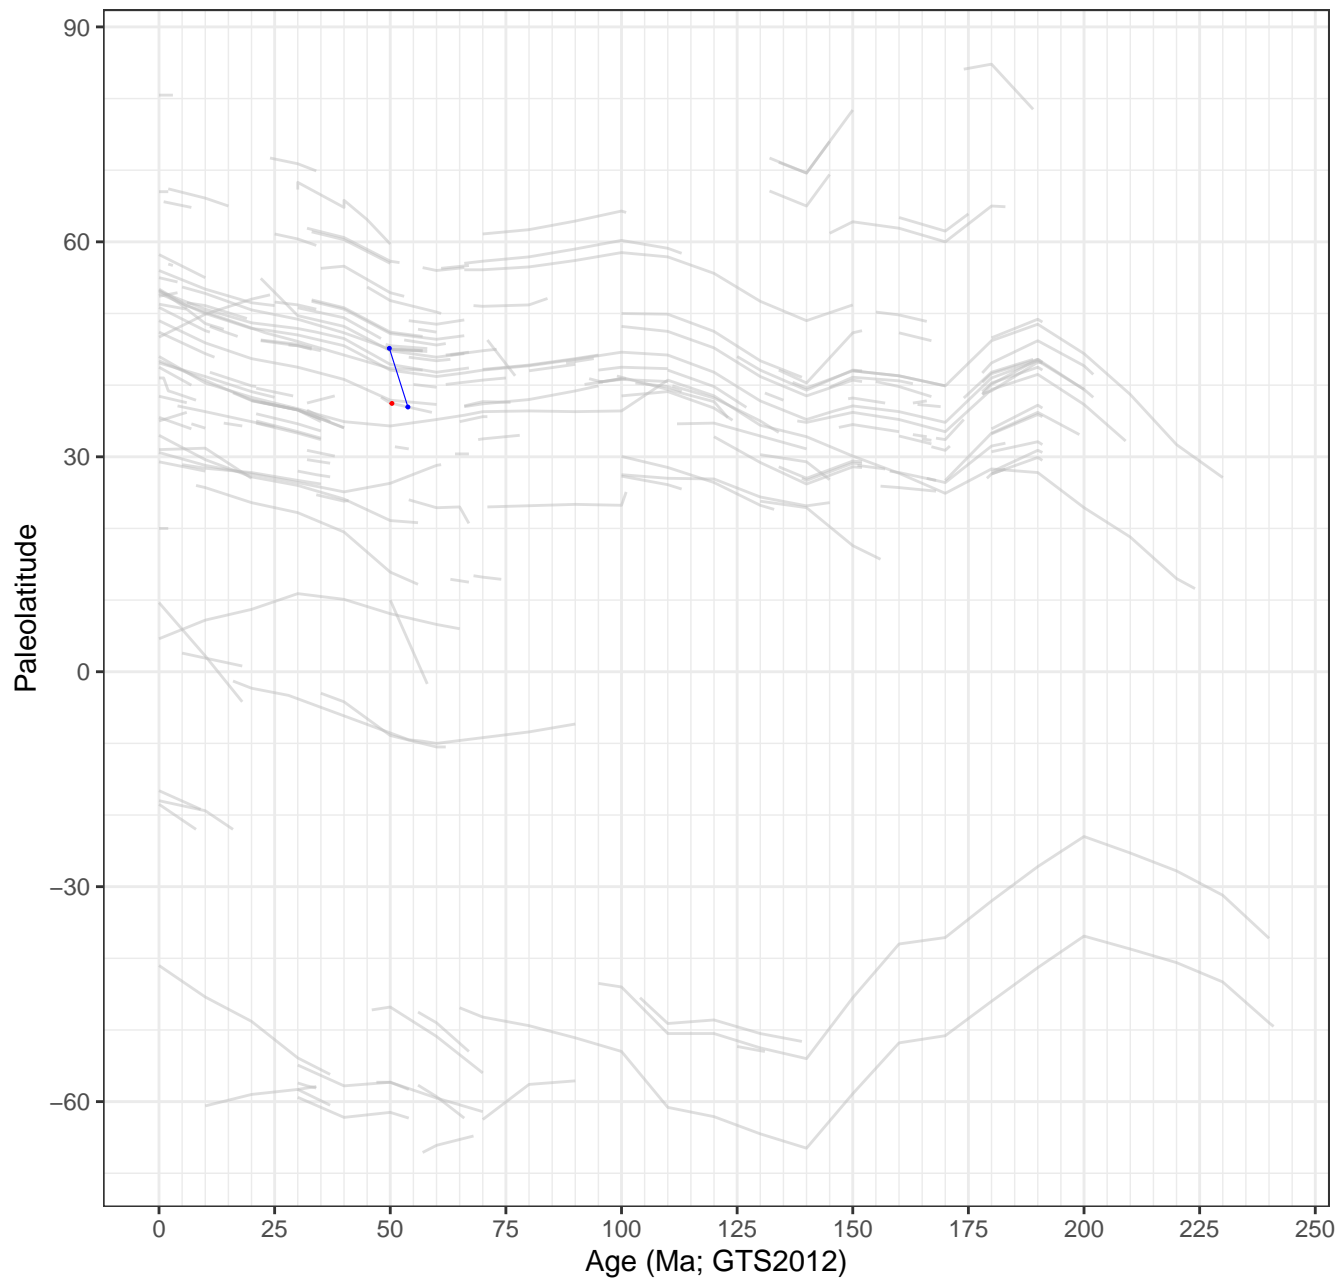

Supplement: Supplementary file 2644 [file Wilsonidinium tabulatum.pdf › Supplement/Supplement 2/Species 1914 plots/Wilsonidinium tabulatum.pdf]

# Species *Wodehousia gracile*

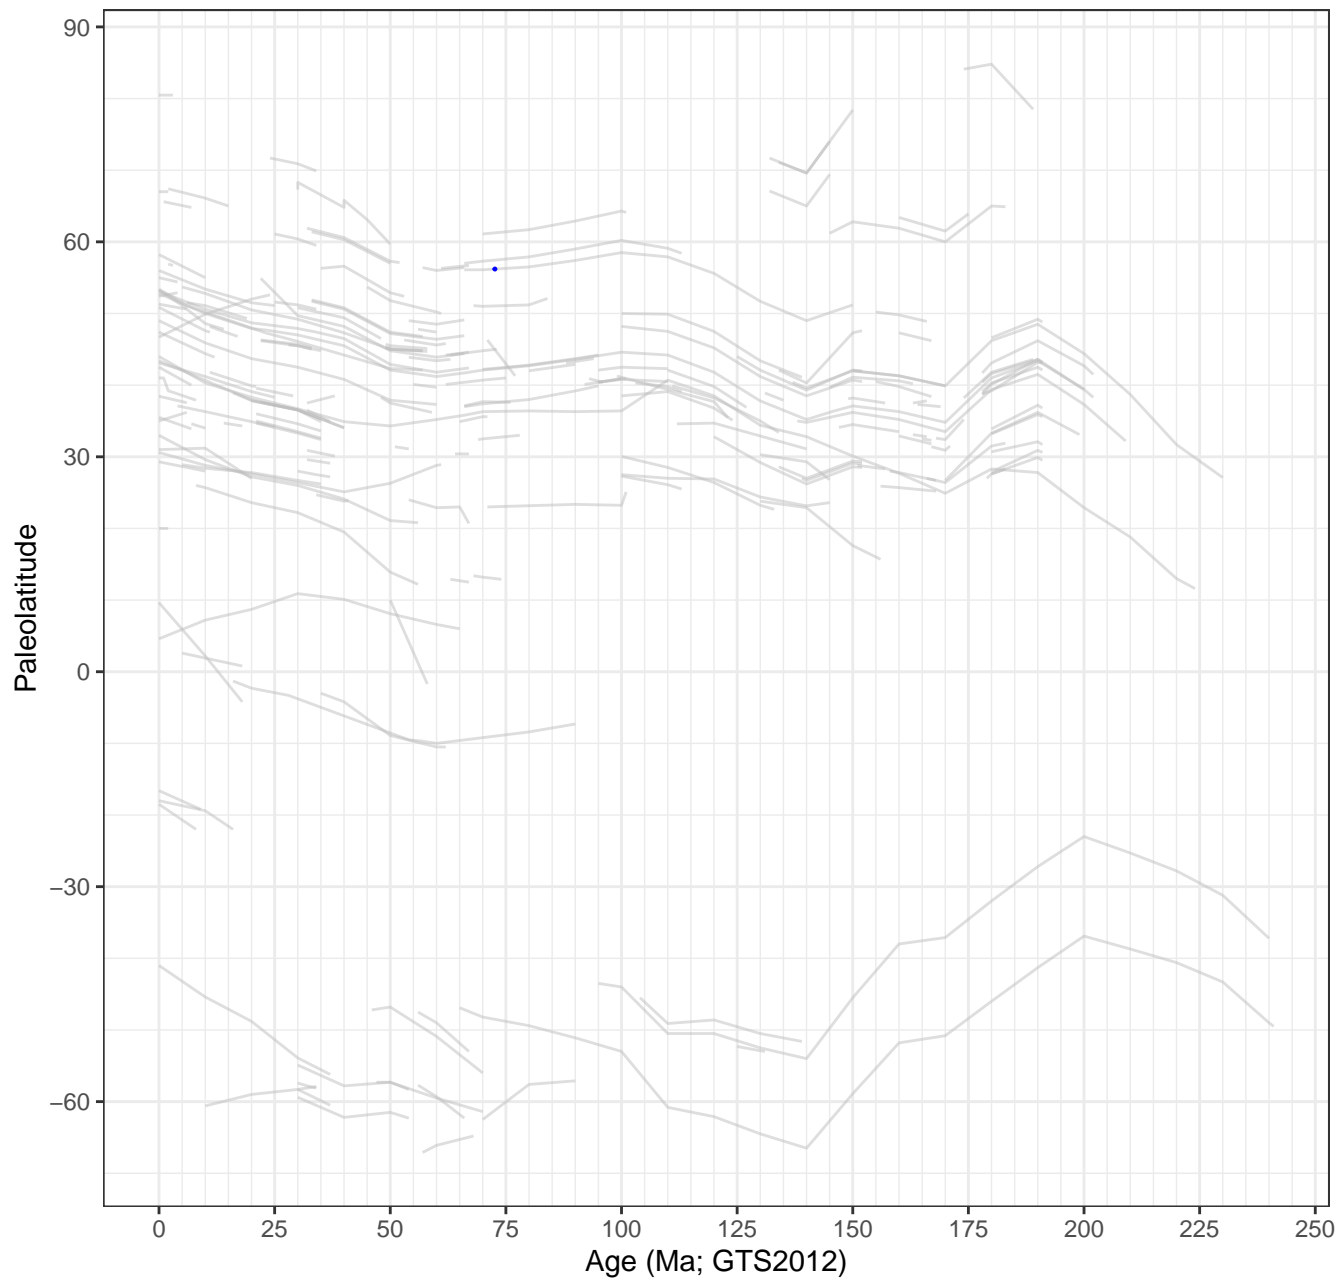

Supplement: Supplementary file 2645 [file Wodehousia gracile.pdf › Supplement/Supplement 2/Species 1914 plots/Wodehousia gracile.pdf]

# Species *Woodinia bensonii*

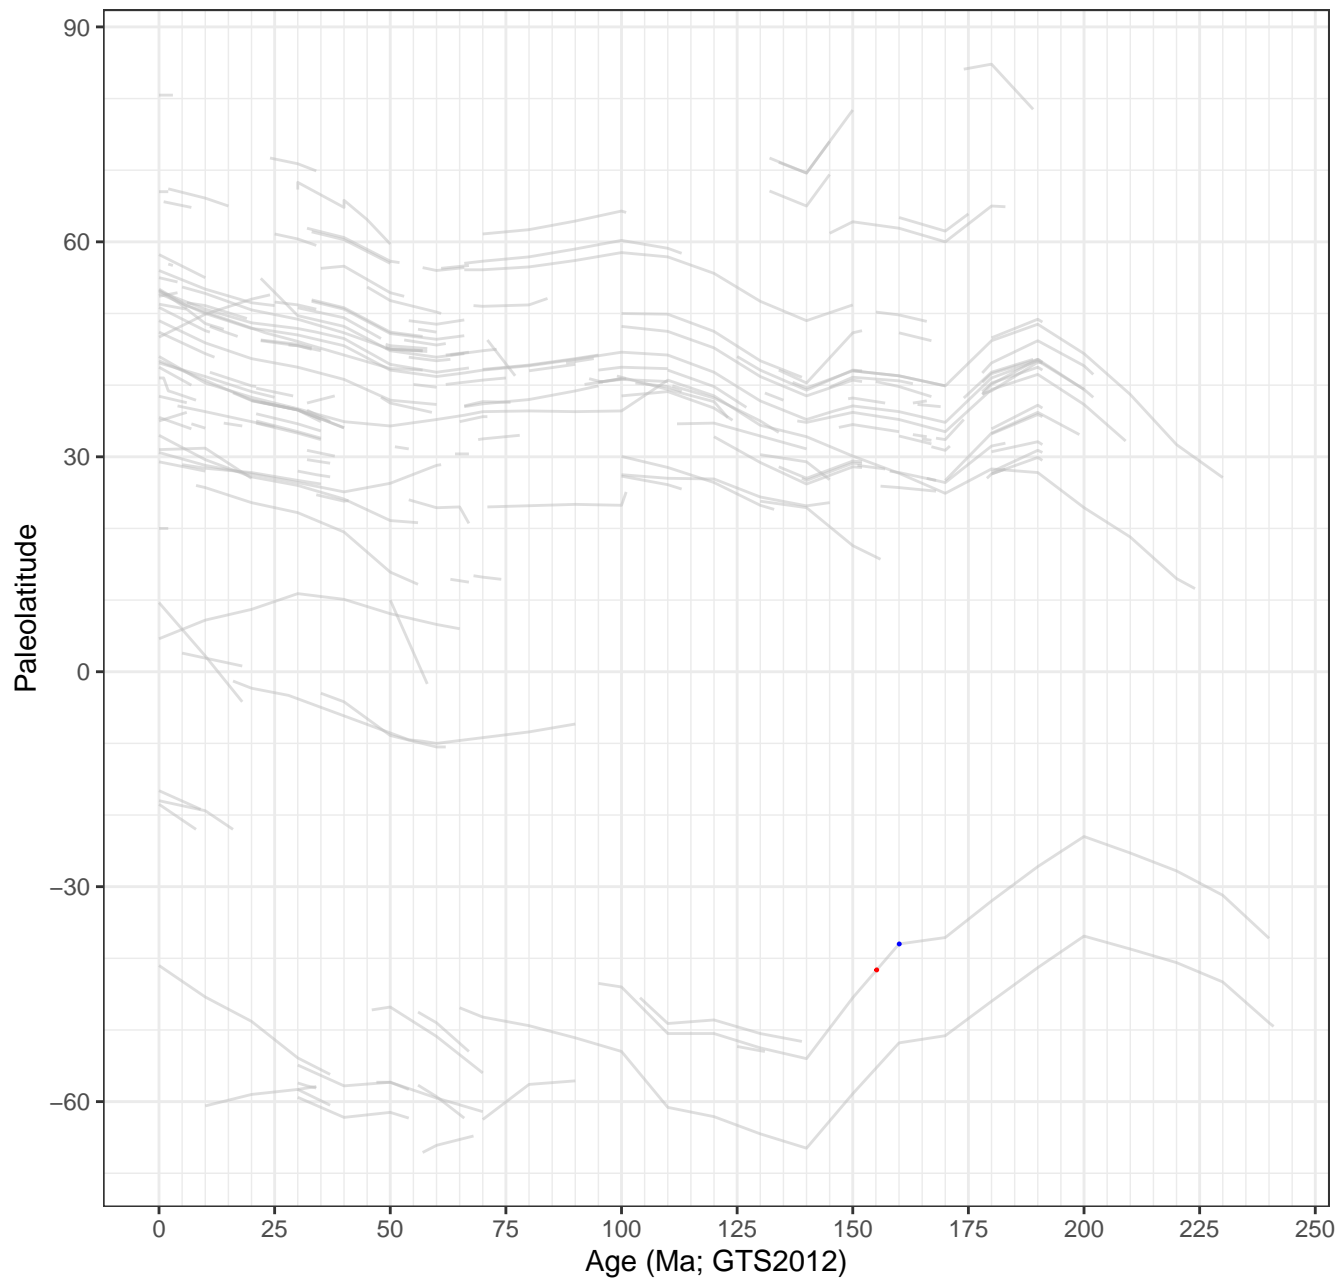

Supplement: Supplementary file 2646 [file Woodinia bensonii.pdf › Supplement/Supplement 2/Species 1914 plots/Woodinia bensonii.pdf]

# Species *Woodinia pedis*

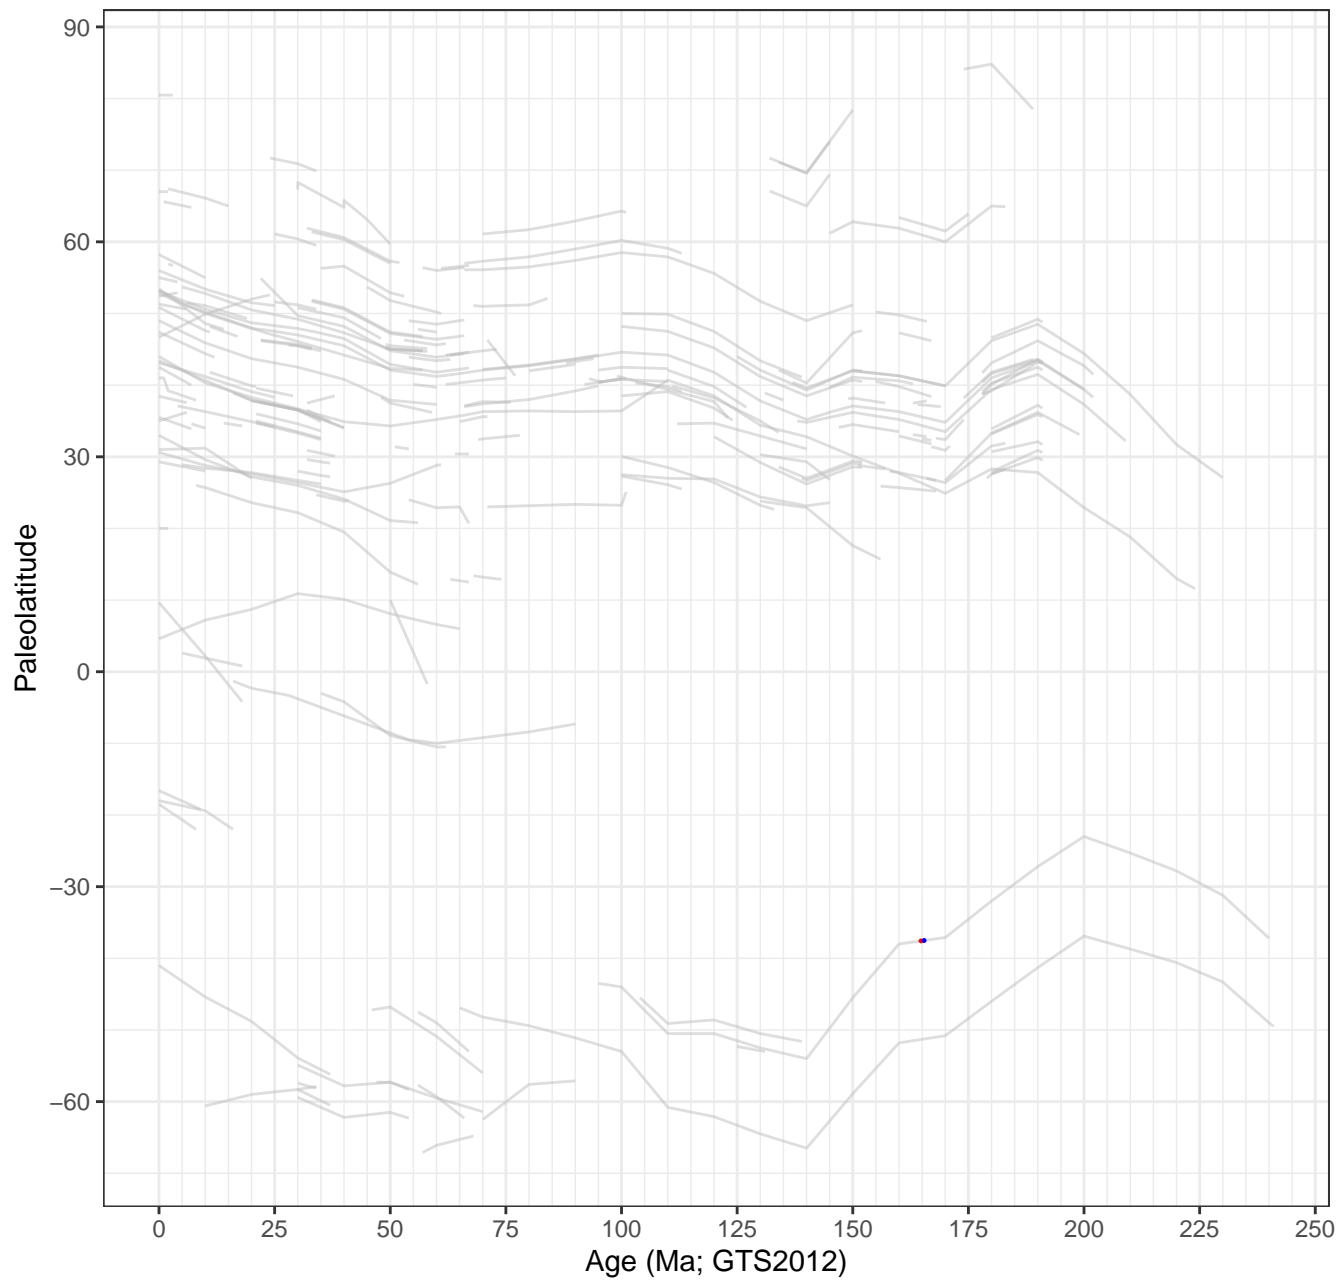

Supplement: Supplementary file 2647 [file Woodinia pedis.pdf › Supplement/Supplement 2/Species 1914 plots/Woodinia pedis.pdf]

# Species *Wrevittia cassidata*

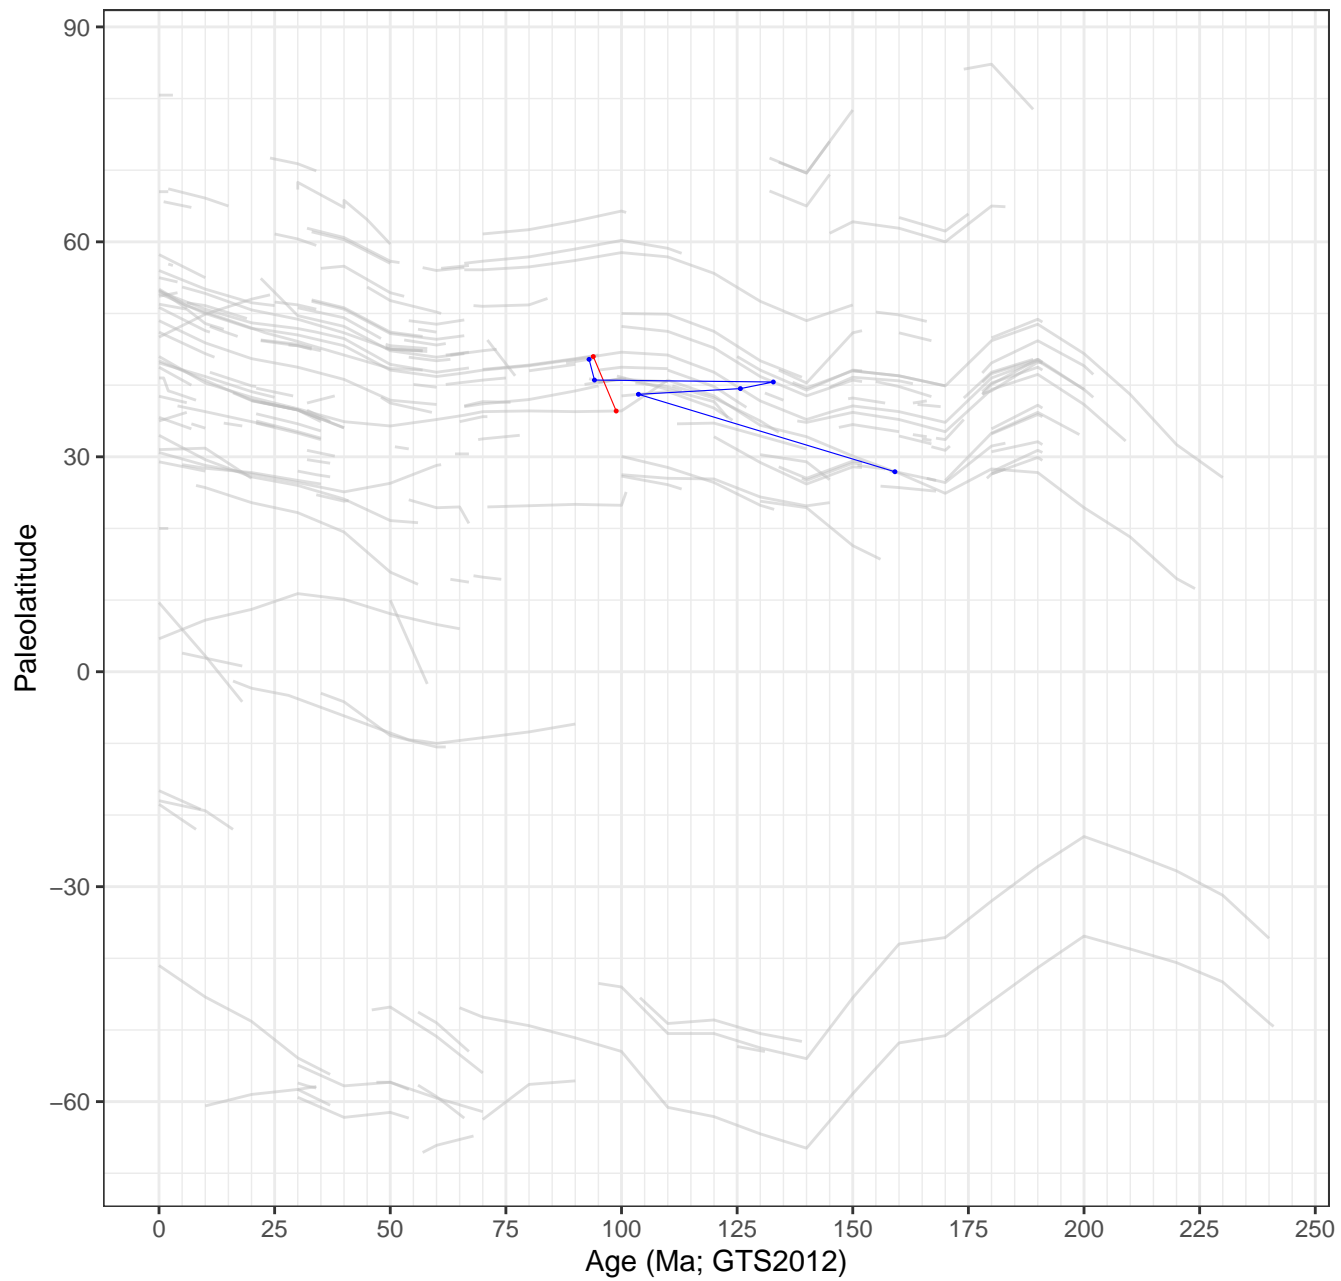

Supplement: Supplementary file 2648 [file Wrevittia cassidata.pdf › Supplement/Supplement 2/Species 1914 plots/Wrevittia cassidata.pdf]

# Species *Wrevittia diutina*

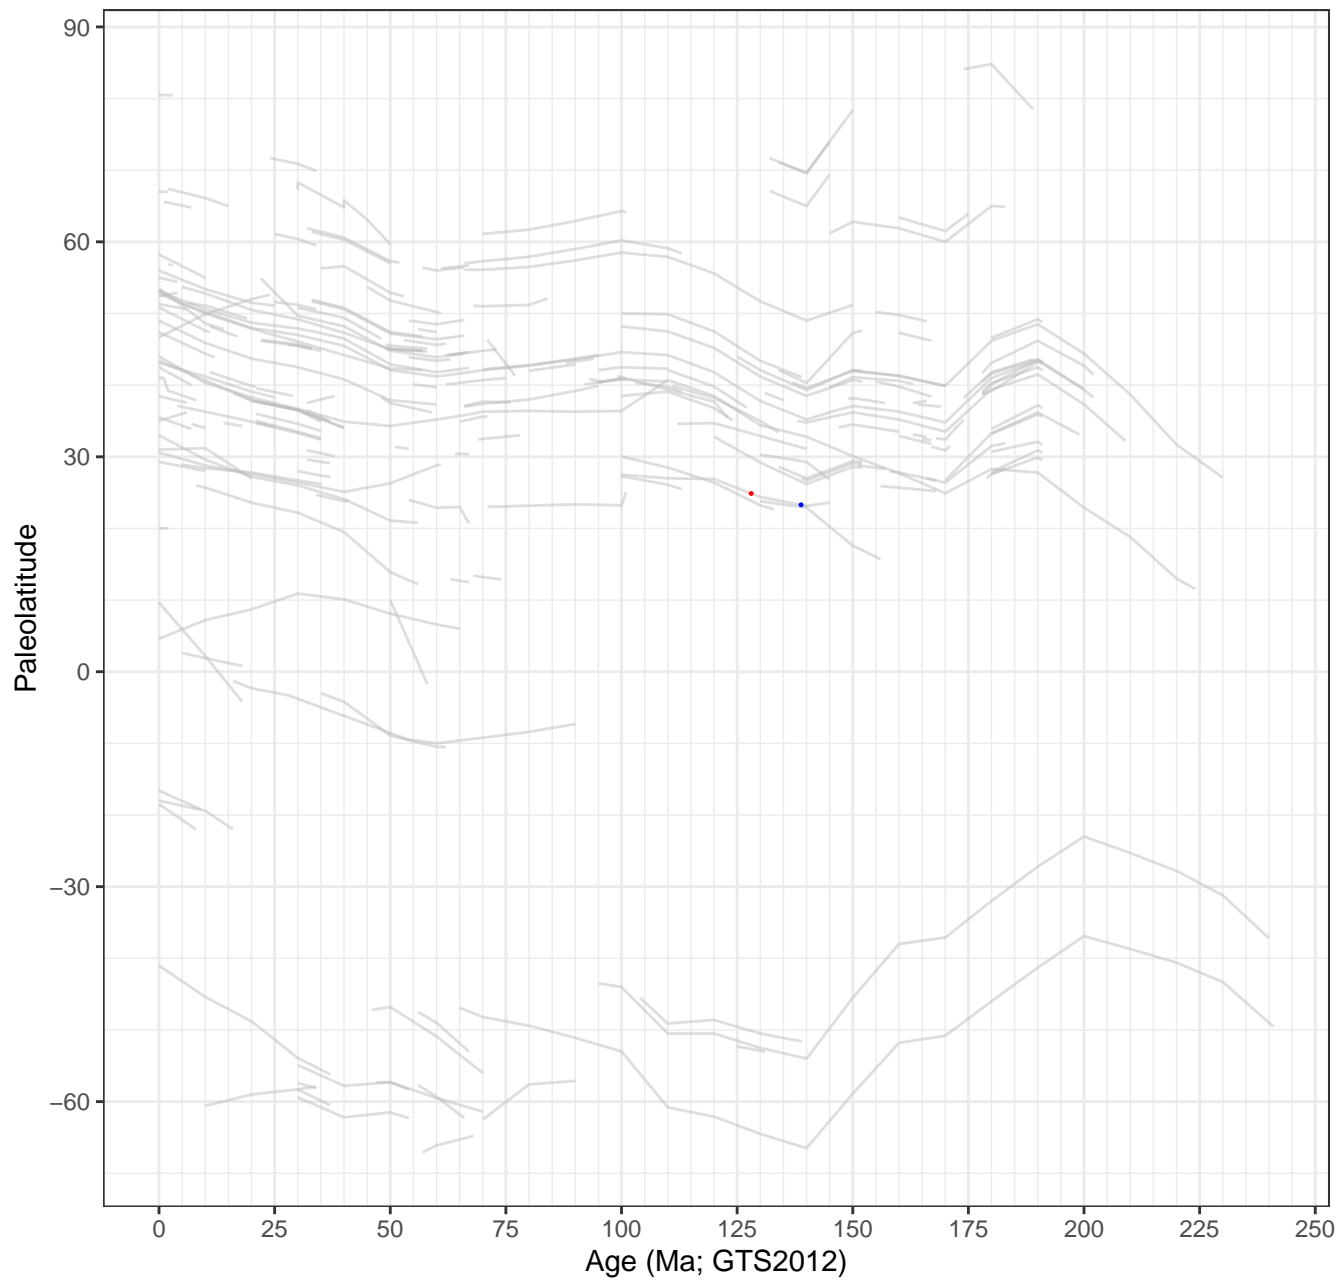

Supplement: Supplementary file 2649 [file Wrevittia diutina.pdf › Supplement/Supplement 2/Species 1914 plots/Wrevittia diutina.pdf]

# Species *Wrevittia helicoidea*

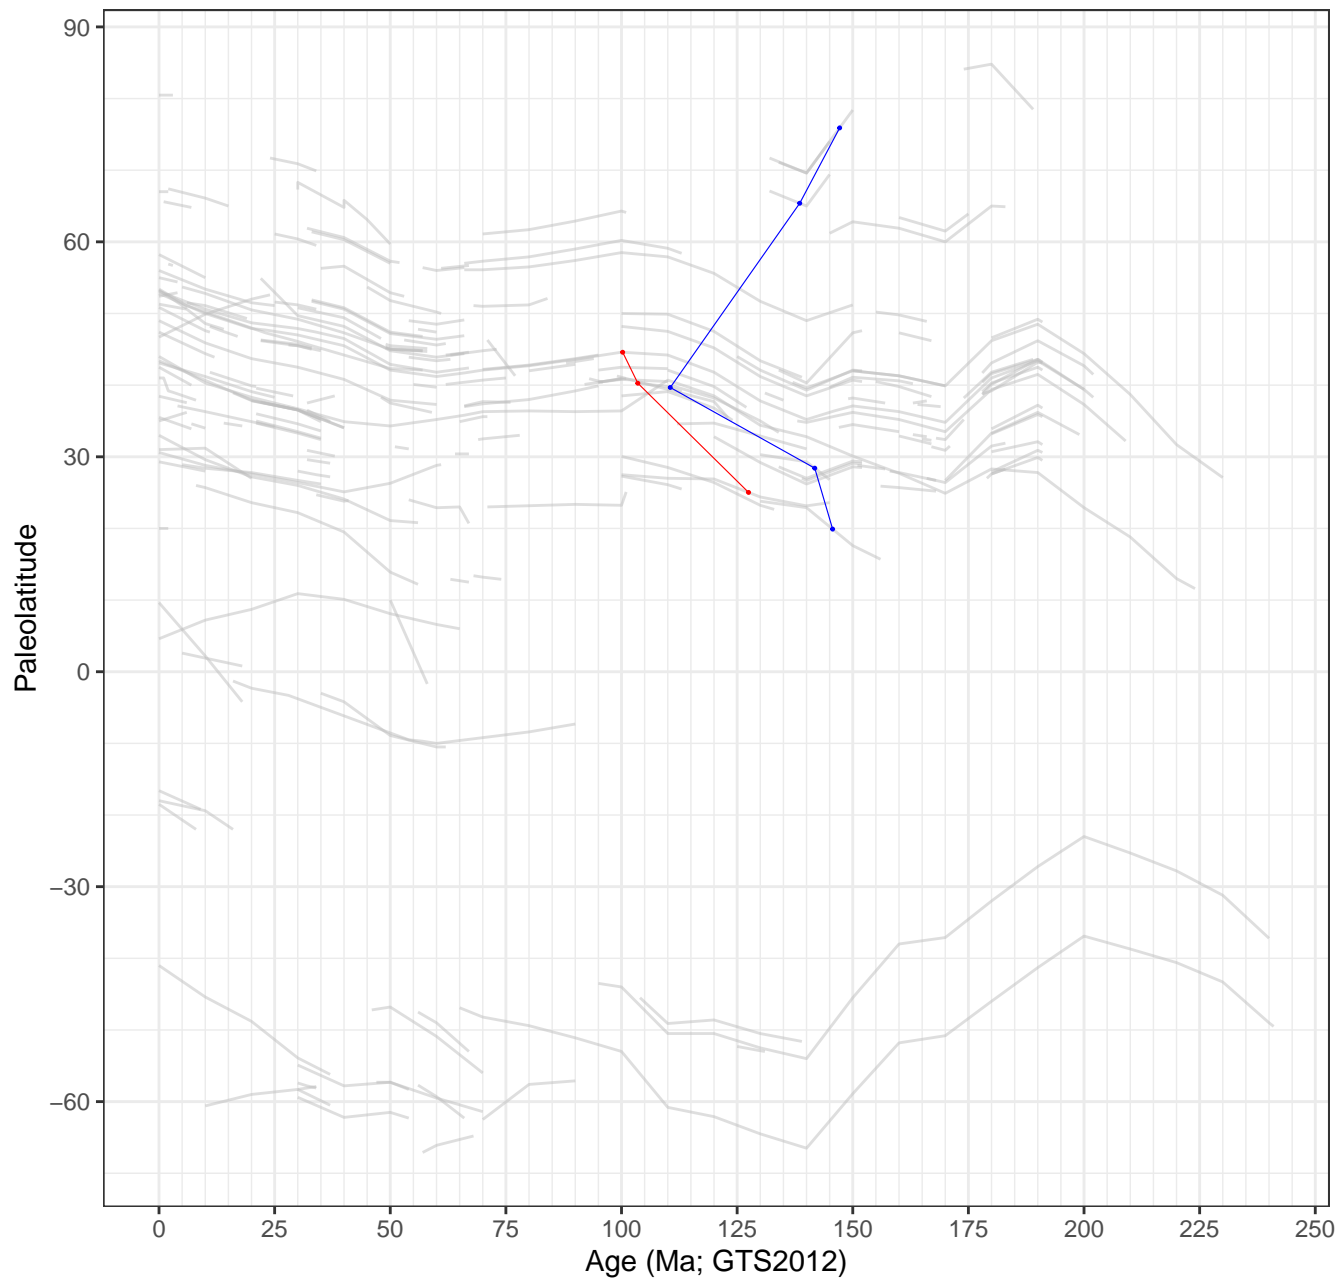

Supplement: Supplementary file 2650 [file Wrevittia helicoidea.pdf › Supplement/Supplement 2/Species 1914 plots/Wrevittia helicoidea.pdf]

# Species *Wrevittia perforobtus*

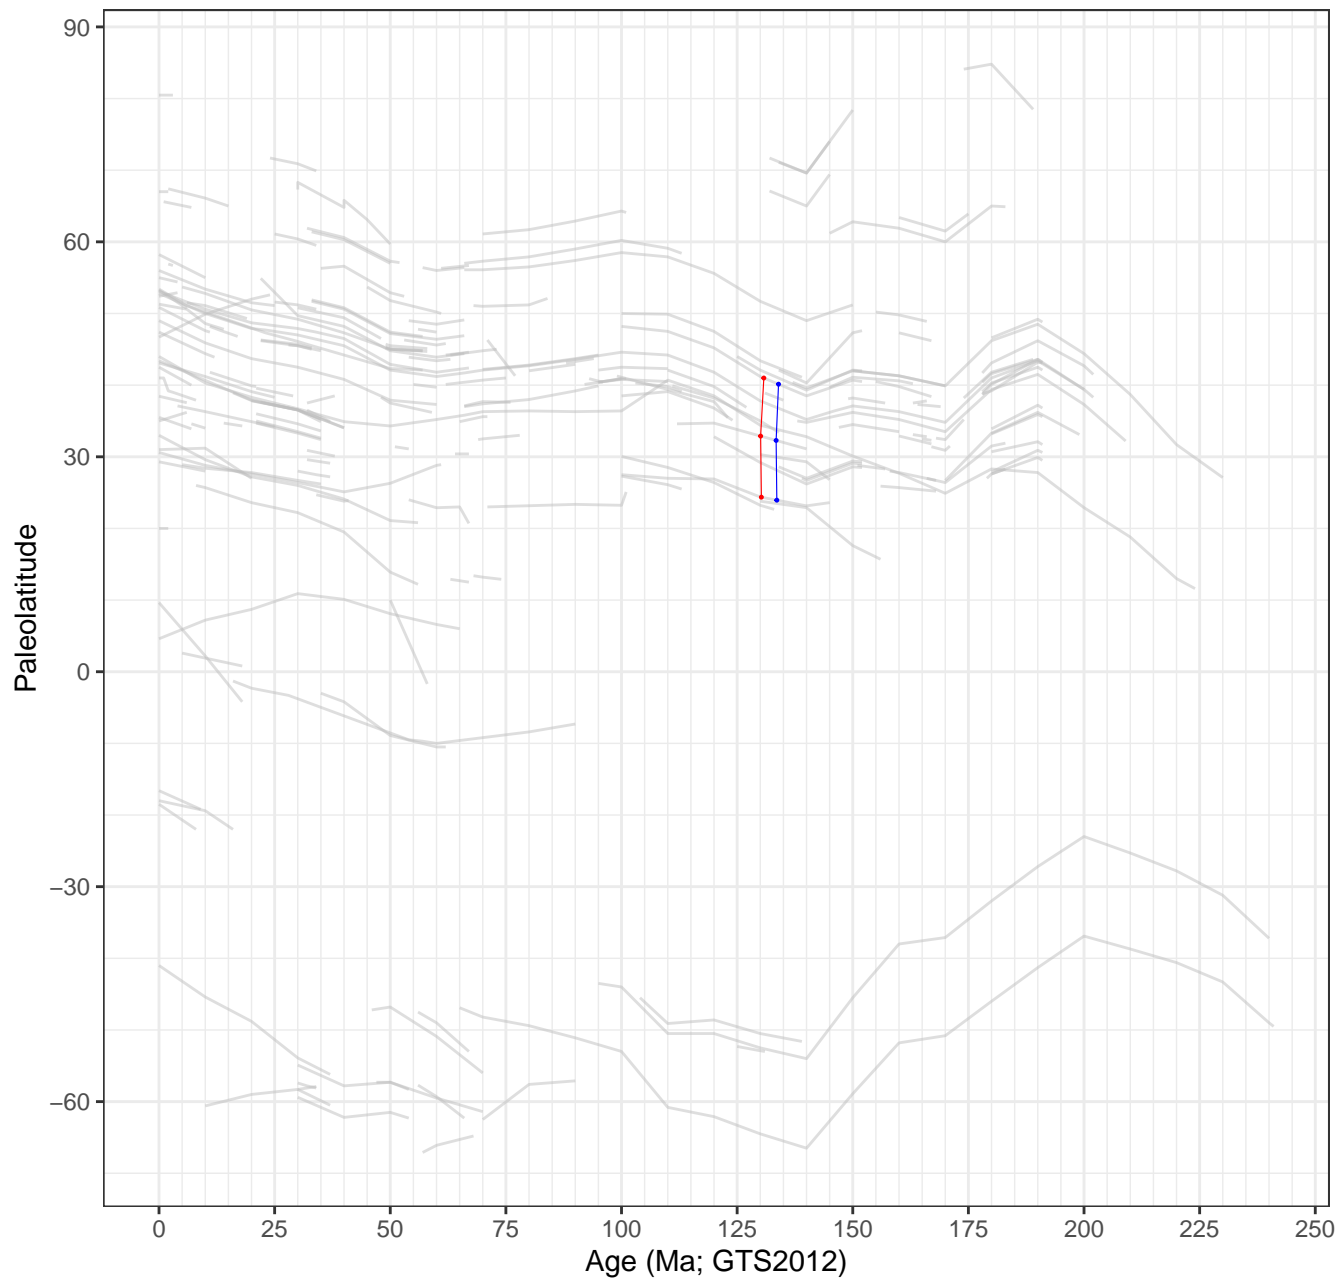

Supplement: Supplementary file 2651 [file Wrevittia perforobtusa.pdf › Supplement/Supplement 2/Species 1914 plots/Wrevittia perforobtusa.pdf]

# Species *Xandarodinium xanthum*

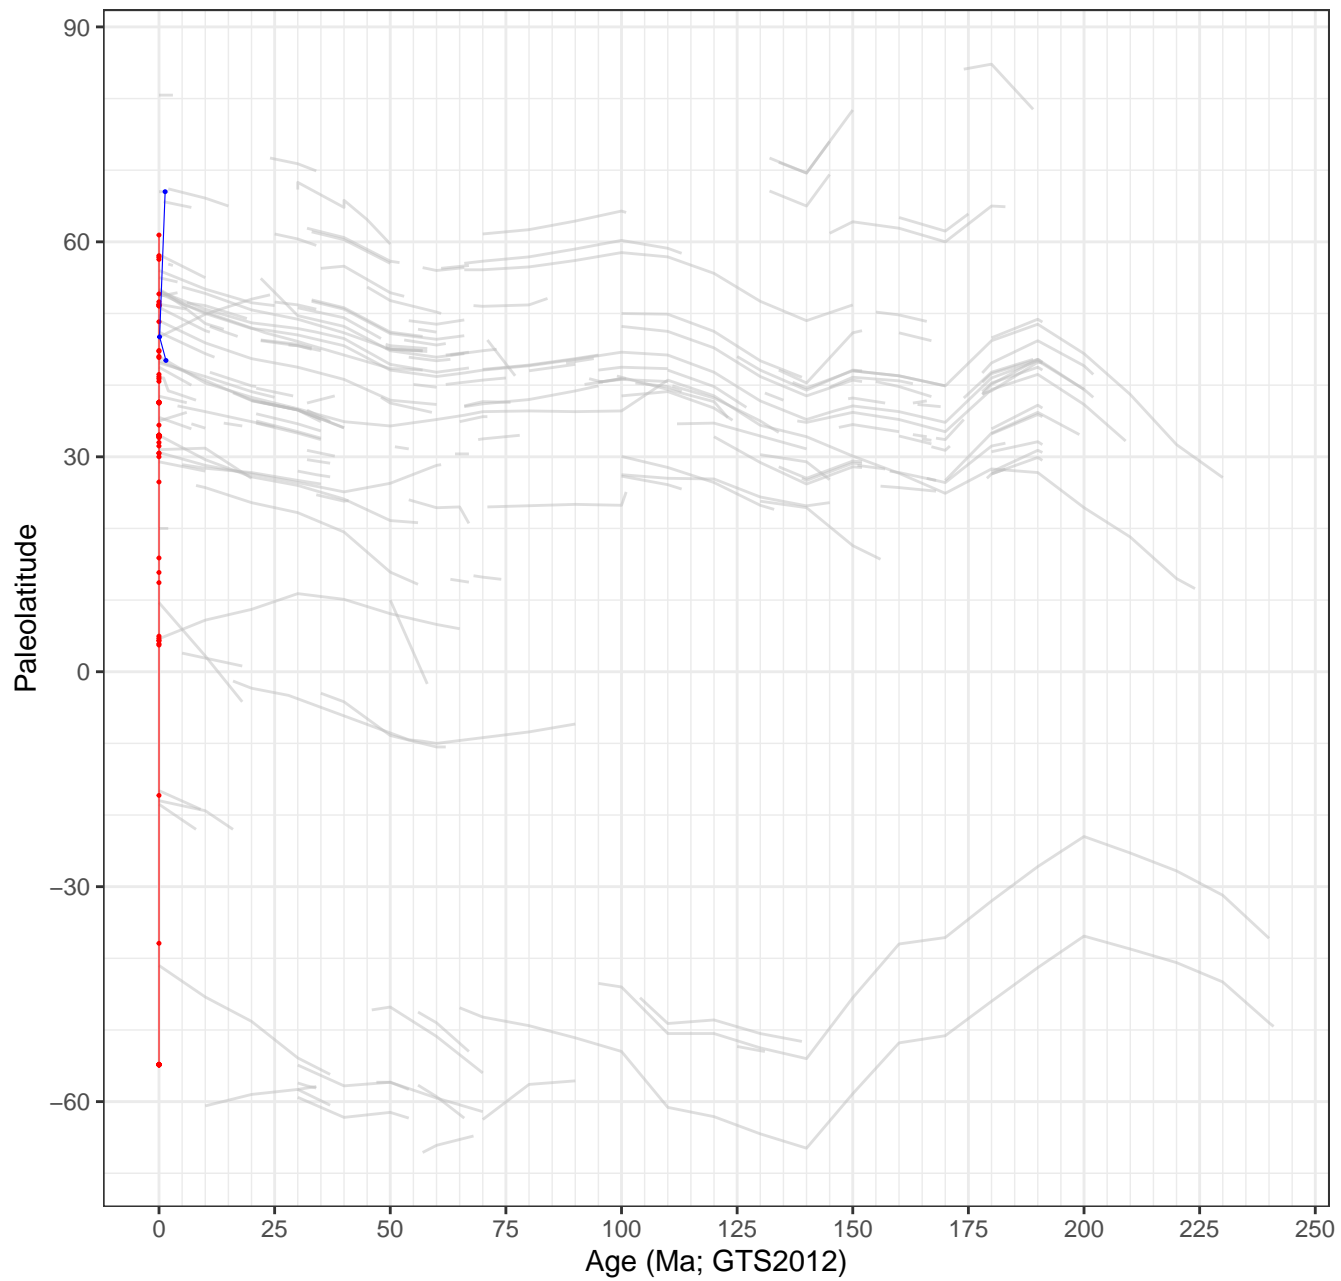

Supplement: Supplementary file 2652 [file Xandarodinium xanthum.pdf › Supplement/Supplement 2/Species 1914 plots/Xandarodinium xanthum.pdf]

# Species *Xenascus asperatus*

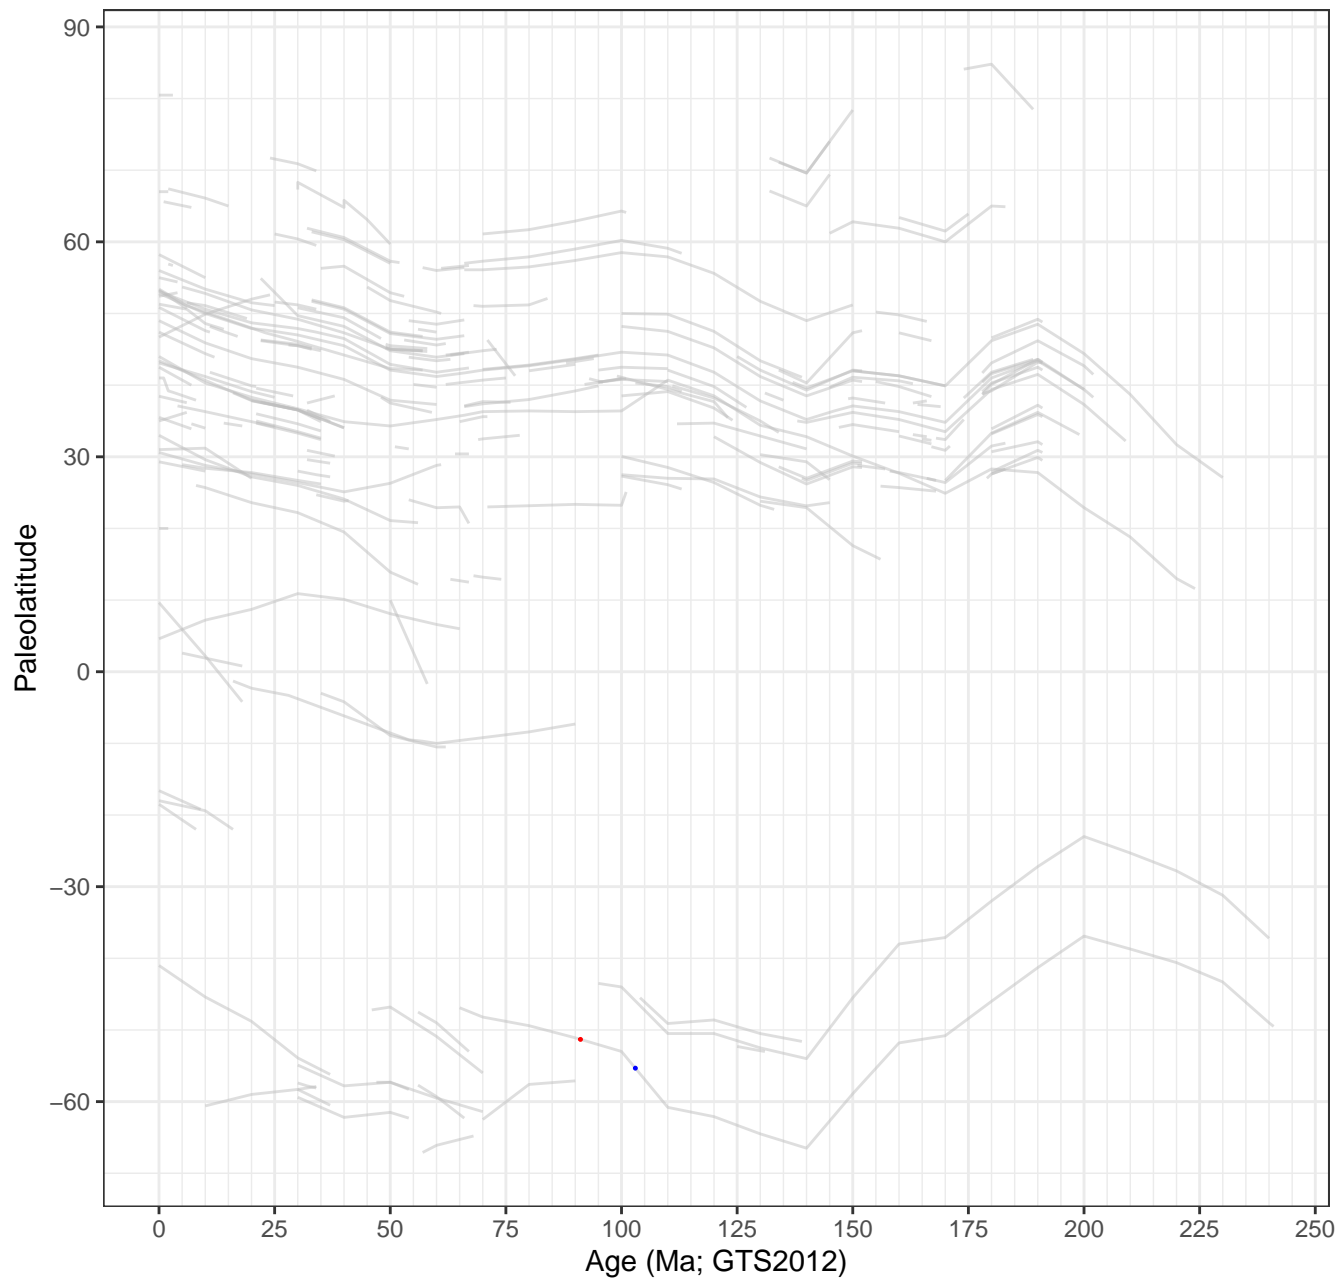

Supplement: Supplementary file 2653 [file Xenascus asperatus.pdf › Supplement/Supplement 2/Species 1914 plots/Xenascus asperatus.pdf]

# Species *Xenascus ceratioides*

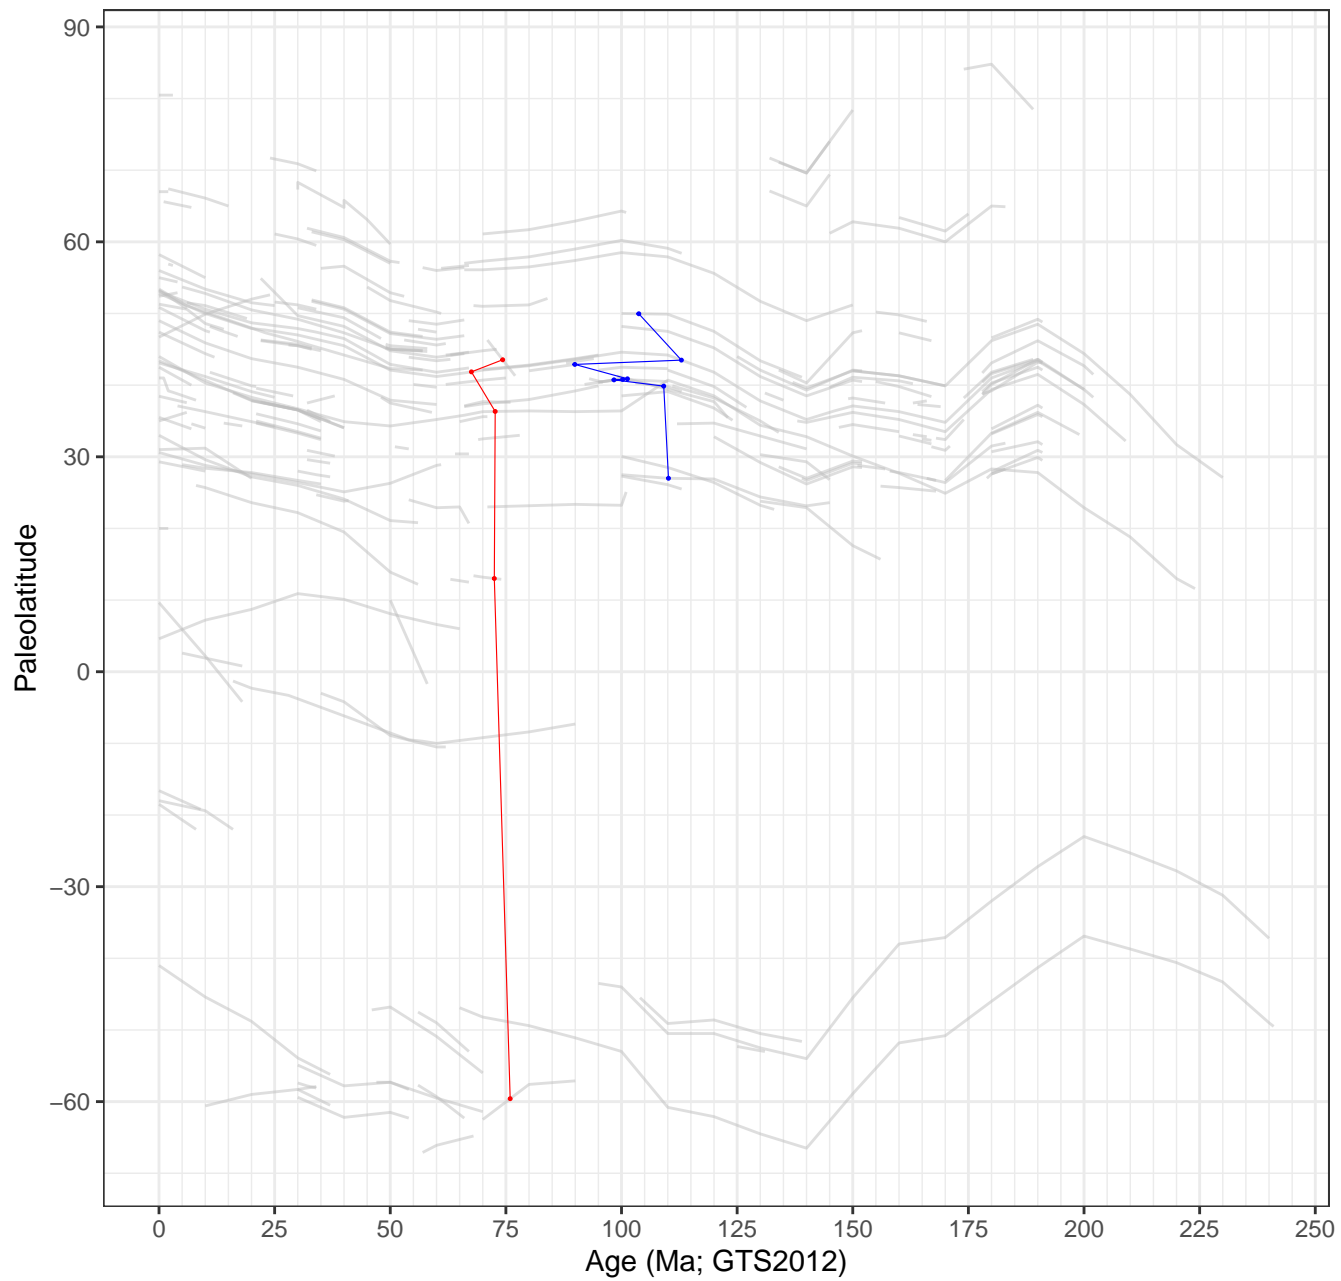

Supplement: Supplementary file 2654 [file Xenascus ceratioides.pdf › Supplement/Supplement 2/Species 1914 plots/Xenascus ceratioides.pdf]

# Species *Xenascus esbeckianus*

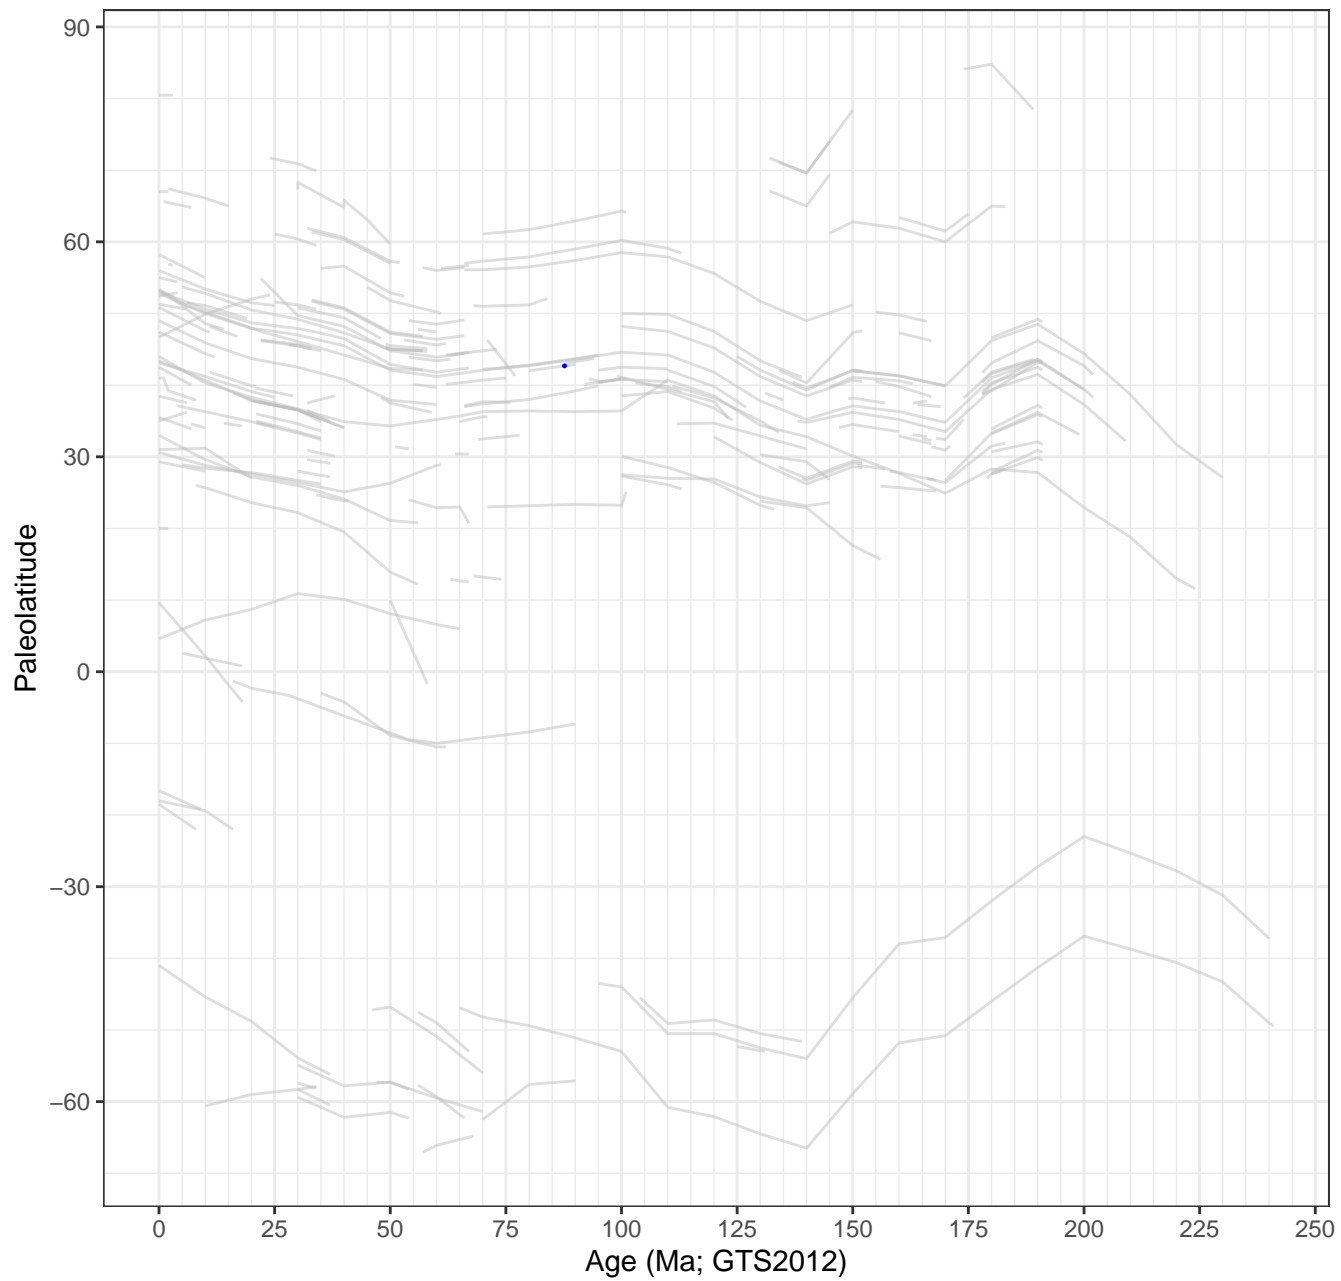

Supplement: Supplementary file 2655 [file Xenascus esbeckianus.pdf › Supplement/Supplement 2/Species 1914 plots/Xenascus esbeckianus.pdf]

# Species *Xenascus ghanaensis*

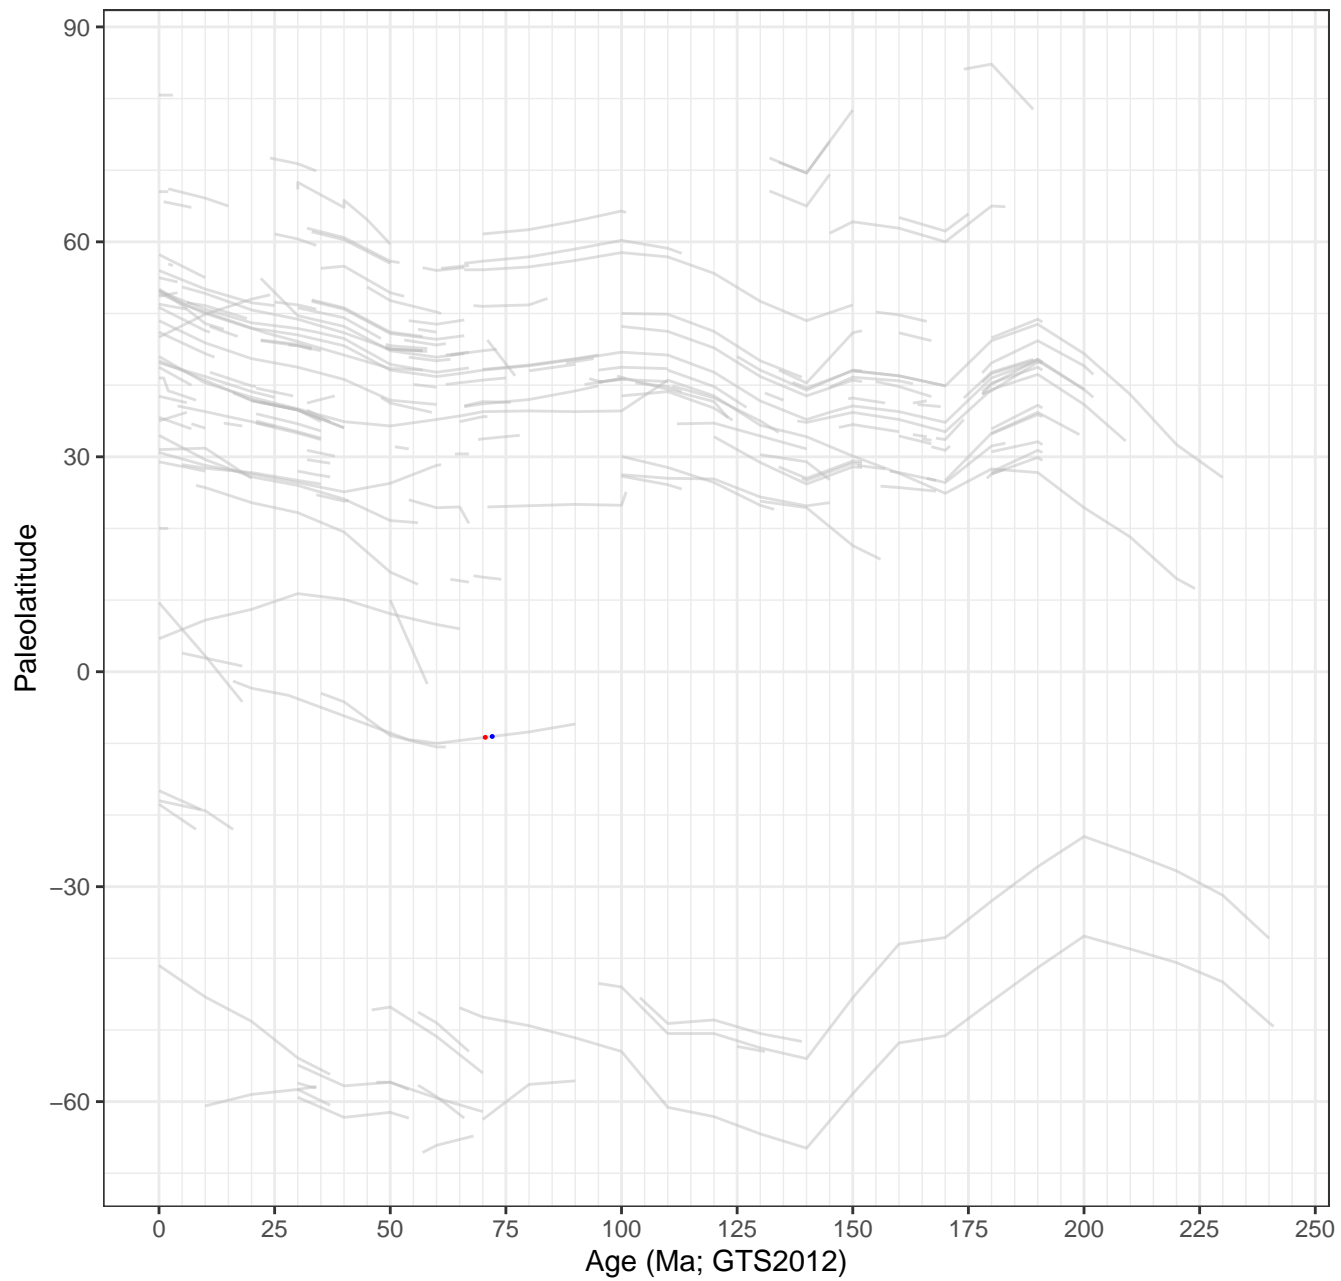

Supplement: Supplementary file 2656 [file Xenascus ghanaensis.pdf › Supplement/Supplement 2/Species 1914 plots/Xenascus ghanaensis.pdf]

# Species *Xenascus gochtii*

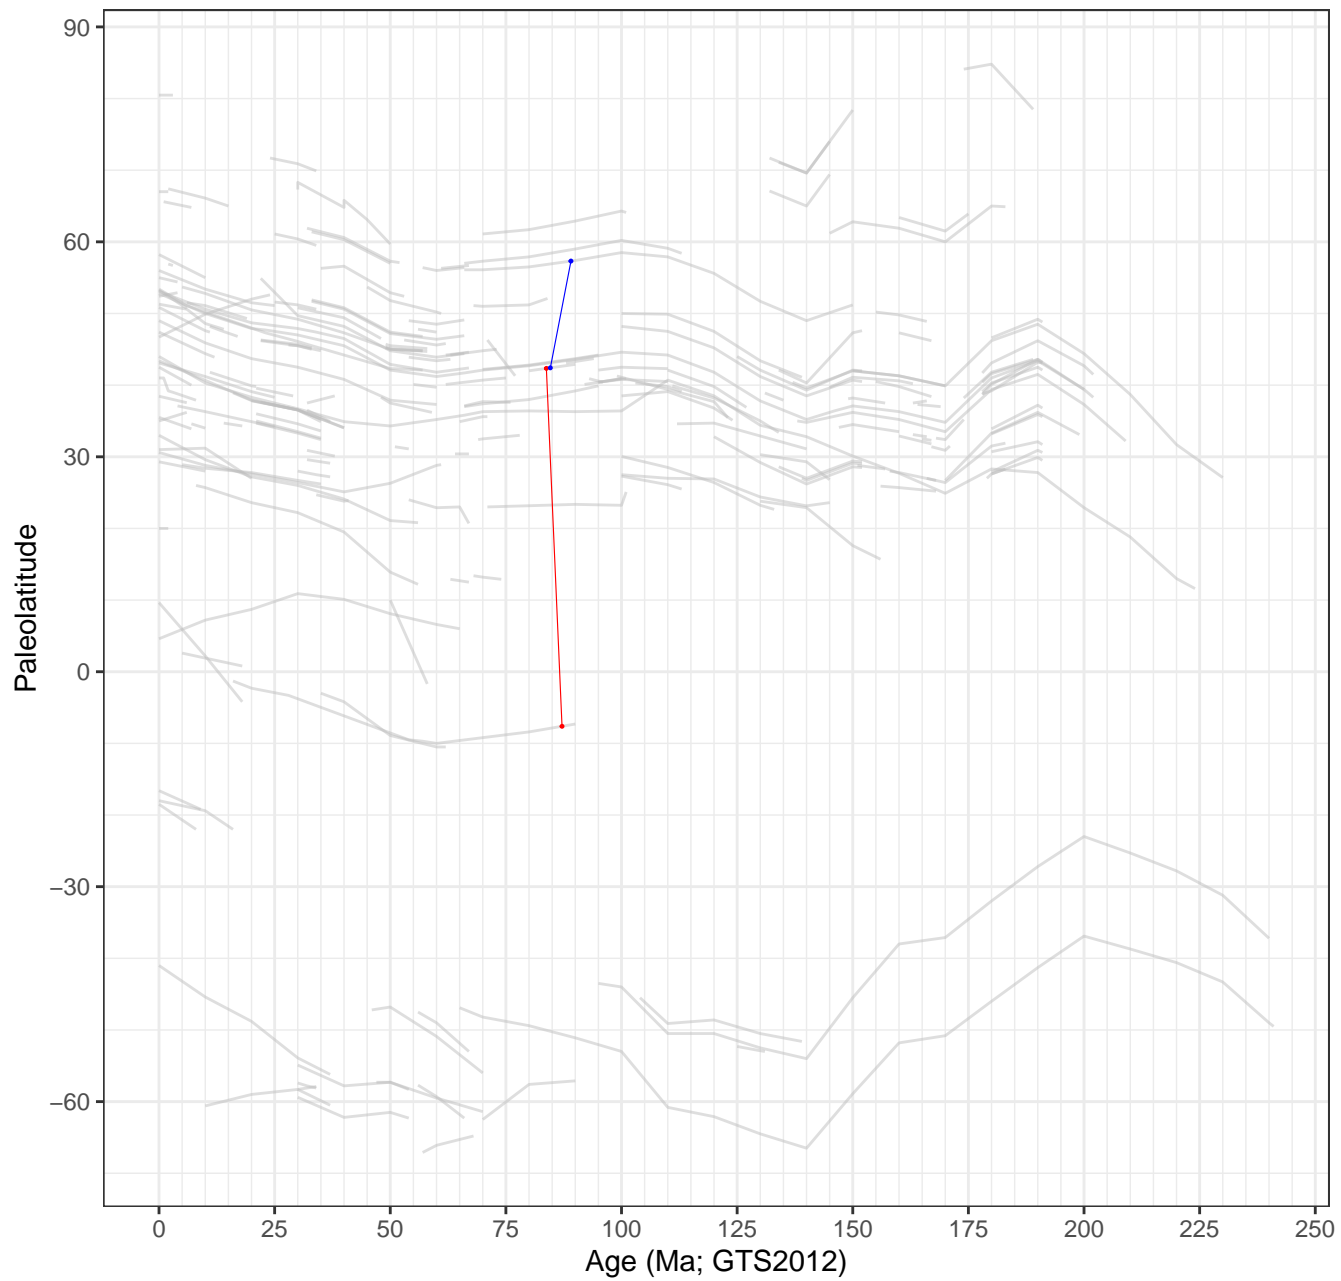

Supplement: Supplementary file 2657 [file Xenascus gochtii.pdf › Supplement/Supplement 2/Species 1914 plots/Xenascus gochtii.pdf]

# Species *Xenascus perforatus*

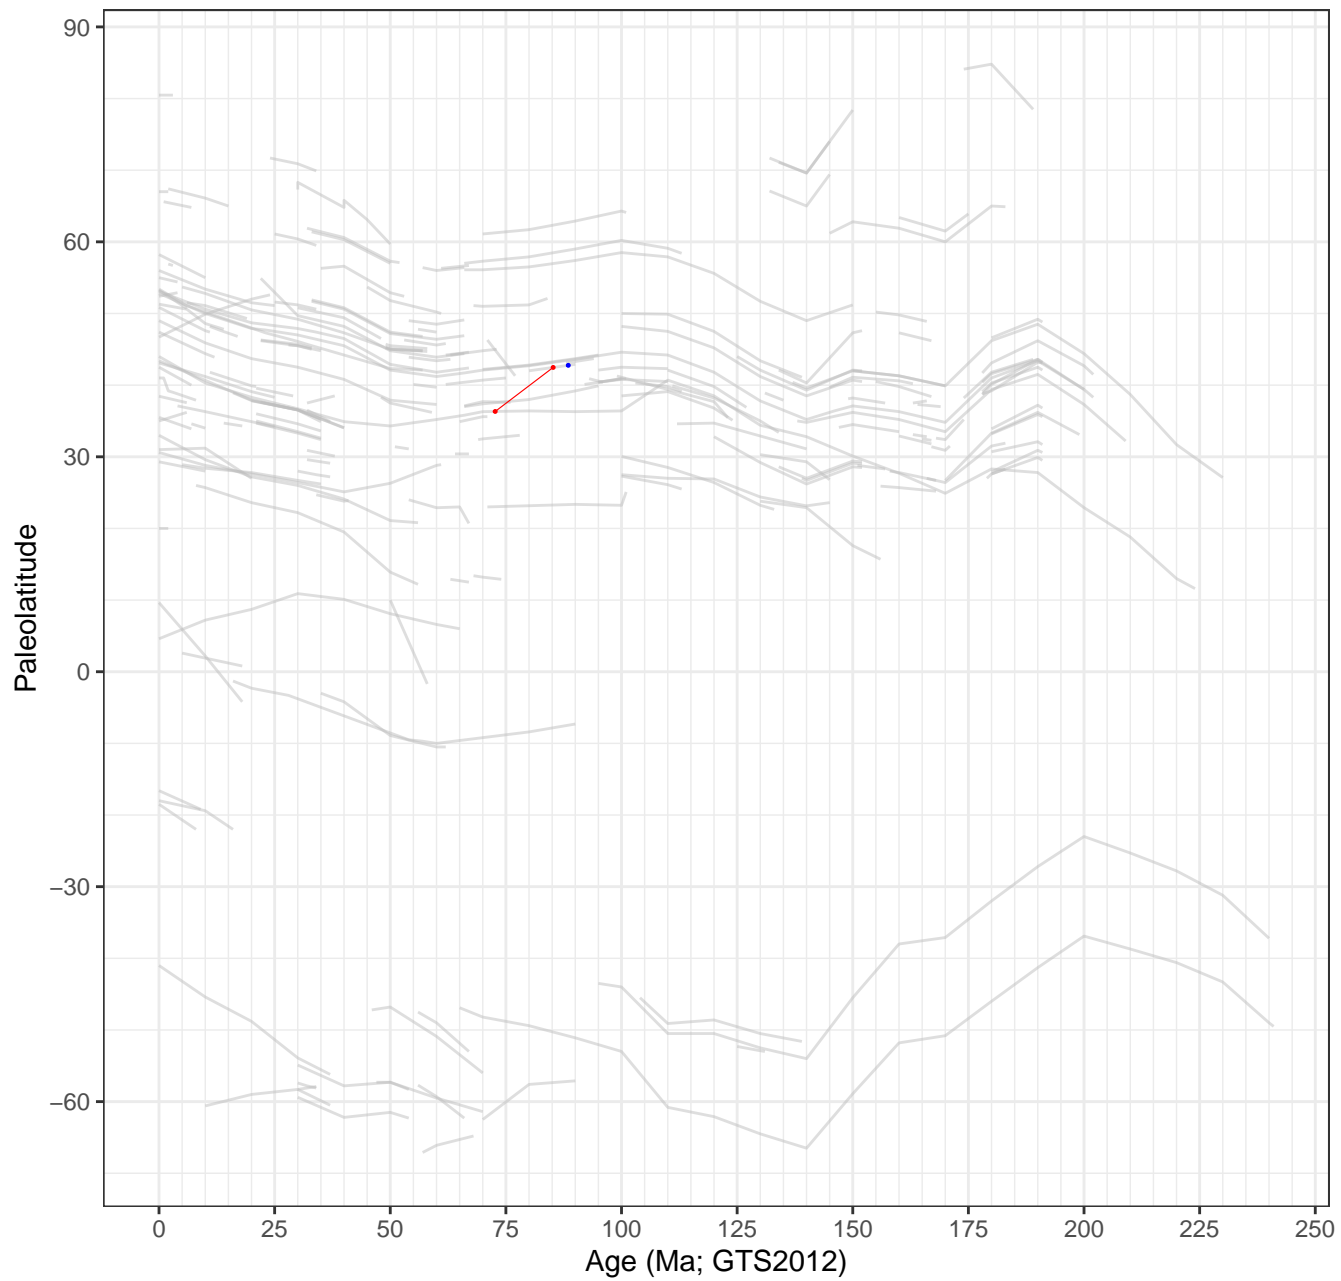

Supplement: Supplementary file 2658 [file Xenascus perforatus.pdf › Supplement/Supplement 2/Species 1914 plots/Xenascus perforatus.pdf]

# Species *Xenascus plotei*

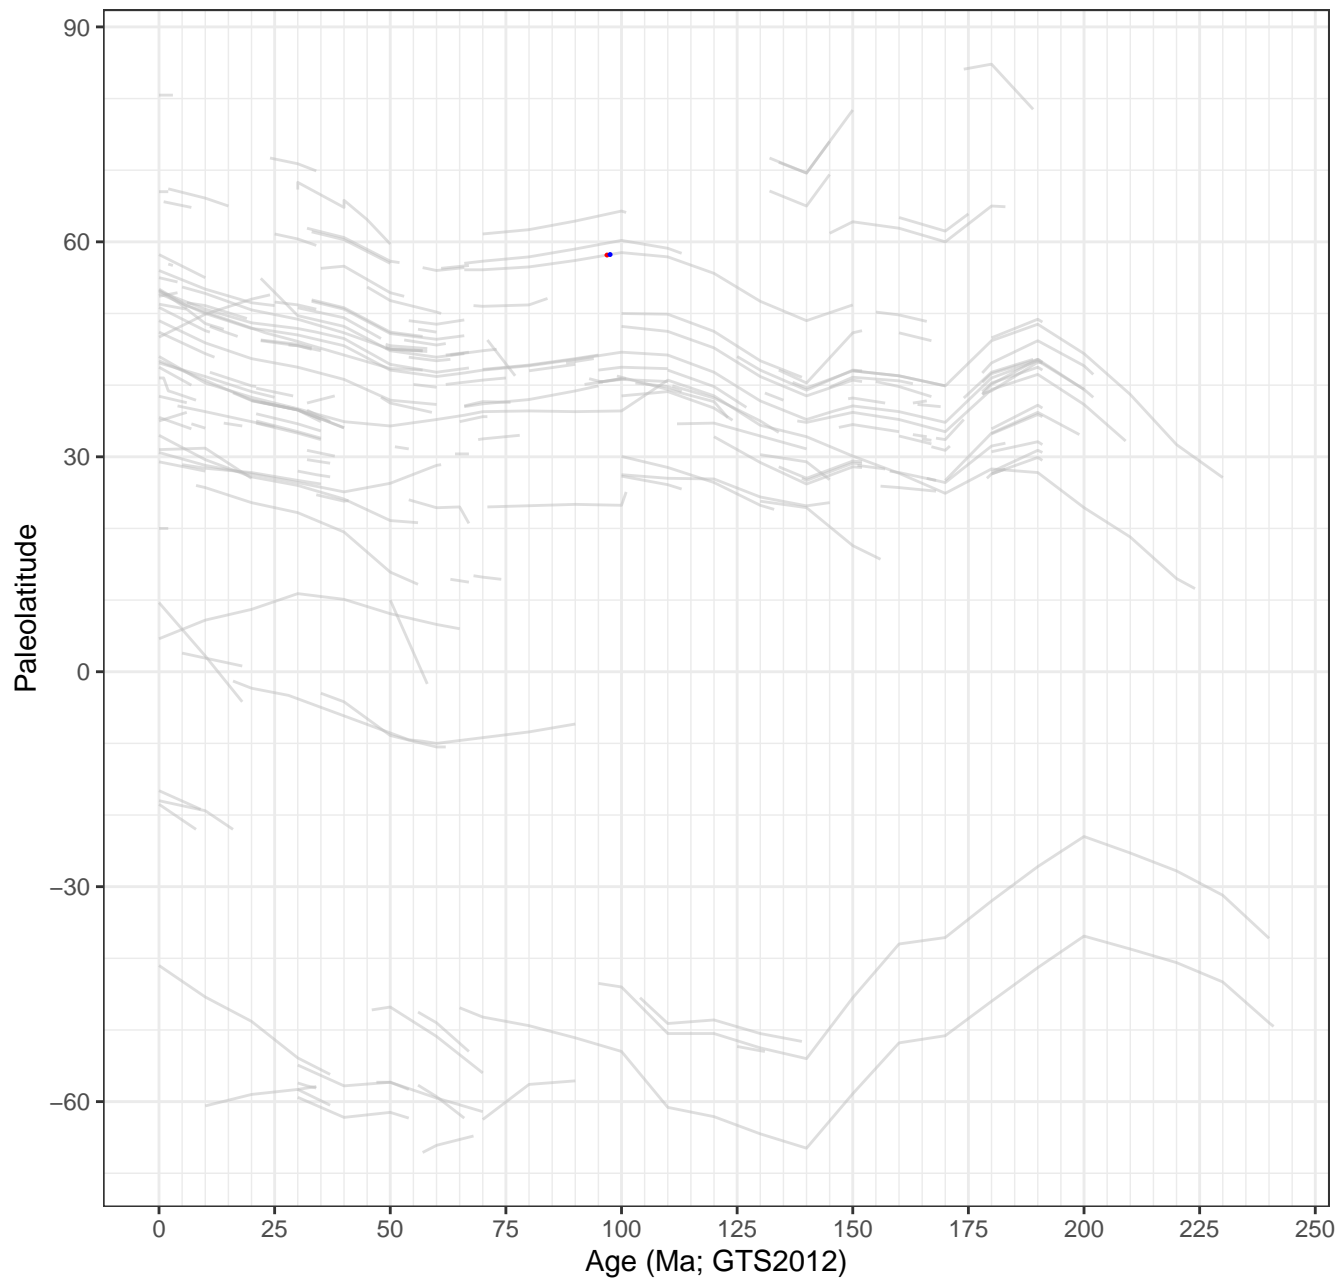

Supplement: Supplementary file 2659 [file Xenascus plotei.pdf › Supplement/Supplement 2/Species 1914 plots/Xenascus plotei.pdf]

# Species *Xenascus spinatus*

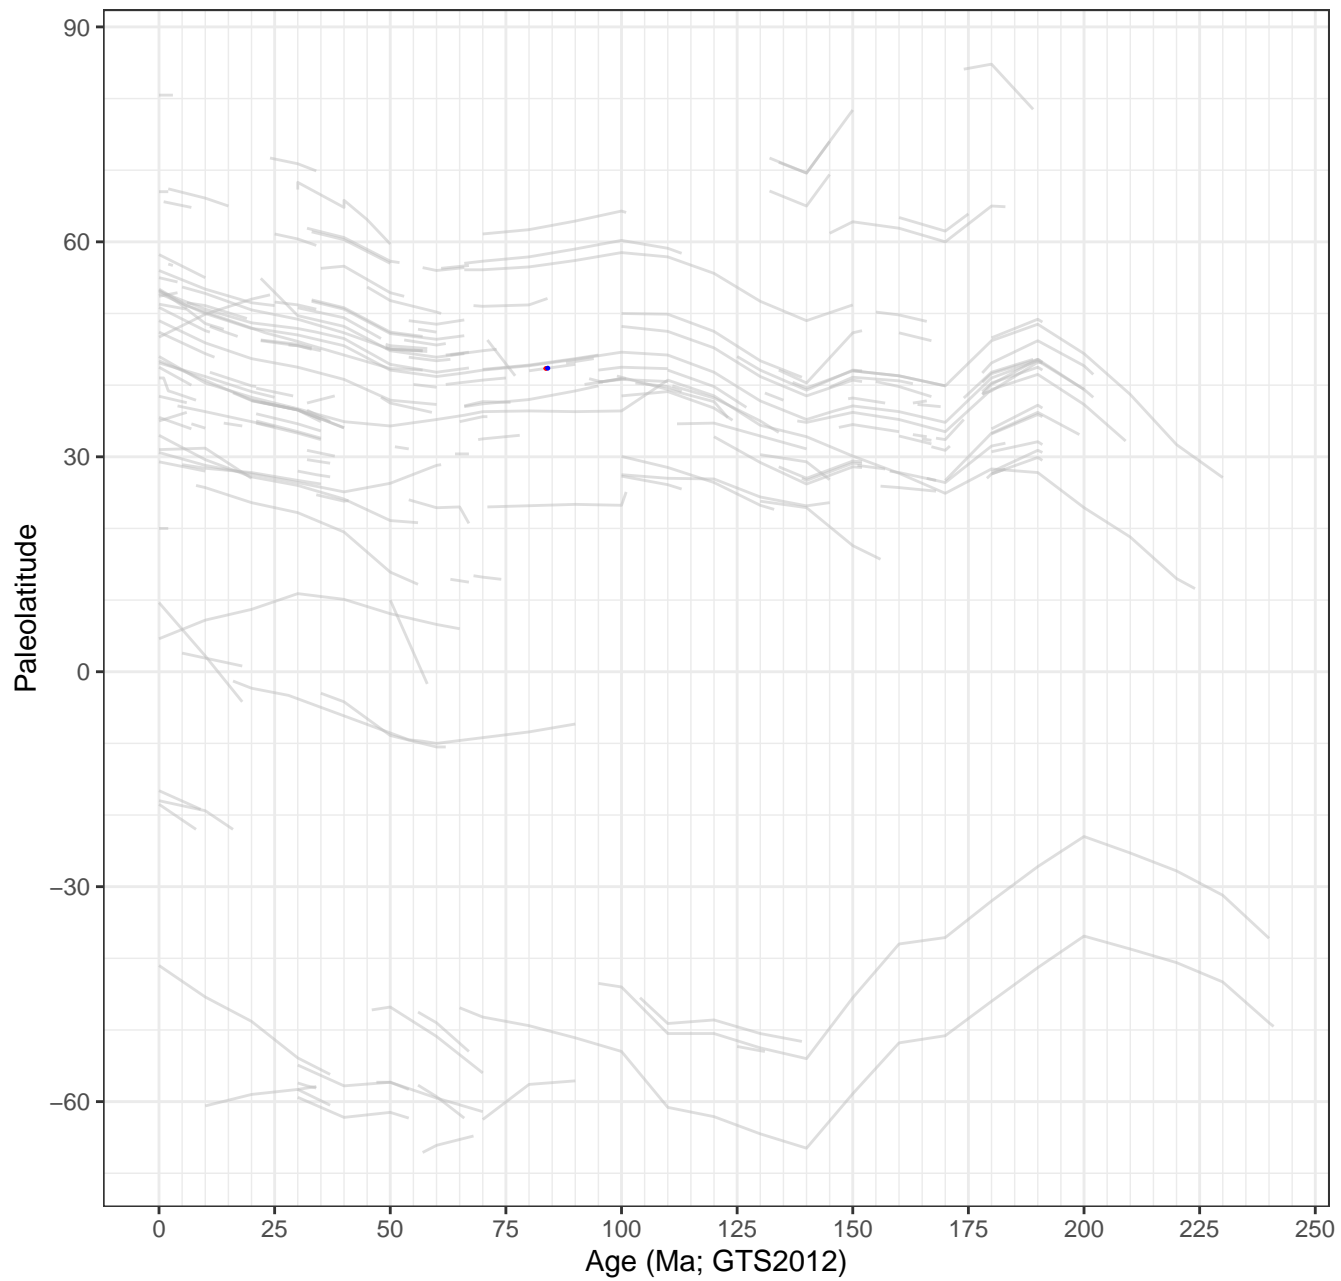

Supplement: Supplementary file 2660 [file Xenascus spinatus.pdf › Supplement/Supplement 2/Species 1914 plots/Xenascus spinatus.pdf]

# Species *Xenascus yunii*

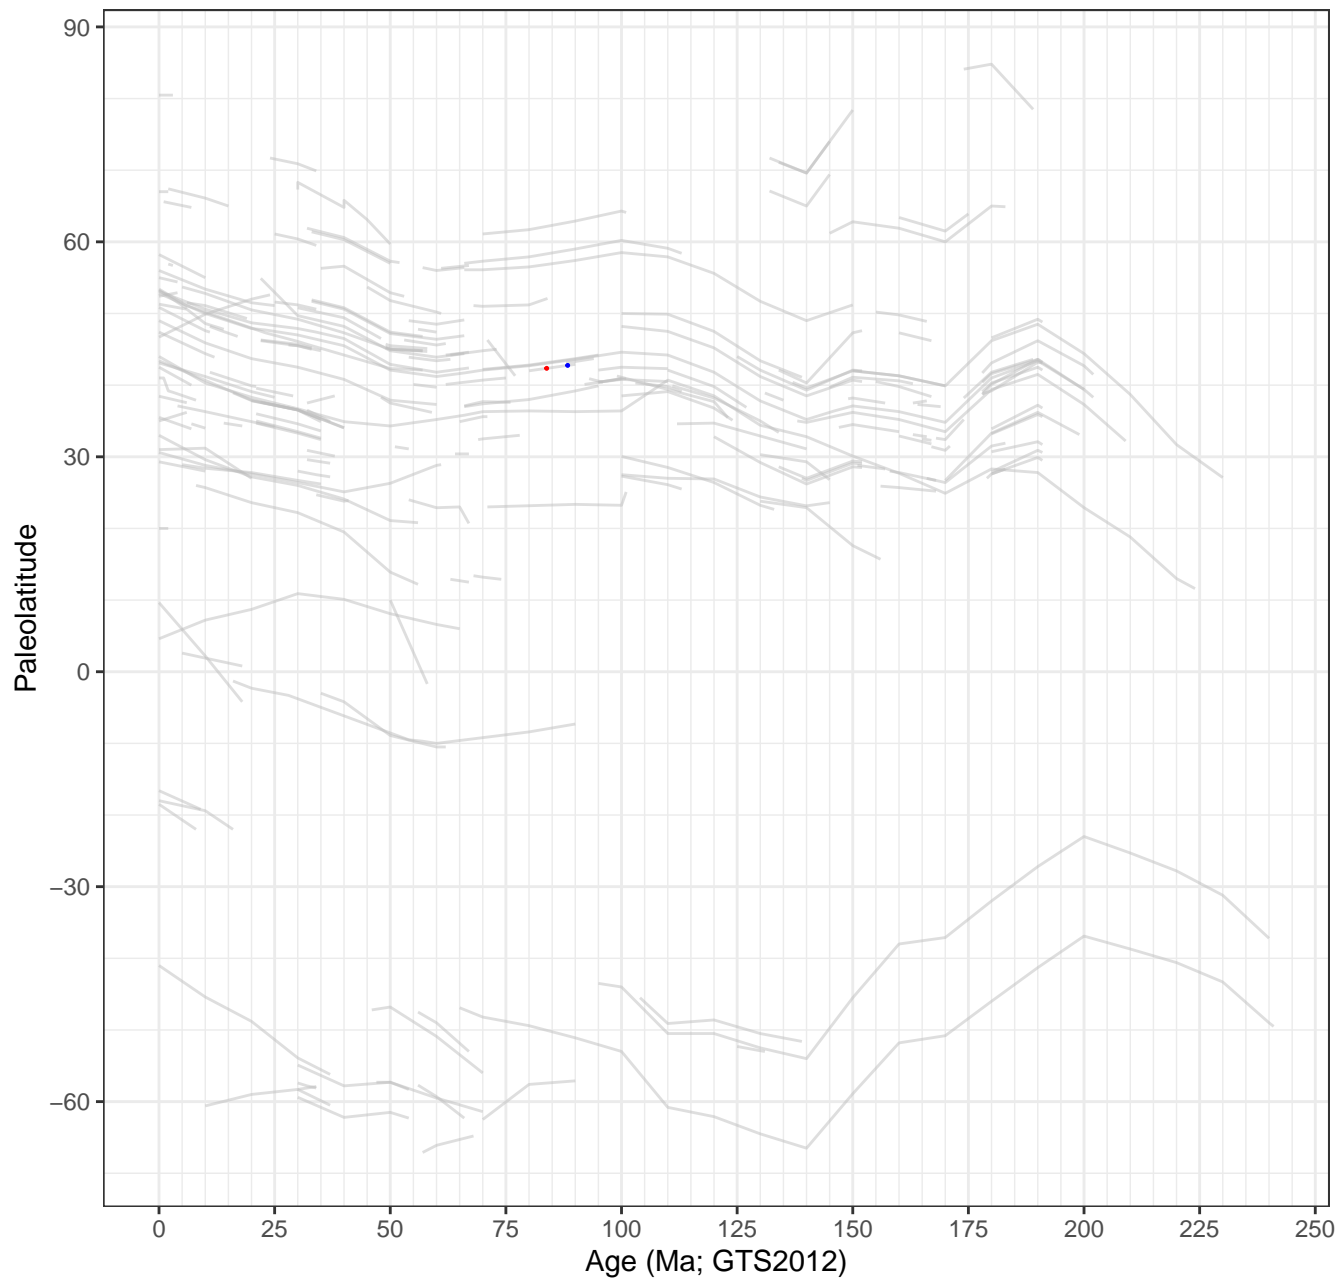

Supplement: Supplementary file 2661 [file Xenascus yunii.pdf › Supplement/Supplement 2/Species 1914 plots/Xenascus yunii.pdf]

# Species *Xenicodinium lubricum*

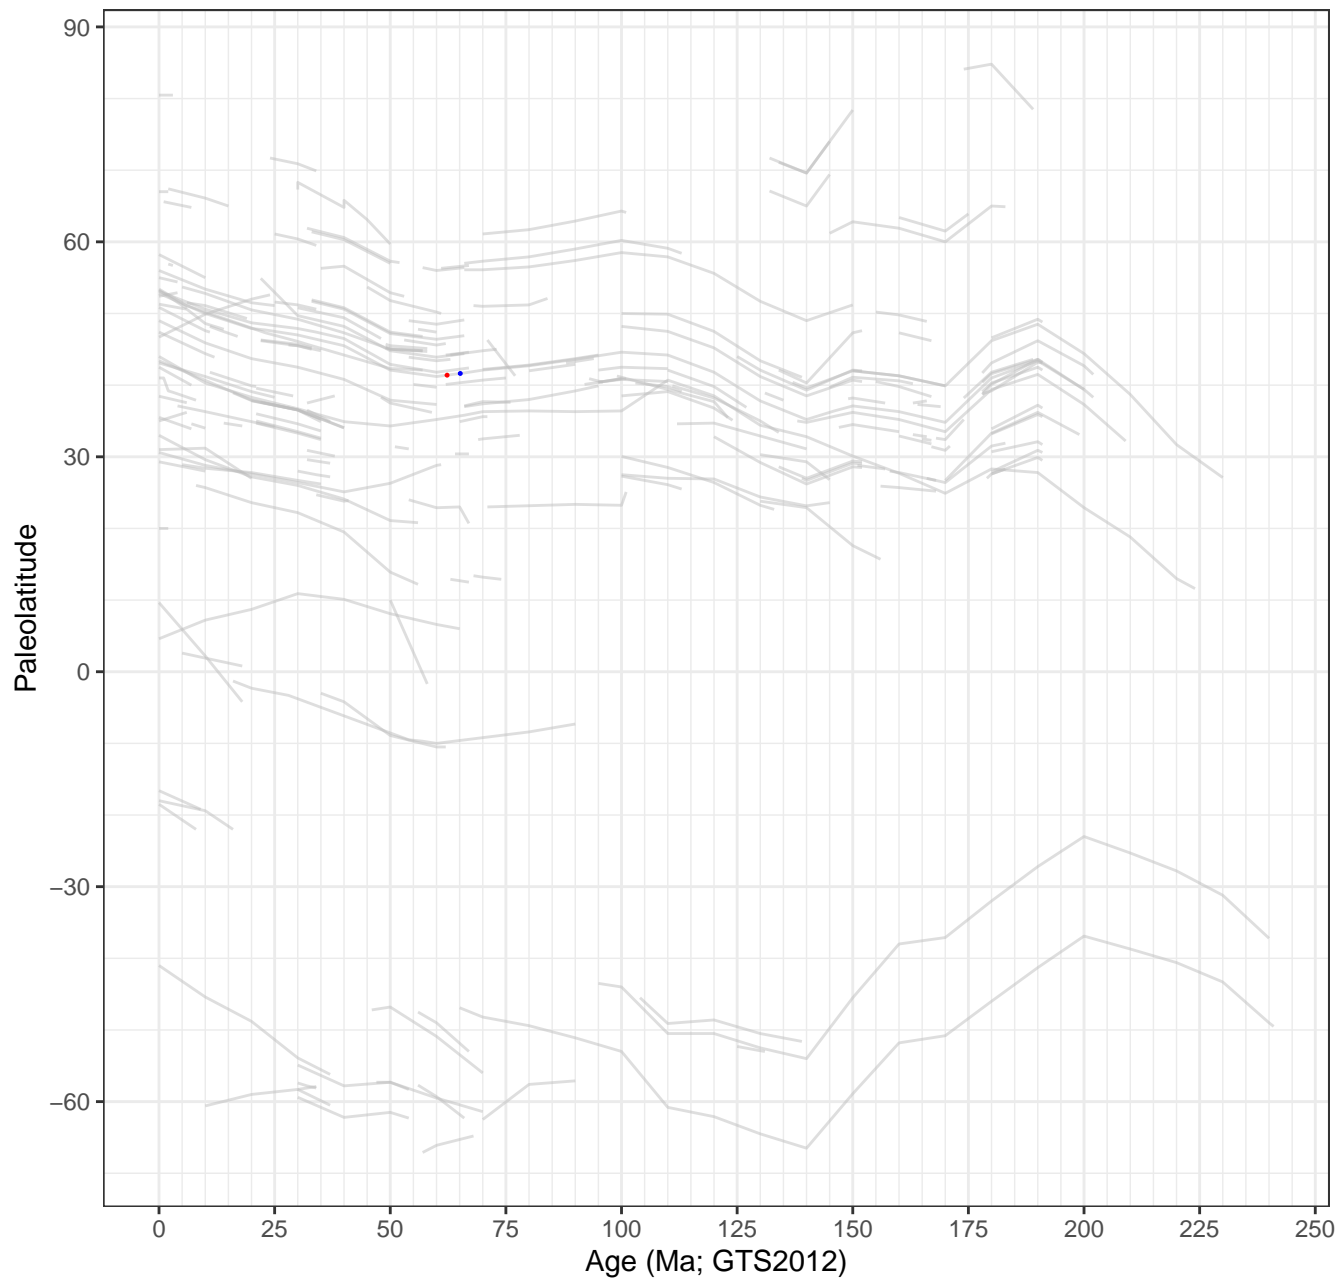

Supplement: Supplementary file 2662 [file Xenicodinium lubricum.pdf › Supplement/Supplement 2/Species 1914 plots/Xenicodinium lubricum.pdf]

# Species *Xenicodinium reticulatum*

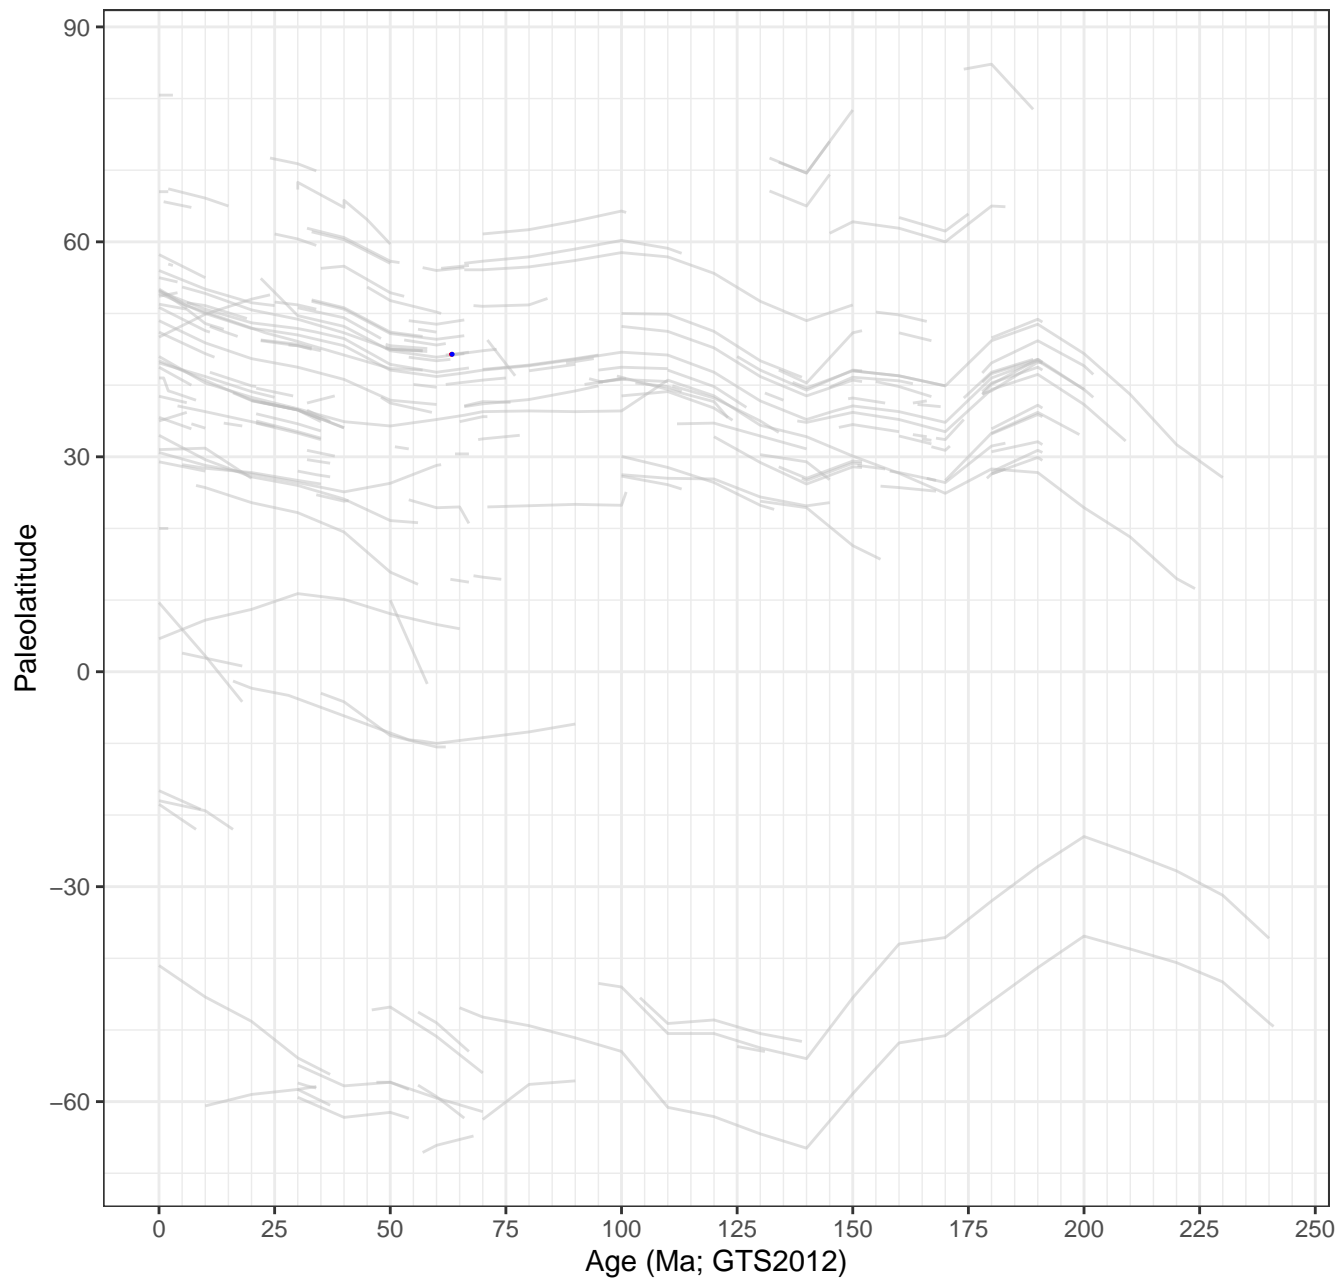

Supplement: Supplementary file 2663 [file Xenicodinium reticulatum.pdf › Supplement/Supplement 2/Species 1914 plots/Xenicodinium reticulatum.pdf]

# Species *Xenikoon australis*

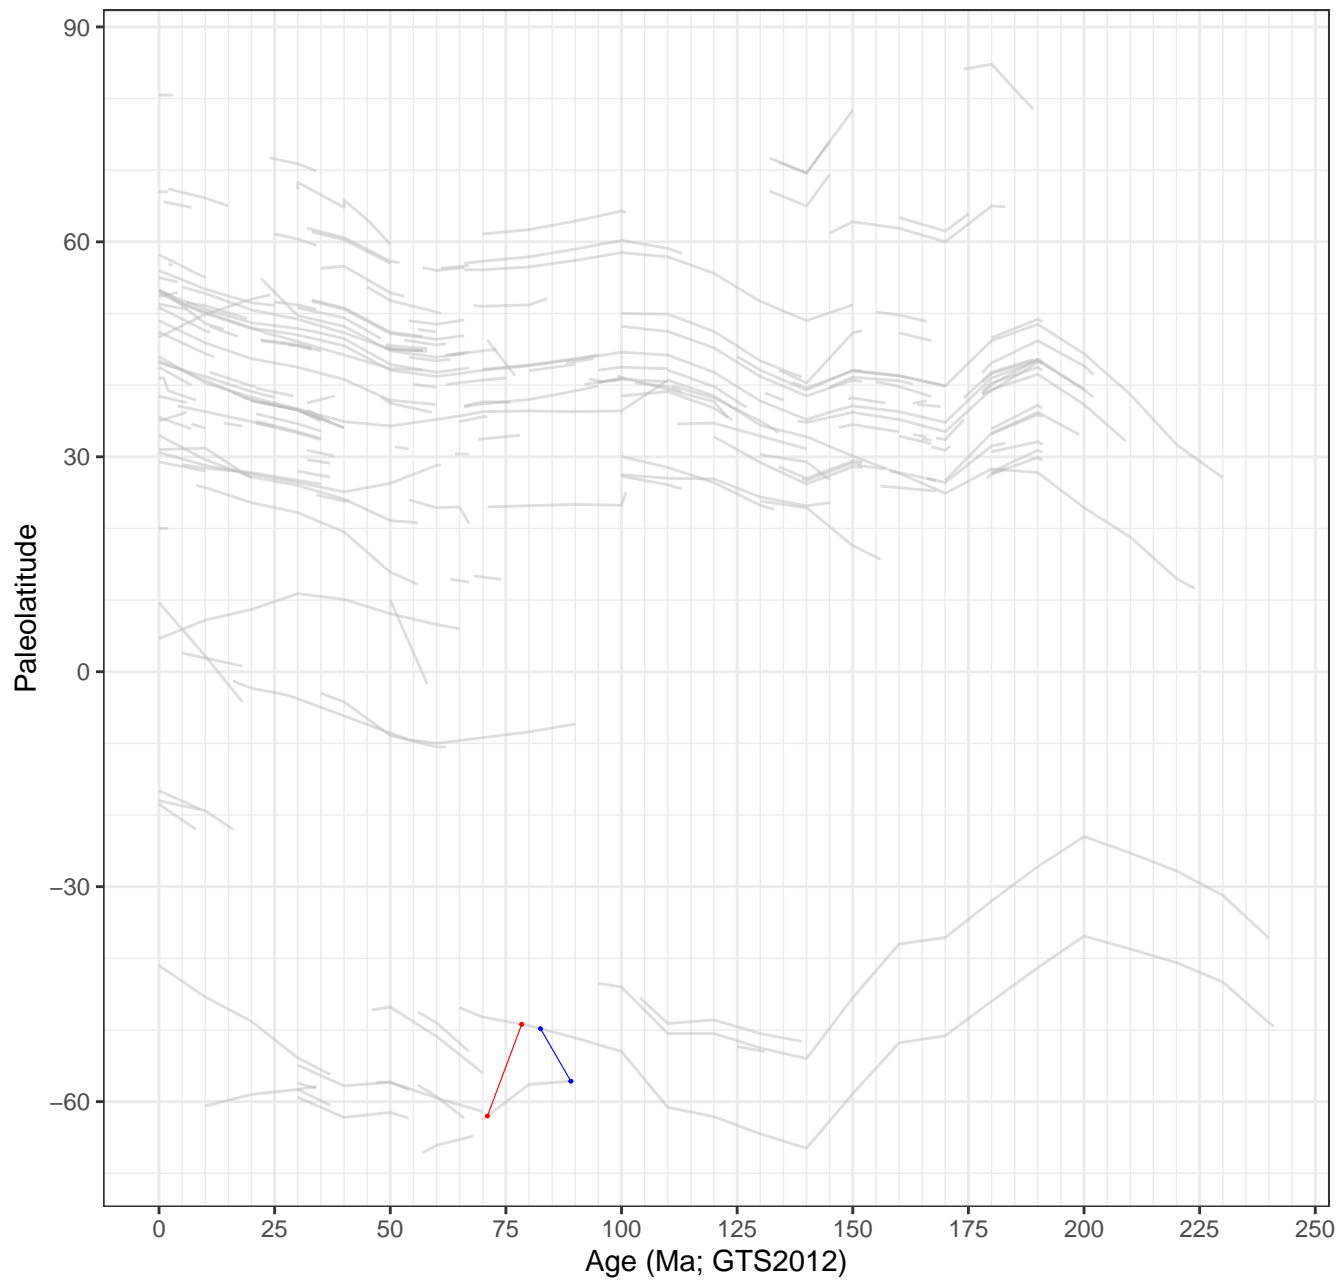

Supplement: Supplementary file 2664 [file Xenikoon australis.pdf › Supplement/Supplement 2/Species 1914 plots/Xenikoon australis.pdf]

# Species *Yalkalpodinium elangianum*

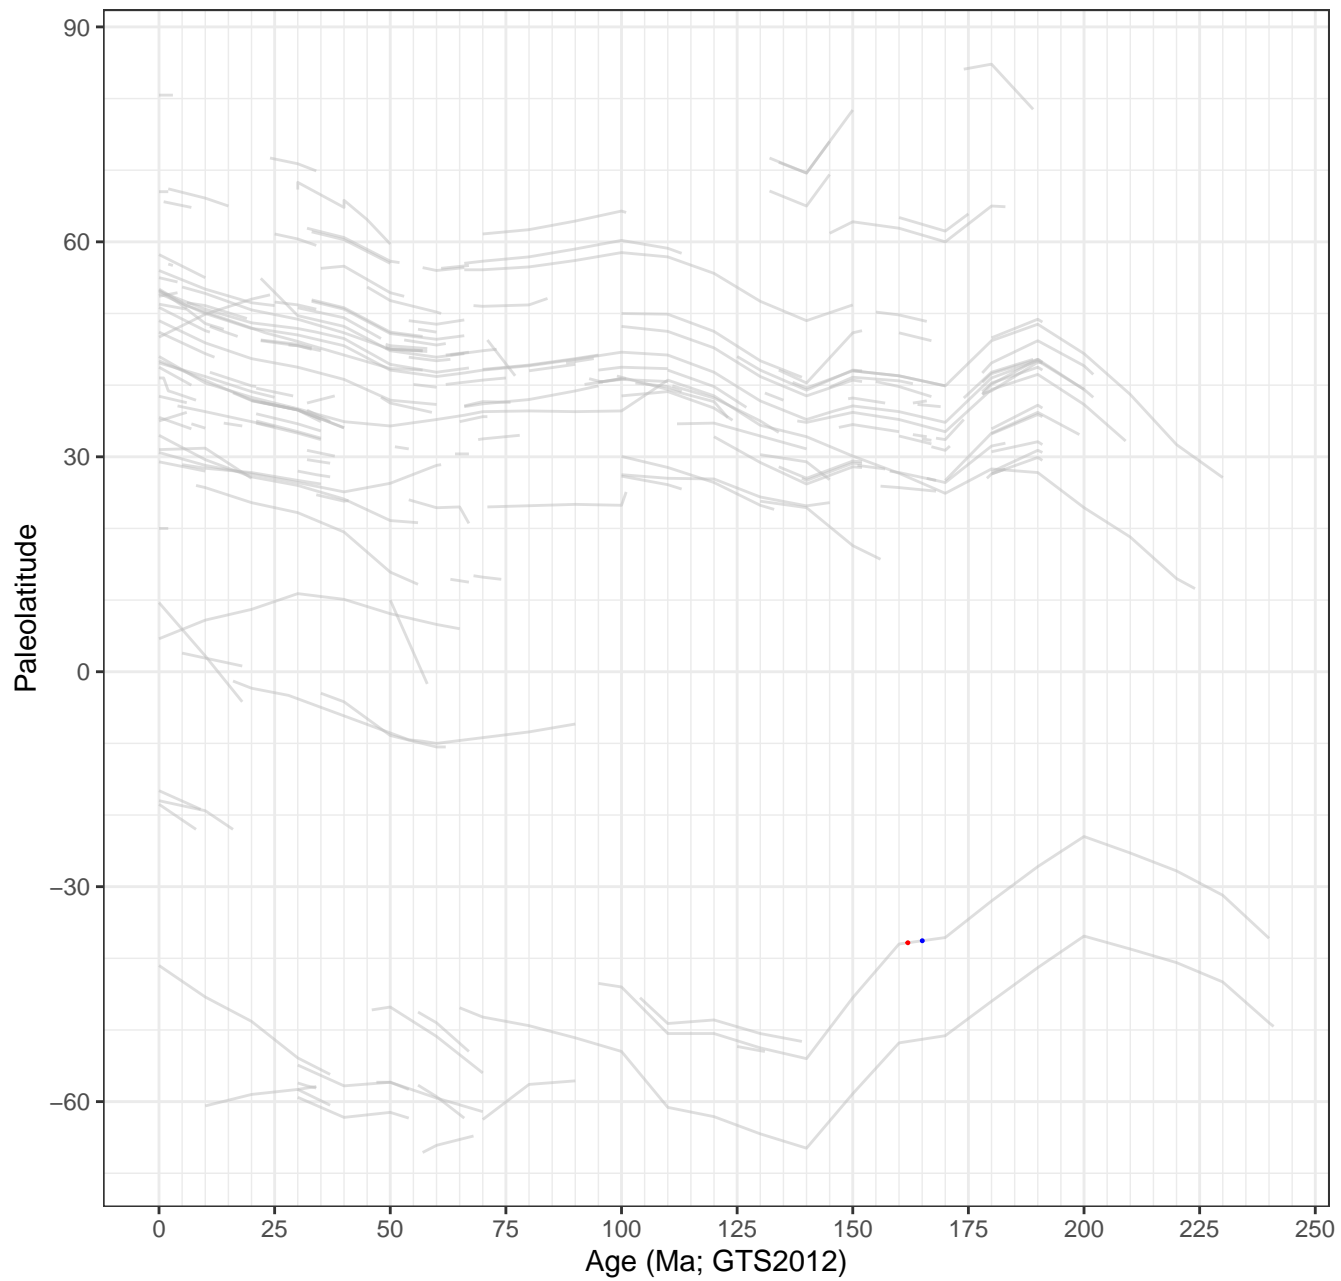

Supplement: Supplementary file 2665 [file Yalkalpodinium elangianum.pdf › Supplement/Supplement 2/Species 1914 plots/Yalkalpodinium elangianum.pdf]

# Species *Ynezidinium brevisulcatum*

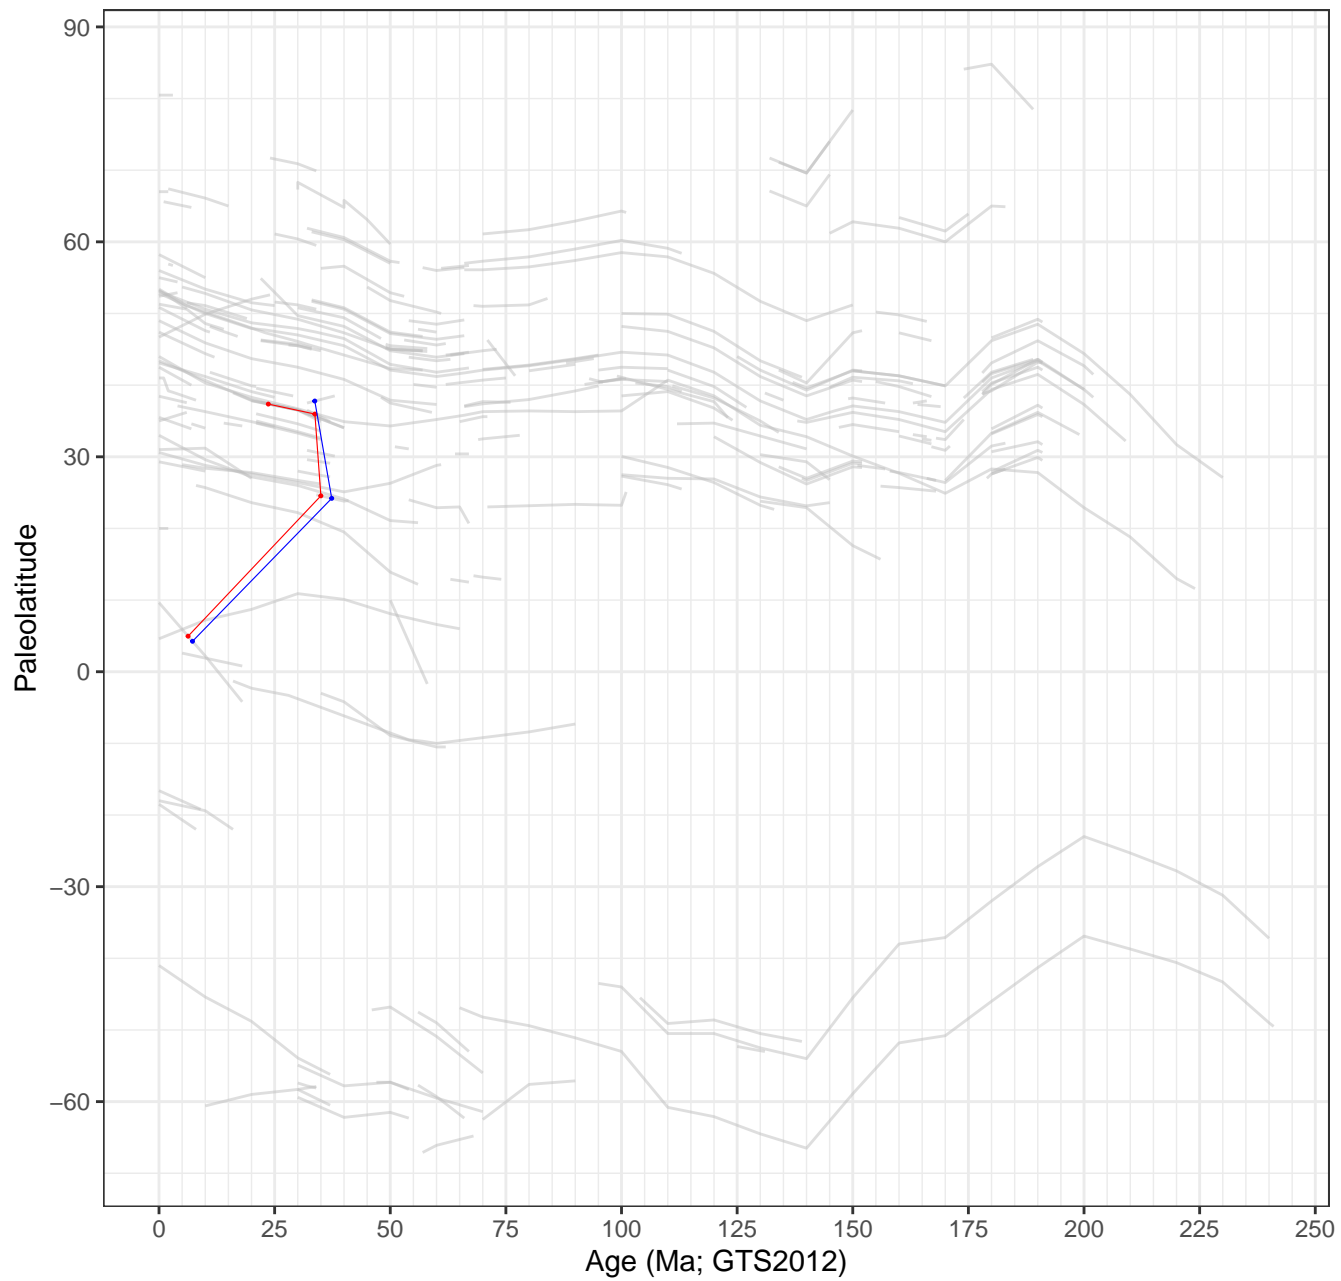

Supplement: Supplementary file 2666 [file Ynezidinium brevisulcatum.pdf › Supplement/Supplement 2/Species 1914 plots/Ynezidinium brevisulcatum.pdf]

# Species Ynezidinium pentahedrias

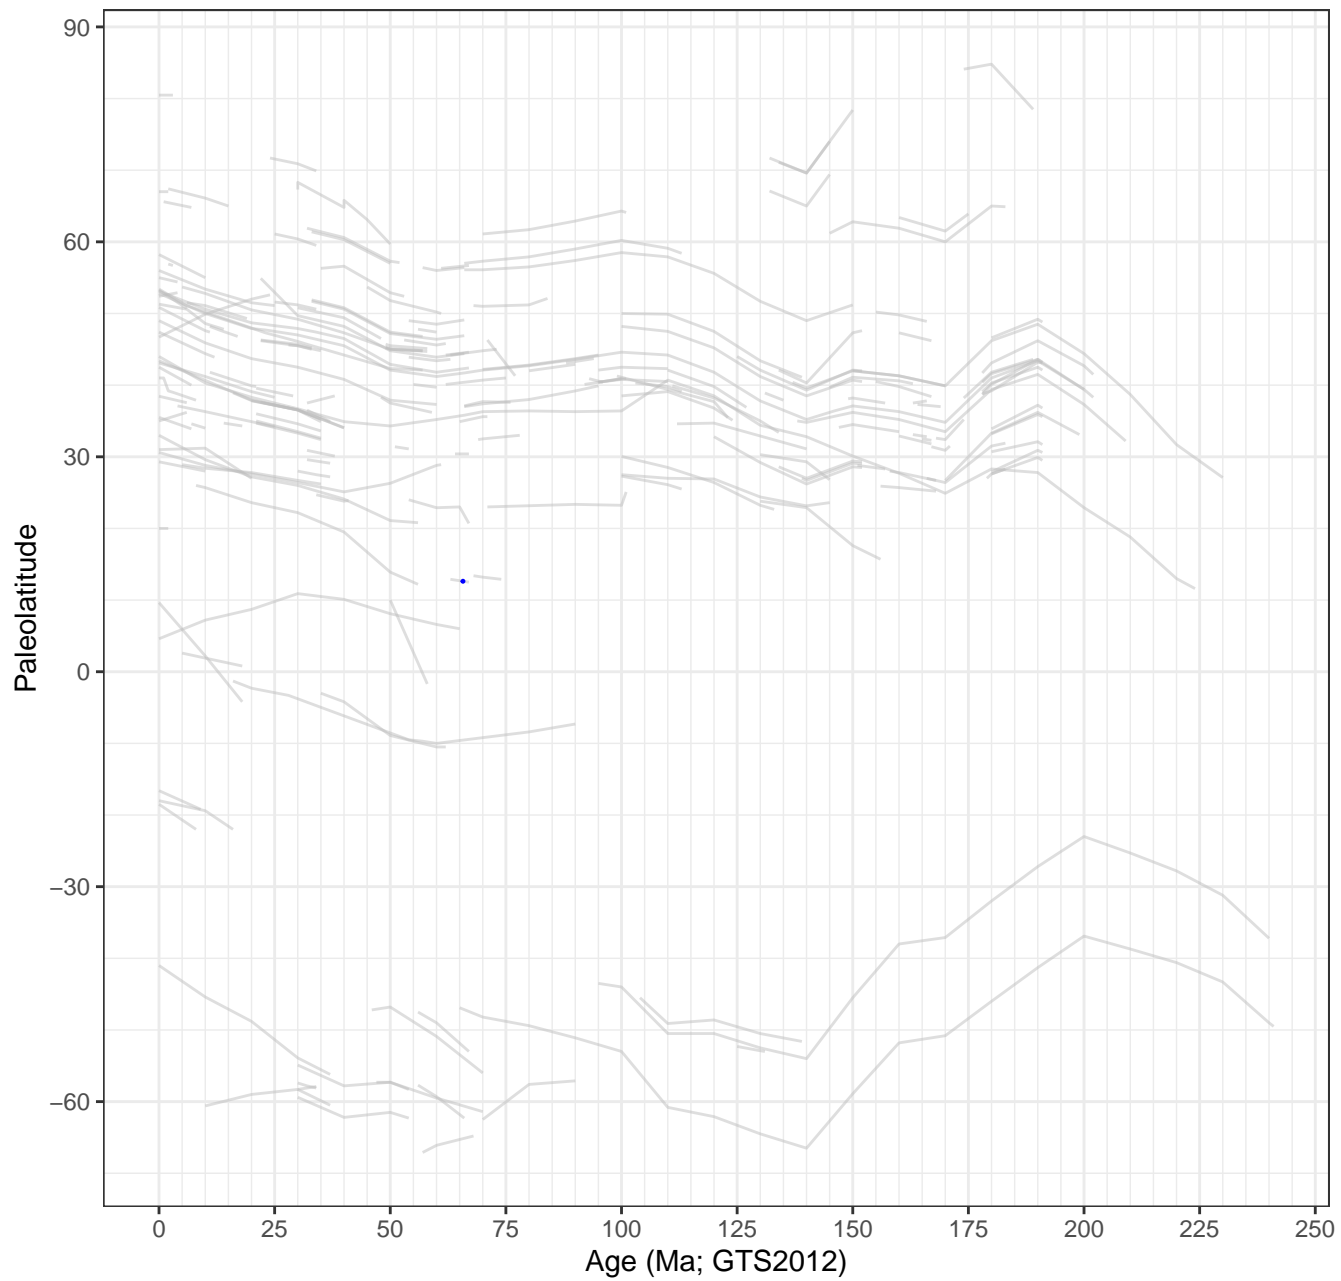

Supplement: Supplementary file 2667 [file Ynezidinium pentahedrias.pdf › Supplement/Supplement 2/Species 1914 plots/Ynezidinium pentahedrias.pdf]

# Species *Ynezidinium waipawaense*

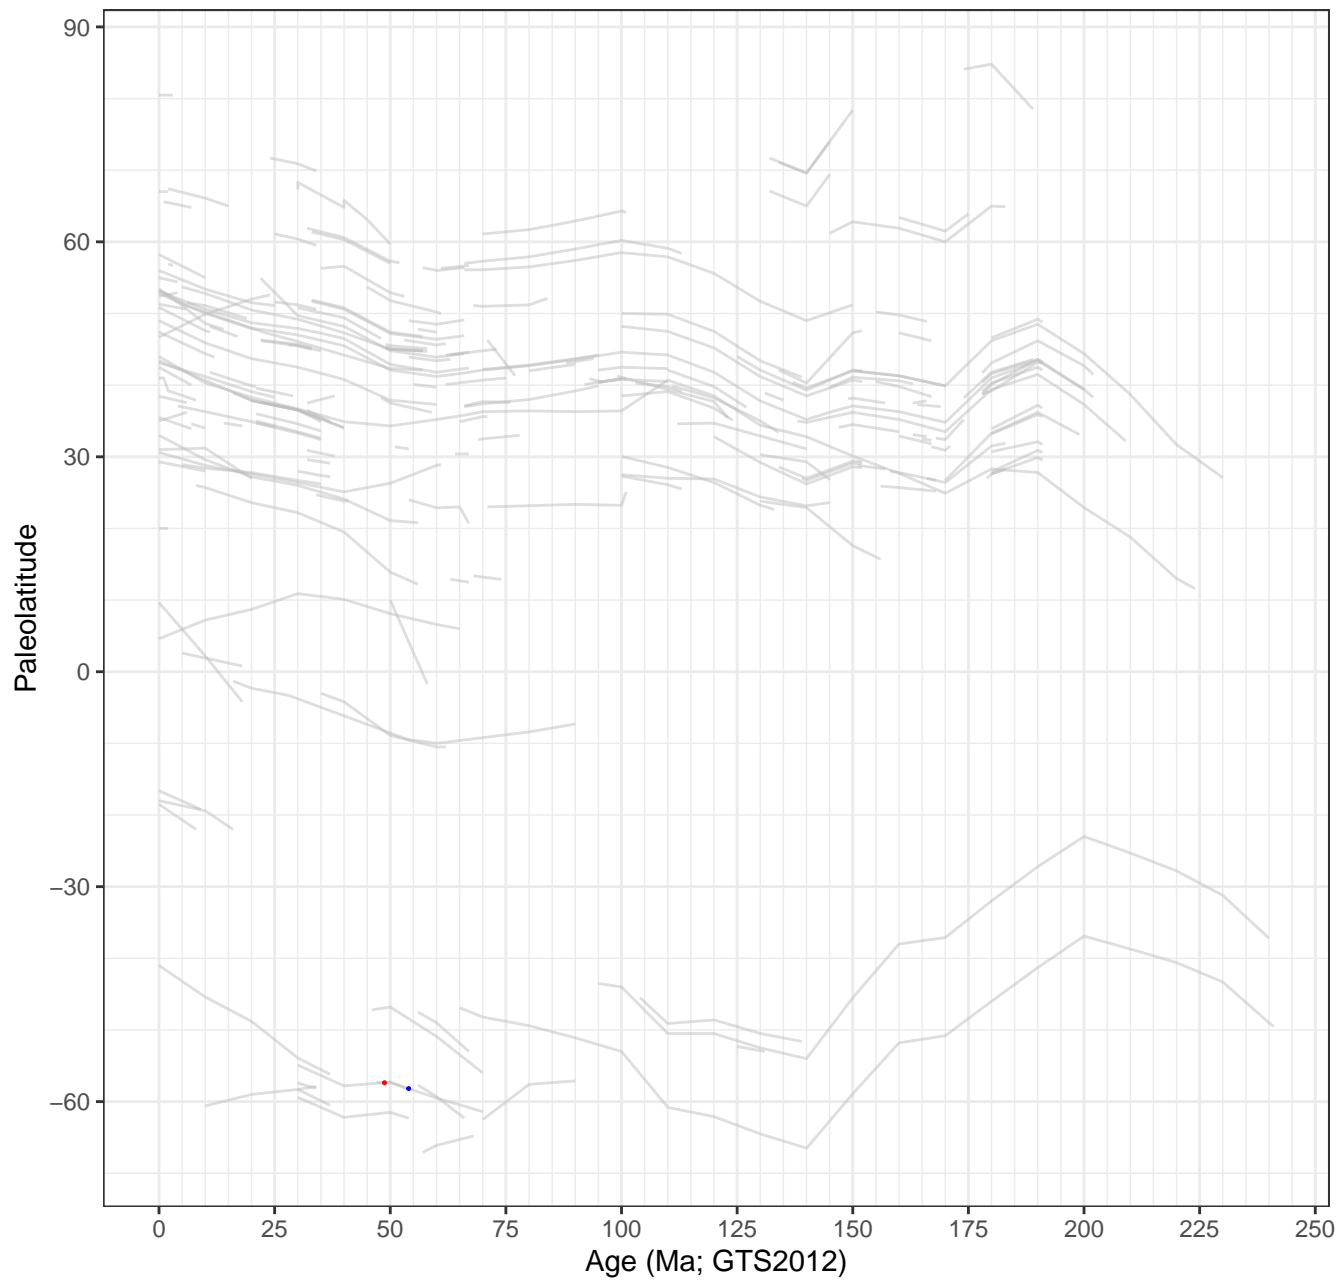

Supplement: Supplementary file 2668 [file Ynezidinium waipawaense.pdf › Supplement/Supplement 2/Species 1914 plots/Ynezidinium waipawaense.pdf]

# Species cyst of *Gymnodinium* spp.

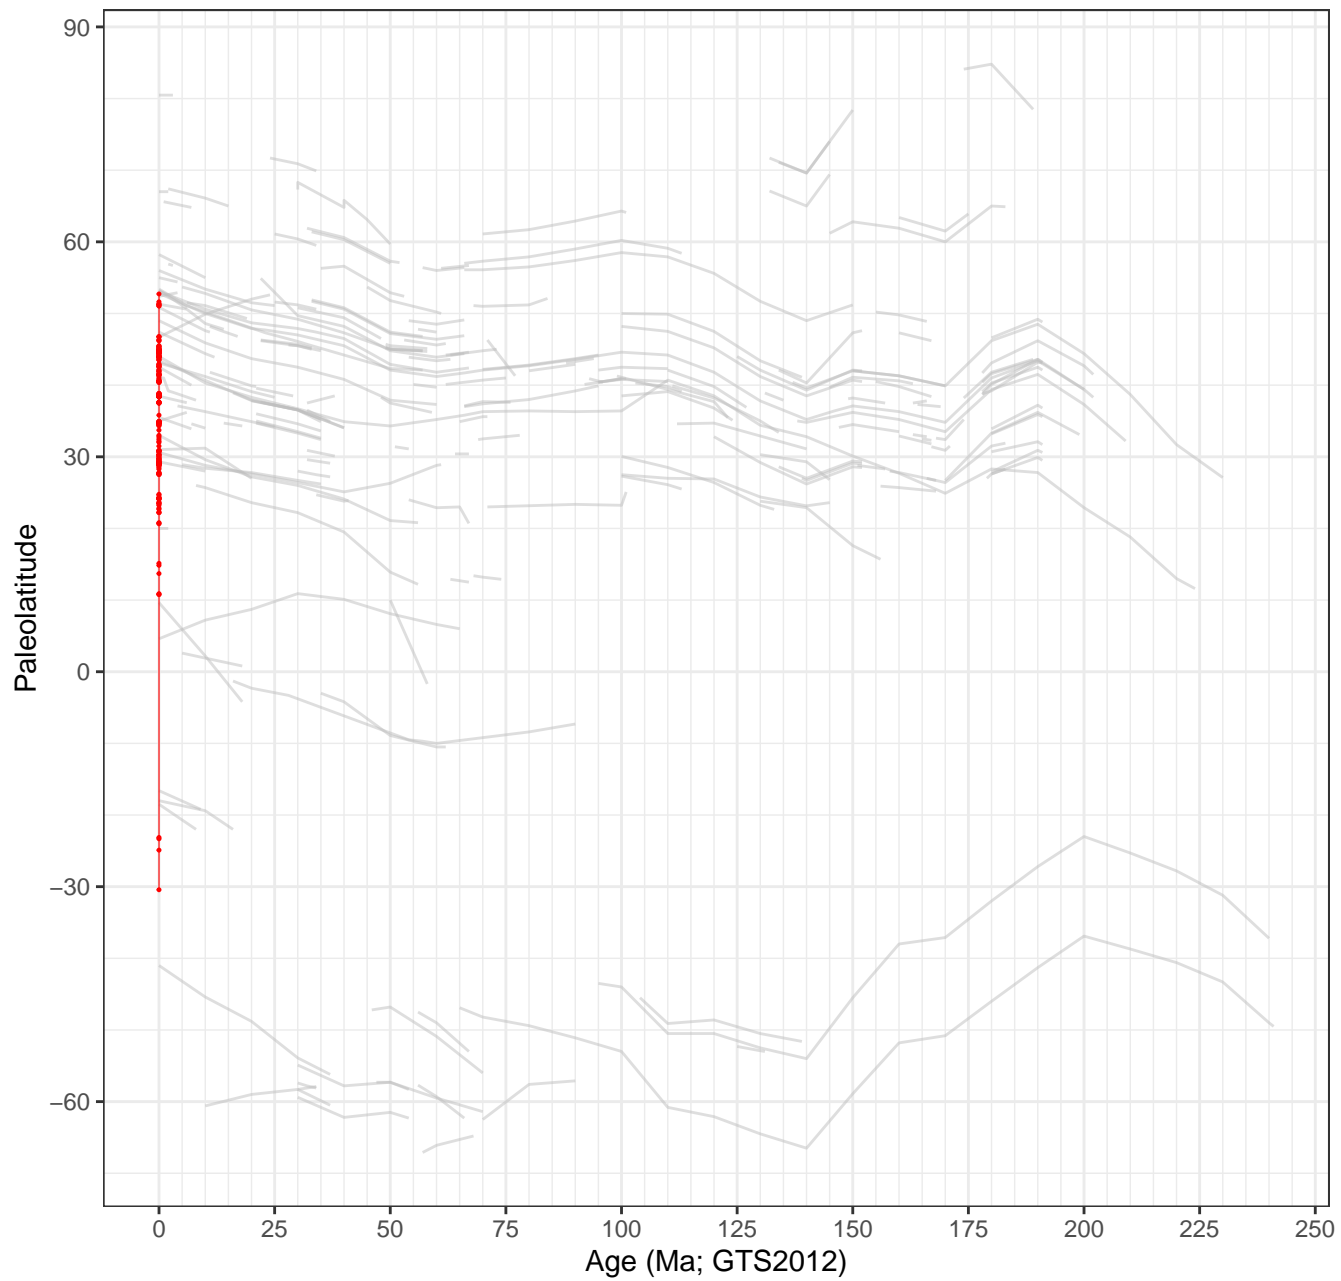

Supplement: Supplementary file 2669 [file cyst of Gymnodinium spp..pdf › Supplement/Supplement 2/Species 1914 plots/cyst of Gymnodinium spp..pdf]

# Species cyst of *Oblea acanthocysta*

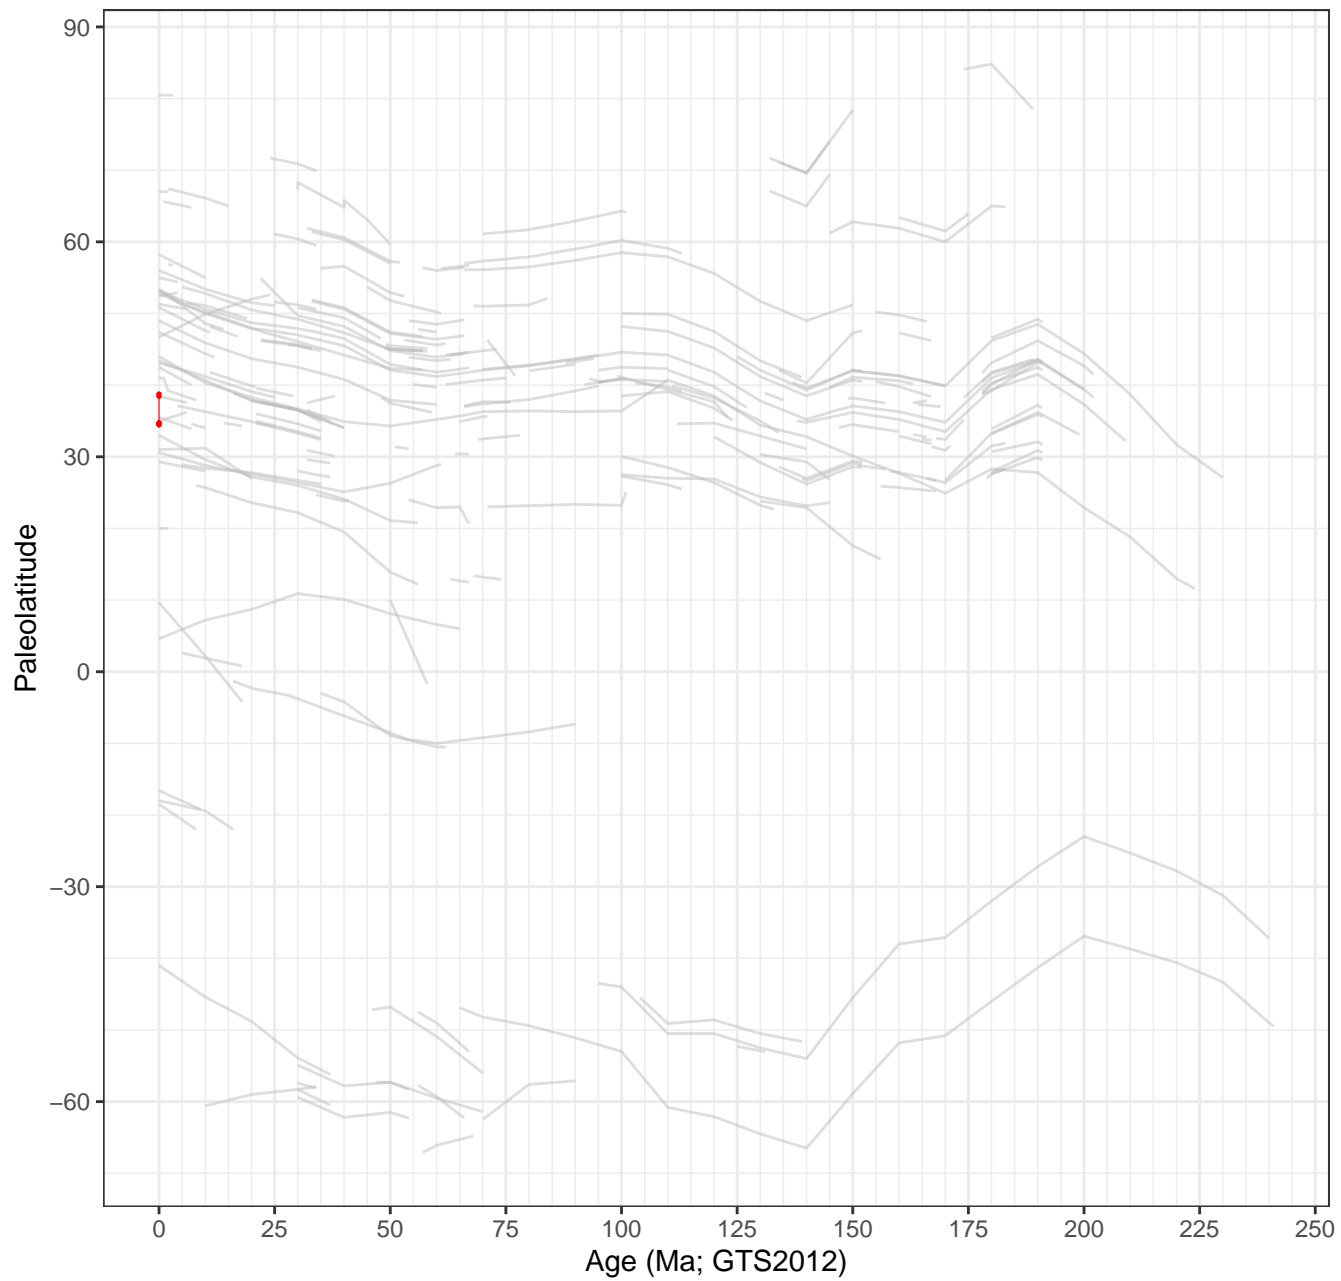

Supplement: Supplementary file 2670 [file cyst of Oblea acanthocysta.pdf › Supplement/Supplement 2/Species 1914 plots/cyst of Oblea acanthocysta.pdf]

# Species cyst of *Polarella glacialis*

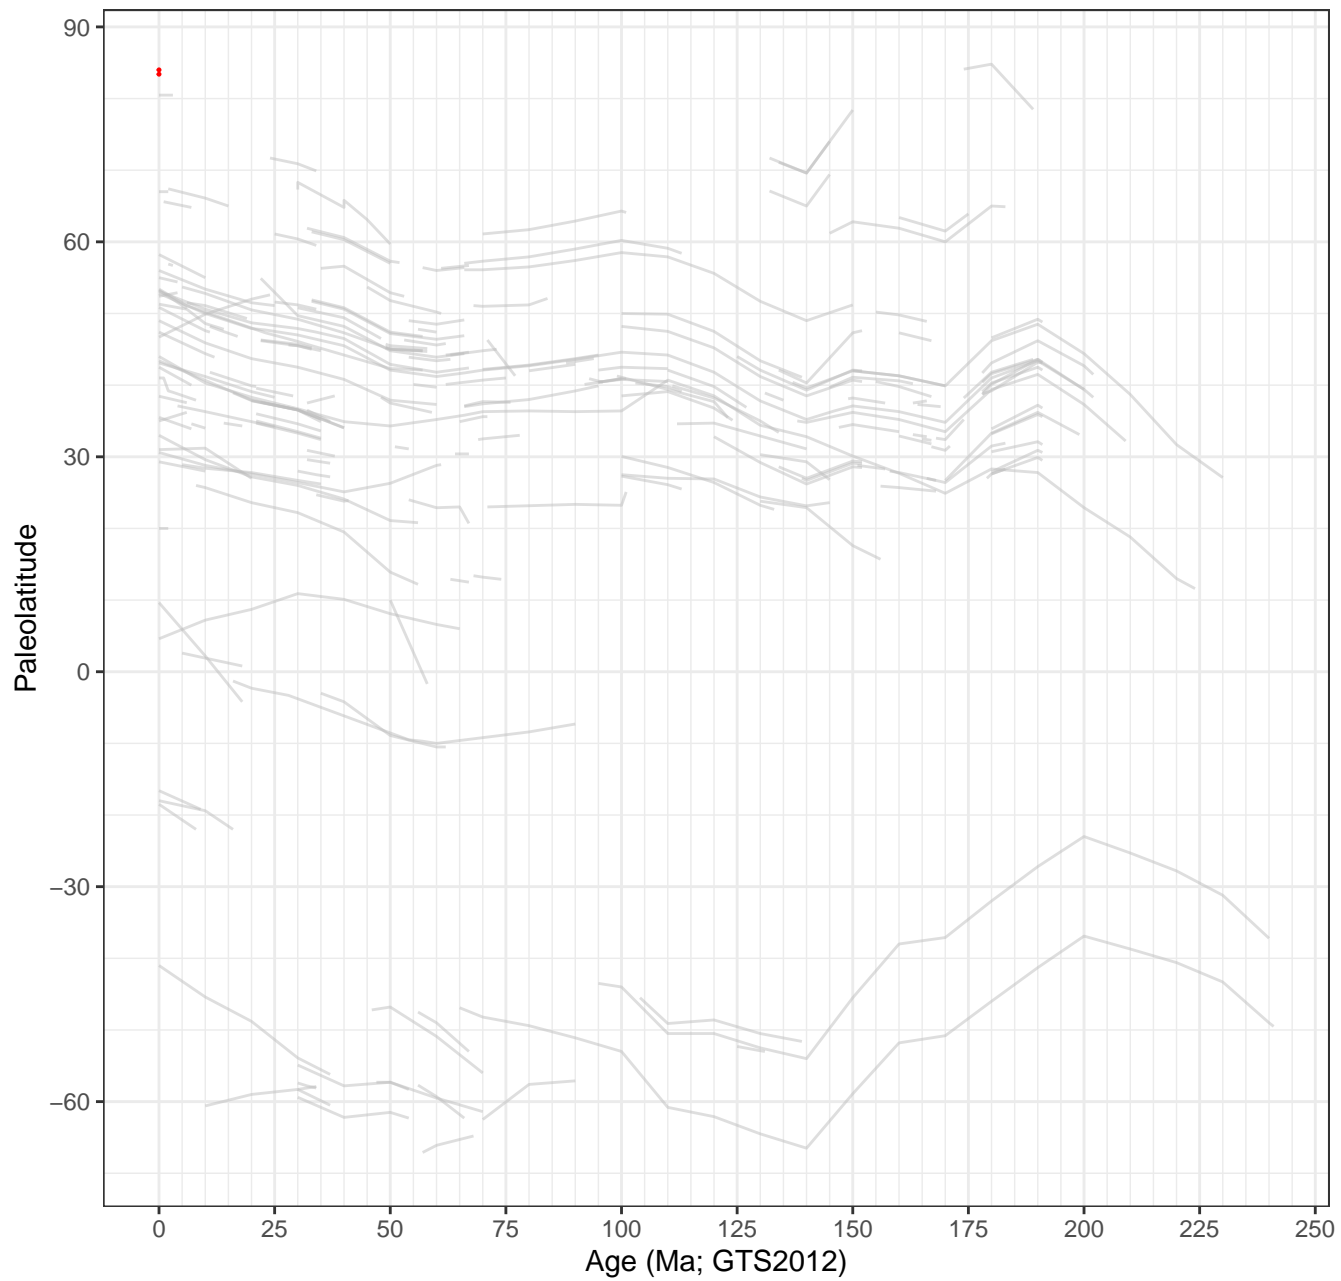

Supplement: Supplementary file 2671 [file cyst of Polarella glacialis.pdf › Supplement/Supplement 2/Species 1914 plots/cyst of Polarella glacialis.pdf]

# Species cyst of *Polykrikos hartmannii*

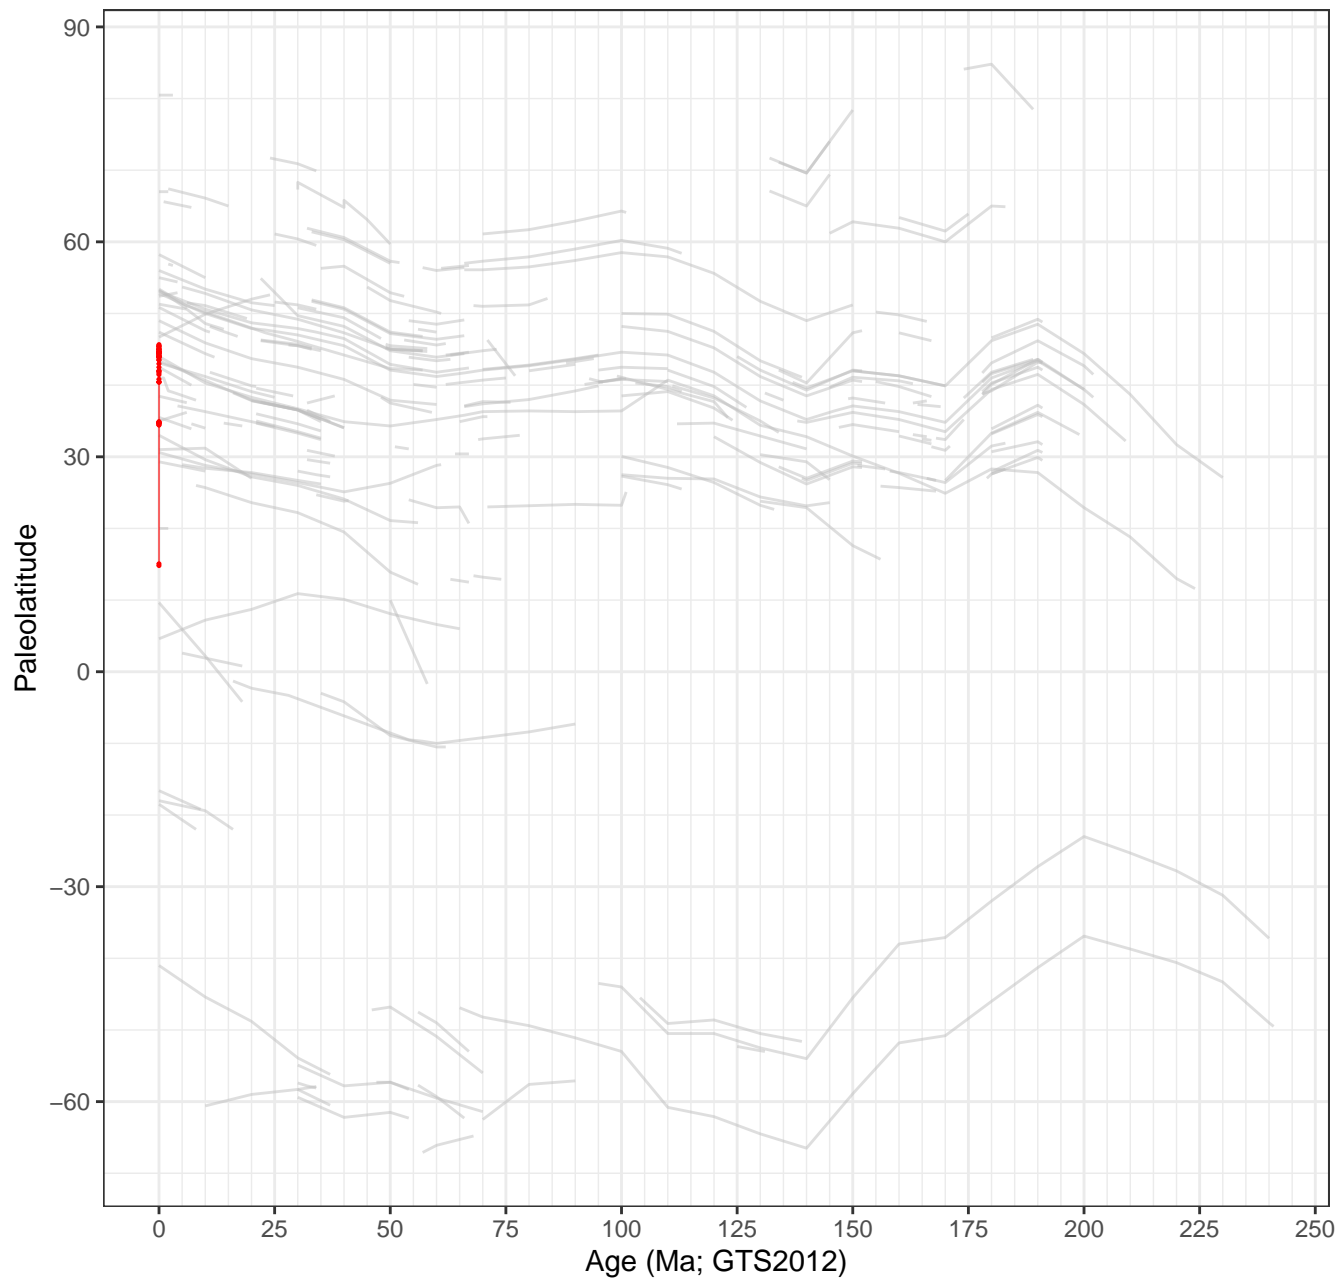

Supplement: Supplementary file 2672 [file cyst of Polykrikos hartmannii.pdf › Supplement/Supplement 2/Species 1914 plots/cyst of Polykrikos hartmannii.pdf]

# Species cyst of *Polykrikos kofoidii*

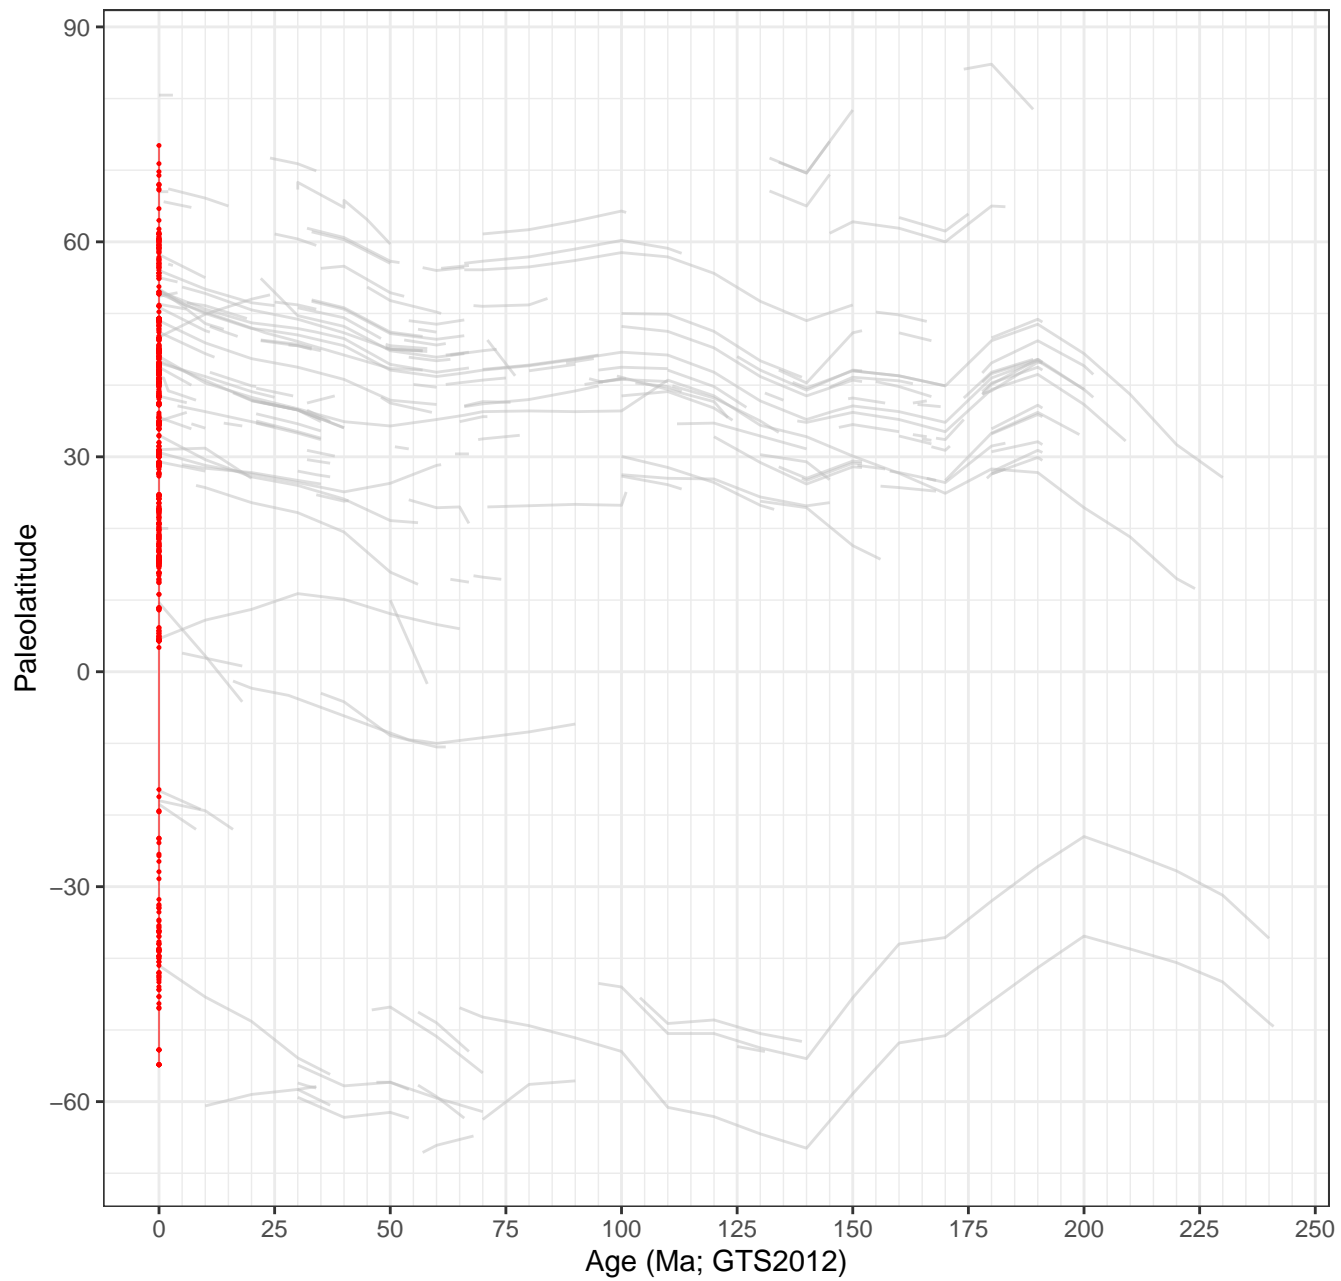

Supplement: Supplementary file 2673 [file cyst of Polykrikos kofoidii.pdf › Supplement/Supplement 2/Species 1914 plots/cyst of Polykrikos kofoidii.pdf]

# Species cyst of *Polykrikos schwartzii*

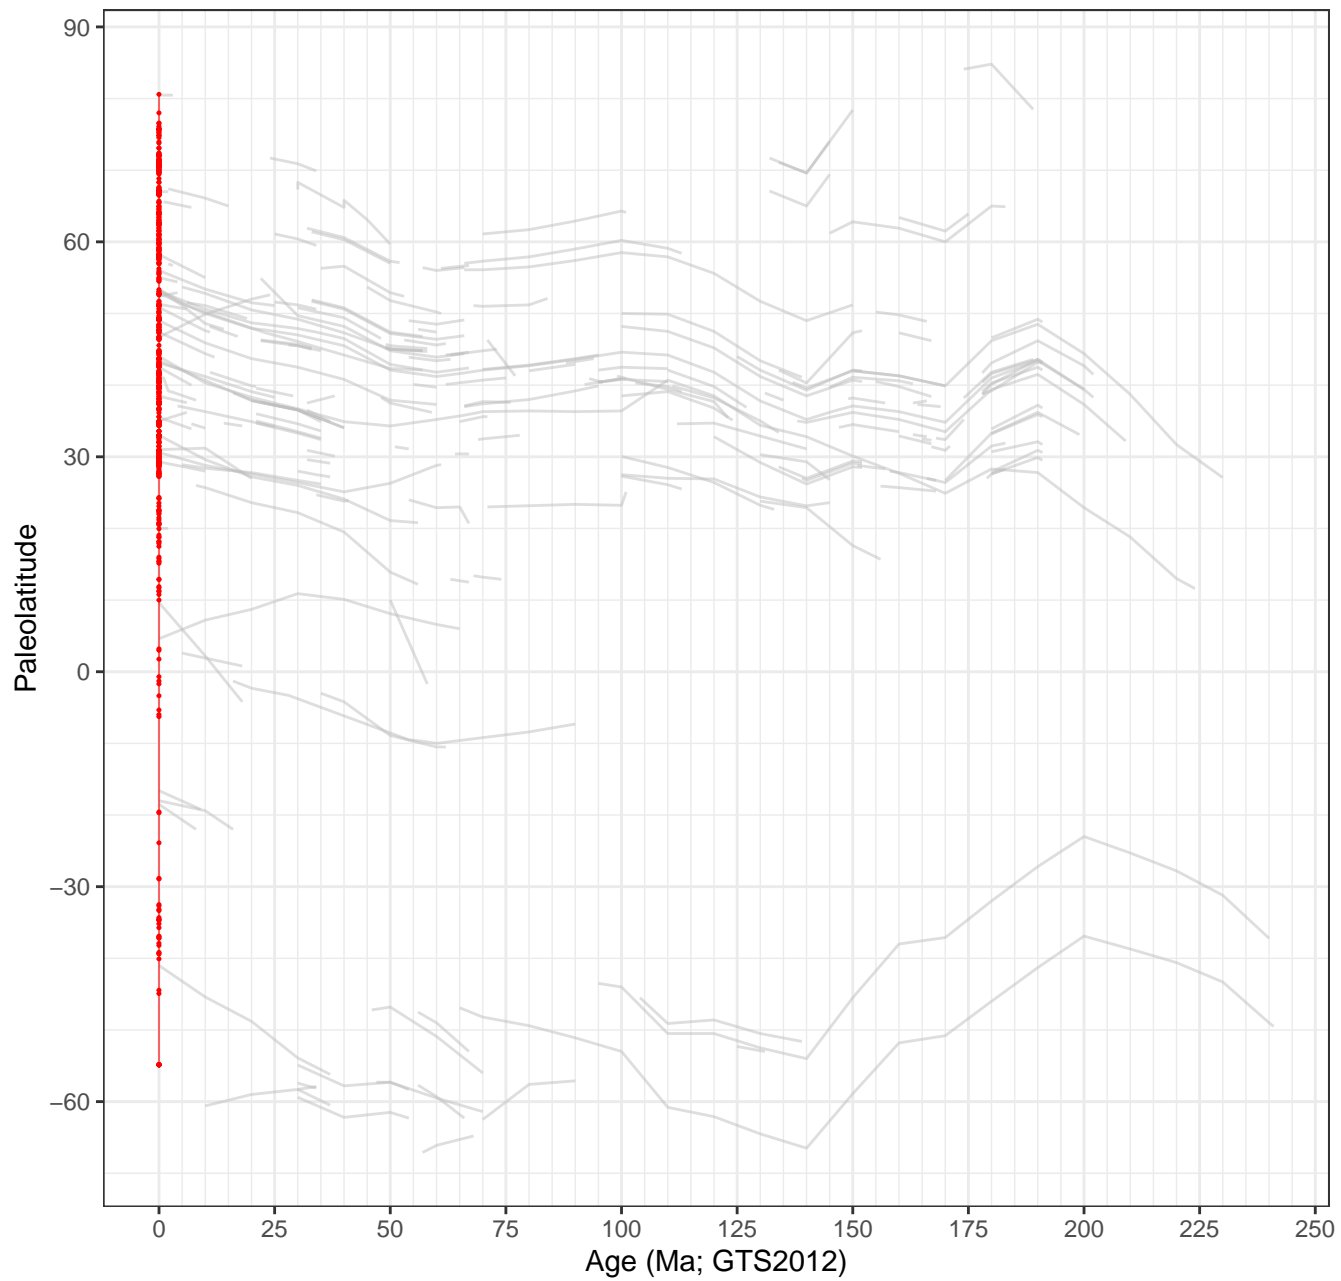

Supplement: Supplementary file 2674 [file cyst of Polykrikos schwartzii.pdf › Supplement/Supplement 2/Species 1914 plots/cyst of Polykrikos schwartzii.pdf]

# Species cyst of *Protoperidinium americanum*

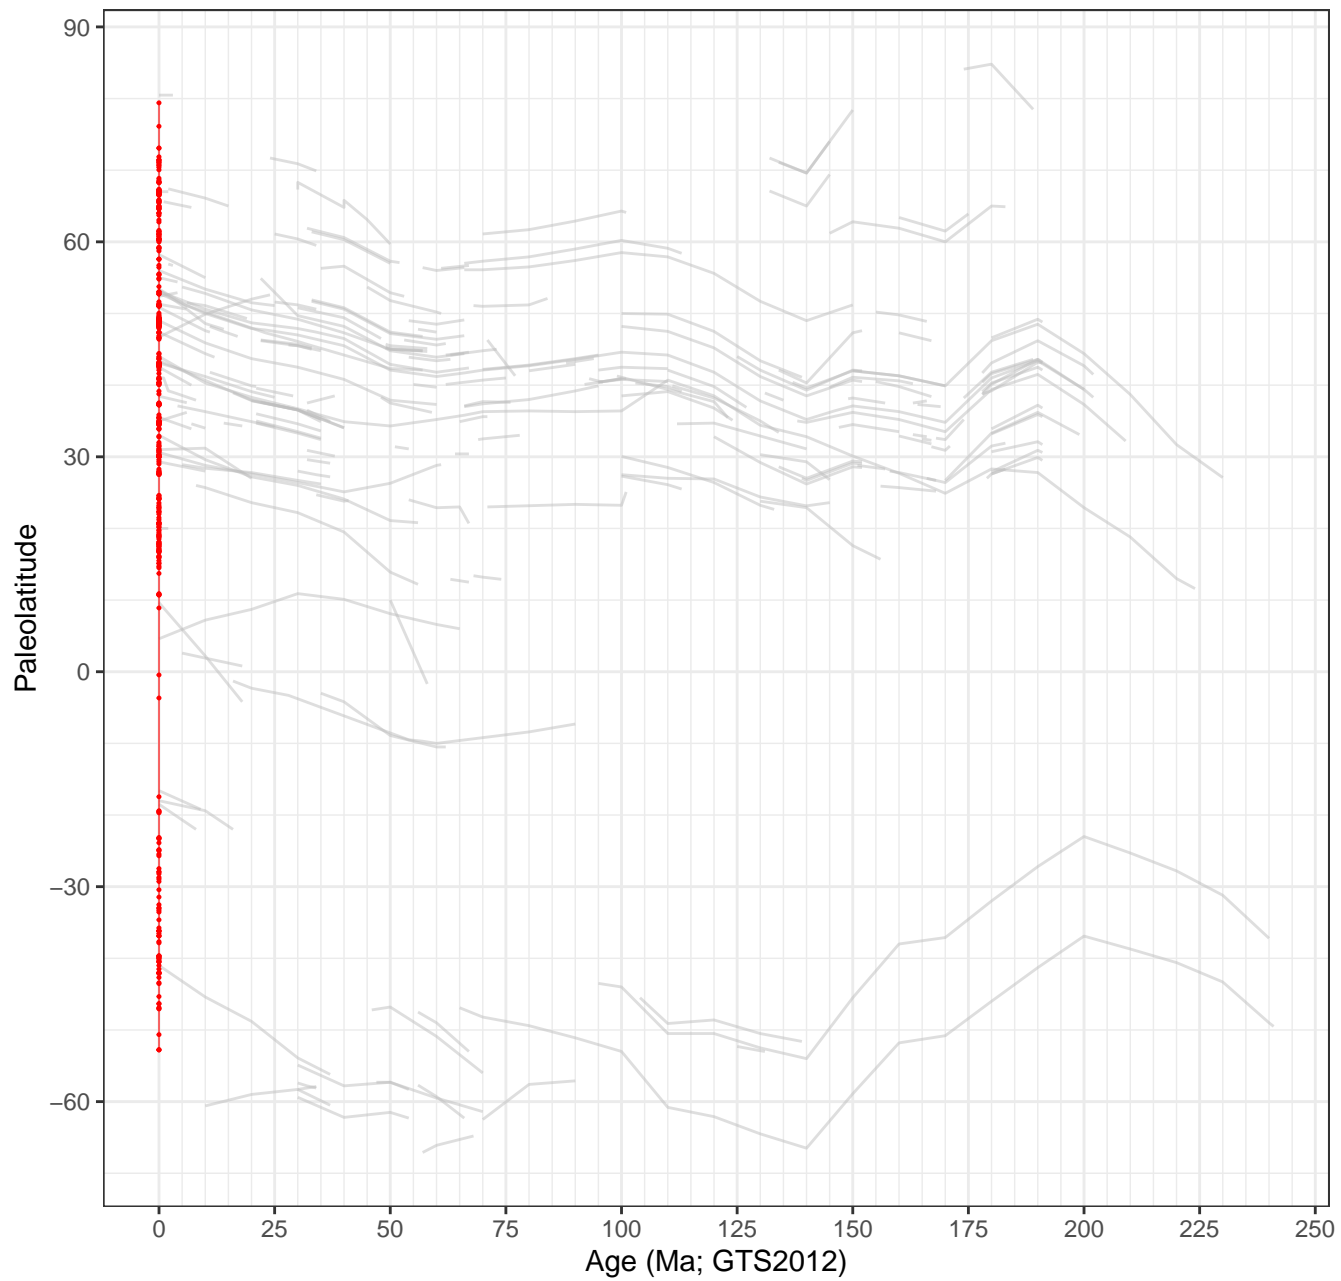

Supplement: Supplementary file 2675 [file cyst of Protoperidinium americanum.pdf › Supplement/Supplement 2/Species 1914 plots/cyst of Protoperidinium americanum.pdf]

# Species cyst of *Protoperidinium fukuyoi*

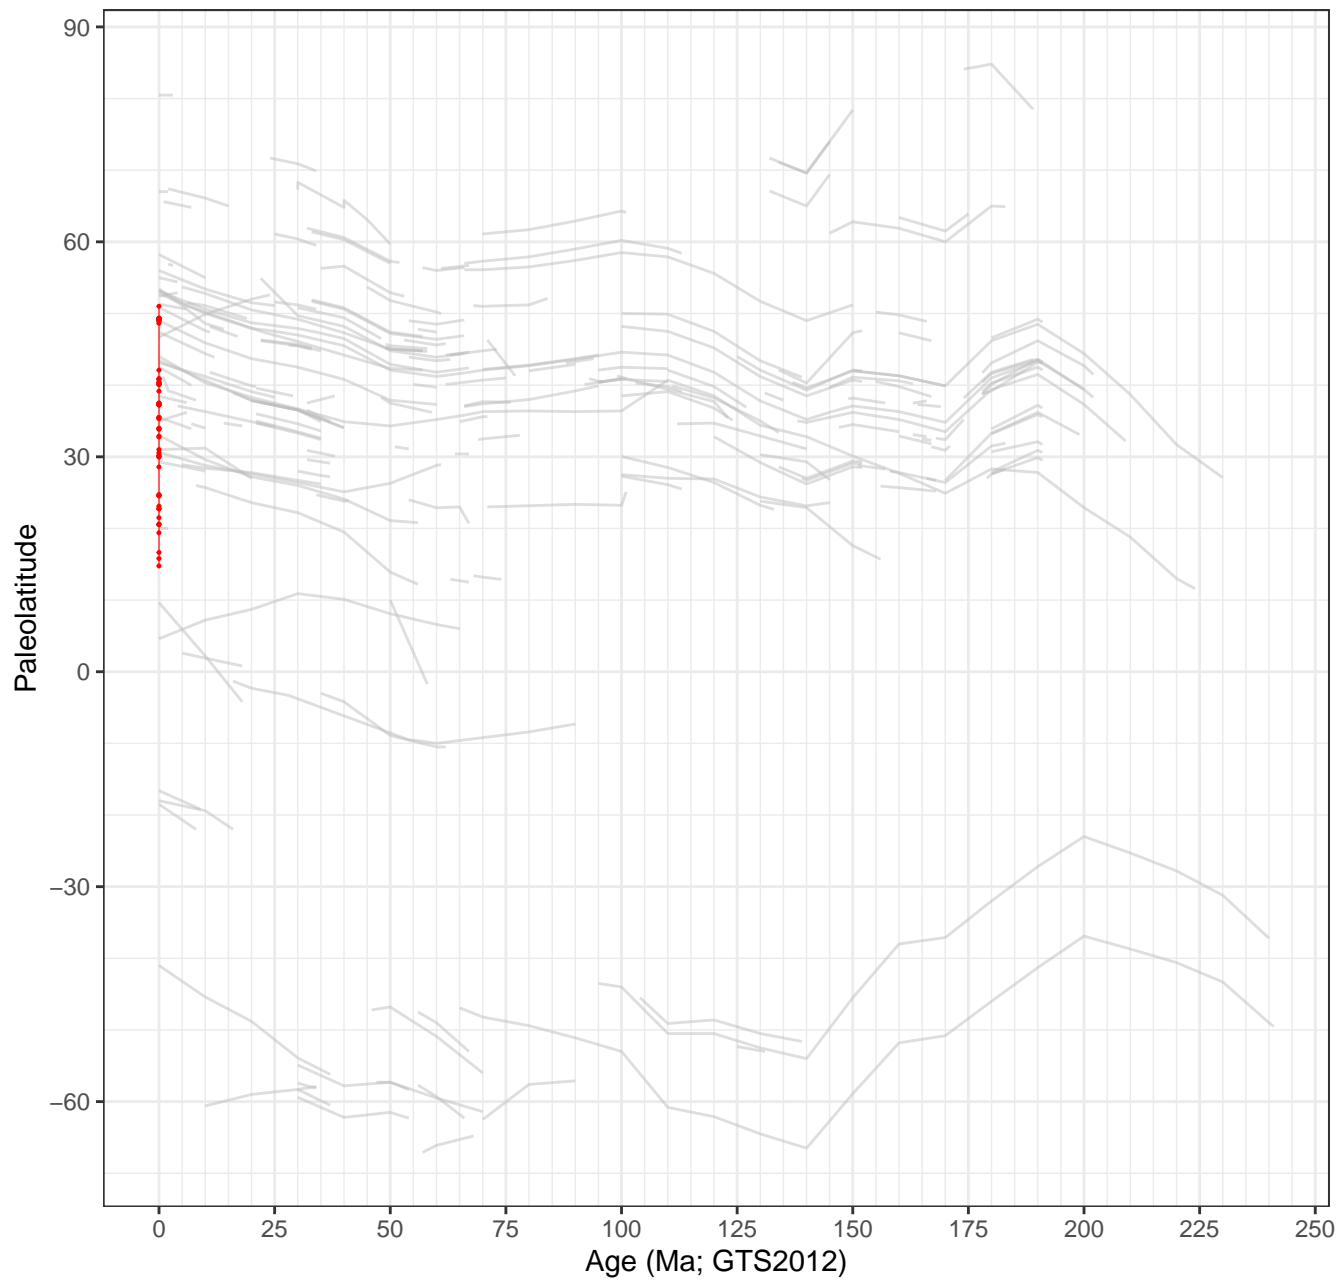

Supplement: Supplementary file 2676 [file cyst of Protoperidinium fukuyoi.pdf › Supplement/Supplement 2/Species 1914 plots/cyst of Protoperidinium fukuyoi.pdf]

# Species cyst of *Protoperidinium minutum*

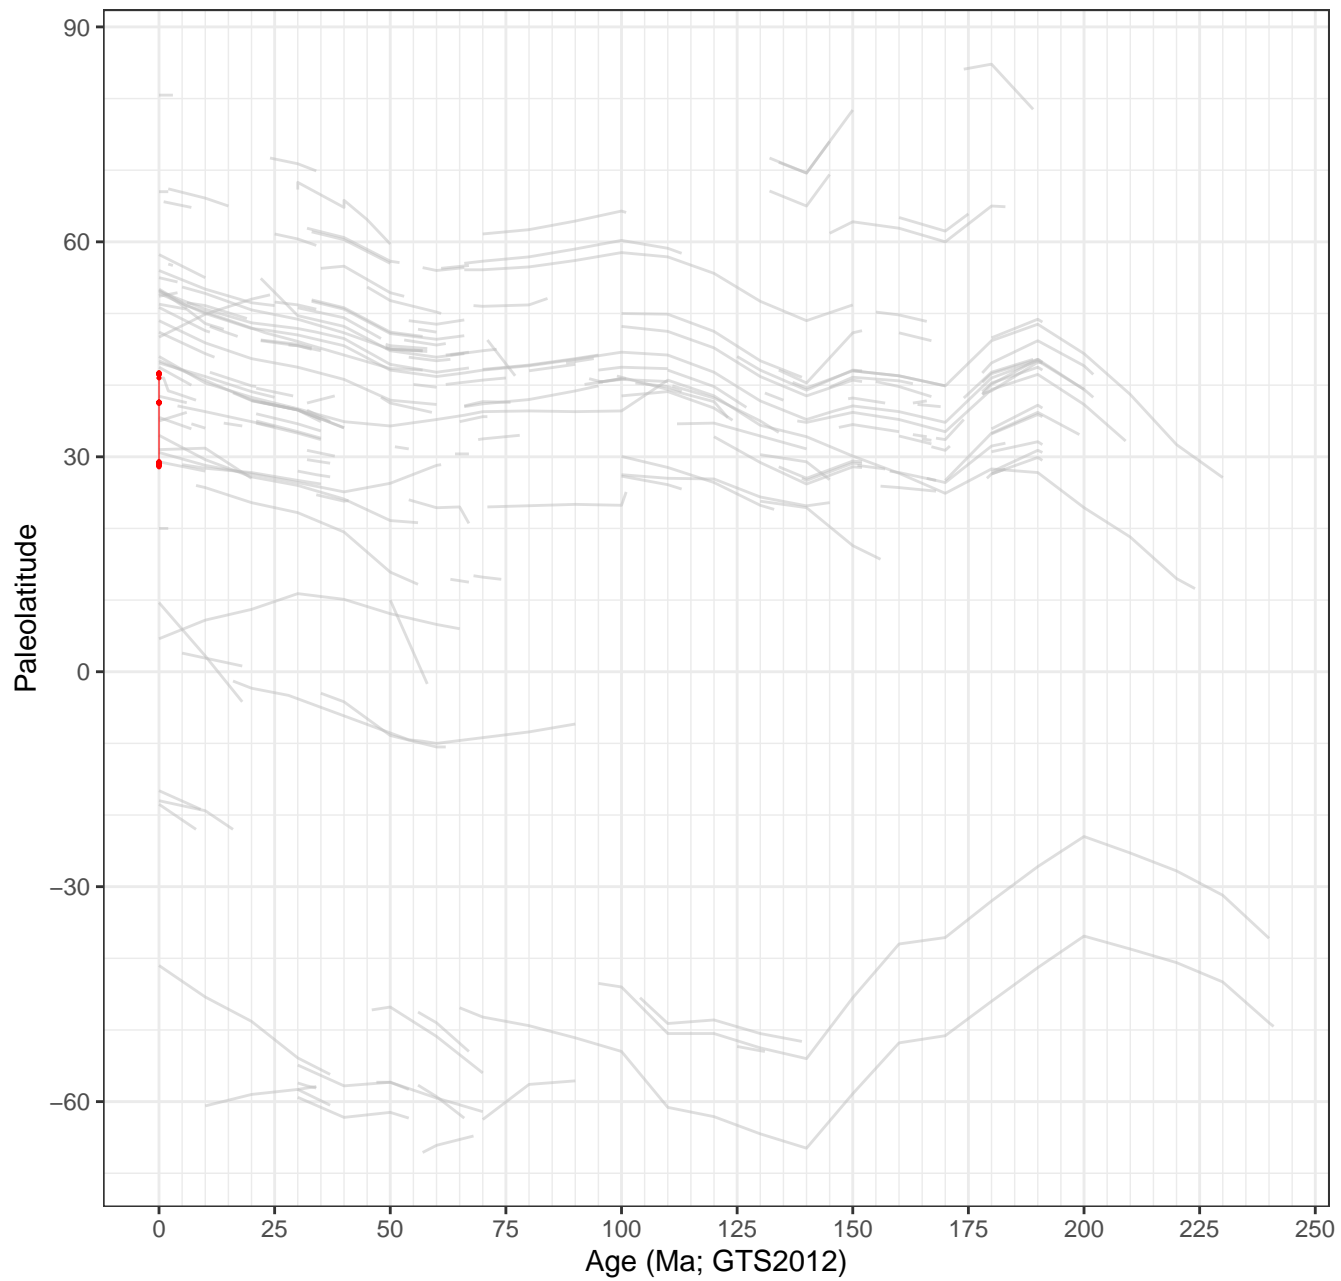

Supplement: Supplementary file 2677 [file cyst of Protoperidinium minutum.pdf › Supplement/Supplement 2/Species 1914 plots/cyst of Protoperidinium minutum.pdf]

# Species cyst of *Protoperidinium monospinum*

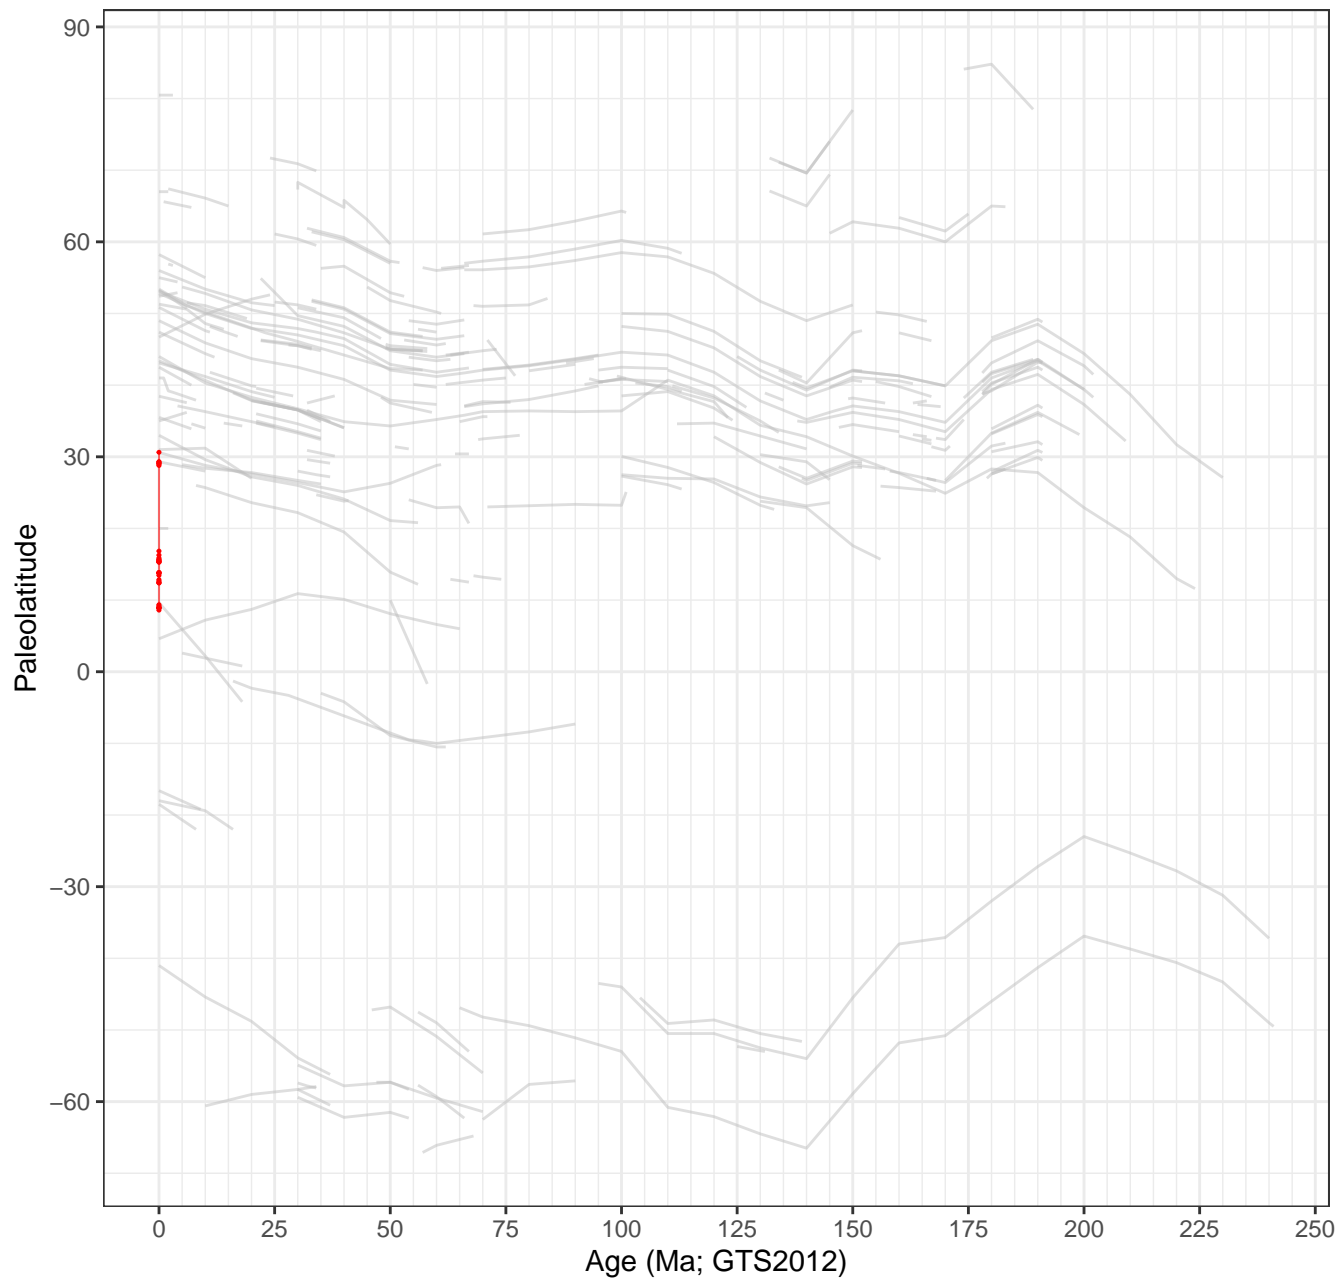

Supplement: Supplementary file 2678 [file cyst of Protoperidinium monospinum.pdf › Supplement/Supplement 2/Species 1914 plots/cyst of Protoperidinium monospinum.pdf]

# Species cyst of *Protoperidinium nudum*

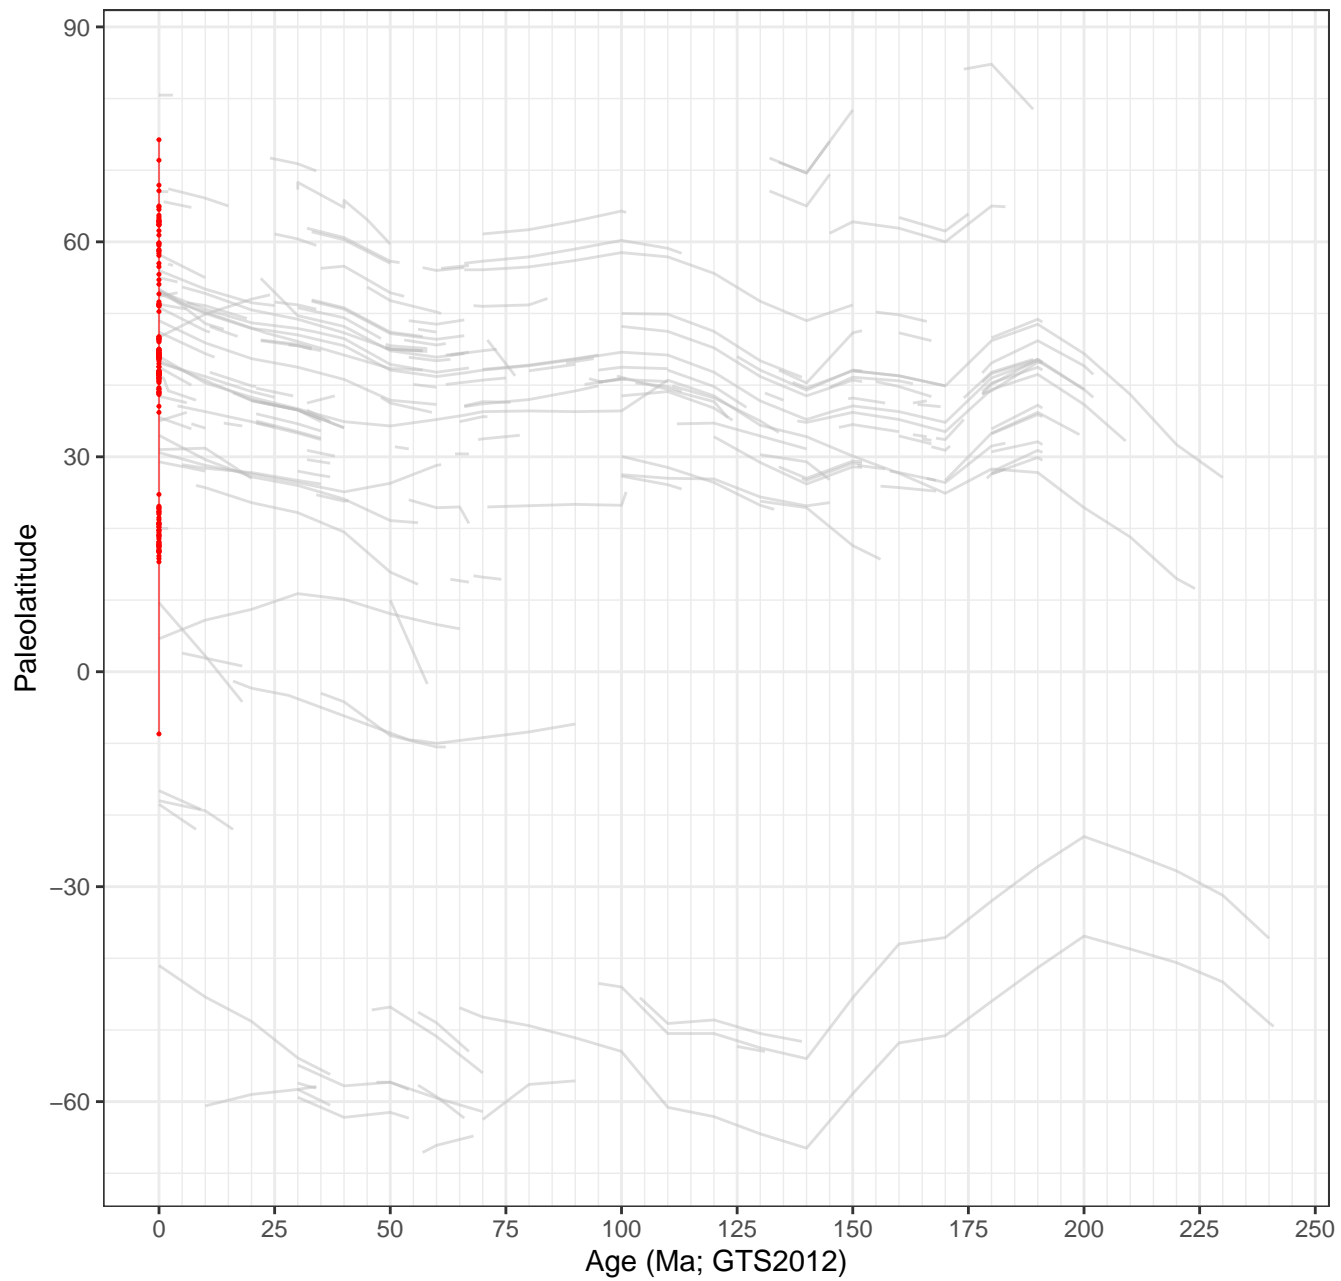

Supplement: Supplementary file 2679 [file cyst of Protoperidinium nudum.pdf › Supplement/Supplement 2/Species 1914 plots/cyst of Protoperidinium nudum.pdf]

# Species cyst of *Scrippsiella trifida*

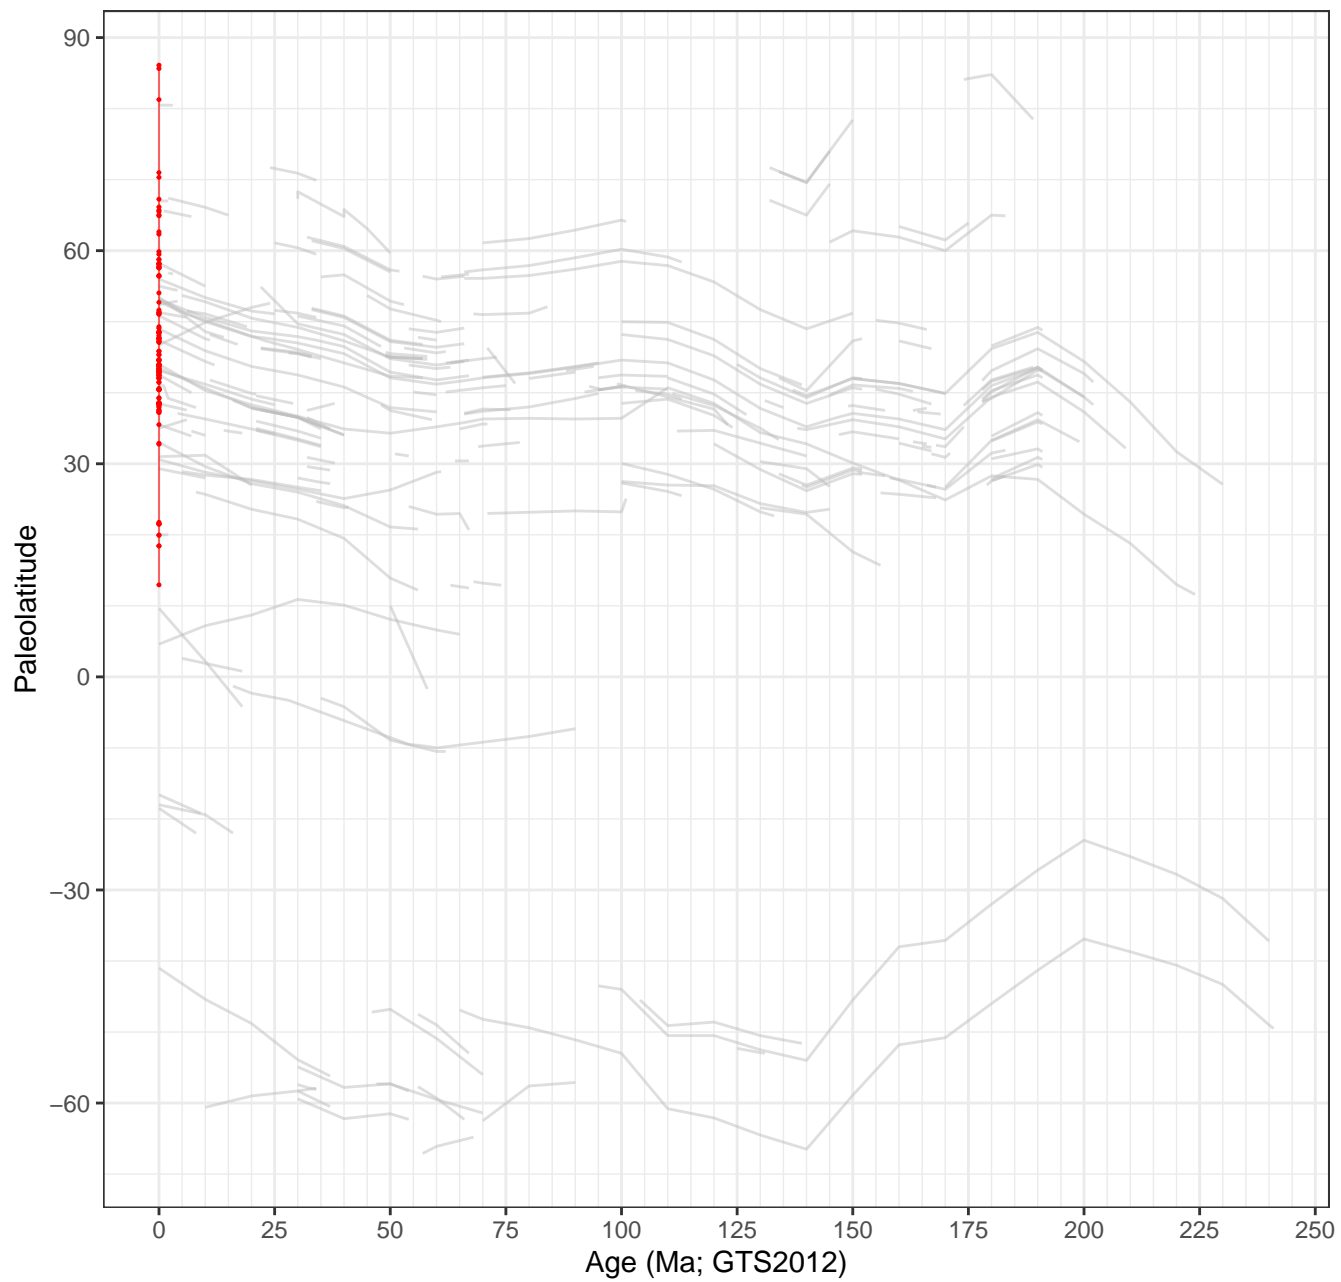

Supplement: Supplementary file 2680 [file cyst of Scrippsiella trifida.pdf › Supplement/Supplement 2/Species 1914 plots/cyst of Scrippsiella trifida.pdf]
